# Supplementary material
Source: HighWire-hosted journal article supplement (http://molpharm.aspetjournals.org/highwire/filestream/76786/field_highwire_adjunct_files/16/supplementary_Table_S5.pdf)
Supplement: supplementary_Table_S5.pdf [file supplementary_Table_S5.pdf]

Identification of Survival Genes in Human Glioblastoma Cells Using siRNA Screening  
 Nikhil G Thaker, Fang Zhang, Peter R. McDonald, Tong Ying Shun, Michael D Lewen, Ian F. Pollack, and John S. Lazo  
 Molecular Pharmacology

Supplementary Table S5  
 Results from the MAD  
 analyses of survival genes  
 from individual experiments.

| Run                          | Accession No  | Gene Symbol | Full Gene Name        | MAD_scor e | Outlier_Statu s |
|------------------------------|---------------|-------------|-----------------------|------------|-----------------|
| siRNA-Temozolomide Run3-DMSO | NM_0528<br>38 | 40057       | septin 1              | -1.514437  | Inlier          |
| siRNA Disorazole DMSO Run3   | NM_0528<br>38 | 1-Sep       | septin 1              | -0.609391  | Inlier          |
| siRNA-Temozolomide Run1-DMSO | NM_0528<br>38 | 1-Sep       | septin 1              | -0.493672  | Inlier          |
| siRNA-Vinblastine Run2-DMSO  | NM_0528<br>38 | 1-Sep       | septin 1              | -0.033499  | Inlier          |
| siRNA-Temozolomide Run2-DMSO | NM_0528<br>38 | 1-Sep       | septin 1              | 0.033499   | Inlier          |
| siRNA Disorazole DMSO Run1   | NM_0528<br>38 | 1-Sep       | septin 1              | 0.739609   | Inlier          |
| siRNA-Vinblastine Run1-DMSO  | NM_0528<br>38 | 1-Sep       | septin 1              | 9.153163   | Outlier         |
| siRNA Disorazole DMSO Run2   | NM_0528<br>38 | 1-Sep       | septin 1              | 9.255507   | Outlier         |
| siRNA-Temozolomide Run3-DMSO | NM_1779<br>66 | 2p-PDE      | 2p-PDE                | -1.407692  | Inlier          |
| siRNA-Temozolomide Run1-DMSO | NM_1779<br>66 | 2p-PDE      | 2p-PDE                | -0.873484  | Inlier          |
| siRNA-Temozolomide Run2-DMSO | NM_1779<br>66 | 2p-PDE      | 2p-PDE                | -0.475516  | Inlier          |
| siRNA Disorazole DMSO Run1   | NM_1779<br>66 | 2p-PDE      | 2p-PDE                | -0.021167  | Inlier          |
| siRNA-Vinblastine Run2-DMSO  | NM_1779<br>66 | 2p-PDE      | 2p-PDE                | 0.021167   | Inlier          |
| siRNA-Vinblastine Run1-DMSO  | NM_1779<br>66 | 2p-PDE      | 2p-PDE                | 0.361305   | Inlier          |
| siRNA Disorazole DMSO Run2   | NM_1779<br>66 | 2p-PDE      | 2p-PDE                | 2.459221   | Inlier          |
| siRNA Disorazole DMSO Run3   | NM_1779<br>66 | 2p-PDE      | 2p-PDE                | 3.473751   | Inlier          |
| siRNA-Temozolomide Run2-DMSO | NM_0000<br>14 | A2M         | alpha-2-macroglobulin | -1.796232  | Inlier          |
| siRNA-Temozolomide Run3-DMSO | NM_0000<br>14 | A2M         | alpha-2-macroglobulin | -1.433975  | Inlier          |
| siRNA-Temozolomide Run1-DMSO | NM_0000<br>14 | A2M         | alpha-2-macroglobulin | -1.016574  | Inlier          |
| siRNA Disorazole DMSO Run1   | NM_0000<br>14 | A2M         | alpha-2-macroglobulin | -0.11901   | Inlier          |

Identification of Survival Genes in Human Glioblastoma Cells Using siRNA Screening  
 Nikhil G Thaker, Fang Zhang, Peter R. McDonald, Tong Ying Shun, Michael D Lewen, Ian F. Pollack, and John S. Lazo

Molecular Pharmacology

|                                  |               |        |                                                           |           |         |
|----------------------------------|---------------|--------|-----------------------------------------------------------|-----------|---------|
| siRNA Disorazole DMSO Run2       | NM_0000<br>14 | A2M    | alpha-2-<br>macroglob<br>ulin                             | 0.11901   | Inlier  |
| siRNA-Vinblastine Run2-<br>DMSO  | NM_0000<br>14 | A2M    | alpha-2-<br>macroglob<br>ulin                             | 0.321664  | Inlier  |
| siRNA Disorazole DMSO Run3       | NM_0000<br>14 | A2M    | alpha-2-<br>macroglob<br>ulin                             | 0.332426  | Inlier  |
| siRNA-Vinblastine Run1-<br>DMSO  | NM_0000<br>14 | A2M    | alpha-2-<br>macroglob<br>ulin                             | 1.132531  | Inlier  |
| siRNA-Vinblastine Run2-<br>DMSO  | NM_0174<br>36 | A4GALT | alpha 1,4-<br>galactosylt<br>ransferase                   | -1.034436 | Inlier  |
| siRNA-Temozolomide Run3-<br>DMSO | NM_0174<br>36 | A4GALT | alpha 1,4-<br>galactosylt<br>ransferase                   | -0.798892 | Inlier  |
| siRNA Disorazole DMSO Run3       | NM_0174<br>36 | A4GALT | alpha 1,4-<br>galactosylt<br>ransferase                   | -0.550108 | Inlier  |
| siRNA-Temozolomide Run2-<br>DMSO | NM_0174<br>36 | A4GALT | alpha 1,4-<br>galactosylt<br>ransferase                   | -0.049566 | Inlier  |
| siRNA Disorazole DMSO Run1       | NM_0174<br>36 | A4GALT | alpha 1,4-<br>galactosylt<br>ransferase                   | 0.049566  | Inlier  |
| siRNA-Temozolomide Run1-<br>DMSO | NM_0174<br>36 | A4GALT | alpha 1,4-<br>galactosylt<br>ransferase                   | 0.479555  | Inlier  |
| siRNA Disorazole DMSO Run2       | NM_0174<br>36 | A4GALT | alpha 1,4-<br>galactosylt<br>ransferase                   | 4.814224  | Outlier |
| siRNA-Vinblastine Run1-<br>DMSO  | NM_0174<br>36 | A4GALT | alpha 1,4-<br>galactosylt<br>ransferase                   | 4.854787  | Outlier |
| siRNA Disorazole DMSO Run1       | NM_0161<br>61 | A4GNT  | alpha-1,4-<br>N-<br>acetylgluc<br>osaminyltr<br>ansferase | -1.226691 | Inlier  |

Identification of Survival Genes in Human Glioblastoma Cells Using siRNA Screening  
 Nikhil G Thaker, Fang Zhang, Peter R. McDonald, Tong Ying Shun, Michael D Lewen, Ian F. Pollack, and John S. Lazo  
 Molecular Pharmacology

|                              |               |       |                                           |                  |
|------------------------------|---------------|-------|-------------------------------------------|------------------|
| siRNA-Vinblastine Run2-DMSO  | NM_0161<br>61 | A4GNT | alpha-1,4-N-acetylglucosaminyltransferase | -0.6896 Inlier   |
| siRNA Disorazole DMSO Run3   | NM_0161<br>61 | A4GNT | alpha-1,4-N-acetylglucosaminyltransferase | -0.6594 Inlier   |
| siRNA-Temozolomide Run2-DMSO | NM_0161<br>61 | A4GNT | alpha-1,4-N-acetylglucosaminyltransferase | -0.058937 Inlier |
| siRNA-Temozolomide Run1-DMSO | NM_0161<br>61 | A4GNT | alpha-1,4-N-acetylglucosaminyltransferase | 0.058937 Inlier  |
| siRNA-Temozolomide Run3-DMSO | NM_0161<br>61 | A4GNT | alpha-1,4-N-acetylglucosaminyltransferase | 0.571124 Inlier  |
| siRNA Disorazole DMSO Run2   | NM_0161<br>61 | A4GNT | alpha-1,4-N-acetylglucosaminyltransferase | 9.476703 Outlier |
| siRNA-Vinblastine Run1-DMSO  | NM_0161<br>61 | A4GNT | alpha-1,4-N-acetylglucosaminyltransferase | 11.15173 Outlier |
| siRNA Disorazole DMSO Run3   | NM_0239<br>28 | AACS  | acetoacetyl-CoA synthetase                | -0.822067 Inlier |
| siRNA-Temozolomide Run2-DMSO | NM_0239<br>28 | AACS  | acetoacetyl-CoA synthetase                | -0.535106 Inlier |

Identification of Survival Genes in Human Glioblastoma Cells Using siRNA Screening  
 Nikhil G Thaker, Fang Zhang, Peter R. McDonald, Tong Ying Shun, Michael D Lewen, Ian F. Pollack, and John S. Lazo

Molecular Pharmacology

|                              |               |       |                                   |           |        |
|------------------------------|---------------|-------|-----------------------------------|-----------|--------|
| siRNA-Temozolomide Run1-DMSO | NM_0239<br>28 | AACS  | acetoacetyl-CoA synthetase        | -0.514802 | Inlier |
| siRNA-Temozolomide Run3-DMSO | NM_0239<br>28 | AACS  | acetoacetyl-CoA synthetase        | -0.056808 | Inlier |
| siRNA Disorazole DMSO Run1   | NM_0239<br>28 | AACS  | acetoacetyl-CoA synthetase        | 0.056807  | Inlier |
| siRNA-Vinblastine Run2-DMSO  | NM_0239<br>28 | AACS  | acetoacetyl-CoA synthetase        | 0.813894  | Inlier |
| siRNA Disorazole DMSO Run2   | NM_0239<br>28 | AACS  | acetoacetyl-CoA synthetase        | 1.70828   | Inlier |
| siRNA-Vinblastine Run1-DMSO  | NM_0239<br>28 | AACS  | acetoacetyl-CoA synthetase        | 2.420473  | Inlier |
| siRNA-Temozolomide Run3-DMSO | NM_0010<br>86 | AADAC | acetyl-CoA arylamidase (esterase) | -2.156372 | Inlier |
| siRNA-Temozolomide Run2-DMSO | NM_0010<br>86 | AADAC | acetyl-CoA arylamidase (esterase) | -0.680457 | Inlier |
| siRNA-Vinblastine Run2-DMSO  | NM_0010<br>86 | AADAC | acetyl-CoA arylamidase (esterase) | -0.668543 | Inlier |
| siRNA Disorazole DMSO Run1   | NM_0010<br>86 | AADAC | acetyl-CoA arylamidase (esterase) | -0.043105 | Inlier |
| siRNA Disorazole DMSO Run3   | NM_0010<br>86 | AADAC | acetyl-CoA arylamidase (esterase) | 0.043105  | Inlier |

Identification of Survival Genes in Human Glioblastoma Cells Using siRNA Screening  
 Nikhil G Thaker, Fang Zhang, Peter R. McDonald, Tong Ying Shun, Michael D Lewen, Ian F. Pollack, and John S. Lazo

Molecular Pharmacology

|                              |           |       |                                                    |           |        |
|------------------------------|-----------|-------|----------------------------------------------------|-----------|--------|
| siRNA-Temozolomide Run1-DMSO | NM_001086 | AADAC | arylaceta<br>mide<br>deacetylas<br>e<br>(esterase) | 0.561242  | Inlier |
| siRNA-Vinblastine Run1-DMSO  | NM_001086 | AADAC | arylaceta<br>mide<br>deacetylas<br>e<br>(esterase) | 1.491183  | Inlier |
| siRNA Disorazole DMSO Run2   | NM_001086 | AADAC | arylaceta<br>mide<br>deacetylas<br>e<br>(esterase) | 1.580688  | Inlier |
| siRNA-Temozolomide Run3-DMSO | NM_016228 | AADAT | aminoadip<br>ate<br>aminotran<br>sferase           | -1.070345 | Inlier |
| siRNA-Temozolomide Run1-DMSO | NM_016228 | AADAT | aminoadip<br>ate<br>aminotran<br>sferase           | -0.697695 | Inlier |
| siRNA Disorazole DMSO Run1   | NM_016228 | AADAT | aminoadip<br>ate<br>aminotran<br>sferase           | -0.146091 | Inlier |
| siRNA-Vinblastine Run2-DMSO  | NM_016228 | AADAT | aminoadip<br>ate<br>aminotran<br>sferase           | -0.048857 | Inlier |
| siRNA-Temozolomide Run2-DMSO | NM_016228 | AADAT | aminoadip<br>ate<br>aminotran<br>sferase           | 0.048858  | Inlier |
| siRNA Disorazole DMSO Run3   | NM_016228 | AADAT | aminoadip<br>ate<br>aminotran<br>sferase           | 0.651305  | Inlier |
| siRNA Disorazole DMSO Run2   | NM_016228 | AADAT | aminoadip<br>ate<br>aminotran<br>sferase           | 1.317106  | Inlier |
| siRNA-Vinblastine Run1-DMSO  | NM_016228 | AADAT | aminoadip<br>ate<br>aminotran<br>sferase           | 1.620814  | Inlier |
| siRNA-Temozolomide Run3-DMSO | NM_014911 | AAK1  | AP2<br>associated<br>kinase 1                      | -0.764033 | Inlier |

Identification of Survival Genes in Human Glioblastoma Cells Using siRNA Screening  
 Nikhil G Thaker, Fang Zhang, Peter R. McDonald, Tong Ying Shun, Michael D Lewen, Ian F. Pollack, and John S. Lazo

Molecular Pharmacology

|                                  |               |       |                                                |           |        |
|----------------------------------|---------------|-------|------------------------------------------------|-----------|--------|
| siRNA Disorazole DMSO Run3       | NM_0149<br>11 | AAK1  | AP2<br>associated<br>kinase 1                  | -0.687131 | Inlier |
| siRNA Disorazole DMSO Run2       | NM_0149<br>11 | AAK1  | AP2<br>associated<br>kinase 1                  | -0.661869 | Inlier |
| siRNA-Temozolomide Run1-<br>DMSO | NM_0149<br>11 | AAK1  | AP2<br>associated<br>kinase 1                  | -0.212446 | Inlier |
| siRNA-Temozolomide Run2-<br>DMSO | NM_0149<br>11 | AAK1  | AP2<br>associated<br>kinase 1                  | 0.212445  | Inlier |
| siRNA Disorazole DMSO Run1       | NM_0149<br>11 | AAK1  | AP2<br>associated<br>kinase 1                  | 0.397641  | Inlier |
| siRNA-Vinblastine Run1-<br>DMSO  | NM_0149<br>11 | AAK1  | AP2<br>associated<br>kinase 1                  | 0.850602  | Inlier |
| siRNA-Vinblastine Run2-<br>DMSO  | NM_0149<br>11 | AAK1  | AP2<br>associated<br>kinase 1                  | 1.087186  | Inlier |
| siRNA Disorazole DMSO Run1       | NM_0010<br>88 | AANAT | arylalkyla<br>mine N-<br>acetyltrans<br>ferase | -1.55244  | Inlier |
| siRNA-Temozolomide Run1-<br>DMSO | NM_0010<br>88 | AANAT | arylalkyla<br>mine N-<br>acetyltrans<br>ferase | -0.815202 | Inlier |
| siRNA-Temozolomide Run2-<br>DMSO | NM_0010<br>88 | AANAT | arylalkyla<br>mine N-<br>acetyltrans<br>ferase | -0.17608  | Inlier |
| siRNA-Vinblastine Run2-<br>DMSO  | NM_0010<br>88 | AANAT | arylalkyla<br>mine N-<br>acetyltrans<br>ferase | -0.071185 | Inlier |
| siRNA-Temozolomide Run3-<br>DMSO | NM_0010<br>88 | AANAT | arylalkyla<br>mine N-<br>acetyltrans<br>ferase | 0.071186  | Inlier |
| siRNA Disorazole DMSO Run3       | NM_0010<br>88 | AANAT | arylalkyla<br>mine N-<br>acetyltrans<br>ferase | 0.533798  | Inlier |

Identification of Survival Genes in Human Glioblastoma Cells Using siRNA Screening  
 Nikhil G Thaker, Fang Zhang, Peter R. McDonald, Tong Ying Shun, Michael D Lewen, Ian F. Pollack, and John S. Lazo

Molecular Pharmacology

|                              |               |         |                                                                       |           |        |
|------------------------------|---------------|---------|-----------------------------------------------------------------------|-----------|--------|
| siRNA Disorazole DMSO Run2   | NM_0010<br>88 | AANAT   | arylalkylamine N-acetyltransferase                                    | 3.073178  | Inlier |
| siRNA-Vinblastine Run1-DMSO  | NM_0010<br>88 | AANAT   | arylalkylamine N-acetyltransferase                                    | 3.262466  | Inlier |
| siRNA Disorazole DMSO Run1   | NM_0016<br>05 | AARS    | alanyl-tRNA synthetase                                                | -2.279481 | Inlier |
| siRNA-Temozolomide Run1-DMSO | NM_0016<br>05 | AARS    | alanyl-tRNA synthetase                                                | -1.031817 | Inlier |
| siRNA Disorazole DMSO Run3   | NM_0016<br>05 | AARS    | alanyl-tRNA synthetase                                                | -0.317183 | Inlier |
| siRNA-Temozolomide Run3-DMSO | NM_0016<br>05 | AARS    | alanyl-tRNA synthetase                                                | -0.115615 | Inlier |
| siRNA-Vinblastine Run2-DMSO  | NM_0016<br>05 | AARS    | alanyl-tRNA synthetase                                                | 0.115617  | Inlier |
| siRNA-Temozolomide Run2-DMSO | NM_0016<br>05 | AARS    | alanyl-tRNA synthetase                                                | 0.143461  | Inlier |
| siRNA Disorazole DMSO Run2   | NM_0016<br>05 | AARS    | alanyl-tRNA synthetase                                                | 1.577842  | Inlier |
| siRNA-Vinblastine Run1-DMSO  | NM_0016<br>05 | AARS    | alanyl-tRNA synthetase                                                | 1.884384  | Inlier |
| siRNA-Temozolomide Run2-DMSO | NM_0154<br>23 | AASDHPT | aminoadipate-semialdehyde dehydrogenase-phosphoantethinyl transferase | -2.905711 | Inlier |

Identification of Survival Genes in Human Glioblastoma Cells Using siRNA Screening  
 Nikhil G Thaker, Fang Zhang, Peter R. McDonald, Tong Ying Shun, Michael D Lewen, Ian F. Pollack, and John S. Lazo  
 Molecular Pharmacology

|                              |               |              |                                                                        |           |        |
|------------------------------|---------------|--------------|------------------------------------------------------------------------|-----------|--------|
| siRNA-Temozolomide Run3-DMSO | NM_0154<br>23 | AASDHPP<br>T | aminoadipate-semialdehyde dehydrogenase-phosphoantetheinyl transferase | -2.016573 | Inlier |
| siRNA Disorazole DMSO Run3   | NM_0154<br>23 | AASDHPP<br>T | aminoadipate-semialdehyde dehydrogenase-phosphoantetheinyl transferase | -1.075854 | Inlier |
| siRNA Disorazole DMSO Run2   | NM_0154<br>23 | AASDHPP<br>T | aminoadipate-semialdehyde dehydrogenase-phosphoantetheinyl transferase | -0.043239 | Inlier |
| siRNA Disorazole DMSO Run1   | NM_0154<br>23 | AASDHPP<br>T | aminoadipate-semialdehyde dehydrogenase-phosphoantetheinyl transferase | 0.043239  | Inlier |



Identification of Survival Genes in Human Glioblastoma Cells Using siRNA Screening  
 Nikhil G Thaker, Fang Zhang, Peter R. McDonald, Tong Ying Shun, Michael D Lewen, Ian F. Pollack, and John S. Lazo  
 Molecular Pharmacology

|                              |           |         |                                                                        |           |        |
|------------------------------|-----------|---------|------------------------------------------------------------------------|-----------|--------|
| siRNA-Temozolomide Run1-DMSO | NM_015423 | AASDHPT | aminoadipate-semialdehyde dehydrogenase-phosphoantetheinyl transferase | 0.279819  | Inlier |
| siRNA-Vinblastine Run1-DMSO  | NM_015423 | AASDHPT | aminoadipate-semialdehyde dehydrogenase-phosphoantetheinyl transferase | 0.451253  | Inlier |
| siRNA-Vinblastine Run2-DMSO  | NM_015423 | AASDHPT | aminoadipate-semialdehyde dehydrogenase-phosphoantetheinyl transferase | 0.897747  | Inlier |
| siRNA-Temozolomide Run2-DMSO | NM_005763 | AASS    | aminoadipate-semialdehyde synthase                                     | -1.718837 | Inlier |
| siRNA-Vinblastine Run2-DMSO  | NM_005763 | AASS    | aminoadipate-semialdehyde synthase                                     | -1.244432 | Inlier |
| siRNA-Temozolomide Run3-DMSO | NM_005763 | AASS    | aminoadipate-semialdehyde synthase                                     | -0.094745 | Inlier |

Identification of Survival Genes in Human Glioblastoma Cells Using siRNA Screening  
 Nikhil G Thaker, Fang Zhang, Peter R. McDonald, Tong Ying Shun, Michael D Lewen, Ian F. Pollack, and John S. Lazo

Molecular Pharmacology

|                              |               |      |                                    |           |        |
|------------------------------|---------------|------|------------------------------------|-----------|--------|
| siRNA-Temozolomide Run1-DMSO | NM_0057<br>63 | AASS | aminoadipate-semialdehyde synthase | -0.084852 | Inlier |
| siRNA Disorazole DMSO Run3   | NM_0057<br>63 | AASS | aminoadipate-semialdehyde synthase | 0.084851  | Inlier |
| siRNA Disorazole DMSO Run1   | NM_0057<br>63 | AASS | aminoadipate-semialdehyde synthase | 0.104568  | Inlier |
| siRNA Disorazole DMSO Run2   | NM_0057<br>63 | AASS | aminoadipate-semialdehyde synthase | 1.467625  | Inlier |
| siRNA-Vinblastine Run1-DMSO  | NM_0057<br>63 | AASS | aminoadipate-semialdehyde synthase | 2.051466  | Inlier |
| siRNA-Temozolomide Run3-DMSO | NM_0006<br>63 | ABAT | 4-aminobutyrate aminotransferase   | -1.205153 | Inlier |
| siRNA-Temozolomide Run2-DMSO | NM_0006<br>63 | ABAT | 4-aminobutyrate aminotransferase   | -0.640754 | Inlier |
| siRNA-Temozolomide Run1-DMSO | NM_0006<br>63 | ABAT | 4-aminobutyrate aminotransferase   | -0.62664  | Inlier |
| siRNA-Vinblastine Run2-DMSO  | NM_0006<br>63 | ABAT | 4-aminobutyrate aminotransferase   | -0.157487 | Inlier |
| siRNA Disorazole DMSO Run3   | NM_0006<br>63 | ABAT | 4-aminobutyrate aminotransferase   | 0.157487  | Inlier |

Identification of Survival Genes in Human Glioblastoma Cells Using siRNA Screening  
 Nikhil G Thaker, Fang Zhang, Peter R. McDonald, Tong Ying Shun, Michael D Lewen, Ian F. Pollack, and John S. Lazo

Molecular Pharmacology

|                              |               |       |                                                     |           |        |
|------------------------------|---------------|-------|-----------------------------------------------------|-----------|--------|
| siRNA Disorazole DMSO Run1   | NM_0006<br>63 | ABAT  | 4-aminobutyrate aminotransferase                    | 0.708246  | Inlier |
| siRNA-Vinblastine Run1-DMSO  | NM_0006<br>63 | ABAT  | 4-aminobutyrate aminotransferase                    | 1.681383  | Inlier |
| siRNA Disorazole DMSO Run2   | NM_0006<br>63 | ABAT  | 4-aminobutyrate aminotransferase                    | 1.992376  | Inlier |
| siRNA Disorazole DMSO Run1   | NM_0055<br>02 | ABCA1 | ATP-binding cassette, sub-family A (ABC1), member 1 | -0.937458 | Inlier |
| siRNA-Vinblastine Run2-DMSO  | NM_0055<br>02 | ABCA1 | ATP-binding cassette, sub-family A (ABC1), member 1 | -0.775507 | Inlier |
| siRNA-Temozolomide Run2-DMSO | NM_0055<br>02 | ABCA1 | ATP-binding cassette, sub-family A (ABC1), member 1 | -0.573493 | Inlier |
| siRNA-Temozolomide Run3-DMSO | NM_0055<br>02 | ABCA1 | ATP-binding cassette, sub-family A (ABC1), member 1 | -0.070364 | Inlier |
| siRNA-Temozolomide Run1-DMSO | NM_0055<br>02 | ABCA1 | ATP-binding cassette, sub-family A (ABC1), member 1 | 0.070365  | Inlier |
| siRNA-Vinblastine Run1-DMSO  | NM_0055<br>02 | ABCA1 | ATP-binding cassette, sub-family A (ABC1), member 1 | 0.460639  | Inlier |

Identification of Survival Genes in Human Glioblastoma Cells Using siRNA Screening

Nikhil G Thaker, Fang Zhang, Peter R. McDonald, Tong Ying Shun, Michael D Lewen, Ian F. Pollack, and John S. Lazo

Molecular Pharmacology

|                              |               |        |                                                      |           |        |
|------------------------------|---------------|--------|------------------------------------------------------|-----------|--------|
| siRNA Disorazole DMSO Run2   | NM_0055<br>02 | ABCA1  | ATP-binding cassette, sub-family A (ABC1), member 1  | 1.010493  | Inlier |
| siRNA Disorazole DMSO Run3   | NM_0055<br>02 | ABCA1  | ATP-binding cassette, sub-family A (ABC1), member 1  | 1.061203  | Inlier |
| siRNA Disorazole DMSO Run2   | NM_0802<br>82 | ABCA10 | ATP-binding cassette, sub-family A (ABC1), member 10 | -1.741878 | Inlier |
| siRNA-Temozolomide Run3-DMSO | NM_0802<br>82 | ABCA10 | ATP-binding cassette, sub-family A (ABC1), member 10 | -0.776737 | Inlier |
| siRNA Disorazole DMSO Run3   | NM_0802<br>82 | ABCA10 | ATP-binding cassette, sub-family A (ABC1), member 10 | -0.572263 | Inlier |
| siRNA-Temozolomide Run2-DMSO | NM_0802<br>82 | ABCA10 | ATP-binding cassette, sub-family A (ABC1), member 10 | -0.192343 | Inlier |
| siRNA-Temozolomide Run1-DMSO | NM_0802<br>82 | ABCA10 | ATP-binding cassette, sub-family A (ABC1), member 10 | 0.192343  | Inlier |

Identification of Survival Genes in Human Glioblastoma Cells Using siRNA Screening  
 Nikhil G Thaker, Fang Zhang, Peter R. McDonald, Tong Ying Shun, Michael D Lewen, Ian F. Pollack, and John S. Lazo

Molecular Pharmacology

| siRNA Treatment              | Gene ID       | Gene Name | Gene Description                                     | Score     | Category |
|------------------------------|---------------|-----------|------------------------------------------------------|-----------|----------|
| siRNA Disorazole DMSO Run1   | NM_0802<br>82 | ABCA10    | ATP-binding cassette, sub-family A (ABC1), member 10 | 0.298866  | Inlier   |
| siRNA-Vinblastine Run2-DMSO  | NM_0802<br>82 | ABCA10    | ATP-binding cassette, sub-family A (ABC1), member 10 | 1.058316  | Inlier   |
| siRNA-Vinblastine Run1-DMSO  | NM_0802<br>82 | ABCA10    | ATP-binding cassette, sub-family A (ABC1), member 10 | 1.655097  | Inlier   |
| siRNA Disorazole DMSO Run1   | NM_0156<br>57 | ABCA12    | ATP-binding cassette, sub-family A (ABC1), member 12 | -1.610418 | Inlier   |
| siRNA-Temozolomide Run3-DMSO | NM_0156<br>57 | ABCA12    | ATP-binding cassette, sub-family A (ABC1), member 12 | -0.353619 | Inlier   |
| siRNA-Vinblastine Run1-DMSO  | NM_0156<br>57 | ABCA12    | ATP-binding cassette, sub-family A (ABC1), member 12 | -0.11576  | Inlier   |
| siRNA-Temozolomide Run1-DMSO | NM_0156<br>57 | ABCA12    | ATP-binding cassette, sub-family A (ABC1), member 12 | -0.020692 | Inlier   |

Identification of Survival Genes in Human Glioblastoma Cells Using siRNA Screening

Nikhil G Thaker, Fang Zhang, Peter R. McDonald, Tong Ying Shun, Michael D Lewen, Ian F. Pollack, and John S. Lazo

Molecular Pharmacology

| siRNA Treatment              | Gene    | Accession | Gene   | Gene                                                 | Value     | Category |
|------------------------------|---------|-----------|--------|------------------------------------------------------|-----------|----------|
| siRNA-Temozolomide Run2-DMSO | NM_0156 | 57        | ABCA12 | ATP-binding cassette, sub-family A (ABC1), member 12 | 0.020691  | Inlier   |
| siRNA-Vinblastine Run2-DMSO  | NM_0156 | 57        | ABCA12 | ATP-binding cassette, sub-family A (ABC1), member 12 | 0.995381  | Inlier   |
| siRNA Disorazole DMSO Run3   | NM_0156 | 57        | ABCA12 | ATP-binding cassette, sub-family A (ABC1), member 12 | 1.701635  | Inlier   |
| siRNA Disorazole DMSO Run2   | NM_0156 | 57        | ABCA12 | ATP-binding cassette, sub-family A (ABC1), member 12 | 3.438075  | Inlier   |
| siRNA-Temozolomide Run3-DMSO | NM_1527 | 01        | ABCA13 | ATP-binding cassette, sub-family A (ABC1), member 13 | -4.662139 | Outlier  |
| siRNA Disorazole DMSO Run1   | NM_1527 | 01        | ABCA13 | ATP-binding cassette, sub-family A (ABC1), member 13 | -0.934013 | Inlier   |
| siRNA Disorazole DMSO Run2   | NM_1527 | 01        | ABCA13 | ATP-binding cassette, sub-family A (ABC1), member 13 | -0.414986 | Inlier   |

Identification of Survival Genes in Human Glioblastoma Cells Using siRNA Screening

Nikhil G Thaker, Fang Zhang, Peter R. McDonald, Tong Ying Shun, Michael D Lewen, Ian F. Pollack, and John S. Lazo

Molecular Pharmacology

|                              |               |        |                                                      |           |        |
|------------------------------|---------------|--------|------------------------------------------------------|-----------|--------|
| siRNA-Temozolomide Run2-DMSO | NM_1527<br>01 | ABCA13 | ATP-binding cassette, sub-family A (ABC1), member 13 | -0.345188 | Inlier |
| siRNA Disorazole DMSO Run3   | NM_1527<br>01 | ABCA13 | ATP-binding cassette, sub-family A (ABC1), member 13 | 0.345187  | Inlier |
| siRNA-Vinblastine Run2-DMSO  | NM_1527<br>01 | ABCA13 | ATP-binding cassette, sub-family A (ABC1), member 13 | 0.345235  | Inlier |
| siRNA-Temozolomide Run1-DMSO | NM_1527<br>01 | ABCA13 | ATP-binding cassette, sub-family A (ABC1), member 13 | 1.333423  | Inlier |
| siRNA-Vinblastine Run1-DMSO  | NM_1527<br>01 | ABCA13 | ATP-binding cassette, sub-family A (ABC1), member 13 | 1.736304  | Inlier |
| siRNA-Temozolomide Run3-DMSO | NM_0016<br>06 | ABCA2  | ATP-binding cassette, sub-family A (ABC1), member 2  | -2.335602 | Inlier |
| siRNA-Temozolomide Run2-DMSO | NM_0016<br>06 | ABCA2  | ATP-binding cassette, sub-family A (ABC1), member 2  | -2.067493 | Inlier |

Identification of Survival Genes in Human Glioblastoma Cells Using siRNA Screening  
 Nikhil G Thaker, Fang Zhang, Peter R. McDonald, Tong Ying Shun, Michael D Lewen, Ian F. Pollack, and John S. Lazo

Molecular Pharmacology

|                              |           |       |                                                     |           |         |
|------------------------------|-----------|-------|-----------------------------------------------------|-----------|---------|
| siRNA Disorazole DMSO Run1   | NM_001606 | ABCA2 | ATP-binding cassette, sub-family A (ABC1), member 2 | -0.445503 | Inlier  |
| siRNA-Temozolomide Run1-DMSO | NM_001606 | ABCA2 | ATP-binding cassette, sub-family A (ABC1), member 2 | -0.145308 | Inlier  |
| siRNA Disorazole DMSO Run3   | NM_001606 | ABCA2 | ATP-binding cassette, sub-family A (ABC1), member 2 | 0.145308  | Inlier  |
| siRNA-Vinblastine Run2-DMSO  | NM_001606 | ABCA2 | ATP-binding cassette, sub-family A (ABC1), member 2 | 0.353487  | Inlier  |
| siRNA Disorazole DMSO Run2   | NM_001606 | ABCA2 | ATP-binding cassette, sub-family A (ABC1), member 2 | 0.903497  | Inlier  |
| siRNA-Vinblastine Run1-DMSO  | NM_001606 | ABCA2 | ATP-binding cassette, sub-family A (ABC1), member 2 | 1.442738  | Inlier  |
| siRNA-Temozolomide Run3-DMSO | NM_001089 | ABCA3 | ATP-binding cassette, sub-family A (ABC1), member 3 | -4.262306 | Outlier |
| siRNA-Temozolomide Run2-DMSO | NM_001089 | ABCA3 | ATP-binding cassette, sub-family A (ABC1), member 3 | -0.541541 | Inlier  |



Identification of Survival Genes in Human Glioblastoma Cells Using siRNA Screening

Nikhil G Thaker, Fang Zhang, Peter R. McDonald, Tong Ying Shun, Michael D Lewen, Ian F. Pollack, and John S. Lazo

Molecular Pharmacology

|                              |               |       |                                                     |           |        |
|------------------------------|---------------|-------|-----------------------------------------------------|-----------|--------|
| siRNA Disorazole DMSO Run3   | NM_0010<br>89 | ABCA3 | ATP-binding cassette, sub-family A (ABC1), member 3 | -0.536668 | Inlier |
| siRNA Disorazole DMSO Run2   | NM_0010<br>89 | ABCA3 | ATP-binding cassette, sub-family A (ABC1), member 3 | -0.183526 | Inlier |
| siRNA Disorazole DMSO Run1   | NM_0010<br>89 | ABCA3 | ATP-binding cassette, sub-family A (ABC1), member 3 | 0.183527  | Inlier |
| siRNA-Temozolomide Run1-DMSO | NM_0010<br>89 | ABCA3 | ATP-binding cassette, sub-family A (ABC1), member 3 | 0.807459  | Inlier |
| siRNA-Vinblastine Run2-DMSO  | NM_0010<br>89 | ABCA3 | ATP-binding cassette, sub-family A (ABC1), member 3 | 1.80248   | Inlier |
| siRNA-Vinblastine Run1-DMSO  | NM_0010<br>89 | ABCA3 | ATP-binding cassette, sub-family A (ABC1), member 3 | 2.151844  | Inlier |
| siRNA Disorazole DMSO Run1   | NM_0003<br>50 | ABCA4 | ATP-binding cassette, sub-family A (ABC1), member 4 | -0.868454 | Inlier |
| siRNA-Temozolomide Run3-DMSO | NM_0003<br>50 | ABCA4 | ATP-binding cassette, sub-family A (ABC1), member 4 | -0.753412 | Inlier |

Identification of Survival Genes in Human Glioblastoma Cells Using siRNA Screening

Nikhil G Thaker, Fang Zhang, Peter R. McDonald, Tong Ying Shun, Michael D Lewen, Ian F. Pollack, and John S. Lazo

Molecular Pharmacology

| siRNA Treatment              | Gene  | Gene ID   | Gene Family | Gene Description                                    | Log2 Fold Change | Outlier Status |
|------------------------------|-------|-----------|-------------|-----------------------------------------------------|------------------|----------------|
| siRNA-Temozolomide Run2-DMSO | ABCA4 | NM_000350 | ABCA4       | ATP-binding cassette, sub-family A (ABC1), member 4 | -0.595588        | Inlier         |
| siRNA-Temozolomide Run1-DMSO | ABCA4 | NM_000350 | ABCA4       | ATP-binding cassette, sub-family A (ABC1), member 4 | -0.045319        | Inlier         |
| siRNA-Vinblastine Run2-DMSO  | ABCA4 | NM_000350 | ABCA4       | ATP-binding cassette, sub-family A (ABC1), member 4 | 0.045319         | Inlier         |
| siRNA Disorazole DMSO Run3   | ABCA4 | NM_000350 | ABCA4       | ATP-binding cassette, sub-family A (ABC1), member 4 | 0.473426         | Inlier         |
| siRNA Disorazole DMSO Run2   | ABCA4 | NM_000350 | ABCA4       | ATP-binding cassette, sub-family A (ABC1), member 4 | 0.986811         | Inlier         |
| siRNA-Vinblastine Run1-DMSO  | ABCA4 | NM_000350 | ABCA4       | ATP-binding cassette, sub-family A (ABC1), member 4 | 1.163471         | Inlier         |
| siRNA Disorazole DMSO Run1   | ABCA5 | NM_172232 | ABCA5       | ATP-binding cassette, sub-family A (ABC1), member 5 | -1.831691        | Inlier         |
| siRNA-Temozolomide Run3-DMSO | ABCA5 | NM_172232 | ABCA5       | ATP-binding cassette, sub-family A (ABC1), member 5 | -1.03702         | Inlier         |

Identification of Survival Genes in Human Glioblastoma Cells Using siRNA Screening  
 Nikhil G Thaker, Fang Zhang, Peter R. McDonald, Tong Ying Shun, Michael D Lewen, Ian F. Pollack, and John S. Lazo

Molecular Pharmacology

| siRNA Treatment              | Gene    | Accession | Gene Name | Gene Description                                    | Log Fold Change | Outlier Status |
|------------------------------|---------|-----------|-----------|-----------------------------------------------------|-----------------|----------------|
| siRNA-Temozolomide Run2-DMSO | NM_1722 | 32        | ABCA5     | ATP-binding cassette, sub-family A (ABC1), member 5 | -0.750863       | Inlier         |
| siRNA-Vinblastine Run2-DMSO  | NM_1722 | 32        | ABCA5     | ATP-binding cassette, sub-family A (ABC1), member 5 | -0.11662        | Inlier         |
| siRNA-Vinblastine Run1-DMSO  | NM_1722 | 32        | ABCA5     | ATP-binding cassette, sub-family A (ABC1), member 5 | 0.11662         | Inlier         |
| siRNA-Temozolomide Run1-DMSO | NM_1722 | 32        | ABCA5     | ATP-binding cassette, sub-family A (ABC1), member 5 | 0.182883        | Inlier         |
| siRNA Disorazole DMSO Run3   | NM_1722 | 32        | ABCA5     | ATP-binding cassette, sub-family A (ABC1), member 5 | 0.598137        | Inlier         |
| siRNA Disorazole DMSO Run2   | NM_1722 | 32        | ABCA5     | ATP-binding cassette, sub-family A (ABC1), member 5 | 3.045029        | Inlier         |
| siRNA-Temozolomide Run3-DMSO | NM_1723 | 46        | ABCA6     | ATP-binding cassette, sub-family A (ABC1), member 6 | -3.449221       | Inlier         |
| siRNA Disorazole DMSO Run1   | NM_1723 | 46        | ABCA6     | ATP-binding cassette, sub-family A (ABC1), member 6 | -1.279637       | Inlier         |

Identification of Survival Genes in Human Glioblastoma Cells Using siRNA Screening  
 Nikhil G Thaker, Fang Zhang, Peter R. McDonald, Tong Ying Shun, Michael D Lewen, Ian F. Pollack, and John S. Lazo

Molecular Pharmacology

| siRNA Treatment              | Gene ID   | Gene Name | Gene Description                                    | Log2 Fold Change | Classification |
|------------------------------|-----------|-----------|-----------------------------------------------------|------------------|----------------|
| siRNA-Temozolomide Run2-DMSO | NM_172346 | ABCA6     | ATP-binding cassette, sub-family A (ABC1), member 6 | -1.132167        | Inlier         |
| siRNA Disorazole DMSO Run2   | NM_172346 | ABCA6     | ATP-binding cassette, sub-family A (ABC1), member 6 | -0.333968        | Inlier         |
| siRNA-Temozolomide Run1-DMSO | NM_172346 | ABCA6     | ATP-binding cassette, sub-family A (ABC1), member 6 | 0.333969         | Inlier         |
| siRNA-Vinblastine Run2-DMSO  | NM_172346 | ABCA6     | ATP-binding cassette, sub-family A (ABC1), member 6 | 0.616534         | Inlier         |
| siRNA Disorazole DMSO Run3   | NM_172346 | ABCA6     | ATP-binding cassette, sub-family A (ABC1), member 6 | 0.619087         | Inlier         |
| siRNA-Vinblastine Run1-DMSO  | NM_172346 | ABCA6     | ATP-binding cassette, sub-family A (ABC1), member 6 | 0.729913         | Inlier         |
| siRNA-Temozolomide Run3-DMSO | NM_019112 | ABCA7     | ATP-binding cassette, sub-family A (ABC1), member 7 | -3.614461        | Outlier        |
| siRNA Disorazole DMSO Run1   | NM_019112 | ABCA7     | ATP-binding cassette, sub-family A (ABC1), member 7 | -1.512483        | Inlier         |

Identification of Survival Genes in Human Glioblastoma Cells Using siRNA Screening  
 Nikhil G Thaker, Fang Zhang, Peter R. McDonald, Tong Ying Shun, Michael D Lewen, Ian F. Pollack, and John S. Lazo

Molecular Pharmacology

|                              |               |       |                                                     |           |         |
|------------------------------|---------------|-------|-----------------------------------------------------|-----------|---------|
| siRNA-Temozolomide Run2-DMSO | NM_0191<br>12 | ABCA7 | ATP-binding cassette, sub-family A (ABC1), member 7 | -1.036924 | Inlier  |
| siRNA-Vinblastine Run2-DMSO  | NM_0191<br>12 | ABCA7 | ATP-binding cassette, sub-family A (ABC1), member 7 | -0.051262 | Inlier  |
| siRNA-Temozolomide Run1-DMSO | NM_0191<br>12 | ABCA7 | ATP-binding cassette, sub-family A (ABC1), member 7 | 0.051263  | Inlier  |
| siRNA Disorazole DMSO Run3   | NM_0191<br>12 | ABCA7 | ATP-binding cassette, sub-family A (ABC1), member 7 | 0.210968  | Inlier  |
| siRNA-Vinblastine Run1-DMSO  | NM_0191<br>12 | ABCA7 | ATP-binding cassette, sub-family A (ABC1), member 7 | 0.312076  | Inlier  |
| siRNA Disorazole DMSO Run2   | NM_0191<br>12 | ABCA7 | ATP-binding cassette, sub-family A (ABC1), member 7 | 5.362711  | Outlier |
| siRNA-Temozolomide Run3-DMSO | NM_0071<br>68 | ABCA8 | ATP-binding cassette, sub-family A (ABC1), member 8 | -1.811717 | Inlier  |
| siRNA Disorazole DMSO Run2   | NM_0071<br>68 | ABCA8 | ATP-binding cassette, sub-family A (ABC1), member 8 | -0.971587 | Inlier  |

Identification of Survival Genes in Human Glioblastoma Cells Using siRNA Screening  
 Nikhil G Thaker, Fang Zhang, Peter R. McDonald, Tong Ying Shun, Michael D Lewen, Ian F. Pollack, and John S. Lazo

Molecular Pharmacology

| siRNA Treatment              | Gene ID   | Gene Name | Gene Description                                    | Log Fold Change | Outlier Status |
|------------------------------|-----------|-----------|-----------------------------------------------------|-----------------|----------------|
| siRNA-Temozolomide Run2-DMSO | NM_007168 | ABCA8     | ATP-binding cassette, sub-family A (ABC1), member 8 | -0.812343       | Inlier         |
| siRNA Disorazole DMSO Run1   | NM_007168 | ABCA8     | ATP-binding cassette, sub-family A (ABC1), member 8 | -0.017169       | Inlier         |
| siRNA-Temozolomide Run1-DMSO | NM_007168 | ABCA8     | ATP-binding cassette, sub-family A (ABC1), member 8 | 0.017169        | Inlier         |
| siRNA Disorazole DMSO Run3   | NM_007168 | ABCA8     | ATP-binding cassette, sub-family A (ABC1), member 8 | 0.279541        | Inlier         |
| siRNA-Vinblastine Run1-DMSO  | NM_007168 | ABCA8     | ATP-binding cassette, sub-family A (ABC1), member 8 | 0.654659        | Inlier         |
| siRNA-Vinblastine Run2-DMSO  | NM_007168 | ABCA8     | ATP-binding cassette, sub-family A (ABC1), member 8 | 0.694341        | Inlier         |
| siRNA-Temozolomide Run3-DMSO | NM_080283 | ABCA9     | ATP-binding cassette, sub-family A (ABC1), member 9 | -1.264677       | Inlier         |
| siRNA Disorazole DMSO Run1   | NM_080283 | ABCA9     | ATP-binding cassette, sub-family A (ABC1), member 9 | -1.006405       | Inlier         |

Identification of Survival Genes in Human Glioblastoma Cells Using siRNA Screening  
 Nikhil G Thaker, Fang Zhang, Peter R. McDonald, Tong Ying Shun, Michael D Lewen, Ian F. Pollack, and John S. Lazo

Molecular Pharmacology

| siRNA Treatment              | Gene      | Accession | Gene Name                                              | Gene Description | Log2 Fold Change | Category |
|------------------------------|-----------|-----------|--------------------------------------------------------|------------------|------------------|----------|
| siRNA-Temozolomide Run2-DMSO | NM_080283 | ABCA9     | ATP-binding cassette, sub-family A (ABC1), member 9    | -0.501987        | Inlier           |          |
| siRNA Disorazole DMSO Run2   | NM_080283 | ABCA9     | ATP-binding cassette, sub-family A (ABC1), member 9    | -0.1935          | Inlier           |          |
| siRNA-Vinblastine Run1-DMSO  | NM_080283 | ABCA9     | ATP-binding cassette, sub-family A (ABC1), member 9    | 0.1935           | Inlier           |          |
| siRNA-Temozolomide Run1-DMSO | NM_080283 | ABCA9     | ATP-binding cassette, sub-family A (ABC1), member 9    | 0.601814         | Inlier           |          |
| siRNA-Vinblastine Run2-DMSO  | NM_080283 | ABCA9     | ATP-binding cassette, sub-family A (ABC1), member 9    | 0.747186         | Inlier           |          |
| siRNA Disorazole DMSO Run3   | NM_080283 | ABCA9     | ATP-binding cassette, sub-family A (ABC1), member 9    | 1.915185         | Inlier           |          |
| siRNA-Temozolomide Run3-DMSO | NM_000927 | ABCB1     | ATP-binding cassette, sub-family B (MDR/TAP), member 1 | -3.531826        | Outlier          |          |
| siRNA-Temozolomide Run2-DMSO | NM_000927 | ABCB1     | ATP-binding cassette, sub-family B (MDR/TAP), member 1 | -2.304445        | Inlier           |          |

Identification of Survival Genes in Human Glioblastoma Cells Using siRNA Screening

Nikhil G Thaker, Fang Zhang, Peter R. McDonald, Tong Ying Shun, Michael D Lewen, Ian F. Pollack, and John S. Lazo

Molecular Pharmacology

| siRNA Treatment              | Gene  | Accession | Gene                                                   | Value     | Category |
|------------------------------|-------|-----------|--------------------------------------------------------|-----------|----------|
| siRNA Disorazole DMSO Run1   | ABCB1 | NM_000927 | ATP-binding cassette, sub-family B (MDR/TAP), member 1 | -0.668261 | Inlier   |
| siRNA Disorazole DMSO Run3   | ABCB1 | NM_000927 | ATP-binding cassette, sub-family B (MDR/TAP), member 1 | -0.320987 | Inlier   |
| siRNA-Temozolomide Run1-DMSO | ABCB1 | NM_000927 | ATP-binding cassette, sub-family B (MDR/TAP), member 1 | 0.320987  | Inlier   |
| siRNA-Vinblastine Run1-DMSO  | ABCB1 | NM_000927 | ATP-binding cassette, sub-family B (MDR/TAP), member 1 | 0.430849  | Inlier   |
| siRNA-Vinblastine Run2-DMSO  | ABCB1 | NM_000927 | ATP-binding cassette, sub-family B (MDR/TAP), member 1 | 0.680739  | Inlier   |
| siRNA Disorazole DMSO Run2   | ABCB1 | NM_000927 | ATP-binding cassette, sub-family B (MDR/TAP), member 1 | 1.265689  | Inlier   |



Identification of Survival Genes in Human Glioblastoma Cells Using siRNA Screening

Nikhil G Thaker, Fang Zhang, Peter R. McDonald, Tong Ying Shun, Michael D Lewen, Ian F. Pollack, and John S. Lazo

Molecular Pharmacology

|                              |               |        |                                                         |           |        |
|------------------------------|---------------|--------|---------------------------------------------------------|-----------|--------|
| siRNA Disorazole DMSO Run1   | NM_0120<br>89 | ABCB10 | ATP-binding cassette, sub-family B (MDR/TAP), member 10 | -1.235346 | Inlier |
| siRNA-Temozolomide Run3-DMSO | NM_0120<br>89 | ABCB10 | ATP-binding cassette, sub-family B (MDR/TAP), member 10 | -0.903021 | Inlier |
| siRNA-Temozolomide Run2-DMSO | NM_0120<br>89 | ABCB10 | ATP-binding cassette, sub-family B (MDR/TAP), member 10 | -0.178882 | Inlier |
| siRNA-Vinblastine Run2-DMSO  | NM_0120<br>89 | ABCB10 | ATP-binding cassette, sub-family B (MDR/TAP), member 10 | -0.122764 | Inlier |
| siRNA-Temozolomide Run1-DMSO | NM_0120<br>89 | ABCB10 | ATP-binding cassette, sub-family B (MDR/TAP), member 10 | 0.122764  | Inlier |

Identification of Survival Genes in Human Glioblastoma Cells Using siRNA Screening

Nikhil G Thaker, Fang Zhang, Peter R. McDonald, Tong Ying Shun, Michael D Lewen, Ian F. Pollack, and John S. Lazo

Molecular Pharmacology

|                              |               |        |                                                         |           |        |
|------------------------------|---------------|--------|---------------------------------------------------------|-----------|--------|
| siRNA-Vinblastine Run1-DMSO  | NM_0120<br>89 | ABCB10 | ATP-binding cassette, sub-family B (MDR/TAP), member 10 | 0.445979  | Inlier |
| siRNA Disorazole DMSO Run3   | NM_0120<br>89 | ABCB10 | ATP-binding cassette, sub-family B (MDR/TAP), member 10 | 1.977985  | Inlier |
| siRNA Disorazole DMSO Run2   | NM_0120<br>89 | ABCB10 | ATP-binding cassette, sub-family B (MDR/TAP), member 10 | 2.33704   | Inlier |
| siRNA-Temozolomide Run3-DMSO | NM_0037<br>42 | ABCB11 | ATP-binding cassette, sub-family B (MDR/TAP), member 11 | -2.478994 | Inlier |
| siRNA Disorazole DMSO Run3   | NM_0037<br>42 | ABCB11 | ATP-binding cassette, sub-family B (MDR/TAP), member 11 | -1.119502 | Inlier |

Identification of Survival Genes in Human Glioblastoma Cells Using siRNA Screening  
 Nikhil G Thaker, Fang Zhang, Peter R. McDonald, Tong Ying Shun, Michael D Lewen, Ian F. Pollack, and John S. Lazo  
 Molecular Pharmacology

|                              |               |        |                                                         |    |           |        |
|------------------------------|---------------|--------|---------------------------------------------------------|----|-----------|--------|
| siRNA-Temozolomide Run2-DMSO | NM_0037<br>42 | ABCB11 | ATP-binding cassette, sub-family B (MDR/TAP), member 11 | 11 | -0.134644 | Inlier |
| siRNA-Temozolomide Run1-DMSO | NM_0037<br>42 | ABCB11 | ATP-binding cassette, sub-family B (MDR/TAP), member 11 | 11 | -0.045493 | Inlier |
| siRNA Disorazole DMSO Run1   | NM_0037<br>42 | ABCB11 | ATP-binding cassette, sub-family B (MDR/TAP), member 11 | 11 | 0.045493  | Inlier |
| siRNA Disorazole DMSO Run2   | NM_0037<br>42 | ABCB11 | ATP-binding cassette, sub-family B (MDR/TAP), member 11 | 11 | 0.524542  | Inlier |
| siRNA-Vinblastine Run2-DMSO  | NM_0037<br>42 | ABCB11 | ATP-binding cassette, sub-family B (MDR/TAP), member 11 | 11 | 0.824458  | Inlier |

Identification of Survival Genes in Human Glioblastoma Cells Using siRNA Screening  
 Nikhil G Thaker, Fang Zhang, Peter R. McDonald, Tong Ying Shun, Michael D Lewen, Ian F. Pollack, and John S. Lazo  
 Molecular Pharmacology

|                              |               |        |                                                         |           |        |
|------------------------------|---------------|--------|---------------------------------------------------------|-----------|--------|
| siRNA-Vinblastine Run1-DMSO  | NM_0037<br>42 | ABCB11 | ATP-binding cassette, sub-family B (MDR/TAP), member 11 | 1.262336  | Inlier |
| siRNA-Temozolomide Run3-DMSO | NM_0188<br>49 | ABCB4  | ATP-binding cassette, sub-family B (MDR/TAP), member 4  | -2.654897 | Inlier |
| siRNA-Temozolomide Run2-DMSO | NM_0188<br>49 | ABCB4  | ATP-binding cassette, sub-family B (MDR/TAP), member 4  | -0.976735 | Inlier |
| siRNA Disorazole DMSO Run1   | NM_0188<br>49 | ABCB4  | ATP-binding cassette, sub-family B (MDR/TAP), member 4  | -0.599518 | Inlier |
| siRNA Disorazole DMSO Run2   | NM_0188<br>49 | ABCB4  | ATP-binding cassette, sub-family B (MDR/TAP), member 4  | -0.04995  | Inlier |
| siRNA Disorazole DMSO Run3   | NM_0188<br>49 | ABCB4  | ATP-binding cassette, sub-family B (MDR/TAP), member 4  | 0.04995   | Inlier |

Identification of Survival Genes in Human Glioblastoma Cells Using siRNA Screening  
 Nikhil G Thaker, Fang Zhang, Peter R. McDonald, Tong Ying Shun, Michael D Lewen, Ian F. Pollack, and John S. Lazo

Molecular Pharmacology

|                              |               |       |                                                        |           |        |
|------------------------------|---------------|-------|--------------------------------------------------------|-----------|--------|
| siRNA-Vinblastine Run2-DMSO  | NM_0188<br>49 | ABCB4 | ATP-binding cassette, sub-family B (MDR/TAP), member 4 | 0.552545  | Inlier |
| siRNA-Temozolomide Run1-DMSO | NM_0188<br>49 | ABCB4 | ATP-binding cassette, sub-family B (MDR/TAP), member 4 | 0.749482  | Inlier |
| siRNA-Vinblastine Run1-DMSO  | NM_0188<br>49 | ABCB4 | ATP-binding cassette, sub-family B (MDR/TAP), member 4 | 0.993174  | Inlier |
| siRNA-Temozolomide Run3-DMSO | NM_1785<br>59 | ABCB5 | ATP-binding cassette, sub-family B (MDR/TAP), member 5 | -2.382422 | Inlier |
| siRNA-Temozolomide Run2-DMSO | NM_1785<br>59 | ABCB5 | ATP-binding cassette, sub-family B (MDR/TAP), member 5 | -0.63726  | Inlier |
| siRNA Disorazole DMSO Run1   | NM_1785<br>59 | ABCB5 | ATP-binding cassette, sub-family B (MDR/TAP), member 5 | -0.512502 | Inlier |



Identification of Survival Genes in Human Glioblastoma Cells Using siRNA Screening  
 Nikhil G Thaker, Fang Zhang, Peter R. McDonald, Tong Ying Shun, Michael D Lewen, Ian F. Pollack, and John S. Lazo

Molecular Pharmacology

| siRNA Treatment              | Gene  | Accession | Gene Symbol | Gene Description                                       | Log Fold Change | Outlier Status |
|------------------------------|-------|-----------|-------------|--------------------------------------------------------|-----------------|----------------|
| siRNA Disorazole DMSO Run1   | ABCB6 | NM_005689 | ABCB6       | ATP-binding cassette, sub-family B (MDR/TAP), member 6 | -0.697412       | Inlier         |
| siRNA-Temozolomide Run2-DMSO | ABCB6 | NM_005689 | ABCB6       | ATP-binding cassette, sub-family B (MDR/TAP), member 6 | -0.651588       | Inlier         |
| siRNA-Vinblastine Run2-DMSO  | ABCB6 | NM_005689 | ABCB6       | ATP-binding cassette, sub-family B (MDR/TAP), member 6 | -0.107337       | Inlier         |
| siRNA Disorazole DMSO Run2   | ABCB6 | NM_005689 | ABCB6       | ATP-binding cassette, sub-family B (MDR/TAP), member 6 | 0.107337        | Inlier         |
| siRNA-Temozolomide Run1-DMSO | ABCB6 | NM_005689 | ABCB6       | ATP-binding cassette, sub-family B (MDR/TAP), member 6 | 0.600808        | Inlier         |
| siRNA-Vinblastine Run1-DMSO  | ABCB6 | NM_005689 | ABCB6       | ATP-binding cassette, sub-family B (MDR/TAP), member 6 | 0.884344        | Inlier         |

Identification of Survival Genes in Human Glioblastoma Cells Using siRNA Screening

Nikhil G Thaker, Fang Zhang, Peter R. McDonald, Tong Ying Shun, Michael D Lewen, Ian F. Pollack, and John S. Lazo

Molecular Pharmacology

|                              |               |       |   |           |        |
|------------------------------|---------------|-------|---|-----------|--------|
| siRNA Disorazole DMSO Run3   | NM_0056<br>89 | ABCB6 | 6 | 0.99728   | Inlier |
| siRNA-Temozolomide Run3-DMSO | NM_0042<br>99 | ABCB7 | 7 | -0.984968 | Inlier |
| siRNA Disorazole DMSO Run2   | NM_0042<br>99 | ABCB7 | 7 | -0.744306 | Inlier |
| siRNA Disorazole DMSO Run3   | NM_0042<br>99 | ABCB7 | 7 | -0.604694 | Inlier |
| siRNA-Temozolomide Run1-DMSO | NM_0042<br>99 | ABCB7 | 7 | -0.050292 | Inlier |
| siRNA-Temozolomide Run2-DMSO | NM_0042<br>99 | ABCB7 | 7 | 0.050292  | Inlier |

ATP-binding cassette, sub-family B (MDR/TAP), member 6  
ATP-binding cassette, sub-family B (MDR/TAP), member 7  
ATP-binding cassette, sub-family B (MDR/TAP), member 7



Identification of Survival Genes in Human Glioblastoma Cells Using siRNA Screening  
 Nikhil G Thaker, Fang Zhang, Peter R. McDonald, Tong Ying Shun, Michael D Lewen, Ian F. Pollack, and John S. Lazo

Molecular Pharmacology

| siRNA Treatment              | Gene  | Accession | Family                                                 | Score     | Category |
|------------------------------|-------|-----------|--------------------------------------------------------|-----------|----------|
| siRNA Disorazole DMSO Run1   | ABCB7 | NM_004299 | ATP-binding cassette, sub-family B (MDR/TAP), member 7 | 0.323209  | Inlier   |
| siRNA-Vinblastine Run1-DMSO  | ABCB7 | NM_004299 | ATP-binding cassette, sub-family B (MDR/TAP), member 7 | 1.154718  | Inlier   |
| siRNA-Vinblastine Run2-DMSO  | ABCB7 | NM_004299 | ATP-binding cassette, sub-family B (MDR/TAP), member 7 | 1.209854  | Inlier   |
| siRNA-Temozolomide Run3-DMSO | ABCB8 | NM_007188 | ATP-binding cassette, sub-family B (MDR/TAP), member 8 | -4.544803 | Outlier  |
| siRNA Disorazole DMSO Run1   | ABCB8 | NM_007188 | ATP-binding cassette, sub-family B (MDR/TAP), member 8 | -2.147145 | Inlier   |
| siRNA-Temozolomide Run2-DMSO | ABCB8 | NM_007188 | ATP-binding cassette, sub-family B (MDR/TAP), member 8 | -1.199622 | Inlier   |

Identification of Survival Genes in Human Glioblastoma Cells Using siRNA Screening  
 Nikhil G Thaker, Fang Zhang, Peter R. McDonald, Tong Ying Shun, Michael D Lewen, Ian F. Pollack, and John S. Lazo

Molecular Pharmacology

|                              |               |       |                                                        |           |        |
|------------------------------|---------------|-------|--------------------------------------------------------|-----------|--------|
| siRNA Disorazole DMSO Run2   | NM_0071<br>88 | ABCB8 | ATP-binding cassette, sub-family B (MDR/TAP), member 8 | -0.04602  | Inlier |
| siRNA-Vinblastine Run2-DMSO  | NM_0071<br>88 | ABCB8 | ATP-binding cassette, sub-family B (MDR/TAP), member 8 | 0.04602   | Inlier |
| siRNA-Temozolomide Run1-DMSO | NM_0071<br>88 | ABCB8 | ATP-binding cassette, sub-family B (MDR/TAP), member 8 | 0.301649  | Inlier |
| siRNA Disorazole DMSO Run3   | NM_0071<br>88 | ABCB8 | ATP-binding cassette, sub-family B (MDR/TAP), member 8 | 0.628259  | Inlier |
| siRNA-Vinblastine Run1-DMSO  | NM_0071<br>88 | ABCB8 | ATP-binding cassette, sub-family B (MDR/TAP), member 8 | 0.720741  | Inlier |
| siRNA-Temozolomide Run3-DMSO | NM_2034<br>44 | ABCB9 | ATP-binding cassette, sub-family B (MDR/TAP), member 9 | -3.190017 | Inlier |

Identification of Survival Genes in Human Glioblastoma Cells Using siRNA Screening  
 Nikhil G Thaker, Fang Zhang, Peter R. McDonald, Tong Ying Shun, Michael D Lewen, Ian F. Pollack, and John S. Lazo

Molecular Pharmacology

| siRNA Treatment         | Run     | Gene  | Gene Description                                       | Value     | Inlier |
|-------------------------|---------|-------|--------------------------------------------------------|-----------|--------|
| siRNA-Temozolomide DMSO | Run2-44 | ABCB9 | ATP-binding cassette, sub-family B (MDR/TAP), member 9 | -0.869777 | Inlier |
| siRNA Disorazole DMSO   | Run1-44 | ABCB9 | ATP-binding cassette, sub-family B (MDR/TAP), member 9 | -0.608804 | Inlier |
| siRNA Disorazole DMSO   | Run2-44 | ABCB9 | ATP-binding cassette, sub-family B (MDR/TAP), member 9 | -0.070914 | Inlier |
| siRNA-Vinblastine DMSO  | Run2-44 | ABCB9 | ATP-binding cassette, sub-family B (MDR/TAP), member 9 | 0.070914  | Inlier |
| siRNA Disorazole DMSO   | Run3-44 | ABCB9 | ATP-binding cassette, sub-family B (MDR/TAP), member 9 | 0.246709  | Inlier |
| siRNA-Temozolomide DMSO | Run1-44 | ABCB9 | ATP-binding cassette, sub-family B (MDR/TAP), member 9 | 0.740196  | Inlier |

Identification of Survival Genes in Human Glioblastoma Cells Using siRNA Screening

Nikhil G Thaker, Fang Zhang, Peter R. McDonald, Tong Ying Shun, Michael D Lewen, Ian F. Pollack, and John S. Lazo

Molecular Pharmacology

|                              |               |       |                                                         |           |        |
|------------------------------|---------------|-------|---------------------------------------------------------|-----------|--------|
| siRNA-Vinblastine Run1-DMSO  | NM_2034<br>44 | ABCB9 | ATP-binding cassette, sub-family B (MDR/TAP), member 9  | 0.757659  | Inlier |
| siRNA Disorazole DMSO Run2   | NM_0199<br>02 | ABCC1 | ATP-binding cassette, sub-family C (CFTR/MRP), member 1 | -1.939387 | Inlier |
| siRNA-Temozolomide Run3-DMSO | NM_0199<br>02 | ABCC1 | ATP-binding cassette, sub-family C (CFTR/MRP), member 1 | -1.822875 | Inlier |
| siRNA Disorazole DMSO Run1   | NM_0199<br>02 | ABCC1 | ATP-binding cassette, sub-family C (CFTR/MRP), member 1 | -0.501193 | Inlier |
| siRNA Disorazole DMSO Run3   | NM_0199<br>02 | ABCC1 | ATP-binding cassette, sub-family C (CFTR/MRP), member 1 | -0.111145 | Inlier |
| siRNA-Temozolomide Run2-DMSO | NM_0199<br>02 | ABCC1 | ATP-binding cassette, sub-family C (CFTR/MRP), member 1 | 0.111145  | Inlier |

Identification of Survival Genes in Human Glioblastoma Cells Using siRNA Screening  
 Nikhil G Thaker, Fang Zhang, Peter R. McDonald, Tong Ying Shun, Michael D Lewen, Ian F. Pollack, and John S. Lazo

Molecular Pharmacology

| siRNA Treatment              | Gene ID   | Gene Name | Gene Description                                         | Score     | Category |
|------------------------------|-----------|-----------|----------------------------------------------------------|-----------|----------|
| siRNA-Temozolomide Run1-DMSO | NM_019902 | ABCC1     | ATP-binding cassette, sub-family C (CFTR/MRP), member 1  | 0.609261  | Inlier   |
| siRNA-Vinblastine Run1-DMSO  | NM_019902 | ABCC1     | ATP-binding cassette, sub-family C (CFTR/MRP), member 1  | 0.739739  | Inlier   |
| siRNA-Vinblastine Run2-DMSO  | NM_019902 | ABCC1     | ATP-binding cassette, sub-family C (CFTR/MRP), member 1  | 0.913537  | Inlier   |
| siRNA Disorazole DMSO Run2   | NM_033450 | ABCC10    | ATP-binding cassette, sub-family C (CFTR/MRP), member 10 | -0.893798 | Inlier   |
| siRNA-Vinblastine Run2-DMSO  | NM_033450 | ABCC10    | ATP-binding cassette, sub-family C (CFTR/MRP), member 10 | -0.743238 | Inlier   |
| siRNA Disorazole DMSO Run1   | NM_033450 | ABCC10    | ATP-binding cassette, sub-family C (CFTR/MRP), member 10 | -0.591799 | Inlier   |

Identification of Survival Genes in Human Glioblastoma Cells Using siRNA Screening

Nikhil G Thaker, Fang Zhang, Peter R. McDonald, Tong Ying Shun, Michael D Lewen, Ian F. Pollack, and John S. Lazo

Molecular Pharmacology

| siRNA Treatment              | Gene ID   | Gene Name | Accession                                                | Value     | Outlier Status |
|------------------------------|-----------|-----------|----------------------------------------------------------|-----------|----------------|
| siRNA-Temozolomide Run3-DMSO | NM_033450 | ABCC10    | ATP-binding cassette, sub-family C (CFTR/MRP), member 10 | -0.501299 | Inlier         |
| siRNA-Temozolomide Run2-DMSO | NM_033450 | ABCC10    | ATP-binding cassette, sub-family C (CFTR/MRP), member 10 | 0.501298  | Inlier         |
| siRNA-Vinblastine Run1-DMSO  | NM_033450 | ABCC10    | ATP-binding cassette, sub-family C (CFTR/MRP), member 10 | 0.605762  | Inlier         |
| siRNA Disorazole DMSO Run3   | NM_033450 | ABCC10    | ATP-binding cassette, sub-family C (CFTR/MRP), member 10 | 0.980993  | Inlier         |
| siRNA-Temozolomide Run1-DMSO | NM_033450 | ABCC10    | ATP-binding cassette, sub-family C (CFTR/MRP), member 10 | 1.340873  | Inlier         |

Identification of Survival Genes in Human Glioblastoma Cells Using siRNA Screening

Nikhil G Thaker, Fang Zhang, Peter R. McDonald, Tong Ying Shun, Michael D Lewen, Ian F. Pollack, and John S.

Lazo

Molecular Pharmacology

| siRNA Treatment              | Gene      | Gene ID | Gene Symbol | Gene Description                                      | Log Fold Change | Outlier Status |
|------------------------------|-----------|---------|-------------|-------------------------------------------------------|-----------------|----------------|
| siRNA Disorazole DMSO Run1   | NM_145186 | ABCC11  | 11          | ATP-binding cassette, sub-family C (CFTR/MRP), member | -1.198213       | Inlier         |
| siRNA-Temozolomide Run3-DMSO | NM_145186 | ABCC11  | 11          | ATP-binding cassette, sub-family C (CFTR/MRP), member | -0.807929       | Inlier         |
| siRNA-Temozolomide Run2-DMSO | NM_145186 | ABCC11  | 11          | ATP-binding cassette, sub-family C (CFTR/MRP), member | -0.541071       | Inlier         |
| siRNA-Temozolomide Run1-DMSO | NM_145186 | ABCC11  | 11          | ATP-binding cassette, sub-family C (CFTR/MRP), member | -0.405022       | Inlier         |
| siRNA-Vinblastine Run2-DMSO  | NM_145186 | ABCC11  | 11          | ATP-binding cassette, sub-family C (CFTR/MRP), member | 0.405021        | Inlier         |

Identification of Survival Genes in Human Glioblastoma Cells Using siRNA Screening

Nikhil G Thaker, Fang Zhang, Peter R. McDonald, Tong Ying Shun, Michael D Lewen, Ian F. Pollack, and John S. Lazo

Molecular Pharmacology

|                              |               |        |    |           |        |
|------------------------------|---------------|--------|----|-----------|--------|
| siRNA Disorazole DMSO Run3   | NM_1451<br>86 | ABCC11 | 11 | 0.479367  | Inlier |
| siRNA Disorazole DMSO Run2   | NM_1451<br>86 | ABCC11 | 11 | 0.89066   | Inlier |
| siRNA-Vinblastine Run1-DMSO  | NM_1451<br>86 | ABCC11 | 11 | 1.146583  | Inlier |
| siRNA-Temozolomide Run3-DMSO | NM_1451<br>89 | ABCC12 | 12 | -1.193742 | Inlier |
| siRNA Disorazole DMSO Run2   | NM_1451<br>89 | ABCC12 | 12 | -0.697456 | Inlier |

ATP-binding cassette, sub-family C (CFTR/MRP), member 11

ATP-binding cassette, sub-family C (CFTR/MRP), member 11

ATP-binding cassette, sub-family C (CFTR/MRP), member 11

ATP-binding cassette, sub-family C (CFTR/MRP), member 12

ATP-binding cassette, sub-family C (CFTR/MRP), member 12



Identification of Survival Genes in Human Glioblastoma Cells Using siRNA Screening

Nikhil G Thaker, Fang Zhang, Peter R. McDonald, Tong Ying Shun, Michael D Lewen, Ian F. Pollack, and John S.

Lazo

Molecular Pharmacology

| siRNA Treatment              | Gene ID   | Gene Name | Gene Description                                         | Score     | Category |
|------------------------------|-----------|-----------|----------------------------------------------------------|-----------|----------|
| siRNA-Temozolomide Run2-DMSO | NM_145189 | ABCC12    | ATP-binding cassette, sub-family C (CFTR/MRP), member 12 | -0.363939 | Inlier   |
| siRNA Disorazole DMSO Run3   | NM_145189 | ABCC12    | ATP-binding cassette, sub-family C (CFTR/MRP), member 12 | -0.090227 | Inlier   |
| siRNA Disorazole DMSO Run1   | NM_145189 | ABCC12    | ATP-binding cassette, sub-family C (CFTR/MRP), member 12 | 0.090227  | Inlier   |
| siRNA-Temozolomide Run1-DMSO | NM_145189 | ABCC12    | ATP-binding cassette, sub-family C (CFTR/MRP), member 12 | 0.651544  | Inlier   |
| siRNA-Vinblastine Run2-DMSO  | NM_145189 | ABCC12    | ATP-binding cassette, sub-family C (CFTR/MRP), member 12 | 0.823534  | Inlier   |

Identification of Survival Genes in Human Glioblastoma Cells Using siRNA Screening

Nikhil G Thaker, Fang Zhang, Peter R. McDonald, Tong Ying Shun, Michael D Lewen, Ian F. Pollack, and John S. Lazo

Molecular Pharmacology

| siRNA Treatment              | Gene ID   | Gene Name | Gene Description                                         | Score     | Outlier Type |
|------------------------------|-----------|-----------|----------------------------------------------------------|-----------|--------------|
| siRNA-Vinblastine Run1-DMSO  | NM_145189 | ABCC12    | ATP-binding cassette, sub-family C (CFTR/MRP), member 12 | 0.907505  | Inlier       |
| siRNA-Temozolomide Run3-DMSO | NM_172025 | ABCC13    | ATP-binding cassette, sub-family C (CFTR/MRP), member 13 | -0.99232  | Inlier       |
| siRNA-Temozolomide Run2-DMSO | NM_172025 | ABCC13    | ATP-binding cassette, sub-family C (CFTR/MRP), member 13 | -0.615561 | Inlier       |
| siRNA Disorazole DMSO Run2   | NM_172025 | ABCC13    | ATP-binding cassette, sub-family C (CFTR/MRP), member 13 | -0.413288 | Inlier       |
| siRNA Disorazole DMSO Run3   | NM_172025 | ABCC13    | ATP-binding cassette, sub-family C (CFTR/MRP), member 13 | -0.259218 | Inlier       |

Identification of Survival Genes in Human Glioblastoma Cells Using siRNA Screening

Nikhil G Thaker, Fang Zhang, Peter R. McDonald, Tong Ying Shun, Michael D Lewen, Ian F. Pollack, and John S. Lazo

Molecular Pharmacology

|                              |               |        |                                                          |           |        |
|------------------------------|---------------|--------|----------------------------------------------------------|-----------|--------|
| siRNA-Temozolomide Run1-DMSO | NM_1720<br>25 | ABCC13 | ATP-binding cassette, sub-family C (CFTR/MRP), member 13 | 0.259218  | Inlier |
| siRNA Disorazole DMSO Run1   | NM_1720<br>25 | ABCC13 | ATP-binding cassette, sub-family C (CFTR/MRP), member 13 | 0.733439  | Inlier |
| siRNA-Vinblastine Run2-DMSO  | NM_1720<br>25 | ABCC13 | ATP-binding cassette, sub-family C (CFTR/MRP), member 13 | 2.441924  | Inlier |
| siRNA-Vinblastine Run1-DMSO  | NM_1720<br>25 | ABCC13 | ATP-binding cassette, sub-family C (CFTR/MRP), member 13 | 2.606645  | Inlier |
| siRNA-Temozolomide Run3-DMSO | NM_0003<br>92 | ABCC2  | ATP-binding cassette, sub-family C (CFTR/MRP), member 2  | -3.152769 | Inlier |
| siRNA-Temozolomide Run2-DMSO | NM_0003<br>92 | ABCC2  | ATP-binding cassette, sub-family C (CFTR/MRP), member 2  | -2.684159 | Inlier |

Identification of Survival Genes in Human Glioblastoma Cells Using siRNA Screening

Nikhil G Thaker, Fang Zhang, Peter R. McDonald, Tong Ying Shun, Michael D Lewen, Ian F. Pollack, and John S. Lazo

Molecular Pharmacology

|                              |           |       |                                                         |           |        |
|------------------------------|-----------|-------|---------------------------------------------------------|-----------|--------|
| siRNA-Temozolomide Run1-DMSO | NM_000392 | ABCC2 | ATP-binding cassette, sub-family C (CFTR/MRP), member 2 | -0.806045 | Inlier |
| siRNA Disorazole DMSO Run1   | NM_000392 | ABCC2 | ATP-binding cassette, sub-family C (CFTR/MRP), member 2 | -0.207217 | Inlier |
| siRNA-Vinblastine Run2-DMSO  | NM_000392 | ABCC2 | ATP-binding cassette, sub-family C (CFTR/MRP), member 2 | 0.207218  | Inlier |
| siRNA Disorazole DMSO Run3   | NM_000392 | ABCC2 | ATP-binding cassette, sub-family C (CFTR/MRP), member 2 | 0.291276  | Inlier |
| siRNA-Vinblastine Run1-DMSO  | NM_000392 | ABCC2 | ATP-binding cassette, sub-family C (CFTR/MRP), member 2 | 0.542955  | Inlier |
| siRNA Disorazole DMSO Run2   | NM_000392 | ABCC2 | ATP-binding cassette, sub-family C (CFTR/MRP), member 2 | 2.369627  | Inlier |

Identification of Survival Genes in Human Glioblastoma Cells Using siRNA Screening

Nikhil G Thaker, Fang Zhang, Peter R. McDonald, Tong Ying Shun, Michael D Lewen, Ian F. Pollack, and John S. Lazo

Molecular Pharmacology

| siRNA Treatment              | Gene ID   | Gene Name | Gene Description                                        | Log Fold Change | Outlier Status |
|------------------------------|-----------|-----------|---------------------------------------------------------|-----------------|----------------|
| siRNA-Temozolomide Run3-DMSO | NM_020038 | ABCC3     | ATP-binding cassette, sub-family C (CFTR/MRP), member 3 | -1.951411       | Inlier         |
| siRNA Disorazole DMSO Run1   | NM_020038 | ABCC3     | ATP-binding cassette, sub-family C (CFTR/MRP), member 3 | -0.843405       | Inlier         |
| siRNA-Vinblastine Run2-DMSO  | NM_020038 | ABCC3     | ATP-binding cassette, sub-family C (CFTR/MRP), member 3 | -0.505595       | Inlier         |
| siRNA-Temozolomide Run2-DMSO | NM_020038 | ABCC3     | ATP-binding cassette, sub-family C (CFTR/MRP), member 3 | -0.022682       | Inlier         |
| siRNA-Vinblastine Run1-DMSO  | NM_020038 | ABCC3     | ATP-binding cassette, sub-family C (CFTR/MRP), member 3 | 0.02268         | Inlier         |
| siRNA-Temozolomide Run1-DMSO | NM_020038 | ABCC3     | ATP-binding cassette, sub-family C (CFTR/MRP), member 3 | 0.377797        | Inlier         |

Identification of Survival Genes in Human Glioblastoma Cells Using siRNA Screening

Nikhil G Thaker, Fang Zhang, Peter R. McDonald, Tong Ying Shun, Michael D Lewen, Ian F. Pollack, and John S. Lazo

Molecular Pharmacology

|                              |               |       |                                                         |           |        |
|------------------------------|---------------|-------|---------------------------------------------------------|-----------|--------|
| siRNA Disorazole DMSO Run2   | NM_0200<br>38 | ABCC3 | ATP-binding cassette, sub-family C (CFTR/MRP), member 3 | 1.411129  | Inlier |
| siRNA Disorazole DMSO Run3   | NM_0200<br>38 | ABCC3 | ATP-binding cassette, sub-family C (CFTR/MRP), member 3 | 1.605597  | Inlier |
| siRNA-Temozolomide Run3-DMSO | NM_0058<br>45 | ABCC4 | ATP-binding cassette, sub-family C (CFTR/MRP), member 4 | -3.091406 | Inlier |
| siRNA-Temozolomide Run2-DMSO | NM_0058<br>45 | ABCC4 | ATP-binding cassette, sub-family C (CFTR/MRP), member 4 | -2.292447 | Inlier |
| siRNA-Vinblastine Run2-DMSO  | NM_0058<br>45 | ABCC4 | ATP-binding cassette, sub-family C (CFTR/MRP), member 4 | -0.710369 | Inlier |
| siRNA-Vinblastine Run1-DMSO  | NM_0058<br>45 | ABCC4 | ATP-binding cassette, sub-family C (CFTR/MRP), member 4 | -0.015198 | Inlier |

Identification of Survival Genes in Human Glioblastoma Cells Using siRNA Screening

Nikhil G Thaker, Fang Zhang, Peter R. McDonald, Tong Ying Shun, Michael D Lewen, Ian F. Pollack, and John S. Lazo

Molecular Pharmacology

|                              |               |       |                                                         |           |        |
|------------------------------|---------------|-------|---------------------------------------------------------|-----------|--------|
| siRNA-Temozolomide Run1-DMSO | NM_0058<br>45 | ABCC4 | ATP-binding cassette, sub-family C (CFTR/MRP), member 4 | 0.015197  | Inlier |
| siRNA Disorazole DMSO Run3   | NM_0058<br>45 | ABCC4 | ATP-binding cassette, sub-family C (CFTR/MRP), member 4 | 0.520667  | Inlier |
| siRNA Disorazole DMSO Run1   | NM_0058<br>45 | ABCC4 | ATP-binding cassette, sub-family C (CFTR/MRP), member 4 | 0.638631  | Inlier |
| siRNA Disorazole DMSO Run2   | NM_0058<br>45 | ABCC4 | ATP-binding cassette, sub-family C (CFTR/MRP), member 4 | 1.065206  | Inlier |
| siRNA-Temozolomide Run3-DMSO | NM_0056<br>88 | ABCC5 | ATP-binding cassette, sub-family C (CFTR/MRP), member 5 | -2.251107 | Inlier |
| siRNA Disorazole DMSO Run1   | NM_0056<br>88 | ABCC5 | ATP-binding cassette, sub-family C (CFTR/MRP), member 5 | -2.226394 | Inlier |

Identification of Survival Genes in Human Glioblastoma Cells Using siRNA Screening

Nikhil G Thaker, Fang Zhang, Peter R. McDonald, Tong Ying Shun, Michael D Lewen, Ian F. Pollack, and John S. Lazo

Molecular Pharmacology

|                              |           |       |                                                         |           |        |
|------------------------------|-----------|-------|---------------------------------------------------------|-----------|--------|
| siRNA-Vinblastine Run2-DMSO  | NM_005688 | ABCC5 | ATP-binding cassette, sub-family C (CFTR/MRP), member 5 | -0.633084 | Inlier |
| siRNA-Vinblastine Run1-DMSO  | NM_005688 | ABCC5 | ATP-binding cassette, sub-family C (CFTR/MRP), member 5 | -0.183381 | Inlier |
| siRNA Disorazole DMSO Run3   | NM_005688 | ABCC5 | ATP-binding cassette, sub-family C (CFTR/MRP), member 5 | 0.183381  | Inlier |
| siRNA-Temozolomide Run1-DMSO | NM_005688 | ABCC5 | ATP-binding cassette, sub-family C (CFTR/MRP), member 5 | 0.224615  | Inlier |
| siRNA-Temozolomide Run2-DMSO | NM_005688 | ABCC5 | ATP-binding cassette, sub-family C (CFTR/MRP), member 5 | 0.715916  | Inlier |
| siRNA Disorazole DMSO Run2   | NM_005688 | ABCC5 | ATP-binding cassette, sub-family C (CFTR/MRP), member 5 | 0.930529  | Inlier |



Identification of Survival Genes in Human Glioblastoma Cells Using siRNA Screening  
 Nikhil G Thaker, Fang Zhang, Peter R. McDonald, Tong Ying Shun, Michael D Lewen, Ian F. Pollack, and John S. Lazo

Molecular Pharmacology

|                              |           |       |                                                         |           |        |
|------------------------------|-----------|-------|---------------------------------------------------------|-----------|--------|
| siRNA-Temozolomide Run3-DMSO | NM_001171 | ABCC6 | ATP-binding cassette, sub-family C (CFTR/MRP), member 6 | -3.016951 | Inlier |
| siRNA Disorazole DMSO Run3   | NM_001171 | ABCC6 | ATP-binding cassette, sub-family C (CFTR/MRP), member 6 | -1.760684 | Inlier |
| siRNA Disorazole DMSO Run2   | NM_001171 | ABCC6 | ATP-binding cassette, sub-family C (CFTR/MRP), member 6 | -1.224834 | Inlier |
| siRNA-Temozolomide Run2-DMSO | NM_001171 | ABCC6 | ATP-binding cassette, sub-family C (CFTR/MRP), member 6 | -0.306258 | Inlier |
| siRNA Disorazole DMSO Run1   | NM_001171 | ABCC6 | ATP-binding cassette, sub-family C (CFTR/MRP), member 6 | 0.306258  | Inlier |
| siRNA-Temozolomide Run1-DMSO | NM_001171 | ABCC6 | ATP-binding cassette, sub-family C (CFTR/MRP), member 6 | 0.359106  | Inlier |

Identification of Survival Genes in Human Glioblastoma Cells Using siRNA Screening

Nikhil G Thaker, Fang Zhang, Peter R. McDonald, Tong Ying Shun, Michael D Lewen, Ian F. Pollack, and John S. Lazo

Molecular Pharmacology

|                              |           |       |                                                         |           |        |
|------------------------------|-----------|-------|---------------------------------------------------------|-----------|--------|
| siRNA-Vinblastine Run1-DMSO  | NM_001171 | ABCC6 | ATP-binding cassette, sub-family C (CFTR/MRP), member 6 | 0.600549  | Inlier |
| siRNA-Vinblastine Run2-DMSO  | NM_001171 | ABCC6 | ATP-binding cassette, sub-family C (CFTR/MRP), member 6 | 0.748451  | Inlier |
| siRNA Disorazole DMSO Run2   | NM_000352 | ABCC8 | ATP-binding cassette, sub-family C (CFTR/MRP), member 8 | -1.207068 | Inlier |
| siRNA-Temozolomide Run3-DMSO | NM_000352 | ABCC8 | ATP-binding cassette, sub-family C (CFTR/MRP), member 8 | -0.939251 | Inlier |
| siRNA-Temozolomide Run2-DMSO | NM_000352 | ABCC8 | ATP-binding cassette, sub-family C (CFTR/MRP), member 8 | -0.711663 | Inlier |
| siRNA Disorazole DMSO Run3   | NM_000352 | ABCC8 | ATP-binding cassette, sub-family C (CFTR/MRP), member 8 | -0.498383 | Inlier |

Identification of Survival Genes in Human Glioblastoma Cells Using siRNA Screening

Nikhil G Thaker, Fang Zhang, Peter R. McDonald, Tong Ying Shun, Michael D Lewen, Ian F. Pollack, and John S. Lazo

Molecular Pharmacology

|                              |           |       |                                                         |           |        |
|------------------------------|-----------|-------|---------------------------------------------------------|-----------|--------|
| siRNA-Vinblastine Run1-DMSO  | NM_000352 | ABCC8 | ATP-binding cassette, sub-family C (CFTR/MRP), member 8 | 0.498383  | Inlier |
| siRNA-Temozolomide Run1-DMSO | NM_000352 | ABCC8 | ATP-binding cassette, sub-family C (CFTR/MRP), member 8 | 0.633201  | Inlier |
| siRNA Disorazole DMSO Run1   | NM_000352 | ABCC8 | ATP-binding cassette, sub-family C (CFTR/MRP), member 8 | 0.672018  | Inlier |
| siRNA-Vinblastine Run2-DMSO  | NM_000352 | ABCC8 | ATP-binding cassette, sub-family C (CFTR/MRP), member 8 | 0.676982  | Inlier |
| siRNA-Temozolomide Run3-DMSO | NM_020298 | ABCC9 | ATP-binding cassette, sub-family C (CFTR/MRP), member 9 | -0.856896 | Inlier |
| siRNA-Temozolomide Run2-DMSO | NM_020298 | ABCC9 | ATP-binding cassette, sub-family C (CFTR/MRP), member 9 | -0.718493 | Inlier |

Identification of Survival Genes in Human Glioblastoma Cells Using siRNA Screening

Nikhil G Thaker, Fang Zhang, Peter R. McDonald, Tong Ying Shun, Michael D Lewen, Ian F. Pollack, and John S. Lazo

Molecular Pharmacology

|                              |               |       |                                                         |           |        |
|------------------------------|---------------|-------|---------------------------------------------------------|-----------|--------|
| siRNA Disorazole DMSO Run2   | NM_0202<br>98 | ABCC9 | ATP-binding cassette, sub-family C (CFTR/MRP), member 9 | -0.630507 | Inlier |
| siRNA Disorazole DMSO Run3   | NM_0202<br>98 | ABCC9 | ATP-binding cassette, sub-family C (CFTR/MRP), member 9 | -0.280858 | Inlier |
| siRNA-Vinblastine Run1-DMSO  | NM_0202<br>98 | ABCC9 | ATP-binding cassette, sub-family C (CFTR/MRP), member 9 | 0.280858  | Inlier |
| siRNA-Temozolomide Run1-DMSO | NM_0202<br>98 | ABCC9 | ATP-binding cassette, sub-family C (CFTR/MRP), member 9 | 0.512131  | Inlier |
| siRNA Disorazole DMSO Run1   | NM_0202<br>98 | ABCC9 | ATP-binding cassette, sub-family C (CFTR/MRP), member 9 | 0.755356  | Inlier |
| siRNA-Vinblastine Run2-DMSO  | NM_0202<br>98 | ABCC9 | ATP-binding cassette, sub-family C (CFTR/MRP), member 9 | 0.910684  | Inlier |

Identification of Survival Genes in Human Glioblastoma Cells Using siRNA Screening

Nikhil G Thaker, Fang Zhang, Peter R. McDonald, Tong Ying Shun, Michael D Lewen, Ian F. Pollack, and John S. Lazo

Molecular Pharmacology

|                              |           |       |                                                    |           |        |
|------------------------------|-----------|-------|----------------------------------------------------|-----------|--------|
| siRNA-Temozolomide Run3-DMSO | NM_000033 | ABCD1 | ATP-binding cassette, sub-family D (ALD), member 1 | -1.706583 | Inlier |
| siRNA Disorazole DMSO Run2   | NM_000033 | ABCD1 | ATP-binding cassette, sub-family D (ALD), member 1 | -1.293813 | Inlier |
| siRNA-Temozolomide Run2-DMSO | NM_000033 | ABCD1 | ATP-binding cassette, sub-family D (ALD), member 1 | -0.802935 | Inlier |
| siRNA Disorazole DMSO Run3   | NM_000033 | ABCD1 | ATP-binding cassette, sub-family D (ALD), member 1 | -0.368126 | Inlier |
| siRNA Disorazole DMSO Run1   | NM_000033 | ABCD1 | ATP-binding cassette, sub-family D (ALD), member 1 | 0.368126  | Inlier |
| siRNA-Temozolomide Run1-DMSO | NM_000033 | ABCD1 | ATP-binding cassette, sub-family D (ALD), member 1 | 0.424313  | Inlier |
| siRNA-Vinblastine Run1-DMSO  | NM_000033 | ABCD1 | ATP-binding cassette, sub-family D (ALD), member 1 | 0.546065  | Inlier |
| siRNA-Vinblastine Run2-DMSO  | NM_000033 | ABCD1 | ATP-binding cassette, sub-family D (ALD), member 1 | 1.494031  | Inlier |

Identification of Survival Genes in Human Glioblastoma Cells Using siRNA Screening  
 Nikhil G Thaker, Fang Zhang, Peter R. McDonald, Tong Ying Shun, Michael D Lewen, Ian F. Pollack, and John S. Lazo

Molecular Pharmacology

|                              |               |       |                                                    |           |        |
|------------------------------|---------------|-------|----------------------------------------------------|-----------|--------|
| siRNA Disorazole DMSO Run2   | NM_0051<br>64 | ABCD2 | ATP-binding cassette, sub-family D (ALD), member 2 | -1.023715 | Inlier |
| siRNA Disorazole DMSO Run3   | NM_0051<br>64 | ABCD2 | ATP-binding cassette, sub-family D (ALD), member 2 | -0.929657 | Inlier |
| siRNA-Temozolomide Run3-DMSO | NM_0051<br>64 | ABCD2 | ATP-binding cassette, sub-family D (ALD), member 2 | -0.809029 | Inlier |
| siRNA-Temozolomide Run2-DMSO | NM_0051<br>64 | ABCD2 | ATP-binding cassette, sub-family D (ALD), member 2 | -0.119979 | Inlier |
| siRNA Disorazole DMSO Run1   | NM_0051<br>64 | ABCD2 | ATP-binding cassette, sub-family D (ALD), member 2 | 0.119979  | Inlier |
| siRNA-Temozolomide Run1-DMSO | NM_0051<br>64 | ABCD2 | ATP-binding cassette, sub-family D (ALD), member 2 | 0.445799  | Inlier |
| siRNA-Vinblastine Run1-DMSO  | NM_0051<br>64 | ABCD2 | ATP-binding cassette, sub-family D (ALD), member 2 | 0.539971  | Inlier |
| siRNA-Vinblastine Run2-DMSO  | NM_0051<br>64 | ABCD2 | ATP-binding cassette, sub-family D (ALD), member 2 | 0.839666  | Inlier |

Identification of Survival Genes in Human Glioblastoma Cells Using siRNA Screening

Nikhil G Thaker, Fang Zhang, Peter R. McDonald, Tong Ying Shun, Michael D Lewen, Ian F. Pollack, and John S. Lazo

Molecular Pharmacology

| siRNA Treatment              | Gene ID   | Gene Name | Gene Description                                   | Log Fold Change | Outlier Status |
|------------------------------|-----------|-----------|----------------------------------------------------|-----------------|----------------|
| siRNA Disorazole DMSO Run3   | NM_002858 | ABCD3     | ATP-binding cassette, sub-family D (ALD), member 3 | -1.29184        | Inlier         |
| siRNA-Temozolomide Run3-DMSO | NM_002858 | ABCD3     | ATP-binding cassette, sub-family D (ALD), member 3 | -0.825863       | Inlier         |
| siRNA-Temozolomide Run2-DMSO | NM_002858 | ABCD3     | ATP-binding cassette, sub-family D (ALD), member 3 | -0.77721        | Inlier         |
| siRNA Disorazole DMSO Run1   | NM_002858 | ABCD3     | ATP-binding cassette, sub-family D (ALD), member 3 | -0.100211       | Inlier         |
| siRNA Disorazole DMSO Run2   | NM_002858 | ABCD3     | ATP-binding cassette, sub-family D (ALD), member 3 | 0.10021         | Inlier         |
| siRNA-Vinblastine Run1-DMSO  | NM_002858 | ABCD3     | ATP-binding cassette, sub-family D (ALD), member 3 | 0.448818        | Inlier         |
| siRNA-Temozolomide Run1-DMSO | NM_002858 | ABCD3     | ATP-binding cassette, sub-family D (ALD), member 3 | 0.57179         | Inlier         |
| siRNA-Vinblastine Run2-DMSO  | NM_002858 | ABCD3     | ATP-binding cassette, sub-family D (ALD), member 3 | 0.980868        | Inlier         |

Identification of Survival Genes in Human Glioblastoma Cells Using siRNA Screening

Nikhil G Thaker, Fang Zhang, Peter R. McDonald, Tong Ying Shun, Michael D Lewen, Ian F. Pollack, and John S. Lazo

Molecular Pharmacology

|                              |               |       |                                                    |           |        |
|------------------------------|---------------|-------|----------------------------------------------------|-----------|--------|
| siRNA-Temozolomide Run2-DMSO | NM_0203<br>25 | ABCD4 | ATP-binding cassette, sub-family D (ALD), member 4 | -1.312887 | Inlier |
| siRNA-Temozolomide Run3-DMSO | NM_0203<br>25 | ABCD4 | ATP-binding cassette, sub-family D (ALD), member 4 | -0.857732 | Inlier |
| siRNA Disorazole DMSO Run1   | NM_0203<br>25 | ABCD4 | ATP-binding cassette, sub-family D (ALD), member 4 | -0.743763 | Inlier |
| siRNA-Temozolomide Run1-DMSO | NM_0203<br>25 | ABCD4 | ATP-binding cassette, sub-family D (ALD), member 4 | -0.268423 | Inlier |
| siRNA-Vinblastine Run2-DMSO  | NM_0203<br>25 | ABCD4 | ATP-binding cassette, sub-family D (ALD), member 4 | 0.268422  | Inlier |
| siRNA Disorazole DMSO Run3   | NM_0203<br>25 | ABCD4 | ATP-binding cassette, sub-family D (ALD), member 4 | 0.505365  | Inlier |
| siRNA-Vinblastine Run1-DMSO  | NM_0203<br>25 | ABCD4 | ATP-binding cassette, sub-family D (ALD), member 4 | 0.605237  | Inlier |
| siRNA Disorazole DMSO Run2   | NM_0203<br>25 | ABCD4 | ATP-binding cassette, sub-family D (ALD), member 4 | 0.810005  | Inlier |



Identification of Survival Genes in Human Glioblastoma Cells Using siRNA Screening

Nikhil G Thaker, Fang Zhang, Peter R. McDonald, Tong Ying Shun, Michael D Lewen, Ian F. Pollack, and John S. Lazo

Molecular Pharmacology

|                              |               |       |                                                     |                  |
|------------------------------|---------------|-------|-----------------------------------------------------|------------------|
| siRNA-Temozolomide Run3-DMSO | NM_0029<br>40 | ABCE1 | ATP-binding cassette, sub-family E (OABP), member 1 | -1.100593 Inlier |
| siRNA-Temozolomide Run2-DMSO | NM_0029<br>40 | ABCE1 | ATP-binding cassette, sub-family E (OABP), member 1 | -0.94035 Inlier  |
| siRNA-Temozolomide Run1-DMSO | NM_0029<br>40 | ABCE1 | ATP-binding cassette, sub-family E (OABP), member 1 | -0.40865 Inlier  |
| siRNA Disorazole DMSO Run1   | NM_0029<br>40 | ABCE1 | ATP-binding cassette, sub-family E (OABP), member 1 | -0.016734 Inlier |
| siRNA Disorazole DMSO Run3   | NM_0029<br>40 | ABCE1 | ATP-binding cassette, sub-family E (OABP), member 1 | 0.016734 Inlier  |
| siRNA Disorazole DMSO Run2   | NM_0029<br>40 | ABCE1 | ATP-binding cassette, sub-family E (OABP), member 1 | 0.12463 Inlier   |
| siRNA-Vinblastine Run1-DMSO  | NM_0029<br>40 | ABCE1 | ATP-binding cassette, sub-family E (OABP), member 1 | 1.024831 Inlier  |

Identification of Survival Genes in Human Glioblastoma Cells Using siRNA Screening  
 Nikhil G Thaker, Fang Zhang, Peter R. McDonald, Tong Ying Shun, Michael D Lewen, Ian F. Pollack, and John S. Lazo  
 Molecular Pharmacology

|                              |               |       |                                                      |           |        |
|------------------------------|---------------|-------|------------------------------------------------------|-----------|--------|
| siRNA-Vinblastine Run2-DMSO  | NM_0029<br>40 | ABCE1 | ATP-binding cassette, sub-family E (OABP), member 1  | 1.195809  | Inlier |
| siRNA Disorazole DMSO Run1   | NM_0010<br>90 | ABCF1 | ATP-binding cassette, sub-family F (GCN20), member 1 | -1.069933 | Inlier |
| siRNA Disorazole DMSO Run2   | NM_0010<br>90 | ABCF1 | ATP-binding cassette, sub-family F (GCN20), member 1 | -0.990915 | Inlier |
| siRNA-Temozolomide Run2-DMSO | NM_0010<br>90 | ABCF1 | ATP-binding cassette, sub-family F (GCN20), member 1 | -0.712239 | Inlier |
| siRNA-Temozolomide Run3-DMSO | NM_0010<br>90 | ABCF1 | ATP-binding cassette, sub-family F (GCN20), member 1 | -0.173494 | Inlier |
| siRNA-Temozolomide Run1-DMSO | NM_0010<br>90 | ABCF1 | ATP-binding cassette, sub-family F (GCN20), member 1 | 0.173494  | Inlier |
| siRNA Disorazole DMSO Run3   | NM_0010<br>90 | ABCF1 | ATP-binding cassette, sub-family F (GCN20), member 1 | 0.246371  | Inlier |

Identification of Survival Genes in Human Glioblastoma Cells Using siRNA Screening

Nikhil G Thaker, Fang Zhang, Peter R. McDonald, Tong Ying Shun, Michael D Lewen, Ian F. Pollack, and John S. Lazo

Molecular Pharmacology

| siRNA Treatment              | Gene ID   | Gene Name | Protein Name | Log Fold Change | Annotation |
|------------------------------|-----------|-----------|--------------|-----------------|------------|
| siRNA-Vinblastine Run2-DMSO  | NM_001090 | ABCF1     | ABCF1        | 0.636761        | Inlier     |
| siRNA-Vinblastine Run1-DMSO  | NM_001090 | ABCF1     | ABCF1        | 0.969102        | Inlier     |
| siRNA Disorazole DMSO Run3   | NM_007189 | ABCF2     | ABCF2        | -1.484807       | Inlier     |
| siRNA Disorazole DMSO Run2   | NM_007189 | ABCF2     | ABCF2        | -0.592601       | Inlier     |
| siRNA-Temozolomide Run2-DMSO | NM_007189 | ABCF2     | ABCF2        | -0.454484       | Inlier     |
| siRNA Disorazole DMSO Run1   | NM_007189 | ABCF2     | ABCF2        | -0.364332       | Inlier     |
| siRNA-Temozolomide Run1-DMSO | NM_007189 | ABCF2     | ABCF2        | 0.364331        | Inlier     |

ATP-binding cassette, sub-family F (GCN20), member 1  
 ATP-binding cassette, sub-family F (GCN20), member 1  
 ATP-binding cassette, sub-family F (GCN20), member 2  
 ATP-binding cassette, sub-family F (GCN20), member 2

Identification of Survival Genes in Human Glioblastoma Cells Using siRNA Screening

Nikhil G Thaker, Fang Zhang, Peter R. McDonald, Tong Ying Shun, Michael D Lewen, Ian F. Pollack, and John S. Lazo

Molecular Pharmacology

|                              |               |       |                                                      |           |        |
|------------------------------|---------------|-------|------------------------------------------------------|-----------|--------|
| siRNA-Vinblastine Run2-DMSO  | NM_0071<br>89 | ABCF2 | ATP-binding cassette, sub-family F (GCN20), member 2 | 0.756399  | Inlier |
| siRNA-Vinblastine Run1-DMSO  | NM_0071<br>89 | ABCF2 | ATP-binding cassette, sub-family F (GCN20), member 2 | 1.002079  | Inlier |
| siRNA-Temozolomide Run3-DMSO | NM_0071<br>89 | ABCF2 | ATP-binding cassette, sub-family F (GCN20), member 2 | 1.160127  | Inlier |
| siRNA-Temozolomide Run3-DMSO | NM_0183<br>58 | ABCF3 | ATP-binding cassette, sub-family F (GCN20), member 3 | -1.134575 | Inlier |
| siRNA-Temozolomide Run2-DMSO | NM_0183<br>58 | ABCF3 | ATP-binding cassette, sub-family F (GCN20), member 3 | -1.129037 | Inlier |
| siRNA Disorazole DMSO Run2   | NM_0183<br>58 | ABCF3 | ATP-binding cassette, sub-family F (GCN20), member 3 | -0.943383 | Inlier |
| siRNA Disorazole DMSO Run3   | NM_0183<br>58 | ABCF3 | ATP-binding cassette, sub-family F (GCN20), member 3 | -0.109865 | Inlier |

Identification of Survival Genes in Human Glioblastoma Cells Using siRNA Screening

Nikhil G Thaker, Fang Zhang, Peter R. McDonald, Tong Ying Shun, Michael D Lewen, Ian F. Pollack, and John S. Lazo

Molecular Pharmacology

|                              |               |       |                                                      |           |         |
|------------------------------|---------------|-------|------------------------------------------------------|-----------|---------|
| siRNA Disorazole DMSO Run1   | NM_0183<br>58 | ABCF3 | ATP-binding cassette, sub-family F (GCN20), member 3 | 0.109864  | Inlier  |
| siRNA-Temozolomide Run1-DMSO | NM_0183<br>58 | ABCF3 | ATP-binding cassette, sub-family F (GCN20), member 3 | 0.23145   | Inlier  |
| siRNA-Vinblastine Run2-DMSO  | NM_0183<br>58 | ABCF3 | ATP-binding cassette, sub-family F (GCN20), member 3 | 0.405617  | Inlier  |
| siRNA-Vinblastine Run1-DMSO  | NM_0183<br>58 | ABCF3 | ATP-binding cassette, sub-family F (GCN20), member 3 | 1.280908  | Inlier  |
| siRNA Disorazole DMSO Run2   | NM_2076<br>30 | ABCG1 | ATP-binding cassette, sub-family G (WHITE), member 1 | -6.933624 | Outlier |
| siRNA Disorazole DMSO Run1   | NM_2076<br>30 | ABCG1 | ATP-binding cassette, sub-family G (WHITE), member 1 | -2.659464 | Inlier  |
| siRNA-Temozolomide Run2-DMSO | NM_2076<br>30 | ABCG1 | ATP-binding cassette, sub-family G (WHITE), member 1 | -0.513946 | Inlier  |

Identification of Survival Genes in Human Glioblastoma Cells Using siRNA Screening  
 Nikhil G Thaker, Fang Zhang, Peter R. McDonald, Tong Ying Shun, Michael D Lewen, Ian F. Pollack, and John S. Lazo

Molecular Pharmacology

|                              |               |       |                                                      |           |        |
|------------------------------|---------------|-------|------------------------------------------------------|-----------|--------|
| siRNA Disorazole DMSO Run3   | NM_2076<br>30 | ABCG1 | ATP-binding cassette, sub-family G (WHITE), member 1 | -0.38234  | Inlier |
| siRNA-Temozolomide Run3-DMSO | NM_2076<br>30 | ABCG1 | ATP-binding cassette, sub-family G (WHITE), member 1 | 0.38234   | Inlier |
| siRNA-Temozolomide Run1-DMSO | NM_2076<br>30 | ABCG1 | ATP-binding cassette, sub-family G (WHITE), member 1 | 0.412405  | Inlier |
| siRNA-Vinblastine Run2-DMSO  | NM_2076<br>30 | ABCG1 | ATP-binding cassette, sub-family G (WHITE), member 1 | 0.835054  | Inlier |
| siRNA-Vinblastine Run1-DMSO  | NM_2076<br>30 | ABCG1 | ATP-binding cassette, sub-family G (WHITE), member 1 | 1.099308  | Inlier |
| siRNA Disorazole DMSO Run2   | NM_0048<br>27 | ABCG2 | ATP-binding cassette, sub-family G (WHITE), member 2 | -1.729025 | Inlier |
| siRNA-Vinblastine Run2-DMSO  | NM_0048<br>27 | ABCG2 | ATP-binding cassette, sub-family G (WHITE), member 2 | -1.314678 | Inlier |

Identification of Survival Genes in Human Glioblastoma Cells Using siRNA Screening

Nikhil G Thaker, Fang Zhang, Peter R. McDonald, Tong Ying Shun, Michael D Lewen, Ian F. Pollack, and John S. Lazo

Molecular Pharmacology

|                              |               |       |                                                      |           |        |
|------------------------------|---------------|-------|------------------------------------------------------|-----------|--------|
| siRNA-Temozolomide Run2-DMSO | NM_0048<br>27 | ABCG2 | ATP-binding cassette, sub-family G (WHITE), member 2 | -0.569707 | Inlier |
| siRNA-Temozolomide Run3-DMSO | NM_0048<br>27 | ABCG2 | ATP-binding cassette, sub-family G (WHITE), member 2 | -0.215923 | Inlier |
| siRNA Disorazole DMSO Run1   | NM_0048<br>27 | ABCG2 | ATP-binding cassette, sub-family G (WHITE), member 2 | 0.215922  | Inlier |
| siRNA-Vinblastine Run1-DMSO  | NM_0048<br>27 | ABCG2 | ATP-binding cassette, sub-family G (WHITE), member 2 | 0.478677  | Inlier |
| siRNA-Temozolomide Run1-DMSO | NM_0048<br>27 | ABCG2 | ATP-binding cassette, sub-family G (WHITE), member 2 | 0.779293  | Inlier |
| siRNA Disorazole DMSO Run3   | NM_0048<br>27 | ABCG2 | ATP-binding cassette, sub-family G (WHITE), member 2 | 0.965909  | Inlier |
| siRNA Disorazole DMSO Run1   | NM_0221<br>69 | ABCG4 | ATP-binding cassette, sub-family G (WHITE), member 4 | -1.878553 | Inlier |

Identification of Survival Genes in Human Glioblastoma Cells Using siRNA Screening

Nikhil G Thaker, Fang Zhang, Peter R. McDonald, Tong Ying Shun, Michael D Lewen, Ian F. Pollack, and John S. Lazo

Molecular Pharmacology

|                              |               |       |                                                      |           |        |
|------------------------------|---------------|-------|------------------------------------------------------|-----------|--------|
| siRNA-Vinblastine Run2-DMSO  | NM_0221<br>69 | ABCG4 | ATP-binding cassette, sub-family G (WHITE), member 4 | -0.677459 | Inlier |
| siRNA-Temozolomide Run2-DMSO | NM_0221<br>69 | ABCG4 | ATP-binding cassette, sub-family G (WHITE), member 4 | -0.285069 | Inlier |
| siRNA-Temozolomide Run1-DMSO | NM_0221<br>69 | ABCG4 | ATP-binding cassette, sub-family G (WHITE), member 4 | -0.122039 | Inlier |
| siRNA-Temozolomide Run3-DMSO | NM_0221<br>69 | ABCG4 | ATP-binding cassette, sub-family G (WHITE), member 4 | 0.122038  | Inlier |
| siRNA Disorazole DMSO Run3   | NM_0221<br>69 | ABCG4 | ATP-binding cassette, sub-family G (WHITE), member 4 | 0.671541  | Inlier |
| siRNA Disorazole DMSO Run2   | NM_0221<br>69 | ABCG4 | ATP-binding cassette, sub-family G (WHITE), member 4 | 2.271885  | Inlier |
| siRNA-Vinblastine Run1-DMSO  | NM_0221<br>69 | ABCG4 | ATP-binding cassette, sub-family G (WHITE), member 4 | 2.364242  | Inlier |



Identification of Survival Genes in Human Glioblastoma Cells Using siRNA Screening

Nikhil G Thaker, Fang Zhang, Peter R. McDonald, Tong Ying Shun, Michael D Lewen, Ian F. Pollack, and John S. Lazo

Molecular Pharmacology

|                                  |               |       |                                                                                         |                  |
|----------------------------------|---------------|-------|-----------------------------------------------------------------------------------------|------------------|
| siRNA-Temozolomide Run3-<br>DMSO | NM_0224<br>36 | ABCG5 | ATP-<br>binding<br>cassette,<br>sub-family<br>G<br>(WHITE),<br>member 5<br>(sterolin 1) | -1.21738 Inlier  |
| siRNA Disorazole DMSO Run2       | NM_0224<br>36 | ABCG5 | ATP-<br>binding<br>cassette,<br>sub-family<br>G<br>(WHITE),<br>member 5<br>(sterolin 1) | -1.052979 Inlier |
| siRNA-Temozolomide Run2-<br>DMSO | NM_0224<br>36 | ABCG5 | ATP-<br>binding<br>cassette,<br>sub-family<br>G<br>(WHITE),<br>member 5<br>(sterolin 1) | -0.926385 Inlier |
| siRNA Disorazole DMSO Run1       | NM_0224<br>36 | ABCG5 | ATP-<br>binding<br>cassette,<br>sub-family<br>G<br>(WHITE),<br>member 5<br>(sterolin 1) | -0.097439 Inlier |
| siRNA-Vinblastine Run2-<br>DMSO  | NM_0224<br>36 | ABCG5 | ATP-<br>binding<br>cassette,<br>sub-family<br>G<br>(WHITE),<br>member 5<br>(sterolin 1) | 0.097439 Inlier  |

Identification of Survival Genes in Human Glioblastoma Cells Using siRNA Screening

Nikhil G Thaker, Fang Zhang, Peter R. McDonald, Tong Ying Shun, Michael D Lewen, Ian F. Pollack, and John S.

Lazo

Molecular Pharmacology

|                              |               |       |                                                                   |           |        |
|------------------------------|---------------|-------|-------------------------------------------------------------------|-----------|--------|
| siRNA Disorazole DMSO Run3   | NM_0224<br>36 | ABCG5 | ATP-binding cassette, sub-family G (WHITE), member 5 (sterolin 1) | 0.286656  | Inlier |
| siRNA-Temozolomide Run1-DMSO | NM_0224<br>36 | ABCG5 | ATP-binding cassette, sub-family G (WHITE), member 5 (sterolin 1) | 0.422615  | Inlier |
| siRNA-Vinblastine Run1-DMSO  | NM_0224<br>36 | ABCG5 | ATP-binding cassette, sub-family G (WHITE), member 5 (sterolin 1) | 1.557828  | Inlier |
| siRNA-Temozolomide Run3-DMSO | NM_0224<br>37 | ABCG8 | ATP-binding cassette, sub-family G (WHITE), member 8 (sterolin 2) | -0.835191 | Inlier |
| siRNA-Temozolomide Run2-DMSO | NM_0224<br>37 | ABCG8 | ATP-binding cassette, sub-family G (WHITE), member 8 (sterolin 2) | -0.685008 | Inlier |

Identification of Survival Genes in Human Glioblastoma Cells Using siRNA Screening  
 Nikhil G Thaker, Fang Zhang, Peter R. McDonald, Tong Ying Shun, Michael D Lewen, Ian F. Pollack, and John S. Lazo  
 Molecular Pharmacology

|                              |               |       |                                                                   |           |        |
|------------------------------|---------------|-------|-------------------------------------------------------------------|-----------|--------|
| siRNA Disorazole DMSO Run1   | NM_0224<br>37 | ABCG8 | ATP-binding cassette, sub-family G (WHITE), member 8 (sterolin 2) | -0.663992 | Inlier |
| siRNA Disorazole DMSO Run2   | NM_0224<br>37 | ABCG8 | ATP-binding cassette, sub-family G (WHITE), member 8 (sterolin 2) | -0.147845 | Inlier |
| siRNA-Temozolomide Run1-DMSO | NM_0224<br>37 | ABCG8 | ATP-binding cassette, sub-family G (WHITE), member 8 (sterolin 2) | 0.147846  | Inlier |
| siRNA-Vinblastine Run2-DMSO  | NM_0224<br>37 | ABCG8 | ATP-binding cassette, sub-family G (WHITE), member 8 (sterolin 2) | 0.301878  | Inlier |
| siRNA Disorazole DMSO Run3   | NM_0224<br>37 | ABCG8 | ATP-binding cassette, sub-family G (WHITE), member 8 (sterolin 2) | 0.788291  | Inlier |

Identification of Survival Genes in Human Glioblastoma Cells Using siRNA Screening  
 Nikhil G Thaker, Fang Zhang, Peter R. McDonald, Tong Ying Shun, Michael D Lewen, Ian F. Pollack, and John S. Lazo  
 Molecular Pharmacology

|                              |           |       |                                                                   |           |        |
|------------------------------|-----------|-------|-------------------------------------------------------------------|-----------|--------|
| siRNA-Vinblastine Run1-DMSO  | NM_022437 | ABCG8 | ATP-binding cassette, sub-family G (WHITE), member 8 (sterolin 2) | 0.939284  | Inlier |
| siRNA Disorazole DMSO Run1   | NM_007011 | ABHD2 | abhydrolase domain containing 2                                   | -1.178637 | Inlier |
| siRNA-Temozolomide Run1-DMSO | NM_007011 | ABHD2 | abhydrolase domain containing 2                                   | -0.744033 | Inlier |
| siRNA-Temozolomide Run2-DMSO | NM_007011 | ABHD2 | abhydrolase domain containing 2                                   | -0.604967 | Inlier |
| siRNA-Vinblastine Run2-DMSO  | NM_007011 | ABHD2 | abhydrolase domain containing 2                                   | -0.445733 | Inlier |
| siRNA Disorazole DMSO Run3   | NM_007011 | ABHD2 | abhydrolase domain containing 2                                   | 0.445733  | Inlier |
| siRNA-Temozolomide Run3-DMSO | NM_007011 | ABHD2 | abhydrolase domain containing 2                                   | 0.603527  | Inlier |
| siRNA Disorazole DMSO Run2   | NM_007011 | ABHD2 | abhydrolase domain containing 2                                   | 1.403188  | Inlier |
| siRNA-Vinblastine Run1-DMSO  | NM_007011 | ABHD2 | abhydrolase domain containing 2                                   | 1.641944  | Inlier |

Identification of Survival Genes in Human Glioblastoma Cells Using siRNA Screening  
 Nikhil G Thaker, Fang Zhang, Peter R. McDonald, Tong Ying Shun, Michael D Lewen, Ian F. Pollack, and John S. Lazo  
 Molecular Pharmacology

|                              |               |       |                                    |           |        |
|------------------------------|---------------|-------|------------------------------------|-----------|--------|
| siRNA-Temozolomide Run3-DMSO | NM_1383<br>40 | ABHD3 | abhydrolase domain containing<br>3 | -1.024747 | Inlier |
| siRNA-Temozolomide Run2-DMSO | NM_1383<br>40 | ABHD3 | abhydrolase domain containing<br>3 | -0.979307 | Inlier |
| siRNA-Vinblastine Run2-DMSO  | NM_1383<br>40 | ABHD3 | abhydrolase domain containing<br>3 | -0.230168 | Inlier |
| siRNA-Temozolomide Run1-DMSO | NM_1383<br>40 | ABHD3 | abhydrolase domain containing<br>3 | -0.186746 | Inlier |
| siRNA Disorazole DMSO Run3   | NM_1383<br>40 | ABHD3 | abhydrolase domain containing<br>3 | 0.186746  | Inlier |
| siRNA Disorazole DMSO Run1   | NM_1383<br>40 | ABHD3 | abhydrolase domain containing<br>3 | 0.369693  | Inlier |
| siRNA Disorazole DMSO Run2   | NM_1383<br>40 | ABHD3 | abhydrolase domain containing<br>3 | 2.020526  | Inlier |
| siRNA-Vinblastine Run1-DMSO  | NM_1383<br>40 | ABHD3 | abhydrolase domain containing<br>3 | 2.312193  | Inlier |
| siRNA-Temozolomide Run3-DMSO | NM_0220<br>60 | ABHD4 | abhydrolase domain containing<br>4 | -1.042939 | Inlier |
| siRNA-Temozolomide Run2-DMSO | NM_0220<br>60 | ABHD4 | abhydrolase domain containing<br>4 | -0.745771 | Inlier |

Identification of Survival Genes in Human Glioblastoma Cells Using siRNA Screening  
 Nikhil G Thaker, Fang Zhang, Peter R. McDonald, Tong Ying Shun, Michael D Lewen, Ian F. Pollack, and John S. Lazo  
 Molecular Pharmacology

|                              |               |       |                                    |           |        |
|------------------------------|---------------|-------|------------------------------------|-----------|--------|
| siRNA-Vinblastine Run2-DMSO  | NM_0220<br>60 | ABHD4 | abhydrolase domain containing<br>4 | -0.603229 | Inlier |
| siRNA Disorazole DMSO Run3   | NM_0220<br>60 | ABHD4 | abhydrolase domain containing<br>4 | -0.035021 | Inlier |
| siRNA-Temozolomide Run1-DMSO | NM_0220<br>60 | ABHD4 | abhydrolase domain containing<br>4 | 0.035021  | Inlier |
| siRNA Disorazole DMSO Run1   | NM_0220<br>60 | ABHD4 | abhydrolase domain containing<br>4 | 0.404512  | Inlier |
| siRNA-Vinblastine Run1-DMSO  | NM_0220<br>60 | ABHD4 | abhydrolase domain containing<br>4 | 1.272063  | Inlier |
| siRNA Disorazole DMSO Run2   | NM_0220<br>60 | ABHD4 | abhydrolase domain containing<br>4 | 1.481308  | Inlier |
| siRNA-Temozolomide Run3-DMSO | NM_0160<br>06 | ABHD5 | abhydrolase domain containing<br>5 | -1.133723 | Inlier |
| siRNA-Temozolomide Run2-DMSO | NM_0160<br>06 | ABHD5 | abhydrolase domain containing<br>5 | -1.031168 | Inlier |
| siRNA Disorazole DMSO Run1   | NM_0160<br>06 | ABHD5 | abhydrolase domain containing<br>5 | -0.202459 | Inlier |
| siRNA-Temozolomide Run1-DMSO | NM_0160<br>06 | ABHD5 | abhydrolase domain containing<br>5 | -0.075166 | Inlier |

Identification of Survival Genes in Human Glioblastoma Cells Using siRNA Screening  
 Nikhil G Thaker, Fang Zhang, Peter R. McDonald, Tong Ying Shun, Michael D Lewen, Ian F. Pollack, and John S. Lazo  
 Molecular Pharmacology

|                              |           |       |                                 |           |        |
|------------------------------|-----------|-------|---------------------------------|-----------|--------|
| siRNA-Vinblastine Run2-DMSO  | NM_016006 | ABHD5 | abhydrolase domain containing 5 | 0.075166  | Inlier |
| siRNA Disorazole DMSO Run3   | NM_016006 | ABHD5 | abhydrolase domain containing 5 | 0.438928  | Inlier |
| siRNA-Vinblastine Run1-DMSO  | NM_016006 | ABHD5 | abhydrolase domain containing 5 | 0.910072  | Inlier |
| siRNA Disorazole DMSO Run2   | NM_016006 | ABHD5 | abhydrolase domain containing 5 | 1.552846  | Inlier |
| siRNA-Temozolomide Run3-DMSO | NM_020676 | ABHD6 | abhydrolase domain containing 6 | -2.305785 | Inlier |
| siRNA-Temozolomide Run2-DMSO | NM_020676 | ABHD6 | abhydrolase domain containing 6 | -2.047663 | Inlier |
| siRNA-Temozolomide Run1-DMSO | NM_020676 | ABHD6 | abhydrolase domain containing 6 | -1.015226 | Inlier |
| siRNA Disorazole DMSO Run1   | NM_020676 | ABHD6 | abhydrolase domain containing 6 | -0.351082 | Inlier |
| siRNA-Vinblastine Run2-DMSO  | NM_020676 | ABHD6 | abhydrolase domain containing 6 | 0.351082  | Inlier |
| siRNA Disorazole DMSO Run3   | NM_020676 | ABHD6 | abhydrolase domain containing 6 | 0.353384  | Inlier |

Identification of Survival Genes in Human Glioblastoma Cells Using siRNA Screening  
 Nikhil G Thaker, Fang Zhang, Peter R. McDonald, Tong Ying Shun, Michael D Lewen, Ian F. Pollack, and John S. Lazo  
 Molecular Pharmacology

|                              |               |       |                                    |           |         |
|------------------------------|---------------|-------|------------------------------------|-----------|---------|
| siRNA-Vinblastine Run1-DMSO  | NM_0206<br>76 | ABHD6 | abhydrolase domain containing<br>6 | 0.510562  | Inlier  |
| siRNA Disorazole DMSO Run2   | NM_0206<br>76 | ABHD6 | abhydrolase domain containing<br>6 | 0.838438  | Inlier  |
| siRNA-Temozolomide Run2-DMSO | NM_1735<br>67 | ABHD7 | abhydrolase domain containing<br>7 | -1.442121 | Inlier  |
| siRNA Disorazole DMSO Run1   | NM_1735<br>67 | ABHD7 | abhydrolase domain containing<br>7 | -1.029006 | Inlier  |
| siRNA-Vinblastine Run2-DMSO  | NM_1735<br>67 | ABHD7 | abhydrolase domain containing<br>7 | -0.262104 | Inlier  |
| siRNA Disorazole DMSO Run3   | NM_1735<br>67 | ABHD7 | abhydrolase domain containing<br>7 | -0.221299 | Inlier  |
| siRNA-Temozolomide Run1-DMSO | NM_1735<br>67 | ABHD7 | abhydrolase domain containing<br>7 | 0.221297  | Inlier  |
| siRNA-Temozolomide Run3-DMSO | NM_1735<br>67 | ABHD7 | abhydrolase domain containing<br>7 | 0.319993  | Inlier  |
| siRNA-Vinblastine Run1-DMSO  | NM_1735<br>67 | ABHD7 | abhydrolase domain containing<br>7 | 3.091404  | Inlier  |
| siRNA Disorazole DMSO Run2   | NM_1735<br>67 | ABHD7 | abhydrolase domain containing<br>7 | 5.538333  | Outlier |



Identification of Survival Genes in Human Glioblastoma Cells Using siRNA Screening  
 Nikhil G Thaker, Fang Zhang, Peter R. McDonald, Tong Ying Shun, Michael D Lewen, Ian F. Pollack, and John S. Lazo  
 Molecular Pharmacology

|                              |               |       |                                 |           |        |
|------------------------------|---------------|-------|---------------------------------|-----------|--------|
| siRNA-Temozolomide Run2-DMSO | NM_0245<br>27 | ABHD8 | abhydrolase domain containing 8 | -1.679112 | Inlier |
| siRNA-Temozolomide Run1-DMSO | NM_0245<br>27 | ABHD8 | abhydrolase domain containing 8 | -0.755046 | Inlier |
| siRNA Disorazole DMSO Run1   | NM_0245<br>27 | ABHD8 | abhydrolase domain containing 8 | -0.593953 | Inlier |
| siRNA-Vinblastine Run2-DMSO  | NM_0245<br>27 | ABHD8 | abhydrolase domain containing 8 | -0.21135  | Inlier |
| siRNA-Temozolomide Run3-DMSO | NM_0245<br>27 | ABHD8 | abhydrolase domain containing 8 | 0.211349  | Inlier |
| siRNA Disorazole DMSO Run3   | NM_0245<br>27 | ABHD8 | abhydrolase domain containing 8 | 0.350173  | Inlier |
| siRNA Disorazole DMSO Run2   | NM_0245<br>27 | ABHD8 | abhydrolase domain containing 8 | 2.29754   | Inlier |
| siRNA-Vinblastine Run1-DMSO  | NM_0245<br>27 | ABHD8 | abhydrolase domain containing 8 | 2.49522   | Inlier |
| siRNA-Temozolomide Run3-DMSO | NM_0247<br>94 | ABHD9 | abhydrolase domain containing 9 | -0.911113 | Inlier |
| siRNA-Vinblastine Run2-DMSO  | NM_0247<br>94 | ABHD9 | abhydrolase domain containing 9 | -0.562564 | Inlier |

Identification of Survival Genes in Human Glioblastoma Cells Using siRNA Screening

Nikhil G Thaker, Fang Zhang, Peter R. McDonald, Tong Ying Shun, Michael D Lewen, Ian F. Pollack, and John S. Lazo

Molecular Pharmacology

|                              |               |       |                                                        |           |         |
|------------------------------|---------------|-------|--------------------------------------------------------|-----------|---------|
| siRNA-Temozolomide Run2-DMSO | NM_0247<br>94 | ABHD9 | abhydrolase domain containing 9                        | -0.491073 | Inlier  |
| siRNA Disorazole DMSO Run3   | NM_0247<br>94 | ABHD9 | abhydrolase domain containing 9                        | -0.485169 | Inlier  |
| siRNA Disorazole DMSO Run1   | NM_0247<br>94 | ABHD9 | abhydrolase domain containing 9                        | 0.485168  | Inlier  |
| siRNA-Temozolomide Run1-DMSO | NM_0247<br>94 | ABHD9 | abhydrolase domain containing 9                        | 0.786436  | Inlier  |
| siRNA-Vinblastine Run1-DMSO  | NM_0247<br>94 | ABHD9 | abhydrolase domain containing 9                        | 2.66089   | Inlier  |
| siRNA Disorazole DMSO Run2   | NM_0247<br>94 | ABHD9 | abhydrolase domain containing 9                        | 3.655694  | Outlier |
| siRNA-Temozolomide Run3-DMSO | NM_0051<br>57 | ABL1  | v-abl Abelson murine leukemia viral oncogene homolog 1 | -1.792317 | Inlier  |
| siRNA-Temozolomide Run1-DMSO | NM_0051<br>57 | ABL1  | v-abl Abelson murine leukemia viral oncogene homolog 1 | -0.784522 | Inlier  |

Identification of Survival Genes in Human Glioblastoma Cells Using siRNA Screening

Nikhil G Thaker, Fang Zhang, Peter R. McDonald, Tong Ying Shun, Michael D Lewen, Ian F. Pollack, and John S. Lazo

Molecular Pharmacology

|                              |               |      |                                                                          |           |        |
|------------------------------|---------------|------|--------------------------------------------------------------------------|-----------|--------|
| siRNA-Temozolomide Run2-DMSO | NM_0051<br>57 | ABL1 | v-abl<br>Abelson<br>murine<br>leukemia<br>viral<br>oncogene<br>homolog 1 | -0.564478 | Inlier |
| siRNA Disorazole DMSO Run1   | NM_0051<br>57 | ABL1 | v-abl<br>Abelson<br>murine<br>leukemia<br>viral<br>oncogene<br>homolog 1 | -0.32528  | Inlier |
| siRNA-Vinblastine Run1-DMSO  | NM_0051<br>57 | ABL1 | v-abl<br>Abelson<br>murine<br>leukemia<br>viral<br>oncogene<br>homolog 1 | 0.32528   | Inlier |
| siRNA Disorazole DMSO Run2   | NM_0051<br>57 | ABL1 | v-abl<br>Abelson<br>murine<br>leukemia<br>viral<br>oncogene<br>homolog 1 | 0.522608  | Inlier |
| siRNA Disorazole DMSO Run3   | NM_0051<br>57 | ABL1 | v-abl<br>Abelson<br>murine<br>leukemia<br>viral<br>oncogene<br>homolog 1 | 0.984274  | Inlier |
| siRNA-Vinblastine Run2-DMSO  | NM_0051<br>57 | ABL1 | v-abl<br>Abelson<br>murine<br>leukemia<br>viral<br>oncogene<br>homolog 1 | 1.060103  | Inlier |

Identification of Survival Genes in Human Glioblastoma Cells Using siRNA Screening

Nikhil G Thaker, Fang Zhang, Peter R. McDonald, Tong Ying Shun, Michael D Lewen, Ian F. Pollack, and John S. Lazo

Molecular Pharmacology

|                              |           |      |                                                                                       |           |        |
|------------------------------|-----------|------|---------------------------------------------------------------------------------------|-----------|--------|
| siRNA-Temozolomide Run3-DMSO | NM_005158 | ABL2 | v-abl<br>Abelson murine leukemia viral oncogene homolog 2 (arg, Abelson-related gene) | -1.90261  | Inlier |
| siRNA-Temozolomide Run1-DMSO | NM_005158 | ABL2 | v-abl<br>Abelson murine leukemia viral oncogene homolog 2 (arg, Abelson-related gene) | -1.265366 | Inlier |
| siRNA-Temozolomide Run2-DMSO | NM_005158 | ABL2 | v-abl<br>Abelson murine leukemia viral oncogene homolog 2 (arg, Abelson-related gene) | -1.258076 | Inlier |
| siRNA Disorazole DMSO Run1   | NM_005158 | ABL2 | v-abl<br>Abelson murine leukemia viral oncogene homolog 2 (arg, Abelson-related gene) | -0.295381 | Inlier |

Identification of Survival Genes in Human Glioblastoma Cells Using siRNA Screening

Nikhil G Thaker, Fang Zhang, Peter R. McDonald, Tong Ying Shun, Michael D Lewen, Ian F. Pollack, and John S. Lazo

Molecular Pharmacology

|                             |               |      |                                                                                                                   |          |        |
|-----------------------------|---------------|------|-------------------------------------------------------------------------------------------------------------------|----------|--------|
| siRNA-Vinblastine Run1-DMSO | NM_0051<br>58 | ABL2 | v-abl<br>Abelson<br>murine<br>leukemia<br>viral<br>oncogene<br>homolog 2<br>(arg,<br>Abelson-<br>related<br>gene) | 0.295381 | Inlier |
| siRNA Disorazole DMSO Run2  | NM_0051<br>58 | ABL2 | v-abl<br>Abelson<br>murine<br>leukemia<br>viral<br>oncogene<br>homolog 2<br>(arg,<br>Abelson-<br>related<br>gene) | 0.429129 | Inlier |
| siRNA-Vinblastine Run2-DMSO | NM_0051<br>58 | ABL2 | v-abl<br>Abelson<br>murine<br>leukemia<br>viral<br>oncogene<br>homolog 2<br>(arg,<br>Abelson-<br>related<br>gene) | 0.619717 | Inlier |
| siRNA Disorazole DMSO Run3  | NM_0051<br>58 | ABL2 | v-abl<br>Abelson<br>murine<br>leukemia<br>viral<br>oncogene<br>homolog 2<br>(arg,<br>Abelson-<br>related<br>gene) | 0.729283 | Inlier |

Identification of Survival Genes in Human Glioblastoma Cells Using siRNA Screening

Nikhil G Thaker, Fang Zhang, Peter R. McDonald, Tong Ying Shun, Michael D Lewen, Ian F. Pollack, and John S. Lazo

Molecular Pharmacology

|                              |           |     |                                                                                                                                |           |        |
|------------------------------|-----------|-----|--------------------------------------------------------------------------------------------------------------------------------|-----------|--------|
| siRNA-Temozolomide Run2-DMSO | NM_020469 | ABO | ABO blood group (transferase A, alpha 1-3-N-acetylgalactosaminyl transferase; transferase B, alpha 1-3-galactosyltransferase ) | -0.936612 | Inlier |
|------------------------------|-----------|-----|--------------------------------------------------------------------------------------------------------------------------------|-----------|--------|

|                              |           |     |                                                                                                                                |           |        |
|------------------------------|-----------|-----|--------------------------------------------------------------------------------------------------------------------------------|-----------|--------|
| siRNA-Temozolomide Run1-DMSO | NM_020469 | ABO | ABO blood group (transferase A, alpha 1-3-N-acetylgalactosaminyl transferase; transferase B, alpha 1-3-galactosyltransferase ) | -0.675799 | Inlier |
|------------------------------|-----------|-----|--------------------------------------------------------------------------------------------------------------------------------|-----------|--------|

|                            |           |     |                                                                                                                                |         |        |
|----------------------------|-----------|-----|--------------------------------------------------------------------------------------------------------------------------------|---------|--------|
| siRNA Disorazole DMSO Run1 | NM_020469 | ABO | ABO blood group (transferase A, alpha 1-3-N-acetylgalactosaminyl transferase; transferase B, alpha 1-3-galactosyltransferase ) | -0.6732 | Inlier |
|----------------------------|-----------|-----|--------------------------------------------------------------------------------------------------------------------------------|---------|--------|

Identification of Survival Genes in Human Glioblastoma Cells Using siRNA Screening

Nikhil G Thaker, Fang Zhang, Peter R. McDonald, Tong Ying Shun, Michael D Lewen, Ian F. Pollack, and John S. Lazo

Molecular Pharmacology

|                              |           |     |                                                                                                                                |           |        |
|------------------------------|-----------|-----|--------------------------------------------------------------------------------------------------------------------------------|-----------|--------|
| siRNA-Temozolomide Run3-DMSO | NM_020469 | ABO | ABO blood group (transferase A, alpha 1-3-N-acetylgalactosaminyl transferase; transferase B, alpha 1-3-galactosyltransferase ) | -0.105869 | Inlier |
| siRNA Disorazole DMSO Run3   | NM_020469 | ABO | ABO blood group (transferase A, alpha 1-3-N-acetylgalactosaminyl transferase; transferase B, alpha 1-3-galactosyltransferase ) | 0.10587   | Inlier |
| siRNA-Vinblastine Run2-DMSO  | NM_020469 | ABO | ABO blood group (transferase A, alpha 1-3-N-acetylgalactosaminyl transferase; transferase B, alpha 1-3-galactosyltransferase ) | 0.626823  | Inlier |

Identification of Survival Genes in Human Glioblastoma Cells Using siRNA Screening

Nikhil G Thaker, Fang Zhang, Peter R. McDonald, Tong Ying Shun, Michael D Lewen, Ian F. Pollack, and John S. Lazo

Molecular Pharmacology

|                              |           |      |                                                                                                                                |           |        |
|------------------------------|-----------|------|--------------------------------------------------------------------------------------------------------------------------------|-----------|--------|
| siRNA-Vinblastine Run1-DMSO  | NM_020469 | ABO  | ABO blood group (transferase A, alpha 1-3-N-acetylgalactosaminyl transferase; transferase B, alpha 1-3-galactosyltransferase ) | 0.720751  | Inlier |
| siRNA Disorazole DMSO Run2   | NM_020469 | ABO  | ABO blood group (transferase A, alpha 1-3-N-acetylgalactosaminyl transferase; transferase B, alpha 1-3-galactosyltransferase ) | 0.943967  | Inlier |
| siRNA Disorazole DMSO Run1   | NM_001091 | ABP1 | amiloride binding protein 1 (amine oxidase (copper-containing ))                                                               | -1.334656 | Inlier |
| siRNA-Temozolomide Run1-DMSO | NM_001091 | ABP1 | amiloride binding protein 1 (amine oxidase (copper-containing ))                                                               | -1.244135 | Inlier |



Identification of Survival Genes in Human Glioblastoma Cells Using siRNA Screening

Nikhil G Thaker, Fang Zhang, Peter R. McDonald, Tong Ying Shun, Michael D Lewen, Ian F. Pollack, and John S. Lazo

Molecular Pharmacology

|                              |           |      |                                                                 |           |        |
|------------------------------|-----------|------|-----------------------------------------------------------------|-----------|--------|
| siRNA-Temozolomide Run2-DMSO | NM_001091 | ABP1 | amiloride binding protein 1 (amine oxidase (copper-containing)) | -1.133406 | Inlier |
| siRNA-Vinblastine Run1-DMSO  | NM_001091 | ABP1 | amiloride binding protein 1 (amine oxidase (copper-containing)) | -0.111039 | Inlier |
| siRNA-Vinblastine Run2-DMSO  | NM_001091 | ABP1 | amiloride binding protein 1 (amine oxidase (copper-containing)) | 0.11104   | Inlier |
| siRNA-Temozolomide Run3-DMSO | NM_001091 | ABP1 | amiloride binding protein 1 (amine oxidase (copper-containing)) | 0.135384  | Inlier |
| siRNA Disorazole DMSO Run3   | NM_001091 | ABP1 | amiloride binding protein 1 (amine oxidase (copper-containing)) | 0.215594  | Inlier |
| siRNA Disorazole DMSO Run2   | NM_001091 | ABP1 | amiloride binding protein 1 (amine oxidase (copper-containing)) | 1.157215  | Inlier |
| siRNA-Temozolomide Run3-DMSO | NM_001092 | ABR  | active BCR-related gene                                         | -1.494696 | Inlier |

Identification of Survival Genes in Human Glioblastoma Cells Using siRNA Screening

Nikhil G Thaker, Fang Zhang, Peter R. McDonald, Tong Ying Shun, Michael D Lewen, Ian F. Pollack, and John S. Lazo

Molecular Pharmacology

|                              |           |       |                                                                                 |           |        |
|------------------------------|-----------|-------|---------------------------------------------------------------------------------|-----------|--------|
| siRNA-Temozolomide Run1-DMSO | NM_001092 | ABR   | active BCR-related gene                                                         | -0.903265 | Inlier |
| siRNA-Vinblastine Run2-DMSO  | NM_001092 | ABR   | active BCR-related gene                                                         | -0.353282 | Inlier |
| siRNA-Temozolomide Run2-DMSO | NM_001092 | ABR   | active BCR-related gene                                                         | -0.186799 | Inlier |
| siRNA Disorazole DMSO Run1   | NM_001092 | ABR   | active BCR-related gene                                                         | 0.186799  | Inlier |
| siRNA Disorazole DMSO Run3   | NM_001092 | ABR   | active BCR-related gene                                                         | 0.445735  | Inlier |
| siRNA-Vinblastine Run1-DMSO  | NM_001092 | ABR   | active BCR-related gene                                                         | 2.454774  | Inlier |
| siRNA Disorazole DMSO Run2   | NM_001092 | ABR   | active BCR-related gene                                                         | 2.824043  | Inlier |
| siRNA-Temozolomide Run1-DMSO | NM_001607 | ACAA1 | acetyl-Coenzyme A acyltransferase 1 (peroxisomal 3-oxoacyl-Coenzyme A thiolase) | -1.454253 | Inlier |
| siRNA-Temozolomide Run3-DMSO | NM_001607 | ACAA1 | acetyl-Coenzyme A acyltransferase 1 (peroxisomal 3-oxoacyl-Coenzyme A thiolase) | -0.766415 | Inlier |

Identification of Survival Genes in Human Glioblastoma Cells Using siRNA Screening

Nikhil G Thaker, Fang Zhang, Peter R. McDonald, Tong Ying Shun, Michael D Lewen, Ian F. Pollack, and John S. Lazo

Molecular Pharmacology

|                              |           |       |                                                                                 |           |        |
|------------------------------|-----------|-------|---------------------------------------------------------------------------------|-----------|--------|
| siRNA-Temozolomide Run2-DMSO | NM_001607 | ACAA1 | acetyl-Coenzyme A acyltransferase 1 (peroxisomal 3-oxoacyl-Coenzyme A thiolase) | -0.582585 | Inlier |
| siRNA Disorazole DMSO Run1   | NM_001607 | ACAA1 | acetyl-Coenzyme A acyltransferase 1 (peroxisomal 3-oxoacyl-Coenzyme A thiolase) | -0.005107 | Inlier |
| siRNA Disorazole DMSO Run3   | NM_001607 | ACAA1 | acetyl-Coenzyme A acyltransferase 1 (peroxisomal 3-oxoacyl-Coenzyme A thiolase) | 0.005107  | Inlier |
| siRNA-Vinblastine Run2-DMSO  | NM_001607 | ACAA1 | acetyl-Coenzyme A acyltransferase 1 (peroxisomal 3-oxoacyl-Coenzyme A thiolase) | 0.200784  | Inlier |

Identification of Survival Genes in Human Glioblastoma Cells Using siRNA Screening

Nikhil G Thaker, Fang Zhang, Peter R. McDonald, Tong Ying Shun, Michael D Lewen, Ian F. Pollack, and John S. Lazo

Molecular Pharmacology

|                              |           |       |                                                                                   |           |         |
|------------------------------|-----------|-------|-----------------------------------------------------------------------------------|-----------|---------|
| siRNA Disorazole DMSO Run2   | NM_001607 | ACAA1 | acetyl-Coenzyme A acyltransferase 1 (peroxisomal 3-oxoacyl-Coenzyme A thiolase)   | 3.547181  | Outlier |
| siRNA-Vinblastine Run1-DMSO  | NM_001607 | ACAA1 | acetyl-Coenzyme A acyltransferase 1 (peroxisomal 3-oxoacyl-Coenzyme A thiolase)   | 4.165621  | Outlier |
| siRNA-Temozolomide Run3-DMSO | NM_006111 | ACAA2 | acetyl-Coenzyme A acyltransferase 2 (mitochondrial 3-oxoacyl-Coenzyme A thiolase) | -2.233587 | Inlier  |
| siRNA-Temozolomide Run1-DMSO | NM_006111 | ACAA2 | acetyl-Coenzyme A acyltransferase 2 (mitochondrial 3-oxoacyl-Coenzyme A thiolase) | -1.082163 | Inlier  |

Identification of Survival Genes in Human Glioblastoma Cells Using siRNA Screening

Nikhil G Thaker, Fang Zhang, Peter R. McDonald, Tong Ying Shun, Michael D Lewen, Ian F. Pollack, and John S. Lazo

Molecular Pharmacology

|                              |    |         |       |                                                                                   |           |        |
|------------------------------|----|---------|-------|-----------------------------------------------------------------------------------|-----------|--------|
| siRNA Disorazole DMSO Run1   | 11 | NM_0061 | ACAA2 | acetyl-Coenzyme A acyltransferase 2 (mitochondrial 3-oxoacyl-Coenzyme A thiolase) | -0.37509  | Inlier |
| siRNA-Temozolomide Run2-DMSO | 11 | NM_0061 | ACAA2 | acetyl-Coenzyme A acyltransferase 2 (mitochondrial 3-oxoacyl-Coenzyme A thiolase) | -0.313022 | Inlier |
| siRNA-Vinblastine Run2-DMSO  | 11 | NM_0061 | ACAA2 | acetyl-Coenzyme A acyltransferase 2 (mitochondrial 3-oxoacyl-Coenzyme A thiolase) | 0.313022  | Inlier |
| siRNA Disorazole DMSO Run3   | 11 | NM_0061 | ACAA2 | acetyl-Coenzyme A acyltransferase 2 (mitochondrial 3-oxoacyl-Coenzyme A thiolase) | 0.422293  | Inlier |

Identification of Survival Genes in Human Glioblastoma Cells Using siRNA Screening  
 Nikhil G Thaker, Fang Zhang, Peter R. McDonald, Tong Ying Shun, Michael D Lewen, Ian F. Pollack, and John S. Lazo  
 Molecular Pharmacology

|                              |               |       |                                                                                     |           |        |
|------------------------------|---------------|-------|-------------------------------------------------------------------------------------|-----------|--------|
| siRNA-Vinblastine Run1-DMSO  | NM_0061<br>11 | ACAA2 | acetyl-Coenzyme A acyltransferase 2 (mitochondrial 3-oxoacetyl-Coenzyme A thiolase) | 0.926707  | Inlier |
| siRNA Disorazole DMSO Run2   | NM_0061<br>11 | ACAA2 | acetyl-Coenzyme A acyltransferase 2 (mitochondrial 3-oxoacetyl-Coenzyme A thiolase) | 1.033551  | Inlier |
| siRNA-Temozolomide Run3-DMSO | NM_1988<br>35 | ACACA | acetyl-Coenzyme A carboxylase alpha                                                 | -0.853141 | Inlier |
| siRNA-Vinblastine Run2-DMSO  | NM_1988<br>35 | ACACA | acetyl-Coenzyme A carboxylase alpha                                                 | -0.495859 | Inlier |
| siRNA-Temozolomide Run1-DMSO | NM_1988<br>35 | ACACA | acetyl-Coenzyme A carboxylase alpha                                                 | -0.349498 | Inlier |
| siRNA-Temozolomide Run2-DMSO | NM_1988<br>35 | ACACA | acetyl-Coenzyme A carboxylase alpha                                                 | -0.298389 | Inlier |
| siRNA Disorazole DMSO Run3   | NM_1988<br>35 | ACACA | acetyl-Coenzyme A carboxylase alpha                                                 | 0.298389  | Inlier |
| siRNA Disorazole DMSO Run1   | NM_1988<br>35 | ACACA | acetyl-Coenzyme A carboxylase alpha                                                 | 0.985473  | Inlier |

Identification of Survival Genes in Human Glioblastoma Cells Using siRNA Screening  
 Nikhil G Thaker, Fang Zhang, Peter R. McDonald, Tong Ying Shun, Michael D Lewen, Ian F. Pollack, and John S. Lazo

Molecular Pharmacology

|                              |               |       |                                     |           |        |
|------------------------------|---------------|-------|-------------------------------------|-----------|--------|
| siRNA Disorazole DMSO Run2   | NM_1988<br>35 | ACACA | acetyl-Coenzyme A carboxylase alpha | 2.20598   | Inlier |
| siRNA-Vinblastine Run1-DMSO  | NM_1988<br>35 | ACACA | acetyl-Coenzyme A carboxylase alpha | 2.393652  | Inlier |
| siRNA-Temozolomide Run2-DMSO | NM_0010<br>93 | ACACB | acetyl-Coenzyme A carboxylase beta  | -3.08503  | Inlier |
| siRNA-Temozolomide Run1-DMSO | NM_0010<br>93 | ACACB | acetyl-Coenzyme A carboxylase beta  | -0.850196 | Inlier |
| siRNA Disorazole DMSO Run1   | NM_0010<br>93 | ACACB | acetyl-Coenzyme A carboxylase beta  | -0.167096 | Inlier |
| siRNA Disorazole DMSO Run3   | NM_0010<br>93 | ACACB | acetyl-Coenzyme A carboxylase beta  | -0.044365 | Inlier |
| siRNA-Temozolomide Run3-DMSO | NM_0010<br>93 | ACACB | acetyl-Coenzyme A carboxylase beta  | 0.044365  | Inlier |
| siRNA Disorazole DMSO Run2   | NM_0010<br>93 | ACACB | acetyl-Coenzyme A carboxylase beta  | 0.498804  | Inlier |
| siRNA-Vinblastine Run2-DMSO  | NM_0010<br>93 | ACACB | acetyl-Coenzyme A carboxylase beta  | 1.091622  | Inlier |
| siRNA-Vinblastine Run1-DMSO  | NM_0010<br>93 | ACACB | acetyl-Coenzyme A carboxylase beta  | 1.42718   | Inlier |

Identification of Survival Genes in Human Glioblastoma Cells Using siRNA Screening

Nikhil G Thaker, Fang Zhang, Peter R. McDonald, Tong Ying Shun, Michael D Lewen, Ian F. Pollack, and John S. Lazo

Molecular Pharmacology

|                              |               |        |                                                    |           |         |
|------------------------------|---------------|--------|----------------------------------------------------|-----------|---------|
| siRNA-Temozolomide Run2-DMSO | NM_0252<br>47 | ACAD10 | acyl-Coenzyme A dehydrogenase family, member<br>10 | -4.111175 | Outlier |
| siRNA-Vinblastine Run2-DMSO  | NM_0252<br>47 | ACAD10 | acyl-Coenzyme A dehydrogenase family, member<br>10 | -1.988621 | Inlier  |
| siRNA-Temozolomide Run3-DMSO | NM_0252<br>47 | ACAD10 | acyl-Coenzyme A dehydrogenase family, member<br>10 | -1.558587 | Inlier  |
| siRNA Disorazole DMSO Run3   | NM_0252<br>47 | ACAD10 | acyl-Coenzyme A dehydrogenase family, member<br>10 | -0.18468  | Inlier  |
| siRNA Disorazole DMSO Run2   | NM_0252<br>47 | ACAD10 | acyl-Coenzyme A dehydrogenase family, member<br>10 | 0.18468   | Inlier  |
| siRNA-Temozolomide Run1-DMSO | NM_0252<br>47 | ACAD10 | acyl-Coenzyme A dehydrogenase family, member<br>10 | 0.472281  | Inlier  |



Identification of Survival Genes in Human Glioblastoma Cells Using siRNA Screening  
 Nikhil G Thaker, Fang Zhang, Peter R. McDonald, Tong Ying Shun, Michael D Lewen, Ian F. Pollack, and John S. Lazo

Molecular Pharmacology

|                              |               |        |                                                 |           |        |
|------------------------------|---------------|--------|-------------------------------------------------|-----------|--------|
| siRNA-Vinblastine Run1-DMSO  | NM_0252<br>47 | ACAD10 | acyl-Coenzyme A dehydrogenase family, member 10 | 0.483053  | Inlier |
| siRNA Disorazole DMSO Run1   | NM_0252<br>47 | ACAD10 | acyl-Coenzyme A dehydrogenase family, member 10 | 0.865947  | Inlier |
| siRNA-Temozolomide Run1-DMSO | NM_0143<br>84 | ACAD8  | acyl-Coenzyme A dehydrogenase family, member 8  | -3.088869 | Inlier |
| siRNA-Temozolomide Run2-DMSO | NM_0143<br>84 | ACAD8  | acyl-Coenzyme A dehydrogenase family, member 8  | -2.315381 | Inlier |
| siRNA-Vinblastine Run2-DMSO  | NM_0143<br>84 | ACAD8  | acyl-Coenzyme A dehydrogenase family, member 8  | -0.478498 | Inlier |
| siRNA Disorazole DMSO Run1   | NM_0143<br>84 | ACAD8  | acyl-Coenzyme A dehydrogenase family, member 8  | -0.325899 | Inlier |
| siRNA Disorazole DMSO Run3   | NM_0143<br>84 | ACAD8  | acyl-Coenzyme A dehydrogenase family, member 8  | 0.325899  | Inlier |

Identification of Survival Genes in Human Glioblastoma Cells Using siRNA Screening

Nikhil G Thaker, Fang Zhang, Peter R. McDonald, Tong Ying Shun, Michael D Lewen, Ian F. Pollack, and John S. Lazo

Molecular Pharmacology

| siRNA Treatment              | Gene ID   | Gene Name | Family                                         | Score     | Category |
|------------------------------|-----------|-----------|------------------------------------------------|-----------|----------|
| siRNA-Temozolomide Run3-DMSO | NM_014384 | ACAD8     | acyl-Coenzyme A dehydrogenase family, member 8 | 0.573009  | Inlier   |
| siRNA-Vinblastine Run1-DMSO  | NM_014384 | ACAD8     | acyl-Coenzyme A dehydrogenase family, member 8 | 0.775991  | Inlier   |
| siRNA Disorazole DMSO Run2   | NM_014384 | ACAD8     | acyl-Coenzyme A dehydrogenase family, member 8 | 8.620785  | Outlier  |
| siRNA-Temozolomide Run2-DMSO | NM_014049 | ACAD9     | acyl-Coenzyme A dehydrogenase family, member 9 | -1.807811 | Inlier   |
| siRNA-Temozolomide Run3-DMSO | NM_014049 | ACAD9     | acyl-Coenzyme A dehydrogenase family, member 9 | -1.661178 | Inlier   |
| siRNA-Temozolomide Run1-DMSO | NM_014049 | ACAD9     | acyl-Coenzyme A dehydrogenase family, member 9 | -0.778894 | Inlier   |
| siRNA Disorazole DMSO Run1   | NM_014049 | ACAD9     | acyl-Coenzyme A dehydrogenase family, member 9 | -0.069145 | Inlier   |

Identification of Survival Genes in Human Glioblastoma Cells Using siRNA Screening

Nikhil G Thaker, Fang Zhang, Peter R. McDonald, Tong Ying Shun, Michael D Lewen, Ian F. Pollack, and John S. Lazo

Molecular Pharmacology

| siRNA Treatment              | Gene ID   | Gene Name | Gene Description                               | Log2 Fold Change | Significance |
|------------------------------|-----------|-----------|------------------------------------------------|------------------|--------------|
| siRNA Disorazole DMSO Run3   | NM_014049 | ACAD9     | acyl-Coenzyme A dehydrogenase family, member 9 | 0.069145         | Inlier       |
| siRNA-Vinblastine Run2-DMSO  | NM_014049 | ACAD9     | acyl-Coenzyme A dehydrogenase family, member 9 | 0.339887         | Inlier       |
| siRNA-Vinblastine Run1-DMSO  | NM_014049 | ACAD9     | acyl-Coenzyme A dehydrogenase family, member 9 | 0.570106         | Inlier       |
| siRNA Disorazole DMSO Run2   | NM_014049 | ACAD9     | acyl-Coenzyme A dehydrogenase family, member 9 | 0.915033         | Inlier       |
| siRNA-Temozolomide Run2-DMSO | NM_001608 | ACADL     | acyl-Coenzyme A dehydrogenase, long chain      | -1.863145        | Inlier       |
| siRNA-Temozolomide Run3-DMSO | NM_001608 | ACADL     | acyl-Coenzyme A dehydrogenase, long chain      | -1.433155        | Inlier       |
| siRNA Disorazole DMSO Run3   | NM_001608 | ACADL     | acyl-Coenzyme A dehydrogenase, long chain      | -0.695428        | Inlier       |
| siRNA-Temozolomide Run1-DMSO | NM_001608 | ACADL     | acyl-Coenzyme A dehydrogenase, long chain      | -0.081662        | Inlier       |

Identification of Survival Genes in Human Glioblastoma Cells Using siRNA Screening

Nikhil G Thaker, Fang Zhang, Peter R. McDonald, Tong Ying Shun, Michael D Lewen, Ian F. Pollack, and John S. Lazo

Molecular Pharmacology

|                              |           |       |                                                           |           |        |
|------------------------------|-----------|-------|-----------------------------------------------------------|-----------|--------|
| siRNA Disorazole DMSO Run1   | NM_001608 | ACADL | acyl-Coenzyme A dehydrogenase, long chain                 | 0.081662  | Inlier |
| siRNA-Vinblastine Run2-DMSO  | NM_001608 | ACADL | acyl-Coenzyme A dehydrogenase, long chain                 | 0.649023  | Inlier |
| siRNA-Vinblastine Run1-DMSO  | NM_001608 | ACADL | acyl-Coenzyme A dehydrogenase, long chain                 | 0.653572  | Inlier |
| siRNA Disorazole DMSO Run2   | NM_001608 | ACADL | acyl-Coenzyme A dehydrogenase, long chain                 | 0.727245  | Inlier |
| siRNA-Temozolomide Run3-DMSO | NM_000016 | ACADM | acyl-Coenzyme A dehydrogenase, C-4 to C-12 straight chain | -1.818437 | Inlier |
| siRNA-Temozolomide Run2-DMSO | NM_000016 | ACADM | acyl-Coenzyme A dehydrogenase, C-4 to C-12 straight chain | -1.529335 | Inlier |
| siRNA Disorazole DMSO Run3   | NM_000016 | ACADM | acyl-Coenzyme A dehydrogenase, C-4 to C-12 straight chain | -0.422828 | Inlier |

Identification of Survival Genes in Human Glioblastoma Cells Using siRNA Screening

Nikhil G Thaker, Fang Zhang, Peter R. McDonald, Tong Ying Shun, Michael D Lewen, Ian F. Pollack, and John S. Lazo

Molecular Pharmacology

|                              |           |       |                                                           |           |        |
|------------------------------|-----------|-------|-----------------------------------------------------------|-----------|--------|
| siRNA Disorazole DMSO Run2   | NM_000016 | ACADM | acyl-Coenzyme A dehydrogenase, C-4 to C-12 straight chain | -0.015036 | Inlier |
| siRNA-Temozolomide Run1-DMSO | NM_000016 | ACADM | acyl-Coenzyme A dehydrogenase, C-4 to C-12 straight chain | 0.015036  | Inlier |
| siRNA Disorazole DMSO Run1   | NM_000016 | ACADM | acyl-Coenzyme A dehydrogenase, C-4 to C-12 straight chain | 0.572445  | Inlier |
| siRNA-Vinblastine Run1-DMSO  | NM_000016 | ACADM | acyl-Coenzyme A dehydrogenase, C-4 to C-12 straight chain | 0.776555  | Inlier |
| siRNA-Vinblastine Run2-DMSO  | NM_000016 | ACADM | acyl-Coenzyme A dehydrogenase, C-2 to C-3 short chain     | 0.783102  | Inlier |
| siRNA-Temozolomide Run3-DMSO | NM_000017 | ACADS | short chain                                               | -2.28724  | Inlier |

Identification of Survival Genes in Human Glioblastoma Cells Using siRNA Screening

Nikhil G Thaker, Fang Zhang, Peter R. McDonald, Tong Ying Shun, Michael D Lewen, Ian F. Pollack, and John S. Lazo

Molecular Pharmacology

| siRNA Treatment              | Gene ID   | Gene Name | Gene Description                                      | Log Fold Change | Outlier Status |
|------------------------------|-----------|-----------|-------------------------------------------------------|-----------------|----------------|
| siRNA-Temozolomide Run2-DMSO | NM_000017 | ACADS     | acyl-Coenzyme A dehydrogenase, C-2 to C-3 short chain | -1.410277       | Inlier         |
| siRNA-Temozolomide Run1-DMSO | NM_000017 | ACADS     | acyl-Coenzyme A dehydrogenase, C-2 to C-3 short chain | -0.373326       | Inlier         |
| siRNA Disorazole DMSO Run1   | NM_000017 | ACADS     | acyl-Coenzyme A dehydrogenase, C-2 to C-3 short chain | -0.28156        | Inlier         |
| siRNA Disorazole DMSO Run3   | NM_000017 | ACADS     | acyl-Coenzyme A dehydrogenase, C-2 to C-3 short chain | 0.28156         | Inlier         |
| siRNA-Vinblastine Run2-DMSO  | NM_000017 | ACADS     | acyl-Coenzyme A dehydrogenase, C-2 to C-3 short chain | 0.525773        | Inlier         |
| siRNA-Vinblastine Run1-DMSO  | NM_000017 | ACADS     | acyl-Coenzyme A dehydrogenase, C-2 to C-3 short chain | 0.823227        | Inlier         |

Identification of Survival Genes in Human Glioblastoma Cells Using siRNA Screening  
 Nikhil G Thaker, Fang Zhang, Peter R. McDonald, Tong Ying Shun, Michael D Lewen, Ian F. Pollack, and John S. Lazo

Molecular Pharmacology

|                              |           |        |                                                       |           |        |
|------------------------------|-----------|--------|-------------------------------------------------------|-----------|--------|
| siRNA Disorazole DMSO Run2   | NM_000017 | ACADS  | acyl-Coenzyme A dehydrogenase, C-2 to C-3 short chain | 2.297056  | Inlier |
| siRNA-Temozolomide Run3-DMSO | NM_001609 | ACADSB | acyl-Coenzyme A dehydrogenase, short/branched chain   | -1.288552 | Inlier |
| siRNA-Temozolomide Run2-DMSO | NM_001609 | ACADSB | acyl-Coenzyme A dehydrogenase, short/branched chain   | -0.983098 | Inlier |
| siRNA Disorazole DMSO Run2   | NM_001609 | ACADSB | acyl-Coenzyme A dehydrogenase, short/branched chain   | -0.628699 | Inlier |
| siRNA Disorazole DMSO Run3   | NM_001609 | ACADSB | acyl-Coenzyme A dehydrogenase, short/branched chain   | -0.007207 | Inlier |
| siRNA Disorazole DMSO Run1   | NM_001609 | ACADSB | acyl-Coenzyme A dehydrogenase, short/branched chain   | 0.007207  | Inlier |

Identification of Survival Genes in Human Glioblastoma Cells Using siRNA Screening  
 Nikhil G Thaker, Fang Zhang, Peter R. McDonald, Tong Ying Shun, Michael D Lewen, Ian F. Pollack, and John S. Lazo  
 Molecular Pharmacology

|                              |           |        |                                                     |           |        |
|------------------------------|-----------|--------|-----------------------------------------------------|-----------|--------|
| siRNA-Temozolomide Run1-DMSO | NM_001609 | ACADSB | acyl-Coenzyme A dehydrogenase, short/branched chain | 0.157934  | Inlier |
| siRNA-Vinblastine Run2-DMSO  | NM_001609 | ACADSB | acyl-Coenzyme A dehydrogenase, short/branched chain | 0.7203    | Inlier |
| siRNA-Vinblastine Run1-DMSO  | NM_001609 | ACADSB | acyl-Coenzyme A dehydrogenase, short/branched chain | 0.779215  | Inlier |
| siRNA-Temozolomide Run3-DMSO | NM_000018 | ACADVL | acyl-Coenzyme A dehydrogenase, very long chain      | -0.832468 | Inlier |
| siRNA-Temozolomide Run2-DMSO | NM_000018 | ACADVL | acyl-Coenzyme A dehydrogenase, very long chain      | -0.757967 | Inlier |
| siRNA Disorazole DMSO Run3   | NM_000018 | ACADVL | acyl-Coenzyme A dehydrogenase, very long chain      | -0.15235  | Inlier |
| siRNA-Temozolomide Run1-DMSO | NM_000018 | ACADVL | acyl-Coenzyme A dehydrogenase, very long chain      | -0.134273 | Inlier |



Identification of Survival Genes in Human Glioblastoma Cells Using siRNA Screening  
 Nikhil G Thaker, Fang Zhang, Peter R. McDonald, Tong Ying Shun, Michael D Lewen, Ian F. Pollack, and John S. Lazo  
 Molecular Pharmacology

|                              |               |        |                                                |           |        |
|------------------------------|---------------|--------|------------------------------------------------|-----------|--------|
| siRNA Disorazole DMSO Run1   | NM_0000<br>18 | ACADVL | acyl-Coenzyme A dehydrogenase, very long chain | 0.134273  | Inlier |
| siRNA Disorazole DMSO Run2   | NM_0000<br>18 | ACADVL | acyl-Coenzyme A dehydrogenase, very long chain | 0.591033  | Inlier |
| siRNA-Vinblastine Run1-DMSO  | NM_0000<br>18 | ACADVL | acyl-Coenzyme A dehydrogenase, very long chain | 1.317053  | Inlier |
| siRNA-Vinblastine Run2-DMSO  | NM_0000<br>18 | ACADVL | acyl-Coenzyme A dehydrogenase, very long chain | 1.769533  | Inlier |
| siRNA-Vinblastine Run2-DMSO  | NM_1392<br>74 | ACAS2  | acetyl-Coenzyme A synthetase 2 (ADP forming)   | -0.930284 | Inlier |
| siRNA Disorazole DMSO Run3   | NM_1392<br>74 | ACAS2  | acetyl-Coenzyme A synthetase 2 (ADP forming)   | -0.418716 | Inlier |
| siRNA-Temozolomide Run2-DMSO | NM_1392<br>74 | ACAS2  | acetyl-Coenzyme A synthetase 2 (ADP forming)   | -0.18824  | Inlier |
| siRNA Disorazole DMSO Run1   | NM_1392<br>74 | ACAS2  | acetyl-Coenzyme A synthetase 2 (ADP forming)   | -0.07956  | Inlier |

Identification of Survival Genes in Human Glioblastoma Cells Using siRNA Screening  
 Nikhil G Thaker, Fang Zhang, Peter R. McDonald, Tong Ying Shun, Michael D Lewen, Ian F. Pollack, and John S. Lazo

Molecular Pharmacology

|                              |           |        |                                                   |           |         |
|------------------------------|-----------|--------|---------------------------------------------------|-----------|---------|
| siRNA-Temozolomide Run1-DMSO | NM_139274 | ACAS2  | acetyl-Coenzyme A synthetase 2 (ADP forming)      | 0.07956   | Inlier  |
| siRNA-Temozolomide Run3-DMSO | NM_139274 | ACAS2  | acetyl-Coenzyme A synthetase 2 (ADP forming)      | 1.784422  | Inlier  |
| siRNA Disorazole DMSO Run2   | NM_139274 | ACAS2  | acetyl-Coenzyme A synthetase 2 (ADP forming)      | 4.067714  | Outlier |
| siRNA-Vinblastine Run1-DMSO  | NM_139274 | ACAS2  | acetyl-Coenzyme A synthetase 2 (ADP forming)      | 4.870326  | Outlier |
| siRNA-Temozolomide Run2-DMSO | NM_032501 | ACAS2L | acetyl-Coenzyme A synthetase 2 (AMP forming)-like | -1.562125 | Inlier  |
| siRNA-Vinblastine Run2-DMSO  | NM_032501 | ACAS2L | acetyl-Coenzyme A synthetase 2 (AMP forming)-like | -0.93166  | Inlier  |
| siRNA-Temozolomide Run1-DMSO | NM_032501 | ACAS2L | acetyl-Coenzyme A synthetase 2 (AMP forming)-like | -0.41734  | Inlier  |
| siRNA Disorazole DMSO Run1   | NM_032501 | ACAS2L | acetyl-Coenzyme A synthetase 2 (AMP forming)-like | -0.274271 | Inlier  |

Identification of Survival Genes in Human Glioblastoma Cells Using siRNA Screening

Nikhil G Thaker, Fang Zhang, Peter R. McDonald, Tong Ying Shun, Michael D Lewen, Ian F. Pollack, and John S. Lazo

Molecular Pharmacology

|                              |               |        |                                                                         |           |        |
|------------------------------|---------------|--------|-------------------------------------------------------------------------|-----------|--------|
| siRNA Disorazole DMSO Run3   | NM_0325<br>01 | ACAS2L | acetyl-Coenzyme A synthetase 2 (AMP forming)-like                       | 0.274271  | Inlier |
| siRNA-Temozolomide Run3-DMSO | NM_0325<br>01 | ACAS2L | acetyl-Coenzyme A synthetase 2 (AMP forming)-like                       | 0.277605  | Inlier |
| siRNA Disorazole DMSO Run2   | NM_0325<br>01 | ACAS2L | acetyl-Coenzyme A synthetase 2 (AMP forming)-like                       | 1.320195  | Inlier |
| siRNA-Vinblastine Run1-DMSO  | NM_0325<br>01 | ACAS2L | acetyl-Coenzyme A synthetase 2 (AMP forming)-like                       | 2.647971  | Inlier |
| siRNA-Temozolomide Run1-DMSO | NM_0000<br>19 | ACAT1  | acetyl-Coenzyme A acetyltransferase 1 (acetoacetyl Coenzyme A thiolase) | -0.881297 | Inlier |
| siRNA-Temozolomide Run3-DMSO | NM_0000<br>19 | ACAT1  | acetyl-Coenzyme A acetyltransferase 1 (acetoacetyl Coenzyme A thiolase) | -0.87765  | Inlier |

Identification of Survival Genes in Human Glioblastoma Cells Using siRNA Screening

Nikhil G Thaker, Fang Zhang, Peter R. McDonald, Tong Ying Shun, Michael D Lewen, Ian F. Pollack, and John S. Lazo

Molecular Pharmacology

|                              |           |       |                                                                         |           |        |
|------------------------------|-----------|-------|-------------------------------------------------------------------------|-----------|--------|
| siRNA-Temozolomide Run2-DMSO | NM_000019 | ACAT1 | acetyl-Coenzyme A acetyltransferase 1 (acetoacetyl Coenzyme A thiolase) | -0.268748 | Inlier |
| siRNA Disorazole DMSO Run1   | NM_000019 | ACAT1 | acetyl-Coenzyme A acetyltransferase 1 (acetoacetyl Coenzyme A thiolase) | -0.182607 | Inlier |
| siRNA Disorazole DMSO Run3   | NM_000019 | ACAT1 | acetyl-Coenzyme A acetyltransferase 1 (acetoacetyl Coenzyme A thiolase) | 0.182608  | Inlier |
| siRNA-Vinblastine Run2-DMSO  | NM_000019 | ACAT1 | acetyl-Coenzyme A acetyltransferase 1 (acetoacetyl Coenzyme A thiolase) | 0.47135   | Inlier |
| siRNA Disorazole DMSO Run2   | NM_000019 | ACAT1 | acetyl-Coenzyme A acetyltransferase 1 (acetoacetyl Coenzyme A thiolase) | 2.388815  | Inlier |

Identification of Survival Genes in Human Glioblastoma Cells Using siRNA Screening

Nikhil G Thaker, Fang Zhang, Peter R. McDonald, Tong Ying Shun, Michael D Lewen, Ian F. Pollack, and John S. Lazo

Molecular Pharmacology

|                              |           |       |                                                                         |           |        |
|------------------------------|-----------|-------|-------------------------------------------------------------------------|-----------|--------|
| siRNA-Vinblastine Run1-DMSO  | NM_000019 | ACAT1 | acetyl-Coenzyme A acetyltransferase 1 (acetoacetyl Coenzyme A thiolase) | 2.47043   | Inlier |
| siRNA-Temozolomide Run1-DMSO | NM_005891 | ACAT2 | acetyl-Coenzyme A acetyltransferase 2 (acetoacetyl Coenzyme A thiolase) | -1.194299 | Inlier |
| siRNA-Temozolomide Run2-DMSO | NM_005891 | ACAT2 | acetyl-Coenzyme A acetyltransferase 2 (acetoacetyl Coenzyme A thiolase) | -0.790669 | Inlier |
| siRNA Disorazole DMSO Run1   | NM_005891 | ACAT2 | acetyl-Coenzyme A acetyltransferase 2 (acetoacetyl Coenzyme A thiolase) | -0.334636 | Inlier |
| siRNA-Temozolomide Run3-DMSO | NM_005891 | ACAT2 | acetyl-Coenzyme A acetyltransferase 2 (acetoacetyl Coenzyme A thiolase) | -0.109585 | Inlier |

Identification of Survival Genes in Human Glioblastoma Cells Using siRNA Screening  
 Nikhil G Thaker, Fang Zhang, Peter R. McDonald, Tong Ying Shun, Michael D Lewen, Ian F. Pollack, and John S. Lazo  
 Molecular Pharmacology

|                              |               |        |                                                                         |           |        |
|------------------------------|---------------|--------|-------------------------------------------------------------------------|-----------|--------|
| siRNA-Vinblastine Run2-DMSO  | NM_0058<br>91 | ACAT2  | acetyl-Coenzyme A acetyltransferase 2 (acetoacetyl Coenzyme A thiolase) | 0.109585  | Inlier |
| siRNA Disorazole DMSO Run3   | NM_0058<br>91 | ACAT2  | acetyl-Coenzyme A acetyltransferase 2 (acetoacetyl Coenzyme A thiolase) | 0.599921  | Inlier |
| siRNA-Vinblastine Run1-DMSO  | NM_0058<br>91 | ACAT2  | acetyl-Coenzyme A acetyltransferase 2 (acetoacetyl Coenzyme A thiolase) | 0.749079  | Inlier |
| siRNA Disorazole DMSO Run2   | NM_0058<br>91 | ACAT2  | acetyl-Coenzyme A acetyltransferase 2 (acetoacetyl Coenzyme A thiolase) | 1.222016  | Inlier |
| siRNA-Temozolomide Run3-DMSO | NM_0123<br>32 | ACATE2 | ACATE2                                                                  | -1.010702 | Inlier |
| siRNA-Vinblastine Run2-DMSO  | NM_0123<br>32 | ACATE2 | ACATE2                                                                  | -0.70035  | Inlier |
| siRNA-Temozolomide Run2-DMSO | NM_0123<br>32 | ACATE2 | ACATE2                                                                  | -0.558904 | Inlier |
| siRNA Disorazole DMSO Run3   | NM_0123<br>32 | ACATE2 | ACATE2                                                                  | -0.433611 | Inlier |
| siRNA-Temozolomide Run1-DMSO | NM_0123<br>32 | ACATE2 | ACATE2                                                                  | 0.433611  | Inlier |
| siRNA Disorazole DMSO Run1   | NM_0123<br>32 | ACATE2 | ACATE2                                                                  | 0.64865   | Inlier |

Identification of Survival Genes in Human Glioblastoma Cells Using siRNA Screening

Nikhil G Thaker, Fang Zhang, Peter R. McDonald, Tong Ying Shun, Michael D Lewen, Ian F. Pollack, and John S.

Lazo

| siRNA Treatment              | Gene ID       | Gene Name | Gene Description                                            | Log Fold Change | Outlier Status |
|------------------------------|---------------|-----------|-------------------------------------------------------------|-----------------|----------------|
| siRNA-Vinblastine Run1-DMSO  | NM_0123<br>32 | ACATE2    |                                                             | 1.482214        | Inlier         |
| siRNA Disorazole DMSO Run2   | NM_0123<br>32 | ACATE2    |                                                             | 1.929729        | Inlier         |
| siRNA Disorazole DMSO Run1   | NM_1833<br>77 | ACCN1     | amiloride-sensitive cation channel 1, neuronal (degenerin ) | -0.825346       | Inlier         |
| siRNA-Vinblastine Run2-DMSO  | NM_1833<br>77 | ACCN1     | amiloride-sensitive cation channel 1, neuronal (degenerin ) | -0.806966       | Inlier         |
| siRNA-Temozolomide Run3-DMSO | NM_1833<br>77 | ACCN1     | amiloride-sensitive cation channel 1, neuronal (degenerin ) | -0.74598        | Inlier         |
| siRNA-Temozolomide Run2-DMSO | NM_1833<br>77 | ACCN1     | amiloride-sensitive cation channel 1, neuronal (degenerin ) | -0.200944       | Inlier         |
| siRNA-Temozolomide Run1-DMSO | NM_1833<br>77 | ACCN1     | amiloride-sensitive cation channel 1, neuronal (degenerin ) | 0.200944        | Inlier         |
| siRNA Disorazole DMSO Run3   | NM_1833<br>77 | ACCN1     | amiloride-sensitive cation channel 1, neuronal (degenerin ) | 0.350499        | Inlier         |

Identification of Survival Genes in Human Glioblastoma Cells Using siRNA Screening  
 Nikhil G Thaker, Fang Zhang, Peter R. McDonald, Tong Ying Shun, Michael D Lewen, Ian F. Pollack, and John S. Lazo  
 Molecular Pharmacology

|                              |               |       |                                                             |                  |
|------------------------------|---------------|-------|-------------------------------------------------------------|------------------|
| siRNA-Vinblastine Run1-DMSO  | NM_1833<br>77 | ACCN1 | amiloride-sensitive cation channel 1, neuronal (degenerin ) | 0.60302 Inlier   |
| siRNA Disorazole DMSO Run2   | NM_1833<br>77 | ACCN1 | amiloride-sensitive cation channel 1, neuronal (degenerin ) | 1.253752 Inlier  |
| siRNA Disorazole DMSO Run1   | NM_0200<br>39 | ACCN2 | amiloride-sensitive cation channel 2, neuronal              | -1.3913 Inlier   |
| siRNA-Temozolomide Run3-DMSO | NM_0200<br>39 | ACCN2 | amiloride-sensitive cation channel 2, neuronal              | -0.733094 Inlier |
| siRNA-Temozolomide Run2-DMSO | NM_0200<br>39 | ACCN2 | amiloride-sensitive cation channel 2, neuronal              | -0.615906 Inlier |
| siRNA-Temozolomide Run1-DMSO | NM_0200<br>39 | ACCN2 | amiloride-sensitive cation channel 2, neuronal              | -0.13549 Inlier  |
| siRNA-Vinblastine Run1-DMSO  | NM_0200<br>39 | ACCN2 | amiloride-sensitive cation channel 2, neuronal              | 0.135491 Inlier  |
| siRNA-Vinblastine Run2-DMSO  | NM_0200<br>39 | ACCN2 | amiloride-sensitive cation channel 2, neuronal              | 0.57477 Inlier   |



Identification of Survival Genes in Human Glioblastoma Cells Using siRNA Screening  
 Nikhil G Thaker, Fang Zhang, Peter R. McDonald, Tong Ying Shun, Michael D Lewen, Ian F. Pollack, and John S. Lazo  
 Molecular Pharmacology

|                              |               |       |                                                 |           |         |
|------------------------------|---------------|-------|-------------------------------------------------|-----------|---------|
| siRNA Disorazole DMSO Run3   | NM_0200<br>39 | ACCN2 | amiloride-sensitive cation channel 2, neuronal  | 2.317167  | Inlier  |
| siRNA Disorazole DMSO Run2   | NM_0200<br>39 | ACCN2 | amiloride-sensitive cation channel 2, neuronal  | 3.589132  | Outlier |
| siRNA-Temozolomide Run3-DMSO | NM_0047<br>69 | ACCN3 | amiloride-sensitive cation channel 3            | -1.345811 | Inlier  |
| siRNA Disorazole DMSO Run3   | NM_0047<br>69 | ACCN3 | amiloride-sensitive cation channel 3            | -0.69544  | Inlier  |
| siRNA-Temozolomide Run2-DMSO | NM_0047<br>69 | ACCN3 | amiloride-sensitive cation channel 3            | -0.476932 | Inlier  |
| siRNA Disorazole DMSO Run2   | NM_0047<br>69 | ACCN3 | amiloride-sensitive cation channel 3            | -0.186409 | Inlier  |
| siRNA Disorazole DMSO Run1   | NM_0047<br>69 | ACCN3 | amiloride-sensitive cation channel 3            | 0.186408  | Inlier  |
| siRNA-Temozolomide Run1-DMSO | NM_0047<br>69 | ACCN3 | amiloride-sensitive cation channel 3            | 0.65356   | Inlier  |
| siRNA-Vinblastine Run2-DMSO  | NM_0047<br>69 | ACCN3 | amiloride-sensitive cation channel 3            | 1.143384  | Inlier  |
| siRNA-Vinblastine Run1-DMSO  | NM_0047<br>69 | ACCN3 | amiloride-sensitive cation channel 3            | 1.763822  | Inlier  |
| siRNA Disorazole DMSO Run1   | NM_0186<br>74 | ACCN4 | amiloride-sensitive cation channel 4, pituitary | -1.734092 | Inlier  |

Identification of Survival Genes in Human Glioblastoma Cells Using siRNA Screening  
 Nikhil G Thaker, Fang Zhang, Peter R. McDonald, Tong Ying Shun, Michael D Lewen, Ian F. Pollack, and John S. Lazo  
 Molecular Pharmacology

|                              |               |       |                                                  |                  |
|------------------------------|---------------|-------|--------------------------------------------------|------------------|
| siRNA-Temozolomide Run1-DMSO | NM_0186<br>74 | ACCN4 | amiloride-sensitive cation channel 4, pituitary  | -0.786984 Inlier |
| siRNA-Temozolomide Run2-DMSO | NM_0186<br>74 | ACCN4 | amiloride-sensitive cation channel 4, pituitary  | -0.562016 Inlier |
| siRNA-Vinblastine Run2-DMSO  | NM_0186<br>74 | ACCN4 | amiloride-sensitive cation channel 4, pituitary  | -0.169713 Inlier |
| siRNA-Vinblastine Run1-DMSO  | NM_0186<br>74 | ACCN4 | amiloride-sensitive cation channel 4, pituitary  | 0.169712 Inlier  |
| siRNA-Temozolomide Run3-DMSO | NM_0186<br>74 | ACCN4 | amiloride-sensitive cation channel 4, pituitary  | 0.422795 Inlier  |
| siRNA Disorazole DMSO Run3   | NM_0186<br>74 | ACCN4 | amiloride-sensitive cation channel 4, pituitary  | 2.318527 Inlier  |
| siRNA Disorazole DMSO Run2   | NM_0186<br>74 | ACCN4 | amiloride-sensitive cation channel 4, pituitary  | 2.599351 Inlier  |
| siRNA Disorazole DMSO Run1   | NM_0174<br>19 | ACCN5 | amiloride-sensitive cation channel 5, intestinal | -1.581297 Inlier |

Identification of Survival Genes in Human Glioblastoma Cells Using siRNA Screening  
 Nikhil G Thaker, Fang Zhang, Peter R. McDonald, Tong Ying Shun, Michael D Lewen, Ian F. Pollack, and John S. Lazo  
 Molecular Pharmacology

|                              |               |       |                                                                                                                |                  |
|------------------------------|---------------|-------|----------------------------------------------------------------------------------------------------------------|------------------|
| siRNA-Temozolomide Run3-DMSO | NM_0174<br>19 | ACCN5 | amiloride-sensitive cation channel 5, intestinal                                                               | -0.836753 Inlier |
| siRNA-Temozolomide Run1-DMSO | NM_0174<br>19 | ACCN5 | amiloride-sensitive cation channel 5, intestinal                                                               | -0.512247 Inlier |
| siRNA-Temozolomide Run2-DMSO | NM_0174<br>19 | ACCN5 | amiloride-sensitive cation channel 5, intestinal                                                               | -0.127131 Inlier |
| siRNA-Vinblastine Run2-DMSO  | NM_0174<br>19 | ACCN5 | amiloride-sensitive cation channel 5, intestinal                                                               | 0.127132 Inlier  |
| siRNA-Vinblastine Run1-DMSO  | NM_0174<br>19 | ACCN5 | amiloride-sensitive cation channel 5, intestinal                                                               | 0.405153 Inlier  |
| siRNA Disorazole DMSO Run3   | NM_0174<br>19 | ACCN5 | amiloride-sensitive cation channel 5, intestinal                                                               | 1.88704 Inlier   |
| siRNA Disorazole DMSO Run2   | NM_0174<br>19 | ACCN5 | amiloride-sensitive cation channel 5, intestinal<br>angiotensin I converting enzyme (peptidyl-dipeptidase A) 1 | 6.309962 Outlier |
| siRNA-Temozolomide Run3-DMSO | NM_1528<br>30 | ACE   | amiloride-sensitive cation channel 5, intestinal<br>angiotensin I converting enzyme (peptidyl-dipeptidase A) 1 | -2.015565 Inlier |

Identification of Survival Genes in Human Glioblastoma Cells Using siRNA Screening

Nikhil G Thaker, Fang Zhang, Peter R. McDonald, Tong Ying Shun, Michael D Lewen, Ian F. Pollack, and John S. Lazo

Molecular Pharmacology

| siRNA Treatment              | Gene ID   | Cell Line | Gene Name                                                  | Log Fold Change | Outlier Status |
|------------------------------|-----------|-----------|------------------------------------------------------------|-----------------|----------------|
| siRNA-Temozolomide Run2-DMSO | NM_152830 | ACE       | angiotensin I converting enzyme (peptidyl-dipeptidase A) 1 | -0.75033        | Inlier         |
| siRNA Disorazole DMSO Run1   | NM_152830 | ACE       | angiotensin I converting enzyme (peptidyl-dipeptidase A) 1 | -0.113673       | Inlier         |
| siRNA-Temozolomide Run1-DMSO | NM_152830 | ACE       | angiotensin I converting enzyme (peptidyl-dipeptidase A) 1 | -0.062112       | Inlier         |
| siRNA Disorazole DMSO Run2   | NM_152830 | ACE       | angiotensin I converting enzyme (peptidyl-dipeptidase A) 1 | 0.062113        | Inlier         |
| siRNA Disorazole DMSO Run3   | NM_152830 | ACE       | angiotensin I converting enzyme (peptidyl-dipeptidase A) 1 | 0.59867         | Inlier         |
| siRNA-Vinblastine Run2-DMSO  | NM_152830 | ACE       | angiotensin I converting enzyme (peptidyl-dipeptidase A) 1 | 1.34339         | Inlier         |
| siRNA-Vinblastine Run1-DMSO  | NM_152830 | ACE       | angiotensin I converting enzyme (peptidyl-dipeptidase A) 1 | 1.617361        | Inlier         |

Identification of Survival Genes in Human Glioblastoma Cells Using siRNA Screening

Nikhil G Thaker, Fang Zhang, Peter R. McDonald, Tong Ying Shun, Michael D Lewen, Ian F. Pollack, and John S. Lazo

Molecular Pharmacology

| siRNA Treatment              | Gene ID   | Gene Name | Gene Description                                           | Log Fold Change | Outlier Status |
|------------------------------|-----------|-----------|------------------------------------------------------------|-----------------|----------------|
| siRNA-Temozolomide Run3-DMSO | NM_021804 | ACE2      | angiotensin I converting enzyme (peptidyl-dipeptidase A) 2 | -2.641918       | Inlier         |
| siRNA-Temozolomide Run2-DMSO | NM_021804 | ACE2      | angiotensin I converting enzyme (peptidyl-dipeptidase A) 2 | -1.617026       | Inlier         |
| siRNA Disorazole DMSO Run1   | NM_021804 | ACE2      | angiotensin I converting enzyme (peptidyl-dipeptidase A) 2 | -0.525705       | Inlier         |
| siRNA-Temozolomide Run1-DMSO | NM_021804 | ACE2      | angiotensin I converting enzyme (peptidyl-dipeptidase A) 2 | -0.380116       | Inlier         |
| siRNA-Vinblastine Run1-DMSO  | NM_021804 | ACE2      | angiotensin I converting enzyme (peptidyl-dipeptidase A) 2 | 0.380116        | Inlier         |
| siRNA Disorazole DMSO Run3   | NM_021804 | ACE2      | angiotensin I converting enzyme (peptidyl-dipeptidase A) 2 | 0.457621        | Inlier         |
| siRNA-Vinblastine Run2-DMSO  | NM_021804 | ACE2      | angiotensin I converting enzyme (peptidyl-dipeptidase A) 2 | 0.823295        | Inlier         |

Identification of Survival Genes in Human Glioblastoma Cells Using siRNA Screening

Nikhil G Thaker, Fang Zhang, Peter R. McDonald, Tong Ying Shun, Michael D Lewen, Ian F. Pollack, and John S. Lazo

Molecular Pharmacology

|                              |              |      |                                                            |           |        |
|------------------------------|--------------|------|------------------------------------------------------------|-----------|--------|
| siRNA Disorazole DMSO Run2   | NM_021804    | ACE2 | angiotensin I converting enzyme (peptidyl-dipeptidase A) 2 | 2.372303  | Inlier |
| siRNA-Temozolomide Run3-DMSO | NM_000665    | ACHE | acetylcholinesterase (YT blood group)                      | -2.399526 | Inlier |
| siRNA Disorazole DMSO Run3   | NM_000665    | ACHE | acetylcholinesterase (YT blood group)                      | -0.740867 | Inlier |
| siRNA-Temozolomide Run2-DMSO | NM_000665    | ACHE | acetylcholinesterase (YT blood group)                      | -0.479133 | Inlier |
| siRNA Disorazole DMSO Run1   | NM_000665    | ACHE | acetylcholinesterase (YT blood group)                      | -0.116808 | Inlier |
| siRNA-Temozolomide Run1-DMSO | NM_000665    | ACHE | acetylcholinesterase (YT blood group)                      | 0.116807  | Inlier |
| siRNA-Vinblastine Run2-DMSO  | NM_000665    | ACHE | acetylcholinesterase (YT blood group)                      | 0.608133  | Inlier |
| siRNA-Vinblastine Run1-DMSO  | NM_000665    | ACHE | acetylcholinesterase (YT blood group)                      | 1.414299  | Inlier |
| siRNA Disorazole DMSO Run2   | NM_000665    | ACHE | acetylcholinesterase (YT blood group)                      | 1.536361  | Inlier |
| siRNA-Temozolomide Run1-DMSO | NM_001010938 | ACK1 | tyrosine kinase, non-receptor, 2                           | -0.753358 | Inlier |

Identification of Survival Genes in Human Glioblastoma Cells Using siRNA Screening  
 Nikhil G Thaker, Fang Zhang, Peter R. McDonald, Tong Ying Shun, Michael D Lewen, Ian F. Pollack, and John S. Lazo  
 Molecular Pharmacology

|                              |                  |      |                                            |           |        |
|------------------------------|------------------|------|--------------------------------------------|-----------|--------|
| siRNA-Temozolomide Run3-DMSO | NM_0010<br>10938 | ACK1 | tyrosine<br>kinase,<br>non-<br>receptor, 2 | -0.69743  | Inlier |
| siRNA Disorazole DMSO Run3   | NM_0010<br>10938 | ACK1 | tyrosine<br>kinase,<br>non-<br>receptor, 2 | -0.532331 | Inlier |
| siRNA Disorazole DMSO Run2   | NM_0010<br>10938 | ACK1 | tyrosine<br>kinase,<br>non-<br>receptor, 2 | -0.275464 | Inlier |
| siRNA Disorazole DMSO Run1   | NM_0010<br>10938 | ACK1 | tyrosine<br>kinase,<br>non-<br>receptor, 2 | 0.275464  | Inlier |
| siRNA-Temozolomide Run2-DMSO | NM_0010<br>10938 | ACK1 | tyrosine<br>kinase,<br>non-<br>receptor, 2 | 0.65157   | Inlier |
| siRNA-Vinblastine Run1-DMSO  | NM_0010<br>10938 | ACK1 | tyrosine<br>kinase,<br>non-<br>receptor, 2 | 1.078503  | Inlier |
| siRNA-Vinblastine Run2-DMSO  | NM_0010<br>10938 | ACK1 | tyrosine<br>kinase,<br>non-<br>receptor, 2 | 1.574033  | Inlier |
| siRNA-Vinblastine Run2-DMSO  | NM_1988<br>30    | ACLY | ATP<br>citrate<br>lyase                    | -1.363568 | Inlier |
| siRNA Disorazole DMSO Run1   | NM_1988<br>30    | ACLY | ATP<br>citrate<br>lyase                    | -0.674432 | Inlier |
| siRNA-Temozolomide Run3-DMSO | NM_1988<br>30    | ACLY | ATP<br>citrate<br>lyase                    | -0.513474 | Inlier |
| siRNA-Vinblastine Run1-DMSO  | NM_1988<br>30    | ACLY | ATP<br>citrate<br>lyase                    | -0.163836 | Inlier |
| siRNA Disorazole DMSO Run3   | NM_1988<br>30    | ACLY | ATP<br>citrate<br>lyase                    | 0.163836  | Inlier |

Identification of Survival Genes in Human Glioblastoma Cells Using siRNA Screening  
 Nikhil G Thaker, Fang Zhang, Peter R. McDonald, Tong Ying Shun, Michael D Lewen, Ian F. Pollack, and John S. Lazo

Molecular Pharmacology

| siRNA Treatment              | Gene          | Enzyme | ATP                                                                   | Value     | Inlier |
|------------------------------|---------------|--------|-----------------------------------------------------------------------|-----------|--------|
| siRNA Disorazole DMSO Run2   | NM_1988<br>30 | ACLY   | citrate<br>lyase                                                      | 0.674568  | Inlier |
| siRNA-Temozolomide Run2-DMSO | NM_1988<br>30 | ACLY   | citrate<br>lyase                                                      | 1.570788  | Inlier |
| siRNA-Temozolomide Run1-DMSO | NM_1988<br>30 | ACLY   | citrate<br>lyase                                                      | 1.590977  | Inlier |
| siRNA-Temozolomide Run3-DMSO | NM_1383<br>26 | ACMSD  | aminocarb<br>oxymucon<br>ate<br>semialdeh<br>yde<br>decarboxyl<br>ase | -2.615314 | Inlier |
| siRNA-Temozolomide Run2-DMSO | NM_1383<br>26 | ACMSD  | aminocarb<br>oxymucon<br>ate<br>semialdeh<br>yde<br>decarboxyl<br>ase | -1.041945 | Inlier |
| siRNA-Temozolomide Run1-DMSO | NM_1383<br>26 | ACMSD  | aminocarb<br>oxymucon<br>ate<br>semialdeh<br>yde<br>decarboxyl<br>ase | -0.307054 | Inlier |
| siRNA Disorazole DMSO Run3   | NM_1383<br>26 | ACMSD  | aminocarb<br>oxymucon<br>ate<br>semialdeh<br>yde<br>decarboxyl<br>ase | -0.017054 | Inlier |
| siRNA Disorazole DMSO Run1   | NM_1383<br>26 | ACMSD  | aminocarb<br>oxymucon<br>ate<br>semialdeh<br>yde<br>decarboxyl<br>ase | 0.017054  | Inlier |
| siRNA-Vinblastine Run2-DMSO  | NM_1383<br>26 | ACMSD  | aminocarb<br>oxymucon<br>ate<br>semialdeh<br>yde<br>decarboxyl<br>ase | 0.027743  | Inlier |



Identification of Survival Genes in Human Glioblastoma Cells Using siRNA Screening  
 Nikhil G Thaker, Fang Zhang, Peter R. McDonald, Tong Ying Shun, Michael D Lewen, Ian F. Pollack, and John S. Lazo

Molecular Pharmacology

|                                  |               |       |                                                                       |           |        |
|----------------------------------|---------------|-------|-----------------------------------------------------------------------|-----------|--------|
| siRNA Disorazole DMSO Run2       | NM_1383<br>26 | ACMSD | aminocarb<br>oxymucon<br>ate<br>semialdeh<br>yde<br>decarboxyl<br>ase | 1.321214  | Inlier |
| siRNA-Vinblastine Run1-<br>DMSO  | NM_1383<br>26 | ACMSD | aminocarb<br>oxymucon<br>ate<br>semialdeh<br>yde<br>decarboxyl<br>ase | 2.045402  | Inlier |
| siRNA-Temozolomide Run3-<br>DMSO | NM_0021<br>97 | ACO1  | aconitase<br>1, soluble                                               | -2.578811 | Inlier |
| siRNA-Temozolomide Run2-<br>DMSO | NM_0021<br>97 | ACO1  | aconitase<br>1, soluble                                               | -1.469483 | Inlier |
| siRNA-Temozolomide Run1-<br>DMSO | NM_0021<br>97 | ACO1  | aconitase<br>1, soluble                                               | -0.549585 | Inlier |
| siRNA Disorazole DMSO Run3       | NM_0021<br>97 | ACO1  | aconitase<br>1, soluble                                               | -0.299285 | Inlier |
| siRNA Disorazole DMSO Run1       | NM_0021<br>97 | ACO1  | aconitase<br>1, soluble                                               | 0.299285  | Inlier |
| siRNA-Vinblastine Run2-<br>DMSO  | NM_0021<br>97 | ACO1  | aconitase<br>1, soluble                                               | 0.585122  | Inlier |
| siRNA Disorazole DMSO Run2       | NM_0021<br>97 | ACO1  | aconitase<br>1, soluble                                               | 0.763878  | Inlier |
| siRNA-Vinblastine Run1-<br>DMSO  | NM_0021<br>97 | ACO1  | aconitase<br>1, soluble<br>aconitase<br>2,                            | 2.24471   | Inlier |
| siRNA-Temozolomide Run3-<br>DMSO | NM_0010<br>98 | ACO2  | mitochond<br>rial<br>aconitase<br>2,                                  | -1.015229 | Inlier |
| siRNA-Temozolomide Run2-<br>DMSO | NM_0010<br>98 | ACO2  | mitochond<br>rial<br>aconitase<br>2,                                  | -0.778513 | Inlier |
| siRNA Disorazole DMSO Run3       | NM_0010<br>98 | ACO2  | mitochond<br>rial<br>aconitase<br>2,                                  | -0.570487 | Inlier |
| siRNA-Vinblastine Run2-<br>DMSO  | NM_0010<br>98 | ACO2  | mitochond<br>rial<br>aconitase<br>2,                                  | -0.062    | Inlier |
| siRNA-Temozolomide Run1-<br>DMSO | NM_0010<br>98 | ACO2  | mitochond<br>rial                                                     | 0.062     | Inlier |

Identification of Survival Genes in Human Glioblastoma Cells Using siRNA Screening  
 Nikhil G Thaker, Fang Zhang, Peter R. McDonald, Tong Ying Shun, Michael D Lewen, Ian F. Pollack, and John S. Lazo

Molecular Pharmacology

|                              |               |       |                                               |           |        |
|------------------------------|---------------|-------|-----------------------------------------------|-----------|--------|
| siRNA Disorazole DMSO Run1   | NM_0010<br>98 | ACO2  | aconitase<br>2,<br>mitochondrial              | 0.074355  | Inlier |
| siRNA Disorazole DMSO Run2   | NM_0010<br>98 | ACO2  | aconitase<br>2,<br>mitochondrial              | 1.287803  | Inlier |
| siRNA-Vinblastine Run1-DMSO  | NM_0010<br>98 | ACO2  | aconitase<br>2,<br>mitochondrial              | 1.370129  | Inlier |
| siRNA-Vinblastine Run2-DMSO  | NM_0040<br>35 | ACOX1 | acyl-Coenzyme<br>A oxidase<br>1,<br>palmitoyl | -0.684577 | Inlier |
| siRNA-Temozolomide Run3-DMSO | NM_0040<br>35 | ACOX1 | acyl-Coenzyme<br>A oxidase<br>1,<br>palmitoyl | -0.664423 | Inlier |
| siRNA Disorazole DMSO Run3   | NM_0040<br>35 | ACOX1 | acyl-Coenzyme<br>A oxidase<br>1,<br>palmitoyl | -0.530667 | Inlier |
| siRNA-Temozolomide Run2-DMSO | NM_0040<br>35 | ACOX1 | acyl-Coenzyme<br>A oxidase<br>1,<br>palmitoyl | -0.055375 | Inlier |
| siRNA Disorazole DMSO Run1   | NM_0040<br>35 | ACOX1 | acyl-Coenzyme<br>A oxidase<br>1,<br>palmitoyl | 0.055375  | Inlier |
| siRNA-Temozolomide Run1-DMSO | NM_0040<br>35 | ACOX1 | acyl-Coenzyme<br>A oxidase<br>1,<br>palmitoyl | 1.238364  | Inlier |

Identification of Survival Genes in Human Glioblastoma Cells Using siRNA Screening  
 Nikhil G Thaker, Fang Zhang, Peter R. McDonald, Tong Ying Shun, Michael D Lewen, Ian F. Pollack, and John S. Lazo  
 Molecular Pharmacology

|                              |           |       |                                           |           |        |
|------------------------------|-----------|-------|-------------------------------------------|-----------|--------|
| siRNA-Vinblastine Run1-DMSO  | NM_004035 | ACOX1 | acyl-Coenzyme A oxidase 1, palmitoyl      | 2.434165  | Inlier |
| siRNA Disorazole DMSO Run2   | NM_004035 | ACOX1 | acyl-Coenzyme A oxidase 1, palmitoyl      | 2.778502  | Inlier |
| siRNA Disorazole DMSO Run1   | NM_003500 | ACOX2 | acyl-Coenzyme A oxidase 2, branched chain | -2.16939  | Inlier |
| siRNA-Temozolomide Run1-DMSO | NM_003500 | ACOX2 | acyl-Coenzyme A oxidase 2, branched chain | -1.535793 | Inlier |
| siRNA-Temozolomide Run2-DMSO | NM_003500 | ACOX2 | acyl-Coenzyme A oxidase 2, branched chain | -1.191949 | Inlier |
| siRNA Disorazole DMSO Run3   | NM_003500 | ACOX2 | acyl-Coenzyme A oxidase 2, branched chain | -0.048459 | Inlier |
| siRNA-Vinblastine Run1-DMSO  | NM_003500 | ACOX2 | acyl-Coenzyme A oxidase 2, branched chain | 0.048459  | Inlier |

Identification of Survival Genes in Human Glioblastoma Cells Using siRNA Screening  
 Nikhil G Thaker, Fang Zhang, Peter R. McDonald, Tong Ying Shun, Michael D Lewen, Ian F. Pollack, and John S. Lazo  
 Molecular Pharmacology

|                              |           |       |                                           |           |        |
|------------------------------|-----------|-------|-------------------------------------------|-----------|--------|
| siRNA-Temozolomide Run3-DMSO | NM_003500 | ACOX2 | acyl-Coenzyme A oxidase 2, branched chain | 0.061023  | Inlier |
| siRNA-Vinblastine Run2-DMSO  | NM_003500 | ACOX2 | acyl-Coenzyme A oxidase 2, branched chain | 0.157051  | Inlier |
| siRNA Disorazole DMSO Run2   | NM_003500 | ACOX2 | acyl-Coenzyme A oxidase 2, branched chain | 2.622266  | Inlier |
| siRNA-Temozolomide Run3-DMSO | NM_003501 | ACOX3 | acyl-Coenzyme A oxidase 3, pristanoyl     | -2.90577  | Inlier |
| siRNA Disorazole DMSO Run1   | NM_003501 | ACOX3 | acyl-Coenzyme A oxidase 3, pristanoyl     | -0.686175 | Inlier |
| siRNA Disorazole DMSO Run3   | NM_003501 | ACOX3 | acyl-Coenzyme A oxidase 3, pristanoyl     | -0.662825 | Inlier |
| siRNA-Temozolomide Run2-DMSO | NM_003501 | ACOX3 | acyl-Coenzyme A oxidase 3, pristanoyl     | -0.489528 | Inlier |
| siRNA-Temozolomide Run1-DMSO | NM_003501 | ACOX3 | acyl-Coenzyme A oxidase 3, pristanoyl     | 0.489528  | Inlier |

Identification of Survival Genes in Human Glioblastoma Cells Using siRNA Screening  
 Nikhil G Thaker, Fang Zhang, Peter R. McDonald, Tong Ying Shun, Michael D Lewen, Ian F. Pollack, and John S. Lazo  
 Molecular Pharmacology

|                              |           |       |                                       |           |         |
|------------------------------|-----------|-------|---------------------------------------|-----------|---------|
| siRNA-Vinblastine Run2-DMSO  | NM_003501 | ACOX3 | acyl-Coenzyme A oxidase 3, pristanoyl | 0.638135  | Inlier  |
| siRNA-Vinblastine Run1-DMSO  | NM_003501 | ACOX3 | acyl-Coenzyme A oxidase 3, pristanoyl | 2.449408  | Inlier  |
| siRNA Disorazole DMSO Run2   | NM_003501 | ACOX3 | acyl-Coenzyme A oxidase 3, pristanoyl | 3.797656  | Outlier |
| siRNA-Temozolomide Run3-DMSO | NM_018308 | ACOXL | acyl-Coenzyme A oxidase-like          | -2.963997 | Inlier  |
| siRNA Disorazole DMSO Run3   | NM_018308 | ACOXL | acyl-Coenzyme A oxidase-like          | -0.837648 | Inlier  |
| siRNA-Temozolomide Run2-DMSO | NM_018308 | ACOXL | acyl-Coenzyme A oxidase-like          | -0.511352 | Inlier  |
| siRNA Disorazole DMSO Run1   | NM_018308 | ACOXL | acyl-Coenzyme A oxidase-like          | -0.000565 | Inlier  |
| siRNA-Vinblastine Run2-DMSO  | NM_018308 | ACOXL | acyl-Coenzyme A oxidase-like          | 0.000565  | Inlier  |
| siRNA-Temozolomide Run1-DMSO | NM_018308 | ACOXL | acyl-Coenzyme A oxidase-like          | 0.4072    | Inlier  |

Identification of Survival Genes in Human Glioblastoma Cells Using siRNA Screening  
 Nikhil G Thaker, Fang Zhang, Peter R. McDonald, Tong Ying Shun, Michael D Lewen, Ian F. Pollack, and John S. Lazo  
 Molecular Pharmacology

|                              |           |       |                               |           |        |
|------------------------------|-----------|-------|-------------------------------|-----------|--------|
| siRNA-Vinblastine Run1-DMSO  | NM_018308 | ACOXL | acyl-Coenzyme A oxidase-like  | 1.962421  | Inlier |
| siRNA Disorazole DMSO Run2   | NM_018308 | ACOXL | acyl-Coenzyme A oxidase-like  | 2.108196  | Inlier |
| siRNA-Temozolomide Run3-DMSO | NM_007099 | ACP1  | acid phosphatase 1, soluble   | -1.484476 | Inlier |
| siRNA Disorazole DMSO Run3   | NM_007099 | ACP1  | acid phosphatase 1, soluble   | -0.679073 | Inlier |
| siRNA Disorazole DMSO Run2   | NM_007099 | ACP1  | acid phosphatase 1, soluble   | -0.542255 | Inlier |
| siRNA-Temozolomide Run2-DMSO | NM_007099 | ACP1  | acid phosphatase 1, soluble   | -0.06816  | Inlier |
| siRNA-Temozolomide Run1-DMSO | NM_007099 | ACP1  | acid phosphatase 1, soluble   | 0.06816   | Inlier |
| siRNA Disorazole DMSO Run1   | NM_007099 | ACP1  | acid phosphatase 1, soluble   | 0.669927  | Inlier |
| siRNA-Vinblastine Run2-DMSO  | NM_007099 | ACP1  | acid phosphatase 1, soluble   | 1.333239  | Inlier |
| siRNA-Vinblastine Run1-DMSO  | NM_007099 | ACP1  | acid phosphatase 1, soluble   | 1.579785  | Inlier |
| siRNA-Temozolomide Run3-DMSO | NM_001610 | ACP2  | acid phosphatase 2, lysosomal | -1.796433 | Inlier |
| siRNA Disorazole DMSO Run2   | NM_001610 | ACP2  | acid phosphatase 2, lysosomal | -0.497155 | Inlier |

Identification of Survival Genes in Human Glioblastoma Cells Using siRNA Screening  
 Nikhil G Thaker, Fang Zhang, Peter R. McDonald, Tong Ying Shun, Michael D Lewen, Ian F. Pollack, and John S. Lazo

Molecular Pharmacology

|                              |               |      |                                        |           |        |
|------------------------------|---------------|------|----------------------------------------|-----------|--------|
| siRNA-Temozolomide Run1-DMSO | NM_0016<br>10 | ACP2 | acid phosphatase 2, lysosomal          | -0.381574 | Inlier |
| siRNA-Temozolomide Run2-DMSO | NM_0016<br>10 | ACP2 | acid phosphatase 2, lysosomal          | -0.224714 | Inlier |
| siRNA Disorazole DMSO Run3   | NM_0016<br>10 | ACP2 | acid phosphatase 2, lysosomal          | 0.224714  | Inlier |
| siRNA-Vinblastine Run2-DMSO  | NM_0016<br>10 | ACP2 | acid phosphatase 2, lysosomal          | 0.851845  | Inlier |
| siRNA Disorazole DMSO Run1   | NM_0016<br>10 | ACP2 | acid phosphatase 2, lysosomal          | 0.873966  | Inlier |
| siRNA-Vinblastine Run1-DMSO  | NM_0016<br>10 | ACP2 | acid phosphatase 2, lysosomal          | 1.06432   | Inlier |
| siRNA-Temozolomide Run3-DMSO | NM_0016<br>11 | ACP5 | acid phosphatase 5, tartrate resistant | -1.635174 | Inlier |
| siRNA Disorazole DMSO Run2   | NM_0016<br>11 | ACP5 | acid phosphatase 5, tartrate resistant | -1.184525 | Inlier |
| siRNA Disorazole DMSO Run3   | NM_0016<br>11 | ACP5 | acid phosphatase 5, tartrate resistant | -0.806071 | Inlier |
| siRNA-Temozolomide Run1-DMSO | NM_0016<br>11 | ACP5 | acid phosphatase 5, tartrate resistant | -0.088553 | Inlier |
| siRNA-Temozolomide Run2-DMSO | NM_0016<br>11 | ACP5 | acid phosphatase 5, tartrate resistant | 0.088553  | Inlier |

Identification of Survival Genes in Human Glioblastoma Cells Using siRNA Screening  
 Nikhil G Thaker, Fang Zhang, Peter R. McDonald, Tong Ying Shun, Michael D Lewen, Ian F. Pollack, and John S. Lazo

Molecular Pharmacology

| siRNA                        | Gene    | Gene ID | Target | Gene Name                              | Value     | Category |
|------------------------------|---------|---------|--------|----------------------------------------|-----------|----------|
| siRNA Disorazole DMSO Run1   | NM_0016 | 11      | ACP5   | acid phosphatase 5, tartrate resistant | 0.331484  | Inlier   |
| siRNA-Vinblastine Run2-DMSO  | NM_0016 | 11      | ACP5   | acid phosphatase 5, tartrate resistant | 0.636439  | Inlier   |
| siRNA-Vinblastine Run1-DMSO  | NM_0016 | 11      | ACP5   | acid phosphatase 5, tartrate resistant | 0.712561  | Inlier   |
| siRNA-Temozolomide Run3-DMSO | NM_0163 | 61      | ACP6   | acid phosphatase 6, lysophosphatidic   | -11.70893 | Outlier  |
| siRNA-Temozolomide Run1-DMSO | NM_0163 | 61      | ACP6   | acid phosphatase 6, lysophosphatidic   | -0.846822 | Inlier   |
| siRNA Disorazole DMSO Run3   | NM_0163 | 61      | ACP6   | acid phosphatase 6, lysophosphatidic   | -0.502178 | Inlier   |
| siRNA Disorazole DMSO Run2   | NM_0163 | 61      | ACP6   | acid phosphatase 6, lysophosphatidic   | -0.183776 | Inlier   |
| siRNA-Temozolomide Run2-DMSO | NM_0163 | 61      | ACP6   | acid phosphatase 6, lysophosphatidic   | 0.183776  | Inlier   |
| siRNA Disorazole DMSO Run1   | NM_0163 | 61      | ACP6   | acid phosphatase 6, lysophosphatidic   | 0.281947  | Inlier   |
| siRNA-Vinblastine Run1-DMSO  | NM_0163 | 61      | ACP6   | acid phosphatase 6, lysophosphatidic   | 4.854448  | Outlier  |



Identification of Survival Genes in Human Glioblastoma Cells Using siRNA Screening  
 Nikhil G Thaker, Fang Zhang, Peter R. McDonald, Tong Ying Shun, Michael D Lewen, Ian F. Pollack, and John S. Lazo

Molecular Pharmacology

|                              |           |      |                                           |           |         |
|------------------------------|-----------|------|-------------------------------------------|-----------|---------|
| siRNA-Vinblastine Run2-DMSO  | NM_016361 | ACP6 | acid phosphatase 6, lysophosphatidic acid | 8.801937  | Outlier |
| siRNA-Temozolomide Run3-DMSO | NM_001099 | ACPP | acid phosphatase, prostate                | -0.706655 | Inlier  |
| siRNA Disorazole DMSO Run2   | NM_001099 | ACPP | acid phosphatase, prostate                | -0.642345 | Inlier  |
| siRNA Disorazole DMSO Run3   | NM_001099 | ACPP | acid phosphatase, prostate                | -0.46629  | Inlier  |
| siRNA-Temozolomide Run1-DMSO | NM_001099 | ACPP | acid phosphatase, prostate                | -0.003944 | Inlier  |
| siRNA-Temozolomide Run2-DMSO | NM_001099 | ACPP | acid phosphatase, prostate                | 0.003944  | Inlier  |
| siRNA-Vinblastine Run1-DMSO  | NM_001099 | ACPP | acid phosphatase, prostate                | 0.740559  | Inlier  |
| siRNA-Vinblastine Run2-DMSO  | NM_001099 | ACPP | acid phosphatase, prostate                | 0.75459   | Inlier  |
| siRNA Disorazole DMSO Run1   | NM_001099 | ACPP | acid phosphatase, prostate                | 0.938063  | Inlier  |
| siRNA-Temozolomide Run3-DMSO | NM_080790 | ACPT | acid phosphatase, testicular              | -1.334946 | Inlier  |
| siRNA Disorazole DMSO Run2   | NM_080790 | ACPT | acid phosphatase, testicular              | -1.101325 | Inlier  |
| siRNA-Temozolomide Run2-DMSO | NM_080790 | ACPT | acid phosphatase, testicular              | -0.858736 | Inlier  |

Identification of Survival Genes in Human Glioblastoma Cells Using siRNA Screening  
 Nikhil G Thaker, Fang Zhang, Peter R. McDonald, Tong Ying Shun, Michael D Lewen, Ian F. Pollack, and John S. Lazo

Molecular Pharmacology

|                              |               |       |                                                |           |        |
|------------------------------|---------------|-------|------------------------------------------------|-----------|--------|
| siRNA-Temozolomide Run1-DMSO | NM_0807<br>90 | ACPT  | acid phosphatase, testicular                   | -0.07179  | Inlier |
| siRNA Disorazole DMSO Run3   | NM_0807<br>90 | ACPT  | acid phosphatase, testicular                   | 0.07179   | Inlier |
| siRNA-Vinblastine Run2-DMSO  | NM_0807<br>90 | ACPT  | acid phosphatase, testicular                   | 0.511915  | Inlier |
| siRNA Disorazole DMSO Run1   | NM_0807<br>90 | ACPT  | acid phosphatase, testicular                   | 0.571082  | Inlier |
| siRNA-Vinblastine Run1-DMSO  | NM_0807<br>90 | ACPT  | acid phosphatase, testicular                   | 0.777918  | Inlier |
| siRNA-Temozolomide Run3-DMSO | NM_0010<br>97 | ACR   | acrosin                                        | -1.392198 | Inlier |
| siRNA Disorazole DMSO Run2   | NM_0010<br>97 | ACR   | acrosin                                        | -0.879676 | Inlier |
| siRNA Disorazole DMSO Run1   | NM_0010<br>97 | ACR   | acrosin                                        | -0.630733 | Inlier |
| siRNA-Temozolomide Run2-DMSO | NM_0010<br>97 | ACR   | acrosin                                        | -0.001769 | Inlier |
| siRNA Disorazole DMSO Run3   | NM_0010<br>97 | ACR   | acrosin                                        | 0.001769  | Inlier |
| siRNA-Temozolomide Run1-DMSO | NM_0010<br>97 | ACR   | acrosin                                        | 0.293685  | Inlier |
| siRNA-Vinblastine Run2-DMSO  | NM_0010<br>97 | ACR   | acrosin                                        | 0.718267  | Inlier |
| siRNA-Vinblastine Run1-DMSO  | NM_0010<br>97 | ACR   | acrosin                                        | 0.919563  | Inlier |
| siRNA-Temozolomide Run3-DMSO | NM_0019<br>95 | ACSL1 | acyl-CoA synthetase long-chain family member 1 | -1.606837 | Inlier |
| siRNA-Temozolomide Run2-DMSO | NM_0019<br>95 | ACSL1 | acyl-CoA synthetase long-chain family member 1 | -1.005181 | Inlier |

Identification of Survival Genes in Human Glioblastoma Cells Using siRNA Screening  
 Nikhil G Thaker, Fang Zhang, Peter R. McDonald, Tong Ying Shun, Michael D Lewen, Ian F. Pollack, and John S. Lazo  
 Molecular Pharmacology

|                                  |               |       |                                                            |           |        |
|----------------------------------|---------------|-------|------------------------------------------------------------|-----------|--------|
| siRNA Disorazole DMSO Run3       | NM_0019<br>95 | ACSL1 | acyl-CoA<br>synthetase<br>long-chain<br>family<br>member 1 | -0.304218 | Inlier |
| siRNA-Temozolomide Run1-<br>DMSO | NM_0019<br>95 | ACSL1 | acyl-CoA<br>synthetase<br>long-chain<br>family<br>member 1 | -0.151545 | Inlier |
| siRNA-Vinblastine Run2-<br>DMSO  | NM_0019<br>95 | ACSL1 | acyl-CoA<br>synthetase<br>long-chain<br>family<br>member 1 | 0.151546  | Inlier |
| siRNA Disorazole DMSO Run1       | NM_0019<br>95 | ACSL1 | acyl-CoA<br>synthetase<br>long-chain<br>family<br>member 1 | 0.531855  | Inlier |
| siRNA Disorazole DMSO Run2       | NM_0019<br>95 | ACSL1 | acyl-CoA<br>synthetase<br>long-chain<br>family<br>member 1 | 0.817145  | Inlier |
| siRNA-Vinblastine Run1-<br>DMSO  | NM_0019<br>95 | ACSL1 | acyl-CoA<br>synthetase<br>long-chain<br>family<br>member 1 | 1.331444  | Inlier |
| siRNA-Temozolomide Run3-<br>DMSO | NM_0044<br>57 | ACSL3 | acyl-CoA<br>synthetase<br>long-chain<br>family<br>member 3 | -2.932188 | Inlier |
| siRNA Disorazole DMSO Run3       | NM_0044<br>57 | ACSL3 | acyl-CoA<br>synthetase<br>long-chain<br>family<br>member 3 | -1.601935 | Inlier |

Identification of Survival Genes in Human Glioblastoma Cells Using siRNA Screening  
 Nikhil G Thaker, Fang Zhang, Peter R. McDonald, Tong Ying Shun, Michael D Lewen, Ian F. Pollack, and John S. Lazo  
 Molecular Pharmacology

|                              |               |       |                                                            |           |        |
|------------------------------|---------------|-------|------------------------------------------------------------|-----------|--------|
| siRNA-Vinblastine Run2-DMSO  | NM_0044<br>57 | ACSL3 | acyl-CoA<br>synthetase<br>long-chain<br>family<br>member 3 | -1.047107 | Inlier |
| siRNA Disorazole DMSO Run1   | NM_0044<br>57 | ACSL3 | acyl-CoA<br>synthetase<br>long-chain<br>family<br>member 3 | -0.002331 | Inlier |
| siRNA-Temozolomide Run2-DMSO | NM_0044<br>57 | ACSL3 | acyl-CoA<br>synthetase<br>long-chain<br>family<br>member 3 | 0.002331  | Inlier |
| siRNA-Temozolomide Run1-DMSO | NM_0044<br>57 | ACSL3 | acyl-CoA<br>synthetase<br>long-chain<br>family<br>member 3 | 0.309307  | Inlier |
| siRNA Disorazole DMSO Run2   | NM_0044<br>57 | ACSL3 | acyl-CoA<br>synthetase<br>long-chain<br>family<br>member 3 | 0.459054  | Inlier |
| siRNA-Vinblastine Run1-DMSO  | NM_0044<br>57 | ACSL3 | acyl-CoA<br>synthetase<br>long-chain<br>family<br>member 3 | 0.889946  | Inlier |
| siRNA-Vinblastine Run2-DMSO  | NM_0229<br>77 | ACSL4 | acyl-CoA<br>synthetase<br>long-chain<br>family<br>member 4 | -0.98568  | Inlier |
| siRNA-Temozolomide Run3-DMSO | NM_0229<br>77 | ACSL4 | acyl-CoA<br>synthetase<br>long-chain<br>family<br>member 4 | -0.740235 | Inlier |

Identification of Survival Genes in Human Glioblastoma Cells Using siRNA Screening  
 Nikhil G Thaker, Fang Zhang, Peter R. McDonald, Tong Ying Shun, Michael D Lewen, Ian F. Pollack, and John S. Lazo  
 Molecular Pharmacology

|                                  |               |       |                                                            |           |        |
|----------------------------------|---------------|-------|------------------------------------------------------------|-----------|--------|
| siRNA Disorazole DMSO Run3       | NM_0229<br>77 | ACSL4 | acyl-CoA<br>synthetase<br>long-chain<br>family<br>member 4 | -0.702535 | Inlier |
| siRNA-Temozolomide Run1-<br>DMSO | NM_0229<br>77 | ACSL4 | acyl-CoA<br>synthetase<br>long-chain<br>family<br>member 4 | -0.281597 | Inlier |
| siRNA Disorazole DMSO Run2       | NM_0229<br>77 | ACSL4 | acyl-CoA<br>synthetase<br>long-chain<br>family<br>member 4 | 0.281596  | Inlier |
| siRNA Disorazole DMSO Run1       | NM_0229<br>77 | ACSL4 | acyl-CoA<br>synthetase<br>long-chain<br>family<br>member 4 | 0.370539  | Inlier |
| siRNA-Temozolomide Run2-<br>DMSO | NM_0229<br>77 | ACSL4 | acyl-CoA<br>synthetase<br>long-chain<br>family<br>member 4 | 0.646465  | Inlier |
| siRNA-Vinblastine Run1-<br>DMSO  | NM_0229<br>77 | ACSL4 | acyl-CoA<br>synthetase<br>long-chain<br>family<br>member 4 | 0.9607    | Inlier |
| siRNA-Temozolomide Run3-<br>DMSO | NM_2033<br>80 | ACSL5 | acyl-CoA<br>synthetase<br>long-chain<br>family<br>member 5 | -2.544472 | Inlier |
| siRNA Disorazole DMSO Run3       | NM_2033<br>80 | ACSL5 | acyl-CoA<br>synthetase<br>long-chain<br>family<br>member 5 | -0.903347 | Inlier |

Identification of Survival Genes in Human Glioblastoma Cells Using siRNA Screening  
 Nikhil G Thaker, Fang Zhang, Peter R. McDonald, Tong Ying Shun, Michael D Lewen, Ian F. Pollack, and John S. Lazo  
 Molecular Pharmacology

|                              |                  |       |                                                            |           |        |
|------------------------------|------------------|-------|------------------------------------------------------------|-----------|--------|
| siRNA-Vinblastine Run2-DMSO  | NM_2033<br>80    | ACSL5 | acyl-CoA<br>synthetase<br>long-chain<br>family<br>member 5 | -0.445653 | Inlier |
| siRNA-Temozolomide Run2-DMSO | NM_2033<br>80    | ACSL5 | acyl-CoA<br>synthetase<br>long-chain<br>family<br>member 5 | -0.401714 | Inlier |
| siRNA Disorazole DMSO Run2   | NM_2033<br>80    | ACSL5 | acyl-CoA<br>synthetase<br>long-chain<br>family<br>member 5 | 0.401714  | Inlier |
| siRNA Disorazole DMSO Run1   | NM_2033<br>80    | ACSL5 | acyl-CoA<br>synthetase<br>long-chain<br>family<br>member 5 | 0.406704  | Inlier |
| siRNA-Temozolomide Run1-DMSO | NM_2033<br>80    | ACSL5 | acyl-CoA<br>synthetase<br>long-chain<br>family<br>member 5 | 1.04035   | Inlier |
| siRNA-Vinblastine Run1-DMSO  | NM_2033<br>80    | ACSL5 | acyl-CoA<br>synthetase<br>long-chain<br>family<br>member 5 | 1.139187  | Inlier |
| siRNA-Temozolomide Run3-DMSO | NM_0010<br>09185 | ACSL6 | acyl-CoA<br>synthetase<br>long-chain<br>family<br>member 6 | -2.270966 | Inlier |
| siRNA-Temozolomide Run2-DMSO | NM_0010<br>09185 | ACSL6 | acyl-CoA<br>synthetase<br>long-chain<br>family<br>member 6 | -0.879613 | Inlier |

Identification of Survival Genes in Human Glioblastoma Cells Using siRNA Screening  
 Nikhil G Thaker, Fang Zhang, Peter R. McDonald, Tong Ying Shun, Michael D Lewen, Ian F. Pollack, and John S. Lazo  
 Molecular Pharmacology

|                              |                  |        |                                                            |           |        |
|------------------------------|------------------|--------|------------------------------------------------------------|-----------|--------|
| siRNA-Vinblastine Run2-DMSO  | NM_0010<br>09185 | ACSL6  | acyl-CoA<br>synthetase<br>long-chain<br>family<br>member 6 | -0.412842 | Inlier |
| siRNA-Temozolomide Run1-DMSO | NM_0010<br>09185 | ACSL6  | acyl-CoA<br>synthetase<br>long-chain<br>family<br>member 6 | -0.000455 | Inlier |
| siRNA Disorazole DMSO Run3   | NM_0010<br>09185 | ACSL6  | acyl-CoA<br>synthetase<br>long-chain<br>family<br>member 6 | 0.000455  | Inlier |
| siRNA Disorazole DMSO Run2   | NM_0010<br>09185 | ACSL6  | acyl-CoA<br>synthetase<br>long-chain<br>family<br>member 6 | 0.469387  | Inlier |
| siRNA Disorazole DMSO Run1   | NM_0010<br>09185 | ACSL6  | acyl-CoA<br>synthetase<br>long-chain<br>family<br>member 6 | 0.910319  | Inlier |
| siRNA-Vinblastine Run1-DMSO  | NM_0010<br>09185 | ACSL6  | acyl-CoA<br>synthetase<br>long-chain<br>family<br>member 6 | 1.263055  | Inlier |
| siRNA-Temozolomide Run3-DMSO | NM_1780<br>42    | ACTL6A | actin-like<br>6A                                           | -1.948278 | Inlier |
| siRNA-Temozolomide Run1-DMSO | NM_1780<br>42    | ACTL6A | actin-like<br>6A                                           | -0.600073 | Inlier |
| siRNA Disorazole DMSO Run1   | NM_1780<br>42    | ACTL6A | actin-like<br>6A                                           | -0.309199 | Inlier |
| siRNA-Temozolomide Run2-DMSO | NM_1780<br>42    | ACTL6A | actin-like<br>6A                                           | -0.005812 | Inlier |
| siRNA Disorazole DMSO Run2   | NM_1780<br>42    | ACTL6A | actin-like<br>6A                                           | 0.005812  | Inlier |
| siRNA Disorazole DMSO Run3   | NM_1780<br>42    | ACTL6A | actin-like<br>6A                                           | 0.748927  | Inlier |
| siRNA-Vinblastine Run2-DMSO  | NM_1780<br>42    | ACTL6A | actin-like<br>6A                                           | 1.216184  | Inlier |
| siRNA-Vinblastine Run1-DMSO  | NM_1780<br>42    | ACTL6A | actin-like<br>6A                                           | 1.675565  | Inlier |

Identification of Survival Genes in Human Glioblastoma Cells Using siRNA Screening  
 Nikhil G Thaker, Fang Zhang, Peter R. McDonald, Tong Ying Shun, Michael D Lewen, Ian F. Pollack, and John S. Lazo

| Molecular Pharmacology       |           |        |  | activin A receptor, type I  |                  |
|------------------------------|-----------|--------|--|-----------------------------|------------------|
| siRNA-Vinblastine Run1-DMSO  | NM_001105 | ACVR1  |  | activin A receptor, type I  | -2.533415 Inlier |
| siRNA-Temozolomide Run2-DMSO | NM_001105 | ACVR1  |  | activin A receptor, type I  | -0.706337 Inlier |
| siRNA-Temozolomide Run1-DMSO | NM_001105 | ACVR1  |  | activin A receptor, type I  | -0.642663 Inlier |
| siRNA Disorazole DMSO Run1   | NM_001105 | ACVR1  |  | activin A receptor, type I  | -0.047457 Inlier |
| siRNA Disorazole DMSO Run2   | NM_001105 | ACVR1  |  | activin A receptor, type I  | 0.047459 Inlier  |
| siRNA-Temozolomide Run3-DMSO | NM_001105 | ACVR1  |  | activin A receptor, type I  | 0.367503 Inlier  |
| siRNA Disorazole DMSO Run3   | NM_001105 | ACVR1  |  | activin A receptor, type I  | 0.884371 Inlier  |
| siRNA-Vinblastine Run2-DMSO  | NM_001105 | ACVR1  |  | activin A receptor, type I  | 1.315715 Inlier  |
| siRNA Disorazole DMSO Run2   | NM_020327 | ACVR1B |  | activin A receptor, type IB | -1.037564 Inlier |
| siRNA-Temozolomide Run3-DMSO | NM_020327 | ACVR1B |  | activin A receptor, type IB | -0.792006 Inlier |
| siRNA-Temozolomide Run2-DMSO | NM_020327 | ACVR1B |  | activin A receptor, type IB | -0.327065 Inlier |
| siRNA-Temozolomide Run1-DMSO | NM_020327 | ACVR1B |  | activin A receptor, type IB | -0.300685 Inlier |
| siRNA Disorazole DMSO Run1   | NM_020327 | ACVR1B |  | activin A receptor, type IB | 0.300685 Inlier  |
| siRNA-Vinblastine Run1-DMSO  | NM_020327 | ACVR1B |  | activin A receptor, type IB | 0.556993 Inlier  |
| siRNA-Vinblastine Run2-DMSO  | NM_020327 | ACVR1B |  | activin A receptor, type IB | 0.796903 Inlier  |
| siRNA Disorazole DMSO Run3   | NM_020327 | ACVR1B |  | activin A receptor, type IB | 1.425274 Inlier  |
| siRNA-Temozolomide Run3-DMSO | NM_145259 | ACVR1C |  | activin A receptor, type IC | -1.209923 Inlier |



Identification of Survival Genes in Human Glioblastoma Cells Using siRNA Screening  
 Nikhil G Thaker, Fang Zhang, Peter R. McDonald, Tong Ying Shun, Michael D Lewen, Ian F. Pollack, and John S. Lazo

| Molecular Pharmacology       |               |        |  | activin A receptor, type IC  |                   |
|------------------------------|---------------|--------|--|------------------------------|-------------------|
| siRNA-Temozolomide Run2-DMSO | NM_1452<br>59 | ACVR1C |  | activin A receptor, type IC  | -0.983382 Inlier  |
| siRNA Disorazole DMSO Run2   | NM_1452<br>59 | ACVR1C |  | activin A receptor, type IC  | -0.569246 Inlier  |
| siRNA-Temozolomide Run1-DMSO | NM_1452<br>59 | ACVR1C |  | activin A receptor, type IC  | -0.332086 Inlier  |
| siRNA Disorazole DMSO Run1   | NM_1452<br>59 | ACVR1C |  | activin A receptor, type IC  | 0.332086 Inlier   |
| siRNA-Vinblastine Run1-DMSO  | NM_1452<br>59 | ACVR1C |  | activin A receptor, type IC  | 0.630499 Inlier   |
| siRNA Disorazole DMSO Run3   | NM_1452<br>59 | ACVR1C |  | activin A receptor, type IC  | 0.718501 Inlier   |
| siRNA-Vinblastine Run2-DMSO  | NM_1452<br>59 | ACVR1C |  | activin A receptor, type IC  | 1.023672 Inlier   |
| siRNA Disorazole DMSO Run2   | NM_0016<br>16 | ACVR2  |  | activin A receptor, type II  | -5.474698 Outlier |
| siRNA-Temozolomide Run3-DMSO | NM_0016<br>16 | ACVR2  |  | activin A receptor, type II  | -3.991083 Outlier |
| siRNA-Temozolomide Run1-DMSO | NM_0016<br>16 | ACVR2  |  | activin A receptor, type II  | -0.574598 Inlier  |
| siRNA-Temozolomide Run2-DMSO | NM_0016<br>16 | ACVR2  |  | activin A receptor, type II  | -0.327135 Inlier  |
| siRNA-Vinblastine Run1-DMSO  | NM_0016<br>16 | ACVR2  |  | activin A receptor, type II  | 0.327135 Inlier   |
| siRNA Disorazole DMSO Run3   | NM_0016<br>16 | ACVR2  |  | activin A receptor, type II  | 0.541076 Inlier   |
| siRNA Disorazole DMSO Run1   | NM_0016<br>16 | ACVR2  |  | activin A receptor, type II  | 0.774402 Inlier   |
| siRNA-Vinblastine Run2-DMSO  | NM_0016<br>16 | ACVR2  |  | activin A receptor, type II  | 2.864254 Inlier   |
| siRNA-Temozolomide Run3-DMSO | NM_0011<br>06 | ACVR2B |  | activin A receptor, type IIB | -0.901377 Inlier  |
| siRNA Disorazole DMSO Run2   | NM_0011<br>06 | ACVR2B |  | activin A receptor, type IIB | -0.644623 Inlier  |

Identification of Survival Genes in Human Glioblastoma Cells Using siRNA Screening  
 Nikhil G Thaker, Fang Zhang, Peter R. McDonald, Tong Ying Shun, Michael D Lewen, Ian F. Pollack, and John S. Lazo

Molecular Pharmacology

|                              |           |        |                                   |           |        |
|------------------------------|-----------|--------|-----------------------------------|-----------|--------|
| siRNA-Temozolomide Run2-DMSO | NM_001106 | ACVR2B | activin A receptor, type IIB      | -0.13868  | Inlier |
| siRNA Disorazole DMSO Run3   | NM_001106 | ACVR2B | activin A receptor, type IIB      | -0.052326 | Inlier |
| siRNA-Temozolomide Run1-DMSO | NM_001106 | ACVR2B | activin A receptor, type IIB      | 0.052325  | Inlier |
| siRNA Disorazole DMSO Run1   | NM_001106 | ACVR2B | activin A receptor, type IIB      | 0.704377  | Inlier |
| siRNA-Vinblastine Run1-DMSO  | NM_001106 | ACVR2B | activin A receptor, type IIB      | 0.788935  | Inlier |
| siRNA-Vinblastine Run2-DMSO  | NM_001106 | ACVR2B | activin A receptor, type IIB      | 1.652498  | Inlier |
| siRNA Disorazole DMSO Run2   | NM_000020 | ACVRL1 | activin A receptor type II-like 1 | -2.806076 | Inlier |
| siRNA-Temozolomide Run3-DMSO | NM_000020 | ACVRL1 | activin A receptor type II-like 1 | -1.513353 | Inlier |
| siRNA-Temozolomide Run2-DMSO | NM_000020 | ACVRL1 | activin A receptor type II-like 1 | -0.647402 | Inlier |
| siRNA Disorazole DMSO Run1   | NM_000020 | ACVRL1 | activin A receptor type II-like 1 | -0.117045 | Inlier |
| siRNA-Temozolomide Run1-DMSO | NM_000020 | ACVRL1 | activin A receptor type II-like 1 | 0.117045  | Inlier |
| siRNA Disorazole DMSO Run3   | NM_000020 | ACVRL1 | activin A receptor type II-like 1 | 0.670455  | Inlier |
| siRNA-Vinblastine Run1-DMSO  | NM_000020 | ACVRL1 | activin A receptor type II-like 1 | 0.678545  | Inlier |
| siRNA-Vinblastine Run2-DMSO  | NM_000020 | ACVRL1 | activin A receptor type II-like 1 | 1.15362   | Inlier |
| siRNA-Temozolomide Run3-DMSO | NM_000066 | ACY1   | aminoacylase 1                    | -1.957713 | Inlier |

Identification of Survival Genes in Human Glioblastoma Cells Using siRNA Screening  
 Nikhil G Thaker, Fang Zhang, Peter R. McDonald, Tong Ying Shun, Michael D Lewen, Ian F. Pollack, and John S. Lazo

|                                  |               |       |                                             |           |         |
|----------------------------------|---------------|-------|---------------------------------------------|-----------|---------|
| siRNA-Temozolomide Run2-<br>DMSO | NM_0006<br>66 | ACY1  | aminoacyl<br>ase 1                          | -1.431124 | Inlier  |
| siRNA-Vinblastine Run2-<br>DMSO  | NM_0006<br>66 | ACY1  | aminoacyl<br>ase 1                          | -0.323138 | Inlier  |
| siRNA-Temozolomide Run1-<br>DMSO | NM_0006<br>66 | ACY1  | aminoacyl<br>ase 1                          | -0.089237 | Inlier  |
| siRNA Disorazole DMSO Run3       | NM_0006<br>66 | ACY1  | aminoacyl<br>ase 1                          | 0.089236  | Inlier  |
| siRNA Disorazole DMSO Run1       | NM_0006<br>66 | ACY1  | aminoacyl<br>ase 1                          | 0.106152  | Inlier  |
| siRNA-Vinblastine Run1-<br>DMSO  | NM_0006<br>66 | ACY1  | aminoacyl<br>ase 1                          | 1.025862  | Inlier  |
| siRNA Disorazole DMSO Run2       | NM_0006<br>66 | ACY1  | aminoacyl<br>ase 1                          | 1.329606  | Inlier  |
| siRNA-Temozolomide Run3-<br>DMSO | NM_0806<br>58 | ACY3  | aspartoacyl<br>lase<br>(aminocycl<br>ase) 3 | -1.930198 | Inlier  |
| siRNA-Vinblastine Run2-<br>DMSO  | NM_0806<br>58 | ACY3  | aspartoacyl<br>lase<br>(aminocycl<br>ase) 3 | -0.909966 | Inlier  |
| siRNA Disorazole DMSO Run3       | NM_0806<br>58 | ACY3  | aspartoacyl<br>lase<br>(aminocycl<br>ase) 3 | -0.439034 | Inlier  |
| siRNA Disorazole DMSO Run1       | NM_0806<br>58 | ACY3  | aspartoacyl<br>lase<br>(aminocycl<br>ase) 3 | -0.152022 | Inlier  |
| siRNA-Temozolomide Run2-<br>DMSO | NM_0806<br>58 | ACY3  | aspartoacyl<br>lase<br>(aminocycl<br>ase) 3 | 0.152023  | Inlier  |
| siRNA-Temozolomide Run1-<br>DMSO | NM_0806<br>58 | ACY3  | aspartoacyl<br>lase<br>(aminocycl<br>ase) 3 | 0.401511  | Inlier  |
| siRNA-Vinblastine Run1-<br>DMSO  | NM_0806<br>58 | ACY3  | aspartoacyl<br>lase<br>(aminocycl<br>ase) 3 | 3.182671  | Inlier  |
| siRNA Disorazole DMSO Run2       | NM_0806<br>58 | ACY3  | aspartoacyl<br>lase<br>(aminocycl<br>ase) 3 | 5.662064  | Outlier |
| siRNA-Temozolomide Run3-<br>DMSO | NM_1384<br>48 | ACYP2 | acylphosp<br>hatase 2,<br>muscle<br>type    | -1.50084  | Inlier  |

Identification of Survival Genes in Human Glioblastoma Cells Using siRNA Screening  
 Nikhil G Thaker, Fang Zhang, Peter R. McDonald, Tong Ying Shun, Michael D Lewen, Ian F. Pollack, and John S. Lazo

Molecular Pharmacology

|                              |                  |        |                                           |           |        |
|------------------------------|------------------|--------|-------------------------------------------|-----------|--------|
| siRNA Disorazole DMSO Run2   | NM_1384<br>48    | ACYP2  | acylphosphatase 2, muscle type            | -0.731063 | Inlier |
| siRNA-Temozolomide Run2-DMSO | NM_1384<br>48    | ACYP2  | acylphosphatase 2, muscle type            | -0.640196 | Inlier |
| siRNA Disorazole DMSO Run3   | NM_1384<br>48    | ACYP2  | acylphosphatase 2, muscle type            | -0.026278 | Inlier |
| siRNA-Temozolomide Run1-DMSO | NM_1384<br>48    | ACYP2  | acylphosphatase 2, muscle type            | 0.026278  | Inlier |
| siRNA-Vinblastine Run2-DMSO  | NM_1384<br>48    | ACYP2  | acylphosphatase 2, muscle type            | 0.56043   | Inlier |
| siRNA-Vinblastine Run1-DMSO  | NM_1384<br>48    | ACYP2  | acylphosphatase 2, muscle type            | 0.708804  | Inlier |
| siRNA Disorazole DMSO Run1   | NM_1384<br>48    | ACYP2  | acylphosphatase 2, muscle type            | 0.838672  | Inlier |
| siRNA-Vinblastine Run2-DMSO  | NM_0140<br>64    | AD-003 | AD-003                                    | -2.004504 | Inlier |
| siRNA Disorazole DMSO Run3   | NM_0140<br>64    | AD-003 | AD-003                                    | -1.456451 | Inlier |
| siRNA Disorazole DMSO Run2   | NM_0140<br>64    | AD-003 | AD-003                                    | -0.760494 | Inlier |
| siRNA-Temozolomide Run2-DMSO | NM_0140<br>64    | AD-003 | AD-003                                    | -0.116323 | Inlier |
| siRNA Disorazole DMSO Run1   | NM_0140<br>64    | AD-003 | AD-003                                    | 0.116323  | Inlier |
| siRNA-Temozolomide Run3-DMSO | NM_0140<br>64    | AD-003 | AD-003                                    | 0.151352  | Inlier |
| siRNA-Temozolomide Run1-DMSO | NM_0140<br>64    | AD-003 | AD-003                                    | 0.588506  | Inlier |
| siRNA-Vinblastine Run1-DMSO  | NM_0140<br>64    | AD-003 | AD-003                                    | 1.016548  | Inlier |
| siRNA-Temozolomide Run3-DMSO | NM_0010<br>10983 | AD-017 | glycosyltransferase 8 domain containing 1 | -1.467495 | Inlier |

Identification of Survival Genes in Human Glioblastoma Cells Using siRNA Screening  
 Nikhil G Thaker, Fang Zhang, Peter R. McDonald, Tong Ying Shun, Michael D Lewen, Ian F. Pollack, and John S. Lazo

Molecular Pharmacology

|                              |              |        |                                           |           |        |
|------------------------------|--------------|--------|-------------------------------------------|-----------|--------|
| siRNA-Temozolomide Run2-DMSO | NM_001010983 | AD-017 | glycosyltransferase 8 domain containing 1 | -1.157778 | Inlier |
| siRNA-Temozolomide Run1-DMSO | NM_001010983 | AD-017 | glycosyltransferase 8 domain containing 1 | -1.042812 | Inlier |
| siRNA Disorazole DMSO Run1   | NM_001010983 | AD-017 | glycosyltransferase 8 domain containing 1 | -0.218219 | Inlier |
| siRNA-Vinblastine Run2-DMSO  | NM_001010983 | AD-017 | glycosyltransferase 8 domain containing 1 | 0.21822   | Inlier |
| siRNA Disorazole DMSO Run3   | NM_001010983 | AD-017 | glycosyltransferase 8 domain containing 1 | 0.244826  | Inlier |
| siRNA Disorazole DMSO Run2   | NM_001010983 | AD-017 | glycosyltransferase 8 domain containing 1 | 0.604251  | Inlier |
| siRNA-Vinblastine Run1-DMSO  | NM_001010983 | AD-017 | glycosyltransferase 8 domain containing 1 | 0.744749  | Inlier |
| siRNA-Temozolomide Run3-DMSO | NM_000022    | ADA    | adenosine deaminase                       | -1.106416 | Inlier |
| siRNA-Temozolomide Run2-DMSO | NM_000022    | ADA    | adenosine deaminase                       | -0.741812 | Inlier |
| siRNA-Temozolomide Run1-DMSO | NM_000022    | ADA    | adenosine deaminase                       | -0.607188 | Inlier |
| siRNA Disorazole DMSO Run1   | NM_000022    | ADA    | adenosine deaminase                       | -0.03352  | Inlier |
| siRNA-Vinblastine Run2-DMSO  | NM_000022    | ADA    | adenosine deaminase                       | 0.03352   | Inlier |

Identification of Survival Genes in Human Glioblastoma Cells Using siRNA Screening  
 Nikhil G Thaker, Fang Zhang, Peter R. McDonald, Tong Ying Shun, Michael D Lewen, Ian F. Pollack, and John S. Lazo

Molecular Pharmacology

|                              |           |        |                                               |           |        |
|------------------------------|-----------|--------|-----------------------------------------------|-----------|--------|
| siRNA Disorazole DMSO Run3   | NM_000022 | ADA    | adenosine deaminase                           | 0.205677  | Inlier |
| siRNA-Vinblastine Run1-DMSO  | NM_000022 | ADA    | adenosine deaminase                           | 1.206552  | Inlier |
| siRNA Disorazole DMSO Run2   | NM_000022 | ADA    | adenosine deaminase                           | 1.556969  | Inlier |
| siRNA-Temozolomide Run3-DMSO | NM_001110 | ADAM10 | a disintegrin and metalloproteinase domain 10 | -2.02211  | Inlier |
| siRNA Disorazole DMSO Run3   | NM_001110 | ADAM10 | a disintegrin and metalloproteinase domain 10 | -0.87178  | Inlier |
| siRNA Disorazole DMSO Run2   | NM_001110 | ADAM10 | a disintegrin and metalloproteinase domain 10 | -0.818861 | Inlier |
| siRNA-Temozolomide Run2-DMSO | NM_001110 | ADAM10 | a disintegrin and metalloproteinase domain 10 | -0.162054 | Inlier |
| siRNA Disorazole DMSO Run1   | NM_001110 | ADAM10 | a disintegrin and metalloproteinase domain 10 | 0.162054  | Inlier |
| siRNA-Temozolomide Run1-DMSO | NM_001110 | ADAM10 | a disintegrin and metalloproteinase domain 10 | 0.406625  | Inlier |

Identification of Survival Genes in Human Glioblastoma Cells Using siRNA Screening  
 Nikhil G Thaker, Fang Zhang, Peter R. McDonald, Tong Ying Shun, Michael D Lewen, Ian F. Pollack, and John S. Lazo  
 Molecular Pharmacology

|                              |               |        |                                                               |           |        |
|------------------------------|---------------|--------|---------------------------------------------------------------|-----------|--------|
| siRNA-Vinblastine Run2-DMSO  | NM_0011<br>10 | ADAM10 | a<br>disintegrin<br>and<br>metallopro<br>teinase<br>domain 10 | 0.530139  | Inlier |
| siRNA-Vinblastine Run1-DMSO  | NM_0011<br>10 | ADAM10 | a<br>disintegrin<br>and<br>metallopro<br>teinase<br>domain 10 | 0.966906  | Inlier |
| siRNA-Temozolomide Run3-DMSO | NM_0216<br>12 | ADAM11 | a<br>disintegrin<br>and<br>metallopro<br>teinase<br>domain 11 | -1.276216 | Inlier |
| siRNA Disorazole DMSO Run1   | NM_0216<br>12 | ADAM11 | a<br>disintegrin<br>and<br>metallopro<br>teinase<br>domain 11 | -0.771623 | Inlier |
| siRNA-Temozolomide Run2-DMSO | NM_0216<br>12 | ADAM11 | a<br>disintegrin<br>and<br>metallopro<br>teinase<br>domain 11 | -0.577377 | Inlier |
| siRNA-Temozolomide Run1-DMSO | NM_0216<br>12 | ADAM11 | a<br>disintegrin<br>and<br>metallopro<br>teinase<br>domain 11 | -0.437741 | Inlier |
| siRNA-Vinblastine Run2-DMSO  | NM_0216<br>12 | ADAM11 | a<br>disintegrin<br>and<br>metallopro<br>teinase<br>domain 11 | 0.437741  | Inlier |

Identification of Survival Genes in Human Glioblastoma Cells Using siRNA Screening

Nikhil G Thaker, Fang Zhang, Peter R. McDonald, Tong Ying Shun, Michael D Lewen, Ian F. Pollack, and John S. Lazo

Molecular Pharmacology

|                              |               |        |                                                                                     |           |        |
|------------------------------|---------------|--------|-------------------------------------------------------------------------------------|-----------|--------|
| siRNA-Vinblastine Run1-DMSO  | NM_0216<br>12 | ADAM11 | a<br>disintegrin<br>and<br>metallopro<br>teinase<br>domain 11                       | 0.526244  | Inlier |
| siRNA Disorazole DMSO Run2   | NM_0216<br>12 | ADAM11 | a<br>disintegrin<br>and<br>metallopro<br>teinase<br>domain 11                       | 0.850942  | Inlier |
| siRNA Disorazole DMSO Run3   | NM_0216<br>12 | ADAM11 | a<br>disintegrin<br>and<br>metallopro<br>teinase<br>domain 11                       | 0.982913  | Inlier |
| siRNA-Temozolomide Run3-DMSO | NM_0216<br>41 | ADAM12 | a<br>disintegrin<br>and<br>metallopro<br>teinase<br>domain 12<br>(meltrin<br>alpha) | -1.078357 | Inlier |
| siRNA-Temozolomide Run2-DMSO | NM_0216<br>41 | ADAM12 | a<br>disintegrin<br>and<br>metallopro<br>teinase<br>domain 12<br>(meltrin<br>alpha) | -0.802339 | Inlier |
| siRNA-Temozolomide Run1-DMSO | NM_0216<br>41 | ADAM12 | a<br>disintegrin<br>and<br>metallopro<br>teinase<br>domain 12<br>(meltrin<br>alpha) | -0.667425 | Inlier |



Identification of Survival Genes in Human Glioblastoma Cells Using siRNA Screening  
 Nikhil G Thaker, Fang Zhang, Peter R. McDonald, Tong Ying Shun, Michael D Lewen, Ian F. Pollack, and John S. Lazo  
 Molecular Pharmacology

|                                 |               |        |                                                                                     |           |        |
|---------------------------------|---------------|--------|-------------------------------------------------------------------------------------|-----------|--------|
| siRNA Disorazole DMSO Run2      | NM_0216<br>41 | ADAM12 | a<br>disintegrin<br>and<br>metallopro<br>teinase<br>domain 12<br>(meltrin<br>alpha) | -0.011512 | Inlier |
| siRNA Disorazole DMSO Run1      | NM_0216<br>41 | ADAM12 | a<br>disintegrin<br>and<br>metallopro<br>teinase<br>domain 12<br>(meltrin<br>alpha) | 0.011512  | Inlier |
| siRNA Disorazole DMSO Run3      | NM_0216<br>41 | ADAM12 | a<br>disintegrin<br>and<br>metallopro<br>teinase<br>domain 12<br>(meltrin<br>alpha) | 0.144943  | Inlier |
| siRNA-Vinblastine Run2-<br>DMSO | NM_0216<br>41 | ADAM12 | a<br>disintegrin<br>and<br>metallopro<br>teinase<br>domain 12<br>(meltrin<br>alpha) | 0.681575  | Inlier |
| siRNA-Vinblastine Run1-<br>DMSO | NM_0216<br>41 | ADAM12 | a<br>disintegrin<br>and<br>metallopro<br>teinase<br>domain 12<br>(meltrin<br>alpha) | 0.696544  | Inlier |

Identification of Survival Genes in Human Glioblastoma Cells Using siRNA Screening

Nikhil G Thaker, Fang Zhang, Peter R. McDonald, Tong Ying Shun, Michael D Lewen, Ian F. Pollack, and John S.

Lazo

Molecular Pharmacology

|                              |               |        |                                                                                   |           |        |
|------------------------------|---------------|--------|-----------------------------------------------------------------------------------|-----------|--------|
| siRNA-Temozolomide Run3-DMSO | NM_2071<br>97 | ADAM15 | a<br>disintegrin<br>and<br>metallopro<br>teinase<br>domain 15<br>(metargidi<br>n) | -1.989187 | Inlier |
| siRNA-Temozolomide Run2-DMSO | NM_2071<br>97 | ADAM15 | a<br>disintegrin<br>and<br>metallopro<br>teinase<br>domain 15<br>(metargidi<br>n) | -0.940338 | Inlier |
| siRNA Disorazole DMSO Run1   | NM_2071<br>97 | ADAM15 | a<br>disintegrin<br>and<br>metallopro<br>teinase<br>domain 15<br>(metargidi<br>n) | -0.560324 | Inlier |
| siRNA Disorazole DMSO Run3   | NM_2071<br>97 | ADAM15 | a<br>disintegrin<br>and<br>metallopro<br>teinase<br>domain 15<br>(metargidi<br>n) | -0.322437 | Inlier |
| siRNA-Temozolomide Run1-DMSO | NM_2071<br>97 | ADAM15 | a<br>disintegrin<br>and<br>metallopro<br>teinase<br>domain 15<br>(metargidi<br>n) | 0.322437  | Inlier |

Identification of Survival Genes in Human Glioblastoma Cells Using siRNA Screening

Nikhil G Thaker, Fang Zhang, Peter R. McDonald, Tong Ying Shun, Michael D Lewen, Ian F. Pollack, and John S. Lazo

Molecular Pharmacology

|                              |               |        |                                                                                                 |           |        |
|------------------------------|---------------|--------|-------------------------------------------------------------------------------------------------|-----------|--------|
| siRNA-Vinblastine Run1-DMSO  | NM_2071<br>97 | ADAM15 | a disintegrin and metalloproteinase domain 15 (metargidin)                                      | 0.58332   | Inlier |
| siRNA-Vinblastine Run2-DMSO  | NM_2071<br>97 | ADAM15 | a disintegrin and metalloproteinase domain 15 (metargidin)                                      | 0.76568   | Inlier |
| siRNA Disorazole DMSO Run2   | NM_2071<br>97 | ADAM15 | a disintegrin and metalloproteinase domain 15 (metargidin)                                      | 0.7849    | Inlier |
| siRNA-Temozolomide Run3-DMSO | NM_0031<br>83 | ADAM17 | a disintegrin and metalloproteinase domain 17 (tumor necrosis factor, alpha, converting enzyme) | -1.545887 | Inlier |
| siRNA-Temozolomide Run2-DMSO | NM_0031<br>83 | ADAM17 | a disintegrin and metalloproteinase domain 17 (tumor necrosis factor, alpha, converting enzyme) | -0.870837 | Inlier |

Identification of Survival Genes in Human Glioblastoma Cells Using siRNA Screening

Nikhil G Thaker, Fang Zhang, Peter R. McDonald, Tong Ying Shun, Michael D Lewen, Ian F. Pollack, and John S. Lazo

Molecular Pharmacology

|                              |           |        |                                                                                                 |           |        |
|------------------------------|-----------|--------|-------------------------------------------------------------------------------------------------|-----------|--------|
| siRNA-Temozolomide Run1-DMSO | NM_003183 | ADAM17 | a disintegrin and metalloproteinase domain 17 (tumor necrosis factor, alpha, converting enzyme) | -0.136707 | Inlier |
| siRNA Disorazole DMSO Run1   | NM_003183 | ADAM17 | a disintegrin and metalloproteinase domain 17 (tumor necrosis factor, alpha, converting enzyme) | -0.048283 | Inlier |
| siRNA Disorazole DMSO Run2   | NM_003183 | ADAM17 | a disintegrin and metalloproteinase domain 17 (tumor necrosis factor, alpha, converting enzyme) | 0.048283  | Inlier |
| siRNA Disorazole DMSO Run3   | NM_003183 | ADAM17 | a disintegrin and metalloproteinase domain 17 (tumor necrosis factor, alpha, converting enzyme) | 0.478163  | Inlier |

Identification of Survival Genes in Human Glioblastoma Cells Using siRNA Screening

Nikhil G Thaker, Fang Zhang, Peter R. McDonald, Tong Ying Shun, Michael D Lewen, Ian F. Pollack, and John S.

Lazo

Molecular Pharmacology

|                              |           |        |                                                                                                 |           |        |
|------------------------------|-----------|--------|-------------------------------------------------------------------------------------------------|-----------|--------|
| siRNA-Vinblastine Run2-DMSO  | NM_003183 | ADAM17 | a disintegrin and metalloproteinase domain 17 (tumor necrosis factor, alpha, converting enzyme) | 0.873317  | Inlier |
| siRNA-Vinblastine Run1-DMSO  | NM_003183 | ADAM17 | a disintegrin and metalloproteinase domain 17 (tumor necrosis factor, alpha, converting enzyme) | 1.152707  | Inlier |
| siRNA-Temozolomide Run1-DMSO | NM_014237 | ADAM18 | a disintegrin and metalloproteinase domain 18                                                   | -0.962159 | Inlier |
| siRNA-Temozolomide Run3-DMSO | NM_014237 | ADAM18 | a disintegrin and metalloproteinase domain 18                                                   | -0.791125 | Inlier |
| siRNA-Temozolomide Run2-DMSO | NM_014237 | ADAM18 | a disintegrin and metalloproteinase domain 18                                                   | -0.613847 | Inlier |
| siRNA Disorazole DMSO Run1   | NM_014237 | ADAM18 | a disintegrin and metalloproteinase domain 18                                                   | -0.048607 | Inlier |

Identification of Survival Genes in Human Glioblastoma Cells Using siRNA Screening  
 Nikhil G Thaker, Fang Zhang, Peter R. McDonald, Tong Ying Shun, Michael D Lewen, Ian F. Pollack, and John S. Lazo  
 Molecular Pharmacology

|                              |               |        |                                                                                    |           |        |
|------------------------------|---------------|--------|------------------------------------------------------------------------------------|-----------|--------|
| siRNA-Vinblastine Run2-DMSO  | NM_0142<br>37 | ADAM18 | a<br>disintegrin<br>and<br>metallopro<br>teinase<br>domain 18                      | 0.048607  | Inlier |
| siRNA-Vinblastine Run1-DMSO  | NM_0142<br>37 | ADAM18 | a<br>disintegrin<br>and<br>metallopro<br>teinase<br>domain 18                      | 0.217174  | Inlier |
| siRNA Disorazole DMSO Run3   | NM_0142<br>37 | ADAM18 | a<br>disintegrin<br>and<br>metallopro<br>teinase<br>domain 18                      | 0.735153  | Inlier |
| siRNA Disorazole DMSO Run2   | NM_0142<br>37 | ADAM18 | a<br>disintegrin<br>and<br>metallopro<br>teinase<br>domain 18                      | 2.448522  | Inlier |
| siRNA-Temozolomide Run3-DMSO | NM_0230<br>38 | ADAM19 | a<br>disintegrin<br>and<br>metallopro<br>teinase<br>domain 19<br>(meltrin<br>beta) | -1.172984 | Inlier |
| siRNA Disorazole DMSO Run2   | NM_0230<br>38 | ADAM19 | a<br>disintegrin<br>and<br>metallopro<br>teinase<br>domain 19<br>(meltrin<br>beta) | -0.712023 | Inlier |

Identification of Survival Genes in Human Glioblastoma Cells Using siRNA Screening  
 Nikhil G Thaker, Fang Zhang, Peter R. McDonald, Tong Ying Shun, Michael D Lewen, Ian F. Pollack, and John S. Lazo  
 Molecular Pharmacology

|                              |           |        |                                                              |           |        |
|------------------------------|-----------|--------|--------------------------------------------------------------|-----------|--------|
| siRNA-Temozolomide Run2-DMSO | NM_023038 | ADAM19 | a disintegrin and metalloproteinase domain 19 (meltrin beta) | -0.296241 | Inlier |
| siRNA Disorazole DMSO Run1   | NM_023038 | ADAM19 | a disintegrin and metalloproteinase domain 19 (meltrin beta) | -0.267573 | Inlier |
| siRNA Disorazole DMSO Run3   | NM_023038 | ADAM19 | a disintegrin and metalloproteinase domain 19 (meltrin beta) | 0.267573  | Inlier |
| siRNA-Temozolomide Run1-DMSO | NM_023038 | ADAM19 | a disintegrin and metalloproteinase domain 19 (meltrin beta) | 0.658185  | Inlier |
| siRNA-Vinblastine Run2-DMSO  | NM_023038 | ADAM19 | a disintegrin and metalloproteinase domain 19 (meltrin beta) | 0.690815  | Inlier |

Identification of Survival Genes in Human Glioblastoma Cells Using siRNA Screening  
 Nikhil G Thaker, Fang Zhang, Peter R. McDonald, Tong Ying Shun, Michael D Lewen, Ian F. Pollack, and John S. Lazo  
 Molecular Pharmacology

|                              |           |        |                                                              |           |        |
|------------------------------|-----------|--------|--------------------------------------------------------------|-----------|--------|
| siRNA-Vinblastine Run1-DMSO  | NM_023038 | ADAM19 | a disintegrin and metalloproteinase domain 19 (meltrin beta) | 1.108581  | Inlier |
| siRNA-Temozolomide Run3-DMSO | NM_001464 | ADAM2  | a disintegrin and metalloproteinase domain 2 (fertilin beta) | -2.859423 | Inlier |
| siRNA-Temozolomide Run1-DMSO | NM_001464 | ADAM2  | a disintegrin and metalloproteinase domain 2 (fertilin beta) | -0.791603 | Inlier |
| siRNA-Temozolomide Run2-DMSO | NM_001464 | ADAM2  | a disintegrin and metalloproteinase domain 2 (fertilin beta) | -0.557397 | Inlier |
| siRNA Disorazole DMSO Run2   | NM_001464 | ADAM2  | a disintegrin and metalloproteinase domain 2 (fertilin beta) | -0.236129 | Inlier |
| siRNA Disorazole DMSO Run1   | NM_001464 | ADAM2  | a disintegrin and metalloproteinase domain 2 (fertilin beta) | 0.236129  | Inlier |



Identification of Survival Genes in Human Glioblastoma Cells Using siRNA Screening  
 Nikhil G Thaker, Fang Zhang, Peter R. McDonald, Tong Ying Shun, Michael D Lewen, Ian F. Pollack, and John S. Lazo

Molecular Pharmacology

| siRNA                        | Gene   | Gene ID   | Gene Name                                                    | Value     | Outlier |
|------------------------------|--------|-----------|--------------------------------------------------------------|-----------|---------|
| siRNA Disorazole DMSO Run3   | ADAM2  | NM_001464 | a disintegrin and metalloproteinase domain 2 (fertilin beta) | 0.540968  | Inlier  |
| siRNA-Vinblastine Run2-DMSO  | ADAM2  | NM_001464 | a disintegrin and metalloproteinase domain 2 (fertilin beta) | 0.969521  | Inlier  |
| siRNA-Vinblastine Run1-DMSO  | ADAM2  | NM_001464 | a disintegrin and metalloproteinase domain 2 (fertilin beta) | 1.25958   | Inlier  |
| siRNA-Temozolomide Run3-DMSO | ADAM20 | NM_003814 | a disintegrin and metalloproteinase domain 20                | -3.204317 | Inlier  |
| siRNA-Temozolomide Run2-DMSO | ADAM20 | NM_003814 | a disintegrin and metalloproteinase domain 20                | -1.890514 | Inlier  |
| siRNA-Temozolomide Run1-DMSO | ADAM20 | NM_003814 | a disintegrin and metalloproteinase domain 20                | -0.596681 | Inlier  |
| siRNA Disorazole DMSO Run3   | ADAM20 | NM_003814 | a disintegrin and metalloproteinase domain 20                | -0.01854  | Inlier  |

Identification of Survival Genes in Human Glioblastoma Cells Using siRNA Screening  
 Nikhil G Thaker, Fang Zhang, Peter R. McDonald, Tong Ying Shun, Michael D Lewen, Ian F. Pollack, and John S. Lazo  
 Molecular Pharmacology

|                                  |               |        |                                                               |           |        |
|----------------------------------|---------------|--------|---------------------------------------------------------------|-----------|--------|
| siRNA Disorazole DMSO Run1       | NM_0038<br>14 | ADAM20 | a<br>disintegrin<br>and<br>metallopro<br>teinase<br>domain 20 | 0.01854   | Inlier |
| siRNA-Vinblastine Run2-<br>DMSO  | NM_0038<br>14 | ADAM20 | a<br>disintegrin<br>and<br>metallopro<br>teinase<br>domain 20 | 0.633561  | Inlier |
| siRNA Disorazole DMSO Run2       | NM_0038<br>14 | ADAM20 | a<br>disintegrin<br>and<br>metallopro<br>teinase<br>domain 20 | 0.715439  | Inlier |
| siRNA-Vinblastine Run1-<br>DMSO  | NM_0038<br>14 | ADAM20 | a<br>disintegrin<br>and<br>metallopro<br>teinase<br>domain 20 | 1.102187  | Inlier |
| siRNA-Temozolomide Run3-<br>DMSO | NM_0038<br>13 | ADAM21 | a<br>disintegrin<br>and<br>metallopro<br>teinase<br>domain 21 | -1.955153 | Inlier |
| siRNA-Temozolomide Run1-<br>DMSO | NM_0038<br>13 | ADAM21 | a<br>disintegrin<br>and<br>metallopro<br>teinase<br>domain 21 | -0.295745 | Inlier |
| siRNA Disorazole DMSO Run2       | NM_0038<br>13 | ADAM21 | a<br>disintegrin<br>and<br>metallopro<br>teinase<br>domain 21 | -0.160556 | Inlier |

Identification of Survival Genes in Human Glioblastoma Cells Using siRNA Screening  
 Nikhil G Thaker, Fang Zhang, Peter R. McDonald, Tong Ying Shun, Michael D Lewen, Ian F. Pollack, and John S. Lazo  
 Molecular Pharmacology

|                                  |               |        |                                                               |           |        |
|----------------------------------|---------------|--------|---------------------------------------------------------------|-----------|--------|
| siRNA Disorazole DMSO Run1       | NM_0038<br>13 | ADAM21 | a<br>disintegrin<br>and<br>metallopro<br>teinase<br>domain 21 | -0.092188 | Inlier |
| siRNA-Temozolomide Run2-<br>DMSO | NM_0038<br>13 | ADAM21 | a<br>disintegrin<br>and<br>metallopro<br>teinase<br>domain 21 | 0.092188  | Inlier |
| siRNA-Vinblastine Run2-<br>DMSO  | NM_0038<br>13 | ADAM21 | a<br>disintegrin<br>and<br>metallopro<br>teinase<br>domain 21 | 1.053255  | Inlier |
| siRNA Disorazole DMSO Run3       | NM_0038<br>13 | ADAM21 | a<br>disintegrin<br>and<br>metallopro<br>teinase<br>domain 21 | 1.096558  | Inlier |
| siRNA-Vinblastine Run1-<br>DMSO  | NM_0038<br>13 | ADAM21 | a<br>disintegrin<br>and<br>metallopro<br>teinase<br>domain 21 | 1.39188   | Inlier |
| siRNA-Temozolomide Run3-<br>DMSO | NM_0217<br>21 | ADAM22 | a<br>disintegrin<br>and<br>metallopro<br>teinase<br>domain 22 | -1.243713 | Inlier |
| siRNA-Temozolomide Run2-<br>DMSO | NM_0217<br>21 | ADAM22 | a<br>disintegrin<br>and<br>metallopro<br>teinase<br>domain 22 | -0.585896 | Inlier |

Identification of Survival Genes in Human Glioblastoma Cells Using siRNA Screening  
 Nikhil G Thaker, Fang Zhang, Peter R. McDonald, Tong Ying Shun, Michael D Lewen, Ian F. Pollack, and John S. Lazo  
 Molecular Pharmacology

|                              |               |        |                                                               |           |        |
|------------------------------|---------------|--------|---------------------------------------------------------------|-----------|--------|
| siRNA-Temozolomide Run1-DMSO | NM_0217<br>21 | ADAM22 | a<br>disintegrin<br>and<br>metallopro<br>teinase<br>domain 22 | -0.055197 | Inlier |
| siRNA Disorazole DMSO Run3   | NM_0217<br>21 | ADAM22 | a<br>disintegrin<br>and<br>metallopro<br>teinase<br>domain 22 | -0.048517 | Inlier |
| siRNA Disorazole DMSO Run2   | NM_0217<br>21 | ADAM22 | a<br>disintegrin<br>and<br>metallopro<br>teinase<br>domain 22 | 0.048517  | Inlier |
| siRNA Disorazole DMSO Run1   | NM_0217<br>21 | ADAM22 | a<br>disintegrin<br>and<br>metallopro<br>teinase<br>domain 22 | 0.763104  | Inlier |
| siRNA-Vinblastine Run2-DMSO  | NM_0217<br>21 | ADAM22 | a<br>disintegrin<br>and<br>metallopro<br>teinase<br>domain 22 | 1.196969  | Inlier |
| siRNA-Vinblastine Run1-DMSO  | NM_0217<br>21 | ADAM22 | a<br>disintegrin<br>and<br>metallopro<br>teinase<br>domain 22 | 1.523452  | Inlier |
| siRNA-Temozolomide Run3-DMSO | NM_0038<br>12 | ADAM23 | a<br>disintegrin<br>and<br>metallopro<br>teinase<br>domain 23 | -1.036673 | Inlier |

Identification of Survival Genes in Human Glioblastoma Cells Using siRNA Screening  
 Nikhil G Thaker, Fang Zhang, Peter R. McDonald, Tong Ying Shun, Michael D Lewen, Ian F. Pollack, and John S. Lazo  
 Molecular Pharmacology

|                                  |               |        |                                                               |           |        |
|----------------------------------|---------------|--------|---------------------------------------------------------------|-----------|--------|
| siRNA Disorazole DMSO Run2       | NM_0038<br>12 | ADAM23 | a<br>disintegrin<br>and<br>metallopro<br>teinase<br>domain 23 | -0.905313 | Inlier |
| siRNA Disorazole DMSO Run3       | NM_0038<br>12 | ADAM23 | a<br>disintegrin<br>and<br>metallopro<br>teinase<br>domain 23 | -0.443687 | Inlier |
| siRNA-Temozolomide Run2-<br>DMSO | NM_0038<br>12 | ADAM23 | a<br>disintegrin<br>and<br>metallopro<br>teinase<br>domain 23 | -0.151261 | Inlier |
| siRNA Disorazole DMSO Run1       | NM_0038<br>12 | ADAM23 | a<br>disintegrin<br>and<br>metallopro<br>teinase<br>domain 23 | 0.151261  | Inlier |
| siRNA-Temozolomide Run1-<br>DMSO | NM_0038<br>12 | ADAM23 | a<br>disintegrin<br>and<br>metallopro<br>teinase<br>domain 23 | 0.333047  | Inlier |
| siRNA-Vinblastine Run2-<br>DMSO  | NM_0038<br>12 | ADAM23 | a<br>disintegrin<br>and<br>metallopro<br>teinase<br>domain 23 | 1.268696  | Inlier |
| siRNA-Vinblastine Run1-<br>DMSO  | NM_0038<br>12 | ADAM23 | a<br>disintegrin<br>and<br>metallopro<br>teinase<br>domain 23 | 1.303514  | Inlier |

Identification of Survival Genes in Human Glioblastoma Cells Using siRNA Screening  
 Nikhil G Thaker, Fang Zhang, Peter R. McDonald, Tong Ying Shun, Michael D Lewen, Ian F. Pollack, and John S. Lazo  
 Molecular Pharmacology

|                              |           |        |                                             |           |        |
|------------------------------|-----------|--------|---------------------------------------------|-----------|--------|
| siRNA-Temozolomide Run3-DMSO | NM_021778 | ADAM28 | a disintegrin and metalloprotease domain 28 | -1.966575 | Inlier |
| siRNA Disorazole DMSO Run2   | NM_021778 | ADAM28 | a disintegrin and metalloprotease domain 28 | -0.885313 | Inlier |
| siRNA-Temozolomide Run2-DMSO | NM_021778 | ADAM28 | a disintegrin and metalloprotease domain 28 | -0.277618 | Inlier |
| siRNA Disorazole DMSO Run3   | NM_021778 | ADAM28 | a disintegrin and metalloprotease domain 28 | -0.240095 | Inlier |
| siRNA Disorazole DMSO Run1   | NM_021778 | ADAM28 | a disintegrin and metalloprotease domain 28 | 0.240095  | Inlier |
| siRNA-Temozolomide Run1-DMSO | NM_021778 | ADAM28 | a disintegrin and metalloprotease domain 28 | 0.463687  | Inlier |
| siRNA-Vinblastine Run2-DMSO  | NM_021778 | ADAM28 | a disintegrin and metalloprotease domain 28 | 2.614812  | Inlier |

Identification of Survival Genes in Human Glioblastoma Cells Using siRNA Screening  
 Nikhil G Thaker, Fang Zhang, Peter R. McDonald, Tong Ying Shun, Michael D Lewen, Ian F. Pollack, and John S. Lazo  
 Molecular Pharmacology

|                              |               |        |                                                               |           |         |
|------------------------------|---------------|--------|---------------------------------------------------------------|-----------|---------|
| siRNA-Vinblastine Run1-DMSO  | NM_0217<br>78 | ADAM28 | a<br>disintegrin<br>and<br>metallopro<br>teinase<br>domain 28 | 3.160318  | Inlier  |
| siRNA-Temozolomide Run3-DMSO | NM_0217<br>79 | ADAM29 | a<br>disintegrin<br>and<br>metallopro<br>teinase<br>domain 29 | -3.807774 | Outlier |
| siRNA-Temozolomide Run2-DMSO | NM_0217<br>79 | ADAM29 | a<br>disintegrin<br>and<br>metallopro<br>teinase<br>domain 29 | -0.891647 | Inlier  |
| siRNA Disorazole DMSO Run2   | NM_0217<br>79 | ADAM29 | a<br>disintegrin<br>and<br>metallopro<br>teinase<br>domain 29 | -0.319932 | Inlier  |
| siRNA Disorazole DMSO Run1   | NM_0217<br>79 | ADAM29 | a<br>disintegrin<br>and<br>metallopro<br>teinase<br>domain 29 | -0.127775 | Inlier  |
| siRNA Disorazole DMSO Run3   | NM_0217<br>79 | ADAM29 | a<br>disintegrin<br>and<br>metallopro<br>teinase<br>domain 29 | 0.127776  | Inlier  |
| siRNA-Temozolomide Run1-DMSO | NM_0217<br>79 | ADAM29 | a<br>disintegrin<br>and<br>metallopro<br>teinase<br>domain 29 | 0.467067  | Inlier  |

Identification of Survival Genes in Human Glioblastoma Cells Using siRNA Screening  
 Nikhil G Thaker, Fang Zhang, Peter R. McDonald, Tong Ying Shun, Michael D Lewen, Ian F. Pollack, and John S. Lazo  
 Molecular Pharmacology

|                              |               |        |                                                               |           |        |
|------------------------------|---------------|--------|---------------------------------------------------------------|-----------|--------|
| siRNA-Vinblastine Run2-DMSO  | NM_0217<br>79 | ADAM29 | a<br>disintegrin<br>and<br>metallopro<br>teinase<br>domain 29 | 0.881933  | Inlier |
| siRNA-Vinblastine Run1-DMSO  | NM_0217<br>79 | ADAM29 | a<br>disintegrin<br>and<br>metallopro<br>teinase<br>domain 29 | 1.604636  | Inlier |
| siRNA-Temozolomide Run3-DMSO | NM_0217<br>94 | ADAM30 | a<br>disintegrin<br>and<br>metallopro<br>teinase<br>domain 30 | -2.664414 | Inlier |
| siRNA-Temozolomide Run2-DMSO | NM_0217<br>94 | ADAM30 | a<br>disintegrin<br>and<br>metallopro<br>teinase<br>domain 30 | -0.549422 | Inlier |
| siRNA Disorazole DMSO Run2   | NM_0217<br>94 | ADAM30 | a<br>disintegrin<br>and<br>metallopro<br>teinase<br>domain 30 | -0.454654 | Inlier |
| siRNA Disorazole DMSO Run3   | NM_0217<br>94 | ADAM30 | a<br>disintegrin<br>and<br>metallopro<br>teinase<br>domain 30 | -0.422244 | Inlier |
| siRNA Disorazole DMSO Run1   | NM_0217<br>94 | ADAM30 | a<br>disintegrin<br>and<br>metallopro<br>teinase<br>domain 30 | 0.422243  | Inlier |



Identification of Survival Genes in Human Glioblastoma Cells Using siRNA Screening  
 Nikhil G Thaker, Fang Zhang, Peter R. McDonald, Tong Ying Shun, Michael D Lewen, Ian F. Pollack, and John S. Lazo  
 Molecular Pharmacology

|                              |           |        |                                               |           |        |
|------------------------------|-----------|--------|-----------------------------------------------|-----------|--------|
| siRNA-Temozolomide Run1-DMSO | NM_021794 | ADAM30 | a disintegrin and metalloproteinase domain 30 | 0.799578  | Inlier |
| siRNA-Vinblastine Run2-DMSO  | NM_021794 | ADAM30 | a disintegrin and metalloproteinase domain 30 | 1.372013  | Inlier |
| siRNA-Vinblastine Run1-DMSO  | NM_021794 | ADAM30 | a disintegrin and metalloproteinase domain 30 | 1.85532   | Inlier |
| siRNA-Temozolomide Run3-DMSO | NM_145004 | ADAM32 | a disintegrin and metalloproteinase domain 32 | -1.651357 | Inlier |
| siRNA Disorazole DMSO Run2   | NM_145004 | ADAM32 | a disintegrin and metalloproteinase domain 32 | -0.716724 | Inlier |
| siRNA-Temozolomide Run2-DMSO | NM_145004 | ADAM32 | a disintegrin and metalloproteinase domain 32 | -0.632276 | Inlier |
| siRNA Disorazole DMSO Run3   | NM_145004 | ADAM32 | a disintegrin and metalloproteinase domain 32 | -0.485671 | Inlier |

Identification of Survival Genes in Human Glioblastoma Cells Using siRNA Screening  
 Nikhil G Thaker, Fang Zhang, Peter R. McDonald, Tong Ying Shun, Michael D Lewen, Ian F. Pollack, and John S. Lazo  
 Molecular Pharmacology

|                              |           |        |                                               |           |        |
|------------------------------|-----------|--------|-----------------------------------------------|-----------|--------|
| siRNA-Temozolomide Run1-DMSO | NM_145004 | ADAM32 | a disintegrin and metalloproteinase domain 32 | 0.485671  | Inlier |
| siRNA Disorazole DMSO Run1   | NM_145004 | ADAM32 | a disintegrin and metalloproteinase domain 32 | 0.522706  | Inlier |
| siRNA-Vinblastine Run2-DMSO  | NM_145004 | ADAM32 | a disintegrin and metalloproteinase domain 32 | 1.756989  | Inlier |
| siRNA-Vinblastine Run1-DMSO  | NM_145004 | ADAM32 | a disintegrin and metalloproteinase domain 32 | 1.974753  | Inlier |
| siRNA-Temozolomide Run3-DMSO | NM_153202 | ADAM33 | a disintegrin and metalloproteinase domain 33 | -1.000024 | Inlier |
| siRNA-Temozolomide Run2-DMSO | NM_153202 | ADAM33 | a disintegrin and metalloproteinase domain 33 | -0.569783 | Inlier |
| siRNA-Temozolomide Run1-DMSO | NM_153202 | ADAM33 | a disintegrin and metalloproteinase domain 33 | -0.428285 | Inlier |

Identification of Survival Genes in Human Glioblastoma Cells Using siRNA Screening  
 Nikhil G Thaker, Fang Zhang, Peter R. McDonald, Tong Ying Shun, Michael D Lewen, Ian F. Pollack, and John S. Lazo  
 Molecular Pharmacology

|                                  |               |        |                                                               |           |        |
|----------------------------------|---------------|--------|---------------------------------------------------------------|-----------|--------|
| siRNA Disorazole DMSO Run1       | NM_1532<br>02 | ADAM33 | a<br>disintegrin<br>and<br>metallopro<br>teinase<br>domain 33 | -0.009233 | Inlier |
| siRNA Disorazole DMSO Run3       | NM_1532<br>02 | ADAM33 | a<br>disintegrin<br>and<br>metallopro<br>teinase<br>domain 33 | 0.009233  | Inlier |
| siRNA Disorazole DMSO Run2       | NM_1532<br>02 | ADAM33 | a<br>disintegrin<br>and<br>metallopro<br>teinase<br>domain 33 | 0.779217  | Inlier |
| siRNA-Vinblastine Run2-<br>DMSO  | NM_1532<br>02 | ADAM33 | a<br>disintegrin<br>and<br>metallopro<br>teinase<br>domain 33 | 1.607174  | Inlier |
| siRNA-Vinblastine Run1-<br>DMSO  | NM_1532<br>02 | ADAM33 | a<br>disintegrin<br>and<br>metallopro<br>teinase<br>domain 33 | 1.781418  | Inlier |
| siRNA Disorazole DMSO Run2       | NM_0038<br>17 | ADAM7  | a<br>disintegrin<br>and<br>metallopro<br>teinase<br>domain 7  | -0.869457 | Inlier |
| siRNA-Temozolomide Run3-<br>DMSO | NM_0038<br>17 | ADAM7  | a<br>disintegrin<br>and<br>metallopro<br>teinase<br>domain 7  | -0.814986 | Inlier |

Identification of Survival Genes in Human Glioblastoma Cells Using siRNA Screening  
 Nikhil G Thaker, Fang Zhang, Peter R. McDonald, Tong Ying Shun, Michael D Lewen, Ian F. Pollack, and John S. Lazo

Molecular Pharmacology

|                              |               |       |                                              |           |        |
|------------------------------|---------------|-------|----------------------------------------------|-----------|--------|
| siRNA Disorazole DMSO Run3   | NM_0038<br>17 | ADAM7 | a disintegrin and metalloproteinase domain 7 | -0.524429 | Inlier |
| siRNA-Temozolomide Run2-DMSO | NM_0038<br>17 | ADAM7 | a disintegrin and metalloproteinase domain 7 | -0.243544 | Inlier |
| siRNA Disorazole DMSO Run1   | NM_0038<br>17 | ADAM7 | a disintegrin and metalloproteinase domain 7 | 0.243544  | Inlier |
| siRNA-Temozolomide Run1-DMSO | NM_0038<br>17 | ADAM7 | a disintegrin and metalloproteinase domain 7 | 0.534014  | Inlier |
| siRNA-Vinblastine Run2-DMSO  | NM_0038<br>17 | ADAM7 | a disintegrin and metalloproteinase domain 7 | 0.925419  | Inlier |
| siRNA-Vinblastine Run1-DMSO  | NM_0038<br>17 | ADAM7 | a disintegrin and metalloproteinase domain 7 | 1.034579  | Inlier |
| siRNA-Temozolomide Run3-DMSO | NM_0011<br>09 | ADAM8 | a disintegrin and metalloproteinase domain 8 | -0.994311 | Inlier |
| siRNA Disorazole DMSO Run2   | NM_0011<br>09 | ADAM8 | a disintegrin and metalloproteinase domain 8 | -0.872738 | Inlier |

Identification of Survival Genes in Human Glioblastoma Cells Using siRNA Screening  
 Nikhil G Thaker, Fang Zhang, Peter R. McDonald, Tong Ying Shun, Michael D Lewen, Ian F. Pollack, and John S. Lazo

Molecular Pharmacology

|                              |           |       |                                                              |           |        |
|------------------------------|-----------|-------|--------------------------------------------------------------|-----------|--------|
| siRNA Disorazole DMSO Run3   | NM_001109 | ADAM8 | a disintegrin and metalloproteinase domain 8                 | -0.293056 | Inlier |
| siRNA-Temozolomide Run2-DMSO | NM_001109 | ADAM8 | a disintegrin and metalloproteinase domain 8                 | -0.245787 | Inlier |
| siRNA-Temozolomide Run1-DMSO | NM_001109 | ADAM8 | a disintegrin and metalloproteinase domain 8                 | 0.245787  | Inlier |
| siRNA Disorazole DMSO Run1   | NM_001109 | ADAM8 | a disintegrin and metalloproteinase domain 8                 | 0.476262  | Inlier |
| siRNA-Vinblastine Run2-DMSO  | NM_001109 | ADAM8 | a disintegrin and metalloproteinase domain 8                 | 1.065498  | Inlier |
| siRNA-Vinblastine Run1-DMSO  | NM_001109 | ADAM8 | a disintegrin and metalloproteinase domain 8                 | 1.066204  | Inlier |
| siRNA Disorazole DMSO Run2   | NM_003816 | ADAM9 | a disintegrin and metalloproteinase domain 9 (meltrin gamma) | -0.860549 | Inlier |
| siRNA Disorazole DMSO Run3   | NM_003816 | ADAM9 | a disintegrin and metalloproteinase domain 9 (meltrin gamma) | -0.720635 | Inlier |

Identification of Survival Genes in Human Glioblastoma Cells Using siRNA Screening

Nikhil G Thaker, Fang Zhang, Peter R. McDonald, Tong Ying Shun, Michael D Lewen, Ian F. Pollack, and John S. Lazo

Molecular Pharmacology

|                              |               |              |                                                              |           |        |
|------------------------------|---------------|--------------|--------------------------------------------------------------|-----------|--------|
| siRNA-Temozolomide Run3-DMSO | NM_0038<br>16 | ADAM9        | a disintegrin and metalloproteinase domain 9 (meltrin gamma) | -0.692321 | Inlier |
| siRNA-Temozolomide Run2-DMSO | NM_0038<br>16 | ADAM9        | a disintegrin and metalloproteinase domain 9 (meltrin gamma) | -0.19492  | Inlier |
| siRNA Disorazole DMSO Run1   | NM_0038<br>16 | ADAM9        | a disintegrin and metalloproteinase domain 9 (meltrin gamma) | 0.19492   | Inlier |
| siRNA-Temozolomide Run1-DMSO | NM_0038<br>16 | ADAM9        | a disintegrin and metalloproteinase domain 9 (meltrin gamma) | 0.271819  | Inlier |
| siRNA-Vinblastine Run2-DMSO  | NM_0038<br>16 | ADAM9        | a disintegrin and metalloproteinase domain 9 (meltrin gamma) | 0.656679  | Inlier |
| siRNA-Vinblastine Run1-DMSO  | NM_0038<br>16 | ADAM9        | a disintegrin and metalloproteinase domain 9 (meltrin gamma) | 0.746495  | Inlier |
| siRNA-Temozolomide Run2-DMSO | NM_0144<br>79 | ADAMDE<br>C1 | ADAM-like, decysin 1                                         | -1.401072 | Inlier |

Identification of Survival Genes in Human Glioblastoma Cells Using siRNA Screening

Nikhil G Thaker, Fang Zhang, Peter R. McDonald, Tong Ying Shun, Michael D Lewen, Ian F. Pollack, and John S. Lazo

Molecular Pharmacology

|                              |               |              |                                                                                                             |           |        |
|------------------------------|---------------|--------------|-------------------------------------------------------------------------------------------------------------|-----------|--------|
| siRNA-Temozolomide Run1-DMSO | NM_0144<br>79 | ADAMDE<br>C1 | ADAM-like,<br>decysin 1                                                                                     | -0.593021 | Inlier |
| siRNA-Vinblastine Run1-DMSO  | NM_0144<br>79 | ADAMDE<br>C1 | ADAM-like,<br>decysin 1                                                                                     | -0.474991 | Inlier |
| siRNA Disorazole DMSO Run1   | NM_0144<br>79 | ADAMDE<br>C1 | ADAM-like,<br>decysin 1                                                                                     | -0.460664 | Inlier |
| siRNA Disorazole DMSO Run2   | NM_0144<br>79 | ADAMDE<br>C1 | ADAM-like,<br>decysin 1                                                                                     | 0.460664  | Inlier |
| siRNA-Temozolomide Run3-DMSO | NM_0144<br>79 | ADAMDE<br>C1 | ADAM-like,<br>decysin 1                                                                                     | 0.755979  | Inlier |
| siRNA-Vinblastine Run2-DMSO  | NM_0144<br>79 | ADAMDE<br>C1 | ADAM-like,<br>decysin 1                                                                                     | 1.756659  | Inlier |
| siRNA Disorazole DMSO Run3   | NM_0144<br>79 | ADAMDE<br>C1 | ADAM-like,<br>decysin 1                                                                                     | 1.921914  | Inlier |
| siRNA-Temozolomide Run3-DMSO | NM_0069<br>88 | ADAMTS1      | a<br>disintegrin-like and<br>metalloprotease<br>(reprolysin type) with<br>thrombospondin type<br>1 motif, 1 | -1.219635 | Inlier |
| siRNA-Temozolomide Run2-DMSO | NM_0069<br>88 | ADAMTS1      | a<br>disintegrin-like and<br>metalloprotease<br>(reprolysin type) with<br>thrombospondin type<br>1 motif, 1 | -0.769822 | Inlier |

Identification of Survival Genes in Human Glioblastoma Cells Using siRNA Screening  
 Nikhil G Thaker, Fang Zhang, Peter R. McDonald, Tong Ying Shun, Michael D Lewen, Ian F. Pollack, and John S. Lazo  
 Molecular Pharmacology

|                                  |               |         |                                                                                                               |            |           |        |
|----------------------------------|---------------|---------|---------------------------------------------------------------------------------------------------------------|------------|-----------|--------|
| siRNA Disorazole DMSO Run3       | NM_0069<br>88 | ADAMTS1 | a<br>disintegrin-<br>like and<br>metallopro-<br>tease<br>(reprolysin<br>type) with<br>thrombosp<br>ondin type | 1 motif, 1 | -0.579178 | Inlier |
| siRNA Disorazole DMSO Run1       | NM_0069<br>88 | ADAMTS1 | a<br>disintegrin-<br>like and<br>metallopro-<br>tease<br>(reprolysin<br>type) with<br>thrombosp<br>ondin type | 1 motif, 1 | -0.120024 | Inlier |
| siRNA-Temozolomide Run1-<br>DMSO | NM_0069<br>88 | ADAMTS1 | a<br>disintegrin-<br>like and<br>metallopro-<br>tease<br>(reprolysin<br>type) with<br>thrombosp<br>ondin type | 1 motif, 1 | 0.120024  | Inlier |
| siRNA Disorazole DMSO Run2       | NM_0069<br>88 | ADAMTS1 | a<br>disintegrin-<br>like and<br>metallopro-<br>tease<br>(reprolysin<br>type) with<br>thrombosp<br>ondin type | 1 motif, 1 | 0.55898   | Inlier |



Identification of Survival Genes in Human Glioblastoma Cells Using siRNA Screening  
 Nikhil G Thaker, Fang Zhang, Peter R. McDonald, Tong Ying Shun, Michael D Lewen, Ian F. Pollack, and John S. Lazo  
 Molecular Pharmacology

|                              |           |          |                                                                                               |           |        |
|------------------------------|-----------|----------|-----------------------------------------------------------------------------------------------|-----------|--------|
| siRNA-Vinblastine Run2-DMSO  | NM_006988 | ADAMTS1  | a disintegrin-like and metalloprotease (reprolysin type) with thrombospondin type 1 motif, 1  | 2.264484  | Inlier |
| siRNA-Vinblastine Run1-DMSO  | NM_006988 | ADAMTS1  | a disintegrin-like and metalloprotease (reprolysin type) with thrombospondin type 1 motif, 1  | 2.437364  | Inlier |
| siRNA-Temozolomide Run3-DMSO | NM_030957 | ADAMTS10 | a disintegrin-like and metalloprotease (reprolysin type) with thrombospondin type 1 motif, 10 | -1.511537 | Inlier |
| siRNA-Temozolomide Run2-DMSO | NM_030957 | ADAMTS10 | a disintegrin-like and metalloprotease (reprolysin type) with thrombospondin type 1 motif, 10 | -1.171001 | Inlier |

Identification of Survival Genes in Human Glioblastoma Cells Using siRNA Screening

Nikhil G Thaker, Fang Zhang, Peter R. McDonald, Tong Ying Shun, Michael D Lewen, Ian F. Pollack, and John S. Lazo

Molecular Pharmacology

|                            |               |              |  |                                                                                                              |                  |
|----------------------------|---------------|--------------|--|--------------------------------------------------------------------------------------------------------------|------------------|
|                            |               |              |  | a<br>disintegrin-<br>like and<br>metallopro<br>tease<br>(reprolysin<br>type) with<br>thrombosp<br>ondin type |                  |
| siRNA Disorazole DMSO Run2 | NM_0309<br>57 | ADAMTS1<br>0 |  | 1 motif, 10                                                                                                  | -0.422935 Inlier |

|                            |               |              |  |                                                                                                              |                  |
|----------------------------|---------------|--------------|--|--------------------------------------------------------------------------------------------------------------|------------------|
|                            |               |              |  | a<br>disintegrin-<br>like and<br>metallopro<br>tease<br>(reprolysin<br>type) with<br>thrombosp<br>ondin type |                  |
| siRNA Disorazole DMSO Run1 | NM_0309<br>57 | ADAMTS1<br>0 |  | 1 motif, 10                                                                                                  | -0.103319 Inlier |

|                            |               |              |  |                                                                                                              |                 |
|----------------------------|---------------|--------------|--|--------------------------------------------------------------------------------------------------------------|-----------------|
|                            |               |              |  | a<br>disintegrin-<br>like and<br>metallopro<br>tease<br>(reprolysin<br>type) with<br>thrombosp<br>ondin type |                 |
| siRNA Disorazole DMSO Run3 | NM_0309<br>57 | ADAMTS1<br>0 |  | 1 motif, 10                                                                                                  | 0.103319 Inlier |

|                                  |               |              |  |                                                                                                              |                |
|----------------------------------|---------------|--------------|--|--------------------------------------------------------------------------------------------------------------|----------------|
|                                  |               |              |  | a<br>disintegrin-<br>like and<br>metallopro<br>tease<br>(reprolysin<br>type) with<br>thrombosp<br>ondin type |                |
| siRNA-Temozolomide Run1-<br>DMSO | NM_0309<br>57 | ADAMTS1<br>0 |  | 1 motif, 10                                                                                                  | 0.41547 Inlier |

Identification of Survival Genes in Human Glioblastoma Cells Using siRNA Screening

Nikhil G Thaker, Fang Zhang, Peter R. McDonald, Tong Ying Shun, Michael D Lewen, Ian F. Pollack, and John S.

Lazo

Molecular Pharmacology

|                             |           |          |                                                                                               |          |        |
|-----------------------------|-----------|----------|-----------------------------------------------------------------------------------------------|----------|--------|
| siRNA-Vinblastine Run1-DMSO | NM_030957 | ADAMTS10 | a disintegrin-like and metalloprotease (reprolysin type) with thrombospondin type 1 motif, 10 | 0.926065 | Inlier |
|-----------------------------|-----------|----------|-----------------------------------------------------------------------------------------------|----------|--------|

|                             |           |          |                                                                                               |          |        |
|-----------------------------|-----------|----------|-----------------------------------------------------------------------------------------------|----------|--------|
| siRNA-Vinblastine Run2-DMSO | NM_030957 | ADAMTS10 | a disintegrin-like and metalloprotease (reprolysin type) with thrombospondin type 1 motif, 10 | 1.423364 | Inlier |
|-----------------------------|-----------|----------|-----------------------------------------------------------------------------------------------|----------|--------|

|                              |           |          |                                                                                               |           |        |
|------------------------------|-----------|----------|-----------------------------------------------------------------------------------------------|-----------|--------|
| siRNA-Temozolomide Run3-DMSO | NM_030955 | ADAMTS12 | a disintegrin-like and metalloprotease (reprolysin type) with thrombospondin type 1 motif, 12 | -1.090664 | Inlier |
|------------------------------|-----------|----------|-----------------------------------------------------------------------------------------------|-----------|--------|

|                              |           |          |                                                                                               |          |        |
|------------------------------|-----------|----------|-----------------------------------------------------------------------------------------------|----------|--------|
| siRNA-Temozolomide Run2-DMSO | NM_030955 | ADAMTS12 | a disintegrin-like and metalloprotease (reprolysin type) with thrombospondin type 1 motif, 12 | -0.75822 | Inlier |
|------------------------------|-----------|----------|-----------------------------------------------------------------------------------------------|----------|--------|

Identification of Survival Genes in Human Glioblastoma Cells Using siRNA Screening  
 Nikhil G Thaker, Fang Zhang, Peter R. McDonald, Tong Ying Shun, Michael D Lewen, Ian F. Pollack, and John S. Lazo  
 Molecular Pharmacology

|                                  |               |              |                                                                                                                              |           |        |
|----------------------------------|---------------|--------------|------------------------------------------------------------------------------------------------------------------------------|-----------|--------|
| siRNA Disorazole DMSO Run2       | NM_0309<br>55 | ADAMTS1<br>2 | a<br>disintegrin-<br>like and<br>metallopro-<br>tease<br>(reprolysin<br>type) with<br>thrombosp<br>ondin type<br>1 motif, 12 | -0.59078  | Inlier |
| siRNA Disorazole DMSO Run1       | NM_0309<br>55 | ADAMTS1<br>2 | a<br>disintegrin-<br>like and<br>metallopro-<br>tease<br>(reprolysin<br>type) with<br>thrombosp<br>ondin type<br>1 motif, 12 | -0.261569 | Inlier |
| siRNA-Temozolomide Run1-<br>DMSO | NM_0309<br>55 | ADAMTS1<br>2 | a<br>disintegrin-<br>like and<br>metallopro-<br>tease<br>(reprolysin<br>type) with<br>thrombosp<br>ondin type<br>1 motif, 12 | 0.261569  | Inlier |
| siRNA Disorazole DMSO Run3       | NM_0309<br>55 | ADAMTS1<br>2 | a<br>disintegrin-<br>like and<br>metallopro-<br>tease<br>(reprolysin<br>type) with<br>thrombosp<br>ondin type<br>1 motif, 12 | 0.470535  | Inlier |

Identification of Survival Genes in Human Glioblastoma Cells Using siRNA Screening  
 Nikhil G Thaker, Fang Zhang, Peter R. McDonald, Tong Ying Shun, Michael D Lewen, Ian F. Pollack, and John S. Lazo  
 Molecular Pharmacology

|                              |           |          |                                                                                               |           |        |
|------------------------------|-----------|----------|-----------------------------------------------------------------------------------------------|-----------|--------|
| siRNA-Vinblastine Run2-DMSO  | NM_030955 | ADAMTS12 | a disintegrin-like and metalloprotease (reprolysin type) with thrombospondin type 1 motif, 12 | 0.818637  | Inlier |
| siRNA-Vinblastine Run1-DMSO  | NM_030955 | ADAMTS12 | a disintegrin-like and metalloprotease (reprolysin type) with thrombospondin type 1 motif, 12 | 0.836751  | Inlier |
| siRNA-Temozolomide Run3-DMSO | NM_139028 | ADAMTS13 | a disintegrin-like and metalloprotease (reprolysin type) with thrombospondin type 1 motif, 13 | -1.218225 | Inlier |
| siRNA-Temozolomide Run2-DMSO | NM_139028 | ADAMTS13 | a disintegrin-like and metalloprotease (reprolysin type) with thrombospondin type 1 motif, 13 | -1.028441 | Inlier |

Identification of Survival Genes in Human Glioblastoma Cells Using siRNA Screening  
 Nikhil G Thaker, Fang Zhang, Peter R. McDonald, Tong Ying Shun, Michael D Lewen, Ian F. Pollack, and John S. Lazo  
 Molecular Pharmacology

|                                  |               |              |                                                                                                                             |           |        |
|----------------------------------|---------------|--------------|-----------------------------------------------------------------------------------------------------------------------------|-----------|--------|
| siRNA Disorazole DMSO Run2       | NM_1390<br>28 | ADAMTS1<br>3 | a<br>disintegrin-<br>like and<br>metallopro<br>tease<br>(reprolysin<br>type) with<br>thrombosp<br>ondin type<br>1 motif, 13 | -0.575951 | Inlier |
| siRNA Disorazole DMSO Run1       | NM_1390<br>28 | ADAMTS1<br>3 | a<br>disintegrin-<br>like and<br>metallopro<br>tease<br>(reprolysin<br>type) with<br>thrombosp<br>ondin type<br>1 motif, 13 | -0.280578 | Inlier |
| siRNA-Temozolomide Run1-<br>DMSO | NM_1390<br>28 | ADAMTS1<br>3 | a<br>disintegrin-<br>like and<br>metallopro<br>tease<br>(reprolysin<br>type) with<br>thrombosp<br>ondin type<br>1 motif, 13 | 0.280578  | Inlier |
| siRNA-Vinblastine Run2-<br>DMSO  | NM_1390<br>28 | ADAMTS1<br>3 | a<br>disintegrin-<br>like and<br>metallopro<br>tease<br>(reprolysin<br>type) with<br>thrombosp<br>ondin type<br>1 motif, 13 | 0.526186  | Inlier |

Identification of Survival Genes in Human Glioblastoma Cells Using siRNA Screening

Nikhil G Thaker, Fang Zhang, Peter R. McDonald, Tong Ying Shun, Michael D Lewen, Ian F. Pollack, and John S. Lazo

Molecular Pharmacology

|                              |    |         |         |   |                                                                                                  |           |        |
|------------------------------|----|---------|---------|---|--------------------------------------------------------------------------------------------------|-----------|--------|
| siRNA Disorazole DMSO Run3   | 28 | NM_1390 | ADAMTS1 | 3 | a<br>disintegrin-like and metalloprotease (reprolysin type) with thrombospondin type 1 motif, 13 | 0.773049  | Inlier |
| siRNA-Vinblastine Run1-DMSO  | 28 | NM_1390 | ADAMTS1 | 3 | a<br>disintegrin-like and metalloprotease (reprolysin type) with thrombospondin type 1 motif, 13 | 0.930597  | Inlier |
| siRNA-Temozolomide Run3-DMSO | 55 | NM_1391 | ADAMTS1 | 4 | a<br>disintegrin-like and metalloprotease (reprolysin type) with thrombospondin type 1 motif, 14 | -1.507521 | Inlier |
| siRNA Disorazole DMSO Run1   | 55 | NM_1391 | ADAMTS1 | 4 | a<br>disintegrin-like and metalloprotease (reprolysin type) with thrombospondin type 1 motif, 14 | -0.780099 | Inlier |

Identification of Survival Genes in Human Glioblastoma Cells Using siRNA Screening

Nikhil G Thaker, Fang Zhang, Peter R. McDonald, Tong Ying Shun, Michael D Lewen, Ian F. Pollack, and John S. Lazo

Molecular Pharmacology

|                                  |               |              |  |                                                                                                              |                  |
|----------------------------------|---------------|--------------|--|--------------------------------------------------------------------------------------------------------------|------------------|
|                                  |               |              |  | a<br>disintegrin-<br>like and<br>metallopro<br>tease<br>(reprolysin<br>type) with<br>thrombosp<br>ondin type |                  |
| siRNA-Temozolomide Run2-<br>DMSO | NM_1391<br>55 | ADAMTS1<br>4 |  | 1 motif, 14                                                                                                  | -0.283649 Inlier |

|                            |               |              |  |                                                                                                              |                  |
|----------------------------|---------------|--------------|--|--------------------------------------------------------------------------------------------------------------|------------------|
|                            |               |              |  | a<br>disintegrin-<br>like and<br>metallopro<br>tease<br>(reprolysin<br>type) with<br>thrombosp<br>ondin type |                  |
| siRNA Disorazole DMSO Run2 | NM_1391<br>55 | ADAMTS1<br>4 |  | 1 motif, 14                                                                                                  | -0.067862 Inlier |

|                                  |               |              |  |                                                                                                              |                 |
|----------------------------------|---------------|--------------|--|--------------------------------------------------------------------------------------------------------------|-----------------|
|                                  |               |              |  | a<br>disintegrin-<br>like and<br>metallopro<br>tease<br>(reprolysin<br>type) with<br>thrombosp<br>ondin type |                 |
| siRNA-Temozolomide Run1-<br>DMSO | NM_1391<br>55 | ADAMTS1<br>4 |  | 1 motif, 14                                                                                                  | 0.067861 Inlier |

|                            |               |              |  |                                                                                                              |                 |
|----------------------------|---------------|--------------|--|--------------------------------------------------------------------------------------------------------------|-----------------|
|                            |               |              |  | a<br>disintegrin-<br>like and<br>metallopro<br>tease<br>(reprolysin<br>type) with<br>thrombosp<br>ondin type |                 |
| siRNA Disorazole DMSO Run3 | NM_1391<br>55 | ADAMTS1<br>4 |  | 1 motif, 14                                                                                                  | 0.568901 Inlier |



Identification of Survival Genes in Human Glioblastoma Cells Using siRNA Screening

Nikhil G Thaker, Fang Zhang, Peter R. McDonald, Tong Ying Shun, Michael D Lewen, Ian F. Pollack, and John S. Lazo

Molecular Pharmacology

|                                 |               |              |                                                                                                              |                 |
|---------------------------------|---------------|--------------|--------------------------------------------------------------------------------------------------------------|-----------------|
|                                 |               |              | a<br>disintegrin-<br>like and<br>metallopro<br>tease<br>(reprolysin<br>type) with<br>thrombosp<br>ondin type |                 |
| siRNA-Vinblastine Run2-<br>DMSO | NM_1391<br>55 | ADAMTS1<br>4 | 1 motif, 14                                                                                                  | 0.886703 Inlier |

|                                 |               |              |                                                                                                              |                 |
|---------------------------------|---------------|--------------|--------------------------------------------------------------------------------------------------------------|-----------------|
|                                 |               |              | a<br>disintegrin-<br>like and<br>metallopro<br>tease<br>(reprolysin<br>type) with<br>thrombosp<br>ondin type |                 |
| siRNA-Vinblastine Run1-<br>DMSO | NM_1391<br>55 | ADAMTS1<br>4 | 1 motif, 14                                                                                                  | 1.126415 Inlier |

|                            |               |              |                                                                                                              |                  |
|----------------------------|---------------|--------------|--------------------------------------------------------------------------------------------------------------|------------------|
|                            |               |              | a<br>disintegrin-<br>like and<br>metallopro<br>tease<br>(reprolysin<br>type) with<br>thrombosp<br>ondin type |                  |
| siRNA Disorazole DMSO Run1 | NM_1390<br>55 | ADAMTS1<br>5 | 1 motif, 15                                                                                                  | -0.799599 Inlier |

|                                  |               |              |                                                                                                              |                  |
|----------------------------------|---------------|--------------|--------------------------------------------------------------------------------------------------------------|------------------|
|                                  |               |              | a<br>disintegrin-<br>like and<br>metallopro<br>tease<br>(reprolysin<br>type) with<br>thrombosp<br>ondin type |                  |
| siRNA-Temozolomide Run3-<br>DMSO | NM_1390<br>55 | ADAMTS1<br>5 | 1 motif, 15                                                                                                  | -0.732253 Inlier |

Identification of Survival Genes in Human Glioblastoma Cells Using siRNA Screening  
 Nikhil G Thaker, Fang Zhang, Peter R. McDonald, Tong Ying Shun, Michael D Lewen, Ian F. Pollack, and John S. Lazo  
 Molecular Pharmacology

|                                  |               |              |                                                                                                                             |           |        |
|----------------------------------|---------------|--------------|-----------------------------------------------------------------------------------------------------------------------------|-----------|--------|
| siRNA Disorazole DMSO Run3       | NM_1390<br>55 | ADAMTS1<br>5 | a<br>disintegrin-<br>like and<br>metallopro<br>tease<br>(reprolysin<br>type) with<br>thrombosp<br>ondin type<br>1 motif, 15 | -0.619018 | Inlier |
| siRNA-Temozolomide Run2-<br>DMSO | NM_1390<br>55 | ADAMTS1<br>5 | a<br>disintegrin-<br>like and<br>metallopro<br>tease<br>(reprolysin<br>type) with<br>thrombosp<br>ondin type<br>1 motif, 15 | -0.531616 | Inlier |
| siRNA-Temozolomide Run1-<br>DMSO | NM_1390<br>55 | ADAMTS1<br>5 | a<br>disintegrin-<br>like and<br>metallopro<br>tease<br>(reprolysin<br>type) with<br>thrombosp<br>ondin type<br>1 motif, 15 | 0.531616  | Inlier |
| siRNA-Vinblastine Run2-<br>DMSO  | NM_1390<br>55 | ADAMTS1<br>5 | a<br>disintegrin-<br>like and<br>metallopro<br>tease<br>(reprolysin<br>type) with<br>thrombosp<br>ondin type<br>1 motif, 15 | 0.653219  | Inlier |

Identification of Survival Genes in Human Glioblastoma Cells Using siRNA Screening  
 Nikhil G Thaker, Fang Zhang, Peter R. McDonald, Tong Ying Shun, Michael D Lewen, Ian F. Pollack, and John S. Lazo  
 Molecular Pharmacology

|                                  |               |              |                                                                                                                             |           |        |
|----------------------------------|---------------|--------------|-----------------------------------------------------------------------------------------------------------------------------|-----------|--------|
| siRNA Disorazole DMSO Run2       | NM_1390<br>55 | ADAMTS1<br>5 | a<br>disintegrin-<br>like and<br>metallopro<br>tease<br>(reprolysin<br>type) with<br>thrombosp<br>ondin type<br>1 motif, 15 | 0.695781  | Inlier |
| siRNA-Vinblastine Run1-<br>DMSO  | NM_1390<br>55 | ADAMTS1<br>5 | a<br>disintegrin-<br>like and<br>metallopro<br>tease<br>(reprolysin<br>type) with<br>thrombosp<br>ondin type<br>1 motif, 15 | 0.925904  | Inlier |
| siRNA-Temozolomide Run2-<br>DMSO | NM_1390<br>56 | ADAMTS1<br>6 | a<br>disintegrin-<br>like and<br>metallopro<br>tease<br>(reprolysin<br>type) with<br>thrombosp<br>ondin type<br>1 motif, 16 | -0.880939 | Inlier |
| siRNA-Temozolomide Run3-<br>DMSO | NM_1390<br>56 | ADAMTS1<br>6 | a<br>disintegrin-<br>like and<br>metallopro<br>tease<br>(reprolysin<br>type) with<br>thrombosp<br>ondin type<br>1 motif, 16 | -0.877143 | Inlier |

Identification of Survival Genes in Human Glioblastoma Cells Using siRNA Screening  
 Nikhil G Thaker, Fang Zhang, Peter R. McDonald, Tong Ying Shun, Michael D Lewen, Ian F. Pollack, and John S. Lazo  
 Molecular Pharmacology

|                                  |               |              |                                                                                                                             |           |        |
|----------------------------------|---------------|--------------|-----------------------------------------------------------------------------------------------------------------------------|-----------|--------|
| siRNA Disorazole DMSO Run1       | NM_1390<br>56 | ADAMTS1<br>6 | a<br>disintegrin-<br>like and<br>metallopro<br>tease<br>(reprolysin<br>type) with<br>thrombosp<br>ondin type<br>1 motif, 16 | -0.471857 | Inlier |
| siRNA-Temozolomide Run1-<br>DMSO | NM_1390<br>56 | ADAMTS1<br>6 | a<br>disintegrin-<br>like and<br>metallopro<br>tease<br>(reprolysin<br>type) with<br>thrombosp<br>ondin type<br>1 motif, 16 | -0.372721 | Inlier |
| siRNA-Vinblastine Run2-<br>DMSO  | NM_1390<br>56 | ADAMTS1<br>6 | a<br>disintegrin-<br>like and<br>metallopro<br>tease<br>(reprolysin<br>type) with<br>thrombosp<br>ondin type<br>1 motif, 16 | 0.372721  | Inlier |
| siRNA-Vinblastine Run1-<br>DMSO  | NM_1390<br>56 | ADAMTS1<br>6 | a<br>disintegrin-<br>like and<br>metallopro<br>tease<br>(reprolysin<br>type) with<br>thrombosp<br>ondin type<br>1 motif, 16 | 0.470994  | Inlier |

Identification of Survival Genes in Human Glioblastoma Cells Using siRNA Screening

Nikhil G Thaker, Fang Zhang, Peter R. McDonald, Tong Ying Shun, Michael D Lewen, Ian F. Pollack, and John S. Lazo

Molecular Pharmacology

|                            |               |              |  |                                                                                                              |                 |
|----------------------------|---------------|--------------|--|--------------------------------------------------------------------------------------------------------------|-----------------|
|                            |               |              |  | a<br>disintegrin-<br>like and<br>metallopro<br>tease<br>(reprolysin<br>type) with<br>thrombosp<br>ondin type |                 |
| siRNA Disorazole DMSO Run2 | NM_1390<br>56 | ADAMTS1<br>6 |  | 1 motif, 16                                                                                                  | 1.611974 Inlier |

|                            |               |              |  |                                                                                                              |                 |
|----------------------------|---------------|--------------|--|--------------------------------------------------------------------------------------------------------------|-----------------|
|                            |               |              |  | a<br>disintegrin-<br>like and<br>metallopro<br>tease<br>(reprolysin<br>type) with<br>thrombosp<br>ondin type |                 |
| siRNA Disorazole DMSO Run3 | NM_1390<br>56 | ADAMTS1<br>6 |  | 1 motif, 16                                                                                                  | 1.670618 Inlier |

|                                  |               |              |  |                                                                                                              |                 |
|----------------------------------|---------------|--------------|--|--------------------------------------------------------------------------------------------------------------|-----------------|
|                                  |               |              |  | a<br>disintegrin-<br>like and<br>metallopro<br>tease<br>(reprolysin<br>type) with<br>thrombosp<br>ondin type |                 |
| siRNA-Temozolomide Run3-<br>DMSO | NM_1390<br>57 | ADAMTS1<br>7 |  | 1 motif, 17                                                                                                  | -3.06179 Inlier |

|                            |               |              |  |                                                                                                              |                  |
|----------------------------|---------------|--------------|--|--------------------------------------------------------------------------------------------------------------|------------------|
|                            |               |              |  | a<br>disintegrin-<br>like and<br>metallopro<br>tease<br>(reprolysin<br>type) with<br>thrombosp<br>ondin type |                  |
| siRNA Disorazole DMSO Run1 | NM_1390<br>57 | ADAMTS1<br>7 |  | 1 motif, 17                                                                                                  | -2.097629 Inlier |

Identification of Survival Genes in Human Glioblastoma Cells Using siRNA Screening  
 Nikhil G Thaker, Fang Zhang, Peter R. McDonald, Tong Ying Shun, Michael D Lewen, Ian F. Pollack, and John S. Lazo  
 Molecular Pharmacology

|                              |               |              |                                                                                                  |           |        |
|------------------------------|---------------|--------------|--------------------------------------------------------------------------------------------------|-----------|--------|
| siRNA-Temozolomide Run2-DMSO | NM_1390<br>57 | ADAMTS1<br>7 | a<br>disintegrin-like and metalloprotease (reprolysin type) with thrombospondin type 1 motif, 17 | -1.820195 | Inlier |
| siRNA Disorazole DMSO Run3   | NM_1390<br>57 | ADAMTS1<br>7 | a<br>disintegrin-like and metalloprotease (reprolysin type) with thrombospondin type 1 motif, 17 | -0.033065 | Inlier |
| siRNA-Temozolomide Run1-DMSO | NM_1390<br>57 | ADAMTS1<br>7 | a<br>disintegrin-like and metalloprotease (reprolysin type) with thrombospondin type 1 motif, 17 | 0.033066  | Inlier |
| siRNA-Vinblastine Run2-DMSO  | NM_1390<br>57 | ADAMTS1<br>7 | a<br>disintegrin-like and metalloprotease (reprolysin type) with thrombospondin type 1 motif, 17 | 0.328183  | Inlier |

Identification of Survival Genes in Human Glioblastoma Cells Using siRNA Screening

Nikhil G Thaker, Fang Zhang, Peter R. McDonald, Tong Ying Shun, Michael D Lewen, Ian F. Pollack, and John S. Lazo

Molecular Pharmacology

|                              |    |         |         |   |                                                                                                  |           |        |
|------------------------------|----|---------|---------|---|--------------------------------------------------------------------------------------------------|-----------|--------|
| siRNA Disorazole DMSO Run2   | 57 | NM_1390 | ADAMTS1 | 7 | a<br>disintegrin-like and metalloprotease (reprolysin type) with thrombospondin type 1 motif, 17 | 0.613741  | Inlier |
| siRNA-Vinblastine Run1-DMSO  | 57 | NM_1390 | ADAMTS1 | 7 | a<br>disintegrin-like and metalloprotease (reprolysin type) with thrombospondin type 1 motif, 17 | 0.735259  | Inlier |
| siRNA-Temozolomide Run3-DMSO | 55 | NM_1993 | ADAMTS1 | 8 | a<br>disintegrin-like and metalloprotease (reprolysin type) with thrombospondin type 1 motif, 18 | -1.916652 | Inlier |
| siRNA Disorazole DMSO Run3   | 55 | NM_1993 | ADAMTS1 | 8 | a<br>disintegrin-like and metalloprotease (reprolysin type) with thrombospondin type 1 motif, 18 | -1.045549 | Inlier |

Identification of Survival Genes in Human Glioblastoma Cells Using siRNA Screening  
 Nikhil G Thaker, Fang Zhang, Peter R. McDonald, Tong Ying Shun, Michael D Lewen, Ian F. Pollack, and John S. Lazo  
 Molecular Pharmacology

|                                  |               |              |                                                                                                                             |           |        |
|----------------------------------|---------------|--------------|-----------------------------------------------------------------------------------------------------------------------------|-----------|--------|
| siRNA Disorazole DMSO Run1       | NM_1993<br>55 | ADAMTS1<br>8 | a<br>disintegrin-<br>like and<br>metallopro<br>tease<br>(reprolysin<br>type) with<br>thrombosp<br>ondin type<br>1 motif, 18 | -0.668709 | Inlier |
| siRNA-Temozolomide Run2-<br>DMSO | NM_1993<br>55 | ADAMTS1<br>8 | a<br>disintegrin-<br>like and<br>metallopro<br>tease<br>(reprolysin<br>type) with<br>thrombosp<br>ondin type<br>1 motif, 18 | -0.441618 | Inlier |
| siRNA-Temozolomide Run1-<br>DMSO | NM_1993<br>55 | ADAMTS1<br>8 | a<br>disintegrin-<br>like and<br>metallopro<br>tease<br>(reprolysin<br>type) with<br>thrombosp<br>ondin type<br>1 motif, 18 | 0.441618  | Inlier |
| siRNA Disorazole DMSO Run2       | NM_1993<br>55 | ADAMTS1<br>8 | a<br>disintegrin-<br>like and<br>metallopro<br>tease<br>(reprolysin<br>type) with<br>thrombosp<br>ondin type<br>1 motif, 18 | 0.589837  | Inlier |



Identification of Survival Genes in Human Glioblastoma Cells Using siRNA Screening

Nikhil G Thaker, Fang Zhang, Peter R. McDonald, Tong Ying Shun, Michael D Lewen, Ian F. Pollack, and John S. Lazo

Molecular Pharmacology

|                                 |               |              |                                                                                                              |                 |
|---------------------------------|---------------|--------------|--------------------------------------------------------------------------------------------------------------|-----------------|
|                                 |               |              | a<br>disintegrin-<br>like and<br>metallopro<br>tease<br>(reprolysin<br>type) with<br>thrombosp<br>ondin type |                 |
| siRNA-Vinblastine Run2-<br>DMSO | NM_1993<br>55 | ADAMTS1<br>8 | 1 motif, 18                                                                                                  | 0.680291 Inlier |

|                                 |               |              |                                                                                                              |                 |
|---------------------------------|---------------|--------------|--------------------------------------------------------------------------------------------------------------|-----------------|
|                                 |               |              | a<br>disintegrin-<br>like and<br>metallopro<br>tease<br>(reprolysin<br>type) with<br>thrombosp<br>ondin type |                 |
| siRNA-Vinblastine Run1-<br>DMSO | NM_1993<br>55 | ADAMTS1<br>8 | 1 motif, 18                                                                                                  | 0.826056 Inlier |

|                            |               |              |                                                                                                              |                  |
|----------------------------|---------------|--------------|--------------------------------------------------------------------------------------------------------------|------------------|
|                            |               |              | a<br>disintegrin-<br>like and<br>metallopro<br>tease<br>(reprolysin<br>type) with<br>thrombosp<br>ondin type |                  |
| siRNA Disorazole DMSO Run1 | NM_1336<br>38 | ADAMTS1<br>9 | 1 motif, 19                                                                                                  | -0.988064 Inlier |

|                                  |               |              |                                                                                                              |                  |
|----------------------------------|---------------|--------------|--------------------------------------------------------------------------------------------------------------|------------------|
|                                  |               |              | a<br>disintegrin-<br>like and<br>metallopro<br>tease<br>(reprolysin<br>type) with<br>thrombosp<br>ondin type |                  |
| siRNA-Temozolomide Run3-<br>DMSO | NM_1336<br>38 | ADAMTS1<br>9 | 1 motif, 19                                                                                                  | -0.701284 Inlier |

Identification of Survival Genes in Human Glioblastoma Cells Using siRNA Screening

Nikhil G Thaker, Fang Zhang, Peter R. McDonald, Tong Ying Shun, Michael D Lewen, Ian F. Pollack, and John S. Lazo

Molecular Pharmacology

|                                  |               |              |                                                                                                              |                  |
|----------------------------------|---------------|--------------|--------------------------------------------------------------------------------------------------------------|------------------|
|                                  |               |              | a<br>disintegrin-<br>like and<br>metallopro<br>tease<br>(reprolysin<br>type) with<br>thrombosp<br>ondin type |                  |
| siRNA-Temozolomide Run2-<br>DMSO | NM_1336<br>38 | ADAMTS1<br>9 | 1 motif, 19                                                                                                  | -0.647716 Inlier |

|                                  |               |              |                                                                                                              |                  |
|----------------------------------|---------------|--------------|--------------------------------------------------------------------------------------------------------------|------------------|
|                                  |               |              | a<br>disintegrin-<br>like and<br>metallopro<br>tease<br>(reprolysin<br>type) with<br>thrombosp<br>ondin type |                  |
| siRNA-Temozolomide Run1-<br>DMSO | NM_1336<br>38 | ADAMTS1<br>9 | 1 motif, 19                                                                                                  | -0.010887 Inlier |

|                            |               |              |                                                                                                              |                 |
|----------------------------|---------------|--------------|--------------------------------------------------------------------------------------------------------------|-----------------|
|                            |               |              | a<br>disintegrin-<br>like and<br>metallopro<br>tease<br>(reprolysin<br>type) with<br>thrombosp<br>ondin type |                 |
| siRNA Disorazole DMSO Run3 | NM_1336<br>38 | ADAMTS1<br>9 | 1 motif, 19                                                                                                  | 0.010887 Inlier |

|                            |               |              |                                                                                                              |                 |
|----------------------------|---------------|--------------|--------------------------------------------------------------------------------------------------------------|-----------------|
|                            |               |              | a<br>disintegrin-<br>like and<br>metallopro<br>tease<br>(reprolysin<br>type) with<br>thrombosp<br>ondin type |                 |
| siRNA Disorazole DMSO Run2 | NM_1336<br>38 | ADAMTS1<br>9 | 1 motif, 19                                                                                                  | 0.273645 Inlier |

Identification of Survival Genes in Human Glioblastoma Cells Using siRNA Screening

Nikhil G Thaker, Fang Zhang, Peter R. McDonald, Tong Ying Shun, Michael D Lewen, Ian F. Pollack, and John S. Lazo

Molecular Pharmacology

|                                 |               |              |                                                                                                              |                 |
|---------------------------------|---------------|--------------|--------------------------------------------------------------------------------------------------------------|-----------------|
|                                 |               |              | a<br>disintegrin-<br>like and<br>metallopro<br>tease<br>(reprolysin<br>type) with<br>thrombosp<br>ondin type |                 |
| siRNA-Vinblastine Run1-<br>DMSO | NM_1336<br>38 | ADAMTS1<br>9 | 1 motif, 19                                                                                                  | 2.428447 Inlier |

|                                 |               |              |                                                                                                              |                 |
|---------------------------------|---------------|--------------|--------------------------------------------------------------------------------------------------------------|-----------------|
|                                 |               |              | a<br>disintegrin-<br>like and<br>metallopro<br>tease<br>(reprolysin<br>type) with<br>thrombosp<br>ondin type |                 |
| siRNA-Vinblastine Run2-<br>DMSO | NM_1336<br>38 | ADAMTS1<br>9 | 1 motif, 19                                                                                                  | 2.571313 Inlier |

|                                  |               |         |                                                                                                              |                  |
|----------------------------------|---------------|---------|--------------------------------------------------------------------------------------------------------------|------------------|
|                                  |               |         | a<br>disintegrin-<br>like and<br>metallopro<br>tease<br>(reprolysin<br>type) with<br>thrombosp<br>ondin type |                  |
| siRNA-Temozolomide Run3-<br>DMSO | NM_0215<br>99 | ADAMTS2 | 1 motif, 2                                                                                                   | -1.154736 Inlier |

|                            |               |         |                                                                                                              |                  |
|----------------------------|---------------|---------|--------------------------------------------------------------------------------------------------------------|------------------|
|                            |               |         | a<br>disintegrin-<br>like and<br>metallopro<br>tease<br>(reprolysin<br>type) with<br>thrombosp<br>ondin type |                  |
| siRNA Disorazole DMSO Run1 | NM_0215<br>99 | ADAMTS2 | 1 motif, 2                                                                                                   | -0.887227 Inlier |

Identification of Survival Genes in Human Glioblastoma Cells Using siRNA Screening

Nikhil G Thaker, Fang Zhang, Peter R. McDonald, Tong Ying Shun, Michael D Lewen, Ian F. Pollack, and John S. Lazo

Molecular Pharmacology

|                                  |               |         |                                                                                                              |                  |
|----------------------------------|---------------|---------|--------------------------------------------------------------------------------------------------------------|------------------|
|                                  |               |         | a<br>disintegrin-<br>like and<br>metallopro<br>tease<br>(reprolysin<br>type) with<br>thrombosp<br>ondin type |                  |
| siRNA-Temozolomide Run2-<br>DMSO | NM_0215<br>99 | ADAMTS2 | 1 motif, 2                                                                                                   | -0.661302 Inlier |

|                            |               |         |                                                                                                              |                  |
|----------------------------|---------------|---------|--------------------------------------------------------------------------------------------------------------|------------------|
|                            |               |         | a<br>disintegrin-<br>like and<br>metallopro<br>tease<br>(reprolysin<br>type) with<br>thrombosp<br>ondin type |                  |
| siRNA Disorazole DMSO Run3 | NM_0215<br>99 | ADAMTS2 | 1 motif, 2                                                                                                   | -0.009649 Inlier |

|                                  |               |         |                                                                                                              |                 |
|----------------------------------|---------------|---------|--------------------------------------------------------------------------------------------------------------|-----------------|
|                                  |               |         | a<br>disintegrin-<br>like and<br>metallopro<br>tease<br>(reprolysin<br>type) with<br>thrombosp<br>ondin type |                 |
| siRNA-Temozolomide Run1-<br>DMSO | NM_0215<br>99 | ADAMTS2 | 1 motif, 2                                                                                                   | 0.009649 Inlier |

|                            |               |         |                                                                                                              |                |
|----------------------------|---------------|---------|--------------------------------------------------------------------------------------------------------------|----------------|
|                            |               |         | a<br>disintegrin-<br>like and<br>metallopro<br>tease<br>(reprolysin<br>type) with<br>thrombosp<br>ondin type |                |
| siRNA Disorazole DMSO Run2 | NM_0215<br>99 | ADAMTS2 | 1 motif, 2                                                                                                   | 0.35277 Inlier |

Identification of Survival Genes in Human Glioblastoma Cells Using siRNA Screening  
 Nikhil G Thaker, Fang Zhang, Peter R. McDonald, Tong Ying Shun, Michael D Lewen, Ian F. Pollack, and John S. Lazo  
 Molecular Pharmacology

|                              |           |         |                                                                                               |           |        |
|------------------------------|-----------|---------|-----------------------------------------------------------------------------------------------|-----------|--------|
| siRNA-Vinblastine Run1-DMSO  | NM_021599 | ADAMTS2 | a disintegrin-like and metalloprotease (reprolysin type) with thrombospondin type 1 motif, 2  | 0.687698  | Inlier |
| siRNA-Vinblastine Run2-DMSO  | NM_021599 | ADAMTS2 | a disintegrin-like and metalloprotease (reprolysin type) with thrombospondin type 1 motif, 2  | 0.945667  | Inlier |
| siRNA-Temozolomide Run3-DMSO | NM_175851 | ADAMTS2 | a disintegrin-like and metalloprotease (reprolysin type) with thrombospondin type 1 motif, 20 | -1.360386 | Inlier |
| siRNA-Temozolomide Run2-DMSO | NM_175851 | ADAMTS2 | a disintegrin-like and metalloprotease (reprolysin type) with thrombospondin type 1 motif, 20 | -1.247487 | Inlier |

Identification of Survival Genes in Human Glioblastoma Cells Using siRNA Screening

Nikhil G Thaker, Fang Zhang, Peter R. McDonald, Tong Ying Shun, Michael D Lewen, Ian F. Pollack, and John S. Lazo

Molecular Pharmacology

|                            |               |              |  |                                                                                                              |                |
|----------------------------|---------------|--------------|--|--------------------------------------------------------------------------------------------------------------|----------------|
|                            |               |              |  | a<br>disintegrin-<br>like and<br>metallopro<br>tease<br>(reprolysin<br>type) with<br>thrombosp<br>ondin type |                |
| siRNA Disorazole DMSO Run1 | NM_1758<br>51 | ADAMTS2<br>0 |  | 1 motif, 20                                                                                                  | -0.6957 Inlier |

|                                  |               |              |  |                                                                                                              |                  |
|----------------------------------|---------------|--------------|--|--------------------------------------------------------------------------------------------------------------|------------------|
|                                  |               |              |  | a<br>disintegrin-<br>like and<br>metallopro<br>tease<br>(reprolysin<br>type) with<br>thrombosp<br>ondin type |                  |
| siRNA-Temozolomide Run1-<br>DMSO | NM_1758<br>51 | ADAMTS2<br>0 |  | 1 motif, 20                                                                                                  | -0.259629 Inlier |

|                                 |               |              |  |                                                                                                              |                 |
|---------------------------------|---------------|--------------|--|--------------------------------------------------------------------------------------------------------------|-----------------|
|                                 |               |              |  | a<br>disintegrin-<br>like and<br>metallopro<br>tease<br>(reprolysin<br>type) with<br>thrombosp<br>ondin type |                 |
| siRNA-Vinblastine Run1-<br>DMSO | NM_1758<br>51 | ADAMTS2<br>0 |  | 1 motif, 20                                                                                                  | 0.259629 Inlier |

|                                 |               |              |  |                                                                                                              |                 |
|---------------------------------|---------------|--------------|--|--------------------------------------------------------------------------------------------------------------|-----------------|
|                                 |               |              |  | a<br>disintegrin-<br>like and<br>metallopro<br>tease<br>(reprolysin<br>type) with<br>thrombosp<br>ondin type |                 |
| siRNA-Vinblastine Run2-<br>DMSO | NM_1758<br>51 | ADAMTS2<br>0 |  | 1 motif, 20                                                                                                  | 0.519128 Inlier |

Identification of Survival Genes in Human Glioblastoma Cells Using siRNA Screening  
 Nikhil G Thaker, Fang Zhang, Peter R. McDonald, Tong Ying Shun, Michael D Lewen, Ian F. Pollack, and John S. Lazo  
 Molecular Pharmacology

|                                  |               |              |                                                                                                                              |           |        |
|----------------------------------|---------------|--------------|------------------------------------------------------------------------------------------------------------------------------|-----------|--------|
| siRNA Disorazole DMSO Run3       | NM_1758<br>51 | ADAMTS2<br>0 | a<br>disintegrin-<br>like and<br>metallopro-<br>tease<br>(reprolysin<br>type) with<br>thrombosp<br>ondin type<br>1 motif, 20 | 0.6533    | Inlier |
| siRNA Disorazole DMSO Run2       | NM_1758<br>51 | ADAMTS2<br>0 | a<br>disintegrin-<br>like and<br>metallopro-<br>tease<br>(reprolysin<br>type) with<br>thrombosp<br>ondin type<br>1 motif, 20 | 1.606694  | Inlier |
| siRNA-Temozolomide Run3-<br>DMSO | NM_0142<br>43 | ADAMTS3      | a<br>disintegrin-<br>like and<br>metallopro-<br>tease<br>(reprolysin<br>type) with<br>thrombosp<br>ondin type<br>1 motif, 3  | -2.2717   | Inlier |
| siRNA Disorazole DMSO Run1       | NM_0142<br>43 | ADAMTS3      | a<br>disintegrin-<br>like and<br>metallopro-<br>tease<br>(reprolysin<br>type) with<br>thrombosp<br>ondin type<br>1 motif, 3  | -0.524577 | Inlier |

Identification of Survival Genes in Human Glioblastoma Cells Using siRNA Screening  
 Nikhil G Thaker, Fang Zhang, Peter R. McDonald, Tong Ying Shun, Michael D Lewen, Ian F. Pollack, and John S. Lazo  
 Molecular Pharmacology

|                                  |               |         |                                                                                                                            |           |        |
|----------------------------------|---------------|---------|----------------------------------------------------------------------------------------------------------------------------|-----------|--------|
| siRNA Disorazole DMSO Run2       | NM_0142<br>43 | ADAMTS3 | a<br>disintegrin-<br>like and<br>metallopro<br>tease<br>(reprolysin<br>type) with<br>thrombosp<br>ondin type<br>1 motif, 3 | -0.441975 | Inlier |
| siRNA-Temozolomide Run2-<br>DMSO | NM_0142<br>43 | ADAMTS3 | a<br>disintegrin-<br>like and<br>metallopro<br>tease<br>(reprolysin<br>type) with<br>thrombosp<br>ondin type<br>1 motif, 3 | -0.111426 | Inlier |
| siRNA Disorazole DMSO Run3       | NM_0142<br>43 | ADAMTS3 | a<br>disintegrin-<br>like and<br>metallopro<br>tease<br>(reprolysin<br>type) with<br>thrombosp<br>ondin type<br>1 motif, 3 | 0.111426  | Inlier |
| siRNA-Temozolomide Run1-<br>DMSO | NM_0142<br>43 | ADAMTS3 | a<br>disintegrin-<br>like and<br>metallopro<br>tease<br>(reprolysin<br>type) with<br>thrombosp<br>ondin type<br>1 motif, 3 | 0.824423  | Inlier |



Identification of Survival Genes in Human Glioblastoma Cells Using siRNA Screening  
 Nikhil G Thaker, Fang Zhang, Peter R. McDonald, Tong Ying Shun, Michael D Lewen, Ian F. Pollack, and John S. Lazo  
 Molecular Pharmacology

|                              |               |         |                                                                                                 |           |        |
|------------------------------|---------------|---------|-------------------------------------------------------------------------------------------------|-----------|--------|
| siRNA-Vinblastine Run2-DMSO  | NM_0142<br>43 | ADAMTS3 | a<br>disintegrin-like and metalloprotease (reprolysin type) with thrombospondin type 1 motif, 3 | 1.97376   | Inlier |
| siRNA-Vinblastine Run1-DMSO  | NM_0142<br>43 | ADAMTS3 | a<br>disintegrin-like and metalloprotease (reprolysin type) with thrombospondin type 1 motif, 3 | 2.130143  | Inlier |
| siRNA-Temozolomide Run3-DMSO | NM_0050<br>99 | ADAMTS4 | a<br>disintegrin-like and metalloprotease (reprolysin type) with thrombospondin type 1 motif, 4 | -1.002333 | Inlier |
| siRNA Disorazole DMSO Run3   | NM_0050<br>99 | ADAMTS4 | a<br>disintegrin-like and metalloprotease (reprolysin type) with thrombospondin type 1 motif, 4 | -0.614465 | Inlier |

Identification of Survival Genes in Human Glioblastoma Cells Using siRNA Screening  
 Nikhil G Thaker, Fang Zhang, Peter R. McDonald, Tong Ying Shun, Michael D Lewen, Ian F. Pollack, and John S. Lazo  
 Molecular Pharmacology

|                              |               |         |                                                                                                 |           |        |
|------------------------------|---------------|---------|-------------------------------------------------------------------------------------------------|-----------|--------|
| siRNA Disorazole DMSO Run2   | NM_0050<br>99 | ADAMTS4 | a<br>disintegrin-like and metalloprotease (reprolysin type) with thrombospondin type 1 motif, 4 | -0.439669 | Inlier |
| siRNA-Temozolomide Run2-DMSO | NM_0050<br>99 | ADAMTS4 | a<br>disintegrin-like and metalloprotease (reprolysin type) with thrombospondin type 1 motif, 4 | -0.43901  | Inlier |
| siRNA Disorazole DMSO Run1   | NM_0050<br>99 | ADAMTS4 | a<br>disintegrin-like and metalloprotease (reprolysin type) with thrombospondin type 1 motif, 4 | 0.43901   | Inlier |
| siRNA-Temozolomide Run1-DMSO | NM_0050<br>99 | ADAMTS4 | a<br>disintegrin-like and metalloprotease (reprolysin type) with thrombospondin type 1 motif, 4 | 0.734535  | Inlier |

Identification of Survival Genes in Human Glioblastoma Cells Using siRNA Screening  
 Nikhil G Thaker, Fang Zhang, Peter R. McDonald, Tong Ying Shun, Michael D Lewen, Ian F. Pollack, and John S. Lazo  
 Molecular Pharmacology

|                             |           |         |                                                                                              |          |        |
|-----------------------------|-----------|---------|----------------------------------------------------------------------------------------------|----------|--------|
| siRNA-Vinblastine Run1-DMSO | NM_005099 | ADAMTS4 | a disintegrin-like and metalloprotease (reprolysin type) with thrombospondin type 1 motif, 4 | 2.357283 | Inlier |
|-----------------------------|-----------|---------|----------------------------------------------------------------------------------------------|----------|--------|

|                             |           |         |                                                                                              |          |        |
|-----------------------------|-----------|---------|----------------------------------------------------------------------------------------------|----------|--------|
| siRNA-Vinblastine Run2-DMSO | NM_005099 | ADAMTS4 | a disintegrin-like and metalloprotease (reprolysin type) with thrombospondin type 1 motif, 4 | 2.357916 | Inlier |
|-----------------------------|-----------|---------|----------------------------------------------------------------------------------------------|----------|--------|

|                              |           |         |                                                                                                              |           |        |
|------------------------------|-----------|---------|--------------------------------------------------------------------------------------------------------------|-----------|--------|
| siRNA-Temozolomide Run3-DMSO | NM_007038 | ADAMTS5 | a disintegrin-like and metalloprotease (reprolysin type) with thrombospondin type 1 motif, 5 (aggrecanase-2) | -1.962971 | Inlier |
|------------------------------|-----------|---------|--------------------------------------------------------------------------------------------------------------|-----------|--------|

|                              |           |         |                                                                                                              |           |        |
|------------------------------|-----------|---------|--------------------------------------------------------------------------------------------------------------|-----------|--------|
| siRNA-Temozolomide Run2-DMSO | NM_007038 | ADAMTS5 | a disintegrin-like and metalloprotease (reprolysin type) with thrombospondin type 1 motif, 5 (aggrecanase-2) | -1.034262 | Inlier |
|------------------------------|-----------|---------|--------------------------------------------------------------------------------------------------------------|-----------|--------|

Identification of Survival Genes in Human Glioblastoma Cells Using siRNA Screening

Nikhil G Thaker, Fang Zhang, Peter R. McDonald, Tong Ying Shun, Michael D Lewen, Ian F. Pollack, and John S. Lazo

Molecular Pharmacology

|                            |         |         |                                                                                                              |           |        |
|----------------------------|---------|---------|--------------------------------------------------------------------------------------------------------------|-----------|--------|
| siRNA Disorazole DMSO Run2 | NM_0070 | ADAMTS5 | a disintegrin-like and metalloprotease (reprolysin type) with thrombospondin type 1 motif, 5 (aggrecanase-2) | -0.156553 | Inlier |
|----------------------------|---------|---------|--------------------------------------------------------------------------------------------------------------|-----------|--------|

|                            |         |         |                                                                                                              |           |        |
|----------------------------|---------|---------|--------------------------------------------------------------------------------------------------------------|-----------|--------|
| siRNA Disorazole DMSO Run3 | NM_0070 | ADAMTS5 | a disintegrin-like and metalloprotease (reprolysin type) with thrombospondin type 1 motif, 5 (aggrecanase-2) | -0.045857 | Inlier |
|----------------------------|---------|---------|--------------------------------------------------------------------------------------------------------------|-----------|--------|

|                               |         |         |                                                                                                              |          |        |
|-------------------------------|---------|---------|--------------------------------------------------------------------------------------------------------------|----------|--------|
| siRNA-Temozolomide DMSO Run1- | NM_0070 | ADAMTS5 | a disintegrin-like and metalloprotease (reprolysin type) with thrombospondin type 1 motif, 5 (aggrecanase-2) | 0.045856 | Inlier |
|-------------------------------|---------|---------|--------------------------------------------------------------------------------------------------------------|----------|--------|

Identification of Survival Genes in Human Glioblastoma Cells Using siRNA Screening

Nikhil G Thaker, Fang Zhang, Peter R. McDonald, Tong Ying Shun, Michael D Lewen, Ian F. Pollack, and John S. Lazo

Molecular Pharmacology

|                                 |               |         |                                                                                                                                                   |          |        |
|---------------------------------|---------------|---------|---------------------------------------------------------------------------------------------------------------------------------------------------|----------|--------|
| siRNA Disorazole DMSO Run1      | NM_0070<br>38 | ADAMTS5 | a<br>disintegrin-<br>like and<br>metallopro<br>tease<br>(reprolysin<br>type) with<br>thrombosp<br>ondin type<br>1 motif, 5<br>(aggrecan<br>ase-2) | 0.314738 | Inlier |
| siRNA-Vinblastine Run2-<br>DMSO | NM_0070<br>38 | ADAMTS5 | a<br>disintegrin-<br>like and<br>metallopro<br>tease<br>(reprolysin<br>type) with<br>thrombosp<br>ondin type<br>1 motif, 5<br>(aggrecan<br>ase-2) | 2.411538 | Inlier |
| siRNA-Vinblastine Run1-<br>DMSO | NM_0070<br>38 | ADAMTS5 | a<br>disintegrin-<br>like and<br>metallopro<br>tease<br>(reprolysin<br>type) with<br>thrombosp<br>ondin type<br>1 motif, 5<br>(aggrecan<br>ase-2) | 2.706691 | Inlier |

Identification of Survival Genes in Human Glioblastoma Cells Using siRNA Screening  
 Nikhil G Thaker, Fang Zhang, Peter R. McDonald, Tong Ying Shun, Michael D Lewen, Ian F. Pollack, and John S. Lazo  
 Molecular Pharmacology

|                              |               |         |                                                                                                 |           |        |
|------------------------------|---------------|---------|-------------------------------------------------------------------------------------------------|-----------|--------|
| siRNA-Temozolomide Run3-DMSO | NM_1979<br>41 | ADAMTS6 | a<br>disintegrin-like and metalloprotease (reprolysin type) with thrombospondin type 1 motif, 6 | -1.581252 | Inlier |
| siRNA-Temozolomide Run1-DMSO | NM_1979<br>41 | ADAMTS6 | a<br>disintegrin-like and metalloprotease (reprolysin type) with thrombospondin type 1 motif, 6 | -0.269511 | Inlier |
| siRNA-Temozolomide Run2-DMSO | NM_1979<br>41 | ADAMTS6 | a<br>disintegrin-like and metalloprotease (reprolysin type) with thrombospondin type 1 motif, 6 | -0.244662 | Inlier |
| siRNA Disorazole DMSO Run1   | NM_1979<br>41 | ADAMTS6 | a<br>disintegrin-like and metalloprotease (reprolysin type) with thrombospondin type 1 motif, 6 | -0.070013 | Inlier |

Identification of Survival Genes in Human Glioblastoma Cells Using siRNA Screening  
 Nikhil G Thaker, Fang Zhang, Peter R. McDonald, Tong Ying Shun, Michael D Lewen, Ian F. Pollack, and John S. Lazo  
 Molecular Pharmacology

|                                  |               |         |                                                                                                                            |           |        |
|----------------------------------|---------------|---------|----------------------------------------------------------------------------------------------------------------------------|-----------|--------|
| siRNA Disorazole DMSO Run3       | NM_1979<br>41 | ADAMTS6 | a<br>disintegrin-<br>like and<br>metallopro<br>tease<br>(reprolysin<br>type) with<br>thrombosp<br>ondin type<br>1 motif, 6 | 0.070013  | Inlier |
| siRNA Disorazole DMSO Run2       | NM_0142<br>73 | ADAMTS6 | a<br>disintegrin-<br>like and<br>metallopro<br>tease<br>(reprolysin<br>type) with<br>thrombosp<br>ondin type<br>1 motif, 6 | -0.809881 | Inlier |
| siRNA-Temozolomide Run3-<br>DMSO | NM_0142<br>73 | ADAMTS6 | a<br>disintegrin-<br>like and<br>metallopro<br>tease<br>(reprolysin<br>type) with<br>thrombosp<br>ondin type<br>1 motif, 6 | -0.70038  | Inlier |
| siRNA-Temozolomide Run1-<br>DMSO | NM_0142<br>73 | ADAMTS6 | a<br>disintegrin-<br>like and<br>metallopro<br>tease<br>(reprolysin<br>type) with<br>thrombosp<br>ondin type<br>1 motif, 6 | -0.64862  | Inlier |

Identification of Survival Genes in Human Glioblastoma Cells Using siRNA Screening  
 Nikhil G Thaker, Fang Zhang, Peter R. McDonald, Tong Ying Shun, Michael D Lewen, Ian F. Pollack, and John S. Lazo  
 Molecular Pharmacology

|                                  |               |         |                                                                                                              |            |           |        |
|----------------------------------|---------------|---------|--------------------------------------------------------------------------------------------------------------|------------|-----------|--------|
| siRNA Disorazole DMSO Run3       | NM_0142<br>73 | ADAMTS6 | a<br>disintegrin-<br>like and<br>metallopro<br>tease<br>(reprolysin<br>type) with<br>thrombosp<br>ondin type | 1 motif, 6 | -0.111505 | Inlier |
| siRNA Disorazole DMSO Run1       | NM_0142<br>73 | ADAMTS6 | a<br>disintegrin-<br>like and<br>metallopro<br>tease<br>(reprolysin<br>type) with<br>thrombosp<br>ondin type | 1 motif, 6 | 0.111504  | Inlier |
| siRNA-Temozolomide Run2-<br>DMSO | NM_0142<br>73 | ADAMTS6 | a<br>disintegrin-<br>like and<br>metallopro<br>tease<br>(reprolysin<br>type) with<br>thrombosp<br>ondin type | 1 motif, 6 | 0.144605  | Inlier |
| siRNA Disorazole DMSO Run2       | NM_1979<br>41 | ADAMTS6 | a<br>disintegrin-<br>like and<br>metallopro<br>tease<br>(reprolysin<br>type) with<br>thrombosp<br>ondin type | 1 motif, 6 | 1.079489  | Inlier |



Identification of Survival Genes in Human Glioblastoma Cells Using siRNA Screening

Nikhil G Thaker, Fang Zhang, Peter R. McDonald, Tong Ying Shun, Michael D Lewen, Ian F. Pollack, and John S. Lazo

Molecular Pharmacology

|                             |           |         |                                                                                              |          |        |
|-----------------------------|-----------|---------|----------------------------------------------------------------------------------------------|----------|--------|
| siRNA-Vinblastine Run2-DMSO | NM_014273 | ADAMTS6 | a disintegrin-like and metalloprotease (reprolysin type) with thrombospondin type 1 motif, 6 | 0.823837 | Inlier |
| siRNA-Vinblastine Run2-DMSO | NM_197941 | ADAMTS6 | a disintegrin-like and metalloprotease (reprolysin type) with thrombospondin type 1 motif, 6 | 1.135511 | Inlier |
| siRNA-Vinblastine Run1-DMSO | NM_014273 | ADAMTS6 | a disintegrin-like and metalloprotease (reprolysin type) with thrombospondin type 1 motif, 6 | 1.002006 | Inlier |
| siRNA-Vinblastine Run1-DMSO | NM_197941 | ADAMTS6 | a disintegrin-like and metalloprotease (reprolysin type) with thrombospondin type 1 motif, 6 | 1.290924 | Inlier |

Identification of Survival Genes in Human Glioblastoma Cells Using siRNA Screening  
 Nikhil G Thaker, Fang Zhang, Peter R. McDonald, Tong Ying Shun, Michael D Lewen, Ian F. Pollack, and John S. Lazo  
 Molecular Pharmacology

|                                  |               |         |                                                                                                              |                  |
|----------------------------------|---------------|---------|--------------------------------------------------------------------------------------------------------------|------------------|
|                                  |               |         | a<br>disintegrin-<br>like and<br>metallopro<br>tease<br>(reprolysin<br>type) with<br>thrombosp<br>ondin type |                  |
| siRNA-Temozolomide Run3-<br>DMSO | NM_0142<br>72 | ADAMTS7 | 1 motif, 7                                                                                                   | -0.787511 Inlier |

|                            |               |         |                                                                                                              |                  |
|----------------------------|---------------|---------|--------------------------------------------------------------------------------------------------------------|------------------|
|                            |               |         | a<br>disintegrin-<br>like and<br>metallopro<br>tease<br>(reprolysin<br>type) with<br>thrombosp<br>ondin type |                  |
| siRNA Disorazole DMSO Run2 | NM_0142<br>72 | ADAMTS7 | 1 motif, 7                                                                                                   | -0.612583 Inlier |

|                                  |               |         |                                                                                                              |                  |
|----------------------------------|---------------|---------|--------------------------------------------------------------------------------------------------------------|------------------|
|                                  |               |         | a<br>disintegrin-<br>like and<br>metallopro<br>tease<br>(reprolysin<br>type) with<br>thrombosp<br>ondin type |                  |
| siRNA-Temozolomide Run2-<br>DMSO | NM_0142<br>72 | ADAMTS7 | 1 motif, 7                                                                                                   | -0.522145 Inlier |

|                            |               |         |                                                                                                              |                  |
|----------------------------|---------------|---------|--------------------------------------------------------------------------------------------------------------|------------------|
|                            |               |         | a<br>disintegrin-<br>like and<br>metallopro<br>tease<br>(reprolysin<br>type) with<br>thrombosp<br>ondin type |                  |
| siRNA Disorazole DMSO Run1 | NM_0142<br>72 | ADAMTS7 | 1 motif, 7                                                                                                   | -0.466121 Inlier |

Identification of Survival Genes in Human Glioblastoma Cells Using siRNA Screening  
 Nikhil G Thaker, Fang Zhang, Peter R. McDonald, Tong Ying Shun, Michael D Lewen, Ian F. Pollack, and John S. Lazo  
 Molecular Pharmacology

|                              |           |         |                                                                                              |          |        |
|------------------------------|-----------|---------|----------------------------------------------------------------------------------------------|----------|--------|
| siRNA-Temozolomide Run1-DMSO | NM_014272 | ADAMTS7 | a disintegrin-like and metalloprotease (reprolysin type) with thrombospondin type 1 motif, 7 | 0.466121 | Inlier |
| siRNA Disorazole DMSO Run3   | NM_014272 | ADAMTS7 | a disintegrin-like and metalloprotease (reprolysin type) with thrombospondin type 1 motif, 7 | 0.736417 | Inlier |
| siRNA-Vinblastine Run2-DMSO  | NM_014272 | ADAMTS7 | a disintegrin-like and metalloprotease (reprolysin type) with thrombospondin type 1 motif, 7 | 1.108021 | Inlier |
| siRNA-Vinblastine Run1-DMSO  | NM_014272 | ADAMTS7 | a disintegrin-like and metalloprotease (reprolysin type) with thrombospondin type 1 motif, 7 | 1.281319 | Inlier |

Identification of Survival Genes in Human Glioblastoma Cells Using siRNA Screening  
 Nikhil G Thaker, Fang Zhang, Peter R. McDonald, Tong Ying Shun, Michael D Lewen, Ian F. Pollack, and John S. Lazo  
 Molecular Pharmacology

|                                  |               |         |                                                                                                              |                  |
|----------------------------------|---------------|---------|--------------------------------------------------------------------------------------------------------------|------------------|
|                                  |               |         | a<br>disintegrin-<br>like and<br>metallopro<br>tease<br>(reprolysin<br>type) with<br>thrombosp<br>ondin type |                  |
| siRNA-Temozolomide Run3-<br>DMSO | NM_0070<br>37 | ADAMTS8 | 1 motif, 8                                                                                                   | -1.468873 Inlier |

|                                  |               |         |                                                                                                              |                  |
|----------------------------------|---------------|---------|--------------------------------------------------------------------------------------------------------------|------------------|
|                                  |               |         | a<br>disintegrin-<br>like and<br>metallopro<br>tease<br>(reprolysin<br>type) with<br>thrombosp<br>ondin type |                  |
| siRNA-Temozolomide Run2-<br>DMSO | NM_0070<br>37 | ADAMTS8 | 1 motif, 8                                                                                                   | -1.079602 Inlier |

|                            |               |         |                                                                                                              |                  |
|----------------------------|---------------|---------|--------------------------------------------------------------------------------------------------------------|------------------|
|                            |               |         | a<br>disintegrin-<br>like and<br>metallopro<br>tease<br>(reprolysin<br>type) with<br>thrombosp<br>ondin type |                  |
| siRNA Disorazole DMSO Run1 | NM_0070<br>37 | ADAMTS8 | 1 motif, 8                                                                                                   | -0.963377 Inlier |

|                                  |               |         |                                                                                                              |                 |
|----------------------------------|---------------|---------|--------------------------------------------------------------------------------------------------------------|-----------------|
|                                  |               |         | a<br>disintegrin-<br>like and<br>metallopro<br>tease<br>(reprolysin<br>type) with<br>thrombosp<br>ondin type |                 |
| siRNA-Temozolomide Run1-<br>DMSO | NM_0070<br>37 | ADAMTS8 | 1 motif, 8                                                                                                   | -0.21301 Inlier |

Identification of Survival Genes in Human Glioblastoma Cells Using siRNA Screening  
 Nikhil G Thaker, Fang Zhang, Peter R. McDonald, Tong Ying Shun, Michael D Lewen, Ian F. Pollack, and John S. Lazo  
 Molecular Pharmacology

|                             |               |         |                                                                                                 |          |        |
|-----------------------------|---------------|---------|-------------------------------------------------------------------------------------------------|----------|--------|
| siRNA Disorazole DMSO Run3  | NM_0070<br>37 | ADAMTS8 | a<br>disintegrin-like and metalloprotease (reprolysin type) with thrombospondin type 1 motif, 8 | 0.213011 | Inlier |
| siRNA-Vinblastine Run2-DMSO | NM_0070<br>37 | ADAMTS8 | a<br>disintegrin-like and metalloprotease (reprolysin type) with thrombospondin type 1 motif, 8 | 0.401056 | Inlier |
| siRNA-Vinblastine Run1-DMSO | NM_0070<br>37 | ADAMTS8 | a<br>disintegrin-like and metalloprotease (reprolysin type) with thrombospondin type 1 motif, 8 | 0.538757 | Inlier |
| siRNA Disorazole DMSO Run2  | NM_0070<br>37 | ADAMTS8 | a<br>disintegrin-like and metalloprotease (reprolysin type) with thrombospondin type 1 motif, 8 | 0.810243 | Inlier |

Identification of Survival Genes in Human Glioblastoma Cells Using siRNA Screening  
 Nikhil G Thaker, Fang Zhang, Peter R. McDonald, Tong Ying Shun, Michael D Lewen, Ian F. Pollack, and John S. Lazo  
 Molecular Pharmacology

|                                  |               |         |                                                                                                              |            |           |        |
|----------------------------------|---------------|---------|--------------------------------------------------------------------------------------------------------------|------------|-----------|--------|
| siRNA Disorazole DMSO Run1       | NM_1829<br>21 | ADAMTS9 | a<br>disintegrin-<br>like and<br>metallopro<br>tease<br>(reprolysin<br>type) with<br>thrombosp<br>ondin type | 1 motif, 9 | -0.879404 | Inlier |
| siRNA-Temozolomide Run1-<br>DMSO | NM_1829<br>21 | ADAMTS9 | a<br>disintegrin-<br>like and<br>metallopro<br>tease<br>(reprolysin<br>type) with<br>thrombosp<br>ondin type | 1 motif, 9 | -0.821451 | Inlier |
| siRNA-Temozolomide Run3-<br>DMSO | NM_1829<br>21 | ADAMTS9 | a<br>disintegrin-<br>like and<br>metallopro<br>tease<br>(reprolysin<br>type) with<br>thrombosp<br>ondin type | 1 motif, 9 | -0.443096 | Inlier |
| siRNA-Temozolomide Run2-<br>DMSO | NM_1829<br>21 | ADAMTS9 | a<br>disintegrin-<br>like and<br>metallopro<br>tease<br>(reprolysin<br>type) with<br>thrombosp<br>ondin type | 1 motif, 9 | -0.259151 | Inlier |

Identification of Survival Genes in Human Glioblastoma Cells Using siRNA Screening  
 Nikhil G Thaker, Fang Zhang, Peter R. McDonald, Tong Ying Shun, Michael D Lewen, Ian F. Pollack, and John S. Lazo  
 Molecular Pharmacology

|                                  |               |              |                                                                                                                            |           |        |
|----------------------------------|---------------|--------------|----------------------------------------------------------------------------------------------------------------------------|-----------|--------|
| siRNA Disorazole DMSO Run2       | NM_1829<br>21 | ADAMTS9      | a<br>disintegrin-<br>like and<br>metallopro<br>tease<br>(reprolysin<br>type) with<br>thrombosp<br>ondin type<br>1 motif, 9 | 0.25915   | Inlier |
| siRNA Disorazole DMSO Run3       | NM_1829<br>21 | ADAMTS9      | a<br>disintegrin-<br>like and<br>metallopro<br>tease<br>(reprolysin<br>type) with<br>thrombosp<br>ondin type<br>1 motif, 9 | 0.635384  | Inlier |
| siRNA-Vinblastine Run2-<br>DMSO  | NM_1829<br>21 | ADAMTS9      | a<br>disintegrin-<br>like and<br>metallopro<br>tease<br>(reprolysin<br>type) with<br>thrombosp<br>ondin type<br>1 motif, 9 | 0.713616  | Inlier |
| siRNA-Vinblastine Run1-<br>DMSO  | NM_1829<br>21 | ADAMTS9      | a<br>disintegrin-<br>like and<br>metallopro<br>tease<br>(reprolysin<br>type) with<br>thrombosp<br>ondin type<br>1 motif, 9 | 1.17526   | Inlier |
| siRNA-Temozolomide Run3-<br>DMSO | NM_0528<br>66 | ADAMTSL<br>1 | ADAMTS-<br>like 1                                                                                                          | -0.909071 | Inlier |
| siRNA Disorazole DMSO Run1       | NM_0528<br>66 | ADAMTSL<br>1 | ADAMTS-<br>like 1                                                                                                          | -0.439929 | Inlier |

Identification of Survival Genes in Human Glioblastoma Cells Using siRNA Screening

Nikhil G Thaker, Fang Zhang, Peter R. McDonald, Tong Ying Shun, Michael D Lewen, Ian F. Pollack, and John S.

Lazo

|                              |               |              |                                   |           |         |
|------------------------------|---------------|--------------|-----------------------------------|-----------|---------|
| siRNA-Temozolomide Run2-DMSO | NM_0528<br>66 | ADAMTSL<br>1 | ADAMTS-like 1                     | -0.220012 | Inlier  |
| siRNA Disorazole DMSO Run2   | NM_0528<br>66 | ADAMTSL<br>1 | ADAMTS-like 1                     | -0.121082 | Inlier  |
| siRNA-Temozolomide Run1-DMSO | NM_0528<br>66 | ADAMTSL<br>1 | ADAMTS-like 1                     | 0.121082  | Inlier  |
| siRNA Disorazole DMSO Run3   | NM_0528<br>66 | ADAMTSL<br>1 | ADAMTS-like 1                     | 0.925198  | Inlier  |
| siRNA-Vinblastine Run1-DMSO  | NM_0528<br>66 | ADAMTSL<br>1 | ADAMTS-like 1                     | 1.394672  | Inlier  |
| siRNA-Vinblastine Run2-DMSO  | NM_0528<br>66 | ADAMTSL<br>1 | ADAMTS-like 1                     | 1.52824   | Inlier  |
| siRNA-Temozolomide Run3-DMSO | NM_0011<br>11 | ADAR         | adenosine deaminase, RNA-specific | -1.346641 | Inlier  |
| siRNA-Temozolomide Run2-DMSO | NM_0011<br>11 | ADAR         | adenosine deaminase, RNA-specific | -0.424094 | Inlier  |
| siRNA-Temozolomide Run1-DMSO | NM_0011<br>11 | ADAR         | adenosine deaminase, RNA-specific | -0.370983 | Inlier  |
| siRNA Disorazole DMSO Run1   | NM_0011<br>11 | ADAR         | adenosine deaminase, RNA-specific | -0.167252 | Inlier  |
| siRNA Disorazole DMSO Run3   | NM_0011<br>11 | ADAR         | adenosine deaminase, RNA-specific | 0.167252  | Inlier  |
| siRNA-Vinblastine Run2-DMSO  | NM_0011<br>11 | ADAR         | adenosine deaminase, RNA-specific | 0.924906  | Inlier  |
| siRNA-Vinblastine Run1-DMSO  | NM_0011<br>11 | ADAR         | adenosine deaminase, RNA-specific | 7.234066  | Outlier |
| siRNA Disorazole DMSO Run2   | NM_0011<br>11 | ADAR         | adenosine deaminase, RNA-specific | 7.88695   | Outlier |
| siRNA-Temozolomide Run3-DMSO | NM_0158<br>34 | ADARB1       | B1 (RED1 homolog rat)             | -0.806955 | Inlier  |



Identification of Survival Genes in Human Glioblastoma Cells Using siRNA Screening

Nikhil G Thaker, Fang Zhang, Peter R. McDonald, Tong Ying Shun, Michael D Lewen, Ian F. Pollack, and John S. Lazo

Molecular Pharmacology

|                              |               |        |                                                          |           |        |
|------------------------------|---------------|--------|----------------------------------------------------------|-----------|--------|
| siRNA-Vinblastine Run2-DMSO  | NM_0158<br>34 | ADARB1 | adenosine deaminase, RNA-specific, B1 (RED1 homolog rat) | -0.542045 | Inlier |
| siRNA Disorazole DMSO Run1   | NM_0158<br>34 | ADARB1 | adenosine deaminase, RNA-specific, B1 (RED1 homolog rat) | -0.260271 | Inlier |
| siRNA-Temozolomide Run1-DMSO | NM_0158<br>34 | ADARB1 | adenosine deaminase, RNA-specific, B1 (RED1 homolog rat) | -0.20084  | Inlier |
| siRNA-Temozolomide Run2-DMSO | NM_0158<br>34 | ADARB1 | adenosine deaminase, RNA-specific, B1 (RED1 homolog rat) | 0.20084   | Inlier |
| siRNA Disorazole DMSO Run3   | NM_0158<br>34 | ADARB1 | adenosine deaminase, RNA-specific, B1 (RED1 homolog rat) | 1.323579  | Inlier |
| siRNA-Vinblastine Run1-DMSO  | NM_0158<br>34 | ADARB1 | adenosine deaminase, RNA-specific, B1 (RED1 homolog rat) | 2.999112  | Inlier |
| siRNA Disorazole DMSO Run2   | NM_0158<br>34 | ADARB1 | adenosine deaminase, RNA-specific, B1 (RED1 homolog rat) | 3.097543  | Inlier |

Identification of Survival Genes in Human Glioblastoma Cells Using siRNA Screening  
 Nikhil G Thaker, Fang Zhang, Peter R. McDonald, Tong Ying Shun, Michael D Lewen, Ian F. Pollack, and John S. Lazo

Molecular Pharmacology

|                              |               |       |                                      |           |        |
|------------------------------|---------------|-------|--------------------------------------|-----------|--------|
| siRNA Disorazole DMSO Run3   | NM_0120<br>91 | ADAT1 | adenosine deaminase, tRNA-specific 1 | -1.029723 | Inlier |
| siRNA-Vinblastine Run2-DMSO  | NM_0120<br>91 | ADAT1 | adenosine deaminase, tRNA-specific 1 | -0.902192 | Inlier |
| siRNA-Temozolomide Run2-DMSO | NM_0120<br>91 | ADAT1 | adenosine deaminase, tRNA-specific 1 | -0.118947 | Inlier |
| siRNA-Temozolomide Run3-DMSO | NM_0120<br>91 | ADAT1 | adenosine deaminase, tRNA-specific 1 | -0.057755 | Inlier |
| siRNA Disorazole DMSO Run1   | NM_0120<br>91 | ADAT1 | adenosine deaminase, tRNA-specific 1 | 0.057755  | Inlier |
| siRNA-Temozolomide Run1-DMSO | NM_0120<br>91 | ADAT1 | adenosine deaminase, tRNA-specific 1 | 0.446808  | Inlier |
| siRNA-Vinblastine Run1-DMSO  | NM_0120<br>91 | ADAT1 | adenosine deaminase, tRNA-specific 1 | 1.975664  | Inlier |
| siRNA Disorazole DMSO Run2   | NM_0120<br>91 | ADAT1 | adenosine deaminase, tRNA-specific 1 | 2.572214  | Inlier |
| siRNA-Temozolomide Run3-DMSO | NM_0204<br>21 | ADCK1 | domain containing kinase 1           | -2.875549 | Inlier |
| siRNA-Temozolomide Run1-DMSO | NM_0204<br>21 | ADCK1 | domain containing kinase 1           | -1.070915 | Inlier |
| siRNA-Temozolomide Run2-DMSO | NM_0204<br>21 | ADCK1 | domain containing kinase 1           | -0.640103 | Inlier |
| siRNA Disorazole DMSO Run2   | NM_0204<br>21 | ADCK1 | domain containing kinase 1           | -0.284367 | Inlier |
| siRNA Disorazole DMSO Run3   | NM_0204<br>21 | ADCK1 | domain containing kinase 1           | 0.284367  | Inlier |

Identification of Survival Genes in Human Glioblastoma Cells Using siRNA Screening  
 Nikhil G Thaker, Fang Zhang, Peter R. McDonald, Tong Ying Shun, Michael D Lewen, Ian F. Pollack, and John S. Lazo

Molecular Pharmacology

|                              |               |       |                                          |           |        |
|------------------------------|---------------|-------|------------------------------------------|-----------|--------|
| siRNA Disorazole DMSO Run1   | NM_0204<br>21 | ADCK1 | aarF<br>domain<br>containing<br>kinase 1 | 0.503795  | Inlier |
| siRNA-Vinblastine Run2-DMSO  | NM_0204<br>21 | ADCK1 | aarF<br>domain<br>containing<br>kinase 1 | 0.708897  | Inlier |
| siRNA-Vinblastine Run1-DMSO  | NM_0204<br>21 | ADCK1 | aarF<br>domain<br>containing<br>kinase 1 | 1.026585  | Inlier |
| siRNA-Temozolomide Run3-DMSO | NM_0528<br>53 | ADCK2 | aarF<br>domain<br>containing<br>kinase 2 | -1.967541 | Inlier |
| siRNA Disorazole DMSO Run2   | NM_0528<br>53 | ADCK2 | aarF<br>domain<br>containing<br>kinase 2 | -1.430926 | Inlier |
| siRNA-Temozolomide Run1-DMSO | NM_0528<br>53 | ADCK2 | aarF<br>domain<br>containing<br>kinase 2 | -0.61943  | Inlier |
| siRNA-Temozolomide Run2-DMSO | NM_0528<br>53 | ADCK2 | aarF<br>domain<br>containing<br>kinase 2 | -0.22488  | Inlier |
| siRNA Disorazole DMSO Run1   | NM_0528<br>53 | ADCK2 | aarF<br>domain<br>containing<br>kinase 2 | 0.22488   | Inlier |
| siRNA Disorazole DMSO Run3   | NM_0528<br>53 | ADCK2 | aarF<br>domain<br>containing<br>kinase 2 | 0.289408  | Inlier |
| siRNA-Vinblastine Run1-DMSO  | NM_0528<br>53 | ADCK2 | aarF<br>domain<br>containing<br>kinase 2 | 0.72957   | Inlier |
| siRNA-Vinblastine Run2-DMSO  | NM_0528<br>53 | ADCK2 | aarF<br>domain<br>containing<br>kinase 2 | 0.779393  | Inlier |
| siRNA-Temozolomide Run3-DMSO | NM_0248<br>76 | ADCK4 | aarF<br>domain<br>containing<br>kinase 4 | -0.909621 | Inlier |
| siRNA Disorazole DMSO Run2   | NM_0248<br>76 | ADCK4 | aarF<br>domain<br>containing<br>kinase 4 | -0.439379 | Inlier |

Identification of Survival Genes in Human Glioblastoma Cells Using siRNA Screening  
 Nikhil G Thaker, Fang Zhang, Peter R. McDonald, Tong Ying Shun, Michael D Lewen, Ian F. Pollack, and John S. Lazo

Molecular Pharmacology

|                              |               |       |                                          |                  |
|------------------------------|---------------|-------|------------------------------------------|------------------|
| siRNA-Temozolomide Run1-DMSO | NM_0248<br>76 | ADCK4 | aarF<br>domain<br>containing<br>kinase 4 | -0.260578 Inlier |
| siRNA-Temozolomide Run2-DMSO | NM_0248<br>76 | ADCK4 | aarF<br>domain<br>containing<br>kinase 4 | -0.025621 Inlier |
| siRNA Disorazole DMSO Run3   | NM_0248<br>76 | ADCK4 | aarF<br>domain<br>containing<br>kinase 4 | 0.025621 Inlier  |
| siRNA Disorazole DMSO Run1   | NM_0248<br>76 | ADCK4 | aarF<br>domain<br>containing<br>kinase 4 | 1.143642 Inlier  |
| siRNA-Vinblastine Run2-DMSO  | NM_0248<br>76 | ADCK4 | aarF<br>domain<br>containing<br>kinase 4 | 1.281598 Inlier  |
| siRNA-Vinblastine Run1-DMSO  | NM_0248<br>76 | ADCK4 | aarF<br>domain<br>containing<br>kinase 4 | 1.497922 Inlier  |
| siRNA Disorazole DMSO Run2   | NM_1749<br>22 | ADCK5 | aarF<br>domain<br>containing<br>kinase 5 | -1.803334 Inlier |
| siRNA Disorazole DMSO Run3   | NM_1749<br>22 | ADCK5 | aarF<br>domain<br>containing<br>kinase 5 | -0.557568 Inlier |
| siRNA-Temozolomide Run3-DMSO | NM_1749<br>22 | ADCK5 | aarF<br>domain<br>containing<br>kinase 5 | -0.449059 Inlier |
| siRNA-Temozolomide Run1-DMSO | NM_1749<br>22 | ADCK5 | aarF<br>domain<br>containing<br>kinase 5 | -0.195356 Inlier |
| siRNA-Temozolomide Run2-DMSO | NM_1749<br>22 | ADCK5 | aarF<br>domain<br>containing<br>kinase 5 | 0.195356 Inlier  |
| siRNA Disorazole DMSO Run1   | NM_1749<br>22 | ADCK5 | aarF<br>domain<br>containing<br>kinase 5 | 0.791432 Inlier  |
| siRNA-Vinblastine Run2-DMSO  | NM_1749<br>22 | ADCK5 | aarF<br>domain<br>containing<br>kinase 5 | 1.292878 Inlier  |

Identification of Survival Genes in Human Glioblastoma Cells Using siRNA Screening  
 Nikhil G Thaker, Fang Zhang, Peter R. McDonald, Tong Ying Shun, Michael D Lewen, Ian F. Pollack, and John S. Lazo

Molecular Pharmacology

| siRNA Treatment              | Gene ID       | Gene Name | Protein                         | Value     | Category |
|------------------------------|---------------|-----------|---------------------------------|-----------|----------|
| siRNA-Vinblastine Run1-DMSO  | NM_1749<br>22 | ADCK5     | aarF domain containing kinase 5 | 1.329343  | Inlier   |
| siRNA-Temozolomide Run1-DMSO | NM_0211<br>16 | ADCY1     | adenylate cyclase 1 (brain)     | -2.342028 | Inlier   |
| siRNA-Temozolomide Run3-DMSO | NM_0211<br>16 | ADCY1     | adenylate cyclase 1 (brain)     | -2.105247 | Inlier   |
| siRNA-Temozolomide Run2-DMSO | NM_0211<br>16 | ADCY1     | adenylate cyclase 1 (brain)     | -1.719555 | Inlier   |
| siRNA-Vinblastine Run2-DMSO  | NM_0211<br>16 | ADCY1     | adenylate cyclase 1 (brain)     | -0.250045 | Inlier   |
| siRNA-Vinblastine Run1-DMSO  | NM_0211<br>16 | ADCY1     | adenylate cyclase 1 (brain)     | 0.250045  | Inlier   |
| siRNA Disorazole DMSO Run3   | NM_0211<br>16 | ADCY1     | adenylate cyclase 1 (brain)     | 0.3877    | Inlier   |
| siRNA Disorazole DMSO Run1   | NM_0211<br>16 | ADCY1     | adenylate cyclase 1 (brain)     | 0.63621   | Inlier   |
| siRNA Disorazole DMSO Run2   | NM_0211<br>16 | ADCY1     | adenylate cyclase 1 (brain)     | 0.71279   | Inlier   |
| siRNA-Temozolomide Run1-DMSO | NM_0205<br>46 | ADCY2     | adenylate cyclase 2 (brain)     | -1.175182 | Inlier   |
| siRNA-Vinblastine Run2-DMSO  | NM_0205<br>46 | ADCY2     | adenylate cyclase 2 (brain)     | -0.497944 | Inlier   |
| siRNA Disorazole DMSO Run3   | NM_0205<br>46 | ADCY2     | adenylate cyclase 2 (brain)     | -0.401921 | Inlier   |
| siRNA-Vinblastine Run1-DMSO  | NM_0205<br>46 | ADCY2     | adenylate cyclase 2 (brain)     | -0.001595 | Inlier   |
| siRNA-Temozolomide Run2-DMSO | NM_0205<br>46 | ADCY2     | adenylate cyclase 2 (brain)     | 0.001595  | Inlier   |
| siRNA Disorazole DMSO Run1   | NM_0205<br>46 | ADCY2     | adenylate cyclase 2 (brain)     | 0.851056  | Inlier   |
| siRNA-Temozolomide Run3-DMSO | NM_0205<br>46 | ADCY2     | adenylate cyclase 2 (brain)     | 0.876545  | Inlier   |
| siRNA Disorazole DMSO Run2   | NM_0205<br>46 | ADCY2     | adenylate cyclase 2 (brain)     | 1.90053   | Inlier   |

Identification of Survival Genes in Human Glioblastoma Cells Using siRNA Screening  
 Nikhil G Thaker, Fang Zhang, Peter R. McDonald, Tong Ying Shun, Michael D Lewen, Ian F. Pollack, and John S.

Lazo

|                                  |               |       |                        |           |        |
|----------------------------------|---------------|-------|------------------------|-----------|--------|
| siRNA-Temozolomide Run2-<br>DMSO | NM_0040<br>36 | ADCY3 | adenylate<br>cyclase 3 | -0.863369 | Inlier |
|                                  | NM_0040       |       | adenylate              |           |        |
| siRNA Disorazole DMSO Run1       | 36            | ADCY3 | cyclase 3              | -0.645057 | Inlier |
| siRNA-Temozolomide Run3-<br>DMSO | NM_0040<br>36 | ADCY3 | adenylate<br>cyclase 3 | -0.468954 | Inlier |
| siRNA-Vinblastine Run2-<br>DMSO  | NM_0040<br>36 | ADCY3 | adenylate<br>cyclase 3 | -0.140741 | Inlier |
|                                  | NM_0040       |       | adenylate              |           |        |
| siRNA Disorazole DMSO Run3       | 36            | ADCY3 | cyclase 3              | 0.140741  | Inlier |
| siRNA-Temozolomide Run1-<br>DMSO | NM_0040<br>36 | ADCY3 | adenylate<br>cyclase 3 | 0.703943  | Inlier |
|                                  | NM_0040       |       | adenylate              |           |        |
| siRNA Disorazole DMSO Run2       | 36            | ADCY3 | cyclase 3              | 1.27725   | Inlier |
| siRNA-Vinblastine Run1-<br>DMSO  | NM_0040<br>36 | ADCY3 | adenylate<br>cyclase 3 | 1.314607  | Inlier |
| siRNA-Temozolomide Run3-<br>DMSO | NM_1392<br>47 | ADCY4 | adenylate<br>cyclase 4 | -1.086655 | Inlier |
| siRNA-Temozolomide Run2-<br>DMSO | NM_1392<br>47 | ADCY4 | adenylate<br>cyclase 4 | -0.6558   | Inlier |
| siRNA-Vinblastine Run2-<br>DMSO  | NM_1392<br>47 | ADCY4 | adenylate<br>cyclase 4 | -0.373665 | Inlier |
| siRNA-Temozolomide Run1-<br>DMSO | NM_1392<br>47 | ADCY4 | adenylate<br>cyclase 4 | -0.067    | Inlier |
|                                  | NM_1392       |       | adenylate              |           |        |
| siRNA Disorazole DMSO Run3       | 47            | ADCY4 | cyclase 4              | 0.067     | Inlier |
|                                  | NM_1392       |       | adenylate              |           |        |
| siRNA Disorazole DMSO Run1       | 47            | ADCY4 | cyclase 4              | 0.6932    | Inlier |
| siRNA-Vinblastine Run1-<br>DMSO  | NM_1392<br>47 | ADCY4 | adenylate<br>cyclase 4 | 1.162988  | Inlier |
|                                  | NM_1392       |       | adenylate              |           |        |
| siRNA Disorazole DMSO Run2       | 47            | ADCY4 | cyclase 4              | 1.533371  | Inlier |
| siRNA-Temozolomide Run3-<br>DMSO | NM_0209<br>83 | ADCY6 | adenylate<br>cyclase 6 | -0.788549 | Inlier |
|                                  | NM_0209       |       | adenylate              |           |        |
| siRNA Disorazole DMSO Run3       | 83            | ADCY6 | cyclase 6              | -0.560451 | Inlier |
| siRNA-Temozolomide Run2-<br>DMSO | NM_0209<br>83 | ADCY6 | adenylate<br>cyclase 6 | -0.433504 | Inlier |
| siRNA-Vinblastine Run2-<br>DMSO  | NM_0209<br>83 | ADCY6 | adenylate<br>cyclase 6 | -0.237819 | Inlier |
| siRNA-Temozolomide Run1-<br>DMSO | NM_0209<br>83 | ADCY6 | adenylate<br>cyclase 6 | 0.23782   | Inlier |
|                                  | NM_0209       |       | adenylate              |           |        |
| siRNA Disorazole DMSO Run1       | 83            | ADCY6 | cyclase 6              | 0.833358  | Inlier |
| siRNA-Vinblastine Run1-<br>DMSO  | NM_0209<br>83 | ADCY6 | adenylate<br>cyclase 6 | 1.176069  | Inlier |
|                                  | NM_0209       |       | adenylate              |           |        |
| siRNA Disorazole DMSO Run2       | 83            | ADCY6 | cyclase 6              | 1.200222  | Inlier |
| siRNA-Temozolomide Run3-<br>DMSO | NM_0011<br>14 | ADCY7 | adenylate<br>cyclase 7 | -2.248978 | Inlier |
| siRNA-Temozolomide Run2-<br>DMSO | NM_0011<br>14 | ADCY7 | adenylate<br>cyclase 7 | -0.480748 | Inlier |

Identification of Survival Genes in Human Glioblastoma Cells Using siRNA Screening  
 Nikhil G Thaker, Fang Zhang, Peter R. McDonald, Tong Ying Shun, Michael D Lewen, Ian F. Pollack, and John S. Lazo

|                              |         |       |           |           |         |
|------------------------------|---------|-------|-----------|-----------|---------|
| Molecular Pharmacology       | NM_0011 |       | adenylate |           |         |
| siRNA Disorazole DMSO Run1   | 14      | ADCY7 | cyclase 7 | -0.323516 | Inlier  |
| siRNA-Temozolomide Run1-DMSO | NM_0011 |       | adenylate |           |         |
|                              | 14      | ADCY7 | cyclase 7 | -0.256391 | Inlier  |
|                              | NM_0011 |       | adenylate |           |         |
| siRNA Disorazole DMSO Run3   | 14      | ADCY7 | cyclase 7 | 0.256392  | Inlier  |
| siRNA-Vinblastine Run2-DMSO  | NM_0011 |       | adenylate |           |         |
|                              | 14      | ADCY7 | cyclase 7 | 0.868252  | Inlier  |
| siRNA-Vinblastine Run1-DMSO  | NM_0011 |       | adenylate |           |         |
|                              | 14      | ADCY7 | cyclase 7 | 1.273863  | Inlier  |
|                              | NM_0011 |       | adenylate |           |         |
| siRNA Disorazole DMSO Run2   | 14      | ADCY7 | cyclase 7 | 2.381344  | Inlier  |
|                              |         |       | adenylate |           |         |
| siRNA-Temozolomide Run3-DMSO | NM_0011 |       | cyclase 8 |           |         |
|                              | 15      | ADCY8 | (brain)   | -1.441258 | Inlier  |
|                              |         |       | adenylate |           |         |
| siRNA-Temozolomide Run2-DMSO | NM_0011 |       | cyclase 8 |           |         |
|                              | 15      | ADCY8 | (brain)   | -0.874778 | Inlier  |
|                              |         |       | adenylate |           |         |
| siRNA-Vinblastine Run2-DMSO  | NM_0011 |       | cyclase 8 |           |         |
|                              | 15      | ADCY8 | (brain)   | -0.153164 | Inlier  |
|                              |         |       | adenylate |           |         |
|                              | NM_0011 |       | cyclase 8 |           |         |
| siRNA Disorazole DMSO Run3   | 15      | ADCY8 | (brain)   | -0.150861 | Inlier  |
|                              |         |       | adenylate |           |         |
| siRNA-Temozolomide Run1-DMSO | NM_0011 |       | cyclase 8 |           |         |
|                              | 15      | ADCY8 | (brain)   | 0.150861  | Inlier  |
|                              |         |       | adenylate |           |         |
|                              | NM_0011 |       | cyclase 8 |           |         |
| siRNA Disorazole DMSO Run1   | 15      | ADCY8 | (brain)   | 0.474222  | Inlier  |
|                              |         |       | adenylate |           |         |
| siRNA-Vinblastine Run1-DMSO  | NM_0011 |       | cyclase 8 |           |         |
|                              | 15      | ADCY8 | (brain)   | 1.129779  | Inlier  |
|                              |         |       | adenylate |           |         |
|                              | NM_0011 |       | cyclase 8 |           |         |
| siRNA Disorazole DMSO Run2   | 15      | ADCY8 | (brain)   | 1.278948  | Inlier  |
| siRNA-Temozolomide Run3-DMSO | NM_0011 |       | adenylate |           |         |
|                              | 16      | ADCY9 | cyclase 9 | -5.783292 | Outlier |
|                              | NM_0011 |       | adenylate |           |         |
| siRNA Disorazole DMSO Run1   | 16      | ADCY9 | cyclase 9 | -0.457392 | Inlier  |
| siRNA-Temozolomide Run2-DMSO | NM_0011 |       | adenylate |           |         |
|                              | 16      | ADCY9 | cyclase 9 | -0.129377 | Inlier  |
|                              | NM_0011 |       | adenylate |           |         |
| siRNA Disorazole DMSO Run3   | 16      | ADCY9 | cyclase 9 | -0.084388 | Inlier  |
| siRNA-Vinblastine Run2-DMSO  | NM_0011 |       | adenylate |           |         |
|                              | 16      | ADCY9 | cyclase 9 | 0.084388  | Inlier  |
| siRNA-Temozolomide Run1-DMSO | NM_0011 |       | adenylate |           |         |
|                              | 16      | ADCY9 | cyclase 9 | 0.891608  | Inlier  |
|                              | NM_0011 |       | adenylate |           |         |
| siRNA Disorazole DMSO Run2   | 16      | ADCY9 | cyclase 9 | 3.214676  | Inlier  |
| siRNA-Vinblastine Run1-DMSO  | NM_0011 |       | adenylate |           |         |
|                              | 16      | ADCY9 | cyclase 9 | 5.631514  | Outlier |

Identification of Survival Genes in Human Glioblastoma Cells Using siRNA Screening  
 Nikhil G Thaker, Fang Zhang, Peter R. McDonald, Tong Ying Shun, Michael D Lewen, Ian F. Pollack, and John S. Lazo

Molecular Pharmacology

| siRNA Treatment              | Gene ID   | Gene Name | Gene Description                                       | Log Fold Change | Outlier Status |
|------------------------------|-----------|-----------|--------------------------------------------------------|-----------------|----------------|
| siRNA-Vinblastine Run2-DMSO  | NM_001117 | ADCYAP1   | adenylate cyclase activating polypeptide 1 (pituitary) | -1.692425       | Inlier         |
| siRNA Disorazole DMSO Run3   | NM_001117 | ADCYAP1   | adenylate cyclase activating polypeptide 1 (pituitary) | -1.34538        | Inlier         |
| siRNA-Temozolomide Run2-DMSO | NM_001117 | ADCYAP1   | adenylate cyclase activating polypeptide 1 (pituitary) | -0.287134       | Inlier         |
| siRNA-Temozolomide Run1-DMSO | NM_001117 | ADCYAP1   | adenylate cyclase activating polypeptide 1 (pituitary) | -0.136294       | Inlier         |
| siRNA Disorazole DMSO Run1   | NM_001117 | ADCYAP1   | adenylate cyclase activating polypeptide 1 (pituitary) | 0.136294        | Inlier         |
| siRNA-Vinblastine Run1-DMSO  | NM_001117 | ADCYAP1   | adenylate cyclase activating polypeptide 1 (pituitary) | 0.55414         | Inlier         |
| siRNA Disorazole DMSO Run2   | NM_001117 | ADCYAP1   | adenylate cyclase activating polypeptide 1 (pituitary) | 0.79486         | Inlier         |
| siRNA-Temozolomide Run3-DMSO | NM_001117 | ADCYAP1   | adenylate cyclase activating polypeptide 1 (pituitary) | 0.919838        | Inlier         |



Identification of Survival Genes in Human Glioblastoma Cells Using siRNA Screening

Nikhil G Thaker, Fang Zhang, Peter R. McDonald, Tong Ying Shun, Michael D Lewen, Ian F. Pollack, and John S. Lazo

Molecular Pharmacology

| siRNA Treatment              | Gene ID   | Gene Name  | Gene Description                                                       | Value     | Outlier Status |
|------------------------------|-----------|------------|------------------------------------------------------------------------|-----------|----------------|
| siRNA-Temozolomide Run2-DMSO | NM_001118 | ADCYAP1 R1 | adenylate cyclase activating polypeptide 1 (pituitary) receptor type I | -1.028365 | Inlier         |
| siRNA-Temozolomide Run3-DMSO | NM_001118 | ADCYAP1 R1 | adenylate cyclase activating polypeptide 1 (pituitary) receptor type I | -0.679755 | Inlier         |
| siRNA Disorazole DMSO Run2   | NM_001118 | ADCYAP1 R1 | adenylate cyclase activating polypeptide 1 (pituitary) receptor type I | -0.54325  | Inlier         |
| siRNA-Temozolomide Run1-DMSO | NM_001118 | ADCYAP1 R1 | adenylate cyclase activating polypeptide 1 (pituitary) receptor type I | -0.242455 | Inlier         |
| siRNA Disorazole DMSO Run1   | NM_001118 | ADCYAP1 R1 | adenylate cyclase activating polypeptide 1 (pituitary) receptor type I | 0.242455  | Inlier         |
| siRNA Disorazole DMSO Run3   | NM_001118 | ADCYAP1 R1 | adenylate cyclase activating polypeptide 1 (pituitary) receptor type I | 0.669245  | Inlier         |

Identification of Survival Genes in Human Glioblastoma Cells Using siRNA Screening

Nikhil G Thaker, Fang Zhang, Peter R. McDonald, Tong Ying Shun, Michael D Lewen, Ian F. Pollack, and John S. Lazo

Molecular Pharmacology

|                              |           |           |                                                                        |           |        |
|------------------------------|-----------|-----------|------------------------------------------------------------------------|-----------|--------|
| siRNA-Vinblastine Run2-DMSO  | NM_001118 | ADCYAP1R1 | adenylate cyclase activating polypeptide 1 (pituitary) receptor type I | 1.465161  | Inlier |
| siRNA-Vinblastine Run1-DMSO  | NM_001118 | ADCYAP1R1 | adenylate cyclase activating polypeptide 1 (pituitary) receptor type I | 1.741591  | Inlier |
| siRNA-Temozolomide Run2-DMSO | NM_000667 | ADH1A     | alcohol dehydrogenase 1A (class I), alpha polypeptide                  | -1.741794 | Inlier |
| siRNA Disorazole DMSO Run1   | NM_000667 | ADH1A     | alcohol dehydrogenase 1A (class I), alpha polypeptide                  | -0.876852 | Inlier |
| siRNA-Vinblastine Run2-DMSO  | NM_000667 | ADH1A     | alcohol dehydrogenase 1A (class I), alpha polypeptide                  | -0.698539 | Inlier |
| siRNA-Temozolomide Run3-DMSO | NM_000667 | ADH1A     | alcohol dehydrogenase 1A (class I), alpha polypeptide                  | -0.076485 | Inlier |
| siRNA-Vinblastine Run1-DMSO  | NM_000667 | ADH1A     | alcohol dehydrogenase 1A (class I), alpha polypeptide                  | 0.076484  | Inlier |

Identification of Survival Genes in Human Glioblastoma Cells Using siRNA Screening  
 Nikhil G Thaker, Fang Zhang, Peter R. McDonald, Tong Ying Shun, Michael D Lewen, Ian F. Pollack, and John S. Lazo

Molecular Pharmacology

|                              |               |       |                                                       |           |        |
|------------------------------|---------------|-------|-------------------------------------------------------|-----------|--------|
| siRNA Disorazole DMSO Run3   | NM_0006<br>67 | ADH1A | alcohol dehydrogenase 1A (class I), alpha polypeptide | 0.562625  | Inlier |
| siRNA-Temozolomide Run1-DMSO | NM_0006<br>67 | ADH1A | alcohol dehydrogenase 1A (class I), alpha polypeptide | 0.650461  | Inlier |
| siRNA Disorazole DMSO Run2   | NM_0006<br>67 | ADH1A | alcohol dehydrogenase 1A (class I), alpha polypeptide | 1.945841  | Inlier |
| siRNA-Temozolomide Run2-DMSO | NM_0006<br>68 | ADH1B | alcohol dehydrogenase IB (class I), beta polypeptide  | -2.285726 | Inlier |
| siRNA-Temozolomide Run3-DMSO | NM_0006<br>68 | ADH1B | alcohol dehydrogenase IB (class I), beta polypeptide  | -1.994909 | Inlier |
| siRNA-Temozolomide Run1-DMSO | NM_0006<br>68 | ADH1B | alcohol dehydrogenase IB (class I), beta polypeptide  | -0.962922 | Inlier |
| siRNA Disorazole DMSO Run1   | NM_0006<br>68 | ADH1B | alcohol dehydrogenase IB (class I), beta polypeptide  | -0.162993 | Inlier |

Identification of Survival Genes in Human Glioblastoma Cells Using siRNA Screening  
 Nikhil G Thaker, Fang Zhang, Peter R. McDonald, Tong Ying Shun, Michael D Lewen, Ian F. Pollack, and John S. Lazo

Molecular Pharmacology

|                              |           |       |                                                       |           |        |
|------------------------------|-----------|-------|-------------------------------------------------------|-----------|--------|
| siRNA-Vinblastine Run1-DMSO  | NM_000668 | ADH1B | alcohol dehydrogenase IB (class I), beta polypeptide  | 0.162993  | Inlier |
| siRNA-Vinblastine Run2-DMSO  | NM_000668 | ADH1B | alcohol dehydrogenase IB (class I), beta polypeptide  | 0.298475  | Inlier |
| siRNA Disorazole DMSO Run2   | NM_000668 | ADH1B | alcohol dehydrogenase IB (class I), beta polypeptide  | 0.584941  | Inlier |
| siRNA Disorazole DMSO Run3   | NM_000668 | ADH1B | alcohol dehydrogenase IB (class I), beta polypeptide  | 0.764059  | Inlier |
| siRNA-Temozolomide Run2-DMSO | NM_000669 | ADH1C | alcohol dehydrogenase 1C (class I), gamma polypeptide | -0.98328  | Inlier |
| siRNA-Temozolomide Run3-DMSO | NM_000669 | ADH1C | alcohol dehydrogenase 1C (class I), gamma polypeptide | -0.518919 | Inlier |
| siRNA Disorazole DMSO Run2   | NM_000669 | ADH1C | alcohol dehydrogenase 1C (class I), gamma polypeptide | -0.406202 | Inlier |

Identification of Survival Genes in Human Glioblastoma Cells Using siRNA Screening  
 Nikhil G Thaker, Fang Zhang, Peter R. McDonald, Tong Ying Shun, Michael D Lewen, Ian F. Pollack, and John S. Lazo

Molecular Pharmacology

|                              |           |       |                                                       |           |        |
|------------------------------|-----------|-------|-------------------------------------------------------|-----------|--------|
| siRNA-Temozolomide Run1-DMSO | NM_000669 | ADH1C | alcohol dehydrogenase 1C (class I), gamma polypeptide | -0.200668 | Inlier |
| siRNA-Vinblastine Run1-DMSO  | NM_000669 | ADH1C | alcohol dehydrogenase 1C (class I), gamma polypeptide | 0.200669  | Inlier |
| siRNA Disorazole DMSO Run1   | NM_000669 | ADH1C | alcohol dehydrogenase 1C (class I), gamma polypeptide | 0.830081  | Inlier |
| siRNA-Vinblastine Run2-DMSO  | NM_000669 | ADH1C | alcohol dehydrogenase 1C (class I), gamma polypeptide | 1.185844  | Inlier |
| siRNA Disorazole DMSO Run3   | NM_000669 | ADH1C | alcohol dehydrogenase 1C (class I), gamma polypeptide | 1.621862  | Inlier |
| siRNA-Temozolomide Run3-DMSO | NM_000670 | ADH4  | alcohol dehydrogenase 4 (class II), pi polypeptide    | -1.500577 | Inlier |
| siRNA-Temozolomide Run2-DMSO | NM_000670 | ADH4  | alcohol dehydrogenase 4 (class II), pi polypeptide    | -0.655769 | Inlier |

Identification of Survival Genes in Human Glioblastoma Cells Using siRNA Screening

Nikhil G Thaker, Fang Zhang, Peter R. McDonald, Tong Ying Shun, Michael D Lewen, Ian F. Pollack, and John S. Lazo

Molecular Pharmacology

|                              |           |      |                                                      |           |        |
|------------------------------|-----------|------|------------------------------------------------------|-----------|--------|
| siRNA-Temozolomide Run1-DMSO | NM_000670 | ADH4 | alcohol dehydrogenase 4 (class II), pi polypeptide   | -0.499433 | Inlier |
| siRNA Disorazole DMSO Run1   | NM_000670 | ADH4 | alcohol dehydrogenase 4 (class II), pi polypeptide   | -0.190497 | Inlier |
| siRNA Disorazole DMSO Run3   | NM_000670 | ADH4 | alcohol dehydrogenase 4 (class II), pi polypeptide   | 0.190497  | Inlier |
| siRNA-Vinblastine Run1-DMSO  | NM_000670 | ADH4 | alcohol dehydrogenase 4 (class II), pi polypeptide   | 0.693231  | Inlier |
| siRNA-Vinblastine Run2-DMSO  | NM_000670 | ADH4 | alcohol dehydrogenase 4 (class II), pi polypeptide   | 1.227056  | Inlier |
| siRNA Disorazole DMSO Run2   | NM_000670 | ADH4 | alcohol dehydrogenase 5 (class III), chi polypeptide | 1.519653  | Inlier |
| siRNA-Temozolomide Run3-DMSO | NM_000671 | ADH5 | alcohol dehydrogenase 5 (class III), chi polypeptide | -3.493816 | Inlier |

Identification of Survival Genes in Human Glioblastoma Cells Using siRNA Screening  
 Nikhil G Thaker, Fang Zhang, Peter R. McDonald, Tong Ying Shun, Michael D Lewen, Ian F. Pollack, and John S. Lazo

Molecular Pharmacology

|                                  |               |       |                                                                          |           |        |
|----------------------------------|---------------|-------|--------------------------------------------------------------------------|-----------|--------|
| siRNA Disorazole DMSO Run2       | NM_0006<br>71 | ADH5  | alcohol<br>dehydroge<br>nase 5<br>(class III),<br>chi<br>polypeptid<br>e | -0.696985 | Inlier |
| siRNA Disorazole DMSO Run3       | NM_0006<br>71 | ADH5  | alcohol<br>dehydroge<br>nase 5<br>(class III),<br>chi<br>polypeptid<br>e | -0.447152 | Inlier |
| siRNA-Temozolomide Run2-<br>DMSO | NM_0006<br>71 | ADH5  | alcohol<br>dehydroge<br>nase 5<br>(class III),<br>chi<br>polypeptid<br>e | -0.439365 | Inlier |
| siRNA-Temozolomide Run1-<br>DMSO | NM_0006<br>71 | ADH5  | alcohol<br>dehydroge<br>nase 5<br>(class III),<br>chi<br>polypeptid<br>e | 0.439366  | Inlier |
| siRNA Disorazole DMSO Run1       | NM_0006<br>71 | ADH5  | alcohol<br>dehydroge<br>nase 5<br>(class III),<br>chi<br>polypeptid<br>e | 0.652015  | Inlier |
| siRNA-Vinblastine Run1-<br>DMSO  | NM_0006<br>71 | ADH5  | alcohol<br>dehydroge<br>nase 5<br>(class III),<br>chi<br>polypeptid<br>e | 0.99104   | Inlier |
| siRNA-Vinblastine Run2-<br>DMSO  | NM_0006<br>71 | ADH5  | alcohol<br>dehydroge<br>nase 5<br>(class III),<br>chi<br>polypeptid<br>e | 2.843676  | Inlier |
| siRNA-Temozolomide Run2-<br>DMSO | XM_20835<br>2 | ADH5B | alcohol<br>dehydroge<br>nase 5B                                          | -1.280912 | Inlier |

Identification of Survival Genes in Human Glioblastoma Cells Using siRNA Screening  
 Nikhil G Thaker, Fang Zhang, Peter R. McDonald, Tong Ying Shun, Michael D Lewen, Ian F. Pollack, and John S. Lazo

| Molecular Pharmacology       |               |       |                  | alcohol dehydrogenase 5B |        |
|------------------------------|---------------|-------|------------------|--------------------------|--------|
| siRNA-Temozolomide Run1-DMSO | XM_20835<br>2 | ADH5B | nase 5B          | -0.740561                | Inlier |
| siRNA-Temozolomide Run3-DMSO | XM_20835<br>2 | ADH5B | nase 5B          | -0.608438                | Inlier |
| siRNA Disorazole DMSO Run1   | XM_20835<br>2 | ADH5B | nase 5B          | -0.202614                | Inlier |
| siRNA-Vinblastine Run2-DMSO  | XM_20835<br>2 | ADH5B | nase 5B          | 0.202615                 | Inlier |
| siRNA-Vinblastine Run1-DMSO  | XM_20835<br>2 | ADH5B | nase 5B          | 0.217013                 | Inlier |
| siRNA Disorazole DMSO Run3   | XM_20835<br>2 | ADH5B | nase 5B          | 1.362661                 | Inlier |
| siRNA Disorazole DMSO Run2   | XM_20835<br>2 | ADH5B | nase 5B          | 2.080034                 | Inlier |
| siRNA-Temozolomide Run2-DMSO | NM_0006<br>72 | ADH6  | nase 6 (class V) | -0.676028                | Inlier |
| siRNA-Temozolomide Run3-DMSO | NM_0006<br>72 | ADH6  | nase 6 (class V) | -0.672972                | Inlier |
| siRNA Disorazole DMSO Run3   | NM_0006<br>72 | ADH6  | nase 6 (class V) | -0.671815                | Inlier |
| siRNA Disorazole DMSO Run2   | NM_0006<br>72 | ADH6  | nase 6 (class V) | -0.378152                | Inlier |
| siRNA-Temozolomide Run1-DMSO | NM_0006<br>72 | ADH6  | nase 6 (class V) | 0.378152                 | Inlier |
| siRNA Disorazole DMSO Run1   | NM_0006<br>72 | ADH6  | nase 6 (class V) | 0.692574                 | Inlier |
| siRNA-Vinblastine Run1-DMSO  | NM_0006<br>72 | ADH6  | nase 6 (class V) | 0.782266                 | Inlier |



Identification of Survival Genes in Human Glioblastoma Cells Using siRNA Screening

Nikhil G Thaker, Fang Zhang, Peter R. McDonald, Tong Ying Shun, Michael D Lewen, Ian F. Pollack, and John S. Lazo

Molecular Pharmacology

|                              |           |      |                                                             |           |        |
|------------------------------|-----------|------|-------------------------------------------------------------|-----------|--------|
| siRNA-Vinblastine Run2-DMSO  | NM_000672 | ADH6 | alcohol dehydrogenase 6 (class V)                           | 1.078606  | Inlier |
| siRNA-Temozolomide Run2-DMSO | NM_000673 | ADH7 | alcohol dehydrogenase 7 (class IV), mu or sigma polypeptide | -0.918516 | Inlier |
| siRNA-Temozolomide Run3-DMSO | NM_000673 | ADH7 | alcohol dehydrogenase 7 (class IV), mu or sigma polypeptide | -0.738992 | Inlier |
| siRNA Disorazole DMSO Run2   | NM_000673 | ADH7 | alcohol dehydrogenase 7 (class IV), mu or sigma polypeptide | -0.610008 | Inlier |
| siRNA Disorazole DMSO Run3   | NM_000673 | ADH7 | alcohol dehydrogenase 7 (class IV), mu or sigma polypeptide | -0.268482 | Inlier |
| siRNA Disorazole DMSO Run1   | NM_000673 | ADH7 | alcohol dehydrogenase 7 (class IV), mu or sigma polypeptide | 0.268482  | Inlier |
| siRNA-Temozolomide Run1-DMSO | NM_000673 | ADH7 | alcohol dehydrogenase 7 (class IV), mu or sigma polypeptide | 0.434368  | Inlier |

Identification of Survival Genes in Human Glioblastoma Cells Using siRNA Screening  
 Nikhil G Thaker, Fang Zhang, Peter R. McDonald, Tong Ying Shun, Michael D Lewen, Ian F. Pollack, and John S. Lazo

Molecular Pharmacology

|                              |           |        |                                                             |           |        |
|------------------------------|-----------|--------|-------------------------------------------------------------|-----------|--------|
| siRNA-Vinblastine Run1-DMSO  | NM_000673 | ADH7   | alcohol dehydrogenase 7 (class IV), mu or sigma polypeptide | 1.388247  | Inlier |
| siRNA-Vinblastine Run2-DMSO  | NM_000673 | ADH7   | alcohol dehydrogenase 7 (class IV), mu or sigma polypeptide | 1.732716  | Inlier |
| siRNA-Temozolomide Run3-DMSO | NM_144650 | ADHFE1 | alcohol dehydrogenase, iron containing, 1                   | -2.12346  | Inlier |
| siRNA-Temozolomide Run2-DMSO | NM_144650 | ADHFE1 | alcohol dehydrogenase, iron containing, 1                   | -0.992796 | Inlier |
| siRNA-Temozolomide Run1-DMSO | NM_144650 | ADHFE1 | alcohol dehydrogenase, iron containing, 1                   | -0.474269 | Inlier |
| siRNA Disorazole DMSO Run1   | NM_144650 | ADHFE1 | alcohol dehydrogenase, iron containing, 1                   | -0.14174  | Inlier |
| siRNA-Vinblastine Run1-DMSO  | NM_144650 | ADHFE1 | alcohol dehydrogenase, iron containing, 1                   | 0.141741  | Inlier |
| siRNA-Vinblastine Run2-DMSO  | NM_144650 | ADHFE1 | alcohol dehydrogenase, iron containing, 1                   | 0.479646  | Inlier |

Identification of Survival Genes in Human Glioblastoma Cells Using siRNA Screening  
 Nikhil G Thaker, Fang Zhang, Peter R. McDonald, Tong Ying Shun, Michael D Lewen, Ian F. Pollack, and John S. Lazo  
 Molecular Pharmacology

|                              |               |         |   |                                         |           |        |
|------------------------------|---------------|---------|---|-----------------------------------------|-----------|--------|
| siRNA Disorazole DMSO Run3   | NM_1446<br>50 | ADHFE1  | 1 | alcohol dehydrogenase, iron containing, | 0.869354  | Inlier |
| siRNA Disorazole DMSO Run2   | NM_1446<br>50 | ADHFE1  | 1 | alcohol dehydrogenase, iron containing, | 1.894605  | Inlier |
| siRNA-Temozolomide Run3-DMSO | NM_0159<br>99 | ADIPOR1 | 1 | adiponectin receptor                    | -1.505838 | Inlier |
| siRNA-Vinblastine Run2-DMSO  | NM_0159<br>99 | ADIPOR1 | 1 | adiponectin receptor                    | -0.761096 | Inlier |
| siRNA-Temozolomide Run1-DMSO | NM_0159<br>99 | ADIPOR1 | 1 | adiponectin receptor                    | -0.133814 | Inlier |
| siRNA Disorazole DMSO Run1   | NM_0159<br>99 | ADIPOR1 | 1 | adiponectin receptor                    | -0.045931 | Inlier |
| siRNA-Temozolomide Run2-DMSO | NM_0159<br>99 | ADIPOR1 | 1 | adiponectin receptor                    | 0.045932  | Inlier |
| siRNA Disorazole DMSO Run3   | NM_0159<br>99 | ADIPOR1 | 1 | adiponectin receptor                    | 0.587904  | Inlier |
| siRNA-Vinblastine Run1-DMSO  | NM_0159<br>99 | ADIPOR1 | 1 | adiponectin receptor                    | 1.678247  | Inlier |
| siRNA Disorazole DMSO Run2   | NM_0159<br>99 | ADIPOR1 | 1 | adiponectin receptor                    | 1.897256  | Inlier |
| siRNA-Vinblastine Run2-DMSO  | NM_0245<br>51 | ADIPOR2 | 2 | adiponectin receptor                    | -1.829967 | Inlier |
| siRNA-Temozolomide Run2-DMSO | NM_0245<br>51 | ADIPOR2 | 2 | adiponectin receptor                    | -0.905179 | Inlier |
| siRNA Disorazole DMSO Run3   | NM_0245<br>51 | ADIPOR2 | 2 | adiponectin receptor                    | -0.305275 | Inlier |
| siRNA-Temozolomide Run3-DMSO | NM_0245<br>51 | ADIPOR2 | 2 | adiponectin receptor                    | -0.165364 | Inlier |
| siRNA Disorazole DMSO Run1   | NM_0245<br>51 | ADIPOR2 | 2 | adiponectin receptor                    | 0.165364  | Inlier |

Identification of Survival Genes in Human Glioblastoma Cells Using siRNA Screening  
 Nikhil G Thaker, Fang Zhang, Peter R. McDonald, Tong Ying Shun, Michael D Lewen, Ian F. Pollack, and John S. Lazo

| Molecular Pharmacology       |               |         |                           |           |         |
|------------------------------|---------------|---------|---------------------------|-----------|---------|
| siRNA-Temozolomide Run1-DMSO | NM_0245<br>51 | ADIPOR2 | adiponectin receptor<br>2 | 0.443821  | Inlier  |
| siRNA Disorazole DMSO Run2   | NM_0245<br>51 | ADIPOR2 | adiponectin receptor<br>2 | 3.721748  | Outlier |
| siRNA-Vinblastine Run1-DMSO  | NM_0245<br>51 | ADIPOR2 | adiponectin receptor<br>2 | 3.867941  | Outlier |
| siRNA-Temozolomide Run3-DMSO | NM_0067<br>21 | ADK     | adenosine kinase          | -0.818189 | Inlier  |
| siRNA Disorazole DMSO Run2   | NM_0067<br>21 | ADK     | adenosine kinase          | -0.530811 | Inlier  |
| siRNA Disorazole DMSO Run3   | NM_0067<br>21 | ADK     | adenosine kinase          | -0.462399 | Inlier  |
| siRNA-Temozolomide Run1-DMSO | NM_0067<br>21 | ADK     | adenosine kinase          | -0.064157 | Inlier  |
| siRNA-Temozolomide Run2-DMSO | NM_0067<br>21 | ADK     | adenosine kinase          | 0.064157  | Inlier  |
| siRNA Disorazole DMSO Run1   | NM_0067<br>21 | ADK     | adenosine kinase          | 0.832366  | Inlier  |
| siRNA-Vinblastine Run1-DMSO  | NM_0067<br>21 | ADK     | adenosine kinase          | 1.510928  | Inlier  |
| siRNA-Vinblastine Run2-DMSO  | NM_0067<br>21 | ADK     | adenosine kinase          | 1.625426  | Inlier  |
| siRNA-Temozolomide Run1-DMSO | NM_0072<br>64 | ADMR    | adrenomedullin receptor   | -0.968604 | Inlier  |
| siRNA Disorazole DMSO Run2   | NM_0072<br>64 | ADMR    | adrenomedullin receptor   | -0.782525 | Inlier  |
| siRNA-Temozolomide Run3-DMSO | NM_0072<br>64 | ADMR    | adrenomedullin receptor   | -0.566475 | Inlier  |
| siRNA-Temozolomide Run2-DMSO | NM_0072<br>64 | ADMR    | adrenomedullin receptor   | -0.33303  | Inlier  |
| siRNA Disorazole DMSO Run3   | NM_0072<br>64 | ADMR    | adrenomedullin receptor   | 0.33303   | Inlier  |
| siRNA Disorazole DMSO Run1   | NM_0072<br>64 | ADMR    | adrenomedullin receptor   | 0.509274  | Inlier  |
| siRNA-Vinblastine Run1-DMSO  | NM_0072<br>64 | ADMR    | adrenomedullin receptor   | 0.915492  | Inlier  |
| siRNA-Vinblastine Run2-DMSO  | NM_0072<br>64 | ADMR    | adrenomedullin receptor   | 1.127044  | Inlier  |
| siRNA-Temozolomide Run3-DMSO | NM_0006<br>74 | ADORA1  | adenosine A1 receptor     | -0.779608 | Inlier  |

Identification of Survival Genes in Human Glioblastoma Cells Using siRNA Screening  
 Nikhil G Thaker, Fang Zhang, Peter R. McDonald, Tong Ying Shun, Michael D Lewen, Ian F. Pollack, and John S. Lazo

| Molecular Pharmacology       |               |         |          | adenosine     |                  |
|------------------------------|---------------|---------|----------|---------------|------------------|
| siRNA-Temozolomide Run2-DMSO | NM_0006<br>74 | ADORA1  | receptor | adenosine A1  | -0.685525 Inlier |
| siRNA-Temozolomide Run1-DMSO | NM_0006<br>74 | ADORA1  | receptor | adenosine A1  | -0.453075 Inlier |
| siRNA Disorazole DMSO Run2   | NM_0006<br>74 | ADORA1  | receptor | adenosine A1  | -0.273613 Inlier |
| siRNA Disorazole DMSO Run1   | NM_0006<br>74 | ADORA1  | receptor | adenosine A1  | 0.273613 Inlier  |
| siRNA Disorazole DMSO Run3   | NM_0006<br>74 | ADORA1  | receptor | adenosine A1  | 0.663475 Inlier  |
| siRNA-Vinblastine Run2-DMSO  | NM_0006<br>74 | ADORA1  | receptor | adenosine A1  | 1.159375 Inlier  |
| siRNA-Vinblastine Run1-DMSO  | NM_0006<br>74 | ADORA1  | receptor | adenosine A1  | 1.172069 Inlier  |
| siRNA-Temozolomide Run1-DMSO | NM_0006<br>75 | ADORA2A | receptor | adenosine A2a | -0.832233 Inlier |
| siRNA Disorazole DMSO Run2   | NM_0006<br>75 | ADORA2A | receptor | adenosine A2a | -0.740434 Inlier |
| siRNA-Temozolomide Run3-DMSO | NM_0006<br>75 | ADORA2A | receptor | adenosine A2a | -0.608566 Inlier |
| siRNA Disorazole DMSO Run1   | NM_0006<br>75 | ADORA2A | receptor | adenosine A2a | -0.081513 Inlier |
| siRNA-Temozolomide Run2-DMSO | NM_0006<br>75 | ADORA2A | receptor | adenosine A2a | 0.081512 Inlier  |
| siRNA Disorazole DMSO Run3   | NM_0006<br>75 | ADORA2A | receptor | adenosine A2a | 0.306812 Inlier  |
| siRNA-Vinblastine Run2-DMSO  | NM_0006<br>75 | ADORA2A | receptor | adenosine A2a | 0.824827 Inlier  |
| siRNA-Vinblastine Run1-DMSO  | NM_0006<br>75 | ADORA2A | receptor | adenosine A2a | 0.990473 Inlier  |
| siRNA-Temozolomide Run3-DMSO | NM_0006<br>76 | ADORA2B | receptor | adenosine A2b | -0.864284 Inlier |
| siRNA Disorazole DMSO Run2   | NM_0006<br>76 | ADORA2B | receptor | adenosine A2b | -0.484716 Inlier |

Identification of Survival Genes in Human Glioblastoma Cells Using siRNA Screening  
 Nikhil G Thaker, Fang Zhang, Peter R. McDonald, Tong Ying Shun, Michael D Lewen, Ian F. Pollack, and John S. Lazo

| Molecular Pharmacology       |               |         |                                          |           |        |
|------------------------------|---------------|---------|------------------------------------------|-----------|--------|
| siRNA-Temozolomide Run2-DMSO | NM_0006<br>76 | ADORA2B | adenosine<br>A2b<br>receptor             | -0.346974 | Inlier |
| siRNA Disorazole DMSO Run1   | NM_0006<br>76 | ADORA2B | adenosine<br>A2b<br>receptor             | -0.038211 | Inlier |
| siRNA-Temozolomide Run1-DMSO | NM_0006<br>76 | ADORA2B | adenosine<br>A2b<br>receptor             | 0.038211  | Inlier |
| siRNA-Vinblastine Run1-DMSO  | NM_0006<br>76 | ADORA2B | adenosine<br>A2b<br>receptor             | 1.691679  | Inlier |
| siRNA-Vinblastine Run2-DMSO  | NM_0006<br>76 | ADORA2B | adenosine<br>A2b<br>receptor             | 1.733773  | Inlier |
| siRNA Disorazole DMSO Run3   | NM_0006<br>76 | ADORA2B | adenosine<br>A2b<br>receptor             | 1.806397  | Inlier |
| siRNA Disorazole DMSO Run2   | NM_0206<br>83 | ADORA3  | adenosine<br>A3<br>receptor              | -0.85466  | Inlier |
| siRNA-Temozolomide Run3-DMSO | NM_0206<br>83 | ADORA3  | adenosine<br>A3<br>receptor              | -0.78306  | Inlier |
| siRNA-Temozolomide Run1-DMSO | NM_0206<br>83 | ADORA3  | adenosine<br>A3<br>receptor              | -0.354935 | Inlier |
| siRNA-Temozolomide Run2-DMSO | NM_0206<br>83 | ADORA3  | adenosine<br>A3<br>receptor              | -0.136989 | Inlier |
| siRNA Disorazole DMSO Run3   | NM_0206<br>83 | ADORA3  | adenosine<br>A3<br>receptor              | 0.136989  | Inlier |
| siRNA Disorazole DMSO Run1   | NM_0206<br>83 | ADORA3  | adenosine<br>A3<br>receptor              | 0.56594   | Inlier |
| siRNA-Vinblastine Run1-DMSO  | NM_0206<br>83 | ADORA3  | adenosine<br>A3<br>receptor              | 1.385621  | Inlier |
| siRNA-Vinblastine Run2-DMSO  | NM_0206<br>83 | ADORA3  | adenosine<br>A3<br>receptor              | 1.959434  | Inlier |
| siRNA-Temozolomide Run2-DMSO | NM_0011<br>25 | ADPRH   | ADP-<br>ribosylargi<br>nine<br>hydrolase | -1.701353 | Inlier |
| siRNA-Temozolomide Run3-DMSO | NM_0011<br>25 | ADPRH   | ADP-<br>ribosylargi<br>nine<br>hydrolase | -1.409846 | Inlier |

Identification of Survival Genes in Human Glioblastoma Cells Using siRNA Screening  
 Nikhil G Thaker, Fang Zhang, Peter R. McDonald, Tong Ying Shun, Michael D Lewen, Ian F. Pollack, and John S. Lazo

Molecular Pharmacology

|                                  |               |         |                                          |           |        |
|----------------------------------|---------------|---------|------------------------------------------|-----------|--------|
| siRNA Disorazole DMSO Run1       | NM_0011<br>25 | ADPRH   | ADP-<br>ribosylargi<br>nine<br>hydrolase | -0.297537 | Inlier |
| siRNA-Temozolomide Run1-<br>DMSO | NM_0011<br>25 | ADPRH   | ADP-<br>ribosylargi<br>nine<br>hydrolase | -0.026809 | Inlier |
| siRNA-Vinblastine Run2-<br>DMSO  | NM_0011<br>25 | ADPRH   | ADP-<br>ribosylargi<br>nine<br>hydrolase | 0.026809  | Inlier |
| siRNA Disorazole DMSO Run3       | NM_0011<br>25 | ADPRH   | ADP-<br>ribosylargi<br>nine<br>hydrolase | 0.269468  | Inlier |
| siRNA-Vinblastine Run1-<br>DMSO  | NM_0011<br>25 | ADPRH   | ADP-<br>ribosylargi<br>nine<br>hydrolase | 1.051463  | Inlier |
| siRNA Disorazole DMSO Run2       | NM_0011<br>25 | ADPRH   | ADP-<br>ribosylargi<br>nine<br>hydrolase | 2.143912  | Inlier |
| siRNA Disorazole DMSO Run1       | NM_1991<br>62 | ADPRHL1 | ADP-<br>ribosylhydr<br>olase like<br>1   | -1.36279  | Inlier |
| siRNA-Temozolomide Run1-<br>DMSO | NM_1991<br>62 | ADPRHL1 | ADP-<br>ribosylhydr<br>olase like<br>1   | -0.868895 | Inlier |
| siRNA-Temozolomide Run2-<br>DMSO | NM_1991<br>62 | ADPRHL1 | ADP-<br>ribosylhydr<br>olase like<br>1   | -0.29549  | Inlier |
| siRNA-Temozolomide Run3-<br>DMSO | NM_1991<br>62 | ADPRHL1 | ADP-<br>ribosylhydr<br>olase like<br>1   | -0.148981 | Inlier |
| siRNA-Vinblastine Run2-<br>DMSO  | NM_1991<br>62 | ADPRHL1 | ADP-<br>ribosylhydr<br>olase like<br>1   | 0.14898   | Inlier |
| siRNA Disorazole DMSO Run3       | NM_1991<br>62 | ADPRHL1 | ADP-<br>ribosylhydr<br>olase like<br>1   | 0.480105  | Inlier |
| siRNA Disorazole DMSO Run2       | NM_1991<br>62 | ADPRHL1 | ADP-<br>ribosylhydr<br>olase like<br>1   | 3.17229   | Inlier |

Identification of Survival Genes in Human Glioblastoma Cells Using siRNA Screening  
 Nikhil G Thaker, Fang Zhang, Peter R. McDonald, Tong Ying Shun, Michael D Lewen, Ian F. Pollack, and John S. Lazo

Molecular Pharmacology

| siRNA Treatment              | Gene ID   | Gene Name | Gene Description                | Log Fold Change | Outlier Status |
|------------------------------|-----------|-----------|---------------------------------|-----------------|----------------|
| siRNA-Vinblastine Run1-DMSO  | NM_199162 | ADPRHL1   | ADP-ribosylhydrolase like       | 3.24978         | Inlier         |
| siRNA-Temozolomide Run3-DMSO | NM_033302 | ADRA1A    | adrenergic, alpha-1A-, receptor | -0.830629       | Inlier         |
| siRNA Disorazole DMSO Run2   | NM_033302 | ADRA1A    | adrenergic, alpha-1A-, receptor | -0.788465       | Inlier         |
| siRNA Disorazole DMSO Run3   | NM_033302 | ADRA1A    | adrenergic, alpha-1A-, receptor | -0.093261       | Inlier         |
| siRNA-Temozolomide Run1-DMSO | NM_033302 | ADRA1A    | adrenergic, alpha-1A-, receptor | -0.04418        | Inlier         |
| siRNA-Temozolomide Run2-DMSO | NM_033302 | ADRA1A    | adrenergic, alpha-1A-, receptor | 0.04418         | Inlier         |
| siRNA Disorazole DMSO Run1   | NM_033302 | ADRA1A    | adrenergic, alpha-1A-, receptor | 0.560535        | Inlier         |
| siRNA-Vinblastine Run1-DMSO  | NM_033302 | ADRA1A    | adrenergic, alpha-1A-, receptor | 0.795179        | Inlier         |
| siRNA-Vinblastine Run2-DMSO  | NM_033302 | ADRA1A    | adrenergic, alpha-1A-, receptor | 1.129036        | Inlier         |
| siRNA Disorazole DMSO Run2   | NM_000679 | ADRA1B    | adrenergic, alpha-1B-, receptor | -3.965173       | Outlier        |
| siRNA-Temozolomide Run3-DMSO | NM_000679 | ADRA1B    | adrenergic, alpha-1B-, receptor | -0.93689        | Inlier         |
| siRNA-Temozolomide Run1-DMSO | NM_000679 | ADRA1B    | adrenergic, alpha-1B-, receptor | -0.780434       | Inlier         |
| siRNA-Temozolomide Run2-DMSO | NM_000679 | ADRA1B    | adrenergic, alpha-1B-, receptor | -0.110811       | Inlier         |



Identification of Survival Genes in Human Glioblastoma Cells Using siRNA Screening  
 Nikhil G Thaker, Fang Zhang, Peter R. McDonald, Tong Ying Shun, Michael D Lewen, Ian F. Pollack, and John S. Lazo

Molecular Pharmacology

|                              |           |        |                                   |           |        |
|------------------------------|-----------|--------|-----------------------------------|-----------|--------|
| siRNA-Vinblastine Run1-DMSO  | NM_000679 | ADRA1B | adrenergic , alpha-1B- , receptor | 0.110811  | Inlier |
| siRNA Disorazole DMSO Run1   | NM_000679 | ADRA1B | adrenergic , alpha-1B- , receptor | 0.235425  | Inlier |
| siRNA Disorazole DMSO Run3   | NM_000679 | ADRA1B | adrenergic , alpha-1B- , receptor | 0.637753  | Inlier |
| siRNA-Vinblastine Run2-DMSO  | NM_000679 | ADRA1B | adrenergic , alpha-1B- , receptor | 0.711247  | Inlier |
| siRNA-Temozolomide Run3-DMSO | NM_000678 | ADRA1D | adrenergic , alpha-1D- , receptor | -1.791965 | Inlier |
| siRNA Disorazole DMSO Run2   | NM_000678 | ADRA1D | adrenergic , alpha-1D- , receptor | -0.795489 | Inlier |
| siRNA Disorazole DMSO Run1   | NM_000678 | ADRA1D | adrenergic , alpha-1D- , receptor | -0.379877 | Inlier |
| siRNA-Temozolomide Run2-DMSO | NM_000678 | ADRA1D | adrenergic , alpha-1D- , receptor | -0.231969 | Inlier |
| siRNA-Temozolomide Run1-DMSO | NM_000678 | ADRA1D | adrenergic , alpha-1D- , receptor | 0.231969  | Inlier |
| siRNA Disorazole DMSO Run3   | NM_000678 | ADRA1D | adrenergic , alpha-1D- , receptor | 0.553511  | Inlier |
| siRNA-Vinblastine Run1-DMSO  | NM_000678 | ADRA1D | adrenergic , alpha-1D- , receptor | 1.150146  | Inlier |
| siRNA-Vinblastine Run2-DMSO  | NM_000678 | ADRA1D | adrenergic , alpha-1D- , receptor | 1.631489  | Inlier |
| siRNA-Temozolomide Run3-DMSO | NM_000681 | ADRA2A | adrenergic , alpha-2A- , receptor | -1.336981 | Inlier |

Identification of Survival Genes in Human Glioblastoma Cells Using siRNA Screening  
 Nikhil G Thaker, Fang Zhang, Peter R. McDonald, Tong Ying Shun, Michael D Lewen, Ian F. Pollack, and John S. Lazo  
 Molecular Pharmacology

|                                  |               |        |                                         |           |        |
|----------------------------------|---------------|--------|-----------------------------------------|-----------|--------|
| siRNA Disorazole DMSO Run2       | NM_0006<br>81 | ADRA2A | adrenergic<br>, alpha-2A-<br>, receptor | -1.232742 | Inlier |
| siRNA-Temozolomide Run1-<br>DMSO | NM_0006<br>81 | ADRA2A | adrenergic<br>, alpha-2A-<br>, receptor | -0.080169 | Inlier |
| siRNA Disorazole DMSO Run1       | NM_0006<br>81 | ADRA2A | adrenergic<br>, alpha-2A-<br>, receptor | -0.0142   | Inlier |
| siRNA-Temozolomide Run2-<br>DMSO | NM_0006<br>81 | ADRA2A | adrenergic<br>, alpha-2A-<br>, receptor | 0.014201  | Inlier |
| siRNA Disorazole DMSO Run3       | NM_0006<br>81 | ADRA2A | adrenergic<br>, alpha-2A-<br>, receptor | 0.445427  | Inlier |
| siRNA-Vinblastine Run1-<br>DMSO  | NM_0006<br>81 | ADRA2A | adrenergic<br>, alpha-2A-<br>, receptor | 0.903573  | Inlier |
| siRNA-Vinblastine Run2-<br>DMSO  | NM_0006<br>81 | ADRA2A | adrenergic<br>, alpha-2A-<br>, receptor | 1.232679  | Inlier |
| siRNA-Temozolomide Run3-<br>DMSO | NM_0006<br>82 | ADRA2B | adrenergic<br>, alpha-2B-<br>, receptor | -0.994169 | Inlier |
| siRNA Disorazole DMSO Run2       | NM_0006<br>82 | ADRA2B | adrenergic<br>, alpha-2B-<br>, receptor | -0.793209 | Inlier |
| siRNA Disorazole DMSO Run1       | NM_0006<br>82 | ADRA2B | adrenergic<br>, alpha-2B-<br>, receptor | -0.651301 | Inlier |
| siRNA-Temozolomide Run2-<br>DMSO | NM_0006<br>82 | ADRA2B | adrenergic<br>, alpha-2B-<br>, receptor | -0.143516 | Inlier |
| siRNA-Temozolomide Run1-<br>DMSO | NM_0006<br>82 | ADRA2B | adrenergic<br>, alpha-2B-<br>, receptor | 0.143516  | Inlier |
| siRNA-Vinblastine Run1-<br>DMSO  | NM_0006<br>82 | ADRA2B | adrenergic<br>, alpha-2B-<br>, receptor | 0.511741  | Inlier |

Identification of Survival Genes in Human Glioblastoma Cells Using siRNA Screening  
 Nikhil G Thaker, Fang Zhang, Peter R. McDonald, Tong Ying Shun, Michael D Lewen, Ian F. Pollack, and John S. Lazo  
 Molecular Pharmacology

|                              |               |        |                                         |           |        |
|------------------------------|---------------|--------|-----------------------------------------|-----------|--------|
| siRNA Disorazole DMSO Run3   | NM_0006<br>82 | ADRA2B | adrenergic<br>, alpha-2B-<br>, receptor | 0.697699  | Inlier |
| siRNA-Vinblastine Run2-DMSO  | NM_0006<br>82 | ADRA2B | adrenergic<br>, alpha-2B-<br>, receptor | 1.059878  | Inlier |
| siRNA Disorazole DMSO Run1   | NM_0006<br>83 | ADRA2C | adrenergic<br>, alpha-2C-<br>, receptor | -0.990341 | Inlier |
| siRNA Disorazole DMSO Run2   | NM_0006<br>83 | ADRA2C | adrenergic<br>, alpha-2C-<br>, receptor | -0.978091 | Inlier |
| siRNA-Temozolomide Run3-DMSO | NM_0006<br>83 | ADRA2C | adrenergic<br>, alpha-2C-<br>, receptor | -0.370909 | Inlier |
| siRNA-Temozolomide Run2-DMSO | NM_0006<br>83 | ADRA2C | adrenergic<br>, alpha-2C-<br>, receptor | -0.017123 | Inlier |
| siRNA-Temozolomide Run1-DMSO | NM_0006<br>83 | ADRA2C | adrenergic<br>, alpha-2C-<br>, receptor | 0.017123  | Inlier |
| siRNA Disorazole DMSO Run3   | NM_0006<br>83 | ADRA2C | adrenergic<br>, alpha-2C-<br>, receptor | 0.172669  | Inlier |
| siRNA-Vinblastine Run1-DMSO  | NM_0006<br>83 | ADRA2C | adrenergic<br>, alpha-2C-<br>, receptor | 1.15837   | Inlier |
| siRNA-Vinblastine Run2-DMSO  | NM_0006<br>83 | ADRA2C | adrenergic<br>, alpha-2C-<br>, receptor | 1.446047  | Inlier |
| siRNA Disorazole DMSO Run2   | NM_0006<br>84 | ADRB1  | adrenergic<br>, beta-1-,<br>receptor    | -2.722863 | Inlier |
| siRNA Disorazole DMSO Run3   | NM_0006<br>84 | ADRB1  | adrenergic<br>, beta-1-,<br>receptor    | -1.205965 | Inlier |
| siRNA-Temozolomide Run2-DMSO | NM_0006<br>84 | ADRB1  | adrenergic<br>, beta-1-,<br>receptor    | -0.396122 | Inlier |
| siRNA-Temozolomide Run1-DMSO | NM_0006<br>84 | ADRB1  | adrenergic<br>, beta-1-,<br>receptor    | -0.189781 | Inlier |

Identification of Survival Genes in Human Glioblastoma Cells Using siRNA Screening  
 Nikhil G Thaker, Fang Zhang, Peter R. McDonald, Tong Ying Shun, Michael D Lewen, Ian F. Pollack, and John S. Lazo

Molecular Pharmacology

| siRNA Treatment              | Gene    | Gene ID | Gene Name | Gene Description                       | Value     | Category |
|------------------------------|---------|---------|-----------|----------------------------------------|-----------|----------|
| siRNA Disorazole DMSO Run1   | NM_0006 | 84      | ADRB1     | adrenergic, beta-1-, receptor          | 0.189782  | Inlier   |
| siRNA-Temozolomide Run3-DMSO | NM_0006 | 84      | ADRB1     | adrenergic, beta-1-, receptor          | 0.395866  | Inlier   |
| siRNA-Vinblastine Run2-DMSO  | NM_0006 | 84      | ADRB1     | adrenergic, beta-1-, receptor          | 0.952878  | Inlier   |
| siRNA-Vinblastine Run1-DMSO  | NM_0006 | 84      | ADRB1     | adrenergic, beta-1-, receptor          | 1.315737  | Inlier   |
| siRNA Disorazole DMSO Run2   | NM_0000 | 24      | ADRB2     | adrenergic, beta-2-, receptor, surface | -6.150169 | Outlier  |
| siRNA Disorazole DMSO Run1   | NM_0000 | 24      | ADRB2     | adrenergic, beta-2-, receptor, surface | -0.701835 | Inlier   |
| siRNA-Temozolomide Run1-DMSO | NM_0000 | 24      | ADRB2     | adrenergic, beta-2-, receptor, surface | -0.647165 | Inlier   |
| siRNA Disorazole DMSO Run3   | NM_0000 | 24      | ADRB2     | adrenergic, beta-2-, receptor, surface | -0.112424 | Inlier   |
| siRNA-Temozolomide Run3-DMSO | NM_0000 | 24      | ADRB2     | adrenergic, beta-2-, receptor, surface | 0.112426  | Inlier   |
| siRNA-Temozolomide Run2-DMSO | NM_0000 | 24      | ADRB2     | adrenergic, beta-2-, receptor, surface | 0.491491  | Inlier   |
| siRNA-Vinblastine Run2-DMSO  | NM_0000 | 24      | ADRB2     | adrenergic, beta-2-, receptor, surface | 7.831816  | Outlier  |
| siRNA-Vinblastine Run1-DMSO  | NM_0000 | 24      | ADRB2     | adrenergic, beta-2-, receptor, surface | 8.862352  | Outlier  |
| siRNA-Temozolomide Run3-DMSO | NM_0000 | 25      | ADRB3     | adrenergic, beta-3-, receptor          | -1.126809 | Inlier   |
| siRNA-Temozolomide Run1-DMSO | NM_0000 | 25      | ADRB3     | adrenergic, beta-3-, receptor          | -0.868268 | Inlier   |

Identification of Survival Genes in Human Glioblastoma Cells Using siRNA Screening  
 Nikhil G Thaker, Fang Zhang, Peter R. McDonald, Tong Ying Shun, Michael D Lewen, Ian F. Pollack, and John S. Lazo

Molecular Pharmacology

| siRNA                        | Gene   | Accession | Gene                                 | Value     | Category |
|------------------------------|--------|-----------|--------------------------------------|-----------|----------|
| siRNA Disorazole DMSO Run1   | ADRB3  | NM_000025 | adrenergic , beta-3-, receptor       | -0.169078 | Inlier   |
| siRNA Disorazole DMSO Run2   | ADRB3  | NM_000025 | adrenergic , beta-3-, receptor       | -0.122744 | Inlier   |
| siRNA Disorazole DMSO Run3   | ADRB3  | NM_000025 | adrenergic , beta-3-, receptor       | 0.122744  | Inlier   |
| siRNA-Temozolomide Run2-DMSO | ADRB3  | NM_000025 | adrenergic , beta-3-, receptor       | 0.480732  | Inlier   |
| siRNA-Vinblastine Run2-DMSO  | ADRB3  | NM_000025 | adrenergic , beta-3-, receptor       | 1.462394  | Inlier   |
| siRNA-Vinblastine Run1-DMSO  | ADRB3  | NM_000025 | adrenergic , beta-3-, receptor       | 2.146661  | Inlier   |
| siRNA-Temozolomide Run3-DMSO | ADRBK1 | NM_001619 | adrenergic , beta, receptor kinase 1 | -0.890359 | Inlier   |
| siRNA Disorazole DMSO Run2   | ADRBK1 | NM_001619 | adrenergic , beta, receptor kinase 1 | -0.458641 | Inlier   |
| siRNA Disorazole DMSO Run3   | ADRBK1 | NM_001619 | adrenergic , beta, receptor kinase 1 | -0.324673 | Inlier   |
| siRNA-Temozolomide Run2-DMSO | ADRBK1 | NM_001619 | adrenergic , beta, receptor kinase 1 | -0.050232 | Inlier   |
| siRNA-Temozolomide Run1-DMSO | ADRBK1 | NM_001619 | adrenergic , beta, receptor kinase 1 | 0.050232  | Inlier   |
| siRNA Disorazole DMSO Run1   | ADRBK1 | NM_001619 | adrenergic , beta, receptor kinase 1 | 1.746969  | Inlier   |
| siRNA-Vinblastine Run1-DMSO  | ADRBK1 | NM_001619 | adrenergic , beta, receptor kinase 1 | 2.143608  | Inlier   |
| siRNA-Vinblastine Run2-DMSO  | ADRBK1 | NM_001619 | adrenergic , beta, receptor kinase 1 | 2.425923  | Inlier   |

Identification of Survival Genes in Human Glioblastoma Cells Using siRNA Screening  
 Nikhil G Thaker, Fang Zhang, Peter R. McDonald, Tong Ying Shun, Michael D Lewen, Ian F. Pollack, and John S. Lazo

Molecular Pharmacology

|                              |               |        |                                               |           |        |
|------------------------------|---------------|--------|-----------------------------------------------|-----------|--------|
| siRNA-Temozolomide Run1-DMSO | NM_0051<br>60 | ADRBK2 | adrenergic<br>, beta,<br>receptor<br>kinase 2 | -0.861698 | Inlier |
| siRNA Disorazole DMSO Run2   | NM_0051<br>60 | ADRBK2 | adrenergic<br>, beta,<br>receptor<br>kinase 2 | -0.487302 | Inlier |
| siRNA Disorazole DMSO Run3   | NM_0051<br>60 | ADRBK2 | adrenergic<br>, beta,<br>receptor<br>kinase 2 | -0.445788 | Inlier |
| siRNA-Temozolomide Run3-DMSO | NM_0051<br>60 | ADRBK2 | adrenergic<br>, beta,<br>receptor<br>kinase 2 | -0.185414 | Inlier |
| siRNA-Temozolomide Run2-DMSO | NM_0051<br>60 | ADRBK2 | adrenergic<br>, beta,<br>receptor<br>kinase 2 | 0.185415  | Inlier |
| siRNA Disorazole DMSO Run1   | NM_0051<br>60 | ADRBK2 | adrenergic<br>, beta,<br>receptor<br>kinase 2 | 2.059396  | Inlier |
| siRNA-Vinblastine Run2-DMSO  | NM_0051<br>60 | ADRBK2 | adrenergic<br>, beta,<br>receptor<br>kinase 2 | 2.885689  | Inlier |
| siRNA-Vinblastine Run1-DMSO  | NM_0051<br>60 | ADRBK2 | adrenergic<br>, beta,<br>receptor<br>kinase 2 | 3.238241  | Inlier |
| siRNA-Temozolomide Run2-DMSO | NM_0000<br>26 | ADSL   | adenylosu<br>ccinate<br>lyase                 | -0.706926 | Inlier |
| siRNA-Temozolomide Run3-DMSO | NM_0000<br>26 | ADSL   | adenylosu<br>ccinate<br>lyase                 | -0.642074 | Inlier |
| siRNA-Temozolomide Run1-DMSO | NM_0000<br>26 | ADSL   | adenylosu<br>ccinate<br>lyase                 | -0.416227 | Inlier |
| siRNA Disorazole DMSO Run3   | NM_0000<br>26 | ADSL   | adenylosu<br>ccinate<br>lyase                 | -0.178149 | Inlier |
| siRNA Disorazole DMSO Run1   | NM_0000<br>26 | ADSL   | adenylosu<br>ccinate<br>lyase                 | 0.178149  | Inlier |
| siRNA-Vinblastine Run2-DMSO  | NM_0000<br>26 | ADSL   | adenylosu<br>ccinate<br>lyase                 | 0.8052    | Inlier |

Identification of Survival Genes in Human Glioblastoma Cells Using siRNA Screening  
 Nikhil G Thaker, Fang Zhang, Peter R. McDonald, Tong Ying Shun, Michael D Lewen, Ian F. Pollack, and John S. Lazo

| Molecular Pharmacology       | Gene ID   | Gene Name | Gene Description                 | Log Fold Change | Outlier Status |
|------------------------------|-----------|-----------|----------------------------------|-----------------|----------------|
| siRNA-Vinblastine Run1-DMSO  | NM_000026 | ADSL      | adenylosuccinate lyase           | 1.400191        | Inlier         |
| siRNA Disorazole DMSO Run2   | NM_000026 | ADSL      | adenylosuccinate lyase           | 1.69484         | Inlier         |
| siRNA Disorazole DMSO Run3   | NM_001126 | ADSS      | adenylosuccinate synthase        | -1.490709       | Inlier         |
| siRNA Disorazole DMSO Run1   | NM_001126 | ADSS      | adenylosuccinate synthase        | -1.165771       | Inlier         |
| siRNA-Temozolomide Run2-DMSO | NM_001126 | ADSS      | adenylosuccinate synthase        | -0.183229       | Inlier         |
| siRNA-Temozolomide Run1-DMSO | NM_001126 | ADSS      | adenylosuccinate synthase        | -0.036872       | Inlier         |
| siRNA-Temozolomide Run3-DMSO | NM_001126 | ADSS      | adenylosuccinate synthase        | 0.036872        | Inlier         |
| siRNA-Vinblastine Run2-DMSO  | NM_001126 | ADSS      | adenylosuccinate synthase        | 0.053085        | Inlier         |
| siRNA Disorazole DMSO Run2   | NM_001126 | ADSS      | adenylosuccinate synthase        | 2.520876        | Inlier         |
| siRNA-Vinblastine Run1-DMSO  | NM_001126 | ADSS      | adenylosuccinate synthase        | 2.723224        | Inlier         |
| siRNA-Temozolomide Run2-DMSO | NM_199165 | ADSSL1    | adenylosuccinate synthase like 1 | -1.19828        | Inlier         |
| siRNA Disorazole DMSO Run1   | NM_199165 | ADSSL1    | adenylosuccinate synthase like 1 | -0.929142       | Inlier         |
| siRNA-Temozolomide Run3-DMSO | NM_199165 | ADSSL1    | adenylosuccinate synthase like 1 | -0.419858       | Inlier         |
| siRNA-Temozolomide Run1-DMSO | NM_199165 | ADSSL1    | adenylosuccinate synthase like 1 | -0.25835        | Inlier         |
| siRNA Disorazole DMSO Run3   | NM_199165 | ADSSL1    | adenylosuccinate synthase like 1 | 0.258349        | Inlier         |

Identification of Survival Genes in Human Glioblastoma Cells Using siRNA Screening  
 Nikhil G Thaker, Fang Zhang, Peter R. McDonald, Tong Ying Shun, Michael D Lewen, Ian F. Pollack, and John S. Lazo

Molecular Pharmacology

|                              |               |        |                                  |           |        |
|------------------------------|---------------|--------|----------------------------------|-----------|--------|
| siRNA-Vinblastine Run2-DMSO  | NM_1991<br>65 | ADSSL1 | adenylosuccinate synthase like 1 | 0.300359  | Inlier |
| siRNA Disorazole DMSO Run2   | NM_1991<br>65 | ADSSL1 | adenylosuccinate synthase like 1 | 0.959959  | Inlier |
| siRNA-Vinblastine Run1-DMSO  | NM_1991<br>65 | ADSSL1 | adenylosuccinate synthase like 1 | 1.080287  | Inlier |
| siRNA Disorazole DMSO Run1   | NM_0011<br>29 | AEBP1  | AE binding protein 1             | -1.446922 | Inlier |
| siRNA-Temozolomide Run3-DMSO | NM_0011<br>29 | AEBP1  | AE binding protein 1             | -1.421752 | Inlier |
| siRNA-Temozolomide Run2-DMSO | NM_0011<br>29 | AEBP1  | AE binding protein 1             | -0.876821 | Inlier |
| siRNA Disorazole DMSO Run2   | NM_0011<br>29 | AEBP1  | AE binding protein 1             | -0.077245 | Inlier |
| siRNA-Temozolomide Run1-DMSO | NM_0011<br>29 | AEBP1  | AE binding protein 1             | 0.077245  | Inlier |
| siRNA-Vinblastine Run2-DMSO  | NM_0011<br>29 | AEBP1  | AE binding protein 1             | 0.215626  | Inlier |
| siRNA-Vinblastine Run1-DMSO  | NM_0011<br>29 | AEBP1  | AE binding protein 1             | 0.472179  | Inlier |
| siRNA Disorazole DMSO Run3   | NM_0011<br>29 | AEBP1  | AE binding protein 1             | 1.436193  | Inlier |
| siRNA-Temozolomide Run3-DMSO | NM_2012<br>52 | AFAR3  | AFAR3                            | -2.214432 | Inlier |
| siRNA-Temozolomide Run2-DMSO | NM_2012<br>52 | AFAR3  | AFAR3                            | -1.32686  | Inlier |
| siRNA Disorazole DMSO Run1   | NM_2012<br>52 | AFAR3  | AFAR3                            | -0.83848  | Inlier |
| siRNA Disorazole DMSO Run3   | NM_2012<br>52 | AFAR3  | AFAR3                            | -0.093155 | Inlier |
| siRNA-Temozolomide Run1-DMSO | NM_2012<br>52 | AFAR3  | AFAR3                            | 0.093155  | Inlier |
| siRNA Disorazole DMSO Run2   | NM_2012<br>52 | AFAR3  | AFAR3                            | 0.34841   | Inlier |
| siRNA-Vinblastine Run2-DMSO  | NM_2012<br>52 | AFAR3  | AFAR3                            | 0.51052   | Inlier |
| siRNA-Vinblastine Run1-DMSO  | NM_2012<br>52 | AFAR3  | AFAR3                            | 1.247731  | Inlier |



Identification of Survival Genes in Human Glioblastoma Cells Using siRNA Screening

Nikhil G Thaker, Fang Zhang, Peter R. McDonald, Tong Ying Shun, Michael D Lewen, Ian F. Pollack, and John S. Lazo

Molecular Pharmacology

| siRNA Treatment              | Gene ID   | Gene Name | Gene Description                         | Log Fold Change | Outlier Status |
|------------------------------|-----------|-----------|------------------------------------------|-----------------|----------------|
| siRNA Disorazole DMSO Run1   | NM_001132 | AFG3L1    | AFG3 ATPase family gene 3-like 1 (yeast) | -1.521126       | Inlier         |
| siRNA-Temozolomide Run3-DMSO | NM_001132 | AFG3L1    | AFG3 ATPase family gene 3-like 1 (yeast) | -0.720282       | Inlier         |
| siRNA-Temozolomide Run2-DMSO | NM_001132 | AFG3L1    | AFG3 ATPase family gene 3-like 1 (yeast) | -0.579954       | Inlier         |
| siRNA-Temozolomide Run1-DMSO | NM_001132 | AFG3L1    | AFG3 ATPase family gene 3-like 1 (yeast) | -0.359075       | Inlier         |
| siRNA-Vinblastine Run2-DMSO  | NM_001132 | AFG3L1    | AFG3 ATPase family gene 3-like 1 (yeast) | 0.359076        | Inlier         |
| siRNA-Vinblastine Run1-DMSO  | NM_001132 | AFG3L1    | AFG3 ATPase family gene 3-like 1 (yeast) | 0.628718        | Inlier         |
| siRNA Disorazole DMSO Run2   | NM_001132 | AFG3L1    | AFG3 ATPase family gene 3-like 1 (yeast) | 1.377431        | Inlier         |
| siRNA Disorazole DMSO Run3   | NM_001132 | AFG3L1    | AFG3 ATPase family gene 3-like 1 (yeast) | 1.84475         | Inlier         |

Identification of Survival Genes in Human Glioblastoma Cells Using siRNA Screening

Nikhil G Thaker, Fang Zhang, Peter R. McDonald, Tong Ying Shun, Michael D Lewen, Ian F. Pollack, and John S. Lazo

Molecular Pharmacology

| siRNA Treatment              | Gene ID   | Gene Name | Family                                   | Score     | Outlier Type |
|------------------------------|-----------|-----------|------------------------------------------|-----------|--------------|
| siRNA-Temozolomide Run3-DMSO | NM_006796 | AFG3L2    | AFG3 ATPase family gene 3-like 2 (yeast) | -0.886701 | Inlier       |
| siRNA Disorazole DMSO Run1   | NM_006796 | AFG3L2    | AFG3 ATPase family gene 3-like 2 (yeast) | -0.774982 | Inlier       |
| siRNA-Temozolomide Run1-DMSO | NM_006796 | AFG3L2    | AFG3 ATPase family gene 3-like 2 (yeast) | -0.621939 | Inlier       |
| siRNA-Temozolomide Run2-DMSO | NM_006796 | AFG3L2    | AFG3 ATPase family gene 3-like 2 (yeast) | -0.405277 | Inlier       |
| siRNA Disorazole DMSO Run2   | NM_006796 | AFG3L2    | AFG3 ATPase family gene 3-like 2 (yeast) | 0.405277  | Inlier       |
| siRNA-Vinblastine Run2-DMSO  | NM_006796 | AFG3L2    | AFG3 ATPase family gene 3-like 2 (yeast) | 0.548231  | Inlier       |
| siRNA Disorazole DMSO Run3   | NM_006796 | AFG3L2    | AFG3 ATPase family gene 3-like 2 (yeast) | 0.727061  | Inlier       |
| siRNA-Vinblastine Run1-DMSO  | NM_006796 | AFG3L2    | AFG3 ATPase family gene 3-like 2 (yeast) | 0.749062  | Inlier       |
| siRNA-Temozolomide Run3-DMSO | NM_000027 | AGA       | aspartylglucosaminidase                  | -0.729707 | Inlier       |

Identification of Survival Genes in Human Glioblastoma Cells Using siRNA Screening  
 Nikhil G Thaker, Fang Zhang, Peter R. McDonald, Tong Ying Shun, Michael D Lewen, Ian F. Pollack, and John S. Lazo

Molecular Pharmacology

|                              |               |      |                                                      |           |        |
|------------------------------|---------------|------|------------------------------------------------------|-----------|--------|
| siRNA-Temozolomide Run2-DMSO | NM_0000<br>27 | AGA  | aspartylglucosaminidase                              | -0.619293 | Inlier |
| siRNA-Temozolomide Run1-DMSO | NM_0000<br>27 | AGA  | aspartylglucosaminidase                              | -0.433577 | Inlier |
| siRNA Disorazole DMSO Run3   | NM_0000<br>27 | AGA  | aspartylglucosaminidase                              | -0.160686 | Inlier |
| siRNA Disorazole DMSO Run1   | NM_0000<br>27 | AGA  | aspartylglucosaminidase                              | 0.160686  | Inlier |
| siRNA Disorazole DMSO Run2   | NM_0000<br>27 | AGA  | aspartylglucosaminidase                              | 1.829556  | Inlier |
| siRNA-Vinblastine Run2-DMSO  | NM_0000<br>27 | AGA  | aspartylglucosaminidase                              | 2.960329  | Inlier |
| siRNA-Vinblastine Run1-DMSO  | NM_0000<br>27 | AGA  | aspartylglucosaminidase                              | 3.45541   | Inlier |
| siRNA-Temozolomide Run2-DMSO | NM_1721<br>97 | AGER | advanced glycosylation end product-specific receptor | -1.507611 | Inlier |
| siRNA Disorazole DMSO Run1   | NM_1721<br>97 | AGER | advanced glycosylation end product-specific receptor | -0.925214 | Inlier |
| siRNA-Temozolomide Run1-DMSO | NM_1721<br>97 | AGER | advanced glycosylation end product-specific receptor | -0.146857 | Inlier |
| siRNA-Temozolomide Run3-DMSO | NM_1721<br>97 | AGER | advanced glycosylation end product-specific receptor | -0.022027 | Inlier |
| siRNA-Vinblastine Run2-DMSO  | NM_1721<br>97 | AGER | advanced glycosylation end product-specific receptor | 0.022026  | Inlier |

Identification of Survival Genes in Human Glioblastoma Cells Using siRNA Screening

Nikhil G Thaker, Fang Zhang, Peter R. McDonald, Tong Ying Shun, Michael D Lewen, Ian F. Pollack, and John S. Lazo

Molecular Pharmacology

|                              |               |      |                                                                                                                     |           |        |
|------------------------------|---------------|------|---------------------------------------------------------------------------------------------------------------------|-----------|--------|
| siRNA Disorazole DMSO Run3   | NM_1721<br>97 | AGER | advanced glycosylation on end product-specific receptor                                                             | 0.423786  | Inlier |
| siRNA-Vinblastine Run1-DMSO  | NM_1721<br>97 | AGER | advanced glycosylation on end product-specific receptor                                                             | 1.641854  | Inlier |
| siRNA Disorazole DMSO Run2   | NM_1721<br>97 | AGER | advanced glycosylation on end product-specific receptor                                                             | 1.756781  | Inlier |
| siRNA Disorazole DMSO Run1   | NM_0006<br>46 | AGL  | amylo-1, 6-glucosidase, 4-alpha-glucanotransferase (glycogen debranching enzyme, glycogen storage disease type III) | -0.814564 | Inlier |
| siRNA-Temozolomide Run1-DMSO | NM_0006<br>46 | AGL  | amylo-1, 6-glucosidase, 4-alpha-glucanotransferase (glycogen debranching enzyme, glycogen storage disease type III) | -0.6456   | Inlier |

Identification of Survival Genes in Human Glioblastoma Cells Using siRNA Screening

Nikhil G Thaker, Fang Zhang, Peter R. McDonald, Tong Ying Shun, Michael D Lewen, Ian F. Pollack, and John S.

Lazo

Molecular Pharmacology

|                              |           |     |                                                                                                                     |           |        |
|------------------------------|-----------|-----|---------------------------------------------------------------------------------------------------------------------|-----------|--------|
| siRNA-Temozolomide Run3-DMSO | NM_000646 | AGL | amylo-1, 6-glucosidase, 4-alpha-glucanotransferase (glycogen debranching enzyme, glycogen storage disease type III) | -0.090558 | Inlier |
| siRNA-Temozolomide Run2-DMSO | NM_000646 | AGL | amylo-1, 6-glucosidase, 4-alpha-glucanotransferase (glycogen debranching enzyme, glycogen storage disease type III) | -0.067588 | Inlier |
| siRNA-Vinblastine Run2-DMSO  | NM_000646 | AGL | amylo-1, 6-glucosidase, 4-alpha-glucanotransferase (glycogen debranching enzyme, glycogen storage disease type III) | 0.067589  | Inlier |

Identification of Survival Genes in Human Glioblastoma Cells Using siRNA Screening

Nikhil G Thaker, Fang Zhang, Peter R. McDonald, Tong Ying Shun, Michael D Lewen, Ian F. Pollack, and John S. Lazo

Molecular Pharmacology

|                                  |               |       |                                                                                                                                                              |                  |
|----------------------------------|---------------|-------|--------------------------------------------------------------------------------------------------------------------------------------------------------------|------------------|
| siRNA Disorazole DMSO Run3       | NM_0006<br>46 | AGL   | amylo-1, 6-<br>glucosidas<br>e, 4-alpha-<br>glucanotra<br>nsferase<br>(glycogen<br>debranchi<br>ng<br>enzyme,<br>glycogen<br>storage<br>disease<br>type III) | 0.7034 Inlier    |
| siRNA-Vinblastine Run1-<br>DMSO  | NM_0006<br>46 | AGL   | amylo-1, 6-<br>glucosidas<br>e, 4-alpha-<br>glucanotra<br>nsferase<br>(glycogen<br>debranchi<br>ng<br>enzyme,<br>glycogen<br>storage<br>disease<br>type III) | 0.972717 Inlier  |
| siRNA Disorazole DMSO Run2       | NM_0006<br>46 | AGL   | amylo-1, 6-<br>glucosidas<br>e, 4-alpha-<br>glucanotra<br>nsferase<br>(glycogen<br>debranchi<br>ng<br>enzyme,<br>glycogen<br>storage<br>disease<br>type III) | 1.039165 Inlier  |
| siRNA-Temozolomide Run3-<br>DMSO | NM_0247<br>58 | AGMAT | agmatine<br>ureohydrol<br>ase<br>(agmatina<br>se)                                                                                                            | -0.830069 Inlier |

Identification of Survival Genes in Human Glioblastoma Cells Using siRNA Screening

Nikhil G Thaker, Fang Zhang, Peter R. McDonald, Tong Ying Shun, Michael D Lewen, Ian F. Pollack, and John S. Lazo

Molecular Pharmacology

|                              |               |        |                                                                                               |           |        |
|------------------------------|---------------|--------|-----------------------------------------------------------------------------------------------|-----------|--------|
| siRNA-Vinblastine Run2-DMSO  | NM_0247<br>58 | AGMAT  | agmatine ureohydrolase (agmatinase)                                                           | -0.763302 | Inlier |
| siRNA-Temozolomide Run2-DMSO | NM_0247<br>58 | AGMAT  | agmatine ureohydrolase (agmatinase)                                                           | -0.585698 | Inlier |
| siRNA Disorazole DMSO Run3   | NM_0247<br>58 | AGMAT  | agmatine ureohydrolase (agmatinase)                                                           | -0.13311  | Inlier |
| siRNA-Temozolomide Run1-DMSO | NM_0247<br>58 | AGMAT  | agmatine ureohydrolase (agmatinase)                                                           | 0.13311   | Inlier |
| siRNA Disorazole DMSO Run1   | NM_0247<br>58 | AGMAT  | agmatine ureohydrolase (agmatinase)                                                           | 0.21653   | Inlier |
| siRNA-Vinblastine Run1-DMSO  | NM_0247<br>58 | AGMAT  | agmatine ureohydrolase (agmatinase)                                                           | 0.829823  | Inlier |
| siRNA Disorazole DMSO Run2   | NM_0247<br>58 | AGMAT  | agmatine ureohydrolase (agmatinase)                                                           | 1.063091  | Inlier |
| siRNA-Temozolomide Run3-DMSO | NM_0064<br>11 | AGPAT1 | 1-acylglycerol-3-phosphate O-acyltransferase 1 (lysophosphatidic acid acyltransferase, alpha) | -1.094301 | Inlier |

Identification of Survival Genes in Human Glioblastoma Cells Using siRNA Screening

Nikhil G Thaker, Fang Zhang, Peter R. McDonald, Tong Ying Shun, Michael D Lewen, Ian F. Pollack, and John S.

Lazo

Molecular Pharmacology

|                              |           |        |                                                                                               |           |        |
|------------------------------|-----------|--------|-----------------------------------------------------------------------------------------------|-----------|--------|
|                              |           |        | 1-acylglycerol-3-phosphate O-acyltransferase 1 (lysophosphatidic acid acyltransferase, alpha) | -0.884825 | Inlier |
| siRNA-Temozolomide Run2-DMSO | NM_006411 | AGPAT1 | 1-acylglycerol-3-phosphate O-acyltransferase 1 (lysophosphatidic acid acyltransferase, alpha) | -0.400497 | Inlier |
| siRNA-Temozolomide Run1-DMSO | NM_006411 | AGPAT1 | 1-acylglycerol-3-phosphate O-acyltransferase 1 (lysophosphatidic acid acyltransferase, alpha) | -0.309548 | Inlier |
| siRNA Disorazole DMSO Run3   | NM_006411 | AGPAT1 | 1-acylglycerol-3-phosphate O-acyltransferase 1 (lysophosphatidic acid acyltransferase, alpha) | 0.309548  | Inlier |
| siRNA Disorazole DMSO Run1   | NM_006411 | AGPAT1 | 1-acylglycerol-3-phosphate O-acyltransferase 1 (lysophosphatidic acid acyltransferase, alpha) |           |        |



Identification of Survival Genes in Human Glioblastoma Cells Using siRNA Screening

Nikhil G Thaker, Fang Zhang, Peter R. McDonald, Tong Ying Shun, Michael D Lewen, Ian F. Pollack, and John S.

Lazo

Molecular Pharmacology

|                              |               |        |                                                                                               |           |        |
|------------------------------|---------------|--------|-----------------------------------------------------------------------------------------------|-----------|--------|
| siRNA-Vinblastine Run2-DMSO  | NM_0064<br>11 | AGPAT1 | 1-acylglycerol-3-phosphate O-acyltransferase 1 (lysophosphatidic acid acyltransferase, alpha) | 0.464175  | Inlier |
| siRNA Disorazole DMSO Run2   | NM_0064<br>11 | AGPAT1 | 1-acylglycerol-3-phosphate O-acyltransferase 1 (lysophosphatidic acid acyltransferase, alpha) | 2.014115  | Inlier |
| siRNA-Vinblastine Run1-DMSO  | NM_0064<br>11 | AGPAT1 | 1-acylglycerol-3-phosphate O-acyltransferase 1 (lysophosphatidic acid acyltransferase, alpha) | 2.894943  | Inlier |
| siRNA-Temozolomide Run1-DMSO | NM_0064<br>12 | AGPAT2 | 1-acylglycerol-3-phosphate O-acyltransferase 2 (lysophosphatidic acid acyltransferase, beta)  | -0.858424 | Inlier |

Identification of Survival Genes in Human Glioblastoma Cells Using siRNA Screening

Nikhil G Thaker, Fang Zhang, Peter R. McDonald, Tong Ying Shun, Michael D Lewen, Ian F. Pollack, and John S. Lazo

Molecular Pharmacology

|                              |               |        |                                                                                              |           |        |
|------------------------------|---------------|--------|----------------------------------------------------------------------------------------------|-----------|--------|
| siRNA-Temozolomide Run2-DMSO | NM_0064<br>12 | AGPAT2 | 1-acylglycerol-3-phosphate O-acyltransferase 2 (lysophosphatidic acid acyltransferase, beta) | -0.662312 | Inlier |
| siRNA-Temozolomide Run3-DMSO | NM_0064<br>12 | AGPAT2 | 1-acylglycerol-3-phosphate O-acyltransferase 2 (lysophosphatidic acid acyltransferase, beta) | -0.659809 | Inlier |
| siRNA Disorazole DMSO Run1   | NM_0064<br>12 | AGPAT2 | 1-acylglycerol-3-phosphate O-acyltransferase 2 (lysophosphatidic acid acyltransferase, beta) | -0.376975 | Inlier |
| siRNA Disorazole DMSO Run3   | NM_0064<br>12 | AGPAT2 | 1-acylglycerol-3-phosphate O-acyltransferase 2 (lysophosphatidic acid acyltransferase, beta) | 0.376975  | Inlier |

Identification of Survival Genes in Human Glioblastoma Cells Using siRNA Screening

Nikhil G Thaker, Fang Zhang, Peter R. McDonald, Tong Ying Shun, Michael D Lewen, Ian F. Pollack, and John S. Lazo

Molecular Pharmacology

|                              |               |        |                                                                                              |           |        |
|------------------------------|---------------|--------|----------------------------------------------------------------------------------------------|-----------|--------|
| siRNA Disorazole DMSO Run2   | NM_0064<br>12 | AGPAT2 | 1-acylglycerol-3-phosphate O-acyltransferase 2 (lysophosphatidic acid acyltransferase, beta) | 0.686688  | Inlier |
| siRNA-Vinblastine Run1-DMSO  | NM_0064<br>12 | AGPAT2 | 1-acylglycerol-3-phosphate O-acyltransferase 2 (lysophosphatidic acid acyltransferase, beta) | 0.689404  | Inlier |
| siRNA-Vinblastine Run2-DMSO  | NM_0064<br>12 | AGPAT2 | 1-acylglycerol-3-phosphate O-acyltransferase 2 (lysophosphatidic acid acyltransferase, beta) | 0.845179  | Inlier |
| siRNA-Temozolomide Run1-DMSO | NM_0201<br>32 | AGPAT3 | 1-acylglycerol-3-phosphate O-acyltransferase 3                                               | -1.779524 | Inlier |

Identification of Survival Genes in Human Glioblastoma Cells Using siRNA Screening  
 Nikhil G Thaker, Fang Zhang, Peter R. McDonald, Tong Ying Shun, Michael D Lewen, Ian F. Pollack, and John S. Lazo

Molecular Pharmacology

|                              |               |        |                                                |           |        |
|------------------------------|---------------|--------|------------------------------------------------|-----------|--------|
| siRNA-Temozolomide Run2-DMSO | NM_0201<br>32 | AGPAT3 | 1-acylglycerol-3-phosphate O-acyltransferase 3 | -0.97439  | Inlier |
| siRNA Disorazole DMSO Run1   | NM_0201<br>32 | AGPAT3 | 1-acylglycerol-3-phosphate O-acyltransferase 3 | -0.137241 | Inlier |
| siRNA-Vinblastine Run2-DMSO  | NM_0201<br>32 | AGPAT3 | 1-acylglycerol-3-phosphate O-acyltransferase 3 | -0.024868 | Inlier |
| siRNA-Temozolomide Run3-DMSO | NM_0201<br>32 | AGPAT3 | 1-acylglycerol-3-phosphate O-acyltransferase 3 | 0.024868  | Inlier |
| siRNA Disorazole DMSO Run3   | NM_0201<br>32 | AGPAT3 | 1-acylglycerol-3-phosphate O-acyltransferase 3 | 0.644547  | Inlier |
| siRNA Disorazole DMSO Run2   | NM_0201<br>32 | AGPAT3 | 1-acylglycerol-3-phosphate O-acyltransferase 3 | 0.704453  | Inlier |
| siRNA-Vinblastine Run1-DMSO  | NM_0201<br>32 | AGPAT3 | 1-acylglycerol-3-phosphate O-acyltransferase 3 | 0.740258  | Inlier |

Identification of Survival Genes in Human Glioblastoma Cells Using siRNA Screening

Nikhil G Thaker, Fang Zhang, Peter R. McDonald, Tong Ying Shun, Michael D Lewen, Ian F. Pollack, and John S.

Lazo

Molecular Pharmacology

|                              |           |        |                                                                                               |           |        |
|------------------------------|-----------|--------|-----------------------------------------------------------------------------------------------|-----------|--------|
|                              |           |        | 1-acylglycerol-3-phosphate O-acyltransferase 4 (lysophosphatidic acid acyltransferase, delta) | -0.770447 | Inlier |
| siRNA-Temozolomide Run1-DMSO | NM_020133 | AGPAT4 | 1-acylglycerol-3-phosphate O-acyltransferase 4 (lysophosphatidic acid acyltransferase, delta) | -0.578553 | Inlier |
| siRNA Disorazole DMSO Run1   | NM_020133 | AGPAT4 | 1-acylglycerol-3-phosphate O-acyltransferase 4 (lysophosphatidic acid acyltransferase, delta) | -0.182346 | Inlier |
| siRNA-Vinblastine Run2-DMSO  | NM_020133 | AGPAT4 | 1-acylglycerol-3-phosphate O-acyltransferase 4 (lysophosphatidic acid acyltransferase, delta) | -0.102855 | Inlier |
| siRNA-Temozolomide Run3-DMSO | NM_020133 | AGPAT4 | 1-acylglycerol-3-phosphate O-acyltransferase 4 (lysophosphatidic acid acyltransferase, delta) |           |        |

Identification of Survival Genes in Human Glioblastoma Cells Using siRNA Screening

Nikhil G Thaker, Fang Zhang, Peter R. McDonald, Tong Ying Shun, Michael D Lewen, Ian F. Pollack, and John S.

Lazo

Molecular Pharmacology

|                              |               |        |                                                                                               |          |         |
|------------------------------|---------------|--------|-----------------------------------------------------------------------------------------------|----------|---------|
| siRNA-Temozolomide Run2-DMSO | NM_0201<br>33 | AGPAT4 | 1-acylglycerol-3-phosphate O-acyltransferase 4 (lysophosphatidic acid acyltransferase, delta) | 0.102855 | Inlier  |
| siRNA Disorazole DMSO Run3   | NM_0201<br>33 | AGPAT4 | 1-acylglycerol-3-phosphate O-acyltransferase 4 (lysophosphatidic acid acyltransferase, delta) | 1.005985 | Inlier  |
| siRNA-Vinblastine Run1-DMSO  | NM_0201<br>33 | AGPAT4 | 1-acylglycerol-3-phosphate O-acyltransferase 4 (lysophosphatidic acid acyltransferase, delta) | 5.934381 | Outlier |
| siRNA Disorazole DMSO Run2   | NM_0201<br>33 | AGPAT4 | 1-acylglycerol-3-phosphate O-acyltransferase 4 (lysophosphatidic acid acyltransferase, delta) | 6.433173 | Outlier |

Identification of Survival Genes in Human Glioblastoma Cells Using siRNA Screening  
 Nikhil G Thaker, Fang Zhang, Peter R. McDonald, Tong Ying Shun, Michael D Lewen, Ian F. Pollack, and John S. Lazo  
 Molecular Pharmacology

|                              |               |      |                                   |           |         |
|------------------------------|---------------|------|-----------------------------------|-----------|---------|
| siRNA-Temozolomide Run2-DMSO | NM_0036<br>59 | AGPS | alkylglycerone phosphate synthase | -5.023054 | Outlier |
| siRNA-Temozolomide Run1-DMSO | NM_0036<br>59 | AGPS | alkylglycerone phosphate synthase | -0.384155 | Inlier  |
| siRNA-Vinblastine Run2-DMSO  | NM_0036<br>59 | AGPS | alkylglycerone phosphate synthase | -0.38187  | Inlier  |
| siRNA Disorazole DMSO Run1   | NM_0036<br>59 | AGPS | alkylglycerone phosphate synthase | -0.10284  | Inlier  |
| siRNA-Temozolomide Run3-DMSO | NM_0036<br>59 | AGPS | alkylglycerone phosphate synthase | 0.102839  | Inlier  |
| siRNA Disorazole DMSO Run3   | NM_0036<br>59 | AGPS | alkylglycerone phosphate synthase | 0.964845  | Inlier  |
| siRNA Disorazole DMSO Run2   | NM_0036<br>59 | AGPS | alkylglycerone phosphate synthase | 14.20175  | Outlier |
| siRNA-Vinblastine Run1-DMSO  | NM_0036<br>59 | AGPS | alkylglycerone phosphate synthase | 23.1127   | Outlier |

Identification of Survival Genes in Human Glioblastoma Cells Using siRNA Screening

Nikhil G Thaker, Fang Zhang, Peter R. McDonald, Tong Ying Shun, Michael D Lewen, Ian F. Pollack, and John S.

Lazo

Molecular Pharmacology

|                                  |               |     |                                                                                                                                                             |                  |
|----------------------------------|---------------|-----|-------------------------------------------------------------------------------------------------------------------------------------------------------------|------------------|
| siRNA-Temozolomide Run3-<br>DMSO | NM_0000<br>29 | AGT | angiotensi<br>nogen<br>(serine (or<br>cysteine)<br>proteinase<br>inhibitor,<br>clade A<br>(alpha-1<br>antiprotein<br>ase,<br>antitrypsin)<br>, member<br>8) | -2.744682 Inlier |
|----------------------------------|---------------|-----|-------------------------------------------------------------------------------------------------------------------------------------------------------------|------------------|

|                                  |               |     |                                                                                                                                                             |                  |
|----------------------------------|---------------|-----|-------------------------------------------------------------------------------------------------------------------------------------------------------------|------------------|
| siRNA-Temozolomide Run2-<br>DMSO | NM_0000<br>29 | AGT | angiotensi<br>nogen<br>(serine (or<br>cysteine)<br>proteinase<br>inhibitor,<br>clade A<br>(alpha-1<br>antiprotein<br>ase,<br>antitrypsin)<br>, member<br>8) | -0.513808 Inlier |
|----------------------------------|---------------|-----|-------------------------------------------------------------------------------------------------------------------------------------------------------------|------------------|

|                                 |               |     |                                                                                                                                                             |                  |
|---------------------------------|---------------|-----|-------------------------------------------------------------------------------------------------------------------------------------------------------------|------------------|
| siRNA-Vinblastine Run2-<br>DMSO | NM_0000<br>29 | AGT | angiotensi<br>nogen<br>(serine (or<br>cysteine)<br>proteinase<br>inhibitor,<br>clade A<br>(alpha-1<br>antiprotein<br>ase,<br>antitrypsin)<br>, member<br>8) | -0.512926 Inlier |
|---------------------------------|---------------|-----|-------------------------------------------------------------------------------------------------------------------------------------------------------------|------------------|



Identification of Survival Genes in Human Glioblastoma Cells Using siRNA Screening

Nikhil G Thaker, Fang Zhang, Peter R. McDonald, Tong Ying Shun, Michael D Lewen, Ian F. Pollack, and John S.

Lazo

Molecular Pharmacology

|                            |         |    |     |                                                                                                                      |           |        |
|----------------------------|---------|----|-----|----------------------------------------------------------------------------------------------------------------------|-----------|--------|
| siRNA Disorazole DMSO Run3 | NM_0000 | 29 | AGT | angiotensinogen (serine (or cysteine) proteinase inhibitor, clade A (alpha-1 antiproteinase, antitrypsin), member 8) | -0.427367 | Inlier |
|----------------------------|---------|----|-----|----------------------------------------------------------------------------------------------------------------------|-----------|--------|

|                            |         |    |     |                                                                                                                      |          |        |
|----------------------------|---------|----|-----|----------------------------------------------------------------------------------------------------------------------|----------|--------|
| siRNA Disorazole DMSO Run1 | NM_0000 | 29 | AGT | angiotensinogen (serine (or cysteine) proteinase inhibitor, clade A (alpha-1 antiproteinase, antitrypsin), member 8) | 0.427367 | Inlier |
|----------------------------|---------|----|-----|----------------------------------------------------------------------------------------------------------------------|----------|--------|

|                              |         |    |     |                                                                                                                      |          |        |
|------------------------------|---------|----|-----|----------------------------------------------------------------------------------------------------------------------|----------|--------|
| siRNA-Temozolomide Run1-DMSO | NM_0000 | 29 | AGT | angiotensinogen (serine (or cysteine) proteinase inhibitor, clade A (alpha-1 antiproteinase, antitrypsin), member 8) | 0.835192 | Inlier |
|------------------------------|---------|----|-----|----------------------------------------------------------------------------------------------------------------------|----------|--------|

Identification of Survival Genes in Human Glioblastoma Cells Using siRNA Screening  
 Nikhil G Thaker, Fang Zhang, Peter R. McDonald, Tong Ying Shun, Michael D Lewen, Ian F. Pollack, and John S. Lazo  
 Molecular Pharmacology

|                              |               |       |                                                                                                                      |           |        |
|------------------------------|---------------|-------|----------------------------------------------------------------------------------------------------------------------|-----------|--------|
| siRNA Disorazole DMSO Run2   | NM_0000<br>29 | AGT   | angiotensinogen (serine (or cysteine) proteinase inhibitor, clade A (alpha-1 antiproteinase, antitrypsin), member 8) | 1.742959  | Inlier |
| siRNA-Vinblastine Run1-DMSO  | NM_0000<br>29 | AGT   | angiotensinogen (serine (or cysteine) proteinase inhibitor, clade A (alpha-1 antiproteinase, antitrypsin), member 8) | 2.428427  | Inlier |
| siRNA Disorazole DMSO Run2   | NM_0320<br>49 | AGTR1 | angiotensin II receptor, type 1                                                                                      | -1.355469 | Inlier |
| siRNA-Temozolomide Run2-DMSO | NM_0320<br>49 | AGTR1 | angiotensin II receptor, type 1                                                                                      | -0.550734 | Inlier |
| siRNA-Temozolomide Run3-DMSO | NM_0320<br>49 | AGTR1 | angiotensin II receptor, type 1                                                                                      | -0.456384 | Inlier |
| siRNA Disorazole DMSO Run1   | NM_0320<br>49 | AGTR1 | angiotensin II receptor, type 1                                                                                      | -0.350044 | Inlier |
| siRNA-Temozolomide Run1-DMSO | NM_0320<br>49 | AGTR1 | angiotensin II receptor, type 1                                                                                      | 0.350044  | Inlier |

Identification of Survival Genes in Human Glioblastoma Cells Using siRNA Screening  
 Nikhil G Thaker, Fang Zhang, Peter R. McDonald, Tong Ying Shun, Michael D Lewen, Ian F. Pollack, and John S. Lazo

Molecular Pharmacology

|                              |               |        |                                 |           |        |
|------------------------------|---------------|--------|---------------------------------|-----------|--------|
| siRNA Disorazole DMSO Run3   | NM_0320<br>49 | AGTR1  | angiotensin II receptor, type 1 | 0.798266  | Inlier |
| siRNA-Vinblastine Run2-DMSO  | NM_0320<br>49 | AGTR1  | angiotensin II receptor, type 1 | 1.950805  | Inlier |
| siRNA-Vinblastine Run1-DMSO  | NM_0320<br>49 | AGTR1  | angiotensin II receptor, type 1 | 2.274875  | Inlier |
| siRNA-Temozolomide Run3-DMSO | NM_0006<br>86 | AGTR2  | angiotensin II receptor, type 2 | -1.128223 | Inlier |
| siRNA Disorazole DMSO Run2   | NM_0006<br>86 | AGTR2  | angiotensin II receptor, type 2 | -0.858511 | Inlier |
| siRNA-Temozolomide Run2-DMSO | NM_0006<br>86 | AGTR2  | angiotensin II receptor, type 2 | -0.490489 | Inlier |
| siRNA Disorazole DMSO Run1   | NM_0006<br>86 | AGTR2  | angiotensin II receptor, type 2 | -0.264865 | Inlier |
| siRNA-Temozolomide Run1-DMSO | NM_0006<br>86 | AGTR2  | angiotensin II receptor, type 2 | 0.264865  | Inlier |
| siRNA Disorazole DMSO Run3   | NM_0006<br>86 | AGTR2  | angiotensin II receptor, type 2 | 0.305897  | Inlier |
| siRNA-Vinblastine Run2-DMSO  | NM_0006<br>86 | AGTR2  | angiotensin II receptor, type 2 | 1.084003  | Inlier |
| siRNA-Vinblastine Run1-DMSO  | NM_0006<br>86 | AGTR2  | angiotensin II receptor, type 2 | 1.199764  | Inlier |
| siRNA Disorazole DMSO Run2   | NM_0051<br>61 | AGTRL1 | angiotensin II receptor-like 1  | -1.463767 | Inlier |
| siRNA Disorazole DMSO Run3   | NM_0051<br>61 | AGTRL1 | angiotensin II receptor-like 1  | -1.452291 | Inlier |

Identification of Survival Genes in Human Glioblastoma Cells Using siRNA Screening  
 Nikhil G Thaker, Fang Zhang, Peter R. McDonald, Tong Ying Shun, Michael D Lewen, Ian F. Pollack, and John S. Lazo

Molecular Pharmacology

| siRNA                        | Gene   | Accession | Gene                           | Value     | Outlier |
|------------------------------|--------|-----------|--------------------------------|-----------|---------|
| siRNA Disorazole DMSO Run1   | AGTRL1 | NM_005161 | angiotensin II receptor-like 1 | -0.487246 | Inlier  |
| siRNA-Temozolomide Run1-DMSO | AGTRL1 | NM_005161 | angiotensin II receptor-like 1 | -0.108117 | Inlier  |
| siRNA-Temozolomide Run2-DMSO | AGTRL1 | NM_005161 | angiotensin II receptor-like 1 | 0.108116  | Inlier  |
| siRNA-Temozolomide Run3-DMSO | AGTRL1 | NM_005161 | angiotensin II receptor-like 1 | 0.627406  | Inlier  |
| siRNA-Vinblastine Run2-DMSO  | AGTRL1 | NM_005161 | angiotensin II receptor-like 1 | 0.721594  | Inlier  |
| siRNA-Vinblastine Run1-DMSO  | AGTRL1 | NM_005161 | angiotensin II receptor-like 1 | 1.807413  | Inlier  |
| siRNA Disorazole DMSO Run1   | AGTRL2 | NM_005162 | angiotensin II receptor-like 2 | -0.944054 | Inlier  |
| siRNA-Temozolomide Run2-DMSO | AGTRL2 | NM_005162 | angiotensin II receptor-like 2 | -0.762565 | Inlier  |
| siRNA-Vinblastine Run2-DMSO  | AGTRL2 | NM_005162 | angiotensin II receptor-like 2 | -0.531616 | Inlier  |
| siRNA-Temozolomide Run3-DMSO | AGTRL2 | NM_005162 | angiotensin II receptor-like 2 | -0.258599 | Inlier  |
| siRNA-Temozolomide Run1-DMSO | AGTRL2 | NM_005162 | angiotensin II receptor-like 2 | 0.258599  | Inlier  |
| siRNA Disorazole DMSO Run3   | AGTRL2 | NM_005162 | angiotensin II receptor-like 2 | 0.586434  | Inlier  |
| siRNA Disorazole DMSO Run2   | AGTRL2 | NM_005162 | angiotensin II receptor-like 2 | 2.355369  | Inlier  |

Identification of Survival Genes in Human Glioblastoma Cells Using siRNA Screening

Nikhil G Thaker, Fang Zhang, Peter R. McDonald, Tong Ying Shun, Michael D Lewen, Ian F. Pollack, and John S. Lazo

Molecular Pharmacology

|                              |           |        |                                                                                                                       |           |        |
|------------------------------|-----------|--------|-----------------------------------------------------------------------------------------------------------------------|-----------|--------|
| siRNA-Vinblastine Run1-DMSO  | NM_005162 | AGTRL2 | angiotensin II receptor-like 2                                                                                        | 2.682434  | Inlier |
| siRNA-Temozolomide Run2-DMSO | NM_000030 | AGXT   | alanine-glyoxylate aminotransferase (oxalosis I; hyperoxaluria I; glycolicaciduria; serine-pyruvate aminotransferase) | -0.961711 | Inlier |
| siRNA-Temozolomide Run1-DMSO | NM_000030 | AGXT   | alanine-glyoxylate aminotransferase (oxalosis I; hyperoxaluria I; glycolicaciduria; serine-pyruvate aminotransferase) | -0.871911 | Inlier |
| siRNA-Temozolomide Run3-DMSO | NM_000030 | AGXT   | alanine-glyoxylate aminotransferase (oxalosis I; hyperoxaluria I; glycolicaciduria; serine-pyruvate aminotransferase) | -0.31916  | Inlier |

Identification of Survival Genes in Human Glioblastoma Cells Using siRNA Screening

Nikhil G Thaker, Fang Zhang, Peter R. McDonald, Tong Ying Shun, Michael D Lewen, Ian F. Pollack, and John S. Lazo

Molecular Pharmacology

|                             |           |      |                                                                                                                       |           |        |
|-----------------------------|-----------|------|-----------------------------------------------------------------------------------------------------------------------|-----------|--------|
| siRNA Disorazole DMSO Run3  | NM_000030 | AGXT | alanine-glyoxylate aminotransferase (oxalosis I; hyperoxaluria I; glycolicaciduria; serine-pyruvate aminotransferase) | -0.103235 | Inlier |
| siRNA-Vinblastine Run2-DMSO | NM_000030 | AGXT | alanine-glyoxylate aminotransferase (oxalosis I; hyperoxaluria I; glycolicaciduria; serine-pyruvate aminotransferase) | 0.103235  | Inlier |
| siRNA Disorazole DMSO Run1  | NM_000030 | AGXT | alanine-glyoxylate aminotransferase (oxalosis I; hyperoxaluria I; glycolicaciduria; serine-pyruvate aminotransferase) | 0.477089  | Inlier |

Identification of Survival Genes in Human Glioblastoma Cells Using siRNA Screening  
 Nikhil G Thaker, Fang Zhang, Peter R. McDonald, Tong Ying Shun, Michael D Lewen, Ian F. Pollack, and John S. Lazo  
 Molecular Pharmacology

|                              |           |       |                                                                                                                       |           |         |
|------------------------------|-----------|-------|-----------------------------------------------------------------------------------------------------------------------|-----------|---------|
| siRNA Disorazole DMSO Run2   | NM_000030 | AGXT  | alanine-glyoxylate aminotransferase (oxalosis I; hyperoxaluria I; glycolicaciduria; serine-pyruvate aminotransferase) | 2.522251  | Inlier  |
| siRNA-Vinblastine Run1-DMSO  | NM_000030 | AGXT  | alanine-glyoxylate aminotransferase (oxalosis I; hyperoxaluria I; glycolicaciduria; serine-pyruvate aminotransferase) | 3.646834  | Outlier |
| siRNA-Temozolomide Run1-DMSO | NM_031900 | AGXT2 | alanine-glyoxylate aminotransferase 2                                                                                 | -1.703786 | Inlier  |
| siRNA Disorazole DMSO Run1   | NM_031900 | AGXT2 | alanine-glyoxylate aminotransferase 2                                                                                 | -1.431885 | Inlier  |
| siRNA-Temozolomide Run2-DMSO | NM_031900 | AGXT2 | alanine-glyoxylate aminotransferase 2                                                                                 | -0.74671  | Inlier  |
| siRNA Disorazole DMSO Run2   | NM_031900 | AGXT2 | alanine-glyoxylate aminotransferase 2                                                                                 | -0.048256 | Inlier  |
| siRNA-Vinblastine Run2-DMSO  | NM_031900 | AGXT2 | alanine-glyoxylate aminotransferase 2                                                                                 | 0.048256  | Inlier  |
| siRNA-Temozolomide Run3-DMSO | NM_031900 | AGXT2 | alanine-glyoxylate aminotransferase 2                                                                                 | 0.360282  | Inlier  |

Identification of Survival Genes in Human Glioblastoma Cells Using siRNA Screening  
 Nikhil G Thaker, Fang Zhang, Peter R. McDonald, Tong Ying Shun, Michael D Lewen, Ian F. Pollack, and John S. Lazo

Molecular Pharmacology

| siRNA                        | Gene    | Accession | Gene    | Value     | Category |
|------------------------------|---------|-----------|---------|-----------|----------|
| siRNA Disorazole DMSO Run3   | NM_0319 | 00        | AGXT2   | 0.60229   | Inlier   |
| siRNA-Vinblastine Run1-DMSO  | NM_0319 | 00        | AGXT2   | 1.377188  | Inlier   |
| siRNA-Temozolomide Run3-DMSO | NM_0312 | 79        | AGXT2L1 | -1.099372 | Inlier   |
| siRNA-Temozolomide Run2-DMSO | NM_0312 | 79        | AGXT2L1 | -0.249628 | Inlier   |
| siRNA-Temozolomide Run1-DMSO | NM_0312 | 79        | AGXT2L1 | -0.211834 | Inlier   |
| siRNA Disorazole DMSO Run3   | NM_0312 | 79        | AGXT2L1 | -0.066172 | Inlier   |
| siRNA-Vinblastine Run2-DMSO  | NM_0312 | 79        | AGXT2L1 | 0.066172  | Inlier   |
| siRNA Disorazole DMSO Run1   | NM_0312 | 79        | AGXT2L1 | 1.482707  | Inlier   |
| siRNA Disorazole DMSO Run2   | NM_0312 | 79        | AGXT2L1 | 6.654132  | Outlier  |
| siRNA-Vinblastine Run1-DMSO  | NM_0312 | 79        | AGXT2L1 | 7.819338  | Outlier  |



Identification of Survival Genes in Human Glioblastoma Cells Using siRNA Screening  
 Nikhil G Thaker, Fang Zhang, Peter R. McDonald, Tong Ying Shun, Michael D Lewen, Ian F. Pollack, and John S. Lazo

Molecular Pharmacology

|                              |               |        |                                         |           |        |
|------------------------------|---------------|--------|-----------------------------------------|-----------|--------|
| siRNA Disorazole DMSO Run1   | NM_0006<br>87 | AHCY   | S-adenosylhomocysteine hydrolase        | -1.05864  | Inlier |
| siRNA-Vinblastine Run2-DMSO  | NM_0006<br>87 | AHCY   | S-adenosylhomocysteine hydrolase        | -0.868638 | Inlier |
| siRNA-Temozolomide Run1-DMSO | NM_0006<br>87 | AHCY   | S-adenosylhomocysteine hydrolase        | -0.702404 | Inlier |
| siRNA Disorazole DMSO Run3   | NM_0006<br>87 | AHCY   | S-adenosylhomocysteine hydrolase        | -0.122241 | Inlier |
| siRNA-Temozolomide Run2-DMSO | NM_0006<br>87 | AHCY   | S-adenosylhomocysteine hydrolase        | 0.122241  | Inlier |
| siRNA-Vinblastine Run1-DMSO  | NM_0006<br>87 | AHCY   | S-adenosylhomocysteine hydrolase        | 0.640623  | Inlier |
| siRNA-Temozolomide Run3-DMSO | NM_0006<br>87 | AHCY   | S-adenosylhomocysteine hydrolase        | 0.646596  | Inlier |
| siRNA Disorazole DMSO Run2   | NM_0006<br>87 | AHCY   | S-adenosylhomocysteine hydrolase        | 1.649236  | Inlier |
| siRNA-Temozolomide Run3-DMSO | NM_0066<br>21 | AHCYL1 | S-adenosylhomocysteine hydrolase-like 1 | -1.039376 | Inlier |
| siRNA-Temozolomide Run2-DMSO | NM_0066<br>21 | AHCYL1 | S-adenosylhomocysteine hydrolase-like 1 | -0.968523 | Inlier |

Identification of Survival Genes in Human Glioblastoma Cells Using siRNA Screening  
 Nikhil G Thaker, Fang Zhang, Peter R. McDonald, Tong Ying Shun, Michael D Lewen, Ian F. Pollack, and John S. Lazo

Molecular Pharmacology

|                              |               |        |                                         |           |        |
|------------------------------|---------------|--------|-----------------------------------------|-----------|--------|
| siRNA Disorazole DMSO Run2   | NM_0066<br>21 | AHCYL1 | S-adenosylhomocysteine hydrolase-like 1 | -0.769789 | Inlier |
| siRNA Disorazole DMSO Run3   | NM_0066<br>21 | AHCYL1 | S-adenosylhomocysteine hydrolase-like 1 | -0.342559 | Inlier |
| siRNA Disorazole DMSO Run1   | NM_0066<br>21 | AHCYL1 | S-adenosylhomocysteine hydrolase-like 1 | 0.342559  | Inlier |
| siRNA-Temozolomide Run1-DMSO | NM_0066<br>21 | AHCYL1 | S-adenosylhomocysteine hydrolase-like 1 | 0.387567  | Inlier |
| siRNA-Vinblastine Run1-DMSO  | NM_0066<br>21 | AHCYL1 | S-adenosylhomocysteine hydrolase-like 1 | 0.579211  | Inlier |
| siRNA-Vinblastine Run2-DMSO  | NM_0066<br>21 | AHCYL1 | S-adenosylhomocysteine hydrolase-like 1 | 1.000046  | Inlier |
| siRNA-Temozolomide Run3-DMSO | NM_0016<br>21 | AHR    | aryl hydrocarbon receptor               | -2.409532 | Inlier |
| siRNA-Temozolomide Run1-DMSO | NM_0016<br>21 | AHR    | aryl hydrocarbon receptor               | -1.100803 | Inlier |
| siRNA-Temozolomide Run2-DMSO | NM_0016<br>21 | AHR    | aryl hydrocarbon receptor               | -0.794225 | Inlier |
| siRNA Disorazole DMSO Run2   | NM_0016<br>21 | AHR    | aryl hydrocarbon receptor               | -0.343983 | Inlier |

Identification of Survival Genes in Human Glioblastoma Cells Using siRNA Screening  
 Nikhil G Thaker, Fang Zhang, Peter R. McDonald, Tong Ying Shun, Michael D Lewen, Ian F. Pollack, and John S. Lazo

Molecular Pharmacology

|                              |               |      |                                                   |           |        |
|------------------------------|---------------|------|---------------------------------------------------|-----------|--------|
| siRNA-Vinblastine Run2-DMSO  | NM_0016<br>21 | AHR  | aryl<br>hydrocarb<br>on<br>receptor               | 0.343984  | Inlier |
| siRNA Disorazole DMSO Run3   | NM_0016<br>21 | AHR  | aryl<br>hydrocarb<br>on<br>receptor               | 0.420492  | Inlier |
| siRNA Disorazole DMSO Run1   | NM_0016<br>21 | AHR  | aryl<br>hydrocarb<br>on<br>receptor               | 0.554775  | Inlier |
| siRNA-Vinblastine Run1-DMSO  | NM_0016<br>21 | AHR  | aryl<br>hydrocarb<br>on<br>receptor               | 1.181724  | Inlier |
| siRNA Disorazole DMSO Run1   | NM_0207<br>31 | AHRR | aryl-<br>hydrocarb<br>on<br>receptor<br>repressor | -2.849132 | Inlier |
| siRNA-Vinblastine Run2-DMSO  | NM_0207<br>31 | AHRR | aryl-<br>hydrocarb<br>on<br>receptor<br>repressor | -0.814678 | Inlier |
| siRNA Disorazole DMSO Run3   | NM_0207<br>31 | AHRR | aryl-<br>hydrocarb<br>on<br>receptor<br>repressor | -0.393377 | Inlier |
| siRNA-Temozolomide Run3-DMSO | NM_0207<br>31 | AHRR | aryl-<br>hydrocarb<br>on<br>receptor<br>repressor | -0.205469 | Inlier |
| siRNA-Temozolomide Run2-DMSO | NM_0207<br>31 | AHRR | aryl-<br>hydrocarb<br>on<br>receptor<br>repressor | 0.205468  | Inlier |
| siRNA-Temozolomide Run1-DMSO | NM_0207<br>31 | AHRR | aryl-<br>hydrocarb<br>on<br>receptor<br>repressor | 0.534322  | Inlier |
| siRNA Disorazole DMSO Run2   | NM_0207<br>31 | AHRR | aryl-<br>hydrocarb<br>on<br>receptor<br>repressor | 2.602697  | Inlier |

Identification of Survival Genes in Human Glioblastoma Cells Using siRNA Screening

Nikhil G Thaker, Fang Zhang, Peter R. McDonald, Tong Ying Shun, Michael D Lewen, Ian F. Pollack, and John S. Lazo

Molecular Pharmacology

| siRNA Treatment              | Gene ID   | Gene Name | Protein Description                                                  | Score     | Category |
|------------------------------|-----------|-----------|----------------------------------------------------------------------|-----------|----------|
| siRNA-Vinblastine Run1-DMSO  | NM_020731 | AHRR      | aryl-hydrocarbon receptor repressor                                  | 4.2905    | Outlier  |
| siRNA-Temozolomide Run3-DMSO | NM_152392 | AHSA2     | AHA1, activator of heat shock 90kDa protein ATPase homolog 2 (yeast) | -0.858157 | Inlier   |
| siRNA-Temozolomide Run2-DMSO | NM_152392 | AHSA2     | AHA1, activator of heat shock 90kDa protein ATPase homolog 2 (yeast) | -0.490843 | Inlier   |
| siRNA-Vinblastine Run2-DMSO  | NM_152392 | AHSA2     | AHA1, activator of heat shock 90kDa protein ATPase homolog 2 (yeast) | -0.351579 | Inlier   |
| siRNA Disorazole DMSO Run3   | NM_152392 | AHSA2     | AHA1, activator of heat shock 90kDa protein ATPase homolog 2 (yeast) | -0.28421  | Inlier   |
| siRNA Disorazole DMSO Run1   | NM_152392 | AHSA2     | AHA1, activator of heat shock 90kDa protein ATPase homolog 2 (yeast) | 0.28421   | Inlier   |

Identification of Survival Genes in Human Glioblastoma Cells Using siRNA Screening

Nikhil G Thaker, Fang Zhang, Peter R. McDonald, Tong Ying Shun, Michael D Lewen, Ian F. Pollack, and John S.

Lazo

Molecular Pharmacology

|                              |               |       |                                                                                              |           |         |
|------------------------------|---------------|-------|----------------------------------------------------------------------------------------------|-----------|---------|
| siRNA-Temozolomide Run1-DMSO | NM_1523<br>92 | AHSA2 | AHA1,<br>activator<br>of heat<br>shock<br>90kDa<br>protein<br>ATPase<br>homolog 2<br>(yeast) | 1.577829  | Inlier  |
| siRNA-Vinblastine Run1-DMSO  | NM_1523<br>92 | AHSA2 | AHA1,<br>activator<br>of heat<br>shock<br>90kDa<br>protein<br>ATPase<br>homolog 2<br>(yeast) | 1.648151  | Inlier  |
| siRNA Disorazole DMSO Run2   | NM_1523<br>92 | AHSA2 | AHA1,<br>activator<br>of heat<br>shock<br>90kDa<br>protein<br>ATPase<br>homolog 2<br>(yeast) | 2.688848  | Inlier  |
| siRNA-Temozolomide Run2-DMSO | NM_0206<br>61 | AICDA | activation-<br>induced<br>cytidine<br>deaminas<br>e                                          | -3.805526 | Outlier |
| siRNA-Temozolomide Run1-DMSO | NM_0206<br>61 | AICDA | activation-<br>induced<br>cytidine<br>deaminas<br>e                                          | -3.365159 | Inlier  |
| siRNA-Vinblastine Run2-DMSO  | NM_0206<br>61 | AICDA | activation-<br>induced<br>cytidine<br>deaminas<br>e                                          | -1.105154 | Inlier  |
| siRNA Disorazole DMSO Run1   | NM_0206<br>61 | AICDA | activation-<br>induced<br>cytidine<br>deaminas<br>e                                          | -0.027688 | Inlier  |
| siRNA Disorazole DMSO Run3   | NM_0206<br>61 | AICDA | activation-<br>induced<br>cytidine<br>deaminas<br>e                                          | 0.02769   | Inlier  |

Identification of Survival Genes in Human Glioblastoma Cells Using siRNA Screening

Nikhil G Thaker, Fang Zhang, Peter R. McDonald, Tong Ying Shun, Michael D Lewen, Ian F. Pollack, and John S. Lazo

Molecular Pharmacology

| siRNA Treatment              | Gene ID   | Gene Name | Gene Description                              | Log Fold Change | Outlier Status |
|------------------------------|-----------|-----------|-----------------------------------------------|-----------------|----------------|
| siRNA-Temozolomide Run3-DMSO | NM_020661 | AICDA     | activation-induced cytidine deaminase         | 0.149639        | Inlier         |
| siRNA-Vinblastine Run1-DMSO  | NM_020661 | AICDA     | activation-induced cytidine deaminase         | 0.243846        | Inlier         |
| siRNA Disorazole DMSO Run2   | NM_020661 | AICDA     | activation-induced cytidine deaminase         | 1.259514        | Inlier         |
| siRNA-Vinblastine Run2-DMSO  | NM_003977 | AIP       | aryl hydrocarbon receptor interacting protein | -1.397721       | Inlier         |
| siRNA Disorazole DMSO Run1   | NM_003977 | AIP       | aryl hydrocarbon receptor interacting protein | -0.436339       | Inlier         |
| siRNA-Temozolomide Run3-DMSO | NM_003977 | AIP       | aryl hydrocarbon receptor interacting protein | -0.314523       | Inlier         |
| siRNA Disorazole DMSO Run3   | NM_003977 | AIP       | aryl hydrocarbon receptor interacting protein | -0.295629       | Inlier         |
| siRNA-Temozolomide Run2-DMSO | NM_003977 | AIP       | aryl hydrocarbon receptor interacting protein | 0.295629        | Inlier         |
| siRNA-Temozolomide Run1-DMSO | NM_003977 | AIP       | aryl hydrocarbon receptor interacting protein | 0.912661        | Inlier         |

Identification of Survival Genes in Human Glioblastoma Cells Using siRNA Screening

Nikhil G Thaker, Fang Zhang, Peter R. McDonald, Tong Ying Shun, Michael D Lewen, Ian F. Pollack, and John S. Lazo

Molecular Pharmacology

|                                  |               |       |                                                                          |           |        |
|----------------------------------|---------------|-------|--------------------------------------------------------------------------|-----------|--------|
| siRNA Disorazole DMSO Run2       | NM_0039<br>77 | AIP   | aryl<br>hydrocarb<br>on<br>receptor<br>interacting<br>protein            | 2.243098  | Inlier |
| siRNA-Vinblastine Run1-<br>DMSO  | NM_0039<br>77 | AIP   | aryl<br>hydrocarb<br>on<br>receptor<br>interacting<br>protein            | 2.498339  | Inlier |
| siRNA-Temozolomide Run2-<br>DMSO | NM_0143<br>36 | AIPL1 | aryl<br>hydrocarb<br>on<br>receptor<br>interacting<br>protein-<br>like 1 | -1.009222 | Inlier |
| siRNA Disorazole DMSO Run1       | NM_0143<br>36 | AIPL1 | aryl<br>hydrocarb<br>on<br>receptor<br>interacting<br>protein-<br>like 1 | -0.664405 | Inlier |
| siRNA-Temozolomide Run3-<br>DMSO | NM_0143<br>36 | AIPL1 | aryl<br>hydrocarb<br>on<br>receptor<br>interacting<br>protein-<br>like 1 | -0.158746 | Inlier |
| siRNA Disorazole DMSO Run3       | NM_0143<br>36 | AIPL1 | aryl<br>hydrocarb<br>on<br>receptor<br>interacting<br>protein-<br>like 1 | -0.144201 | Inlier |
| siRNA-Vinblastine Run2-<br>DMSO  | NM_0143<br>36 | AIPL1 | aryl<br>hydrocarb<br>on<br>receptor<br>interacting<br>protein-<br>like 1 | 0.1442    | Inlier |

Identification of Survival Genes in Human Glioblastoma Cells Using siRNA Screening  
 Nikhil G Thaker, Fang Zhang, Peter R. McDonald, Tong Ying Shun, Michael D Lewen, Ian F. Pollack, and John S. Lazo

Molecular Pharmacology

|                              |           |       |                                                      |           |        |
|------------------------------|-----------|-------|------------------------------------------------------|-----------|--------|
|                              |           |       | aryl hydrocarbon receptor interacting protein-like 1 | 0.684595  | Inlier |
| siRNA-Temozolomide Run1-DMSO | NM_014336 | AIPL1 | aryl hydrocarbon receptor interacting protein-like 1 | 0.684595  | Inlier |
| siRNA-Vinblastine Run1-DMSO  | NM_014336 | AIPL1 | aryl hydrocarbon receptor interacting protein-like 1 | 2.138466  | Inlier |
| siRNA Disorazole DMSO Run2   | NM_014336 | AIPL1 | aryl hydrocarbon receptor interacting protein-like 1 | 2.406819  | Inlier |
| siRNA Disorazole DMSO Run1   | NM_000476 | AK1   | adenylate kinase 1                                   | -0.815981 | Inlier |
| siRNA-Temozolomide Run3-DMSO | NM_000476 | AK1   | adenylate kinase 1                                   | -0.533019 | Inlier |
| siRNA Disorazole DMSO Run3   | NM_000476 | AK1   | adenylate kinase 1                                   | -0.152219 | Inlier |
| siRNA-Temozolomide Run2-DMSO | NM_000476 | AK1   | adenylate kinase 1                                   | -0.100195 | Inlier |
| siRNA-Temozolomide Run1-DMSO | NM_000476 | AK1   | adenylate kinase 1                                   | 0.100195  | Inlier |
| siRNA Disorazole DMSO Run2   | NM_000476 | AK1   | adenylate kinase 1                                   | 1.098301  | Inlier |
| siRNA-Vinblastine Run2-DMSO  | NM_000476 | AK1   | adenylate kinase 1                                   | 1.109751  | Inlier |
| siRNA-Vinblastine Run1-DMSO  | NM_000476 | AK1   | adenylate kinase 1                                   | 1.395523  | Inlier |
| siRNA-Temozolomide Run3-DMSO | NM_013411 | AK2   | adenylate kinase 2                                   | -1.24256  | Inlier |
| siRNA Disorazole DMSO Run2   | NM_013411 | AK2   | adenylate kinase 2                                   | -1.083058 | Inlier |
| siRNA-Temozolomide Run2-DMSO | NM_013411 | AK2   | adenylate kinase 2                                   | -0.320364 | Inlier |
| siRNA-Temozolomide Run1-DMSO | NM_013411 | AK2   | adenylate kinase 2                                   | -0.21089  | Inlier |
| siRNA Disorazole DMSO Run3   | NM_013411 | AK2   | adenylate kinase 2                                   | 0.21089   | Inlier |
| siRNA Disorazole DMSO Run1   | NM_013411 | AK2   | adenylate kinase 2                                   | 0.593137  | Inlier |
| siRNA-Vinblastine Run1-DMSO  | NM_013411 | AK2   | adenylate kinase 2                                   | 0.755863  | Inlier |



Identification of Survival Genes in Human Glioblastoma Cells Using siRNA Screening  
 Nikhil G Thaker, Fang Zhang, Peter R. McDonald, Tong Ying Shun, Michael D Lewen, Ian F. Pollack, and John S. Lazo

|                                  |               |       |                                 |           |        |
|----------------------------------|---------------|-------|---------------------------------|-----------|--------|
| siRNA-Vinblastine Run2-<br>DMSO  | NM_0134<br>11 | AK2   | adenylate<br>kinase 2           | 1.154215  | Inlier |
| siRNA-Temozolomide Run1-<br>DMSO | NM_0134<br>10 | AK3   | adenylate<br>kinase 3           | -0.96986  | Inlier |
| siRNA-Temozolomide Run3-<br>DMSO | NM_0134<br>10 | AK3   | adenylate<br>kinase 3           | -0.677262 | Inlier |
| siRNA-Temozolomide Run2-<br>DMSO | NM_0134<br>10 | AK3   | adenylate<br>kinase 3           | -0.671738 | Inlier |
| siRNA Disorazole DMSO Run2       | NM_0134<br>10 | AK3   | adenylate<br>kinase 3           | -0.124612 | Inlier |
| siRNA Disorazole DMSO Run1       | NM_0134<br>10 | AK3   | adenylate<br>kinase 3           | 0.124612  | Inlier |
| siRNA Disorazole DMSO Run3       | NM_0134<br>10 | AK3   | adenylate<br>kinase 3           | 0.423885  | Inlier |
| siRNA-Vinblastine Run1-<br>DMSO  | NM_0134<br>10 | AK3   | adenylate<br>kinase 3           | 0.911516  | Inlier |
| siRNA-Vinblastine Run2-<br>DMSO  | NM_0134<br>10 | AK3   | adenylate<br>kinase 3           | 1.056022  | Inlier |
| siRNA Disorazole DMSO Run2       | NM_0162<br>82 | AK3L1 | adenylate<br>kinase 3<br>like 1 | -1.639142 | Inlier |
| siRNA-Temozolomide Run1-<br>DMSO | NM_0162<br>82 | AK3L1 | adenylate<br>kinase 3<br>like 1 | -0.410739 | Inlier |
| siRNA Disorazole DMSO Run3       | NM_0162<br>82 | AK3L1 | adenylate<br>kinase 3<br>like 1 | -0.371316 | Inlier |
| siRNA-Temozolomide Run3-<br>DMSO | NM_0162<br>82 | AK3L1 | adenylate<br>kinase 3<br>like 1 | -0.277025 | Inlier |
| siRNA-Temozolomide Run2-<br>DMSO | NM_0162<br>82 | AK3L1 | adenylate<br>kinase 3<br>like 1 | 0.277025  | Inlier |
| siRNA Disorazole DMSO Run1       | NM_0162<br>82 | AK3L1 | adenylate<br>kinase 3<br>like 1 | 0.938261  | Inlier |
| siRNA-Vinblastine Run2-<br>DMSO  | NM_0162<br>82 | AK3L1 | adenylate<br>kinase 3<br>like 1 | 1.018051  | Inlier |
| siRNA-Vinblastine Run1-<br>DMSO  | NM_0162<br>82 | AK3L1 | adenylate<br>kinase 3<br>like 1 | 1.576081  | Inlier |
| siRNA Disorazole DMSO Run2       | NM_1748<br>58 | AK5   | adenylate<br>kinase 5           | -2.339402 | Inlier |
| siRNA-Temozolomide Run3-<br>DMSO | NM_1748<br>58 | AK5   | adenylate<br>kinase 5           | -1.551665 | Inlier |
| siRNA-Temozolomide Run2-<br>DMSO | NM_1748<br>58 | AK5   | adenylate<br>kinase 5           | -0.3123   | Inlier |
| siRNA-Temozolomide Run1-<br>DMSO | NM_1748<br>58 | AK5   | adenylate<br>kinase 5           | -0.223934 | Inlier |
| siRNA Disorazole DMSO Run3       | NM_1748<br>58 | AK5   | adenylate<br>kinase 5           | 0.223934  | Inlier |

Identification of Survival Genes in Human Glioblastoma Cells Using siRNA Screening

Nikhil G Thaker, Fang Zhang, Peter R. McDonald, Tong Ying Shun, Michael D Lewen, Ian F. Pollack, and John S. Lazo

|                                  |               |       |                                           |           |        |
|----------------------------------|---------------|-------|-------------------------------------------|-----------|--------|
| siRNA-Vinblastine Run2-<br>DMSO  | NM_1748<br>58 | AK5   | adenylate<br>kinase 5                     | 0.532833  | Inlier |
| siRNA-Vinblastine Run1-<br>DMSO  | NM_1748<br>58 | AK5   | adenylate<br>kinase 5                     | 0.816167  | Inlier |
| siRNA Disorazole DMSO Run1       | NM_1748<br>58 | AK5   | adenylate<br>kinase 5                     | 0.830214  | Inlier |
| siRNA-Temozolomide Run3-<br>DMSO | NM_1523<br>27 | AK7   | adenylate<br>kinase 7                     | -2.306074 | Inlier |
| siRNA Disorazole DMSO Run2       | NM_1523<br>27 | AK7   | adenylate<br>kinase 7                     | -0.600199 | Inlier |
| siRNA-Temozolomide Run1-<br>DMSO | NM_1523<br>27 | AK7   | adenylate<br>kinase 7                     | -0.336654 | Inlier |
| siRNA Disorazole DMSO Run3       | NM_1523<br>27 | AK7   | adenylate<br>kinase 7                     | -0.326043 | Inlier |
| siRNA Disorazole DMSO Run1       | NM_1523<br>27 | AK7   | adenylate<br>kinase 7                     | 0.326043  | Inlier |
| siRNA-Temozolomide Run2-<br>DMSO | NM_1523<br>27 | AK7   | adenylate<br>kinase 7                     | 0.748801  | Inlier |
| siRNA-Vinblastine Run1-<br>DMSO  | NM_1523<br>27 | AK7   | adenylate<br>kinase 7                     | 1.498964  | Inlier |
| siRNA-Vinblastine Run2-<br>DMSO  | NM_1523<br>27 | AK7   | adenylate<br>kinase 7                     | 1.902159  | Inlier |
| siRNA-Temozolomide Run2-<br>DMSO | NM_1392<br>75 | AKAP1 | A kinase<br>(PRKA)<br>anchor<br>protein 1 | -2.707083 | Inlier |
| siRNA-Temozolomide Run3-<br>DMSO | NM_1392<br>75 | AKAP1 | A kinase<br>(PRKA)<br>anchor<br>protein 1 | -2.241302 | Inlier |
| siRNA-Temozolomide Run1-<br>DMSO | NM_1392<br>75 | AKAP1 | A kinase<br>(PRKA)<br>anchor<br>protein 1 | -0.510579 | Inlier |
| siRNA Disorazole DMSO Run1       | NM_1392<br>75 | AKAP1 | A kinase<br>(PRKA)<br>anchor<br>protein 1 | -0.08311  | Inlier |
| siRNA Disorazole DMSO Run2       | NM_1392<br>75 | AKAP1 | A kinase<br>(PRKA)<br>anchor<br>protein 1 | 0.08311   | Inlier |
| siRNA-Vinblastine Run2-<br>DMSO  | NM_1392<br>75 | AKAP1 | A kinase<br>(PRKA)<br>anchor<br>protein 1 | 0.530462  | Inlier |
| siRNA-Vinblastine Run1-<br>DMSO  | NM_1392<br>75 | AKAP1 | A kinase<br>(PRKA)<br>anchor<br>protein 1 | 0.818538  | Inlier |

Identification of Survival Genes in Human Glioblastoma Cells Using siRNA Screening  
 Nikhil G Thaker, Fang Zhang, Peter R. McDonald, Tong Ying Shun, Michael D Lewen, Ian F. Pollack, and John S. Lazo

Molecular Pharmacology

|                              |               |        |                 |                  |
|------------------------------|---------------|--------|-----------------|------------------|
|                              |               |        | A kinase (PRKA) |                  |
|                              |               |        | anchor          |                  |
| siRNA Disorazole DMSO Run3   | NM_1392<br>75 | AKAP1  | protein 1       | 1.050288 Inlier  |
|                              |               |        | A kinase (PRKA) |                  |
|                              |               |        | anchor          |                  |
| siRNA Disorazole DMSO Run2   | NM_0072<br>02 | AKAP10 | protein 10      | -1.623149 Inlier |
|                              |               |        | A kinase (PRKA) |                  |
|                              |               |        | anchor          |                  |
| siRNA-Temozolomide Run3-DMSO | NM_0072<br>02 | AKAP10 | protein 10      | -1.262818 Inlier |
|                              |               |        | A kinase (PRKA) |                  |
|                              |               |        | anchor          |                  |
| siRNA Disorazole DMSO Run3   | NM_0072<br>02 | AKAP10 | protein 10      | -0.442566 Inlier |
|                              |               |        | A kinase (PRKA) |                  |
|                              |               |        | anchor          |                  |
| siRNA-Temozolomide Run2-DMSO | NM_0072<br>02 | AKAP10 | protein 10      | -0.09606 Inlier  |
|                              |               |        | A kinase (PRKA) |                  |
|                              |               |        | anchor          |                  |
| siRNA-Temozolomide Run1-DMSO | NM_0072<br>02 | AKAP10 | protein 10      | 0.09606 Inlier   |
|                              |               |        | A kinase (PRKA) |                  |
|                              |               |        | anchor          |                  |
| siRNA Disorazole DMSO Run1   | NM_0072<br>02 | AKAP10 | protein 10      | 0.375901 Inlier  |
|                              |               |        | A kinase (PRKA) |                  |
|                              |               |        | anchor          |                  |
| siRNA-Vinblastine Run2-DMSO  | NM_0072<br>02 | AKAP10 | protein 10      | 0.906434 Inlier  |
|                              |               |        | A kinase (PRKA) |                  |
|                              |               |        | anchor          |                  |
| siRNA-Vinblastine Run1-DMSO  | NM_0072<br>02 | AKAP10 | protein 10      | 1.216394 Inlier  |
|                              |               |        | A kinase (PRKA) |                  |
|                              |               |        | anchor          |                  |
| siRNA Disorazole DMSO Run2   | NM_1444<br>90 | AKAP11 | protein 11      | -2.011514 Inlier |
|                              |               |        | A kinase (PRKA) |                  |
|                              |               |        | anchor          |                  |
| siRNA-Temozolomide Run2-DMSO | NM_1444<br>90 | AKAP11 | protein 11      | -0.633777 Inlier |
|                              |               |        | A kinase (PRKA) |                  |
|                              |               |        | anchor          |                  |
| siRNA-Temozolomide Run3-DMSO | NM_1444<br>90 | AKAP11 | protein 11      | -0.555364 Inlier |
|                              |               |        | A kinase (PRKA) |                  |
|                              |               |        | anchor          |                  |
| siRNA-Temozolomide Run1-DMSO | NM_1444<br>90 | AKAP11 | protein 11      | -0.033526 Inlier |

Identification of Survival Genes in Human Glioblastoma Cells Using siRNA Screening  
 Nikhil G Thaker, Fang Zhang, Peter R. McDonald, Tong Ying Shun, Michael D Lewen, Ian F. Pollack, and John S. Lazo

Molecular Pharmacology

|                              |               |        |                            |           |        |
|------------------------------|---------------|--------|----------------------------|-----------|--------|
|                              |               |        | A kinase (PRKA)            |           |        |
| siRNA Disorazole DMSO Run1   | NM_1444<br>90 | AKAP11 | anchor protein 11          | 0.033526  | Inlier |
| siRNA Disorazole DMSO Run3   | NM_1444<br>90 | AKAP11 | anchor protein 11          | 0.715223  | Inlier |
| siRNA-Vinblastine Run2-DMSO  | NM_1444<br>90 | AKAP11 | anchor protein 11          | 0.726339  | Inlier |
| siRNA-Vinblastine Run1-DMSO  | NM_1444<br>90 | AKAP11 | anchor protein 11          | 0.759758  | Inlier |
| siRNA Disorazole DMSO Run2   | NM_1444<br>97 | AKAP12 | anchor protein (gravin) 12 | -1.863096 | Inlier |
| siRNA-Temozolomide Run1-DMSO | NM_1444<br>97 | AKAP12 | anchor protein (gravin) 12 | -0.33018  | Inlier |
| siRNA Disorazole DMSO Run3   | NM_1444<br>97 | AKAP12 | anchor protein (gravin) 12 | -0.160894 | Inlier |
| siRNA-Temozolomide Run2-DMSO | NM_1444<br>97 | AKAP12 | anchor protein (gravin) 12 | -0.131097 | Inlier |
| siRNA-Temozolomide Run3-DMSO | NM_1444<br>97 | AKAP12 | anchor protein (gravin) 12 | 0.131098  | Inlier |
| siRNA-Vinblastine Run2-DMSO  | NM_1444<br>97 | AKAP12 | anchor protein (gravin) 12 | 1.01882   | Inlier |
| siRNA Disorazole DMSO Run1   | NM_1444<br>97 | AKAP12 | anchor protein (gravin) 12 | 1.057684  | Inlier |

Identification of Survival Genes in Human Glioblastoma Cells Using siRNA Screening

Nikhil G Thaker, Fang Zhang, Peter R. McDonald, Tong Ying Shun, Michael D Lewen, Ian F. Pollack, and John S. Lazo

Molecular Pharmacology

|                              |                  |        |                                            |           |        |
|------------------------------|------------------|--------|--------------------------------------------|-----------|--------|
| siRNA-Vinblastine Run1-DMSO  | NM_1444<br>97    | AKAP12 | A kinase (PRKA) anchor protein (gravin) 12 | 1.409215  | Inlier |
| siRNA-Temozolomide Run3-DMSO | NM_0067<br>38    | AKAP13 | A kinase (PRKA) anchor protein 13          | -1.24067  | Inlier |
| siRNA-Temozolomide Run1-DMSO | NM_0067<br>38    | AKAP13 | A kinase (PRKA) anchor protein 13          | -0.557791 | Inlier |
| siRNA-Temozolomide Run2-DMSO | NM_0067<br>38    | AKAP13 | A kinase (PRKA) anchor protein 13          | -0.166867 | Inlier |
| siRNA-Vinblastine Run2-DMSO  | NM_0067<br>38    | AKAP13 | A kinase (PRKA) anchor protein 13          | -0.142585 | Inlier |
| siRNA Disorazole DMSO Run3   | NM_0067<br>38    | AKAP13 | A kinase (PRKA) anchor protein 13          | 0.142584  | Inlier |
| siRNA Disorazole DMSO Run1   | NM_0067<br>38    | AKAP13 | A kinase (PRKA) anchor protein 13          | 0.791209  | Inlier |
| siRNA Disorazole DMSO Run2   | NM_0067<br>38    | AKAP13 | A kinase (PRKA) anchor protein 13          | 0.836864  | Inlier |
| siRNA-Vinblastine Run1-DMSO  | NM_0067<br>38    | AKAP13 | A kinase (PRKA) anchor protein 13          | 0.998054  | Inlier |
| siRNA Disorazole DMSO Run2   | NM_0010<br>04065 | AKAP2  | A kinase (PRKA) anchor protein 2           | -2.07474  | Inlier |
| siRNA-Temozolomide Run2-DMSO | NM_0010<br>04065 | AKAP2  | A kinase (PRKA) anchor protein 2           | -0.727925 | Inlier |
| siRNA-Temozolomide Run1-DMSO | NM_0010<br>04065 | AKAP2  | A kinase (PRKA) anchor protein 2           | -0.621075 | Inlier |

Identification of Survival Genes in Human Glioblastoma Cells Using siRNA Screening  
 Nikhil G Thaker, Fang Zhang, Peter R. McDonald, Tong Ying Shun, Michael D Lewen, Ian F. Pollack, and John S. Lazo

Molecular Pharmacology

|                              |                  |        |                                      |           |        |
|------------------------------|------------------|--------|--------------------------------------|-----------|--------|
| siRNA-Temozolomide Run3-DMSO | NM_0010<br>04065 | AKAP2  | A kinase (PRKA)<br>anchor protein 2  | -0.424061 | Inlier |
| siRNA Disorazole DMSO Run1   | NM_0010<br>04065 | AKAP2  | A kinase (PRKA)<br>anchor protein 2  | 0.42406   | Inlier |
| siRNA-Vinblastine Run1-DMSO  | NM_0010<br>04065 | AKAP2  | A kinase (PRKA)<br>anchor protein 2  | 0.590958  | Inlier |
| siRNA Disorazole DMSO Run3   | NM_0010<br>04065 | AKAP2  | A kinase (PRKA)<br>anchor protein 2  | 0.911376  | Inlier |
| siRNA-Vinblastine Run2-DMSO  | NM_0010<br>04065 | AKAP2  | A kinase (PRKA)<br>anchor protein 2  | 1.191676  | Inlier |
| siRNA-Temozolomide Run2-DMSO | NM_1788<br>13    | AKAP28 | A kinase (PRKA)<br>anchor protein 14 | -0.971646 | Inlier |
| siRNA-Temozolomide Run3-DMSO | NM_1788<br>13    | AKAP28 | A kinase (PRKA)<br>anchor protein 14 | -0.920947 | Inlier |
| siRNA-Temozolomide Run1-DMSO | NM_1788<br>13    | AKAP28 | A kinase (PRKA)<br>anchor protein 14 | -0.470969 | Inlier |
| siRNA Disorazole DMSO Run2   | NM_1788<br>13    | AKAP28 | A kinase (PRKA)<br>anchor protein 14 | -0.210847 | Inlier |
| siRNA Disorazole DMSO Run3   | NM_1788<br>13    | AKAP28 | A kinase (PRKA)<br>anchor protein 14 | 0.210847  | Inlier |
| siRNA Disorazole DMSO Run1   | NM_1788<br>13    | AKAP28 | A kinase (PRKA)<br>anchor protein 14 | 0.272526  | Inlier |
| siRNA-Vinblastine Run1-DMSO  | NM_1788<br>13    | AKAP28 | A kinase (PRKA)<br>anchor protein 14 | 0.878031  | Inlier |
| siRNA-Vinblastine Run2-DMSO  | NM_1788<br>13    | AKAP28 | A kinase (PRKA)<br>anchor protein 14 | 0.894451  | Inlier |

Identification of Survival Genes in Human Glioblastoma Cells Using siRNA Screening  
 Nikhil G Thaker, Fang Zhang, Peter R. McDonald, Tong Ying Shun, Michael D Lewen, Ian F. Pollack, and John S. Lazo

Molecular Pharmacology

|                                  |               |       |                                           |           |         |
|----------------------------------|---------------|-------|-------------------------------------------|-----------|---------|
| siRNA Disorazole DMSO Run2       | NM_0064<br>22 | AKAP3 | A kinase<br>(PRKA)<br>anchor<br>protein 3 | -1.487061 | Inlier  |
| siRNA-Temozolomide Run3-<br>DMSO | NM_0064<br>22 | AKAP3 | A kinase<br>(PRKA)<br>anchor<br>protein 3 | -1.341385 | Inlier  |
| siRNA-Temozolomide Run2-<br>DMSO | NM_0064<br>22 | AKAP3 | A kinase<br>(PRKA)<br>anchor<br>protein 3 | -0.735211 | Inlier  |
| siRNA-Temozolomide Run1-<br>DMSO | NM_0064<br>22 | AKAP3 | A kinase<br>(PRKA)<br>anchor<br>protein 3 | -0.308582 | Inlier  |
| siRNA Disorazole DMSO Run3       | NM_0064<br>22 | AKAP3 | A kinase<br>(PRKA)<br>anchor<br>protein 3 | 0.308582  | Inlier  |
| siRNA Disorazole DMSO Run1       | NM_0064<br>22 | AKAP3 | A kinase<br>(PRKA)<br>anchor<br>protein 3 | 0.543783  | Inlier  |
| siRNA-Vinblastine Run2-<br>DMSO  | NM_0064<br>22 | AKAP3 | A kinase<br>(PRKA)<br>anchor<br>protein 3 | 0.613789  | Inlier  |
| siRNA-Vinblastine Run1-<br>DMSO  | NM_0064<br>22 | AKAP3 | A kinase<br>(PRKA)<br>anchor<br>protein 3 | 1.324712  | Inlier  |
| siRNA-Temozolomide Run3-<br>DMSO | NM_0038<br>86 | AKAP4 | A kinase<br>(PRKA)<br>anchor<br>protein 4 | -4.025392 | Outlier |
| siRNA-Temozolomide Run2-<br>DMSO | NM_0038<br>86 | AKAP4 | A kinase<br>(PRKA)<br>anchor<br>protein 4 | -2.909336 | Inlier  |
| siRNA Disorazole DMSO Run2       | NM_0038<br>86 | AKAP4 | A kinase<br>(PRKA)<br>anchor<br>protein 4 | -0.516872 | Inlier  |
| siRNA-Temozolomide Run1-<br>DMSO | NM_0038<br>86 | AKAP4 | A kinase<br>(PRKA)<br>anchor<br>protein 4 | -0.007195 | Inlier  |
| siRNA Disorazole DMSO Run1       | NM_0038<br>86 | AKAP4 | A kinase<br>(PRKA)<br>anchor<br>protein 4 | 0.007195  | Inlier  |

Identification of Survival Genes in Human Glioblastoma Cells Using siRNA Screening  
 Nikhil G Thaker, Fang Zhang, Peter R. McDonald, Tong Ying Shun, Michael D Lewen, Ian F. Pollack, and John S. Lazo

Molecular Pharmacology

|                              |               |       |                 |                  |
|------------------------------|---------------|-------|-----------------|------------------|
|                              |               |       | A kinase (PRKA) |                  |
|                              |               |       | anchor          |                  |
| siRNA Disorazole DMSO Run3   | NM_0038<br>86 | AKAP4 | protein 4       | 0.154868 Inlier  |
|                              |               |       | A kinase (PRKA) |                  |
|                              |               |       | anchor          |                  |
| siRNA-Vinblastine Run2-DMSO  | NM_0038<br>86 | AKAP4 | protein 4       | 0.832128 Inlier  |
|                              |               |       | A kinase (PRKA) |                  |
|                              |               |       | anchor          |                  |
| siRNA-Vinblastine Run1-DMSO  | NM_0038<br>86 | AKAP4 | protein 4       | 1.689754 Inlier  |
|                              |               |       | A kinase (PRKA) |                  |
|                              |               |       | anchor          |                  |
| siRNA Disorazole DMSO Run2   | NM_0048<br>57 | AKAP5 | protein 5       | -1.397707 Inlier |
|                              |               |       | A kinase (PRKA) |                  |
|                              |               |       | anchor          |                  |
| siRNA-Temozolomide Run3-DMSO | NM_0048<br>57 | AKAP5 | protein 5       | -0.508522 Inlier |
|                              |               |       | A kinase (PRKA) |                  |
|                              |               |       | anchor          |                  |
| siRNA-Temozolomide Run2-DMSO | NM_0048<br>57 | AKAP5 | protein 5       | -0.390152 Inlier |
|                              |               |       | A kinase (PRKA) |                  |
|                              |               |       | anchor          |                  |
| siRNA-Temozolomide Run1-DMSO | NM_0048<br>57 | AKAP5 | protein 5       | -0.075618 Inlier |
|                              |               |       | A kinase (PRKA) |                  |
|                              |               |       | anchor          |                  |
| siRNA Disorazole DMSO Run3   | NM_0048<br>57 | AKAP5 | protein 5       | 0.075618 Inlier  |
|                              |               |       | A kinase (PRKA) |                  |
|                              |               |       | anchor          |                  |
| siRNA-Vinblastine Run2-DMSO  | NM_0048<br>57 | AKAP5 | protein 5       | 0.840478 Inlier  |
|                              |               |       | A kinase (PRKA) |                  |
|                              |               |       | anchor          |                  |
| siRNA Disorazole DMSO Run1   | NM_0048<br>57 | AKAP5 | protein 5       | 0.906057 Inlier  |
|                              |               |       | A kinase (PRKA) |                  |
|                              |               |       | anchor          |                  |
| siRNA-Vinblastine Run1-DMSO  | NM_0048<br>57 | AKAP5 | protein 5       | 1.136096 Inlier  |
|                              |               |       | A kinase (PRKA) |                  |
|                              |               |       | anchor          |                  |
| siRNA-Temozolomide Run3-DMSO | NM_0042<br>74 | AKAP6 | protein 6       | -1.457721 Inlier |
|                              |               |       | A kinase (PRKA) |                  |
|                              |               |       | anchor          |                  |
| siRNA Disorazole DMSO Run2   | NM_0042<br>74 | AKAP6 | protein 6       | -1.101314 Inlier |



Identification of Survival Genes in Human Glioblastoma Cells Using siRNA Screening  
 Nikhil G Thaker, Fang Zhang, Peter R. McDonald, Tong Ying Shun, Michael D Lewen, Ian F. Pollack, and John S. Lazo

Molecular Pharmacology

|                              |               |       |                                     |           |        |
|------------------------------|---------------|-------|-------------------------------------|-----------|--------|
| siRNA-Temozolomide Run2-DMSO | NM_0042<br>74 | AKAP6 | A kinase (PRKA)<br>anchor protein 6 | -0.441537 | Inlier |
| siRNA-Temozolomide Run1-DMSO | NM_0042<br>74 | AKAP6 | A kinase (PRKA)<br>anchor protein 6 | -0.303924 | Inlier |
| siRNA Disorazole DMSO Run1   | NM_0042<br>74 | AKAP6 | A kinase (PRKA)<br>anchor protein 6 | 0.303924  | Inlier |
| siRNA Disorazole DMSO Run3   | NM_0042<br>74 | AKAP6 | A kinase (PRKA)<br>anchor protein 6 | 0.525869  | Inlier |
| siRNA-Vinblastine Run1-DMSO  | NM_0042<br>74 | AKAP6 | A kinase (PRKA)<br>anchor protein 6 | 0.823131  | Inlier |
| siRNA-Vinblastine Run2-DMSO  | NM_0042<br>74 | AKAP6 | A kinase (PRKA)<br>anchor protein 6 | 0.83013   | Inlier |
| siRNA Disorazole DMSO Run2   | NM_0048<br>42 | AKAP7 | A kinase (PRKA)<br>anchor protein 7 | -1.892523 | Inlier |
| siRNA-Temozolomide Run3-DMSO | NM_0048<br>42 | AKAP7 | A kinase (PRKA)<br>anchor protein 7 | -1.430436 | Inlier |
| siRNA-Temozolomide Run1-DMSO | NM_0048<br>42 | AKAP7 | A kinase (PRKA)<br>anchor protein 7 | -0.594528 | Inlier |
| siRNA-Temozolomide Run2-DMSO | NM_0048<br>42 | AKAP7 | A kinase (PRKA)<br>anchor protein 7 | -0.456088 | Inlier |
| siRNA Disorazole DMSO Run1   | NM_0048<br>42 | AKAP7 | A kinase (PRKA)<br>anchor protein 7 | 0.456088  | Inlier |
| siRNA Disorazole DMSO Run3   | NM_0048<br>42 | AKAP7 | A kinase (PRKA)<br>anchor protein 7 | 0.457986  | Inlier |
| siRNA-Vinblastine Run1-DMSO  | NM_0048<br>42 | AKAP7 | A kinase (PRKA)<br>anchor protein 7 | 0.754472  | Inlier |

Identification of Survival Genes in Human Glioblastoma Cells Using siRNA Screening  
 Nikhil G Thaker, Fang Zhang, Peter R. McDonald, Tong Ying Shun, Michael D Lewen, Ian F. Pollack, and John S. Lazo

Molecular Pharmacology

|                              |               |        |                                          |           |        |
|------------------------------|---------------|--------|------------------------------------------|-----------|--------|
| siRNA-Vinblastine Run2-DMSO  | NM_0048<br>42 | AKAP7  | A kinase (PRKA)<br>anchor protein 7      | 0.850093  | Inlier |
| siRNA-Temozolomide Run3-DMSO | NM_0058<br>58 | AKAP8  | A kinase (PRKA)<br>anchor protein 8      | -1.094503 | Inlier |
| siRNA Disorazole DMSO Run2   | NM_0058<br>58 | AKAP8  | A kinase (PRKA)<br>anchor protein 8      | -0.827268 | Inlier |
| siRNA-Temozolomide Run2-DMSO | NM_0058<br>58 | AKAP8  | A kinase (PRKA)<br>anchor protein 8      | -0.434706 | Inlier |
| siRNA-Temozolomide Run1-DMSO | NM_0058<br>58 | AKAP8  | A kinase (PRKA)<br>anchor protein 8      | -0.023642 | Inlier |
| siRNA Disorazole DMSO Run3   | NM_0058<br>58 | AKAP8  | A kinase (PRKA)<br>anchor protein 8      | 0.023641  | Inlier |
| siRNA-Vinblastine Run2-DMSO  | NM_0058<br>58 | AKAP8  | A kinase (PRKA)<br>anchor protein 8      | 0.6121    | Inlier |
| siRNA Disorazole DMSO Run1   | NM_0058<br>58 | AKAP8  | A kinase (PRKA)<br>anchor protein 8      | 0.7369    | Inlier |
| siRNA-Vinblastine Run1-DMSO  | NM_0058<br>58 | AKAP8  | A kinase (PRKA)<br>anchor protein 8      | 0.977022  | Inlier |
| siRNA Disorazole DMSO Run2   | NM_0143<br>71 | AKAP8L | A kinase (PRKA)<br>anchor protein 8-like | -1.521036 | Inlier |
| siRNA-Temozolomide Run3-DMSO | NM_0143<br>71 | AKAP8L | A kinase (PRKA)<br>anchor protein 8-like | -1.316931 | Inlier |
| siRNA-Temozolomide Run1-DMSO | NM_0143<br>71 | AKAP8L | A kinase (PRKA)<br>anchor protein 8-like | -0.314852 | Inlier |

Identification of Survival Genes in Human Glioblastoma Cells Using siRNA Screening

Nikhil G Thaker, Fang Zhang, Peter R. McDonald, Tong Ying Shun, Michael D Lewen, Ian F. Pollack, and John S. Lazo

Molecular Pharmacology

|                              |               |        |                                              |           |        |
|------------------------------|---------------|--------|----------------------------------------------|-----------|--------|
| siRNA Disorazole DMSO Run3   | NM_0143<br>71 | AKAP8L | A kinase (PRKA)<br>anchor protein 8-like     | -0.097419 | Inlier |
| siRNA Disorazole DMSO Run1   | NM_0143<br>71 | AKAP8L | A kinase (PRKA)<br>anchor protein 8-like     | 0.097419  | Inlier |
| siRNA-Temozolomide Run2-DMSO | NM_0143<br>71 | AKAP8L | A kinase (PRKA)<br>anchor protein 8-like     | 0.126912  | Inlier |
| siRNA-Vinblastine Run1-DMSO  | NM_0143<br>71 | AKAP8L | A kinase (PRKA)<br>anchor protein 8-like     | 1.034148  | Inlier |
| siRNA-Vinblastine Run2-DMSO  | NM_0143<br>71 | AKAP8L | A kinase (PRKA)<br>anchor protein 8-like     | 1.051458  | Inlier |
| siRNA-Temozolomide Run3-DMSO | NM_1471<br>71 | AKAP9  | anchor protein (yotiao) 9<br>A kinase (PRKA) | -0.819984 | Inlier |
| siRNA Disorazole DMSO Run2   | NM_1471<br>71 | AKAP9  | anchor protein (yotiao) 9<br>A kinase (PRKA) | -0.529016 | Inlier |
| siRNA-Temozolomide Run2-DMSO | NM_1471<br>71 | AKAP9  | anchor protein (yotiao) 9<br>A kinase (PRKA) | -0.387298 | Inlier |
| siRNA-Temozolomide Run1-DMSO | NM_1471<br>71 | AKAP9  | anchor protein (yotiao) 9<br>A kinase (PRKA) | -0.295632 | Inlier |
| siRNA Disorazole DMSO Run3   | NM_1471<br>71 | AKAP9  | anchor protein (yotiao) 9                    | 0.295632  | Inlier |

Identification of Survival Genes in Human Glioblastoma Cells Using siRNA Screening  
 Nikhil G Thaker, Fang Zhang, Peter R. McDonald, Tong Ying Shun, Michael D Lewen, Ian F. Pollack, and John S. Lazo

Molecular Pharmacology

|                              |               |        |                                                              |           |        |
|------------------------------|---------------|--------|--------------------------------------------------------------|-----------|--------|
| siRNA Disorazole DMSO Run1   | NM_1471<br>71 | AKAP9  | A kinase (PRKA) anchor protein (yotiao) 9                    | 0.984268  | Inlier |
| siRNA-Vinblastine Run2-DMSO  | NM_1471<br>71 | AKAP9  | A kinase (PRKA) anchor protein (yotiao) 9                    | 1.042001  | Inlier |
| siRNA-Vinblastine Run1-DMSO  | NM_1471<br>71 | AKAP9  | A kinase (PRKA) anchor protein (yotiao) 9                    | 1.123385  | Inlier |
| siRNA Disorazole DMSO Run2   | NM_0179<br>00 | AKIP   | AKIP                                                         | -0.973    | Inlier |
| siRNA-Temozolomide Run3-DMSO | NM_0179<br>00 | AKIP   | AKIP                                                         | -0.907348 | Inlier |
| siRNA-Temozolomide Run2-DMSO | NM_0179<br>00 | AKIP   | AKIP                                                         | -0.748814 | Inlier |
| siRNA-Temozolomide Run1-DMSO | NM_0179<br>00 | AKIP   | AKIP                                                         | -0.094525 | Inlier |
| siRNA Disorazole DMSO Run3   | NM_0179<br>00 | AKIP   | AKIP                                                         | 0.094525  | Inlier |
| siRNA Disorazole DMSO Run1   | NM_0179<br>00 | AKIP   | AKIP                                                         | 0.420782  | Inlier |
| siRNA-Vinblastine Run2-DMSO  | NM_0179<br>00 | AKIP   | AKIP                                                         | 0.600186  | Inlier |
| siRNA-Vinblastine Run1-DMSO  | NM_0179<br>00 | AKIP   | AKIP                                                         | 0.93371   | Inlier |
| siRNA-Vinblastine Run2-DMSO  | NM_1533<br>26 | AKR1A1 | aldo-keto reductase family 1, member A1 (aldehyde reductase) | -1.077382 | Inlier |
| siRNA-Temozolomide Run3-DMSO | NM_1533<br>26 | AKR1A1 | aldo-keto reductase family 1, member A1 (aldehyde reductase) | -0.805997 | Inlier |

Identification of Survival Genes in Human Glioblastoma Cells Using siRNA Screening  
 Nikhil G Thaker, Fang Zhang, Peter R. McDonald, Tong Ying Shun, Michael D Lewen, Ian F. Pollack, and John S. Lazo  
 Molecular Pharmacology

|                              |               |        |                                                              |           |        |
|------------------------------|---------------|--------|--------------------------------------------------------------|-----------|--------|
| siRNA-Temozolomide Run2-DMSO | NM_1533<br>26 | AKR1A1 | aldo-keto reductase family 1, member A1 (aldehyde reductase) | -0.543003 | Inlier |
| siRNA Disorazole DMSO Run1   | NM_1533<br>26 | AKR1A1 | aldo-keto reductase family 1, member A1 (aldehyde reductase) | -0.078549 | Inlier |
| siRNA-Temozolomide Run1-DMSO | NM_1533<br>26 | AKR1A1 | aldo-keto reductase family 1, member A1 (aldehyde reductase) | 0.078548  | Inlier |
| siRNA Disorazole DMSO Run3   | NM_1533<br>26 | AKR1A1 | aldo-keto reductase family 1, member A1 (aldehyde reductase) | 0.43187   | Inlier |
| siRNA Disorazole DMSO Run2   | NM_1533<br>26 | AKR1A1 | aldo-keto reductase family 1, member A1 (aldehyde reductase) | 0.876904  | Inlier |
| siRNA-Vinblastine Run1-DMSO  | NM_1533<br>26 | AKR1A1 | aldo-keto reductase family 1, member A1 (aldehyde reductase) | 0.998715  | Inlier |

Identification of Survival Genes in Human Glioblastoma Cells Using siRNA Screening  
 Nikhil G Thaker, Fang Zhang, Peter R. McDonald, Tong Ying Shun, Michael D Lewen, Ian F. Pollack, and John S. Lazo  
 Molecular Pharmacology

|                              |           |        |                                                            |           |        |
|------------------------------|-----------|--------|------------------------------------------------------------|-----------|--------|
| siRNA-Temozolomide Run3-DMSO | NM_001628 | AKR1B1 | aldo-keto reductase family 1, member B1 (aldose reductase) | -1.086729 | Inlier |
| siRNA-Temozolomide Run2-DMSO | NM_001628 | AKR1B1 | aldo-keto reductase family 1, member B1 (aldose reductase) | -0.43523  | Inlier |
| siRNA Disorazole DMSO Run3   | NM_001628 | AKR1B1 | aldo-keto reductase family 1, member B1 (aldose reductase) | -0.14477  | Inlier |
| siRNA Disorazole DMSO Run1   | NM_001628 | AKR1B1 | aldo-keto reductase family 1, member B1 (aldose reductase) | -0.008044 | Inlier |
| siRNA-Vinblastine Run2-DMSO  | NM_001628 | AKR1B1 | aldo-keto reductase family 1, member B1 (aldose reductase) | 0.008044  | Inlier |
| siRNA-Temozolomide Run1-DMSO | NM_001628 | AKR1B1 | aldo-keto reductase family 1, member B1 (aldose reductase) | 0.91377   | Inlier |

Identification of Survival Genes in Human Glioblastoma Cells Using siRNA Screening  
 Nikhil G Thaker, Fang Zhang, Peter R. McDonald, Tong Ying Shun, Michael D Lewen, Ian F. Pollack, and John S. Lazo  
 Molecular Pharmacology

|                              |               |         |                                                             |           |        |
|------------------------------|---------------|---------|-------------------------------------------------------------|-----------|--------|
| siRNA-Vinblastine Run1-DMSO  | NM_0016<br>28 | AKR1B1  | aldo-keto reductase family 1, member B1 (aldose reductase)  | 1.665987  | Inlier |
| siRNA Disorazole DMSO Run2   | NM_0016<br>28 | AKR1B1  | aldo-keto reductase family 1, member B1 (aldose reductase)  | 1.725642  | Inlier |
| siRNA Disorazole DMSO Run1   | NM_0202<br>99 | AKR1B10 | aldo-keto reductase family 1, member B10 (aldose reductase) | -0.820697 | Inlier |
| siRNA Disorazole DMSO Run3   | NM_0202<br>99 | AKR1B10 | aldo-keto reductase family 1, member B10 (aldose reductase) | -0.528303 | Inlier |
| siRNA-Temozolomide Run3-DMSO | NM_0202<br>99 | AKR1B10 | aldo-keto reductase family 1, member B10 (aldose reductase) | -0.452304 | Inlier |
| siRNA-Temozolomide Run2-DMSO | NM_0202<br>99 | AKR1B10 | aldo-keto reductase family 1, member B10 (aldose reductase) | -0.024308 | Inlier |

Identification of Survival Genes in Human Glioblastoma Cells Using siRNA Screening

Nikhil G Thaker, Fang Zhang, Peter R. McDonald, Tong Ying Shun, Michael D Lewen, Ian F. Pollack, and John S. Lazo

Molecular Pharmacology

|                              |           |         |                                                                                                                        |           |        |
|------------------------------|-----------|---------|------------------------------------------------------------------------------------------------------------------------|-----------|--------|
| siRNA-Vinblastine Run2-DMSO  | NM_020299 | AKR1B10 | aldo-keto reductase family 1, member B10 (aldose reductase)                                                            | 0.024308  | Inlier |
| siRNA-Temozolomide Run1-DMSO | NM_020299 | AKR1B10 | aldo-keto reductase family 1, member B10 (aldose reductase)                                                            | 0.986608  | Inlier |
| siRNA-Vinblastine Run1-DMSO  | NM_020299 | AKR1B10 | aldo-keto reductase family 1, member B10 (aldose reductase)                                                            | 1.640071  | Inlier |
| siRNA Disorazole DMSO Run2   | NM_020299 | AKR1B10 | aldo-keto reductase family 1, member B10 (aldose reductase)                                                            | 2.206119  | Inlier |
| siRNA-Temozolomide Run3-DMSO | NM_001353 | AKR1C1  | aldo-keto reductase family 1, member C1 (dihydrodiol dehydrogenase 1; 20-alpha (3-alpha)-hydroxysteroid dehydrogenase) | -1.126787 | Inlier |



Identification of Survival Genes in Human Glioblastoma Cells Using siRNA Screening

Nikhil G Thaker, Fang Zhang, Peter R. McDonald, Tong Ying Shun, Michael D Lewen, Ian F. Pollack, and John S. Lazo

Molecular Pharmacology

|                              |           |        |                                                                                                                        |                  |
|------------------------------|-----------|--------|------------------------------------------------------------------------------------------------------------------------|------------------|
|                              |           |        | aldo-keto reductase family 1, member C1 (dihydrodiol dehydrogenase 1; 20-alpha (3-alpha)-hydroxysteroid dehydrogenase) |                  |
| siRNA-Temozolomide Run2-DMSO | NM_001353 | AKR1C1 | aldo-keto reductase family 1, member C1 (dihydrodiol dehydrogenase 1; 20-alpha (3-alpha)-hydroxysteroid dehydrogenase) | -0.968628 Inlier |
|                              |           |        | aldo-keto reductase family 1, member C1 (dihydrodiol dehydrogenase 1; 20-alpha (3-alpha)-hydroxysteroid dehydrogenase) |                  |
| siRNA Disorazole DMSO Run2   | NM_001353 | AKR1C1 | aldo-keto reductase family 1, member C1 (dihydrodiol dehydrogenase 1; 20-alpha (3-alpha)-hydroxysteroid dehydrogenase) | -0.108531 Inlier |
|                              |           |        | aldo-keto reductase family 1, member C1 (dihydrodiol dehydrogenase 1; 20-alpha (3-alpha)-hydroxysteroid dehydrogenase) |                  |
| siRNA Disorazole DMSO Run3   | NM_001353 | AKR1C1 | aldo-keto reductase family 1, member C1 (dihydrodiol dehydrogenase 1; 20-alpha (3-alpha)-hydroxysteroid dehydrogenase) | -0.000431 Inlier |

Identification of Survival Genes in Human Glioblastoma Cells Using siRNA Screening

Nikhil G Thaker, Fang Zhang, Peter R. McDonald, Tong Ying Shun, Michael D Lewen, Ian F. Pollack, and John S.

Lazo

Molecular Pharmacology

| siRNA                        | Gene      | Gene   | Gene   | Gene   | Gene   | Gene            |
|------------------------------|-----------|--------|--------|--------|--------|-----------------|
| siRNA-Temozolomide Run1-DMSO | NM_001353 | AKR1C1 | AKR1C1 | AKR1C1 | AKR1C1 | 0.000431 Inlier |
| siRNA Disorazole DMSO Run1   | NM_001353 | AKR1C1 | AKR1C1 | AKR1C1 | AKR1C1 | 0.446079 Inlier |
| siRNA-Vinblastine Run1-DMSO  | NM_001353 | AKR1C1 | AKR1C1 | AKR1C1 | AKR1C1 | 0.902921 Inlier |

aldo-keto reductase family 1, member C1 (dihydrodiol dehydrogenase 1; 20-alpha (3-alpha)-hydroxysteroid dehydrogenase)

aldo-keto reductase family 1, member C1 (dihydrodiol dehydrogenase 1; 20-alpha (3-alpha)-hydroxysteroid dehydrogenase)

aldo-keto reductase family 1, member C1 (dihydrodiol dehydrogenase 1; 20-alpha (3-alpha)-hydroxysteroid dehydrogenase)

Identification of Survival Genes in Human Glioblastoma Cells Using siRNA Screening

Nikhil G Thaker, Fang Zhang, Peter R. McDonald, Tong Ying Shun, Michael D Lewen, Ian F. Pollack, and John S.

Lazo

Molecular Pharmacology

|                              |           |        |                                                                                                                                                  |           |        |
|------------------------------|-----------|--------|--------------------------------------------------------------------------------------------------------------------------------------------------|-----------|--------|
| siRNA-Vinblastine Run2-DMSO  | NM_001353 | AKR1C1 | aldo-keto reductase family 1, member C1 (dihydrodiol dehydrogenase 1; 20-alpha (3-alpha)-hydroxysteroid dehydrogenase)                           | 1.065868  | Inlier |
| siRNA-Temozolomide Run3-DMSO | NM_001354 | AKR1C2 | aldo-keto reductase family 1, member C2 (dihydrodiol dehydrogenase 2; bile acid binding protein; 3-alpha hydroxysteroid dehydrogenase, type III) | -1.43336  | Inlier |
| siRNA-Temozolomide Run2-DMSO | NM_001354 | AKR1C2 | aldo-keto reductase family 1, member C2 (dihydrodiol dehydrogenase 2; bile acid binding protein; 3-alpha hydroxysteroid dehydrogenase, type III) | -1.323883 | Inlier |

Identification of Survival Genes in Human Glioblastoma Cells Using siRNA Screening

Nikhil G Thaker, Fang Zhang, Peter R. McDonald, Tong Ying Shun, Michael D Lewen, Ian F. Pollack, and John S. Lazo

Molecular Pharmacology

|                              |           |        |                                                                                                                                                  |           |        |
|------------------------------|-----------|--------|--------------------------------------------------------------------------------------------------------------------------------------------------|-----------|--------|
| siRNA-Temozolomide Run1-DMSO | NM_001354 | AKR1C2 | aldo-keto reductase family 1, member C2 (dihydrodiol dehydrogenase 2; bile acid binding protein; 3-alpha hydroxysteroid dehydrogenase, type III) | -0.733663 | Inlier |
| siRNA-Vinblastine Run1-DMSO  | NM_001354 | AKR1C2 | aldo-keto reductase family 1, member C2 (dihydrodiol dehydrogenase 2; bile acid binding protein; 3-alpha hydroxysteroid dehydrogenase, type III) | -0.005681 | Inlier |

Identification of Survival Genes in Human Glioblastoma Cells Using siRNA Screening

Nikhil G Thaker, Fang Zhang, Peter R. McDonald, Tong Ying Shun, Michael D Lewen, Ian F. Pollack, and John S. Lazo

Molecular Pharmacology

|                             |               |        |                                                                                                                                                  |          |        |
|-----------------------------|---------------|--------|--------------------------------------------------------------------------------------------------------------------------------------------------|----------|--------|
| siRNA Disorazole DMSO Run1  | NM_0013<br>54 | AKR1C2 | aldo-keto reductase family 1, member C2 (dihydrodiol dehydrogenase 2; bile acid binding protein; 3-alpha hydroxysteroid dehydrogenase, type III) | 0.005681 | Inlier |
| siRNA-Vinblastine Run2-DMSO | NM_0013<br>54 | AKR1C2 | aldo-keto reductase family 1, member C2 (dihydrodiol dehydrogenase 2; bile acid binding protein; 3-alpha hydroxysteroid dehydrogenase, type III) | 0.275929 | Inlier |

Identification of Survival Genes in Human Glioblastoma Cells Using siRNA Screening

Nikhil G Thaker, Fang Zhang, Peter R. McDonald, Tong Ying Shun, Michael D Lewen, Ian F. Pollack, and John S. Lazo

Molecular Pharmacology

|                              |               |        |                                                                                                                                                  |                  |
|------------------------------|---------------|--------|--------------------------------------------------------------------------------------------------------------------------------------------------|------------------|
|                              |               |        | aldo-keto reductase family 1, member C2 (dihydrodiol dehydrogenase 2; bile acid binding protein; 3-alpha hydroxysteroid dehydrogenase, type III) |                  |
| siRNA Disorazole DMSO Run2   | NM_0013<br>54 | AKR1C2 |                                                                                                                                                  | 0.615337 Inlier  |
|                              |               |        | aldo-keto reductase family 1, member C2 (dihydrodiol dehydrogenase 2; bile acid binding protein; 3-alpha hydroxysteroid dehydrogenase, type III) |                  |
| siRNA Disorazole DMSO Run3   | NM_0013<br>54 | AKR1C2 |                                                                                                                                                  | 0.787944 Inlier  |
|                              |               |        | aldo-keto reductase family 1, member C3 (3-alpha hydroxysteroid dehydrogenase, type II)                                                          |                  |
| siRNA-Temozolomide Run1-DMSO | NM_0037<br>39 | AKR1C3 |                                                                                                                                                  | -0.807206 Inlier |

Identification of Survival Genes in Human Glioblastoma Cells Using siRNA Screening

Nikhil G Thaker, Fang Zhang, Peter R. McDonald, Tong Ying Shun, Michael D Lewen, Ian F. Pollack, and John S. Lazo

Molecular Pharmacology

|                              |               |        |                                                                                         |           |        |
|------------------------------|---------------|--------|-----------------------------------------------------------------------------------------|-----------|--------|
| siRNA-Temozolomide Run2-DMSO | NM_0037<br>39 | AKR1C3 | aldo-keto reductase family 1, member C3 (3-alpha hydroxysteroid dehydrogenase, type II) | -0.541794 | Inlier |
| siRNA-Vinblastine Run2-DMSO  | NM_0037<br>39 | AKR1C3 | aldo-keto reductase family 1, member C3 (3-alpha hydroxysteroid dehydrogenase, type II) | -0.415279 | Inlier |
| siRNA Disorazole DMSO Run2   | NM_0037<br>39 | AKR1C3 | aldo-keto reductase family 1, member C3 (3-alpha hydroxysteroid dehydrogenase, type II) | -0.187532 | Inlier |
| siRNA Disorazole DMSO Run1   | NM_0037<br>39 | AKR1C3 | aldo-keto reductase family 1, member C3 (3-alpha hydroxysteroid dehydrogenase, type II) | 0.187533  | Inlier |

Identification of Survival Genes in Human Glioblastoma Cells Using siRNA Screening

Nikhil G Thaker, Fang Zhang, Peter R. McDonald, Tong Ying Shun, Michael D Lewen, Ian F. Pollack, and John S. Lazo

Molecular Pharmacology

|                              |               |        |                                                                                                                                            |           |        |
|------------------------------|---------------|--------|--------------------------------------------------------------------------------------------------------------------------------------------|-----------|--------|
| siRNA-Vinblastine Run1-DMSO  | NM_0037<br>39 | AKR1C3 | aldo-keto reductase family 1, member C3 (3-alpha hydroxysteroid dehydrogenase, type II)                                                    | 0.893414  | Inlier |
| siRNA Disorazole DMSO Run3   | NM_0037<br>39 | AKR1C3 | aldo-keto reductase family 1, member C3 (3-alpha hydroxysteroid dehydrogenase, type II)                                                    | 1.100392  | Inlier |
| siRNA-Temozolomide Run3-DMSO | NM_0037<br>39 | AKR1C3 | aldo-keto reductase family 1, member C3 (3-alpha hydroxysteroid dehydrogenase, type II)                                                    | 1.323544  | Inlier |
| siRNA-Temozolomide Run3-DMSO | NM_0018<br>18 | AKR1C4 | aldo-keto reductase family 1, member C4 (chlordecone reductase; 3-alpha hydroxysteroid dehydrogenase, type I; dihydrodiol dehydrogenase 4) | -1.816207 | Inlier |



Identification of Survival Genes in Human Glioblastoma Cells Using siRNA Screening

Nikhil G Thaker, Fang Zhang, Peter R. McDonald, Tong Ying Shun, Michael D Lewen, Ian F. Pollack, and John S. Lazo

Molecular Pharmacology

|                              |           |        |                                                                                                                                            |           |        |
|------------------------------|-----------|--------|--------------------------------------------------------------------------------------------------------------------------------------------|-----------|--------|
| siRNA-Temozolomide Run2-DMSO | NM_001818 | AKR1C4 | aldo-keto reductase family 1, member C4 (chlordecone reductase; 3-alpha hydroxysteroid dehydrogenase, type I; dihydrodiol dehydrogenase 4) | -0.958374 | Inlier |
|------------------------------|-----------|--------|--------------------------------------------------------------------------------------------------------------------------------------------|-----------|--------|

|                              |           |        |                                                                                                                                            |           |        |
|------------------------------|-----------|--------|--------------------------------------------------------------------------------------------------------------------------------------------|-----------|--------|
| siRNA-Temozolomide Run1-DMSO | NM_001818 | AKR1C4 | aldo-keto reductase family 1, member C4 (chlordecone reductase; 3-alpha hydroxysteroid dehydrogenase, type I; dihydrodiol dehydrogenase 4) | -0.917051 | Inlier |
|------------------------------|-----------|--------|--------------------------------------------------------------------------------------------------------------------------------------------|-----------|--------|

Identification of Survival Genes in Human Glioblastoma Cells Using siRNA Screening

Nikhil G Thaker, Fang Zhang, Peter R. McDonald, Tong Ying Shun, Michael D Lewen, Ian F. Pollack, and John S.

Lazo

Molecular Pharmacology

|                             |           |        |                                                                                                                                            |           |        |
|-----------------------------|-----------|--------|--------------------------------------------------------------------------------------------------------------------------------------------|-----------|--------|
| siRNA-Vinblastine Run2-DMSO | NM_001818 | AKR1C4 | aldo-keto reductase family 1, member C4 (chlordecone reductase; 3-alpha hydroxysteroid dehydrogenase, type I; dihydrodiol dehydrogenase 4) | -0.004027 | Inlier |
| siRNA-Vinblastine Run1-DMSO | NM_001818 | AKR1C4 | aldo-keto reductase family 1, member C4 (chlordecone reductase; 3-alpha hydroxysteroid dehydrogenase, type I; dihydrodiol dehydrogenase 4) | 0.004026  | Inlier |

Identification of Survival Genes in Human Glioblastoma Cells Using siRNA Screening

Nikhil G Thaker, Fang Zhang, Peter R. McDonald, Tong Ying Shun, Michael D Lewen, Ian F. Pollack, and John S. Lazo

Molecular Pharmacology

|                            |    |         |        |                                                                                                                                            |          |        |
|----------------------------|----|---------|--------|--------------------------------------------------------------------------------------------------------------------------------------------|----------|--------|
| siRNA Disorazole DMSO Run1 | 18 | NM_0018 | AKR1C4 | aldo-keto reductase family 1, member C4 (chlordecone reductase; 3-alpha hydroxysteroid dehydrogenase, type I; dihydrodiol dehydrogenase 4) | 0.279377 | Inlier |
|----------------------------|----|---------|--------|--------------------------------------------------------------------------------------------------------------------------------------------|----------|--------|

|                            |    |         |        |                                                                                                                                            |          |        |
|----------------------------|----|---------|--------|--------------------------------------------------------------------------------------------------------------------------------------------|----------|--------|
| siRNA Disorazole DMSO Run3 | 18 | NM_0018 | AKR1C4 | aldo-keto reductase family 1, member C4 (chlordecone reductase; 3-alpha hydroxysteroid dehydrogenase, type I; dihydrodiol dehydrogenase 4) | 0.431949 | Inlier |
|----------------------------|----|---------|--------|--------------------------------------------------------------------------------------------------------------------------------------------|----------|--------|

Identification of Survival Genes in Human Glioblastoma Cells Using siRNA Screening

Nikhil G Thaker, Fang Zhang, Peter R. McDonald, Tong Ying Shun, Michael D Lewen, Ian F. Pollack, and John S. Lazo

Molecular Pharmacology

|                              |               |         |                                                                                                                                            |           |        |
|------------------------------|---------------|---------|--------------------------------------------------------------------------------------------------------------------------------------------|-----------|--------|
| siRNA Disorazole DMSO Run2   | NM_0018<br>18 | AKR1C4  | aldo-keto reductase family 1, member C4 (chlordecone reductase; 3-alpha hydroxysteroid dehydrogenase, type I; dihydrodiol dehydrogenase 4) | 1.714015  | Inlier |
| siRNA Disorazole DMSO Run3   | NM_0314<br>36 | AKR1CL2 | aldo-keto reductase family 1, member C-like 2                                                                                              | -0.729231 | Inlier |
| siRNA-Temozolomide Run3-DMSO | NM_0314<br>36 | AKR1CL2 | aldo-keto reductase family 1, member C-like 2                                                                                              | -0.619769 | Inlier |
| siRNA-Temozolomide Run2-DMSO | NM_0314<br>36 | AKR1CL2 | aldo-keto reductase family 1, member C-like 2                                                                                              | -0.249924 | Inlier |
| siRNA Disorazole DMSO Run1   | NM_0314<br>36 | AKR1CL2 | aldo-keto reductase family 1, member C-like 2                                                                                              | -0.232948 | Inlier |
| siRNA-Vinblastine Run2-DMSO  | NM_0314<br>36 | AKR1CL2 | aldo-keto reductase family 1, member C-like 2                                                                                              | 0.232948  | Inlier |
| siRNA-Temozolomide Run1-DMSO | NM_0314<br>36 | AKR1CL2 | aldo-keto reductase family 1, member C-like 2                                                                                              | 0.790096  | Inlier |

Identification of Survival Genes in Human Glioblastoma Cells Using siRNA Screening

Nikhil G Thaker, Fang Zhang, Peter R. McDonald, Tong Ying Shun, Michael D Lewen, Ian F. Pollack, and John S. Lazo

Molecular Pharmacology

|                              |               |         |                                                                                  |           |        |
|------------------------------|---------------|---------|----------------------------------------------------------------------------------|-----------|--------|
| siRNA-Vinblastine Run1-DMSO  | NM_0314<br>36 | AKR1CL2 | aldo-keto reductase family 1, member C-like 2                                    | 2.071513  | Inlier |
| siRNA Disorazole DMSO Run2   | NM_0314<br>36 | AKR1CL2 | aldo-keto reductase family 1, member C-like 2                                    | 2.92399   | Inlier |
| siRNA-Temozolomide Run2-DMSO | NM_0059<br>89 | AKR1D1  | aldo-keto reductase family 1, member D1 (delta 4-3-ketosteroid-5-beta-reductase) | -2.198301 | Inlier |
| siRNA-Temozolomide Run3-DMSO | NM_0059<br>89 | AKR1D1  | aldo-keto reductase family 1, member D1 (delta 4-3-ketosteroid-5-beta-reductase) | -1.806505 | Inlier |
| siRNA-Vinblastine Run2-DMSO  | NM_0059<br>89 | AKR1D1  | aldo-keto reductase family 1, member D1 (delta 4-3-ketosteroid-5-beta-reductase) | -0.625277 | Inlier |
| siRNA-Vinblastine Run1-DMSO  | NM_0059<br>89 | AKR1D1  | aldo-keto reductase family 1, member D1 (delta 4-3-ketosteroid-5-beta-reductase) | -0.131882 | Inlier |

Identification of Survival Genes in Human Glioblastoma Cells Using siRNA Screening

Nikhil G Thaker, Fang Zhang, Peter R. McDonald, Tong Ying Shun, Michael D Lewen, Ian F. Pollack, and John S. Lazo

Molecular Pharmacology

|                                  |               |        |                                                                                                             |           |        |
|----------------------------------|---------------|--------|-------------------------------------------------------------------------------------------------------------|-----------|--------|
| siRNA Disorazole DMSO Run2       | NM_0059<br>89 | AKR1D1 | aldo-keto<br>reductase<br>family 1,<br>member<br>D1 (delta<br>4-3-<br>ketosteroi<br>d-5-beta-<br>reductase) | 0.131881  | Inlier |
| siRNA Disorazole DMSO Run1       | NM_0059<br>89 | AKR1D1 | aldo-keto<br>reductase<br>family 1,<br>member<br>D1 (delta<br>4-3-<br>ketosteroi<br>d-5-beta-<br>reductase) | 0.182328  | Inlier |
| siRNA Disorazole DMSO Run3       | NM_0059<br>89 | AKR1D1 | aldo-keto<br>reductase<br>family 1,<br>member<br>D1 (delta<br>4-3-<br>ketosteroi<br>d-5-beta-<br>reductase) | 0.723723  | Inlier |
| siRNA-Temozolomide Run1-<br>DMSO | NM_0059<br>89 | AKR1D1 | aldo-keto<br>reductase<br>family 1,<br>member<br>D1 (delta<br>4-3-<br>ketosteroi<br>d-5-beta-<br>reductase) | 0.974765  | Inlier |
| siRNA Disorazole DMSO Run1       | NM_0036<br>89 | AKR7A2 | aldo-keto<br>reductase<br>family 7,<br>member<br>A2<br>(aflatoxin<br>aldehyde<br>reductase)                 | -0.753038 | Inlier |

Identification of Survival Genes in Human Glioblastoma Cells Using siRNA Screening

Nikhil G Thaker, Fang Zhang, Peter R. McDonald, Tong Ying Shun, Michael D Lewen, Ian F. Pollack, and John S. Lazo

Molecular Pharmacology

|                              |           |        |                                                                        |           |        |
|------------------------------|-----------|--------|------------------------------------------------------------------------|-----------|--------|
| siRNA-Temozolomide Run3-DMSO | NM_003689 | AKR7A2 | aldo-keto reductase family 7, member A2 (aflatoxin aldehyde reductase) | -0.595962 | Inlier |
| siRNA-Temozolomide Run2-DMSO | NM_003689 | AKR7A2 | aldo-keto reductase family 7, member A2 (aflatoxin aldehyde reductase) | -0.075291 | Inlier |
| siRNA Disorazole DMSO Run3   | NM_003689 | AKR7A2 | aldo-keto reductase family 7, member A2 (aflatoxin aldehyde reductase) | -0.015581 | Inlier |
| siRNA-Temozolomide Run1-DMSO | NM_003689 | AKR7A2 | aldo-keto reductase family 7, member A2 (aflatoxin aldehyde reductase) | 0.015581  | Inlier |
| siRNA-Vinblastine Run2-DMSO  | NM_003689 | AKR7A2 | aldo-keto reductase family 7, member A2 (aflatoxin aldehyde reductase) | 1.381547  | Inlier |

Identification of Survival Genes in Human Glioblastoma Cells Using siRNA Screening  
 Nikhil G Thaker, Fang Zhang, Peter R. McDonald, Tong Ying Shun, Michael D Lewen, Ian F. Pollack, and John S. Lazo  
 Molecular Pharmacology

|                                  |               |        |                                                                                             |           |        |
|----------------------------------|---------------|--------|---------------------------------------------------------------------------------------------|-----------|--------|
| siRNA Disorazole DMSO Run2       | NM_0036<br>89 | AKR7A2 | aldo-keto<br>reductase<br>family 7,<br>member<br>A2<br>(aflatoxin<br>aldehyde<br>reductase) | 2.350035  | Inlier |
| siRNA-Vinblastine Run1-<br>DMSO  | NM_0036<br>89 | AKR7A2 | aldo-keto<br>reductase<br>family 7,<br>member<br>A2<br>(aflatoxin<br>aldehyde<br>reductase) | 2.579385  | Inlier |
| siRNA-Temozolomide Run3-<br>DMSO | NM_0120<br>67 | AKR7A3 | aldo-keto<br>reductase<br>family 7,<br>member<br>A3<br>(aflatoxin<br>aldehyde<br>reductase) | -1.71946  | Inlier |
| siRNA Disorazole DMSO Run1       | NM_0120<br>67 | AKR7A3 | aldo-keto<br>reductase<br>family 7,<br>member<br>A3<br>(aflatoxin<br>aldehyde<br>reductase) | -1.614083 | Inlier |
| siRNA-Temozolomide Run2-<br>DMSO | NM_0120<br>67 | AKR7A3 | aldo-keto<br>reductase<br>family 7,<br>member<br>A3<br>(aflatoxin<br>aldehyde<br>reductase) | -0.583387 | Inlier |



Identification of Survival Genes in Human Glioblastoma Cells Using siRNA Screening  
 Nikhil G Thaker, Fang Zhang, Peter R. McDonald, Tong Ying Shun, Michael D Lewen, Ian F. Pollack, and John S. Lazo  
 Molecular Pharmacology

|                              |              |        |                                                                        |           |         |
|------------------------------|--------------|--------|------------------------------------------------------------------------|-----------|---------|
| siRNA-Temozolomide Run1-DMSO | NM_012067    | AKR7A3 | aldo-keto reductase family 7, member A3 (aflatoxin aldehyde reductase) | -0.159429 | Inlier  |
| siRNA Disorazole DMSO Run3   | NM_012067    | AKR7A3 | aldo-keto reductase family 7, member A3 (aflatoxin aldehyde reductase) | 0.159427  | Inlier  |
| siRNA-Vinblastine Run2-DMSO  | NM_012067    | AKR7A3 | aldo-keto reductase family 7, member A3 (aflatoxin aldehyde reductase) | 0.441474  | Inlier  |
| siRNA-Vinblastine Run1-DMSO  | NM_012067    | AKR7A3 | aldo-keto reductase family 7, member A3 (aflatoxin aldehyde reductase) | 0.765613  | Inlier  |
| siRNA Disorazole DMSO Run2   | NM_012067    | AKR7A3 | aldo-keto reductase family 7, member A3 (aflatoxin aldehyde reductase) | 3.851829  | Outlier |
| siRNA-Temozolomide Run2-DMSO | NM_001014432 | AKT1   | v-akt murine thymoma viral oncogene homolog 1                          | -0.897757 | Inlier  |

Identification of Survival Genes in Human Glioblastoma Cells Using siRNA Screening  
 Nikhil G Thaker, Fang Zhang, Peter R. McDonald, Tong Ying Shun, Michael D Lewen, Ian F. Pollack, and John S. Lazo  
 Molecular Pharmacology

|                              |                  |      |                                                              |           |        |
|------------------------------|------------------|------|--------------------------------------------------------------|-----------|--------|
| siRNA-Temozolomide Run3-DMSO | NM_0010<br>14432 | AKT1 | v-akt<br>murine<br>thymoma<br>viral<br>oncogene<br>homolog 1 | -0.879856 | Inlier |
| siRNA Disorazole DMSO Run3   | NM_0010<br>14432 | AKT1 | v-akt<br>murine<br>thymoma<br>viral<br>oncogene<br>homolog 1 | -0.469144 | Inlier |
| siRNA Disorazole DMSO Run1   | NM_0010<br>14432 | AKT1 | v-akt<br>murine<br>thymoma<br>viral<br>oncogene<br>homolog 1 | -0.164232 | Inlier |
| siRNA-Temozolomide Run1-DMSO | NM_0010<br>14432 | AKT1 | v-akt<br>murine<br>thymoma<br>viral<br>oncogene<br>homolog 1 | 0.164232  | Inlier |
| siRNA Disorazole DMSO Run2   | NM_0010<br>14432 | AKT1 | v-akt<br>murine<br>thymoma<br>viral<br>oncogene<br>homolog 1 | 0.434181  | Inlier |
| siRNA-Vinblastine Run1-DMSO  | NM_0010<br>14432 | AKT1 | v-akt<br>murine<br>thymoma<br>viral<br>oncogene<br>homolog 1 | 1.311807  | Inlier |
| siRNA-Vinblastine Run2-DMSO  | NM_0010<br>14432 | AKT1 | v-akt<br>murine<br>thymoma<br>viral<br>oncogene<br>homolog 1 | 1.348764  | Inlier |

Identification of Survival Genes in Human Glioblastoma Cells Using siRNA Screening

Nikhil G Thaker, Fang Zhang, Peter R. McDonald, Tong Ying Shun, Michael D Lewen, Ian F. Pollack, and John S. Lazo

Molecular Pharmacology

|                              |               |      |                                                              |           |        |
|------------------------------|---------------|------|--------------------------------------------------------------|-----------|--------|
| siRNA-Temozolomide Run2-DMSO | NM_0016<br>26 | AKT2 | v-akt<br>murine<br>thymoma<br>viral<br>oncogene<br>homolog 2 | -0.766467 | Inlier |
| siRNA-Temozolomide Run3-DMSO | NM_0016<br>26 | AKT2 | v-akt<br>murine<br>thymoma<br>viral<br>oncogene<br>homolog 2 | -0.752168 | Inlier |
| siRNA-Temozolomide Run1-DMSO | NM_0016<br>26 | AKT2 | v-akt<br>murine<br>thymoma<br>viral<br>oncogene<br>homolog 2 | -0.312506 | Inlier |
| siRNA Disorazole DMSO Run3   | NM_0016<br>26 | AKT2 | v-akt<br>murine<br>thymoma<br>viral<br>oncogene<br>homolog 2 | -0.13555  | Inlier |
| siRNA Disorazole DMSO Run1   | NM_0016<br>26 | AKT2 | v-akt<br>murine<br>thymoma<br>viral<br>oncogene<br>homolog 2 | 0.13555   | Inlier |
| siRNA Disorazole DMSO Run2   | NM_0016<br>26 | AKT2 | v-akt<br>murine<br>thymoma<br>viral<br>oncogene<br>homolog 2 | 0.596832  | Inlier |
| siRNA-Vinblastine Run2-DMSO  | NM_0016<br>26 | AKT2 | v-akt<br>murine<br>thymoma<br>viral<br>oncogene<br>homolog 2 | 0.968146  | Inlier |

Identification of Survival Genes in Human Glioblastoma Cells Using siRNA Screening  
 Nikhil G Thaker, Fang Zhang, Peter R. McDonald, Tong Ying Shun, Michael D Lewen, Ian F. Pollack, and John S. Lazo  
 Molecular Pharmacology

|                              |           |      |                                                                                                 |           |        |
|------------------------------|-----------|------|-------------------------------------------------------------------------------------------------|-----------|--------|
| siRNA-Vinblastine Run1-DMSO  | NM_001626 | AKT2 | v-akt<br>murine<br>thymoma<br>viral<br>oncogene<br>homolog 2                                    | 1.708104  | Inlier |
| siRNA Disorazole DMSO Run1   | NM_181690 | AKT3 | v-akt<br>murine<br>thymoma<br>viral<br>oncogene<br>homolog 3<br>(protein<br>kinase B,<br>gamma) | -0.798962 | Inlier |
| siRNA-Temozolomide Run3-DMSO | NM_181690 | AKT3 | v-akt<br>murine<br>thymoma<br>viral<br>oncogene<br>homolog 3<br>(protein<br>kinase B,<br>gamma) | -0.550038 | Inlier |
| siRNA Disorazole DMSO Run3   | NM_181690 | AKT3 | v-akt<br>murine<br>thymoma<br>viral<br>oncogene<br>homolog 3<br>(protein<br>kinase B,<br>gamma) | -0.309887 | Inlier |
| siRNA-Temozolomide Run2-DMSO | NM_181690 | AKT3 | v-akt<br>murine<br>thymoma<br>viral<br>oncogene<br>homolog 3<br>(protein<br>kinase B,<br>gamma) | -0.196499 | Inlier |
| siRNA-Temozolomide Run1-DMSO | NM_181690 | AKT3 | v-akt<br>murine<br>thymoma<br>viral<br>oncogene<br>homolog 3<br>(protein<br>kinase B,<br>gamma) | 0.196499  | Inlier |

Identification of Survival Genes in Human Glioblastoma Cells Using siRNA Screening  
 Nikhil G Thaker, Fang Zhang, Peter R. McDonald, Tong Ying Shun, Michael D Lewen, Ian F. Pollack, and John S. Lazo

Molecular Pharmacology

|                                  |                  |      |                                                                                                 |           |         |
|----------------------------------|------------------|------|-------------------------------------------------------------------------------------------------|-----------|---------|
| siRNA Disorazole DMSO Run2       | NM_1816<br>90    | AKT3 | v-akt<br>murine<br>thymoma<br>viral<br>oncogene<br>homolog 3<br>(protein<br>kinase B,<br>gamma) | 5.96897   | Outlier |
| siRNA-Vinblastine Run2-<br>DMSO  | NM_1816<br>90    | AKT3 | v-akt<br>murine<br>thymoma<br>viral<br>oncogene<br>homolog 3<br>(protein<br>kinase B,<br>gamma) | 6.012547  | Outlier |
| siRNA-Vinblastine Run1-<br>DMSO  | NM_1816<br>90    | AKT3 | v-akt<br>murine<br>thymoma<br>viral<br>oncogene<br>homolog 3<br>(protein<br>kinase B,<br>gamma) | 6.113482  | Outlier |
| siRNA-Temozolomide Run3-<br>DMSO | NM_0010<br>03945 | ALAD | aminolevulinate, delta-                                                                         | -1.918364 | Inlier  |
| siRNA-Temozolomide Run2-<br>DMSO | NM_0010<br>03945 | ALAD | aminolevulinate, delta-                                                                         | -0.553321 | Inlier  |
| siRNA-Temozolomide Run1-<br>DMSO | NM_0010<br>03945 | ALAD | aminolevulinate, delta-                                                                         | -0.42148  | Inlier  |
| siRNA Disorazole DMSO Run1       | NM_0010<br>03945 | ALAD | aminolevulinate, delta-                                                                         | -0.2884   | Inlier  |
| siRNA-Vinblastine Run2-<br>DMSO  | NM_0010<br>03945 | ALAD | aminolevulinate, delta-                                                                         | 0.288399  | Inlier  |

Identification of Survival Genes in Human Glioblastoma Cells Using siRNA Screening  
 Nikhil G Thaker, Fang Zhang, Peter R. McDonald, Tong Ying Shun, Michael D Lewen, Ian F. Pollack, and John S. Lazo

Molecular Pharmacology

|                              |                  |       |  |                                         |                  |
|------------------------------|------------------|-------|--|-----------------------------------------|------------------|
|                              |                  |       |  | aminolevulinic acid, delta-             |                  |
| siRNA Disorazole DMSO Run2   | NM_0010<br>03945 | ALAD  |  | aminolevulinic acid, delta-             | 0.795679 Inlier  |
| siRNA Disorazole DMSO Run3   | NM_0010<br>03945 | ALAD  |  | aminolevulinic acid, delta-             | 1.028172 Inlier  |
| siRNA-Vinblastine Run1-DMSO  | NM_0010<br>03945 | ALAD  |  | aminolevulinic acid, delta-             | 2.309081 Inlier  |
| siRNA Disorazole DMSO Run1   | NM_0006<br>88    | ALAS1 |  | aminolevulinic acid, delta-, synthase 1 | -1.036903 Inlier |
| siRNA Disorazole DMSO Run3   | NM_0006<br>88    | ALAS1 |  | aminolevulinic acid, delta-, synthase 1 | -0.987903 Inlier |
| siRNA-Vinblastine Run2-DMSO  | NM_0006<br>88    | ALAS1 |  | aminolevulinic acid, delta-, synthase 1 | -0.361097 Inlier |
| siRNA Disorazole DMSO Run2   | NM_0006<br>88    | ALAS1 |  | aminolevulinic acid, delta-, synthase 1 | -0.274714 Inlier |
| siRNA-Temozolomide Run3-DMSO | NM_0006<br>88    | ALAS1 |  | aminolevulinic acid, delta-, synthase 1 | 0.274714 Inlier  |
| siRNA-Temozolomide Run2-DMSO | NM_0006<br>88    | ALAS1 |  | aminolevulinic acid, delta-, synthase 1 | 0.358228 Inlier  |
| siRNA-Temozolomide Run1-DMSO | NM_0006<br>88    | ALAS1 |  | aminolevulinic acid, delta-, synthase 1 | 1.743619 Inlier  |

Identification of Survival Genes in Human Glioblastoma Cells Using siRNA Screening  
 Nikhil G Thaker, Fang Zhang, Peter R. McDonald, Tong Ying Shun, Michael D Lewen, Ian F. Pollack, and John S. Lazo  
 Molecular Pharmacology

|                              |           |       |                                                                        |           |        |
|------------------------------|-----------|-------|------------------------------------------------------------------------|-----------|--------|
| siRNA-Vinblastine Run1-DMSO  | NM_000688 | ALAS1 | aminolevulinate, delta-, synthase 1                                    | 2.380439  | Inlier |
| siRNA-Temozolomide Run1-DMSO | NM_000032 | ALAS2 | aminolevulinate, delta-, synthase 2 (sideroblastic/hypochromic anemia) | -1.207317 | Inlier |
| siRNA-Temozolomide Run2-DMSO | NM_000032 | ALAS2 | aminolevulinate, delta-, synthase 2 (sideroblastic/hypochromic anemia) | -0.828887 | Inlier |
| siRNA Disorazole DMSO Run3   | NM_000032 | ALAS2 | aminolevulinate, delta-, synthase 2 (sideroblastic/hypochromic anemia) | -0.714474 | Inlier |
| siRNA Disorazole DMSO Run1   | NM_000032 | ALAS2 | aminolevulinate, delta-, synthase 2 (sideroblastic/hypochromic anemia) | -0.02371  | Inlier |
| siRNA-Vinblastine Run2-DMSO  | NM_000032 | ALAS2 | aminolevulinate, delta-, synthase 2 (sideroblastic/hypochromic anemia) | 0.023709  | Inlier |

Identification of Survival Genes in Human Glioblastoma Cells Using siRNA Screening

Nikhil G Thaker, Fang Zhang, Peter R. McDonald, Tong Ying Shun, Michael D Lewen, Ian F. Pollack, and John S. Lazo

Molecular Pharmacology

|                              |           |          |                                                                   |           |         |
|------------------------------|-----------|----------|-------------------------------------------------------------------|-----------|---------|
| siRNA-Temozolomide Run3-DMSO | NM_000032 | ALAS2    | aminolevulinic acid synthase 2 (sideroblastic/hypochromic anemia) | 0.56265   | Inlier  |
| siRNA Disorazole DMSO Run2   | NM_000032 | ALAS2    | aminolevulinic acid synthase 2 (sideroblastic/hypochromic anemia) | 0.634526  | Inlier  |
| siRNA-Vinblastine Run1-DMSO  | NM_000032 | ALAS2    | aminolevulinic acid synthase 2 (sideroblastic/hypochromic anemia) | 3.6195    | Outlier |
| siRNA Disorazole DMSO Run2   | NM_002860 | ALDH18A1 | aldehyde dehydrogenase 18 family, member A1                       | -0.927817 | Inlier  |
| siRNA-Temozolomide Run3-DMSO | NM_002860 | ALDH18A1 | aldehyde dehydrogenase 18 family, member A1                       | -0.421183 | Inlier  |
| siRNA-Temozolomide Run2-DMSO | NM_002860 | ALDH18A1 | aldehyde dehydrogenase 18 family, member A1                       | -0.360013 | Inlier  |
| siRNA Disorazole DMSO Run3   | NM_002860 | ALDH18A1 | aldehyde dehydrogenase 18 family, member A1                       | -0.223176 | Inlier  |



Identification of Survival Genes in Human Glioblastoma Cells Using siRNA Screening  
 Nikhil G Thaker, Fang Zhang, Peter R. McDonald, Tong Ying Shun, Michael D Lewen, Ian F. Pollack, and John S. Lazo

Molecular Pharmacology

| siRNA Treatment              | Gene ID   | Gene Name | Family                            | Member    | Value     | Outlier Type |
|------------------------------|-----------|-----------|-----------------------------------|-----------|-----------|--------------|
| siRNA-Temozolomide Run1-DMSO | NM_002860 | ALDH18A1  | aldehyde dehydrogenase 18 family, | member A1 | 0.223176  | Inlier       |
| siRNA Disorazole DMSO Run1   | NM_002860 | ALDH18A1  | aldehyde dehydrogenase 18 family, | member A1 | 1.964322  | Inlier       |
| siRNA-Vinblastine Run2-DMSO  | NM_002860 | ALDH18A1  | aldehyde dehydrogenase 18 family, | member A1 | 2.550529  | Inlier       |
| siRNA-Vinblastine Run1-DMSO  | NM_002860 | ALDH18A1  | aldehyde dehydrogenase 18 family, | member A1 | 2.829411  | Inlier       |
| siRNA-Temozolomide Run3-DMSO | NM_000689 | ALDH1A1   | aldehyde dehydrogenase 1 family,  | member A1 | -1.192904 | Inlier       |
| siRNA-Temozolomide Run2-DMSO | NM_000689 | ALDH1A1   | aldehyde dehydrogenase 1 family,  | member A1 | -0.74363  | Inlier       |
| siRNA Disorazole DMSO Run2   | NM_000689 | ALDH1A1   | aldehyde dehydrogenase 1 family,  | member A1 | -0.645585 | Inlier       |
| siRNA Disorazole DMSO Run3   | NM_000689 | ALDH1A1   | aldehyde dehydrogenase 1 family,  | member A1 | -0.12747  | Inlier       |

Identification of Survival Genes in Human Glioblastoma Cells Using siRNA Screening  
 Nikhil G Thaker, Fang Zhang, Peter R. McDonald, Tong Ying Shun, Michael D Lewen, Ian F. Pollack, and John S. Lazo

Molecular Pharmacology

| siRNA Treatment              | Gene ID   | Gene Name | Family                           | Member | Value     | Category |
|------------------------------|-----------|-----------|----------------------------------|--------|-----------|----------|
| siRNA-Temozolomide Run1-DMSO | NM_000689 | ALDH1A1   | aldehyde dehydrogenase 1 family, | A1     | 0.12747   | Inlier   |
| siRNA Disorazole DMSO Run1   | NM_000689 | ALDH1A1   | aldehyde dehydrogenase 1 family, | A1     | 0.321952  | Inlier   |
| siRNA-Vinblastine Run1-DMSO  | NM_000689 | ALDH1A1   | aldehyde dehydrogenase 1 family, | A1     | 0.703415  | Inlier   |
| siRNA-Vinblastine Run2-DMSO  | NM_000689 | ALDH1A1   | aldehyde dehydrogenase 1 family, | A1     | 1.013414  | Inlier   |
| siRNA-Temozolomide Run2-DMSO | NM_170697 | ALDH1A2   | aldehyde dehydrogenase 1 family, | A2     | -1.889421 | Inlier   |
| siRNA-Temozolomide Run3-DMSO | NM_170697 | ALDH1A2   | aldehyde dehydrogenase 1 family, | A2     | -0.60121  | Inlier   |
| siRNA-Temozolomide Run1-DMSO | NM_170697 | ALDH1A2   | aldehyde dehydrogenase 1 family, | A2     | -0.447418 | Inlier   |
| siRNA Disorazole DMSO Run1   | NM_170697 | ALDH1A2   | aldehyde dehydrogenase 1 family, | A2     | -0.354351 | Inlier   |

Identification of Survival Genes in Human Glioblastoma Cells Using siRNA Screening  
 Nikhil G Thaker, Fang Zhang, Peter R. McDonald, Tong Ying Shun, Michael D Lewen, Ian F. Pollack, and John S. Lazo

Molecular Pharmacology

| siRNA Treatment              | Gene ID       | Gene Name | Accession                                  | Score     | Category |
|------------------------------|---------------|-----------|--------------------------------------------|-----------|----------|
| siRNA Disorazole DMSO Run2   | NM_1706<br>97 | ALDH1A2   | aldehyde dehydrogenase 1 family, member A2 | 0.354352  | Inlier   |
| siRNA Disorazole DMSO Run3   | NM_1706<br>97 | ALDH1A2   | aldehyde dehydrogenase 1 family, member A2 | 0.74779   | Inlier   |
| siRNA-Vinblastine Run1-DMSO  | NM_1706<br>97 | ALDH1A2   | aldehyde dehydrogenase 1 family, member A2 | 0.845747  | Inlier   |
| siRNA-Vinblastine Run2-DMSO  | NM_1706<br>97 | ALDH1A2   | aldehyde dehydrogenase 1 family, member A2 | 1.148659  | Inlier   |
| siRNA-Temozolomide Run3-DMSO | NM_0006<br>93 | ALDH1A3   | aldehyde dehydrogenase 1 family, member A3 | -3.40137  | Inlier   |
| siRNA-Temozolomide Run1-DMSO | NM_0006<br>93 | ALDH1A3   | aldehyde dehydrogenase 1 family, member A3 | -1.937146 | Inlier   |
| siRNA-Vinblastine Run1-DMSO  | NM_0006<br>93 | ALDH1A3   | aldehyde dehydrogenase 1 family, member A3 | -0.351477 | Inlier   |
| siRNA-Vinblastine Run2-DMSO  | NM_0006<br>93 | ALDH1A3   | aldehyde dehydrogenase 1 family, member A3 | -0.069592 | Inlier   |

Identification of Survival Genes in Human Glioblastoma Cells Using siRNA Screening  
 Nikhil G Thaker, Fang Zhang, Peter R. McDonald, Tong Ying Shun, Michael D Lewen, Ian F. Pollack, and John S. Lazo

Molecular Pharmacology

| siRNA Treatment              | Gene ID   | Gene Name | Accession | Score     | Category |
|------------------------------|-----------|-----------|-----------|-----------|----------|
| siRNA Disorazole DMSO Run1   | NM_000693 | ALDH1A3   | A3        | 0.069592  | Inlier   |
| siRNA-Temozolomide Run2-DMSO | NM_000693 | ALDH1A3   | A3        | 0.670096  | Inlier   |
| siRNA Disorazole DMSO Run2   | NM_000693 | ALDH1A3   | A3        | 0.678904  | Inlier   |
| siRNA Disorazole DMSO Run3   | NM_000693 | ALDH1A3   | A3        | 4.507441  | Outlier  |
| siRNA-Temozolomide Run3-DMSO | NM_000692 | ALDH1B1   | B1        | -2.629931 | Inlier   |
| siRNA-Temozolomide Run2-DMSO | NM_000692 | ALDH1B1   | B1        | -0.692018 | Inlier   |
| siRNA Disorazole DMSO Run2   | NM_000692 | ALDH1B1   | B1        | -0.656982 | Inlier   |
| siRNA-Temozolomide Run1-DMSO | NM_000692 | ALDH1B1   | B1        | -0.231141 | Inlier   |

Identification of Survival Genes in Human Glioblastoma Cells Using siRNA Screening  
 Nikhil G Thaker, Fang Zhang, Peter R. McDonald, Tong Ying Shun, Michael D Lewen, Ian F. Pollack, and John S. Lazo

Molecular Pharmacology

|                                  |               |         |                                                                  |           |        |
|----------------------------------|---------------|---------|------------------------------------------------------------------|-----------|--------|
| siRNA Disorazole DMSO Run3       | NM_0006<br>92 | ALDH1B1 | aldehyde<br>dehydroge<br>nase 1<br>family,<br>member<br>B1       | 0.23114   | Inlier |
| siRNA Disorazole DMSO Run1       | NM_0006<br>92 | ALDH1B1 | aldehyde<br>dehydroge<br>nase 1<br>family,<br>member<br>B1       | 0.462196  | Inlier |
| siRNA-Vinblastine Run2-<br>DMSO  | NM_0006<br>92 | ALDH1B1 | aldehyde<br>dehydroge<br>nase 1<br>family,<br>member<br>B1       | 1.141621  | Inlier |
| siRNA-Vinblastine Run1-<br>DMSO  | NM_0006<br>92 | ALDH1B1 | aldehyde<br>dehydroge<br>nase 2<br>family,<br>member<br>B1       | 2.11652   | Inlier |
| siRNA-Temozolomide Run3-<br>DMSO | NM_0006<br>90 | ALDH2   | aldehyde<br>dehydroge<br>nase 2<br>family<br>(mitochon<br>drial) | -0.850395 | Inlier |
| siRNA-Temozolomide Run2-<br>DMSO | NM_0006<br>90 | ALDH2   | aldehyde<br>dehydroge<br>nase 2<br>family<br>(mitochon<br>drial) | -0.742209 | Inlier |
| siRNA Disorazole DMSO Run3       | NM_0006<br>90 | ALDH2   | aldehyde<br>dehydroge<br>nase 2<br>family<br>(mitochon<br>drial) | -0.098598 | Inlier |
| siRNA-Temozolomide Run1-<br>DMSO | NM_0006<br>90 | ALDH2   | aldehyde<br>dehydroge<br>nase 2<br>family<br>(mitochon<br>drial) | -0.052742 | Inlier |

Identification of Survival Genes in Human Glioblastoma Cells Using siRNA Screening  
 Nikhil G Thaker, Fang Zhang, Peter R. McDonald, Tong Ying Shun, Michael D Lewen, Ian F. Pollack, and John S. Lazo

Molecular Pharmacology

| siRNA Treatment              | Gene ID   | Gene Name | Family                                          | Value     | Category |
|------------------------------|-----------|-----------|-------------------------------------------------|-----------|----------|
| siRNA Disorazole DMSO Run1   | NM_000690 | ALDH2     | aldehyde dehydrogenase 2 family (mitochondrial) | 0.052742  | Inlier   |
| siRNA-Vinblastine Run1-DMSO  | NM_000690 | ALDH2     | aldehyde dehydrogenase 2 family (mitochondrial) | 0.606791  | Inlier   |
| siRNA-Vinblastine Run2-DMSO  | NM_000690 | ALDH2     | aldehyde dehydrogenase 2 family (mitochondrial) | 0.94128   | Inlier   |
| siRNA Disorazole DMSO Run2   | NM_000690 | ALDH2     | aldehyde dehydrogenase 2 family (mitochondrial) | 1.808832  | Inlier   |
| siRNA-Temozolomide Run3-DMSO | NM_000691 | ALDH3A1   | aldehyde dehydrogenase 3 family, memberA1       | -3.481216 | Inlier   |
| siRNA-Temozolomide Run2-DMSO | NM_000691 | ALDH3A1   | aldehyde dehydrogenase 3 family, memberA1       | -3.318534 | Inlier   |
| siRNA-Temozolomide Run1-DMSO | NM_000691 | ALDH3A1   | aldehyde dehydrogenase 3 family, memberA1       | -0.411347 | Inlier   |
| siRNA Disorazole DMSO Run1   | NM_000691 | ALDH3A1   | aldehyde dehydrogenase 3 family, memberA1       | -0.274681 | Inlier   |

Identification of Survival Genes in Human Glioblastoma Cells Using siRNA Screening  
 Nikhil G Thaker, Fang Zhang, Peter R. McDonald, Tong Ying Shun, Michael D Lewen, Ian F. Pollack, and John S. Lazo

Molecular Pharmacology

| siRNA Treatment              | Gene ID       | Gene Name | Accession | Value     | Outlier Type |
|------------------------------|---------------|-----------|-----------|-----------|--------------|
| siRNA Disorazole DMSO Run3   | NM_0006<br>91 | ALDH3A1   | 1         | 0.274681  | Inlier       |
| siRNA Disorazole DMSO Run2   | NM_0006<br>91 | ALDH3A1   | 1         | 0.6524    | Inlier       |
| siRNA-Vinblastine Run1-DMSO  | NM_0006<br>91 | ALDH3A1   | 1         | 0.6966    | Inlier       |
| siRNA-Vinblastine Run2-DMSO  | NM_0006<br>91 | ALDH3A1   | 1         | 0.869289  | Inlier       |
| siRNA-Temozolomide Run3-DMSO | NM_0003<br>82 | ALDH3A2   | A2        | -1.216909 | Inlier       |
| siRNA-Temozolomide Run2-DMSO | NM_0003<br>82 | ALDH3A2   | A2        | -0.903859 | Inlier       |
| siRNA Disorazole DMSO Run1   | NM_0003<br>82 | ALDH3A2   | A2        | -0.379975 | Inlier       |
| siRNA-Temozolomide Run1-DMSO | NM_0003<br>82 | ALDH3A2   | A2        | -0.346556 | Inlier       |

Identification of Survival Genes in Human Glioblastoma Cells Using siRNA Screening  
 Nikhil G Thaker, Fang Zhang, Peter R. McDonald, Tong Ying Shun, Michael D Lewen, Ian F. Pollack, and John S. Lazo

Molecular Pharmacology

| siRNA Treatment              | Gene ID   | Gene Name | Family                           | Member | Value     | Category |
|------------------------------|-----------|-----------|----------------------------------|--------|-----------|----------|
| siRNA-Vinblastine Run2-DMSO  | NM_000382 | ALDH3A2   | aldehyde dehydrogenase 3 family, | A2     | 0.346556  | Inlier   |
| siRNA-Vinblastine Run1-DMSO  | NM_000382 | ALDH3A2   | aldehyde dehydrogenase 3 family, | A2     | 0.445141  | Inlier   |
| siRNA Disorazole DMSO Run3   | NM_000382 | ALDH3A2   | aldehyde dehydrogenase 3 family, | A2     | 0.93075   | Inlier   |
| siRNA Disorazole DMSO Run2   | NM_000382 | ALDH3A2   | aldehyde dehydrogenase 3 family, | A2     | 1.69943   | Inlier   |
| siRNA-Temozolomide Run3-DMSO | NM_000694 | ALDH3B1   | aldehyde dehydrogenase 3 family, | B1     | -3.117689 | Inlier   |
| siRNA-Temozolomide Run2-DMSO | NM_000694 | ALDH3B1   | aldehyde dehydrogenase 3 family, | B1     | -2.502349 | Inlier   |
| siRNA-Temozolomide Run1-DMSO | NM_000694 | ALDH3B1   | aldehyde dehydrogenase 3 family, | B1     | -0.67234  | Inlier   |
| siRNA Disorazole DMSO Run1   | NM_000694 | ALDH3B1   | aldehyde dehydrogenase 3 family, | B1     | -0.20752  | Inlier   |



Identification of Survival Genes in Human Glioblastoma Cells Using siRNA Screening  
 Nikhil G Thaker, Fang Zhang, Peter R. McDonald, Tong Ying Shun, Michael D Lewen, Ian F. Pollack, and John S. Lazo

Molecular Pharmacology

| siRNA Treatment              | Gene ID   | Gene Name | Family                           | Member | Z-score   | Outlier Type |
|------------------------------|-----------|-----------|----------------------------------|--------|-----------|--------------|
| siRNA Disorazole DMSO Run3   | NM_000694 | ALDH3B1   | aldehyde dehydrogenase 3 family, | B1     | 0.20752   | Inlier       |
| siRNA-Vinblastine Run2-DMSO  | NM_000694 | ALDH3B1   | aldehyde dehydrogenase 3 family, | B1     | 0.468618  | Inlier       |
| siRNA-Vinblastine Run1-DMSO  | NM_000694 | ALDH3B1   | aldehyde dehydrogenase 3 family, | B1     | 0.67666   | Inlier       |
| siRNA Disorazole DMSO Run2   | NM_000694 | ALDH3B1   | aldehyde dehydrogenase 3 family, | B1     | 0.874967  | Inlier       |
| siRNA-Temozolomide Run3-DMSO | NM_000695 | ALDH3B2   | aldehyde dehydrogenase 3 family, | B2     | -1.746714 | Inlier       |
| siRNA-Temozolomide Run2-DMSO | NM_000695 | ALDH3B2   | aldehyde dehydrogenase 3 family, | B2     | -1.703682 | Inlier       |
| siRNA-Temozolomide Run1-DMSO | NM_000695 | ALDH3B2   | aldehyde dehydrogenase 3 family, | B2     | -0.177594 | Inlier       |
| siRNA Disorazole DMSO Run3   | NM_000695 | ALDH3B2   | aldehyde dehydrogenase 3 family, | B2     | -0.049997 | Inlier       |

Identification of Survival Genes in Human Glioblastoma Cells Using siRNA Screening

Nikhil G Thaker, Fang Zhang, Peter R. McDonald, Tong Ying Shun, Michael D Lewen, Ian F. Pollack, and John S. Lazo

Molecular Pharmacology

| siRNA Treatment              | Gene ID   | Gene Name | Family                           | Member | Value     | Outlier Type |
|------------------------------|-----------|-----------|----------------------------------|--------|-----------|--------------|
| siRNA Disorazole DMSO Run1   | NM_000695 | ALDH3B2   | aldehyde dehydrogenase 3 family, | B2     | 0.049997  | Inlier       |
| siRNA-Vinblastine Run2-DMSO  | NM_000695 | ALDH3B2   | aldehyde dehydrogenase 3 family, | B2     | 0.420943  | Inlier       |
| siRNA-Vinblastine Run1-DMSO  | NM_000695 | ALDH3B2   | aldehyde dehydrogenase 3 family, | B2     | 0.928057  | Inlier       |
| siRNA Disorazole DMSO Run2   | NM_000695 | ALDH3B2   | aldehyde dehydrogenase 3 family, | B2     | 2.491864  | Inlier       |
| siRNA-Temozolomide Run2-DMSO | NM_170726 | ALDH4A1   | aldehyde dehydrogenase 4 family, | A1     | -1.13846  | Inlier       |
| siRNA-Temozolomide Run3-DMSO | NM_170726 | ALDH4A1   | aldehyde dehydrogenase 4 family, | A1     | -0.938911 | Inlier       |
| siRNA-Temozolomide Run1-DMSO | NM_170726 | ALDH4A1   | aldehyde dehydrogenase 4 family, | A1     | -0.676562 | Inlier       |
| siRNA Disorazole DMSO Run1   | NM_170726 | ALDH4A1   | aldehyde dehydrogenase 4 family, | A1     | -0.049893 | Inlier       |

Identification of Survival Genes in Human Glioblastoma Cells Using siRNA Screening  
 Nikhil G Thaker, Fang Zhang, Peter R. McDonald, Tong Ying Shun, Michael D Lewen, Ian F. Pollack, and John S. Lazo

Molecular Pharmacology

|                                  |               |         |                                                                                                                     |           |        |
|----------------------------------|---------------|---------|---------------------------------------------------------------------------------------------------------------------|-----------|--------|
| siRNA Disorazole DMSO Run2       | NM_1707<br>26 | ALDH4A1 | aldehyde<br>dehydroge<br>nase 4<br>family,<br>member<br>A1                                                          | 0.049893  | Inlier |
| siRNA-Vinblastine Run1-<br>DMSO  | NM_1707<br>26 | ALDH4A1 | aldehyde<br>dehydroge<br>nase 4<br>family,<br>member<br>A1                                                          | 0.226206  | Inlier |
| siRNA-Vinblastine Run2-<br>DMSO  | NM_1707<br>26 | ALDH4A1 | aldehyde<br>dehydroge<br>nase 4<br>family,<br>member<br>A1                                                          | 0.672438  | Inlier |
| siRNA Disorazole DMSO Run3       | NM_1707<br>26 | ALDH4A1 | aldehyde<br>dehydroge<br>nase 4<br>family,<br>member<br>A1                                                          | 1.089403  | Inlier |
| siRNA-Temozolomide Run2-<br>DMSO | NM_0010<br>80 | ALDH5A1 | aldehyde<br>dehydroge<br>nase 5<br>family,<br>member<br>A1<br>(succinate-<br>semialdeh<br>yde<br>dehydroge<br>nase) | -1.600278 | Inlier |
| siRNA-Temozolomide Run3-<br>DMSO | NM_0010<br>80 | ALDH5A1 | aldehyde<br>dehydroge<br>nase 5<br>family,<br>member<br>A1<br>(succinate-<br>semialdeh<br>yde<br>dehydroge<br>nase) | -1.322089 | Inlier |

Identification of Survival Genes in Human Glioblastoma Cells Using siRNA Screening

Nikhil G Thaker, Fang Zhang, Peter R. McDonald, Tong Ying Shun, Michael D Lewen, Ian F. Pollack, and John S. Lazo

Molecular Pharmacology

|                                  |               |         |                                                                                                                     |           |        |
|----------------------------------|---------------|---------|---------------------------------------------------------------------------------------------------------------------|-----------|--------|
| siRNA Disorazole DMSO Run3       | NM_0010<br>80 | ALDH5A1 | aldehyde<br>dehydroge<br>nase 5<br>family,<br>member<br>A1<br>(succinate-<br>semialdeh<br>yde<br>dehydroge<br>nase) | -0.645652 | Inlier |
| siRNA-Temozolomide Run1-<br>DMSO | NM_0010<br>80 | ALDH5A1 | aldehyde<br>dehydroge<br>nase 5<br>family,<br>member<br>A1<br>(succinate-<br>semialdeh<br>yde<br>dehydroge<br>nase) | -0.013169 | Inlier |
| siRNA Disorazole DMSO Run2       | NM_0010<br>80 | ALDH5A1 | aldehyde<br>dehydroge<br>nase 5<br>family,<br>member<br>A1<br>(succinate-<br>semialdeh<br>yde<br>dehydroge<br>nase) | 0.013168  | Inlier |
| siRNA Disorazole DMSO Run1       | NM_0010<br>80 | ALDH5A1 | aldehyde<br>dehydroge<br>nase 5<br>family,<br>member<br>A1<br>(succinate-<br>semialdeh<br>yde<br>dehydroge<br>nase) | 0.017141  | Inlier |

Identification of Survival Genes in Human Glioblastoma Cells Using siRNA Screening  
 Nikhil G Thaker, Fang Zhang, Peter R. McDonald, Tong Ying Shun, Michael D Lewen, Ian F. Pollack, and John S. Lazo  
 Molecular Pharmacology

|                              |           |         |                                                                                   |           |        |
|------------------------------|-----------|---------|-----------------------------------------------------------------------------------|-----------|--------|
| siRNA-Vinblastine Run2-DMSO  | NM_001080 | ALDH5A1 | aldehyde dehydrogenase 5 family, member A1 (succinate-semialdehyde dehydrogenase) | 0.703348  | Inlier |
| siRNA-Vinblastine Run1-DMSO  | NM_001080 | ALDH5A1 | aldehyde dehydrogenase 5 family, member A1 (succinate-semialdehyde dehydrogenase) | 0.887496  | Inlier |
| siRNA-Temozolomide Run2-DMSO | NM_005589 | ALDH6A1 | aldehyde dehydrogenase 6 family, member A1                                        | -1.851969 | Inlier |
| siRNA-Temozolomide Run1-DMSO | NM_005589 | ALDH6A1 | aldehyde dehydrogenase 6 family, member A1                                        | -0.527662 | Inlier |
| siRNA Disorazole DMSO Run1   | NM_005589 | ALDH6A1 | aldehyde dehydrogenase 6 family, member A1                                        | -0.449617 | Inlier |
| siRNA-Vinblastine Run2-DMSO  | NM_005589 | ALDH6A1 | aldehyde dehydrogenase 6 family, member A1                                        | -0.0194   | Inlier |

Identification of Survival Genes in Human Glioblastoma Cells Using siRNA Screening

Nikhil G Thaker, Fang Zhang, Peter R. McDonald, Tong Ying Shun, Michael D Lewen, Ian F. Pollack, and John S. Lazo

Molecular Pharmacology

| siRNA Treatment              | Gene ID   | Gene Name | Family                           | Member | Value     | Category |
|------------------------------|-----------|-----------|----------------------------------|--------|-----------|----------|
| siRNA-Temozolomide Run3-DMSO | NM_005589 | ALDH6A1   | aldehyde dehydrogenase 6 family, | A1     | 0.0194    | Inlier   |
| siRNA-Vinblastine Run1-DMSO  | NM_005589 | ALDH6A1   | aldehyde dehydrogenase 6 family, | A1     | 0.821338  | Inlier   |
| siRNA Disorazole DMSO Run3   | NM_005589 | ALDH6A1   | aldehyde dehydrogenase 6 family, | A1     | 1.448071  | Inlier   |
| siRNA Disorazole DMSO Run2   | NM_005589 | ALDH6A1   | aldehyde dehydrogenase 6 family, | A1     | 2.396359  | Inlier   |
| siRNA-Temozolomide Run2-DMSO | NM_001182 | ALDH7A1   | aldehyde dehydrogenase 7 family, | A1     | -1.889195 | Inlier   |
| siRNA-Temozolomide Run3-DMSO | NM_001182 | ALDH7A1   | aldehyde dehydrogenase 7 family, | A1     | -1.864344 | Inlier   |
| siRNA Disorazole DMSO Run1   | NM_001182 | ALDH7A1   | aldehyde dehydrogenase 7 family, | A1     | -0.788447 | Inlier   |
| siRNA-Temozolomide Run1-DMSO | NM_001182 | ALDH7A1   | aldehyde dehydrogenase 7 family, | A1     | -0.297399 | Inlier   |

Identification of Survival Genes in Human Glioblastoma Cells Using siRNA Screening  
 Nikhil G Thaker, Fang Zhang, Peter R. McDonald, Tong Ying Shun, Michael D Lewen, Ian F. Pollack, and John S. Lazo

Molecular Pharmacology

| siRNA Treatment              | Gene ID       | Gene Name | Family                           | Member | Value     | Outlier Status |
|------------------------------|---------------|-----------|----------------------------------|--------|-----------|----------------|
| siRNA Disorazole DMSO Run2   | NM_0011<br>82 | ALDH7A1   | aldehyde dehydrogenase 7 family, | A1     | 0.297399  | Inlier         |
| siRNA Disorazole DMSO Run3   | NM_0011<br>82 | ALDH7A1   | aldehyde dehydrogenase 7 family, | A1     | 0.384175  | Inlier         |
| siRNA-Vinblastine Run1-DMSO  | NM_0011<br>82 | ALDH7A1   | aldehyde dehydrogenase 7 family, | A1     | 0.560553  | Inlier         |
| siRNA-Vinblastine Run2-DMSO  | NM_0011<br>82 | ALDH7A1   | aldehyde dehydrogenase 8 family, | A1     | 0.885963  | Inlier         |
| siRNA-Temozolomide Run3-DMSO | NM_0225<br>68 | ALDH8A1   | aldehyde dehydrogenase 8 family, | A1     | -0.804738 | Inlier         |
| siRNA-Temozolomide Run2-DMSO | NM_0225<br>68 | ALDH8A1   | aldehyde dehydrogenase 8 family, | A1     | -0.70467  | Inlier         |
| siRNA Disorazole DMSO Run3   | NM_0225<br>68 | ALDH8A1   | aldehyde dehydrogenase 8 family, | A1     | -0.115922 | Inlier         |
| siRNA-Temozolomide Run1-DMSO | NM_0225<br>68 | ALDH8A1   | aldehyde dehydrogenase 8 family, | A1     | -0.056118 | Inlier         |

Identification of Survival Genes in Human Glioblastoma Cells Using siRNA Screening  
 Nikhil G Thaker, Fang Zhang, Peter R. McDonald, Tong Ying Shun, Michael D Lewen, Ian F. Pollack, and John S. Lazo

Molecular Pharmacology

| siRNA Treatment              | Gene ID       | Gene Name | Family                           | Member | Value     | Outlier Type |
|------------------------------|---------------|-----------|----------------------------------|--------|-----------|--------------|
| siRNA Disorazole DMSO Run1   | NM_0225<br>68 | ALDH8A1   | aldehyde dehydrogenase 8 family, | A1     | 0.056119  | Inlier       |
| siRNA-Vinblastine Run2-DMSO  | NM_0225<br>68 | ALDH8A1   | aldehyde dehydrogenase 8 family, | A1     | 0.64433   | Inlier       |
| siRNA Disorazole DMSO Run2   | NM_0225<br>68 | ALDH8A1   | aldehyde dehydrogenase 8 family, | A1     | 0.758981  | Inlier       |
| siRNA-Vinblastine Run1-DMSO  | NM_0225<br>68 | ALDH8A1   | aldehyde dehydrogenase 8 family, | A1     | 0.777586  | Inlier       |
| siRNA-Temozolomide Run2-DMSO | NM_0006<br>96 | ALDH9A1   | aldehyde dehydrogenase 9 family, | A1     | -1.09485  | Inlier       |
| siRNA-Temozolomide Run1-DMSO | NM_0006<br>96 | ALDH9A1   | aldehyde dehydrogenase 9 family, | A1     | -0.25415  | Inlier       |
| siRNA-Temozolomide Run3-DMSO | NM_0006<br>96 | ALDH9A1   | aldehyde dehydrogenase 9 family, | A1     | -0.121693 | Inlier       |
| siRNA Disorazole DMSO Run3   | NM_0006<br>96 | ALDH9A1   | aldehyde dehydrogenase 9 family, | A1     | -0.107655 | Inlier       |



Identification of Survival Genes in Human Glioblastoma Cells Using siRNA Screening

Nikhil G Thaker, Fang Zhang, Peter R. McDonald, Tong Ying Shun, Michael D Lewen, Ian F. Pollack, and John S. Lazo

Molecular Pharmacology

|                                  |               |         |                                                            |           |        |
|----------------------------------|---------------|---------|------------------------------------------------------------|-----------|--------|
| siRNA Disorazole DMSO Run1       | NM_0006<br>96 | ALDH9A1 | aldehyde<br>dehydroge<br>nase 9<br>family,<br>member<br>A1 | 0.107655  | Inlier |
| siRNA-Vinblastine Run1-<br>DMSO  | NM_0006<br>96 | ALDH9A1 | aldehyde<br>dehydroge<br>nase 9<br>family,<br>member<br>A1 | 1.205968  | Inlier |
| siRNA-Vinblastine Run2-<br>DMSO  | NM_0006<br>96 | ALDH9A1 | aldehyde<br>dehydroge<br>nase 9<br>family,<br>member<br>A1 | 1.272059  | Inlier |
| siRNA Disorazole DMSO Run2       | NM_0006<br>96 | ALDH9A1 | aldehyde<br>dehydroge<br>nase 9<br>family,<br>member<br>A1 | 2.703008  | Inlier |
| siRNA-Temozolomide Run3-<br>DMSO | NM_1840<br>41 | ALDOA   | aldolase<br>A, fructose-<br>bisphosph<br>ate               | -2.337592 | Inlier |
| siRNA-Temozolomide Run1-<br>DMSO | NM_1840<br>41 | ALDOA   | aldolase<br>A, fructose-<br>bisphosph<br>ate               | -1.254431 | Inlier |
| siRNA-Temozolomide Run2-<br>DMSO | NM_1840<br>41 | ALDOA   | aldolase<br>A, fructose-<br>bisphosph<br>ate               | -0.927626 | Inlier |
| siRNA Disorazole DMSO Run3       | NM_1840<br>41 | ALDOA   | aldolase<br>A, fructose-<br>bisphosph<br>ate               | -0.162716 | Inlier |
| siRNA-Vinblastine Run2-<br>DMSO  | NM_1840<br>41 | ALDOA   | aldolase<br>A, fructose-<br>bisphosph<br>ate               | 0.162715  | Inlier |

Identification of Survival Genes in Human Glioblastoma Cells Using siRNA Screening  
 Nikhil G Thaker, Fang Zhang, Peter R. McDonald, Tong Ying Shun, Michael D Lewen, Ian F. Pollack, and John S. Lazo  
 Molecular Pharmacology

|                                  |               |       |                                              |                  |
|----------------------------------|---------------|-------|----------------------------------------------|------------------|
| siRNA Disorazole DMSO Run1       | NM_1840<br>41 | ALDOA | aldolase<br>A, fructose-<br>bisphosph<br>ate | 0.17363 Inlier   |
| siRNA Disorazole DMSO Run2       | NM_1840<br>41 | ALDOA | aldolase<br>A, fructose-<br>bisphosph<br>ate | 0.421374 Inlier  |
| siRNA-Vinblastine Run1-<br>DMSO  | NM_1840<br>41 | ALDOA | aldolase<br>A, fructose-<br>bisphosph<br>ate | 1.166998 Inlier  |
| siRNA-Temozolomide Run3-<br>DMSO | NM_0000<br>35 | ALDOB | aldolase<br>B, fructose-<br>bisphosph<br>ate | -1.341709 Inlier |
| siRNA-Temozolomide Run2-<br>DMSO | NM_0000<br>35 | ALDOB | aldolase<br>B, fructose-<br>bisphosph<br>ate | -0.965434 Inlier |
| siRNA-Temozolomide Run1-<br>DMSO | NM_0000<br>35 | ALDOB | aldolase<br>B, fructose-<br>bisphosph<br>ate | -0.399707 Inlier |
| siRNA Disorazole DMSO Run1       | NM_0000<br>35 | ALDOB | aldolase<br>B, fructose-<br>bisphosph<br>ate | -0.21192 Inlier  |
| siRNA Disorazole DMSO Run3       | NM_0000<br>35 | ALDOB | aldolase<br>B, fructose-<br>bisphosph<br>ate | 0.21192 Inlier   |
| siRNA-Vinblastine Run2-<br>DMSO  | NM_0000<br>35 | ALDOB | aldolase<br>B, fructose-<br>bisphosph<br>ate | 0.24168 Inlier   |
| siRNA-Vinblastine Run1-<br>DMSO  | NM_0000<br>35 | ALDOB | aldolase<br>B, fructose-<br>bisphosph<br>ate | 0.949293 Inlier  |

Identification of Survival Genes in Human Glioblastoma Cells Using siRNA Screening  
 Nikhil G Thaker, Fang Zhang, Peter R. McDonald, Tong Ying Shun, Michael D Lewen, Ian F. Pollack, and John S. Lazo  
 Molecular Pharmacology

|                                  |               |        |                                                          |                  |
|----------------------------------|---------------|--------|----------------------------------------------------------|------------------|
| siRNA Disorazole DMSO Run2       | NM_0000<br>35 | ALDOB  | aldolase<br>B, fructose-<br>bisphosph<br>ate             | 1.016995 Inlier  |
| siRNA-Temozolomide Run3-<br>DMSO | NM_0051<br>65 | ALDOC  | aldolase<br>C, fructose-<br>bisphosph<br>ate             | -1.601092 Inlier |
| siRNA-Temozolomide Run2-<br>DMSO | NM_0051<br>65 | ALDOC  | aldolase<br>C, fructose-<br>bisphosph<br>ate             | -1.132691 Inlier |
| siRNA-Temozolomide Run1-<br>DMSO | NM_0051<br>65 | ALDOC  | aldolase<br>C, fructose-<br>bisphosph<br>ate             | -0.63826 Inlier  |
| siRNA Disorazole DMSO Run1       | NM_0051<br>65 | ALDOC  | aldolase<br>C, fructose-<br>bisphosph<br>ate             | -0.046834 Inlier |
| siRNA Disorazole DMSO Run3       | NM_0051<br>65 | ALDOC  | aldolase<br>C, fructose-<br>bisphosph<br>ate             | 0.046834 Inlier  |
| siRNA-Vinblastine Run2-<br>DMSO  | NM_0051<br>65 | ALDOC  | aldolase<br>C, fructose-<br>bisphosph<br>ate             | 0.66938 Inlier   |
| siRNA Disorazole DMSO Run2       | NM_0051<br>65 | ALDOC  | aldolase<br>C, fructose-<br>bisphosph<br>ate             | 0.67962 Inlier   |
| siRNA-Vinblastine Run1-<br>DMSO  | NM_0051<br>65 | ALDOC  | aldolase<br>C, fructose-<br>bisphosph<br>ate             | 0.92984 Inlier   |
| siRNA-Temozolomide Run3-<br>DMSO | NM_0175<br>84 | ALDRL6 | aldehyde<br>reductase<br>(aldose<br>reductase)<br>like 6 | -0.911516 Inlier |

Identification of Survival Genes in Human Glioblastoma Cells Using siRNA Screening

Nikhil G Thaker, Fang Zhang, Peter R. McDonald, Tong Ying Shun, Michael D Lewen, Ian F. Pollack, and John S. Lazo

Molecular Pharmacology

|                              |               |        |                                                                                  |           |        |
|------------------------------|---------------|--------|----------------------------------------------------------------------------------|-----------|--------|
| siRNA Disorazole DMSO Run3   | NM_0175<br>84 | ALDRL6 | aldehyde reductase (aldose reductase) like 6                                     | -0.437484 | Inlier |
| siRNA-Vinblastine Run2-DMSO  | NM_0175<br>84 | ALDRL6 | aldehyde reductase (aldose reductase) like 6                                     | -0.307173 | Inlier |
| siRNA-Temozolomide Run2-DMSO | NM_0175<br>84 | ALDRL6 | aldehyde reductase (aldose reductase) like 6                                     | -0.188362 | Inlier |
| siRNA Disorazole DMSO Run1   | NM_0175<br>84 | ALDRL6 | aldehyde reductase (aldose reductase) like 6                                     | 0.188362  | Inlier |
| siRNA-Temozolomide Run1-DMSO | NM_0175<br>84 | ALDRL6 | aldehyde reductase (aldose reductase) like 6                                     | 1.027644  | Inlier |
| siRNA-Vinblastine Run1-DMSO  | NM_0175<br>84 | ALDRL6 | aldehyde reductase (aldose reductase) like 6                                     | 1.690886  | Inlier |
| siRNA Disorazole DMSO Run2   | NM_0175<br>84 | ALDRL6 | aldehyde reductase (aldose reductase) like 6                                     | 1.856057  | Inlier |
| siRNA-Temozolomide Run3-DMSO | NM_0191<br>09 | ALG1   | asparagin e-linked glycosylation 1 homolog (yeast, beta-1,4-mannosyltransferase) | -1.973775 | Inlier |

Identification of Survival Genes in Human Glioblastoma Cells Using siRNA Screening

Nikhil G Thaker, Fang Zhang, Peter R. McDonald, Tong Ying Shun, Michael D Lewen, Ian F. Pollack, and John S. Lazo

Molecular Pharmacology

|                              |           |      |                                                                                                                 |           |        |
|------------------------------|-----------|------|-----------------------------------------------------------------------------------------------------------------|-----------|--------|
| siRNA-Temozolomide Run1-DMSO | NM_019109 | ALG1 | asparagin<br>e-linked<br>glycosylati<br>on 1<br>homolog<br>(yeast,<br>beta-1,4-<br>mannosylt<br>ransferase<br>) | -1.405184 | Inlier |
| siRNA-Temozolomide Run2-DMSO | NM_019109 | ALG1 | asparagin<br>e-linked<br>glycosylati<br>on 1<br>homolog<br>(yeast,<br>beta-1,4-<br>mannosylt<br>ransferase<br>) | -1.059568 | Inlier |
| siRNA Disorazole DMSO Run1   | NM_019109 | ALG1 | asparagin<br>e-linked<br>glycosylati<br>on 1<br>homolog<br>(yeast,<br>beta-1,4-<br>mannosylt<br>ransferase<br>) | -0.366479 | Inlier |
| siRNA-Vinblastine Run2-DMSO  | NM_019109 | ALG1 | asparagin<br>e-linked<br>glycosylati<br>on 1<br>homolog<br>(yeast,<br>beta-1,4-<br>mannosylt<br>ransferase<br>) | 0.366479  | Inlier |
| siRNA-Vinblastine Run1-DMSO  | NM_019109 | ALG1 | asparagin<br>e-linked<br>glycosylati<br>on 1<br>homolog<br>(yeast,<br>beta-1,4-<br>mannosylt<br>ransferase<br>) | 0.51318   | Inlier |

Identification of Survival Genes in Human Glioblastoma Cells Using siRNA Screening

Nikhil G Thaker, Fang Zhang, Peter R. McDonald, Tong Ying Shun, Michael D Lewen, Ian F. Pollack, and John S. Lazo

Molecular Pharmacology

|                                  |               |       |                                                                                                                   |           |        |
|----------------------------------|---------------|-------|-------------------------------------------------------------------------------------------------------------------|-----------|--------|
| siRNA Disorazole DMSO Run2       | NM_0191<br>09 | ALG1  | asparagin<br>e-linked<br>glycosylati<br>on 1<br>homolog<br>(yeast,<br>beta-1,4-<br>mannosylt<br>ransferase<br>)   | 0.596328  | Inlier |
| siRNA Disorazole DMSO Run3       | NM_0191<br>09 | ALG1  | asparagin<br>e-linked<br>glycosylati<br>on 1<br>homolog<br>(yeast,<br>beta-1,4-<br>mannosylt<br>ransferase<br>)   | 0.752672  | Inlier |
| siRNA-Temozolomide Run1-<br>DMSO | NM_0241<br>05 | ALG12 | asparagin<br>e-linked<br>glycosylati<br>on 12<br>homolog<br>(yeast,<br>alpha-1,6-<br>mannosylt<br>ransferase<br>) | -0.81962  | Inlier |
| siRNA-Temozolomide Run2-<br>DMSO | NM_0241<br>05 | ALG12 | asparagin<br>e-linked<br>glycosylati<br>on 12<br>homolog<br>(yeast,<br>alpha-1,6-<br>mannosylt<br>ransferase<br>) | -0.781596 | Inlier |
| siRNA-Temozolomide Run3-<br>DMSO | NM_0241<br>05 | ALG12 | asparagin<br>e-linked<br>glycosylati<br>on 12<br>homolog<br>(yeast,<br>alpha-1,6-<br>mannosylt<br>ransferase<br>) | -0.567404 | Inlier |

Identification of Survival Genes in Human Glioblastoma Cells Using siRNA Screening

Nikhil G Thaker, Fang Zhang, Peter R. McDonald, Tong Ying Shun, Michael D Lewen, Ian F. Pollack, and John S. Lazo

Molecular Pharmacology

|                                 |               |       |                                                                                                                   |          |        |
|---------------------------------|---------------|-------|-------------------------------------------------------------------------------------------------------------------|----------|--------|
| siRNA Disorazole DMSO Run3      | NM_0241<br>05 | ALG12 | asparagin<br>e-linked<br>glycosylati<br>on 12<br>homolog<br>(yeast,<br>alpha-1,6-<br>mannosylt<br>ransferase<br>) | -0.23604 | Inlier |
| siRNA Disorazole DMSO Run1      | NM_0241<br>05 | ALG12 | asparagin<br>e-linked<br>glycosylati<br>on 12<br>homolog<br>(yeast,<br>alpha-1,6-<br>mannosylt<br>ransferase<br>) | 0.23604  | Inlier |
| siRNA-Vinblastine Run2-<br>DMSO | NM_0241<br>05 | ALG12 | asparagin<br>e-linked<br>glycosylati<br>on 12<br>homolog<br>(yeast,<br>alpha-1,6-<br>mannosylt<br>ransferase<br>) | 0.263521 | Inlier |
| siRNA Disorazole DMSO Run2      | NM_0241<br>05 | ALG12 | asparagin<br>e-linked<br>glycosylati<br>on 12<br>homolog<br>(yeast,<br>alpha-1,6-<br>mannosylt<br>ransferase<br>) | 1.601304 | Inlier |
| siRNA-Vinblastine Run1-<br>DMSO | NM_0241<br>05 | ALG12 | asparagin<br>e-linked<br>glycosylati<br>on 12<br>homolog<br>(yeast,<br>alpha-1,6-<br>mannosylt<br>ransferase<br>) | 1.808683 | Inlier |

Identification of Survival Genes in Human Glioblastoma Cells Using siRNA Screening

Nikhil G Thaker, Fang Zhang, Peter R. McDonald, Tong Ying Shun, Michael D Lewen, Ian F. Pollack, and John S. Lazo

Molecular Pharmacology

|                              |           |      |                                                                                                                  |           |        |
|------------------------------|-----------|------|------------------------------------------------------------------------------------------------------------------|-----------|--------|
| siRNA-Temozolomide Run1-DMSO | NM_033087 | ALG2 | asparagin<br>e-linked<br>glycosylati<br>on 2<br>homolog<br>(yeast,<br>alpha-1,3-<br>mannosylt<br>ransferase<br>) | -0.986633 | Inlier |
| siRNA-Temozolomide Run2-DMSO | NM_033087 | ALG2 | asparagin<br>e-linked<br>glycosylati<br>on 2<br>homolog<br>(yeast,<br>alpha-1,3-<br>mannosylt<br>ransferase<br>) | -0.638908 | Inlier |
| siRNA Disorazole DMSO Run1   | NM_033087 | ALG2 | asparagin<br>e-linked<br>glycosylati<br>on 2<br>homolog<br>(yeast,<br>alpha-1,3-<br>mannosylt<br>ransferase<br>) | -0.538811 | Inlier |
| siRNA-Temozolomide Run3-DMSO | NM_033087 | ALG2 | asparagin<br>e-linked<br>glycosylati<br>on 2<br>homolog<br>(yeast,<br>alpha-1,3-<br>mannosylt<br>ransferase<br>) | -0.404131 | Inlier |
| siRNA-Vinblastine Run2-DMSO  | NM_033087 | ALG2 | asparagin<br>e-linked<br>glycosylati<br>on 2<br>homolog<br>(yeast,<br>alpha-1,3-<br>mannosylt<br>ransferase<br>) | 0.404131  | Inlier |



Identification of Survival Genes in Human Glioblastoma Cells Using siRNA Screening

Nikhil G Thaker, Fang Zhang, Peter R. McDonald, Tong Ying Shun, Michael D Lewen, Ian F. Pollack, and John S. Lazo

Molecular Pharmacology

|                                  |               |      |                                                                                                                  |           |        |
|----------------------------------|---------------|------|------------------------------------------------------------------------------------------------------------------|-----------|--------|
| siRNA Disorazole DMSO Run3       | NM_0330<br>87 | ALG2 | asparagin<br>e-linked<br>glycosylati<br>on 2<br>homolog<br>(yeast,<br>alpha-1,3-<br>mannosylt<br>ransferase<br>) | 0.710092  | Inlier |
| siRNA-Vinblastine Run1-<br>DMSO  | NM_0330<br>87 | ALG2 | asparagin<br>e-linked<br>glycosylati<br>on 2<br>homolog<br>(yeast,<br>alpha-1,3-<br>mannosylt<br>ransferase<br>) | 1.45189   | Inlier |
| siRNA Disorazole DMSO Run2       | NM_0330<br>87 | ALG2 | asparagin<br>e-linked<br>glycosylati<br>on 3<br>homolog<br>(yeast,<br>alpha-1,3-<br>mannosylt<br>ransferase<br>) | 1.682702  | Inlier |
| siRNA-Temozolomide Run1-<br>DMSO | NM_0057<br>87 | ALG3 | asparagin<br>e-linked<br>glycosylati<br>on 3<br>homolog<br>(yeast,<br>alpha-1,3-<br>mannosylt<br>ransferase<br>) | -1.399413 | Inlier |
| siRNA-Temozolomide Run2-<br>DMSO | NM_0057<br>87 | ALG3 | asparagin<br>e-linked<br>glycosylati<br>on 3<br>homolog<br>(yeast,<br>alpha-1,3-<br>mannosylt<br>ransferase<br>) | -0.191152 | Inlier |

Identification of Survival Genes in Human Glioblastoma Cells Using siRNA Screening

Nikhil G Thaker, Fang Zhang, Peter R. McDonald, Tong Ying Shun, Michael D Lewen, Ian F. Pollack, and John S. Lazo

Molecular Pharmacology

| siRNA                        | Gene      | Cell Line | Condition | Log Fold Change | Outlier Status |
|------------------------------|-----------|-----------|-----------|-----------------|----------------|
| siRNA-Vinblastine Run2-DMSO  | NM_005787 | ALG3      |           | -0.167282       | Inlier         |
| siRNA Disorazole DMSO Run1   | NM_005787 | ALG3      |           | -0.093925       | Inlier         |
| siRNA-Temozolomide Run3-DMSO | NM_005787 | ALG3      |           | 0.093925        | Inlier         |
| siRNA Disorazole DMSO Run3   | NM_005787 | ALG3      |           | 1.157848        | Inlier         |
| siRNA Disorazole DMSO Run2   | NM_005787 | ALG3      |           | 1.826567        | Inlier         |

asparagin  
e-linked  
glycosylati  
on 3  
homolog  
(yeast,  
alpha-1,3-  
mannosylt  
ransferase  
)  
asparagin  
e-linked  
glycosylati  
on 3  
homolog  
(yeast,  
alpha-1,3-  
mannosylt  
ransferase  
)  
asparagin  
e-linked  
glycosylati  
on 3  
homolog  
(yeast,  
alpha-1,3-  
mannosylt  
ransferase  
)  
asparagin  
e-linked  
glycosylati  
on 3  
homolog  
(yeast,  
alpha-1,3-  
mannosylt  
ransferase  
)  
asparagin  
e-linked  
glycosylati  
on 3  
homolog  
(yeast,  
alpha-1,3-  
mannosylt  
ransferase  
)

Identification of Survival Genes in Human Glioblastoma Cells Using siRNA Screening

Nikhil G Thaker, Fang Zhang, Peter R. McDonald, Tong Ying Shun, Michael D Lewen, Ian F. Pollack, and John S. Lazo

Molecular Pharmacology

|                              |           |      |                                                                                                    |           |        |
|------------------------------|-----------|------|----------------------------------------------------------------------------------------------------|-----------|--------|
| siRNA-Vinblastine Run1-DMSO  | NM_005787 | ALG3 | asparagin e-linked glycosylation on 3 homolog (yeast, alpha-1,3-mannosyltransferase)               | 2.997325  | Inlier |
| siRNA-Temozolomide Run1-DMSO | NM_013338 | ALG5 | asparagin e-linked glycosylation on 5 homolog (yeast, dolichyl-phosphate beta-glucosyltransferase) | -1.881312 | Inlier |
| siRNA Disorazole DMSO Run1   | NM_013338 | ALG5 | asparagin e-linked glycosylation on 5 homolog (yeast, dolichyl-phosphate beta-glucosyltransferase) | -0.815464 | Inlier |
| siRNA-Temozolomide Run2-DMSO | NM_013338 | ALG5 | asparagin e-linked glycosylation on 5 homolog (yeast, dolichyl-phosphate beta-glucosyltransferase) | -0.44136  | Inlier |

Identification of Survival Genes in Human Glioblastoma Cells Using siRNA Screening

Nikhil G Thaker, Fang Zhang, Peter R. McDonald, Tong Ying Shun, Michael D Lewen, Ian F. Pollack, and John S. Lazo

Molecular Pharmacology

|                                  |               |      |                                                                                                                                   |           |        |
|----------------------------------|---------------|------|-----------------------------------------------------------------------------------------------------------------------------------|-----------|--------|
| siRNA Disorazole DMSO Run2       | NM_0133<br>38 | ALG5 | asparagin<br>e-linked<br>glycosylati<br>on 5<br>homolog<br>(yeast,<br>dolichyl-<br>phosphate<br>beta-<br>glucosyltra<br>nsferase) | -0.103479 | Inlier |
| siRNA-Vinblastine Run2-<br>DMSO  | NM_0133<br>38 | ALG5 | asparagin<br>e-linked<br>glycosylati<br>on 5<br>homolog<br>(yeast,<br>dolichyl-<br>phosphate<br>beta-<br>glucosyltra<br>nsferase) | 0.103478  | Inlier |
| siRNA-Temozolomide Run3-<br>DMSO | NM_0133<br>38 | ALG5 | asparagin<br>e-linked<br>glycosylati<br>on 5<br>homolog<br>(yeast,<br>dolichyl-<br>phosphate<br>beta-<br>glucosyltra<br>nsferase) | 0.587167  | Inlier |
| siRNA-Vinblastine Run1-<br>DMSO  | NM_0133<br>38 | ALG5 | asparagin<br>e-linked<br>glycosylati<br>on 5<br>homolog<br>(yeast,<br>dolichyl-<br>phosphate<br>beta-<br>glucosyltra<br>nsferase) | 0.761833  | Inlier |

Identification of Survival Genes in Human Glioblastoma Cells Using siRNA Screening

Nikhil G Thaker, Fang Zhang, Peter R. McDonald, Tong Ying Shun, Michael D Lewen, Ian F. Pollack, and John S. Lazo

Molecular Pharmacology

|                                  |               |      |                                                                                                                                   |           |        |
|----------------------------------|---------------|------|-----------------------------------------------------------------------------------------------------------------------------------|-----------|--------|
| siRNA Disorazole DMSO Run3       | NM_0133<br>38 | ALG5 | asparagin<br>e-linked<br>glycosylati<br>on 5<br>homolog<br>(yeast,<br>dolichyl-<br>phosphate<br>beta-<br>glucosyltra<br>nsferase) | 0.905414  | Inlier |
| siRNA-Temozolomide Run3-<br>DMSO | NM_0133<br>39 | ALG6 | asparagin<br>e-linked<br>glycosylati<br>on 6<br>homolog<br>(yeast,<br>alpha-1,3-<br>glucosyltra<br>nsferase)                      | -1.625847 | Inlier |
| siRNA-Temozolomide Run2-<br>DMSO | NM_0133<br>39 | ALG6 | asparagin<br>e-linked<br>glycosylati<br>on 6<br>homolog<br>(yeast,<br>alpha-1,3-<br>glucosyltra<br>nsferase)                      | -1.035928 | Inlier |
| siRNA-Temozolomide Run1-<br>DMSO | NM_0133<br>39 | ALG6 | asparagin<br>e-linked<br>glycosylati<br>on 6<br>homolog<br>(yeast,<br>alpha-1,3-<br>glucosyltra<br>nsferase)                      | -0.903261 | Inlier |
| siRNA Disorazole DMSO Run1       | NM_0133<br>39 | ALG6 | asparagin<br>e-linked<br>glycosylati<br>on 6<br>homolog<br>(yeast,<br>alpha-1,3-<br>glucosyltra<br>nsferase)                      | -0.099371 | Inlier |

Identification of Survival Genes in Human Glioblastoma Cells Using siRNA Screening

Nikhil G Thaker, Fang Zhang, Peter R. McDonald, Tong Ying Shun, Michael D Lewen, Ian F. Pollack, and John S. Lazo

Molecular Pharmacology

|                                  |                  |      |                                                                                                              |           |        |
|----------------------------------|------------------|------|--------------------------------------------------------------------------------------------------------------|-----------|--------|
| siRNA Disorazole DMSO Run3       | NM_0133<br>39    | ALG6 | asparagin<br>e-linked<br>glycosylati<br>on 6<br>homolog<br>(yeast,<br>alpha-1,3-<br>glucosyltra<br>nsferase) | 0.099371  | Inlier |
| siRNA-Vinblastine Run2-<br>DMSO  | NM_0133<br>39    | ALG6 | asparagin<br>e-linked<br>glycosylati<br>on 6<br>homolog<br>(yeast,<br>alpha-1,3-<br>glucosyltra<br>nsferase) | 0.243737  | Inlier |
| siRNA Disorazole DMSO Run2       | NM_0133<br>39    | ALG6 | asparagin<br>e-linked<br>glycosylati<br>on 6<br>homolog<br>(yeast,<br>alpha-1,3-<br>glucosyltra<br>nsferase) | 0.445739  | Inlier |
| siRNA-Vinblastine Run1-<br>DMSO  | NM_0133<br>39    | ALG6 | asparagin<br>e-linked<br>glycosylati<br>on 6<br>homolog<br>(yeast,<br>alpha-1,3-<br>glucosyltra<br>nsferase) | 1.358352  | Inlier |
| siRNA-Temozolomide Run1-<br>DMSO | NM_0010<br>07027 | ALG8 | asparagin<br>e-linked<br>glycosylati<br>on 8<br>homolog<br>(yeast,<br>alpha-1,3-<br>glucosyltra<br>nsferase) | -1.494582 | Inlier |

Identification of Survival Genes in Human Glioblastoma Cells Using siRNA Screening

Nikhil G Thaker, Fang Zhang, Peter R. McDonald, Tong Ying Shun, Michael D Lewen, Ian F. Pollack, and John S. Lazo

Molecular Pharmacology

|                              |              |      |                                                                                      |           |        |
|------------------------------|--------------|------|--------------------------------------------------------------------------------------|-----------|--------|
| siRNA-Temozolomide Run2-DMSO | NM_001007027 | ALG8 | asparagin e-linked glycosylation on 8 homolog (yeast, alpha-1,3-glucosyltransferase) | -1.062424 | Inlier |
| siRNA Disorazole DMSO Run1   | NM_001007027 | ALG8 | asparagin e-linked glycosylation on 8 homolog (yeast, alpha-1,3-glucosyltransferase) | -0.979877 | Inlier |
| siRNA-Vinblastine Run2-DMSO  | NM_001007027 | ALG8 | asparagin e-linked glycosylation on 8 homolog (yeast, alpha-1,3-glucosyltransferase) | -0.089166 | Inlier |
| siRNA Disorazole DMSO Run3   | NM_001007027 | ALG8 | asparagin e-linked glycosylation on 8 homolog (yeast, alpha-1,3-glucosyltransferase) | 0.089166  | Inlier |
| siRNA Disorazole DMSO Run2   | NM_001007027 | ALG8 | asparagin e-linked glycosylation on 8 homolog (yeast, alpha-1,3-glucosyltransferase) | 0.361574  | Inlier |

Identification of Survival Genes in Human Glioblastoma Cells Using siRNA Screening  
 Nikhil G Thaker, Fang Zhang, Peter R. McDonald, Tong Ying Shun, Michael D Lewen, Ian F. Pollack, and John S. Lazo  
 Molecular Pharmacology

|                              |              |      |                                                                                      |           |        |
|------------------------------|--------------|------|--------------------------------------------------------------------------------------|-----------|--------|
| siRNA-Temozolomide Run3-DMSO | NM_001007027 | ALG8 | asparagin e-linked glycosylation on 8 homolog (yeast, alpha-1,3-glucosyltransferase) | 0.369123  | Inlier |
| siRNA-Vinblastine Run1-DMSO  | NM_001007027 | ALG8 | asparagin e-linked glycosylation on 8 homolog (yeast, alpha-1,3-glucosyltransferase) | 1.131627  | Inlier |
| siRNA-Temozolomide Run3-DMSO | NM_004304    | ALK  | anaplastic lymphoma kinase (K1)                                                      | -1.19622  | Inlier |
| siRNA-Temozolomide Run1-DMSO | NM_004304    | ALK  | anaplastic lymphoma kinase (K1)                                                      | -1.11096  | Inlier |
| siRNA-Temozolomide Run2-DMSO | NM_004304    | ALK  | anaplastic lymphoma kinase (K1)                                                      | -0.950979 | Inlier |
| siRNA Disorazole DMSO Run1   | NM_004304    | ALK  | anaplastic lymphoma kinase (K1)                                                      | -0.039207 | Inlier |
| siRNA-Vinblastine Run1-DMSO  | NM_004304    | ALK  | anaplastic lymphoma kinase (K1)                                                      | 0.039207  | Inlier |
| siRNA Disorazole DMSO Run2   | NM_004304    | ALK  | anaplastic lymphoma kinase (K1)                                                      | 0.514511  | Inlier |
| siRNA-Vinblastine Run2-DMSO  | NM_004304    | ALK  | anaplastic lymphoma kinase (K1)                                                      | 0.572618  | Inlier |
| siRNA Disorazole DMSO Run3   | NM_004304    | ALK  | anaplastic lymphoma kinase (K1)                                                      | 0.776382  | Inlier |



Identification of Survival Genes in Human Glioblastoma Cells Using siRNA Screening  
 Nikhil G Thaker, Fang Zhang, Peter R. McDonald, Tong Ying Shun, Michael D Lewen, Ian F. Pollack, and John S. Lazo

Molecular Pharmacology

|                              |               |        |                                                       |           |        |
|------------------------------|---------------|--------|-------------------------------------------------------|-----------|--------|
| siRNA-Vinblastine Run2-DMSO  | NM_0060<br>20 | ALKBH  | alkB,<br>alkylation<br>repair<br>homolog<br>(E. coli) | -1.038587 | Inlier |
| siRNA Disorazole DMSO Run1   | NM_0060<br>20 | ALKBH  | alkB,<br>alkylation<br>repair<br>homolog<br>(E. coli) | -0.986344 | Inlier |
| siRNA Disorazole DMSO Run3   | NM_0060<br>20 | ALKBH  | alkB,<br>alkylation<br>repair<br>homolog<br>(E. coli) | -0.310921 | Inlier |
| siRNA-Temozolomide Run2-DMSO | NM_0060<br>20 | ALKBH  | alkB,<br>alkylation<br>repair<br>homolog<br>(E. coli) | -0.014138 | Inlier |
| siRNA-Temozolomide Run1-DMSO | NM_0060<br>20 | ALKBH  | alkB,<br>alkylation<br>repair<br>homolog<br>(E. coli) | 0.014137  | Inlier |
| siRNA-Temozolomide Run3-DMSO | NM_0060<br>20 | ALKBH  | alkB,<br>alkylation<br>repair<br>homolog<br>(E. coli) | 0.465049  | Inlier |
| siRNA-Vinblastine Run1-DMSO  | NM_0060<br>20 | ALKBH  | alkB,<br>alkylation<br>repair<br>homolog<br>(E. coli) | 0.883951  | Inlier |
| siRNA Disorazole DMSO Run2   | NM_0060<br>20 | ALKBH  | alkB,<br>alkylation<br>repair<br>homolog<br>(E. coli) | 1.174692  | Inlier |
| siRNA-Temozolomide Run2-DMSO | NM_0006<br>97 | ALOX12 | arachidon<br>ate 12-<br>lipoxygena<br>se              | -1.505009 | Inlier |
| siRNA Disorazole DMSO Run1   | NM_0006<br>97 | ALOX12 | arachidon<br>ate 12-<br>lipoxygena<br>se              | -0.535757 | Inlier |
| siRNA-Temozolomide Run1-DMSO | NM_0006<br>97 | ALOX12 | arachidon<br>ate 12-<br>lipoxygena<br>se              | -0.473281 | Inlier |

Identification of Survival Genes in Human Glioblastoma Cells Using siRNA Screening  
 Nikhil G Thaker, Fang Zhang, Peter R. McDonald, Tong Ying Shun, Michael D Lewen, Ian F. Pollack, and John S. Lazo

Molecular Pharmacology

|                              |           |         |                                        |           |        |
|------------------------------|-----------|---------|----------------------------------------|-----------|--------|
| siRNA-Temozolomide Run3-DMSO | NM_000697 | ALOX12  | arachidonate 12-lipoxygenase           | -0.401103 | Inlier |
| siRNA-Vinblastine Run2-DMSO  | NM_000697 | ALOX12  | arachidonate 12-lipoxygenase           | 0.401103  | Inlier |
| siRNA Disorazole DMSO Run3   | NM_000697 | ALOX12  | arachidonate 12-lipoxygenase           | 0.813243  | Inlier |
| siRNA Disorazole DMSO Run2   | NM_000697 | ALOX12  | arachidonate 12-lipoxygenase           | 1.028641  | Inlier |
| siRNA-Vinblastine Run1-DMSO  | NM_000697 | ALOX12  | arachidonate 12-lipoxygenase           | 1.969624  | Inlier |
| siRNA-Temozolomide Run3-DMSO | NM_001139 | ALOX12B | arachidonate 12-lipoxygenase, 12R type | -0.755979 | Inlier |
| siRNA-Temozolomide Run2-DMSO | NM_001139 | ALOX12B | arachidonate 12-lipoxygenase, 12R type | -0.593021 | Inlier |
| siRNA Disorazole DMSO Run1   | NM_001139 | ALOX12B | arachidonate 12-lipoxygenase, 12R type | -0.410851 | Inlier |
| siRNA-Vinblastine Run2-DMSO  | NM_001139 | ALOX12B | arachidonate 12-lipoxygenase, 12R type | -0.202455 | Inlier |
| siRNA-Temozolomide Run1-DMSO | NM_001139 | ALOX12B | arachidonate 12-lipoxygenase, 12R type | 0.202455  | Inlier |
| siRNA Disorazole DMSO Run3   | NM_001139 | ALOX12B | arachidonate 12-lipoxygenase, 12R type | 0.835227  | Inlier |

Identification of Survival Genes in Human Glioblastoma Cells Using siRNA Screening  
 Nikhil G Thaker, Fang Zhang, Peter R. McDonald, Tong Ying Shun, Michael D Lewen, Ian F. Pollack, and John S. Lazo

Molecular Pharmacology

|                              |               |         |                                           |           |        |
|------------------------------|---------------|---------|-------------------------------------------|-----------|--------|
| siRNA Disorazole DMSO Run2   | NM_0011<br>39 | ALOX12B | arachidonate 12-lipoxygenase, 12R type    | 1.162425  | Inlier |
| siRNA-Vinblastine Run1-DMSO  | NM_0011<br>39 | ALOX12B | arachidonate 12-lipoxygenase, 12R type    | 1.586163  | Inlier |
| siRNA-Temozolomide Run2-DMSO | NM_0011<br>40 | ALOX15  | arachidonate 15-lipoxygenase              | -0.710988 | Inlier |
| siRNA-Temozolomide Run3-DMSO | NM_0011<br>40 | ALOX15  | arachidonate 15-lipoxygenase              | -0.638012 | Inlier |
| siRNA Disorazole DMSO Run1   | NM_0011<br>40 | ALOX15  | arachidonate 15-lipoxygenase              | -0.165926 | Inlier |
| siRNA-Vinblastine Run2-DMSO  | NM_0011<br>40 | ALOX15  | arachidonate 15-lipoxygenase              | -0.086717 | Inlier |
| siRNA-Temozolomide Run1-DMSO | NM_0011<br>40 | ALOX15  | arachidonate 15-lipoxygenase              | 0.086717  | Inlier |
| siRNA Disorazole DMSO Run3   | NM_0011<br>40 | ALOX15  | arachidonate 15-lipoxygenase              | 0.950593  | Inlier |
| siRNA Disorazole DMSO Run2   | NM_0011<br>40 | ALOX15  | arachidonate 15-lipoxygenase              | 1.231878  | Inlier |
| siRNA-Vinblastine Run1-DMSO  | NM_0011<br>40 | ALOX15  | arachidonate 15-lipoxygenase              | 1.87821   | Inlier |
| siRNA-Temozolomide Run3-DMSO | NM_0011<br>41 | ALOX15B | arachidonate 15-lipoxygenase, second type | -0.717593 | Inlier |

Identification of Survival Genes in Human Glioblastoma Cells Using siRNA Screening  
 Nikhil G Thaker, Fang Zhang, Peter R. McDonald, Tong Ying Shun, Michael D Lewen, Ian F. Pollack, and John S. Lazo  
 Molecular Pharmacology

|                              |               |         |                                           |           |         |
|------------------------------|---------------|---------|-------------------------------------------|-----------|---------|
| siRNA-Vinblastine Run2-DMSO  | NM_0011<br>41 | ALOX15B | arachidonate 15-lipoxygenase, second type | -0.631407 | Inlier  |
| siRNA Disorazole DMSO Run1   | NM_0011<br>41 | ALOX15B | arachidonate 15-lipoxygenase, second type | -0.305305 | Inlier  |
| siRNA-Temozolomide Run2-DMSO | NM_0011<br>41 | ALOX15B | arachidonate 15-lipoxygenase, second type | -0.059398 | Inlier  |
| siRNA Disorazole DMSO Run3   | NM_0011<br>41 | ALOX15B | arachidonate 15-lipoxygenase, second type | 0.059398  | Inlier  |
| siRNA-Temozolomide Run1-DMSO | NM_0011<br>41 | ALOX15B | arachidonate 15-lipoxygenase, second type | 0.766803  | Inlier  |
| siRNA Disorazole DMSO Run2   | NM_0011<br>41 | ALOX15B | arachidonate 15-lipoxygenase, second type | 5.694561  | Outlier |
| siRNA-Vinblastine Run1-DMSO  | NM_0011<br>41 | ALOX15B | arachidonate 15-lipoxygenase, second type | 6.771685  | Outlier |
| siRNA-Temozolomide Run3-DMSO | NM_0006<br>98 | ALOX5   | arachidonate 5-lipoxygenase               | -1.788678 | Inlier  |
| siRNA-Temozolomide Run2-DMSO | NM_0006<br>98 | ALOX5   | arachidonate 5-lipoxygenase               | -0.867234 | Inlier  |

Identification of Survival Genes in Human Glioblastoma Cells Using siRNA Screening  
 Nikhil G Thaker, Fang Zhang, Peter R. McDonald, Tong Ying Shun, Michael D Lewen, Ian F. Pollack, and John S. Lazo

Molecular Pharmacology

|                              |           |         |                                                |           |        |
|------------------------------|-----------|---------|------------------------------------------------|-----------|--------|
| siRNA-Temozolomide Run1-DMSO | NM_000698 | ALOX5   | arachidonate 5-lipoxygenase                    | -0.481766 | Inlier |
| siRNA-Vinblastine Run2-DMSO  | NM_000698 | ALOX5   | arachidonate 5-lipoxygenase                    | -0.026711 | Inlier |
| siRNA Disorazole DMSO Run3   | NM_000698 | ALOX5   | arachidonate 5-lipoxygenase                    | 0.026711  | Inlier |
| siRNA Disorazole DMSO Run1   | NM_000698 | ALOX5   | arachidonate 5-lipoxygenase                    | 0.37336   | Inlier |
| siRNA Disorazole DMSO Run2   | NM_000698 | ALOX5   | arachidonate 5-lipoxygenase                    | 2.043755  | Inlier |
| siRNA-Vinblastine Run1-DMSO  | NM_000698 | ALOX5   | arachidonate 5-lipoxygenase                    | 2.96984   | Inlier |
| siRNA-Temozolomide Run1-DMSO | NM_001629 | ALOX5AP | arachidonate 5-lipoxygenase-activating protein | -1.644944 | Inlier |
| siRNA Disorazole DMSO Run1   | NM_001629 | ALOX5AP | arachidonate 5-lipoxygenase-activating protein | -0.877376 | Inlier |
| siRNA-Temozolomide Run2-DMSO | NM_001629 | ALOX5AP | arachidonate 5-lipoxygenase-activating protein | -0.573704 | Inlier |
| siRNA-Temozolomide Run3-DMSO | NM_001629 | ALOX5AP | arachidonate 5-lipoxygenase-activating protein | -0.461395 | Inlier |

Identification of Survival Genes in Human Glioblastoma Cells Using siRNA Screening

Nikhil G Thaker, Fang Zhang, Peter R. McDonald, Tong Ying Shun, Michael D Lewen, Ian F. Pollack, and John S. Lazo

Molecular Pharmacology

| siRNA Treatment              | Gene ID   | Gene Name | Gene Description                               | Value     | Category |
|------------------------------|-----------|-----------|------------------------------------------------|-----------|----------|
| siRNA-Vinblastine Run2-DMSO  | NM_001629 | ALOX5AP   | arachidonate 5-lipoxygenase-activating protein | 0.461395  | Inlier   |
| siRNA Disorazole DMSO Run3   | NM_001629 | ALOX5AP   | arachidonate 5-lipoxygenase-activating protein | 0.638333  | Inlier   |
| siRNA Disorazole DMSO Run2   | NM_001629 | ALOX5AP   | arachidonate 5-lipoxygenase-activating protein | 0.710667  | Inlier   |
| siRNA-Vinblastine Run1-DMSO  | NM_001629 | ALOX5AP   | arachidonate 5-lipoxygenase-activating protein | 1.807692  | Inlier   |
| siRNA-Temozolomide Run3-DMSO | NM_021628 | ALOXE3    | arachidonate 5-lipoxygenase 3                  | -1.038225 | Inlier   |
| siRNA-Temozolomide Run2-DMSO | NM_021628 | ALOXE3    | arachidonate 5-lipoxygenase 3                  | -0.73079  | Inlier   |
| siRNA-Temozolomide Run1-DMSO | NM_021628 | ALOXE3    | arachidonate 5-lipoxygenase 3                  | -0.620536 | Inlier   |
| siRNA Disorazole DMSO Run1   | NM_021628 | ALOXE3    | arachidonate 5-lipoxygenase 3                  | -0.466547 | Inlier   |
| siRNA Disorazole DMSO Run2   | NM_021628 | ALOXE3    | arachidonate 5-lipoxygenase 3                  | 0.466547  | Inlier   |
| siRNA Disorazole DMSO Run3   | NM_021628 | ALOXE3    | arachidonate 5-lipoxygenase 3                  | 0.48185   | Inlier   |
| siRNA-Vinblastine Run2-DMSO  | NM_021628 | ALOXE3    | arachidonate 5-lipoxygenase 3                  | 0.728464  | Inlier   |

Identification of Survival Genes in Human Glioblastoma Cells Using siRNA Screening  
 Nikhil G Thaker, Fang Zhang, Peter R. McDonald, Tong Ying Shun, Michael D Lewen, Ian F. Pollack, and John S. Lazo

Molecular Pharmacology

| siRNA Treatment              | Gene ID   | Gene Name | Gene Description                        | Log2 Fold Change | Outlier Status |
|------------------------------|-----------|-----------|-----------------------------------------|------------------|----------------|
| siRNA-Vinblastine Run1-DMSO  | NM_021628 | ALOXE3    | arachidonate lipoxygenase 3             | 0.939041         | Inlier         |
| siRNA-Temozolomide Run2-DMSO | NM_001631 | ALPI      | alkaline phosphatase, intestinal        | -1.891062        | Inlier         |
| siRNA Disorazole DMSO Run2   | NM_001631 | ALPI      | alkaline phosphatase, intestinal        | -0.965207        | Inlier         |
| siRNA-Temozolomide Run1-DMSO | NM_001631 | ALPI      | alkaline phosphatase, intestinal        | -0.309844        | Inlier         |
| siRNA-Vinblastine Run1-DMSO  | NM_001631 | ALPI      | alkaline phosphatase, intestinal        | -0.19303         | Inlier         |
| siRNA-Temozolomide Run3-DMSO | NM_001631 | ALPI      | alkaline phosphatase, intestinal        | 0.19303          | Inlier         |
| siRNA Disorazole DMSO Run1   | NM_001631 | ALPI      | alkaline phosphatase, intestinal        | 0.383793         | Inlier         |
| siRNA-Vinblastine Run2-DMSO  | NM_001631 | ALPI      | alkaline phosphatase, intestinal        | 2.519629         | Inlier         |
| siRNA Disorazole DMSO Run3   | NM_001631 | ALPI      | alkaline phosphatase, intestinal        | 2.635736         | Inlier         |
| siRNA-Temozolomide Run3-DMSO | NM_000478 | ALPL      | alkaline phosphatase, liver/bone/kidney | -1.748087        | Inlier         |
| siRNA-Temozolomide Run2-DMSO | NM_000478 | ALPL      | alkaline phosphatase, liver/bone/kidney | -1.443455        | Inlier         |
| siRNA-Temozolomide Run1-DMSO | NM_000478 | ALPL      | alkaline phosphatase, liver/bone/kidney | -1.112041        | Inlier         |

Identification of Survival Genes in Human Glioblastoma Cells Using siRNA Screening  
 Nikhil G Thaker, Fang Zhang, Peter R. McDonald, Tong Ying Shun, Michael D Lewen, Ian F. Pollack, and John S. Lazo

Molecular Pharmacology

|                              |               |      |                                                 |           |        |
|------------------------------|---------------|------|-------------------------------------------------|-----------|--------|
| siRNA Disorazole DMSO Run1   | NM_0004<br>78 | ALPL | alkaline phosphatase, liver/bone/kidney         | -0.041592 | Inlier |
| siRNA Disorazole DMSO Run2   | NM_0004<br>78 | ALPL | alkaline phosphatase, liver/bone/kidney         | 0.041592  | Inlier |
| siRNA Disorazole DMSO Run3   | NM_0004<br>78 | ALPL | alkaline phosphatase, liver/bone/kidney         | 0.072291  | Inlier |
| siRNA-Vinblastine Run1-DMSO  | NM_0004<br>78 | ALPL | alkaline phosphatase, liver/bone/kidney         | 0.236959  | Inlier |
| siRNA-Vinblastine Run2-DMSO  | NM_0004<br>78 | ALPL | alkaline phosphatase, liver/bone/kidney         | 1.221021  | Inlier |
| siRNA Disorazole DMSO Run2   | NM_0016<br>32 | ALPP | alkaline phosphatase, placental (Regan isozyme) | -1.509198 | Inlier |
| siRNA-Temozolomide Run1-DMSO | NM_0016<br>32 | ALPP | alkaline phosphatase, placental (Regan isozyme) | -1.189743 | Inlier |
| siRNA-Temozolomide Run2-DMSO | NM_0016<br>32 | ALPP | alkaline phosphatase, placental (Regan isozyme) | -0.982523 | Inlier |
| siRNA Disorazole DMSO Run1   | NM_0016<br>32 | ALPP | alkaline phosphatase, placental (Regan isozyme) | -0.070368 | Inlier |



Identification of Survival Genes in Human Glioblastoma Cells Using siRNA Screening

Nikhil G Thaker, Fang Zhang, Peter R. McDonald, Tong Ying Shun, Michael D Lewen, Ian F. Pollack, and John S. Lazo

Molecular Pharmacology

| siRNA Treatment              | Gene ID   | Method | Gene Name                                       | Value     | Category |
|------------------------------|-----------|--------|-------------------------------------------------|-----------|----------|
| siRNA-Temozolomide Run3-DMSO | NM_001632 | ALPP   | alkaline phosphatase, placental (Regan isozyme) | 0.070367  | Inlier   |
| siRNA-Vinblastine Run1-DMSO  | NM_001632 | ALPP   | alkaline phosphatase, placental (Regan isozyme) | 0.252293  | Inlier   |
| siRNA Disorazole DMSO Run3   | NM_001632 | ALPP   | alkaline phosphatase, placental (Regan isozyme) | 0.366477  | Inlier   |
| siRNA-Vinblastine Run2-DMSO  | NM_001632 | ALPP   | alkaline phosphatase, placental (Regan isozyme) | 0.983056  | Inlier   |
| siRNA-Temozolomide Run2-DMSO | NM_031313 | ALPPL2 | alkaline phosphatase, placental-like 2          | -1.669358 | Inlier   |
| siRNA Disorazole DMSO Run3   | NM_031313 | ALPPL2 | alkaline phosphatase, placental-like 2          | -0.927943 | Inlier   |
| siRNA-Temozolomide Run3-DMSO | NM_031313 | ALPPL2 | alkaline phosphatase, placental-like 2          | -0.421057 | Inlier   |
| siRNA-Vinblastine Run1-DMSO  | NM_031313 | ALPPL2 | alkaline phosphatase, placental-like 2          | -0.211672 | Inlier   |
| siRNA-Temozolomide Run1-DMSO | NM_031313 | ALPPL2 | alkaline phosphatase, placental-like 2          | 0.211672  | Inlier   |

Identification of Survival Genes in Human Glioblastoma Cells Using siRNA Screening  
 Nikhil G Thaker, Fang Zhang, Peter R. McDonald, Tong Ying Shun, Michael D Lewen, Ian F. Pollack, and John S. Lazo

Molecular Pharmacology

|                              |               |         |                                                                           |           |        |
|------------------------------|---------------|---------|---------------------------------------------------------------------------|-----------|--------|
| siRNA Disorazole DMSO Run1   | NM_0313<br>13 | ALPPL2  | alkaline phosphatase, placental-like 2                                    | 0.392936  | Inlier |
| siRNA Disorazole DMSO Run2   | NM_0313<br>13 | ALPPL2  | alkaline phosphatase, placental-like 2                                    | 1.155642  | Inlier |
| siRNA-Vinblastine Run2-DMSO  | NM_0313<br>13 | ALPPL2  | alkaline phosphatase, placental-like 2                                    | 1.866196  | Inlier |
| siRNA-Temozolomide Run3-DMSO | NM_0185<br>71 | ALS2CR2 | 2 amyotrophic lateral sclerosis 2 (juvenile) chromosome region, candidate | -2.065422 | Inlier |
| siRNA-Temozolomide Run2-DMSO | NM_0185<br>71 | ALS2CR2 | 2 amyotrophic lateral sclerosis 2 (juvenile) chromosome region, candidate | -0.929808 | Inlier |
| siRNA-Temozolomide Run1-DMSO | NM_0185<br>71 | ALS2CR2 | 2 amyotrophic lateral sclerosis 2 (juvenile) chromosome region, candidate | -0.678292 | Inlier |

Identification of Survival Genes in Human Glioblastoma Cells Using siRNA Screening  
 Nikhil G Thaker, Fang Zhang, Peter R. McDonald, Tong Ying Shun, Michael D Lewen, Ian F. Pollack, and John S. Lazo  
 Molecular Pharmacology

|                             |               |         |   |                                                                         |           |        |
|-----------------------------|---------------|---------|---|-------------------------------------------------------------------------|-----------|--------|
| siRNA-Vinblastine Run1-DMSO | NM_0185<br>71 | ALS2CR2 | 2 | amyotrophic lateral sclerosis 2 (juvenile) chromosome region, candidate | -0.062391 | Inlier |
| siRNA Disorazole DMSO Run3  | NM_0185<br>71 | ALS2CR2 | 2 | amyotrophic lateral sclerosis 2 (juvenile) chromosome region, candidate | 0.062391  | Inlier |
| siRNA Disorazole DMSO Run1  | NM_0185<br>71 | ALS2CR2 | 2 | amyotrophic lateral sclerosis 2 (juvenile) chromosome region, candidate | 0.115169  | Inlier |
| siRNA-Vinblastine Run2-DMSO | NM_0185<br>71 | ALS2CR2 | 2 | amyotrophic lateral sclerosis 2 (juvenile) chromosome region, candidate | 0.670708  | Inlier |
| siRNA Disorazole DMSO Run2  | NM_0185<br>71 | ALS2CR2 | 2 | amyotrophic lateral sclerosis 2 (juvenile) chromosome region, candidate | 1.627485  | Inlier |

Identification of Survival Genes in Human Glioblastoma Cells Using siRNA Screening  
 Nikhil G Thaker, Fang Zhang, Peter R. McDonald, Tong Ying Shun, Michael D Lewen, Ian F. Pollack, and John S. Lazo  
 Molecular Pharmacology

|                              |               |         |   |                                                                         |                  |
|------------------------------|---------------|---------|---|-------------------------------------------------------------------------|------------------|
| siRNA Disorazole DMSO Run2   | NM_1391<br>58 | ALS2CR7 | 7 | amyotrophic lateral sclerosis 2 (juvenile) chromosome region, candidate | -1.413872 Inlier |
| siRNA-Temozolomide Run2-DMSO | NM_1391<br>58 | ALS2CR7 | 7 | amyotrophic lateral sclerosis 2 (juvenile) chromosome region, candidate | -0.950179 Inlier |
| siRNA-Vinblastine Run1-DMSO  | NM_1391<br>58 | ALS2CR7 | 7 | amyotrophic lateral sclerosis 2 (juvenile) chromosome region, candidate | -0.904963 Inlier |
| siRNA-Temozolomide Run1-DMSO | NM_1391<br>58 | ALS2CR7 | 7 | amyotrophic lateral sclerosis 2 (juvenile) chromosome region, candidate | -0.213105 Inlier |
| siRNA-Temozolomide Run3-DMSO | NM_1391<br>58 | ALS2CR7 | 7 | amyotrophic lateral sclerosis 2 (juvenile) chromosome region, candidate | 0.213105 Inlier  |

Identification of Survival Genes in Human Glioblastoma Cells Using siRNA Screening  
 Nikhil G Thaker, Fang Zhang, Peter R. McDonald, Tong Ying Shun, Michael D Lewen, Ian F. Pollack, and John S. Lazo  
 Molecular Pharmacology

|                              |               |         |   |                                                                         |           |        |
|------------------------------|---------------|---------|---|-------------------------------------------------------------------------|-----------|--------|
| siRNA Disorazole DMSO Run3   | NM_1391<br>58 | ALS2CR7 | 7 | amyotrophic lateral sclerosis 2 (juvenile) chromosome region, candidate | 0.299494  | Inlier |
| siRNA Disorazole DMSO Run1   | NM_1391<br>58 | ALS2CR7 | 7 | amyotrophic lateral sclerosis 2 (juvenile) chromosome region, candidate | 0.614497  | Inlier |
| siRNA-Vinblastine Run2-DMSO  | NM_1391<br>58 | ALS2CR7 | 7 | amyotrophic lateral sclerosis 2 (juvenile) chromosome region, candidate | 0.734503  | Inlier |
| siRNA-Vinblastine Run2-DMSO  | NM_2033<br>82 | AMACR   |   | alpha-methylacyl-CoA racemase                                           | -1.66813  | Inlier |
| siRNA-Temozolomide Run2-DMSO | NM_2033<br>82 | AMACR   |   | alpha-methylacyl-CoA racemase                                           | -0.438838 | Inlier |
| siRNA Disorazole DMSO Run3   | NM_2033<br>82 | AMACR   |   | alpha-methylacyl-CoA racemase                                           | -0.387843 | Inlier |
| siRNA-Temozolomide Run3-DMSO | NM_2033<br>82 | AMACR   |   | alpha-methylacyl-CoA racemase                                           | -0.382544 | Inlier |
| siRNA-Temozolomide Run1-DMSO | NM_2033<br>82 | AMACR   |   | alpha-methylacyl-CoA racemase                                           | 0.382542  | Inlier |

Identification of Survival Genes in Human Glioblastoma Cells Using siRNA Screening  
 Nikhil G Thaker, Fang Zhang, Peter R. McDonald, Tong Ying Shun, Michael D Lewen, Ian F. Pollack, and John S. Lazo

Molecular Pharmacology

|                              |               |       |                                         |           |        |
|------------------------------|---------------|-------|-----------------------------------------|-----------|--------|
| siRNA Disorazole DMSO Run1   | NM_2033<br>82 | AMACR | alpha-methylacyl-CoA racemase           | 0.910162  | Inlier |
| siRNA-Vinblastine Run1-DMSO  | NM_2033<br>82 | AMACR | alpha-methylacyl-CoA racemase           | 3.008424  | Inlier |
| siRNA Disorazole DMSO Run2   | NM_2033<br>82 | AMACR | alpha-methylacyl-CoA racemase           | 3.291874  | Inlier |
| siRNA-Temozolomide Run2-DMSO | NM_0016<br>33 | AMBP  | alpha-1-microglobulin/bikunin precursor | -1.113175 | Inlier |
| siRNA-Temozolomide Run3-DMSO | NM_0016<br>33 | AMBP  | alpha-1-microglobulin/bikunin precursor | -1.064115 | Inlier |
| siRNA-Temozolomide Run1-DMSO | NM_0016<br>33 | AMBP  | alpha-1-microglobulin/bikunin precursor | -0.73493  | Inlier |
| siRNA Disorazole DMSO Run1   | NM_0016<br>33 | AMBP  | alpha-1-microglobulin/bikunin precursor | -0.16049  | Inlier |
| siRNA Disorazole DMSO Run3   | NM_0016<br>33 | AMBP  | alpha-1-microglobulin/bikunin precursor | 0.16049   | Inlier |
| siRNA-Vinblastine Run2-DMSO  | NM_0016<br>33 | AMBP  | alpha-1-microglobulin/bikunin precursor | 0.445948  | Inlier |
| siRNA Disorazole DMSO Run2   | NM_0016<br>33 | AMBP  | alpha-1-microglobulin/bikunin precursor | 0.61407   | Inlier |
| siRNA-Vinblastine Run1-DMSO  | NM_0016<br>33 | AMBP  | alpha-1-microglobulin/bikunin precursor | 1.098981  | Inlier |

Identification of Survival Genes in Human Glioblastoma Cells Using siRNA Screening  
 Nikhil G Thaker, Fang Zhang, Peter R. McDonald, Tong Ying Shun, Michael D Lewen, Ian F. Pollack, and John S. Lazo  
 Molecular Pharmacology

|                              |           |      |                                    |           |         |
|------------------------------|-----------|------|------------------------------------|-----------|---------|
| siRNA-Temozolomide Run3-DMSO | NM_001634 | AMD1 | adenosylmethionine decarboxylase 1 | -1.007305 | Inlier  |
| siRNA-Temozolomide Run1-DMSO | NM_001634 | AMD1 | adenosylmethionine decarboxylase 1 | -0.341695 | Inlier  |
| siRNA-Temozolomide Run2-DMSO | NM_001634 | AMD1 | adenosylmethionine decarboxylase 1 | -0.23381  | Inlier  |
| siRNA-Vinblastine Run2-DMSO  | NM_001634 | AMD1 | adenosylmethionine decarboxylase 1 | -0.017145 | Inlier  |
| siRNA Disorazole DMSO Run3   | NM_001634 | AMD1 | adenosylmethionine decarboxylase 1 | 0.017144  | Inlier  |
| siRNA Disorazole DMSO Run1   | NM_001634 | AMD1 | adenosylmethionine decarboxylase 1 | 1.514107  | Inlier  |
| siRNA Disorazole DMSO Run2   | NM_001634 | AMD1 | adenosylmethionine decarboxylase 1 | 3.397856  | Inlier  |
| siRNA-Vinblastine Run1-DMSO  | NM_001634 | AMD1 | adenosylmethionine decarboxylase 1 | 5.268046  | Outlier |
| siRNA-Temozolomide Run3-DMSO | NM_001144 | AMFR | autocrine motility factor receptor | -0.737755 | Inlier  |
| siRNA-Vinblastine Run2-DMSO  | NM_001144 | AMFR | autocrine motility factor receptor | -0.611245 | Inlier  |
| siRNA-Temozolomide Run2-DMSO | NM_001144 | AMFR | autocrine motility factor receptor | -0.449917 | Inlier  |

Identification of Survival Genes in Human Glioblastoma Cells Using siRNA Screening  
 Nikhil G Thaker, Fang Zhang, Peter R. McDonald, Tong Ying Shun, Michael D Lewen, Ian F. Pollack, and John S. Lazo

Molecular Pharmacology

|                                  |               |       |                                                       |           |        |
|----------------------------------|---------------|-------|-------------------------------------------------------|-----------|--------|
| siRNA Disorazole DMSO Run3       | NM_0011<br>44 | AMFR  | autocrine<br>motility<br>factor<br>receptor           | -0.093113 | Inlier |
| siRNA Disorazole DMSO Run1       | NM_0011<br>44 | AMFR  | autocrine<br>motility<br>factor<br>receptor           | 0.093113  | Inlier |
| siRNA-Temozolomide Run1-<br>DMSO | NM_0011<br>44 | AMFR  | autocrine<br>motility<br>factor<br>receptor           | 1.006874  | Inlier |
| siRNA-Vinblastine Run1-<br>DMSO  | NM_0011<br>44 | AMFR  | autocrine<br>motility<br>factor<br>receptor           | 2.468175  | Inlier |
| siRNA Disorazole DMSO Run2       | NM_0011<br>44 | AMFR  | autocrine<br>motility<br>factor<br>receptor           | 2.499999  | Inlier |
| siRNA Disorazole DMSO Run2       | NM_0205<br>47 | AMHR2 | anti-<br>Mullerian<br>hormone<br>receptor,<br>type II | -0.755847 | Inlier |
| siRNA-Temozolomide Run3-<br>DMSO | NM_0205<br>47 | AMHR2 | anti-<br>Mullerian<br>hormone<br>receptor,<br>type II | -0.593153 | Inlier |
| siRNA Disorazole DMSO Run3       | NM_0205<br>47 | AMHR2 | anti-<br>Mullerian<br>hormone<br>receptor,<br>type II | -0.249753 | Inlier |
| siRNA-Temozolomide Run1-<br>DMSO | NM_0205<br>47 | AMHR2 | anti-<br>Mullerian<br>hormone<br>receptor,<br>type II | -0.008266 | Inlier |
| siRNA-Temozolomide Run2-<br>DMSO | NM_0205<br>47 | AMHR2 | anti-<br>Mullerian<br>hormone<br>receptor,<br>type II | 0.008267  | Inlier |
| siRNA Disorazole DMSO Run1       | NM_0205<br>47 | AMHR2 | anti-<br>Mullerian<br>hormone<br>receptor,<br>type II | 1.094321  | Inlier |



Identification of Survival Genes in Human Glioblastoma Cells Using siRNA Screening

Nikhil G Thaker, Fang Zhang, Peter R. McDonald, Tong Ying Shun, Michael D Lewen, Ian F. Pollack, and John S. Lazo

Molecular Pharmacology

|                              |               |       |                                                                                |           |        |
|------------------------------|---------------|-------|--------------------------------------------------------------------------------|-----------|--------|
| siRNA-Vinblastine Run1-DMSO  | NM_0205<br>47 | AMHR2 | anti-Mullerian hormone receptor, type II                                       | 1.794422  | Inlier |
| siRNA-Vinblastine Run2-DMSO  | NM_0205<br>47 | AMHR2 | anti-Mullerian hormone receptor, type II                                       | 2.050885  | Inlier |
| siRNA-Temozolomide Run3-DMSO | NM_0327<br>97 | AMID  | apoptosis-inducing factor (AIF)-like mitochondrion-associated inducer of death | -0.951088 | Inlier |
| siRNA Disorazole DMSO Run3   | NM_0327<br>97 | AMID  | apoptosis-inducing factor (AIF)-like mitochondrion-associated inducer of death | -0.590986 | Inlier |
| siRNA-Temozolomide Run2-DMSO | NM_0327<br>97 | AMID  | apoptosis-inducing factor (AIF)-like mitochondrion-associated inducer of death | -0.457394 | Inlier |
| siRNA-Vinblastine Run2-DMSO  | NM_0327<br>97 | AMID  | apoptosis-inducing factor (AIF)-like mitochondrion-associated inducer of death | -0.280176 | Inlier |

Identification of Survival Genes in Human Glioblastoma Cells Using siRNA Screening

Nikhil G Thaker, Fang Zhang, Peter R. McDonald, Tong Ying Shun, Michael D Lewen, Ian F. Pollack, and John S.

Lazo

Molecular Pharmacology

|                              |               |       |                                                                                |           |        |
|------------------------------|---------------|-------|--------------------------------------------------------------------------------|-----------|--------|
| siRNA Disorazole DMSO Run1   | NM_0327<br>97 | AMID  | apoptosis-inducing factor (AIF)-like mitochondrion-associated inducer of death | 0.280176  | Inlier |
| siRNA-Temozolomide Run1-DMSO | NM_0327<br>97 | AMID  | apoptosis-inducing factor (AIF)-like mitochondrion-associated inducer of death | 0.758014  | Inlier |
| siRNA-Vinblastine Run1-DMSO  | NM_0327<br>97 | AMID  | apoptosis-inducing factor (AIF)-like mitochondrion-associated inducer of death | 1.194809  | Inlier |
| siRNA Disorazole DMSO Run2   | NM_0327<br>97 | AMID  | apoptosis-inducing factor (AIF)-like mitochondrion-associated inducer of death | 1.573152  | Inlier |
| siRNA-Temozolomide Run3-DMSO | NM_0000<br>36 | AMPD1 | adenosine monophosphate deaminase 1 (isoform M)                                | -1.266436 | Inlier |
| siRNA-Temozolomide Run2-DMSO | NM_0000<br>36 | AMPD1 | adenosine monophosphate deaminase 1 (isoform M)                                | -1.085247 | Inlier |

Identification of Survival Genes in Human Glioblastoma Cells Using siRNA Screening

Nikhil G Thaker, Fang Zhang, Peter R. McDonald, Tong Ying Shun, Michael D Lewen, Ian F. Pollack, and John S. Lazo

Molecular Pharmacology

|                              |           |       |                                                 |           |        |
|------------------------------|-----------|-------|-------------------------------------------------|-----------|--------|
| siRNA-Vinblastine Run2-DMSO  | NM_000036 | AMPD1 | adenosine monophosphate deaminase 1 (isoform M) | -0.301194 | Inlier |
| siRNA Disorazole DMSO Run1   | NM_000036 | AMPD1 | adenosine monophosphate deaminase 1 (isoform M) | -0.117912 | Inlier |
| siRNA Disorazole DMSO Run3   | NM_000036 | AMPD1 | adenosine monophosphate deaminase 1 (isoform M) | 0.117912  | Inlier |
| siRNA-Temozolomide Run1-DMSO | NM_000036 | AMPD1 | adenosine monophosphate deaminase 1 (isoform M) | 0.204892  | Inlier |
| siRNA-Vinblastine Run1-DMSO  | NM_000036 | AMPD1 | adenosine monophosphate deaminase 1 (isoform M) | 1.047806  | Inlier |
| siRNA Disorazole DMSO Run2   | NM_000036 | AMPD1 | adenosine monophosphate deaminase 1 (isoform M) | 1.370614  | Inlier |
| siRNA Disorazole DMSO Run1   | NM_203404 | AMPD2 | adenosine monophosphate deaminase 2 (isoform L) | -1.857627 | Inlier |

Identification of Survival Genes in Human Glioblastoma Cells Using siRNA Screening  
 Nikhil G Thaker, Fang Zhang, Peter R. McDonald, Tong Ying Shun, Michael D Lewen, Ian F. Pollack, and John S. Lazo  
 Molecular Pharmacology

|                              |           |       |                                                 |           |        |
|------------------------------|-----------|-------|-------------------------------------------------|-----------|--------|
| siRNA-Temozolomide Run2-DMSO | NM_203404 | AMPD2 | adenosine monophosphate deaminase 2 (isoform L) | -0.717076 | Inlier |
| siRNA-Temozolomide Run1-DMSO | NM_203404 | AMPD2 | adenosine monophosphate deaminase 2 (isoform L) | -0.631924 | Inlier |
| siRNA-Vinblastine Run2-DMSO  | NM_203404 | AMPD2 | adenosine monophosphate deaminase 2 (isoform L) | -0.056588 | Inlier |
| siRNA Disorazole DMSO Run2   | NM_203404 | AMPD2 | adenosine monophosphate deaminase 2 (isoform L) | 0.056588  | Inlier |
| siRNA-Temozolomide Run3-DMSO | NM_203404 | AMPD2 | adenosine monophosphate deaminase 2 (isoform L) | 0.101387  | Inlier |
| siRNA Disorazole DMSO Run3   | NM_203404 | AMPD2 | adenosine monophosphate deaminase 2 (isoform L) | 0.804331  | Inlier |
| siRNA-Vinblastine Run1-DMSO  | NM_203404 | AMPD2 | adenosine monophosphate deaminase 2 (isoform L) | 0.857967  | Inlier |

Identification of Survival Genes in Human Glioblastoma Cells Using siRNA Screening  
 Nikhil G Thaker, Fang Zhang, Peter R. McDonald, Tong Ying Shun, Michael D Lewen, Ian F. Pollack, and John S. Lazo

Molecular Pharmacology

| siRNA Treatment              | Gene ID   | Gene Name | Gene Description                              | Log Fold Change | Outlier Status |
|------------------------------|-----------|-----------|-----------------------------------------------|-----------------|----------------|
| siRNA Disorazole DMSO Run1   | NM_000480 | AMPD3     | adenosine monophosphate deaminase (isoform E) | -1.512331       | Inlier         |
| siRNA-Temozolomide Run2-DMSO | NM_000480 | AMPD3     | adenosine monophosphate deaminase (isoform E) | -1.026357       | Inlier         |
| siRNA-Temozolomide Run1-DMSO | NM_000480 | AMPD3     | adenosine monophosphate deaminase (isoform E) | -0.54074        | Inlier         |
| siRNA-Temozolomide Run3-DMSO | NM_000480 | AMPD3     | adenosine monophosphate deaminase (isoform E) | -0.23299        | Inlier         |
| siRNA Disorazole DMSO Run3   | NM_000480 | AMPD3     | adenosine monophosphate deaminase (isoform E) | 0.232989        | Inlier         |
| siRNA-Vinblastine Run1-DMSO  | NM_000480 | AMPD3     | adenosine monophosphate deaminase (isoform E) | 0.39358         | Inlier         |
| siRNA Disorazole DMSO Run2   | NM_000480 | AMPD3     | adenosine monophosphate deaminase (isoform E) | 0.80826         | Inlier         |
| siRNA-Vinblastine Run2-DMSO  | NM_000480 | AMPD3     | adenosine monophosphate deaminase (isoform E) | 0.980273        | Inlier         |

Identification of Survival Genes in Human Glioblastoma Cells Using siRNA Screening  
 Nikhil G Thaker, Fang Zhang, Peter R. McDonald, Tong Ying Shun, Michael D Lewen, Ian F. Pollack, and John S. Lazo

Molecular Pharmacology

| siRNA Treatment              | Gene ID   | Accession | Gene Name                                                    | Log Fold Change | Outlier Status |
|------------------------------|-----------|-----------|--------------------------------------------------------------|-----------------|----------------|
| siRNA-Temozolomide Run3-DMSO | NM_000481 | AMT       | aminomet hyltransfer ase (glycine cleavage system protein T) | -0.807446       | Inlier         |
| siRNA-Temozolomide Run1-DMSO | NM_000481 | AMT       | aminomet hyltransfer ase (glycine cleavage system protein T) | -0.541554       | Inlier         |
| siRNA-Temozolomide Run2-DMSO | NM_000481 | AMT       | aminomet hyltransfer ase (glycine cleavage system protein T) | -0.466174       | Inlier         |
| siRNA Disorazole DMSO Run1   | NM_000481 | AMT       | aminomet hyltransfer ase (glycine cleavage system protein T) | -0.014108       | Inlier         |
| siRNA Disorazole DMSO Run3   | NM_000481 | AMT       | aminomet hyltransfer ase (glycine cleavage system protein T) | 0.014108        | Inlier         |
| siRNA-Vinblastine Run2-DMSO  | NM_000481 | AMT       | aminomet hyltransfer ase (glycine cleavage system protein T) | 0.846517        | Inlier         |
| siRNA Disorazole DMSO Run2   | NM_000481 | AMT       | aminomet hyltransfer ase (glycine cleavage system protein T) | 0.856008        | Inlier         |

Identification of Survival Genes in Human Glioblastoma Cells Using siRNA Screening  
 Nikhil G Thaker, Fang Zhang, Peter R. McDonald, Tong Ying Shun, Michael D Lewen, Ian F. Pollack, and John S. Lazo

Molecular Pharmacology

| siRNA Treatment              | Gene ID      | Gene Name | Gene Description                                           | Log2 Fold Change | Outlier Status |
|------------------------------|--------------|-----------|------------------------------------------------------------|------------------|----------------|
| siRNA-Vinblastine Run1-DMSO  | NM_000481    | AMT       | aminomethyltransferase (glycine cleavage system protein T) | 1.1292           | Inlier         |
| siRNA-Temozolomide Run3-DMSO | NM_001008221 | AMY1A     | amylase, alpha 1A; salivary                                | -0.77939         | Inlier         |
| siRNA-Temozolomide Run2-DMSO | NM_001008221 | AMY1A     | amylase, alpha 1A; salivary                                | -0.56961         | Inlier         |
| siRNA-Vinblastine Run2-DMSO  | NM_001008221 | AMY1A     | amylase, alpha 1A; salivary                                | -0.55011         | Inlier         |
| siRNA Disorazole DMSO Run3   | NM_001008221 | AMY1A     | amylase, alpha 1A; salivary                                | -0.112931        | Inlier         |
| siRNA-Temozolomide Run1-DMSO | NM_001008221 | AMY1A     | amylase, alpha 1A; salivary                                | 0.112931         | Inlier         |
| siRNA Disorazole DMSO Run1   | NM_001008221 | AMY1A     | amylase, alpha 1A; salivary                                | 1.12073          | Inlier         |
| siRNA-Vinblastine Run1-DMSO  | NM_001008221 | AMY1A     | amylase, alpha 1A; salivary                                | 2.348233         | Inlier         |
| siRNA Disorazole DMSO Run2   | NM_001008221 | AMY1A     | amylase, alpha 1A; salivary                                | 2.972704         | Inlier         |
| siRNA-Temozolomide Run2-DMSO | NM_000699    | AMY2A     | amylase, alpha 2A; pancreatic                              | -1.070477        | Inlier         |
| siRNA-Temozolomide Run3-DMSO | NM_000699    | AMY2A     | amylase, alpha 2A; pancreatic                              | -0.99883         | Inlier         |
| siRNA Disorazole DMSO Run1   | NM_000699    | AMY2A     | amylase, alpha 2A; pancreatic                              | -0.597497        | Inlier         |
| siRNA-Temozolomide Run1-DMSO | NM_000699    | AMY2A     | amylase, alpha 2A; pancreatic                              | -0.057199        | Inlier         |
| siRNA-Vinblastine Run2-DMSO  | NM_000699    | AMY2A     | amylase, alpha 2A; pancreatic                              | 0.057199         | Inlier         |

Identification of Survival Genes in Human Glioblastoma Cells Using siRNA Screening  
 Nikhil G Thaker, Fang Zhang, Peter R. McDonald, Tong Ying Shun, Michael D Lewen, Ian F. Pollack, and John S. Lazo

Molecular Pharmacology

|                              |               |       |                                                           |           |        |
|------------------------------|---------------|-------|-----------------------------------------------------------|-----------|--------|
| siRNA Disorazole DMSO Run3   | NM_0006<br>99 | AMY2A | amylase,<br>alpha 2A;<br>pancreatic                       | 0.414886  | Inlier |
| siRNA-Vinblastine Run1-DMSO  | NM_0006<br>99 | AMY2A | amylase,<br>alpha 2A;<br>pancreatic                       | 0.751503  | Inlier |
| siRNA Disorazole DMSO Run2   | NM_0006<br>99 | AMY2A | amylase,<br>alpha 2A;<br>pancreatic                       | 2.012018  | Inlier |
| siRNA-Temozolomide Run3-DMSO | NM_0209<br>78 | AMY2B | amylase,<br>alpha 2B;<br>pancreatic                       | -1.835143 | Inlier |
| siRNA-Vinblastine Run2-DMSO  | NM_0209<br>78 | AMY2B | amylase,<br>alpha 2B;<br>pancreatic                       | -0.695474 | Inlier |
| siRNA Disorazole DMSO Run1   | NM_0209<br>78 | AMY2B | amylase,<br>alpha 2B;<br>pancreatic                       | -0.653526 | Inlier |
| siRNA-Temozolomide Run2-DMSO | NM_0209<br>78 | AMY2B | amylase,<br>alpha 2B;<br>pancreatic                       | -0.144422 | Inlier |
| siRNA-Temozolomide Run1-DMSO | NM_0209<br>78 | AMY2B | amylase,<br>alpha 2B;<br>pancreatic                       | 0.144422  | Inlier |
| siRNA Disorazole DMSO Run3   | NM_0209<br>78 | AMY2B | amylase,<br>alpha 2B;<br>pancreatic                       | 0.238608  | Inlier |
| siRNA-Vinblastine Run1-DMSO  | NM_0209<br>78 | AMY2B | amylase,<br>alpha 2B;<br>pancreatic                       | 1.610954  | Inlier |
| siRNA Disorazole DMSO Run2   | NM_0209<br>78 | AMY2B | amylase,<br>alpha 2B;<br>pancreatic                       | 3.252879  | Inlier |
| siRNA-Temozolomide Run3-DMSO | NM_0011<br>45 | ANG   | angiogenin<br>,<br>ribonuclea<br>se, RNase<br>A family, 5 | -1.333428 | Inlier |



Identification of Survival Genes in Human Glioblastoma Cells Using siRNA Screening  
 Nikhil G Thaker, Fang Zhang, Peter R. McDonald, Tong Ying Shun, Michael D Lewen, Ian F. Pollack, and John S. Lazo  
 Molecular Pharmacology

|                              |           |      |                                                           |                   |
|------------------------------|-----------|------|-----------------------------------------------------------|-------------------|
|                              |           |      | angiogenin                                                |                   |
| siRNA-Temozolomide Run2-DMSO | NM_001145 | ANG  | ,<br>ribonuclea<br>se, RNase<br>A family, 5               | -1.159329 Inlier  |
| siRNA-Temozolomide Run1-DMSO | NM_001145 | ANG  | angiogenin<br>,<br>ribonuclea<br>se, RNase<br>A family, 5 | -0.613002 Inlier  |
| siRNA-Vinblastine Run2-DMSO  | NM_001145 | ANG  | angiogenin<br>,<br>ribonuclea<br>se, RNase<br>A family, 5 | -0.013358 Inlier  |
| siRNA Disorazole DMSO Run3   | NM_001145 | ANG  | angiogenin<br>,<br>ribonuclea<br>se, RNase<br>A family, 5 | 0.013359 Inlier   |
| siRNA Disorazole DMSO Run1   | NM_001145 | ANG  | angiogenin<br>,<br>ribonuclea<br>se, RNase<br>A family, 5 | 0.050301 Inlier   |
| siRNA Disorazole DMSO Run2   | NM_001145 | ANG  | angiogenin<br>,<br>ribonuclea<br>se, RNase<br>A family, 5 | 0.735998 Inlier   |
| siRNA-Vinblastine Run1-DMSO  | NM_001145 | ANG  | angiogenin<br>,<br>ribonuclea<br>se, RNase<br>A family, 5 | 1.173384 Inlier   |
| siRNA-Temozolomide Run2-DMSO | NM_020977 | ANK2 | ankyrin 2,<br>neuronal                                    | -5.208079 Outlier |
| siRNA-Vinblastine Run2-DMSO  | NM_020977 | ANK2 | ankyrin 2,<br>neuronal                                    | -0.865891 Inlier  |
| siRNA Disorazole DMSO Run1   | NM_020977 | ANK2 | ankyrin 2,<br>neuronal                                    | -0.483109 Inlier  |
| siRNA-Temozolomide Run3-DMSO | NM_020977 | ANK2 | ankyrin 2,<br>neuronal                                    | -0.09052 Inlier   |
| siRNA-Temozolomide Run1-DMSO | NM_020977 | ANK2 | ankyrin 2,<br>neuronal                                    | 0.09052 Inlier    |

Identification of Survival Genes in Human Glioblastoma Cells Using siRNA Screening  
 Nikhil G Thaker, Fang Zhang, Peter R. McDonald, Tong Ying Shun, Michael D Lewen, Ian F. Pollack, and John S. Lazo

|                              |         |       |                                             |           |        |
|------------------------------|---------|-------|---------------------------------------------|-----------|--------|
| Molecular Pharmacology       | NM_0209 |       | ankyrin 2,                                  |           |        |
| siRNA Disorazole DMSO Run3   | 77      | ANK2  | neuronal                                    | 0.411017  | Inlier |
|                              | NM_0209 |       | ankyrin 2,                                  |           |        |
| siRNA Disorazole DMSO Run2   | 77      | ANK2  | neuronal                                    | 1.238235  | Inlier |
| siRNA-Vinblastine Run1-DMSO  | NM_0209 |       | ankyrin 2,                                  |           |        |
|                              | 77      | ANK2  | neuronal                                    | 2.074728  | Inlier |
|                              |         |       | ankyrin repeat and kinase domain containing |           |        |
| siRNA-Temozolomide Run3-DMSO | NM_1785 |       | 1                                           | -2.746941 | Inlier |
|                              | 10      | ANKK1 |                                             |           |        |
|                              |         |       | ankyrin repeat and kinase domain containing |           |        |
| siRNA-Temozolomide Run1-DMSO | NM_1785 |       | 1                                           | -1.055136 | Inlier |
|                              | 10      | ANKK1 |                                             |           |        |
|                              |         |       | ankyrin repeat and kinase domain containing |           |        |
| siRNA-Temozolomide Run2-DMSO | NM_1785 |       | 1                                           | -0.82445  | Inlier |
|                              | 10      | ANKK1 |                                             |           |        |
|                              |         |       | ankyrin repeat and kinase domain containing |           |        |
| siRNA Disorazole DMSO Run2   | NM_1785 |       | 1                                           | -0.274744 | Inlier |
|                              | 10      | ANKK1 |                                             |           |        |
|                              |         |       | ankyrin repeat and kinase domain containing |           |        |
| siRNA Disorazole DMSO Run3   | NM_1785 |       | 1                                           | 0.274744  | Inlier |
|                              | 10      | ANKK1 |                                             |           |        |
|                              |         |       | ankyrin repeat and kinase domain containing |           |        |
| siRNA Disorazole DMSO Run1   | NM_1785 |       | 1                                           | 0.279991  | Inlier |
|                              | 10      | ANKK1 |                                             |           |        |

Identification of Survival Genes in Human Glioblastoma Cells Using siRNA Screening  
 Nikhil G Thaker, Fang Zhang, Peter R. McDonald, Tong Ying Shun, Michael D Lewen, Ian F. Pollack, and John S. Lazo  
 Molecular Pharmacology

|                              |               |              |                                                  |                  |
|------------------------------|---------------|--------------|--------------------------------------------------|------------------|
| siRNA-Vinblastine Run1-DMSO  | NM_1785<br>10 | ANKK1        | ankyrin repeat and kinase domain containing<br>1 | 0.52455 Inlier   |
| siRNA-Vinblastine Run2-DMSO  | NM_1785<br>10 | ANKK1        | ankyrin repeat and kinase domain containing<br>1 | 2.008957 Inlier  |
| siRNA-Temozolomide Run3-DMSO | NM_0529<br>97 | ANKRD30<br>A | ankyrin repeat domain<br>30A                     | -2.029634 Inlier |
| siRNA-Temozolomide Run2-DMSO | NM_0529<br>97 | ANKRD30<br>A | ankyrin repeat domain<br>30A                     | -0.917805 Inlier |
| siRNA-Temozolomide Run1-DMSO | NM_0529<br>97 | ANKRD30<br>A | ankyrin repeat domain<br>30A                     | -0.397457 Inlier |
| siRNA Disorazole DMSO Run1   | NM_0529<br>97 | ANKRD30<br>A | ankyrin repeat domain<br>30A                     | -0.16064 Inlier  |
| siRNA Disorazole DMSO Run3   | NM_0529<br>97 | ANKRD30<br>A | ankyrin repeat domain<br>30A                     | 0.16064 Inlier   |
| siRNA Disorazole DMSO Run2   | NM_0529<br>97 | ANKRD30<br>A | ankyrin repeat domain<br>30A                     | 0.431195 Inlier  |
| siRNA-Vinblastine Run2-DMSO  | NM_0529<br>97 | ANKRD30<br>A | ankyrin repeat domain<br>30A                     | 1.169575 Inlier  |
| siRNA-Vinblastine Run1-DMSO  | NM_0529<br>97 | ANKRD30<br>A | ankyrin repeat domain<br>30A                     | 2.43191 Inlier   |

Identification of Survival Genes in Human Glioblastoma Cells Using siRNA Screening

Nikhil G Thaker, Fang Zhang, Peter R. McDonald, Tong Ying Shun, Michael D Lewen, Ian F. Pollack, and John S.

Lazo

Molecular Pharmacology

|                              |           |       |                                                                                                              |           |        |
|------------------------------|-----------|-------|--------------------------------------------------------------------------------------------------------------|-----------|--------|
| siRNA-Temozolomide Run3-DMSO | NM_001150 | ANPEP | alanyl (membrane) aminopeptidase (aminopeptidase N, aminopeptidase M, microsomal aminopeptidase, CD13, p150) | -2.009404 | Inlier |
| siRNA-Temozolomide Run2-DMSO | NM_001150 | ANPEP | alanyl (membrane) aminopeptidase (aminopeptidase N, aminopeptidase M, microsomal aminopeptidase, CD13, p150) | -1.194346 | Inlier |
| siRNA Disorazole DMSO Run2   | NM_001150 | ANPEP | alanyl (membrane) aminopeptidase (aminopeptidase N, aminopeptidase M, microsomal aminopeptidase, CD13, p150) | -0.216745 | Inlier |

Identification of Survival Genes in Human Glioblastoma Cells Using siRNA Screening

Nikhil G Thaker, Fang Zhang, Peter R. McDonald, Tong Ying Shun, Michael D Lewen, Ian F. Pollack, and John S. Lazo

Molecular Pharmacology

|                              |               |       |                                                                                                                                      |           |        |
|------------------------------|---------------|-------|--------------------------------------------------------------------------------------------------------------------------------------|-----------|--------|
| siRNA-Temozolomide Run1-DMSO | NM_0011<br>50 | ANPEP | alanyl<br>(membrane)<br>aminopeptidase<br>(aminopeptidase N,<br>aminopeptidase M,<br>microsomal<br>aminopeptidase,<br>CD13,<br>p150) | -0.180565 | Inlier |
| siRNA Disorazole DMSO Run1   | NM_0011<br>50 | ANPEP | alanyl<br>(membrane)<br>aminopeptidase<br>(aminopeptidase N,<br>aminopeptidase M,<br>microsomal<br>aminopeptidase,<br>CD13,<br>p150) | 0.180566  | Inlier |
| siRNA Disorazole DMSO Run3   | NM_0011<br>50 | ANPEP | alanyl<br>(membrane)<br>aminopeptidase<br>(aminopeptidase N,<br>aminopeptidase M,<br>microsomal<br>aminopeptidase,<br>CD13,<br>p150) | 0.348784  | Inlier |

Identification of Survival Genes in Human Glioblastoma Cells Using siRNA Screening

Nikhil G Thaker, Fang Zhang, Peter R. McDonald, Tong Ying Shun, Michael D Lewen, Ian F. Pollack, and John S. Lazo

Molecular Pharmacology

|                                  |               |       |                                                                                                                                                              |           |        |
|----------------------------------|---------------|-------|--------------------------------------------------------------------------------------------------------------------------------------------------------------|-----------|--------|
|                                  |               |       | alanyl<br>(membran<br>e)<br>aminopept<br>idase<br>(aminopep<br>tidase N,<br>aminopept<br>idase M,<br>microsom<br>al<br>aminopept<br>idase,<br>CD13,<br>p150) | 1.000216  | Inlier |
| siRNA-Vinblastine Run1-<br>DMSO  | NM_0011<br>50 | ANPEP | alanyl<br>(membran<br>e)<br>aminopept<br>idase<br>(aminopep<br>tidase N,<br>aminopept<br>idase M,<br>microsom<br>al<br>aminopept<br>idase,<br>CD13,<br>p150) | 1.000216  | Inlier |
| siRNA-Vinblastine Run2-<br>DMSO  | NM_0011<br>50 | ANPEP | annexin                                                                                                                                                      | 1.318288  | Inlier |
| siRNA-Temozolomide Run3-<br>DMSO | NM_0051<br>39 | ANXA3 | A3                                                                                                                                                           | -0.991953 | Inlier |
| siRNA-Vinblastine Run2-<br>DMSO  | NM_0051<br>39 | ANXA3 | A3                                                                                                                                                           | -0.357047 | Inlier |
| siRNA-Temozolomide Run2-<br>DMSO | NM_0051<br>39 | ANXA3 | A3                                                                                                                                                           | -0.161562 | Inlier |
| siRNA Disorazole DMSO Run3       | NM_0051<br>39 | ANXA3 | A3                                                                                                                                                           | -0.144202 | Inlier |
| siRNA-Temozolomide Run1-<br>DMSO | NM_0051<br>39 | ANXA3 | A3                                                                                                                                                           | 0.144202  | Inlier |
| siRNA Disorazole DMSO Run1       | NM_0051<br>39 | ANXA3 | A3                                                                                                                                                           | 1.150415  | Inlier |
| siRNA-Vinblastine Run1-<br>DMSO  | NM_0051<br>39 | ANXA3 | A3                                                                                                                                                           | 2.874714  | Inlier |
| siRNA Disorazole DMSO Run2       | NM_0051<br>39 | ANXA3 | A3                                                                                                                                                           | 3.494726  | Inlier |
| siRNA-Temozolomide Run3-<br>DMSO | NM_0016<br>37 | AOAH  | acyloxyacy<br>l hydrolase<br>(neutrophil<br>)                                                                                                                | -0.919206 | Inlier |

Identification of Survival Genes in Human Glioblastoma Cells Using siRNA Screening  
 Nikhil G Thaker, Fang Zhang, Peter R. McDonald, Tong Ying Shun, Michael D Lewen, Ian F. Pollack, and John S. Lazo  
 Molecular Pharmacology

|                              |           |      |                                                      |           |        |
|------------------------------|-----------|------|------------------------------------------------------|-----------|--------|
| siRNA-Vinblastine Run2-DMSO  | NM_001637 | AOAH | acyloxyacyl hydrolase (neutrophil)                   | -0.71095  | Inlier |
| siRNA-Temozolomide Run2-DMSO | NM_001637 | AOAH | acyloxyacyl hydrolase (neutrophil)                   | -0.63805  | Inlier |
| siRNA Disorazole DMSO Run3   | NM_001637 | AOAH | acyloxyacyl hydrolase (neutrophil)                   | -0.176325 | Inlier |
| siRNA Disorazole DMSO Run1   | NM_001637 | AOAH | acyloxyacyl hydrolase (neutrophil)                   | 0.176325  | Inlier |
| siRNA-Temozolomide Run1-DMSO | NM_001637 | AOAH | acyloxyacyl hydrolase (neutrophil)                   | 0.370825  | Inlier |
| siRNA Disorazole DMSO Run2   | NM_001637 | AOAH | acyloxyacyl hydrolase (neutrophil)                   | 1.224542  | Inlier |
| siRNA-Vinblastine Run1-DMSO  | NM_001637 | AOAH | acyloxyacyl hydrolase (neutrophil)                   | 1.243344  | Inlier |
| siRNA-Temozolomide Run3-DMSO | NM_009590 | AOC2 | amine oxidase, copper containing 2 (retina-specific) | -1.641306 | Inlier |
| siRNA-Temozolomide Run2-DMSO | NM_009590 | AOC2 | amine oxidase, copper containing 2 (retina-specific) | -1.279704 | Inlier |

Identification of Survival Genes in Human Glioblastoma Cells Using siRNA Screening  
 Nikhil G Thaker, Fang Zhang, Peter R. McDonald, Tong Ying Shun, Michael D Lewen, Ian F. Pollack, and John S. Lazo

Molecular Pharmacology

|                              |               |      |                                                                  |           |        |
|------------------------------|---------------|------|------------------------------------------------------------------|-----------|--------|
| siRNA-Vinblastine Run2-DMSO  | NM_0095<br>90 | AOC2 | amine oxidase, copper containing 2 (retina-specific)             | -0.436529 | Inlier |
| siRNA Disorazole DMSO Run1   | NM_0095<br>90 | AOC2 | amine oxidase, copper containing 2 (retina-specific)             | -0.092564 | Inlier |
| siRNA Disorazole DMSO Run3   | NM_0095<br>90 | AOC2 | amine oxidase, copper containing 2 (retina-specific)             | 0.092563  | Inlier |
| siRNA-Temozolomide Run1-DMSO | NM_0095<br>90 | AOC2 | amine oxidase, copper containing 2 (retina-specific)             | 0.458967  | Inlier |
| siRNA Disorazole DMSO Run2   | NM_0095<br>90 | AOC2 | amine oxidase, copper containing 2 (retina-specific)             | 0.890033  | Inlier |
| siRNA-Vinblastine Run1-DMSO  | NM_0095<br>90 | AOC2 | amine oxidase, copper containing 2 (retina-specific)             | 1.031074  | Inlier |
| siRNA-Temozolomide Run3-DMSO | NM_0037<br>34 | AOC3 | amine oxidase, copper containing 3 (vascular adhesion protein 1) | -1.007275 | Inlier |
| siRNA-Temozolomide Run2-DMSO | NM_0037<br>34 | AOC3 | amine oxidase, copper containing 3 (vascular adhesion protein 1) | -0.671792 | Inlier |



Identification of Survival Genes in Human Glioblastoma Cells Using siRNA Screening

Nikhil G Thaker, Fang Zhang, Peter R. McDonald, Tong Ying Shun, Michael D Lewen, Ian F. Pollack, and John S. Lazo

Molecular Pharmacology

| siRNA                        | Gene      | Run | Condition | Value     | Outlier | Gene Description                                                 |
|------------------------------|-----------|-----|-----------|-----------|---------|------------------------------------------------------------------|
| siRNA-Vinblastine Run2-DMSO  | NM_003734 | 34  | AOC3      | -0.285918 | Inlier  | amine oxidase, copper containing 3 (vascular adhesion protein 1) |
| siRNA Disorazole DMSO Run3   | NM_003734 | 34  | AOC3      | -0.177207 | Inlier  | amine oxidase, copper containing 3 (vascular adhesion protein 1) |
| siRNA Disorazole DMSO Run1   | NM_003734 | 34  | AOC3      | 0.177207  | Inlier  | amine oxidase, copper containing 3 (vascular adhesion protein 1) |
| siRNA-Temozolomide Run1-DMSO | NM_003734 | 34  | AOC3      | 0.677208  | Inlier  | amine oxidase, copper containing 3 (vascular adhesion protein 1) |
| siRNA Disorazole DMSO Run2   | NM_003734 | 34  | AOC3      | 1.241986  | Inlier  | amine oxidase, copper containing 3 (vascular adhesion protein 1) |
| siRNA-Vinblastine Run1-DMSO  | NM_003734 | 34  | AOC3      | 1.575539  | Inlier  | amine oxidase, copper containing 3 (vascular adhesion protein 1) |

Identification of Survival Genes in Human Glioblastoma Cells Using siRNA Screening  
 Nikhil G Thaker, Fang Zhang, Peter R. McDonald, Tong Ying Shun, Michael D Lewen, Ian F. Pollack, and John S. Lazo  
 Molecular Pharmacology

|                              |              |      |                                            |           |        |
|------------------------------|--------------|------|--------------------------------------------|-----------|--------|
| siRNA-Temozolomide Run3-DMSO | NM_001009999 | AOF2 | amine oxidase (flavin containing) domain 2 | -1.120042 | Inlier |
| siRNA Disorazole DMSO Run3   | NM_001009999 | AOF2 | amine oxidase (flavin containing) domain 2 | -0.970561 | Inlier |
| siRNA-Vinblastine Run2-DMSO  | NM_001009999 | AOF2 | amine oxidase (flavin containing) domain 2 | -0.40153  | Inlier |
| siRNA Disorazole DMSO Run1   | NM_001009999 | AOF2 | amine oxidase (flavin containing) domain 2 | -0.229551 | Inlier |
| siRNA-Temozolomide Run2-DMSO | NM_001009999 | AOF2 | amine oxidase (flavin containing) domain 2 | 0.229551  | Inlier |
| siRNA-Temozolomide Run1-DMSO | NM_001009999 | AOF2 | amine oxidase (flavin containing) domain 2 | 0.416226  | Inlier |
| siRNA Disorazole DMSO Run2   | NM_001009999 | AOF2 | amine oxidase (flavin containing) domain 2 | 0.932774  | Inlier |
| siRNA-Vinblastine Run1-DMSO  | NM_001009999 | AOF2 | amine oxidase (flavin containing) domain 2 | 1.348767  | Inlier |
| siRNA-Vinblastine Run2-DMSO  | NM_001159    | AOX1 | aldehyde oxidase 1                         | -0.826005 | Inlier |
| siRNA-Temozolomide Run3-DMSO | NM_001159    | AOX1 | aldehyde oxidase 1                         | -0.716627 | Inlier |

Identification of Survival Genes in Human Glioblastoma Cells Using siRNA Screening  
 Nikhil G Thaker, Fang Zhang, Peter R. McDonald, Tong Ying Shun, Michael D Lewen, Ian F. Pollack, and John S. Lazo

|                            |         |      |           |           |        |
|----------------------------|---------|------|-----------|-----------|--------|
| Molecular Pharmacology     | NM_0011 |      | aldehyde  |           |        |
| siRNA Disorazole DMSO Run1 | 59      | AOX1 | oxidase 1 | -0.29919  | Inlier |
| siRNA-Temozolomide Run2-   | NM_0011 |      | aldehyde  |           |        |
| DMSO                       | 59      | AOX1 | oxidase 1 | -0.021075 | Inlier |
|                            | NM_0011 |      | aldehyde  |           |        |
| siRNA Disorazole DMSO Run3 | 59      | AOX1 | oxidase 1 | 0.021075  | Inlier |
| siRNA-Temozolomide Run1-   | NM_0011 |      | aldehyde  |           |        |
| DMSO                       | 59      | AOX1 | oxidase 1 | 0.632373  | Inlier |
| siRNA-Vinblastine Run1-    | NM_0011 |      | aldehyde  |           |        |
| DMSO                       | 59      | AOX1 | oxidase 1 | 1.816208  | Inlier |
|                            | NM_0011 |      | aldehyde  |           |        |
| siRNA Disorazole DMSO Run2 | 59      | AOX1 | oxidase 1 | 2.20122   | Inlier |
|                            |         |      | adenomat  |           |        |
|                            |         |      | osis      |           |        |
| siRNA-Temozolomide Run3-   | NM_0000 |      | polyposis |           |        |
| DMSO                       | 38      | APC  | coli      | -1.997324 | Inlier |
|                            |         |      | adenomat  |           |        |
|                            |         |      | osis      |           |        |
| siRNA-Temozolomide Run2-   | NM_0000 |      | polyposis |           |        |
| DMSO                       | 38      | APC  | coli      | -1.036429 | Inlier |
|                            |         |      | adenomat  |           |        |
|                            |         |      | osis      |           |        |
| siRNA-Temozolomide Run1-   | NM_0000 |      | polyposis |           |        |
| DMSO                       | 38      | APC  | coli      | -0.430284 | Inlier |
|                            |         |      | adenomat  |           |        |
|                            |         |      | osis      |           |        |
| siRNA Disorazole DMSO Run1 | NM_0000 |      | polyposis |           |        |
|                            | 38      | APC  | coli      | -0.044054 | Inlier |
|                            |         |      | adenomat  |           |        |
|                            |         |      | osis      |           |        |
| siRNA Disorazole DMSO Run3 | NM_0000 |      | polyposis |           |        |
|                            | 38      | APC  | coli      | 0.044053  | Inlier |
|                            |         |      | adenomat  |           |        |
|                            |         |      | osis      |           |        |
| siRNA Disorazole DMSO Run2 | NM_0000 |      | polyposis |           |        |
|                            | 38      | APC  | coli      | 0.484285  | Inlier |
|                            |         |      | adenomat  |           |        |
|                            |         |      | osis      |           |        |
| siRNA-Vinblastine Run1-    | NM_0000 |      | polyposis |           |        |
| DMSO                       | 38      | APC  | coli      | 0.864715  | Inlier |
|                            |         |      | adenomat  |           |        |
|                            |         |      | osis      |           |        |
| siRNA-Vinblastine Run2-    | NM_0000 |      | polyposis |           |        |
| DMSO                       | 38      | APC  | coli      | 0.888833  | Inlier |
|                            |         |      | adenomat  |           |        |
|                            |         |      | osis      |           |        |
| siRNA-Temozolomide Run3-   | NM_0058 |      | polyposis |           |        |
| DMSO                       | 83      | APC2 | coli 2    | -0.941846 | Inlier |
|                            |         |      | adenomat  |           |        |
|                            |         |      | osis      |           |        |
| siRNA-Temozolomide Run1-   | NM_0058 |      | polyposis |           |        |
| DMSO                       | 83      | APC2 | coli 2    | -0.601921 | Inlier |

Identification of Survival Genes in Human Glioblastoma Cells Using siRNA Screening  
 Nikhil G Thaker, Fang Zhang, Peter R. McDonald, Tong Ying Shun, Michael D Lewen, Ian F. Pollack, and John S. Lazo

Molecular Pharmacology

|                              |               |       |                                        |           |        |
|------------------------------|---------------|-------|----------------------------------------|-----------|--------|
| siRNA-Temozolomide Run2-DMSO | NM_0058<br>83 | APC2  | adenomatosis<br>polyposis coli 2       | -0.435205 | Inlier |
| siRNA Disorazole DMSO Run1   | NM_0058<br>83 | APC2  | adenomatosis<br>polyposis coli 2       | -0.054278 | Inlier |
| siRNA Disorazole DMSO Run3   | NM_0058<br>83 | APC2  | adenomatosis<br>polyposis coli 2       | 0.054278  | Inlier |
| siRNA-Vinblastine Run2-DMSO  | NM_0058<br>83 | APC2  | adenomatosis<br>polyposis coli 2       | 0.747079  | Inlier |
| siRNA Disorazole DMSO Run2   | NM_0058<br>83 | APC2  | adenomatosis<br>polyposis coli 2       | 1.021866  | Inlier |
| siRNA-Vinblastine Run1-DMSO  | NM_0058<br>83 | APC2  | adenomatosis<br>polyposis coli 2       | 1.34538   | Inlier |
| siRNA Disorazole DMSO Run2   | NM_0058<br>76 | APEG1 | aortic preferentially expressed gene 1 | -1.261419 | Inlier |
| siRNA Disorazole DMSO Run3   | NM_0058<br>76 | APEG1 | aortic preferentially expressed gene 1 | -0.544328 | Inlier |
| siRNA-Temozolomide Run2-DMSO | NM_0058<br>76 | APEG1 | aortic preferentially expressed gene 1 | -0.468732 | Inlier |
| siRNA-Temozolomide Run3-DMSO | NM_0058<br>76 | APEG1 | aortic preferentially expressed gene 1 | -0.447766 | Inlier |
| siRNA-Temozolomide Run1-DMSO | NM_0058<br>76 | APEG1 | aortic preferentially expressed gene 1 | 0.447766  | Inlier |

Identification of Survival Genes in Human Glioblastoma Cells Using siRNA Screening  
 Nikhil G Thaker, Fang Zhang, Peter R. McDonald, Tong Ying Shun, Michael D Lewen, Ian F. Pollack, and John S. Lazo

Molecular Pharmacology

|                              |               |       |                                        |           |        |
|------------------------------|---------------|-------|----------------------------------------|-----------|--------|
| siRNA-Vinblastine Run1-DMSO  | NM_0058<br>76 | APEG1 | aortic preferentially expressed gene 1 | 0.804672  | Inlier |
| siRNA Disorazole DMSO Run1   | NM_0058<br>76 | APEG1 | aortic preferentially expressed gene 1 | 1.727907  | Inlier |
| siRNA-Vinblastine Run2-DMSO  | NM_0058<br>76 | APEG1 | aortic preferentially expressed gene 1 | 2.167752  | Inlier |
| siRNA Disorazole DMSO Run1   | NM_0016<br>40 | APEH  | N-acylamino acyl-peptide hydrolase     | -0.749138 | Inlier |
| siRNA-Temozolomide Run3-DMSO | NM_0016<br>40 | APEH  | N-acylamino acyl-peptide hydrolase     | -0.599862 | Inlier |
| siRNA-Temozolomide Run2-DMSO | NM_0016<br>40 | APEH  | N-acylamino acyl-peptide hydrolase     | -0.185943 | Inlier |
| siRNA-Temozolomide Run1-DMSO | NM_0016<br>40 | APEH  | N-acylamino acyl-peptide hydrolase     | -0.016283 | Inlier |
| siRNA Disorazole DMSO Run2   | NM_0016<br>40 | APEH  | N-acylamino acyl-peptide hydrolase     | 0.016284  | Inlier |
| siRNA-Vinblastine Run1-DMSO  | NM_0016<br>40 | APEH  | N-acylamino acyl-peptide hydrolase     | 1.01732   | Inlier |
| siRNA-Vinblastine Run2-DMSO  | NM_0016<br>40 | APEH  | N-acylamino acyl-peptide hydrolase     | 1.240036  | Inlier |

Identification of Survival Genes in Human Glioblastoma Cells Using siRNA Screening  
 Nikhil G Thaker, Fang Zhang, Peter R. McDonald, Tong Ying Shun, Michael D Lewen, Ian F. Pollack, and John S. Lazo

Molecular Pharmacology

| siRNA              | Condition | Run  | Gene ID   | Gene Name | Log Fold Change | Outlier Status |
|--------------------|-----------|------|-----------|-----------|-----------------|----------------|
| siRNA Disorazole   | DMSO      | Run3 | NM_001640 | APEH      | 2.61698         | Inlier         |
| siRNA-Temozolomide | Run3-DMSO |      | NM_001641 | APEX1     | -0.817078       | Inlier         |
| siRNA Disorazole   | DMSO      | Run3 | NM_001641 | APEX1     | -0.700643       | Inlier         |
| siRNA Disorazole   | DMSO      | Run2 | NM_001641 | APEX1     | -0.648357       | Inlier         |
| siRNA-Temozolomide | Run2-DMSO |      | NM_001641 | APEX1     | -0.216586       | Inlier         |
| siRNA-Temozolomide | Run1-DMSO |      | NM_001641 | APEX1     | 0.216585        | Inlier         |

Identification of Survival Genes in Human Glioblastoma Cells Using siRNA Screening  
 Nikhil G Thaker, Fang Zhang, Peter R. McDonald, Tong Ying Shun, Michael D Lewen, Ian F. Pollack, and John S. Lazo  
 Molecular Pharmacology

|                                  |               |       |                                                                 |           |        |
|----------------------------------|---------------|-------|-----------------------------------------------------------------|-----------|--------|
| siRNA Disorazole DMSO Run1       | NM_0016<br>41 | APEX1 | APEX<br>nuclease<br>(multifunctional DNA<br>repair<br>enzyme) 1 | 0.239455  | Inlier |
| siRNA-Vinblastine Run1-<br>DMSO  | NM_0016<br>41 | APEX1 | APEX<br>nuclease<br>(multifunctional DNA<br>repair<br>enzyme) 1 | 1.243528  | Inlier |
| siRNA-Vinblastine Run2-<br>DMSO  | NM_0016<br>41 | APEX1 | APEX<br>nuclease<br>(multifunctional DNA<br>repair<br>enzyme) 1 | 1.280354  | Inlier |
| siRNA-Temozolomide Run3-<br>DMSO | NM_1782<br>70 | APG4A | APG4<br>autophagy<br>4 homolog<br>A (S.<br>cerevisiae)          | -1.458563 | Inlier |
| siRNA-Temozolomide Run1-<br>DMSO | NM_1782<br>70 | APG4A | APG4<br>autophagy<br>4 homolog<br>A (S.<br>cerevisiae)          | -0.492505 | Inlier |
| siRNA-Temozolomide Run2-<br>DMSO | NM_1782<br>70 | APG4A | APG4<br>autophagy<br>4 homolog<br>A (S.<br>cerevisiae)          | -0.418172 | Inlier |
| siRNA Disorazole DMSO Run3       | NM_1782<br>70 | APG4A | APG4<br>autophagy<br>4 homolog<br>A (S.<br>cerevisiae)          | -0.108968 | Inlier |

Identification of Survival Genes in Human Glioblastoma Cells Using siRNA Screening  
 Nikhil G Thaker, Fang Zhang, Peter R. McDonald, Tong Ying Shun, Michael D Lewen, Ian F. Pollack, and John S. Lazo  
 Molecular Pharmacology

|                                  |               |       |                                                        |           |        |
|----------------------------------|---------------|-------|--------------------------------------------------------|-----------|--------|
| siRNA Disorazole DMSO Run1       | NM_1782<br>70 | APG4A | APG4<br>autophagy<br>4 homolog<br>A (S.<br>cerevisiae) | 0.108968  | Inlier |
| siRNA-Vinblastine Run2-<br>DMSO  | NM_1782<br>70 | APG4A | APG4<br>autophagy<br>4 homolog<br>A (S.<br>cerevisiae) | 0.856495  | Inlier |
| siRNA Disorazole DMSO Run2       | NM_1782<br>70 | APG4A | APG4<br>autophagy<br>4 homolog<br>A (S.<br>cerevisiae) | 1.820147  | Inlier |
| siRNA-Vinblastine Run1-<br>DMSO  | NM_1782<br>70 | APG4A | APG4<br>autophagy<br>4 homolog<br>A (S.<br>cerevisiae) | 2.350934  | Inlier |
| siRNA-Temozolomide Run3-<br>DMSO | NM_1783<br>26 | APG4B | APG4<br>autophagy<br>4 homolog<br>B (S.<br>cerevisiae) | -1.881985 | Inlier |
| siRNA-Temozolomide Run2-<br>DMSO | NM_1783<br>26 | APG4B | APG4<br>autophagy<br>4 homolog<br>B (S.<br>cerevisiae) | -1.40233  | Inlier |
| siRNA-Temozolomide Run1-<br>DMSO | NM_1783<br>26 | APG4B | APG4<br>autophagy<br>4 homolog<br>B (S.<br>cerevisiae) | -0.156732 | Inlier |



Identification of Survival Genes in Human Glioblastoma Cells Using siRNA Screening  
 Nikhil G Thaker, Fang Zhang, Peter R. McDonald, Tong Ying Shun, Michael D Lewen, Ian F. Pollack, and John S. Lazo  
 Molecular Pharmacology

|                                  |               |       |                                                        |           |        |
|----------------------------------|---------------|-------|--------------------------------------------------------|-----------|--------|
| siRNA Disorazole DMSO Run3       | NM_1783<br>26 | APG4B | APG4<br>autophagy<br>4 homolog<br>B (S.<br>cerevisiae) | -0.006416 | Inlier |
| siRNA Disorazole DMSO Run1       | NM_1783<br>26 | APG4B | APG4<br>autophagy<br>4 homolog<br>B (S.<br>cerevisiae) | 0.006416  | Inlier |
| siRNA-Vinblastine Run2-<br>DMSO  | NM_1783<br>26 | APG4B | APG4<br>autophagy<br>4 homolog<br>B (S.<br>cerevisiae) | 0.567619  | Inlier |
| siRNA Disorazole DMSO Run2       | NM_1783<br>26 | APG4B | APG4<br>autophagy<br>4 homolog<br>B (S.<br>cerevisiae) | 0.781381  | Inlier |
| siRNA-Vinblastine Run1-<br>DMSO  | NM_1783<br>26 | APG4B | APG4<br>autophagy<br>4 homolog<br>B (S.<br>cerevisiae) | 1.163253  | Inlier |
| siRNA-Temozolomide Run3-<br>DMSO | NM_1782<br>21 | APG4C | APG4<br>autophagy<br>4 homolog<br>C (S.<br>cerevisiae) | -1.906315 | Inlier |
| siRNA-Temozolomide Run1-<br>DMSO | NM_1782<br>21 | APG4C | APG4<br>autophagy<br>4 homolog<br>C (S.<br>cerevisiae) | -0.814198 | Inlier |

Identification of Survival Genes in Human Glioblastoma Cells Using siRNA Screening  
 Nikhil G Thaker, Fang Zhang, Peter R. McDonald, Tong Ying Shun, Michael D Lewen, Ian F. Pollack, and John S. Lazo  
 Molecular Pharmacology

|                              |               |       |                                                        |           |         |
|------------------------------|---------------|-------|--------------------------------------------------------|-----------|---------|
| siRNA-Temozolomide Run2-DMSO | NM_1782<br>21 | APG4C | APG4<br>autophagy<br>4 homolog<br>C (S.<br>cerevisiae) | -0.41821  | Inlier  |
| siRNA Disorazole DMSO Run1   | NM_1782<br>21 | APG4C | APG4<br>autophagy<br>4 homolog<br>C (S.<br>cerevisiae) | -0.001207 | Inlier  |
| siRNA Disorazole DMSO Run3   | NM_1782<br>21 | APG4C | APG4<br>autophagy<br>4 homolog<br>C (S.<br>cerevisiae) | 0.001207  | Inlier  |
| siRNA Disorazole DMSO Run2   | NM_1782<br>21 | APG4C | APG4<br>autophagy<br>4 homolog<br>C (S.<br>cerevisiae) | 0.534802  | Inlier  |
| siRNA-Vinblastine Run2-DMSO  | NM_1782<br>21 | APG4C | APG4<br>autophagy<br>4 homolog<br>C (S.<br>cerevisiae) | 2.552629  | Inlier  |
| siRNA-Vinblastine Run1-DMSO  | NM_1782<br>21 | APG4C | APG4<br>autophagy<br>4 homolog<br>C (S.<br>cerevisiae) | 3.971149  | Outlier |
| siRNA-Temozolomide Run2-DMSO | NM_0003<br>84 | APOB  | apolipoprotein B<br>(including<br>Ag(x)<br>antigen)    | -1.031495 | Inlier  |
| siRNA Disorazole DMSO Run1   | NM_0003<br>84 | APOB  | apolipoprotein B<br>(including<br>Ag(x)<br>antigen)    | -0.991058 | Inlier  |

Identification of Survival Genes in Human Glioblastoma Cells Using siRNA Screening

Nikhil G Thaker, Fang Zhang, Peter R. McDonald, Tong Ying Shun, Michael D Lewen, Ian F. Pollack, and John S. Lazo

Molecular Pharmacology

|                              |           |         |                                                               |           |         |
|------------------------------|-----------|---------|---------------------------------------------------------------|-----------|---------|
| siRNA-Vinblastine Run2-DMSO  | NM_000384 | APOB    | apolipoprotein B (including Ag(x) antigen)                    | -0.339423 | Inlier  |
| siRNA-Temozolomide Run1-DMSO | NM_000384 | APOB    | apolipoprotein B (including Ag(x) antigen)                    | -0.061963 | Inlier  |
| siRNA-Temozolomide Run3-DMSO | NM_000384 | APOB    | apolipoprotein B (including Ag(x) antigen)                    | 0.061963  | Inlier  |
| siRNA Disorazole DMSO Run3   | NM_000384 | APOB    | apolipoprotein B (including Ag(x) antigen)                    | 0.357942  | Inlier  |
| siRNA-Vinblastine Run1-DMSO  | NM_000384 | APOB    | apolipoprotein B (including Ag(x) antigen)                    | 3.356033  | Inlier  |
| siRNA Disorazole DMSO Run2   | NM_000384 | APOB    | apolipoprotein B mRNA editing enzyme, catalytic polypeptide 1 | 3.709704  | Outlier |
| siRNA-Temozolomide Run2-DMSO | NM_001644 | APOBEC1 | apolipoprotein B mRNA editing enzyme, catalytic polypeptide 1 | -1.251958 | Inlier  |
| siRNA-Temozolomide Run1-DMSO | NM_001644 | APOBEC1 | apolipoprotein B mRNA editing enzyme, catalytic polypeptide 1 | -0.981887 | Inlier  |

Identification of Survival Genes in Human Glioblastoma Cells Using siRNA Screening

Nikhil G Thaker, Fang Zhang, Peter R. McDonald, Tong Ying Shun, Michael D Lewen, Ian F. Pollack, and John S. Lazo

Molecular Pharmacology

| siRNA Treatment              | Gene ID   | Gene Name | Gene Description                                              | Log Fold Change | Outlier Status |
|------------------------------|-----------|-----------|---------------------------------------------------------------|-----------------|----------------|
| siRNA-Vinblastine Run2-DMSO  | NM_001644 | APOBEC1   | apolipoprotein B mRNA editing enzyme, catalytic polypeptide 1 | -0.728055       | Inlier         |
| siRNA-Temozolomide Run3-DMSO | NM_001644 | APOBEC1   | apolipoprotein B mRNA editing enzyme, catalytic polypeptide 1 | -0.255415       | Inlier         |
| siRNA Disorazole DMSO Run3   | NM_001644 | APOBEC1   | apolipoprotein B mRNA editing enzyme, catalytic polypeptide 1 | 0.255416        | Inlier         |
| siRNA-Vinblastine Run1-DMSO  | NM_001644 | APOBEC1   | apolipoprotein B mRNA editing enzyme, catalytic polypeptide 1 | 0.500244        | Inlier         |
| siRNA Disorazole DMSO Run1   | NM_001644 | APOBEC1   | apolipoprotein B mRNA editing enzyme, catalytic polypeptide 1 | 0.620945        | Inlier         |
| siRNA Disorazole DMSO Run2   | NM_001644 | APOBEC1   | apolipoprotein B mRNA editing enzyme, catalytic polypeptide 1 | 1.130489        | Inlier         |

Identification of Survival Genes in Human Glioblastoma Cells Using siRNA Screening

Nikhil G Thaker, Fang Zhang, Peter R. McDonald, Tong Ying Shun, Michael D Lewen, Ian F. Pollack, and John S. Lazo

Molecular Pharmacology

| siRNA Treatment              | Gene    | Accession | Gene Name                                                          | Log Fold Change | Outlier Status |
|------------------------------|---------|-----------|--------------------------------------------------------------------|-----------------|----------------|
| siRNA Disorazole DMSO Run1   | APOBEC2 | NM_006789 | apolipoprotein B mRNA editing enzyme, catalytic polypeptide-like 2 | -2.039214       | Inlier         |
| siRNA Disorazole DMSO Run3   | APOBEC2 | NM_006789 | apolipoprotein B mRNA editing enzyme, catalytic polypeptide-like 2 | -0.546957       | Inlier         |
| siRNA-Vinblastine Run2-DMSO  | APOBEC2 | NM_006789 | apolipoprotein B mRNA editing enzyme, catalytic polypeptide-like 2 | -0.447926       | Inlier         |
| siRNA-Temozolomide Run1-DMSO | APOBEC2 | NM_006789 | apolipoprotein B mRNA editing enzyme, catalytic polypeptide-like 2 | -0.119287       | Inlier         |
| siRNA-Temozolomide Run2-DMSO | APOBEC2 | NM_006789 | apolipoprotein B mRNA editing enzyme, catalytic polypeptide-like 2 | 0.119287        | Inlier         |
| siRNA-Temozolomide Run3-DMSO | APOBEC2 | NM_006789 | apolipoprotein B mRNA editing enzyme, catalytic polypeptide-like 2 | 0.802043        | Inlier         |

Identification of Survival Genes in Human Glioblastoma Cells Using siRNA Screening  
 Nikhil G Thaker, Fang Zhang, Peter R. McDonald, Tong Ying Shun, Michael D Lewen, Ian F. Pollack, and John S. Lazo

Molecular Pharmacology

|                              |               |         |                                                                            |           |         |
|------------------------------|---------------|---------|----------------------------------------------------------------------------|-----------|---------|
| siRNA-Vinblastine Run1-DMSO  | NM_0067<br>89 | APOBEC2 | apolipoprotein B mRNA editing enzyme, catalytic polypeptide-like 2         | 1.979845  | Inlier  |
| siRNA Disorazole DMSO Run2   | NM_0067<br>89 | APOBEC2 | apolipoprotein B mRNA editing enzyme, catalytic polypeptide-like 2         | 4.024955  | Outlier |
| siRNA-Temozolomide Run3-DMSO | NM_0004<br>83 | APOC2   | apolipoprotein C-II                                                        | -1.202315 | Inlier  |
| siRNA-Temozolomide Run2-DMSO | NM_0004<br>83 | APOC2   | apolipoprotein C-II                                                        | -1.061969 | Inlier  |
| siRNA-Vinblastine Run2-DMSO  | NM_0004<br>83 | APOC2   | apolipoprotein C-II                                                        | -0.287031 | Inlier  |
| siRNA Disorazole DMSO Run3   | NM_0004<br>83 | APOC2   | apolipoprotein C-II                                                        | -0.148701 | Inlier  |
| siRNA-Temozolomide Run1-DMSO | NM_0004<br>83 | APOC2   | apolipoprotein C-II                                                        | 0.148702  | Inlier  |
| siRNA Disorazole DMSO Run1   | NM_0004<br>83 | APOC2   | apolipoprotein C-II                                                        | 0.151729  | Inlier  |
| siRNA Disorazole DMSO Run2   | NM_0004<br>83 | APOC2   | apolipoprotein C-II                                                        | 1.687378  | Inlier  |
| siRNA-Vinblastine Run1-DMSO  | NM_0004<br>83 | APOC2   | apolipoprotein C-II                                                        | 1.98949   | Inlier  |
| siRNA-Temozolomide Run1-DMSO | NM_2014<br>14 | APP     | amyloid beta (A4) precursor protein (protease nexin-II, Alzheimer disease) | -0.746247 | Inlier  |
| siRNA-Temozolomide Run2-DMSO | NM_2014<br>14 | APP     | amyloid beta (A4) precursor protein (protease nexin-II, Alzheimer disease) | -0.735646 | Inlier  |

Identification of Survival Genes in Human Glioblastoma Cells Using siRNA Screening

Nikhil G Thaker, Fang Zhang, Peter R. McDonald, Tong Ying Shun, Michael D Lewen, Ian F. Pollack, and John S. Lazo

Molecular Pharmacology

|                              |               |      |                                                                            |           |         |
|------------------------------|---------------|------|----------------------------------------------------------------------------|-----------|---------|
| siRNA-Temozolomide Run3-DMSO | NM_2014<br>14 | APP  | amyloid beta (A4) precursor protein (protease nexin-II, Alzheimer disease) | -0.613354 | Inlier  |
| siRNA Disorazole DMSO Run1   | NM_2014<br>14 | APP  | amyloid beta (A4) precursor protein (protease nexin-II, Alzheimer disease) | -0.199284 | Inlier  |
| siRNA-Vinblastine Run2-DMSO  | NM_2014<br>14 | APP  | amyloid beta (A4) precursor protein (protease nexin-II, Alzheimer disease) | 0.199284  | Inlier  |
| siRNA Disorazole DMSO Run3   | NM_2014<br>14 | APP  | amyloid beta (A4) precursor protein (protease nexin-II, Alzheimer disease) | 0.214168  | Inlier  |
| siRNA Disorazole DMSO Run2   | NM_2014<br>14 | APP  | amyloid beta (A4) precursor protein (protease nexin-II, Alzheimer disease) | 2.903696  | Inlier  |
| siRNA-Vinblastine Run1-DMSO  | NM_2014<br>14 | APP  | adenine phosphoribosyltransferase                                          | 4.964756  | Outlier |
| siRNA-Temozolomide Run1-DMSO | NM_0004<br>85 | APRT | adenine phosphoribosyltransferase                                          | -0.764236 | Inlier  |

Identification of Survival Genes in Human Glioblastoma Cells Using siRNA Screening

Nikhil G Thaker, Fang Zhang, Peter R. McDonald, Tong Ying Shun, Michael D Lewen, Ian F. Pollack, and John S. Lazo

Molecular Pharmacology

|                              |           |      |                                      |           |         |
|------------------------------|-----------|------|--------------------------------------|-----------|---------|
| siRNA-Temozolomide Run3-DMSO | NM_000485 | APRT | adenine phosphoribosyltransferase    | -0.716518 | Inlier  |
| siRNA-Temozolomide Run2-DMSO | NM_000485 | APRT | adenine phosphoribosyltransferase    | -0.632482 | Inlier  |
| siRNA Disorazole DMSO Run1   | NM_000485 | APRT | adenine phosphoribosyltransferase    | -0.209247 | Inlier  |
| siRNA Disorazole DMSO Run3   | NM_000485 | APRT | adenine phosphoribosyltransferase    | 0.209247  | Inlier  |
| siRNA-Vinblastine Run2-DMSO  | NM_000485 | APRT | adenine phosphoribosyltransferase    | 0.35387   | Inlier  |
| siRNA Disorazole DMSO Run2   | NM_000485 | APRT | adenine phosphoribosyltransferase    | 0.762753  | Inlier  |
| siRNA-Vinblastine Run1-DMSO  | NM_000485 | APRT | adenine phosphoribosyltransferase    | 1.056839  | Inlier  |
| siRNA Disorazole DMSO Run2   | NM_001649 | APXL | apical protein-like (Xenopus laevis) | -5.579519 | Outlier |
| siRNA-Temozolomide Run3-DMSO | NM_001649 | APXL | apical protein-like (Xenopus laevis) | -1.995623 | Inlier  |
| siRNA Disorazole DMSO Run3   | NM_001649 | APXL | apical protein-like (Xenopus laevis) | -0.353111 | Inlier  |
| siRNA-Vinblastine Run2-DMSO  | NM_001649 | APXL | apical protein-like (Xenopus laevis) | -0.134384 | Inlier  |



Identification of Survival Genes in Human Glioblastoma Cells Using siRNA Screening  
 Nikhil G Thaker, Fang Zhang, Peter R. McDonald, Tong Ying Shun, Michael D Lewen, Ian F. Pollack, and John S. Lazo

Molecular Pharmacology

|                              |               |       |                                                       |           |        |
|------------------------------|---------------|-------|-------------------------------------------------------|-----------|--------|
| siRNA-Temozolomide Run2-DMSO | NM_0016<br>49 | APXL  | apical protein-like (Xenopus laevis)                  | 0.134385  | Inlier |
| siRNA-Temozolomide Run1-DMSO | NM_0016<br>49 | APXL  | apical protein-like (Xenopus laevis)                  | 0.363796  | Inlier |
| siRNA Disorazole DMSO Run1   | NM_0016<br>49 | APXL  | apical protein-like (Xenopus laevis)                  | 0.985204  | Inlier |
| siRNA-Vinblastine Run1-DMSO  | NM_0016<br>49 | APXL  | apical protein-like (Xenopus laevis)                  | 1.211747  | Inlier |
| siRNA-Temozolomide Run3-DMSO | NM_1334<br>56 | APXL2 | APXL2                                                 | -1.418875 | Inlier |
| siRNA Disorazole DMSO Run1   | NM_1334<br>56 | APXL2 | APXL2                                                 | -0.502797 | Inlier |
| siRNA Disorazole DMSO Run2   | NM_1334<br>56 | APXL2 | APXL2                                                 | -0.322334 | Inlier |
| siRNA Disorazole DMSO Run3   | NM_1334<br>56 | APXL2 | APXL2                                                 | -0.227817 | Inlier |
| siRNA-Temozolomide Run2-DMSO | NM_1334<br>56 | APXL2 | APXL2                                                 | 0.227816  | Inlier |
| siRNA-Vinblastine Run1-DMSO  | NM_1334<br>56 | APXL2 | APXL2                                                 | 0.846202  | Inlier |
| siRNA-Temozolomide Run1-DMSO | NM_1334<br>56 | APXL2 | APXL2                                                 | 1.105715  | Inlier |
| siRNA-Vinblastine Run2-DMSO  | NM_1334<br>56 | APXL2 | APXL2                                                 | 1.941942  | Inlier |
| siRNA Disorazole DMSO Run2   | NM_1980<br>98 | AQP1  | aquaporin 1 (channel-forming integral protein, 28kDa) | -0.994951 | Inlier |
| siRNA Disorazole DMSO Run1   | NM_1980<br>98 | AQP1  | aquaporin 1 (channel-forming integral protein, 28kDa) | -0.817991 | Inlier |

Identification of Survival Genes in Human Glioblastoma Cells Using siRNA Screening  
 Nikhil G Thaker, Fang Zhang, Peter R. McDonald, Tong Ying Shun, Michael D Lewen, Ian F. Pollack, and John S. Lazo  
 Molecular Pharmacology

|                                  |               |       |                                                                       |                  |
|----------------------------------|---------------|-------|-----------------------------------------------------------------------|------------------|
| siRNA Disorazole DMSO Run3       | NM_1980<br>98 | AQP1  | aquaporin<br>1 (channel-<br>forming<br>integral<br>protein,<br>28kDa) | -0.724252 Inlier |
| siRNA-Temozolomide Run2-<br>DMSO | NM_1980<br>98 | AQP1  | aquaporin<br>1 (channel-<br>forming<br>integral<br>protein,<br>28kDa) | -0.014162 Inlier |
| siRNA-Temozolomide Run3-<br>DMSO | NM_1980<br>98 | AQP1  | aquaporin<br>1 (channel-<br>forming<br>integral<br>protein,<br>28kDa) | 0.014163 Inlier  |
| siRNA-Vinblastine Run1-<br>DMSO  | NM_1980<br>98 | AQP1  | aquaporin<br>1 (channel-<br>forming<br>integral<br>protein,<br>28kDa) | 0.268058 Inlier  |
| siRNA-Temozolomide Run1-<br>DMSO | NM_1980<br>98 | AQP1  | aquaporin<br>1 (channel-<br>forming<br>integral<br>protein,<br>28kDa) | 0.624748 Inlier  |
| siRNA-Vinblastine Run2-<br>DMSO  | NM_1980<br>98 | AQP1  | aquaporin<br>1 (channel-<br>forming<br>integral<br>protein,<br>28kDa) | 0.757501 Inlier  |
| siRNA Disorazole DMSO Run2       | NM_0804<br>29 | AQP10 | aquaporin<br>10                                                       | -1.265872 Inlier |
| siRNA-Temozolomide Run3-<br>DMSO | NM_0804<br>29 | AQP10 | aquaporin<br>10                                                       | -1.208138 Inlier |
| siRNA Disorazole DMSO Run1       | NM_0804<br>29 | AQP10 | aquaporin<br>10                                                       | -0.385827 Inlier |
| siRNA Disorazole DMSO Run3       | NM_0804<br>29 | AQP10 | aquaporin<br>10                                                       | -0.175376 Inlier |
| siRNA-Temozolomide Run2-<br>DMSO | NM_0804<br>29 | AQP10 | aquaporin<br>10                                                       | 0.175375 Inlier  |

Identification of Survival Genes in Human Glioblastoma Cells Using siRNA Screening  
 Nikhil G Thaker, Fang Zhang, Peter R. McDonald, Tong Ying Shun, Michael D Lewen, Ian F. Pollack, and John S. Lazo

|                                  |               |       |                                        |           |        |
|----------------------------------|---------------|-------|----------------------------------------|-----------|--------|
| siRNA-Temozolomide Run1-<br>DMSO | NM_0804<br>29 | AQP10 | aquaporin<br>10                        | 0.218003  | Inlier |
| siRNA-Vinblastine Run1-<br>DMSO  | NM_0804<br>29 | AQP10 | aquaporin<br>10                        | 0.963172  | Inlier |
| siRNA-Vinblastine Run2-<br>DMSO  | NM_0804<br>29 | AQP10 | aquaporin<br>10                        | 1.882031  | Inlier |
| siRNA-Temozolomide Run3-<br>DMSO | NM_1730<br>39 | AQP11 | aquaporin<br>11                        | -1.010446 | Inlier |
| siRNA Disorazole DMSO Run2       | NM_1730<br>39 | AQP11 | aquaporin<br>11                        | -0.97861  | Inlier |
| siRNA-Temozolomide Run2-<br>DMSO | NM_1730<br>39 | AQP11 | aquaporin<br>11                        | -0.460107 | Inlier |
| siRNA Disorazole DMSO Run1       | NM_1730<br>39 | AQP11 | aquaporin<br>11                        | -0.012433 | Inlier |
| siRNA Disorazole DMSO Run3       | NM_1730<br>39 | AQP11 | aquaporin<br>11                        | 0.012433  | Inlier |
| siRNA-Temozolomide Run1-<br>DMSO | NM_1730<br>39 | AQP11 | aquaporin<br>11                        | 0.466449  | Inlier |
| siRNA-Vinblastine Run2-<br>DMSO  | NM_1730<br>39 | AQP11 | aquaporin<br>11                        | 0.882551  | Inlier |
| siRNA-Vinblastine Run1-<br>DMSO  | NM_1730<br>39 | AQP11 | aquaporin<br>11                        | 1.206681  | Inlier |
| siRNA-Vinblastine Run2-<br>DMSO  | NM_0004<br>86 | AQP2  | aquaporin<br>2<br>(collecting<br>duct) | -1.095634 | Inlier |
| siRNA Disorazole DMSO Run3       | NM_0004<br>86 | AQP2  | aquaporin<br>2<br>(collecting<br>duct) | -0.715963 | Inlier |
| siRNA-Temozolomide Run2-<br>DMSO | NM_0004<br>86 | AQP2  | aquaporin<br>2<br>(collecting<br>duct) | -0.633037 | Inlier |
| siRNA Disorazole DMSO Run1       | NM_0004<br>86 | AQP2  | aquaporin<br>2<br>(collecting<br>duct) | -0.262888 | Inlier |
| siRNA-Temozolomide Run3-<br>DMSO | NM_0004<br>86 | AQP2  | aquaporin<br>2<br>(collecting<br>duct) | 0.262888  | Inlier |
| siRNA-Temozolomide Run1-<br>DMSO | NM_0004<br>86 | AQP2  | aquaporin<br>2<br>(collecting<br>duct) | 0.495722  | Inlier |
| siRNA-Vinblastine Run1-<br>DMSO  | NM_0004<br>86 | AQP2  | aquaporin<br>2<br>(collecting<br>duct) | 1.502522  | Inlier |

Identification of Survival Genes in Human Glioblastoma Cells Using siRNA Screening  
 Nikhil G Thaker, Fang Zhang, Peter R. McDonald, Tong Ying Shun, Michael D Lewen, Ian F. Pollack, and John S. Lazo

Molecular Pharmacology

| siRNA                        | Run | Gene | Protein           | Value     | Inlier |
|------------------------------|-----|------|-------------------|-----------|--------|
|                              |     |      | aquaporin 2       |           |        |
| siRNA Disorazole DMSO Run2   | 86  | AQP2 | (collecting duct) | 2.943787  | Inlier |
|                              |     |      | aquaporin 3       |           |        |
| siRNA Disorazole DMSO Run2   | 25  | AQP3 |                   | -1.567843 | Inlier |
| siRNA-Temozolomide Run1-DMSO | 25  | AQP3 |                   | -1.041293 | Inlier |
|                              |     |      | aquaporin 3       |           |        |
| siRNA Disorazole DMSO Run1   | 25  | AQP3 |                   | -0.148972 | Inlier |
| siRNA-Temozolomide Run3-DMSO | 25  | AQP3 |                   | -0.014675 | Inlier |
| siRNA-Temozolomide Run2-DMSO | 25  | AQP3 |                   | 0.014674  | Inlier |
|                              |     |      | aquaporin 3       |           |        |
| siRNA Disorazole DMSO Run3   | 25  | AQP3 |                   | 0.56991   | Inlier |
| siRNA-Vinblastine Run1-DMSO  | 25  | AQP3 |                   | 0.77909   | Inlier |
| siRNA-Vinblastine Run2-DMSO  | 25  | AQP3 |                   | 1.045723  | Inlier |
| siRNA-Temozolomide Run3-DMSO | 28  | AQP4 |                   | -0.926655 | Inlier |
| siRNA-Temozolomide Run1-DMSO | 28  | AQP4 |                   | -0.856065 | Inlier |
| siRNA-Temozolomide Run2-DMSO | 28  | AQP4 |                   | -0.834961 | Inlier |
|                              |     |      | aquaporin 4       |           |        |
| siRNA Disorazole DMSO Run3   | 28  | AQP4 |                   | -0.042274 | Inlier |
|                              |     |      | aquaporin 4       |           |        |
| siRNA Disorazole DMSO Run2   | 28  | AQP4 |                   | 0.042274  | Inlier |
| siRNA-Vinblastine Run1-DMSO  | 28  | AQP4 |                   | 0.457046  | Inlier |
|                              |     |      | aquaporin 4       |           |        |
| siRNA Disorazole DMSO Run1   | 28  | AQP4 |                   | 0.514039  | Inlier |
| siRNA-Vinblastine Run2-DMSO  | 28  | AQP4 |                   | 0.987916  | Inlier |
|                              |     |      | aquaporin 5       |           |        |
| siRNA Disorazole DMSO Run1   | 51  | AQP5 |                   | -0.996356 | Inlier |
| siRNA-Temozolomide Run2-DMSO | 51  | AQP5 |                   | -0.707488 | Inlier |
| siRNA-Vinblastine Run2-DMSO  | 51  | AQP5 |                   | -0.287775 | Inlier |
| siRNA-Temozolomide Run3-DMSO | 51  | AQP5 |                   | -0.075997 | Inlier |
| siRNA-Temozolomide Run1-DMSO | 51  | AQP5 |                   | 0.075998  | Inlier |
|                              |     |      | aquaporin 5       |           |        |
| siRNA Disorazole DMSO Run3   | 51  | AQP5 |                   | 0.641512  | Inlier |
| siRNA-Vinblastine Run1-DMSO  | 51  | AQP5 |                   | 1.014646  | Inlier |
|                              |     |      | aquaporin 5       |           |        |
| siRNA Disorazole DMSO Run2   | 51  | AQP5 |                   | 2.631695  | Inlier |

Identification of Survival Genes in Human Glioblastoma Cells Using siRNA Screening  
 Nikhil G Thaker, Fang Zhang, Peter R. McDonald, Tong Ying Shun, Michael D Lewen, Ian F. Pollack, and John S. Lazo

Molecular Pharmacology

|                                  |               |      |           |                  |
|----------------------------------|---------------|------|-----------|------------------|
|                                  |               |      | aquaporin |                  |
|                                  |               |      | 6, kidney |                  |
| siRNA Disorazole DMSO Run1       | NM_0532<br>86 | AQP6 | specific  | -1.005472 Inlier |
|                                  |               |      | aquaporin |                  |
| siRNA-Temozolomide Run2-<br>DMSO | NM_0532<br>86 | AQP6 | specific  | -0.527924 Inlier |
|                                  |               |      | aquaporin |                  |
| siRNA-Temozolomide Run3-<br>DMSO | NM_0532<br>86 | AQP6 | specific  | -0.287708 Inlier |
|                                  |               |      | aquaporin |                  |
| siRNA-Vinblastine Run2-<br>DMSO  | NM_0532<br>86 | AQP6 | specific  | -0.023917 Inlier |
|                                  |               |      | aquaporin |                  |
| siRNA-Temozolomide Run1-<br>DMSO | NM_0532<br>86 | AQP6 | specific  | 0.023916 Inlier  |
|                                  |               |      | aquaporin |                  |
| siRNA Disorazole DMSO Run3       | NM_0532<br>86 | AQP6 | specific  | 0.821076 Inlier  |
|                                  |               |      | aquaporin |                  |
| siRNA-Vinblastine Run1-<br>DMSO  | NM_0532<br>86 | AQP6 | specific  | 1.070831 Inlier  |
|                                  |               |      | aquaporin |                  |
| siRNA Disorazole DMSO Run2       | NM_0532<br>86 | AQP6 | specific  | 1.215763 Inlier  |
|                                  |               |      | aquaporin |                  |
| siRNA-Temozolomide Run3-<br>DMSO | NM_0011<br>70 | AQP7 | 7         | -1.326858 Inlier |
|                                  |               |      | aquaporin |                  |
| siRNA-Temozolomide Run2-<br>DMSO | NM_0011<br>70 | AQP7 | 7         | -1.134112 Inlier |
|                                  |               |      | aquaporin |                  |
| siRNA Disorazole DMSO Run3       | NM_0011<br>70 | AQP7 | 7         | -0.484242 Inlier |
|                                  |               |      | aquaporin |                  |
| siRNA-Temozolomide Run1-<br>DMSO | NM_0011<br>70 | AQP7 | 7         | -0.069695 Inlier |
|                                  |               |      | aquaporin |                  |
| siRNA Disorazole DMSO Run2       | NM_0011<br>70 | AQP7 | 7         | 0.069695 Inlier  |
|                                  |               |      | aquaporin |                  |
| siRNA Disorazole DMSO Run1       | NM_0011<br>70 | AQP7 | 7         | 0.365876 Inlier  |
|                                  |               |      | aquaporin |                  |
| siRNA-Vinblastine Run1-<br>DMSO  | NM_0011<br>70 | AQP7 | 7         | 0.864757 Inlier  |
|                                  |               |      | aquaporin |                  |
| siRNA-Vinblastine Run2-<br>DMSO  | NM_0011<br>70 | AQP7 | 7         | 1.656904 Inlier  |
|                                  |               |      | aquaporin |                  |
| siRNA-Temozolomide Run1-<br>DMSO | NM_0011<br>69 | AQP8 | 8         | -1.928107 Inlier |
|                                  |               |      | aquaporin |                  |
| siRNA-Temozolomide Run3-<br>DMSO | NM_0011<br>69 | AQP8 | 8         | -1.549439 Inlier |
|                                  |               |      | aquaporin |                  |
| siRNA-Temozolomide Run2-<br>DMSO | NM_0011<br>69 | AQP8 | 8         | -1.093988 Inlier |
|                                  |               |      | aquaporin |                  |
| siRNA Disorazole DMSO Run1       | NM_0011<br>69 | AQP8 | 8         | -0.271014 Inlier |
|                                  |               |      | aquaporin |                  |
| siRNA-Vinblastine Run1-<br>DMSO  | NM_0011<br>69 | AQP8 | 8         | 0.271014 Inlier  |
|                                  |               |      | aquaporin |                  |
| siRNA Disorazole DMSO Run2       | NM_0011<br>69 | AQP8 | 8         | 0.28796 Inlier   |

Identification of Survival Genes in Human Glioblastoma Cells Using siRNA Screening

Nikhil G Thaker, Fang Zhang, Peter R. McDonald, Tong Ying Shun, Michael D Lewen, Ian F. Pollack, and John S.

Lazo

|                                  |                  |      |                                                                                                                                                                      |           |         |
|----------------------------------|------------------|------|----------------------------------------------------------------------------------------------------------------------------------------------------------------------|-----------|---------|
| siRNA-Vinblastine Run2-<br>DMSO  | NM_0011<br>69    | AQP8 | aquaporin<br>8                                                                                                                                                       | 0.545814  | Inlier  |
|                                  | NM_0011          |      | aquaporin                                                                                                                                                            |           |         |
| siRNA Disorazole DMSO Run3       | 69               | AQP8 | 8                                                                                                                                                                    | 0.803186  | Inlier  |
| siRNA-Temozolomide Run3-<br>DMSO | NM_0209<br>80    | AQP9 | aquaporin<br>9                                                                                                                                                       | -2.309225 | Inlier  |
| siRNA-Temozolomide Run2-<br>DMSO | NM_0209<br>80    | AQP9 | aquaporin<br>9                                                                                                                                                       | -0.88613  | Inlier  |
|                                  | NM_0209          |      | aquaporin                                                                                                                                                            |           |         |
| siRNA Disorazole DMSO Run1       | 80               | AQP9 | 9                                                                                                                                                                    | -0.604713 | Inlier  |
|                                  | NM_0209          |      | aquaporin                                                                                                                                                            |           |         |
| siRNA Disorazole DMSO Run2       | 80               | AQP9 | 9                                                                                                                                                                    | -0.122335 | Inlier  |
| siRNA-Temozolomide Run1-<br>DMSO | NM_0209<br>80    | AQP9 | aquaporin<br>9                                                                                                                                                       | 0.122336  | Inlier  |
|                                  | NM_0209          |      | aquaporin                                                                                                                                                            |           |         |
| siRNA Disorazole DMSO Run3       | 80               | AQP9 | 9                                                                                                                                                                    | 0.536647  | Inlier  |
| siRNA-Vinblastine Run1-<br>DMSO  | NM_0209<br>80    | AQP9 | aquaporin<br>9                                                                                                                                                       | 0.744287  | Inlier  |
| siRNA-Vinblastine Run2-<br>DMSO  | NM_0209<br>80    | AQP9 | aquaporin<br>9                                                                                                                                                       | 1.338798  | Inlier  |
|                                  |                  |      | androgen<br>receptor<br>(dihydrote<br>stosterone<br>receptor;<br>testicular<br>feminizatio<br>n; spinal<br>and bulbar<br>muscular<br>atrophy;<br>Kennedy<br>disease) |           |         |
| siRNA Disorazole DMSO Run2       | NM_0010<br>11645 | AR   |                                                                                                                                                                      | -3.605102 | Outlier |
|                                  |                  |      | androgen<br>receptor<br>(dihydrote<br>stosterone<br>receptor;<br>testicular<br>feminizatio<br>n; spinal<br>and bulbar<br>muscular<br>atrophy;<br>Kennedy<br>disease) |           |         |
| siRNA-Temozolomide Run3-<br>DMSO | NM_0010<br>11645 | AR   |                                                                                                                                                                      | -2.885947 | Inlier  |

Identification of Survival Genes in Human Glioblastoma Cells Using siRNA Screening

Nikhil G Thaker, Fang Zhang, Peter R. McDonald, Tong Ying Shun, Michael D Lewen, Ian F. Pollack, and John S.

Lazo

Molecular Pharmacology

|                              |              |    |                                                                                                                                |           |        |
|------------------------------|--------------|----|--------------------------------------------------------------------------------------------------------------------------------|-----------|--------|
| siRNA-Temozolomide Run1-DMSO | NM_001011645 | AR | androgen receptor (dihydrotestosterone receptor; testicular feminization; spinal and bulbar muscular atrophy; Kennedy disease) | -0.782935 | Inlier |
| siRNA-Temozolomide Run2-DMSO | NM_001011645 | AR | androgen receptor (dihydrotestosterone receptor; testicular feminization; spinal and bulbar muscular atrophy; Kennedy disease) | -0.021827 | Inlier |
| siRNA Disorazole DMSO Run1   | NM_001011645 | AR | androgen receptor (dihydrotestosterone receptor; testicular feminization; spinal and bulbar muscular atrophy; Kennedy disease) | 0.021827  | Inlier |

Identification of Survival Genes in Human Glioblastoma Cells Using siRNA Screening

Nikhil G Thaker, Fang Zhang, Peter R. McDonald, Tong Ying Shun, Michael D Lewen, Ian F. Pollack, and John S. Lazo

Molecular Pharmacology

|                                  |                  |       |                                                                                                                                                                      |                  |
|----------------------------------|------------------|-------|----------------------------------------------------------------------------------------------------------------------------------------------------------------------|------------------|
| siRNA Disorazole DMSO Run3       | NM_0010<br>11645 | AR    | androgen<br>receptor<br>(dihydrote<br>stosterone<br>receptor;<br>testicular<br>feminizatio<br>n; spinal<br>and bulbar<br>muscular<br>atrophy;<br>Kennedy<br>disease) | 0.177961 Inlier  |
| siRNA-Vinblastine Run1-<br>DMSO  | NM_0010<br>11645 | AR    | androgen<br>receptor<br>(dihydrote<br>stosterone<br>receptor;<br>testicular<br>feminizatio<br>n; spinal<br>and bulbar<br>muscular<br>atrophy;<br>Kennedy<br>disease) | 0.669629 Inlier  |
| siRNA-Vinblastine Run2-<br>DMSO  | NM_0010<br>11645 | AR    | androgen<br>receptor<br>(dihydrote<br>stosterone<br>receptor;<br>testicular<br>feminizatio<br>n; spinal<br>and bulbar<br>muscular<br>atrophy;<br>Kennedy<br>disease) | 0.679371 Inlier  |
| siRNA-Temozolomide Run2-<br>DMSO | NM_0016<br>54    | ARAF1 | v-raf<br>murine<br>sarcoma<br>3611 viral<br>oncogene<br>homolog                                                                                                      | -1.226929 Inlier |



Identification of Survival Genes in Human Glioblastoma Cells Using siRNA Screening  
 Nikhil G Thaker, Fang Zhang, Peter R. McDonald, Tong Ying Shun, Michael D Lewen, Ian F. Pollack, and John S. Lazo

Molecular Pharmacology

|                              |               |       |                                                                 |           |        |
|------------------------------|---------------|-------|-----------------------------------------------------------------|-----------|--------|
| siRNA-Temozolomide Run3-DMSO | NM_0016<br>54 | ARAF1 | v-raf<br>murine<br>sarcoma<br>3611 viral<br>oncogene<br>homolog | -1.179592 | Inlier |
| siRNA Disorazole DMSO Run2   | NM_0016<br>54 | ARAF1 | v-raf<br>murine<br>sarcoma<br>3611 viral<br>oncogene<br>homolog | -0.79204  | Inlier |
| siRNA Disorazole DMSO Run3   | NM_0016<br>54 | ARAF1 | v-raf<br>murine<br>sarcoma<br>3611 viral<br>oncogene<br>homolog | -0.341023 | Inlier |
| siRNA Disorazole DMSO Run1   | NM_0016<br>54 | ARAF1 | v-raf<br>murine<br>sarcoma<br>3611 viral<br>oncogene<br>homolog | 0.341023  | Inlier |
| siRNA-Temozolomide Run1-DMSO | NM_0016<br>54 | ARAF1 | v-raf<br>murine<br>sarcoma<br>3611 viral<br>oncogene<br>homolog | 0.553977  | Inlier |
| siRNA-Vinblastine Run1-DMSO  | NM_0016<br>54 | ARAF1 | v-raf<br>murine<br>sarcoma<br>3611 viral<br>oncogene<br>homolog | 0.55696   | Inlier |
| siRNA-Vinblastine Run2-DMSO  | NM_0016<br>54 | ARAF1 | v-raf<br>murine<br>sarcoma<br>3611 viral<br>oncogene<br>homolog | 1.080077  | Inlier |
| siRNA Disorazole DMSO Run1   | NM_0224<br>81 | ARAP3 | centaurin,<br>delta 3                                           | -2.697625 | Inlier |
| siRNA-Temozolomide Run2-DMSO | NM_0224<br>81 | ARAP3 | centaurin,<br>delta 3                                           | -1.586072 | Inlier |
| siRNA-Temozolomide Run1-DMSO | NM_0224<br>81 | ARAP3 | centaurin,<br>delta 3                                           | -0.988014 | Inlier |
| siRNA-Vinblastine Run2-DMSO  | NM_0224<br>81 | ARAP3 | centaurin,<br>delta 3                                           | -0.06244  | Inlier |
| siRNA-Vinblastine Run1-DMSO  | NM_0224<br>81 | ARAP3 | centaurin,<br>delta 3                                           | 0.062439  | Inlier |

Identification of Survival Genes in Human Glioblastoma Cells Using siRNA Screening

Nikhil G Thaker, Fang Zhang, Peter R. McDonald, Tong Ying Shun, Michael D Lewen, Ian F. Pollack, and John S.

Lazo

|                                  |               |       |                                                                    |           |        |
|----------------------------------|---------------|-------|--------------------------------------------------------------------|-----------|--------|
| siRNA-Temozolomide Run3-<br>DMSO | NM_0224<br>81 | ARAP3 | centaurin,<br>delta 3                                              | 0.227968  | Inlier |
| siRNA Disorazole DMSO Run2       | NM_0224<br>81 | ARAP3 | centaurin,<br>delta 3                                              | 0.360986  | Inlier |
| siRNA Disorazole DMSO Run3       | NM_0224<br>81 | ARAP3 | centaurin,<br>delta 3                                              | 1.383849  | Inlier |
| siRNA-Temozolomide Run2-<br>DMSO | NM_0034<br>91 | ARD1  | ARD1<br>homolog,<br>N-<br>acetyltrans<br>ferase (S.<br>cerevisiae) | -1.652211 | Inlier |
| siRNA-Temozolomide Run1-<br>DMSO | NM_0034<br>91 | ARD1  | ARD1<br>homolog,<br>N-<br>acetyltrans<br>ferase (S.<br>cerevisiae) | -1.468169 | Inlier |
| siRNA-Temozolomide Run3-<br>DMSO | NM_0034<br>91 | ARD1  | ARD1<br>homolog,<br>N-<br>acetyltrans<br>ferase (S.<br>cerevisiae) | -0.556957 | Inlier |
| siRNA Disorazole DMSO Run1       | NM_0034<br>91 | ARD1  | ARD1<br>homolog,<br>N-<br>acetyltrans<br>ferase (S.<br>cerevisiae) | -0.339433 | Inlier |
| siRNA Disorazole DMSO Run3       | NM_0034<br>91 | ARD1  | ARD1<br>homolog,<br>N-<br>acetyltrans<br>ferase (S.<br>cerevisiae) | 0.339433  | Inlier |

Identification of Survival Genes in Human Glioblastoma Cells Using siRNA Screening  
 Nikhil G Thaker, Fang Zhang, Peter R. McDonald, Tong Ying Shun, Michael D Lewen, Ian F. Pollack, and John S. Lazo  
 Molecular Pharmacology

|                              |               |      |                                                                    |           |        |
|------------------------------|---------------|------|--------------------------------------------------------------------|-----------|--------|
| siRNA-Vinblastine Run2-DMSO  | NM_0034<br>91 | ARD1 | ARD1<br>homolog,<br>N-<br>acetyltrans<br>ferase (S.<br>cerevisiae) | 0.653119  | Inlier |
| siRNA Disorazole DMSO Run2   | NM_0034<br>91 | ARD1 | ARD1<br>homolog,<br>N-<br>acetyltrans<br>ferase (S.<br>cerevisiae) | 0.695881  | Inlier |
| siRNA-Vinblastine Run1-DMSO  | NM_0034<br>91 | ARD1 | ARD1<br>homolog,<br>N-<br>acetyltrans<br>ferase (S.<br>cerevisiae) | 2.265641  | Inlier |
| siRNA-Temozolomide Run3-DMSO | NM_0016<br>58 | ARF1 | ADP-<br>ribosylatio<br>n factor 1                                  | -1.508283 | Inlier |
| siRNA-Temozolomide Run2-DMSO | NM_0016<br>58 | ARF1 | ADP-<br>ribosylatio<br>n factor 1                                  | -0.823457 | Inlier |
| siRNA Disorazole DMSO Run3   | NM_0016<br>58 | ARF1 | ADP-<br>ribosylatio<br>n factor 1                                  | -0.525543 | Inlier |
| siRNA-Temozolomide Run1-DMSO | NM_0016<br>58 | ARF1 | ADP-<br>ribosylatio<br>n factor 1                                  | -0.113502 | Inlier |
| siRNA-Vinblastine Run2-DMSO  | NM_0016<br>58 | ARF1 | ADP-<br>ribosylatio<br>n factor 1                                  | 0.113502  | Inlier |
| siRNA Disorazole DMSO Run1   | NM_0016<br>58 | ARF1 | ADP-<br>ribosylatio<br>n factor 1                                  | 0.26368   | Inlier |
| siRNA Disorazole DMSO Run2   | NM_0016<br>58 | ARF1 | ADP-<br>ribosylatio<br>n factor 1                                  | 0.937757  | Inlier |
| siRNA-Vinblastine Run1-DMSO  | NM_0016<br>58 | ARF1 | ADP-<br>ribosylatio<br>n factor 1                                  | 1.127746  | Inlier |
| siRNA-Temozolomide Run3-DMSO | NM_0016<br>59 | ARF3 | ADP-<br>ribosylatio<br>n factor 3                                  | -1.663714 | Inlier |

Identification of Survival Genes in Human Glioblastoma Cells Using siRNA Screening  
 Nikhil G Thaker, Fang Zhang, Peter R. McDonald, Tong Ying Shun, Michael D Lewen, Ian F. Pollack, and John S. Lazo

| Molecular Pharmacology       |               |       |                                | ADP-ribosylation factor 3 |        |
|------------------------------|---------------|-------|--------------------------------|---------------------------|--------|
| siRNA-Temozolomide Run1-DMSO | NM_0016<br>59 | ARF3  | ADP-ribosylation factor 3      | -0.708001                 | Inlier |
| siRNA-Temozolomide Run2-DMSO | NM_0016<br>59 | ARF3  | ADP-ribosylation factor 3      | -0.640999                 | Inlier |
| siRNA-Vinblastine Run2-DMSO  | NM_0016<br>59 | ARF3  | ADP-ribosylation factor 3      | -0.186293                 | Inlier |
| siRNA Disorazole DMSO Run3   | NM_0016<br>59 | ARF3  | ADP-ribosylation factor 3      | 0.186294                  | Inlier |
| siRNA Disorazole DMSO Run1   | NM_0016<br>59 | ARF3  | ADP-ribosylation factor 3      | 0.431933                  | Inlier |
| siRNA-Vinblastine Run1-DMSO  | NM_0016<br>59 | ARF3  | ADP-ribosylation factor 3      | 0.89677                   | Inlier |
| siRNA Disorazole DMSO Run2   | NM_0016<br>59 | ARF3  | ADP-ribosylation factor 3      | 1.204484                  | Inlier |
| siRNA-Temozolomide Run3-DMSO | NM_0016<br>60 | ARF4  | ADP-ribosylation factor 4      | -1.251295                 | Inlier |
| siRNA-Temozolomide Run1-DMSO | NM_0016<br>60 | ARF4  | ADP-ribosylation factor 4      | -0.710515                 | Inlier |
| siRNA-Temozolomide Run2-DMSO | NM_0016<br>60 | ARF4  | ADP-ribosylation factor 4      | -0.139139                 | Inlier |
| siRNA-Vinblastine Run2-DMSO  | NM_0016<br>60 | ARF4  | ADP-ribosylation factor 4      | -0.060233                 | Inlier |
| siRNA Disorazole DMSO Run3   | NM_0016<br>60 | ARF4  | ADP-ribosylation factor 4      | 0.060233                  | Inlier |
| siRNA Disorazole DMSO Run1   | NM_0016<br>60 | ARF4  | ADP-ribosylation factor 4      | 0.638485                  | Inlier |
| siRNA Disorazole DMSO Run2   | NM_0016<br>60 | ARF4  | ADP-ribosylation factor 4      | 0.981958                  | Inlier |
| siRNA-Vinblastine Run1-DMSO  | NM_0016<br>60 | ARF4  | ADP-ribosylation factor 4      | 1.122522                  | Inlier |
| siRNA-Temozolomide Run1-DMSO | NM_0016<br>61 | ARF4L | ADP-ribosylation factor 4-like | -0.901836                 | Inlier |

Identification of Survival Genes in Human Glioblastoma Cells Using siRNA Screening  
 Nikhil G Thaker, Fang Zhang, Peter R. McDonald, Tong Ying Shun, Michael D Lewen, Ian F. Pollack, and John S. Lazo

Molecular Pharmacology

| siRNA Treatment              | Gene ID   | Gene Name | ADP-ribosylation factor | Log Fold Change | Classification |
|------------------------------|-----------|-----------|-------------------------|-----------------|----------------|
| siRNA-Temozolomide Run3-DMSO | NM_001661 | ARF4L     | n factor 4-like         | -0.637708       | Inlier         |
| siRNA-Temozolomide Run2-DMSO | NM_001661 | ARF4L     | n factor 4-like         | -0.450445       | Inlier         |
| siRNA Disorazole DMSO Run3   | NM_001661 | ARF4L     | n factor 4-like         | -0.06323        | Inlier         |
| siRNA-Vinblastine Run2-DMSO  | NM_001661 | ARF4L     | n factor 4-like         | 0.06323         | Inlier         |
| siRNA Disorazole DMSO Run2   | NM_001661 | ARF4L     | n factor 4-like         | 0.711292        | Inlier         |
| siRNA Disorazole DMSO Run1   | NM_001661 | ARF4L     | n factor 4-like         | 0.988396        | Inlier         |
| siRNA-Vinblastine Run1-DMSO  | NM_001661 | ARF4L     | n factor 4-like         | 1.37405         | Inlier         |
| siRNA-Temozolomide Run3-DMSO | NM_001662 | ARF5      | n factor 5              | -5.8327         | Outlier        |
| siRNA-Temozolomide Run2-DMSO | NM_001662 | ARF5      | n factor 5              | -4.098964       | Outlier        |
| siRNA-Temozolomide Run1-DMSO | NM_001662 | ARF5      | n factor 5              | -2.968229       | Inlier         |
| siRNA Disorazole DMSO Run3   | NM_001662 | ARF5      | n factor 5              | -0.301788       | Inlier         |
| siRNA Disorazole DMSO Run1   | NM_001662 | ARF5      | n factor 5              | 0.30179         | Inlier         |
| siRNA-Vinblastine Run2-DMSO  | NM_001662 | ARF5      | n factor 5              | 0.449887        | Inlier         |
| siRNA Disorazole DMSO Run2   | NM_001662 | ARF5      | n factor 5              | 0.609111        | Inlier         |
| siRNA-Vinblastine Run1-DMSO  | NM_001662 | ARF5      | n factor 5              | 0.739889        | Inlier         |

Identification of Survival Genes in Human Glioblastoma Cells Using siRNA Screening  
 Nikhil G Thaker, Fang Zhang, Peter R. McDonald, Tong Ying Shun, Michael D Lewen, Ian F. Pollack, and John S. Lazo

| Molecular Pharmacology       |               |         |                             |           |        |
|------------------------------|---------------|---------|-----------------------------|-----------|--------|
| siRNA-Temozolomide Run3-DMSO | NM_0016<br>63 | ARF6    | ADP-ribosylation factor 6   | -1.571773 | Inlier |
| siRNA-Temozolomide Run1-DMSO | NM_0016<br>63 | ARF6    | ADP-ribosylation factor 6   | -0.875437 | Inlier |
| siRNA-Temozolomide Run2-DMSO | NM_0016<br>63 | ARF6    | ADP-ribosylation factor 6   | -0.606949 | Inlier |
| siRNA Disorazole DMSO Run3   | NM_0016<br>63 | ARF6    | ADP-ribosylation factor 6   | -0.171467 | Inlier |
| siRNA-Vinblastine Run2-DMSO  | NM_0016<br>63 | ARF6    | ADP-ribosylation factor 6   | 0.171467  | Inlier |
| siRNA Disorazole DMSO Run1   | NM_0016<br>63 | ARF6    | ADP-ribosylation factor 6   | 0.389107  | Inlier |
| siRNA-Vinblastine Run1-DMSO  | NM_0016<br>63 | ARF6    | ADP-ribosylation factor 6   | 0.742051  | Inlier |
| siRNA Disorazole DMSO Run2   | NM_0016<br>63 | ARF6    | ADP-ribosylation factor 6   | 0.833143  | Inlier |
| siRNA-Temozolomide Run1-DMSO | NM_0145<br>70 | ARFGAP3 | GTPase activating protein 3 | -1.779394 | Inlier |
| siRNA-Temozolomide Run3-DMSO | NM_0145<br>70 | ARFGAP3 | GTPase activating protein 3 | -1.200809 | Inlier |
| siRNA-Vinblastine Run2-DMSO  | NM_0145<br>70 | ARFGAP3 | GTPase activating protein 3 | -0.663005 | Inlier |
| siRNA Disorazole DMSO Run3   | NM_0145<br>70 | ARFGAP3 | GTPase activating protein 3 | -0.093591 | Inlier |

Identification of Survival Genes in Human Glioblastoma Cells Using siRNA Screening  
 Nikhil G Thaker, Fang Zhang, Peter R. McDonald, Tong Ying Shun, Michael D Lewen, Ian F. Pollack, and John S. Lazo

Molecular Pharmacology

|                              |               |         |                                                     |           |        |
|------------------------------|---------------|---------|-----------------------------------------------------|-----------|--------|
| siRNA-Temozolomide Run2-DMSO | NM_0145<br>70 | ARFGAP3 | ADP-ribosylation factor GTPase activating protein 3 | 0.093592  | Inlier |
| siRNA Disorazole DMSO Run2   | NM_0145<br>70 | ARFGAP3 | ADP-ribosylation factor GTPase activating protein 3 | 0.497556  | Inlier |
| siRNA-Vinblastine Run1-DMSO  | NM_0145<br>70 | ARFGAP3 | ADP-ribosylation factor GTPase activating protein 3 | 0.685995  | Inlier |
| siRNA Disorazole DMSO Run1   | NM_0145<br>70 | ARFGAP3 | ADP-ribosylation factor GTPase activating protein 3 | 1.283775  | Inlier |
| siRNA-Vinblastine Run2-DMSO  | NM_0000<br>45 | ARG1    | arginase, liver                                     | -1.102646 | Inlier |
| siRNA-Temozolomide Run2-DMSO | NM_0000<br>45 | ARG1    | arginase, liver                                     | -0.793285 | Inlier |
| siRNA-Temozolomide Run3-DMSO | NM_0000<br>45 | ARG1    | arginase, liver                                     | -0.333978 | Inlier |
| siRNA-Temozolomide Run1-DMSO | NM_0000<br>45 | ARG1    | arginase, liver                                     | -0.246691 | Inlier |
| siRNA Disorazole DMSO Run3   | NM_0000<br>45 | ARG1    | arginase, liver                                     | 0.246691  | Inlier |
| siRNA Disorazole DMSO Run1   | NM_0000<br>45 | ARG1    | arginase, liver                                     | 0.555715  | Inlier |
| siRNA-Vinblastine Run1-DMSO  | NM_0000<br>45 | ARG1    | arginase, liver                                     | 2.074519  | Inlier |
| siRNA Disorazole DMSO Run2   | NM_0000<br>45 | ARG1    | arginase, liver                                     | 3.05207   | Inlier |
| siRNA Disorazole DMSO Run1   | NM_0011<br>72 | ARG2    | arginase, type II                                   | -1.610147 | Inlier |
| siRNA-Temozolomide Run2-DMSO | NM_0011<br>72 | ARG2    | arginase, type II                                   | -0.806371 | Inlier |
| siRNA-Temozolomide Run1-DMSO | NM_0011<br>72 | ARG2    | arginase, type II                                   | -0.542629 | Inlier |
| siRNA-Vinblastine Run2-DMSO  | NM_0011<br>72 | ARG2    | arginase, type II                                   | -0.090613 | Inlier |
| siRNA Disorazole DMSO Run3   | NM_0011<br>72 | ARG2    | arginase, type II                                   | 0.090613  | Inlier |
| siRNA-Temozolomide Run3-DMSO | NM_0011<br>72 | ARG2    | arginase, type II                                   | 0.427258  | Inlier |

Identification of Survival Genes in Human Glioblastoma Cells Using siRNA Screening

Nikhil G Thaker, Fang Zhang, Peter R. McDonald, Tong Ying Shun, Michael D Lewen, Ian F. Pollack, and John S.

Lazo

|                                  |               |         |                                          |           |        |
|----------------------------------|---------------|---------|------------------------------------------|-----------|--------|
| siRNA-Vinblastine Run1-<br>DMSO  | NM_0011<br>72 | ARG2    | arginase,<br>type II                     | 1.392193  | Inlier |
| siRNA Disorazole DMSO Run2       | NM_0011<br>72 | ARG2    | arginase,<br>type II                     | 2.324236  | Inlier |
| siRNA Disorazole DMSO Run1       | NM_0051<br>68 | ARHE    | Rho family<br>GTPase 3                   | -1.87272  | Inlier |
| siRNA-Temozolomide Run1-<br>DMSO | NM_0051<br>68 | ARHE    | Rho family<br>GTPase 3                   | -1.732988 | Inlier |
| siRNA-Temozolomide Run2-<br>DMSO | NM_0051<br>68 | ARHE    | Rho family<br>GTPase 3                   | -0.890545 | Inlier |
| siRNA-Temozolomide Run3-<br>DMSO | NM_0051<br>68 | ARHE    | Rho family<br>GTPase 3                   | -0.411751 | Inlier |
| siRNA Disorazole DMSO Run3       | NM_0051<br>68 | ARHE    | Rho family<br>GTPase 3                   | 0.411751  | Inlier |
| siRNA-Vinblastine Run2-<br>DMSO  | NM_0051<br>68 | ARHE    | Rho family<br>GTPase 3                   | 0.423676  | Inlier |
| siRNA Disorazole DMSO Run2       | NM_0051<br>68 | ARHE    | Rho family<br>GTPase 3                   | 0.458455  | Inlier |
| siRNA-Vinblastine Run1-<br>DMSO  | NM_0051<br>68 | ARHE    | Rho family<br>GTPase 3                   | 1.440516  | Inlier |
| siRNA-Temozolomide Run3-<br>DMSO | NM_0043<br>08 | ARHGAP1 | Rho<br>GTPase<br>activating<br>protein 1 | -1.88345  | Inlier |
| siRNA-Temozolomide Run1-<br>DMSO | NM_0043<br>08 | ARHGAP1 | Rho<br>GTPase<br>activating<br>protein 1 | -1.013163 | Inlier |
| siRNA-Temozolomide Run2-<br>DMSO | NM_0043<br>08 | ARHGAP1 | Rho<br>GTPase<br>activating<br>protein 1 | -0.577249 | Inlier |
| siRNA-Vinblastine Run2-<br>DMSO  | NM_0043<br>08 | ARHGAP1 | Rho<br>GTPase<br>activating<br>protein 1 | -0.456046 | Inlier |
| siRNA Disorazole DMSO Run3       | NM_0043<br>08 | ARHGAP1 | Rho<br>GTPase<br>activating<br>protein 1 | 0.456046  | Inlier |
| siRNA Disorazole DMSO Run1       | NM_0043<br>08 | ARHGAP1 | Rho<br>GTPase<br>activating<br>protein 1 | 0.646697  | Inlier |



Identification of Survival Genes in Human Glioblastoma Cells Using siRNA Screening  
 Nikhil G Thaker, Fang Zhang, Peter R. McDonald, Tong Ying Shun, Michael D Lewen, Ian F. Pollack, and John S. Lazo

Molecular Pharmacology

| siRNA Treatment              | Gene ID   | Gene Name | Protein Name                     | Value     | Outlier Type |
|------------------------------|-----------|-----------|----------------------------------|-----------|--------------|
| siRNA-Vinblastine Run1-DMSO  | NM_004308 | ARHGAP1   | Rho GTPase activating protein 1  | 0.702303  | Inlier       |
| siRNA Disorazole DMSO Run2   | NM_004308 | ARHGAP1   | Rho GTPase activating protein 1  | 0.944689  | Inlier       |
| siRNA-Temozolomide Run3-DMSO | NM_024605 | ARHGAP1   | Rho GTPase activating protein 10 | -0.725071 | Inlier       |
| siRNA-Temozolomide Run1-DMSO | NM_024605 | ARHGAP1   | Rho GTPase activating protein 10 | -0.623928 | Inlier       |
| siRNA-Temozolomide Run2-DMSO | NM_024605 | ARHGAP1   | Rho GTPase activating protein 10 | -0.164857 | Inlier       |
| siRNA-Vinblastine Run2-DMSO  | NM_024605 | ARHGAP1   | Rho GTPase activating protein 10 | -0.031918 | Inlier       |
| siRNA Disorazole DMSO Run3   | NM_024605 | ARHGAP1   | Rho GTPase activating protein 10 | 0.031918  | Inlier       |
| siRNA Disorazole DMSO Run1   | NM_024605 | ARHGAP1   | Rho GTPase activating protein 10 | 0.829947  | Inlier       |
| siRNA-Vinblastine Run1-DMSO  | NM_024605 | ARHGAP1   | Rho GTPase activating protein 10 | 0.99152   | Inlier       |
| siRNA Disorazole DMSO Run2   | NM_024605 | ARHGAP1   | Rho GTPase activating protein 10 | 1.176717  | Inlier       |
| siRNA-Temozolomide Run3-DMSO | NM_018287 | ARHGAP1   | Rho GTPase activating protein 12 | -1.613    | Inlier       |
| siRNA-Temozolomide Run2-DMSO | NM_018287 | ARHGAP1   | Rho GTPase activating protein 12 | -0.876817 | Inlier       |
| siRNA-Temozolomide Run1-DMSO | NM_018287 | ARHGAP1   | Rho GTPase activating protein 12 | -0.607447 | Inlier       |

Identification of Survival Genes in Human Glioblastoma Cells Using siRNA Screening  
 Nikhil G Thaker, Fang Zhang, Peter R. McDonald, Tong Ying Shun, Michael D Lewen, Ian F. Pollack, and John S. Lazo

Molecular Pharmacology

|                                  |                  |              | Rho<br>GTPase<br>activating<br>protein 12 |                  |
|----------------------------------|------------------|--------------|-------------------------------------------|------------------|
| siRNA Disorazole DMSO Run3       | NM_0182<br>87    | ARHGAP1<br>2 | Rho<br>GTPase<br>activating<br>protein 12 | -0.014921 Inlier |
| siRNA-Vinblastine Run2-<br>DMSO  | NM_0182<br>87    | ARHGAP1<br>2 | Rho<br>GTPase<br>activating<br>protein 12 | 0.014921 Inlier  |
| siRNA-Vinblastine Run1-<br>DMSO  | NM_0182<br>87    | ARHGAP1<br>2 | Rho<br>GTPase<br>activating<br>protein 12 | 0.612845 Inlier  |
| siRNA Disorazole DMSO Run1       | NM_0182<br>87    | ARHGAP1<br>2 | Rho<br>GTPase<br>activating<br>protein 12 | 0.736155 Inlier  |
| siRNA Disorazole DMSO Run2       | NM_0182<br>87    | ARHGAP1<br>2 | Rho<br>GTPase<br>activating<br>protein 12 | 0.764539 Inlier  |
| siRNA-Temozolomide Run3-<br>DMSO | NM_0010<br>06634 | ARHGAP1<br>7 | Rho<br>GTPase<br>activating<br>protein 17 | -1.017987 Inlier |
| siRNA-Temozolomide Run1-<br>DMSO | NM_0010<br>06634 | ARHGAP1<br>7 | Rho<br>GTPase<br>activating<br>protein 17 | -0.671877 Inlier |
| siRNA-Temozolomide Run2-<br>DMSO | NM_0010<br>06634 | ARHGAP1<br>7 | Rho<br>GTPase<br>activating<br>protein 17 | -0.327373 Inlier |
| siRNA-Vinblastine Run2-<br>DMSO  | NM_0010<br>06634 | ARHGAP1<br>7 | Rho<br>GTPase<br>activating<br>protein 17 | -0.154704 Inlier |
| siRNA Disorazole DMSO Run3       | NM_0010<br>06634 | ARHGAP1<br>7 | Rho<br>GTPase<br>activating<br>protein 17 | 0.154703 Inlier  |
| siRNA Disorazole DMSO Run1       | NM_0010<br>06634 | ARHGAP1<br>7 | Rho<br>GTPase<br>activating<br>protein 17 | 0.677123 Inlier  |
| siRNA Disorazole DMSO Run2       | NM_0010<br>06634 | ARHGAP1<br>7 | Rho<br>GTPase<br>activating<br>protein 17 | 1.272077 Inlier  |
| siRNA-Vinblastine Run1-<br>DMSO  | NM_0010<br>06634 | ARHGAP1<br>7 | Rho<br>GTPase<br>activating<br>protein 17 | 1.292137 Inlier  |

Identification of Survival Genes in Human Glioblastoma Cells Using siRNA Screening  
 Nikhil G Thaker, Fang Zhang, Peter R. McDonald, Tong Ying Shun, Michael D Lewen, Ian F. Pollack, and John S. Lazo

Molecular Pharmacology

|                                  |               |              | Rho<br>GTPase<br>activating<br>protein 21 |                  |
|----------------------------------|---------------|--------------|-------------------------------------------|------------------|
| siRNA-Temozolomide Run1-<br>DMSO | NM_0208<br>24 | ARHGAP2<br>1 | Rho<br>GTPase<br>activating<br>protein 21 | -2.353958 Inlier |
| siRNA-Vinblastine Run2-<br>DMSO  | NM_0208<br>24 | ARHGAP2<br>1 | Rho<br>GTPase<br>activating<br>protein 21 | -1.527051 Inlier |
| siRNA-Temozolomide Run2-<br>DMSO | NM_0208<br>24 | ARHGAP2<br>1 | Rho<br>GTPase<br>activating<br>protein 21 | -0.616981 Inlier |
| siRNA Disorazole DMSO Run3       | NM_0208<br>24 | ARHGAP2<br>1 | Rho<br>GTPase<br>activating<br>protein 21 | -0.424118 Inlier |
| siRNA Disorazole DMSO Run1       | NM_0208<br>24 | ARHGAP2<br>1 | Rho<br>GTPase<br>activating<br>protein 21 | 0.424117 Inlier  |
| siRNA-Temozolomide Run3-<br>DMSO | NM_0208<br>24 | ARHGAP2<br>1 | Rho<br>GTPase<br>activating<br>protein 21 | 0.545683 Inlier  |
| siRNA Disorazole DMSO Run2       | NM_0208<br>24 | ARHGAP2<br>1 | Rho<br>GTPase<br>activating<br>protein 21 | 0.732019 Inlier  |
| siRNA-Vinblastine Run1-<br>DMSO  | NM_0208<br>24 | ARHGAP2<br>1 | Rho<br>GTPase<br>activating<br>protein 21 | 0.969762 Inlier  |
| siRNA-Temozolomide Run3-<br>DMSO | NM_0150<br>71 | ARHGAP2<br>6 | Rho<br>GTPase<br>activating<br>protein 26 | -1.959712 Inlier |
| siRNA-Temozolomide Run2-<br>DMSO | NM_0150<br>71 | ARHGAP2<br>6 | Rho<br>GTPase<br>activating<br>protein 26 | -0.888909 Inlier |
| siRNA Disorazole DMSO Run3       | NM_0150<br>71 | ARHGAP2<br>6 | Rho<br>GTPase<br>activating<br>protein 26 | -0.413149 Inlier |
| siRNA-Temozolomide Run1-<br>DMSO | NM_0150<br>71 | ARHGAP2<br>6 | Rho<br>GTPase<br>activating<br>protein 26 | -0.280764 Inlier |
| siRNA-Vinblastine Run2-<br>DMSO  | NM_0150<br>71 | ARHGAP2<br>6 | Rho<br>GTPase<br>activating<br>protein 26 | 0.280763 Inlier  |

Identification of Survival Genes in Human Glioblastoma Cells Using siRNA Screening  
 Nikhil G Thaker, Fang Zhang, Peter R. McDonald, Tong Ying Shun, Michael D Lewen, Ian F. Pollack, and John S. Lazo

Molecular Pharmacology

|                                  |               |              | Rho<br>GTPase<br>activating<br>protein 26 |                  |
|----------------------------------|---------------|--------------|-------------------------------------------|------------------|
| siRNA Disorazole DMSO Run1       | NM_0150<br>71 | ARHGAP2<br>6 | Rho<br>GTPase<br>activating<br>protein 26 | 0.638161 Inlier  |
| siRNA Disorazole DMSO Run2       | NM_0150<br>71 | ARHGAP2<br>6 | Rho<br>GTPase<br>activating<br>protein 26 | 0.710839 Inlier  |
| siRNA-Vinblastine Run1-<br>DMSO  | NM_0150<br>71 | ARHGAP2<br>6 | Rho<br>GTPase<br>activating<br>protein 26 | 0.814919 Inlier  |
| siRNA-Temozolomide Run3-<br>DMSO | NM_0016<br>66 | ARHGAP4      | Rho<br>GTPase<br>activating<br>protein 4  | -1.435639 Inlier |
| siRNA-Temozolomide Run2-<br>DMSO | NM_0016<br>66 | ARHGAP4      | Rho<br>GTPase<br>activating<br>protein 4  | -0.827254 Inlier |
| siRNA-Temozolomide Run1-<br>DMSO | NM_0016<br>66 | ARHGAP4      | Rho<br>GTPase<br>activating<br>protein 4  | -0.559262 Inlier |
| siRNA-Vinblastine Run2-<br>DMSO  | NM_0016<br>66 | ARHGAP4      | Rho<br>GTPase<br>activating<br>protein 4  | -0.057708 Inlier |
| siRNA Disorazole DMSO Run3       | NM_0016<br>66 | ARHGAP4      | Rho<br>GTPase<br>activating<br>protein 4  | 0.057708 Inlier  |
| siRNA Disorazole DMSO Run1       | NM_0016<br>66 | ARHGAP4      | Rho<br>GTPase<br>activating<br>protein 4  | 0.248824 Inlier  |
| siRNA Disorazole DMSO Run2       | NM_0016<br>66 | ARHGAP4      | Rho<br>GTPase<br>activating<br>protein 4  | 0.789738 Inlier  |
| siRNA-Vinblastine Run1-<br>DMSO  | NM_0016<br>66 | ARHGAP4      | Rho<br>GTPase<br>activating<br>protein 4  | 0.792603 Inlier  |
| siRNA-Temozolomide Run1-<br>DMSO | NM_0011<br>73 | ARHGAP5      | Rho<br>GTPase<br>activating<br>protein 5  | -2.348977 Inlier |
| siRNA-Temozolomide Run3-<br>DMSO | NM_0011<br>73 | ARHGAP5      | Rho<br>GTPase<br>activating<br>protein 5  | -2.196856 Inlier |

Identification of Survival Genes in Human Glioblastoma Cells Using siRNA Screening  
 Nikhil G Thaker, Fang Zhang, Peter R. McDonald, Tong Ying Shun, Michael D Lewen, Ian F. Pollack, and John S. Lazo

Molecular Pharmacology

| siRNA Treatment              | Gene ID   | Gene Name | Protein                         | Pathway | Value     | Outlier |
|------------------------------|-----------|-----------|---------------------------------|---------|-----------|---------|
| siRNA-Temozolomide Run2-DMSO | NM_001173 | ARHGAP5   | Rho GTPase activating protein 5 |         | -0.778039 | Inlier  |
| siRNA Disorazole DMSO Run3   | NM_001173 | ARHGAP5   | Rho GTPase activating protein 5 |         | -0.075486 | Inlier  |
| siRNA-Vinblastine Run2-DMSO  | NM_001173 | ARHGAP5   | Rho GTPase activating protein 5 |         | 0.075485  | Inlier  |
| siRNA Disorazole DMSO Run2   | NM_001173 | ARHGAP5   | Rho GTPase activating protein 5 |         | 0.548777  | Inlier  |
| siRNA Disorazole DMSO Run1   | NM_001173 | ARHGAP5   | Rho GTPase activating protein 5 |         | 0.570961  | Inlier  |
| siRNA-Vinblastine Run1-DMSO  | NM_001173 | ARHGAP5   | Rho GTPase activating protein 5 |         | 1.324103  | Inlier  |
| siRNA-Temozolomide Run3-DMSO | NM_032496 | ARHGAP9   | Rho GTPase activating protein 9 |         | -1.21975  | Inlier  |
| siRNA-Temozolomide Run1-DMSO | NM_032496 | ARHGAP9   | Rho GTPase activating protein 9 |         | -0.77487  | Inlier  |
| siRNA-Temozolomide Run2-DMSO | NM_032496 | ARHGAP9   | Rho GTPase activating protein 9 |         | -0.692318 | Inlier  |
| siRNA-Vinblastine Run2-DMSO  | NM_032496 | ARHGAP9   | Rho GTPase activating protein 9 |         | -0.053416 | Inlier  |
| siRNA Disorazole DMSO Run3   | NM_032496 | ARHGAP9   | Rho GTPase activating protein 9 |         | 0.053416  | Inlier  |
| siRNA Disorazole DMSO Run1   | NM_032496 | ARHGAP9   | Rho GTPase activating protein 9 |         | 0.363442  | Inlier  |
| siRNA Disorazole DMSO Run2   | NM_032496 | ARHGAP9   | Rho GTPase activating protein 9 |         | 0.656682  | Inlier  |

Identification of Survival Genes in Human Glioblastoma Cells Using siRNA Screening  
 Nikhil G Thaker, Fang Zhang, Peter R. McDonald, Tong Ying Shun, Michael D Lewen, Ian F. Pollack, and John S. Lazo

Molecular Pharmacology

| siRNA Treatment              | Gene ID   | Gene Name | Protein Name                               | Log2 Fold Change | Significance |
|------------------------------|-----------|-----------|--------------------------------------------|------------------|--------------|
| siRNA-Vinblastine Run1-DMSO  | NM_032496 | ARHGAP9   | Rho GTPase activating protein 9            | 1.100323         | Inlier       |
| siRNA-Temozolomide Run3-DMSO | NM_004309 | ARHGDI1A  | Rho GDP dissociation inhibitor (GDI) alpha | -1.322143        | Inlier       |
| siRNA-Temozolomide Run2-DMSO | NM_004309 | ARHGDI1A  | Rho GDP dissociation inhibitor (GDI) alpha | -0.408081        | Inlier       |
| siRNA-Temozolomide Run1-DMSO | NM_004309 | ARHGDI1A  | Rho GDP dissociation inhibitor (GDI) alpha | -0.354731        | Inlier       |
| siRNA Disorazole DMSO Run3   | NM_004309 | ARHGDI1A  | Rho GDP dissociation inhibitor (GDI) alpha | -0.087292        | Inlier       |
| siRNA-Vinblastine Run2-DMSO  | NM_004309 | ARHGDI1A  | Rho GDP dissociation inhibitor (GDI) alpha | 0.087291         | Inlier       |
| siRNA Disorazole DMSO Run2   | NM_004309 | ARHGDI1A  | Rho GDP dissociation inhibitor (GDI) alpha | 0.940919         | Inlier       |
| siRNA Disorazole DMSO Run1   | NM_004309 | ARHGDI1A  | Rho GDP dissociation inhibitor (GDI) alpha | 1.045844         | Inlier       |
| siRNA-Vinblastine Run1-DMSO  | NM_004309 | ARHGDI1A  | Rho GDP dissociation inhibitor (GDI) alpha | 1.52396          | Inlier       |

Identification of Survival Genes in Human Glioblastoma Cells Using siRNA Screening  
 Nikhil G Thaker, Fang Zhang, Peter R. McDonald, Tong Ying Shun, Michael D Lewen, Ian F. Pollack, and John S. Lazo  
 Molecular Pharmacology

|                              |           |         |                                            |           |        |
|------------------------------|-----------|---------|--------------------------------------------|-----------|--------|
| siRNA-Vinblastine Run2-DMSO  | NM_001175 | ARHGDIB | Rho GDP dissociation inhibitor (GDI) beta  | -2.286667 | Inlier |
| siRNA-Temozolomide Run3-DMSO | NM_001175 | ARHGDIB | Rho GDP dissociation inhibitor (GDI) beta  | -2.069099 | Inlier |
| siRNA Disorazole DMSO Run3   | NM_001175 | ARHGDIB | Rho GDP dissociation inhibitor (GDI) beta  | -1.376616 | Inlier |
| siRNA-Temozolomide Run2-DMSO | NM_001175 | ARHGDIB | Rho GDP dissociation inhibitor (GDI) beta  | -0.203367 | Inlier |
| siRNA-Vinblastine Run1-DMSO  | NM_001175 | ARHGDIB | Rho GDP dissociation inhibitor (GDI) beta  | 0.203367  | Inlier |
| siRNA-Temozolomide Run1-DMSO | NM_001175 | ARHGDIB | Rho GDP dissociation inhibitor (GDI) beta  | 0.455413  | Inlier |
| siRNA Disorazole DMSO Run2   | NM_001175 | ARHGDIB | Rho GDP dissociation inhibitor (GDI) beta  | 0.525566  | Inlier |
| siRNA Disorazole DMSO Run1   | NM_001175 | ARHGDIB | Rho GDP dissociation inhibitor (GDI) beta  | 0.823434  | Inlier |
| siRNA-Temozolomide Run3-DMSO | NM_001176 | ARHGDIG | Rho GDP dissociation inhibitor (GDI) gamma | -1.338828 | Inlier |
| siRNA-Temozolomide Run1-DMSO | NM_001176 | ARHGDIG | Rho GDP dissociation inhibitor (GDI) gamma | -1.119668 | Inlier |

Identification of Survival Genes in Human Glioblastoma Cells Using siRNA Screening  
 Nikhil G Thaker, Fang Zhang, Peter R. McDonald, Tong Ying Shun, Michael D Lewen, Ian F. Pollack, and John S. Lazo  
 Molecular Pharmacology

|                              |               |         |                                                |           |        |
|------------------------------|---------------|---------|------------------------------------------------|-----------|--------|
| siRNA Disorazole DMSO Run3   | NM_0011<br>76 | ARHGDIG | Rho GDP dissociation inhibitor (GDI) gamma     | -0.37378  | Inlier |
| siRNA-Temozolomide Run2-DMSO | NM_0011<br>76 | ARHGDIG | Rho GDP dissociation inhibitor (GDI) gamma     | -0.293845 | Inlier |
| siRNA Disorazole DMSO Run2   | NM_0011<br>76 | ARHGDIG | Rho GDP dissociation inhibitor (GDI) gamma     | 0.293844  | Inlier |
| siRNA-Vinblastine Run1-DMSO  | NM_0011<br>76 | ARHGDIG | Rho GDP dissociation inhibitor (GDI) gamma     | 0.623863  | Inlier |
| siRNA-Vinblastine Run2-DMSO  | NM_0011<br>76 | ARHGDIG | Rho GDP dissociation inhibitor (GDI) gamma     | 0.725137  | Inlier |
| siRNA Disorazole DMSO Run1   | NM_0011<br>76 | ARHGDIG | Rho GDP dissociation inhibitor (GDI) gamma     | 1.277228  | Inlier |
| siRNA-Temozolomide Run3-DMSO | NM_1989<br>77 | ARHGEF1 | Rho guanine nucleotide exchange factor (GEF) 1 | -0.941843 | Inlier |
| siRNA-Temozolomide Run2-DMSO | NM_1989<br>77 | ARHGEF1 | Rho guanine nucleotide exchange factor (GEF) 1 | -0.679944 | Inlier |



Identification of Survival Genes in Human Glioblastoma Cells Using siRNA Screening  
 Nikhil G Thaker, Fang Zhang, Peter R. McDonald, Tong Ying Shun, Michael D Lewen, Ian F. Pollack, and John S. Lazo

Molecular Pharmacology

| siRNA Treatment              | Gene ID   | Gene Name | Protein Name                                    | Log2 Fold Change | Outlier Status |
|------------------------------|-----------|-----------|-------------------------------------------------|------------------|----------------|
| siRNA Disorazole DMSO Run3   | NM_198977 | ARHGEF1   | Rho guanine nucleotide exchange factor (GEF) 1  | -0.104388        | Inlier         |
| siRNA-Temozolomide Run1-DMSO | NM_198977 | ARHGEF1   | Rho guanine nucleotide exchange factor (GEF) 1  | -0.028385        | Inlier         |
| siRNA-Vinblastine Run2-DMSO  | NM_198977 | ARHGEF1   | Rho guanine nucleotide exchange factor (GEF) 1  | 0.028385         | Inlier         |
| siRNA Disorazole DMSO Run1   | NM_198977 | ARHGEF1   | Rho guanine nucleotide exchange factor (GEF) 1  | 0.669056         | Inlier         |
| siRNA Disorazole DMSO Run2   | NM_198977 | ARHGEF1   | Rho guanine nucleotide exchange factor (GEF) 1  | 1.509119         | Inlier         |
| siRNA-Vinblastine Run1-DMSO  | NM_198977 | ARHGEF1   | Rho guanine nucleotide exchange factor (GEF) 1  | 2.232637         | Inlier         |
| siRNA-Temozolomide Run2-DMSO | NM_014784 | ARHGEF1   | Rho guanine nucleotide exchange factor (GEF) 11 | -0.810177        | Inlier         |
| siRNA-Temozolomide Run3-DMSO | NM_014784 | ARHGEF1   | Rho guanine nucleotide exchange factor (GEF) 11 | -0.704875        | Inlier         |

Identification of Survival Genes in Human Glioblastoma Cells Using siRNA Screening

Nikhil G Thaker, Fang Zhang, Peter R. McDonald, Tong Ying Shun, Michael D Lewen, Ian F. Pollack, and John S.

Lazo

Molecular Pharmacology

| siRNA Treatment              | Gene ID   | Gene Name | Protein Name                                    | Score     | Category |
|------------------------------|-----------|-----------|-------------------------------------------------|-----------|----------|
| siRNA-Vinblastine Run2-DMSO  | NM_014784 | ARHGEF1   | Rho guanine nucleotide exchange factor (GEF) 11 | -0.32795  | Inlier   |
| siRNA Disorazole DMSO Run3   | NM_014784 | ARHGEF1   | Rho guanine nucleotide exchange factor (GEF) 11 | -0.036227 | Inlier   |
| siRNA-Temozolomide Run1-DMSO | NM_014784 | ARHGEF1   | Rho guanine nucleotide exchange factor (GEF) 11 | 0.036227  | Inlier   |
| siRNA Disorazole DMSO Run1   | NM_014784 | ARHGEF1   | Rho guanine nucleotide exchange factor (GEF) 11 | 0.644125  | Inlier   |
| siRNA Disorazole DMSO Run2   | NM_014784 | ARHGEF1   | Rho guanine nucleotide exchange factor (GEF) 11 | 6.05936   | Outlier  |
| siRNA-Vinblastine Run1-DMSO  | NM_014784 | ARHGEF1   | Rho guanine nucleotide exchange factor (GEF) 11 | 6.909899  | Outlier  |
| siRNA-Temozolomide Run3-DMSO | NM_015313 | ARHGEF1   | Rho guanine nucleotide exchange factor (GEF) 12 | -0.699427 | Inlier   |
| siRNA-Vinblastine Run1-DMSO  | NM_015313 | ARHGEF1   | Rho guanine nucleotide exchange factor (GEF) 12 | -0.649573 | Inlier   |

Identification of Survival Genes in Human Glioblastoma Cells Using siRNA Screening  
 Nikhil G Thaker, Fang Zhang, Peter R. McDonald, Tong Ying Shun, Michael D Lewen, Ian F. Pollack, and John S. Lazo

Molecular Pharmacology

| siRNA Treatment              | Gene ID   | Gene Name | Pathway                                             | Value     | Outlier Status |
|------------------------------|-----------|-----------|-----------------------------------------------------|-----------|----------------|
| siRNA-Temozolomide Run2-DMSO | NM_015313 | ARHGEF1   | Rho guanine nucleotide exchange factor (GEF) 12     | -0.487091 | Inlier         |
| siRNA Disorazole DMSO Run2   | NM_015313 | ARHGEF1   | Rho guanine nucleotide exchange factor (GEF) 12     | -0.275275 | Inlier         |
| siRNA-Vinblastine Run2-DMSO  | NM_015313 | ARHGEF1   | Rho guanine nucleotide exchange factor (GEF) 12     | 0.275275  | Inlier         |
| siRNA-Temozolomide Run1-DMSO | NM_015313 | ARHGEF1   | Rho guanine nucleotide exchange factor (GEF) 12     | 0.862176  | Inlier         |
| siRNA Disorazole DMSO Run3   | NM_015313 | ARHGEF1   | Rho guanine nucleotide exchange factor (GEF) 12     | 1.054986  | Inlier         |
| siRNA Disorazole DMSO Run1   | NM_015313 | ARHGEF1   | Rho/rac guanine nucleotide exchange factor (GEF) 12 | 1.117305  | Inlier         |
| siRNA-Temozolomide Run3-DMSO | NM_015318 | ARHGEF1   | Rho/rac guanine nucleotide exchange factor (GEF) 18 | -2.800922 | Inlier         |
| siRNA-Temozolomide Run2-DMSO | NM_015318 | ARHGEF1   | Rho/rac guanine nucleotide exchange factor (GEF) 18 | -1.904477 | Inlier         |

Identification of Survival Genes in Human Glioblastoma Cells Using siRNA Screening  
 Nikhil G Thaker, Fang Zhang, Peter R. McDonald, Tong Ying Shun, Michael D Lewen, Ian F. Pollack, and John S. Lazo

Molecular Pharmacology

| siRNA Treatment              | Gene ID    | Gene Name | Factor                                              | Value     | Outlier Status |
|------------------------------|------------|-----------|-----------------------------------------------------|-----------|----------------|
| siRNA-Temozolomide Run1-DMSO | NM_0153 18 | ARHGEF1 8 | rho/rac guanine nucleotide exchange factor (GEF) 18 | -1.525423 | Inlier         |
| siRNA Disorazole DMSO Run1   | NM_0153 18 | ARHGEF1 8 | rho/rac guanine nucleotide exchange factor (GEF) 18 | -0.01087  | Inlier         |
| siRNA-Vinblastine Run2-DMSO  | NM_0153 18 | ARHGEF1 8 | rho/rac guanine nucleotide exchange factor (GEF) 18 | 0.01087   | Inlier         |
| siRNA Disorazole DMSO Run2   | NM_0153 18 | ARHGEF1 8 | rho/rac guanine nucleotide exchange factor (GEF) 18 | 0.158895  | Inlier         |
| siRNA Disorazole DMSO Run3   | NM_0153 18 | ARHGEF1 8 | rho/rac guanine nucleotide exchange factor (GEF) 18 | 0.255024  | Inlier         |
| siRNA-Vinblastine Run1-DMSO  | NM_0153 18 | ARHGEF1 8 | rho/rac guanine nucleotide exchange factor (GEF) 18 | 1.093976  | Inlier         |
| siRNA-Temozolomide Run3-DMSO | NM_0047 23 | ARHGEF2 2 | rho/rac guanine nucleotide exchange factor (GEF) 2  | -2.434824 | Inlier         |
| siRNA-Vinblastine Run2-DMSO  | NM_0047 23 | ARHGEF2 2 | rho/rac guanine nucleotide exchange factor (GEF) 2  | -1.622893 | Inlier         |

Identification of Survival Genes in Human Glioblastoma Cells Using siRNA Screening  
 Nikhil G Thaker, Fang Zhang, Peter R. McDonald, Tong Ying Shun, Michael D Lewen, Ian F. Pollack, and John S. Lazo

Molecular Pharmacology

| siRNA Treatment              | Gene ID   | Gene Name | Protein Name                                       | Log Fold Change | Outlier Status |
|------------------------------|-----------|-----------|----------------------------------------------------|-----------------|----------------|
| siRNA-Vinblastine Run1-DMSO  | NM_004723 | ARHGEF2   | rho/rac guanine nucleotide exchange factor (GEF) 2 | -0.338548       | Inlier         |
| siRNA Disorazole DMSO Run3   | NM_004723 | ARHGEF2   | rho/rac guanine nucleotide exchange factor (GEF) 2 | -0.056978       | Inlier         |
| siRNA-Temozolomide Run2-DMSO | NM_004723 | ARHGEF2   | rho/rac guanine nucleotide exchange factor (GEF) 2 | 0.056978        | Inlier         |
| siRNA Disorazole DMSO Run1   | NM_004723 | ARHGEF2   | rho/rac guanine nucleotide exchange factor (GEF) 2 | 0.502321        | Inlier         |
| siRNA-Temozolomide Run1-DMSO | NM_004723 | ARHGEF2   | rho/rac guanine nucleotide exchange factor (GEF) 2 | 0.846679        | Inlier         |
| siRNA Disorazole DMSO Run2   | NM_004723 | ARHGEF2   | Rho guanine nucleotide exchange factor (GEF) 2     | 2.204034        | Inlier         |
| siRNA-Temozolomide Run3-DMSO | NM_032995 | ARHGEF4   | Rho guanine nucleotide exchange factor (GEF) 4     | -1.680455       | Inlier         |
| siRNA-Vinblastine Run2-DMSO  | NM_032995 | ARHGEF4   | Rho guanine nucleotide exchange factor (GEF) 4     | -1.059231       | Inlier         |

Identification of Survival Genes in Human Glioblastoma Cells Using siRNA Screening  
 Nikhil G Thaker, Fang Zhang, Peter R. McDonald, Tong Ying Shun, Michael D Lewen, Ian F. Pollack, and John S. Lazo

Molecular Pharmacology

| siRNA Treatment              | Gene ID       | Gene Name | Protein Name                                                                                   | Score     | Outlier Status |
|------------------------------|---------------|-----------|------------------------------------------------------------------------------------------------|-----------|----------------|
| siRNA-Temozolomide Run2-DMSO | NM_0329<br>95 | ARHGEF4   | Rho guanine nucleotide exchange factor (GEF) 4                                                 | -0.636002 | Inlier         |
| siRNA Disorazole DMSO Run3   | NM_0329<br>95 | ARHGEF4   | Rho guanine nucleotide exchange factor (GEF) 4                                                 | -0.341337 | Inlier         |
| siRNA-Temozolomide Run1-DMSO | NM_0329<br>95 | ARHGEF4   | Rho guanine nucleotide exchange factor (GEF) 4                                                 | 0.341338  | Inlier         |
| siRNA Disorazole DMSO Run1   | NM_0329<br>95 | ARHGEF4   | Rho guanine nucleotide exchange factor (GEF) 4                                                 | 0.506482  | Inlier         |
| siRNA-Vinblastine Run1-DMSO  | NM_0329<br>95 | ARHGEF4   | Rho guanine nucleotide exchange factor (GEF) 4                                                 | 0.712998  | Inlier         |
| siRNA Disorazole DMSO Run2   | NM_0329<br>95 | ARHGEF4   | Rho guanine nucleotide exchange factor (GEF) 4<br>Rac/Cdc42 guanine nucleotide exchange factor | 1.298883  | Inlier         |
| siRNA-Temozolomide Run3-DMSO | NM_0048<br>40 | ARHGEF6   | Rac/Cdc42 guanine nucleotide exchange factor (GEF) 6                                           | -2.08201  | Inlier         |
| siRNA-Temozolomide Run1-DMSO | NM_0048<br>40 | ARHGEF6   | Rac/Cdc42 guanine nucleotide exchange factor (GEF) 6                                           | -0.539532 | Inlier         |

Identification of Survival Genes in Human Glioblastoma Cells Using siRNA Screening

Nikhil G Thaker, Fang Zhang, Peter R. McDonald, Tong Ying Shun, Michael D Lewen, Ian F. Pollack, and John S. Lazo

Molecular Pharmacology

| siRNA Treatment              | Gene ID       | Gene Name | Protein Name                                                         | Log Fold Change | Outlier Status |
|------------------------------|---------------|-----------|----------------------------------------------------------------------|-----------------|----------------|
| siRNA-Temozolomide Run2-DMSO | NM_0048<br>40 | ARHGEF6   | Rac/Cdc4<br>2 guanine<br>nucleotide<br>exchange<br>factor<br>(GEF) 6 | -0.102396       | Inlier         |
| siRNA-Vinblastine Run1-DMSO  | NM_0048<br>40 | ARHGEF6   | Rac/Cdc4<br>2 guanine<br>nucleotide<br>exchange<br>factor<br>(GEF) 6 | -0.030077       | Inlier         |
| siRNA Disorazole DMSO Run3   | NM_0048<br>40 | ARHGEF6   | Rac/Cdc4<br>2 guanine<br>nucleotide<br>exchange<br>factor<br>(GEF) 6 | 0.030077        | Inlier         |
| siRNA Disorazole DMSO Run2   | NM_0048<br>40 | ARHGEF6   | Rac/Cdc4<br>2 guanine<br>nucleotide<br>exchange<br>factor<br>(GEF) 6 | 0.809468        | Inlier         |
| siRNA-Vinblastine Run2-DMSO  | NM_0048<br>40 | ARHGEF6   | Rac/Cdc4<br>2 guanine<br>nucleotide<br>exchange<br>factor<br>(GEF) 6 | 0.946139        | Inlier         |
| siRNA Disorazole DMSO Run1   | NM_0048<br>40 | ARHGEF6   | Rho<br>guanine<br>nucleotide<br>exchange<br>factor<br>(GEF) 6        | 0.972267        | Inlier         |
| siRNA-Temozolomide Run3-DMSO | NM_1457<br>35 | ARHGEF7   | Rho<br>guanine<br>nucleotide<br>exchange<br>factor<br>(GEF) 7        | -1.268324       | Inlier         |
| siRNA-Temozolomide Run1-DMSO | NM_1457<br>35 | ARHGEF7   | Rho<br>guanine<br>nucleotide<br>exchange<br>factor<br>(GEF) 7        | -0.76948        | Inlier         |

Identification of Survival Genes in Human Glioblastoma Cells Using siRNA Screening

Nikhil G Thaker, Fang Zhang, Peter R. McDonald, Tong Ying Shun, Michael D Lewen, Ian F. Pollack, and John S. Lazo

Molecular Pharmacology

|                              |               |         |                                                               |           |        |
|------------------------------|---------------|---------|---------------------------------------------------------------|-----------|--------|
| siRNA-Temozolomide Run2-DMSO | NM_1457<br>35 | ARHGEF7 | Rho<br>guanine<br>nucleotide<br>exchange<br>factor<br>(GEF) 7 | -0.57952  | Inlier |
| siRNA-Vinblastine Run2-DMSO  | NM_1457<br>35 | ARHGEF7 | Rho<br>guanine<br>nucleotide<br>exchange<br>factor<br>(GEF) 7 | -0.08123  | Inlier |
| siRNA Disorazole DMSO Run3   | NM_1457<br>35 | ARHGEF7 | Rho<br>guanine<br>nucleotide<br>exchange<br>factor<br>(GEF) 7 | 0.08123   | Inlier |
| siRNA Disorazole DMSO Run1   | NM_1457<br>35 | ARHGEF7 | Rho<br>guanine<br>nucleotide<br>exchange<br>factor<br>(GEF) 7 | 0.327736  | Inlier |
| siRNA Disorazole DMSO Run2   | NM_1457<br>35 | ARHGEF7 | Rho<br>guanine<br>nucleotide<br>exchange<br>factor<br>(GEF) 7 | 1.40834   | Inlier |
| siRNA-Vinblastine Run1-DMSO  | NM_1457<br>35 | ARHGEF7 | Rho<br>guanine<br>nucleotide<br>exchange<br>factor<br>(GEF) 7 | 1.879414  | Inlier |
| siRNA-Temozolomide Run2-DMSO | NM_0046<br>75 | ARHI    | DIRAS<br>family,<br>GTP-<br>binding<br>RAS-like 3             | -0.845068 | Inlier |
| siRNA-Temozolomide Run1-DMSO | NM_0046<br>75 | ARHI    | DIRAS<br>family,<br>GTP-<br>binding<br>RAS-like 3             | -0.649262 | Inlier |



Identification of Survival Genes in Human Glioblastoma Cells Using siRNA Screening  
 Nikhil G Thaker, Fang Zhang, Peter R. McDonald, Tong Ying Shun, Michael D Lewen, Ian F. Pollack, and John S. Lazo  
 Molecular Pharmacology

|                              |               |      |                                            |           |        |
|------------------------------|---------------|------|--------------------------------------------|-----------|--------|
| siRNA-Temozolomide Run3-DMSO | NM_0046<br>75 | ARHI | DIRAS family,<br>GTP-binding<br>RAS-like 3 | -0.234292 | Inlier |
| siRNA Disorazole DMSO Run1   | NM_0046<br>75 | ARHI | DIRAS family,<br>GTP-binding<br>RAS-like 3 | -0.005745 | Inlier |
| siRNA-Vinblastine Run2-DMSO  | NM_0046<br>75 | ARHI | DIRAS family,<br>GTP-binding<br>RAS-like 3 | 0.005745  | Inlier |
| siRNA Disorazole DMSO Run3   | NM_0046<br>75 | ARHI | DIRAS family,<br>GTP-binding<br>RAS-like 3 | 0.699738  | Inlier |
| siRNA Disorazole DMSO Run2   | NM_0046<br>75 | ARHI | DIRAS family,<br>GTP-binding<br>RAS-like 3 | 1.045434  | Inlier |
| siRNA-Vinblastine Run1-DMSO  | NM_0046<br>75 | ARHI | DIRAS family,<br>GTP-binding<br>RAS-like 3 | 1.677276  | Inlier |
| siRNA-Vinblastine Run2-DMSO  | NM_0054<br>40 | ARHN | Rho family<br>GTPase 2                     | -1.294008 | Inlier |
| siRNA-Temozolomide Run2-DMSO | NM_0054<br>40 | ARHN | Rho family<br>GTPase 2                     | -0.846367 | Inlier |
| siRNA Disorazole DMSO Run1   | NM_0054<br>40 | ARHN | Rho family<br>GTPase 2                     | -0.364418 | Inlier |
| siRNA-Temozolomide Run1-DMSO | NM_0054<br>40 | ARHN | Rho family<br>GTPase 2                     | -0.222497 | Inlier |
| siRNA-Temozolomide Run3-DMSO | NM_0054<br>40 | ARHN | Rho family<br>GTPase 2                     | 0.222497  | Inlier |

Identification of Survival Genes in Human Glioblastoma Cells Using siRNA Screening  
 Nikhil G Thaker, Fang Zhang, Peter R. McDonald, Tong Ying Shun, Michael D Lewen, Ian F. Pollack, and John S. Lazo

Molecular Pharmacology

|                                  |               |       |                                                                                                             |           |        |
|----------------------------------|---------------|-------|-------------------------------------------------------------------------------------------------------------|-----------|--------|
| siRNA Disorazole DMSO Run3       | NM_0054<br>40 | ARHN  | Rho family<br>GTPase 2                                                                                      | 0.502632  | Inlier |
| siRNA-Vinblastine Run1-<br>DMSO  | NM_0054<br>40 | ARHN  | Rho family<br>GTPase 2                                                                                      | 1.847299  | Inlier |
| siRNA Disorazole DMSO Run2       | NM_0054<br>40 | ARHN  | Rho family<br>GTPase 2                                                                                      | 1.87019   | Inlier |
| siRNA-Temozolomide Run3-<br>DMSO | NM_0057<br>44 | ARIH1 | ariadne<br>homolog,<br>ubiquitin-<br>conjugatin<br>g enzyme<br>E2 binding<br>protein, 1<br>(Drosophil<br>a) | -1.39692  | Inlier |
| siRNA-Temozolomide Run2-<br>DMSO | NM_0057<br>44 | ARIH1 | ariadne<br>homolog,<br>ubiquitin-<br>conjugatin<br>g enzyme<br>E2 binding<br>protein, 1<br>(Drosophil<br>a) | -0.976836 | Inlier |
| siRNA Disorazole DMSO Run3       | NM_0057<br>44 | ARIH1 | ariadne<br>homolog,<br>ubiquitin-<br>conjugatin<br>g enzyme<br>E2 binding<br>protein, 1<br>(Drosophil<br>a) | -0.462848 | Inlier |
| siRNA-Vinblastine Run2-<br>DMSO  | NM_0057<br>44 | ARIH1 | ariadne<br>homolog,<br>ubiquitin-<br>conjugatin<br>g enzyme<br>E2 binding<br>protein, 1<br>(Drosophil<br>a) | -0.174655 | Inlier |

Identification of Survival Genes in Human Glioblastoma Cells Using siRNA Screening

Nikhil G Thaker, Fang Zhang, Peter R. McDonald, Tong Ying Shun, Michael D Lewen, Ian F. Pollack, and John S. Lazo

Molecular Pharmacology

|                              |               |       |                                                                                  |           |        |
|------------------------------|---------------|-------|----------------------------------------------------------------------------------|-----------|--------|
| siRNA-Temozolomide Run1-DMSO | NM_0057<br>44 | ARIH1 | ariadne homolog, ubiquitin-conjugating enzyme E2 binding protein, 1 (Drosophila) | 0.174656  | Inlier |
| siRNA Disorazole DMSO Run1   | NM_0057<br>44 | ARIH1 | ariadne homolog, ubiquitin-conjugating enzyme E2 binding protein, 1 (Drosophila) | 0.387804  | Inlier |
| siRNA Disorazole DMSO Run2   | NM_0057<br>44 | ARIH1 | ariadne homolog, ubiquitin-conjugating enzyme E2 binding protein, 1 (Drosophila) | 0.886152  | Inlier |
| siRNA-Vinblastine Run1-DMSO  | NM_0057<br>44 | ARIH1 | ariadne homolog, ubiquitin-conjugating enzyme E2 binding protein, 1 (Drosophila) | 1.365269  | Inlier |
| siRNA Disorazole DMSO Run2   | NM_0148<br>40 | ARK5  | NUAK family, SNF1-like kinase, 1                                                 | -3.135428 | Inlier |
| siRNA-Temozolomide Run1-DMSO | NM_0148<br>40 | ARK5  | NUAK family, SNF1-like kinase, 1                                                 | -1.050554 | Inlier |
| siRNA-Temozolomide Run2-DMSO | NM_0148<br>40 | ARK5  | NUAK family, SNF1-like kinase, 1                                                 | -0.640812 | Inlier |

Identification of Survival Genes in Human Glioblastoma Cells Using siRNA Screening

Nikhil G Thaker, Fang Zhang, Peter R. McDonald, Tong Ying Shun, Michael D Lewen, Ian F. Pollack, and John S.

Lazo

Molecular Pharmacology

|                              |               |      |                                  |           |        |
|------------------------------|---------------|------|----------------------------------|-----------|--------|
| siRNA-Temozolomide Run3-DMSO | NM_0148<br>40 | ARK5 | NUAK family, SNF1-like kinase, 1 | -0.557913 | Inlier |
| siRNA-Vinblastine Run2-DMSO  | NM_0148<br>40 | ARK5 | NUAK family, SNF1-like kinase, 1 | 0.557913  | Inlier |
| siRNA Disorazole DMSO Run3   | NM_0148<br>40 | ARK5 | NUAK family, SNF1-like kinase, 1 | 0.598528  | Inlier |
| siRNA Disorazole DMSO Run1   | NM_0148<br>40 | ARK5 | NUAK family, SNF1-like kinase, 1 | 0.708188  | Inlier |
| siRNA-Vinblastine Run1-DMSO  | NM_0148<br>40 | ARK5 | NUAK family, SNF1-like kinase, 1 | 1.01048   | Inlier |
| siRNA-Temozolomide Run1-DMSO | NM_0011<br>77 | ARL1 | ADP-ribosylation factor-like 1   | -1.508026 | Inlier |
| siRNA-Temozolomide Run2-DMSO | NM_0011<br>77 | ARL1 | ADP-ribosylation factor-like 1   | -1.343569 | Inlier |
| siRNA-Vinblastine Run2-DMSO  | NM_0011<br>77 | ARL1 | ADP-ribosylation factor-like 1   | -0.540589 | Inlier |
| siRNA Disorazole DMSO Run2   | NM_0011<br>77 | ARL1 | ADP-ribosylation factor-like 1   | -0.026591 | Inlier |
| siRNA Disorazole DMSO Run3   | NM_0011<br>77 | ARL1 | ADP-ribosylation factor-like 1   | 0.02659   | Inlier |
| siRNA-Temozolomide Run3-DMSO | NM_0011<br>77 | ARL1 | ADP-ribosylation factor-like 1   | 0.290411  | Inlier |
| siRNA-Vinblastine Run1-DMSO  | NM_0011<br>77 | ARL1 | ADP-ribosylation factor-like 1   | 0.808411  | Inlier |
| siRNA Disorazole DMSO Run1   | NM_0011<br>77 | ARL1 | ADP-ribosylation factor-like 1   | 1.352755  | Inlier |

Identification of Survival Genes in Human Glioblastoma Cells Using siRNA Screening  
 Nikhil G Thaker, Fang Zhang, Peter R. McDonald, Tong Ying Shun, Michael D Lewen, Ian F. Pollack, and John S. Lazo

Molecular Pharmacology

|                              |               |      |                                |           |        |
|------------------------------|---------------|------|--------------------------------|-----------|--------|
| siRNA-Temozolomide Run3-DMSO | NM_0016<br>67 | ARL2 | ADP-ribosylation factor-like 2 | -1.154872 | Inlier |
| siRNA-Temozolomide Run1-DMSO | NM_0016<br>67 | ARL2 | ADP-ribosylation factor-like 2 | -0.744462 | Inlier |
| siRNA-Temozolomide Run2-DMSO | NM_0016<br>67 | ARL2 | ADP-ribosylation factor-like 2 | -0.21134  | Inlier |
| siRNA-Vinblastine Run2-DMSO  | NM_0016<br>67 | ARL2 | ADP-ribosylation factor-like 2 | -0.026499 | Inlier |
| siRNA Disorazole DMSO Run3   | NM_0016<br>67 | ARL2 | ADP-ribosylation factor-like 2 | 0.026499  | Inlier |
| siRNA Disorazole DMSO Run1   | NM_0016<br>67 | ARL2 | ADP-ribosylation factor-like 2 | 0.604538  | Inlier |
| siRNA Disorazole DMSO Run2   | NM_0016<br>67 | ARL2 | ADP-ribosylation factor-like 2 | 0.800043  | Inlier |
| siRNA-Vinblastine Run1-DMSO  | NM_0016<br>67 | ARL2 | ADP-ribosylation factor-like 2 | 1.441833  | Inlier |
| siRNA-Temozolomide Run3-DMSO | NM_0043<br>11 | ARL3 | ADP-ribosylation factor-like 3 | -1.198593 | Inlier |
| siRNA-Temozolomide Run1-DMSO | NM_0043<br>11 | ARL3 | ADP-ribosylation factor-like 3 | -0.948554 | Inlier |
| siRNA-Temozolomide Run2-DMSO | NM_0043<br>11 | ARL3 | ADP-ribosylation factor-like 3 | -0.762659 | Inlier |
| siRNA Disorazole DMSO Run3   | NM_0043<br>11 | ARL3 | ADP-ribosylation factor-like 3 | -0.236649 | Inlier |
| siRNA-Vinblastine Run2-DMSO  | NM_0043<br>11 | ARL3 | ADP-ribosylation factor-like 3 | 0.236649  | Inlier |

Identification of Survival Genes in Human Glioblastoma Cells Using siRNA Screening  
 Nikhil G Thaker, Fang Zhang, Peter R. McDonald, Tong Ying Shun, Michael D Lewen, Ian F. Pollack, and John S. Lazo

Molecular Pharmacology

|                                  |               |       |                                                                    |           |        |
|----------------------------------|---------------|-------|--------------------------------------------------------------------|-----------|--------|
| siRNA Disorazole DMSO Run2       | NM_0043<br>11 | ARL3  | ADP-<br>ribosylatio<br>n factor-<br>like 3                         | 0.294148  | Inlier |
| siRNA Disorazole DMSO Run1       | NM_0043<br>11 | ARL3  | ADP-<br>ribosylatio<br>n factor-<br>like 3                         | 0.659533  | Inlier |
| siRNA-Vinblastine Run1-<br>DMSO  | NM_0043<br>11 | ARL3  | ADP-<br>ribosylatio<br>n factor-<br>like 3                         | 0.689467  | Inlier |
| siRNA-Temozolomide Run3-<br>DMSO | NM_0057<br>19 | ARPC3 | actin<br>related<br>protein 2/3<br>complex,<br>subunit 3,<br>21kDa | -2.52526  | Inlier |
| siRNA-Temozolomide Run2-<br>DMSO | NM_0057<br>19 | ARPC3 | actin<br>related<br>protein 2/3<br>complex,<br>subunit 3,<br>21kDa | -1.586768 | Inlier |
| siRNA Disorazole DMSO Run1       | NM_0057<br>19 | ARPC3 | actin<br>related<br>protein 2/3<br>complex,<br>subunit 3,<br>21kDa | -0.212965 | Inlier |
| siRNA Disorazole DMSO Run2       | NM_0057<br>19 | ARPC3 | actin<br>related<br>protein 2/3<br>complex,<br>subunit 3,<br>21kDa | -0.017318 | Inlier |
| siRNA Disorazole DMSO Run3       | NM_0057<br>19 | ARPC3 | actin<br>related<br>protein 2/3<br>complex,<br>subunit 3,<br>21kDa | 0.017319  | Inlier |

Identification of Survival Genes in Human Glioblastoma Cells Using siRNA Screening  
 Nikhil G Thaker, Fang Zhang, Peter R. McDonald, Tong Ying Shun, Michael D Lewen, Ian F. Pollack, and John S. Lazo  
 Molecular Pharmacology

|                              |               |       |                                                     |           |        |
|------------------------------|---------------|-------|-----------------------------------------------------|-----------|--------|
| siRNA-Vinblastine Run1-DMSO  | NM_0057<br>19 | ARPC3 | actin related protein 2/3 complex, subunit 3, 21kDa | 0.630856  | Inlier |
| siRNA-Temozolomide Run1-DMSO | NM_0057<br>19 | ARPC3 | actin related protein 2/3 complex, subunit 3, 21kDa | 0.718144  | Inlier |
| siRNA-Vinblastine Run2-DMSO  | NM_0057<br>19 | ARPC3 | actin related protein 2/3 complex, subunit 3, 21kDa | 1.890058  | Inlier |
| siRNA-Temozolomide Run3-DMSO | NM_0057<br>18 | ARPC4 | actin related protein 2/3 complex, subunit 4, 20kDa | -1.442582 | Inlier |
| siRNA-Temozolomide Run2-DMSO | NM_0057<br>18 | ARPC4 | actin related protein 2/3 complex, subunit 4, 20kDa | -0.528151 | Inlier |
| siRNA Disorazole DMSO Run3   | NM_0057<br>18 | ARPC4 | actin related protein 2/3 complex, subunit 4, 20kDa | -0.308323 | Inlier |
| siRNA-Vinblastine Run2-DMSO  | NM_0057<br>18 | ARPC4 | actin related protein 2/3 complex, subunit 4, 20kDa | -0.030302 | Inlier |

Identification of Survival Genes in Human Glioblastoma Cells Using siRNA Screening  
 Nikhil G Thaker, Fang Zhang, Peter R. McDonald, Tong Ying Shun, Michael D Lewen, Ian F. Pollack, and John S. Lazo  
 Molecular Pharmacology

|                              |               |       |                                                     |           |        |
|------------------------------|---------------|-------|-----------------------------------------------------|-----------|--------|
| siRNA-Temozolomide Run1-DMSO | NM_0057<br>18 | ARPC4 | actin related protein 2/3 complex, subunit 4, 20kDa | 0.030302  | Inlier |
| siRNA Disorazole DMSO Run1   | NM_0057<br>18 | ARPC4 | actin related protein 2/3 complex, subunit 4, 20kDa | 0.820849  | Inlier |
| siRNA Disorazole DMSO Run2   | NM_0057<br>18 | ARPC4 | actin related protein 2/3 complex, subunit 4, 20kDa | 2.051992  | Inlier |
| siRNA-Vinblastine Run1-DMSO  | NM_0057<br>18 | ARPC4 | actin related protein 2/3 complex, subunit 4, 20kDa | 2.572738  | Inlier |
| siRNA-Temozolomide Run3-DMSO | NM_0004<br>87 | ARSA  | arylsulfatase A                                     | -1.003982 | Inlier |
| siRNA-Temozolomide Run2-DMSO | NM_0004<br>87 | ARSA  | arylsulfatase A                                     | -0.792103 | Inlier |
| siRNA-Vinblastine Run2-DMSO  | NM_0004<br>87 | ARSA  | arylsulfatase A                                     | -0.198161 | Inlier |
| siRNA Disorazole DMSO Run3   | NM_0004<br>87 | ARSA  | arylsulfatase A                                     | -0.138602 | Inlier |
| siRNA Disorazole DMSO Run1   | NM_0004<br>87 | ARSA  | arylsulfatase A                                     | 0.138602  | Inlier |
| siRNA-Temozolomide Run1-DMSO | NM_0004<br>87 | ARSA  | arylsulfatase A                                     | 0.556897  | Inlier |
| siRNA-Vinblastine Run1-DMSO  | NM_0004<br>87 | ARSA  | arylsulfatase A                                     | 1.272792  | Inlier |
| siRNA Disorazole DMSO Run2   | NM_0004<br>87 | ARSA  | arylsulfatase A                                     | 1.527088  | Inlier |
| siRNA-Temozolomide Run3-DMSO | NM_1987<br>09 | ARSB  | arylsulfatase B                                     | -1.576688 | Inlier |
| siRNA-Temozolomide Run2-DMSO | NM_1987<br>09 | ARSB  | arylsulfatase B                                     | -1.061239 | Inlier |
| siRNA-Vinblastine Run2-DMSO  | NM_1987<br>09 | ARSB  | arylsulfatase B                                     | -0.287761 | Inlier |
| siRNA-Temozolomide Run1-DMSO | NM_1987<br>09 | ARSB  | arylsulfatase B                                     | -0.064327 | Inlier |



Identification of Survival Genes in Human Glioblastoma Cells Using siRNA Screening  
 Nikhil G Thaker, Fang Zhang, Peter R. McDonald, Tong Ying Shun, Michael D Lewen, Ian F. Pollack, and John S. Lazo

|                              |         |      |                               |           |         |
|------------------------------|---------|------|-------------------------------|-----------|---------|
| Molecular Pharmacology       | NM_1987 |      | arylsulfata                   |           |         |
| siRNA Disorazole DMSO Run1   | 09      | ARSB | se B                          | 0.064327  | Inlier  |
|                              | NM_1987 |      | arylsulfata                   |           |         |
| siRNA Disorazole DMSO Run3   | 09      | ARSB | se B                          | 0.156795  | Inlier  |
| siRNA-Vinblastine Run1-DMSO  | NM_1987 |      | arylsulfata                   |           |         |
|                              | 09      | ARSB | se B                          | 2.870582  | Inlier  |
|                              | NM_1987 |      | arylsulfata                   |           |         |
| siRNA Disorazole DMSO Run2   | 09      | ARSB | se B                          | 4.528468  | Outlier |
| siRNA-Vinblastine Run2-DMSO  | NM_0095 |      | arylsulfata                   |           |         |
|                              | 89      | ARSD | se D                          | -1.9162   | Inlier  |
|                              | NM_0095 |      | arylsulfata                   |           |         |
| siRNA Disorazole DMSO Run3   | 89      | ARSD | se D                          | -0.580938 | Inlier  |
| siRNA-Temozolomide Run3-DMSO | NM_0095 |      | arylsulfata                   |           |         |
|                              | 89      | ARSD | se D                          | -0.55764  | Inlier  |
| siRNA-Temozolomide Run2-DMSO | NM_0095 |      | arylsulfata                   |           |         |
|                              | 89      | ARSD | se D                          | -0.383745 | Inlier  |
| siRNA-Temozolomide Run1-DMSO | NM_0095 |      | arylsulfata                   |           |         |
|                              | 89      | ARSD | se D                          | 0.383745  | Inlier  |
|                              | NM_0095 |      | arylsulfata                   |           |         |
| siRNA Disorazole DMSO Run1   | 89      | ARSD | se D                          | 0.768062  | Inlier  |
| siRNA-Vinblastine Run1-DMSO  | NM_0095 |      | arylsulfata                   |           |         |
|                              | 89      | ARSD | se D                          | 1.720483  | Inlier  |
|                              | NM_0095 |      | arylsulfata                   |           |         |
| siRNA Disorazole DMSO Run2   | 89      | ARSD | se D                          | 2.48877   | Inlier  |
|                              |         |      | arylsulfata                   |           |         |
|                              |         |      | se E                          |           |         |
|                              |         |      | (chondrodysplasia punctata 1) |           |         |
| siRNA-Vinblastine Run2-DMSO  | NM_0000 |      | arylsulfata                   |           |         |
|                              | 47      | ARSE | se E                          | -1.608265 | Inlier  |
|                              |         |      | (chondrodysplasia punctata 1) |           |         |
|                              | NM_0000 |      | arylsulfata                   |           |         |
| siRNA Disorazole DMSO Run1   | 47      | ARSE | se E                          | -1.007131 | Inlier  |
|                              |         |      | (chondrodysplasia punctata 1) |           |         |
|                              | NM_0000 |      | arylsulfata                   |           |         |
| siRNA Disorazole DMSO Run3   | 47      | ARSE | se E                          | -0.543982 | Inlier  |
|                              |         |      | (chondrodysplasia punctata 1) |           |         |
|                              | NM_0000 |      | arylsulfata                   |           |         |
| siRNA-Temozolomide Run3-DMSO | 47      | ARSE | se E                          | -0.022144 | Inlier  |
|                              |         |      | (chondrodysplasia punctata 1) |           |         |

Identification of Survival Genes in Human Glioblastoma Cells Using siRNA Screening  
 Nikhil G Thaker, Fang Zhang, Peter R. McDonald, Tong Ying Shun, Michael D Lewen, Ian F. Pollack, and John S. Lazo

Molecular Pharmacology

|                              |           |      |                                               |           |        |
|------------------------------|-----------|------|-----------------------------------------------|-----------|--------|
| siRNA-Temozolomide Run1-DMSO | NM_000047 | ARSE | arylsulfatase E (chondrodysplasia punctata 1) | 0.022144  | Inlier |
| siRNA-Temozolomide Run2-DMSO | NM_000047 | ARSE | arylsulfatase E (chondrodysplasia punctata 1) | 0.025455  | Inlier |
| siRNA-Vinblastine Run1-DMSO  | NM_000047 | ARSE | arylsulfatase E (chondrodysplasia punctata 1) | 0.805018  | Inlier |
| siRNA Disorazole DMSO Run2   | NM_000047 | ARSE | arylsulfatase E (chondrodysplasia punctata 1) | 1.449657  | Inlier |
| siRNA Disorazole DMSO Run1   | NM_004042 | ARSF | arylsulfatase F                               | -1.305989 | Inlier |
| siRNA-Temozolomide Run1-DMSO | NM_004042 | ARSF | arylsulfatase F                               | -1.13186  | Inlier |
| siRNA-Temozolomide Run2-DMSO | NM_004042 | ARSF | arylsulfatase F                               | -0.424946 | Inlier |
| siRNA-Vinblastine Run1-DMSO  | NM_004042 | ARSF | arylsulfatase F                               | -0.044095 | Inlier |
| siRNA-Vinblastine Run2-DMSO  | NM_004042 | ARSF | arylsulfatase F                               | 0.044095  | Inlier |
| siRNA Disorazole DMSO Run3   | NM_004042 | ARSF | arylsulfatase F                               | 0.217277  | Inlier |
| siRNA Disorazole DMSO Run2   | NM_004042 | ARSF | arylsulfatase F                               | 0.924054  | Inlier |
| siRNA-Temozolomide Run3-DMSO | NM_004042 | ARSF | arylsulfatase F                               | 1.255564  | Inlier |
| siRNA-Temozolomide Run3-DMSO | NM_004314 | ART1 | ADP-ribosyltransferase 1                      | -1.060585 | Inlier |
| siRNA-Temozolomide Run1-DMSO | NM_004314 | ART1 | ADP-ribosyltransferase 1                      | -0.681452 | Inlier |
| siRNA-Temozolomide Run2-DMSO | NM_004314 | ART1 | ADP-ribosyltransferase 1                      | -0.667548 | Inlier |

Identification of Survival Genes in Human Glioblastoma Cells Using siRNA Screening  
 Nikhil G Thaker, Fang Zhang, Peter R. McDonald, Tong Ying Shun, Michael D Lewen, Ian F. Pollack, and John S. Lazo

Molecular Pharmacology

|                                  |               |      |                                  |           |         |
|----------------------------------|---------------|------|----------------------------------|-----------|---------|
| siRNA Disorazole DMSO Run3       | NM_0043<br>14 | ART1 | ADP-<br>ribosyltran<br>sferase 1 | -0.157963 | Inlier  |
| siRNA-Vinblastine Run2-<br>DMSO  | NM_0043<br>14 | ART1 | ADP-<br>ribosyltran<br>sferase 1 | 0.157962  | Inlier  |
| siRNA Disorazole DMSO Run1       | NM_0043<br>14 | ART1 | ADP-<br>ribosyltran<br>sferase 1 | 0.397585  | Inlier  |
| siRNA Disorazole DMSO Run2       | NM_0043<br>14 | ART1 | ADP-<br>ribosyltran<br>sferase 1 | 2.438551  | Inlier  |
| siRNA-Vinblastine Run1-<br>DMSO  | NM_0043<br>14 | ART1 | ADP-<br>ribosyltran<br>sferase 1 | 4.217183  | Outlier |
| siRNA-Temozolomide Run3-<br>DMSO | NM_0011<br>79 | ART3 | ADP-<br>ribosyltran<br>sferase 3 | -0.912902 | Inlier  |
| siRNA-Temozolomide Run2-<br>DMSO | NM_0011<br>79 | ART3 | ADP-<br>ribosyltran<br>sferase 3 | -0.890526 | Inlier  |
| siRNA-Temozolomide Run1-<br>DMSO | NM_0011<br>79 | ART3 | ADP-<br>ribosyltran<br>sferase 3 | -0.847683 | Inlier  |
| siRNA Disorazole DMSO Run1       | NM_0011<br>79 | ART3 | ADP-<br>ribosyltran<br>sferase 3 | -0.134468 | Inlier  |
| siRNA-Vinblastine Run2-<br>DMSO  | NM_0011<br>79 | ART3 | ADP-<br>ribosyltran<br>sferase 3 | 0.134467  | Inlier  |
| siRNA Disorazole DMSO Run3       | NM_0011<br>79 | ART3 | ADP-<br>ribosyltran<br>sferase 3 | 0.232383  | Inlier  |
| siRNA Disorazole DMSO Run2       | NM_0011<br>79 | ART3 | ADP-<br>ribosyltran<br>sferase 3 | 0.501317  | Inlier  |
| siRNA-Vinblastine Run1-<br>DMSO  | NM_0011<br>79 | ART3 | ADP-<br>ribosyltran<br>sferase 3 | 0.963792  | Inlier  |

Identification of Survival Genes in Human Glioblastoma Cells Using siRNA Screening  
 Nikhil G Thaker, Fang Zhang, Peter R. McDonald, Tong Ying Shun, Michael D Lewen, Ian F. Pollack, and John S. Lazo

Molecular Pharmacology

|                              |               |        |                          |           |        |
|------------------------------|---------------|--------|--------------------------|-----------|--------|
| siRNA-Temozolomide Run1-DMSO | NM_0530<br>17 | ART5   | ADP-ribosyltransferase 5 | -2.264607 | Inlier |
| siRNA-Temozolomide Run2-DMSO | NM_0530<br>17 | ART5   | ADP-ribosyltransferase 5 | -1.651047 | Inlier |
| siRNA Disorazole DMSO Run1   | NM_0530<br>17 | ART5   | ADP-ribosyltransferase 5 | -0.65744  | Inlier |
| siRNA-Temozolomide Run3-DMSO | NM_0530<br>17 | ART5   | ADP-ribosyltransferase 5 | -0.327254 | Inlier |
| siRNA-Vinblastine Run2-DMSO  | NM_0530<br>17 | ART5   | ADP-ribosyltransferase 5 | 0.327255  | Inlier |
| siRNA Disorazole DMSO Run3   | NM_0530<br>17 | ART5   | ADP-ribosyltransferase 5 | 0.641567  | Inlier |
| siRNA Disorazole DMSO Run2   | NM_0530<br>17 | ART5   | ADP-ribosyltransferase 5 | 0.69156   | Inlier |
| siRNA-Vinblastine Run1-DMSO  | NM_0530<br>17 | ART5   | ADP-ribosyltransferase 5 | 1.690008  | Inlier |
| siRNA-Temozolomide Run3-DMSO | NM_0164<br>42 | ARTS-1 | ARTS-1                   | -1.262834 | Inlier |
| siRNA Disorazole DMSO Run2   | NM_0164<br>42 | ARTS-1 | ARTS-1                   | -1.017713 | Inlier |
| siRNA-Temozolomide Run2-DMSO | NM_0164<br>42 | ARTS-1 | ARTS-1                   | -0.546907 | Inlier |
| siRNA-Temozolomide Run1-DMSO | NM_0164<br>42 | ARTS-1 | ARTS-1                   | -0.103239 | Inlier |
| siRNA Disorazole DMSO Run1   | NM_0164<br>42 | ARTS-1 | ARTS-1                   | 0.103239  | Inlier |
| siRNA-Vinblastine Run2-DMSO  | NM_0164<br>42 | ARTS-1 | ARTS-1                   | 0.254749  | Inlier |
| siRNA-Vinblastine Run1-DMSO  | NM_0164<br>42 | ARTS-1 | ARTS-1                   | 0.802093  | Inlier |
| siRNA Disorazole DMSO Run3   | NM_0164<br>42 | ARTS-1 | ARTS-1                   | 3.203758  | Inlier |

Identification of Survival Genes in Human Glioblastoma Cells Using siRNA Screening

Nikhil G Thaker, Fang Zhang, Peter R. McDonald, Tong Ying Shun, Michael D Lewen, Ian F. Pollack, and John S. Lazo

Molecular Pharmacology

|                                  |               |       |                                                                |           |        |
|----------------------------------|---------------|-------|----------------------------------------------------------------|-----------|--------|
| siRNA Disorazole DMSO Run1       | NM_0206<br>82 | AS3MT | arsenic<br>(+3<br>oxidation<br>state)<br>methyltran<br>sferase | -1.273035 | Inlier |
| siRNA-Temozolomide Run1-<br>DMSO | NM_0206<br>82 | AS3MT | arsenic<br>(+3<br>oxidation<br>state)<br>methyltran<br>sferase | -1.18949  | Inlier |
| siRNA-Vinblastine Run2-<br>DMSO  | NM_0206<br>82 | AS3MT | arsenic<br>(+3<br>oxidation<br>state)<br>methyltran<br>sferase | -0.639245 | Inlier |
| siRNA Disorazole DMSO Run3       | NM_0206<br>82 | AS3MT | arsenic<br>(+3<br>oxidation<br>state)<br>methyltran<br>sferase | -0.049648 | Inlier |
| siRNA-Temozolomide Run2-<br>DMSO | NM_0206<br>82 | AS3MT | arsenic<br>(+3<br>oxidation<br>state)<br>methyltran<br>sferase | 0.049648  | Inlier |
| siRNA Disorazole DMSO Run2       | NM_0206<br>82 | AS3MT | arsenic<br>(+3<br>oxidation<br>state)<br>methyltran<br>sferase | 0.522198  | Inlier |
| siRNA-Temozolomide Run3-<br>DMSO | NM_0206<br>82 | AS3MT | arsenic<br>(+3<br>oxidation<br>state)<br>methyltran<br>sferase | 0.709755  | Inlier |
| siRNA-Vinblastine Run1-<br>DMSO  | NM_0206<br>82 | AS3MT | arsenic<br>(+3<br>oxidation<br>state)<br>methyltran<br>sferase | 1.654507  | Inlier |

Identification of Survival Genes in Human Glioblastoma Cells Using siRNA Screening

Nikhil G Thaker, Fang Zhang, Peter R. McDonald, Tong Ying Shun, Michael D Lewen, Ian F. Pollack, and John S. Lazo

Molecular Pharmacology

|                              |               |       |                                                      |           |        |
|------------------------------|---------------|-------|------------------------------------------------------|-----------|--------|
| siRNA-Temozolomide Run3-DMSO | NM_1779<br>24 | ASAH1 | N-acylsphingosine amidohydrolase (acid ceramidase) 1 | -1.263154 | Inlier |
| siRNA-Temozolomide Run2-DMSO | NM_1779<br>24 | ASAH1 | N-acylsphingosine amidohydrolase (acid ceramidase) 1 | -1.057003 | Inlier |
| siRNA Disorazole DMSO Run3   | NM_1779<br>24 | ASAH1 | N-acylsphingosine amidohydrolase (acid ceramidase) 1 | -0.291997 | Inlier |
| siRNA Disorazole DMSO Run1   | NM_1779<br>24 | ASAH1 | N-acylsphingosine amidohydrolase (acid ceramidase) 1 | -0.057789 | Inlier |
| siRNA-Vinblastine Run2-DMSO  | NM_1779<br>24 | ASAH1 | N-acylsphingosine amidohydrolase (acid ceramidase) 1 | 0.057789  | Inlier |
| siRNA-Temozolomide Run1-DMSO | NM_1779<br>24 | ASAH1 | N-acylsphingosine amidohydrolase (acid ceramidase) 1 | 0.090867  | Inlier |

Identification of Survival Genes in Human Glioblastoma Cells Using siRNA Screening  
 Nikhil G Thaker, Fang Zhang, Peter R. McDonald, Tong Ying Shun, Michael D Lewen, Ian F. Pollack, and John S. Lazo  
 Molecular Pharmacology

|                              |               |       |                                                               |           |        |
|------------------------------|---------------|-------|---------------------------------------------------------------|-----------|--------|
| siRNA-Vinblastine Run1-DMSO  | NM_1779<br>24 | ASAH1 | N-acylsphingosine amidohydrolase (acid ceramidase) 1          | 1.598139  | Inlier |
| siRNA Disorazole DMSO Run2   | NM_1779<br>24 | ASAH1 | N-acylsphingosine amidohydrolase (acid ceramidase) 1          | 2.186989  | Inlier |
| siRNA-Temozolomide Run3-DMSO | NM_0198<br>93 | ASAH2 | N-acylsphingosine amidohydrolase (non-lysosomal ceramidase) 2 | -1.278798 | Inlier |
| siRNA-Temozolomide Run2-DMSO | NM_0198<br>93 | ASAH2 | N-acylsphingosine amidohydrolase (non-lysosomal ceramidase) 2 | -0.943924 | Inlier |
| siRNA Disorazole DMSO Run3   | NM_0198<br>93 | ASAH2 | N-acylsphingosine amidohydrolase (non-lysosomal ceramidase) 2 | -0.405076 | Inlier |
| siRNA-Temozolomide Run1-DMSO | NM_0198<br>93 | ASAH2 | N-acylsphingosine amidohydrolase (non-lysosomal ceramidase) 2 | -0.006577 | Inlier |

Identification of Survival Genes in Human Glioblastoma Cells Using siRNA Screening

Nikhil G Thaker, Fang Zhang, Peter R. McDonald, Tong Ying Shun, Michael D Lewen, Ian F. Pollack, and John S. Lazo

Molecular Pharmacology

|                              |               |       |                                                             |           |        |
|------------------------------|---------------|-------|-------------------------------------------------------------|-----------|--------|
| siRNA-Vinblastine Run2-DMSO  | NM_0198<br>93 | ASAH2 | N-acylsphingosine amidohydrolase (non-lysosomal ceramide) 2 | 0.006577  | Inlier |
| siRNA Disorazole DMSO Run1   | NM_0198<br>93 | ASAH2 | N-acylsphingosine amidohydrolase (non-lysosomal ceramide) 2 | 0.322296  | Inlier |
| siRNA Disorazole DMSO Run2   | NM_0198<br>93 | ASAH2 | N-acylsphingosine amidohydrolase (non-lysosomal ceramide) 2 | 1.258031  | Inlier |
| siRNA-Vinblastine Run1-DMSO  | NM_0198<br>93 | ASAH2 | N-acylsphingosine amidohydrolase (non-lysosomal ceramide) 2 | 1.374065  | Inlier |
| siRNA-Vinblastine Run2-DMSO  | NM_1334<br>92 | ASAH3 | N-acylsphingosine amidohydrolase (alkaline ceramide) 3      | -1.950795 | Inlier |
| siRNA-Temozolomide Run1-DMSO | NM_1334<br>92 | ASAH3 | N-acylsphingosine amidohydrolase (alkaline ceramide) 3      | -0.952319 | Inlier |



Identification of Survival Genes in Human Glioblastoma Cells Using siRNA Screening

Nikhil G Thaker, Fang Zhang, Peter R. McDonald, Tong Ying Shun, Michael D Lewen, Ian F. Pollack, and John S. Lazo

Molecular Pharmacology

| siRNA              | Condition | Run   | Gene | Accession | Probe  | Log2FC    | Category |
|--------------------|-----------|-------|------|-----------|--------|-----------|----------|
| siRNA Disorazole   | DMSO      | Run3  | 92   | NM_1334   | ASA3H3 | -0.396681 | Inlier   |
| siRNA-Temozolomide | DMSO      | Run2- | 92   | NM_1334   | ASA3H3 | -0.237931 | Inlier   |
| siRNA-Temozolomide | DMSO      | Run3- | 92   | NM_1334   | ASA3H3 | 0.23793   | Inlier   |
| siRNA Disorazole   | DMSO      | Run1  | 92   | NM_1334   | ASA3H3 | 0.312992  | Inlier   |
| siRNA-Vinblastine  | DMSO      | Run1- | 92   | NM_1334   | ASA3H3 | 0.966176  | Inlier   |
| siRNA Disorazole   | DMSO      | Run2  | 92   | NM_1334   | ASA3H3 | 3.030052  | Inlier   |

N-acylsphingosine amidohydrolase (alkaline ceramidase) 3

Identification of Survival Genes in Human Glioblastoma Cells Using siRNA Screening  
 Nikhil G Thaker, Fang Zhang, Peter R. McDonald, Tong Ying Shun, Michael D Lewen, Ian F. Pollack, and John S. Lazo  
 Molecular Pharmacology

|                              |               |       |                                                         |           |        |
|------------------------------|---------------|-------|---------------------------------------------------------|-----------|--------|
| siRNA Disorazole DMSO Run1   | NM_0144<br>35 | ASAHL | N-acylsphingosine amidohydrolase (acid ceramidase)-like | -1.268145 | Inlier |
| siRNA-Temozolomide Run2-DMSO | NM_0144<br>35 | ASAHL | N-acylsphingosine amidohydrolase (acid ceramidase)-like | -1.138113 | Inlier |
| siRNA-Temozolomide Run1-DMSO | NM_0144<br>35 | ASAHL | N-acylsphingosine amidohydrolase (acid ceramidase)-like | -0.845681 | Inlier |
| siRNA-Temozolomide Run3-DMSO | NM_0144<br>35 | ASAHL | N-acylsphingosine amidohydrolase (acid ceramidase)-like | -0.40737  | Inlier |
| siRNA Disorazole DMSO Run3   | NM_0144<br>35 | ASAHL | N-acylsphingosine amidohydrolase (acid ceramidase)-like | 0.40737   | Inlier |
| siRNA-Vinblastine Run1-DMSO  | NM_0144<br>35 | ASAHL | N-acylsphingosine amidohydrolase (acid ceramidase)-like | 0.453491  | Inlier |

Identification of Survival Genes in Human Glioblastoma Cells Using siRNA Screening  
 Nikhil G Thaker, Fang Zhang, Peter R. McDonald, Tong Ying Shun, Michael D Lewen, Ian F. Pollack, and John S. Lazo  
 Molecular Pharmacology

|                              |               |       |                                                         |           |        |
|------------------------------|---------------|-------|---------------------------------------------------------|-----------|--------|
| siRNA-Vinblastine Run2-DMSO  | NM_0144<br>35 | ASAHL | N-acylsphingosine amidohydrolase (acid ceramidase)-like | 0.503319  | Inlier |
| siRNA Disorazole DMSO Run2   | NM_0144<br>35 | ASAHL | N-acylsphingosine amidohydrolase (acid ceramidase)-like | 1.081901  | Inlier |
| siRNA Disorazole DMSO Run2   | NM_0808<br>71 | ASB10 | ankyrin repeat and SOCS box-containing 10               | -2.892395 | Inlier |
| siRNA-Temozolomide Run3-DMSO | NM_0808<br>71 | ASB10 | ankyrin repeat and SOCS box-containing 10               | -1.637107 | Inlier |
| siRNA-Vinblastine Run2-DMSO  | NM_0808<br>71 | ASB10 | ankyrin repeat and SOCS box-containing 10               | -0.922901 | Inlier |
| siRNA Disorazole DMSO Run1   | NM_0808<br>71 | ASB10 | ankyrin repeat and SOCS box-containing 10               | -0.187613 | Inlier |
| siRNA Disorazole DMSO Run3   | NM_0808<br>71 | ASB10 | ankyrin repeat and SOCS box-containing 10               | 0.187614  | Inlier |

Identification of Survival Genes in Human Glioblastoma Cells Using siRNA Screening  
 Nikhil G Thaker, Fang Zhang, Peter R. McDonald, Tong Ying Shun, Michael D Lewen, Ian F. Pollack, and John S. Lazo  
 Molecular Pharmacology

|                              |               |       |                                              |                  |
|------------------------------|---------------|-------|----------------------------------------------|------------------|
| siRNA-Temozolomide Run2-DMSO | NM_0808<br>71 | ASB10 | ankyrin repeat and SOCS box-containing<br>10 | 0.412243 Inlier  |
| siRNA-Temozolomide Run1-DMSO | NM_0808<br>71 | ASB10 | ankyrin repeat and SOCS box-containing<br>10 | 0.426099 Inlier  |
| siRNA-Vinblastine Run1-DMSO  | NM_0808<br>71 | ASB10 | ankyrin repeat and SOCS box-containing<br>10 | 1.132768 Inlier  |
| siRNA-Vinblastine Run2-DMSO  | NM_0016<br>71 | ASGR1 | asialoglyc oprotein receptor 1               | -1.618108 Inlier |
| siRNA-Temozolomide Run2-DMSO | NM_0016<br>71 | ASGR1 | asialoglyc oprotein receptor 1               | -0.683912 Inlier |
| siRNA Disorazole DMSO Run1   | NM_0016<br>71 | ASGR1 | asialoglyc oprotein receptor 1               | -0.665088 Inlier |
| siRNA-Temozolomide Run3-DMSO | NM_0016<br>71 | ASGR1 | asialoglyc oprotein receptor 1               | -0.076499 Inlier |
| siRNA-Temozolomide Run1-DMSO | NM_0016<br>71 | ASGR1 | asialoglyc oprotein receptor 1               | 0.076499 Inlier  |
| siRNA Disorazole DMSO Run3   | NM_0016<br>71 | ASGR1 | asialoglyc oprotein receptor 1               | 0.308687 Inlier  |
| siRNA-Vinblastine Run1-DMSO  | NM_0016<br>71 | ASGR1 | asialoglyc oprotein receptor 1               | 2.563543 Inlier  |
| siRNA Disorazole DMSO Run2   | NM_0016<br>71 | ASGR1 | asialoglyc oprotein receptor 1               | 3.178704 Inlier  |
| siRNA Disorazole DMSO Run1   | NM_0809<br>12 | ASGR2 | asialoglyc oprotein receptor 2               | -1.772924 Inlier |
| siRNA-Temozolomide Run1-DMSO | NM_0809<br>12 | ASGR2 | asialoglyc oprotein receptor 2               | -1.145216 Inlier |

Identification of Survival Genes in Human Glioblastoma Cells Using siRNA Screening  
 Nikhil G Thaker, Fang Zhang, Peter R. McDonald, Tong Ying Shun, Michael D Lewen, Ian F. Pollack, and John S. Lazo

| Molecular Pharmacology       |                  |       |                                | asialoglyc |        |
|------------------------------|------------------|-------|--------------------------------|------------|--------|
| siRNA-Temozolomide Run2-DMSO | NM_0809<br>12    | ASGR2 | receptor 2                     | -0.247054  | Inlier |
| siRNA-Temozolomide Run3-DMSO | NM_0809<br>12    | ASGR2 | receptor 2                     | -0.013072  | Inlier |
| siRNA-Vinblastine Run2-DMSO  | NM_0809<br>12    | ASGR2 | receptor 2                     | 0.013073   | Inlier |
| siRNA Disorazole DMSO Run3   | NM_0809<br>12    | ASGR2 | receptor 2                     | 0.396997   | Inlier |
| siRNA-Vinblastine Run1-DMSO  | NM_0809<br>12    | ASGR2 | receptor 2                     | 0.952002   | Inlier |
| siRNA Disorazole DMSO Run2   | NM_0809<br>12    | ASGR2 | receptor 2                     | 2.211206   | Inlier |
| siRNA-Temozolomide Run3-DMSO | NM_0067<br>16    | ASK   | ASK                            | -1.195379  | Inlier |
| siRNA Disorazole DMSO Run2   | NM_0067<br>16    | ASK   | ASK                            | -0.780889  | Inlier |
| siRNA Disorazole DMSO Run3   | NM_0067<br>16    | ASK   | ASK                            | -0.568111  | Inlier |
| siRNA-Temozolomide Run2-DMSO | NM_0067<br>16    | ASK   | ASK                            | -0.388146  | Inlier |
| siRNA Disorazole DMSO Run1   | NM_0067<br>16    | ASK   | ASK                            | 0.388146   | Inlier |
| siRNA-Temozolomide Run1-DMSO | NM_0067<br>16    | ASK   | ASK                            | 0.440967   | Inlier |
| siRNA-Vinblastine Run1-DMSO  | NM_0067<br>16    | ASK   | ASK                            | 1.446741   | Inlier |
| siRNA-Vinblastine Run2-DMSO  | NM_0067<br>16    | ASK   | ASK                            | 1.548016   | Inlier |
| siRNA-Temozolomide Run3-DMSO | NM_0010<br>24946 | ASL   | argininosu<br>ccinate<br>lyase | -1.161291  | Inlier |
| siRNA-Temozolomide Run2-DMSO | NM_0010<br>24946 | ASL   | argininosu<br>ccinate<br>lyase | -0.695308  | Inlier |
| siRNA-Temozolomide Run1-DMSO | NM_0010<br>24946 | ASL   | argininosu<br>ccinate<br>lyase | -0.603015  | Inlier |
| siRNA Disorazole DMSO Run1   | NM_0010<br>24946 | ASL   | argininosu<br>ccinate<br>lyase | -0.171059  | Inlier |
| siRNA Disorazole DMSO Run3   | NM_0010<br>24946 | ASL   | argininosu<br>ccinate<br>lyase | 0.171059   | Inlier |
| siRNA-Vinblastine Run2-DMSO  | NM_0010<br>24946 | ASL   | argininosu<br>ccinate<br>lyase | 0.653692   | Inlier |

Identification of Survival Genes in Human Glioblastoma Cells Using siRNA Screening  
 Nikhil G Thaker, Fang Zhang, Peter R. McDonald, Tong Ying Shun, Michael D Lewen, Ian F. Pollack, and John S. Lazo

| Condition                                                 | Gene ID          | Accession | Gene Name                                                | Z-score   | Outlier Type |
|-----------------------------------------------------------|------------------|-----------|----------------------------------------------------------|-----------|--------------|
| Molecular Pharmacology<br>siRNA-Vinblastine Run1-<br>DMSO | NM_0010<br>24946 | ASL       | argininosu<br>ccinate<br>lyase                           | 0.816997  | Inlier       |
| siRNA Disorazole DMSO Run2                                | NM_0010<br>24946 | ASL       | argininosu<br>ccinate<br>lyase                           | 1.004039  | Inlier       |
| siRNA-Temozolomide Run3-<br>DMSO                          | NM_0040<br>43    | ASMT      | acetylserot<br>onin O-<br>methyltran<br>sferase          | -2.866989 | Inlier       |
| siRNA-Temozolomide Run1-<br>DMSO                          | NM_0040<br>43    | ASMT      | acetylserot<br>onin O-<br>methyltran<br>sferase          | -2.220163 | Inlier       |
| siRNA-Temozolomide Run2-<br>DMSO                          | NM_0040<br>43    | ASMT      | acetylserot<br>onin O-<br>methyltran<br>sferase          | -1.628585 | Inlier       |
| siRNA Disorazole DMSO Run1                                | NM_0040<br>43    | ASMT      | acetylserot<br>onin O-<br>methyltran<br>sferase          | -0.001864 | Inlier       |
| siRNA Disorazole DMSO Run3                                | NM_0040<br>43    | ASMT      | acetylserot<br>onin O-<br>methyltran<br>sferase          | 0.001865  | Inlier       |
| siRNA-Vinblastine Run2-<br>DMSO                           | NM_0040<br>43    | ASMT      | acetylserot<br>onin O-<br>methyltran<br>sferase          | 0.116575  | Inlier       |
| siRNA Disorazole DMSO Run2                                | NM_0040<br>43    | ASMT      | acetylserot<br>onin O-<br>methyltran<br>sferase          | 0.641772  | Inlier       |
| siRNA-Vinblastine Run1-<br>DMSO                           | NM_0040<br>43    | ASMT      | acetylserot<br>onin O-<br>methyltran<br>sferase          | 0.707228  | Inlier       |
| siRNA-Temozolomide Run1-<br>DMSO                          | NM_0041<br>92    | ASMTL     | acetylserot<br>onin O-<br>methyltran<br>sferase-<br>like | -1.461543 | Inlier       |
| siRNA Disorazole DMSO Run1                                | NM_0041<br>92    | ASMTL     | acetylserot<br>onin O-<br>methyltran<br>sferase-<br>like | -0.621627 | Inlier       |

Identification of Survival Genes in Human Glioblastoma Cells Using siRNA Screening

Nikhil G Thaker, Fang Zhang, Peter R. McDonald, Tong Ying Shun, Michael D Lewen, Ian F. Pollack, and John S. Lazo

Molecular Pharmacology

|                              |           |       |                                                               |           |        |
|------------------------------|-----------|-------|---------------------------------------------------------------|-----------|--------|
| siRNA-Temozolomide Run2-DMSO | NM_004192 | ASMTL | acetylserotonin O-methyltransferase-like                      | -0.354299 | Inlier |
| siRNA-Temozolomide Run3-DMSO | NM_004192 | ASMTL | acetylserotonin O-methyltransferase-like                      | -0.062414 | Inlier |
| siRNA-Vinblastine Run2-DMSO  | NM_004192 | ASMTL | acetylserotonin O-methyltransferase-like                      | 0.062415  | Inlier |
| siRNA Disorazole DMSO Run3   | NM_004192 | ASMTL | acetylserotonin O-methyltransferase-like                      | 0.727373  | Inlier |
| siRNA Disorazole DMSO Run2   | NM_004192 | ASMTL | acetylserotonin O-methyltransferase-like                      | 0.872505  | Inlier |
| siRNA-Vinblastine Run1-DMSO  | NM_004192 | ASMTL | acetylserotonin O-methyltransferase-like                      | 1.420576  | Inlier |
| siRNA-Temozolomide Run3-DMSO | NM_004317 | ASNA1 | arsA arsenite transporter, ATP-binding, homolog 1 (bacterial) | -1.311719 | Inlier |
| siRNA-Temozolomide Run2-DMSO | NM_004317 | ASNA1 | arsA arsenite transporter, ATP-binding, homolog 1 (bacterial) | -0.973211 | Inlier |

Identification of Survival Genes in Human Glioblastoma Cells Using siRNA Screening  
 Nikhil G Thaker, Fang Zhang, Peter R. McDonald, Tong Ying Shun, Michael D Lewen, Ian F. Pollack, and John S. Lazo  
 Molecular Pharmacology

|                                  |               |       |                                                                                   |           |        |
|----------------------------------|---------------|-------|-----------------------------------------------------------------------------------|-----------|--------|
| siRNA Disorazole DMSO Run3       | NM_0043<br>17 | ASNA1 | arsA<br>arsenite<br>transporter<br>, ATP-<br>binding,<br>homolog 1<br>(bacterial) | -0.540949 | Inlier |
| siRNA Disorazole DMSO Run2       | NM_0043<br>17 | ASNA1 | arsA<br>arsenite<br>transporter<br>, ATP-<br>binding,<br>homolog 1<br>(bacterial) | -0.102216 | Inlier |
| siRNA-Temozolomide Run1-<br>DMSO | NM_0043<br>17 | ASNA1 | arsA<br>arsenite<br>transporter<br>, ATP-<br>binding,<br>homolog 1<br>(bacterial) | 0.102216  | Inlier |
| siRNA Disorazole DMSO Run1       | NM_0043<br>17 | ASNA1 | arsA<br>arsenite<br>transporter<br>, ATP-<br>binding,<br>homolog 1<br>(bacterial) | 0.146842  | Inlier |
| siRNA-Vinblastine Run2-<br>DMSO  | NM_0043<br>17 | ASNA1 | arsA<br>arsenite<br>transporter<br>, ATP-<br>binding,<br>homolog 1<br>(bacterial) | 0.808051  | Inlier |
| siRNA-Vinblastine Run1-<br>DMSO  | NM_0043<br>17 | ASNA1 | arsA<br>arsenite<br>transporter<br>, ATP-<br>binding,<br>homolog 1<br>(bacterial) | 0.850386  | Inlier |
| siRNA Disorazole DMSO Run3       | NM_1334<br>36 | ASNS  | asparagin<br>e<br>synthetase                                                      | -1.4656   | Inlier |



Identification of Survival Genes in Human Glioblastoma Cells Using siRNA Screening  
 Nikhil G Thaker, Fang Zhang, Peter R. McDonald, Tong Ying Shun, Michael D Lewen, Ian F. Pollack, and John S. Lazo

Molecular Pharmacology

|                              |               |      |                                                     |           |        |
|------------------------------|---------------|------|-----------------------------------------------------|-----------|--------|
| siRNA-Vinblastine Run2-DMSO  | NM_1334<br>36 | ASNS | asparagine synthetase                               | -0.602682 | Inlier |
| siRNA Disorazole DMSO Run1   | NM_1334<br>36 | ASNS | asparagine synthetase                               | -0.602428 | Inlier |
| siRNA-Temozolomide Run2-DMSO | NM_1334<br>36 | ASNS | asparagine synthetase                               | -0.380682 | Inlier |
| siRNA-Temozolomide Run3-DMSO | NM_1334<br>36 | ASNS | asparagine synthetase                               | 0.380682  | Inlier |
| siRNA-Temozolomide Run1-DMSO | NM_1334<br>36 | ASNS | asparagine synthetase                               | 0.746318  | Inlier |
| siRNA Disorazole DMSO Run2   | NM_1334<br>36 | ASNS | asparagine synthetase                               | 3.083686  | Inlier |
| siRNA-Vinblastine Run1-DMSO  | NM_1334<br>36 | ASNS | asparagine synthetase                               | 3.41344   | Inlier |
| siRNA-Temozolomide Run3-DMSO | NM_0000<br>49 | ASPA | aspartoacylase 2, (aminoacylase 2, Canavan disease) | -1.490072 | Inlier |
| siRNA-Temozolomide Run2-DMSO | NM_0000<br>49 | ASPA | aspartoacylase 2, (aminoacylase 2, Canavan disease) | -0.862762 | Inlier |
| siRNA-Temozolomide Run1-DMSO | NM_0000<br>49 | ASPA | aspartoacylase 2, (aminoacylase 2, Canavan disease) | -0.145847 | Inlier |
| siRNA Disorazole DMSO Run1   | NM_0000<br>49 | ASPA | aspartoacylase 2, (aminoacylase 2, Canavan disease) | -0.066406 | Inlier |

Identification of Survival Genes in Human Glioblastoma Cells Using siRNA Screening  
 Nikhil G Thaker, Fang Zhang, Peter R. McDonald, Tong Ying Shun, Michael D Lewen, Ian F. Pollack, and John S. Lazo

Molecular Pharmacology

|                              |           |      |                                                     |           |        |
|------------------------------|-----------|------|-----------------------------------------------------|-----------|--------|
| siRNA-Vinblastine Run2-DMSO  | NM_000049 | ASPA | aspartoacylase 2, (aminoacylase 2, Canavan disease) | 0.066406  | Inlier |
| siRNA Disorazole DMSO Run3   | NM_000049 | ASPA | aspartoacylase 2, (aminoacylase 2, Canavan disease) | 0.619097  | Inlier |
| siRNA-Vinblastine Run1-DMSO  | NM_000049 | ASPA | aspartoacylase 2, (aminoacylase 2, Canavan disease) | 0.729903  | Inlier |
| siRNA Disorazole DMSO Run2   | NM_000049 | ASPA | aspartate beta-hydroxylase                          | 1.159898  | Inlier |
| siRNA Disorazole DMSO Run3   | NM_032468 | ASPH | aspartate beta-hydroxylase                          | -2.287575 | Inlier |
| siRNA-Vinblastine Run2-DMSO  | NM_032468 | ASPH | aspartate beta-hydroxylase                          | -0.911693 | Inlier |
| siRNA-Temozolomide Run2-DMSO | NM_032468 | ASPH | aspartate beta-hydroxylase                          | -0.429855 | Inlier |
| siRNA Disorazole DMSO Run1   | NM_032468 | ASPH | aspartate beta-hydroxylase                          | -0.167588 | Inlier |
| siRNA-Temozolomide Run1-DMSO | NM_032468 | ASPH | aspartate beta-hydroxylase                          | 0.167588  | Inlier |
| siRNA-Temozolomide Run3-DMSO | NM_032468 | ASPH | aspartate beta-hydroxylase                          | 0.437307  | Inlier |
| siRNA Disorazole DMSO Run2   | NM_032468 | ASPH | aspartate beta-hydroxylase                          | 2.77378   | Inlier |

Identification of Survival Genes in Human Glioblastoma Cells Using siRNA Screening  
 Nikhil G Thaker, Fang Zhang, Peter R. McDonald, Tong Ying Shun, Michael D Lewen, Ian F. Pollack, and John S. Lazo

Molecular Pharmacology

|                              |               |        |                                   |           |        |
|------------------------------|---------------|--------|-----------------------------------|-----------|--------|
| siRNA-Vinblastine Run1-DMSO  | NM_0324<br>68 | ASPH   | aspartate<br>beta-<br>hydroxylase | 3.257107  | Inlier |
| siRNA-Temozolomide Run2-DMSO | NM_0250<br>80 | ASRGL1 | asparaginase like 1               | -1.181092 | Inlier |
| siRNA-Vinblastine Run2-DMSO  | NM_0250<br>80 | ASRGL1 | asparaginase like 1               | -0.758119 | Inlier |
| siRNA Disorazole DMSO Run1   | NM_0250<br>80 | ASRGL1 | asparaginase like 1               | -0.590881 | Inlier |
| siRNA-Temozolomide Run1-DMSO | NM_0250<br>80 | ASRGL1 | asparaginase like 1               | -0.025708 | Inlier |
| siRNA Disorazole DMSO Run3   | NM_0250<br>80 | ASRGL1 | asparaginase like 1               | 0.025708  | Inlier |
| siRNA-Temozolomide Run3-DMSO | NM_0250<br>80 | ASRGL1 | asparaginase like 1               | 0.485266  | Inlier |
| siRNA-Vinblastine Run1-DMSO  | NM_0250<br>80 | ASRGL1 | asparaginase like 1               | 1.910364  | Inlier |
| siRNA Disorazole DMSO Run2   | NM_0250<br>80 | ASRGL1 | asparaginase like 1               | 2.77318   | Inlier |
| siRNA-Vinblastine Run2-DMSO  | NM_0000<br>50 | ASS    | argininosuccinate<br>synthetase   | -0.907492 | Inlier |
| siRNA Disorazole DMSO Run3   | NM_0000<br>50 | ASS    | argininosuccinate<br>synthetase   | -0.726554 | Inlier |
| siRNA Disorazole DMSO Run1   | NM_0000<br>50 | ASS    | argininosuccinate<br>synthetase   | -0.586868 | Inlier |
| siRNA-Temozolomide Run2-DMSO | NM_0000<br>50 | ASS    | argininosuccinate<br>synthetase   | -0.347124 | Inlier |
| siRNA-Temozolomide Run1-DMSO | NM_0000<br>50 | ASS    | argininosuccinate<br>synthetase   | 0.347123  | Inlier |
| siRNA-Temozolomide Run3-DMSO | NM_0000<br>50 | ASS    | argininosuccinate<br>synthetase   | 0.622446  | Inlier |
| siRNA Disorazole DMSO Run2   | NM_0000<br>50 | ASS    | argininosuccinate<br>synthetase   | 1.2769    | Inlier |
| siRNA-Vinblastine Run1-DMSO  | NM_0000<br>50 | ASS    | argininosuccinate<br>synthetase   | 1.311397  | Inlier |

Identification of Survival Genes in Human Glioblastoma Cells Using siRNA Screening

Nikhil G Thaker, Fang Zhang, Peter R. McDonald, Tong Ying Shun, Michael D Lewen, Ian F. Pollack, and John S. Lazo

Molecular Pharmacology

|                              |               |       |                                        |           |         |
|------------------------------|---------------|-------|----------------------------------------|-----------|---------|
| siRNA-Vinblastine Run2-DMSO  | NM_0328<br>10 | ATAD1 | ATPase family, AAA domain containing 1 | -0.789086 | Inlier  |
| siRNA-Temozolomide Run2-DMSO | NM_0328<br>10 | ATAD1 | ATPase family, AAA domain containing 1 | -0.632978 | Inlier  |
| siRNA-Temozolomide Run3-DMSO | NM_0328<br>10 | ATAD1 | ATPase family, AAA domain containing 1 | -0.593479 | Inlier  |
| siRNA Disorazole DMSO Run3   | NM_0328<br>10 | ATAD1 | ATPase family, AAA domain containing 1 | -0.474142 | Inlier  |
| siRNA Disorazole DMSO Run1   | NM_0328<br>10 | ATAD1 | ATPase family, AAA domain containing 1 | 0.474142  | Inlier  |
| siRNA-Temozolomide Run1-DMSO | NM_0328<br>10 | ATAD1 | ATPase family, AAA domain containing 1 | 0.716022  | Inlier  |
| siRNA-Vinblastine Run1-DMSO  | NM_0328<br>10 | ATAD1 | ATPase family, AAA domain containing 1 | 3.049468  | Inlier  |
| siRNA Disorazole DMSO Run2   | NM_0328<br>10 | ATAD1 | ATPase family, AAA domain containing 1 | 3.669687  | Outlier |
| siRNA-Temozolomide Run1-DMSO | NM_0070<br>41 | ATE1  | arginyltransferase 1                   | -0.95507  | Inlier  |

Identification of Survival Genes in Human Glioblastoma Cells Using siRNA Screening  
 Nikhil G Thaker, Fang Zhang, Peter R. McDonald, Tong Ying Shun, Michael D Lewen, Ian F. Pollack, and John S. Lazo

Molecular Pharmacology

|                              |               |      |                                   |           |        |
|------------------------------|---------------|------|-----------------------------------|-----------|--------|
| siRNA-Temozolomide Run2-DMSO | NM_0070<br>41 | ATE1 | arginyltransferase 1              | -0.680011 | Inlier |
| siRNA-Temozolomide Run3-DMSO | NM_0070<br>41 | ATE1 | arginyltransferase 1              | -0.668989 | Inlier |
| siRNA-Vinblastine Run2-DMSO  | NM_0070<br>41 | ATE1 | arginyltransferase 1              | -0.055176 | Inlier |
| siRNA Disorazole DMSO Run1   | NM_0070<br>41 | ATE1 | arginyltransferase 1              | 0.055176  | Inlier |
| siRNA Disorazole DMSO Run3   | NM_0070<br>41 | ATE1 | arginyltransferase 1              | 0.585852  | Inlier |
| siRNA-Vinblastine Run1-DMSO  | NM_0070<br>41 | ATE1 | arginyltransferase 1              | 1.21422   | Inlier |
| siRNA Disorazole DMSO Run2   | NM_0070<br>41 | ATE1 | arginyltransferase 1              | 1.336036  | Inlier |
| siRNA-Temozolomide Run3-DMSO | NM_0051<br>71 | ATF1 | activating transcription factor 1 | -1.910172 | Inlier |
| siRNA-Temozolomide Run2-DMSO | NM_0051<br>71 | ATF1 | activating transcription factor 1 | -1.142121 | Inlier |
| siRNA-Temozolomide Run1-DMSO | NM_0051<br>71 | ATF1 | activating transcription factor 1 | -1.000828 | Inlier |
| siRNA Disorazole DMSO Run1   | NM_0051<br>71 | ATF1 | activating transcription factor 1 | -0.165461 | Inlier |
| siRNA Disorazole DMSO Run2   | NM_0051<br>71 | ATF1 | activating transcription factor 1 | 0.165461  | Inlier |
| siRNA Disorazole DMSO Run3   | NM_0051<br>71 | ATF1 | activating transcription factor 1 | 0.252079  | Inlier |
| siRNA-Vinblastine Run1-DMSO  | NM_0051<br>71 | ATF1 | activating transcription factor 1 | 0.572077  | Inlier |

Identification of Survival Genes in Human Glioblastoma Cells Using siRNA Screening

Nikhil G Thaker, Fang Zhang, Peter R. McDonald, Tong Ying Shun, Michael D Lewen, Ian F. Pollack, and John S.

Lazo

Molecular Pharmacology

|                              |           |      |                                                                                    |           |        |
|------------------------------|-----------|------|------------------------------------------------------------------------------------|-----------|--------|
| siRNA-Vinblastine Run2-DMSO  | NM_005171 | ATF1 | activating transcription factor 1                                                  | 0.776923  | Inlier |
| siRNA-Temozolomide Run1-DMSO | NM_004044 | ATIC | 5-aminoimidazole-4-carboxamide ribonucleotide formyltransferase/IMP cyclohydrolase | -1.458739 | Inlier |
| siRNA Disorazole DMSO Run1   | NM_004044 | ATIC | 5-aminoimidazole-4-carboxamide ribonucleotide formyltransferase/IMP cyclohydrolase | -1.071149 | Inlier |
| siRNA-Temozolomide Run2-DMSO | NM_004044 | ATIC | 5-aminoimidazole-4-carboxamide ribonucleotide formyltransferase/IMP cyclohydrolase | -1.038518 | Inlier |
| siRNA Disorazole DMSO Run3   | NM_004044 | ATIC | cyclohydrolase                                                                     | -0.086421 | Inlier |

Identification of Survival Genes in Human Glioblastoma Cells Using siRNA Screening

Nikhil G Thaker, Fang Zhang, Peter R. McDonald, Tong Ying Shun, Michael D Lewen, Ian F. Pollack, and John S. Lazo

Molecular Pharmacology

|                                  |               |      |                                                                                                     |          |        |
|----------------------------------|---------------|------|-----------------------------------------------------------------------------------------------------|----------|--------|
| siRNA Disorazole DMSO Run2       | NM_0040<br>44 | ATIC | 5-<br>aminoimidazole-4-<br>carboxamide<br>ribonucleotide<br>formyltransferase/IMP<br>cyclohydrolase | 0.086421 | Inlier |
| siRNA-Vinblastine Run2-<br>DMSO  | NM_0040<br>44 | ATIC | 5-<br>aminoimidazole-4-<br>carboxamide<br>ribonucleotide<br>formyltransferase/IMP<br>cyclohydrolase | 0.117577 | Inlier |
| siRNA-Temozolomide Run3-<br>DMSO | NM_0040<br>44 | ATIC | 5-<br>aminoimidazole-4-<br>carboxamide<br>ribonucleotide<br>formyltransferase/IMP<br>cyclohydrolase | 0.310482 | Inlier |
| siRNA-Vinblastine Run1-<br>DMSO  | NM_0040<br>44 | ATIC | 5-<br>aminoimidazole-4-<br>carboxamide<br>ribonucleotide<br>formyltransferase/IMP<br>cyclohydrolase | 1.464807 | Inlier |

Identification of Survival Genes in Human Glioblastoma Cells Using siRNA Screening

Nikhil G Thaker, Fang Zhang, Peter R. McDonald, Tong Ying Shun, Michael D Lewen, Ian F. Pollack, and John S. Lazo

Molecular Pharmacology

|                              |           |     |                                                                                     |           |        |
|------------------------------|-----------|-----|-------------------------------------------------------------------------------------|-----------|--------|
| siRNA-Temozolomide Run3-DMSO | NM_000051 | ATM | ataxia<br>telangiectasia<br>mutated<br>(includes complementation groups A, C and D) | -1.289465 | Inlier |
| siRNA-Temozolomide Run2-DMSO | NM_000051 | ATM | ataxia<br>telangiectasia<br>mutated<br>(includes complementation groups A, C and D) | -0.904511 | Inlier |
| siRNA-Temozolomide Run1-DMSO | NM_000051 | ATM | ataxia<br>telangiectasia<br>mutated<br>(includes complementation groups A, C and D) | -0.604097 | Inlier |
| siRNA Disorazole DMSO Run1   | NM_000051 | ATM | ataxia<br>telangiectasia<br>mutated<br>(includes complementation groups A, C and D) | -0.00499  | Inlier |
| siRNA Disorazole DMSO Run3   | NM_000051 | ATM | ataxia<br>telangiectasia<br>mutated<br>(includes complementation groups A, C and D) | 0.004991  | Inlier |



Identification of Survival Genes in Human Glioblastoma Cells Using siRNA Screening  
 Nikhil G Thaker, Fang Zhang, Peter R. McDonald, Tong Ying Shun, Michael D Lewen, Ian F. Pollack, and John S. Lazo

Molecular Pharmacology

|                              |               |        |                                                                                     |           |        |
|------------------------------|---------------|--------|-------------------------------------------------------------------------------------|-----------|--------|
| siRNA Disorazole DMSO Run2   | NM_0000<br>51 | ATM    | ataxia<br>telangiectasia<br>mutated<br>(includes complementation groups A, C and D) | 0.226024  | Inlier |
| siRNA-Vinblastine Run2-DMSO  | NM_0000<br>51 | ATM    | ataxia<br>telangiectasia<br>mutated<br>(includes complementation groups A, C and D) | 0.744903  | Inlier |
| siRNA-Vinblastine Run1-DMSO  | NM_0000<br>51 | ATM    | ataxia<br>telangiectasia<br>mutated<br>(includes complementation groups A, C and D) | 1.417944  | Inlier |
| siRNA-Temozolomide Run3-DMSO | NM_0244<br>90 | ATP10A | ATPase, Class V, type 10A                                                           | -3.250898 | Inlier |
| siRNA-Temozolomide Run2-DMSO | NM_0244<br>90 | ATP10A | ATPase, Class V, type 10A                                                           | -2.622572 | Inlier |
| siRNA-Temozolomide Run1-DMSO | NM_0244<br>90 | ATP10A | ATPase, Class V, type 10A                                                           | -0.257678 | Inlier |
| siRNA Disorazole DMSO Run1   | NM_0244<br>90 | ATP10A | ATPase, Class V, type 10A                                                           | -0.036692 | Inlier |
| siRNA Disorazole DMSO Run2   | NM_0244<br>90 | ATP10A | ATPase, Class V, type 10A                                                           | 0.036691  | Inlier |
| siRNA-Vinblastine Run1-DMSO  | NM_0244<br>90 | ATP10A | ATPase, Class V, type 10A                                                           | 0.513384  | Inlier |
| siRNA Disorazole DMSO Run3   | NM_0244<br>90 | ATP10A | ATPase, Class V, type 10A                                                           | 0.835616  | Inlier |
| siRNA-Vinblastine Run2-DMSO  | NM_0244<br>90 | ATP10A | ATPase, Class V, type 10A                                                           | 1.521912  | Inlier |

Identification of Survival Genes in Human Glioblastoma Cells Using siRNA Screening  
 Nikhil G Thaker, Fang Zhang, Peter R. McDonald, Tong Ying Shun, Michael D Lewen, Ian F. Pollack, and John S. Lazo

Molecular Pharmacology

|                              |               |        |                                  |           |        |
|------------------------------|---------------|--------|----------------------------------|-----------|--------|
| siRNA Disorazole DMSO Run1   | NM_0204<br>53 | ATP10D | ATPase,<br>Class V,<br>type 10D  | -0.942445 | Inlier |
| siRNA-Temozolomide Run3-DMSO | NM_0204<br>53 | ATP10D | ATPase,<br>Class V,<br>type 10D  | -0.735134 | Inlier |
| siRNA Disorazole DMSO Run2   | NM_0204<br>53 | ATP10D | ATPase,<br>Class V,<br>type 10D  | -0.613866 | Inlier |
| siRNA-Temozolomide Run2-DMSO | NM_0204<br>53 | ATP10D | ATPase,<br>Class V,<br>type 10D  | -0.227101 | Inlier |
| siRNA-Temozolomide Run1-DMSO | NM_0204<br>53 | ATP10D | ATPase,<br>Class V,<br>type 10D  | 0.227101  | Inlier |
| siRNA-Vinblastine Run1-DMSO  | NM_0204<br>53 | ATP10D | ATPase,<br>Class V,<br>type 10D  | 0.418746  | Inlier |
| siRNA-Vinblastine Run2-DMSO  | NM_0204<br>53 | ATP10D | ATPase,<br>Class V,<br>type 10D  | 0.916956  | Inlier |
| siRNA Disorazole DMSO Run3   | NM_0204<br>53 | ATP10D | ATPase,<br>Class V,<br>type 10D  | 1.120121  | Inlier |
| siRNA-Temozolomide Run3-DMSO | XM_08502<br>8 | ATP11A | ATPase,<br>Class VI,<br>type 11A | -1.172057 | Inlier |
| siRNA-Temozolomide Run2-DMSO | XM_08502<br>8 | ATP11A | ATPase,<br>Class VI,<br>type 11A | -0.801426 | Inlier |
| siRNA-Temozolomide Run1-DMSO | XM_08502<br>8 | ATP11A | ATPase,<br>Class VI,<br>type 11A | -0.547574 | Inlier |
| siRNA Disorazole DMSO Run2   | XM_08502<br>8 | ATP11A | ATPase,<br>Class VI,<br>type 11A | -0.000597 | Inlier |
| siRNA Disorazole DMSO Run3   | XM_08502<br>8 | ATP11A | ATPase,<br>Class VI,<br>type 11A | 0.000597  | Inlier |
| siRNA Disorazole DMSO Run1   | XM_08502<br>8 | ATP11A | ATPase,<br>Class VI,<br>type 11A | 0.411219  | Inlier |
| siRNA-Vinblastine Run1-DMSO  | XM_08502<br>8 | ATP11A | ATPase,<br>Class VI,<br>type 11A | 1.072522  | Inlier |
| siRNA-Vinblastine Run2-DMSO  | XM_08502<br>8 | ATP11A | ATPase,<br>Class VI,<br>type 11A | 1.405143  | Inlier |
| siRNA-Temozolomide Run3-DMSO | XM_08725<br>4 | ATP11B | ATPase,<br>Class VI,<br>type 11B | -1.505906 | Inlier |

Identification of Survival Genes in Human Glioblastoma Cells Using siRNA Screening  
 Nikhil G Thaker, Fang Zhang, Peter R. McDonald, Tong Ying Shun, Michael D Lewen, Ian F. Pollack, and John S. Lazo

Molecular Pharmacology

|                              |           |    |        |                                                             |           |        |
|------------------------------|-----------|----|--------|-------------------------------------------------------------|-----------|--------|
| siRNA Disorazole DMSO Run2   | XM_08725  | 4  | ATP11B | ATPase, Class VI, type 11B                                  | -1.294569 | Inlier |
| siRNA-Temozolomide Run2-DMSO | XM_08725  | 4  | ATP11B | ATPase, Class VI, type 11B                                  | -0.059404 | Inlier |
| siRNA-Temozolomide Run1-DMSO | XM_08725  | 4  | ATP11B | ATPase, Class VI, type 11B                                  | -0.01129  | Inlier |
| siRNA Disorazole DMSO Run3   | XM_08725  | 4  | ATP11B | ATPase, Class VI, type 11B                                  | 0.01129   | Inlier |
| siRNA Disorazole DMSO Run1   | XM_08725  | 4  | ATP11B | ATPase, Class VI, type 11B                                  | 0.323904  | Inlier |
| siRNA-Vinblastine Run1-DMSO  | XM_08725  | 4  | ATP11B | ATPase, Class VI, type 11B                                  | 1.025096  | Inlier |
| siRNA-Vinblastine Run2-DMSO  | XM_08725  | 4  | ATP11B | ATPase, Class VI, type 11B                                  | 2.467114  | Inlier |
| siRNA-Temozolomide Run3-DMSO | NM_001676 | 76 | ATP12A | H+/K+ transportin g, nongastric , alpha polypeptide         | -0.788281 | Inlier |
| siRNA-Temozolomide Run1-DMSO | NM_001676 | 76 | ATP12A | ATPase, H+/K+ transportin g, nongastric , alpha polypeptide | -0.751521 | Inlier |
| siRNA-Temozolomide Run2-DMSO | NM_001676 | 76 | ATP12A | ATPase, H+/K+ transportin g, nongastric , alpha polypeptide | -0.597479 | Inlier |

Identification of Survival Genes in Human Glioblastoma Cells Using siRNA Screening  
 Nikhil G Thaker, Fang Zhang, Peter R. McDonald, Tong Ying Shun, Michael D Lewen, Ian F. Pollack, and John S. Lazo

Molecular Pharmacology

|                              |           |        |                                                              |           |        |
|------------------------------|-----------|--------|--------------------------------------------------------------|-----------|--------|
| siRNA-Vinblastine Run2-DMSO  | NM_001676 | ATP12A | ATPase, H+/K+ transportin g, nongastric , alpha polypeptid e | -0.105288 | Inlier |
| siRNA Disorazole DMSO Run1   | NM_001676 | ATP12A | ATPase, H+/K+ transportin g, nongastric , alpha polypeptid e | 0.105288  | Inlier |
| siRNA Disorazole DMSO Run3   | NM_001676 | ATP12A | ATPase, H+/K+ transportin g, nongastric , alpha polypeptid e | 0.176637  | Inlier |
| siRNA Disorazole DMSO Run2   | NM_001676 | ATP12A | ATPase, H+/K+ transportin g, nongastric , alpha polypeptid e | 0.996569  | Inlier |
| siRNA-Vinblastine Run1-DMSO  | NM_001676 | ATP12A | ATPase, H+/K+ transportin g, nongastric , alpha polypeptid e | 1.028341  | Inlier |
| siRNA-Temozolomide Run2-DMSO | NM_020410 | ATP13A | ATPase type 13A1                                             | -1.510881 | Inlier |
| siRNA-Temozolomide Run3-DMSO | NM_020410 | ATP13A | ATPase type 13A1                                             | -1.451441 | Inlier |
| siRNA-Vinblastine Run2-DMSO  | NM_020410 | ATP13A | ATPase type 13A1                                             | -0.479875 | Inlier |
| siRNA Disorazole DMSO Run3   | NM_020410 | ATP13A | ATPase type 13A1                                             | -0.181398 | Inlier |
| siRNA Disorazole DMSO Run1   | NM_020410 | ATP13A | ATPase type 13A1                                             | 0.181398  | Inlier |
| siRNA-Temozolomide Run1-DMSO | NM_020410 | ATP13A | ATPase type 13A1                                             | 0.280062  | Inlier |

Identification of Survival Genes in Human Glioblastoma Cells Using siRNA Screening

Nikhil G Thaker, Fang Zhang, Peter R. McDonald, Tong Ying Shun, Michael D Lewen, Ian F. Pollack, and John S.

Lazo

| siRNA                        | siRNA        | siRNA | Gene   | Gene                                             | Gene      | Gene   | Gene | Gene | Gene |
|------------------------------|--------------|-------|--------|--------------------------------------------------|-----------|--------|------|------|------|
| siRNA-Vinblastine Run1-DMSO  | NM_0204      | 10    | ATP13A | ATPase type 13A1                                 | 0.869125  | Inlier |      |      |      |
| siRNA Disorazole DMSO Run2   | NM_0204      | 10    | ATP13A | ATPase type 13A1                                 | 0.897345  | Inlier |      |      |      |
| siRNA-Temozolomide Run2-DMSO | NM_001001586 |       | ATP1A1 | ATPase, Na+/K+ transporting, alpha 1 polypeptide | -2.017924 | Inlier |      |      |      |
| siRNA-Temozolomide Run3-DMSO | NM_001001586 |       | ATP1A1 | ATPase, Na+/K+ transporting, alpha 1 polypeptide | -1.998429 | Inlier |      |      |      |
| siRNA-Temozolomide Run1-DMSO | NM_001001586 |       | ATP1A1 | ATPase, Na+/K+ transporting, alpha 1 polypeptide | -1.356257 | Inlier |      |      |      |
| siRNA-Vinblastine Run2-DMSO  | NM_001001586 |       | ATP1A1 | ATPase, Na+/K+ transporting, alpha 1 polypeptide | -0.193502 | Inlier |      |      |      |
| siRNA Disorazole DMSO Run3   | NM_001001586 |       | ATP1A1 | ATPase, Na+/K+ transporting, alpha 1 polypeptide | 0.193502  | Inlier |      |      |      |
| siRNA Disorazole DMSO Run1   | NM_001001586 |       | ATP1A1 | ATPase, Na+/K+ transporting, alpha 1 polypeptide | 0.308605  | Inlier |      |      |      |

Identification of Survival Genes in Human Glioblastoma Cells Using siRNA Screening  
 Nikhil G Thaker, Fang Zhang, Peter R. McDonald, Tong Ying Shun, Michael D Lewen, Ian F. Pollack, and John S. Lazo  
 Molecular Pharmacology

|                              |              |        |                                                      |           |        |
|------------------------------|--------------|--------|------------------------------------------------------|-----------|--------|
| siRNA-Vinblastine Run1-DMSO  | NM_001001586 | ATP1A1 | ATPase, Na+/K+ transporting, alpha 1 polypeptide     | 0.645963  | Inlier |
| siRNA Disorazole DMSO Run2   | NM_001001586 | ATP1A1 | ATPase, Na+/K+ transporting, alpha 1 polypeptide     | 0.703037  | Inlier |
| siRNA-Temozolomide Run3-DMSO | NM_000702    | ATP1A2 | ATPase, Na+/K+ transporting, alpha 2 (+) polypeptide | -2.196835 | Inlier |
| siRNA-Temozolomide Run2-DMSO | NM_000702    | ATP1A2 | ATPase, Na+/K+ transporting, alpha 2 (+) polypeptide | -0.761779 | Inlier |
| siRNA-Vinblastine Run2-DMSO  | NM_000702    | ATP1A2 | ATPase, Na+/K+ transporting, alpha 2 (+) polypeptide | -0.73765  | Inlier |
| siRNA-Vinblastine Run1-DMSO  | NM_000702    | ATP1A2 | ATPase, Na+/K+ transporting, alpha 2 (+) polypeptide | -0.298954 | Inlier |
| siRNA-Temozolomide Run1-DMSO | NM_000702    | ATP1A2 | ATPase, Na+/K+ transporting, alpha 2 (+) polypeptide | 0.298954  | Inlier |

Identification of Survival Genes in Human Glioblastoma Cells Using siRNA Screening  
 Nikhil G Thaker, Fang Zhang, Peter R. McDonald, Tong Ying Shun, Michael D Lewen, Ian F. Pollack, and John S. Lazo

Molecular Pharmacology

|                                  |               |        |                                                                                                   |           |        |
|----------------------------------|---------------|--------|---------------------------------------------------------------------------------------------------|-----------|--------|
| siRNA Disorazole DMSO Run1       | NM_0007<br>02 | ATP1A2 | ATPase,<br>Na <sup>+</sup> /K <sup>+</sup><br>transportin<br>g, alpha 2<br>(+)<br>polypeptid<br>e | 0.299735  | Inlier |
| siRNA Disorazole DMSO Run3       | NM_0007<br>02 | ATP1A2 | ATPase,<br>Na <sup>+</sup> /K <sup>+</sup><br>transportin<br>g, alpha 2<br>(+)<br>polypeptid<br>e | 0.61135   | Inlier |
| siRNA Disorazole DMSO Run2       | NM_0007<br>02 | ATP1A2 | ATPase,<br>Na <sup>+</sup> /K <sup>+</sup><br>transportin<br>g, alpha 2<br>(+)<br>polypeptid<br>e | 1.02637   | Inlier |
| siRNA-Temozolomide Run3-<br>DMSO | NM_1522<br>96 | ATP1A3 | ATPase,<br>Na <sup>+</sup> /K <sup>+</sup><br>transportin<br>g, alpha 3<br>polypeptid<br>e        | -1.56975  | Inlier |
| siRNA-Temozolomide Run2-<br>DMSO | NM_1522<br>96 | ATP1A3 | ATPase,<br>Na <sup>+</sup> /K <sup>+</sup><br>transportin<br>g, alpha 3<br>polypeptid<br>e        | -0.706594 | Inlier |
| siRNA-Temozolomide Run1-<br>DMSO | NM_1522<br>96 | ATP1A3 | ATPase,<br>Na <sup>+</sup> /K <sup>+</sup><br>transportin<br>g, alpha 3<br>polypeptid<br>e        | -0.642406 | Inlier |
| siRNA-Vinblastine Run2-<br>DMSO  | NM_1522<br>96 | ATP1A3 | ATPase,<br>Na <sup>+</sup> /K <sup>+</sup><br>transportin<br>g, alpha 3<br>polypeptid<br>e        | -0.140771 | Inlier |

Identification of Survival Genes in Human Glioblastoma Cells Using siRNA Screening  
 Nikhil G Thaker, Fang Zhang, Peter R. McDonald, Tong Ying Shun, Michael D Lewen, Ian F. Pollack, and John S. Lazo  
 Molecular Pharmacology

|                                  |               |        |                                                                                            |           |        |
|----------------------------------|---------------|--------|--------------------------------------------------------------------------------------------|-----------|--------|
| siRNA Disorazole DMSO Run1       | NM_1522<br>96 | ATP1A3 | ATPase,<br>Na <sup>+</sup> /K <sup>+</sup><br>transportin<br>g, alpha 3<br>polypeptid<br>e | 0.14077   | Inlier |
| siRNA Disorazole DMSO Run3       | NM_1522<br>96 | ATP1A3 | ATPase,<br>Na <sup>+</sup> /K <sup>+</sup><br>transportin<br>g, alpha 3<br>polypeptid<br>e | 0.292409  | Inlier |
| siRNA Disorazole DMSO Run2       | NM_1522<br>96 | ATP1A3 | ATPase,<br>Na <sup>+</sup> /K <sup>+</sup><br>transportin<br>g, alpha 3<br>polypeptid<br>e | 0.966938  | Inlier |
| siRNA-Vinblastine Run1-<br>DMSO  | NM_1522<br>96 | ATP1A3 | ATPase,<br>Na <sup>+</sup> /K <sup>+</sup><br>transportin<br>g, alpha 3<br>polypeptid<br>e | 1.060093  | Inlier |
| siRNA Disorazole DMSO Run2       | NM_1446<br>99 | ATP1A4 | ATPase,<br>Na <sup>+</sup> /K <sup>+</sup><br>transportin<br>g, alpha 4<br>polypeptid<br>e | -2.584926 | Inlier |
| siRNA-Vinblastine Run2-<br>DMSO  | NM_1446<br>99 | ATP1A4 | ATPase,<br>Na <sup>+</sup> /K <sup>+</sup><br>transportin<br>g, alpha 4<br>polypeptid<br>e | -1.719758 | Inlier |
| siRNA-Temozolomide Run1-<br>DMSO | NM_1446<br>99 | ATP1A4 | ATPase,<br>Na <sup>+</sup> /K <sup>+</sup><br>transportin<br>g, alpha 4<br>polypeptid<br>e | -0.631178 | Inlier |



Identification of Survival Genes in Human Glioblastoma Cells Using siRNA Screening  
 Nikhil G Thaker, Fang Zhang, Peter R. McDonald, Tong Ying Shun, Michael D Lewen, Ian F. Pollack, and John S. Lazo  
 Molecular Pharmacology

|                                  |               |        |                                                                   |           |        |
|----------------------------------|---------------|--------|-------------------------------------------------------------------|-----------|--------|
| siRNA Disorazole DMSO Run1       | NM_1446<br>99 | ATP1A4 | ATPase,<br>Na+/K+<br>transportin<br>g, alpha 4<br>polypeptid<br>e | -0.288793 | Inlier |
| siRNA-Temozolomide Run2-<br>DMSO | NM_1446<br>99 | ATP1A4 | ATPase,<br>Na+/K+<br>transportin<br>g, alpha 4<br>polypeptid<br>e | 0.28879   | Inlier |
| siRNA-Vinblastine Run1-<br>DMSO  | NM_1446<br>99 | ATP1A4 | ATPase,<br>Na+/K+<br>transportin<br>g, alpha 4<br>polypeptid<br>e | 0.430548  | Inlier |
| siRNA-Temozolomide Run3-<br>DMSO | NM_1446<br>99 | ATP1A4 | ATPase,<br>Na+/K+<br>transportin<br>g, alpha 4<br>polypeptid<br>e | 0.717822  | Inlier |
| siRNA Disorazole DMSO Run3       | NM_1446<br>99 | ATP1A4 | ATPase,<br>Na+/K+<br>transportin<br>g, alpha 4<br>polypeptid<br>e | 0.805756  | Inlier |
| siRNA-Temozolomide Run2-<br>DMSO | NM_0016<br>77 | ATP1B1 | ATPase,<br>Na+/K+<br>transportin<br>g, beta 1<br>polypeptid<br>e  | -1.183715 | Inlier |
| siRNA-Temozolomide Run3-<br>DMSO | NM_0016<br>77 | ATP1B1 | ATPase,<br>Na+/K+<br>transportin<br>g, beta 1<br>polypeptid<br>e  | -0.871489 | Inlier |

Identification of Survival Genes in Human Glioblastoma Cells Using siRNA Screening  
 Nikhil G Thaker, Fang Zhang, Peter R. McDonald, Tong Ying Shun, Michael D Lewen, Ian F. Pollack, and John S. Lazo

Molecular Pharmacology

| siRNA Treatment              | Gene ID   | Gene Name | Protein Name                                    | Log Fold Change | Inlier |
|------------------------------|-----------|-----------|-------------------------------------------------|-----------------|--------|
| siRNA-Temozolomide Run1-DMSO | NM_001677 | ATP1B1    | ATPase, Na+/K+ transporting, beta 1 polypeptide | -0.646798       | Inlier |
| siRNA-Vinblastine Run2-DMSO  | NM_001677 | ATP1B1    | ATPase, Na+/K+ transporting, beta 1 polypeptide | -0.063662       | Inlier |
| siRNA Disorazole DMSO Run3   | NM_001677 | ATP1B1    | ATPase, Na+/K+ transporting, beta 1 polypeptide | 0.063662        | Inlier |
| siRNA Disorazole DMSO Run1   | NM_001677 | ATP1B1    | ATPase, Na+/K+ transporting, beta 1 polypeptide | 0.242325        | Inlier |
| siRNA Disorazole DMSO Run2   | NM_001677 | ATP1B1    | ATPase, Na+/K+ transporting, beta 1 polypeptide | 0.702202        | Inlier |
| siRNA-Vinblastine Run1-DMSO  | NM_001677 | ATP1B1    | ATPase, Na+/K+ transporting, beta 1 polypeptide | 0.80776         | Inlier |
| siRNA-Temozolomide Run3-DMSO | NM_001678 | ATP1B2    | ATPase, Na+/K+ transporting, beta 2 polypeptide | -1.233051       | Inlier |
| siRNA-Temozolomide Run2-DMSO | NM_001678 | ATP1B2    | ATPase, Na+/K+ transporting, beta 2 polypeptide | -0.544442       | Inlier |

Identification of Survival Genes in Human Glioblastoma Cells Using siRNA Screening  
 Nikhil G Thaker, Fang Zhang, Peter R. McDonald, Tong Ying Shun, Michael D Lewen, Ian F. Pollack, and John S. Lazo

Molecular Pharmacology

| siRNA Treatment              | Gene ID   | Gene Name | Log Fold Change | Category |
|------------------------------|-----------|-----------|-----------------|----------|
| siRNA-Temozolomide Run1-DMSO | NM_001678 | ATP1B2    | -0.129861       | Inlier   |
| siRNA-Vinblastine Run2-DMSO  | NM_001678 | ATP1B2    | -0.014346       | Inlier   |
| siRNA Disorazole DMSO Run3   | NM_001678 | ATP1B2    | 0.014346        | Inlier   |
| siRNA Disorazole DMSO Run1   | NM_001678 | ATP1B2    | 0.804558        | Inlier   |
| siRNA-Vinblastine Run1-DMSO  | NM_001678 | ATP1B2    | 2.688886        | Inlier   |
| siRNA Disorazole DMSO Run2   | NM_001678 | ATP1B2    | 3.55299         | Outlier  |
| siRNA-Temozolomide Run2-DMSO | NM_001679 | ATP1B3    | -1.010551       | Inlier   |
| siRNA-Temozolomide Run1-DMSO | NM_001679 | ATP1B3    | -0.912306       | Inlier   |

ATPase, Na<sup>+</sup>/K<sup>+</sup> transporting, beta 2 polypeptide  
 ATPase, Na<sup>+</sup>/K<sup>+</sup> transporting, beta 3 polypeptide  
 ATPase, Na<sup>+</sup>/K<sup>+</sup> transporting, beta 3 polypeptide

Identification of Survival Genes in Human Glioblastoma Cells Using siRNA Screening

Nikhil G Thaker, Fang Zhang, Peter R. McDonald, Tong Ying Shun, Michael D Lewen, Ian F. Pollack, and John S. Lazo

Molecular Pharmacology

| siRNA Treatment              | Gene ID   | Gene Name | Gene Description                                                           | Log Fold Change | Outlier Status |
|------------------------------|-----------|-----------|----------------------------------------------------------------------------|-----------------|----------------|
| siRNA-Temozolomide Run3-DMSO | NM_001679 | ATP1B3    | ATPase, Na <sup>+</sup> /K <sup>+</sup> transporting, beta 3 polypeptide   | -0.873477       | Inlier         |
| siRNA-Vinblastine Run2-DMSO  | NM_001679 | ATP1B3    | ATPase, Na <sup>+</sup> /K <sup>+</sup> transporting, beta 3 polypeptide   | -0.026789       | Inlier         |
| siRNA Disorazole DMSO Run3   | NM_001679 | ATP1B3    | ATPase, Na <sup>+</sup> /K <sup>+</sup> transporting, beta 3 polypeptide   | 0.02679         | Inlier         |
| siRNA Disorazole DMSO Run1   | NM_001679 | ATP1B3    | ATPase, Na <sup>+</sup> /K <sup>+</sup> transporting, beta 3 polypeptide   | 0.244949        | Inlier         |
| siRNA Disorazole DMSO Run2   | NM_001679 | ATP1B3    | ATPase, Na <sup>+</sup> /K <sup>+</sup> transporting, beta 3 polypeptide   | 0.529356        | Inlier         |
| siRNA-Vinblastine Run1-DMSO  | NM_001679 | ATP1B3    | ATPase, (Na <sup>+</sup> )/K <sup>+</sup> transporting, beta 3 polypeptide | 0.819644        | Inlier         |
| siRNA-Temozolomide Run2-DMSO | NM_012069 | ATP1B4    | ATPase, (Na <sup>+</sup> )/K <sup>+</sup> transporting, beta 4 polypeptide | -1.081259       | Inlier         |
| siRNA-Temozolomide Run3-DMSO | NM_012069 | ATP1B4    | ATPase, (Na <sup>+</sup> )/K <sup>+</sup> transporting, beta 4 polypeptide | -0.821456       | Inlier         |

Identification of Survival Genes in Human Glioblastoma Cells Using siRNA Screening  
 Nikhil G Thaker, Fang Zhang, Peter R. McDonald, Tong Ying Shun, Michael D Lewen, Ian F. Pollack, and John S. Lazo

Molecular Pharmacology

|                                  |               |        |                                                                             |           |        |
|----------------------------------|---------------|--------|-----------------------------------------------------------------------------|-----------|--------|
| siRNA Disorazole DMSO Run2       | NM_0120<br>69 | ATP1B4 | ATPase,<br>(Na+)/K+<br>transportin<br>g, beta 4<br>polypeptid<br>e          | -0.330217 | Inlier |
| siRNA Disorazole DMSO Run3       | NM_0120<br>69 | ATP1B4 | ATPase,<br>(Na+)/K+<br>transportin<br>g, beta 4<br>polypeptid<br>e          | -0.077388 | Inlier |
| siRNA-Temozolomide Run1-<br>DMSO | NM_0120<br>69 | ATP1B4 | ATPase,<br>(Na+)/K+<br>transportin<br>g, beta 4<br>polypeptid<br>e          | 0.077388  | Inlier |
| siRNA Disorazole DMSO Run1       | NM_0120<br>69 | ATP1B4 | ATPase,<br>(Na+)/K+<br>transportin<br>g, beta 4<br>polypeptid<br>e          | 0.527544  | Inlier |
| siRNA-Vinblastine Run1-<br>DMSO  | NM_0120<br>69 | ATP1B4 | ATPase,<br>(Na+)/K+<br>transportin<br>g, beta 4<br>polypeptid<br>e          | 1.355619  | Inlier |
| siRNA-Vinblastine Run2-<br>DMSO  | NM_0120<br>69 | ATP1B4 | ATPase,<br>(Na+)/K+<br>transportin<br>g, beta 4<br>polypeptid<br>e          | 2.633275  | Inlier |
| siRNA-Temozolomide Run3-<br>DMSO | NM_0043<br>20 | ATP2A1 | ATPase,<br>Ca++<br>transportin<br>g, cardiac<br>muscle,<br>fast twitch<br>1 | -0.865311 | Inlier |
| siRNA-Vinblastine Run2-<br>DMSO  | NM_0043<br>20 | ATP2A1 | ATPase,<br>Ca++<br>transportin<br>g, cardiac<br>muscle,<br>fast twitch<br>1 | -0.69294  | Inlier |

Identification of Survival Genes in Human Glioblastoma Cells Using siRNA Screening  
 Nikhil G Thaker, Fang Zhang, Peter R. McDonald, Tong Ying Shun, Michael D Lewen, Ian F. Pollack, and John S. Lazo  
 Molecular Pharmacology

|                                  |               |        |                                                                                         |           |        |
|----------------------------------|---------------|--------|-----------------------------------------------------------------------------------------|-----------|--------|
| siRNA Disorazole DMSO Run3       | NM_0043<br>20 | ATP2A1 | ATPase,<br>Ca <sup>++</sup><br>transportin<br>g, cardiac<br>muscle,<br>fast twitch<br>1 | -0.65606  | Inlier |
| siRNA Disorazole DMSO Run1       | NM_0043<br>20 | ATP2A1 | ATPase,<br>Ca <sup>++</sup><br>transportin<br>g, cardiac<br>muscle,<br>fast twitch<br>1 | -0.011532 | Inlier |
| siRNA-Temozolomide Run2-<br>DMSO | NM_0043<br>20 | ATP2A1 | ATPase,<br>Ca <sup>++</sup><br>transportin<br>g, cardiac<br>muscle,<br>fast twitch<br>1 | 0.011532  | Inlier |
| siRNA Disorazole DMSO Run2       | NM_0043<br>20 | ATP2A1 | ATPase,<br>Ca <sup>++</sup><br>transportin<br>g, cardiac<br>muscle,<br>fast twitch<br>1 | 0.621444  | Inlier |
| siRNA-Temozolomide Run1-<br>DMSO | NM_0043<br>20 | ATP2A1 | ATPase,<br>Ca <sup>++</sup><br>transportin<br>g, cardiac<br>muscle,<br>fast twitch<br>1 | 1.431207  | Inlier |
| siRNA-Vinblastine Run1-<br>DMSO  | NM_0043<br>20 | ATP2A1 | ATPase,<br>Ca <sup>++</sup><br>transportin<br>g, cardiac<br>muscle,<br>fast twitch<br>1 | 3.229725  | Inlier |

Identification of Survival Genes in Human Glioblastoma Cells Using siRNA Screening

Nikhil G Thaker, Fang Zhang, Peter R. McDonald, Tong Ying Shun, Michael D Lewen, Ian F. Pollack, and John S. Lazo

Molecular Pharmacology

|                              |           |        |                                                                      |           |        |
|------------------------------|-----------|--------|----------------------------------------------------------------------|-----------|--------|
| siRNA-Vinblastine Run2-DMSO  | NM_001681 | ATP2A2 | ATPase, Ca <sup>++</sup> transporting, cardiac muscle, slow twitch 2 | -1.539554 | Inlier |
| siRNA-Temozolomide Run1-DMSO | NM_001681 | ATP2A2 | ATPase, Ca <sup>++</sup> transporting, cardiac muscle, slow twitch 2 | -0.419011 | Inlier |
| siRNA-Temozolomide Run2-DMSO | NM_001681 | ATP2A2 | ATPase, Ca <sup>++</sup> transporting, cardiac muscle, slow twitch 2 | -0.194049 | Inlier |
| siRNA-Temozolomide Run3-DMSO | NM_001681 | ATP2A2 | ATPase, Ca <sup>++</sup> transporting, cardiac muscle, slow twitch 2 | -0.148509 | Inlier |
| siRNA Disorazole DMSO Run3   | NM_001681 | ATP2A2 | ATPase, Ca <sup>++</sup> transporting, cardiac muscle, slow twitch 2 | 0.148509  | Inlier |
| siRNA Disorazole DMSO Run1   | NM_001681 | ATP2A2 | ATPase, Ca <sup>++</sup> transporting, cardiac muscle, slow twitch 2 | 0.929989  | Inlier |

Identification of Survival Genes in Human Glioblastoma Cells Using siRNA Screening  
 Nikhil G Thaker, Fang Zhang, Peter R. McDonald, Tong Ying Shun, Michael D Lewen, Ian F. Pollack, and John S. Lazo  
 Molecular Pharmacology

|                                  |               |        |                                                                                    |   |           |         |
|----------------------------------|---------------|--------|------------------------------------------------------------------------------------|---|-----------|---------|
| siRNA Disorazole DMSO Run2       | NM_0016<br>81 | ATP2A2 | ATPase,<br>Ca <sup>++</sup><br>transportin<br>g, cardiac<br>muscle,<br>slow twitch | 2 | 4.076546  | Outlier |
| siRNA-Vinblastine Run1-<br>DMSO  | NM_0016<br>81 | ATP2A2 | ATPase,<br>Ca <sup>++</sup><br>transportin<br>g, cardiac<br>muscle,<br>slow twitch | 2 | 4.893663  | Outlier |
| siRNA-Vinblastine Run2-<br>DMSO  | NM_0051<br>73 | ATP2A3 | ATPase,<br>Ca <sup>++</sup><br>transportin<br>g,<br>ubiquitous                     |   | -2.079211 | Inlier  |
| siRNA-Temozolomide Run3-<br>DMSO | NM_0051<br>73 | ATP2A3 | ATPase,<br>Ca <sup>++</sup><br>transportin<br>g,<br>ubiquitous                     |   | -0.681534 | Inlier  |
| siRNA Disorazole DMSO Run1       | NM_0051<br>73 | ATP2A3 | ATPase,<br>Ca <sup>++</sup><br>transportin<br>g,<br>ubiquitous                     |   | -0.667466 | Inlier  |
| siRNA-Temozolomide Run2-<br>DMSO | NM_0051<br>73 | ATP2A3 | ATPase,<br>Ca <sup>++</sup><br>transportin<br>g,<br>ubiquitous                     |   | -0.350991 | Inlier  |
| siRNA Disorazole DMSO Run3       | NM_0051<br>73 | ATP2A3 | ATPase,<br>Ca <sup>++</sup><br>transportin<br>g,<br>ubiquitous                     |   | 0.350991  | Inlier  |
| siRNA-Temozolomide Run1-<br>DMSO | NM_0051<br>73 | ATP2A3 | ATPase,<br>Ca <sup>++</sup><br>transportin<br>g,<br>ubiquitous                     |   | 0.460718  | Inlier  |
| siRNA Disorazole DMSO Run2       | NM_0051<br>73 | ATP2A3 | ATPase,<br>Ca <sup>++</sup><br>transportin<br>g,<br>ubiquitous                     |   | 1.066931  | Inlier  |



Identification of Survival Genes in Human Glioblastoma Cells Using siRNA Screening

Nikhil G Thaker, Fang Zhang, Peter R. McDonald, Tong Ying Shun, Michael D Lewen, Ian F. Pollack, and John S. Lazo

Molecular Pharmacology

|                              |           |        |                                                        |           |        |
|------------------------------|-----------|--------|--------------------------------------------------------|-----------|--------|
| siRNA-Vinblastine Run1-DMSO  | NM_005173 | ATP2A3 | ATPase, Ca <sup>++</sup> transporting, ubiquitous      | 1.81877   | Inlier |
| siRNA-Temozolomide Run3-DMSO | NM_001682 | ATP2B1 | ATPase, Ca <sup>++</sup> transporting, plasma membrane | -1.125753 | Inlier |
| siRNA-Temozolomide Run2-DMSO | NM_001682 | ATP2B1 | ATPase, Ca <sup>++</sup> transporting, plasma membrane | -0.959552 | Inlier |
| siRNA-Vinblastine Run2-DMSO  | NM_001682 | ATP2B1 | ATPase, Ca <sup>++</sup> transporting, plasma membrane | -0.35334  | Inlier |
| siRNA Disorazole DMSO Run1   | NM_001682 | ATP2B1 | ATPase, Ca <sup>++</sup> transporting, plasma membrane | -0.005704 | Inlier |
| siRNA-Temozolomide Run1-DMSO | NM_001682 | ATP2B1 | ATPase, Ca <sup>++</sup> transporting, plasma membrane | 0.005704  | Inlier |
| siRNA Disorazole DMSO Run3   | NM_001682 | ATP2B1 | ATPase, Ca <sup>++</sup> transporting, plasma membrane | 0.389448  | Inlier |

Identification of Survival Genes in Human Glioblastoma Cells Using siRNA Screening  
 Nikhil G Thaker, Fang Zhang, Peter R. McDonald, Tong Ying Shun, Michael D Lewen, Ian F. Pollack, and John S. Lazo  
 Molecular Pharmacology

|                              |               |        |                                                                          |           |        |
|------------------------------|---------------|--------|--------------------------------------------------------------------------|-----------|--------|
| siRNA Disorazole DMSO Run2   | NM_0016<br>82 | ATP2B1 | ATPase,<br>Ca <sup>++</sup><br>transportin<br>g, plasma<br>membrane<br>1 | 1.406659  | Inlier |
| siRNA-Vinblastine Run1-DMSO  | NM_0016<br>82 | ATP2B1 | ATPase,<br>Ca <sup>++</sup><br>transportin<br>g, plasma<br>membrane<br>1 | 1.4751    | Inlier |
| siRNA-Temozolomide Run2-DMSO | NM_0016<br>83 | ATP2B2 | ATPase,<br>Ca <sup>++</sup><br>transportin<br>g, plasma<br>membrane<br>2 | -1.075028 | Inlier |
| siRNA-Vinblastine Run2-DMSO  | NM_0016<br>83 | ATP2B2 | ATPase,<br>Ca <sup>++</sup><br>transportin<br>g, plasma<br>membrane<br>2 | -0.613836 | Inlier |
| siRNA-Temozolomide Run3-DMSO | NM_0016<br>83 | ATP2B2 | ATPase,<br>Ca <sup>++</sup><br>transportin<br>g, plasma<br>membrane<br>2 | -0.506477 | Inlier |
| siRNA Disorazole DMSO Run1   | NM_0016<br>83 | ATP2B2 | ATPase,<br>Ca <sup>++</sup><br>transportin<br>g, plasma<br>membrane<br>2 | -0.118613 | Inlier |
| siRNA Disorazole DMSO Run3   | NM_0016<br>83 | ATP2B2 | ATPase,<br>Ca <sup>++</sup><br>transportin<br>g, plasma<br>membrane<br>2 | 0.118614  | Inlier |

Identification of Survival Genes in Human Glioblastoma Cells Using siRNA Screening  
 Nikhil G Thaker, Fang Zhang, Peter R. McDonald, Tong Ying Shun, Michael D Lewen, Ian F. Pollack, and John S. Lazo  
 Molecular Pharmacology

|                              |           |        |   |                                                        |                  |
|------------------------------|-----------|--------|---|--------------------------------------------------------|------------------|
| siRNA-Temozolomide Run1-DMSO | NM_001683 | ATP2B2 | 2 | ATPase, Ca <sup>++</sup> transporting, plasma membrane | 0.735164 Inlier  |
| siRNA-Vinblastine Run1-DMSO  | NM_001683 | ATP2B2 | 2 | ATPase, Ca <sup>++</sup> transporting, plasma membrane | 1.513784 Inlier  |
| siRNA Disorazole DMSO Run2   | NM_001683 | ATP2B2 | 2 | ATPase, Ca <sup>++</sup> transporting, plasma membrane | 2.221501 Inlier  |
| siRNA-Temozolomide Run2-DMSO | NM_021949 | ATP2B3 | 3 | ATPase, Ca <sup>++</sup> transporting, plasma membrane | -1.438382 Inlier |
| siRNA-Temozolomide Run3-DMSO | NM_021949 | ATP2B3 | 3 | ATPase, Ca <sup>++</sup> transporting, plasma membrane | -0.948637 Inlier |
| siRNA-Temozolomide Run1-DMSO | NM_021949 | ATP2B3 | 3 | ATPase, Ca <sup>++</sup> transporting, plasma membrane | -0.759536 Inlier |
| siRNA-Vinblastine Run2-DMSO  | NM_021949 | ATP2B3 | 3 | ATPase, Ca <sup>++</sup> transporting, plasma membrane | -0.005374 Inlier |

Identification of Survival Genes in Human Glioblastoma Cells Using siRNA Screening  
 Nikhil G Thaker, Fang Zhang, Peter R. McDonald, Tong Ying Shun, Michael D Lewen, Ian F. Pollack, and John S. Lazo  
 Molecular Pharmacology

|                                  |                  |        |                                                                          |           |        |
|----------------------------------|------------------|--------|--------------------------------------------------------------------------|-----------|--------|
| siRNA Disorazole DMSO Run1       | NM_0219<br>49    | ATP2B3 | ATPase,<br>Ca <sup>++</sup><br>transportin<br>g, plasma<br>membrane<br>3 | 0.005374  | Inlier |
| siRNA Disorazole DMSO Run3       | NM_0219<br>49    | ATP2B3 | ATPase,<br>Ca <sup>++</sup><br>transportin<br>g, plasma<br>membrane<br>3 | 0.277522  | Inlier |
| siRNA Disorazole DMSO Run2       | NM_0219<br>49    | ATP2B3 | ATPase,<br>Ca <sup>++</sup><br>transportin<br>g, plasma<br>membrane<br>3 | 0.589464  | Inlier |
| siRNA-Vinblastine Run1-<br>DMSO  | NM_0219<br>49    | ATP2B3 | ATPase,<br>Ca <sup>++</sup><br>transportin<br>g, plasma<br>membrane<br>3 | 0.867021  | Inlier |
| siRNA-Vinblastine Run2-<br>DMSO  | NM_0010<br>01396 | ATP2B4 | ATPase,<br>Ca <sup>++</sup><br>transportin<br>g, plasma<br>membrane<br>4 | -1.12808  | Inlier |
| siRNA-Temozolomide Run2-<br>DMSO | NM_0010<br>01396 | ATP2B4 | ATPase,<br>Ca <sup>++</sup><br>transportin<br>g, plasma<br>membrane<br>4 | -0.589101 | Inlier |
| siRNA-Vinblastine Run1-<br>DMSO  | NM_0010<br>01396 | ATP2B4 | ATPase,<br>Ca <sup>++</sup><br>transportin<br>g, plasma<br>membrane<br>4 | -0.571336 | Inlier |

Identification of Survival Genes in Human Glioblastoma Cells Using siRNA Screening

Nikhil G Thaker, Fang Zhang, Peter R. McDonald, Tong Ying Shun, Michael D Lewen, Ian F. Pollack, and John S. Lazo

Molecular Pharmacology

|                                  |                  |        |                                                                          |           |        |
|----------------------------------|------------------|--------|--------------------------------------------------------------------------|-----------|--------|
| siRNA Disorazole DMSO Run1       | NM_0010<br>01396 | ATP2B4 | ATPase,<br>Ca <sup>++</sup><br>transportin<br>g, plasma<br>membrane<br>4 | -0.156733 | Inlier |
| siRNA-Temozolomide Run3-<br>DMSO | NM_0010<br>01396 | ATP2B4 | ATPase,<br>Ca <sup>++</sup><br>transportin<br>g, plasma<br>membrane<br>4 | 0.156734  | Inlier |
| siRNA-Temozolomide Run1-<br>DMSO | NM_0010<br>01396 | ATP2B4 | ATPase,<br>Ca <sup>++</sup><br>transportin<br>g, plasma<br>membrane<br>4 | 0.759899  | Inlier |
| siRNA Disorazole DMSO Run3       | NM_0010<br>01396 | ATP2B4 | ATPase,<br>Ca <sup>++</sup><br>transportin<br>g, plasma<br>membrane<br>4 | 1.091034  | Inlier |
| siRNA Disorazole DMSO Run2       | NM_0010<br>01396 | ATP2B4 | ATPase,<br>Ca <sup>++</sup><br>transportin<br>g, plasma<br>membrane<br>4 | 1.517399  | Inlier |
| siRNA-Temozolomide Run1-<br>DMSO | NM_0010<br>01485 | ATP2C1 | ATPase,<br>Ca <sup>++</sup><br>transportin<br>g, type 2C,<br>member 1    | -1.14568  | Inlier |
| siRNA-Temozolomide Run2-<br>DMSO | NM_0010<br>01485 | ATP2C1 | ATPase,<br>Ca <sup>++</sup><br>transportin<br>g, type 2C,<br>member 1    | -0.938602 | Inlier |

Identification of Survival Genes in Human Glioblastoma Cells Using siRNA Screening  
 Nikhil G Thaker, Fang Zhang, Peter R. McDonald, Tong Ying Shun, Michael D Lewen, Ian F. Pollack, and John S. Lazo  
 Molecular Pharmacology

|                              |              |        |                                                                      |           |        |
|------------------------------|--------------|--------|----------------------------------------------------------------------|-----------|--------|
| siRNA-Vinblastine Run2-DMSO  | NM_001001485 | ATP2C1 | ATPase, Ca <sup>++</sup> transporting, type 2C, member 1             | -0.662055 | Inlier |
| siRNA-Temozolomide Run3-DMSO | NM_001001485 | ATP2C1 | ATPase, Ca <sup>++</sup> transporting, type 2C, member 1             | -0.165711 | Inlier |
| siRNA Disorazole DMSO Run2   | NM_001001485 | ATP2C1 | ATPase, Ca <sup>++</sup> transporting, type 2C, member 1             | 0.16571   | Inlier |
| siRNA Disorazole DMSO Run1   | NM_001001485 | ATP2C1 | ATPase, Ca <sup>++</sup> transporting, type 2C, member 1             | 0.426656  | Inlier |
| siRNA Disorazole DMSO Run3   | NM_001001485 | ATP2C1 | ATPase, Ca <sup>++</sup> transporting, type 2C, member 1             | 0.686945  | Inlier |
| siRNA-Vinblastine Run1-DMSO  | NM_001001485 | ATP2C1 | ATPase, Ca <sup>++</sup> transporting, type 2C, member 1             | 1.042812  | Inlier |
| siRNA-Temozolomide Run3-DMSO | NM_000704    | ATP4A  | ATPase, H <sup>+</sup> /K <sup>+</sup> exchanging, alpha polypeptide | -2.444161 | Inlier |
| siRNA-Vinblastine Run1-DMSO  | NM_000704    | ATP4A  | ATPase, H <sup>+</sup> /K <sup>+</sup> exchanging, alpha polypeptide | -0.773725 | Inlier |

Identification of Survival Genes in Human Glioblastoma Cells Using siRNA Screening  
 Nikhil G Thaker, Fang Zhang, Peter R. McDonald, Tong Ying Shun, Michael D Lewen, Ian F. Pollack, and John S. Lazo

Molecular Pharmacology

| siRNA Treatment              | Gene ID   | Gene Name | Protein Name                                | Log2 Fold Change | Outlier Status |
|------------------------------|-----------|-----------|---------------------------------------------|------------------|----------------|
| siRNA-Temozolomide Run2-DMSO | NM_000704 | ATP4A     | ATPase, H+/K+ exchanging, alpha polypeptide | -0.637231        | Inlier         |
| siRNA Disorazole DMSO Run2   | NM_000704 | ATP4A     | ATPase, H+/K+ exchanging, alpha polypeptide | -0.101264        | Inlier         |
| siRNA-Temozolomide Run1-DMSO | NM_000704 | ATP4A     | ATPase, H+/K+ exchanging, alpha polypeptide | 0.101265         | Inlier         |
| siRNA Disorazole DMSO Run1   | NM_000704 | ATP4A     | ATPase, H+/K+ exchanging, alpha polypeptide | 0.400961         | Inlier         |
| siRNA Disorazole DMSO Run3   | NM_000704 | ATP4A     | ATPase, H+/K+ exchanging, alpha polypeptide | 0.711769         | Inlier         |
| siRNA-Vinblastine Run2-DMSO  | NM_000704 | ATP4A     | ATPase, H+/K+ exchanging, alpha polypeptide | 1.084926         | Inlier         |
| siRNA Disorazole DMSO Run2   | NM_000705 | ATP4B     | ATPase, H+/K+ exchanging, beta polypeptide  | -1.662632        | Inlier         |
| siRNA-Temozolomide Run2-DMSO | NM_000705 | ATP4B     | ATPase, H+/K+ exchanging, beta polypeptide  | -1.071883        | Inlier         |

Identification of Survival Genes in Human Glioblastoma Cells Using siRNA Screening  
 Nikhil G Thaker, Fang Zhang, Peter R. McDonald, Tong Ying Shun, Michael D Lewen, Ian F. Pollack, and John S. Lazo

Molecular Pharmacology

|                              |             |        |                                                                                                    |           |        |
|------------------------------|-------------|--------|----------------------------------------------------------------------------------------------------|-----------|--------|
| siRNA Disorazole DMSO Run1   | NM_000705   | ATP4B  | ATPase, H+/K+ exchanging, beta polypeptide                                                         | -0.59553  | Inlier |
| siRNA-Temozolomide Run3-DMSO | NM_000705   | ATP4B  | ATPase, H+/K+ exchanging, beta polypeptide                                                         | -0.00113  | Inlier |
| siRNA Disorazole DMSO Run3   | NM_000705   | ATP4B  | ATPase, H+/K+ exchanging, beta polypeptide                                                         | 0.001129  | Inlier |
| siRNA-Temozolomide Run1-DMSO | NM_000705   | ATP4B  | ATPase, H+/K+ exchanging, beta polypeptide                                                         | 0.076588  | Inlier |
| siRNA-Vinblastine Run2-DMSO  | NM_000705   | ATP4B  | ATPase, H+/K+ exchanging, beta polypeptide                                                         | 0.75347   | Inlier |
| siRNA-Vinblastine Run1-DMSO  | NM_000705   | ATP4B  | ATPase, H+/K+ exchanging, beta polypeptide                                                         | 0.853786  | Inlier |
| siRNA-Temozolomide Run3-DMSO | NM_00101935 | ATP5A1 | ATP synthase, H+ transportin g, mitochondrial F1 complex, alpha subunit, isoform 1, cardiac muscle | -2.012637 | Inlier |



Identification of Survival Genes in Human Glioblastoma Cells Using siRNA Screening

Nikhil G Thaker, Fang Zhang, Peter R. McDonald, Tong Ying Shun, Michael D Lewen, Ian F. Pollack, and John S.

Lazo

Molecular Pharmacology

| siRNA                        | Gene        | Gene ID | Gene Name                                                                                          | Log Fold Change | Inlier |
|------------------------------|-------------|---------|----------------------------------------------------------------------------------------------------|-----------------|--------|
| siRNA-Temozolomide Run2-DMSO | NM_00101935 | ATP5A1  | ATP synthase, H+ transportin 9, mitochondrial F1 complex, alpha subunit, isoform 1, cardiac muscle | -0.665685       | Inlier |
| siRNA Disorazole DMSO Run1   | NM_00101935 | ATP5A1  | ATP synthase, H+ transportin 9, mitochondrial F1 complex, alpha subunit, isoform 1, cardiac muscle | -0.659327       | Inlier |
| siRNA Disorazole DMSO Run3   | NM_00101935 | ATP5A1  | ATP synthase, H+ transportin 9, mitochondrial F1 complex, alpha subunit, isoform 1, cardiac muscle | -0.334322       | Inlier |
| siRNA-Temozolomide Run1-DMSO | NM_00101935 | ATP5A1  | ATP synthase, H+ transportin 9, mitochondrial F1 complex, alpha subunit, isoform 1, cardiac muscle | 0.334322        | Inlier |

Identification of Survival Genes in Human Glioblastoma Cells Using siRNA Screening

Nikhil G Thaker, Fang Zhang, Peter R. McDonald, Tong Ying Shun, Michael D Lewen, Ian F. Pollack, and John S.

Lazo

Molecular Pharmacology

|                              |              |        |                                                                                                    |          |        |
|------------------------------|--------------|--------|----------------------------------------------------------------------------------------------------|----------|--------|
| siRNA-Vinblastine Run1-DMSO  | NM_001001935 | ATP5A1 | ATP synthase, H+ transportin g, mitochondrial F1 complex, alpha subunit, isoform 1, cardiac muscle | 0.683315 | Inlier |
| siRNA Disorazole DMSO Run2   | NM_001001935 | ATP5A1 | ATP synthase, H+ transportin g, mitochondrial F1 complex, alpha subunit, isoform 1, cardiac muscle | 0.873835 | Inlier |
| siRNA-Vinblastine Run2-DMSO  | NM_001001935 | ATP5A1 | ATP synthase, H+ transportin g, mitochondrial F1 complex, alpha subunit, isoform 1, cardiac muscle | 0.924449 | Inlier |
| siRNA-Temozolomide Run2-DMSO | NM_001686    | ATP5B  | ATP synthase, H+ transportin g, mitochondrial F1 complex, beta polypeptide                         | -2.09933 | Inlier |

Identification of Survival Genes in Human Glioblastoma Cells Using siRNA Screening

Nikhil G Thaker, Fang Zhang, Peter R. McDonald, Tong Ying Shun, Michael D Lewen, Ian F. Pollack, and John S. Lazo

Molecular Pharmacology

| siRNA Treatment              | Gene ID   | Gene Name | Log Fold Change | Inlier |
|------------------------------|-----------|-----------|-----------------|--------|
| siRNA-Temozolomide Run3-DMSO | NM_001686 | ATP5B     | -0.739706       | Inlier |
| siRNA Disorazole DMSO Run1   | NM_001686 | ATP5B     | -0.661238       | Inlier |
| siRNA-Temozolomide Run1-DMSO | NM_001686 | ATP5B     | -0.17496        | Inlier |
| siRNA Disorazole DMSO Run3   | NM_001686 | ATP5B     | 0.174961        | Inlier |

ATP synthase, H+ transportin g, mitochondrial F1 complex, beta polypeptide  
 ATP synthase, H+ transportin g, mitochondrial F1 complex, beta polypeptide  
 ATP synthase, H+ transportin g, mitochondrial F1 complex, beta polypeptide  
 ATP synthase, H+ transportin g, mitochondrial F1 complex, beta polypeptide

Identification of Survival Genes in Human Glioblastoma Cells Using siRNA Screening

Nikhil G Thaker, Fang Zhang, Peter R. McDonald, Tong Ying Shun, Michael D Lewen, Ian F. Pollack, and John S. Lazo

Molecular Pharmacology

| siRNA Treatment             | Gene ID     | Gene Name | Log2 Fold Change | Outlier Status |
|-----------------------------|-------------|-----------|------------------|----------------|
| siRNA-Vinblastine Run2-DMSO | NM_001686   | ATP5B     | 0.213568         | Inlier         |
| siRNA Disorazole DMSO Run2  | NM_001686   | ATP5B     | 0.687762         | Inlier         |
| siRNA-Vinblastine Run1-DMSO | NM_001686   | ATP5B     | 0.866934         | Inlier         |
| siRNA Disorazole DMSO Run3  | NM_00101973 | ATP5C1    | -2.027418        | Inlier         |

ATP synthase, H+ transportin g, mitochondrial F1 complex, beta polypeptide  
 ATP synthase, H+ transportin g, mitochondrial F1 complex, beta polypeptide  
 ATP synthase, H+ transportin g, mitochondrial F1 complex, beta polypeptide  
 ATP synthase, H+ transportin g, mitochondrial F1 complex, gamma polypeptide 1

Identification of Survival Genes in Human Glioblastoma Cells Using siRNA Screening

Nikhil G Thaker, Fang Zhang, Peter R. McDonald, Tong Ying Shun, Michael D Lewen, Ian F. Pollack, and John S. Lazo

Molecular Pharmacology

| siRNA Treatment              | Gene ID      | Gene Name | Gene Description                                                                          | Log Fold Change | Outlier Status |
|------------------------------|--------------|-----------|-------------------------------------------------------------------------------------------|-----------------|----------------|
| siRNA-Temozolomide Run2-DMSO | NM_001001973 | ATP5C1    | ATP synthase, H <sup>+</sup> transportin g, mitochondrial F1 complex, gamma polypeptide 1 | -1.684426       | Inlier         |
| siRNA-Temozolomide Run3-DMSO | NM_001001973 | ATP5C1    | ATP synthase, H <sup>+</sup> transportin g, mitochondrial F1 complex, gamma polypeptide 1 | -0.272694       | Inlier         |
| siRNA Disorazole DMSO Run2   | NM_001001973 | ATP5C1    | ATP synthase, H <sup>+</sup> transportin g, mitochondrial F1 complex, gamma polypeptide 1 | -0.082894       | Inlier         |
| siRNA-Temozolomide Run1-DMSO | NM_001001973 | ATP5C1    | ATP synthase, H <sup>+</sup> transportin g, mitochondrial F1 complex, gamma polypeptide 1 | 0.082895        | Inlier         |

Identification of Survival Genes in Human Glioblastoma Cells Using siRNA Screening

Nikhil G Thaker, Fang Zhang, Peter R. McDonald, Tong Ying Shun, Michael D Lewen, Ian F. Pollack, and John S. Lazo

Molecular Pharmacology

|                              |                  |        |                                                                                           |          |        |
|------------------------------|------------------|--------|-------------------------------------------------------------------------------------------|----------|--------|
| siRNA Disorazole DMSO Run1   | NM_0010<br>01973 | ATP5C1 | ATP synthase, H <sup>+</sup> transportin g, mitochondrial F1 complex, gamma polypeptide 1 | 0.167918 | Inlier |
| siRNA-Vinblastine Run2-DMSO  | NM_0010<br>01973 | ATP5C1 | ATP synthase, H <sup>+</sup> transportin g, mitochondrial F1 complex, gamma polypeptide 1 | 1.076306 | Inlier |
| siRNA-Vinblastine Run1-DMSO  | NM_0010<br>01973 | ATP5C1 | ATP synthase, H <sup>+</sup> transportin g, mitochondrial F1 complex, gamma polypeptide 1 | 2.344085 | Inlier |
| siRNA-Temozolomide Run2-DMSO | NM_0016<br>87    | ATP5D  | ATP synthase, H <sup>+</sup> transportin g, mitochondrial F1 complex, delta subunit       | -1.44457 | Inlier |

Identification of Survival Genes in Human Glioblastoma Cells Using siRNA Screening

Nikhil G Thaker, Fang Zhang, Peter R. McDonald, Tong Ying Shun, Michael D Lewen, Ian F. Pollack, and John S. Lazo

Molecular Pharmacology

| siRNA Treatment              | Gene ID   | Gene Name | Log Fold Change | Annotation                                                                        |
|------------------------------|-----------|-----------|-----------------|-----------------------------------------------------------------------------------|
| siRNA Disorazole DMSO Run1   | NM_001687 | ATP5D     | -0.609747       | Inlier<br>ATP synthase, H+ transportin g, mitochondrial F1 complex, delta subunit |
| siRNA-Vinblastine Run1-DMSO  | NM_001687 | ATP5D     | -0.263966       | Inlier<br>ATP synthase, H+ transportin g, mitochondrial F1 complex, delta subunit |
| siRNA Disorazole DMSO Run2   | NM_001687 | ATP5D     | -0.008811       | Inlier<br>ATP synthase, H+ transportin g, mitochondrial F1 complex, delta subunit |
| siRNA Disorazole DMSO Run3   | NM_001687 | ATP5D     | 0.008811        | Inlier<br>ATP synthase, H+ transportin g, mitochondrial F1 complex, delta subunit |
| siRNA-Temozolomide Run1-DMSO | NM_001687 | ATP5D     | 0.739253        | Inlier<br>ATP synthase, H+ transportin g, mitochondrial F1 complex, delta subunit |

Identification of Survival Genes in Human Glioblastoma Cells Using siRNA Screening

Nikhil G Thaker, Fang Zhang, Peter R. McDonald, Tong Ying Shun, Michael D Lewen, Ian F. Pollack, and John S. Lazo

Molecular Pharmacology

| siRNA Treatment              | Gene ID   | Gene Name | Protein Name                                                              | Score     | Outlier Type |
|------------------------------|-----------|-----------|---------------------------------------------------------------------------|-----------|--------------|
| siRNA-Vinblastine Run2-DMSO  | NM_001687 | ATP5D     | ATP synthase, H+ transportin g, mitochondrial F1 complex, delta subunit   | 0.745193  | Inlier       |
| siRNA-Temozolomide Run3-DMSO | NM_001687 | ATP5D     | ATP synthase, H+ transportin g, mitochondrial F1 complex, delta subunit   | 0.880151  | Inlier       |
| siRNA-Temozolomide Run2-DMSO | NM_006886 | ATP5E     | ATP synthase, H+ transportin g, mitochondrial F1 complex, epsilon subunit | -1.969061 | Inlier       |
| siRNA Disorazole DMSO Run1   | NM_006886 | ATP5E     | ATP synthase, H+ transportin g, mitochondrial F1 complex, epsilon subunit | -0.632371 | Inlier       |
| siRNA Disorazole DMSO Run2   | NM_006886 | ATP5E     | ATP synthase, H+ transportin g, mitochondrial F1 complex, epsilon subunit | -0.127334 | Inlier       |



Identification of Survival Genes in Human Glioblastoma Cells Using siRNA Screening

Nikhil G Thaker, Fang Zhang, Peter R. McDonald, Tong Ying Shun, Michael D Lewen, Ian F. Pollack, and John S. Lazo

Molecular Pharmacology

| siRNA Treatment              | Gene ID   | Gene Name | Gene Description                                                          | Log Fold Change | Outlier Status |
|------------------------------|-----------|-----------|---------------------------------------------------------------------------|-----------------|----------------|
| siRNA-Temozolomide Run1-DMSO | NM_006886 | ATP5E     | ATP synthase, H+ transportin g, mitochondrial F1 complex, epsilon subunit | -0.06395        | Inlier         |
| siRNA-Temozolomide Run3-DMSO | NM_006886 | ATP5E     | ATP synthase, H+ transportin g, mitochondrial F1 complex, epsilon subunit | 0.06395         | Inlier         |
| siRNA Disorazole DMSO Run3   | NM_006886 | ATP5E     | ATP synthase, H+ transportin g, mitochondrial F1 complex, epsilon subunit | 0.716628        | Inlier         |
| siRNA-Vinblastine Run1-DMSO  | NM_006886 | ATP5E     | ATP synthase, H+ transportin g, mitochondrial F1 complex, epsilon subunit | 1.030417        | Inlier         |
| siRNA-Vinblastine Run2-DMSO  | NM_006886 | ATP5E     | ATP synthase, H+ transportin g, mitochondrial F1 complex, epsilon subunit | 1.114539        | Inlier         |

Identification of Survival Genes in Human Glioblastoma Cells Using siRNA Screening

Nikhil G Thaker, Fang Zhang, Peter R. McDonald, Tong Ying Shun, Michael D Lewen, Ian F. Pollack, and John S. Lazo

Molecular Pharmacology

| siRNA                        | Gene   | Gene ID   | Gene Name                                                                                  | Value     | Category |
|------------------------------|--------|-----------|--------------------------------------------------------------------------------------------|-----------|----------|
| siRNA-Temozolomide Run2-DMSO | ATP5F1 | NM_001688 | ATP synthase, H <sup>+</sup> transportin g, mitochondrial F0 complex, subunit b, isoform 1 | -0.980448 | Inlier   |
| siRNA Disorazole DMSO Run2   | ATP5F1 | NM_001688 | ATP synthase, H <sup>+</sup> transportin g, mitochondrial F0 complex, subunit b, isoform 1 | -0.805726 | Inlier   |
| siRNA-Temozolomide Run3-DMSO | ATP5F1 | NM_001688 | ATP synthase, H <sup>+</sup> transportin g, mitochondrial F0 complex, subunit b, isoform 1 | -0.348145 | Inlier   |
| siRNA Disorazole DMSO Run3   | ATP5F1 | NM_001688 | ATP synthase, H <sup>+</sup> transportin g, mitochondrial F0 complex, subunit b, isoform 1 | -0.188996 | Inlier   |
| siRNA Disorazole DMSO Run1   | ATP5F1 | NM_001688 | ATP synthase, H <sup>+</sup> transportin g, mitochondrial F0 complex, subunit b, isoform 1 | 0.188996  | Inlier   |

Identification of Survival Genes in Human Glioblastoma Cells Using siRNA Screening

Nikhil G Thaker, Fang Zhang, Peter R. McDonald, Tong Ying Shun, Michael D Lewen, Ian F. Pollack, and John S. Lazo

Molecular Pharmacology

| siRNA Treatment              | Gene ID   | Gene Name | Protein Name                                                                               | Log2 Fold Change | Classification |
|------------------------------|-----------|-----------|--------------------------------------------------------------------------------------------|------------------|----------------|
| siRNA-Temozolomide Run1-DMSO | NM_001688 | ATP5F1    | ATP synthase, H+ transportin g, mitochondrial F0 complex, subunit b, isoform 1             | 0.564147         | Inlier         |
| siRNA-Vinblastine Run1-DMSO  | NM_001688 | ATP5F1    | ATP synthase, H+ transportin g, mitochondrial F0 complex, subunit b, isoform 1             | 0.784853         | Inlier         |
| siRNA-Vinblastine Run2-DMSO  | NM_001688 | ATP5F1    | ATP synthase, H+ transportin g, mitochondrial F0 complex, subunit b, isoform 1             | 1.244316         | Inlier         |
| siRNA-Temozolomide Run3-DMSO | NM_005175 | ATP5G1    | ATP synthase, H+ transportin g, mitochondrial F0 complex, subunit c (subunit 9), isoform 1 | -5.713123        | Outlier        |

Identification of Survival Genes in Human Glioblastoma Cells Using siRNA Screening

Nikhil G Thaker, Fang Zhang, Peter R. McDonald, Tong Ying Shun, Michael D Lewen, Ian F. Pollack, and John S. Lazo

Molecular Pharmacology

| siRNA Treatment    | Run       | Gene   | Accession | Protein                                                                                                | Log2 Fold Change | Significance |
|--------------------|-----------|--------|-----------|--------------------------------------------------------------------------------------------------------|------------------|--------------|
| siRNA-Temozolomide | Run2-DMSO | ATP5G1 | NM_005175 | ATP synthase, H <sup>+</sup> transportin g, mitochondrial F0 complex, subunit c (subunit 9), isoform 1 | -4.50155         | Outlier      |
| siRNA Disorazole   | DMSO Run1 | ATP5G1 | NM_005175 | ATP synthase, H <sup>+</sup> transportin g, mitochondrial F0 complex, subunit c (subunit 9), isoform 1 | -4.141615        | Outlier      |
| siRNA-Vinblastine  | Run2-DMSO | ATP5G1 | NM_005175 | ATP synthase, H <sup>+</sup> transportin g, mitochondrial F0 complex, subunit c (subunit 9), isoform 1 | -0.190908        | Inlier       |
| siRNA-Temozolomide | Run1-DMSO | ATP5G1 | NM_005175 | ATP synthase, H <sup>+</sup> transportin g, mitochondrial F0 complex, subunit c (subunit 9), isoform 1 | 0.190906         | Inlier       |

Identification of Survival Genes in Human Glioblastoma Cells Using siRNA Screening

Nikhil G Thaker, Fang Zhang, Peter R. McDonald, Tong Ying Shun, Michael D Lewen, Ian F. Pollack, and John S. Lazo

Molecular Pharmacology

| siRNA Treatment              | Gene   | Accession | Gene ID | Gene Name                                                                                              | Score     | Category |
|------------------------------|--------|-----------|---------|--------------------------------------------------------------------------------------------------------|-----------|----------|
| siRNA Disorazole DMSO Run3   | ATP5G1 | NM_0051   | 75      | ATP synthase, H <sup>+</sup> transportin g, mitochondrial F0 complex, subunit c (subunit 9), isoform 1 | 0.663554  | Inlier   |
| siRNA-Vinblastine Run1-DMSO  | ATP5G1 | NM_0051   | 75      | ATP synthase, H <sup>+</sup> transportin g, mitochondrial F0 complex, subunit c (subunit 9), isoform 1 | 0.667808  | Inlier   |
| siRNA Disorazole DMSO Run2   | ATP5G1 | NM_0051   | 75      | ATP synthase, H <sup>+</sup> transportin g, mitochondrial F0 complex, subunit c (subunit 9), isoform 1 | 0.681192  | Inlier   |
| siRNA-Temozolomide Run2-DMSO | ATP5G2 | NM_0051   | 76      | ATP synthase, H <sup>+</sup> transportin g, mitochondrial F0 complex, subunit c (subunit 9), isoform 2 | -4.156596 | Outlier  |

Identification of Survival Genes in Human Glioblastoma Cells Using siRNA Screening

Nikhil G Thaker, Fang Zhang, Peter R. McDonald, Tong Ying Shun, Michael D Lewen, Ian F. Pollack, and John S. Lazo

Molecular Pharmacology

| siRNA              | Condition | Run  | Gene   | Log2 Fold Change | Inlier |
|--------------------|-----------|------|--------|------------------|--------|
| siRNA Disorazole   | DMSO      | Run1 | ATP5G2 | -2.334109        | Inlier |
| siRNA-Temozolomide | DMSO      | Run1 | ATP5G2 | -0.520639        | Inlier |
| siRNA Disorazole   | DMSO      | Run3 | ATP5G2 | -0.081659        | Inlier |
| siRNA-Temozolomide | DMSO      | Run3 | ATP5G2 | 0.08166          | Inlier |

ATP  
synthase,  
H+  
transportin  
g,  
mitochond  
rial F0  
complex,  
subunit c  
(subunit  
9), isoform  
2

ATP  
synthase,  
H+  
transportin  
g,  
mitochond  
rial F0  
complex,  
subunit c  
(subunit  
9), isoform  
2

ATP  
synthase,  
H+  
transportin  
g,  
mitochond  
rial F0  
complex,  
subunit c  
(subunit  
9), isoform  
2

ATP  
synthase,  
H+  
transportin  
g,  
mitochond  
rial F0  
complex,  
subunit c  
(subunit  
9), isoform  
2

Identification of Survival Genes in Human Glioblastoma Cells Using siRNA Screening

Nikhil G Thaker, Fang Zhang, Peter R. McDonald, Tong Ying Shun, Michael D Lewen, Ian F. Pollack, and John S. Lazo

Molecular Pharmacology

| siRNA Treatment              | Gene ID   | Gene Name | Protein Name                                                                                           | Score     | Category |
|------------------------------|-----------|-----------|--------------------------------------------------------------------------------------------------------|-----------|----------|
| siRNA-Vinblastine Run2-DMSO  | NM_005176 | ATP5G2    | ATP synthase, H <sup>+</sup> transportin g, mitochondrial F0 complex, subunit c (subunit 9), isoform 2 | 0.255415  | Inlier   |
| siRNA-Vinblastine Run1-DMSO  | NM_005176 | ATP5G2    | ATP synthase, H <sup>+</sup> transportin g, mitochondrial F0 complex, subunit c (subunit 9), isoform 2 | 0.828361  | Inlier   |
| siRNA Disorazole DMSO Run2   | NM_005176 | ATP5G2    | ATP synthase, H <sup>+</sup> transportin g, mitochondrial F0 complex, subunit c (subunit 9), isoform 2 | 0.967173  | Inlier   |
| siRNA-Temozolomide Run3-DMSO | NM_001689 | ATP5G3    | ATP synthase, H <sup>+</sup> transportin g, mitochondrial F0 complex, subunit c (subunit 9) isoform 3  | -0.996951 | Inlier   |

Identification of Survival Genes in Human Glioblastoma Cells Using siRNA Screening  
 Nikhil G Thaker, Fang Zhang, Peter R. McDonald, Tong Ying Shun, Michael D Lewen, Ian F. Pollack, and John S. Lazo  
 Molecular Pharmacology

|                              |               |        |                                                                                                       |           |        |
|------------------------------|---------------|--------|-------------------------------------------------------------------------------------------------------|-----------|--------|
| siRNA Disorazole DMSO Run2   | NM_0016<br>89 | ATP5G3 | ATP synthase, H <sup>+</sup> transportin g, mitochondrial F0 complex, subunit c (subunit 9) isoform 3 | -0.742961 | Inlier |
| siRNA Disorazole DMSO Run3   | NM_0016<br>89 | ATP5G3 | ATP synthase, H <sup>+</sup> transportin g, mitochondrial F0 complex, subunit c (subunit 9) isoform 3 | -0.371176 | Inlier |
| siRNA-Temozolomide Run2-DMSO | NM_0016<br>89 | ATP5G3 | ATP synthase, H <sup>+</sup> transportin g, mitochondrial F0 complex, subunit c (subunit 9) isoform 3 | -0.164738 | Inlier |
| siRNA Disorazole DMSO Run1   | NM_0016<br>89 | ATP5G3 | ATP synthase, H <sup>+</sup> transportin g, mitochondrial F0 complex, subunit c (subunit 9) isoform 3 | 0.164738  | Inlier |



Identification of Survival Genes in Human Glioblastoma Cells Using siRNA Screening

Nikhil G Thaker, Fang Zhang, Peter R. McDonald, Tong Ying Shun, Michael D Lewen, Ian F. Pollack, and John S. Lazo

Molecular Pharmacology

|                              |           |        |                                                                                                       |           |         |
|------------------------------|-----------|--------|-------------------------------------------------------------------------------------------------------|-----------|---------|
| siRNA-Temozolomide Run1-DMSO | NM_001689 | ATP5G3 | ATP synthase, H <sup>+</sup> transportin g, mitochondrial F0 complex, subunit c (subunit 9) isoform 3 | 0.606039  | Inlier  |
| siRNA-Vinblastine Run1-DMSO  | NM_001689 | ATP5G3 | ATP synthase, H <sup>+</sup> transportin g, mitochondrial F0 complex, subunit c (subunit 9) isoform 3 | 0.857851  | Inlier  |
| siRNA-Vinblastine Run2-DMSO  | NM_001689 | ATP5G3 | ATP synthase, H <sup>+</sup> transportin g, mitochondrial F0 complex, subunit c (subunit 9) isoform 3 | 1.091872  | Inlier  |
| siRNA-Temozolomide Run2-DMSO | NM_007100 | ATP5I  | ATP synthase, H <sup>+</sup> transportin g, mitochondrial F0 complex, subunit e                       | -8.235766 | Outlier |

Identification of Survival Genes in Human Glioblastoma Cells Using siRNA Screening

Nikhil G Thaker, Fang Zhang, Peter R. McDonald, Tong Ying Shun, Michael D Lewen, Ian F. Pollack, and John S. Lazo

Molecular Pharmacology

| siRNA Treatment              | Gene ID   | Gene Name | Log Fold Change | Outlier Status |
|------------------------------|-----------|-----------|-----------------|----------------|
| siRNA Disorazole DMSO Run1   | NM_007100 | ATP5I     | -0.713846       | Inlier         |
| siRNA-Temozolomide Run3-DMSO | NM_007100 | ATP5I     | -0.635154       | Inlier         |
| siRNA Disorazole DMSO Run3   | NM_007100 | ATP5I     | -0.017879       | Inlier         |
| siRNA Disorazole DMSO Run2   | NM_007100 | ATP5I     | 0.017877        | Inlier         |
| siRNA-Vinblastine Run2-DMSO  | NM_007100 | ATP5I     | 0.37597         | Inlier         |

ATP synthase, H<sup>+</sup> transportin g, mitochondrial F0 complex, subunit e

-0.713846 Inlier

-0.635154 Inlier

-0.017879 Inlier

0.017877 Inlier

0.37597 Inlier

Identification of Survival Genes in Human Glioblastoma Cells Using siRNA Screening

Nikhil G Thaker, Fang Zhang, Peter R. McDonald, Tong Ying Shun, Michael D Lewen, Ian F. Pollack, and John S.

Lazo

Molecular Pharmacology

|                              |              |       |                                                                                  |           |        |
|------------------------------|--------------|-------|----------------------------------------------------------------------------------|-----------|--------|
| siRNA-Temozolomide Run1-DMSO | NM_007100    | ATP5I | ATP synthase, H <sup>+</sup> transportin g, mitochondrial F0 complex, subunit e  | 1.282331  | Inlier |
| siRNA-Vinblastine Run1-DMSO  | NM_007100    | ATP5I | ATP synthase, H <sup>+</sup> transportin g, mitochondrial F0 complex, subunit e  | 2.025713  | Inlier |
| siRNA-Temozolomide Run3-DMSO | NM_001003697 | ATP5J | ATP synthase, H <sup>+</sup> transportin g, mitochondrial F0 complex, subunit F6 | -0.93012  | Inlier |
| siRNA-Temozolomide Run2-DMSO | NM_001003697 | ATP5J | ATP synthase, H <sup>+</sup> transportin g, mitochondrial F0 complex, subunit F6 | -0.776552 | Inlier |
| siRNA Disorazole DMSO Run2   | NM_001003697 | ATP5J | ATP synthase, H <sup>+</sup> transportin g, mitochondrial F0 complex, subunit F6 | -0.572448 | Inlier |

Identification of Survival Genes in Human Glioblastoma Cells Using siRNA Screening

Nikhil G Thaker, Fang Zhang, Peter R. McDonald, Tong Ying Shun, Michael D Lewen, Ian F. Pollack, and John S. Lazo

Molecular Pharmacology

|                              |                  |       |                                                                                  |           |        |
|------------------------------|------------------|-------|----------------------------------------------------------------------------------|-----------|--------|
| siRNA Disorazole DMSO Run3   | NM_0010<br>03697 | ATP5J | ATP synthase, H <sup>+</sup> transportin g, mitochondrial F0 complex, subunit F6 | -0.293306 | Inlier |
| siRNA Disorazole DMSO Run1   | NM_0010<br>03697 | ATP5J | ATP synthase, H <sup>+</sup> transportin g, mitochondrial F0 complex, subunit F6 | 0.293306  | Inlier |
| siRNA-Temozolomide Run1-DMSO | NM_0010<br>03697 | ATP5J | ATP synthase, H <sup>+</sup> transportin g, mitochondrial F0 complex, subunit F6 | 0.567447  | Inlier |
| siRNA-Vinblastine Run1-DMSO  | NM_0010<br>03697 | ATP5J | ATP synthase, H <sup>+</sup> transportin g, mitochondrial F0 complex, subunit F6 | 1.075821  | Inlier |
| siRNA-Vinblastine Run2-DMSO  | NM_0010<br>03697 | ATP5J | ATP synthase, H <sup>+</sup> transportin g, mitochondrial F0 complex, subunit F6 | 1.084474  | Inlier |

Identification of Survival Genes in Human Glioblastoma Cells Using siRNA Screening

Nikhil G Thaker, Fang Zhang, Peter R. McDonald, Tong Ying Shun, Michael D Lewen, Ian F. Pollack, and John S. Lazo

Molecular Pharmacology

| siRNA                        | Gene      | Gene ID | Gene Name                                                                                  | Log Fold Change | Outlier |
|------------------------------|-----------|---------|--------------------------------------------------------------------------------------------|-----------------|---------|
| siRNA-Temozolomide Run3-DMSO | NM_004889 | ATP5J2  | ATP synthase, H <sup>+</sup> transportin g, mitochondrial F0 complex, subunit f, isoform 2 | -0.748804       | Inlier  |
| siRNA Disorazole DMSO Run2   | NM_004889 | ATP5J2  | ATP synthase, H <sup>+</sup> transportin g, mitochondrial F0 complex, subunit f, isoform 2 | -0.70598        | Inlier  |
| siRNA-Temozolomide Run2-DMSO | NM_004889 | ATP5J2  | ATP synthase, H <sup>+</sup> transportin g, mitochondrial F0 complex, subunit f, isoform 2 | -0.64302        | Inlier  |
| siRNA Disorazole DMSO Run3   | NM_004889 | ATP5J2  | ATP synthase, H <sup>+</sup> transportin g, mitochondrial F0 complex, subunit f, isoform 2 | -0.477983       | Inlier  |
| siRNA Disorazole DMSO Run1   | NM_004889 | ATP5J2  | ATP synthase, H <sup>+</sup> transportin g, mitochondrial F0 complex, subunit f, isoform 2 | 0.477983        | Inlier  |

Identification of Survival Genes in Human Glioblastoma Cells Using siRNA Screening

Nikhil G Thaker, Fang Zhang, Peter R. McDonald, Tong Ying Shun, Michael D Lewen, Ian F. Pollack, and John S. Lazo

Molecular Pharmacology

| siRNA Treatment              | Gene ID   | Gene Name | Protein Name                                                                   | Log2 Fold Change | Significance |
|------------------------------|-----------|-----------|--------------------------------------------------------------------------------|------------------|--------------|
| siRNA-Vinblastine Run1-DMSO  | NM_004889 | ATP5J2    | ATP synthase, H+ transportin g, mitochondrial F0 complex, subunit f, isoform 2 | 0.558944         | Inlier       |
| siRNA-Temozolomide Run1-DMSO | NM_004889 | ATP5J2    | ATP synthase, H+ transportin g, mitochondrial F0 complex, subunit f, isoform 2 | 1.476139         | Inlier       |
| siRNA-Vinblastine Run2-DMSO  | NM_004889 | ATP5J2    | ATP synthase, H+ transportin g, mitochondrial F0 complex, subunit f, isoform 2 | 1.915712         | Inlier       |
| siRNA Disorazole DMSO Run1   | NM_006476 | ATP5L     | ATP synthase, H+ transportin g, mitochondrial F0 complex, subunit g            | -1.653995        | Inlier       |
| siRNA-Temozolomide Run2-DMSO | NM_006476 | ATP5L     | ATP synthase, H+ transportin g, mitochondrial F0 complex, subunit g            | -1.628984        | Inlier       |

Identification of Survival Genes in Human Glioblastoma Cells Using siRNA Screening

Nikhil G Thaker, Fang Zhang, Peter R. McDonald, Tong Ying Shun, Michael D Lewen, Ian F. Pollack, and John S.

Lazo

Molecular Pharmacology

| siRNA Treatment              | Gene ID   | Gene Name | Protein Name                                                                    | Log2 Fold Change | Outlier Type |
|------------------------------|-----------|-----------|---------------------------------------------------------------------------------|------------------|--------------|
| siRNA-Temozolomide Run1-DMSO | NM_006476 | ATP5L     | ATP synthase, H <sup>+</sup> transportin g, mitochondrial F0 complex, subunit g | -0.215485        | Inlier       |
| siRNA-Temozolomide Run3-DMSO | NM_006476 | ATP5L     | ATP synthase, H <sup>+</sup> transportin g, mitochondrial F0 complex, subunit g | -0.109011        | Inlier       |
| siRNA Disorazole DMSO Run3   | NM_006476 | ATP5L     | ATP synthase, H <sup>+</sup> transportin g, mitochondrial F0 complex, subunit g | 0.109011         | Inlier       |
| siRNA-Vinblastine Run2-DMSO  | NM_006476 | ATP5L     | ATP synthase, H <sup>+</sup> transportin g, mitochondrial F0 complex, subunit g | 0.375411         | Inlier       |
| siRNA Disorazole DMSO Run2   | NM_006476 | ATP5L     | ATP synthase, H <sup>+</sup> transportin g, mitochondrial F0 complex, subunit g | 0.973589         | Inlier       |

Identification of Survival Genes in Human Glioblastoma Cells Using siRNA Screening

Nikhil G Thaker, Fang Zhang, Peter R. McDonald, Tong Ying Shun, Michael D Lewen, Ian F. Pollack, and John S. Lazo

Molecular Pharmacology

| siRNA Treatment              | Gene ID   | Gene Name | Protein Name                                                                                                                | Log2 Fold Change | Inlier |
|------------------------------|-----------|-----------|-----------------------------------------------------------------------------------------------------------------------------|------------------|--------|
| siRNA-Vinblastine Run1-DMSO  | NM_006476 | ATP5L     | ATP synthase, H <sup>+</sup> transportin g, mitochondrial F0 complex, subunit g                                             | 1.624117         | Inlier |
| siRNA-Temozolomide Run3-DMSO | NM_001697 | ATP5O     | ATP synthase, H <sup>+</sup> transportin g, mitochondrial F1 complex, O subunit (oligomycin sensitivity conferring protein) | -1.008857        | Inlier |
| siRNA-Temozolomide Run2-DMSO | NM_001697 | ATP5O     | ATP synthase, H <sup>+</sup> transportin g, mitochondrial F1 complex, O subunit (oligomycin sensitivity conferring protein) | -0.715665        | Inlier |
| siRNA Disorazole DMSO Run2   | NM_001697 | ATP5O     | ATP synthase, H <sup>+</sup> transportin g, mitochondrial F1 complex, O subunit (oligomycin sensitivity conferring protein) | -0.633335        | Inlier |



Identification of Survival Genes in Human Glioblastoma Cells Using siRNA Screening

Nikhil G Thaker, Fang Zhang, Peter R. McDonald, Tong Ying Shun, Michael D Lewen, Ian F. Pollack, and John S.

Lazo

Molecular Pharmacology

| siRNA              | Condition | Run  | Gene  | Log2FC    | Inlier |
|--------------------|-----------|------|-------|-----------|--------|
| siRNA Disorazole   | DMSO      | Run3 | ATP5O | -0.279008 | Inlier |
| siRNA Disorazole   | DMSO      | Run1 | ATP5O | 0.279008  | Inlier |
| siRNA-Temozolomide | DMSO      | Run1 | ATP5O | 0.500872  | Inlier |

ATP  
synthase,  
H+  
transportin  
g,  
mitochond  
rial F1  
complex,  
O subunit  
(oligomyci  
n  
sensitivity  
conferring  
protein)

ATP  
synthase,  
H+  
transportin  
g,  
mitochond  
rial F1  
complex,  
O subunit  
(oligomyci  
n  
sensitivity  
conferring  
protein)

ATP  
synthase,  
H+  
transportin  
g,  
mitochond  
rial F1  
complex,  
O subunit  
(oligomyci  
n  
sensitivity  
conferring  
protein)

Identification of Survival Genes in Human Glioblastoma Cells Using siRNA Screening

Nikhil G Thaker, Fang Zhang, Peter R. McDonald, Tong Ying Shun, Michael D Lewen, Ian F. Pollack, and John S. Lazo

Molecular Pharmacology

|                              |           |         |                                                                                                                             |           |        |
|------------------------------|-----------|---------|-----------------------------------------------------------------------------------------------------------------------------|-----------|--------|
| siRNA-Vinblastine Run1-DMSO  | NM_001697 | ATP5O   | ATP synthase, H <sup>+</sup> transportin g, mitochondrial F1 complex, O subunit (oligomycin sensitivity conferring protein) | 0.761488  | Inlier |
| siRNA-Vinblastine Run2-DMSO  | NM_001697 | ATP5O   | ATP synthase, H <sup>+</sup> transportin g, mitochondrial F1 complex, O subunit (oligomycin sensitivity conferring protein) | 0.948515  | Inlier |
| siRNA Disorazole DMSO Run1   | NM_001183 | ATP6AP1 | ATPase, H <sup>+</sup> transportin g, lysosomal accessory protein 1                                                         | -3.445069 | Inlier |
| siRNA-Vinblastine Run1-DMSO  | NM_001183 | ATP6AP1 | ATPase, H <sup>+</sup> transportin g, lysosomal accessory protein 1                                                         | -2.795593 | Inlier |
| siRNA-Temozolomide Run2-DMSO | NM_001183 | ATP6AP1 | ATPase, H <sup>+</sup> transportin g, lysosomal accessory protein 1                                                         | -2.738523 | Inlier |

Identification of Survival Genes in Human Glioblastoma Cells Using siRNA Screening

Nikhil G Thaker, Fang Zhang, Peter R. McDonald, Tong Ying Shun, Michael D Lewen, Ian F. Pollack, and John S. Lazo

Molecular Pharmacology

|                              |           |          |                                                                      |           |        |
|------------------------------|-----------|----------|----------------------------------------------------------------------|-----------|--------|
| siRNA-Temozolomide Run1-DMSO | NM_001183 | ATP6AP1  | ATPase, H <sup>+</sup> transportin g, lysosomal accessory protein 1  | -0.018815 | Inlier |
| siRNA-Temozolomide Run3-DMSO | NM_001183 | ATP6AP1  | ATPase, H <sup>+</sup> transportin g, lysosomal accessory protein 1  | 0.018813  | Inlier |
| siRNA-Vinblastine Run2-DMSO  | NM_001183 | ATP6AP1  | ATPase, H <sup>+</sup> transportin g, lysosomal accessory protein 1  | 0.220094  | Inlier |
| siRNA Disorazole DMSO Run3   | NM_001183 | ATP6AP1  | ATPase, H <sup>+</sup> transportin g, lysosomal accessory protein 1  | 0.399884  | Inlier |
| siRNA Disorazole DMSO Run2   | NM_001183 | ATP6AP1  | ATPase, H <sup>+</sup> transportin g, lysosomal accessory protein 1  | 0.949116  | Inlier |
| siRNA-Temozolomide Run3-DMSO | NM_005177 | ATP6V0A1 | ATPase, H <sup>+</sup> transportin g, lysosomal V0 subunit a isoform | -1.618381 | Inlier |

Identification of Survival Genes in Human Glioblastoma Cells Using siRNA Screening

Nikhil G Thaker, Fang Zhang, Peter R. McDonald, Tong Ying Shun, Michael D Lewen, Ian F. Pollack, and John S. Lazo

Molecular Pharmacology

| siRNA Treatment              | Gene ID | Accession | Transcript                                               | Log2 Fold Change | Outlier Status |
|------------------------------|---------|-----------|----------------------------------------------------------|------------------|----------------|
| siRNA Disorazole DMSO Run3   | NM_0051 | ATP6V0A   | ATPase, H+ transportin g, lysosomal V0 subunit a isoform | -0.674642        | Inlier         |
| siRNA Disorazole DMSO Run2   | NM_0051 | ATP6V0A   | ATPase, H+ transportin g, lysosomal V0 subunit a isoform | -0.674358        | Inlier         |
| siRNA-Temozolomide Run2-DMSO | NM_0051 | ATP6V0A   | ATPase, H+ transportin g, lysosomal V0 subunit a isoform | -0.554134        | Inlier         |
| siRNA Disorazole DMSO Run1   | NM_0051 | ATP6V0A   | ATPase, H+ transportin g, lysosomal V0 subunit a isoform | 0.554134         | Inlier         |
| siRNA-Temozolomide Run1-DMSO | NM_0051 | ATP6V0A   | ATPase, H+ transportin g, lysosomal V0 subunit a isoform | 0.590041         | Inlier         |
| siRNA-Vinblastine Run2-DMSO  | NM_0051 | ATP6V0A   | ATPase, H+ transportin g, lysosomal V0 subunit a isoform | 1.389566         | Inlier         |

Identification of Survival Genes in Human Glioblastoma Cells Using siRNA Screening

Nikhil G Thaker, Fang Zhang, Peter R. McDonald, Tong Ying Shun, Michael D Lewen, Ian F. Pollack, and John S. Lazo

Molecular Pharmacology

| siRNA                        | Gene      | Accession | Transcript                                                 | Log2FC    | Category |
|------------------------------|-----------|-----------|------------------------------------------------------------|-----------|----------|
| siRNA-Vinblastine Run1-DMSO  | NM_005177 | ATP6V0A1  | ATPase, H+ transportin g, lysosomal V0 subunit a isoform 1 | 1.720024  | Inlier   |
| siRNA-Temozolomide Run2-DMSO | NM_012463 | ATP6V0A2  | ATPase, H+ transportin g, lysosomal V0 subunit a isoform 2 | -2.160577 | Inlier   |
| siRNA-Temozolomide Run3-DMSO | NM_012463 | ATP6V0A2  | ATPase, H+ transportin g, lysosomal V0 subunit a isoform 2 | -0.849857 | Inlier   |
| siRNA Disorazole DMSO Run2   | NM_012463 | ATP6V0A2  | ATPase, H+ transportin g, lysosomal V0 subunit a isoform 2 | -0.543802 | Inlier   |
| siRNA Disorazole DMSO Run3   | NM_012463 | ATP6V0A2  | ATPase, H+ transportin g, lysosomal V0 subunit a isoform 2 | -0.022235 | Inlier   |
| siRNA-Vinblastine Run1-DMSO  | NM_012463 | ATP6V0A2  | ATPase, H+ transportin g, lysosomal V0 subunit a isoform 2 | 0.022235  | Inlier   |

Identification of Survival Genes in Human Glioblastoma Cells Using siRNA Screening

Nikhil G Thaker, Fang Zhang, Peter R. McDonald, Tong Ying Shun, Michael D Lewen, Ian F. Pollack, and John S. Lazo

Molecular Pharmacology

| siRNA                        | Gene    | Accession | Transcript                                                 | Value     | Outlier |
|------------------------------|---------|-----------|------------------------------------------------------------|-----------|---------|
| siRNA Disorazole DMSO Run1   | ATP6V0A | NM_012463 | ATPase, H+ transportin g, lysosomal V0 subunit a isoform 2 | 0.095083  | Inlier  |
| siRNA-Temozolomide Run1-DMSO | ATP6V0A | NM_012463 | ATPase, H+ transportin g, lysosomal V0 subunit a isoform 2 | 0.805198  | Inlier  |
| siRNA-Vinblastine Run2-DMSO  | ATP6V0A | NM_012463 | ATPase, H+ transportin g, lysosomal V0 subunit a isoform 2 | 1.899921  | Inlier  |
| siRNA-Temozolomide Run3-DMSO | ATP6V0A | NM_130840 | ATPase, H+ transportin g, lysosomal V0 subunit a isoform 4 | -2.069244 | Inlier  |
| siRNA Disorazole DMSO Run1   | ATP6V0A | NM_130840 | ATPase, H+ transportin g, lysosomal V0 subunit a isoform 4 | -0.68412  | Inlier  |
| siRNA Disorazole DMSO Run3   | ATP6V0A | NM_130840 | ATPase, H+ transportin g, lysosomal V0 subunit a isoform 4 | -0.100038 | Inlier  |

Identification of Survival Genes in Human Glioblastoma Cells Using siRNA Screening

Nikhil G Thaker, Fang Zhang, Peter R. McDonald, Tong Ying Shun, Michael D Lewen, Ian F. Pollack, and John S. Lazo

Molecular Pharmacology

| siRNA Treatment              | Gene ID   | Accession | Gene Name                                                            | Protein Name                                                         | Log2 Fold Change | Outlier Status |
|------------------------------|-----------|-----------|----------------------------------------------------------------------|----------------------------------------------------------------------|------------------|----------------|
| siRNA-Temozolomide Run2-DMSO | NM_130840 | ATP6V0A4  | ATPase, H <sup>+</sup> transportin g, lysosomal V0 subunit a isoform | ATPase, H <sup>+</sup> transportin g, lysosomal V0 subunit a isoform | -0.029733        | Inlier         |
| siRNA Disorazole DMSO Run2   | NM_130840 | ATP6V0A4  | ATPase, H <sup>+</sup> transportin g, lysosomal V0 subunit a isoform | ATPase, H <sup>+</sup> transportin g, lysosomal V0 subunit a isoform | 0.029733         | Inlier         |
| siRNA-Temozolomide Run1-DMSO | NM_130840 | ATP6V0A4  | ATPase, H <sup>+</sup> transportin g, lysosomal V0 subunit a isoform | ATPase, H <sup>+</sup> transportin g, lysosomal V0 subunit a isoform | 0.66488          | Inlier         |
| siRNA-Vinblastine Run1-DMSO  | NM_130840 | ATP6V0A4  | ATPase, H <sup>+</sup> transportin g, lysosomal V0 subunit a isoform | ATPase, H <sup>+</sup> transportin g, lysosomal V0 subunit a isoform | 0.778839         | Inlier         |
| siRNA-Vinblastine Run2-DMSO  | NM_130840 | ATP6V0A4  | ATPase, H <sup>+</sup> transportin g, lysosomal V0 subunit a isoform | ATPase, H <sup>+</sup> transportin g, lysosomal V0 subunit a isoform | 1.297049         | Inlier         |
| siRNA-Temozolomide Run3-DMSO | NM_004047 | ATP6V0B   | ATPase, H <sup>+</sup> transportin g, lysosomal 21kDa, V0 subunit c  | ATPase, H <sup>+</sup> transportin g, lysosomal 21kDa, V0 subunit c  | -1.657175        | Inlier         |

Identification of Survival Genes in Human Glioblastoma Cells Using siRNA Screening

Nikhil G Thaker, Fang Zhang, Peter R. McDonald, Tong Ying Shun, Michael D Lewen, Ian F. Pollack, and John S. Lazo

Molecular Pharmacology

|                              |               |         |                                                                           |           |        |
|------------------------------|---------------|---------|---------------------------------------------------------------------------|-----------|--------|
| siRNA-Temozolomide Run2-DMSO | NM_0040<br>47 | ATP6V0B | ATPase,<br>H+<br>transportin<br>g,<br>lysosomal<br>21kDa, V0<br>subunit c | -1.508139 | Inlier |
| siRNA Disorazole DMSO Run2   | NM_0040<br>47 | ATP6V0B | ATPase,<br>H+<br>transportin<br>g,<br>lysosomal<br>21kDa, V0<br>subunit c | -0.724074 | Inlier |
| siRNA Disorazole DMSO Run3   | NM_0040<br>47 | ATP6V0B | ATPase,<br>H+<br>transportin<br>g,<br>lysosomal<br>21kDa, V0<br>subunit c | -0.181465 | Inlier |
| siRNA Disorazole DMSO Run1   | NM_0040<br>47 | ATP6V0B | ATPase,<br>H+<br>transportin<br>g,<br>lysosomal<br>21kDa, V0<br>subunit c | 0.181464  | Inlier |
| siRNA-Vinblastine Run1-DMSO  | NM_0040<br>47 | ATP6V0B | ATPase,<br>H+<br>transportin<br>g,<br>lysosomal<br>21kDa, V0<br>subunit c | 0.387514  | Inlier |
| siRNA-Temozolomide Run1-DMSO | NM_0040<br>47 | ATP6V0B | ATPase,<br>H+<br>transportin<br>g,<br>lysosomal<br>21kDa, V0<br>subunit c | 0.624926  | Inlier |



Identification of Survival Genes in Human Glioblastoma Cells Using siRNA Screening  
 Nikhil G Thaker, Fang Zhang, Peter R. McDonald, Tong Ying Shun, Michael D Lewen, Ian F. Pollack, and John S. Lazo  
 Molecular Pharmacology

|                              |           |         |                                                         |           |        |
|------------------------------|-----------|---------|---------------------------------------------------------|-----------|--------|
| siRNA-Vinblastine Run2-DMSO  | NM_004047 | ATP6V0B | ATPase, H+ transportin g, lysosomal 21kDa, V0 subunit c | 1.703133  | Inlier |
| siRNA Disorazole DMSO Run2   | NM_001694 | ATP6V0C | ATPase, H+ transportin g, lysosomal 16kDa, V0 subunit c | -0.927841 | Inlier |
| siRNA-Temozolomide Run3-DMSO | NM_001694 | ATP6V0C | ATPase, H+ transportin g, lysosomal 16kDa, V0 subunit c | -0.655034 | Inlier |
| siRNA Disorazole DMSO Run3   | NM_001694 | ATP6V0C | ATPase, H+ transportin g, lysosomal 16kDa, V0 subunit c | -0.155666 | Inlier |
| siRNA Disorazole DMSO Run1   | NM_001694 | ATP6V0C | ATPase, H+ transportin g, lysosomal 16kDa, V0 subunit c | -0.074859 | Inlier |
| siRNA-Temozolomide Run2-DMSO | NM_001694 | ATP6V0C | ATPase, H+ transportin g, lysosomal 16kDa, V0 subunit c | 0.074859  | Inlier |

Identification of Survival Genes in Human Glioblastoma Cells Using siRNA Screening

Nikhil G Thaker, Fang Zhang, Peter R. McDonald, Tong Ying Shun, Michael D Lewen, Ian F. Pollack, and John S. Lazo

Molecular Pharmacology

|                              |           |          |                                                                               |           |        |
|------------------------------|-----------|----------|-------------------------------------------------------------------------------|-----------|--------|
| siRNA-Temozolomide Run1-DMSO | NM_001694 | ATP6V0C  | ATPase, H <sup>+</sup> transportin g, lysosomal 16kDa, V0 subunit c           | 0.693966  | Inlier |
| siRNA-Vinblastine Run1-DMSO  | NM_001694 | ATP6V0C  | ATPase, H <sup>+</sup> transportin g, lysosomal 16kDa, V0 subunit c           | 1.229628  | Inlier |
| siRNA-Vinblastine Run2-DMSO  | NM_001694 | ATP6V0C  | ATPase, H <sup>+</sup> transportin g, lysosomal 16kDa, V0 subunit c           | 1.439333  | Inlier |
| siRNA-Temozolomide Run3-DMSO | NM_004691 | ATP6V0D1 | ATPase, H <sup>+</sup> transportin g, lysosomal 38kDa, V0 subunit d isoform 1 | -1.349835 | Inlier |
| siRNA-Temozolomide Run2-DMSO | NM_004691 | ATP6V0D1 | ATPase, H <sup>+</sup> transportin g, lysosomal 38kDa, V0 subunit d isoform 1 | -1.131325 | Inlier |
| siRNA Disorazole DMSO Run2   | NM_004691 | ATP6V0D1 | ATPase, H <sup>+</sup> transportin g, lysosomal 38kDa, V0 subunit d isoform 1 | -0.82268  | Inlier |

Identification of Survival Genes in Human Glioblastoma Cells Using siRNA Screening

Nikhil G Thaker, Fang Zhang, Peter R. McDonald, Tong Ying Shun, Michael D Lewen, Ian F. Pollack, and John S. Lazo

Molecular Pharmacology

|                                  |               |              |                                                                                        |           |        |
|----------------------------------|---------------|--------------|----------------------------------------------------------------------------------------|-----------|--------|
| siRNA Disorazole DMSO Run1       | NM_0046<br>91 | ATP6V0D<br>1 | ATPase,<br>H+<br>transportin<br>g,<br>lysosomal<br>38kDa, V0<br>subunit d<br>isoform 1 | -0.257726 | Inlier |
| siRNA Disorazole DMSO Run3       | NM_0046<br>91 | ATP6V0D<br>1 | ATPase,<br>H+<br>transportin<br>g,<br>lysosomal<br>38kDa, V0<br>subunit d<br>isoform 1 | 0.257726  | Inlier |
| siRNA-Vinblastine Run1-<br>DMSO  | NM_0046<br>91 | ATP6V0D<br>1 | ATPase,<br>H+<br>transportin<br>g,<br>lysosomal<br>38kDa, V0<br>subunit d<br>isoform 1 | 0.43587   | Inlier |
| siRNA-Temozolomide Run1-<br>DMSO | NM_0046<br>91 | ATP6V0D<br>1 | ATPase,<br>H+<br>transportin<br>g,<br>lysosomal<br>38kDa, V0<br>subunit d<br>isoform 1 | 0.52632   | Inlier |
| siRNA-Vinblastine Run2-<br>DMSO  | NM_0046<br>91 | ATP6V0D<br>1 | ATPase,<br>H+<br>transportin<br>g,<br>lysosomal<br>38kDa, V0<br>subunit d<br>isoform 1 | 1.119121  | Inlier |
| siRNA-Temozolomide Run3-<br>DMSO | NM_0039<br>45 | ATP6V0E      | ATPase,<br>H+<br>transportin<br>g,<br>lysosomal<br>9kDa, V0<br>subunit e               | -1.734791 | Inlier |

Identification of Survival Genes in Human Glioblastoma Cells Using siRNA Screening  
 Nikhil G Thaker, Fang Zhang, Peter R. McDonald, Tong Ying Shun, Michael D Lewen, Ian F. Pollack, and John S. Lazo

Molecular Pharmacology

| siRNA Treatment              | Gene    | Accession | Protein                                                | Log2 Fold Change | Classification |
|------------------------------|---------|-----------|--------------------------------------------------------|------------------|----------------|
| siRNA Disorazole DMSO Run2   | ATP6V0E | NM_003945 | ATPase, H+ transportin 9, lysosomal 9kDa, V0 subunit e | -0.6861          | Inlier         |
| siRNA Disorazole DMSO Run3   | ATP6V0E | NM_003945 | ATPase, H+ transportin 9, lysosomal 9kDa, V0 subunit e | -0.490105        | Inlier         |
| siRNA-Temozolomide Run2-DMSO | ATP6V0E | NM_003945 | ATPase, H+ transportin 9, lysosomal 9kDa, V0 subunit e | -0.278422        | Inlier         |
| siRNA-Temozolomide Run1-DMSO | ATP6V0E | NM_003945 | ATPase, H+ transportin 9, lysosomal 9kDa, V0 subunit e | 0.278422         | Inlier         |
| siRNA Disorazole DMSO Run1   | ATP6V0E | NM_003945 | ATPase, H+ transportin 9, lysosomal 9kDa, V0 subunit e | 0.6629           | Inlier         |
| siRNA-Vinblastine Run1-DMSO  | ATP6V0E | NM_003945 | ATPase, H+ transportin 9, lysosomal 9kDa, V0 subunit e | 2.293666         | Inlier         |
| siRNA-Vinblastine Run2-DMSO  | ATP6V0E | NM_003945 | ATPase, H+ transportin 9, lysosomal 9kDa, V0 subunit e | 3.516273         | Outlier        |

Identification of Survival Genes in Human Glioblastoma Cells Using siRNA Screening  
 Nikhil G Thaker, Fang Zhang, Peter R. McDonald, Tong Ying Shun, Michael D Lewen, Ian F. Pollack, and John S. Lazo  
 Molecular Pharmacology

|                              |           |         |                                                                     |           |        |
|------------------------------|-----------|---------|---------------------------------------------------------------------|-----------|--------|
| siRNA-Temozolomide Run3-DMSO | NM_001690 | ATP6V1A | ATPase, H <sup>+</sup> transportin g, lysosomal 70kDa, V1 subunit A | -1.676228 | Inlier |
| siRNA Disorazole DMSO Run2   | NM_001690 | ATP6V1A | ATPase, H <sup>+</sup> transportin g, lysosomal 70kDa, V1 subunit A | -1.324841 | Inlier |
| siRNA Disorazole DMSO Run3   | NM_001690 | ATP6V1A | ATPase, H <sup>+</sup> transportin g, lysosomal 70kDa, V1 subunit A | -0.259663 | Inlier |
| siRNA Disorazole DMSO Run1   | NM_001690 | ATP6V1A | ATPase, H <sup>+</sup> transportin g, lysosomal 70kDa, V1 subunit A | -0.243824 | Inlier |
| siRNA-Temozolomide Run1-DMSO | NM_001690 | ATP6V1A | ATPase, H <sup>+</sup> transportin g, lysosomal 70kDa, V1 subunit A | 0.243825  | Inlier |
| siRNA-Temozolomide Run2-DMSO | NM_001690 | ATP6V1A | ATPase, H <sup>+</sup> transportin g, lysosomal 70kDa, V1 subunit A | 0.372226  | Inlier |

Identification of Survival Genes in Human Glioblastoma Cells Using siRNA Screening

Nikhil G Thaker, Fang Zhang, Peter R. McDonald, Tong Ying Shun, Michael D Lewen, Ian F. Pollack, and John S. Lazo

Molecular Pharmacology

|                              |           |          |                                                                                                                          |           |        |
|------------------------------|-----------|----------|--------------------------------------------------------------------------------------------------------------------------|-----------|--------|
| siRNA-Vinblastine Run2-DMSO  | NM_001690 | ATP6V1A  | ATPase, H <sup>+</sup> transportin g, lysosomal 70kDa, V1 subunit A                                                      | 0.976774  | Inlier |
| siRNA-Vinblastine Run1-DMSO  | NM_001690 | ATP6V1A  | ATPase, H <sup>+</sup> transportin g, lysosomal 70kDa, V1 subunit A                                                      | 1.126557  | Inlier |
| siRNA-Temozolomide Run3-DMSO | NM_001692 | ATP6V1B1 | ATPase, H <sup>+</sup> transportin g, lysosomal 56/58kDa, V1 subunit B, isoform 1 (Renal tubular acidosis with deafness) | -1.021648 | Inlier |
| siRNA Disorazole DMSO Run3   | NM_001692 | ATP6V1B1 | ATPase, H <sup>+</sup> transportin g, lysosomal 56/58kDa, V1 subunit B, isoform 1 (Renal tubular acidosis with deafness) | -0.764775 | Inlier |

Identification of Survival Genes in Human Glioblastoma Cells Using siRNA Screening

Nikhil G Thaker, Fang Zhang, Peter R. McDonald, Tong Ying Shun, Michael D Lewen, Ian F. Pollack, and John S.

Lazo

Molecular Pharmacology

|                              |           |          |                                                                                                                          |           |        |
|------------------------------|-----------|----------|--------------------------------------------------------------------------------------------------------------------------|-----------|--------|
| siRNA-Temozolomide Run2-DMSO | NM_001692 | ATP6V1B1 | ATPase, H <sup>+</sup> transportin 9, lysosomal 56/58kDa, V1 subunit B, isoform 1 (Renal tubular acidosis with deafness) | -0.584225 | Inlier |
| siRNA-Temozolomide Run1-DMSO | NM_001692 | ATP6V1B1 | ATPase, H <sup>+</sup> transportin 9, lysosomal 56/58kDa, V1 subunit B, isoform 1 (Renal tubular acidosis with deafness) | -0.010519 | Inlier |
| siRNA Disorazole DMSO Run2   | NM_001692 | ATP6V1B1 | ATPase, H <sup>+</sup> transportin 9, lysosomal 56/58kDa, V1 subunit B, isoform 1 (Renal tubular acidosis with deafness) | 0.010519  | Inlier |

Identification of Survival Genes in Human Glioblastoma Cells Using siRNA Screening  
 Nikhil G Thaker, Fang Zhang, Peter R. McDonald, Tong Ying Shun, Michael D Lewen, Ian F. Pollack, and John S. Lazo  
 Molecular Pharmacology

|                                 |               |              |                                                                                                                                                  |           |        |
|---------------------------------|---------------|--------------|--------------------------------------------------------------------------------------------------------------------------------------------------|-----------|--------|
| siRNA Disorazole DMSO Run1      | NM_0016<br>92 | ATP6V1B<br>1 | ATPase,<br>H+<br>transportin<br>g,<br>lysosomal<br>56/58kDa,<br>V1 subunit<br>B, isoform<br>1 (Renal<br>tubular<br>acidosis<br>with<br>deafness) | 0.121995  | Inlier |
| siRNA-Vinblastine Run1-<br>DMSO | NM_0016<br>92 | ATP6V1B<br>1 | ATPase,<br>H+<br>transportin<br>g,<br>lysosomal<br>56/58kDa,<br>V1 subunit<br>B, isoform<br>1 (Renal<br>tubular<br>acidosis<br>with<br>deafness) | 2.428536  | Inlier |
| siRNA-Vinblastine Run2-<br>DMSO | NM_0016<br>92 | ATP6V1B<br>1 | ATPase,<br>H+<br>transportin<br>g,<br>lysosomal<br>56/58kDa,<br>V1 subunit<br>B, isoform<br>1 (Renal<br>tubular<br>acidosis<br>with<br>deafness) | 2.704473  | Inlier |
| siRNA Disorazole DMSO Run1      | NM_0016<br>93 | ATP6V1B<br>2 | ATPase,<br>H+<br>transportin<br>g,<br>lysosomal<br>56/58kDa,<br>V1 subunit<br>B, isoform<br>2                                                    | -0.847578 | Inlier |



Identification of Survival Genes in Human Glioblastoma Cells Using siRNA Screening

Nikhil G Thaker, Fang Zhang, Peter R. McDonald, Tong Ying Shun, Michael D Lewen, Ian F. Pollack, and John S. Lazo

Molecular Pharmacology

| siRNA Treatment              | Gene ID   | Gene Name | Protein Name                                                                      | Score     | Category |
|------------------------------|-----------|-----------|-----------------------------------------------------------------------------------|-----------|----------|
| siRNA-Vinblastine Run1-DMSO  | NM_001693 | ATP6V1B2  | ATPase, H <sup>+</sup> transportin 9, lysosomal 56/58kDa, V1 subunit B, isoform 2 | -0.771437 | Inlier   |
| siRNA-Temozolomide Run3-DMSO | NM_001693 | ATP6V1B2  | ATPase, H <sup>+</sup> transportin 9, lysosomal 56/58kDa, V1 subunit B, isoform 2 | -0.61604  | Inlier   |
| siRNA-Temozolomide Run2-DMSO | NM_001693 | ATP6V1B2  | ATPase, H <sup>+</sup> transportin 9, lysosomal 56/58kDa, V1 subunit B, isoform 2 | -0.088957 | Inlier   |
| siRNA Disorazole DMSO Run2   | NM_001693 | ATP6V1B2  | ATPase, H <sup>+</sup> transportin 9, lysosomal 56/58kDa, V1 subunit B, isoform 2 | 0.088957  | Inlier   |
| siRNA Disorazole DMSO Run3   | NM_001693 | ATP6V1B2  | ATPase, H <sup>+</sup> transportin 9, lysosomal 56/58kDa, V1 subunit B, isoform 2 | 0.596573  | Inlier   |

Identification of Survival Genes in Human Glioblastoma Cells Using siRNA Screening

Nikhil G Thaker, Fang Zhang, Peter R. McDonald, Tong Ying Shun, Michael D Lewen, Ian F. Pollack, and John S. Lazo

Molecular Pharmacology

| siRNA Treatment              | Gene ID     | Accession | Gene Name                                                                         | Protein Description                                                               | Score     | Category |
|------------------------------|-------------|-----------|-----------------------------------------------------------------------------------|-----------------------------------------------------------------------------------|-----------|----------|
| siRNA-Vinblastine Run2-DMSO  | NM_001693   | ATP6V1B2  | ATPase, H <sup>+</sup> transportin 9, lysosomal 56/58kDa, V1 subunit B, isoform 2 | ATPase, H <sup>+</sup> transportin 9, lysosomal 56/58kDa, V1 subunit B, isoform 2 | 0.73296   | Inlier   |
| siRNA-Temozolomide Run1-DMSO | NM_001693   | ATP6V1B2  | ATPase, H <sup>+</sup> transportin 9, lysosomal 56/58kDa, V1 subunit B, isoform 2 | ATPase, H <sup>+</sup> transportin 9, lysosomal 56/58kDa, V1 subunit B, isoform 2 | 0.826587  | Inlier   |
| siRNA-Temozolomide Run3-DMSO | NM_00107254 | ATP6V1C1  | ATPase, H <sup>+</sup> transportin 9, lysosomal 42kDa, V1 subunit C, isoform 1    | ATPase, H <sup>+</sup> transportin 9, lysosomal 42kDa, V1 subunit C, isoform 1    | -0.727939 | Inlier   |
| siRNA-Temozolomide Run2-DMSO | NM_00107254 | ATP6V1C1  | ATPase, H <sup>+</sup> transportin 9, lysosomal 42kDa, V1 subunit C, isoform 1    | ATPase, H <sup>+</sup> transportin 9, lysosomal 42kDa, V1 subunit C, isoform 1    | -0.621061 | Inlier   |
| siRNA Disorazole DMSO Run2   | NM_00107254 | ATP6V1C1  | ATPase, H <sup>+</sup> transportin 9, lysosomal 42kDa, V1 subunit C, isoform 1    | ATPase, H <sup>+</sup> transportin 9, lysosomal 42kDa, V1 subunit C, isoform 1    | -0.422575 | Inlier   |

Identification of Survival Genes in Human Glioblastoma Cells Using siRNA Screening

Nikhil G Thaker, Fang Zhang, Peter R. McDonald, Tong Ying Shun, Michael D Lewen, Ian F. Pollack, and John S. Lazo

Molecular Pharmacology

|                                  |                  |              |                                                                                         |           |        |
|----------------------------------|------------------|--------------|-----------------------------------------------------------------------------------------|-----------|--------|
| siRNA Disorazole DMSO Run3       | NM_0010<br>07254 | ATP6V1C<br>1 | ATPase,<br>H+<br>transportin<br>g,<br>lysosomal<br>42kDa, V1<br>subunit C,<br>isoform 1 | -0.234275 | Inlier |
| siRNA Disorazole DMSO Run1       | NM_0010<br>07254 | ATP6V1C<br>1 | ATPase,<br>H+<br>transportin<br>g,<br>lysosomal<br>42kDa, V1<br>subunit C,<br>isoform 1 | 0.234275  | Inlier |
| siRNA-Temozolomide Run1-<br>DMSO | NM_0010<br>07254 | ATP6V1C<br>1 | ATPase,<br>H+<br>transportin<br>g,<br>lysosomal<br>42kDa, V1<br>subunit C,<br>isoform 1 | 0.758311  | Inlier |
| siRNA-Vinblastine Run1-<br>DMSO  | NM_0010<br>07254 | ATP6V1C<br>1 | ATPase,<br>H+<br>transportin<br>g,<br>lysosomal<br>42kDa, V1<br>subunit C,<br>isoform 1 | 0.765483  | Inlier |
| siRNA-Vinblastine Run2-<br>DMSO  | NM_0010<br>07254 | ATP6V1C<br>1 | ATPase,<br>H+<br>transportin<br>g,<br>lysosomal<br>42kDa, V1<br>subunit C,<br>isoform 1 | 1.292875  | Inlier |

Identification of Survival Genes in Human Glioblastoma Cells Using siRNA Screening

Nikhil G Thaker, Fang Zhang, Peter R. McDonald, Tong Ying Shun, Michael D Lewen, Ian F. Pollack, and John S. Lazo

Molecular Pharmacology

|                                  |               |              |                                                                                        |           |        |
|----------------------------------|---------------|--------------|----------------------------------------------------------------------------------------|-----------|--------|
| siRNA Disorazole DMSO Run2       | NM_0016<br>96 | ATP6V1E<br>1 | ATPase,<br>H+<br>transportin<br>g,<br>lysosomal<br>31kDa, V1<br>subunit E<br>isoform 1 | -1.170524 | Inlier |
| siRNA-Temozolomide Run3-<br>DMSO | NM_0016<br>96 | ATP6V1E<br>1 | ATPase,<br>H+<br>transportin<br>g,<br>lysosomal<br>31kDa, V1<br>subunit E<br>isoform 1 | -0.92458  | Inlier |
| siRNA-Temozolomide Run2-<br>DMSO | NM_0016<br>96 | ATP6V1E<br>1 | ATPase,<br>H+<br>transportin<br>g,<br>lysosomal<br>31kDa, V1<br>subunit E<br>isoform 1 | -0.727309 | Inlier |
| siRNA Disorazole DMSO Run3       | NM_0016<br>96 | ATP6V1E<br>1 | ATPase,<br>H+<br>transportin<br>g,<br>lysosomal<br>31kDa, V1<br>subunit E<br>isoform 1 | -0.434868 | Inlier |
| siRNA-Temozolomide Run1-<br>DMSO | NM_0016<br>96 | ATP6V1E<br>1 | ATPase,<br>H+<br>transportin<br>g,<br>lysosomal<br>31kDa, V1<br>subunit E<br>isoform 1 | 0.434869  | Inlier |

Identification of Survival Genes in Human Glioblastoma Cells Using siRNA Screening  
 Nikhil G Thaker, Fang Zhang, Peter R. McDonald, Tong Ying Shun, Michael D Lewen, Ian F. Pollack, and John S. Lazo  
 Molecular Pharmacology

|                                  |               |              |                                                                                        |           |        |
|----------------------------------|---------------|--------------|----------------------------------------------------------------------------------------|-----------|--------|
| siRNA Disorazole DMSO Run1       | NM_0016<br>96 | ATP6V1E<br>1 | ATPase,<br>H+<br>transportin<br>g,<br>lysosomal<br>31kDa, V1<br>subunit E<br>isoform 1 | 0.467158  | Inlier |
| siRNA-Vinblastine Run1-<br>DMSO  | NM_0016<br>96 | ATP6V1E<br>1 | ATPase,<br>H+<br>transportin<br>g,<br>lysosomal<br>31kDa, V1<br>subunit E<br>isoform 1 | 0.635509  | Inlier |
| siRNA-Vinblastine Run2-<br>DMSO  | NM_0016<br>96 | ATP6V1E<br>1 | ATPase,<br>H+<br>transportin<br>g,<br>lysosomal<br>31kDa, V1<br>subunit E<br>isoform 1 | 0.713491  | Inlier |
| siRNA-Temozolomide Run3-<br>DMSO | NM_0048<br>88 | ATP6V1G<br>1 | ATPase,<br>H+<br>transportin<br>g,<br>lysosomal<br>13kDa, V1<br>subunit G<br>isoform 1 | -0.784415 | Inlier |
| siRNA-Temozolomide Run2-<br>DMSO | NM_0048<br>88 | ATP6V1G<br>1 | ATPase,<br>H+<br>transportin<br>g,<br>lysosomal<br>13kDa, V1<br>subunit G<br>isoform 1 | -0.694092 | Inlier |

Identification of Survival Genes in Human Glioblastoma Cells Using siRNA Screening

Nikhil G Thaker, Fang Zhang, Peter R. McDonald, Tong Ying Shun, Michael D Lewen, Ian F. Pollack, and John S. Lazo

Molecular Pharmacology

|                                  |               |              |                                                                                        |           |        |
|----------------------------------|---------------|--------------|----------------------------------------------------------------------------------------|-----------|--------|
| siRNA Disorazole DMSO Run2       | NM_0048<br>88 | ATP6V1G<br>1 | ATPase,<br>H+<br>transportin<br>g,<br>lysosomal<br>13kDa, V1<br>subunit G<br>isoform 1 | -0.501245 | Inlier |
| siRNA Disorazole DMSO Run3       | NM_0048<br>88 | ATP6V1G<br>1 | ATPase,<br>H+<br>transportin<br>g,<br>lysosomal<br>13kDa, V1<br>subunit G<br>isoform 1 | -0.330081 | Inlier |
| siRNA Disorazole DMSO Run1       | NM_0048<br>88 | ATP6V1G<br>1 | ATPase,<br>H+<br>transportin<br>g,<br>lysosomal<br>13kDa, V1<br>subunit G<br>isoform 1 | 0.33008   | Inlier |
| siRNA-Temozolomide Run1-<br>DMSO | NM_0048<br>88 | ATP6V1G<br>1 | ATPase,<br>H+<br>transportin<br>g,<br>lysosomal<br>13kDa, V1<br>subunit G<br>isoform 1 | 0.654908  | Inlier |
| siRNA-Vinblastine Run2-<br>DMSO  | NM_0048<br>88 | ATP6V1G<br>1 | ATPase,<br>H+<br>transportin<br>g,<br>lysosomal<br>13kDa, V1<br>subunit G<br>isoform 1 | 1.681157  | Inlier |

Identification of Survival Genes in Human Glioblastoma Cells Using siRNA Screening  
 Nikhil G Thaker, Fang Zhang, Peter R. McDonald, Tong Ying Shun, Michael D Lewen, Ian F. Pollack, and John S. Lazo  
 Molecular Pharmacology

|                              |           |          |                                                                               |           |        |
|------------------------------|-----------|----------|-------------------------------------------------------------------------------|-----------|--------|
| siRNA-Vinblastine Run1-DMSO  | NM_004888 | ATP6V1G1 | ATPase, H <sup>+</sup> transportin g, lysosomal 13kDa, V1 subunit G isoform 1 | 2.066248  | Inlier |
| siRNA-Temozolomide Run3-DMSO | NM_138282 | ATP6V1G2 | ATPase, H <sup>+</sup> transportin g, lysosomal 13kDa, V1 subunit G isoform 2 | -0.781868 | Inlier |
| siRNA Disorazole DMSO Run2   | NM_138282 | ATP6V1G2 | ATPase, H <sup>+</sup> transportin g, lysosomal 13kDa, V1 subunit G isoform 2 | -0.731461 | Inlier |
| siRNA-Temozolomide Run2-DMSO | NM_138282 | ATP6V1G2 | ATPase, H <sup>+</sup> transportin g, lysosomal 13kDa, V1 subunit G isoform 2 | -0.504979 | Inlier |
| siRNA Disorazole DMSO Run3   | NM_138282 | ATP6V1G2 | ATPase, H <sup>+</sup> transportin g, lysosomal 13kDa, V1 subunit G isoform 2 | -0.172713 | Inlier |

Identification of Survival Genes in Human Glioblastoma Cells Using siRNA Screening

Nikhil G Thaker, Fang Zhang, Peter R. McDonald, Tong Ying Shun, Michael D Lewen, Ian F. Pollack, and John S. Lazo

Molecular Pharmacology

|                                  |               |              |                                                                                        |           |        |
|----------------------------------|---------------|--------------|----------------------------------------------------------------------------------------|-----------|--------|
| siRNA Disorazole DMSO Run1       | NM_1382<br>82 | ATP6V1G<br>2 | ATPase,<br>H+<br>transportin<br>g,<br>lysosomal<br>13kDa, V1<br>subunit G<br>isoform 2 | 0.172713  | Inlier |
| siRNA-Temozolomide Run1-<br>DMSO | NM_1382<br>82 | ATP6V1G<br>2 | ATPase,<br>H+<br>transportin<br>g,<br>lysosomal<br>13kDa, V1<br>subunit G<br>isoform 2 | 0.617539  | Inlier |
| siRNA-Vinblastine Run1-<br>DMSO  | NM_1382<br>82 | ATP6V1G<br>2 | ATPase,<br>H+<br>transportin<br>g,<br>lysosomal<br>13kDa, V1<br>subunit G<br>isoform 2 | 0.733225  | Inlier |
| siRNA-Vinblastine Run2-<br>DMSO  | NM_1382<br>82 | ATP6V1G<br>2 | ATPase,<br>H+<br>transportin<br>g,<br>lysosomal<br>13kDa, V1<br>subunit G<br>isoform 2 | 0.927839  | Inlier |
| siRNA-Temozolomide Run3-<br>DMSO | NM_2136<br>20 | ATP6V1H<br>H | ATPase,<br>H+<br>transportin<br>g,<br>lysosomal<br>50/57kDa,<br>V1 subunit<br>H        | -0.993114 | Inlier |
| siRNA-Temozolomide Run2-<br>DMSO | NM_2136<br>20 | ATP6V1H<br>H | ATPase,<br>H+<br>transportin<br>g,<br>lysosomal<br>50/57kDa,<br>V1 subunit<br>H        | -0.825388 | Inlier |



Identification of Survival Genes in Human Glioblastoma Cells Using siRNA Screening

Nikhil G Thaker, Fang Zhang, Peter R. McDonald, Tong Ying Shun, Michael D Lewen, Ian F. Pollack, and John S. Lazo

Molecular Pharmacology

| siRNA              | Condition     | Run  | Gene          | Protein                                                                    | Score     | Category |
|--------------------|---------------|------|---------------|----------------------------------------------------------------------------|-----------|----------|
| siRNA Disorazole   | DMSO          | Run2 | NM_2136<br>20 | ATP6V1H                                                                    | -0.523611 | Inlier   |
|                    |               |      |               | H                                                                          |           |          |
|                    |               |      |               | ATPase,<br>H+<br>transportin<br>g,<br>lysosomal<br>50/57kDa,<br>V1 subunit |           |          |
| siRNA Disorazole   | DMSO          | Run3 | NM_2136<br>20 | ATP6V1H                                                                    | -0.342322 | Inlier   |
|                    |               |      |               | H                                                                          |           |          |
|                    |               |      |               | ATPase,<br>H+<br>transportin<br>g,<br>lysosomal<br>50/57kDa,<br>V1 subunit |           |          |
| siRNA Disorazole   | DMSO          | Run1 | NM_2136<br>20 | ATP6V1H                                                                    | 0.342322  | Inlier   |
|                    |               |      |               | H                                                                          |           |          |
|                    |               |      |               | ATPase,<br>H+<br>transportin<br>g,<br>lysosomal<br>50/57kDa,<br>V1 subunit |           |          |
| siRNA-Vinblastine  | Run1-<br>DMSO |      | NM_2136<br>20 | ATP6V1H                                                                    | 0.512112  | Inlier   |
|                    |               |      |               | H                                                                          |           |          |
|                    |               |      |               | ATPase,<br>H+<br>transportin<br>g,<br>lysosomal<br>50/57kDa,<br>V1 subunit |           |          |
| siRNA-Temozolomide | Run1-<br>DMSO |      | NM_2136<br>20 | ATP6V1H                                                                    | 0.985147  | Inlier   |
|                    |               |      |               | H                                                                          |           |          |
|                    |               |      |               | ATPase,<br>H+<br>transportin<br>g,<br>lysosomal<br>50/57kDa,<br>V1 subunit |           |          |
| siRNA-Vinblastine  | Run2-<br>DMSO |      | NM_2136<br>20 | ATP6V1H                                                                    | 1.556621  | Inlier   |
|                    |               |      |               | H                                                                          |           |          |
|                    |               |      |               | ATPase,<br>H+<br>transportin<br>g,<br>lysosomal<br>50/57kDa,<br>V1 subunit |           |          |

Identification of Survival Genes in Human Glioblastoma Cells Using siRNA Screening

Nikhil G Thaker, Fang Zhang, Peter R. McDonald, Tong Ying Shun, Michael D Lewen, Ian F. Pollack, and John S.

Lazo

Molecular Pharmacology

|                              |           |       |                                                                            |           |        |
|------------------------------|-----------|-------|----------------------------------------------------------------------------|-----------|--------|
| siRNA-Temozolomide Run3-DMSO | NM_000052 | ATP7A | ATPase, Cu <sup>++</sup> transporting, alpha polypeptide (Menkes syndrome) | -0.805015 | Inlier |
| siRNA-Temozolomide Run2-DMSO | NM_000052 | ATP7A | ATPase, Cu <sup>++</sup> transporting, alpha polypeptide (Menkes syndrome) | -0.716446 | Inlier |
| siRNA-Temozolomide Run1-DMSO | NM_000052 | ATP7A | ATPase, Cu <sup>++</sup> transporting, alpha polypeptide (Menkes syndrome) | -0.632554 | Inlier |
| siRNA Disorazole DMSO Run1   | NM_000052 | ATP7A | ATPase, Cu <sup>++</sup> transporting, alpha polypeptide (Menkes syndrome) | -0.019147 | Inlier |
| siRNA-Vinblastine Run2-DMSO  | NM_000052 | ATP7A | ATPase, Cu <sup>++</sup> transporting, alpha polypeptide (Menkes syndrome) | 0.019148  | Inlier |

Identification of Survival Genes in Human Glioblastoma Cells Using siRNA Screening  
 Nikhil G Thaker, Fang Zhang, Peter R. McDonald, Tong Ying Shun, Michael D Lewen, Ian F. Pollack, and John S. Lazo  
 Molecular Pharmacology

|                              |              |       |                                                                            |           |         |
|------------------------------|--------------|-------|----------------------------------------------------------------------------|-----------|---------|
| siRNA Disorazole DMSO Run3   | NM_000052    | ATP7A | ATPase, Cu <sup>++</sup> transporting, alpha polypeptide (Menkes syndrome) | 0.543546  | Inlier  |
| siRNA-Vinblastine Run1-DMSO  | NM_000052    | ATP7A | ATPase, Cu <sup>++</sup> transporting, alpha polypeptide (Menkes syndrome) | 3.782379  | Outlier |
| siRNA Disorazole DMSO Run2   | NM_000052    | ATP7A | ATPase, Cu <sup>++</sup> transporting, alpha polypeptide (Menkes syndrome) | 3.820637  | Outlier |
| siRNA-Temozolomide Run3-DMSO | NM_001005918 | ATP7B | ATPase, Cu <sup>++</sup> transporting, beta polypeptide (Wilson disease)   | -2.983813 | Inlier  |
| siRNA-Temozolomide Run2-DMSO | NM_001005918 | ATP7B | ATPase, Cu <sup>++</sup> transporting, beta polypeptide (Wilson disease)   | -2.354694 | Inlier  |
| siRNA-Temozolomide Run1-DMSO | NM_001005918 | ATP7B | ATPase, Cu <sup>++</sup> transporting, beta polypeptide (Wilson disease)   | -0.563405 | Inlier  |

Identification of Survival Genes in Human Glioblastoma Cells Using siRNA Screening

Nikhil G Thaker, Fang Zhang, Peter R. McDonald, Tong Ying Shun, Michael D Lewen, Ian F. Pollack, and John S. Lazo

Molecular Pharmacology

|                              |              |        |                                                                          |           |        |
|------------------------------|--------------|--------|--------------------------------------------------------------------------|-----------|--------|
| siRNA-Vinblastine Run2-DMSO  | NM_001005918 | ATP7B  | ATPase, Cu <sup>++</sup> transporting, beta polypeptide (Wilson disease) | -0.276188 | Inlier |
| siRNA-Vinblastine Run1-DMSO  | NM_001005918 | ATP7B  | ATPase, Cu <sup>++</sup> transporting, beta polypeptide (Wilson disease) | 0.276189  | Inlier |
| siRNA Disorazole DMSO Run1   | NM_001005918 | ATP7B  | ATPase, Cu <sup>++</sup> transporting, beta polypeptide (Wilson disease) | 0.279788  | Inlier |
| siRNA Disorazole DMSO Run3   | NM_001005918 | ATP7B  | ATPase, Cu <sup>++</sup> transporting, beta polypeptide (Wilson disease) | 0.785595  | Inlier |
| siRNA Disorazole DMSO Run2   | NM_001005918 | ATP7B  | ATPase, aminophospholipid transporter (APLT), Class I, type 8A, member 1 | 0.931998  | Inlier |
| siRNA-Temozolomide Run3-DMSO | NM_006095    | ATP8A1 | ATPase, aminophospholipid transporter (APLT), Class I, type 8A, member 1 | -1.922025 | Inlier |
| siRNA-Temozolomide Run2-DMSO | NM_006095    | ATP8A1 | ATPase, aminophospholipid transporter (APLT), Class I, type 8A, member 1 | -1.768207 | Inlier |

Identification of Survival Genes in Human Glioblastoma Cells Using siRNA Screening

Nikhil G Thaker, Fang Zhang, Peter R. McDonald, Tong Ying Shun, Michael D Lewen, Ian F. Pollack, and John S. Lazo

Molecular Pharmacology

| siRNA                        | Gene      | Accession | Gene                                                                     | Value     | Outlier |
|------------------------------|-----------|-----------|--------------------------------------------------------------------------|-----------|---------|
| siRNA-Temozolomide Run1-DMSO | NM_006095 | ATP8A1    | ATPase, aminophospholipid transporter (APLT), Class I, type 8A, member 1 | -0.366565 | Inlier  |
| siRNA Disorazole DMSO Run1   | NM_006095 | ATP8A1    | ATPase, aminophospholipid transporter (APLT), Class I, type 8A, member 1 | -0.234136 | Inlier  |
| siRNA Disorazole DMSO Run3   | NM_006095 | ATP8A1    | ATPase, aminophospholipid transporter (APLT), Class I, type 8A, member 1 | 0.234136  | Inlier  |
| siRNA Disorazole DMSO Run2   | NM_006095 | ATP8A1    | ATPase, aminophospholipid transporter (APLT), Class I, type 8A, member 1 | 0.31592   | Inlier  |
| siRNA-Vinblastine Run1-DMSO  | NM_006095 | ATP8A1    | ATPase, aminophospholipid transporter (APLT), Class I, type 8A, member 1 | 0.982435  | Inlier  |
| siRNA-Vinblastine Run2-DMSO  | NM_006095 | ATP8A1    | ATPase, aminophospholipid transporter (APLT), Class I, type 8A, member 1 | 1.364916  | Inlier  |

Identification of Survival Genes in Human Glioblastoma Cells Using siRNA Screening

Nikhil G Thaker, Fang Zhang, Peter R. McDonald, Tong Ying Shun, Michael D Lewen, Ian F. Pollack, and John S. Lazo

Molecular Pharmacology

|                                  |               |        |                                                                                        |           |        |
|----------------------------------|---------------|--------|----------------------------------------------------------------------------------------|-----------|--------|
| siRNA Disorazole DMSO Run2       | NM_0165<br>29 | ATP8A2 | ATPase,<br>aminophospholipid<br>transporter-<br>like, Class<br>I, type 8A,<br>member 2 | -0.907816 | Inlier |
| siRNA-Temozolomide Run3-<br>DMSO | NM_0165<br>29 | ATP8A2 | ATPase,<br>aminophospholipid<br>transporter-<br>like, Class<br>I, type 8A,<br>member 2 | -0.578138 | Inlier |
| siRNA-Temozolomide Run1-<br>DMSO | NM_0165<br>29 | ATP8A2 | ATPase,<br>aminophospholipid<br>transporter-<br>like, Class<br>I, type 8A,<br>member 2 | -0.418591 | Inlier |
| siRNA Disorazole DMSO Run1       | NM_0165<br>29 | ATP8A2 | ATPase,<br>aminophospholipid<br>transporter-<br>like, Class<br>I, type 8A,<br>member 2 | -0.127601 | Inlier |
| siRNA-Temozolomide Run2-<br>DMSO | NM_0165<br>29 | ATP8A2 | ATPase,<br>aminophospholipid<br>transporter-<br>like, Class<br>I, type 8A,<br>member 2 | 0.1276    | Inlier |
| siRNA-Vinblastine Run1-<br>DMSO  | NM_0165<br>29 | ATP8A2 | ATPase,<br>aminophospholipid<br>transporter-<br>like, Class<br>I, type 8A,<br>member 2 | 0.770862  | Inlier |

Identification of Survival Genes in Human Glioblastoma Cells Using siRNA Screening  
 Nikhil G Thaker, Fang Zhang, Peter R. McDonald, Tong Ying Shun, Michael D Lewen, Ian F. Pollack, and John S. Lazo  
 Molecular Pharmacology

|                              |               |        |                                                                        |           |        |
|------------------------------|---------------|--------|------------------------------------------------------------------------|-----------|--------|
| siRNA-Vinblastine Run2-DMSO  | NM_0165<br>29 | ATP8A2 | ATPase, aminophospholipid transporter-like, Class I, type 8A, member 2 | 1.07141   | Inlier |
| siRNA Disorazole DMSO Run3   | NM_0165<br>29 | ATP8A2 | ATPase, aminophospholipid transporter-like, Class I, type 8A, member 2 | 1.243108  | Inlier |
| siRNA-Temozolomide Run3-DMSO | NM_0056<br>03 | ATP8B1 | ATPase, Class I, type 8B, member 1                                     | -1.249628 | Inlier |
| siRNA-Temozolomide Run2-DMSO | NM_0056<br>03 | ATP8B1 | ATPase, Class I, type 8B, member 1                                     | -1.102462 | Inlier |
| siRNA-Temozolomide Run1-DMSO | NM_0056<br>03 | ATP8B1 | ATPase, Class I, type 8B, member 1                                     | -0.947082 | Inlier |
| siRNA Disorazole DMSO Run1   | NM_0056<br>03 | ATP8B1 | ATPase, Class I, type 8B, member 1                                     | -0.095274 | Inlier |
| siRNA Disorazole DMSO Run2   | NM_0056<br>03 | ATP8B1 | ATPase, Class I, type 8B, member 1                                     | 0.095274  | Inlier |
| siRNA-Vinblastine Run1-DMSO  | NM_0056<br>03 | ATP8B1 | ATPase, Class I, type 8B, member 1                                     | 0.37883   | Inlier |
| siRNA Disorazole DMSO Run3   | NM_0056<br>03 | ATP8B1 | ATPase, Class I, type 8B, member 1                                     | 0.401918  | Inlier |
| siRNA-Vinblastine Run2-DMSO  | NM_0056<br>03 | ATP8B1 | ATPase, Class I, type 8B, member 1                                     | 1.315593  | Inlier |
| siRNA-Temozolomide Run3-DMSO | NM_0204<br>52 | ATP8B2 | ATPase, Class I, type 8B, member 2                                     | -1.349739 | Inlier |

Identification of Survival Genes in Human Glioblastoma Cells Using siRNA Screening  
 Nikhil G Thaker, Fang Zhang, Peter R. McDonald, Tong Ying Shun, Michael D Lewen, Ian F. Pollack, and John S. Lazo

Molecular Pharmacology

|                              |               |        |                                             |           |        |
|------------------------------|---------------|--------|---------------------------------------------|-----------|--------|
| siRNA-Temozolomide Run2-DMSO | NM_0204<br>52 | ATP8B2 | ATPase,<br>Class I,<br>type 8B,<br>member 2 | -0.706931 | Inlier |
| siRNA Disorazole DMSO Run2   | NM_0204<br>52 | ATP8B2 | ATPase,<br>Class I,<br>type 8B,<br>member 2 | -0.525074 | Inlier |
| siRNA-Temozolomide Run1-DMSO | NM_0204<br>52 | ATP8B2 | ATPase,<br>Class I,<br>type 8B,<br>member 2 | -0.39548  | Inlier |
| siRNA Disorazole DMSO Run3   | NM_0204<br>52 | ATP8B2 | ATPase,<br>Class I,<br>type 8B,<br>member 2 | 0.39548   | Inlier |
| siRNA Disorazole DMSO Run1   | NM_0204<br>52 | ATP8B2 | ATPase,<br>Class I,<br>type 8B,<br>member 2 | 0.642069  | Inlier |
| siRNA-Vinblastine Run1-DMSO  | NM_0204<br>52 | ATP8B2 | ATPase,<br>Class I,<br>type 8B,<br>member 2 | 1.238008  | Inlier |
| siRNA-Vinblastine Run2-DMSO  | NM_0204<br>52 | ATP8B2 | ATPase,<br>Class I,<br>type 8B,<br>member 2 | 1.680675  | Inlier |
| siRNA-Temozolomide Run3-DMSO | NM_1388<br>13 | ATP8B3 | ATPase,<br>Class I,<br>type 8B,<br>member 3 | -2.061914 | Inlier |
| siRNA Disorazole DMSO Run2   | NM_1388<br>13 | ATP8B3 | ATPase,<br>Class I,<br>type 8B,<br>member 3 | -0.842554 | Inlier |
| siRNA Disorazole DMSO Run3   | NM_1388<br>13 | ATP8B3 | ATPase,<br>Class I,<br>type 8B,<br>member 3 | -0.766471 | Inlier |
| siRNA-Temozolomide Run2-DMSO | NM_1388<br>13 | ATP8B3 | ATPase,<br>Class I,<br>type 8B,<br>member 3 | -0.416507 | Inlier |
| siRNA Disorazole DMSO Run1   | NM_1388<br>13 | ATP8B3 | ATPase,<br>Class I,<br>type 8B,<br>member 3 | 0.416507  | Inlier |
| siRNA-Vinblastine Run1-DMSO  | NM_1388<br>13 | ATP8B3 | ATPase,<br>Class I,<br>type 8B,<br>member 3 | 0.506854  | Inlier |



Identification of Survival Genes in Human Glioblastoma Cells Using siRNA Screening  
 Nikhil G Thaker, Fang Zhang, Peter R. McDonald, Tong Ying Shun, Michael D Lewen, Ian F. Pollack, and John S. Lazo

Molecular Pharmacology

|                              |               |        |                                             |           |        |
|------------------------------|---------------|--------|---------------------------------------------|-----------|--------|
| siRNA-Temozolomide Run1-DMSO | NM_1388<br>13 | ATP8B3 | ATPase,<br>Class I,<br>type 8B,<br>member 3 | 0.582529  | Inlier |
| siRNA-Vinblastine Run2-DMSO  | NM_1388<br>13 | ATP8B3 | ATPase,<br>Class I,<br>type 8B,<br>member 3 | 1.09557   | Inlier |
| siRNA-Temozolomide Run3-DMSO | XM_03057<br>7 | ATP9A  | ATPase,<br>Class II,<br>type 9A             | -1.274784 | Inlier |
| siRNA-Temozolomide Run1-DMSO | XM_03057<br>7 | ATP9A  | ATPase,<br>Class II,<br>type 9A             | -1.220113 | Inlier |
| siRNA Disorazole DMSO Run1   | XM_03057<br>7 | ATP9A  | ATPase,<br>Class II,<br>type 9A             | -0.625707 | Inlier |
| siRNA-Temozolomide Run2-DMSO | XM_03057<br>7 | ATP9A  | ATPase,<br>Class II,<br>type 9A             | -0.26147  | Inlier |
| siRNA Disorazole DMSO Run3   | XM_03057<br>7 | ATP9A  | ATPase,<br>Class II,<br>type 9A             | 0.26147   | Inlier |
| siRNA-Vinblastine Run1-DMSO  | XM_03057<br>7 | ATP9A  | ATPase,<br>Class II,<br>type 9A             | 0.587973  | Inlier |
| siRNA Disorazole DMSO Run2   | XM_03057<br>7 | ATP9A  | ATPase,<br>Class II,<br>type 9A             | 0.723293  | Inlier |
| siRNA-Vinblastine Run2-DMSO  | XM_03057<br>7 | ATP9A  | ATPase,<br>Class II,<br>type 9A             | 0.754556  | Inlier |
| siRNA-Temozolomide Run3-DMSO | NM_1985<br>31 | ATP9B  | ATPase,<br>Class II,<br>type 9B             | -1.040145 | Inlier |
| siRNA-Temozolomide Run2-DMSO | NM_1985<br>31 | ATP9B  | ATPase,<br>Class II,<br>type 9B             | -0.80433  | Inlier |
| siRNA-Vinblastine Run2-DMSO  | NM_1985<br>31 | ATP9B  | ATPase,<br>Class II,<br>type 9B             | -0.54467  | Inlier |
| siRNA-Temozolomide Run1-DMSO | NM_1985<br>31 | ATP9B  | ATPase,<br>Class II,<br>type 9B             | -0.176322 | Inlier |
| siRNA Disorazole DMSO Run3   | NM_1985<br>31 | ATP9B  | ATPase,<br>Class II,<br>type 9B             | 0.176322  | Inlier |
| siRNA Disorazole DMSO Run1   | NM_1985<br>31 | ATP9B  | ATPase,<br>Class II,<br>type 9B             | 0.354778  | Inlier |



Identification of Survival Genes in Human Glioblastoma Cells Using siRNA Screening

Nikhil G Thaker, Fang Zhang, Peter R. McDonald, Tong Ying Shun, Michael D Lewen, Ian F. Pollack, and John S. Lazo

Molecular Pharmacology

| siRNA Treatment              | Gene ID   | Cell Line | Gene Name                                         | Log Fold Change | Category |
|------------------------------|-----------|-----------|---------------------------------------------------|-----------------|----------|
| siRNA-Temozolomide Run2-DMSO | NM_001698 | AUH       | AU RNA binding protein/enoyl-Coenzyme A hydratase | -0.722774       | Inlier   |
| siRNA-Temozolomide Run3-DMSO | NM_001698 | AUH       | AU RNA binding protein/enoyl-Coenzyme A hydratase | -0.626226       | Inlier   |
| siRNA-Vinblastine Run2-DMSO  | NM_001698 | AUH       | AU RNA binding protein/enoyl-Coenzyme A hydratase | -0.524618       | Inlier   |
| siRNA-Temozolomide Run1-DMSO | NM_001698 | AUH       | AU RNA binding protein/enoyl-Coenzyme A hydratase | -0.24857        | Inlier   |
| siRNA Disorazole DMSO Run1   | NM_001698 | AUH       | AU RNA binding protein/enoyl-Coenzyme A hydratase | 0.24857         | Inlier   |
| siRNA Disorazole DMSO Run3   | NM_001698 | AUH       | AU RNA binding protein/enoyl-Coenzyme A hydratase | 1.932519        | Inlier   |
| siRNA Disorazole DMSO Run2   | NM_001698 | AUH       | AU RNA binding protein/enoyl-Coenzyme A hydratase | 1.996123        | Inlier   |

Identification of Survival Genes in Human Glioblastoma Cells Using siRNA Screening  
 Nikhil G Thaker, Fang Zhang, Peter R. McDonald, Tong Ying Shun, Michael D Lewen, Ian F. Pollack, and John S. Lazo

Molecular Pharmacology

|                                  |               |       | AU RNA<br>binding<br>protein/en-<br>oyl-<br>Coenzyme |                  |
|----------------------------------|---------------|-------|------------------------------------------------------|------------------|
| siRNA-Vinblastine Run1-<br>DMSO  | NM_0016<br>98 | AUH   | hydratase                                            | 2.973162 Inlier  |
|                                  | NM_0042       |       | aurora                                               |                  |
| siRNA Disorazole DMSO Run2       | 17            | AURKB | kinase B                                             | -1.47286 Inlier  |
| siRNA-Temozolomide Run3-<br>DMSO | NM_0042<br>17 | AURKB | kinase B                                             | -1.248214 Inlier |
|                                  | NM_0042       |       | aurora                                               |                  |
| siRNA Disorazole DMSO Run3       | 17            | AURKB | kinase B                                             | -0.544529 Inlier |
| siRNA-Temozolomide Run2-<br>DMSO | NM_0042<br>17 | AURKB | kinase B                                             | -0.143848 Inlier |
| siRNA-Temozolomide Run1-<br>DMSO | NM_0042<br>17 | AURKB | kinase B                                             | 0.143848 Inlier  |
|                                  | NM_0042       |       | aurora                                               |                  |
| siRNA Disorazole DMSO Run1       | 17            | AURKB | kinase B                                             | 0.521537 Inlier  |
| siRNA-Vinblastine Run2-<br>DMSO  | NM_0042<br>17 | AURKB | kinase B                                             | 0.804471 Inlier  |
| siRNA-Vinblastine Run1-<br>DMSO  | NM_0042<br>17 | AURKB | kinase B                                             | 0.877364 Inlier  |
|                                  | NM_0031       |       | aurora                                               |                  |
| siRNA Disorazole DMSO Run2       | 60            | AURKC | kinase C                                             | -1.078161 Inlier |
|                                  | NM_0031       |       | aurora                                               |                  |
| siRNA Disorazole DMSO Run3       | 60            | AURKC | kinase C                                             | -1.006627 Inlier |
| siRNA-Temozolomide Run3-<br>DMSO | NM_0031<br>60 | AURKC | kinase C                                             | -0.779182 Inlier |
| siRNA-Temozolomide Run1-<br>DMSO | NM_0031<br>60 | AURKC | kinase C                                             | -0.027659 Inlier |
| siRNA-Temozolomide Run2-<br>DMSO | NM_0031<br>60 | AURKC | kinase C                                             | 0.027659 Inlier  |
|                                  | NM_0031       |       | aurora                                               |                  |
| siRNA Disorazole DMSO Run1       | 60            | AURKC | kinase C                                             | 0.31132 Inlier   |
| siRNA-Vinblastine Run2-<br>DMSO  | NM_0031<br>60 | AURKC | kinase C                                             | 0.569818 Inlier  |
| siRNA-Vinblastine Run1-<br>DMSO  | NM_0031<br>60 | AURKC | kinase C                                             | 0.839251 Inlier  |
|                                  |               |       | apoptosis,<br>caspase                                |                  |
| siRNA-Temozolomide Run3-<br>DMSO | NM_0203<br>71 | AVEN  | activation<br>inhibitor                              | -2.215157 Inlier |
|                                  | NM_0203       |       | apoptosis,<br>caspase                                |                  |
| siRNA Disorazole DMSO Run2       | 71            | AVEN  | activation<br>inhibitor                              | -0.268223 Inlier |
|                                  |               |       | apoptosis,<br>caspase                                |                  |
| siRNA-Temozolomide Run2-<br>DMSO | NM_0203<br>71 | AVEN  | activation<br>inhibitor                              | -0.148439 Inlier |

Identification of Survival Genes in Human Glioblastoma Cells Using siRNA Screening  
 Nikhil G Thaker, Fang Zhang, Peter R. McDonald, Tong Ying Shun, Michael D Lewen, Ian F. Pollack, and John S. Lazo

Molecular Pharmacology

|                              |               |        |                                                  |           |         |
|------------------------------|---------------|--------|--------------------------------------------------|-----------|---------|
| siRNA-Temozolomide Run1-DMSO | NM_0203<br>71 | AVEN   | apoptosis,<br>caspase<br>activation<br>inhibitor | -0.005056 | Inlier  |
| siRNA Disorazole DMSO Run3   | NM_0203<br>71 | AVEN   | apoptosis,<br>caspase<br>activation<br>inhibitor | 0.005056  | Inlier  |
| siRNA Disorazole DMSO Run1   | NM_0203<br>71 | AVEN   | apoptosis,<br>caspase<br>activation<br>inhibitor | 1.080777  | Inlier  |
| siRNA-Vinblastine Run1-DMSO  | NM_0203<br>71 | AVEN   | apoptosis,<br>caspase<br>activation<br>inhibitor | 5.269918  | Outlier |
| siRNA-Vinblastine Run2-DMSO  | NM_0203<br>71 | AVEN   | apoptosis,<br>caspase<br>activation<br>inhibitor | 5.821116  | Outlier |
| siRNA-Temozolomide Run3-DMSO | NM_0007<br>06 | AVPR1A | arginine<br>vasopressi<br>n receptor<br>1A       | -2.21281  | Inlier  |
| siRNA Disorazole DMSO Run2   | NM_0007<br>06 | AVPR1A | arginine<br>vasopressi<br>n receptor<br>1A       | -1.500936 | Inlier  |
| siRNA-Temozolomide Run2-DMSO | NM_0007<br>06 | AVPR1A | arginine<br>vasopressi<br>n receptor<br>1A       | -1.29002  | Inlier  |
| siRNA Disorazole DMSO Run1   | NM_0007<br>06 | AVPR1A | arginine<br>vasopressi<br>n receptor<br>1A       | -0.181995 | Inlier  |
| siRNA Disorazole DMSO Run3   | NM_0007<br>06 | AVPR1A | arginine<br>vasopressi<br>n receptor<br>1A       | 0.181995  | Inlier  |
| siRNA-Temozolomide Run1-DMSO | NM_0007<br>06 | AVPR1A | arginine<br>vasopressi<br>n receptor<br>1A       | 0.187281  | Inlier  |

Identification of Survival Genes in Human Glioblastoma Cells Using siRNA Screening  
 Nikhil G Thaker, Fang Zhang, Peter R. McDonald, Tong Ying Shun, Michael D Lewen, Ian F. Pollack, and John S. Lazo  
 Molecular Pharmacology

|                              |           |        |                                  |           |        |
|------------------------------|-----------|--------|----------------------------------|-----------|--------|
| siRNA-Vinblastine Run2-DMSO  | NM_000706 | AVPR1A | arginine vasopressin receptor 1A | 0.380722  | Inlier |
| siRNA-Vinblastine Run1-DMSO  | NM_000706 | AVPR1A | arginine vasopressin receptor 1A | 0.968278  | Inlier |
| siRNA Disorazole DMSO Run2   | NM_000707 | AVPR1B | arginine vasopressin receptor 1B | -0.682934 | Inlier |
| siRNA-Temozolomide Run3-DMSO | NM_000707 | AVPR1B | arginine vasopressin receptor 1B | -0.666066 | Inlier |
| siRNA-Temozolomide Run1-DMSO | NM_000707 | AVPR1B | arginine vasopressin receptor 1B | -0.364217 | Inlier |
| siRNA Disorazole DMSO Run1   | NM_000707 | AVPR1B | arginine vasopressin receptor 1B | -0.013555 | Inlier |
| siRNA Disorazole DMSO Run3   | NM_000707 | AVPR1B | arginine vasopressin receptor 1B | 0.013555  | Inlier |
| siRNA-Temozolomide Run2-DMSO | NM_000707 | AVPR1B | arginine vasopressin receptor 1B | 1.567929  | Inlier |
| siRNA-Vinblastine Run2-DMSO  | NM_000707 | AVPR1B | arginine vasopressin receptor 1B | 1.99908   | Inlier |
| siRNA-Vinblastine Run1-DMSO  | NM_000707 | AVPR1B | arginine vasopressin receptor 1B | 2.675889  | Inlier |

Identification of Survival Genes in Human Glioblastoma Cells Using siRNA Screening

Nikhil G Thaker, Fang Zhang, Peter R. McDonald, Tong Ying Shun, Michael D Lewen, Ian F. Pollack, and John S. Lazo

Molecular Pharmacology

| siRNA Treatment              | Gene ID   | Gene Name | Log Fold Change | Outlier Status |
|------------------------------|-----------|-----------|-----------------|----------------|
| siRNA Disorazole DMSO Run1   | NM_000054 | AVPR2     | -2.677508       | Inlier         |
| siRNA Disorazole DMSO Run2   | NM_000054 | AVPR2     | -2.070631       | Inlier         |
| siRNA-Temozolomide Run2-DMSO | NM_000054 | AVPR2     | -0.308957       | Inlier         |
| siRNA-Temozolomide Run1-DMSO | NM_000054 | AVPR2     | -0.15921        | Inlier         |
| siRNA-Temozolomide Run3-DMSO | NM_000054 | AVPR2     | 0.159209        | Inlier         |
| siRNA-Vinblastine Run2-DMSO  | NM_000054 | AVPR2     | 0.342794        | Inlier         |

arginine  
vasopressin  
receptor  
2  
(nephrogenic  
diabetes  
insipidus)  
arginine  
vasopressin  
receptor  
2  
(nephrogenic  
diabetes  
insipidus)

Identification of Survival Genes in Human Glioblastoma Cells Using siRNA Screening

Nikhil G Thaker, Fang Zhang, Peter R. McDonald, Tong Ying Shun, Michael D Lewen, Ian F. Pollack, and John S. Lazo

Molecular Pharmacology

| siRNA                        | Gene      | Gene ID | Gene Name                                                        | Value     | Category |
|------------------------------|-----------|---------|------------------------------------------------------------------|-----------|----------|
| siRNA-Vinblastine Run1-DMSO  | NM_000054 | AVPR2   | arginine vasopressin receptor 2 (nephrogenic diabetes insipidus) | 1.006206  | Inlier   |
| siRNA Disorazole DMSO Run3   | NM_000054 | AVPR2   | arginine vasopressin receptor 2 (nephrogenic diabetes insipidus) | 1.369837  | Inlier   |
| siRNA-Temozolomide Run3-DMSO | NM_021913 | AXL     | AXL receptor tyrosine kinase                                     | -2.602547 | Inlier   |
| siRNA Disorazole DMSO Run2   | NM_021913 | AXL     | AXL receptor tyrosine kinase                                     | -0.581876 | Inlier   |
| siRNA-Temozolomide Run1-DMSO | NM_021913 | AXL     | AXL receptor tyrosine kinase                                     | -0.431104 | Inlier   |
| siRNA-Temozolomide Run2-DMSO | NM_021913 | AXL     | AXL receptor tyrosine kinase                                     | -0.160008 | Inlier   |
| siRNA-Vinblastine Run1-DMSO  | NM_021913 | AXL     | AXL receptor tyrosine kinase                                     | 0.160008  | Inlier   |
| siRNA Disorazole DMSO Run3   | NM_021913 | AXL     | AXL receptor tyrosine kinase                                     | 0.767124  | Inlier   |
| siRNA Disorazole DMSO Run1   | NM_021913 | AXL     | AXL receptor tyrosine kinase                                     | 1.312099  | Inlier   |
| siRNA-Vinblastine Run2-DMSO  | NM_021913 | AXL     | AXL receptor tyrosine kinase                                     | 3.611879  | Outlier  |



Identification of Survival Genes in Human Glioblastoma Cells Using siRNA Screening  
 Nikhil G Thaker, Fang Zhang, Peter R. McDonald, Tong Ying Shun, Michael D Lewen, Ian F. Pollack, and John S. Lazo  
 Molecular Pharmacology

|                              |           |      |                                                  |           |        |
|------------------------------|-----------|------|--------------------------------------------------|-----------|--------|
| siRNA Disorazole DMSO Run3   | NM_001700 | AZU1 | azurocidin 1 (cationic antimicrobial protein 37) | -3.006256 | Inlier |
| siRNA-Temozolomide Run2-DMSO | NM_001700 | AZU1 | azurocidin 1 (cationic antimicrobial protein 37) | -0.73998  | Inlier |
| siRNA-Temozolomide Run3-DMSO | NM_001700 | AZU1 | azurocidin 1 (cationic antimicrobial protein 37) | -0.60902  | Inlier |
| siRNA Disorazole DMSO Run2   | NM_001700 | AZU1 | azurocidin 1 (cationic antimicrobial protein 37) | -0.430148 | Inlier |
| siRNA Disorazole DMSO Run1   | NM_001700 | AZU1 | azurocidin 1 (cationic antimicrobial protein 37) | 0.430148  | Inlier |
| siRNA-Temozolomide Run1-DMSO | NM_001700 | AZU1 | azurocidin 1 (cationic antimicrobial protein 37) | 0.563753  | Inlier |
| siRNA-Vinblastine Run1-DMSO  | NM_001700 | AZU1 | azurocidin 1 (cationic antimicrobial protein 37) | 1.127621  | Inlier |

Identification of Survival Genes in Human Glioblastoma Cells Using siRNA Screening  
 Nikhil G Thaker, Fang Zhang, Peter R. McDonald, Tong Ying Shun, Michael D Lewen, Ian F. Pollack, and John S. Lazo  
 Molecular Pharmacology

|                              |           |         |                                                                                                     |           |        |
|------------------------------|-----------|---------|-----------------------------------------------------------------------------------------------------|-----------|--------|
| siRNA-Vinblastine Run2-DMSO  | NM_001700 | AZU1    | azurocidin 1 (cationic antimicrobial protein 37) UDP-Gal:betaGl cNAc beta 1,3-galactosyltransferase | 1.469434  | Inlier |
| siRNA-Temozolomide Run3-DMSO | NM_020981 | B3GALT1 | , polypeptide 1 UDP-Gal:betaGl cNAc beta 1,3-galactosyltransferase                                  | -0.958453 | Inlier |
| siRNA-Temozolomide Run2-DMSO | NM_020981 | B3GALT1 | , polypeptide 1 UDP-Gal:betaGl cNAc beta 1,3-galactosyltransferase                                  | -0.856915 | Inlier |
| siRNA-Temozolomide Run1-DMSO | NM_020981 | B3GALT1 | , polypeptide 1 UDP-Gal:betaGl cNAc beta 1,3-galactosyltransferase                                  | -0.6778   | Inlier |
| siRNA-Vinblastine Run2-DMSO  | NM_020981 | B3GALT1 | , polypeptide 1 UDP-Gal:betaGl cNAc beta 1,3-galactosyltransferase                                  | -0.029645 | Inlier |
| siRNA Disorazole DMSO Run1   | NM_020981 | B3GALT1 | , polypeptide 1                                                                                     | 0.029644  | Inlier |

Identification of Survival Genes in Human Glioblastoma Cells Using siRNA Screening

Nikhil G Thaker, Fang Zhang, Peter R. McDonald, Tong Ying Shun, Michael D Lewen, Ian F. Pollack, and John S.

Lazo

Molecular Pharmacology

|                                  |               |         |                                                                      |                                                                      |        |
|----------------------------------|---------------|---------|----------------------------------------------------------------------|----------------------------------------------------------------------|--------|
|                                  |               |         |                                                                      | UDP-<br>Gal:betaGl<br>cNAc beta<br>1,3-<br>galactosylt<br>ransferase |        |
| siRNA Disorazole DMSO Run3       | NM_0209<br>81 | B3GALT1 | ,<br>polypeptid<br>e 1                                               | 0.12267                                                              | Inlier |
|                                  |               |         | UDP-<br>Gal:betaGl<br>cNAc beta<br>1,3-<br>galactosylt<br>ransferase |                                                                      |        |
| siRNA Disorazole DMSO Run2       | NM_0209<br>81 | B3GALT1 | ,<br>polypeptid<br>e 1                                               | 0.6712                                                               | Inlier |
|                                  |               |         | UDP-<br>Gal:betaGl<br>cNAc beta<br>1,3-<br>galactosylt<br>ransferase |                                                                      |        |
| siRNA-Vinblastine Run1-<br>DMSO  | NM_0209<br>81 | B3GALT1 | ,<br>polypeptid<br>e 1                                               | 0.713929                                                             | Inlier |
|                                  |               |         | UDP-<br>Gal:betaGl<br>cNAc beta<br>1,3-<br>galactosylt<br>ransferase |                                                                      |        |
| siRNA-Temozolomide Run3-<br>DMSO | NM_0037<br>83 | B3GALT2 | ,<br>polypeptid<br>e 2                                               | -1.21686                                                             | Inlier |
|                                  |               |         | UDP-<br>Gal:betaGl<br>cNAc beta<br>1,3-<br>galactosylt<br>ransferase |                                                                      |        |
| siRNA-Temozolomide Run2-<br>DMSO | NM_0037<br>83 | B3GALT2 | ,<br>polypeptid<br>e 2                                               | -1.033737                                                            | Inlier |
|                                  |               |         |                                                                      |                                                                      |        |

Identification of Survival Genes in Human Glioblastoma Cells Using siRNA Screening

Nikhil G Thaker, Fang Zhang, Peter R. McDonald, Tong Ying Shun, Michael D Lewen, Ian F. Pollack, and John S.

Lazo

Molecular Pharmacology

| siRNA Treatment              | Gene ID   | Gene Name | Log Fold Change | Outlier Status |
|------------------------------|-----------|-----------|-----------------|----------------|
| siRNA-Temozolomide Run1-DMSO | NM_003783 | B3GALT2   | -0.734234       | Inlier         |
| siRNA-Vinblastine Run2-DMSO  | NM_003783 | B3GALT2   | -0.003843       | Inlier         |
| siRNA Disorazole DMSO Run1   | NM_003783 | B3GALT2   | 0.003842        | Inlier         |
| siRNA Disorazole DMSO Run3   | NM_003783 | B3GALT2   | 0.034593        | Inlier         |
| siRNA Disorazole DMSO Run2   | NM_003783 | B3GALT2   | 0.614765        | Inlier         |

UDP-Gal:betaGl  
cNAc beta  
1,3-  
galactosylt  
ransferase

,  
polypeptid  
e 2

UDP-Gal:betaGl  
cNAc beta  
1,3-  
galactosylt  
ransferase

,  
polypeptid  
e 2

UDP-Gal:betaGl  
cNAc beta  
1,3-  
galactosylt  
ransferase

,  
polypeptid  
e 2

UDP-Gal:betaGl  
cNAc beta  
1,3-  
galactosylt  
ransferase

,  
polypeptid  
e 2

UDP-Gal:betaGl  
cNAc beta  
1,3-  
galactosylt  
ransferase

,  
polypeptid  
e 2

Identification of Survival Genes in Human Glioblastoma Cells Using siRNA Screening

Nikhil G Thaker, Fang Zhang, Peter R. McDonald, Tong Ying Shun, Michael D Lewen, Ian F. Pollack, and John S.

Lazo

Molecular Pharmacology

| siRNA Treatment              | Gene ID   | Gene Name | Protein Name                                        | Log2 Fold Change | Inlier |
|------------------------------|-----------|-----------|-----------------------------------------------------|------------------|--------|
| siRNA-Vinblastine Run1-DMSO  | NM_003783 | B3GALT2   | UDP-Gal:betaGl cNAc beta 1,3-galactosylt ransferase | 0.983702         | Inlier |
| siRNA-Temozolomide Run2-DMSO | NM_033169 | B3GALT3   | UDP-Gal:betaGl cNAc beta 1,3-galactosylt ransferase | -1.09634         | Inlier |
| siRNA-Temozolomide Run3-DMSO | NM_033169 | B3GALT3   | UDP-Gal:betaGl cNAc beta 1,3-galactosylt ransferase | -0.550008        | Inlier |
| siRNA Disorazole DMSO Run3   | NM_033169 | B3GALT3   | UDP-Gal:betaGl cNAc beta 1,3-galactosylt ransferase | -0.298669        | Inlier |
| siRNA-Vinblastine Run2-DMSO  | NM_033169 | B3GALT3   | UDP-Gal:betaGl cNAc beta 1,3-galactosylt ransferase | -0.095313        | Inlier |

Identification of Survival Genes in Human Glioblastoma Cells Using siRNA Screening

Nikhil G Thaker, Fang Zhang, Peter R. McDonald, Tong Ying Shun, Michael D Lewen, Ian F. Pollack, and John S.

Lazo

Molecular Pharmacology

|                                  |               |         |                                                                      |                                                                      |         |
|----------------------------------|---------------|---------|----------------------------------------------------------------------|----------------------------------------------------------------------|---------|
|                                  |               |         |                                                                      | UDP-<br>Gal:betaGl<br>cNAc beta<br>1,3-<br>galactosylt<br>ransferase |         |
| siRNA Disorazole DMSO Run1       | NM_0331<br>69 | B3GALT3 | ,<br>polypeptid<br>e 3                                               | 0.095313                                                             | Inlier  |
|                                  |               |         | UDP-<br>Gal:betaGl<br>cNAc beta<br>1,3-<br>galactosylt<br>ransferase |                                                                      |         |
| siRNA-Temozolomide Run1-<br>DMSO | NM_0331<br>69 | B3GALT3 | ,<br>polypeptid<br>e 3                                               | 0.798992                                                             | Inlier  |
|                                  |               |         | UDP-<br>Gal:betaGl<br>cNAc beta<br>1,3-<br>galactosylt<br>ransferase |                                                                      |         |
| siRNA Disorazole DMSO Run2       | NM_0331<br>69 | B3GALT3 | ,<br>polypeptid<br>e 3                                               | 1.760705                                                             | Inlier  |
|                                  |               |         | UDP-<br>Gal:betaGl<br>cNAc beta<br>1,3-<br>galactosylt<br>ransferase |                                                                      |         |
| siRNA-Vinblastine Run1-<br>DMSO  | NM_0331<br>69 | B3GALT3 | ,<br>polypeptid<br>e 3                                               | 2.050619                                                             | Inlier  |
|                                  |               |         | UDP-<br>Gal:betaGl<br>cNAc beta<br>1,3-<br>galactosylt<br>ransferase |                                                                      |         |
| siRNA-Temozolomide Run3-<br>DMSO | NM_0037<br>82 | B3GALT4 | ,<br>polypeptid<br>e 4                                               | -6.178622                                                            | Outlier |

Identification of Survival Genes in Human Glioblastoma Cells Using siRNA Screening

Nikhil G Thaker, Fang Zhang, Peter R. McDonald, Tong Ying Shun, Michael D Lewen, Ian F. Pollack, and John S.

Lazo

Molecular Pharmacology

| siRNA Treatment              | Gene ID   | Gene Name | Log Fold Change | Annotation |
|------------------------------|-----------|-----------|-----------------|------------|
| siRNA Disorazole DMSO Run3   | NM_003782 | B3GALT4   | -0.591074       | Inlier     |
| siRNA-Vinblastine Run1-DMSO  | NM_003782 | B3GALT4   | -0.376204       | Inlier     |
| siRNA-Vinblastine Run2-DMSO  | NM_003782 | B3GALT4   | -0.139892       | Inlier     |
| siRNA Disorazole DMSO Run1   | NM_003782 | B3GALT4   | 0.139891        | Inlier     |
| siRNA-Temozolomide Run2-DMSO | NM_003782 | B3GALT4   | 0.757926        | Inlier     |

UDP-Gal:betaGl  
cNAc beta  
1,3-  
galactosylt  
ransferase

,  
polypeptid  
e 4

UDP-Gal:betaGl  
cNAc beta  
1,3-  
galactosylt  
ransferase

,  
polypeptid  
e 4

UDP-Gal:betaGl  
cNAc beta  
1,3-  
galactosylt  
ransferase

,  
polypeptid  
e 4

UDP-Gal:betaGl  
cNAc beta  
1,3-  
galactosylt  
ransferase

,  
polypeptid  
e 4

UDP-Gal:betaGl  
cNAc beta  
1,3-  
galactosylt  
ransferase

,  
polypeptid  
e 4

Identification of Survival Genes in Human Glioblastoma Cells Using siRNA Screening

Nikhil G Thaker, Fang Zhang, Peter R. McDonald, Tong Ying Shun, Michael D Lewen, Ian F. Pollack, and John S.

Lazo

Molecular Pharmacology

| siRNA Treatment              | Gene ID   | Gene Name | Protein Name                                        | Log2 Fold Change | Annotation |
|------------------------------|-----------|-----------|-----------------------------------------------------|------------------|------------|
| siRNA-Temozolomide Run1-DMSO | NM_003782 | B3GALT4   | UDP-Gal:betaGl cNAc beta 1,3-galactosylt ransferase | 1.602299         | Inlier     |
| siRNA Disorazole DMSO Run2   | NM_003782 | B3GALT4   | UDP-Gal:betaGl cNAc beta 1,3-galactosylt ransferase | 1.989905         | Inlier     |
| siRNA-Temozolomide Run1-DMSO | NM_033172 | B3GALT5   | UDP-Gal:betaGl cNAc beta 1,3-galactosylt ransferase | -1.597769        | Inlier     |
| siRNA Disorazole DMSO Run3   | NM_033172 | B3GALT5   | UDP-Gal:betaGl cNAc beta 1,3-galactosylt ransferase | -0.868974        | Inlier     |
| siRNA-Temozolomide Run2-DMSO | NM_033172 | B3GALT5   | UDP-Gal:betaGl cNAc beta 1,3-galactosylt ransferase | -0.480026        | Inlier     |



Identification of Survival Genes in Human Glioblastoma Cells Using siRNA Screening

Nikhil G Thaker, Fang Zhang, Peter R. McDonald, Tong Ying Shun, Michael D Lewen, Ian F. Pollack, and John S.

Lazo

Molecular Pharmacology

| siRNA Treatment              | Gene ID   | Gene Name | Log Fold Change | Outlier Status |
|------------------------------|-----------|-----------|-----------------|----------------|
| siRNA-Vinblastine Run2-DMSO  | NM_033172 | B3GALT5   | -0.263276       | Inlier         |
| siRNA Disorazole DMSO Run1   | NM_033172 | B3GALT5   | 0.263276        | Inlier         |
| siRNA-Temozolomide Run3-DMSO | NM_033172 | B3GALT5   | 0.401194        | Inlier         |
| siRNA Disorazole DMSO Run2   | NM_033172 | B3GALT5   | 1.497323        | Inlier         |
| siRNA-Vinblastine Run1-DMSO  | NM_033172 | B3GALT5   | 2.077098        | Inlier         |

UDP-Gal:betaGl  
cNAc beta  
1,3-  
galactosylt  
ransferase

, polypeptid  
e 5  
UDP-Gal:betaGl  
cNAc beta  
1,3-  
galactosylt  
ransferase

, polypeptid  
e 5  
UDP-Gal:betaGl  
cNAc beta  
1,3-  
galactosylt  
ransferase

, polypeptid  
e 5  
UDP-Gal:betaGl  
cNAc beta  
1,3-  
galactosylt  
ransferase

, polypeptid  
e 5  
UDP-Gal:betaGl  
cNAc beta  
1,3-  
galactosylt  
ransferase

, polypeptid  
e 5

Identification of Survival Genes in Human Glioblastoma Cells Using siRNA Screening

Nikhil G Thaker, Fang Zhang, Peter R. McDonald, Tong Ying Shun, Michael D Lewen, Ian F. Pollack, and John S.

Lazo

Molecular Pharmacology

|                              |           |         |                                                              |           |        |
|------------------------------|-----------|---------|--------------------------------------------------------------|-----------|--------|
| siRNA Disorazole DMSO Run3   | NM_080605 | B3GALT6 | UDP-Gal:betaGal beta 1,3-galactosyltransferase polypeptide 6 | -0.889597 | Inlier |
| siRNA-Temozolomide Run3-DMSO | NM_080605 | B3GALT6 | UDP-Gal:betaGal beta 1,3-galactosyltransferase polypeptide 6 | -0.459403 | Inlier |
| siRNA-Vinblastine Run2-DMSO  | NM_080605 | B3GALT6 | UDP-Gal:betaGal beta 1,3-galactosyltransferase polypeptide 6 | -0.270554 | Inlier |
| siRNA-Temozolomide Run1-DMSO | NM_080605 | B3GALT6 | UDP-Gal:betaGal beta 1,3-galactosyltransferase polypeptide 6 | -0.172575 | Inlier |
| siRNA Disorazole DMSO Run1   | NM_080605 | B3GALT6 | UDP-Gal:betaGal beta 1,3-galactosyltransferase polypeptide 6 | 0.172574  | Inlier |

Identification of Survival Genes in Human Glioblastoma Cells Using siRNA Screening  
 Nikhil G Thaker, Fang Zhang, Peter R. McDonald, Tong Ying Shun, Michael D Lewen, Ian F. Pollack, and John S. Lazo  
 Molecular Pharmacology

|                              |           |         |                                                              |           |         |
|------------------------------|-----------|---------|--------------------------------------------------------------|-----------|---------|
| siRNA Disorazole DMSO Run2   | NM_080605 | B3GALT6 | UDP-Gal:betaGal beta 1,3-galactosyltransferase polypeptide 6 | 3.319594  | Inlier  |
| siRNA-Vinblastine Run1-DMSO  | NM_080605 | B3GALT6 | UDP-Gal:betaGal beta 1,3-galactosyltransferase polypeptide 6 | 4.096567  | Outlier |
| siRNA-Temozolomide Run2-DMSO | NM_080605 | B3GALT6 | UDP-Gal:betaGal beta 1,3-galactosyltransferase polypeptide 6 | 4.274561  | Outlier |
| siRNA-Vinblastine Run2-DMSO  | NM_054025 | B3GAT1  | beta-1,3-glucuronyltransferase 1 (glucuronosyltransferase P) | -0.691671 | Inlier  |
| siRNA Disorazole DMSO Run3   | NM_054025 | B3GAT1  | beta-1,3-glucuronyltransferase 1 (glucuronosyltransferase P) | -0.657329 | Inlier  |
| siRNA Disorazole DMSO Run1   | NM_054025 | B3GAT1  | beta-1,3-glucuronyltransferase 1 (glucuronosyltransferase P) | -0.119751 | Inlier  |

Identification of Survival Genes in Human Glioblastoma Cells Using siRNA Screening  
 Nikhil G Thaker, Fang Zhang, Peter R. McDonald, Tong Ying Shun, Michael D Lewen, Ian F. Pollack, and John S. Lazo

Molecular Pharmacology

|                              |               |        |                                                                 |           |        |
|------------------------------|---------------|--------|-----------------------------------------------------------------|-----------|--------|
| siRNA-Temozolomide Run3-DMSO | NM_0540<br>25 | B3GAT1 | beta-1,3-glucuronyltransferase 1<br>(glucuronosyltransferase P) | -0.093077 | Inlier |
| siRNA-Temozolomide Run1-DMSO | NM_0540<br>25 | B3GAT1 | beta-1,3-glucuronyltransferase 1<br>(glucuronosyltransferase P) | 0.093077  | Inlier |
| siRNA-Temozolomide Run2-DMSO | NM_0540<br>25 | B3GAT1 | beta-1,3-glucuronyltransferase 1<br>(glucuronosyltransferase P) | 0.894883  | Inlier |
| siRNA Disorazole DMSO Run2   | NM_0540<br>25 | B3GAT1 | beta-1,3-glucuronyltransferase 1<br>(glucuronosyltransferase P) | 2.164831  | Inlier |
| siRNA-Vinblastine Run1-DMSO  | NM_0540<br>25 | B3GAT1 | beta-1,3-glucuronyltransferase 2<br>(glucuronosyltransferase P) | 2.525224  | Inlier |
| siRNA-Temozolomide Run3-DMSO | NM_0807<br>42 | B3GAT2 | beta-1,3-glucuronyltransferase 2<br>(glucuronosyltransferase S) | -1.529714 | Inlier |
| siRNA-Vinblastine Run2-DMSO  | NM_0807<br>42 | B3GAT2 | beta-1,3-glucuronyltransferase 2<br>(glucuronosyltransferase S) | -0.897229 | Inlier |

Identification of Survival Genes in Human Glioblastoma Cells Using siRNA Screening  
 Nikhil G Thaker, Fang Zhang, Peter R. McDonald, Tong Ying Shun, Michael D Lewen, Ian F. Pollack, and John S. Lazo

Molecular Pharmacology

|                                  |               |        |                                                                                    |           |        |
|----------------------------------|---------------|--------|------------------------------------------------------------------------------------|-----------|--------|
| siRNA Disorazole DMSO Run1       | NM_0807<br>42 | B3GAT2 | beta-1,3-<br>glucuronylt<br>ransferase<br>2<br>(glucurono<br>syltransfer<br>ase S) | -0.23814  | Inlier |
| siRNA-Temozolomide Run1-<br>DMSO | NM_0807<br>42 | B3GAT2 | beta-1,3-<br>glucuronylt<br>ransferase<br>2<br>(glucurono<br>syltransfer<br>ase S) | -0.054969 | Inlier |
| siRNA-Temozolomide Run2-<br>DMSO | NM_0807<br>42 | B3GAT2 | beta-1,3-<br>glucuronylt<br>ransferase<br>2<br>(glucurono<br>syltransfer<br>ase S) | 0.054969  | Inlier |
| siRNA Disorazole DMSO Run3       | NM_0807<br>42 | B3GAT2 | beta-1,3-<br>glucuronylt<br>ransferase<br>2<br>(glucurono<br>syltransfer<br>ase S) | 0.451771  | Inlier |
| siRNA Disorazole DMSO Run2       | NM_0807<br>42 | B3GAT2 | beta-1,3-<br>glucuronylt<br>ransferase<br>2<br>(glucurono<br>syltransfer<br>ase S) | 1.995968  | Inlier |
| siRNA-Vinblastine Run1-<br>DMSO  | NM_0807<br>42 | B3GAT2 | beta-1,3-<br>glucuronylt<br>ransferase<br>3<br>(glucurono<br>syltransfer<br>ase I) | 2.914976  | Inlier |
| siRNA-Temozolomide Run2-<br>DMSO | NM_0122<br>00 | B3GAT3 | beta-1,3-<br>glucuronylt<br>ransferase<br>3<br>(glucurono<br>syltransfer<br>ase I) | -1.188121 | Inlier |

Identification of Survival Genes in Human Glioblastoma Cells Using siRNA Screening  
 Nikhil G Thaker, Fang Zhang, Peter R. McDonald, Tong Ying Shun, Michael D Lewen, Ian F. Pollack, and John S. Lazo

Molecular Pharmacology

| siRNA Treatment              | Gene ID   | Gene Name                                                                 | Log Fold Change | Classification |
|------------------------------|-----------|---------------------------------------------------------------------------|-----------------|----------------|
| siRNA-Temozolomide Run3-DMSO | NM_012200 | B3GAT3<br>beta-1,3-glucuronyltransferase 3<br>(glucuronosyltransferase I) | -0.785786       | Inlier         |
| siRNA-Vinblastine Run2-DMSO  | NM_012200 | B3GAT3<br>beta-1,3-glucuronyltransferase 3<br>(glucuronosyltransferase I) | -0.563214       | Inlier         |
| siRNA Disorazole DMSO Run3   | NM_012200 | B3GAT3<br>beta-1,3-glucuronyltransferase 3<br>(glucuronosyltransferase I) | -0.122864       | Inlier         |
| siRNA-Temozolomide Run1-DMSO | NM_012200 | B3GAT3<br>beta-1,3-glucuronyltransferase 3<br>(glucuronosyltransferase I) | 0.122864        | Inlier         |
| siRNA Disorazole DMSO Run1   | NM_012200 | B3GAT3<br>beta-1,3-glucuronyltransferase 3<br>(glucuronosyltransferase I) | 0.247014        | Inlier         |
| siRNA Disorazole DMSO Run2   | NM_012200 | B3GAT3<br>beta-1,3-glucuronyltransferase 3<br>(glucuronosyltransferase I) | 3.625981        | Outlier        |
| siRNA-Vinblastine Run1-DMSO  | NM_012200 | B3GAT3<br>beta-1,3-glucuronyltransferase 3<br>(glucuronosyltransferase I) | 3.982381        | Outlier        |

Identification of Survival Genes in Human Glioblastoma Cells Using siRNA Screening  
 Nikhil G Thaker, Fang Zhang, Peter R. McDonald, Tong Ying Shun, Michael D Lewen, Ian F. Pollack, and John S. Lazo  
 Molecular Pharmacology

|                              |           |        |                                                               |           |        |
|------------------------------|-----------|--------|---------------------------------------------------------------|-----------|--------|
| siRNA-Temozolomide Run3-DMSO | NM_006577 | B3GNT1 | UDP-GlcNAc:betaGal beta-1,3-N-acetylglucosaminyltransferase 1 | -1.178156 | Inlier |
| siRNA-Temozolomide Run2-DMSO | NM_006577 | B3GNT1 | UDP-GlcNAc:betaGal beta-1,3-N-acetylglucosaminyltransferase 1 | -0.777194 | Inlier |
| siRNA Disorazole DMSO Run1   | NM_006577 | B3GNT1 | UDP-GlcNAc:betaGal beta-1,3-N-acetylglucosaminyltransferase 1 | -0.571806 | Inlier |
| siRNA-Temozolomide Run1-DMSO | NM_006577 | B3GNT1 | UDP-GlcNAc:betaGal beta-1,3-N-acetylglucosaminyltransferase 1 | -0.251196 | Inlier |
| siRNA-Vinblastine Run2-DMSO  | NM_006577 | B3GNT1 | UDP-GlcNAc:betaGal beta-1,3-N-acetylglucosaminyltransferase 1 | 0.251196  | Inlier |

Identification of Survival Genes in Human Glioblastoma Cells Using siRNA Screening  
 Nikhil G Thaker, Fang Zhang, Peter R. McDonald, Tong Ying Shun, Michael D Lewen, Ian F. Pollack, and John S. Lazo  
 Molecular Pharmacology

|                                  |               |        |   |                                                                                     |                  |
|----------------------------------|---------------|--------|---|-------------------------------------------------------------------------------------|------------------|
| siRNA Disorazole DMSO Run3       | NM_0065<br>77 | B3GNT1 | 1 | UDP-<br>GlcNAc:be<br>taGal beta-<br>1,3-N-<br>acetylgluc<br>osaminyltr<br>ansferase | 0.468218 Inlier  |
| siRNA Disorazole DMSO Run2       | NM_0065<br>77 | B3GNT1 | 1 | UDP-<br>GlcNAc:be<br>taGal beta-<br>1,3-N-<br>acetylgluc<br>osaminyltr<br>ansferase | 0.966577 Inlier  |
| siRNA-Vinblastine Run1-<br>DMSO  | NM_0065<br>77 | B3GNT1 | 1 | UDP-<br>GlcNAc:be<br>taGal beta-<br>1,3-N-<br>acetylgluc<br>osaminyltr<br>ansferase | 1.196734 Inlier  |
| siRNA-Temozolomide Run2-<br>DMSO | NM_0142<br>56 | B3GNT3 | 3 | UDP-<br>GlcNAc:be<br>taGal beta-<br>1,3-N-<br>acetylgluc<br>osaminyltr<br>ansferase | -0.997562 Inlier |
| siRNA Disorazole DMSO Run1       | NM_0142<br>56 | B3GNT3 | 3 | UDP-<br>GlcNAc:be<br>taGal beta-<br>1,3-N-<br>acetylgluc<br>osaminyltr<br>ansferase | -0.931399 Inlier |



Identification of Survival Genes in Human Glioblastoma Cells Using siRNA Screening  
 Nikhil G Thaker, Fang Zhang, Peter R. McDonald, Tong Ying Shun, Michael D Lewen, Ian F. Pollack, and John S. Lazo  
 Molecular Pharmacology

|                              |               |        |                                                                                          |           |        |
|------------------------------|---------------|--------|------------------------------------------------------------------------------------------|-----------|--------|
| siRNA-Temozolomide Run3-DMSO | NM_0142<br>56 | B3GNT3 | UDP-<br>GlcNAc:be<br>taGal beta-<br>1,3-N-<br>acetylgluc<br>osaminyltr<br>ansferase<br>3 | -0.417601 | Inlier |
| siRNA-Temozolomide Run1-DMSO | NM_0142<br>56 | B3GNT3 | UDP-<br>GlcNAc:be<br>taGal beta-<br>1,3-N-<br>acetylgluc<br>osaminyltr<br>ansferase<br>3 | -0.207232 | Inlier |
| siRNA-Vinblastine Run2-DMSO  | NM_0142<br>56 | B3GNT3 | UDP-<br>GlcNAc:be<br>taGal beta-<br>1,3-N-<br>acetylgluc<br>osaminyltr<br>ansferase<br>3 | 0.207232  | Inlier |
| siRNA Disorazole DMSO Run3   | NM_0142<br>56 | B3GNT3 | UDP-<br>GlcNAc:be<br>taGal beta-<br>1,3-N-<br>acetylgluc<br>osaminyltr<br>ansferase<br>3 | 0.267082  | Inlier |
| siRNA Disorazole DMSO Run2   | NM_0142<br>56 | B3GNT3 | UDP-<br>GlcNAc:be<br>taGal beta-<br>1,3-N-<br>acetylgluc<br>osaminyltr<br>ansferase<br>3 | 2.344807  | Inlier |

Identification of Survival Genes in Human Glioblastoma Cells Using siRNA Screening  
 Nikhil G Thaker, Fang Zhang, Peter R. McDonald, Tong Ying Shun, Michael D Lewen, Ian F. Pollack, and John S. Lazo  
 Molecular Pharmacology

|                              |           |        |                                                               |           |        |
|------------------------------|-----------|--------|---------------------------------------------------------------|-----------|--------|
| siRNA-Vinblastine Run1-DMSO  | NM_014256 | B3GNT3 | UDP-GlcNAc:betaGal beta-1,3-N-acetylglucosaminyltransferase 3 | 2.492666  | Inlier |
| siRNA-Temozolomide Run2-DMSO | NM_030765 | B3GNT4 | UDP-GlcNAc:betaGal beta-1,3-N-acetylglucosaminyltransferase 4 | -0.928177 | Inlier |
| siRNA-Temozolomide Run3-DMSO | NM_030765 | B3GNT4 | UDP-GlcNAc:betaGal beta-1,3-N-acetylglucosaminyltransferase 4 | -0.782059 | Inlier |
| siRNA-Temozolomide Run1-DMSO | NM_030765 | B3GNT4 | UDP-GlcNAc:betaGal beta-1,3-N-acetylglucosaminyltransferase 4 | -0.370438 | Inlier |
| siRNA-Vinblastine Run2-DMSO  | NM_030765 | B3GNT4 | UDP-GlcNAc:betaGal beta-1,3-N-acetylglucosaminyltransferase 4 | -0.016697 | Inlier |

Identification of Survival Genes in Human Glioblastoma Cells Using siRNA Screening  
 Nikhil G Thaker, Fang Zhang, Peter R. McDonald, Tong Ying Shun, Michael D Lewen, Ian F. Pollack, and John S. Lazo  
 Molecular Pharmacology

|                                 |               |        |                                                                                          |           |        |
|---------------------------------|---------------|--------|------------------------------------------------------------------------------------------|-----------|--------|
| siRNA Disorazole DMSO Run1      | NM_0307<br>65 | B3GNT4 | UDP-<br>GlcNAc:be<br>taGal beta-<br>1,3-N-<br>acetylgluc<br>osaminyltr<br>ansferase<br>4 | 0.016697  | Inlier |
| siRNA Disorazole DMSO Run3      | NM_0307<br>65 | B3GNT4 | UDP-<br>GlcNAc:be<br>taGal beta-<br>1,3-N-<br>acetylgluc<br>osaminyltr<br>ansferase<br>4 | 0.566941  | Inlier |
| siRNA Disorazole DMSO Run2      | NM_0307<br>65 | B3GNT4 | UDP-<br>GlcNAc:be<br>taGal beta-<br>1,3-N-<br>acetylgluc<br>osaminyltr<br>ansferase<br>4 | 1.292647  | Inlier |
| siRNA-Vinblastine Run1-<br>DMSO | NM_0307<br>65 | B3GNT4 | UDP-<br>GlcNAc:be<br>taGal beta-<br>1,3-N-<br>acetylgluc<br>osaminyltr<br>ansferase<br>4 | 1.652988  | Inlier |
| siRNA-Vinblastine Run2-<br>DMSO | NM_0320<br>47 | B3GNT5 | UDP-<br>GlcNAc:be<br>taGal beta-<br>1,3-N-<br>acetylgluc<br>osaminyltr<br>ansferase<br>5 | -0.681423 | Inlier |

Identification of Survival Genes in Human Glioblastoma Cells Using siRNA Screening  
 Nikhil G Thaker, Fang Zhang, Peter R. McDonald, Tong Ying Shun, Michael D Lewen, Ian F. Pollack, and John S. Lazo  
 Molecular Pharmacology

|                                  |               |        |   |                                                                                     |           |        |
|----------------------------------|---------------|--------|---|-------------------------------------------------------------------------------------|-----------|--------|
| siRNA Disorazole DMSO Run3       | NM_0320<br>47 | B3GNT5 | 5 | UDP-<br>GlcNAc:be<br>taGal beta-<br>1,3-N-<br>acetylgluc<br>osaminyltr<br>ansferase | -0.667577 | Inlier |
| siRNA-Temozolomide Run1-<br>DMSO | NM_0320<br>47 | B3GNT5 | 5 | UDP-<br>GlcNAc:be<br>taGal beta-<br>1,3-N-<br>acetylgluc<br>osaminyltr<br>ansferase | -0.180106 | Inlier |
| siRNA Disorazole DMSO Run1       | NM_0320<br>47 | B3GNT5 | 5 | UDP-<br>GlcNAc:be<br>taGal beta-<br>1,3-N-<br>acetylgluc<br>osaminyltr<br>ansferase | -0.044214 | Inlier |
| siRNA-Temozolomide Run2-<br>DMSO | NM_0320<br>47 | B3GNT5 | 5 | UDP-<br>GlcNAc:be<br>taGal beta-<br>1,3-N-<br>acetylgluc<br>osaminyltr<br>ansferase | 0.044214  | Inlier |
| siRNA-Temozolomide Run3-<br>DMSO | NM_0320<br>47 | B3GNT5 | 5 | UDP-<br>GlcNAc:be<br>taGal beta-<br>1,3-N-<br>acetylgluc<br>osaminyltr<br>ansferase | 1.540578  | Inlier |

Identification of Survival Genes in Human Glioblastoma Cells Using siRNA Screening

Nikhil G Thaker, Fang Zhang, Peter R. McDonald, Tong Ying Shun, Michael D Lewen, Ian F. Pollack, and John S.

Lazo

Molecular Pharmacology

|                              |               |        |                                                               |           |        |
|------------------------------|---------------|--------|---------------------------------------------------------------|-----------|--------|
| siRNA-Vinblastine Run1-DMSO  | NM_0320<br>47 | B3GNT5 | UDP-GlcNAc:betaGal beta-1,3-N-acetylglucosaminyltransferase 5 | 2.981793  | Inlier |
| siRNA Disorazole DMSO Run2   | NM_0320<br>47 | B3GNT5 | UDP-GlcNAc:betaGal beta-1,3-N-acetylglucosaminyltransferase 5 | 3.236646  | Inlier |
| siRNA-Temozolomide Run3-DMSO | NM_0068<br>76 | B3GNT6 | UDP-GlcNAc:betaGal beta-1,3-N-acetylglucosaminyltransferase 6 | -0.747804 | Inlier |
| siRNA-Temozolomide Run1-DMSO | NM_0068<br>76 | B3GNT6 | UDP-GlcNAc:betaGal beta-1,3-N-acetylglucosaminyltransferase 6 | -0.601196 | Inlier |
| siRNA-Temozolomide Run2-DMSO | NM_0068<br>76 | B3GNT6 | UDP-GlcNAc:betaGal beta-1,3-N-acetylglucosaminyltransferase 6 | -0.455675 | Inlier |

Identification of Survival Genes in Human Glioblastoma Cells Using siRNA Screening

Nikhil G Thaker, Fang Zhang, Peter R. McDonald, Tong Ying Shun, Michael D Lewen, Ian F. Pollack, and John S. Lazo

Molecular Pharmacology

|                                 |               |        |                                                                                          |           |         |
|---------------------------------|---------------|--------|------------------------------------------------------------------------------------------|-----------|---------|
| siRNA Disorazole DMSO Run3      | NM_0068<br>76 | B3GNT6 | UDP-<br>GlcNAc:be<br>taGal beta-<br>1,3-N-<br>acetylgluc<br>osaminyltr<br>ansferase<br>6 | -0.251015 | Inlier  |
| siRNA-Vinblastine Run2-<br>DMSO | NM_0068<br>76 | B3GNT6 | UDP-<br>GlcNAc:be<br>taGal beta-<br>1,3-N-<br>acetylgluc<br>osaminyltr<br>ansferase<br>6 | 0.251015  | Inlier  |
| siRNA Disorazole DMSO Run1      | NM_0068<br>76 | B3GNT6 | UDP-<br>GlcNAc:be<br>taGal beta-<br>1,3-N-<br>acetylgluc<br>osaminyltr<br>ansferase<br>6 | 1.137525  | Inlier  |
| siRNA Disorazole DMSO Run2      | NM_0068<br>76 | B3GNT6 | UDP-<br>GlcNAc:be<br>taGal beta-<br>1,3-N-<br>acetylgluc<br>osaminyltr<br>ansferase<br>6 | 7.233782  | Outlier |
| siRNA-Vinblastine Run1-<br>DMSO | NM_0068<br>76 | B3GNT6 | UDP-<br>GlcNAc:be<br>taGal beta-<br>1,3-N-<br>acetylgluc<br>osaminyltr<br>ansferase<br>6 | 7.447136  | Outlier |

Identification of Survival Genes in Human Glioblastoma Cells Using siRNA Screening  
 Nikhil G Thaker, Fang Zhang, Peter R. McDonald, Tong Ying Shun, Michael D Lewen, Ian F. Pollack, and John S. Lazo  
 Molecular Pharmacology

|                              |               |        |                                                                                          |           |        |
|------------------------------|---------------|--------|------------------------------------------------------------------------------------------|-----------|--------|
| siRNA-Temozolomide Run3-DMSO | NM_1452<br>36 | B3GNT7 | UDP-<br>GlcNAc:be<br>taGal beta-<br>1,3-N-<br>acetylgluc<br>osaminyltr<br>ansferase<br>7 | -0.685768 | Inlier |
| siRNA-Temozolomide Run2-DMSO | NM_1452<br>36 | B3GNT7 | UDP-<br>GlcNAc:be<br>taGal beta-<br>1,3-N-<br>acetylgluc<br>osaminyltr<br>ansferase<br>7 | -0.663232 | Inlier |
| siRNA Disorazole DMSO Run3   | NM_1452<br>36 | B3GNT7 | UDP-<br>GlcNAc:be<br>taGal beta-<br>1,3-N-<br>acetylgluc<br>osaminyltr<br>ansferase<br>7 | -0.500271 | Inlier |
| siRNA-Vinblastine Run2-DMSO  | NM_1452<br>36 | B3GNT7 | UDP-<br>GlcNAc:be<br>taGal beta-<br>1,3-N-<br>acetylgluc<br>osaminyltr<br>ansferase<br>7 | -0.354057 | Inlier |
| siRNA Disorazole DMSO Run1   | NM_1452<br>36 | B3GNT7 | UDP-<br>GlcNAc:be<br>taGal beta-<br>1,3-N-<br>acetylgluc<br>osaminyltr<br>ansferase<br>7 | 0.354057  | Inlier |

Identification of Survival Genes in Human Glioblastoma Cells Using siRNA Screening

Nikhil G Thaker, Fang Zhang, Peter R. McDonald, Tong Ying Shun, Michael D Lewen, Ian F. Pollack, and John S.

Lazo

Molecular Pharmacology

|                              |               |         |                                                               |           |         |
|------------------------------|---------------|---------|---------------------------------------------------------------|-----------|---------|
| siRNA-Temozolomide Run1-DMSO | NM_1452<br>36 | B3GNT7  | UDP-GlcNAc:betaGal beta-1,3-N-acetylglucosaminyltransferase 7 | 0.796673  | Inlier  |
| siRNA Disorazole DMSO Run2   | NM_1452<br>36 | B3GNT7  | UDP-GlcNAc:betaGal beta-1,3-N-acetylglucosaminyltransferase 7 | 7.581861  | Outlier |
| siRNA-Vinblastine Run1-DMSO  | NM_1452<br>36 | B3GNT7  | UDP-GlcNAc:betaGal beta-1,3-N-acetylglucosaminyltransferase 7 | 7.872368  | Outlier |
| siRNA-Temozolomide Run2-DMSO | NM_0014<br>97 | B4GALT1 | UDP-Gal:betaGlcNAc beta 1,4-galactosyltransferase 1           | -1.196186 | Inlier  |
| siRNA-Temozolomide Run3-DMSO | NM_0014<br>97 | B4GALT1 | UDP-Gal:betaGlcNAc beta 1,4-galactosyltransferase 1           | -1.030799 | Inlier  |



Identification of Survival Genes in Human Glioblastoma Cells Using siRNA Screening

Nikhil G Thaker, Fang Zhang, Peter R. McDonald, Tong Ying Shun, Michael D Lewen, Ian F. Pollack, and John S.

Lazo

Molecular Pharmacology

| siRNA Treatment              | Gene ID   | Gene Name | Log Fold Change | Annotation |
|------------------------------|-----------|-----------|-----------------|------------|
| siRNA-Temozolomide Run1-DMSO | NM_001497 | B4GALT1   | -0.308149       | Inlier     |
| siRNA-Vinblastine Run2-DMSO  | NM_001497 | B4GALT1   | -0.099122       | Inlier     |
| siRNA Disorazole DMSO Run3   | NM_001497 | B4GALT1   | 0.099122        | Inlier     |
| siRNA Disorazole DMSO Run1   | NM_001497 | B4GALT1   | 0.318201        | Inlier     |
| siRNA-Vinblastine Run1-DMSO  | NM_001497 | B4GALT1   | 1.591182        | Inlier     |

UDP-Gal:betaGl  
cNAc beta  
1,4-  
galactosylt  
ransferase

,  
polypeptid  
e 1

UDP-Gal:betaGl  
cNAc beta  
1,4-  
galactosylt  
ransferase

,  
polypeptid  
e 1

UDP-Gal:betaGl  
cNAc beta  
1,4-  
galactosylt  
ransferase

,  
polypeptid  
e 1

UDP-Gal:betaGl  
cNAc beta  
1,4-  
galactosylt  
ransferase

,  
polypeptid  
e 1

UDP-Gal:betaGl  
cNAc beta  
1,4-  
galactosylt  
ransferase

,  
polypeptid  
e 1

Identification of Survival Genes in Human Glioblastoma Cells Using siRNA Screening

Nikhil G Thaker, Fang Zhang, Peter R. McDonald, Tong Ying Shun, Michael D Lewen, Ian F. Pollack, and John S. Lazo

Molecular Pharmacology

|                                  |               |         |                                                                      |                                                                      |        |
|----------------------------------|---------------|---------|----------------------------------------------------------------------|----------------------------------------------------------------------|--------|
|                                  |               |         |                                                                      | UDP-<br>Gal:betaGl<br>cNAc beta<br>1,4-<br>galactosylt<br>ransferase |        |
| siRNA Disorazole DMSO Run2       | NM_0014<br>97 | B4GALT1 | ,<br>polypeptid<br>e 1                                               | 2.121459                                                             | Inlier |
|                                  |               |         | UDP-<br>Gal:betaGl<br>cNAc beta<br>1,4-<br>galactosylt<br>ransferase |                                                                      |        |
| siRNA-Temozolomide Run3-<br>DMSO | NM_0305<br>87 | B4GALT2 | ,<br>polypeptid<br>e 2                                               | -0.774803                                                            | Inlier |
|                                  |               |         | UDP-<br>Gal:betaGl<br>cNAc beta<br>1,4-<br>galactosylt<br>ransferase |                                                                      |        |
| siRNA-Temozolomide Run1-<br>DMSO | NM_0305<br>87 | B4GALT2 | ,<br>polypeptid<br>e 2                                               | -0.574197                                                            | Inlier |
|                                  |               |         | UDP-<br>Gal:betaGl<br>cNAc beta<br>1,4-<br>galactosylt<br>ransferase |                                                                      |        |
| siRNA Disorazole DMSO Run1       | NM_0305<br>87 | B4GALT2 | ,<br>polypeptid<br>e 2                                               | -0.35954                                                             | Inlier |
|                                  |               |         | UDP-<br>Gal:betaGl<br>cNAc beta<br>1,4-<br>galactosylt<br>ransferase |                                                                      |        |
| siRNA-Temozolomide Run2-<br>DMSO | NM_0305<br>87 | B4GALT2 | ,<br>polypeptid<br>e 2                                               | -0.234402                                                            | Inlier |

Identification of Survival Genes in Human Glioblastoma Cells Using siRNA Screening

Nikhil G Thaker, Fang Zhang, Peter R. McDonald, Tong Ying Shun, Michael D Lewen, Ian F. Pollack, and John S.

Lazo

Molecular Pharmacology

| siRNA Treatment              | Gene ID   | Gene Name | Protein Name                                        | Value     | Category |
|------------------------------|-----------|-----------|-----------------------------------------------------|-----------|----------|
| siRNA-Vinblastine Run2-DMSO  | NM_030587 | B4GALT2   | UDP-Gal:betaGl cNAc beta 1,4-galactosylt ransferase | 0.2344    | Inlier   |
| siRNA Disorazole DMSO Run3   | NM_030587 | B4GALT2   | UDP-Gal:betaGl cNAc beta 1,4-galactosylt ransferase | 1.739223  | Inlier   |
| siRNA Disorazole DMSO Run2   | NM_030587 | B4GALT2   | UDP-Gal:betaGl cNAc beta 1,4-galactosylt ransferase | 3.482293  | Inlier   |
| siRNA-Vinblastine Run1-DMSO  | NM_030587 | B4GALT2   | UDP-Gal:betaGl cNAc beta 1,4-galactosylt ransferase | 3.560717  | Outlier  |
| siRNA-Temozolomide Run2-DMSO | NM_003779 | B4GALT3   | polypeptid e 3                                      | -0.921885 | Inlier   |

Identification of Survival Genes in Human Glioblastoma Cells Using siRNA Screening

Nikhil G Thaker, Fang Zhang, Peter R. McDonald, Tong Ying Shun, Michael D Lewen, Ian F. Pollack, and John S. Lazo

Molecular Pharmacology

| siRNA Treatment              | Gene      | Accession | Gene Name                                          | Log Fold Change | Outlier Status |
|------------------------------|-----------|-----------|----------------------------------------------------|-----------------|----------------|
| siRNA-Temozolomide Run3-DMSO | NM_003779 | B4GALT3   | UDP-Gal:betaGl cNAc beta 1,4-galactosyltransferase | -0.714047       | Inlier         |
| siRNA Disorazole DMSO Run3   | NM_003779 | B4GALT3   | UDP-Gal:betaGl cNAc beta 1,4-galactosyltransferase | -0.634953       | Inlier         |
| siRNA-Vinblastine Run2-DMSO  | NM_003779 | B4GALT3   | UDP-Gal:betaGl cNAc beta 1,4-galactosyltransferase | -0.312285       | Inlier         |
| siRNA-Temozolomide Run1-DMSO | NM_003779 | B4GALT3   | UDP-Gal:betaGl cNAc beta 1,4-galactosyltransferase | 0.312286        | Inlier         |
| siRNA Disorazole DMSO Run1   | NM_003779 | B4GALT3   | UDP-Gal:betaGl cNAc beta 1,4-galactosyltransferase | 0.367958        | Inlier         |

Identification of Survival Genes in Human Glioblastoma Cells Using siRNA Screening

Nikhil G Thaker, Fang Zhang, Peter R. McDonald, Tong Ying Shun, Michael D Lewen, Ian F. Pollack, and John S.

Lazo

Molecular Pharmacology

| siRNA Treatment              | Gene ID   | Gene Name | Protein Name                                        | Score     | Category |
|------------------------------|-----------|-----------|-----------------------------------------------------|-----------|----------|
| siRNA-Vinblastine Run1-DMSO  | NM_003779 | B4GALT3   | UDP-Gal:betaGl cNAc beta 1,4-galactosylt ransferase | 4.745552  | Outlier  |
| siRNA Disorazole DMSO Run2   | NM_003779 | B4GALT3   | UDP-Gal:betaGl cNAc beta 1,4-galactosylt ransferase | 4.766486  | Outlier  |
| siRNA Disorazole DMSO Run1   | NM_003778 | B4GALT4   | UDP-Gal:betaGl cNAc beta 1,4-galactosylt ransferase | -2.999943 | Inlier   |
| siRNA-Temozolomide Run1-DMSO | NM_003778 | B4GALT4   | UDP-Gal:betaGl cNAc beta 1,4-galactosylt ransferase | -1.274009 | Inlier   |
| siRNA-Vinblastine Run2-DMSO  | NM_003778 | B4GALT4   | UDP-Gal:betaGl cNAc beta 1,4-galactosylt ransferase | -0.80818  | Inlier   |

Identification of Survival Genes in Human Glioblastoma Cells Using siRNA Screening

Nikhil G Thaker, Fang Zhang, Peter R. McDonald, Tong Ying Shun, Michael D Lewen, Ian F. Pollack, and John S.

Lazo

Molecular Pharmacology

| siRNA Treatment              | Gene ID   | Gene Name | Protein Name                                       | Value     | Outlier Status |
|------------------------------|-----------|-----------|----------------------------------------------------|-----------|----------------|
| siRNA-Temozolomide Run2-DMSO | NM_003778 | B4GALT4   | UDP-Gal:betaGl cNAc beta 1,4-galactosyltransferase | -0.083784 | Inlier         |
| siRNA Disorazole DMSO Run3   | NM_003778 | B4GALT4   | UDP-Gal:betaGl cNAc beta 1,4-galactosyltransferase | 0.083784  | Inlier         |
| siRNA Disorazole DMSO Run2   | NM_003778 | B4GALT4   | UDP-Gal:betaGl cNAc beta 1,4-galactosyltransferase | 0.440121  | Inlier         |
| siRNA-Temozolomide Run3-DMSO | NM_003778 | B4GALT4   | UDP-Gal:betaGl cNAc beta 1,4-galactosyltransferase | 0.54082   | Inlier         |
| siRNA-Vinblastine Run1-DMSO  | NM_003778 | B4GALT4   | UDP-Gal:betaGl cNAc beta 1,4-galactosyltransferase | 1.175307  | Inlier         |

Identification of Survival Genes in Human Glioblastoma Cells Using siRNA Screening

Nikhil G Thaker, Fang Zhang, Peter R. McDonald, Tong Ying Shun, Michael D Lewen, Ian F. Pollack, and John S.

Lazo

Molecular Pharmacology

| siRNA Treatment              | Gene ID   | Gene Name | Log Fold Change | Outlier Status |
|------------------------------|-----------|-----------|-----------------|----------------|
| siRNA-Temozolomide Run3-DMSO | NM_004776 | B4GALT5   | -1.472591       | Inlier         |
| siRNA-Temozolomide Run2-DMSO | NM_004776 | B4GALT5   | -0.740679       | Inlier         |
| siRNA Disorazole DMSO Run1   | NM_004776 | B4GALT5   | -0.608321       | Inlier         |
| siRNA-Temozolomide Run1-DMSO | NM_004776 | B4GALT5   | -0.245345       | Inlier         |
| siRNA-Vinblastine Run2-DMSO  | NM_004776 | B4GALT5   | 0.245345        | Inlier         |

UDP-Gal:betaGl  
cNAc beta  
1,4-  
galactosylt  
ransferase

,  
polypeptid  
e 5  
UDP-Gal:betaGl  
cNAc beta  
1,4-  
galactosylt  
ransferase

,  
polypeptid  
e 5  
UDP-Gal:betaGl  
cNAc beta  
1,4-  
galactosylt  
ransferase

,  
polypeptid  
e 5  
UDP-Gal:betaGl  
cNAc beta  
1,4-  
galactosylt  
ransferase

,  
polypeptid  
e 5  
UDP-Gal:betaGl  
cNAc beta  
1,4-  
galactosylt  
ransferase

,  
polypeptid  
e 5

Identification of Survival Genes in Human Glioblastoma Cells Using siRNA Screening

Nikhil G Thaker, Fang Zhang, Peter R. McDonald, Tong Ying Shun, Michael D Lewen, Ian F. Pollack, and John S.

Lazo

Molecular Pharmacology

|                                  |               |         |                                                                      |                                                                      |        |
|----------------------------------|---------------|---------|----------------------------------------------------------------------|----------------------------------------------------------------------|--------|
|                                  |               |         |                                                                      | UDP-<br>Gal:betaGl<br>cNAc beta<br>1,4-<br>galactosylt<br>ransferase |        |
| siRNA Disorazole DMSO Run3       | NM_0047<br>76 | B4GALT5 | ,<br>polypeptid<br>e 5                                               | 0.24853                                                              | Inlier |
|                                  |               |         | UDP-<br>Gal:betaGl<br>cNAc beta<br>1,4-<br>galactosylt<br>ransferase |                                                                      |        |
| siRNA-Vinblastine Run1-<br>DMSO  | NM_0047<br>76 | B4GALT5 | ,<br>polypeptid<br>e 5                                               | 1.01501                                                              | Inlier |
|                                  |               |         | UDP-<br>Gal:betaGl<br>cNAc beta<br>1,4-<br>galactosylt<br>ransferase |                                                                      |        |
| siRNA Disorazole DMSO Run2       | NM_0047<br>76 | B4GALT5 | ,<br>polypeptid<br>e 5                                               | 1.360051                                                             | Inlier |
|                                  |               |         | UDP-<br>Gal:betaGl<br>cNAc beta<br>1,4-<br>galactosylt<br>ransferase |                                                                      |        |
| siRNA-Temozolomide Run1-<br>DMSO | NM_0047<br>75 | B4GALT6 | ,<br>polypeptid<br>e 6                                               | -1.415908                                                            | Inlier |
|                                  |               |         | UDP-<br>Gal:betaGl<br>cNAc beta<br>1,4-<br>galactosylt<br>ransferase |                                                                      |        |
| siRNA-Temozolomide Run2-<br>DMSO | NM_0047<br>75 | B4GALT6 | ,<br>polypeptid<br>e 6                                               | -0.850253                                                            | Inlier |



Identification of Survival Genes in Human Glioblastoma Cells Using siRNA Screening

Nikhil G Thaker, Fang Zhang, Peter R. McDonald, Tong Ying Shun, Michael D Lewen, Ian F. Pollack, and John S.

Lazo

Molecular Pharmacology

| siRNA Treatment              | Gene    | Gene ID   | Gene Symbol | Protein Name                                       | Log2 Fold Change | Outlier Status |
|------------------------------|---------|-----------|-------------|----------------------------------------------------|------------------|----------------|
| siRNA Disorazole DMSO Run1   | B4GALT6 | NM_004775 | B4GALT6     | UDP-Gal:betaGlucNAc beta 1,4-galactosyltransferase | -0.498747        | Inlier         |
| siRNA Disorazole DMSO Run2   | B4GALT6 | NM_004775 | B4GALT6     | UDP-Gal:betaGlucNAc beta 1,4-galactosyltransferase | -0.341306        | Inlier         |
| siRNA-Temozolomide DMSO Run3 | B4GALT6 | NM_004775 | B4GALT6     | UDP-Gal:betaGlucNAc beta 1,4-galactosyltransferase | 0.341306         | Inlier         |
| siRNA-Vinblastine DMSO Run2  | B4GALT6 | NM_004775 | B4GALT6     | UDP-Gal:betaGlucNAc beta 1,4-galactosyltransferase | 0.412798         | Inlier         |
| siRNA-Vinblastine DMSO Run1  | B4GALT6 | NM_004775 | B4GALT6     | UDP-Gal:betaGlucNAc beta 1,4-galactosyltransferase | 1.058323         | Inlier         |

Identification of Survival Genes in Human Glioblastoma Cells Using siRNA Screening

Nikhil G Thaker, Fang Zhang, Peter R. McDonald, Tong Ying Shun, Michael D Lewen, Ian F. Pollack, and John S.

Lazo

Molecular Pharmacology

| siRNA              | Condition | Run  | Gene    | Accession | Gene Name                                                                                        | Score     | Inlier |
|--------------------|-----------|------|---------|-----------|--------------------------------------------------------------------------------------------------|-----------|--------|
| siRNA Disorazole   | DMSO      | Run3 | B4GALT6 | NM_004775 | UDP-Gal:betaGl cNAc beta 1,4-galactosylt ransferase                                              | 1.137685  | Inlier |
| siRNA-Temozolomide | DMSO      | Run2 | B4GALT7 | NM_007255 | polypeptid e 6<br>(galactosyl transferas e I)<br>xylosylprot ein beta 1,4-galactosylt ransferase | -0.931575 | Inlier |
| siRNA-Temozolomide | DMSO      | Run1 | B4GALT7 | NM_007255 | polypeptid e 7<br>(galactosyl transferas e I)<br>xylosylprot ein beta 1,4-galactosylt ransferase | -0.764343 | Inlier |
| siRNA-Temozolomide | DMSO      | Run3 | B4GALT7 | NM_007255 | polypeptid e 7<br>(galactosyl transferas e I)                                                    | -0.198074 | Inlier |

Identification of Survival Genes in Human Glioblastoma Cells Using siRNA Screening

Nikhil G Thaker, Fang Zhang, Peter R. McDonald, Tong Ying Shun, Michael D Lewen, Ian F. Pollack, and John S. Lazo

Molecular Pharmacology

|                                 |               |         |                                                                                                                             |          |        |
|---------------------------------|---------------|---------|-----------------------------------------------------------------------------------------------------------------------------|----------|--------|
| siRNA Disorazole DMSO Run3      | NM_0072<br>55 | B4GALT7 | xylosylprot<br>ein beta<br>1,4-<br>galactosylt<br>ransferase<br>,<br>polypeptid<br>e 7<br>(galactosyl<br>transferas<br>e I) | -0.03359 | Inlier |
| siRNA-Vinblastine Run2-<br>DMSO | NM_0072<br>55 | B4GALT7 | xylosylprot<br>ein beta<br>1,4-<br>galactosylt<br>ransferase<br>,<br>polypeptid<br>e 7<br>(galactosyl<br>transferas<br>e I) | 0.03359  | Inlier |
| siRNA Disorazole DMSO Run1      | NM_0072<br>55 | B4GALT7 | xylosylprot<br>ein beta<br>1,4-<br>galactosylt<br>ransferase<br>,<br>polypeptid<br>e 7<br>(galactosyl<br>transferas<br>e I) | 0.584657 | Inlier |
| siRNA Disorazole DMSO Run2      | NM_0072<br>55 | B4GALT7 | xylosylprot<br>ein beta<br>1,4-<br>galactosylt<br>ransferase<br>,<br>polypeptid<br>e 7<br>(galactosyl<br>transferas<br>e I) | 0.982476 | Inlier |

Identification of Survival Genes in Human Glioblastoma Cells Using siRNA Screening  
 Nikhil G Thaker, Fang Zhang, Peter R. McDonald, Tong Ying Shun, Michael D Lewen, Ian F. Pollack, and John S. Lazo

Molecular Pharmacology

|                              |           |         |                                                                                   |           |        |
|------------------------------|-----------|---------|-----------------------------------------------------------------------------------|-----------|--------|
| siRNA-Vinblastine Run1-DMSO  | NM_007255 | B4GALT7 | xylosylprotein beta 1,4-galactosyltransferase 7 (galactosyltransferase I)         | 2.409844  | Inlier |
| siRNA-Temozolomide Run2-DMSO | NM_001701 | BAAT    | bile acid Coenzyme A: amino acid N-acyltransferase (glycine N-choloyltransferase) | -0.706291 | Inlier |
| siRNA Disorazole DMSO Run1   | NM_001701 | BAAT    | bile acid Coenzyme A: amino acid N-acyltransferase (glycine N-choloyltransferase) | -0.642709 | Inlier |
| siRNA-Vinblastine Run2-DMSO  | NM_001701 | BAAT    | bile acid Coenzyme A: amino acid N-acyltransferase (glycine N-choloyltransferase) | -0.602202 | Inlier |
| siRNA-Temozolomide Run3-DMSO | NM_001701 | BAAT    | bile acid Coenzyme A: amino acid N-acyltransferase (glycine N-choloyltransferase) | -0.079014 | Inlier |

Identification of Survival Genes in Human Glioblastoma Cells Using siRNA Screening

Nikhil G Thaker, Fang Zhang, Peter R. McDonald, Tong Ying Shun, Michael D Lewen, Ian F. Pollack, and John S. Lazo

Molecular Pharmacology

|                              |           |       |                                                                                                               |           |         |
|------------------------------|-----------|-------|---------------------------------------------------------------------------------------------------------------|-----------|---------|
| siRNA-Temozolomide Run1-DMSO | NM_001701 | BAAT  | bile acid<br>Coenzyme<br>A: amino<br>acid N-<br>acyltransfe<br>rase<br>(glycine N-<br>choloyltran<br>sferase) | 0.079014  | Inlier  |
| siRNA Disorazole DMSO Run3   | NM_001701 | BAAT  | bile acid<br>Coenzyme<br>A: amino<br>acid N-<br>acyltransfe<br>rase<br>(glycine N-<br>choloyltran<br>sferase) | 2.028383  | Inlier  |
| siRNA-Vinblastine Run1-DMSO  | NM_001701 | BAAT  | bile acid<br>Coenzyme<br>A: amino<br>acid N-<br>acyltransfe<br>rase<br>(glycine N-<br>choloyltran<br>sferase) | 5.850728  | Outlier |
| siRNA Disorazole DMSO Run2   | NM_001701 | BAAT  | bile acid<br>Coenzyme<br>A: amino<br>acid N-<br>acyltransfe<br>rase<br>(glycine N-<br>choloyltran<br>sferase) | 5.910522  | Outlier |
| siRNA-Temozolomide Run3-DMSO | NM_138973 | BACE1 | beta-site<br>APP-<br>cleaving<br>enzyme 1                                                                     | -0.810435 | Inlier  |
| siRNA-Temozolomide Run2-DMSO | NM_138973 | BACE1 | beta-site<br>APP-<br>cleaving<br>enzyme 1                                                                     | -0.538565 | Inlier  |
| siRNA-Temozolomide Run1-DMSO | NM_138973 | BACE1 | beta-site<br>APP-<br>cleaving<br>enzyme 1                                                                     | -0.460067 | Inlier  |

Identification of Survival Genes in Human Glioblastoma Cells Using siRNA Screening  
 Nikhil G Thaker, Fang Zhang, Peter R. McDonald, Tong Ying Shun, Michael D Lewen, Ian F. Pollack, and John S. Lazo

Molecular Pharmacology

| siRNA Treatment              | Gene ID       | Gene Name | Target                          | Value     | Outlier Status |
|------------------------------|---------------|-----------|---------------------------------|-----------|----------------|
| siRNA Disorazole DMSO Run1   | NM_1389<br>73 | BACE1     | beta-site APP-cleaving enzyme 1 | -0.007901 | Inlier         |
| siRNA Disorazole DMSO Run2   | NM_1389<br>73 | BACE1     | beta-site APP-cleaving enzyme 1 | 0.007901  | Inlier         |
| siRNA Disorazole DMSO Run3   | NM_1389<br>73 | BACE1     | beta-site APP-cleaving enzyme 1 | 0.915901  | Inlier         |
| siRNA-Vinblastine Run2-DMSO  | NM_1389<br>73 | BACE1     | beta-site APP-cleaving enzyme 1 | 1.382447  | Inlier         |
| siRNA-Vinblastine Run1-DMSO  | NM_1389<br>73 | BACE1     | beta-site APP-cleaving enzyme 1 | 1.413275  | Inlier         |
| siRNA-Temozolomide Run2-DMSO | NM_1389<br>91 | BACE2     | beta-site APP-cleaving enzyme 2 | -0.906128 | Inlier         |
| siRNA Disorazole DMSO Run1   | NM_1389<br>91 | BACE2     | beta-site APP-cleaving enzyme 2 | -0.613366 | Inlier         |
| siRNA-Temozolomide Run3-DMSO | NM_1389<br>91 | BACE2     | beta-site APP-cleaving enzyme 2 | -0.516018 | Inlier         |
| siRNA Disorazole DMSO Run2   | NM_1389<br>91 | BACE2     | beta-site APP-cleaving enzyme 2 | -0.509771 | Inlier         |
| siRNA-Temozolomide Run1-DMSO | NM_1389<br>91 | BACE2     | beta-site APP-cleaving enzyme 2 | 0.509771  | Inlier         |
| siRNA Disorazole DMSO Run3   | NM_1389<br>91 | BACE2     | beta-site APP-cleaving enzyme 2 | 0.735634  | Inlier         |
| siRNA-Vinblastine Run2-DMSO  | NM_1389<br>91 | BACE2     | beta-site APP-cleaving enzyme 2 | 1.944768  | Inlier         |
| siRNA-Vinblastine Run1-DMSO  | NM_1389<br>91 | BACE2     | beta-site APP-cleaving enzyme 2 | 2.156124  | Inlier         |

Identification of Survival Genes in Human Glioblastoma Cells Using siRNA Screening

Nikhil G Thaker, Fang Zhang, Peter R. McDonald, Tong Ying Shun, Michael D Lewen, Ian F. Pollack, and John S.

Lazo

|                                  |               |      |                                         |           |         |
|----------------------------------|---------------|------|-----------------------------------------|-----------|---------|
| siRNA-Vinblastine Run2-<br>DMSO  | NM_1818<br>65 | BACH | BACH                                    | -0.861291 | Inlier  |
| siRNA-Temozolomide Run2-<br>DMSO | NM_1818<br>65 | BACH | BACH                                    | -0.754765 | Inlier  |
| siRNA-Temozolomide Run3-<br>DMSO | NM_1818<br>65 | BACH | BACH                                    | -0.413352 | Inlier  |
| siRNA-Temozolomide Run1-<br>DMSO | NM_1818<br>65 | BACH | BACH                                    | -0.247869 | Inlier  |
| siRNA Disorazole DMSO Run3       | NM_1818<br>65 | BACH | BACH                                    | 0.247869  | Inlier  |
| siRNA Disorazole DMSO Run1       | NM_1818<br>65 | BACH | BACH                                    | 0.594235  | Inlier  |
| siRNA Disorazole DMSO Run2       | NM_1818<br>65 | BACH | BACH                                    | 3.111042  | Inlier  |
| siRNA-Vinblastine Run1-<br>DMSO  | NM_1818<br>65 | BACH | BACH                                    | 3.233908  | Inlier  |
| siRNA-Temozolomide Run3-<br>DMSO | NM_0043<br>22 | BAD  | BCL2-<br>antagonist<br>of cell<br>death | -2.069679 | Inlier  |
| siRNA-Temozolomide Run2-<br>DMSO | NM_0043<br>22 | BAD  | BCL2-<br>antagonist<br>of cell<br>death | -0.847594 | Inlier  |
| siRNA-Temozolomide Run1-<br>DMSO | NM_0043<br>22 | BAD  | BCL2-<br>antagonist<br>of cell<br>death | -0.501406 | Inlier  |
| siRNA Disorazole DMSO Run3       | NM_0043<br>22 | BAD  | BCL2-<br>antagonist<br>of cell<br>death | -0.175275 | Inlier  |
| siRNA Disorazole DMSO Run1       | NM_0043<br>22 | BAD  | BCL2-<br>antagonist<br>of cell<br>death | 0.175275  | Inlier  |
| siRNA-Vinblastine Run2-<br>DMSO  | NM_0043<br>22 | BAD  | BCL2-<br>antagonist<br>of cell<br>death | 0.220151  | Inlier  |
| siRNA Disorazole DMSO Run2       | NM_0043<br>22 | BAD  | BCL2-<br>antagonist<br>of cell<br>death | 2.302359  | Inlier  |
| siRNA-Vinblastine Run1-<br>DMSO  | NM_0043<br>22 | BAD  | BCL2-<br>antagonist<br>of cell<br>death | 4.374751  | Outlier |

Identification of Survival Genes in Human Glioblastoma Cells Using siRNA Screening  
 Nikhil G Thaker, Fang Zhang, Peter R. McDonald, Tong Ying Shun, Michael D Lewen, Ian F. Pollack, and John S. Lazo

Molecular Pharmacology

|                              |           |      |                                         |           |        |
|------------------------------|-----------|------|-----------------------------------------|-----------|--------|
| siRNA-Temozolomide Run3-DMSO | NM_001702 | BAI1 | brain-specific angiogenesis inhibitor 1 | -1.26601  | Inlier |
| siRNA-Temozolomide Run1-DMSO | NM_001702 | BAI1 | brain-specific angiogenesis inhibitor 1 | -0.983321 | Inlier |
| siRNA Disorazole DMSO Run2   | NM_001702 | BAI1 | brain-specific angiogenesis inhibitor 1 | -0.625797 | Inlier |
| siRNA-Temozolomide Run2-DMSO | NM_001702 | BAI1 | brain-specific angiogenesis inhibitor 1 | -0.464754 | Inlier |
| siRNA Disorazole DMSO Run1   | NM_001702 | BAI1 | brain-specific angiogenesis inhibitor 1 | 0.464754  | Inlier |
| siRNA Disorazole DMSO Run3   | NM_001702 | BAI1 | brain-specific angiogenesis inhibitor 1 | 0.626456  | Inlier |
| siRNA-Vinblastine Run2-DMSO  | NM_001702 | BAI1 | brain-specific angiogenesis inhibitor 1 | 0.722544  | Inlier |
| siRNA-Vinblastine Run1-DMSO  | NM_001702 | BAI1 | brain-specific angiogenesis inhibitor 1 | 1.304845  | Inlier |
| siRNA Disorazole DMSO Run2   | NM_001703 | BAI2 | brain-specific angiogenesis inhibitor 2 | -0.926516 | Inlier |
| siRNA Disorazole DMSO Run3   | NM_001703 | BAI2 | brain-specific angiogenesis inhibitor 2 | -0.551283 | Inlier |



Identification of Survival Genes in Human Glioblastoma Cells Using siRNA Screening  
 Nikhil G Thaker, Fang Zhang, Peter R. McDonald, Tong Ying Shun, Michael D Lewen, Ian F. Pollack, and John S. Lazo

Molecular Pharmacology

|                              |           |      |                                         |           |        |
|------------------------------|-----------|------|-----------------------------------------|-----------|--------|
| siRNA-Temozolomide Run3-DMSO | NM_001703 | BAI2 | brain-specific angiogenesis inhibitor 2 | -0.395818 | Inlier |
| siRNA-Temozolomide Run1-DMSO | NM_001703 | BAI2 | brain-specific angiogenesis inhibitor 2 | -0.235329 | Inlier |
| siRNA Disorazole DMSO Run1   | NM_001703 | BAI2 | brain-specific angiogenesis inhibitor 2 | 0.235329  | Inlier |
| siRNA-Temozolomide Run2-DMSO | NM_001703 | BAI2 | brain-specific angiogenesis inhibitor 2 | 0.797717  | Inlier |
| siRNA-Vinblastine Run2-DMSO  | NM_001703 | BAI2 | brain-specific angiogenesis inhibitor 2 | 2.021346  | Inlier |
| siRNA-Vinblastine Run1-DMSO  | NM_001703 | BAI2 | brain-specific angiogenesis inhibitor 2 | 2.234257  | Inlier |
| siRNA Disorazole DMSO Run2   | NM_001704 | BAI3 | brain-specific angiogenesis inhibitor 3 | -1.550232 | Inlier |
| siRNA-Temozolomide Run3-DMSO | NM_001704 | BAI3 | brain-specific angiogenesis inhibitor 3 | -0.805619 | Inlier |
| siRNA Disorazole DMSO Run3   | NM_001704 | BAI3 | brain-specific angiogenesis inhibitor 3 | -0.543381 | Inlier |
| siRNA Disorazole DMSO Run1   | NM_001704 | BAI3 | brain-specific angiogenesis inhibitor 3 | -0.182954 | Inlier |

Identification of Survival Genes in Human Glioblastoma Cells Using siRNA Screening  
 Nikhil G Thaker, Fang Zhang, Peter R. McDonald, Tong Ying Shun, Michael D Lewen, Ian F. Pollack, and John S. Lazo

Molecular Pharmacology

|                              |           |       |                                                |           |        |
|------------------------------|-----------|-------|------------------------------------------------|-----------|--------|
| siRNA-Temozolomide Run1-DMSO | NM_001704 | BAI3  | brain-specific angiogenesis inhibitor 3        | 0.182954  | Inlier |
| siRNA-Temozolomide Run2-DMSO | NM_001704 | BAI3  | brain-specific angiogenesis inhibitor 3        | 0.435169  | Inlier |
| siRNA-Vinblastine Run2-DMSO  | NM_001704 | BAI3  | brain-specific angiogenesis inhibitor 3        | 1.571084  | Inlier |
| siRNA-Vinblastine Run1-DMSO  | NM_001704 | BAI3  | brain-specific angiogenesis inhibitor 3        | 1.579395  | Inlier |
| siRNA-Temozolomide Run3-DMSO | NM_001188 | BAK1  | BCL2-antagonist /killer 1                      | -0.924666 | Inlier |
| siRNA-Temozolomide Run2-DMSO | NM_001188 | BAK1  | BCL2-antagonist /killer 1                      | -0.864208 | Inlier |
| siRNA-Temozolomide Run1-DMSO | NM_001188 | BAK1  | BCL2-antagonist /killer 1                      | -0.624542 | Inlier |
| siRNA Disorazole DMSO Run1   | NM_001188 | BAK1  | BCL2-antagonist /killer 1                      | -0.207404 | Inlier |
| siRNA Disorazole DMSO Run3   | NM_001188 | BAK1  | BCL2-antagonist /killer 1                      | 0.207404  | Inlier |
| siRNA Disorazole DMSO Run2   | NM_001188 | BAK1  | BCL2-antagonist /killer 1                      | 0.347541  | Inlier |
| siRNA-Vinblastine Run2-DMSO  | NM_001188 | BAK1  | BCL2-antagonist /killer 1                      | 0.724458  | Inlier |
| siRNA-Vinblastine Run1-DMSO  | NM_001188 | BAK1  | BCL2-antagonist /killer 1                      | 1.250396  | Inlier |
| siRNA-Temozolomide Run2-DMSO | NM_017935 | BANK1 | B-cell scaffold protein with ankyrin repeats 1 | -3.018926 | Inlier |

Identification of Survival Genes in Human Glioblastoma Cells Using siRNA Screening  
 Nikhil G Thaker, Fang Zhang, Peter R. McDonald, Tong Ying Shun, Michael D Lewen, Ian F. Pollack, and John S. Lazo

Molecular Pharmacology

|                              |               |       |                                                                   |           |        |
|------------------------------|---------------|-------|-------------------------------------------------------------------|-----------|--------|
| siRNA-Vinblastine Run2-DMSO  | NM_0179<br>35 | BANK1 | B-cell scaffold protein with ankyrin repeats 1                    | -1.080264 | Inlier |
| siRNA-Temozolomide Run3-DMSO | NM_0179<br>35 | BANK1 | B-cell scaffold protein with ankyrin repeats 1                    | -0.279202 | Inlier |
| siRNA Disorazole DMSO Run3   | NM_0179<br>35 | BANK1 | B-cell scaffold protein with ankyrin repeats 1                    | -0.232292 | Inlier |
| siRNA Disorazole DMSO Run1   | NM_0179<br>35 | BANK1 | B-cell scaffold protein with ankyrin repeats 1                    | 0.232292  | Inlier |
| siRNA-Temozolomide Run1-DMSO | NM_0179<br>35 | BANK1 | B-cell scaffold protein with ankyrin repeats 1                    | 0.518163  | Inlier |
| siRNA Disorazole DMSO Run2   | NM_0179<br>35 | BANK1 | B-cell scaffold protein with ankyrin repeats 1                    | 0.830837  | Inlier |
| siRNA-Vinblastine Run1-DMSO  | NM_0179<br>35 | BANK1 | B-cell scaffold protein with ankyrin repeats 1                    | 2.057336  | Inlier |
| siRNA-Temozolomide Run3-DMSO | NM_0046<br>56 | BAP1  | BRCA1 associated protein-1 (ubiquitin carboxy-terminal hydrolase) | -0.964507 | Inlier |

Identification of Survival Genes in Human Glioblastoma Cells Using siRNA Screening

Nikhil G Thaker, Fang Zhang, Peter R. McDonald, Tong Ying Shun, Michael D Lewen, Ian F. Pollack, and John S.

Lazo

Molecular Pharmacology

|                                  |               |      |                                                                                      |           |        |
|----------------------------------|---------------|------|--------------------------------------------------------------------------------------|-----------|--------|
| siRNA Disorazole DMSO Run1       | NM_0046<br>56 | BAP1 | BRCA1<br>associated<br>protein-1<br>(ubiquitin<br>carboxy-<br>terminal<br>hydrolase) | -0.826762 | Inlier |
| siRNA-Temozolomide Run2-<br>DMSO | NM_0046<br>56 | BAP1 | BRCA1<br>associated<br>protein-1<br>(ubiquitin<br>carboxy-<br>terminal<br>hydrolase) | -0.444096 | Inlier |
| siRNA-Vinblastine Run1-<br>DMSO  | NM_0046<br>56 | BAP1 | BRCA1<br>associated<br>protein-1<br>(ubiquitin<br>carboxy-<br>terminal<br>hydrolase) | -0.293412 | Inlier |
| siRNA-Temozolomide Run1-<br>DMSO | NM_0046<br>56 | BAP1 | BRCA1<br>associated<br>protein-1<br>(ubiquitin<br>carboxy-<br>terminal<br>hydrolase) | 0.293412  | Inlier |
| siRNA-Vinblastine Run2-<br>DMSO  | NM_0046<br>56 | BAP1 | BRCA1<br>associated<br>protein-1<br>(ubiquitin<br>carboxy-<br>terminal<br>hydrolase) | 0.522238  | Inlier |

Identification of Survival Genes in Human Glioblastoma Cells Using siRNA Screening  
 Nikhil G Thaker, Fang Zhang, Peter R. McDonald, Tong Ying Shun, Michael D Lewen, Ian F. Pollack, and John S. Lazo  
 Molecular Pharmacology

|                              |               |       |                                                                   |           |         |
|------------------------------|---------------|-------|-------------------------------------------------------------------|-----------|---------|
| siRNA Disorazole DMSO Run3   | NM_0046<br>56 | BAP1  | BRCA1 associated protein-1 (ubiquitin carboxy-terminal hydrolase) | 1.513196  | Inlier  |
| siRNA Disorazole DMSO Run2   | NM_0046<br>56 | BAP1  | BRCA1 associated protein-1 (ubiquitin carboxy-terminal hydrolase) | 1.926653  | Inlier  |
| siRNA-Temozolomide Run3-DMSO | NM_0036<br>58 | BARX2 | BarH-like homeobox 2                                              | -2.28539  | Inlier  |
| siRNA Disorazole DMSO Run1   | NM_0036<br>58 | BARX2 | BarH-like homeobox 2                                              | -0.251956 | Inlier  |
| siRNA Disorazole DMSO Run3   | NM_0036<br>58 | BARX2 | BarH-like homeobox 2                                              | -0.045937 | Inlier  |
| siRNA-Vinblastine Run2-DMSO  | NM_0036<br>58 | BARX2 | BarH-like homeobox 2                                              | -0.003592 | Inlier  |
| siRNA-Temozolomide Run2-DMSO | NM_0036<br>58 | BARX2 | BarH-like homeobox 2                                              | 0.003592  | Inlier  |
| siRNA-Temozolomide Run1-DMSO | NM_0036<br>58 | BARX2 | BarH-like homeobox 2                                              | 1.097044  | Inlier  |
| siRNA-Vinblastine Run1-DMSO  | NM_0036<br>58 | BARX2 | BarH-like homeobox 2                                              | 3.661044  | Outlier |
| siRNA Disorazole DMSO Run2   | NM_0036<br>58 | BARX2 | BarH-like homeobox 2                                              | 4.734552  | Outlier |
| siRNA-Vinblastine Run2-DMSO  | NM_1387<br>64 | BAX   | BCL2-associated X protein                                         | -0.895172 | Inlier  |
| siRNA Disorazole DMSO Run1   | NM_1387<br>64 | BAX   | BCL2-associated X protein                                         | -0.885452 | Inlier  |

Identification of Survival Genes in Human Glioblastoma Cells Using siRNA Screening  
 Nikhil G Thaker, Fang Zhang, Peter R. McDonald, Tong Ying Shun, Michael D Lewen, Ian F. Pollack, and John S. Lazo

Molecular Pharmacology

|                                  |               |       |                                                                                                                      |           |        |
|----------------------------------|---------------|-------|----------------------------------------------------------------------------------------------------------------------|-----------|--------|
| siRNA Disorazole DMSO Run2       | NM_1387<br>64 | BAX   | BCL2-<br>associated<br>X protein                                                                                     | -0.683135 | Inlier |
| siRNA Disorazole DMSO Run3       | NM_1387<br>64 | BAX   | BCL2-<br>associated<br>X protein                                                                                     | -0.045103 | Inlier |
| siRNA-Temozolomide Run1-<br>DMSO | NM_1387<br>64 | BAX   | BCL2-<br>associated<br>X protein                                                                                     | 0.045103  | Inlier |
| siRNA-Vinblastine Run1-<br>DMSO  | NM_1387<br>64 | BAX   | BCL2-<br>associated<br>X protein                                                                                     | 0.516399  | Inlier |
| siRNA-Temozolomide Run2-<br>DMSO | NM_1387<br>64 | BAX   | BCL2-<br>associated<br>X protein                                                                                     | 0.665865  | Inlier |
| siRNA-Temozolomide Run3-<br>DMSO | NM_1387<br>64 | BAX   | BCL2-<br>associated<br>X protein                                                                                     | 1.122642  | Inlier |
| siRNA Disorazole DMSO Run1       | NM_0039<br>86 | BBOX1 | butyrobeta<br>ine<br>(gamma),<br>2-<br>oxoglutarate<br>dioxygenase<br>(gamma-<br>butyrobeta<br>ine<br>hydroxylase) 1 | -0.865711 | Inlier |
| siRNA Disorazole DMSO Run3       | NM_0039<br>86 | BBOX1 | butyrobeta<br>ine<br>(gamma),<br>2-<br>oxoglutarate<br>dioxygenase<br>(gamma-<br>butyrobeta<br>ine<br>hydroxylase) 1 | -0.483289 | Inlier |

Identification of Survival Genes in Human Glioblastoma Cells Using siRNA Screening

Nikhil G Thaker, Fang Zhang, Peter R. McDonald, Tong Ying Shun, Michael D Lewen, Ian F. Pollack, and John S.

Lazo

Molecular Pharmacology

|                                  |               |       |                                                                                                    |                  |
|----------------------------------|---------------|-------|----------------------------------------------------------------------------------------------------|------------------|
|                                  |               |       | butyrobeta<br>ine<br>(gamma),<br>2-<br>oxoglutarate<br>dioxygenase<br>(gamma-<br>butyrobeta<br>ine |                  |
| siRNA-Vinblastine Run2-<br>DMSO  | NM_0039<br>86 | BBOX1 | hydroxylase<br>1                                                                                   | -0.173341 Inlier |
|                                  |               |       | butyrobeta<br>ine<br>(gamma),<br>2-<br>oxoglutarate<br>dioxygenase<br>(gamma-<br>butyrobeta<br>ine |                  |
| siRNA-Temozolomide Run2-<br>DMSO | NM_0039<br>86 | BBOX1 | hydroxylase<br>1                                                                                   | -0.012246 Inlier |
|                                  |               |       | butyrobeta<br>ine<br>(gamma),<br>2-<br>oxoglutarate<br>dioxygenase<br>(gamma-<br>butyrobeta<br>ine |                  |
| siRNA-Temozolomide Run3-<br>DMSO | NM_0039<br>86 | BBOX1 | hydroxylase<br>1                                                                                   | 0.012246 Inlier  |
|                                  |               |       | butyrobeta<br>ine<br>(gamma),<br>2-<br>oxoglutarate<br>dioxygenase<br>(gamma-<br>butyrobeta<br>ine |                  |
| siRNA-Temozolomide Run1-<br>DMSO | NM_0039<br>86 | BBOX1 | hydroxylase<br>1                                                                                   | 1.039245 Inlier  |

Identification of Survival Genes in Human Glioblastoma Cells Using siRNA Screening  
 Nikhil G Thaker, Fang Zhang, Peter R. McDonald, Tong Ying Shun, Michael D Lewen, Ian F. Pollack, and John S. Lazo

Molecular Pharmacology

|                                  |               |       |                                                                                                                                                        |           |        |
|----------------------------------|---------------|-------|--------------------------------------------------------------------------------------------------------------------------------------------------------|-----------|--------|
|                                  |               |       | butyrobeta<br>ine<br>(gamma),<br>2-<br>oxoglutarate<br>dioxygenase<br>(gamma-<br>butyrobeta<br>ine<br>hydroxylase) 1                                   | 1.936611  | Inlier |
| siRNA-Vinblastine Run1-<br>DMSO  | NM_0039<br>86 | BBOX1 | butyrobeta<br>ine<br>(gamma),<br>2-<br>oxoglutarate<br>dioxygenase<br>(gamma-<br>butyrobeta<br>ine<br>hydroxylase) 1                                   | 1.936611  | Inlier |
| siRNA Disorazole DMSO Run2       | NM_0039<br>86 | BBOX1 | butyrobeta<br>ine<br>(gamma),<br>2-<br>oxoglutarate<br>dioxygenase<br>(gamma-<br>butyrobeta<br>ine<br>hydroxylase) 1<br>Bardet-<br>Biedl<br>syndrome 2 | 2.308695  | Inlier |
| siRNA-Temozolomide Run2-<br>DMSO | NM_0318<br>85 | BBS2  | Bardet-<br>Biedl<br>syndrome 2                                                                                                                         | -0.981992 | Inlier |
| siRNA-Temozolomide Run1-<br>DMSO | NM_0318<br>85 | BBS2  | Bardet-<br>Biedl<br>syndrome 2                                                                                                                         | -0.769806 | Inlier |
| siRNA-Temozolomide Run3-<br>DMSO | NM_0318<br>85 | BBS2  | Bardet-<br>Biedl<br>syndrome 2                                                                                                                         | -0.3462   | Inlier |
| siRNA-Vinblastine Run2-<br>DMSO  | NM_0318<br>85 | BBS2  | Bardet-<br>Biedl<br>syndrome 2                                                                                                                         | -0.320304 | Inlier |
| siRNA Disorazole DMSO Run3       | NM_0318<br>85 | BBS2  | Bardet-<br>Biedl<br>syndrome 2                                                                                                                         | 0.320305  | Inlier |
| siRNA-Vinblastine Run1-<br>DMSO  | NM_0318<br>85 | BBS2  | Bardet-<br>Biedl<br>syndrome 2                                                                                                                         | 0.579194  | Inlier |



Identification of Survival Genes in Human Glioblastoma Cells Using siRNA Screening  
 Nikhil G Thaker, Fang Zhang, Peter R. McDonald, Tong Ying Shun, Michael D Lewen, Ian F. Pollack, and John S. Lazo

Molecular Pharmacology

|                              |               |       |                                              |           |        |
|------------------------------|---------------|-------|----------------------------------------------|-----------|--------|
| siRNA Disorazole DMSO Run1   | NM_0318<br>85 | BBS2  | Bardet-Biedl syndrome 2                      | 1.179289  | Inlier |
| siRNA Disorazole DMSO Run2   | NM_0318<br>85 | BBS2  | Bardet-Biedl syndrome 2                      | 1.583162  | Inlier |
| siRNA Disorazole DMSO Run3   | NM_0055<br>04 | BCAT1 | branched chain aminotransferase 1, cytosolic | -0.717226 | Inlier |
| siRNA-Temozolomide Run2-DMSO | NM_0055<br>04 | BCAT1 | branched chain aminotransferase 1, cytosolic | -0.662057 | Inlier |
| siRNA-Vinblastine Run2-DMSO  | NM_0055<br>04 | BCAT1 | branched chain aminotransferase 1, cytosolic | -0.451535 | Inlier |
| siRNA Disorazole DMSO Run1   | NM_0055<br>04 | BCAT1 | branched chain aminotransferase 1, cytosolic | -0.03936  | Inlier |
| siRNA-Temozolomide Run1-DMSO | NM_0055<br>04 | BCAT1 | branched chain aminotransferase 1, cytosolic | 0.039361  | Inlier |
| siRNA-Temozolomide Run3-DMSO | NM_0055<br>04 | BCAT1 | branched chain aminotransferase 1, cytosolic | 0.686943  | Inlier |
| siRNA-Vinblastine Run1-DMSO  | NM_0055<br>04 | BCAT1 | branched chain aminotransferase 1, cytosolic | 2.279437  | Inlier |
| siRNA Disorazole DMSO Run2   | NM_0055<br>04 | BCAT1 | branched chain aminotransferase 1, cytosolic | 2.456573  | Inlier |

Identification of Survival Genes in Human Glioblastoma Cells Using siRNA Screening  
 Nikhil G Thaker, Fang Zhang, Peter R. McDonald, Tong Ying Shun, Michael D Lewen, Ian F. Pollack, and John S. Lazo

Molecular Pharmacology

|                              |           |       |                                                  |           |        |
|------------------------------|-----------|-------|--------------------------------------------------|-----------|--------|
| siRNA-Temozolomide Run2-DMSO | NM_001190 | BCAT2 | branched chain aminotransferase 2, mitochondrial | -0.67895  | Inlier |
| siRNA-Temozolomide Run1-DMSO | NM_001190 | BCAT2 | branched chain aminotransferase 2, mitochondrial | -0.67005  | Inlier |
| siRNA Disorazole DMSO Run1   | NM_001190 | BCAT2 | branched chain aminotransferase 2, mitochondrial | -0.662644 | Inlier |
| siRNA-Temozolomide Run3-DMSO | NM_001190 | BCAT2 | branched chain aminotransferase 2, mitochondrial | -0.329817 | Inlier |
| siRNA-Vinblastine Run2-DMSO  | NM_001190 | BCAT2 | branched chain aminotransferase 2, mitochondrial | 0.329818  | Inlier |
| siRNA Disorazole DMSO Run3   | NM_001190 | BCAT2 | branched chain aminotransferase 2, mitochondrial | 0.790532  | Inlier |
| siRNA-Vinblastine Run1-DMSO  | NM_001190 | BCAT2 | branched chain aminotransferase 2, mitochondrial | 1.112817  | Inlier |
| siRNA Disorazole DMSO Run2   | NM_001190 | BCAT2 | branched chain aminotransferase 2, mitochondrial | 1.29571   | Inlier |
| siRNA-Temozolomide Run3-DMSO | NM_031938 | BCDO2 | beta-carotene dioxygenase 2                      | -1.800183 | Inlier |

Identification of Survival Genes in Human Glioblastoma Cells Using siRNA Screening  
 Nikhil G Thaker, Fang Zhang, Peter R. McDonald, Tong Ying Shun, Michael D Lewen, Ian F. Pollack, and John S. Lazo

Molecular Pharmacology

|                              |               |       |                             |           |         |
|------------------------------|---------------|-------|-----------------------------|-----------|---------|
| siRNA-Temozolomide Run2-DMSO | NM_0319<br>38 | BCDO2 | beta-carotene dioxygenase 2 | -1.406296 | Inlier  |
| siRNA-Temozolomide Run1-DMSO | NM_0319<br>38 | BCDO2 | beta-carotene dioxygenase 2 | -0.855476 | Inlier  |
| siRNA-Vinblastine Run2-DMSO  | NM_0319<br>38 | BCDO2 | beta-carotene dioxygenase 2 | -0.101819 | Inlier  |
| siRNA Disorazole DMSO Run1   | NM_0319<br>38 | BCDO2 | beta-carotene dioxygenase 2 | 0.101819  | Inlier  |
| siRNA Disorazole DMSO Run3   | NM_0319<br>38 | BCDO2 | beta-carotene dioxygenase 2 | 0.440816  | Inlier  |
| siRNA Disorazole DMSO Run2   | NM_0319<br>38 | BCDO2 | beta-carotene dioxygenase 2 | 0.493524  | Inlier  |
| siRNA-Vinblastine Run1-DMSO  | NM_0319<br>38 | BCDO2 | beta-carotene dioxygenase 2 | 1.028572  | Inlier  |
| siRNA-Temozolomide Run3-DMSO | NM_0000<br>55 | BCHE  | butyrylcholinesterase       | -7.799892 | Outlier |
| siRNA-Vinblastine Run2-DMSO  | NM_0000<br>55 | BCHE  | butyrylcholinesterase       | -1.762296 | Inlier  |
| siRNA-Temozolomide Run1-DMSO | NM_0000<br>55 | BCHE  | butyrylcholinesterase       | -0.416701 | Inlier  |
| siRNA-Temozolomide Run2-DMSO | NM_0000<br>55 | BCHE  | butyrylcholinesterase       | -0.399118 | Inlier  |
| siRNA Disorazole DMSO Run3   | NM_0000<br>55 | BCHE  | butyrylcholinesterase       | 0.399118  | Inlier  |
| siRNA Disorazole DMSO Run2   | NM_0000<br>55 | BCHE  | butyrylcholinesterase       | 0.530448  | Inlier  |
| siRNA-Vinblastine Run1-DMSO  | NM_0000<br>55 | BCHE  | butyrylcholinesterase       | 0.818552  | Inlier  |
| siRNA Disorazole DMSO Run1   | NM_0000<br>55 | BCHE  | butyrylcholinesterase       | 1.85428   | Inlier  |

Identification of Survival Genes in Human Glioblastoma Cells Using siRNA Screening

Nikhil G Thaker, Fang Zhang, Peter R. McDonald, Tong Ying Shun, Michael D Lewen, Ian F. Pollack, and John S.

Lazo

Molecular Pharmacology

|                              |           |        |                                                                                          |           |        |
|------------------------------|-----------|--------|------------------------------------------------------------------------------------------|-----------|--------|
| siRNA-Temozolomide Run2-DMSO | NM_000709 | BCKDHA | branched chain keto acid dehydrogenase E1, alpha polypeptide (maple syrup urine disease) | -1.447086 | Inlier |
| siRNA-Temozolomide Run3-DMSO | NM_000709 | BCKDHA | branched chain keto acid dehydrogenase E1, alpha polypeptide (maple syrup urine disease) | -1.011238 | Inlier |
| siRNA Disorazole DMSO Run2   | NM_000709 | BCKDHA | branched chain keto acid dehydrogenase E1, alpha polypeptide (maple syrup urine disease) | -0.431584 | Inlier |
| siRNA Disorazole DMSO Run3   | NM_000709 | BCKDHA | branched chain keto acid dehydrogenase E1, alpha polypeptide (maple syrup urine disease) | -0.044702 | Inlier |

Identification of Survival Genes in Human Glioblastoma Cells Using siRNA Screening

Nikhil G Thaker, Fang Zhang, Peter R. McDonald, Tong Ying Shun, Michael D Lewen, Ian F. Pollack, and John S. Lazo

Molecular Pharmacology

|                              |           |        |                                                                                          |          |        |
|------------------------------|-----------|--------|------------------------------------------------------------------------------------------|----------|--------|
| siRNA-Temozolomide Run1-DMSO | NM_000709 | BCKDHA | branched chain keto acid dehydrogenase E1, alpha polypeptide (maple syrup urine disease) | 0.044702 | Inlier |
| siRNA Disorazole DMSO Run1   | NM_000709 | BCKDHA | branched chain keto acid dehydrogenase E1, alpha polypeptide (maple syrup urine disease) | 0.212686 | Inlier |
| siRNA-Vinblastine Run2-DMSO  | NM_000709 | BCKDHA | branched chain keto acid dehydrogenase E1, alpha polypeptide (maple syrup urine disease) | 0.917416 | Inlier |
| siRNA-Vinblastine Run1-DMSO  | NM_000709 | BCKDHA | branched chain keto acid dehydrogenase E1, alpha polypeptide (maple syrup urine disease) | 1.151529 | Inlier |

Identification of Survival Genes in Human Glioblastoma Cells Using siRNA Screening

Nikhil G Thaker, Fang Zhang, Peter R. McDonald, Tong Ying Shun, Michael D Lewen, Ian F. Pollack, and John S.

Lazo

Molecular Pharmacology

|                              |           |        |                                                                                         |           |        |
|------------------------------|-----------|--------|-----------------------------------------------------------------------------------------|-----------|--------|
| siRNA-Temozolomide Run3-DMSO | NM_183050 | BCKDHB | branched chain keto acid dehydrogenase E1, beta polypeptide (maple syrup urine disease) | -1.720596 | Inlier |
| siRNA-Temozolomide Run2-DMSO | NM_183050 | BCKDHB | branched chain keto acid dehydrogenase E1, beta polypeptide (maple syrup urine disease) | -1.29984  | Inlier |
| siRNA-Temozolomide Run1-DMSO | NM_183050 | BCKDHB | branched chain keto acid dehydrogenase E1, beta polypeptide (maple syrup urine disease) | -0.515937 | Inlier |
| siRNA-Vinblastine Run2-DMSO  | NM_183050 | BCKDHB | branched chain keto acid dehydrogenase E1, beta polypeptide (maple syrup urine disease) | -0.100161 | Inlier |

Identification of Survival Genes in Human Glioblastoma Cells Using siRNA Screening

Nikhil G Thaker, Fang Zhang, Peter R. McDonald, Tong Ying Shun, Michael D Lewen, Ian F. Pollack, and John S. Lazo

Molecular Pharmacology

|                             |    |         |        |                                                                                         |           |        |
|-----------------------------|----|---------|--------|-----------------------------------------------------------------------------------------|-----------|--------|
| siRNA Disorazole DMSO Run3  | 50 | NM_1830 | BCKDHB | branched chain keto acid dehydrogenase E1, beta polypeptide (maple syrup urine disease) | 0.100161  | Inlier |
| siRNA-Vinblastine Run1-DMSO | 50 | NM_1830 | BCKDHB | branched chain keto acid dehydrogenase E1, beta polypeptide (maple syrup urine disease) | 0.443921  | Inlier |
| siRNA Disorazole DMSO Run1  | 50 | NM_1830 | BCKDHB | branched chain keto acid dehydrogenase E1, beta polypeptide (maple syrup urine disease) | 0.833063  | Inlier |
| siRNA Disorazole DMSO Run2  | 50 | NM_1830 | BCKDHB | branched chain keto acid dehydrogenase E1, beta polypeptide (maple syrup urine disease) | 1.558932  | Inlier |
| siRNA Disorazole DMSO Run2  | 81 | NM_0058 | BCKDK  | kinase                                                                                  | -0.940053 | Inlier |

Identification of Survival Genes in Human Glioblastoma Cells Using siRNA Screening  
 Nikhil G Thaker, Fang Zhang, Peter R. McDonald, Tong Ying Shun, Michael D Lewen, Ian F. Pollack, and John S. Lazo

Molecular Pharmacology

|                              |               |       |                                              |           |        |
|------------------------------|---------------|-------|----------------------------------------------|-----------|--------|
| siRNA-Temozolomide Run1-DMSO | NM_0058<br>81 | BCKDK | branched chain ketoacid dehydrogenase kinase | -0.711508 | Inlier |
| siRNA-Temozolomide Run3-DMSO | NM_0058<br>81 | BCKDK | branched chain ketoacid dehydrogenase kinase | -0.584097 | Inlier |
| siRNA Disorazole DMSO Run3   | NM_0058<br>81 | BCKDK | branched chain ketoacid dehydrogenase kinase | -0.235925 | Inlier |
| siRNA-Temozolomide Run2-DMSO | NM_0058<br>81 | BCKDK | branched chain ketoacid dehydrogenase kinase | 0.235926  | Inlier |
| siRNA Disorazole DMSO Run1   | NM_0058<br>81 | BCKDK | branched chain ketoacid dehydrogenase kinase | 0.637492  | Inlier |
| siRNA-Vinblastine Run1-DMSO  | NM_0058<br>81 | BCKDK | branched chain ketoacid dehydrogenase kinase | 1.585186  | Inlier |
| siRNA-Vinblastine Run2-DMSO  | NM_0058<br>81 | BCKDK | branched chain ketoacid dehydrogenase kinase | 1.702032  | Inlier |
| siRNA-Temozolomide Run2-DMSO | NM_0006<br>33 | BCL2  | B-cell CLL/lymphoma 2                        | -0.728366 | Inlier |
| siRNA-Temozolomide Run3-DMSO | NM_0006<br>33 | BCL2  | B-cell CLL/lymphoma 2                        | -0.620634 | Inlier |
| siRNA-Temozolomide Run1-DMSO | NM_0006<br>33 | BCL2  | B-cell CLL/lymphoma 2                        | -0.185498 | Inlier |



Identification of Survival Genes in Human Glioblastoma Cells Using siRNA Screening  
 Nikhil G Thaker, Fang Zhang, Peter R. McDonald, Tong Ying Shun, Michael D Lewen, Ian F. Pollack, and John S. Lazo

Molecular Pharmacology

| siRNA                        | Gene   | Cell Line               | Log2 Fold Change | Category |
|------------------------------|--------|-------------------------|------------------|----------|
| siRNA Disorazole DMSO Run3   | BCL2   | CLL/lymphoma 2          | -0.146919        | Inlier   |
| siRNA Disorazole DMSO Run1   | BCL2   | CLL/lymphoma 2          | 0.146919         | Inlier   |
| siRNA Disorazole DMSO Run2   | BCL2   | CLL/lymphoma 2          | 1.141072         | Inlier   |
| siRNA-Vinblastine Run1-DMSO  | BCL2   | CLL/lymphoma 2          | 1.592957         | Inlier   |
| siRNA-Vinblastine Run2-DMSO  | BCL2   | CLL/lymphoma 2          | 1.62838          | Inlier   |
| siRNA-Vinblastine Run2-DMSO  | BCL2A1 | BCL2-related protein A1 | -1.036255        | Inlier   |
| siRNA Disorazole DMSO Run3   | BCL2A1 | BCL2-related protein A1 | -0.597059        | Inlier   |
| siRNA-Temozolomide Run2-DMSO | BCL2A1 | BCL2-related protein A1 | -0.438589        | Inlier   |
| siRNA-Temozolomide Run1-DMSO | BCL2A1 | BCL2-related protein A1 | -0.326782        | Inlier   |
| siRNA Disorazole DMSO Run1   | BCL2A1 | BCL2-related protein A1 | 0.326781         | Inlier   |
| siRNA-Temozolomide Run3-DMSO | BCL2A1 | BCL2-related protein A1 | 0.751941         | Inlier   |
| siRNA Disorazole DMSO Run2   | BCL2A1 | BCL2-related protein A1 | 1.054034         | Inlier   |
| siRNA-Vinblastine Run1-DMSO  | BCL2A1 | BCL2-related protein A1 | 1.119403         | Inlier   |
| siRNA-Temozolomide Run1-DMSO | BCL2L1 | BCL2-like 1             | -0.847918        | Inlier   |
| siRNA-Temozolomide Run3-DMSO | BCL2L1 | BCL2-like 1             | -0.742747        | Inlier   |
| siRNA Disorazole DMSO Run1   | BCL2L1 | BCL2-like 1             | -0.284571        | Inlier   |
| siRNA Disorazole DMSO Run3   | BCL2L1 | BCL2-like 1             | -0.078851        | Inlier   |
| siRNA-Temozolomide Run2-DMSO | BCL2L1 | BCL2-like 1             | 0.078851         | Inlier   |
| siRNA-Vinblastine Run2-DMSO  | BCL2L1 | BCL2-like 1             | 0.606253         | Inlier   |

Identification of Survival Genes in Human Glioblastoma Cells Using siRNA Screening

Nikhil G Thaker, Fang Zhang, Peter R. McDonald, Tong Ying Shun, Michael D Lewen, Ian F. Pollack, and John S.

Lazo

|                                  |               |         |                                               |           |        |
|----------------------------------|---------------|---------|-----------------------------------------------|-----------|--------|
| siRNA-Vinblastine Run1-<br>DMSO  | NM_1385<br>78 | BCL2L1  | BCL2-like<br>1                                | 0.789875  | Inlier |
| siRNA Disorazole DMSO Run2       | NM_1385<br>78 | BCL2L1  | BCL2-like<br>1                                | 0.82226   | Inlier |
| siRNA-Temozolomide Run3-<br>DMSO | NM_0203<br>96 | BCL2L10 | BCL2-like<br>10<br>(apoptosis<br>facilitator) | -1.215647 | Inlier |
| siRNA-Temozolomide Run2-<br>DMSO | NM_0203<br>96 | BCL2L10 | BCL2-like<br>10<br>(apoptosis<br>facilitator) | -0.813298 | Inlier |
| siRNA-Temozolomide Run1-<br>DMSO | NM_0203<br>96 | BCL2L10 | BCL2-like<br>10<br>(apoptosis<br>facilitator) | -0.129324 | Inlier |
| siRNA Disorazole DMSO Run1       | NM_0203<br>96 | BCL2L10 | BCL2-like<br>10<br>(apoptosis<br>facilitator) | -0.081382 | Inlier |
| siRNA Disorazole DMSO Run3       | NM_0203<br>96 | BCL2L10 | BCL2-like<br>10<br>(apoptosis<br>facilitator) | 0.081382  | Inlier |
| siRNA Disorazole DMSO Run2       | NM_0203<br>96 | BCL2L10 | BCL2-like<br>10<br>(apoptosis<br>facilitator) | 0.535702  | Inlier |
| siRNA-Vinblastine Run1-<br>DMSO  | NM_0203<br>96 | BCL2L10 | BCL2-like<br>10<br>(apoptosis<br>facilitator) | 1.277169  | Inlier |
| siRNA-Vinblastine Run2-<br>DMSO  | NM_0203<br>96 | BCL2L10 | BCL2-like<br>10<br>(apoptosis<br>facilitator) | 1.344977  | Inlier |
| siRNA-Temozolomide Run3-<br>DMSO | NM_1386<br>26 | BCL2L11 | BCL2-like<br>11<br>(apoptosis<br>facilitator) | -3.159606 | Inlier |

Identification of Survival Genes in Human Glioblastoma Cells Using siRNA Screening  
 Nikhil G Thaker, Fang Zhang, Peter R. McDonald, Tong Ying Shun, Michael D Lewen, Ian F. Pollack, and John S. Lazo  
 Molecular Pharmacology

|                              |               |         |                                               |           |        |
|------------------------------|---------------|---------|-----------------------------------------------|-----------|--------|
| siRNA-Temozolomide Run2-DMSO | NM_1386<br>26 | BCL2L11 | BCL2-like<br>11<br>(apoptosis<br>facilitator) | -0.398616 | Inlier |
| siRNA-Vinblastine Run2-DMSO  | NM_1386<br>26 | BCL2L11 | BCL2-like<br>11<br>(apoptosis<br>facilitator) | -0.381012 | Inlier |
| siRNA Disorazole DMSO Run1   | NM_1386<br>26 | BCL2L11 | BCL2-like<br>11<br>(apoptosis<br>facilitator) | -0.199667 | Inlier |
| siRNA-Temozolomide Run1-DMSO | NM_1386<br>26 | BCL2L11 | BCL2-like<br>11<br>(apoptosis<br>facilitator) | 0.199666  | Inlier |
| siRNA Disorazole DMSO Run3   | NM_1386<br>26 | BCL2L11 | BCL2-like<br>11<br>(apoptosis<br>facilitator) | 0.950384  | Inlier |
| siRNA-Vinblastine Run1-DMSO  | NM_1386<br>26 | BCL2L11 | BCL2-like<br>11<br>(apoptosis<br>facilitator) | 0.96142   | Inlier |
| siRNA Disorazole DMSO Run2   | NM_1386<br>26 | BCL2L11 | BCL2-like<br>11<br>(apoptosis<br>facilitator) | 1.216539  | Inlier |
| siRNA-Temozolomide Run3-DMSO | NM_0528<br>42 | BCL2L12 | BCL2-like<br>12 (proline<br>rich)             | -2.075498 | Inlier |
| siRNA-Vinblastine Run2-DMSO  | NM_0528<br>42 | BCL2L12 | BCL2-like<br>12 (proline<br>rich)             | -0.952366 | Inlier |
| siRNA Disorazole DMSO Run3   | NM_0528<br>42 | BCL2L12 | BCL2-like<br>12 (proline<br>rich)             | -0.435057 | Inlier |
| siRNA-Temozolomide Run2-DMSO | NM_0528<br>42 | BCL2L12 | BCL2-like<br>12 (proline<br>rich)             | -0.251171 | Inlier |

Identification of Survival Genes in Human Glioblastoma Cells Using siRNA Screening  
 Nikhil G Thaker, Fang Zhang, Peter R. McDonald, Tong Ying Shun, Michael D Lewen, Ian F. Pollack, and John S. Lazo

Molecular Pharmacology

|                                  |               |         |                                               |           |        |
|----------------------------------|---------------|---------|-----------------------------------------------|-----------|--------|
| siRNA Disorazole DMSO Run1       | NM_0528<br>42 | BCL2L12 | BCL2-like<br>12 (proline<br>rich)             | 0.251171  | Inlier |
| siRNA-Temozolomide Run1-<br>DMSO | NM_0528<br>42 | BCL2L12 | BCL2-like<br>12 (proline<br>rich)             | 0.490346  | Inlier |
| siRNA Disorazole DMSO Run2       | NM_0528<br>42 | BCL2L12 | BCL2-like<br>12 (proline<br>rich)             | 0.858654  | Inlier |
| siRNA-Vinblastine Run1-<br>DMSO  | NM_0528<br>42 | BCL2L12 | BCL2-like<br>12 (proline<br>rich)             | 1.851765  | Inlier |
| siRNA-Temozolomide Run3-<br>DMSO | NM_1387<br>23 | BCL2L14 | BCL2-like<br>14<br>(apoptosis<br>facilitator) | -1.634295 | Inlier |
| siRNA Disorazole DMSO Run3       | NM_1387<br>23 | BCL2L14 | BCL2-like<br>14<br>(apoptosis<br>facilitator) | -0.66636  | Inlier |
| siRNA-Vinblastine Run2-<br>DMSO  | NM_1387<br>23 | BCL2L14 | BCL2-like<br>14<br>(apoptosis<br>facilitator) | -0.449517 | Inlier |
| siRNA Disorazole DMSO Run2       | NM_1387<br>23 | BCL2L14 | BCL2-like<br>14<br>(apoptosis<br>facilitator) | -0.080803 | Inlier |
| siRNA Disorazole DMSO Run1       | NM_1387<br>23 | BCL2L14 | BCL2-like<br>14<br>(apoptosis<br>facilitator) | 0.080803  | Inlier |
| siRNA-Temozolomide Run1-<br>DMSO | NM_1387<br>23 | BCL2L14 | BCL2-like<br>14<br>(apoptosis<br>facilitator) | 0.68264   | Inlier |
| siRNA-Temozolomide Run2-<br>DMSO | NM_1387<br>23 | BCL2L14 | BCL2-like<br>14<br>(apoptosis<br>facilitator) | 0.781052  | Inlier |

Identification of Survival Genes in Human Glioblastoma Cells Using siRNA Screening  
 Nikhil G Thaker, Fang Zhang, Peter R. McDonald, Tong Ying Shun, Michael D Lewen, Ian F. Pollack, and John S. Lazo

Molecular Pharmacology

|                                  |               |         |                                                    |                  |
|----------------------------------|---------------|---------|----------------------------------------------------|------------------|
|                                  |               |         | BCL2-like<br>14                                    |                  |
| siRNA-Vinblastine Run1-<br>DMSO  | NM_1387<br>23 | BCL2L14 | (apoptosis<br>facilitator)                         | 2.015944 Inlier  |
| siRNA-Temozolomide Run3-<br>DMSO | NM_0040<br>50 | BCL2L2  | BCL2-like<br>2                                     | -0.83174 Inlier  |
| siRNA-Temozolomide Run2-<br>DMSO | NM_0040<br>50 | BCL2L2  | BCL2-like<br>2                                     | -0.764923 Inlier |
| siRNA-Temozolomide Run1-<br>DMSO | NM_0040<br>50 | BCL2L2  | BCL2-like<br>2                                     | -0.693991 Inlier |
| siRNA Disorazole DMSO Run2       | NM_0040<br>50 | BCL2L2  | BCL2-like<br>2                                     | -0.05897 Inlier  |
| siRNA Disorazole DMSO Run1       | NM_0040<br>50 | BCL2L2  | BCL2-like<br>2                                     | 0.05897 Inlier   |
| siRNA Disorazole DMSO Run3       | NM_0040<br>50 | BCL2L2  | BCL2-like<br>2                                     | 0.20451 Inlier   |
| siRNA-Vinblastine Run2-<br>DMSO  | NM_0040<br>50 | BCL2L2  | BCL2-like<br>2                                     | 0.655009 Inlier  |
| siRNA-Vinblastine Run1-<br>DMSO  | NM_0040<br>50 | BCL2L2  | BCL2-like<br>2                                     | 0.758765 Inlier  |
| siRNA-Vinblastine Run2-<br>DMSO  | NM_0174<br>29 | BCMO1   | beta-<br>carotene<br>15,15-<br>monooxyg<br>enase 1 | -1.994813 Inlier |
| siRNA-Temozolomide Run3-<br>DMSO | NM_0174<br>29 | BCMO1   | beta-<br>carotene<br>15,15-<br>monooxyg<br>enase 1 | -1.73172 Inlier  |
| siRNA-Temozolomide Run2-<br>DMSO | NM_0174<br>29 | BCMO1   | beta-<br>carotene<br>15,15-<br>monooxyg<br>enase 1 | -1.105569 Inlier |
| siRNA Disorazole DMSO Run1       | NM_0174<br>29 | BCMO1   | beta-<br>carotene<br>15,15-<br>monooxyg<br>enase 1 | -0.009121 Inlier |
| siRNA Disorazole DMSO Run3       | NM_0174<br>29 | BCMO1   | beta-<br>carotene<br>15,15-<br>monooxyg<br>enase 1 | 0.009121 Inlier  |
| siRNA-Temozolomide Run1-<br>DMSO | NM_0174<br>29 | BCMO1   | beta-<br>carotene<br>15,15-<br>monooxyg<br>enase 1 | 0.114395 Inlier  |

Identification of Survival Genes in Human Glioblastoma Cells Using siRNA Screening  
 Nikhil G Thaker, Fang Zhang, Peter R. McDonald, Tong Ying Shun, Michael D Lewen, Ian F. Pollack, and John S. Lazo

Molecular Pharmacology

|                                  |               |       |                                                |           |        |
|----------------------------------|---------------|-------|------------------------------------------------|-----------|--------|
| siRNA Disorazole DMSO Run2       | NM_0174<br>29 | BCMO1 | beta-carotene<br>15,15-<br>monooxyg<br>enase 1 | 0.243431  | Inlier |
| siRNA-Vinblastine Run1-<br>DMSO  | NM_0174<br>29 | BCMO1 | beta-carotene<br>15,15-<br>monooxyg<br>enase 1 | 1.21715   | Inlier |
| siRNA Disorazole DMSO Run2       | NM_0215<br>74 | BCR   | breakpoint<br>cluster<br>region                | -0.814859 | Inlier |
| siRNA Disorazole DMSO Run3       | NM_0215<br>74 | BCR   | breakpoint<br>cluster<br>region                | -0.741624 | Inlier |
| siRNA-Temozolomide Run3-<br>DMSO | NM_0215<br>74 | BCR   | breakpoint<br>cluster<br>region                | -0.719373 | Inlier |
| siRNA-Temozolomide Run1-<br>DMSO | NM_0215<br>74 | BCR   | breakpoint<br>cluster<br>region                | -0.082074 | Inlier |
| siRNA-Temozolomide Run2-<br>DMSO | NM_0215<br>74 | BCR   | breakpoint<br>cluster<br>region                | 0.082075  | Inlier |
| siRNA Disorazole DMSO Run1       | NM_0215<br>74 | BCR   | breakpoint<br>cluster<br>region                | 0.182423  | Inlier |
| siRNA-Vinblastine Run2-<br>DMSO  | NM_0215<br>74 | BCR   | breakpoint<br>cluster<br>region                | 0.629627  | Inlier |
| siRNA-Vinblastine Run1-<br>DMSO  | NM_0215<br>74 | BCR   | breakpoint<br>cluster<br>region                | 0.814055  | Inlier |
| siRNA Disorazole DMSO Run1       | NM_0043<br>28 | BCS1L | BCS1-like<br>(yeast)                           | -1.930217 | Inlier |
| siRNA-Temozolomide Run1-<br>DMSO | NM_0043<br>28 | BCS1L | BCS1-like<br>(yeast)                           | -0.784395 | Inlier |
| siRNA-Temozolomide Run2-<br>DMSO | NM_0043<br>28 | BCS1L | BCS1-like<br>(yeast)                           | -0.564605 | Inlier |
| siRNA-Temozolomide Run3-<br>DMSO | NM_0043<br>28 | BCS1L | BCS1-like<br>(yeast)                           | -0.157093 | Inlier |
| siRNA-Vinblastine Run1-<br>DMSO  | NM_0043<br>28 | BCS1L | BCS1-like<br>(yeast)                           | 0.157094  | Inlier |
| siRNA-Vinblastine Run2-<br>DMSO  | NM_0043<br>28 | BCS1L | BCS1-like<br>(yeast)                           | 0.453538  | Inlier |
| siRNA Disorazole DMSO Run2       | NM_0043<br>28 | BCS1L | BCS1-like<br>(yeast)                           | 0.800379  | Inlier |
| siRNA Disorazole DMSO Run3       | NM_0043<br>28 | BCS1L | BCS1-like<br>(yeast)                           | 1.55266   | Inlier |

Identification of Survival Genes in Human Glioblastoma Cells Using siRNA Screening

Nikhil G Thaker, Fang Zhang, Peter R. McDonald, Tong Ying Shun, Michael D Lewen, Ian F. Pollack, and John S. Lazo

Molecular Pharmacology

|                              |               |     |                                                        |           |        |
|------------------------------|---------------|-----|--------------------------------------------------------|-----------|--------|
| siRNA-Temozolomide Run3-DMSO | NM_2033<br>15 | BDH | 3-hydroxybutyrate dehydrogenase (heart, mitochondrial) | -1.107766 | Inlier |
| siRNA-Temozolomide Run2-DMSO | NM_2033<br>15 | BDH | 3-hydroxybutyrate dehydrogenase (heart, mitochondrial) | -0.810408 | Inlier |
| siRNA Disorazole DMSO Run2   | NM_2033<br>15 | BDH | 3-hydroxybutyrate dehydrogenase (heart, mitochondrial) | -0.538592 | Inlier |
| siRNA Disorazole DMSO Run3   | NM_2033<br>15 | BDH | 3-hydroxybutyrate dehydrogenase (heart, mitochondrial) | -0.020928 | Inlier |
| siRNA-Temozolomide Run1-DMSO | NM_2033<br>15 | BDH | 3-hydroxybutyrate dehydrogenase (heart, mitochondrial) | 0.020928  | Inlier |
| siRNA Disorazole DMSO Run1   | NM_2033<br>15 | BDH | 3-hydroxybutyrate dehydrogenase (heart, mitochondrial) | 0.384815  | Inlier |

Identification of Survival Genes in Human Glioblastoma Cells Using siRNA Screening  
 Nikhil G Thaker, Fang Zhang, Peter R. McDonald, Tong Ying Shun, Michael D Lewen, Ian F. Pollack, and John S. Lazo

Molecular Pharmacology

|                              |               |        |                                                        |           |        |
|------------------------------|---------------|--------|--------------------------------------------------------|-----------|--------|
| siRNA-Vinblastine Run1-DMSO  | NM_2033<br>15 | BDH    | 3-hydroxybutyrate dehydrogenase (heart, mitochondrial) | 1.227425  | Inlier |
| siRNA-Vinblastine Run2-DMSO  | NM_2033<br>15 | BDH    | 3-hydroxybutyrate dehydrogenase (heart, mitochondrial) | 1.918906  | Inlier |
| siRNA Disorazole DMSO Run2   | NM_0007<br>10 | BDKRB1 | bradykinin receptor B1                                 | -3.062792 | Inlier |
| siRNA Disorazole DMSO Run1   | NM_0007<br>10 | BDKRB1 | bradykinin receptor B1                                 | -1.324647 | Inlier |
| siRNA Disorazole DMSO Run3   | NM_0007<br>10 | BDKRB1 | bradykinin receptor B1                                 | -1.122408 | Inlier |
| siRNA-Temozolomide Run1-DMSO | NM_0007<br>10 | BDKRB1 | bradykinin receptor B1                                 | -0.212231 | Inlier |
| siRNA-Vinblastine Run2-DMSO  | NM_0007<br>10 | BDKRB1 | bradykinin receptor B1                                 | 0.212231  | Inlier |
| siRNA-Temozolomide Run3-DMSO | NM_0007<br>10 | BDKRB1 | bradykinin receptor B1                                 | 0.236281  | Inlier |
| siRNA-Temozolomide Run2-DMSO | NM_0007<br>10 | BDKRB1 | bradykinin receptor B1                                 | 0.403422  | Inlier |
| siRNA-Vinblastine Run1-DMSO  | NM_0007<br>10 | BDKRB1 | bradykinin receptor B1                                 | 0.945578  | Inlier |
| siRNA Disorazole DMSO Run2   | NM_0006<br>23 | BDKRB2 | bradykinin receptor B2                                 | -0.801876 | Inlier |
| siRNA-Temozolomide Run3-DMSO | NM_0006<br>23 | BDKRB2 | bradykinin receptor B2                                 | -0.738368 | Inlier |
| siRNA-Temozolomide Run2-DMSO | NM_0006<br>23 | BDKRB2 | bradykinin receptor B2                                 | -0.610632 | Inlier |
| siRNA-Temozolomide Run1-DMSO | NM_0006<br>23 | BDKRB2 | bradykinin receptor B2                                 | -0.229784 | Inlier |



Identification of Survival Genes in Human Glioblastoma Cells Using siRNA Screening  
 Nikhil G Thaker, Fang Zhang, Peter R. McDonald, Tong Ying Shun, Michael D Lewen, Ian F. Pollack, and John S. Lazo

Molecular Pharmacology

|                              |               |        |                                                         |           |        |
|------------------------------|---------------|--------|---------------------------------------------------------|-----------|--------|
|                              |               |        | bradykinin receptor                                     |           |        |
| siRNA Disorazole DMSO Run1   | NM_0006<br>23 | BDKRB2 | B2                                                      | 0.229784  | Inlier |
|                              |               |        | bradykinin receptor                                     |           |        |
| siRNA Disorazole DMSO Run3   | NM_0006<br>23 | BDKRB2 | B2                                                      | 0.56337   | Inlier |
|                              |               |        | bradykinin receptor                                     |           |        |
| siRNA-Vinblastine Run2-DMSO  | NM_0006<br>23 | BDKRB2 | B2                                                      | 1.350385  | Inlier |
|                              |               |        | bradykinin receptor                                     |           |        |
| siRNA-Vinblastine Run1-DMSO  | NM_0006<br>23 | BDKRB2 | B2                                                      | 1.390137  | Inlier |
|                              |               |        | B-factor, properdin                                     |           |        |
| siRNA-Temozolomide Run3-DMSO | NM_0017<br>10 | BF     | B-factor, properdin                                     | -2.348867 | Inlier |
|                              |               |        | B-factor, properdin                                     |           |        |
| siRNA Disorazole DMSO Run2   | NM_0017<br>10 | BF     | B-factor, properdin                                     | -1.549261 | Inlier |
|                              |               |        | B-factor, properdin                                     |           |        |
| siRNA Disorazole DMSO Run1   | NM_0017<br>10 | BF     | B-factor, properdin                                     | -0.272918 | Inlier |
|                              |               |        | B-factor, properdin                                     |           |        |
| siRNA-Temozolomide Run2-DMSO | NM_0017<br>10 | BF     | B-factor, properdin                                     | -0.232403 | Inlier |
|                              |               |        | B-factor, properdin                                     |           |        |
| siRNA-Vinblastine Run1-DMSO  | NM_0017<br>10 | BF     | B-factor, properdin                                     | 0.232402  | Inlier |
|                              |               |        | B-factor, properdin                                     |           |        |
| siRNA-Temozolomide Run1-DMSO | NM_0017<br>10 | BF     | B-factor, properdin                                     | 0.346343  | Inlier |
|                              |               |        | B-factor, properdin                                     |           |        |
| siRNA-Vinblastine Run2-DMSO  | NM_0017<br>10 | BF     | B-factor, properdin                                     | 1.002657  | Inlier |
|                              |               |        | B-factor, properdin                                     |           |        |
| siRNA Disorazole DMSO Run3   | NM_0017<br>10 | BF     | B-factor, properdin                                     | 1.30891   | Inlier |
|                              |               |        | bone gamma-carboxyglutamate (gla) protein (osteocalcin) |           |        |
|                              |               |        | bone gamma-carboxyglutamate (gla) protein (osteocalcin) |           |        |
| siRNA-Temozolomide Run3-DMSO | NM_1991<br>73 | BGLAP  | bone gamma-carboxyglutamate (gla) protein (osteocalcin) | -1.30888  | Inlier |
|                              |               |        | bone gamma-carboxyglutamate (gla) protein (osteocalcin) |           |        |
|                              |               |        | bone gamma-carboxyglutamate (gla) protein (osteocalcin) |           |        |
| siRNA Disorazole DMSO Run1   | NM_1991<br>73 | BGLAP  | bone gamma-carboxyglutamate (gla) protein (osteocalcin) | -1.169191 | Inlier |
|                              |               |        | bone gamma-carboxyglutamate (gla) protein (osteocalcin) |           |        |
|                              |               |        | bone gamma-carboxyglutamate (gla) protein (osteocalcin) |           |        |
| siRNA-Temozolomide Run1-DMSO | NM_1991<br>73 | BGLAP  | bone gamma-carboxyglutamate (gla) protein (osteocalcin) | -0.049936 | Inlier |

Identification of Survival Genes in Human Glioblastoma Cells Using siRNA Screening

Nikhil G Thaker, Fang Zhang, Peter R. McDonald, Tong Ying Shun, Michael D Lewen, Ian F. Pollack, and John S. Lazo

Molecular Pharmacology

|                              |           |       |                                                         |           |         |
|------------------------------|-----------|-------|---------------------------------------------------------|-----------|---------|
| siRNA-Temozolomide Run2-DMSO | NM_199173 | BGLAP | bone gamma-carboxyglutamate (gla) protein (osteocalcin) | -0.019365 | Inlier  |
| siRNA Disorazole DMSO Run3   | NM_199173 | BGLAP | bone gamma-carboxyglutamate (gla) protein (osteocalcin) | 0.019365  | Inlier  |
| siRNA-Vinblastine Run2-DMSO  | NM_199173 | BGLAP | bone gamma-carboxyglutamate (gla) protein (osteocalcin) | 0.179809  | Inlier  |
| siRNA Disorazole DMSO Run2   | NM_199173 | BGLAP | bone gamma-carboxyglutamate (gla) protein (osteocalcin) | 4.103451  | Outlier |
| siRNA-Vinblastine Run1-DMSO  | NM_199173 | BGLAP | bone gamma-carboxyglutamate (gla) protein (osteocalcin) | 4.150354  | Outlier |
| siRNA-Temozolomide Run2-DMSO | NM_001713 | BHMT  | betaine-homocysteine methyltransferase                  | -0.714837 | Inlier  |
| siRNA-Temozolomide Run1-DMSO | NM_001713 | BHMT  | betaine-homocysteine methyltransferase                  | -0.634163 | Inlier  |

Identification of Survival Genes in Human Glioblastoma Cells Using siRNA Screening  
 Nikhil G Thaker, Fang Zhang, Peter R. McDonald, Tong Ying Shun, Michael D Lewen, Ian F. Pollack, and John S. Lazo

Molecular Pharmacology

|                              |               |       |                                          |           |         |
|------------------------------|---------------|-------|------------------------------------------|-----------|---------|
| siRNA Disorazole DMSO Run1   | NM_0017<br>13 | BHMT  | betaine-homocysteine methyltransferase   | -0.627441 | Inlier  |
| siRNA-Temozolomide Run3-DMSO | NM_0017<br>13 | BHMT  | betaine-homocysteine methyltransferase   | -0.189558 | Inlier  |
| siRNA-Vinblastine Run2-DMSO  | NM_0017<br>13 | BHMT  | betaine-homocysteine methyltransferase   | 0.189557  | Inlier  |
| siRNA Disorazole DMSO Run3   | NM_0017<br>13 | BHMT  | betaine-homocysteine methyltransferase   | 1.274029  | Inlier  |
| siRNA-Vinblastine Run1-DMSO  | NM_0017<br>13 | BHMT  | betaine-homocysteine methyltransferase   | 2.283319  | Inlier  |
| siRNA Disorazole DMSO Run2   | NM_0017<br>13 | BHMT  | betaine-homocysteine methyltransferase   | 3.930882  | Outlier |
| siRNA Disorazole DMSO Run1   | NM_0176<br>14 | BHMT2 | betaine-homocysteine methyltransferase 2 | -0.978767 | Inlier  |
| siRNA-Temozolomide Run1-DMSO | NM_0176<br>14 | BHMT2 | betaine-homocysteine methyltransferase 2 | -0.787875 | Inlier  |
| siRNA-Vinblastine Run2-DMSO  | NM_0176<br>14 | BHMT2 | betaine-homocysteine methyltransferase 2 | -0.326026 | Inlier  |

Identification of Survival Genes in Human Glioblastoma Cells Using siRNA Screening  
 Nikhil G Thaker, Fang Zhang, Peter R. McDonald, Tong Ying Shun, Michael D Lewen, Ian F. Pollack, and John S. Lazo  
 Molecular Pharmacology

|                              |               |       |                                          |           |         |
|------------------------------|---------------|-------|------------------------------------------|-----------|---------|
| siRNA-Temozolomide Run2-DMSO | NM_0176<br>14 | BHMT2 | betaine-homocysteine methyltransferase 2 | -0.28512  | Inlier  |
| siRNA-Temozolomide Run3-DMSO | NM_0176<br>14 | BHMT2 | betaine-homocysteine methyltransferase 2 | 0.28512   | Inlier  |
| siRNA Disorazole DMSO Run2   | NM_0176<br>14 | BHMT2 | betaine-homocysteine methyltransferase 2 | 0.561125  | Inlier  |
| siRNA Disorazole DMSO Run3   | NM_0176<br>14 | BHMT2 | betaine-homocysteine methyltransferase 2 | 2.842306  | Inlier  |
| siRNA-Vinblastine Run1-DMSO  | NM_0176<br>14 | BHMT2 | betaine-homocysteine methyltransferase 2 | 3.285579  | Inlier  |
| siRNA-Temozolomide Run3-DMSO | NM_0154<br>31 | BIA2  | tripartite motif-containing 58           | -4.398761 | Outlier |
| siRNA-Temozolomide Run1-DMSO | NM_0154<br>31 | BIA2  | tripartite motif-containing 58           | -2.024573 | Inlier  |
| siRNA-Temozolomide Run2-DMSO | NM_0154<br>31 | BIA2  | tripartite motif-containing 58           | -0.983509 | Inlier  |
| siRNA Disorazole DMSO Run2   | NM_0154<br>31 | BIA2  | tripartite motif-containing 58           | -0.063515 | Inlier  |
| siRNA Disorazole DMSO Run1   | NM_0154<br>31 | BIA2  | tripartite motif-containing 58           | 0.063515  | Inlier  |

Identification of Survival Genes in Human Glioblastoma Cells Using siRNA Screening  
 Nikhil G Thaker, Fang Zhang, Peter R. McDonald, Tong Ying Shun, Michael D Lewen, Ian F. Pollack, and John S. Lazo

Molecular Pharmacology

|                              |               |      |                                                                              |           |         |
|------------------------------|---------------|------|------------------------------------------------------------------------------|-----------|---------|
| siRNA-Vinblastine Run2-DMSO  | NM_0154<br>31 | BIA2 | tripartite motif-containing<br>58                                            | 0.0641    | Inlier  |
| siRNA Disorazole DMSO Run3   | NM_0154<br>31 | BIA2 | tripartite motif-containing<br>58                                            | 0.365491  | Inlier  |
| siRNA-Vinblastine Run1-DMSO  | NM_0154<br>31 | BIA2 | tripartite motif-containing<br>58                                            | 4.516523  | Outlier |
| siRNA Disorazole DMSO Run3   | NM_1979<br>67 | BID  | BH3 interacting domain death agonist<br>BH3 interacting domain death agonist | -2.155925 | Inlier  |
| siRNA-Temozolomide Run3-DMSO | NM_1979<br>67 | BID  | BH3 interacting domain death agonist<br>BH3 interacting domain death agonist | -1.398215 | Inlier  |
| siRNA-Vinblastine Run2-DMSO  | NM_1979<br>67 | BID  | BH3 interacting domain death agonist<br>BH3 interacting domain death agonist | -1.005337 | Inlier  |
| siRNA Disorazole DMSO Run1   | NM_1979<br>67 | BID  | BH3 interacting domain death agonist<br>BH3 interacting domain death agonist | -0.037954 | Inlier  |
| siRNA-Temozolomide Run2-DMSO | NM_1979<br>67 | BID  | BH3 interacting domain death agonist<br>BH3 interacting domain death agonist | 0.037954  | Inlier  |
| siRNA-Temozolomide Run1-DMSO | NM_1979<br>67 | BID  | BH3 interacting domain death agonist<br>BH3 interacting domain death agonist | 0.17599   | Inlier  |
| siRNA Disorazole DMSO Run2   | NM_1979<br>67 | BID  | BH3 interacting domain death agonist<br>BH3 interacting domain death agonist | 0.434863  | Inlier  |
| siRNA-Vinblastine Run1-DMSO  | NM_1979<br>67 | BID  | BH3 interacting domain death agonist<br>BH3 interacting domain death agonist | 0.914137  | Inlier  |

Identification of Survival Genes in Human Glioblastoma Cells Using siRNA Screening

Nikhil G Thaker, Fang Zhang, Peter R. McDonald, Tong Ying Shun, Michael D Lewen, Ian F. Pollack, and John S. Lazo

Molecular Pharmacology

|                              |               |     |                                                    |                  |
|------------------------------|---------------|-----|----------------------------------------------------|------------------|
| siRNA-Temozolomide Run3-DMSO | NM_0011<br>97 | BIK | BCL2-interacting<br>killer<br>(apoptosis-inducing) | -2.052081 Inlier |
| siRNA-Temozolomide Run2-DMSO | NM_0011<br>97 | BIK | BCL2-interacting<br>killer<br>(apoptosis-inducing) | -1.507066 Inlier |
| siRNA Disorazole DMSO Run3   | NM_0011<br>97 | BIK | BCL2-interacting<br>killer<br>(apoptosis-inducing) | -0.548044 Inlier |
| siRNA-Temozolomide Run1-DMSO | NM_0011<br>97 | BIK | BCL2-interacting<br>killer<br>(apoptosis-inducing) | -0.234562 Inlier |
| siRNA-Vinblastine Run2-DMSO  | NM_0011<br>97 | BIK | BCL2-interacting<br>killer<br>(apoptosis-inducing) | 0.234562 Inlier  |
| siRNA Disorazole DMSO Run1   | NM_0011<br>97 | BIK | BCL2-interacting<br>killer<br>(apoptosis-inducing) | 0.282877 Inlier  |
| siRNA Disorazole DMSO Run2   | NM_0011<br>97 | BIK | BCL2-interacting<br>killer<br>(apoptosis-inducing) | 0.800956 Inlier  |
| siRNA-Vinblastine Run1-DMSO  | NM_0011<br>97 | BIK | BCL2-interacting<br>killer<br>(apoptosis-inducing) | 1.26035 Inlier   |

Identification of Survival Genes in Human Glioblastoma Cells Using siRNA Screening  
 Nikhil G Thaker, Fang Zhang, Peter R. McDonald, Tong Ying Shun, Michael D Lewen, Ian F. Pollack, and John S. Lazo  
 Molecular Pharmacology

|                              |                  |       |                                                             |                  |
|------------------------------|------------------|-------|-------------------------------------------------------------|------------------|
| siRNA-Temozolomide Run3-DMSO | NM_0011<br>67    | BIRC4 | baculoviral<br>IAP repeat-<br>containing<br>4               | -0.745692 Inlier |
| siRNA-Temozolomide Run1-DMSO | NM_0011<br>67    | BIRC4 | baculoviral<br>IAP repeat-<br>containing<br>4               | -0.603308 Inlier |
| siRNA-Temozolomide Run2-DMSO | NM_0011<br>67    | BIRC4 | baculoviral<br>IAP repeat-<br>containing<br>4               | -0.535304 Inlier |
| siRNA Disorazole DMSO Run3   | NM_0011<br>67    | BIRC4 | baculoviral<br>IAP repeat-<br>containing<br>4               | -0.140655 Inlier |
| siRNA Disorazole DMSO Run1   | NM_0011<br>67    | BIRC4 | baculoviral<br>IAP repeat-<br>containing<br>4               | 0.140655 Inlier  |
| siRNA Disorazole DMSO Run2   | NM_0011<br>67    | BIRC4 | baculoviral<br>IAP repeat-<br>containing<br>4               | 1.614406 Inlier  |
| siRNA-Vinblastine Run1-DMSO  | NM_0011<br>67    | BIRC4 | baculoviral<br>IAP repeat-<br>containing<br>4               | 1.782842 Inlier  |
| siRNA-Vinblastine Run2-DMSO  | NM_0011<br>67    | BIRC4 | baculoviral<br>IAP repeat-<br>containing<br>4               | 2.116952 Inlier  |
| siRNA-Temozolomide Run3-DMSO | NM_0010<br>12271 | BIRC5 | baculoviral<br>IAP repeat-<br>containing<br>5<br>(survivin) | -1.950697 Inlier |
| siRNA-Temozolomide Run1-DMSO | NM_0010<br>12271 | BIRC5 | baculoviral<br>IAP repeat-<br>containing<br>5<br>(survivin) | -0.687574 Inlier |

Identification of Survival Genes in Human Glioblastoma Cells Using siRNA Screening  
 Nikhil G Thaker, Fang Zhang, Peter R. McDonald, Tong Ying Shun, Michael D Lewen, Ian F. Pollack, and John S. Lazo  
 Molecular Pharmacology

|                              |                  |       |                                                |           |        |
|------------------------------|------------------|-------|------------------------------------------------|-----------|--------|
| siRNA-Temozolomide Run2-DMSO | NM_0010<br>12271 | BIRC5 | baculoviral IAP repeat-containing 5 (survivin) | -0.661426 | Inlier |
| siRNA Disorazole DMSO Run1   | NM_0010<br>12271 | BIRC5 | baculoviral IAP repeat-containing 5 (survivin) | -0.01721  | Inlier |
| siRNA Disorazole DMSO Run3   | NM_0010<br>12271 | BIRC5 | baculoviral IAP repeat-containing 5 (survivin) | 0.01721   | Inlier |
| siRNA Disorazole DMSO Run2   | NM_0010<br>12271 | BIRC5 | baculoviral IAP repeat-containing 5 (survivin) | 0.535061  | Inlier |
| siRNA-Vinblastine Run1-DMSO  | NM_0010<br>12271 | BIRC5 | baculoviral IAP repeat-containing 5 (survivin) | 1.942677  | Inlier |
| siRNA-Vinblastine Run2-DMSO  | NM_0010<br>12271 | BIRC5 | baculoviral IAP repeat-containing 5 (survivin) | 1.969913  | Inlier |
| siRNA-Temozolomide Run3-DMSO | NM_1393<br>17    | BIRC7 | baculoviral IAP repeat-containing 7 (livin)    | -0.955389 | Inlier |
| siRNA-Temozolomide Run2-DMSO | NM_1393<br>17    | BIRC7 | baculoviral IAP repeat-containing 7 (livin)    | -0.654043 | Inlier |
| siRNA Disorazole DMSO Run1   | NM_1393<br>17    | BIRC7 | baculoviral IAP repeat-containing 7 (livin)    | -0.625582 | Inlier |



Identification of Survival Genes in Human Glioblastoma Cells Using siRNA Screening  
 Nikhil G Thaker, Fang Zhang, Peter R. McDonald, Tong Ying Shun, Michael D Lewen, Ian F. Pollack, and John S. Lazo  
 Molecular Pharmacology

|                              |               |       |                                                  |           |        |
|------------------------------|---------------|-------|--------------------------------------------------|-----------|--------|
| siRNA-Temozolomide Run1-DMSO | NM_1393<br>17 | BIRC7 | baculoviral IAP repeat-containing 7 (livin)      | -0.159636 | Inlier |
| siRNA Disorazole DMSO Run2   | NM_1393<br>17 | BIRC7 | baculoviral IAP repeat-containing 7 (livin)      | 0.159637  | Inlier |
| siRNA-Vinblastine Run2-DMSO  | NM_1393<br>17 | BIRC7 | baculoviral IAP repeat-containing 7 (livin)      | 0.694957  | Inlier |
| siRNA-Vinblastine Run1-DMSO  | NM_1393<br>17 | BIRC7 | baculoviral IAP repeat-containing 7 (livin)      | 0.847094  | Inlier |
| siRNA Disorazole DMSO Run3   | NM_1393<br>17 | BIRC7 | baculoviral IAP repeat-containing 7 (livin)<br>B | 2.597458  | Inlier |
| siRNA-Temozolomide Run3-DMSO | NM_0017<br>15 | BLK   | lymphoid tyrosine kinase<br>B                    | -1.897072 | Inlier |
| siRNA Disorazole DMSO Run2   | NM_0017<br>15 | BLK   | lymphoid tyrosine kinase<br>B                    | -0.948658 | Inlier |
| siRNA-Temozolomide Run2-DMSO | NM_0017<br>15 | BLK   | lymphoid tyrosine kinase<br>B                    | -0.60009  | Inlier |
| siRNA-Temozolomide Run1-DMSO | NM_0017<br>15 | BLK   | lymphoid tyrosine kinase<br>B                    | -0.356934 | Inlier |
| siRNA Disorazole DMSO Run1   | NM_0017<br>15 | BLK   | lymphoid tyrosine kinase<br>B                    | 0.356934  | Inlier |
| siRNA Disorazole DMSO Run3   | NM_0017<br>15 | BLK   | lymphoid tyrosine kinase                         | 0.413168  | Inlier |

Identification of Survival Genes in Human Glioblastoma Cells Using siRNA Screening  
 Nikhil G Thaker, Fang Zhang, Peter R. McDonald, Tong Ying Shun, Michael D Lewen, Ian F. Pollack, and John S. Lazo

Molecular Pharmacology

|                              |               |      |                                                                                       |           |         |
|------------------------------|---------------|------|---------------------------------------------------------------------------------------|-----------|---------|
| siRNA-Vinblastine Run1-DMSO  | NM_0017<br>15 | BLK  | B lymphoid tyrosine kinase                                                            | 0.74891   | Inlier  |
| siRNA-Vinblastine Run2-DMSO  | NM_0017<br>15 | BLK  | B lymphoid tyrosine kinase                                                            | 1.344797  | Inlier  |
| siRNA-Temozolomide Run2-DMSO | NM_0000<br>57 | BLM  | Bloom syndrome                                                                        | -2.446938 | Inlier  |
| siRNA-Temozolomide Run1-DMSO | NM_0000<br>57 | BLM  | Bloom syndrome                                                                        | -1.83425  | Inlier  |
| siRNA-Temozolomide Run3-DMSO | NM_0000<br>57 | BLM  | Bloom syndrome                                                                        | -0.893301 | Inlier  |
| siRNA-Vinblastine Run2-DMSO  | NM_0000<br>57 | BLM  | Bloom syndrome                                                                        | -0.163634 | Inlier  |
| siRNA Disorazole DMSO Run1   | NM_0000<br>57 | BLM  | Bloom syndrome                                                                        | 0.163634  | Inlier  |
| siRNA-Vinblastine Run1-DMSO  | NM_0000<br>57 | BLM  | Bloom syndrome                                                                        | 0.330295  | Inlier  |
| siRNA Disorazole DMSO Run3   | NM_0000<br>57 | BLM  | Bloom syndrome                                                                        | 0.455699  | Inlier  |
| siRNA Disorazole DMSO Run2   | NM_0000<br>57 | BLM  | Bloom syndrome                                                                        | 1.202013  | Inlier  |
| siRNA-Temozolomide Run3-DMSO | NM_0003<br>86 | BLMH | bleomycin hydrolase                                                                   | -1.915843 | Inlier  |
| siRNA Disorazole DMSO Run2   | NM_0003<br>86 | BLMH | bleomycin hydrolase                                                                   | -0.811321 | Inlier  |
| siRNA Disorazole DMSO Run1   | NM_0003<br>86 | BLMH | bleomycin hydrolase                                                                   | -0.610853 | Inlier  |
| siRNA-Temozolomide Run1-DMSO | NM_0003<br>86 | BLMH | bleomycin hydrolase                                                                   | -0.088779 | Inlier  |
| siRNA-Temozolomide Run2-DMSO | NM_0003<br>86 | BLMH | bleomycin hydrolase                                                                   | 0.088779  | Inlier  |
| siRNA-Vinblastine Run1-DMSO  | NM_0003<br>86 | BLMH | bleomycin hydrolase                                                                   | 0.181052  | Inlier  |
| siRNA-Vinblastine Run2-DMSO  | NM_0003<br>86 | BLMH | bleomycin hydrolase                                                                   | 0.738147  | Inlier  |
| siRNA Disorazole DMSO Run3   | NM_0003<br>86 | BLMH | bleomycin hydrolase                                                                   | 1.459305  | Inlier  |
| siRNA Disorazole DMSO Run2   | NM_0329<br>66 | BLR1 | Burkitt lymphoma receptor 1, GTP binding protein (chemokine (C-X-C motif) receptor 5) | -9.003514 | Outlier |

Identification of Survival Genes in Human Glioblastoma Cells Using siRNA Screening

Nikhil G Thaker, Fang Zhang, Peter R. McDonald, Tong Ying Shun, Michael D Lewen, Ian F. Pollack, and John S. Lazo

Molecular Pharmacology

|                              |               |      |                                                                                       |           |        |
|------------------------------|---------------|------|---------------------------------------------------------------------------------------|-----------|--------|
| siRNA-Temozolomide Run1-DMSO | NM_0329<br>66 | BLR1 | Burkitt lymphoma receptor 1, GTP binding protein (chemokine (C-X-C motif) receptor 5) | -0.987946 | Inlier |
| siRNA Disorazole DMSO Run1   | NM_0329<br>66 | BLR1 | Burkitt lymphoma receptor 1, GTP binding protein (chemokine (C-X-C motif) receptor 5) | -0.573512 | Inlier |
| siRNA-Temozolomide Run3-DMSO | NM_0329<br>66 | BLR1 | Burkitt lymphoma receptor 1, GTP binding protein (chemokine (C-X-C motif) receptor 5) | -0.521373 | Inlier |
| siRNA-Vinblastine Run2-DMSO  | NM_0329<br>66 | BLR1 | Burkitt lymphoma receptor 1, GTP binding protein (chemokine (C-X-C motif) receptor 5) | 0.521373  | Inlier |

Identification of Survival Genes in Human Glioblastoma Cells Using siRNA Screening  
 Nikhil G Thaker, Fang Zhang, Peter R. McDonald, Tong Ying Shun, Michael D Lewen, Ian F. Pollack, and John S. Lazo  
 Molecular Pharmacology

|                              |           |       |                                                                                       |           |        |
|------------------------------|-----------|-------|---------------------------------------------------------------------------------------|-----------|--------|
| siRNA-Vinblastine Run1-DMSO  | NM_032966 | BLR1  | Burkitt lymphoma receptor 1, GTP binding protein (chemokine (C-X-C motif) receptor 5) | 0.646967  | Inlier |
| siRNA-Temozolomide Run2-DMSO | NM_032966 | BLR1  | Burkitt lymphoma receptor 1, GTP binding protein (chemokine (C-X-C motif) receptor 5) | 0.702033  | Inlier |
| siRNA Disorazole DMSO Run3   | NM_032966 | BLR1  | Burkitt lymphoma receptor 1, GTP binding protein (chemokine (C-X-C motif) receptor 5) | 0.827979  | Inlier |
| siRNA Disorazole DMSO Run1   | NM_000712 | BLVRA | biliverdin reductase A                                                                | -1.41224  | Inlier |
| siRNA-Temozolomide Run3-DMSO | NM_000712 | BLVRA | biliverdin reductase A                                                                | -0.448594 | Inlier |
| siRNA Disorazole DMSO Run3   | NM_000712 | BLVRA | biliverdin reductase A                                                                | -0.397016 | Inlier |
| siRNA-Temozolomide Run2-DMSO | NM_000712 | BLVRA | biliverdin reductase A                                                                | -0.135837 | Inlier |
| siRNA-Temozolomide Run1-DMSO | NM_000712 | BLVRA | biliverdin reductase A                                                                | 0.135837  | Inlier |
| siRNA-Vinblastine Run1-DMSO  | NM_000712 | BLVRA | biliverdin reductase A                                                                | 0.900406  | Inlier |

Identification of Survival Genes in Human Glioblastoma Cells Using siRNA Screening  
 Nikhil G Thaker, Fang Zhang, Peter R. McDonald, Tong Ying Shun, Michael D Lewen, Ian F. Pollack, and John S. Lazo

|                                                           |               |       |                                                               |           |         |
|-----------------------------------------------------------|---------------|-------|---------------------------------------------------------------|-----------|---------|
| Molecular Pharmacology<br>siRNA-Vinblastine Run2-<br>DMSO | NM_0007<br>12 | BLVRA | biliverdin<br>reductase<br>A                                  | 1.516381  | Inlier  |
| siRNA Disorazole DMSO Run2                                | NM_0007<br>12 | BLVRA | biliverdin<br>reductase<br>A                                  | 5.22491   | Outlier |
| siRNA-Temozolomide Run3-<br>DMSO                          | NM_0007<br>13 | BLVRB | biliverdin<br>reductase<br>B (flavin<br>reductase<br>(NADPH)) | -2.165436 | Inlier  |
| siRNA-Temozolomide Run2-<br>DMSO                          | NM_0007<br>13 | BLVRB | biliverdin<br>reductase<br>B (flavin<br>reductase<br>(NADPH)) | -0.577446 | Inlier  |
| siRNA Disorazole DMSO Run1                                | NM_0007<br>13 | BLVRB | biliverdin<br>reductase<br>B (flavin<br>reductase<br>(NADPH)) | -0.329423 | Inlier  |
| siRNA Disorazole DMSO Run3                                | NM_0007<br>13 | BLVRB | biliverdin<br>reductase<br>B (flavin<br>reductase<br>(NADPH)) | -0.156419 | Inlier  |
| siRNA-Vinblastine Run2-<br>DMSO                           | NM_0007<br>13 | BLVRB | biliverdin<br>reductase<br>B (flavin<br>reductase<br>(NADPH)) | 0.156419  | Inlier  |
| siRNA-Temozolomide Run1-<br>DMSO                          | NM_0007<br>13 | BLVRB | biliverdin<br>reductase<br>B (flavin<br>reductase<br>(NADPH)) | 0.771554  | Inlier  |
| siRNA-Vinblastine Run1-<br>DMSO                           | NM_0007<br>13 | BLVRB | biliverdin<br>reductase<br>B (flavin<br>reductase<br>(NADPH)) | 1.943233  | Inlier  |
| siRNA Disorazole DMSO Run2                                | NM_0007<br>13 | BLVRB | biliverdin<br>reductase<br>B (flavin<br>reductase<br>(NADPH)) | 2.945472  | Inlier  |
| siRNA-Temozolomide Run3-<br>DMSO                          | NM_0061<br>29 | BMP1  | bone<br>morphoge<br>netic<br>protein 1                        | -1.624949 | Inlier  |

Identification of Survival Genes in Human Glioblastoma Cells Using siRNA Screening  
 Nikhil G Thaker, Fang Zhang, Peter R. McDonald, Tong Ying Shun, Michael D Lewen, Ian F. Pollack, and John S. Lazo

Molecular Pharmacology

|                              |               |       |                              |           |        |
|------------------------------|---------------|-------|------------------------------|-----------|--------|
| siRNA Disorazole DMSO Run2   | NM_0061<br>29 | BMP1  | bone morphogenetic protein 1 | -1.058541 | Inlier |
| siRNA Disorazole DMSO Run1   | NM_0061<br>29 | BMP1  | bone morphogenetic protein 1 | -0.290459 | Inlier |
| siRNA-Temozolomide Run1-DMSO | NM_0061<br>29 | BMP1  | bone morphogenetic protein 1 | -0.013271 | Inlier |
| siRNA-Temozolomide Run2-DMSO | NM_0061<br>29 | BMP1  | bone morphogenetic protein 1 | 0.013271  | Inlier |
| siRNA Disorazole DMSO Run3   | NM_0061<br>29 | BMP1  | bone morphogenetic protein 1 | 0.151786  | Inlier |
| siRNA-Vinblastine Run2-DMSO  | NM_0061<br>29 | BMP1  | bone morphogenetic protein 1 | 1.285159  | Inlier |
| siRNA-Vinblastine Run1-DMSO  | NM_0061<br>29 | BMP1  | bone morphogenetic protein 1 | 1.433287  | Inlier |
| siRNA-Temozolomide Run3-DMSO | NM_1988<br>92 | BMP2K | inducible BMP2 kinase        | -1.487295 | Inlier |
| siRNA Disorazole DMSO Run2   | NM_1988<br>92 | BMP2K | inducible BMP2 kinase        | -1.157845 | Inlier |
| siRNA-Temozolomide Run2-DMSO | NM_1988<br>92 | BMP2K | inducible BMP2 kinase        | -0.079416 | Inlier |
| siRNA Disorazole DMSO Run1   | NM_1988<br>92 | BMP2K | inducible BMP2 kinase        | -0.057626 | Inlier |
| siRNA-Temozolomide Run1-DMSO | NM_1988<br>92 | BMP2K | inducible BMP2 kinase        | 0.057626  | Inlier |
| siRNA Disorazole DMSO Run3   | NM_1988<br>92 | BMP2K | inducible BMP2 kinase        | 0.191155  | Inlier |
| siRNA-Vinblastine Run1-DMSO  | NM_1988<br>92 | BMP2K | inducible BMP2 kinase        | 2.219821  | Inlier |
| siRNA-Vinblastine Run2-DMSO  | NM_1988<br>92 | BMP2K | inducible BMP2 kinase        | 2.378125  | Inlier |

Identification of Survival Genes in Human Glioblastoma Cells Using siRNA Screening  
 Nikhil G Thaker, Fang Zhang, Peter R. McDonald, Tong Ying Shun, Michael D Lewen, Ian F. Pollack, and John S. Lazo

Molecular Pharmacology

| siRNA Treatment              | Gene ID   | Gene Name | Gene Description                             | Log Fold Change | Outlier Status |
|------------------------------|-----------|-----------|----------------------------------------------|-----------------|----------------|
| siRNA-Temozolomide Run3-DMSO | NM_004329 | BMPR1A    | bone morphogenetic protein receptor, type IA | -1.307838       | Inlier         |
| siRNA Disorazole DMSO Run2   | NM_004329 | BMPR1A    | bone morphogenetic protein receptor, type IA | -0.895028       | Inlier         |
| siRNA-Temozolomide Run1-DMSO | NM_004329 | BMPR1A    | bone morphogenetic protein receptor, type IA | -0.105117       | Inlier         |
| siRNA Disorazole DMSO Run3   | NM_004329 | BMPR1A    | bone morphogenetic protein receptor, type IA | -0.053753       | Inlier         |
| siRNA-Temozolomide Run2-DMSO | NM_004329 | BMPR1A    | bone morphogenetic protein receptor, type IA | 0.053753        | Inlier         |
| siRNA-Vinblastine Run1-DMSO  | NM_004329 | BMPR1A    | bone morphogenetic protein receptor, type IA | 0.67401         | Inlier         |
| siRNA Disorazole DMSO Run1   | NM_004329 | BMPR1A    | bone morphogenetic protein receptor, type IA | 0.67499         | Inlier         |
| siRNA-Vinblastine Run2-DMSO  | NM_004329 | BMPR1A    | bone morphogenetic protein receptor, type IA | 2.196635        | Inlier         |

Identification of Survival Genes in Human Glioblastoma Cells Using siRNA Screening  
 Nikhil G Thaker, Fang Zhang, Peter R. McDonald, Tong Ying Shun, Michael D Lewen, Ian F. Pollack, and John S. Lazo

Molecular Pharmacology

| siRNA Treatment              | Gene   | Gene ID   | Gene Description                             | Log Fold Change | Outlier Status |
|------------------------------|--------|-----------|----------------------------------------------|-----------------|----------------|
| siRNA Disorazole DMSO Run2   | BMPR1B | NM_001203 | bone morphogenetic protein receptor, type IB | -1.418717       | Inlier         |
| siRNA-Temozolomide Run2-DMSO | BMPR1B | NM_001203 | bone morphogenetic protein receptor, type IB | -0.523698       | Inlier         |
| siRNA-Temozolomide Run3-DMSO | BMPR1B | NM_001203 | bone morphogenetic protein receptor, type IB | -0.450342       | Inlier         |
| siRNA-Temozolomide Run1-DMSO | BMPR1B | NM_001203 | bone morphogenetic protein receptor, type IB | -0.251718       | Inlier         |
| siRNA Disorazole DMSO Run1   | BMPR1B | NM_001203 | bone morphogenetic protein receptor, type IB | 0.251718        | Inlier         |
| siRNA-Vinblastine Run1-DMSO  | BMPR1B | NM_001203 | bone morphogenetic protein receptor, type IB | 0.825302        | Inlier         |
| siRNA Disorazole DMSO Run3   | BMPR1B | NM_001203 | bone morphogenetic protein receptor, type IB | 1.386756        | Inlier         |
| siRNA-Vinblastine Run2-DMSO  | BMPR1B | NM_001203 | bone morphogenetic protein receptor, type IB | 1.457218        | Inlier         |



Identification of Survival Genes in Human Glioblastoma Cells Using siRNA Screening  
 Nikhil G Thaker, Fang Zhang, Peter R. McDonald, Tong Ying Shun, Michael D Lewen, Ian F. Pollack, and John S. Lazo  
 Molecular Pharmacology

| siRNA Treatment              | Gene ID   | Gene Name | Log Fold Change | Category |
|------------------------------|-----------|-----------|-----------------|----------|
| siRNA Disorazole DMSO Run2   | NM_033346 | BMPR2     | -2.14729        | Inlier   |
| siRNA-Temozolomide Run3-DMSO | NM_033346 | BMPR2     | -1.39956        | Inlier   |
| siRNA-Temozolomide Run2-DMSO | NM_033346 | BMPR2     | -0.674973       | Inlier   |
| siRNA-Vinblastine Run1-DMSO  | NM_033346 | BMPR2     | -0.008316       | Inlier   |
| siRNA-Temozolomide Run1-DMSO | NM_033346 | BMPR2     | 0.008316        | Inlier   |

bone morphogenetic protein receptor, type II (serine/threonine kinase)  
 bone morphogenetic protein receptor, type II (serine/threonine kinase)

Identification of Survival Genes in Human Glioblastoma Cells Using siRNA Screening  
 Nikhil G Thaker, Fang Zhang, Peter R. McDonald, Tong Ying Shun, Michael D Lewen, Ian F. Pollack, and John S. Lazo

Molecular Pharmacology

|                              |               |       |                                                                        |           |        |
|------------------------------|---------------|-------|------------------------------------------------------------------------|-----------|--------|
| siRNA Disorazole DMSO Run1   | NM_0333<br>46 | BMPR2 | bone morphogenetic protein receptor, type II (serine/threonine kinase) | 0.469082  | Inlier |
| siRNA Disorazole DMSO Run3   | NM_0333<br>46 | BMPR2 | bone morphogenetic protein receptor, type II (serine/threonine kinase) | 0.674027  | Inlier |
| siRNA-Vinblastine Run2-DMSO  | NM_0333<br>46 | BMPR2 | bone morphogenetic protein receptor, type II (serine/threonine kinase) | 1.376915  | Inlier |
| siRNA-Vinblastine Run1-DMSO  | NM_0017<br>21 | BMX   | BMX non-receptor tyrosine kinase                                       | -1.027443 | Inlier |
| siRNA-Temozolomide Run1-DMSO | NM_0017<br>21 | BMX   | BMX non-receptor tyrosine kinase                                       | -0.850734 | Inlier |
| siRNA-Temozolomide Run3-DMSO | NM_0017<br>21 | BMX   | BMX non-receptor tyrosine kinase                                       | -0.498266 | Inlier |
| siRNA-Temozolomide Run2-DMSO | NM_0017<br>21 | BMX   | BMX non-receptor tyrosine kinase                                       | -0.121065 | Inlier |
| siRNA Disorazole DMSO Run1   | NM_0017<br>21 | BMX   | BMX non-receptor tyrosine kinase                                       | 0.121064  | Inlier |
| siRNA Disorazole DMSO Run3   | NM_0017<br>21 | BMX   | BMX non-receptor tyrosine kinase                                       | 0.452652  | Inlier |

Identification of Survival Genes in Human Glioblastoma Cells Using siRNA Screening  
 Nikhil G Thaker, Fang Zhang, Peter R. McDonald, Tong Ying Shun, Michael D Lewen, Ian F. Pollack, and John S. Lazo

Molecular Pharmacology

|                              |               |       |                                                 |           |        |
|------------------------------|---------------|-------|-------------------------------------------------|-----------|--------|
| siRNA-Vinblastine Run2-DMSO  | NM_0017<br>21 | BMX   | BMX non-receptor tyrosine kinase                | 1.490851  | Inlier |
| siRNA Disorazole DMSO Run2   | NM_0017<br>21 | BMX   | BMX non-receptor tyrosine kinase                | 1.503166  | Inlier |
| siRNA-Temozolomide Run3-DMSO | NM_0139<br>79 | BNIP1 | BCL2/adenovirus E1B 19kDa interacting protein 1 | -1.848356 | Inlier |
| siRNA-Vinblastine Run2-DMSO  | NM_0139<br>79 | BNIP1 | BCL2/adenovirus E1B 19kDa interacting protein 1 | -0.72608  | Inlier |
| siRNA Disorazole DMSO Run3   | NM_0139<br>79 | BNIP1 | BCL2/adenovirus E1B 19kDa interacting protein 1 | -0.62292  | Inlier |
| siRNA-Temozolomide Run2-DMSO | NM_0139<br>79 | BNIP1 | BCL2/adenovirus E1B 19kDa interacting protein 1 | -0.059617 | Inlier |
| siRNA Disorazole DMSO Run1   | NM_0139<br>79 | BNIP1 | BCL2/adenovirus E1B 19kDa interacting protein 1 | 0.059617  | Inlier |
| siRNA-Temozolomide Run1-DMSO | NM_0139<br>79 | BNIP1 | BCL2/adenovirus E1B 19kDa interacting protein 1 | 0.340822  | Inlier |

Identification of Survival Genes in Human Glioblastoma Cells Using siRNA Screening  
 Nikhil G Thaker, Fang Zhang, Peter R. McDonald, Tong Ying Shun, Michael D Lewen, Ian F. Pollack, and John S. Lazo  
 Molecular Pharmacology

|                              |               |       |                                                 |           |         |
|------------------------------|---------------|-------|-------------------------------------------------|-----------|---------|
| siRNA Disorazole DMSO Run2   | NM_0139<br>79 | BNIP1 | BCL2/adenovirus E1B 19kDa interacting protein 1 | 1.016366  | Inlier  |
| siRNA-Vinblastine Run1-DMSO  | NM_0139<br>79 | BNIP1 | BCL2/adenovirus E1B 19kDa interacting protein 1 | 1.282068  | Inlier  |
| siRNA Disorazole DMSO Run1   | NM_0332<br>54 | BOC   | BOC                                             | -1.854057 | Inlier  |
| siRNA Disorazole DMSO Run3   | NM_0332<br>54 | BOC   | BOC                                             | -0.828744 | Inlier  |
| siRNA-Temozolomide Run3-DMSO | NM_0332<br>54 | BOC   | BOC                                             | -0.480564 | Inlier  |
| siRNA-Vinblastine Run2-DMSO  | NM_0332<br>54 | BOC   | BOC                                             | -0.126893 | Inlier  |
| siRNA-Temozolomide Run1-DMSO | NM_0332<br>54 | BOC   | BOC                                             | 0.126891  | Inlier  |
| siRNA Disorazole DMSO Run2   | NM_0332<br>54 | BOC   | BOC                                             | 0.520256  | Inlier  |
| siRNA-Temozolomide Run2-DMSO | NM_0332<br>54 | BOC   | BOC                                             | 1.095633  | Inlier  |
| siRNA-Vinblastine Run1-DMSO  | NM_0332<br>54 | BOC   | BOC                                             | 5.299061  | Outlier |
| siRNA-Temozolomide Run1-DMSO | NM_0325<br>15 | BOK   | BCL2-related ovarian killer                     | -1.761089 | Inlier  |
| siRNA Disorazole DMSO Run3   | NM_0325<br>15 | BOK   | BCL2-related ovarian killer                     | -1.065904 | Inlier  |
| siRNA Disorazole DMSO Run1   | NM_0325<br>15 | BOK   | BCL2-related ovarian killer                     | -0.942727 | Inlier  |
| siRNA-Temozolomide Run3-DMSO | NM_0325<br>15 | BOK   | BCL2-related ovarian killer                     | -0.096013 | Inlier  |
| siRNA-Vinblastine Run2-DMSO  | NM_0325<br>15 | BOK   | BCL2-related ovarian killer                     | 0.096011  | Inlier  |

Identification of Survival Genes in Human Glioblastoma Cells Using siRNA Screening  
 Nikhil G Thaker, Fang Zhang, Peter R. McDonald, Tong Ying Shun, Michael D Lewen, Ian F. Pollack, and John S. Lazo

Molecular Pharmacology

|                                  |               |      |                                           |                  |
|----------------------------------|---------------|------|-------------------------------------------|------------------|
| siRNA Disorazole DMSO Run2       | NM_0325<br>15 | BOK  | BCL2-<br>related<br>ovarian<br>killer     | 0.346323 Inlier  |
| siRNA-Temozolomide Run2-<br>DMSO | NM_0325<br>15 | BOK  | BCL2-<br>related<br>ovarian<br>killer     | 0.406273 Inlier  |
| siRNA-Vinblastine Run1-<br>DMSO  | NM_0325<br>15 | BOK  | BCL2-<br>related<br>ovarian<br>killer     | 1.900649 Inlier  |
| siRNA-Temozolomide Run3-<br>DMSO | NM_0017<br>24 | BPGM | 2,3-<br>bisphosph<br>oglycerate<br>mutase | -0.807501 Inlier |
| siRNA-Temozolomide Run2-<br>DMSO | NM_0017<br>24 | BPGM | 2,3-<br>bisphosph<br>oglycerate<br>mutase | -0.541499 Inlier |
| siRNA Disorazole DMSO Run3       | NM_0017<br>24 | BPGM | 2,3-<br>bisphosph<br>oglycerate<br>mutase | -0.497904 Inlier |
| siRNA-Vinblastine Run2-<br>DMSO  | NM_0017<br>24 | BPGM | 2,3-<br>bisphosph<br>oglycerate<br>mutase | -0.456173 Inlier |
| siRNA Disorazole DMSO Run1       | NM_0017<br>24 | BPGM | 2,3-<br>bisphosph<br>oglycerate<br>mutase | 0.456173 Inlier  |
| siRNA-Temozolomide Run1-<br>DMSO | NM_0017<br>24 | BPGM | 2,3-<br>bisphosph<br>oglycerate<br>mutase | 0.915991 Inlier  |
| siRNA Disorazole DMSO Run2       | NM_0017<br>24 | BPGM | 2,3-<br>bisphosph<br>oglycerate<br>mutase | 3.064998 Inlier  |
| siRNA-Vinblastine Run1-<br>DMSO  | NM_0017<br>24 | BPGM | 2,3-<br>bisphosph<br>oglycerate<br>mutase | 3.135168 Inlier  |

Identification of Survival Genes in Human Glioblastoma Cells Using siRNA Screening

Nikhil G Thaker, Fang Zhang, Peter R. McDonald, Tong Ying Shun, Michael D Lewen, Ian F. Pollack, and John S. Lazo

Molecular Pharmacology

|                              |           |      |                                                                                        |           |        |
|------------------------------|-----------|------|----------------------------------------------------------------------------------------|-----------|--------|
| siRNA-Temozolomide Run3-DMSO | NM_004332 | BPHL | biphenyl hydrolase-like (serine hydrolase; breast epithelial mucin-associated antigen) | -1.255097 | Inlier |
| siRNA-Temozolomide Run2-DMSO | NM_004332 | BPHL | biphenyl hydrolase-like (serine hydrolase; breast epithelial mucin-associated antigen) | -0.772447 | Inlier |
| siRNA-Vinblastine Run2-DMSO  | NM_004332 | BPHL | biphenyl hydrolase-like (serine hydrolase; breast epithelial mucin-associated antigen) | -0.18533  | Inlier |
| siRNA Disorazole DMSO Run1   | NM_004332 | BPHL | biphenyl hydrolase-like (serine hydrolase; breast epithelial mucin-associated antigen) | -0.087134 | Inlier |
| siRNA Disorazole DMSO Run3   | NM_004332 | BPHL | biphenyl hydrolase-like (serine hydrolase; breast epithelial mucin-associated antigen) | 0.087134  | Inlier |

Identification of Survival Genes in Human Glioblastoma Cells Using siRNA Screening

Nikhil G Thaker, Fang Zhang, Peter R. McDonald, Tong Ying Shun, Michael D Lewen, Ian F. Pollack, and John S. Lazo

Molecular Pharmacology

|                              |           |      |                                                                                        |           |         |
|------------------------------|-----------|------|----------------------------------------------------------------------------------------|-----------|---------|
| siRNA-Temozolomide Run1-DMSO | NM_004332 | BPHL | biphenyl hydrolase-like (serine hydrolase; breast epithelial mucin-associated antigen) | 0.576553  | Inlier  |
| siRNA-Vinblastine Run1-DMSO  | NM_004332 | BPHL | biphenyl hydrolase-like (serine hydrolase; breast epithelial mucin-associated antigen) | 4.855536  | Outlier |
| siRNA Disorazole DMSO Run2   | NM_004332 | BPHL | biphenyl hydrolase-like (serine hydrolase; breast epithelial mucin-associated antigen) | 5.272033  | Outlier |
| siRNA-Temozolomide Run3-DMSO | NM_001725 | BPI  | bactericidal/permeability-increasing protein                                           | -1.228809 | Inlier  |
| siRNA-Temozolomide Run2-DMSO | NM_001725 | BPI  | bactericidal/permeability-increasing protein                                           | -0.74783  | Inlier  |
| siRNA-Vinblastine Run2-DMSO  | NM_001725 | BPI  | bactericidal/permeability-increasing protein                                           | -0.60117  | Inlier  |
| siRNA-Temozolomide Run1-DMSO | NM_001725 | BPI  | bactericidal/permeability-increasing protein                                           | -0.41993  | Inlier  |

Identification of Survival Genes in Human Glioblastoma Cells Using siRNA Screening

Nikhil G Thaker, Fang Zhang, Peter R. McDonald, Tong Ying Shun, Michael D Lewen, Ian F. Pollack, and John S. Lazo

Molecular Pharmacology

|                                  |               |       |                                                                        |           |        |
|----------------------------------|---------------|-------|------------------------------------------------------------------------|-----------|--------|
| siRNA Disorazole DMSO Run3       | NM_0017<br>25 | BPI   | bactericida<br>l/permeabi<br>lity-<br>increasing<br>protein            | 0.41993   | Inlier |
| siRNA Disorazole DMSO Run1       | NM_0017<br>25 | BPI   | bactericida<br>l/permeabi<br>lity-<br>increasing<br>protein            | 0.462603  | Inlier |
| siRNA-Vinblastine Run1-<br>DMSO  | NM_0017<br>25 | BPI   | bactericida<br>l/permeabi<br>lity-<br>increasing<br>protein            | 1.502814  | Inlier |
| siRNA Disorazole DMSO Run2       | NM_0017<br>25 | BPI   | bactericida<br>l/permeabi<br>lity-<br>increasing<br>protein            | 2.033226  | Inlier |
| siRNA-Temozolomide Run2-<br>DMSO | NM_0252<br>27 | BPIL1 | protein-<br>like 1<br>bactericida<br>l/permeabi<br>lity-<br>increasing | -3.216271 | Inlier |
| siRNA-Temozolomide Run3-<br>DMSO | NM_0252<br>27 | BPIL1 | protein-<br>like 1<br>bactericida<br>l/permeabi<br>lity-<br>increasing | -2.536337 | Inlier |
| siRNA-Vinblastine Run2-<br>DMSO  | NM_0252<br>27 | BPIL1 | protein-<br>like 1<br>bactericida<br>l/permeabi<br>lity-<br>increasing | -0.499422 | Inlier |
| siRNA-Temozolomide Run1-<br>DMSO | NM_0252<br>27 | BPIL1 | protein-<br>like 1<br>bactericida<br>l/permeabi<br>lity-<br>increasing | -0.29651  | Inlier |
| siRNA Disorazole DMSO Run3       | NM_0252<br>27 | BPIL1 | protein-<br>like 1                                                     | 0.29651   | Inlier |



Identification of Survival Genes in Human Glioblastoma Cells Using siRNA Screening

Nikhil G Thaker, Fang Zhang, Peter R. McDonald, Tong Ying Shun, Michael D Lewen, Ian F. Pollack, and John S. Lazo

Molecular Pharmacology

|                                  |               |       |                                                                        |           |        |
|----------------------------------|---------------|-------|------------------------------------------------------------------------|-----------|--------|
| siRNA Disorazole DMSO Run2       | NM_0252<br>27 | BPIL1 | bactericida<br>l/permeabi<br>lity-<br>increasing<br>protein-<br>like 1 | 0.310361  | Inlier |
| siRNA Disorazole DMSO Run1       | NM_0252<br>27 | BPIL1 | bactericida<br>l/permeabi<br>lity-<br>increasing<br>protein-<br>like 1 | 0.849578  | Inlier |
| siRNA-Vinblastine Run1-<br>DMSO  | NM_0252<br>27 | BPIL1 | bactericida<br>l/permeabi<br>lity-<br>increasing<br>protein-<br>like 1 | 2.502409  | Inlier |
| siRNA-Temozolomide Run3-<br>DMSO | NM_1749<br>32 | BPIL2 | bactericida<br>l/permeabi<br>lity-<br>increasing<br>protein-<br>like 2 | -1.352632 | Inlier |
| siRNA-Temozolomide Run2-<br>DMSO | NM_1749<br>32 | BPIL2 | bactericida<br>l/permeabi<br>lity-<br>increasing<br>protein-<br>like 2 | -0.964014 | Inlier |
| siRNA-Vinblastine Run2-<br>DMSO  | NM_1749<br>32 | BPIL2 | bactericida<br>l/permeabi<br>lity-<br>increasing<br>protein-<br>like 2 | -0.223969 | Inlier |
| siRNA Disorazole DMSO Run3       | NM_1749<br>32 | BPIL2 | bactericida<br>l/permeabi<br>lity-<br>increasing<br>protein-<br>like 2 | -0.192099 | Inlier |
| siRNA Disorazole DMSO Run2       | NM_1749<br>32 | BPIL2 | bactericida<br>l/permeabi<br>lity-<br>increasing<br>protein-<br>like 2 | 0.192098  | Inlier |

Identification of Survival Genes in Human Glioblastoma Cells Using siRNA Screening

Nikhil G Thaker, Fang Zhang, Peter R. McDonald, Tong Ying Shun, Michael D Lewen, Ian F. Pollack, and John S. Lazo

Molecular Pharmacology

|                                  |               |       |                                                                        |           |        |
|----------------------------------|---------------|-------|------------------------------------------------------------------------|-----------|--------|
| siRNA Disorazole DMSO Run1       | NM_1749<br>32 | BPIL2 | bactericida<br>l/permeabi<br>lity-<br>increasing<br>protein-<br>like 2 | 0.384986  | Inlier |
| siRNA-Temozolomide Run1-<br>DMSO | NM_1749<br>32 | BPIL2 | bactericida<br>l/permeabi<br>lity-<br>increasing<br>protein-<br>like 2 | 1.292204  | Inlier |
| siRNA-Vinblastine Run1-<br>DMSO  | NM_1749<br>32 | BPIL2 | bactericida<br>l/permeabi<br>lity-<br>increasing<br>protein-<br>like 2 | 1.820194  | Inlier |
| siRNA-Temozolomide Run3-<br>DMSO | NM_1748<br>97 | BPIL3 | bactericida<br>l/permeabi<br>lity-<br>increasing<br>protein-<br>like 3 | -0.926736 | Inlier |
| siRNA-Temozolomide Run2-<br>DMSO | NM_1748<br>97 | BPIL3 | bactericida<br>l/permeabi<br>lity-<br>increasing<br>protein-<br>like 3 | -0.704134 | Inlier |
| siRNA-Vinblastine Run2-<br>DMSO  | NM_1748<br>97 | BPIL3 | bactericida<br>l/permeabi<br>lity-<br>increasing<br>protein-<br>like 3 | -0.40408  | Inlier |
| siRNA Disorazole DMSO Run3       | NM_1748<br>97 | BPIL3 | bactericida<br>l/permeabi<br>lity-<br>increasing<br>protein-<br>like 3 | -0.360981 | Inlier |
| siRNA-Temozolomide Run1-<br>DMSO | NM_1748<br>97 | BPIL3 | bactericida<br>l/permeabi<br>lity-<br>increasing<br>protein-<br>like 3 | 0.360981  | Inlier |

Identification of Survival Genes in Human Glioblastoma Cells Using siRNA Screening

Nikhil G Thaker, Fang Zhang, Peter R. McDonald, Tong Ying Shun, Michael D Lewen, Ian F. Pollack, and John S. Lazo

Molecular Pharmacology

|                                  |               |       |                                                                        |           |        |
|----------------------------------|---------------|-------|------------------------------------------------------------------------|-----------|--------|
| siRNA Disorazole DMSO Run1       | NM_1748<br>97 | BPIL3 | bactericida<br>l/permeabi<br>lity-<br>increasing<br>protein-<br>like 3 | 0.644866  | Inlier |
| siRNA Disorazole DMSO Run2       | NM_1748<br>97 | BPIL3 | bactericida<br>l/permeabi<br>lity-<br>increasing<br>protein-<br>like 3 | 1.865914  | Inlier |
| siRNA-Vinblastine Run1-<br>DMSO  | NM_1748<br>97 | BPIL3 | bactericida<br>l/permeabi<br>lity-<br>increasing<br>protein-<br>like 3 | 2.202231  | Inlier |
| siRNA-Temozolomide Run2-<br>DMSO | NM_0060<br>85 | BPNT1 | 3(2), 5-<br>bisphosph<br>ate<br>nucleotida<br>se 1                     | -1.656434 | Inlier |
| siRNA-Temozolomide Run3-<br>DMSO | NM_0060<br>85 | BPNT1 | 3(2), 5-<br>bisphosph<br>ate<br>nucleotida<br>se 1                     | -1.467769 | Inlier |
| siRNA-Vinblastine Run2-<br>DMSO  | NM_0060<br>85 | BPNT1 | 3(2), 5-<br>bisphosph<br>ate<br>nucleotida<br>se 1                     | -0.633071 | Inlier |
| siRNA Disorazole DMSO Run1       | NM_0060<br>85 | BPNT1 | 3(2), 5-<br>bisphosph<br>ate<br>nucleotida<br>se 1                     | -0.205118 | Inlier |
| siRNA Disorazole DMSO Run3       | NM_0060<br>85 | BPNT1 | 3(2), 5-<br>bisphosph<br>ate<br>nucleotida<br>se 1                     | 0.205118  | Inlier |
| siRNA-Temozolomide Run1-<br>DMSO | NM_0060<br>85 | BPNT1 | nucleotida<br>se 1                                                     | 0.431783  | Inlier |

Identification of Survival Genes in Human Glioblastoma Cells Using siRNA Screening  
 Nikhil G Thaker, Fang Zhang, Peter R. McDonald, Tong Ying Shun, Michael D Lewen, Ian F. Pollack, and John S. Lazo

Molecular Pharmacology

|                              |               |       |                                                |           |        |
|------------------------------|---------------|-------|------------------------------------------------|-----------|--------|
| siRNA-Vinblastine Run1-DMSO  | NM_0060<br>85 | BPNT1 | 3(2), 5-bisphosphate nucleotide se 1           | 0.715929  | Inlier |
| siRNA Disorazole DMSO Run2   | NM_0060<br>85 | BPNT1 | 3(2), 5-bisphosphate nucleotide se 1           | 1.077472  | Inlier |
| siRNA-Temozolomide Run3-DMSO | NM_0043<br>33 | BRAF  | v-raf murine sarcoma viral oncogene homolog B1 | -1.488575 | Inlier |
| siRNA-Temozolomide Run2-DMSO | NM_0043<br>33 | BRAF  | v-raf murine sarcoma viral oncogene homolog B1 | -0.76036  | Inlier |
| siRNA-Temozolomide Run1-DMSO | NM_0043<br>33 | BRAF  | v-raf murine sarcoma viral oncogene homolog B1 | -0.206809 | Inlier |
| siRNA Disorazole DMSO Run3   | NM_0043<br>33 | BRAF  | v-raf murine sarcoma viral oncogene homolog B1 | -0.069192 | Inlier |
| siRNA Disorazole DMSO Run1   | NM_0043<br>33 | BRAF  | v-raf murine sarcoma viral oncogene homolog B1 | 0.069192  | Inlier |
| siRNA Disorazole DMSO Run2   | NM_0043<br>33 | BRAF  | v-raf murine sarcoma viral oncogene homolog B1 | 0.58864   | Inlier |

Identification of Survival Genes in Human Glioblastoma Cells Using siRNA Screening  
 Nikhil G Thaker, Fang Zhang, Peter R. McDonald, Tong Ying Shun, Michael D Lewen, Ian F. Pollack, and John S. Lazo

Molecular Pharmacology

|                              |           |      |                                                                  |           |        |
|------------------------------|-----------|------|------------------------------------------------------------------|-----------|--------|
| siRNA-Vinblastine Run1-DMSO  | NM_004333 | BRAF | v-raf<br>murine<br>sarcoma<br>viral<br>oncogene<br>homolog<br>B1 | 1.18289   | Inlier |
| siRNA-Vinblastine Run2-DMSO  | NM_004333 | BRAF | v-raf<br>murine<br>sarcoma<br>viral<br>oncogene<br>homolog<br>B1 | 1.255549  | Inlier |
| siRNA-Temozolomide Run3-DMSO | NM_005104 | BRD2 | bromodom<br>ain<br>containing<br>2                               | -0.899112 | Inlier |
| siRNA Disorazole DMSO Run2   | NM_005104 | BRD2 | bromodom<br>ain<br>containing<br>2                               | -0.825236 | Inlier |
| siRNA-Temozolomide Run1-DMSO | NM_005104 | BRD2 | bromodom<br>ain<br>containing<br>2                               | -0.525557 | Inlier |
| siRNA Disorazole DMSO Run3   | NM_005104 | BRD2 | bromodom<br>ain<br>containing<br>2                               | -0.074003 | Inlier |
| siRNA-Temozolomide Run2-DMSO | NM_005104 | BRD2 | bromodom<br>ain<br>containing<br>2                               | 0.074003  | Inlier |
| siRNA Disorazole DMSO Run1   | NM_005104 | BRD2 | bromodom<br>ain<br>containing<br>2                               | 0.417453  | Inlier |
| siRNA-Vinblastine Run2-DMSO  | NM_005104 | BRD2 | bromodom<br>ain<br>containing<br>2                               | 0.823443  | Inlier |
| siRNA-Vinblastine Run1-DMSO  | NM_005104 | BRD2 | bromodom<br>ain<br>containing<br>2                               | 0.949748  | Inlier |
| siRNA-Temozolomide Run3-DMSO | NM_007371 | BRD3 | ain<br>containing<br>3                                           | -1.164419 | Inlier |

Identification of Survival Genes in Human Glioblastoma Cells Using siRNA Screening  
 Nikhil G Thaker, Fang Zhang, Peter R. McDonald, Tong Ying Shun, Michael D Lewen, Ian F. Pollack, and John S. Lazo

Molecular Pharmacology

|                                  |               |      |                                    |           |        |
|----------------------------------|---------------|------|------------------------------------|-----------|--------|
| siRNA Disorazole DMSO Run2       | NM_0073<br>71 | BRD3 | bromodom<br>ain<br>containing<br>3 | -0.695763 | Inlier |
| siRNA-Temozolomide Run1-<br>DMSO | NM_0073<br>71 | BRD3 | bromodom<br>ain<br>containing<br>3 | -0.633193 | Inlier |
| siRNA Disorazole DMSO Run3       | NM_0073<br>71 | BRD3 | bromodom<br>ain<br>containing<br>3 | -0.563887 | Inlier |
| siRNA-Temozolomide Run2-<br>DMSO | NM_0073<br>71 | BRD3 | bromodom<br>ain<br>containing<br>3 | 0.563887  | Inlier |
| siRNA Disorazole DMSO Run1       | NM_0073<br>71 | BRD3 | bromodom<br>ain<br>containing<br>3 | 0.653237  | Inlier |
| siRNA-Vinblastine Run2-<br>DMSO  | NM_0073<br>71 | BRD3 | bromodom<br>ain<br>containing<br>3 | 1.775357  | Inlier |
| siRNA-Vinblastine Run1-<br>DMSO  | NM_0073<br>71 | BRD3 | bromodom<br>ain<br>containing<br>3 | 2.228336  | Inlier |
| siRNA-Temozolomide Run3-<br>DMSO | NM_0582<br>43 | BRD4 | bromodom<br>ain<br>containing<br>4 | -0.958952 | Inlier |
| siRNA-Temozolomide Run2-<br>DMSO | NM_0582<br>43 | BRD4 | bromodom<br>ain<br>containing<br>4 | -0.803543 | Inlier |
| siRNA Disorazole DMSO Run2       | NM_0582<br>43 | BRD4 | bromodom<br>ain<br>containing<br>4 | -0.545457 | Inlier |
| siRNA Disorazole DMSO Run3       | NM_0582<br>43 | BRD4 | bromodom<br>ain<br>containing<br>4 | -0.442922 | Inlier |
| siRNA-Temozolomide Run1-<br>DMSO | NM_0582<br>43 | BRD4 | bromodom<br>ain<br>containing<br>4 | 0.442922  | Inlier |
| siRNA-Vinblastine Run2-<br>DMSO  | NM_0582<br>43 | BRD4 | bromodom<br>ain<br>containing<br>4 | 0.528578  | Inlier |

Identification of Survival Genes in Human Glioblastoma Cells Using siRNA Screening  
 Nikhil G Thaker, Fang Zhang, Peter R. McDonald, Tong Ying Shun, Michael D Lewen, Ian F. Pollack, and John S. Lazo

Molecular Pharmacology

|                                  |               |      |                                      |           |         |
|----------------------------------|---------------|------|--------------------------------------|-----------|---------|
| siRNA Disorazole DMSO Run1       | NM_0582<br>43 | BRD4 | bromodom<br>ain<br>containing<br>4   | 0.854414  | Inlier  |
| siRNA-Vinblastine Run1-<br>DMSO  | NM_0582<br>43 | BRD4 | bromodom<br>ain<br>containing<br>4   | 1.034979  | Inlier  |
| siRNA Disorazole DMSO Run3       | NM_1391<br>99 | BRD8 | bromodom<br>ain<br>containing<br>8   | -4.634412 | Outlier |
| siRNA-Temozolomide Run3-<br>DMSO | NM_1391<br>99 | BRD8 | bromodom<br>ain<br>containing<br>8   | -1.118583 | Inlier  |
| siRNA Disorazole DMSO Run2       | NM_1391<br>99 | BRD8 | bromodom<br>ain<br>containing<br>8   | -0.672761 | Inlier  |
| siRNA-Temozolomide Run1-<br>DMSO | NM_1391<br>99 | BRD8 | bromodom<br>ain<br>containing<br>8   | -0.022313 | Inlier  |
| siRNA-Temozolomide Run2-<br>DMSO | NM_1391<br>99 | BRD8 | bromodom<br>ain<br>containing<br>8   | 0.022313  | Inlier  |
| siRNA Disorazole DMSO Run1       | NM_1391<br>99 | BRD8 | bromodom<br>ain<br>containing<br>8   | 0.21307   | Inlier  |
| siRNA-Vinblastine Run1-<br>DMSO  | NM_1391<br>99 | BRD8 | bromodom<br>ain<br>containing<br>8   | 0.676238  | Inlier  |
| siRNA-Vinblastine Run2-<br>DMSO  | NM_1391<br>99 | BRD8 | bromodom<br>ain<br>containing<br>8   | 1.531007  | Inlier  |
| siRNA-Temozolomide Run3-<br>DMSO | NM_0017<br>26 | BRDT | bromodom<br>ain, testis-<br>specific | -0.768057 | Inlier  |
| siRNA Disorazole DMSO Run2       | NM_0017<br>26 | BRDT | bromodom<br>ain, testis-<br>specific | -0.590615 | Inlier  |
| siRNA-Temozolomide Run1-<br>DMSO | NM_0017<br>26 | BRDT | bromodom<br>ain, testis-<br>specific | -0.043627 | Inlier  |

Identification of Survival Genes in Human Glioblastoma Cells Using siRNA Screening  
 Nikhil G Thaker, Fang Zhang, Peter R. McDonald, Tong Ying Shun, Michael D Lewen, Ian F. Pollack, and John S. Lazo  
 Molecular Pharmacology

|                                  |               |      |                                                           |           |        |
|----------------------------------|---------------|------|-----------------------------------------------------------|-----------|--------|
| siRNA Disorazole DMSO Run3       | NM_0017<br>26 | BRDT | bromodom<br>ain, testis-<br>specific                      | -0.00849  | Inlier |
| siRNA-Temozolomide Run2-<br>DMSO | NM_0017<br>26 | BRDT | bromodom<br>ain, testis-<br>specific                      | 0.00849   | Inlier |
| siRNA Disorazole DMSO Run1       | NM_0017<br>26 | BRDT | bromodom<br>ain, testis-<br>specific                      | 0.758385  | Inlier |
| siRNA-Vinblastine Run2-<br>DMSO  | NM_0017<br>26 | BRDT | bromodom<br>ain, testis-<br>specific                      | 0.863381  | Inlier |
| siRNA-Vinblastine Run1-<br>DMSO  | NM_0017<br>26 | BRDT | bromodom<br>ain, testis-<br>specific                      | 1.058124  | Inlier |
| siRNA-Temozolomide Run3-<br>DMSO | NM_0017<br>27 | BRS3 | bromodom<br>ain, testis-<br>specific<br>bombesin-<br>like | -0.986157 | Inlier |
| siRNA-Temozolomide Run2-<br>DMSO | NM_0017<br>27 | BRS3 | receptor 3<br>bombesin-<br>like                           | -0.696195 | Inlier |
| siRNA Disorazole DMSO Run2       | NM_0017<br>27 | BRS3 | receptor 3<br>bombesin-<br>like                           | -0.652805 | Inlier |
| siRNA-Temozolomide Run1-<br>DMSO | NM_0017<br>27 | BRS3 | receptor 3<br>bombesin-<br>like                           | -0.29564  | Inlier |
| siRNA Disorazole DMSO Run3       | NM_0017<br>27 | BRS3 | receptor 3<br>bombesin-<br>like                           | 0.29564   | Inlier |
| siRNA Disorazole DMSO Run1       | NM_0017<br>27 | BRS3 | receptor 3<br>bombesin-<br>like                           | 0.5958    | Inlier |
| siRNA-Vinblastine Run2-<br>DMSO  | NM_0017<br>27 | BRS3 | receptor 3<br>bombesin-<br>like                           | 2.958205  | Inlier |
| siRNA-Vinblastine Run1-<br>DMSO  | NM_0017<br>27 | BRS3 | receptor 3<br>bombesin-<br>like                           | 3.1503    | Inlier |
| siRNA-Temozolomide Run3-<br>DMSO | NM_0043<br>34 | BST1 | bone<br>marrow<br>stromal<br>cell<br>antigen 1            | -0.806889 | Inlier |



Identification of Survival Genes in Human Glioblastoma Cells Using siRNA Screening  
 Nikhil G Thaker, Fang Zhang, Peter R. McDonald, Tong Ying Shun, Michael D Lewen, Ian F. Pollack, and John S. Lazo

Molecular Pharmacology

|                              |               |      |                                    |           |         |
|------------------------------|---------------|------|------------------------------------|-----------|---------|
| siRNA-Temozolomide Run2-DMSO | NM_0043<br>34 | BST1 | bone marrow stromal cell antigen 1 | -0.542111 | Inlier  |
| siRNA-Vinblastine Run2-DMSO  | NM_0043<br>34 | BST1 | bone marrow stromal cell antigen 1 | -0.389068 | Inlier  |
| siRNA Disorazole DMSO Run3   | NM_0043<br>34 | BST1 | bone marrow stromal cell antigen 1 | -0.115419 | Inlier  |
| siRNA Disorazole DMSO Run1   | NM_0043<br>34 | BST1 | bone marrow stromal cell antigen 1 | 0.115419  | Inlier  |
| siRNA-Temozolomide Run1-DMSO | NM_0043<br>34 | BST1 | bone marrow stromal cell antigen 1 | 1.003063  | Inlier  |
| siRNA-Vinblastine Run1-DMSO  | NM_0043<br>34 | BST1 | bone marrow stromal cell antigen 1 | 7.717659  | Outlier |
| siRNA Disorazole DMSO Run2   | NM_0043<br>34 | BST1 | bone marrow stromal cell antigen 1 | 10.34431  | Outlier |
| siRNA-Temozolomide Run2-DMSO | NM_0000<br>60 | BTD  | biotinidase                        | -1.633615 | Inlier  |
| siRNA-Temozolomide Run3-DMSO | NM_0000<br>60 | BTD  | biotinidase                        | -0.90415  | Inlier  |
| siRNA Disorazole DMSO Run1   | NM_0000<br>60 | BTD  | biotinidase                        | -0.44485  | Inlier  |
| siRNA-Temozolomide Run1-DMSO | NM_0000<br>60 | BTD  | biotinidase                        | -0.076408 | Inlier  |
| siRNA Disorazole DMSO Run3   | NM_0000<br>60 | BTD  | biotinidase                        | 0.076408  | Inlier  |
| siRNA-Vinblastine Run2-DMSO  | NM_0000<br>60 | BTD  | biotinidase                        | 0.174981  | Inlier  |
| siRNA-Vinblastine Run1-DMSO  | NM_0000<br>60 | BTD  | biotinidase                        | 1.834932  | Inlier  |
| siRNA Disorazole DMSO Run2   | NM_0000<br>60 | BTD  | biotinidase                        | 2.082141  | Inlier  |

Identification of Survival Genes in Human Glioblastoma Cells Using siRNA Screening  
 Nikhil G Thaker, Fang Zhang, Peter R. McDonald, Tong Ying Shun, Michael D Lewen, Ian F. Pollack, and John S. Lazo

Molecular Pharmacology

|                              |           |        |                                           |           |        |
|------------------------------|-----------|--------|-------------------------------------------|-----------|--------|
| siRNA-Temozolomide Run3-DMSO | NM_000061 | BTK    | Bruton agammaglobulinemia tyrosine kinase | -0.735019 | Inlier |
| siRNA Disorazole DMSO Run2   | NM_000061 | BTK    | Bruton agammaglobulinemia tyrosine kinase | -0.613981 | Inlier |
| siRNA-Temozolomide Run1-DMSO | NM_000061 | BTK    | Bruton agammaglobulinemia tyrosine kinase | -0.295773 | Inlier |
| siRNA Disorazole DMSO Run3   | NM_000061 | BTK    | Bruton agammaglobulinemia tyrosine kinase | -0.111173 | Inlier |
| siRNA-Temozolomide Run2-DMSO | NM_000061 | BTK    | Bruton agammaglobulinemia tyrosine kinase | 0.111173  | Inlier |
| siRNA Disorazole DMSO Run1   | NM_000061 | BTK    | Bruton agammaglobulinemia tyrosine kinase | 1.321034  | Inlier |
| siRNA-Vinblastine Run1-DMSO  | NM_000061 | BTK    | Bruton agammaglobulinemia tyrosine kinase | 1.623382  | Inlier |
| siRNA-Vinblastine Run2-DMSO  | NM_000061 | BTK    | Bruton agammaglobulinemia tyrosine kinase | 2.100164  | Inlier |
| siRNA-Temozolomide Run3-DMSO | NM_001732 | BTN1A1 | butyrophilin, subfamily 1, member A1      | -2.463676 | Inlier |
| siRNA-Temozolomide Run2-DMSO | NM_001732 | BTN1A1 | butyrophilin, subfamily 1, member A1      | -1.520475 | Inlier |

Identification of Survival Genes in Human Glioblastoma Cells Using siRNA Screening  
 Nikhil G Thaker, Fang Zhang, Peter R. McDonald, Tong Ying Shun, Michael D Lewen, Ian F. Pollack, and John S. Lazo  
 Molecular Pharmacology

|                              |               |        |                                      |           |        |
|------------------------------|---------------|--------|--------------------------------------|-----------|--------|
| siRNA-Vinblastine Run2-DMSO  | NM_0017<br>32 | BTN1A1 | butyrophilin, subfamily 1, member A1 | -0.770988 | Inlier |
| siRNA Disorazole DMSO Run3   | NM_0017<br>32 | BTN1A1 | butyrophilin, subfamily 1, member A1 | -0.13914  | Inlier |
| siRNA Disorazole DMSO Run1   | NM_0017<br>32 | BTN1A1 | butyrophilin, subfamily 1, member A1 | 0.13914   | Inlier |
| siRNA-Temozolomide Run1-DMSO | NM_0017<br>32 | BTN1A1 | butyrophilin, subfamily 1, member A1 | 0.229466  | Inlier |
| siRNA-Vinblastine Run1-DMSO  | NM_0017<br>32 | BTN1A1 | butyrophilin, subfamily 1, member A1 | 0.578012  | Inlier |
| siRNA Disorazole DMSO Run2   | NM_0017<br>32 | BTN1A1 | butyrophilin, subfamily 1, member A1 | 1.186218  | Inlier |
| siRNA-Temozolomide Run2-DMSO | NM_0784<br>76 | BTN2A1 | butyrophilin, subfamily 2, member A1 | -1.528636 | Inlier |
| siRNA-Temozolomide Run3-DMSO | NM_0784<br>76 | BTN2A1 | butyrophilin, subfamily 2, member A1 | -1.316287 | Inlier |

Identification of Survival Genes in Human Glioblastoma Cells Using siRNA Screening  
 Nikhil G Thaker, Fang Zhang, Peter R. McDonald, Tong Ying Shun, Michael D Lewen, Ian F. Pollack, and John S. Lazo  
 Molecular Pharmacology

|                              |               |        |                                               |           |        |
|------------------------------|---------------|--------|-----------------------------------------------|-----------|--------|
| siRNA Disorazole DMSO Run3   | NM_0784<br>76 | BTN2A1 | butyrophilin,<br>subfamily<br>2, member<br>A1 | -0.032713 | Inlier |
| siRNA-Vinblastine Run2-DMSO  | NM_0784<br>76 | BTN2A1 | butyrophilin,<br>subfamily<br>2, member<br>A1 | -0.009251 | Inlier |
| siRNA-Temozolomide Run1-DMSO | NM_0784<br>76 | BTN2A1 | butyrophilin,<br>subfamily<br>2, member<br>A1 | 0.00925   | Inlier |
| siRNA Disorazole DMSO Run1   | NM_0784<br>76 | BTN2A1 | butyrophilin,<br>subfamily<br>2, member<br>A1 | 0.032052  | Inlier |
| siRNA Disorazole DMSO Run2   | NM_0784<br>76 | BTN2A1 | butyrophilin,<br>subfamily<br>2, member<br>A1 | 2.03238   | Inlier |
| siRNA-Vinblastine Run1-DMSO  | NM_0784<br>76 | BTN2A1 | butyrophilin,<br>subfamily<br>2, member<br>A1 | 2.345408  | Inlier |
| siRNA-Temozolomide Run3-DMSO | NM_1815<br>31 | BTN2A2 | butyrophilin,<br>subfamily<br>2, member<br>A2 | -1.437225 | Inlier |
| siRNA Disorazole DMSO Run3   | NM_1815<br>31 | BTN2A2 | butyrophilin,<br>subfamily<br>2, member<br>A2 | -0.62372  | Inlier |

Identification of Survival Genes in Human Glioblastoma Cells Using siRNA Screening  
 Nikhil G Thaker, Fang Zhang, Peter R. McDonald, Tong Ying Shun, Michael D Lewen, Ian F. Pollack, and John S. Lazo  
 Molecular Pharmacology

|                              |               |        |                                               |           |        |
|------------------------------|---------------|--------|-----------------------------------------------|-----------|--------|
| siRNA Disorazole DMSO Run1   | NM_1815<br>31 | BTN2A2 | butyrophilin,<br>subfamily<br>2, member<br>A2 | -0.525557 | Inlier |
| siRNA-Temozolomide Run1-DMSO | NM_1815<br>31 | BTN2A2 | butyrophilin,<br>subfamily<br>2, member<br>A2 | -0.040215 | Inlier |
| siRNA-Temozolomide Run2-DMSO | NM_1815<br>31 | BTN2A2 | butyrophilin,<br>subfamily<br>2, member<br>A2 | 0.040215  | Inlier |
| siRNA-Vinblastine Run2-DMSO  | NM_1815<br>31 | BTN2A2 | butyrophilin,<br>subfamily<br>2, member<br>A2 | 0.72528   | Inlier |
| siRNA Disorazole DMSO Run2   | NM_1815<br>31 | BTN2A2 | butyrophilin,<br>subfamily<br>2, member<br>A2 | 1.577274  | Inlier |
| siRNA-Vinblastine Run1-DMSO  | NM_1815<br>31 | BTN2A2 | butyrophilin,<br>subfamily<br>2, member<br>A2 | 1.83073   | Inlier |
| siRNA-Temozolomide Run1-DMSO | NM_0240<br>18 | BTN2A3 | butyrophilin,<br>subfamily<br>2, member<br>A3 | -0.992843 | Inlier |
| siRNA-Temozolomide Run2-DMSO | NM_0240<br>18 | BTN2A3 | butyrophilin,<br>subfamily<br>2, member<br>A3 | -0.356157 | Inlier |

Identification of Survival Genes in Human Glioblastoma Cells Using siRNA Screening  
 Nikhil G Thaker, Fang Zhang, Peter R. McDonald, Tong Ying Shun, Michael D Lewen, Ian F. Pollack, and John S. Lazo  
 Molecular Pharmacology

|                              |               |        |                                      |           |         |
|------------------------------|---------------|--------|--------------------------------------|-----------|---------|
| siRNA-Temozolomide Run3-DMSO | NM_0240<br>18 | BTN2A3 | butyrophilin, subfamily 2, member A3 | -0.281251 | Inlier  |
| siRNA Disorazole DMSO Run3   | NM_0240<br>18 | BTN2A3 | butyrophilin, subfamily 2, member A3 | -0.231324 | Inlier  |
| siRNA Disorazole DMSO Run1   | NM_0240<br>18 | BTN2A3 | butyrophilin, subfamily 2, member A3 | 0.231325  | Inlier  |
| siRNA-Vinblastine Run2-DMSO  | NM_0240<br>18 | BTN2A3 | butyrophilin, subfamily 2, member A3 | 4.644249  | Outlier |
| siRNA Disorazole DMSO Run2   | NM_0240<br>18 | BTN2A3 | butyrophilin, subfamily 2, member A3 | 23.58529  | Outlier |
| siRNA-Vinblastine Run1-DMSO  | NM_0240<br>18 | BTN2A3 | butyrophilin, subfamily 2, member A3 | 40.55259  | Outlier |
| siRNA Disorazole DMSO Run1   | NM_1944<br>41 | BTN3A1 | butyrophilin, subfamily 3, member A1 | -0.764464 | Inlier  |
| siRNA Disorazole DMSO Run2   | NM_1944<br>41 | BTN3A1 | butyrophilin, subfamily 3, member A1 | -0.584536 | Inlier  |

Identification of Survival Genes in Human Glioblastoma Cells Using siRNA Screening  
 Nikhil G Thaker, Fang Zhang, Peter R. McDonald, Tong Ying Shun, Michael D Lewen, Ian F. Pollack, and John S. Lazo  
 Molecular Pharmacology

|                              |               |        |                                               |           |        |
|------------------------------|---------------|--------|-----------------------------------------------|-----------|--------|
| siRNA-Temozolomide Run3-DMSO | NM_1944<br>41 | BTN3A1 | butyrophilin,<br>subfamily<br>3, member<br>A1 | -0.401698 | Inlier |
| siRNA-Vinblastine Run2-DMSO  | NM_1944<br>41 | BTN3A1 | butyrophilin,<br>subfamily<br>3, member<br>A1 | -0.207508 | Inlier |
| siRNA-Temozolomide Run2-DMSO | NM_1944<br>41 | BTN3A1 | butyrophilin,<br>subfamily<br>3, member<br>A1 | 0.207506  | Inlier |
| siRNA-Vinblastine Run1-DMSO  | NM_1944<br>41 | BTN3A1 | butyrophilin,<br>subfamily<br>3, member<br>A1 | 1.178854  | Inlier |
| siRNA-Temozolomide Run1-DMSO | NM_1944<br>41 | BTN3A1 | butyrophilin,<br>subfamily<br>3, member<br>A1 | 1.200482  | Inlier |
| siRNA Disorazole DMSO Run3   | NM_1944<br>41 | BTN3A1 | butyrophilin,<br>subfamily<br>3, member<br>A1 | 1.827141  | Inlier |
| siRNA-Temozolomide Run3-DMSO | NM_0070<br>47 | BTN3A2 | butyrophilin,<br>subfamily<br>3, member<br>A2 | -0.753859 | Inlier |
| siRNA-Temozolomide Run2-DMSO | NM_0070<br>47 | BTN3A2 | butyrophilin,<br>subfamily<br>3, member<br>A2 | -0.595141 | Inlier |

Identification of Survival Genes in Human Glioblastoma Cells Using siRNA Screening  
 Nikhil G Thaker, Fang Zhang, Peter R. McDonald, Tong Ying Shun, Michael D Lewen, Ian F. Pollack, and John S. Lazo  
 Molecular Pharmacology

|                              |               |        |                                      |           |        |
|------------------------------|---------------|--------|--------------------------------------|-----------|--------|
| siRNA-Temozolomide Run1-DMSO | NM_0070<br>47 | BTN3A2 | butyrophilin, subfamily 3, member A2 | -0.373753 | Inlier |
| siRNA Disorazole DMSO Run3   | NM_0070<br>47 | BTN3A2 | butyrophilin, subfamily 3, member A2 | -0.099255 | Inlier |
| siRNA-Vinblastine Run2-DMSO  | NM_0070<br>47 | BTN3A2 | butyrophilin, subfamily 3, member A2 | 0.099255  | Inlier |
| siRNA Disorazole DMSO Run1   | NM_0070<br>47 | BTN3A2 | butyrophilin, subfamily 3, member A2 | 0.817892  | Inlier |
| siRNA Disorazole DMSO Run2   | NM_0070<br>47 | BTN3A2 | butyrophilin, subfamily 3, member A2 | 2.284562  | Inlier |
| siRNA-Vinblastine Run1-DMSO  | NM_0070<br>47 | BTN3A2 | butyrophilin, subfamily 3, member A2 | 2.702556  | Inlier |
| siRNA-Temozolomide Run3-DMSO | NM_1979<br>74 | BTN3A3 | butyrophilin, subfamily 3, member A3 | -2.550921 | Inlier |
| siRNA-Temozolomide Run2-DMSO | NM_1979<br>74 | BTN3A3 | butyrophilin, subfamily 3, member A3 | -1.625897 | Inlier |



Identification of Survival Genes in Human Glioblastoma Cells Using siRNA Screening  
 Nikhil G Thaker, Fang Zhang, Peter R. McDonald, Tong Ying Shun, Michael D Lewen, Ian F. Pollack, and John S. Lazo  
 Molecular Pharmacology

|                              |               |        |                                      |           |        |
|------------------------------|---------------|--------|--------------------------------------|-----------|--------|
| siRNA Disorazole DMSO Run1   | NM_1979<br>74 | BTN3A3 | butyrophilin, subfamily 3, member A3 | -0.414181 | Inlier |
| siRNA-Vinblastine Run2-DMSO  | NM_1979<br>74 | BTN3A3 | butyrophilin, subfamily 3, member A3 | -0.118108 | Inlier |
| siRNA Disorazole DMSO Run3   | NM_1979<br>74 | BTN3A3 | butyrophilin, subfamily 3, member A3 | 0.118109  | Inlier |
| siRNA-Temozolomide Run1-DMSO | NM_1979<br>74 | BTN3A3 | butyrophilin, subfamily 3, member A3 | 0.439813  | Inlier |
| siRNA-Vinblastine Run1-DMSO  | NM_1979<br>74 | BTN3A3 | butyrophilin, subfamily 3, member A3 | 0.909187  | Inlier |
| siRNA Disorazole DMSO Run2   | NM_1979<br>74 | BTN3A3 | butyrophilin, subfamily 3, member A3 | 1.502702  | Inlier |
| siRNA-Temozolomide Run3-DMSO | NM_1979<br>75 | BTNL3  | butyrophilin-like 3                  | -1.489226 | Inlier |
| siRNA-Temozolomide Run2-DMSO | NM_1979<br>75 | BTNL3  | butyrophilin-like 3                  | -0.89073  | Inlier |
| siRNA-Temozolomide Run1-DMSO | NM_1979<br>75 | BTNL3  | butyrophilin-like 3                  | -0.407117 | Inlier |
| siRNA Disorazole DMSO Run2   | NM_1979<br>75 | BTNL3  | butyrophilin-like 3                  | -0.136396 | Inlier |
| siRNA Disorazole DMSO Run3   | NM_1979<br>75 | BTNL3  | butyrophilin-like 3                  | 0.136396  | Inlier |
| siRNA Disorazole DMSO Run1   | NM_1979<br>75 | BTNL3  | butyrophilin-like 3                  | 0.45827   | Inlier |
| siRNA-Vinblastine Run2-DMSO  | NM_1979<br>75 | BTNL3  | butyrophilin-like 3                  | 0.989076  | Inlier |
| siRNA-Vinblastine Run1-DMSO  | NM_1979<br>75 | BTNL3  | butyrophilin-like 3                  | 1.403999  | Inlier |

Identification of Survival Genes in Human Glioblastoma Cells Using siRNA Screening  
 Nikhil G Thaker, Fang Zhang, Peter R. McDonald, Tong Ying Shun, Michael D Lewen, Ian F. Pollack, and John S. Lazo

Molecular Pharmacology

|                              |               |      |                                                                               |           |        |
|------------------------------|---------------|------|-------------------------------------------------------------------------------|-----------|--------|
| siRNA-Temozolomide Run3-DMSO | NM_0043<br>36 | BUB1 | BUB1<br>budding<br>uninhibited<br>by<br>benzimidazole 1<br>homolog<br>(yeast) | -0.688927 | Inlier |
| siRNA-Temozolomide Run1-DMSO | NM_0043<br>36 | BUB1 | BUB1<br>budding<br>uninhibited<br>by<br>benzimidazole 1<br>homolog<br>(yeast) | -0.660073 | Inlier |
| siRNA-Temozolomide Run2-DMSO | NM_0043<br>36 | BUB1 | BUB1<br>budding<br>uninhibited<br>by<br>benzimidazole 1<br>homolog<br>(yeast) | -0.38396  | Inlier |
| siRNA Disorazole DMSO Run2   | NM_0043<br>36 | BUB1 | BUB1<br>budding<br>uninhibited<br>by<br>benzimidazole 1<br>homolog<br>(yeast) | -0.073099 | Inlier |
| siRNA Disorazole DMSO Run3   | NM_0043<br>36 | BUB1 | BUB1<br>budding<br>uninhibited<br>by<br>benzimidazole 1<br>homolog<br>(yeast) | 0.073099  | Inlier |
| siRNA Disorazole DMSO Run1   | NM_0043<br>36 | BUB1 | BUB1<br>budding<br>uninhibited<br>by<br>benzimidazole 1<br>homolog<br>(yeast) | 1.035562  | Inlier |

Identification of Survival Genes in Human Glioblastoma Cells Using siRNA Screening  
 Nikhil G Thaker, Fang Zhang, Peter R. McDonald, Tong Ying Shun, Michael D Lewen, Ian F. Pollack, and John S. Lazo

Molecular Pharmacology

|                              |           |       |                                                                  |           |        |
|------------------------------|-----------|-------|------------------------------------------------------------------|-----------|--------|
| siRNA-Vinblastine Run1-DMSO  | NM_004336 | BUB1  | BUB1 budding uninhibited by benzimidazole 1 homolog (yeast)      | 1.464804  | Inlier |
| siRNA-Vinblastine Run2-DMSO  | NM_004336 | BUB1  | BUB1 budding uninhibited by benzimidazole 1 homolog (yeast)      | 1.631788  | Inlier |
| siRNA-Temozolomide Run2-DMSO | NM_001211 | BUB1B | BUB1 budding uninhibited by benzimidazole 1 homolog beta (yeast) | -0.858632 | Inlier |
| siRNA Disorazole DMSO Run3   | NM_001211 | BUB1B | BUB1 budding uninhibited by benzimidazole 1 homolog beta (yeast) | -0.490368 | Inlier |
| siRNA-Temozolomide Run3-DMSO | NM_001211 | BUB1B | BUB1 budding uninhibited by benzimidazole 1 homolog beta (yeast) | -0.447926 | Inlier |
| siRNA-Temozolomide Run1-DMSO | NM_001211 | BUB1B | BUB1 budding uninhibited by benzimidazole 1 homolog beta (yeast) | -0.37331  | Inlier |

Identification of Survival Genes in Human Glioblastoma Cells Using siRNA Screening  
 Nikhil G Thaker, Fang Zhang, Peter R. McDonald, Tong Ying Shun, Michael D Lewen, Ian F. Pollack, and John S. Lazo

Molecular Pharmacology

| siRNA Treatment              | Gene ID       | Gene Name | Score     | Category | Biological Context                                               |
|------------------------------|---------------|-----------|-----------|----------|------------------------------------------------------------------|
| siRNA Disorazole DMSO Run1   | NM_0012<br>11 | BUB1B     | 0.37331   | Inlier   | BUB1 budding uninhibited by benzimidazole 1 homolog beta (yeast) |
| siRNA Disorazole DMSO Run2   | NM_0012<br>11 | BUB1B     | 3.892815  | Outlier  | BUB1 budding uninhibited by benzimidazole 1 homolog beta (yeast) |
| siRNA-Vinblastine Run2-DMSO  | NM_0012<br>11 | BUB1B     | 4.715521  | Outlier  | BUB1 budding uninhibited by benzimidazole 1 homolog beta (yeast) |
| siRNA-Vinblastine Run1-DMSO  | NM_0012<br>11 | BUB1B     | 6.750292  | Outlier  | butyryl Coenzyme A synthetase 1                                  |
| siRNA Disorazole DMSO Run1   | NM_0529<br>56 | BUCS1     | -0.922464 | Inlier   | butyryl Coenzyme A synthetase 1                                  |
| siRNA-Temozolomide Run2-DMSO | NM_0529<br>56 | BUCS1     | -0.759086 | Inlier   | butyryl Coenzyme A synthetase 1                                  |
| siRNA-Temozolomide Run3-DMSO | NM_0529<br>56 | BUCS1     | -0.589914 | Inlier   | butyryl Coenzyme A synthetase 1                                  |

Identification of Survival Genes in Human Glioblastoma Cells Using siRNA Screening  
 Nikhil G Thaker, Fang Zhang, Peter R. McDonald, Tong Ying Shun, Michael D Lewen, Ian F. Pollack, and John S. Lazo

Molecular Pharmacology

|                              |               |       |                                                    |           |        |
|------------------------------|---------------|-------|----------------------------------------------------|-----------|--------|
| siRNA-Vinblastine Run2-DMSO  | NM_0529<br>56 | BUCS1 | butyryl<br>Coenzyme<br>A<br>synthetase<br>1        | -0.128321 | Inlier |
| siRNA-Temozolomide Run1-DMSO | NM_0529<br>56 | BUCS1 | butyryl<br>Coenzyme<br>A<br>synthetase<br>1        | 0.12832   | Inlier |
| siRNA Disorazole DMSO Run3   | NM_0529<br>56 | BUCS1 | butyryl<br>Coenzyme<br>A<br>synthetase<br>1        | 0.199554  | Inlier |
| siRNA Disorazole DMSO Run2   | NM_0529<br>56 | BUCS1 | butyryl<br>Coenzyme<br>A<br>synthetase<br>1        | 0.794157  | Inlier |
| siRNA-Vinblastine Run1-DMSO  | NM_0529<br>56 | BUCS1 | butyryl<br>Coenzyme<br>A<br>synthetase<br>1        | 0.971527  | Inlier |
| siRNA-Temozolomide Run3-DMSO | NM_0073<br>11 | BZRP  | benzodiaz<br>apine<br>receptor<br>(peripheral<br>) | -1.125044 | Inlier |
| siRNA-Temozolomide Run2-DMSO | NM_0073<br>11 | BZRP  | benzodiaz<br>apine<br>receptor<br>(peripheral<br>) | -1.005457 | Inlier |
| siRNA Disorazole DMSO Run2   | NM_0073<br>11 | BZRP  | benzodiaz<br>apine<br>receptor<br>(peripheral<br>) | -0.343543 | Inlier |
| siRNA Disorazole DMSO Run3   | NM_0073<br>11 | BZRP  | benzodiaz<br>apine<br>receptor<br>(peripheral<br>) | -0.032627 | Inlier |
| siRNA-Temozolomide Run1-DMSO | NM_0073<br>11 | BZRP  | benzodiaz<br>apine<br>receptor<br>(peripheral<br>) | 0.032626  | Inlier |

Identification of Survival Genes in Human Glioblastoma Cells Using siRNA Screening  
 Nikhil G Thaker, Fang Zhang, Peter R. McDonald, Tong Ying Shun, Michael D Lewen, Ian F. Pollack, and John S. Lazo

Molecular Pharmacology

|                                  |               |         |                                                    |           |        |
|----------------------------------|---------------|---------|----------------------------------------------------|-----------|--------|
| siRNA Disorazole DMSO Run1       | NM_0073<br>11 | BZRP    | benzodiaz<br>apine<br>receptor<br>(peripheral<br>) | 0.047249  | Inlier |
| siRNA-Vinblastine Run1-<br>DMSO  | NM_0073<br>11 | BZRP    | benzodiaz<br>apine<br>receptor<br>(peripheral<br>) | 1.129655  | Inlier |
| siRNA-Vinblastine Run2-<br>DMSO  | NM_0073<br>11 | BZRP    | benzodiaz<br>apine<br>receptor<br>(peripheral<br>) | 1.565648  | Inlier |
| siRNA-Temozolomide Run2-<br>DMSO | NM_0201<br>55 | C11ORF4 | C11ORF4                                            | -1.439239 | Inlier |
| siRNA-Temozolomide Run3-<br>DMSO | NM_0201<br>55 | C11ORF4 | C11ORF4                                            | -1.387793 | Inlier |
| siRNA Disorazole DMSO Run1       | NM_0201<br>55 | C11ORF4 | C11ORF4                                            | -0.341356 | Inlier |
| siRNA-Temozolomide Run1-<br>DMSO | NM_0201<br>55 | C11ORF4 | C11ORF4                                            | -0.335641 | Inlier |
| siRNA-Vinblastine Run2-<br>DMSO  | NM_0201<br>55 | C11ORF4 | C11ORF4                                            | 0.335641  | Inlier |
| siRNA Disorazole DMSO Run3       | NM_0201<br>55 | C11ORF4 | C11ORF4                                            | 0.372381  | Inlier |
| siRNA-Vinblastine Run1-<br>DMSO  | NM_0201<br>55 | C11ORF4 | C11ORF4                                            | 0.976619  | Inlier |
| siRNA Disorazole DMSO Run2       | NM_0201<br>55 | C11ORF4 | C11ORF4                                            | 1.692829  | Inlier |
| siRNA-Vinblastine Run2-<br>DMSO  | NM_0015<br>84 | C11orf8 | chromoso<br>me 11<br>open<br>reading<br>frame 8    | -0.814277 | Inlier |
| siRNA-Temozolomide Run3-<br>DMSO | NM_0015<br>84 | C11orf8 | chromoso<br>me 11<br>open<br>reading<br>frame 8    | -0.534723 | Inlier |
| siRNA-Temozolomide Run2-<br>DMSO | NM_0015<br>84 | C11orf8 | chromoso<br>me 11<br>open<br>reading<br>frame 8    | -0.322688 | Inlier |
| siRNA-Temozolomide Run1-<br>DMSO | NM_0015<br>84 | C11orf8 | chromoso<br>me 11<br>open<br>reading<br>frame 8    | -0.230912 | Inlier |

Identification of Survival Genes in Human Glioblastoma Cells Using siRNA Screening  
 Nikhil G Thaker, Fang Zhang, Peter R. McDonald, Tong Ying Shun, Michael D Lewen, Ian F. Pollack, and John S. Lazo

Molecular Pharmacology

| siRNA Treatment              | Gene ID   | Gene Name | Chromosome    | Reading Frame         | Score     | Category |
|------------------------------|-----------|-----------|---------------|-----------------------|-----------|----------|
| siRNA Disorazole DMSO Run3   | NM_001584 | C11orf8   | chromosome 11 | open reading frame 8  | 0.230911  | Inlier   |
| siRNA Disorazole DMSO Run1   | NM_001584 | C11orf8   | chromosome 11 | open reading frame 8  | 2.956444  | Inlier   |
| siRNA-Vinblastine Run1-DMSO  | NM_001584 | C11orf8   | chromosome 11 | open reading frame 8  | 10.39631  | Outlier  |
| siRNA Disorazole DMSO Run2   | NM_001584 | C11orf8   | chromosome 11 | open reading frame 8  | 10.52433  | Outlier  |
| siRNA-Temozolomide Run3-DMSO | NM_005800 | C13orf22  | chromosome 13 | open reading frame 22 | -1.401206 | Inlier   |
| siRNA-Temozolomide Run1-DMSO | NM_005800 | C13orf22  | chromosome 13 | open reading frame 22 | -0.824267 | Inlier   |
| siRNA-Temozolomide Run2-DMSO | NM_005800 | C13orf22  | chromosome 13 | open reading frame 22 | -0.812527 | Inlier   |
| siRNA Disorazole DMSO Run1   | NM_005800 | C13orf22  | chromosome 13 | open reading frame 22 | -0.094554 | Inlier   |
| siRNA Disorazole DMSO Run3   | NM_005800 | C13orf22  | chromosome 13 | open reading frame 22 | 0.094554  | Inlier   |
| siRNA Disorazole DMSO Run2   | NM_005800 | C13orf22  | chromosome 13 | open reading frame 22 | 0.204602  | Inlier   |

Identification of Survival Genes in Human Glioblastoma Cells Using siRNA Screening  
 Nikhil G Thaker, Fang Zhang, Peter R. McDonald, Tong Ying Shun, Michael D Lewen, Ian F. Pollack, and John S. Lazo

Molecular Pharmacology

| siRNA Treatment              | Gene ID   | Gene Name | Chromosome    | Reading Frame         | Value     | Inlier |
|------------------------------|-----------|-----------|---------------|-----------------------|-----------|--------|
| siRNA-Vinblastine Run2-DMSO  | NM_005800 | C13orf22  | chromosome 13 | open reading frame 22 | 0.536473  | Inlier |
| siRNA-Vinblastine Run1-DMSO  | NM_005800 | C13orf22  | chromosome 13 | open reading frame 22 | 1.176536  | Inlier |
| siRNA-Temozolomide Run3-DMSO | NM_170719 | C13orf23  | chromosome 13 | open reading frame 23 | -2.014324 | Inlier |
| siRNA Disorazole DMSO Run1   | NM_170719 | C13orf23  | chromosome 13 | open reading frame 23 | -0.854768 | Inlier |
| siRNA-Temozolomide Run2-DMSO | NM_170719 | C13orf23  | chromosome 13 | open reading frame 23 | -0.395585 | Inlier |
| siRNA-Vinblastine Run2-DMSO  | NM_170719 | C13orf23  | chromosome 13 | open reading frame 23 | -0.284416 | Inlier |
| siRNA-Temozolomide Run1-DMSO | NM_170719 | C13orf23  | chromosome 13 | open reading frame 23 | 0.284416  | Inlier |
| siRNA Disorazole DMSO Run3   | NM_170719 | C13orf23  | chromosome 13 | open reading frame 23 | 0.494232  | Inlier |
| siRNA Disorazole DMSO Run2   | NM_170719 | C13orf23  | chromosome 13 | open reading frame 23 | 1.946056  | Inlier |
| siRNA-Vinblastine Run1-DMSO  | NM_170719 | C13orf23  | chromosome 13 | open reading frame 23 | 2.944934  | Inlier |



Identification of Survival Genes in Human Glioblastoma Cells Using siRNA Screening  
 Nikhil G Thaker, Fang Zhang, Peter R. McDonald, Tong Ying Shun, Michael D Lewen, Ian F. Pollack, and John S. Lazo

Molecular Pharmacology

| siRNA Treatment              | Gene ID   | Gene Name | Chromosome    | Start                  | End       | Score  | Category |
|------------------------------|-----------|-----------|---------------|------------------------|-----------|--------|----------|
| siRNA-Temozolomide Run3-DMSO | NM_144581 | C14orf149 | chromosome 14 | open reading frame 149 | -1.251668 | Inlier |          |
| siRNA-Temozolomide Run2-DMSO | NM_144581 | C14orf149 | chromosome 14 | open reading frame 149 | -0.779486 | Inlier |          |
| siRNA-Temozolomide Run1-DMSO | NM_144581 | C14orf149 | chromosome 14 | open reading frame 149 | -0.569514 | Inlier |          |
| siRNA Disorazole DMSO Run1   | NM_144581 | C14orf149 | chromosome 14 | open reading frame 149 | -0.001899 | Inlier |          |
| siRNA Disorazole DMSO Run3   | NM_144581 | C14orf149 | chromosome 14 | open reading frame 149 | 0.001899  | Inlier |          |
| siRNA-Vinblastine Run2-DMSO  | NM_144581 | C14orf149 | chromosome 14 | open reading frame 149 | 0.168035  | Inlier |          |
| siRNA Disorazole DMSO Run2   | NM_144581 | C14orf149 | chromosome 14 | open reading frame 149 | 1.496938  | Inlier |          |
| siRNA-Vinblastine Run1-DMSO  | NM_144581 | C14orf149 | chromosome 14 | open reading frame 149 | 1.631925  | Inlier |          |
| siRNA-Temozolomide Run2-DMSO | NM_174944 | C14orf20  | chromosome 14 | open reading frame 20  | -0.97413  | Inlier |          |
| siRNA Disorazole DMSO Run2   | NM_174944 | C14orf20  | chromosome 14 | open reading frame 20  | -0.754141 | Inlier |          |

Identification of Survival Genes in Human Glioblastoma Cells Using siRNA Screening  
 Nikhil G Thaker, Fang Zhang, Peter R. McDonald, Tong Ying Shun, Michael D Lewen, Ian F. Pollack, and John S. Lazo

Molecular Pharmacology

| siRNA Treatment              | Gene ID   | Chromosome | Reading Frame                       | Score     | Category |
|------------------------------|-----------|------------|-------------------------------------|-----------|----------|
| siRNA-Temozolomide Run3-DMSO | NM_174944 | C14orf20   | chromosome 14 open reading frame 20 | -0.594859 | Inlier   |
| siRNA Disorazole DMSO Run3   | NM_174944 | C14orf20   | chromosome 14 open reading frame 20 | -0.216214 | Inlier   |
| siRNA Disorazole DMSO Run1   | NM_174944 | C14orf20   | chromosome 14 open reading frame 20 | 0.216214  | Inlier   |
| siRNA-Temozolomide Run1-DMSO | NM_174944 | C14orf20   | chromosome 14 open reading frame 20 | 0.238296  | Inlier   |
| siRNA-Vinblastine Run1-DMSO  | NM_174944 | C14orf20   | chromosome 14 open reading frame 20 | 0.869219  | Inlier   |
| siRNA-Vinblastine Run2-DMSO  | NM_174944 | C14orf20   | chromosome 15 open reading frame 20 | 3.352247  | Inlier   |
| siRNA-Temozolomide Run3-DMSO | NM_130901 | C15orf16   | chromosome 15 open reading frame 16 | -0.874249 | Inlier   |
| siRNA-Temozolomide Run2-DMSO | NM_130901 | C15orf16   | chromosome 15 open reading frame 16 | -0.474751 | Inlier   |
| siRNA-Temozolomide Run1-DMSO | NM_130901 | C15orf16   | chromosome 15 open reading frame 16 | -0.362681 | Inlier   |
| siRNA Disorazole DMSO Run3   | NM_130901 | C15orf16   | chromosome 15 open reading frame 16 | -0.150335 | Inlier   |

Identification of Survival Genes in Human Glioblastoma Cells Using siRNA Screening  
 Nikhil G Thaker, Fang Zhang, Peter R. McDonald, Tong Ying Shun, Michael D Lewen, Ian F. Pollack, and John S. Lazo

Molecular Pharmacology

| siRNA                        | Gene    | Accession | Gene     | Chromosome | Reading Frame | Value     | Inlier |
|------------------------------|---------|-----------|----------|------------|---------------|-----------|--------|
| siRNA Disorazole DMSO Run1   | NM_1309 | 01        | C15orf16 | 15         | 16            | 0.150335  | Inlier |
| siRNA-Vinblastine Run2-DMSO  | NM_1309 | 01        | C15orf16 | 15         | 16            | 1.914588  | Inlier |
| siRNA Disorazole DMSO Run2   | NM_1309 | 01        | C15orf16 | 15         | 16            | 1.925845  | Inlier |
| siRNA-Vinblastine Run1-DMSO  | NM_1309 | 01        | C15orf16 | 15         | 16            | 2.115524  | Inlier |
| siRNA Disorazole DMSO Run2   | NM_1523 | 35        | C15orf27 | 15         | 27            | -2.16786  | Inlier |
| siRNA Disorazole DMSO Run1   | NM_1523 | 35        | C15orf27 | 15         | 27            | -0.667058 | Inlier |
| siRNA-Temozolomide Run3-DMSO | NM_1523 | 35        | C15orf27 | 15         | 27            | -0.618458 | Inlier |
| siRNA-Temozolomide Run2-DMSO | NM_1523 | 35        | C15orf27 | 15         | 27            | -0.21928  | Inlier |
| siRNA-Temozolomide Run1-DMSO | NM_1523 | 35        | C15orf27 | 15         | 27            | 0.21928   | Inlier |
| siRNA Disorazole DMSO Run3   | NM_1523 | 35        | C15orf27 | 15         | 27            | 0.681942  | Inlier |

Identification of Survival Genes in Human Glioblastoma Cells Using siRNA Screening  
 Nikhil G Thaker, Fang Zhang, Peter R. McDonald, Tong Ying Shun, Michael D Lewen, Ian F. Pollack, and John S. Lazo

Molecular Pharmacology

|                              |               |          |                                        |           |        |
|------------------------------|---------------|----------|----------------------------------------|-----------|--------|
| siRNA-Vinblastine Run1-DMSO  | NM_1523<br>35 | C15orf27 | chromosome 15<br>open reading frame 27 | 0.901345  | Inlier |
| siRNA-Vinblastine Run2-DMSO  | NM_1523<br>35 | C15orf27 | chromosome 15<br>open reading frame 27 | 1.133745  | Inlier |
| siRNA Disorazole DMSO Run3   | NM_0038<br>76 | C17orf35 | chromosome 17<br>open reading frame 35 | -0.694602 | Inlier |
| siRNA-Temozolomide Run2-DMSO | NM_0038<br>76 | C17orf35 | chromosome 17<br>open reading frame 35 | -0.654398 | Inlier |
| siRNA Disorazole DMSO Run2   | NM_0038<br>76 | C17orf35 | chromosome 17<br>open reading frame 35 | -0.562492 | Inlier |
| siRNA-Temozolomide Run3-DMSO | NM_0038<br>76 | C17orf35 | chromosome 17<br>open reading frame 35 | -0.451234 | Inlier |
| siRNA-Temozolomide Run1-DMSO | NM_0038<br>76 | C17orf35 | chromosome 17<br>open reading frame 35 | 0.451234  | Inlier |
| siRNA-Vinblastine Run2-DMSO  | NM_0038<br>76 | C17orf35 | chromosome 17<br>open reading frame 35 | 2.483865  | Inlier |
| siRNA Disorazole DMSO Run1   | NM_0038<br>76 | C17orf35 | chromosome 17<br>open reading frame 35 | 2.801293  | Inlier |
| siRNA-Vinblastine Run1-DMSO  | NM_0038<br>76 | C17orf35 | chromosome 17<br>open reading frame 35 | 3.076885  | Inlier |

Identification of Survival Genes in Human Glioblastoma Cells Using siRNA Screening  
 Nikhil G Thaker, Fang Zhang, Peter R. McDonald, Tong Ying Shun, Michael D Lewen, Ian F. Pollack, and John S. Lazo

Molecular Pharmacology

|                              |               |         |                      |           |        |
|------------------------------|---------------|---------|----------------------|-----------|--------|
|                              |               |         | chromosome 18        |           |        |
|                              |               |         | open reading frame 4 |           |        |
| siRNA Disorazole DMSO Run1   | NM_0321<br>60 | C18orf4 | chromosome 18        | -0.85312  | Inlier |
|                              |               |         | open reading frame 4 |           |        |
| siRNA Disorazole DMSO Run3   | NM_0321<br>60 | C18orf4 | chromosome 18        | -0.701435 | Inlier |
|                              |               |         | open reading frame 4 |           |        |
| siRNA-Temozolomide Run1-DMSO | NM_0321<br>60 | C18orf4 | chromosome 18        | -0.335706 | Inlier |
|                              |               |         | open reading frame 4 |           |        |
| siRNA-Vinblastine Run2-DMSO  | NM_0321<br>60 | C18orf4 | chromosome 18        | -0.241374 | Inlier |
|                              |               |         | open reading frame 4 |           |        |
| siRNA-Temozolomide Run3-DMSO | NM_0321<br>60 | C18orf4 | chromosome 18        | 0.241373  | Inlier |
|                              |               |         | open reading frame 4 |           |        |
| siRNA Disorazole DMSO Run2   | NM_0321<br>60 | C18orf4 | chromosome 18        | 0.647565  | Inlier |
|                              |               |         | open reading frame 4 |           |        |
| siRNA-Temozolomide Run2-DMSO | NM_0321<br>60 | C18orf4 | chromosome 18        | 0.75869   | Inlier |
|                              |               |         | open reading frame 4 |           |        |
| siRNA-Vinblastine Run1-DMSO  | NM_0321<br>60 | C18orf4 | chromosome 18        | 1.367057  | Inlier |
| siRNA-Temozolomide Run3-DMSO | NM_1731<br>77 | C1D     | C1D                  | -0.979316 | Inlier |
| siRNA Disorazole DMSO Run3   | NM_1731<br>77 | C1D     | C1D                  | -0.707949 | Inlier |
| siRNA Disorazole DMSO Run2   | NM_1731<br>77 | C1D     | C1D                  | -0.174474 | Inlier |
| siRNA-Temozolomide Run1-DMSO | NM_1731<br>77 | C1D     | C1D                  | -0.008119 | Inlier |
| siRNA-Temozolomide Run2-DMSO | NM_1731<br>77 | C1D     | C1D                  | 0.008119  | Inlier |
| siRNA Disorazole DMSO Run1   | NM_1731<br>77 | C1D     | C1D                  | 0.641051  | Inlier |

Identification of Survival Genes in Human Glioblastoma Cells Using siRNA Screening

Nikhil G Thaker, Fang Zhang, Peter R. McDonald, Tong Ying Shun, Michael D Lewen, Ian F. Pollack, and John S. Lazo

| siRNA Treatment              | Gene ID | Gene Name | Log2 Fold Change | Significance |
|------------------------------|---------|-----------|------------------|--------------|
| siRNA-Vinblastine Run1-DMSO  | NM_1731 | C1D       | 2.535884         | Inlier       |
| siRNA-Vinblastine Run2-DMSO  | NM_1731 | C1D       | 2.823087         | Inlier       |
| siRNA-Disorazole DMSO Run1   | NM_0201 | C1GALT1   | -1.038841        | Inlier       |
| siRNA-Temozolomide Run2-DMSO | NM_0201 | C1GALT1   | -0.832278        | Inlier       |
| siRNA-Temozolomide Run1-DMSO | NM_0201 | C1GALT1   | -0.516722        | Inlier       |
| siRNA-Vinblastine Run2-DMSO  | NM_0201 | C1GALT1   | -0.102434        | Inlier       |

Identification of Survival Genes in Human Glioblastoma Cells Using siRNA Screening  
 Nikhil G Thaker, Fang Zhang, Peter R. McDonald, Tong Ying Shun, Michael D Lewen, Ian F. Pollack, and John S. Lazo

Molecular Pharmacology

| siRNA Treatment              | Gene ID      | Gene Name | Protein Name                                                                       | Value     | Category |
|------------------------------|--------------|-----------|------------------------------------------------------------------------------------|-----------|----------|
| siRNA Disorazole DMSO Run3   | NM_020156    | C1GALT1   | core 1 synthase, glycoprotein N-acetylgalactosamine 3-beta-galactosyltransferase 1 | 0.102434  | Inlier   |
| siRNA-Temozolomide Run3-DMSO | NM_020156    | C1GALT1   | core 1 synthase, glycoprotein N-acetylgalactosamine 3-beta-galactosyltransferase 1 | 0.172335  | Inlier   |
| siRNA Disorazole DMSO Run2   | NM_020156    | C1GALT1   | core 1 synthase, glycoprotein N-acetylgalactosamine 3-beta-galactosyltransferase 1 | 0.898095  | Inlier   |
| siRNA-Vinblastine Run1-DMSO  | NM_020156    | C1GALT1   | C1GALT1-specific chaperone 1                                                       | 1.459838  | Inlier   |
| siRNA-Temozolomide Run3-DMSO | NM_001011551 | C1GALT2   | C1GALT1-specific chaperone 1                                                       | -1.812223 | Inlier   |
| siRNA-Temozolomide Run1-DMSO | NM_001011551 | C1GALT2   | C1GALT1-specific chaperone 1                                                       | -1.006601 | Inlier   |
| siRNA Disorazole DMSO Run1   | NM_001011551 | C1GALT2   | C1GALT1-specific chaperone 1                                                       | -0.142026 | Inlier   |

Identification of Survival Genes in Human Glioblastoma Cells Using siRNA Screening  
 Nikhil G Thaker, Fang Zhang, Peter R. McDonald, Tong Ying Shun, Michael D Lewen, Ian F. Pollack, and John S. Lazo

Molecular Pharmacology

|                              |                  |         |                                    |           |        |
|------------------------------|------------------|---------|------------------------------------|-----------|--------|
| siRNA-Temozolomide Run2-DMSO | NM_0010<br>11551 | C1GALT2 | C1GALT1-specific chaperone 1       | -0.130969 | Inlier |
| siRNA-Vinblastine Run2-DMSO  | NM_0010<br>11551 | C1GALT2 | C1GALT1-specific chaperone 1       | 0.130968  | Inlier |
| siRNA Disorazole DMSO Run3   | NM_0010<br>11551 | C1GALT2 | C1GALT1-specific chaperone 1       | 0.342399  | Inlier |
| siRNA-Vinblastine Run1-DMSO  | NM_0010<br>11551 | C1GALT2 | C1GALT1-specific chaperone 1       | 2.916932  | Inlier |
| siRNA Disorazole DMSO Run2   | NM_0010<br>11551 | C1GALT2 | C1GALT1-specific chaperone 1       | 3.039035  | Inlier |
| siRNA-Vinblastine Run2-DMSO  | NM_0251<br>91    | C1orf22 | chromosome 1 open reading frame 22 | -1.176534 | Inlier |
| siRNA-Temozolomide Run2-DMSO | NM_0251<br>91    | C1orf22 | chromosome 1 open reading frame 22 | -0.870414 | Inlier |
| siRNA Disorazole DMSO Run3   | NM_0251<br>91    | C1orf22 | chromosome 1 open reading frame 22 | -0.64821  | Inlier |
| siRNA-Temozolomide Run3-DMSO | NM_0251<br>91    | C1orf22 | chromosome 1 open reading frame 22 | -0.015128 | Inlier |
| siRNA-Temozolomide Run1-DMSO | NM_0251<br>91    | C1orf22 | chromosome 1 open reading frame 22 | 0.015128  | Inlier |
| siRNA Disorazole DMSO Run1   | NM_0251<br>91    | C1orf22 | chromosome 1 open reading frame 22 | 0.525396  | Inlier |



Identification of Survival Genes in Human Glioblastoma Cells Using siRNA Screening  
 Nikhil G Thaker, Fang Zhang, Peter R. McDonald, Tong Ying Shun, Michael D Lewen, Ian F. Pollack, and John S. Lazo  
 Molecular Pharmacology

|                              |           |         |                                                                            |           |        |
|------------------------------|-----------|---------|----------------------------------------------------------------------------|-----------|--------|
| siRNA-Vinblastine Run1-DMSO  | NM_025191 | C1orf22 | chromosome 1 open reading frame 22                                         | 0.70079   | Inlier |
| siRNA Disorazole DMSO Run2   | NM_025191 | C1orf22 | chromosome 1 open reading frame 22 complement component 1, q subcomponent, | 0.921169  | Inlier |
| siRNA Disorazole DMSO Run3   | NM_012072 | C1QR1   | receptor 1 complement component 1, q subcomponent,                         | -0.749955 | Inlier |
| siRNA-Temozolomide Run2-DMSO | NM_012072 | C1QR1   | receptor 1 complement component 1, q subcomponent,                         | -0.742603 | Inlier |
| siRNA-Temozolomide Run3-DMSO | NM_012072 | C1QR1   | receptor 1 complement component 1, q subcomponent,                         | -0.606397 | Inlier |
| siRNA-Vinblastine Run2-DMSO  | NM_012072 | C1QR1   | receptor 1 complement component 1, q subcomponent,                         | -0.161058 | Inlier |
| siRNA Disorazole DMSO Run1   | NM_012072 | C1QR1   | receptor 1 complement component 1, q subcomponent,                         | 0.161058  | Inlier |
| siRNA-Temozolomide Run1-DMSO | NM_012072 | C1QR1   | receptor 1                                                                 | 0.251899  | Inlier |

Identification of Survival Genes in Human Glioblastoma Cells Using siRNA Screening  
 Nikhil G Thaker, Fang Zhang, Peter R. McDonald, Tong Ying Shun, Michael D Lewen, Ian F. Pollack, and John S. Lazo

Molecular Pharmacology

| siRNA Treatment              | Gene ID   | Cell Line | Gene Name                                          | Log Fold Change | Outlier Status |
|------------------------------|-----------|-----------|----------------------------------------------------|-----------------|----------------|
| siRNA-Vinblastine Run1-DMSO  | NM_012072 | C1QR1     | complement component 1, q subcomponent, receptor 1 | 3.266875        | Inlier         |
| siRNA Disorazole DMSO Run2   | NM_012072 | C1QR1     | complement component 1, q subcomponent, receptor 1 | 3.442413        | Inlier         |
| siRNA-Temozolomide Run3-DMSO | NM_001733 | C1R       | complement component 1, r subcomponent             | -1.670142       | Inlier         |
| siRNA-Temozolomide Run2-DMSO | NM_001733 | C1R       | complement component 1, r subcomponent             | -0.822477       | Inlier         |
| siRNA Disorazole DMSO Run2   | NM_001733 | C1R       | complement component 1, r subcomponent             | -0.526523       | Inlier         |
| siRNA Disorazole DMSO Run1   | NM_001733 | C1R       | complement component 1, r subcomponent             | -0.037625       | Inlier         |
| siRNA-Vinblastine Run1-DMSO  | NM_001733 | C1R       | complement component 1, r subcomponent             | 0.037625        | Inlier         |
| siRNA-Temozolomide Run1-DMSO | NM_001733 | C1R       | complement component 1, r subcomponent             | 0.1745          | Inlier         |

Identification of Survival Genes in Human Glioblastoma Cells Using siRNA Screening  
 Nikhil G Thaker, Fang Zhang, Peter R. McDonald, Tong Ying Shun, Michael D Lewen, Ian F. Pollack, and John S. Lazo

Molecular Pharmacology

| siRNA Treatment              | Gene ID   | Cell Line | Component                                   | Value     | Category |
|------------------------------|-----------|-----------|---------------------------------------------|-----------|----------|
| siRNA-Vinblastine Run2-DMSO  | NM_001733 | C1R       | complement component 1, r subcomponent      | 1.826317  | Inlier   |
| siRNA Disorazole DMSO Run3   | NM_001733 | C1R       | complement component 1, r subcomponent      | 3.991527  | Outlier  |
| siRNA Disorazole DMSO Run2   | NM_016546 | C1RL      | complement component 1, r subcomponent-like | -2.042112 | Inlier   |
| siRNA-Temozolomide Run3-DMSO | NM_016546 | C1RL      | complement component 1, r subcomponent-like | -1.025042 | Inlier   |
| siRNA Disorazole DMSO Run1   | NM_016546 | C1RL      | complement component 1, r subcomponent-like | -0.637087 | Inlier   |
| siRNA-Temozolomide Run2-DMSO | NM_016546 | C1RL      | complement component 1, r subcomponent-like | -0.132321 | Inlier   |
| siRNA-Temozolomide Run1-DMSO | NM_016546 | C1RL      | complement component 1, r subcomponent-like | 0.132321  | Inlier   |
| siRNA-Vinblastine Run1-DMSO  | NM_016546 | C1RL      | complement component 1, r subcomponent-like | 0.403684  | Inlier   |

Identification of Survival Genes in Human Glioblastoma Cells Using siRNA Screening  
 Nikhil G Thaker, Fang Zhang, Peter R. McDonald, Tong Ying Shun, Michael D Lewen, Ian F. Pollack, and John S. Lazo

Molecular Pharmacology

| siRNA Treatment              | Gene ID   | Condition | Component                                   | Value     | Outlier Status |
|------------------------------|-----------|-----------|---------------------------------------------|-----------|----------------|
| siRNA-Vinblastine Run2-DMSO  | NM_016546 | C1RL      | complement component 1, r subcomponent-like | 0.711913  | Inlier         |
| siRNA Disorazole DMSO Run3   | NM_016546 | C1RL      | complement component 1, r subcomponent-like | 1.214974  | Inlier         |
| siRNA-Temozolomide Run3-DMSO | NM_001734 | C1S       | complement component 1, s subcomponent      | -0.985956 | Inlier         |
| siRNA-Temozolomide Run2-DMSO | NM_001734 | C1S       | complement component 1, s subcomponent      | -0.736371 | Inlier         |
| siRNA-Temozolomide Run1-DMSO | NM_001734 | C1S       | complement component 1, s subcomponent      | -0.612629 | Inlier         |
| siRNA Disorazole DMSO Run2   | NM_001734 | C1S       | complement component 1, s subcomponent      | -0.072569 | Inlier         |
| siRNA Disorazole DMSO Run3   | NM_001734 | C1S       | complement component 1, s subcomponent      | 0.072569  | Inlier         |
| siRNA Disorazole DMSO Run1   | NM_001734 | C1S       | complement component 1, s subcomponent      | 0.147684  | Inlier         |

Identification of Survival Genes in Human Glioblastoma Cells Using siRNA Screening

Nikhil G Thaker, Fang Zhang, Peter R. McDonald, Tong Ying Shun, Michael D Lewen, Ian F. Pollack, and John S. Lazo

Molecular Pharmacology

|                              |           |           |                                      |           |        |
|------------------------------|-----------|-----------|--------------------------------------|-----------|--------|
| siRNA-Vinblastine Run1-DMSO  | NM_001734 | C1S       | complement component 1, subcomponent | 2.336268  | Inlier |
| siRNA-Vinblastine Run2-DMSO  | NM_001734 | C1S       | complement component 1, subcomponent | 2.569685  | Inlier |
| siRNA-Temozolomide Run3-DMSO | NM_000063 | C2        | complement component 2               | -0.997225 | Inlier |
| siRNA-Vinblastine Run2-DMSO  | NM_000063 | C2        | complement component 2               | -0.788549 | Inlier |
| siRNA Disorazole DMSO Run3   | NM_000063 | C2        | complement component 2               | -0.560451 | Inlier |
| siRNA Disorazole DMSO Run1   | NM_000063 | C2        | complement component 2               | -0.436258 | Inlier |
| siRNA-Temozolomide Run2-DMSO | NM_000063 | C2        | complement component 2               | 0.436257  | Inlier |
| siRNA-Temozolomide Run1-DMSO | NM_000063 | C2        | complement component 2               | 0.541485  | Inlier |
| siRNA-Vinblastine Run1-DMSO  | NM_000063 | C2        | complement component 2               | 1.147389  | Inlier |
| siRNA Disorazole DMSO Run2   | NM_000063 | C2        | complement component 20              | 2.097309  | Inlier |
| siRNA-Temozolomide Run3-DMSO | NM_033197 | C20orf114 | open reading frame 114               | -1.443613 | Inlier |

Identification of Survival Genes in Human Glioblastoma Cells Using siRNA Screening  
 Nikhil G Thaker, Fang Zhang, Peter R. McDonald, Tong Ying Shun, Michael D Lewen, Ian F. Pollack, and John S. Lazo

Molecular Pharmacology

| siRNA                        | Gene    | Accession | Chromosome | Reading Frame | Value     | Category |
|------------------------------|---------|-----------|------------|---------------|-----------|----------|
| siRNA-Temozolomide Run2-DMSO | NM_0331 | 97        | C20orf114  | frame 114     | -1.104242 | Inlier   |
| siRNA Disorazole DMSO Run3   | NM_0331 | 97        | C20orf114  | frame 114     | -0.154102 | Inlier   |
| siRNA-Temozolomide Run1-DMSO | NM_0331 | 97        | C20orf114  | frame 114     | -0.02935  | Inlier   |
| siRNA-Vinblastine Run2-DMSO  | NM_0331 | 97        | C20orf114  | frame 114     | 0.02935   | Inlier   |
| siRNA Disorazole DMSO Run1   | NM_0331 | 97        | C20orf114  | frame 114     | 0.244758  | Inlier   |
| siRNA-Vinblastine Run1-DMSO  | NM_0331 | 97        | C20orf114  | frame 114     | 1.113649  | Inlier   |
| siRNA Disorazole DMSO Run2   | NM_0331 | 97        | C20orf114  | frame 114     | 1.361348  | Inlier   |
| siRNA-Temozolomide Run3-DMSO | NM_0181 | 52        | C20orf12   | frame 12      | -1.127725 | Inlier   |
| siRNA Disorazole DMSO Run2   | NM_0181 | 52        | C20orf12   | frame 12      | -0.695649 | Inlier   |
| siRNA-Temozolomide Run2-DMSO | NM_0181 | 52        | C20orf12   | frame 12      | -0.653351 | Inlier   |

Identification of Survival Genes in Human Glioblastoma Cells Using siRNA Screening  
 Nikhil G Thaker, Fang Zhang, Peter R. McDonald, Tong Ying Shun, Michael D Lewen, Ian F. Pollack, and John S. Lazo

Molecular Pharmacology

| siRNA Treatment              | Gene ID       | Gene Name | Chromosome    | Reading Frame         | Value     | Category |
|------------------------------|---------------|-----------|---------------|-----------------------|-----------|----------|
| siRNA-Vinblastine Run2-DMSO  | NM_0181<br>52 | C20orf12  | chromosome 20 | open reading frame 12 | -0.09626  | Inlier   |
| siRNA Disorazole DMSO Run3   | NM_0181<br>52 | C20orf12  | chromosome 20 | open reading frame 12 | 0.096261  | Inlier   |
| siRNA-Temozolomide Run1-DMSO | NM_0181<br>52 | C20orf12  | chromosome 20 | open reading frame 12 | 0.329345  | Inlier   |
| siRNA Disorazole DMSO Run1   | NM_0181<br>52 | C20orf12  | chromosome 20 | open reading frame 12 | 1.0791    | Inlier   |
| siRNA-Vinblastine Run1-DMSO  | NM_0181<br>52 | C20orf12  | chromosome 20 | open reading frame 12 | 1.442713  | Inlier   |
| siRNA-Temozolomide Run3-DMSO | NM_0312<br>28 | C20orf18  | chromosome 20 | open reading frame 18 | -0.919873 | Inlier   |
| siRNA-Temozolomide Run2-DMSO | NM_0312<br>28 | C20orf18  | chromosome 20 | open reading frame 18 | -0.614437 | Inlier   |
| siRNA Disorazole DMSO Run1   | NM_0312<br>28 | C20orf18  | chromosome 20 | open reading frame 18 | -0.151735 | Inlier   |
| siRNA Disorazole DMSO Run3   | NM_0312<br>28 | C20orf18  | chromosome 20 | open reading frame 18 | -0.114271 | Inlier   |
| siRNA-Vinblastine Run2-DMSO  | NM_0312<br>28 | C20orf18  | chromosome 20 | open reading frame 18 | 0.11427   | Inlier   |

Identification of Survival Genes in Human Glioblastoma Cells Using siRNA Screening  
 Nikhil G Thaker, Fang Zhang, Peter R. McDonald, Tong Ying Shun, Michael D Lewen, Ian F. Pollack, and John S. Lazo

Molecular Pharmacology

| siRNA Treatment              | Gene ID   | Gene Name | Chromosome    | Reading Frame          | Score     | Category |
|------------------------------|-----------|-----------|---------------|------------------------|-----------|----------|
| siRNA-Temozolomide Run1-DMSO | NM_031228 | C20orf18  | chromosome 20 | open reading frame 18  | 0.734563  | Inlier   |
| siRNA-Vinblastine Run1-DMSO  | NM_031228 | C20orf18  | chromosome 20 | open reading frame 18  | 1.253675  | Inlier   |
| siRNA Disorazole DMSO Run2   | NM_031228 | C20orf18  | chromosome 20 | open reading frame 18  | 1.354497  | Inlier   |
| siRNA-Vinblastine Run2-DMSO  | NM_182658 | C20orf185 | chromosome 20 | open reading frame 185 | -0.685461 | Inlier   |
| siRNA-Temozolomide Run3-DMSO | NM_182658 | C20orf185 | chromosome 20 | open reading frame 185 | -0.663539 | Inlier   |
| siRNA Disorazole DMSO Run3   | NM_182658 | C20orf185 | chromosome 20 | open reading frame 185 | -0.57232  | Inlier   |
| siRNA-Temozolomide Run2-DMSO | NM_182658 | C20orf185 | chromosome 20 | open reading frame 185 | -0.542098 | Inlier   |
| siRNA Disorazole DMSO Run1   | NM_182658 | C20orf185 | chromosome 20 | open reading frame 185 | 0.542098  | Inlier   |
| siRNA-Temozolomide Run1-DMSO | NM_182658 | C20orf185 | chromosome 20 | open reading frame 185 | 0.751498  | Inlier   |
| siRNA-Vinblastine Run1-DMSO  | NM_182658 | C20orf185 | chromosome 20 | open reading frame 185 | 4.541024  | Outlier  |



Identification of Survival Genes in Human Glioblastoma Cells Using siRNA Screening  
 Nikhil G Thaker, Fang Zhang, Peter R. McDonald, Tong Ying Shun, Michael D Lewen, Ian F. Pollack, and John S. Lazo

Molecular Pharmacology

| siRNA Treatment              | Gene      | Gene ID | Chromosome | Reading Frame | Value     | Category |
|------------------------------|-----------|---------|------------|---------------|-----------|----------|
| siRNA Disorazole DMSO Run2   | NM_1826   | 58      | C20orf185  | frame 185     | 5.356583  | Outlier  |
| siRNA-Temozolomide Run3-DMSO | NM_1825   | 19      | C20orf186  | frame 186     | -1.39108  | Inlier   |
| siRNA-Temozolomide Run2-DMSO | NM_1825   | 19      | C20orf186  | frame 186     | -0.686359 | Inlier   |
| siRNA Disorazole DMSO Run2   | NM_1825   | 19      | C20orf186  | frame 186     | -0.662641 | Inlier   |
| siRNA Disorazole DMSO Run3   | NM_1825   | 19      | C20orf186  | frame 186     | -0.087589 | Inlier   |
| siRNA-Vinblastine Run2-DMSO  | NM_1825   | 19      | C20orf186  | frame 186     | 0.087589  | Inlier   |
| siRNA Disorazole DMSO Run1   | NM_1825   | 19      | C20orf186  | frame 186     | 0.197661  | Inlier   |
| siRNA-Temozolomide Run1-DMSO | NM_1825   | 19      | C20orf186  | frame 186     | 0.897251  | Inlier   |
| siRNA-Vinblastine Run1-DMSO  | NM_1825   | 19      | C20orf186  | frame 186     | 0.928861  | Inlier   |
| siRNA-Temozolomide Run3-DMSO | NM_015600 | 00      | C20orf22   | frame 22      | -1.40728  | Inlier   |

Identification of Survival Genes in Human Glioblastoma Cells Using siRNA Screening  
 Nikhil G Thaker, Fang Zhang, Peter R. McDonald, Tong Ying Shun, Michael D Lewen, Ian F. Pollack, and John S. Lazo

Molecular Pharmacology

|                              |           |          |                                        |           |        |
|------------------------------|-----------|----------|----------------------------------------|-----------|--------|
| siRNA-Temozolomide Run1-DMSO | NM_015600 | C20orf22 | chromosome 20<br>open reading frame 22 | -0.749304 | Inlier |
| siRNA-Temozolomide Run2-DMSO | NM_015600 | C20orf22 | chromosome 20<br>open reading frame 22 | -0.691989 | Inlier |
| siRNA Disorazole DMSO Run1   | NM_015600 | C20orf22 | chromosome 20<br>open reading frame 22 | -0.087107 | Inlier |
| siRNA Disorazole DMSO Run3   | NM_015600 | C20orf22 | chromosome 20<br>open reading frame 22 | 0.087107  | Inlier |
| siRNA Disorazole DMSO Run2   | NM_015600 | C20orf22 | chromosome 20<br>open reading frame 22 | 0.28419   | Inlier |
| siRNA-Vinblastine Run2-DMSO  | NM_015600 | C20orf22 | chromosome 20<br>open reading frame 22 | 0.65701   | Inlier |
| siRNA-Vinblastine Run1-DMSO  | NM_015600 | C20orf22 | chromosome 20<br>open reading frame 22 | 1.238997  | Inlier |
| siRNA-Temozolomide Run3-DMSO | NM_024704 | C20orf23 | chromosome 20<br>open reading frame 23 | -0.80888  | Inlier |
| siRNA Disorazole DMSO Run3   | NM_024704 | C20orf23 | chromosome 20<br>open reading frame 23 | -0.70957  | Inlier |
| siRNA-Vinblastine Run2-DMSO  | NM_024704 | C20orf23 | chromosome 20<br>open reading frame 23 | -0.63943  | Inlier |

Identification of Survival Genes in Human Glioblastoma Cells Using siRNA Screening  
 Nikhil G Thaker, Fang Zhang, Peter R. McDonald, Tong Ying Shun, Michael D Lewen, Ian F. Pollack, and John S. Lazo

Molecular Pharmacology

| siRNA Treatment              | Gene ID   | Gene Name | Chromosome    | Reading Frame         | Value     | Inlier |
|------------------------------|-----------|-----------|---------------|-----------------------|-----------|--------|
| siRNA Disorazole DMSO Run1   | NM_024704 | C20orf23  | chromosome 20 | open reading frame 23 | -0.105145 | Inlier |
| siRNA-Temozolomide Run2-DMSO | NM_024704 | C20orf23  | chromosome 20 | open reading frame 23 | 0.105144  | Inlier |
| siRNA-Temozolomide Run1-DMSO | NM_024704 | C20orf23  | chromosome 20 | open reading frame 23 | 0.439854  | Inlier |
| siRNA Disorazole DMSO Run2   | NM_024704 | C20orf23  | chromosome 20 | open reading frame 23 | 1.190252  | Inlier |
| siRNA-Vinblastine Run1-DMSO  | NM_024704 | C20orf23  | chromosome 20 | open reading frame 23 | 1.405237  | Inlier |
| siRNA-Temozolomide Run3-DMSO | NM_016434 | C20orf41  | chromosome 20 | open reading frame 23 | -0.968062 | Inlier |
| siRNA-Vinblastine Run2-DMSO  | NM_016434 | C20orf41  | chromosome 20 | open reading frame 23 | -0.380938 | Inlier |
| siRNA-Temozolomide Run2-DMSO | NM_016434 | C20orf41  | chromosome 20 | open reading frame 23 | -0.306354 | Inlier |
| siRNA Disorazole DMSO Run3   | NM_016434 | C20orf41  | chromosome 20 | open reading frame 23 | -0.132905 | Inlier |
| siRNA Disorazole DMSO Run1   | NM_016434 | C20orf41  | chromosome 20 | open reading frame 23 | 0.132905  | Inlier |

Identification of Survival Genes in Human Glioblastoma Cells Using siRNA Screening  
 Nikhil G Thaker, Fang Zhang, Peter R. McDonald, Tong Ying Shun, Michael D Lewen, Ian F. Pollack, and John S. Lazo

Molecular Pharmacology

| siRNA Treatment              | Gene ID | Accession | Gene Name                                                 | Log2 Fold Change | Significance |
|------------------------------|---------|-----------|-----------------------------------------------------------|------------------|--------------|
| siRNA-Temozolomide Run1-DMSO | NM_0164 | C20orf41  | regulator of telomere elongation helicase 1               | 1.283787         | Inlier       |
| siRNA Disorazole DMSO Run2   | NM_0164 | C20orf41  | regulator of telomere elongation helicase 1               | 3.217861         | Inlier       |
| siRNA-Vinblastine Run1-DMSO  | NM_0164 | C20orf41  | regulator of telomere elongation helicase 1 chromosome 20 | 3.652996         | Outlier      |
| siRNA-Temozolomide Run3-DMSO | NM_1784 | C20orf71  | open reading frame 71 chromosome 20                       | -1.227388        | Inlier       |
| siRNA Disorazole DMSO Run3   | NM_1784 | C20orf71  | open reading frame 71 chromosome 20                       | -0.122526        | Inlier       |
| siRNA-Temozolomide Run2-DMSO | NM_1784 | C20orf71  | open reading frame 71 chromosome 20                       | -0.104929        | Inlier       |
| siRNA Disorazole DMSO Run1   | NM_1784 | C20orf71  | open reading frame 71 chromosome 20                       | -0.083424        | Inlier       |
| siRNA-Vinblastine Run2-DMSO  | NM_1784 | C20orf71  | open reading frame 71 chromosome 20                       | 0.083424         | Inlier       |
| siRNA-Temozolomide Run1-DMSO | NM_1784 | C20orf71  | open reading frame 71 chromosome 20                       | 1.226474         | Inlier       |
| siRNA Disorazole DMSO Run2   | NM_1784 | C20orf71  | open reading frame 71                                     | 1.66625          | Inlier       |

Identification of Survival Genes in Human Glioblastoma Cells Using siRNA Screening  
 Nikhil G Thaker, Fang Zhang, Peter R. McDonald, Tong Ying Shun, Michael D Lewen, Ian F. Pollack, and John S. Lazo

Molecular Pharmacology

|                              |               |           |                                        |           |        |
|------------------------------|---------------|-----------|----------------------------------------|-----------|--------|
| siRNA-Vinblastine Run1-DMSO  | NM_1784<br>66 | C20orf71  | chromosome 20<br>open reading frame 71 | 2.040545  | Inlier |
| siRNA-Temozolomide Run2-DMSO | NM_1784<br>83 | C20orf79  | chromosome 20<br>open reading frame 79 | -1.780799 | Inlier |
| siRNA-Vinblastine Run1-DMSO  | NM_1784<br>83 | C20orf79  | chromosome 20<br>open reading frame 79 | -1.0611   | Inlier |
| siRNA Disorazole DMSO Run1   | NM_1784<br>83 | C20orf79  | chromosome 20<br>open reading frame 79 | -0.544523 | Inlier |
| siRNA Disorazole DMSO Run3   | NM_1784<br>83 | C20orf79  | chromosome 20<br>open reading frame 79 | -0.467519 | Inlier |
| siRNA-Vinblastine Run2-DMSO  | NM_1784<br>83 | C20orf79  | chromosome 20<br>open reading frame 79 | 0.467519  | Inlier |
| siRNA-Temozolomide Run1-DMSO | NM_1784<br>83 | C20orf79  | chromosome 20<br>open reading frame 79 | 0.504387  | Inlier |
| siRNA Disorazole DMSO Run2   | NM_1784<br>83 | C20orf79  | chromosome 20<br>open reading frame 79 | 0.804477  | Inlier |
| siRNA-Temozolomide Run3-DMSO | NM_1784<br>83 | C20orf79  | chromosome 21<br>open reading frame 79 | 0.80912   | Inlier |
| siRNA-Temozolomide Run2-DMSO | NM_1827<br>49 | C21orf127 | open reading frame 127                 | -1.11943  | Inlier |

Identification of Survival Genes in Human Glioblastoma Cells Using siRNA Screening  
 Nikhil G Thaker, Fang Zhang, Peter R. McDonald, Tong Ying Shun, Michael D Lewen, Ian F. Pollack, and John S. Lazo

Molecular Pharmacology

|                              |               |           |               |           |        |
|------------------------------|---------------|-----------|---------------|-----------|--------|
|                              |               |           | chromosome 21 |           |        |
|                              |               |           | open reading  |           |        |
| siRNA Disorazole DMSO Run1   | NM_1827<br>49 | C21orf127 | frame 127     | -0.732957 | Inlier |
|                              |               |           | chromosome 21 |           |        |
|                              |               |           | open reading  |           |        |
| siRNA-Temozolomide Run1-DMSO | NM_1827<br>49 | C21orf127 | frame 127     | -0.616043 | Inlier |
|                              |               |           | chromosome 21 |           |        |
|                              |               |           | open reading  |           |        |
| siRNA-Temozolomide Run3-DMSO | NM_1827<br>49 | C21orf127 | frame 127     | -0.327768 | Inlier |
|                              |               |           | chromosome 21 |           |        |
|                              |               |           | open reading  |           |        |
| siRNA Disorazole DMSO Run3   | NM_1827<br>49 | C21orf127 | frame 127     | 0.327768  | Inlier |
|                              |               |           | chromosome 21 |           |        |
|                              |               |           | open reading  |           |        |
| siRNA-Vinblastine Run2-DMSO  | NM_1827<br>49 | C21orf127 | frame 127     | 0.390141  | Inlier |
|                              |               |           | chromosome 21 |           |        |
|                              |               |           | open reading  |           |        |
| siRNA-Vinblastine Run1-DMSO  | NM_1827<br>49 | C21orf127 | frame 127     | 1.322625  | Inlier |
|                              |               |           | chromosome 21 |           |        |
|                              |               |           | open reading  |           |        |
| siRNA Disorazole DMSO Run2   | NM_1827<br>49 | C21orf127 | frame 127     | 1.925342  | Inlier |
|                              |               |           |               |           |        |
| siRNA Disorazole DMSO Run1   | NM_0165<br>91 | C2GNT3    | C2GNT3        | -1.106673 | Inlier |
| siRNA-Temozolomide Run1-DMSO | NM_0165<br>91 | C2GNT3    | C2GNT3        | -0.866571 | Inlier |
| siRNA-Temozolomide Run2-DMSO | NM_0165<br>91 | C2GNT3    | C2GNT3        | -0.482429 | Inlier |
| siRNA-Vinblastine Run2-DMSO  | NM_0165<br>91 | C2GNT3    | C2GNT3        | -0.073082 | Inlier |
| siRNA-Temozolomide Run3-DMSO | NM_0165<br>91 | C2GNT3    | C2GNT3        | 0.073082  | Inlier |
|                              |               |           |               |           |        |
| siRNA Disorazole DMSO Run3   | NM_0165<br>91 | C2GNT3    | C2GNT3        | 0.416435  | Inlier |
|                              |               |           |               |           |        |
| siRNA Disorazole DMSO Run2   | NM_0165<br>91 | C2GNT3    | C2GNT3        | 1.020012  | Inlier |
| siRNA-Vinblastine Run1-DMSO  | NM_0165<br>91 | C2GNT3    | C2GNT3        | 1.053907  | Inlier |

Identification of Survival Genes in Human Glioblastoma Cells Using siRNA Screening

Nikhil G Thaker, Fang Zhang, Peter R. McDonald, Tong Ying Shun, Michael D Lewen, Ian F. Pollack, and John S. Lazo

Molecular Pharmacology

|                              |               |       |                                                |           |        |
|------------------------------|---------------|-------|------------------------------------------------|-----------|--------|
| siRNA Disorazole DMSO Run3   | NM_0040<br>54 | C3AR1 | complement component 3a receptor 1             | -1.192818 | Inlier |
| siRNA-Temozolomide Run3-DMSO | NM_0040<br>54 | C3AR1 | complement component 3a receptor 1             | -0.609841 | Inlier |
| siRNA Disorazole DMSO Run2   | NM_0040<br>54 | C3AR1 | complement component 3a receptor 1             | -0.355116 | Inlier |
| siRNA Disorazole DMSO Run1   | NM_0040<br>54 | C3AR1 | complement component 3a receptor 1             | -0.078412 | Inlier |
| siRNA-Temozolomide Run1-DMSO | NM_0040<br>54 | C3AR1 | complement component 3a receptor 1             | 0.078412  | Inlier |
| siRNA-Temozolomide Run2-DMSO | NM_0040<br>54 | C3AR1 | complement component 3a receptor 1             | 0.739159  | Inlier |
| siRNA-Vinblastine Run2-DMSO  | NM_0040<br>54 | C3AR1 | complement component 3a receptor 1             | 1.999136  | Inlier |
| siRNA-Vinblastine Run1-DMSO  | NM_0040<br>54 | C3AR1 | complement component 3a receptor 1             | 2.217727  | Inlier |
| siRNA-Temozolomide Run3-DMSO | NM_0017<br>36 | C5R1  | complement component 5 receptor 1 (C5a ligand) | -0.786203 | Inlier |





Identification of Survival Genes in Human Glioblastoma Cells Using siRNA Screening  
 Nikhil G Thaker, Fang Zhang, Peter R. McDonald, Tong Ying Shun, Michael D Lewen, Ian F. Pollack, and John S. Lazo  
 Molecular Pharmacology

|                              |               |          |                                     |           |        |
|------------------------------|---------------|----------|-------------------------------------|-----------|--------|
| siRNA Disorazole DMSO Run2   | NM_1450<br>25 | C6orf199 | chromosome 6 open reading frame 199 | -2.780502 | Inlier |
| siRNA-Temozolomide Run3-DMSO | NM_1450<br>25 | C6orf199 | chromosome 6 open reading frame 199 | -0.898202 | Inlier |
| siRNA Disorazole DMSO Run3   | NM_1450<br>25 | C6orf199 | chromosome 6 open reading frame 199 | -0.633048 | Inlier |
| siRNA-Temozolomide Run1-DMSO | NM_1450<br>25 | C6orf199 | chromosome 6 open reading frame 199 | -0.039913 | Inlier |
| siRNA-Temozolomide Run2-DMSO | NM_1450<br>25 | C6orf199 | chromosome 6 open reading frame 199 | 0.039912  | Inlier |
| siRNA Disorazole DMSO Run1   | NM_1450<br>25 | C6orf199 | chromosome 6 open reading frame 199 | 0.066438  | Inlier |
| siRNA-Vinblastine Run1-DMSO  | NM_1450<br>25 | C6orf199 | chromosome 6 open reading frame 199 | 0.715952  | Inlier |
| siRNA-Vinblastine Run2-DMSO  | NM_1450<br>25 | C6orf199 | chromosome 6 open reading frame 199 | 0.813168  | Inlier |
| siRNA-Temozolomide Run3-DMSO | NM_0164<br>87 | C6orf203 | chromosome 6 open reading frame 203 | -1.493906 | Inlier |
| siRNA Disorazole DMSO Run1   | NM_0164<br>87 | C6orf203 | chromosome 6 open reading frame 203 | -0.581045 | Inlier |

Identification of Survival Genes in Human Glioblastoma Cells Using siRNA Screening  
 Nikhil G Thaker, Fang Zhang, Peter R. McDonald, Tong Ying Shun, Michael D Lewen, Ian F. Pollack, and John S. Lazo  
 Molecular Pharmacology

|                              |               |          |                                     |           |        |
|------------------------------|---------------|----------|-------------------------------------|-----------|--------|
| siRNA-Temozolomide Run2-DMSO | NM_0164<br>87 | C6orf203 | chromosome 6 open reading frame 203 | -0.528888 | Inlier |
| siRNA Disorazole DMSO Run3   | NM_0164<br>87 | C6orf203 | chromosome 6 open reading frame 203 | -0.118945 | Inlier |
| siRNA-Vinblastine Run2-DMSO  | NM_0164<br>87 | C6orf203 | chromosome 6 open reading frame 203 | 0.118945  | Inlier |
| siRNA-Temozolomide Run1-DMSO | NM_0164<br>87 | C6orf203 | chromosome 6 open reading frame 203 | 0.767955  | Inlier |
| siRNA Disorazole DMSO Run2   | NM_0164<br>87 | C6orf203 | chromosome 6 open reading frame 203 | 2.209343  | Inlier |
| siRNA-Vinblastine Run1-DMSO  | NM_0164<br>87 | C6orf203 | chromosome 6 open reading frame 203 | 2.252339  | Inlier |
| siRNA-Temozolomide Run3-DMSO | NM_0250<br>59 | C6orf97  | chromosome 6 open reading frame 97  | -1.516491 | Inlier |
| siRNA-Temozolomide Run2-DMSO | NM_0250<br>59 | C6orf97  | chromosome 6 open reading frame 97  | -1.417991 | Inlier |
| siRNA Disorazole DMSO Run3   | NM_0250<br>59 | C6orf97  | chromosome 6 open reading frame 97  | -0.50779  | Inlier |
| siRNA-Temozolomide Run1-DMSO | NM_0250<br>59 | C6orf97  | chromosome 6 open reading frame 97  | -0.113448 | Inlier |

Identification of Survival Genes in Human Glioblastoma Cells Using siRNA Screening

Nikhil G Thaker, Fang Zhang, Peter R. McDonald, Tong Ying Shun, Michael D Lewen, Ian F. Pollack, and John S. Lazo

Molecular Pharmacology

|                              |               |         |                                    |           |        |
|------------------------------|---------------|---------|------------------------------------|-----------|--------|
| siRNA Disorazole DMSO Run1   | NM_0250<br>59 | C6orf97 | chromosome 6 open reading frame 97 | 0.113448  | Inlier |
| siRNA-Vinblastine Run2-DMSO  | NM_0250<br>59 | C6orf97 | chromosome 6 open reading frame 97 | 0.315956  | Inlier |
| siRNA-Vinblastine Run1-DMSO  | NM_0250<br>59 | C6orf97 | chromosome 6 open reading frame 97 | 0.84121   | Inlier |
| siRNA Disorazole DMSO Run2   | NM_0250<br>59 | C6orf97 | chromosome 6 open reading frame 97 | 1.488387  | Inlier |
| siRNA-Temozolomide Run2-DMSO | NM_0221<br>50 | C7orf9  | chromosome 7 open reading frame 9  | -1.053809 | Inlier |
| siRNA-Temozolomide Run3-DMSO | NM_0221<br>50 | C7orf9  | chromosome 7 open reading frame 9  | -0.900067 | Inlier |
| siRNA Disorazole DMSO Run1   | NM_0221<br>50 | C7orf9  | chromosome 7 open reading frame 9  | -0.448933 | Inlier |
| siRNA Disorazole DMSO Run3   | NM_0221<br>50 | C7orf9  | chromosome 7 open reading frame 9  | -0.146471 | Inlier |
| siRNA-Temozolomide Run1-DMSO | NM_0221<br>50 | C7orf9  | chromosome 7 open reading frame 9  | 0.14647   | Inlier |
| siRNA Disorazole DMSO Run2   | NM_0221<br>50 | C7orf9  | chromosome 7 open reading frame 9  | 0.176192  | Inlier |

Identification of Survival Genes in Human Glioblastoma Cells Using siRNA Screening  
 Nikhil G Thaker, Fang Zhang, Peter R. McDonald, Tong Ying Shun, Michael D Lewen, Ian F. Pollack, and John S. Lazo  
 Molecular Pharmacology

|                              |           |        |                                                                 |           |        |
|------------------------------|-----------|--------|-----------------------------------------------------------------|-----------|--------|
| siRNA-Vinblastine Run1-DMSO  | NM_022150 | C7orf9 | chromosome 7 open reading frame 9                               | 2.502498  | Inlier |
| siRNA-Vinblastine Run2-DMSO  | NM_022150 | C7orf9 | chromosome 7 open reading frame 9 complement component 8, gamma | 2.793533  | Inlier |
| siRNA-Temozolomide Run3-DMSO | NM_000606 | C8G    | polypeptide complement component 8, gamma                       | -1.681563 | Inlier |
| siRNA-Temozolomide Run1-DMSO | NM_000606 | C8G    | polypeptide complement component 8, gamma                       | -0.777543 | Inlier |
| siRNA Disorazole DMSO Run3   | NM_000606 | C8G    | polypeptide complement component 8, gamma                       | -0.571457 | Inlier |
| siRNA-Temozolomide Run2-DMSO | NM_000606 | C8G    | polypeptide complement component 8, gamma                       | -0.249009 | Inlier |
| siRNA Disorazole DMSO Run1   | NM_000606 | C8G    | polypeptide complement component 8, gamma                       | 0.249009  | Inlier |
| siRNA-Vinblastine Run1-DMSO  | NM_000606 | C8G    | polypeptide                                                     | 0.491618  | Inlier |

Identification of Survival Genes in Human Glioblastoma Cells Using siRNA Screening  
 Nikhil G Thaker, Fang Zhang, Peter R. McDonald, Tong Ying Shun, Michael D Lewen, Ian F. Pollack, and John S. Lazo

Molecular Pharmacology

|                              |           |         |                                           |           |        |
|------------------------------|-----------|---------|-------------------------------------------|-----------|--------|
| siRNA Disorazole DMSO Run2   | NM_000606 | C8G     | complement component 8, gamma polypeptide | 1.151055  | Inlier |
| siRNA-Vinblastine Run2-DMSO  | NM_000606 | C8G     | complement component 8, gamma polypeptide | 1.203937  | Inlier |
| siRNA Disorazole DMSO Run2   | NM_022755 | C9orf12 | chromosome 9 open reading frame 12        | -1.151376 | Inlier |
| siRNA-Temozolomide Run3-DMSO | NM_022755 | C9orf12 | chromosome 9 open reading frame 12        | -1.140684 | Inlier |
| siRNA Disorazole DMSO Run3   | NM_022755 | C9orf12 | chromosome 9 open reading frame 12        | -0.587112 | Inlier |
| siRNA-Temozolomide Run2-DMSO | NM_022755 | C9orf12 | chromosome 9 open reading frame 12        | -0.175907 | Inlier |
| siRNA-Temozolomide Run1-DMSO | NM_022755 | C9orf12 | chromosome 9 open reading frame 12        | 0.175907  | Inlier |
| siRNA Disorazole DMSO Run1   | NM_022755 | C9orf12 | chromosome 9 open reading frame 12        | 0.443798  | Inlier |
| siRNA-Vinblastine Run2-DMSO  | NM_022755 | C9orf12 | chromosome 9 open reading frame 12        | 0.761888  | Inlier |

Identification of Survival Genes in Human Glioblastoma Cells Using siRNA Screening  
 Nikhil G Thaker, Fang Zhang, Peter R. McDonald, Tong Ying Shun, Michael D Lewen, Ian F. Pollack, and John S. Lazo  
 Molecular Pharmacology

|                              |           |         |                                    |           |         |
|------------------------------|-----------|---------|------------------------------------|-----------|---------|
| siRNA-Vinblastine Run1-DMSO  | NM_022755 | C9orf12 | chromosome 9 open reading frame 12 | 0.917679  | Inlier  |
| siRNA-Temozolomide Run3-DMSO | NM_032823 | C9orf3  | chromosome 9 open reading frame 3  | -1.111436 | Inlier  |
| siRNA-Temozolomide Run2-DMSO | NM_032823 | C9orf3  | chromosome 9 open reading frame 3  | -0.636588 | Inlier  |
| siRNA-Temozolomide Run1-DMSO | NM_032823 | C9orf3  | chromosome 9 open reading frame 3  | -0.489933 | Inlier  |
| siRNA Disorazole DMSO Run1   | NM_032823 | C9orf3  | chromosome 9 open reading frame 3  | -0.136926 | Inlier  |
| siRNA Disorazole DMSO Run3   | NM_032823 | C9orf3  | chromosome 9 open reading frame 3  | 0.136926  | Inlier  |
| siRNA-Vinblastine Run2-DMSO  | NM_032823 | C9orf3  | chromosome 9 open reading frame 3  | 0.712412  | Inlier  |
| siRNA Disorazole DMSO Run2   | NM_032823 | C9orf3  | chromosome 9 open reading frame 3  | 0.77211   | Inlier  |
| siRNA-Vinblastine Run1-DMSO  | NM_032823 | C9orf3  | chromosome 9 open reading frame 3  | 0.944451  | Inlier  |
| siRNA-Temozolomide Run3-DMSO | NM_139246 | C9orf97 | chromosome 9 open reading frame 97 | -4.576896 | Outlier |

Identification of Survival Genes in Human Glioblastoma Cells Using siRNA Screening  
 Nikhil G Thaker, Fang Zhang, Peter R. McDonald, Tong Ying Shun, Michael D Lewen, Ian F. Pollack, and John S. Lazo  
 Molecular Pharmacology

|                              |               |         |                                    |           |         |
|------------------------------|---------------|---------|------------------------------------|-----------|---------|
| siRNA-Temozolomide Run2-DMSO | NM_1392<br>46 | C9orf97 | chromosome 9 open reading frame 97 | -4.476532 | Outlier |
| siRNA Disorazole DMSO Run1   | NM_1392<br>46 | C9orf97 | chromosome 9 open reading frame 97 | -0.278686 | Inlier  |
| siRNA Disorazole DMSO Run3   | NM_1392<br>46 | C9orf97 | chromosome 9 open reading frame 97 | -0.078299 | Inlier  |
| siRNA-Vinblastine Run2-DMSO  | NM_1392<br>46 | C9orf97 | chromosome 9 open reading frame 97 | 0.078299  | Inlier  |
| siRNA Disorazole DMSO Run2   | NM_1392<br>46 | C9orf97 | chromosome 9 open reading frame 97 | 0.501136  | Inlier  |
| siRNA-Temozolomide Run1-DMSO | NM_1392<br>46 | C9orf97 | chromosome 9 open reading frame 97 | 0.847864  | Inlier  |
| siRNA-Vinblastine Run1-DMSO  | NM_1392<br>46 | C9orf97 | chromosome 9 open reading frame 97 | 3.500291  | Outlier |
| siRNA-Temozolomide Run3-DMSO | NM_1525<br>72 | C9orf98 | chromosome 9 open reading frame 98 | -0.753075 | Inlier  |
| siRNA Disorazole DMSO Run2   | NM_1525<br>72 | C9orf98 | chromosome 9 open reading frame 98 | -0.595924 | Inlier  |
| siRNA-Temozolomide Run1-DMSO | NM_1525<br>72 | C9orf98 | chromosome 9 open reading frame 98 | -0.331916 | Inlier  |

Identification of Survival Genes in Human Glioblastoma Cells Using siRNA Screening  
 Nikhil G Thaker, Fang Zhang, Peter R. McDonald, Tong Ying Shun, Michael D Lewen, Ian F. Pollack, and John S. Lazo  
 Molecular Pharmacology

|                              |               |         |                                     |           |        |
|------------------------------|---------------|---------|-------------------------------------|-----------|--------|
| siRNA Disorazole DMSO Run3   | NM_1525<br>72 | C9orf98 | chromosome 9 open reading frame 98  | -0.119596 | Inlier |
| siRNA-Temozolomide Run2-DMSO | NM_1525<br>72 | C9orf98 | chromosome 9 open reading frame 98  | 0.119596  | Inlier |
| siRNA Disorazole DMSO Run1   | NM_1525<br>72 | C9orf98 | chromosome 9 open reading frame 98  | 1.490084  | Inlier |
| siRNA-Vinblastine Run1-DMSO  | NM_1525<br>72 | C9orf98 | chromosome 9 open reading frame 98  | 2.552212  | Inlier |
| siRNA-Vinblastine Run2-DMSO  | NM_1525<br>72 | C9orf98 | chromosome 9 open reading frame 98  | 2.623901  | Inlier |
| siRNA-Temozolomide Run3-DMSO | NM_0323<br>03 | C9orf99 | hydroxysteroid dehydrogenase like 2 | -2.146613 | Inlier |
| siRNA-Temozolomide Run2-DMSO | NM_0323<br>03 | C9orf99 | hydroxysteroid dehydrogenase like 2 | -2.084553 | Inlier |
| siRNA-Vinblastine Run2-DMSO  | NM_0323<br>03 | C9orf99 | hydroxysteroid dehydrogenase like 2 | -0.448371 | Inlier |
| siRNA-Temozolomide Run1-DMSO | NM_0323<br>03 | C9orf99 | hydroxysteroid dehydrogenase like 2 | -0.40204  | Inlier |
| siRNA Disorazole DMSO Run1   | NM_0323<br>03 | C9orf99 | hydroxysteroid dehydrogenase like 2 | 0.40204   | Inlier |



Identification of Survival Genes in Human Glioblastoma Cells Using siRNA Screening  
 Nikhil G Thaker, Fang Zhang, Peter R. McDonald, Tong Ying Shun, Michael D Lewen, Ian F. Pollack, and John S. Lazo  
 Molecular Pharmacology

|                              |               |         |                                     |           |        |
|------------------------------|---------------|---------|-------------------------------------|-----------|--------|
| siRNA Disorazole DMSO Run3   | NM_0323<br>03 | C9orf99 | hydroxysteroid dehydrogenase like 2 | 0.574016  | Inlier |
| siRNA Disorazole DMSO Run2   | NM_0323<br>03 | C9orf99 | hydroxysteroid dehydrogenase like 2 | 0.774984  | Inlier |
| siRNA-Vinblastine Run1-DMSO  | NM_0323<br>03 | C9orf99 | hydroxysteroid dehydrogenase like 2 | 2.400863  | Inlier |
| siRNA-Temozolomide Run3-DMSO | NM_0017<br>38 | CA1     | carbonic anhydrase I                | -1.596477 | Inlier |
| siRNA-Temozolomide Run2-DMSO | NM_0017<br>38 | CA1     | carbonic anhydrase I                | -0.567149 | Inlier |
| siRNA-Vinblastine Run2-DMSO  | NM_0017<br>38 | CA1     | carbonic anhydrase I                | -0.345346 | Inlier |
| siRNA Disorazole DMSO Run3   | NM_0017<br>38 | CA1     | carbonic anhydrase I                | -0.130309 | Inlier |
| siRNA Disorazole DMSO Run1   | NM_0017<br>38 | CA1     | carbonic anhydrase I                | 0.130309  | Inlier |
| siRNA-Temozolomide Run1-DMSO | NM_0017<br>38 | CA1     | carbonic anhydrase I                | 0.781851  | Inlier |
| siRNA-Vinblastine Run1-DMSO  | NM_0017<br>38 | CA1     | carbonic anhydrase I                | 1.953701  | Inlier |
| siRNA Disorazole DMSO Run2   | NM_0017<br>38 | CA1     | carbonic anhydrase I                | 2.433141  | Inlier |
| siRNA-Temozolomide Run3-DMSO | NM_0201<br>78 | CA10    | carbonic anhydrase X                | -0.929437 | Inlier |
| siRNA-Vinblastine Run2-DMSO  | NM_0201<br>78 | CA10    | carbonic anhydrase X                | -0.90995  | Inlier |
| siRNA-Temozolomide Run2-DMSO | NM_0201<br>78 | CA10    | carbonic anhydrase X                | -0.510663 | Inlier |
| siRNA-Temozolomide Run1-DMSO | NM_0201<br>78 | CA10    | carbonic anhydrase X                | -0.167773 | Inlier |

Identification of Survival Genes in Human Glioblastoma Cells Using siRNA Screening  
 Nikhil G Thaker, Fang Zhang, Peter R. McDonald, Tong Ying Shun, Michael D Lewen, Ian F. Pollack, and John S. Lazo

Molecular Pharmacology

|                              |         |      |                    |                  |
|------------------------------|---------|------|--------------------|------------------|
|                              | NM_0201 |      | carbonic anhydrase |                  |
| siRNA Disorazole DMSO Run3   | 78      | CA10 | X                  | 0.167774 Inlier  |
|                              | NM_0201 |      | carbonic anhydrase |                  |
| siRNA Disorazole DMSO Run1   | 78      | CA10 | X                  | 0.224301 Inlier  |
|                              | NM_0201 |      | carbonic anhydrase |                  |
| siRNA Disorazole DMSO Run2   | 78      | CA10 | X                  | 0.838337 Inlier  |
|                              | NM_0201 |      | carbonic anhydrase |                  |
| siRNA-Vinblastine Run1-DMSO  | 78      | CA10 | X                  | 0.96788 Inlier   |
|                              | NM_0012 |      | carbonic anhydrase |                  |
| siRNA-Temozolomide Run2-DMSO | 17      | CA11 | XI                 | -0.689819 Inlier |
|                              | NM_0012 |      | carbonic anhydrase |                  |
| siRNA Disorazole DMSO Run3   | 17      | CA11 | XI                 | -0.659181 Inlier |
|                              | NM_0012 |      | carbonic anhydrase |                  |
| siRNA-Temozolomide Run3-DMSO | 17      | CA11 | XI                 | -0.542874 Inlier |
|                              | NM_0012 |      | carbonic anhydrase |                  |
| siRNA-Vinblastine Run2-DMSO  | 17      | CA11 | XI                 | -0.44432 Inlier  |
|                              | NM_0012 |      | carbonic anhydrase |                  |
| siRNA-Temozolomide Run1-DMSO | 17      | CA11 | XI                 | 0.44432 Inlier   |
|                              | NM_0012 |      | carbonic anhydrase |                  |
| siRNA Disorazole DMSO Run1   | 17      | CA11 | XI                 | 1.102384 Inlier  |
|                              | NM_0012 |      | carbonic anhydrase |                  |
| siRNA Disorazole DMSO Run2   | 17      | CA11 | XI                 | 3.018907 Inlier  |
|                              | NM_0012 |      | carbonic anhydrase |                  |
| siRNA-Vinblastine Run1-DMSO  | 17      | CA11 | XI                 | 3.143708 Inlier  |
|                              | NM_2069 |      | carbonic anhydrase |                  |
| siRNA-Temozolomide Run3-DMSO | 25      | CA12 | XII                | -0.899171 Inlier |
|                              | NM_2069 |      | carbonic anhydrase |                  |
| siRNA-Temozolomide Run2-DMSO | 25      | CA12 | XII                | -0.895818 Inlier |
|                              | NM_2069 |      | carbonic anhydrase |                  |
| siRNA Disorazole DMSO Run3   | 25      | CA12 | XII                | -0.453182 Inlier |
|                              | NM_2069 |      | carbonic anhydrase |                  |
| siRNA-Vinblastine Run2-DMSO  | 25      | CA12 | XII                | -0.105204 Inlier |
|                              | NM_2069 |      | carbonic anhydrase |                  |
| siRNA Disorazole DMSO Run1   | 25      | CA12 | XII                | 0.105205 Inlier  |

Identification of Survival Genes in Human Glioblastoma Cells Using siRNA Screening  
 Nikhil G Thaker, Fang Zhang, Peter R. McDonald, Tong Ying Shun, Michael D Lewen, Ian F. Pollack, and John S. Lazo

Molecular Pharmacology

|                              |               |      |                               |           |        |
|------------------------------|---------------|------|-------------------------------|-----------|--------|
| siRNA-Temozolomide Run1-DMSO | NM_2069<br>25 | CA12 | carbonic<br>anhydrase<br>XII  | 0.160154  | Inlier |
| siRNA Disorazole DMSO Run2   | NM_2069<br>25 | CA12 | carbonic<br>anhydrase<br>XII  | 2.206161  | Inlier |
| siRNA-Vinblastine Run1-DMSO  | NM_2069<br>25 | CA12 | carbonic<br>anhydrase<br>XII  | 2.385294  | Inlier |
| siRNA-Temozolomide Run3-DMSO | NM_1985<br>84 | CA13 | carbonic<br>anhydrase<br>XIII | -1.777725 | Inlier |
| siRNA-Temozolomide Run2-DMSO | NM_1985<br>84 | CA13 | carbonic<br>anhydrase<br>XIII | -1.170272 | Inlier |
| siRNA-Vinblastine Run2-DMSO  | NM_1985<br>84 | CA13 | carbonic<br>anhydrase<br>XIII | -0.071858 | Inlier |
| siRNA-Temozolomide Run1-DMSO | NM_1985<br>84 | CA13 | carbonic<br>anhydrase<br>XIII | -0.069361 | Inlier |
| siRNA Disorazole DMSO Run3   | NM_1985<br>84 | CA13 | carbonic<br>anhydrase<br>XIII | 0.06936   | Inlier |
| siRNA Disorazole DMSO Run1   | NM_1985<br>84 | CA13 | carbonic<br>anhydrase<br>XIII | 0.235805  | Inlier |
| siRNA-Vinblastine Run1-DMSO  | NM_1985<br>84 | CA13 | carbonic<br>anhydrase<br>XIII | 1.113195  | Inlier |
| siRNA Disorazole DMSO Run2   | NM_1985<br>84 | CA13 | carbonic<br>anhydrase<br>XIII | 1.123362  | Inlier |
| siRNA Disorazole DMSO Run3   | NM_0121<br>13 | CA14 | carbonic<br>anhydrase<br>XIV  | -1.544382 | Inlier |
| siRNA-Temozolomide Run3-DMSO | NM_0121<br>13 | CA14 | carbonic<br>anhydrase<br>XIV  | -0.727894 | Inlier |
| siRNA-Vinblastine Run2-DMSO  | NM_0121<br>13 | CA14 | carbonic<br>anhydrase<br>XIV  | -0.621106 | Inlier |
| siRNA-Temozolomide Run2-DMSO | NM_0121<br>13 | CA14 | carbonic<br>anhydrase<br>XIV  | -0.402743 | Inlier |
| siRNA-Temozolomide Run1-DMSO | NM_0121<br>13 | CA14 | carbonic<br>anhydrase<br>XIV  | 0.402743  | Inlier |
| siRNA Disorazole DMSO Run1   | NM_0121<br>13 | CA14 | carbonic<br>anhydrase<br>XIV  | 0.461581  | Inlier |

Identification of Survival Genes in Human Glioblastoma Cells Using siRNA Screening  
 Nikhil G Thaker, Fang Zhang, Peter R. McDonald, Tong Ying Shun, Michael D Lewen, Ian F. Pollack, and John S. Lazo

Molecular Pharmacology

|                                  |               |      |                                                  |           |        |
|----------------------------------|---------------|------|--------------------------------------------------|-----------|--------|
| siRNA Disorazole DMSO Run2       | NM_0121<br>13 | CA14 | carbonic<br>anhydrase<br>XIV                     | 2.643878  | Inlier |
| siRNA-Vinblastine Run1-<br>DMSO  | NM_0121<br>13 | CA14 | carbonic<br>anhydrase<br>XIV                     | 2.671712  | Inlier |
| siRNA Disorazole DMSO Run1       | NM_0000<br>67 | CA2  | carbonic<br>anhydrase<br>II                      | -1.269331 | Inlier |
| siRNA-Temozolomide Run3-<br>DMSO | NM_0000<br>67 | CA2  | carbonic<br>anhydrase<br>II                      | -0.74047  | Inlier |
| siRNA-Vinblastine Run2-<br>DMSO  | NM_0000<br>67 | CA2  | carbonic<br>anhydrase<br>II                      | -0.60853  | Inlier |
| siRNA-Temozolomide Run2-<br>DMSO | NM_0000<br>67 | CA2  | carbonic<br>anhydrase<br>II                      | -0.063699 | Inlier |
| siRNA-Temozolomide Run1-<br>DMSO | NM_0000<br>67 | CA2  | carbonic<br>anhydrase<br>II                      | 0.063697  | Inlier |
| siRNA Disorazole DMSO Run3       | NM_0000<br>67 | CA2  | carbonic<br>anhydrase<br>II                      | 0.283444  | Inlier |
| siRNA Disorazole DMSO Run2       | NM_0000<br>67 | CA2  | carbonic<br>anhydrase<br>II                      | 1.528119  | Inlier |
| siRNA-Vinblastine Run1-<br>DMSO  | NM_0000<br>67 | CA2  | carbonic<br>anhydrase<br>II                      | 2.976518  | Inlier |
| siRNA-Temozolomide Run3-<br>DMSO | NM_0051<br>81 | CA3  | carbonic<br>anhydrase<br>III, muscle<br>specific | -2.677603 | Inlier |
| siRNA-Vinblastine Run2-<br>DMSO  | NM_0051<br>81 | CA3  | carbonic<br>anhydrase<br>III, muscle<br>specific | -0.687575 | Inlier |
| siRNA-Temozolomide Run2-<br>DMSO | NM_0051<br>81 | CA3  | carbonic<br>anhydrase<br>III, muscle<br>specific | -0.661425 | Inlier |
| siRNA Disorazole DMSO Run3       | NM_0051<br>81 | CA3  | carbonic<br>anhydrase<br>III, muscle<br>specific | -0.000813 | Inlier |

Identification of Survival Genes in Human Glioblastoma Cells Using siRNA Screening  
 Nikhil G Thaker, Fang Zhang, Peter R. McDonald, Tong Ying Shun, Michael D Lewen, Ian F. Pollack, and John S. Lazo  
 Molecular Pharmacology

|                                  |               |      |                                                   |           |        |
|----------------------------------|---------------|------|---------------------------------------------------|-----------|--------|
| siRNA Disorazole DMSO Run1       | NM_0051<br>81 | CA3  | carbonic<br>anhydrase<br>III, muscle<br>specific  | 0.000812  | Inlier |
| siRNA-Temozolomide Run1-<br>DMSO | NM_0051<br>81 | CA3  | carbonic<br>anhydrase<br>III, muscle<br>specific  | 0.599304  | Inlier |
| siRNA Disorazole DMSO Run2       | NM_0051<br>81 | CA3  | carbonic<br>anhydrase<br>III, muscle<br>specific  | 1.167033  | Inlier |
| siRNA-Vinblastine Run1-<br>DMSO  | NM_0051<br>81 | CA3  | carbonic<br>anhydrase<br>III, muscle<br>specific  | 1.362251  | Inlier |
| siRNA-Temozolomide Run3-<br>DMSO | NM_0007<br>17 | CA4  | carbonic<br>anhydrase<br>IV                       | -0.830053 | Inlier |
| siRNA-Temozolomide Run2-<br>DMSO | NM_0007<br>17 | CA4  | carbonic<br>anhydrase<br>IV                       | -0.747431 | Inlier |
| siRNA Disorazole DMSO Run1       | NM_0007<br>17 | CA4  | carbonic<br>anhydrase<br>IV                       | -0.499572 | Inlier |
| siRNA Disorazole DMSO Run3       | NM_0007<br>17 | CA4  | carbonic<br>anhydrase<br>IV                       | -0.220261 | Inlier |
| siRNA-Vinblastine Run2-<br>DMSO  | NM_0007<br>17 | CA4  | carbonic<br>anhydrase<br>IV                       | 0.220262  | Inlier |
| siRNA-Temozolomide Run1-<br>DMSO | NM_0007<br>17 | CA4  | carbonic<br>anhydrase<br>IV                       | 0.601569  | Inlier |
| siRNA-Vinblastine Run1-<br>DMSO  | NM_0007<br>17 | CA4  | carbonic<br>anhydrase<br>IV                       | 1.386457  | Inlier |
| siRNA Disorazole DMSO Run2       | NM_0007<br>17 | CA4  | carbonic<br>anhydrase<br>IV                       | 1.472329  | Inlier |
| siRNA-Temozolomide Run3-<br>DMSO | NM_0017<br>39 | CA5A | carbonic<br>anhydrase<br>VA,<br>mitochond<br>rial | -0.760058 | Inlier |

Identification of Survival Genes in Human Glioblastoma Cells Using siRNA Screening  
 Nikhil G Thaker, Fang Zhang, Peter R. McDonald, Tong Ying Shun, Michael D Lewen, Ian F. Pollack, and John S. Lazo

Molecular Pharmacology

|                              |               |      |                                               |           |        |
|------------------------------|---------------|------|-----------------------------------------------|-----------|--------|
| siRNA-Temozolomide Run2-DMSO | NM_0017<br>39 | CA5A | carbonic<br>anhydrase<br>VA,<br>mitochondrial | -0.588942 | Inlier |
| siRNA Disorazole DMSO Run3   | NM_0017<br>39 | CA5A | carbonic<br>anhydrase<br>VA,<br>mitochondrial | -0.378351 | Inlier |
| siRNA-Vinblastine Run2-DMSO  | NM_0017<br>39 | CA5A | carbonic<br>anhydrase<br>VA,<br>mitochondrial | -0.272803 | Inlier |
| siRNA Disorazole DMSO Run1   | NM_0017<br>39 | CA5A | carbonic<br>anhydrase<br>VA,<br>mitochondrial | 0.272803  | Inlier |
| siRNA-Temozolomide Run1-DMSO | NM_0017<br>39 | CA5A | carbonic<br>anhydrase<br>VA,<br>mitochondrial | 1.264311  | Inlier |
| siRNA-Vinblastine Run1-DMSO  | NM_0017<br>39 | CA5A | carbonic<br>anhydrase<br>VA,<br>mitochondrial | 1.81459   | Inlier |
| siRNA Disorazole DMSO Run2   | NM_0017<br>39 | CA5A | carbonic<br>anhydrase<br>VA,<br>mitochondrial | 1.841899  | Inlier |
| siRNA-Temozolomide Run3-DMSO | NM_0072<br>20 | CA5B | carbonic<br>anhydrase<br>VB,<br>mitochondrial | -0.772668 | Inlier |
| siRNA-Vinblastine Run2-DMSO  | NM_0072<br>20 | CA5B | carbonic<br>anhydrase<br>VB,<br>mitochondrial | -0.649106 | Inlier |
| siRNA-Temozolomide Run2-DMSO | NM_0072<br>20 | CA5B | carbonic<br>anhydrase<br>VB,<br>mitochondrial | -0.373164 | Inlier |

Identification of Survival Genes in Human Glioblastoma Cells Using siRNA Screening  
 Nikhil G Thaker, Fang Zhang, Peter R. McDonald, Tong Ying Shun, Michael D Lewen, Ian F. Pollack, and John S. Lazo

Molecular Pharmacology

|                              |         |    |      |                                      |           |         |
|------------------------------|---------|----|------|--------------------------------------|-----------|---------|
| siRNA Disorazole DMSO Run3   | NM_0072 | 20 | CA5B | carbonic anhydrase VB, mitochondrial | -0.265487 | Inlier  |
| siRNA Disorazole DMSO Run1   | NM_0072 | 20 | CA5B | carbonic anhydrase VB, mitochondrial | 0.265487  | Inlier  |
| siRNA-Temozolomide Run1-DMSO | NM_0072 | 20 | CA5B | carbonic anhydrase VB, mitochondrial | 0.699894  | Inlier  |
| siRNA Disorazole DMSO Run2   | NM_0072 | 20 | CA5B | carbonic anhydrase VB, mitochondrial | 1.331645  | Inlier  |
| siRNA-Vinblastine Run1-DMSO  | NM_0072 | 20 | CA5B | carbonic anhydrase VB, mitochondrial | 1.386588  | Inlier  |
| siRNA-Temozolomide Run3-DMSO | NM_0012 | 15 | CA6  | carbonic anhydrase VI                | -2.326227 | Inlier  |
| siRNA-Temozolomide Run2-DMSO | NM_0012 | 15 | CA6  | carbonic anhydrase VI                | -0.888624 | Inlier  |
| siRNA-Vinblastine Run2-DMSO  | NM_0012 | 15 | CA6  | carbonic anhydrase VI                | -0.164947 | Inlier  |
| siRNA Disorazole DMSO Run3   | NM_0012 | 15 | CA6  | carbonic anhydrase VI                | -0.150079 | Inlier  |
| siRNA-Temozolomide Run1-DMSO | NM_0012 | 15 | CA6  | carbonic anhydrase VI                | 0.15008   | Inlier  |
| siRNA Disorazole DMSO Run1   | NM_0012 | 15 | CA6  | carbonic anhydrase VI                | 0.460376  | Inlier  |
| siRNA-Vinblastine Run1-DMSO  | NM_0012 | 15 | CA6  | carbonic anhydrase VI                | 2.270689  | Inlier  |
| siRNA Disorazole DMSO Run2   | NM_0012 | 15 | CA6  | carbonic anhydrase VI                | 2.439788  | Inlier  |
| siRNA Disorazole DMSO Run1   | NM_0051 | 82 | CA7  | carbonic anhydrase VII               | -3.600584 | Outlier |

Identification of Survival Genes in Human Glioblastoma Cells Using siRNA Screening  
 Nikhil G Thaker, Fang Zhang, Peter R. McDonald, Tong Ying Shun, Michael D Lewen, Ian F. Pollack, and John S. Lazo

Molecular Pharmacology

|                              |               |     |                               |           |        |
|------------------------------|---------------|-----|-------------------------------|-----------|--------|
| siRNA-Temozolomide Run2-DMSO | NM_0051<br>82 | CA7 | carbonic<br>anhydrase<br>VII  | -1.905856 | Inlier |
| siRNA-Temozolomide Run1-DMSO | NM_0051<br>82 | CA7 | carbonic<br>anhydrase<br>VII  | -0.576566 | Inlier |
| siRNA Disorazole DMSO Run2   | NM_0051<br>82 | CA7 | carbonic<br>anhydrase<br>VII  | -0.00753  | Inlier |
| siRNA-Vinblastine Run2-DMSO  | NM_0051<br>82 | CA7 | carbonic<br>anhydrase<br>VII  | 0.007531  | Inlier |
| siRNA-Temozolomide Run3-DMSO | NM_0051<br>82 | CA7 | carbonic<br>anhydrase<br>VII  | 0.168397  | Inlier |
| siRNA Disorazole DMSO Run3   | NM_0051<br>82 | CA7 | carbonic<br>anhydrase<br>VII  | 0.772434  | Inlier |
| siRNA-Vinblastine Run1-DMSO  | NM_0051<br>82 | CA7 | carbonic<br>anhydrase<br>VII  | 0.826128  | Inlier |
| siRNA-Temozolomide Run3-DMSO | NM_0040<br>56 | CA8 | carbonic<br>anhydrase<br>VIII | -1.137089 | Inlier |
| siRNA-Temozolomide Run2-DMSO | NM_0040<br>56 | CA8 | carbonic<br>anhydrase<br>VIII | -1.016809 | Inlier |
| siRNA Disorazole DMSO Run1   | NM_0040<br>56 | CA8 | carbonic<br>anhydrase<br>VIII | -0.036005 | Inlier |
| siRNA-Vinblastine Run2-DMSO  | NM_0040<br>56 | CA8 | carbonic<br>anhydrase<br>VIII | -0.020873 | Inlier |
| siRNA-Temozolomide Run1-DMSO | NM_0040<br>56 | CA8 | carbonic<br>anhydrase<br>VIII | 0.020873  | Inlier |
| siRNA Disorazole DMSO Run3   | NM_0040<br>56 | CA8 | carbonic<br>anhydrase<br>VIII | 0.486635  | Inlier |
| siRNA Disorazole DMSO Run2   | NM_0040<br>56 | CA8 | carbonic<br>anhydrase<br>VIII | 0.862364  | Inlier |
| siRNA-Vinblastine Run1-DMSO  | NM_0040<br>56 | CA8 | carbonic<br>anhydrase<br>VIII | 0.940055  | Inlier |
| siRNA-Temozolomide Run3-DMSO | NM_0012<br>16 | CA9 | carbonic<br>anhydrase<br>IX   | -0.863731 | Inlier |
| siRNA Disorazole DMSO Run1   | NM_0012<br>16 | CA9 | carbonic<br>anhydrase<br>IX   | -0.682842 | Inlier |



Identification of Survival Genes in Human Glioblastoma Cells Using siRNA Screening

Nikhil G Thaker, Fang Zhang, Peter R. McDonald, Tong Ying Shun, Michael D Lewen, Ian F. Pollack, and John S.

Lazo

Molecular Pharmacology

|                              |               |       |                                                                            |           |        |
|------------------------------|---------------|-------|----------------------------------------------------------------------------|-----------|--------|
| siRNA-Temozolomide Run2-DMSO | NM_0012<br>16 | CA9   | carbonic<br>anhydrase<br>IX                                                | -0.666158 | Inlier |
| siRNA-Vinblastine Run2-DMSO  | NM_0012<br>16 | CA9   | carbonic<br>anhydrase<br>IX                                                | -0.060865 | Inlier |
| siRNA-Temozolomide Run1-DMSO | NM_0012<br>16 | CA9   | carbonic<br>anhydrase<br>IX                                                | 0.060865  | Inlier |
| siRNA Disorazole DMSO Run3   | NM_0012<br>16 | CA9   | carbonic<br>anhydrase<br>IX                                                | 0.389855  | Inlier |
| siRNA Disorazole DMSO Run2   | NM_0012<br>16 | CA9   | carbonic<br>anhydrase<br>IX                                                | 1.136917  | Inlier |
| siRNA-Vinblastine Run1-DMSO  | NM_0012<br>16 | CA9   | carbonic<br>anhydrase<br>IX                                                | 1.405702  | Inlier |
| siRNA Disorazole DMSO Run1   | NM_0202<br>47 | CABC1 | chaperone<br>, ABC1<br>activity of<br>bc1<br>complex<br>like (S.<br>pombe) | -1.408525 | Inlier |
| siRNA-Temozolomide Run2-DMSO | NM_0202<br>47 | CABC1 | chaperone<br>, ABC1<br>activity of<br>bc1<br>complex<br>like (S.<br>pombe) | -0.902325 | Inlier |
| siRNA-Temozolomide Run1-DMSO | NM_0202<br>47 | CABC1 | chaperone<br>, ABC1<br>activity of<br>bc1<br>complex<br>like (S.<br>pombe) | -0.700781 | Inlier |
| siRNA-Temozolomide Run3-DMSO | NM_0202<br>47 | CABC1 | complex<br>like (S.<br>pombe)                                              | -0.10628  | Inlier |

Identification of Survival Genes in Human Glioblastoma Cells Using siRNA Screening  
 Nikhil G Thaker, Fang Zhang, Peter R. McDonald, Tong Ying Shun, Michael D Lewen, Ian F. Pollack, and John S. Lazo

Molecular Pharmacology

|                                  |               |         |        |                                                                                    |                  |
|----------------------------------|---------------|---------|--------|------------------------------------------------------------------------------------|------------------|
|                                  |               |         |        | chaperone<br>, ABC1<br>activity of<br>bc1<br>complex<br>like (S.<br>pombe)         |                  |
| siRNA Disorazole DMSO Run3       | NM_0202<br>47 | CABC1   |        | chaperone<br>, ABC1<br>activity of<br>bc1<br>complex<br>like (S.<br>pombe)         | 0.106279 Inlier  |
| siRNA-Vinblastine Run2-<br>DMSO  | NM_0202<br>47 | CABC1   |        | chaperone<br>, ABC1<br>activity of<br>bc1<br>complex<br>like (S.<br>pombe)         | 0.293077 Inlier  |
| siRNA Disorazole DMSO Run2       | NM_0202<br>47 | CABC1   |        | chaperone<br>, ABC1<br>activity of<br>bc1<br>complex<br>like (S.<br>pombe)         | 0.648219 Inlier  |
| siRNA-Vinblastine Run1-<br>DMSO  | NM_0202<br>47 | CABC1   |        | chaperone<br>, ABC1<br>activity of<br>bc1<br>complex<br>like (S.<br>pombe)         | 1.034549 Inlier  |
| siRNA-Temozolomide Run3-<br>DMSO | NM_1307<br>67 | CACH-1  | CACH-1 |                                                                                    | -1.045808 Inlier |
| siRNA-Temozolomide Run2-<br>DMSO | NM_1307<br>67 | CACH-1  | CACH-1 |                                                                                    | -0.797538 Inlier |
| siRNA-Vinblastine Run2-<br>DMSO  | NM_1307<br>67 | CACH-1  | CACH-1 |                                                                                    | -0.338014 Inlier |
| siRNA Disorazole DMSO Run3       | NM_1307<br>67 | CACH-1  | CACH-1 |                                                                                    | -0.097502 Inlier |
| siRNA-Temozolomide Run1-<br>DMSO | NM_1307<br>67 | CACH-1  | CACH-1 |                                                                                    | 0.097502 Inlier  |
| siRNA Disorazole DMSO Run1       | NM_1307<br>67 | CACH-1  | CACH-1 |                                                                                    | 0.551462 Inlier  |
| siRNA-Vinblastine Run1-<br>DMSO  | NM_1307<br>67 | CACH-1  | CACH-1 |                                                                                    | 2.348993 Inlier  |
| siRNA Disorazole DMSO Run2       | NM_1307<br>67 | CACH-1  | CACH-1 |                                                                                    | 2.396529 Inlier  |
|                                  |               |         |        | calcium<br>channel,<br>voltage-<br>dependent<br>, P/Q type,<br>alpha 1A<br>subunit |                  |
| siRNA Disorazole DMSO Run1       | NM_0230<br>35 | CACNA1A |        |                                                                                    | -1.786529 Inlier |

Identification of Survival Genes in Human Glioblastoma Cells Using siRNA Screening  
 Nikhil G Thaker, Fang Zhang, Peter R. McDonald, Tong Ying Shun, Michael D Lewen, Ian F. Pollack, and John S. Lazo  
 Molecular Pharmacology

|                              |               |         |                                                                |           |        |
|------------------------------|---------------|---------|----------------------------------------------------------------|-----------|--------|
| siRNA-Temozolomide Run2-DMSO | NM_0230<br>35 | CACNA1A | calcium channel, voltage-dependent, P/Q type, alpha 1A subunit | -1.646411 | Inlier |
| siRNA Disorazole DMSO Run2   | NM_0230<br>35 | CACNA1A | calcium channel, voltage-dependent, P/Q type, alpha 1A subunit | -0.848224 | Inlier |
| siRNA Disorazole DMSO Run3   | NM_0230<br>35 | CACNA1A | calcium channel, voltage-dependent, P/Q type, alpha 1A subunit | -0.125063 | Inlier |
| siRNA-Temozolomide Run1-DMSO | NM_0230<br>35 | CACNA1A | calcium channel, voltage-dependent, P/Q type, alpha 1A subunit | 0.125062  | Inlier |
| siRNA-Vinblastine Run2-DMSO  | NM_0230<br>35 | CACNA1A | calcium channel, voltage-dependent, P/Q type, alpha 1A subunit | 0.20839   | Inlier |
| siRNA-Temozolomide Run3-DMSO | NM_0230<br>35 | CACNA1A | calcium channel, voltage-dependent, P/Q type, alpha 1A subunit | 0.500776  | Inlier |

Identification of Survival Genes in Human Glioblastoma Cells Using siRNA Screening  
 Nikhil G Thaker, Fang Zhang, Peter R. McDonald, Tong Ying Shun, Michael D Lewen, Ian F. Pollack, and John S. Lazo  
 Molecular Pharmacology

|                              |           |         |                                                                |           |        |
|------------------------------|-----------|---------|----------------------------------------------------------------|-----------|--------|
| siRNA-Vinblastine Run1-DMSO  | NM_023035 | CACNA1A | calcium channel, voltage-dependent, P/Q type, alpha 1A subunit | 2.262433  | Inlier |
| siRNA-Temozolomide Run2-DMSO | NM_000718 | CACNA1B | calcium channel, voltage-dependent, L type, alpha 1B subunit   | -1.338659 | Inlier |
| siRNA-Temozolomide Run1-DMSO | NM_000718 | CACNA1B | calcium channel, voltage-dependent, L type, alpha 1B subunit   | -1.021699 | Inlier |
| siRNA-Temozolomide Run3-DMSO | NM_000718 | CACNA1B | calcium channel, voltage-dependent, L type, alpha 1B subunit   | -0.579559 | Inlier |
| siRNA Disorazole DMSO Run2   | NM_000718 | CACNA1B | calcium channel, voltage-dependent, L type, alpha 1B subunit   | -0.001458 | Inlier |
| siRNA Disorazole DMSO Run1   | NM_000718 | CACNA1B | calcium channel, voltage-dependent, L type, alpha 1B subunit   | 0.001458  | Inlier |
| siRNA-Vinblastine Run1-DMSO  | NM_000718 | CACNA1B | calcium channel, voltage-dependent, L type, alpha 1B subunit   | 0.548401  | Inlier |

Identification of Survival Genes in Human Glioblastoma Cells Using siRNA Screening

Nikhil G Thaker, Fang Zhang, Peter R. McDonald, Tong Ying Shun, Michael D Lewen, Ian F. Pollack, and John S. Lazo

Molecular Pharmacology

| siRNA Treatment              | Gene    | Gene ID   | Gene Description                                             | Score     | Outlier Type |
|------------------------------|---------|-----------|--------------------------------------------------------------|-----------|--------------|
| siRNA-Vinblastine Run2-DMSO  | CACNA1B | NM_000718 | calcium channel, voltage-dependent, L type, alpha 1B subunit | 0.769441  | Inlier       |
| siRNA Disorazole DMSO Run3   | CACNA1B | NM_000718 | calcium channel, voltage-dependent, L type, alpha 1B subunit | 1.958501  | Inlier       |
| siRNA-Temozolomide Run2-DMSO | CACNA1C | NM_000719 | calcium channel, voltage-dependent, L type, alpha 1C subunit | -1.485445 | Inlier       |
| siRNA-Temozolomide Run1-DMSO | CACNA1C | NM_000719 | calcium channel, voltage-dependent, L type, alpha 1C subunit | -0.781223 | Inlier       |
| siRNA Disorazole DMSO Run3   | CACNA1C | NM_000719 | calcium channel, voltage-dependent, L type, alpha 1C subunit | -0.748468 | Inlier       |
| siRNA Disorazole DMSO Run1   | CACNA1C | NM_000719 | calcium channel, voltage-dependent, L type, alpha 1C subunit | -0.36131  | Inlier       |
| siRNA Disorazole DMSO Run2   | CACNA1C | NM_000719 | calcium channel, voltage-dependent, L type, alpha 1C subunit | 0.361309  | Inlier       |

Identification of Survival Genes in Human Glioblastoma Cells Using siRNA Screening

Nikhil G Thaker, Fang Zhang, Peter R. McDonald, Tong Ying Shun, Michael D Lewen, Ian F. Pollack, and John S. Lazo

Molecular Pharmacology

|                              |           |         |                                                              |           |        |
|------------------------------|-----------|---------|--------------------------------------------------------------|-----------|--------|
| siRNA-Vinblastine Run2-DMSO  | NM_000719 | CACNA1C | calcium channel, voltage-dependent, L type, alpha 1C subunit | 0.557804  | Inlier |
| siRNA-Vinblastine Run1-DMSO  | NM_000719 | CACNA1C | calcium channel, voltage-dependent, L type, alpha 1C subunit | 0.600532  | Inlier |
| siRNA-Temozolomide Run3-DMSO | NM_000719 | CACNA1C | calcium channel, voltage-dependent, L type, alpha 1C subunit | 0.924702  | Inlier |
| siRNA-Temozolomide Run3-DMSO | NM_000720 | CACNA1D | calcium channel, voltage-dependent, L type, alpha 1D subunit | -1.431982 | Inlier |
| siRNA-Temozolomide Run2-DMSO | NM_000720 | CACNA1D | calcium channel, voltage-dependent, L type, alpha 1D subunit | -0.87735  | Inlier |
| siRNA Disorazole DMSO Run3   | NM_000720 | CACNA1D | calcium channel, voltage-dependent, L type, alpha 1D subunit | -0.173924 | Inlier |
| siRNA Disorazole DMSO Run1   | NM_000720 | CACNA1D | calcium channel, voltage-dependent, L type, alpha 1D subunit | -0.101625 | Inlier |

Identification of Survival Genes in Human Glioblastoma Cells Using siRNA Screening

Nikhil G Thaker, Fang Zhang, Peter R. McDonald, Tong Ying Shun, Michael D Lewen, Ian F. Pollack, and John S. Lazo

Molecular Pharmacology

|                              |               |         |                                                              |           |        |
|------------------------------|---------------|---------|--------------------------------------------------------------|-----------|--------|
| siRNA Disorazole DMSO Run2   | NM_0007<br>20 | CACNA1D | calcium channel, voltage-dependent, L type, alpha 1D subunit | 0.101625  | Inlier |
| siRNA-Temozolomide Run1-DMSO | NM_0007<br>20 | CACNA1D | calcium channel, voltage-dependent, L type, alpha 1D subunit | 0.47165   | Inlier |
| siRNA-Vinblastine Run1-DMSO  | NM_0007<br>20 | CACNA1D | calcium channel, voltage-dependent, L type, alpha 1D subunit | 1.562403  | Inlier |
| siRNA-Vinblastine Run2-DMSO  | NM_0007<br>20 | CACNA1D | calcium channel, voltage-dependent, L type, alpha 1D subunit | 1.919595  | Inlier |
| siRNA-Temozolomide Run3-DMSO | NM_0007<br>21 | CACNA1E | calcium channel, voltage-dependent, alpha 1E subunit         | -0.961573 | Inlier |
| siRNA Disorazole DMSO Run2   | NM_0007<br>21 | CACNA1E | calcium channel, voltage-dependent, alpha 1E subunit         | -0.637699 | Inlier |
| siRNA-Temozolomide Run2-DMSO | NM_0007<br>21 | CACNA1E | calcium channel, voltage-dependent, alpha 1E subunit         | -0.313144 | Inlier |

Identification of Survival Genes in Human Glioblastoma Cells Using siRNA Screening  
 Nikhil G Thaker, Fang Zhang, Peter R. McDonald, Tong Ying Shun, Michael D Lewen, Ian F. Pollack, and John S. Lazo  
 Molecular Pharmacology

|                              |               |         |                                                      |           |        |
|------------------------------|---------------|---------|------------------------------------------------------|-----------|--------|
| siRNA Disorazole DMSO Run3   | NM_0007<br>21 | CACNA1E | calcium channel, voltage-dependent, alpha 1E subunit | -0.309728 | Inlier |
| siRNA-Temozolomide Run1-DMSO | NM_0007<br>21 | CACNA1E | calcium channel, voltage-dependent, alpha 1E subunit | 0.309728  | Inlier |
| siRNA Disorazole DMSO Run1   | NM_0007<br>21 | CACNA1E | calcium channel, voltage-dependent, alpha 1E subunit | 0.711301  | Inlier |
| siRNA-Vinblastine Run1-DMSO  | NM_0007<br>21 | CACNA1E | calcium channel, voltage-dependent, alpha 1E subunit | 0.823665  | Inlier |
| siRNA-Vinblastine Run2-DMSO  | NM_0007<br>21 | CACNA1E | calcium channel, voltage-dependent, alpha 1E subunit | 1.230241  | Inlier |
| siRNA-Temozolomide Run2-DMSO | NM_0051<br>83 | CACNA1F | calcium channel, voltage-dependent, alpha 1F subunit | -1.533316 | Inlier |
| siRNA Disorazole DMSO Run2   | NM_0051<br>83 | CACNA1F | calcium channel, voltage-dependent, alpha 1F subunit | -1.07133  | Inlier |



Identification of Survival Genes in Human Glioblastoma Cells Using siRNA Screening

Nikhil G Thaker, Fang Zhang, Peter R. McDonald, Tong Ying Shun, Michael D Lewen, Ian F. Pollack, and John S. Lazo

Molecular Pharmacology

|                              |               |         |                                                      |           |        |
|------------------------------|---------------|---------|------------------------------------------------------|-----------|--------|
| siRNA-Temozolomide Run3-DMSO | NM_0051<br>83 | CACNA1F | calcium channel, voltage-dependent, alpha 1F subunit | -0.131173 | Inlier |
| siRNA-Temozolomide Run1-DMSO | NM_0051<br>83 | CACNA1F | calcium channel, voltage-dependent, alpha 1F subunit | -0.054249 | Inlier |
| siRNA Disorazole DMSO Run1   | NM_0051<br>83 | CACNA1F | calcium channel, voltage-dependent, alpha 1F subunit | 0.05425   | Inlier |
| siRNA Disorazole DMSO Run3   | NM_0051<br>83 | CACNA1F | calcium channel, voltage-dependent, alpha 1F subunit | 0.561208  | Inlier |
| siRNA-Vinblastine Run2-DMSO  | NM_0051<br>83 | CACNA1F | calcium channel, voltage-dependent, alpha 1F subunit | 0.787792  | Inlier |
| siRNA-Vinblastine Run1-DMSO  | NM_0051<br>83 | CACNA1F | calcium channel, voltage-dependent, alpha 1F subunit | 0.800571  | Inlier |
| siRNA Disorazole DMSO Run2   | NM_1983<br>77 | CACNA1G | calcium channel, voltage-dependent, alpha 1G subunit | -1.027177 | Inlier |

Identification of Survival Genes in Human Glioblastoma Cells Using siRNA Screening  
 Nikhil G Thaker, Fang Zhang, Peter R. McDonald, Tong Ying Shun, Michael D Lewen, Ian F. Pollack, and John S. Lazo  
 Molecular Pharmacology

|                              |               |         |                                                      |           |        |
|------------------------------|---------------|---------|------------------------------------------------------|-----------|--------|
| siRNA-Temozolomide Run3-DMSO | NM_1983<br>77 | CACNA1G | calcium channel, voltage-dependent, alpha 1G subunit | -0.967222 | Inlier |
| siRNA Disorazole DMSO Run3   | NM_1983<br>77 | CACNA1G | calcium channel, voltage-dependent, alpha 1G subunit | -0.56611  | Inlier |
| siRNA-Temozolomide Run2-DMSO | NM_1983<br>77 | CACNA1G | calcium channel, voltage-dependent, alpha 1G subunit | -0.391057 | Inlier |
| siRNA Disorazole DMSO Run1   | NM_1983<br>77 | CACNA1G | calcium channel, voltage-dependent, alpha 1G subunit | 0.391057  | Inlier |
| siRNA-Temozolomide Run1-DMSO | NM_1983<br>77 | CACNA1G | calcium channel, voltage-dependent, alpha 1G subunit | 0.396037  | Inlier |
| siRNA-Vinblastine Run2-DMSO  | NM_1983<br>77 | CACNA1G | calcium channel, voltage-dependent, alpha 1G subunit | 0.78289   | Inlier |
| siRNA-Vinblastine Run1-DMSO  | NM_1983<br>77 | CACNA1G | calcium channel, voltage-dependent, alpha 1G subunit | 1.072008  | Inlier |

Identification of Survival Genes in Human Glioblastoma Cells Using siRNA Screening  
 Nikhil G Thaker, Fang Zhang, Peter R. McDonald, Tong Ying Shun, Michael D Lewen, Ian F. Pollack, and John S. Lazo  
 Molecular Pharmacology

|                              |           |         |                                                      |           |        |
|------------------------------|-----------|---------|------------------------------------------------------|-----------|--------|
| siRNA-Temozolomide Run2-DMSO | NM_021098 | CACNA1H | calcium channel, voltage-dependent, alpha 1H subunit | -2.637155 | Inlier |
| siRNA-Temozolomide Run1-DMSO | NM_021098 | CACNA1H | calcium channel, voltage-dependent, alpha 1H subunit | -1.232848 | Inlier |
| siRNA Disorazole DMSO Run1   | NM_021098 | CACNA1H | calcium channel, voltage-dependent, alpha 1H subunit | -0.604072 | Inlier |
| siRNA-Temozolomide Run3-DMSO | NM_021098 | CACNA1H | calcium channel, voltage-dependent, alpha 1H subunit | -0.032713 | Inlier |
| siRNA-Vinblastine Run2-DMSO  | NM_021098 | CACNA1H | calcium channel, voltage-dependent, alpha 1H subunit | 0.032714  | Inlier |
| siRNA Disorazole DMSO Run2   | NM_021098 | CACNA1H | calcium channel, voltage-dependent, alpha 1H subunit | 0.213982  | Inlier |
| siRNA-Vinblastine Run1-DMSO  | NM_021098 | CACNA1H | calcium channel, voltage-dependent, alpha 1H subunit | 0.744928  | Inlier |

Identification of Survival Genes in Human Glioblastoma Cells Using siRNA Screening  
 Nikhil G Thaker, Fang Zhang, Peter R. McDonald, Tong Ying Shun, Michael D Lewen, Ian F. Pollack, and John S. Lazo  
 Molecular Pharmacology

|                              |               |         |                                                      |           |        |
|------------------------------|---------------|---------|------------------------------------------------------|-----------|--------|
| siRNA Disorazole DMSO Run3   | NM_0210<br>98 | CACNA1H | calcium channel, voltage-dependent, alpha 1H subunit | 1.989021  | Inlier |
| siRNA-Temozolomide Run3-DMSO | NM_0210<br>96 | CACNA1I | calcium channel, voltage-dependent, alpha 1I subunit | -2.728696 | Inlier |
| siRNA-Temozolomide Run2-DMSO | NM_0210<br>96 | CACNA1I | calcium channel, voltage-dependent, alpha 1I subunit | -1.810101 | Inlier |
| siRNA Disorazole DMSO Run3   | NM_0210<br>96 | CACNA1I | calcium channel, voltage-dependent, alpha 1I subunit | -0.663588 | Inlier |
| siRNA Disorazole DMSO Run1   | NM_0210<br>96 | CACNA1I | calcium channel, voltage-dependent, alpha 1I subunit | -0.192785 | Inlier |
| siRNA Disorazole DMSO Run2   | NM_0210<br>96 | CACNA1I | calcium channel, voltage-dependent, alpha 1I subunit | 0.192785  | Inlier |
| siRNA-Temozolomide Run1-DMSO | NM_0210<br>96 | CACNA1I | calcium channel, voltage-dependent, alpha 1I subunit | 0.454062  | Inlier |
| siRNA-Vinblastine Run2-DMSO  | NM_0210<br>96 | CACNA1I | calcium channel, voltage-dependent, alpha 1I subunit | 0.685412  | Inlier |

Identification of Survival Genes in Human Glioblastoma Cells Using siRNA Screening

Nikhil G Thaker, Fang Zhang, Peter R. McDonald, Tong Ying Shun, Michael D Lewen, Ian F. Pollack, and John S. Lazo

Molecular Pharmacology

|                              |           |         |                                                              |           |        |
|------------------------------|-----------|---------|--------------------------------------------------------------|-----------|--------|
| siRNA-Vinblastine Run1-DMSO  | NM_021096 | CACNA1I | calcium channel, voltage-dependent, alpha 1I subunit         | 1.241433  | Inlier |
| siRNA-Temozolomide Run2-DMSO | NM_000069 | CACNA1S | calcium channel, voltage-dependent, L type, alpha 1S subunit | -0.999403 | Inlier |
| siRNA-Temozolomide Run3-DMSO | NM_000069 | CACNA1S | calcium channel, voltage-dependent, L type, alpha 1S subunit | -0.944814 | Inlier |
| siRNA Disorazole DMSO Run3   | NM_000069 | CACNA1S | calcium channel, voltage-dependent, L type, alpha 1S subunit | -0.212063 | Inlier |
| siRNA Disorazole DMSO Run2   | NM_000069 | CACNA1S | calcium channel, voltage-dependent, L type, alpha 1S subunit | -0.084351 | Inlier |
| siRNA-Temozolomide Run1-DMSO | NM_000069 | CACNA1S | calcium channel, voltage-dependent, L type, alpha 1S subunit | 0.084351  | Inlier |
| siRNA Disorazole DMSO Run1   | NM_000069 | CACNA1S | calcium channel, voltage-dependent, L type, alpha 1S subunit | 0.553596  | Inlier |

Identification of Survival Genes in Human Glioblastoma Cells Using siRNA Screening

Nikhil G Thaker, Fang Zhang, Peter R. McDonald, Tong Ying Shun, Michael D Lewen, Ian F. Pollack, and John S. Lazo

Molecular Pharmacology

|                              |           |          |                                                              |           |        |
|------------------------------|-----------|----------|--------------------------------------------------------------|-----------|--------|
| siRNA-Vinblastine Run1-DMSO  | NM_000069 | CACNA1S  | calcium channel, voltage-dependent, L type, alpha 1S subunit | 0.795404  | Inlier |
| siRNA-Vinblastine Run2-DMSO  | NM_000069 | CACNA1S  | calcium channel, voltage-dependent, L type, alpha 1S subunit | 0.94963   | Inlier |
| siRNA-Temozolomide Run3-DMSO | NM_000722 | CACNA2D1 | calcium channel, voltage-dependent, alpha 2/delta subunit 1  | -0.956957 | Inlier |
| siRNA-Temozolomide Run2-DMSO | NM_000722 | CACNA2D1 | calcium channel, voltage-dependent, alpha 2/delta subunit 1  | -0.814269 | Inlier |
| siRNA Disorazole DMSO Run2   | NM_000722 | CACNA2D1 | calcium channel, voltage-dependent, alpha 2/delta subunit 1  | -0.483054 | Inlier |
| siRNA Disorazole DMSO Run3   | NM_000722 | CACNA2D1 | calcium channel, voltage-dependent, alpha 2/delta subunit 1  | -0.317843 | Inlier |
| siRNA Disorazole DMSO Run1   | NM_000722 | CACNA2D1 | calcium channel, voltage-dependent, alpha 2/delta subunit 1  | 0.317843  | Inlier |

Identification of Survival Genes in Human Glioblastoma Cells Using siRNA Screening

Nikhil G Thaker, Fang Zhang, Peter R. McDonald, Tong Ying Shun, Michael D Lewen, Ian F. Pollack, and John S. Lazo

Molecular Pharmacology

|                              |              |          |                                                             |           |        |
|------------------------------|--------------|----------|-------------------------------------------------------------|-----------|--------|
| siRNA-Temozolomide Run1-DMSO | NM_000722    | CACNA2D1 | calcium channel, voltage-dependent, alpha 2/delta subunit 1 | 0.534731  | Inlier |
| siRNA-Vinblastine Run1-DMSO  | NM_000722    | CACNA2D1 | calcium channel, voltage-dependent, alpha 2/delta subunit 1 | 0.847719  | Inlier |
| siRNA-Vinblastine Run2-DMSO  | NM_000722    | CACNA2D1 | calcium channel, voltage-dependent, alpha 2/delta subunit 1 | 0.953786  | Inlier |
| siRNA-Temozolomide Run2-DMSO | NM_001005505 | CACNA2D2 | calcium channel, voltage-dependent, alpha 2/delta subunit 2 | -1.346811 | Inlier |
| siRNA-Temozolomide Run3-DMSO | NM_001005505 | CACNA2D2 | calcium channel, voltage-dependent, alpha 2/delta subunit 2 | -0.899188 | Inlier |
| siRNA Disorazole DMSO Run3   | NM_001005505 | CACNA2D2 | calcium channel, voltage-dependent, alpha 2/delta subunit 2 | -0.252777 | Inlier |
| siRNA Disorazole DMSO Run1   | NM_001005505 | CACNA2D2 | calcium channel, voltage-dependent, alpha 2/delta subunit 2 | -0.006003 | Inlier |

Identification of Survival Genes in Human Glioblastoma Cells Using siRNA Screening  
 Nikhil G Thaker, Fang Zhang, Peter R. McDonald, Tong Ying Shun, Michael D Lewen, Ian F. Pollack, and John S. Lazo

Molecular Pharmacology

|                              |               |           |  |                                                             |                  |
|------------------------------|---------------|-----------|--|-------------------------------------------------------------|------------------|
|                              |               |           |  | calcium channel, voltage-dependent, alpha 2/delta subunit 2 |                  |
| siRNA Disorazole DMSO Run2   | NM_0010 05505 | CACNA2D 2 |  | calcium channel, voltage-dependent, alpha 2/delta subunit 2 | 0.006003 Inlier  |
| siRNA-Temozolomide Run1-DMSO | NM_0010 05505 | CACNA2D 2 |  | calcium channel, voltage-dependent, alpha 2/delta subunit 2 | 0.449812 Inlier  |
| siRNA-Vinblastine Run2-DMSO  | NM_0010 05505 | CACNA2D 2 |  | calcium channel, voltage-dependent, alpha 2/delta subunit 2 | 1.315604 Inlier  |
| siRNA-Vinblastine Run1-DMSO  | NM_0010 05505 | CACNA2D 2 |  | calcium channel, voltage-dependent, alpha 2/delta subunit 2 | 1.331009 Inlier  |
| siRNA-Temozolomide Run3-DMSO | NM_0183 98    | CACNA2D 3 |  | calcium channel, voltage-dependent, alpha 2/delta 3 subunit | -0.936978 Inlier |
| siRNA-Temozolomide Run2-DMSO | NM_0183 98    | CACNA2D 3 |  | calcium channel, voltage-dependent, alpha 2/delta 3 subunit | -0.799395 Inlier |
| siRNA Disorazole DMSO Run3   | NM_0183 98    | CACNA2D 3 |  | calcium channel, voltage-dependent, alpha 2/delta 3 subunit | -0.549605 Inlier |



Identification of Survival Genes in Human Glioblastoma Cells Using siRNA Screening

Nikhil G Thaker, Fang Zhang, Peter R. McDonald, Tong Ying Shun, Michael D Lewen, Ian F. Pollack, and John S. Lazo

Molecular Pharmacology

| siRNA Treatment              | Gene ID       | Gene Name | Accession | Subunit                                                     | Value     | Outlier Type |
|------------------------------|---------------|-----------|-----------|-------------------------------------------------------------|-----------|--------------|
| siRNA Disorazole DMSO Run2   | NM_0183<br>98 | CACNA2D   | 3         | calcium channel, voltage-dependent, alpha 2/delta 3 subunit | -0.095679 | Inlier       |
| siRNA-Temozolomide Run1-DMSO | NM_0183<br>98 | CACNA2D   | 3         | calcium channel, voltage-dependent, alpha 2/delta 3 subunit | 0.095679  | Inlier       |
| siRNA Disorazole DMSO Run1   | NM_0183<br>98 | CACNA2D   | 3         | calcium channel, voltage-dependent, alpha 2/delta 3 subunit | 0.386669  | Inlier       |
| siRNA-Vinblastine Run1-DMSO  | NM_0183<br>98 | CACNA2D   | 3         | calcium channel, voltage-dependent, alpha 2/delta 3 subunit | 1.780707  | Inlier       |
| siRNA-Vinblastine Run2-DMSO  | NM_0183<br>98 | CACNA2D   | 3         | calcium channel, voltage-dependent, alpha 2/delta 3 subunit | 2.098466  | Inlier       |
| siRNA-Temozolomide Run3-DMSO | NM_1723<br>64 | CACNA2D   | 4         | calcium channel, voltage-dependent, alpha 2/delta subunit 4 | -1.026648 | Inlier       |
| siRNA-Temozolomide Run2-DMSO | NM_1723<br>64 | CACNA2D   | 4         | calcium channel, voltage-dependent, alpha 2/delta subunit 4 | -0.72506  | Inlier       |

Identification of Survival Genes in Human Glioblastoma Cells Using siRNA Screening

Nikhil G Thaker, Fang Zhang, Peter R. McDonald, Tong Ying Shun, Michael D Lewen, Ian F. Pollack, and John S. Lazo

Molecular Pharmacology

| siRNA Treatment              | Gene    | Accession | Transcript        | Value     | Category |
|------------------------------|---------|-----------|-------------------|-----------|----------|
| siRNA Disorazole DMSO Run3   | CACNA2D | NM_1723   | 2/delta subunit 4 | -0.604672 | Inlier   |
| siRNA Disorazole DMSO Run2   | CACNA2D | NM_1723   | 2/delta subunit 4 | -0.344998 | Inlier   |
| siRNA Disorazole DMSO Run1   | CACNA2D | NM_1723   | 2/delta subunit 4 | 0.344998  | Inlier   |
| siRNA-Temozolomide Run1-DMSO | CACNA2D | NM_1723   | 2/delta subunit 4 | 0.62394   | Inlier   |
| siRNA-Vinblastine Run2-DMSO  | CACNA2D | NM_1723   | 2/delta subunit 4 | 1.369194  | Inlier   |
| siRNA-Vinblastine Run1-DMSO  | CACNA2D | NM_1723   | 2/delta subunit 4 | 1.442941  | Inlier   |
| siRNA-Temozolomide Run3-DMSO | CACNB1  | NM_1992   | beta 1 subunit    | -3.038376 | Inlier   |

Identification of Survival Genes in Human Glioblastoma Cells Using siRNA Screening

Nikhil G Thaker, Fang Zhang, Peter R. McDonald, Tong Ying Shun, Michael D Lewen, Ian F. Pollack, and John S. Lazo

Molecular Pharmacology

|                              |               |        |                                                    |           |        |
|------------------------------|---------------|--------|----------------------------------------------------|-----------|--------|
| siRNA-Temozolomide Run2-DMSO | NM_1992<br>48 | CACNB1 | calcium channel, voltage-dependent, beta 1 subunit | -2.628631 | Inlier |
| siRNA Disorazole DMSO Run3   | NM_1992<br>48 | CACNB1 | calcium channel, voltage-dependent, beta 1 subunit | -1.573581 | Inlier |
| siRNA Disorazole DMSO Run2   | NM_1992<br>48 | CACNB1 | calcium channel, voltage-dependent, beta 1 subunit | -0.063339 | Inlier |
| siRNA Disorazole DMSO Run1   | NM_1992<br>48 | CACNB1 | calcium channel, voltage-dependent, beta 1 subunit | 0.063339  | Inlier |
| siRNA-Temozolomide Run1-DMSO | NM_1992<br>48 | CACNB1 | calcium channel, voltage-dependent, beta 1 subunit | 0.287121  | Inlier |
| siRNA-Vinblastine Run1-DMSO  | NM_1992<br>48 | CACNB1 | calcium channel, voltage-dependent, beta 1 subunit | 0.386709  | Inlier |
| siRNA-Vinblastine Run2-DMSO  | NM_1992<br>48 | CACNB1 | calcium channel, voltage-dependent, beta 1 subunit | 0.962291  | Inlier |
| siRNA-Temozolomide Run3-DMSO | NM_2015<br>96 | CACNB2 | calcium channel, voltage-dependent, beta 2 subunit | -0.993213 | Inlier |

Identification of Survival Genes in Human Glioblastoma Cells Using siRNA Screening  
 Nikhil G Thaker, Fang Zhang, Peter R. McDonald, Tong Ying Shun, Michael D Lewen, Ian F. Pollack, and John S. Lazo

Molecular Pharmacology

|                              |               |        |                                                    |           |        |
|------------------------------|---------------|--------|----------------------------------------------------|-----------|--------|
| siRNA-Temozolomide Run2-DMSO | NM_2015<br>96 | CACNB2 | calcium channel, voltage-dependent, beta 2 subunit | -0.854139 | Inlier |
| siRNA Disorazole DMSO Run2   | NM_2015<br>96 | CACNB2 | calcium channel, voltage-dependent, beta 2 subunit | -0.796976 | Inlier |
| siRNA Disorazole DMSO Run3   | NM_2015<br>96 | CACNB2 | calcium channel, voltage-dependent, beta 2 subunit | -0.212208 | Inlier |
| siRNA Disorazole DMSO Run1   | NM_2015<br>96 | CACNB2 | calcium channel, voltage-dependent, beta 2 subunit | 0.212208  | Inlier |
| siRNA-Temozolomide Run1-DMSO | NM_2015<br>96 | CACNB2 | calcium channel, voltage-dependent, beta 2 subunit | 0.389815  | Inlier |
| siRNA-Vinblastine Run1-DMSO  | NM_2015<br>96 | CACNB2 | calcium channel, voltage-dependent, beta 2 subunit | 0.552024  | Inlier |
| siRNA-Vinblastine Run2-DMSO  | NM_2015<br>96 | CACNB2 | calcium channel, voltage-dependent, beta 2 subunit | 1.269428  | Inlier |
| siRNA-Temozolomide Run3-DMSO | NM_0007<br>25 | CACNB3 | calcium channel, voltage-dependent, beta 3 subunit | -2.055401 | Inlier |

Identification of Survival Genes in Human Glioblastoma Cells Using siRNA Screening

Nikhil G Thaker, Fang Zhang, Peter R. McDonald, Tong Ying Shun, Michael D Lewen, Ian F. Pollack, and John S. Lazo

Molecular Pharmacology

|                              |                  |        |                                                    |           |        |
|------------------------------|------------------|--------|----------------------------------------------------|-----------|--------|
| siRNA-Temozolomide Run2-DMSO | NM_0007<br>25    | CACNB3 | calcium channel, voltage-dependent, beta 3 subunit | -1.237472 | Inlier |
| siRNA-Temozolomide Run1-DMSO | NM_0007<br>25    | CACNB3 | calcium channel, voltage-dependent, beta 3 subunit | -0.065382 | Inlier |
| siRNA Disorazole DMSO Run1   | NM_0007<br>25    | CACNB3 | calcium channel, voltage-dependent, beta 3 subunit | -0.032884 | Inlier |
| siRNA Disorazole DMSO Run3   | NM_0007<br>25    | CACNB3 | calcium channel, voltage-dependent, beta 3 subunit | 0.032884  | Inlier |
| siRNA Disorazole DMSO Run2   | NM_0007<br>25    | CACNB3 | calcium channel, voltage-dependent, beta 3 subunit | 0.233189  | Inlier |
| siRNA-Vinblastine Run2-DMSO  | NM_0007<br>25    | CACNB3 | calcium channel, voltage-dependent, beta 3 subunit | 1.115811  | Inlier |
| siRNA-Vinblastine Run1-DMSO  | NM_0007<br>25    | CACNB3 | calcium channel, voltage-dependent, beta 3 subunit | 2.161862  | Inlier |
| siRNA Disorazole DMSO Run2   | NM_0010<br>05747 | CACNB4 | calcium channel, voltage-dependent, beta 4 subunit | -1.050524 | Inlier |

Identification of Survival Genes in Human Glioblastoma Cells Using siRNA Screening

Nikhil G Thaker, Fang Zhang, Peter R. McDonald, Tong Ying Shun, Michael D Lewen, Ian F. Pollack, and John S. Lazo

Molecular Pharmacology

|                              |              |        |                                                    |           |        |
|------------------------------|--------------|--------|----------------------------------------------------|-----------|--------|
| siRNA-Temozolomide Run2-DMSO | NM_001005747 | CACNB4 | calcium channel, voltage-dependent, beta 4 subunit | -0.886576 | Inlier |
| siRNA-Temozolomide Run3-DMSO | NM_001005747 | CACNB4 | calcium channel, voltage-dependent, beta 4 subunit | -0.634546 | Inlier |
| siRNA Disorazole DMSO Run1   | NM_001005747 | CACNB4 | calcium channel, voltage-dependent, beta 4 subunit | -0.116522 | Inlier |
| siRNA-Temozolomide Run1-DMSO | NM_001005747 | CACNB4 | calcium channel, voltage-dependent, beta 4 subunit | 0.116522  | Inlier |
| siRNA Disorazole DMSO Run3   | NM_001005747 | CACNB4 | calcium channel, voltage-dependent, beta 4 subunit | 0.137854  | Inlier |
| siRNA-Vinblastine Run2-DMSO  | NM_001005747 | CACNB4 | calcium channel, voltage-dependent, beta 4 subunit | 0.714454  | Inlier |
| siRNA-Vinblastine Run1-DMSO  | NM_001005747 | CACNB4 | calcium channel, voltage-dependent, beta 4 subunit | 0.739101  | Inlier |
| siRNA Disorazole DMSO Run2   | NM_000727    | CACNG1 | gamma subunit 1                                    | -0.684399 | Inlier |

Identification of Survival Genes in Human Glioblastoma Cells Using siRNA Screening

Nikhil G Thaker, Fang Zhang, Peter R. McDonald, Tong Ying Shun, Michael D Lewen, Ian F. Pollack, and John S. Lazo

Molecular Pharmacology

|                              |               |        |                                                     |           |        |
|------------------------------|---------------|--------|-----------------------------------------------------|-----------|--------|
| siRNA-Temozolomide Run2-DMSO | NM_0007<br>27 | CACNG1 | calcium channel, voltage-dependent, gamma subunit 1 | -0.664601 | Inlier |
| siRNA-Temozolomide Run3-DMSO | NM_0007<br>27 | CACNG1 | calcium channel, voltage-dependent, gamma subunit 1 | -0.199204 | Inlier |
| siRNA Disorazole DMSO Run1   | NM_0007<br>27 | CACNG1 | calcium channel, voltage-dependent, gamma subunit 1 | -0.015164 | Inlier |
| siRNA Disorazole DMSO Run3   | NM_0007<br>27 | CACNG1 | calcium channel, voltage-dependent, gamma subunit 1 | 0.015163  | Inlier |
| siRNA-Temozolomide Run1-DMSO | NM_0007<br>27 | CACNG1 | calcium channel, voltage-dependent, gamma subunit 1 | 0.938799  | Inlier |
| siRNA-Vinblastine Run2-DMSO  | NM_0007<br>27 | CACNG1 | calcium channel, voltage-dependent, gamma subunit 1 | 1.928026  | Inlier |
| siRNA-Vinblastine Run1-DMSO  | NM_0007<br>27 | CACNG1 | calcium channel, voltage-dependent, gamma subunit 1 | 2.832161  | Inlier |
| siRNA Disorazole DMSO Run2   | NM_0060<br>78 | CACNG2 | calcium channel, voltage-dependent, gamma subunit 2 | -1.463405 | Inlier |

Identification of Survival Genes in Human Glioblastoma Cells Using siRNA Screening

Nikhil G Thaker, Fang Zhang, Peter R. McDonald, Tong Ying Shun, Michael D Lewen, Ian F. Pollack, and John S. Lazo

Molecular Pharmacology

|                              |           |        |                                                     |           |        |
|------------------------------|-----------|--------|-----------------------------------------------------|-----------|--------|
| siRNA-Temozolomide Run2-DMSO | NM_006078 | CACNG2 | calcium channel, voltage-dependent, gamma subunit 2 | -1.214549 | Inlier |
| siRNA-Temozolomide Run3-DMSO | NM_006078 | CACNG2 | calcium channel, voltage-dependent, gamma subunit 2 | -0.545017 | Inlier |
| siRNA Disorazole DMSO Run3   | NM_006078 | CACNG2 | calcium channel, voltage-dependent, gamma subunit 2 | -0.5094   | Inlier |
| siRNA-Temozolomide Run1-DMSO | NM_006078 | CACNG2 | calcium channel, voltage-dependent, gamma subunit 2 | 0.509399  | Inlier |
| siRNA Disorazole DMSO Run1   | NM_006078 | CACNG2 | calcium channel, voltage-dependent, gamma subunit 2 | 0.542422  | Inlier |
| siRNA-Vinblastine Run1-DMSO  | NM_006078 | CACNG2 | calcium channel, voltage-dependent, gamma subunit 2 | 0.803983  | Inlier |
| siRNA-Vinblastine Run2-DMSO  | NM_006078 | CACNG2 | calcium channel, voltage-dependent, gamma subunit 2 | 2.163374  | Inlier |
| siRNA-Temozolomide Run3-DMSO | NM_006539 | CACNG3 | calcium channel, voltage-dependent, gamma subunit 3 | -2.147348 | Inlier |



Identification of Survival Genes in Human Glioblastoma Cells Using siRNA Screening

Nikhil G Thaker, Fang Zhang, Peter R. McDonald, Tong Ying Shun, Michael D Lewen, Ian F. Pollack, and John S. Lazo

Molecular Pharmacology

|                              |               |        |                                                     |           |        |
|------------------------------|---------------|--------|-----------------------------------------------------|-----------|--------|
| siRNA-Temozolomide Run2-DMSO | NM_0065<br>39 | CACNG3 | calcium channel, voltage-dependent, gamma subunit 3 | -1.404976 | Inlier |
| siRNA Disorazole DMSO Run2   | NM_0065<br>39 | CACNG3 | calcium channel, voltage-dependent, gamma subunit 3 | -0.6109   | Inlier |
| siRNA Disorazole DMSO Run3   | NM_0065<br>39 | CACNG3 | calcium channel, voltage-dependent, gamma subunit 3 | -0.161845 | Inlier |
| siRNA-Temozolomide Run1-DMSO | NM_0065<br>39 | CACNG3 | calcium channel, voltage-dependent, gamma subunit 3 | 0.161845  | Inlier |
| siRNA Disorazole DMSO Run1   | NM_0065<br>39 | CACNG3 | calcium channel, voltage-dependent, gamma subunit 3 | 0.29085   | Inlier |
| siRNA-Vinblastine Run1-DMSO  | NM_0065<br>39 | CACNG3 | calcium channel, voltage-dependent, gamma subunit 3 | 0.7381    | Inlier |
| siRNA-Vinblastine Run2-DMSO  | NM_0065<br>39 | CACNG3 | calcium channel, voltage-dependent, gamma subunit 3 | 0.81535   | Inlier |
| siRNA-Temozolomide Run2-DMSO | NM_0144<br>05 | CACNG4 | calcium channel, voltage-dependent, gamma subunit 4 | -1.767217 | Inlier |

Identification of Survival Genes in Human Glioblastoma Cells Using siRNA Screening  
 Nikhil G Thaker, Fang Zhang, Peter R. McDonald, Tong Ying Shun, Michael D Lewen, Ian F. Pollack, and John S. Lazo

Molecular Pharmacology

|                              |               |        |                                                     |           |        |
|------------------------------|---------------|--------|-----------------------------------------------------|-----------|--------|
| siRNA Disorazole DMSO Run1   | NM_0144<br>05 | CACNG4 | calcium channel, voltage-dependent, gamma subunit 4 | -0.697388 | Inlier |
| siRNA Disorazole DMSO Run3   | NM_0144<br>05 | CACNG4 | calcium channel, voltage-dependent, gamma subunit 4 | -0.239483 | Inlier |
| siRNA-Temozolomide Run3-DMSO | NM_0144<br>05 | CACNG4 | calcium channel, voltage-dependent, gamma subunit 4 | -0.017356 | Inlier |
| siRNA Disorazole DMSO Run2   | NM_0144<br>05 | CACNG4 | calcium channel, voltage-dependent, gamma subunit 4 | 0.017356  | Inlier |
| siRNA-Temozolomide Run1-DMSO | NM_0144<br>05 | CACNG4 | calcium channel, voltage-dependent, gamma subunit 4 | 0.651612  | Inlier |
| siRNA-Vinblastine Run2-DMSO  | NM_0144<br>05 | CACNG4 | calcium channel, voltage-dependent, gamma subunit 4 | 2.420946  | Inlier |
| siRNA-Vinblastine Run1-DMSO  | NM_0144<br>05 | CACNG4 | calcium channel, voltage-dependent, gamma subunit 4 | 2.810598  | Inlier |
| siRNA-Temozolomide Run3-DMSO | NM_1458<br>11 | CACNG5 | gamma subunit 5                                     | -1.427465 | Inlier |

Identification of Survival Genes in Human Glioblastoma Cells Using siRNA Screening

Nikhil G Thaker, Fang Zhang, Peter R. McDonald, Tong Ying Shun, Michael D Lewen, Ian F. Pollack, and John S. Lazo

Molecular Pharmacology

|                              |               |        |                                                     |           |        |
|------------------------------|---------------|--------|-----------------------------------------------------|-----------|--------|
| siRNA Disorazole DMSO Run2   | NM_1458<br>11 | CACNG5 | calcium channel, voltage-dependent, gamma subunit 5 | -1.040005 | Inlier |
| siRNA Disorazole DMSO Run3   | NM_1458<br>11 | CACNG5 | calcium channel, voltage-dependent, gamma subunit 5 | -0.518231 | Inlier |
| siRNA-Temozolomide Run2-DMSO | NM_1458<br>11 | CACNG5 | calcium channel, voltage-dependent, gamma subunit 5 | -0.484367 | Inlier |
| siRNA-Temozolomide Run1-DMSO | NM_1458<br>11 | CACNG5 | calcium channel, voltage-dependent, gamma subunit 5 | 0.484367  | Inlier |
| siRNA Disorazole DMSO Run1   | NM_1458<br>11 | CACNG5 | calcium channel, voltage-dependent, gamma subunit 5 | 0.604758  | Inlier |
| siRNA-Vinblastine Run2-DMSO  | NM_1458<br>11 | CACNG5 | calcium channel, voltage-dependent, gamma subunit 5 | 0.744242  | Inlier |
| siRNA-Vinblastine Run1-DMSO  | NM_1458<br>11 | CACNG5 | calcium channel, voltage-dependent, gamma subunit 5 | 0.989345  | Inlier |
| siRNA-Temozolomide Run2-DMSO | NM_1458<br>14 | CACNG6 | calcium channel, voltage-dependent, gamma subunit 6 | -0.743113 | Inlier |

Identification of Survival Genes in Human Glioblastoma Cells Using siRNA Screening  
 Nikhil G Thaker, Fang Zhang, Peter R. McDonald, Tong Ying Shun, Michael D Lewen, Ian F. Pollack, and John S. Lazo

Molecular Pharmacology

|                              |               |        |                                                     |           |        |
|------------------------------|---------------|--------|-----------------------------------------------------|-----------|--------|
| siRNA-Temozolomide Run3-DMSO | NM_1458<br>14 | CACNG6 | calcium channel, voltage-dependent, gamma subunit 6 | -0.728301 | Inlier |
| siRNA Disorazole DMSO Run2   | NM_1458<br>14 | CACNG6 | calcium channel, voltage-dependent, gamma subunit 6 | -0.621969 | Inlier |
| siRNA Disorazole DMSO Run3   | NM_1458<br>14 | CACNG6 | calcium channel, voltage-dependent, gamma subunit 6 | -0.139586 | Inlier |
| siRNA-Temozolomide Run1-DMSO | NM_1458<br>14 | CACNG6 | calcium channel, voltage-dependent, gamma subunit 6 | 0.139586  | Inlier |
| siRNA Disorazole DMSO Run1   | NM_1458<br>14 | CACNG6 | calcium channel, voltage-dependent, gamma subunit 6 | 0.500977  | Inlier |
| siRNA-Vinblastine Run1-DMSO  | NM_1458<br>14 | CACNG6 | calcium channel, voltage-dependent, gamma subunit 6 | 0.727031  | Inlier |
| siRNA-Vinblastine Run2-DMSO  | NM_1458<br>14 | CACNG6 | calcium channel, voltage-dependent, gamma subunit 6 | 0.803444  | Inlier |
| siRNA Disorazole DMSO Run2   | NM_0318<br>96 | CACNG7 | calcium channel, voltage-dependent, gamma subunit 7 | -2.911469 | Inlier |

Identification of Survival Genes in Human Glioblastoma Cells Using siRNA Screening  
 Nikhil G Thaker, Fang Zhang, Peter R. McDonald, Tong Ying Shun, Michael D Lewen, Ian F. Pollack, and John S. Lazo

Molecular Pharmacology

|                              |               |        |                                                     |           |        |
|------------------------------|---------------|--------|-----------------------------------------------------|-----------|--------|
| siRNA-Temozolomide Run2-DMSO | NM_0318<br>96 | CACNG7 | calcium channel, voltage-dependent, gamma subunit 7 | -1.223644 | Inlier |
| siRNA-Temozolomide Run3-DMSO | NM_0318<br>96 | CACNG7 | calcium channel, voltage-dependent, gamma subunit 7 | -0.326447 | Inlier |
| siRNA Disorazole DMSO Run3   | NM_0318<br>96 | CACNG7 | calcium channel, voltage-dependent, gamma subunit 7 | -0.058094 | Inlier |
| siRNA-Temozolomide Run1-DMSO | NM_0318<br>96 | CACNG7 | calcium channel, voltage-dependent, gamma subunit 7 | 0.058094  | Inlier |
| siRNA Disorazole DMSO Run1   | NM_0318<br>96 | CACNG7 | calcium channel, voltage-dependent, gamma subunit 7 | 0.349744  | Inlier |
| siRNA-Vinblastine Run2-DMSO  | NM_0318<br>96 | CACNG7 | calcium channel, voltage-dependent, gamma subunit 7 | 0.999256  | Inlier |
| siRNA-Vinblastine Run1-DMSO  | NM_0318<br>96 | CACNG7 | calcium channel, voltage-dependent, gamma subunit 7 | 1.916279  | Inlier |
| siRNA Disorazole DMSO Run2   | NM_0318<br>95 | CACNG8 | calcium channel, voltage-dependent, gamma subunit 8 | -0.801945 | Inlier |

Identification of Survival Genes in Human Glioblastoma Cells Using siRNA Screening

Nikhil G Thaker, Fang Zhang, Peter R. McDonald, Tong Ying Shun, Michael D Lewen, Ian F. Pollack, and John S. Lazo

Molecular Pharmacology

| siRNA Treatment              | Gene      | Accession | Gene Name                                           | Value     | Outlier Status |
|------------------------------|-----------|-----------|-----------------------------------------------------|-----------|----------------|
| siRNA-Temozolomide Run2-DMSO | NM_031895 | CACNG8    | calcium channel, voltage-dependent, gamma subunit 8 | -0.76082  | Inlier         |
| siRNA-Temozolomide Run3-DMSO | NM_031895 | CACNG8    | calcium channel, voltage-dependent, gamma subunit 8 | -0.659388 | Inlier         |
| siRNA Disorazole DMSO Run3   | NM_031895 | CACNG8    | calcium channel, voltage-dependent, gamma subunit 8 | -0.133311 | Inlier         |
| siRNA Disorazole DMSO Run1   | NM_031895 | CACNG8    | calcium channel, voltage-dependent, gamma subunit 8 | 0.133311  | Inlier         |
| siRNA-Temozolomide Run1-DMSO | NM_031895 | CACNG8    | calcium channel, voltage-dependent, gamma subunit 8 | 0.191478  | Inlier         |
| siRNA-Vinblastine Run1-DMSO  | NM_031895 | CACNG8    | calcium channel, voltage-dependent, gamma subunit 8 | 0.689613  | Inlier         |
| siRNA-Vinblastine Run2-DMSO  | NM_031895 | CACNG8    | calcium channel, voltage-dependent, gamma subunit 8 | 1.245689  | Inlier         |

Identification of Survival Genes in Human Glioblastoma Cells Using siRNA Screening

Nikhil G Thaker, Fang Zhang, Peter R. McDonald, Tong Ying Shun, Michael D Lewen, Ian F. Pollack, and John S. Lazo

Molecular Pharmacology

|                              |               |     |                                                                                  |           |        |
|------------------------------|---------------|-----|----------------------------------------------------------------------------------|-----------|--------|
| siRNA Disorazole DMSO Run1   | NM_0043<br>41 | CAD | carbamoyl-phosphate synthetase 2, aspartate transcarbamylase, and dihydroorotase | -1.631354 | Inlier |
| siRNA Disorazole DMSO Run3   | NM_0043<br>41 | CAD | carbamoyl-phosphate synthetase 2, aspartate transcarbamylase, and dihydroorotase | -0.927824 | Inlier |
| siRNA-Temozolomide Run1-DMSO | NM_0043<br>41 | CAD | carbamoyl-phosphate synthetase 2, aspartate transcarbamylase, and dihydroorotase | -0.412775 | Inlier |
| siRNA-Temozolomide Run2-DMSO | NM_0043<br>41 | CAD | carbamoyl-phosphate synthetase 2, aspartate transcarbamylase, and dihydroorotase | -0.100747 | Inlier |

Identification of Survival Genes in Human Glioblastoma Cells Using siRNA Screening

Nikhil G Thaker, Fang Zhang, Peter R. McDonald, Tong Ying Shun, Michael D Lewen, Ian F. Pollack, and John S. Lazo

Molecular Pharmacology

|                              |               |     |                                                                                  |                 |
|------------------------------|---------------|-----|----------------------------------------------------------------------------------|-----------------|
| siRNA-Vinblastine Run2-DMSO  | NM_0043<br>41 | CAD | carbamoyl-phosphate synthetase 2, aspartate transcarbamylase, and dihydroorotase | 0.100748 Inlier |
| siRNA-Temozolomide Run3-DMSO | NM_0043<br>41 | CAD | carbamoyl-phosphate synthetase 2, aspartate transcarbamylase, and dihydroorotase | 0.421176 Inlier |
| siRNA-Vinblastine Run1-DMSO  | NM_0043<br>41 | CAD | carbamoyl-phosphate synthetase 2, aspartate transcarbamylase, and dihydroorotase | 1.258441 Inlier |
| siRNA Disorazole DMSO Run2   | NM_0043<br>41 | CAD | carbamoyl-phosphate synthetase 2, aspartate transcarbamylase, and dihydroorotase | 1.487134 Inlier |



Identification of Survival Genes in Human Glioblastoma Cells Using siRNA Screening  
 Nikhil G Thaker, Fang Zhang, Peter R. McDonald, Tong Ying Shun, Michael D Lewen, Ian F. Pollack, and John S. Lazo  
 Molecular Pharmacology

|                              |               |       |                                    |           |        |
|------------------------------|---------------|-------|------------------------------------|-----------|--------|
| siRNA-Temozolomide Run2-DMSO | NM_1833<br>93 | CADPS | Ca2+-dependent secretion activator | -1.106668 | Inlier |
| siRNA-Temozolomide Run3-DMSO | NM_1833<br>93 | CADPS | Ca2+-dependent secretion activator | -0.723518 | Inlier |
| siRNA Disorazole DMSO Run1   | NM_1833<br>93 | CADPS | Ca2+-dependent secretion activator | -0.625482 | Inlier |
| siRNA Disorazole DMSO Run3   | NM_1833<br>93 | CADPS | Ca2+-dependent secretion activator | -0.114228 | Inlier |
| siRNA-Temozolomide Run1-DMSO | NM_1833<br>93 | CADPS | Ca2+-dependent secretion activator | 0.114228  | Inlier |
| siRNA-Vinblastine Run2-DMSO  | NM_1833<br>93 | CADPS | Ca2+-dependent secretion activator | 0.317215  | Inlier |
| siRNA-Vinblastine Run1-DMSO  | NM_1833<br>93 | CADPS | Ca2+-dependent secretion activator | 0.955801  | Inlier |
| siRNA Disorazole DMSO Run2   | NM_1833<br>93 | CADPS | Ca2+-dependent secretion activator | 1.754694  | Inlier |
| siRNA Disorazole DMSO Run2   | NM_0017<br>42 | CALCR | calcitonin receptor                | -2.168746 | Inlier |
| siRNA Disorazole DMSO Run1   | NM_0017<br>42 | CALCR | calcitonin receptor                | -1.44784  | Inlier |
| siRNA-Temozolomide Run2-DMSO | NM_0017<br>42 | CALCR | calcitonin receptor                | -0.371216 | Inlier |
| siRNA-Temozolomide Run3-DMSO | NM_0017<br>42 | CALCR | calcitonin receptor                | -0.334385 | Inlier |
| siRNA-Temozolomide Run1-DMSO | NM_0017<br>42 | CALCR | calcitonin receptor                | 0.334385  | Inlier |
| siRNA-Vinblastine Run1-DMSO  | NM_0017<br>42 | CALCR | calcitonin receptor                | 0.668528  | Inlier |

Identification of Survival Genes in Human Glioblastoma Cells Using siRNA Screening  
 Nikhil G Thaker, Fang Zhang, Peter R. McDonald, Tong Ying Shun, Michael D Lewen, Ian F. Pollack, and John S. Lazo

|                                  |               |        |                                                            |           |        |
|----------------------------------|---------------|--------|------------------------------------------------------------|-----------|--------|
| siRNA-Vinblastine Run2-<br>DMSO  | NM_0017<br>42 | CALCR  | calcitonin<br>receptor                                     | 0.680472  | Inlier |
| siRNA Disorazole DMSO Run3       | NM_0017<br>42 | CALCR  | calcitonin<br>receptor                                     | 1.424038  | Inlier |
| siRNA-Temozolomide Run3-<br>DMSO | NM_0057<br>95 | CALCRL | calcitonin<br>receptor-<br>like                            | -2.953812 | Inlier |
| siRNA-Temozolomide Run2-<br>DMSO | NM_0057<br>95 | CALCRL | calcitonin<br>receptor-<br>like                            | -1.136063 | Inlier |
| siRNA-Temozolomide Run1-<br>DMSO | NM_0057<br>95 | CALCRL | calcitonin<br>receptor-<br>like                            | -0.480832 | Inlier |
| siRNA Disorazole DMSO Run2       | NM_0057<br>95 | CALCRL | calcitonin<br>receptor-<br>like                            | -0.108489 | Inlier |
| siRNA Disorazole DMSO Run1       | NM_0057<br>95 | CALCRL | calcitonin<br>receptor-<br>like                            | 0.10849   | Inlier |
| siRNA-Vinblastine Run1-<br>DMSO  | NM_0057<br>95 | CALCRL | calcitonin<br>receptor-<br>like                            | 0.351045  | Inlier |
| siRNA-Vinblastine Run2-<br>DMSO  | NM_0057<br>95 | CALCRL | calcitonin<br>receptor-<br>like                            | 0.868168  | Inlier |
| siRNA Disorazole DMSO Run3       | NM_0057<br>95 | CALCRL | calcitonin<br>receptor-<br>like                            | 1.966023  | Inlier |
| siRNA-Temozolomide Run3-<br>DMSO | NM_0068<br>88 | CALM1  | calmodulin<br>1<br>(phosphor<br>ylase<br>kinase,<br>delta) | -2.862481 | Inlier |
| siRNA Disorazole DMSO Run2       | NM_0068<br>88 | CALM1  | calmodulin<br>1<br>(phosphor<br>ylase<br>kinase,<br>delta) | -1.025678 | Inlier |
| siRNA-Temozolomide Run2-<br>DMSO | NM_0068<br>88 | CALM1  | calmodulin<br>1<br>(phosphor<br>ylase<br>kinase,<br>delta) | -0.486858 | Inlier |
| siRNA-Temozolomide Run1-<br>DMSO | NM_0068<br>88 | CALM1  | calmodulin<br>1<br>(phosphor<br>ylase<br>kinase,<br>delta) | -0.481633 | Inlier |

Identification of Survival Genes in Human Glioblastoma Cells Using siRNA Screening  
 Nikhil G Thaker, Fang Zhang, Peter R. McDonald, Tong Ying Shun, Michael D Lewen, Ian F. Pollack, and John S. Lazo

Molecular Pharmacology

| siRNA Treatment              | Gene ID   | Gene Name | Protein Name                               | Value     | Category |
|------------------------------|-----------|-----------|--------------------------------------------|-----------|----------|
| siRNA-Vinblastine Run2-DMSO  | NM_006888 | CALM1     | calmodulin 1 (phosphorylase kinase, delta) | 0.481633  | Inlier   |
| siRNA Disorazole DMSO Run1   | NM_006888 | CALM1     | calmodulin 1 (phosphorylase kinase, delta) | 0.570387  | Inlier   |
| siRNA Disorazole DMSO Run3   | NM_006888 | CALM1     | calmodulin 1 (phosphorylase kinase, delta) | 0.778613  | Inlier   |
| siRNA-Vinblastine Run1-DMSO  | NM_006888 | CALM1     | calmodulin 2 (phosphorylase kinase, delta) | 1.001393  | Inlier   |
| siRNA Disorazole DMSO Run2   | NM_001743 | CALM2     | calmodulin 2 (phosphorylase kinase, delta) | -0.802361 | Inlier   |
| siRNA-Temozolomide Run3-DMSO | NM_001743 | CALM2     | calmodulin 2 (phosphorylase kinase, delta) | -0.656627 | Inlier   |
| siRNA Disorazole DMSO Run3   | NM_001743 | CALM2     | calmodulin 2 (phosphorylase kinase, delta) | -0.262373 | Inlier   |
| siRNA-Temozolomide Run2-DMSO | NM_001743 | CALM2     | calmodulin 2 (phosphorylase kinase, delta) | -0.021364 | Inlier   |

Identification of Survival Genes in Human Glioblastoma Cells Using siRNA Screening  
 Nikhil G Thaker, Fang Zhang, Peter R. McDonald, Tong Ying Shun, Michael D Lewen, Ian F. Pollack, and John S. Lazo

Molecular Pharmacology

| siRNA Treatment              | Gene ID   | Gene Name | Protein Name                               | Value     | Outlier Type |
|------------------------------|-----------|-----------|--------------------------------------------|-----------|--------------|
| siRNA-Temozolomide Run1-DMSO | NM_001743 | CALM2     | calmodulin 2 (phosphorylase kinase, delta) | 0.021363  | Inlier       |
| siRNA Disorazole DMSO Run1   | NM_001743 | CALM2     | calmodulin 2 (phosphorylase kinase, delta) | 0.692373  | Inlier       |
| siRNA-Vinblastine Run2-DMSO  | NM_001743 | CALM2     | calmodulin 2 (phosphorylase kinase, delta) | 0.795584  | Inlier       |
| siRNA-Vinblastine Run1-DMSO  | NM_001743 | CALM2     | calmodulin 3 (phosphorylase kinase, delta) | 0.974036  | Inlier       |
| siRNA Disorazole DMSO Run2   | NM_005184 | CALM3     | calmodulin 3 (phosphorylase kinase, delta) | -0.794638 | Inlier       |
| siRNA Disorazole DMSO Run3   | NM_005184 | CALM3     | calmodulin 3 (phosphorylase kinase, delta) | -0.787752 | Inlier       |
| siRNA-Temozolomide Run3-DMSO | NM_005184 | CALM3     | calmodulin 3 (phosphorylase kinase, delta) | -0.114238 | Inlier       |
| siRNA-Temozolomide Run1-DMSO | NM_005184 | CALM3     | calmodulin 3 (phosphorylase kinase, delta) | -0.108105 | Inlier       |

Identification of Survival Genes in Human Glioblastoma Cells Using siRNA Screening  
 Nikhil G Thaker, Fang Zhang, Peter R. McDonald, Tong Ying Shun, Michael D Lewen, Ian F. Pollack, and John S. Lazo

Molecular Pharmacology

|                                  |               |       |                                                                 |           |        |
|----------------------------------|---------------|-------|-----------------------------------------------------------------|-----------|--------|
|                                  |               |       | calmodulin<br>3<br>(phosphor<br>ylase<br>kinase,<br>delta)      | 0.108104  | Inlier |
| siRNA-Temozolomide Run2-<br>DMSO | NM_0051<br>84 | CALM3 | calmodulin<br>3<br>(phosphor<br>ylase<br>kinase,<br>delta)      | 0.561248  | Inlier |
| siRNA Disorazole DMSO Run1       | NM_0051<br>84 | CALM3 | calmodulin<br>3<br>(phosphor<br>ylase<br>kinase,<br>delta)      | 1.425748  | Inlier |
| siRNA-Vinblastine Run1-<br>DMSO  | NM_0051<br>84 | CALM3 | calmodulin<br>3<br>(phosphor<br>ylase<br>kinase,<br>delta)      | 1.531323  | Inlier |
| siRNA-Vinblastine Run2-<br>DMSO  | NM_0051<br>84 | CALM3 | calmodulin<br>3<br>(phosphor<br>ylase<br>kinase,<br>delta)      | -1.642247 | Inlier |
| siRNA Disorazole DMSO Run1       | NM_0043<br>43 | CALR  | calreticulin                                                    | -1.104932 | Inlier |
| siRNA-Temozolomide Run3-<br>DMSO | NM_0043<br>43 | CALR  | calreticulin                                                    | -1.018899 | Inlier |
| siRNA-Temozolomide Run1-<br>DMSO | NM_0043<br>43 | CALR  | calreticulin                                                    | -0.012806 | Inlier |
| siRNA-Temozolomide Run2-<br>DMSO | NM_0043<br>43 | CALR  | calreticulin                                                    | 0.012807  | Inlier |
| siRNA-Vinblastine Run2-<br>DMSO  | NM_0043<br>43 | CALR  | calreticulin                                                    | 0.083798  | Inlier |
| siRNA-Vinblastine Run1-<br>DMSO  | NM_0043<br>43 | CALR  | calreticulin                                                    | 0.330101  | Inlier |
| siRNA Disorazole DMSO Run2       | NM_0043<br>43 | CALR  | calreticulin                                                    | 1.121347  | Inlier |
| siRNA Disorazole DMSO Run3       | NM_0043<br>43 | CALR  | calreticulin<br>calcium/ca<br>lmodulin-<br>dependent<br>protein | -2.164243 | Inlier |
| siRNA-Temozolomide Run3-<br>DMSO | NM_0036<br>56 | CAMK1 | kinase I<br>calcium/ca<br>lmodulin-<br>dependent<br>protein     | -1.579424 | Inlier |
| siRNA-Temozolomide Run2-<br>DMSO | NM_0036<br>56 | CAMK1 | kinase I                                                        |           |        |

Identification of Survival Genes in Human Glioblastoma Cells Using siRNA Screening

Nikhil G Thaker, Fang Zhang, Peter R. McDonald, Tong Ying Shun, Michael D Lewen, Ian F. Pollack, and John S. Lazo

Molecular Pharmacology

|                              |               |        |                                                |           |        |
|------------------------------|---------------|--------|------------------------------------------------|-----------|--------|
| siRNA-Temozolomide Run1-DMSO | NM_0036<br>56 | CAMK1  | calcium/calmodulin-dependent protein kinase I  | -0.23868  | Inlier |
| siRNA Disorazole DMSO Run1   | NM_0036<br>56 | CAMK1  | calcium/calmodulin-dependent protein kinase I  | -0.106887 | Inlier |
| siRNA Disorazole DMSO Run2   | NM_0036<br>56 | CAMK1  | calcium/calmodulin-dependent protein kinase I  | 0.106888  | Inlier |
| siRNA Disorazole DMSO Run3   | NM_0036<br>56 | CAMK1  | calcium/calmodulin-dependent protein kinase I  | 0.212042  | Inlier |
| siRNA-Vinblastine Run2-DMSO  | NM_0036<br>56 | CAMK1  | calcium/calmodulin-dependent protein kinase I  | 1.11032   | Inlier |
| siRNA-Vinblastine Run1-DMSO  | NM_0036<br>56 | CAMK1  | calcium/calmodulin-dependent protein kinase I  | 3.010448  | Inlier |
| siRNA Disorazole DMSO Run2   | NM_1534<br>98 | CAMK1D | calcium/calmodulin-dependent protein kinase ID | -2.322939 | Inlier |
| siRNA Disorazole DMSO Run3   | NM_1534<br>98 | CAMK1D | calcium/calmodulin-dependent protein kinase ID | -1.149502 | Inlier |
| siRNA-Temozolomide Run3-DMSO | NM_1534<br>98 | CAMK1D | calcium/calmodulin-dependent protein kinase ID | -0.745508 | Inlier |
| siRNA-Temozolomide Run2-DMSO | NM_1534<br>98 | CAMK1D | calcium/calmodulin-dependent protein kinase ID | -0.017099 | Inlier |

Identification of Survival Genes in Human Glioblastoma Cells Using siRNA Screening  
 Nikhil G Thaker, Fang Zhang, Peter R. McDonald, Tong Ying Shun, Michael D Lewen, Ian F. Pollack, and John S. Lazo

Molecular Pharmacology

| siRNA Treatment              | Gene ID   | Gene Name | Protein Name                                   | Value     | Outlier Status |
|------------------------------|-----------|-----------|------------------------------------------------|-----------|----------------|
| siRNA-Temozolomide Run1-DMSO | NM_153498 | CAMK1D    | calcium/calmodulin-dependent protein kinase ID | 0.017099  | Inlier         |
| siRNA-Vinblastine Run2-DMSO  | NM_153498 | CAMK1D    | calcium/calmodulin-dependent protein kinase ID | 0.445577  | Inlier         |
| siRNA-Vinblastine Run1-DMSO  | NM_153498 | CAMK1D    | calcium/calmodulin-dependent protein kinase ID | 0.603492  | Inlier         |
| siRNA Disorazole DMSO Run1   | NM_153498 | CAMK1D    | calcium/calmodulin-dependent protein kinase ID | 1.268287  | Inlier         |
| siRNA-Temozolomide Run1-DMSO | NM_020439 | CAMK1G    | calcium/calmodulin-dependent protein kinase IG | -0.762598 | Inlier         |
| siRNA-Temozolomide Run2-DMSO | NM_020439 | CAMK1G    | calcium/calmodulin-dependent protein kinase IG | -0.586402 | Inlier         |
| siRNA Disorazole DMSO Run2   | NM_020439 | CAMK1G    | calcium/calmodulin-dependent protein kinase IG | -0.380478 | Inlier         |
| siRNA-Temozolomide Run3-DMSO | NM_020439 | CAMK1G    | calcium/calmodulin-dependent protein kinase IG | -0.312931 | Inlier         |
| siRNA Disorazole DMSO Run3   | NM_020439 | CAMK1G    | calcium/calmodulin-dependent protein kinase IG | 0.312931  | Inlier         |
| siRNA Disorazole DMSO Run1   | NM_020439 | CAMK1G    | calcium/calmodulin-dependent protein kinase IG | 2.469808  | Inlier         |

Identification of Survival Genes in Human Glioblastoma Cells Using siRNA Screening

Nikhil G Thaker, Fang Zhang, Peter R. McDonald, Tong Ying Shun, Michael D Lewen, Ian F. Pollack, and John S. Lazo

Molecular Pharmacology

|                              |               |        |                                                                |           |        |
|------------------------------|---------------|--------|----------------------------------------------------------------|-----------|--------|
| siRNA-Vinblastine Run2-DMSO  | NM_0204<br>39 | CAMK1G | calcium/calcium-dependent protein kinase IG                    | 2.760232  | Inlier |
| siRNA-Vinblastine Run1-DMSO  | NM_0204<br>39 | CAMK1G | calcium/calcium-dependent protein kinase IG                    | 3.43878   | Inlier |
| siRNA-Temozolomide Run3-DMSO | NM_1718<br>25 | CAMK2A | calcium/calcium-dependent protein kinase (CaM kinase) II alpha | -1.643852 | Inlier |
| siRNA-Temozolomide Run2-DMSO | NM_1718<br>25 | CAMK2A | calcium/calcium-dependent protein kinase (CaM kinase) II alpha | -0.834349 | Inlier |
| siRNA Disorazole DMSO Run2   | NM_1718<br>25 | CAMK2A | calcium/calcium-dependent protein kinase (CaM kinase) II alpha | -0.179784 | Inlier |
| siRNA Disorazole DMSO Run3   | NM_1718<br>25 | CAMK2A | calcium/calcium-dependent protein kinase (CaM kinase) II alpha | -0.045948 | Inlier |
| siRNA-Vinblastine Run1-DMSO  | NM_1718<br>25 | CAMK2A | calcium/calcium-dependent protein kinase (CaM kinase) II alpha | 0.045947  | Inlier |



Identification of Survival Genes in Human Glioblastoma Cells Using siRNA Screening

Nikhil G Thaker, Fang Zhang, Peter R. McDonald, Tong Ying Shun, Michael D Lewen, Ian F. Pollack, and John S. Lazo

Molecular Pharmacology

| siRNA                        | Gene    | Accession | Protein                                                           | Value     | Outlier |
|------------------------------|---------|-----------|-------------------------------------------------------------------|-----------|---------|
| siRNA-Temozolomide Run1-DMSO | NM_1718 | 25        | CAMK2A                                                            | 0.514651  | Inlier  |
|                              |         |           | calcium/calmodulin-dependent protein kinase (CaM kinase) II alpha |           |         |
| siRNA Disorazole DMSO Run1   | NM_1718 | 25        | CAMK2A                                                            | 1.190421  | Inlier  |
|                              |         |           | calcium/calmodulin-dependent protein kinase (CaM kinase) II alpha |           |         |
| siRNA-Vinblastine Run2-DMSO  | NM_1718 | 25        | CAMK2A                                                            | 1.376899  | Inlier  |
|                              |         |           | calcium/calmodulin-dependent protein kinase (CaM kinase) II alpha |           |         |
| siRNA-Temozolomide Run3-DMSO | NM_1720 | 84        | CAMK2B                                                            | -1.129416 | Inlier  |
|                              |         |           | calcium/calmodulin-dependent protein kinase (CaM kinase) II beta  |           |         |
| siRNA Disorazole DMSO Run3   | NM_1720 | 84        | CAMK2B                                                            | -0.906945 | Inlier  |
|                              |         |           | calcium/calmodulin-dependent protein kinase (CaM kinase) II beta  |           |         |
| siRNA-Temozolomide Run2-DMSO | NM_1720 | 84        | CAMK2B                                                            | -0.732561 | Inlier  |
|                              |         |           | calcium/calmodulin-dependent protein kinase (CaM kinase) II beta  |           |         |

Identification of Survival Genes in Human Glioblastoma Cells Using siRNA Screening

Nikhil G Thaker, Fang Zhang, Peter R. McDonald, Tong Ying Shun, Michael D Lewen, Ian F. Pollack, and John S. Lazo

Molecular Pharmacology

| siRNA              | Drug      | Run  | Gene   | Accession | Gene Name                                                         | Value     | Outlier |
|--------------------|-----------|------|--------|-----------|-------------------------------------------------------------------|-----------|---------|
| siRNA Disorazole   | DMSO      | Run1 | CAMK2B | NM_172084 | calcium/calmodulin-dependent protein kinase (CaM kinase) II beta  | -0.150249 | Inlier  |
| siRNA-Temozolomide | Run1-DMSO |      | CAMK2B | NM_172084 | calcium/calmodulin-dependent protein kinase (CaM kinase) II beta  | 0.150249  | Inlier  |
| siRNA Disorazole   | DMSO      | Run2 | CAMK2B | NM_172084 | calcium/calmodulin-dependent protein kinase (CaM kinase) II beta  | 0.1975    | Inlier  |
| siRNA-Vinblastine  | Run1-DMSO |      | CAMK2B | NM_172084 | calcium/calmodulin-dependent protein kinase (CaM kinase) II beta  | 0.616439  | Inlier  |
| siRNA-Vinblastine  | Run2-DMSO |      | CAMK2B | NM_172084 | calcium/calmodulin-dependent protein kinase (CaM kinase) II beta  | 0.766363  | Inlier  |
| siRNA Disorazole   | DMSO      | Run2 | CAMK2D | NM_172115 | calcium/calmodulin-dependent protein kinase (CaM kinase) II delta | -1.034385 | Inlier  |

Identification of Survival Genes in Human Glioblastoma Cells Using siRNA Screening

Nikhil G Thaker, Fang Zhang, Peter R. McDonald, Tong Ying Shun, Michael D Lewen, Ian F. Pollack, and John S. Lazo

Molecular Pharmacology

| siRNA              | Drug      | Run  | Gene   | Value     | Outlier |
|--------------------|-----------|------|--------|-----------|---------|
| siRNA Disorazole   | DMSO      | Run3 | CAMK2D | -0.810287 | Inlier  |
| siRNA-Temozolomide | Run3-DMSO | Run3 | CAMK2D | -0.768927 | Inlier  |
| siRNA-Temozolomide | Run2-DMSO | Run2 | CAMK2D | -0.154246 | Inlier  |
| siRNA-Temozolomide | Run1-DMSO | Run1 | CAMK2D | 0.154246  | Inlier  |
| siRNA-Vinblastine  | Run1-DMSO | Run1 | CAMK2D | 0.403151  | Inlier  |
| siRNA Disorazole   | DMSO      | Run1 | CAMK2D | 0.580073  | Inlier  |

Identification of Survival Genes in Human Glioblastoma Cells Using siRNA Screening

Nikhil G Thaker, Fang Zhang, Peter R. McDonald, Tong Ying Shun, Michael D Lewen, Ian F. Pollack, and John S. Lazo

Molecular Pharmacology

|                              |               |        |                                                                   |           |         |
|------------------------------|---------------|--------|-------------------------------------------------------------------|-----------|---------|
| siRNA-Vinblastine Run2-DMSO  | NM_1721<br>15 | CAMK2D | calcium/calmodulin-dependent protein kinase (CaM kinase) II delta | 1.333222  | Inlier  |
| siRNA-Temozolomide Run3-DMSO | NM_1721<br>73 | CAMK2G | calcium/calmodulin-dependent protein kinase (CaM kinase) II gamma | -7.673792 | Outlier |
| siRNA-Temozolomide Run2-DMSO | NM_1721<br>73 | CAMK2G | calcium/calmodulin-dependent protein kinase (CaM kinase) II gamma | -0.405876 | Inlier  |
| siRNA-Temozolomide Run1-DMSO | NM_1721<br>73 | CAMK2G | calcium/calmodulin-dependent protein kinase (CaM kinase) II gamma | -0.127983 | Inlier  |
| siRNA Disorazole DMSO Run2   | NM_1721<br>73 | CAMK2G | calcium/calmodulin-dependent protein kinase (CaM kinase) II gamma | -0.068636 | Inlier  |
| siRNA-Vinblastine Run1-DMSO  | NM_1721<br>73 | CAMK2G | calcium/calmodulin-dependent protein kinase (CaM kinase) II gamma | 0.068636  | Inlier  |

Identification of Survival Genes in Human Glioblastoma Cells Using siRNA Screening

Nikhil G Thaker, Fang Zhang, Peter R. McDonald, Tong Ying Shun, Michael D Lewen, Ian F. Pollack, and John S. Lazo

Molecular Pharmacology

| siRNA              | Condition | Run  | Gene   | Accession | Protein                                                           | Value     | Category |
|--------------------|-----------|------|--------|-----------|-------------------------------------------------------------------|-----------|----------|
| siRNA Disorazole   | DMSO      | Run3 | CAMK2G | NM_172173 | calcium/calmodulin-dependent protein kinase (CaM kinase) II gamma | 0.943124  | Inlier   |
| siRNA-Vinblastine  | Run2-DMSO |      | CAMK2G | NM_172173 | calcium/calmodulin-dependent protein kinase (CaM kinase) II gamma | 5.145699  | Outlier  |
| siRNA Disorazole   | DMSO      | Run1 | CAMK2G | NM_172173 | calcium/calmodulin-dependent protein kinase (CaM kinase) II gamma | 8.913084  | Outlier  |
| siRNA Disorazole   | DMSO      | Run3 | CAMK4  | NM_001744 | calcium/calmodulin-dependent protein kinase IV                    | -1.26315  | Inlier   |
| siRNA Disorazole   | DMSO      | Run2 | CAMK4  | NM_001744 | calcium/calmodulin-dependent protein kinase IV                    | -1.179184 | Inlier   |
| siRNA-Temozolomide | Run3-DMSO |      | CAMK4  | NM_001744 | calcium/calmodulin-dependent protein kinase IV                    | -0.66164  | Inlier   |
| siRNA-Temozolomide | Run2-DMSO |      | CAMK4  | NM_001744 | calcium/calmodulin-dependent protein kinase IV                    | -0.12656  | Inlier   |
| siRNA-Vinblastine  | Run1-DMSO |      | CAMK4  | NM_001744 | calcium/calmodulin-dependent protein kinase IV                    | 0.12656   | Inlier   |

Identification of Survival Genes in Human Glioblastoma Cells Using siRNA Screening

Nikhil G Thaker, Fang Zhang, Peter R. McDonald, Tong Ying Shun, Michael D Lewen, Ian F. Pollack, and John S. Lazo

Molecular Pharmacology

|                              |               |                |                                                |           |        |
|------------------------------|---------------|----------------|------------------------------------------------|-----------|--------|
| siRNA-Temozolomide Run1-DMSO | NM_0017<br>44 | CAMK4          | calcium/calmodulin-dependent protein kinase IV | 0.480228  | Inlier |
| siRNA Disorazole DMSO Run1   | NM_0017<br>44 | CAMK4          | calcium/calmodulin-dependent protein kinase IV | 0.68736   | Inlier |
| siRNA-Vinblastine Run2-DMSO  | NM_0017<br>44 | CAMK4          | calcium/calmodulin-dependent protein kinase IV | 1.646594  | Inlier |
| siRNA Disorazole DMSO Run2   | NM_0185<br>84 | CaMKIIINal pha | kinase II inhibitor 1                          | -0.741848 | Inlier |
| siRNA-Temozolomide Run3-DMSO | NM_0185<br>84 | CaMKIIINal pha | kinase II inhibitor 1                          | -0.626131 | Inlier |
| siRNA-Temozolomide Run2-DMSO | NM_0185<br>84 | CaMKIIINal pha | kinase II inhibitor 1                          | -0.379952 | Inlier |
| siRNA-Temozolomide Run1-DMSO | NM_0185<br>84 | CaMKIIINal pha | kinase II inhibitor 1                          | -0.168035 | Inlier |
| siRNA Disorazole DMSO Run3   | NM_0185<br>84 | CaMKIIINal pha | kinase II inhibitor 1                          | 0.168035  | Inlier |
| siRNA Disorazole DMSO Run1   | NM_0185<br>84 | CaMKIIINal pha | kinase II inhibitor 1                          | 0.722869  | Inlier |

Identification of Survival Genes in Human Glioblastoma Cells Using siRNA Screening

Nikhil G Thaker, Fang Zhang, Peter R. McDonald, Tong Ying Shun, Michael D Lewen, Ian F. Pollack, and John S. Lazo

Molecular Pharmacology

| siRNA Treatment              | Gene ID   | Gene Name      | Protein Description                                        | Log2 Fold Change | Outlier Status |
|------------------------------|-----------|----------------|------------------------------------------------------------|------------------|----------------|
| siRNA-Vinblastine Run2-DMSO  | NM_018584 | CaMKIIINal pha | calcium/calmodulin-dependent protein kinase II inhibitor 1 | 1.051057         | Inlier         |
| siRNA-Vinblastine Run1-DMSO  | NM_018584 | CaMKIIINal pha | calcium/calmodulin-dependent protein kinase II inhibitor 1 | 1.269762         | Inlier         |
| siRNA-Temozolomide Run3-DMSO | NM_032294 | CAMKK1         | calcium/calmodulin-dependent protein kinase 1, alpha       | -1.459514        | Inlier         |
| siRNA-Temozolomide Run1-DMSO | NM_032294 | CAMKK1         | calcium/calmodulin-dependent protein kinase 1, alpha       | -0.711583        | Inlier         |
| siRNA-Temozolomide Run2-DMSO | NM_032294 | CAMKK1         | calcium/calmodulin-dependent protein kinase 1, alpha       | -0.684279        | Inlier         |
| siRNA Disorazole DMSO Run2   | NM_032294 | CAMKK1         | calcium/calmodulin-dependent protein kinase 1, alpha       | -0.152021        | Inlier         |
| siRNA Disorazole DMSO Run1   | NM_032294 | CAMKK1         | calcium/calmodulin-dependent protein kinase 1, alpha       | 0.15202          | Inlier         |

Identification of Survival Genes in Human Glioblastoma Cells Using siRNA Screening

Nikhil G Thaker, Fang Zhang, Peter R. McDonald, Tong Ying Shun, Michael D Lewen, Ian F. Pollack, and John S. Lazo

Molecular Pharmacology

|                              |               |        |                                                      |           |        |
|------------------------------|---------------|--------|------------------------------------------------------|-----------|--------|
| siRNA-Vinblastine Run2-DMSO  | NM_0322<br>94 | CAMKK1 | calcium/calmodulin-dependent protein kinase 1, alpha | 0.506645  | Inlier |
| siRNA-Vinblastine Run1-DMSO  | NM_0322<br>94 | CAMKK1 | calcium/calmodulin-dependent protein kinase 1, alpha | 0.664721  | Inlier |
| siRNA Disorazole DMSO Run3   | NM_0322<br>94 | CAMKK1 | calcium/calmodulin-dependent protein kinase 1, alpha | 0.810606  | Inlier |
| siRNA-Temozolomide Run3-DMSO | NM_1722<br>26 | CAMKK2 | calcium/calmodulin-dependent protein kinase 2, beta  | -0.784378 | Inlier |
| siRNA-Temozolomide Run2-DMSO | NM_1722<br>26 | CAMKK2 | calcium/calmodulin-dependent protein kinase 2, beta  | -0.655667 | Inlier |
| siRNA-Temozolomide Run1-DMSO | NM_1722<br>26 | CAMKK2 | calcium/calmodulin-dependent protein kinase 2, beta  | -0.190215 | Inlier |
| siRNA Disorazole DMSO Run2   | NM_1722<br>26 | CAMKK2 | calcium/calmodulin-dependent protein kinase 2, beta  | -0.177046 | Inlier |



Identification of Survival Genes in Human Glioblastoma Cells Using siRNA Screening  
 Nikhil G Thaker, Fang Zhang, Peter R. McDonald, Tong Ying Shun, Michael D Lewen, Ian F. Pollack, and John S. Lazo

Molecular Pharmacology

|                              |               |        |                                                     |           |        |
|------------------------------|---------------|--------|-----------------------------------------------------|-----------|--------|
| siRNA Disorazole DMSO Run3   | NM_1722<br>26 | CAMKK2 | calcium/calmodulin-dependent protein kinase 2, beta | 0.177046  | Inlier |
| siRNA Disorazole DMSO Run1   | NM_1722<br>26 | CAMKK2 | calcium/calmodulin-dependent protein kinase 2, beta | 0.693333  | Inlier |
| siRNA-Vinblastine Run2-DMSO  | NM_1722<br>26 | CAMKK2 | calcium/calmodulin-dependent protein kinase 2, beta | 0.875535  | Inlier |
| siRNA-Vinblastine Run1-DMSO  | NM_1722<br>26 | CAMKK2 | calpain 1, (mu/l)                                   | 0.885505  | Inlier |
| siRNA-Temozolomide Run3-DMSO | NM_0051<br>86 | CAPN1  | large subunit calpain 1, (mu/l)                     | -1.613257 | Inlier |
| siRNA-Temozolomide Run2-DMSO | NM_0051<br>86 | CAPN1  | large subunit calpain 1, (mu/l)                     | -1.439735 | Inlier |
| siRNA-Temozolomide Run1-DMSO | NM_0051<br>86 | CAPN1  | large subunit calpain 1, (mu/l)                     | -0.431434 | Inlier |
| siRNA Disorazole DMSO Run2   | NM_0051<br>86 | CAPN1  | large subunit calpain 1, (mu/l)                     | -0.06429  | Inlier |
| siRNA Disorazole DMSO Run1   | NM_0051<br>86 | CAPN1  | large subunit calpain 1, (mu/l)                     | 0.06429   | Inlier |
| siRNA-Vinblastine Run1-DMSO  | NM_0051<br>86 | CAPN1  | large subunit                                       | 0.39416   | Inlier |

Identification of Survival Genes in Human Glioblastoma Cells Using siRNA Screening  
 Nikhil G Thaker, Fang Zhang, Peter R. McDonald, Tong Ying Shun, Michael D Lewen, Ian F. Pollack, and John S. Lazo

Molecular Pharmacology

| siRNA                        | Gene    | Gene ID | Gene Name | Value                           | Outlier          |
|------------------------------|---------|---------|-----------|---------------------------------|------------------|
| siRNA-Vinblastine Run2-DMSO  | NM_0051 | 86      | CAPN1     | calpain 1, (mu/l) large subunit | 0.917566 Inlier  |
| siRNA Disorazole DMSO Run3   | NM_0051 | 86      | CAPN1     | calpain 1, (mu/l) large subunit | 1.150763 Inlier  |
| siRNA-Temozolomide Run3-DMSO | NM_0230 | 87      | CAPN10    | calpain 10                      | -0.712019 Inlier |
| siRNA-Temozolomide Run2-DMSO | NM_0230 | 87      | CAPN10    | calpain 10                      | -0.665453 Inlier |
| siRNA-Temozolomide Run1-DMSO | NM_0230 | 87      | CAPN10    | calpain 10                      | -0.367892 Inlier |
| siRNA Disorazole DMSO Run2   | NM_0230 | 87      | CAPN10    | calpain 10                      | -0.094517 Inlier |
| siRNA Disorazole DMSO Run1   | NM_0230 | 87      | CAPN10    | calpain 10                      | 0.094517 Inlier  |
| siRNA-Vinblastine Run1-DMSO  | NM_0230 | 87      | CAPN10    | calpain 10                      | 0.683547 Inlier  |
| siRNA-Vinblastine Run2-DMSO  | NM_0230 | 87      | CAPN10    | calpain 10                      | 0.814683 Inlier  |
| siRNA Disorazole DMSO Run3   | NM_0230 | 87      | CAPN10    | calpain 10                      | 1.084358 Inlier  |
| siRNA-Temozolomide Run3-DMSO | NM_0070 | 58      | CAPN11    | calpain 11                      | -1.429764 Inlier |
| siRNA Disorazole DMSO Run2   | NM_0070 | 58      | CAPN11    | calpain 11                      | -1.214943 Inlier |
| siRNA-Temozolomide Run1-DMSO | NM_0070 | 58      | CAPN11    | calpain 11                      | -1.193132 Inlier |
| siRNA Disorazole DMSO Run1   | NM_0070 | 58      | CAPN11    | calpain 11                      | -0.018171 Inlier |
| siRNA-Temozolomide Run2-DMSO | NM_0070 | 58      | CAPN11    | calpain 11                      | 0.01817 Inlier   |
| siRNA-Vinblastine Run1-DMSO  | NM_0070 | 58      | CAPN11    | calpain 11                      | 0.652951 Inlier  |
| siRNA Disorazole DMSO Run3   | NM_0070 | 58      | CAPN11    | calpain 11                      | 0.669534 Inlier  |
| siRNA-Vinblastine Run2-DMSO  | NM_0070 | 58      | CAPN11    | calpain 11                      | 0.679466 Inlier  |
| siRNA-Temozolomide Run3-DMSO | NM_1446 | 91      | CAPN12    | calpain 12                      | -1.56642 Inlier  |
| siRNA Disorazole DMSO Run1   | NM_1446 | 91      | CAPN12    | calpain 12                      | -1.494807 Inlier |
| siRNA-Vinblastine Run1-DMSO  | NM_1446 | 91      | CAPN12    | calpain 12                      | -0.961648 Inlier |
| siRNA-Vinblastine Run2-DMSO  | NM_1446 | 91      | CAPN12    | calpain 12                      | -0.151596 Inlier |
| siRNA-Temozolomide Run2-DMSO | NM_1446 | 91      | CAPN12    | calpain 12                      | 0.151596 Inlier  |
| siRNA-Temozolomide Run1-DMSO | NM_1446 | 91      | CAPN12    | calpain 12                      | 0.200047 Inlier  |

Identification of Survival Genes in Human Glioblastoma Cells Using siRNA Screening

Nikhil G Thaker, Fang Zhang, Peter R. McDonald, Tong Ying Shun, Michael D Lewen, Ian F. Pollack, and John S. Lazo

|                              |         |        |                                 |           |         |
|------------------------------|---------|--------|---------------------------------|-----------|---------|
| Molecular Pharmacology       | NM_1446 |        |                                 |           |         |
| siRNA Disorazole DMSO Run2   | 91      | CAPN12 | calpain 12                      | 0.387352  | Inlier  |
|                              | NM_1446 |        |                                 |           |         |
| siRNA Disorazole DMSO Run3   | 91      | CAPN12 | calpain 12                      | 3.252222  | Inlier  |
| siRNA-Temozolomide Run3-DMSO | NM_1445 |        |                                 |           |         |
|                              | 75      | CAPN13 | calpain 13                      | -2.153339 | Inlier  |
| siRNA-Temozolomide Run1-DMSO | NM_1445 |        |                                 |           |         |
|                              | 75      | CAPN13 | calpain 13                      | -0.664875 | Inlier  |
| siRNA-Temozolomide Run2-DMSO | NM_1445 |        |                                 |           |         |
|                              | 75      | CAPN13 | calpain 13                      | -0.452761 | Inlier  |
|                              | NM_1445 |        |                                 |           |         |
| siRNA Disorazole DMSO Run2   | 75      | CAPN13 | calpain 13                      | -0.030657 | Inlier  |
|                              | NM_1445 |        |                                 |           |         |
| siRNA Disorazole DMSO Run1   | 75      | CAPN13 | calpain 13                      | 0.030657  | Inlier  |
| siRNA-Vinblastine Run1-DMSO  | NM_1445 |        |                                 |           |         |
|                              | 75      | CAPN13 | calpain 13                      | 0.684125  | Inlier  |
|                              | NM_1445 |        |                                 |           |         |
| siRNA Disorazole DMSO Run3   | 75      | CAPN13 | calpain 13                      | 0.820933  | Inlier  |
| siRNA-Vinblastine Run2-DMSO  | NM_1445 |        |                                 |           |         |
|                              | 75      | CAPN13 | calpain 13                      | 1.514407  | Inlier  |
|                              |         |        | calpain 2, (m/II) large subunit |           |         |
| siRNA Disorazole DMSO Run1   | NM_0017 | CAPN2  |                                 | -0.857458 | Inlier  |
|                              | 48      |        |                                 |           |         |
|                              |         |        | calpain 2, (m/II) large subunit |           |         |
| siRNA-Vinblastine Run2-DMSO  | NM_0017 | CAPN2  |                                 | -0.502681 | Inlier  |
|                              | 48      |        |                                 |           |         |
|                              |         |        | calpain 2, (m/II) large subunit |           |         |
| siRNA-Vinblastine Run1-DMSO  | NM_0017 | CAPN2  |                                 | -0.370145 | Inlier  |
|                              | 48      |        |                                 |           |         |
|                              |         |        | calpain 2, (m/II) large subunit |           |         |
| siRNA-Temozolomide Run3-DMSO | NM_0017 | CAPN2  |                                 | -0.036678 | Inlier  |
|                              | 48      |        |                                 |           |         |
|                              |         |        | calpain 2, (m/II) large subunit |           |         |
| siRNA-Temozolomide Run2-DMSO | NM_0017 | CAPN2  |                                 | 0.036677  | Inlier  |
|                              | 48      |        |                                 |           |         |
|                              |         |        | calpain 2, (m/II) large subunit |           |         |
| siRNA-Temozolomide Run1-DMSO | NM_0017 | CAPN2  |                                 | 0.846319  | Inlier  |
|                              | 48      |        |                                 |           |         |
|                              |         |        | calpain 2, (m/II) large subunit |           |         |
| siRNA Disorazole DMSO Run2   | NM_0017 | CAPN2  |                                 | 2.66273   | Inlier  |
|                              | 48      |        |                                 |           |         |
|                              |         |        | calpain 2, (m/II) large subunit |           |         |
| siRNA Disorazole DMSO Run3   | NM_0017 | CAPN2  |                                 | 4.963382  | Outlier |
|                              | 48      |        |                                 |           |         |

Identification of Survival Genes in Human Glioblastoma Cells Using siRNA Screening

Nikhil G Thaker, Fang Zhang, Peter R. McDonald, Tong Ying Shun, Michael D Lewen, Ian F. Pollack, and John S.

Lazo

|                                  |               |       |                     |           |         |
|----------------------------------|---------------|-------|---------------------|-----------|---------|
| siRNA-Temozolomide Run3-<br>DMSO | NM_2124<br>64 | CAPN3 | calpain 3,<br>(p94) | -0.824359 | Inlier  |
| siRNA Disorazole DMSO Run2       | NM_2124<br>64 | CAPN3 | calpain 3,<br>(p94) | -0.524641 | Inlier  |
| siRNA Disorazole DMSO Run3       | NM_2124<br>64 | CAPN3 | calpain 3,<br>(p94) | -0.224747 | Inlier  |
| siRNA-Temozolomide Run1-<br>DMSO | NM_2124<br>64 | CAPN3 | calpain 3,<br>(p94) | -0.080929 | Inlier  |
| siRNA-Temozolomide Run2-<br>DMSO | NM_2124<br>64 | CAPN3 | calpain 3,<br>(p94) | 0.080928  | Inlier  |
| siRNA Disorazole DMSO Run1       | NM_2124<br>64 | CAPN3 | calpain 3,<br>(p94) | 3.235554  | Inlier  |
| siRNA-Vinblastine Run1-<br>DMSO  | NM_2124<br>64 | CAPN3 | calpain 3,<br>(p94) | 5.943148  | Outlier |
| siRNA-Vinblastine Run2-<br>DMSO  | NM_2124<br>64 | CAPN3 | calpain 3,<br>(p94) | 8.238629  | Outlier |
| siRNA-Temozolomide Run3-<br>DMSO | NM_0040<br>55 | CAPN5 | calpain 5           | -1.507614 | Inlier  |
| siRNA Disorazole DMSO Run2       | NM_0040<br>55 | CAPN5 | calpain 5           | -1.501692 | Inlier  |
| siRNA-Temozolomide Run2-<br>DMSO | NM_0040<br>55 | CAPN5 | calpain 5           | -0.390524 | Inlier  |
| siRNA Disorazole DMSO Run1       | NM_0040<br>55 | CAPN5 | calpain 5           | -0.048827 | Inlier  |
| siRNA-Temozolomide Run1-<br>DMSO | NM_0040<br>55 | CAPN5 | calpain 5           | 0.048827  | Inlier  |
| siRNA-Vinblastine Run1-<br>DMSO  | NM_0040<br>55 | CAPN5 | calpain 5           | 0.535182  | Inlier  |
| siRNA Disorazole DMSO Run3       | NM_0040<br>55 | CAPN5 | calpain 5           | 0.813818  | Inlier  |
| siRNA-Vinblastine Run2-<br>DMSO  | NM_0142<br>89 | CAPN6 | calpain 6           | 1.53128   | Inlier  |
| siRNA Disorazole DMSO Run1       | NM_0142<br>89 | CAPN6 | calpain 6           | -0.908689 | Inlier  |
| siRNA-Temozolomide Run1-<br>DMSO | NM_0142<br>89 | CAPN6 | calpain 6           | -0.770278 | Inlier  |
| siRNA-Vinblastine Run1-<br>DMSO  | NM_0142<br>89 | CAPN6 | calpain 6           | -0.473154 | Inlier  |
| siRNA-Temozolomide Run3-<br>DMSO | NM_0142<br>89 | CAPN6 | calpain 6           | -0.129829 | Inlier  |
| siRNA-Temozolomide Run2-<br>DMSO | NM_0142<br>89 | CAPN6 | calpain 6           | 0.129829  | Inlier  |
| siRNA Disorazole DMSO Run2       | NM_0142<br>89 | CAPN6 | calpain 6           | 0.643544  | Inlier  |
| siRNA-Vinblastine Run2-<br>DMSO  | NM_0142<br>89 | CAPN6 | calpain 6           | 0.705456  | Inlier  |
| siRNA Disorazole DMSO Run3       | NM_0142<br>89 | CAPN6 | calpain 6           | 1.901554  | Inlier  |
| siRNA-Temozolomide Run3-<br>DMSO | NM_0142<br>96 | CAPN7 | calpain 7           | -1.281019 | Inlier  |
| siRNA-Temozolomide Run2-<br>DMSO | NM_0142<br>96 | CAPN7 | calpain 7           | -0.75739  | Inlier  |

Identification of Survival Genes in Human Glioblastoma Cells Using siRNA Screening  
 Nikhil G Thaker, Fang Zhang, Peter R. McDonald, Tong Ying Shun, Michael D Lewen, Ian F. Pollack, and John S. Lazo

| siRNA-Temozolomide Run1-<br>DMSO | NM_0142<br>96    | CAPN7  | calpain 7         | -0.389967 | Inlier |
|----------------------------------|------------------|--------|-------------------|-----------|--------|
|                                  | NM_0142          |        |                   |           |        |
| siRNA Disorazole DMSO Run1       | 96               | CAPN7  | calpain 7         | -0.293747 | Inlier |
|                                  | NM_0142          |        |                   |           |        |
| siRNA Disorazole DMSO Run2       | 96               | CAPN7  | calpain 7         | 0.293747  | Inlier |
| siRNA-Vinblastine Run1-<br>DMSO  | NM_0142<br>96    | CAPN7  | calpain 7         | 0.59161   | Inlier |
|                                  | NM_0142          |        |                   |           |        |
| siRNA Disorazole DMSO Run3       | 96               | CAPN7  | calpain 7         | 0.947246  | Inlier |
| siRNA-Vinblastine Run2-<br>DMSO  | NM_0142<br>96    | CAPN7  | calpain 7         | 1.225011  | Inlier |
| siRNA-Temozolomide Run3-<br>DMSO | NM_0164<br>52    | CAPN9  | calpain 9         | -0.950469 | Inlier |
|                                  | NM_0164          |        |                   |           |        |
| siRNA Disorazole DMSO Run2       | 52               | CAPN9  | calpain 9         | -0.815104 | Inlier |
|                                  | NM_0164          |        |                   |           |        |
| siRNA Disorazole DMSO Run3       | 52               | CAPN9  | calpain 9         | -0.533896 | Inlier |
| siRNA-Temozolomide Run1-<br>DMSO | NM_0164<br>52    | CAPN9  | calpain 9         | -0.178439 | Inlier |
|                                  | NM_0164          |        |                   |           |        |
| siRNA Disorazole DMSO Run1       | 52               | CAPN9  | calpain 9         | 0.178439  | Inlier |
| siRNA-Temozolomide Run2-<br>DMSO | NM_0164<br>52    | CAPN9  | calpain 9         | 0.442142  | Inlier |
| siRNA-Vinblastine Run1-<br>DMSO  | NM_0164<br>52    | CAPN9  | calpain 9         | 0.859116  | Inlier |
| siRNA-Vinblastine Run2-<br>DMSO  | NM_0164<br>52    | CAPN9  | calpain 9         | 0.947269  | Inlier |
|                                  |                  |        | calpain,<br>small |           |        |
| siRNA-Temozolomide Run3-<br>DMSO | NM_0010<br>03962 | CAPNS1 | subunit 1         | -1.067806 | Inlier |
|                                  | NM_0010          |        | calpain,<br>small |           |        |
| siRNA Disorazole DMSO Run2       | 03962            | CAPNS1 | subunit 1         | -1.011561 | Inlier |
|                                  | NM_0010          |        | calpain,<br>small |           |        |
| siRNA Disorazole DMSO Run3       | 03962            | CAPNS1 | subunit 1         | -0.284961 | Inlier |
|                                  |                  |        | calpain,<br>small |           |        |
| siRNA-Temozolomide Run2-<br>DMSO | NM_0010<br>03962 | CAPNS1 | subunit 1         | -0.080954 | Inlier |
|                                  |                  |        | calpain,<br>small |           |        |
| siRNA-Temozolomide Run1-<br>DMSO | NM_0010<br>03962 | CAPNS1 | subunit 1         | 0.080954  | Inlier |
|                                  |                  |        | calpain,<br>small |           |        |
| siRNA Disorazole DMSO Run1       | 03962            | CAPNS1 | subunit 1         | 0.337439  | Inlier |
|                                  |                  |        | calpain,<br>small |           |        |
| siRNA-Vinblastine Run1-<br>DMSO  | NM_0010<br>03962 | CAPNS1 | subunit 1         | 1.69121   | Inlier |
|                                  |                  |        | calpain,<br>small |           |        |
| siRNA-Vinblastine Run2-<br>DMSO  | NM_0010<br>03962 | CAPNS1 | subunit 1         | 2.676423  | Inlier |
|                                  |                  |        | calpain,<br>small |           |        |

Identification of Survival Genes in Human Glioblastoma Cells Using siRNA Screening  
 Nikhil G Thaker, Fang Zhang, Peter R. McDonald, Tong Ying Shun, Michael D Lewen, Ian F. Pollack, and John S. Lazo

| Molecular Pharmacology           |               |        |  | calpain,<br>small<br>subunit 2                               |                  |
|----------------------------------|---------------|--------|--|--------------------------------------------------------------|------------------|
| siRNA-Temozolomide Run1-<br>DMSO | NM_0323<br>30 | CAPNS2 |  |                                                              | -0.716225 Inlier |
| siRNA-Vinblastine Run1-<br>DMSO  | NM_0323<br>30 | CAPNS2 |  | calpain,<br>small<br>subunit 2                               | -0.632775 Inlier |
| siRNA Disorazole DMSO Run1       | NM_0323<br>30 | CAPNS2 |  | calpain,<br>small<br>subunit 2                               | -0.594937 Inlier |
| siRNA Disorazole DMSO Run2       | NM_0323<br>30 | CAPNS2 |  | calpain,<br>small<br>subunit 2                               | -0.222874 Inlier |
| siRNA-Temozolomide Run2-<br>DMSO | NM_0323<br>30 | CAPNS2 |  | calpain,<br>small<br>subunit 2                               | 0.222875 Inlier  |
| siRNA-Temozolomide Run3-<br>DMSO | NM_0323<br>30 | CAPNS2 |  | calpain,<br>small<br>subunit 2                               | 0.757321 Inlier  |
| siRNA-Vinblastine Run2-<br>DMSO  | NM_0323<br>30 | CAPNS2 |  | calpain,<br>small<br>subunit 2                               | 1.249699 Inlier  |
| siRNA Disorazole DMSO Run3       | NM_0323<br>30 | CAPNS2 |  | calpain,<br>small<br>subunit 2                               | 4.438972 Outlier |
| siRNA-Temozolomide Run3-<br>DMSO | NM_0145<br>50 | CARD10 |  | caspace<br>recruitmen<br>t domain<br>family,<br>member<br>10 | -1.991456 Inlier |
| siRNA Disorazole DMSO Run1       | NM_0145<br>50 | CARD10 |  | caspace<br>recruitmen<br>t domain<br>family,<br>member<br>10 | -1.003449 Inlier |
| siRNA-Temozolomide Run1-<br>DMSO | NM_0145<br>50 | CARD10 |  | caspace<br>recruitmen<br>t domain<br>family,<br>member<br>10 | -0.34074 Inlier  |
| siRNA-Temozolomide Run2-<br>DMSO | NM_0145<br>50 | CARD10 |  | caspace<br>recruitmen<br>t domain<br>family,<br>member<br>10 | -0.278477 Inlier |

Identification of Survival Genes in Human Glioblastoma Cells Using siRNA Screening  
 Nikhil G Thaker, Fang Zhang, Peter R. McDonald, Tong Ying Shun, Michael D Lewen, Ian F. Pollack, and John S. Lazo

Molecular Pharmacology

| siRNA Treatment              | Gene    | Gene ID | Gene Family | Gene ID | Value     | Category |
|------------------------------|---------|---------|-------------|---------|-----------|----------|
| siRNA Disorazole DMSO Run2   | NM_0145 | 50      | CARD10      | 10      | 0.278479  | Inlier   |
| siRNA-Vinblastine Run2-DMSO  | NM_0145 | 50      | CARD10      | 10      | 0.345551  | Inlier   |
| siRNA-Vinblastine Run1-DMSO  | NM_0145 | 50      | CARD10      | 10      | 1.01891   | Inlier   |
| siRNA Disorazole DMSO Run3   | NM_0145 | 50      | CARD10      | 10      | 3.625697  | Outlier  |
| siRNA-Temozolomide Run3-DMSO | NM_0324 | 15      | CARD11      | 11      | -1.670239 | Inlier   |
| siRNA-Temozolomide Run2-DMSO | NM_0324 | 15      | CARD11      | 11      | -0.634252 | Inlier   |
| siRNA Disorazole DMSO Run3   | NM_0324 | 15      | CARD11      | 11      | -0.182111 | Inlier   |
| siRNA-Temozolomide Run1-DMSO | NM_0324 | 15      | CARD11      | 11      | -0.149032 | Inlier   |

Identification of Survival Genes in Human Glioblastoma Cells Using siRNA Screening  
 Nikhil G Thaker, Fang Zhang, Peter R. McDonald, Tong Ying Shun, Michael D Lewen, Ian F. Pollack, and John S. Lazo

Molecular Pharmacology

| siRNA Treatment              | Gene    | Accession | Gene ID | Family | Score     | Outlier |
|------------------------------|---------|-----------|---------|--------|-----------|---------|
| siRNA Disorazole DMSO Run1   | NM_0324 | 15        | CARD11  | 11     | 0.149032  | Inlier  |
| siRNA Disorazole DMSO Run2   | NM_0324 | 15        | CARD11  | 11     | 0.714748  | Inlier  |
| siRNA-Vinblastine Run2-DMSO  | NM_0324 | 15        | CARD11  | 11     | 1.875004  | Inlier  |
| siRNA-Vinblastine Run1-DMSO  | NM_0324 | 15        | CARD11  | 11     | 2.245303  | Inlier  |
| siRNA-Temozolomide Run3-DMSO | NM_0212 | 09        | CARD12  | 12     | -1.607736 | Inlier  |
| siRNA Disorazole DMSO Run2   | NM_0212 | 09        | CARD12  | 12     | -0.329396 | Inlier  |
| siRNA-Temozolomide Run1-DMSO | NM_0212 | 09        | CARD12  | 12     | -0.16368  | Inlier  |
| siRNA Disorazole DMSO Run1   | NM_0212 | 09        | CARD12  | 12     | -0.143777 | Inlier  |



Identification of Survival Genes in Human Glioblastoma Cells Using siRNA Screening  
 Nikhil G Thaker, Fang Zhang, Peter R. McDonald, Tong Ying Shun, Michael D Lewen, Ian F. Pollack, and John S. Lazo

Molecular Pharmacology

| siRNA Treatment              | Gene ID   | Gene Name | Family                             | Member | Value     | Outlier |
|------------------------------|-----------|-----------|------------------------------------|--------|-----------|---------|
| siRNA-Temozolomide Run2-DMSO | NM_021209 | CARD12    | caspase recruitment domain family, | 12     | 0.143777  | Inlier  |
| siRNA Disorazole DMSO Run3   | NM_021209 | CARD12    | caspase recruitment domain family, | 12     | 1.019603  | Inlier  |
| siRNA-Vinblastine Run1-DMSO  | NM_021209 | CARD12    | caspase recruitment domain family, | 12     | 1.172457  | Inlier  |
| siRNA-Vinblastine Run2-DMSO  | NM_021209 | CARD12    | caspase recruitment domain family, | 12     | 1.214829  | Inlier  |
| siRNA-Temozolomide Run3-DMSO | NM_052819 | CARD14    | caspase recruitment domain family, | 14     | -0.770648 | Inlier  |
| siRNA Disorazole DMSO Run2   | NM_052819 | CARD14    | caspase recruitment domain family, | 14     | -0.578352 | Inlier  |
| siRNA Disorazole DMSO Run1   | NM_052819 | CARD14    | caspase recruitment domain family, | 14     | -0.470056 | Inlier  |
| siRNA-Temozolomide Run2-DMSO | NM_052819 | CARD14    | caspase recruitment domain family, | 14     | -0.128548 | Inlier  |

Identification of Survival Genes in Human Glioblastoma Cells Using siRNA Screening  
 Nikhil G Thaker, Fang Zhang, Peter R. McDonald, Tong Ying Shun, Michael D Lewen, Ian F. Pollack, and John S. Lazo

Molecular Pharmacology

| siRNA Treatment              | Gene      | Accession | Gene ID | Family                                    | Value     | Outlier |
|------------------------------|-----------|-----------|---------|-------------------------------------------|-----------|---------|
| siRNA-Temozolomide Run1-DMSO | NM_052819 | CARD14    | 14      | caspase recruitment domain family, member | 0.128548  | Inlier  |
| siRNA-Vinblastine Run1-DMSO  | NM_052819 | CARD14    | 14      | caspase recruitment domain family, member | 0.83938   | Inlier  |
| siRNA-Vinblastine Run2-DMSO  | NM_052819 | CARD14    | 14      | caspase recruitment domain family, member | 1.064252  | Inlier  |
| siRNA Disorazole DMSO Run3   | NM_052819 | CARD14    | 14      | caspase recruitment domain family, member | 1.982378  | Inlier  |
| siRNA-Temozolomide Run3-DMSO | NM_022162 | CARD15    | 15      | caspase recruitment domain family, member | -1.096436 | Inlier  |
| siRNA Disorazole DMSO Run2   | NM_022162 | CARD15    | 15      | caspase recruitment domain family, member | -0.738223 | Inlier  |
| siRNA Disorazole DMSO Run3   | NM_022162 | CARD15    | 15      | caspase recruitment domain family, member | -0.610777 | Inlier  |
| siRNA-Temozolomide Run2-DMSO | NM_022162 | CARD15    | 15      | caspase recruitment domain family, member | -0.099251 | Inlier  |

Identification of Survival Genes in Human Glioblastoma Cells Using siRNA Screening  
 Nikhil G Thaker, Fang Zhang, Peter R. McDonald, Tong Ying Shun, Michael D Lewen, Ian F. Pollack, and John S. Lazo

Molecular Pharmacology

| siRNA Treatment              | Gene ID   | Gene Name | Family                                       | Value     | Category |
|------------------------------|-----------|-----------|----------------------------------------------|-----------|----------|
| siRNA-Temozolomide Run1-DMSO | NM_022162 | CARD15    | caspase recruitment domain family, member 15 | 0.099251  | Inlier   |
| siRNA Disorazole DMSO Run1   | NM_022162 | CARD15    | caspase recruitment domain family, member 15 | 0.297492  | Inlier   |
| siRNA-Vinblastine Run2-DMSO  | NM_022162 | CARD15    | caspase recruitment domain family, member 15 | 0.874567  | Inlier   |
| siRNA-Vinblastine Run1-DMSO  | NM_022162 | CARD15    | caspase recruitment domain family, member 15 | 0.993703  | Inlier   |
| siRNA-Temozolomide Run3-DMSO | NM_006092 | CARD4     | caspase recruitment domain family, member 4  | -2.268928 | Inlier   |
| siRNA-Temozolomide Run2-DMSO | NM_006092 | CARD4     | caspase recruitment domain family, member 4  | -1.452063 | Inlier   |
| siRNA Disorazole DMSO Run1   | NM_006092 | CARD4     | caspase recruitment domain family, member 4  | -0.500281 | Inlier   |
| siRNA-Temozolomide Run1-DMSO | NM_006092 | CARD4     | caspase recruitment domain family, member 4  | -0.311989 | Inlier   |
| siRNA-Vinblastine Run1-DMSO  | NM_006092 | CARD4     | caspase recruitment domain family, member 4  | 0.311988  | Inlier   |

Identification of Survival Genes in Human Glioblastoma Cells Using siRNA Screening  
 Nikhil G Thaker, Fang Zhang, Peter R. McDonald, Tong Ying Shun, Michael D Lewen, Ian F. Pollack, and John S. Lazo

Molecular Pharmacology

|                              |               |       |                                                          |           |        |
|------------------------------|---------------|-------|----------------------------------------------------------|-----------|--------|
| siRNA-Vinblastine Run2-DMSO  | NM_0060<br>92 | CARD4 | caspase<br>recruitmen<br>t domain<br>family,<br>member 4 | 0.590529  | Inlier |
| siRNA Disorazole DMSO Run2   | NM_0060<br>92 | CARD4 | caspase<br>recruitmen<br>t domain<br>family,<br>member 4 | 0.758471  | Inlier |
| siRNA Disorazole DMSO Run3   | NM_0060<br>92 | CARD4 | caspase<br>recruitmen<br>t domain<br>family,<br>member 4 | 2.48131   | Inlier |
| siRNA-Temozolomide Run3-DMSO | NM_0325<br>87 | CARD6 | caspase<br>recruitmen<br>t domain<br>family,<br>member 6 | -1.422359 | Inlier |
| siRNA Disorazole DMSO Run1   | NM_0325<br>87 | CARD6 | caspase<br>recruitmen<br>t domain<br>family,<br>member 6 | -0.760847 | Inlier |
| siRNA Disorazole DMSO Run2   | NM_0325<br>87 | CARD6 | caspase<br>recruitmen<br>t domain<br>family,<br>member 6 | -0.669001 | Inlier |
| siRNA-Vinblastine Run1-DMSO  | NM_0325<br>87 | CARD6 | caspase<br>recruitmen<br>t domain<br>family,<br>member 6 | -0.01833  | Inlier |
| siRNA-Temozolomide Run2-DMSO | NM_0325<br>87 | CARD6 | caspase<br>recruitmen<br>t domain<br>family,<br>member 6 | 0.018331  | Inlier |
| siRNA-Vinblastine Run2-DMSO  | NM_0325<br>87 | CARD6 | caspase<br>recruitmen<br>t domain<br>family,<br>member 6 | 0.377595  | Inlier |
| siRNA-Temozolomide Run1-DMSO | NM_0325<br>87 | CARD6 | caspase<br>recruitmen<br>t domain<br>family,<br>member 6 | 0.679999  | Inlier |

Identification of Survival Genes in Human Glioblastoma Cells Using siRNA Screening  
 Nikhil G Thaker, Fang Zhang, Peter R. McDonald, Tong Ying Shun, Michael D Lewen, Ian F. Pollack, and John S. Lazo

Molecular Pharmacology

|                                  |               |       |                                                          |           |        |
|----------------------------------|---------------|-------|----------------------------------------------------------|-----------|--------|
| siRNA Disorazole DMSO Run3       | NM_0325<br>87 | CARD6 | caspase<br>recruitmen<br>t domain<br>family,<br>member 6 | 1.73414   | Inlier |
| siRNA-Temozolomide Run3-<br>DMSO | NM_0149<br>59 | CARD8 | caspase<br>recruitmen<br>t domain<br>family,<br>member 8 | -0.833443 | Inlier |
| siRNA Disorazole DMSO Run2       | NM_0149<br>59 | CARD8 | caspase<br>recruitmen<br>t domain<br>family,<br>member 8 | -0.828752 | Inlier |
| siRNA-Temozolomide Run2-<br>DMSO | NM_0149<br>59 | CARD8 | caspase<br>recruitmen<br>t domain<br>family,<br>member 8 | -0.520248 | Inlier |
| siRNA Disorazole DMSO Run3       | NM_0149<br>59 | CARD8 | caspase<br>recruitmen<br>t domain<br>family,<br>member 8 | -0.227799 | Inlier |
| siRNA-Temozolomide Run1-<br>DMSO | NM_0149<br>59 | CARD8 | caspase<br>recruitmen<br>t domain<br>family,<br>member 8 | 0.227799  | Inlier |
| siRNA Disorazole DMSO Run1       | NM_0149<br>59 | CARD8 | caspase<br>recruitmen<br>t domain<br>family,<br>member 8 | 0.316941  | Inlier |
| siRNA-Vinblastine Run1-<br>DMSO  | NM_0149<br>59 | CARD8 | caspase<br>recruitmen<br>t domain<br>family,<br>member 8 | 0.872344  | Inlier |
| siRNA-Vinblastine Run2-<br>DMSO  | NM_0149<br>59 | CARD8 | caspase<br>recruitmen<br>t domain<br>family,<br>member 8 | 1.526538  | Inlier |
| siRNA-Temozolomide Run3-<br>DMSO | NM_0528<br>13 | CARD9 | caspase<br>recruitmen<br>t domain<br>family,<br>member 9 | -2.147934 | Inlier |

Identification of Survival Genes in Human Glioblastoma Cells Using siRNA Screening  
 Nikhil G Thaker, Fang Zhang, Peter R. McDonald, Tong Ying Shun, Michael D Lewen, Ian F. Pollack, and John S. Lazo

Molecular Pharmacology

|                                  |               |       |                                                          |           |         |
|----------------------------------|---------------|-------|----------------------------------------------------------|-----------|---------|
| siRNA Disorazole DMSO Run2       | NM_0528<br>13 | CARD9 | caspase<br>recruitmen<br>t domain<br>family,<br>member 9 | -0.80116  | Inlier  |
| siRNA-Temozolomide Run2-<br>DMSO | NM_0528<br>13 | CARD9 | caspase<br>recruitmen<br>t domain<br>family,<br>member 9 | -0.54784  | Inlier  |
| siRNA Disorazole DMSO Run1       | NM_0528<br>13 | CARD9 | caspase<br>recruitmen<br>t domain<br>family,<br>member 9 | -0.074477 | Inlier  |
| siRNA-Temozolomide Run1-<br>DMSO | NM_0528<br>13 | CARD9 | caspase<br>recruitmen<br>t domain<br>family,<br>member 9 | 0.074477  | Inlier  |
| siRNA-Vinblastine Run2-<br>DMSO  | NM_0528<br>13 | CARD9 | caspase<br>recruitmen<br>t domain<br>family,<br>member 9 | 0.366101  | Inlier  |
| siRNA-Vinblastine Run1-<br>DMSO  | NM_0528<br>13 | CARD9 | caspase<br>recruitmen<br>t domain<br>family,<br>member 9 | 1.840858  | Inlier  |
| siRNA Disorazole DMSO Run3       | NM_0528<br>13 | CARD9 | caspase<br>recruitmen<br>t domain<br>family,<br>member 9 | 4.651895  | Outlier |
| siRNA Disorazole DMSO Run2       | NM_0132<br>76 | CARKL | carbohydr<br>ate kinase-<br>like                         | -0.937578 | Inlier  |
| siRNA-Temozolomide Run3-<br>DMSO | NM_0132<br>76 | CARKL | carbohydr<br>ate kinase-<br>like                         | -0.772478 | Inlier  |
| siRNA-Temozolomide Run2-<br>DMSO | NM_0132<br>76 | CARKL | carbohydr<br>ate kinase-<br>like                         | -0.379568 | Inlier  |
| siRNA Disorazole DMSO Run3       | NM_0132<br>76 | CARKL | carbohydr<br>ate kinase-<br>like                         | -0.075672 | Inlier  |

Identification of Survival Genes in Human Glioblastoma Cells Using siRNA Screening  
 Nikhil G Thaker, Fang Zhang, Peter R. McDonald, Tong Ying Shun, Michael D Lewen, Ian F. Pollack, and John S. Lazo

Molecular Pharmacology

|                              |               |       |                                                     |           |        |
|------------------------------|---------------|-------|-----------------------------------------------------|-----------|--------|
| siRNA-Temozolomide Run1-DMSO | NM_0132<br>76 | CARKL | carbohydrate kinase-like                            | 0.075673  | Inlier |
| siRNA Disorazole DMSO Run1   | NM_0132<br>76 | CARKL | carbohydrate kinase-like                            | 0.576522  | Inlier |
| siRNA-Vinblastine Run1-DMSO  | NM_0132<br>76 | CARKL | carbohydrate kinase-like                            | 0.950576  | Inlier |
| siRNA-Vinblastine Run2-DMSO  | NM_0132<br>76 | CARKL | carbohydrate kinase-like                            | 0.965167  | Inlier |
| siRNA Disorazole DMSO Run3   | NM_1991<br>41 | CARM1 | coactivator-associated arginine methyltransferase 1 | -0.712321 | Inlier |
| siRNA Disorazole DMSO Run1   | NM_1991<br>41 | CARM1 | coactivator-associated arginine methyltransferase 1 | -0.710292 | Inlier |
| siRNA-Vinblastine Run2-DMSO  | NM_1991<br>41 | CARM1 | coactivator-associated arginine methyltransferase 1 | -0.638708 | Inlier |
| siRNA-Temozolomide Run2-DMSO | NM_1991<br>41 | CARM1 | coactivator-associated arginine methyltransferase 1 | -0.14494  | Inlier |
| siRNA-Temozolomide Run1-DMSO | NM_1991<br>41 | CARM1 | coactivator-associated arginine methyltransferase 1 | 0.14494   | Inlier |

Identification of Survival Genes in Human Glioblastoma Cells Using siRNA Screening  
 Nikhil G Thaker, Fang Zhang, Peter R. McDonald, Tong Ying Shun, Michael D Lewen, Ian F. Pollack, and John S. Lazo  
 Molecular Pharmacology

|                              |               |       |                                                     |           |         |
|------------------------------|---------------|-------|-----------------------------------------------------|-----------|---------|
| siRNA-Temozolomide Run3-DMSO | NM_1991<br>41 | CARM1 | coactivator-associated arginine methyltransferase 1 | 0.16373   | Inlier  |
| siRNA-Vinblastine Run1-DMSO  | NM_1991<br>41 | CARM1 | coactivator-associated arginine methyltransferase 1 | 4.627418  | Outlier |
| siRNA Disorazole DMSO Run2   | NM_1991<br>41 | CARM1 | coactivator-associated arginine methyltransferase 1 | 4.945794  | Outlier |
| siRNA-Temozolomide Run2-DMSO | NM_0017<br>51 | CARS  | cysteinyl-tRNA synthetase                           | -0.98608  | Inlier  |
| siRNA Disorazole DMSO Run1   | NM_0017<br>51 | CARS  | cysteinyl-tRNA synthetase                           | -0.926538 | Inlier  |
| siRNA-Vinblastine Run2-DMSO  | NM_0017<br>51 | CARS  | cysteinyl-tRNA synthetase                           | -0.422462 | Inlier  |
| siRNA-Temozolomide Run1-DMSO | NM_0017<br>51 | CARS  | cysteinyl-tRNA synthetase                           | -0.141766 | Inlier  |
| siRNA Disorazole DMSO Run3   | NM_0017<br>51 | CARS  | cysteinyl-tRNA synthetase                           | 0.141766  | Inlier  |
| siRNA-Temozolomide Run3-DMSO | NM_0017<br>51 | CARS  | cysteinyl-tRNA synthetase                           | 0.389148  | Inlier  |
| siRNA Disorazole DMSO Run2   | NM_0017<br>51 | CARS  | cysteinyl-tRNA synthetase                           | 2.282707  | Inlier  |



Identification of Survival Genes in Human Glioblastoma Cells Using siRNA Screening  
 Nikhil G Thaker, Fang Zhang, Peter R. McDonald, Tong Ying Shun, Michael D Lewen, Ian F. Pollack, and John S. Lazo

Molecular Pharmacology

|                              |               |      |                                                                   |           |        |
|------------------------------|---------------|------|-------------------------------------------------------------------|-----------|--------|
| siRNA-Vinblastine Run1-DMSO  | NM_0017<br>51 | CARS | cysteinyl-tRNA synthetase                                         | 2.283674  | Inlier |
| siRNA-Temozolomide Run2-DMSO | NM_0229<br>00 | CAS1 | CAS1                                                              | -1.068993 | Inlier |
| siRNA-Temozolomide Run3-DMSO | NM_0229<br>00 | CAS1 | CAS1                                                              | -0.888131 | Inlier |
| siRNA-Temozolomide Run1-DMSO | NM_0229<br>00 | CAS1 | CAS1                                                              | -0.460869 | Inlier |
| siRNA Disorazole DMSO Run1   | NM_0229<br>00 | CAS1 | CAS1                                                              | -0.052896 | Inlier |
| siRNA Disorazole DMSO Run3   | NM_0229<br>00 | CAS1 | CAS1                                                              | 0.052896  | Inlier |
| siRNA-Vinblastine Run2-DMSO  | NM_0229<br>00 | CAS1 | CAS1                                                              | 0.128749  | Inlier |
| siRNA-Vinblastine Run1-DMSO  | NM_0229<br>00 | CAS1 | CAS1                                                              | 1.395116  | Inlier |
| siRNA Disorazole DMSO Run2   | NM_0229<br>00 | CAS1 | CAS1                                                              | 1.58545   | Inlier |
| siRNA Disorazole DMSO Run2   | NM_0036<br>88 | CASK | calcium/calmodulin-dependent serine protein kinase (MAGUK family) | -1.986166 | Inlier |
| siRNA Disorazole DMSO Run3   | NM_0036<br>88 | CASK | calcium/calmodulin-dependent serine protein kinase (MAGUK family) | -1.216059 | Inlier |
| siRNA-Temozolomide Run3-DMSO | NM_0036<br>88 | CASK | calcium/calmodulin-dependent serine protein kinase (MAGUK family) | -0.496419 | Inlier |
| siRNA-Temozolomide Run2-DMSO | NM_0036<br>88 | CASK | calcium/calmodulin-dependent serine protein kinase (MAGUK family) | -0.172952 | Inlier |

Identification of Survival Genes in Human Glioblastoma Cells Using siRNA Screening

Nikhil G Thaker, Fang Zhang, Peter R. McDonald, Tong Ying Shun, Michael D Lewen, Ian F. Pollack, and John S. Lazo

Molecular Pharmacology

|                              |           |       |                                                                                  |           |        |
|------------------------------|-----------|-------|----------------------------------------------------------------------------------|-----------|--------|
| siRNA-Temozolomide Run1-DMSO | NM_003688 | CASK  | calcium/calmodulin-dependent serine protein kinase (MAGUK family)                | 0.172952  | Inlier |
| siRNA-Vinblastine Run1-DMSO  | NM_003688 | CASK  | calcium/calmodulin-dependent serine protein kinase (MAGUK family)                | 0.388697  | Inlier |
| siRNA Disorazole DMSO Run1   | NM_003688 | CASK  | calcium/calmodulin-dependent serine protein kinase (MAGUK family)                | 0.852581  | Inlier |
| siRNA-Vinblastine Run2-DMSO  | NM_003688 | CASK  | calcium/calmodulin-dependent serine protein kinase (MAGUK family)                | 1.067032  | Inlier |
| siRNA Disorazole DMSO Run2   | NM_033294 | CASP1 | caspase 1, apoptosis-related cysteine protease (interleukin 1, beta, convertase) | -1.5093   | Inlier |
| siRNA-Temozolomide Run3-DMSO | NM_033294 | CASP1 | caspase 1, apoptosis-related cysteine protease (interleukin 1, beta, convertase) | -0.733081 | Inlier |

Identification of Survival Genes in Human Glioblastoma Cells Using siRNA Screening

Nikhil G Thaker, Fang Zhang, Peter R. McDonald, Tong Ying Shun, Michael D Lewen, Ian F. Pollack, and John S. Lazo

Molecular Pharmacology

|                              |               |       |                                                                                  |           |        |
|------------------------------|---------------|-------|----------------------------------------------------------------------------------|-----------|--------|
| siRNA-Temozolomide Run2-DMSO | NM_0332<br>94 | CASP1 | caspase 1, apoptosis-related cysteine protease (interleukin 1, beta, convertase) | -0.614458 | Inlier |
| siRNA Disorazole DMSO Run1   | NM_0332<br>94 | CASP1 | caspase 1, apoptosis-related cysteine protease (interleukin 1, beta, convertase) | -0.087132 | Inlier |
| siRNA-Temozolomide Run1-DMSO | NM_0332<br>94 | CASP1 | caspase 1, apoptosis-related cysteine protease (interleukin 1, beta, convertase) | 0.087132  | Inlier |
| siRNA Disorazole DMSO Run3   | NM_0332<br>94 | CASP1 | caspase 1, apoptosis-related cysteine protease (interleukin 1, beta, convertase) | 0.615919  | Inlier |
| siRNA-Vinblastine Run2-DMSO  | NM_0332<br>94 | CASP1 | caspase 1, apoptosis-related cysteine protease (interleukin 1, beta, convertase) | 1.014582  | Inlier |

Identification of Survival Genes in Human Glioblastoma Cells Using siRNA Screening  
 Nikhil G Thaker, Fang Zhang, Peter R. McDonald, Tong Ying Shun, Michael D Lewen, Ian F. Pollack, and John S. Lazo  
 Molecular Pharmacology

|                              |           |        |                                                                                  |           |        |
|------------------------------|-----------|--------|----------------------------------------------------------------------------------|-----------|--------|
| siRNA-Vinblastine Run1-DMSO  | NM_033294 | CASP1  | caspase 1, apoptosis-related cysteine protease (interleukin 1, beta, convertase) | 1.154383  | Inlier |
| siRNA-Temozolomide Run3-DMSO | NM_032977 | CASP10 | caspase 10, apoptosis-related cysteine protease                                  | -1.324357 | Inlier |
| siRNA-Temozolomide Run2-DMSO | NM_032977 | CASP10 | caspase 10, apoptosis-related cysteine protease                                  | -0.860489 | Inlier |
| siRNA Disorazole DMSO Run2   | NM_032977 | CASP10 | caspase 10, apoptosis-related cysteine protease                                  | -0.461109 | Inlier |
| siRNA Disorazole DMSO Run1   | NM_032977 | CASP10 | caspase 10, apoptosis-related cysteine protease                                  | -0.427801 | Inlier |
| siRNA-Vinblastine Run2-DMSO  | NM_032977 | CASP10 | caspase 10, apoptosis-related cysteine protease                                  | 0.4278    | Inlier |
| siRNA-Temozolomide Run1-DMSO | NM_032977 | CASP10 | caspase 10, apoptosis-related cysteine protease                                  | 0.488511  | Inlier |
| siRNA-Vinblastine Run1-DMSO  | NM_032977 | CASP10 | caspase 10, apoptosis-related cysteine protease                                  | 1.146305  | Inlier |



Identification of Survival Genes in Human Glioblastoma Cells Using siRNA Screening

Nikhil G Thaker, Fang Zhang, Peter R. McDonald, Tong Ying Shun, Michael D Lewen, Ian F. Pollack, and John S. Lazo

Molecular Pharmacology

|                              |           |        |                                                                                                                    |                  |
|------------------------------|-----------|--------|--------------------------------------------------------------------------------------------------------------------|------------------|
| siRNA-Vinblastine Run2-DMSO  | NM_012114 | CASP14 | caspase 14, apoptosis-related cysteine protease                                                                    | 1.67908 Inlier   |
| siRNA-Temozolomide Run3-DMSO | NM_032982 | CASP2  | caspase 2, apoptosis-related cysteine protease (neural precursor cell expressed, developmentally down-regulated 2) | -1.648162 Inlier |
| siRNA-Temozolomide Run2-DMSO | NM_032982 | CASP2  | caspase 2, apoptosis-related cysteine protease (neural precursor cell expressed, developmentally down-regulated 2) | -1.457808 Inlier |

Identification of Survival Genes in Human Glioblastoma Cells Using siRNA Screening

Nikhil G Thaker, Fang Zhang, Peter R. McDonald, Tong Ying Shun, Michael D Lewen, Ian F. Pollack, and John S. Lazo

Molecular Pharmacology

|                              |           |       |                                                                                                                    |           |        |
|------------------------------|-----------|-------|--------------------------------------------------------------------------------------------------------------------|-----------|--------|
| siRNA-Temozolomide Run1-DMSO | NM_032982 | CASP2 | caspase 2, apoptosis-related cysteine protease (neural precursor cell expressed, developmentally down-regulated 2) | -0.826074 | Inlier |
| siRNA Disorazole DMSO Run3   | NM_032982 | CASP2 | caspase 2, apoptosis-related cysteine protease (neural precursor cell expressed, developmentally down-regulated 2) | -0.079829 | Inlier |
| siRNA Disorazole DMSO Run2   | NM_032982 | CASP2 | caspase 2, apoptosis-related cysteine protease (neural precursor cell expressed, developmentally down-regulated 2) | 0.079829  | Inlier |

Identification of Survival Genes in Human Glioblastoma Cells Using siRNA Screening

Nikhil G Thaker, Fang Zhang, Peter R. McDonald, Tong Ying Shun, Michael D Lewen, Ian F. Pollack, and John S. Lazo

Molecular Pharmacology

|                                 |               |       |                                                                                                                                                                  |                 |
|---------------------------------|---------------|-------|------------------------------------------------------------------------------------------------------------------------------------------------------------------|-----------------|
| siRNA Disorazole DMSO Run1      | NM_0329<br>82 | CASP2 | caspase 2,<br>apoptosis-<br>related<br>cysteine<br>protease<br>(neural<br>precursor<br>cell<br>expressed<br>,<br>developm<br>entally<br>down-<br>regulated<br>2) | 0.084619 Inlier |
| siRNA-Vinblastine Run2-<br>DMSO | NM_0329<br>82 | CASP2 | caspase 2,<br>apoptosis-<br>related<br>cysteine<br>protease<br>(neural<br>precursor<br>cell<br>expressed<br>,<br>developm<br>entally<br>down-<br>regulated<br>2) | 0.522925 Inlier |
| siRNA-Vinblastine Run1-<br>DMSO | NM_0329<br>82 | CASP2 | caspase 2,<br>apoptosis-<br>related<br>cysteine<br>protease<br>(neural<br>precursor<br>cell<br>expressed<br>,<br>developm<br>entally<br>down-<br>regulated<br>2) | 0.920193 Inlier |



Identification of Survival Genes in Human Glioblastoma Cells Using siRNA Screening  
 Nikhil G Thaker, Fang Zhang, Peter R. McDonald, Tong Ying Shun, Michael D Lewen, Ian F. Pollack, and John S. Lazo  
 Molecular Pharmacology

|                              |               |       |                                                             |                  |
|------------------------------|---------------|-------|-------------------------------------------------------------|------------------|
| siRNA-Temozolomide Run3-DMSO | NM_0329<br>91 | CASP3 | caspase 3,<br>apoptosis-<br>related<br>cysteine<br>protease | -1.162318 Inlier |
| siRNA-Temozolomide Run1-DMSO | NM_0329<br>91 | CASP3 | caspase 3,<br>apoptosis-<br>related<br>cysteine<br>protease | -0.509926 Inlier |
| siRNA-Temozolomide Run2-DMSO | NM_0329<br>91 | CASP3 | caspase 3,<br>apoptosis-<br>related<br>cysteine<br>protease | -0.245885 Inlier |
| siRNA Disorazole DMSO Run3   | NM_0329<br>91 | CASP3 | caspase 3,<br>apoptosis-<br>related<br>cysteine<br>protease | -0.232126 Inlier |
| siRNA Disorazole DMSO Run1   | NM_0329<br>91 | CASP3 | caspase 3,<br>apoptosis-<br>related<br>cysteine<br>protease | 0.232126 Inlier  |
| siRNA Disorazole DMSO Run2   | NM_0329<br>91 | CASP3 | caspase 3,<br>apoptosis-<br>related<br>cysteine<br>protease | 0.839074 Inlier  |
| siRNA-Vinblastine Run2-DMSO  | NM_0329<br>91 | CASP3 | caspase 3,<br>apoptosis-<br>related<br>cysteine<br>protease | 0.872788 Inlier  |
| siRNA-Vinblastine Run1-DMSO  | NM_0329<br>91 | CASP3 | caspase 3,<br>apoptosis-<br>related<br>cysteine<br>protease | 1.339248 Inlier  |

Identification of Survival Genes in Human Glioblastoma Cells Using siRNA Screening  
 Nikhil G Thaker, Fang Zhang, Peter R. McDonald, Tong Ying Shun, Michael D Lewen, Ian F. Pollack, and John S. Lazo  
 Molecular Pharmacology

|                              |               |       |                                                             |                  |
|------------------------------|---------------|-------|-------------------------------------------------------------|------------------|
| siRNA-Temozolomide Run3-DMSO | NM_0012<br>25 | CASP4 | caspase 4,<br>apoptosis-<br>related<br>cysteine<br>protease | -1.47824 Inlier  |
| siRNA-Temozolomide Run2-DMSO | NM_0012<br>25 | CASP4 | caspase 4,<br>apoptosis-<br>related<br>cysteine<br>protease | -0.761522 Inlier |
| siRNA Disorazole DMSO Run2   | NM_0012<br>25 | CASP4 | caspase 4,<br>apoptosis-<br>related<br>cysteine<br>protease | -0.475058 Inlier |
| siRNA Disorazole DMSO Run1   | NM_0012<br>25 | CASP4 | caspase 4,<br>apoptosis-<br>related<br>cysteine<br>protease | -0.085298 Inlier |
| siRNA-Vinblastine Run2-DMSO  | NM_0012<br>25 | CASP4 | caspase 4,<br>apoptosis-<br>related<br>cysteine<br>protease | 0.085298 Inlier  |
| siRNA-Temozolomide Run1-DMSO | NM_0012<br>25 | CASP4 | caspase 4,<br>apoptosis-<br>related<br>cysteine<br>protease | 0.587478 Inlier  |
| siRNA-Vinblastine Run1-DMSO  | NM_0012<br>25 | CASP4 | caspase 4,<br>apoptosis-<br>related<br>cysteine<br>protease | 0.803276 Inlier  |
| siRNA Disorazole DMSO Run3   | NM_0012<br>25 | CASP4 | caspase 4,<br>apoptosis-<br>related<br>cysteine<br>protease | 3.168833 Inlier  |

Identification of Survival Genes in Human Glioblastoma Cells Using siRNA Screening  
 Nikhil G Thaker, Fang Zhang, Peter R. McDonald, Tong Ying Shun, Michael D Lewen, Ian F. Pollack, and John S. Lazo  
 Molecular Pharmacology

|                                  |               |       |                                                             |                  |
|----------------------------------|---------------|-------|-------------------------------------------------------------|------------------|
| siRNA Disorazole DMSO Run2       | NM_0043<br>47 | CASP5 | caspase 5,<br>apoptosis-<br>related<br>cysteine<br>protease | -1.371351 Inlier |
| siRNA-Temozolomide Run3-<br>DMSO | NM_0043<br>47 | CASP5 | caspase 5,<br>apoptosis-<br>related<br>cysteine<br>protease | -0.799304 Inlier |
| siRNA Disorazole DMSO Run3       | NM_0043<br>47 | CASP5 | caspase 5,<br>apoptosis-<br>related<br>cysteine<br>protease | -0.77987 Inlier  |
| siRNA-Temozolomide Run2-<br>DMSO | NM_0043<br>47 | CASP5 | caspase 5,<br>apoptosis-<br>related<br>cysteine<br>protease | -0.29649 Inlier  |
| siRNA Disorazole DMSO Run1       | NM_0043<br>47 | CASP5 | caspase 5,<br>apoptosis-<br>related<br>cysteine<br>protease | 0.29649 Inlier   |
| siRNA-Temozolomide Run1-<br>DMSO | NM_0043<br>47 | CASP5 | caspase 5,<br>apoptosis-<br>related<br>cysteine<br>protease | 0.48129 Inlier   |
| siRNA-Vinblastine Run2-<br>DMSO  | NM_0043<br>47 | CASP5 | caspase 5,<br>apoptosis-<br>related<br>cysteine<br>protease | 0.56913 Inlier   |
| siRNA-Vinblastine Run1-<br>DMSO  | NM_0043<br>47 | CASP5 | caspase 5,<br>apoptosis-<br>related<br>cysteine<br>protease | 1.026193 Inlier  |

Identification of Survival Genes in Human Glioblastoma Cells Using siRNA Screening  
 Nikhil G Thaker, Fang Zhang, Peter R. McDonald, Tong Ying Shun, Michael D Lewen, Ian F. Pollack, and John S. Lazo  
 Molecular Pharmacology

|                                  |               |       |                                                             |           |        |
|----------------------------------|---------------|-------|-------------------------------------------------------------|-----------|--------|
| siRNA Disorazole DMSO Run2       | NM_0329<br>92 | CASP6 | caspase 6,<br>apoptosis-<br>related<br>cysteine<br>protease | -2.393422 | Inlier |
| siRNA-Temozolomide Run3-<br>DMSO | NM_0329<br>92 | CASP6 | caspase 6,<br>apoptosis-<br>related<br>cysteine<br>protease | -1.72451  | Inlier |
| siRNA Disorazole DMSO Run1       | NM_0329<br>92 | CASP6 | caspase 6,<br>apoptosis-<br>related<br>cysteine<br>protease | -0.897748 | Inlier |
| siRNA-Temozolomide Run2-<br>DMSO | NM_0329<br>92 | CASP6 | caspase 6,<br>apoptosis-<br>related<br>cysteine<br>protease | -0.160234 | Inlier |
| siRNA-Vinblastine Run1-<br>DMSO  | NM_0329<br>92 | CASP6 | caspase 6,<br>apoptosis-<br>related<br>cysteine<br>protease | 0.160234  | Inlier |
| siRNA-Vinblastine Run2-<br>DMSO  | NM_0329<br>92 | CASP6 | caspase 6,<br>apoptosis-<br>related<br>cysteine<br>protease | 0.436068  | Inlier |
| siRNA-Temozolomide Run1-<br>DMSO | NM_0329<br>92 | CASP6 | caspase 6,<br>apoptosis-<br>related<br>cysteine<br>protease | 0.451252  | Inlier |
| siRNA Disorazole DMSO Run3       | NM_0329<br>92 | CASP6 | caspase 6,<br>apoptosis-<br>related<br>cysteine<br>protease | 1.776239  | Inlier |

Identification of Survival Genes in Human Glioblastoma Cells Using siRNA Screening  
 Nikhil G Thaker, Fang Zhang, Peter R. McDonald, Tong Ying Shun, Michael D Lewen, Ian F. Pollack, and John S. Lazo  
 Molecular Pharmacology

|                                  |               |       |                                                             |                  |
|----------------------------------|---------------|-------|-------------------------------------------------------------|------------------|
| siRNA Disorazole DMSO Run2       | NM_0333<br>40 | CASP7 | caspase 7,<br>apoptosis-<br>related<br>cysteine<br>protease | -0.8549 Inlier   |
| siRNA-Temozolomide Run3-<br>DMSO | NM_0333<br>40 | CASP7 | caspase 7,<br>apoptosis-<br>related<br>cysteine<br>protease | -0.800862 Inlier |
| siRNA Disorazole DMSO Run3       | NM_0333<br>40 | CASP7 | caspase 7,<br>apoptosis-<br>related<br>cysteine<br>protease | -0.548138 Inlier |
| siRNA-Temozolomide Run2-<br>DMSO | NM_0333<br>40 | CASP7 | caspase 7,<br>apoptosis-<br>related<br>cysteine<br>protease | -0.393427 Inlier |
| siRNA Disorazole DMSO Run1       | NM_0333<br>40 | CASP7 | caspase 7,<br>apoptosis-<br>related<br>cysteine<br>protease | 0.393427 Inlier  |
| siRNA-Temozolomide Run1-<br>DMSO | NM_0333<br>40 | CASP7 | caspase 7,<br>apoptosis-<br>related<br>cysteine<br>protease | 0.470653 Inlier  |
| siRNA-Vinblastine Run1-<br>DMSO  | NM_0333<br>40 | CASP7 | caspase 7,<br>apoptosis-<br>related<br>cysteine<br>protease | 0.847214 Inlier  |
| siRNA-Vinblastine Run2-<br>DMSO  | NM_0333<br>40 | CASP7 | caspase 7,<br>apoptosis-<br>related<br>cysteine<br>protease | 1.000858 Inlier  |

Identification of Survival Genes in Human Glioblastoma Cells Using siRNA Screening  
 Nikhil G Thaker, Fang Zhang, Peter R. McDonald, Tong Ying Shun, Michael D Lewen, Ian F. Pollack, and John S. Lazo  
 Molecular Pharmacology

|                              |           |       |                                                |           |        |
|------------------------------|-----------|-------|------------------------------------------------|-----------|--------|
| siRNA-Temozolomide Run2-DMSO | NM_001228 | CASP8 | caspase 8, apoptosis-related cysteine protease | -1.446132 | Inlier |
| siRNA-Temozolomide Run3-DMSO | NM_001228 | CASP8 | caspase 8, apoptosis-related cysteine protease | -1.435874 | Inlier |
| siRNA Disorazole DMSO Run1   | NM_001228 | CASP8 | caspase 8, apoptosis-related cysteine protease | -0.592507 | Inlier |
| siRNA-Temozolomide Run1-DMSO | NM_001228 | CASP8 | caspase 8, apoptosis-related cysteine protease | -0.343055 | Inlier |
| siRNA Disorazole DMSO Run3   | NM_001228 | CASP8 | caspase 8, apoptosis-related cysteine protease | 0.343056  | Inlier |
| siRNA-Vinblastine Run2-DMSO  | NM_001228 | CASP8 | caspase 8, apoptosis-related cysteine protease | 0.462658  | Inlier |
| siRNA Disorazole DMSO Run2   | NM_001228 | CASP8 | caspase 8, apoptosis-related cysteine protease | 0.756493  | Inlier |
| siRNA-Vinblastine Run1-DMSO  | NM_001228 | CASP8 | caspase 8, apoptosis-related cysteine protease | 0.965343  | Inlier |

Identification of Survival Genes in Human Glioblastoma Cells Using siRNA Screening  
 Nikhil G Thaker, Fang Zhang, Peter R. McDonald, Tong Ying Shun, Michael D Lewen, Ian F. Pollack, and John S. Lazo  
 Molecular Pharmacology

|                              |               |       |                                                             |                  |
|------------------------------|---------------|-------|-------------------------------------------------------------|------------------|
| siRNA-Temozolomide Run3-DMSO | NM_0012<br>29 | CASP9 | caspase 9,<br>apoptosis-<br>related<br>cysteine<br>protease | -2.309149 Inlier |
| siRNA Disorazole DMSO Run2   | NM_0012<br>29 | CASP9 | caspase 9,<br>apoptosis-<br>related<br>cysteine<br>protease | -2.171942 Inlier |
| siRNA-Temozolomide Run2-DMSO | NM_0012<br>29 | CASP9 | caspase 9,<br>apoptosis-<br>related<br>cysteine<br>protease | -0.453729 Inlier |
| siRNA Disorazole DMSO Run3   | NM_0012<br>29 | CASP9 | caspase 9,<br>apoptosis-<br>related<br>cysteine<br>protease | -0.043136 Inlier |
| siRNA-Temozolomide Run1-DMSO | NM_0012<br>29 | CASP9 | caspase 9,<br>apoptosis-<br>related<br>cysteine<br>protease | 0.043136 Inlier  |
| siRNA Disorazole DMSO Run1   | NM_0012<br>29 | CASP9 | caspase 9,<br>apoptosis-<br>related<br>cysteine<br>protease | 0.183286 Inlier  |
| siRNA-Vinblastine Run2-DMSO  | NM_0012<br>29 | CASP9 | caspase 9,<br>apoptosis-<br>related<br>cysteine<br>protease | 0.895271 Inlier  |
| siRNA-Vinblastine Run1-DMSO  | NM_0012<br>29 | CASP9 | caspase 9,<br>apoptosis-<br>related<br>cysteine<br>protease | 0.975448 Inlier  |

Identification of Survival Genes in Human Glioblastoma Cells Using siRNA Screening

Nikhil G Thaker, Fang Zhang, Peter R. McDonald, Tong Ying Shun, Michael D Lewen, Ian F. Pollack, and John S. Lazo

Molecular Pharmacology

|                              |               |      |                                                                                              |           |        |
|------------------------------|---------------|------|----------------------------------------------------------------------------------------------|-----------|--------|
| siRNA Disorazole DMSO Run2   | NM_0003<br>88 | CASR | calcium-sensing receptor (hypocalcemic hypercalcemia 1, severe neonatal hyperparathyroidism) | -1.826992 | Inlier |
| siRNA-Temozolomide DMSO Run2 | NM_0003<br>88 | CASR | calcium-sensing receptor (hypocalcemic hypercalcemia 1, severe neonatal hyperparathyroidism) | -1.469948 | Inlier |
| siRNA Disorazole DMSO Run3   | NM_0003<br>88 | CASR | calcium-sensing receptor (hypocalcemic hypercalcemia 1, severe neonatal hyperparathyroidism) | -0.611872 | Inlier |
| siRNA-Temozolomide DMSO Run3 | NM_0003<br>88 | CASR | calcium-sensing receptor (hypocalcemic hypercalcemia 1, severe neonatal hyperparathyroidism) | -0.100531 | Inlier |



Identification of Survival Genes in Human Glioblastoma Cells Using siRNA Screening

Nikhil G Thaker, Fang Zhang, Peter R. McDonald, Tong Ying Shun, Michael D Lewen, Ian F. Pollack, and John S. Lazo

Molecular Pharmacology

|                              |               |      |                                                                                              |           |        |
|------------------------------|---------------|------|----------------------------------------------------------------------------------------------|-----------|--------|
| siRNA Disorazole DMSO Run1   | NM_0003<br>88 | CASR | calcium-sensing receptor (hypocalcemic hypercalcemia 1, severe neonatal hyperparathyroidism) | 0.100531  | Inlier |
| siRNA-Temozolomide Run1-DMSO | NM_0003<br>88 | CASR | calcium-sensing receptor (hypocalcemic hypercalcemia 1, severe neonatal hyperparathyroidism) | 0.181173  | Inlier |
| siRNA-Vinblastine Run2-DMSO  | NM_0003<br>88 | CASR | calcium-sensing receptor (hypocalcemic hypercalcemia 1, severe neonatal hyperparathyroidism) | 0.737128  | Inlier |
| siRNA-Vinblastine Run1-DMSO  | NM_0003<br>88 | CASR | calcium-sensing receptor (hypocalcemic hypercalcemia 1, severe neonatal hyperparathyroidism) | 0.817634  | Inlier |
| siRNA Disorazole DMSO Run3   | NM_0017<br>52 | CAT  | catalase                                                                                     | -0.885669 | Inlier |
| siRNA-Temozolomide Run3-DMSO | NM_0017<br>52 | CAT  | catalase                                                                                     | -0.463331 | Inlier |

Identification of Survival Genes in Human Glioblastoma Cells Using siRNA Screening

Nikhil G Thaker, Fang Zhang, Peter R. McDonald, Tong Ying Shun, Michael D Lewen, Ian F. Pollack, and John S. Lazo

|                              |         |    |         |                                     |           |         |
|------------------------------|---------|----|---------|-------------------------------------|-----------|---------|
| siRNA-Vinblastine Run2-DMSO  | NM_0017 | 52 | CAT     | catalase                            | -0.135515 | Inlier  |
| siRNA-Temozolomide Run2-DMSO | NM_0017 | 52 | CAT     | catalase                            | -0.041792 | Inlier  |
| siRNA Disorazole DMSO Run1   | NM_0017 | 52 | CAT     | catalase                            | 0.04179   | Inlier  |
| siRNA Disorazole DMSO Run2   | NM_0017 | 52 | CAT     | catalase                            | 1.864321  | Inlier  |
| siRNA-Temozolomide Run1-DMSO | NM_0017 | 52 | CAT     | catalase                            | 3.949893  | Outlier |
| siRNA-Vinblastine Run1-DMSO  | NM_0017 | 52 | CAT     | catalase                            | 5.298042  | Outlier |
| siRNA-Temozolomide Run3-DMSO | NM_0530 | 54 | CATSPER | associated<br>cation channel, sperm | -2.842176 | Inlier  |
| siRNA-Temozolomide Run2-DMSO | NM_0530 | 54 | CATSPER | associated<br>cation channel, sperm | -1.233176 | Inlier  |
| siRNA Disorazole DMSO Run1   | NM_0530 | 54 | CATSPER | associated<br>cation channel, sperm | -0.647201 | Inlier  |
| siRNA-Temozolomide Run1-DMSO | NM_0530 | 54 | CATSPER | associated<br>cation channel, sperm | -0.444667 | Inlier  |
| siRNA Disorazole DMSO Run3   | NM_0530 | 54 | CATSPER | associated<br>cation channel, sperm | 0.444667  | Inlier  |
| siRNA-Vinblastine Run2-DMSO  | NM_0530 | 54 | CATSPER | associated<br>cation channel, sperm | 0.456905  | Inlier  |
| siRNA-Vinblastine Run1-DMSO  | NM_0530 | 54 | CATSPER | associated<br>cation channel, sperm | 0.701799  | Inlier  |
| siRNA Disorazole DMSO Run2   | NM_0530 | 54 | CATSPER | associated<br>cation channel, sperm | 1.582065  | Inlier  |

Identification of Survival Genes in Human Glioblastoma Cells Using siRNA Screening  
 Nikhil G Thaker, Fang Zhang, Peter R. McDonald, Tong Ying Shun, Michael D Lewen, Ian F. Pollack, and John S. Lazo

Molecular Pharmacology

| siRNA Treatment              | Gene ID       | Gene Name    | Category                              | Value     | Outlier Status |
|------------------------------|---------------|--------------|---------------------------------------|-----------|----------------|
| siRNA Disorazole DMSO Run1   | NM_1720<br>97 | CATSPER<br>2 | cation channel, sperm associated<br>2 | -4.499192 | Outlier        |
| siRNA-Vinblastine Run2-DMSO  | NM_1720<br>97 | CATSPER<br>2 | cation channel, sperm associated<br>2 | -0.709724 | Inlier         |
| siRNA-Temozolomide Run1-DMSO | NM_1720<br>97 | CATSPER<br>2 | cation channel, sperm associated<br>2 | -0.702136 | Inlier         |
| siRNA-Temozolomide Run3-DMSO | NM_1720<br>97 | CATSPER<br>2 | cation channel, sperm associated<br>2 | -0.249821 | Inlier         |
| siRNA-Temozolomide Run2-DMSO | NM_1720<br>97 | CATSPER<br>2 | cation channel, sperm associated<br>2 | 0.249818  | Inlier         |
| siRNA Disorazole DMSO Run2   | NM_1720<br>97 | CATSPER<br>2 | cation channel, sperm associated<br>2 | 0.634731  | Inlier         |
| siRNA-Vinblastine Run1-DMSO  | NM_1720<br>97 | CATSPER<br>2 | cation channel, sperm associated<br>2 | 0.646864  | Inlier         |
| siRNA Disorazole DMSO Run3   | NM_1720<br>97 | CATSPER<br>2 | cation channel, sperm associated<br>2 | 4.609932  | Outlier        |
| siRNA-Temozolomide Run3-DMSO | NM_1780<br>19 | CATSPER<br>3 | cation channel, sperm associated<br>3 | -1.569997 | Inlier         |
| siRNA Disorazole DMSO Run1   | NM_1780<br>19 | CATSPER<br>3 | cation channel, sperm associated<br>3 | -0.54317  | Inlier         |

Identification of Survival Genes in Human Glioblastoma Cells Using siRNA Screening  
 Nikhil G Thaker, Fang Zhang, Peter R. McDonald, Tong Ying Shun, Michael D Lewen, Ian F. Pollack, and John S. Lazo

Molecular Pharmacology

|                              |               |              |                                                                                                                              |                  |
|------------------------------|---------------|--------------|------------------------------------------------------------------------------------------------------------------------------|------------------|
| siRNA-Temozolomide Run2-DMSO | NM_1780<br>19 | CATSPER<br>3 | cation channel, sperm associated<br>3                                                                                        | -0.193293 Inlier |
| siRNA-Vinblastine Run2-DMSO  | NM_1780<br>19 | CATSPER<br>3 | cation channel, sperm associated<br>3                                                                                        | -0.176858 Inlier |
| siRNA-Temozolomide Run1-DMSO | NM_1780<br>19 | CATSPER<br>3 | cation channel, sperm associated<br>3                                                                                        | 0.176857 Inlier  |
| siRNA-Vinblastine Run1-DMSO  | NM_1780<br>19 | CATSPER<br>3 | cation channel, sperm associated<br>3                                                                                        | 0.80583 Inlier   |
| siRNA Disorazole DMSO Run3   | NM_1780<br>19 | CATSPER<br>3 | cation channel, sperm associated<br>3                                                                                        | 1.626814 Inlier  |
| siRNA Disorazole DMSO Run2   | NM_1780<br>19 | CATSPER<br>3 | cation channel, sperm associated<br>3                                                                                        | 3.585951 Outlier |
| siRNA-Temozolomide Run3-DMSO | NM_0051<br>88 | CBL          | Cas-Br-M (murine) ecotropic retroviral transforming sequence<br>Cas-Br-M (murine) ecotropic retroviral transforming sequence | -1.783742 Inlier |
| siRNA-Temozolomide Run2-DMSO | NM_0051<br>88 | CBL          | Cas-Br-M (murine) ecotropic retroviral transforming sequence<br>Cas-Br-M (murine) ecotropic retroviral transforming sequence | -1.44041 Inlier  |
| siRNA-Temozolomide Run1-DMSO | NM_0051<br>88 | CBL          | Cas-Br-M (murine) ecotropic retroviral transforming sequence                                                                 | -0.56203 Inlier  |

Identification of Survival Genes in Human Glioblastoma Cells Using siRNA Screening  
 Nikhil G Thaker, Fang Zhang, Peter R. McDonald, Tong Ying Shun, Michael D Lewen, Ian F. Pollack, and John S. Lazo

Molecular Pharmacology

| siRNA                        | Gene    | Accession | Cell Line | Gene Name                                                    | Value     | Outlier |
|------------------------------|---------|-----------|-----------|--------------------------------------------------------------|-----------|---------|
| siRNA Disorazole DMSO Run1   | NM_0051 | 88        | CBL       | Cas-Br-M (murine) ecotropic retroviral transforming sequence | -0.31373  | Inlier  |
| siRNA Disorazole DMSO Run2   | NM_0051 | 88        | CBL       | Cas-Br-M (murine) ecotropic retroviral transforming sequence | 0.31373   | Inlier  |
| siRNA Disorazole DMSO Run3   | NM_0051 | 88        | CBL       | Cas-Br-M (murine) ecotropic retroviral transforming sequence | 0.427793  | Inlier  |
| siRNA-Vinblastine Run2-DMSO  | NM_0051 | 88        | CBL       | Cas-Br-M (murine) ecotropic retroviral transforming sequence | 0.78697   | Inlier  |
| siRNA-Vinblastine Run1-DMSO  | NM_0051 | 88        | CBL       | Cas-Br-M (murine) ecotropic retroviral transforming sequence | 1.215842  | Inlier  |
| siRNA-Temozolomide Run3-DMSO | NM_0017 | 57        | CBR1      | carbonyl reductase 1                                         | -1.959816 | Inlier  |
| siRNA Disorazole DMSO Run1   | NM_0017 | 57        | CBR1      | carbonyl reductase 1                                         | -0.713155 | Inlier  |
| siRNA-Temozolomide Run2-DMSO | NM_0017 | 57        | CBR1      | carbonyl reductase 1                                         | -0.635845 | Inlier  |
| siRNA-Temozolomide Run1-DMSO | NM_0017 | 57        | CBR1      | carbonyl reductase 1                                         | -0.044664 | Inlier  |
| siRNA-Vinblastine Run2-DMSO  | NM_0017 | 57        | CBR1      | carbonyl reductase 1                                         | 0.044665  | Inlier  |

Identification of Survival Genes in Human Glioblastoma Cells Using siRNA Screening  
 Nikhil G Thaker, Fang Zhang, Peter R. McDonald, Tong Ying Shun, Michael D Lewen, Ian F. Pollack, and John S. Lazo

Molecular Pharmacology

|                              |               |      |                             |           |        |
|------------------------------|---------------|------|-----------------------------|-----------|--------|
|                              |               |      | carbonyl reductase          |           |        |
| siRNA Disorazole DMSO Run3   | NM_0017<br>57 | CBR1 | 1                           | 0.081212  | Inlier |
| siRNA-Vinblastine Run1-DMSO  | NM_0017<br>57 | CBR1 | 1                           | 0.984499  | Inlier |
| siRNA Disorazole DMSO Run2   | NM_0017<br>57 | CBR1 | 1                           | 1.863492  | Inlier |
| siRNA-Temozolomide Run3-DMSO | NM_0012<br>36 | CBR3 | 3                           | -1.499404 | Inlier |
| siRNA Disorazole DMSO Run1   | NM_0012<br>36 | CBR3 | 3                           | -0.315899 | Inlier |
| siRNA Disorazole DMSO Run3   | NM_0012<br>36 | CBR3 | 3                           | -0.221062 | Inlier |
| siRNA-Temozolomide Run2-DMSO | NM_0012<br>36 | CBR3 | 3                           | -0.190656 | Inlier |
| siRNA-Temozolomide Run1-DMSO | NM_0012<br>36 | CBR3 | 3                           | 0.190656  | Inlier |
| siRNA-Vinblastine Run2-DMSO  | NM_0012<br>36 | CBR3 | 3                           | 1.033101  | Inlier |
| siRNA-Vinblastine Run1-DMSO  | NM_0012<br>36 | CBR3 | 3                           | 1.113745  | Inlier |
| siRNA Disorazole DMSO Run2   | NM_0012<br>36 | CBR3 | 3                           | 2.568178  | Inlier |
| siRNA-Temozolomide Run2-DMSO | NM_0327<br>83 | CBR4 | CBR4                        | -1.903388 | Inlier |
| siRNA Disorazole DMSO Run1   | NM_0327<br>83 | CBR4 | CBR4                        | -1.183387 | Inlier |
| siRNA-Temozolomide Run3-DMSO | NM_0327<br>83 | CBR4 | CBR4                        | -1.11285  | Inlier |
| siRNA-Vinblastine Run2-DMSO  | NM_0327<br>83 | CBR4 | CBR4                        | -0.293238 | Inlier |
| siRNA Disorazole DMSO Run3   | NM_0327<br>83 | CBR4 | CBR4                        | 0.293238  | Inlier |
| siRNA-Temozolomide Run1-DMSO | NM_0327<br>83 | CBR4 | CBR4                        | 0.365865  | Inlier |
| siRNA-Vinblastine Run1-DMSO  | NM_0327<br>83 | CBR4 | CBR4                        | 0.53692   | Inlier |
| siRNA Disorazole DMSO Run2   | NM_0327<br>83 | CBR4 | CBR4                        | 0.81208   | Inlier |
| siRNA Disorazole DMSO Run1   | NM_0000<br>71 | CBS  | cystathionine-beta-synthase | -1.286936 | Inlier |

Identification of Survival Genes in Human Glioblastoma Cells Using siRNA Screening

Nikhil G Thaker, Fang Zhang, Peter R. McDonald, Tong Ying Shun, Michael D Lewen, Ian F. Pollack, and John S. Lazo

Molecular Pharmacology

|                              |           |       |                                                                                                     |           |        |
|------------------------------|-----------|-------|-----------------------------------------------------------------------------------------------------|-----------|--------|
| siRNA-Temozolomide Run2-DMSO | NM_000071 | CBS   | cystathionine-beta-synthase                                                                         | -0.823378 | Inlier |
| siRNA-Temozolomide Run1-DMSO | NM_000071 | CBS   | cystathionine-beta-synthase                                                                         | -0.525622 | Inlier |
| siRNA-Temozolomide Run3-DMSO | NM_000071 | CBS   | cystathionine-beta-synthase                                                                         | -0.205262 | Inlier |
| siRNA Disorazole DMSO Run3   | NM_000071 | CBS   | cystathionine-beta-synthase                                                                         | 0.205262  | Inlier |
| siRNA-Vinblastine Run2-DMSO  | NM_000071 | CBS   | cystathionine-beta-synthase                                                                         | 0.255293  | Inlier |
| siRNA Disorazole DMSO Run2   | NM_000071 | CBS   | cystathionine-beta-synthase                                                                         | 0.825052  | Inlier |
| siRNA-Vinblastine Run1-DMSO  | NM_000071 | CBS   | cystathionine-beta-synthase                                                                         | 0.930203  | Inlier |
| siRNA-Temozolomide Run3-DMSO | NM_004059 | CCBL1 | cysteine conjugate-beta lyase; cytoplasmic (glutamine transaminase K, kyneurenine aminotransferase) | -0.920029 | Inlier |
| siRNA-Vinblastine Run2-DMSO  | NM_004059 | CCBL1 | cysteine conjugate-beta lyase; cytoplasmic (glutamine transaminase K, kyneurenine aminotransferase) | -0.428971 | Inlier |

Identification of Survival Genes in Human Glioblastoma Cells Using siRNA Screening

Nikhil G Thaker, Fang Zhang, Peter R. McDonald, Tong Ying Shun, Michael D Lewen, Ian F. Pollack, and John S. Lazo

Molecular Pharmacology

|                              |           |       |                                                                                                     |           |        |
|------------------------------|-----------|-------|-----------------------------------------------------------------------------------------------------|-----------|--------|
| siRNA-Temozolomide Run2-DMSO | NM_004059 | CCBL1 | cysteine conjugate-beta lyase; cytoplasmic (glutamine transaminase K, kyneurenine aminotransferase) | -0.304748 | Inlier |
| siRNA Disorazole DMSO Run3   | NM_004059 | CCBL1 | cysteine conjugate-beta lyase; cytoplasmic (glutamine transaminase K, kyneurenine aminotransferase) | -0.267935 | Inlier |
| siRNA Disorazole DMSO Run1   | NM_004059 | CCBL1 | cysteine conjugate-beta lyase; cytoplasmic (glutamine transaminase K, kyneurenine aminotransferase) | 0.267935  | Inlier |



Identification of Survival Genes in Human Glioblastoma Cells Using siRNA Screening

Nikhil G Thaker, Fang Zhang, Peter R. McDonald, Tong Ying Shun, Michael D Lewen, Ian F. Pollack, and John S.

Lazo

Molecular Pharmacology

|                              |           |       |                                                                                                      |           |         |
|------------------------------|-----------|-------|------------------------------------------------------------------------------------------------------|-----------|---------|
| siRNA-Temozolomide Run1-DMSO | NM_004059 | CCBL1 | cysteine conjugate-beta lyase; cytoplasmic (glutamine transaminase K, kynureninase aminotransferase) | 1.018109  | Inlier  |
| siRNA-Vinblastine Run1-DMSO  | NM_004059 | CCBL1 | cysteine conjugate-beta lyase; cytoplasmic (glutamine transaminase K, kynureninase aminotransferase) | 4.597456  | Outlier |
| siRNA Disorazole DMSO Run2   | NM_004059 | CCBL1 | cysteine conjugate-beta lyase; cytoplasmic (glutamine transaminase K, kynureninase aminotransferase) | 5.637985  | Outlier |
| siRNA-Temozolomide Run3-DMSO | NM_001296 | CCBP2 | chemokine binding protein 2                                                                          | -0.70775  | Inlier  |
| siRNA Disorazole DMSO Run2   | NM_001296 | CCBP2 | chemokine binding protein 2                                                                          | -0.64125  | Inlier  |
| siRNA Disorazole DMSO Run3   | NM_001296 | CCBP2 | chemokine binding protein 2                                                                          | -0.591479 | Inlier  |

Identification of Survival Genes in Human Glioblastoma Cells Using siRNA Screening  
 Nikhil G Thaker, Fang Zhang, Peter R. McDonald, Tong Ying Shun, Michael D Lewen, Ian F. Pollack, and John S. Lazo

| Molecular Pharmacology       |               |       |                             |           |         |
|------------------------------|---------------|-------|-----------------------------|-----------|---------|
| siRNA-Temozolomide Run2-DMSO | NM_0012<br>96 | CCBP2 | chemokine binding protein 2 | -0.099314 | Inlier  |
| siRNA-Temozolomide Run1-DMSO | NM_0012<br>96 | CCBP2 | chemokine binding protein 2 | 0.099314  | Inlier  |
| siRNA Disorazole DMSO Run1   | NM_0012<br>96 | CCBP2 | chemokine binding protein 2 | 1.729483  | Inlier  |
| siRNA-Vinblastine Run2-DMSO  | NM_0012<br>96 | CCBP2 | chemokine binding protein 2 | 4.176843  | Outlier |
| siRNA-Vinblastine Run1-DMSO  | NM_0012<br>96 | CCBP2 | chemokine binding protein 2 | 4.205029  | Outlier |
| siRNA Disorazole DMSO Run2   | NM_0007<br>30 | CCKAR | cholecysto kinin A receptor | -1.751666 | Inlier  |
| siRNA-Temozolomide Run2-DMSO | NM_0007<br>30 | CCKAR | cholecysto kinin A receptor | -0.703704 | Inlier  |
| siRNA-Temozolomide Run3-DMSO | NM_0007<br>30 | CCKAR | cholecysto kinin A receptor | -0.651014 | Inlier  |
| siRNA Disorazole DMSO Run1   | NM_0007<br>30 | CCKAR | cholecysto kinin A receptor | -0.00314  | Inlier  |
| siRNA-Temozolomide Run1-DMSO | NM_0007<br>30 | CCKAR | cholecysto kinin A receptor | 0.00314   | Inlier  |
| siRNA Disorazole DMSO Run3   | NM_0007<br>30 | CCKAR | cholecysto kinin A receptor | 0.267128  | Inlier  |
| siRNA-Vinblastine Run2-DMSO  | NM_0007<br>30 | CCKAR | cholecysto kinin A receptor | 0.697986  | Inlier  |
| siRNA-Vinblastine Run1-DMSO  | NM_0007<br>30 | CCKAR | cholecysto kinin A receptor | 0.852784  | Inlier  |
| siRNA-Temozolomide Run3-DMSO | NM_1768<br>75 | CCKBR | kinin B receptor            | -1.127941 | Inlier  |
| siRNA-Temozolomide Run2-DMSO | NM_1768<br>75 | CCKBR | cholecysto kinin B receptor | -0.331166 | Inlier  |
| siRNA Disorazole DMSO Run1   | NM_1768<br>75 | CCKBR | cholecysto kinin B receptor | -0.206269 | Inlier  |
| siRNA Disorazole DMSO Run2   | NM_1768<br>75 | CCKBR | cholecysto kinin B receptor | -0.074036 | Inlier  |

Identification of Survival Genes in Human Glioblastoma Cells Using siRNA Screening  
 Nikhil G Thaker, Fang Zhang, Peter R. McDonald, Tong Ying Shun, Michael D Lewen, Ian F. Pollack, and John S. Lazo

| Molecular Pharmacology       |               |       |                                               |           |        |
|------------------------------|---------------|-------|-----------------------------------------------|-----------|--------|
| siRNA-Temozolomide Run1-DMSO | NM_1768<br>75 | CCKBR | cholecysto<br>kinin B<br>receptor             | 0.074036  | Inlier |
| siRNA-Vinblastine Run2-DMSO  | NM_1768<br>75 | CCKBR | cholecysto<br>kinin B<br>receptor             | 1.017834  | Inlier |
| siRNA Disorazole DMSO Run3   | NM_1768<br>75 | CCKBR | cholecysto<br>kinin B<br>receptor             | 1.206956  | Inlier |
| siRNA-Vinblastine Run1-DMSO  | NM_1768<br>75 | CCKBR | cholecysto<br>kinin B<br>receptor<br>cerebral | 1.332519  | Inlier |
| siRNA-Temozolomide Run1-DMSO | NM_0049<br>12 | CCM1  | cavernous<br>malformati<br>ons 1<br>cerebral  | -0.773879 | Inlier |
| siRNA-Temozolomide Run3-DMSO | NM_0049<br>12 | CCM1  | cavernous<br>malformati<br>ons 1<br>cerebral  | -0.768358 | Inlier |
| siRNA Disorazole DMSO Run3   | NM_0049<br>12 | CCM1  | cavernous<br>malformati<br>ons 1<br>cerebral  | -0.539189 | Inlier |
| siRNA-Temozolomide Run2-DMSO | NM_0049<br>12 | CCM1  | cavernous<br>malformati<br>ons 1<br>cerebral  | -0.142661 | Inlier |
| siRNA-Vinblastine Run2-DMSO  | NM_0049<br>12 | CCM1  | cavernous<br>malformati<br>ons 1<br>cerebral  | 0.142661  | Inlier |
| siRNA Disorazole DMSO Run1   | NM_0049<br>12 | CCM1  | cavernous<br>malformati<br>ons 1<br>cerebral  | 0.580642  | Inlier |
| siRNA Disorazole DMSO Run2   | NM_0049<br>12 | CCM1  | cavernous<br>malformati<br>ons 1<br>cerebral  | 2.369044  | Inlier |
| siRNA-Vinblastine Run1-DMSO  | NM_0049<br>12 | CCM1  | cavernous<br>malformati<br>ons 1              | 2.976988  | Inlier |
| siRNA-Temozolomide Run1-DMSO | NM_0039<br>14 | CCNA1 | cyclin A1                                     | -1.49471  | Inlier |
| siRNA Disorazole DMSO Run1   | NM_0039<br>14 | CCNA1 | cyclin A1                                     | -0.449708 | Inlier |
| siRNA Disorazole DMSO Run2   | NM_0039<br>14 | CCNA1 | cyclin A1                                     | -0.432466 | Inlier |
| siRNA-Temozolomide Run2-DMSO | NM_0039<br>14 | CCNA1 | cyclin A1                                     | -0.340216 | Inlier |

Identification of Survival Genes in Human Glioblastoma Cells Using siRNA Screening  
 Nikhil G Thaker, Fang Zhang, Peter R. McDonald, Tong Ying Shun, Michael D Lewen, Ian F. Pollack, and John S. Lazo

|                              |               |       |           |           |         |
|------------------------------|---------------|-------|-----------|-----------|---------|
| Molecular Pharmacology       | NM_0039       |       |           |           |         |
| siRNA Disorazole DMSO Run3   | 14            | CCNA1 | cyclin A1 | 0.340216  | Inlier  |
| siRNA-Vinblastine Run2-DMSO  | NM_0039<br>14 | CCNA1 | cyclin A1 | 0.899292  | Inlier  |
| siRNA-Vinblastine Run1-DMSO  | NM_0039<br>14 | CCNA1 | cyclin A1 | 1.905492  | Inlier  |
| siRNA-Temozolomide Run3-DMSO | NM_0039<br>14 | CCNA1 | cyclin A1 | 5.992092  | Outlier |
| siRNA-Temozolomide Run3-DMSO | NM_0012<br>37 | CCNA2 | cyclin A2 | -2.057552 | Inlier  |
| siRNA-Temozolomide Run1-DMSO | NM_0012<br>37 | CCNA2 | cyclin A2 | -0.565073 | Inlier  |
| siRNA-Vinblastine Run2-DMSO  | NM_0012<br>37 | CCNA2 | cyclin A2 | -0.359692 | Inlier  |
| siRNA Disorazole DMSO Run1   | NM_0012<br>37 | CCNA2 | cyclin A2 | -0.100047 | Inlier  |
| siRNA-Temozolomide Run2-DMSO | NM_0012<br>37 | CCNA2 | cyclin A2 | 0.100047  | Inlier  |
| siRNA Disorazole DMSO Run3   | NM_0012<br>37 | CCNA2 | cyclin A2 | 0.783927  | Inlier  |
| siRNA-Vinblastine Run1-DMSO  | NM_0012<br>37 | CCNA2 | cyclin A2 | 2.097793  | Inlier  |
| siRNA Disorazole DMSO Run2   | NM_0012<br>37 | CCNA2 | cyclin A2 | 2.451977  | Inlier  |
| siRNA-Temozolomide Run3-DMSO | NM_0319<br>66 | CCNB1 | cyclin B1 | -0.781815 | Inlier  |
| siRNA-Temozolomide Run1-DMSO | NM_0319<br>66 | CCNB1 | cyclin B1 | -0.567185 | Inlier  |
| siRNA-Temozolomide Run2-DMSO | NM_0319<br>66 | CCNB1 | cyclin B1 | -0.226744 | Inlier  |
| siRNA-Vinblastine Run2-DMSO  | NM_0319<br>66 | CCNB1 | cyclin B1 | -0.051718 | Inlier  |
| siRNA Disorazole DMSO Run3   | NM_0319<br>66 | CCNB1 | cyclin B1 | 0.051718  | Inlier  |
| siRNA Disorazole DMSO Run1   | NM_0319<br>66 | CCNB1 | cyclin B1 | 1.298111  | Inlier  |
| siRNA-Vinblastine Run1-DMSO  | NM_0319<br>66 | CCNB1 | cyclin B1 | 3.085974  | Inlier  |
| siRNA Disorazole DMSO Run2   | NM_0319<br>66 | CCNB1 | cyclin B1 | 3.512678  | Outlier |
| siRNA Disorazole DMSO Run1   | NM_0047<br>01 | CCNB2 | cyclin B2 | -1.346388 | Inlier  |
| siRNA-Vinblastine Run2-DMSO  | NM_0047<br>01 | CCNB2 | cyclin B2 | -0.926347 | Inlier  |
| siRNA Disorazole DMSO Run3   | NM_0047<br>01 | CCNB2 | cyclin B2 | -0.422653 | Inlier  |
| siRNA-Temozolomide Run1-DMSO | NM_0047<br>01 | CCNB2 | cyclin B2 | -0.289045 | Inlier  |
| siRNA-Temozolomide Run2-DMSO | NM_0047<br>01 | CCNB2 | cyclin B2 | 0.289044  | Inlier  |
| siRNA-Temozolomide Run3-DMSO | NM_0047<br>01 | CCNB2 | cyclin B2 | 0.328446  | Inlier  |

Identification of Survival Genes in Human Glioblastoma Cells Using siRNA Screening

Nikhil G Thaker, Fang Zhang, Peter R. McDonald, Tong Ying Shun, Michael D Lewen, Ian F. Pollack, and John S.

Lazo

|                                  |               |       |                                                     |           |        |
|----------------------------------|---------------|-------|-----------------------------------------------------|-----------|--------|
| siRNA-Vinblastine Run1-<br>DMSO  | NM_0047<br>01 | CCNB2 | cyclin B2                                           | 1.007066  | Inlier |
|                                  | NM_0047       |       |                                                     |           |        |
| siRNA Disorazole DMSO Run2       | 01            | CCNB2 | cyclin B2                                           | 1.943431  | Inlier |
| siRNA-Temozolomide Run3-<br>DMSO | NM_0336<br>70 | CCNB3 | cyclin B3                                           | -1.308971 | Inlier |
| siRNA-Vinblastine Run2-<br>DMSO  | NM_0336<br>70 | CCNB3 | cyclin B3                                           | -0.82017  | Inlier |
|                                  | NM_0336       |       |                                                     |           |        |
| siRNA Disorazole DMSO Run1       | 70            | CCNB3 | cyclin B3                                           | -0.432025 | Inlier |
|                                  | NM_0336       |       |                                                     |           |        |
| siRNA Disorazole DMSO Run3       | 70            | CCNB3 | cyclin B3                                           | -0.172136 | Inlier |
| siRNA-Temozolomide Run2-<br>DMSO | NM_0336<br>70 | CCNB3 | cyclin B3                                           | 0.172136  | Inlier |
| siRNA-Temozolomide Run1-<br>DMSO | NM_0336<br>70 | CCNB3 | cyclin B3                                           | 0.52883   | Inlier |
|                                  | NM_0336       |       |                                                     |           |        |
| siRNA Disorazole DMSO Run2       | 70            | CCNB3 | cyclin B3                                           | 1.129793  | Inlier |
| siRNA-Vinblastine Run1-<br>DMSO  | NM_0336<br>70 | CCNB3 | cyclin B3                                           | 1.190432  | Inlier |
| siRNA-Temozolomide Run3-<br>DMSO | NM_0051<br>90 | CCNC  | cyclin C                                            | -2.015314 | Inlier |
| siRNA-Temozolomide Run2-<br>DMSO | NM_0051<br>90 | CCNC  | cyclin C                                            | -1.118883 | Inlier |
| siRNA-Temozolomide Run1-<br>DMSO | NM_0051<br>90 | CCNC  | cyclin C                                            | -0.667063 | Inlier |
|                                  | NM_0051       |       |                                                     |           |        |
| siRNA Disorazole DMSO Run1       | 90            | CCNC  | cyclin C                                            | -0.166807 | Inlier |
|                                  | NM_0051       |       |                                                     |           |        |
| siRNA Disorazole DMSO Run3       | 90            | CCNC  | cyclin C                                            | 0.166807  | Inlier |
| siRNA-Vinblastine Run2-<br>DMSO  | NM_0051<br>90 | CCNC  | cyclin C                                            | 0.187212  | Inlier |
| siRNA-Vinblastine Run1-<br>DMSO  | NM_0051<br>90 | CCNC  | cyclin C                                            | 0.681936  | Inlier |
|                                  | NM_0051       |       |                                                     |           |        |
| siRNA Disorazole DMSO Run2       | 90            | CCNC  | cyclin C<br>cyclin D1<br>(PRAD1:<br>parathyroi<br>d | 1.066326  | Inlier |
|                                  | NM_0530       |       | adenomat<br>osis 1)                                 |           |        |
| siRNA Disorazole DMSO Run1       | 56            | CCND1 | cyclin D1<br>(PRAD1:<br>parathyroi<br>d             | -1.342821 | Inlier |
|                                  | NM_0530       |       | adenomat<br>osis 1)                                 |           |        |
| siRNA-Temozolomide Run1-<br>DMSO | NM_0530<br>56 | CCND1 | adenomat<br>osis 1)                                 | -0.767323 | Inlier |

Identification of Survival Genes in Human Glioblastoma Cells Using siRNA Screening  
 Nikhil G Thaker, Fang Zhang, Peter R. McDonald, Tong Ying Shun, Michael D Lewen, Ian F. Pollack, and John S. Lazo

Molecular Pharmacology

|                              |               |       |  |                                                        |                  |
|------------------------------|---------------|-------|--|--------------------------------------------------------|------------------|
|                              |               |       |  | cyclin D1<br>(PRAD1:<br>parathyroid<br>adenomatosis 1) |                  |
| siRNA-Vinblastine Run2-DMSO  | NM_0530<br>56 | CCND1 |  |                                                        | -0.078089 Inlier |
| siRNA-Temozolomide Run2-DMSO | NM_0530<br>56 | CCND1 |  | cyclin D1<br>(PRAD1:<br>parathyroid<br>adenomatosis 1) | -0.008067 Inlier |
| siRNA Disorazole DMSO Run3   | NM_0530<br>56 | CCND1 |  | cyclin D1<br>(PRAD1:<br>parathyroid<br>adenomatosis 1) | 0.008068 Inlier  |
| siRNA-Temozolomide Run3-DMSO | NM_0530<br>56 | CCND1 |  | cyclin D1<br>(PRAD1:<br>parathyroid<br>adenomatosis 1) | 0.581677 Inlier  |
| siRNA-Vinblastine Run1-DMSO  | NM_0530<br>56 | CCND1 |  | cyclin D1<br>(PRAD1:<br>parathyroid<br>adenomatosis 1) | 1.603484 Inlier  |
| siRNA Disorazole DMSO Run2   | NM_0530<br>56 | CCND1 |  | adenomatosis 1)                                        | 2.274863 Inlier  |
| siRNA-Temozolomide Run3-DMSO | NM_0017<br>59 | CCND2 |  | cyclin D2                                              | -1.817163 Inlier |
| siRNA-Temozolomide Run2-DMSO | NM_0017<br>59 | CCND2 |  | cyclin D2                                              | -0.747116 Inlier |
| siRNA-Temozolomide Run1-DMSO | NM_0017<br>59 | CCND2 |  | cyclin D2                                              | -0.601884 Inlier |
| siRNA-Vinblastine Run2-DMSO  | NM_0017<br>59 | CCND2 |  | cyclin D2                                              | -0.033911 Inlier |
| siRNA Disorazole DMSO Run1   | NM_0017<br>59 | CCND2 |  | cyclin D2                                              | 0.033911 Inlier  |
| siRNA Disorazole DMSO Run3   | NM_0017<br>59 | CCND2 |  | cyclin D2                                              | 0.341353 Inlier  |
| siRNA-Vinblastine Run1-DMSO  | NM_0017<br>59 | CCND2 |  | cyclin D2                                              | 1.644762 Inlier  |
| siRNA Disorazole DMSO Run2   | NM_0017<br>59 | CCND2 |  | cyclin D2                                              | 2.093853 Inlier  |

Identification of Survival Genes in Human Glioblastoma Cells Using siRNA Screening  
 Nikhil G Thaker, Fang Zhang, Peter R. McDonald, Tong Ying Shun, Michael D Lewen, Ian F. Pollack, and John S. Lazo

|                                  |               |       |           |           |        |
|----------------------------------|---------------|-------|-----------|-----------|--------|
| siRNA-Temozolomide Run3-<br>DMSO | NM_0017<br>60 | CCND3 | cyclin D3 | -1.165957 | Inlier |
| siRNA-Temozolomide Run2-<br>DMSO | NM_0017<br>60 | CCND3 | cyclin D3 | -0.752083 | Inlier |
| siRNA-Temozolomide Run1-<br>DMSO | NM_0017<br>60 | CCND3 | cyclin D3 | -0.713719 | Inlier |
| siRNA Disorazole DMSO Run1       | NM_0017<br>60 | CCND3 | cyclin D3 | -0.00012  | Inlier |
| siRNA Disorazole DMSO Run3       | NM_0017<br>60 | CCND3 | cyclin D3 | 0.00012   | Inlier |
| siRNA-Vinblastine Run2-<br>DMSO  | NM_0017<br>60 | CCND3 | cyclin D3 | 0.168338  | Inlier |
| siRNA-Vinblastine Run1-<br>DMSO  | NM_0017<br>60 | CCND3 | cyclin D3 | 0.635281  | Inlier |
| siRNA Disorazole DMSO Run2       | NM_0017<br>60 | CCND3 | cyclin D3 | 0.80606   | Inlier |
| siRNA-Temozolomide Run3-<br>DMSO | NM_0571<br>82 | CCNE1 | cyclin E1 | -1.440193 | Inlier |
| siRNA-Temozolomide Run2-<br>DMSO | NM_0571<br>82 | CCNE1 | cyclin E1 | -0.976471 | Inlier |
| siRNA-Temozolomide Run1-<br>DMSO | NM_0571<br>82 | CCNE1 | cyclin E1 | -0.364795 | Inlier |
| siRNA Disorazole DMSO Run1       | NM_0571<br>82 | CCNE1 | cyclin E1 | -0.210976 | Inlier |
| siRNA Disorazole DMSO Run3       | NM_0571<br>82 | CCNE1 | cyclin E1 | 0.210976  | Inlier |
| siRNA-Vinblastine Run2-<br>DMSO  | NM_0571<br>82 | CCNE1 | cyclin E1 | 0.372529  | Inlier |
| siRNA Disorazole DMSO Run2       | NM_0571<br>82 | CCNE1 | cyclin E1 | 1.441859  | Inlier |
| siRNA-Vinblastine Run1-<br>DMSO  | NM_0571<br>82 | CCNE1 | cyclin E1 | 1.573309  | Inlier |
| siRNA-Temozolomide Run3-<br>DMSO | NM_0577<br>49 | CCNE2 | cyclin E2 | -1.150176 | Inlier |
| siRNA-Temozolomide Run2-<br>DMSO | NM_0577<br>49 | CCNE2 | cyclin E2 | -0.981216 | Inlier |
| siRNA-Temozolomide Run1-<br>DMSO | NM_0577<br>49 | CCNE2 | cyclin E2 | -0.658794 | Inlier |
| siRNA Disorazole DMSO Run1       | NM_0577<br>49 | CCNE2 | cyclin E2 | -0.019265 | Inlier |
| siRNA-Vinblastine Run2-<br>DMSO  | NM_0577<br>49 | CCNE2 | cyclin E2 | 0.019265  | Inlier |
| siRNA Disorazole DMSO Run3       | NM_0577<br>49 | CCNE2 | cyclin E2 | 0.124037  | Inlier |
| siRNA-Vinblastine Run1-<br>DMSO  | NM_0577<br>49 | CCNE2 | cyclin E2 | 0.690206  | Inlier |
| siRNA Disorazole DMSO Run2       | NM_0577<br>49 | CCNE2 | cyclin E2 | 0.884837  | Inlier |
| siRNA-Temozolomide Run3-<br>DMSO | NM_0017<br>61 | CCNF  | cyclin F  | -1.411568 | Inlier |
| siRNA-Temozolomide Run2-<br>DMSO | NM_0017<br>61 | CCNF  | cyclin F  | -0.830143 | Inlier |

Identification of Survival Genes in Human Glioblastoma Cells Using siRNA Screening  
 Nikhil G Thaker, Fang Zhang, Peter R. McDonald, Tong Ying Shun, Michael D Lewen, Ian F. Pollack, and John S. Lazo

|                                  |               |       |           |           |        |
|----------------------------------|---------------|-------|-----------|-----------|--------|
| siRNA-Vinblastine Run2-<br>DMSO  | NM_0017<br>61 | CCNF  | cyclin F  | -0.094219 | Inlier |
| siRNA-Temozolomide Run1-<br>DMSO | NM_0017<br>61 | CCNF  | cyclin F  | -0.060686 | Inlier |
| siRNA Disorazole DMSO Run3       | NM_0017<br>61 | CCNF  | cyclin F  | 0.060686  | Inlier |
| siRNA Disorazole DMSO Run1       | NM_0017<br>61 | CCNF  | cyclin F  | 0.518857  | Inlier |
| siRNA-Vinblastine Run1-<br>DMSO  | NM_0017<br>61 | CCNF  | cyclin F  | 1.202931  | Inlier |
| siRNA Disorazole DMSO Run2       | NM_0017<br>61 | CCNF  | cyclin F  | 1.389034  | Inlier |
| siRNA Disorazole DMSO Run1       | NM_0040<br>60 | CCNG1 | cyclin G1 | -1.069533 | Inlier |
| siRNA-Temozolomide Run2-<br>DMSO | NM_0040<br>60 | CCNG1 | cyclin G1 | -0.873148 | Inlier |
| siRNA-Temozolomide Run1-<br>DMSO | NM_0040<br>60 | CCNG1 | cyclin G1 | -0.643686 | Inlier |
| siRNA-Vinblastine Run2-<br>DMSO  | NM_0040<br>60 | CCNG1 | cyclin G1 | -0.073381 | Inlier |
| siRNA Disorazole DMSO Run3       | NM_0040<br>60 | CCNG1 | cyclin G1 | 0.073381  | Inlier |
| siRNA-Vinblastine Run1-<br>DMSO  | NM_0040<br>60 | CCNG1 | cyclin G1 | 0.446879  | Inlier |
| siRNA-Temozolomide Run3-<br>DMSO | NM_0040<br>60 | CCNG1 | cyclin G1 | 0.705314  | Inlier |
| siRNA Disorazole DMSO Run2       | NM_0040<br>60 | CCNG1 | cyclin G1 | 1.160363  | Inlier |
| siRNA-Temozolomide Run1-<br>DMSO | NM_0043<br>54 | CCNG2 | cyclin G2 | -0.948365 | Inlier |
| siRNA Disorazole DMSO Run3       | NM_0043<br>54 | CCNG2 | cyclin G2 | -0.421896 | Inlier |
| siRNA-Temozolomide Run2-<br>DMSO | NM_0043<br>54 | CCNG2 | cyclin G2 | -0.352669 | Inlier |
| siRNA-Temozolomide Run3-<br>DMSO | NM_0043<br>54 | CCNG2 | cyclin G2 | -0.050834 | Inlier |
| siRNA-Vinblastine Run2-<br>DMSO  | NM_0043<br>54 | CCNG2 | cyclin G2 | 0.050833  | Inlier |
| siRNA Disorazole DMSO Run1       | NM_0043<br>54 | CCNG2 | cyclin G2 | 0.927104  | Inlier |
| siRNA-Vinblastine Run1-<br>DMSO  | NM_0043<br>54 | CCNG2 | cyclin G2 | 1.83088   | Inlier |
| siRNA Disorazole DMSO Run2       | NM_0043<br>54 | CCNG2 | cyclin G2 | 1.845973  | Inlier |
| siRNA-Temozolomide Run3-<br>DMSO | NM_0012<br>39 | CCNH  | cyclin H  | -1.514226 | Inlier |
| siRNA-Temozolomide Run2-<br>DMSO | NM_0012<br>39 | CCNH  | cyclin H  | -0.886436 | Inlier |
| siRNA-Vinblastine Run2-<br>DMSO  | NM_0012<br>39 | CCNH  | cyclin H  | -0.133685 | Inlier |
| siRNA-Temozolomide Run1-<br>DMSO | NM_0012<br>39 | CCNH  | cyclin H  | -0.090442 | Inlier |



Identification of Survival Genes in Human Glioblastoma Cells Using siRNA Screening  
 Nikhil G Thaker, Fang Zhang, Peter R. McDonald, Tong Ying Shun, Michael D Lewen, Ian F. Pollack, and John S. Lazo

|                              |         |       |           |           |        |
|------------------------------|---------|-------|-----------|-----------|--------|
| Molecular Pharmacology       | NM_0012 |       |           |           |        |
| siRNA Disorazole DMSO Run3   | 39      | CCNH  | cyclin H  | 0.090442  | Inlier |
|                              | NM_0012 |       |           |           |        |
| siRNA Disorazole DMSO Run2   | 39      | CCNH  | cyclin H  | 0.669528  | Inlier |
|                              | NM_0012 |       |           |           |        |
| siRNA Disorazole DMSO Run1   | 39      | CCNH  | cyclin H  | 0.679472  | Inlier |
| siRNA-Vinblastine Run1-DMSO  | NM_0012 |       |           |           |        |
|                              | 39      | CCNH  | cyclin H  | 0.738642  | Inlier |
| siRNA-Temozolomide Run1-DMSO | NM_0068 |       |           |           |        |
|                              | 35      | CCNI  | cyclin I  | -0.956318 | Inlier |
| siRNA-Temozolomide Run3-DMSO | NM_0068 |       |           |           |        |
|                              | 35      | CCNI  | cyclin I  | -0.663951 | Inlier |
| siRNA-Temozolomide Run2-DMSO | NM_0068 |       |           |           |        |
|                              | 35      | CCNI  | cyclin I  | -0.370711 | Inlier |
| siRNA-Vinblastine Run2-DMSO  | NM_0068 |       |           |           |        |
|                              | 35      | CCNI  | cyclin I  | -0.240072 | Inlier |
|                              | NM_0068 |       |           |           |        |
| siRNA Disorazole DMSO Run1   | 35      | CCNI  | cyclin I  | 0.240071  | Inlier |
|                              | NM_0068 |       |           |           |        |
| siRNA Disorazole DMSO Run3   | 35      | CCNI  | cyclin I  | 0.685049  | Inlier |
| siRNA-Vinblastine Run1-DMSO  | NM_0068 |       |           |           |        |
|                              | 35      | CCNI  | cyclin I  | 1.776788  | Inlier |
|                              | NM_0068 |       |           |           |        |
| siRNA Disorazole DMSO Run2   | 35      | CCNI  | cyclin I  | 2.991872  | Inlier |
| siRNA-Temozolomide Run2-DMSO | NM_0203 |       |           |           |        |
|                              | 07      | CCNL1 | cyclin L1 | -1.500476 | Inlier |
| siRNA-Temozolomide Run1-DMSO | NM_0203 |       |           |           |        |
|                              | 07      | CCNL1 | cyclin L1 | -1.337145 | Inlier |
| siRNA-Temozolomide Run3-DMSO | NM_0203 |       |           |           |        |
|                              | 07      | CCNL1 | cyclin L1 | -0.619315 | Inlier |
| siRNA-Vinblastine Run2-DMSO  | NM_0203 |       |           |           |        |
|                              | 07      | CCNL1 | cyclin L1 | -0.284539 | Inlier |
| siRNA-Vinblastine Run1-DMSO  | NM_0203 |       |           |           |        |
|                              | 07      | CCNL1 | cyclin L1 | 0.284539  | Inlier |
|                              | NM_0203 |       |           |           |        |
| siRNA Disorazole DMSO Run3   | 07      | CCNL1 | cyclin L1 | 0.544409  | Inlier |
|                              | NM_0203 |       |           |           |        |
| siRNA Disorazole DMSO Run2   | 07      | CCNL1 | cyclin L1 | 0.729685  | Inlier |
|                              | NM_0203 |       |           |           |        |
| siRNA Disorazole DMSO Run1   | 07      | CCNL1 | cyclin L1 | 1.027749  | Inlier |
| siRNA-Temozolomide Run3-DMSO | NM_0012 |       |           |           |        |
|                              | 40      | CCNT1 | cyclin T1 | -1.15316  | Inlier |
| siRNA-Temozolomide Run2-DMSO | NM_0012 |       |           |           |        |
|                              | 40      | CCNT1 | cyclin T1 | -1.013796 | Inlier |
| siRNA-Vinblastine Run2-DMSO  | NM_0012 |       |           |           |        |
|                              | 40      | CCNT1 | cyclin T1 | -0.335204 | Inlier |
| siRNA-Temozolomide Run1-DMSO | NM_0012 |       |           |           |        |
|                              | 40      | CCNT1 | cyclin T1 | -0.096416 | Inlier |
|                              | NM_0012 |       |           |           |        |
| siRNA Disorazole DMSO Run3   | 40      | CCNT1 | cyclin T1 | 0.096416  | Inlier |
|                              | NM_0012 |       |           |           |        |
| siRNA Disorazole DMSO Run1   | 40      | CCNT1 | cyclin T1 | 0.129682  | Inlier |

Identification of Survival Genes in Human Glioblastoma Cells Using siRNA Screening

Nikhil G Thaker, Fang Zhang, Peter R. McDonald, Tong Ying Shun, Michael D Lewen, Ian F. Pollack, and John S.

Lazo

| siRNA/Vinblastine Run        | Gene  | Gene ID       | Gene Name                                 | Value     | Category |
|------------------------------|-------|---------------|-------------------------------------------|-----------|----------|
| siRNA-Vinblastine Run1-DMSO  | CCNT1 | NM_0012<br>40 | cyclin T1                                 | 1.684646  | Inlier   |
| siRNA Disorazole DMSO Run2   | CCNT1 | NM_0012<br>40 | cyclin T1                                 | 1.871299  | Inlier   |
| siRNA-Temozolomide Run2-DMSO | CCNT2 | NM_0582<br>41 | cyclin T2                                 | -1.149437 | Inlier   |
| siRNA-Temozolomide Run3-DMSO | CCNT2 | NM_0582<br>41 | cyclin T2                                 | -0.873218 | Inlier   |
| siRNA-Temozolomide Run1-DMSO | CCNT2 | NM_0582<br>41 | cyclin T2                                 | -0.717841 | Inlier   |
| siRNA Disorazole DMSO Run3   | CCNT2 | NM_0582<br>41 | cyclin T2                                 | -0.008085 | Inlier   |
| siRNA-Vinblastine Run2-DMSO  | CCNT2 | NM_0582<br>41 | cyclin T2                                 | 0.008085  | Inlier   |
| siRNA Disorazole DMSO Run1   | CCNT2 | NM_0582<br>41 | cyclin T2                                 | 0.24182   | Inlier   |
| siRNA-Vinblastine Run1-DMSO  | CCNT2 | NM_0582<br>41 | cyclin T2                                 | 0.631159  | Inlier   |
| siRNA Disorazole DMSO Run2   | CCNT2 | NM_0582<br>41 | cyclin T2<br>chemokine<br>(C-C<br>motif)  | 0.746458  | Inlier   |
| siRNA Disorazole DMSO Run2   | CCR1  | NM_0012<br>95 | receptor 1<br>chemokine<br>(C-C<br>motif) | -2.203284 | Inlier   |
| siRNA-Temozolomide Run3-DMSO | CCR1  | NM_0012<br>95 | receptor 1<br>chemokine<br>(C-C<br>motif) | -1.425779 | Inlier   |
| siRNA Disorazole DMSO Run3   | CCR1  | NM_0012<br>95 | receptor 1<br>chemokine<br>(C-C<br>motif) | -0.672837 | Inlier   |
| siRNA-Temozolomide Run1-DMSO | CCR1  | NM_0012<br>95 | receptor 1<br>chemokine<br>(C-C<br>motif) | -0.059881 | Inlier   |
| siRNA Disorazole DMSO Run1   | CCR1  | NM_0012<br>95 | receptor 1<br>chemokine<br>(C-C<br>motif) | 0.059882  | Inlier   |
| siRNA-Temozolomide Run2-DMSO | CCR1  | NM_0012<br>95 | receptor 1<br>chemokine<br>(C-C<br>motif) | 0.481741  | Inlier   |
| siRNA-Vinblastine Run2-DMSO  | CCR1  | NM_0012<br>95 | receptor 1<br>chemokine<br>(C-C<br>motif) | 0.676162  | Inlier   |
| siRNA-Vinblastine Run1-DMSO  | CCR1  | NM_0012<br>95 | receptor 1<br>chemokine<br>(C-C<br>motif) | 0.970215  | Inlier   |

Identification of Survival Genes in Human Glioblastoma Cells Using siRNA Screening  
 Nikhil G Thaker, Fang Zhang, Peter R. McDonald, Tong Ying Shun, Michael D Lewen, Ian F. Pollack, and John S. Lazo

Molecular Pharmacology

|                                  |               |      |                             |                             |        |  |
|----------------------------------|---------------|------|-----------------------------|-----------------------------|--------|--|
|                                  |               |      |                             | chemokine<br>(C-C<br>motif) |        |  |
| siRNA Disorazole DMSO Run2       | NM_0006<br>48 | CCR2 | receptor 2                  | -2.607027                   | Inlier |  |
|                                  |               |      | chemokine<br>(C-C<br>motif) |                             |        |  |
| siRNA Disorazole DMSO Run1       | NM_0006<br>48 | CCR2 | receptor 2                  | -2.335541                   | Inlier |  |
|                                  |               |      | chemokine<br>(C-C<br>motif) |                             |        |  |
| siRNA-Temozolomide Run2-<br>DMSO | NM_0006<br>48 | CCR2 | receptor 2                  | -0.548815                   | Inlier |  |
|                                  |               |      | chemokine<br>(C-C<br>motif) |                             |        |  |
| siRNA-Temozolomide Run1-<br>DMSO | NM_0006<br>48 | CCR2 | receptor 2                  | -0.121488                   | Inlier |  |
|                                  |               |      | chemokine<br>(C-C<br>motif) |                             |        |  |
| siRNA-Temozolomide Run3-<br>DMSO | NM_0006<br>48 | CCR2 | receptor 2                  | 0.121489                    | Inlier |  |
|                                  |               |      | chemokine<br>(C-C<br>motif) |                             |        |  |
| siRNA Disorazole DMSO Run3       | NM_0006<br>48 | CCR2 | receptor 2                  | 0.275288                    | Inlier |  |
|                                  |               |      | chemokine<br>(C-C<br>motif) |                             |        |  |
| siRNA-Vinblastine Run2-<br>DMSO  | NM_0006<br>48 | CCR2 | receptor 2                  | 0.800185                    | Inlier |  |
|                                  |               |      | chemokine<br>(C-C<br>motif) |                             |        |  |
| siRNA-Vinblastine Run1-<br>DMSO  | NM_0006<br>48 | CCR2 | receptor 2                  | 1.676504                    | Inlier |  |
|                                  |               |      | chemokine<br>(C-C<br>motif) |                             |        |  |
| siRNA Disorazole DMSO Run2       | NM_0018<br>37 | CCR3 | receptor 3                  | -1.504975                   | Inlier |  |
|                                  |               |      | chemokine<br>(C-C<br>motif) |                             |        |  |
| siRNA-Temozolomide Run3-<br>DMSO | NM_0018<br>37 | CCR3 | receptor 3                  | -0.864906                   | Inlier |  |
|                                  |               |      | chemokine<br>(C-C<br>motif) |                             |        |  |
| siRNA Disorazole DMSO Run1       | NM_0018<br>37 | CCR3 | receptor 3                  | -0.37879                    | Inlier |  |
|                                  |               |      | chemokine<br>(C-C<br>motif) |                             |        |  |
| siRNA Disorazole DMSO Run3       | NM_0018<br>37 | CCR3 | receptor 3                  | -0.133896                   | Inlier |  |
|                                  |               |      | chemokine<br>(C-C<br>motif) |                             |        |  |
| siRNA-Temozolomide Run2-<br>DMSO | NM_0018<br>37 | CCR3 | receptor 3                  | 0.133896                    | Inlier |  |

Identification of Survival Genes in Human Glioblastoma Cells Using siRNA Screening  
 Nikhil G Thaker, Fang Zhang, Peter R. McDonald, Tong Ying Shun, Michael D Lewen, Ian F. Pollack, and John S. Lazo

Molecular Pharmacology

|                              |               |      |                                  |           |        |
|------------------------------|---------------|------|----------------------------------|-----------|--------|
| siRNA-Temozolomide Run1-DMSO | NM_0018<br>37 | CCR3 | chemokine (C-C motif) receptor 3 | 0.484094  | Inlier |
| siRNA-Vinblastine Run1-DMSO  | NM_0018<br>37 | CCR3 | chemokine (C-C motif) receptor 3 | 1.347875  | Inlier |
| siRNA-Vinblastine Run2-DMSO  | NM_0018<br>37 | CCR3 | chemokine (C-C motif) receptor 3 | 1.541506  | Inlier |
| siRNA Disorazole DMSO Run2   | NM_0055<br>08 | CCR4 | chemokine (C-C motif) receptor 4 | -1.801443 | Inlier |
| siRNA-Temozolomide Run2-DMSO | NM_0055<br>08 | CCR4 | chemokine (C-C motif) receptor 4 | -0.893528 | Inlier |
| siRNA-Temozolomide Run3-DMSO | NM_0055<br>08 | CCR4 | chemokine (C-C motif) receptor 4 | -0.816833 | Inlier |
| siRNA-Temozolomide Run1-DMSO | NM_0055<br>08 | CCR4 | chemokine (C-C motif) receptor 4 | -0.2972   | Inlier |
| siRNA Disorazole DMSO Run3   | NM_0055<br>08 | CCR4 | chemokine (C-C motif) receptor 4 | 0.297199  | Inlier |
| siRNA Disorazole DMSO Run1   | NM_0055<br>08 | CCR4 | chemokine (C-C motif) receptor 4 | 0.518629  | Inlier |
| siRNA-Vinblastine Run2-DMSO  | NM_0055<br>08 | CCR4 | chemokine (C-C motif) receptor 4 | 0.606838  | Inlier |
| siRNA-Vinblastine Run1-DMSO  | NM_0055<br>08 | CCR4 | chemokine (C-C motif) receptor 4 | 0.742162  | Inlier |
| siRNA Disorazole DMSO Run2   | NM_0005<br>79 | CCR5 | chemokine (C-C motif) receptor 5 | -1.856256 | Inlier |
| siRNA Disorazole DMSO Run1   | NM_0005<br>79 | CCR5 | chemokine (C-C motif) receptor 5 | -0.97342  | Inlier |

Identification of Survival Genes in Human Glioblastoma Cells Using siRNA Screening  
 Nikhil G Thaker, Fang Zhang, Peter R. McDonald, Tong Ying Shun, Michael D Lewen, Ian F. Pollack, and John S. Lazo

Molecular Pharmacology

|                              |           |      |                                  |           |        |
|------------------------------|-----------|------|----------------------------------|-----------|--------|
| siRNA-Temozolomide Run3-DMSO | NM_000579 | CCR5 | chemokine (C-C motif) receptor 5 | -0.37558  | Inlier |
| siRNA-Temozolomide Run1-DMSO | NM_000579 | CCR5 | chemokine (C-C motif) receptor 5 | -0.07521  | Inlier |
| siRNA Disorazole DMSO Run3   | NM_000579 | CCR5 | chemokine (C-C motif) receptor 5 | 0.075209  | Inlier |
| siRNA-Temozolomide Run2-DMSO | NM_000579 | CCR5 | chemokine (C-C motif) receptor 5 | 0.242734  | Inlier |
| siRNA-Vinblastine Run2-DMSO  | NM_000579 | CCR5 | chemokine (C-C motif) receptor 5 | 1.128732  | Inlier |
| siRNA-Vinblastine Run1-DMSO  | NM_000579 | CCR5 | chemokine (C-C motif) receptor 5 | 1.362885  | Inlier |
| siRNA-Temozolomide Run3-DMSO | NM_031409 | CCR6 | chemokine (C-C motif) receptor 6 | -1.286817 | Inlier |
| siRNA Disorazole DMSO Run2   | NM_031409 | CCR6 | chemokine (C-C motif) receptor 6 | -0.839616 | Inlier |
| siRNA Disorazole DMSO Run1   | NM_031409 | CCR6 | chemokine (C-C motif) receptor 6 | -0.581652 | Inlier |
| siRNA Disorazole DMSO Run3   | NM_031409 | CCR6 | chemokine (C-C motif) receptor 6 | -0.343816 | Inlier |
| siRNA-Temozolomide Run2-DMSO | NM_031409 | CCR6 | chemokine (C-C motif) receptor 6 | 0.343816  | Inlier |
| siRNA-Temozolomide Run1-DMSO | NM_031409 | CCR6 | chemokine (C-C motif) receptor 6 | 0.407191  | Inlier |
| siRNA-Vinblastine Run2-DMSO  | NM_031409 | CCR6 | chemokine (C-C motif) receptor 6 | 0.767348  | Inlier |

Identification of Survival Genes in Human Glioblastoma Cells Using siRNA Screening  
 Nikhil G Thaker, Fang Zhang, Peter R. McDonald, Tong Ying Shun, Michael D Lewen, Ian F. Pollack, and John S. Lazo

Molecular Pharmacology

|                              |           |      |                                  |           |        |
|------------------------------|-----------|------|----------------------------------|-----------|--------|
| siRNA-Vinblastine Run1-DMSO  | NM_031409 | CCR6 | chemokine (C-C motif) receptor 6 | 1.273469  | Inlier |
| siRNA Disorazole DMSO Run2   | NM_001838 | CCR7 | chemokine (C-C motif) receptor 7 | -2.490677 | Inlier |
| siRNA Disorazole DMSO Run1   | NM_001838 | CCR7 | chemokine (C-C motif) receptor 7 | -1.594834 | Inlier |
| siRNA Disorazole DMSO Run3   | NM_001838 | CCR7 | chemokine (C-C motif) receptor 7 | -0.316439 | Inlier |
| siRNA-Temozolomide Run3-DMSO | NM_001838 | CCR7 | chemokine (C-C motif) receptor 7 | -0.19049  | Inlier |
| siRNA-Temozolomide Run1-DMSO | NM_001838 | CCR7 | chemokine (C-C motif) receptor 7 | 0.190489  | Inlier |
| siRNA-Temozolomide Run2-DMSO | NM_001838 | CCR7 | chemokine (C-C motif) receptor 7 | 0.208862  | Inlier |
| siRNA-Vinblastine Run1-DMSO  | NM_001838 | CCR7 | chemokine (C-C motif) receptor 7 | 1.032561  | Inlier |
| siRNA-Vinblastine Run2-DMSO  | NM_001838 | CCR7 | chemokine (C-C motif) receptor 7 | 1.081545  | Inlier |
| siRNA Disorazole DMSO Run1   | NM_005201 | CCR8 | chemokine (C-C motif) receptor 8 | -1.236488 | Inlier |
| siRNA Disorazole DMSO Run2   | NM_005201 | CCR8 | chemokine (C-C motif) receptor 8 | -1.048803 | Inlier |
| siRNA-Temozolomide Run3-DMSO | NM_005201 | CCR8 | chemokine (C-C motif) receptor 8 | -0.817709 | Inlier |
| siRNA-Temozolomide Run2-DMSO | NM_005201 | CCR8 | chemokine (C-C motif) receptor 8 | -0.311558 | Inlier |

Identification of Survival Genes in Human Glioblastoma Cells Using siRNA Screening  
 Nikhil G Thaker, Fang Zhang, Peter R. McDonald, Tong Ying Shun, Michael D Lewen, Ian F. Pollack, and John S. Lazo

Molecular Pharmacology

|                              |           |      |                                  |           |        |
|------------------------------|-----------|------|----------------------------------|-----------|--------|
| siRNA-Temozolomide Run1-DMSO | NM_005201 | CCR8 | chemokine (C-C motif) receptor 8 | 0.311558  | Inlier |
| siRNA-Vinblastine Run2-DMSO  | NM_005201 | CCR8 | chemokine (C-C motif) receptor 8 | 0.434559  | Inlier |
| siRNA-Vinblastine Run1-DMSO  | NM_005201 | CCR8 | chemokine (C-C motif) receptor 8 | 0.531291  | Inlier |
| siRNA Disorazole DMSO Run3   | NM_005201 | CCR8 | chemokine (C-C motif) receptor 8 | 0.975986  | Inlier |
| siRNA Disorazole DMSO Run1   | NM_031200 | CCR9 | chemokine (C-C motif) receptor 9 | -1.386013 | Inlier |
| siRNA Disorazole DMSO Run2   | NM_031200 | CCR9 | chemokine (C-C motif) receptor 9 | -1.113387 | Inlier |
| siRNA-Temozolomide Run3-DMSO | NM_031200 | CCR9 | chemokine (C-C motif) receptor 9 | -0.235613 | Inlier |
| siRNA-Temozolomide Run1-DMSO | NM_031200 | CCR9 | chemokine (C-C motif) receptor 9 | -0.045155 | Inlier |
| siRNA Disorazole DMSO Run3   | NM_031200 | CCR9 | chemokine (C-C motif) receptor 9 | 0.045155  | Inlier |
| siRNA-Temozolomide Run2-DMSO | NM_031200 | CCR9 | chemokine (C-C motif) receptor 9 | 0.112868  | Inlier |
| siRNA-Vinblastine Run2-DMSO  | NM_031200 | CCR9 | chemokine (C-C motif) receptor 9 | 1.154769  | Inlier |
| siRNA-Vinblastine Run1-DMSO  | NM_031200 | CCR9 | chemokine (C-C motif) receptor 9 | 1.7       | Inlier |
| siRNA Disorazole DMSO Run2   | NM_178432 | CCRK | cell cycle related kinase        | -0.722431 | Inlier |

Identification of Survival Genes in Human Glioblastoma Cells Using siRNA Screening

Nikhil G Thaker, Fang Zhang, Peter R. McDonald, Tong Ying Shun, Michael D Lewen, Ian F. Pollack, and John S.

Lazo

Molecular Pharmacology

|                              |               |       |                                          |           |        |
|------------------------------|---------------|-------|------------------------------------------|-----------|--------|
| siRNA-Temozolomide Run3-DMSO | NM_1784<br>32 | CCRK  | cell cycle related<br>kinase             | -0.626569 | Inlier |
| siRNA-Temozolomide Run1-DMSO | NM_1784<br>32 | CCRK  | cell cycle related<br>kinase             | -0.439235 | Inlier |
| siRNA-Temozolomide Run2-DMSO | NM_1784<br>32 | CCRK  | cell cycle related<br>kinase             | -0.091902 | Inlier |
| siRNA Disorazole DMSO Run3   | NM_1784<br>32 | CCRK  | cell cycle related<br>kinase             | 0.091902  | Inlier |
| siRNA Disorazole DMSO Run1   | NM_1784<br>32 | CCRK  | cell cycle related<br>kinase             | 0.778536  | Inlier |
| siRNA-Vinblastine Run1-DMSO  | NM_1784<br>32 | CCRK  | cell cycle related<br>kinase             | 1.181681  | Inlier |
| siRNA-Vinblastine Run2-DMSO  | NM_1784<br>32 | CCRK  | cell cycle related<br>kinase             | 1.561313  | Inlier |
| siRNA-Temozolomide Run3-DMSO | NM_1784<br>45 | CCRL1 | chemokine (C-C motif)<br>receptor-like 1 | -0.911154 | Inlier |
| siRNA-Temozolomide Run2-DMSO | NM_1784<br>45 | CCRL1 | chemokine (C-C motif)<br>receptor-like 1 | -0.713818 | Inlier |
| siRNA-Temozolomide Run1-DMSO | NM_1784<br>45 | CCRL1 | chemokine (C-C motif)<br>receptor-like 1 | -0.635182 | Inlier |
| siRNA Disorazole DMSO Run2   | NM_1784<br>45 | CCRL1 | chemokine (C-C motif)<br>receptor-like 1 | -0.32838  | Inlier |
| siRNA Disorazole DMSO Run3   | NM_1784<br>45 | CCRL1 | chemokine (C-C motif)<br>receptor-like 1 | 0.32838   | Inlier |
| siRNA Disorazole DMSO Run1   | NM_1784<br>45 | CCRL1 | chemokine (C-C motif)<br>receptor-like 1 | 0.515889  | Inlier |



Identification of Survival Genes in Human Glioblastoma Cells Using siRNA Screening  
 Nikhil G Thaker, Fang Zhang, Peter R. McDonald, Tong Ying Shun, Michael D Lewen, Ian F. Pollack, and John S. Lazo

Molecular Pharmacology

|                              |               |       |                                                    |           |        |
|------------------------------|---------------|-------|----------------------------------------------------|-----------|--------|
| siRNA-Vinblastine Run1-DMSO  | NM_1784<br>45 | CCRL1 | chemokine<br>(C-C<br>motif)<br>receptor-<br>like 1 | 2.291419  | Inlier |
| siRNA-Vinblastine Run2-DMSO  | NM_1784<br>45 | CCRL1 | chemokine<br>(C-C<br>motif)<br>receptor-<br>like 1 | 2.29248   | Inlier |
| siRNA Disorazole DMSO Run2   | NM_0039<br>65 | CCRL2 | chemokine<br>(C-C<br>motif)<br>receptor-<br>like 2 | -0.990602 | Inlier |
| siRNA-Temozolomide Run3-DMSO | NM_0039<br>65 | CCRL2 | chemokine<br>(C-C<br>motif)<br>receptor-<br>like 2 | -0.844087 | Inlier |
| siRNA Disorazole DMSO Run1   | NM_0039<br>65 | CCRL2 | chemokine<br>(C-C<br>motif)<br>receptor-<br>like 2 | -0.624872 | Inlier |
| siRNA-Temozolomide Run2-DMSO | NM_0039<br>65 | CCRL2 | chemokine<br>(C-C<br>motif)<br>receptor-<br>like 2 | -0.162191 | Inlier |
| siRNA-Temozolomide Run1-DMSO | NM_0039<br>65 | CCRL2 | chemokine<br>(C-C<br>motif)<br>receptor-<br>like 2 | 0.162191  | Inlier |
| siRNA Disorazole DMSO Run3   | NM_0039<br>65 | CCRL2 | chemokine<br>(C-C<br>motif)<br>receptor-<br>like 2 | 0.269958  | Inlier |
| siRNA-Vinblastine Run1-DMSO  | NM_0039<br>65 | CCRL2 | chemokine<br>(C-C<br>motif)<br>receptor-<br>like 2 | 0.724128  | Inlier |
| siRNA-Vinblastine Run2-DMSO  | NM_0039<br>65 | CCRL2 | chemokine<br>(C-C<br>motif)<br>receptor-<br>like 2 | 0.826663  | Inlier |

Identification of Survival Genes in Human Glioblastoma Cells Using siRNA Screening  
 Nikhil G Thaker, Fang Zhang, Peter R. McDonald, Tong Ying Shun, Michael D Lewen, Ian F. Pollack, and John S. Lazo  
 Molecular Pharmacology

|                              |               |     |                                                           |           |        |
|------------------------------|---------------|-----|-----------------------------------------------------------|-----------|--------|
| siRNA-Temozolomide Run3-DMSO | NM_0051<br>25 | CCS | copper<br>chaperone<br>for<br>superoxid<br>e<br>dismutase | -1.138644 | Inlier |
| siRNA Disorazole DMSO Run1   | NM_0051<br>25 | CCS | copper<br>chaperone<br>for<br>superoxid<br>e<br>dismutase | -0.838834 | Inlier |
| siRNA Disorazole DMSO Run3   | NM_0051<br>25 | CCS | copper<br>chaperone<br>for<br>superoxid<br>e<br>dismutase | -0.73143  | Inlier |
| siRNA-Vinblastine Run2-DMSO  | NM_0051<br>25 | CCS | copper<br>chaperone<br>for<br>superoxid<br>e<br>dismutase | -0.102121 | Inlier |
| siRNA-Temozolomide Run1-DMSO | NM_0051<br>25 | CCS | copper<br>chaperone<br>for<br>superoxid<br>e<br>dismutase | 0.102121  | Inlier |
| siRNA-Temozolomide Run2-DMSO | NM_0051<br>25 | CCS | copper<br>chaperone<br>for<br>superoxid<br>e<br>dismutase | 0.287757  | Inlier |
| siRNA-Vinblastine Run1-DMSO  | NM_0051<br>25 | CCS | copper<br>chaperone<br>for<br>superoxid<br>e<br>dismutase | 0.61757   | Inlier |

Identification of Survival Genes in Human Glioblastoma Cells Using siRNA Screening  
 Nikhil G Thaker, Fang Zhang, Peter R. McDonald, Tong Ying Shun, Michael D Lewen, Ian F. Pollack, and John S. Lazo  
 Molecular Pharmacology

|                                  |               |       |                                                                                     |                  |
|----------------------------------|---------------|-------|-------------------------------------------------------------------------------------|------------------|
|                                  |               |       | copper<br>chaperone<br>for<br>superoxid<br>e                                        |                  |
| siRNA Disorazole DMSO Run2       | NM_0051<br>25 | CCS   | dismutase                                                                           | 0.921971 Inlier  |
| siRNA-Temozolomide Run3-<br>DMSO | NM_0042<br>44 | CD163 | CD163<br>antigen                                                                    | -1.311458 Inlier |
| siRNA-Temozolomide Run2-<br>DMSO | NM_0042<br>44 | CD163 | CD163<br>antigen                                                                    | -1.099754 Inlier |
| siRNA-Temozolomide Run1-<br>DMSO | NM_0042<br>44 | CD163 | CD163<br>antigen                                                                    | -0.187836 Inlier |
| siRNA Disorazole DMSO Run3       | NM_0042<br>44 | CD163 | CD163<br>antigen                                                                    | -0.025555 Inlier |
| siRNA Disorazole DMSO Run1       | NM_0042<br>44 | CD163 | CD163<br>antigen                                                                    | 0.025555 Inlier  |
| siRNA-Vinblastine Run2-<br>DMSO  | NM_0042<br>44 | CD163 | CD163<br>antigen                                                                    | 0.249246 Inlier  |
| siRNA Disorazole DMSO Run2       | NM_0042<br>44 | CD163 | CD163<br>antigen                                                                    | 1.481818 Inlier  |
| siRNA-Vinblastine Run1-<br>DMSO  | NM_0042<br>44 | CD163 | CD163<br>antigen<br>CD2<br>antigen<br>(p50),<br>sheep red<br>blood cell<br>receptor | -1.642262 Inlier |
| siRNA-Temozolomide Run1-<br>DMSO | NM_0017<br>67 | CD2   | CD2<br>antigen<br>(p50),<br>sheep red<br>blood cell<br>receptor                     | -0.483018 Inlier |
| siRNA-Vinblastine Run2-<br>DMSO  | NM_0017<br>67 | CD2   | CD2<br>antigen<br>(p50),<br>sheep red<br>blood cell<br>receptor                     | -0.384176 Inlier |
| siRNA-Temozolomide Run3-<br>DMSO | NM_0017<br>67 | CD2   | CD2<br>antigen<br>(p50),<br>sheep red<br>blood cell<br>receptor                     | -0.183264 Inlier |

Identification of Survival Genes in Human Glioblastoma Cells Using siRNA Screening  
 Nikhil G Thaker, Fang Zhang, Peter R. McDonald, Tong Ying Shun, Michael D Lewen, Ian F. Pollack, and John S. Lazo

Molecular Pharmacology

| siRNA Treatment              | Gene ID   | Gene Name | Gene Description                                 | Value     | Category |
|------------------------------|-----------|-----------|--------------------------------------------------|-----------|----------|
| siRNA Disorazole DMSO Run3   | NM_001767 | CD2       | CD2 antigen (p50), sheep red blood cell receptor | 0.183263  | Inlier   |
| siRNA-Vinblastine Run1-DMSO  | NM_001767 | CD2       | CD2 antigen (p50), sheep red blood cell receptor | 0.865982  | Inlier   |
| siRNA-Temozolomide Run2-DMSO | NM_001767 | CD2       | CD2 antigen (p50), sheep red blood cell receptor | 1.251691  | Inlier   |
| siRNA Disorazole DMSO Run2   | NM_001767 | CD2       | CD2 antigen (p50), sheep red blood cell receptor | 1.385577  | Inlier   |
| siRNA Disorazole DMSO Run1   | NM_016382 | CD244     | CD244 natural killer cell receptor 2B4           | -1.253016 | Inlier   |
| siRNA-Temozolomide Run3-DMSO | NM_016382 | CD244     | CD244 natural killer cell receptor 2B4           | -0.847938 | Inlier   |
| siRNA-Temozolomide Run1-DMSO | NM_016382 | CD244     | CD244 natural killer cell receptor 2B4           | -0.501062 | Inlier   |
| siRNA Disorazole DMSO Run3   | NM_016382 | CD244     | CD244 natural killer cell receptor 2B4           | -0.049457 | Inlier   |
| siRNA-Temozolomide Run2-DMSO | NM_016382 | CD244     | CD244 natural killer cell receptor 2B4           | 0.049458  | Inlier   |

Identification of Survival Genes in Human Glioblastoma Cells Using siRNA Screening

Nikhil G Thaker, Fang Zhang, Peter R. McDonald, Tong Ying Shun, Michael D Lewen, Ian F. Pollack, and John S. Lazo

Molecular Pharmacology

| siRNA                        | Gene         | Cell Line | Gene Name                                                        | Value     | Outlier |
|------------------------------|--------------|-----------|------------------------------------------------------------------|-----------|---------|
| siRNA-Vinblastine Run2-DMSO  | NM_016382    | CD244     | CD244 natural killer cell receptor 2B4                           | 0.215761  | Inlier  |
| siRNA Disorazole DMSO Run2   | NM_016382    | CD244     | CD244 natural killer cell receptor 2B4                           | 1.48157   | Inlier  |
| siRNA-Vinblastine Run1-DMSO  | NM_016382    | CD244     | CD244 natural killer cell receptor 2B4                           | 1.497318  | Inlier  |
| siRNA-Temozolomide Run2-DMSO | NM_001001548 | CD36      | CD36 antigen (collagen type I receptor, thrombospondin receptor) | -1.033221 | Inlier  |
| siRNA-Temozolomide Run1-DMSO | NM_001001548 | CD36      | CD36 antigen (collagen type I receptor, thrombospondin receptor) | -0.678005 | Inlier  |
| siRNA-Temozolomide Run3-DMSO | NM_001001548 | CD36      | CD36 antigen (collagen type I receptor, thrombospondin receptor) | -0.670995 | Inlier  |
| siRNA Disorazole DMSO Run3   | NM_001001548 | CD36      | CD36 antigen (collagen type I receptor, thrombospondin receptor) | -0.01169  | Inlier  |

Identification of Survival Genes in Human Glioblastoma Cells Using siRNA Screening  
 Nikhil G Thaker, Fang Zhang, Peter R. McDonald, Tong Ying Shun, Michael D Lewen, Ian F. Pollack, and John S. Lazo

Molecular Pharmacology

| siRNA Treatment              | Gene ID     | Gene Name | Gene Description                                                 | Log Fold Change | Outlier Status |
|------------------------------|-------------|-----------|------------------------------------------------------------------|-----------------|----------------|
| siRNA-Vinblastine Run2-DMSO  | NM_00101548 | CD36      | CD36 antigen (collagen type I receptor, thrombospondin receptor) | 0.01169         | Inlier         |
| siRNA Disorazole DMSO Run1   | NM_00101548 | CD36      | CD36 antigen (collagen type I receptor, thrombospondin receptor) | 0.267705        | Inlier         |
| siRNA-Vinblastine Run1-DMSO  | NM_00101548 | CD36      | CD36 antigen (collagen type I receptor, thrombospondin receptor) | 1.049026        | Inlier         |
| siRNA Disorazole DMSO Run2   | NM_00101548 | CD36      | CD36 antigen (collagen type I receptor, thrombospondin receptor) | 1.156388        | Inlier         |
| siRNA-Vinblastine Run2-DMSO  | NM_001775   | CD38      | CD38 antigen (p45)                                               | -2.037647       | Inlier         |
| siRNA Disorazole DMSO Run1   | NM_001775   | CD38      | CD38 antigen (p45)                                               | -1.04084        | Inlier         |
| siRNA Disorazole DMSO Run3   | NM_001775   | CD38      | CD38 antigen (p45)                                               | -0.671138       | Inlier         |
| siRNA-Temozolomide Run2-DMSO | NM_001775   | CD38      | CD38 antigen (p45)                                               | -0.512904       | Inlier         |
| siRNA-Temozolomide Run3-DMSO | NM_001775   | CD38      | CD38 antigen (p45)                                               | 0.512905        | Inlier         |
| siRNA Disorazole DMSO Run2   | NM_001775   | CD38      | CD38 antigen (p45)                                               | 0.644696        | Inlier         |

Identification of Survival Genes in Human Glioblastoma Cells Using siRNA Screening

Nikhil G Thaker, Fang Zhang, Peter R. McDonald, Tong Ying Shun, Michael D Lewen, Ian F. Pollack, and John S.

Lazo

Molecular Pharmacology

|                              |                  |      |                                                                                   |           |        |
|------------------------------|------------------|------|-----------------------------------------------------------------------------------|-----------|--------|
| siRNA-Vinblastine Run1-DMSO  | NM_0017<br>75    | CD38 | CD38<br>antigen<br>(p45)                                                          | 0.677861  | Inlier |
| siRNA-Temozolomide Run1-DMSO | NM_0017<br>75    | CD38 | CD38<br>antigen<br>(p45)                                                          | 2.325833  | Inlier |
| siRNA-Temozolomide Run3-DMSO | NM_0010<br>01391 | CD44 | CD44<br>antigen<br>(homing<br>function<br>and Indian<br>blood<br>group<br>system) | -2.092615 | Inlier |
| siRNA-Temozolomide Run2-DMSO | NM_0010<br>01391 | CD44 | CD44<br>antigen<br>(homing<br>function<br>and Indian<br>blood<br>group<br>system) | -1.865254 | Inlier |
| siRNA-Temozolomide Run1-DMSO | NM_0010<br>01391 | CD44 | CD44<br>antigen<br>(homing<br>function<br>and Indian<br>blood<br>group<br>system) | -0.40928  | Inlier |
| siRNA Disorazole DMSO Run1   | NM_0010<br>01391 | CD44 | CD44<br>antigen<br>(homing<br>function<br>and Indian<br>blood<br>group<br>system) | -0.206309 | Inlier |
| siRNA-Vinblastine Run2-DMSO  | NM_0010<br>01391 | CD44 | CD44<br>antigen<br>(homing<br>function<br>and Indian<br>blood<br>group<br>system) | 0.206308  | Inlier |

Identification of Survival Genes in Human Glioblastoma Cells Using siRNA Screening  
 Nikhil G Thaker, Fang Zhang, Peter R. McDonald, Tong Ying Shun, Michael D Lewen, Ian F. Pollack, and John S. Lazo

Molecular Pharmacology

| siRNA Treatment              | Gene ID     | Gene Name | Gene Description                                             | Value     | Outlier Status |
|------------------------------|-------------|-----------|--------------------------------------------------------------|-----------|----------------|
| siRNA Disorazole DMSO Run3   | NM_00101391 | CD44      | CD44 antigen (homing function and Indian blood group system) | 0.433315  | Inlier         |
| siRNA-Vinblastine Run1-DMSO  | NM_00101391 | CD44      | CD44 antigen (homing function and Indian blood group system) | 0.915685  | Inlier         |
| siRNA Disorazole DMSO Run2   | NM_00101391 | CD44      | CD44 antigen (homing function and Indian blood group system) | 1.912903  | Inlier         |
| siRNA-Temozolomide Run2-DMSO | NM_014207   | CD5       | CD5 antigen (p56-62)                                         | -1.870318 | Inlier         |
| siRNA-Temozolomide Run3-DMSO | NM_014207   | CD5       | CD5 antigen (p56-62)                                         | -1.784448 | Inlier         |
| siRNA-Temozolomide Run1-DMSO | NM_014207   | CD5       | CD5 antigen (p56-62)                                         | -0.750075 | Inlier         |
| siRNA Disorazole DMSO Run1   | NM_014207   | CD5       | CD5 antigen (p56-62)                                         | -0.117259 | Inlier         |
| siRNA-Vinblastine Run2-DMSO  | NM_014207   | CD5       | CD5 antigen (p56-62)                                         | 0.117259  | Inlier         |
| siRNA Disorazole DMSO Run3   | NM_014207   | CD5       | CD5 antigen (p56-62)                                         | 0.154038  | Inlier         |
| siRNA-Vinblastine Run1-DMSO  | NM_014207   | CD5       | CD5 antigen (p56-62)                                         | 0.613152  | Inlier         |
| siRNA Disorazole DMSO Run2   | NM_014207   | CD5       | CD5 antigen (p56-62)                                         | 0.735847  | Inlier         |



Identification of Survival Genes in Human Glioblastoma Cells Using siRNA Screening

Nikhil G Thaker, Fang Zhang, Peter R. McDonald, Tong Ying Shun, Michael D Lewen, Ian F. Pollack, and John S. Lazo

Molecular Pharmacology

|                                  |               |      |                                                                               |           |        |
|----------------------------------|---------------|------|-------------------------------------------------------------------------------|-----------|--------|
| siRNA Disorazole DMSO Run1       | NM_0058<br>94 | CD5L | CD5<br>antigen-<br>like<br>(scavenger<br>receptor<br>cysteine<br>rich family) | -0.799652 | Inlier |
| siRNA-Vinblastine Run2-<br>DMSO  | NM_0058<br>94 | CD5L | CD5<br>antigen-<br>like<br>(scavenger<br>receptor<br>cysteine<br>rich family) | -0.750402 | Inlier |
| siRNA-Temozolomide Run3-<br>DMSO | NM_0058<br>94 | CD5L | CD5<br>antigen-<br>like<br>(scavenger<br>receptor<br>cysteine<br>rich family) | -0.457178 | Inlier |
| siRNA Disorazole DMSO Run3       | NM_0058<br>94 | CD5L | CD5<br>antigen-<br>like<br>(scavenger<br>receptor<br>cysteine<br>rich family) | -0.018061 | Inlier |
| siRNA-Temozolomide Run2-<br>DMSO | NM_0058<br>94 | CD5L | CD5<br>antigen-<br>like<br>(scavenger<br>receptor<br>cysteine<br>rich family) | 0.018061  | Inlier |
| siRNA-Temozolomide Run1-<br>DMSO | NM_0058<br>94 | CD5L | CD5<br>antigen-<br>like<br>(scavenger<br>receptor<br>cysteine<br>rich family) | 0.598599  | Inlier |

Identification of Survival Genes in Human Glioblastoma Cells Using siRNA Screening  
 Nikhil G Thaker, Fang Zhang, Peter R. McDonald, Tong Ying Shun, Michael D Lewen, Ian F. Pollack, and John S. Lazo  
 Molecular Pharmacology

|                              |               |      |                                                                     |           |         |
|------------------------------|---------------|------|---------------------------------------------------------------------|-----------|---------|
| siRNA-Vinblastine Run1-DMSO  | NM_0058<br>94 | CD5L | CD5<br>antigen-like<br>(scavenger receptor<br>cysteine rich family) | 0.875978  | Inlier  |
| siRNA Disorazole DMSO Run2   | NM_0058<br>94 | CD5L | CD5<br>antigen-like<br>(scavenger receptor<br>cysteine rich family) | 1.028416  | Inlier  |
| siRNA-Temozolomide Run3-DMSO | NM_0067<br>25 | CD6  | CD6<br>antigen                                                      | -4.069106 | Outlier |
| siRNA-Temozolomide Run2-DMSO | NM_0067<br>25 | CD6  | CD6<br>antigen                                                      | -0.900979 | Inlier  |
| siRNA-Vinblastine Run2-DMSO  | NM_0067<br>25 | CD6  | CD6<br>antigen                                                      | -0.651486 | Inlier  |
| siRNA Disorazole DMSO Run1   | NM_0067<br>25 | CD6  | CD6<br>antigen                                                      | -0.510092 | Inlier  |
| siRNA-Temozolomide Run1-DMSO | NM_0067<br>25 | CD6  | CD6<br>antigen                                                      | 0.510092  | Inlier  |
| siRNA Disorazole DMSO Run2   | NM_0067<br>25 | CD6  | CD6<br>antigen                                                      | 0.654541  | Inlier  |
| siRNA Disorazole DMSO Run3   | NM_0067<br>25 | CD6  | CD6<br>antigen                                                      | 0.694459  | Inlier  |
| siRNA-Vinblastine Run1-DMSO  | NM_0067<br>25 | CD6  | CD6<br>antigen                                                      | 0.821133  | Inlier  |
| siRNA-Temozolomide Run3-DMSO | NM_0784<br>81 | CD97 | CD97<br>antigen                                                     | -0.925044 | Inlier  |
| siRNA-Temozolomide Run1-DMSO | NM_0784<br>81 | CD97 | CD97<br>antigen                                                     | -0.800479 | Inlier  |
| siRNA-Vinblastine Run1-DMSO  | NM_0784<br>81 | CD97 | CD97<br>antigen                                                     | -0.611694 | Inlier  |
| siRNA Disorazole DMSO Run1   | NM_0784<br>81 | CD97 | CD97<br>antigen                                                     | -0.00121  | Inlier  |
| siRNA-Temozolomide Run2-DMSO | NM_0784<br>81 | CD97 | CD97<br>antigen                                                     | 0.00121   | Inlier  |
| siRNA-Vinblastine Run2-DMSO  | NM_0784<br>81 | CD97 | CD97<br>antigen                                                     | 0.392486  | Inlier  |
| siRNA Disorazole DMSO Run2   | NM_0784<br>81 | CD97 | CD97<br>antigen                                                     | 0.737306  | Inlier  |
| siRNA Disorazole DMSO Run3   | NM_0784<br>81 | CD97 | CD97<br>antigen<br>cytidine                                         | 4.475647  | Outlier |
| siRNA-Temozolomide Run2-DMSO | NM_0017<br>85 | CDA  | deaminase                                                           | -1.14446  | Inlier  |

Identification of Survival Genes in Human Glioblastoma Cells Using siRNA Screening  
 Nikhil G Thaker, Fang Zhang, Peter R. McDonald, Tong Ying Shun, Michael D Lewen, Ian F. Pollack, and John S. Lazo

Molecular Pharmacology

|                              |               |        |                                                                 |           |        |
|------------------------------|---------------|--------|-----------------------------------------------------------------|-----------|--------|
| siRNA-Temozolomide Run3-DMSO | NM_0017<br>85 | CDA    | cytidine<br>deaminas<br>e                                       | -0.87588  | Inlier |
| siRNA Disorazole DMSO Run3   | NM_0017<br>85 | CDA    | cytidine<br>deaminas<br>e                                       | -0.055007 | Inlier |
| siRNA-Vinblastine Run2-DMSO  | NM_0017<br>85 | CDA    | cytidine<br>deaminas<br>e                                       | -0.033611 | Inlier |
| siRNA Disorazole DMSO Run1   | NM_0017<br>85 | CDA    | cytidine<br>deaminas<br>e                                       | 0.03361   | Inlier |
| siRNA-Temozolomide Run1-DMSO | NM_0017<br>85 | CDA    | cytidine<br>deaminas<br>e                                       | 0.47312   | Inlier |
| siRNA Disorazole DMSO Run2   | NM_0017<br>85 | CDA    | cytidine<br>deaminas<br>e                                       | 2.195627  | Inlier |
| siRNA-Vinblastine Run1-DMSO  | NM_0017<br>85 | CDA    | cytidine<br>deaminas<br>e                                       | 2.65082   | Inlier |
| siRNA-Temozolomide Run3-DMSO | NM_0307<br>90 | CDA08  | CDA08                                                           | -1.226507 | Inlier |
| siRNA-Temozolomide Run1-DMSO | NM_0307<br>90 | CDA08  | CDA08                                                           | -1.130823 | Inlier |
| siRNA Disorazole DMSO Run3   | NM_0307<br>90 | CDA08  | CDA08                                                           | -0.688164 | Inlier |
| siRNA-Temozolomide Run2-DMSO | NM_0307<br>90 | CDA08  | CDA08                                                           | -0.20242  | Inlier |
| siRNA-Vinblastine Run1-DMSO  | NM_0307<br>90 | CDA08  | CDA08                                                           | 0.202419  | Inlier |
| siRNA-Vinblastine Run2-DMSO  | NM_0307<br>90 | CDA08  | CDA08                                                           | 0.39937   | Inlier |
| siRNA Disorazole DMSO Run1   | NM_0307<br>90 | CDA08  | CDA08                                                           | 0.660836  | Inlier |
| siRNA Disorazole DMSO Run2   | NM_0307<br>90 | CDA08  | CDA08                                                           | 1.231776  | Inlier |
| siRNA Disorazole DMSO Run2   | NM_0309<br>11 | CDADC1 | cytidine<br>and dCMP<br>deaminas<br>e domain<br>containing<br>1 | -0.945721 | Inlier |
| siRNA-Temozolomide Run3-DMSO | NM_0309<br>11 | CDADC1 | cytidine<br>and dCMP<br>deaminas<br>e domain<br>containing<br>1 | -0.933498 | Inlier |

Identification of Survival Genes in Human Glioblastoma Cells Using siRNA Screening  
 Nikhil G Thaker, Fang Zhang, Peter R. McDonald, Tong Ying Shun, Michael D Lewen, Ian F. Pollack, and John S. Lazo  
 Molecular Pharmacology

|                                  |               |        |   |                                                                          |                  |
|----------------------------------|---------------|--------|---|--------------------------------------------------------------------------|------------------|
| siRNA Disorazole DMSO Run3       | NM_0309<br>11 | CDADC1 | 1 | cytidine<br>and dCMP<br>deaminas<br>e domain<br>containing               | -0.415502 Inlier |
| siRNA-Temozolomide Run2-<br>DMSO | NM_0309<br>11 | CDADC1 | 1 | cytidine<br>and dCMP<br>deaminas<br>e domain<br>containing               | -0.061855 Inlier |
| siRNA-Temozolomide Run1-<br>DMSO | NM_0309<br>11 | CDADC1 | 1 | cytidine<br>and dCMP<br>deaminas<br>e domain<br>containing               | 0.061856 Inlier  |
| siRNA Disorazole DMSO Run1       | NM_0309<br>11 | CDADC1 | 1 | cytidine<br>and dCMP<br>deaminas<br>e domain<br>containing               | 0.233467 Inlier  |
| siRNA-Vinblastine Run2-<br>DMSO  | NM_0309<br>11 | CDADC1 | 1 | cytidine<br>and dCMP<br>deaminas<br>e domain<br>containing               | 0.948854 Inlier  |
| siRNA-Vinblastine Run1-<br>DMSO  | NM_0309<br>11 | CDADC1 | 1 | cytidine<br>and dCMP<br>deaminas<br>e domain<br>containing               | 1.027771 Inlier  |
| siRNA Disorazole DMSO Run2       | NM_0333<br>13 | CDC14A | 1 | CDC14<br>cell<br>division<br>cycle 14<br>homolog A<br>(S.<br>cerevisiae) | -0.911263 Inlier |

Identification of Survival Genes in Human Glioblastoma Cells Using siRNA Screening  
 Nikhil G Thaker, Fang Zhang, Peter R. McDonald, Tong Ying Shun, Michael D Lewen, Ian F. Pollack, and John S. Lazo  
 Molecular Pharmacology

|                              |               |        |                                                                          |           |        |
|------------------------------|---------------|--------|--------------------------------------------------------------------------|-----------|--------|
| siRNA-Temozolomide Run3-DMSO | NM_0333<br>13 | CDC14A | CDC14<br>cell<br>division<br>cycle 14<br>homolog A<br>(S.<br>cerevisiae) | -0.678595 | Inlier |
| siRNA-Temozolomide Run2-DMSO | NM_0333<br>13 | CDC14A | CDC14<br>cell<br>division<br>cycle 14<br>homolog A<br>(S.<br>cerevisiae) | -0.609723 | Inlier |
| siRNA Disorazole DMSO Run1   | NM_0333<br>13 | CDC14A | CDC14<br>cell<br>division<br>cycle 14<br>homolog A<br>(S.<br>cerevisiae) | -0.41308  | Inlier |
| siRNA-Vinblastine Run1-DMSO  | NM_0333<br>13 | CDC14A | CDC14<br>cell<br>division<br>cycle 14<br>homolog A<br>(S.<br>cerevisiae) | 0.41308   | Inlier |
| siRNA Disorazole DMSO Run3   | NM_0333<br>13 | CDC14A | CDC14<br>cell<br>division<br>cycle 14<br>homolog A<br>(S.<br>cerevisiae) | 0.670405  | Inlier |
| siRNA-Temozolomide Run1-DMSO | NM_0333<br>13 | CDC14A | CDC14<br>cell<br>division<br>cycle 14<br>homolog A<br>(S.<br>cerevisiae) | 0.732988  | Inlier |

Identification of Survival Genes in Human Glioblastoma Cells Using siRNA Screening  
 Nikhil G Thaker, Fang Zhang, Peter R. McDonald, Tong Ying Shun, Michael D Lewen, Ian F. Pollack, and John S. Lazo  
 Molecular Pharmacology

|                              |               |        |                                                                       |           |        |
|------------------------------|---------------|--------|-----------------------------------------------------------------------|-----------|--------|
| siRNA-Vinblastine Run2-DMSO  | NM_0333<br>13 | CDC14A | CDC14<br>cell<br>division<br>cycle 14<br>homolog A<br>(S. cerevisiae) | 1.199115  | Inlier |
| siRNA-Temozolomide Run2-DMSO | NM_0333<br>32 | CDC14B | CDC14<br>cell<br>division<br>cycle 14<br>homolog B<br>(S. cerevisiae) | -1.843156 | Inlier |
| siRNA Disorazole DMSO Run2   | NM_0333<br>32 | CDC14B | CDC14<br>cell<br>division<br>cycle 14<br>homolog B<br>(S. cerevisiae) | -0.849083 | Inlier |
| siRNA-Temozolomide Run3-DMSO | NM_0333<br>32 | CDC14B | CDC14<br>cell<br>division<br>cycle 14<br>homolog B<br>(S. cerevisiae) | -0.717037 | Inlier |
| siRNA Disorazole DMSO Run1   | NM_0333<br>32 | CDC14B | CDC14<br>cell<br>division<br>cycle 14<br>homolog B<br>(S. cerevisiae) | -0.219575 | Inlier |
| siRNA-Vinblastine Run1-DMSO  | NM_0333<br>32 | CDC14B | CDC14<br>cell<br>division<br>cycle 14<br>homolog B<br>(S. cerevisiae) | 0.219575  | Inlier |

Identification of Survival Genes in Human Glioblastoma Cells Using siRNA Screening  
 Nikhil G Thaker, Fang Zhang, Peter R. McDonald, Tong Ying Shun, Michael D Lewen, Ian F. Pollack, and John S. Lazo  
 Molecular Pharmacology

|                              |           |        |                                                                       |           |        |
|------------------------------|-----------|--------|-----------------------------------------------------------------------|-----------|--------|
| siRNA-Temozolomide Run1-DMSO | NM_033332 | CDC14B | CDC14<br>cell<br>division<br>cycle 14<br>homolog B<br>(S. cerevisiae) | 0.453098  | Inlier |
| siRNA-Vinblastine Run2-DMSO  | NM_033332 | CDC14B | CDC14<br>cell<br>division<br>cycle 14<br>homolog B<br>(S. cerevisiae) | 0.631963  | Inlier |
| siRNA Disorazole DMSO Run3   | NM_033332 | CDC14B | CDC14<br>cell<br>division<br>cycle 14<br>homolog B<br>(S. cerevisiae) | 2.157265  | Inlier |
| siRNA-Temozolomide Run3-DMSO | NM_001786 | CDC2   | cell<br>division<br>cycle 2,<br>G1 to S<br>and G2 to<br>M             | -1.916568 | Inlier |
| siRNA-Temozolomide Run2-DMSO | NM_001786 | CDC2   | cell<br>division<br>cycle 2,<br>G1 to S<br>and G2 to<br>M             | -0.72448  | Inlier |
| siRNA-Vinblastine Run2-DMSO  | NM_001786 | CDC2   | cell<br>division<br>cycle 2,<br>G1 to S<br>and G2 to<br>M             | -0.45531  | Inlier |
| siRNA-Temozolomide Run1-DMSO | NM_001786 | CDC2   | cell<br>division<br>cycle 2,<br>G1 to S<br>and G2 to<br>M             | -0.250922 | Inlier |

Identification of Survival Genes in Human Glioblastoma Cells Using siRNA Screening  
 Nikhil G Thaker, Fang Zhang, Peter R. McDonald, Tong Ying Shun, Michael D Lewen, Ian F. Pollack, and John S. Lazo

Molecular Pharmacology

|                                  |               |       |                                                               |           |        |
|----------------------------------|---------------|-------|---------------------------------------------------------------|-----------|--------|
| siRNA Disorazole DMSO Run3       | NM_0017<br>86 | CDC2  | cell<br>division<br>cycle 2,<br>G1 to S<br>and G2 to<br>M     | 0.250922  | Inlier |
| siRNA Disorazole DMSO Run1       | NM_0017<br>86 | CDC2  | cell<br>division<br>cycle 2,<br>G1 to S<br>and G2 to<br>M     | 0.62452   | Inlier |
| siRNA-Vinblastine Run1-<br>DMSO  | NM_0017<br>86 | CDC2  | cell<br>division<br>cycle 2,<br>G1 to S<br>and G2 to<br>M     | 1.971406  | Inlier |
| siRNA Disorazole DMSO Run2       | NM_0017<br>86 | CDC2  | cell<br>division<br>cycle 2,<br>G1 to S<br>and G2 to<br>M     | 1.98946   | Inlier |
| siRNA-Temozolomide Run3-<br>DMSO | NM_0046<br>61 | CDC23 | CDC23<br>(cell<br>division<br>cycle 23,<br>yeast,<br>homolog) | -1.304693 | Inlier |
| siRNA-Temozolomide Run2-<br>DMSO | NM_0046<br>61 | CDC23 | CDC23<br>(cell<br>division<br>cycle 23,<br>yeast,<br>homolog) | -0.797097 | Inlier |
| siRNA-Temozolomide Run1-<br>DMSO | NM_0046<br>61 | CDC23 | CDC23<br>(cell<br>division<br>cycle 23,<br>yeast,<br>homolog) | -0.310832 | Inlier |
| siRNA-Vinblastine Run2-<br>DMSO  | NM_0046<br>61 | CDC23 | CDC23<br>(cell<br>division<br>cycle 23,<br>yeast,<br>homolog) | -0.073425 | Inlier |



Identification of Survival Genes in Human Glioblastoma Cells Using siRNA Screening  
 Nikhil G Thaker, Fang Zhang, Peter R. McDonald, Tong Ying Shun, Michael D Lewen, Ian F. Pollack, and John S. Lazo

Molecular Pharmacology

|                                  |               |        |                                                                        |           |        |
|----------------------------------|---------------|--------|------------------------------------------------------------------------|-----------|--------|
| siRNA Disorazole DMSO Run3       | NM_0046<br>61 | CDC23  | CDC23<br>(cell<br>division<br>cycle 23,<br>yeast,<br>homolog)<br>CDC23 | 0.073425  | Inlier |
| siRNA Disorazole DMSO Run1       | NM_0046<br>61 | CDC23  | CDC23<br>(cell<br>division<br>cycle 23,<br>yeast,<br>homolog)<br>CDC23 | 0.551903  | Inlier |
| siRNA Disorazole DMSO Run2       | NM_0046<br>61 | CDC23  | CDC23<br>(cell<br>division<br>cycle 23,<br>yeast,<br>homolog)<br>CDC23 | 1.114816  | Inlier |
| siRNA-Vinblastine Run1-<br>DMSO  | NM_0046<br>61 | CDC23  | CDC23<br>(cell<br>division<br>cycle 23,<br>yeast,<br>homolog)<br>cell  | 1.273848  | Inlier |
| siRNA Disorazole DMSO Run2       | NM_2015<br>67 | CDC25A | division<br>cycle 25A<br>cell                                          | -0.731883 | Inlier |
| siRNA-Temozolomide Run2-<br>DMSO | NM_2015<br>67 | CDC25A | division<br>cycle 25A<br>cell                                          | -0.617117 | Inlier |
| siRNA-Temozolomide Run3-<br>DMSO | NM_2015<br>67 | CDC25A | division<br>cycle 25A<br>cell                                          | -0.494229 | Inlier |
| siRNA Disorazole DMSO Run3       | NM_2015<br>67 | CDC25A | division<br>cycle 25A<br>cell                                          | -0.13803  | Inlier |
| siRNA Disorazole DMSO Run1       | NM_2015<br>67 | CDC25A | division<br>cycle 25A<br>cell                                          | 0.13803   | Inlier |
| siRNA-Temozolomide Run1-<br>DMSO | NM_2015<br>67 | CDC25A | division<br>cycle 25A<br>cell                                          | 1.101599  | Inlier |
| siRNA-Vinblastine Run1-<br>DMSO  | NM_2015<br>67 | CDC25A | division<br>cycle 25A<br>cell                                          | 1.110747  | Inlier |
| siRNA-Vinblastine Run2-<br>DMSO  | NM_2015<br>67 | CDC25A | division<br>cycle 25A<br>cell                                          | 1.126517  | Inlier |
| siRNA-Vinblastine Run1-<br>DMSO  | NM_0218<br>72 | CDC25B | division<br>cycle 25B                                                  | -1.107244 | Inlier |

Identification of Survival Genes in Human Glioblastoma Cells Using siRNA Screening  
 Nikhil G Thaker, Fang Zhang, Peter R. McDonald, Tong Ying Shun, Michael D Lewen, Ian F. Pollack, and John S. Lazo

Molecular Pharmacology

|                              |         |        |                                                                 |           |        |
|------------------------------|---------|--------|-----------------------------------------------------------------|-----------|--------|
|                              | NM_0218 |        | cell<br>division                                                |           |        |
| siRNA Disorazole DMSO Run2   | 72      | CDC25B | cycle 25B                                                       | -0.673631 | Inlier |
|                              | NM_0218 |        | cell<br>division                                                |           |        |
| siRNA-Temozolomide Run3-DMSO | 72      | CDC25B | cycle 25B                                                       | -0.400655 | Inlier |
|                              | NM_0218 |        | cell<br>division                                                |           |        |
| siRNA-Temozolomide Run2-DMSO | 72      | CDC25B | cycle 25B                                                       | -0.124761 | Inlier |
|                              | NM_0218 |        | cell<br>division                                                |           |        |
| siRNA Disorazole DMSO Run1   | 72      | CDC25B | cycle 25B                                                       | 0.124759  | Inlier |
|                              | NM_0218 |        | cell<br>division                                                |           |        |
| siRNA-Temozolomide Run1-DMSO | 72      | CDC25B | cycle 25B                                                       | 0.675369  | Inlier |
|                              | NM_0218 |        | cell<br>division                                                |           |        |
| siRNA-Vinblastine Run2-DMSO  | 72      | CDC25B | cycle 25B                                                       | 2.312521  | Inlier |
|                              | NM_0218 |        | cell<br>division                                                |           |        |
| siRNA Disorazole DMSO Run3   | 72      | CDC25B | cycle 25B                                                       | 3.150997  | Inlier |
|                              | NM_0017 |        | cell<br>division                                                |           |        |
| siRNA Disorazole DMSO Run2   | 90      | CDC25C | cycle 25C                                                       | -1.193778 | Inlier |
|                              | NM_0017 |        | cell<br>division                                                |           |        |
| siRNA-Temozolomide Run2-DMSO | 90      | CDC25C | cycle 25C                                                       | -0.919915 | Inlier |
|                              | NM_0017 |        | cell<br>division                                                |           |        |
| siRNA-Temozolomide Run3-DMSO | 90      | CDC25C | cycle 25C                                                       | -0.357712 | Inlier |
|                              | NM_0017 |        | cell<br>division                                                |           |        |
| siRNA Disorazole DMSO Run3   | 90      | CDC25C | cycle 25C                                                       | -0.33147  | Inlier |
|                              | NM_0017 |        | cell<br>division                                                |           |        |
| siRNA Disorazole DMSO Run1   | 90      | CDC25C | cycle 25C                                                       | 0.33147   | Inlier |
|                              | NM_0017 |        | cell<br>division                                                |           |        |
| siRNA-Temozolomide Run1-DMSO | 90      | CDC25C | cycle 25C                                                       | 0.429085  | Inlier |
|                              | NM_0017 |        | cell<br>division                                                |           |        |
| siRNA-Vinblastine Run1-DMSO  | 90      | CDC25C | cycle 25C                                                       | 0.966983  | Inlier |
|                              | NM_0017 |        | cell<br>division                                                |           |        |
| siRNA-Vinblastine Run2-DMSO  | 90      | CDC25C | cycle 25C                                                       | 1.770257  | Inlier |
|                              | NM_0334 |        | cell<br>division<br>cycle 2-<br>like 1<br>(PITSLRE<br>proteins) |           |        |
| siRNA Disorazole DMSO Run2   | 92      | CDC2L1 |                                                                 | -1.154514 | Inlier |

Identification of Survival Genes in Human Glioblastoma Cells Using siRNA Screening  
 Nikhil G Thaker, Fang Zhang, Peter R. McDonald, Tong Ying Shun, Michael D Lewen, Ian F. Pollack, and John S. Lazo

Molecular Pharmacology

| siRNA Treatment              | Gene ID   | Gene Name | Category                                        | Value     | Outlier Status |
|------------------------------|-----------|-----------|-------------------------------------------------|-----------|----------------|
| siRNA-Temozolomide Run3-DMSO | NM_033492 | CDC2L1    | cell division cycle 2-like 1 (PITSLRE proteins) | -0.776817 | Inlier         |
| siRNA-Temozolomide Run2-DMSO | NM_033492 | CDC2L1    | cell division cycle 2-like 1 (PITSLRE proteins) | -0.61516  | Inlier         |
| siRNA Disorazole DMSO Run3   | NM_033492 | CDC2L1    | cell division cycle 2-like 1 (PITSLRE proteins) | -0.139548 | Inlier         |
| siRNA Disorazole DMSO Run1   | NM_033492 | CDC2L1    | cell division cycle 2-like 1 (PITSLRE proteins) | 0.139548  | Inlier         |
| siRNA-Temozolomide Run1-DMSO | NM_033492 | CDC2L1    | cell division cycle 2-like 1 (PITSLRE proteins) | 0.202034  | Inlier         |
| siRNA-Vinblastine Run1-DMSO  | NM_033492 | CDC2L1    | cell division cycle 2-like 1 (PITSLRE proteins) | 0.73384   | Inlier         |
| siRNA-Vinblastine Run2-DMSO  | NM_033492 | CDC2L1    | cell division cycle 2-like 1 (PITSLRE proteins) | 1.967851  | Inlier         |
| siRNA-Temozolomide Run3-DMSO | NM_033532 | CDC2L2    | cell division cycle 2-like 2 (PITSLRE proteins) | -0.728042 | Inlier         |

Identification of Survival Genes in Human Glioblastoma Cells Using siRNA Screening

Nikhil G Thaker, Fang Zhang, Peter R. McDonald, Tong Ying Shun, Michael D Lewen, Ian F. Pollack, and John S. Lazo

Molecular Pharmacology

|                              |               |        |                                                                                                           |           |        |
|------------------------------|---------------|--------|-----------------------------------------------------------------------------------------------------------|-----------|--------|
| siRNA-Temozolomide Run2-DMSO | NM_0335<br>32 | CDC2L2 | cell<br>division<br>cycle 2-<br>like 2<br>(PITSLRE<br>proteins)                                           | -0.646482 | Inlier |
| siRNA-Temozolomide Run1-DMSO | NM_0335<br>32 | CDC2L2 | cell<br>division<br>cycle 2-<br>like 2<br>(PITSLRE<br>proteins)                                           | -0.358234 | Inlier |
| siRNA Disorazole DMSO Run3   | NM_0335<br>32 | CDC2L2 | cell<br>division<br>cycle 2-<br>like 2<br>(PITSLRE<br>proteins)                                           | -0.157257 | Inlier |
| siRNA Disorazole DMSO Run1   | NM_0335<br>32 | CDC2L2 | cell<br>division<br>cycle 2-<br>like 2<br>(PITSLRE<br>proteins)                                           | 0.157257  | Inlier |
| siRNA Disorazole DMSO Run2   | NM_0335<br>32 | CDC2L2 | cell<br>division<br>cycle 2-<br>like 2<br>(PITSLRE<br>proteins)                                           | 0.702518  | Inlier |
| siRNA-Vinblastine Run2-DMSO  | NM_0335<br>32 | CDC2L2 | cell<br>division<br>cycle 2-<br>like 2<br>(PITSLRE<br>proteins)                                           | 0.708715  | Inlier |
| siRNA-Vinblastine Run1-DMSO  | NM_0335<br>32 | CDC2L2 | cell<br>division<br>cycle 2-<br>like 2<br>(PITSLRE<br>proteins)                                           | 1.178943  | Inlier |
| siRNA-Temozolomide Run3-DMSO | NM_0037<br>18 | CDC2L5 | cell<br>division<br>cycle 2-<br>like 5<br>(cholineste<br>rase-<br>related cell<br>division<br>controller) | -0.719169 | Inlier |

Identification of Survival Genes in Human Glioblastoma Cells Using siRNA Screening

Nikhil G Thaker, Fang Zhang, Peter R. McDonald, Tong Ying Shun, Michael D Lewen, Ian F. Pollack, and John S. Lazo

Molecular Pharmacology

|                                  |               |        |                                                                                                           |           |        |
|----------------------------------|---------------|--------|-----------------------------------------------------------------------------------------------------------|-----------|--------|
| siRNA Disorazole DMSO Run2       | NM_0037<br>18 | CDC2L5 | cell<br>division<br>cycle 2-<br>like 5<br>(cholineste<br>rase-<br>related cell<br>division<br>controller) | -0.629831 | Inlier |
| siRNA Disorazole DMSO Run3       | NM_0037<br>18 | CDC2L5 | cell<br>division<br>cycle 2-<br>like 5<br>(cholineste<br>rase-<br>related cell<br>division<br>controller) | -0.436542 | Inlier |
| siRNA-Temozolomide Run1-<br>DMSO | NM_0037<br>18 | CDC2L5 | cell<br>division<br>cycle 2-<br>like 5<br>(cholineste<br>rase-<br>related cell<br>division<br>controller) | -0.055613 | Inlier |
| siRNA-Temozolomide Run2-<br>DMSO | NM_0037<br>18 | CDC2L5 | cell<br>division<br>cycle 2-<br>like 5<br>(cholineste<br>rase-<br>related cell<br>division<br>controller) | 0.055614  | Inlier |
| siRNA-Vinblastine Run1-<br>DMSO  | NM_0037<br>18 | CDC2L5 | cell<br>division<br>cycle 2-<br>like 5<br>(cholineste<br>rase-<br>related cell<br>division<br>controller) | 1.453285  | Inlier |

Identification of Survival Genes in Human Glioblastoma Cells Using siRNA Screening  
 Nikhil G Thaker, Fang Zhang, Peter R. McDonald, Tong Ying Shun, Michael D Lewen, Ian F. Pollack, and John S. Lazo  
 Molecular Pharmacology

|                                  |               |        |                                                                                                           |           |        |
|----------------------------------|---------------|--------|-----------------------------------------------------------------------------------------------------------|-----------|--------|
| siRNA Disorazole DMSO Run1       | NM_0037<br>18 | CDC2L5 | cell<br>division<br>cycle 2-<br>like 5<br>(cholineste<br>rase-<br>related cell<br>division<br>controller) | 1.51939   | Inlier |
| siRNA-Vinblastine Run2-<br>DMSO  | NM_0037<br>18 | CDC2L5 | cell<br>division<br>cycle 2-<br>like 5<br>(cholineste<br>rase-<br>related cell<br>division<br>controller) | 2.293977  | Inlier |
| siRNA-Temozolomide Run3-<br>DMSO | NM_0043<br>59 | CDC34  | cell<br>division<br>cycle 34                                                                              | -2.260077 | Inlier |
| siRNA Disorazole DMSO Run3       | NM_0043<br>59 | CDC34  | cell<br>division<br>cycle 34                                                                              | -0.648914 | Inlier |
| siRNA-Vinblastine Run2-<br>DMSO  | NM_0043<br>59 | CDC34  | cell<br>division<br>cycle 34                                                                              | -0.648305 | Inlier |
| siRNA-Temozolomide Run2-<br>DMSO | NM_0043<br>59 | CDC34  | cell<br>division<br>cycle 34                                                                              | -0.303626 | Inlier |
| siRNA-Temozolomide Run1-<br>DMSO | NM_0043<br>59 | CDC34  | cell<br>division<br>cycle 34                                                                              | 0.303626  | Inlier |
| siRNA Disorazole DMSO Run1       | NM_0043<br>59 | CDC34  | cell<br>division<br>cycle 34                                                                              | 0.700086  | Inlier |
| siRNA Disorazole DMSO Run2       | NM_0043<br>59 | CDC34  | cell<br>division<br>cycle 34                                                                              | 1.275929  | Inlier |
| siRNA-Vinblastine Run1-<br>DMSO  | NM_0043<br>59 | CDC34  | cell<br>division<br>cycle 34                                                                              | 2.607739  | Inlier |
| siRNA-Temozolomide Run3-<br>DMSO | NM_0444<br>72 | CDC42  | cell<br>division<br>cycle 42<br>(GTP<br>binding<br>protein,<br>25kDa)                                     | -1.061088 | Inlier |

Identification of Survival Genes in Human Glioblastoma Cells Using siRNA Screening  
 Nikhil G Thaker, Fang Zhang, Peter R. McDonald, Tong Ying Shun, Michael D Lewen, Ian F. Pollack, and John S. Lazo

Molecular Pharmacology

| siRNA Treatment              | Gene ID   | Gene Name | Protein Name                                        | Value     | Outlier Type |
|------------------------------|-----------|-----------|-----------------------------------------------------|-----------|--------------|
| siRNA-Temozolomide Run1-DMSO | NM_044472 | CDC42     | cell division cycle 42 (GTP binding protein, 25kDa) | -0.837257 | Inlier       |
| siRNA-Temozolomide Run2-DMSO | NM_044472 | CDC42     | cell division cycle 42 (GTP binding protein, 25kDa) | -0.368298 | Inlier       |
| siRNA Disorazole DMSO Run3   | NM_044472 | CDC42     | cell division cycle 42 (GTP binding protein, 25kDa) | -0.125662 | Inlier       |
| siRNA Disorazole DMSO Run1   | NM_044472 | CDC42     | cell division cycle 42 (GTP binding protein, 25kDa) | 0.125662  | Inlier       |
| siRNA Disorazole DMSO Run2   | NM_044472 | CDC42     | cell division cycle 42 (GTP binding protein, 25kDa) | 0.511743  | Inlier       |
| siRNA-Vinblastine Run2-DMSO  | NM_044472 | CDC42     | cell division cycle 42 (GTP binding protein, 25kDa) | 1.010245  | Inlier       |
| siRNA-Vinblastine Run1-DMSO  | NM_044472 | CDC42     | cell division cycle 42 (GTP binding protein, 25kDa) | 1.116261  | Inlier       |

Identification of Survival Genes in Human Glioblastoma Cells Using siRNA Screening

Nikhil G Thaker, Fang Zhang, Peter R. McDonald, Tong Ying Shun, Michael D Lewen, Ian F. Pollack, and John S. Lazo

Molecular Pharmacology

| siRNA Treatment              | Gene ID   | Accession | Gene Name                                                 | Value     | Outlier Status |
|------------------------------|-----------|-----------|-----------------------------------------------------------|-----------|----------------|
| siRNA-Temozolomide Run3-DMSO | NM_014826 | A         | CDC42BP (DMPK-like)<br>CDC42 binding protein kinase alpha | -2.203325 | Inlier         |
| siRNA Disorazole DMSO Run3   | NM_014826 | A         | CDC42BP (DMPK-like)<br>CDC42 binding protein kinase alpha | -0.383785 | Inlier         |
| siRNA Disorazole DMSO Run2   | NM_014826 | A         | CDC42BP (DMPK-like)<br>CDC42 binding protein kinase alpha | -0.110207 | Inlier         |
| siRNA-Temozolomide Run1-DMSO | NM_014826 | A         | CDC42BP (DMPK-like)<br>CDC42 binding protein kinase alpha | -0.068074 | Inlier         |
| siRNA-Temozolomide Run2-DMSO | NM_014826 | A         | CDC42BP (DMPK-like)<br>CDC42 binding protein kinase alpha | 0.068074  | Inlier         |
| siRNA Disorazole DMSO Run1   | NM_014826 | A         | CDC42BP (DMPK-like)<br>CDC42 binding protein kinase alpha | 0.965215  | Inlier         |
| siRNA-Vinblastine Run1-DMSO  | NM_014826 | A         | CDC42BP (DMPK-like)<br>CDC42 binding protein kinase alpha | 1.785951  | Inlier         |



Identification of Survival Genes in Human Glioblastoma Cells Using siRNA Screening

Nikhil G Thaker, Fang Zhang, Peter R. McDonald, Tong Ying Shun, Michael D Lewen, Ian F. Pollack, and John S. Lazo

Molecular Pharmacology

| siRNA Treatment              | Gene ID   | Accession | Gene Name                                                 | Value     | Outlier Status |
|------------------------------|-----------|-----------|-----------------------------------------------------------|-----------|----------------|
| siRNA-Vinblastine Run2-DMSO  | NM_014826 | A         | CDC42BP (DMPK-like)<br>CDC42 binding protein kinase alpha | 2.19008   | Inlier         |
| siRNA-Temozolomide Run3-DMSO | NM_006035 | B         | CDC42BP (DMPK-like)<br>CDC42 binding protein kinase beta  | -0.82767  | Inlier         |
| siRNA Disorazole DMSO Run3   | NM_006035 | B         | CDC42BP (DMPK-like)<br>CDC42 binding protein kinase beta  | -0.52133  | Inlier         |
| siRNA Disorazole DMSO Run2   | NM_006035 | B         | CDC42BP (DMPK-like)<br>CDC42 binding protein kinase beta  | -0.396562 | Inlier         |
| siRNA-Temozolomide Run2-DMSO | NM_006035 | B         | CDC42BP (DMPK-like)<br>CDC42 binding protein kinase beta  | -0.118308 | Inlier         |
| siRNA-Temozolomide Run1-DMSO | NM_006035 | B         | CDC42BP (DMPK-like)<br>CDC42 binding protein kinase beta  | 0.118308  | Inlier         |
| siRNA Disorazole DMSO Run1   | NM_006035 | B         | CDC42BP (DMPK-like)<br>CDC42 binding protein kinase beta  | 1.175176  | Inlier         |

Identification of Survival Genes in Human Glioblastoma Cells Using siRNA Screening  
 Nikhil G Thaker, Fang Zhang, Peter R. McDonald, Tong Ying Shun, Michael D Lewen, Ian F. Pollack, and John S. Lazo

Molecular Pharmacology

|                              |           |           |                                            |                                   |        |
|------------------------------|-----------|-----------|--------------------------------------------|-----------------------------------|--------|
|                              |           |           |                                            | CDC42 binding protein kinase beta |        |
| siRNA-Vinblastine Run1-DMSO  | NM_006035 | CDC42BP B | (DMPK-like)                                | 1.257595                          | Inlier |
|                              |           |           | CDC42 binding protein kinase beta          |                                   |        |
| siRNA-Vinblastine Run2-DMSO  | NM_006035 | CDC42BP B | (DMPK-like)                                | 1.446673                          | Inlier |
|                              |           |           | CDC42 small effector 2                     |                                   |        |
| siRNA Disorazole DMSO Run2   | NM_020240 | CDC42SE 2 | CDC42                                      | -1.323589                         | Inlier |
|                              |           |           | CDC42 small effector 2                     |                                   |        |
| siRNA-Temozolomide Run3-DMSO | NM_020240 | CDC42SE 2 | CDC42                                      | -0.593881                         | Inlier |
|                              |           |           | CDC42 small effector 2                     |                                   |        |
| siRNA-Temozolomide Run1-DMSO | NM_020240 | CDC42SE 2 | CDC42                                      | -0.067709                         | Inlier |
|                              |           |           | CDC42 small effector 2                     |                                   |        |
| siRNA-Temozolomide Run2-DMSO | NM_020240 | CDC42SE 2 | CDC42                                      | -0.051119                         | Inlier |
|                              |           |           | CDC42 small effector 2                     |                                   |        |
| siRNA Disorazole DMSO Run1   | NM_020240 | CDC42SE 2 | CDC42                                      | 0.05112                           | Inlier |
|                              |           |           | CDC42 small effector 2                     |                                   |        |
| siRNA-Vinblastine Run2-DMSO  | NM_020240 | CDC42SE 2 | CDC42                                      | 0.755119                          | Inlier |
|                              |           |           | CDC42 small effector 2                     |                                   |        |
| siRNA Disorazole DMSO Run3   | NM_020240 | CDC42SE 2 | CDC42                                      | 0.911353                          | Inlier |
|                              |           |           | CDC42 small effector 2                     |                                   |        |
| siRNA-Vinblastine Run1-DMSO  | NM_020240 | CDC42SE 2 |                                            | 1.337019                          | Inlier |
|                              |           |           | CDC7 cell division cycle 7 (S. cerevisiae) |                                   |        |
| siRNA-Temozolomide Run3-DMSO | NM_003503 | CDC7      |                                            | -1.424599                         | Inlier |
|                              |           |           | CDC7 cell division cycle 7 (S. cerevisiae) |                                   |        |
| siRNA Disorazole DMSO Run2   | NM_003503 | CDC7      |                                            | -1.051703                         | Inlier |

Identification of Survival Genes in Human Glioblastoma Cells Using siRNA Screening  
 Nikhil G Thaker, Fang Zhang, Peter R. McDonald, Tong Ying Shun, Michael D Lewen, Ian F. Pollack, and John S. Lazo  
 Molecular Pharmacology

|                              |           |       |                                                                                       |           |        |
|------------------------------|-----------|-------|---------------------------------------------------------------------------------------|-----------|--------|
| siRNA-Temozolomide Run1-DMSO | NM_003503 | CDC7  | CDC7 cell division cycle 7 (S. cerevisiae)                                            | -0.951767 | Inlier |
| siRNA-Temozolomide Run2-DMSO | NM_003503 | CDC7  | CDC7 cell division cycle 7 (S. cerevisiae)                                            | -0.204618 | Inlier |
| siRNA-Vinblastine Run2-DMSO  | NM_003503 | CDC7  | CDC7 cell division cycle 7 (S. cerevisiae)                                            | 0.204618  | Inlier |
| siRNA Disorazole DMSO Run1   | NM_003503 | CDC7  | CDC7 cell division cycle 7 (S. cerevisiae)                                            | 0.325676  | Inlier |
| siRNA-Vinblastine Run1-DMSO  | NM_003503 | CDC7  | CDC7 cell division cycle 7 (S. cerevisiae)                                            | 0.486624  | Inlier |
| siRNA Disorazole DMSO Run3   | NM_003503 | CDC7  | CDC7 cell division cycle 7 (S. cerevisiae)                                            | 0.862376  | Inlier |
| siRNA-Temozolomide Run1-DMSO | NM_145752 | CDIPT | CDP-diacylglycerol--inositol 3-phosphatidytransferase (phosphatidylinositol synthase) | -1.510116 | Inlier |

Identification of Survival Genes in Human Glioblastoma Cells Using siRNA Screening

Nikhil G Thaker, Fang Zhang, Peter R. McDonald, Tong Ying Shun, Michael D Lewen, Ian F. Pollack, and John S. Lazo

Molecular Pharmacology

|                                  |               |       |                                                                                                                          |           |        |
|----------------------------------|---------------|-------|--------------------------------------------------------------------------------------------------------------------------|-----------|--------|
| siRNA Disorazole DMSO Run1       | NM_1457<br>52 | CDIPT | CDP-<br>diacylglyce<br>rol--<br>inositol 3-<br>phosphati<br>dyltransfer<br>ase<br>(phosphati<br>dylinositol<br>synthase) | -1.312742 | Inlier |
| siRNA-Temozolomide Run2-<br>DMSO | NM_1457<br>52 | CDIPT | CDP-<br>diacylglyce<br>rol--<br>inositol 3-<br>phosphati<br>dyltransfer<br>ase<br>(phosphati<br>dylinositol<br>synthase) | -0.813014 | Inlier |
| siRNA-Vinblastine Run2-<br>DMSO  | NM_1457<br>52 | CDIPT | CDP-<br>diacylglyce<br>rol--<br>inositol 3-<br>phosphati<br>dyltransfer<br>ase<br>(phosphati<br>dylinositol<br>synthase) | -0.07328  | Inlier |
| siRNA Disorazole DMSO Run3       | NM_1457<br>52 | CDIPT | CDP-<br>diacylglyce<br>rol--<br>inositol 3-<br>phosphati<br>dyltransfer<br>ase<br>(phosphati<br>dylinositol<br>synthase) | 0.073279  | Inlier |

Identification of Survival Genes in Human Glioblastoma Cells Using siRNA Screening

Nikhil G Thaker, Fang Zhang, Peter R. McDonald, Tong Ying Shun, Michael D Lewen, Ian F. Pollack, and John S.

Lazo

Molecular Pharmacology

|                              |               |       |                                                    |           |        |
|------------------------------|---------------|-------|----------------------------------------------------|-----------|--------|
| siRNA-Temozolomide Run3-DMSO | NM_1457<br>52 | CDIPT | CDP-diacylglycerol-3-phosphatidylinositol synthase | 0.12917   | Inlier |
| siRNA-Vinblastine Run1-DMSO  | NM_1457<br>52 | CDIPT | CDP-diacylglycerol-3-phosphatidylinositol synthase | 0.535985  | Inlier |
| siRNA Disorazole DMSO Run2   | NM_1457<br>52 | CDIPT | CDP-diacylglycerol-3-phosphatidylinositol synthase | 1.081181  | Inlier |
| siRNA-Temozolomide Run3-DMSO | NM_0529<br>88 | CDK10 | cyclin-dependent kinase (CDC2-like) 10             | -0.8048   | Inlier |
| siRNA-Temozolomide Run2-DMSO | NM_0529<br>88 | CDK10 | cyclin-dependent kinase (CDC2-like) 10             | -0.668615 | Inlier |
| siRNA Disorazole DMSO Run2   | NM_0529<br>88 | CDK10 | cyclin-dependent kinase (CDC2-like) 10             | -0.576139 | Inlier |

Identification of Survival Genes in Human Glioblastoma Cells Using siRNA Screening  
 Nikhil G Thaker, Fang Zhang, Peter R. McDonald, Tong Ying Shun, Michael D Lewen, Ian F. Pollack, and John S. Lazo

Molecular Pharmacology

|                              |               |       |                                          |           |        |
|------------------------------|---------------|-------|------------------------------------------|-----------|--------|
| siRNA-Temozolomide Run1-DMSO | NM_0529<br>88 | CDK10 | cyclin-dependent kinase (CDC2-like) 10   | -0.515163 | Inlier |
| siRNA Disorazole DMSO Run3   | NM_0529<br>88 | CDK10 | cyclin-dependent kinase (CDC2-like) 10   | 0.515163  | Inlier |
| siRNA Disorazole DMSO Run1   | NM_0529<br>88 | CDK10 | cyclin-dependent kinase (CDC2-like) 10   | 0.680385  | Inlier |
| siRNA-Vinblastine Run1-DMSO  | NM_0529<br>88 | CDK10 | cyclin-dependent kinase (CDC2-like) 10   | 1.328899  | Inlier |
| siRNA-Vinblastine Run2-DMSO  | NM_0529<br>88 | CDK10 | cyclin-dependent kinase (CDC2-like) 10   | 1.803541  | Inlier |
| siRNA-Temozolomide Run3-DMSO | NM_0150<br>76 | CDK11 | cell division cycle 2-like 6 (CDK8-like) | -1.013023 | Inlier |
| siRNA-Temozolomide Run2-DMSO | NM_0150<br>76 | CDK11 | cell division cycle 2-like 6 (CDK8-like) | -0.592711 | Inlier |
| siRNA-Temozolomide Run1-DMSO | NM_0150<br>76 | CDK11 | cell division cycle 2-like 6 (CDK8-like) | -0.116302 | Inlier |
| siRNA Disorazole DMSO Run3   | NM_0150<br>76 | CDK11 | cell division cycle 2-like 6 (CDK8-like) | -0.051119 | Inlier |

Identification of Survival Genes in Human Glioblastoma Cells Using siRNA Screening  
 Nikhil G Thaker, Fang Zhang, Peter R. McDonald, Tong Ying Shun, Michael D Lewen, Ian F. Pollack, and John S. Lazo

Molecular Pharmacology

| siRNA                        | Gene    | Gene ID | Gene Name | Value     | Outlier |
|------------------------------|---------|---------|-----------|-----------|---------|
| siRNA Disorazole DMSO Run1   | NM_0150 | 76      | CDK11     | 0.051119  | Inlier  |
| siRNA-Vinblastine Run2-DMSO  | NM_0150 | 76      | CDK11     | 0.756289  | Inlier  |
| siRNA Disorazole DMSO Run2   | NM_0150 | 76      | CDK11     | 0.894011  | Inlier  |
| siRNA-Vinblastine Run1-DMSO  | NM_0150 | 76      | CDK11     | 1.674297  | Inlier  |
| siRNA-Temozolomide Run3-DMSO | NM_0528 | 27      | CDK2      | -0.834087 | Inlier  |
| siRNA-Temozolomide Run2-DMSO | NM_0528 | 27      | CDK2      | -0.685091 | Inlier  |
| siRNA Disorazole DMSO Run1   | NM_0528 | 27      | CDK2      | -0.149462 | Inlier  |
| siRNA-Temozolomide Run1-DMSO | NM_0528 | 27      | CDK2      | -0.113562 | Inlier  |
| siRNA Disorazole DMSO Run3   | NM_0528 | 27      | CDK2      | 0.113562  | Inlier  |
| siRNA-Vinblastine Run2-DMSO  | NM_0528 | 27      | CDK2      | 0.663909  | Inlier  |
| siRNA Disorazole DMSO Run2   | NM_0528 | 27      | CDK2      | 1.140739  | Inlier  |
| siRNA-Vinblastine Run1-DMSO  | NM_0528 | 27      | CDK2      | 1.240757  | Inlier  |
| siRNA Disorazole DMSO Run2   | NM_0012 | 58      | CDK3      | -2.462835 | Inlier  |

Identification of Survival Genes in Human Glioblastoma Cells Using siRNA Screening  
 Nikhil G Thaker, Fang Zhang, Peter R. McDonald, Tong Ying Shun, Michael D Lewen, Ian F. Pollack, and John S. Lazo

| Molecular Pharmacology       |               |      |                              |           |        |
|------------------------------|---------------|------|------------------------------|-----------|--------|
| siRNA-Temozolomide Run2-DMSO | NM_0012<br>58 | CDK3 | cyclin-dependent<br>kinase 3 | -1.020069 | Inlier |
| siRNA-Temozolomide Run3-DMSO | NM_0012<br>58 | CDK3 | cyclin-dependent<br>kinase 3 | -0.494575 | Inlier |
| siRNA-Temozolomide Run1-DMSO | NM_0012<br>58 | CDK3 | cyclin-dependent<br>kinase 3 | -0.414823 | Inlier |
| siRNA Disorazole DMSO Run3   | NM_0012<br>58 | CDK3 | cyclin-dependent<br>kinase 3 | 0.414823  | Inlier |
| siRNA Disorazole DMSO Run1   | NM_0012<br>58 | CDK3 | cyclin-dependent<br>kinase 3 | 0.441719  | Inlier |
| siRNA-Vinblastine Run2-DMSO  | NM_0012<br>58 | CDK3 | cyclin-dependent<br>kinase 3 | 0.854425  | Inlier |
| siRNA-Vinblastine Run1-DMSO  | NM_0012<br>58 | CDK3 | cyclin-dependent<br>kinase 3 | 1.044989  | Inlier |
| siRNA-Temozolomide Run3-DMSO | NM_0000<br>75 | CDK4 | cyclin-dependent<br>kinase 4 | -1.099632 | Inlier |
| siRNA-Temozolomide Run2-DMSO | NM_0000<br>75 | CDK4 | cyclin-dependent<br>kinase 4 | -0.594854 | Inlier |
| siRNA Disorazole DMSO Run3   | NM_0000<br>75 | CDK4 | cyclin-dependent<br>kinase 4 | -0.469208 | Inlier |
| siRNA-Temozolomide Run1-DMSO | NM_0000<br>75 | CDK4 | cyclin-dependent<br>kinase 4 | -0.088044 | Inlier |
| siRNA Disorazole DMSO Run1   | NM_0000<br>75 | CDK4 | cyclin-dependent<br>kinase 4 | 0.088044  | Inlier |
| siRNA Disorazole DMSO Run2   | NM_0000<br>75 | CDK4 | cyclin-dependent<br>kinase 4 | 0.754146  | Inlier |
| siRNA-Vinblastine Run2-DMSO  | NM_0000<br>75 | CDK4 | cyclin-dependent<br>kinase 4 | 1.930108  | Inlier |
| siRNA-Vinblastine Run1-DMSO  | NM_0000<br>75 | CDK4 | cyclin-dependent<br>kinase 4 | 3.119376  | Inlier |
| siRNA-Temozolomide Run3-DMSO | NM_0049<br>35 | CDK5 | cyclin-dependent<br>kinase 5 | -1.101141 | Inlier |
| siRNA-Temozolomide Run2-DMSO | NM_0049<br>35 | CDK5 | cyclin-dependent<br>kinase 5 | -0.891705 | Inlier |



Identification of Survival Genes in Human Glioblastoma Cells Using siRNA Screening  
 Nikhil G Thaker, Fang Zhang, Peter R. McDonald, Tong Ying Shun, Michael D Lewen, Ian F. Pollack, and John S. Lazo

Molecular Pharmacology

|                              |               |        |                                                       |           |        |
|------------------------------|---------------|--------|-------------------------------------------------------|-----------|--------|
| siRNA Disorazole DMSO Run3   | NM_0049<br>35 | CDK5   | cyclin-dependent kinase 5                             | -0.457295 | Inlier |
| siRNA Disorazole DMSO Run1   | NM_0049<br>35 | CDK5   | cyclin-dependent kinase 5                             | -0.083281 | Inlier |
| siRNA-Temozolomide Run1-DMSO | NM_0049<br>35 | CDK5   | cyclin-dependent kinase 5                             | 0.083281  | Inlier |
| siRNA Disorazole DMSO Run2   | NM_0049<br>35 | CDK5   | cyclin-dependent kinase 5                             | 0.362811  | Inlier |
| siRNA-Vinblastine Run2-DMSO  | NM_0049<br>35 | CDK5   | cyclin-dependent kinase 5                             | 0.965365  | Inlier |
| siRNA-Vinblastine Run1-DMSO  | NM_0049<br>35 | CDK5   | cyclin-dependent kinase 5                             | 1.305622  | Inlier |
| siRNA Disorazole DMSO Run3   | NM_0038<br>85 | CDK5R1 | cyclin-dependent kinase 5, regulatory subunit 1 (p35) | -1.405351 | Inlier |
| siRNA-Vinblastine Run2-DMSO  | NM_0038<br>85 | CDK5R1 | cyclin-dependent kinase 5, regulatory subunit 1 (p35) | -0.537811 | Inlier |
| siRNA Disorazole DMSO Run1   | NM_0038<br>85 | CDK5R1 | cyclin-dependent kinase 5, regulatory subunit 1 (p35) | -0.354304 | Inlier |
| siRNA-Temozolomide Run1-DMSO | NM_0038<br>85 | CDK5R1 | cyclin-dependent kinase 5, regulatory subunit 1 (p35) | -0.277523 | Inlier |

Identification of Survival Genes in Human Glioblastoma Cells Using siRNA Screening  
 Nikhil G Thaker, Fang Zhang, Peter R. McDonald, Tong Ying Shun, Michael D Lewen, Ian F. Pollack, and John S. Lazo  
 Molecular Pharmacology

|                              |               |        |                                                       |           |        |
|------------------------------|---------------|--------|-------------------------------------------------------|-----------|--------|
| siRNA-Temozolomide Run3-DMSO | NM_0038<br>85 | CDK5R1 | cyclin-dependent kinase 5, regulatory subunit 1 (p35) | 0.277523  | Inlier |
| siRNA-Vinblastine Run1-DMSO  | NM_0038<br>85 | CDK5R1 | cyclin-dependent kinase 5, regulatory subunit 1 (p35) | 0.811189  | Inlier |
| siRNA-Temozolomide Run2-DMSO | NM_0038<br>85 | CDK5R1 | cyclin-dependent kinase 5, regulatory subunit 1 (p35) | 0.81254   | Inlier |
| siRNA Disorazole DMSO Run2   | NM_0038<br>85 | CDK5R1 | cyclin-dependent kinase 5, regulatory subunit 1 (p35) | 0.989435  | Inlier |
| siRNA-Temozolomide Run3-DMSO | NM_0039<br>36 | CDK5R2 | cyclin-dependent kinase 5, regulatory subunit 2 (p39) | -1.797205 | Inlier |
| siRNA-Temozolomide Run2-DMSO | NM_0039<br>36 | CDK5R2 | cyclin-dependent kinase 5, regulatory subunit 2 (p39) | -1.077721 | Inlier |
| siRNA-Temozolomide Run1-DMSO | NM_0039<br>36 | CDK5R2 | cyclin-dependent kinase 5, regulatory subunit 2 (p39) | -0.263354 | Inlier |

Identification of Survival Genes in Human Glioblastoma Cells Using siRNA Screening  
 Nikhil G Thaker, Fang Zhang, Peter R. McDonald, Tong Ying Shun, Michael D Lewen, Ian F. Pollack, and John S. Lazo  
 Molecular Pharmacology

|                                  |               |        |                                                                       |           |         |
|----------------------------------|---------------|--------|-----------------------------------------------------------------------|-----------|---------|
| siRNA Disorazole DMSO Run3       | NM_0039<br>36 | CDK5R2 | cyclin-<br>dependent<br>kinase 5,<br>regulatory<br>subunit 2<br>(p39) | -0.041485 | Inlier  |
| siRNA-Vinblastine Run2-<br>DMSO  | NM_0039<br>36 | CDK5R2 | cyclin-<br>dependent<br>kinase 5,<br>regulatory<br>subunit 2<br>(p39) | 0.041485  | Inlier  |
| siRNA Disorazole DMSO Run1       | NM_0039<br>36 | CDK5R2 | cyclin-<br>dependent<br>kinase 5,<br>regulatory<br>subunit 2<br>(p39) | 0.271279  | Inlier  |
| siRNA-Vinblastine Run1-<br>DMSO  | NM_0039<br>36 | CDK5R2 | cyclin-<br>dependent<br>kinase 5,<br>regulatory<br>subunit 2<br>(p39) | 4.340446  | Outlier |
| siRNA Disorazole DMSO Run2       | NM_0039<br>36 | CDK5R2 | cyclin-<br>dependent<br>kinase 5,<br>regulatory<br>subunit 2<br>(p39) | 5.494899  | Outlier |
| siRNA Disorazole DMSO Run2       | NM_0012<br>59 | CDK6   | cyclin-<br>dependent<br>kinase 6                                      | -0.888661 | Inlier  |
| siRNA Disorazole DMSO Run3       | NM_0012<br>59 | CDK6   | cyclin-<br>dependent<br>kinase 6                                      | -0.587434 | Inlier  |
| siRNA-Temozolomide Run3-<br>DMSO | NM_0012<br>59 | CDK6   | cyclin-<br>dependent<br>kinase 6                                      | -0.476238 | Inlier  |
| siRNA-Temozolomide Run2-<br>DMSO | NM_0012<br>59 | CDK6   | cyclin-<br>dependent<br>kinase 6                                      | -0.12857  | Inlier  |
| siRNA-Temozolomide Run1-<br>DMSO | NM_0012<br>59 | CDK6   | cyclin-<br>dependent<br>kinase 6                                      | 0.12857   | Inlier  |

Identification of Survival Genes in Human Glioblastoma Cells Using siRNA Screening

Nikhil G Thaker, Fang Zhang, Peter R. McDonald, Tong Ying Shun, Michael D Lewen, Ian F. Pollack, and John S. Lazo

Molecular Pharmacology

|                              |               |      |                                                                                 |           |        |
|------------------------------|---------------|------|---------------------------------------------------------------------------------|-----------|--------|
| siRNA Disorazole DMSO Run1   | NM_0012<br>59 | CDK6 | cyclin-dependent kinase 6                                                       | 0.761566  | Inlier |
| siRNA-Vinblastine Run2-DMSO  | NM_0012<br>59 | CDK6 | cyclin-dependent kinase 6                                                       | 0.899453  | Inlier |
| siRNA-Vinblastine Run1-DMSO  | NM_0012<br>59 | CDK6 | cyclin-dependent kinase 6                                                       | 1.153744  | Inlier |
| siRNA-Temozolomide Run2-DMSO | NM_0017<br>99 | CDK7 | cyclin-dependent kinase 7 (MO15 homolog, Xenopus laevis, cdk-activating kinase) | -0.707141 | Inlier |
| siRNA-Temozolomide Run3-DMSO | NM_0017<br>99 | CDK7 | cyclin-dependent kinase 7 (MO15 homolog, Xenopus laevis, cdk-activating kinase) | -0.641859 | Inlier |
| siRNA-Temozolomide Run1-DMSO | NM_0017<br>99 | CDK7 | cyclin-dependent kinase 7 (MO15 homolog, Xenopus laevis, cdk-activating kinase) | -0.423321 | Inlier |
| siRNA Disorazole DMSO Run3   | NM_0017<br>99 | CDK7 | cyclin-dependent kinase 7 (MO15 homolog, Xenopus laevis, cdk-activating kinase) | -0.223898 | Inlier |

Identification of Survival Genes in Human Glioblastoma Cells Using siRNA Screening

Nikhil G Thaker, Fang Zhang, Peter R. McDonald, Tong Ying Shun, Michael D Lewen, Ian F. Pollack, and John S. Lazo

Molecular Pharmacology

|                              |               |      |                                                                                 |           |        |
|------------------------------|---------------|------|---------------------------------------------------------------------------------|-----------|--------|
| siRNA Disorazole DMSO Run1   | NM_0017<br>99 | CDK7 | cyclin-dependent kinase 7 (MO15 homolog, Xenopus laevis, cdk-activating kinase) | 0.223898  | Inlier |
| siRNA Disorazole DMSO Run2   | NM_0017<br>99 | CDK7 | cyclin-dependent kinase 7 (MO15 homolog, Xenopus laevis, cdk-activating kinase) | 1.871625  | Inlier |
| siRNA-Vinblastine Run2-DMSO  | NM_0017<br>99 | CDK7 | cyclin-dependent kinase 7 (MO15 homolog, Xenopus laevis, cdk-activating kinase) | 2.975674  | Inlier |
| siRNA-Vinblastine Run1-DMSO  | NM_0017<br>99 | CDK7 | cyclin-dependent kinase 7 (MO15 homolog, Xenopus laevis, cdk-activating kinase) | 3.133218  | Inlier |
| siRNA-Temozolomide Run3-DMSO | NM_0012<br>60 | CDK8 | cyclin-dependent kinase 8                                                       | -1.280824 | Inlier |
| siRNA Disorazole DMSO Run2   | NM_0012<br>60 | CDK8 | cyclin-dependent kinase 8                                                       | -1.058758 | Inlier |
| siRNA Disorazole DMSO Run3   | NM_0012<br>60 | CDK8 | cyclin-dependent kinase 8                                                       | -0.550821 | Inlier |
| siRNA-Temozolomide Run2-DMSO | NM_0012<br>60 | CDK8 | cyclin-dependent kinase 8                                                       | -0.047509 | Inlier |

Identification of Survival Genes in Human Glioblastoma Cells Using siRNA Screening

Nikhil G Thaker, Fang Zhang, Peter R. McDonald, Tong Ying Shun, Michael D Lewen, Ian F. Pollack, and John S.

Lazo

Molecular Pharmacology

|                              |               |      |                                                          |           |         |
|------------------------------|---------------|------|----------------------------------------------------------|-----------|---------|
| siRNA-Temozolomide Run1-DMSO | NM_0012<br>60 | CDK8 | cyclin-dependent<br>kinase 8                             | 0.047508  | Inlier  |
| siRNA Disorazole DMSO Run1   | NM_0012<br>60 | CDK8 | cyclin-dependent<br>kinase 8                             | 0.444653  | Inlier  |
| siRNA-Vinblastine Run1-DMSO  | NM_0012<br>60 | CDK8 | cyclin-dependent<br>kinase 8                             | 0.798179  | Inlier  |
| siRNA-Vinblastine Run2-DMSO  | NM_0012<br>60 | CDK8 | cyclin-dependent<br>kinase 8                             | 1.067604  | Inlier  |
| siRNA-Temozolomide Run3-DMSO | NM_0012<br>61 | CDK9 | cyclin-dependent<br>kinase 9<br>(CDC2-related<br>kinase) | -0.923353 | Inlier  |
| siRNA-Temozolomide Run1-DMSO | NM_0012<br>61 | CDK9 | cyclin-dependent<br>kinase 9<br>(CDC2-related<br>kinase) | -0.425647 | Inlier  |
| siRNA Disorazole DMSO Run3   | NM_0012<br>61 | CDK9 | cyclin-dependent<br>kinase 9<br>(CDC2-related<br>kinase) | -0.138762 | Inlier  |
| siRNA Disorazole DMSO Run2   | NM_0012<br>61 | CDK9 | cyclin-dependent<br>kinase 9<br>(CDC2-related<br>kinase) | -0.056384 | Inlier  |
| siRNA-Temozolomide Run2-DMSO | NM_0012<br>61 | CDK9 | cyclin-dependent<br>kinase 9<br>(CDC2-related<br>kinase) | 0.056384  | Inlier  |
| siRNA Disorazole DMSO Run1   | NM_0012<br>61 | CDK9 | cyclin-dependent<br>kinase 9<br>(CDC2-related<br>kinase) | 5.571088  | Outlier |

Identification of Survival Genes in Human Glioblastoma Cells Using siRNA Screening

Nikhil G Thaker, Fang Zhang, Peter R. McDonald, Tong Ying Shun, Michael D Lewen, Ian F. Pollack, and John S. Lazo

Molecular Pharmacology

|                              |           |       |                                                      |           |         |
|------------------------------|-----------|-------|------------------------------------------------------|-----------|---------|
| siRNA-Vinblastine Run1-DMSO  | NM_001261 | CDK9  | cyclin-dependent kinase 9 (CDC2-related kinase)      | 8.088376  | Outlier |
| siRNA-Vinblastine Run2-DMSO  | NM_001261 | CDK9  | cyclin-dependent kinase 9 (CDC2-related kinase)      | 8.338943  | Outlier |
| siRNA-Temozolomide Run1-DMSO | NM_004196 | CDKL1 | cyclin-dependent kinase-like 1 (CDC2-related kinase) | -3.289145 | Inlier  |
| siRNA-Temozolomide Run2-DMSO | NM_004196 | CDKL1 | cyclin-dependent kinase-like 1 (CDC2-related kinase) | -2.817943 | Inlier  |
| siRNA-Temozolomide Run3-DMSO | NM_004196 | CDKL1 | cyclin-dependent kinase-like 1 (CDC2-related kinase) | -0.227637 | Inlier  |
| siRNA-Vinblastine Run2-DMSO  | NM_004196 | CDKL1 | cyclin-dependent kinase-like 1 (CDC2-related kinase) | -0.048508 | Inlier  |
| siRNA Disorazole DMSO Run3   | NM_004196 | CDKL1 | cyclin-dependent kinase-like 1 (CDC2-related kinase) | 0.048508  | Inlier  |

Identification of Survival Genes in Human Glioblastoma Cells Using siRNA Screening  
 Nikhil G Thaker, Fang Zhang, Peter R. McDonald, Tong Ying Shun, Michael D Lewen, Ian F. Pollack, and John S. Lazo  
 Molecular Pharmacology

|                              |               |       |                                                      |           |        |
|------------------------------|---------------|-------|------------------------------------------------------|-----------|--------|
| siRNA Disorazole DMSO Run2   | NM_0041<br>96 | CDKL1 | cyclin-dependent kinase-like 1 (CDC2-related kinase) | 0.553302  | Inlier |
| siRNA-Vinblastine Run1-DMSO  | NM_0041<br>96 | CDKL1 | cyclin-dependent kinase-like 1 (CDC2-related kinase) | 0.795698  | Inlier |
| siRNA Disorazole DMSO Run1   | NM_0041<br>96 | CDKL1 | cyclin-dependent kinase-like 1 (CDC2-related kinase) | 3.39496   | Inlier |
| siRNA-Temozolomide Run3-DMSO | NM_0039<br>48 | CDKL2 | cyclin-dependent kinase-like 2 (CDC2-related kinase) | -1.115585 | Inlier |
| siRNA-Temozolomide Run1-DMSO | NM_0039<br>48 | CDKL2 | cyclin-dependent kinase-like 2 (CDC2-related kinase) | -0.731606 | Inlier |
| siRNA-Temozolomide Run2-DMSO | NM_0039<br>48 | CDKL2 | cyclin-dependent kinase-like 2 (CDC2-related kinase) | -0.693385 | Inlier |
| siRNA-Vinblastine Run2-DMSO  | NM_0039<br>48 | CDKL2 | cyclin-dependent kinase-like 2 (CDC2-related kinase) | -0.046005 | Inlier |



Identification of Survival Genes in Human Glioblastoma Cells Using siRNA Screening  
 Nikhil G Thaker, Fang Zhang, Peter R. McDonald, Tong Ying Shun, Michael D Lewen, Ian F. Pollack, and John S. Lazo  
 Molecular Pharmacology

|                              |               |       |                                                      |           |        |
|------------------------------|---------------|-------|------------------------------------------------------|-----------|--------|
| siRNA Disorazole DMSO Run3   | NM_0039<br>48 | CDKL2 | cyclin-dependent kinase-like 2 (CDC2-related kinase) | 0.046004  | Inlier |
| siRNA Disorazole DMSO Run1   | NM_0039<br>48 | CDKL2 | cyclin-dependent kinase-like 2 (CDC2-related kinase) | 0.503578  | Inlier |
| siRNA Disorazole DMSO Run2   | NM_0039<br>48 | CDKL2 | cyclin-dependent kinase-like 2 (CDC2-related kinase) | 0.655615  | Inlier |
| siRNA-Vinblastine Run1-DMSO  | NM_0039<br>48 | CDKL2 | cyclin-dependent kinase-like 2 (CDC2-related kinase) | 0.919537  | Inlier |
| siRNA Disorazole DMSO Run2   | NM_0165<br>08 | CDKL3 | cyclin-dependent kinase-like 3                       | -0.973305 | Inlier |
| siRNA-Temozolomide Run3-DMSO | NM_0165<br>08 | CDKL3 | cyclin-dependent kinase-like 3                       | -0.957671 | Inlier |
| siRNA Disorazole DMSO Run3   | NM_0165<br>08 | CDKL3 | cyclin-dependent kinase-like 3                       | -0.787189 | Inlier |
| siRNA-Temozolomide Run1-DMSO | NM_0165<br>08 | CDKL3 | cyclin-dependent kinase-like 3                       | -0.0983   | Inlier |
| siRNA-Temozolomide Run2-DMSO | NM_0165<br>08 | CDKL3 | cyclin-dependent kinase-like 3                       | 0.0983    | Inlier |
| siRNA Disorazole DMSO Run1   | NM_0165<br>08 | CDKL3 | cyclin-dependent kinase-like 3                       | 0.120034  | Inlier |

Identification of Survival Genes in Human Glioblastoma Cells Using siRNA Screening  
 Nikhil G Thaker, Fang Zhang, Peter R. McDonald, Tong Ying Shun, Michael D Lewen, Ian F. Pollack, and John S. Lazo

Molecular Pharmacology

|                              |           |        |                                 |           |         |
|------------------------------|-----------|--------|---------------------------------|-----------|---------|
| siRNA-Vinblastine Run2-DMSO  | NM_016508 | CDKL3  | 3                               | 0.660941  | Inlier  |
| siRNA-Vinblastine Run1-DMSO  | NM_016508 | CDKL3  | 3                               | 0.688059  | Inlier  |
| siRNA Disorazole DMSO Run3   | NM_003159 | CDKL5  | 5                               | -7.566339 | Outlier |
| siRNA-Temozolomide Run1-DMSO | NM_003159 | CDKL5  | 5                               | -0.822507 | Inlier  |
| siRNA Disorazole DMSO Run2   | NM_003159 | CDKL5  | 5                               | -0.42114  | Inlier  |
| siRNA-Temozolomide Run3-DMSO | NM_003159 | CDKL5  | 5                               | -0.225648 | Inlier  |
| siRNA-Temozolomide Run2-DMSO | NM_003159 | CDKL5  | 5                               | 0.225641  | Inlier  |
| siRNA Disorazole DMSO Run1   | NM_003159 | CDKL5  | 5                               | 0.526493  | Inlier  |
| siRNA-Vinblastine Run1-DMSO  | NM_003159 | CDKL5  | 5                               | 1.721022  | Inlier  |
| siRNA-Vinblastine Run2-DMSO  | NM_003159 | CDKL5  | 5                               | 8.311311  | Outlier |
| siRNA-Temozolomide Run2-DMSO | NM_000389 | CDKN1A | kinase inhibitor 1A (p21, Cip1) | -0.772693 | Inlier  |
| siRNA-Temozolomide Run3-DMSO | NM_000389 | CDKN1A | kinase inhibitor 1A (p21, Cip1) | -0.576307 | Inlier  |

Identification of Survival Genes in Human Glioblastoma Cells Using siRNA Screening  
 Nikhil G Thaker, Fang Zhang, Peter R. McDonald, Tong Ying Shun, Michael D Lewen, Ian F. Pollack, and John S. Lazo

Molecular Pharmacology

| siRNA Treatment              | Gene ID   | Gene Name | Gene Description                                 | Value     | Outlier Status |
|------------------------------|-----------|-----------|--------------------------------------------------|-----------|----------------|
| siRNA Disorazole DMSO Run1   | NM_000389 | CDKN1A    | cyclin-dependent kinase inhibitor 1A (p21, Cip1) | -0.30325  | Inlier         |
| siRNA-Temozolomide Run1-DMSO | NM_000389 | CDKN1A    | cyclin-dependent kinase inhibitor 1A (p21, Cip1) | -0.183885 | Inlier         |
| siRNA Disorazole DMSO Run3   | NM_000389 | CDKN1A    | cyclin-dependent kinase inhibitor 1A (p21, Cip1) | 0.183885  | Inlier         |
| siRNA-Vinblastine Run2-DMSO  | NM_000389 | CDKN1A    | cyclin-dependent kinase inhibitor 1A (p21, Cip1) | 1.459827  | Inlier         |
| siRNA Disorazole DMSO Run2   | NM_000389 | CDKN1A    | cyclin-dependent kinase inhibitor 1A (p21, Cip1) | 1.690524  | Inlier         |
| siRNA-Vinblastine Run1-DMSO  | NM_000389 | CDKN1A    | cyclin-dependent kinase inhibitor 1A (p21, Cip1) | 1.930255  | Inlier         |
| siRNA Disorazole DMSO Run2   | NM_004064 | CDKN1B    | cyclin-dependent kinase inhibitor 1B (p27, Kip1) | -3.300858 | Inlier         |
| siRNA-Temozolomide Run3-DMSO | NM_004064 | CDKN1B    | cyclin-dependent kinase inhibitor 1B (p27, Kip1) | -1.549759 | Inlier         |

Identification of Survival Genes in Human Glioblastoma Cells Using siRNA Screening

Nikhil G Thaker, Fang Zhang, Peter R. McDonald, Tong Ying Shun, Michael D Lewen, Ian F. Pollack, and John S. Lazo

Molecular Pharmacology

| siRNA Treatment              | Gene ID   | Gene Name | Gene Description                                 | Log Fold Change | Outlier Status |
|------------------------------|-----------|-----------|--------------------------------------------------|-----------------|----------------|
| siRNA-Temozolomide Run1-DMSO | NM_004064 | CDKN1B    | cyclin-dependent kinase inhibitor 1B (p27, Kip1) | -0.397818       | Inlier         |
| siRNA-Temozolomide Run2-DMSO | NM_004064 | CDKN1B    | cyclin-dependent kinase inhibitor 1B (p27, Kip1) | -0.201317       | Inlier         |
| siRNA Disorazole DMSO Run3   | NM_004064 | CDKN1B    | cyclin-dependent kinase inhibitor 1B (p27, Kip1) | 0.201316        | Inlier         |
| siRNA Disorazole DMSO Run1   | NM_004064 | CDKN1B    | cyclin-dependent kinase inhibitor 1B (p27, Kip1) | 0.362082        | Inlier         |
| siRNA-Vinblastine Run1-DMSO  | NM_004064 | CDKN1B    | cyclin-dependent kinase inhibitor 1B (p27, Kip1) | 0.951182        | Inlier         |
| siRNA-Vinblastine Run2-DMSO  | NM_004064 | CDKN1B    | cyclin-dependent kinase inhibitor 1B (p27, Kip1) | 2.111972        | Inlier         |
| siRNA Disorazole DMSO Run2   | NM_000076 | CDKN1C    | cyclin-dependent kinase inhibitor 1C (p57, Kip2) | -2.56208        | Inlier         |
| siRNA-Temozolomide Run3-DMSO | NM_000076 | CDKN1C    | cyclin-dependent kinase inhibitor 1C (p57, Kip2) | -0.957609       | Inlier         |

Identification of Survival Genes in Human Glioblastoma Cells Using siRNA Screening  
 Nikhil G Thaker, Fang Zhang, Peter R. McDonald, Tong Ying Shun, Michael D Lewen, Ian F. Pollack, and John S. Lazo

Molecular Pharmacology

| siRNA Treatment              | Gene ID   | Gene Name | Gene Description                                          | Log Fold Change | Classification |
|------------------------------|-----------|-----------|-----------------------------------------------------------|-----------------|----------------|
| siRNA-Temozolomide Run1-DMSO | NM_000076 | CDKN1C    | cyclin-dependent kinase inhibitor 1C (p57, Kip2)          | -0.386951       | Inlier         |
| siRNA-Temozolomide Run2-DMSO | NM_000076 | CDKN1C    | cyclin-dependent kinase inhibitor 1C (p57, Kip2)          | -0.379643       | Inlier         |
| siRNA Disorazole DMSO Run1   | NM_000076 | CDKN1C    | cyclin-dependent kinase inhibitor 1C (p57, Kip2)          | 0.379644        | Inlier         |
| siRNA-Vinblastine Run1-DMSO  | NM_000076 | CDKN1C    | cyclin-dependent kinase inhibitor 1C (p57, Kip2)          | 0.391391        | Inlier         |
| siRNA-Vinblastine Run2-DMSO  | NM_000076 | CDKN1C    | cyclin-dependent kinase inhibitor 1C (p57, Kip2)          | 1.288793        | Inlier         |
| siRNA Disorazole DMSO Run3   | NM_000076 | CDKN1C    | cyclin-dependent kinase inhibitor 1C (p57, Kip2)          | 4.368223        | Outlier        |
| siRNA-Temozolomide Run1-DMSO | NM_058197 | CDKN2A    | inhibits cyclin-dependent kinase 2A (melanoma, p16, CDK4) | -1.240151       | Inlier         |

Identification of Survival Genes in Human Glioblastoma Cells Using siRNA Screening

Nikhil G Thaker, Fang Zhang, Peter R. McDonald, Tong Ying Shun, Michael D Lewen, Ian F. Pollack, and John S. Lazo

Molecular Pharmacology

| siRNA Treatment              | Gene   | Gene ID   | Gene Description                                                    | Log Fold Change | Outlier Status |
|------------------------------|--------|-----------|---------------------------------------------------------------------|-----------------|----------------|
| siRNA Disorazole DMSO Run2   | CDKN2A | NM_058197 | cyclin-dependent kinase inhibitor 2A (melanoma, p16, inhibits CDK4) | -0.291708       | Inlier         |
| siRNA-Temozolomide Run3-DMSO | CDKN2A | NM_058197 | cyclin-dependent kinase inhibitor 2A (melanoma, p16, inhibits CDK4) | -0.198021       | Inlier         |
| siRNA Disorazole DMSO Run1   | CDKN2A | NM_058197 | cyclin-dependent kinase inhibitor 2A (melanoma, p16, inhibits CDK4) | -0.148922       | Inlier         |
| siRNA-Temozolomide Run2-DMSO | CDKN2A | NM_058197 | cyclin-dependent kinase inhibitor 2A (melanoma, p16, inhibits CDK4) | 0.148924        | Inlier         |
| siRNA-Vinblastine Run1-DMSO  | CDKN2A | NM_058197 | cyclin-dependent kinase inhibitor 2A (melanoma, p16, inhibits CDK4) | 1.057292        | Inlier         |

Identification of Survival Genes in Human Glioblastoma Cells Using siRNA Screening

Nikhil G Thaker, Fang Zhang, Peter R. McDonald, Tong Ying Shun, Michael D Lewen, Ian F. Pollack, and John S. Lazo

Molecular Pharmacology

|                              |               |        |                                                                     |           |         |
|------------------------------|---------------|--------|---------------------------------------------------------------------|-----------|---------|
| siRNA-Vinblastine Run2-DMSO  | NM_0581<br>97 | CDKN2A | cyclin-dependent kinase inhibitor 2A (melanoma, p16, inhibits CDK4) | 2.547295  | Inlier  |
| siRNA Disorazole DMSO Run3   | NM_0581<br>97 | CDKN2A | cyclin-dependent kinase inhibitor 2A (melanoma, p16, inhibits CDK4) | 8.622487  | Outlier |
| siRNA-Temozolomide Run3-DMSO | NM_0049<br>36 | CDKN2B | cyclin-dependent kinase inhibitor 2B (p15, inhibits CDK4)           | -0.848139 | Inlier  |
| siRNA Disorazole DMSO Run2   | NM_0049<br>36 | CDKN2B | cyclin-dependent kinase inhibitor 2B (p15, inhibits CDK4)           | -0.769602 | Inlier  |
| siRNA-Temozolomide Run1-DMSO | NM_0049<br>36 | CDKN2B | cyclin-dependent kinase inhibitor 2B (p15, inhibits CDK4)           | -0.566072 | Inlier  |
| siRNA-Temozolomide Run2-DMSO | NM_0049<br>36 | CDKN2B | cyclin-dependent kinase inhibitor 2B (p15, inhibits CDK4)           | -0.358873 | Inlier  |

Identification of Survival Genes in Human Glioblastoma Cells Using siRNA Screening

Nikhil G Thaker, Fang Zhang, Peter R. McDonald, Tong Ying Shun, Michael D Lewen, Ian F. Pollack, and John S. Lazo

Molecular Pharmacology

| siRNA Treatment              | Gene   | Gene ID       | Gene Description                                          | Value     | Outlier Status |
|------------------------------|--------|---------------|-----------------------------------------------------------|-----------|----------------|
| siRNA Disorazole DMSO Run3   | CDKN2B | NM_0049<br>36 | cyclin-dependent kinase inhibitor 2B (p15, inhibits CDK4) | 0.358873  | Inlier         |
| siRNA Disorazole DMSO Run1   | CDKN2B | NM_0049<br>36 | cyclin-dependent kinase inhibitor 2B (p15, inhibits CDK4) | 0.579398  | Inlier         |
| siRNA-Vinblastine Run1-DMSO  | CDKN2B | NM_0049<br>36 | cyclin-dependent kinase inhibitor 2B (p15, inhibits CDK4) | 1.218327  | Inlier         |
| siRNA-Vinblastine Run2-DMSO  | CDKN2B | NM_0049<br>36 | cyclin-dependent kinase inhibitor 2B (p15, inhibits CDK4) | 1.717955  | Inlier         |
| siRNA Disorazole DMSO Run2   | CDKN2C | NM_0012<br>62 | cyclin-dependent kinase inhibitor 2C (p18, inhibits CDK4) | -0.737318 | Inlier         |
| siRNA-Temozolomide Run3-DMSO | CDKN2C | NM_0012<br>62 | cyclin-dependent kinase inhibitor 2C (p18, inhibits CDK4) | -0.611682 | Inlier         |
| siRNA-Temozolomide Run1-DMSO | CDKN2C | NM_0012<br>62 | cyclin-dependent kinase inhibitor 2C (p18, inhibits CDK4) | -0.388401 | Inlier         |



Identification of Survival Genes in Human Glioblastoma Cells Using siRNA Screening

Nikhil G Thaker, Fang Zhang, Peter R. McDonald, Tong Ying Shun, Michael D Lewen, Ian F. Pollack, and John S. Lazo

Molecular Pharmacology

| siRNA Treatment              | Gene ID   | Gene Name | Function                                                  | Value     | Category |
|------------------------------|-----------|-----------|-----------------------------------------------------------|-----------|----------|
| siRNA-Temozolomide Run2-DMSO | NM_001262 | CDKN2C    | cyclin-dependent kinase inhibitor 2C (p18, inhibits CDK4) | -0.111127 | Inlier   |
| siRNA Disorazole DMSO Run1   | NM_001262 | CDKN2C    | cyclin-dependent kinase inhibitor 2C (p18, inhibits CDK4) | 0.111127  | Inlier   |
| siRNA-Vinblastine Run1-DMSO  | NM_001262 | CDKN2C    | cyclin-dependent kinase inhibitor 2C (p18, inhibits CDK4) | 0.761868  | Inlier   |
| siRNA-Vinblastine Run2-DMSO  | NM_001262 | CDKN2C    | cyclin-dependent kinase inhibitor 2C (p18, inhibits CDK4) | 0.842537  | Inlier   |
| siRNA Disorazole DMSO Run3   | NM_001262 | CDKN2C    | cyclin-dependent kinase inhibitor 2C (p18, inhibits CDK4) | 1.501453  | Inlier   |
| siRNA Disorazole DMSO Run2   | NM_001800 | CDKN2D    | cyclin-dependent kinase inhibitor 2D (p19, inhibits CDK4) | -1.460953 | Inlier   |
| siRNA-Temozolomide Run3-DMSO | NM_001800 | CDKN2D    | cyclin-dependent kinase inhibitor 2D (p19, inhibits CDK4) | -0.930618 | Inlier   |

Identification of Survival Genes in Human Glioblastoma Cells Using siRNA Screening  
 Nikhil G Thaker, Fang Zhang, Peter R. McDonald, Tong Ying Shun, Michael D Lewen, Ian F. Pollack, and John S. Lazo

Molecular Pharmacology

|                              |           |        |                                                                                    |           |        |
|------------------------------|-----------|--------|------------------------------------------------------------------------------------|-----------|--------|
| siRNA-Temozolomide Run1-DMSO | NM_001800 | CDKN2D | cyclin-dependent kinase inhibitor 2D (p19, inhibits CDK4)                          | -0.102383 | Inlier |
| siRNA Disorazole DMSO Run3   | NM_001800 | CDKN2D | cyclin-dependent kinase inhibitor 2D (p19, inhibits CDK4)                          | -0.056114 | Inlier |
| siRNA-Temozolomide Run2-DMSO | NM_001800 | CDKN2D | cyclin-dependent kinase inhibitor 2D (p19, inhibits CDK4)                          | 0.056114  | Inlier |
| siRNA Disorazole DMSO Run1   | NM_001800 | CDKN2D | cyclin-dependent kinase inhibitor 2D (p19, inhibits CDK4)                          | 0.642661  | Inlier |
| siRNA-Vinblastine Run1-DMSO  | NM_001800 | CDKN2D | cyclin-dependent kinase inhibitor 2D (p19, inhibits CDK4)                          | 0.706339  | Inlier |
| siRNA-Vinblastine Run2-DMSO  | NM_001800 | CDKN2D | cyclin-dependent kinase inhibitor 2D (p19, inhibits CDK4)                          | 0.9943    | Inlier |
| siRNA Disorazole DMSO Run2   | NM_005192 | CDKN3  | cyclin-dependent kinase inhibitor 3 (CDK2-associated dual specificity phosphatase) | -1.016302 | Inlier |

Identification of Survival Genes in Human Glioblastoma Cells Using siRNA Screening

Nikhil G Thaker, Fang Zhang, Peter R. McDonald, Tong Ying Shun, Michael D Lewen, Ian F. Pollack, and John S. Lazo

Molecular Pharmacology

|                              |           |       |                                                                                    |           |        |
|------------------------------|-----------|-------|------------------------------------------------------------------------------------|-----------|--------|
| siRNA-Temozolomide Run3-DMSO | NM_005192 | CDKN3 | cyclin-dependent kinase inhibitor 3 (CDK2-associated dual specificity phosphatase) | -0.744134 | Inlier |
| siRNA-Temozolomide Run2-DMSO | NM_005192 | CDKN3 | cyclin-dependent kinase inhibitor 3 (CDK2-associated dual specificity phosphatase) | -0.475919 | Inlier |
| siRNA-Temozolomide Run1-DMSO | NM_005192 | CDKN3 | cyclin-dependent kinase inhibitor 3 (CDK2-associated dual specificity phosphatase) | -0.184589 | Inlier |
| siRNA Disorazole DMSO Run1   | NM_005192 | CDKN3 | cyclin-dependent kinase inhibitor 3 (CDK2-associated dual specificity phosphatase) | 0.184589  | Inlier |
| siRNA-Vinblastine Run2-DMSO  | NM_005192 | CDKN3 | cyclin-dependent kinase inhibitor 3 (CDK2-associated dual specificity phosphatase) | 0.610902  | Inlier |

Identification of Survival Genes in Human Glioblastoma Cells Using siRNA Screening  
 Nikhil G Thaker, Fang Zhang, Peter R. McDonald, Tong Ying Shun, Michael D Lewen, Ian F. Pollack, and John S. Lazo

Molecular Pharmacology

| siRNA Treatment              | Gene ID   | Gene Name | Gene Description                                                                   | Score     | Outlier Status |
|------------------------------|-----------|-----------|------------------------------------------------------------------------------------|-----------|----------------|
| siRNA-Vinblastine Run1-DMSO  | NM_005192 | CDKN3     | cyclin-dependent kinase inhibitor 3 (CDK2-associated dual specificity phosphatase) | 0.738098  | Inlier         |
| siRNA Disorazole DMSO Run3   | NM_005192 | CDKN3     | cyclin-dependent kinase inhibitor 3 (CDK2-associated dual specificity phosphatase) | 2.470624  | Inlier         |
| siRNA-Temozolomide Run2-DMSO | NM_001801 | CDO1      | cysteine dioxygenase, type I                                                       | -0.723849 | Inlier         |
| siRNA-Vinblastine Run2-DMSO  | NM_001801 | CDO1      | cysteine dioxygenase, type I                                                       | -0.711204 | Inlier         |
| siRNA-Temozolomide Run3-DMSO | NM_001801 | CDO1      | cysteine dioxygenase, type I                                                       | -0.367893 | Inlier         |
| siRNA Disorazole DMSO Run3   | NM_001801 | CDO1      | cysteine dioxygenase, type I                                                       | -0.22284  | Inlier         |
| siRNA Disorazole DMSO Run1   | NM_001801 | CDO1      | cysteine dioxygenase, type I                                                       | 0.22284   | Inlier         |
| siRNA-Temozolomide Run1-DMSO | NM_001801 | CDO1      | cysteine dioxygenase, type I                                                       | 0.637796  | Inlier         |
| siRNA Disorazole DMSO Run2   | NM_001801 | CDO1      | cysteine dioxygenase, type I                                                       | 1.807197  | Inlier         |
| siRNA-Vinblastine Run1-DMSO  | NM_001801 | CDO1      | cysteine dioxygenase, type I                                                       | 2.860346  | Inlier         |

Identification of Survival Genes in Human Glioblastoma Cells Using siRNA Screening

Nikhil G Thaker, Fang Zhang, Peter R. McDonald, Tong Ying Shun, Michael D Lewen, Ian F. Pollack, and John S. Lazo

Molecular Pharmacology

| siRNA Treatment              | Gene ID   | Gene Name | Log Fold Change | Outlier Status |
|------------------------------|-----------|-----------|-----------------|----------------|
| siRNA-Temozolomide Run2-DMSO | NM_001263 | CDS1      | -0.753245       | Inlier         |
| siRNA-Temozolomide Run3-DMSO | NM_001263 | CDS1      | -0.711459       | Inlier         |
| siRNA-Temozolomide Run1-DMSO | NM_001263 | CDS1      | -0.551783       | Inlier         |
| siRNA Disorazole DMSO Run1   | NM_001263 | CDS1      | -0.339859       | Inlier         |
| siRNA-Vinblastine Run2-DMSO  | NM_001263 | CDS1      | 0.339859        | Inlier         |

CDP-  
diacylglyce  
rol  
synthase  
(phosphati  
date  
cytidyltra  
nsferase)

Identification of Survival Genes in Human Glioblastoma Cells Using siRNA Screening

Nikhil G Thaker, Fang Zhang, Peter R. McDonald, Tong Ying Shun, Michael D Lewen, Ian F. Pollack, and John S. Lazo

Molecular Pharmacology

|                              |               |      |   |           |        |
|------------------------------|---------------|------|---|-----------|--------|
| siRNA Disorazole DMSO Run3   | NM_0012<br>63 | CDS1 | 1 | 0.637541  | Inlier |
| siRNA Disorazole DMSO Run2   | NM_0012<br>63 | CDS1 | 1 | 0.99321   | Inlier |
| siRNA-Vinblastine Run1-DMSO  | NM_0012<br>63 | CDS1 | 1 | 1.157     | Inlier |
| siRNA-Temozolomide Run1-DMSO | NM_0038<br>18 | CDS2 | 2 | -0.821961 | Inlier |
| siRNA-Temozolomide Run2-DMSO | NM_0038<br>18 | CDS2 | 2 | -0.527039 | Inlier |

CDP-  
diacylglyce  
rol  
synthase  
(phosphati  
date  
cytidyltra  
nsferase)

Identification of Survival Genes in Human Glioblastoma Cells Using siRNA Screening

Nikhil G Thaker, Fang Zhang, Peter R. McDonald, Tong Ying Shun, Michael D Lewen, Ian F. Pollack, and John S. Lazo

Molecular Pharmacology

| siRNA                        | Gene    | Run | Condition | Gene                                                         | Value | Outlier          |
|------------------------------|---------|-----|-----------|--------------------------------------------------------------|-------|------------------|
| siRNA Disorazole DMSO Run1   | NM_0038 | 18  | CDS2      | CDP-diacylglycerol synthase (phosphate cytidylyltransferase) | 2     | -0.439458 Inlier |
| siRNA-Temozolomide Run3-DMSO | NM_0038 | 18  | CDS2      | CDP-diacylglycerol synthase (phosphate cytidylyltransferase) | 2     | -0.131179 Inlier |
| siRNA-Vinblastine Run2-DMSO  | NM_0038 | 18  | CDS2      | CDP-diacylglycerol synthase (phosphate cytidylyltransferase) | 2     | 0.131179 Inlier  |
| siRNA Disorazole DMSO Run3   | NM_0038 | 18  | CDS2      | CDP-diacylglycerol synthase (phosphate cytidylyltransferase) | 2     | 0.954611 Inlier  |
| siRNA-Vinblastine Run1-DMSO  | NM_0038 | 18  | CDS2      | CDP-diacylglycerol synthase (phosphate cytidylyltransferase) | 2     | 1.142941 Inlier  |

Identification of Survival Genes in Human Glioblastoma Cells Using siRNA Screening  
 Nikhil G Thaker, Fang Zhang, Peter R. McDonald, Tong Ying Shun, Michael D Lewen, Ian F. Pollack, and John S. Lazo

Molecular Pharmacology

| siRNA Treatment              | Gene    | Gene ID | Gene Symbol | Gene Description                                               | Log Fold Change | Outlier Status |
|------------------------------|---------|---------|-------------|----------------------------------------------------------------|-----------------|----------------|
| siRNA Disorazole DMSO Run2   | NM_0038 | 18      | CDS2        | CDP-diacylglycerol synthase (phosphatidate cytidyltransferase) | 1.456483        | Inlier         |
| siRNA-Temozolomide Run2-DMSO | NM_1707 | 23      | CDY1        | chromodomain protein, Y-linked, 1                              | -1.70592        | Inlier         |
| siRNA Disorazole DMSO Run1   | NM_1707 | 23      | CDY1        | chromodomain protein, Y-linked, 1                              | -0.759702       | Inlier         |
| siRNA-Temozolomide Run3-DMSO | NM_1707 | 23      | CDY1        | chromodomain protein, Y-linked, 1                              | -0.57377        | Inlier         |
| siRNA-Vinblastine Run2-DMSO  | NM_1707 | 23      | CDY1        | chromodomain protein, Y-linked, 1                              | -0.139914       | Inlier         |
| siRNA-Temozolomide Run1-DMSO | NM_1707 | 23      | CDY1        | chromodomain protein, Y-linked, 1                              | 0.139914        | Inlier         |
| siRNA Disorazole DMSO Run3   | NM_1707 | 23      | CDY1        | chromodomain protein, Y-linked, 1                              | 0.589298        | Inlier         |
| siRNA Disorazole DMSO Run2   | NM_1707 | 23      | CDY1        | chromodomain protein, Y-linked, 1                              | 1.835064        | Inlier         |
| siRNA-Vinblastine Run1-DMSO  | NM_1707 | 23      | CDY1        | chromodomain protein, Y-linked, 1                              | 2.023966        | Inlier         |
| siRNA-Temozolomide Run2-DMSO | NM_0048 | 25      | CDY2        | chromodomain protein, Y-linked, 2                              | -1.818779       | Inlier         |
| siRNA-Temozolomide Run3-DMSO | NM_0048 | 25      | CDY2        | chromodomain protein, Y-linked, 2                              | -0.823223       | Inlier         |



Identification of Survival Genes in Human Glioblastoma Cells Using siRNA Screening

Nikhil G Thaker, Fang Zhang, Peter R. McDonald, Tong Ying Shun, Michael D Lewen, Ian F. Pollack, and John S. Lazo

Molecular Pharmacology

|                              |               |      |                                              |           |        |
|------------------------------|---------------|------|----------------------------------------------|-----------|--------|
| siRNA-Vinblastine Run2-DMSO  | NM_0048<br>25 | CDY2 | chromodo<br>main<br>protein, Y-<br>linked, 2 | -0.525777 | Inlier |
| siRNA Disorazole DMSO Run1   | NM_0048<br>25 | CDY2 | chromodo<br>main<br>protein, Y-<br>linked, 2 | -0.262223 | Inlier |
| siRNA-Temozolomide Run1-DMSO | NM_0048<br>25 | CDY2 | chromodo<br>main<br>protein, Y-<br>linked, 2 | 0.262223  | Inlier |
| siRNA Disorazole DMSO Run3   | NM_0048<br>25 | CDY2 | chromodo<br>main<br>protein, Y-<br>linked, 2 | 0.438293  | Inlier |
| siRNA Disorazole DMSO Run2   | NM_0048<br>25 | CDY2 | chromodo<br>main<br>protein, Y-<br>linked, 2 | 0.985455  | Inlier |
| siRNA-Vinblastine Run1-DMSO  | NM_0048<br>25 | CDY2 | chromodo<br>main<br>protein, Y-<br>linked, 2 | 2.653364  | Inlier |
| siRNA-Temozolomide Run2-DMSO | NM_1707<br>52 | CDYL | chromodo<br>main<br>protein, Y-<br>like      | -0.948434 | Inlier |
| siRNA-Temozolomide Run3-DMSO | NM_1707<br>52 | CDYL | chromodo<br>main<br>protein, Y-<br>like      | -0.833856 | Inlier |
| siRNA Disorazole DMSO Run1   | NM_1707<br>52 | CDYL | chromodo<br>main<br>protein, Y-<br>like      | -0.221796 | Inlier |
| siRNA-Vinblastine Run2-DMSO  | NM_1707<br>52 | CDYL | chromodo<br>main<br>protein, Y-<br>like      | -0.16341  | Inlier |
| siRNA Disorazole DMSO Run3   | NM_1707<br>52 | CDYL | chromodo<br>main<br>protein, Y-<br>like      | 0.163409  | Inlier |
| siRNA-Temozolomide Run1-DMSO | NM_1707<br>52 | CDYL | chromodo<br>main<br>protein, Y-<br>like      | 0.515144  | Inlier |
| siRNA Disorazole DMSO Run2   | NM_1707<br>52 | CDYL | chromodo<br>main<br>protein, Y-<br>like      | 0.988363  | Inlier |

Identification of Survival Genes in Human Glioblastoma Cells Using siRNA Screening

Nikhil G Thaker, Fang Zhang, Peter R. McDonald, Tong Ying Shun, Michael D Lewen, Ian F. Pollack, and John S. Lazo

Molecular Pharmacology

|                              |                  |         |                                                                                                             |           |        |
|------------------------------|------------------|---------|-------------------------------------------------------------------------------------------------------------|-----------|--------|
| siRNA-Vinblastine Run1-DMSO  | NM_1707<br>52    | CDYL    | chromodo<br>main<br>protein, Y-<br>like                                                                     | 1.280171  | Inlier |
| siRNA-Temozolomide Run2-DMSO | NM_1523<br>42    | CDYL2   | chromodo<br>main<br>protein, Y-<br>like 2                                                                   | -0.989457 | Inlier |
| siRNA-Vinblastine Run1-DMSO  | NM_1523<br>42    | CDYL2   | chromodo<br>main<br>protein, Y-<br>like 2                                                                   | -0.688882 | Inlier |
| siRNA-Vinblastine Run2-DMSO  | NM_1523<br>42    | CDYL2   | chromodo<br>main<br>protein, Y-<br>like 2                                                                   | -0.660118 | Inlier |
| siRNA-Temozolomide Run3-DMSO | NM_1523<br>42    | CDYL2   | chromodo<br>main<br>protein, Y-<br>like 2                                                                   | -0.368002 | Inlier |
| siRNA Disorazole DMSO Run2   | NM_1523<br>42    | CDYL2   | chromodo<br>main<br>protein, Y-<br>like 2                                                                   | 0.368002  | Inlier |
| siRNA Disorazole DMSO Run1   | NM_1523<br>42    | CDYL2   | chromodo<br>main<br>protein, Y-<br>like 2                                                                   | 0.389599  | Inlier |
| siRNA Disorazole DMSO Run3   | NM_1523<br>42    | CDYL2   | chromodo<br>main<br>protein, Y-<br>like 2                                                                   | 1.089717  | Inlier |
| siRNA-Temozolomide Run1-DMSO | NM_1523<br>42    | CDYL2   | chromodo<br>main<br>protein, Y-<br>like 2                                                                   | 1.559701  | Inlier |
| siRNA-Temozolomide Run2-DMSO | NM_0010<br>24912 | CEACAM1 | carcinoem<br>bryonic<br>antigen-<br>related cell<br>adhesion<br>molecule 1<br>(biliary<br>glycoprotei<br>n) | -2.582891 | Inlier |

Identification of Survival Genes in Human Glioblastoma Cells Using siRNA Screening

Nikhil G Thaker, Fang Zhang, Peter R. McDonald, Tong Ying Shun, Michael D Lewen, Ian F. Pollack, and John S. Lazo

Molecular Pharmacology

|                              |                  |         |                                                                                                             |           |        |
|------------------------------|------------------|---------|-------------------------------------------------------------------------------------------------------------|-----------|--------|
| siRNA-Temozolomide Run3-DMSO | NM_0010<br>24912 | CEACAM1 | carcinoem<br>bryonic<br>antigen-<br>related cell<br>adhesion<br>molecule 1<br>(biliary<br>glycoprotei<br>n) | -2.393724 | Inlier |
| siRNA Disorazole DMSO Run3   | NM_0010<br>24912 | CEACAM1 | carcinoem<br>bryonic<br>antigen-<br>related cell<br>adhesion<br>molecule 1<br>(biliary<br>glycoprotei<br>n) | -0.77515  | Inlier |
| siRNA-Vinblastine Run2-DMSO  | NM_0010<br>24912 | CEACAM1 | carcinoem<br>bryonic<br>antigen-<br>related cell<br>adhesion<br>molecule 1<br>(biliary<br>glycoprotei<br>n) | -0.427231 | Inlier |
| siRNA Disorazole DMSO Run2   | NM_0010<br>24912 | CEACAM1 | carcinoem<br>bryonic<br>antigen-<br>related cell<br>adhesion<br>molecule 1<br>(biliary<br>glycoprotei<br>n) | 0.427231  | Inlier |
| siRNA-Temozolomide Run1-DMSO | NM_0010<br>24912 | CEACAM1 | carcinoem<br>bryonic<br>antigen-<br>related cell<br>adhesion<br>molecule 1<br>(biliary<br>glycoprotei<br>n) | 0.486092  | Inlier |

Identification of Survival Genes in Human Glioblastoma Cells Using siRNA Screening  
 Nikhil G Thaker, Fang Zhang, Peter R. McDonald, Tong Ying Shun, Michael D Lewen, Ian F. Pollack, and John S. Lazo  
 Molecular Pharmacology

|                              |              |         |                                                                                  |           |        |
|------------------------------|--------------|---------|----------------------------------------------------------------------------------|-----------|--------|
| siRNA-Vinblastine Run1-DMSO  | NM_001024912 | CEACAM1 | carcinoembryonic antigen-related cell adhesion molecule 1 (biliary glycoprotein) | 0.57385   | Inlier |
| siRNA Disorazole DMSO Run1   | NM_001024912 | CEACAM1 | carcinoembryonic antigen-related cell adhesion molecule 1 (biliary glycoprotein) | 0.820858  | Inlier |
| siRNA-Temozolomide Run3-DMSO | NM_177405    | CECR1   | cat eye syndrome chromosome region, candidate 1                                  | -1.08151  | Inlier |
| siRNA-Temozolomide Run2-DMSO | NM_177405    | CECR1   | cat eye syndrome chromosome region, candidate 1                                  | -0.584643 | Inlier |
| siRNA Disorazole DMSO Run1   | NM_177405    | CECR1   | cat eye syndrome chromosome region, candidate 1                                  | -0.157662 | Inlier |
| siRNA-Vinblastine Run2-DMSO  | NM_177405    | CECR1   | cat eye syndrome chromosome region, candidate 1                                  | -0.002432 | Inlier |

Identification of Survival Genes in Human Glioblastoma Cells Using siRNA Screening  
 Nikhil G Thaker, Fang Zhang, Peter R. McDonald, Tong Ying Shun, Michael D Lewen, Ian F. Pollack, and John S. Lazo  
 Molecular Pharmacology

|                                  |               |       |                                                                                                                                            |           |        |
|----------------------------------|---------------|-------|--------------------------------------------------------------------------------------------------------------------------------------------|-----------|--------|
| siRNA Disorazole DMSO Run3       | NM_1774<br>05 | CECR1 | cat eye<br>syndrome<br>chromoso<br>me region,<br>candidate<br>1                                                                            | 0.002432  | Inlier |
| siRNA-Temozolomide Run1-<br>DMSO | NM_1774<br>05 | CECR1 | cat eye<br>syndrome<br>chromoso<br>me region,<br>candidate<br>1                                                                            | 0.764357  | Inlier |
| siRNA Disorazole DMSO Run2       | NM_1774<br>05 | CECR1 | cat eye<br>syndrome<br>chromoso<br>me region,<br>candidate<br>1                                                                            | 1.475691  | Inlier |
| siRNA-Vinblastine Run1-<br>DMSO  | NM_1774<br>05 | CECR1 | cat eye<br>syndrome<br>chromoso<br>me region,<br>candidate<br>1                                                                            | 1.586742  | Inlier |
| siRNA-Vinblastine Run2-<br>DMSO  | NM_0018<br>07 | CEL   | carboxyl<br>ester<br>lipase (bile<br>salt-<br>stimulated<br>lipase)<br>carboxyl<br>ester<br>lipase (bile<br>salt-<br>stimulated<br>lipase) | -0.810865 | Inlier |
| siRNA Disorazole DMSO Run3       | NM_0018<br>07 | CEL   | carboxyl<br>ester<br>lipase (bile<br>salt-<br>stimulated<br>lipase)<br>carboxyl<br>ester<br>lipase (bile<br>salt-<br>stimulated<br>lipase) | -0.774896 | Inlier |
| siRNA-Temozolomide Run3-<br>DMSO | NM_0018<br>07 | CEL   | carboxyl<br>ester<br>lipase (bile<br>salt-<br>stimulated<br>lipase)<br>carboxyl<br>ester<br>lipase (bile<br>salt-<br>stimulated<br>lipase) | -0.271664 | Inlier |
| siRNA Disorazole DMSO Run1       | NM_0018<br>07 | CEL   | carboxyl<br>ester<br>lipase (bile<br>salt-<br>stimulated<br>lipase)                                                                        | -0.028092 | Inlier |

Identification of Survival Genes in Human Glioblastoma Cells Using siRNA Screening

Nikhil G Thaker, Fang Zhang, Peter R. McDonald, Tong Ying Shun, Michael D Lewen, Ian F. Pollack, and John S. Lazo

Molecular Pharmacology

|                              |           |        |                                                                                |           |        |
|------------------------------|-----------|--------|--------------------------------------------------------------------------------|-----------|--------|
| siRNA-Temozolomide Run2-DMSO | NM_001807 | CEL    | carboxyl ester lipase (bile salt-stimulated lipase)                            | 0.028092  | Inlier |
| siRNA-Temozolomide Run1-DMSO | NM_001807 | CEL    | carboxyl ester lipase (bile salt-stimulated lipase)                            | 0.574104  | Inlier |
| siRNA-Vinblastine Run1-DMSO  | NM_001807 | CEL    | carboxyl ester lipase (bile salt-stimulated lipase)                            | 1.217676  | Inlier |
| siRNA Disorazole DMSO Run2   | NM_001807 | CEL    | carboxyl ester lipase (bile salt-stimulated lipase)                            | 1.328376  | Inlier |
| siRNA Disorazole DMSO Run2   | NM_014246 | CELSR1 | cadherin, EGF LAG seven-pass G-type receptor 1 (flamingo homolog, Drosophila ) | -1.961132 | Inlier |
| siRNA-Temozolomide Run3-DMSO | NM_014246 | CELSR1 | cadherin, EGF LAG seven-pass G-type receptor 1 (flamingo homolog, Drosophila ) | -1.554003 | Inlier |

Identification of Survival Genes in Human Glioblastoma Cells Using siRNA Screening

Nikhil G Thaker, Fang Zhang, Peter R. McDonald, Tong Ying Shun, Michael D Lewen, Ian F. Pollack, and John S. Lazo

Molecular Pharmacology

|                                  |               |        |                                                                                                             |           |        |
|----------------------------------|---------------|--------|-------------------------------------------------------------------------------------------------------------|-----------|--------|
| siRNA Disorazole DMSO Run1       | NM_0142<br>46 | CELSR1 | cadherin,<br>EGF LAG<br>seven-<br>pass G-<br>type<br>receptor 1<br>(flamingo<br>homolog,<br>Drosophila<br>) | -1.370924 | Inlier |
| siRNA-Temozolomide Run2-<br>DMSO | NM_0142<br>46 | CELSR1 | cadherin,<br>EGF LAG<br>seven-<br>pass G-<br>type<br>receptor 1<br>(flamingo<br>homolog,<br>Drosophila<br>) | -0.286049 | Inlier |
| siRNA-Temozolomide Run1-<br>DMSO | NM_0142<br>46 | CELSR1 | cadherin,<br>EGF LAG<br>seven-<br>pass G-<br>type<br>receptor 1<br>(flamingo<br>homolog,<br>Drosophila<br>) | 0.286049  | Inlier |
| siRNA-Vinblastine Run2-<br>DMSO  | NM_0142<br>46 | CELSR1 | cadherin,<br>EGF LAG<br>seven-<br>pass G-<br>type<br>receptor 1<br>(flamingo<br>homolog,<br>Drosophila<br>) | 0.334826  | Inlier |
| siRNA Disorazole DMSO Run3       | NM_0142<br>46 | CELSR1 | cadherin,<br>EGF LAG<br>seven-<br>pass G-<br>type<br>receptor 1<br>(flamingo<br>homolog,<br>Drosophila<br>) | 0.577376  | Inlier |

Identification of Survival Genes in Human Glioblastoma Cells Using siRNA Screening

Nikhil G Thaker, Fang Zhang, Peter R. McDonald, Tong Ying Shun, Michael D Lewen, Ian F. Pollack, and John S. Lazo

Molecular Pharmacology

|                              |           |        |                                                                                |           |        |
|------------------------------|-----------|--------|--------------------------------------------------------------------------------|-----------|--------|
| siRNA-Vinblastine Run1-DMSO  | NM_014246 | CELSR1 | cadherin, EGF LAG seven-pass G-type receptor 1 (flamingo homolog, Drosophila ) | 0.771624  | Inlier |
| siRNA-Temozolomide Run3-DMSO | NM_001408 | CELSR2 | cadherin, EGF LAG seven-pass G-type receptor 2 (flamingo homolog, Drosophila ) | -0.727955 | Inlier |
| siRNA-Temozolomide Run2-DMSO | NM_001408 | CELSR2 | cadherin, EGF LAG seven-pass G-type receptor 2 (flamingo homolog, Drosophila ) | -0.621045 | Inlier |
| siRNA Disorazole DMSO Run3   | NM_001408 | CELSR2 | cadherin, EGF LAG seven-pass G-type receptor 2 (flamingo homolog, Drosophila ) | -0.573874 | Inlier |
| siRNA Disorazole DMSO Run2   | NM_001408 | CELSR2 | cadherin, EGF LAG seven-pass G-type receptor 2 (flamingo homolog, Drosophila ) | -0.061261 | Inlier |



Identification of Survival Genes in Human Glioblastoma Cells Using siRNA Screening

Nikhil G Thaker, Fang Zhang, Peter R. McDonald, Tong Ying Shun, Michael D Lewen, Ian F. Pollack, and John S. Lazo

Molecular Pharmacology

|                              |           |        |                                                                                |           |        |
|------------------------------|-----------|--------|--------------------------------------------------------------------------------|-----------|--------|
| siRNA-Temozolomide Run1-DMSO | NM_001408 | CELSR2 | cadherin, EGF LAG seven-pass G-type receptor 2 (flamingo homolog, Drosophila ) | 0.061261  | Inlier |
| siRNA-Vinblastine Run2-DMSO  | NM_001408 | CELSR2 | cadherin, EGF LAG seven-pass G-type receptor 2 (flamingo homolog, Drosophila ) | 0.944302  | Inlier |
| siRNA-Vinblastine Run1-DMSO  | NM_001408 | CELSR2 | cadherin, EGF LAG seven-pass G-type receptor 2 (flamingo homolog, Drosophila ) | 1.037185  | Inlier |
| siRNA Disorazole DMSO Run1   | NM_001408 | CELSR2 | cadherin, EGF LAG seven-pass G-type receptor 3 (flamingo homolog, Drosophila ) | 1.872975  | Inlier |
| siRNA-Temozolomide Run3-DMSO | NM_001407 | CELSR3 | cadherin, EGF LAG seven-pass G-type receptor 3 (flamingo homolog, Drosophila ) | -1.790024 | Inlier |

Identification of Survival Genes in Human Glioblastoma Cells Using siRNA Screening

Nikhil G Thaker, Fang Zhang, Peter R. McDonald, Tong Ying Shun, Michael D Lewen, Ian F. Pollack, and John S. Lazo

Molecular Pharmacology

|                              |           |        |                                                                               |           |        |
|------------------------------|-----------|--------|-------------------------------------------------------------------------------|-----------|--------|
| siRNA Disorazole DMSO Run1   | NM_001407 | CELSR3 | cadherin, EGF LAG seven-pass G-type receptor 3 (flamingo homolog, Drosophila) | -0.706249 | Inlier |
| siRNA-Temozolomide Run2-DMSO | NM_001407 | CELSR3 | cadherin, EGF LAG seven-pass G-type receptor 3 (flamingo homolog, Drosophila) | -0.642751 | Inlier |
| siRNA Disorazole DMSO Run2   | NM_001407 | CELSR3 | cadherin, EGF LAG seven-pass G-type receptor 3 (flamingo homolog, Drosophila) | -0.268938 | Inlier |
| siRNA-Temozolomide Run1-DMSO | NM_001407 | CELSR3 | cadherin, EGF LAG seven-pass G-type receptor 3 (flamingo homolog, Drosophila) | 0.268938  | Inlier |
| siRNA Disorazole DMSO Run3   | NM_001407 | CELSR3 | cadherin, EGF LAG seven-pass G-type receptor 3 (flamingo homolog, Drosophila) | 0.491655  | Inlier |

Identification of Survival Genes in Human Glioblastoma Cells Using siRNA Screening  
 Nikhil G Thaker, Fang Zhang, Peter R. McDonald, Tong Ying Shun, Michael D Lewen, Ian F. Pollack, and John S. Lazo

Molecular Pharmacology

|                              |           |        |                                                                                |           |        |
|------------------------------|-----------|--------|--------------------------------------------------------------------------------|-----------|--------|
| siRNA-Vinblastine Run1-DMSO  | NM_001407 | CELSR3 | cadherin, EGF LAG seven-pass G-type receptor 3 (flamingo homolog, Drosophila ) | 0.853974  | Inlier |
| siRNA-Vinblastine Run2-DMSO  | NM_001407 | CELSR3 | cadherin, EGF LAG seven-pass G-type receptor 3 (flamingo homolog, Drosophila ) | 0.91409   | Inlier |
| siRNA-Temozolomide Run3-DMSO | NM_015230 | CENTD1 | centaurin, delta 1                                                             | -1.546455 | Inlier |
| siRNA-Temozolomide Run1-DMSO | NM_015230 | CENTD1 | centaurin, delta 1                                                             | -0.678997 | Inlier |
| siRNA-Temozolomide Run2-DMSO | NM_015230 | CENTD1 | centaurin, delta 1                                                             | -0.416504 | Inlier |
| siRNA Disorazole DMSO Run3   | NM_015230 | CENTD1 | centaurin, delta 1                                                             | -0.346384 | Inlier |
| siRNA-Vinblastine Run2-DMSO  | NM_015230 | CENTD1 | centaurin, delta 1                                                             | 0.346384  | Inlier |
| siRNA Disorazole DMSO Run2   | NM_015230 | CENTD1 | centaurin, delta 1                                                             | 0.670003  | Inlier |
| siRNA Disorazole DMSO Run1   | NM_015230 | CENTD1 | centaurin, delta 1                                                             | 0.766822  | Inlier |
| siRNA-Vinblastine Run1-DMSO  | NM_015230 | CENTD1 | centaurin, delta 1                                                             | 0.947503  | Inlier |
| siRNA-Temozolomide Run3-DMSO | NM_139181 | CENTD2 | centaurin, delta 2                                                             | -1.648045 | Inlier |
| siRNA-Temozolomide Run1-DMSO | NM_139181 | CENTD2 | centaurin, delta 2                                                             | -0.951278 | Inlier |
| siRNA-Temozolomide Run2-DMSO | NM_139181 | CENTD2 | centaurin, delta 2                                                             | -0.905278 | Inlier |
| siRNA Disorazole DMSO Run3   | NM_139181 | CENTD2 | centaurin, delta 2                                                             | -0.019908 | Inlier |
| siRNA-Vinblastine Run2-DMSO  | NM_139181 | CENTD2 | centaurin, delta 2                                                             | 0.019908  | Inlier |
| siRNA Disorazole DMSO Run1   | NM_139181 | CENTD2 | centaurin, delta 2                                                             | 0.183817  | Inlier |
| siRNA Disorazole DMSO Run2   | NM_139181 | CENTD2 | centaurin, delta 2                                                             | 0.594628  | Inlier |
| siRNA-Vinblastine Run1-DMSO  | NM_139181 | CENTD2 | centaurin, delta 2                                                             | 0.754372  | Inlier |

Identification of Survival Genes in Human Glioblastoma Cells Using siRNA Screening  
 Nikhil G Thaker, Fang Zhang, Peter R. McDonald, Tong Ying Shun, Michael D Lewen, Ian F. Pollack, and John S. Lazo  
 Molecular Pharmacology

|                              |                  |       |                                           |           |        |
|------------------------------|------------------|-------|-------------------------------------------|-----------|--------|
| siRNA Disorazole DMSO Run3   | NM_0010<br>07794 | CEPT1 | choline/ethanolamine phosphotransferase 1 | -1.137128 | Inlier |
| siRNA-Temozolomide Run1-DMSO | NM_0010<br>07794 | CEPT1 | choline/ethanolamine phosphotransferase 1 | -0.211872 | Inlier |
| siRNA-Vinblastine Run2-DMSO  | NM_0010<br>07794 | CEPT1 | choline/ethanolamine phosphotransferase 1 | -0.071626 | Inlier |
| siRNA-Temozolomide Run2-DMSO | NM_0010<br>07794 | CEPT1 | choline/ethanolamine phosphotransferase 1 | -0.034567 | Inlier |
| siRNA Disorazole DMSO Run1   | NM_0010<br>07794 | CEPT1 | choline/ethanolamine phosphotransferase 1 | 0.034567  | Inlier |
| siRNA-Temozolomide Run3-DMSO | NM_0010<br>07794 | CEPT1 | choline/ethanolamine phosphotransferase 1 | 2.153089  | Inlier |
| siRNA Disorazole DMSO Run2   | NM_0010<br>07794 | CEPT1 | choline/ethanolamine phosphotransferase 1 | 2.850135  | Inlier |
| siRNA-Vinblastine Run1-DMSO  | NM_0010<br>07794 | CEPT1 | choline/ethanolamine phosphotransferase 1 | 3.467157  | Inlier |
| siRNA Disorazole DMSO Run2   | NM_0227<br>66    | CERK  | ceramide kinase                           | -1.53166  | Inlier |
| siRNA-Temozolomide Run3-DMSO | NM_0227<br>66    | CERK  | ceramide kinase                           | -1.407238 | Inlier |

Identification of Survival Genes in Human Glioblastoma Cells Using siRNA Screening  
 Nikhil G Thaker, Fang Zhang, Peter R. McDonald, Tong Ying Shun, Michael D Lewen, Ian F. Pollack, and John S. Lazo

|                              |               |      |                                                                                |           |        |
|------------------------------|---------------|------|--------------------------------------------------------------------------------|-----------|--------|
| siRNA-Temozolomide Run1-DMSO | NM_0227<br>66 | CERK | ceramide<br>kinase                                                             | -0.497577 | Inlier |
| siRNA-Temozolomide Run2-DMSO | NM_0227<br>66 | CERK | ceramide<br>kinase                                                             | -0.134851 | Inlier |
| siRNA Disorazole DMSO Run1   | NM_0227<br>66 | CERK | ceramide<br>kinase                                                             | 0.134851  | Inlier |
| siRNA Disorazole DMSO Run3   | NM_0227<br>66 | CERK | ceramide<br>kinase                                                             | 0.614235  | Inlier |
| siRNA-Vinblastine Run1-DMSO  | NM_0227<br>66 | CERK | ceramide<br>kinase                                                             | 0.734765  | Inlier |
| siRNA-Vinblastine Run2-DMSO  | NM_0227<br>66 | CERK | ceramide<br>kinase                                                             | 1.21481   | Inlier |
| siRNA-Vinblastine Run2-DMSO  | NM_0012<br>66 | CES1 | carboxyles<br>terase 1<br>(monocyte<br>/macrophage<br>serine<br>esterase<br>1) | -2.396585 | Inlier |
| siRNA Disorazole DMSO Run3   | NM_0012<br>66 | CES1 | carboxyles<br>terase 1<br>(monocyte<br>/macrophage<br>serine<br>esterase<br>1) | -1.740854 | Inlier |
| siRNA-Temozolomide Run3-DMSO | NM_0012<br>66 | CES1 | carboxyles<br>terase 1<br>(monocyte<br>/macrophage<br>serine<br>esterase<br>1) | -0.54525  | Inlier |
| siRNA Disorazole DMSO Run1   | NM_0012<br>66 | CES1 | carboxyles<br>terase 1<br>(monocyte<br>/macrophage<br>serine<br>esterase<br>1) | -0.084964 | Inlier |
| siRNA-Temozolomide Run1-DMSO | NM_0012<br>66 | CES1 | carboxyles<br>terase 1<br>(monocyte<br>/macrophage<br>serine<br>esterase<br>1) | 0.084964  | Inlier |

Identification of Survival Genes in Human Glioblastoma Cells Using siRNA Screening  
 Nikhil G Thaker, Fang Zhang, Peter R. McDonald, Tong Ying Shun, Michael D Lewen, Ian F. Pollack, and John S. Lazo  
 Molecular Pharmacology

|                              |           |      |                                                                                 |           |        |
|------------------------------|-----------|------|---------------------------------------------------------------------------------|-----------|--------|
| siRNA-Temozolomide Run2-DMSO | NM_001266 | CES1 | carboxyles<br>terase 1<br>(monocyte<br>/macropha<br>ge serine<br>esterase<br>1) | 0.134611  | Inlier |
| siRNA-Vinblastine Run1-DMSO  | NM_001266 | CES1 | carboxyles<br>terase 1<br>(monocyte<br>/macropha<br>ge serine<br>esterase<br>1) | 0.80375   | Inlier |
| siRNA Disorazole DMSO Run2   | NM_001266 | CES1 | carboxyles<br>terase 1<br>(monocyte<br>/macropha<br>ge serine<br>esterase<br>1) | 1.78772   | Inlier |
| siRNA Disorazole DMSO Run1   | NM_198061 | CES2 | carboxyles<br>terase 2<br>(intestine,<br>liver)                                 | -1.290658 | Inlier |
| siRNA-Vinblastine Run1-DMSO  | NM_198061 | CES2 | carboxyles<br>terase 2<br>(intestine,<br>liver)                                 | -0.821401 | Inlier |
| siRNA-Vinblastine Run2-DMSO  | NM_198061 | CES2 | carboxyles<br>terase 2<br>(intestine,<br>liver)                                 | -0.735429 | Inlier |
| siRNA Disorazole DMSO Run3   | NM_198061 | CES2 | carboxyles<br>terase 2<br>(intestine,<br>liver)                                 | -0.441131 | Inlier |
| siRNA-Temozolomide Run3-DMSO | NM_198061 | CES2 | carboxyles<br>terase 2<br>(intestine,<br>liver)                                 | 0.44113   | Inlier |
| siRNA-Temozolomide Run2-DMSO | NM_198061 | CES2 | carboxyles<br>terase 2<br>(intestine,<br>liver)                                 | 0.609626  | Inlier |
| siRNA-Temozolomide Run1-DMSO | NM_198061 | CES2 | carboxyles<br>terase 2<br>(intestine,<br>liver)                                 | 0.613571  | Inlier |

Identification of Survival Genes in Human Glioblastoma Cells Using siRNA Screening  
 Nikhil G Thaker, Fang Zhang, Peter R. McDonald, Tong Ying Shun, Michael D Lewen, Ian F. Pollack, and John S. Lazo

Molecular Pharmacology

|                                  |               |       |                                                                 |           |         |
|----------------------------------|---------------|-------|-----------------------------------------------------------------|-----------|---------|
| siRNA Disorazole DMSO Run2       | NM_1980<br>61 | CES2  | carboxyles<br>terase 2<br>(intestine,<br>liver)                 | 1.41765   | Inlier  |
| siRNA-Vinblastine Run2-<br>DMSO  | NM_0162<br>80 | CES4  | carboxyles<br>terase 4-<br>like                                 | -5.143753 | Outlier |
| siRNA-Temozolomide Run2-<br>DMSO | NM_0162<br>80 | CES4  | carboxyles<br>terase 4-<br>like                                 | -0.463626 | Inlier  |
| siRNA-Temozolomide Run3-<br>DMSO | NM_0162<br>80 | CES4  | carboxyles<br>terase 4-<br>like                                 | -0.09893  | Inlier  |
| siRNA Disorazole DMSO Run3       | NM_0162<br>80 | CES4  | carboxyles<br>terase 4-<br>like                                 | -0.047406 | Inlier  |
| siRNA-Temozolomide Run1-<br>DMSO | NM_0162<br>80 | CES4  | carboxyles<br>terase 4-<br>like                                 | 0.047406  | Inlier  |
| siRNA-Vinblastine Run1-<br>DMSO  | NM_0162<br>80 | CES4  | carboxyles<br>terase 4-<br>like                                 | 0.885374  | Inlier  |
| siRNA Disorazole DMSO Run2       | NM_0162<br>80 | CES4  | carboxyles<br>terase 4-<br>like                                 | 1.281344  | Inlier  |
| siRNA Disorazole DMSO Run1       | NM_0162<br>80 | CES4  | carboxyles<br>terase 4-<br>like                                 | 1.313221  | Inlier  |
| siRNA-Temozolomide Run3-<br>DMSO | NM_0144<br>06 | CESK1 | CESK1                                                           | -0.948507 | Inlier  |
| siRNA-Temozolomide Run2-<br>DMSO | NM_0144<br>06 | CESK1 | CESK1                                                           | -0.933481 | Inlier  |
| siRNA-Temozolomide Run1-<br>DMSO | NM_0144<br>06 | CESK1 | CESK1                                                           | -0.886177 | Inlier  |
| siRNA Disorazole DMSO Run3       | NM_0144<br>06 | CESK1 | CESK1                                                           | -0.261919 | Inlier  |
| siRNA Disorazole DMSO Run2       | NM_0144<br>06 | CESK1 | CESK1                                                           | 0.261919  | Inlier  |
| siRNA Disorazole DMSO Run1       | NM_0144<br>06 | CESK1 | CESK1                                                           | 0.340685  | Inlier  |
| siRNA-Vinblastine Run1-<br>DMSO  | NM_0144<br>06 | CESK1 | CESK1                                                           | 0.462823  | Inlier  |
| siRNA-Vinblastine Run2-<br>DMSO  | NM_0144<br>06 | CESK1 | CESK1<br>cholesteryl<br>ester<br>transfer<br>protein,<br>plasma | 1.153631  | Inlier  |
| siRNA-Temozolomide Run3-<br>DMSO | NM_0000<br>78 | CETP  |                                                                 | -1.713163 | Inlier  |

Identification of Survival Genes in Human Glioblastoma Cells Using siRNA Screening  
 Nikhil G Thaker, Fang Zhang, Peter R. McDonald, Tong Ying Shun, Michael D Lewen, Ian F. Pollack, and John S. Lazo

Molecular Pharmacology

|                              |           |       |                                                                                                                                                                      |           |        |
|------------------------------|-----------|-------|----------------------------------------------------------------------------------------------------------------------------------------------------------------------|-----------|--------|
| siRNA-Temozolomide Run2-DMSO | NM_000078 | CETP  | cholesteryl ester transfer protein, plasma cholesteryl ester transfer protein, plasma cholesteryl ester transfer protein, plasma cholesteryl ester transfer protein, | -1.000217 | Inlier |
| siRNA Disorazole DMSO Run1   | NM_000078 | CETP  | cholesteryl ester transfer protein, plasma cholesteryl ester transfer protein,                                                                                       | -0.348783 | Inlier |
| siRNA Disorazole DMSO Run3   | NM_000078 | CETP  | cholesteryl ester transfer protein, plasma cholesteryl ester transfer protein,                                                                                       | -0.017582 | Inlier |
| siRNA-Vinblastine Run2-DMSO  | NM_000078 | CETP  | cholesteryl ester transfer protein, plasma cholesteryl ester transfer protein,                                                                                       | 0.017582  | Inlier |
| siRNA-Temozolomide Run1-DMSO | NM_000078 | CETP  | cholesteryl ester transfer protein, plasma cholesteryl ester transfer protein,                                                                                       | 0.292507  | Inlier |
| siRNA-Vinblastine Run1-DMSO  | NM_000078 | CETP  | cholesteryl ester transfer protein, plasma cholesteryl ester transfer protein,                                                                                       | 1.290383  | Inlier |
| siRNA Disorazole DMSO Run2   | NM_000078 | CETP  | cholesteryl ester transfer protein, plasma CASP8 and FADD-like                                                                                                       | 1.379404  | Inlier |
| siRNA-Temozolomide Run3-DMSO | NM_003879 | CFLAR | apoptosis regulator CASP8 and FADD-like                                                                                                                              | -1.331489 | Inlier |
| siRNA-Temozolomide Run2-DMSO | NM_003879 | CFLAR | apoptosis regulator CASP8 and FADD-like                                                                                                                              | -0.938534 | Inlier |
| siRNA-Vinblastine Run2-DMSO  | NM_003879 | CFLAR | apoptosis regulator                                                                                                                                                  | -0.410466 | Inlier |



Identification of Survival Genes in Human Glioblastoma Cells Using siRNA Screening

Nikhil G Thaker, Fang Zhang, Peter R. McDonald, Tong Ying Shun, Michael D Lewen, Ian F. Pollack, and John S. Lazo

Molecular Pharmacology

|                                  |               |       |                                                                                                                                                                                                       |           |         |
|----------------------------------|---------------|-------|-------------------------------------------------------------------------------------------------------------------------------------------------------------------------------------------------------|-----------|---------|
| siRNA Disorazole DMSO Run2       | NM_0038<br>79 | CFLAR | CASP8<br>and FADD-<br>like<br>apoptosis<br>regulator                                                                                                                                                  | -0.215586 | Inlier  |
| siRNA Disorazole DMSO Run1       | NM_0038<br>79 | CFLAR | CASP8<br>and FADD-<br>like<br>apoptosis<br>regulator                                                                                                                                                  | 0.215587  | Inlier  |
| siRNA-Temozolomide Run1-<br>DMSO | NM_0038<br>79 | CFLAR | CASP8<br>and FADD-<br>like<br>apoptosis<br>regulator                                                                                                                                                  | 0.388663  | Inlier  |
| siRNA-Vinblastine Run1-<br>DMSO  | NM_0038<br>79 | CFLAR | CASP8<br>and FADD-<br>like<br>apoptosis<br>regulator                                                                                                                                                  | 2.332387  | Inlier  |
| siRNA Disorazole DMSO Run3       | NM_0038<br>79 | CFLAR | CASP8<br>and FADD-<br>like<br>apoptosis<br>regulator<br>cystic<br>fibrosis<br>transmem<br>brane<br>conductan<br>ce<br>regulator,<br>ATP-<br>binding<br>cassette<br>(sub-<br>family C,<br>member<br>7) | 4.824364  | Outlier |
| siRNA-Temozolomide Run3-<br>DMSO | NM_0004<br>92 | CFTR  |                                                                                                                                                                                                       | -1.072773 | Inlier  |

Identification of Survival Genes in Human Glioblastoma Cells Using siRNA Screening

Nikhil G Thaker, Fang Zhang, Peter R. McDonald, Tong Ying Shun, Michael D Lewen, Ian F. Pollack, and John S.

Lazo

Molecular Pharmacology

|                                  |               |      |  |                                                                                                                                               |                  |
|----------------------------------|---------------|------|--|-----------------------------------------------------------------------------------------------------------------------------------------------|------------------|
|                                  |               |      |  | cystic<br>fibrosis<br>transmem<br>brane<br>conductan<br>ce<br>regulator,<br>ATP-<br>binding<br>cassette<br>(sub-<br>family C,<br>member<br>7) |                  |
| siRNA Disorazole DMSO Run2       | NM_0004<br>92 | CFTR |  |                                                                                                                                               | -0.90174 Inlier  |
|                                  |               |      |  | cystic<br>fibrosis<br>transmem<br>brane<br>conductan<br>ce<br>regulator,<br>ATP-<br>binding<br>cassette<br>(sub-<br>family C,<br>member<br>7) |                  |
| siRNA Disorazole DMSO Run3       | NM_0004<br>92 | CFTR |  |                                                                                                                                               | -0.653126 Inlier |
|                                  |               |      |  | cystic<br>fibrosis<br>transmem<br>brane<br>conductan<br>ce<br>regulator,<br>ATP-<br>binding<br>cassette<br>(sub-<br>family C,<br>member<br>7) |                  |
| siRNA-Temozolomide Run2-<br>DMSO | NM_0004<br>92 | CFTR |  |                                                                                                                                               | -0.22462 Inlier  |

Identification of Survival Genes in Human Glioblastoma Cells Using siRNA Screening

Nikhil G Thaker, Fang Zhang, Peter R. McDonald, Tong Ying Shun, Michael D Lewen, Ian F. Pollack, and John S.

Lazo

Molecular Pharmacology

|                                 |               |      |                                                                                                                                               |                 |
|---------------------------------|---------------|------|-----------------------------------------------------------------------------------------------------------------------------------------------|-----------------|
| siRNA Disorazole DMSO Run1      | NM_0004<br>92 | CFTR | cystic<br>fibrosis<br>transmem<br>brane<br>conductan<br>ce<br>regulator,<br>ATP-<br>binding<br>cassette<br>(sub-<br>family C,<br>member<br>7) | 0.22462 Inlier  |
| siRNA-Vinblastine Run1-<br>DMSO | NM_0004<br>92 | CFTR | cystic<br>fibrosis<br>transmem<br>brane<br>conductan<br>ce<br>regulator,<br>ATP-<br>binding<br>cassette<br>(sub-<br>family C,<br>member<br>7) | 0.475621 Inlier |
| siRNA-Vinblastine Run2-<br>DMSO | NM_0004<br>92 | CFTR | cystic<br>fibrosis<br>transmem<br>brane<br>conductan<br>ce<br>regulator,<br>ATP-<br>binding<br>cassette<br>(sub-<br>family C,<br>member<br>7) | 0.695874 Inlier |

Identification of Survival Genes in Human Glioblastoma Cells Using siRNA Screening

Nikhil G Thaker, Fang Zhang, Peter R. McDonald, Tong Ying Shun, Michael D Lewen, Ian F. Pollack, and John S.

Lazo

Molecular Pharmacology

| siRNA Treatment              | Gene ID   | Gene Name | Gene Description                                                                                   | Value     | Category |
|------------------------------|-----------|-----------|----------------------------------------------------------------------------------------------------|-----------|----------|
| siRNA-Temozolomide Run1-DMSO | NM_000492 | CFTR      | cystic fibrosis transmembrane conductance regulator, ATP-binding cassette (sub-family C, member 7) | 0.726409  | Inlier   |
| siRNA-Temozolomide Run2-DMSO | NM_015936 | CGI-04    | tyrosyl-tRNA synthetase 2 (mitochondrial)                                                          | -0.693001 | Inlier   |
| siRNA Disorazole DMSO Run1   | NM_015936 | CGI-04    | tyrosyl-tRNA synthetase 2 (mitochondrial)                                                          | -0.655999 | Inlier   |
| siRNA Disorazole DMSO Run3   | NM_015936 | CGI-04    | tyrosyl-tRNA synthetase 2 (mitochondrial)                                                          | -0.518874 | Inlier   |
| siRNA-Vinblastine Run2-DMSO  | NM_015936 | CGI-04    | tyrosyl-tRNA synthetase 2 (mitochondrial)                                                          | -0.403692 | Inlier   |
| siRNA-Temozolomide Run1-DMSO | NM_015936 | CGI-04    | tyrosyl-tRNA synthetase 2 (mitochondrial)                                                          | 0.403692  | Inlier   |
| siRNA-Temozolomide Run3-DMSO | NM_015936 | CGI-04    | tyrosyl-tRNA synthetase 2 (mitochondrial)                                                          | 1.185802  | Inlier   |

Identification of Survival Genes in Human Glioblastoma Cells Using siRNA Screening  
 Nikhil G Thaker, Fang Zhang, Peter R. McDonald, Tong Ying Shun, Michael D Lewen, Ian F. Pollack, and John S. Lazo

Molecular Pharmacology

|                                  |                  |        |                                                            |           |         |
|----------------------------------|------------------|--------|------------------------------------------------------------|-----------|---------|
| siRNA Disorazole DMSO Run2       | NM_0159<br>36    | CGI-04 | tyrosyl-<br>tRNA<br>synthetase<br>2<br>(mitochon<br>drial) | 3.161224  | Inlier  |
| siRNA-Vinblastine Run1-<br>DMSO  | NM_0159<br>36    | CGI-04 | tyrosyl-<br>tRNA<br>synthetase<br>2<br>(mitochon<br>drial) | 4.168063  | Outlier |
| siRNA-Temozolomide Run2-<br>DMSO | NM_0159<br>44    | CGI-14 | CGI-14                                                     | -2.100805 | Inlier  |
| siRNA-Vinblastine Run2-<br>DMSO  | NM_0159<br>44    | CGI-14 | CGI-14                                                     | -0.910802 | Inlier  |
| siRNA Disorazole DMSO Run1       | NM_0159<br>44    | CGI-14 | CGI-14                                                     | -0.165549 | Inlier  |
| siRNA-Temozolomide Run1-<br>DMSO | NM_0159<br>44    | CGI-14 | CGI-14                                                     | -0.074994 | Inlier  |
| siRNA-Temozolomide Run3-<br>DMSO | NM_0159<br>44    | CGI-14 | CGI-14                                                     | 0.074994  | Inlier  |
| siRNA Disorazole DMSO Run3       | NM_0159<br>44    | CGI-14 | CGI-14                                                     | 0.438198  | Inlier  |
| siRNA-Vinblastine Run1-<br>DMSO  | NM_0159<br>44    | CGI-14 | CGI-14                                                     | 2.192422  | Inlier  |
| siRNA Disorazole DMSO Run2       | NM_0159<br>44    | CGI-14 | CGI-14                                                     | 3.542802  | Outlier |
| siRNA-Temozolomide Run2-<br>DMSO | NM_0010<br>24732 | CGI-63 | mitochond<br>rial trans-2-<br>enoyl-CoA<br>reductase       | -1.366763 | Inlier  |
| siRNA-Temozolomide Run3-<br>DMSO | NM_0010<br>24732 | CGI-63 | mitochond<br>rial trans-2-<br>enoyl-CoA<br>reductase       | -1.092315 | Inlier  |
| siRNA Disorazole DMSO Run1       | NM_0010<br>24732 | CGI-63 | mitochond<br>rial trans-2-<br>enoyl-CoA<br>reductase       | -0.256685 | Inlier  |
| siRNA Disorazole DMSO Run3       | NM_0010<br>24732 | CGI-63 | mitochond<br>rial trans-2-<br>enoyl-CoA<br>reductase       | -0.113571 | Inlier  |

Identification of Survival Genes in Human Glioblastoma Cells Using siRNA Screening  
 Nikhil G Thaker, Fang Zhang, Peter R. McDonald, Tong Ying Shun, Michael D Lewen, Ian F. Pollack, and John S. Lazo  
 Molecular Pharmacology

|                              |                  |        |                                           |           |         |
|------------------------------|------------------|--------|-------------------------------------------|-----------|---------|
| siRNA-Temozolomide Run1-DMSO | NM_0010<br>24732 | CGI-63 | mitochondrial trans-2-enoyl-CoA reductase | 0.113571  | Inlier  |
| siRNA-Vinblastine Run2-DMSO  | NM_0010<br>24732 | CGI-63 | mitochondrial trans-2-enoyl-CoA reductase | 0.238006  | Inlier  |
| siRNA-Vinblastine Run1-DMSO  | NM_0010<br>24732 | CGI-63 | mitochondrial trans-2-enoyl-CoA reductase | 3.696314  | Outlier |
| siRNA Disorazole DMSO Run2   | NM_0010<br>24732 | CGI-63 | mitochondrial trans-2-enoyl-CoA reductase | 3.795786  | Outlier |
| siRNA-Temozolomide Run3-DMSO | NM_0039<br>56    | CH25H  | cholesterol 25-hydroxylase                | -2.540693 | Inlier  |
| siRNA-Temozolomide Run1-DMSO | NM_0039<br>56    | CH25H  | cholesterol 25-hydroxylase                | -0.606268 | Inlier  |
| siRNA Disorazole DMSO Run1   | NM_0039<br>56    | CH25H  | cholesterol 25-hydroxylase                | -0.346197 | Inlier  |
| siRNA Disorazole DMSO Run3   | NM_0039<br>56    | CH25H  | cholesterol 25-hydroxylase                | -0.049332 | Inlier  |
| siRNA-Temozolomide Run2-DMSO | NM_0039<br>56    | CH25H  | cholesterol 25-hydroxylase                | 0.049332  | Inlier  |
| siRNA-Vinblastine Run2-DMSO  | NM_0039<br>56    | CH25H  | cholesterol 25-hydroxylase                | 0.742732  | Inlier  |
| siRNA-Vinblastine Run1-DMSO  | NM_0039<br>56    | CH25H  | cholesterol 25-hydroxylase                | 1.223244  | Inlier  |
| siRNA Disorazole DMSO Run2   | NM_0039<br>56    | CH25H  | cholesterol 25-hydroxylase                | 2.915452  | Inlier  |

Identification of Survival Genes in Human Glioblastoma Cells Using siRNA Screening  
 Nikhil G Thaker, Fang Zhang, Peter R. McDonald, Tong Ying Shun, Michael D Lewen, Ian F. Pollack, and John S. Lazo

Molecular Pharmacology

|                              |               |      |                                                                                                 |           |        |
|------------------------------|---------------|------|-------------------------------------------------------------------------------------------------|-----------|--------|
| siRNA-Temozolomide Run2-DMSO | NM_0205<br>49 | CHAT | choline<br>acetyltrans<br>ferase                                                                | -1.625968 | Inlier |
| siRNA-Temozolomide Run1-DMSO | NM_0205<br>49 | CHAT | choline<br>acetyltrans<br>ferase                                                                | -1.558512 | Inlier |
| siRNA Disorazole DMSO Run1   | NM_0205<br>49 | CHAT | choline<br>acetyltrans<br>ferase                                                                | -0.371253 | Inlier |
| siRNA-Temozolomide Run3-DMSO | NM_0205<br>49 | CHAT | choline<br>acetyltrans<br>ferase                                                                | -0.230539 | Inlier |
| siRNA-Vinblastine Run2-DMSO  | NM_0205<br>49 | CHAT | choline<br>acetyltrans<br>ferase                                                                | 0.23054   | Inlier |
| siRNA Disorazole DMSO Run2   | NM_0205<br>49 | CHAT | choline<br>acetyltrans<br>ferase                                                                | 0.6669    | Inlier |
| siRNA Disorazole DMSO Run3   | NM_0205<br>49 | CHAT | choline<br>acetyltrans<br>ferase                                                                | 0.6821    | Inlier |
| siRNA-Vinblastine Run1-DMSO  | NM_0205<br>49 | CHAT | choline<br>acetyltrans<br>ferase<br>chromodo<br>main<br>helicase<br>DNA<br>binding<br>protein 1 | 1.050119  | Inlier |
| siRNA-Temozolomide Run2-DMSO | NM_0012<br>70 | CHD1 | chromodo<br>main<br>helicase<br>DNA<br>binding<br>protein 1                                     | -0.720693 | Inlier |
| siRNA-Temozolomide Run3-DMSO | NM_0012<br>70 | CHD1 | chromodo<br>main<br>helicase<br>DNA<br>binding<br>protein 1                                     | -0.628307 | Inlier |
| siRNA Disorazole DMSO Run3   | NM_0012<br>70 | CHD1 | chromodo<br>main<br>helicase<br>DNA<br>binding<br>protein 1                                     | -0.542834 | Inlier |
| siRNA-Vinblastine Run2-DMSO  | NM_0012<br>70 | CHD1 | chromodo<br>main<br>helicase<br>DNA<br>binding<br>protein 1                                     | -0.084784 | Inlier |

Identification of Survival Genes in Human Glioblastoma Cells Using siRNA Screening  
 Nikhil G Thaker, Fang Zhang, Peter R. McDonald, Tong Ying Shun, Michael D Lewen, Ian F. Pollack, and John S. Lazo

Molecular Pharmacology

|                              |           |      |                                             |           |        |
|------------------------------|-----------|------|---------------------------------------------|-----------|--------|
| siRNA-Temozolomide Run1-DMSO | NM_001270 | CHD1 | chromodomain helicase DNA binding protein 1 | 0.084784  | Inlier |
| siRNA Disorazole DMSO Run1   | NM_001270 | CHD1 | chromodomain helicase DNA binding protein 1 | 0.755427  | Inlier |
| siRNA Disorazole DMSO Run2   | NM_001270 | CHD1 | chromodomain helicase DNA binding protein 1 | 2.323359  | Inlier |
| siRNA-Vinblastine Run1-DMSO  | NM_001270 | CHD1 | chromodomain helicase DNA binding protein 1 | 2.50402   | Inlier |
| siRNA-Temozolomide Run3-DMSO | NM_001271 | CHD2 | chromodomain helicase DNA binding protein 2 | -1.477113 | Inlier |
| siRNA-Temozolomide Run2-DMSO | NM_001271 | CHD2 | chromodomain helicase DNA binding protein 2 | -1.471174 | Inlier |
| siRNA-Temozolomide Run1-DMSO | NM_001271 | CHD2 | chromodomain helicase DNA binding protein 2 | -0.406013 | Inlier |
| siRNA Disorazole DMSO Run3   | NM_001271 | CHD2 | chromodomain helicase DNA binding protein 2 | -0.298887 | Inlier |



Identification of Survival Genes in Human Glioblastoma Cells Using siRNA Screening  
 Nikhil G Thaker, Fang Zhang, Peter R. McDonald, Tong Ying Shun, Michael D Lewen, Ian F. Pollack, and John S. Lazo

Molecular Pharmacology

|                                  |               |      |                                                             |           |        |
|----------------------------------|---------------|------|-------------------------------------------------------------|-----------|--------|
| siRNA Disorazole DMSO Run1       | NM_0012<br>71 | CHD2 | chromodo<br>main<br>helicase<br>DNA<br>binding<br>protein 2 | 0.298887  | Inlier |
| siRNA-Vinblastine Run2-<br>DMSO  | NM_0012<br>71 | CHD2 | chromodo<br>main<br>helicase<br>DNA<br>binding<br>protein 2 | 0.33082   | Inlier |
| siRNA Disorazole DMSO Run2       | NM_0012<br>71 | CHD2 | chromodo<br>main<br>helicase<br>DNA<br>binding<br>protein 2 | 0.942987  | Inlier |
| siRNA-Vinblastine Run1-<br>DMSO  | NM_0012<br>71 | CHD2 | chromodo<br>main<br>helicase<br>DNA<br>binding<br>protein 2 | 1.641804  | Inlier |
| siRNA-Temozolomide Run3-<br>DMSO | NM_0012<br>73 | CHD4 | chromodo<br>main<br>helicase<br>DNA<br>binding<br>protein 4 | -1.336101 | Inlier |
| siRNA-Temozolomide Run2-<br>DMSO | NM_0012<br>73 | CHD4 | chromodo<br>main<br>helicase<br>DNA<br>binding<br>protein 4 | -0.760658 | Inlier |
| siRNA Disorazole DMSO Run3       | NM_0012<br>73 | CHD4 | chromodo<br>main<br>helicase<br>DNA<br>binding<br>protein 4 | -0.588342 | Inlier |
| siRNA-Temozolomide Run1-<br>DMSO | NM_0012<br>73 | CHD4 | chromodo<br>main<br>helicase<br>DNA<br>binding<br>protein 4 | -0.050957 | Inlier |

Identification of Survival Genes in Human Glioblastoma Cells Using siRNA Screening  
 Nikhil G Thaker, Fang Zhang, Peter R. McDonald, Tong Ying Shun, Michael D Lewen, Ian F. Pollack, and John S. Lazo

Molecular Pharmacology

|                                  |               |      |                                                             |           |        |
|----------------------------------|---------------|------|-------------------------------------------------------------|-----------|--------|
| siRNA Disorazole DMSO Run1       | NM_0012<br>73 | CHD4 | chromodo<br>main<br>helicase<br>DNA<br>binding<br>protein 4 | 0.050957  | Inlier |
| siRNA-Vinblastine Run2-<br>DMSO  | NM_0012<br>73 | CHD4 | chromodo<br>main<br>helicase<br>DNA<br>binding<br>protein 4 | 0.168461  | Inlier |
| siRNA-Vinblastine Run1-<br>DMSO  | NM_0012<br>73 | CHD4 | chromodo<br>main<br>helicase<br>DNA<br>binding<br>protein 4 | 1.296961  | Inlier |
| siRNA Disorazole DMSO Run2       | NM_0012<br>73 | CHD4 | chromodo<br>main<br>helicase<br>DNA<br>binding<br>protein 4 | 1.370606  | Inlier |
| siRNA-Temozolomide Run3-<br>DMSO | NM_0155<br>57 | CHD5 | chromodo<br>main<br>helicase<br>DNA<br>binding<br>protein 5 | -1.080139 | Inlier |
| siRNA-Temozolomide Run2-<br>DMSO | NM_0155<br>57 | CHD5 | chromodo<br>main<br>helicase<br>DNA<br>binding<br>protein 5 | -1.046924 | Inlier |
| siRNA Disorazole DMSO Run3       | NM_0155<br>57 | CHD5 | chromodo<br>main<br>helicase<br>DNA<br>binding<br>protein 5 | -0.208456 | Inlier |
| siRNA-Vinblastine Run2-<br>DMSO  | NM_0155<br>57 | CHD5 | chromodo<br>main<br>helicase<br>DNA<br>binding<br>protein 5 | -0.158332 | Inlier |

Identification of Survival Genes in Human Glioblastoma Cells Using siRNA Screening

Nikhil G Thaker, Fang Zhang, Peter R. McDonald, Tong Ying Shun, Michael D Lewen, Ian F. Pollack, and John S. Lazo

Molecular Pharmacology

|                              |               |      |                                                             |           |        |
|------------------------------|---------------|------|-------------------------------------------------------------|-----------|--------|
| siRNA-Temozolomide Run1-DMSO | NM_0155<br>57 | CHD5 | chromodo<br>main<br>helicase<br>DNA<br>binding<br>protein 5 | 0.158332  | Inlier |
| siRNA Disorazole DMSO Run1   | NM_0155<br>57 | CHD5 | chromodo<br>main<br>helicase<br>DNA<br>binding<br>protein 5 | 0.302076  | Inlier |
| siRNA-Vinblastine Run1-DMSO  | NM_0155<br>57 | CHD5 | chromodo<br>main<br>helicase<br>DNA<br>binding<br>protein 5 | 1.398492  | Inlier |
| siRNA Disorazole DMSO Run2   | NM_0155<br>57 | CHD5 | chromodo<br>main<br>helicase<br>DNA<br>binding<br>protein 5 | 1.561839  | Inlier |
| siRNA-Temozolomide Run2-DMSO | NM_0183<br>97 | CHDH | choline<br>dehydroge<br>nase                                | -0.769615 | Inlier |
| siRNA-Temozolomide Run3-DMSO | NM_0183<br>97 | CHDH | choline<br>dehydroge<br>nase                                | -0.750137 | Inlier |
| siRNA Disorazole DMSO Run2   | NM_0183<br>97 | CHDH | choline<br>dehydroge<br>nase                                | -0.277653 | Inlier |
| siRNA Disorazole DMSO Run3   | NM_0183<br>97 | CHDH | choline<br>dehydroge<br>nase                                | -0.047599 | Inlier |
| siRNA-Temozolomide Run1-DMSO | NM_0183<br>97 | CHDH | choline<br>dehydroge<br>nase                                | 0.047599  | Inlier |
| siRNA Disorazole DMSO Run1   | NM_0183<br>97 | CHDH | choline<br>dehydroge<br>nase                                | 0.598863  | Inlier |
| siRNA-Vinblastine Run1-DMSO  | NM_0183<br>97 | CHDH | choline<br>dehydroge<br>nase                                | 2.208314  | Inlier |
| siRNA-Vinblastine Run2-DMSO  | NM_0183<br>97 | CHDH | choline<br>dehydroge<br>nase                                | 2.938452  | Inlier |

Identification of Survival Genes in Human Glioblastoma Cells Using siRNA Screening  
 Nikhil G Thaker, Fang Zhang, Peter R. McDonald, Tong Ying Shun, Michael D Lewen, Ian F. Pollack, and John S. Lazo

Molecular Pharmacology

| siRNA                            | Gene    | Run | Gene  | Gene                                           | Value     | Category |
|----------------------------------|---------|-----|-------|------------------------------------------------|-----------|----------|
| siRNA Disorazole DMSO Run2       | NM_0012 | 74  | CHEK1 | CHK1<br>checkpoint<br>homolog<br>(S.<br>pombe) | -2.971674 | Inlier   |
| siRNA Disorazole DMSO Run3       | NM_0012 | 74  | CHEK1 | CHK1<br>checkpoint<br>homolog<br>(S.<br>pombe) | -1.835342 | Inlier   |
| siRNA-Temozolomide Run3-<br>DMSO | NM_0012 | 74  | CHEK1 | CHK1<br>checkpoint<br>homolog<br>(S.<br>pombe) | -0.363761 | Inlier   |
| siRNA-Temozolomide Run2-<br>DMSO | NM_0012 | 74  | CHEK1 | CHK1<br>checkpoint<br>homolog<br>(S.<br>pombe) | -0.285669 | Inlier   |
| siRNA-Vinblastine Run1-<br>DMSO  | NM_0012 | 74  | CHEK1 | CHK1<br>checkpoint<br>homolog<br>(S.<br>pombe) | 0.285669  | Inlier   |
| siRNA-Temozolomide Run1-<br>DMSO | NM_0012 | 74  | CHEK1 | CHK1<br>checkpoint<br>homolog<br>(S.<br>pombe) | 0.629543  | Inlier   |
| siRNA Disorazole DMSO Run1       | NM_0012 | 74  | CHEK1 | CHK1<br>checkpoint<br>homolog<br>(S.<br>pombe) | 0.719457  | Inlier   |
| siRNA-Vinblastine Run2-<br>DMSO  | NM_0012 | 74  | CHEK1 | CHK2<br>checkpoint<br>homolog<br>(S.<br>pombe) | 2.159239  | Inlier   |
| siRNA Disorazole DMSO Run2       | NM_0071 | 94  | CHEK2 | CHK2<br>checkpoint<br>homolog<br>(S.<br>pombe) | -1.667513 | Inlier   |
| siRNA Disorazole DMSO Run3       | NM_0071 | 94  | CHEK2 | CHK2<br>checkpoint<br>homolog<br>(S.<br>pombe) | -0.954237 | Inlier   |

Identification of Survival Genes in Human Glioblastoma Cells Using siRNA Screening  
 Nikhil G Thaker, Fang Zhang, Peter R. McDonald, Tong Ying Shun, Michael D Lewen, Ian F. Pollack, and John S. Lazo

Molecular Pharmacology

|                              |               |        |                                                          |           |        |
|------------------------------|---------------|--------|----------------------------------------------------------|-----------|--------|
| siRNA-Temozolomide Run3-DMSO | NM_0071<br>94 | CHEK2  | CHK2<br>checkpoint<br>homolog<br>(S.<br>pombe)           | -0.629595 | Inlier |
| siRNA-Temozolomide Run2-DMSO | NM_0071<br>94 | CHEK2  | CHK2<br>checkpoint<br>homolog<br>(S.<br>pombe)           | -0.001173 | Inlier |
| siRNA-Temozolomide Run1-DMSO | NM_0071<br>94 | CHEK2  | CHK2<br>checkpoint<br>homolog<br>(S.<br>pombe)           | 0.001173  | Inlier |
| siRNA-Vinblastine Run1-DMSO  | NM_0071<br>94 | CHEK2  | CHK2<br>checkpoint<br>homolog<br>(S.<br>pombe)           | 0.641755  | Inlier |
| siRNA Disorazole DMSO Run1   | NM_0071<br>94 | CHEK2  | CHK2<br>checkpoint<br>homolog<br>(S.<br>pombe)           | 0.707245  | Inlier |
| siRNA-Vinblastine Run2-DMSO  | NM_0071<br>94 | CHEK2  | CHK2<br>checkpoint<br>homolog<br>(S.<br>pombe)           | 0.884271  | Inlier |
| siRNA-Vinblastine Run2-DMSO  | NM_0183<br>71 | ChGn   | ChGn                                                     | -0.794099 | Inlier |
| siRNA Disorazole DMSO Run1   | NM_0183<br>71 | ChGn   | ChGn                                                     | -0.646032 | Inlier |
| siRNA-Temozolomide Run2-DMSO | NM_0183<br>71 | ChGn   | ChGn                                                     | -0.463519 | Inlier |
| siRNA-Temozolomide Run1-DMSO | NM_0183<br>71 | ChGn   | ChGn                                                     | -0.25228  | Inlier |
| siRNA Disorazole DMSO Run3   | NM_0183<br>71 | ChGn   | ChGn                                                     | 0.25228   | Inlier |
| siRNA-Temozolomide Run3-DMSO | NM_0183<br>71 | ChGn   | ChGn                                                     | 0.702968  | Inlier |
| siRNA-Vinblastine Run1-DMSO  | NM_0183<br>71 | ChGn   | ChGn                                                     | 1.206799  | Inlier |
| siRNA Disorazole DMSO Run2   | NM_0183<br>71 | ChGn   | ChGn                                                     | 1.491737  | Inlier |
| siRNA-Temozolomide Run2-DMSO | NM_0012<br>76 | CHI3L1 | chitinase 3-<br>like 1<br>(cartilage<br>glycoprotein-39) | -1.912513 | Inlier |

Identification of Survival Genes in Human Glioblastoma Cells Using siRNA Screening  
 Nikhil G Thaker, Fang Zhang, Peter R. McDonald, Tong Ying Shun, Michael D Lewen, Ian F. Pollack, and John S. Lazo

Molecular Pharmacology

|                              |                  |        |                                                     |                  |
|------------------------------|------------------|--------|-----------------------------------------------------|------------------|
|                              |                  |        | chitinase 3-like 1<br>(cartilage glycoprotein n-39) |                  |
| siRNA Disorazole DMSO Run1   | NM_0012<br>76    | CHI3L1 | chitinase 3-like 1<br>(cartilage glycoprotein n-39) | -1.504346 Inlier |
| siRNA-Temozolomide Run1-DMSO | NM_0012<br>76    | CHI3L1 | chitinase 3-like 1<br>(cartilage glycoprotein n-39) | -1.248446 Inlier |
| siRNA-Vinblastine Run2-DMSO  | NM_0012<br>76    | CHI3L1 | chitinase 3-like 1<br>(cartilage glycoprotein n-39) | -0.003769 Inlier |
| siRNA-Temozolomide Run3-DMSO | NM_0012<br>76    | CHI3L1 | chitinase 3-like 1<br>(cartilage glycoprotein n-39) | 0.003769 Inlier  |
| siRNA Disorazole DMSO Run3   | NM_0012<br>76    | CHI3L1 | chitinase 3-like 1<br>(cartilage glycoprotein n-39) | 0.377744 Inlier  |
| siRNA-Vinblastine Run1-DMSO  | NM_0012<br>76    | CHI3L1 | chitinase 3-like 1<br>(cartilage glycoprotein n-39) | 0.454864 Inlier  |
| siRNA Disorazole DMSO Run2   | NM_0012<br>76    | CHI3L1 | chitinase 3-like 1<br>(cartilage glycoprotein n-39) | 0.894136 Inlier  |
| siRNA Disorazole DMSO Run1   | NM_0010<br>25199 | CHI3L2 | chitinase 3-like 2                                  | -1.840608 Inlier |
| siRNA-Temozolomide Run2-DMSO | NM_0010<br>25199 | CHI3L2 | chitinase 3-like 2                                  | -0.984729 Inlier |
| siRNA-Vinblastine Run2-DMSO  | NM_0010<br>25199 | CHI3L2 | chitinase 3-like 2                                  | -0.263786 Inlier |
| siRNA-Temozolomide Run1-DMSO | NM_0010<br>25199 | CHI3L2 | chitinase 3-like 2                                  | -0.111788 Inlier |
| siRNA-Temozolomide Run3-DMSO | NM_0010<br>25199 | CHI3L2 | chitinase 3-like 2                                  | 0.111787 Inlier  |
| siRNA Disorazole DMSO Run3   | NM_0010<br>25199 | CHI3L2 | chitinase 3-like 2                                  | 0.364271 Inlier  |
| siRNA-Vinblastine Run1-DMSO  | NM_0010<br>25199 | CHI3L2 | chitinase 3-like 2                                  | 0.991747 Inlier  |
| siRNA Disorazole DMSO Run2   | NM_0010<br>25199 | CHI3L2 | chitinase 3-like 2                                  | 1.789281 Inlier  |

Identification of Survival Genes in Human Glioblastoma Cells Using siRNA Screening  
 Nikhil G Thaker, Fang Zhang, Peter R. McDonald, Tong Ying Shun, Michael D Lewen, Ian F. Pollack, and John S. Lazo  
 Molecular Pharmacology

|                                  |               |       |                                      |                  |
|----------------------------------|---------------|-------|--------------------------------------|------------------|
| siRNA Disorazole DMSO Run1       | NM_0034<br>65 | CHIT1 | chitinase 1<br>(chitotriosi<br>dase) | -1.43112 Inlier  |
| siRNA-Vinblastine Run2-<br>DMSO  | NM_0034<br>65 | CHIT1 | chitinase 1<br>(chitotriosi<br>dase) | -1.184498 Inlier |
| siRNA-Temozolomide Run1-<br>DMSO | NM_0034<br>65 | CHIT1 | chitinase 1<br>(chitotriosi<br>dase) | -0.476865 Inlier |
| siRNA Disorazole DMSO Run3       | NM_0034<br>65 | CHIT1 | chitinase 1<br>(chitotriosi<br>dase) | -0.243065 Inlier |
| siRNA-Temozolomide Run2-<br>DMSO | NM_0034<br>65 | CHIT1 | chitinase 1<br>(chitotriosi<br>dase) | 0.243064 Inlier  |
| siRNA-Temozolomide Run3-<br>DMSO | NM_0034<br>65 | CHIT1 | chitinase 1<br>(chitotriosi<br>dase) | 0.358034 Inlier  |
| siRNA-Vinblastine Run1-<br>DMSO  | NM_0034<br>65 | CHIT1 | chitinase 1<br>(chitotriosi<br>dase) | 0.872135 Inlier  |
| siRNA Disorazole DMSO Run2       | NM_0034<br>65 | CHIT1 | chitinase 1<br>(chitotriosi<br>dase) | 1.479339 Inlier  |
| siRNA Disorazole DMSO Run2       | NM_2124<br>69 | CHKA  | choline<br>kinase<br>alpha           | -0.964034 Inlier |
| siRNA-Temozolomide Run3-<br>DMSO | NM_2124<br>69 | CHKA  | choline<br>kinase<br>alpha           | -0.954962 Inlier |
| siRNA-Temozolomide Run2-<br>DMSO | NM_2124<br>69 | CHKA  | choline<br>kinase<br>alpha           | -0.609644 Inlier |
| siRNA-Temozolomide Run1-<br>DMSO | NM_2124<br>69 | CHKA  | choline<br>kinase<br>alpha           | -0.099405 Inlier |
| siRNA Disorazole DMSO Run3       | NM_2124<br>69 | CHKA  | choline<br>kinase<br>alpha           | 0.099405 Inlier  |
| siRNA Disorazole DMSO Run1       | NM_2124<br>69 | CHKA  | choline<br>kinase<br>alpha           | 0.387745 Inlier  |

Identification of Survival Genes in Human Glioblastoma Cells Using siRNA Screening  
 Nikhil G Thaker, Fang Zhang, Peter R. McDonald, Tong Ying Shun, Michael D Lewen, Ian F. Pollack, and John S. Lazo

| Condition                                                 | Gene ID       | Gene Symbol | Gene Name                                      | Value     | Category |
|-----------------------------------------------------------|---------------|-------------|------------------------------------------------|-----------|----------|
| Molecular Pharmacology<br>siRNA-Vinblastine Run1-<br>DMSO | NM_2124<br>69 | CHKA        | choline<br>kinase<br>alpha                     | 0.739356  | Inlier   |
| siRNA-Vinblastine Run2-<br>DMSO                           | NM_2124<br>69 | CHKA        | choline<br>kinase<br>alpha                     | 0.752352  | Inlier   |
| siRNA-Temozolomide Run3-<br>DMSO                          | NM_0051<br>98 | CHKB        | choline<br>kinase<br>beta                      | -1.954601 | Inlier   |
| siRNA Disorazole DMSO Run2                                | NM_0051<br>98 | CHKB        | choline<br>kinase<br>beta                      | -1.909598 | Inlier   |
| siRNA-Temozolomide Run1-<br>DMSO                          | NM_0051<br>98 | CHKB        | choline<br>kinase<br>beta                      | -0.240862 | Inlier   |
| siRNA-Temozolomide Run2-<br>DMSO                          | NM_0051<br>98 | CHKB        | choline<br>kinase<br>beta                      | -0.127607 | Inlier   |
| siRNA Disorazole DMSO Run1                                | NM_0051<br>98 | CHKB        | choline<br>kinase<br>beta                      | 0.127607  | Inlier   |
| siRNA Disorazole DMSO Run3                                | NM_0051<br>98 | CHKB        | choline<br>kinase<br>beta                      | 0.617465  | Inlier   |
| siRNA-Vinblastine Run1-<br>DMSO                           | NM_0051<br>98 | CHKB        | choline<br>kinase<br>beta                      | 0.731535  | Inlier   |
| siRNA-Vinblastine Run2-<br>DMSO                           | NM_0051<br>98 | CHKB        | choline<br>kinase<br>beta                      | 1.470484  | Inlier   |
| siRNA-Temozolomide Run3-<br>DMSO                          | NM_0003<br>90 | CHM         | choroidere<br>mia (Rab<br>escort<br>protein 1) | -1.083013 | Inlier   |
| siRNA Disorazole DMSO Run3                                | NM_0003<br>90 | CHM         | choroidere<br>mia (Rab<br>escort<br>protein 1) | -0.750913 | Inlier   |
| siRNA-Vinblastine Run2-<br>DMSO                           | NM_0003<br>90 | CHM         | choroidere<br>mia (Rab<br>escort<br>protein 1) | -0.598087 | Inlier   |
| siRNA Disorazole DMSO Run1                                | NM_0003<br>90 | CHM         | choroidere<br>mia (Rab<br>escort<br>protein 1) | -0.389156 | Inlier   |
| siRNA-Temozolomide Run2-<br>DMSO                          | NM_0003<br>90 | CHM         | choroidere<br>mia (Rab<br>escort<br>protein 1) | 0.389156  | Inlier   |



Identification of Survival Genes in Human Glioblastoma Cells Using siRNA Screening  
 Nikhil G Thaker, Fang Zhang, Peter R. McDonald, Tong Ying Shun, Michael D Lewen, Ian F. Pollack, and John S. Lazo

Molecular Pharmacology

|                              |                  |      |                                      |           |         |
|------------------------------|------------------|------|--------------------------------------|-----------|---------|
| siRNA-Temozolomide Run1-DMSO | NM_0003<br>90    | CHM  | choroideremia (Rab escort protein 1) | 0.456905  | Inlier  |
| siRNA-Vinblastine Run1-DMSO  | NM_0003<br>90    | CHM  | choroideremia (Rab escort protein 1) | 1.526646  | Inlier  |
| siRNA Disorazole DMSO Run2   | NM_0003<br>90    | CHM  | choroideremia (Rab escort protein 1) | 2.237681  | Inlier  |
| siRNA-Temozolomide Run3-DMSO | NM_0010<br>25201 | CHN1 | chimerin (chimaerin ) 1              | -0.703929 | Inlier  |
| siRNA-Temozolomide Run1-DMSO | NM_0010<br>25201 | CHN1 | chimerin (chimaerin ) 1              | -0.645071 | Inlier  |
| siRNA Disorazole DMSO Run1   | NM_0010<br>25201 | CHN1 | chimerin (chimaerin ) 1              | -0.316888 | Inlier  |
| siRNA-Vinblastine Run2-DMSO  | NM_0010<br>25201 | CHN1 | chimerin (chimaerin ) 1              | -0.138788 | Inlier  |
| siRNA Disorazole DMSO Run3   | NM_0010<br>25201 | CHN1 | chimerin (chimaerin ) 1              | 0.138788  | Inlier  |
| siRNA-Temozolomide Run2-DMSO | NM_0010<br>25201 | CHN1 | chimerin (chimaerin ) 1              | 0.933098  | Inlier  |
| siRNA-Vinblastine Run1-DMSO  | NM_0010<br>25201 | CHN1 | chimerin (chimaerin ) 1              | 9.90795   | Outlier |
| siRNA Disorazole DMSO Run2   | NM_0010<br>25201 | CHN1 | chimerin (chimaerin ) 1              | 12.98019  | Outlier |
| siRNA-Temozolomide Run3-DMSO | NM_0040<br>67    | CHN2 | chimerin (chimaerin ) 2              | -1.118326 | Inlier  |
| siRNA-Temozolomide Run1-DMSO | NM_0040<br>67    | CHN2 | chimerin (chimaerin ) 2              | -0.963089 | Inlier  |
| siRNA-Temozolomide Run2-DMSO | NM_0040<br>67    | CHN2 | chimerin (chimaerin ) 2              | -0.792392 | Inlier  |
| siRNA-Vinblastine Run2-DMSO  | NM_0040<br>67    | CHN2 | chimerin (chimaerin ) 2              | -0.001403 | Inlier  |
| siRNA Disorazole DMSO Run3   | NM_0040<br>67    | CHN2 | chimerin (chimaerin ) 2              | 0.001403  | Inlier  |

Identification of Survival Genes in Human Glioblastoma Cells Using siRNA Screening  
 Nikhil G Thaker, Fang Zhang, Peter R. McDonald, Tong Ying Shun, Michael D Lewen, Ian F. Pollack, and John S. Lazo

Molecular Pharmacology

|                                  |               |        |                                             |           |        |
|----------------------------------|---------------|--------|---------------------------------------------|-----------|--------|
| siRNA Disorazole DMSO Run1       | NM_0040<br>67 | CHN2   | chimerin<br>(chimaerin<br>) 2               | 0.182028  | Inlier |
| siRNA Disorazole DMSO Run2       | NM_0040<br>67 | CHN2   | chimerin<br>(chimaerin<br>) 2               | 0.556608  | Inlier |
| siRNA-Vinblastine Run1-<br>DMSO  | NM_0040<br>67 | CHN2   | chimerin<br>(chimaerin<br>) 2               | 0.82818   | Inlier |
| siRNA-Temozolomide Run2-<br>DMSO | NM_0202<br>44 | CHPT1  | choline<br>phosphotr<br>ansferase<br>1      | -0.798665 | Inlier |
| siRNA-Temozolomide Run3-<br>DMSO | NM_0202<br>44 | CHPT1  | choline<br>phosphotr<br>ansferase<br>1      | -0.725624 | Inlier |
| siRNA-Temozolomide Run1-<br>DMSO | NM_0202<br>44 | CHPT1  | choline<br>phosphotr<br>ansferase<br>1      | -0.413574 | Inlier |
| siRNA Disorazole DMSO Run1       | NM_0202<br>44 | CHPT1  | choline<br>phosphotr<br>ansferase<br>1      | -0.227866 | Inlier |
| siRNA-Vinblastine Run2-<br>DMSO  | NM_0202<br>44 | CHPT1  | choline<br>phosphotr<br>ansferase<br>1      | 0.227866  | Inlier |
| siRNA Disorazole DMSO Run3       | NM_0202<br>44 | CHPT1  | choline<br>phosphotr<br>ansferase<br>1      | 0.623376  | Inlier |
| siRNA-Vinblastine Run1-<br>DMSO  | NM_0202<br>44 | CHPT1  | choline<br>phosphotr<br>ansferase<br>1      | 0.808519  | Inlier |
| siRNA Disorazole DMSO Run2       | NM_0202<br>44 | CHPT1  | choline<br>phosphotr<br>ansferase<br>1      | 0.89042   | Inlier |
| siRNA-Temozolomide Run2-<br>DMSO | NM_0174<br>44 | CHRAC1 | chromatin<br>accessibilit<br>y complex<br>1 | -1.851318 | Inlier |
| siRNA-Vinblastine Run2-<br>DMSO  | NM_0174<br>44 | CHRAC1 | chromatin<br>accessibilit<br>y complex<br>1 | -0.720268 | Inlier |

Identification of Survival Genes in Human Glioblastoma Cells Using siRNA Screening  
 Nikhil G Thaker, Fang Zhang, Peter R. McDonald, Tong Ying Shun, Michael D Lewen, Ian F. Pollack, and John S. Lazo  
 Molecular Pharmacology

|                                  |               |              |                                                                                                                                                                                           |           |        |
|----------------------------------|---------------|--------------|-------------------------------------------------------------------------------------------------------------------------------------------------------------------------------------------|-----------|--------|
| siRNA Disorazole DMSO Run1       | NM_0174<br>44 | CHRAC1       | chromatin<br>accessibilit<br>y complex<br>1                                                                                                                                               | -0.628732 | Inlier |
| siRNA-Temozolomide Run3-<br>DMSO | NM_0174<br>44 | CHRAC1       | chromatin<br>accessibilit<br>y complex<br>1                                                                                                                                               | -0.101428 | Inlier |
| siRNA Disorazole DMSO Run3       | NM_0174<br>44 | CHRAC1       | chromatin<br>accessibilit<br>y complex<br>1                                                                                                                                               | 0.101427  | Inlier |
| siRNA-Temozolomide Run1-<br>DMSO | NM_0174<br>44 | CHRAC1       | chromatin<br>accessibilit<br>y complex<br>1                                                                                                                                               | 0.324362  | Inlier |
| siRNA Disorazole DMSO Run2       | NM_0174<br>44 | CHRAC1       | chromatin<br>accessibilit<br>y complex<br>1                                                                                                                                               | 0.910132  | Inlier |
| siRNA-Vinblastine Run1-<br>DMSO  | NM_0174<br>44 | CHRAC1       | chromatin<br>accessibilit<br>y complex<br>1                                                                                                                                               | 2.858158  | Inlier |
| siRNA-Temozolomide Run3-<br>DMSO | NM_1489<br>11 | CHRFAM7<br>A | CHRNA7<br>(cholinergi<br>c receptor,<br>nicotinic,<br>alpha<br>polypeptid<br>e 7, exons<br>5-10) and<br>FAM7A<br>(family<br>with<br>sequence<br>similarity<br>7A, exons<br>A-E)<br>fusion | -3.102333 | Inlier |

Identification of Survival Genes in Human Glioblastoma Cells Using siRNA Screening

Nikhil G Thaker, Fang Zhang, Peter R. McDonald, Tong Ying Shun, Michael D Lewen, Ian F. Pollack, and John S.

Lazo

Molecular Pharmacology

|                            |    |         |              |                                                                                                                                                                         |                  |
|----------------------------|----|---------|--------------|-------------------------------------------------------------------------------------------------------------------------------------------------------------------------|------------------|
|                            |    |         |              | CHRNA7<br>(cholinergic receptor,<br>nicotinic,<br>alpha<br>polypeptide 7, exons<br>5-10) and<br>FAM7A<br>(family<br>with<br>sequence<br>similarity<br>7A, exons<br>A-E) |                  |
| siRNA Disorazole DMSO Run1 | 11 | NM_1489 | CHRFAM7<br>A | fusion                                                                                                                                                                  | -0.676116 Inlier |

|                                  |    |         |              |                                                                                                                                                                         |                  |
|----------------------------------|----|---------|--------------|-------------------------------------------------------------------------------------------------------------------------------------------------------------------------|------------------|
|                                  |    |         |              | CHRNA7<br>(cholinergic receptor,<br>nicotinic,<br>alpha<br>polypeptide 7, exons<br>5-10) and<br>FAM7A<br>(family<br>with<br>sequence<br>similarity<br>7A, exons<br>A-E) |                  |
| siRNA-Temozolomide Run2-<br>DMSO | 11 | NM_1489 | CHRFAM7<br>A | fusion                                                                                                                                                                  | -0.672884 Inlier |

Identification of Survival Genes in Human Glioblastoma Cells Using siRNA Screening

Nikhil G Thaker, Fang Zhang, Peter R. McDonald, Tong Ying Shun, Michael D Lewen, Ian F. Pollack, and John S.

Lazo

Molecular Pharmacology

|                              |           |          |                                                                                                                                            |           |        |
|------------------------------|-----------|----------|--------------------------------------------------------------------------------------------------------------------------------------------|-----------|--------|
| siRNA-Temozolomide Run1-DMSO | NM_148911 | CHRFAM7A | CHRNA7 (cholinergic receptor, nicotinic, alpha polypeptide 7, exons 5-10) and FAM7A (family with sequence similarity 7A, exons A-E) fusion | -0.247781 | Inlier |
|------------------------------|-----------|----------|--------------------------------------------------------------------------------------------------------------------------------------------|-----------|--------|

|                             |           |          |                                                                                                                                            |          |        |
|-----------------------------|-----------|----------|--------------------------------------------------------------------------------------------------------------------------------------------|----------|--------|
| siRNA-Vinblastine Run2-DMSO | NM_148911 | CHRFAM7A | CHRNA7 (cholinergic receptor, nicotinic, alpha polypeptide 7, exons 5-10) and FAM7A (family with sequence similarity 7A, exons A-E) fusion | 0.247781 | Inlier |
|-----------------------------|-----------|----------|--------------------------------------------------------------------------------------------------------------------------------------------|----------|--------|

Identification of Survival Genes in Human Glioblastoma Cells Using siRNA Screening

Nikhil G Thaker, Fang Zhang, Peter R. McDonald, Tong Ying Shun, Michael D Lewen, Ian F. Pollack, and John S.

Lazo

Molecular Pharmacology

|                             |               |              |                                                                                                                                                                          |          |        |
|-----------------------------|---------------|--------------|--------------------------------------------------------------------------------------------------------------------------------------------------------------------------|----------|--------|
| siRNA Disorazole DMSO Run3  | NM_1489<br>11 | CHRFAM7<br>A | CHRNA7<br>(cholinergic receptor,<br>nicotinic,<br>alpha polypeptide 7, exons<br>5-10) and<br>FAM7A<br>(family with<br>sequence similarity<br>7A, exons<br>A-E)<br>fusion | 0.619917 | Inlier |
| siRNA-Vinblastine Run1-DMSO | NM_1489<br>11 | CHRFAM7<br>A | CHRNA7<br>(cholinergic receptor,<br>nicotinic,<br>alpha polypeptide 7, exons<br>5-10) and<br>FAM7A<br>(family with<br>sequence similarity<br>7A, exons<br>A-E)<br>fusion | 1.868581 | Inlier |

Identification of Survival Genes in Human Glioblastoma Cells Using siRNA Screening  
 Nikhil G Thaker, Fang Zhang, Peter R. McDonald, Tong Ying Shun, Michael D Lewen, Ian F. Pollack, and John S. Lazo  
 Molecular Pharmacology

|                              |               |              |        |                                                                                                                                        |        |
|------------------------------|---------------|--------------|--------|----------------------------------------------------------------------------------------------------------------------------------------|--------|
|                              |               |              |        | CHRNA7<br>(cholinergic receptor, nicotinic, alpha polypeptide 7, exons 5-10) and FAM7A (family with sequence similarity 7A, exons A-E) |        |
| siRNA Disorazole DMSO Run2   | NM_1489<br>11 | CHRFAM7<br>A | fusion | 2.86762                                                                                                                                | Inlier |
| siRNA Disorazole DMSO Run3   | NM_0007<br>38 | CHRM1        | 1      | -1.019895                                                                                                                              | Inlier |
| siRNA-Temozolomide Run3-DMSO | NM_0007<br>38 | CHRM1        | 1      | -0.776073                                                                                                                              | Inlier |
| siRNA Disorazole DMSO Run2   | NM_0007<br>38 | CHRM1        | 1      | -0.618676                                                                                                                              | Inlier |
| siRNA-Temozolomide Run2-DMSO | NM_0007<br>38 | CHRM1        | 1      | -0.111063                                                                                                                              | Inlier |
| siRNA Disorazole DMSO Run1   | NM_0007<br>38 | CHRM1        | 1      | 0.111063                                                                                                                               | Inlier |
| siRNA-Temozolomide Run1-DMSO | NM_0007<br>38 | CHRM1        | 1      | 0.126253                                                                                                                               | Inlier |

Identification of Survival Genes in Human Glioblastoma Cells Using siRNA Screening  
 Nikhil G Thaker, Fang Zhang, Peter R. McDonald, Tong Ying Shun, Michael D Lewen, Ian F. Pollack, and John S. Lazo  
 Molecular Pharmacology

|                              |               |       |   |                                  |                  |
|------------------------------|---------------|-------|---|----------------------------------|------------------|
| siRNA-Vinblastine Run1-DMSO  | NM_0007<br>38 | CHRM1 | 1 | cholinergic receptor, muscarinic | 0.730324 Inlier  |
| siRNA-Vinblastine Run2-DMSO  | NM_0007<br>38 | CHRM1 | 1 | cholinergic receptor, muscarinic | 0.748598 Inlier  |
| siRNA Disorazole DMSO Run2   | NM_0007<br>40 | CHRM3 | 3 | cholinergic receptor, muscarinic | -3.350604 Inlier |
| siRNA-Temozolomide Run3-DMSO | NM_0007<br>40 | CHRM3 | 3 | cholinergic receptor, muscarinic | -0.840455 Inlier |
| siRNA Disorazole DMSO Run1   | NM_0007<br>40 | CHRM3 | 3 | cholinergic receptor, muscarinic | -0.508545 Inlier |
| siRNA-Temozolomide Run2-DMSO | NM_0007<br>40 | CHRM3 | 3 | cholinergic receptor, muscarinic | -0.262692 Inlier |
| siRNA Disorazole DMSO Run3   | NM_0007<br>40 | CHRM3 | 3 | cholinergic receptor, muscarinic | 0.262692 Inlier  |
| siRNA-Temozolomide Run1-DMSO | NM_0007<br>40 | CHRM3 | 3 | cholinergic receptor, muscarinic | 0.264718 Inlier  |
| siRNA-Vinblastine Run2-DMSO  | NM_0007<br>40 | CHRM3 | 3 | cholinergic receptor, muscarinic | 1.096978 Inlier  |
| siRNA-Vinblastine Run1-DMSO  | NM_0007<br>40 | CHRM3 | 3 | cholinergic receptor, muscarinic | 2.051476 Inlier  |



Identification of Survival Genes in Human Glioblastoma Cells Using siRNA Screening  
 Nikhil G Thaker, Fang Zhang, Peter R. McDonald, Tong Ying Shun, Michael D Lewen, Ian F. Pollack, and John S. Lazo  
 Molecular Pharmacology

|                              |               |       |   |                                        |                  |
|------------------------------|---------------|-------|---|----------------------------------------|------------------|
| siRNA-Temozolomide Run3-DMSO | NM_0007<br>41 | CHRM4 | 4 | cholinergic<br>receptor,<br>muscarinic | -1.069764 Inlier |
| siRNA Disorazole DMSO Run2   | NM_0007<br>41 | CHRM4 | 4 | cholinergic<br>receptor,<br>muscarinic | -0.851841 Inlier |
| siRNA Disorazole DMSO Run3   | NM_0007<br>41 | CHRM4 | 4 | cholinergic<br>receptor,<br>muscarinic | -0.306399 Inlier |
| siRNA-Temozolomide Run1-DMSO | NM_0007<br>41 | CHRM4 | 4 | cholinergic<br>receptor,<br>muscarinic | -0.235547 Inlier |
| siRNA-Temozolomide Run2-DMSO | NM_0007<br>41 | CHRM4 | 4 | cholinergic<br>receptor,<br>muscarinic | 0.235547 Inlier  |
| siRNA Disorazole DMSO Run1   | NM_0007<br>41 | CHRM4 | 4 | cholinergic<br>receptor,<br>muscarinic | 0.497159 Inlier  |
| siRNA-Vinblastine Run2-DMSO  | NM_0007<br>41 | CHRM4 | 4 | cholinergic<br>receptor,<br>muscarinic | 1.964697 Inlier  |
| siRNA-Vinblastine Run1-DMSO  | NM_0007<br>41 | CHRM4 | 4 | cholinergic<br>receptor,<br>muscarinic | 2.304958 Inlier  |
| siRNA Disorazole DMSO Run2   | NM_0121<br>25 | CHRM5 | 5 | cholinergic<br>receptor,<br>muscarinic | -0.763742 Inlier |
| siRNA Disorazole DMSO Run3   | NM_0121<br>25 | CHRM5 | 5 | cholinergic<br>receptor,<br>muscarinic | -0.621648 Inlier |

Identification of Survival Genes in Human Glioblastoma Cells Using siRNA Screening

Nikhil G Thaker, Fang Zhang, Peter R. McDonald, Tong Ying Shun, Michael D Lewen, Ian F. Pollack, and John S. Lazo

Molecular Pharmacology

|                              |               |        |          |                                                                      |                  |
|------------------------------|---------------|--------|----------|----------------------------------------------------------------------|------------------|
| siRNA-Temozolomide Run2-DMSO | NM_0121<br>25 | CHRM5  | 5        | cholinergic<br>receptor,<br>muscarinic                               | -0.549147 Inlier |
| siRNA-Temozolomide Run3-DMSO | NM_0121<br>25 | CHRM5  | 5        | cholinergic<br>receptor,<br>muscarinic                               | -0.417901 Inlier |
| siRNA-Temozolomide Run1-DMSO | NM_0121<br>25 | CHRM5  | 5        | cholinergic<br>receptor,<br>muscarinic                               | 0.417901 Inlier  |
| siRNA-Vinblastine Run2-DMSO  | NM_0121<br>25 | CHRM5  | 5        | cholinergic<br>receptor,<br>muscarinic                               | 0.727352 Inlier  |
| siRNA Disorazole DMSO Run1   | NM_0121<br>25 | CHRM5  | 5        | cholinergic<br>receptor,<br>muscarinic                               | 0.766494 Inlier  |
| siRNA-Vinblastine Run1-DMSO  | NM_0121<br>25 | CHRM5  | 5        | cholinergic<br>receptor,<br>muscarinic                               | 0.827592 Inlier  |
| siRNA-Vinblastine Run2-DMSO  | NM_0000<br>79 | CHRNA1 | (muscle) | cholinergic<br>receptor,<br>nicotinic,<br>alpha<br>polypeptid<br>e 1 | -2.367725 Inlier |
| siRNA-Temozolomide Run3-DMSO | NM_0000<br>79 | CHRNA1 | (muscle) | cholinergic<br>receptor,<br>nicotinic,<br>alpha<br>polypeptid<br>e 1 | -1.624759 Inlier |

Identification of Survival Genes in Human Glioblastoma Cells Using siRNA Screening  
 Nikhil G Thaker, Fang Zhang, Peter R. McDonald, Tong Ying Shun, Michael D Lewen, Ian F. Pollack, and John S. Lazo  
 Molecular Pharmacology

|                              |           |        |                                                               |           |         |
|------------------------------|-----------|--------|---------------------------------------------------------------|-----------|---------|
| siRNA Disorazole DMSO Run3   | NM_000079 | CHRNA1 | cholinergic receptor, nicotinic, alpha polypeptide 1 (muscle) | -0.552129 | Inlier  |
| siRNA-Temozolomide Run2-DMSO | NM_000079 | CHRNA1 | cholinergic receptor, nicotinic, alpha polypeptide 1 (muscle) | -0.339022 | Inlier  |
| siRNA-Vinblastine Run1-DMSO  | NM_000079 | CHRNA1 | cholinergic receptor, nicotinic, alpha polypeptide 1 (muscle) | 0.339022  | Inlier  |
| siRNA Disorazole DMSO Run1   | NM_000079 | CHRNA1 | cholinergic receptor, nicotinic, alpha polypeptide 1 (muscle) | 0.411858  | Inlier  |
| siRNA-Temozolomide Run1-DMSO | NM_000079 | CHRNA1 | cholinergic receptor, nicotinic, alpha polypeptide 1 (muscle) | 0.796871  | Inlier  |
| siRNA Disorazole DMSO Run2   | NM_000079 | CHRNA1 | cholinergic receptor, nicotinic, alpha polypeptide 1 (muscle) | 7.26452   | Outlier |

Identification of Survival Genes in Human Glioblastoma Cells Using siRNA Screening  
 Nikhil G Thaker, Fang Zhang, Peter R. McDonald, Tong Ying Shun, Michael D Lewen, Ian F. Pollack, and John S. Lazo  
 Molecular Pharmacology

|                              |           |         |                                                       |           |        |
|------------------------------|-----------|---------|-------------------------------------------------------|-----------|--------|
| siRNA-Temozolomide Run3-DMSO | NM_020402 | CHRNA10 | cholinergic receptor, nicotinic, alpha polypeptide 10 | -2.756892 | Inlier |
| siRNA Disorazole DMSO Run1   | NM_020402 | CHRNA10 | cholinergic receptor, nicotinic, alpha polypeptide 10 | -0.617342 | Inlier |
| siRNA Disorazole DMSO Run3   | NM_020402 | CHRNA10 | cholinergic receptor, nicotinic, alpha polypeptide 10 | -0.271189 | Inlier |
| siRNA-Temozolomide Run2-DMSO | NM_020402 | CHRNA10 | cholinergic receptor, nicotinic, alpha polypeptide 10 | -0.077395 | Inlier |
| siRNA-Temozolomide Run1-DMSO | NM_020402 | CHRNA10 | cholinergic receptor, nicotinic, alpha polypeptide 10 | 0.077394  | Inlier |
| siRNA-Vinblastine Run2-DMSO  | NM_020402 | CHRNA10 | cholinergic receptor, nicotinic, alpha polypeptide 10 | 0.731658  | Inlier |
| siRNA Disorazole DMSO Run2   | NM_020402 | CHRNA10 | cholinergic receptor, nicotinic, alpha polypeptide 10 | 1.051715  | Inlier |

Identification of Survival Genes in Human Glioblastoma Cells Using siRNA Screening

Nikhil G Thaker, Fang Zhang, Peter R. McDonald, Tong Ying Shun, Michael D Lewen, Ian F. Pollack, and John S. Lazo

Molecular Pharmacology

|                              |           |         |                                                                 |           |        |
|------------------------------|-----------|---------|-----------------------------------------------------------------|-----------|--------|
| siRNA-Vinblastine Run1-DMSO  | NM_020402 | CHRNA10 | cholinergic receptor, nicotinic, alpha polypeptide 10           | 1.375403  | Inlier |
| siRNA-Temozolomide Run3-DMSO | NM_000742 | CHRNA2  | cholinergic receptor, nicotinic, alpha polypeptide 2 (neuronal) | -1.795603 | Inlier |
| siRNA Disorazole DMSO Run3   | NM_000742 | CHRNA2  | cholinergic receptor, nicotinic, alpha polypeptide 2 (neuronal) | -0.62048  | Inlier |
| siRNA-Temozolomide Run2-DMSO | NM_000742 | CHRNA2  | cholinergic receptor, nicotinic, alpha polypeptide 2 (neuronal) | -0.514988 | Inlier |
| siRNA Disorazole DMSO Run2   | NM_000742 | CHRNA2  | cholinergic receptor, nicotinic, alpha polypeptide 2 (neuronal) | -0.382967 | Inlier |
| siRNA Disorazole DMSO Run1   | NM_000742 | CHRNA2  | cholinergic receptor, nicotinic, alpha polypeptide 2 (neuronal) | 0.382967  | Inlier |

Identification of Survival Genes in Human Glioblastoma Cells Using siRNA Screening  
 Nikhil G Thaker, Fang Zhang, Peter R. McDonald, Tong Ying Shun, Michael D Lewen, Ian F. Pollack, and John S. Lazo  
 Molecular Pharmacology

|                              |           |        |                                                                 |           |         |
|------------------------------|-----------|--------|-----------------------------------------------------------------|-----------|---------|
| siRNA-Temozolomide Run1-DMSO | NM_000742 | CHRNA2 | cholinergic receptor, nicotinic, alpha polypeptide 2 (neuronal) | 0.72852   | Inlier  |
| siRNA-Vinblastine Run2-DMSO  | NM_000742 | CHRNA2 | cholinergic receptor, nicotinic, alpha polypeptide 2 (neuronal) | 1.546275  | Inlier  |
| siRNA-Vinblastine Run1-DMSO  | NM_000742 | CHRNA2 | cholinergic receptor, nicotinic, alpha polypeptide 2 (neuronal) | 1.828713  | Inlier  |
| siRNA-Temozolomide Run3-DMSO | NM_000743 | CHRNA3 | cholinergic receptor, nicotinic, alpha polypeptide 3            | -7.878066 | Outlier |
| siRNA Disorazole DMSO Run1   | NM_000743 | CHRNA3 | cholinergic receptor, nicotinic, alpha polypeptide 3            | -0.809779 | Inlier  |
| siRNA Disorazole DMSO Run3   | NM_000743 | CHRNA3 | cholinergic receptor, nicotinic, alpha polypeptide 3            | -0.539222 | Inlier  |
| siRNA-Temozolomide Run2-DMSO | NM_000743 | CHRNA3 | cholinergic receptor, nicotinic, alpha polypeptide 3            | -0.092843 | Inlier  |

Identification of Survival Genes in Human Glioblastoma Cells Using siRNA Screening  
 Nikhil G Thaker, Fang Zhang, Peter R. McDonald, Tong Ying Shun, Michael D Lewen, Ian F. Pollack, and John S. Lazo  
 Molecular Pharmacology

|                                  |               |        |                                                                      |           |         |
|----------------------------------|---------------|--------|----------------------------------------------------------------------|-----------|---------|
| siRNA Disorazole DMSO Run2       | NM_0007<br>43 | CHRNA3 | cholinergic<br>receptor,<br>nicotinic,<br>alpha<br>polypeptid<br>e 3 | 0.092843  | Inlier  |
| siRNA-Temozolomide Run1-<br>DMSO | NM_0007<br>43 | CHRNA3 | cholinergic<br>receptor,<br>nicotinic,<br>alpha<br>polypeptid<br>e 3 | 0.120661  | Inlier  |
| siRNA-Vinblastine Run1-<br>DMSO  | NM_0007<br>43 | CHRNA3 | cholinergic<br>receptor,<br>nicotinic,<br>alpha<br>polypeptid<br>e 3 | 6.837822  | Outlier |
| siRNA-Vinblastine Run2-<br>DMSO  | NM_0007<br>43 | CHRNA3 | cholinergic<br>receptor,<br>nicotinic,<br>alpha<br>polypeptid<br>e 3 | 7.557904  | Outlier |
| siRNA-Temozolomide Run3-<br>DMSO | NM_0007<br>44 | CHRNA4 | cholinergic<br>receptor,<br>nicotinic,<br>alpha<br>polypeptid<br>e 4 | -1.073788 | Inlier  |
| siRNA Disorazole DMSO Run1       | NM_0007<br>44 | CHRNA4 | cholinergic<br>receptor,<br>nicotinic,<br>alpha<br>polypeptid<br>e 4 | -0.415422 | Inlier  |
| siRNA-Temozolomide Run2-<br>DMSO | NM_0007<br>44 | CHRNA4 | cholinergic<br>receptor,<br>nicotinic,<br>alpha<br>polypeptid<br>e 4 | -0.130029 | Inlier  |

Identification of Survival Genes in Human Glioblastoma Cells Using siRNA Screening  
 Nikhil G Thaker, Fang Zhang, Peter R. McDonald, Tong Ying Shun, Michael D Lewen, Ian F. Pollack, and John S. Lazo  
 Molecular Pharmacology

|                              |           |        |                                                      |           |        |
|------------------------------|-----------|--------|------------------------------------------------------|-----------|--------|
| siRNA-Temozolomide Run1-DMSO | NM_000744 | CHRNA4 | cholinergic receptor, nicotinic, alpha polypeptide 4 | -0.017482 | Inlier |
| siRNA-Vinblastine Run2-DMSO  | NM_000744 | CHRNA4 | cholinergic receptor, nicotinic, alpha polypeptide 4 | 0.017483  | Inlier |
| siRNA-Vinblastine Run1-DMSO  | NM_000744 | CHRNA4 | cholinergic receptor, nicotinic, alpha polypeptide 4 | 0.933578  | Inlier |
| siRNA Disorazole DMSO Run3   | NM_000744 | CHRNA4 | cholinergic receptor, nicotinic, alpha polypeptide 4 | 1.05547   | Inlier |
| siRNA Disorazole DMSO Run2   | NM_000744 | CHRNA4 | cholinergic receptor, nicotinic, alpha polypeptide 4 | 1.682496  | Inlier |
| siRNA-Temozolomide Run3-DMSO | NM_000745 | CHRNA5 | cholinergic receptor, nicotinic, alpha polypeptide 5 | -2.796491 | Inlier |
| siRNA Disorazole DMSO Run1   | NM_000745 | CHRNA5 | cholinergic receptor, nicotinic, alpha polypeptide 5 | -1.361444 | Inlier |



Identification of Survival Genes in Human Glioblastoma Cells Using siRNA Screening  
 Nikhil G Thaker, Fang Zhang, Peter R. McDonald, Tong Ying Shun, Michael D Lewen, Ian F. Pollack, and John S. Lazo  
 Molecular Pharmacology

|                              |           |        |                                                      |           |        |
|------------------------------|-----------|--------|------------------------------------------------------|-----------|--------|
| siRNA-Vinblastine Run2-DMSO  | NM_000745 | CHRNA5 | cholinergic receptor, nicotinic, alpha polypeptide 5 | -0.206256 | Inlier |
| siRNA-Temozolomide Run1-DMSO | NM_000745 | CHRNA5 | cholinergic receptor, nicotinic, alpha polypeptide 5 | -0.111657 | Inlier |
| siRNA Disorazole DMSO Run3   | NM_000745 | CHRNA5 | cholinergic receptor, nicotinic, alpha polypeptide 5 | 0.111657  | Inlier |
| siRNA-Temozolomide Run2-DMSO | NM_000745 | CHRNA5 | cholinergic receptor, nicotinic, alpha polypeptide 5 | 0.323386  | Inlier |
| siRNA-Vinblastine Run1-DMSO  | NM_000745 | CHRNA5 | cholinergic receptor, nicotinic, alpha polypeptide 5 | 1.025614  | Inlier |
| siRNA Disorazole DMSO Run2   | NM_000745 | CHRNA5 | cholinergic receptor, nicotinic, alpha polypeptide 5 | 2.997986  | Inlier |
| siRNA Disorazole DMSO Run1   | NM_004198 | CHRNA6 | cholinergic receptor, nicotinic, alpha polypeptide 6 | -1.777133 | Inlier |

Identification of Survival Genes in Human Glioblastoma Cells Using siRNA Screening  
 Nikhil G Thaker, Fang Zhang, Peter R. McDonald, Tong Ying Shun, Michael D Lewen, Ian F. Pollack, and John S. Lazo  
 Molecular Pharmacology

|                              |           |        |                                                      |           |        |
|------------------------------|-----------|--------|------------------------------------------------------|-----------|--------|
| siRNA-Temozolomide Run3-DMSO | NM_004198 | CHRNA6 | cholinergic receptor, nicotinic, alpha polypeptide 6 | -1.131159 | Inlier |
| siRNA-Vinblastine Run2-DMSO  | NM_004198 | CHRNA6 | cholinergic receptor, nicotinic, alpha polypeptide 6 | -0.217841 | Inlier |
| siRNA-Temozolomide Run1-DMSO | NM_004198 | CHRNA6 | cholinergic receptor, nicotinic, alpha polypeptide 6 | -0.027074 | Inlier |
| siRNA-Vinblastine Run1-DMSO  | NM_004198 | CHRNA6 | cholinergic receptor, nicotinic, alpha polypeptide 6 | 0.027075  | Inlier |
| siRNA-Temozolomide Run2-DMSO | NM_004198 | CHRNA6 | cholinergic receptor, nicotinic, alpha polypeptide 6 | 0.072102  | Inlier |
| siRNA Disorazole DMSO Run3   | NM_004198 | CHRNA6 | cholinergic receptor, nicotinic, alpha polypeptide 6 | 1.154161  | Inlier |
| siRNA Disorazole DMSO Run2   | NM_004198 | CHRNA6 | cholinergic receptor, nicotinic, alpha polypeptide 6 | 2.283103  | Inlier |

Identification of Survival Genes in Human Glioblastoma Cells Using siRNA Screening  
 Nikhil G Thaker, Fang Zhang, Peter R. McDonald, Tong Ying Shun, Michael D Lewen, Ian F. Pollack, and John S. Lazo  
 Molecular Pharmacology

|                              |           |        |                                                      |           |        |
|------------------------------|-----------|--------|------------------------------------------------------|-----------|--------|
| siRNA-Temozolomide Run3-DMSO | NM_000746 | CHRNA7 | cholinergic receptor, nicotinic, alpha polypeptide 7 | -1.046061 | Inlier |
| siRNA-Temozolomide Run2-DMSO | NM_000746 | CHRNA7 | cholinergic receptor, nicotinic, alpha polypeptide 7 | -0.927396 | Inlier |
| siRNA-Temozolomide Run1-DMSO | NM_000746 | CHRNA7 | cholinergic receptor, nicotinic, alpha polypeptide 7 | -0.473598 | Inlier |
| siRNA Disorazole DMSO Run1   | NM_000746 | CHRNA7 | cholinergic receptor, nicotinic, alpha polypeptide 7 | -0.300023 | Inlier |
| siRNA Disorazole DMSO Run2   | NM_000746 | CHRNA7 | cholinergic receptor, nicotinic, alpha polypeptide 7 | 0.300023  | Inlier |
| siRNA Disorazole DMSO Run3   | NM_000746 | CHRNA7 | cholinergic receptor, nicotinic, alpha polypeptide 7 | 0.397573  | Inlier |
| siRNA-Vinblastine Run1-DMSO  | NM_000746 | CHRNA7 | cholinergic receptor, nicotinic, alpha polypeptide 7 | 0.875402  | Inlier |

Identification of Survival Genes in Human Glioblastoma Cells Using siRNA Screening  
 Nikhil G Thaker, Fang Zhang, Peter R. McDonald, Tong Ying Shun, Michael D Lewen, Ian F. Pollack, and John S. Lazo  
 Molecular Pharmacology

|                              |           |        |                                                      |           |        |
|------------------------------|-----------|--------|------------------------------------------------------|-----------|--------|
| siRNA-Vinblastine Run2-DMSO  | NM_000746 | CHRNA7 | cholinergic receptor, nicotinic, alpha polypeptide 7 | 1.37641   | Inlier |
| siRNA-Temozolomide Run3-DMSO | NM_017581 | CHRNA9 | cholinergic receptor, nicotinic, alpha polypeptide 9 | -1.65671  | Inlier |
| siRNA Disorazole DMSO Run1   | NM_017581 | CHRNA9 | cholinergic receptor, nicotinic, alpha polypeptide 9 | -0.725102 | Inlier |
| siRNA-Temozolomide Run2-DMSO | NM_017581 | CHRNA9 | cholinergic receptor, nicotinic, alpha polypeptide 9 | -0.623898 | Inlier |
| siRNA-Temozolomide Run1-DMSO | NM_017581 | CHRNA9 | cholinergic receptor, nicotinic, alpha polypeptide 9 | -0.092093 | Inlier |
| siRNA Disorazole DMSO Run3   | NM_017581 | CHRNA9 | cholinergic receptor, nicotinic, alpha polypeptide 9 | 0.092093  | Inlier |
| siRNA-Vinblastine Run2-DMSO  | NM_017581 | CHRNA9 | cholinergic receptor, nicotinic, alpha polypeptide 9 | 0.591929  | Inlier |

Identification of Survival Genes in Human Glioblastoma Cells Using siRNA Screening  
 Nikhil G Thaker, Fang Zhang, Peter R. McDonald, Tong Ying Shun, Michael D Lewen, Ian F. Pollack, and John S. Lazo  
 Molecular Pharmacology

|                              |               |        |                                                                                 |           |        |
|------------------------------|---------------|--------|---------------------------------------------------------------------------------|-----------|--------|
| siRNA Disorazole DMSO Run2   | NM_0175<br>81 | CHRNA9 | cholinergic<br>receptor,<br>nicotinic,<br>alpha<br>polypeptid<br>e 9            | 2.405602  | Inlier |
| siRNA-Vinblastine Run1-DMSO  | NM_0175<br>81 | CHRNA9 | cholinergic<br>receptor,<br>nicotinic,<br>alpha<br>polypeptid<br>e 9            | 2.92428   | Inlier |
| siRNA-Temozolomide Run3-DMSO | NM_0007<br>47 | CHRNA9 | cholinergic<br>receptor,<br>nicotinic,<br>beta<br>polypeptid<br>e 1<br>(muscle) | -1.60986  | Inlier |
| siRNA-Temozolomide Run2-DMSO | NM_0007<br>47 | CHRNA9 | cholinergic<br>receptor,<br>nicotinic,<br>beta<br>polypeptid<br>e 1<br>(muscle) | -0.52811  | Inlier |
| siRNA Disorazole DMSO Run1   | NM_0007<br>47 | CHRNA9 | cholinergic<br>receptor,<br>nicotinic,<br>beta<br>polypeptid<br>e 1<br>(muscle) | -0.117346 | Inlier |
| siRNA Disorazole DMSO Run3   | NM_0007<br>47 | CHRNA9 | cholinergic<br>receptor,<br>nicotinic,<br>beta<br>polypeptid<br>e 1<br>(muscle) | -0.109883 | Inlier |

Identification of Survival Genes in Human Glioblastoma Cells Using siRNA Screening

Nikhil G Thaker, Fang Zhang, Peter R. McDonald, Tong Ying Shun, Michael D Lewen, Ian F. Pollack, and John S. Lazo

Molecular Pharmacology

|                              |           |        |                                                                |           |         |
|------------------------------|-----------|--------|----------------------------------------------------------------|-----------|---------|
| siRNA-Vinblastine Run2-DMSO  | NM_000747 | CHRNA1 | cholinergic receptor, nicotinic, beta polypeptide 1 (muscle)   | 0.109883  | Inlier  |
| siRNA-Temozolomide Run1-DMSO | NM_000747 | CHRNA1 | cholinergic receptor, nicotinic, beta polypeptide 1 (muscle)   | 0.82089   | Inlier  |
| siRNA Disorazole DMSO Run2   | NM_000747 | CHRNA1 | cholinergic receptor, nicotinic, beta polypeptide 1 (muscle)   | 3.187395  | Inlier  |
| siRNA-Vinblastine Run1-DMSO  | NM_000747 | CHRNA1 | cholinergic receptor, nicotinic, beta polypeptide 1 (muscle)   | 5.178692  | Outlier |
| siRNA-Temozolomide Run3-DMSO | NM_000748 | CHRNA2 | cholinergic receptor, nicotinic, beta polypeptide 2 (neuronal) | -0.915638 | Inlier  |
| siRNA-Vinblastine Run2-DMSO  | NM_000748 | CHRNA2 | cholinergic receptor, nicotinic, beta polypeptide 2 (neuronal) | -0.433362 | Inlier  |

Identification of Survival Genes in Human Glioblastoma Cells Using siRNA Screening

Nikhil G Thaker, Fang Zhang, Peter R. McDonald, Tong Ying Shun, Michael D Lewen, Ian F. Pollack, and John S. Lazo

Molecular Pharmacology

|                              |               |        |                                                                                   |           |         |
|------------------------------|---------------|--------|-----------------------------------------------------------------------------------|-----------|---------|
| siRNA-Temozolomide Run1-DMSO | NM_0007<br>48 | CHRNA2 | cholinergic<br>receptor,<br>nicotinic,<br>beta<br>polypeptid<br>e 2<br>(neuronal) | -0.348951 | Inlier  |
| siRNA Disorazole DMSO Run3   | NM_0007<br>48 | CHRNA2 | cholinergic<br>receptor,<br>nicotinic,<br>beta<br>polypeptid<br>e 2<br>(neuronal) | -0.026729 | Inlier  |
| siRNA-Temozolomide Run2-DMSO | NM_0007<br>48 | CHRNA2 | cholinergic<br>receptor,<br>nicotinic,<br>beta<br>polypeptid<br>e 2<br>(neuronal) | 0.026729  | Inlier  |
| siRNA Disorazole DMSO Run1   | NM_0007<br>48 | CHRNA2 | cholinergic<br>receptor,<br>nicotinic,<br>beta<br>polypeptid<br>e 2<br>(neuronal) | 1.313185  | Inlier  |
| siRNA-Vinblastine Run1-DMSO  | NM_0007<br>48 | CHRNA2 | cholinergic<br>receptor,<br>nicotinic,<br>beta<br>polypeptid<br>e 2<br>(neuronal) | 1.888108  | Inlier  |
| siRNA Disorazole DMSO Run2   | NM_0007<br>48 | CHRNA2 | cholinergic<br>receptor,<br>nicotinic,<br>beta<br>polypeptid<br>e 2<br>(neuronal) | 4.115613  | Outlier |

Identification of Survival Genes in Human Glioblastoma Cells Using siRNA Screening  
 Nikhil G Thaker, Fang Zhang, Peter R. McDonald, Tong Ying Shun, Michael D Lewen, Ian F. Pollack, and John S. Lazo  
 Molecular Pharmacology

|                              |           |        |                                                     |           |        |
|------------------------------|-----------|--------|-----------------------------------------------------|-----------|--------|
| siRNA-Temozolomide Run3-DMSO | NM_000749 | CHRNB3 | cholinergic receptor, nicotinic, beta polypeptide 3 | -2.087158 | Inlier |
| siRNA Disorazole DMSO Run3   | NM_000749 | CHRNB3 | cholinergic receptor, nicotinic, beta polypeptide 3 | -1.118762 | Inlier |
| siRNA-Temozolomide Run1-DMSO | NM_000749 | CHRNB3 | cholinergic receptor, nicotinic, beta polypeptide 3 | -0.230238 | Inlier |
| siRNA-Temozolomide Run2-DMSO | NM_000749 | CHRNB3 | cholinergic receptor, nicotinic, beta polypeptide 3 | -0.026639 | Inlier |
| siRNA Disorazole DMSO Run2   | NM_000749 | CHRNB3 | cholinergic receptor, nicotinic, beta polypeptide 3 | 0.026638  | Inlier |
| siRNA Disorazole DMSO Run1   | NM_000749 | CHRNB3 | cholinergic receptor, nicotinic, beta polypeptide 3 | 0.205891  | Inlier |
| siRNA-Vinblastine Run2-DMSO  | NM_000749 | CHRNB3 | cholinergic receptor, nicotinic, beta polypeptide 3 | 1.558534  | Inlier |



Identification of Survival Genes in Human Glioblastoma Cells Using siRNA Screening  
 Nikhil G Thaker, Fang Zhang, Peter R. McDonald, Tong Ying Shun, Michael D Lewen, Ian F. Pollack, and John S. Lazo  
 Molecular Pharmacology

|                              |           |        |                                                     |           |        |
|------------------------------|-----------|--------|-----------------------------------------------------|-----------|--------|
| siRNA-Vinblastine Run1-DMSO  | NM_000749 | CHRNB3 | cholinergic receptor, nicotinic, beta polypeptide 3 | 2.344562  | Inlier |
| siRNA-Temozolomide Run3-DMSO | NM_000750 | CHRNB4 | cholinergic receptor, nicotinic, beta polypeptide 4 | -1.628653 | Inlier |
| siRNA Disorazole DMSO Run1   | NM_000750 | CHRNB4 | cholinergic receptor, nicotinic, beta polypeptide 4 | -0.663685 | Inlier |
| siRNA-Vinblastine Run2-DMSO  | NM_000750 | CHRNB4 | cholinergic receptor, nicotinic, beta polypeptide 4 | -0.439491 | Inlier |
| siRNA-Temozolomide Run1-DMSO | NM_000750 | CHRNB4 | cholinergic receptor, nicotinic, beta polypeptide 4 | -0.436136 | Inlier |
| siRNA-Temozolomide Run2-DMSO | NM_000750 | CHRNB4 | cholinergic receptor, nicotinic, beta polypeptide 4 | 0.436135  | Inlier |
| siRNA Disorazole DMSO Run3   | NM_000750 | CHRNB4 | cholinergic receptor, nicotinic, beta polypeptide 4 | 0.685315  | Inlier |

Identification of Survival Genes in Human Glioblastoma Cells Using siRNA Screening  
 Nikhil G Thaker, Fang Zhang, Peter R. McDonald, Tong Ying Shun, Michael D Lewen, Ian F. Pollack, and John S. Lazo  
 Molecular Pharmacology

|                              |               |        |                                                                     |           |         |
|------------------------------|---------------|--------|---------------------------------------------------------------------|-----------|---------|
| siRNA Disorazole DMSO Run2   | NM_0007<br>50 | CHRNA4 | cholinergic<br>receptor,<br>nicotinic,<br>beta<br>polypeptid<br>e 4 | 3.231376  | Inlier  |
| siRNA-Vinblastine Run1-DMSO  | NM_0007<br>50 | CHRNA4 | cholinergic<br>receptor,<br>nicotinic,<br>beta<br>polypeptid<br>e 4 | 4.336438  | Outlier |
| siRNA Disorazole DMSO Run1   | NM_0007<br>51 | CHRNA4 | cholinergic<br>receptor,<br>nicotinic,<br>delta<br>polypeptid<br>e  | -1.619426 | Inlier  |
| siRNA-Temozolomide Run1-DMSO | NM_0007<br>51 | CHRNA4 | cholinergic<br>receptor,<br>nicotinic,<br>delta<br>polypeptid<br>e  | -0.911384 | Inlier  |
| siRNA-Vinblastine Run2-DMSO  | NM_0007<br>51 | CHRNA4 | cholinergic<br>receptor,<br>nicotinic,<br>delta<br>polypeptid<br>e  | -0.731008 | Inlier  |
| siRNA-Temozolomide Run3-DMSO | NM_0007<br>51 | CHRNA4 | cholinergic<br>receptor,<br>nicotinic,<br>delta<br>polypeptid<br>e  | -0.247296 | Inlier  |
| siRNA-Vinblastine Run1-DMSO  | NM_0007<br>51 | CHRNA4 | cholinergic<br>receptor,<br>nicotinic,<br>delta<br>polypeptid<br>e  | 0.247298  | Inlier  |

Identification of Survival Genes in Human Glioblastoma Cells Using siRNA Screening  
 Nikhil G Thaker, Fang Zhang, Peter R. McDonald, Tong Ying Shun, Michael D Lewen, Ian F. Pollack, and John S. Lazo  
 Molecular Pharmacology

|                                  |               |       |                                                                      |           |        |
|----------------------------------|---------------|-------|----------------------------------------------------------------------|-----------|--------|
| siRNA Disorazole DMSO Run3       | NM_0007<br>51 | CHRND | cholinergic<br>receptor,<br>nicotinic,<br>delta<br>polypeptid<br>e   | 0.534967  | Inlier |
| siRNA-Temozolomide Run2-<br>DMSO | NM_0007<br>51 | CHRND | cholinergic<br>receptor,<br>nicotinic,<br>delta<br>polypeptid<br>e   | 0.617992  | Inlier |
| siRNA Disorazole DMSO Run2       | NM_0007<br>51 | CHRND | cholinergic<br>receptor,<br>nicotinic,<br>delta<br>polypeptid<br>e   | 2.695246  | Inlier |
| siRNA-Temozolomide Run3-<br>DMSO | NM_0000<br>80 | CHRNE | cholinergic<br>receptor,<br>nicotinic,<br>epsilon<br>polypeptid<br>e | -1.120728 | Inlier |
| siRNA-Temozolomide Run2-<br>DMSO | NM_0000<br>80 | CHRNE | cholinergic<br>receptor,<br>nicotinic,<br>epsilon<br>polypeptid<br>e | -0.466188 | Inlier |
| siRNA Disorazole DMSO Run1       | NM_0000<br>80 | CHRNE | cholinergic<br>receptor,<br>nicotinic,<br>epsilon<br>polypeptid<br>e | -0.187425 | Inlier |
| siRNA Disorazole DMSO Run3       | NM_0000<br>80 | CHRNE | cholinergic<br>receptor,<br>nicotinic,<br>epsilon<br>polypeptid<br>e | -0.154498 | Inlier |

Identification of Survival Genes in Human Glioblastoma Cells Using siRNA Screening  
 Nikhil G Thaker, Fang Zhang, Peter R. McDonald, Tong Ying Shun, Michael D Lewen, Ian F. Pollack, and John S. Lazo  
 Molecular Pharmacology

|                              |           |       |                                                      |           |        |
|------------------------------|-----------|-------|------------------------------------------------------|-----------|--------|
| siRNA-Vinblastine Run2-DMSO  | NM_000080 | CHRNE | cholinergic receptor, nicotinic, epsilon polypeptide | 0.154498  | Inlier |
| siRNA-Temozolomide Run1-DMSO | NM_000080 | CHRNE | cholinergic receptor, nicotinic, epsilon polypeptide | 0.882812  | Inlier |
| siRNA Disorazole DMSO Run2   | NM_000080 | CHRNE | cholinergic receptor, nicotinic, epsilon polypeptide | 2.396655  | Inlier |
| siRNA-Vinblastine Run1-DMSO  | NM_000080 | CHRNE | cholinergic receptor, nicotinic, epsilon polypeptide | 2.766949  | Inlier |
| siRNA-Temozolomide Run3-DMSO | NM_005199 | CHRNG | cholinergic receptor, nicotinic, gamma polypeptide   | -2.401667 | Inlier |
| siRNA-Temozolomide Run2-DMSO | NM_005199 | CHRNG | cholinergic receptor, nicotinic, gamma polypeptide   | -0.612724 | Inlier |
| siRNA Disorazole DMSO Run1   | NM_005199 | CHRNG | cholinergic receptor, nicotinic, gamma polypeptide   | -0.381787 | Inlier |

Identification of Survival Genes in Human Glioblastoma Cells Using siRNA Screening  
 Nikhil G Thaker, Fang Zhang, Peter R. McDonald, Tong Ying Shun, Michael D Lewen, Ian F. Pollack, and John S. Lazo  
 Molecular Pharmacology

|                              |               |        |                                                                              |           |         |
|------------------------------|---------------|--------|------------------------------------------------------------------------------|-----------|---------|
| siRNA Disorazole DMSO Run3   | NM_0051<br>99 | CHRNA3 | cholinergic<br>receptor,<br>nicotinic,<br>gamma<br>polypeptid<br>e           | -0.113385 | Inlier  |
| siRNA-Vinblastine Run2-DMSO  | NM_0051<br>99 | CHRNA3 | cholinergic<br>receptor,<br>nicotinic,<br>gamma<br>polypeptid<br>e           | 0.113385  | Inlier  |
| siRNA-Temozolomide Run1-DMSO | NM_0051<br>99 | CHRNA3 | cholinergic<br>receptor,<br>nicotinic,<br>gamma<br>polypeptid<br>e           | 0.736276  | Inlier  |
| siRNA-Vinblastine Run1-DMSO  | NM_0051<br>99 | CHRNA3 | cholinergic<br>receptor,<br>nicotinic,<br>gamma<br>polypeptid<br>e           | 5.25574   | Outlier |
| siRNA Disorazole DMSO Run2   | NM_0051<br>99 | CHRNA3 | cholinergic<br>receptor,<br>nicotinic,<br>gamma<br>polypeptid<br>e           | 5.749806  | Outlier |
| siRNA-Temozolomide Run3-DMSO | NM_0036<br>54 | CHST1  | carbohydr<br>ate<br>(keratan<br>sulfate Gal-<br>6)<br>sulfotransf<br>erase 1 | -0.790636 | Inlier  |
| siRNA-Vinblastine Run2-DMSO  | NM_0036<br>54 | CHST1  | carbohydr<br>ate<br>(keratan<br>sulfate Gal-<br>6)<br>sulfotransf<br>erase 1 | -0.558364 | Inlier  |

Identification of Survival Genes in Human Glioblastoma Cells Using siRNA Screening

Nikhil G Thaker, Fang Zhang, Peter R. McDonald, Tong Ying Shun, Michael D Lewen, Ian F. Pollack, and John S. Lazo

Molecular Pharmacology

|                              |               |        |                                                               |           |         |
|------------------------------|---------------|--------|---------------------------------------------------------------|-----------|---------|
| siRNA-Temozolomide Run2-DMSO | NM_0036<br>54 | CHST1  | carbohydrate<br>(keratan sulfate Gal-6)<br>sulfotransferase 1 | -0.312745 | Inlier  |
| siRNA Disorazole DMSO Run3   | NM_0036<br>54 | CHST1  | carbohydrate<br>(keratan sulfate Gal-6)<br>sulfotransferase 1 | -0.184209 | Inlier  |
| siRNA Disorazole DMSO Run1   | NM_0036<br>54 | CHST1  | carbohydrate<br>(keratan sulfate Gal-6)<br>sulfotransferase 1 | 0.184208  | Inlier  |
| siRNA-Temozolomide Run1-DMSO | NM_0036<br>54 | CHST1  | carbohydrate<br>(keratan sulfate Gal-6)<br>sulfotransferase 1 | 0.897413  | Inlier  |
| siRNA Disorazole DMSO Run2   | NM_0036<br>54 | CHST1  | carbohydrate<br>(keratan sulfate Gal-6)<br>sulfotransferase 1 | 3.919912  | Outlier |
| siRNA-Vinblastine Run1-DMSO  | NM_0036<br>54 | CHST1  | carbohydrate<br>(keratan sulfate Gal-6)<br>sulfotransferase 1 | 4.263843  | Outlier |
| siRNA-Temozolomide Run1-DMSO | NM_0048<br>54 | CHST10 | carbohydrate<br>sulfotransferase 10                           | -1.07574  | Inlier  |
| siRNA-Temozolomide Run2-DMSO | NM_0048<br>54 | CHST10 | carbohydrate<br>sulfotransferase 10                           | -0.756781 | Inlier  |

Identification of Survival Genes in Human Glioblastoma Cells Using siRNA Screening  
 Nikhil G Thaker, Fang Zhang, Peter R. McDonald, Tong Ying Shun, Michael D Lewen, Ian F. Pollack, and John S. Lazo

Molecular Pharmacology

|                              |               |        |                                     |           |        |
|------------------------------|---------------|--------|-------------------------------------|-----------|--------|
| siRNA-Vinblastine Run2-DMSO  | NM_0048<br>54 | CHST10 | carbohydrate sulfotransferase 10    | -0.491046 | Inlier |
| siRNA Disorazole DMSO Run1   | NM_0048<br>54 | CHST10 | carbohydrate sulfotransferase 10    | -0.171722 | Inlier |
| siRNA-Temozolomide Run3-DMSO | NM_0048<br>54 | CHST10 | carbohydrate sulfotransferase 10    | 0.171721  | Inlier |
| siRNA Disorazole DMSO Run2   | NM_0048<br>54 | CHST10 | carbohydrate sulfotransferase 10    | 0.592219  | Inlier |
| siRNA-Vinblastine Run1-DMSO  | NM_0048<br>54 | CHST10 | carbohydrate sulfotransferase 10    | 0.789484  | Inlier |
| siRNA Disorazole DMSO Run3   | NM_0048<br>54 | CHST10 | carbohydrate sulfotransferase 10    | 1.034356  | Inlier |
| siRNA-Temozolomide Run2-DMSO | NM_0184<br>13 | CHST11 | (chondroitin 4) sulfotransferase 11 | -1.080571 | Inlier |
| siRNA-Temozolomide Run3-DMSO | NM_0184<br>13 | CHST11 | (chondroitin 4) sulfotransferase 11 | -0.822196 | Inlier |
| siRNA-Temozolomide Run1-DMSO | NM_0184<br>13 | CHST11 | (chondroitin 4) sulfotransferase 11 | -0.653546 | Inlier |
| siRNA Disorazole DMSO Run1   | NM_0184<br>13 | CHST11 | (chondroitin 4) sulfotransferase 11 | -0.060738 | Inlier |

Identification of Survival Genes in Human Glioblastoma Cells Using siRNA Screening  
 Nikhil G Thaker, Fang Zhang, Peter R. McDonald, Tong Ying Shun, Michael D Lewen, Ian F. Pollack, and John S. Lazo

Molecular Pharmacology

|                              |               |        |                                                        |           |        |
|------------------------------|---------------|--------|--------------------------------------------------------|-----------|--------|
| siRNA-Vinblastine Run2-DMSO  | NM_0184<br>13 | CHST11 | carbohydrate<br>(chondroitin 4)<br>sulfotransferase 11 | 0.060737  | Inlier |
| siRNA Disorazole DMSO Run3   | NM_0184<br>13 | CHST11 | carbohydrate<br>(chondroitin 4)<br>sulfotransferase 11 | 0.564881  | Inlier |
| siRNA Disorazole DMSO Run2   | NM_0184<br>13 | CHST11 | carbohydrate<br>(chondroitin 4)<br>sulfotransferase 11 | 0.695454  | Inlier |
| siRNA-Vinblastine Run1-DMSO  | NM_0184<br>13 | CHST11 | carbohydrate<br>(chondroitin 4)<br>sulfotransferase 11 | 0.820051  | Inlier |
| siRNA-Temozolomide Run1-DMSO | NM_0186<br>41 | CHST12 | carbohydrate<br>(chondroitin 4)<br>sulfotransferase 12 | -1.20913  | Inlier |
| siRNA Disorazole DMSO Run1   | NM_0186<br>41 | CHST12 | carbohydrate<br>(chondroitin 4)<br>sulfotransferase 12 | -1.067506 | Inlier |
| siRNA-Temozolomide Run2-DMSO | NM_0186<br>41 | CHST12 | carbohydrate<br>(chondroitin 4)<br>sulfotransferase 12 | -0.742683 | Inlier |
| siRNA-Temozolomide Run3-DMSO | NM_0186<br>41 | CHST12 | carbohydrate<br>(chondroitin 4)<br>sulfotransferase 12 | -0.046992 | Inlier |



Identification of Survival Genes in Human Glioblastoma Cells Using siRNA Screening  
 Nikhil G Thaker, Fang Zhang, Peter R. McDonald, Tong Ying Shun, Michael D Lewen, Ian F. Pollack, and John S. Lazo

Molecular Pharmacology

| siRNA Treatment              | Gene ID   | Gene Name | Value     | Category |
|------------------------------|-----------|-----------|-----------|----------|
| siRNA-Vinblastine Run2-DMSO  | NM_018641 | CHST12    | 0.046992  | Inlier   |
| siRNA-Vinblastine Run1-DMSO  | NM_018641 | CHST12    | 0.532759  | Inlier   |
| siRNA Disorazole DMSO Run3   | NM_018641 | CHST12    | 0.632239  | Inlier   |
| siRNA Disorazole DMSO Run2   | NM_018641 | CHST12    | 0.716761  | Inlier   |
| siRNA-Temozolomide Run2-DMSO | NM_152889 | CHST13    | -2.772653 | Inlier   |
| siRNA Disorazole DMSO Run3   | NM_152889 | CHST13    | -0.835984 | Inlier   |
| siRNA-Temozolomide Run1-DMSO | NM_152889 | CHST13    | -0.214878 | Inlier   |
| siRNA-Temozolomide Run3-DMSO | NM_152889 | CHST13    | -0.127182 | Inlier   |

carbohydrate  
 (chondroitin 4)  
 sulfotransferase 12  
 carbohydrate  
 (chondroitin 4)  
 sulfotransferase 13  
 carbohydrate  
 (chondroitin 4)  
 sulfotransferase 13  
 carbohydrate  
 (chondroitin 4)  
 sulfotransferase 13  
 carbohydrate  
 (chondroitin 4)  
 sulfotransferase 13

Identification of Survival Genes in Human Glioblastoma Cells Using siRNA Screening  
 Nikhil G Thaker, Fang Zhang, Peter R. McDonald, Tong Ying Shun, Michael D Lewen, Ian F. Pollack, and John S. Lazo

Molecular Pharmacology

|                              |               |        |                                                               |           |         |
|------------------------------|---------------|--------|---------------------------------------------------------------|-----------|---------|
| siRNA Disorazole DMSO Run1   | NM_1528<br>89 | CHST13 | carbohydrate<br>(chondroitin 4)<br>sulfotransferase 13        | 0.127181  | Inlier  |
| siRNA-Vinblastine Run2-DMSO  | NM_1528<br>89 | CHST13 | carbohydrate<br>(chondroitin 4)<br>sulfotransferase 13        | 0.513016  | Inlier  |
| siRNA Disorazole DMSO Run2   | NM_1528<br>89 | CHST13 | carbohydrate<br>(chondroitin 4)<br>sulfotransferase 13        | 6.717426  | Outlier |
| siRNA-Vinblastine Run1-DMSO  | NM_1528<br>89 | CHST13 | carbohydrate (N-acetylglucosamine-6-O)<br>sulfotransferase 13 | 7.824757  | Outlier |
| siRNA-Temozolomide Run2-DMSO | NM_0042<br>67 | CHST2  | carbohydrate (N-acetylglucosamine-6-O)<br>sulfotransferase 2  | -1.494648 | Inlier  |
| siRNA-Temozolomide Run3-DMSO | NM_0042<br>67 | CHST2  | carbohydrate (N-acetylglucosamine-6-O)<br>sulfotransferase 2  | -0.884027 | Inlier  |
| siRNA Disorazole DMSO Run3   | NM_0042<br>67 | CHST2  | carbohydrate (N-acetylglucosamine-6-O)<br>sulfotransferase 2  | -0.169456 | Inlier  |
| siRNA-Vinblastine Run2-DMSO  | NM_0042<br>67 | CHST2  | sulfotransferase 2                                            | -0.163431 | Inlier  |

Identification of Survival Genes in Human Glioblastoma Cells Using siRNA Screening

Nikhil G Thaker, Fang Zhang, Peter R. McDonald, Tong Ying Shun, Michael D Lewen, Ian F. Pollack, and John S. Lazo

Molecular Pharmacology

|                              |               |       |                                                           |           |        |
|------------------------------|---------------|-------|-----------------------------------------------------------|-----------|--------|
| siRNA-Temozolomide Run1-DMSO | NM_0042<br>67 | CHST2 | carbohydrate (N-acetylglucosamine-6-O) sulfotransferase 2 | 0.163431  | Inlier |
| siRNA Disorazole DMSO Run1   | NM_0042<br>67 | CHST2 | carbohydrate (N-acetylglucosamine-6-O) sulfotransferase 2 | 0.464972  | Inlier |
| siRNA-Vinblastine Run1-DMSO  | NM_0042<br>67 | CHST2 | carbohydrate (N-acetylglucosamine-6-O) sulfotransferase 2 | 1.545558  | Inlier |
| siRNA Disorazole DMSO Run2   | NM_0042<br>67 | CHST2 | carbohydrate (chondroitin 6) sulfotransferase 2           | 2.216228  | Inlier |
| siRNA-Temozolomide Run3-DMSO | NM_0042<br>73 | CHST3 | carbohydrate (chondroitin 6) sulfotransferase 3           | -0.917131 | Inlier |
| siRNA Disorazole DMSO Run1   | NM_0042<br>73 | CHST3 | carbohydrate (chondroitin 6) sulfotransferase 3           | -0.597101 | Inlier |
| siRNA Disorazole DMSO Run3   | NM_0042<br>73 | CHST3 | carbohydrate (chondroitin 6) sulfotransferase 3           | -0.312278 | Inlier |
| siRNA-Vinblastine Run2-DMSO  | NM_0042<br>73 | CHST3 | carbohydrate (chondroitin 6) sulfotransferase 3           | -0.062393 | Inlier |

Identification of Survival Genes in Human Glioblastoma Cells Using siRNA Screening

Nikhil G Thaker, Fang Zhang, Peter R. McDonald, Tong Ying Shun, Michael D Lewen, Ian F. Pollack, and John S. Lazo

Molecular Pharmacology

|                              |           |       |                                                           |           |         |
|------------------------------|-----------|-------|-----------------------------------------------------------|-----------|---------|
| siRNA-Temozolomide Run2-DMSO | NM_004273 | CHST3 | carbohydrate (chondroitin 6) sulfotransferase 3           | 0.062393  | Inlier  |
| siRNA-Temozolomide Run1-DMSO | NM_004273 | CHST3 | carbohydrate (chondroitin 6) sulfotransferase 3           | 0.751899  | Inlier  |
| siRNA-Vinblastine Run1-DMSO  | NM_004273 | CHST3 | carbohydrate (chondroitin 6) sulfotransferase 3           | 6.601081  | Outlier |
| siRNA Disorazole DMSO Run2   | NM_004273 | CHST3 | carbohydrate (chondroitin 6) sulfotransferase 3           | 7.647923  | Outlier |
| siRNA-Temozolomide Run2-DMSO | NM_005769 | CHST4 | carbohydrate (N-acetylglucosamine 6-O) sulfotransferase 4 | -1.665115 | Inlier  |
| siRNA-Temozolomide Run3-DMSO | NM_005769 | CHST4 | carbohydrate (N-acetylglucosamine 6-O) sulfotransferase 4 | -1.042241 | Inlier  |
| siRNA-Temozolomide Run1-DMSO | NM_005769 | CHST4 | carbohydrate (N-acetylglucosamine 6-O) sulfotransferase 4 | -0.306759 | Inlier  |
| siRNA-Vinblastine Run2-DMSO  | NM_005769 | CHST4 | carbohydrate (N-acetylglucosamine 6-O) sulfotransferase 4 | -0.0214   | Inlier  |

Identification of Survival Genes in Human Glioblastoma Cells Using siRNA Screening

Nikhil G Thaker, Fang Zhang, Peter R. McDonald, Tong Ying Shun, Michael D Lewen, Ian F. Pollack, and John S. Lazo

Molecular Pharmacology

|                              |               |       |                                                           |           |        |
|------------------------------|---------------|-------|-----------------------------------------------------------|-----------|--------|
| siRNA Disorazole DMSO Run3   | NM_0057<br>69 | CHST4 | carbohydrate (N-acetylglucosamine 6-O) sulfotransferase 4 | 0.0214    | Inlier |
| siRNA Disorazole DMSO Run1   | NM_0057<br>69 | CHST4 | carbohydrate (N-acetylglucosamine 6-O) sulfotransferase 4 | 0.027672  | Inlier |
| siRNA Disorazole DMSO Run2   | NM_0057<br>69 | CHST4 | carbohydrate (N-acetylglucosamine 6-O) sulfotransferase 4 | 1.887401  | Inlier |
| siRNA-Vinblastine Run1-DMSO  | NM_0057<br>69 | CHST4 | carbohydrate (N-acetylglucosamine 6-O) sulfotransferase 4 | 2.616302  | Inlier |
| siRNA-Temozolomide Run3-DMSO | NM_0121<br>26 | CHST5 | carbohydrate (N-acetylglucosamine 6-O) sulfotransferase 5 | -0.945295 | Inlier |
| siRNA-Temozolomide Run1-DMSO | NM_0121<br>26 | CHST5 | carbohydrate (N-acetylglucosamine 6-O) sulfotransferase 5 | -0.699419 | Inlier |
| siRNA-Temozolomide Run2-DMSO | NM_0121<br>26 | CHST5 | carbohydrate (N-acetylglucosamine 6-O) sulfotransferase 5 | -0.649581 | Inlier |

Identification of Survival Genes in Human Glioblastoma Cells Using siRNA Screening

Nikhil G Thaker, Fang Zhang, Peter R. McDonald, Tong Ying Shun, Michael D Lewen, Ian F. Pollack, and John S. Lazo

Molecular Pharmacology

|                             |               |       |                                                           |           |         |
|-----------------------------|---------------|-------|-----------------------------------------------------------|-----------|---------|
| siRNA-Vinblastine Run2-DMSO | NM_0121<br>26 | CHST5 | carbohydrate (N-acetylglucosamine 6-O) sulfotransferase 5 | -0.094034 | Inlier  |
| siRNA Disorazole DMSO Run1  | NM_0121<br>26 | CHST5 | carbohydrate (N-acetylglucosamine 6-O) sulfotransferase 5 | 0.094034  | Inlier  |
| siRNA Disorazole DMSO Run3  | NM_0121<br>26 | CHST5 | carbohydrate (N-acetylglucosamine 6-O) sulfotransferase 5 | 0.352593  | Inlier  |
| siRNA Disorazole DMSO Run2  | NM_0121<br>26 | CHST5 | carbohydrate (N-acetylglucosamine 6-O) sulfotransferase 5 | 4.373171  | Outlier |
| siRNA-Vinblastine Run1-DMSO | NM_0121<br>26 | CHST5 | carbohydrate (N-acetylglucosamine 6-O) sulfotransferase 5 | 4.660789  | Outlier |
| siRNA Disorazole DMSO Run1  | NM_0216<br>15 | CHST6 | carbohydrate (N-acetylglucosamine 6-O) sulfotransferase 6 | -1.002609 | Inlier  |
| siRNA-Vinblastine Run2-DMSO | NM_0216<br>15 | CHST6 | carbohydrate (N-acetylglucosamine 6-O) sulfotransferase 6 | -0.643428 | Inlier  |

Identification of Survival Genes in Human Glioblastoma Cells Using siRNA Screening  
 Nikhil G Thaker, Fang Zhang, Peter R. McDonald, Tong Ying Shun, Michael D Lewen, Ian F. Pollack, and John S. Lazo

Molecular Pharmacology

|                              |               |       |                                                           |           |        |
|------------------------------|---------------|-------|-----------------------------------------------------------|-----------|--------|
| siRNA Disorazole DMSO Run3   | NM_0216<br>15 | CHST6 | carbohydrate (N-acetylglucosamine 6-O) sulfotransferase 6 | -0.553361 | Inlier |
| siRNA-Temozolomide Run1-DMSO | NM_0216<br>15 | CHST6 | carbohydrate (N-acetylglucosamine 6-O) sulfotransferase 6 | -0.512036 | Inlier |
| siRNA-Temozolomide Run3-DMSO | NM_0216<br>15 | CHST6 | carbohydrate (N-acetylglucosamine 6-O) sulfotransferase 6 | 0.512035  | Inlier |
| siRNA-Vinblastine Run1-DMSO  | NM_0216<br>15 | CHST6 | carbohydrate (N-acetylglucosamine 6-O) sulfotransferase 6 | 0.705572  | Inlier |
| siRNA Disorazole DMSO Run2   | NM_0216<br>15 | CHST6 | carbohydrate (N-acetylglucosamine 6-O) sulfotransferase 6 | 0.771167  | Inlier |
| siRNA-Temozolomide Run2-DMSO | NM_0216<br>15 | CHST6 | carbohydrate (N-acetylglucosamine 6-O) sulfotransferase 6 | 0.931578  | Inlier |
| siRNA-Temozolomide Run3-DMSO | NM_0198<br>86 | CHST7 | sulfotransferase 7                                        | -1.184183 | Inlier |

Identification of Survival Genes in Human Glioblastoma Cells Using siRNA Screening

Nikhil G Thaker, Fang Zhang, Peter R. McDonald, Tong Ying Shun, Michael D Lewen, Ian F. Pollack, and John S. Lazo

Molecular Pharmacology

|                              |               |       |                                                           |           |        |
|------------------------------|---------------|-------|-----------------------------------------------------------|-----------|--------|
| siRNA-Vinblastine Run2-DMSO  | NM_0198<br>86 | CHST7 | carbohydrate (N-acetylglucosamine 6-O) sulfotransferase 7 | -0.860896 | Inlier |
| siRNA Disorazole DMSO Run1   | NM_0198<br>86 | CHST7 | carbohydrate (N-acetylglucosamine 6-O) sulfotransferase 7 | -0.670469 | Inlier |
| siRNA-Temozolomide Run1-DMSO | NM_0198<br>86 | CHST7 | carbohydrate (N-acetylglucosamine 6-O) sulfotransferase 7 | -0.184763 | Inlier |
| siRNA Disorazole DMSO Run3   | NM_0198<br>86 | CHST7 | carbohydrate (N-acetylglucosamine 6-O) sulfotransferase 7 | 0.184763  | Inlier |
| siRNA Disorazole DMSO Run2   | NM_0198<br>86 | CHST7 | carbohydrate (N-acetylglucosamine 6-O) sulfotransferase 7 | 0.516859  | Inlier |
| siRNA-Temozolomide Run2-DMSO | NM_0198<br>86 | CHST7 | carbohydrate (N-acetylglucosamine 6-O) sulfotransferase 7 | 0.678531  | Inlier |
| siRNA-Vinblastine Run1-DMSO  | NM_0198<br>86 | CHST7 | carbohydrate (N-acetylglucosamine 6-O) sulfotransferase 7 | 0.701728  | Inlier |



Identification of Survival Genes in Human Glioblastoma Cells Using siRNA Screening

Nikhil G Thaker, Fang Zhang, Peter R. McDonald, Tong Ying Shun, Michael D Lewen, Ian F. Pollack, and John S. Lazo

Molecular Pharmacology

|                              |               |       |                                                             |           |        |
|------------------------------|---------------|-------|-------------------------------------------------------------|-----------|--------|
| siRNA Disorazole DMSO Run1   | NM_0224<br>67 | CHST8 | carbohydrate (N-acetylgalactosamine 4-0) sulfotransferase 8 | -0.838477 | Inlier |
| siRNA-Temozolomide Run1-DMSO | NM_0224<br>67 | CHST8 | carbohydrate (N-acetylgalactosamine 4-0) sulfotransferase 8 | -0.510523 | Inlier |
| siRNA Disorazole DMSO Run3   | NM_0224<br>67 | CHST8 | carbohydrate (N-acetylgalactosamine 4-0) sulfotransferase 8 | -0.207971 | Inlier |
| siRNA-Vinblastine Run2-DMSO  | NM_0224<br>67 | CHST8 | carbohydrate (N-acetylgalactosamine 4-0) sulfotransferase 8 | -0.092543 | Inlier |
| siRNA-Temozolomide Run2-DMSO | NM_0224<br>67 | CHST8 | carbohydrate (N-acetylgalactosamine 4-0) sulfotransferase 8 | 0.092543  | Inlier |
| siRNA-Temozolomide Run3-DMSO | NM_0224<br>67 | CHST8 | carbohydrate (N-acetylgalactosamine 4-0) sulfotransferase 8 | 0.983165  | Inlier |
| siRNA Disorazole DMSO Run2   | NM_0224<br>67 | CHST8 | carbohydrate (N-acetylgalactosamine 4-0) sulfotransferase 8 | 0.994119  | Inlier |

Identification of Survival Genes in Human Glioblastoma Cells Using siRNA Screening

Nikhil G Thaker, Fang Zhang, Peter R. McDonald, Tong Ying Shun, Michael D Lewen, Ian F. Pollack, and John S. Lazo

Molecular Pharmacology

|                              |           |       |                                                             |           |        |
|------------------------------|-----------|-------|-------------------------------------------------------------|-----------|--------|
| siRNA-Vinblastine Run1-DMSO  | NM_022467 | CHST8 | carbohydrate (N-acetylgalactosamine 4-0) sulfotransferase 8 | 1.189937  | Inlier |
| siRNA-Temozolomide Run2-DMSO | NM_031422 | CHST9 | carbohydrate (N-acetylgalactosamine 4-0) sulfotransferase 9 | -1.419446 | Inlier |
| siRNA-Vinblastine Run2-DMSO  | NM_031422 | CHST9 | carbohydrate (N-acetylgalactosamine 4-0) sulfotransferase 9 | -0.53879  | Inlier |
| siRNA-Temozolomide Run3-DMSO | NM_031422 | CHST9 | carbohydrate (N-acetylgalactosamine 4-0) sulfotransferase 9 | -0.205891 | Inlier |
| siRNA-Temozolomide Run1-DMSO | NM_031422 | CHST9 | carbohydrate (N-acetylgalactosamine 4-0) sulfotransferase 9 | -0.148814 | Inlier |
| siRNA Disorazole DMSO Run1   | NM_031422 | CHST9 | carbohydrate (N-acetylgalactosamine 4-0) sulfotransferase 9 | 0.148814  | Inlier |
| siRNA Disorazole DMSO Run3   | NM_031422 | CHST9 | carbohydrate (N-acetylgalactosamine 4-0) sulfotransferase 9 | 0.81021   | Inlier |

Identification of Survival Genes in Human Glioblastoma Cells Using siRNA Screening  
 Nikhil G Thaker, Fang Zhang, Peter R. McDonald, Tong Ying Shun, Michael D Lewen, Ian F. Pollack, and John S. Lazo

Molecular Pharmacology

|                              |               |       |                                                             |           |         |
|------------------------------|---------------|-------|-------------------------------------------------------------|-----------|---------|
| siRNA Disorazole DMSO Run2   | NM_0314<br>22 | CHST9 | carbohydrate (N-acetylgalactosamine 4-0) sulfotransferase 9 | 3.345883  | Inlier  |
| siRNA-Vinblastine Run1-DMSO  | NM_0314<br>22 | CHST9 | carbohydrate (N-acetylgalactosamine 4-0) sulfotransferase 9 | 3.600456  | Outlier |
| siRNA-Temozolomide Run3-DMSO | NM_0012<br>78 | CHUK  | conserved helix-loop-helix ubiquitous kinase                | -1.904783 | Inlier  |
| siRNA-Temozolomide Run2-DMSO | NM_0012<br>78 | CHUK  | conserved helix-loop-helix ubiquitous kinase                | -1.331437 | Inlier  |
| siRNA-Temozolomide Run1-DMSO | NM_0012<br>78 | CHUK  | conserved helix-loop-helix ubiquitous kinase                | -0.354787 | Inlier  |
| siRNA Disorazole DMSO Run3   | NM_0012<br>78 | CHUK  | conserved helix-loop-helix ubiquitous kinase                | -0.168978 | Inlier  |
| siRNA Disorazole DMSO Run2   | NM_0012<br>78 | CHUK  | conserved helix-loop-helix ubiquitous kinase                | 0.168978  | Inlier  |
| siRNA Disorazole DMSO Run1   | NM_0012<br>78 | CHUK  | conserved helix-loop-helix ubiquitous kinase                | 0.641806  | Inlier  |
| siRNA-Vinblastine Run2-DMSO  | NM_0012<br>78 | CHUK  | ubiquitous kinase                                           | 0.707194  | Inlier  |

Identification of Survival Genes in Human Glioblastoma Cells Using siRNA Screening

Nikhil G Thaker, Fang Zhang, Peter R. McDonald, Tong Ying Shun, Michael D Lewen, Ian F. Pollack, and John S. Lazo

Molecular Pharmacology

| siRNA Treatment              | Gene ID   | Gene Name | Protein Description                          | Log Fold Change | Outlier Status |
|------------------------------|-----------|-----------|----------------------------------------------|-----------------|----------------|
| siRNA-Vinblastine Run1-DMSO  | NM_001278 | CHUK      | conserved helix-loop-helix ubiquitous kinase | 1.338708        | Inlier         |
| siRNA-Temozolomide Run2-DMSO | NM_006383 | CIB2      | calcium and integrin binding family member 2 | -1.674136       | Inlier         |
| siRNA Disorazole DMSO Run1   | NM_006383 | CIB2      | calcium and integrin binding family member 2 | -0.57057        | Inlier         |
| siRNA-Temozolomide Run1-DMSO | NM_006383 | CIB2      | calcium and integrin binding family member 2 | -0.488407       | Inlier         |
| siRNA Disorazole DMSO Run2   | NM_006383 | CIB2      | calcium and integrin binding family member 2 | -0.132752       | Inlier         |
| siRNA-Temozolomide Run3-DMSO | NM_006383 | CIB2      | calcium and integrin binding family member 2 | 0.132752        | Inlier         |
| siRNA-Vinblastine Run1-DMSO  | NM_006383 | CIB2      | calcium and integrin binding family member 2 | 0.77843         | Inlier         |
| siRNA-Vinblastine Run2-DMSO  | NM_006383 | CIB2      | calcium and integrin binding family member 2 | 1.01806         | Inlier         |

Identification of Survival Genes in Human Glioblastoma Cells Using siRNA Screening  
 Nikhil G Thaker, Fang Zhang, Peter R. McDonald, Tong Ying Shun, Michael D Lewen, Ian F. Pollack, and John S. Lazo

Molecular Pharmacology

| siRNA Treatment              | Gene ID | Accession | Family | Score     | Outlier |
|------------------------------|---------|-----------|--------|-----------|---------|
| siRNA Disorazole DMSO Run3   | NM_0063 | 83        | CIB2   | 1.600308  | Inlier  |
| siRNA Disorazole DMSO Run2   | NM_0541 | 13        | CIB3   | -1.88772  | Inlier  |
| siRNA-Temozolomide Run3-DMSO | NM_0541 | 13        | CIB3   | -1.437868 | Inlier  |
| siRNA-Temozolomide Run1-DMSO | NM_0541 | 13        | CIB3   | -0.94638  | Inlier  |
| siRNA Disorazole DMSO Run1   | NM_0541 | 13        | CIB3   | -0.004686 | Inlier  |
| siRNA-Vinblastine Run1-DMSO  | NM_0541 | 13        | CIB3   | 0.004687  | Inlier  |
| siRNA-Temozolomide Run2-DMSO | NM_0541 | 13        | CIB3   | 0.365801  | Inlier  |
| siRNA-Vinblastine Run2-DMSO  | NM_0541 | 13        | CIB3   | 0.40262   | Inlier  |

calcium  
and  
integrin  
binding  
family

member 2

calcium  
and  
integrin  
binding  
family

member 3

Identification of Survival Genes in Human Glioblastoma Cells Using siRNA Screening  
 Nikhil G Thaker, Fang Zhang, Peter R. McDonald, Tong Ying Shun, Michael D Lewen, Ian F. Pollack, and John S. Lazo

Molecular Pharmacology

|                              |               |      |                                                                       |           |        |
|------------------------------|---------------|------|-----------------------------------------------------------------------|-----------|--------|
| siRNA Disorazole DMSO Run3   | NM_0541<br>13 | CIB3 | calcium and integrin binding family member 3                          | 2.087256  | Inlier |
| siRNA-Temozolomide Run2-DMSO | NM_0036<br>13 | CILP | cartilage intermediate layer protein, nucleotide pyrophosphohydrolase | -0.9038   | Inlier |
| siRNA-Temozolomide Run3-DMSO | NM_0036<br>13 | CILP | cartilage intermediate layer protein, nucleotide pyrophosphohydrolase | -0.834305 | Inlier |
| siRNA-Temozolomide Run1-DMSO | NM_0036<br>13 | CILP | cartilage intermediate layer protein, nucleotide pyrophosphohydrolase | -0.514695 | Inlier |
| siRNA Disorazole DMSO Run3   | NM_0036<br>13 | CILP | cartilage intermediate layer protein, nucleotide pyrophosphohydrolase | -0.085834 | Inlier |
| siRNA Disorazole DMSO Run1   | NM_0036<br>13 | CILP | cartilage intermediate layer protein, nucleotide pyrophosphohydrolase | 0.085833  | Inlier |

Identification of Survival Genes in Human Glioblastoma Cells Using siRNA Screening

Nikhil G Thaker, Fang Zhang, Peter R. McDonald, Tong Ying Shun, Michael D Lewen, Ian F. Pollack, and John S. Lazo

Molecular Pharmacology

|                              |           |      |                                                                       |           |        |
|------------------------------|-----------|------|-----------------------------------------------------------------------|-----------|--------|
| siRNA-Vinblastine Run2-DMSO  | NM_003613 | CILP | cartilage intermediate layer protein, nucleotide pyrophosphohydrolase | 0.189505  | Inlier |
| siRNA-Vinblastine Run1-DMSO  | NM_003613 | CILP | cartilage intermediate layer protein, nucleotide pyrophosphohydrolase | 1.516083  | Inlier |
| siRNA Disorazole DMSO Run2   | NM_003613 | CILP | cartilage intermediate layer protein, nucleotide pyrophosphohydrolase | 2.026043  | Inlier |
| siRNA-Temozolomide Run3-DMSO | NM_007174 | CIT  | citron (rho-interacting, serine/threonine kinase 21)                  | -1.035946 | Inlier |
| siRNA-Temozolomide Run2-DMSO | NM_007174 | CIT  | citron (rho-interacting, serine/threonine kinase 21)                  | -0.313054 | Inlier |
| siRNA Disorazole DMSO Run3   | NM_007174 | CIT  | citron (rho-interacting, serine/threonine kinase 21)                  | -0.221144 | Inlier |
| siRNA-Temozolomide Run1-DMSO | NM_007174 | CIT  | citron (rho-interacting, serine/threonine kinase 21)                  | -0.194605 | Inlier |

Identification of Survival Genes in Human Glioblastoma Cells Using siRNA Screening  
 Nikhil G Thaker, Fang Zhang, Peter R. McDonald, Tong Ying Shun, Michael D Lewen, Ian F. Pollack, and John S. Lazo  
 Molecular Pharmacology

|                              |               |     |                                                                |           |         |
|------------------------------|---------------|-----|----------------------------------------------------------------|-----------|---------|
| siRNA Disorazole DMSO Run2   | NM_0071<br>74 | CIT | citron (rho-interacting<br>,<br>serine/threonine<br>kinase 21) | 0.194605  | Inlier  |
| siRNA Disorazole DMSO Run1   | NM_0071<br>74 | CIT | citron (rho-interacting<br>,<br>serine/threonine<br>kinase 21) | 5.714843  | Outlier |
| siRNA-Vinblastine Run1-DMSO  | NM_0071<br>74 | CIT | citron (rho-interacting<br>,<br>serine/threonine<br>kinase 21) | 7.590771  | Outlier |
| siRNA-Vinblastine Run2-DMSO  | NM_0071<br>74 | CIT | citron (rho-interacting<br>,<br>serine/threonine<br>kinase 21) | 8.596907  | Outlier |
| siRNA Disorazole DMSO Run2   | NM_0018<br>23 | CKB | creatine<br>kinase,<br>brain                                   | -2.431588 | Inlier  |
| siRNA-Temozolomide Run3-DMSO | NM_0018<br>23 | CKB | creatine<br>kinase,<br>brain                                   | -2.35126  | Inlier  |
| siRNA-Temozolomide Run1-DMSO | NM_0018<br>23 | CKB | creatine<br>kinase,<br>brain                                   | -0.498514 | Inlier  |
| siRNA-Temozolomide Run2-DMSO | NM_0018<br>23 | CKB | creatine<br>kinase,<br>brain                                   | -0.148447 | Inlier  |
| siRNA Disorazole DMSO Run1   | NM_0018<br>23 | CKB | creatine<br>kinase,<br>brain                                   | 0.148446  | Inlier  |
| siRNA-Vinblastine Run1-DMSO  | NM_0018<br>23 | CKB | creatine<br>kinase,<br>brain                                   | 0.287197  | Inlier  |
| siRNA-Vinblastine Run2-DMSO  | NM_0018<br>23 | CKB | creatine<br>kinase,<br>brain                                   | 0.850486  | Inlier  |
| siRNA Disorazole DMSO Run3   | NM_0018<br>23 | CKB | creatine<br>kinase,<br>brain                                   | 1.033354  | Inlier  |



Identification of Survival Genes in Human Glioblastoma Cells Using siRNA Screening  
 Nikhil G Thaker, Fang Zhang, Peter R. McDonald, Tong Ying Shun, Michael D Lewen, Ian F. Pollack, and John S. Lazo

Molecular Pharmacology

|                                  |               |       |                                                                |           |        |
|----------------------------------|---------------|-------|----------------------------------------------------------------|-----------|--------|
| siRNA Disorazole DMSO Run2       | NM_0018<br>24 | CKM   | creatine<br>kinase,<br>muscle                                  | -1.916883 | Inlier |
| siRNA-Temozolomide Run3-<br>DMSO | NM_0018<br>24 | CKM   | creatine<br>kinase,<br>muscle                                  | -1.010738 | Inlier |
| siRNA-Temozolomide Run1-<br>DMSO | NM_0018<br>24 | CKM   | creatine<br>kinase,<br>muscle                                  | -0.338262 | Inlier |
| siRNA Disorazole DMSO Run1       | NM_0018<br>24 | CKM   | creatine<br>kinase,<br>muscle                                  | -0.013162 | Inlier |
| siRNA-Temozolomide Run2-<br>DMSO | NM_0018<br>24 | CKM   | creatine<br>kinase,<br>muscle                                  | 0.013162  | Inlier |
| siRNA-Vinblastine Run1-<br>DMSO  | NM_0018<br>24 | CKM   | creatine<br>kinase,<br>muscle                                  | 0.284349  | Inlier |
| siRNA-Vinblastine Run2-<br>DMSO  | NM_0018<br>24 | CKM   | creatine<br>kinase,<br>muscle                                  | 1.234036  | Inlier |
| siRNA Disorazole DMSO Run3       | NM_0018<br>24 | CKM   | creatine<br>kinase,<br>muscle                                  | 1.990579  | Inlier |
| siRNA Disorazole DMSO Run2       | NM_0209<br>90 | CKMT1 | creatine<br>kinase,<br>mitochond<br>rial 1<br>(ubiquitou<br>s) | -1.52326  | Inlier |
| siRNA-Temozolomide Run3-<br>DMSO | NM_0209<br>90 | CKMT1 | creatine<br>kinase,<br>mitochond<br>rial 1<br>(ubiquitou<br>s) | -1.102656 | Inlier |
| siRNA-Temozolomide Run1-<br>DMSO | NM_0209<br>90 | CKMT1 | creatine<br>kinase,<br>mitochond<br>rial 1<br>(ubiquitou<br>s) | -0.629373 | Inlier |
| siRNA-Temozolomide Run2-<br>DMSO | NM_0209<br>90 | CKMT1 | creatine<br>kinase,<br>mitochond<br>rial 1<br>(ubiquitou<br>s) | -0.248647 | Inlier |

Identification of Survival Genes in Human Glioblastoma Cells Using siRNA Screening  
 Nikhil G Thaker, Fang Zhang, Peter R. McDonald, Tong Ying Shun, Michael D Lewen, Ian F. Pollack, and John S. Lazo

Molecular Pharmacology

|                              |               |       |                                               |           |        |
|------------------------------|---------------|-------|-----------------------------------------------|-----------|--------|
| siRNA-Vinblastine Run1-DMSO  | NM_0209<br>90 | CKMT1 | creatine kinase, mitochondrial 1 (ubiquitous) | 0.248647  | Inlier |
| siRNA Disorazole DMSO Run1   | NM_0209<br>90 | CKMT1 | creatine kinase, mitochondrial 1 (ubiquitous) | 0.453898  | Inlier |
| siRNA-Vinblastine Run2-DMSO  | NM_0209<br>90 | CKMT1 | creatine kinase, mitochondrial 1 (ubiquitous) | 0.719627  | Inlier |
| siRNA Disorazole DMSO Run3   | NM_0209<br>90 | CKMT1 | creatine kinase, mitochondrial 1 (ubiquitous) | 1.042825  | Inlier |
| siRNA-Temozolomide Run3-DMSO | NM_0018<br>25 | CKMT2 | creatine kinase, mitochondrial 2 (sarcomeric) | -0.714172 | Inlier |
| siRNA Disorazole DMSO Run2   | NM_0018<br>25 | CKMT2 | creatine kinase, mitochondrial 2 (sarcomeric) | -0.634828 | Inlier |
| siRNA-Temozolomide Run1-DMSO | NM_0018<br>25 | CKMT2 | creatine kinase, mitochondrial 2 (sarcomeric) | -0.181628 | Inlier |
| siRNA-Temozolomide Run2-DMSO | NM_0018<br>25 | CKMT2 | creatine kinase, mitochondrial 2 (sarcomeric) | -0.094678 | Inlier |

Identification of Survival Genes in Human Glioblastoma Cells Using siRNA Screening  
 Nikhil G Thaker, Fang Zhang, Peter R. McDonald, Tong Ying Shun, Michael D Lewen, Ian F. Pollack, and John S. Lazo

Molecular Pharmacology

|                                  |               |       |                                                                |           |         |
|----------------------------------|---------------|-------|----------------------------------------------------------------|-----------|---------|
| siRNA Disorazole DMSO Run3       | NM_0018<br>25 | CKMT2 | creatine<br>kinase,<br>mitochond<br>rial 2<br>(sarcomeri<br>c) | 0.094678  | Inlier  |
| siRNA Disorazole DMSO Run1       | NM_0018<br>25 | CKMT2 | creatine<br>kinase,<br>mitochond<br>rial 2<br>(sarcomeri<br>c) | 0.733328  | Inlier  |
| siRNA-Vinblastine Run2-<br>DMSO  | NM_0018<br>25 | CKMT2 | creatine<br>kinase,<br>mitochond<br>rial 2<br>(sarcomeri<br>c) | 1.067026  | Inlier  |
| siRNA-Vinblastine Run1-<br>DMSO  | NM_0018<br>25 | CKMT2 | creatine<br>kinase,<br>mitochond<br>rial 2<br>(sarcomeri<br>c) | 1.607817  | Inlier  |
| siRNA Disorazole DMSO Run1       | NM_0018<br>26 | CKS1B | CDC28<br>protein<br>kinase<br>regulatory<br>subunit 1B         | -3.957902 | Outlier |
| siRNA-Temozolomide Run2-<br>DMSO | NM_0018<br>26 | CKS1B | CDC28<br>protein<br>kinase<br>regulatory<br>subunit 1B         | -0.688298 | Inlier  |
| siRNA-Temozolomide Run3-<br>DMSO | NM_0018<br>26 | CKS1B | CDC28<br>protein<br>kinase<br>regulatory<br>subunit 1B         | -0.660702 | Inlier  |
| siRNA-Vinblastine Run2-<br>DMSO  | NM_0018<br>26 | CKS1B | CDC28<br>protein<br>kinase<br>regulatory<br>subunit 1B         | -0.15603  | Inlier  |

Identification of Survival Genes in Human Glioblastoma Cells Using siRNA Screening  
 Nikhil G Thaker, Fang Zhang, Peter R. McDonald, Tong Ying Shun, Michael D Lewen, Ian F. Pollack, and John S. Lazo  
 Molecular Pharmacology

|                                  |               |       |                                                        |           |         |
|----------------------------------|---------------|-------|--------------------------------------------------------|-----------|---------|
| siRNA Disorazole DMSO Run3       | NM_0018<br>26 | CKS1B | CDC28<br>protein<br>kinase<br>regulatory<br>subunit 1B | 0.15603   | Inlier  |
| siRNA-Temozolomide Run1-<br>DMSO | NM_0018<br>26 | CKS1B | CDC28<br>protein<br>kinase<br>regulatory<br>subunit 1B | 0.396929  | Inlier  |
| siRNA-Vinblastine Run1-<br>DMSO  | NM_0018<br>26 | CKS1B | CDC28<br>protein<br>kinase<br>regulatory<br>subunit 1B | 6.565272  | Outlier |
| siRNA Disorazole DMSO Run2       | NM_0018<br>26 | CKS1B | CDC28<br>protein<br>kinase<br>regulatory<br>subunit 1B | 6.995006  | Outlier |
| siRNA-Temozolomide Run3-<br>DMSO | NM_0018<br>27 | CKS2  | CDC28<br>protein<br>kinase<br>regulatory<br>subunit 2  | -1.264676 | Inlier  |
| siRNA Disorazole DMSO Run3       | NM_0018<br>27 | CKS2  | CDC28<br>protein<br>kinase<br>regulatory<br>subunit 2  | -0.68204  | Inlier  |
| siRNA-Temozolomide Run2-<br>DMSO | NM_0018<br>27 | CKS2  | CDC28<br>protein<br>kinase<br>regulatory<br>subunit 2  | -0.66696  | Inlier  |
| siRNA-Vinblastine Run2-<br>DMSO  | NM_0018<br>27 | CKS2  | CDC28<br>protein<br>kinase<br>regulatory<br>subunit 2  | -0.345004 | Inlier  |
| siRNA Disorazole DMSO Run1       | NM_0018<br>27 | CKS2  | CDC28<br>protein<br>kinase<br>regulatory<br>subunit 2  | 0.345004  | Inlier  |

Identification of Survival Genes in Human Glioblastoma Cells Using siRNA Screening  
 Nikhil G Thaker, Fang Zhang, Peter R. McDonald, Tong Ying Shun, Michael D Lewen, Ian F. Pollack, and John S. Lazo

Molecular Pharmacology

| siRNA Treatment              | Gene      | Accession | Gene Symbol                                          | Gene Description | Value  | Category |
|------------------------------|-----------|-----------|------------------------------------------------------|------------------|--------|----------|
| siRNA-Temozolomide Run1-DMSO | NM_001827 | CKS2      | CDC28 protein kinase regulatory subunit 2            | 0.565234         | Inlier |          |
| siRNA-Vinblastine Run1-DMSO  | NM_001827 | CKS2      | CDC28 protein kinase regulatory subunit 2            | 0.894161         | Inlier |          |
| siRNA Disorazole DMSO Run2   | NM_001827 | CKS2      | CDC28 protein kinase regulatory subunit 2            | 1.227211         | Inlier |          |
| siRNA-Temozolomide Run3-DMSO | NM_001285 | CLCA1     | chloride channel, calcium activated, family member 1 | -2.720167        | Inlier |          |
| siRNA Disorazole DMSO Run1   | NM_001285 | CLCA1     | chloride channel, calcium activated, family member 1 | -1.578505        | Inlier |          |
| siRNA-Temozolomide Run2-DMSO | NM_001285 | CLCA1     | chloride channel, calcium activated, family member 1 | -0.972352        | Inlier |          |
| siRNA-Temozolomide Run1-DMSO | NM_001285 | CLCA1     | chloride channel, calcium activated, family member 1 | -0.006474        | Inlier |          |
| siRNA Disorazole DMSO Run3   | NM_001285 | CLCA1     | chloride channel, calcium activated, family member 1 | 0.006474         | Inlier |          |
| siRNA Disorazole DMSO Run2   | NM_001285 | CLCA1     | chloride channel, calcium activated, family member 1 | 0.159879         | Inlier |          |

Identification of Survival Genes in Human Glioblastoma Cells Using siRNA Screening  
 Nikhil G Thaker, Fang Zhang, Peter R. McDonald, Tong Ying Shun, Michael D Lewen, Ian F. Pollack, and John S. Lazo

Molecular Pharmacology

|                              |           |       |                                                      |           |        |
|------------------------------|-----------|-------|------------------------------------------------------|-----------|--------|
| siRNA-Vinblastine Run2-DMSO  | NM_001285 | CLCA1 | chloride channel, calcium activated, family member 1 | 0.528014  | Inlier |
| siRNA-Vinblastine Run1-DMSO  | NM_001285 | CLCA1 | chloride channel, calcium activated, family member 1 | 0.820986  | Inlier |
| siRNA Disorazole DMSO Run2   | NM_006536 | CLCA2 | chloride channel, calcium activated, family member 2 | -2.288031 | Inlier |
| siRNA Disorazole DMSO Run3   | NM_006536 | CLCA2 | chloride channel, calcium activated, family member 2 | -1.61315  | Inlier |
| siRNA-Temozolomide Run3-DMSO | NM_006536 | CLCA2 | chloride channel, calcium activated, family member 2 | -0.653414 | Inlier |
| siRNA-Temozolomide Run1-DMSO | NM_006536 | CLCA2 | chloride channel, calcium activated, family member 2 | -0.007475 | Inlier |
| siRNA-Temozolomide Run2-DMSO | NM_006536 | CLCA2 | chloride channel, calcium activated, family member 2 | 0.007474  | Inlier |
| siRNA-Vinblastine Run2-DMSO  | NM_006536 | CLCA2 | chloride channel, calcium activated, family member 2 | 0.400199  | Inlier |

Identification of Survival Genes in Human Glioblastoma Cells Using siRNA Screening  
 Nikhil G Thaker, Fang Zhang, Peter R. McDonald, Tong Ying Shun, Michael D Lewen, Ian F. Pollack, and John S. Lazo

Molecular Pharmacology

|                              |               |       |                                                      |           |        |
|------------------------------|---------------|-------|------------------------------------------------------|-----------|--------|
| siRNA Disorazole DMSO Run1   | NM_0065<br>36 | CLCA2 | chloride channel, calcium activated, family member 2 | 0.695586  | Inlier |
| siRNA-Vinblastine Run1-DMSO  | NM_0065<br>36 | CLCA2 | chloride channel, calcium activated, family member 2 | 0.955223  | Inlier |
| siRNA-Temozolomide Run3-DMSO | NM_0049<br>21 | CLCA3 | chloride channel, calcium activated, family member 3 | -1.761241 | Inlier |
| siRNA Disorazole DMSO Run3   | NM_0049<br>21 | CLCA3 | chloride channel, calcium activated, family member 3 | -1.168771 | Inlier |
| siRNA-Temozolomide Run2-DMSO | NM_0049<br>21 | CLCA3 | chloride channel, calcium activated, family member 3 | -0.713533 | Inlier |
| siRNA Disorazole DMSO Run1   | NM_0049<br>21 | CLCA3 | chloride channel, calcium activated, family member 3 | -0.049356 | Inlier |
| siRNA Disorazole DMSO Run2   | NM_0049<br>21 | CLCA3 | chloride channel, calcium activated, family member 3 | 0.049356  | Inlier |
| siRNA-Temozolomide Run1-DMSO | NM_0049<br>21 | CLCA3 | chloride channel, calcium activated, family member 3 | 0.491392  | Inlier |

Identification of Survival Genes in Human Glioblastoma Cells Using siRNA Screening  
 Nikhil G Thaker, Fang Zhang, Peter R. McDonald, Tong Ying Shun, Michael D Lewen, Ian F. Pollack, and John S. Lazo

Molecular Pharmacology

|                              |               |       |                                                      |           |        |
|------------------------------|---------------|-------|------------------------------------------------------|-----------|--------|
| siRNA-Vinblastine Run1-DMSO  | NM_0049<br>21 | CLCA3 | chloride channel, calcium activated, family member 3 | 0.635467  | Inlier |
| siRNA-Vinblastine Run2-DMSO  | NM_0049<br>21 | CLCA3 | chloride channel, calcium activated, family member 3 | 0.848319  | Inlier |
| siRNA-Temozolomide Run3-DMSO | NM_0121<br>28 | CLCA4 | chloride channel, calcium activated, family member 4 | -1.409953 | Inlier |
| siRNA-Temozolomide Run2-DMSO | NM_0121<br>28 | CLCA4 | chloride channel, calcium activated, family member 4 | -0.916397 | Inlier |
| siRNA Disorazole DMSO Run2   | NM_0121<br>28 | CLCA4 | chloride channel, calcium activated, family member 4 | -0.790274 | Inlier |
| siRNA Disorazole DMSO Run3   | NM_0121<br>28 | CLCA4 | chloride channel, calcium activated, family member 4 | -0.447253 | Inlier |
| siRNA Disorazole DMSO Run1   | NM_0121<br>28 | CLCA4 | chloride channel, calcium activated, family member 4 | 0.447253  | Inlier |
| siRNA-Temozolomide Run1-DMSO | NM_0121<br>28 | CLCA4 | chloride channel, calcium activated, family member 4 | 0.502241  | Inlier |



Identification of Survival Genes in Human Glioblastoma Cells Using siRNA Screening

Nikhil G Thaker, Fang Zhang, Peter R. McDonald, Tong Ying Shun, Michael D Lewen, Ian F. Pollack, and John S. Lazo

Molecular Pharmacology

|                              |               |       |                                                                           |           |        |
|------------------------------|---------------|-------|---------------------------------------------------------------------------|-----------|--------|
| siRNA-Vinblastine Run2-DMSO  | NM_0121<br>28 | CLCA4 | chloride channel, calcium activated, family member 4                      | 0.558726  | Inlier |
| siRNA-Vinblastine Run1-DMSO  | NM_0121<br>28 | CLCA4 | chloride channel, calcium activated, family member 4                      | 0.888242  | Inlier |
| siRNA Disorazole DMSO Run2   | NM_0000<br>83 | CLCN1 | chloride channel 1, skeletal muscle (Thomsen disease, autosomal dominant) | -1.473555 | Inlier |
| siRNA-Temozolomide Run3-DMSO | NM_0000<br>83 | CLCN1 | chloride channel 1, skeletal muscle (Thomsen disease, autosomal dominant) | -1.450896 | Inlier |
| siRNA Disorazole DMSO Run3   | NM_0000<br>83 | CLCN1 | chloride channel 1, skeletal muscle (Thomsen disease, autosomal dominant) | -1.096602 | Inlier |
| siRNA-Temozolomide Run1-DMSO | NM_0000<br>83 | CLCN1 | chloride channel 1, skeletal muscle (Thomsen disease, autosomal dominant) | -0.025299 | Inlier |

Identification of Survival Genes in Human Glioblastoma Cells Using siRNA Screening  
 Nikhil G Thaker, Fang Zhang, Peter R. McDonald, Tong Ying Shun, Michael D Lewen, Ian F. Pollack, and John S. Lazo  
 Molecular Pharmacology

|                              |           |       |                                                                           |           |        |
|------------------------------|-----------|-------|---------------------------------------------------------------------------|-----------|--------|
| siRNA-Temozolomide Run2-DMSO | NM_000083 | CLCN1 | chloride channel 1, skeletal muscle (Thomsen disease, autosomal dominant) | 0.025299  | Inlier |
| siRNA Disorazole DMSO Run1   | NM_000083 | CLCN1 | chloride channel 1, skeletal muscle (Thomsen disease, autosomal dominant) | 0.244035  | Inlier |
| siRNA-Vinblastine Run1-DMSO  | NM_000083 | CLCN1 | chloride channel 1, skeletal muscle (Thomsen disease, autosomal dominant) | 0.604243  | Inlier |
| siRNA-Vinblastine Run2-DMSO  | NM_000083 | CLCN1 | chloride channel 1, skeletal muscle (Thomsen disease, autosomal dominant) | 0.744757  | Inlier |
| siRNA Disorazole DMSO Run2   | NM_004366 | CLCN2 | chloride channel 2                                                        | -1.188014 | Inlier |
| siRNA-Temozolomide Run3-DMSO | NM_004366 | CLCN2 | chloride channel 2                                                        | -1.129908 | Inlier |
| siRNA Disorazole DMSO Run3   | NM_004366 | CLCN2 | chloride channel 2                                                        | -0.676073 | Inlier |
| siRNA-Temozolomide Run2-DMSO | NM_004366 | CLCN2 | chloride channel 2                                                        | -0.23738  | Inlier |
| siRNA-Temozolomide Run1-DMSO | NM_004366 | CLCN2 | chloride channel 2                                                        | 0.237379  | Inlier |
| siRNA-Vinblastine Run2-DMSO  | NM_004366 | CLCN2 | chloride channel 2                                                        | 0.550132  | Inlier |

Identification of Survival Genes in Human Glioblastoma Cells Using siRNA Screening

Nikhil G Thaker, Fang Zhang, Peter R. McDonald, Tong Ying Shun, Michael D Lewen, Ian F. Pollack, and John S.

Lazo

|                                  |               |       |                                            |           |         |
|----------------------------------|---------------|-------|--------------------------------------------|-----------|---------|
| siRNA-Vinblastine Run1-<br>DMSO  | NM_0043<br>66 | CLCN2 | chloride<br>channel 2                      | 0.672927  | Inlier  |
|                                  | NM_0043       |       | chloride                                   |           |         |
| siRNA Disorazole DMSO Run1       | 66            | CLCN2 | channel 2                                  | 0.809116  | Inlier  |
| siRNA-Temozolomide Run3-<br>DMSO | NM_1738<br>72 | CLCN3 | chloride<br>channel 3                      | -0.834436 | Inlier  |
| siRNA-Temozolomide Run2-<br>DMSO | NM_1738<br>72 | CLCN3 | chloride<br>channel 3                      | -0.514565 | Inlier  |
|                                  | NM_1738       |       | chloride                                   |           |         |
| siRNA Disorazole DMSO Run3       | 72            | CLCN3 | channel 3                                  | -0.278638 | Inlier  |
|                                  | NM_1738       |       | chloride                                   |           |         |
| siRNA Disorazole DMSO Run2       | 72            | CLCN3 | channel 3                                  | -0.043956 | Inlier  |
| siRNA-Temozolomide Run1-<br>DMSO | NM_1738<br>72 | CLCN3 | chloride<br>channel 3                      | 0.043957  | Inlier  |
|                                  | NM_1738       |       | chloride                                   |           |         |
| siRNA Disorazole DMSO Run1       | 72            | CLCN3 | channel 3                                  | 0.874679  | Inlier  |
| siRNA-Vinblastine Run1-<br>DMSO  | NM_1738<br>72 | CLCN3 | chloride<br>channel 3                      | 3.342071  | Inlier  |
| siRNA-Vinblastine Run2-<br>DMSO  | NM_1738<br>72 | CLCN3 | chloride<br>channel 3                      | 5.128082  | Outlier |
|                                  | NM_0018       |       | chloride                                   |           |         |
| siRNA Disorazole DMSO Run2       | 30            | CLCN4 | channel 4                                  | -1.688531 | Inlier  |
|                                  | NM_0018       |       | chloride                                   |           |         |
| siRNA Disorazole DMSO Run3       | 30            | CLCN4 | channel 4                                  | -1.008355 | Inlier  |
| siRNA-Temozolomide Run3-<br>DMSO | NM_0018<br>30 | CLCN4 | chloride<br>channel 4                      | -0.885221 | Inlier  |
| siRNA-Temozolomide Run2-<br>DMSO | NM_0018<br>30 | CLCN4 | chloride<br>channel 4                      | -0.479283 | Inlier  |
| siRNA-Vinblastine Run2-<br>DMSO  | NM_0018<br>30 | CLCN4 | chloride<br>channel 4                      | 0.479282  | Inlier  |
|                                  | NM_0018       |       | chloride                                   |           |         |
| siRNA Disorazole DMSO Run1       | 30            | CLCN4 | channel 4                                  | 0.641752  | Inlier  |
| siRNA-Vinblastine Run1-<br>DMSO  | NM_0018<br>30 | CLCN4 | chloride<br>channel 4                      | 0.663439  | Inlier  |
| siRNA-Temozolomide Run1-<br>DMSO | NM_0018<br>30 | CLCN4 | chloride<br>channel 4                      | 0.685561  | Inlier  |
|                                  |               |       | chloride                                   |           |         |
|                                  |               |       | channel 5<br>(nephrolithiasis 2, X-linked, |           |         |
| siRNA-Temozolomide Run2-<br>DMSO | NM_0000<br>84 | CLCN5 | Dent<br>disease)                           | -0.780226 | Inlier  |
|                                  |               |       | chloride                                   |           |         |
|                                  |               |       | channel 5<br>(nephrolithiasis 2, X-linked, |           |         |
|                                  |               |       | Dent                                       |           |         |
| siRNA-Temozolomide Run3-<br>DMSO | NM_0000<br>84 | CLCN5 | disease)                                   | -0.689856 | Inlier  |

Identification of Survival Genes in Human Glioblastoma Cells Using siRNA Screening

Nikhil G Thaker, Fang Zhang, Peter R. McDonald, Tong Ying Shun, Michael D Lewen, Ian F. Pollack, and John S. Lazo

Molecular Pharmacology

|                              |               |       |                                                                |           |        |
|------------------------------|---------------|-------|----------------------------------------------------------------|-----------|--------|
| siRNA Disorazole DMSO Run3   | NM_0000<br>84 | CLCN5 | chloride channel 5 (nephrolithiasis 2, X-linked, Dent disease) | -0.659144 | Inlier |
| siRNA Disorazole DMSO Run2   | NM_0000<br>84 | CLCN5 | chloride channel 5 (nephrolithiasis 2, X-linked, Dent disease) | -0.327504 | Inlier |
| siRNA Disorazole DMSO Run1   | NM_0000<br>84 | CLCN5 | chloride channel 5 (nephrolithiasis 2, X-linked, Dent disease) | 0.327504  | Inlier |
| siRNA-Temozolomide Run1-DMSO | NM_0000<br>84 | CLCN5 | chloride channel 5 (nephrolithiasis 2, X-linked, Dent disease) | 0.487739  | Inlier |
| siRNA-Vinblastine Run2-DMSO  | NM_0000<br>84 | CLCN5 | chloride channel 5 (nephrolithiasis 2, X-linked, Dent disease) | 1.494385  | Inlier |
| siRNA-Vinblastine Run1-DMSO  | NM_0000<br>84 | CLCN5 | chloride channel 5 (nephrolithiasis 2, X-linked, Dent disease) | 1.634592  | Inlier |
| siRNA-Temozolomide Run2-DMSO | NM_0217<br>37 | CLCN6 | chloride channel 6                                             | -3.241827 | Inlier |
| siRNA-Temozolomide Run1-DMSO | NM_0217<br>37 | CLCN6 | chloride channel 6                                             | -0.864976 | Inlier |
| siRNA-Temozolomide Run3-DMSO | NM_0217<br>37 | CLCN6 | chloride channel 6                                             | -0.329911 | Inlier |
| siRNA Disorazole DMSO Run1   | NM_0217<br>37 | CLCN6 | chloride channel 6                                             | -0.249527 | Inlier |
| siRNA Disorazole DMSO Run3   | NM_0217<br>37 | CLCN6 | chloride channel 6                                             | 0.249528  | Inlier |

Identification of Survival Genes in Human Glioblastoma Cells Using siRNA Screening  
 Nikhil G Thaker, Fang Zhang, Peter R. McDonald, Tong Ying Shun, Michael D Lewen, Ian F. Pollack, and John S. Lazo

| siRNA Treatment                  | Gene          | Channel | Value                     | Inlier    |        |
|----------------------------------|---------------|---------|---------------------------|-----------|--------|
| siRNA-Vinblastine Run1-<br>DMSO  | NM_0217<br>37 | CLCN6   | chloride<br>channel 6     | 0.579888  | Inlier |
| siRNA Disorazole DMSO Run2       | NM_0217<br>37 | CLCN6   | chloride<br>channel 6     | 0.769112  | Inlier |
| siRNA-Vinblastine Run2-<br>DMSO  | NM_0217<br>37 | CLCN6   | chloride<br>channel 6     | 1.050044  | Inlier |
| siRNA Disorazole DMSO Run1       | NM_0012<br>87 | CLCN7   | chloride<br>channel 7     | -0.819341 | Inlier |
| siRNA-Temozolomide Run2-<br>DMSO | NM_0012<br>87 | CLCN7   | chloride<br>channel 7     | -0.541204 | Inlier |
| siRNA Disorazole DMSO Run3       | NM_0012<br>87 | CLCN7   | chloride<br>channel 7     | -0.130601 | Inlier |
| siRNA Disorazole DMSO Run2       | NM_0012<br>87 | CLCN7   | chloride<br>channel 7     | -0.089203 | Inlier |
| siRNA-Temozolomide Run1-<br>DMSO | NM_0012<br>87 | CLCN7   | chloride<br>channel 7     | 0.089203  | Inlier |
| siRNA-Temozolomide Run3-<br>DMSO | NM_0012<br>87 | CLCN7   | chloride<br>channel 7     | 0.807796  | Inlier |
| siRNA-Vinblastine Run2-<br>DMSO  | NM_0012<br>87 | CLCN7   | chloride<br>channel 7     | 1.127181  | Inlier |
| siRNA-Vinblastine Run1-<br>DMSO  | NM_0012<br>87 | CLCN7   | chloride<br>channel 7     | 1.315922  | Inlier |
| siRNA Disorazole DMSO Run3       | NM_0040<br>70 | CLCNKA  | chloride<br>channel<br>Ka | -0.902795 | Inlier |
| siRNA Disorazole DMSO Run2       | NM_0040<br>70 | CLCNKA  | chloride<br>channel<br>Ka | -0.782492 | Inlier |
| siRNA-Temozolomide Run3-<br>DMSO | NM_0040<br>70 | CLCNKA  | chloride<br>channel<br>Ka | -0.31218  | Inlier |
| siRNA-Temozolomide Run2-<br>DMSO | NM_0040<br>70 | CLCNKA  | chloride<br>channel<br>Ka | -0.286075 | Inlier |
| siRNA Disorazole DMSO Run1       | NM_0040<br>70 | CLCNKA  | chloride<br>channel<br>Ka | 0.286075  | Inlier |
| siRNA-Temozolomide Run1-<br>DMSO | NM_0040<br>70 | CLCNKA  | chloride<br>channel<br>Ka | 0.581005  | Inlier |
| siRNA-Vinblastine Run2-<br>DMSO  | NM_0040<br>70 | CLCNKA  | chloride<br>channel<br>Ka | 0.767995  | Inlier |
| siRNA-Vinblastine Run1-<br>DMSO  | NM_0040<br>70 | CLCNKA  | chloride<br>channel<br>Ka | 1.694458  | Inlier |
| siRNA Disorazole DMSO Run1       | NM_0000<br>85 | CLCNKB  | chloride<br>channel<br>Kb | -0.9335   | Inlier |
| siRNA-Temozolomide Run2-<br>DMSO | NM_0000<br>85 | CLCNKB  | chloride<br>channel<br>Kb | -0.4155   | Inlier |

Identification of Survival Genes in Human Glioblastoma Cells Using siRNA Screening

Nikhil G Thaker, Fang Zhang, Peter R. McDonald, Tong Ying Shun, Michael D Lewen, Ian F. Pollack, and John S.

Lazo

Molecular Pharmacology

|                              |           |         |                                                                                          |           |        |
|------------------------------|-----------|---------|------------------------------------------------------------------------------------------|-----------|--------|
| siRNA-Temozolomide Run1-DMSO | NM_000085 | CLCNKB  | chloride channel Kb                                                                      | -0.168905 | Inlier |
| siRNA-Temozolomide Run3-DMSO | NM_000085 | CLCNKB  | chloride channel Kb                                                                      | -0.115686 | Inlier |
| siRNA-Vinblastine Run2-DMSO  | NM_000085 | CLCNKB  | chloride channel Kb                                                                      | 0.115687  | Inlier |
| siRNA-Vinblastine Run1-DMSO  | NM_000085 | CLCNKB  | chloride channel Kb                                                                      | 0.978775  | Inlier |
| siRNA Disorazole DMSO Run3   | NM_000085 | CLCNKB  | chloride channel Kb                                                                      | 1.071197  | Inlier |
| siRNA Disorazole DMSO Run2   | NM_000085 | CLCNKB  | chloride channel Kb                                                                      | 2.291569  | Inlier |
| siRNA-Temozolomide Run2-DMSO | NM_130441 | CLECSF7 | C-type (calcium dependent, carbohydrate-recognition domain) lectin, superfamily member 7 | -0.99679  | Inlier |
| siRNA-Temozolomide Run3-DMSO | NM_130441 | CLECSF7 | C-type (calcium dependent, carbohydrate-recognition domain) lectin, superfamily member 7 | -0.854255 | Inlier |

Identification of Survival Genes in Human Glioblastoma Cells Using siRNA Screening

Nikhil G Thaker, Fang Zhang, Peter R. McDonald, Tong Ying Shun, Michael D Lewen, Ian F. Pollack, and John S. Lazo

Molecular Pharmacology

| siRNA              | Drug | Run  | Gene    | Gene ID   | Gene Description                                                                        | Score     | Outlier |
|--------------------|------|------|---------|-----------|-----------------------------------------------------------------------------------------|-----------|---------|
| siRNA Disorazole   | DMSO | Run3 | CLECSF7 | NM_130441 | C-type (calcium dependent), carbohydrate-recognition domain) lectin, superfamily member | -0.494745 | Inlier  |
| siRNA-Vinblastine  | DMSO | Run2 | CLECSF7 | NM_130441 | C-type (calcium dependent), carbohydrate-recognition domain) lectin, superfamily member | -0.057479 | Inlier  |
| siRNA-Temozolomide | DMSO | Run1 | CLECSF7 | NM_130441 | C-type (calcium dependent), carbohydrate-recognition domain) lectin, superfamily member | 0.057479  | Inlier  |
| siRNA Disorazole   | DMSO | Run1 | CLECSF7 | NM_130441 | C-type (calcium dependent), carbohydrate-recognition domain) lectin, superfamily member | 0.37693   | Inlier  |

Identification of Survival Genes in Human Glioblastoma Cells Using siRNA Screening

Nikhil G Thaker, Fang Zhang, Peter R. McDonald, Tong Ying Shun, Michael D Lewen, Ian F. Pollack, and John S. Lazo

Molecular Pharmacology

| siRNA Treatment              | Gene    | Accession | Gene ID | Log Fold Change | Outlier Status | Gene Description                                                                        |
|------------------------------|---------|-----------|---------|-----------------|----------------|-----------------------------------------------------------------------------------------|
| siRNA Disorazole DMSO Run2   | CLECSF7 | NM_1304   | 7       | 2.280529        | Inlier         | C-type (calcium dependent), carbohydrate-recognition domain) lectin, superfamily member |
| siRNA-Vinblastine Run1-DMSO  | CLECSF7 | NM_1304   | 7       | 3.351118        | Inlier         | C-type (calcium dependent), carbohydrate-recognition domain) lectin, superfamily member |
| siRNA-Temozolomide Run3-DMSO | CLIC1   | NM_0012   | 1       | -1.258084       | Inlier         | chloride intracellular channel                                                          |
| siRNA Disorazole DMSO Run3   | CLIC1   | NM_0012   | 1       | -1.223395       | Inlier         | chloride intracellular channel                                                          |
| siRNA Disorazole DMSO Run1   | CLIC1   | NM_0012   | 1       | -0.53269        | Inlier         | chloride intracellular channel                                                          |
| siRNA-Temozolomide Run2-DMSO | CLIC1   | NM_0012   | 1       | -0.475242       | Inlier         | chloride intracellular channel                                                          |
| siRNA-Vinblastine Run2-DMSO  | CLIC1   | NM_0012   | 1       | 0.475243        | Inlier         | chloride intracellular channel                                                          |
| siRNA-Temozolomide Run1-DMSO | CLIC1   | NM_0012   | 1       | 0.650684        | Inlier         | chloride intracellular channel                                                          |
| siRNA-Vinblastine Run1-DMSO  | CLIC1   | NM_0012   | 1       | 0.698316        | Inlier         | chloride intracellular channel                                                          |



Identification of Survival Genes in Human Glioblastoma Cells Using siRNA Screening  
 Nikhil G Thaker, Fang Zhang, Peter R. McDonald, Tong Ying Shun, Michael D Lewen, Ian F. Pollack, and John S. Lazo

Molecular Pharmacology

|                              |            |       |   |                                |        |
|------------------------------|------------|-------|---|--------------------------------|--------|
|                              |            |       |   | chloride intracellular channel |        |
| siRNA Disorazole DMSO Run2   | NM_0012 88 | CLIC1 | 1 | 1.281277                       | Inlier |
| siRNA-Temozolomide Run3-DMSO | NM_0012 89 | CLIC2 | 2 | -1.182942                      | Inlier |
| siRNA Disorazole DMSO Run2   | NM_0012 89 | CLIC2 | 2 | -0.816956                      | Inlier |
| siRNA Disorazole DMSO Run3   | NM_0012 89 | CLIC2 | 2 | -0.410762                      | Inlier |
| siRNA-Temozolomide Run1-DMSO | NM_0012 89 | CLIC2 | 2 | -0.183041                      | Inlier |
| siRNA-Temozolomide Run2-DMSO | NM_0012 89 | CLIC2 | 2 | 0.183041                       | Inlier |
| siRNA Disorazole DMSO Run1   | NM_0012 89 | CLIC2 | 2 | 0.532044                       | Inlier |
| siRNA-Vinblastine Run1-DMSO  | NM_0012 89 | CLIC2 | 2 | 1.779771                       | Inlier |
| siRNA-Vinblastine Run2-DMSO  | NM_0012 89 | CLIC2 | 2 | 2.027228                       | Inlier |
| siRNA Disorazole DMSO Run1   | NM_0046 69 | CLIC3 | 3 | -1.585366                      | Inlier |
| siRNA-Temozolomide Run3-DMSO | NM_0046 69 | CLIC3 | 3 | -1.06289                       | Inlier |
| siRNA-Vinblastine Run2-DMSO  | NM_0046 69 | CLIC3 | 3 | -1.055462                      | Inlier |
| siRNA Disorazole DMSO Run3   | NM_0046 69 | CLIC3 | 3 | -0.036579                      | Inlier |

Identification of Survival Genes in Human Glioblastoma Cells Using siRNA Screening  
 Nikhil G Thaker, Fang Zhang, Peter R. McDonald, Tong Ying Shun, Michael D Lewen, Ian F. Pollack, and John S. Lazo

Molecular Pharmacology

|                              |               |       |                                           |           |        |
|------------------------------|---------------|-------|-------------------------------------------|-----------|--------|
| siRNA-Vinblastine Run1-DMSO  | NM_0046<br>69 | CLIC3 | chloride<br>intracellular<br>channel<br>3 | 0.036579  | Inlier |
| siRNA-Temozolomide Run1-DMSO | NM_0046<br>69 | CLIC3 | chloride<br>intracellular<br>channel<br>3 | 0.224102  | Inlier |
| siRNA-Temozolomide Run2-DMSO | NM_0046<br>69 | CLIC3 | chloride<br>intracellular<br>channel<br>3 | 0.293538  | Inlier |
| siRNA Disorazole DMSO Run2   | NM_0046<br>69 | CLIC3 | chloride<br>intracellular<br>channel<br>3 | 1.694368  | Inlier |
| siRNA-Temozolomide Run3-DMSO | NM_0139<br>43 | CLIC4 | chloride<br>intracellular<br>channel<br>4 | -1.15574  | Inlier |
| siRNA-Temozolomide Run2-DMSO | NM_0139<br>43 | CLIC4 | chloride<br>intracellular<br>channel<br>4 | -0.852938 | Inlier |
| siRNA Disorazole DMSO Run2   | NM_0139<br>43 | CLIC4 | chloride<br>intracellular<br>channel<br>4 | -0.846494 | Inlier |
| siRNA Disorazole DMSO Run3   | NM_0139<br>43 | CLIC4 | chloride<br>intracellular<br>channel<br>4 | -0.112287 | Inlier |
| siRNA Disorazole DMSO Run1   | NM_0139<br>43 | CLIC4 | chloride<br>intracellular<br>channel<br>4 | 0.112286  | Inlier |
| siRNA-Temozolomide Run1-DMSO | NM_0139<br>43 | CLIC4 | chloride<br>intracellular<br>channel<br>4 | 0.114645  | Inlier |
| siRNA-Vinblastine Run1-DMSO  | NM_0139<br>43 | CLIC4 | chloride<br>intracellular<br>channel<br>4 | 0.502506  | Inlier |
| siRNA-Vinblastine Run2-DMSO  | NM_0139<br>43 | CLIC4 | chloride<br>intracellular<br>channel<br>4 | 0.968937  | Inlier |
| siRNA-Temozolomide Run3-DMSO | NM_0169<br>29 | CLIC5 | chloride<br>intracellular<br>channel<br>5 | -1.982497 | Inlier |

Identification of Survival Genes in Human Glioblastoma Cells Using siRNA Screening  
 Nikhil G Thaker, Fang Zhang, Peter R. McDonald, Tong Ying Shun, Michael D Lewen, Ian F. Pollack, and John S. Lazo

Molecular Pharmacology

|                              |               |       |                                |           |        |
|------------------------------|---------------|-------|--------------------------------|-----------|--------|
|                              |               |       | chloride intracellular channel |           |        |
| siRNA Disorazole DMSO Run2   | NM_0169<br>29 | CLIC5 | 5                              | -1.046261 | Inlier |
|                              |               |       | chloride intracellular channel |           |        |
| siRNA Disorazole DMSO Run3   | NM_0169<br>29 | CLIC5 | 5                              | -0.904034 | Inlier |
|                              |               |       | chloride intracellular channel |           |        |
| siRNA Disorazole DMSO Run1   | NM_0169<br>29 | CLIC5 | 5                              | -0.149624 | Inlier |
|                              |               |       | chloride intracellular channel |           |        |
| siRNA-Temozolomide Run1-DMSO | NM_0169<br>29 | CLIC5 | 5                              | 0.149624  | Inlier |
|                              |               |       | chloride intracellular channel |           |        |
| siRNA-Vinblastine Run2-DMSO  | NM_0169<br>29 | CLIC5 | 5                              | 0.408535  | Inlier |
|                              |               |       | chloride intracellular channel |           |        |
| siRNA-Temozolomide Run2-DMSO | NM_0169<br>29 | CLIC5 | 5                              | 0.444966  | Inlier |
|                              |               |       | chloride intracellular channel |           |        |
| siRNA-Vinblastine Run1-DMSO  | NM_0169<br>29 | CLIC5 | 5                              | 1.182766  | Inlier |
|                              |               |       | CDC-like kinase 1              |           |        |
| siRNA Disorazole DMSO Run2   | NM_0040<br>71 | CLK1  | 1                              | -3.12296  | Inlier |
|                              |               |       | CDC-like kinase 1              |           |        |
| siRNA-Temozolomide Run1-DMSO | NM_0040<br>71 | CLK1  | 1                              | -1.282756 | Inlier |
|                              |               |       | CDC-like kinase 1              |           |        |
| siRNA-Temozolomide Run2-DMSO | NM_0040<br>71 | CLK1  | 1                              | -0.588013 | Inlier |
|                              |               |       | CDC-like kinase 1              |           |        |
| siRNA-Temozolomide Run3-DMSO | NM_0040<br>71 | CLK1  | 1                              | -0.141773 | Inlier |
|                              |               |       | CDC-like kinase 1              |           |        |
| siRNA Disorazole DMSO Run3   | NM_0040<br>71 | CLK1  | 1                              | 0.141773  | Inlier |
|                              |               |       | CDC-like kinase 1              |           |        |
| siRNA Disorazole DMSO Run1   | NM_0040<br>71 | CLK1  | 1                              | 0.296355  | Inlier |
|                              |               |       | CDC-like kinase 1              |           |        |
| siRNA-Vinblastine Run1-DMSO  | NM_0040<br>71 | CLK1  | 1                              | 0.760987  | Inlier |
|                              |               |       | CDC-like kinase 1              |           |        |
| siRNA-Vinblastine Run2-DMSO  | NM_0040<br>71 | CLK1  | 1                              | 0.887291  | Inlier |
|                              |               |       | CDC-like kinase 2              |           |        |
| siRNA Disorazole DMSO Run2   | NM_0012<br>91 | CLK2  | 2                              | -3.156947 | Inlier |
|                              |               |       | CDC-like kinase 2              |           |        |
| siRNA Disorazole DMSO Run1   | NM_0012<br>91 | CLK2  | 2                              | -0.996455 | Inlier |
|                              |               |       | CDC-like kinase 2              |           |        |
| siRNA-Temozolomide Run1-DMSO | NM_0012<br>91 | CLK2  | 2                              | -0.661909 | Inlier |
|                              |               |       | CDC-like kinase 2              |           |        |
| siRNA-Temozolomide Run3-DMSO | NM_0012<br>91 | CLK2  | 2                              | -0.168537 | Inlier |

Identification of Survival Genes in Human Glioblastoma Cells Using siRNA Screening  
 Nikhil G Thaker, Fang Zhang, Peter R. McDonald, Tong Ying Shun, Michael D Lewen, Ian F. Pollack, and John S. Lazo

| siRNA Treatment                  | Gene | Gene ID       | Gene Family                   | Value     | Outlier Status |
|----------------------------------|------|---------------|-------------------------------|-----------|----------------|
| siRNA-Temozolomide Run2-<br>DMSO | CLK2 | NM_0012<br>91 | CDC-like<br>kinase 2          | 0.168537  | Inlier         |
| siRNA Disorazole DMSO Run3       | CLK2 | NM_0012<br>91 | CDC-like<br>kinase 2          | 0.387132  | Inlier         |
| siRNA-Vinblastine Run1-<br>DMSO  | CLK2 | NM_0012<br>91 | CDC-like<br>kinase 2          | 0.687091  | Inlier         |
| siRNA-Vinblastine Run2-<br>DMSO  | CLK2 | NM_0012<br>91 | CDC-like<br>kinase 2          | 3.671967  | Outlier        |
| siRNA-Vinblastine Run1-<br>DMSO  | CLK3 | NM_0012<br>92 | CDC-like<br>kinase 3          | -0.868703 | Inlier         |
| siRNA Disorazole DMSO Run2       | CLK3 | NM_0012<br>92 | CDC-like<br>kinase 3          | -0.835512 | Inlier         |
| siRNA-Temozolomide Run1-<br>DMSO | CLK3 | NM_0012<br>92 | CDC-like<br>kinase 3          | -0.759183 | Inlier         |
| siRNA-Temozolomide Run3-<br>DMSO | CLK3 | NM_0012<br>92 | CDC-like<br>kinase 3          | -0.297884 | Inlier         |
| siRNA Disorazole DMSO Run3       | CLK3 | NM_0012<br>92 | CDC-like<br>kinase 3          | 0.297884  | Inlier         |
| siRNA-Temozolomide Run2-<br>DMSO | CLK3 | NM_0012<br>92 | CDC-like<br>kinase 3          | 0.54769   | Inlier         |
| siRNA Disorazole DMSO Run1       | CLK3 | NM_0012<br>92 | CDC-like<br>kinase 3          | 0.589817  | Inlier         |
| siRNA-Vinblastine Run2-<br>DMSO  | CLK3 | NM_0012<br>92 | CDC-like<br>kinase 3          | 3.659689  | Outlier        |
| siRNA-Temozolomide Run2-<br>DMSO | CLK4 | NM_0206<br>66 | CDC-like<br>kinase 4          | -1.279779 | Inlier         |
| siRNA-Temozolomide Run1-<br>DMSO | CLK4 | NM_0206<br>66 | CDC-like<br>kinase 4          | -0.88232  | Inlier         |
| siRNA-Temozolomide Run3-<br>DMSO | CLK4 | NM_0206<br>66 | CDC-like<br>kinase 4          | -0.43511  | Inlier         |
| siRNA Disorazole DMSO Run1       | CLK4 | NM_0206<br>66 | CDC-like<br>kinase 4          | -0.111371 | Inlier         |
| siRNA Disorazole DMSO Run2       | CLK4 | NM_0206<br>66 | CDC-like<br>kinase 4          | 0.111371  | Inlier         |
| siRNA Disorazole DMSO Run3       | CLK4 | NM_0206<br>66 | CDC-like<br>kinase 4          | 0.46668   | Inlier         |
| siRNA-Vinblastine Run1-<br>DMSO  | CLK4 | NM_0206<br>66 | CDC-like<br>kinase 4          | 2.316555  | Inlier         |
| siRNA-Vinblastine Run2-<br>DMSO  | CLK4 | NM_0206<br>66 | CDC-like<br>kinase 4          | 2.541646  | Inlier         |
| siRNA-Temozolomide Run3-<br>DMSO | CLN2 | NM_0003<br>91 | tripeptidyl<br>peptidase<br>I | -2.011097 | Inlier         |
| siRNA-Temozolomide Run2-<br>DMSO | CLN2 | NM_0003<br>91 | tripeptidyl<br>peptidase<br>I | -1.029143 | Inlier         |
| siRNA-Temozolomide Run1-<br>DMSO | CLN2 | NM_0003<br>91 | tripeptidyl<br>peptidase<br>I | -0.225252 | Inlier         |
| siRNA Disorazole DMSO Run3       | CLN2 | NM_0003<br>91 | tripeptidyl<br>peptidase<br>I | -0.049225 | Inlier         |

Identification of Survival Genes in Human Glioblastoma Cells Using siRNA Screening  
 Nikhil G Thaker, Fang Zhang, Peter R. McDonald, Tong Ying Shun, Michael D Lewen, Ian F. Pollack, and John S. Lazo

Molecular Pharmacology

| siRNA Treatment              | Gene    | Accession | Gene   | Value     | Outlier |
|------------------------------|---------|-----------|--------|-----------|---------|
| siRNA Disorazole DMSO Run1   | NM_0003 | 91        | CLN2   | 0.049225  | Inlier  |
| siRNA Disorazole DMSO Run2   | NM_0003 | 91        | CLN2   | 0.494161  | Inlier  |
| siRNA-Vinblastine Run2-DMSO  | NM_0003 | 91        | CLN2   | 0.854839  | Inlier  |
| siRNA-Vinblastine Run1-DMSO  | NM_0003 | 91        | CLN2   | 1.621065  | Inlier  |
| siRNA-Temozolomide Run3-DMSO | NM_0012 | 93        | CLNS1A | -0.75048  | Inlier  |
| siRNA Disorazole DMSO Run2   | NM_0012 | 93        | CLNS1A | -0.59852  | Inlier  |
| siRNA Disorazole DMSO Run3   | NM_0012 | 93        | CLNS1A | -0.546942 | Inlier  |
| siRNA-Temozolomide Run2-DMSO | NM_0012 | 93        | CLNS1A | -0.321681 | Inlier  |
| siRNA-Temozolomide Run1-DMSO | NM_0012 | 93        | CLNS1A | 0.321681  | Inlier  |
| siRNA-Vinblastine Run2-DMSO  | NM_0012 | 93        | CLNS1A | 1.259612  | Inlier  |
| siRNA Disorazole DMSO Run1   | NM_0012 | 93        | CLNS1A | 1.279676  | Inlier  |
| siRNA-Vinblastine Run1-DMSO  | NM_0012 | 93        | CLNS1A | 1.628042  | Inlier  |

Identification of Survival Genes in Human Glioblastoma Cells Using siRNA Screening

Nikhil G Thaker, Fang Zhang, Peter R. McDonald, Tong Ying Shun, Michael D Lewen, Ian F. Pollack, and John S. Lazo

Molecular Pharmacology

| siRNA Treatment              | Gene ID   | CLPP | Gene Name                                                                        | Score     | Inlier |
|------------------------------|-----------|------|----------------------------------------------------------------------------------|-----------|--------|
| siRNA-Temozolomide Run2-DMSO | NM_006012 | CLPP | ClpP caseinolytic protease, ATP-dependent, proteolytic subunit homolog (E. coli) | -0.815735 | Inlier |
| siRNA Disorazole DMSO Run2   | NM_006012 | CLPP | ClpP caseinolytic protease, ATP-dependent, proteolytic subunit homolog (E. coli) | -0.793872 | Inlier |
| siRNA-Temozolomide Run3-DMSO | NM_006012 | CLPP | ClpP caseinolytic protease, ATP-dependent, proteolytic subunit homolog (E. coli) | -0.413799 | Inlier |
| siRNA-Temozolomide Run1-DMSO | NM_006012 | CLPP | ClpP caseinolytic protease, ATP-dependent, proteolytic subunit homolog (E. coli) | -0.136487 | Inlier |

Identification of Survival Genes in Human Glioblastoma Cells Using siRNA Screening

Nikhil G Thaker, Fang Zhang, Peter R. McDonald, Tong Ying Shun, Michael D Lewen, Ian F. Pollack, and John S. Lazo

Molecular Pharmacology

|                                  |               |      |  |                                                                                                                   |           |        |
|----------------------------------|---------------|------|--|-------------------------------------------------------------------------------------------------------------------|-----------|--------|
|                                  |               |      |  | ClpP<br>caseinolyti<br>c<br>protease,<br>ATP-<br>dependent<br>,<br>proteolytic<br>subunit<br>homolog<br>(E. coli) | 0.136487  | Inlier |
| siRNA Disorazole DMSO Run3       | NM_0060<br>12 | CLPP |  | ClpP<br>caseinolyti<br>c<br>protease,<br>ATP-<br>dependent<br>,<br>proteolytic<br>subunit<br>homolog<br>(E. coli) | 0.555128  | Inlier |
| siRNA Disorazole DMSO Run1       | NM_0060<br>12 | CLPP |  | ClpP<br>caseinolyti<br>c<br>protease,<br>ATP-<br>dependent<br>,<br>proteolytic<br>subunit<br>homolog<br>(E. coli) | 1.437587  | Inlier |
| siRNA-Vinblastine Run1-<br>DMSO  | NM_0060<br>12 | CLPP |  | ClpP<br>caseinolyti<br>c<br>protease,<br>ATP-<br>dependent<br>,<br>proteolytic<br>subunit<br>homolog<br>(E. coli) | 2.188029  | Inlier |
| siRNA-Vinblastine Run2-<br>DMSO  | NM_0060<br>12 | CLPP |  | colipase,<br>pancreatic                                                                                           | -2.52563  | Inlier |
| siRNA-Temozolomide Run3-<br>DMSO | NM_0018<br>32 | CLPS |  | colipase,<br>pancreatic                                                                                           | -1.111188 | Inlier |
| siRNA-Temozolomide Run2-<br>DMSO | NM_0018<br>32 | CLPS |  |                                                                                                                   |           |        |

Identification of Survival Genes in Human Glioblastoma Cells Using siRNA Screening  
 Nikhil G Thaker, Fang Zhang, Peter R. McDonald, Tong Ying Shun, Michael D Lewen, Ian F. Pollack, and John S. Lazo

Molecular Pharmacology

|                                  |               |      |                                                             |           |        |
|----------------------------------|---------------|------|-------------------------------------------------------------|-----------|--------|
| siRNA Disorazole DMSO Run3       | NM_0018<br>32 | CLPS | colipase,<br>pancreatic                                     | -0.237812 | Inlier |
| siRNA Disorazole DMSO Run1       | NM_0018<br>32 | CLPS | colipase,<br>pancreatic                                     | -0.076865 | Inlier |
| siRNA-Vinblastine Run2-<br>DMSO  | NM_0018<br>32 | CLPS | colipase,<br>pancreatic                                     | 0.076865  | Inlier |
| siRNA-Temozolomide Run1-<br>DMSO | NM_0018<br>32 | CLPS | colipase,<br>pancreatic                                     | 0.086839  | Inlier |
| siRNA-Vinblastine Run1-<br>DMSO  | NM_0018<br>32 | CLPS | colipase,<br>pancreatic                                     | 1.454488  | Inlier |
| siRNA Disorazole DMSO Run2       | NM_0018<br>32 | CLPS | colipase,<br>pancreatic                                     | 2.403319  | Inlier |
| siRNA Disorazole DMSO Run2       | NM_0066<br>60 | CLPX | ClpX<br>caseinolyti<br>c protease<br>X homolog<br>(E. coli) | -0.914213 | Inlier |
| siRNA-Temozolomide Run2-<br>DMSO | NM_0066<br>60 | CLPX | ClpX<br>caseinolyti<br>c protease<br>X homolog<br>(E. coli) | -0.684344 | Inlier |
| siRNA Disorazole DMSO Run1       | NM_0066<br>60 | CLPX | ClpX<br>caseinolyti<br>c protease<br>X homolog<br>(E. coli) | -0.425209 | Inlier |
| siRNA-Temozolomide Run3-<br>DMSO | NM_0066<br>60 | CLPX | ClpX<br>caseinolyti<br>c protease<br>X homolog<br>(E. coli) | -0.007533 | Inlier |



Identification of Survival Genes in Human Glioblastoma Cells Using siRNA Screening  
 Nikhil G Thaker, Fang Zhang, Peter R. McDonald, Tong Ying Shun, Michael D Lewen, Ian F. Pollack, and John S. Lazo  
 Molecular Pharmacology

|                              |           |      |                                                |           |        |
|------------------------------|-----------|------|------------------------------------------------|-----------|--------|
| siRNA-Temozolomide Run1-DMSO | NM_006660 | CLPX | ClpX caseinolytic protease X homolog (E. coli) | 0.007533  | Inlier |
| siRNA-Vinblastine Run1-DMSO  | NM_006660 | CLPX | ClpX caseinolytic protease X homolog (E. coli) | 0.664656  | Inlier |
| siRNA-Vinblastine Run2-DMSO  | NM_006660 | CLPX | ClpX caseinolytic protease X homolog (E. coli) | 1.025666  | Inlier |
| siRNA Disorazole DMSO Run3   | NM_006660 | CLPX | ClpX caseinolytic protease X homolog (E. coli) | 1.400575  | Inlier |
| siRNA-Temozolomide Run2-DMSO | NM_001836 | CMA1 | chymase 1, mast cell                           | -0.852747 | Inlier |
| siRNA-Temozolomide Run3-DMSO | NM_001836 | CMA1 | chymase 1, mast cell                           | -0.829786 | Inlier |
| siRNA Disorazole DMSO Run2   | NM_001836 | CMA1 | chymase 1, mast cell                           | -0.519214 | Inlier |
| siRNA-Temozolomide Run1-DMSO | NM_001836 | CMA1 | chymase 1, mast cell                           | -0.100839 | Inlier |
| siRNA Disorazole DMSO Run1   | NM_001836 | CMA1 | chymase 1, mast cell                           | 0.100839  | Inlier |
| siRNA Disorazole DMSO Run3   | NM_001836 | CMA1 | chymase 1, mast cell                           | 0.261374  | Inlier |
| siRNA-Vinblastine Run1-DMSO  | NM_001836 | CMA1 | chymase 1, mast cell                           | 1.427721  | Inlier |
| siRNA-Vinblastine Run2-DMSO  | NM_001836 | CMA1 | chymase 1, mast cell                           | 1.714559  | Inlier |

Identification of Survival Genes in Human Glioblastoma Cells Using siRNA Screening  
 Nikhil G Thaker, Fang Zhang, Peter R. McDonald, Tong Ying Shun, Michael D Lewen, Ian F. Pollack, and John S. Lazo  
 Molecular Pharmacology

|                                  |               |      |                                                                                |           |        |
|----------------------------------|---------------|------|--------------------------------------------------------------------------------|-----------|--------|
| siRNA Disorazole DMSO Run1       | NM_0186<br>86 | CMAS | cytidine<br>monophos<br>phate N-<br>acetylneur<br>aminic<br>acid<br>synthetase | -1.30832  | Inlier |
| siRNA-Vinblastine Run2-<br>DMSO  | NM_0186<br>86 | CMAS | cytidine<br>monophos<br>phate N-<br>acetylneur<br>aminic<br>acid<br>synthetase | -0.730541 | Inlier |
| siRNA Disorazole DMSO Run3       | NM_0186<br>86 | CMAS | cytidine<br>monophos<br>phate N-<br>acetylneur<br>aminic<br>acid<br>synthetase | -0.493839 | Inlier |
| siRNA-Temozolomide Run1-<br>DMSO | NM_0186<br>86 | CMAS | cytidine<br>monophos<br>phate N-<br>acetylneur<br>aminic<br>acid<br>synthetase | -0.461848 | Inlier |
| siRNA-Temozolomide Run2-<br>DMSO | NM_0186<br>86 | CMAS | cytidine<br>monophos<br>phate N-<br>acetylneur<br>aminic<br>acid<br>synthetase | 0.461848  | Inlier |
| siRNA-Temozolomide Run3-<br>DMSO | NM_0186<br>86 | CMAS | cytidine<br>monophos<br>phate N-<br>acetylneur<br>aminic<br>acid<br>synthetase | 0.618459  | Inlier |

Identification of Survival Genes in Human Glioblastoma Cells Using siRNA Screening  
 Nikhil G Thaker, Fang Zhang, Peter R. McDonald, Tong Ying Shun, Michael D Lewen, Ian F. Pollack, and John S. Lazo  
 Molecular Pharmacology

|                              |               |        |                                                              |           |         |
|------------------------------|---------------|--------|--------------------------------------------------------------|-----------|---------|
| siRNA Disorazole DMSO Run2   | NM_0186<br>86 | CMAS   | cytidine<br>monophosphate N-acetylneuraminic acid synthetase | 3.369362  | Inlier  |
| siRNA-Vinblastine Run1-DMSO  | NM_0186<br>86 | CMAS   | cytidine<br>monophosphate N-acetylneuraminic acid synthetase | 4.172605  | Outlier |
| siRNA-Temozolomide Run3-DMSO | NM_0040<br>72 | CMKLR1 | chemokine-like receptor 1                                    | -1.002876 | Inlier  |
| siRNA Disorazole DMSO Run2   | NM_0040<br>72 | CMKLR1 | chemokine-like receptor 1                                    | -0.346124 | Inlier  |
| siRNA Disorazole DMSO Run3   | NM_0040<br>72 | CMKLR1 | chemokine-like receptor 1                                    | -0.245803 | Inlier  |
| siRNA-Temozolomide Run2-DMSO | NM_0040<br>72 | CMKLR1 | chemokine-like receptor 1                                    | -0.146386 | Inlier  |
| siRNA-Temozolomide Run1-DMSO | NM_0040<br>72 | CMKLR1 | chemokine-like receptor 1                                    | 0.146386  | Inlier  |
| siRNA-Vinblastine Run2-DMSO  | NM_0040<br>72 | CMKLR1 | chemokine-like receptor 1                                    | 1.322542  | Inlier  |
| siRNA-Vinblastine Run1-DMSO  | NM_0040<br>72 | CMKLR1 | chemokine-like receptor 1                                    | 1.514946  | Inlier  |
| siRNA Disorazole DMSO Run1   | NM_0040<br>72 | CMKLR1 | chemokine orphan receptor 1                                  | 1.653162  | Inlier  |
| siRNA Disorazole DMSO Run1   | NM_0203<br>11 | CMKOR1 | chemokine orphan receptor 1                                  | -0.816593 | Inlier  |
| siRNA-Temozolomide Run3-DMSO | NM_0203<br>11 | CMKOR1 | chemokine orphan receptor 1                                  | -0.779784 | Inlier  |
| siRNA-Vinblastine Run2-DMSO  | NM_0203<br>11 | CMKOR1 | chemokine orphan receptor 1                                  | -0.200484 | Inlier  |
| siRNA-Temozolomide Run1-DMSO | NM_0203<br>11 | CMKOR1 | chemokine orphan receptor 1                                  | -0.179842 | Inlier  |

Identification of Survival Genes in Human Glioblastoma Cells Using siRNA Screening  
 Nikhil G Thaker, Fang Zhang, Peter R. McDonald, Tong Ying Shun, Michael D Lewen, Ian F. Pollack, and John S. Lazo

|                                                            |               |        |                                       |           |        |
|------------------------------------------------------------|---------------|--------|---------------------------------------|-----------|--------|
| Molecular Pharmacology<br>siRNA-Temozolomide Run2-<br>DMSO | NM_0203<br>11 | CMKOR1 | chemokine<br>orphan<br>receptor 1     | 0.179841  | Inlier |
| siRNA Disorazole DMSO Run3                                 | NM_0203<br>11 | CMKOR1 | chemokine<br>orphan<br>receptor 1     | 0.569216  | Inlier |
| siRNA Disorazole DMSO Run2                                 | NM_0203<br>11 | CMKOR1 | chemokine<br>orphan<br>receptor 1     | 0.845438  | Inlier |
| siRNA-Vinblastine Run1-<br>DMSO                            | NM_0203<br>11 | CMKOR1 | chemokine<br>orphan<br>receptor 1     | 1.068205  | Inlier |
| siRNA-Temozolomide Run3-<br>DMSO                           | NM_0163<br>47 | CML2   | CML2                                  | -1.345458 | Inlier |
| siRNA-Temozolomide Run2-<br>DMSO                           | NM_0163<br>47 | CML2   | CML2                                  | -0.784296 | Inlier |
| siRNA-Temozolomide Run1-<br>DMSO                           | NM_0163<br>47 | CML2   | CML2                                  | -0.214962 | Inlier |
| siRNA-Vinblastine Run2-<br>DMSO                            | NM_0163<br>47 | CML2   | CML2                                  | -0.041599 | Inlier |
| siRNA Disorazole DMSO Run3                                 | NM_0163<br>47 | CML2   | CML2                                  | 0.041599  | Inlier |
| siRNA Disorazole DMSO Run1                                 | NM_0163<br>47 | CML2   | CML2                                  | 0.564704  | Inlier |
| siRNA Disorazole DMSO Run2                                 | NM_0163<br>47 | CML2   | CML2                                  | 2.359893  | Inlier |
| siRNA-Vinblastine Run1-<br>DMSO                            | NM_0163<br>47 | CML2   | CML2                                  | 2.655339  | Inlier |
| siRNA-Temozolomide Run3-<br>DMSO                           | NM_1536<br>10 | CMYA5  | cardiomyo<br>pathy<br>associated<br>5 | -2.571331 | Inlier |
| siRNA-Temozolomide Run1-<br>DMSO                           | NM_1536<br>10 | CMYA5  | cardiomyo<br>pathy<br>associated<br>5 | -0.732766 | Inlier |
| siRNA Disorazole DMSO Run1                                 | NM_1536<br>10 | CMYA5  | cardiomyo<br>pathy<br>associated<br>5 | -0.408339 | Inlier |
| siRNA-Vinblastine Run2-<br>DMSO                            | NM_1536<br>10 | CMYA5  | cardiomyo<br>pathy<br>associated<br>5 | -0.179205 | Inlier |
| siRNA Disorazole DMSO Run3                                 | NM_1536<br>10 | CMYA5  | cardiomyo<br>pathy<br>associated<br>5 | 0.179204  | Inlier |
| siRNA-Temozolomide Run2-<br>DMSO                           | NM_1536<br>10 | CMYA5  | cardiomyo<br>pathy<br>associated<br>5 | 0.616234  | Inlier |

Identification of Survival Genes in Human Glioblastoma Cells Using siRNA Screening  
 Nikhil G Thaker, Fang Zhang, Peter R. McDonald, Tong Ying Shun, Michael D Lewen, Ian F. Pollack, and John S. Lazo

Molecular Pharmacology

|                              |               |       |                                                                                                                    |           |        |
|------------------------------|---------------|-------|--------------------------------------------------------------------------------------------------------------------|-----------|--------|
| siRNA-Vinblastine Run1-DMSO  | NM_1536<br>10 | CMYA5 | cardiomyo<br>pathy<br>associated<br>5                                                                              | 2.868995  | Inlier |
| siRNA Disorazole DMSO Run2   | NM_1536<br>10 | CMYA5 | cardiomyo<br>pathy<br>associated<br>5                                                                              | 3.20424   | Inlier |
| siRNA-Temozolomide Run3-DMSO | NM_0326<br>49 | CNDP1 | cardiomyo<br>pathy<br>associated<br>5<br>carnosine<br>dipeptidas<br>e 1<br>(metallope<br>ptidase<br>M20<br>family) | -0.686001 | Inlier |
| siRNA-Temozolomide Run1-DMSO | NM_0326<br>49 | CNDP1 | carnosine<br>dipeptidas<br>e 1<br>(metallope<br>ptidase<br>M20<br>family)                                          | -0.662999 | Inlier |
| siRNA-Temozolomide Run2-DMSO | NM_0326<br>49 | CNDP1 | carnosine<br>dipeptidas<br>e 1<br>(metallope<br>ptidase<br>M20<br>family)                                          | -0.449464 | Inlier |
| siRNA Disorazole DMSO Run3   | NM_0326<br>49 | CNDP1 | carnosine<br>dipeptidas<br>e 1<br>(metallope<br>ptidase<br>M20<br>family)                                          | -0.135028 | Inlier |
| siRNA Disorazole DMSO Run1   | NM_0326<br>49 | CNDP1 | carnosine<br>dipeptidas<br>e 1<br>(metallope<br>ptidase<br>M20<br>family)                                          | 0.135028  | Inlier |
| siRNA Disorazole DMSO Run2   | NM_0326<br>49 | CNDP1 | carnosine<br>dipeptidas<br>e 1<br>(metallope<br>ptidase<br>M20<br>family)                                          | 0.818417  | Inlier |

Identification of Survival Genes in Human Glioblastoma Cells Using siRNA Screening

Nikhil G Thaker, Fang Zhang, Peter R. McDonald, Tong Ying Shun, Michael D Lewen, Ian F. Pollack, and John S. Lazo

Molecular Pharmacology

|                              |               |       |                                                                                       |           |        |
|------------------------------|---------------|-------|---------------------------------------------------------------------------------------|-----------|--------|
| siRNA-Vinblastine Run2-DMSO  | NM_0326<br>49 | CNDP1 | car<br>nosine<br>dipeptidas<br>e 1<br>(metallope<br>ptidase<br>M20<br>family)         | 0.989793  | Inlier |
| siRNA-Vinblastine Run1-DMSO  | NM_0326<br>49 | CNDP1 | car<br>nosine<br>dipeptidas<br>e 1<br>(metallope<br>ptidase<br>M20<br>family)<br>CNDP | 1.76988   | Inlier |
| siRNA-Temozolomide Run3-DMSO | NM_0182<br>35 | CNDP2 | dipeptidas<br>e 2<br>(metallope<br>ptidase<br>M20<br>family)<br>CNDP                  | -0.921547 | Inlier |
| siRNA-Temozolomide Run1-DMSO | NM_0182<br>35 | CNDP2 | dipeptidas<br>e 2<br>(metallope<br>ptidase<br>M20<br>family)<br>CNDP                  | -0.731357 | Inlier |
| siRNA-Temozolomide Run2-DMSO | NM_0182<br>35 | CNDP2 | dipeptidas<br>e 2<br>(metallope<br>ptidase<br>M20<br>family)<br>CNDP                  | -0.468551 | Inlier |
| siRNA Disorazole DMSO Run1   | NM_0182<br>35 | CNDP2 | dipeptidas<br>e 2<br>(metallope<br>ptidase<br>M20<br>family)<br>CNDP                  | -0.031682 | Inlier |
| siRNA Disorazole DMSO Run3   | NM_0182<br>35 | CNDP2 | dipeptidas<br>e 2<br>(metallope<br>ptidase<br>M20<br>family)                          | 0.031682  | Inlier |

Identification of Survival Genes in Human Glioblastoma Cells Using siRNA Screening

Nikhil G Thaker, Fang Zhang, Peter R. McDonald, Tong Ying Shun, Michael D Lewen, Ian F. Pollack, and John S. Lazo

Molecular Pharmacology

| siRNA Treatment              | Gene ID   | Gene Name | Gene Description                                 | Value     | Category |
|------------------------------|-----------|-----------|--------------------------------------------------|-----------|----------|
| siRNA-Vinblastine Run2-DMSO  | NM_018235 | CNDP2     | CNDP dipeptidase 2 (metallopeptidase M20 family) | 0.617643  | Inlier   |
| siRNA Disorazole DMSO Run2   | NM_018235 | CNDP2     | CNDP dipeptidase 2 (metallopeptidase M20 family) | 0.88037   | Inlier   |
| siRNA-Vinblastine Run1-DMSO  | NM_018235 | CNDP2     | CNDP dipeptidase 2 (metallopeptidase M20 family) | 1.299892  | Inlier   |
| siRNA-Temozolomide Run3-DMSO | NM_000087 | CNGA1     | cyclic nucleotide gated channel alpha 1          | -0.773989 | Inlier   |
| siRNA Disorazole DMSO Run2   | NM_000087 | CNGA1     | cyclic nucleotide gated channel alpha 1          | -0.726692 | Inlier   |
| siRNA-Temozolomide Run2-DMSO | NM_000087 | CNGA1     | cyclic nucleotide gated channel alpha 1          | -0.622308 | Inlier   |
| siRNA Disorazole DMSO Run3   | NM_000087 | CNGA1     | cyclic nucleotide gated channel alpha 1          | -0.513685 | Inlier   |
| siRNA-Temozolomide Run1-DMSO | NM_000087 | CNGA1     | cyclic nucleotide gated channel alpha 1          | 0.513685  | Inlier   |
| siRNA Disorazole DMSO Run1   | NM_000087 | CNGA1     | cyclic nucleotide gated channel alpha 1          | 0.598724  | Inlier   |

Identification of Survival Genes in Human Glioblastoma Cells Using siRNA Screening  
 Nikhil G Thaker, Fang Zhang, Peter R. McDonald, Tong Ying Shun, Michael D Lewen, Ian F. Pollack, and John S. Lazo

Molecular Pharmacology

|                              |           |       |                                         |           |        |
|------------------------------|-----------|-------|-----------------------------------------|-----------|--------|
| siRNA-Vinblastine Run2-DMSO  | NM_000087 | CNGA1 | cyclic nucleotide gated channel alpha 1 | 0.815041  | Inlier |
| siRNA-Vinblastine Run1-DMSO  | NM_000087 | CNGA1 | cyclic nucleotide gated channel alpha 1 | 1.116321  | Inlier |
| siRNA Disorazole DMSO Run1   | NM_001298 | CNGA3 | cyclic nucleotide gated channel alpha 3 | -1.151529 | Inlier |
| siRNA-Temozolomide Run2-DMSO | NM_001298 | CNGA3 | cyclic nucleotide gated channel alpha 3 | -0.926778 | Inlier |
| siRNA-Temozolomide Run3-DMSO | NM_001298 | CNGA3 | cyclic nucleotide gated channel alpha 3 | -0.71432  | Inlier |
| siRNA-Vinblastine Run1-DMSO  | NM_001298 | CNGA3 | cyclic nucleotide gated channel alpha 3 | -0.176667 | Inlier |
| siRNA-Temozolomide Run1-DMSO | NM_001298 | CNGA3 | cyclic nucleotide gated channel alpha 3 | 0.176668  | Inlier |
| siRNA Disorazole DMSO Run2   | NM_001298 | CNGA3 | cyclic nucleotide gated channel alpha 3 | 0.235794  | Inlier |
| siRNA Disorazole DMSO Run3   | NM_001298 | CNGA3 | cyclic nucleotide gated channel alpha 3 | 0.63468   | Inlier |
| siRNA-Vinblastine Run2-DMSO  | NM_001298 | CNGA3 | cyclic nucleotide gated channel alpha 3 | 0.804391  | Inlier |



Identification of Survival Genes in Human Glioblastoma Cells Using siRNA Screening  
 Nikhil G Thaker, Fang Zhang, Peter R. McDonald, Tong Ying Shun, Michael D Lewen, Ian F. Pollack, and John S. Lazo

Molecular Pharmacology

|                              |               |       |                                        |           |        |
|------------------------------|---------------|-------|----------------------------------------|-----------|--------|
| siRNA Disorazole DMSO Run2   | NM_0012<br>97 | CNGB1 | cyclic nucleotide gated channel beta 1 | -2.245814 | Inlier |
| siRNA Disorazole DMSO Run1   | NM_0012<br>97 | CNGB1 | cyclic nucleotide gated channel beta 1 | -0.746044 | Inlier |
| siRNA-Temozolomide Run3-DMSO | NM_0012<br>97 | CNGB1 | cyclic nucleotide gated channel beta 1 | -0.601319 | Inlier |
| siRNA-Temozolomide Run1-DMSO | NM_0012<br>97 | CNGB1 | cyclic nucleotide gated channel beta 1 | -0.067108 | Inlier |
| siRNA-Temozolomide Run2-DMSO | NM_0012<br>97 | CNGB1 | cyclic nucleotide gated channel beta 1 | 0.067108  | Inlier |
| siRNA-Vinblastine Run1-DMSO  | NM_0012<br>97 | CNGB1 | cyclic nucleotide gated channel beta 1 | 0.602956  | Inlier |
| siRNA-Vinblastine Run2-DMSO  | NM_0012<br>97 | CNGB1 | cyclic nucleotide gated channel beta 1 | 1.051212  | Inlier |
| siRNA Disorazole DMSO Run3   | NM_0012<br>97 | CNGB1 | cyclic nucleotide gated channel beta 1 | 1.631385  | Inlier |
| siRNA Disorazole DMSO Run2   | NM_0190<br>98 | CNGB3 | cyclic nucleotide gated channel beta 3 | -1.085364 | Inlier |
| siRNA Disorazole DMSO Run1   | NM_0190<br>98 | CNGB3 | cyclic nucleotide gated channel beta 3 | -0.998548 | Inlier |

Identification of Survival Genes in Human Glioblastoma Cells Using siRNA Screening

Nikhil G Thaker, Fang Zhang, Peter R. McDonald, Tong Ying Shun, Michael D Lewen, Ian F. Pollack, and John S. Lazo

Molecular Pharmacology

|                              |               |        |                                                  |           |        |
|------------------------------|---------------|--------|--------------------------------------------------|-----------|--------|
| siRNA Disorazole DMSO Run3   | NM_0190<br>98 | CNGB3  | cyclic nucleotide gated channel beta 3           | -0.287939 | Inlier |
| siRNA-Temozolomide Run3-DMSO | NM_0190<br>98 | CNGB3  | cyclic nucleotide gated channel beta 3           | -0.22821  | Inlier |
| siRNA-Temozolomide Run2-DMSO | NM_0190<br>98 | CNGB3  | cyclic nucleotide gated channel beta 3           | 0.228209  | Inlier |
| siRNA-Temozolomide Run1-DMSO | NM_0190<br>98 | CNGB3  | cyclic nucleotide gated channel beta 3           | 0.350452  | Inlier |
| siRNA-Vinblastine Run1-DMSO  | NM_0190<br>98 | CNGB3  | cyclic nucleotide gated channel beta 3           | 1.100379  | Inlier |
| siRNA-Vinblastine Run2-DMSO  | NM_0190<br>98 | CNGB3  | cyclic nucleotide gated channel beta 3           | 1.187839  | Inlier |
| siRNA-Temozolomide Run3-DMSO | NM_0063<br>14 | CNKSR1 | connector enhancer of kinase suppressor of Ras 1 | -1.380553 | Inlier |
| siRNA Disorazole DMSO Run2   | NM_0063<br>14 | CNKSR1 | connector enhancer of kinase suppressor of Ras 1 | -1.269897 | Inlier |
| siRNA-Temozolomide Run2-DMSO | NM_0063<br>14 | CNKSR1 | connector enhancer of kinase suppressor of Ras 1 | -0.516188 | Inlier |

Identification of Survival Genes in Human Glioblastoma Cells Using siRNA Screening  
 Nikhil G Thaker, Fang Zhang, Peter R. McDonald, Tong Ying Shun, Michael D Lewen, Ian F. Pollack, and John S. Lazo  
 Molecular Pharmacology

|                              |               |        |                                                               |           |        |
|------------------------------|---------------|--------|---------------------------------------------------------------|-----------|--------|
| siRNA-Temozolomide Run1-DMSO | NM_0063<br>14 | CNKSR1 | connector<br>enhancer<br>of kinase<br>suppresso<br>r of Ras 1 | -0.272037 | Inlier |
| siRNA Disorazole DMSO Run1   | NM_0063<br>14 | CNKSR1 | connector<br>enhancer<br>of kinase<br>suppresso<br>r of Ras 1 | 0.272037  | Inlier |
| siRNA Disorazole DMSO Run3   | NM_0063<br>14 | CNKSR1 | connector<br>enhancer<br>of kinase<br>suppresso<br>r of Ras 1 | 0.457452  | Inlier |
| siRNA-Vinblastine Run2-DMSO  | NM_0063<br>14 | CNKSR1 | connector<br>enhancer<br>of kinase<br>suppresso<br>r of Ras 1 | 0.832812  | Inlier |
| siRNA-Vinblastine Run1-DMSO  | NM_0063<br>14 | CNKSR1 | connector<br>enhancer<br>of kinase<br>suppresso<br>r of Ras 1 | 1.009361  | Inlier |
| siRNA-Temozolomide Run3-DMSO | NM_0331<br>33 | CNP    | 2,3-cyclic<br>nucleotide<br>3<br>phosphodi<br>esterase        | -1.017635 | Inlier |
| siRNA Disorazole DMSO Run1   | NM_0331<br>33 | CNP    | 2,3-cyclic<br>nucleotide<br>3<br>phosphodi<br>esterase        | -0.524194 | Inlier |
| siRNA-Temozolomide Run2-DMSO | NM_0331<br>33 | CNP    | 2,3-cyclic<br>nucleotide<br>3<br>phosphodi<br>esterase        | -0.119031 | Inlier |
| siRNA Disorazole DMSO Run2   | NM_0331<br>33 | CNP    | 2,3-cyclic<br>nucleotide<br>3<br>phosphodi<br>esterase        | -0.075008 | Inlier |

Identification of Survival Genes in Human Glioblastoma Cells Using siRNA Screening  
 Nikhil G Thaker, Fang Zhang, Peter R. McDonald, Tong Ying Shun, Michael D Lewen, Ian F. Pollack, and John S. Lazo

Molecular Pharmacology

|                              |           |      |                                           |           |         |
|------------------------------|-----------|------|-------------------------------------------|-----------|---------|
| siRNA-Temozolomide Run1-DMSO | NM_033133 | CNP  | 2,3-cyclic nucleotide 3 phosphodiesterase | 0.075007  | Inlier  |
| siRNA-Vinblastine Run2-DMSO  | NM_033133 | CNP  | 2,3-cyclic nucleotide 3 phosphodiesterase | 0.824805  | Inlier  |
| siRNA-Vinblastine Run1-DMSO  | NM_033133 | CNP  | 2,3-cyclic nucleotide 3 phosphodiesterase | 1.061028  | Inlier  |
| siRNA Disorazole DMSO Run3   | NM_033133 | CNP  | 2,3-cyclic nucleotide 3 phosphodiesterase | 3.805285  | Outlier |
| siRNA-Temozolomide Run2-DMSO | NM_033181 | CNR1 | cannabinoid receptor 1 (brain)            | -1.279629 | Inlier  |
| siRNA-Temozolomide Run3-DMSO | NM_033181 | CNR1 | cannabinoid receptor 1 (brain)            | -0.934761 | Inlier  |
| siRNA Disorazole DMSO Run1   | NM_033181 | CNR1 | cannabinoid receptor 1 (brain)            | -0.210981 | Inlier  |
| siRNA-Temozolomide Run1-DMSO | NM_033181 | CNR1 | cannabinoid receptor 1 (brain)            | -0.103417 | Inlier  |
| siRNA-Vinblastine Run2-DMSO  | NM_033181 | CNR1 | cannabinoid receptor 1 (brain)            | 0.103417  | Inlier  |
| siRNA-Vinblastine Run1-DMSO  | NM_033181 | CNR1 | cannabinoid receptor 1 (brain)            | 0.440934  | Inlier  |
| siRNA Disorazole DMSO Run2   | NM_033181 | CNR1 | cannabinoid receptor 1 (brain)            | 0.908066  | Inlier  |
| siRNA Disorazole DMSO Run3   | NM_033181 | CNR1 | cannabinoid receptor 1 (brain)            | 1.033804  | Inlier  |

Identification of Survival Genes in Human Glioblastoma Cells Using siRNA Screening  
 Nikhil G Thaker, Fang Zhang, Peter R. McDonald, Tong Ying Shun, Michael D Lewen, Ian F. Pollack, and John S. Lazo

Molecular Pharmacology

|                              |               |       |                                                     |           |        |
|------------------------------|---------------|-------|-----------------------------------------------------|-----------|--------|
| siRNA-Temozolomide Run3-DMSO | NM_0018<br>41 | CNR2  | cannabinoid receptor 2 (macrophage)                 | -0.768505 | Inlier |
| siRNA-Temozolomide Run2-DMSO | NM_0018<br>41 | CNR2  | cannabinoid receptor 2 (macrophage)                 | -0.580495 | Inlier |
| siRNA Disorazole DMSO Run2   | NM_0018<br>41 | CNR2  | cannabinoid receptor 2 (macrophage)                 | -0.572241 | Inlier |
| siRNA Disorazole DMSO Run3   | NM_0018<br>41 | CNR2  | cannabinoid receptor 2 (macrophage)                 | -0.35099  | Inlier |
| siRNA-Temozolomide Run1-DMSO | NM_0018<br>41 | CNR2  | cannabinoid receptor 2 (macrophage)                 | 0.350991  | Inlier |
| siRNA Disorazole DMSO Run1   | NM_0018<br>41 | CNR2  | cannabinoid receptor 2 (macrophage)                 | 1.128759  | Inlier |
| siRNA-Vinblastine Run1-DMSO  | NM_0018<br>41 | CNR2  | cannabinoid receptor 2 (macrophage)                 | 1.411997  | Inlier |
| siRNA-Vinblastine Run2-DMSO  | NM_0018<br>41 | CNR2  | ciliary neurotrophic factor receptor 2 (macrophage) | 1.497071  | Inlier |
| siRNA-Temozolomide Run3-DMSO | NM_1471<br>64 | CNTFR | ciliary neurotrophic factor receptor                | -1.367551 | Inlier |
| siRNA-Temozolomide Run1-DMSO | NM_1471<br>64 | CNTFR | ciliary neurotrophic factor receptor                | -1.336933 | Inlier |
| siRNA-Temozolomide Run2-DMSO | NM_1471<br>64 | CNTFR | ciliary neurotrophic factor receptor                | -0.767388 | Inlier |

Identification of Survival Genes in Human Glioblastoma Cells Using siRNA Screening  
 Nikhil G Thaker, Fang Zhang, Peter R. McDonald, Tong Ying Shun, Michael D Lewen, Ian F. Pollack, and John S. Lazo

Molecular Pharmacology

|                              |               |         |                                      |           |        |
|------------------------------|---------------|---------|--------------------------------------|-----------|--------|
| siRNA-Vinblastine Run2-DMSO  | NM_1471<br>64 | CNTFR   | ciliary neurotrophic factor receptor | -0.190989 | Inlier |
| siRNA Disorazole DMSO Run1   | NM_1471<br>64 | CNTFR   | ciliary neurotrophic factor receptor | 0.190989  | Inlier |
| siRNA Disorazole DMSO Run3   | NM_1471<br>64 | CNTFR   | ciliary neurotrophic factor receptor | 0.43622   | Inlier |
| siRNA Disorazole DMSO Run2   | NM_1471<br>64 | CNTFR   | ciliary neurotrophic factor receptor | 0.581612  | Inlier |
| siRNA-Vinblastine Run1-DMSO  | NM_1471<br>64 | CNTFR   | ciliary neurotrophic factor receptor | 0.940351  | Inlier |
| siRNA-Temozolomide Run3-DMSO | NM_0036<br>32 | CNTNAP1 | contactin associated protein 1       | -1.758069 | Inlier |
| siRNA-Temozolomide Run2-DMSO | NM_0036<br>32 | CNTNAP1 | contactin associated protein 1       | -0.594705 | Inlier |
| siRNA Disorazole DMSO Run3   | NM_0036<br>32 | CNTNAP1 | contactin associated protein 1       | -0.126858 | Inlier |
| siRNA-Temozolomide Run1-DMSO | NM_0036<br>32 | CNTNAP1 | contactin associated protein 1       | -0.0371   | Inlier |
| siRNA Disorazole DMSO Run1   | NM_0036<br>32 | CNTNAP1 | contactin associated protein 1       | 0.0371    | Inlier |
| siRNA-Vinblastine Run2-DMSO  | NM_0036<br>32 | CNTNAP1 | contactin associated protein 1       | 0.754295  | Inlier |
| siRNA Disorazole DMSO Run2   | NM_0036<br>32 | CNTNAP1 | contactin associated protein 1       | 1.219241  | Inlier |
| siRNA-Vinblastine Run1-DMSO  | NM_0036<br>32 | CNTNAP1 | contactin associated protein 1       | 1.811269  | Inlier |

Identification of Survival Genes in Human Glioblastoma Cells Using siRNA Screening  
 Nikhil G Thaker, Fang Zhang, Peter R. McDonald, Tong Ying Shun, Michael D Lewen, Ian F. Pollack, and John S. Lazo

Molecular Pharmacology

|                              |               |         |                                     |           |        |
|------------------------------|---------------|---------|-------------------------------------|-----------|--------|
| siRNA-Temozolomide Run3-DMSO | NM_0141<br>41 | CNTNAP2 | contactin associated protein-like 2 | -1.504601 | Inlier |
| siRNA Disorazole DMSO Run3   | NM_0141<br>41 | CNTNAP2 | contactin associated protein-like 2 | -0.356146 | Inlier |
| siRNA-Vinblastine Run2-DMSO  | NM_0141<br>41 | CNTNAP2 | contactin associated protein-like 2 | -0.112318 | Inlier |
| siRNA-Temozolomide Run2-DMSO | NM_0141<br>41 | CNTNAP2 | contactin associated protein-like 2 | -0.047753 | Inlier |
| siRNA-Temozolomide Run1-DMSO | NM_0141<br>41 | CNTNAP2 | contactin associated protein-like 2 | 0.047753  | Inlier |
| siRNA Disorazole DMSO Run1   | NM_0141<br>41 | CNTNAP2 | contactin associated protein-like 2 | 0.992854  | Inlier |
| siRNA Disorazole DMSO Run2   | NM_0141<br>41 | CNTNAP2 | contactin associated protein-like 2 | 1.001984  | Inlier |
| siRNA-Vinblastine Run1-DMSO  | NM_0141<br>41 | CNTNAP2 | contactin associated protein-like 2 | 1.031377  | Inlier |
| siRNA-Vinblastine Run2-DMSO  | NM_1389<br>94 | CNTNAP4 | contactin associated protein-like 4 | -1.141418 | Inlier |
| siRNA Disorazole DMSO Run3   | NM_1389<br>94 | CNTNAP4 | contactin associated protein-like 4 | -0.726047 | Inlier |
| siRNA-Temozolomide Run3-DMSO | NM_1389<br>94 | CNTNAP4 | contactin associated protein-like 4 | -0.110657 | Inlier |
| siRNA-Temozolomide Run2-DMSO | NM_1389<br>94 | CNTNAP4 | contactin associated protein-like 4 | -0.01881  | Inlier |
| siRNA Disorazole DMSO Run1   | NM_1389<br>94 | CNTNAP4 | contactin associated protein-like 4 | 0.01881   | Inlier |

Identification of Survival Genes in Human Glioblastoma Cells Using siRNA Screening  
 Nikhil G Thaker, Fang Zhang, Peter R. McDonald, Tong Ying Shun, Michael D Lewen, Ian F. Pollack, and John S. Lazo

Molecular Pharmacology

|                              |               |         |                                                                   |           |        |
|------------------------------|---------------|---------|-------------------------------------------------------------------|-----------|--------|
| siRNA-Temozolomide Run1-DMSO | NM_1389<br>94 | CNTNAP4 | contactin associated protein-like 4                               | 0.622953  | Inlier |
| siRNA-Vinblastine Run1-DMSO  | NM_1389<br>94 | CNTNAP4 | contactin associated protein-like 4                               | 1.981623  | Inlier |
| siRNA Disorazole DMSO Run2   | NM_1389<br>94 | CNTNAP4 | contactin associated protein-like 4<br>peptidylprolyl isomerase A | 2.48649   | Inlier |
| siRNA-Temozolomide Run2-DMSO | NM_1782<br>30 | COAS2   | (cyclophilin A)-like 4<br>peptidylprolyl isomerase A              | -1.194345 | Inlier |
| siRNA-Temozolomide Run3-DMSO | NM_1782<br>30 | COAS2   | (cyclophilin A)-like 4<br>peptidylprolyl isomerase A              | -0.854833 | Inlier |
| siRNA-Vinblastine Run2-DMSO  | NM_1782<br>30 | COAS2   | (cyclophilin A)-like 4<br>peptidylprolyl isomerase A              | -0.494167 | Inlier |
| siRNA Disorazole DMSO Run3   | NM_1782<br>30 | COAS2   | (cyclophilin A)-like 4<br>peptidylprolyl isomerase A              | -0.113982 | Inlier |
| siRNA Disorazole DMSO Run1   | NM_1782<br>30 | COAS2   | (cyclophilin A)-like 4<br>peptidylprolyl isomerase A              | 0.113982  | Inlier |
| siRNA-Temozolomide Run1-DMSO | NM_1782<br>30 | COAS2   | (cyclophilin A)-like 4                                            | 0.280642  | Inlier |



Identification of Survival Genes in Human Glioblastoma Cells Using siRNA Screening  
 Nikhil G Thaker, Fang Zhang, Peter R. McDonald, Tong Ying Shun, Michael D Lewen, Ian F. Pollack, and John S. Lazo

Molecular Pharmacology

|                              |               |       |                                                   |           |        |
|------------------------------|---------------|-------|---------------------------------------------------|-----------|--------|
| siRNA-Vinblastine Run1-DMSO  | NM_1782<br>30 | COAS2 | peptidylprolyl isomerase A (cyclophilin A)-like 4 | 2.138959  | Inlier |
| siRNA Disorazole DMSO Run2   | NM_1782<br>30 | COAS2 | peptidylprolyl isomerase A (cyclophilin A)-like 4 | 2.46565   | Inlier |
| siRNA Disorazole DMSO Run2   | NM_0252<br>33 | COASY | Coenzyme A synthase                               | -2.45575  | Inlier |
| siRNA-Temozolomide Run3-DMSO | NM_0252<br>33 | COASY | Coenzyme A synthase                               | -0.715827 | Inlier |
| siRNA-Temozolomide Run1-DMSO | NM_0252<br>33 | COASY | Coenzyme A synthase                               | -0.633173 | Inlier |
| siRNA-Vinblastine Run1-DMSO  | NM_0252<br>33 | COASY | Coenzyme A synthase                               | -0.030801 | Inlier |
| siRNA Disorazole DMSO Run1   | NM_0252<br>33 | COASY | Coenzyme A synthase                               | 0.030801  | Inlier |
| siRNA-Temozolomide Run2-DMSO | NM_0252<br>33 | COASY | Coenzyme A synthase                               | 0.379325  | Inlier |
| siRNA-Vinblastine Run2-DMSO  | NM_0252<br>33 | COASY | Coenzyme A synthase                               | 1.689759  | Inlier |
| siRNA Disorazole DMSO Run3   | NM_0252<br>33 | COASY | Coenzyme A synthase                               | 2.411786  | Inlier |
| siRNA-Temozolomide Run3-DMSO | NM_0073<br>57 | COG2  | component of oligomeric golgi complex 2           | -1.278609 | Inlier |
| siRNA-Temozolomide Run2-DMSO | NM_0073<br>57 | COG2  | component of oligomeric golgi complex 2           | -0.266639 | Inlier |

Identification of Survival Genes in Human Glioblastoma Cells Using siRNA Screening  
 Nikhil G Thaker, Fang Zhang, Peter R. McDonald, Tong Ying Shun, Michael D Lewen, Ian F. Pollack, and John S. Lazo  
 Molecular Pharmacology

|                              |               |      |                                         |           |        |
|------------------------------|---------------|------|-----------------------------------------|-----------|--------|
| siRNA Disorazole DMSO Run3   | NM_0073<br>57 | COG2 | component of oligomeric golgi complex 2 | -0.170307 | Inlier |
| siRNA-Temozolomide Run1-DMSO | NM_0073<br>57 | COG2 | component of oligomeric golgi complex 2 | -0.009563 | Inlier |
| siRNA Disorazole DMSO Run2   | NM_0073<br>57 | COG2 | component of oligomeric golgi complex 2 | 0.009563  | Inlier |
| siRNA Disorazole DMSO Run1   | NM_0073<br>57 | COG2 | component of oligomeric golgi complex 2 | 1.082361  | Inlier |
| siRNA-Vinblastine Run2-DMSO  | NM_0073<br>57 | COG2 | component of oligomeric golgi complex 2 | 2.480388  | Inlier |
| siRNA-Vinblastine Run1-DMSO  | NM_0073<br>57 | COG2 | component of oligomeric golgi complex 2 | 2.503774  | Inlier |
| siRNA-Temozolomide Run3-DMSO | NM_0063<br>48 | COG5 | component of oligomeric golgi complex 5 | -1.980816 | Inlier |
| siRNA-Temozolomide Run2-DMSO | NM_0063<br>48 | COG5 | component of oligomeric golgi complex 5 | -0.904403 | Inlier |

Identification of Survival Genes in Human Glioblastoma Cells Using siRNA Screening  
 Nikhil G Thaker, Fang Zhang, Peter R. McDonald, Tong Ying Shun, Michael D Lewen, Ian F. Pollack, and John S. Lazo  
 Molecular Pharmacology

|                              |               |      |                                         |           |        |
|------------------------------|---------------|------|-----------------------------------------|-----------|--------|
| siRNA Disorazole DMSO Run1   | NM_0063<br>48 | COG5 | component of oligomeric golgi complex 5 | -0.591346 | Inlier |
| siRNA-Temozolomide Run1-DMSO | NM_0063<br>48 | COG5 | component of oligomeric golgi complex 5 | -0.277674 | Inlier |
| siRNA-Vinblastine Run1-DMSO  | NM_0063<br>48 | COG5 | component of oligomeric golgi complex 5 | 0.277674  | Inlier |
| siRNA Disorazole DMSO Run3   | NM_0063<br>48 | COG5 | component of oligomeric golgi complex 5 | 0.360136  | Inlier |
| siRNA-Vinblastine Run2-DMSO  | NM_0063<br>48 | COG5 | component of oligomeric golgi complex 5 | 0.757654  | Inlier |
| siRNA Disorazole DMSO Run2   | NM_0063<br>48 | COG5 | component of oligomeric golgi complex 5 | 0.814483  | Inlier |
| siRNA-Temozolomide Run3-DMSO | NM_0323<br>82 | COG8 | component of oligomeric golgi complex 8 | -1.279496 | Inlier |
| siRNA-Temozolomide Run2-DMSO | NM_0323<br>82 | COG8 | component of oligomeric golgi complex 8 | -0.829022 | Inlier |

Identification of Survival Genes in Human Glioblastoma Cells Using siRNA Screening  
 Nikhil G Thaker, Fang Zhang, Peter R. McDonald, Tong Ying Shun, Michael D Lewen, Ian F. Pollack, and John S. Lazo  
 Molecular Pharmacology

|                              |               |          |                                                                                             |           |        |
|------------------------------|---------------|----------|---------------------------------------------------------------------------------------------|-----------|--------|
| siRNA-Temozolomide Run1-DMSO | NM_0323<br>82 | COG8     | component of oligomeric golgi complex 8                                                     | -0.519978 | Inlier |
| siRNA Disorazole DMSO Run3   | NM_0323<br>82 | COG8     | component of oligomeric golgi complex 8                                                     | -0.301609 | Inlier |
| siRNA Disorazole DMSO Run1   | NM_0323<br>82 | COG8     | component of oligomeric golgi complex 8                                                     | 0.301609  | Inlier |
| siRNA Disorazole DMSO Run2   | NM_0323<br>82 | COG8     | component of oligomeric golgi complex 8                                                     | 0.463233  | Inlier |
| siRNA-Vinblastine Run1-DMSO  | NM_0323<br>82 | COG8     | component of oligomeric golgi complex 8                                                     | 0.979285  | Inlier |
| siRNA-Vinblastine Run2-DMSO  | NM_0323<br>82 | COG8     | component of oligomeric golgi complex 8<br>collagen, type IV, alpha 3 (Goodpasture antigen) | 1.268023  | Inlier |
| siRNA-Temozolomide Run2-DMSO | NM_0313<br>61 | COL4A3BP | binding protein collagen, type IV, alpha 3 (Goodpasture antigen)                            | -1.398234 | Inlier |
| siRNA-Temozolomide Run3-DMSO | NM_0313<br>61 | COL4A3BP | binding protein                                                                             | -1.124027 | Inlier |

Identification of Survival Genes in Human Glioblastoma Cells Using siRNA Screening

Nikhil G Thaker, Fang Zhang, Peter R. McDonald, Tong Ying Shun, Michael D Lewen, Ian F. Pollack, and John S. Lazo

Molecular Pharmacology

|                                  |               |              |  |                                                                                        |                  |
|----------------------------------|---------------|--------------|--|----------------------------------------------------------------------------------------|------------------|
|                                  |               |              |  | collagen,<br>type IV,<br>alpha 3<br>(Goodpast<br>ure<br>antigen)<br>binding<br>protein |                  |
| siRNA-Temozolomide Run1-<br>DMSO | NM_0313<br>61 | COL4A3B<br>P |  | collagen,<br>type IV,<br>alpha 3<br>(Goodpast<br>ure<br>antigen)<br>binding<br>protein | -0.210374 Inlier |
| siRNA Disorazole DMSO Run3       | NM_0313<br>61 | COL4A3B<br>P |  | collagen,<br>type IV,<br>alpha 3<br>(Goodpast<br>ure<br>antigen)<br>binding<br>protein | -0.080486 Inlier |
| siRNA Disorazole DMSO Run1       | NM_0313<br>61 | COL4A3B<br>P |  | collagen,<br>type IV,<br>alpha 3<br>(Goodpast<br>ure<br>antigen)<br>binding<br>protein | 0.080486 Inlier  |
| siRNA Disorazole DMSO Run2       | NM_0313<br>61 | COL4A3B<br>P |  | collagen,<br>type IV,<br>alpha 3<br>(Goodpast<br>ure<br>antigen)<br>binding<br>protein | 0.39551 Inlier   |
| siRNA-Vinblastine Run2-<br>DMSO  | NM_0313<br>61 | COL4A3B<br>P |  | collagen,<br>type IV,<br>alpha 3<br>(Goodpast<br>ure<br>antigen)<br>binding<br>protein | 0.95349 Inlier   |
| siRNA-Vinblastine Run1-<br>DMSO  | NM_0313<br>61 | COL4A3B<br>P |  | collagen,<br>type IV,<br>alpha 3<br>(Goodpast<br>ure<br>antigen)<br>binding<br>protein | 1.1388 Inlier    |
| siRNA-Temozolomide Run3-<br>DMSO | NM_0073<br>10 | COMT         |  | catechol-O-<br>methyltran<br>sferase                                                   | -1.142509 Inlier |

Identification of Survival Genes in Human Glioblastoma Cells Using siRNA Screening  
 Nikhil G Thaker, Fang Zhang, Peter R. McDonald, Tong Ying Shun, Michael D Lewen, Ian F. Pollack, and John S. Lazo  
 Molecular Pharmacology

|                                  |               |        |                                                                   |           |         |
|----------------------------------|---------------|--------|-------------------------------------------------------------------|-----------|---------|
| siRNA Disorazole DMSO Run3       | NM_0073<br>10 | COMT   | catechol-O-<br>methyltran<br>sferase                              | -0.77085  | Inlier  |
| siRNA-Temozolomide Run2-<br>DMSO | NM_0073<br>10 | COMT   | catechol-O-<br>methyltran<br>sferase                              | -0.57815  | Inlier  |
| siRNA-Temozolomide Run1-<br>DMSO | NM_0073<br>10 | COMT   | catechol-O-<br>methyltran<br>sferase                              | -0.083198 | Inlier  |
| siRNA Disorazole DMSO Run1       | NM_0073<br>10 | COMT   | catechol-O-<br>methyltran<br>sferase                              | 0.083198  | Inlier  |
| siRNA-Vinblastine Run2-<br>DMSO  | NM_0073<br>10 | COMT   | catechol-O-<br>methyltran<br>sferase                              | 0.273849  | Inlier  |
| siRNA Disorazole DMSO Run2       | NM_0073<br>10 | COMT   | catechol-O-<br>methyltran<br>sferase                              | 8.031831  | Outlier |
| siRNA-Vinblastine Run1-<br>DMSO  | NM_0073<br>10 | COMT   | catechol-O-<br>methyltran<br>sferase                              | 10.68922  | Outlier |
| siRNA Disorazole DMSO Run1       | NM_1445<br>89 | COMTD1 | catechol-O-<br>methyltran<br>sferase<br>domain<br>containing<br>1 | -1.213861 | Inlier  |
| siRNA-Temozolomide Run2-<br>DMSO | NM_1445<br>89 | COMTD1 | catechol-O-<br>methyltran<br>sferase<br>domain<br>containing<br>1 | -0.699615 | Inlier  |
| siRNA-Temozolomide Run1-<br>DMSO | NM_1445<br>89 | COMTD1 | catechol-O-<br>methyltran<br>sferase<br>domain<br>containing<br>1 | -0.649385 | Inlier  |

Identification of Survival Genes in Human Glioblastoma Cells Using siRNA Screening

Nikhil G Thaker, Fang Zhang, Peter R. McDonald, Tong Ying Shun, Michael D Lewen, Ian F. Pollack, and John S. Lazo

Molecular Pharmacology

|                              |               |        |                                                                                                  |           |        |
|------------------------------|---------------|--------|--------------------------------------------------------------------------------------------------|-----------|--------|
| siRNA-Vinblastine Run2-DMSO  | NM_1445<br>89 | COMTD1 | catechol-O-methyltransferase domain containing<br>1                                              | -0.101229 | Inlier |
| siRNA Disorazole DMSO Run3   | NM_1445<br>89 | COMTD1 | catechol-O-methyltransferase domain containing<br>1                                              | 0.101229  | Inlier |
| siRNA-Temozolomide Run3-DMSO | NM_1445<br>89 | COMTD1 | catechol-O-methyltransferase domain containing<br>1                                              | 0.270338  | Inlier |
| siRNA Disorazole DMSO Run2   | NM_1445<br>89 | COMTD1 | catechol-O-methyltransferase domain containing<br>1                                              | 1.618881  | Inlier |
| siRNA-Vinblastine Run1-DMSO  | NM_1445<br>89 | COMTD1 | catechol-O-methyltransferase domain containing<br>1                                              | 2.604206  | Inlier |
| siRNA Disorazole DMSO Run3   | NM_0174<br>21 | COQ3   | coenzyme Q3 homolog, methyltransferase (yeast)<br>coenzyme Q3 homolog, methyltransferase (yeast) | -0.703375 | Inlier |
| siRNA-Temozolomide Run1-DMSO | NM_0174<br>21 | COQ3   | coenzyme Q3 homolog, methyltransferase (yeast)                                                   | -0.645625 | Inlier |

Identification of Survival Genes in Human Glioblastoma Cells Using siRNA Screening  
 Nikhil G Thaker, Fang Zhang, Peter R. McDonald, Tong Ying Shun, Michael D Lewen, Ian F. Pollack, and John S. Lazo

Molecular Pharmacology

| siRNA Treatment              | Gene ID       | Gene Name | Gene Description                               | Log2 Fold Change | Outlier Status |
|------------------------------|---------------|-----------|------------------------------------------------|------------------|----------------|
| siRNA-Temozolomide Run3-DMSO | NM_0174<br>21 | COQ3      | coenzyme Q3 homolog, methyltransferase (yeast) | -0.591516        | Inlier         |
| siRNA-Temozolomide Run2-DMSO | NM_0174<br>21 | COQ3      | coenzyme Q3 homolog, methyltransferase (yeast) | -0.248762        | Inlier         |
| siRNA Disorazole DMSO Run1   | NM_0174<br>21 | COQ3      | coenzyme Q3 homolog, methyltransferase (yeast) | 0.248762         | Inlier         |
| siRNA-Vinblastine Run2-DMSO  | NM_0174<br>21 | COQ3      | coenzyme Q3 homolog, methyltransferase (yeast) | 1.377189         | Inlier         |
| siRNA-Vinblastine Run1-DMSO  | NM_0174<br>21 | COQ3      | coenzyme Q3 homolog, methyltransferase (yeast) | 2.101576         | Inlier         |
| siRNA Disorazole DMSO Run2   | NM_0174<br>21 | COQ3      | coenzyme Q3 homolog, methyltransferase (yeast) | 2.527112         | Inlier         |
| siRNA Disorazole DMSO Run3   | NM_1824<br>76 | COQ6      | coenzyme Q6 homolog (yeast)                    | -1.114371        | Inlier         |
| siRNA-Temozolomide Run3-DMSO | NM_1824<br>76 | COQ6      | coenzyme Q6 homolog (yeast)                    | -0.891551        | Inlier         |
| siRNA Disorazole DMSO Run1   | NM_1824<br>76 | COQ6      | coenzyme Q6 homolog (yeast)                    | -0.110255        | Inlier         |
| siRNA-Temozolomide Run2-DMSO | NM_1824<br>76 | COQ6      | coenzyme Q6 homolog (yeast)                    | -0.072926        | Inlier         |



Identification of Survival Genes in Human Glioblastoma Cells Using siRNA Screening  
 Nikhil G Thaker, Fang Zhang, Peter R. McDonald, Tong Ying Shun, Michael D Lewen, Ian F. Pollack, and John S. Lazo

Molecular Pharmacology

|                              |               |       |                                                                                     |                  |
|------------------------------|---------------|-------|-------------------------------------------------------------------------------------|------------------|
|                              |               |       | coenzyme Q6                                                                         |                  |
| siRNA-Vinblastine Run2-DMSO  | NM_1824<br>76 | COQ6  | homolog (yeast) coenzyme Q6                                                         | 0.072926 Inlier  |
| siRNA-Temozolomide Run1-DMSO | NM_1824<br>76 | COQ6  | homolog (yeast) coenzyme Q6                                                         | 0.457449 Inlier  |
| siRNA-Vinblastine Run1-DMSO  | NM_1824<br>76 | COQ6  | homolog (yeast) coenzyme Q6                                                         | 4.227736 Outlier |
| siRNA Disorazole DMSO Run2   | NM_1824<br>76 | COQ6  | homolog (yeast) corin,                                                              | 5.161734 Outlier |
| siRNA Disorazole DMSO Run2   | NM_0065<br>87 | CORIN | serine protease corin,                                                              | -1.273467 Inlier |
| siRNA-Temozolomide Run3-DMSO | NM_0065<br>87 | CORIN | serine protease corin,                                                              | -0.774096 Inlier |
| siRNA Disorazole DMSO Run1   | NM_0065<br>87 | CORIN | serine protease corin,                                                              | -0.373867 Inlier |
| siRNA-Temozolomide Run2-DMSO | NM_0065<br>87 | CORIN | serine protease corin,                                                              | -0.264255 Inlier |
| siRNA-Temozolomide Run1-DMSO | NM_0065<br>87 | CORIN | serine protease corin,                                                              | 0.264255 Inlier  |
| siRNA-Vinblastine Run1-DMSO  | NM_0065<br>87 | CORIN | serine protease corin,                                                              | 0.643621 Inlier  |
| siRNA-Vinblastine Run2-DMSO  | NM_0065<br>87 | CORIN | serine protease corin,                                                              | 0.705379 Inlier  |
| siRNA Disorazole DMSO Run3   | NM_0065<br>87 | CORIN | serine protease COX10                                                               | 0.719756 Inlier  |
| siRNA-Temozolomide Run3-DMSO | NM_0013<br>03 | COX10 | homolog, cytochrome c oxidase assembly protein, heme A: farnesyltransferase (yeast) | -1.47709 Inlier  |

Identification of Survival Genes in Human Glioblastoma Cells Using siRNA Screening

Nikhil G Thaker, Fang Zhang, Peter R. McDonald, Tong Ying Shun, Michael D Lewen, Ian F. Pollack, and John S.

Lazo

Molecular Pharmacology

| siRNA Treatment              | Gene ID   | Gene Name | Log Fold Change | Outlier Status |
|------------------------------|-----------|-----------|-----------------|----------------|
| siRNA-Temozolomide Run2-DMSO | NM_001303 | COX10     | -1.060756       | Inlier         |
| siRNA Disorazole DMSO Run1   | NM_001303 | COX10     | -0.376708       | Inlier         |
| siRNA-Temozolomide Run1-DMSO | NM_001303 | COX10     | -0.010971       | Inlier         |
| siRNA-Vinblastine Run2-DMSO  | NM_001303 | COX10     | 0.010971        | Inlier         |

COX10  
homolog,  
cytochrom  
e c  
oxidase  
assembly  
protein,  
heme A:  
farnesyltra  
nsferase  
(yeast)

COX10  
homolog,  
cytochrom  
e c  
oxidase  
assembly  
protein,  
heme A:  
farnesyltra  
nsferase  
(yeast)

COX10  
homolog,  
cytochrom  
e c  
oxidase  
assembly  
protein,  
heme A:  
farnesyltra  
nsferase  
(yeast)

COX10  
homolog,  
cytochrom  
e c  
oxidase  
assembly  
protein,  
heme A:  
farnesyltra  
nsferase  
(yeast)

Identification of Survival Genes in Human Glioblastoma Cells Using siRNA Screening

Nikhil G Thaker, Fang Zhang, Peter R. McDonald, Tong Ying Shun, Michael D Lewen, Ian F. Pollack, and John S. Lazo

Molecular Pharmacology

|                              |           |        |                                                                                           |           |        |
|------------------------------|-----------|--------|-------------------------------------------------------------------------------------------|-----------|--------|
| siRNA Disorazole DMSO Run3   | NM_001303 | COX10  | COX10 homolog, cytochrome c oxidase assembly protein, heme A: farnesyltransferase (yeast) | 0.465966  | Inlier |
| siRNA-Vinblastine Run1-DMSO  | NM_001303 | COX10  | COX10 homolog, cytochrome c oxidase assembly protein, heme A: farnesyltransferase (yeast) | 0.883034  | Inlier |
| siRNA Disorazole DMSO Run2   | NM_001303 | COX10  | COX10 homolog, cytochrome c oxidase assembly protein, heme A: farnesyltransferase (yeast) | 1.021073  | Inlier |
| siRNA-Temozolomide Run1-DMSO | NM_001861 | COX4I1 | cytochrome c oxidase subunit IV isoform 1                                                 | -1.099033 | Inlier |
| siRNA-Temozolomide Run2-DMSO | NM_001861 | COX4I1 | cytochrome c oxidase subunit IV isoform 1                                                 | -0.914002 | Inlier |
| siRNA-Temozolomide Run3-DMSO | NM_001861 | COX4I1 | cytochrome c oxidase subunit IV isoform 1                                                 | -0.163854 | Inlier |

Identification of Survival Genes in Human Glioblastoma Cells Using siRNA Screening

Nikhil G Thaker, Fang Zhang, Peter R. McDonald, Tong Ying Shun, Michael D Lewen, Ian F. Pollack, and John S. Lazo

Molecular Pharmacology

| siRNA Treatment              | Gene ID   | Gene Name | Gene Description                                 | Value     | Outlier Status |
|------------------------------|-----------|-----------|--------------------------------------------------|-----------|----------------|
| siRNA-Vinblastine Run2-DMSO  | NM_001861 | COX4I1    | cytochrome c oxidase subunit IV isoform 1        | -0.128122 | Inlier         |
| siRNA Disorazole DMSO Run3   | NM_001861 | COX4I1    | cytochrome c oxidase subunit IV isoform 1        | 0.128121  | Inlier         |
| siRNA-Vinblastine Run1-DMSO  | NM_001861 | COX4I1    | cytochrome c oxidase subunit IV isoform 1        | 0.598131  | Inlier         |
| siRNA Disorazole DMSO Run2   | NM_001861 | COX4I1    | cytochrome c oxidase subunit IV isoform 1        | 0.750869  | Inlier         |
| siRNA Disorazole DMSO Run1   | NM_001861 | COX4I1    | cytochrome c oxidase subunit IV isoform 1        | 0.841391  | Inlier         |
| siRNA-Temozolomide Run3-DMSO | NM_032609 | COX4I2    | cytochrome c oxidase subunit IV isoform 2 (lung) | -1.91365  | Inlier         |
| siRNA Disorazole DMSO Run3   | NM_032609 | COX4I2    | cytochrome c oxidase subunit IV isoform 2 (lung) | -0.739741 | Inlier         |
| siRNA Disorazole DMSO Run1   | NM_032609 | COX4I2    | cytochrome c oxidase subunit IV isoform 2 (lung) | -0.609259 | Inlier         |
| siRNA-Vinblastine Run2-DMSO  | NM_032609 | COX4I2    | cytochrome c oxidase subunit IV isoform 2 (lung) | -0.052104 | Inlier         |

Identification of Survival Genes in Human Glioblastoma Cells Using siRNA Screening

Nikhil G Thaker, Fang Zhang, Peter R. McDonald, Tong Ying Shun, Michael D Lewen, Ian F. Pollack, and John S. Lazo

Molecular Pharmacology

|                              |           |        |                                                  |           |        |
|------------------------------|-----------|--------|--------------------------------------------------|-----------|--------|
| siRNA-Vinblastine Run1-DMSO  | NM_032609 | COX4I2 | cytochrome c oxidase subunit IV isoform 2 (lung) | 0.052104  | Inlier |
| siRNA-Temozolomide Run1-DMSO | NM_032609 | COX4I2 | cytochrome c oxidase subunit IV isoform 2 (lung) | 0.391623  | Inlier |
| siRNA-Temozolomide Run2-DMSO | NM_032609 | COX4I2 | cytochrome c oxidase subunit IV isoform 2 (lung) | 0.896041  | Inlier |
| siRNA Disorazole DMSO Run2   | NM_032609 | COX4I2 | cytochrome c oxidase subunit IV isoform 2 (lung) | 1.552424  | Inlier |
| siRNA-Temozolomide Run3-DMSO | NM_004255 | COX5A  | cytochrome c oxidase subunit Va                  | -3.433038 | Inlier |
| siRNA Disorazole DMSO Run1   | NM_004255 | COX5A  | cytochrome c oxidase subunit Va                  | -2.731936 | Inlier |
| siRNA Disorazole DMSO Run3   | NM_004255 | COX5A  | cytochrome c oxidase subunit Va                  | -0.825446 | Inlier |
| siRNA-Vinblastine Run2-DMSO  | NM_004255 | COX5A  | cytochrome c oxidase subunit Va                  | -0.265578 | Inlier |
| siRNA-Temozolomide Run1-DMSO | NM_004255 | COX5A  | cytochrome c oxidase subunit Va                  | 0.265578  | Inlier |

Identification of Survival Genes in Human Glioblastoma Cells Using siRNA Screening  
 Nikhil G Thaker, Fang Zhang, Peter R. McDonald, Tong Ying Shun, Michael D Lewen, Ian F. Pollack, and John S. Lazo  
 Molecular Pharmacology

|                              |               |       |                                           |           |        |
|------------------------------|---------------|-------|-------------------------------------------|-----------|--------|
| siRNA-Temozolomide Run2-DMSO | NM_0042<br>55 | COX5A | cytochrom<br>e c<br>oxidase<br>subunit Va | 0.394208  | Inlier |
| siRNA Disorazole DMSO Run2   | NM_0042<br>55 | COX5A | cytochrom<br>e c<br>oxidase<br>subunit Va | 0.523554  | Inlier |
| siRNA-Vinblastine Run1-DMSO  | NM_0042<br>55 | COX5A | cytochrom<br>e c<br>oxidase<br>subunit Va | 1.37813   | Inlier |
| siRNA-Temozolomide Run3-DMSO | NM_0018<br>62 | COX5B | cytochrom<br>e c<br>oxidase<br>subunit Vb | -0.984012 | Inlier |
| siRNA-Temozolomide Run1-DMSO | NM_0018<br>62 | COX5B | cytochrom<br>e c<br>oxidase<br>subunit Vb | -0.57561  | Inlier |
| siRNA-Temozolomide Run2-DMSO | NM_0018<br>62 | COX5B | cytochrom<br>e c<br>oxidase<br>subunit Vb | -0.126277 | Inlier |
| siRNA Disorazole DMSO Run3   | NM_0018<br>62 | COX5B | cytochrom<br>e c<br>oxidase<br>subunit Vb | -0.006313 | Inlier |
| siRNA-Vinblastine Run2-DMSO  | NM_0018<br>62 | COX5B | cytochrom<br>e c<br>oxidase<br>subunit Vb | 0.006313  | Inlier |
| siRNA Disorazole DMSO Run1   | NM_0018<br>62 | COX5B | cytochrom<br>e c<br>oxidase<br>subunit Vb | 0.77339   | Inlier |
| siRNA Disorazole DMSO Run2   | NM_0018<br>62 | COX5B | cytochrom<br>e c<br>oxidase<br>subunit Vb | 0.847165  | Inlier |

Identification of Survival Genes in Human Glioblastoma Cells Using siRNA Screening  
 Nikhil G Thaker, Fang Zhang, Peter R. McDonald, Tong Ying Shun, Michael D Lewen, Ian F. Pollack, and John S. Lazo  
 Molecular Pharmacology

|                              |           |        |                                                |           |        |
|------------------------------|-----------|--------|------------------------------------------------|-----------|--------|
| siRNA-Vinblastine Run1-DMSO  | NM_001862 | COX5B  | cytochrome c oxidase subunit Vb                | 1.35487   | Inlier |
| siRNA Disorazole DMSO Run3   | NM_004373 | COX6A1 | cytochrome c oxidase subunit VIa polypeptide 1 | -0.861795 | Inlier |
| siRNA-Temozolomide Run3-DMSO | NM_004373 | COX6A1 | cytochrome c oxidase subunit VIa polypeptide 1 | -0.835467 | Inlier |
| siRNA-Temozolomide Run1-DMSO | NM_004373 | COX6A1 | cytochrome c oxidase subunit VIa polypeptide 1 | -0.513533 | Inlier |
| siRNA Disorazole DMSO Run1   | NM_004373 | COX6A1 | cytochrome c oxidase subunit VIa polypeptide 1 | -0.340374 | Inlier |
| siRNA-Vinblastine Run2-DMSO  | NM_004373 | COX6A1 | cytochrome c oxidase subunit VIa polypeptide 1 | 0.340374  | Inlier |
| siRNA-Temozolomide Run2-DMSO | NM_004373 | COX6A1 | cytochrome c oxidase subunit VIa polypeptide 1 | 0.442668  | Inlier |

Identification of Survival Genes in Human Glioblastoma Cells Using siRNA Screening  
 Nikhil G Thaker, Fang Zhang, Peter R. McDonald, Tong Ying Shun, Michael D Lewen, Ian F. Pollack, and John S. Lazo

Molecular Pharmacology

|                              |           |        |                                                |           |        |
|------------------------------|-----------|--------|------------------------------------------------|-----------|--------|
| siRNA-Vinblastine Run1-DMSO  | NM_004373 | COX6A1 | cytochrome c oxidase subunit VIa polypeptide 1 | 1.398195  | Inlier |
| siRNA Disorazole DMSO Run2   | NM_004373 | COX6A1 | cytochrome c oxidase subunit VIa polypeptide 1 | 2.058006  | Inlier |
| siRNA Disorazole DMSO Run1   | NM_005205 | COX6A2 | cytochrome c oxidase subunit VIa polypeptide 2 | -0.898179 | Inlier |
| siRNA Disorazole DMSO Run3   | NM_005205 | COX6A2 | cytochrome c oxidase subunit VIa polypeptide 2 | -0.700954 | Inlier |
| siRNA-Temozolomide Run3-DMSO | NM_005205 | COX6A2 | cytochrome c oxidase subunit VIa polypeptide 2 | -0.648046 | Inlier |
| siRNA-Temozolomide Run2-DMSO | NM_005205 | COX6A2 | cytochrome c oxidase subunit VIa polypeptide 2 | -0.089302 | Inlier |
| siRNA-Temozolomide Run1-DMSO | NM_005205 | COX6A2 | cytochrome c oxidase subunit VIa polypeptide 2 | 0.089303  | Inlier |



Identification of Survival Genes in Human Glioblastoma Cells Using siRNA Screening

Nikhil G Thaker, Fang Zhang, Peter R. McDonald, Tong Ying Shun, Michael D Lewen, Ian F. Pollack, and John S. Lazo

Molecular Pharmacology

|                              |           |        |                                                             |           |        |
|------------------------------|-----------|--------|-------------------------------------------------------------|-----------|--------|
| siRNA-Vinblastine Run2-DMSO  | NM_005205 | COX6A2 | cytochrome c oxidase subunit VIa polypeptide 2              | 0.544195  | Inlier |
| siRNA-Vinblastine Run1-DMSO  | NM_005205 | COX6A2 | cytochrome c oxidase subunit VIa polypeptide 2              | 1.398922  | Inlier |
| siRNA Disorazole DMSO Run2   | NM_005205 | COX6A2 | cytochrome c oxidase subunit VIb polypeptide 1              | 1.494639  | Inlier |
| siRNA-Temozolomide Run3-DMSO | NM_001863 | COX6B1 | cytochrome c oxidase subunit VIb polypeptide 1 (ubiquitous) | -1.087901 | Inlier |
| siRNA-Temozolomide Run2-DMSO | NM_001863 | COX6B1 | cytochrome c oxidase subunit VIb polypeptide 1 (ubiquitous) | -0.664493 | Inlier |
| siRNA-Vinblastine Run2-DMSO  | NM_001863 | COX6B1 | cytochrome c oxidase subunit VIb polypeptide 1 (ubiquitous) | -0.260235 | Inlier |

Identification of Survival Genes in Human Glioblastoma Cells Using siRNA Screening

Nikhil G Thaker, Fang Zhang, Peter R. McDonald, Tong Ying Shun, Michael D Lewen, Ian F. Pollack, and John S. Lazo

Molecular Pharmacology

|                              |               |        |                                                            |           |        |
|------------------------------|---------------|--------|------------------------------------------------------------|-----------|--------|
| siRNA Disorazole DMSO Run3   | NM_0018<br>63 | COX6B1 | cytochrome c oxidase subunit Vb polypeptide 1 (ubiquitous) | -0.253835 | Inlier |
| siRNA-Temozolomide Run1-DMSO | NM_0018<br>63 | COX6B1 | cytochrome c oxidase subunit Vb polypeptide 1 (ubiquitous) | 0.253836  | Inlier |
| siRNA Disorazole DMSO Run1   | NM_0018<br>63 | COX6B1 | cytochrome c oxidase subunit Vb polypeptide 1 (ubiquitous) | 0.684507  | Inlier |
| siRNA-Vinblastine Run1-DMSO  | NM_0018<br>63 | COX6B1 | cytochrome c oxidase subunit Vb polypeptide 1 (ubiquitous) | 1.659404  | Inlier |
| siRNA Disorazole DMSO Run2   | NM_0018<br>63 | COX6B1 | cytochrome c oxidase subunit Vb polypeptide 1 (ubiquitous) | 2.137517  | Inlier |
| siRNA Disorazole DMSO Run1   | NM_0043<br>74 | COX6C  | Vlc                                                        | -0.809496 | Inlier |

Identification of Survival Genes in Human Glioblastoma Cells Using siRNA Screening  
 Nikhil G Thaker, Fang Zhang, Peter R. McDonald, Tong Ying Shun, Michael D Lewen, Ian F. Pollack, and John S. Lazo

Molecular Pharmacology

|                                  |               |        |  |                                                            |                  |
|----------------------------------|---------------|--------|--|------------------------------------------------------------|------------------|
|                                  |               |        |  | cytochrom<br>e c<br>oxidase<br>subunit<br>Vlc              |                  |
| siRNA Disorazole DMSO Run3       | NM_0043<br>74 | COX6C  |  |                                                            | -0.700524 Inlier |
|                                  |               |        |  | cytochrom<br>e c<br>oxidase<br>subunit<br>Vlc              |                  |
| siRNA-Vinblastine Run2-<br>DMSO  | NM_0043<br>74 | COX6C  |  |                                                            | -0.43425 Inlier  |
|                                  |               |        |  | cytochrom<br>e c<br>oxidase<br>subunit<br>Vlc              |                  |
| siRNA-Temozolomide Run1-<br>DMSO | NM_0043<br>74 | COX6C  |  |                                                            | -0.047114 Inlier |
|                                  |               |        |  | cytochrom<br>e c<br>oxidase<br>subunit<br>Vlc              |                  |
| siRNA-Temozolomide Run2-<br>DMSO | NM_0043<br>74 | COX6C  |  |                                                            | 0.047114 Inlier  |
|                                  |               |        |  | cytochrom<br>e c<br>oxidase<br>subunit<br>Vlc              |                  |
| siRNA-Vinblastine Run1-<br>DMSO  | NM_0043<br>74 | COX6C  |  |                                                            | 0.648476 Inlier  |
|                                  |               |        |  | cytochrom<br>e c<br>oxidase<br>subunit<br>Vlc              |                  |
| siRNA Disorazole DMSO Run2       | NM_0043<br>74 | COX6C  |  |                                                            | 1.025155 Inlier  |
|                                  |               |        |  | cytochrom<br>e c<br>oxidase<br>subunit<br>Vlc              |                  |
| siRNA-Temozolomide Run3-<br>DMSO | NM_0043<br>74 | COX6C  |  |                                                            | 1.266176 Inlier  |
|                                  |               |        |  | cytochrom<br>e c<br>oxidase<br>subunit<br>VIIa             |                  |
|                                  |               |        |  | polypeptid<br>e 1                                          |                  |
| siRNA Disorazole DMSO Run1       | NM_0018<br>64 | COX7A1 |  | (muscle)<br>cytochrom<br>e c<br>oxidase<br>subunit<br>VIIa | -1.630183 Inlier |
|                                  |               |        |  | polypeptid<br>e 1                                          |                  |
| siRNA-Temozolomide Run1-<br>DMSO | NM_0018<br>64 | COX7A1 |  | (muscle)                                                   | -0.86413 Inlier  |

Identification of Survival Genes in Human Glioblastoma Cells Using siRNA Screening

Nikhil G Thaker, Fang Zhang, Peter R. McDonald, Tong Ying Shun, Michael D Lewen, Ian F. Pollack, and John S. Lazo

Molecular Pharmacology

|                              |               |        |                                                          |           |        |
|------------------------------|---------------|--------|----------------------------------------------------------|-----------|--------|
| siRNA Disorazole DMSO Run3   | NM_0018<br>64 | COX7A1 | cytochrome c oxidase subunit VIIa polypeptide 1 (muscle) | -0.774309 | Inlier |
| siRNA-Vinblastine Run2-DMSO  | NM_0018<br>64 | COX7A1 | cytochrome c oxidase subunit VIIa polypeptide 1 (muscle) | -0.163739 | Inlier |
| siRNA-Vinblastine Run1-DMSO  | NM_0018<br>64 | COX7A1 | cytochrome c oxidase subunit VIIa polypeptide 1 (muscle) | 0.163741  | Inlier |
| siRNA-Temozolomide Run2-DMSO | NM_0018<br>64 | COX7A1 | cytochrome c oxidase subunit VIIa polypeptide 1 (muscle) | 0.185003  | Inlier |
| siRNA-Temozolomide Run3-DMSO | NM_0018<br>64 | COX7A1 | cytochrome c oxidase subunit VIIa polypeptide 1 (muscle) | 0.574691  | Inlier |
| siRNA Disorazole DMSO Run2   | NM_0018<br>64 | COX7A1 | cytochrome c oxidase subunit VIIa polypeptide 1 (muscle) | 1.303759  | Inlier |

Identification of Survival Genes in Human Glioblastoma Cells Using siRNA Screening  
 Nikhil G Thaker, Fang Zhang, Peter R. McDonald, Tong Ying Shun, Michael D Lewen, Ian F. Pollack, and John S. Lazo

Molecular Pharmacology

|                                  |               |        |                                                                             |           |         |
|----------------------------------|---------------|--------|-----------------------------------------------------------------------------|-----------|---------|
|                                  |               |        | cytochrom<br>e c<br>oxidase<br>subunit<br>VIIa                              |           |         |
| siRNA-Temozolomide Run2-<br>DMSO | NM_0018<br>65 | COX7A2 | polypeptid<br>e 2 (liver)<br>cytochrom<br>e c<br>oxidase<br>subunit<br>VIIa | -0.926255 | Inlier  |
| siRNA Disorazole DMSO Run1       | NM_0018<br>65 | COX7A2 | polypeptid<br>e 2 (liver)<br>cytochrom<br>e c<br>oxidase<br>subunit<br>VIIa | -0.422745 | Inlier  |
| siRNA Disorazole DMSO Run3       | NM_0018<br>65 | COX7A2 | polypeptid<br>e 2 (liver)<br>cytochrom<br>e c<br>oxidase<br>subunit<br>VIIa | -0.326061 | Inlier  |
| siRNA-Vinblastine Run2-<br>DMSO  | NM_0018<br>65 | COX7A2 | polypeptid<br>e 2 (liver)<br>cytochrom<br>e c<br>oxidase<br>subunit<br>VIIa | -0.10282  | Inlier  |
| siRNA-Temozolomide Run3-<br>DMSO | NM_0018<br>65 | COX7A2 | polypeptid<br>e 2 (liver)<br>cytochrom<br>e c<br>oxidase<br>subunit<br>VIIa | 0.102821  | Inlier  |
| siRNA-Temozolomide Run1-<br>DMSO | NM_0018<br>65 | COX7A2 | polypeptid<br>e 2 (liver)<br>cytochrom<br>e c<br>oxidase<br>subunit<br>VIIa | 1.409538  | Inlier  |
| siRNA Disorazole DMSO Run2       | NM_0018<br>65 | COX7A2 | polypeptid<br>e 2 (liver)                                                   | 4.530821  | Outlier |

Identification of Survival Genes in Human Glioblastoma Cells Using siRNA Screening  
 Nikhil G Thaker, Fang Zhang, Peter R. McDonald, Tong Ying Shun, Michael D Lewen, Ian F. Pollack, and John S. Lazo

Molecular Pharmacology

|                              |           |         |                                                         |           |         |
|------------------------------|-----------|---------|---------------------------------------------------------|-----------|---------|
| siRNA-Vinblastine Run1-DMSO  | NM_001865 | COX7A2  | cytochrome c oxidase subunit VIIa polypeptide 2 (liver) | 4.72185   | Outlier |
| siRNA-Temozolomide Run3-DMSO | NM_004718 | COX7A2L | cytochrome c oxidase subunit VIIa polypeptide 2 like    | -1.764145 | Inlier  |
| siRNA-Temozolomide Run2-DMSO | NM_004718 | COX7A2L | cytochrome c oxidase subunit VIIa polypeptide 2 like    | -0.825626 | Inlier  |
| siRNA Disorazole DMSO Run2   | NM_004718 | COX7A2L | cytochrome c oxidase subunit VIIa polypeptide 2 like    | -0.600234 | Inlier  |
| siRNA Disorazole DMSO Run1   | NM_004718 | COX7A2L | cytochrome c oxidase subunit VIIa polypeptide 2 like    | -0.078386 | Inlier  |
| siRNA Disorazole DMSO Run3   | NM_004718 | COX7A2L | cytochrome c oxidase subunit VIIa polypeptide 2 like    | 0.078386  | Inlier  |
| siRNA-Vinblastine Run1-DMSO  | NM_004718 | COX7A2L | cytochrome c oxidase subunit VIIa polypeptide 2 like    | 0.412807  | Inlier  |

Identification of Survival Genes in Human Glioblastoma Cells Using siRNA Screening  
 Nikhil G Thaker, Fang Zhang, Peter R. McDonald, Tong Ying Shun, Michael D Lewen, Ian F. Pollack, and John S. Lazo

Molecular Pharmacology

|                              |           |         |                                                      |           |        |
|------------------------------|-----------|---------|------------------------------------------------------|-----------|--------|
| siRNA-Temozolomide Run1-DMSO | NM_004718 | COX7A2L | cytochrome c oxidase subunit VIIa polypeptide 2 like | 0.748766  | Inlier |
| siRNA-Vinblastine Run2-DMSO  | NM_004718 | COX7A2L | cytochrome c oxidase subunit VIIa polypeptide 2 like | 1.691265  | Inlier |
| siRNA Disorazole DMSO Run3   | NM_183003 | COX7A3  | cytochrome c oxidase subunit VIIa pseudogene 2       | -0.733484 | Inlier |
| siRNA-Temozolomide Run3-DMSO | NM_183003 | COX7A3  | cytochrome c oxidase subunit VIIa pseudogene 2       | -0.615516 | Inlier |
| siRNA-Temozolomide Run2-DMSO | NM_183003 | COX7A3  | cytochrome c oxidase subunit VIIa pseudogene 2       | -0.220041 | Inlier |
| siRNA-Vinblastine Run2-DMSO  | NM_183003 | COX7A3  | cytochrome c oxidase subunit VIIa pseudogene 2       | -0.083874 | Inlier |
| siRNA Disorazole DMSO Run1   | NM_183003 | COX7A3  | cytochrome c oxidase subunit VIIa pseudogene 2       | 0.083875  | Inlier |

Identification of Survival Genes in Human Glioblastoma Cells Using siRNA Screening  
 Nikhil G Thaker, Fang Zhang, Peter R. McDonald, Tong Ying Shun, Michael D Lewen, Ian F. Pollack, and John S. Lazo

Molecular Pharmacology

|                              |           |        |                                                |           |        |
|------------------------------|-----------|--------|------------------------------------------------|-----------|--------|
| siRNA-Temozolomide Run1-DMSO | NM_183003 | COX7A3 | cytochrome c oxidase subunit VIIa pseudogene 2 | 1.183152  | Inlier |
| siRNA Disorazole DMSO Run2   | NM_183003 | COX7A3 | cytochrome c oxidase subunit VIIa pseudogene 2 | 1.728429  | Inlier |
| siRNA-Vinblastine Run1-DMSO  | NM_183003 | COX7A3 | cytochrome c oxidase subunit VIIa pseudogene 2 | 2.636302  | Inlier |
| siRNA-Vinblastine Run2-DMSO  | NM_001866 | COX7B  | cytochrome c oxidase subunit VIIb              | -0.770724 | Inlier |
| siRNA-Temozolomide Run3-DMSO | NM_001866 | COX7B  | cytochrome c oxidase subunit VIIb              | -0.745931 | Inlier |
| siRNA-Temozolomide Run2-DMSO | NM_001866 | COX7B  | cytochrome c oxidase subunit VIIb              | -0.475231 | Inlier |
| siRNA Disorazole DMSO Run1   | NM_001866 | COX7B  | cytochrome c oxidase subunit VIIb              | -0.433451 | Inlier |
| siRNA Disorazole DMSO Run3   | NM_001866 | COX7B  | cytochrome c oxidase subunit VIIb              | 0.43345   | Inlier |
| siRNA-Temozolomide Run1-DMSO | NM_001866 | COX7B  | cytochrome c oxidase subunit VIIb              | 0.603069  | Inlier |



Identification of Survival Genes in Human Glioblastoma Cells Using siRNA Screening  
 Nikhil G Thaker, Fang Zhang, Peter R. McDonald, Tong Ying Shun, Michael D Lewen, Ian F. Pollack, and John S. Lazo

Molecular Pharmacology

|                                  |               |       |                                                |           |        |
|----------------------------------|---------------|-------|------------------------------------------------|-----------|--------|
| siRNA Disorazole DMSO Run2       | NM_0018<br>66 | COX7B | cytochrom<br>e c<br>oxidase<br>subunit<br>VIIb | 2.021276  | Inlier |
| siRNA-Vinblastine Run1-<br>DMSO  | NM_0018<br>66 | COX7B | cytochrom<br>e c<br>oxidase<br>subunit<br>VIIb | 2.321704  | Inlier |
| siRNA-Temozolomide Run3-<br>DMSO | NM_0018<br>67 | COX7C | cytochrom<br>e c<br>oxidase<br>subunit<br>VIIc | -1.420543 | Inlier |
| siRNA Disorazole DMSO Run3       | NM_0018<br>67 | COX7C | cytochrom<br>e c<br>oxidase<br>subunit<br>VIIc | -0.911143 | Inlier |
| siRNA-Vinblastine Run2-<br>DMSO  | NM_0018<br>67 | COX7C | cytochrom<br>e c<br>oxidase<br>subunit<br>VIIc | -0.437857 | Inlier |
| siRNA Disorazole DMSO Run1       | NM_0018<br>67 | COX7C | cytochrom<br>e c<br>oxidase<br>subunit<br>VIIc | -0.247085 | Inlier |
| siRNA-Temozolomide Run2-<br>DMSO | NM_0018<br>67 | COX7C | cytochrom<br>e c<br>oxidase<br>subunit<br>VIIc | 0.247085  | Inlier |
| siRNA-Temozolomide Run1-<br>DMSO | NM_0018<br>67 | COX7C | cytochrom<br>e c<br>oxidase<br>subunit<br>VIIc | 0.404014  | Inlier |
| siRNA Disorazole DMSO Run2       | NM_0018<br>67 | COX7C | cytochrom<br>e c<br>oxidase<br>subunit<br>VIIc | 0.99663   | Inlier |
| siRNA-Vinblastine Run1-<br>DMSO  | NM_0018<br>67 | COX7C | cytochrom<br>e c<br>oxidase<br>subunit<br>VIIc | 1.836707  | Inlier |

Identification of Survival Genes in Human Glioblastoma Cells Using siRNA Screening  
 Nikhil G Thaker, Fang Zhang, Peter R. McDonald, Tong Ying Shun, Michael D Lewen, Ian F. Pollack, and John S. Lazo  
 Molecular Pharmacology

|                              |           |       |                                              |           |        |
|------------------------------|-----------|-------|----------------------------------------------|-----------|--------|
| siRNA-Temozolomide Run3-DMSO | NM_004074 | COX8A | cytochrome c oxidase subunit 8A (ubiquitous) | -2.97233  | Inlier |
| siRNA-Temozolomide Run2-DMSO | NM_004074 | COX8A | cytochrome c oxidase subunit 8A (ubiquitous) | -0.674175 | Inlier |
| siRNA Disorazole DMSO Run1   | NM_004074 | COX8A | cytochrome c oxidase subunit 8A (ubiquitous) | -0.163352 | Inlier |
| siRNA-Temozolomide Run1-DMSO | NM_004074 | COX8A | cytochrome c oxidase subunit 8A (ubiquitous) | -0.104209 | Inlier |
| siRNA Disorazole DMSO Run3   | NM_004074 | COX8A | cytochrome c oxidase subunit 8A (ubiquitous) | 0.104209  | Inlier |
| siRNA-Vinblastine Run2-DMSO  | NM_004074 | COX8A | cytochrome c oxidase subunit 8A (ubiquitous) | 0.674825  | Inlier |
| siRNA-Vinblastine Run1-DMSO  | NM_004074 | COX8A | cytochrome c oxidase subunit 8A (ubiquitous) | 2.270953  | Inlier |

Identification of Survival Genes in Human Glioblastoma Cells Using siRNA Screening  
 Nikhil G Thaker, Fang Zhang, Peter R. McDonald, Tong Ying Shun, Michael D Lewen, Ian F. Pollack, and John S. Lazo  
 Molecular Pharmacology

|                              |               |       |                                              |           |         |
|------------------------------|---------------|-------|----------------------------------------------|-----------|---------|
| siRNA Disorazole DMSO Run2   | NM_0040<br>74 | COX8A | cytochrome c oxidase subunit 8A (ubiquitous) | 4.215563  | Outlier |
| siRNA Disorazole DMSO Run1   | NM_0000<br>96 | CP    | ceruloplasmin (ferroxidase)                  | -1.3374   | Inlier  |
| siRNA-Temozolomide Run1-DMSO | NM_0000<br>96 | CP    | ceruloplasmin (ferroxidase)                  | -0.663952 | Inlier  |
| siRNA Disorazole DMSO Run3   | NM_0000<br>96 | CP    | ceruloplasmin (ferroxidase)                  | -0.640065 | Inlier  |
| siRNA-Temozolomide Run2-DMSO | NM_0000<br>96 | CP    | ceruloplasmin (ferroxidase)                  | -0.049021 | Inlier  |
| siRNA-Vinblastine Run2-DMSO  | NM_0000<br>96 | CP    | ceruloplasmin (ferroxidase)                  | 0.049021  | Inlier  |
| siRNA-Vinblastine Run1-DMSO  | NM_0000<br>96 | CP    | ceruloplasmin (ferroxidase)                  | 0.685048  | Inlier  |
| siRNA-Temozolomide Run3-DMSO | NM_0000<br>96 | CP    | ceruloplasmin (ferroxidase)                  | 0.751118  | Inlier  |
| siRNA Disorazole DMSO Run2   | NM_0000<br>96 | CP    | ceruloplasmin (ferroxidase)                  | 3.82559   | Outlier |
| siRNA-Temozolomide Run3-DMSO | NM_0018<br>68 | CPA1  | carboxypeptidase A1 (pancreatic)             | -2.479058 | Inlier  |
| siRNA-Temozolomide Run1-DMSO | NM_0018<br>68 | CPA1  | carboxypeptidase A1 (pancreatic)             | -0.897857 | Inlier  |

Identification of Survival Genes in Human Glioblastoma Cells Using siRNA Screening  
 Nikhil G Thaker, Fang Zhang, Peter R. McDonald, Tong Ying Shun, Michael D Lewen, Ian F. Pollack, and John S. Lazo  
 Molecular Pharmacology

|                              |               |      |                                  |           |        |
|------------------------------|---------------|------|----------------------------------|-----------|--------|
| siRNA-Temozolomide Run2-DMSO | NM_0018<br>68 | CPA1 | carboxypeptidase A1 (pancreatic) | -0.451143 | Inlier |
| siRNA Disorazole DMSO Run1   | NM_0018<br>68 | CPA1 | carboxypeptidase A1 (pancreatic) | -0.149139 | Inlier |
| siRNA Disorazole DMSO Run2   | NM_0018<br>68 | CPA1 | carboxypeptidase A1 (pancreatic) | 0.14914   | Inlier |
| siRNA Disorazole DMSO Run3   | NM_0018<br>68 | CPA1 | carboxypeptidase A1 (pancreatic) | 0.364026  | Inlier |
| siRNA-Vinblastine Run1-DMSO  | NM_0018<br>68 | CPA1 | carboxypeptidase A1 (pancreatic) | 1.446213  | Inlier |
| siRNA-Vinblastine Run2-DMSO  | NM_0018<br>68 | CPA1 | carboxypeptidase A1 (pancreatic) | 1.577454  | Inlier |
| siRNA Disorazole DMSO Run2   | NM_0018<br>69 | CPA2 | carboxypeptidase A2 (pancreatic) | -1.151718 | Inlier |
| siRNA-Temozolomide Run3-DMSO | NM_0018<br>69 | CPA2 | carboxypeptidase A2 (pancreatic) | -0.715731 | Inlier |
| siRNA-Temozolomide Run1-DMSO | NM_0018<br>69 | CPA2 | carboxypeptidase A2 (pancreatic) | -0.209702 | Inlier |
| siRNA Disorazole DMSO Run1   | NM_0018<br>69 | CPA2 | carboxypeptidase A2 (pancreatic) | -0.162435 | Inlier |

Identification of Survival Genes in Human Glioblastoma Cells Using siRNA Screening  
 Nikhil G Thaker, Fang Zhang, Peter R. McDonald, Tong Ying Shun, Michael D Lewen, Ian F. Pollack, and John S. Lazo  
 Molecular Pharmacology

|                              |               |      |                                  |           |        |
|------------------------------|---------------|------|----------------------------------|-----------|--------|
| siRNA Disorazole DMSO Run3   | NM_0018<br>69 | CPA2 | carboxypeptidase A2 (pancreatic) | 0.162434  | Inlier |
| siRNA-Temozolomide Run2-DMSO | NM_0018<br>69 | CPA2 | carboxypeptidase A2 (pancreatic) | 0.633269  | Inlier |
| siRNA-Vinblastine Run2-DMSO  | NM_0018<br>69 | CPA2 | carboxypeptidase A2 (pancreatic) | 1.256517  | Inlier |
| siRNA-Vinblastine Run1-DMSO  | NM_0018<br>69 | CPA2 | carboxypeptidase A2 (pancreatic) | 1.352983  | Inlier |
| siRNA-Temozolomide Run3-DMSO | NM_0018<br>70 | CPA3 | carboxypeptidase A3 (mast cell)  | -1.426247 | Inlier |
| siRNA-Temozolomide Run1-DMSO | NM_0018<br>70 | CPA3 | carboxypeptidase A3 (mast cell)  | -0.912379 | Inlier |
| siRNA Disorazole DMSO Run1   | NM_0018<br>70 | CPA3 | carboxypeptidase A3 (mast cell)  | -0.612919 | Inlier |
| siRNA-Temozolomide Run2-DMSO | NM_0018<br>70 | CPA3 | carboxypeptidase A3 (mast cell)  | -0.556896 | Inlier |
| siRNA-Vinblastine Run2-DMSO  | NM_0018<br>70 | CPA3 | carboxypeptidase A3 (mast cell)  | 0.556895  | Inlier |
| siRNA-Vinblastine Run1-DMSO  | NM_0018<br>70 | CPA3 | carboxypeptidase A3 (mast cell)  | 0.647388  | Inlier |
| siRNA Disorazole DMSO Run3   | NM_0018<br>70 | CPA3 | carboxypeptidase A3 (mast cell)  | 0.701612  | Inlier |
| siRNA Disorazole DMSO Run2   | NM_0018<br>70 | CPA3 | carboxypeptidase A3 (mast cell)  | 1.553869  | Inlier |

Identification of Survival Genes in Human Glioblastoma Cells Using siRNA Screening  
 Nikhil G Thaker, Fang Zhang, Peter R. McDonald, Tong Ying Shun, Michael D Lewen, Ian F. Pollack, and John S. Lazo

Molecular Pharmacology

|                              |               |      |                     |           |        |
|------------------------------|---------------|------|---------------------|-----------|--------|
| siRNA-Temozolomide Run3-DMSO | NM_0163<br>52 | CPA4 | carboxypeptidase A4 | -0.767752 | Inlier |
| siRNA Disorazole DMSO Run3   | NM_0163<br>52 | CPA4 | carboxypeptidase A4 | -0.581248 | Inlier |
| siRNA-Temozolomide Run2-DMSO | NM_0163<br>52 | CPA4 | carboxypeptidase A4 | -0.579302 | Inlier |
| siRNA Disorazole DMSO Run2   | NM_0163<br>52 | CPA4 | carboxypeptidase A4 | -0.004874 | Inlier |
| siRNA-Temozolomide Run1-DMSO | NM_0163<br>52 | CPA4 | carboxypeptidase A4 | 0.004874  | Inlier |
| siRNA Disorazole DMSO Run1   | NM_0163<br>52 | CPA4 | carboxypeptidase A4 | 0.850569  | Inlier |
| siRNA-Vinblastine Run1-DMSO  | NM_0163<br>52 | CPA4 | carboxypeptidase A4 | 1.976164  | Inlier |
| siRNA-Vinblastine Run2-DMSO  | NM_0163<br>52 | CPA4 | carboxypeptidase A4 | 2.033495  | Inlier |
| siRNA-Temozolomide Run3-DMSO | NM_0803<br>85 | CPA5 | carboxypeptidase A5 | -0.729559 | Inlier |
| siRNA-Temozolomide Run2-DMSO | NM_0803<br>85 | CPA5 | carboxypeptidase A5 | -0.658376 | Inlier |
| siRNA Disorazole DMSO Run2   | NM_0803<br>85 | CPA5 | carboxypeptidase A5 | -0.455731 | Inlier |
| siRNA Disorazole DMSO Run3   | NM_0803<br>85 | CPA5 | carboxypeptidase A5 | -0.026262 | Inlier |
| siRNA-Temozolomide Run1-DMSO | NM_0803<br>85 | CPA5 | carboxypeptidase A5 | 0.026262  | Inlier |
| siRNA Disorazole DMSO Run1   | NM_0803<br>85 | CPA5 | carboxypeptidase A5 | 0.690624  | Inlier |
| siRNA-Vinblastine Run2-DMSO  | NM_0803<br>85 | CPA5 | carboxypeptidase A5 | 1.85721   | Inlier |
| siRNA-Vinblastine Run1-DMSO  | NM_0803<br>85 | CPA5 | carboxypeptidase A5 | 1.862965  | Inlier |
| siRNA Disorazole DMSO Run2   | NM_0203<br>61 | CPA6 | carboxypeptidase A6 | -1.877918 | Inlier |

Identification of Survival Genes in Human Glioblastoma Cells Using siRNA Screening  
 Nikhil G Thaker, Fang Zhang, Peter R. McDonald, Tong Ying Shun, Michael D Lewen, Ian F. Pollack, and John S. Lazo

Molecular Pharmacology

|                              |               |      |                              |           |        |
|------------------------------|---------------|------|------------------------------|-----------|--------|
| siRNA-Temozolomide Run3-DMSO | NM_0203<br>61 | CPA6 | carboxypeptidase A6          | -0.435239 | Inlier |
| siRNA-Temozolomide Run2-DMSO | NM_0203<br>61 | CPA6 | carboxypeptidase A6          | -0.306065 | Inlier |
| siRNA Disorazole DMSO Run3   | NM_0203<br>61 | CPA6 | carboxypeptidase A6          | -0.144809 | Inlier |
| siRNA-Temozolomide Run1-DMSO | NM_0203<br>61 | CPA6 | carboxypeptidase A6          | 0.144809  | Inlier |
| siRNA Disorazole DMSO Run1   | NM_0203<br>61 | CPA6 | carboxypeptidase A6          | 0.913761  | Inlier |
| siRNA-Vinblastine Run2-DMSO  | NM_0203<br>61 | CPA6 | carboxypeptidase A6          | 1.743969  | Inlier |
| siRNA-Vinblastine Run1-DMSO  | NM_0203<br>61 | CPA6 | carboxypeptidase A6          | 2.031824  | Inlier |
| siRNA-Temozolomide Run1-DMSO | NM_0018<br>71 | CPB1 | carboxypeptidase B1 (tissue) | -1.600006 | Inlier |
| siRNA-Temozolomide Run3-DMSO | NM_0018<br>71 | CPB1 | carboxypeptidase B1 (tissue) | -1.389027 | Inlier |
| siRNA-Temozolomide Run2-DMSO | NM_0018<br>71 | CPB1 | carboxypeptidase B1 (tissue) | -0.569658 | Inlier |
| siRNA-Vinblastine Run2-DMSO  | NM_0018<br>71 | CPB1 | carboxypeptidase B1 (tissue) | -0.079679 | Inlier |
| siRNA Disorazole DMSO Run1   | NM_0018<br>71 | CPB1 | carboxypeptidase B1 (tissue) | 0.07968   | Inlier |
| siRNA Disorazole DMSO Run3   | NM_0018<br>71 | CPB1 | carboxypeptidase B1 (tissue) | 0.531728  | Inlier |
| siRNA Disorazole DMSO Run2   | NM_0018<br>71 | CPB1 | carboxypeptidase B1 (tissue) | 0.779342  | Inlier |

Identification of Survival Genes in Human Glioblastoma Cells Using siRNA Screening  
 Nikhil G Thaker, Fang Zhang, Peter R. McDonald, Tong Ying Shun, Michael D Lewen, Ian F. Pollack, and John S. Lazo

Molecular Pharmacology

|                              |           |      |                                                  |           |        |
|------------------------------|-----------|------|--------------------------------------------------|-----------|--------|
| siRNA-Vinblastine Run1-DMSO  | NM_001871 | CPB1 | carboxypeptidase B1 (tissue)                     | 1.259123  | Inlier |
| siRNA-Temozolomide Run3-DMSO | NM_016413 | CPB2 | carboxypeptidase B2 (plasma, carboxypeptidase U) | -1.196171 | Inlier |
| siRNA Disorazole DMSO Run2   | NM_016413 | CPB2 | carboxypeptidase B2 (plasma, carboxypeptidase U) | -1.138701 | Inlier |
| siRNA-Temozolomide Run2-DMSO | NM_016413 | CPB2 | carboxypeptidase B2 (plasma, carboxypeptidase U) | -0.449239 | Inlier |
| siRNA-Temozolomide Run1-DMSO | NM_016413 | CPB2 | carboxypeptidase B2 (plasma, carboxypeptidase U) | -0.070264 | Inlier |
| siRNA Disorazole DMSO Run3   | NM_016413 | CPB2 | carboxypeptidase B2 (plasma, carboxypeptidase U) | 0.070264  | Inlier |
| siRNA Disorazole DMSO Run1   | NM_016413 | CPB2 | carboxypeptidase B2 (plasma, carboxypeptidase U) | 0.430791  | Inlier |



Identification of Survival Genes in Human Glioblastoma Cells Using siRNA Screening  
 Nikhil G Thaker, Fang Zhang, Peter R. McDonald, Tong Ying Shun, Michael D Lewen, Ian F. Pollack, and John S. Lazo  
 Molecular Pharmacology

|                              |               |      |                                                  |           |        |
|------------------------------|---------------|------|--------------------------------------------------|-----------|--------|
| siRNA-Vinblastine Run2-DMSO  | NM_0164<br>13 | CPB2 | carboxypeptidase B2 (plasma, carboxypeptidase U) | 0.899761  | Inlier |
| siRNA-Vinblastine Run1-DMSO  | NM_0164<br>13 | CPB2 | carboxypeptidase B2 (plasma, carboxypeptidase U) | 0.956794  | Inlier |
| siRNA-Temozolomide Run3-DMSO | NM_0013<br>04 | CPD  | carboxypeptidase D                               | -1.889624 | Inlier |
| siRNA-Temozolomide Run2-DMSO | NM_0013<br>04 | CPD  | carboxypeptidase D                               | -0.568007 | Inlier |
| siRNA Disorazole DMSO Run1   | NM_0013<br>04 | CPD  | carboxypeptidase D                               | -0.09182  | Inlier |
| siRNA-Temozolomide Run1-DMSO | NM_0013<br>04 | CPD  | carboxypeptidase D                               | -0.020782 | Inlier |
| siRNA Disorazole DMSO Run2   | NM_0013<br>04 | CPD  | carboxypeptidase D                               | 0.020782  | Inlier |
| siRNA Disorazole DMSO Run3   | NM_0013<br>04 | CPD  | carboxypeptidase D                               | 0.780993  | Inlier |
| siRNA-Vinblastine Run2-DMSO  | NM_0013<br>04 | CPD  | carboxypeptidase D                               | 1.097917  | Inlier |
| siRNA-Vinblastine Run1-DMSO  | NM_0013<br>04 | CPD  | carboxypeptidase D                               | 1.436824  | Inlier |
| siRNA-Temozolomide Run3-DMSO | NM_0018<br>73 | CPE  | carboxypeptidase E                               | -1.68997  | Inlier |
| siRNA-Temozolomide Run2-DMSO | NM_0018<br>73 | CPE  | carboxypeptidase E                               | -1.185182 | Inlier |
| siRNA-Temozolomide Run1-DMSO | NM_0018<br>73 | CPE  | carboxypeptidase E                               | -0.572815 | Inlier |
| siRNA Disorazole DMSO Run3   | NM_0018<br>73 | CPE  | carboxypeptidase E                               | -0.013689 | Inlier |

Identification of Survival Genes in Human Glioblastoma Cells Using siRNA Screening  
 Nikhil G Thaker, Fang Zhang, Peter R. McDonald, Tong Ying Shun, Michael D Lewen, Ian F. Pollack, and John S. Lazo

Molecular Pharmacology

|                              |                  |      |                                         |           |        |
|------------------------------|------------------|------|-----------------------------------------|-----------|--------|
| siRNA Disorazole DMSO Run2   | NM_0018<br>73    | CPE  | carboxypeptidase E                      | 0.013689  | Inlier |
| siRNA Disorazole DMSO Run1   | NM_0018<br>73    | CPE  | carboxypeptidase E                      | 0.54501   | Inlier |
| siRNA-Vinblastine Run2-DMSO  | NM_0018<br>73    | CPE  | carboxypeptidase E                      | 0.776184  | Inlier |
| siRNA-Vinblastine Run1-DMSO  | NM_0018<br>73    | CPE  | carboxypeptidase E                      | 0.858581  | Inlier |
| siRNA-Temozolomide Run3-DMSO | NM_0010<br>05502 | CPM  | carboxypeptidase M                      | -2.22497  | Inlier |
| siRNA-Temozolomide Run2-DMSO | NM_0010<br>05502 | CPM  | carboxypeptidase M                      | -1.139465 | Inlier |
| siRNA-Temozolomide Run1-DMSO | NM_0010<br>05502 | CPM  | carboxypeptidase M                      | -0.739202 | Inlier |
| siRNA Disorazole DMSO Run2   | NM_0010<br>05502 | CPM  | carboxypeptidase M                      | -0.103307 | Inlier |
| siRNA Disorazole DMSO Run3   | NM_0010<br>05502 | CPM  | carboxypeptidase M                      | 0.103308  | Inlier |
| siRNA-Vinblastine Run2-DMSO  | NM_0010<br>05502 | CPM  | carboxypeptidase M                      | 0.323412  | Inlier |
| siRNA Disorazole DMSO Run1   | NM_0010<br>05502 | CPM  | carboxypeptidase M                      | 0.609798  | Inlier |
| siRNA-Vinblastine Run1-DMSO  | NM_0010<br>05502 | CPM  | carboxypeptidase M                      | 0.781617  | Inlier |
| siRNA-Temozolomide Run2-DMSO | NM_0013<br>08    | CPN1 | carboxypeptidase N, polypeptide 1, 50kD | -1.288576 | Inlier |
| siRNA-Temozolomide Run3-DMSO | NM_0013<br>08    | CPN1 | carboxypeptidase N, polypeptide 1, 50kD | -1.257406 | Inlier |
| siRNA Disorazole DMSO Run2   | NM_0013<br>08    | CPN1 | carboxypeptidase N, polypeptide 1, 50kD | -0.507977 | Inlier |

Identification of Survival Genes in Human Glioblastoma Cells Using siRNA Screening  
 Nikhil G Thaker, Fang Zhang, Peter R. McDonald, Tong Ying Shun, Michael D Lewen, Ian F. Pollack, and John S. Lazo  
 Molecular Pharmacology

|                              |               |       |                                         |           |        |
|------------------------------|---------------|-------|-----------------------------------------|-----------|--------|
| siRNA Disorazole DMSO Run1   | NM_0013<br>08 | CPN1  | carboxypeptidase N, polypeptide 1, 50kD | -0.502433 | Inlier |
| siRNA Disorazole DMSO Run3   | NM_0013<br>08 | CPN1  | carboxypeptidase N, polypeptide 1, 50kD | 0.502434  | Inlier |
| siRNA-Temozolomide Run1-DMSO | NM_0013<br>08 | CPN1  | carboxypeptidase N, polypeptide 1, 50kD | 0.611323  | Inlier |
| siRNA-Vinblastine Run2-DMSO  | NM_0013<br>08 | CPN1  | carboxypeptidase N, polypeptide 1, 50kD | 0.737677  | Inlier |
| siRNA-Vinblastine Run1-DMSO  | NM_0013<br>08 | CPN1  | carboxypeptidase N, polypeptide 1, 50kD | 1.219795  | Inlier |
| siRNA Disorazole DMSO Run1   | NM_1308<br>08 | CPNE4 | copine IV                               | -1.032176 | Inlier |
| siRNA-Temozolomide Run2-DMSO | NM_1308<br>08 | CPNE4 | copine IV                               | -0.905781 | Inlier |
| siRNA Disorazole DMSO Run2   | NM_1308<br>08 | CPNE4 | copine IV                               | -0.855912 | Inlier |
| siRNA-Temozolomide Run3-DMSO | NM_1308<br>08 | CPNE4 | copine IV                               | -0.017799 | Inlier |
| siRNA-Temozolomide Run1-DMSO | NM_1308<br>08 | CPNE4 | copine IV                               | 0.017799  | Inlier |
| siRNA-Vinblastine Run1-DMSO  | NM_1308<br>08 | CPNE4 | copine IV                               | 0.153206  | Inlier |
| siRNA Disorazole DMSO Run3   | NM_1308<br>08 | CPNE4 | copine IV                               | 0.510768  | Inlier |
| siRNA-Vinblastine Run2-DMSO  | NM_1308<br>08 | CPNE4 | copine IV                               | 0.838232  | Inlier |
| siRNA Disorazole DMSO Run3   | NM_1730<br>77 | CPO   | carboxypeptidase O                      | -1.330321 | Inlier |
| siRNA Disorazole DMSO Run2   | NM_1730<br>77 | CPO   | carboxypeptidase O                      | -1.198089 | Inlier |
| siRNA-Temozolomide Run3-DMSO | NM_1730<br>77 | CPO   | carboxypeptidase O                      | -0.960688 | Inlier |

Identification of Survival Genes in Human Glioblastoma Cells Using siRNA Screening  
 Nikhil G Thaker, Fang Zhang, Peter R. McDonald, Tong Ying Shun, Michael D Lewen, Ian F. Pollack, and John S. Lazo

Molecular Pharmacology

|                              |               |      |                                                 |           |        |
|------------------------------|---------------|------|-------------------------------------------------|-----------|--------|
| siRNA-Temozolomide Run2-DMSO | NM_1730<br>77 | CPO  | carboxypeptidase O                              | -0.281969 | Inlier |
| siRNA Disorazole DMSO Run1   | NM_1730<br>77 | CPO  | carboxypeptidase O                              | 0.281969  | Inlier |
| siRNA-Temozolomide Run1-DMSO | NM_1730<br>77 | CPO  | carboxypeptidase O                              | 0.32458   | Inlier |
| siRNA-Vinblastine Run2-DMSO  | NM_1730<br>77 | CPO  | carboxypeptidase O                              | 0.592302  | Inlier |
| siRNA-Vinblastine Run1-DMSO  | NM_1730<br>77 | CPO  | carboxypeptidase O                              | 0.756698  | Inlier |
| siRNA-Temozolomide Run3-DMSO | NM_0000<br>97 | CPOX | coproporphyrinogen oxidase                      | -0.920445 | Inlier |
| siRNA-Temozolomide Run2-DMSO | NM_0000<br>97 | CPOX | coproporphyrinogen oxidase                      | -0.807365 | Inlier |
| siRNA Disorazole DMSO Run3   | NM_0000<br>97 | CPOX | coproporphyrinogen oxidase                      | -0.541635 | Inlier |
| siRNA Disorazole DMSO Run1   | NM_0000<br>97 | CPOX | coproporphyrinogen oxidase                      | -0.094163 | Inlier |
| siRNA-Vinblastine Run2-DMSO  | NM_0000<br>97 | CPOX | coproporphyrinogen oxidase                      | 0.094163  | Inlier |
| siRNA-Temozolomide Run1-DMSO | NM_0000<br>97 | CPOX | coproporphyrinogen oxidase                      | 0.358366  | Inlier |
| siRNA-Vinblastine Run1-DMSO  | NM_0000<br>97 | CPOX | coproporphyrinogen oxidase                      | 1.542701  | Inlier |
| siRNA Disorazole DMSO Run2   | NM_0000<br>97 | CPOX | coproporphyrinogen oxidase                      | 2.551196  | Inlier |
| siRNA-Vinblastine Run2-DMSO  | NM_0018<br>75 | CPS1 | carbamoyl-phosphate synthetase 1, mitochondrial | -0.797157 | Inlier |

Identification of Survival Genes in Human Glioblastoma Cells Using siRNA Screening  
 Nikhil G Thaker, Fang Zhang, Peter R. McDonald, Tong Ying Shun, Michael D Lewen, Ian F. Pollack, and John S. Lazo  
 Molecular Pharmacology

|                              |               |      |                                                 |                  |
|------------------------------|---------------|------|-------------------------------------------------|------------------|
| siRNA Disorazole DMSO Run3   | NM_0018<br>75 | CPS1 | carbamoyl-phosphate synthetase 1, mitochondrial | -0.683961 Inlier |
| siRNA-Temozolomide Run2-DMSO | NM_0018<br>75 | CPS1 | carbamoyl-phosphate synthetase 1, mitochondrial | -0.6349 Inlier   |
| siRNA Disorazole DMSO Run1   | NM_0018<br>75 | CPS1 | carbamoyl-phosphate synthetase 1, mitochondrial | -0.32379 Inlier  |
| siRNA-Temozolomide Run1-DMSO | NM_0018<br>75 | CPS1 | carbamoyl-phosphate synthetase 1, mitochondrial | 0.32379 Inlier   |
| siRNA-Temozolomide Run3-DMSO | NM_0018<br>75 | CPS1 | carbamoyl-phosphate synthetase 1, mitochondrial | 0.665039 Inlier  |
| siRNA-Vinblastine Run1-DMSO  | NM_0018<br>75 | CPS1 | carbamoyl-phosphate synthetase 1, mitochondrial | 1.297787 Inlier  |

Identification of Survival Genes in Human Glioblastoma Cells Using siRNA Screening  
 Nikhil G Thaker, Fang Zhang, Peter R. McDonald, Tong Ying Shun, Michael D Lewen, Ian F. Pollack, and John S. Lazo  
 Molecular Pharmacology

|                                  |               |       |                                                                  |           |         |
|----------------------------------|---------------|-------|------------------------------------------------------------------|-----------|---------|
| siRNA Disorazole DMSO Run2       | NM_0018<br>75 | CPS1  | carbamoyl-<br>phosphate<br>synthetase<br>1,<br>mitochond<br>rial | 2.089237  | Inlier  |
| siRNA-Temozolomide Run3-<br>DMSO | NM_0018<br>76 | CPT1A | carnitine<br>palmitoyltr<br>ansferase<br>1A (liver)              | -1.139514 | Inlier  |
| siRNA-Temozolomide Run2-<br>DMSO | NM_0018<br>76 | CPT1A | carnitine<br>palmitoyltr<br>ansferase<br>1A (liver)              | -0.990921 | Inlier  |
| siRNA-Temozolomide Run1-<br>DMSO | NM_0018<br>76 | CPT1A | carnitine<br>palmitoyltr<br>ansferase<br>1A (liver)              | -0.039334 | Inlier  |
| siRNA-Vinblastine Run2-<br>DMSO  | NM_0018<br>76 | CPT1A | carnitine<br>palmitoyltr<br>ansferase<br>1A (liver)              | -0.022063 | Inlier  |
| siRNA Disorazole DMSO Run1       | NM_0018<br>76 | CPT1A | carnitine<br>palmitoyltr<br>ansferase<br>1A (liver)              | 0.022063  | Inlier  |
| siRNA Disorazole DMSO Run3       | NM_0018<br>76 | CPT1A | carnitine<br>palmitoyltr<br>ansferase<br>1A (liver)              | 0.358079  | Inlier  |
| siRNA-Vinblastine Run1-<br>DMSO  | NM_0018<br>76 | CPT1A | carnitine<br>palmitoyltr<br>ansferase<br>1A (liver)              | 2.922391  | Inlier  |
| siRNA Disorazole DMSO Run2       | NM_0018<br>76 | CPT1A | carnitine<br>palmitoyltr<br>ansferase<br>1A (liver)              | 3.835181  | Outlier |

Identification of Survival Genes in Human Glioblastoma Cells Using siRNA Screening  
 Nikhil G Thaker, Fang Zhang, Peter R. McDonald, Tong Ying Shun, Michael D Lewen, Ian F. Pollack, and John S. Lazo

Molecular Pharmacology

|                                  |               |       |                                                         |           |        |
|----------------------------------|---------------|-------|---------------------------------------------------------|-----------|--------|
| siRNA Disorazole DMSO Run1       | NM_1522<br>45 | CPT1B | carnitine<br>palmitoyltr<br>ansferase<br>1B<br>(muscle) | -1.420317 | Inlier |
| siRNA-Temozolomide Run1-<br>DMSO | NM_1522<br>45 | CPT1B | carnitine<br>palmitoyltr<br>ansferase<br>1B<br>(muscle) | -1.332626 | Inlier |
| siRNA-Temozolomide Run2-<br>DMSO | NM_1522<br>45 | CPT1B | carnitine<br>palmitoyltr<br>ansferase<br>1B<br>(muscle) | -1.045211 | Inlier |
| siRNA Disorazole DMSO Run3       | NM_1522<br>45 | CPT1B | carnitine<br>palmitoyltr<br>ansferase<br>1B<br>(muscle) | -0.085446 | Inlier |
| siRNA-Vinblastine Run1-<br>DMSO  | NM_1522<br>45 | CPT1B | carnitine<br>palmitoyltr<br>ansferase<br>1B<br>(muscle) | 0.085447  | Inlier |
| siRNA-Temozolomide Run3-<br>DMSO | NM_1522<br>45 | CPT1B | carnitine<br>palmitoyltr<br>ansferase<br>1B<br>(muscle) | 0.238893  | Inlier |
| siRNA Disorazole DMSO Run2       | NM_1522<br>45 | CPT1B | carnitine<br>palmitoyltr<br>ansferase<br>1B<br>(muscle) | 0.523281  | Inlier |
| siRNA-Vinblastine Run2-<br>DMSO  | NM_1522<br>45 | CPT1B | carnitine<br>palmitoyltr<br>ansferase<br>1B<br>(muscle) | 0.825719  | Inlier |
| siRNA Disorazole DMSO Run1       | NM_1523<br>59 | CPT1C | carnitine<br>palmitoyltr<br>ansferase<br>1C<br>(muscle) | -0.734137 | Inlier |
| siRNA-Temozolomide Run3-<br>DMSO | NM_1523<br>59 | CPT1C | carnitine<br>palmitoyltr<br>ansferase<br>1C<br>(muscle) | -0.614863 | Inlier |
| siRNA-Temozolomide Run1-<br>DMSO | NM_1523<br>59 | CPT1C | carnitine<br>palmitoyltr<br>ansferase<br>1C<br>(muscle) | -0.191814 | Inlier |

Identification of Survival Genes in Human Glioblastoma Cells Using siRNA Screening  
 Nikhil G Thaker, Fang Zhang, Peter R. McDonald, Tong Ying Shun, Michael D Lewen, Ian F. Pollack, and John S. Lazo

Molecular Pharmacology

|                              |               |       |                                         |           |        |
|------------------------------|---------------|-------|-----------------------------------------|-----------|--------|
| siRNA-Vinblastine Run2-DMSO  | NM_1523<br>59 | CPT1C | carnitine<br>palmitoyltransferase<br>1C | -0.140107 | Inlier |
| siRNA Disorazole DMSO Run3   | NM_1523<br>59 | CPT1C | carnitine<br>palmitoyltransferase<br>1C | 0.140107  | Inlier |
| siRNA-Temozolomide Run2-DMSO | NM_1523<br>59 | CPT1C | carnitine<br>palmitoyltransferase<br>1C | 0.779304  | Inlier |
| siRNA Disorazole DMSO Run2   | NM_1523<br>59 | CPT1C | carnitine<br>palmitoyltransferase<br>1C | 2.476242  | Inlier |
| siRNA-Vinblastine Run1-DMSO  | NM_1523<br>59 | CPT1C | carnitine<br>palmitoyltransferase<br>1C | 2.638911  | Inlier |
| siRNA Disorazole DMSO Run1   | NM_0000<br>98 | CPT2  | carnitine<br>palmitoyltransferase<br>II | -0.714719 | Inlier |
| siRNA-Vinblastine Run2-DMSO  | NM_0000<br>98 | CPT2  | carnitine<br>palmitoyltransferase<br>II | -0.634281 | Inlier |
| siRNA-Temozolomide Run1-DMSO | NM_0000<br>98 | CPT2  | carnitine<br>palmitoyltransferase<br>II | -0.291382 | Inlier |
| siRNA-Temozolomide Run2-DMSO | NM_0000<br>98 | CPT2  | carnitine<br>palmitoyltransferase<br>II | -0.002293 | Inlier |
| siRNA Disorazole DMSO Run3   | NM_0000<br>98 | CPT2  | carnitine<br>palmitoyltransferase<br>II | 0.002293  | Inlier |
| siRNA-Temozolomide Run3-DMSO | NM_0000<br>98 | CPT2  | carnitine<br>palmitoyltransferase<br>II | 0.863108  | Inlier |
| siRNA Disorazole DMSO Run2   | NM_0000<br>98 | CPT2  | carnitine<br>palmitoyltransferase<br>II | 1.258276  | Inlier |
| siRNA-Vinblastine Run1-DMSO  | NM_0000<br>98 | CPT2  | carnitine<br>palmitoyltransferase<br>II | 1.432374  | Inlier |



Identification of Survival Genes in Human Glioblastoma Cells Using siRNA Screening  
 Nikhil G Thaker, Fang Zhang, Peter R. McDonald, Tong Ying Shun, Michael D Lewen, Ian F. Pollack, and John S. Lazo

Molecular Pharmacology

|                              |               |      |                                       |           |        |
|------------------------------|---------------|------|---------------------------------------|-----------|--------|
| siRNA Disorazole DMSO Run1   | NM_0313<br>11 | CPVL | carboxypeptidase, vitellogenin c-like | -2.428853 | Inlier |
| siRNA Disorazole DMSO Run2   | NM_0313<br>11 | CPVL | carboxypeptidase, vitellogenin c-like | -1.115306 | Inlier |
| siRNA-Temozolomide Run2-DMSO | NM_0313<br>11 | CPVL | carboxypeptidase, vitellogenin c-like | -0.126016 | Inlier |
| siRNA-Temozolomide Run3-DMSO | NM_0313<br>11 | CPVL | carboxypeptidase, vitellogenin c-like | -0.09604  | Inlier |
| siRNA-Temozolomide Run1-DMSO | NM_0313<br>11 | CPVL | carboxypeptidase, vitellogenin c-like | 0.09604   | Inlier |
| siRNA-Vinblastine Run1-DMSO  | NM_0313<br>11 | CPVL | carboxypeptidase, vitellogenin c-like | 0.233694  | Inlier |
| siRNA-Vinblastine Run2-DMSO  | NM_0313<br>11 | CPVL | carboxypeptidase, vitellogenin c-like | 1.164684  | Inlier |
| siRNA Disorazole DMSO Run3   | NM_0313<br>11 | CPVL | carboxypeptidase, vitellogenin c-like | 3.240736  | Inlier |
| siRNA-Temozolomide Run3-DMSO | NM_0196<br>09 | CPXM | carboxypeptidase X (M14 family)       | -1.307814 | Inlier |
| siRNA-Temozolomide Run2-DMSO | NM_0196<br>09 | CPXM | carboxypeptidase X (M14 family)       | -0.753542 | Inlier |
| siRNA-Temozolomide Run1-DMSO | NM_0196<br>09 | CPXM | carboxypeptidase X (M14 family)       | -0.186453 | Inlier |
| siRNA Disorazole DMSO Run3   | NM_0196<br>09 | CPXM | carboxypeptidase X (M14 family)       | -0.062404 | Inlier |
| siRNA Disorazole DMSO Run2   | NM_0196<br>09 | CPXM | carboxypeptidase X (M14 family)       | 0.062403  | Inlier |

Identification of Survival Genes in Human Glioblastoma Cells Using siRNA Screening

Nikhil G Thaker, Fang Zhang, Peter R. McDonald, Tong Ying Shun, Michael D Lewen, Ian F. Pollack, and John S. Lazo

Molecular Pharmacology

|                              |               |       |                                           |           |         |
|------------------------------|---------------|-------|-------------------------------------------|-----------|---------|
| siRNA Disorazole DMSO Run1   | NM_0196<br>09 | CPXM  | carboxypeptidase X (M14 family)           | 0.595458  | Inlier  |
| siRNA-Vinblastine Run2-DMSO  | NM_0196<br>09 | CPXM  | carboxypeptidase X (M14 family)           | 3.372765  | Inlier  |
| siRNA-Vinblastine Run1-DMSO  | NM_0196<br>09 | CPXM  | carboxypeptidase X (M14 family)           | 3.892961  | Outlier |
| siRNA-Temozolomide Run3-DMSO | NM_1981<br>48 | CPXM2 | carboxypeptidase X (M14 family), member 2 | -1.136639 | Inlier  |
| siRNA Disorazole DMSO Run3   | NM_1981<br>48 | CPXM2 | carboxypeptidase X (M14 family), member 2 | -0.553251 | Inlier  |
| siRNA Disorazole DMSO Run2   | NM_1981<br>48 | CPXM2 | carboxypeptidase X (M14 family), member 2 | -0.352306 | Inlier  |
| siRNA-Temozolomide Run2-DMSO | NM_1981<br>48 | CPXM2 | carboxypeptidase X (M14 family), member 2 | -0.336566 | Inlier  |
| siRNA-Temozolomide Run1-DMSO | NM_1981<br>48 | CPXM2 | carboxypeptidase X (M14 family), member 2 | 0.336566  | Inlier  |
| siRNA-Vinblastine Run2-DMSO  | NM_1981<br>48 | CPXM2 | carboxypeptidase X (M14 family), member 2 | 0.795749  | Inlier  |
| siRNA Disorazole DMSO Run1   | NM_1981<br>48 | CPXM2 | carboxypeptidase X (M14 family), member 2 | 1.24677   | Inlier  |
| siRNA-Vinblastine Run1-DMSO  | NM_1981<br>48 | CPXM2 | carboxypeptidase X (M14 family), member 2 | 1.347412  | Inlier  |

Identification of Survival Genes in Human Glioblastoma Cells Using siRNA Screening

Nikhil G Thaker, Fang Zhang, Peter R. McDonald, Tong Ying Shun, Michael D Lewen, Ian F. Pollack, and John S. Lazo

Molecular Pharmacology

|                              |               |     |                                                                             |           |        |
|------------------------------|---------------|-----|-----------------------------------------------------------------------------|-----------|--------|
| siRNA-Temozolomide Run3-DMSO | NM_0036<br>52 | CPZ | carboxypeptidase Z                                                          | -1.391968 | Inlier |
| siRNA Disorazole DMSO Run2   | NM_0036<br>52 | CPZ | carboxypeptidase Z                                                          | -0.847885 | Inlier |
| siRNA-Temozolomide Run2-DMSO | NM_0036<br>52 | CPZ | carboxypeptidase Z                                                          | -0.774061 | Inlier |
| siRNA Disorazole DMSO Run3   | NM_0036<br>52 | CPZ | carboxypeptidase Z                                                          | -0.189361 | Inlier |
| siRNA-Temozolomide Run1-DMSO | NM_0036<br>52 | CPZ | carboxypeptidase Z                                                          | 0.189361  | Inlier |
| siRNA Disorazole DMSO Run1   | NM_0036<br>52 | CPZ | carboxypeptidase Z                                                          | 0.404163  | Inlier |
| siRNA-Vinblastine Run2-DMSO  | NM_0036<br>52 | CPZ | carboxypeptidase Z                                                          | 0.630132  | Inlier |
| siRNA-Vinblastine Run1-DMSO  | NM_0036<br>52 | CPZ | carboxypeptidase Z                                                          | 0.718868  | Inlier |
| siRNA Disorazole DMSO Run2   | NM_0006<br>51 | CR1 | complement component (3b/4b) receptor 1, including Knops blood group system | -0.934758 | Inlier |
| siRNA-Temozolomide Run3-DMSO | NM_0006<br>51 | CR1 | complement component (3b/4b) receptor 1, including Knops blood group system | -0.746614 | Inlier |

Identification of Survival Genes in Human Glioblastoma Cells Using siRNA Screening

Nikhil G Thaker, Fang Zhang, Peter R. McDonald, Tong Ying Shun, Michael D Lewen, Ian F. Pollack, and John S. Lazo

Molecular Pharmacology

|                                  |               |     |                                                                                                          |           |        |
|----------------------------------|---------------|-----|----------------------------------------------------------------------------------------------------------|-----------|--------|
| siRNA Disorazole DMSO Run3       | NM_0006<br>51 | CR1 | compleme<br>nt<br>componen<br>t (3b/4b)<br>receptor 1,<br>including<br>Knops<br>blood<br>group<br>system | -0.256632 | Inlier |
| siRNA-Temozolomide Run2-<br>DMSO | NM_0006<br>51 | CR1 | compleme<br>nt<br>componen<br>t (3b/4b)<br>receptor 1,<br>including<br>Knops<br>blood<br>group<br>system | -0.182155 | Inlier |
| siRNA Disorazole DMSO Run1       | NM_0006<br>51 | CR1 | compleme<br>nt<br>componen<br>t (3b/4b)<br>receptor 1,<br>including<br>Knops<br>blood<br>group<br>system | 0.182155  | Inlier |
| siRNA-Vinblastine Run2-<br>DMSO  | NM_0006<br>51 | CR1 | compleme<br>nt<br>componen<br>t (3b/4b)<br>receptor 1,<br>including<br>Knops<br>blood<br>group<br>system | 0.612401  | Inlier |

Identification of Survival Genes in Human Glioblastoma Cells Using siRNA Screening

Nikhil G Thaker, Fang Zhang, Peter R. McDonald, Tong Ying Shun, Michael D Lewen, Ian F. Pollack, and John S. Lazo

Molecular Pharmacology

|                              |           |     |                                                                             |           |        |
|------------------------------|-----------|-----|-----------------------------------------------------------------------------|-----------|--------|
| siRNA-Temozolomide Run1-DMSO | NM_000651 | CR1 | complement component (3b/4b) receptor 1, including Knops blood group system | 0.736599  | Inlier |
| siRNA-Vinblastine Run1-DMSO  | NM_000651 | CR1 | complement component (3b/4b) receptor 1, including Knops blood group system | 1.08232   | Inlier |
| siRNA Disorazole DMSO Run1   | NM_001877 | CR2 | complement component (3d/Epstein Barr virus) receptor 2                     | -1.173133 | Inlier |
| siRNA-Temozolomide Run2-DMSO | NM_001877 | CR2 | complement component (3d/Epstein Barr virus) receptor 2                     | -0.837012 | Inlier |
| siRNA Disorazole DMSO Run3   | NM_001877 | CR2 | complement component (3d/Epstein Barr virus) receptor 2                     | -0.539889 | Inlier |

Identification of Survival Genes in Human Glioblastoma Cells Using siRNA Screening

Nikhil G Thaker, Fang Zhang, Peter R. McDonald, Tong Ying Shun, Michael D Lewen, Ian F. Pollack, and John S. Lazo

Molecular Pharmacology

| siRNA Treatment              | Gene ID   | Target | Gene Name                                               | Log Fold Change | Outlier Status |
|------------------------------|-----------|--------|---------------------------------------------------------|-----------------|----------------|
| siRNA-Temozolomide Run3-DMSO | NM_001877 | CR2    | complement component (3d/Epstein Barr virus) receptor 2 | -0.153124       | Inlier         |
| siRNA-Temozolomide Run1-DMSO | NM_001877 | CR2    | complement component (3d/Epstein Barr virus) receptor 2 | 0.153124        | Inlier         |
| siRNA-Vinblastine Run1-DMSO  | NM_001877 | CR2    | complement component (3d/Epstein Barr virus) receptor 2 | 0.369903        | Inlier         |
| siRNA Disorazole DMSO Run2   | NM_001877 | CR2    | complement component (3d/Epstein Barr virus) receptor 2 | 0.809112        | Inlier         |
| siRNA-Vinblastine Run2-DMSO  | NM_001877 | CR2    | cellular retinoic acid binding protein 1                | 1.167054        | Inlier         |
| siRNA Disorazole DMSO Run1   | NM_004378 | CRABP1 | cellular retinoic acid binding protein 1                | -0.677728       | Inlier         |
| siRNA-Temozolomide Run2-DMSO | NM_004378 | CRABP1 | cellular retinoic acid binding protein 1                | -0.671272       | Inlier         |

Identification of Survival Genes in Human Glioblastoma Cells Using siRNA Screening  
 Nikhil G Thaker, Fang Zhang, Peter R. McDonald, Tong Ying Shun, Michael D Lewen, Ian F. Pollack, and John S. Lazo

Molecular Pharmacology

|                              |           |        |                                          |           |        |
|------------------------------|-----------|--------|------------------------------------------|-----------|--------|
| siRNA-Temozolomide Run1-DMSO | NM_004378 | CRABP1 | cellular retinoic acid binding protein 1 | -0.280277 | Inlier |
| siRNA-Temozolomide Run3-DMSO | NM_004378 | CRABP1 | cellular retinoic acid binding protein 1 | -0.090547 | Inlier |
| siRNA-Vinblastine Run2-DMSO  | NM_004378 | CRABP1 | cellular retinoic acid binding protein 1 | 0.090546  | Inlier |
| siRNA Disorazole DMSO Run3   | NM_004378 | CRABP1 | cellular retinoic acid binding protein 1 | 1.509626  | Inlier |
| siRNA-Vinblastine Run1-DMSO  | NM_004378 | CRABP1 | cellular retinoic acid binding protein 1 | 2.67976   | Inlier |
| siRNA Disorazole DMSO Run2   | NM_004378 | CRABP1 | cellular retinoic acid binding protein 1 | 3.396792  | Inlier |
| siRNA Disorazole DMSO Run1   | NM_001878 | CRABP2 | cellular retinoic acid binding protein 2 | -0.957264 | Inlier |
| siRNA-Temozolomide Run1-DMSO | NM_001878 | CRABP2 | cellular retinoic acid binding protein 2 | -0.693068 | Inlier |
| siRNA-Vinblastine Run2-DMSO  | NM_001878 | CRABP2 | cellular retinoic acid binding protein 2 | -0.557224 | Inlier |
| siRNA-Temozolomide Run2-DMSO | NM_001878 | CRABP2 | cellular retinoic acid binding protein 2 | -0.158884 | Inlier |

Identification of Survival Genes in Human Glioblastoma Cells Using siRNA Screening  
 Nikhil G Thaker, Fang Zhang, Peter R. McDonald, Tong Ying Shun, Michael D Lewen, Ian F. Pollack, and John S. Lazo

Molecular Pharmacology

|                              |           |        |                                                  |           |         |
|------------------------------|-----------|--------|--------------------------------------------------|-----------|---------|
| siRNA-Vinblastine Run1-DMSO  | NM_001878 | CRABP2 | cellular retinoic acid binding protein 2         | 0.158884  | Inlier  |
| siRNA Disorazole DMSO Run3   | NM_001878 | CRABP2 | cellular retinoic acid binding protein 2         | 0.655932  | Inlier  |
| siRNA Disorazole DMSO Run2   | NM_001878 | CRABP2 | cellular retinoic acid binding protein 2         | 0.816596  | Inlier  |
| siRNA-Temozolomide Run3-DMSO | NM_001878 | CRABP2 | cellular retinoic acid binding protein 2         | 0.933093  | Inlier  |
| siRNA-Temozolomide Run3-DMSO | NM_004003 | CRAT   | carnitine acetyltransferase                      | -0.690645 | Inlier  |
| siRNA Disorazole DMSO Run3   | NM_004003 | CRAT   | carnitine acetyltransferase                      | -0.658355 | Inlier  |
| siRNA-Temozolomide Run1-DMSO | NM_004003 | CRAT   | carnitine acetyltransferase                      | -0.19754  | Inlier  |
| siRNA-Vinblastine Run2-DMSO  | NM_004003 | CRAT   | carnitine acetyltransferase                      | -0.172179 | Inlier  |
| siRNA Disorazole DMSO Run1   | NM_004003 | CRAT   | carnitine acetyltransferase                      | 0.172179  | Inlier  |
| siRNA-Temozolomide Run2-DMSO | NM_004003 | CRAT   | carnitine acetyltransferase                      | 1.268406  | Inlier  |
| siRNA-Vinblastine Run1-DMSO  | NM_004003 | CRAT   | carnitine acetyltransferase                      | 4.362071  | Outlier |
| siRNA Disorazole DMSO Run2   | NM_004003 | CRAT   | carnitine acetyltransferase                      | 5.611235  | Outlier |
| siRNA-Temozolomide Run2-DMSO | NM_004380 | CREBBP | CREB binding protein (Rubinstein-Taybi syndrome) | -0.791472 | Inlier  |



Identification of Survival Genes in Human Glioblastoma Cells Using siRNA Screening  
 Nikhil G Thaker, Fang Zhang, Peter R. McDonald, Tong Ying Shun, Michael D Lewen, Ian F. Pollack, and John S. Lazo  
 Molecular Pharmacology

|                                  |               |        |                                                                  |           |         |
|----------------------------------|---------------|--------|------------------------------------------------------------------|-----------|---------|
| siRNA Disorazole DMSO Run3       | NM_0043<br>80 | CREBBP | CREB<br>binding<br>protein<br>(Rubinstei<br>n-Taybi<br>syndrome) | -0.750326 | Inlier  |
| siRNA-Vinblastine Run2-<br>DMSO  | NM_0043<br>80 | CREBBP | CREB<br>binding<br>protein<br>(Rubinstei<br>n-Taybi<br>syndrome) | -0.598674 | Inlier  |
| siRNA Disorazole DMSO Run1       | NM_0043<br>80 | CREBBP | CREB<br>binding<br>protein<br>(Rubinstei<br>n-Taybi<br>syndrome) | -0.318609 | Inlier  |
| siRNA-Temozolomide Run1-<br>DMSO | NM_0043<br>80 | CREBBP | CREB<br>binding<br>protein<br>(Rubinstei<br>n-Taybi<br>syndrome) | 0.318609  | Inlier  |
| siRNA-Temozolomide Run3-<br>DMSO | NM_0043<br>80 | CREBBP | CREB<br>binding<br>protein<br>(Rubinstei<br>n-Taybi<br>syndrome) | 0.440152  | Inlier  |
| siRNA Disorazole DMSO Run2       | NM_0043<br>80 | CREBBP | CREB<br>binding<br>protein<br>(Rubinstei<br>n-Taybi<br>syndrome) | 3.400245  | Inlier  |
| siRNA-Vinblastine Run1-<br>DMSO  | NM_0043<br>80 | CREBBP | CREB<br>binding<br>protein<br>(Rubinstei<br>n-Taybi<br>syndrome) | 4.83664   | Outlier |

Identification of Survival Genes in Human Glioblastoma Cells Using siRNA Screening

Nikhil G Thaker, Fang Zhang, Peter R. McDonald, Tong Ying Shun, Michael D Lewen, Ian F. Pollack, and John S. Lazo

Molecular Pharmacology

| siRNA Treatment              | Gene ID   | Gene Name | Log Fold Change | Outlier Status | Biological Pathway                             |
|------------------------------|-----------|-----------|-----------------|----------------|------------------------------------------------|
| siRNA-Temozolomide Run3-DMSO | NM_004381 | CREBL1    | -1.186372       | Inlier         | cAMP responsive element binding protein-like 1 |
| siRNA-Temozolomide Run2-DMSO | NM_004381 | CREBL1    | -1.000276       | Inlier         | cAMP responsive element binding protein-like 1 |
| siRNA Disorazole DMSO Run3   | NM_004381 | CREBL1    | -0.115613       | Inlier         | cAMP responsive element binding protein-like 1 |
| siRNA Disorazole DMSO Run1   | NM_004381 | CREBL1    | -0.022473       | Inlier         | cAMP responsive element binding protein-like 1 |
| siRNA-Temozolomide Run1-DMSO | NM_004381 | CREBL1    | 0.022474        | Inlier         | cAMP responsive element binding protein-like 1 |
| siRNA Disorazole DMSO Run2   | NM_004381 | CREBL1    | 0.348724        | Inlier         | cAMP responsive element binding protein-like 1 |
| siRNA-Vinblastine Run1-DMSO  | NM_004381 | CREBL1    | 1.143763        | Inlier         | cAMP responsive element binding protein-like 1 |
| siRNA-Vinblastine Run2-DMSO  | NM_004381 | CREBL1    | 1.357193        | Inlier         | corticotropin                                  |
| siRNA-Temozolomide Run3-DMSO | NM_000756 | CRH       | -1.93526        | Inlier         | releasing hormone                              |

Identification of Survival Genes in Human Glioblastoma Cells Using siRNA Screening  
 Nikhil G Thaker, Fang Zhang, Peter R. McDonald, Tong Ying Shun, Michael D Lewen, Ian F. Pollack, and John S. Lazo

Molecular Pharmacology

|                                  |               |       |                                                         |           |        |
|----------------------------------|---------------|-------|---------------------------------------------------------|-----------|--------|
| siRNA Disorazole DMSO Run2       | NM_0007<br>56 | CRH   | corticotrop<br>in<br>releasing<br>hormone               | -0.933428 | Inlier |
| siRNA Disorazole DMSO Run3       | NM_0007<br>56 | CRH   | corticotrop<br>in<br>releasing<br>hormone               | -0.415572 | Inlier |
| siRNA-Temozolomide Run2-<br>DMSO | NM_0007<br>56 | CRH   | corticotrop<br>in<br>releasing<br>hormone               | -0.033497 | Inlier |
| siRNA Disorazole DMSO Run1       | NM_0007<br>56 | CRH   | corticotrop<br>in<br>releasing<br>hormone               | 0.033497  | Inlier |
| siRNA-Temozolomide Run1-<br>DMSO | NM_0007<br>56 | CRH   | corticotrop<br>in<br>releasing<br>hormone               | 0.406853  | Inlier |
| siRNA-Vinblastine Run2-<br>DMSO  | NM_0007<br>56 | CRH   | corticotrop<br>in<br>releasing<br>hormone               | 0.975481  | Inlier |
| siRNA-Vinblastine Run1-<br>DMSO  | NM_0007<br>56 | CRH   | corticotrop<br>in<br>releasing<br>hormone               | 1.136356  | Inlier |
| siRNA-Temozolomide Run3-<br>DMSO | NM_0043<br>82 | CRHR1 | corticotrop<br>in<br>releasing<br>hormone<br>receptor 1 | -1.428265 | Inlier |
| siRNA Disorazole DMSO Run2       | NM_0043<br>82 | CRHR1 | corticotrop<br>in<br>releasing<br>hormone<br>receptor 1 | -0.559036 | Inlier |
| siRNA-Temozolomide Run2-<br>DMSO | NM_0043<br>82 | CRHR1 | corticotrop<br>in<br>releasing<br>hormone<br>receptor 1 | -0.243801 | Inlier |
| siRNA Disorazole DMSO Run3       | NM_0043<br>82 | CRHR1 | corticotrop<br>in<br>releasing<br>hormone<br>receptor 1 | -0.204956 | Inlier |

Identification of Survival Genes in Human Glioblastoma Cells Using siRNA Screening  
 Nikhil G Thaker, Fang Zhang, Peter R. McDonald, Tong Ying Shun, Michael D Lewen, Ian F. Pollack, and John S. Lazo

Molecular Pharmacology

|                              |               |       |                                                         |           |        |
|------------------------------|---------------|-------|---------------------------------------------------------|-----------|--------|
| siRNA-Temozolomide Run1-DMSO | NM_0043<br>82 | CRHR1 | corticotrop<br>in<br>releasing<br>hormone<br>receptor 1 | 0.204956  | Inlier |
| siRNA Disorazole DMSO Run1   | NM_0043<br>82 | CRHR1 | corticotrop<br>in<br>releasing<br>hormone<br>receptor 1 | 0.789964  | Inlier |
| siRNA-Vinblastine Run1-DMSO  | NM_0043<br>82 | CRHR1 | corticotrop<br>in<br>releasing<br>hormone<br>receptor 1 | 1.108335  | Inlier |
| siRNA-Vinblastine Run2-DMSO  | NM_0043<br>82 | CRHR1 | corticotrop<br>in<br>releasing<br>hormone<br>receptor 1 | 1.234008  | Inlier |
| siRNA-Temozolomide Run3-DMSO | NM_0018<br>83 | CRHR2 | corticotrop<br>in<br>releasing<br>hormone<br>receptor 2 | -1.738381 | Inlier |
| siRNA Disorazole DMSO Run3   | NM_0018<br>83 | CRHR2 | corticotrop<br>in<br>releasing<br>hormone<br>receptor 2 | -1.197713 | Inlier |
| siRNA Disorazole DMSO Run2   | NM_0018<br>83 | CRHR2 | corticotrop<br>in<br>releasing<br>hormone<br>receptor 2 | -1.074274 | Inlier |
| siRNA-Temozolomide Run2-DMSO | NM_0018<br>83 | CRHR2 | corticotrop<br>in<br>releasing<br>hormone<br>receptor 2 | -0.244911 | Inlier |
| siRNA-Temozolomide Run1-DMSO | NM_0018<br>83 | CRHR2 | corticotrop<br>in<br>releasing<br>hormone<br>receptor 2 | 0.244911  | Inlier |
| siRNA Disorazole DMSO Run1   | NM_0018<br>83 | CRHR2 | corticotrop<br>in<br>releasing<br>hormone<br>receptor 2 | 0.267534  | Inlier |

Identification of Survival Genes in Human Glioblastoma Cells Using siRNA Screening  
 Nikhil G Thaker, Fang Zhang, Peter R. McDonald, Tong Ying Shun, Michael D Lewen, Ian F. Pollack, and John S. Lazo

Molecular Pharmacology

|                              |           |       |                                            |           |        |
|------------------------------|-----------|-------|--------------------------------------------|-----------|--------|
| siRNA-Vinblastine Run2-DMSO  | NM_001883 | CRHR2 | corticotropin releasing hormone receptor 2 | 0.514319  | Inlier |
| siRNA-Vinblastine Run1-DMSO  | NM_001883 | CRHR2 | corticotropin releasing hormone receptor 2 | 0.834681  | Inlier |
| siRNA Disorazole DMSO Run2   | NM_016441 | CRIM1 | cysteine-rich motor neuron 1               | -2.892114 | Inlier |
| siRNA-Temozolomide Run3-DMSO | NM_016441 | CRIM1 | cysteine-rich motor neuron 1               | -2.066353 | Inlier |
| siRNA-Temozolomide Run1-DMSO | NM_016441 | CRIM1 | cysteine-rich motor neuron 1               | -0.646877 | Inlier |
| siRNA-Temozolomide Run2-DMSO | NM_016441 | CRIM1 | cysteine-rich motor neuron 1               | -0.004666 | Inlier |
| siRNA Disorazole DMSO Run3   | NM_016441 | CRIM1 | cysteine-rich motor neuron 1               | 0.004665  | Inlier |
| siRNA Disorazole DMSO Run1   | NM_016441 | CRIM1 | cysteine-rich motor neuron 1               | 0.622242  | Inlier |
| siRNA-Vinblastine Run2-DMSO  | NM_016441 | CRIM1 | cysteine-rich motor neuron 1               | 0.702123  | Inlier |
| siRNA-Vinblastine Run1-DMSO  | NM_016441 | CRIM1 | cysteine-rich motor neuron 1               | 0.900385  | Inlier |
| siRNA-Temozolomide Run3-DMSO | NM_016507 | CRK7  | CRK7                                       | -1.126984 | Inlier |
| siRNA-Temozolomide Run1-DMSO | NM_016507 | CRK7  | CRK7                                       | -0.380008 | Inlier |
| siRNA Disorazole DMSO Run1   | NM_016507 | CRK7  | CRK7                                       | -0.247295 | Inlier |
| siRNA-Vinblastine Run1-DMSO  | NM_016507 | CRK7  | CRK7                                       | -0.010156 | Inlier |
| siRNA-Temozolomide Run2-DMSO | NM_016507 | CRK7  | CRK7                                       | 0.010156  | Inlier |
| siRNA Disorazole DMSO Run2   | NM_016507 | CRK7  | CRK7                                       | 0.968992  | Inlier |
| siRNA-Vinblastine Run2-DMSO  | NM_016507 | CRK7  | CRK7                                       | 1.609598  | Inlier |
| siRNA Disorazole DMSO Run3   | NM_016507 | CRK7  | CRK7                                       | 3.153894  | Inlier |

Identification of Survival Genes in Human Glioblastoma Cells Using siRNA Screening  
 Nikhil G Thaker, Fang Zhang, Peter R. McDonald, Tong Ying Shun, Michael D Lewen, Ian F. Pollack, and John S. Lazo

Molecular Pharmacology

|                              |                  |       |                                                |           |        |
|------------------------------|------------------|-------|------------------------------------------------|-----------|--------|
| siRNA-Temozolomide Run3-DMSO | NM_0221<br>48    | CRLF2 | cytokine<br>receptor-<br>like factor<br>2      | -0.959338 | Inlier |
| siRNA-Temozolomide Run1-DMSO | NM_0221<br>48    | CRLF2 | cytokine<br>receptor-<br>like factor<br>2      | -0.389662 | Inlier |
| siRNA-Temozolomide Run2-DMSO | NM_0221<br>48    | CRLF2 | cytokine<br>receptor-<br>like factor<br>2      | -0.252261 | Inlier |
| siRNA-Vinblastine Run2-DMSO  | NM_0221<br>48    | CRLF2 | cytokine<br>receptor-<br>like factor<br>2      | -0.086847 | Inlier |
| siRNA Disorazole DMSO Run1   | NM_0221<br>48    | CRLF2 | cytokine<br>receptor-<br>like factor<br>2      | 0.086848  | Inlier |
| siRNA Disorazole DMSO Run3   | NM_0221<br>48    | CRLF2 | cytokine<br>receptor-<br>like factor<br>2      | 1.357378  | Inlier |
| siRNA-Vinblastine Run1-DMSO  | NM_0221<br>48    | CRLF2 | cytokine<br>receptor-<br>like factor<br>2      | 1.440149  | Inlier |
| siRNA Disorazole DMSO Run2   | NM_0221<br>48    | CRLF2 | cytokine<br>receptor-<br>like factor<br>2      | 1.882634  | Inlier |
| siRNA-Temozolomide Run2-DMSO | NM_0010<br>14809 | CRMP1 | collapsin<br>response<br>mediator<br>protein 1 | -0.87412  | Inlier |
| siRNA-Temozolomide Run3-DMSO | NM_0010<br>14809 | CRMP1 | collapsin<br>response<br>mediator<br>protein 1 | -0.700371 | Inlier |
| siRNA-Vinblastine Run2-DMSO  | NM_0010<br>14809 | CRMP1 | collapsin<br>response<br>mediator<br>protein 1 | -0.648629 | Inlier |
| siRNA Disorazole DMSO Run3   | NM_0010<br>14809 | CRMP1 | collapsin<br>response<br>mediator<br>protein 1 | -0.364685 | Inlier |
| siRNA Disorazole DMSO Run1   | NM_0010<br>14809 | CRMP1 | collapsin<br>response<br>mediator<br>protein 1 | 0.364685  | Inlier |

Identification of Survival Genes in Human Glioblastoma Cells Using siRNA Screening  
 Nikhil G Thaker, Fang Zhang, Peter R. McDonald, Tong Ying Shun, Michael D Lewen, Ian F. Pollack, and John S. Lazo

Molecular Pharmacology

|                              |                  |       |                                                                                       |           |        |
|------------------------------|------------------|-------|---------------------------------------------------------------------------------------|-----------|--------|
| siRNA-Temozolomide Run1-DMSO | NM_0010<br>14809 | CRMP1 | collapsin response mediator protein 1                                                 | 0.49138   | Inlier |
| siRNA-Vinblastine Run1-DMSO  | NM_0010<br>14809 | CRMP1 | collapsin response mediator protein 1                                                 | 1.749585  | Inlier |
| siRNA Disorazole DMSO Run2   | NM_0010<br>14809 | CRMP1 | collapsin response mediator protein 1                                                 | 2.232196  | Inlier |
| siRNA Disorazole DMSO Run1   | NM_0211<br>51    | CROT  | carnitine O-octanoyltransferase                                                       | -1.067721 | Inlier |
| siRNA-Temozolomide Run1-DMSO | NM_0211<br>51    | CROT  | carnitine O-octanoyltransferase                                                       | -0.92977  | Inlier |
| siRNA-Temozolomide Run2-DMSO | NM_0211<br>51    | CROT  | carnitine O-octanoyltransferase                                                       | -0.044161 | Inlier |
| siRNA-Vinblastine Run2-DMSO  | NM_0211<br>51    | CROT  | carnitine O-octanoyltransferase                                                       | -0.037223 | Inlier |
| siRNA Disorazole DMSO Run3   | NM_0211<br>51    | CROT  | carnitine O-octanoyltransferase                                                       | 0.037223  | Inlier |
| siRNA-Vinblastine Run1-DMSO  | NM_0211<br>51    | CROT  | carnitine O-octanoyltransferase                                                       | 0.646747  | Inlier |
| siRNA Disorazole DMSO Run2   | NM_0211<br>51    | CROT  | carnitine O-octanoyltransferase                                                       | 0.702253  | Inlier |
| siRNA-Temozolomide Run3-DMSO | NM_0211<br>51    | CROT  | carnitine O-octanoyltransferase cofactor required for Sp1 transcriptional activation, | 0.806912  | Inlier |
| siRNA-Temozolomide Run3-DMSO | NM_0042<br>29    | CRSP2 | subunit 2, 150kDa                                                                     | -0.989022 | Inlier |

Identification of Survival Genes in Human Glioblastoma Cells Using siRNA Screening

Nikhil G Thaker, Fang Zhang, Peter R. McDonald, Tong Ying Shun, Michael D Lewen, Ian F. Pollack, and John S. Lazo

Molecular Pharmacology

| siRNA              | Condition | Gene  | Accession | Protein                                                                 | Value     | Category |
|--------------------|-----------|-------|-----------|-------------------------------------------------------------------------|-----------|----------|
| siRNA Disorazole   | DMSO Run2 | CRSP2 | NM_004229 | cofactor required for Sp1 transcriptional activation, subunit 2, 150kDa | -0.458068 | Inlier   |
| siRNA-Temozolomide | Run2-DMSO | CRSP2 | NM_004229 | cofactor required for Sp1 transcriptional activation, subunit 2, 150kDa | -0.332133 | Inlier   |
| siRNA Disorazole   | DMSO Run1 | CRSP2 | NM_004229 | cofactor required for Sp1 transcriptional activation, subunit 2, 150kDa | -0.149332 | Inlier   |
| siRNA-Temozolomide | Run1-DMSO | CRSP2 | NM_004229 | cofactor required for Sp1 transcriptional activation, subunit 2, 150kDa | 0.149332  | Inlier   |
| siRNA-Vinblastine  | Run2-DMSO | CRSP2 | NM_004229 | cofactor required for Sp1 transcriptional activation, subunit 2, 150kDa | 0.890932  | Inlier   |
| siRNA Disorazole   | DMSO Run3 | CRSP2 | NM_004229 | cofactor required for Sp1 transcriptional activation, subunit 2, 150kDa | 0.967387  | Inlier   |



Identification of Survival Genes in Human Glioblastoma Cells Using siRNA Screening

Nikhil G Thaker, Fang Zhang, Peter R. McDonald, Tong Ying Shun, Michael D Lewen, Ian F. Pollack, and John S. Lazo

Molecular Pharmacology

|                              |               |       |                                                                         |           |        |
|------------------------------|---------------|-------|-------------------------------------------------------------------------|-----------|--------|
| siRNA-Vinblastine Run1-DMSO  | NM_0042<br>29 | CRSP2 | cofactor required for Sp1 transcriptional activation, subunit 2, 150kDa | 1.000565  | Inlier |
| siRNA Disorazole DMSO Run2   | NM_0042<br>68 | CRSP6 | cofactor required for Sp1 transcriptional activation, subunit 6, 77kDa  | -0.954943 | Inlier |
| siRNA-Temozolomide Run3-DMSO | NM_0042<br>68 | CRSP6 | cofactor required for Sp1 transcriptional activation, subunit 6, 77kDa  | -0.898857 | Inlier |
| siRNA-Temozolomide Run2-DMSO | NM_0042<br>68 | CRSP6 | cofactor required for Sp1 transcriptional activation, subunit 6, 77kDa  | -0.498361 | Inlier |
| siRNA-Temozolomide Run1-DMSO | NM_0042<br>68 | CRSP6 | cofactor required for Sp1 transcriptional activation, subunit 6, 77kDa  | -0.021342 | Inlier |
| siRNA Disorazole DMSO Run1   | NM_0042<br>68 | CRSP6 | cofactor required for Sp1 transcriptional activation, subunit 6, 77kDa  | 0.021341  | Inlier |

Identification of Survival Genes in Human Glioblastoma Cells Using siRNA Screening

Nikhil G Thaker, Fang Zhang, Peter R. McDonald, Tong Ying Shun, Michael D Lewen, Ian F. Pollack, and John S. Lazo

Molecular Pharmacology

|                                  |               |        |                                                                                              |           |        |
|----------------------------------|---------------|--------|----------------------------------------------------------------------------------------------|-----------|--------|
| siRNA Disorazole DMSO Run3       | NM_0042<br>68 | CRSP6  | cofactor<br>required<br>for Sp1<br>transcripti<br>onal<br>activation,<br>subunit 6,<br>77kDa | 0.343558  | Inlier |
| siRNA-Vinblastine Run2-<br>DMSO  | NM_0042<br>68 | CRSP6  | cofactor<br>required<br>for Sp1<br>transcripti<br>onal<br>activation,<br>subunit 6,<br>77kDa | 0.850639  | Inlier |
| siRNA-Vinblastine Run1-<br>DMSO  | NM_0042<br>68 | CRSP6  | activation,<br>subunit 6,<br>77kDa                                                           | 0.97085   | Inlier |
| siRNA-Temozolomide Run3-<br>DMSO | NM_0180<br>58 | CRTAC1 | cartilage<br>acidic<br>protein 1                                                             | -2.196383 | Inlier |
| siRNA-Temozolomide Run2-<br>DMSO | NM_0180<br>58 | CRTAC1 | cartilage<br>acidic<br>protein 1                                                             | -1.640813 | Inlier |
| siRNA-Temozolomide Run1-<br>DMSO | NM_0180<br>58 | CRTAC1 | cartilage<br>acidic<br>protein 1                                                             | -0.302434 | Inlier |
| siRNA-Vinblastine Run2-<br>DMSO  | NM_0180<br>58 | CRTAC1 | cartilage<br>acidic<br>protein 1                                                             | -0.136193 | Inlier |
| siRNA Disorazole DMSO Run1       | NM_0180<br>58 | CRTAC1 | cartilage<br>acidic<br>protein 1                                                             | 0.136192  | Inlier |
| siRNA Disorazole DMSO Run3       | NM_0180<br>58 | CRTAC1 | cartilage<br>acidic<br>protein 1                                                             | 0.228825  | Inlier |
| siRNA-Vinblastine Run1-<br>DMSO  | NM_0180<br>58 | CRTAC1 | cartilage<br>acidic<br>protein 1                                                             | 1.046566  | Inlier |
| siRNA Disorazole DMSO Run2       | NM_0180<br>58 | CRTAC1 | cartilage<br>acidic<br>protein 1                                                             | 1.960333  | Inlier |
| siRNA-Temozolomide Run3-<br>DMSO | NM_0040<br>75 | CRY1   | cryptochro<br>me 1<br>(photolyas<br>e-like)                                                  | -2.161817 | Inlier |

Identification of Survival Genes in Human Glioblastoma Cells Using siRNA Screening  
 Nikhil G Thaker, Fang Zhang, Peter R. McDonald, Tong Ying Shun, Michael D Lewen, Ian F. Pollack, and John S. Lazo

Molecular Pharmacology

|                              |               |      |                                         |           |        |
|------------------------------|---------------|------|-----------------------------------------|-----------|--------|
| siRNA-Temozolomide Run2-DMSO | NM_0040<br>75 | CRY1 | cryptochrome 1<br>(photolyase-like)     | -1.418818 | Inlier |
| siRNA Disorazole DMSO Run2   | NM_0040<br>75 | CRY1 | cryptochrome 1<br>(photolyase-like)     | -0.595674 | Inlier |
| siRNA Disorazole DMSO Run1   | NM_0040<br>75 | CRY1 | cryptochrome 1<br>(photolyase-like)     | -0.072228 | Inlier |
| siRNA-Temozolomide Run1-DMSO | NM_0040<br>75 | CRY1 | cryptochrome 1<br>(photolyase-like)     | 0.072228  | Inlier |
| siRNA Disorazole DMSO Run3   | NM_0040<br>75 | CRY1 | cryptochrome 1<br>(photolyase-like)     | 0.338442  | Inlier |
| siRNA-Vinblastine Run2-DMSO  | NM_0040<br>75 | CRY1 | cryptochrome 1<br>(photolyase-like)     | 0.753326  | Inlier |
| siRNA-Vinblastine Run1-DMSO  | NM_0040<br>75 | CRY1 | cryptochrome 1<br>(photolyase-like)     | 1.120157  | Inlier |
| siRNA-Temozolomide Run2-DMSO | NM_0018<br>89 | CRYZ | crystallin, zeta<br>(quinone reductase) | -1.587086 | Inlier |
| siRNA-Temozolomide Run3-DMSO | NM_0018<br>89 | CRYZ | crystallin, zeta<br>(quinone reductase) | -1.032064 | Inlier |
| siRNA-Temozolomide Run1-DMSO | NM_0018<br>89 | CRYZ | crystallin, zeta<br>(quinone reductase) | -0.262057 | Inlier |
| siRNA-Vinblastine Run2-DMSO  | NM_0018<br>89 | CRYZ | crystallin, zeta<br>(quinone reductase) | -0.17947  | Inlier |

Identification of Survival Genes in Human Glioblastoma Cells Using siRNA Screening  
 Nikhil G Thaker, Fang Zhang, Peter R. McDonald, Tong Ying Shun, Michael D Lewen, Ian F. Pollack, and John S. Lazo  
 Molecular Pharmacology

|                                  |               |        |                                                          |           |        |
|----------------------------------|---------------|--------|----------------------------------------------------------|-----------|--------|
| siRNA Disorazole DMSO Run1       | NM_0018<br>89 | CRYZ   | crystallin,<br>zeta<br>(quinone<br>reductase)            | 0.17947   | Inlier |
| siRNA Disorazole DMSO Run3       | NM_0018<br>89 | CRYZ   | crystallin,<br>zeta<br>(quinone<br>reductase)            | 0.461118  | Inlier |
| siRNA-Vinblastine Run1-<br>DMSO  | NM_0018<br>89 | CRYZ   | crystallin,<br>zeta<br>(quinone<br>reductase)            | 0.887882  | Inlier |
| siRNA Disorazole DMSO Run2       | NM_0018<br>89 | CRYZ   | crystallin,<br>zeta<br>(quinone<br>reductase)            | 1.027117  | Inlier |
| siRNA-Temozolomide Run3-<br>DMSO | NM_1458<br>58 | CRYZL1 | crystallin,<br>zeta<br>(quinone<br>reductase)-<br>like 1 | -0.801676 | Inlier |
| siRNA-Vinblastine Run2-<br>DMSO  | NM_1458<br>58 | CRYZL1 | crystallin,<br>zeta<br>(quinone<br>reductase)-<br>like 1 | -0.72217  | Inlier |
| siRNA-Temozolomide Run2-<br>DMSO | NM_1458<br>58 | CRYZL1 | crystallin,<br>zeta<br>(quinone<br>reductase)-<br>like 1 | -0.667454 | Inlier |
| siRNA Disorazole DMSO Run3       | NM_1458<br>58 | CRYZL1 | crystallin,<br>zeta<br>(quinone<br>reductase)-<br>like 1 | -0.261039 | Inlier |
| siRNA Disorazole DMSO Run1       | NM_1458<br>58 | CRYZL1 | crystallin,<br>zeta<br>(quinone<br>reductase)-<br>like 1 | 0.261038  | Inlier |
| siRNA-Temozolomide Run1-<br>DMSO | NM_1458<br>58 | CRYZL1 | crystallin,<br>zeta<br>(quinone<br>reductase)-<br>like 1 | 0.661675  | Inlier |

Identification of Survival Genes in Human Glioblastoma Cells Using siRNA Screening  
 Nikhil G Thaker, Fang Zhang, Peter R. McDonald, Tong Ying Shun, Michael D Lewen, Ian F. Pollack, and John S. Lazo

Molecular Pharmacology

|                              |               |        |                                                          |           |         |
|------------------------------|---------------|--------|----------------------------------------------------------|-----------|---------|
| siRNA-Vinblastine Run1-DMSO  | NM_1458<br>58 | CRYZL1 | crystallin,<br>zeta<br>(quinone<br>reductase)-<br>like 1 | 0.681546  | Inlier  |
| siRNA Disorazole DMSO Run2   | NM_1458<br>58 | CRYZL1 | crystallin,<br>zeta<br>(quinone<br>reductase)-<br>like 1 | 1.302911  | Inlier  |
| siRNA-Temozolomide Run1-DMSO | NM_0040<br>77 | CS     | citrate<br>synthase                                      | -1.386317 | Inlier  |
| siRNA Disorazole DMSO Run1   | NM_0040<br>77 | CS     | citrate<br>synthase                                      | -0.899119 | Inlier  |
| siRNA-Vinblastine Run2-DMSO  | NM_0040<br>77 | CS     | citrate<br>synthase                                      | -0.15355  | Inlier  |
| siRNA-Temozolomide Run3-DMSO | NM_0040<br>77 | CS     | citrate<br>synthase                                      | -0.126622 | Inlier  |
| siRNA Disorazole DMSO Run3   | NM_0040<br>77 | CS     | citrate<br>synthase                                      | 0.126622  | Inlier  |
| siRNA-Temozolomide Run2-DMSO | NM_0040<br>77 | CS     | citrate<br>synthase                                      | 0.44988   | Inlier  |
| siRNA Disorazole DMSO Run2   | NM_0040<br>77 | CS     | citrate<br>synthase                                      | 1.049668  | Inlier  |
| siRNA-Vinblastine Run1-DMSO  | NM_0040<br>77 | CS     | citrate<br>synthase<br>cysteine<br>sulfinic<br>acid      | 3.797257  | Outlier |
| siRNA-Temozolomide Run3-DMSO | NM_0159<br>89 | CSAD   | decarboxyl<br>ase<br>cysteine<br>sulfinic<br>acid        | -1.314104 | Inlier  |
| siRNA-Temozolomide Run1-DMSO | NM_0159<br>89 | CSAD   | decarboxyl<br>ase<br>cysteine<br>sulfinic<br>acid        | -0.723991 | Inlier  |
| siRNA-Temozolomide Run2-DMSO | NM_0159<br>89 | CSAD   | decarboxyl<br>ase<br>cysteine<br>sulfinic<br>acid        | -0.625009 | Inlier  |
| siRNA Disorazole DMSO Run1   | NM_0159<br>89 | CSAD   | decarboxyl<br>ase<br>cysteine<br>sulfinic<br>acid        | -0.211144 | Inlier  |
| siRNA Disorazole DMSO Run3   | NM_0159<br>89 | CSAD   | decarboxyl<br>ase                                        | 0.211145  | Inlier  |

Identification of Survival Genes in Human Glioblastoma Cells Using siRNA Screening

Nikhil G Thaker, Fang Zhang, Peter R. McDonald, Tong Ying Shun, Michael D Lewen, Ian F. Pollack, and John S. Lazo

Molecular Pharmacology

|                              |               |       |                                                                                                                                           |           |         |
|------------------------------|---------------|-------|-------------------------------------------------------------------------------------------------------------------------------------------|-----------|---------|
| siRNA-Vinblastine Run2-DMSO  | NM_0159<br>89 | CSAD  | cysteine<br>sulfinic<br>acid<br>decarboxyl<br>ase                                                                                         | 0.231248  | Inlier  |
| siRNA-Vinblastine Run1-DMSO  | NM_0159<br>89 | CSAD  | cysteine<br>sulfinic<br>acid<br>decarboxyl<br>ase                                                                                         | 4.627806  | Outlier |
| siRNA Disorazole DMSO Run2   | NM_0159<br>89 | CSAD  | cysteine<br>sulfinic<br>acid<br>decarboxyl<br>ase                                                                                         | 4.854624  | Outlier |
| siRNA Disorazole DMSO Run2   | NM_0052<br>11 | CSF1R | colony<br>stimulating<br>factor 1<br>receptor,<br>formerly<br>McDonoug<br>h feline<br>sarcoma<br>viral (v-<br>fms)<br>oncogene<br>homolog | -2.431629 | Inlier  |
| siRNA-Temozolomide Run3-DMSO | NM_0052<br>11 | CSF1R | colony<br>stimulating<br>factor 1<br>receptor,<br>formerly<br>McDonoug<br>h feline<br>sarcoma<br>viral (v-<br>fms)<br>oncogene<br>homolog | -1.095353 | Inlier  |
| siRNA-Temozolomide Run1-DMSO | NM_0052<br>11 | CSF1R | colony<br>stimulating<br>factor 1<br>receptor,<br>formerly<br>McDonoug<br>h feline<br>sarcoma<br>viral (v-<br>fms)<br>oncogene<br>homolog | -0.536138 | Inlier  |

Identification of Survival Genes in Human Glioblastoma Cells Using siRNA Screening

Nikhil G Thaker, Fang Zhang, Peter R. McDonald, Tong Ying Shun, Michael D Lewen, Ian F. Pollack, and John S. Lazo

Molecular Pharmacology

| siRNA              | Drug      | Run  | Gene  | Accession | Gene Description                                                                                        | Log Fold Change | Outlier Status |
|--------------------|-----------|------|-------|-----------|---------------------------------------------------------------------------------------------------------|-----------------|----------------|
| siRNA Disorazole   | DMSO      | Run3 | CSF1R | NM_005211 | colony stimulating factor 1 receptor, formerly McDonoug h feline sarcoma viral (v-fms) oncogene homolog | -0.028827       | Inlier         |
| siRNA-Temozolomide | Run2-DMSO |      | CSF1R | NM_005211 | colony stimulating factor 1 receptor, formerly McDonoug h feline sarcoma viral (v-fms) oncogene homolog | 0.028827        | Inlier         |
| siRNA Disorazole   | DMSO      | Run1 | CSF1R | NM_005211 | colony stimulating factor 1 receptor, formerly McDonoug h feline sarcoma viral (v-fms) oncogene homolog | 0.594273        | Inlier         |
| siRNA-Vinblastine  | Run1-DMSO |      | CSF1R | NM_005211 | colony stimulating factor 1 receptor, formerly McDonoug h feline sarcoma viral (v-fms) oncogene homolog | 0.754727        | Inlier         |

Identification of Survival Genes in Human Glioblastoma Cells Using siRNA Screening

Nikhil G Thaker, Fang Zhang, Peter R. McDonald, Tong Ying Shun, Michael D Lewen, Ian F. Pollack, and John S. Lazo

Molecular Pharmacology

| siRNA Treatment              | Gene ID   | Gene Name | Log Fold Change | Annotation                                                                                                       |
|------------------------------|-----------|-----------|-----------------|------------------------------------------------------------------------------------------------------------------|
| siRNA-Vinblastine Run2-DMSO  | NM_005211 | CSF1R     | 1.308427        | Inlier<br>colony stimulating factor 1 receptor, formerly McDonough feline sarcoma viral (v-fms) oncogene homolog |
| siRNA Disorazole DMSO Run1   | NM_172249 | CSF2RA    | -1.117255       | Inlier<br>colony stimulating factor 2 receptor, alpha, low-affinity (granulocyte-macrophage)                     |
| siRNA-Temozolomide Run1-DMSO | NM_172249 | CSF2RA    | -1.083363       | Inlier<br>colony stimulating factor 2 receptor, alpha, low-affinity (granulocyte-macrophage)                     |
| siRNA-Temozolomide Run3-DMSO | NM_172249 | CSF2RA    | -0.488005       | Inlier<br>colony stimulating factor 2 receptor, alpha, low-affinity (granulocyte-macrophage)                     |
| siRNA-Temozolomide Run2-DMSO | NM_172249 | CSF2RA    | -0.291179       | Inlier<br>colony stimulating factor 2 receptor, alpha, low-affinity (granulocyte-macrophage)                     |



Identification of Survival Genes in Human Glioblastoma Cells Using siRNA Screening

Nikhil G Thaker, Fang Zhang, Peter R. McDonald, Tong Ying Shun, Michael D Lewen, Ian F. Pollack, and John S. Lazo

Molecular Pharmacology

|                              |               |        |                                                                                    |           |        |
|------------------------------|---------------|--------|------------------------------------------------------------------------------------|-----------|--------|
| siRNA-Vinblastine Run2-DMSO  | NM_1722<br>49 | CSF2RA | colony stimulating factor 2 receptor, alpha, low-affinity (granulocyte-macrophage) | 0.291179  | Inlier |
| siRNA Disorazole DMSO Run2   | NM_1722<br>49 | CSF2RA | colony stimulating factor 2 receptor, alpha, low-affinity (granulocyte-macrophage) | 0.581191  | Inlier |
| siRNA-Vinblastine Run1-DMSO  | NM_1722<br>49 | CSF2RA | colony stimulating factor 2 receptor, alpha, low-affinity (granulocyte-macrophage) | 0.767809  | Inlier |
| siRNA Disorazole DMSO Run3   | NM_1722<br>49 | CSF2RA | colony stimulating factor 2 receptor, beta, low-affinity (granulocyte-macrophage)  | 1.744915  | Inlier |
| siRNA-Temozolomide Run1-DMSO | NM_0003<br>95 | CSF2RB | colony stimulating factor 2 receptor, beta, low-affinity (granulocyte-macrophage)  | -1.456522 | Inlier |

Identification of Survival Genes in Human Glioblastoma Cells Using siRNA Screening

Nikhil G Thaker, Fang Zhang, Peter R. McDonald, Tong Ying Shun, Michael D Lewen, Ian F. Pollack, and John S. Lazo

Molecular Pharmacology

| siRNA Treatment              | Gene ID   | Gene Name | Gene Description                                                                  | Value     | Category |
|------------------------------|-----------|-----------|-----------------------------------------------------------------------------------|-----------|----------|
| siRNA-Temozolomide Run3-DMSO | NM_000395 | CSF2RB    | colony stimulating factor 2 receptor, beta, low-affinity (granulocyte-macrophage) | -0.966862 | Inlier   |
| siRNA Disorazole DMSO Run1   | NM_000395 | CSF2RB    | colony stimulating factor 2 receptor, beta, low-affinity (granulocyte-macrophage) | -0.382138 | Inlier   |
| siRNA-Temozolomide Run2-DMSO | NM_000395 | CSF2RB    | colony stimulating factor 2 receptor, beta, low-affinity (granulocyte-macrophage) | -0.116582 | Inlier   |
| siRNA-Vinblastine Run2-DMSO  | NM_000395 | CSF2RB    | colony stimulating factor 2 receptor, beta, low-affinity (granulocyte-macrophage) | 0.116583  | Inlier   |
| siRNA Disorazole DMSO Run2   | NM_000395 | CSF2RB    | colony stimulating factor 2 receptor, beta, low-affinity (granulocyte-macrophage) | 0.303825  | Inlier   |

Identification of Survival Genes in Human Glioblastoma Cells Using siRNA Screening

Nikhil G Thaker, Fang Zhang, Peter R. McDonald, Tong Ying Shun, Michael D Lewen, Ian F. Pollack, and John S. Lazo

Molecular Pharmacology

| siRNA              | Condition | Run  | Gene   | Value     | Outlier |
|--------------------|-----------|------|--------|-----------|---------|
| siRNA Disorazole   | DMSO      | Run3 | CSF2RB | 1.727059  | Inlier  |
| siRNA-Vinblastine  | DMSO      | Run1 | CSF2RB | 2.231761  | Inlier  |
| siRNA-Temozolomide | DMSO      | Run3 | CSF3R  | -0.757508 | Inlier  |
| siRNA-Temozolomide | DMSO      | Run2 | CSF3R  | -0.666712 | Inlier  |
| siRNA-Vinblastine  | DMSO      | Run2 | CSF3R  | -0.456064 | Inlier  |
| siRNA Disorazole   | DMSO      | Run1 | CSF3R  | -0.080146 | Inlier  |
| siRNA Disorazole   | DMSO      | Run3 | CSF3R  | 0.080146  | Inlier  |

colony stimulating factor 2 receptor, beta, low-affinity (granulocyte-macrophage)  
 colony stimulating factor 2 receptor, beta, low-affinity (granulocyte-macrophage)  
 colony stimulating factor 3 receptor (granulocyte)  
 colony stimulating factor 3 receptor (granulocyte)

Identification of Survival Genes in Human Glioblastoma Cells Using siRNA Screening  
 Nikhil G Thaker, Fang Zhang, Peter R. McDonald, Tong Ying Shun, Michael D Lewen, Ian F. Pollack, and John S. Lazo

Molecular Pharmacology

|                              |           |         |                                                    |           |        |
|------------------------------|-----------|---------|----------------------------------------------------|-----------|--------|
| siRNA-Temozolomide Run1-DMSO | NM_156038 | CSF3R   | colony stimulating factor 3 receptor (granulocyte) | 0.682288  | Inlier |
| siRNA Disorazole DMSO Run2   | NM_156038 | CSF3R   | colony stimulating factor 3 receptor (granulocyte) | 1.604737  | Inlier |
| siRNA-Vinblastine Run1-DMSO  | NM_156038 | CSF3R   | colony stimulating factor 3 receptor (granulocyte) | 2.501292  | Inlier |
| siRNA-Temozolomide Run1-DMSO | NM_004383 | CSK     | c-src tyrosine kinase                              | -0.920573 | Inlier |
| siRNA-Temozolomide Run2-DMSO | NM_004383 | CSK     | c-src tyrosine kinase                              | -0.821955 | Inlier |
| siRNA-Temozolomide Run3-DMSO | NM_004383 | CSK     | c-src tyrosine kinase                              | -0.527045 | Inlier |
| siRNA Disorazole DMSO Run1   | NM_004383 | CSK     | c-src tyrosine kinase                              | -0.027109 | Inlier |
| siRNA Disorazole DMSO Run2   | NM_004383 | CSK     | c-src tyrosine kinase                              | 0.027108  | Inlier |
| siRNA-Vinblastine Run1-DMSO  | NM_004383 | CSK     | c-src tyrosine kinase                              | 0.054356  | Inlier |
| siRNA-Vinblastine Run2-DMSO  | NM_004383 | CSK     | c-src tyrosine kinase                              | 1.416911  | Inlier |
| siRNA Disorazole DMSO Run3   | NM_004383 | CSK     | c-src tyrosine kinase                              | 1.909792  | Inlier |
| siRNA-Temozolomide Run3-DMSO | NM_001892 | CSNK1A1 | casein kinase 1, alpha 1                           | -2.863537 | Inlier |
| siRNA-Temozolomide Run1-DMSO | NM_001892 | CSNK1A1 | casein kinase 1, alpha 1                           | -0.809344 | Inlier |
| siRNA-Temozolomide Run2-DMSO | NM_001892 | CSNK1A1 | casein kinase 1, alpha 1                           | -0.76169  | Inlier |

Identification of Survival Genes in Human Glioblastoma Cells Using siRNA Screening  
 Nikhil G Thaker, Fang Zhang, Peter R. McDonald, Tong Ying Shun, Michael D Lewen, Ian F. Pollack, and John S. Lazo

Molecular Pharmacology

| siRNA                        | Gene     | Accession  | Gene Name                     | Value     | Outlier |
|------------------------------|----------|------------|-------------------------------|-----------|---------|
| siRNA Disorazole DMSO Run3   | CSNK1A1  | NM_0018 92 | casein kinase 1, alpha 1      | -0.326959 | Inlier  |
| siRNA Disorazole DMSO Run2   | CSNK1A1  | NM_0018 92 | casein kinase 1, alpha 1      | 0.326959  | Inlier  |
| siRNA Disorazole DMSO Run1   | CSNK1A1  | NM_0018 92 | casein kinase 1, alpha 1      | 0.521677  | Inlier  |
| siRNA-Vinblastine Run1-DMSO  | CSNK1A1  | NM_0018 92 | casein kinase 1, alpha 1      | 0.58731   | Inlier  |
| siRNA-Vinblastine Run2-DMSO  | CSNK1A1  | NM_0018 92 | casein kinase 1, alpha 1      | 2.578959  | Inlier  |
| siRNA Disorazole DMSO Run2   | CSNK1A1L | NM_1452 03 | casein kinase 1, alpha 1-like | -0.822573 | Inlier  |
| siRNA Disorazole DMSO Run3   | CSNK1A1L | NM_1452 03 | casein kinase 1, alpha 1-like | -0.745701 | Inlier  |
| siRNA-Temozolomide Run3-DMSO | CSNK1A1L | NM_1452 03 | casein kinase 1, alpha 1-like | -0.596238 | Inlier  |
| siRNA-Temozolomide Run1-DMSO | CSNK1A1L | NM_1452 03 | casein kinase 1, alpha 1-like | -0.153224 | Inlier  |
| siRNA-Temozolomide Run2-DMSO | CSNK1A1L | NM_1452 03 | casein kinase 1, alpha 1-like | 0.153224  | Inlier  |
| siRNA Disorazole DMSO Run1   | CSNK1A1L | NM_1452 03 | casein kinase 1, alpha 1-like | 0.603299  | Inlier  |
| siRNA-Vinblastine Run1-DMSO  | CSNK1A1L | NM_1452 03 | casein kinase 1, alpha 1-like | 1.44432   | Inlier  |
| siRNA-Vinblastine Run2-DMSO  | CSNK1A1L | NM_1452 03 | casein kinase 1, alpha 1-like | 1.805671  | Inlier  |
| siRNA Disorazole DMSO Run2   | CSNK1D   | NM_1390 62 | casein kinase 1, delta        | -1.515079 | Inlier  |

Identification of Survival Genes in Human Glioblastoma Cells Using siRNA Screening  
 Nikhil G Thaker, Fang Zhang, Peter R. McDonald, Tong Ying Shun, Michael D Lewen, Ian F. Pollack, and John S. Lazo

Molecular Pharmacology

|                              |                  |         |                                |           |        |
|------------------------------|------------------|---------|--------------------------------|-----------|--------|
| siRNA Disorazole DMSO Run3   | NM_1390<br>62    | CSNK1D  | casein<br>kinase 1,<br>delta   | -0.67738  | Inlier |
| siRNA-Temozolomide Run3-DMSO | NM_1390<br>62    | CSNK1D  | casein<br>kinase 1,<br>delta   | -0.604267 | Inlier |
| siRNA-Temozolomide Run1-DMSO | NM_1390<br>62    | CSNK1D  | casein<br>kinase 1,<br>delta   | -0.578577 | Inlier |
| siRNA Disorazole DMSO Run1   | NM_1390<br>62    | CSNK1D  | casein<br>kinase 1,<br>delta   | 0.578577  | Inlier |
| siRNA-Temozolomide Run2-DMSO | NM_1390<br>62    | CSNK1D  | casein<br>kinase 1,<br>delta   | 0.67162   | Inlier |
| siRNA-Vinblastine Run1-DMSO  | NM_1390<br>62    | CSNK1D  | casein<br>kinase 1,<br>delta   | 1.134424  | Inlier |
| siRNA-Vinblastine Run2-DMSO  | NM_1390<br>62    | CSNK1D  | casein<br>kinase 1,<br>delta   | 2.112379  | Inlier |
| siRNA-Temozolomide Run3-DMSO | NM_1522<br>21    | CSNK1E  | casein<br>kinase 1,<br>epsilon | -0.820552 | Inlier |
| siRNA Disorazole DMSO Run3   | NM_1522<br>21    | CSNK1E  | casein<br>kinase 1,<br>epsilon | -0.558839 | Inlier |
| siRNA-Temozolomide Run2-DMSO | NM_1522<br>21    | CSNK1E  | casein<br>kinase 1,<br>epsilon | -0.308179 | Inlier |
| siRNA Disorazole DMSO Run2   | NM_1522<br>21    | CSNK1E  | casein<br>kinase 1,<br>epsilon | -0.118036 | Inlier |
| siRNA-Temozolomide Run1-DMSO | NM_1522<br>21    | CSNK1E  | casein<br>kinase 1,<br>epsilon | 0.118035  | Inlier |
| siRNA Disorazole DMSO Run1   | NM_1522<br>21    | CSNK1E  | casein<br>kinase 1,<br>epsilon | 0.790161  | Inlier |
| siRNA-Vinblastine Run1-DMSO  | NM_1522<br>21    | CSNK1E  | casein<br>kinase 1,<br>epsilon | 0.968584  | Inlier |
| siRNA-Vinblastine Run2-DMSO  | NM_1522<br>21    | CSNK1E  | casein<br>kinase 1,<br>epsilon | 1.509878  | Inlier |
| siRNA-Temozolomide Run3-DMSO | NM_0010<br>11664 | CSNK1G1 | casein<br>kinase 1,<br>gamma 1 | -1.000342 | Inlier |
| siRNA-Temozolomide Run2-DMSO | NM_0010<br>11664 | CSNK1G1 | casein<br>kinase 1,<br>gamma 1 | -0.348658 | Inlier |

Identification of Survival Genes in Human Glioblastoma Cells Using siRNA Screening  
 Nikhil G Thaker, Fang Zhang, Peter R. McDonald, Tong Ying Shun, Michael D Lewen, Ian F. Pollack, and John S. Lazo

| Molecular Pharmacology       |                  |         | casein               |           |         |
|------------------------------|------------------|---------|----------------------|-----------|---------|
| siRNA-Temozolomide Run1-DMSO | NM_0010<br>11664 | CSNK1G1 | kinase 1,<br>gamma 1 | -0.309307 | Inlier  |
| siRNA Disorazole DMSO Run2   | NM_0010<br>11664 | CSNK1G1 | kinase 1,<br>gamma 1 | -0.117601 | Inlier  |
| siRNA Disorazole DMSO Run1   | NM_0010<br>11664 | CSNK1G1 | kinase 1,<br>gamma 1 | 0.117601  | Inlier  |
| siRNA-Vinblastine Run2-DMSO  | NM_0010<br>11664 | CSNK1G1 | kinase 1,<br>gamma 1 | 1.126012  | Inlier  |
| siRNA Disorazole DMSO Run3   | NM_0010<br>11664 | CSNK1G1 | kinase 1,<br>gamma 1 | 1.367923  | Inlier  |
| siRNA-Vinblastine Run1-DMSO  | NM_0010<br>11664 | CSNK1G1 | kinase 1,<br>gamma 1 | 1.474161  | Inlier  |
| siRNA-Temozolomide Run3-DMSO | NM_0013<br>19    | CSNK1G2 | kinase 1,<br>gamma 2 | -2.855581 | Inlier  |
| siRNA-Temozolomide Run2-DMSO | NM_0013<br>19    | CSNK1G2 | kinase 1,<br>gamma 2 | -2.052182 | Inlier  |
| siRNA-Vinblastine Run1-DMSO  | NM_0013<br>19    | CSNK1G2 | kinase 1,<br>gamma 2 | -0.875961 | Inlier  |
| siRNA Disorazole DMSO Run1   | NM_0013<br>19    | CSNK1G2 | kinase 1,<br>gamma 2 | -0.223072 | Inlier  |
| siRNA-Temozolomide Run1-DMSO | NM_0013<br>19    | CSNK1G2 | kinase 1,<br>gamma 2 | 0.223074  | Inlier  |
| siRNA Disorazole DMSO Run2   | NM_0013<br>19    | CSNK1G2 | kinase 1,<br>gamma 2 | 0.348783  | Inlier  |
| siRNA Disorazole DMSO Run3   | NM_0013<br>19    | CSNK1G2 | kinase 1,<br>gamma 2 | 0.473039  | Inlier  |
| siRNA-Vinblastine Run2-DMSO  | NM_0013<br>19    | CSNK1G2 | kinase 1,<br>gamma 2 | 3.667521  | Outlier |
| siRNA-Temozolomide Run3-DMSO | NM_0043<br>84    | CSNK1G3 | kinase 1,<br>gamma 3 | -1.468747 | Inlier  |
| siRNA-Temozolomide Run1-DMSO | NM_0043<br>84    | CSNK1G3 | kinase 1,<br>gamma 3 | -0.888611 | Inlier  |
| siRNA-Temozolomide Run2-DMSO | NM_0043<br>84    | CSNK1G3 | kinase 1,<br>gamma 3 | -0.712605 | Inlier  |

Identification of Survival Genes in Human Glioblastoma Cells Using siRNA Screening  
 Nikhil G Thaker, Fang Zhang, Peter R. McDonald, Tong Ying Shun, Michael D Lewen, Ian F. Pollack, and John S. Lazo

Molecular Pharmacology

| siRNA                        | Gene    | Accession | Gene                                 | Value     | Outlier |
|------------------------------|---------|-----------|--------------------------------------|-----------|---------|
| siRNA Disorazole DMSO Run3   | CSNK1G3 | NM_004384 | casein kinase 1, gamma 3             | -0.376037 | Inlier  |
| siRNA Disorazole DMSO Run2   | CSNK1G3 | NM_004384 | casein kinase 1, gamma 3             | 0.376037  | Inlier  |
| siRNA Disorazole DMSO Run1   | CSNK1G3 | NM_004384 | casein kinase 1, gamma 3             | 0.473754  | Inlier  |
| siRNA-Vinblastine Run1-DMSO  | CSNK1G3 | NM_004384 | casein kinase 1, gamma 3             | 0.636395  | Inlier  |
| siRNA-Vinblastine Run2-DMSO  | CSNK1G3 | NM_004384 | casein kinase 1, gamma 3             | 1.333338  | Inlier  |
| siRNA-Temozolomide Run1-DMSO | CSNK2A1 | NM_177560 | casein kinase 2, alpha 1 polypeptide | -3.099024 | Inlier  |
| siRNA Disorazole DMSO Run2   | CSNK2A1 | NM_177560 | casein kinase 2, alpha 1 polypeptide | -3.031645 | Inlier  |
| siRNA-Temozolomide Run3-DMSO | CSNK2A1 | NM_177560 | casein kinase 2, alpha 1 polypeptide | -2.708982 | Inlier  |
| siRNA Disorazole DMSO Run3   | CSNK2A1 | NM_177560 | casein kinase 2, alpha 1 polypeptide | -0.475217 | Inlier  |
| siRNA-Vinblastine Run1-DMSO  | CSNK2A1 | NM_177560 | casein kinase 2, alpha 1 polypeptide | 0.475219  | Inlier  |
| siRNA Disorazole DMSO Run1   | CSNK2A1 | NM_177560 | casein kinase 2, alpha 1 polypeptide | 0.584359  | Inlier  |
| siRNA-Temozolomide Run2-DMSO | CSNK2A1 | NM_177560 | casein kinase 2, alpha 1 polypeptide | 0.669603  | Inlier  |



Identification of Survival Genes in Human Glioblastoma Cells Using siRNA Screening  
 Nikhil G Thaker, Fang Zhang, Peter R. McDonald, Tong Ying Shun, Michael D Lewen, Ian F. Pollack, and John S. Lazo

Molecular Pharmacology

|                              |               |         |                                                          |           |        |
|------------------------------|---------------|---------|----------------------------------------------------------|-----------|--------|
| siRNA-Vinblastine Run2-DMSO  | NM_1775<br>60 | CSNK2A1 | casein<br>kinase 2,<br>alpha 1<br>polypeptid<br>e        | 0.679397  | Inlier |
| siRNA Disorazole DMSO Run2   | NM_0018<br>96 | CSNK2A2 | casein<br>kinase 2,<br>alpha<br>prime<br>polypeptid<br>e | -1.965111 | Inlier |
| siRNA-Temozolomide Run3-DMSO | NM_0018<br>96 | CSNK2A2 | casein<br>kinase 2,<br>alpha<br>prime<br>polypeptid<br>e | -0.844707 | Inlier |
| siRNA-Temozolomide Run1-DMSO | NM_0018<br>96 | CSNK2A2 | casein<br>kinase 2,<br>alpha<br>prime<br>polypeptid<br>e | -0.504293 | Inlier |
| siRNA Disorazole DMSO Run3   | NM_0018<br>96 | CSNK2A2 | casein<br>kinase 2,<br>alpha<br>prime<br>polypeptid<br>e | -0.108109 | Inlier |
| siRNA-Temozolomide Run2-DMSO | NM_0018<br>96 | CSNK2A2 | casein<br>kinase 2,<br>alpha<br>prime<br>polypeptid<br>e | 0.108109  | Inlier |
| siRNA Disorazole DMSO Run1   | NM_0018<br>96 | CSNK2A2 | casein<br>kinase 2,<br>alpha<br>prime<br>polypeptid<br>e | 0.442729  | Inlier |
| siRNA-Vinblastine Run1-DMSO  | NM_0018<br>96 | CSNK2A2 | casein<br>kinase 2,<br>alpha<br>prime<br>polypeptid<br>e | 0.991708  | Inlier |

Identification of Survival Genes in Human Glioblastoma Cells Using siRNA Screening  
 Nikhil G Thaker, Fang Zhang, Peter R. McDonald, Tong Ying Shun, Michael D Lewen, Ian F. Pollack, and John S. Lazo

Molecular Pharmacology

|                              |           |         |                                          |           |        |
|------------------------------|-----------|---------|------------------------------------------|-----------|--------|
| siRNA-Vinblastine Run2-DMSO  | NM_001896 | CSNK2A2 | casein kinase 2, alpha prime polypeptide | 1.107911  | Inlier |
| siRNA-Temozolomide Run3-DMSO | NM_001320 | CSNK2B  | casein kinase 2, beta polypeptide        | -1.029959 | Inlier |
| siRNA Disorazole DMSO Run2   | NM_001320 | CSNK2B  | casein kinase 2, beta polypeptide        | -0.975006 | Inlier |
| siRNA-Temozolomide Run2-DMSO | NM_001320 | CSNK2B  | casein kinase 2, beta polypeptide        | -0.481012 | Inlier |
| siRNA-Temozolomide Run1-DMSO | NM_001320 | CSNK2B  | casein kinase 2, beta polypeptide        | -0.177095 | Inlier |
| siRNA Disorazole DMSO Run1   | NM_001320 | CSNK2B  | casein kinase 2, beta polypeptide        | 0.177095  | Inlier |
| siRNA Disorazole DMSO Run3   | NM_001320 | CSNK2B  | casein kinase 2, beta polypeptide        | 0.461949  | Inlier |
| siRNA-Vinblastine Run1-DMSO  | NM_001320 | CSNK2B  | casein kinase 2, beta polypeptide        | 0.867988  | Inlier |
| siRNA-Vinblastine Run2-DMSO  | NM_001320 | CSNK2B  | casein kinase 2, beta polypeptide        | 0.904973  | Inlier |
| siRNA Disorazole DMSO Run1   | NM_177926 | CSRP2BP | CSRP2 binding protein                    | -0.948755 | Inlier |
| siRNA-Temozolomide Run3-DMSO | NM_177926 | CSRP2BP | CSRP2 binding protein                    | -0.82586  | Inlier |

Identification of Survival Genes in Human Glioblastoma Cells Using siRNA Screening  
 Nikhil G Thaker, Fang Zhang, Peter R. McDonald, Tong Ying Shun, Michael D Lewen, Ian F. Pollack, and John S. Lazo

|                              |         |    |         |                 |                  |
|------------------------------|---------|----|---------|-----------------|------------------|
| Molecular Pharmacology       |         |    | CSRP2   |                 |                  |
| siRNA-Vinblastine Run2-DMSO  | NM_1779 | 26 | CSRP2BP | binding protein | -0.256061 Inlier |
| siRNA-Temozolomide Run2-DMSO | NM_1779 | 26 | CSRP2BP | binding protein | -0.069926 Inlier |
| siRNA-Temozolomide Run1-DMSO | NM_1779 | 26 | CSRP2BP | binding protein | 0.069926 Inlier  |
| siRNA Disorazole DMSO Run3   | NM_1779 | 26 | CSRP2BP | binding protein | 0.52314 Inlier   |
| siRNA-Vinblastine Run1-DMSO  | NM_1779 | 26 | CSRP2BP | binding protein | 1.363683 Inlier  |
| siRNA Disorazole DMSO Run2   | NM_1779 | 26 | CSRP2BP | binding protein | 1.421434 Inlier  |
| siRNA-Temozolomide Run2-DMSO | NM_0018 | 98 | CST1    | cystatin SN     | -1.738406 Inlier |
| siRNA-Temozolomide Run1-DMSO | NM_0018 | 98 | CST1    | cystatin SN     | -0.848494 Inlier |
| siRNA-Temozolomide Run3-DMSO | NM_0018 | 98 | CST1    | cystatin SN     | -0.5503 Inlier   |
| siRNA-Vinblastine Run2-DMSO  | NM_0018 | 98 | CST1    | cystatin SN     | -0.352456 Inlier |
| siRNA Disorazole DMSO Run1   | NM_0018 | 98 | CST1    | cystatin SN     | 0.352456 Inlier  |
| siRNA Disorazole DMSO Run3   | NM_0018 | 98 | CST1    | cystatin SN     | 0.494685 Inlier  |
| siRNA Disorazole DMSO Run2   | NM_0018 | 98 | CST1    | cystatin SN     | 0.7987 Inlier    |
| siRNA-Vinblastine Run1-DMSO  | NM_0018 | 98 | CST1    | cystatin SN     | 2.150428 Inlier  |
| siRNA-Temozolomide Run3-DMSO | NM_0013 | 22 | CST2    | cystatin SA     | -1.078431 Inlier |
| siRNA-Temozolomide Run2-DMSO | NM_0013 | 22 | CST2    | cystatin SA     | -1.039534 Inlier |
| siRNA-Temozolomide Run1-DMSO | NM_0013 | 22 | CST2    | cystatin SA     | -0.762269 Inlier |
| siRNA Disorazole DMSO Run1   | NM_0013 | 22 | CST2    | cystatin SA     | -0.019276 Inlier |
| siRNA Disorazole DMSO Run3   | NM_0013 | 22 | CST2    | cystatin SA     | 0.019276 Inlier  |
| siRNA-Vinblastine Run2-DMSO  | NM_0013 | 22 | CST2    | cystatin SA     | 0.191891 Inlier  |
| siRNA Disorazole DMSO Run2   | NM_0013 | 22 | CST2    | cystatin SA     | 0.648104 Inlier  |
| siRNA-Vinblastine Run1-DMSO  | NM_0013 | 22 | CST2    | cystatin SA     | 0.700896 Inlier  |

Identification of Survival Genes in Human Glioblastoma Cells Using siRNA Screening

Nikhil G Thaker, Fang Zhang, Peter R. McDonald, Tong Ying Shun, Michael D Lewen, Ian F. Pollack, and John S. Lazo

Molecular Pharmacology

|                              |           |      |                                                         |           |        |
|------------------------------|-----------|------|---------------------------------------------------------|-----------|--------|
| siRNA-Temozolomide Run3-DMSO | NM_000099 | CST3 | cystatin C (amyloid angiopathy and cerebral hemorrhage) | -1.029719 | Inlier |
| siRNA-Temozolomide Run2-DMSO | NM_000099 | CST3 | cystatin C (amyloid angiopathy and cerebral hemorrhage) | -0.319281 | Inlier |
| siRNA-Temozolomide Run1-DMSO | NM_000099 | CST3 | cystatin C (amyloid angiopathy and cerebral hemorrhage) | -0.285061 | Inlier |
| siRNA Disorazole DMSO Run1   | NM_000099 | CST3 | cystatin C (amyloid angiopathy and cerebral hemorrhage) | -0.032843 | Inlier |
| siRNA Disorazole DMSO Run3   | NM_000099 | CST3 | cystatin C (amyloid angiopathy and cerebral hemorrhage) | 0.032843  | Inlier |
| siRNA-Vinblastine Run2-DMSO  | NM_000099 | CST3 | cystatin C (amyloid angiopathy and cerebral hemorrhage) | 2.007818  | Inlier |
| siRNA-Vinblastine Run1-DMSO  | NM_000099 | CST3 | cystatin C (amyloid angiopathy and cerebral hemorrhage) | 2.052309  | Inlier |

Identification of Survival Genes in Human Glioblastoma Cells Using siRNA Screening  
 Nikhil G Thaker, Fang Zhang, Peter R. McDonald, Tong Ying Shun, Michael D Lewen, Ian F. Pollack, and John S. Lazo

Molecular Pharmacology

|                                  |               |      |                                                                            |           |        |
|----------------------------------|---------------|------|----------------------------------------------------------------------------|-----------|--------|
|                                  |               |      | cystatin C<br>(amyloid<br>angiopathy<br>and<br>cerebral<br>hemorrhag<br>e) | 2.447687  | Inlier |
| siRNA Disorazole DMSO Run2       | NM_0000<br>99 | CST3 |                                                                            |           |        |
| siRNA-Temozolomide Run3-<br>DMSO | NM_0018<br>99 | CST4 | cystatin S                                                                 | -0.75038  | Inlier |
| siRNA Disorazole DMSO Run3       | NM_0018<br>99 | CST4 | cystatin S                                                                 | -0.59862  | Inlier |
| siRNA-Temozolomide Run2-<br>DMSO | NM_0018<br>99 | CST4 | cystatin S                                                                 | -0.562925 | Inlier |
| siRNA Disorazole DMSO Run1       | NM_0018<br>99 | CST4 | cystatin S                                                                 | -0.169807 | Inlier |
| siRNA-Temozolomide Run1-<br>DMSO | NM_0018<br>99 | CST4 | cystatin S                                                                 | 0.169807  | Inlier |
| siRNA-Vinblastine Run1-<br>DMSO  | NM_0018<br>99 | CST4 | cystatin S                                                                 | 0.973757  | Inlier |
| siRNA-Vinblastine Run2-<br>DMSO  | NM_0018<br>99 | CST4 | cystatin S                                                                 | 1.128004  | Inlier |
| siRNA Disorazole DMSO Run2       | NM_0018<br>99 | CST4 | cystatin S                                                                 | 1.32511   | Inlier |
| siRNA-Temozolomide Run2-<br>DMSO | NM_0019<br>00 | CST5 | cystatin D                                                                 | -0.723292 | Inlier |
| siRNA-Temozolomide Run3-<br>DMSO | NM_0019<br>00 | CST5 | cystatin D                                                                 | -0.625708 | Inlier |
| siRNA Disorazole DMSO Run3       | NM_0019<br>00 | CST5 | cystatin D                                                                 | -0.33417  | Inlier |
| siRNA-Temozolomide Run1-<br>DMSO | NM_0019<br>00 | CST5 | cystatin D                                                                 | -0.221241 | Inlier |
| siRNA Disorazole DMSO Run1       | NM_0019<br>00 | CST5 | cystatin D                                                                 | 0.221241  | Inlier |
| siRNA-Vinblastine Run2-<br>DMSO  | NM_0019<br>00 | CST5 | cystatin D                                                                 | 1.678555  | Inlier |
| siRNA Disorazole DMSO Run2       | NM_0019<br>00 | CST5 | cystatin D                                                                 | 1.93812   | Inlier |
| siRNA-Vinblastine Run1-<br>DMSO  | NM_0019<br>00 | CST5 | cystatin D                                                                 | 2.423082  | Inlier |
| siRNA-Temozolomide Run3-<br>DMSO | NM_0013<br>23 | CST6 | cystatin<br>E/M                                                            | -1.151298 | Inlier |
| siRNA-Temozolomide Run1-<br>DMSO | NM_0013<br>23 | CST6 | cystatin<br>E/M                                                            | -0.569221 | Inlier |
| siRNA-Temozolomide Run2-<br>DMSO | NM_0013<br>23 | CST6 | cystatin<br>E/M                                                            | -0.5514   | Inlier |
| siRNA Disorazole DMSO Run3       | NM_0013<br>23 | CST6 | cystatin<br>E/M                                                            | -0.279794 | Inlier |
| siRNA Disorazole DMSO Run1       | NM_0013<br>23 | CST6 | cystatin<br>E/M                                                            | 0.279794  | Inlier |
| siRNA-Vinblastine Run2-<br>DMSO  | NM_0013<br>23 | CST6 | cystatin<br>E/M                                                            | 0.779779  | Inlier |

Identification of Survival Genes in Human Glioblastoma Cells Using siRNA Screening  
 Nikhil G Thaker, Fang Zhang, Peter R. McDonald, Tong Ying Shun, Michael D Lewen, Ian F. Pollack, and John S. Lazo

|                              |         |      |                                                   |                  |
|------------------------------|---------|------|---------------------------------------------------|------------------|
| Molecular Pharmacology       | NM_0013 |      | cystatin                                          |                  |
| siRNA Disorazole DMSO Run2   | 23      | CST6 | E/M                                               | 1.411639 Inlier  |
| siRNA-Vinblastine Run1-DMSO  | NM_0013 |      | cystatin                                          |                  |
|                              | 23      | CST6 | E/M                                               | 2.185701 Inlier  |
| siRNA-Temozolomide Run3-DMSO | NM_0036 |      | cystatin F (leukocystatin)                        | -1.052238 Inlier |
|                              | 50      | CST7 |                                                   |                  |
| siRNA-Temozolomide Run2-DMSO | NM_0036 |      | cystatin F (leukocystatin)                        | -0.845465 Inlier |
|                              | 50      | CST7 |                                                   |                  |
| siRNA-Temozolomide Run1-DMSO | NM_0036 |      | cystatin F (leukocystatin)                        | -0.055747 Inlier |
|                              | 50      | CST7 |                                                   |                  |
| siRNA Disorazole DMSO Run1   | NM_0036 |      | cystatin F (leukocystatin)                        | -0.033488 Inlier |
|                              | 50      | CST7 |                                                   |                  |
| siRNA Disorazole DMSO Run3   | NM_0036 |      | cystatin F (leukocystatin)                        | 0.033489 Inlier  |
|                              | 50      | CST7 |                                                   |                  |
| siRNA-Vinblastine Run2-DMSO  | NM_0036 |      | cystatin F (leukocystatin)                        | 0.503534 Inlier  |
|                              | 50      | CST7 |                                                   |                  |
| siRNA Disorazole DMSO Run2   | NM_0036 |      | cystatin F (leukocystatin)                        | 1.08002 Inlier   |
|                              | 50      | CST7 |                                                   |                  |
| siRNA-Vinblastine Run1-DMSO  | NM_0036 |      | cystatin F (leukocystatin)                        | 1.543732 Inlier  |
|                              | 50      | CST7 |                                                   |                  |
| siRNA-Temozolomide Run3-DMSO | NM_0054 |      | cystatin 8 (cystatin-related epididymal specific) | -0.82132 Inlier  |
|                              | 92      | CST8 |                                                   |                  |
| siRNA-Temozolomide Run2-DMSO | NM_0054 |      | cystatin 8 (cystatin-related epididymal specific) | -0.727433 Inlier |
|                              | 92      | CST8 |                                                   |                  |
| siRNA-Temozolomide Run1-DMSO | NM_0054 |      | cystatin 8 (cystatin-related epididymal specific) | -0.073307 Inlier |
|                              | 92      | CST8 |                                                   |                  |
| siRNA Disorazole DMSO Run1   | NM_0054 |      | cystatin 8 (cystatin-related epididymal specific) | -0.015852 Inlier |
|                              | 92      | CST8 |                                                   |                  |

Identification of Survival Genes in Human Glioblastoma Cells Using siRNA Screening  
 Nikhil G Thaker, Fang Zhang, Peter R. McDonald, Tong Ying Shun, Michael D Lewen, Ian F. Pollack, and John S. Lazo

Molecular Pharmacology

|                                  |               |      |                                                                |           |        |
|----------------------------------|---------------|------|----------------------------------------------------------------|-----------|--------|
|                                  |               |      | cystatin 8<br>(cystatin-<br>related<br>epididymal<br>specific) | 0.015852  | Inlier |
| siRNA Disorazole DMSO Run3       | NM_0054<br>92 | CST8 | cystatin 8<br>(cystatin-<br>related<br>epididymal<br>specific) | 0.659945  | Inlier |
| siRNA-Vinblastine Run2-<br>DMSO  | NM_0054<br>92 | CST8 | cystatin 8<br>(cystatin-<br>related<br>epididymal<br>specific) | 0.689055  | Inlier |
| siRNA Disorazole DMSO Run2       | NM_0054<br>92 | CST8 | cystatin 8<br>(cystatin-<br>related<br>epididymal<br>specific) | 1.059451  | Inlier |
| siRNA-Vinblastine Run1-<br>DMSO  | NM_0054<br>92 | CST8 | cystatin A<br>(stefin A)                                       | -0.803801 | Inlier |
| siRNA-Temozolomide Run3-<br>DMSO | NM_0052<br>13 | CSTA | cystatin A<br>(stefin A)                                       | -0.545199 | Inlier |
| siRNA-Temozolomide Run2-<br>DMSO | NM_0052<br>13 | CSTA | cystatin A<br>(stefin A)                                       | -0.503058 | Inlier |
| siRNA Disorazole DMSO Run3       | NM_0052<br>13 | CSTA | cystatin A<br>(stefin A)                                       | -0.06246  | Inlier |
| siRNA Disorazole DMSO Run1       | NM_0052<br>13 | CSTA | cystatin A<br>(stefin A)                                       | 0.06246   | Inlier |
| siRNA-Temozolomide Run1-<br>DMSO | NM_0052<br>13 | CSTA | cystatin A<br>(stefin A)                                       | 1.216154  | Inlier |
| siRNA-Vinblastine Run2-<br>DMSO  | NM_0052<br>13 | CSTA | cystatin A<br>(stefin A)                                       | 1.589212  | Inlier |
| siRNA-Vinblastine Run1-<br>DMSO  | NM_0052<br>13 | CSTA | cystatin A<br>(stefin A)                                       | 1.752392  | Inlier |
| siRNA Disorazole DMSO Run2       | NM_0052<br>13 | CSTA | cystatin A<br>(stefin A)                                       | -0.822514 | Inlier |
| siRNA-Temozolomide Run2-<br>DMSO | NM_0001<br>00 | CSTB | cystatin B<br>(stefin B)                                       | -0.804942 | Inlier |
| siRNA-Temozolomide Run3-<br>DMSO | NM_0001<br>00 | CSTB | cystatin B<br>(stefin B)                                       | -0.545379 | Inlier |
| siRNA Disorazole DMSO Run3       | NM_0001<br>00 | CSTB | cystatin B<br>(stefin B)                                       | -0.012759 | Inlier |
| siRNA-Temozolomide Run1-<br>DMSO | NM_0001<br>00 | CSTB | cystatin B<br>(stefin B)                                       | 0.012759  | Inlier |
| siRNA Disorazole DMSO Run1       | NM_0001<br>00 | CSTB | cystatin B<br>(stefin B)                                       | 0.136332  | Inlier |
| siRNA Disorazole DMSO Run2       | NM_0001<br>00 | CSTB | cystatin B<br>(stefin B)                                       | 0.803621  | Inlier |
| siRNA-Vinblastine Run2-<br>DMSO  | NM_0001<br>00 | CSTB | cystatin B<br>(stefin B)                                       | 2.27445   | Inlier |
| siRNA-Vinblastine Run1-<br>DMSO  | NM_0001<br>00 | CSTB | cystatin B<br>(stefin B)                                       |           |        |

Identification of Survival Genes in Human Glioblastoma Cells Using siRNA Screening  
 Nikhil G Thaker, Fang Zhang, Peter R. McDonald, Tong Ying Shun, Michael D Lewen, Ian F. Pollack, and John S. Lazo  
 Molecular Pharmacology

|                                  |               |       |                                                          |           |         |
|----------------------------------|---------------|-------|----------------------------------------------------------|-----------|---------|
| siRNA Disorazole DMSO Run1       | NM_0247<br>92 | CT120 | family with<br>sequence<br>similarity<br>57,<br>member A | -1.027818 | Inlier  |
| siRNA-Temozolomide Run1-<br>DMSO | NM_0247<br>92 | CT120 | family with<br>sequence<br>similarity<br>57,<br>member A | -0.321182 | Inlier  |
| siRNA-Temozolomide Run2-<br>DMSO | NM_0247<br>92 | CT120 | family with<br>sequence<br>similarity<br>57,<br>member A | -0.181795 | Inlier  |
| siRNA-Temozolomide Run3-<br>DMSO | NM_0247<br>92 | CT120 | family with<br>sequence<br>similarity<br>57,<br>member A | -0.156562 | Inlier  |
| siRNA-Vinblastine Run2-<br>DMSO  | NM_0247<br>92 | CT120 | family with<br>sequence<br>similarity<br>57,<br>member A | 0.156561  | Inlier  |
| siRNA-Vinblastine Run1-<br>DMSO  | NM_0247<br>92 | CT120 | family with<br>sequence<br>similarity<br>57,<br>member A | 1.688865  | Inlier  |
| siRNA Disorazole DMSO Run2       | NM_0247<br>92 | CT120 | family with<br>sequence<br>similarity<br>57,<br>member A | 4.946908  | Outlier |



Identification of Survival Genes in Human Glioblastoma Cells Using siRNA Screening  
 Nikhil G Thaker, Fang Zhang, Peter R. McDonald, Tong Ying Shun, Michael D Lewen, Ian F. Pollack, and John S. Lazo  
 Molecular Pharmacology

|                                  |               |       |                                                          |           |         |
|----------------------------------|---------------|-------|----------------------------------------------------------|-----------|---------|
| siRNA Disorazole DMSO Run3       | NM_0247<br>92 | CT120 | family with<br>sequence<br>similarity<br>57,<br>member A | 8.91983   | Outlier |
| siRNA-Temozolomide Run3-<br>DMSO | NM_0013<br>28 | CTBP1 | C-terminal<br>binding<br>protein 1                       | -2.770942 | Inlier  |
| siRNA Disorazole DMSO Run1       | NM_0013<br>28 | CTBP1 | C-terminal<br>binding<br>protein 1                       | -1.73469  | Inlier  |
| siRNA-Temozolomide Run2-<br>DMSO | NM_0013<br>28 | CTBP1 | C-terminal<br>binding<br>protein 1                       | -0.741129 | Inlier  |
| siRNA Disorazole DMSO Run3       | NM_0013<br>28 | CTBP1 | C-terminal<br>binding<br>protein 1                       | -0.141339 | Inlier  |
| siRNA-Temozolomide Run1-<br>DMSO | NM_0013<br>28 | CTBP1 | C-terminal<br>binding<br>protein 1                       | 0.141339  | Inlier  |
| siRNA-Vinblastine Run2-<br>DMSO  | NM_0013<br>28 | CTBP1 | C-terminal<br>binding<br>protein 1                       | 0.252563  | Inlier  |
| siRNA-Vinblastine Run1-<br>DMSO  | NM_0013<br>28 | CTBP1 | C-terminal<br>binding<br>protein 1                       | 0.607871  | Inlier  |
| siRNA Disorazole DMSO Run2       | NM_0013<br>28 | CTBP1 | C-terminal<br>binding<br>protein 1                       | 2.556834  | Inlier  |
| siRNA-Temozolomide Run3-<br>DMSO | NM_0228<br>02 | CTBP2 | C-terminal<br>binding<br>protein 2                       | -2.468466 | Inlier  |
| siRNA Disorazole DMSO Run1       | NM_0228<br>02 | CTBP2 | C-terminal<br>binding<br>protein 2                       | -0.941505 | Inlier  |
| siRNA-Temozolomide Run1-<br>DMSO | NM_0228<br>02 | CTBP2 | C-terminal<br>binding<br>protein 2                       | -0.326443 | Inlier  |
| siRNA-Temozolomide Run2-<br>DMSO | NM_0228<br>02 | CTBP2 | C-terminal<br>binding<br>protein 2                       | -0.001706 | Inlier  |
| siRNA Disorazole DMSO Run3       | NM_0228<br>02 | CTBP2 | C-terminal<br>binding<br>protein 2                       | 0.001706  | Inlier  |
| siRNA-Vinblastine Run2-<br>DMSO  | NM_0228<br>02 | CTBP2 | C-terminal<br>binding<br>protein 2                       | 0.407495  | Inlier  |
| siRNA-Vinblastine Run1-<br>DMSO  | NM_0228<br>02 | CTBP2 | C-terminal<br>binding<br>protein 2                       | 1.221038  | Inlier  |

Identification of Survival Genes in Human Glioblastoma Cells Using siRNA Screening  
 Nikhil G Thaker, Fang Zhang, Peter R. McDonald, Tong Ying Shun, Michael D Lewen, Ian F. Pollack, and John S. Lazo

Molecular Pharmacology

| siRNA                        | Gene      | CT    | Protein                                                                                | Score     | Inlier |
|------------------------------|-----------|-------|----------------------------------------------------------------------------------------|-----------|--------|
| siRNA Disorazole DMSO Run2   | NM_022802 | CTBP2 | C-terminal binding protein 2                                                           | 2.86023   | Inlier |
| siRNA-Temozolomide Run3-DMSO | NM_004388 | CTBS  | chitinase, di-N-acetyl-                                                                | -1.883436 | Inlier |
| siRNA-Vinblastine Run2-DMSO  | NM_004388 | CTBS  | chitinase, di-N-acetyl-                                                                | -0.879289 | Inlier |
| siRNA-Temozolomide Run2-DMSO | NM_004388 | CTBS  | chitinase, di-N-acetyl-                                                                | -0.469711 | Inlier |
| siRNA Disorazole DMSO Run3   | NM_004388 | CTBS  | chitinase, di-N-acetyl-                                                                | -0.183928 | Inlier |
| siRNA Disorazole DMSO Run1   | NM_004388 | CTBS  | chitinase, di-N-acetyl-                                                                | 0.183928  | Inlier |
| siRNA-Temozolomide Run1-DMSO | NM_004388 | CTBS  | chitinase, di-N-acetyl-                                                                | 0.463416  | Inlier |
| siRNA-Vinblastine Run1-DMSO  | NM_004388 | CTBS  | chitinase, di-N-acetyl-                                                                | 2.271385  | Inlier |
| siRNA Disorazole DMSO Run2   | NM_004388 | CTBS  | chitinase, di-N-acetyl-CTD (carboxy-terminal domain, RNA polymerase II, polypeptide A) | 3.354491  | Inlier |
| siRNA-Temozolomide Run2-DMSO | NM_048368 | CTDP1 | phosphatase, subunit 1 CTD (carboxy-terminal domain, RNA polymerase II, polypeptide A) | -2.58788  | Inlier |
| siRNA-Temozolomide Run3-DMSO | NM_048368 | CTDP1 | phosphatase, subunit 1                                                                 | -0.810739 | Inlier |

Identification of Survival Genes in Human Glioblastoma Cells Using siRNA Screening

Nikhil G Thaker, Fang Zhang, Peter R. McDonald, Tong Ying Shun, Michael D Lewen, Ian F. Pollack, and John S. Lazo

Molecular Pharmacology

| siRNA                   | Run  | Gene          | CTDP1 | CTD<br>(carboxy-terminal domain, RNA polymerase II, polypeptide A) phosphatase, subunit 1 | Value     | Inlier |
|-------------------------|------|---------------|-------|-------------------------------------------------------------------------------------------|-----------|--------|
| siRNA Disorazole DMSO   | Run1 | NM_0483<br>68 | CTDP1 | CTD<br>(carboxy-terminal domain, RNA polymerase II, polypeptide A) phosphatase, subunit 1 | -0.538261 | Inlier |
| siRNA-Vinblastine DMSO  | Run1 | NM_0483<br>68 | CTDP1 | CTD<br>(carboxy-terminal domain, RNA polymerase II, polypeptide A) phosphatase, subunit 1 | -0.047196 | Inlier |
| siRNA-Temozolomide DMSO | Run1 | NM_0483<br>68 | CTDP1 | CTD<br>(carboxy-terminal domain, RNA polymerase II, polypeptide A) phosphatase, subunit 1 | 0.047196  | Inlier |
| siRNA Disorazole DMSO   | Run2 | NM_0483<br>68 | CTDP1 | CTD<br>(carboxy-terminal domain, RNA polymerase II, polypeptide A) phosphatase, subunit 1 | 0.069533  | Inlier |

Identification of Survival Genes in Human Glioblastoma Cells Using siRNA Screening

Nikhil G Thaker, Fang Zhang, Peter R. McDonald, Tong Ying Shun, Michael D Lewen, Ian F. Pollack, and John S. Lazo

Molecular Pharmacology

| siRNA Treatment              | Gene ID   | Gene Name | CTD                                                                                    | Score     | Inlier |
|------------------------------|-----------|-----------|----------------------------------------------------------------------------------------|-----------|--------|
| siRNA-Vinblastine Run2-DMSO  | NM_048368 | CTDP1     | CTD (carboxy-terminal domain, RNA polymerase II, polypeptide A) phosphatase, subunit 1 | 1.653278  | Inlier |
| siRNA Disorazole DMSO Run3   | NM_048368 | CTDP1     | CTD (carboxy-terminal domain, RNA polymerase II, polypeptide A) phosphatase, subunit 1 | 2.292863  | Inlier |
| siRNA-Temozolomide Run3-DMSO | NM_182642 | CTDSP1    | CTD (carboxy-terminal domain, RNA polymerase II, polypeptide A) small phosphatase 1    | -2.088905 | Inlier |
| siRNA-Temozolomide Run2-DMSO | NM_182642 | CTDSP1    | CTD (carboxy-terminal domain, RNA polymerase II, polypeptide A) small phosphatase 1    | -1.979645 | Inlier |

Identification of Survival Genes in Human Glioblastoma Cells Using siRNA Screening

Nikhil G Thaker, Fang Zhang, Peter R. McDonald, Tong Ying Shun, Michael D Lewen, Ian F. Pollack, and John S.

Lazo

Molecular Pharmacology

| siRNA              | Condition | Run           | Gene          | CTD       | Value     | Inlier |
|--------------------|-----------|---------------|---------------|-----------|-----------|--------|
| siRNA Disorazole   | DMSO      | Run2          | NM_1826<br>42 | CTDSP1    | -1.526979 | Inlier |
| siRNA-Temozolomide | Run1-DMSO | NM_1826<br>42 | CTDSP1        | -0.049019 | Inlier    |        |
| siRNA Disorazole   | DMSO      | Run1          | NM_1826<br>42 | CTDSP1    | 0.049019  | Inlier |
| siRNA Disorazole   | DMSO      | Run3          | NM_1826<br>42 | CTDSP1    | 0.179621  | Inlier |

CTD  
(carboxy-terminal domain, RNA polymerase II, polypeptide A) small phosphatase 1

CTD  
(carboxy-terminal domain, RNA polymerase II, polypeptide A) small phosphatase 1

CTD  
(carboxy-terminal domain, RNA polymerase II, polypeptide A) small phosphatase 1

CTD  
(carboxy-terminal domain, RNA polymerase II, polypeptide A) small phosphatase 1

Identification of Survival Genes in Human Glioblastoma Cells Using siRNA Screening

Nikhil G Thaker, Fang Zhang, Peter R. McDonald, Tong Ying Shun, Michael D Lewen, Ian F. Pollack, and John S.

Lazo

Molecular Pharmacology

| siRNA Treatment              | Gene ID   | Gene Name | Protein Description                                                                 | Log Fold Change | Outlier Status |
|------------------------------|-----------|-----------|-------------------------------------------------------------------------------------|-----------------|----------------|
| siRNA-Vinblastine Run1-DMSO  | NM_182642 | CTDSP1    | CTD (carboxy-terminal domain, RNA polymerase II, polypeptide A) small phosphatase 1 | 0.659698        | Inlier         |
| siRNA-Vinblastine Run2-DMSO  | NM_182642 | CTDSP1    | CTD (carboxy-terminal domain, RNA polymerase II, polypeptide A) small phosphatase 1 | 0.689301        | Inlier         |
| siRNA-Temozolomide Run2-DMSO | NM_005730 | CTDSP2    | CTD (carboxy-terminal domain, RNA polymerase II, polypeptide A) small phosphatase 2 | -2.371851       | Inlier         |
| siRNA-Temozolomide Run3-DMSO | NM_005730 | CTDSP2    | CTD (carboxy-terminal domain, RNA polymerase II, polypeptide A) small phosphatase 2 | -1.216324       | Inlier         |

Identification of Survival Genes in Human Glioblastoma Cells Using siRNA Screening

Nikhil G Thaker, Fang Zhang, Peter R. McDonald, Tong Ying Shun, Michael D Lewen, Ian F. Pollack, and John S. Lazo

Molecular Pharmacology

| siRNA Treatment              | Gene ID   | Gene Name | CTD                                                                                 | Value     | Inlier |
|------------------------------|-----------|-----------|-------------------------------------------------------------------------------------|-----------|--------|
| siRNA-Temozolomide Run1-DMSO | NM_005730 | CTDSP2    | CTD (carboxy-terminal domain, RNA polymerase II, polypeptide A) small phosphatase 2 | -0.661939 | Inlier |
| siRNA-Vinblastine Run1-DMSO  | NM_005730 | CTDSP2    | CTD (carboxy-terminal domain, RNA polymerase II, polypeptide A) small phosphatase 2 | -0.430672 | Inlier |
| siRNA-Vinblastine Run2-DMSO  | NM_005730 | CTDSP2    | CTD (carboxy-terminal domain, RNA polymerase II, polypeptide A) small phosphatase 2 | 0.430672  | Inlier |
| siRNA Disorazole DMSO Run2   | NM_005730 | CTDSP2    | CTD (carboxy-terminal domain, RNA polymerase II, polypeptide A) small phosphatase 2 | 0.527313  | Inlier |

Identification of Survival Genes in Human Glioblastoma Cells Using siRNA Screening

Nikhil G Thaker, Fang Zhang, Peter R. McDonald, Tong Ying Shun, Michael D Lewen, Ian F. Pollack, and John S. Lazo

Molecular Pharmacology

|                              |               |        |                                                                                           |           |        |
|------------------------------|---------------|--------|-------------------------------------------------------------------------------------------|-----------|--------|
| siRNA Disorazole DMSO Run3   | NM_0057<br>30 | CTDSP2 | CTD<br>(carboxy-terminal domain, RNA polymerase II, polypeptide A) small phosphatase 2    | 0.687061  | Inlier |
| siRNA Disorazole DMSO Run1   | NM_0057<br>30 | CTDSP2 | CTD<br>(carboxy-terminal domain, RNA polymerase II, polypeptide A) small phosphatase 2    | 0.925106  | Inlier |
| siRNA Disorazole DMSO Run2   | NM_0058<br>08 | CTDSPL | CTD<br>(carboxy-terminal domain, RNA polymerase II, polypeptide A) small phosphatase-like | -1.608177 | Inlier |
| siRNA-Temozolomide Run2-DMSO | NM_0058<br>08 | CTDSPL | CTD<br>(carboxy-terminal domain, RNA polymerase II, polypeptide A) small phosphatase-like | -1.084546 | Inlier |



Identification of Survival Genes in Human Glioblastoma Cells Using siRNA Screening

Nikhil G Thaker, Fang Zhang, Peter R. McDonald, Tong Ying Shun, Michael D Lewen, Ian F. Pollack, and John S. Lazo

Molecular Pharmacology

| siRNA Treatment              | Gene ID   | Gene Name | CTD                                                                                    | Value     | Inlier |
|------------------------------|-----------|-----------|----------------------------------------------------------------------------------------|-----------|--------|
| siRNA-Temozolomide Run3-DMSO | NM_005808 | CTDSPL    | CTD (carboxy-terminal domain, RNA polymerase II, polypeptide A) small phosphatase-like | -1.0664   | Inlier |
| siRNA-Vinblastine Run1-DMSO  | NM_005808 | CTDSPL    | CTD (carboxy-terminal domain, RNA polymerase II, polypeptide A) small phosphatase-like | -0.140801 | Inlier |
| siRNA Disorazole DMSO Run3   | NM_005808 | CTDSPL    | CTD (carboxy-terminal domain, RNA polymerase II, polypeptide A) small phosphatase-like | 0.140801  | Inlier |
| siRNA-Temozolomide Run1-DMSO | NM_005808 | CTDSPL    | CTD (carboxy-terminal domain, RNA polymerase II, polypeptide A) small phosphatase-like | 0.269011  | Inlier |

Identification of Survival Genes in Human Glioblastoma Cells Using siRNA Screening

Nikhil G Thaker, Fang Zhang, Peter R. McDonald, Tong Ying Shun, Michael D Lewen, Ian F. Pollack, and John S. Lazo

Molecular Pharmacology

| siRNA Treatment              | Gene ID   | Gene Name | Gene Description                                                                       | Log2 Fold Change | Category |
|------------------------------|-----------|-----------|----------------------------------------------------------------------------------------|------------------|----------|
| siRNA Disorazole DMSO Run1   | NM_005808 | CTDSPL    | CTD (carboxy-terminal domain, RNA polymerase II, polypeptide A) small phosphatase-like | 0.425473         | Inlier   |
| siRNA-Vinblastine Run2-DMSO  | NM_005808 | CTDSPL    | CTD (carboxy-terminal domain, RNA polymerase II, polypeptide A) small phosphatase-like | 0.923527         | Inlier   |
| siRNA-Temozolomide Run3-DMSO | NM_001902 | CTH       | gamma-cystathionase (cystathionine gamma-lyase)                                        | -1.518536        | Inlier   |
| siRNA-Temozolomide Run2-DMSO | NM_001902 | CTH       | gamma-cystathionase (cystathionine gamma-lyase)                                        | -1.389173        | Inlier   |
| siRNA-Temozolomide Run1-DMSO | NM_001902 | CTH       | gamma-cystathionase (cystathionine gamma-lyase)                                        | -1.010478        | Inlier   |
| siRNA Disorazole DMSO Run1   | NM_001902 | CTH       | gamma-cystathionase (cystathionine gamma-lyase)                                        | -0.148554        | Inlier   |
| siRNA Disorazole DMSO Run3   | NM_001902 | CTH       | gamma-cystathionase (cystathionine gamma-lyase)                                        | 0.148553         | Inlier   |

Identification of Survival Genes in Human Glioblastoma Cells Using siRNA Screening  
 Nikhil G Thaker, Fang Zhang, Peter R. McDonald, Tong Ying Shun, Michael D Lewen, Ian F. Pollack, and John S. Lazo

Molecular Pharmacology

|                              |           |       |                                           |           |        |
|------------------------------|-----------|-------|-------------------------------------------|-----------|--------|
| siRNA-Vinblastine Run2-DMSO  | NM_001902 | CTH   | cystathionase (cystathionine gamma-lyase) | 0.26791   | Inlier |
| siRNA Disorazole DMSO Run2   | NM_001902 | CTH   | cystathionase (cystathionine gamma-lyase) | 0.523882  | Inlier |
| siRNA-Vinblastine Run1-DMSO  | NM_001902 | CTH   | gamma-lyase)                              | 0.825118  | Inlier |
| siRNA-Temozolomide Run2-DMSO | NM_001905 | CTPS  | CTP synthase                              | -1.289426 | Inlier |
| siRNA Disorazole DMSO Run1   | NM_001905 | CTPS  | CTP synthase                              | -1.032587 | Inlier |
| siRNA-Temozolomide Run1-DMSO | NM_001905 | CTPS  | CTP synthase                              | -0.316413 | Inlier |
| siRNA-Temozolomide Run3-DMSO | NM_001905 | CTPS  | CTP synthase                              | -0.029926 | Inlier |
| siRNA Disorazole DMSO Run3   | NM_001905 | CTPS  | CTP synthase                              | 0.029926  | Inlier |
| siRNA-Vinblastine Run2-DMSO  | NM_001905 | CTPS  | CTP synthase                              | 0.071764  | Inlier |
| siRNA-Vinblastine Run1-DMSO  | NM_001905 | CTPS  | CTP synthase                              | 1.12795   | Inlier |
| siRNA Disorazole DMSO Run2   | NM_001905 | CTPS  | CTP synthase                              | 1.159422  | Inlier |
| siRNA-Temozolomide Run1-DMSO | NM_175859 | CTPS2 | CTP synthase II                           | -0.823643 | Inlier |
| siRNA Disorazole DMSO Run1   | NM_175859 | CTPS2 | CTP synthase II                           | -0.566763 | Inlier |
| siRNA-Temozolomide Run3-DMSO | NM_175859 | CTPS2 | CTP synthase II                           | -0.542319 | Inlier |
| siRNA-Temozolomide Run2-DMSO | NM_175859 | CTPS2 | CTP synthase II                           | -0.3633   | Inlier |
| siRNA Disorazole DMSO Run3   | NM_175859 | CTPS2 | CTP synthase II                           | 0.3633    | Inlier |
| siRNA-Vinblastine Run1-DMSO  | NM_175859 | CTPS2 | CTP synthase II                           | 0.782237  | Inlier |

Identification of Survival Genes in Human Glioblastoma Cells Using siRNA Screening  
 Nikhil G Thaker, Fang Zhang, Peter R. McDonald, Tong Ying Shun, Michael D Lewen, Ian F. Pollack, and John S. Lazo

Molecular Pharmacology

|                              |               |       |                            |           |        |
|------------------------------|---------------|-------|----------------------------|-----------|--------|
| siRNA-Vinblastine Run2-DMSO  | NM_1758<br>59 | CTPS2 | CTP synthase II            | 0.921018  | Inlier |
| siRNA Disorazole DMSO Run2   | NM_1758<br>59 | CTPS2 | CTP synthase II            | 1.328193  | Inlier |
| siRNA Disorazole DMSO Run2   | NM_0019<br>06 | CTRB1 | chymotrypsinogen B1        | -2.278363 | Inlier |
| siRNA-Temozolomide Run3-DMSO | NM_0019<br>06 | CTRB1 | chymotrypsinogen B1        | -1.424289 | Inlier |
| siRNA Disorazole DMSO Run1   | NM_0019<br>06 | CTRB1 | chymotrypsinogen B1        | -1.283581 | Inlier |
| siRNA-Vinblastine Run1-DMSO  | NM_0019<br>06 | CTRB1 | chymotrypsinogen B1        | -8.53E-05 | Inlier |
| siRNA-Temozolomide Run2-DMSO | NM_0019<br>06 | CTRB1 | chymotrypsinogen B1        | 8.53E-05  | Inlier |
| siRNA-Temozolomide Run1-DMSO | NM_0019<br>06 | CTRB1 | chymotrypsinogen B1        | 0.046456  | Inlier |
| siRNA-Vinblastine Run2-DMSO  | NM_0019<br>06 | CTRB1 | chymotrypsinogen B1        | 0.485713  | Inlier |
| siRNA Disorazole DMSO Run3   | NM_0019<br>06 | CTRB1 | chymotrypsinogen B1        | 0.863287  | Inlier |
| siRNA-Temozolomide Run3-DMSO | NM_0072<br>72 | CTRC  | chymotrypsin C (caldecrin) | -1.122929 | Inlier |
| siRNA Disorazole DMSO Run2   | NM_0072<br>72 | CTRC  | chymotrypsin C (caldecrin) | -0.361107 | Inlier |
| siRNA-Temozolomide Run1-DMSO | NM_0072<br>72 | CTRC  | chymotrypsin C (caldecrin) | -0.218184 | Inlier |
| siRNA-Temozolomide Run2-DMSO | NM_0072<br>72 | CTRC  | chymotrypsin C (caldecrin) | -0.073402 | Inlier |
| siRNA Disorazole DMSO Run1   | NM_0072<br>72 | CTRC  | chymotrypsin C (caldecrin) | 0.073402  | Inlier |

Identification of Survival Genes in Human Glioblastoma Cells Using siRNA Screening  
 Nikhil G Thaker, Fang Zhang, Peter R. McDonald, Tong Ying Shun, Michael D Lewen, Ian F. Pollack, and John S. Lazo  
 Molecular Pharmacology

|                                  |               |      |                                   |           |        |
|----------------------------------|---------------|------|-----------------------------------|-----------|--------|
| siRNA Disorazole DMSO Run3       | NM_0072<br>72 | CTRC | chymotryp<br>sin C<br>(caldecrin) | 0.987893  | Inlier |
| siRNA-Vinblastine Run2-<br>DMSO  | NM_0072<br>72 | CTRC | chymotryp<br>sin C<br>(caldecrin) | 1.981673  | Inlier |
| siRNA-Vinblastine Run1-<br>DMSO  | NM_0072<br>72 | CTRC | chymotryp<br>sin C<br>(caldecrin) | 3.152736  | Inlier |
| siRNA-Temozolomide Run3-<br>DMSO | NM_0019<br>07 | CTRL | chymotryp<br>sin-like             | -0.859688 | Inlier |
| siRNA-Temozolomide Run2-<br>DMSO | NM_0019<br>07 | CTRL | chymotryp<br>sin-like             | -0.489312 | Inlier |
| siRNA Disorazole DMSO Run1       | NM_0019<br>07 | CTRL | chymotryp<br>sin-like             | -0.391331 | Inlier |
| siRNA Disorazole DMSO Run2       | NM_0019<br>07 | CTRL | chymotryp<br>sin-like             | -0.138129 | Inlier |
| siRNA-Temozolomide Run1-<br>DMSO | NM_0019<br>07 | CTRL | chymotryp<br>sin-like             | 0.138129  | Inlier |
| siRNA-Vinblastine Run1-<br>DMSO  | NM_0019<br>07 | CTRL | chymotryp<br>sin-like             | 2.144006  | Inlier |
| siRNA Disorazole DMSO Run3       | NM_0019<br>07 | CTRL | chymotryp<br>sin-like             | 2.188992  | Inlier |
| siRNA-Vinblastine Run2-<br>DMSO  | NM_0019<br>07 | CTRL | chymotryp<br>sin-like             | 2.742051  | Inlier |
| siRNA-Temozolomide Run3-<br>DMSO | NM_1477<br>80 | CTSB | cathepsin<br>B                    | -1.665501 | Inlier |
| siRNA-Temozolomide Run1-<br>DMSO | NM_1477<br>80 | CTSB | cathepsin<br>B                    | -0.917632 | Inlier |
| siRNA-Temozolomide Run2-<br>DMSO | NM_1477<br>80 | CTSB | cathepsin<br>B                    | -0.345589 | Inlier |
| siRNA Disorazole DMSO Run1       | NM_1477<br>80 | CTSB | cathepsin<br>B                    | -0.204141 | Inlier |
| siRNA Disorazole DMSO Run2       | NM_1477<br>80 | CTSB | cathepsin<br>B                    | 0.204142  | Inlier |
| siRNA-Vinblastine Run1-<br>DMSO  | NM_1477<br>80 | CTSB | cathepsin<br>B                    | 0.598386  | Inlier |
| siRNA-Vinblastine Run2-<br>DMSO  | NM_1477<br>80 | CTSB | cathepsin<br>B                    | 0.750614  | Inlier |
| siRNA Disorazole DMSO Run3       | NM_1477<br>80 | CTSB | cathepsin<br>B                    | 1.117226  | Inlier |
| siRNA Disorazole DMSO Run2       | NM_0018<br>14 | CTSC | cathepsin<br>C                    | -1.288453 | Inlier |
| siRNA-Temozolomide Run3-<br>DMSO | NM_0018<br>14 | CTSC | cathepsin<br>C                    | -0.956303 | Inlier |
| siRNA-Temozolomide Run2-<br>DMSO | NM_0018<br>14 | CTSC | cathepsin<br>C                    | -0.678114 | Inlier |
| siRNA-Temozolomide Run1-<br>DMSO | NM_0018<br>14 | CTSC | cathepsin<br>C                    | -0.174993 | Inlier |

Identification of Survival Genes in Human Glioblastoma Cells Using siRNA Screening  
 Nikhil G Thaker, Fang Zhang, Peter R. McDonald, Tong Ying Shun, Michael D Lewen, Ian F. Pollack, and John S. Lazo

|                              |         |      |            |                  |
|------------------------------|---------|------|------------|------------------|
| Molecular Pharmacology       | NM_0018 |      | cathepsin  |                  |
| siRNA Disorazole DMSO Run1   | 14      | CTSC | C          | 0.174993 Inlier  |
|                              | NM_0018 |      | cathepsin  |                  |
| siRNA Disorazole DMSO Run3   | 14      | CTSC | C          | 0.604791 Inlier  |
| siRNA-Vinblastine Run2-DMSO  | NM_0018 |      | cathepsin  |                  |
|                              | 14      | CTSC | C          | 0.670886 Inlier  |
| siRNA-Vinblastine Run1-DMSO  | NM_0018 |      | cathepsin  |                  |
|                              | 14      | CTSC | C          | 0.734701 Inlier  |
|                              |         |      | cathepsin  |                  |
|                              |         |      | D          |                  |
|                              |         |      | (lysosomal |                  |
| siRNA-Temozolomide Run3-DMSO | NM_0019 |      | aspartyl   |                  |
|                              | 09      | CTSD | protease)  | -1.622387 Inlier |
|                              |         |      | cathepsin  |                  |
|                              |         |      | D          |                  |
|                              |         |      | (lysosomal |                  |
| siRNA Disorazole DMSO Run2   | NM_0019 |      | aspartyl   |                  |
|                              | 09      | CTSD | protease)  | -1.507737 Inlier |
|                              |         |      | cathepsin  |                  |
|                              |         |      | D          |                  |
|                              |         |      | (lysosomal |                  |
| siRNA Disorazole DMSO Run3   | NM_0019 |      | aspartyl   |                  |
|                              | 09      | CTSD | protease)  | -0.648391 Inlier |
|                              |         |      | cathepsin  |                  |
|                              |         |      | D          |                  |
|                              |         |      | (lysosomal |                  |
| siRNA-Temozolomide Run1-DMSO | NM_0019 |      | aspartyl   |                  |
|                              | 09      | CTSD | protease)  | -0.034637 Inlier |
|                              |         |      | cathepsin  |                  |
|                              |         |      | D          |                  |
|                              |         |      | (lysosomal |                  |
| siRNA Disorazole DMSO Run1   | NM_0019 |      | aspartyl   |                  |
|                              | 09      | CTSD | protease)  | 0.034637 Inlier  |
|                              |         |      | cathepsin  |                  |
|                              |         |      | D          |                  |
|                              |         |      | (lysosomal |                  |
| siRNA-Temozolomide Run2-DMSO | NM_0019 |      | aspartyl   |                  |
|                              | 09      | CTSD | protease)  | 0.119603 Inlier  |
|                              |         |      | cathepsin  |                  |
|                              |         |      | D          |                  |
|                              |         |      | (lysosomal |                  |
| siRNA-Vinblastine Run1-DMSO  | NM_0019 |      | aspartyl   |                  |
|                              | 09      | CTSD | protease)  | 0.700609 Inlier  |

Identification of Survival Genes in Human Glioblastoma Cells Using siRNA Screening  
 Nikhil G Thaker, Fang Zhang, Peter R. McDonald, Tong Ying Shun, Michael D Lewen, Ian F. Pollack, and John S. Lazo  
 Molecular Pharmacology

| siRNA                        | Gene    | Gene ID | Gene                                      | Value     | Outlier |
|------------------------------|---------|---------|-------------------------------------------|-----------|---------|
|                              |         |         | cathepsin D (lysosomal aspartyl protease) | 1.440372  | Inlier  |
| siRNA-Vinblastine Run2-DMSO  | NM_0019 | 09      | CTSD                                      |           |         |
| siRNA-Temozolomide Run3-DMSO | NM_1489 | 64      | CTSE                                      | -1.424278 | Inlier  |
| siRNA Disorazole DMSO Run1   | NM_1489 | 64      | CTSE                                      | -0.776709 | Inlier  |
| siRNA-Vinblastine Run2-DMSO  | NM_1489 | 64      | CTSE                                      | -0.420562 | Inlier  |
| siRNA-Temozolomide Run2-DMSO | NM_1489 | 64      | CTSE                                      | -0.177567 | Inlier  |
| siRNA-Temozolomide Run1-DMSO | NM_1489 | 64      | CTSE                                      | 0.177567  | Inlier  |
| siRNA-Vinblastine Run1-DMSO  | NM_1489 | 64      | CTSE                                      | 0.572291  | Inlier  |
| siRNA Disorazole DMSO Run2   | NM_1489 | 64      | CTSE                                      | 1.630113  | Inlier  |
| siRNA Disorazole DMSO Run3   | NM_1489 | 64      | CTSE                                      | 6.818512  | Outlier |
| siRNA-Temozolomide Run3-DMSO | NM_0037 | 93      | CTSF                                      | -1.073838 | Inlier  |
| siRNA-Temozolomide Run2-DMSO | NM_0037 | 93      | CTSF                                      | -0.839253 | Inlier  |
| siRNA-Temozolomide Run1-DMSO | NM_0037 | 93      | CTSF                                      | -0.763742 | Inlier  |
| siRNA Disorazole DMSO Run1   | NM_0037 | 93      | CTSF                                      | -0.003384 | Inlier  |
| siRNA-Vinblastine Run1-DMSO  | NM_0037 | 93      | CTSF                                      | 0.003385  | Inlier  |
| siRNA-Vinblastine Run2-DMSO  | NM_0037 | 93      | CTSF                                      | 0.251305  | Inlier  |
| siRNA Disorazole DMSO Run2   | NM_0037 | 93      | CTSF                                      | 0.603419  | Inlier  |
| siRNA Disorazole DMSO Run3   | NM_0037 | 93      | CTSF                                      | 0.745581  | Inlier  |
| siRNA-Temozolomide Run3-DMSO | NM_0019 | 11      | CTSG                                      | -1.4188   | Inlier  |
| siRNA Disorazole DMSO Run2   | NM_0019 | 11      | CTSG                                      | -1.05481  | Inlier  |
| siRNA Disorazole DMSO Run1   | NM_0019 | 11      | CTSG                                      | -0.716891 | Inlier  |
| siRNA-Temozolomide Run2-DMSO | NM_0019 | 11      | CTSG                                      | -0.028851 | Inlier  |
| siRNA-Temozolomide Run1-DMSO | NM_0019 | 11      | CTSG                                      | 0.028851  | Inlier  |
| siRNA-Vinblastine Run1-DMSO  | NM_0019 | 11      | CTSG                                      | 0.210226  | Inlier  |
| siRNA-Vinblastine Run2-DMSO  | NM_0019 | 11      | CTSG                                      | 0.632109  | Inlier  |

Identification of Survival Genes in Human Glioblastoma Cells Using siRNA Screening  
 Nikhil G Thaker, Fang Zhang, Peter R. McDonald, Tong Ying Shun, Michael D Lewen, Ian F. Pollack, and John S. Lazo

|                              |               |      |                                         |           |         |
|------------------------------|---------------|------|-----------------------------------------|-----------|---------|
| Molecular Pharmacology       | NM_0019       |      | cathepsin                               |           |         |
| siRNA Disorazole DMSO Run3   | 11            | CTSG | G                                       | 1.655942  | Inlier  |
| siRNA-Temozolomide Run3-DMSO | NM_0043<br>90 | CTSH | H                                       | -1.434048 | Inlier  |
| siRNA Disorazole DMSO Run1   | NM_0043<br>90 | CTSH | H                                       | -0.894522 | Inlier  |
| siRNA Disorazole DMSO Run2   | NM_0043<br>90 | CTSH | H                                       | -0.440577 | Inlier  |
| siRNA-Vinblastine Run1-DMSO  | NM_0043<br>90 | CTSH | H                                       | -0.179285 | Inlier  |
| siRNA-Temozolomide Run2-DMSO | NM_0043<br>90 | CTSH | H                                       | 0.179285  | Inlier  |
| siRNA-Temozolomide Run1-DMSO | NM_0043<br>90 | CTSH | H                                       | 0.454478  | Inlier  |
| siRNA-Vinblastine Run2-DMSO  | NM_0043<br>90 | CTSH | H                                       | 1.616988  | Inlier  |
| siRNA Disorazole DMSO Run3   | NM_0043<br>90 | CTSH | H                                       | 3.148931  | Inlier  |
| siRNA-Temozolomide Run3-DMSO | NM_0003<br>96 | CTSK | (pycnodys<br>ostosis)<br>cathepsin<br>K | -1.216997 | Inlier  |
| siRNA Disorazole DMSO Run2   | NM_0003<br>96 | CTSK | (pycnodys<br>ostosis)<br>cathepsin<br>K | -0.494357 | Inlier  |
| siRNA-Temozolomide Run2-DMSO | NM_0003<br>96 | CTSK | (pycnodys<br>ostosis)<br>cathepsin<br>K | -0.297615 | Inlier  |
| siRNA Disorazole DMSO Run3   | NM_0003<br>96 | CTSK | (pycnodys<br>ostosis)<br>cathepsin<br>K | -0.049943 | Inlier  |
| siRNA-Temozolomide Run1-DMSO | NM_0003<br>96 | CTSK | (pycnodys<br>ostosis)<br>cathepsin<br>K | 0.049943  | Inlier  |
| siRNA Disorazole DMSO Run1   | NM_0003<br>96 | CTSK | (pycnodys<br>ostosis)<br>cathepsin<br>K | 0.854643  | Inlier  |
| siRNA-Vinblastine Run1-DMSO  | NM_0003<br>96 | CTSK | (pycnodys<br>ostosis)<br>cathepsin<br>K | 1.45328   | Inlier  |
| siRNA-Vinblastine Run2-DMSO  | NM_0003<br>96 | CTSK | (pycnodys<br>ostosis)<br>cathepsin<br>K | 2.082541  | Inlier  |
| siRNA Disorazole DMSO Run2   | NM_1459<br>18 | CTSL | L                                       | -3.690118 | Outlier |



Identification of Survival Genes in Human Glioblastoma Cells Using siRNA Screening  
 Nikhil G Thaker, Fang Zhang, Peter R. McDonald, Tong Ying Shun, Michael D Lewen, Ian F. Pollack, and John S. Lazo

|                                  |               |       |                 |           |        |
|----------------------------------|---------------|-------|-----------------|-----------|--------|
| siRNA-Temozolomide Run3-<br>DMSO | NM_1459<br>18 | CTSL  | cathepsin<br>L  | -1.242594 | Inlier |
| siRNA-Temozolomide Run1-<br>DMSO | NM_1459<br>18 | CTSL  | cathepsin<br>L  | -0.444948 | Inlier |
| siRNA-Temozolomide Run2-<br>DMSO | NM_1459<br>18 | CTSL  | cathepsin<br>L  | -0.349155 | Inlier |
| siRNA Disorazole DMSO Run1       | NM_1459<br>18 | CTSL  | cathepsin<br>L  | 0.349154  | Inlier |
| siRNA Disorazole DMSO Run3       | NM_1459<br>18 | CTSL  | cathepsin<br>L  | 0.491313  | Inlier |
| siRNA-Vinblastine Run1-<br>DMSO  | NM_1459<br>18 | CTSL  | cathepsin<br>L  | 0.857687  | Inlier |
| siRNA-Vinblastine Run2-<br>DMSO  | NM_1459<br>18 | CTSL  | cathepsin<br>L  | 0.948049  | Inlier |
| siRNA-Temozolomide Run2-<br>DMSO | NM_0013<br>33 | CTSL2 | cathepsin<br>L2 | -1.929049 | Inlier |
| siRNA-Temozolomide Run3-<br>DMSO | NM_0013<br>33 | CTSL2 | cathepsin<br>L2 | -0.96615  | Inlier |
| siRNA Disorazole DMSO Run1       | NM_0013<br>33 | CTSL2 | cathepsin<br>L2 | -0.456635 | Inlier |
| siRNA-Temozolomide Run1-<br>DMSO | NM_0013<br>33 | CTSL2 | cathepsin<br>L2 | -0.259096 | Inlier |
| siRNA-Vinblastine Run1-<br>DMSO  | NM_0013<br>33 | CTSL2 | cathepsin<br>L2 | 0.259096  | Inlier |
| siRNA-Vinblastine Run2-<br>DMSO  | NM_0013<br>33 | CTSL2 | cathepsin<br>L2 | 0.540238  | Inlier |
| siRNA Disorazole DMSO Run3       | NM_0013<br>33 | CTSL2 | cathepsin<br>L2 | 0.808762  | Inlier |
| siRNA Disorazole DMSO Run2       | NM_0013<br>33 | CTSL2 | cathepsin<br>L2 | 1.480078  | Inlier |
| siRNA-Temozolomide Run3-<br>DMSO | NM_0013<br>34 | CTSO  | cathepsin<br>O  | -1.120952 | Inlier |
| siRNA-Temozolomide Run1-<br>DMSO | NM_0013<br>34 | CTSO  | cathepsin<br>O  | -0.791738 | Inlier |
| siRNA Disorazole DMSO Run1       | NM_0013<br>34 | CTSO  | cathepsin<br>O  | -0.411539 | Inlier |
| siRNA-Vinblastine Run1-<br>DMSO  | NM_0013<br>34 | CTSO  | cathepsin<br>O  | -0.084246 | Inlier |
| siRNA-Temozolomide Run2-<br>DMSO | NM_0013<br>34 | CTSO  | cathepsin<br>O  | 0.084246  | Inlier |
| siRNA Disorazole DMSO Run2       | NM_0013<br>34 | CTSO  | cathepsin<br>O  | 0.557262  | Inlier |
| siRNA-Vinblastine Run2-<br>DMSO  | NM_0013<br>34 | CTSO  | cathepsin<br>O  | 1.209669  | Inlier |
| siRNA Disorazole DMSO Run3       | NM_0013<br>34 | CTSO  | cathepsin<br>O  | 3.465874  | Inlier |
| siRNA-Temozolomide Run3-<br>DMSO | NM_0040<br>79 | CTSS  | cathepsin<br>S  | -1.009604 | Inlier |
| siRNA-Temozolomide Run2-<br>DMSO | NM_0040<br>79 | CTSS  | cathepsin<br>S  | -0.339396 | Inlier |
| siRNA-Temozolomide Run1-<br>DMSO | NM_0040<br>79 | CTSS  | cathepsin<br>S  | -0.295909 | Inlier |

Identification of Survival Genes in Human Glioblastoma Cells Using siRNA Screening  
 Nikhil G Thaker, Fang Zhang, Peter R. McDonald, Tong Ying Shun, Michael D Lewen, Ian F. Pollack, and John S. Lazo

|                              |         |      |            |                  |
|------------------------------|---------|------|------------|------------------|
| Molecular Pharmacology       | NM_0040 |      | cathepsin  |                  |
| siRNA Disorazole DMSO Run3   | 79      | CTSS | S          | -0.12772 Inlier  |
|                              | NM_0040 |      | cathepsin  |                  |
| siRNA Disorazole DMSO Run2   | 79      | CTSS | S          | 0.127721 Inlier  |
|                              | NM_0040 |      | cathepsin  |                  |
| siRNA Disorazole DMSO Run1   | 79      | CTSS | S          | 1.300925 Inlier  |
| siRNA-Vinblastine Run1-DMSO  | NM_0040 |      | cathepsin  |                  |
|                              | 79      | CTSS | S          | 4.267605 Outlier |
| siRNA-Vinblastine Run2-DMSO  | NM_0040 |      | cathepsin  |                  |
|                              | 79      | CTSS | S          | 4.662659 Outlier |
|                              |         |      | cathepsin  |                  |
|                              |         |      | W          |                  |
|                              | NM_0013 |      | (lymphopai |                  |
| siRNA Disorazole DMSO Run2   | 35      | CTSW | n)         | -3.155227 Inlier |
|                              |         |      | cathepsin  |                  |
|                              |         |      | W          |                  |
|                              | NM_0013 |      | (lymphopai |                  |
| siRNA-Temozolomide Run3-DMSO | 35      | CTSW | n)         | -1.173698 Inlier |
|                              |         |      | cathepsin  |                  |
|                              |         |      | W          |                  |
|                              | NM_0013 |      | (lymphopai |                  |
| siRNA-Temozolomide Run1-DMSO | 35      | CTSW | n)         | -0.703931 Inlier |
|                              |         |      | cathepsin  |                  |
|                              |         |      | W          |                  |
|                              | NM_0013 |      | (lymphopai |                  |
| siRNA-Temozolomide Run2-DMSO | 35      | CTSW | n)         | -0.202332 Inlier |
|                              |         |      | cathepsin  |                  |
|                              |         |      | W          |                  |
|                              | NM_0013 |      | (lymphopai |                  |
| siRNA Disorazole DMSO Run1   | 35      | CTSW | n)         | 0.202333 Inlier  |
|                              |         |      | cathepsin  |                  |
|                              |         |      | W          |                  |
|                              | NM_0013 |      | (lymphopai |                  |
| siRNA-Vinblastine Run2-DMSO  | 35      | CTSW | n)         | 0.613595 Inlier  |
|                              |         |      | cathepsin  |                  |
|                              |         |      | W          |                  |
|                              | NM_0013 |      | (lymphopai |                  |
| siRNA Disorazole DMSO Run3   | 35      | CTSW | n)         | 0.645069 Inlier  |
|                              |         |      | cathepsin  |                  |
|                              |         |      | W          |                  |
|                              | NM_0013 |      | (lymphopai |                  |
| siRNA-Vinblastine Run1-DMSO  | 35      | CTSW | n)         | 1.722454 Inlier  |
|                              |         |      | cathepsin  |                  |
|                              | NM_0013 |      | cathepsin  |                  |
| siRNA Disorazole DMSO Run2   | 36      | CTSZ | Z          | -2.163478 Inlier |
| siRNA-Temozolomide Run3-DMSO | NM_0013 |      | cathepsin  |                  |
|                              | 36      | CTSZ | Z          | -1.397264 Inlier |
|                              | NM_0013 |      | cathepsin  |                  |
| siRNA Disorazole DMSO Run3   | 36      | CTSZ | Z          | -0.834702 Inlier |
| siRNA-Temozolomide Run2-DMSO | NM_0013 |      | cathepsin  |                  |
|                              | 36      | CTSZ | Z          | -0.166695 Inlier |
| siRNA-Temozolomide Run1-DMSO | NM_0013 |      | cathepsin  |                  |
|                              | 36      | CTSZ | Z          | 0.166696 Inlier  |

Identification of Survival Genes in Human Glioblastoma Cells Using siRNA Screening

Nikhil G Thaker, Fang Zhang, Peter R. McDonald, Tong Ying Shun, Michael D Lewen, Ian F. Pollack, and John S.

Lazo

|                              |         |        |                                                            |           |        |
|------------------------------|---------|--------|------------------------------------------------------------|-----------|--------|
| Molecular Pharmacology       | NM_0013 |        | cathepsin                                                  |           |        |
| siRNA Disorazole DMSO Run1   | 36      | CTSZ   | Z                                                          | 0.401749  | Inlier |
| siRNA-Vinblastine Run2-DMSO  | NM_0013 |        | cathepsin                                                  |           |        |
|                              | 36      | CTSZ   | Z                                                          | 0.524626  | Inlier |
| siRNA-Vinblastine Run1-DMSO  | NM_0013 |        | cathepsin                                                  |           |        |
|                              | 36      | CTSZ   | Z                                                          | 0.824374  | Inlier |
|                              |         |        | cubilin<br>(intrinsic<br>factor-<br>cobalamin<br>receptor) |           |        |
| siRNA-Vinblastine Run2-DMSO  | NM_0010 |        |                                                            |           |        |
|                              | 81      | CUBN   |                                                            | -1.454762 | Inlier |
|                              |         |        | cubilin<br>(intrinsic<br>factor-<br>cobalamin<br>receptor) |           |        |
| siRNA-Temozolomide Run3-DMSO | NM_0010 |        |                                                            |           |        |
|                              | 81      | CUBN   |                                                            | -1.222868 | Inlier |
|                              |         |        | cubilin<br>(intrinsic<br>factor-<br>cobalamin<br>receptor) |           |        |
| siRNA-Temozolomide Run2-DMSO | NM_0010 |        |                                                            |           |        |
|                              | 81      | CUBN   |                                                            | -0.683657 | Inlier |
|                              |         |        | cubilin<br>(intrinsic<br>factor-<br>cobalamin<br>receptor) |           |        |
| siRNA Disorazole DMSO Run3   | NM_0010 |        |                                                            |           |        |
|                              | 81      | CUBN   |                                                            | -0.054956 | Inlier |
|                              |         |        | cubilin<br>(intrinsic<br>factor-<br>cobalamin<br>receptor) |           |        |
| siRNA Disorazole DMSO Run1   | NM_0010 |        |                                                            |           |        |
|                              | 81      | CUBN   |                                                            | 0.054956  | Inlier |
|                              |         |        | cubilin<br>(intrinsic<br>factor-<br>cobalamin<br>receptor) |           |        |
| siRNA-Temozolomide Run1-DMSO | NM_0010 |        |                                                            |           |        |
|                              | 81      | CUBN   |                                                            | 0.378927  | Inlier |
|                              |         |        | cubilin<br>(intrinsic<br>factor-<br>cobalamin<br>receptor) |           |        |
| siRNA Disorazole DMSO Run2   | NM_0010 |        |                                                            |           |        |
|                              | 81      | CUBN   |                                                            | 0.665343  | Inlier |
|                              |         |        | cubilin<br>(intrinsic<br>factor-<br>cobalamin<br>receptor) |           |        |
| siRNA-Vinblastine Run1-DMSO  | NM_0010 |        |                                                            |           |        |
|                              | 81      | CUBN   |                                                            | 1.636024  | Inlier |
|                              |         |        | chemokine<br>(C-X3-C<br>motif)                             |           |        |
| siRNA-Temozolomide Run3-DMSO | NM_0013 |        |                                                            |           |        |
|                              | 37      | CX3CR1 | receptor 1                                                 | -0.998475 | Inlier |

Identification of Survival Genes in Human Glioblastoma Cells Using siRNA Screening  
 Nikhil G Thaker, Fang Zhang, Peter R. McDonald, Tong Ying Shun, Michael D Lewen, Ian F. Pollack, and John S. Lazo

Molecular Pharmacology

| siRNA Treatment              | Gene ID   | Gene Name | Gene Description                        | Log Fold Change | Outlier Status |
|------------------------------|-----------|-----------|-----------------------------------------|-----------------|----------------|
| siRNA-Temozolomide Run2-DMSO | NM_001337 | CX3CR1    | chemokine (C-X3-C motif) receptor 1     | -0.479576       | Inlier         |
| siRNA Disorazole DMSO Run2   | NM_001337 | CX3CR1    | chemokine (C-X3-C motif) receptor 1     | -0.303299       | Inlier         |
| siRNA Disorazole DMSO Run3   | NM_001337 | CX3CR1    | chemokine (C-X3-C motif) receptor 1     | -0.253607       | Inlier         |
| siRNA-Temozolomide Run1-DMSO | NM_001337 | CX3CR1    | chemokine (C-X3-C motif) receptor 1     | 0.253607        | Inlier         |
| siRNA Disorazole DMSO Run1   | NM_001337 | CX3CR1    | chemokine (C-X3-C motif) receptor 1     | 0.869424        | Inlier         |
| siRNA-Vinblastine Run1-DMSO  | NM_001337 | CX3CR1    | chemokine (C-X3-C motif) receptor 1     | 1.529437        | Inlier         |
| siRNA-Vinblastine Run2-DMSO  | NM_001337 | CX3CR1    | chemokine (C-X3-C motif) receptor 1     | 1.603369        | Inlier         |
| siRNA-Vinblastine Run2-DMSO  | NM_001338 | CXADR     | coxsackie virus and adenovirus receptor | -8.209418       | Outlier        |
| siRNA Disorazole DMSO Run2   | NM_001338 | CXADR     | coxsackie virus and adenovirus receptor | -1.02672        | Inlier         |
| siRNA Disorazole DMSO Run3   | NM_001338 | CXADR     | coxsackie virus and adenovirus receptor | -0.32228        | Inlier         |
| siRNA-Temozolomide Run2-DMSO | NM_001338 | CXADR     | coxsackie virus and adenovirus receptor | -0.060045       | Inlier         |
| siRNA-Temozolomide Run3-DMSO | NM_001338 | CXADR     | coxsackie virus and adenovirus receptor | 0.060045        | Inlier         |
| siRNA Disorazole DMSO Run1   | NM_001338 | CXADR     | coxsackie virus and adenovirus receptor | 0.271121        | Inlier         |

Identification of Survival Genes in Human Glioblastoma Cells Using siRNA Screening  
 Nikhil G Thaker, Fang Zhang, Peter R. McDonald, Tong Ying Shun, Michael D Lewen, Ian F. Pollack, and John S. Lazo

Molecular Pharmacology

|                              |           |       |                                         |           |         |
|------------------------------|-----------|-------|-----------------------------------------|-----------|---------|
| siRNA-Temozolomide Run1-DMSO | NM_001338 | CXADR | coxsackie virus and adenovirus receptor | 1.164606  | Inlier  |
| siRNA-Vinblastine Run1-DMSO  | NM_001338 | CXADR | coxsackie virus and adenovirus receptor | 4.512573  | Outlier |
| siRNA-Temozolomide Run3-DMSO | NM_001504 | CXCR3 | chemokine (C-X-C motif) receptor 3      | -2.767806 | Inlier  |
| siRNA Disorazole DMSO Run2   | NM_001504 | CXCR3 | chemokine (C-X-C motif) receptor 3      | -1.296232 | Inlier  |
| siRNA-Temozolomide Run2-DMSO | NM_001504 | CXCR3 | chemokine (C-X-C motif) receptor 3      | -0.783838 | Inlier  |
| siRNA-Temozolomide Run1-DMSO | NM_001504 | CXCR3 | chemokine (C-X-C motif) receptor 3      | -0.070876 | Inlier  |
| siRNA Disorazole DMSO Run1   | NM_001504 | CXCR3 | chemokine (C-X-C motif) receptor 3      | 0.070876  | Inlier  |
| siRNA Disorazole DMSO Run3   | NM_001504 | CXCR3 | chemokine (C-X-C motif) receptor 3      | 0.406664  | Inlier  |
| siRNA-Vinblastine Run2-DMSO  | NM_001504 | CXCR3 | chemokine (C-X-C motif) receptor 3      | 0.663172  | Inlier  |
| siRNA-Vinblastine Run1-DMSO  | NM_001504 | CXCR3 | chemokine (C-X-C motif) receptor 3      | 0.685828  | Inlier  |
| siRNA-Temozolomide Run3-DMSO | NM_003467 | CXCR4 | chemokine (C-X-C motif) receptor 4      | -2.209908 | Inlier  |
| siRNA-Temozolomide Run2-DMSO | NM_003467 | CXCR4 | chemokine (C-X-C motif) receptor 4      | -0.703176 | Inlier  |
| siRNA-Temozolomide Run1-DMSO | NM_003467 | CXCR4 | chemokine (C-X-C motif) receptor 4      | -0.692223 | Inlier  |

Identification of Survival Genes in Human Glioblastoma Cells Using siRNA Screening  
 Nikhil G Thaker, Fang Zhang, Peter R. McDonald, Tong Ying Shun, Michael D Lewen, Ian F. Pollack, and John S. Lazo

Molecular Pharmacology

|                                  |               |       |                                             |           |        |
|----------------------------------|---------------|-------|---------------------------------------------|-----------|--------|
| siRNA Disorazole DMSO Run1       | NM_0034<br>67 | CXCR4 | chemokine<br>(C-X-C<br>motif)<br>receptor 4 | -0.235741 | Inlier |
| siRNA-Vinblastine Run1-<br>DMSO  | NM_0034<br>67 | CXCR4 | chemokine<br>(C-X-C<br>motif)<br>receptor 4 | 0.235742  | Inlier |
| siRNA Disorazole DMSO Run2       | NM_0034<br>67 | CXCR4 | chemokine<br>(C-X-C<br>motif)<br>receptor 4 | 0.607288  | Inlier |
| siRNA-Vinblastine Run2-<br>DMSO  | NM_0034<br>67 | CXCR4 | chemokine<br>(C-X-C<br>motif)<br>receptor 4 | 0.656777  | Inlier |
| siRNA Disorazole DMSO Run3       | NM_0034<br>67 | CXCR4 | chemokine<br>(C-X-C<br>motif)<br>receptor 4 | 2.49263   | Inlier |
| siRNA-Temozolomide Run3-<br>DMSO | NM_0065<br>64 | CXCR6 | chemokine<br>(C-X-C<br>motif)<br>receptor 6 | -1.409396 | Inlier |
| siRNA Disorazole DMSO Run2       | NM_0065<br>64 | CXCR6 | chemokine<br>(C-X-C<br>motif)<br>receptor 6 | -0.682297 | Inlier |
| siRNA-Temozolomide Run2-<br>DMSO | NM_0065<br>64 | CXCR6 | chemokine<br>(C-X-C<br>motif)<br>receptor 6 | -0.464519 | Inlier |
| siRNA Disorazole DMSO Run3       | NM_0065<br>64 | CXCR6 | chemokine<br>(C-X-C<br>motif)<br>receptor 6 | -0.23345  | Inlier |
| siRNA Disorazole DMSO Run1       | NM_0065<br>64 | CXCR6 | chemokine<br>(C-X-C<br>motif)<br>receptor 6 | 0.233449  | Inlier |
| siRNA-Temozolomide Run1-<br>DMSO | NM_0065<br>64 | CXCR6 | chemokine<br>(C-X-C<br>motif)<br>receptor 6 | 0.666703  | Inlier |
| siRNA-Vinblastine Run2-<br>DMSO  | NM_0065<br>64 | CXCR6 | chemokine<br>(C-X-C<br>motif)<br>receptor 6 | 1.192683  | Inlier |
| siRNA-Vinblastine Run1-<br>DMSO  | NM_0065<br>64 | CXCR6 | chemokine<br>(C-X-C<br>motif)<br>receptor 6 | 1.363296  | Inlier |

Identification of Survival Genes in Human Glioblastoma Cells Using siRNA Screening  
 Nikhil G Thaker, Fang Zhang, Peter R. McDonald, Tong Ying Shun, Michael D Lewen, Ian F. Pollack, and John S. Lazo  
 Molecular Pharmacology

|                              |               |         |                                    |           |         |
|------------------------------|---------------|---------|------------------------------------|-----------|---------|
| siRNA-Temozolomide Run3-DMSO | NM_0249<br>17 | CXorf34 | chromosome X open reading frame 34 | -1.702692 | Inlier  |
| siRNA-Temozolomide Run1-DMSO | NM_0249<br>17 | CXorf34 | chromosome X open reading frame 34 | -0.856853 | Inlier  |
| siRNA Disorazole DMSO Run1   | NM_0249<br>17 | CXorf34 | chromosome X open reading frame 34 | -0.492147 | Inlier  |
| siRNA-Temozolomide Run2-DMSO | NM_0249<br>17 | CXorf34 | chromosome X open reading frame 34 | -0.143985 | Inlier  |
| siRNA-Vinblastine Run2-DMSO  | NM_0249<br>17 | CXorf34 | chromosome X open reading frame 34 | 0.143985  | Inlier  |
| siRNA Disorazole DMSO Run3   | NM_0249<br>17 | CXorf34 | chromosome X open reading frame 34 | 0.404914  | Inlier  |
| siRNA-Vinblastine Run1-DMSO  | NM_0249<br>17 | CXorf34 | chromosome X open reading frame 34 | 3.491305  | Inlier  |
| siRNA Disorazole DMSO Run2   | NM_0249<br>17 | CXorf34 | chromosome X open reading frame 34 | 3.683864  | Outlier |
| siRNA Disorazole DMSO Run3   | NM_0162<br>29 | CYB5R2  | CYB5R2                             | -1.110949 | Inlier  |
| siRNA Disorazole DMSO Run1   | NM_0162<br>29 | CYB5R2  | CYB5R2                             | -0.238051 | Inlier  |
| siRNA-Vinblastine Run2-DMSO  | NM_0162<br>29 | CYB5R2  | CYB5R2                             | -0.080659 | Inlier  |
| siRNA-Temozolomide Run2-DMSO | NM_0162<br>29 | CYB5R2  | CYB5R2                             | -0.0387   | Inlier  |
| siRNA-Temozolomide Run3-DMSO | NM_0162<br>29 | CYB5R2  | CYB5R2                             | 0.0387    | Inlier  |
| siRNA-Temozolomide Run1-DMSO | NM_0162<br>29 | CYB5R2  | CYB5R2                             | 4.001488  | Outlier |

Identification of Survival Genes in Human Glioblastoma Cells Using siRNA Screening  
 Nikhil G Thaker, Fang Zhang, Peter R. McDonald, Tong Ying Shun, Michael D Lewen, Ian F. Pollack, and John S. Lazo

| siRNA Treatment              | Gene ID | Gene Symbol | Gene Description                        | Log Fold Change | Classification |
|------------------------------|---------|-------------|-----------------------------------------|-----------------|----------------|
| siRNA-Vinblastine Run1-DMSO  | NM_0162 | CYB5R2      | CYB5R2                                  | 9.510963        | Outlier        |
| siRNA Disorazole DMSO Run2   | NM_0162 | CYB5R2      | CYB5R2                                  | 10.16281        | Outlier        |
| siRNA-Temozolomide Run3-DMSO | NM_0248 | CYBRD1      | cytochrome b reductase 1                | -1.974967       | Inlier         |
| siRNA Disorazole DMSO Run1   | NM_0248 | CYBRD1      | cytochrome b reductase 1                | -0.667463       | Inlier         |
| siRNA Disorazole DMSO Run3   | NM_0248 | CYBRD1      | cytochrome b reductase 1                | -0.512801       | Inlier         |
| siRNA-Vinblastine Run2-DMSO  | NM_0248 | CYBRD1      | cytochrome b reductase 1                | -0.108808       | Inlier         |
| siRNA-Temozolomide Run2-DMSO | NM_0248 | CYBRD1      | cytochrome b reductase 1                | 0.108807        | Inlier         |
| siRNA-Temozolomide Run1-DMSO | NM_0248 | CYBRD1      | cytochrome b reductase 1                | 0.681537        | Inlier         |
| siRNA-Vinblastine Run1-DMSO  | NM_0248 | CYBRD1      | cytochrome b reductase 1                | 1.19986         | Inlier         |
| siRNA Disorazole DMSO Run2   | NM_0248 | CYBRD1      | cytochrome b reductase 1                | 2.29017         | Inlier         |
| siRNA-Temozolomide Run2-DMSO | NM_0152 | CYLD        | cylindromatosis (turban tumor syndrome) | -1.072657       | Inlier         |
| siRNA-Temozolomide Run3-DMSO | NM_0152 | CYLD        | cylindromatosis (turban tumor syndrome) | -0.703798       | Inlier         |



Identification of Survival Genes in Human Glioblastoma Cells Using siRNA Screening

Nikhil G Thaker, Fang Zhang, Peter R. McDonald, Tong Ying Shun, Michael D Lewen, Ian F. Pollack, and John S. Lazo

Molecular Pharmacology

|                              |               |         |                                                        |           |        |
|------------------------------|---------------|---------|--------------------------------------------------------|-----------|--------|
| siRNA-Temozolomide Run1-DMSO | NM_0152<br>47 | CYLD    | cylindromatosis (turban tumor syndrome)                | -0.645202 | Inlier |
| siRNA Disorazole DMSO Run1   | NM_0152<br>47 | CYLD    | cylindromatosis (turban tumor syndrome)                | -0.087413 | Inlier |
| siRNA-Vinblastine Run2-DMSO  | NM_0152<br>47 | CYLD    | cylindromatosis (turban tumor syndrome)                | 0.087413  | Inlier |
| siRNA Disorazole DMSO Run3   | NM_0152<br>47 | CYLD    | cylindromatosis (turban tumor syndrome)                | 0.143621  | Inlier |
| siRNA Disorazole DMSO Run2   | NM_0152<br>47 | CYLD    | cylindromatosis (turban tumor syndrome)                | 1.151367  | Inlier |
| siRNA-Vinblastine Run1-DMSO  | NM_0152<br>47 | CYLD    | cylindromatosis (turban tumor syndrome)                | 2.349809  | Inlier |
| siRNA-Temozolomide Run1-DMSO | NM_0007<br>81 | CYP11A1 | cytochrome P450, family 11, subfamily A, polypeptide 1 | -1.143816 | Inlier |
| siRNA Disorazole DMSO Run3   | NM_0007<br>81 | CYP11A1 | cytochrome P450, family 11, subfamily A, polypeptide 1 | -0.63186  | Inlier |

Identification of Survival Genes in Human Glioblastoma Cells Using siRNA Screening

Nikhil G Thaker, Fang Zhang, Peter R. McDonald, Tong Ying Shun, Michael D Lewen, Ian F. Pollack, and John S. Lazo

Molecular Pharmacology

|                              |           |         |                                                        |           |        |
|------------------------------|-----------|---------|--------------------------------------------------------|-----------|--------|
| siRNA-Temozolomide Run2-DMSO | NM_000781 | CYP11A1 | cytochrome P450, family 11, subfamily A, polypeptide 1 | -0.429956 | Inlier |
| siRNA-Vinblastine Run2-DMSO  | NM_000781 | CYP11A1 | cytochrome P450, family 11, subfamily A, polypeptide 1 | -0.05888  | Inlier |
| siRNA Disorazole DMSO Run1   | NM_000781 | CYP11A1 | cytochrome P450, family 11, subfamily A, polypeptide 1 | 0.05888   | Inlier |
| siRNA-Vinblastine Run1-DMSO  | NM_000781 | CYP11A1 | cytochrome P450, family 11, subfamily A, polypeptide 1 | 0.71714   | Inlier |
| siRNA Disorazole DMSO Run2   | NM_000781 | CYP11A1 | cytochrome P450, family 11, subfamily A, polypeptide 1 | 0.843144  | Inlier |
| siRNA-Temozolomide Run3-DMSO | NM_000781 | CYP11A1 | cytochrome P450, family 11, subfamily B, polypeptide 1 | 2.244238  | Inlier |
| siRNA Disorazole DMSO Run3   | NM_000497 | CYP11B1 | polypeptide 1                                          | -1.882927 | Inlier |

Identification of Survival Genes in Human Glioblastoma Cells Using siRNA Screening

Nikhil G Thaker, Fang Zhang, Peter R. McDonald, Tong Ying Shun, Michael D Lewen, Ian F. Pollack, and John S. Lazo

Molecular Pharmacology

|                              |           |         |                                                        |           |        |
|------------------------------|-----------|---------|--------------------------------------------------------|-----------|--------|
| siRNA-Temozolomide Run3-DMSO | NM_000497 | CYP11B1 | cytochrome P450, family 11, subfamily B, polypeptide 1 | -0.981277 | Inlier |
| siRNA-Temozolomide Run2-DMSO | NM_000497 | CYP11B1 | cytochrome P450, family 11, subfamily B, polypeptide 1 | -0.56533  | Inlier |
| siRNA-Temozolomide Run1-DMSO | NM_000497 | CYP11B1 | cytochrome P450, family 11, subfamily B, polypeptide 1 | -0.133661 | Inlier |
| siRNA Disorazole DMSO Run1   | NM_000497 | CYP11B1 | cytochrome P450, family 11, subfamily B, polypeptide 1 | 0.133661  | Inlier |
| siRNA-Vinblastine Run2-DMSO  | NM_000497 | CYP11B1 | cytochrome P450, family 11, subfamily B, polypeptide 1 | 0.404604  | Inlier |
| siRNA-Vinblastine Run1-DMSO  | NM_000497 | CYP11B1 | cytochrome P450, family 11, subfamily B, polypeptide 1 | 0.78367   | Inlier |
| siRNA Disorazole DMSO Run2   | NM_000497 | CYP11B1 | cytochrome P450, family 11, subfamily B, polypeptide 1 | 1.390565  | Inlier |

Identification of Survival Genes in Human Glioblastoma Cells Using siRNA Screening

Nikhil G Thaker, Fang Zhang, Peter R. McDonald, Tong Ying Shun, Michael D Lewen, Ian F. Pollack, and John S. Lazo

Molecular Pharmacology

|                              |           |         |                                                        |           |        |
|------------------------------|-----------|---------|--------------------------------------------------------|-----------|--------|
| siRNA-Temozolomide Run3-DMSO | NM_000498 | CYP11B2 | cytochrome P450, family 11, subfamily B, polypeptide 2 | -1.280012 | Inlier |
| siRNA Disorazole DMSO Run3   | NM_000498 | CYP11B2 | cytochrome P450, family 11, subfamily B, polypeptide 2 | -0.233403 | Inlier |
| siRNA Disorazole DMSO Run1   | NM_000498 | CYP11B2 | cytochrome P450, family 11, subfamily B, polypeptide 2 | -0.050654 | Inlier |
| siRNA-Temozolomide Run2-DMSO | NM_000498 | CYP11B2 | cytochrome P450, family 11, subfamily B, polypeptide 2 | -0.044484 | Inlier |
| siRNA-Temozolomide Run1-DMSO | NM_000498 | CYP11B2 | cytochrome P450, family 11, subfamily B, polypeptide 2 | 0.044485  | Inlier |
| siRNA Disorazole DMSO Run2   | NM_000498 | CYP11B2 | cytochrome P450, family 11, subfamily B, polypeptide 2 | 1.115597  | Inlier |
| siRNA-Vinblastine Run2-DMSO  | NM_000498 | CYP11B2 | cytochrome P450, family 11, subfamily B, polypeptide 2 | 1.524969  | Inlier |

Identification of Survival Genes in Human Glioblastoma Cells Using siRNA Screening

Nikhil G Thaker, Fang Zhang, Peter R. McDonald, Tong Ying Shun, Michael D Lewen, Ian F. Pollack, and John S. Lazo

Molecular Pharmacology

|                              |           |         |                                                        |           |        |
|------------------------------|-----------|---------|--------------------------------------------------------|-----------|--------|
| siRNA-Vinblastine Run1-DMSO  | NM_000498 | CYP11B2 | cytochrome P450, family 11, subfamily B, polypeptide 2 | 1.962505  | Inlier |
| siRNA-Temozolomide Run2-DMSO | NM_000102 | CYP17A1 | cytochrome P450, family 17, subfamily A, polypeptide 1 | -1.886436 | Inlier |
| siRNA-Temozolomide Run3-DMSO | NM_000102 | CYP17A1 | cytochrome P450, family 17, subfamily A, polypeptide 1 | -1.403442 | Inlier |
| siRNA Disorazole DMSO Run3   | NM_000102 | CYP17A1 | cytochrome P450, family 17, subfamily A, polypeptide 1 | -0.690574 | Inlier |
| siRNA-Temozolomide Run1-DMSO | NM_000102 | CYP17A1 | cytochrome P450, family 17, subfamily A, polypeptide 1 | -0.107841 | Inlier |
| siRNA Disorazole DMSO Run2   | NM_000102 | CYP17A1 | cytochrome P450, family 17, subfamily A, polypeptide 1 | 0.107842  | Inlier |
| siRNA Disorazole DMSO Run1   | NM_000102 | CYP17A1 | cytochrome P450, family 17, subfamily A, polypeptide 1 | 0.302409  | Inlier |

Identification of Survival Genes in Human Glioblastoma Cells Using siRNA Screening

Nikhil G Thaker, Fang Zhang, Peter R. McDonald, Tong Ying Shun, Michael D Lewen, Ian F. Pollack, and John S. Lazo

Molecular Pharmacology

|                              |           |         |                                                        |           |        |
|------------------------------|-----------|---------|--------------------------------------------------------|-----------|--------|
| siRNA-Vinblastine Run2-DMSO  | NM_000102 | CYP17A1 | cytochrome P450, family 17, subfamily A, polypeptide 1 | 0.658426  | Inlier |
| siRNA-Vinblastine Run1-DMSO  | NM_000102 | CYP17A1 | cytochrome P450, family 17, subfamily A, polypeptide 1 | 1.478982  | Inlier |
| siRNA Disorazole DMSO Run2   | NM_031226 | CYP19A1 | cytochrome P450, family 19, subfamily A, polypeptide 1 | -1.094635 | Inlier |
| siRNA-Temozolomide Run3-DMSO | NM_031226 | CYP19A1 | cytochrome P450, family 19, subfamily A, polypeptide 1 | -0.729923 | Inlier |
| siRNA Disorazole DMSO Run3   | NM_031226 | CYP19A1 | cytochrome P450, family 19, subfamily A, polypeptide 1 | -0.619077 | Inlier |
| siRNA-Temozolomide Run2-DMSO | NM_031226 | CYP19A1 | cytochrome P450, family 19, subfamily A, polypeptide 1 | -0.574084 | Inlier |
| siRNA Disorazole DMSO Run1   | NM_031226 | CYP19A1 | cytochrome P450, family 19, subfamily A, polypeptide 1 | 0.574084  | Inlier |

Identification of Survival Genes in Human Glioblastoma Cells Using siRNA Screening

Nikhil G Thaker, Fang Zhang, Peter R. McDonald, Tong Ying Shun, Michael D Lewen, Ian F. Pollack, and John S. Lazo

Molecular Pharmacology

|                              |           |         |                                                        |           |        |
|------------------------------|-----------|---------|--------------------------------------------------------|-----------|--------|
| siRNA-Temozolomide Run1-DMSO | NM_031226 | CYP19A1 | cytochrome P450, family 19, subfamily A, polypeptide 1 | 0.577551  | Inlier |
| siRNA-Vinblastine Run2-DMSO  | NM_031226 | CYP19A1 | cytochrome P450, family 19, subfamily A, polypeptide 1 | 1.608338  | Inlier |
| siRNA-Vinblastine Run1-DMSO  | NM_031226 | CYP19A1 | cytochrome P450, family 1, subfamily A, polypeptide 1  | 1.763765  | Inlier |
| siRNA-Temozolomide Run3-DMSO | NM_000499 | CYP1A1  | cytochrome P450, family 1, subfamily A, polypeptide 1  | -0.822728 | Inlier |
| siRNA-Temozolomide Run2-DMSO | NM_000499 | CYP1A1  | cytochrome P450, family 1, subfamily A, polypeptide 1  | -0.724452 | Inlier |
| siRNA Disorazole DMSO Run3   | NM_000499 | CYP1A1  | cytochrome P450, family 1, subfamily A, polypeptide 1  | -0.155291 | Inlier |
| siRNA-Temozolomide Run1-DMSO | NM_000499 | CYP1A1  | cytochrome P450, family 1, subfamily A, polypeptide 1  | -0.061941 | Inlier |

Identification of Survival Genes in Human Glioblastoma Cells Using siRNA Screening

Nikhil G Thaker, Fang Zhang, Peter R. McDonald, Tong Ying Shun, Michael D Lewen, Ian F. Pollack, and John S. Lazo

Molecular Pharmacology

|                              |               |        |                                                       |           |        |
|------------------------------|---------------|--------|-------------------------------------------------------|-----------|--------|
| siRNA Disorazole DMSO Run1   | NM_0004<br>99 | CYP1A1 | cytochrome P450, family 1, subfamily A, polypeptide 1 | 0.061941  | Inlier |
| siRNA-Vinblastine Run2-DMSO  | NM_0004<br>99 | CYP1A1 | cytochrome P450, family 1, subfamily A, polypeptide 1 | 0.624548  | Inlier |
| siRNA Disorazole DMSO Run2   | NM_0004<br>99 | CYP1A1 | cytochrome P450, family 1, subfamily A, polypeptide 1 | 0.7944    | Inlier |
| siRNA-Vinblastine Run1-DMSO  | NM_0004<br>99 | CYP1A1 | cytochrome P450, family 1, subfamily A, polypeptide 1 | 1.024759  | Inlier |
| siRNA-Temozolomide Run3-DMSO | NM_0007<br>61 | CYP1A2 | cytochrome P450, family 1, subfamily A, polypeptide 2 | -1.287198 | Inlier |
| siRNA-Temozolomide Run2-DMSO | NM_0007<br>61 | CYP1A2 | cytochrome P450, family 1, subfamily A, polypeptide 2 | -0.635236 | Inlier |
| siRNA Disorazole DMSO Run2   | NM_0007<br>61 | CYP1A2 | cytochrome P450, family 1, subfamily A, polypeptide 2 | -0.280381 | Inlier |



Identification of Survival Genes in Human Glioblastoma Cells Using siRNA Screening

Nikhil G Thaker, Fang Zhang, Peter R. McDonald, Tong Ying Shun, Michael D Lewen, Ian F. Pollack, and John S. Lazo

Molecular Pharmacology

|                              |           |        |                                                       |           |        |
|------------------------------|-----------|--------|-------------------------------------------------------|-----------|--------|
| siRNA-Temozolomide Run1-DMSO | NM_000761 | CYP1A2 | cytochrome P450, family 1, subfamily A, polypeptide 2 | -0.044463 | Inlier |
| siRNA Disorazole DMSO Run1   | NM_000761 | CYP1A2 | cytochrome P450, family 1, subfamily A, polypeptide 2 | 0.044464  | Inlier |
| siRNA Disorazole DMSO Run3   | NM_000761 | CYP1A2 | cytochrome P450, family 1, subfamily A, polypeptide 2 | 0.713764  | Inlier |
| siRNA-Vinblastine Run1-DMSO  | NM_000761 | CYP1A2 | cytochrome P450, family 1, subfamily A, polypeptide 2 | 1.124262  | Inlier |
| siRNA-Vinblastine Run2-DMSO  | NM_000761 | CYP1A2 | cytochrome P450, family 1, subfamily B, polypeptide 2 | 2.363575  | Inlier |
| siRNA-Temozolomide Run2-DMSO | NM_000104 | CYP1B1 | cytochrome P450, family 1, subfamily B, polypeptide 1 | -0.825583 | Inlier |
| siRNA-Temozolomide Run3-DMSO | NM_000104 | CYP1B1 | cytochrome P450, family 1, subfamily B, polypeptide 1 | -0.523417 | Inlier |

Identification of Survival Genes in Human Glioblastoma Cells Using siRNA Screening

Nikhil G Thaker, Fang Zhang, Peter R. McDonald, Tong Ying Shun, Michael D Lewen, Ian F. Pollack, and John S. Lazo

Molecular Pharmacology

|                              |           |         |                                                        |           |         |
|------------------------------|-----------|---------|--------------------------------------------------------|-----------|---------|
| siRNA-Temozolomide Run1-DMSO | NM_000104 | CYP1B1  | cytochrome P450, family 1, subfamily B, polypeptide 1  | -0.314687 | Inlier  |
| siRNA Disorazole DMSO Run3   | NM_000104 | CYP1B1  | cytochrome P450, family 1, subfamily B, polypeptide 1  | -0.032728 | Inlier  |
| siRNA Disorazole DMSO Run2   | NM_000104 | CYP1B1  | cytochrome P450, family 1, subfamily B, polypeptide 1  | 0.032728  | Inlier  |
| siRNA Disorazole DMSO Run1   | NM_000104 | CYP1B1  | cytochrome P450, family 1, subfamily B, polypeptide 1  | 1.504773  | Inlier  |
| siRNA-Vinblastine Run1-DMSO  | NM_000104 | CYP1B1  | cytochrome P450, family 1, subfamily B, polypeptide 1  | 2.635269  | Inlier  |
| siRNA-Vinblastine Run2-DMSO  | NM_000104 | CYP1B1  | cytochrome P450, family 20, subfamily A, polypeptide 1 | 4.200501  | Outlier |
| siRNA-Temozolomide Run2-DMSO | NM_177538 | CYP20A1 | polypeptide 1                                          | -0.874032 | Inlier  |

Identification of Survival Genes in Human Glioblastoma Cells Using siRNA Screening

Nikhil G Thaker, Fang Zhang, Peter R. McDonald, Tong Ying Shun, Michael D Lewen, Ian F. Pollack, and John S. Lazo

Molecular Pharmacology

| siRNA Treatment              | Gene ID   | Enzyme  | Protein Name                                           | Value     | Outlier Status |
|------------------------------|-----------|---------|--------------------------------------------------------|-----------|----------------|
| siRNA-Temozolomide Run3-DMSO | NM_177538 | CYP20A1 | cytochrome P450, family 20, subfamily A, polypeptide 1 | -0.75747  | Inlier         |
| siRNA-Temozolomide Run1-DMSO | NM_177538 | CYP20A1 | cytochrome P450, family 20, subfamily A, polypeptide 1 | -0.614342 | Inlier         |
| siRNA Disorazole DMSO Run1   | NM_177538 | CYP20A1 | cytochrome P450, family 20, subfamily A, polypeptide 1 | -0.049703 | Inlier         |
| siRNA Disorazole DMSO Run2   | NM_177538 | CYP20A1 | cytochrome P450, family 20, subfamily A, polypeptide 1 | 0.049703  | Inlier         |
| siRNA-Vinblastine Run1-DMSO  | NM_177538 | CYP20A1 | cytochrome P450, family 20, subfamily A, polypeptide 1 | 0.185814  | Inlier         |
| siRNA Disorazole DMSO Run3   | NM_177538 | CYP20A1 | cytochrome P450, family 20, subfamily A, polypeptide 1 | 0.734658  | Inlier         |
| siRNA-Vinblastine Run2-DMSO  | NM_177538 | CYP20A1 | cytochrome P450, family 20, subfamily A, polypeptide 1 | 0.778093  | Inlier         |

Identification of Survival Genes in Human Glioblastoma Cells Using siRNA Screening

Nikhil G Thaker, Fang Zhang, Peter R. McDonald, Tong Ying Shun, Michael D Lewen, Ian F. Pollack, and John S. Lazo

Molecular Pharmacology

|                              |           |         |                                                        |           |        |
|------------------------------|-----------|---------|--------------------------------------------------------|-----------|--------|
| siRNA Disorazole DMSO Run2   | NM_000500 | CYP21A2 | cytochrome P450, family 21, subfamily A, polypeptide 2 | -1.73434  | Inlier |
| siRNA-Temozolomide Run3-DMSO | NM_000500 | CYP21A2 | cytochrome P450, family 21, subfamily A, polypeptide 2 | -1.19785  | Inlier |
| siRNA Disorazole DMSO Run1   | NM_000500 | CYP21A2 | cytochrome P450, family 21, subfamily A, polypeptide 2 | -0.624416 | Inlier |
| siRNA-Temozolomide Run2-DMSO | NM_000500 | CYP21A2 | cytochrome P450, family 21, subfamily A, polypeptide 2 | -0.284375 | Inlier |
| siRNA Disorazole DMSO Run3   | NM_000500 | CYP21A2 | cytochrome P450, family 21, subfamily A, polypeptide 2 | 0.284375  | Inlier |
| siRNA-Temozolomide Run1-DMSO | NM_000500 | CYP21A2 | cytochrome P450, family 21, subfamily A, polypeptide 2 | 0.337077  | Inlier |
| siRNA-Vinblastine Run1-DMSO  | NM_000500 | CYP21A2 | cytochrome P450, family 21, subfamily A, polypeptide 2 | 0.724584  | Inlier |

Identification of Survival Genes in Human Glioblastoma Cells Using siRNA Screening  
 Nikhil G Thaker, Fang Zhang, Peter R. McDonald, Tong Ying Shun, Michael D Lewen, Ian F. Pollack, and John S. Lazo

Molecular Pharmacology

|                              |           |         |                                                        |           |        |
|------------------------------|-----------|---------|--------------------------------------------------------|-----------|--------|
| siRNA-Vinblastine Run2-DMSO  | NM_000500 | CYP21A2 | cytochrome P450, family 21, subfamily A, polypeptide 2 | 1.702436  | Inlier |
| siRNA Disorazole DMSO Run2   | NM_000782 | CYP24A1 | cytochrome P450, family 24, subfamily A, polypeptide 1 | -0.822361 | Inlier |
| siRNA Disorazole DMSO Run3   | NM_000782 | CYP24A1 | cytochrome P450, family 24, subfamily A, polypeptide 1 | -0.708106 | Inlier |
| siRNA-Temozolomide Run2-DMSO | NM_000782 | CYP24A1 | cytochrome P450, family 24, subfamily A, polypeptide 1 | -0.640894 | Inlier |
| siRNA-Temozolomide Run3-DMSO | NM_000782 | CYP24A1 | cytochrome P450, family 24, subfamily A, polypeptide 1 | -0.11589  | Inlier |
| siRNA Disorazole DMSO Run1   | NM_000782 | CYP24A1 | cytochrome P450, family 24, subfamily A, polypeptide 1 | 0.11589   | Inlier |
| siRNA-Temozolomide Run1-DMSO | NM_000782 | CYP24A1 | cytochrome P450, family 24, subfamily A, polypeptide 1 | 0.122233  | Inlier |

Identification of Survival Genes in Human Glioblastoma Cells Using siRNA Screening

Nikhil G Thaker, Fang Zhang, Peter R. McDonald, Tong Ying Shun, Michael D Lewen, Ian F. Pollack, and John S. Lazo

Molecular Pharmacology

|                              |           |         |                                                        |           |        |
|------------------------------|-----------|---------|--------------------------------------------------------|-----------|--------|
| siRNA-Vinblastine Run2-DMSO  | NM_000782 | CYP24A1 | cytochrome P450, family 24, subfamily A, polypeptide 1 | 0.829053  | Inlier |
| siRNA-Vinblastine Run1-DMSO  | NM_000782 | CYP24A1 | cytochrome P450, family 24, subfamily A, polypeptide 1 | 0.830567  | Inlier |
| siRNA-Temozolomide Run2-DMSO | NM_057157 | CYP26A1 | cytochrome P450, family 26, subfamily A, polypeptide 1 | -1.393738 | Inlier |
| siRNA-Temozolomide Run3-DMSO | NM_057157 | CYP26A1 | cytochrome P450, family 26, subfamily A, polypeptide 1 | -1.107592 | Inlier |
| siRNA Disorazole DMSO Run1   | NM_057157 | CYP26A1 | cytochrome P450, family 26, subfamily A, polypeptide 1 | -0.241407 | Inlier |
| siRNA Disorazole DMSO Run3   | NM_057157 | CYP26A1 | cytochrome P450, family 26, subfamily A, polypeptide 1 | -0.022759 | Inlier |
| siRNA Disorazole DMSO Run2   | NM_057157 | CYP26A1 | cytochrome P450, family 26, subfamily A, polypeptide 1 | 0.022759  | Inlier |

Identification of Survival Genes in Human Glioblastoma Cells Using siRNA Screening

Nikhil G Thaker, Fang Zhang, Peter R. McDonald, Tong Ying Shun, Michael D Lewen, Ian F. Pollack, and John S. Lazo

Molecular Pharmacology

|                              |               |         |                                                        |           |        |
|------------------------------|---------------|---------|--------------------------------------------------------|-----------|--------|
| siRNA-Temozolomide Run1-DMSO | NM_0571<br>57 | CYP26A1 | cytochrome P450, family 26, subfamily A, polypeptide 1 | 0.112613  | Inlier |
| siRNA-Vinblastine Run1-DMSO  | NM_0571<br>57 | CYP26A1 | cytochrome P450, family 26, subfamily A, polypeptide 1 | 1.896778  | Inlier |
| siRNA-Vinblastine Run2-DMSO  | NM_0571<br>57 | CYP26A1 | cytochrome P450, family 26, subfamily B, polypeptide 1 | 2.201312  | Inlier |
| siRNA-Temozolomide Run2-DMSO | NM_0198<br>85 | CYP26B1 | cytochrome P450, family 26, subfamily B, polypeptide 1 | -1.464055 | Inlier |
| siRNA Disorazole DMSO Run1   | NM_0198<br>85 | CYP26B1 | cytochrome P450, family 26, subfamily B, polypeptide 1 | -1.426823 | Inlier |
| siRNA Disorazole DMSO Run3   | NM_0198<br>85 | CYP26B1 | cytochrome P450, family 26, subfamily B, polypeptide 1 | -0.399929 | Inlier |
| siRNA-Temozolomide Run1-DMSO | NM_0198<br>85 | CYP26B1 | cytochrome P450, family 26, subfamily B, polypeptide 1 | -0.397885 | Inlier |

Identification of Survival Genes in Human Glioblastoma Cells Using siRNA Screening

Nikhil G Thaker, Fang Zhang, Peter R. McDonald, Tong Ying Shun, Michael D Lewen, Ian F. Pollack, and John S. Lazo

Molecular Pharmacology

|                              |               |         |                                                        |           |        |
|------------------------------|---------------|---------|--------------------------------------------------------|-----------|--------|
| siRNA-Temozolomide Run3-DMSO | NM_0198<br>85 | CYP26B1 | cytochrome P450, family 26, subfamily B, polypeptide 1 | 0.397886  | Inlier |
| siRNA-Vinblastine Run2-DMSO  | NM_0198<br>85 | CYP26B1 | cytochrome P450, family 26, subfamily B, polypeptide 1 | 0.614947  | Inlier |
| siRNA-Vinblastine Run1-DMSO  | NM_0198<br>85 | CYP26B1 | cytochrome P450, family 26, subfamily B, polypeptide 1 | 0.734053  | Inlier |
| siRNA Disorazole DMSO Run2   | NM_0198<br>85 | CYP26B1 | cytochrome P450, family 26, subfamily C, polypeptide 1 | 1.73659   | Inlier |
| siRNA-Temozolomide Run2-DMSO | NM_1833<br>74 | CYP26C1 | cytochrome P450, family 26, subfamily C, polypeptide 1 | -0.992863 | Inlier |
| siRNA Disorazole DMSO Run1   | NM_1833<br>74 | CYP26C1 | cytochrome P450, family 26, subfamily C, polypeptide 1 | -0.674912 | Inlier |
| siRNA-Temozolomide Run1-DMSO | NM_1833<br>74 | CYP26C1 | cytochrome P450, family 26, subfamily C, polypeptide 1 | -0.65632  | Inlier |



Identification of Survival Genes in Human Glioblastoma Cells Using siRNA Screening

Nikhil G Thaker, Fang Zhang, Peter R. McDonald, Tong Ying Shun, Michael D Lewen, Ian F. Pollack, and John S. Lazo

Molecular Pharmacology

|                              |           |         |                                                        |           |        |
|------------------------------|-----------|---------|--------------------------------------------------------|-----------|--------|
| siRNA-Temozolomide Run3-DMSO | NM_183374 | CYP26C1 | cytochrome P450, family 26, subfamily C, polypeptide 1 | -0.126054 | Inlier |
| siRNA-Vinblastine Run2-DMSO  | NM_183374 | CYP26C1 | cytochrome P450, family 26, subfamily C, polypeptide 1 | 0.126054  | Inlier |
| siRNA Disorazole DMSO Run3   | NM_183374 | CYP26C1 | cytochrome P450, family 26, subfamily C, polypeptide 1 | 0.674088  | Inlier |
| siRNA Disorazole DMSO Run2   | NM_183374 | CYP26C1 | cytochrome P450, family 26, subfamily C, polypeptide 1 | 1.095331  | Inlier |
| siRNA-Vinblastine Run1-DMSO  | NM_183374 | CYP26C1 | cytochrome P450, family 27, subfamily A, polypeptide 1 | 1.273795  | Inlier |
| siRNA-Temozolomide Run2-DMSO | NM_000784 | CYP27A1 | cytochrome P450, family 27, subfamily A, polypeptide 1 | -1.758245 | Inlier |
| siRNA-Temozolomide Run3-DMSO | NM_000784 | CYP27A1 | cytochrome P450, family 27, subfamily A, polypeptide 1 | -1.440389 | Inlier |

Identification of Survival Genes in Human Glioblastoma Cells Using siRNA Screening

Nikhil G Thaker, Fang Zhang, Peter R. McDonald, Tong Ying Shun, Michael D Lewen, Ian F. Pollack, and John S. Lazo

Molecular Pharmacology

|                              |               |         |                                                        |           |        |
|------------------------------|---------------|---------|--------------------------------------------------------|-----------|--------|
| siRNA Disorazole DMSO Run3   | NM_0007<br>84 | CYP27A1 | cytochrome P450, family 27, subfamily A, polypeptide 1 | -0.89578  | Inlier |
| siRNA-Temozolomide Run1-DMSO | NM_0007<br>84 | CYP27A1 | cytochrome P450, family 27, subfamily A, polypeptide 1 | -0.116614 | Inlier |
| siRNA Disorazole DMSO Run1   | NM_0007<br>84 | CYP27A1 | cytochrome P450, family 27, subfamily A, polypeptide 1 | 0.116614  | Inlier |
| siRNA Disorazole DMSO Run2   | NM_0007<br>84 | CYP27A1 | cytochrome P450, family 27, subfamily A, polypeptide 1 | 0.228446  | Inlier |
| siRNA-Vinblastine Run1-DMSO  | NM_0007<br>84 | CYP27A1 | cytochrome P450, family 27, subfamily A, polypeptide 1 | 0.45322   | Inlier |
| siRNA-Vinblastine Run2-DMSO  | NM_0007<br>84 | CYP27A1 | cytochrome P450, family 27, subfamily A, polypeptide 1 | 1.171891  | Inlier |
| siRNA-Temozolomide Run2-DMSO | NM_0007<br>85 | CYP27B1 | cytochrome P450, family 27, subfamily B, polypeptide 1 | -1.15835  | Inlier |

Identification of Survival Genes in Human Glioblastoma Cells Using siRNA Screening

Nikhil G Thaker, Fang Zhang, Peter R. McDonald, Tong Ying Shun, Michael D Lewen, Ian F. Pollack, and John S. Lazo

Molecular Pharmacology

|                              |           |         |                                                        |           |        |
|------------------------------|-----------|---------|--------------------------------------------------------|-----------|--------|
| siRNA-Temozolomide Run3-DMSO | NM_000785 | CYP27B1 | cytochrome P450, family 27, subfamily B, polypeptide 1 | -0.688646 | Inlier |
| siRNA Disorazole DMSO Run1   | NM_000785 | CYP27B1 | cytochrome P450, family 27, subfamily B, polypeptide 1 | -0.660354 | Inlier |
| siRNA-Temozolomide Run1-DMSO | NM_000785 | CYP27B1 | cytochrome P450, family 27, subfamily B, polypeptide 1 | -0.034449 | Inlier |
| siRNA Disorazole DMSO Run3   | NM_000785 | CYP27B1 | cytochrome P450, family 27, subfamily B, polypeptide 1 | 0.034448  | Inlier |
| siRNA-Vinblastine Run2-DMSO  | NM_000785 | CYP27B1 | cytochrome P450, family 27, subfamily B, polypeptide 1 | 0.646713  | Inlier |
| siRNA-Vinblastine Run1-DMSO  | NM_000785 | CYP27B1 | cytochrome P450, family 27, subfamily B, polypeptide 1 | 0.724976  | Inlier |
| siRNA Disorazole DMSO Run2   | NM_000785 | CYP27B1 | cytochrome P450, family 27, subfamily B, polypeptide 1 | 1.950717  | Inlier |

Identification of Survival Genes in Human Glioblastoma Cells Using siRNA Screening

Nikhil G Thaker, Fang Zhang, Peter R. McDonald, Tong Ying Shun, Michael D Lewen, Ian F. Pollack, and John S. Lazo

Molecular Pharmacology

| siRNA Treatment              | Gene ID   | Enzyme  | Protein Description                                    | Log Fold Change | Classification |
|------------------------------|-----------|---------|--------------------------------------------------------|-----------------|----------------|
| siRNA-Temozolomide Run2-DMSO | NM_000766 | CYP2A13 | cytochrome P450, family 2, subfamily A, polypeptide 13 | -4.105457       | Outlier        |
| siRNA-Temozolomide Run1-DMSO | NM_000766 | CYP2A13 | cytochrome P450, family 2, subfamily A, polypeptide 13 | -2.032998       | Inlier         |
| siRNA-Temozolomide Run3-DMSO | NM_000766 | CYP2A13 | cytochrome P450, family 2, subfamily A, polypeptide 13 | -0.391708       | Inlier         |
| siRNA Disorazole DMSO Run1   | NM_000766 | CYP2A13 | cytochrome P450, family 2, subfamily A, polypeptide 13 | -0.233301       | Inlier         |
| siRNA Disorazole DMSO Run2   | NM_000766 | CYP2A13 | cytochrome P450, family 2, subfamily A, polypeptide 13 | 0.233303        | Inlier         |
| siRNA Disorazole DMSO Run3   | NM_000766 | CYP2A13 | cytochrome P450, family 2, subfamily A, polypeptide 13 | 0.420537        | Inlier         |
| siRNA-Vinblastine Run1-DMSO  | NM_000766 | CYP2A13 | cytochrome P450, family 2, subfamily A, polypeptide 13 | 0.928463        | Inlier         |

Identification of Survival Genes in Human Glioblastoma Cells Using siRNA Screening

Nikhil G Thaker, Fang Zhang, Peter R. McDonald, Tong Ying Shun, Michael D Lewen, Ian F. Pollack, and John S. Lazo

Molecular Pharmacology

|                              |           |         |                                                        |           |        |
|------------------------------|-----------|---------|--------------------------------------------------------|-----------|--------|
| siRNA-Vinblastine Run2-DMSO  | NM_000766 | CYP2A13 | cytochrome P450, family 2, subfamily A, polypeptide 13 | 1.165041  | Inlier |
| siRNA-Temozolomide Run2-DMSO | NM_000762 | CYP2A6  | cytochrome P450, family 2, subfamily A, polypeptide 6  | -1.219952 | Inlier |
| siRNA-Temozolomide Run3-DMSO | NM_000762 | CYP2A6  | cytochrome P450, family 2, subfamily A, polypeptide 6  | -0.768792 | Inlier |
| siRNA Disorazole DMSO Run1   | NM_000762 | CYP2A6  | cytochrome P450, family 2, subfamily A, polypeptide 6  | -0.320875 | Inlier |
| siRNA-Temozolomide Run1-DMSO | NM_000762 | CYP2A6  | cytochrome P450, family 2, subfamily A, polypeptide 6  | -0.033783 | Inlier |
| siRNA Disorazole DMSO Run3   | NM_000762 | CYP2A6  | cytochrome P450, family 2, subfamily A, polypeptide 6  | 0.033783  | Inlier |
| siRNA-Vinblastine Run2-DMSO  | NM_000762 | CYP2A6  | cytochrome P450, family 2, subfamily A, polypeptide 6  | 0.580208  | Inlier |

Identification of Survival Genes in Human Glioblastoma Cells Using siRNA Screening

Nikhil G Thaker, Fang Zhang, Peter R. McDonald, Tong Ying Shun, Michael D Lewen, Ian F. Pollack, and John S. Lazo

Molecular Pharmacology

|                              |               |        |                                                       |           |        |
|------------------------------|---------------|--------|-------------------------------------------------------|-----------|--------|
| siRNA Disorazole DMSO Run2   | NM_0007<br>62 | CYP2A6 | cytochrome P450, family 2, subfamily A, polypeptide 6 | 0.935167  | Inlier |
| siRNA-Vinblastine Run1-DMSO  | NM_0007<br>62 | CYP2A6 | cytochrome P450, family 2, subfamily A, polypeptide 6 | 0.957154  | Inlier |
| siRNA Disorazole DMSO Run3   | NM_0305<br>89 | CYP2A7 | cytochrome P450, family 2, subfamily A, polypeptide 7 | -0.71445  | Inlier |
| siRNA-Temozolomide Run2-DMSO | NM_0305<br>89 | CYP2A7 | cytochrome P450, family 2, subfamily A, polypeptide 7 | -0.69829  | Inlier |
| siRNA-Temozolomide Run3-DMSO | NM_0305<br>89 | CYP2A7 | cytochrome P450, family 2, subfamily A, polypeptide 7 | -0.65071  | Inlier |
| siRNA Disorazole DMSO Run2   | NM_0305<br>89 | CYP2A7 | cytochrome P450, family 2, subfamily A, polypeptide 7 | -0.504213 | Inlier |
| siRNA Disorazole DMSO Run1   | NM_0305<br>89 | CYP2A7 | cytochrome P450, family 2, subfamily A, polypeptide 7 | 0.504213  | Inlier |

Identification of Survival Genes in Human Glioblastoma Cells Using siRNA Screening

Nikhil G Thaker, Fang Zhang, Peter R. McDonald, Tong Ying Shun, Michael D Lewen, Ian F. Pollack, and John S. Lazo

Molecular Pharmacology

|                              |           |        |                                                       |           |        |
|------------------------------|-----------|--------|-------------------------------------------------------|-----------|--------|
| siRNA-Temozolomide Run1-DMSO | NM_030589 | CYP2A7 | cytochrome P450, family 2, subfamily A, polypeptide 7 | 0.52543   | Inlier |
| siRNA-Vinblastine Run1-DMSO  | NM_030589 | CYP2A7 | cytochrome P450, family 2, subfamily A, polypeptide 7 | 1.171734  | Inlier |
| siRNA-Vinblastine Run2-DMSO  | NM_030589 | CYP2A7 | cytochrome P450, family 2, subfamily A, polypeptide 7 | 1.702113  | Inlier |
| siRNA-Temozolomide Run2-DMSO | NM_000767 | CYP2B6 | cytochrome P450, family 2, subfamily B, polypeptide 6 | -0.899325 | Inlier |
| siRNA-Temozolomide Run3-DMSO | NM_000767 | CYP2B6 | cytochrome P450, family 2, subfamily B, polypeptide 6 | -0.738537 | Inlier |
| siRNA-Temozolomide Run1-DMSO | NM_000767 | CYP2B6 | cytochrome P450, family 2, subfamily B, polypeptide 6 | -0.54824  | Inlier |
| siRNA Disorazole DMSO Run1   | NM_000767 | CYP2B6 | cytochrome P450, family 2, subfamily B, polypeptide 6 | -0.17184  | Inlier |

Identification of Survival Genes in Human Glioblastoma Cells Using siRNA Screening

Nikhil G Thaker, Fang Zhang, Peter R. McDonald, Tong Ying Shun, Michael D Lewen, Ian F. Pollack, and John S. Lazo

Molecular Pharmacology

|                              |               |         |                                                        |           |        |
|------------------------------|---------------|---------|--------------------------------------------------------|-----------|--------|
| siRNA Disorazole DMSO Run3   | NM_0007<br>67 | CYP2B6  | cytochrome P450, family 2, subfamily B, polypeptide 6  | 0.17184   | Inlier |
| siRNA-Vinblastine Run1-DMSO  | NM_0007<br>67 | CYP2B6  | cytochrome P450, family 2, subfamily B, polypeptide 6  | 0.610463  | Inlier |
| siRNA-Vinblastine Run2-DMSO  | NM_0007<br>67 | CYP2B6  | cytochrome P450, family 2, subfamily B, polypeptide 6  | 1.037539  | Inlier |
| siRNA Disorazole DMSO Run2   | NM_0007<br>67 | CYP2B6  | cytochrome P450, family 2, subfamily C, polypeptide 6  | 1.650431  | Inlier |
| siRNA-Temozolomide Run2-DMSO | NM_0007<br>72 | CYP2C18 | cytochrome P450, family 2, subfamily C, polypeptide 18 | -1.112842 | Inlier |
| siRNA-Temozolomide Run3-DMSO | NM_0007<br>72 | CYP2C18 | cytochrome P450, family 2, subfamily C, polypeptide 18 | -0.236158 | Inlier |
| siRNA-Temozolomide Run1-DMSO | NM_0007<br>72 | CYP2C18 | cytochrome P450, family 2, subfamily C, polypeptide 18 | -0.148218 | Inlier |



Identification of Survival Genes in Human Glioblastoma Cells Using siRNA Screening

Nikhil G Thaker, Fang Zhang, Peter R. McDonald, Tong Ying Shun, Michael D Lewen, Ian F. Pollack, and John S. Lazo

Molecular Pharmacology

|                              |               |         |                                                        |           |        |
|------------------------------|---------------|---------|--------------------------------------------------------|-----------|--------|
| siRNA Disorazole DMSO Run1   | NM_0007<br>72 | CYP2C18 | cytochrome P450, family 2, subfamily C, polypeptide 18 | -0.010306 | Inlier |
| siRNA Disorazole DMSO Run2   | NM_0007<br>72 | CYP2C18 | cytochrome P450, family 2, subfamily C, polypeptide 18 | 0.010304  | Inlier |
| siRNA-Vinblastine Run1-DMSO  | NM_0007<br>72 | CYP2C18 | cytochrome P450, family 2, subfamily C, polypeptide 18 | 1.309881  | Inlier |
| siRNA-Vinblastine Run2-DMSO  | NM_0007<br>72 | CYP2C18 | cytochrome P450, family 2, subfamily C, polypeptide 18 | 1.570908  | Inlier |
| siRNA Disorazole DMSO Run3   | NM_0007<br>72 | CYP2C18 | cytochrome P450, family 2, subfamily C, polypeptide 18 | 2.011878  | Inlier |
| siRNA-Temozolomide Run2-DMSO | NM_0007<br>69 | CYP2C19 | cytochrome P450, family 2, subfamily C, polypeptide 19 | -2.368857 | Inlier |
| siRNA-Temozolomide Run3-DMSO | NM_0007<br>69 | CYP2C19 | cytochrome P450, family 2, subfamily C, polypeptide 19 | -1.858553 | Inlier |

Identification of Survival Genes in Human Glioblastoma Cells Using siRNA Screening

Nikhil G Thaker, Fang Zhang, Peter R. McDonald, Tong Ying Shun, Michael D Lewen, Ian F. Pollack, and John S. Lazo

Molecular Pharmacology

|                              |               |         |                                                        |           |        |
|------------------------------|---------------|---------|--------------------------------------------------------|-----------|--------|
| siRNA-Temozolomide Run1-DMSO | NM_0007<br>69 | CYP2C19 | cytochrome P450, family 2, subfamily C, polypeptide 19 | -0.618635 | Inlier |
| siRNA Disorazole DMSO Run2   | NM_0007<br>69 | CYP2C19 | cytochrome P450, family 2, subfamily C, polypeptide 19 | -0.001315 | Inlier |
| siRNA Disorazole DMSO Run3   | NM_0007<br>69 | CYP2C19 | cytochrome P450, family 2, subfamily C, polypeptide 19 | 0.001315  | Inlier |
| siRNA Disorazole DMSO Run1   | NM_0007<br>69 | CYP2C19 | cytochrome P450, family 2, subfamily C, polypeptide 19 | 0.636415  | Inlier |
| siRNA-Vinblastine Run2-DMSO  | NM_0007<br>69 | CYP2C19 | cytochrome P450, family 2, subfamily C, polypeptide 19 | 0.712584  | Inlier |
| siRNA-Vinblastine Run1-DMSO  | NM_0007<br>69 | CYP2C19 | cytochrome P450, family 2, subfamily C, polypeptide 19 | 0.861052  | Inlier |
| siRNA-Temozolomide Run3-DMSO | NM_0007<br>70 | CYP2C8  | cytochrome P450, family 2, subfamily C, polypeptide 8  | -1.20978  | Inlier |

Identification of Survival Genes in Human Glioblastoma Cells Using siRNA Screening

Nikhil G Thaker, Fang Zhang, Peter R. McDonald, Tong Ying Shun, Michael D Lewen, Ian F. Pollack, and John S. Lazo

Molecular Pharmacology

|                              |           |        |                                                       |           |        |
|------------------------------|-----------|--------|-------------------------------------------------------|-----------|--------|
| siRNA-Temozolomide Run2-DMSO | NM_000770 | CYP2C8 | cytochrome P450, family 2, subfamily C, polypeptide 8 | -1.117265 | Inlier |
| siRNA Disorazole DMSO Run3   | NM_000770 | CYP2C8 | cytochrome P450, family 2, subfamily C, polypeptide 8 | -0.813938 | Inlier |
| siRNA-Temozolomide Run1-DMSO | NM_000770 | CYP2C8 | cytochrome P450, family 2, subfamily C, polypeptide 8 | -0.123057 | Inlier |
| siRNA Disorazole DMSO Run1   | NM_000770 | CYP2C8 | cytochrome P450, family 2, subfamily C, polypeptide 8 | 0.123056  | Inlier |
| siRNA-Vinblastine Run1-DMSO  | NM_000770 | CYP2C8 | cytochrome P450, family 2, subfamily C, polypeptide 8 | 0.341916  | Inlier |
| siRNA Disorazole DMSO Run2   | NM_000770 | CYP2C8 | cytochrome P450, family 2, subfamily C, polypeptide 8 | 0.535062  | Inlier |
| siRNA-Vinblastine Run2-DMSO  | NM_000770 | CYP2C8 | cytochrome P450, family 2, subfamily C, polypeptide 8 | 1.854019  | Inlier |

Identification of Survival Genes in Human Glioblastoma Cells Using siRNA Screening

Nikhil G Thaker, Fang Zhang, Peter R. McDonald, Tong Ying Shun, Michael D Lewen, Ian F. Pollack, and John S.

Lazo

Molecular Pharmacology

|                              |           |        |                                                       |           |        |
|------------------------------|-----------|--------|-------------------------------------------------------|-----------|--------|
| siRNA-Temozolomide Run2-DMSO | NM_000771 | CYP2C9 | cytochrome P450, family 2, subfamily C, polypeptide 9 | -1.801739 | Inlier |
| siRNA-Temozolomide Run3-DMSO | NM_000771 | CYP2C9 | cytochrome P450, family 2, subfamily C, polypeptide 9 | -1.439093 | Inlier |
| siRNA Disorazole DMSO Run1   | NM_000771 | CYP2C9 | cytochrome P450, family 2, subfamily C, polypeptide 9 | -0.826018 | Inlier |
| siRNA-Temozolomide Run1-DMSO | NM_000771 | CYP2C9 | cytochrome P450, family 2, subfamily C, polypeptide 9 | -0.194928 | Inlier |
| siRNA-Vinblastine Run2-DMSO  | NM_000771 | CYP2C9 | cytochrome P450, family 2, subfamily C, polypeptide 9 | 0.194928  | Inlier |
| siRNA-Vinblastine Run1-DMSO  | NM_000771 | CYP2C9 | cytochrome P450, family 2, subfamily C, polypeptide 9 | 0.196866  | Inlier |
| siRNA Disorazole DMSO Run3   | NM_000771 | CYP2C9 | cytochrome P450, family 2, subfamily C, polypeptide 9 | 0.522982  | Inlier |

Identification of Survival Genes in Human Glioblastoma Cells Using siRNA Screening  
 Nikhil G Thaker, Fang Zhang, Peter R. McDonald, Tong Ying Shun, Michael D Lewen, Ian F. Pollack, and John S. Lazo

Molecular Pharmacology

|                              |                  |        |                                                       |           |        |
|------------------------------|------------------|--------|-------------------------------------------------------|-----------|--------|
| siRNA Disorazole DMSO Run2   | NM_0007<br>71    | CYP2C9 | cytochrome P450, family 2, subfamily C, polypeptide 9 | 1.180156  | Inlier |
| siRNA-Temozolomide Run2-DMSO | NM_0010<br>25161 | CYP2D6 | cytochrome P450, family 2, subfamily D, polypeptide 6 | -0.797011 | Inlier |
| siRNA-Vinblastine Run2-DMSO  | NM_0010<br>25161 | CYP2D6 | cytochrome P450, family 2, subfamily D, polypeptide 6 | -0.677293 | Inlier |
| siRNA-Temozolomide Run1-DMSO | NM_0010<br>25161 | CYP2D6 | cytochrome P450, family 2, subfamily D, polypeptide 6 | -0.671707 | Inlier |
| siRNA Disorazole DMSO Run1   | NM_0010<br>25161 | CYP2D6 | cytochrome P450, family 2, subfamily D, polypeptide 6 | -0.298742 | Inlier |
| siRNA-Temozolomide Run3-DMSO | NM_0010<br>25161 | CYP2D6 | cytochrome P450, family 2, subfamily D, polypeptide 6 | 0.298742  | Inlier |
| siRNA-Vinblastine Run1-DMSO  | NM_0010<br>25161 | CYP2D6 | cytochrome P450, family 2, subfamily D, polypeptide 6 | 0.397937  | Inlier |

Identification of Survival Genes in Human Glioblastoma Cells Using siRNA Screening

Nikhil G Thaker, Fang Zhang, Peter R. McDonald, Tong Ying Shun, Michael D Lewen, Ian F. Pollack, and John S. Lazo

Molecular Pharmacology

|                              |                  |        |                                                       |           |        |
|------------------------------|------------------|--------|-------------------------------------------------------|-----------|--------|
| siRNA Disorazole DMSO Run3   | NM_0010<br>25161 | CYP2D6 | cytochrome P450, family 2, subfamily D, polypeptide 6 | 0.824856  | Inlier |
| siRNA Disorazole DMSO Run2   | NM_0010<br>25161 | CYP2D6 | cytochrome P450, family 2, subfamily D, polypeptide 6 | 1.167874  | Inlier |
| siRNA-Temozolomide Run3-DMSO | NM_0007<br>73    | CYP2E1 | cytochrome P450, family 2, subfamily E, polypeptide 1 | -2.128295 | Inlier |
| siRNA-Temozolomide Run2-DMSO | NM_0007<br>73    | CYP2E1 | cytochrome P450, family 2, subfamily E, polypeptide 1 | -0.796358 | Inlier |
| siRNA-Temozolomide Run1-DMSO | NM_0007<br>73    | CYP2E1 | cytochrome P450, family 2, subfamily E, polypeptide 1 | -0.526487 | Inlier |
| siRNA Disorazole DMSO Run3   | NM_0007<br>73    | CYP2E1 | cytochrome P450, family 2, subfamily E, polypeptide 1 | -0.115631 | Inlier |
| siRNA Disorazole DMSO Run1   | NM_0007<br>73    | CYP2E1 | cytochrome P450, family 2, subfamily E, polypeptide 1 | 0.115631  | Inlier |

Identification of Survival Genes in Human Glioblastoma Cells Using siRNA Screening

Nikhil G Thaker, Fang Zhang, Peter R. McDonald, Tong Ying Shun, Michael D Lewen, Ian F. Pollack, and John S. Lazo

Molecular Pharmacology

|                              |           |        |                                                       |           |         |
|------------------------------|-----------|--------|-------------------------------------------------------|-----------|---------|
| siRNA-Vinblastine Run1-DMSO  | NM_000773 | CYP2E1 | cytochrome P450, family 2, subfamily E, polypeptide 1 | 0.552641  | Inlier  |
| siRNA-Vinblastine Run2-DMSO  | NM_000773 | CYP2E1 | cytochrome P450, family 2, subfamily E, polypeptide 1 | 0.999485  | Inlier  |
| siRNA Disorazole DMSO Run2   | NM_000773 | CYP2E1 | cytochrome P450, family 2, subfamily E, polypeptide 1 | 4.94306   | Outlier |
| siRNA Disorazole DMSO Run1   | NM_000774 | CYP2F1 | cytochrome P450, family 2, subfamily F, polypeptide 1 | -0.881942 | Inlier  |
| siRNA-Temozolomide Run2-DMSO | NM_000774 | CYP2F1 | cytochrome P450, family 2, subfamily F, polypeptide 1 | -0.785531 | Inlier  |
| siRNA-Temozolomide Run3-DMSO | NM_000774 | CYP2F1 | cytochrome P450, family 2, subfamily F, polypeptide 1 | -0.108785 | Inlier  |
| siRNA-Temozolomide Run1-DMSO | NM_000774 | CYP2F1 | cytochrome P450, family 2, subfamily F, polypeptide 1 | -0.033034 | Inlier  |

Identification of Survival Genes in Human Glioblastoma Cells Using siRNA Screening  
 Nikhil G Thaker, Fang Zhang, Peter R. McDonald, Tong Ying Shun, Michael D Lewen, Ian F. Pollack, and John S. Lazo

Molecular Pharmacology

|                              |               |        |                                                       |           |         |
|------------------------------|---------------|--------|-------------------------------------------------------|-----------|---------|
| siRNA Disorazole DMSO Run3   | NM_0007<br>74 | CYP2F1 | cytochrome P450, family 2, subfamily F, polypeptide 1 | 0.033035  | Inlier  |
| siRNA-Vinblastine Run1-DMSO  | NM_0007<br>74 | CYP2F1 | cytochrome P450, family 2, subfamily F, polypeptide 1 | 0.563469  | Inlier  |
| siRNA-Vinblastine Run2-DMSO  | NM_0007<br>74 | CYP2F1 | cytochrome P450, family 2, subfamily F, polypeptide 1 | 0.867153  | Inlier  |
| siRNA Disorazole DMSO Run2   | NM_0007<br>74 | CYP2F1 | cytochrome P450, family 2, subfamily J, polypeptide 1 | 1.484457  | Inlier  |
| siRNA-Temozolomide Run3-DMSO | NM_0007<br>75 | CYP2J2 | cytochrome P450, family 2, subfamily J, polypeptide 2 | -3.822491 | Outlier |
| siRNA Disorazole DMSO Run1   | NM_0007<br>75 | CYP2J2 | cytochrome P450, family 2, subfamily J, polypeptide 2 | -1.00086  | Inlier  |
| siRNA-Temozolomide Run1-DMSO | NM_0007<br>75 | CYP2J2 | cytochrome P450, family 2, subfamily J, polypeptide 2 | -0.522869 | Inlier  |



Identification of Survival Genes in Human Glioblastoma Cells Using siRNA Screening

Nikhil G Thaker, Fang Zhang, Peter R. McDonald, Tong Ying Shun, Michael D Lewen, Ian F. Pollack, and John S. Lazo

Molecular Pharmacology

|                              |           |        |                                                       |           |        |
|------------------------------|-----------|--------|-------------------------------------------------------|-----------|--------|
| siRNA-Temozolomide Run2-DMSO | NM_000775 | CYP2J2 | cytochrome P450, family 2, subfamily J, polypeptide 2 | -0.423174 | Inlier |
| siRNA-Vinblastine Run1-DMSO  | NM_000775 | CYP2J2 | cytochrome P450, family 2, subfamily J, polypeptide 2 | 0.423175  | Inlier |
| siRNA-Vinblastine Run2-DMSO  | NM_000775 | CYP2J2 | cytochrome P450, family 2, subfamily J, polypeptide 2 | 0.592611  | Inlier |
| siRNA Disorazole DMSO Run3   | NM_000775 | CYP2J2 | cytochrome P450, family 2, subfamily J, polypeptide 2 | 0.756388  | Inlier |
| siRNA Disorazole DMSO Run2   | NM_000775 | CYP2J2 | cytochrome P450, family 2, subfamily R, polypeptide 2 | 2.051872  | Inlier |
| siRNA-Temozolomide Run3-DMSO | NM_024514 | CYP2R1 | cytochrome P450, family 2, subfamily R, polypeptide 1 | -1.268061 | Inlier |
| siRNA-Temozolomide Run2-DMSO | NM_024514 | CYP2R1 | cytochrome P450, family 2, subfamily R, polypeptide 1 | -0.872504 | Inlier |

Identification of Survival Genes in Human Glioblastoma Cells Using siRNA Screening

Nikhil G Thaker, Fang Zhang, Peter R. McDonald, Tong Ying Shun, Michael D Lewen, Ian F. Pollack, and John S. Lazo

Molecular Pharmacology

|                               |               |        |                                                       |           |        |
|-------------------------------|---------------|--------|-------------------------------------------------------|-----------|--------|
| siRNA Disorazole DMSO Run2    | NM_0245<br>14 | CYP2R1 | cytochrome P450, family 2, subfamily R, polypeptide 1 | -0.476496 | Inlier |
| siRNA-Temozolomide DMSO Run1- | NM_0245<br>14 | CYP2R1 | cytochrome P450, family 2, subfamily R, polypeptide 1 | -0.025406 | Inlier |
| siRNA Disorazole DMSO Run3    | NM_0245<br>14 | CYP2R1 | cytochrome P450, family 2, subfamily R, polypeptide 1 | 0.025406  | Inlier |
| siRNA Disorazole DMSO Run1    | NM_0245<br>14 | CYP2R1 | cytochrome P450, family 2, subfamily R, polypeptide 1 | 0.380098  | Inlier |
| siRNA-Vinblastine DMSO Run2-  | NM_0245<br>14 | CYP2R1 | cytochrome P450, family 2, subfamily R, polypeptide 1 | 0.944558  | Inlier |
| siRNA-Vinblastine DMSO Run1-  | NM_0245<br>14 | CYP2R1 | cytochrome P450, family 2, subfamily S, polypeptide 1 | 1.35436   | Inlier |
| siRNA-Temozolomide DMSO Run3- | NM_0306<br>22 | CYP2S1 | polypeptide 1                                         | -2.046578 | Inlier |

Identification of Survival Genes in Human Glioblastoma Cells Using siRNA Screening  
 Nikhil G Thaker, Fang Zhang, Peter R. McDonald, Tong Ying Shun, Michael D Lewen, Ian F. Pollack, and John S. Lazo

Molecular Pharmacology

|                              |           |        |                                                       |           |        |
|------------------------------|-----------|--------|-------------------------------------------------------|-----------|--------|
| siRNA-Temozolomide Run2-DMSO | NM_030622 | CYP2S1 | cytochrome P450, family 2, subfamily S, polypeptide 1 | -0.867259 | Inlier |
| siRNA-Temozolomide Run1-DMSO | NM_030622 | CYP2S1 | cytochrome P450, family 2, subfamily S, polypeptide 1 | -0.602673 | Inlier |
| siRNA Disorazole DMSO Run1   | NM_030622 | CYP2S1 | cytochrome P450, family 2, subfamily S, polypeptide 1 | -0.226114 | Inlier |
| siRNA Disorazole DMSO Run3   | NM_030622 | CYP2S1 | cytochrome P450, family 2, subfamily S, polypeptide 1 | 0.226115  | Inlier |
| siRNA Disorazole DMSO Run2   | NM_030622 | CYP2S1 | cytochrome P450, family 2, subfamily S, polypeptide 1 | 0.522824  | Inlier |
| siRNA-Vinblastine Run1-DMSO  | NM_030622 | CYP2S1 | cytochrome P450, family 2, subfamily S, polypeptide 1 | 0.746327  | Inlier |
| siRNA-Vinblastine Run2-DMSO  | NM_030622 | CYP2S1 | cytochrome P450, family 2, subfamily S, polypeptide 1 | 1.094864  | Inlier |

Identification of Survival Genes in Human Glioblastoma Cells Using siRNA Screening

Nikhil G Thaker, Fang Zhang, Peter R. McDonald, Tong Ying Shun, Michael D Lewen, Ian F. Pollack, and John S. Lazo

Molecular Pharmacology

|                              |               |        |                                                       |           |        |
|------------------------------|---------------|--------|-------------------------------------------------------|-----------|--------|
| siRNA-Temozolomide Run2-DMSO | NM_1830<br>75 | CYP2U1 | cytochrome P450, family 2, subfamily U, polypeptide 1 | -0.820663 | Inlier |
| siRNA Disorazole DMSO Run1   | NM_1830<br>75 | CYP2U1 | cytochrome P450, family 2, subfamily U, polypeptide 1 | -0.672092 | Inlier |
| siRNA-Temozolomide Run1-DMSO | NM_1830<br>75 | CYP2U1 | cytochrome P450, family 2, subfamily U, polypeptide 1 | -0.530552 | Inlier |
| siRNA-Temozolomide Run3-DMSO | NM_1830<br>75 | CYP2U1 | cytochrome P450, family 2, subfamily U, polypeptide 1 | -0.150326 | Inlier |
| siRNA-Vinblastine Run2-DMSO  | NM_1830<br>75 | CYP2U1 | cytochrome P450, family 2, subfamily U, polypeptide 1 | 0.150325  | Inlier |
| siRNA Disorazole DMSO Run3   | NM_1830<br>75 | CYP2U1 | cytochrome P450, family 2, subfamily U, polypeptide 1 | 0.676908  | Inlier |
| siRNA Disorazole DMSO Run2   | NM_1830<br>75 | CYP2U1 | cytochrome P450, family 2, subfamily U, polypeptide 1 | 0.853517  | Inlier |

Identification of Survival Genes in Human Glioblastoma Cells Using siRNA Screening

Nikhil G Thaker, Fang Zhang, Peter R. McDonald, Tong Ying Shun, Michael D Lewen, Ian F. Pollack, and John S. Lazo

Molecular Pharmacology

|                              |           |        |                                                       |           |        |
|------------------------------|-----------|--------|-------------------------------------------------------|-----------|--------|
| siRNA-Vinblastine Run1-DMSO  | NM_183075 | CYP2U1 | cytochrome P450, family 2, subfamily U, polypeptide 1 | 0.877765  | Inlier |
| siRNA-Temozolomide Run2-DMSO | NM_017781 | CYP2W1 | cytochrome P450, family 2, subfamily W, polypeptide 1 | -1.153889 | Inlier |
| siRNA-Temozolomide Run3-DMSO | NM_017781 | CYP2W1 | cytochrome P450, family 2, subfamily W, polypeptide 1 | -0.832406 | Inlier |
| siRNA Disorazole DMSO Run2   | NM_017781 | CYP2W1 | cytochrome P450, family 2, subfamily W, polypeptide 1 | -0.426046 | Inlier |
| siRNA Disorazole DMSO Run3   | NM_017781 | CYP2W1 | cytochrome P450, family 2, subfamily W, polypeptide 1 | -0.221696 | Inlier |
| siRNA Disorazole DMSO Run1   | NM_017781 | CYP2W1 | cytochrome P450, family 2, subfamily W, polypeptide 1 | 0.221696  | Inlier |
| siRNA-Temozolomide Run1-DMSO | NM_017781 | CYP2W1 | cytochrome P450, family 2, subfamily W, polypeptide 1 | 0.516594  | Inlier |

Identification of Survival Genes in Human Glioblastoma Cells Using siRNA Screening

Nikhil G Thaker, Fang Zhang, Peter R. McDonald, Tong Ying Shun, Michael D Lewen, Ian F. Pollack, and John S. Lazo

Molecular Pharmacology

|                              |           |         |                                                        |           |        |
|------------------------------|-----------|---------|--------------------------------------------------------|-----------|--------|
| siRNA-Vinblastine Run1-DMSO  | NM_017781 | CYP2W1  | cytochrome P450, family 2, subfamily W, polypeptide 1  | 1.145891  | Inlier |
| siRNA-Vinblastine Run2-DMSO  | NM_017781 | CYP2W1  | cytochrome P450, family 2, subfamily W, polypeptide 1  | 1.72069   | Inlier |
| siRNA-Temozolomide Run3-DMSO | NM_016593 | CYP39A1 | cytochrome P450, family 39, subfamily A, polypeptide 1 | -2.999357 | Inlier |
| siRNA Disorazole DMSO Run2   | NM_016593 | CYP39A1 | cytochrome P450, family 39, subfamily A, polypeptide 1 | -0.908567 | Inlier |
| siRNA Disorazole DMSO Run3   | NM_016593 | CYP39A1 | cytochrome P450, family 39, subfamily A, polypeptide 1 | -0.230255 | Inlier |
| siRNA-Temozolomide Run1-DMSO | NM_016593 | CYP39A1 | cytochrome P450, family 39, subfamily A, polypeptide 1 | -0.184221 | Inlier |
| siRNA-Temozolomide Run2-DMSO | NM_016593 | CYP39A1 | cytochrome P450, family 39, subfamily A, polypeptide 1 | 0.184221  | Inlier |

Identification of Survival Genes in Human Glioblastoma Cells Using siRNA Screening

Nikhil G Thaker, Fang Zhang, Peter R. McDonald, Tong Ying Shun, Michael D Lewen, Ian F. Pollack, and John S. Lazo

Molecular Pharmacology

|                              |               |         |                                                        |           |        |
|------------------------------|---------------|---------|--------------------------------------------------------|-----------|--------|
| siRNA Disorazole DMSO Run1   | NM_0165<br>93 | CYP39A1 | cytochrome P450, family 39, subfamily A, polypeptide 1 | 0.584959  | Inlier |
| siRNA-Vinblastine Run1-DMSO  | NM_0165<br>93 | CYP39A1 | cytochrome P450, family 39, subfamily A, polypeptide 1 | 0.764041  | Inlier |
| siRNA-Vinblastine Run2-DMSO  | NM_0165<br>93 | CYP39A1 | cytochrome P450, family 3, subfamily A, polypeptide 1  | 1.313279  | Inlier |
| siRNA-Temozolomide Run3-DMSO | NM_0174<br>60 | CYP3A4  | cytochrome P450, family 3, subfamily A, polypeptide 4  | -1.778189 | Inlier |
| siRNA-Temozolomide Run2-DMSO | NM_0174<br>60 | CYP3A4  | cytochrome P450, family 3, subfamily A, polypeptide 4  | -0.874707 | Inlier |
| siRNA-Temozolomide Run1-DMSO | NM_0174<br>60 | CYP3A4  | cytochrome P450, family 3, subfamily A, polypeptide 4  | -0.624824 | Inlier |
| siRNA Disorazole DMSO Run1   | NM_0174<br>60 | CYP3A4  | cytochrome P450, family 3, subfamily A, polypeptide 4  | -0.022017 | Inlier |

Identification of Survival Genes in Human Glioblastoma Cells Using siRNA Screening

Nikhil G Thaker, Fang Zhang, Peter R. McDonald, Tong Ying Shun, Michael D Lewen, Ian F. Pollack, and John S. Lazo

Molecular Pharmacology

|                              |               |         |                                                        |           |        |
|------------------------------|---------------|---------|--------------------------------------------------------|-----------|--------|
| siRNA-Vinblastine Run1-DMSO  | NM_0174<br>60 | CYP3A4  | cytochrome P450, family 3, subfamily A, polypeptide 4  | 0.022017  | Inlier |
| siRNA Disorazole DMSO Run3   | NM_0174<br>60 | CYP3A4  | cytochrome P450, family 3, subfamily A, polypeptide 4  | 0.328525  | Inlier |
| siRNA-Vinblastine Run2-DMSO  | NM_0174<br>60 | CYP3A4  | cytochrome P450, family 3, subfamily A, polypeptide 4  | 0.724176  | Inlier |
| siRNA Disorazole DMSO Run2   | NM_0174<br>60 | CYP3A4  | cytochrome P450, family 3, subfamily A, polypeptide 4  | 2.762802  | Inlier |
| siRNA-Temozolomide Run2-DMSO | NM_0570<br>95 | CYP3A43 | cytochrome P450, family 3, subfamily A, polypeptide 43 | -0.772204 | Inlier |
| siRNA-Temozolomide Run3-DMSO | NM_0570<br>95 | CYP3A43 | cytochrome P450, family 3, subfamily A, polypeptide 43 | -0.640582 | Inlier |
| siRNA Disorazole DMSO Run2   | NM_0570<br>95 | CYP3A43 | cytochrome P450, family 3, subfamily A, polypeptide 43 | -0.319336 | Inlier |



Identification of Survival Genes in Human Glioblastoma Cells Using siRNA Screening

Nikhil G Thaker, Fang Zhang, Peter R. McDonald, Tong Ying Shun, Michael D Lewen, Ian F. Pollack, and John S. Lazo

Molecular Pharmacology

|                              |               |         |                                                        |           |        |
|------------------------------|---------------|---------|--------------------------------------------------------|-----------|--------|
| siRNA Disorazole DMSO Run1   | NM_0570<br>95 | CYP3A43 | cytochrome P450, family 3, subfamily A, polypeptide 43 | -0.070014 | Inlier |
| siRNA-Temozolomide Run1-DMSO | NM_0570<br>95 | CYP3A43 | cytochrome P450, family 3, subfamily A, polypeptide 43 | 0.070014  | Inlier |
| siRNA Disorazole DMSO Run3   | NM_0570<br>95 | CYP3A43 | cytochrome P450, family 3, subfamily A, polypeptide 43 | 0.708418  | Inlier |
| siRNA-Vinblastine Run1-DMSO  | NM_0570<br>95 | CYP3A43 | cytochrome P450, family 3, subfamily A, polypeptide 43 | 0.812319  | Inlier |
| siRNA-Vinblastine Run2-DMSO  | NM_0570<br>95 | CYP3A43 | cytochrome P450, family 3, subfamily A, polypeptide 43 | 0.828224  | Inlier |
| siRNA-Temozolomide Run2-DMSO | NM_0007<br>77 | CYP3A5  | cytochrome P450, family 3, subfamily A, polypeptide 5  | -1.927601 | Inlier |
| siRNA-Temozolomide Run1-DMSO | NM_0007<br>77 | CYP3A5  | cytochrome P450, family 3, subfamily A, polypeptide 5  | -1.213271 | Inlier |

Identification of Survival Genes in Human Glioblastoma Cells Using siRNA Screening

Nikhil G Thaker, Fang Zhang, Peter R. McDonald, Tong Ying Shun, Michael D Lewen, Ian F. Pollack, and John S. Lazo

Molecular Pharmacology

|                              |           |        |                                                       |           |         |
|------------------------------|-----------|--------|-------------------------------------------------------|-----------|---------|
| siRNA-Temozolomide Run3-DMSO | NM_000777 | CYP3A5 | cytochrome P450, family 3, subfamily A, polypeptide 5 | -0.431304 | Inlier  |
| siRNA Disorazole DMSO Run1   | NM_000777 | CYP3A5 | cytochrome P450, family 3, subfamily A, polypeptide 5 | -0.131233 | Inlier  |
| siRNA-Vinblastine Run1-DMSO  | NM_000777 | CYP3A5 | cytochrome P450, family 3, subfamily A, polypeptide 5 | 0.131233  | Inlier  |
| siRNA-Vinblastine Run2-DMSO  | NM_000777 | CYP3A5 | cytochrome P450, family 3, subfamily A, polypeptide 5 | 0.56217   | Inlier  |
| siRNA Disorazole DMSO Run3   | NM_000777 | CYP3A5 | cytochrome P450, family 3, subfamily A, polypeptide 5 | 0.78683   | Inlier  |
| siRNA Disorazole DMSO Run2   | NM_000777 | CYP3A5 | cytochrome P450, family 3, subfamily A, polypeptide 5 | 8.727263  | Outlier |
| siRNA-Temozolomide Run2-DMSO | NM_000765 | CYP3A7 | cytochrome P450, family 3, subfamily A, polypeptide 7 | -1.429673 | Inlier  |

Identification of Survival Genes in Human Glioblastoma Cells Using siRNA Screening

Nikhil G Thaker, Fang Zhang, Peter R. McDonald, Tong Ying Shun, Michael D Lewen, Ian F. Pollack, and John S. Lazo

Molecular Pharmacology

|                              |           |        |                                                       |           |        |
|------------------------------|-----------|--------|-------------------------------------------------------|-----------|--------|
| siRNA-Temozolomide Run3-DMSO | NM_000765 | CYP3A7 | cytochrome P450, family 3, subfamily A, polypeptide 7 | -0.941105 | Inlier |
| siRNA Disorazole DMSO Run3   | NM_000765 | CYP3A7 | cytochrome P450, family 3, subfamily A, polypeptide 7 | -0.112644 | Inlier |
| siRNA-Temozolomide Run1-DMSO | NM_000765 | CYP3A7 | cytochrome P450, family 3, subfamily A, polypeptide 7 | -0.088851 | Inlier |
| siRNA Disorazole DMSO Run1   | NM_000765 | CYP3A7 | cytochrome P450, family 3, subfamily A, polypeptide 7 | 0.088851  | Inlier |
| siRNA-Vinblastine Run2-DMSO  | NM_000765 | CYP3A7 | cytochrome P450, family 3, subfamily A, polypeptide 7 | 0.653444  | Inlier |
| siRNA-Vinblastine Run1-DMSO  | NM_000765 | CYP3A7 | cytochrome P450, family 3, subfamily A, polypeptide 7 | 0.695556  | Inlier |
| siRNA Disorazole DMSO Run2   | NM_000765 | CYP3A7 | cytochrome P450, family 3, subfamily A, polypeptide 7 | 0.806444  | Inlier |

Identification of Survival Genes in Human Glioblastoma Cells Using siRNA Screening

Nikhil G Thaker, Fang Zhang, Peter R. McDonald, Tong Ying Shun, Michael D Lewen, Ian F. Pollack, and John S. Lazo

Molecular Pharmacology

|                              |               |         |                                                        |           |        |
|------------------------------|---------------|---------|--------------------------------------------------------|-----------|--------|
| siRNA Disorazole DMSO Run2   | NM_0066<br>68 | CYP46A1 | cytochrome P450, family 46, subfamily A, polypeptide 1 | -0.982086 | Inlier |
| siRNA-Temozolomide Run3-DMSO | NM_0066<br>68 | CYP46A1 | cytochrome P450, family 46, subfamily A, polypeptide 1 | -0.707146 | Inlier |
| siRNA Disorazole DMSO Run3   | NM_0066<br>68 | CYP46A1 | cytochrome P450, family 46, subfamily A, polypeptide 1 | -0.641854 | Inlier |
| siRNA-Temozolomide Run2-DMSO | NM_0066<br>68 | CYP46A1 | cytochrome P450, family 46, subfamily A, polypeptide 1 | -0.394683 | Inlier |
| siRNA Disorazole DMSO Run1   | NM_0066<br>68 | CYP46A1 | cytochrome P450, family 46, subfamily A, polypeptide 1 | 0.394683  | Inlier |
| siRNA-Temozolomide Run1-DMSO | NM_0066<br>68 | CYP46A1 | cytochrome P450, family 46, subfamily A, polypeptide 1 | 0.551149  | Inlier |
| siRNA-Vinblastine Run1-DMSO  | NM_0066<br>68 | CYP46A1 | cytochrome P450, family 46, subfamily A, polypeptide 1 | 0.927816  | Inlier |

Identification of Survival Genes in Human Glioblastoma Cells Using siRNA Screening

Nikhil G Thaker, Fang Zhang, Peter R. McDonald, Tong Ying Shun, Michael D Lewen, Ian F. Pollack, and John S. Lazo

Molecular Pharmacology

|                              |           |         |                                                        |           |        |
|------------------------------|-----------|---------|--------------------------------------------------------|-----------|--------|
| siRNA-Vinblastine Run2-DMSO  | NM_006668 | CYP46A1 | cytochrome P450, family 46, subfamily A, polypeptide 1 | 1.182377  | Inlier |
| siRNA-Temozolomide Run1-DMSO | NM_000778 | CYP4A11 | cytochrome P450, family 4, subfamily A, polypeptide 11 | -0.83216  | Inlier |
| siRNA Disorazole DMSO Run3   | NM_000778 | CYP4A11 | cytochrome P450, family 4, subfamily A, polypeptide 11 | -0.51684  | Inlier |
| siRNA Disorazole DMSO Run1   | NM_000778 | CYP4A11 | cytochrome P450, family 4, subfamily A, polypeptide 11 | -0.135814 | Inlier |
| siRNA-Temozolomide Run2-DMSO | NM_000778 | CYP4A11 | cytochrome P450, family 4, subfamily A, polypeptide 11 | -0.030772 | Inlier |
| siRNA-Temozolomide Run3-DMSO | NM_000778 | CYP4A11 | cytochrome P450, family 4, subfamily A, polypeptide 11 | 0.030772  | Inlier |
| siRNA-Vinblastine Run1-DMSO  | NM_000778 | CYP4A11 | cytochrome P450, family 4, subfamily A, polypeptide 11 | 1.316765  | Inlier |

Identification of Survival Genes in Human Glioblastoma Cells Using siRNA Screening  
 Nikhil G Thaker, Fang Zhang, Peter R. McDonald, Tong Ying Shun, Michael D Lewen, Ian F. Pollack, and John S. Lazo

Molecular Pharmacology

|                              |           |         |                                                        |           |        |
|------------------------------|-----------|---------|--------------------------------------------------------|-----------|--------|
| siRNA-Vinblastine Run2-DMSO  | NM_000778 | CYP4A11 | cytochrome P450, family 4, subfamily A, polypeptide 11 | 1.467201  | Inlier |
| siRNA Disorazole DMSO Run2   | NM_000778 | CYP4A11 | cytochrome P450, family 4, subfamily A, polypeptide 11 | 2.446747  | Inlier |
| siRNA-Temozolomide Run3-DMSO | NM_000779 | CYP4B1  | cytochrome P450, family 4, subfamily B, polypeptide 1  | -2.377049 | Inlier |
| siRNA-Temozolomide Run2-DMSO | NM_000779 | CYP4B1  | cytochrome P450, family 4, subfamily B, polypeptide 1  | -1.372981 | Inlier |
| siRNA Disorazole DMSO Run1   | NM_000779 | CYP4B1  | cytochrome P450, family 4, subfamily B, polypeptide 1  | -0.387674 | Inlier |
| siRNA-Temozolomide Run1-DMSO | NM_000779 | CYP4B1  | cytochrome P450, family 4, subfamily B, polypeptide 1  | -0.36911  | Inlier |
| siRNA-Vinblastine Run1-DMSO  | NM_000779 | CYP4B1  | cytochrome P450, family 4, subfamily B, polypeptide 1  | 0.369111  | Inlier |

Identification of Survival Genes in Human Glioblastoma Cells Using siRNA Screening

Nikhil G Thaker, Fang Zhang, Peter R. McDonald, Tong Ying Shun, Michael D Lewen, Ian F. Pollack, and John S. Lazo

Molecular Pharmacology

|                              |           |         |                                                        |           |        |
|------------------------------|-----------|---------|--------------------------------------------------------|-----------|--------|
| siRNA-Vinblastine Run2-DMSO  | NM_000779 | CYP4B1  | cytochrome P450, family 4, subfamily B, polypeptide 1  | 0.594571  | Inlier |
| siRNA Disorazole DMSO Run3   | NM_000779 | CYP4B1  | cytochrome P450, family 4, subfamily B, polypeptide 1  | 0.75443   | Inlier |
| siRNA Disorazole DMSO Run2   | NM_000779 | CYP4B1  | cytochrome P450, family 4, subfamily B, polypeptide 1  | 1.443267  | Inlier |
| siRNA-Temozolomide Run3-DMSO | NM_021187 | CYP4F11 | cytochrome P450, family 4, subfamily F, polypeptide 11 | -1.75368  | Inlier |
| siRNA-Temozolomide Run2-DMSO | NM_021187 | CYP4F11 | cytochrome P450, family 4, subfamily F, polypeptide 11 | -0.75388  | Inlier |
| siRNA Disorazole DMSO Run3   | NM_021187 | CYP4F11 | cytochrome P450, family 4, subfamily F, polypeptide 11 | -0.592173 | Inlier |
| siRNA-Temozolomide Run1-DMSO | NM_021187 | CYP4F11 | cytochrome P450, family 4, subfamily F, polypeptide 11 | -0.182929 | Inlier |

Identification of Survival Genes in Human Glioblastoma Cells Using siRNA Screening

Nikhil G Thaker, Fang Zhang, Peter R. McDonald, Tong Ying Shun, Michael D Lewen, Ian F. Pollack, and John S. Lazo

Molecular Pharmacology

|                              |               |         |                                                        |           |        |
|------------------------------|---------------|---------|--------------------------------------------------------|-----------|--------|
| siRNA Disorazole DMSO Run1   | NM_0211<br>87 | CYP4F11 | cytochrome P450, family 4, subfamily F, polypeptide 11 | 0.18293   | Inlier |
| siRNA-Vinblastine Run1-DMSO  | NM_0211<br>87 | CYP4F11 | cytochrome P450, family 4, subfamily F, polypeptide 11 | 0.59512   | Inlier |
| siRNA-Vinblastine Run2-DMSO  | NM_0211<br>87 | CYP4F11 | cytochrome P450, family 4, subfamily F, polypeptide 11 | 0.790157  | Inlier |
| siRNA Disorazole DMSO Run2   | NM_0211<br>87 | CYP4F11 | cytochrome P450, family 4, subfamily F, polypeptide 11 | 0.841612  | Inlier |
| siRNA-Temozolomide Run2-DMSO | NM_0239<br>44 | CYP4F12 | cytochrome P450, family 4, subfamily F, polypeptide 12 | -1.911244 | Inlier |
| siRNA-Temozolomide Run3-DMSO | NM_0239<br>44 | CYP4F12 | cytochrome P450, family 4, subfamily F, polypeptide 12 | -0.64841  | Inlier |
| siRNA Disorazole DMSO Run1   | NM_0239<br>44 | CYP4F12 | cytochrome P450, family 4, subfamily F, polypeptide 12 | -0.323738 | Inlier |



Identification of Survival Genes in Human Glioblastoma Cells Using siRNA Screening

Nikhil G Thaker, Fang Zhang, Peter R. McDonald, Tong Ying Shun, Michael D Lewen, Ian F. Pollack, and John S. Lazo

Molecular Pharmacology

|                              |               |         |                                                        |           |        |
|------------------------------|---------------|---------|--------------------------------------------------------|-----------|--------|
| siRNA-Temozolomide Run1-DMSO | NM_0239<br>44 | CYP4F12 | cytochrome P450, family 4, subfamily F, polypeptide 12 | -0.196197 | Inlier |
| siRNA Disorazole DMSO Run3   | NM_0239<br>44 | CYP4F12 | cytochrome P450, family 4, subfamily F, polypeptide 12 | 0.196197  | Inlier |
| siRNA-Vinblastine Run2-DMSO  | NM_0239<br>44 | CYP4F12 | cytochrome P450, family 4, subfamily F, polypeptide 12 | 0.70059   | Inlier |
| siRNA-Vinblastine Run1-DMSO  | NM_0239<br>44 | CYP4F12 | cytochrome P450, family 4, subfamily F, polypeptide 12 | 1.296679  | Inlier |
| siRNA Disorazole DMSO Run2   | NM_0239<br>44 | CYP4F12 | cytochrome P450, family 4, subfamily F, polypeptide 12 | 1.799352  | Inlier |
| siRNA Disorazole DMSO Run3   | NM_0010<br>82 | CYP4F2  | cytochrome P450, family 4, subfamily F, polypeptide 2  | -0.729597 | Inlier |
| siRNA-Temozolomide Run3-DMSO | NM_0010<br>82 | CYP4F2  | cytochrome P450, family 4, subfamily F, polypeptide 2  | -0.677592 | Inlier |

Identification of Survival Genes in Human Glioblastoma Cells Using siRNA Screening

Nikhil G Thaker, Fang Zhang, Peter R. McDonald, Tong Ying Shun, Michael D Lewen, Ian F. Pollack, and John S. Lazo

Molecular Pharmacology

|                              |               |        |                                                       |           |        |
|------------------------------|---------------|--------|-------------------------------------------------------|-----------|--------|
| siRNA Disorazole DMSO Run2   | NM_0010<br>82 | CYP4F2 | cytochrome P450, family 4, subfamily F, polypeptide 2 | -0.503303 | Inlier |
| siRNA-Temozolomide Run2-DMSO | NM_0010<br>82 | CYP4F2 | cytochrome P450, family 4, subfamily F, polypeptide 2 | -0.47789  | Inlier |
| siRNA-Temozolomide Run1-DMSO | NM_0010<br>82 | CYP4F2 | cytochrome P450, family 4, subfamily F, polypeptide 2 | 0.47789   | Inlier |
| siRNA Disorazole DMSO Run1   | NM_0010<br>82 | CYP4F2 | cytochrome P450, family 4, subfamily F, polypeptide 2 | 0.671408  | Inlier |
| siRNA-Vinblastine Run1-DMSO  | NM_0010<br>82 | CYP4F2 | cytochrome P450, family 4, subfamily F, polypeptide 2 | 1.603783  | Inlier |
| siRNA-Vinblastine Run2-DMSO  | NM_0010<br>82 | CYP4F2 | cytochrome P450, family 4, subfamily F, polypeptide 2 | 1.717684  | Inlier |
| siRNA-Temozolomide Run1-DMSO | NM_0008<br>96 | CYP4F3 | polypeptide 3                                         | -0.954898 | Inlier |

Identification of Survival Genes in Human Glioblastoma Cells Using siRNA Screening

Nikhil G Thaker, Fang Zhang, Peter R. McDonald, Tong Ying Shun, Michael D Lewen, Ian F. Pollack, and John S. Lazo

Molecular Pharmacology

|                              |           |        |                                                       |           |        |
|------------------------------|-----------|--------|-------------------------------------------------------|-----------|--------|
| siRNA-Temozolomide Run3-DMSO | NM_000896 | CYP4F3 | cytochrome P450, family 4, subfamily F, polypeptide 3 | -0.678868 | Inlier |
| siRNA-Temozolomide Run2-DMSO | NM_000896 | CYP4F3 | cytochrome P450, family 4, subfamily F, polypeptide 3 | -0.670132 | Inlier |
| siRNA-Vinblastine Run2-DMSO  | NM_000896 | CYP4F3 | cytochrome P450, family 4, subfamily F, polypeptide 3 | -0.074158 | Inlier |
| siRNA Disorazole DMSO Run1   | NM_000896 | CYP4F3 | cytochrome P450, family 4, subfamily F, polypeptide 3 | 0.074158  | Inlier |
| siRNA Disorazole DMSO Run3   | NM_000896 | CYP4F3 | cytochrome P450, family 4, subfamily F, polypeptide 3 | 0.336382  | Inlier |
| siRNA Disorazole DMSO Run2   | NM_000896 | CYP4F3 | cytochrome P450, family 4, subfamily F, polypeptide 3 | 1.620915  | Inlier |
| siRNA-Vinblastine Run1-DMSO  | NM_000896 | CYP4F3 | cytochrome P450, family 4, subfamily F, polypeptide 3 | 2.488609  | Inlier |

Identification of Survival Genes in Human Glioblastoma Cells Using siRNA Screening  
 Nikhil G Thaker, Fang Zhang, Peter R. McDonald, Tong Ying Shun, Michael D Lewen, Ian F. Pollack, and John S. Lazo

Molecular Pharmacology

|                              |               |        |                                                       |           |        |
|------------------------------|---------------|--------|-------------------------------------------------------|-----------|--------|
| siRNA Disorazole DMSO Run3   | NM_0072<br>53 | CYP4F8 | cytochrome P450, family 4, subfamily F, polypeptide 8 | -1.655821 | Inlier |
| siRNA Disorazole DMSO Run2   | NM_0072<br>53 | CYP4F8 | cytochrome P450, family 4, subfamily F, polypeptide 8 | -0.3423   | Inlier |
| siRNA-Temozolomide Run3-DMSO | NM_0072<br>53 | CYP4F8 | cytochrome P450, family 4, subfamily F, polypeptide 8 | -0.148892 | Inlier |
| siRNA-Temozolomide Run2-DMSO | NM_0072<br>53 | CYP4F8 | cytochrome P450, family 4, subfamily F, polypeptide 8 | -0.148246 | Inlier |
| siRNA-Temozolomide Run1-DMSO | NM_0072<br>53 | CYP4F8 | cytochrome P450, family 4, subfamily F, polypeptide 8 | 0.148248  | Inlier |
| siRNA Disorazole DMSO Run1   | NM_0072<br>53 | CYP4F8 | cytochrome P450, family 4, subfamily F, polypeptide 8 | 1.0067    | Inlier |
| siRNA-Vinblastine Run2-DMSO  | NM_0072<br>53 | CYP4F8 | cytochrome P450, family 4, subfamily F, polypeptide 8 | 1.917867  | Inlier |

Identification of Survival Genes in Human Glioblastoma Cells Using siRNA Screening

Nikhil G Thaker, Fang Zhang, Peter R. McDonald, Tong Ying Shun, Michael D Lewen, Ian F. Pollack, and John S. Lazo

Molecular Pharmacology

|                              |           |        |                                                       |           |         |
|------------------------------|-----------|--------|-------------------------------------------------------|-----------|---------|
| siRNA-Vinblastine Run1-DMSO  | NM_007253 | CYP4F8 | cytochrome P450, family 4, subfamily F, polypeptide 8 | 4.180714  | Outlier |
| siRNA-Temozolomide Run2-DMSO | NM_178033 | CYP4X1 | cytochrome P450, family 4, subfamily X, polypeptide 1 | -1.042701 | Inlier  |
| siRNA-Temozolomide Run3-DMSO | NM_178033 | CYP4X1 | cytochrome P450, family 4, subfamily X, polypeptide 1 | -0.97688  | Inlier  |
| siRNA Disorazole DMSO Run3   | NM_178033 | CYP4X1 | cytochrome P450, family 4, subfamily X, polypeptide 1 | -0.529026 | Inlier  |
| siRNA-Temozolomide Run1-DMSO | NM_178033 | CYP4X1 | cytochrome P450, family 4, subfamily X, polypeptide 1 | -0.030034 | Inlier  |
| siRNA Disorazole DMSO Run1   | NM_178033 | CYP4X1 | cytochrome P450, family 4, subfamily X, polypeptide 1 | 0.030034  | Inlier  |
| siRNA-Vinblastine Run2-DMSO  | NM_178033 | CYP4X1 | cytochrome P450, family 4, subfamily X, polypeptide 1 | 0.57505   | Inlier  |

Identification of Survival Genes in Human Glioblastoma Cells Using siRNA Screening

Nikhil G Thaker, Fang Zhang, Peter R. McDonald, Tong Ying Shun, Michael D Lewen, Ian F. Pollack, and John S. Lazo

Molecular Pharmacology

|                              |               |        |                                                       |           |        |
|------------------------------|---------------|--------|-------------------------------------------------------|-----------|--------|
| siRNA-Vinblastine Run1-DMSO  | NM_1780<br>33 | CYP4X1 | cytochrome P450, family 4, subfamily X, polypeptide 1 | 0.77395   | Inlier |
| siRNA Disorazole DMSO Run2   | NM_1780<br>33 | CYP4X1 | cytochrome P450, family 4, subfamily X, polypeptide 1 | 1.741676  | Inlier |
| siRNA-Vinblastine Run2-DMSO  | NM_1781<br>34 | CYP4Z1 | cytochrome P450, family 4, subfamily Z, polypeptide 1 | -0.883198 | Inlier |
| siRNA-Temozolomide Run1-DMSO | NM_1781<br>34 | CYP4Z1 | cytochrome P450, family 4, subfamily Z, polypeptide 1 | -0.789336 | Inlier |
| siRNA Disorazole DMSO Run1   | NM_1781<br>34 | CYP4Z1 | cytochrome P450, family 4, subfamily Z, polypeptide 1 | -0.688622 | Inlier |
| siRNA Disorazole DMSO Run3   | NM_1781<br>34 | CYP4Z1 | cytochrome P450, family 4, subfamily Z, polypeptide 1 | -0.081143 | Inlier |
| siRNA-Vinblastine Run1-DMSO  | NM_1781<br>34 | CYP4Z1 | cytochrome P450, family 4, subfamily Z, polypeptide 1 | 0.081144  | Inlier |

Identification of Survival Genes in Human Glioblastoma Cells Using siRNA Screening

Nikhil G Thaker, Fang Zhang, Peter R. McDonald, Tong Ying Shun, Michael D Lewen, Ian F. Pollack, and John S. Lazo

Molecular Pharmacology

|                              |           |         |                                                        |           |        |
|------------------------------|-----------|---------|--------------------------------------------------------|-----------|--------|
| siRNA-Temozolomide Run2-DMSO | NM_178134 | CYP4Z1  | cytochrome P450, family 4, subfamily Z, polypeptide 1  | 0.322325  | Inlier |
| siRNA-Temozolomide Run3-DMSO | NM_178134 | CYP4Z1  | cytochrome P450, family 4, subfamily Z, polypeptide 1  | 0.660378  | Inlier |
| siRNA Disorazole DMSO Run2   | NM_178134 | CYP4Z1  | cytochrome P450, family 51, subfamily A, polypeptide 1 | 2.43242   | Inlier |
| siRNA-Temozolomide Run1-DMSO | NM_000786 | CYP51A1 | cytochrome P450, family 51, subfamily A, polypeptide 1 | -0.892381 | Inlier |
| siRNA-Temozolomide Run3-DMSO | NM_000786 | CYP51A1 | cytochrome P450, family 51, subfamily A, polypeptide 1 | -0.704839 | Inlier |
| siRNA-Temozolomide Run2-DMSO | NM_000786 | CYP51A1 | cytochrome P450, family 51, subfamily A, polypeptide 1 | -0.64416  | Inlier |
| siRNA Disorazole DMSO Run3   | NM_000786 | CYP51A1 | cytochrome P450, family 51, subfamily A, polypeptide 1 | -0.447493 | Inlier |

Identification of Survival Genes in Human Glioblastoma Cells Using siRNA Screening

Nikhil G Thaker, Fang Zhang, Peter R. McDonald, Tong Ying Shun, Michael D Lewen, Ian F. Pollack, and John S. Lazo

Molecular Pharmacology

|                              |               |         |                                                        |           |        |
|------------------------------|---------------|---------|--------------------------------------------------------|-----------|--------|
| siRNA Disorazole DMSO Run1   | NM_0007<br>86 | CYP51A1 | cytochrome P450, family 51, subfamily A, polypeptide 1 | 0.447493  | Inlier |
| siRNA Disorazole DMSO Run2   | NM_0007<br>86 | CYP51A1 | cytochrome P450, family 51, subfamily A, polypeptide 1 | 0.52788   | Inlier |
| siRNA-Vinblastine Run2-DMSO  | NM_0007<br>86 | CYP51A1 | cytochrome P450, family 51, subfamily A, polypeptide 1 | 1.311189  | Inlier |
| siRNA-Vinblastine Run1-DMSO  | NM_0007<br>86 | CYP51A1 | cytochrome P450, family 7, subfamily A, polypeptide 1  | 1.687555  | Inlier |
| siRNA Disorazole DMSO Run2   | NM_0007<br>80 | CYP7A1  | cytochrome P450, family 7, subfamily A, polypeptide 1  | -1.080724 | Inlier |
| siRNA-Temozolomide Run2-DMSO | NM_0007<br>80 | CYP7A1  | cytochrome P450, family 7, subfamily A, polypeptide 1  | -0.812782 | Inlier |
| siRNA-Temozolomide Run3-DMSO | NM_0007<br>80 | CYP7A1  | cytochrome P450, family 7, subfamily A, polypeptide 1  | -0.470876 | Inlier |



Identification of Survival Genes in Human Glioblastoma Cells Using siRNA Screening

Nikhil G Thaker, Fang Zhang, Peter R. McDonald, Tong Ying Shun, Michael D Lewen, Ian F. Pollack, and John S. Lazo

Molecular Pharmacology

|                              |               |        |                                                       |           |        |
|------------------------------|---------------|--------|-------------------------------------------------------|-----------|--------|
| siRNA Disorazole DMSO Run3   | NM_0007<br>80 | CYP7A1 | cytochrome P450, family 7, subfamily A, polypeptide 1 | -0.220625 | Inlier |
| siRNA-Temozolomide Run1-DMSO | NM_0007<br>80 | CYP7A1 | cytochrome P450, family 7, subfamily A, polypeptide 1 | 0.220625  | Inlier |
| siRNA Disorazole DMSO Run1   | NM_0007<br>80 | CYP7A1 | cytochrome P450, family 7, subfamily A, polypeptide 1 | 0.642035  | Inlier |
| siRNA-Vinblastine Run2-DMSO  | NM_0007<br>80 | CYP7A1 | cytochrome P450, family 7, subfamily A, polypeptide 1 | 0.706965  | Inlier |
| siRNA-Vinblastine Run1-DMSO  | NM_0007<br>80 | CYP7A1 | cytochrome P450, family 7, subfamily B, polypeptide 1 | 1.386019  | Inlier |
| siRNA Disorazole DMSO Run2   | NM_0048<br>20 | CYP7B1 | cytochrome P450, family 7, subfamily B, polypeptide 1 | -0.914972 | Inlier |
| siRNA-Temozolomide Run1-DMSO | NM_0048<br>20 | CYP7B1 | cytochrome P450, family 7, subfamily B, polypeptide 1 | -0.689049 | Inlier |

Identification of Survival Genes in Human Glioblastoma Cells Using siRNA Screening

Nikhil G Thaker, Fang Zhang, Peter R. McDonald, Tong Ying Shun, Michael D Lewen, Ian F. Pollack, and John S. Lazo

Molecular Pharmacology

|                              |               |        |                                                       |           |        |
|------------------------------|---------------|--------|-------------------------------------------------------|-----------|--------|
| siRNA-Temozolomide Run2-DMSO | NM_0048<br>20 | CYP7B1 | cytochrome P450, family 7, subfamily B, polypeptide 1 | -0.65995  | Inlier |
| siRNA Disorazole DMSO Run1   | NM_0048<br>20 | CYP7B1 | cytochrome P450, family 7, subfamily B, polypeptide 1 | -0.048664 | Inlier |
| siRNA-Vinblastine Run2-DMSO  | NM_0048<br>20 | CYP7B1 | cytochrome P450, family 7, subfamily B, polypeptide 1 | 0.048665  | Inlier |
| siRNA-Temozolomide Run3-DMSO | NM_0048<br>20 | CYP7B1 | cytochrome P450, family 7, subfamily B, polypeptide 1 | 0.601457  | Inlier |
| siRNA Disorazole DMSO Run3   | NM_0048<br>20 | CYP7B1 | cytochrome P450, family 7, subfamily B, polypeptide 1 | 0.838445  | Inlier |
| siRNA-Vinblastine Run1-DMSO  | NM_0048<br>20 | CYP7B1 | cytochrome P450, family 8, subfamily B, polypeptide 1 | 0.951379  | Inlier |
| siRNA-Temozolomide Run3-DMSO | NM_0043<br>91 | CYP8B1 | polypeptide 1                                         | -1.406051 | Inlier |

Identification of Survival Genes in Human Glioblastoma Cells Using siRNA Screening

Nikhil G Thaker, Fang Zhang, Peter R. McDonald, Tong Ying Shun, Michael D Lewen, Ian F. Pollack, and John S. Lazo

Molecular Pharmacology

|                              |           |        |                                                       |           |        |
|------------------------------|-----------|--------|-------------------------------------------------------|-----------|--------|
| siRNA-Temozolomide Run2-DMSO | NM_004391 | CYP8B1 | cytochrome P450, family 8, subfamily B, polypeptide 1 | -1.059946 | Inlier |
| siRNA Disorazole DMSO Run3   | NM_004391 | CYP8B1 | cytochrome P450, family 8, subfamily B, polypeptide 1 | -0.708873 | Inlier |
| siRNA-Temozolomide Run1-DMSO | NM_004391 | CYP8B1 | cytochrome P450, family 8, subfamily B, polypeptide 1 | -0.390553 | Inlier |
| siRNA Disorazole DMSO Run1   | NM_004391 | CYP8B1 | cytochrome P450, family 8, subfamily B, polypeptide 1 | 0.390553  | Inlier |
| siRNA Disorazole DMSO Run2   | NM_004391 | CYP8B1 | cytochrome P450, family 8, subfamily B, polypeptide 1 | 0.393777  | Inlier |
| siRNA-Vinblastine Run2-DMSO  | NM_004391 | CYP8B1 | cytochrome P450, family 8, subfamily B, polypeptide 1 | 0.640127  | Inlier |
| siRNA-Vinblastine Run1-DMSO  | NM_004391 | CYP8B1 | cytochrome P450, family 8, subfamily B, polypeptide 1 | 1.185368  | Inlier |

Identification of Survival Genes in Human Glioblastoma Cells Using siRNA Screening  
 Nikhil G Thaker, Fang Zhang, Peter R. McDonald, Tong Ying Shun, Michael D Lewen, Ian F. Pollack, and John S. Lazo

Molecular Pharmacology

| siRNA Treatment              | Gene ID   | Gene Name | Accession | Value     | Outlier Type |
|------------------------------|-----------|-----------|-----------|-----------|--------------|
| siRNA-Temozolomide Run3-DMSO | NM_006639 | CYSLTR1   | 1         | -0.761097 | Inlier       |
| siRNA-Temozolomide Run2-DMSO | NM_006639 | CYSLTR1   | 1         | -0.587903 | Inlier       |
| siRNA Disorazole DMSO Run2   | NM_006639 | CYSLTR1   | 1         | -0.379532 | Inlier       |
| siRNA-Temozolomide Run1-DMSO | NM_006639 | CYSLTR1   | 1         | -0.037802 | Inlier       |
| siRNA Disorazole DMSO Run3   | NM_006639 | CYSLTR1   | 1         | 0.037802  | Inlier       |
| siRNA Disorazole DMSO Run1   | NM_006639 | CYSLTR1   | 1         | 1.248437  | Inlier       |
| siRNA-Vinblastine Run1-DMSO  | NM_006639 | CYSLTR1   | 1         | 1.670763  | Inlier       |
| siRNA-Vinblastine Run2-DMSO  | NM_006639 | CYSLTR1   | 1         | 2.181524  | Inlier       |
| siRNA-Temozolomide Run3-DMSO | NM_020377 | CYSLTR2   | 2         | -2.242571 | Inlier       |
| siRNA-Temozolomide Run2-DMSO | NM_020377 | CYSLTR2   | 2         | -1.696567 | Inlier       |
| siRNA Disorazole DMSO Run2   | NM_020377 | CYSLTR2   | 2         | -0.545874 | Inlier       |
| siRNA-Temozolomide Run1-DMSO | NM_020377 | CYSLTR2   | 2         | -0.237041 | Inlier       |
| siRNA Disorazole DMSO Run1   | NM_020377 | CYSLTR2   | 2         | 0.237041  | Inlier       |

Identification of Survival Genes in Human Glioblastoma Cells Using siRNA Screening  
 Nikhil G Thaker, Fang Zhang, Peter R. McDonald, Tong Ying Shun, Michael D Lewen, Ian F. Pollack, and John S. Lazo

Molecular Pharmacology

|                              |               |         |                                              |           |         |
|------------------------------|---------------|---------|----------------------------------------------|-----------|---------|
| siRNA Disorazole DMSO Run3   | NM_0203<br>77 | CYSLTR2 | cysteinyl<br>leukotrien<br>e receptor<br>2   | 0.312154  | Inlier  |
| siRNA-Vinblastine Run1-DMSO  | NM_0203<br>77 | CYSLTR2 | cysteinyl<br>leukotrien<br>e receptor<br>2   | 0.803126  | Inlier  |
| siRNA-Vinblastine Run2-DMSO  | NM_0203<br>77 | CYSLTR2 | cysteinyl<br>leukotrien<br>e receptor<br>2   | 0.8603    | Inlier  |
| siRNA-Temozolomide Run3-DMSO | NM_1304<br>68 | D4ST1   | dermatan<br>4<br>sulfotransf<br>erase 1<br>4 | -0.778052 | Inlier  |
| siRNA Disorazole DMSO Run3   | NM_1304<br>68 | D4ST1   | dermatan<br>4<br>sulfotransf<br>erase 1<br>4 | -0.720756 | Inlier  |
| siRNA-Temozolomide Run1-DMSO | NM_1304<br>68 | D4ST1   | dermatan<br>4<br>sulfotransf<br>erase 1<br>4 | -0.084907 | Inlier  |
| siRNA-Vinblastine Run2-DMSO  | NM_1304<br>68 | D4ST1   | dermatan<br>4<br>sulfotransf<br>erase 1<br>4 | -0.071662 | Inlier  |
| siRNA-Temozolomide Run2-DMSO | NM_1304<br>68 | D4ST1   | dermatan<br>4<br>sulfotransf<br>erase 1<br>4 | 0.071661  | Inlier  |
| siRNA Disorazole DMSO Run1   | NM_1304<br>68 | D4ST1   | dermatan<br>4<br>sulfotransf<br>erase 1<br>4 | 0.628244  | Inlier  |
| siRNA-Vinblastine Run1-DMSO  | NM_1304<br>68 | D4ST1   | dermatan<br>4<br>sulfotransf<br>erase 1<br>4 | 5.112306  | Outlier |
| siRNA Disorazole DMSO Run2   | NM_1304<br>68 | D4ST1   | dermatan<br>4<br>sulfotransf<br>erase 1<br>4 | 6.023149  | Outlier |
| siRNA-Temozolomide Run3-DMSO | NM_0210<br>80 | DAB1    | disabled<br>homolog 1<br>(Drosophil<br>a)    | -1.271077 | Inlier  |

Identification of Survival Genes in Human Glioblastoma Cells Using siRNA Screening  
 Nikhil G Thaker, Fang Zhang, Peter R. McDonald, Tong Ying Shun, Michael D Lewen, Ian F. Pollack, and John S. Lazo  
 Molecular Pharmacology

|                              |               |      |                                                                    |           |        |
|------------------------------|---------------|------|--------------------------------------------------------------------|-----------|--------|
| siRNA-Temozolomide Run2-DMSO | NM_0210<br>80 | DAB1 | disabled homolog 1 (Drosophila)                                    | -0.723303 | Inlier |
| siRNA-Temozolomide Run1-DMSO | NM_0210<br>80 | DAB1 | disabled homolog 1 (Drosophila)                                    | -0.721517 | Inlier |
| siRNA Disorazole DMSO Run3   | NM_0210<br>80 | DAB1 | disabled homolog 1 (Drosophila)                                    | -0.289729 | Inlier |
| siRNA Disorazole DMSO Run2   | NM_0210<br>80 | DAB1 | disabled homolog 1 (Drosophila)                                    | 0.289729  | Inlier |
| siRNA Disorazole DMSO Run1   | NM_0210<br>80 | DAB1 | disabled homolog 1 (Drosophila)                                    | 0.477684  | Inlier |
| siRNA-Vinblastine Run2-DMSO  | NM_0210<br>80 | DAB1 | disabled homolog 1 (Drosophila)                                    | 0.627483  | Inlier |
| siRNA-Vinblastine Run1-DMSO  | NM_0210<br>80 | DAB1 | disabled homolog 1 (Drosophila)                                    | 1.041592  | Inlier |
| siRNA-Temozolomide Run3-DMSO | NM_0013<br>43 | DAB2 | disabled homolog 2, mitogen-responsive phosphoprotein (Drosophila) | -2.32643  | Inlier |

Identification of Survival Genes in Human Glioblastoma Cells Using siRNA Screening  
 Nikhil G Thaker, Fang Zhang, Peter R. McDonald, Tong Ying Shun, Michael D Lewen, Ian F. Pollack, and John S. Lazo  
 Molecular Pharmacology

|                              |           |      |                                                                    |                  |
|------------------------------|-----------|------|--------------------------------------------------------------------|------------------|
| siRNA-Temozolomide Run2-DMSO | NM_001343 | DAB2 | disabled homolog 2, mitogen-responsive phosphoprotein (Drosophila) | -1.325368 Inlier |
| siRNA-Temozolomide Run1-DMSO | NM_001343 | DAB2 | disabled homolog 2, mitogen-responsive phosphoprotein (Drosophila) | -0.641165 Inlier |
| siRNA Disorazole DMSO Run1   | NM_001343 | DAB2 | disabled homolog 2, mitogen-responsive phosphoprotein (Drosophila) | -0.439499 Inlier |
| siRNA-Vinblastine Run2-DMSO  | NM_001343 | DAB2 | disabled homolog 2, mitogen-responsive phosphoprotein (Drosophila) | 0.4395 Inlier    |
| siRNA Disorazole DMSO Run3   | NM_001343 | DAB2 | disabled homolog 2, mitogen-responsive phosphoprotein (Drosophila) | 0.490665 Inlier  |

Identification of Survival Genes in Human Glioblastoma Cells Using siRNA Screening  
 Nikhil G Thaker, Fang Zhang, Peter R. McDonald, Tong Ying Shun, Michael D Lewen, Ian F. Pollack, and John S. Lazo  
 Molecular Pharmacology

|                               |               |        |                                                                    |           |        |
|-------------------------------|---------------|--------|--------------------------------------------------------------------|-----------|--------|
| siRNA Disorazole DMSO Run2    | NM_0013<br>43 | DAB2   | disabled homolog 2, mitogen-responsive phosphoprotein (Drosophila) | 0.707835  | Inlier |
| siRNA-Vinblastine DMSO Run1-  | NM_0013<br>43 | DAB2   | disabled homolog 2, mitogen-responsive phosphoprotein (Drosophila) | 1.544454  | Inlier |
| siRNA-Temozolomide DMSO Run3- | NM_1387<br>09 | DAB2IP | interacting protein DAB2                                           | -1.897405 | Inlier |
| siRNA-Temozolomide DMSO Run1- | NM_1387<br>09 | DAB2IP | interacting protein DAB2                                           | -1.223679 | Inlier |
| siRNA-Temozolomide DMSO Run2- | NM_1387<br>09 | DAB2IP | interacting protein DAB2                                           | -0.785622 | Inlier |
| siRNA Disorazole DMSO Run3    | NM_1387<br>09 | DAB2IP | interacting protein DAB2                                           | -0.24719  | Inlier |
| siRNA-Vinblastine DMSO Run2-  | NM_1387<br>09 | DAB2IP | interacting protein DAB2                                           | 0.247189  | Inlier |
| siRNA Disorazole DMSO Run1    | NM_1387<br>09 | DAB2IP | interacting protein DAB2                                           | 0.405104  | Inlier |
| siRNA Disorazole DMSO Run2    | NM_1387<br>09 | DAB2IP | interacting protein DAB2                                           | 0.563378  | Inlier |
| siRNA-Vinblastine DMSO Run1-  | NM_1387<br>09 | DAB2IP | interacting protein DAB2                                           | 1.337586  | Inlier |
| siRNA-Temozolomide DMSO Run3- | NM_0019<br>17 | DAO    | D-amino-acid oxidase                                               | -0.765823 | Inlier |
| siRNA Disorazole DMSO Run1    | NM_0019<br>17 | DAO    | D-amino-acid oxidase                                               | -0.583177 | Inlier |



Identification of Survival Genes in Human Glioblastoma Cells Using siRNA Screening  
 Nikhil G Thaker, Fang Zhang, Peter R. McDonald, Tong Ying Shun, Michael D Lewen, Ian F. Pollack, and John S. Lazo

| Molecular Pharmacology       |               |       |                                   |           |         |
|------------------------------|---------------|-------|-----------------------------------|-----------|---------|
| siRNA-Temozolomide Run2-DMSO | NM_0019<br>17 | DAO   | D-amino-acid oxidase              | -0.212546 | Inlier  |
| siRNA-Temozolomide Run1-DMSO | NM_0019<br>17 | DAO   | D-amino-acid oxidase              | -0.109206 | Inlier  |
| siRNA Disorazole DMSO Run3   | NM_0019<br>17 | DAO   | D-amino-acid oxidase              | 0.109206  | Inlier  |
| siRNA-Vinblastine Run2-DMSO  | NM_0019<br>17 | DAO   | D-amino-acid oxidase              | 0.825182  | Inlier  |
| siRNA-Vinblastine Run1-DMSO  | NM_0019<br>17 | DAO   | D-amino-acid oxidase              | 1.361729  | Inlier  |
| siRNA Disorazole DMSO Run2   | NM_0019<br>17 | DAO   | D-amino-acid oxidase              | 2.296366  | Inlier  |
| siRNA-Temozolomide Run3-DMSO | NM_0188<br>38 | DAP13 | DAP13                             | -4.770936 | Outlier |
| siRNA Disorazole DMSO Run2   | NM_0188<br>38 | DAP13 | DAP13                             | -0.788386 | Inlier  |
| siRNA-Vinblastine Run2-DMSO  | NM_0188<br>38 | DAP13 | DAP13                             | -0.46872  | Inlier  |
| siRNA Disorazole DMSO Run1   | NM_0188<br>38 | DAP13 | DAP13                             | -0.114222 | Inlier  |
| siRNA-Temozolomide Run2-DMSO | NM_0188<br>38 | DAP13 | DAP13                             | 0.114222  | Inlier  |
| siRNA-Temozolomide Run1-DMSO | NM_0188<br>38 | DAP13 | DAP13                             | 0.560614  | Inlier  |
| siRNA Disorazole DMSO Run3   | NM_0188<br>38 | DAP13 | DAP13                             | 4.408414  | Outlier |
| siRNA-Vinblastine Run1-DMSO  | NM_0188<br>38 | DAP13 | DAP13                             | 5.13627   | Outlier |
| siRNA Disorazole DMSO Run2   | NM_0049<br>38 | DAPK1 | death-associated protein kinase 1 | -1.486965 | Inlier  |
| siRNA Disorazole DMSO Run3   | NM_0049<br>38 | DAPK1 | death-associated protein kinase 1 | -0.715134 | Inlier  |
| siRNA-Temozolomide Run3-DMSO | NM_0049<br>38 | DAPK1 | death-associated protein kinase 1 | -0.706449 | Inlier  |
| siRNA-Temozolomide Run2-DMSO | NM_0049<br>38 | DAPK1 | death-associated protein kinase 1 | -0.049948 | Inlier  |

Identification of Survival Genes in Human Glioblastoma Cells Using siRNA Screening  
 Nikhil G Thaker, Fang Zhang, Peter R. McDonald, Tong Ying Shun, Michael D Lewen, Ian F. Pollack, and John S. Lazo

Molecular Pharmacology

|                              |               |       |                                   |           |        |
|------------------------------|---------------|-------|-----------------------------------|-----------|--------|
| siRNA-Vinblastine Run1-DMSO  | NM_0049<br>38 | DAPK1 | death-associated protein kinase 1 | 0.049948  | Inlier |
| siRNA-Temozolomide Run1-DMSO | NM_0049<br>38 | DAPK1 | death-associated protein kinase 1 | 0.252807  | Inlier |
| siRNA Disorazole DMSO Run1   | NM_0049<br>38 | DAPK1 | death-associated protein kinase 1 | 0.642551  | Inlier |
| siRNA-Vinblastine Run2-DMSO  | NM_0049<br>38 | DAPK1 | death-associated protein kinase 1 | 1.357958  | Inlier |
| siRNA Disorazole DMSO Run2   | NM_0143<br>26 | DAPK2 | death-associated protein kinase 2 | -1.991771 | Inlier |
| siRNA-Temozolomide Run3-DMSO | NM_0143<br>26 | DAPK2 | death-associated protein kinase 2 | -1.165861 | Inlier |
| siRNA-Temozolomide Run2-DMSO | NM_0143<br>26 | DAPK2 | death-associated protein kinase 2 | -0.491127 | Inlier |
| siRNA-Temozolomide Run1-DMSO | NM_0143<br>26 | DAPK2 | death-associated protein kinase 2 | -0.205289 | Inlier |
| siRNA-Vinblastine Run1-DMSO  | NM_0143<br>26 | DAPK2 | death-associated protein kinase 2 | 0.205288  | Inlier |
| siRNA Disorazole DMSO Run3   | NM_0143<br>26 | DAPK2 | death-associated protein kinase 2 | 0.324822  | Inlier |
| siRNA Disorazole DMSO Run1   | NM_0143<br>26 | DAPK2 | death-associated protein kinase 2 | 0.857873  | Inlier |
| siRNA-Vinblastine Run2-DMSO  | NM_0143<br>26 | DAPK2 | death-associated protein kinase 2 | 1.61423   | Inlier |
| siRNA Disorazole DMSO Run2   | NM_0013<br>48 | DAPK3 | death-associated protein kinase 3 | -1.798663 | Inlier |

Identification of Survival Genes in Human Glioblastoma Cells Using siRNA Screening  
 Nikhil G Thaker, Fang Zhang, Peter R. McDonald, Tong Ying Shun, Michael D Lewen, Ian F. Pollack, and John S. Lazo

Molecular Pharmacology

|                              |               |       |                                   |           |        |
|------------------------------|---------------|-------|-----------------------------------|-----------|--------|
| siRNA Disorazole DMSO Run3   | NM_0013<br>48 | DAPK3 | death-associated protein kinase 3 | -1.457116 | Inlier |
| siRNA-Temozolomide Run3-DMSO | NM_0013<br>48 | DAPK3 | death-associated protein kinase 3 | -0.611987 | Inlier |
| siRNA-Vinblastine Run1-DMSO  | NM_0013<br>48 | DAPK3 | death-associated protein kinase 3 | -0.12636  | Inlier |
| siRNA-Temozolomide Run2-DMSO | NM_0013<br>48 | DAPK3 | death-associated protein kinase 3 | 0.12636   | Inlier |
| siRNA-Temozolomide Run1-DMSO | NM_0013<br>48 | DAPK3 | death-associated protein kinase 3 | 0.241798  | Inlier |
| siRNA Disorazole DMSO Run1   | NM_0013<br>48 | DAPK3 | death-associated protein kinase 3 | 0.737013  | Inlier |
| siRNA-Vinblastine Run2-DMSO  | NM_0013<br>48 | DAPK3 | death-associated protein kinase 3 | 0.928772  | Inlier |
| siRNA Disorazole DMSO Run1   | NM_0013<br>49 | DARS  | aspartyl-tRNA synthetase          | -0.708726 | Inlier |
| siRNA-Temozolomide Run1-DMSO | NM_0013<br>49 | DARS  | aspartyl-tRNA synthetase          | -0.640274 | Inlier |
| siRNA-Vinblastine Run2-DMSO  | NM_0013<br>49 | DARS  | aspartyl-tRNA synthetase          | -0.275851 | Inlier |
| siRNA-Temozolomide Run2-DMSO | NM_0013<br>49 | DARS  | aspartyl-tRNA synthetase          | -0.045689 | Inlier |
| siRNA Disorazole DMSO Run3   | NM_0013<br>49 | DARS  | aspartyl-tRNA synthetase          | 0.045689  | Inlier |
| siRNA-Temozolomide Run3-DMSO | NM_0013<br>49 | DARS  | aspartyl-tRNA synthetase          | 1.031914  | Inlier |

Identification of Survival Genes in Human Glioblastoma Cells Using siRNA Screening  
 Nikhil G Thaker, Fang Zhang, Peter R. McDonald, Tong Ying Shun, Michael D Lewen, Ian F. Pollack, and John S. Lazo

Molecular Pharmacology

|                              |               |      |                                                         |           |         |
|------------------------------|---------------|------|---------------------------------------------------------|-----------|---------|
| siRNA-Vinblastine Run1-DMSO  | NM_0013<br>49 | DARS | aspartyl-tRNA synthetase                                | 3.494772  | Inlier  |
| siRNA Disorazole DMSO Run2   | NM_0013<br>49 | DARS | aspartyl-tRNA synthetase                                | 3.816511  | Outlier |
| siRNA-Temozolomide Run3-DMSO | NM_0013<br>50 | DAXX | death-associated protein 6                              | -1.073295 | Inlier  |
| siRNA Disorazole DMSO Run1   | NM_0013<br>50 | DAXX | death-associated protein 6                              | -0.808416 | Inlier  |
| siRNA Disorazole DMSO Run2   | NM_0013<br>50 | DAXX | death-associated protein 6                              | -0.753942 | Inlier  |
| siRNA-Vinblastine Run1-DMSO  | NM_0013<br>50 | DAXX | death-associated protein 6                              | -0.025729 | Inlier  |
| siRNA-Temozolomide Run2-DMSO | NM_0013<br>50 | DAXX | death-associated protein 6                              | 0.025729  | Inlier  |
| siRNA-Vinblastine Run2-DMSO  | NM_0013<br>50 | DAXX | death-associated protein 6                              | 0.08414   | Inlier  |
| siRNA-Temozolomide Run1-DMSO | NM_0013<br>50 | DAXX | death-associated protein 6                              | 0.595058  | Inlier  |
| siRNA Disorazole DMSO Run3   | NM_0013<br>50 | DAXX | death-associated protein 6                              | 3.054571  | Inlier  |
| siRNA-Temozolomide Run2-DMSO | NM_0007<br>87 | DBH  | dopamine beta-hydroxylase (dopamine beta-monooxygenase) | -0.753987 | Inlier  |

Identification of Survival Genes in Human Glioblastoma Cells Using siRNA Screening

Nikhil G Thaker, Fang Zhang, Peter R. McDonald, Tong Ying Shun, Michael D Lewen, Ian F. Pollack, and John S. Lazo

Molecular Pharmacology

|                              |           |     |                                                         |           |        |
|------------------------------|-----------|-----|---------------------------------------------------------|-----------|--------|
| siRNA-Temozolomide Run3-DMSO | NM_000787 | DBH | dopamine beta-hydroxylase (dopamine beta-monooxygenase) | -0.668818 | Inlier |
| siRNA-Vinblastine Run2-DMSO  | NM_000787 | DBH | dopamine beta-hydroxylase (dopamine beta-monooxygenase) | -0.491622 | Inlier |
| siRNA Disorazole DMSO Run1   | NM_000787 | DBH | dopamine beta-hydroxylase (dopamine beta-monooxygenase) | -0.185506 | Inlier |
| siRNA Disorazole DMSO Run3   | NM_000787 | DBH | dopamine beta-hydroxylase (dopamine beta-monooxygenase) | 0.185505  | Inlier |
| siRNA-Temozolomide Run1-DMSO | NM_000787 | DBH | dopamine beta-hydroxylase (dopamine beta-monooxygenase) | 0.680182  | Inlier |
| siRNA-Vinblastine Run1-DMSO  | NM_000787 | DBH | dopamine beta-hydroxylase (dopamine beta-monooxygenase) | 2.328629  | Inlier |

Identification of Survival Genes in Human Glioblastoma Cells Using siRNA Screening

Nikhil G Thaker, Fang Zhang, Peter R. McDonald, Tong Ying Shun, Michael D Lewen, Ian F. Pollack, and John S. Lazo

Molecular Pharmacology

|                                  |               |     |                                                                                                                   |           |        |
|----------------------------------|---------------|-----|-------------------------------------------------------------------------------------------------------------------|-----------|--------|
| siRNA Disorazole DMSO Run2       | NM_0007<br>87 | DBH | dopamine<br>beta-<br>hydroxylas<br>e<br>(dopamine<br>beta-<br>monooxyg<br>enase)                                  | 3.089596  | Inlier |
| siRNA-Temozolomide Run3-<br>DMSO | NM_0205<br>48 | DBI | diazepam<br>binding<br>inhibitor<br>(GABA<br>receptor<br>modulator,<br>acyl-<br>Coenzyme<br>A binding<br>protein) | -1.660619 | Inlier |
| siRNA-Temozolomide Run2-<br>DMSO | NM_0205<br>48 | DBI | diazepam<br>binding<br>inhibitor<br>(GABA<br>receptor<br>modulator,<br>acyl-<br>Coenzyme<br>A binding<br>protein) | -1.022534 | Inlier |
| siRNA Disorazole DMSO Run1       | NM_0205<br>48 | DBI | diazepam<br>binding<br>inhibitor<br>(GABA<br>receptor<br>modulator,<br>acyl-<br>Coenzyme<br>A binding<br>protein) | -0.212494 | Inlier |
| siRNA Disorazole DMSO Run3       | NM_0205<br>48 | DBI | diazepam<br>binding<br>inhibitor<br>(GABA<br>receptor<br>modulator,<br>acyl-<br>Coenzyme<br>A binding<br>protein) | -0.185903 | Inlier |

Identification of Survival Genes in Human Glioblastoma Cells Using siRNA Screening

Nikhil G Thaker, Fang Zhang, Peter R. McDonald, Tong Ying Shun, Michael D Lewen, Ian F. Pollack, and John S. Lazo

Molecular Pharmacology

|                              |           |      |                                                                                       |           |        |
|------------------------------|-----------|------|---------------------------------------------------------------------------------------|-----------|--------|
| siRNA-Temozolomide Run1-DMSO | NM_020548 | DBI  | diazepam binding inhibitor (GABA receptor modulator, acyl-Coenzyme A binding protein) | 0.185903  | Inlier |
| siRNA-Vinblastine Run2-DMSO  | NM_020548 | DBI  | diazepam binding inhibitor (GABA receptor modulator, acyl-Coenzyme A binding protein) | 0.326466  | Inlier |
| siRNA Disorazole DMSO Run2   | NM_020548 | DBI  | diazepam binding inhibitor (GABA receptor modulator, acyl-Coenzyme A binding protein) | 1.364875  | Inlier |
| siRNA-Vinblastine Run1-DMSO  | NM_020548 | DBI  | diazepam binding inhibitor (GABA receptor modulator, acyl-Coenzyme A binding protein) | 1.382686  | Inlier |
| siRNA-Temozolomide Run2-DMSO | NM_016216 | DBR1 | debranching enzyme homolog 1 (S. cerevisiae)                                          | -1.008346 | Inlier |

Identification of Survival Genes in Human Glioblastoma Cells Using siRNA Screening  
 Nikhil G Thaker, Fang Zhang, Peter R. McDonald, Tong Ying Shun, Michael D Lewen, Ian F. Pollack, and John S. Lazo  
 Molecular Pharmacology

|                              |               |      |                                              |           |        |
|------------------------------|---------------|------|----------------------------------------------|-----------|--------|
| siRNA-Temozolomide Run3-DMSO | NM_0162<br>16 | DBR1 | debranching enzyme homolog 1 (S. cerevisiae) | -0.704053 | Inlier |
| siRNA-Temozolomide Run1-DMSO | NM_0162<br>16 | DBR1 | debranching enzyme homolog 1 (S. cerevisiae) | -0.291607 | Inlier |
| siRNA Disorazole DMSO Run3   | NM_0162<br>16 | DBR1 | debranching enzyme homolog 1 (S. cerevisiae) | -0.068469 | Inlier |
| siRNA-Vinblastine Run2-DMSO  | NM_0162<br>16 | DBR1 | debranching enzyme homolog 1 (S. cerevisiae) | 0.068469  | Inlier |
| siRNA Disorazole DMSO Run1   | NM_0162<br>16 | DBR1 | debranching enzyme homolog 1 (S. cerevisiae) | 0.644947  | Inlier |
| siRNA Disorazole DMSO Run2   | NM_0162<br>16 | DBR1 | debranching enzyme homolog 1 (S. cerevisiae) | 2.589849  | Inlier |
| siRNA-Vinblastine Run1-DMSO  | NM_0162<br>16 | DBR1 | debranching enzyme homolog 1 (S. cerevisiae) | 2.973392  | Inlier |



Identification of Survival Genes in Human Glioblastoma Cells Using siRNA Screening  
 Nikhil G Thaker, Fang Zhang, Peter R. McDonald, Tong Ying Shun, Michael D Lewen, Ian F. Pollack, and John S. Lazo

Molecular Pharmacology

|                              |               |     |                                                                  |           |        |
|------------------------------|---------------|-----|------------------------------------------------------------------|-----------|--------|
| siRNA-Temozolomide Run3-DMSO | NM_0019<br>18 | DBT | dihydrolipo<br>amide<br>branched<br>chain<br>transacyla<br>se E2 | -0.797454 | Inlier |
| siRNA-Temozolomide Run2-DMSO | NM_0019<br>18 | DBT | dihydrolipo<br>amide<br>branched<br>chain<br>transacyla<br>se E2 | -0.784124 | Inlier |
| siRNA Disorazole DMSO Run2   | NM_0019<br>18 | DBT | dihydrolipo<br>amide<br>branched<br>chain<br>transacyla<br>se E2 | -0.564876 | Inlier |
| siRNA Disorazole DMSO Run3   | NM_0019<br>18 | DBT | dihydrolipo<br>amide<br>branched<br>chain<br>transacyla<br>se E2 | -0.263239 | Inlier |
| siRNA Disorazole DMSO Run1   | NM_0019<br>18 | DBT | dihydrolipo<br>amide<br>branched<br>chain<br>transacyla<br>se E2 | 0.263239  | Inlier |
| siRNA-Temozolomide Run1-DMSO | NM_0019<br>18 | DBT | dihydrolipo<br>amide<br>branched<br>chain<br>transacyla<br>se E2 | 0.427954  | Inlier |
| siRNA-Vinblastine Run1-DMSO  | NM_0019<br>18 | DBT | dihydrolipo<br>amide<br>branched<br>chain<br>transacyla<br>se E2 | 0.892588  | Inlier |
| siRNA-Vinblastine Run2-DMSO  | NM_0019<br>18 | DBT | transacyla<br>se E2                                              | 1.593393  | Inlier |

Identification of Survival Genes in Human Glioblastoma Cells Using siRNA Screening  
 Nikhil G Thaker, Fang Zhang, Peter R. McDonald, Tong Ying Shun, Michael D Lewen, Ian F. Pollack, and John S. Lazo

Molecular Pharmacology

|                                  |               |         |   |                                                                                                        |           |        |
|----------------------------------|---------------|---------|---|--------------------------------------------------------------------------------------------------------|-----------|--------|
| siRNA Disorazole DMSO Run2       | NM_0047<br>34 | DCAMKL1 | 1 | doublecort<br>in and<br>CaM<br>kinase-like                                                             | -1.034245 | Inlier |
| siRNA-Temozolomide Run3-<br>DMSO | NM_0047<br>34 | DCAMKL1 | 1 | doublecort<br>in and<br>CaM<br>kinase-like                                                             | -0.506495 | Inlier |
| siRNA-Temozolomide Run2-<br>DMSO | NM_0047<br>34 | DCAMKL1 | 1 | doublecort<br>in and<br>CaM<br>kinase-like                                                             | -0.095237 | Inlier |
| siRNA-Temozolomide Run1-<br>DMSO | NM_0047<br>34 | DCAMKL1 | 1 | doublecort<br>in and<br>CaM<br>kinase-like                                                             | -0.020884 | Inlier |
| siRNA Disorazole DMSO Run3       | NM_0047<br>34 | DCAMKL1 | 1 | doublecort<br>in and<br>CaM<br>kinase-like                                                             | 0.020884  | Inlier |
| siRNA Disorazole DMSO Run1       | NM_0047<br>34 | DCAMKL1 | 1 | doublecort<br>in and<br>CaM<br>kinase-like                                                             | 0.842505  | Inlier |
| siRNA-Vinblastine Run1-<br>DMSO  | NM_0047<br>34 | DCAMKL1 | 1 | doublecort<br>in and<br>CaM<br>kinase-like                                                             | 0.967882  | Inlier |
| siRNA-Vinblastine Run2-<br>DMSO  | NM_0047<br>34 | DCAMKL1 | 1 | doublecort<br>in and<br>CaM<br>kinase-like                                                             | 1.533805  | Inlier |
| siRNA Disorazole DMSO Run3       | NM_0019<br>19 | DCI     | ) | dodecenoyl-<br>Coenzyme<br>A delta<br>isomerase<br>(3,2 trans-<br>enoyl-<br>Coenzyme<br>A<br>isomerase | -1.019318 | Inlier |

Identification of Survival Genes in Human Glioblastoma Cells Using siRNA Screening

Nikhil G Thaker, Fang Zhang, Peter R. McDonald, Tong Ying Shun, Michael D Lewen, Ian F. Pollack, and John S. Lazo

Molecular Pharmacology

|                              |           |     |                                                                              |           |        |
|------------------------------|-----------|-----|------------------------------------------------------------------------------|-----------|--------|
| siRNA-Temozolomide Run3-DMSO | NM_001919 | DCI | dodecenoyl-Coenzyme A delta isomerase (3,2 trans-enoyl-Coenzyme A isomerase) | -0.945985 | Inlier |
| siRNA-Vinblastine Run2-DMSO  | NM_001919 | DCI | dodecenoyl-Coenzyme A delta isomerase (3,2 trans-enoyl-Coenzyme A isomerase) | -0.294186 | Inlier |
| siRNA Disorazole DMSO Run1   | NM_001919 | DCI | dodecenoyl-Coenzyme A delta isomerase (3,2 trans-enoyl-Coenzyme A isomerase) | -0.095998 | Inlier |
| siRNA-Temozolomide Run2-DMSO | NM_001919 | DCI | dodecenoyl-Coenzyme A delta isomerase (3,2 trans-enoyl-Coenzyme A isomerase) | 0.095998  | Inlier |

Identification of Survival Genes in Human Glioblastoma Cells Using siRNA Screening  
 Nikhil G Thaker, Fang Zhang, Peter R. McDonald, Tong Ying Shun, Michael D Lewen, Ian F. Pollack, and John S. Lazo  
 Molecular Pharmacology

|                              |           |     |                                                                              |           |        |
|------------------------------|-----------|-----|------------------------------------------------------------------------------|-----------|--------|
| siRNA-Temozolomide Run1-DMSO | NM_001919 | DCI | dodecenoyl-Coenzyme A delta isomerase (3,2 trans-enoyl-Coenzyme A isomerase) | 0.636365  | Inlier |
| siRNA-Vinblastine Run1-DMSO  | NM_001919 | DCI | dodecenoyl-Coenzyme A delta isomerase (3,2 trans-enoyl-Coenzyme A isomerase) | 0.712635  | Inlier |
| siRNA Disorazole DMSO Run2   | NM_001919 | DCI | dodecenoyl-Coenzyme A delta isomerase (3,2 trans-enoyl-Coenzyme A isomerase) | 0.991751  | Inlier |
| siRNA Disorazole DMSO Run2   | NM_000788 | DCK | deoxycytidine kinase                                                         | -3.293741 | Inlier |
| siRNA-Temozolomide Run3-DMSO | NM_000788 | DCK | deoxycytidine kinase                                                         | -0.876674 | Inlier |
| siRNA-Temozolomide Run1-DMSO | NM_000788 | DCK | deoxycytidine kinase                                                         | -0.472326 | Inlier |
| siRNA Disorazole DMSO Run1   | NM_000788 | DCK | deoxycytidine kinase                                                         | -0.345741 | Inlier |
| siRNA-Temozolomide Run2-DMSO | NM_000788 | DCK | deoxycytidine kinase                                                         | 0.345742  | Inlier |

Identification of Survival Genes in Human Glioblastoma Cells Using siRNA Screening  
 Nikhil G Thaker, Fang Zhang, Peter R. McDonald, Tong Ying Shun, Michael D Lewen, Ian F. Pollack, and John S. Lazo

Molecular Pharmacology

|                              |               |       |                                                                                                          |           |        |
|------------------------------|---------------|-------|----------------------------------------------------------------------------------------------------------|-----------|--------|
| siRNA Disorazole DMSO Run3   | NM_0007<br>88 | DCK   | deoxycytidine kinase                                                                                     | 0.435149  | Inlier |
| siRNA-Vinblastine Run2-DMSO  | NM_0007<br>88 | DCK   | deoxycytidine kinase                                                                                     | 1.271171  | Inlier |
| siRNA-Vinblastine Run1-DMSO  | NM_0007<br>88 | DCK   | deoxycytidine kinase                                                                                     | 1.662025  | Inlier |
| siRNA-Temozolomide Run3-DMSO | NM_0321<br>51 | DCOHM | 6-pyruvoyl-tetrahydropterin synthase/dimerization cofactor of hepatocyte nuclear factor 1 alpha (TCF1) 2 | -1.055655 | Inlier |
| siRNA-Temozolomide Run2-DMSO | NM_0321<br>51 | DCOHM | 6-pyruvoyl-tetrahydropterin synthase/dimerization cofactor of hepatocyte nuclear factor 1 alpha (TCF1) 2 | -0.847701 | Inlier |
| siRNA Disorazole DMSO Run1   | NM_0321<br>51 | DCOHM | 6-pyruvoyl-tetrahydropterin synthase/dimerization cofactor of hepatocyte nuclear factor 1 alpha (TCF1) 2 | -0.494446 | Inlier |

Identification of Survival Genes in Human Glioblastoma Cells Using siRNA Screening  
 Nikhil G Thaker, Fang Zhang, Peter R. McDonald, Tong Ying Shun, Michael D Lewen, Ian F. Pollack, and John S. Lazo  
 Molecular Pharmacology

|                              |               |       |                                                                                                          |           |        |
|------------------------------|---------------|-------|----------------------------------------------------------------------------------------------------------|-----------|--------|
| siRNA-Temozolomide Run1-DMSO | NM_0321<br>51 | DCOHM | 6-pyruvoyl-tetrahydropterin synthase/dimerization cofactor of hepatocyte nuclear factor 1 alpha (TCF1) 2 | -0.179603 | Inlier |
| siRNA Disorazole DMSO Run3   | NM_0321<br>51 | DCOHM | 6-pyruvoyl-tetrahydropterin synthase/dimerization cofactor of hepatocyte nuclear factor 1 alpha (TCF1) 2 | 0.179603  | Inlier |
| siRNA-Vinblastine Run2-DMSO  | NM_0321<br>51 | DCOHM | 6-pyruvoyl-tetrahydropterin synthase/dimerization cofactor of hepatocyte nuclear factor 1 alpha (TCF1) 2 | 0.501299  | Inlier |
| siRNA-Vinblastine Run1-DMSO  | NM_0321<br>51 | DCOHM | 6-pyruvoyl-tetrahydropterin synthase/dimerization cofactor of hepatocyte nuclear factor 1 alpha (TCF1) 2 | 1.635624  | Inlier |

Identification of Survival Genes in Human Glioblastoma Cells Using siRNA Screening

Nikhil G Thaker, Fang Zhang, Peter R. McDonald, Tong Ying Shun, Michael D Lewen, Ian F. Pollack, and John S. Lazo

Molecular Pharmacology

|                                  |               |       |                                                                                                                                           |           |        |
|----------------------------------|---------------|-------|-------------------------------------------------------------------------------------------------------------------------------------------|-----------|--------|
| siRNA Disorazole DMSO Run2       | NM_0321<br>51 | DCOHM | 6-pyruvoyl-<br>tetrahydro<br>pterin<br>synthase/d<br>imerization<br>cofactor of<br>hepatocyte<br>nuclear<br>factor 1<br>alpha<br>(TCF1) 2 | 1.777668  | Inlier |
| siRNA-Temozolomide Run3-<br>DMSO | NM_0019<br>22 | DCT   | dopachro<br>me<br>tautomera<br>se<br>(dopachro<br>me delta-<br>isomerase<br>, tyrosine-<br>related<br>protein 2)                          | -1.024992 | Inlier |
| siRNA-Temozolomide Run2-<br>DMSO | NM_0019<br>22 | DCT   | dopachro<br>me<br>tautomera<br>se<br>(dopachro<br>me delta-<br>isomerase<br>, tyrosine-<br>related<br>protein 2)                          | -0.578694 | Inlier |
| siRNA Disorazole DMSO Run3       | NM_0019<br>22 | DCT   | dopachro<br>me<br>tautomera<br>se<br>(dopachro<br>me delta-<br>isomerase<br>, tyrosine-<br>related<br>protein 2)                          | -0.175324 | Inlier |

Identification of Survival Genes in Human Glioblastoma Cells Using siRNA Screening

Nikhil G Thaker, Fang Zhang, Peter R. McDonald, Tong Ying Shun, Michael D Lewen, Ian F. Pollack, and John S. Lazo

Molecular Pharmacology

|                              |               |     |                                                                                 |           |         |
|------------------------------|---------------|-----|---------------------------------------------------------------------------------|-----------|---------|
| siRNA Disorazole DMSO Run1   | NM_0019<br>22 | DCT | dopachrome tautomerase (dopachrome delta-isomerase, tyrosine-related protein 2) | -0.071866 | Inlier  |
| siRNA-Vinblastine Run2-DMSO  | NM_0019<br>22 | DCT | dopachrome tautomerase (dopachrome delta-isomerase, tyrosine-related protein 2) | 0.071866  | Inlier  |
| siRNA-Temozolomide Run1-DMSO | NM_0019<br>22 | DCT | dopachrome tautomerase (dopachrome delta-isomerase, tyrosine-related protein 2) | 0.770306  | Inlier  |
| siRNA-Vinblastine Run1-DMSO  | NM_0019<br>22 | DCT | dopachrome tautomerase (dopachrome delta-isomerase, tyrosine-related protein 2) | 5.058569  | Outlier |



Identification of Survival Genes in Human Glioblastoma Cells Using siRNA Screening  
 Nikhil G Thaker, Fang Zhang, Peter R. McDonald, Tong Ying Shun, Michael D Lewen, Ian F. Pollack, and John S. Lazo  
 Molecular Pharmacology

|                              |                  |      |                                                                                 |                  |
|------------------------------|------------------|------|---------------------------------------------------------------------------------|------------------|
|                              |                  |      | dopachrome tautomerase (dopachrome delta-isomerase, tyrosine-related protein 2) |                  |
| siRNA Disorazole DMSO Run2   | NM_0019<br>22    | DCT  | dCMP deaminase                                                                  | 6.381104 Outlier |
| siRNA-Temozolomide Run3-DMSO | NM_0010<br>12732 | DCTD | dCMP deaminase                                                                  | -0.816341 Inlier |
| siRNA-Temozolomide Run2-DMSO | NM_0010<br>12732 | DCTD | dCMP deaminase                                                                  | -0.796931 Inlier |
| siRNA-Temozolomide Run1-DMSO | NM_0010<br>12732 | DCTD | dCMP deaminase                                                                  | -0.533919 Inlier |
| siRNA-Vinblastine Run2-DMSO  | NM_0010<br>12732 | DCTD | dCMP deaminase                                                                  | -0.140446 Inlier |
| siRNA Disorazole DMSO Run3   | NM_0010<br>12732 | DCTD | dCMP deaminase                                                                  | 0.140445 Inlier  |
| siRNA Disorazole DMSO Run1   | NM_0010<br>12732 | DCTD | dCMP deaminase                                                                  | 0.552069 Inlier  |
| siRNA-Vinblastine Run1-DMSO  | NM_0010<br>12732 | DCTD | dCMP deaminase                                                                  | 1.4946 Inlier    |
| siRNA Disorazole DMSO Run2   | NM_0010<br>12732 | DCTD | dCMP deaminase                                                                  | 1.651625 Inlier  |
| siRNA Disorazole DMSO Run1   | NM_0162<br>86    | DCXR | dicarbonyl/L-xylulose reductase                                                 | -0.761853 Inlier |
| siRNA-Temozolomide Run2-DMSO | NM_0162<br>86    | DCXR | dicarbonyl/L-xylulose reductase                                                 | -0.701022 Inlier |
| siRNA-Temozolomide Run1-DMSO | NM_0162<br>86    | DCXR | dicarbonyl/L-xylulose reductase                                                 | -0.407624 Inlier |
| siRNA-Temozolomide Run3-DMSO | NM_0162<br>86    | DCXR | dicarbonyl/L-xylulose reductase                                                 | -0.178529 Inlier |

Identification of Survival Genes in Human Glioblastoma Cells Using siRNA Screening  
 Nikhil G Thaker, Fang Zhang, Peter R. McDonald, Tong Ying Shun, Michael D Lewen, Ian F. Pollack, and John S. Lazo

Molecular Pharmacology

|                              |               |       |                                                                                                    |           |        |
|------------------------------|---------------|-------|----------------------------------------------------------------------------------------------------|-----------|--------|
| siRNA-Vinblastine Run2-DMSO  | NM_0162<br>86 | DCXR  | dicarbonyl/<br>L-xylulose<br>reductase                                                             | 0.178529  | Inlier |
| siRNA Disorazole DMSO Run2   | NM_0162<br>86 | DCXR  | dicarbonyl/<br>L-xylulose<br>reductase                                                             | 0.647978  | Inlier |
| siRNA Disorazole DMSO Run3   | NM_0162<br>86 | DCXR  | dicarbonyl/<br>L-xylulose<br>reductase                                                             | 1.258117  | Inlier |
| siRNA-Vinblastine Run1-DMSO  | NM_0162<br>86 | DCXR  | dicarbonyl/<br>L-xylulose<br>reductase                                                             | 1.376171  | Inlier |
| siRNA-Temozolomide Run3-DMSO | NM_0121<br>37 | DDAH1 | dicarbonyl/<br>L-xylulose<br>reductase<br>dimethylar<br>ginine<br>dimethyla<br>minohydrol<br>ase 1 | -1.053594 | Inlier |
| siRNA-Vinblastine Run2-DMSO  | NM_0121<br>37 | DDAH1 | dicarbonyl/<br>L-xylulose<br>reductase<br>dimethylar<br>ginine<br>dimethyla<br>minohydrol<br>ase 1 | -0.980446 | Inlier |
| siRNA Disorazole DMSO Run3   | NM_0121<br>37 | DDAH1 | dicarbonyl/<br>L-xylulose<br>reductase<br>dimethylar<br>ginine<br>dimethyla<br>minohydrol<br>ase 1 | -0.390678 | Inlier |
| siRNA-Temozolomide Run2-DMSO | NM_0121<br>37 | DDAH1 | dicarbonyl/<br>L-xylulose<br>reductase<br>dimethylar<br>ginine<br>dimethyla<br>minohydrol<br>ase 1 | -0.198449 | Inlier |
| siRNA Disorazole DMSO Run1   | NM_0121<br>37 | DDAH1 | dicarbonyl/<br>L-xylulose<br>reductase<br>dimethylar<br>ginine<br>dimethyla<br>minohydrol<br>ase 1 | 0.198449  | Inlier |
| siRNA-Temozolomide Run1-DMSO | NM_0121<br>37 | DDAH1 | dicarbonyl/<br>L-xylulose<br>reductase<br>dimethylar<br>ginine<br>dimethyla<br>minohydrol<br>ase 1 | 0.304651  | Inlier |
| siRNA Disorazole DMSO Run2   | NM_0121<br>37 | DDAH1 | dicarbonyl/<br>L-xylulose<br>reductase<br>dimethylar<br>ginine<br>dimethyla<br>minohydrol<br>ase 1 | 0.958322  | Inlier |

Identification of Survival Genes in Human Glioblastoma Cells Using siRNA Screening  
 Nikhil G Thaker, Fang Zhang, Peter R. McDonald, Tong Ying Shun, Michael D Lewen, Ian F. Pollack, and John S. Lazo

Molecular Pharmacology

|                              |           |       |                                           |           |        |
|------------------------------|-----------|-------|-------------------------------------------|-----------|--------|
| siRNA-Vinblastine Run1-DMSO  | NM_012137 | DDAH1 | dimethylarginine dimethylaminohydrolase 1 | 1.656224  | Inlier |
| siRNA-Temozolomide Run3-DMSO | NM_013974 | DDAH2 | dimethylarginine dimethylaminohydrolase 2 | -1.651571 | Inlier |
| siRNA-Temozolomide Run2-DMSO | NM_013974 | DDAH2 | dimethylarginine dimethylaminohydrolase 2 | -0.828184 | Inlier |
| siRNA-Temozolomide Run1-DMSO | NM_013974 | DDAH2 | dimethylarginine dimethylaminohydrolase 2 | -0.536837 | Inlier |
| siRNA-Vinblastine Run2-DMSO  | NM_013974 | DDAH2 | dimethylarginine dimethylaminohydrolase 2 | -0.007337 | Inlier |
| siRNA Disorazole DMSO Run1   | NM_013974 | DDAH2 | dimethylarginine dimethylaminohydrolase 2 | 0.007337  | Inlier |
| siRNA Disorazole DMSO Run3   | NM_013974 | DDAH2 | dimethylarginine dimethylaminohydrolase 2 | 0.404857  | Inlier |
| siRNA-Vinblastine Run1-DMSO  | NM_013974 | DDAH2 | dimethylarginine dimethylaminohydrolase 2 | 0.812163  | Inlier |
| siRNA Disorazole DMSO Run2   | NM_013974 | DDAH2 | dimethylarginine dimethylaminohydrolase 2 | 1.696918  | Inlier |

Identification of Survival Genes in Human Glioblastoma Cells Using siRNA Screening

Nikhil G Thaker, Fang Zhang, Peter R. McDonald, Tong Ying Shun, Michael D Lewen, Ian F. Pollack, and John S. Lazo

Molecular Pharmacology

|                              |           |     |                                                          |           |        |
|------------------------------|-----------|-----|----------------------------------------------------------|-----------|--------|
| siRNA-Temozolomide Run3-DMSO | NM_000790 | DDC | dopa decarboxylase (aromatic L-amino acid decarboxylase) | -1.912378 | Inlier |
| siRNA-Temozolomide Run2-DMSO | NM_000790 | DDC | dopa decarboxylase (aromatic L-amino acid decarboxylase) | -0.754431 | Inlier |
| siRNA Disorazole DMSO Run3   | NM_000790 | DDC | dopa decarboxylase (aromatic L-amino acid decarboxylase) | -0.594569 | Inlier |
| siRNA-Vinblastine Run2-DMSO  | NM_000790 | DDC | dopa decarboxylase (aromatic L-amino acid decarboxylase) | -0.15086  | Inlier |
| siRNA-Temozolomide Run1-DMSO | NM_000790 | DDC | dopa decarboxylase (aromatic L-amino acid decarboxylase) | 0.15086   | Inlier |
| siRNA Disorazole DMSO Run1   | NM_000790 | DDC | dopa decarboxylase)                                      | 0.452037  | Inlier |

Identification of Survival Genes in Human Glioblastoma Cells Using siRNA Screening  
 Nikhil G Thaker, Fang Zhang, Peter R. McDonald, Tong Ying Shun, Michael D Lewen, Ian F. Pollack, and John S. Lazo

Molecular Pharmacology

|                                  |               |       |                                                                                      |           |         |
|----------------------------------|---------------|-------|--------------------------------------------------------------------------------------|-----------|---------|
| siRNA Disorazole DMSO Run2       | NM_0007<br>90 | DDC   | dopa<br>decarboxyl<br>ase<br>(aromatic<br>L-amino<br>acid<br>decarboxyl<br>ase)      | 3.791394  | Outlier |
| siRNA-Vinblastine Run1-<br>DMSO  | NM_0007<br>90 | DDC   | dopa<br>decarboxyl<br>ase<br>(aromatic<br>L-amino<br>acid<br>decarboxyl<br>ase)      | 4.659474  | Outlier |
| siRNA Disorazole DMSO Run1       | NM_0040<br>32 | DDO   | D-<br>aspartate<br>oxidase                                                           | -0.905979 | Inlier  |
| siRNA-Temozolomide Run1-<br>DMSO | NM_0040<br>32 | DDO   | D-<br>aspartate<br>oxidase                                                           | -0.443021 | Inlier  |
| siRNA Disorazole DMSO Run3       | NM_0040<br>32 | DDO   | D-<br>aspartate<br>oxidase                                                           | -0.369228 | Inlier  |
| siRNA-Temozolomide Run2-<br>DMSO | NM_0040<br>32 | DDO   | D-<br>aspartate<br>oxidase                                                           | -0.19579  | Inlier  |
| siRNA-Vinblastine Run2-<br>DMSO  | NM_0040<br>32 | DDO   | D-<br>aspartate<br>oxidase                                                           | 0.19579   | Inlier  |
| siRNA-Temozolomide Run3-<br>DMSO | NM_0040<br>32 | DDO   | D-<br>aspartate<br>oxidase                                                           | 1.18074   | Inlier  |
| siRNA-Vinblastine Run1-<br>DMSO  | NM_0040<br>32 | DDO   | D-<br>aspartate<br>oxidase                                                           | 2.341764  | Inlier  |
| siRNA Disorazole DMSO Run2       | NM_0040<br>32 | DDO   | D-<br>aspartate<br>oxidase                                                           | 4.244531  | Outlier |
| siRNA-Temozolomide Run3-<br>DMSO | NM_0052<br>16 | DDOST | dolichyl-<br>diphospho<br>oligosacch<br>aride-<br>protein<br>glycosyltra<br>nsferase | -1.370219 | Inlier  |

Identification of Survival Genes in Human Glioblastoma Cells Using siRNA Screening

Nikhil G Thaker, Fang Zhang, Peter R. McDonald, Tong Ying Shun, Michael D Lewen, Ian F. Pollack, and John S. Lazo

Molecular Pharmacology

|                                  |               |       |                                                                                      |           |        |
|----------------------------------|---------------|-------|--------------------------------------------------------------------------------------|-----------|--------|
| siRNA Disorazole DMSO Run1       | NM_0052<br>16 | DDOST | dolichyl-<br>diphospho<br>oligosacch<br>aride-<br>protein<br>glycosyltra<br>nsferase | -0.797435 | Inlier |
| siRNA-Temozolomide Run1-<br>DMSO | NM_0052<br>16 | DDOST | dolichyl-<br>diphospho<br>oligosacch<br>aride-<br>protein<br>glycosyltra<br>nsferase | -0.551565 | Inlier |
| siRNA-Temozolomide Run2-<br>DMSO | NM_0052<br>16 | DDOST | dolichyl-<br>diphospho<br>oligosacch<br>aride-<br>protein<br>glycosyltra<br>nsferase | -0.103058 | Inlier |
| siRNA Disorazole DMSO Run3       | NM_0052<br>16 | DDOST | dolichyl-<br>diphospho<br>oligosacch<br>aride-<br>protein<br>glycosyltra<br>nsferase | 0.103059  | Inlier |
| siRNA-Vinblastine Run2-<br>DMSO  | NM_0052<br>16 | DDOST | dolichyl-<br>diphospho<br>oligosacch<br>aride-<br>protein<br>glycosyltra<br>nsferase | 0.503144  | Inlier |
| siRNA-Vinblastine Run1-<br>DMSO  | NM_0052<br>16 | DDOST | dolichyl-<br>diphospho<br>oligosacch<br>aride-<br>protein<br>glycosyltra<br>nsferase | 0.922897  | Inlier |
| siRNA Disorazole DMSO Run2       | NM_0052<br>16 | DDOST | glycosyltra<br>nsferase                                                              | 1.071195  | Inlier |

Identification of Survival Genes in Human Glioblastoma Cells Using siRNA Screening  
 Nikhil G Thaker, Fang Zhang, Peter R. McDonald, Tong Ying Shun, Michael D Lewen, Ian F. Pollack, and John S. Lazo

Molecular Pharmacology

|                              |               |      |                                            |           |        |
|------------------------------|---------------|------|--------------------------------------------|-----------|--------|
| siRNA-Temozolomide Run3-DMSO | NM_0139<br>94 | DDR1 | discoidin domain receptor family, member 1 | -1.419134 | Inlier |
| siRNA-Temozolomide Run1-DMSO | NM_0139<br>94 | DDR1 | discoidin domain receptor family, member 1 | -1.197334 | Inlier |
| siRNA Disorazole DMSO Run2   | NM_0139<br>94 | DDR1 | discoidin domain receptor family, member 1 | -0.752754 | Inlier |
| siRNA Disorazole DMSO Run1   | NM_0139<br>94 | DDR1 | discoidin domain receptor family, member 1 | -0.282412 | Inlier |
| siRNA-Temozolomide Run2-DMSO | NM_0139<br>94 | DDR1 | discoidin domain receptor family, member 1 | 0.282413  | Inlier |
| siRNA-Vinblastine Run1-DMSO  | NM_0139<br>94 | DDR1 | discoidin domain receptor family, member 1 | 0.556932  | Inlier |
| siRNA Disorazole DMSO Run3   | NM_0139<br>94 | DDR1 | discoidin domain receptor family, member 1 | 0.596246  | Inlier |
| siRNA-Vinblastine Run2-DMSO  | NM_0139<br>94 | DDR1 | discoidin domain receptor family, member 1 | 1.778198  | Inlier |
| siRNA Disorazole DMSO Run2   | NM_0061<br>82 | DDR2 | discoidin domain receptor family, member 2 | -2.025526 | Inlier |
| siRNA-Temozolomide Run3-DMSO | NM_0061<br>82 | DDR2 | discoidin domain receptor family, member 2 | -1.084795 | Inlier |

Identification of Survival Genes in Human Glioblastoma Cells Using siRNA Screening  
 Nikhil G Thaker, Fang Zhang, Peter R. McDonald, Tong Ying Shun, Michael D Lewen, Ian F. Pollack, and John S. Lazo

Molecular Pharmacology

|                                  |               |      |                                                        |           |        |
|----------------------------------|---------------|------|--------------------------------------------------------|-----------|--------|
| siRNA Disorazole DMSO Run3       | NM_0061<br>82 | DDR2 | discoidin<br>domain<br>receptor<br>family,<br>member 2 | -0.640767 | Inlier |
| siRNA-Temozolomide Run2-<br>DMSO | NM_0061<br>82 | DDR2 | discoidin<br>domain<br>receptor<br>family,<br>member 2 | -0.002771 | Inlier |
| siRNA-Temozolomide Run1-<br>DMSO | NM_0061<br>82 | DDR2 | discoidin<br>domain<br>receptor<br>family,<br>member 2 | 0.002772  | Inlier |
| siRNA Disorazole DMSO Run1       | NM_0061<br>82 | DDR2 | discoidin<br>domain<br>receptor<br>family,<br>member 2 | 0.271366  | Inlier |
| siRNA-Vinblastine Run2-<br>DMSO  | NM_0061<br>82 | DDR2 | discoidin<br>domain<br>receptor<br>family,<br>member 2 | 0.708233  | Inlier |
| siRNA-Vinblastine Run1-<br>DMSO  | NM_0061<br>82 | DDR2 | discoidin<br>domain<br>receptor<br>family,<br>member 2 | 0.888417  | Inlier |
| siRNA-Temozolomide Run3-<br>DMSO | NM_0013<br>55 | DDT  | D-<br>dopachro<br>me<br>tautomer<br>ase                | -2.383022 | Inlier |
| siRNA-Temozolomide Run1-<br>DMSO | NM_0013<br>55 | DDT  | D-<br>dopachro<br>me<br>tautomer<br>ase                | -0.856437 | Inlier |
| siRNA-Vinblastine Run2-<br>DMSO  | NM_0013<br>55 | DDT  | D-<br>dopachro<br>me<br>tautomer<br>ase                | -0.492563 | Inlier |
| siRNA-Temozolomide Run2-<br>DMSO | NM_0013<br>55 | DDT  | D-<br>dopachro<br>me<br>tautomer<br>ase                | -0.263714 | Inlier |



Identification of Survival Genes in Human Glioblastoma Cells Using siRNA Screening

Nikhil G Thaker, Fang Zhang, Peter R. McDonald, Tong Ying Shun, Michael D Lewen, Ian F. Pollack, and John S. Lazo

Molecular Pharmacology

|                                  |               |      |                                                                                |           |        |
|----------------------------------|---------------|------|--------------------------------------------------------------------------------|-----------|--------|
| siRNA Disorazole DMSO Run1       | NM_0013<br>55 | DDT  | D-<br>dopachro<br>me<br>tautomer<br>se                                         | 0.263713  | Inlier |
| siRNA Disorazole DMSO Run3       | NM_0013<br>55 | DDT  | D-<br>dopachro<br>me<br>tautomer<br>se                                         | 0.330122  | Inlier |
| siRNA Disorazole DMSO Run2       | NM_0013<br>55 | DDT  | D-<br>dopachro<br>me<br>tautomer<br>se                                         | 2.488071  | Inlier |
| siRNA-Vinblastine Run1-<br>DMSO  | NM_0013<br>55 | DDT  | D-<br>dopachro<br>me<br>tautomer<br>se<br>DEAD<br>(Asp-Glu-<br>Ala-Asp)<br>box | 3.060911  | Inlier |
| siRNA-Temozolomide Run3-<br>DMSO | NM_0049<br>39 | DDX1 | polypeptid<br>e 1<br>DEAD<br>(Asp-Glu-<br>Ala-Asp)<br>box                      | -0.830329 | Inlier |
| siRNA-Temozolomide Run2-<br>DMSO | NM_0049<br>39 | DDX1 | polypeptid<br>e 1<br>DEAD<br>(Asp-Glu-<br>Ala-Asp)<br>box                      | -0.758207 | Inlier |
| siRNA Disorazole DMSO Run3       | NM_0049<br>39 | DDX1 | polypeptid<br>e 1<br>DEAD<br>(Asp-Glu-<br>Ala-Asp)<br>box                      | -0.244085 | Inlier |
| siRNA-Vinblastine Run2-<br>DMSO  | NM_0049<br>39 | DDX1 | polypeptid<br>e 1<br>DEAD<br>(Asp-Glu-<br>Ala-Asp)<br>box                      | -0.099187 | Inlier |
| siRNA-Temozolomide Run1-<br>DMSO | NM_0049<br>39 | DDX1 | polypeptid<br>e 1                                                              | 0.099187  | Inlier |

Identification of Survival Genes in Human Glioblastoma Cells Using siRNA Screening  
 Nikhil G Thaker, Fang Zhang, Peter R. McDonald, Tong Ying Shun, Michael D Lewen, Ian F. Pollack, and John S. Lazo

Molecular Pharmacology

|                              |               |       |                                                    |           |         |
|------------------------------|---------------|-------|----------------------------------------------------|-----------|---------|
| siRNA Disorazole DMSO Run1   | NM_0049<br>39 | DDX1  | DEAD<br>(Asp-Glu-Ala-Asp)<br>box<br>polypeptide 1  | 0.590793  | Inlier  |
| siRNA-Vinblastine Run1-DMSO  | NM_0049<br>39 | DDX1  | DEAD<br>(Asp-Glu-Ala-Asp)<br>box<br>polypeptide 1  | 3.625668  | Outlier |
| siRNA Disorazole DMSO Run2   | NM_0049<br>39 | DDX1  | DEAD<br>(Asp-Glu-Ala-Asp)<br>box<br>polypeptide 1  | 4.091752  | Outlier |
| siRNA-Temozolomide Run1-DMSO | NM_0308<br>81 | DDX17 | DEAD<br>(Asp-Glu-Ala-Asp)<br>box<br>polypeptide 17 | -1.18446  | Inlier  |
| siRNA-Temozolomide Run3-DMSO | NM_0308<br>81 | DDX17 | DEAD<br>(Asp-Glu-Ala-Asp)<br>box<br>polypeptide 17 | -0.930242 | Inlier  |
| siRNA-Vinblastine Run2-DMSO  | NM_0308<br>81 | DDX17 | DEAD<br>(Asp-Glu-Ala-Asp)<br>box<br>polypeptide 17 | -0.142521 | Inlier  |
| siRNA-Temozolomide Run2-DMSO | NM_0308<br>81 | DDX17 | DEAD<br>(Asp-Glu-Ala-Asp)<br>box<br>polypeptide 17 | -0.05594  | Inlier  |
| siRNA Disorazole DMSO Run3   | NM_0308<br>81 | DDX17 | DEAD<br>(Asp-Glu-Ala-Asp)<br>box<br>polypeptide 17 | 0.05594   | Inlier  |

Identification of Survival Genes in Human Glioblastoma Cells Using siRNA Screening  
 Nikhil G Thaker, Fang Zhang, Peter R. McDonald, Tong Ying Shun, Michael D Lewen, Ian F. Pollack, and John S. Lazo

Molecular Pharmacology

|                                  |               |       |                                                            |           |        |
|----------------------------------|---------------|-------|------------------------------------------------------------|-----------|--------|
| siRNA Disorazole DMSO Run2       | NM_0308<br>81 | DDX17 | DEAD<br>(Asp-Glu-<br>Ala-Asp)<br>box<br>polypeptid<br>e 17 | 0.565404  | Inlier |
| siRNA Disorazole DMSO Run1       | NM_0308<br>81 | DDX17 | DEAD<br>(Asp-Glu-<br>Ala-Asp)<br>box<br>polypeptid<br>e 17 | 0.783596  | Inlier |
| siRNA-Vinblastine Run1-<br>DMSO  | NM_0308<br>81 | DDX17 | DEAD<br>(Asp-Glu-<br>Ala-As)<br>box<br>polypeptid<br>e 17  | 1.180589  | Inlier |
| siRNA-Temozolomide Run3-<br>DMSO | NM_0072<br>42 | DDX19 | DEAD<br>(Asp-Glu-<br>Ala-As)<br>box<br>polypeptid<br>e 19  | -0.954733 | Inlier |
| siRNA-Temozolomide Run2-<br>DMSO | NM_0072<br>42 | DDX19 | DEAD<br>(Asp-Glu-<br>Ala-As)<br>box<br>polypeptid<br>e 19  | -0.590464 | Inlier |
| siRNA-Vinblastine Run2-<br>DMSO  | NM_0072<br>42 | DDX19 | DEAD<br>(Asp-Glu-<br>Ala-As)<br>box<br>polypeptid<br>e 19  | -0.573767 | Inlier |
| siRNA Disorazole DMSO Run3       | NM_0072<br>42 | DDX19 | DEAD<br>(Asp-Glu-<br>Ala-As)<br>box<br>polypeptid<br>e 19  | -0.466812 | Inlier |
| siRNA-Temozolomide Run1-<br>DMSO | NM_0072<br>42 | DDX19 | DEAD<br>(Asp-Glu-<br>Ala-As)<br>box<br>polypeptid<br>e 19  | 0.466812  | Inlier |

Identification of Survival Genes in Human Glioblastoma Cells Using siRNA Screening  
 Nikhil G Thaker, Fang Zhang, Peter R. McDonald, Tong Ying Shun, Michael D Lewen, Ian F. Pollack, and John S. Lazo

Molecular Pharmacology

|                              |               |       |                                                    |           |         |
|------------------------------|---------------|-------|----------------------------------------------------|-----------|---------|
| siRNA Disorazole DMSO Run1   | NM_0072<br>42 | DDX19 | DEAD<br>(Asp-Glu-Ala-As)<br>box<br>polypeptide 19  | 0.758536  | Inlier  |
| siRNA-Vinblastine Run1-DMSO  | NM_0072<br>42 | DDX19 | DEAD<br>(Asp-Glu-Ala-As)<br>box<br>polypeptide 19  | 3.071033  | Inlier  |
| siRNA Disorazole DMSO Run2   | NM_0072<br>42 | DDX19 | DEAD<br>(Asp-Glu-Ala-Asp)<br>box<br>polypeptide 19 | 3.569876  | Outlier |
| siRNA-Temozolomide Run2-DMSO | NM_0204<br>14 | DDX24 | DEAD<br>(Asp-Glu-Ala-Asp)<br>box<br>polypeptide 24 | -0.864727 | Inlier  |
| siRNA-Temozolomide Run3-DMSO | NM_0204<br>14 | DDX24 | DEAD<br>(Asp-Glu-Ala-Asp)<br>box<br>polypeptide 24 | -0.847381 | Inlier  |
| siRNA-Temozolomide Run1-DMSO | NM_0204<br>14 | DDX24 | DEAD<br>(Asp-Glu-Ala-Asp)<br>box<br>polypeptide 24 | -0.501619 | Inlier  |
| siRNA Disorazole DMSO Run3   | NM_0204<br>14 | DDX24 | DEAD<br>(Asp-Glu-Ala-Asp)<br>box<br>polypeptide 24 | -0.180624 | Inlier  |
| siRNA-Vinblastine Run2-DMSO  | NM_0204<br>14 | DDX24 | DEAD<br>(Asp-Glu-Ala-Asp)<br>box<br>polypeptide 24 | 0.180624  | Inlier  |

Identification of Survival Genes in Human Glioblastoma Cells Using siRNA Screening  
 Nikhil G Thaker, Fang Zhang, Peter R. McDonald, Tong Ying Shun, Michael D Lewen, Ian F. Pollack, and John S. Lazo

Molecular Pharmacology

|                                  |               |       |                                                            |           |        |
|----------------------------------|---------------|-------|------------------------------------------------------------|-----------|--------|
| siRNA Disorazole DMSO Run1       | NM_0204<br>14 | DDX24 | DEAD<br>(Asp-Glu-<br>Ala-Asp)<br>box<br>polypeptid<br>e 24 | 0.235283  | Inlier |
| siRNA-Vinblastine Run1-<br>DMSO  | NM_0204<br>14 | DDX24 | DEAD<br>(Asp-Glu-<br>Ala-Asp)<br>box<br>polypeptid<br>e 24 | 1.365986  | Inlier |
| siRNA Disorazole DMSO Run2       | NM_0204<br>14 | DDX24 | DEAD<br>(Asp-Glu-<br>Ala-Asp)<br>box<br>polypeptid<br>e 24 | 2.400652  | Inlier |
| siRNA-Temozolomide Run3-<br>DMSO | NM_1386<br>20 | DDX31 | DEAD<br>(Asp-Glu-<br>Ala-Asp)<br>box<br>polypeptid<br>e 31 | -1.16002  | Inlier |
| siRNA-Temozolomide Run2-<br>DMSO | NM_1386<br>20 | DDX31 | DEAD<br>(Asp-Glu-<br>Ala-Asp)<br>box<br>polypeptid<br>e 31 | -0.888552 | Inlier |
| siRNA-Vinblastine Run2-<br>DMSO  | NM_1386<br>20 | DDX31 | DEAD<br>(Asp-Glu-<br>Ala-Asp)<br>box<br>polypeptid<br>e 31 | -0.460448 | Inlier |
| siRNA Disorazole DMSO Run3       | NM_1386<br>20 | DDX31 | DEAD<br>(Asp-Glu-<br>Ala-Asp)<br>box<br>polypeptid<br>e 31 | -0.077317 | Inlier |
| siRNA-Temozolomide Run1-<br>DMSO | NM_1386<br>20 | DDX31 | DEAD<br>(Asp-Glu-<br>Ala-Asp)<br>box<br>polypeptid<br>e 31 | 0.077317  | Inlier |

Identification of Survival Genes in Human Glioblastoma Cells Using siRNA Screening  
 Nikhil G Thaker, Fang Zhang, Peter R. McDonald, Tong Ying Shun, Michael D Lewen, Ian F. Pollack, and John S. Lazo

Molecular Pharmacology

|                              |               |       |                                                    |           |        |
|------------------------------|---------------|-------|----------------------------------------------------|-----------|--------|
| siRNA Disorazole DMSO Run1   | NM_1386<br>20 | DDX31 | DEAD<br>(Asp-Glu-Ala-Asp)<br>box<br>polypeptide 31 | 0.316494  | Inlier |
| siRNA-Vinblastine Run1-DMSO  | NM_1386<br>20 | DDX31 | DEAD<br>(Asp-Glu-Ala-Asp)<br>box<br>polypeptide 31 | 1.89336   | Inlier |
| siRNA Disorazole DMSO Run2   | NM_1386<br>20 | DDX31 | DEAD<br>(Asp-Glu-Ala-Asp)<br>box<br>polypeptide 31 | 2.176314  | Inlier |
| siRNA-Temozolomide Run2-DMSO | NM_1389<br>98 | DDX39 | DEAD<br>(Asp-Glu-Ala-Asp)<br>box<br>polypeptide 39 | -0.895235 | Inlier |
| siRNA-Temozolomide Run3-DMSO | NM_1389<br>98 | DDX39 | DEAD<br>(Asp-Glu-Ala-Asp)<br>box<br>polypeptide 39 | -0.453765 | Inlier |
| siRNA-Vinblastine Run2-DMSO  | NM_1389<br>98 | DDX39 | DEAD<br>(Asp-Glu-Ala-Asp)<br>box<br>polypeptide 39 | -0.309296 | Inlier |
| siRNA Disorazole DMSO Run3   | NM_1389<br>98 | DDX39 | DEAD<br>(Asp-Glu-Ala-Asp)<br>box<br>polypeptide 39 | -0.136514 | Inlier |
| siRNA Disorazole DMSO Run1   | NM_1389<br>98 | DDX39 | DEAD<br>(Asp-Glu-Ala-Asp)<br>box<br>polypeptide 39 | 0.136514  | Inlier |

Identification of Survival Genes in Human Glioblastoma Cells Using siRNA Screening  
 Nikhil G Thaker, Fang Zhang, Peter R. McDonald, Tong Ying Shun, Michael D Lewen, Ian F. Pollack, and John S. Lazo

Molecular Pharmacology

|                              |               |       |                                                    |           |         |
|------------------------------|---------------|-------|----------------------------------------------------|-----------|---------|
| siRNA-Temozolomide Run1-DMSO | NM_1389<br>98 | DDX39 | DEAD<br>(Asp-Glu-Ala-Asp)<br>box<br>polypeptide 39 | 1.372832  | Inlier  |
| siRNA-Vinblastine Run1-DMSO  | NM_1389<br>98 | DDX39 | DEAD<br>(Asp-Glu-Ala-Asp)<br>box<br>polypeptide 39 | 10.34509  | Outlier |
| siRNA Disorazole DMSO Run2   | NM_1389<br>98 | DDX39 | DEAD<br>(Asp-Glu-Ala-Asp)<br>box<br>polypeptide 39 | 36.73523  | Outlier |
| siRNA-Vinblastine Run2-DMSO  | NM_0244<br>15 | DDX4  | DEAD<br>(Asp-Glu-Ala-Asp)<br>box<br>polypeptide 4  | -1.051266 | Inlier  |
| siRNA-Temozolomide Run3-DMSO | NM_0244<br>15 | DDX4  | DEAD<br>(Asp-Glu-Ala-Asp)<br>box<br>polypeptide 4  | -0.763179 | Inlier  |
| siRNA-Temozolomide Run2-DMSO | NM_0244<br>15 | DDX4  | DEAD<br>(Asp-Glu-Ala-Asp)<br>box<br>polypeptide 4  | -0.520946 | Inlier  |
| siRNA Disorazole DMSO Run3   | NM_0244<br>15 | DDX4  | DEAD<br>(Asp-Glu-Ala-Asp)<br>box<br>polypeptide 4  | -0.460748 | Inlier  |
| siRNA Disorazole DMSO Run1   | NM_0244<br>15 | DDX4  | DEAD<br>(Asp-Glu-Ala-Asp)<br>box<br>polypeptide 4  | 0.460748  | Inlier  |

Identification of Survival Genes in Human Glioblastoma Cells Using siRNA Screening  
 Nikhil G Thaker, Fang Zhang, Peter R. McDonald, Tong Ying Shun, Michael D Lewen, Ian F. Pollack, and John S. Lazo

Molecular Pharmacology

|                              |               |       |                                                    |           |         |
|------------------------------|---------------|-------|----------------------------------------------------|-----------|---------|
| siRNA-Temozolomide Run1-DMSO | NM_0244<br>15 | DDX4  | DEAD<br>(Asp-Glu-Ala-Asp)<br>box<br>polypeptide 4  | 0.585821  | Inlier  |
| siRNA-Vinblastine Run1-DMSO  | NM_0244<br>15 | DDX4  | DEAD<br>(Asp-Glu-Ala-Asp)<br>box<br>polypeptide 4  | 3.201988  | Inlier  |
| siRNA Disorazole DMSO Run2   | NM_0244<br>15 | DDX4  | DEAD<br>(Asp-Glu-Ala-Asp)<br>box<br>polypeptide 4  | 4.032224  | Outlier |
| siRNA-Temozolomide Run2-DMSO | NM_0190<br>70 | DDX49 | DEAD<br>(Asp-Glu-Ala-Asp)<br>box<br>polypeptide 49 | -2.255076 | Inlier  |
| siRNA-Temozolomide Run1-DMSO | NM_0190<br>70 | DDX49 | DEAD<br>(Asp-Glu-Ala-Asp)<br>box<br>polypeptide 49 | -0.813819 | Inlier  |
| siRNA-Temozolomide Run3-DMSO | NM_0190<br>70 | DDX49 | DEAD<br>(Asp-Glu-Ala-Asp)<br>box<br>polypeptide 49 | -0.264176 | Inlier  |
| siRNA-Vinblastine Run2-DMSO  | NM_0190<br>70 | DDX49 | DEAD<br>(Asp-Glu-Ala-Asp)<br>box<br>polypeptide 49 | -0.077085 | Inlier  |
| siRNA Disorazole DMSO Run1   | NM_0190<br>70 | DDX49 | DEAD<br>(Asp-Glu-Ala-Asp)<br>box<br>polypeptide 49 | 0.077084  | Inlier  |



Identification of Survival Genes in Human Glioblastoma Cells Using siRNA Screening  
 Nikhil G Thaker, Fang Zhang, Peter R. McDonald, Tong Ying Shun, Michael D Lewen, Ian F. Pollack, and John S. Lazo

Molecular Pharmacology

|                              |               |       |                                                    |           |        |
|------------------------------|---------------|-------|----------------------------------------------------|-----------|--------|
| siRNA Disorazole DMSO Run3   | NM_0190<br>70 | DDX49 | DEAD<br>(Asp-Glu-Ala-Asp)<br>box<br>polypeptide 49 | 0.535181  | Inlier |
| siRNA-Vinblastine Run1-DMSO  | NM_0190<br>70 | DDX49 | DEAD<br>(Asp-Glu-Ala-Asp)<br>box<br>polypeptide 49 | 1.854934  | Inlier |
| siRNA Disorazole DMSO Run2   | NM_0190<br>70 | DDX49 | DEAD<br>(Asp-Glu-Ala-Asp)<br>box<br>polypeptide 49 | 2.32071   | Inlier |
| siRNA-Temozolomide Run3-DMSO | NM_0240<br>72 | DDX54 | DEAD<br>(Asp-Glu-Ala-Asp)<br>box<br>polypeptide 54 | -1.801456 | Inlier |
| siRNA Disorazole DMSO Run1   | NM_0240<br>72 | DDX54 | DEAD<br>(Asp-Glu-Ala-Asp)<br>box<br>polypeptide 54 | -0.890881 | Inlier |
| siRNA-Temozolomide Run2-DMSO | NM_0240<br>72 | DDX54 | DEAD<br>(Asp-Glu-Ala-Asp)<br>box<br>polypeptide 54 | -0.775917 | Inlier |
| siRNA-Temozolomide Run1-DMSO | NM_0240<br>72 | DDX54 | DEAD<br>(Asp-Glu-Ala-Asp)<br>box<br>polypeptide 54 | -0.373308 | Inlier |
| siRNA-Vinblastine Run1-DMSO  | NM_0240<br>72 | DDX54 | DEAD<br>(Asp-Glu-Ala-Asp)<br>box<br>polypeptide 54 | 0.373308  | Inlier |

Identification of Survival Genes in Human Glioblastoma Cells Using siRNA Screening  
 Nikhil G Thaker, Fang Zhang, Peter R. McDonald, Tong Ying Shun, Michael D Lewen, Ian F. Pollack, and John S. Lazo

Molecular Pharmacology

|                              |               |       |                                                        |           |        |
|------------------------------|---------------|-------|--------------------------------------------------------|-----------|--------|
| siRNA-Vinblastine Run2-DMSO  | NM_0240<br>72 | DDX54 | DEAD<br>(Asp-Glu-Ala-Asp)<br>box<br>polypeptide 54     | 0.389662  | Inlier |
| siRNA Disorazole DMSO Run2   | NM_0240<br>72 | DDX54 | DEAD<br>(Asp-Glu-Ala-Asp)<br>box<br>polypeptide 54     | 0.597228  | Inlier |
| siRNA Disorazole DMSO Run3   | NM_0240<br>72 | DDX54 | DEAD<br>(Asp-Glu-Ala-Asp)<br>box<br>polypeptide 54     | 0.751772  | Inlier |
| siRNA-Temozolomide Run2-DMSO | NM_0013<br>59 | DECR1 | 2,4-dienoyl<br>CoA<br>reductase<br>1,<br>mitochondrial | -1.477938 | Inlier |
| siRNA-Vinblastine Run2-DMSO  | NM_0013<br>59 | DECR1 | 2,4-dienoyl<br>CoA<br>reductase<br>1,<br>mitochondrial | -0.680909 | Inlier |
| siRNA-Temozolomide Run3-DMSO | NM_0013<br>59 | DECR1 | 2,4-dienoyl<br>CoA<br>reductase<br>1,<br>mitochondrial | -0.668091 | Inlier |
| siRNA Disorazole DMSO Run1   | NM_0013<br>59 | DECR1 | 2,4-dienoyl<br>CoA<br>reductase<br>1,<br>mitochondrial | -0.209367 | Inlier |

Identification of Survival Genes in Human Glioblastoma Cells Using siRNA Screening  
 Nikhil G Thaker, Fang Zhang, Peter R. McDonald, Tong Ying Shun, Michael D Lewen, Ian F. Pollack, and John S. Lazo  
 Molecular Pharmacology

|                                  |               |       |                                                            |           |        |
|----------------------------------|---------------|-------|------------------------------------------------------------|-----------|--------|
| siRNA Disorazole DMSO Run3       | NM_0013<br>59 | DECR1 | 2,4-dienoyl<br>CoA<br>reductase<br>1,<br>mitochond<br>rial | 0.209366  | Inlier |
| siRNA-Vinblastine Run1-<br>DMSO  | NM_0013<br>59 | DECR1 | 2,4-dienoyl<br>CoA<br>reductase<br>1,<br>mitochond<br>rial | 0.641084  | Inlier |
| siRNA Disorazole DMSO Run2       | NM_0013<br>59 | DECR1 | 2,4-dienoyl<br>CoA<br>reductase<br>1,<br>mitochond<br>rial | 0.748273  | Inlier |
| siRNA-Temozolomide Run1-<br>DMSO | NM_0013<br>59 | DECR1 | 2,4-dienoyl<br>CoA<br>reductase<br>1,<br>mitochond<br>rial | 0.926442  | Inlier |
| siRNA-Temozolomide Run3-<br>DMSO | NM_0206<br>64 | DECR2 | 2,4-dienoyl<br>CoA<br>reductase<br>2,<br>peroxisom<br>al   | -1.418337 | Inlier |
| siRNA-Temozolomide Run2-<br>DMSO | NM_0206<br>64 | DECR2 | 2,4-dienoyl<br>CoA<br>reductase<br>2,<br>peroxisom<br>al   | -0.944108 | Inlier |
| siRNA Disorazole DMSO Run1       | NM_0206<br>64 | DECR2 | 2,4-dienoyl<br>CoA<br>reductase<br>2,<br>peroxisom<br>al   | -0.404892 | Inlier |

Identification of Survival Genes in Human Glioblastoma Cells Using siRNA Screening  
 Nikhil G Thaker, Fang Zhang, Peter R. McDonald, Tong Ying Shun, Michael D Lewen, Ian F. Pollack, and John S. Lazo  
 Molecular Pharmacology

|                              |           |       |                                                                    |           |         |
|------------------------------|-----------|-------|--------------------------------------------------------------------|-----------|---------|
| siRNA-Temozolomide Run1-DMSO | NM_020664 | DECR2 | 2,4-dienoyl CoA reductase 2, peroxisomal                           | -0.10913  | Inlier  |
| siRNA Disorazole DMSO Run3   | NM_020664 | DECR2 | 2,4-dienoyl CoA reductase 2, peroxisomal                           | 0.10913   | Inlier  |
| siRNA-Vinblastine Run2-DMSO  | NM_020664 | DECR2 | 2,4-dienoyl CoA reductase 2, peroxisomal                           | 0.28075   | Inlier  |
| siRNA Disorazole DMSO Run2   | NM_020664 | DECR2 | 2,4-dienoyl CoA reductase 2, peroxisomal                           | 3.04937   | Inlier  |
| siRNA-Vinblastine Run1-DMSO  | NM_020664 | DECR2 | 2,4-dienoyl CoA reductase 2, peroxisomal                           | 4.020334  | Outlier |
| siRNA-Temozolomide Run2-DMSO | NM_144780 | DEGS  | degenerative spermatocyte homolog 1, lipid desaturase (Drosophila) | -1.003416 | Inlier  |

Identification of Survival Genes in Human Glioblastoma Cells Using siRNA Screening

Nikhil G Thaker, Fang Zhang, Peter R. McDonald, Tong Ying Shun, Michael D Lewen, Ian F. Pollack, and John S. Lazo

Molecular Pharmacology

| siRNA              | Condition     | Run  | Gene ID | DEGS | Gene Name | Value                                                                                             | Inlier    |        |
|--------------------|---------------|------|---------|------|-----------|---------------------------------------------------------------------------------------------------|-----------|--------|
| siRNA Disorazole   | DMSO          | Run1 | NM_1447 | 80   | DEGS      | degenerati<br>ve<br>spermatoc<br>yte<br>homolog<br>1, lipid<br>desaturas<br>e<br>(Drosophil<br>a) | -0.758635 | Inlier |
| siRNA-Temozolomide | Run3-<br>DMSO |      | NM_1447 | 80   | DEGS      | degenerati<br>ve<br>spermatoc<br>yte<br>homolog<br>1, lipid<br>desaturas<br>e<br>(Drosophil<br>a) | -0.590365 | Inlier |
| siRNA-Temozolomide | Run1-<br>DMSO |      | NM_1447 | 80   | DEGS      | degenerati<br>ve<br>spermatoc<br>yte<br>homolog<br>1, lipid<br>desaturas<br>e<br>(Drosophil<br>a) | -0.39252  | Inlier |
| siRNA Disorazole   | DMSO          | Run3 | NM_1447 | 80   | DEGS      | degenerati<br>ve<br>spermatoc<br>yte<br>homolog<br>1, lipid<br>desaturas<br>e<br>(Drosophil<br>a) | 0.39252   | Inlier |
| siRNA-Vinblastine  | Run2-<br>DMSO |      | NM_1447 | 80   | DEGS      | degenerati<br>ve<br>spermatoc<br>yte<br>homolog<br>1, lipid<br>desaturas<br>e<br>(Drosophil<br>a) | 0.506587  | Inlier |

Identification of Survival Genes in Human Glioblastoma Cells Using siRNA Screening  
 Nikhil G Thaker, Fang Zhang, Peter R. McDonald, Tong Ying Shun, Michael D Lewen, Ian F. Pollack, and John S. Lazo

Molecular Pharmacology

|                              |               |       |                                                                    |           |        |
|------------------------------|---------------|-------|--------------------------------------------------------------------|-----------|--------|
| siRNA-Vinblastine Run1-DMSO  | NM_1447<br>80 | DEGS  | degenerative spermatocyte homolog 1, lipid desaturase (Drosophila) | 1.067116  | Inlier |
| siRNA Disorazole DMSO Run2   | NM_1447<br>80 | DEGS  | degenerative spermatocyte homolog 1, lipid desaturase (Drosophila) | 2.163895  | Inlier |
| siRNA-Temozolomide Run3-DMSO | NM_0140<br>58 | DESC1 | transmembrane protease, serine 11E                                 | -0.878628 | Inlier |
| siRNA-Temozolomide Run2-DMSO | NM_0140<br>58 | DESC1 | transmembrane protease, serine 11E                                 | -0.71636  | Inlier |
| siRNA Disorazole DMSO Run2   | NM_0140<br>58 | DESC1 | transmembrane protease, serine 11E                                 | -0.63264  | Inlier |
| siRNA Disorazole DMSO Run1   | NM_0140<br>58 | DESC1 | transmembrane protease, serine 11E                                 | -0.078529 | Inlier |
| siRNA-Temozolomide Run1-DMSO | NM_0140<br>58 | DESC1 | transmembrane protease, serine 11E                                 | 0.078529  | Inlier |
| siRNA Disorazole DMSO Run3   | NM_0140<br>58 | DESC1 | transmembrane protease, serine 11E                                 | 0.515701  | Inlier |

Identification of Survival Genes in Human Glioblastoma Cells Using siRNA Screening  
 Nikhil G Thaker, Fang Zhang, Peter R. McDonald, Tong Ying Shun, Michael D Lewen, Ian F. Pollack, and John S. Lazo  
 Molecular Pharmacology

|                              |           |       |                                     |           |        |
|------------------------------|-----------|-------|-------------------------------------|-----------|--------|
| siRNA-Vinblastine Run2-DMSO  | NM_014058 | DESC1 | transmembrane protease, serine 11E  | 1.251395  | Inlier |
| siRNA-Vinblastine Run1-DMSO  | NM_014058 | DESC1 | transmembrane protease, serine 11E  | 1.380878  | Inlier |
| siRNA-Temozolomide Run3-DMSO | NM_001928 | DF    | D component of complement (adipsin) | -1.370015 | Inlier |
| siRNA Disorazole DMSO Run3   | NM_001928 | DF    | D component of complement (adipsin) | -0.815433 | Inlier |
| siRNA Disorazole DMSO Run1   | NM_001928 | DF    | D component of complement (adipsin) | -0.25657  | Inlier |
| siRNA-Temozolomide Run2-DMSO | NM_001928 | DF    | D component of complement (adipsin) | -0.116334 | Inlier |
| siRNA Disorazole DMSO Run2   | NM_001928 | DF    | D component of complement (adipsin) | 0.116334  | Inlier |
| siRNA-Temozolomide Run1-DMSO | NM_001928 | DF    | D component of complement (adipsin) | 0.533567  | Inlier |
| siRNA-Vinblastine Run2-DMSO  | NM_001928 | DF    | D component of complement (adipsin) | 1.654876  | Inlier |

Identification of Survival Genes in Human Glioblastoma Cells Using siRNA Screening  
 Nikhil G Thaker, Fang Zhang, Peter R. McDonald, Tong Ying Shun, Michael D Lewen, Ian F. Pollack, and John S. Lazo

Molecular Pharmacology

| siRNA Treatment              | Gene ID   | Method | Component of Complement (adipsin)                  | Value     | Inlier |
|------------------------------|-----------|--------|----------------------------------------------------|-----------|--------|
| siRNA-Vinblastine Run1-DMSO  | NM_001928 | DF     | DNA component of complement (adipsin)              | 1.704506  | Inlier |
| siRNA-Temozolomide Run3-DMSO | NM_213566 | DFFA   | DNA fragmentation factor, 45kDa, alpha polypeptide | -0.765161 | Inlier |
| siRNA-Temozolomide Run1-DMSO | NM_213566 | DFFA   | DNA fragmentation factor, 45kDa, alpha polypeptide | -0.618157 | Inlier |
| siRNA Disorazole DMSO Run1   | NM_213566 | DFFA   | DNA fragmentation factor, 45kDa, alpha polypeptide | -0.543899 | Inlier |
| siRNA-Temozolomide Run2-DMSO | NM_213566 | DFFA   | DNA fragmentation factor, 45kDa, alpha polypeptide | -0.396339 | Inlier |
| siRNA-Vinblastine Run1-DMSO  | NM_213566 | DFFA   | DNA fragmentation factor, 45kDa, alpha polypeptide | 0.396339  | Inlier |



Identification of Survival Genes in Human Glioblastoma Cells Using siRNA Screening

Nikhil G Thaker, Fang Zhang, Peter R. McDonald, Tong Ying Shun, Michael D Lewen, Ian F. Pollack, and John S. Lazo

Molecular Pharmacology

|                              |                  |      |                                                                                                           |           |         |
|------------------------------|------------------|------|-----------------------------------------------------------------------------------------------------------|-----------|---------|
| siRNA-Vinblastine Run2-DMSO  | NM_2135<br>66    | DFFA | DNA<br>fragmentat<br>ion factor,<br>45kDa,<br>alpha<br>polypeptid<br>e                                    | 0.730843  | Inlier  |
| siRNA Disorazole DMSO Run2   | NM_2135<br>66    | DFFA | DNA<br>fragmentat<br>ion factor,<br>45kDa,<br>alpha<br>polypeptid<br>e                                    | 1.261425  | Inlier  |
| siRNA Disorazole DMSO Run3   | NM_2135<br>66    | DFFA | DNA<br>fragmentat<br>ion factor,<br>45kDa,<br>alpha<br>polypeptid<br>e                                    | 5.727172  | Outlier |
| siRNA-Temozolomide Run3-DMSO | NM_0010<br>04286 | DFFB | DNA<br>fragmentat<br>ion factor,<br>40kDa,<br>beta<br>polypeptid<br>e<br>(caspase-<br>activated<br>DNase) | -1.946717 | Inlier  |
| siRNA-Temozolomide Run2-DMSO | NM_0010<br>04286 | DFFB | DNA<br>fragmentat<br>ion factor,<br>40kDa,<br>beta<br>polypeptid<br>e<br>(caspase-<br>activated<br>DNase) | -0.90663  | Inlier  |

Identification of Survival Genes in Human Glioblastoma Cells Using siRNA Screening

Nikhil G Thaker, Fang Zhang, Peter R. McDonald, Tong Ying Shun, Michael D Lewen, Ian F. Pollack, and John S. Lazo

Molecular Pharmacology

|                                  |                  |      |                                                                                                           |           |        |
|----------------------------------|------------------|------|-----------------------------------------------------------------------------------------------------------|-----------|--------|
| siRNA Disorazole DMSO Run2       | NM_0010<br>04286 | DFFB | DNA<br>fragmentat<br>ion factor,<br>40kDa,<br>beta<br>polypeptid<br>e<br>(caspase-<br>activated<br>DNase) | -0.58014  | Inlier |
| siRNA Disorazole DMSO Run3       | NM_0010<br>04286 | DFFB | DNA<br>fragmentat<br>ion factor,<br>40kDa,<br>beta<br>polypeptid<br>e<br>(caspase-<br>activated<br>DNase) | -0.021154 | Inlier |
| siRNA-Temozolomide Run1-<br>DMSO | NM_0010<br>04286 | DFFB | DNA<br>fragmentat<br>ion factor,<br>40kDa,<br>beta<br>polypeptid<br>e<br>(caspase-<br>activated<br>DNase) | 0.021154  | Inlier |
| siRNA Disorazole DMSO Run1       | NM_0010<br>04286 | DFFB | DNA<br>fragmentat<br>ion factor,<br>40kDa,<br>beta<br>polypeptid<br>e<br>(caspase-<br>activated<br>DNase) | 0.240825  | Inlier |

Identification of Survival Genes in Human Glioblastoma Cells Using siRNA Screening

Nikhil G Thaker, Fang Zhang, Peter R. McDonald, Tong Ying Shun, Michael D Lewen, Ian F. Pollack, and John S.

Lazo

Molecular Pharmacology

|                              |              |       |                                                                             |           |        |
|------------------------------|--------------|-------|-----------------------------------------------------------------------------|-----------|--------|
| siRNA-Vinblastine Run2-DMSO  | NM_001004286 | DFFB  | DNA fragmentation factor, 40kDa, beta polypeptide (caspase-activated DNase) | 0.76886   | Inlier |
| siRNA-Vinblastine Run1-DMSO  | NM_001004286 | DFFB  | DNA fragmentation factor, 40kDa, beta polypeptide (caspase-activated DNase) | 1.94742   | Inlier |
| siRNA-Temozolomide Run3-DMSO | NM_012079    | DGAT1 | diacylglycerol O-acyltransferase homolog 1 (mouse)                          | -1.171324 | Inlier |
| siRNA-Temozolomide Run1-DMSO | NM_012079    | DGAT1 | diacylglycerol O-acyltransferase homolog 1 (mouse)                          | -0.374398 | Inlier |
| siRNA-Temozolomide Run2-DMSO | NM_012079    | DGAT1 | diacylglycerol O-acyltransferase homolog 1 (mouse)                          | -0.267365 | Inlier |
| siRNA Disorazole DMSO Run1   | NM_012079    | DGAT1 | diacylglycerol O-acyltransferase homolog 1 (mouse)                          | -0.029105 | Inlier |
| siRNA Disorazole DMSO Run3   | NM_012079    | DGAT1 | diacylglycerol O-acyltransferase homolog 1 (mouse)                          | 0.029105  | Inlier |

Identification of Survival Genes in Human Glioblastoma Cells Using siRNA Screening  
 Nikhil G Thaker, Fang Zhang, Peter R. McDonald, Tong Ying Shun, Michael D Lewen, Ian F. Pollack, and John S. Lazo

Molecular Pharmacology

| siRNA Treatment              | Gene ID   | Gene Name | Gene Description                                   | Value     | Outlier Status |
|------------------------------|-----------|-----------|----------------------------------------------------|-----------|----------------|
| siRNA-Vinblastine Run2-DMSO  | NM_012079 | DGAT1     | diacylglycerol O-acyltransferase homolog 1 (mouse) | 0.974602  | Inlier         |
| siRNA Disorazole DMSO Run2   | NM_012079 | DGAT1     | diacylglycerol O-acyltransferase homolog 1 (mouse) | 1.961968  | Inlier         |
| siRNA-Vinblastine Run1-DMSO  | NM_012079 | DGAT1     | diacylglycerol O-acyltransferase homolog 1 (mouse) | 2.83009   | Inlier         |
| siRNA-Temozolomide Run1-DMSO | NM_032564 | DGAT2     | diacylglycerol O-acyltransferase homolog 2 (mouse) | -0.888312 | Inlier         |
| siRNA Disorazole DMSO Run1   | NM_032564 | DGAT2     | diacylglycerol O-acyltransferase homolog 2 (mouse) | -0.644794 | Inlier         |
| siRNA-Vinblastine Run2-DMSO  | NM_032564 | DGAT2     | diacylglycerol O-acyltransferase homolog 2 (mouse) | -0.077286 | Inlier         |
| siRNA-Temozolomide Run3-DMSO | NM_032564 | DGAT2     | diacylglycerol O-acyltransferase homolog 2 (mouse) | -0.032415 | Inlier         |
| siRNA-Temozolomide Run2-DMSO | NM_032564 | DGAT2     | diacylglycerol O-acyltransferase homolog 2 (mouse) | 0.032415  | Inlier         |

Identification of Survival Genes in Human Glioblastoma Cells Using siRNA Screening  
 Nikhil G Thaker, Fang Zhang, Peter R. McDonald, Tong Ying Shun, Michael D Lewen, Ian F. Pollack, and John S. Lazo

Molecular Pharmacology

|                              |               |       |                                                    |           |        |
|------------------------------|---------------|-------|----------------------------------------------------|-----------|--------|
| siRNA Disorazole DMSO Run3   | NM_0325<br>64 | DGAT2 | diacylglycerol O-acyltransferase homolog 2 (mouse) | 0.704206  | Inlier |
| siRNA-Vinblastine Run1-DMSO  | NM_0325<br>64 | DGAT2 | diacylglycerol O-acyltransferase homolog 2 (mouse) | 1.611585  | Inlier |
| siRNA Disorazole DMSO Run2   | NM_0325<br>64 | DGAT2 | diacylglycerol O-acyltransferase homolog 2 (mouse) | 2.104353  | Inlier |
| siRNA-Temozolomide Run3-DMSO | NM_0013<br>45 | DGKA  | diacylglycerol kinase, alpha 80kDa                 | -0.848632 | Inlier |
| siRNA-Temozolomide Run2-DMSO | NM_0013<br>45 | DGKA  | diacylglycerol kinase, alpha 80kDa                 | -0.73266  | Inlier |
| siRNA-Temozolomide Run1-DMSO | NM_0013<br>45 | DGKA  | diacylglycerol kinase, alpha 80kDa                 | -0.692547 | Inlier |
| siRNA Disorazole DMSO Run2   | NM_0013<br>45 | DGKA  | diacylglycerol kinase, alpha 80kDa                 | -0.369295 | Inlier |
| siRNA-Vinblastine Run1-DMSO  | NM_0013<br>45 | DGKA  | diacylglycerol kinase, alpha 80kDa                 | 0.369296  | Inlier |
| siRNA Disorazole DMSO Run1   | NM_0013<br>45 | DGKA  | diacylglycerol kinase, alpha 80kDa                 | 0.475731  | Inlier |

Identification of Survival Genes in Human Glioblastoma Cells Using siRNA Screening  
 Nikhil G Thaker, Fang Zhang, Peter R. McDonald, Tong Ying Shun, Michael D Lewen, Ian F. Pollack, and John S. Lazo  
 Molecular Pharmacology

|                              |               |      |                                       |           |         |
|------------------------------|---------------|------|---------------------------------------|-----------|---------|
| siRNA-Vinblastine Run2-DMSO  | NM_0013<br>45 | DGKA | diacylglycerol kinase, alpha<br>80kDa | 0.656453  | Inlier  |
| siRNA Disorazole DMSO Run3   | NM_0013<br>45 | DGKA | diacylglycerol kinase, alpha<br>80kDa | 1.707444  | Inlier  |
| siRNA Disorazole DMSO Run1   | NM_1456<br>95 | DGKB | diacylglycerol kinase, beta<br>90kDa  | -0.888164 | Inlier  |
| siRNA-Temozolomide Run3-DMSO | NM_1456<br>95 | DGKB | diacylglycerol kinase, beta<br>90kDa  | -0.460836 | Inlier  |
| siRNA-Temozolomide Run1-DMSO | NM_1456<br>95 | DGKB | diacylglycerol kinase, beta<br>90kDa  | -0.209606 | Inlier  |
| siRNA Disorazole DMSO Run2   | NM_1456<br>95 | DGKB | diacylglycerol kinase, beta<br>90kDa  | -0.209121 | Inlier  |
| siRNA-Temozolomide Run2-DMSO | NM_1456<br>95 | DGKB | diacylglycerol kinase, beta<br>90kDa  | 0.209123  | Inlier  |
| siRNA-Vinblastine Run2-DMSO  | NM_1456<br>95 | DGKB | diacylglycerol kinase, beta<br>90kDa  | 1.804653  | Inlier  |
| siRNA-Vinblastine Run1-DMSO  | NM_1456<br>95 | DGKB | diacylglycerol kinase, beta<br>90kDa  | 3.048651  | Inlier  |
| siRNA Disorazole DMSO Run3   | NM_1456<br>95 | DGKB | diacylglycerol kinase, beta<br>90kDa  | 7.581887  | Outlier |

Identification of Survival Genes in Human Glioblastoma Cells Using siRNA Screening  
 Nikhil G Thaker, Fang Zhang, Peter R. McDonald, Tong Ying Shun, Michael D Lewen, Ian F. Pollack, and John S. Lazo  
 Molecular Pharmacology

|                              |               |      |                                         |           |        |
|------------------------------|---------------|------|-----------------------------------------|-----------|--------|
| siRNA-Temozolomide Run1-DMSO | NM_1528<br>79 | DGKD | diacylglycerol kinase, delta<br>130kDa  | -2.095618 | Inlier |
| siRNA-Temozolomide Run3-DMSO | NM_1528<br>79 | DGKD | diacylglycerol kinase, delta<br>130kDa  | -1.54126  | Inlier |
| siRNA-Temozolomide Run2-DMSO | NM_1528<br>79 | DGKD | diacylglycerol kinase, delta<br>130kDa  | -0.707784 | Inlier |
| siRNA-Vinblastine Run1-DMSO  | NM_1528<br>79 | DGKD | diacylglycerol kinase, delta<br>130kDa  | -0.049002 | Inlier |
| siRNA Disorazole DMSO Run2   | NM_1528<br>79 | DGKD | diacylglycerol kinase, delta<br>130kDa  | 0.049002  | Inlier |
| siRNA-Vinblastine Run2-DMSO  | NM_1528<br>79 | DGKD | diacylglycerol kinase, delta<br>130kDa  | 0.545996  | Inlier |
| siRNA Disorazole DMSO Run1   | NM_1528<br>79 | DGKD | diacylglycerol kinase, delta<br>130kDa  | 0.641216  | Inlier |
| siRNA Disorazole DMSO Run3   | NM_1528<br>79 | DGKD | diacylglycerol kinase, delta<br>130kDa  | 1.432162  | Inlier |
| siRNA-Temozolomide Run3-DMSO | NM_0036<br>47 | DGKE | diacylglycerol kinase, epsilon<br>64kDa | -0.836372 | Inlier |
| siRNA Disorazole DMSO Run2   | NM_0036<br>47 | DGKE | diacylglycerol kinase, epsilon<br>64kDa | -0.714283 | Inlier |

Identification of Survival Genes in Human Glioblastoma Cells Using siRNA Screening  
 Nikhil G Thaker, Fang Zhang, Peter R. McDonald, Tong Ying Shun, Michael D Lewen, Ian F. Pollack, and John S. Lazo  
 Molecular Pharmacology

|                              |               |      |                                         |           |        |
|------------------------------|---------------|------|-----------------------------------------|-----------|--------|
| siRNA-Temozolomide Run2-DMSO | NM_0036<br>47 | DGKE | diacylglycerol kinase, epsilon<br>64kDa | -0.373253 | Inlier |
| siRNA-Temozolomide Run1-DMSO | NM_0036<br>47 | DGKE | diacylglycerol kinase, epsilon<br>64kDa | -0.318497 | Inlier |
| siRNA-Vinblastine Run1-DMSO  | NM_0036<br>47 | DGKE | diacylglycerol kinase, epsilon<br>64kDa | 0.318496  | Inlier |
| siRNA Disorazole DMSO Run1   | NM_0036<br>47 | DGKE | diacylglycerol kinase, epsilon<br>64kDa | 0.634717  | Inlier |
| siRNA Disorazole DMSO Run3   | NM_0036<br>47 | DGKE | diacylglycerol kinase, epsilon<br>64kDa | 1.532663  | Inlier |
| siRNA-Vinblastine Run2-DMSO  | NM_0036<br>47 | DGKE | diacylglycerol kinase, epsilon<br>64kDa | 1.68043   | Inlier |
| siRNA-Temozolomide Run1-DMSO | NM_0013<br>46 | DGKG | diacylglycerol kinase, gamma<br>90kDa   | -2.021485 | Inlier |
| siRNA Disorazole DMSO Run2   | NM_0013<br>46 | DGKG | diacylglycerol kinase, gamma<br>90kDa   | -1.792454 | Inlier |
| siRNA-Temozolomide Run3-DMSO | NM_0013<br>46 | DGKG | diacylglycerol kinase, gamma<br>90kDa   | -1.396811 | Inlier |
| siRNA Disorazole DMSO Run1   | NM_0013<br>46 | DGKG | diacylglycerol kinase, gamma<br>90kDa   | -0.007366 | Inlier |



Identification of Survival Genes in Human Glioblastoma Cells Using siRNA Screening  
 Nikhil G Thaker, Fang Zhang, Peter R. McDonald, Tong Ying Shun, Michael D Lewen, Ian F. Pollack, and John S. Lazo  
 Molecular Pharmacology

|                              |           |      |                                    |           |        |
|------------------------------|-----------|------|------------------------------------|-----------|--------|
| siRNA-Temozolomide Run2-DMSO | NM_001346 | DGKG | diacylglycerol kinase, gamma 90kDa | 0.007367  | Inlier |
| siRNA-Vinblastine Run2-DMSO  | NM_001346 | DGKG | diacylglycerol kinase, gamma 90kDa | 0.363024  | Inlier |
| siRNA-Vinblastine Run1-DMSO  | NM_001346 | DGKG | diacylglycerol kinase, gamma 90kDa | 0.497283  | Inlier |
| siRNA Disorazole DMSO Run3   | NM_001346 | DGKG | diacylglycerol kinase, gamma 90kDa | 0.851718  | Inlier |
| siRNA Disorazole DMSO Run2   | NM_152910 | DGKH | diacylglycerol kinase, eta         | -1.158498 | Inlier |
| siRNA-Temozolomide Run3-DMSO | NM_152910 | DGKH | diacylglycerol kinase, eta         | -0.819792 | Inlier |
| siRNA-Temozolomide Run1-DMSO | NM_152910 | DGKH | diacylglycerol kinase, eta         | -0.364956 | Inlier |
| siRNA-Temozolomide Run2-DMSO | NM_152910 | DGKH | diacylglycerol kinase, eta         | -0.21541  | Inlier |
| siRNA Disorazole DMSO Run1   | NM_152910 | DGKH | diacylglycerol kinase, eta         | 0.21541   | Inlier |
| siRNA Disorazole DMSO Run3   | NM_152910 | DGKH | diacylglycerol kinase, eta         | 0.529208  | Inlier |
| siRNA-Vinblastine Run2-DMSO  | NM_152910 | DGKH | diacylglycerol kinase, eta         | 1.531819  | Inlier |
| siRNA-Vinblastine Run1-DMSO  | NM_152910 | DGKH | diacylglycerol kinase, eta         | 1.532899  | Inlier |

Identification of Survival Genes in Human Glioblastoma Cells Using siRNA Screening  
 Nikhil G Thaker, Fang Zhang, Peter R. McDonald, Tong Ying Shun, Michael D Lewen, Ian F. Pollack, and John S. Lazo

Molecular Pharmacology

|                              |               |      |                                     |           |         |
|------------------------------|---------------|------|-------------------------------------|-----------|---------|
| siRNA-Temozolomide Run1-DMSO | NM_0047<br>17 | DGKI | diacylglycerol kinase, iota         | -0.796991 | Inlier  |
| siRNA Disorazole DMSO Run1   | NM_0047<br>17 | DGKI | diacylglycerol kinase, iota         | -0.552009 | Inlier  |
| siRNA Disorazole DMSO Run2   | NM_0047<br>17 | DGKI | diacylglycerol kinase, iota         | -0.241896 | Inlier  |
| siRNA-Temozolomide Run3-DMSO | NM_0047<br>17 | DGKI | diacylglycerol kinase, iota         | -0.21958  | Inlier  |
| siRNA-Temozolomide Run2-DMSO | NM_0047<br>17 | DGKI | diacylglycerol kinase, iota         | 0.219579  | Inlier  |
| siRNA-Vinblastine Run1-DMSO  | NM_0047<br>17 | DGKI | diacylglycerol kinase, iota         | 1.304056  | Inlier  |
| siRNA-Vinblastine Run2-DMSO  | NM_0047<br>17 | DGKI | diacylglycerol kinase, iota         | 2.444338  | Inlier  |
| siRNA Disorazole DMSO Run3   | NM_0047<br>17 | DGKI | diacylglycerol kinase, iota         | 3.978828  | Outlier |
| siRNA-Temozolomide Run3-DMSO | NM_0013<br>47 | DGKQ | diacylglycerol kinase, theta 110kDa | -1.319436 | Inlier  |
| siRNA-Temozolomide Run1-DMSO | NM_0013<br>47 | DGKQ | diacylglycerol kinase, theta 110kDa | -0.869819 | Inlier  |
| siRNA Disorazole DMSO Run2   | NM_0013<br>47 | DGKQ | diacylglycerol kinase, theta 110kDa | -0.479181 | Inlier  |
| siRNA Disorazole DMSO Run1   | NM_0013<br>47 | DGKQ | diacylglycerol kinase, theta 110kDa | -0.18533  | Inlier  |

Identification of Survival Genes in Human Glioblastoma Cells Using siRNA Screening  
 Nikhil G Thaker, Fang Zhang, Peter R. McDonald, Tong Ying Shun, Michael D Lewen, Ian F. Pollack, and John S. Lazo  
 Molecular Pharmacology

|                              |               |      |                                        |           |        |
|------------------------------|---------------|------|----------------------------------------|-----------|--------|
| siRNA-Vinblastine Run1-DMSO  | NM_0013<br>47 | DGKQ | diacylglycerol kinase, theta<br>110kDa | 0.18533   | Inlier |
| siRNA-Temozolomide Run2-DMSO | NM_0013<br>47 | DGKQ | diacylglycerol kinase, theta<br>110kDa | 0.350497  | Inlier |
| siRNA-Vinblastine Run2-DMSO  | NM_0013<br>47 | DGKQ | diacylglycerol kinase, theta<br>110kDa | 1.109301  | Inlier |
| siRNA Disorazole DMSO Run3   | NM_0013<br>47 | DGKQ | diacylglycerol kinase, theta<br>110kDa | 1.534623  | Inlier |
| siRNA Disorazole DMSO Run2   | NM_0036<br>46 | DGKZ | diacylglycerol kinase, zeta<br>104kDa  | -2.24719  | Inlier |
| siRNA Disorazole DMSO Run3   | NM_0036<br>46 | DGKZ | diacylglycerol kinase, zeta<br>104kDa  | -1.782624 | Inlier |
| siRNA-Temozolomide Run3-DMSO | NM_0036<br>46 | DGKZ | diacylglycerol kinase, zeta<br>104kDa  | -1.542889 | Inlier |
| siRNA-Temozolomide Run2-DMSO | NM_0036<br>46 | DGKZ | diacylglycerol kinase, zeta<br>104kDa  | -0.234866 | Inlier |
| siRNA Disorazole DMSO Run1   | NM_0036<br>46 | DGKZ | diacylglycerol kinase, zeta<br>104kDa  | 0.234866  | Inlier |
| siRNA-Temozolomide Run1-DMSO | NM_0036<br>46 | DGKZ | diacylglycerol kinase, zeta<br>104kDa  | 0.297093  | Inlier |

Identification of Survival Genes in Human Glioblastoma Cells Using siRNA Screening

Nikhil G Thaker, Fang Zhang, Peter R. McDonald, Tong Ying Shun, Michael D Lewen, Ian F. Pollack, and John S.

Lazo

Molecular Pharmacology

|                              |               |        |                                                      |           |        |
|------------------------------|---------------|--------|------------------------------------------------------|-----------|--------|
| siRNA-Vinblastine Run2-DMSO  | NM_0036<br>46 | DGKZ   | diacylglycerol kinase, zeta<br>104kDa                | 0.549525  | Inlier |
| siRNA-Vinblastine Run1-DMSO  | NM_0036<br>46 | DGKZ   | diacylglycerol kinase, zeta<br>104kDa                | 0.799475  | Inlier |
| siRNA-Temozolomide Run3-DMSO | NM_1524<br>30 | D-GPCR | olfactory receptor, family 51, subfamily E, member 1 | -0.93745  | Inlier |
| siRNA-Temozolomide Run2-DMSO | NM_1524<br>30 | D-GPCR | olfactory receptor, family 51, subfamily E, member 1 | -0.466447 | Inlier |
| siRNA Disorazole DMSO Run1   | NM_1524<br>30 | D-GPCR | olfactory receptor, family 51, subfamily E, member 1 | -0.112198 | Inlier |
| siRNA-Temozolomide Run1-DMSO | NM_1524<br>30 | D-GPCR | olfactory receptor, family 51, subfamily E, member 1 | -0.074863 | Inlier |
| siRNA Disorazole DMSO Run2   | NM_1524<br>30 | D-GPCR | olfactory receptor, family 51, subfamily E, member 1 | 0.074863  | Inlier |
| siRNA Disorazole DMSO Run3   | NM_1524<br>30 | D-GPCR | olfactory receptor, family 51, subfamily E, member 1 | 0.882553  | Inlier |
| siRNA-Vinblastine Run1-DMSO  | NM_1524<br>30 | D-GPCR | olfactory receptor, family 51, subfamily E, member 1 | 1.812608  | Inlier |

Identification of Survival Genes in Human Glioblastoma Cells Using siRNA Screening  
 Nikhil G Thaker, Fang Zhang, Peter R. McDonald, Tong Ying Shun, Michael D Lewen, Ian F. Pollack, and John S. Lazo

Molecular Pharmacology

|                              |               |        |                                                      |           |        |
|------------------------------|---------------|--------|------------------------------------------------------|-----------|--------|
| siRNA-Vinblastine Run2-DMSO  | NM_1524<br>30 | D-GPCR | olfactory receptor, family 51, subfamily E, member 1 | 1.874939  | Inlier |
| siRNA Disorazole DMSO Run2   | NM_0809<br>18 | DGUOK  | deoxyguanosine kinase                                | -0.773608 | Inlier |
| siRNA-Temozolomide Run1-DMSO | NM_0809<br>18 | DGUOK  | deoxyguanosine kinase                                | -0.724312 | Inlier |
| siRNA-Temozolomide Run2-DMSO | NM_0809<br>18 | DGUOK  | deoxyguanosine kinase                                | -0.117362 | Inlier |
| siRNA Disorazole DMSO Run1   | NM_0809<br>18 | DGUOK  | deoxyguanosine kinase                                | -0.098202 | Inlier |
| siRNA-Temozolomide Run3-DMSO | NM_0809<br>18 | DGUOK  | deoxyguanosine kinase                                | 0.098202  | Inlier |
| siRNA-Vinblastine Run2-DMSO  | NM_0809<br>18 | DGUOK  | deoxyguanosine kinase                                | 0.624688  | Inlier |
| siRNA-Vinblastine Run1-DMSO  | NM_0809<br>18 | DGUOK  | deoxyguanosine kinase                                | 0.989637  | Inlier |
| siRNA Disorazole DMSO Run3   | NM_0809<br>18 | DGUOK  | deoxyguanosine kinase                                | 1.167114  | Inlier |
| siRNA-Temozolomide Run3-DMSO | NM_0147<br>62 | DHCR24 | 24-dehydrocholesterol reductase                      | -0.895768 | Inlier |
| siRNA Disorazole DMSO Run1   | NM_0147<br>62 | DHCR24 | 24-dehydrocholesterol reductase                      | -0.698406 | Inlier |
| siRNA-Temozolomide Run1-DMSO | NM_0147<br>62 | DHCR24 | 24-dehydrocholesterol reductase                      | -0.206003 | Inlier |
| siRNA-Temozolomide Run2-DMSO | NM_0147<br>62 | DHCR24 | 24-dehydrocholesterol reductase                      | -0.071364 | Inlier |
| siRNA Disorazole DMSO Run3   | NM_0147<br>62 | DHCR24 | 24-dehydrocholesterol reductase                      | 0.071364  | Inlier |

Identification of Survival Genes in Human Glioblastoma Cells Using siRNA Screening  
 Nikhil G Thaker, Fang Zhang, Peter R. McDonald, Tong Ying Shun, Michael D Lewen, Ian F. Pollack, and John S. Lazo

Molecular Pharmacology

|                              |               |        |                                     |           |        |
|------------------------------|---------------|--------|-------------------------------------|-----------|--------|
| siRNA-Vinblastine Run2-DMSO  | NM_0147<br>62 | DHCR24 | 24-dehydrocholesterol reductase     | 0.665898  | Inlier |
| siRNA-Vinblastine Run1-DMSO  | NM_0147<br>62 | DHCR24 | 24-dehydrocholesterol reductase     | 0.683102  | Inlier |
| siRNA Disorazole DMSO Run2   | NM_0147<br>62 | DHCR24 | 24-dehydrocholesterol reductase     | 1.794711  | Inlier |
| siRNA-Temozolomide Run3-DMSO | NM_0013<br>60 | DHCR7  | 7-dehydrocholesterol reductase      | -2.150014 | Inlier |
| siRNA Disorazole DMSO Run1   | NM_0013<br>60 | DHCR7  | 7-dehydrocholesterol reductase      | -1.020721 | Inlier |
| siRNA-Temozolomide Run2-DMSO | NM_0013<br>60 | DHCR7  | 7-dehydrocholesterol reductase      | -0.721138 | Inlier |
| siRNA-Temozolomide Run1-DMSO | NM_0013<br>60 | DHCR7  | 7-dehydrocholesterol reductase      | -0.234218 | Inlier |
| siRNA Disorazole DMSO Run3   | NM_0013<br>60 | DHCR7  | 7-dehydrocholesterol reductase      | 0.234218  | Inlier |
| siRNA-Vinblastine Run1-DMSO  | NM_0013<br>60 | DHCR7  | 7-dehydrocholesterol reductase      | 0.61348   | Inlier |
| siRNA-Vinblastine Run2-DMSO  | NM_0013<br>60 | DHCR7  | 7-dehydrocholesterol reductase      | 0.627862  | Inlier |
| siRNA Disorazole DMSO Run2   | NM_0013<br>60 | DHCR7  | 7-dehydrocholesterol reductase      | 1.647087  | Inlier |
| siRNA-Temozolomide Run3-DMSO | NM_0144<br>75 | DHDH   | dihydrodiol dehydrogenase (dimeric) | -0.959719 | Inlier |

Identification of Survival Genes in Human Glioblastoma Cells Using siRNA Screening  
 Nikhil G Thaker, Fang Zhang, Peter R. McDonald, Tong Ying Shun, Michael D Lewen, Ian F. Pollack, and John S. Lazo  
 Molecular Pharmacology

|                                  |               |      |                                               |           |        |
|----------------------------------|---------------|------|-----------------------------------------------|-----------|--------|
| siRNA Disorazole DMSO Run1       | NM_0144<br>75 | DHDH | dihydrodiol<br>dehydroge<br>nase<br>(dimeric) | -0.38928  | Inlier |
| siRNA-Temozolomide Run2-<br>DMSO | NM_0144<br>75 | DHDH | dihydrodiol<br>dehydroge<br>nase<br>(dimeric) | -0.191325 | Inlier |
| siRNA Disorazole DMSO Run2       | NM_0144<br>75 | DHDH | dihydrodiol<br>dehydroge<br>nase<br>(dimeric) | -0.135996 | Inlier |
| siRNA-Temozolomide Run1-<br>DMSO | NM_0144<br>75 | DHDH | dihydrodiol<br>dehydroge<br>nase<br>(dimeric) | 0.135997  | Inlier |
| siRNA-Vinblastine Run1-<br>DMSO  | NM_0144<br>75 | DHDH | dihydrodiol<br>dehydroge<br>nase<br>(dimeric) | 1.457772  | Inlier |
| siRNA Disorazole DMSO Run3       | NM_0144<br>75 | DHDH | dihydrodiol<br>dehydroge<br>nase<br>(dimeric) | 1.778444  | Inlier |
| siRNA-Vinblastine Run2-<br>DMSO  | NM_0144<br>75 | DHDH | dihydrodiol<br>dehydroge<br>nase<br>(dimeric) | 2.438547  | Inlier |
| siRNA-Temozolomide Run3-<br>DMSO | NM_0007<br>91 | DHFR | dihydrofola<br>te<br>reductase                | -1.801296 | Inlier |
| siRNA-Temozolomide Run2-<br>DMSO | NM_0007<br>91 | DHFR | dihydrofola<br>te<br>reductase                | -0.953476 | Inlier |
| siRNA-Vinblastine Run2-<br>DMSO  | NM_0007<br>91 | DHFR | dihydrofola<br>te<br>reductase                | -0.174617 | Inlier |
| siRNA Disorazole DMSO Run1       | NM_0007<br>91 | DHFR | dihydrofola<br>te<br>reductase                | -0.029889 | Inlier |
| siRNA Disorazole DMSO Run3       | NM_0007<br>91 | DHFR | dihydrofola<br>te<br>reductase                | 0.029889  | Inlier |

Identification of Survival Genes in Human Glioblastoma Cells Using siRNA Screening  
 Nikhil G Thaker, Fang Zhang, Peter R. McDonald, Tong Ying Shun, Michael D Lewen, Ian F. Pollack, and John S. Lazo

| Molecular Pharmacology       |                  |       |                              |           |        |
|------------------------------|------------------|-------|------------------------------|-----------|--------|
| siRNA-Temozolomide Run1-DMSO | NM_0007<br>91    | DHFR  | dihydrofolate reductase      | 0.395524  | Inlier |
| siRNA-Vinblastine Run1-DMSO  | NM_0007<br>91    | DHFR  | dihydrofolate reductase      | 1.30812   | Inlier |
| siRNA Disorazole DMSO Run2   | NM_0007<br>91    | DHFR  | dihydrofolate reductase      | 1.615284  | Inlier |
| siRNA Disorazole DMSO Run2   | NM_0010<br>25193 | DHODH | dihydroorotate dehydrogenase | -2.306795 | Inlier |
| siRNA Disorazole DMSO Run1   | NM_0010<br>25193 | DHODH | dihydroorotate dehydrogenase | -1.789255 | Inlier |
| siRNA-Temozolomide Run2-DMSO | NM_0010<br>25193 | DHODH | dihydroorotate dehydrogenase | -0.621168 | Inlier |
| siRNA-Vinblastine Run1-DMSO  | NM_0010<br>25193 | DHODH | dihydroorotate dehydrogenase | -0.094319 | Inlier |
| siRNA-Temozolomide Run3-DMSO | NM_0010<br>25193 | DHODH | dihydroorotate dehydrogenase | 0.094319  | Inlier |
| siRNA Disorazole DMSO Run3   | NM_0010<br>25193 | DHODH | dihydroorotate dehydrogenase | 0.482698  | Inlier |
| siRNA-Vinblastine Run2-DMSO  | NM_0010<br>25193 | DHODH | dihydroorotate dehydrogenase | 0.727832  | Inlier |
| siRNA-Temozolomide Run1-DMSO | NM_0010<br>25193 | DHODH | dihydroorotate dehydrogenase | 0.862613  | Inlier |
| siRNA Disorazole DMSO Run1   | NM_0134<br>07    | DHPS  | deoxyhypusine synthase       | -2.196905 | Inlier |
| siRNA-Temozolomide Run1-DMSO | NM_0134<br>07    | DHPS  | deoxyhypusine synthase       | -1.73075  | Inlier |
| siRNA Disorazole DMSO Run3   | NM_0134<br>07    | DHPS  | deoxyhypusine synthase       | -0.664528 | Inlier |



Identification of Survival Genes in Human Glioblastoma Cells Using siRNA Screening

Nikhil G Thaker, Fang Zhang, Peter R. McDonald, Tong Ying Shun, Michael D Lewen, Ian F. Pollack, and John S.

Lazo

Molecular Pharmacology

|                              |           |       |                                               |           |        |
|------------------------------|-----------|-------|-----------------------------------------------|-----------|--------|
| siRNA-Temozolomide Run2-DMSO | NM_013407 | DHPS  | deoxyhypusine synthase                        | -0.134304 | Inlier |
| siRNA-Temozolomide Run3-DMSO | NM_013407 | DHPS  | deoxyhypusine synthase                        | 0.134304  | Inlier |
| siRNA Disorazole DMSO Run2   | NM_013407 | DHPS  | deoxyhypusine synthase                        | 0.192593  | Inlier |
| siRNA-Vinblastine Run2-DMSO  | NM_013407 | DHPS  | deoxyhypusine synthase                        | 0.684471  | Inlier |
| siRNA-Vinblastine Run1-DMSO  | NM_013407 | DHPS  | deoxyhypusine synthase                        | 2.121704  | Inlier |
| siRNA-Temozolomide Run3-DMSO | NM_138452 | DHRS1 | dehydrogenase/reductase (SDR family) member 1 | -3.28435  | Inlier |
| siRNA-Temozolomide Run2-DMSO | NM_138452 | DHRS1 | dehydrogenase/reductase (SDR family) member 1 | -2.277916 | Inlier |
| siRNA-Temozolomide Run1-DMSO | NM_138452 | DHRS1 | dehydrogenase/reductase (SDR family) member 1 | -0.55834  | Inlier |
| siRNA Disorazole DMSO Run2   | NM_138452 | DHRS1 | dehydrogenase/reductase (SDR family) member 1 | -0.289078 | Inlier |
| siRNA Disorazole DMSO Run3   | NM_138452 | DHRS1 | dehydrogenase/reductase (SDR family) member 1 | 0.289078  | Inlier |
| siRNA Disorazole DMSO Run1   | NM_138452 | DHRS1 | dehydrogenase/reductase (SDR family) member 1 | 0.453983  | Inlier |

Identification of Survival Genes in Human Glioblastoma Cells Using siRNA Screening

Nikhil G Thaker, Fang Zhang, Peter R. McDonald, Tong Ying Shun, Michael D Lewen, Ian F. Pollack, and John S. Lazo

Molecular Pharmacology

|                              |               |        |                                                |           |        |
|------------------------------|---------------|--------|------------------------------------------------|-----------|--------|
| siRNA-Vinblastine Run1-DMSO  | NM_1384<br>52 | DHRS1  | dehydrogenase/reductase (SDR family) member 1  | 0.79066   | Inlier |
| siRNA-Vinblastine Run2-DMSO  | NM_1384<br>52 | DHRS1  | dehydrogenase/reductase (SDR family) member 1  | 2.590929  | Inlier |
| siRNA-Temozolomide Run3-DMSO | NM_0162<br>46 | DHRS10 | dehydrogenase/reductase (SDR family) member 10 | -1.558246 | Inlier |
| siRNA Disorazole DMSO Run1   | NM_0162<br>46 | DHRS10 | dehydrogenase/reductase (SDR family) member 10 | -1.042828 | Inlier |
| siRNA-Temozolomide Run2-DMSO | NM_0162<br>46 | DHRS10 | dehydrogenase/reductase (SDR family) member 10 | -0.786338 | Inlier |
| siRNA-Temozolomide Run1-DMSO | NM_0162<br>46 | DHRS10 | dehydrogenase/reductase (SDR family) member 10 | -0.167785 | Inlier |
| siRNA-Vinblastine Run2-DMSO  | NM_0162<br>46 | DHRS10 | dehydrogenase/reductase (SDR family) member 10 | 0.167785  | Inlier |

Identification of Survival Genes in Human Glioblastoma Cells Using siRNA Screening  
 Nikhil G Thaker, Fang Zhang, Peter R. McDonald, Tong Ying Shun, Michael D Lewen, Ian F. Pollack, and John S. Lazo

Molecular Pharmacology

|                                  |               |        |                                                                |                                                              |        |
|----------------------------------|---------------|--------|----------------------------------------------------------------|--------------------------------------------------------------|--------|
|                                  |               |        |                                                                | dehydroge<br>nase/redu<br>ctase<br>(SDR<br>family)<br>member |        |
| siRNA Disorazole DMSO Run3       | NM_0162<br>46 | DHRS10 | 10                                                             | 0.342885                                                     | Inlier |
|                                  |               |        | dehydroge<br>nase/redu<br>ctase<br>(SDR<br>family)<br>member   |                                                              |        |
| siRNA-Vinblastine Run1-<br>DMSO  | NM_0162<br>46 | DHRS10 | 10                                                             | 0.562662                                                     | Inlier |
|                                  |               |        | dehydroge<br>nase/redu<br>ctase<br>(SDR<br>family)<br>member   |                                                              |        |
| siRNA Disorazole DMSO Run2       | NM_0162<br>46 | DHRS10 | 10                                                             | 1.577941                                                     | Inlier |
|                                  |               |        | dehydroge<br>nase/redu<br>ctase<br>(SDR<br>family)<br>member 2 |                                                              |        |
| siRNA-Temozolomide Run3-<br>DMSO | NM_1829<br>08 | DHRS2  | member 2                                                       | -1.343934                                                    | Inlier |
|                                  |               |        | dehydroge<br>nase/redu<br>ctase<br>(SDR<br>family)<br>member 2 |                                                              |        |
| siRNA-Temozolomide Run2-<br>DMSO | NM_1829<br>08 | DHRS2  | member 2                                                       | -1.091841                                                    | Inlier |
|                                  |               |        | dehydroge<br>nase/redu<br>ctase<br>(SDR<br>family)<br>member 2 |                                                              |        |
| siRNA Disorazole DMSO Run1       | NM_1829<br>08 | DHRS2  | member 2                                                       | -0.807825                                                    | Inlier |
|                                  |               |        | dehydroge<br>nase/redu<br>ctase<br>(SDR<br>family)<br>member 2 |                                                              |        |
| siRNA-Temozolomide Run1-<br>DMSO | NM_1829<br>08 | DHRS2  | member 2                                                       | -0.024676                                                    | Inlier |
|                                  |               |        | dehydroge<br>nase/redu<br>ctase<br>(SDR<br>family)<br>member 2 |                                                              |        |
| siRNA Disorazole DMSO Run3       | NM_1829<br>08 | DHRS2  | member 2                                                       | 0.024676                                                     | Inlier |

Identification of Survival Genes in Human Glioblastoma Cells Using siRNA Screening

Nikhil G Thaker, Fang Zhang, Peter R. McDonald, Tong Ying Shun, Michael D Lewen, Ian F. Pollack, and John S. Lazo

Molecular Pharmacology

|                              |           |       |                                               |           |        |
|------------------------------|-----------|-------|-----------------------------------------------|-----------|--------|
| siRNA-Vinblastine Run2-DMSO  | NM_182908 | DHRS2 | dehydrogenase/reductase (SDR family) member 2 | 0.430267  | Inlier |
| siRNA-Vinblastine Run1-DMSO  | NM_182908 | DHRS2 | dehydrogenase/reductase (SDR family) member 2 | 0.541175  | Inlier |
| siRNA Disorazole DMSO Run2   | NM_182908 | DHRS2 | dehydrogenase/reductase (SDR family) member 2 | 0.929941  | Inlier |
| siRNA-Temozolomide Run3-DMSO | NM_004753 | DHRS3 | dehydrogenase/reductase (SDR family) member 3 | -1.932978 | Inlier |
| siRNA-Temozolomide Run2-DMSO | NM_004753 | DHRS3 | dehydrogenase/reductase (SDR family) member 3 | -1.091604 | Inlier |
| siRNA Disorazole DMSO Run1   | NM_004753 | DHRS3 | dehydrogenase/reductase (SDR family) member 3 | -0.394843 | Inlier |
| siRNA-Temozolomide Run1-DMSO | NM_004753 | DHRS3 | dehydrogenase/reductase (SDR family) member 3 | -0.048448 | Inlier |
| siRNA-Vinblastine Run2-DMSO  | NM_004753 | DHRS3 | dehydrogenase/reductase (SDR family) member 3 | 0.048448  | Inlier |

Identification of Survival Genes in Human Glioblastoma Cells Using siRNA Screening  
 Nikhil G Thaker, Fang Zhang, Peter R. McDonald, Tong Ying Shun, Michael D Lewen, Ian F. Pollack, and John S. Lazo

Molecular Pharmacology

|                                  |               |       |                                                                |           |        |
|----------------------------------|---------------|-------|----------------------------------------------------------------|-----------|--------|
| siRNA Disorazole DMSO Run2       | NM_0047<br>53 | DHRS3 | dehydroge<br>nase/redu<br>ctase<br>(SDR<br>family)<br>member 3 | 0.631087  | Inlier |
| siRNA Disorazole DMSO Run3       | NM_0047<br>53 | DHRS3 | dehydroge<br>nase/redu<br>ctase<br>(SDR<br>family)<br>member 3 | 0.717913  | Inlier |
| siRNA-Vinblastine Run1-<br>DMSO  | NM_0047<br>53 | DHRS3 | dehydroge<br>nase/redu<br>ctase<br>(SDR<br>family)<br>member 3 | 0.759445  | Inlier |
| siRNA-Temozolomide Run3-<br>DMSO | NM_0210<br>04 | DHRS4 | dehydroge<br>nase/redu<br>ctase<br>(SDR<br>family)<br>member 4 | -0.875744 | Inlier |
| siRNA Disorazole DMSO Run2       | NM_0210<br>04 | DHRS4 | dehydroge<br>nase/redu<br>ctase<br>(SDR<br>family)<br>member 4 | -0.761006 | Inlier |
| siRNA-Temozolomide Run2-<br>DMSO | NM_0210<br>04 | DHRS4 | dehydroge<br>nase/redu<br>ctase<br>(SDR<br>family)<br>member 4 | -0.587994 | Inlier |
| siRNA Disorazole DMSO Run1       | NM_0210<br>04 | DHRS4 | dehydroge<br>nase/redu<br>ctase<br>(SDR<br>family)<br>member 4 | -0.030487 | Inlier |
| siRNA Disorazole DMSO Run3       | NM_0210<br>04 | DHRS4 | dehydroge<br>nase/redu<br>ctase<br>(SDR<br>family)<br>member 4 | 0.030487  | Inlier |

Identification of Survival Genes in Human Glioblastoma Cells Using siRNA Screening

Nikhil G Thaker, Fang Zhang, Peter R. McDonald, Tong Ying Shun, Michael D Lewen, Ian F. Pollack, and John S. Lazo

Molecular Pharmacology

|                              |           |         |                                                      |           |        |
|------------------------------|-----------|---------|------------------------------------------------------|-----------|--------|
| siRNA-Temozolomide Run1-DMSO | NM_021004 | DHRS4   | dehydrogenase/reductase (SDR family) member 4        | 0.109754  | Inlier |
| siRNA-Vinblastine Run1-DMSO  | NM_021004 | DHRS4   | dehydrogenase/reductase (SDR family) member 4        | 1.548526  | Inlier |
| siRNA-Vinblastine Run2-DMSO  | NM_021004 | DHRS4   | dehydrogenase/reductase (SDR family) member 4        | 1.806452  | Inlier |
| siRNA-Temozolomide Run2-DMSO | NM_198083 | DHRS4L2 | dehydrogenase/reductase (SDR family) member 4 like 2 | -2.231825 | Inlier |
| siRNA Disorazole DMSO Run1   | NM_198083 | DHRS4L2 | dehydrogenase/reductase (SDR family) member 4 like 2 | -0.393255 | Inlier |
| siRNA-Vinblastine Run1-DMSO  | NM_198083 | DHRS4L2 | dehydrogenase/reductase (SDR family) member 4 like 2 | -0.198591 | Inlier |
| siRNA-Temozolomide Run1-DMSO | NM_198083 | DHRS4L2 | dehydrogenase/reductase (SDR family) member 4 like 2 | -0.007469 | Inlier |

Identification of Survival Genes in Human Glioblastoma Cells Using siRNA Screening

Nikhil G Thaker, Fang Zhang, Peter R. McDonald, Tong Ying Shun, Michael D Lewen, Ian F. Pollack, and John S. Lazo

Molecular Pharmacology

|                              |           |         |                                                      |           |         |
|------------------------------|-----------|---------|------------------------------------------------------|-----------|---------|
| siRNA-Vinblastine Run2-DMSO  | NM_198083 | DHRS4L2 | dehydrogenase/reductase (SDR family) member 4 like 2 | 0.00747   | Inlier  |
| siRNA-Temozolomide Run3-DMSO | NM_198083 | DHRS4L2 | dehydrogenase/reductase (SDR family) member 4 like 2 | 0.955745  | Inlier  |
| siRNA Disorazole DMSO Run3   | NM_198083 | DHRS4L2 | dehydrogenase/reductase (SDR family) member 4 like 2 | 1.550969  | Inlier  |
| siRNA Disorazole DMSO Run2   | NM_198083 | DHRS4L2 | dehydrogenase/reductase (SDR family) member 4 like 2 | 5.784589  | Outlier |
| siRNA-Temozolomide Run3-DMSO | NM_020139 | DHRS6   | dehydrogenase/reductase (SDR family) member 6        | -3.482864 | Inlier  |
| siRNA-Temozolomide Run2-DMSO | NM_020139 | DHRS6   | dehydrogenase/reductase (SDR family) member 6        | -1.704947 | Inlier  |
| siRNA Disorazole DMSO Run1   | NM_020139 | DHRS6   | dehydrogenase/reductase (SDR family) member 6        | -0.714646 | Inlier  |
| siRNA Disorazole DMSO Run2   | NM_020139 | DHRS6   | dehydrogenase/reductase (SDR family) member 6        | -0.145004 | Inlier  |

Identification of Survival Genes in Human Glioblastoma Cells Using siRNA Screening  
 Nikhil G Thaker, Fang Zhang, Peter R. McDonald, Tong Ying Shun, Michael D Lewen, Ian F. Pollack, and John S. Lazo

Molecular Pharmacology

|                              |           |       |                                               |           |        |
|------------------------------|-----------|-------|-----------------------------------------------|-----------|--------|
| siRNA-Temozolomide Run1-DMSO | NM_020139 | DHRS6 | dehydrogenase/reductase (SDR family) member 6 | 0.145003  | Inlier |
| siRNA-Vinblastine Run2-DMSO  | NM_020139 | DHRS6 | dehydrogenase/reductase (SDR family) member 6 | 0.356879  | Inlier |
| siRNA-Vinblastine Run1-DMSO  | NM_020139 | DHRS6 | dehydrogenase/reductase (SDR family) member 6 | 0.634354  | Inlier |
| siRNA Disorazole DMSO Run3   | NM_020139 | DHRS6 | dehydrogenase/reductase (SDR family) member 6 | 0.836057  | Inlier |
| siRNA-Temozolomide Run2-DMSO | NM_016029 | DHRS7 | dehydrogenase/reductase (SDR family) member 7 | -1.332074 | Inlier |
| siRNA-Temozolomide Run3-DMSO | NM_016029 | DHRS7 | dehydrogenase/reductase (SDR family) member 7 | -0.825378 | Inlier |
| siRNA Disorazole DMSO Run3   | NM_016029 | DHRS7 | dehydrogenase/reductase (SDR family) member 7 | -0.122615 | Inlier |
| siRNA Disorazole DMSO Run1   | NM_016029 | DHRS7 | dehydrogenase/reductase (SDR family) member 7 | -0.111805 | Inlier |



Identification of Survival Genes in Human Glioblastoma Cells Using siRNA Screening  
 Nikhil G Thaker, Fang Zhang, Peter R. McDonald, Tong Ying Shun, Michael D Lewen, Ian F. Pollack, and John S. Lazo

Molecular Pharmacology

|                              |               |       |                                               |           |        |
|------------------------------|---------------|-------|-----------------------------------------------|-----------|--------|
| siRNA-Temozolomide Run1-DMSO | NM_0160<br>29 | DHRS7 | dehydrogenase/reductase (SDR family) member 7 | 0.111806  | Inlier |
| siRNA Disorazole DMSO Run2   | NM_0160<br>29 | DHRS7 | dehydrogenase/reductase (SDR family) member 7 | 0.523622  | Inlier |
| siRNA-Vinblastine Run2-DMSO  | NM_0160<br>29 | DHRS7 | dehydrogenase/reductase (SDR family) member 7 | 0.934225  | Inlier |
| siRNA-Vinblastine Run1-DMSO  | NM_0160<br>29 | DHRS7 | dehydrogenase/reductase (SDR family) member 7 | 1.09804   | Inlier |
| siRNA-Temozolomide Run3-DMSO | NM_0162<br>45 | DHRS8 | dehydrogenase/reductase (SDR family) member 8 | -1.358883 | Inlier |
| siRNA-Temozolomide Run2-DMSO | NM_0162<br>45 | DHRS8 | dehydrogenase/reductase (SDR family) member 8 | -1.272785 | Inlier |
| siRNA Disorazole DMSO Run2   | NM_0162<br>45 | DHRS8 | dehydrogenase/reductase (SDR family) member 8 | -0.653592 | Inlier |
| siRNA Disorazole DMSO Run3   | NM_0162<br>45 | DHRS8 | dehydrogenase/reductase (SDR family) member 8 | -0.164814 | Inlier |

Identification of Survival Genes in Human Glioblastoma Cells Using siRNA Screening

Nikhil G Thaker, Fang Zhang, Peter R. McDonald, Tong Ying Shun, Michael D Lewen, Ian F. Pollack, and John S. Lazo

Molecular Pharmacology

|                              |               |       |                                               |           |         |
|------------------------------|---------------|-------|-----------------------------------------------|-----------|---------|
| siRNA-Temozolomide Run1-DMSO | NM_0162<br>45 | DHRS8 | dehydrogenase/reductase (SDR family) member 8 | 0.164813  | Inlier  |
| siRNA Disorazole DMSO Run1   | NM_0162<br>45 | DHRS8 | dehydrogenase/reductase (SDR family) member 8 | 0.231953  | Inlier  |
| siRNA-Vinblastine Run1-DMSO  | NM_0162<br>45 | DHRS8 | dehydrogenase/reductase (SDR family) member 8 | 0.695408  | Inlier  |
| siRNA-Vinblastine Run2-DMSO  | NM_0162<br>45 | DHRS8 | dehydrogenase/reductase (SDR family) member 8 | 1.352688  | Inlier  |
| siRNA-Temozolomide Run2-DMSO | NM_1992<br>04 | DHRS9 | dehydrogenase/reductase (SDR family) member 9 | -6.443621 | Outlier |
| siRNA-Temozolomide Run3-DMSO | NM_1992<br>04 | DHRS9 | dehydrogenase/reductase (SDR family) member 9 | -4.836973 | Outlier |
| siRNA-Temozolomide Run1-DMSO | NM_1992<br>04 | DHRS9 | dehydrogenase/reductase (SDR family) member 9 | -0.574272 | Inlier  |
| siRNA Disorazole DMSO Run1   | NM_1992<br>04 | DHRS9 | dehydrogenase/reductase (SDR family) member 9 | -0.187404 | Inlier  |

Identification of Survival Genes in Human Glioblastoma Cells Using siRNA Screening

Nikhil G Thaker, Fang Zhang, Peter R. McDonald, Tong Ying Shun, Michael D Lewen, Ian F. Pollack, and John S. Lazo

Molecular Pharmacology

|                              |           |       |                                               |           |        |
|------------------------------|-----------|-------|-----------------------------------------------|-----------|--------|
| siRNA-Vinblastine Run1-DMSO  | NM_199204 | DHRS9 | dehydrogenase/reductase (SDR family) member 9 | 0.187404  | Inlier |
| siRNA-Vinblastine Run2-DMSO  | NM_199204 | DHRS9 | dehydrogenase/reductase (SDR family) member 9 | 0.278687  | Inlier |
| siRNA Disorazole DMSO Run3   | NM_199204 | DHRS9 | dehydrogenase/reductase (SDR family) member 9 | 0.774728  | Inlier |
| siRNA Disorazole DMSO Run2   | NM_199204 | DHRS9 | dehydrogenase/reductase (SDR family) member 9 | 0.953608  | Inlier |
| siRNA-Temozolomide Run2-DMSO | NM_145177 | DHRSX | dehydrogenase/reductase (SDR family) X-linked | -1.358628 | Inlier |
| siRNA-Temozolomide Run3-DMSO | NM_145177 | DHRSX | dehydrogenase/reductase (SDR family) X-linked | -0.803583 | Inlier |
| siRNA-Temozolomide Run1-DMSO | NM_145177 | DHRSX | dehydrogenase/reductase (SDR family) X-linked | -0.545417 | Inlier |
| siRNA Disorazole DMSO Run1   | NM_145177 | DHRSX | dehydrogenase/reductase (SDR family) X-linked | -0.406503 | Inlier |

Identification of Survival Genes in Human Glioblastoma Cells Using siRNA Screening

Nikhil G Thaker, Fang Zhang, Peter R. McDonald, Tong Ying Shun, Michael D Lewen, Ian F. Pollack, and John S. Lazo

Molecular Pharmacology

|                              |               |        |                                                                               |           |         |
|------------------------------|---------------|--------|-------------------------------------------------------------------------------|-----------|---------|
| siRNA-Vinblastine Run1-DMSO  | NM_1451<br>77 | DHR SX | dehydroge<br>nase/redu<br>ctase<br>(SDR<br>family) X-<br>linked               | 0.406503  | Inlier  |
| siRNA-Vinblastine Run2-DMSO  | NM_1451<br>77 | DHR SX | dehydroge<br>nase/redu<br>ctase<br>(SDR<br>family) X-<br>linked               | 0.48222   | Inlier  |
| siRNA Disorazole DMSO Run2   | NM_1451<br>77 | DHR SX | dehydroge<br>nase/redu<br>ctase<br>(SDR<br>family) X-<br>linked               | 2.656857  | Inlier  |
| siRNA Disorazole DMSO Run3   | NM_1451<br>77 | DHR SX | dehydroge<br>nase E1<br>and<br>transketol<br>ase<br>domain<br>containing      | 2.681534  | Inlier  |
| siRNA-Temozolomide Run2-DMSO | NM_0187<br>06 | DHTKD1 | 1<br>dehydroge<br>nase E1<br>and<br>transketol<br>ase<br>domain<br>containing | -3.746145 | Outlier |
| siRNA-Temozolomide Run3-DMSO | NM_0187<br>06 | DHTKD1 | 1<br>dehydroge<br>nase E1<br>and<br>transketol<br>ase<br>domain<br>containing | -1.625021 | Inlier  |
| siRNA Disorazole DMSO Run1   | NM_0187<br>06 | DHTKD1 | 1<br>dehydroge<br>nase E1<br>and<br>transketol<br>ase<br>domain<br>containing | -0.615906 | Inlier  |

Identification of Survival Genes in Human Glioblastoma Cells Using siRNA Screening

Nikhil G Thaker, Fang Zhang, Peter R. McDonald, Tong Ying Shun, Michael D Lewen, Ian F. Pollack, and John S. Lazo

Molecular Pharmacology

|                              |           |        |                                                        |           |        |
|------------------------------|-----------|--------|--------------------------------------------------------|-----------|--------|
| siRNA-Temozolomide Run1-DMSO | NM_018706 | DHTKD1 | dehydrogenase E1 and transketolase domain containing 1 | -0.079784 | Inlier |
| siRNA-Vinblastine Run1-DMSO  | NM_018706 | DHTKD1 | dehydrogenase E1 and transketolase domain containing 1 | 0.079782  | Inlier |
| siRNA-Vinblastine Run2-DMSO  | NM_018706 | DHTKD1 | dehydrogenase E1 and transketolase domain containing 1 | 0.333583  | Inlier |
| siRNA Disorazole DMSO Run3   | NM_018706 | DHTKD1 | dehydrogenase E1 and transketolase domain containing 1 | 0.733094  | Inlier |
| siRNA Disorazole DMSO Run2   | NM_018706 | DHTKD1 | DEAH (Asp-Glu-Ala-His) box                             | 1.969642  | Inlier |
| siRNA Disorazole DMSO Run1   | NM_003587 | DHX16  | polypeptide 16                                         | -0.846545 | Inlier |
| siRNA-Temozolomide Run2-DMSO | NM_003587 | DHX16  | DEAH (Asp-Glu-Ala-His) box polypeptide 16              | -0.502455 | Inlier |

Identification of Survival Genes in Human Glioblastoma Cells Using siRNA Screening  
 Nikhil G Thaker, Fang Zhang, Peter R. McDonald, Tong Ying Shun, Michael D Lewen, Ian F. Pollack, and John S. Lazo

Molecular Pharmacology

|                                  |               |       |                                                            |           |         |
|----------------------------------|---------------|-------|------------------------------------------------------------|-----------|---------|
| siRNA Disorazole DMSO Run3       | NM_0035<br>87 | DHX16 | DEAH<br>(Asp-Glu-<br>Ala-His)<br>box<br>polypeptid<br>e 16 | -0.02117  | Inlier  |
| siRNA-Vinblastine Run2-<br>DMSO  | NM_0035<br>87 | DHX16 | DEAH<br>(Asp-Glu-<br>Ala-His)<br>box<br>polypeptid<br>e 16 | -0.014497 | Inlier  |
| siRNA-Temozolomide Run1-<br>DMSO | NM_0035<br>87 | DHX16 | DEAH<br>(Asp-Glu-<br>Ala-His)<br>box<br>polypeptid<br>e 16 | 0.014496  | Inlier  |
| siRNA-Temozolomide Run3-<br>DMSO | NM_0035<br>87 | DHX16 | DEAH<br>(Asp-Glu-<br>Ala-His)<br>box<br>polypeptid<br>e 16 | 1.527103  | Inlier  |
| siRNA-Vinblastine Run1-<br>DMSO  | NM_0035<br>87 | DHX16 | DEAH<br>(Asp-Glu-<br>Ala-His)<br>box<br>polypeptid<br>e 16 | 1.827994  | Inlier  |
| siRNA Disorazole DMSO Run2       | NM_0035<br>87 | DHX16 | DEAH<br>(Asp-Glu-<br>Ala-His)<br>box<br>polypeptid<br>e 16 | 4.28551   | Outlier |
| siRNA-Temozolomide Run3-<br>DMSO | NM_1944<br>28 | DHX34 | DEAH<br>(Asp-Glu-<br>Ala-His)<br>box<br>polypeptid<br>e 34 | -0.891354 | Inlier  |
| siRNA-Temozolomide Run2-<br>DMSO | NM_1944<br>28 | DHX34 | DEAH<br>(Asp-Glu-<br>Ala-His)<br>box<br>polypeptid<br>e 34 | -0.591964 | Inlier  |

Identification of Survival Genes in Human Glioblastoma Cells Using siRNA Screening  
 Nikhil G Thaker, Fang Zhang, Peter R. McDonald, Tong Ying Shun, Michael D Lewen, Ian F. Pollack, and John S. Lazo

Molecular Pharmacology

|                              |               |       |                                                    |           |        |
|------------------------------|---------------|-------|----------------------------------------------------|-----------|--------|
| siRNA-Vinblastine Run2-DMSO  | NM_1944<br>28 | DHX34 | DEAH<br>(Asp-Glu-Ala-His)<br>box<br>polypeptide 34 | -0.454253 | Inlier |
| siRNA Disorazole DMSO Run3   | NM_1944<br>28 | DHX34 | DEAH<br>(Asp-Glu-Ala-His)<br>box<br>polypeptide 34 | -0.337319 | Inlier |
| siRNA-Temozolomide Run1-DMSO | NM_1944<br>28 | DHX34 | DEAH<br>(Asp-Glu-Ala-His)<br>box<br>polypeptide 34 | 0.337319  | Inlier |
| siRNA Disorazole DMSO Run1   | NM_1944<br>28 | DHX34 | DEAH<br>(Asp-Glu-Ala-His)<br>box<br>polypeptide 34 | 0.757036  | Inlier |
| siRNA-Vinblastine Run1-DMSO  | NM_1944<br>28 | DHX34 | DEAH<br>(Asp-Glu-Ala-His)<br>box<br>polypeptide 34 | 2.707468  | Inlier |
| siRNA Disorazole DMSO Run2   | NM_1944<br>28 | DHX34 | DEAH<br>(Asp-Glu-Ala-His)<br>box<br>polypeptide 34 | 2.715667  | Inlier |
| siRNA-Vinblastine Run2-DMSO  | NM_0219<br>31 | DHX35 | DEAH<br>(Asp-Glu-Ala-His)<br>box<br>polypeptide 35 | -1.130517 | Inlier |
| siRNA Disorazole DMSO Run3   | NM_0219<br>31 | DHX35 | DEAH<br>(Asp-Glu-Ala-His)<br>box<br>polypeptide 35 | -0.74132  | Inlier |

Identification of Survival Genes in Human Glioblastoma Cells Using siRNA Screening  
 Nikhil G Thaker, Fang Zhang, Peter R. McDonald, Tong Ying Shun, Michael D Lewen, Ian F. Pollack, and John S. Lazo

Molecular Pharmacology

|                              |               |       |                                                    |           |         |
|------------------------------|---------------|-------|----------------------------------------------------|-----------|---------|
| siRNA-Temozolomide Run3-DMSO | NM_0219<br>31 | DHX35 | DEAH<br>(Asp-Glu-Ala-His)<br>box<br>polypeptide 35 | -0.509007 | Inlier  |
| siRNA-Temozolomide Run2-DMSO | NM_0219<br>31 | DHX35 | DEAH<br>(Asp-Glu-Ala-His)<br>box<br>polypeptide 35 | -0.265329 | Inlier  |
| siRNA-Temozolomide Run1-DMSO | NM_0219<br>31 | DHX35 | DEAH<br>(Asp-Glu-Ala-His)<br>box<br>polypeptide 35 | 0.265329  | Inlier  |
| siRNA Disorazole DMSO Run1   | NM_0219<br>31 | DHX35 | DEAH<br>(Asp-Glu-Ala-His)<br>box<br>polypeptide 35 | 0.60768   | Inlier  |
| siRNA-Vinblastine Run1-DMSO  | NM_0219<br>31 | DHX35 | DEAH<br>(Asp-Glu-Ala-His)<br>box<br>polypeptide 35 | 4.034214  | Outlier |
| siRNA Disorazole DMSO Run2   | NM_0219<br>31 | DHX35 | DEAH<br>(Asp-Glu-Ala-His)<br>box<br>polypeptide 35 | 4.853745  | Outlier |
| siRNA-Temozolomide Run3-DMSO | NM_0073<br>26 | DIA1  | diaphorase (NADH)<br>(cytochrome b-5 reductase)    | -2.608463 | Inlier  |
| siRNA-Temozolomide Run2-DMSO | NM_0073<br>26 | DIA1  | diaphorase (NADH)<br>(cytochrome b-5 reductase)    | -1.291416 | Inlier  |



Identification of Survival Genes in Human Glioblastoma Cells Using siRNA Screening  
 Nikhil G Thaker, Fang Zhang, Peter R. McDonald, Tong Ying Shun, Michael D Lewen, Ian F. Pollack, and John S. Lazo  
 Molecular Pharmacology

|                              |               |        |                                              |           |        |
|------------------------------|---------------|--------|----------------------------------------------|-----------|--------|
| siRNA Disorazole DMSO Run1   | NM_0073<br>26 | DIA1   | diaphorase (NADH) (cytochrome b-5 reductase) | -0.248006 | Inlier |
| siRNA-Temozolomide Run1-DMSO | NM_0073<br>26 | DIA1   | diaphorase (NADH) (cytochrome b-5 reductase) | -0.021988 | Inlier |
| siRNA Disorazole DMSO Run3   | NM_0073<br>26 | DIA1   | diaphorase (NADH) (cytochrome b-5 reductase) | 0.021988  | Inlier |
| siRNA-Vinblastine Run2-DMSO  | NM_0073<br>26 | DIA1   | diaphorase (NADH) (cytochrome b-5 reductase) | 0.140167  | Inlier |
| siRNA-Vinblastine Run1-DMSO  | NM_0073<br>26 | DIA1   | diaphorase (NADH) (cytochrome b-5 reductase) | 1.100994  | Inlier |
| siRNA Disorazole DMSO Run2   | NM_0073<br>26 | DIA1   | diaphorase (NADH) (cytochrome b-5 reductase) | 2.201234  | Inlier |
| siRNA-Temozolomide Run3-DMSO | NM_1389<br>30 | DIABLO | diablo homolog (Drosophila)                  | -1.231735 | Inlier |
| siRNA-Temozolomide Run2-DMSO | NM_1389<br>30 | DIABLO | diablo homolog (Drosophila)                  | -1.210187 | Inlier |
| siRNA-Temozolomide Run1-DMSO | NM_1389<br>30 | DIABLO | diablo homolog (Drosophila)                  | -0.632623 | Inlier |
| siRNA Disorazole DMSO Run1   | NM_1389<br>30 | DIABLO | diablo homolog (Drosophila)                  | -0.273944 | Inlier |

Identification of Survival Genes in Human Glioblastoma Cells Using siRNA Screening  
 Nikhil G Thaker, Fang Zhang, Peter R. McDonald, Tong Ying Shun, Michael D Lewen, Ian F. Pollack, and John S. Lazo

Molecular Pharmacology

|                                  |               |        |                                              |           |        |
|----------------------------------|---------------|--------|----------------------------------------------|-----------|--------|
| siRNA Disorazole DMSO Run2       | NM_1389<br>30 | DIABLO | diablo<br>homolog<br>(Drosophil<br>a)        | 0.273944  | Inlier |
| siRNA Disorazole DMSO Run3       | NM_1389<br>30 | DIABLO | diablo<br>homolog<br>(Drosophil<br>a)        | 0.294335  | Inlier |
| siRNA-Vinblastine Run2-<br>DMSO  | NM_1389<br>30 | DIABLO | diablo<br>homolog<br>(Drosophil<br>a)        | 0.716377  | Inlier |
| siRNA-Vinblastine Run1-<br>DMSO  | NM_1389<br>30 | DIABLO | diablo<br>homolog<br>(Drosophil<br>a)        | 0.779602  | Inlier |
| siRNA-Temozolomide Run2-<br>DMSO | NM_0007<br>92 | DIO1   | deiodinase<br>,<br>iodothyroni<br>ne, type I | -1.333673 | Inlier |
| siRNA-Temozolomide Run1-<br>DMSO | NM_0007<br>92 | DIO1   | deiodinase<br>,<br>iodothyroni<br>ne, type I | -0.950393 | Inlier |
| siRNA Disorazole DMSO Run1       | NM_0007<br>92 | DIO1   | deiodinase<br>,<br>iodothyroni<br>ne, type I | -0.845679 | Inlier |
| siRNA-Vinblastine Run2-<br>DMSO  | NM_0007<br>92 | DIO1   | deiodinase<br>,<br>iodothyroni<br>ne, type I | -0.097316 | Inlier |
| siRNA-Temozolomide Run3-<br>DMSO | NM_0007<br>92 | DIO1   | deiodinase<br>,<br>iodothyroni<br>ne, type I | 0.097316  | Inlier |
| siRNA-Vinblastine Run1-<br>DMSO  | NM_0007<br>92 | DIO1   | deiodinase<br>,<br>iodothyroni<br>ne, type I | 0.330501  | Inlier |
| siRNA Disorazole DMSO Run3       | NM_0007<br>92 | DIO1   | deiodinase<br>,<br>iodothyroni<br>ne, type I | 0.503321  | Inlier |

Identification of Survival Genes in Human Glioblastoma Cells Using siRNA Screening  
 Nikhil G Thaker, Fang Zhang, Peter R. McDonald, Tong Ying Shun, Michael D Lewen, Ian F. Pollack, and John S. Lazo  
 Molecular Pharmacology

|                              |               |      |                              |                  |
|------------------------------|---------------|------|------------------------------|------------------|
|                              |               |      | deiodinase                   |                  |
| siRNA Disorazole DMSO Run2   | NM_0007<br>92 | DIO1 | ,<br>iodothyronine, type I   | 2.596783 Inlier  |
|                              |               |      | deiodinase                   |                  |
| siRNA-Temozolomide Run3-DMSO | NM_0007<br>93 | DIO2 | ,<br>iodothyronine, type II  | -1.232134 Inlier |
|                              |               |      | deiodinase                   |                  |
| siRNA-Temozolomide Run2-DMSO | NM_0007<br>93 | DIO2 | ,<br>iodothyronine, type II  | -0.831518 Inlier |
|                              |               |      | deiodinase                   |                  |
| siRNA Disorazole DMSO Run1   | NM_0007<br>93 | DIO2 | ,<br>iodothyronine, type II  | -0.188705 Inlier |
|                              |               |      | deiodinase                   |                  |
| siRNA-Vinblastine Run2-DMSO  | NM_0007<br>93 | DIO2 | ,<br>iodothyronine, type II  | -0.132198 Inlier |
|                              |               |      | deiodinase                   |                  |
| siRNA Disorazole DMSO Run3   | NM_0007<br>93 | DIO2 | ,<br>iodothyronine, type II  | 0.132198 Inlier  |
|                              |               |      | deiodinase                   |                  |
| siRNA-Temozolomide Run1-DMSO | NM_0007<br>93 | DIO2 | ,<br>iodothyronine, type II  | 0.517482 Inlier  |
|                              |               |      | deiodinase                   |                  |
| siRNA-Vinblastine Run1-DMSO  | NM_0007<br>93 | DIO2 | ,<br>iodothyronine, type II  | 0.932121 Inlier  |
|                              |               |      | deiodinase                   |                  |
| siRNA Disorazole DMSO Run2   | NM_0007<br>93 | DIO2 | ,<br>iodothyronine, type II  | 1.650754 Inlier  |
|                              |               |      | deiodinase                   |                  |
| siRNA-Temozolomide Run3-DMSO | NM_0013<br>62 | DIO3 | ,<br>iodothyronine, type III | -1.885546 Inlier |

Identification of Survival Genes in Human Glioblastoma Cells Using siRNA Screening  
 Nikhil G Thaker, Fang Zhang, Peter R. McDonald, Tong Ying Shun, Michael D Lewen, Ian F. Pollack, and John S. Lazo  
 Molecular Pharmacology

|                              |           |        |                                      |           |        |
|------------------------------|-----------|--------|--------------------------------------|-----------|--------|
| siRNA-Temozolomide Run2-DMSO | NM_001362 | DIO3   | deiodinase, iodothyronine, type III  | -0.757808 | Inlier |
| siRNA Disorazole DMSO Run1   | NM_001362 | DIO3   | deiodinase, iodothyronine, type III  | -0.591192 | Inlier |
| siRNA-Temozolomide Run1-DMSO | NM_001362 | DIO3   | deiodinase, iodothyronine, type III  | -0.044129 | Inlier |
| siRNA-Vinblastine Run2-DMSO  | NM_001362 | DIO3   | deiodinase, iodothyronine, type III  | 0.044129  | Inlier |
| siRNA Disorazole DMSO Run3   | NM_001362 | DIO3   | deiodinase, iodothyronine, type III  | 0.476598  | Inlier |
| siRNA Disorazole DMSO Run2   | NM_001362 | DIO3   | deiodinase, iodothyronine, type III  | 1.806958  | Inlier |
| siRNA-Vinblastine Run1-DMSO  | NM_001362 | DIO3   | deiodinase, iodothyronine, type III  | 1.807828  | Inlier |
| siRNA Disorazole DMSO Run1   | NM_145173 | DIRAS1 | DIRAS family, GTP-binding RAS-like 1 | -0.998058 | Inlier |
| siRNA Disorazole DMSO Run3   | NM_145173 | DIRAS1 | DIRAS family, GTP-binding RAS-like 1 | -0.7295   | Inlier |

Identification of Survival Genes in Human Glioblastoma Cells Using siRNA Screening  
 Nikhil G Thaker, Fang Zhang, Peter R. McDonald, Tong Ying Shun, Michael D Lewen, Ian F. Pollack, and John S. Lazo  
 Molecular Pharmacology

|                              |               |        |                                            |                  |
|------------------------------|---------------|--------|--------------------------------------------|------------------|
| siRNA-Vinblastine Run2-DMSO  | NM_1451<br>73 | DIRAS1 | DIRAS family,<br>GTP-binding<br>RAS-like 1 | -0.6195 Inlier   |
| siRNA-Temozolomide Run1-DMSO | NM_1451<br>73 | DIRAS1 | DIRAS family,<br>GTP-binding<br>RAS-like 1 | -0.075762 Inlier |
| siRNA-Temozolomide Run2-DMSO | NM_1451<br>73 | DIRAS1 | DIRAS family,<br>GTP-binding<br>RAS-like 1 | 0.075763 Inlier  |
| siRNA-Temozolomide Run3-DMSO | NM_1451<br>73 | DIRAS1 | DIRAS family,<br>GTP-binding<br>RAS-like 1 | 0.362801 Inlier  |
| siRNA Disorazole DMSO Run2   | NM_1451<br>73 | DIRAS1 | DIRAS family,<br>GTP-binding<br>RAS-like 1 | 0.876174 Inlier  |
| siRNA-Vinblastine Run1-DMSO  | NM_1451<br>73 | DIRAS1 | DIRAS family,<br>GTP-binding<br>RAS-like 1 | 0.997514 Inlier  |
| siRNA-Vinblastine Run2-DMSO  | NM_0175<br>94 | DIRAS2 | DIRAS family,<br>GTP-binding<br>RAS-like 2 | -0.99942 Inlier  |
| siRNA Disorazole DMSO Run1   | NM_0175<br>94 | DIRAS2 | DIRAS family,<br>GTP-binding<br>RAS-like 2 | -0.620658 Inlier |

Identification of Survival Genes in Human Glioblastoma Cells Using siRNA Screening  
 Nikhil G Thaker, Fang Zhang, Peter R. McDonald, Tong Ying Shun, Michael D Lewen, Ian F. Pollack, and John S. Lazo  
 Molecular Pharmacology

|                              |               |                  |                                            |           |        |
|------------------------------|---------------|------------------|--------------------------------------------|-----------|--------|
| siRNA-Temozolomide Run2-DMSO | NM_0175<br>94 | DIRAS2           | DIRAS family,<br>GTP-binding<br>RAS-like 2 | -0.227181 | Inlier |
| siRNA-Temozolomide Run3-DMSO | NM_0175<br>94 | DIRAS2           | DIRAS family,<br>GTP-binding<br>RAS-like 2 | -0.128018 | Inlier |
| siRNA Disorazole DMSO Run3   | NM_0175<br>94 | DIRAS2           | DIRAS family,<br>GTP-binding<br>RAS-like 2 | 0.128017  | Inlier |
| siRNA-Temozolomide Run1-DMSO | NM_0175<br>94 | DIRAS2           | DIRAS family,<br>GTP-binding<br>RAS-like 2 | 0.728342  | Inlier |
| siRNA-Vinblastine Run1-DMSO  | NM_0175<br>94 | DIRAS2           | DIRAS family,<br>GTP-binding<br>RAS-like 2 | 1.860272  | Inlier |
| siRNA Disorazole DMSO Run2   | NM_0175<br>94 | DIRAS2           | DIRAS family,<br>GTP-binding<br>RAS-like 2 | 2.043643  | Inlier |
| siRNA-Temozolomide Run3-DMSO | NM_0155<br>18 | DKFZP43<br>4C131 | unc-51-like kinase<br>3 (C. elegans)       | -0.834786 | Inlier |
| siRNA-Temozolomide Run2-DMSO | NM_0155<br>18 | DKFZP43<br>4C131 | unc-51-like kinase<br>3 (C. elegans)       | -0.514214 | Inlier |
| siRNA Disorazole DMSO Run3   | NM_0155<br>18 | DKFZP43<br>4C131 | unc-51-like kinase<br>3 (C. elegans)       | -0.168523 | Inlier |

Identification of Survival Genes in Human Glioblastoma Cells Using siRNA Screening  
 Nikhil G Thaker, Fang Zhang, Peter R. McDonald, Tong Ying Shun, Michael D Lewen, Ian F. Pollack, and John S. Lazo  
 Molecular Pharmacology

|                                  |               |                   |                                             |           |         |
|----------------------------------|---------------|-------------------|---------------------------------------------|-----------|---------|
| siRNA Disorazole DMSO Run1       | NM_0155<br>18 | DKFZP43<br>4C131  | unc-51-<br>like kinase<br>3 (C.<br>elegans) | -0.031325 | Inlier  |
| siRNA-Temozolomide Run1-<br>DMSO | NM_0155<br>18 | DKFZP43<br>4C131  | unc-51-<br>like kinase<br>3 (C.<br>elegans) | 0.031325  | Inlier  |
| siRNA Disorazole DMSO Run2       | NM_0155<br>18 | DKFZP43<br>4C131  | unc-51-<br>like kinase<br>3 (C.<br>elegans) | 0.904575  | Inlier  |
| siRNA-Vinblastine Run1-<br>DMSO  | NM_0155<br>18 | DKFZP43<br>4C131  | unc-51-<br>like kinase<br>3 (C.<br>elegans) | 1.539479  | Inlier  |
| siRNA-Vinblastine Run2-<br>DMSO  | NM_0155<br>18 | DKFZP43<br>4C131  | unc-51-<br>like kinase<br>3 (C.<br>elegans) | 1.546013  | Inlier  |
| siRNA-Temozolomide Run3-<br>DMSO | NM_1736<br>55 | DKFZp434<br>C1418 | receptor<br>EPH<br>A6                       | -6.263306 | Outlier |
| siRNA-Temozolomide Run2-<br>DMSO | NM_1736<br>55 | DKFZp434<br>C1418 | receptor<br>EPH<br>A6                       | -2.903325 | Inlier  |
| siRNA Disorazole DMSO Run3       | NM_1736<br>55 | DKFZp434<br>C1418 | receptor<br>EPH<br>A6                       | -0.185327 | Inlier  |
| siRNA-Vinblastine Run2-<br>DMSO  | NM_1736<br>55 | DKFZp434<br>C1418 | receptor<br>EPH<br>A6                       | -0.019729 | Inlier  |
| siRNA Disorazole DMSO Run1       | NM_1736<br>55 | DKFZp434<br>C1418 | receptor<br>EPH<br>A6                       | 0.019728  | Inlier  |
| siRNA-Vinblastine Run1-<br>DMSO  | NM_1736<br>55 | DKFZp434<br>C1418 | receptor<br>EPH<br>A6                       | 0.125713  | Inlier  |
| siRNA-Temozolomide Run1-<br>DMSO | NM_1736<br>55 | DKFZp434<br>C1418 | receptor<br>EPH<br>A6                       | 1.163673  | Inlier  |
| siRNA Disorazole DMSO Run2       | NM_1736<br>55 | DKFZp434<br>C1418 | receptor<br>EPH<br>A6                       | 2.10454   | Inlier  |
| siRNA-Temozolomide Run1-<br>DMSO | XM_29115<br>9 | DKFZP43<br>4F011  | DKFZP43<br>4F011                            | -1.375635 | Inlier  |

Identification of Survival Genes in Human Glioblastoma Cells Using siRNA Screening  
 Nikhil G Thaker, Fang Zhang, Peter R. McDonald, Tong Ying Shun, Michael D Lewen, Ian F. Pollack, and John S. Lazo

|                                  |          |         |         |           |                                                                                                                 |
|----------------------------------|----------|---------|---------|-----------|-----------------------------------------------------------------------------------------------------------------|
| siRNA-Temozolomide Run3-<br>DMSO | XM_29115 | DKFZP43 | DKFZP43 |           |                                                                                                                 |
|                                  | 9        | 4F011   | 4F011   | -0.777917 | Inlier                                                                                                          |
|                                  | XM_29115 | DKFZP43 | DKFZP43 |           |                                                                                                                 |
| siRNA Disorazole DMSO Run3       | 9        | 4F011   | 4F011   | -0.379255 | Inlier                                                                                                          |
| siRNA-Vinblastine Run2-<br>DMSO  | XM_29115 | DKFZP43 | DKFZP43 |           |                                                                                                                 |
|                                  | 9        | 4F011   | 4F011   | -0.199584 | Inlier                                                                                                          |
| siRNA-Temozolomide Run2-<br>DMSO | XM_29115 | DKFZP43 | DKFZP43 |           |                                                                                                                 |
|                                  | 9        | 4F011   | 4F011   | 0.199584  | Inlier                                                                                                          |
|                                  | XM_29115 | DKFZP43 | DKFZP43 |           |                                                                                                                 |
| siRNA Disorazole DMSO Run1       | 9        | 4F011   | 4F011   | 0.673759  | Inlier                                                                                                          |
| siRNA-Vinblastine Run1-<br>DMSO  | XM_29115 | DKFZP43 | DKFZP43 |           |                                                                                                                 |
|                                  | 9        | 4F011   | 4F011   | 0.675241  | Inlier                                                                                                          |
|                                  | XM_29115 | DKFZP43 | DKFZP43 |           |                                                                                                                 |
| siRNA Disorazole DMSO Run2       | 9        | 4F011   | 4F011   | 1.343799  | Inlier                                                                                                          |
| siRNA-Vinblastine Run2-<br>DMSO  | NM_0321  | DKFZP43 | DKFZP43 |           |                                                                                                                 |
|                                  | 36       | 4L1717  | 4L1717  | -0.887554 | Inlier                                                                                                          |
| siRNA-Temozolomide Run1-<br>DMSO | NM_0321  | DKFZP43 | DKFZP43 |           |                                                                                                                 |
|                                  | 36       | 4L1717  | 4L1717  | -0.691252 | Inlier                                                                                                          |
|                                  | NM_0321  | DKFZP43 | DKFZP43 |           |                                                                                                                 |
| siRNA Disorazole DMSO Run3       | 36       | 4L1717  | 4L1717  | -0.657748 | Inlier                                                                                                          |
|                                  | NM_0321  | DKFZP43 | DKFZP43 |           |                                                                                                                 |
| siRNA Disorazole DMSO Run1       | 36       | 4L1717  | 4L1717  | -0.142009 | Inlier                                                                                                          |
| siRNA-Temozolomide Run3-<br>DMSO | NM_0321  | DKFZP43 | DKFZP43 |           |                                                                                                                 |
|                                  | 36       | 4L1717  | 4L1717  | 0.142009  | Inlier                                                                                                          |
| siRNA-Temozolomide Run2-<br>DMSO | NM_0321  | DKFZP43 | DKFZP43 |           |                                                                                                                 |
|                                  | 36       | 4L1717  | 4L1717  | 0.357243  | Inlier                                                                                                          |
|                                  | NM_0321  | DKFZP43 | DKFZP43 |           |                                                                                                                 |
| siRNA Disorazole DMSO Run2       | 36       | 4L1717  | 4L1717  | 3.550472  | Outlier                                                                                                         |
| siRNA-Vinblastine Run1-<br>DMSO  | NM_0321  | DKFZP43 | DKFZP43 |           |                                                                                                                 |
|                                  | 36       | 4L1717  | 4L1717  | 4.957335  | Outlier                                                                                                         |
|                                  |          |         |         |           | solute<br>carrier<br>family 25<br>(mitochon<br>drial<br>carrier;<br>adenine<br>nucleotide<br>translocat<br>or), |
| siRNA-Temozolomide Run1-<br>DMSO | NM_0312  | DKFZP43 | member  |           |                                                                                                                 |
|                                  | 91       | 4N1235  | 31      | -3.265136 | Inlier                                                                                                          |



Identification of Survival Genes in Human Glioblastoma Cells Using siRNA Screening

Nikhil G Thaker, Fang Zhang, Peter R. McDonald, Tong Ying Shun, Michael D Lewen, Ian F. Pollack, and John S.

Lazo

Molecular Pharmacology

| siRNA Treatment              | Gene ID   | Accession     | Gene Name | Score     | Category |
|------------------------------|-----------|---------------|-----------|-----------|----------|
| siRNA-Temozolomide Run2-DMSO | NM_031291 | DKFZP434N1235 | member 31 | -0.760569 | Inlier   |
| siRNA-Vinblastine Run2-DMSO  | NM_031291 | DKFZP434N1235 | member 31 | -0.456024 | Inlier   |
| siRNA Disorazole DMSO Run1   | NM_031291 | DKFZP434N1235 | member 31 | -0.013397 | Inlier   |
| siRNA-Temozolomide Run3-DMSO | NM_031291 | DKFZP434N1235 | member 31 | 0.013397  | Inlier   |

solute carrier family 25 (mitochondrial carrier; adenine nucleotide translocator),

solute carrier family 25 (mitochondrial carrier; adenine nucleotide translocator),

solute carrier family 25 (mitochondrial carrier; adenine nucleotide translocator),

solute carrier family 25 (mitochondrial carrier; adenine nucleotide translocator),

solute carrier family 25 (mitochondrial carrier; adenine nucleotide translocator),

Identification of Survival Genes in Human Glioblastoma Cells Using siRNA Screening

Nikhil G Thaker, Fang Zhang, Peter R. McDonald, Tong Ying Shun, Michael D Lewen, Ian F. Pollack, and John S. Lazo

Molecular Pharmacology

| siRNA Treatment              | Gene ID   | Accession     | Gene Name                                                                                    | Score     | Outlier |
|------------------------------|-----------|---------------|----------------------------------------------------------------------------------------------|-----------|---------|
| siRNA Disorazole DMSO Run3   | NM_031291 | DKFZP434N1235 | solute carrier family 25 (mitochondrial carrier; adenine nucleotide translocator), member 31 | 0.588431  | Inlier  |
| siRNA-Vinblastine Run1-DMSO  | NM_031291 | DKFZP434N1235 | solute carrier family 25 (mitochondrial carrier; adenine nucleotide translocator), member 31 | 1.708241  | Inlier  |
| siRNA Disorazole DMSO Run2   | NM_031291 | DKFZP434N1235 | solute carrier family 25 (mitochondrial carrier; adenine nucleotide translocator), member 31 | 3.010655  | Inlier  |
| siRNA-Temozolomide Run3-DMSO | NM_031306 | DKFZP564B1023 | DEAD (Asp-Glu-Ala-Asp) box polypeptide 59                                                    | -1.001211 | Inlier  |
| siRNA-Temozolomide Run2-DMSO | NM_031306 | DKFZP564B1023 | DEAD (Asp-Glu-Ala-Asp) box polypeptide 59                                                    | -0.888062 | Inlier  |

Identification of Survival Genes in Human Glioblastoma Cells Using siRNA Screening  
 Nikhil G Thaker, Fang Zhang, Peter R. McDonald, Tong Ying Shun, Michael D Lewen, Ian F. Pollack, and John S. Lazo

Molecular Pharmacology

|                              |           |               |                                  |           |         |
|------------------------------|-----------|---------------|----------------------------------|-----------|---------|
|                              |           |               | DEAD<br>(Asp-Glu-Ala-Asp)<br>box |           |         |
| siRNA-Vinblastine Run2-DMSO  | NM_031306 | DKFZP564B1023 | polypeptide 59                   | -0.207857 | Inlier  |
|                              |           |               | DEAD<br>(Asp-Glu-Ala-Asp)<br>box |           |         |
| siRNA Disorazole DMSO Run3   | NM_031306 | DKFZP564B1023 | polypeptide 59                   | -0.129253 | Inlier  |
|                              |           |               | DEAD<br>(Asp-Glu-Ala-Asp)<br>box |           |         |
| siRNA-Temozolomide Run1-DMSO | NM_031306 | DKFZP564B1023 | polypeptide 59                   | 0.129253  | Inlier  |
|                              |           |               | DEAD<br>(Asp-Glu-Ala-Asp)<br>box |           |         |
| siRNA Disorazole DMSO Run1   | NM_031306 | DKFZP564B1023 | polypeptide 59                   | 0.460938  | Inlier  |
|                              |           |               | DEAD<br>(Asp-Glu-Ala-Asp)<br>box |           |         |
| siRNA-Vinblastine Run1-DMSO  | NM_031306 | DKFZP564B1023 | polypeptide 59                   | 1.655908  | Inlier  |
|                              |           |               | DEAD<br>(Asp-Glu-Ala-Asp)<br>box |           |         |
| siRNA Disorazole DMSO Run2   | NM_031306 | DKFZP564B1023 | polypeptide 59                   | 2.341836  | Inlier  |
| siRNA-Temozolomide Run3-DMSO | NM_015605 | DKFZP566K0524 | DKFZP566K0524                    | -3.848501 | Outlier |
| siRNA-Temozolomide Run2-DMSO | NM_015605 | DKFZP566K0524 | DKFZP566K0524                    | -0.747802 | Inlier  |
| siRNA-Temozolomide Run1-DMSO | NM_015605 | DKFZP566K0524 | DKFZP566K0524                    | -0.741557 | Inlier  |
|                              | NM_015605 | DKFZP566K0524 | DKFZP566K0524                    | -0.302897 | Inlier  |
| siRNA Disorazole DMSO Run3   | NM_015605 | DKFZP566K0524 | DKFZP566K0524                    | 0.302897  | Inlier  |
| siRNA Disorazole DMSO Run2   | NM_015605 | DKFZP566K0524 | DKFZP566K0524                    | 0.362078  | Inlier  |
| siRNA Disorazole DMSO Run1   | NM_015605 | DKFZP566K0524 | DKFZP566K0524                    | 0.607443  | Inlier  |
| siRNA-Vinblastine Run1-DMSO  | NM_015605 | DKFZP566K0524 | DKFZP566K0524                    | 0.607443  | Inlier  |
| siRNA-Vinblastine Run2-DMSO  | NM_015605 | DKFZP566K0524 | DKFZP566K0524                    | 1.120913  | Inlier  |

Identification of Survival Genes in Human Glioblastoma Cells Using siRNA Screening  
 Nikhil G Thaker, Fang Zhang, Peter R. McDonald, Tong Ying Shun, Michael D Lewen, Ian F. Pollack, and John S. Lazo

|                                  |               |                   |                   |           |         |
|----------------------------------|---------------|-------------------|-------------------|-----------|---------|
| siRNA-Temozolomide Run2-<br>DMSO | NM_0155<br>10 | DKFZp566<br>O084  | DKFZp566<br>O084  | -5.136016 | Outlier |
|                                  | NM_0155       | DKFZp566          | DKFZp566          |           |         |
| siRNA Disorazole DMSO Run1       | 10            | O084              | O084              | -0.689003 | Inlier  |
| siRNA-Temozolomide Run3-<br>DMSO | NM_0155<br>10 | DKFZp566<br>O084  | DKFZp566<br>O084  | -0.659997 | Inlier  |
| siRNA-Vinblastine Run2-<br>DMSO  | NM_0155<br>10 | DKFZp566<br>O084  | DKFZp566<br>O084  | -0.404239 | Inlier  |
|                                  | NM_0155       | DKFZp566          | DKFZp566          |           |         |
| siRNA Disorazole DMSO Run3       | 10            | O084              | O084              | 0.404239  | Inlier  |
| siRNA-Temozolomide Run1-<br>DMSO | NM_0155<br>10 | DKFZp566<br>O084  | DKFZp566<br>O084  | 0.647581  | Inlier  |
| siRNA-Vinblastine Run1-<br>DMSO  | NM_0155<br>10 | DKFZp566<br>O084  | DKFZp566<br>O084  | 5.001007  | Outlier |
|                                  | NM_0155       | DKFZp566          | DKFZp566          |           |         |
| siRNA Disorazole DMSO Run2       | 10            | O084              | O084              | 9.407449  | Outlier |
| siRNA-Temozolomide Run1-<br>DMSO | NM_0140<br>33 | DKFZP58<br>6A0522 | DKFZP58<br>6A0522 | -3.246306 | Inlier  |
| siRNA-Temozolomide Run3-<br>DMSO | NM_0140<br>33 | DKFZP58<br>6A0522 | DKFZP58<br>6A0522 | -2.850981 | Inlier  |
|                                  | NM_0140       | DKFZP58           | DKFZP58           |           |         |
| siRNA Disorazole DMSO Run1       | 33            | 6A0522            | 6A0522            | -0.848816 | Inlier  |
| siRNA-Temozolomide Run2-<br>DMSO | NM_0140<br>33 | DKFZP58<br>6A0522 | DKFZP58<br>6A0522 | -0.318    | Inlier  |
| siRNA-Vinblastine Run2-<br>DMSO  | NM_0140<br>33 | DKFZP58<br>6A0522 | DKFZP58<br>6A0522 | 0.318     | Inlier  |
|                                  | NM_0140       | DKFZP58           | DKFZP58           |           |         |
| siRNA Disorazole DMSO Run2       | 33            | 6A0522            | 6A0522            | 0.4118    | Inlier  |
|                                  | NM_0140       | DKFZP58           | DKFZP58           |           |         |
| siRNA Disorazole DMSO Run3       | 33            | 6A0522            | 6A0522            | 0.500184  | Inlier  |
| siRNA-Vinblastine Run1-<br>DMSO  | NM_0140<br>33 | DKFZP58<br>6A0522 | DKFZP58<br>6A0522 | 3.884623  | Outlier |
| siRNA-Temozolomide Run3-<br>DMSO | NM_0155<br>33 | DKFZP58<br>6B1621 | DKFZP58<br>6B1621 | -4.409694 | Outlier |
|                                  | NM_0155       | DKFZP58           | DKFZP58           |           |         |
| siRNA Disorazole DMSO Run2       | 33            | 6B1621            | 6B1621            | -4.15168  | Outlier |
| siRNA-Temozolomide Run1-<br>DMSO | NM_0155<br>33 | DKFZP58<br>6B1621 | DKFZP58<br>6B1621 | -0.673828 | Inlier  |
| siRNA-Temozolomide Run2-<br>DMSO | NM_0155<br>33 | DKFZP58<br>6B1621 | DKFZP58<br>6B1621 | -0.181302 | Inlier  |
|                                  | NM_0155       | DKFZP58           | DKFZP58           |           |         |
| siRNA Disorazole DMSO Run3       | 33            | 6B1621            | 6B1621            | 0.181303  | Inlier  |
|                                  | NM_0155       | DKFZP58           | DKFZP58           |           |         |
| siRNA Disorazole DMSO Run1       | 33            | 6B1621            | 6B1621            | 0.24138   | Inlier  |
| siRNA-Vinblastine Run1-<br>DMSO  | NM_0155<br>33 | DKFZP58<br>6B1621 | DKFZP58<br>6B1621 | 0.675171  | Inlier  |
| siRNA-Vinblastine Run2-<br>DMSO  | NM_0155<br>33 | DKFZP58<br>6B1621 | DKFZP58<br>6B1621 | 1.051285  | Inlier  |
|                                  | NM_0154       | DKFZP58           | DKFZP58           |           |         |
| siRNA Disorazole DMSO Run2       | 30            | 6H2123            | 6H2123            | -0.909906 | Inlier  |
| siRNA-Temozolomide Run3-<br>DMSO | NM_0154<br>30 | DKFZP58<br>6H2123 | DKFZP58<br>6H2123 | -0.788128 | Inlier  |

Identification of Survival Genes in Human Glioblastoma Cells Using siRNA Screening  
 Nikhil G Thaker, Fang Zhang, Peter R. McDonald, Tong Ying Shun, Michael D Lewen, Ian F. Pollack, and John S. Lazo

|                              |         |          |                      |           |         |
|------------------------------|---------|----------|----------------------|-----------|---------|
| siRNA-Temozolomide Run2-DMSO | NM_0154 | DKFZP58  | DKFZP58              |           |         |
|                              | 30      | 6H2123   | 6H2123               | -0.300587 | Inlier  |
|                              | NM_0154 | DKFZP58  | DKFZP58              |           |         |
| siRNA Disorazole DMSO Run1   | 30      | 6H2123   | 6H2123               | -0.046507 | Inlier  |
|                              | NM_0154 | DKFZP58  | DKFZP58              |           |         |
| siRNA Disorazole DMSO Run3   | 30      | 6H2123   | 6H2123               | 0.046507  | Inlier  |
| siRNA-Temozolomide Run1-DMSO | NM_0154 | DKFZP58  | DKFZP58              |           |         |
|                              | 30      | 6H2123   | 6H2123               | 0.560872  | Inlier  |
| siRNA-Vinblastine Run1-DMSO  | NM_0154 | DKFZP58  | DKFZP58              |           |         |
|                              | 30      | 6H2123   | 6H2123               | 0.989558  | Inlier  |
| siRNA-Vinblastine Run2-DMSO  | NM_0154 | DKFZP58  | DKFZP58              |           |         |
|                              | 30      | 6H2123   | 6H2123               | 1.708011  | Inlier  |
|                              |         |          | transmembrane        |           |         |
| siRNA-Temozolomide Run3-DMSO | NM_1825 | DKFZp686 | protease, serine 11B | -1.234149 | Inlier  |
|                              | 02      | L1818    |                      |           |         |
|                              |         |          | transmembrane        |           |         |
| siRNA-Temozolomide Run2-DMSO | NM_1825 | DKFZp686 | protease, serine 11B | -0.583989 | Inlier  |
|                              | 02      | L1818    |                      |           |         |
|                              |         |          | transmembrane        |           |         |
| siRNA Disorazole DMSO Run2   | NM_1825 | DKFZp686 | protease, serine 11B | -0.118384 | Inlier  |
|                              | 02      | L1818    |                      |           |         |
|                              |         |          | transmembrane        |           |         |
| siRNA-Temozolomide Run1-DMSO | NM_1825 | DKFZp686 | protease, serine 11B | -0.035892 | Inlier  |
|                              | 02      | L1818    |                      |           |         |
|                              |         |          | transmembrane        |           |         |
| siRNA Disorazole DMSO Run1   | NM_1825 | DKFZp686 | protease, serine 11B | 0.035891  | Inlier  |
|                              | 02      | L1818    |                      |           |         |
|                              |         |          | transmembrane        |           |         |
| siRNA Disorazole DMSO Run3   | NM_1825 | DKFZp686 | protease, serine 11B | 0.765011  | Inlier  |
|                              | 02      | L1818    |                      |           |         |
|                              |         |          | transmembrane        |           |         |
| siRNA-Vinblastine Run1-DMSO  | NM_1825 | DKFZp686 | protease, serine 11B | 3.10217   | Inlier  |
|                              | 02      | L1818    |                      |           |         |
|                              |         |          | transmembrane        |           |         |
| siRNA-Vinblastine Run2-DMSO  | NM_1825 | DKFZp686 | protease, serine 11B | 4.402391  | Outlier |
|                              | 02      | L1818    |                      |           |         |

Identification of Survival Genes in Human Glioblastoma Cells Using siRNA Screening  
 Nikhil G Thaker, Fang Zhang, Peter R. McDonald, Tong Ying Shun, Michael D Lewen, Ian F. Pollack, and John S. Lazo

Molecular Pharmacology

| siRNA Treatment              | Gene ID | Accession     | Chromosome    | Reading Frame        | Value     | Category |
|------------------------------|---------|---------------|---------------|----------------------|-----------|----------|
| siRNA-Temozolomide Run2-DMSO | NM_0320 | DKFZP761D0211 | chromosome 16 | open reading frame 9 | -0.952126 | Inlier   |
| siRNA-Temozolomide Run3-DMSO | NM_0320 | DKFZP761D0211 | chromosome 16 | open reading frame 9 | -0.742305 | Inlier   |
| siRNA Disorazole DMSO Run3   | NM_0320 | DKFZP761D0211 | chromosome 16 | open reading frame 9 | -0.275321 | Inlier   |
| siRNA-Temozolomide Run1-DMSO | NM_0320 | DKFZP761D0211 | chromosome 16 | open reading frame 9 | -0.08881  | Inlier   |
| siRNA-Vinblastine Run2-DMSO  | NM_0320 | DKFZP761D0211 | chromosome 16 | open reading frame 9 | 0.08881   | Inlier   |
| siRNA Disorazole DMSO Run1   | NM_0320 | DKFZP761D0211 | chromosome 16 | open reading frame 9 | 0.606695  | Inlier   |
| siRNA-Vinblastine Run1-DMSO  | NM_0320 | DKFZP761D0211 | chromosome 16 | open reading frame 9 | 1.279046  | Inlier   |
| siRNA Disorazole DMSO Run2   | NM_0320 | DKFZP761D0211 | chromosome 16 | open reading frame 9 | 1.463391  | Inlier   |
| siRNA-Temozolomide Run3-DMSO | NM_0187 | DKFZp761H039  | chromosome 11 | DKFZp761H039         | -2.309884 | Inlier   |
| siRNA Disorazole DMSO Run2   | NM_0187 | DKFZp761H039  | chromosome 11 | DKFZp761H039         | -0.657542 | Inlier   |
| siRNA-Temozolomide Run2-DMSO | NM_0187 | DKFZp761H039  | chromosome 11 | DKFZp761H039         | -0.630978 | Inlier   |
| siRNA Disorazole DMSO Run1   | NM_0187 | DKFZp761H039  | chromosome 11 | DKFZp761H039         | -0.5539   | Inlier   |
| siRNA Disorazole DMSO Run3   | NM_0187 | DKFZp761H039  | chromosome 11 | DKFZp761H039         | 0.5539    | Inlier   |
| siRNA-Temozolomide Run1-DMSO | NM_0187 | DKFZp761H039  | chromosome 11 | DKFZp761H039         | 0.691458  | Inlier   |

Identification of Survival Genes in Human Glioblastoma Cells Using siRNA Screening  
 Nikhil G Thaker, Fang Zhang, Peter R. McDonald, Tong Ying Shun, Michael D Lewen, Ian F. Pollack, and John S. Lazo

|                                  |               |                   |                                  |           |        |
|----------------------------------|---------------|-------------------|----------------------------------|-----------|--------|
| siRNA-Vinblastine Run1-<br>DMSO  | NM_0187<br>11 | DKFZp761<br>H039  | DKFZp761<br>H039                 | 0.780157  | Inlier |
| siRNA-Vinblastine Run2-<br>DMSO  | NM_0187<br>11 | DKFZp761<br>H039  | DKFZp761<br>H039                 | 1.157334  | Inlier |
| siRNA-Temozolomide Run3-<br>DMSO | XM_29061<br>5 | DKFZp762<br>F0713 | DKFZp762<br>F0713                | -1.881694 | Inlier |
| siRNA-Temozolomide Run1-<br>DMSO | XM_29061<br>5 | DKFZp762<br>F0713 | DKFZp762<br>F0713                | -0.755611 | Inlier |
| siRNA-Temozolomide Run2-<br>DMSO | XM_29061<br>5 | DKFZp762<br>F0713 | DKFZp762<br>F0713                | -0.442883 | Inlier |
| siRNA-Vinblastine Run2-<br>DMSO  | XM_29061<br>5 | DKFZp762<br>F0713 | DKFZp762<br>F0713                | -0.288829 | Inlier |
| siRNA Disorazole DMSO Run1       | XM_29061<br>5 | DKFZp762<br>F0713 | DKFZp762<br>F0713                | 0.288829  | Inlier |
| siRNA Disorazole DMSO Run2       | XM_29061<br>5 | DKFZp762<br>F0713 | DKFZp762<br>F0713                | 0.593389  | Inlier |
| siRNA Disorazole DMSO Run3       | XM_29061<br>5 | DKFZp762<br>F0713 | DKFZp762<br>F0713                | 0.767492  | Inlier |
| siRNA-Vinblastine Run1-<br>DMSO  | XM_29061<br>5 | DKFZp762<br>F0713 | DKFZp762<br>F0713                | 2.013323  | Inlier |
| siRNA Disorazole DMSO Run3       | NM_0582<br>48 | DLAD              | deoxyribon<br>uclease II<br>beta | -0.928675 | Inlier |
| siRNA-Vinblastine Run2-<br>DMSO  | NM_0582<br>48 | DLAD              | deoxyribon<br>uclease II<br>beta | -0.887074 | Inlier |
| siRNA-Temozolomide Run3-<br>DMSO | NM_0582<br>48 | DLAD              | deoxyribon<br>uclease II<br>beta | -0.401519 | Inlier |
| siRNA-Temozolomide Run2-<br>DMSO | NM_0582<br>48 | DLAD              | deoxyribon<br>uclease II<br>beta | -0.108153 | Inlier |
| siRNA Disorazole DMSO Run1       | NM_0582<br>48 | DLAD              | deoxyribon<br>uclease II<br>beta | 0.108153  | Inlier |
| siRNA-Temozolomide Run1-<br>DMSO | NM_0582<br>48 | DLAD              | deoxyribon<br>uclease II<br>beta | 0.461926  | Inlier |
| siRNA-Vinblastine Run1-<br>DMSO  | NM_0582<br>48 | DLAD              | deoxyribon<br>uclease II<br>beta | 1.516454  | Inlier |
| siRNA Disorazole DMSO Run2       | NM_0582<br>48 | DLAD              | deoxyribon<br>uclease II<br>beta | 2.150304  | Inlier |

Identification of Survival Genes in Human Glioblastoma Cells Using siRNA Screening

Nikhil G Thaker, Fang Zhang, Peter R. McDonald, Tong Ying Shun, Michael D Lewen, Ian F. Pollack, and John S. Lazo

Molecular Pharmacology

|                              |           |      |                                                                                       |           |        |
|------------------------------|-----------|------|---------------------------------------------------------------------------------------|-----------|--------|
| siRNA-Temozolomide Run2-DMSO | NM_001931 | DLAT | dihydrolipoamide S-acetyltransferase (E2 component of pyruvate dehydrogenase complex) | -1.122086 | Inlier |
| siRNA-Temozolomide Run3-DMSO | NM_001931 | DLAT | dihydrolipoamide S-acetyltransferase (E2 component of pyruvate dehydrogenase complex) | -1.036136 | Inlier |
| siRNA-Temozolomide Run1-DMSO | NM_001931 | DLAT | dihydrolipoamide S-acetyltransferase (E2 component of pyruvate dehydrogenase complex) | -0.326348 | Inlier |
| siRNA Disorazole DMSO Run1   | NM_001931 | DLAT | dihydrolipoamide S-acetyltransferase (E2 component of pyruvate dehydrogenase complex) | -0.155958 | Inlier |



Identification of Survival Genes in Human Glioblastoma Cells Using siRNA Screening

Nikhil G Thaker, Fang Zhang, Peter R. McDonald, Tong Ying Shun, Michael D Lewen, Ian F. Pollack, and John S. Lazo

Molecular Pharmacology

|                              |           |      |                                                                                       |           |        |
|------------------------------|-----------|------|---------------------------------------------------------------------------------------|-----------|--------|
| siRNA-Vinblastine Run2-DMSO  | NM_001931 | DLAT | dihydrolipoamide S-acetyltransferase (E2 component of pyruvate dehydrogenase complex) | 0.155959  | Inlier |
| siRNA Disorazole DMSO Run3   | NM_001931 | DLAT | dihydrolipoamide S-acetyltransferase (E2 component of pyruvate dehydrogenase complex) | 0.330279  | Inlier |
| siRNA-Vinblastine Run1-DMSO  | NM_001931 | DLAT | dihydrolipoamide S-acetyltransferase (E2 component of pyruvate dehydrogenase complex) | 1.018721  | Inlier |
| siRNA Disorazole DMSO Run2   | NM_001931 | DLAT | dihydrolipoamide S-acetyltransferase (E2 component of pyruvate dehydrogenase complex) | 3.07104   | Inlier |
| siRNA-Temozolomide Run3-DMSO | NM_024767 | DLC1 | deleted in liver cancer 1                                                             | -2.307484 | Inlier |
| siRNA-Temozolomide Run1-DMSO | NM_024767 | DLC1 | deleted in liver cancer 1                                                             | -1.39279  | Inlier |

Identification of Survival Genes in Human Glioblastoma Cells Using siRNA Screening

Nikhil G Thaker, Fang Zhang, Peter R. McDonald, Tong Ying Shun, Michael D Lewen, Ian F. Pollack, and John S.

Lazo

Molecular Pharmacology

|                                  |               |      |                                 |           |        |
|----------------------------------|---------------|------|---------------------------------|-----------|--------|
| siRNA-Vinblastine Run2-<br>DMSO  | NM_0247<br>67 | DLC1 | deleted in<br>liver<br>cancer 1 | -0.067963 | Inlier |
| siRNA-Temozolomide Run2-<br>DMSO | NM_0247<br>67 | DLC1 | deleted in<br>liver<br>cancer 1 | -0.041261 | Inlier |
| siRNA Disorazole DMSO Run3       | NM_0247<br>67 | DLC1 | deleted in<br>liver<br>cancer 1 | 0.041261  | Inlier |
| siRNA Disorazole DMSO Run2       | NM_0247<br>67 | DLC1 | deleted in<br>liver<br>cancer 1 | 0.327577  | Inlier |
| siRNA-Vinblastine Run1-<br>DMSO  | NM_0247<br>67 | DLC1 | deleted in<br>liver<br>cancer 1 | 1.021423  | Inlier |
| siRNA Disorazole DMSO Run1       | NM_0247<br>67 | DLC1 | deleted in<br>liver<br>cancer 1 | 1.188052  | Inlier |
| siRNA-Temozolomide Run3-<br>DMSO | NM_0806<br>77 | Dlc2 | Dlc2                            | -0.895986 | Inlier |
| siRNA-Temozolomide Run2-<br>DMSO | NM_0806<br>77 | Dlc2 | Dlc2                            | -0.859568 | Inlier |
| siRNA Disorazole DMSO Run1       | NM_0806<br>77 | Dlc2 | Dlc2                            | -0.225993 | Inlier |
| siRNA Disorazole DMSO Run3       | NM_0806<br>77 | Dlc2 | Dlc2                            | -0.151545 | Inlier |
| siRNA-Vinblastine Run2-<br>DMSO  | NM_0806<br>77 | Dlc2 | Dlc2                            | 0.151545  | Inlier |
| siRNA-Temozolomide Run1-<br>DMSO | NM_0806<br>77 | Dlc2 | Dlc2                            | 0.489432  | Inlier |
| siRNA Disorazole DMSO Run2       | NM_0806<br>77 | Dlc2 | Dlc2                            | 1.402664  | Inlier |
| siRNA-Vinblastine Run1-<br>DMSO  | NM_0806<br>77 | Dlc2 | Dlc2                            | 1.59533   | Inlier |

Identification of Survival Genes in Human Glioblastoma Cells Using siRNA Screening

Nikhil G Thaker, Fang Zhang, Peter R. McDonald, Tong Ying Shun, Michael D Lewen, Ian F. Pollack, and John S. Lazo

Molecular Pharmacology

|                                  |               |     |                                                                                                                                                                                                                       |           |        |
|----------------------------------|---------------|-----|-----------------------------------------------------------------------------------------------------------------------------------------------------------------------------------------------------------------------|-----------|--------|
|                                  |               |     | dihydrolipo<br>amide<br>dehydroge<br>nase (E3<br>componen<br>t of<br>pyruvate<br>dehydroge<br>nase<br>complex, 2-<br>oxo-<br>glutarate<br>complex,<br>branched<br>chain keto<br>acid<br>dehydroge<br>nase<br>complex) | -1.144325 | Inlier |
| siRNA-Temozolomide Run3-<br>DMSO | NM_0001<br>08 | DLD | dihydrolipo<br>amide<br>dehydroge<br>nase (E3<br>componen<br>t of<br>pyruvate<br>dehydroge<br>nase<br>complex, 2-<br>oxo-<br>glutarate<br>complex,<br>branched<br>chain keto<br>acid<br>dehydroge<br>nase<br>complex) | -1.144325 | Inlier |
| siRNA-Temozolomide Run2-<br>DMSO | NM_0001<br>08 | DLD | dihydrolipo<br>amide<br>dehydroge<br>nase (E3<br>componen<br>t of<br>pyruvate<br>dehydroge<br>nase<br>complex, 2-<br>oxo-<br>glutarate<br>complex,<br>branched<br>chain keto<br>acid<br>dehydroge<br>nase<br>complex) | -1.058913 | Inlier |

Identification of Survival Genes in Human Glioblastoma Cells Using siRNA Screening

Nikhil G Thaker, Fang Zhang, Peter R. McDonald, Tong Ying Shun, Michael D Lewen, Ian F. Pollack, and John S.

Lazo

Molecular Pharmacology

|                    |         |    |                                                                                                                                                                                                                                                                                                                              |           |        |
|--------------------|---------|----|------------------------------------------------------------------------------------------------------------------------------------------------------------------------------------------------------------------------------------------------------------------------------------------------------------------------------|-----------|--------|
|                    |         |    | dihydrolipo<br>amide<br>dehydroge<br>nase (E3<br>componen<br>t of<br>pyruvate<br>dehydroge<br>nase<br>complex, 2-<br>oxo-<br>glutarate<br>complex,<br>branched<br>chain keto<br>acid<br>dehydroge<br>nase<br>complex, 2-<br>oxo-<br>glutarate<br>complex,<br>branched<br>chain keto<br>acid<br>dehydroge<br>nase<br>complex) | -0.732443 | Inlier |
| siRNA Disorazole   | NM_0001 | 08 | DLD                                                                                                                                                                                                                                                                                                                          |           |        |
| DMSO               |         |    |                                                                                                                                                                                                                                                                                                                              |           |        |
| siRNA-Temozolomide | NM_0001 | 08 | DLD                                                                                                                                                                                                                                                                                                                          | -0.047422 | Inlier |
| DMSO               |         |    |                                                                                                                                                                                                                                                                                                                              |           |        |

Identification of Survival Genes in Human Glioblastoma Cells Using siRNA Screening

Nikhil G Thaker, Fang Zhang, Peter R. McDonald, Tong Ying Shun, Michael D Lewen, Ian F. Pollack, and John S. Lazo

Molecular Pharmacology

|                                 |               |  |     |                                                                                                                                                                                                                                                                                                                              |          |        |
|---------------------------------|---------------|--|-----|------------------------------------------------------------------------------------------------------------------------------------------------------------------------------------------------------------------------------------------------------------------------------------------------------------------------------|----------|--------|
|                                 |               |  |     | dihydrolipo<br>amide<br>dehydroge<br>nase (E3<br>componen<br>t of<br>pyruvate<br>dehydroge<br>nase<br>complex, 2-<br>oxo-<br>glutarate<br>complex,<br>branched<br>chain keto<br>acid<br>dehydroge<br>nase<br>complex, 2-<br>oxo-<br>glutarate<br>complex,<br>branched<br>chain keto<br>acid<br>dehydroge<br>nase<br>complex) | 0.047422 | Inlier |
| siRNA Disorazole DMSO Run1      | NM_0001<br>08 |  | DLD |                                                                                                                                                                                                                                                                                                                              |          |        |
| siRNA-Vinblastine Run1-<br>DMSO | NM_0001<br>08 |  | DLD |                                                                                                                                                                                                                                                                                                                              | 0.449242 | Inlier |

Identification of Survival Genes in Human Glioblastoma Cells Using siRNA Screening

Nikhil G Thaker, Fang Zhang, Peter R. McDonald, Tong Ying Shun, Michael D Lewen, Ian F. Pollack, and John S. Lazo

Molecular Pharmacology

|                              |           |      |                                                                                                                                                          |           |        |
|------------------------------|-----------|------|----------------------------------------------------------------------------------------------------------------------------------------------------------|-----------|--------|
| siRNA-Vinblastine Run2-DMSO  | NM_000108 | DLD  | dihydrolipoamide dehydrogenase (E3 component of pyruvate dehydrogenase complex, 2-oxo-glutarate complex, branched chain keto acid dehydrogenase complex) | 0.616557  | Inlier |
| siRNA Disorazole DMSO Run2   | NM_000108 | DLD  | dihydrolipoamide dehydrogenase (E3 component of pyruvate dehydrogenase complex, 2-oxo-glutarate complex, branched chain keto acid dehydrogenase complex) | 0.76861   | Inlier |
| siRNA Disorazole DMSO Run2   | NM_004087 | DLG1 | discs, large homolog 1 (Drosophila)                                                                                                                      | -2.208961 | Inlier |
| siRNA-Temozolomide Run3-DMSO | NM_004087 | DLG1 | discs, large homolog 1 (Drosophila)                                                                                                                      | -1.581285 | Inlier |

Identification of Survival Genes in Human Glioblastoma Cells Using siRNA Screening  
 Nikhil G Thaker, Fang Zhang, Peter R. McDonald, Tong Ying Shun, Michael D Lewen, Ian F. Pollack, and John S. Lazo  
 Molecular Pharmacology

|                                  |               |      |                                                                             |                  |
|----------------------------------|---------------|------|-----------------------------------------------------------------------------|------------------|
| siRNA Disorazole DMSO Run3       | NM_0040<br>87 | DLG1 | discs,<br>large<br>homolog 1<br>(Drosophil<br>a)                            | -0.573708 Inlier |
| siRNA-Temozolomide Run2-<br>DMSO | NM_0040<br>87 | DLG1 | discs,<br>large<br>homolog 1<br>(Drosophil<br>a)                            | -0.051937 Inlier |
| siRNA-Temozolomide Run1-<br>DMSO | NM_0040<br>87 | DLG1 | discs,<br>large<br>homolog 1<br>(Drosophil<br>a)                            | 0.051936 Inlier  |
| siRNA Disorazole DMSO Run1       | NM_0040<br>87 | DLG1 | discs,<br>large<br>homolog 1<br>(Drosophil<br>a)                            | 0.635769 Inlier  |
| siRNA-Vinblastine Run1-<br>DMSO  | NM_0040<br>87 | DLG1 | discs,<br>large<br>homolog 1<br>(Drosophil<br>a)                            | 0.713231 Inlier  |
| siRNA-Vinblastine Run2-<br>DMSO  | NM_0040<br>87 | DLG1 | discs,<br>large<br>homolog 1<br>(Drosophil<br>a)                            | 1.648639 Inlier  |
| siRNA-Temozolomide Run3-<br>DMSO | NM_0211<br>20 | DLG3 | discs,<br>large<br>homolog 3<br>(neuroend<br>ocrine-dlg,<br>Drosophila<br>) | -1.517474 Inlier |

Identification of Survival Genes in Human Glioblastoma Cells Using siRNA Screening  
 Nikhil G Thaker, Fang Zhang, Peter R. McDonald, Tong Ying Shun, Michael D Lewen, Ian F. Pollack, and John S. Lazo  
 Molecular Pharmacology

|                              |               |      |                                                                         |                  |
|------------------------------|---------------|------|-------------------------------------------------------------------------|------------------|
| siRNA-Temozolomide Run1-DMSO | NM_0211<br>20 | DLG3 | discs,<br>large<br>homolog 3<br>(neuroendocrine-dlg,<br>Drosophila<br>) | -1.213428 Inlier |
| siRNA-Vinblastine Run1-DMSO  | NM_0211<br>20 | DLG3 | discs,<br>large<br>homolog 3<br>(neuroendocrine-dlg,<br>Drosophila<br>) | -0.109006 Inlier |
| siRNA Disorazole DMSO Run2   | NM_0211<br>20 | DLG3 | discs,<br>large<br>homolog 3<br>(neuroendocrine-dlg,<br>Drosophila<br>) | -0.02145 Inlier  |
| siRNA-Temozolomide Run2-DMSO | NM_0211<br>20 | DLG3 | discs,<br>large<br>homolog 3<br>(neuroendocrine-dlg,<br>Drosophila<br>) | 0.021451 Inlier  |
| siRNA Disorazole DMSO Run1   | NM_0211<br>20 | DLG3 | discs,<br>large<br>homolog 3<br>(neuroendocrine-dlg,<br>Drosophila<br>) | 0.135571 Inlier  |



Identification of Survival Genes in Human Glioblastoma Cells Using siRNA Screening  
 Nikhil G Thaker, Fang Zhang, Peter R. McDonald, Tong Ying Shun, Michael D Lewen, Ian F. Pollack, and John S. Lazo  
 Molecular Pharmacology

|                              |               |      |                                                                         |                  |
|------------------------------|---------------|------|-------------------------------------------------------------------------|------------------|
| siRNA-Vinblastine Run2-DMSO  | NM_0211<br>20 | DLG3 | discs,<br>large<br>homolog 3<br>(neuroendocrine-dlg,<br>Drosophila<br>) | 1.287724 Inlier  |
| siRNA Disorazole DMSO Run3   | NM_0211<br>20 | DLG3 | discs,<br>large<br>homolog 3<br>(neuroendocrine-dlg,<br>Drosophila<br>) | 3.328764 Inlier  |
| siRNA Disorazole DMSO Run2   | NM_0013<br>65 | DLG4 | discs,<br>large<br>homolog 4<br>(Drosophila<br>a)                       | -2.272247 Inlier |
| siRNA-Temozolomide Run3-DMSO | NM_0013<br>65 | DLG4 | discs,<br>large<br>homolog 4<br>(Drosophila<br>a)                       | -0.830235 Inlier |
| siRNA-Temozolomide Run1-DMSO | NM_0013<br>65 | DLG4 | discs,<br>large<br>homolog 4<br>(Drosophila<br>a)                       | -0.380466 Inlier |
| siRNA-Temozolomide Run2-DMSO | NM_0013<br>65 | DLG4 | discs,<br>large<br>homolog 4<br>(Drosophila<br>a)                       | -0.278385 Inlier |
| siRNA Disorazole DMSO Run3   | NM_0013<br>65 | DLG4 | discs,<br>large<br>homolog 4<br>(Drosophila<br>a)                       | 0.278385 Inlier  |

Identification of Survival Genes in Human Glioblastoma Cells Using siRNA Screening  
 Nikhil G Thaker, Fang Zhang, Peter R. McDonald, Tong Ying Shun, Michael D Lewen, Ian F. Pollack, and John S. Lazo  
 Molecular Pharmacology

|                                  |               |      |                                                  |                  |
|----------------------------------|---------------|------|--------------------------------------------------|------------------|
| siRNA Disorazole DMSO Run1       | NM_0013<br>65 | DLG4 | discs,<br>large<br>homolog 4<br>(Drosophil<br>a) | 0.518765 Inlier  |
| siRNA-Vinblastine Run1-<br>DMSO  | NM_0013<br>65 | DLG4 | discs,<br>large<br>homolog 4<br>(Drosophil<br>a) | 0.97218 Inlier   |
| siRNA-Vinblastine Run2-<br>DMSO  | NM_0013<br>65 | DLG4 | discs,<br>large<br>homolog 4<br>(Drosophil<br>a) | 1.673555 Inlier  |
| siRNA-Temozolomide Run3-<br>DMSO | NM_0047<br>47 | DLG5 | discs,<br>large<br>homolog 5<br>(Drosophil<br>a) | -0.792199 Inlier |
| siRNA-Temozolomide Run2-<br>DMSO | NM_0047<br>47 | DLG5 | discs,<br>large<br>homolog 5<br>(Drosophil<br>a) | -0.764054 Inlier |
| siRNA-Temozolomide Run1-<br>DMSO | NM_0047<br>47 | DLG5 | discs,<br>large<br>homolog 5<br>(Drosophil<br>a) | -0.363506 Inlier |
| siRNA Disorazole DMSO Run1       | NM_0047<br>47 | DLG5 | discs,<br>large<br>homolog 5<br>(Drosophil<br>a) | -0.167419 Inlier |
| siRNA Disorazole DMSO Run3       | NM_0047<br>47 | DLG5 | discs,<br>large<br>homolog 5<br>(Drosophil<br>a) | 0.167419 Inlier  |

Identification of Survival Genes in Human Glioblastoma Cells Using siRNA Screening  
 Nikhil G Thaker, Fang Zhang, Peter R. McDonald, Tong Ying Shun, Michael D Lewen, Ian F. Pollack, and John S. Lazo  
 Molecular Pharmacology

|                              |               |        |                                                                            |                  |
|------------------------------|---------------|--------|----------------------------------------------------------------------------|------------------|
| siRNA-Vinblastine Run2-DMSO  | NM_0047<br>47 | DLG5   | discs,<br>large<br>homolog 5<br>(Drosophil<br>a)                           | 0.621818 Inlier  |
| siRNA Disorazole DMSO Run2   | NM_0047<br>47 | DLG5   | discs,<br>large<br>homolog 5<br>(Drosophil<br>a)                           | 0.727183 Inlier  |
| siRNA-Vinblastine Run1-DMSO  | NM_0047<br>47 | DLG5   | discs,<br>large<br>homolog 5<br>(Drosophil<br>a)                           | 1.309812 Inlier  |
| siRNA Disorazole DMSO Run2   | NM_0047<br>45 | DLGAP2 | discs,<br>large<br>(Drosophil<br>a)<br>homolog-<br>associated<br>protein 2 | -1.141406 Inlier |
| siRNA-Temozolomide Run2-DMSO | NM_0047<br>45 | DLGAP2 | discs,<br>large<br>(Drosophil<br>a)<br>homolog-<br>associated<br>protein 2 | -0.256028 Inlier |
| siRNA-Temozolomide Run3-DMSO | NM_0047<br>45 | DLGAP2 | discs,<br>large<br>(Drosophil<br>a)<br>homolog-<br>associated<br>protein 2 | -0.196978 Inlier |
| siRNA-Temozolomide Run1-DMSO | NM_0047<br>45 | DLGAP2 | discs,<br>large<br>(Drosophil<br>a)<br>homolog-<br>associated<br>protein 2 | -0.06823 Inlier  |

Identification of Survival Genes in Human Glioblastoma Cells Using siRNA Screening

Nikhil G Thaker, Fang Zhang, Peter R. McDonald, Tong Ying Shun, Michael D Lewen, Ian F. Pollack, and John S. Lazo

Molecular Pharmacology

|                                  |               |        |                                                                                                               |           |        |
|----------------------------------|---------------|--------|---------------------------------------------------------------------------------------------------------------|-----------|--------|
| siRNA Disorazole DMSO Run1       | NM_0047<br>45 | DLGAP2 | discs,<br>large<br>(Drosophil<br>a)<br>homolog-<br>associated<br>protein 2                                    | 0.06823   | Inlier |
| siRNA-Vinblastine Run2-<br>DMSO  | NM_0047<br>45 | DLGAP2 | discs,<br>large<br>(Drosophil<br>a)<br>homolog-<br>associated<br>protein 2                                    | 1.092972  | Inlier |
| siRNA-Vinblastine Run1-<br>DMSO  | NM_0047<br>45 | DLGAP2 | discs,<br>large<br>(Drosophil<br>a)<br>homolog-<br>associated<br>protein 2                                    | 1.212995  | Inlier |
| siRNA Disorazole DMSO Run3       | NM_0047<br>45 | DLGAP2 | discs,<br>large<br>(Drosophil<br>a)<br>homolog-<br>associated<br>protein 2                                    | 2.395785  | Inlier |
| siRNA Disorazole DMSO Run2       | NM_0019<br>33 | DLST   | dihydrolipo<br>amide S-<br>succinyltra<br>nsferase<br>(E2<br>componen<br>t of 2-oxo-<br>glutarate<br>complex) | -0.940524 | Inlier |
| siRNA-Temozolomide Run1-<br>DMSO | NM_0019<br>33 | DLST   | dihydrolipo<br>amide S-<br>succinyltra<br>nsferase<br>(E2<br>componen<br>t of 2-oxo-<br>glutarate<br>complex) | -0.810407 | Inlier |

Identification of Survival Genes in Human Glioblastoma Cells Using siRNA Screening

Nikhil G Thaker, Fang Zhang, Peter R. McDonald, Tong Ying Shun, Michael D Lewen, Ian F. Pollack, and John S. Lazo

Molecular Pharmacology

|                              |           |      |                                                                                 |           |        |
|------------------------------|-----------|------|---------------------------------------------------------------------------------|-----------|--------|
| siRNA-Temozolomide Run2-DMSO | NM_001933 | DLST | dihydrolipoamide S-succinyltransferase (E2 component of 2-oxoglutarate complex) | -0.272993 | Inlier |
| siRNA-Vinblastine Run2-DMSO  | NM_001933 | DLST | dihydrolipoamide S-succinyltransferase (E2 component of 2-oxoglutarate complex) | -0.201594 | Inlier |
| siRNA Disorazole DMSO Run1   | NM_001933 | DLST | dihydrolipoamide S-succinyltransferase (E2 component of 2-oxoglutarate complex) | 0.201594  | Inlier |
| siRNA Disorazole DMSO Run3   | NM_001933 | DLST | dihydrolipoamide S-succinyltransferase (E2 component of 2-oxoglutarate complex) | 0.538593  | Inlier |
| siRNA-Vinblastine Run1-DMSO  | NM_001933 | DLST | dihydrolipoamide S-succinyltransferase (E2 component of 2-oxoglutarate complex) | 1.009066  | Inlier |

Identification of Survival Genes in Human Glioblastoma Cells Using siRNA Screening

Nikhil G Thaker, Fang Zhang, Peter R. McDonald, Tong Ying Shun, Michael D Lewen, Ian F. Pollack, and John S. Lazo

Molecular Pharmacology

|                              |           |       |                                                                                 |           |        |
|------------------------------|-----------|-------|---------------------------------------------------------------------------------|-----------|--------|
| siRNA-Temozolomide Run3-DMSO | NM_001933 | DLST  | dihydrolipoamide S-succinyltransferase (E2 component of 2-oxoglutarate complex) | 1.429405  | Inlier |
| siRNA-Temozolomide Run2-DMSO | NM_019100 | DMAP1 | DNA methyltransferase 1 associated protein 1                                    | -1.593262 | Inlier |
| siRNA-Temozolomide Run1-DMSO | NM_019100 | DMAP1 | DNA methyltransferase 1 associated protein 1                                    | -0.922027 | Inlier |
| siRNA Disorazole DMSO Run1   | NM_019100 | DMAP1 | DNA methyltransferase 1 associated protein 1                                    | -0.576533 | Inlier |
| siRNA-Temozolomide Run3-DMSO | NM_019100 | DMAP1 | DNA methyltransferase 1 associated protein 1                                    | -0.266285 | Inlier |
| siRNA-Vinblastine Run2-DMSO  | NM_019100 | DMAP1 | DNA methyltransferase 1 associated protein 1                                    | 0.266285  | Inlier |
| siRNA-Vinblastine Run1-DMSO  | NM_019100 | DMAP1 | DNA methyltransferase 1 associated protein 1                                    | 0.433677  | Inlier |

Identification of Survival Genes in Human Glioblastoma Cells Using siRNA Screening  
 Nikhil G Thaker, Fang Zhang, Peter R. McDonald, Tong Ying Shun, Michael D Lewen, Ian F. Pollack, and John S. Lazo  
 Molecular Pharmacology

|                              |               |       |                                              |           |        |
|------------------------------|---------------|-------|----------------------------------------------|-----------|--------|
| siRNA Disorazole DMSO Run2   | NM_0191<br>00 | DMAP1 | DNA methyltransferase 1 associated protein 1 | 0.772467  | Inlier |
| siRNA Disorazole DMSO Run3   | NM_0191<br>00 | DMAP1 | DNA methyltransferase 1 associated protein 1 | 0.919325  | Inlier |
| siRNA-Temozolomide Run3-DMSO | NM_0044<br>06 | DMBT1 | deleted in malignant brain tumors 1          | -1.781656 | Inlier |
| siRNA-Temozolomide Run2-DMSO | NM_0044<br>06 | DMBT1 | deleted in malignant brain tumors 1          | -0.714665 | Inlier |
| siRNA Disorazole DMSO Run3   | NM_0044<br>06 | DMBT1 | deleted in malignant brain tumors 1          | -0.448923 | Inlier |
| siRNA Disorazole DMSO Run1   | NM_0044<br>06 | DMBT1 | deleted in malignant brain tumors 1          | -0.016959 | Inlier |
| siRNA-Vinblastine Run2-DMSO  | NM_0044<br>06 | DMBT1 | deleted in malignant brain tumors 1          | 0.01696   | Inlier |
| siRNA-Vinblastine Run1-DMSO  | NM_0044<br>06 | DMBT1 | deleted in malignant brain tumors 1          | 0.634335  | Inlier |
| siRNA-Temozolomide Run1-DMSO | NM_0044<br>06 | DMBT1 | deleted in malignant brain tumors 1          | 1.15782   | Inlier |
| siRNA Disorazole DMSO Run2   | NM_0044<br>06 | DMBT1 | deleted in malignant brain tumors 1          | 1.447788  | Inlier |
| siRNA-Temozolomide Run2-DMSO | NM_0133<br>91 | DMGDH | dimethylglycine dehydrogenase                | -1.505815 | Inlier |

Identification of Survival Genes in Human Glioblastoma Cells Using siRNA Screening  
 Nikhil G Thaker, Fang Zhang, Peter R. McDonald, Tong Ying Shun, Michael D Lewen, Ian F. Pollack, and John S. Lazo

Molecular Pharmacology

|                              |               |       |                                     |           |        |
|------------------------------|---------------|-------|-------------------------------------|-----------|--------|
| siRNA-Temozolomide Run3-DMSO | NM_0133<br>91 | DMGDH | dimethylglycine dehydrogenase       | -0.926302 | Inlier |
| siRNA-Temozolomide Run1-DMSO | NM_0133<br>91 | DMGDH | dimethylglycine dehydrogenase       | -0.422698 | Inlier |
| siRNA-Vinblastine Run1-DMSO  | NM_0133<br>91 | DMGDH | dimethylglycine dehydrogenase       | -0.075723 | Inlier |
| siRNA Disorazole DMSO Run1   | NM_0133<br>91 | DMGDH | dimethylglycine dehydrogenase       | 0.075724  | Inlier |
| siRNA-Vinblastine Run2-DMSO  | NM_0133<br>91 | DMGDH | dimethylglycine dehydrogenase       | 0.181894  | Inlier |
| siRNA Disorazole DMSO Run3   | NM_0133<br>91 | DMGDH | dimethylglycine dehydrogenase       | 0.990625  | Inlier |
| siRNA Disorazole DMSO Run2   | NM_0133<br>91 | DMGDH | dimethylglycine dehydrogenase       | 2.977279  | Inlier |
| siRNA Disorazole DMSO Run2   | NM_0044<br>09 | DMPK  | dystrophia myotonica-protein kinase | -1.726583 | Inlier |
| siRNA Disorazole DMSO Run3   | NM_0044<br>09 | DMPK  | dystrophia myotonica-protein kinase | -0.546373 | Inlier |
| siRNA-Temozolomide Run3-DMSO | NM_0044<br>09 | DMPK  | dystrophia myotonica-protein kinase | -0.065692 | Inlier |
| siRNA-Temozolomide Run1-DMSO | NM_0044<br>09 | DMPK  | dystrophia myotonica-protein kinase | -0.013597 | Inlier |



Identification of Survival Genes in Human Glioblastoma Cells Using siRNA Screening  
 Nikhil G Thaker, Fang Zhang, Peter R. McDonald, Tong Ying Shun, Michael D Lewen, Ian F. Pollack, and John S. Lazo  
 Molecular Pharmacology

|                              |           |       |                                              |           |        |
|------------------------------|-----------|-------|----------------------------------------------|-----------|--------|
| siRNA-Temozolomide Run2-DMSO | NM_004409 | DMPK  | dystrophia myotonica-protein kinase          | 0.013597  | Inlier |
| siRNA Disorazole DMSO Run1   | NM_004409 | DMPK  | dystrophia myotonica-protein kinase          | 0.802627  | Inlier |
| siRNA-Vinblastine Run1-DMSO  | NM_004409 | DMPK  | dystrophia myotonica-protein kinase          | 1.058921  | Inlier |
| siRNA-Vinblastine Run2-DMSO  | NM_004409 | DMPK  | dystrophia myotonica-protein kinase          | 1.441494  | Inlier |
| siRNA-Temozolomide Run3-DMSO | XM_166103 | DNA2L | DNA2 DNA replication helicase 2-like (yeast) | -1.393628 | Inlier |
| siRNA-Temozolomide Run2-DMSO | XM_166103 | DNA2L | DNA2 DNA replication helicase 2-like (yeast) | -0.946609 | Inlier |
| siRNA-Vinblastine Run2-DMSO  | XM_166103 | DNA2L | DNA2 DNA replication helicase 2-like (yeast) | -0.402391 | Inlier |
| siRNA Disorazole DMSO Run3   | XM_166103 | DNA2L | DNA2 DNA replication helicase 2-like (yeast) | -0.158049 | Inlier |
| siRNA-Temozolomide Run1-DMSO | XM_166103 | DNA2L | DNA2 DNA replication helicase 2-like (yeast) | 0.158049  | Inlier |

Identification of Survival Genes in Human Glioblastoma Cells Using siRNA Screening  
 Nikhil G Thaker, Fang Zhang, Peter R. McDonald, Tong Ying Shun, Michael D Lewen, Ian F. Pollack, and John S. Lazo  
 Molecular Pharmacology

|                                  |               |        |                                                           |           |        |
|----------------------------------|---------------|--------|-----------------------------------------------------------|-----------|--------|
| siRNA Disorazole DMSO Run1       | XM_16610<br>3 | DNA2L  | DNA2<br>DNA<br>replication<br>helicase 2-<br>like (yeast) | 0.367509  | Inlier |
| siRNA Disorazole DMSO Run2       | XM_16610<br>3 | DNA2L  | DNA2<br>DNA<br>replication<br>helicase 2-<br>like (yeast) | 1.838969  | Inlier |
| siRNA-Vinblastine Run1-<br>DMSO  | XM_16610<br>3 | DNA2L  | DNA2<br>DNA<br>replication<br>helicase 2-<br>like (yeast) | 1.901356  | Inlier |
| siRNA-Temozolomide Run3-<br>DMSO | NM_0037<br>77 | DNAH11 | dynein,<br>axonemal,<br>heavy<br>polypeptid<br>e 11       | -0.969182 | Inlier |
| siRNA-Temozolomide Run2-<br>DMSO | NM_0037<br>77 | DNAH11 | dynein,<br>axonemal,<br>heavy<br>polypeptid<br>e 11       | -0.808965 | Inlier |
| siRNA Disorazole DMSO Run1       | NM_0037<br>77 | DNAH11 | dynein,<br>axonemal,<br>heavy<br>polypeptid<br>e 11       | -0.647147 | Inlier |
| siRNA-Temozolomide Run1-<br>DMSO | NM_0037<br>77 | DNAH11 | dynein,<br>axonemal,<br>heavy<br>polypeptid<br>e 11       | -0.005017 | Inlier |
| siRNA Disorazole DMSO Run3       | NM_0037<br>77 | DNAH11 | dynein,<br>axonemal,<br>heavy<br>polypeptid<br>e 11       | 0.005017  | Inlier |
| siRNA-Vinblastine Run2-<br>DMSO  | NM_0037<br>77 | DNAH11 | dynein,<br>axonemal,<br>heavy<br>polypeptid<br>e 11       | 0.267082  | Inlier |

Identification of Survival Genes in Human Glioblastoma Cells Using siRNA Screening  
 Nikhil G Thaker, Fang Zhang, Peter R. McDonald, Tong Ying Shun, Michael D Lewen, Ian F. Pollack, and John S. Lazo

Molecular Pharmacology

|                                  |               |        |                                                     |           |        |
|----------------------------------|---------------|--------|-----------------------------------------------------|-----------|--------|
| siRNA Disorazole DMSO Run2       | NM_0037<br>77 | DNAH11 | dynein,<br>axonemal,<br>heavy<br>polypeptid<br>e 11 | 0.701853  | Inlier |
| siRNA-Vinblastine Run1-<br>DMSO  | NM_0037<br>77 | DNAH11 | dynein,<br>axonemal,<br>heavy<br>polypeptid<br>e 11 | 1.013138  | Inlier |
| siRNA-Temozolomide Run3-<br>DMSO | NM_0013<br>69 | DNAH5  | dynein,<br>axonemal,<br>heavy<br>polypeptid<br>e 5  | -1.450787 | Inlier |
| siRNA-Temozolomide Run2-<br>DMSO | NM_0013<br>69 | DNAH5  | dynein,<br>axonemal,<br>heavy<br>polypeptid<br>e 5  | -0.895355 | Inlier |
| siRNA Disorazole DMSO Run1       | NM_0013<br>69 | DNAH5  | dynein,<br>axonemal,<br>heavy<br>polypeptid<br>e 5  | -0.179669 | Inlier |
| siRNA Disorazole DMSO Run3       | NM_0013<br>69 | DNAH5  | dynein,<br>axonemal,<br>heavy<br>polypeptid<br>e 5  | -0.042367 | Inlier |
| siRNA-Temozolomide Run1-<br>DMSO | NM_0013<br>69 | DNAH5  | dynein,<br>axonemal,<br>heavy<br>polypeptid<br>e 5  | 0.042367  | Inlier |
| siRNA-Vinblastine Run2-<br>DMSO  | NM_0013<br>69 | DNAH5  | dynein,<br>axonemal,<br>heavy<br>polypeptid<br>e 5  | 0.453645  | Inlier |
| siRNA-Vinblastine Run1-<br>DMSO  | NM_0013<br>69 | DNAH5  | dynein,<br>axonemal,<br>heavy<br>polypeptid<br>e 5  | 1.492971  | Inlier |
| siRNA Disorazole DMSO Run2       | NM_0013<br>69 | DNAH5  | dynein,<br>axonemal,<br>heavy<br>polypeptid<br>e 5  | 1.509761  | Inlier |

Identification of Survival Genes in Human Glioblastoma Cells Using siRNA Screening  
 Nikhil G Thaker, Fang Zhang, Peter R. McDonald, Tong Ying Shun, Michael D Lewen, Ian F. Pollack, and John S. Lazo

Molecular Pharmacology

|                              |               |       |                                                    |           |        |
|------------------------------|---------------|-------|----------------------------------------------------|-----------|--------|
| siRNA-Temozolomide Run2-DMSO | NM_0188<br>97 | DNAH7 | dynein,<br>axonemal,<br>heavy<br>polypeptid<br>e 7 | -2.097929 | Inlier |
| siRNA-Temozolomide Run3-DMSO | NM_0188<br>97 | DNAH7 | dynein,<br>axonemal,<br>heavy<br>polypeptid<br>e 7 | -1.584413 | Inlier |
| siRNA-Temozolomide Run1-DMSO | NM_0188<br>97 | DNAH7 | dynein,<br>axonemal,<br>heavy<br>polypeptid<br>e 7 | -0.261324 | Inlier |
| siRNA Disorazole DMSO Run1   | NM_0188<br>97 | DNAH7 | dynein,<br>axonemal,<br>heavy<br>polypeptid<br>e 7 | -0.114631 | Inlier |
| siRNA-Vinblastine Run2-DMSO  | NM_0188<br>97 | DNAH7 | dynein,<br>axonemal,<br>heavy<br>polypeptid<br>e 7 | 0.114631  | Inlier |
| siRNA Disorazole DMSO Run3   | NM_0188<br>97 | DNAH7 | dynein,<br>axonemal,<br>heavy<br>polypeptid<br>e 7 | 0.367657  | Inlier |
| siRNA-Vinblastine Run1-DMSO  | NM_0188<br>97 | DNAH7 | dynein,<br>axonemal,<br>heavy<br>polypeptid<br>e 7 | 0.981343  | Inlier |
| siRNA Disorazole DMSO Run2   | NM_0188<br>97 | DNAH7 | dynein,<br>axonemal,<br>heavy<br>polypeptid<br>e 7 | 0.982679  | Inlier |
| siRNA-Temozolomide Run3-DMSO | NM_0013<br>71 | DNAH8 | dynein,<br>axonemal,<br>heavy<br>polypeptid<br>e 8 | -1.446903 | Inlier |
| siRNA-Temozolomide Run2-DMSO | NM_0013<br>71 | DNAH8 | dynein,<br>axonemal,<br>heavy<br>polypeptid<br>e 8 | -1.062593 | Inlier |

Identification of Survival Genes in Human Glioblastoma Cells Using siRNA Screening  
 Nikhil G Thaker, Fang Zhang, Peter R. McDonald, Tong Ying Shun, Michael D Lewen, Ian F. Pollack, and John S. Lazo

Molecular Pharmacology

|                                  |               |       |                                                    |           |        |
|----------------------------------|---------------|-------|----------------------------------------------------|-----------|--------|
| siRNA Disorazole DMSO Run3       | NM_0013<br>71 | DNAH8 | dynein,<br>axonemal,<br>heavy<br>polypeptid<br>e 8 | -0.20263  | Inlier |
| siRNA-Temozolomide Run1-<br>DMSO | NM_0013<br>71 | DNAH8 | dynein,<br>axonemal,<br>heavy<br>polypeptid<br>e 8 | -0.20053  | Inlier |
| siRNA-Vinblastine Run2-<br>DMSO  | NM_0013<br>71 | DNAH8 | dynein,<br>axonemal,<br>heavy<br>polypeptid<br>e 8 | 0.200529  | Inlier |
| siRNA Disorazole DMSO Run1       | NM_0013<br>71 | DNAH8 | dynein,<br>axonemal,<br>heavy<br>polypeptid<br>e 8 | 0.286407  | Inlier |
| siRNA-Vinblastine Run1-<br>DMSO  | NM_0013<br>71 | DNAH8 | dynein,<br>axonemal,<br>heavy<br>polypeptid<br>e 8 | 1.721504  | Inlier |
| siRNA Disorazole DMSO Run2       | NM_0013<br>71 | DNAH8 | dynein,<br>axonemal,<br>heavy<br>polypeptid<br>e 8 | 1.802334  | Inlier |
| siRNA-Temozolomide Run3-<br>DMSO | NM_0046<br>62 | DNAH9 | dynein,<br>axonemal,<br>heavy<br>polypeptid<br>e 9 | -1.699535 | Inlier |
| siRNA-Temozolomide Run2-<br>DMSO | NM_0046<br>62 | DNAH9 | dynein,<br>axonemal,<br>heavy<br>polypeptid<br>e 9 | -1.208094 | Inlier |
| siRNA Disorazole DMSO Run3       | NM_0046<br>62 | DNAH9 | dynein,<br>axonemal,<br>heavy<br>polypeptid<br>e 9 | -0.59058  | Inlier |
| siRNA-Temozolomide Run1-<br>DMSO | NM_0046<br>62 | DNAH9 | dynein,<br>axonemal,<br>heavy<br>polypeptid<br>e 9 | -0.062466 | Inlier |

Identification of Survival Genes in Human Glioblastoma Cells Using siRNA Screening  
 Nikhil G Thaker, Fang Zhang, Peter R. McDonald, Tong Ying Shun, Michael D Lewen, Ian F. Pollack, and John S. Lazo

Molecular Pharmacology

|                              |               |       |                                                               |           |        |
|------------------------------|---------------|-------|---------------------------------------------------------------|-----------|--------|
| siRNA-Vinblastine Run2-DMSO  | NM_0046<br>62 | DNAH9 | dynein,<br>axonemal,<br>heavy<br>polypeptid<br>e 9            | 0.062466  | Inlier |
| siRNA Disorazole DMSO Run1   | NM_0046<br>62 | DNAH9 | dynein,<br>axonemal,<br>heavy<br>polypeptid<br>e 9            | 0.281191  | Inlier |
| siRNA Disorazole DMSO Run2   | NM_0046<br>62 | DNAH9 | dynein,<br>axonemal,<br>heavy<br>polypeptid<br>e 9            | 0.75842   | Inlier |
| siRNA-Vinblastine Run1-DMSO  | NM_0046<br>62 | DNAH9 | dynein,<br>axonemal,<br>heavy<br>polypeptid<br>e 9            | 0.998619  | Inlier |
| siRNA-Temozolomide Run3-DMSO | NM_0121<br>44 | DNAI1 | dynein,<br>axonemal,<br>intermedia<br>te<br>polypeptid<br>e 1 | -1.859959 | Inlier |
| siRNA-Vinblastine Run2-DMSO  | NM_0121<br>44 | DNAI1 | dynein,<br>axonemal,<br>intermedia<br>te<br>polypeptid<br>e 1 | -1.220108 | Inlier |
| siRNA Disorazole DMSO Run3   | NM_0121<br>44 | DNAI1 | dynein,<br>axonemal,<br>intermedia<br>te<br>polypeptid<br>e 1 | -1.108529 | Inlier |
| siRNA Disorazole DMSO Run1   | NM_0121<br>44 | DNAI1 | dynein,<br>axonemal,<br>intermedia<br>te<br>polypeptid<br>e 1 | -0.061044 | Inlier |

Identification of Survival Genes in Human Glioblastoma Cells Using siRNA Screening  
 Nikhil G Thaker, Fang Zhang, Peter R. McDonald, Tong Ying Shun, Michael D Lewen, Ian F. Pollack, and John S. Lazo  
 Molecular Pharmacology

|                              |               |       |                                                               |           |        |
|------------------------------|---------------|-------|---------------------------------------------------------------|-----------|--------|
| siRNA-Temozolomide Run2-DMSO | NM_0121<br>44 | DNAI1 | dynein,<br>axonemal,<br>intermedia<br>te<br>polypeptid<br>e 1 | 0.061043  | Inlier |
| siRNA-Vinblastine Run1-DMSO  | NM_0121<br>44 | DNAI1 | dynein,<br>axonemal,<br>intermedia<br>te<br>polypeptid<br>e 1 | 0.324819  | Inlier |
| siRNA-Temozolomide Run1-DMSO | NM_0121<br>44 | DNAI1 | dynein,<br>axonemal,<br>intermedia<br>te<br>polypeptid<br>e 1 | 0.568485  | Inlier |
| siRNA Disorazole DMSO Run2   | NM_0121<br>44 | DNAI1 | dynein,<br>axonemal,<br>intermedia<br>te<br>polypeptid<br>e 1 | 0.780515  | Inlier |
| siRNA-Temozolomide Run2-DMSO | NM_0230<br>36 | DNAI2 | dynein,<br>axonemal,<br>intermedia<br>te<br>polypeptid<br>e 2 | -1.018202 | Inlier |
| siRNA Disorazole DMSO Run3   | NM_0230<br>36 | DNAI2 | dynein,<br>axonemal,<br>intermedia<br>te<br>polypeptid<br>e 2 | -0.69016  | Inlier |
| siRNA-Temozolomide Run3-DMSO | NM_0230<br>36 | DNAI2 | dynein,<br>axonemal,<br>intermedia<br>te<br>polypeptid<br>e 2 | -0.65884  | Inlier |

Identification of Survival Genes in Human Glioblastoma Cells Using siRNA Screening  
 Nikhil G Thaker, Fang Zhang, Peter R. McDonald, Tong Ying Shun, Michael D Lewen, Ian F. Pollack, and John S. Lazo  
 Molecular Pharmacology

|                              |               |       |                                                       |           |        |
|------------------------------|---------------|-------|-------------------------------------------------------|-----------|--------|
| siRNA-Vinblastine Run2-DMSO  | NM_0230<br>36 | DNAI2 | dynein,<br>axonemal,<br>intermediate<br>polypeptide 2 | -0.251182 | Inlier |
| siRNA Disorazole DMSO Run1   | NM_0230<br>36 | DNAI2 | dynein,<br>axonemal,<br>intermediate<br>polypeptide 2 | 0.251182  | Inlier |
| siRNA-Temozolomide Run1-DMSO | NM_0230<br>36 | DNAI2 | dynein,<br>axonemal,<br>intermediate<br>polypeptide 2 | 0.348273  | Inlier |
| siRNA Disorazole DMSO Run2   | NM_0230<br>36 | DNAI2 | dynein,<br>axonemal,<br>intermediate<br>polypeptide 2 | 0.749057  | Inlier |
| siRNA-Vinblastine Run1-DMSO  | NM_0230<br>36 | DNAI2 | dynein,<br>axonemal,<br>intermediate<br>polypeptide 2 | 1.336927  | Inlier |
| siRNA-Vinblastine Run2-DMSO  | NM_0057<br>40 | DNAL4 | dynein,<br>axonemal,<br>light<br>polypeptide 4        | -1.127746 | Inlier |
| siRNA-Temozolomide Run3-DMSO | NM_0057<br>40 | DNAL4 | dynein,<br>axonemal,<br>light<br>polypeptide 4        | -1.063165 | Inlier |
| siRNA Disorazole DMSO Run3   | NM_0057<br>40 | DNAL4 | dynein,<br>axonemal,<br>light<br>polypeptide 4        | -0.496237 | Inlier |



Identification of Survival Genes in Human Glioblastoma Cells Using siRNA Screening

Nikhil G Thaker, Fang Zhang, Peter R. McDonald, Tong Ying Shun, Michael D Lewen, Ian F. Pollack, and John S. Lazo

Molecular Pharmacology

|                              |               |        |                                                    |           |        |
|------------------------------|---------------|--------|----------------------------------------------------|-----------|--------|
| siRNA Disorazole DMSO Run1   | NM_0057<br>40 | DNAL4  | dynein,<br>axonemal,<br>light<br>polypeptid<br>e 4 | -0.020508 | Inlier |
| siRNA-Temozolomide Run1-DMSO | NM_0057<br>40 | DNAL4  | dynein,<br>axonemal,<br>light<br>polypeptid<br>e 4 | 0.020508  | Inlier |
| siRNA-Temozolomide Run2-DMSO | NM_0057<br>40 | DNAL4  | dynein,<br>axonemal,<br>light<br>polypeptid<br>e 4 | 0.077966  | Inlier |
| siRNA Disorazole DMSO Run2   | NM_0057<br>40 | DNAL4  | dynein,<br>axonemal,<br>light<br>polypeptid<br>e 4 | 0.852763  | Inlier |
| siRNA-Vinblastine Run1-DMSO  | NM_0057<br>40 | DNAL4  | dynein,<br>axonemal,<br>light<br>polypeptid<br>e 4 | 2.234467  | Inlier |
| siRNA Disorazole DMSO Run3   | NM_0034<br>62 | DNALI1 | intermedia<br>te<br>polypeptid<br>e 1              | -1.003323 | Inlier |
| siRNA-Temozolomide Run3-DMSO | NM_0034<br>62 | DNALI1 | intermedia<br>te<br>polypeptid<br>e 1              | -0.870437 | Inlier |
| siRNA-Temozolomide Run2-DMSO | NM_0034<br>62 | DNALI1 | intermedia<br>te<br>polypeptid<br>e 1              | -0.478563 | Inlier |

Identification of Survival Genes in Human Glioblastoma Cells Using siRNA Screening  
 Nikhil G Thaker, Fang Zhang, Peter R. McDonald, Tong Ying Shun, Michael D Lewen, Ian F. Pollack, and John S. Lazo

Molecular Pharmacology

|                              |               |        |                                                                        |           |         |
|------------------------------|---------------|--------|------------------------------------------------------------------------|-----------|---------|
| siRNA-Vinblastine Run2-DMSO  | NM_0034<br>62 | DNALI1 | dynein,<br>axonemal,<br>light<br>intermedia<br>te<br>polypeptid<br>e 1 | -0.087623 | Inlier  |
| siRNA Disorazole DMSO Run1   | NM_0034<br>62 | DNALI1 | dynein,<br>axonemal,<br>light<br>intermedia<br>te<br>polypeptid<br>e 1 | 0.087624  | Inlier  |
| siRNA-Temozolomide Run1-DMSO | NM_0034<br>62 | DNALI1 | dynein,<br>axonemal,<br>light<br>intermedia<br>te<br>polypeptid<br>e 1 | 0.258303  | Inlier  |
| siRNA Disorazole DMSO Run2   | NM_0034<br>62 | DNALI1 | dynein,<br>axonemal,<br>light<br>intermedia<br>te<br>polypeptid<br>e 1 | 3.051026  | Inlier  |
| siRNA-Vinblastine Run1-DMSO  | NM_0034<br>62 | DNALI1 | polypeptid<br>e 1                                                      | 3.93303   | Outlier |
| siRNA-Temozolomide Run3-DMSO | NM_0052<br>23 | DNASE1 | deoxyribon<br>uclease I                                                | -3.004815 | Inlier  |
| siRNA Disorazole DMSO Run1   | NM_0052<br>23 | DNASE1 | deoxyribon<br>uclease I                                                | -0.65485  | Inlier  |
| siRNA-Temozolomide Run2-DMSO | NM_0052<br>23 | DNASE1 | deoxyribon<br>uclease I                                                | -0.562666 | Inlier  |
| siRNA-Vinblastine Run2-DMSO  | NM_0052<br>23 | DNASE1 | deoxyribon<br>uclease I                                                | -0.03924  | Inlier  |
| siRNA-Vinblastine Run1-DMSO  | NM_0052<br>23 | DNASE1 | deoxyribon<br>uclease I                                                | 0.03924   | Inlier  |
| siRNA Disorazole DMSO Run3   | NM_0052<br>23 | DNASE1 | deoxyribon<br>uclease I                                                | 0.69415   | Inlier  |
| siRNA-Temozolomide Run1-DMSO | NM_0052<br>23 | DNASE1 | deoxyribon<br>uclease I                                                | 1.03243   | Inlier  |
| siRNA Disorazole DMSO Run2   | NM_0052<br>23 | DNASE1 | deoxyribon<br>uclease I                                                | 1.263923  | Inlier  |

Identification of Survival Genes in Human Glioblastoma Cells Using siRNA Screening  
 Nikhil G Thaker, Fang Zhang, Peter R. McDonald, Tong Ying Shun, Michael D Lewen, Ian F. Pollack, and John S. Lazo

| Molecular Pharmacology       | Gene ID    | DNASE1L | deoxyribonuclease I-like | Value     | Inlier |
|------------------------------|------------|---------|--------------------------|-----------|--------|
| siRNA-Temozolomide Run3-DMSO | NM_0067 30 | 1       | like 1                   | -1.398418 | Inlier |
| siRNA-Temozolomide Run2-DMSO | NM_0067 30 | 1       | like 1                   | -0.551254 | Inlier |
| siRNA-Temozolomide Run1-DMSO | NM_0067 30 | 1       | like 1                   | -0.128948 | Inlier |
| siRNA Disorazole DMSO Run3   | NM_0067 30 | 1       | like 1                   | -0.112821 | Inlier |
| siRNA-Vinblastine Run2-DMSO  | NM_0067 30 | 1       | like 1                   | 0.112821  | Inlier |
| siRNA Disorazole DMSO Run1   | NM_0067 30 | 1       | like 1                   | 0.797746  | Inlier |
| siRNA Disorazole DMSO Run2   | NM_0067 30 | 1       | like 1                   | 1.237721  | Inlier |
| siRNA-Vinblastine Run1-DMSO  | NM_0067 30 | 1       | like 1                   | 1.77766   | Inlier |
| siRNA-Temozolomide Run3-DMSO | NM_0013 74 | 2       | like 2                   | -1.288379 | Inlier |
| siRNA Disorazole DMSO Run1   | NM_0013 74 | 2       | like 2                   | -0.952505 | Inlier |
| siRNA-Temozolomide Run2-DMSO | NM_0013 74 | 2       | like 2                   | -0.291783 | Inlier |
| siRNA-Vinblastine Run2-DMSO  | NM_0013 74 | 2       | like 2                   | -0.135621 | Inlier |
| siRNA-Temozolomide Run1-DMSO | NM_0013 74 | 2       | like 2                   | 0.135622  | Inlier |
| siRNA Disorazole DMSO Run3   | NM_0013 74 | 2       | like 2                   | 0.396495  | Inlier |
| siRNA Disorazole DMSO Run2   | NM_0013 74 | 2       | like 2                   | 1.335337  | Inlier |
| siRNA-Vinblastine Run1-DMSO  | NM_0013 74 | 2       | like 2                   | 1.987026  | Inlier |
| siRNA-Temozolomide Run3-DMSO | NM_0049 44 | 3       | like 3                   | -3.251419 | Inlier |

Identification of Survival Genes in Human Glioblastoma Cells Using siRNA Screening  
 Nikhil G Thaker, Fang Zhang, Peter R. McDonald, Tong Ying Shun, Michael D Lewen, Ian F. Pollack, and John S. Lazo

| Molecular Pharmacology       | Gene ID    | Enzyme    | Substrate                       | Log2 Fold Change | Category |
|------------------------------|------------|-----------|---------------------------------|------------------|----------|
| siRNA-Temozolomide Run2-DMSO | NM_0049 44 | DNASE1L 3 | deoxyribonuclease I-like 3      | -1.525491        | Inlier   |
| siRNA-Temozolomide Run1-DMSO | NM_0049 44 | DNASE1L 3 | deoxyribonuclease I-like 3      | -0.298553        | Inlier   |
| siRNA Disorazole DMSO Run1   | NM_0049 44 | DNASE1L 3 | deoxyribonuclease I-like 3      | -0.181108        | Inlier   |
| siRNA Disorazole DMSO Run3   | NM_0049 44 | DNASE1L 3 | deoxyribonuclease I-like 3      | 0.181108         | Inlier   |
| siRNA-Vinblastine Run2-DMSO  | NM_0049 44 | DNASE1L 3 | deoxyribonuclease I-like 3      | 0.38551          | Inlier   |
| siRNA Disorazole DMSO Run2   | NM_0049 44 | DNASE1L 3 | deoxyribonuclease I-like 3      | 0.96349          | Inlier   |
| siRNA-Vinblastine Run1-DMSO  | NM_0049 44 | DNASE1L 3 | deoxyribonuclease I-like 3      | 1.744274         | Inlier   |
| siRNA-Temozolomide Run3-DMSO | NM_0013 75 | DNASE2    | deoxyribonuclease II, lysosomal | -2.124651        | Inlier   |
| siRNA Disorazole DMSO Run3   | NM_0013 75 | DNASE2    | deoxyribonuclease II, lysosomal | -1.34841         | Inlier   |
| siRNA-Temozolomide Run2-DMSO | NM_0013 75 | DNASE2    | deoxyribonuclease II, lysosomal | -1.228102        | Inlier   |
| siRNA-Vinblastine Run2-DMSO  | NM_0013 75 | DNASE2    | deoxyribonuclease II, lysosomal | -0.07826         | Inlier   |
| siRNA Disorazole DMSO Run1   | NM_0013 75 | DNASE2    | deoxyribonuclease II, lysosomal | 0.07826          | Inlier   |
| siRNA-Temozolomide Run1-DMSO | NM_0013 75 | DNASE2    | deoxyribonuclease II, lysosomal | 0.533909         | Inlier   |
| siRNA Disorazole DMSO Run2   | NM_0013 75 | DNASE2    | deoxyribonuclease II, lysosomal | 0.602932         | Inlier   |

Identification of Survival Genes in Human Glioblastoma Cells Using siRNA Screening  
 Nikhil G Thaker, Fang Zhang, Peter R. McDonald, Tong Ying Shun, Michael D Lewen, Ian F. Pollack, and John S. Lazo  
 Molecular Pharmacology

|                              |           |        |                                          |           |        |
|------------------------------|-----------|--------|------------------------------------------|-----------|--------|
| siRNA-Vinblastine Run1-DMSO  | NM_001375 | DNASE2 | deoxyribonuclease II, lysosomal          | 0.746068  | Inlier |
| siRNA-Temozolomide Run3-DMSO | NM_001376 | DNCH1  | dynein, cytoplasmic, heavy polypeptide 1 | -1.505211 | Inlier |
| siRNA-Temozolomide Run2-DMSO | NM_001376 | DNCH1  | dynein, cytoplasmic, heavy polypeptide 1 | -0.840187 | Inlier |
| siRNA Disorazole DMSO Run3   | NM_001376 | DNCH1  | dynein, cytoplasmic, heavy polypeptide 1 | -0.136459 | Inlier |
| siRNA-Vinblastine Run2-DMSO  | NM_001376 | DNCH1  | dynein, cytoplasmic, heavy polypeptide 1 | -0.133657 | Inlier |
| siRNA Disorazole DMSO Run1   | NM_001376 | DNCH1  | dynein, cytoplasmic, heavy polypeptide 1 | 0.133657  | Inlier |
| siRNA-Temozolomide Run1-DMSO | NM_001376 | DNCH1  | dynein, cytoplasmic, heavy polypeptide 1 | 0.508813  | Inlier |
| siRNA Disorazole DMSO Run2   | NM_001376 | DNCH1  | dynein, cytoplasmic, heavy polypeptide 1 | 1.379594  | Inlier |
| siRNA-Vinblastine Run1-DMSO  | NM_001376 | DNCH1  | dynein, cytoplasmic, heavy polypeptide 1 | 2.191459  | Inlier |

Identification of Survival Genes in Human Glioblastoma Cells Using siRNA Screening

Nikhil G Thaker, Fang Zhang, Peter R. McDonald, Tong Ying Shun, Michael D Lewen, Ian F. Pollack, and John S. Lazo

Molecular Pharmacology

|                              |               |       |                                                          |                   |
|------------------------------|---------------|-------|----------------------------------------------------------|-------------------|
| siRNA-Temozolomide Run3-DMSO | NM_0044<br>11 | DNCI1 | dynein,<br>cytoplasmic,<br>intermediate<br>polypeptide 1 | -3.700322 Outlier |
| siRNA-Vinblastine Run2-DMSO  | NM_0044<br>11 | DNCI1 | dynein,<br>cytoplasmic,<br>intermediate<br>polypeptide 1 | -0.806511 Inlier  |
| siRNA-Temozolomide Run2-DMSO | NM_0044<br>11 | DNCI1 | dynein,<br>cytoplasmic,<br>intermediate<br>polypeptide 1 | -0.431792 Inlier  |
| siRNA Disorazole DMSO Run1   | NM_0044<br>11 | DNCI1 | dynein,<br>cytoplasmic,<br>intermediate<br>polypeptide 1 | -0.293306 Inlier  |
| siRNA-Temozolomide Run1-DMSO | NM_0044<br>11 | DNCI1 | dynein,<br>cytoplasmic,<br>intermediate<br>polypeptide 1 | 0.293304 Inlier   |
| siRNA Disorazole DMSO Run3   | NM_0044<br>11 | DNCI1 | dynein,<br>cytoplasmic,<br>intermediate<br>polypeptide 1 | 0.542489 Inlier   |
| siRNA Disorazole DMSO Run2   | NM_0044<br>11 | DNCI1 | dynein,<br>cytoplasmic,<br>intermediate<br>polypeptide 1 | 1.489003 Inlier   |

Identification of Survival Genes in Human Glioblastoma Cells Using siRNA Screening  
 Nikhil G Thaker, Fang Zhang, Peter R. McDonald, Tong Ying Shun, Michael D Lewen, Ian F. Pollack, and John S. Lazo

Molecular Pharmacology

|                              |           |       |                                                 |           |        |
|------------------------------|-----------|-------|-------------------------------------------------|-----------|--------|
| siRNA-Vinblastine Run1-DMSO  | NM_004411 | DNCI1 | dynein, cytoplasmic, intermediate polypeptide 1 | 2.413566  | Inlier |
| siRNA-Vinblastine Run2-DMSO  | NM_001378 | DNCI2 | dynein, cytoplasmic, intermediate polypeptide 2 | -0.835363 | Inlier |
| siRNA-Temozolomide Run3-DMSO | NM_001378 | DNCI2 | dynein, cytoplasmic, intermediate polypeptide 2 | -0.712482 | Inlier |
| siRNA Disorazole DMSO Run3   | NM_001378 | DNCI2 | dynein, cytoplasmic, intermediate polypeptide 2 | -0.543425 | Inlier |
| siRNA-Temozolomide Run2-DMSO | NM_001378 | DNCI2 | dynein, cytoplasmic, intermediate polypeptide 2 | -0.099764 | Inlier |
| siRNA-Temozolomide Run1-DMSO | NM_001378 | DNCI2 | dynein, cytoplasmic, intermediate polypeptide 2 | 0.099764  | Inlier |
| siRNA Disorazole DMSO Run1   | NM_001378 | DNCI2 | dynein, cytoplasmic, intermediate polypeptide 2 | 0.636518  | Inlier |

Identification of Survival Genes in Human Glioblastoma Cells Using siRNA Screening  
 Nikhil G Thaker, Fang Zhang, Peter R. McDonald, Tong Ying Shun, Michael D Lewen, Ian F. Pollack, and John S. Lazo

Molecular Pharmacology

|                              |               |       |                                                          |           |        |
|------------------------------|---------------|-------|----------------------------------------------------------|-----------|--------|
| siRNA Disorazole DMSO Run2   | NM_0013<br>78 | DNCL2 | dynein,<br>cytoplasmic,<br>intermediate<br>polypeptide 2 | 1.861905  | Inlier |
| siRNA-Vinblastine Run1-DMSO  | NM_0013<br>78 | DNCL2 | dynein,<br>cytoplasmic,<br>intermediate<br>polypeptide 2 | 2.560017  | Inlier |
| siRNA-Temozolomide Run3-DMSO | NM_0037<br>46 | DNCL1 | dynein,<br>cytoplasmic, light<br>polypeptide 1           | -1.185241 | Inlier |
| siRNA-Temozolomide Run2-DMSO | NM_0037<br>46 | DNCL1 | dynein,<br>cytoplasmic, light<br>polypeptide 1           | -1.14019  | Inlier |
| siRNA-Temozolomide Run1-DMSO | NM_0037<br>46 | DNCL1 | dynein,<br>cytoplasmic, light<br>polypeptide 1           | -0.160613 | Inlier |
| siRNA-Vinblastine Run2-DMSO  | NM_0037<br>46 | DNCL1 | dynein,<br>cytoplasmic, light<br>polypeptide 1           | -0.003274 | Inlier |
| siRNA Disorazole DMSO Run3   | NM_0037<br>46 | DNCL1 | dynein,<br>cytoplasmic, light<br>polypeptide 1           | 0.003274  | Inlier |
| siRNA Disorazole DMSO Run1   | NM_0037<br>46 | DNCL1 | dynein,<br>cytoplasmic, light<br>polypeptide 1           | 0.20881   | Inlier |
| siRNA Disorazole DMSO Run2   | NM_0037<br>46 | DNCL1 | dynein,<br>cytoplasmic, light<br>polypeptide 1           | 1.170817  | Inlier |



Identification of Survival Genes in Human Glioblastoma Cells Using siRNA Screening  
 Nikhil G Thaker, Fang Zhang, Peter R. McDonald, Tong Ying Shun, Michael D Lewen, Ian F. Pollack, and John S. Lazo

Molecular Pharmacology

|                              |               |        |                                                 |           |        |
|------------------------------|---------------|--------|-------------------------------------------------|-----------|--------|
| siRNA-Vinblastine Run1-DMSO  | NM_0037<br>46 | DNCL1  | dynein,<br>cytoplasmic,<br>light polypeptide 1  | 1.213067  | Inlier |
| siRNA Disorazole DMSO Run3   | NM_1779<br>54 | DNCL2A | dynein,<br>cytoplasmic,<br>light polypeptide 2A | -0.852493 | Inlier |
| siRNA-Temozolomide Run3-DMSO | NM_1779<br>54 | DNCL2A | dynein,<br>cytoplasmic,<br>light polypeptide 2A | -0.675994 | Inlier |
| siRNA-Vinblastine Run2-DMSO  | NM_1779<br>54 | DNCL2A | dynein,<br>cytoplasmic,<br>light polypeptide 2A | -0.673006 | Inlier |
| siRNA-Temozolomide Run2-DMSO | NM_1779<br>54 | DNCL2A | dynein,<br>cytoplasmic,<br>light polypeptide 2A | -0.066282 | Inlier |
| siRNA-Temozolomide Run1-DMSO | NM_1779<br>54 | DNCL2A | dynein,<br>cytoplasmic,<br>light polypeptide 2A | 0.066282  | Inlier |
| siRNA Disorazole DMSO Run1   | NM_1779<br>54 | DNCL2A | dynein,<br>cytoplasmic,<br>light polypeptide 2A | 0.162571  | Inlier |
| siRNA Disorazole DMSO Run2   | NM_1779<br>54 | DNCL2A | dynein,<br>cytoplasmic,<br>light polypeptide 2A | 0.856033  | Inlier |
| siRNA-Vinblastine Run1-DMSO  | NM_1779<br>54 | DNCL2A | dynein,<br>cytoplasmic,<br>light polypeptide 2A | 0.981733  | Inlier |
| siRNA-Temozolomide Run3-DMSO | NM_1308<br>97 | DNCL2B | dynein,<br>cytoplasmic,<br>light polypeptide 2B | -1.851201 | Inlier |

Identification of Survival Genes in Human Glioblastoma Cells Using siRNA Screening

Nikhil G Thaker, Fang Zhang, Peter R. McDonald, Tong Ying Shun, Michael D Lewen, Ian F. Pollack, and John S. Lazo

Molecular Pharmacology

|                              |               |        |                                                 |           |         |
|------------------------------|---------------|--------|-------------------------------------------------|-----------|---------|
| siRNA Disorazole DMSO Run1   | NM_1308<br>97 | DNCL2B | dynein,<br>cytoplasmic,<br>light polypeptide 2B | -0.402252 | Inlier  |
| siRNA Disorazole DMSO Run3   | NM_1308<br>97 | DNCL2B | dynein,<br>cytoplasmic,<br>light polypeptide 2B | -0.215944 | Inlier  |
| siRNA-Temozolomide Run2-DMSO | NM_1308<br>97 | DNCL2B | dynein,<br>cytoplasmic,<br>light polypeptide 2B | -0.134289 | Inlier  |
| siRNA-Vinblastine Run2-DMSO  | NM_1308<br>97 | DNCL2B | dynein,<br>cytoplasmic,<br>light polypeptide 2B | 0.134289  | Inlier  |
| siRNA-Temozolomide Run1-DMSO | NM_1308<br>97 | DNCL2B | dynein,<br>cytoplasmic,<br>light polypeptide 2B | 0.946748  | Inlier  |
| siRNA Disorazole DMSO Run2   | NM_1308<br>97 | DNCL2B | dynein,<br>cytoplasmic,<br>light polypeptide 2B | 2.032078  | Inlier  |
| siRNA-Vinblastine Run1-DMSO  | NM_1308<br>97 | DNCL2B | dynein,<br>cytoplasmic,<br>light polypeptide 2B | 2.208414  | Inlier  |
| siRNA-Temozolomide Run2-DMSO | NM_0161<br>41 | DNCLI1 | intermediate polypeptide 1                      | -4.871188 | Outlier |
| siRNA Disorazole DMSO Run3   | NM_0161<br>41 | DNCLI1 | intermediate polypeptide 1                      | -0.714282 | Inlier  |

Identification of Survival Genes in Human Glioblastoma Cells Using siRNA Screening

Nikhil G Thaker, Fang Zhang, Peter R. McDonald, Tong Ying Shun, Michael D Lewen, Ian F. Pollack, and John S. Lazo

Molecular Pharmacology

|                              |           |        |                                                       |           |         |
|------------------------------|-----------|--------|-------------------------------------------------------|-----------|---------|
| siRNA-Vinblastine Run2-DMSO  | NM_016141 | DNCLI1 | dynein, cytoplasmic, light intermediate polypeptide 1 | -0.634718 | Inlier  |
| siRNA-Temozolomide Run3-DMSO | NM_016141 | DNCLI1 | dynein, cytoplasmic, light intermediate polypeptide 1 | -0.421712 | Inlier  |
| siRNA Disorazole DMSO Run1   | NM_016141 | DNCLI1 | dynein, cytoplasmic, light intermediate polypeptide 1 | 0.421712  | Inlier  |
| siRNA-Temozolomide Run1-DMSO | NM_016141 | DNCLI1 | dynein, cytoplasmic, light intermediate polypeptide 1 | 0.422458  | Inlier  |
| siRNA Disorazole DMSO Run2   | NM_016141 | DNCLI1 | dynein, cytoplasmic, light intermediate polypeptide 1 | 2.917131  | Inlier  |
| siRNA-Vinblastine Run1-DMSO  | NM_016141 | DNCLI1 | dynein, cytoplasmic, light intermediate polypeptide 1 | 6.706198  | Outlier |
| siRNA-Temozolomide Run3-DMSO | NM_006141 | DNCLI2 | dynein, cytoplasmic, light intermediate polypeptide 2 | -1.220815 | Inlier  |

Identification of Survival Genes in Human Glioblastoma Cells Using siRNA Screening

Nikhil G Thaker, Fang Zhang, Peter R. McDonald, Tong Ying Shun, Michael D Lewen, Ian F. Pollack, and John S. Lazo

Molecular Pharmacology

|                              |                  |        |                                                             |           |        |
|------------------------------|------------------|--------|-------------------------------------------------------------|-----------|--------|
| siRNA-Temozolomide Run2-DMSO | NM_0061<br>41    | DNCLI2 | dynein,<br>cytoplasmic,<br>light intermediate polypeptide 2 | -0.808357 | Inlier |
| siRNA Disorazole DMSO Run3   | NM_0061<br>41    | DNCLI2 | dynein,<br>cytoplasmic,<br>light intermediate polypeptide 2 | -0.548702 | Inlier |
| siRNA-Vinblastine Run2-DMSO  | NM_0061<br>41    | DNCLI2 | dynein,<br>cytoplasmic,<br>light intermediate polypeptide 2 | -0.104552 | Inlier |
| siRNA Disorazole DMSO Run1   | NM_0061<br>41    | DNCLI2 | dynein,<br>cytoplasmic,<br>light intermediate polypeptide 2 | 0.104552  | Inlier |
| siRNA-Temozolomide Run1-DMSO | NM_0061<br>41    | DNCLI2 | dynein,<br>cytoplasmic,<br>light intermediate polypeptide 2 | 0.151425  | Inlier |
| siRNA Disorazole DMSO Run2   | NM_0061<br>41    | DNCLI2 | dynein,<br>cytoplasmic,<br>light intermediate polypeptide 2 | 0.800298  | Inlier |
| siRNA-Vinblastine Run1-DMSO  | NM_0061<br>41    | DNCLI2 | dynein,<br>cytoplasmic,<br>light intermediate polypeptide 2 | 1.644266  | Inlier |
| siRNA-Temozolomide Run3-DMSO | NM_0010<br>05336 | DNM1   | dynamamin 1                                                 | -0.869672 | Inlier |

Identification of Survival Genes in Human Glioblastoma Cells Using siRNA Screening  
 Nikhil G Thaker, Fang Zhang, Peter R. McDonald, Tong Ying Shun, Michael D Lewen, Ian F. Pollack, and John S.

Lazo

|                                  |                  |       |                                                      |           |        |
|----------------------------------|------------------|-------|------------------------------------------------------|-----------|--------|
| siRNA-Temozolomide Run2-<br>DMSO | NM_0010<br>05336 | DNM1  | dynamamin 1                                          | -0.841607 | Inlier |
| siRNA-Temozolomide Run1-<br>DMSO | NM_0010<br>05336 | DNM1  | dynamamin 1                                          | -0.541116 | Inlier |
| siRNA-Vinblastine Run2-<br>DMSO  | NM_0010<br>05336 | DNM1  | dynamamin 1                                          | -0.159076 | Inlier |
| siRNA Disorazole DMSO Run1       | NM_0010<br>05336 | DNM1  | dynamamin 1                                          | 0.159076  | Inlier |
| siRNA Disorazole DMSO Run3       | 05336            | DNM1  | dynamamin 1                                          | 0.188287  | Inlier |
| siRNA-Vinblastine Run1-<br>DMSO  | NM_0010<br>05336 | DNM1  | dynamamin 1                                          | 0.807884  | Inlier |
| siRNA Disorazole DMSO Run2       | 05336            | DNM1  | dynamamin 1                                          | 0.877917  | Inlier |
| siRNA-Temozolomide Run3-<br>DMSO | NM_0120<br>62    | DNM1L | dynamamin 1-<br>like                                 | -1.712719 | Inlier |
| siRNA-Temozolomide Run1-<br>DMSO | NM_0120<br>62    | DNM1L | dynamamin 1-<br>like                                 | -0.308746 | Inlier |
| siRNA-Vinblastine Run2-<br>DMSO  | NM_0120<br>62    | DNM1L | dynamamin 1-<br>like                                 | -0.271385 | Inlier |
| siRNA-Temozolomide Run2-<br>DMSO | NM_0120<br>62    | DNM1L | dynamamin 1-<br>like                                 | -0.131077 | Inlier |
| siRNA Disorazole DMSO Run3       | NM_0120<br>62    | DNM1L | dynamamin 1-<br>like                                 | 0.131077  | Inlier |
| siRNA Disorazole DMSO Run2       | NM_0120<br>62    | DNM1L | dynamamin 1-<br>like                                 | 1.040254  | Inlier |
| siRNA Disorazole DMSO Run1       | 62               | DNM1L | dynamamin 1-<br>like                                 | 1.048047  | Inlier |
| siRNA-Vinblastine Run1-<br>DMSO  | NM_0120<br>62    | DNM1L | dynamamin 1-<br>like                                 | 1.598915  | Inlier |
| siRNA-Temozolomide Run3-<br>DMSO | NM_0049<br>45    | DNM2  | dynamamin 2                                          | -2.366623 | Inlier |
| siRNA-Temozolomide Run2-<br>DMSO | NM_0049<br>45    | DNM2  | dynamamin 2                                          | -1.094897 | Inlier |
| siRNA Disorazole DMSO Run1       | NM_0049<br>45    | DNM2  | dynamamin 2                                          | -0.254103 | Inlier |
| siRNA-Vinblastine Run2-<br>DMSO  | NM_0049<br>45    | DNM2  | dynamamin 2                                          | -0.069339 | Inlier |
| siRNA-Temozolomide Run1-<br>DMSO | NM_0049<br>45    | DNM2  | dynamamin 2                                          | 0.069339  | Inlier |
| siRNA Disorazole DMSO Run3       | NM_0049<br>45    | DNM2  | dynamamin 2                                          | 0.071292  | Inlier |
| siRNA-Vinblastine Run1-<br>DMSO  | NM_0049<br>45    | DNM2  | dynamamin 2                                          | 2.033443  | Inlier |
| siRNA Disorazole DMSO Run2       | NM_0049<br>45    | DNM2  | dynamamin 2                                          | 3.352513  | Inlier |
| siRNA Disorazole DMSO Run1       | NM_0013<br>79    | DNMT1 | DNA<br>(cytosine-5-<br>)-<br>methyltran<br>sferase 1 | -0.852389 | Inlier |

Identification of Survival Genes in Human Glioblastoma Cells Using siRNA Screening  
 Nikhil G Thaker, Fang Zhang, Peter R. McDonald, Tong Ying Shun, Michael D Lewen, Ian F. Pollack, and John S. Lazo  
 Molecular Pharmacology

|                              |           |       |                                     |           |        |
|------------------------------|-----------|-------|-------------------------------------|-----------|--------|
| siRNA-Temozolomide Run3-DMSO | NM_001379 | DNMT1 | DNA (cytosine-5-methyltransferase 1 | -0.819888 | Inlier |
| siRNA-Temozolomide Run1-DMSO | NM_001379 | DNMT1 | DNA (cytosine-5-methyltransferase 1 | -0.529112 | Inlier |
| siRNA Disorazole DMSO Run3   | NM_001379 | DNMT1 | DNA (cytosine-5-methyltransferase 1 | -0.010889 | Inlier |
| siRNA-Vinblastine Run2-DMSO  | NM_001379 | DNMT1 | DNA (cytosine-5-methyltransferase 1 | 0.010889  | Inlier |
| siRNA-Temozolomide Run2-DMSO | NM_001379 | DNMT1 | DNA (cytosine-5-methyltransferase 1 | 0.038496  | Inlier |
| siRNA Disorazole DMSO Run2   | NM_001379 | DNMT1 | DNA (cytosine-5-methyltransferase 1 | 0.940825  | Inlier |
| siRNA-Vinblastine Run1-DMSO  | NM_001379 | DNMT1 | DNA (cytosine-5-methyltransferase 1 | 0.941235  | Inlier |
| siRNA-Temozolomide Run1-DMSO | NM_176084 | DNMT2 | DNA (cytosine-5-methyltransferase 2 | -0.954611 | Inlier |

Identification of Survival Genes in Human Glioblastoma Cells Using siRNA Screening  
 Nikhil G Thaker, Fang Zhang, Peter R. McDonald, Tong Ying Shun, Michael D Lewen, Ian F. Pollack, and John S. Lazo  
 Molecular Pharmacology

|                                  |               |        |                                                               |           |        |
|----------------------------------|---------------|--------|---------------------------------------------------------------|-----------|--------|
| siRNA Disorazole DMSO Run1       | NM_1760<br>84 | DNMT2  | DNA<br>(cytosine-5-<br>)-<br>methyltran<br>sferase 2          | -0.394389 | Inlier |
| siRNA-Temozolomide Run3-<br>DMSO | NM_1760<br>84 | DNMT2  | DNA<br>(cytosine-5-<br>)-<br>methyltran<br>sferase 2          | -0.328849 | Inlier |
| siRNA-Temozolomide Run2-<br>DMSO | NM_1760<br>84 | DNMT2  | DNA<br>(cytosine-5-<br>)-<br>methyltran<br>sferase 2          | -0.295843 | Inlier |
| siRNA-Vinblastine Run2-<br>DMSO  | NM_1760<br>84 | DNMT2  | DNA<br>(cytosine-5-<br>)-<br>methyltran<br>sferase 2          | 0.295844  | Inlier |
| siRNA Disorazole DMSO Run3       | NM_1760<br>84 | DNMT2  | DNA<br>(cytosine-5-<br>)-<br>methyltran<br>sferase 2          | 1.141536  | Inlier |
| siRNA-Vinblastine Run1-<br>DMSO  | NM_1760<br>84 | DNMT2  | DNA<br>(cytosine-5-<br>)-<br>methyltran<br>sferase 2          | 2.330821  | Inlier |
| siRNA Disorazole DMSO Run2       | NM_1760<br>84 | DNMT2  | DNA<br>(cytosine-5-<br>)-<br>methyltran<br>sferase 2          | 2.566071  | Inlier |
| siRNA-Temozolomide Run1-<br>DMSO | NM_1756<br>29 | DNMT3A | DNA<br>(cytosine-5-<br>)-<br>methyltran<br>sferase 3<br>alpha | -2.259958 | Inlier |

Identification of Survival Genes in Human Glioblastoma Cells Using siRNA Screening  
 Nikhil G Thaker, Fang Zhang, Peter R. McDonald, Tong Ying Shun, Michael D Lewen, Ian F. Pollack, and John S. Lazo

Molecular Pharmacology

| siRNA              | Drug | Run  | Gene   | Accession     | Value     | Category |
|--------------------|------|------|--------|---------------|-----------|----------|
| siRNA Disorazole   | DMSO | Run1 | DNMT3A | NM_1756<br>29 | -1.667485 | Inlier   |
| siRNA-Temozolomide | DMSO | Run2 | DNMT3A | NM_1756<br>29 | -0.768822 | Inlier   |
| siRNA-Vinblastine  | DMSO | Run2 | DNMT3A | NM_1756<br>29 | -0.488225 | Inlier   |
| siRNA-Vinblastine  | DMSO | Run1 | DNMT3A | NM_1756<br>29 | 0.488224  | Inlier   |
| siRNA Disorazole   | DMSO | Run3 | DNMT3A | NM_1756<br>29 | 0.559606  | Inlier   |
| siRNA-Temozolomide | DMSO | Run3 | DNMT3A | NM_1756<br>29 | 0.635289  | Inlier   |
| siRNA Disorazole   | DMSO | Run2 | DNMT3A | NM_1756<br>29 | 0.713711  | Inlier   |
| siRNA Disorazole   | DMSO | Run1 | DNMT3B | NM_1758<br>49 | -0.999585 | Inlier   |

DNA  
(cytosine-5-  
)-  
methyltran  
sferase 3



Identification of Survival Genes in Human Glioblastoma Cells Using siRNA Screening

Nikhil G Thaker, Fang Zhang, Peter R. McDonald, Tong Ying Shun, Michael D Lewen, Ian F. Pollack, and John S.

Lazo

Molecular Pharmacology

| siRNA Treatment              | Gene ID   | Gene Name | beta      | Inlier |
|------------------------------|-----------|-----------|-----------|--------|
| siRNA-Temozolomide Run1-DMSO | NM_175849 | DNMT3B    | -0.890894 | Inlier |
| siRNA-Vinblastine Run2-DMSO  | NM_175849 | DNMT3B    | -0.458106 | Inlier |
| siRNA-Temozolomide Run2-DMSO | NM_175849 | DNMT3B    | -0.276463 | Inlier |
| siRNA-Temozolomide Run3-DMSO | NM_175849 | DNMT3B    | 0.276462  | Inlier |
| siRNA Disorazole DMSO Run3   | NM_175849 | DNMT3B    | 0.313136  | Inlier |
| siRNA-Vinblastine Run1-DMSO  | NM_175849 | DNMT3B    | 1.345352  | Inlier |
| siRNA Disorazole DMSO Run2   | NM_175849 | DNMT3B    | 2.112909  | Inlier |
| siRNA-Temozolomide Run3-DMSO | NM_175867 | DNMT3L    | -2.382085 | Inlier |

Identification of Survival Genes in Human Glioblastoma Cells Using siRNA Screening

Nikhil G Thaker, Fang Zhang, Peter R. McDonald, Tong Ying Shun, Michael D Lewen, Ian F. Pollack, and John S. Lazo

Molecular Pharmacology

| siRNA Treatment              | Gene ID   | Gene Name | Log Fold Change | Category |
|------------------------------|-----------|-----------|-----------------|----------|
| siRNA-Temozolomide Run1-DMSO | NM_175867 | DNMT3L    | -1.045132       | Inlier   |
| siRNA-Temozolomide Run2-DMSO | NM_175867 | DNMT3L    | -0.303868       | Inlier   |
| siRNA-Vinblastine Run2-DMSO  | NM_175867 | DNMT3L    | -0.018629       | Inlier   |
| siRNA Disorazole DMSO Run3   | NM_175867 | DNMT3L    | 0.018629        | Inlier   |
| siRNA Disorazole DMSO Run1   | NM_175867 | DNMT3L    | 0.214861        | Inlier   |
| siRNA Disorazole DMSO Run2   | NM_175867 | DNMT3L    | 3.844941        | Outlier  |
| siRNA-Vinblastine Run1-DMSO  | NM_175867 | DNMT3L    | 4.959459        | Outlier  |
| siRNA-Temozolomide Run3-DMSO | NM_012100 | DNPEP     | -1.039266       | Inlier   |
| siRNA Disorazole DMSO Run2   | NM_012100 | DNPEP     | -0.309734       | Inlier   |
| siRNA-Temozolomide Run2-DMSO | NM_012100 | DNPEP     | -0.240438       | Inlier   |

Identification of Survival Genes in Human Glioblastoma Cells Using siRNA Screening  
 Nikhil G Thaker, Fang Zhang, Peter R. McDonald, Tong Ying Shun, Michael D Lewen, Ian F. Pollack, and John S. Lazo

Molecular Pharmacology

|                                  |                  |       |                                                  |           |         |
|----------------------------------|------------------|-------|--------------------------------------------------|-----------|---------|
| siRNA Disorazole DMSO Run3       | NM_0121<br>00    | DNPEP | aspartyl<br>aminopept<br>idase                   | -0.178391 | Inlier  |
| siRNA Disorazole DMSO Run1       | NM_0121<br>00    | DNPEP | aspartyl<br>aminopept<br>idase                   | 0.178391  | Inlier  |
| siRNA-Temozolomide Run1-<br>DMSO | NM_0121<br>00    | DNPEP | aspartyl<br>aminopept<br>idase                   | 1.160942  | Inlier  |
| siRNA-Vinblastine Run1-<br>DMSO  | NM_0121<br>00    | DNPEP | aspartyl<br>aminopept<br>idase                   | 1.824644  | Inlier  |
| siRNA-Vinblastine Run2-<br>DMSO  | NM_0121<br>00    | DNPEP | aspartyl<br>aminopept<br>idase                   | 2.791867  | Inlier  |
| siRNA-Temozolomide Run1-<br>DMSO | NM_0010<br>17520 | DNTT  | deoxynucl<br>eotidyltran<br>sferase,<br>terminal | -1.459039 | Inlier  |
| siRNA-Temozolomide Run2-<br>DMSO | NM_0010<br>17520 | DNTT  | deoxynucl<br>eotidyltran<br>sferase,<br>terminal | -0.69941  | Inlier  |
| siRNA Disorazole DMSO Run3       | NM_0010<br>17520 | DNTT  | deoxynucl<br>eotidyltran<br>sferase,<br>terminal | -0.504522 | Inlier  |
| siRNA-Temozolomide Run3-<br>DMSO | NM_0010<br>17520 | DNTT  | deoxynucl<br>eotidyltran<br>sferase,<br>terminal | -0.090837 | Inlier  |
| siRNA Disorazole DMSO Run1       | NM_0010<br>17520 | DNTT  | deoxynucl<br>eotidyltran<br>sferase,<br>terminal | 0.090837  | Inlier  |
| siRNA-Vinblastine Run2-<br>DMSO  | NM_0010<br>17520 | DNTT  | deoxynucl<br>eotidyltran<br>sferase,<br>terminal | 0.64959   | Inlier  |
| siRNA Disorazole DMSO Run2       | NM_0010<br>17520 | DNTT  | deoxynucl<br>eotidyltran<br>sferase,<br>terminal | 6.673549  | Outlier |
| siRNA-Vinblastine Run1-<br>DMSO  | NM_0010<br>17520 | DNTT  | deoxynucl<br>eotidyltran<br>sferase,<br>terminal | 6.802028  | Outlier |

Identification of Survival Genes in Human Glioblastoma Cells Using siRNA Screening

Nikhil G Thaker, Fang Zhang, Peter R. McDonald, Tong Ying Shun, Michael D Lewen, Ian F. Pollack, and John S. Lazo

Molecular Pharmacology

|                                  |               |         |                                                                               |           |        |
|----------------------------------|---------------|---------|-------------------------------------------------------------------------------|-----------|--------|
| siRNA Disorazole DMSO Run2       | NM_0529<br>51 | DNTTIP1 | deoxynucl<br>eotidyltran<br>sferase,<br>terminal,<br>interacting<br>protein 1 | -3.104805 | Inlier |
| siRNA-Temozolomide Run3-<br>DMSO | NM_0529<br>51 | DNTTIP1 | deoxynucl<br>eotidyltran<br>sferase,<br>terminal,<br>interacting<br>protein 1 | -1.580307 | Inlier |
| siRNA-Temozolomide Run2-<br>DMSO | NM_0529<br>51 | DNTTIP1 | deoxynucl<br>eotidyltran<br>sferase,<br>terminal,<br>interacting<br>protein 1 | -0.50426  | Inlier |
| siRNA Disorazole DMSO Run1       | NM_0529<br>51 | DNTTIP1 | deoxynucl<br>eotidyltran<br>sferase,<br>terminal,<br>interacting<br>protein 1 | -0.264108 | Inlier |
| siRNA-Temozolomide Run1-<br>DMSO | NM_0529<br>51 | DNTTIP1 | deoxynucl<br>eotidyltran<br>sferase,<br>terminal,<br>interacting<br>protein 1 | 0.264108  | Inlier |
| siRNA-Vinblastine Run2-<br>DMSO  | NM_0529<br>51 | DNTTIP1 | deoxynucl<br>eotidyltran<br>sferase,<br>terminal,<br>interacting<br>protein 1 | 0.416074  | Inlier |
| siRNA Disorazole DMSO Run3       | NM_0529<br>51 | DNTTIP1 | deoxynucl<br>eotidyltran<br>sferase,<br>terminal,<br>interacting<br>protein 1 | 0.84474   | Inlier |

Identification of Survival Genes in Human Glioblastoma Cells Using siRNA Screening  
 Nikhil G Thaker, Fang Zhang, Peter R. McDonald, Tong Ying Shun, Michael D Lewen, Ian F. Pollack, and John S. Lazo  
 Molecular Pharmacology

|                              |               |         |                                                                                 |           |        |
|------------------------------|---------------|---------|---------------------------------------------------------------------------------|-----------|--------|
| siRNA-Vinblastine Run1-DMSO  | NM_0529<br>51 | DNTTIP1 | deoxynucleotidyltransferase, terminal, interacting protein 1                    | 1.070293  | Inlier |
| siRNA-Temozolomide Run1-DMSO | NM_0210<br>71 | DO      | Dombrock blood group                                                            | -1.120906 | Inlier |
| siRNA-Temozolomide Run3-DMSO | NM_0210<br>71 | DO      | Dombrock blood group                                                            | -0.738871 | Inlier |
| siRNA Disorazole DMSO Run2   | NM_0210<br>71 | DO      | Dombrock blood group                                                            | -0.142902 | Inlier |
| siRNA Disorazole DMSO Run1   | NM_0210<br>71 | DO      | Dombrock blood group                                                            | -0.097747 | Inlier |
| siRNA-Temozolomide Run2-DMSO | NM_0210<br>71 | DO      | Dombrock blood group                                                            | 0.097747  | Inlier |
| siRNA Disorazole DMSO Run3   | NM_0210<br>71 | DO      | Dombrock blood group                                                            | 0.647201  | Inlier |
| siRNA-Vinblastine Run1-DMSO  | NM_0210<br>71 | DO      | Dombrock blood group                                                            | 0.701799  | Inlier |
| siRNA-Vinblastine Run2-DMSO  | NM_0210<br>71 | DO      | Dombrock blood group docking protein 1, 62kDa (downstream of tyrosine kinase 1) | 0.728313  | Inlier |
| siRNA-Temozolomide Run3-DMSO | NM_0013<br>81 | DOK1    | docking protein 1, 62kDa (downstream of tyrosine kinase 1)                      | -1.205485 | Inlier |
| siRNA Disorazole DMSO Run2   | NM_0013<br>81 | DOK1    | docking protein 1, 62kDa (downstream of tyrosine kinase 1)                      | -0.723439 | Inlier |
| siRNA Disorazole DMSO Run3   | NM_0013<br>81 | DOK1    | tyrosine kinase 1)                                                              | -0.625561 | Inlier |

Identification of Survival Genes in Human Glioblastoma Cells Using siRNA Screening

Nikhil G Thaker, Fang Zhang, Peter R. McDonald, Tong Ying Shun, Michael D Lewen, Ian F. Pollack, and John S. Lazo

Molecular Pharmacology

|                              |           |        |                                                            |           |        |
|------------------------------|-----------|--------|------------------------------------------------------------|-----------|--------|
| siRNA-Temozolomide Run1-DMSO | NM_001381 | DOK1   | docking protein 1, 62kDa (downstream of tyrosine kinase 1) | -0.090752 | Inlier |
| siRNA-Temozolomide Run2-DMSO | NM_001381 | DOK1   | docking protein 1, 62kDa (downstream of tyrosine kinase 1) | 0.090752  | Inlier |
| siRNA Disorazole DMSO Run1   | NM_001381 | DOK1   | docking protein 1, 62kDa (downstream of tyrosine kinase 1) | 0.346902  | Inlier |
| siRNA-Vinblastine Run1-DMSO  | NM_001381 | DOK1   | docking protein 1, 62kDa (downstream of tyrosine kinase 1) | 0.794684  | Inlier |
| siRNA-Vinblastine Run2-DMSO  | NM_001381 | DOK1   | docking protein 1, 62kDa (downstream of tyrosine kinase 1) | 0.99014   | Inlier |
| siRNA Disorazole DMSO Run2   | NM_020438 | DOLPP1 | dolichyl pyrophosphate phosphatase 1                       | -2.47556  | Inlier |
| siRNA-Temozolomide Run3-DMSO | NM_020438 | DOLPP1 | dolichyl pyrophosphate phosphatase 1                       | -1.334004 | Inlier |
| siRNA-Temozolomide Run2-DMSO | NM_020438 | DOLPP1 | dolichyl pyrophosphate phosphatase 1                       | -0.223073 | Inlier |

Identification of Survival Genes in Human Glioblastoma Cells Using siRNA Screening

Nikhil G Thaker, Fang Zhang, Peter R. McDonald, Tong Ying Shun, Michael D Lewen, Ian F. Pollack, and John S. Lazo

Molecular Pharmacology

|                                  |               |        |                                                                      |           |        |
|----------------------------------|---------------|--------|----------------------------------------------------------------------|-----------|--------|
| siRNA Disorazole DMSO Run1       | NM_0204<br>38 | DOLPP1 | dolichyl<br>pyrophosp<br>hate<br>phosphata<br>se 1                   | -0.022324 | Inlier |
| siRNA Disorazole DMSO Run3       | NM_0204<br>38 | DOLPP1 | dolichyl<br>pyrophosp<br>hate<br>phosphata<br>se 1                   | 0.022324  | Inlier |
| siRNA-Vinblastine Run1-<br>DMSO  | NM_0204<br>38 | DOLPP1 | dolichyl<br>pyrophosp<br>hate<br>phosphata<br>se 1                   | 0.478703  | Inlier |
| siRNA-Temozolomide Run1-<br>DMSO | NM_0204<br>38 | DOLPP1 | dolichyl<br>pyrophosp<br>hate<br>phosphata<br>se 1                   | 0.870297  | Inlier |
| siRNA-Vinblastine Run2-<br>DMSO  | NM_0204<br>38 | DOLPP1 | dolichyl<br>pyrophosp<br>hate<br>phosphata<br>se 1                   | 2.506969  | Inlier |
| siRNA Disorazole DMSO Run1       | NM_0324<br>82 | DOT1L  | DOT1-like,<br>histone H3<br>methyltran<br>sferase (S.<br>cerevisiae) | -1.089122 | Inlier |
| siRNA-Temozolomide Run1-<br>DMSO | NM_0324<br>82 | DOT1L  | DOT1-like,<br>histone H3<br>methyltran<br>sferase (S.<br>cerevisiae) | -0.938787 | Inlier |
| siRNA-Temozolomide Run2-<br>DMSO | NM_0324<br>82 | DOT1L  | DOT1-like,<br>histone H3<br>methyltran<br>sferase (S.<br>cerevisiae) | -0.749418 | Inlier |

Identification of Survival Genes in Human Glioblastoma Cells Using siRNA Screening  
 Nikhil G Thaker, Fang Zhang, Peter R. McDonald, Tong Ying Shun, Michael D Lewen, Ian F. Pollack, and John S. Lazo  
 Molecular Pharmacology

|                              |           |       |                                                                  |           |        |
|------------------------------|-----------|-------|------------------------------------------------------------------|-----------|--------|
| siRNA-Vinblastine Run2-DMSO  | NM_032482 | DOT1L | DOT1-like, histone H3 methyltransferase ( <i>S. cerevisiae</i> ) | -0.059138 | Inlier |
| siRNA-Temozolomide Run3-DMSO | NM_032482 | DOT1L | DOT1-like, histone H3 methyltransferase ( <i>S. cerevisiae</i> ) | 0.059138  | Inlier |
| siRNA-Vinblastine Run1-DMSO  | NM_032482 | DOT1L | DOT1-like, histone H3 methyltransferase ( <i>S. cerevisiae</i> ) | 0.384848  | Inlier |
| siRNA Disorazole DMSO Run3   | NM_032482 | DOT1L | DOT1-like, histone H3 methyltransferase ( <i>S. cerevisiae</i> ) | 0.599582  | Inlier |
| siRNA Disorazole DMSO Run2   | NM_032482 | DOT1L | DOT1-like, histone H3 methyltransferase ( <i>S. cerevisiae</i> ) | 0.975042  | Inlier |



Identification of Survival Genes in Human Glioblastoma Cells Using siRNA Screening

Nikhil G Thaker, Fang Zhang, Peter R. McDonald, Tong Ying Shun, Michael D Lewen, Ian F. Pollack, and John S.

Lazo

Molecular Pharmacology

|                              |           |        |                                                                                                               |           |        |
|------------------------------|-----------|--------|---------------------------------------------------------------------------------------------------------------|-----------|--------|
| siRNA-Temozolomide Run2-DMSO | NM_203316 | DPAGT1 | dolichyl-phosphate (UDP-N-acetylglucosamine) N-acetylglucosaminephosphotransferase 1 (GlcNAc-1-P transferase) | -1.450337 | Inlier |
| siRNA-Temozolomide Run3-DMSO | NM_203316 | DPAGT1 | dolichyl-phosphate (UDP-N-acetylglucosamine) N-acetylglucosaminephosphotransferase 1 (GlcNAc-1-P transferase) | -1.106578 | Inlier |
| siRNA-Temozolomide Run1-DMSO | NM_203316 | DPAGT1 | dolichyl-phosphate (UDP-N-acetylglucosamine) N-acetylglucosaminephosphotransferase 1 (GlcNAc-1-P transferase) | -0.889522 | Inlier |

Identification of Survival Genes in Human Glioblastoma Cells Using siRNA Screening

Nikhil G Thaker, Fang Zhang, Peter R. McDonald, Tong Ying Shun, Michael D Lewen, Ian F. Pollack, and John S. Lazo

Molecular Pharmacology

|                                 |               |        |                                                                                                                                                               |           |        |
|---------------------------------|---------------|--------|---------------------------------------------------------------------------------------------------------------------------------------------------------------|-----------|--------|
| siRNA Disorazole DMSO Run1      | NM_2033<br>16 | DPAGT1 | dolichyl-<br>phosphate<br>(UDP-N-<br>acetylgluc<br>osamine)<br>N-<br>acetylgluc<br>osaminep<br>hosphotra<br>nsferase 1<br>(GlcNAc-1-<br>P<br>transferas<br>e) | -0.087109 | Inlier |
| siRNA-Vinblastine Run2-<br>DMSO | NM_2033<br>16 | DPAGT1 | dolichyl-<br>phosphate<br>(UDP-N-<br>acetylgluc<br>osamine)<br>N-<br>acetylgluc<br>osaminep<br>hosphotra<br>nsferase 1<br>(GlcNAc-1-<br>P<br>transferas<br>e) | 0.087109  | Inlier |
| siRNA Disorazole DMSO Run3      | NM_2033<br>16 | DPAGT1 | dolichyl-<br>phosphate<br>(UDP-N-<br>acetylgluc<br>osamine)<br>N-<br>acetylgluc<br>osaminep<br>hosphotra<br>nsferase 1<br>(GlcNAc-1-<br>P<br>transferas<br>e) | 0.304904  | Inlier |

Identification of Survival Genes in Human Glioblastoma Cells Using siRNA Screening  
 Nikhil G Thaker, Fang Zhang, Peter R. McDonald, Tong Ying Shun, Michael D Lewen, Ian F. Pollack, and John S. Lazo  
 Molecular Pharmacology

|                              |               |        |                                                                                                                |           |        |
|------------------------------|---------------|--------|----------------------------------------------------------------------------------------------------------------|-----------|--------|
| siRNA-Vinblastine Run1-DMSO  | NM_2033<br>16 | DPAGT1 | dolichyl-phosphate (UDP-N-acetylglucosamine) N-acetylglucosamine phosphotransferase 1 (GlcNAc-1-P transferase) | 0.617558  | Inlier |
| siRNA Disorazole DMSO Run2   | NM_2033<br>16 | DPAGT1 | dolichyl-phosphate (UDP-N-acetylglucosamine) N-acetylglucosamine phosphotransferase 1 (GlcNAc-1-P transferase) | 0.731442  | Inlier |
| siRNA-Temozolomide Run3-DMSO | NM_0044<br>13 | DPEP1  | dipeptidase 1 (renal)                                                                                          | -1.636914 | Inlier |
| siRNA-Temozolomide Run2-DMSO | NM_0044<br>13 | DPEP1  | dipeptidase 1 (renal)                                                                                          | -1.204174 | Inlier |
| siRNA Disorazole DMSO Run2   | NM_0044<br>13 | DPEP1  | dipeptidase 1 (renal)                                                                                          | -0.700584 | Inlier |
| siRNA Disorazole DMSO Run3   | NM_0044<br>13 | DPEP1  | dipeptidase 1 (renal)                                                                                          | -0.143205 | Inlier |
| siRNA-Temozolomide Run1-DMSO | NM_0044<br>13 | DPEP1  | dipeptidase 1 (renal)                                                                                          | 0.143205  | Inlier |
| siRNA Disorazole DMSO Run1   | NM_0044<br>13 | DPEP1  | dipeptidase 1 (renal)                                                                                          | 0.216351  | Inlier |
| siRNA-Vinblastine Run1-DMSO  | NM_0044<br>13 | DPEP1  | dipeptidase 1 (renal)                                                                                          | 0.648416  | Inlier |
| siRNA-Vinblastine Run2-DMSO  | NM_0044<br>13 | DPEP1  | dipeptidase 1 (renal)                                                                                          | 0.858388  | Inlier |
| siRNA Disorazole DMSO Run2   | NM_0223<br>55 | DPEP2  | dipeptidase 2                                                                                                  | -1.530194 | Inlier |
| siRNA-Temozolomide Run3-DMSO | NM_0223<br>55 | DPEP2  | dipeptidase 2                                                                                                  | -0.762347 | Inlier |
| siRNA-Temozolomide Run2-DMSO | NM_0223<br>55 | DPEP2  | dipeptidase 2                                                                                                  | -0.705156 | Inlier |

Identification of Survival Genes in Human Glioblastoma Cells Using siRNA Screening  
 Nikhil G Thaker, Fang Zhang, Peter R. McDonald, Tong Ying Shun, Michael D Lewen, Ian F. Pollack, and John S. Lazo

|                              |         |       |                                                                                             |           |        |
|------------------------------|---------|-------|---------------------------------------------------------------------------------------------|-----------|--------|
| Molecular Pharmacology       | NM_0223 |       | dipeptidas                                                                                  |           |        |
| siRNA Disorazole DMSO Run1   | 55      | DPEP2 | e 2                                                                                         | -0.006948 | Inlier |
| siRNA-Temozolomide Run1-DMSO | NM_0223 |       | dipeptidas                                                                                  |           |        |
|                              | 55      | DPEP2 | e 2                                                                                         | 0.006948  | Inlier |
| siRNA-Vinblastine Run1-DMSO  | NM_0223 |       | dipeptidas                                                                                  |           |        |
|                              | 55      | DPEP2 | e 2                                                                                         | 0.291045  | Inlier |
| siRNA-Vinblastine Run2-DMSO  | NM_0223 |       | dipeptidas                                                                                  |           |        |
|                              | 55      | DPEP2 | e 2                                                                                         | 0.643844  | Inlier |
|                              | NM_0223 |       | dipeptidas                                                                                  |           |        |
| siRNA Disorazole DMSO Run3   | 55      | DPEP2 | e 2                                                                                         | 1.13635   | Inlier |
| siRNA-Temozolomide Run3-DMSO | NM_0223 |       | dipeptidas                                                                                  |           |        |
|                              | 57      | DPEP3 | e 3                                                                                         | -1.403941 | Inlier |
| siRNA-Temozolomide Run2-DMSO | NM_0223 |       | dipeptidas                                                                                  |           |        |
|                              | 57      | DPEP3 | e 3                                                                                         | -0.890239 | Inlier |
|                              | NM_0223 |       | dipeptidas                                                                                  |           |        |
| siRNA Disorazole DMSO Run1   | 57      | DPEP3 | e 3                                                                                         | -0.388591 | Inlier |
|                              | NM_0223 |       | dipeptidas                                                                                  |           |        |
| siRNA Disorazole DMSO Run2   | 57      | DPEP3 | e 3                                                                                         | -0.237717 | Inlier |
|                              | NM_0223 |       | dipeptidas                                                                                  |           |        |
| siRNA Disorazole DMSO Run3   | 57      | DPEP3 | e 3                                                                                         | 0.237717  | Inlier |
| siRNA-Temozolomide Run1-DMSO | NM_0223 |       | dipeptidas                                                                                  |           |        |
|                              | 57      | DPEP3 | e 3                                                                                         | 0.458761  | Inlier |
| siRNA-Vinblastine Run2-DMSO  | NM_0223 |       | dipeptidas                                                                                  |           |        |
|                              | 57      | DPEP3 | e 3                                                                                         | 0.890531  | Inlier |
| siRNA-Vinblastine Run1-DMSO  | NM_0223 |       | dipeptidas                                                                                  |           |        |
|                              | 57      | DPEP3 | e 3                                                                                         | 1.281852  | Inlier |
|                              |         |       | dolichyl-phosphate<br>mannosylt<br>ransferase<br>polypeptid<br>e 1,<br>catalytic<br>subunit |           |        |
| siRNA-Vinblastine Run2-DMSO  | NM_0038 |       |                                                                                             |           |        |
|                              | 59      | DPM1  |                                                                                             | -1.201724 | Inlier |
|                              |         |       | dolichyl-phosphate<br>mannosylt<br>ransferase<br>polypeptid<br>e 1,<br>catalytic<br>subunit |           |        |
| siRNA Disorazole DMSO Run1   | NM_0038 |       |                                                                                             |           |        |
|                              | 59      | DPM1  |                                                                                             | -0.775265 | Inlier |

Identification of Survival Genes in Human Glioblastoma Cells Using siRNA Screening

Nikhil G Thaker, Fang Zhang, Peter R. McDonald, Tong Ying Shun, Michael D Lewen, Ian F. Pollack, and John S. Lazo

Molecular Pharmacology

|                              |           |      |                                                                         |           |        |
|------------------------------|-----------|------|-------------------------------------------------------------------------|-----------|--------|
| siRNA-Temozolomide Run1-DMSO | NM_003859 | DPM1 | dolichyl-phosphate mannosyltransferase polypeptide 1, catalytic subunit | -0.388302 | Inlier |
| siRNA-Temozolomide Run2-DMSO | NM_003859 | DPM1 | dolichyl-phosphate mannosyltransferase polypeptide 1, catalytic subunit | -0.068056 | Inlier |
| siRNA Disorazole DMSO Run3   | NM_003859 | DPM1 | dolichyl-phosphate mannosyltransferase polypeptide 1, catalytic subunit | 0.068055  | Inlier |
| siRNA-Temozolomide Run3-DMSO | NM_003859 | DPM1 | dolichyl-phosphate mannosyltransferase polypeptide 1, catalytic subunit | 0.573735  | Inlier |
| siRNA-Vinblastine Run1-DMSO  | NM_003859 | DPM1 | dolichyl-phosphate mannosyltransferase polypeptide 1, catalytic subunit | 0.918387  | Inlier |

Identification of Survival Genes in Human Glioblastoma Cells Using siRNA Screening  
 Nikhil G Thaker, Fang Zhang, Peter R. McDonald, Tong Ying Shun, Michael D Lewen, Ian F. Pollack, and John S. Lazo  
 Molecular Pharmacology

|                                  |               |      |                                                                                                  |                  |
|----------------------------------|---------------|------|--------------------------------------------------------------------------------------------------|------------------|
| siRNA Disorazole DMSO Run2       | NM_0038<br>59 | DPM1 | dolichyl-<br>phosphate<br>mannosylt<br>ransferase<br>polypeptid<br>e 1,<br>catalytic<br>subunit  | 1.14075 Inlier   |
| siRNA-Temozolomide Run2-<br>DMSO | NM_0038<br>63 | DPM2 | dolichyl-<br>phosphate<br>mannosylt<br>ransferase<br>polypeptid<br>e 2,<br>regulatory<br>subunit | -1.465327 Inlier |
| siRNA-Temozolomide Run1-<br>DMSO | NM_0038<br>63 | DPM2 | dolichyl-<br>phosphate<br>mannosylt<br>ransferase<br>polypeptid<br>e 2,<br>regulatory<br>subunit | -1.072411 Inlier |
| siRNA Disorazole DMSO Run1       | NM_0038<br>63 | DPM2 | dolichyl-<br>phosphate<br>mannosylt<br>ransferase<br>polypeptid<br>e 2,<br>regulatory<br>subunit | -1.03491 Inlier  |
| siRNA Disorazole DMSO Run3       | NM_0038<br>63 | DPM2 | dolichyl-<br>phosphate<br>mannosylt<br>ransferase<br>polypeptid<br>e 2,<br>regulatory<br>subunit | -0.00322 Inlier  |

Identification of Survival Genes in Human Glioblastoma Cells Using siRNA Screening  
 Nikhil G Thaker, Fang Zhang, Peter R. McDonald, Tong Ying Shun, Michael D Lewen, Ian F. Pollack, and John S. Lazo  
 Molecular Pharmacology

|                              |           |       |                                                                          |           |        |
|------------------------------|-----------|-------|--------------------------------------------------------------------------|-----------|--------|
| siRNA-Temozolomide Run3-DMSO | NM_003863 | DPM2  | dolichyl-phosphate mannosyltransferase polypeptide 2, regulatory subunit | 0.00322   | Inlier |
| siRNA-Vinblastine Run2-DMSO  | NM_003863 | DPM2  | dolichyl-phosphate mannosyltransferase polypeptide 2, regulatory subunit | 0.076959  | Inlier |
| siRNA-Vinblastine Run1-DMSO  | NM_003863 | DPM2  | dolichyl-phosphate mannosyltransferase polypeptide 2, regulatory subunit | 0.50867   | Inlier |
| siRNA Disorazole DMSO Run2   | NM_003863 | DPM2  | dolichyl-phosphate mannosyltransferase polypeptide 2, regulatory subunit | 0.84033   | Inlier |
| siRNA Disorazole DMSO Run2   | NM_020868 | DPP10 | dipeptidylpeptidase 10                                                   | -2.803479 | Inlier |
| siRNA-Temozolomide Run3-DMSO | NM_020868 | DPP10 | dipeptidylpeptidase 10                                                   | -1.396056 | Inlier |
| siRNA-Temozolomide Run2-DMSO | NM_020868 | DPP10 | dipeptidylpeptidase 10                                                   | -0.510055 | Inlier |
| siRNA Disorazole DMSO Run1   | NM_020868 | DPP10 | dipeptidylpeptidase 10                                                   | -0.383182 | Inlier |

Identification of Survival Genes in Human Glioblastoma Cells Using siRNA Screening  
 Nikhil G Thaker, Fang Zhang, Peter R. McDonald, Tong Ying Shun, Michael D Lewen, Ian F. Pollack, and John S. Lazo

|                                                           |               |       |                                                                                                                                |           |         |
|-----------------------------------------------------------|---------------|-------|--------------------------------------------------------------------------------------------------------------------------------|-----------|---------|
| Molecular Pharmacology<br>siRNA-Vinblastine Run1-<br>DMSO | NM_0208<br>68 | DPP10 | dipeptidylp<br>eptidase<br>10                                                                                                  | 0.383183  | Inlier  |
| siRNA-Temozolomide Run1-<br>DMSO                          | NM_0208<br>68 | DPP10 | dipeptidylp<br>eptidase<br>10                                                                                                  | 0.487179  | Inlier  |
| siRNA Disorazole DMSO Run3                                | NM_0208<br>68 | DPP10 | dipeptidylp<br>eptidase<br>10                                                                                                  | 0.838945  | Inlier  |
| siRNA-Vinblastine Run2-<br>DMSO                           | NM_0208<br>68 | DPP10 | dipeptidylp<br>eptidase<br>10                                                                                                  | 1.726253  | Inlier  |
| siRNA-Temozolomide Run3-<br>DMSO                          | NM_1304<br>43 | DPP3  | dipeptidylp<br>eptidase 3                                                                                                      | -0.853515 | Inlier  |
| siRNA-Temozolomide Run2-<br>DMSO                          | NM_1304<br>43 | DPP3  | dipeptidylp<br>eptidase 3                                                                                                      | -0.704635 | Inlier  |
| siRNA-Temozolomide Run1-<br>DMSO                          | NM_1304<br>43 | DPP3  | dipeptidylp<br>eptidase 3                                                                                                      | -0.196296 | Inlier  |
| siRNA Disorazole DMSO Run1                                | NM_1304<br>43 | DPP3  | dipeptidylp<br>eptidase 3                                                                                                      | -0.022795 | Inlier  |
| siRNA Disorazole DMSO Run2                                | NM_1304<br>43 | DPP3  | dipeptidylp<br>eptidase 3                                                                                                      | 0.022795  | Inlier  |
| siRNA-Vinblastine Run1-<br>DMSO                           | NM_1304<br>43 | DPP3  | dipeptidylp<br>eptidase 3                                                                                                      | 0.657268  | Inlier  |
| siRNA Disorazole DMSO Run3                                | NM_1304<br>43 | DPP3  | dipeptidylp<br>eptidase 3                                                                                                      | 0.691732  | Inlier  |
| siRNA-Vinblastine Run2-<br>DMSO                           | NM_1304<br>43 | DPP3  | dipeptidylp<br>eptidase 3<br>dipeptidylp<br>eptidase 4<br>(CD26,<br>adenosine<br>deaminas<br>e<br>complexin<br>g protein<br>2) | 0.733252  | Inlier  |
| siRNA Disorazole DMSO Run2                                | NM_0019<br>35 | DPP4  |                                                                                                                                | -3.600937 | Outlier |



Identification of Survival Genes in Human Glioblastoma Cells Using siRNA Screening

Nikhil G Thaker, Fang Zhang, Peter R. McDonald, Tong Ying Shun, Michael D Lewen, Ian F. Pollack, and John S.

Lazo

Molecular Pharmacology

| siRNA                   | Run  | Gene      | Target | Log2FC    | Category |
|-------------------------|------|-----------|--------|-----------|----------|
| Disorazole DMSO         | Run1 | NM_001935 | DPP4   | -2.46144  | Inlier   |
| siRNA-Temozolomide DMSO | Run2 | NM_001935 | DPP4   | -0.103113 | Inlier   |
| siRNA-Temozolomide DMSO | Run3 | NM_001935 | DPP4   | -0.057997 | Inlier   |
| siRNA-Temozolomide DMSO | Run1 | NM_001935 | DPP4   | 0.057997  | Inlier   |
| siRNA-Vinblastine DMSO  | Run1 | NM_001935 | DPP4   | 0.170912  | Inlier   |

dipeptidylpeptidase 4 (CD26, adenosine deaminase complexing protein 2)

-2.46144 Inlier  
-0.103113 Inlier  
-0.057997 Inlier  
0.057997 Inlier  
0.170912 Inlier

Identification of Survival Genes in Human Glioblastoma Cells Using siRNA Screening  
 Nikhil G Thaker, Fang Zhang, Peter R. McDonald, Tong Ying Shun, Michael D Lewen, Ian F. Pollack, and John S. Lazo

Molecular Pharmacology

|                              |           |      |                                                                        |           |        |
|------------------------------|-----------|------|------------------------------------------------------------------------|-----------|--------|
| siRNA-Vinblastine Run2-DMSO  | NM_001935 | DPP4 | dipeptidylpeptidase 4 (CD26, adenosine deaminase complexing protein 2) | 1.178088  | Inlier |
| siRNA Disorazole DMSO Run3   | NM_001935 | DPP4 | dipeptidylpeptidase 4 (CD26, adenosine deaminase complexing protein 2) | 3.310128  | Inlier |
| siRNA Disorazole DMSO Run2   | NM_130797 | DPP6 | dipeptidylpeptidase 6                                                  | -0.979207 | Inlier |
| siRNA-Temozolomide Run3-DMSO | NM_130797 | DPP6 | dipeptidylpeptidase 6                                                  | -0.847486 | Inlier |
| siRNA Disorazole DMSO Run1   | NM_130797 | DPP6 | dipeptidylpeptidase 6                                                  | -0.523892 | Inlier |
| siRNA-Temozolomide Run1-DMSO | NM_130797 | DPP6 | dipeptidylpeptidase 6                                                  | -0.05419  | Inlier |
| siRNA-Temozolomide Run2-DMSO | NM_130797 | DPP6 | dipeptidylpeptidase 6                                                  | 0.05419   | Inlier |
| siRNA-Vinblastine Run1-DMSO  | NM_130797 | DPP6 | dipeptidylpeptidase 6                                                  | 0.441178  | Inlier |
| siRNA Disorazole DMSO Run3   | NM_130797 | DPP6 | dipeptidylpeptidase 6                                                  | 0.825108  | Inlier |
| siRNA-Vinblastine Run2-DMSO  | NM_130797 | DPP6 | dipeptidylpeptidase 6                                                  | 0.889991  | Inlier |
| siRNA-Temozolomide Run3-DMSO | NM_013379 | DPP7 | dipeptidylpeptidase 7                                                  | -1.402302 | Inlier |
| siRNA Disorazole DMSO Run3   | NM_013379 | DPP7 | dipeptidylpeptidase 7                                                  | -0.825224 | Inlier |
| siRNA Disorazole DMSO Run2   | NM_013379 | DPP7 | dipeptidylpeptidase 7                                                  | -0.650438 | Inlier |

Identification of Survival Genes in Human Glioblastoma Cells Using siRNA Screening  
 Nikhil G Thaker, Fang Zhang, Peter R. McDonald, Tong Ying Shun, Michael D Lewen, Ian F. Pollack, and John S. Lazo

Molecular Pharmacology

|                                  |               |      |                           |           |         |
|----------------------------------|---------------|------|---------------------------|-----------|---------|
| siRNA Disorazole DMSO Run1       | NM_0133<br>79 | DPP7 | dipeptidylp<br>eptidase 7 | -0.356816 | Inlier  |
| siRNA-Temozolomide Run2-<br>DMSO | NM_0133<br>79 | DPP7 | dipeptidylp<br>eptidase 7 | 0.356816  | Inlier  |
| siRNA-Temozolomide Run1-<br>DMSO | NM_0133<br>79 | DPP7 | dipeptidylp<br>eptidase 7 | 0.49547   | Inlier  |
| siRNA-Vinblastine Run1-<br>DMSO  | NM_0133<br>79 | DPP7 | dipeptidylp<br>eptidase 7 | 0.698562  | Inlier  |
| siRNA-Vinblastine Run2-<br>DMSO  | NM_0133<br>79 | DPP7 | dipeptidylp<br>eptidase 7 | 1.388758  | Inlier  |
| siRNA-Temozolomide Run3-<br>DMSO | NM_1979<br>60 | DPP8 | dipeptidylp<br>eptidase 8 | -1.199918 | Inlier  |
| siRNA Disorazole DMSO Run2       | NM_1979<br>60 | DPP8 | dipeptidylp<br>eptidase 8 | -0.977594 | Inlier  |
| siRNA-Temozolomide Run1-<br>DMSO | NM_1979<br>60 | DPP8 | dipeptidylp<br>eptidase 8 | -0.803056 | Inlier  |
| siRNA Disorazole DMSO Run1       | NM_1979<br>60 | DPP8 | dipeptidylp<br>eptidase 8 | -0.476855 | Inlier  |
| siRNA-Temozolomide Run2-<br>DMSO | NM_1979<br>60 | DPP8 | dipeptidylp<br>eptidase 8 | 0.476855  | Inlier  |
| siRNA Disorazole DMSO Run3       | NM_1979<br>60 | DPP8 | dipeptidylp<br>eptidase 8 | 0.491215  | Inlier  |
| siRNA-Vinblastine Run1-<br>DMSO  | NM_1979<br>60 | DPP8 | dipeptidylp<br>eptidase 8 | 0.545944  | Inlier  |
| siRNA-Vinblastine Run2-<br>DMSO  | NM_1979<br>60 | DPP8 | dipeptidylp<br>eptidase 8 | 1.284858  | Inlier  |
| siRNA Disorazole DMSO Run1       | NM_1391<br>59 | DPP9 | dipeptidylp<br>eptidase 9 | -5.224855 | Outlier |
| siRNA-Temozolomide Run1-<br>DMSO | NM_1391<br>59 | DPP9 | dipeptidylp<br>eptidase 9 | -1.815137 | Inlier  |
| siRNA Disorazole DMSO Run3       | NM_1391<br>59 | DPP9 | dipeptidylp<br>eptidase 9 | -0.24076  | Inlier  |
| siRNA-Vinblastine Run1-<br>DMSO  | NM_1391<br>59 | DPP9 | dipeptidylp<br>eptidase 9 | -0.016331 | Inlier  |

Identification of Survival Genes in Human Glioblastoma Cells Using siRNA Screening  
 Nikhil G Thaker, Fang Zhang, Peter R. McDonald, Tong Ying Shun, Michael D Lewen, Ian F. Pollack, and John S. Lazo

Molecular Pharmacology

|                              |               |      |                           |           |        |
|------------------------------|---------------|------|---------------------------|-----------|--------|
| siRNA-Temozolomide Run2-DMSO | NM_1391<br>59 | DPP9 | dipeptidylp<br>eptidase 9 | 0.016329  | Inlier |
| siRNA Disorazole DMSO Run2   | NM_1391<br>59 | DPP9 | dipeptidylp<br>eptidase 9 | 0.564343  | Inlier |
| siRNA-Vinblastine Run2-DMSO  | NM_1391<br>59 | DPP9 | dipeptidylp<br>eptidase 9 | 0.784657  | Inlier |
| siRNA-Temozolomide Run3-DMSO | NM_1391<br>59 | DPP9 | dipeptidylp<br>eptidase 9 | 0.800995  | Inlier |
| siRNA Disorazole DMSO Run1   | NM_0001<br>10 | DPYD | dehydroge<br>nase         | -1.392806 | Inlier |
| siRNA-Temozolomide Run2-DMSO | NM_0001<br>10 | DPYD | dehydroge<br>nase         | -0.827368 | Inlier |
| siRNA-Temozolomide Run3-DMSO | NM_0001<br>10 | DPYD | dehydroge<br>nase         | -0.234287 | Inlier |
| siRNA-Temozolomide Run1-DMSO | NM_0001<br>10 | DPYD | dehydroge<br>nase         | -0.214228 | Inlier |
| siRNA-Vinblastine Run2-DMSO  | NM_0001<br>10 | DPYD | dehydroge<br>nase         | 0.214229  | Inlier |
| siRNA-Vinblastine Run1-DMSO  | NM_0001<br>10 | DPYD | dehydroge<br>nase         | 0.521632  | Inlier |
| siRNA Disorazole DMSO Run3   | NM_0001<br>10 | DPYD | dehydroge<br>nase         | 2.186549  | Inlier |
| siRNA Disorazole DMSO Run2   | NM_0001<br>10 | DPYD | dehydroge<br>nase         | 2.587254  | Inlier |
| siRNA Disorazole DMSO Run1   | NM_0013<br>85 | DPYS | dihydropyri<br>midinase   | -1.307862 | Inlier |
| siRNA-Temozolomide Run2-DMSO | NM_0013<br>85 | DPYS | dihydropyri<br>midinase   | -0.761744 | Inlier |
| siRNA-Temozolomide Run1-DMSO | NM_0013<br>85 | DPYS | dihydropyri<br>midinase   | -0.448103 | Inlier |
| siRNA-Temozolomide Run3-DMSO | NM_0013<br>85 | DPYS | dihydropyri<br>midinase   | -0.186371 | Inlier |

Identification of Survival Genes in Human Glioblastoma Cells Using siRNA Screening  
 Nikhil G Thaker, Fang Zhang, Peter R. McDonald, Tong Ying Shun, Michael D Lewen, Ian F. Pollack, and John S. Lazo

|                                  |               |        |                         |           |        |
|----------------------------------|---------------|--------|-------------------------|-----------|--------|
| siRNA-Vinblastine Run2-<br>DMSO  | NM_0013<br>85 | DPYS   | dihydropyri<br>midinase | 0.186372  | Inlier |
| siRNA Disorazole DMSO Run3       | NM_0013<br>85 | DPYS   | dihydropyri<br>midinase | 0.587256  | Inlier |
| siRNA-Vinblastine Run1-<br>DMSO  | NM_0013<br>85 | DPYS   | dihydropyri<br>midinase | 0.80184   | Inlier |
| siRNA Disorazole DMSO Run2       | NM_0013<br>85 | DPYS   | dihydropyri<br>midinase | 1.534889  | Inlier |
| siRNA-Vinblastine Run2-<br>DMSO  | NM_0013<br>86 | DPYSL2 | midinase-<br>like 2     | -1.268796 | Inlier |
| siRNA Disorazole DMSO Run3       | NM_0013<br>86 | DPYSL2 | midinase-<br>like 2     | -0.813907 | Inlier |
| siRNA-Temozolomide Run2-<br>DMSO | NM_0013<br>86 | DPYSL2 | midinase-<br>like 2     | -0.439537 | Inlier |
| siRNA Disorazole DMSO Run1       | NM_0013<br>86 | DPYSL2 | midinase-<br>like 2     | -0.354127 | Inlier |
| siRNA-Temozolomide Run3-<br>DMSO | NM_0013<br>86 | DPYSL2 | midinase-<br>like 2     | 0.354127  | Inlier |
| siRNA-Temozolomide Run1-<br>DMSO | NM_0013<br>86 | DPYSL2 | midinase-<br>like 2     | 0.535093  | Inlier |
| siRNA-Vinblastine Run1-<br>DMSO  | NM_0013<br>86 | DPYSL2 | midinase-<br>like 2     | 0.993567  | Inlier |
| siRNA Disorazole DMSO Run2       | NM_0013<br>86 | DPYSL2 | midinase-<br>like 2     | 1.728412  | Inlier |
| siRNA-Temozolomide Run3-<br>DMSO | NM_0013<br>87 | DPYSL3 | midinase-<br>like 3     | -0.991082 | Inlier |
| siRNA-Temozolomide Run2-<br>DMSO | NM_0013<br>87 | DPYSL3 | midinase-<br>like 3     | -0.644794 | Inlier |
| siRNA-Vinblastine Run2-<br>DMSO  | NM_0013<br>87 | DPYSL3 | midinase-<br>like 3     | -0.605722 | Inlier |
| siRNA Disorazole DMSO Run3       | NM_0013<br>87 | DPYSL3 | midinase-<br>like 3     | -0.169283 | Inlier |
| siRNA-Temozolomide Run1-<br>DMSO | NM_0013<br>87 | DPYSL3 | midinase-<br>like 3     | 0.169283  | Inlier |
| siRNA Disorazole DMSO Run1       | NM_0013<br>87 | DPYSL3 | midinase-<br>like 3     | 0.704206  | Inlier |

Identification of Survival Genes in Human Glioblastoma Cells Using siRNA Screening  
 Nikhil G Thaker, Fang Zhang, Peter R. McDonald, Tong Ying Shun, Michael D Lewen, Ian F. Pollack, and John S. Lazo

| Molecular Pharmacology           |               |        |  | dihydropyri<br>midinase-<br>like 3 |         |
|----------------------------------|---------------|--------|--|------------------------------------|---------|
| siRNA-Vinblastine Run1-<br>DMSO  | NM_0013<br>87 | DPYSL3 |  | 3.041676                           | Inlier  |
| siRNA Disorazole DMSO Run2       | NM_0013<br>87 | DPYSL3 |  | 4.173075                           | Outlier |
| siRNA-Temozolomide Run2-<br>DMSO | NM_0064<br>26 | DPYSL4 |  | -1.106448                          | Inlier  |
| siRNA-Temozolomide Run3-<br>DMSO | NM_0064<br>26 | DPYSL4 |  | -0.925029                          | Inlier  |
| siRNA-Vinblastine Run2-<br>DMSO  | NM_0064<br>26 | DPYSL4 |  | -0.423971                          | Inlier  |
| siRNA Disorazole DMSO Run3       | NM_0064<br>26 | DPYSL4 |  | -0.12753                           | Inlier  |
| siRNA Disorazole DMSO Run1       | NM_0064<br>26 | DPYSL4 |  | 0.12753                            | Inlier  |
| siRNA-Temozolomide Run1-<br>DMSO | NM_0064<br>26 | DPYSL4 |  | 0.273988                           | Inlier  |
| siRNA Disorazole DMSO Run2       | NM_0064<br>26 | DPYSL4 |  | 2.409932                           | Inlier  |
| siRNA-Vinblastine Run1-<br>DMSO  | NM_0064<br>26 | DPYSL4 |  | 2.947252                           | Inlier  |
| siRNA-Vinblastine Run2-<br>DMSO  | NM_0201<br>34 | DPYSL5 |  | -0.718237                          | Inlier  |
| siRNA-Temozolomide Run2-<br>DMSO | NM_0201<br>34 | DPYSL5 |  | -0.69476                           | Inlier  |
| siRNA Disorazole DMSO Run1       | NM_0201<br>34 | DPYSL5 |  | -0.65424                           | Inlier  |
| siRNA Disorazole DMSO Run3       | NM_0201<br>34 | DPYSL5 |  | -0.338102                          | Inlier  |
| siRNA-Temozolomide Run1-<br>DMSO | NM_0201<br>34 | DPYSL5 |  | 0.338102                           | Inlier  |
| siRNA-Temozolomide Run3-<br>DMSO | NM_0201<br>34 | DPYSL5 |  | 0.376544                           | Inlier  |
| siRNA-Vinblastine Run1-<br>DMSO  | NM_0201<br>34 | DPYSL5 |  | 0.95528                            | Inlier  |

Identification of Survival Genes in Human Glioblastoma Cells Using siRNA Screening  
 Nikhil G Thaker, Fang Zhang, Peter R. McDonald, Tong Ying Shun, Michael D Lewen, Ian F. Pollack, and John S. Lazo

Molecular Pharmacology

|                              |               |        |                                          |           |        |
|------------------------------|---------------|--------|------------------------------------------|-----------|--------|
| siRNA Disorazole DMSO Run2   | NM_0201<br>34 | DPYSL5 | dihydropyridinase-like 5                 | 1.585404  | Inlier |
| siRNA-Temozolomide Run3-DMSO | NM_0007<br>94 | DRD1   | dopamine receptor D1                     | -2.026156 | Inlier |
| siRNA Disorazole DMSO Run2   | NM_0007<br>94 | DRD1   | dopamine receptor D1                     | -0.883457 | Inlier |
| siRNA-Temozolomide Run2-DMSO | NM_0007<br>94 | DRD1   | dopamine receptor D1                     | -0.723665 | Inlier |
| siRNA-Temozolomide Run1-DMSO | NM_0007<br>94 | DRD1   | dopamine receptor D1                     | -0.126693 | Inlier |
| siRNA Disorazole DMSO Run1   | NM_0007<br>94 | DRD1   | dopamine receptor D1                     | 0.126693  | Inlier |
| siRNA Disorazole DMSO Run3   | NM_0007<br>94 | DRD1   | dopamine receptor D1                     | 0.220794  | Inlier |
| siRNA-Vinblastine Run1-DMSO  | NM_0007<br>94 | DRD1   | dopamine receptor D1                     | 0.625335  | Inlier |
| siRNA-Vinblastine Run2-DMSO  | NM_0007<br>94 | DRD1   | dopamine receptor D1                     | 0.753434  | Inlier |
| siRNA-Temozolomide Run3-DMSO | NM_0157<br>22 | DRD1IP | dopamine receptor D1 interacting protein | -2.162678 | Inlier |
| siRNA Disorazole DMSO Run1   | NM_0157<br>22 | DRD1IP | dopamine receptor D1 interacting protein | -0.686011 | Inlier |
| siRNA-Temozolomide Run2-DMSO | NM_0157<br>22 | DRD1IP | dopamine receptor D1 interacting protein | -0.662989 | Inlier |
| siRNA Disorazole DMSO Run3   | NM_0157<br>22 | DRD1IP | dopamine receptor D1 interacting protein | -0.013275 | Inlier |
| siRNA Disorazole DMSO Run2   | NM_0157<br>22 | DRD1IP | dopamine receptor D1 interacting protein | 0.013275  | Inlier |

Identification of Survival Genes in Human Glioblastoma Cells Using siRNA Screening  
 Nikhil G Thaker, Fang Zhang, Peter R. McDonald, Tong Ying Shun, Michael D Lewen, Ian F. Pollack, and John S. Lazo

Molecular Pharmacology

|                              |           |        |                                          |                  |
|------------------------------|-----------|--------|------------------------------------------|------------------|
|                              |           |        | dopamine receptor D1                     |                  |
| siRNA-Temozolomide Run1-DMSO | NM_015722 | DRD1IP | interacting protein dopamine receptor D1 | 0.550002 Inlier  |
| siRNA-Vinblastine Run1-DMSO  | NM_015722 | DRD1IP | interacting protein dopamine receptor D1 | 1.314039 Inlier  |
| siRNA-Vinblastine Run2-DMSO  | NM_015722 | DRD1IP | interacting protein dopamine receptor D1 | 1.361338 Inlier  |
| siRNA-Temozolomide Run3-DMSO | NM_016574 | DRD2   | dopamine receptor D2                     | -3.76412 Outlier |
| siRNA-Temozolomide Run2-DMSO | NM_016574 | DRD2   | dopamine receptor D2                     | -0.806659 Inlier |
| siRNA-Temozolomide Run1-DMSO | NM_016574 | DRD2   | dopamine receptor D2                     | -0.670883 Inlier |
| siRNA Disorazole DMSO Run1   | NM_016574 | DRD2   | dopamine receptor D2                     | -0.048943 Inlier |
| siRNA-Vinblastine Run2-DMSO  | NM_016574 | DRD2   | dopamine receptor D2                     | 0.048944 Inlier  |
| siRNA-Vinblastine Run1-DMSO  | NM_016574 | DRD2   | dopamine receptor D2                     | 0.091588 Inlier  |
| siRNA Disorazole DMSO Run3   | NM_016574 | DRD2   | dopamine receptor D2                     | 0.678117 Inlier  |
| siRNA Disorazole DMSO Run2   | NM_016574 | DRD2   | dopamine receptor D2                     | 0.805465 Inlier  |
| siRNA-Temozolomide Run3-DMSO | NM_033663 | DRD3   | dopamine receptor D3                     | -1.270367 Inlier |
| siRNA Disorazole DMSO Run2   | NM_033663 | DRD3   | dopamine receptor D3                     | -0.761306 Inlier |
| siRNA-Temozolomide Run2-DMSO | NM_033663 | DRD3   | dopamine receptor D3                     | -0.097559 Inlier |
| siRNA Disorazole DMSO Run3   | NM_033663 | DRD3   | dopamine receptor D3                     | -0.077221 Inlier |



Identification of Survival Genes in Human Glioblastoma Cells Using siRNA Screening  
 Nikhil G Thaker, Fang Zhang, Peter R. McDonald, Tong Ying Shun, Michael D Lewen, Ian F. Pollack, and John S. Lazo

Molecular Pharmacology

|                              |               |      |                         |           |        |
|------------------------------|---------------|------|-------------------------|-----------|--------|
| siRNA-Temozolomide Run1-DMSO | NM_0336<br>63 | DRD3 | dopamine receptor<br>D3 | 0.077221  | Inlier |
| siRNA Disorazole DMSO Run1   | NM_0336<br>63 | DRD3 | dopamine receptor<br>D3 | 0.587694  | Inlier |
| siRNA-Vinblastine Run1-DMSO  | NM_0336<br>63 | DRD3 | dopamine receptor<br>D3 | 0.792211  | Inlier |
| siRNA-Vinblastine Run2-DMSO  | NM_0336<br>63 | DRD3 | dopamine receptor<br>D3 | 0.809277  | Inlier |
| siRNA Disorazole DMSO Run2   | NM_0007<br>97 | DRD4 | dopamine receptor<br>D4 | -2.266847 | Inlier |
| siRNA-Temozolomide Run3-DMSO | NM_0007<br>97 | DRD4 | dopamine receptor<br>D4 | -1.127829 | Inlier |
| siRNA-Temozolomide Run2-DMSO | NM_0007<br>97 | DRD4 | dopamine receptor<br>D4 | -0.14966  | Inlier |
| siRNA-Temozolomide Run1-DMSO | NM_0007<br>97 | DRD4 | dopamine receptor<br>D4 | -0.064589 | Inlier |
| siRNA Disorazole DMSO Run3   | NM_0007<br>97 | DRD4 | dopamine receptor<br>D4 | 0.064589  | Inlier |
| siRNA Disorazole DMSO Run1   | NM_0007<br>97 | DRD4 | dopamine receptor<br>D4 | 0.541316  | Inlier |
| siRNA-Vinblastine Run1-DMSO  | NM_0007<br>97 | DRD4 | dopamine receptor<br>D4 | 0.807684  | Inlier |
| siRNA-Vinblastine Run2-DMSO  | NM_0007<br>97 | DRD4 | dopamine receptor<br>D4 | 0.910028  | Inlier |
| siRNA-Temozolomide Run3-DMSO | NM_0007<br>98 | DRD5 | dopamine receptor<br>D5 | -2.028667 | Inlier |
| siRNA Disorazole DMSO Run2   | NM_0007<br>98 | DRD5 | dopamine receptor<br>D5 | -0.686895 | Inlier |
| siRNA-Temozolomide Run2-DMSO | NM_0007<br>98 | DRD5 | dopamine receptor<br>D5 | -0.567923 | Inlier |
| siRNA Disorazole DMSO Run1   | NM_0007<br>98 | DRD5 | dopamine receptor<br>D5 | -0.086068 | Inlier |
| siRNA-Temozolomide Run1-DMSO | NM_0007<br>98 | DRD5 | dopamine receptor<br>D5 | 0.086068  | Inlier |

Identification of Survival Genes in Human Glioblastoma Cells Using siRNA Screening

Nikhil G Thaker, Fang Zhang, Peter R. McDonald, Tong Ying Shun, Michael D Lewen, Ian F. Pollack, and John S.

Lazo

|                                                           |               |       |                                                            |           |        |
|-----------------------------------------------------------|---------------|-------|------------------------------------------------------------|-----------|--------|
| Molecular Pharmacology<br>siRNA-Vinblastine Run1-<br>DMSO | NM_0007<br>98 | DRD5  | dopamine<br>receptor<br>D5                                 | 0.662105  | Inlier |
| siRNA-Vinblastine Run2-<br>DMSO                           | NM_0007<br>98 | DRD5  | dopamine<br>receptor<br>D5                                 | 0.940664  | Inlier |
| siRNA Disorazole DMSO Run3                                | NM_0007<br>98 | DRD5  | dopamine<br>receptor<br>D5                                 | 1.47975   | Inlier |
| siRNA Disorazole DMSO Run2                                | NM_0121<br>45 | DTYMK | deoxythym<br>idylate<br>kinase<br>(thymidylat<br>e kinase) | -3.173949 | Inlier |
| siRNA-Temozolomide Run3-<br>DMSO                          | NM_0121<br>45 | DTYMK | deoxythym<br>idylate<br>kinase<br>(thymidylat<br>e kinase) | -1.121094 | Inlier |
| siRNA Disorazole DMSO Run3                                | NM_0121<br>45 | DTYMK | deoxythym<br>idylate<br>kinase<br>(thymidylat<br>e kinase) | -0.530689 | Inlier |
| siRNA-Temozolomide Run1-<br>DMSO                          | NM_0121<br>45 | DTYMK | deoxythym<br>idylate<br>kinase<br>(thymidylat<br>e kinase) | -0.185357 | Inlier |
| siRNA-Temozolomide Run2-<br>DMSO                          | NM_0121<br>45 | DTYMK | deoxythym<br>idylate<br>kinase<br>(thymidylat<br>e kinase) | 0.185358  | Inlier |
| siRNA Disorazole DMSO Run1                                | NM_0121<br>45 | DTYMK | deoxythym<br>idylate<br>kinase<br>(thymidylat<br>e kinase) | 0.194211  | Inlier |
| siRNA-Vinblastine Run2-<br>DMSO                           | NM_0121<br>45 | DTYMK | deoxythym<br>idylate<br>kinase<br>(thymidylat<br>e kinase) | 0.818311  | Inlier |

Identification of Survival Genes in Human Glioblastoma Cells Using siRNA Screening  
 Nikhil G Thaker, Fang Zhang, Peter R. McDonald, Tong Ying Shun, Michael D Lewen, Ian F. Pollack, and John S. Lazo  
 Molecular Pharmacology

|                              |               |       |                                              |           |         |
|------------------------------|---------------|-------|----------------------------------------------|-----------|---------|
| siRNA-Vinblastine Run1-DMSO  | NM_0121<br>45 | DTYMK | deoxythymidylate kinase (thymidylate kinase) | 0.883997  | Inlier  |
| siRNA Disorazole DMSO Run3   | NM_0174<br>34 | DUOX1 | dual oxidase 1                               | -0.889183 | Inlier  |
| siRNA-Vinblastine Run2-DMSO  | NM_0174<br>34 | DUOX1 | dual oxidase 1                               | -0.459817 | Inlier  |
| siRNA Disorazole DMSO Run1   | NM_0174<br>34 | DUOX1 | dual oxidase 1                               | -0.452492 | Inlier  |
| siRNA-Temozolomide Run2-DMSO | NM_0174<br>34 | DUOX1 | dual oxidase 1                               | -0.059711 | Inlier  |
| siRNA-Temozolomide Run3-DMSO | NM_0174<br>34 | DUOX1 | dual oxidase 1                               | 0.059711  | Inlier  |
| siRNA-Temozolomide Run1-DMSO | NM_0174<br>34 | DUOX1 | dual oxidase 1                               | 1.977068  | Inlier  |
| siRNA-Vinblastine Run1-DMSO  | NM_0174<br>34 | DUOX1 | dual oxidase 1                               | 5.336203  | Outlier |
| siRNA Disorazole DMSO Run2   | NM_0174<br>34 | DUOX1 | dual oxidase 1                               | 5.626225  | Outlier |
| siRNA-Temozolomide Run3-DMSO | NM_0140<br>80 | DUOX2 | dual oxidase 2                               | -1.038391 | Inlier  |
| siRNA-Temozolomide Run2-DMSO | NM_0140<br>80 | DUOX2 | dual oxidase 2                               | -0.816402 | Inlier  |
| siRNA Disorazole DMSO Run1   | NM_0140<br>80 | DUOX2 | dual oxidase 2                               | -0.532598 | Inlier  |
| siRNA Disorazole DMSO Run3   | NM_0140<br>80 | DUOX2 | dual oxidase 2                               | -0.132861 | Inlier  |
| siRNA-Vinblastine Run2-DMSO  | NM_0140<br>80 | DUOX2 | dual oxidase 2                               | 0.132861  | Inlier  |
| siRNA-Temozolomide Run1-DMSO | NM_0140<br>80 | DUOX2 | dual oxidase 2                               | 0.467951  | Inlier  |
| siRNA-Vinblastine Run1-DMSO  | NM_0140<br>80 | DUOX2 | dual oxidase 2                               | 2.378768  | Inlier  |
| siRNA Disorazole DMSO Run2   | NM_0140<br>80 | DUOX2 | dual oxidase 2                               | 2.750317  | Inlier  |
| siRNA Disorazole DMSO Run1   | NM_0044<br>17 | DUSP1 | specificity phosphatase 1                    | -0.712536 | Inlier  |
| siRNA-Temozolomide Run1-DMSO | NM_0044<br>17 | DUSP1 | specificity phosphatase 1                    | -0.636464 | Inlier  |
| siRNA-Temozolomide Run2-DMSO | NM_0044<br>17 | DUSP1 | specificity phosphatase 1                    | -0.528306 | Inlier  |

Identification of Survival Genes in Human Glioblastoma Cells Using siRNA Screening  
 Nikhil G Thaker, Fang Zhang, Peter R. McDonald, Tong Ying Shun, Michael D Lewen, Ian F. Pollack, and John S. Lazo

Molecular Pharmacology

| siRNA                        | Gene    | Gene ID | Gene Symbol | Gene Description                | Value     | Outlier Status |
|------------------------------|---------|---------|-------------|---------------------------------|-----------|----------------|
| siRNA-Temozolomide Run3-DMSO | NM_0044 | 17      | DUSP1       | dual specificity phosphatase 1  | -0.301536 | Inlier         |
| siRNA Disorazole DMSO Run2   | NM_0044 | 17      | DUSP1       | dual specificity phosphatase 1  | 0.301536  | Inlier         |
| siRNA-Vinblastine Run1-DMSO  | NM_0044 | 17      | DUSP1       | dual specificity phosphatase 1  | 2.678884  | Inlier         |
| siRNA Disorazole DMSO Run3   | NM_0044 | 17      | DUSP1       | dual specificity phosphatase 1  | 3.039466  | Inlier         |
| siRNA-Vinblastine Run2-DMSO  | NM_0044 | 17      | DUSP1       | dual specificity phosphatase 1  | 3.378573  | Inlier         |
| siRNA-Temozolomide Run3-DMSO | NM_1447 | 29      | DUSP10      | dual specificity phosphatase 10 | -1.418765 | Inlier         |
| siRNA-Temozolomide Run2-DMSO | NM_1447 | 29      | DUSP10      | dual specificity phosphatase 10 | -1.369678 | Inlier         |
| siRNA Disorazole DMSO Run2   | NM_1447 | 29      | DUSP10      | dual specificity phosphatase 10 | -1.246149 | Inlier         |
| siRNA-Vinblastine Run1-DMSO  | NM_1447 | 29      | DUSP10      | dual specificity phosphatase 10 | -0.065287 | Inlier         |
| siRNA Disorazole DMSO Run1   | NM_1447 | 29      | DUSP10      | dual specificity phosphatase 10 | 0.065287  | Inlier         |
| siRNA-Vinblastine Run2-DMSO  | NM_1447 | 29      | DUSP10      | dual specificity phosphatase 10 | 0.611777  | Inlier         |
| siRNA-Temozolomide Run1-DMSO | NM_1447 | 29      | DUSP10      | dual specificity phosphatase 10 | 0.631175  | Inlier         |
| siRNA Disorazole DMSO Run3   | NM_1447 | 29      | DUSP10      | dual specificity phosphatase 10 | 0.717825  | Inlier         |

Identification of Survival Genes in Human Glioblastoma Cells Using siRNA Screening  
 Nikhil G Thaker, Fang Zhang, Peter R. McDonald, Tong Ying Shun, Michael D Lewen, Ian F. Pollack, and John S. Lazo  
 Molecular Pharmacology

|                                  |               |        |                                                                                         |                  |
|----------------------------------|---------------|--------|-----------------------------------------------------------------------------------------|------------------|
| siRNA Disorazole DMSO Run2       | NM_0035<br>84 | DUSP11 | dual<br>specificity<br>phosphata<br>se 11<br>(RNA/RNP<br>complex 1-<br>interacting<br>) | -0.820865 Inlier |
| siRNA-Temozolomide Run3-<br>DMSO | NM_0035<br>84 | DUSP11 | dual<br>specificity<br>phosphata<br>se 11<br>(RNA/RNP<br>complex 1-<br>interacting<br>) | -0.709216 Inlier |
| siRNA-Temozolomide Run2-<br>DMSO | NM_0035<br>84 | DUSP11 | dual<br>specificity<br>phosphata<br>se 11<br>(RNA/RNP<br>complex 1-<br>interacting<br>) | -0.686138 Inlier |
| siRNA Disorazole DMSO Run3       | NM_0035<br>84 | DUSP11 | dual<br>specificity<br>phosphata<br>se 11<br>(RNA/RNP<br>complex 1-<br>interacting<br>) | -0.243699 Inlier |
| siRNA-Temozolomide Run1-<br>DMSO | NM_0035<br>84 | DUSP11 | dual<br>specificity<br>phosphata<br>se 11<br>(RNA/RNP<br>complex 1-<br>interacting<br>) | 0.243699 Inlier  |

Identification of Survival Genes in Human Glioblastoma Cells Using siRNA Screening  
 Nikhil G Thaker, Fang Zhang, Peter R. McDonald, Tong Ying Shun, Michael D Lewen, Ian F. Pollack, and John S. Lazo  
 Molecular Pharmacology

|                                  |               |        |                                                                                         |           |        |
|----------------------------------|---------------|--------|-----------------------------------------------------------------------------------------|-----------|--------|
| siRNA Disorazole DMSO Run1       | NM_0035<br>84 | DUSP11 | dual<br>specificity<br>phosphata<br>se 11<br>(RNA/RNP<br>complex 1-<br>interacting<br>) | 0.383016  | Inlier |
| siRNA-Vinblastine Run1-<br>DMSO  | NM_0035<br>84 | DUSP11 | dual<br>specificity<br>phosphata<br>se 11<br>(RNA/RNP<br>complex 1-<br>interacting<br>) | 0.662862  | Inlier |
| siRNA-Vinblastine Run2-<br>DMSO  | NM_0035<br>84 | DUSP11 | dual<br>specificity<br>phosphata<br>se 11<br>(RNA/RNP<br>complex 1-<br>interacting<br>) | 1.539355  | Inlier |
| siRNA Disorazole DMSO Run2       | NM_0072<br>40 | DUSP12 | dual<br>specificity<br>phosphata<br>se 12                                               | -1.12316  | Inlier |
| siRNA-Temozolomide Run3-<br>DMSO | NM_0072<br>40 | DUSP12 | dual<br>specificity<br>phosphata<br>se 12                                               | -0.991418 | Inlier |
| siRNA-Temozolomide Run2-<br>DMSO | NM_0072<br>40 | DUSP12 | dual<br>specificity<br>phosphata<br>se 12                                               | -0.818612 | Inlier |
| siRNA Disorazole DMSO Run1       | NM_0072<br>40 | DUSP12 | dual<br>specificity<br>phosphata<br>se 12                                               | -0.005377 | Inlier |
| siRNA Disorazole DMSO Run3       | NM_0072<br>40 | DUSP12 | dual<br>specificity<br>phosphata<br>se 12                                               | 0.005377  | Inlier |

Identification of Survival Genes in Human Glioblastoma Cells Using siRNA Screening  
 Nikhil G Thaker, Fang Zhang, Peter R. McDonald, Tong Ying Shun, Michael D Lewen, Ian F. Pollack, and John S. Lazo

Molecular Pharmacology

|                              |                  |        |                                       |           |        |
|------------------------------|------------------|--------|---------------------------------------|-----------|--------|
| siRNA-Vinblastine Run1-DMSO  | NM_0072<br>40    | DUSP12 | dual<br>specificity<br>phosphatase 12 | 0.19103   | Inlier |
| siRNA-Temozolomide Run1-DMSO | NM_0072<br>40    | DUSP12 | dual<br>specificity<br>phosphatase 12 | 0.530388  | Inlier |
| siRNA-Vinblastine Run2-DMSO  | NM_0072<br>40    | DUSP12 | dual<br>specificity<br>phosphatase 12 | 0.947237  | Inlier |
| siRNA-Temozolomide Run2-DMSO | NM_0010<br>07271 | DUSP13 | dual<br>specificity<br>phosphatase 13 | -0.918723 | Inlier |
| siRNA-Temozolomide Run3-DMSO | NM_0010<br>07271 | DUSP13 | dual<br>specificity<br>phosphatase 13 | -0.697407 | Inlier |
| siRNA Disorazole DMSO Run2   | NM_0010<br>07271 | DUSP13 | dual<br>specificity<br>phosphatase 13 | -0.651593 | Inlier |
| siRNA Disorazole DMSO Run3   | NM_0010<br>07271 | DUSP13 | dual<br>specificity<br>phosphatase 13 | -0.102649 | Inlier |
| siRNA-Temozolomide Run1-DMSO | NM_0010<br>07271 | DUSP13 | dual<br>specificity<br>phosphatase 13 | 0.102649  | Inlier |
| siRNA Disorazole DMSO Run1   | NM_0010<br>07271 | DUSP13 | dual<br>specificity<br>phosphatase 13 | 0.601217  | Inlier |
| siRNA-Vinblastine Run1-DMSO  | NM_0010<br>07271 | DUSP13 | dual<br>specificity<br>phosphatase 13 | 1.123804  | Inlier |
| siRNA-Vinblastine Run2-DMSO  | NM_0010<br>07271 | DUSP13 | dual<br>specificity<br>phosphatase 13 | 1.219848  | Inlier |
| siRNA-Temozolomide Run3-DMSO | NM_0070<br>26    | DUSP14 | dual<br>specificity<br>phosphatase 14 | -2.381478 | Inlier |
| siRNA-Temozolomide Run2-DMSO | NM_0070<br>26    | DUSP14 | dual<br>specificity<br>phosphatase 14 | -2.300915 | Inlier |

Identification of Survival Genes in Human Glioblastoma Cells Using siRNA Screening  
 Nikhil G Thaker, Fang Zhang, Peter R. McDonald, Tong Ying Shun, Michael D Lewen, Ian F. Pollack, and John S. Lazo

Molecular Pharmacology

|                              |               |        |                                            |           |        |
|------------------------------|---------------|--------|--------------------------------------------|-----------|--------|
| siRNA-Temozolomide Run1-DMSO | NM_0070<br>26 | DUSP14 | dual<br>specificity<br>phosphatase 14      | -0.386847 | Inlier |
| siRNA-Vinblastine Run1-DMSO  | NM_0070<br>26 | DUSP14 | dual<br>specificity<br>phosphatase 14      | -0.320619 | Inlier |
| siRNA Disorazole DMSO Run2   | NM_0070<br>26 | DUSP14 | dual<br>specificity<br>phosphatase 14      | 0.320619  | Inlier |
| siRNA-Vinblastine Run2-DMSO  | NM_0070<br>26 | DUSP14 | dual<br>specificity<br>phosphatase 14      | 0.413725  | Inlier |
| siRNA Disorazole DMSO Run1   | NM_0070<br>26 | DUSP14 | dual<br>specificity<br>phosphatase 14      | 0.935275  | Inlier |
| siRNA Disorazole DMSO Run3   | NM_0070<br>26 | DUSP14 | dual<br>specificity<br>phosphatase 14      | 3.321236  | Inlier |
| siRNA Disorazole DMSO Run2   | NM_1779<br>91 | DUSP15 | dual<br>specificity<br>phosphatase-like 15 | -3.453624 | Inlier |
| siRNA-Temozolomide Run2-DMSO | NM_1779<br>91 | DUSP15 | dual<br>specificity<br>phosphatase-like 15 | -0.701867 | Inlier |
| siRNA-Vinblastine Run1-DMSO  | NM_1779<br>91 | DUSP15 | dual<br>specificity<br>phosphatase-like 15 | -0.068758 | Inlier |
| siRNA Disorazole DMSO Run1   | NM_1779<br>91 | DUSP15 | dual<br>specificity<br>phosphatase-like 15 | -0.06208  | Inlier |
| siRNA-Temozolomide Run3-DMSO | NM_1779<br>91 | DUSP15 | dual<br>specificity<br>phosphatase-like 15 | 0.06208   | Inlier |



Identification of Survival Genes in Human Glioblastoma Cells Using siRNA Screening  
 Nikhil G Thaker, Fang Zhang, Peter R. McDonald, Tong Ying Shun, Michael D Lewen, Ian F. Pollack, and John S. Lazo  
 Molecular Pharmacology

|                              |               |        |                                                |           |        |
|------------------------------|---------------|--------|------------------------------------------------|-----------|--------|
| siRNA-Temozolomide Run1-DMSO | NM_1779<br>91 | DUSP15 | dual<br>specificity<br>phosphata<br>se-like 15 | 0.647133  | Inlier |
| siRNA Disorazole DMSO Run3   | NM_1779<br>91 | DUSP15 | dual<br>specificity<br>phosphata<br>se-like 15 | 1.119385  | Inlier |
| siRNA-Vinblastine Run2-DMSO  | NM_1779<br>91 | DUSP15 | dual<br>specificity<br>phosphata<br>se-like 15 | 1.443983  | Inlier |
| siRNA Disorazole DMSO Run2   | NM_0306<br>40 | DUSP16 | dual<br>specificity<br>phosphata<br>se 16      | -0.721389 | Inlier |
| siRNA-Temozolomide Run3-DMSO | NM_0306<br>40 | DUSP16 | dual<br>specificity<br>phosphata<br>se 16      | -0.702653 | Inlier |
| siRNA Disorazole DMSO Run3   | NM_0306<br>40 | DUSP16 | dual<br>specificity<br>phosphata<br>se 16      | -0.601132 | Inlier |
| siRNA-Temozolomide Run2-DMSO | NM_0306<br>40 | DUSP16 | dual<br>specificity<br>phosphata<br>se 16      | -0.379482 | Inlier |
| siRNA-Temozolomide Run1-DMSO | NM_0306<br>40 | DUSP16 | dual<br>specificity<br>phosphata<br>se 16      | 0.379482  | Inlier |
| siRNA Disorazole DMSO Run1   | NM_0306<br>40 | DUSP16 | dual<br>specificity<br>phosphata<br>se 16      | 0.646347  | Inlier |
| siRNA-Vinblastine Run1-DMSO  | NM_0306<br>40 | DUSP16 | dual<br>specificity<br>phosphata<br>se 16      | 1.272579  | Inlier |
| siRNA-Vinblastine Run2-DMSO  | NM_0306<br>40 | DUSP16 | dual<br>specificity<br>phosphata<br>se 16      | 1.439222  | Inlier |
| siRNA-Temozolomide Run2-DMSO | NM_1525<br>11 | DUSP18 | dual<br>specificity<br>phosphata<br>se 18      | -1.160649 | Inlier |

Identification of Survival Genes in Human Glioblastoma Cells Using siRNA Screening  
 Nikhil G Thaker, Fang Zhang, Peter R. McDonald, Tong Ying Shun, Michael D Lewen, Ian F. Pollack, and John S. Lazo

Molecular Pharmacology

| siRNA                        | Gene    | Gene ID | Gene   | Gene                            | Value     | Outlier |
|------------------------------|---------|---------|--------|---------------------------------|-----------|---------|
| siRNA-Temozolomide Run3-DMSO | NM_1525 | 11      | DUSP18 | dual specificity phosphatase 18 | -0.850312 | Inlier  |
| siRNA Disorazole DMSO Run2   | NM_1525 | 11      | DUSP18 | dual specificity phosphatase 18 | -0.498688 | Inlier  |
| siRNA Disorazole DMSO Run3   | NM_1525 | 11      | DUSP18 | dual specificity phosphatase 18 | -0.039489 | Inlier  |
| siRNA Disorazole DMSO Run1   | NM_1525 | 11      | DUSP18 | dual specificity phosphatase 18 | 0.039489  | Inlier  |
| siRNA-Temozolomide Run1-DMSO | NM_1525 | 11      | DUSP18 | dual specificity phosphatase 18 | 0.115596  | Inlier  |
| siRNA-Vinblastine Run1-DMSO  | NM_1525 | 11      | DUSP18 | dual specificity phosphatase 18 | 1.009898  | Inlier  |
| siRNA-Vinblastine Run2-DMSO  | NM_1525 | 11      | DUSP18 | dual specificity phosphatase 18 | 1.642566  | Inlier  |
| siRNA-Temozolomide Run3-DMSO | NM_0808 | 76      | DUSP19 | dual specificity phosphatase 19 | -1.548331 | Inlier  |
| siRNA-Temozolomide Run2-DMSO | NM_0808 | 76      | DUSP19 | dual specificity phosphatase 19 | -1.214626 | Inlier  |
| siRNA Disorazole DMSO Run3   | NM_0808 | 76      | DUSP19 | dual specificity phosphatase 19 | -0.183498 | Inlier  |
| siRNA Disorazole DMSO Run2   | NM_0808 | 76      | DUSP19 | dual specificity phosphatase 19 | -0.053805 | Inlier  |
| siRNA-Temozolomide Run1-DMSO | NM_0808 | 76      | DUSP19 | dual specificity phosphatase 19 | 0.053805  | Inlier  |
| siRNA Disorazole DMSO Run1   | NM_0808 | 76      | DUSP19 | dual specificity phosphatase 19 | 0.492893  | Inlier  |

Identification of Survival Genes in Human Glioblastoma Cells Using siRNA Screening  
 Nikhil G Thaker, Fang Zhang, Peter R. McDonald, Tong Ying Shun, Michael D Lewen, Ian F. Pollack, and John S. Lazo

Molecular Pharmacology

| siRNA Treatment              | Gene ID   | Gene Name | Specificity                     | Value     | Outlier Status |
|------------------------------|-----------|-----------|---------------------------------|-----------|----------------|
| siRNA-Vinblastine Run1-DMSO  | NM_080876 | DUSP19    | dual specificity phosphatase 19 | 0.856107  | Inlier         |
| siRNA-Vinblastine Run2-DMSO  | NM_080876 | DUSP19    | dual specificity phosphatase 19 | 1.306454  | Inlier         |
| siRNA-Temozolomide Run3-DMSO | NM_004418 | DUSP2     | dual specificity phosphatase 2  | -1.088444 | Inlier         |
| siRNA-Temozolomide Run2-DMSO | NM_004418 | DUSP2     | dual specificity phosphatase 2  | -0.965944 | Inlier         |
| siRNA Disorazole DMSO Run2   | NM_004418 | DUSP2     | dual specificity phosphatase 2  | -0.383056 | Inlier         |
| siRNA Disorazole DMSO Run1   | NM_004418 | DUSP2     | dual specificity phosphatase 2  | -0.172101 | Inlier         |
| siRNA Disorazole DMSO Run3   | NM_004418 | DUSP2     | dual specificity phosphatase 2  | 0.172101  | Inlier         |
| siRNA-Temozolomide Run1-DMSO | NM_004418 | DUSP2     | dual specificity phosphatase 2  | 0.355232  | Inlier         |
| siRNA-Vinblastine Run1-DMSO  | NM_004418 | DUSP2     | dual specificity phosphatase 2  | 1.209986  | Inlier         |
| siRNA-Vinblastine Run2-DMSO  | NM_004418 | DUSP2     | dual specificity phosphatase 2  | 2.293073  | Inlier         |
| siRNA-Temozolomide Run2-DMSO | NM_022076 | DUSP21    | dual specificity phosphatase 21 | -1.297943 | Inlier         |
| siRNA Disorazole DMSO Run1   | NM_022076 | DUSP21    | dual specificity phosphatase 21 | -0.901309 | Inlier         |
| siRNA Disorazole DMSO Run2   | NM_022076 | DUSP21    | dual specificity phosphatase 21 | -0.447691 | Inlier         |

Identification of Survival Genes in Human Glioblastoma Cells Using siRNA Screening  
 Nikhil G Thaker, Fang Zhang, Peter R. McDonald, Tong Ying Shun, Michael D Lewen, Ian F. Pollack, and John S. Lazo

Molecular Pharmacology

| siRNA Treatment              | Gene ID   | Gene Name | Specificity                     | Value     | Outlier Status |
|------------------------------|-----------|-----------|---------------------------------|-----------|----------------|
| siRNA-Temozolomide Run3-DMSO | NM_022076 | DUSP21    | dual specificity phosphatase 21 | -0.262223 | Inlier         |
| siRNA-Temozolomide Run1-DMSO | NM_022076 | DUSP21    | dual specificity phosphatase 21 | 0.262223  | Inlier         |
| siRNA-Vinblastine Run1-DMSO  | NM_022076 | DUSP21    | dual specificity phosphatase 21 | 0.314114  | Inlier         |
| siRNA Disorazole DMSO Run3   | NM_022076 | DUSP21    | dual specificity phosphatase 21 | 1.098422  | Inlier         |
| siRNA-Vinblastine Run2-DMSO  | NM_022076 | DUSP21    | dual specificity phosphatase 21 | 1.210384  | Inlier         |
| siRNA-Temozolomide Run2-DMSO | NM_020185 | DUSP22    | dual specificity phosphatase 22 | -0.700833 | Inlier         |
| siRNA-Temozolomide Run3-DMSO | NM_020185 | DUSP22    | dual specificity phosphatase 22 | -0.648167 | Inlier         |
| siRNA-Temozolomide Run1-DMSO | NM_020185 | DUSP22    | dual specificity phosphatase 22 | -0.425885 | Inlier         |
| siRNA Disorazole DMSO Run2   | NM_020185 | DUSP22    | dual specificity phosphatase 22 | -0.016684 | Inlier         |
| siRNA Disorazole DMSO Run1   | NM_020185 | DUSP22    | dual specificity phosphatase 22 | 0.016683  | Inlier         |
| siRNA-Vinblastine Run2-DMSO  | NM_020185 | DUSP22    | dual specificity phosphatase 22 | 0.701032  | Inlier         |
| siRNA-Vinblastine Run1-DMSO  | NM_020185 | DUSP22    | dual specificity phosphatase 22 | 0.724475  | Inlier         |
| siRNA Disorazole DMSO Run3   | NM_020185 | DUSP22    | dual specificity phosphatase 22 | 1.187297  | Inlier         |

Identification of Survival Genes in Human Glioblastoma Cells Using siRNA Screening  
 Nikhil G Thaker, Fang Zhang, Peter R. McDonald, Tong Ying Shun, Michael D Lewen, Ian F. Pollack, and John S. Lazo

Molecular Pharmacology

| siRNA                        | Gene    | Gene ID | Gene Name | Log Fold Change | Outlier Type |
|------------------------------|---------|---------|-----------|-----------------|--------------|
| siRNA-Temozolomide Run3-DMSO | NM_0178 | 23      | DUSP23    | -2.840789       | Inlier       |
| siRNA Disorazole DMSO Run2   | NM_0178 | 23      | DUSP23    | -2.301543       | Inlier       |
| siRNA-Temozolomide Run2-DMSO | NM_0178 | 23      | DUSP23    | -2.00432        | Inlier       |
| siRNA-Vinblastine Run1-DMSO  | NM_0178 | 23      | DUSP23    | -0.079069       | Inlier       |
| siRNA Disorazole DMSO Run1   | NM_0178 | 23      | DUSP23    | 0.079068        | Inlier       |
| siRNA-Temozolomide Run1-DMSO | NM_0178 | 23      | DUSP23    | 0.085813        | Inlier       |
| siRNA Disorazole DMSO Run3   | NM_0178 | 23      | DUSP23    | 0.550406        | Inlier       |
| siRNA-Vinblastine Run2-DMSO  | NM_0178 | 23      | DUSP23    | 0.798594        | Inlier       |
| siRNA Disorazole DMSO Run2   | NM_0040 | 90      | DUSP3     | -2.801086       | Inlier       |
| siRNA-Temozolomide Run3-DMSO | NM_0040 | 90      | DUSP3     | -1.765038       | Inlier       |

Identification of Survival Genes in Human Glioblastoma Cells Using siRNA Screening

Nikhil G Thaker, Fang Zhang, Peter R. McDonald, Tong Ying Shun, Michael D Lewen, Ian F. Pollack, and John S. Lazo

Molecular Pharmacology

| siRNA Treatment              | Gene ID   | Gene Name | Log Fold Change | Outlier Status |
|------------------------------|-----------|-----------|-----------------|----------------|
| siRNA-Temozolomide Run2-DMSO | NM_004090 | DUSP3     | -0.711988       | Inlier         |
| siRNA Disorazole DMSO Run1   | NM_004090 | DUSP3     | -0.024117       | Inlier         |
| siRNA-Vinblastine Run1-DMSO  | NM_004090 | DUSP3     | 0.024117        | Inlier         |
| siRNA-Vinblastine Run2-DMSO  | NM_004090 | DUSP3     | 0.539385        | Inlier         |
| siRNA-Temozolomide Run1-DMSO | NM_004090 | DUSP3     | 0.637012        | Inlier         |

dual  
specificity  
phosphata  
se 3  
(vaccinia  
virus  
phosphata  
se VH1-  
related)  
dual  
specificity  
phosphata  
se 3  
(vaccinia  
virus  
phosphata  
se VH1-  
related)  
dual  
specificity  
phosphata  
se 3  
(vaccinia  
virus  
phosphata  
se VH1-  
related)  
dual  
specificity  
phosphata  
se 3  
(vaccinia  
virus  
phosphata  
se VH1-  
related)

Identification of Survival Genes in Human Glioblastoma Cells Using siRNA Screening  
 Nikhil G Thaker, Fang Zhang, Peter R. McDonald, Tong Ying Shun, Michael D Lewen, Ian F. Pollack, and John S. Lazo

Molecular Pharmacology

| siRNA Treatment              | Gene ID | Gene Name | Log Fold Change | Outlier Type |
|------------------------------|---------|-----------|-----------------|--------------|
| siRNA Disorazole DMSO Run3   | NM_0040 | DUSP3     | 1.975437        | Inlier       |
| siRNA Disorazole DMSO Run2   | NM_0013 | DUSP4     | -1.443768       | Inlier       |
| siRNA-Temozolomide Run3-DMSO | NM_0013 | DUSP4     | -0.787601       | Inlier       |
| siRNA-Temozolomide Run2-DMSO | NM_0013 | DUSP4     | -0.185232       | Inlier       |
| siRNA Disorazole DMSO Run3   | NM_0013 | DUSP4     | -0.007275       | Inlier       |
| siRNA-Temozolomide Run1-DMSO | NM_0013 | DUSP4     | 0.007275        | Inlier       |
| siRNA Disorazole DMSO Run1   | NM_0013 | DUSP4     | 0.649603        | Inlier       |
| siRNA-Vinblastine Run1-DMSO  | NM_0013 | DUSP4     | 0.699397        | Inlier       |
| siRNA-Vinblastine Run2-DMSO  | NM_0013 | DUSP4     | 1.040217        | Inlier       |
| siRNA-Temozolomide Run3-DMSO | NM_0044 | DUSP5     | -0.983439       | Inlier       |
| siRNA-Temozolomide Run2-DMSO | NM_0044 | DUSP5     | -0.790418       | Inlier       |

dual  
 specificity  
 phosphata  
 se 3  
 (vaccinia  
 virus  
 phosphata  
 se VH1-  
 related)  
 dual  
 specificity  
 phosphata  
 se 4  
 dual  
 specificity  
 phosphata  
 se 5  
 dual  
 specificity  
 phosphata  
 se 5

Identification of Survival Genes in Human Glioblastoma Cells Using siRNA Screening  
 Nikhil G Thaker, Fang Zhang, Peter R. McDonald, Tong Ying Shun, Michael D Lewen, Ian F. Pollack, and John S. Lazo

Molecular Pharmacology

| siRNA                        | Gene    | Gene ID | Gene  | Specificity                    | Value     | Outlier |
|------------------------------|---------|---------|-------|--------------------------------|-----------|---------|
| siRNA Disorazole DMSO Run3   | NM_0044 | 19      | DUSP5 | dual specificity phosphatase 5 | -0.558582 | Inlier  |
| siRNA Disorazole DMSO Run1   | NM_0044 | 19      | DUSP5 | dual specificity phosphatase 5 | -0.089892 | Inlier  |
| siRNA-Temozolomide Run1-DMSO | NM_0044 | 19      | DUSP5 | dual specificity phosphatase 5 | 0.089892  | Inlier  |
| siRNA Disorazole DMSO Run2   | NM_0044 | 19      | DUSP5 | dual specificity phosphatase 5 | 0.215636  | Inlier  |
| siRNA-Vinblastine Run1-DMSO  | NM_0044 | 19      | DUSP5 | dual specificity phosphatase 5 | 0.817464  | Inlier  |
| siRNA-Vinblastine Run2-DMSO  | NM_0044 | 19      | DUSP5 | dual specificity phosphatase 5 | 1.00408   | Inlier  |
| siRNA-Temozolomide Run3-DMSO | NM_0226 | 52      | DUSP6 | dual specificity phosphatase 6 | -1.159975 | Inlier  |
| siRNA-Temozolomide Run2-DMSO | NM_0226 | 52      | DUSP6 | dual specificity phosphatase 6 | -0.880169 | Inlier  |
| siRNA Disorazole DMSO Run1   | NM_0226 | 52      | DUSP6 | dual specificity phosphatase 6 | -0.195825 | Inlier  |
| siRNA Disorazole DMSO Run2   | NM_0226 | 52      | DUSP6 | dual specificity phosphatase 6 | -0.15524  | Inlier  |
| siRNA-Temozolomide Run1-DMSO | NM_0226 | 52      | DUSP6 | dual specificity phosphatase 6 | 0.155241  | Inlier  |
| siRNA Disorazole DMSO Run3   | NM_0226 | 52      | DUSP6 | dual specificity phosphatase 6 | 0.468831  | Inlier  |
| siRNA-Vinblastine Run1-DMSO  | NM_0226 | 52      | DUSP6 | dual specificity phosphatase 6 | 1.455607  | Inlier  |



Identification of Survival Genes in Human Glioblastoma Cells Using siRNA Screening  
 Nikhil G Thaker, Fang Zhang, Peter R. McDonald, Tong Ying Shun, Michael D Lewen, Ian F. Pollack, and John S. Lazo

Molecular Pharmacology

|                              |           |       |                                |           |        |
|------------------------------|-----------|-------|--------------------------------|-----------|--------|
| siRNA-Vinblastine Run2-DMSO  | NM_022652 | DUSP6 | dual specificity phosphatase 6 | 3.216844  | Inlier |
| siRNA-Temozolomide Run3-DMSO | NM_001947 | DUSP7 | dual specificity phosphatase 7 | -1.162268 | Inlier |
| siRNA Disorazole DMSO Run2   | NM_001947 | DUSP7 | dual specificity phosphatase 7 | -1.116343 | Inlier |
| siRNA-Temozolomide Run2-DMSO | NM_001947 | DUSP7 | dual specificity phosphatase 7 | -0.958751 | Inlier |
| siRNA-Vinblastine Run1-DMSO  | NM_001947 | DUSP7 | dual specificity phosphatase 7 | -0.035222 | Inlier |
| siRNA Disorazole DMSO Run1   | NM_001947 | DUSP7 | dual specificity phosphatase 7 | 0.035222  | Inlier |
| siRNA Disorazole DMSO Run3   | NM_001947 | DUSP7 | dual specificity phosphatase 7 | 0.068759  | Inlier |
| siRNA-Temozolomide Run1-DMSO | NM_001947 | DUSP7 | dual specificity phosphatase 7 | 0.390249  | Inlier |
| siRNA-Vinblastine Run2-DMSO  | NM_001947 | DUSP7 | dual specificity phosphatase 7 | 1.739205  | Inlier |
| siRNA-Temozolomide Run3-DMSO | NM_004420 | DUSP8 | dual specificity phosphatase 8 | -1.450476 | Inlier |
| siRNA-Temozolomide Run2-DMSO | NM_004420 | DUSP8 | dual specificity phosphatase 8 | -1.31441  | Inlier |
| siRNA-Temozolomide Run1-DMSO | NM_004420 | DUSP8 | dual specificity phosphatase 8 | -0.21173  | Inlier |
| siRNA Disorazole DMSO Run1   | NM_004420 | DUSP8 | dual specificity phosphatase 8 | -0.016142 | Inlier |

Identification of Survival Genes in Human Glioblastoma Cells Using siRNA Screening  
 Nikhil G Thaker, Fang Zhang, Peter R. McDonald, Tong Ying Shun, Michael D Lewen, Ian F. Pollack, and John S. Lazo

Molecular Pharmacology

|                                  |               |       |                                          |           |         |
|----------------------------------|---------------|-------|------------------------------------------|-----------|---------|
| siRNA Disorazole DMSO Run2       | NM_0044<br>20 | DUSP8 | dual<br>specificity<br>phosphata<br>se 8 | 0.016142  | Inlier  |
| siRNA Disorazole DMSO Run3       | NM_0044<br>20 | DUSP8 | dual<br>specificity<br>phosphata<br>se 8 | 0.289081  | Inlier  |
| siRNA-Vinblastine Run1-<br>DMSO  | NM_0044<br>20 | DUSP8 | dual<br>specificity<br>phosphata<br>se 8 | 1.059919  | Inlier  |
| siRNA-Vinblastine Run2-<br>DMSO  | NM_0044<br>20 | DUSP8 | dual<br>specificity<br>phosphata<br>se 8 | 3.109     | Inlier  |
| siRNA Disorazole DMSO Run2       | NM_0013<br>95 | DUSP9 | dual<br>specificity<br>phosphata<br>se 9 | -4.171087 | Outlier |
| siRNA-Temozolomide Run3-<br>DMSO | NM_0013<br>95 | DUSP9 | dual<br>specificity<br>phosphata<br>se 9 | -2.74051  | Inlier  |
| siRNA-Temozolomide Run2-<br>DMSO | NM_0013<br>95 | DUSP9 | dual<br>specificity<br>phosphata<br>se 9 | -0.797886 | Inlier  |
| siRNA Disorazole DMSO Run3       | NM_0013<br>95 | DUSP9 | dual<br>specificity<br>phosphata<br>se 9 | -0.170533 | Inlier  |
| siRNA Disorazole DMSO Run1       | NM_0013<br>95 | DUSP9 | dual<br>specificity<br>phosphata<br>se 9 | 0.170532  | Inlier  |
| siRNA-Vinblastine Run2-<br>DMSO  | NM_0013<br>95 | DUSP9 | dual<br>specificity<br>phosphata<br>se 9 | 0.50779   | Inlier  |
| siRNA-Temozolomide Run1-<br>DMSO | NM_0013<br>95 | DUSP9 | dual<br>specificity<br>phosphata<br>se 9 | 0.551114  | Inlier  |
| siRNA-Vinblastine Run1-<br>DMSO  | NM_0013<br>95 | DUSP9 | dual<br>specificity<br>phosphata<br>se 9 | 1.497377  | Inlier  |
| siRNA Disorazole DMSO Run2       | NM_0019<br>48 | DUT   | dUTP<br>pyrophosp<br>hatase              | -1.568577 | Inlier  |

Identification of Survival Genes in Human Glioblastoma Cells Using siRNA Screening  
 Nikhil G Thaker, Fang Zhang, Peter R. McDonald, Tong Ying Shun, Michael D Lewen, Ian F. Pollack, and John S. Lazo

| Molecular Pharmacology       |               |        |                                                                   |           |        |
|------------------------------|---------------|--------|-------------------------------------------------------------------|-----------|--------|
| siRNA-Temozolomide Run2-DMSO | NM_0019<br>48 | DUT    | dUTP<br>pyrophosphatase                                           | -0.747032 | Inlier |
| siRNA-Temozolomide Run3-DMSO | NM_0019<br>48 | DUT    | dUTP<br>pyrophosphatase                                           | -0.710085 | Inlier |
| siRNA Disorazole DMSO Run3   | NM_0019<br>48 | DUT    | dUTP<br>pyrophosphatase                                           | -0.378348 | Inlier |
| siRNA Disorazole DMSO Run1   | NM_0019<br>48 | DUT    | dUTP<br>pyrophosphatase                                           | 0.378347  | Inlier |
| siRNA-Vinblastine Run2-DMSO  | NM_0019<br>48 | DUT    | dUTP<br>pyrophosphatase                                           | 0.551188  | Inlier |
| siRNA-Vinblastine Run1-DMSO  | NM_0019<br>48 | DUT    | dUTP<br>pyrophosphatase                                           | 0.638915  | Inlier |
| siRNA-Temozolomide Run1-DMSO | NM_0019<br>48 | DUT    | dUTP<br>pyrophosphatase                                           | 1.014808  | Inlier |
| siRNA-Temozolomide Run3-DMSO | NM_0013<br>96 | DYRK1A | dual-specificity tyrosine-(Y)-phosphorylation regulated kinase 1A | -0.815471 | Inlier |
| siRNA Disorazole DMSO Run2   | NM_0013<br>96 | DYRK1A | dual-specificity tyrosine-(Y)-phosphorylation regulated kinase 1A | -0.533529 | Inlier |
| siRNA-Temozolomide Run2-DMSO | NM_0013<br>96 | DYRK1A | dual-specificity tyrosine-(Y)-phosphorylation regulated kinase 1A | -0.533295 | Inlier |

Identification of Survival Genes in Human Glioblastoma Cells Using siRNA Screening

Nikhil G Thaker, Fang Zhang, Peter R. McDonald, Tong Ying Shun, Michael D Lewen, Ian F. Pollack, and John S. Lazo

Molecular Pharmacology

| siRNA Treatment              | Gene ID   | Gene Name | Regulation                                                        | Score     | Category |
|------------------------------|-----------|-----------|-------------------------------------------------------------------|-----------|----------|
| siRNA Disorazole DMSO Run3   | NM_001396 | DYRK1A    | dual-specificity tyrosine-(Y)-phosphorylation regulated kinase 1A | -0.119758 | Inlier   |
| siRNA-Temozolomide Run1-DMSO | NM_001396 | DYRK1A    | dual-specificity tyrosine-(Y)-phosphorylation regulated kinase 1A | 0.119758  | Inlier   |
| siRNA Disorazole DMSO Run1   | NM_001396 | DYRK1A    | dual-specificity tyrosine-(Y)-phosphorylation regulated kinase 1A | 2.384837  | Inlier   |
| siRNA-Vinblastine Run1-DMSO  | NM_001396 | DYRK1A    | dual-specificity tyrosine-(Y)-phosphorylation regulated kinase 1A | 4.970982  | Outlier  |
| siRNA-Vinblastine Run2-DMSO  | NM_001396 | DYRK1A    | dual-specificity tyrosine-(Y)-phosphorylation regulated kinase 1A | 7.453012  | Outlier  |
| siRNA-Temozolomide Run3-DMSO | NM_006484 | DYRK1B    | regulated kinase 1B                                               | -0.920063 | Inlier   |

Identification of Survival Genes in Human Glioblastoma Cells Using siRNA Screening

Nikhil G Thaker, Fang Zhang, Peter R. McDonald, Tong Ying Shun, Michael D Lewen, Ian F. Pollack, and John S. Lazo

Molecular Pharmacology

|                              |           |        |                                                                   |           |        |
|------------------------------|-----------|--------|-------------------------------------------------------------------|-----------|--------|
| siRNA-Vinblastine Run1-DMSO  | NM_006484 | DYRK1B | dual-specificity tyrosine-(Y)-phosphorylation regulated kinase 1B | -0.8163   | Inlier |
| siRNA-Temozolomide Run1-DMSO | NM_006484 | DYRK1B | dual-specificity tyrosine-(Y)-phosphorylation regulated kinase 1B | -0.400017 | Inlier |
| siRNA-Temozolomide Run2-DMSO | NM_006484 | DYRK1B | dual-specificity tyrosine-(Y)-phosphorylation regulated kinase 1B | -0.367607 | Inlier |
| siRNA-Vinblastine Run2-DMSO  | NM_006484 | DYRK1B | dual-specificity tyrosine-(Y)-phosphorylation regulated kinase 1B | 0.367607  | Inlier |
| siRNA Disorazole DMSO Run1   | NM_006484 | DYRK1B | dual-specificity tyrosine-(Y)-phosphorylation regulated kinase 1B | 0.5327    | Inlier |
| siRNA Disorazole DMSO Run3   | NM_006484 | DYRK1B | regulated kinase 1B                                               | 0.852831  | Inlier |

Identification of Survival Genes in Human Glioblastoma Cells Using siRNA Screening

Nikhil G Thaker, Fang Zhang, Peter R. McDonald, Tong Ying Shun, Michael D Lewen, Ian F. Pollack, and John S. Lazo

Molecular Pharmacology

| siRNA              | Condition     | Run           | Gene          | Protein                                                          | Score     | Inlier |
|--------------------|---------------|---------------|---------------|------------------------------------------------------------------|-----------|--------|
| siRNA Disorazole   | DMSO          | Run2          | NM_0064<br>84 | DYRK1B                                                           | 1.526177  | Inlier |
|                    |               |               |               | regulated<br>kinase 1B                                           |           |        |
|                    |               |               |               | dual-<br>specificity<br>tyrosine-<br>(Y)-<br>phosphoryl<br>ation |           |        |
| siRNA-Temozolomide | Run3-<br>DMSO | NM_0035<br>83 | DYRK2         | regulated<br>kinase 2                                            | -1.482949 | Inlier |
|                    |               |               |               | dual-<br>specificity<br>tyrosine-<br>(Y)-<br>phosphoryl<br>ation |           |        |
| siRNA-Temozolomide | Run2-<br>DMSO | NM_0035<br>83 | DYRK2         | regulated<br>kinase 2                                            | -0.857752 | Inlier |
|                    |               |               |               | dual-<br>specificity<br>tyrosine-<br>(Y)-<br>phosphoryl<br>ation |           |        |
| siRNA-Temozolomide | Run1-<br>DMSO | NM_0035<br>83 | DYRK2         | regulated<br>kinase 2                                            | -0.214133 | Inlier |
|                    |               |               |               | dual-<br>specificity<br>tyrosine-<br>(Y)-<br>phosphoryl<br>ation |           |        |
| siRNA Disorazole   | DMSO          | Run3          | NM_0035<br>83 | DYRK2                                                            | -0.128551 | Inlier |
|                    |               |               |               | regulated<br>kinase 2                                            |           |        |
|                    |               |               |               | dual-<br>specificity<br>tyrosine-<br>(Y)-<br>phosphoryl<br>ation |           |        |
| siRNA Disorazole   | DMSO          | Run1          | NM_0035<br>83 | DYRK2                                                            | 0.128551  | Inlier |
|                    |               |               |               | regulated<br>kinase 2                                            |           |        |

Identification of Survival Genes in Human Glioblastoma Cells Using siRNA Screening

Nikhil G Thaker, Fang Zhang, Peter R. McDonald, Tong Ying Shun, Michael D Lewen, Ian F. Pollack, and John S. Lazo

Molecular Pharmacology

|                              |               |       |                                                                  |           |        |
|------------------------------|---------------|-------|------------------------------------------------------------------|-----------|--------|
| siRNA-Vinblastine Run1-DMSO  | NM_0035<br>83 | DYRK2 | dual-specificity tyrosine-(Y)-phosphorylation regulated kinase 2 | 0.564251  | Inlier |
| siRNA Disorazole DMSO Run2   | NM_0035<br>83 | DYRK2 | dual-specificity tyrosine-(Y)-phosphorylation regulated kinase 2 | 0.784749  | Inlier |
| siRNA-Vinblastine Run2-DMSO  | NM_0035<br>83 | DYRK2 | dual-specificity tyrosine-(Y)-phosphorylation regulated kinase 2 | 1.956145  | Inlier |
| siRNA-Temozolomide Run3-DMSO | NM_0035<br>82 | DYRK3 | dual-specificity tyrosine-(Y)-phosphorylation regulated kinase 3 | -0.832737 | Inlier |
| siRNA Disorazole DMSO Run2   | NM_0035<br>82 | DYRK3 | dual-specificity tyrosine-(Y)-phosphorylation regulated kinase 3 | -0.781453 | Inlier |
| siRNA-Temozolomide Run1-DMSO | NM_0035<br>82 | DYRK3 | dual-specificity tyrosine-(Y)-phosphorylation regulated kinase 3 | -0.375769 | Inlier |

Identification of Survival Genes in Human Glioblastoma Cells Using siRNA Screening

Nikhil G Thaker, Fang Zhang, Peter R. McDonald, Tong Ying Shun, Michael D Lewen, Ian F. Pollack, and John S. Lazo

Molecular Pharmacology

|                              |           |       |                                                                  |           |        |
|------------------------------|-----------|-------|------------------------------------------------------------------|-----------|--------|
| siRNA-Vinblastine Run1-DMSO  | NM_003582 | DYRK3 | dual-specificity tyrosine-(Y)-phosphorylation regulated kinase 3 | -0.054537 | Inlier |
| siRNA-Temozolomide Run2-DMSO | NM_003582 | DYRK3 | dual-specificity tyrosine-(Y)-phosphorylation regulated kinase 3 | 0.054537  | Inlier |
| siRNA Disorazole DMSO Run1   | NM_003582 | DYRK3 | dual-specificity tyrosine-(Y)-phosphorylation regulated kinase 3 | 0.600534  | Inlier |
| siRNA Disorazole DMSO Run3   | NM_003582 | DYRK3 | dual-specificity tyrosine-(Y)-phosphorylation regulated kinase 3 | 0.748466  | Inlier |
| siRNA-Vinblastine Run2-DMSO  | NM_003582 | DYRK3 | dual-specificity tyrosine-(Y)-phosphorylation regulated kinase 3 | 1.884553  | Inlier |
| siRNA-Temozolomide Run3-DMSO | NM_003845 | DYRK4 | regulated kinase 4                                               | -3.38092  | Inlier |



Identification of Survival Genes in Human Glioblastoma Cells Using siRNA Screening

Nikhil G Thaker, Fang Zhang, Peter R. McDonald, Tong Ying Shun, Michael D Lewen, Ian F. Pollack, and John S. Lazo

Molecular Pharmacology

| siRNA Treatment              | Gene ID   | Gene Name | Regulation                                                       | Score     | Outlier Status |
|------------------------------|-----------|-----------|------------------------------------------------------------------|-----------|----------------|
| siRNA-Temozolomide Run1-DMSO | NM_003845 | DYRK4     | dual-specificity tyrosine-(Y)-phosphorylation regulated kinase 4 | -2.413704 | Inlier         |
| siRNA Disorazole DMSO Run3   | NM_003845 | DYRK4     | dual-specificity tyrosine-(Y)-phosphorylation regulated kinase 4 | -0.437291 | Inlier         |
| siRNA Disorazole DMSO Run2   | NM_003845 | DYRK4     | dual-specificity tyrosine-(Y)-phosphorylation regulated kinase 4 | -0.06699  | Inlier         |
| siRNA-Vinblastine Run1-DMSO  | NM_003845 | DYRK4     | dual-specificity tyrosine-(Y)-phosphorylation regulated kinase 4 | 0.066992  | Inlier         |
| siRNA-Temozolomide Run2-DMSO | NM_003845 | DYRK4     | dual-specificity tyrosine-(Y)-phosphorylation regulated kinase 4 | 0.315969  | Inlier         |
| siRNA Disorazole DMSO Run1   | NM_003845 | DYRK4     | dual-specificity tyrosine-(Y)-phosphorylation regulated kinase 4 | 0.911709  | Inlier         |

Identification of Survival Genes in Human Glioblastoma Cells Using siRNA Screening  
 Nikhil G Thaker, Fang Zhang, Peter R. McDonald, Tong Ying Shun, Michael D Lewen, Ian F. Pollack, and John S. Lazo

Molecular Pharmacology

|                              |           |         |                                                                  |           |         |
|------------------------------|-----------|---------|------------------------------------------------------------------|-----------|---------|
| siRNA-Vinblastine Run2-DMSO  | NM_003845 | DYRK4   | dual-specificity tyrosine-(Y)-phosphorylation regulated kinase 4 | 4.609971  | Outlier |
| siRNA-Temozolomide Run3-DMSO | NM_000113 | DYT1    | torsin family 1, member A (torsin A)                             | -1.182307 | Inlier  |
| siRNA-Temozolomide Run2-DMSO | NM_000113 | DYT1    | torsin family 1, member A (torsin A)                             | -0.863081 | Inlier  |
| siRNA-Temozolomide Run1-DMSO | NM_000113 | DYT1    | torsin family 1, member A (torsin A)                             | -0.225157 | Inlier  |
| siRNA Disorazole DMSO Run1   | NM_000113 | DYT1    | torsin family 1, member A (torsin A)                             | -0.068283 | Inlier  |
| siRNA Disorazole DMSO Run3   | NM_000113 | DYT1    | torsin family 1, member A (torsin A)                             | 0.068283  | Inlier  |
| siRNA Disorazole DMSO Run2   | NM_000113 | DYT1    | torsin family 1, member A (torsin A)                             | 0.485919  | Inlier  |
| siRNA-Vinblastine Run2-DMSO  | NM_000113 | DYT1    | torsin family 1, member A (torsin A)                             | 1.919927  | Inlier  |
| siRNA-Vinblastine Run1-DMSO  | NM_000113 | DYT1    | torsin family 1, member A (torsin A)                             | 2.926161  | Inlier  |
| siRNA-Temozolomide Run2-DMSO | NM_022066 | E2-230K | E2-230K                                                          | -0.80986  | Inlier  |
| siRNA-Vinblastine Run2-DMSO  | NM_022066 | E2-230K | E2-230K                                                          | -0.764505 | Inlier  |

Identification of Survival Genes in Human Glioblastoma Cells Using siRNA Screening

Nikhil G Thaker, Fang Zhang, Peter R. McDonald, Tong Ying Shun, Michael D Lewen, Ian F. Pollack, and John S. Lazo

| siRNA Treatment               | Gene ID | Cell Line | Condition                                                                          | Log Fold Change | Outlier Status |
|-------------------------------|---------|-----------|------------------------------------------------------------------------------------|-----------------|----------------|
| siRNA-Temozolomide Run3- DMSO | NM_0220 | E2-230K   | E2-230K                                                                            | -0.669522       | Inlier         |
| siRNA Disorazole DMSO Run3    | NM_0220 | E2-230K   | E2-230K                                                                            | -0.27705        | Inlier         |
| siRNA-Temozolomide Run1- DMSO | NM_0220 | E2-230K   | E2-230K                                                                            | 0.27705         | Inlier         |
| siRNA Disorazole DMSO Run2    | NM_0220 | E2-230K   | E2-230K                                                                            | 0.468213        | Inlier         |
| siRNA Disorazole DMSO Run1    | NM_0220 | E2-230K   | E2-230K                                                                            | 0.679478        | Inlier         |
| siRNA-Vinblastine Run1- DMSO  | NM_0220 | E2-230K   | E2-230K                                                                            | 2.073989        | Inlier         |
| siRNA-Temozolomide Run3- DMSO | NM_0049 | EBI2      | Epstein-Barr virus induced gene 2 (lymphocyte-specific G protein-coupled receptor) | -1.448995       | Inlier         |
| siRNA Disorazole DMSO Run2    | NM_0049 | EBI2      | Epstein-Barr virus induced gene 2 (lymphocyte-specific G protein-coupled receptor) | -1.0875         | Inlier         |
| siRNA Disorazole DMSO Run3    | NM_0049 | EBI2      | Epstein-Barr virus induced gene 2 (lymphocyte-specific G protein-coupled receptor) | -0.713338       | Inlier         |
| siRNA-Temozolomide Run2- DMSO | NM_0049 | EBI2      | Epstein-Barr virus induced gene 2 (lymphocyte-specific G protein-coupled receptor) | -0.044533       | Inlier         |

Identification of Survival Genes in Human Glioblastoma Cells Using siRNA Screening

Nikhil G Thaker, Fang Zhang, Peter R. McDonald, Tong Ying Shun, Michael D Lewen, Ian F. Pollack, and John S. Lazo

Molecular Pharmacology

|                              |               |      |                                                                                    |           |        |
|------------------------------|---------------|------|------------------------------------------------------------------------------------|-----------|--------|
| siRNA-Temozolomide Run1-DMSO | NM_0049<br>51 | EBI2 | Epstein-Barr virus induced gene 2 (lymphocyte-specific G protein-coupled receptor) | 0.044533  | Inlier |
| siRNA Disorazole DMSO Run1   | NM_0049<br>51 | EBI2 | Epstein-Barr virus induced gene 2 (lymphocyte-specific G protein-coupled receptor) | 0.074089  | Inlier |
| siRNA-Vinblastine Run2-DMSO  | NM_0049<br>51 | EBI2 | Epstein-Barr virus induced gene 2 (lymphocyte-specific G protein-coupled receptor) | 0.635662  | Inlier |
| siRNA-Vinblastine Run1-DMSO  | NM_0049<br>51 | EBI2 | Epstein-Barr virus induced gene 2 (lymphocyte-specific G protein-coupled receptor) | 0.791576  | Inlier |
| siRNA Disorazole DMSO Run3   | NM_0065<br>79 | EBP  | emopamil binding protein (sterol isomerase)                                        | -1.410081 | Inlier |
| siRNA-Temozolomide Run3-DMSO | NM_0065<br>79 | EBP  | emopamil binding protein (sterol isomerase)                                        | -0.875791 | Inlier |

Identification of Survival Genes in Human Glioblastoma Cells Using siRNA Screening  
 Nikhil G Thaker, Fang Zhang, Peter R. McDonald, Tong Ying Shun, Michael D Lewen, Ian F. Pollack, and John S. Lazo

Molecular Pharmacology

|                              |               |      |                                                             |           |         |
|------------------------------|---------------|------|-------------------------------------------------------------|-----------|---------|
| siRNA-Vinblastine Run2-DMSO  | NM_0065<br>79 | EBP  | emopamil<br>binding<br>protein<br>(sterol<br>isomerase<br>) | -0.473209 | Inlier  |
| siRNA Disorazole DMSO Run1   | NM_0065<br>79 | EBP  | emopamil<br>binding<br>protein<br>(sterol<br>isomerase<br>) | -0.000346 | Inlier  |
| siRNA-Temozolomide Run1-DMSO | NM_0065<br>79 | EBP  | emopamil<br>binding<br>protein<br>(sterol<br>isomerase<br>) | 0.000346  | Inlier  |
| siRNA-Temozolomide Run2-DMSO | NM_0065<br>79 | EBP  | emopamil<br>binding<br>protein<br>(sterol<br>isomerase<br>) | 0.322449  | Inlier  |
| siRNA Disorazole DMSO Run2   | NM_0065<br>79 | EBP  | emopamil<br>binding<br>protein<br>(sterol<br>isomerase<br>) | 1.025179  | Inlier  |
| siRNA-Vinblastine Run1-DMSO  | NM_0065<br>79 | EBP  | emopamil<br>binding<br>protein<br>(sterol<br>isomerase<br>) | 1.873013  | Inlier  |
| siRNA Disorazole DMSO Run3   | NM_0325<br>65 | EBPL | emopamil<br>binding<br>protein-<br>like                     | -3.646539 | Outlier |
| siRNA-Vinblastine Run2-DMSO  | NM_0325<br>65 | EBPL | emopamil<br>binding<br>protein-<br>like                     | -2.544304 | Inlier  |
| siRNA-Temozolomide Run2-DMSO | NM_0325<br>65 | EBPL | emopamil<br>binding<br>protein-<br>like                     | -0.941581 | Inlier  |
| siRNA Disorazole DMSO Run1   | NM_0325<br>65 | EBPL | emopamil<br>binding<br>protein-<br>like                     | -0.104295 | Inlier  |

Identification of Survival Genes in Human Glioblastoma Cells Using siRNA Screening  
 Nikhil G Thaker, Fang Zhang, Peter R. McDonald, Tong Ying Shun, Michael D Lewen, Ian F. Pollack, and John S. Lazo

Molecular Pharmacology

|                              |               |      |                                         |           |        |
|------------------------------|---------------|------|-----------------------------------------|-----------|--------|
| siRNA-Temozolomide Run3-DMSO | NM_0325<br>65 | EBPL | emopamil<br>binding<br>protein-<br>like | 0.104294  | Inlier |
| siRNA-Vinblastine Run1-DMSO  | NM_0325<br>65 | EBPL | emopamil<br>binding<br>protein-<br>like | 0.264317  | Inlier |
| siRNA-Temozolomide Run1-DMSO | NM_0325<br>65 | EBPL | emopamil<br>binding<br>protein-<br>like | 0.407419  | Inlier |
| siRNA Disorazole DMSO Run2   | NM_0325<br>65 | EBPL | emopamil<br>binding<br>protein-<br>like | 1.601897  | Inlier |
| siRNA Disorazole DMSO Run1   | NM_0013<br>97 | ECE1 | endothelin<br>converting<br>enzyme 1    | -1.206971 | Inlier |
| siRNA-Temozolomide Run2-DMSO | NM_0013<br>97 | ECE1 | endothelin<br>converting<br>enzyme 1    | -0.66052  | Inlier |
| siRNA-Temozolomide Run1-DMSO | NM_0013<br>97 | ECE1 | endothelin<br>converting<br>enzyme 1    | -0.475704 | Inlier |
| siRNA-Temozolomide Run3-DMSO | NM_0013<br>97 | ECE1 | endothelin<br>converting<br>enzyme 1    | -0.108707 | Inlier |
| siRNA-Vinblastine Run1-DMSO  | NM_0013<br>97 | ECE1 | endothelin<br>converting<br>enzyme 1    | 0.108707  | Inlier |
| siRNA-Vinblastine Run2-DMSO  | NM_0013<br>97 | ECE1 | endothelin<br>converting<br>enzyme 1    | 0.68848   | Inlier |
| siRNA Disorazole DMSO Run3   | NM_0013<br>97 | ECE1 | endothelin<br>converting<br>enzyme 1    | 1.468415  | Inlier |
| siRNA Disorazole DMSO Run2   | NM_0013<br>97 | ECE1 | endothelin<br>converting<br>enzyme 1    | 1.651752  | Inlier |
| siRNA Disorazole DMSO Run1   | NM_0146<br>93 | ECE2 | endothelin<br>converting<br>enzyme 2    | -1.432309 | Inlier |
| siRNA-Temozolomide Run2-DMSO | NM_0146<br>93 | ECE2 | endothelin<br>converting<br>enzyme 2    | -0.871407 | Inlier |
| siRNA-Temozolomide Run3-DMSO | NM_0146<br>93 | ECE2 | endothelin<br>converting<br>enzyme 2    | -0.293201 | Inlier |
| siRNA-Temozolomide Run1-DMSO | NM_0146<br>93 | ECE2 | endothelin<br>converting<br>enzyme 2    | -0.154427 | Inlier |

Identification of Survival Genes in Human Glioblastoma Cells Using siRNA Screening  
 Nikhil G Thaker, Fang Zhang, Peter R. McDonald, Tong Ying Shun, Michael D Lewen, Ian F. Pollack, and John S. Lazo

|                                                           |               |       |                                                                  |           |        |
|-----------------------------------------------------------|---------------|-------|------------------------------------------------------------------|-----------|--------|
| Molecular Pharmacology<br>siRNA-Vinblastine Run2-<br>DMSO | NM_0146<br>93 | ECE2  | endothelin<br>converting<br>enzyme 2                             | 0.154427  | Inlier |
| siRNA-Vinblastine Run1-<br>DMSO                           | NM_0146<br>93 | ECE2  | endothelin<br>converting<br>enzyme 2                             | 0.477593  | Inlier |
| siRNA Disorazole DMSO Run2                                | NM_0146<br>93 | ECE2  | endothelin<br>converting<br>enzyme 2                             | 1.056187  | Inlier |
| siRNA Disorazole DMSO Run3                                | NM_0146<br>93 | ECE2  | endothelin<br>converting<br>enzyme 2                             | 1.304077  | Inlier |
| siRNA-Temozolomide Run3-<br>DMSO                          | NM_0048<br>26 | ECEL1 | endothelin<br>converting<br>enzyme-<br>like 1                    | -2.229031 | Inlier |
| siRNA-Temozolomide Run2-<br>DMSO                          | NM_0048<br>26 | ECEL1 | endothelin<br>converting<br>enzyme-<br>like 1                    | -2.067021 | Inlier |
| siRNA Disorazole DMSO Run1                                | NM_0048<br>26 | ECEL1 | endothelin<br>converting<br>enzyme-<br>like 1                    | -0.558931 | Inlier |
| siRNA Disorazole DMSO Run3                                | NM_0048<br>26 | ECEL1 | endothelin<br>converting<br>enzyme-<br>like 1                    | -0.008342 | Inlier |
| siRNA Disorazole DMSO Run2                                | NM_0048<br>26 | ECEL1 | endothelin<br>converting<br>enzyme-<br>like 1                    | 0.008341  | Inlier |
| siRNA-Temozolomide Run1-<br>DMSO                          | NM_0048<br>26 | ECEL1 | endothelin<br>converting<br>enzyme-<br>like 1                    | 0.098661  | Inlier |
| siRNA-Vinblastine Run2-<br>DMSO                           | NM_0048<br>26 | ECEL1 | endothelin<br>converting<br>enzyme-<br>like 1                    | 0.790069  | Inlier |
| siRNA-Vinblastine Run1-<br>DMSO                           | NM_0048<br>26 | ECEL1 | endothelin<br>converting<br>enzyme-<br>like 1                    | 0.945963  | Inlier |
| siRNA-Temozolomide Run2-<br>DMSO                          | NM_0019<br>53 | ECGF1 | endothelial<br>cell growth<br>factor 1<br>(platelet-<br>derived) | -2.497037 | Inlier |

Identification of Survival Genes in Human Glioblastoma Cells Using siRNA Screening  
 Nikhil G Thaker, Fang Zhang, Peter R. McDonald, Tong Ying Shun, Michael D Lewen, Ian F. Pollack, and John S. Lazo  
 Molecular Pharmacology

|                              |               |       |                                                     |           |        |
|------------------------------|---------------|-------|-----------------------------------------------------|-----------|--------|
| siRNA-Temozolomide Run1-DMSO | NM_0019<br>53 | ECGF1 | endothelial cell growth factor 1 (platelet-derived) | -0.935193 | Inlier |
| siRNA Disorazole DMSO Run1   | NM_0019<br>53 | ECGF1 | endothelial cell growth factor 1 (platelet-derived) | -0.732652 | Inlier |
| siRNA Disorazole DMSO Run3   | NM_0019<br>53 | ECGF1 | endothelial cell growth factor 1 (platelet-derived) | -0.056966 | Inlier |
| siRNA-Vinblastine Run2-DMSO  | NM_0019<br>53 | ECGF1 | endothelial cell growth factor 1 (platelet-derived) | 0.056966  | Inlier |
| siRNA-Temozolomide Run3-DMSO | NM_0019<br>53 | ECGF1 | endothelial cell growth factor 1 (platelet-derived) | 0.218507  | Inlier |
| siRNA Disorazole DMSO Run2   | NM_0019<br>53 | ECGF1 | endothelial cell growth factor 1 (platelet-derived) | 0.616348  | Inlier |
| siRNA-Vinblastine Run1-DMSO  | NM_0019<br>53 | ECGF1 | endothelial cell growth factor 1 (platelet-derived) | 1.880652  | Inlier |
| siRNA-Temozolomide Run3-DMSO | NM_0013<br>98 | ECH1  | enoyl Coenzyme A hydratase 1, peroxisomal           | -1.377381 | Inlier |



Identification of Survival Genes in Human Glioblastoma Cells Using siRNA Screening  
 Nikhil G Thaker, Fang Zhang, Peter R. McDonald, Tong Ying Shun, Michael D Lewen, Ian F. Pollack, and John S. Lazo

Molecular Pharmacology

|                                  |               |      |                                                              |           |         |
|----------------------------------|---------------|------|--------------------------------------------------------------|-----------|---------|
| siRNA Disorazole DMSO Run1       | NM_0013<br>98 | ECH1 | enoyl<br>Coenzyme<br>A<br>hydratase<br>1,<br>peroxisom<br>al | -1.193564 | Inlier  |
| siRNA Disorazole DMSO Run3       | NM_0013<br>98 | ECH1 | enoyl<br>Coenzyme<br>A<br>hydratase<br>1,<br>peroxisom<br>al | -0.124562 | Inlier  |
| siRNA-Temozolomide Run2-<br>DMSO | NM_0013<br>98 | ECH1 | enoyl<br>Coenzyme<br>A<br>hydratase<br>1,<br>peroxisom<br>al | -0.069218 | Inlier  |
| siRNA-Vinblastine Run2-<br>DMSO  | NM_0013<br>98 | ECH1 | enoyl<br>Coenzyme<br>A<br>hydratase<br>1,<br>peroxisom<br>al | 0.069218  | Inlier  |
| siRNA-Temozolomide Run1-<br>DMSO | NM_0013<br>98 | ECH1 | enoyl<br>Coenzyme<br>A<br>hydratase<br>1,<br>peroxisom<br>al | 0.155436  | Inlier  |
| siRNA Disorazole DMSO Run2       | NM_0013<br>98 | ECH1 | enoyl<br>Coenzyme<br>A<br>hydratase<br>1,<br>peroxisom<br>al | 1.828773  | Inlier  |
| siRNA-Vinblastine Run1-<br>DMSO  | NM_0013<br>98 | ECH1 | enoyl<br>Coenzyme<br>A<br>hydratase<br>1,<br>peroxisom<br>al | 3.634607  | Outlier |

Identification of Survival Genes in Human Glioblastoma Cells Using siRNA Screening

Nikhil G Thaker, Fang Zhang, Peter R. McDonald, Tong Ying Shun, Michael D Lewen, Ian F. Pollack, and John S. Lazo

Molecular Pharmacology

|                              |           |       |                                                           |           |        |
|------------------------------|-----------|-------|-----------------------------------------------------------|-----------|--------|
| siRNA-Vinblastine Run1-DMSO  | NM_004092 | ECHS1 | enoyl Coenzyme A hydratase, short chain, 1, mitochondrial | -1.050934 | Inlier |
| siRNA Disorazole DMSO Run1   | NM_004092 | ECHS1 | enoyl Coenzyme A hydratase, short chain, 1, mitochondrial | -0.81677  | Inlier |
| siRNA-Temozolomide Run3-DMSO | NM_004092 | ECHS1 | enoyl Coenzyme A hydratase, short chain, 1, mitochondrial | -0.53223  | Inlier |
| siRNA Disorazole DMSO Run3   | NM_004092 | ECHS1 | enoyl Coenzyme A hydratase, short chain, 1, mitochondrial | -0.159535 | Inlier |
| siRNA-Temozolomide Run1-DMSO | NM_004092 | ECHS1 | enoyl Coenzyme A hydratase, short chain, 1, mitochondrial | 0.159537  | Inlier |
| siRNA-Temozolomide Run2-DMSO | NM_004092 | ECHS1 | enoyl Coenzyme A hydratase, short chain, 1, mitochondrial | 0.324172  | Inlier |

Identification of Survival Genes in Human Glioblastoma Cells Using siRNA Screening  
 Nikhil G Thaker, Fang Zhang, Peter R. McDonald, Tong Ying Shun, Michael D Lewen, Ian F. Pollack, and John S. Lazo

Molecular Pharmacology

|                                  |               |       |                                                                                                                                |           |        |
|----------------------------------|---------------|-------|--------------------------------------------------------------------------------------------------------------------------------|-----------|--------|
| siRNA Disorazole DMSO Run2       | NM_0040<br>92 | ECHS1 | enoyl<br>Coenzyme<br>A<br>hydratase,<br>short<br>chain, 1,<br>mitochond<br>rial                                                | 0.860179  | Inlier |
| siRNA-Vinblastine Run2-<br>DMSO  | NM_0040<br>92 | ECHS1 | enoyl<br>Coenzyme<br>A<br>hydratase,<br>short<br>chain, 1,<br>mitochond<br>rial                                                | 0.959103  | Inlier |
| siRNA-Temozolomide Run3-<br>DMSO | NM_0180<br>98 | ECT2  | epithelial<br>cell<br>transformi<br>ng<br>sequence<br>2<br>oncogene<br>epithelial<br>cell<br>transformi<br>ng<br>sequence<br>2 | -1.383659 | Inlier |
| siRNA-Vinblastine Run2-<br>DMSO  | NM_0180<br>98 | ECT2  | epithelial<br>cell<br>transformi<br>ng<br>sequence<br>2<br>oncogene<br>epithelial<br>cell<br>transformi<br>ng<br>sequence<br>2 | -0.745823 | Inlier |
| siRNA-Temozolomide Run2-<br>DMSO | NM_0180<br>98 | ECT2  | epithelial<br>cell<br>transformi<br>ng<br>sequence<br>2<br>oncogene<br>epithelial<br>cell<br>transformi<br>ng<br>sequence<br>2 | -0.603177 | Inlier |
| siRNA Disorazole DMSO Run3       | NM_0180<br>98 | ECT2  | epithelial<br>cell<br>transformi<br>ng<br>sequence<br>2<br>oncogene<br>epithelial<br>cell<br>transformi<br>ng<br>sequence<br>2 | -0.35382  | Inlier |
| siRNA-Temozolomide Run1-<br>DMSO | NM_0180<br>98 | ECT2  | epithelial<br>cell<br>transformi<br>ng<br>sequence<br>2<br>oncogene                                                            | 0.35382   | Inlier |

Identification of Survival Genes in Human Glioblastoma Cells Using siRNA Screening  
 Nikhil G Thaker, Fang Zhang, Peter R. McDonald, Tong Ying Shun, Michael D Lewen, Ian F. Pollack, and John S. Lazo

Molecular Pharmacology

| siRNA Treatment              | Gene ID       | Gene Name | Log Fold Change | Category |
|------------------------------|---------------|-----------|-----------------|----------|
| siRNA Disorazole DMSO Run1   | NM_0180<br>98 | ECT2      | 0.444571        | Inlier   |
| siRNA-Vinblastine Run1-DMSO  | NM_0180<br>98 | ECT2      | 0.764607        | Inlier   |
| siRNA Disorazole DMSO Run2   | NM_0180<br>98 | ECT2      | 1.174075        | Inlier   |
| siRNA-Temozolomide Run3-DMSO | NM_0217<br>83 | EDA2R     | -1.08218        | Inlier   |
| siRNA-Vinblastine Run2-DMSO  | NM_0217<br>83 | EDA2R     | -0.729654       | Inlier   |
| siRNA-Temozolomide Run2-DMSO | NM_0217<br>83 | EDA2R     | -0.619346       | Inlier   |
| siRNA Disorazole DMSO Run3   | NM_0217<br>83 | EDA2R     | -0.084222       | Inlier   |
| siRNA-Temozolomide Run1-DMSO | NM_0217<br>83 | EDA2R     | 0.084222        | Inlier   |
| siRNA Disorazole DMSO Run1   | NM_0217<br>83 | EDA2R     | 0.10999         | Inlier   |
| siRNA Disorazole DMSO Run2   | NM_0217<br>83 | EDA2R     | 1.000409        | Inlier   |
| siRNA-Vinblastine Run1-DMSO  | NM_0217<br>83 | EDA2R     | 1.288634        | Inlier   |
| siRNA-Vinblastine Run2-DMSO  | NM_0223<br>36 | EDAR      | -1.891441       | Inlier   |
| siRNA-Temozolomide Run3-DMSO | NM_0223<br>36 | EDAR      | -0.747238       | Inlier   |

epithelial  
cell  
transformi  
ng  
sequence  
2

oncogene  
epithelial  
cell  
transformi  
ng  
sequence  
2

oncogene  
epithelial  
cell  
transformi  
ng  
sequence  
2

oncogene  
ectodyspla  
sin A2

receptor  
ectodyspla  
sin A

receptor  
ectodyspla  
sin A

Identification of Survival Genes in Human Glioblastoma Cells Using siRNA Screening  
 Nikhil G Thaker, Fang Zhang, Peter R. McDonald, Tong Ying Shun, Michael D Lewen, Ian F. Pollack, and John S. Lazo

| Condition                                                  | Gene ID | Count | Method | Gene Name                                                               | Log Fold Change | Outlier Status |
|------------------------------------------------------------|---------|-------|--------|-------------------------------------------------------------------------|-----------------|----------------|
| Molecular Pharmacology<br>siRNA-Temozolomide Run2-<br>DMSO | NM_0223 | 36    | EDAR   | ectodysplasia receptor                                                  | -0.601762       | Inlier         |
| siRNA-Temozolomide Run1-<br>DMSO                           | NM_0223 | 36    | EDAR   | ectodysplasia receptor                                                  | -0.070834       | Inlier         |
| siRNA Disorazole DMSO Run3                                 | NM_0223 | 36    | EDAR   | ectodysplasia receptor                                                  | 0.070835        | Inlier         |
| siRNA Disorazole DMSO Run1                                 | NM_0223 | 36    | EDAR   | ectodysplasia receptor                                                  | 0.589973        | Inlier         |
| siRNA Disorazole DMSO Run2                                 | NM_0223 | 36    | EDAR   | ectodysplasia receptor                                                  | 1.835875        | Inlier         |
| siRNA-Vinblastine Run1-<br>DMSO                            | NM_0223 | 36    | EDAR   | ectodysplasia receptor                                                  | 2.656565        | Inlier         |
| siRNA-Temozolomide Run3-<br>DMSO                           | NM_0014 | 00    | EDG1   | endothelial differentiation, sphingolipid G-protein-coupled receptor, 1 | -2.112289       | Inlier         |
| siRNA-Temozolomide Run2-<br>DMSO                           | NM_0014 | 00    | EDG1   | endothelial differentiation, sphingolipid G-protein-coupled receptor, 1 | -0.708022       | Inlier         |
| siRNA Disorazole DMSO Run2                                 | NM_0014 | 00    | EDG1   | endothelial differentiation, sphingolipid G-protein-coupled receptor, 1 | -0.640978       | Inlier         |

Identification of Survival Genes in Human Glioblastoma Cells Using siRNA Screening

Nikhil G Thaker, Fang Zhang, Peter R. McDonald, Tong Ying Shun, Michael D Lewen, Ian F. Pollack, and John S. Lazo

Molecular Pharmacology

|                              |           |      |                                                                         |           |        |
|------------------------------|-----------|------|-------------------------------------------------------------------------|-----------|--------|
| siRNA Disorazole DMSO Run3   | NM_001400 | EDG1 | endothelial differentiation, sphingolipid G-protein-coupled receptor, 1 | -0.432668 | Inlier |
| siRNA-Temozolomide Run1-DMSO | NM_001400 | EDG1 | endothelial differentiation, sphingolipid G-protein-coupled receptor, 1 | 0.432668  | Inlier |
| siRNA Disorazole DMSO Run1   | NM_001400 | EDG1 | endothelial differentiation, sphingolipid G-protein-coupled receptor, 1 | 0.574261  | Inlier |
| siRNA-Vinblastine Run2-DMSO  | NM_001400 | EDG1 | endothelial differentiation, sphingolipid G-protein-coupled receptor, 1 | 0.876579  | Inlier |
| siRNA-Vinblastine Run1-DMSO  | NM_001400 | EDG1 | endothelial differentiation, sphingolipid G-protein-coupled receptor, 1 | 0.941806  | Inlier |

Identification of Survival Genes in Human Glioblastoma Cells Using siRNA Screening  
 Nikhil G Thaker, Fang Zhang, Peter R. McDonald, Tong Ying Shun, Michael D Lewen, Ian F. Pollack, and John S. Lazo  
 Molecular Pharmacology

|                              |           |      |                                                                                  |           |        |
|------------------------------|-----------|------|----------------------------------------------------------------------------------|-----------|--------|
| siRNA-Temozolomide Run3-DMSO | NM_001401 | EDG2 | endothelial differentiation, lysophosphatidic acid G-protein-coupled receptor, 2 | -1.023686 | Inlier |
| siRNA Disorazole DMSO Run2   | NM_001401 | EDG2 | endothelial differentiation, lysophosphatidic acid G-protein-coupled receptor, 2 | -0.983284 | Inlier |
| siRNA Disorazole DMSO Run3   | NM_001401 | EDG2 | endothelial differentiation, lysophosphatidic acid G-protein-coupled receptor, 2 | -0.795241 | Inlier |
| siRNA-Temozolomide Run2-DMSO | NM_001401 | EDG2 | endothelial differentiation, lysophosphatidic acid G-protein-coupled receptor, 2 | -0.14439  | Inlier |

Identification of Survival Genes in Human Glioblastoma Cells Using siRNA Screening  
 Nikhil G Thaker, Fang Zhang, Peter R. McDonald, Tong Ying Shun, Michael D Lewen, Ian F. Pollack, and John S. Lazo  
 Molecular Pharmacology

|                              |           |      |                                                                                  |          |        |
|------------------------------|-----------|------|----------------------------------------------------------------------------------|----------|--------|
| siRNA-Temozolomide Run1-DMSO | NM_001401 | EDG2 | endothelial differentiation, lysophosphatidic acid G-protein-coupled receptor, 2 | 0.14439  | Inlier |
| siRNA Disorazole DMSO Run1   | NM_001401 | EDG2 | endothelial differentiation, lysophosphatidic acid G-protein-coupled receptor, 2 | 0.372485 | Inlier |
| siRNA-Vinblastine Run2-DMSO  | NM_001401 | EDG2 | endothelial differentiation, lysophosphatidic acid G-protein-coupled receptor, 2 | 0.663444 | Inlier |
| siRNA-Vinblastine Run1-DMSO  | NM_001401 | EDG2 | endothelial differentiation, lysophosphatidic acid G-protein-coupled receptor, 2 | 0.685556 | Inlier |



Identification of Survival Genes in Human Glioblastoma Cells Using siRNA Screening  
 Nikhil G Thaker, Fang Zhang, Peter R. McDonald, Tong Ying Shun, Michael D Lewen, Ian F. Pollack, and John S. Lazo  
 Molecular Pharmacology

|                              |           |      |                                                                         |           |        |
|------------------------------|-----------|------|-------------------------------------------------------------------------|-----------|--------|
| siRNA-Temozolomide Run3-DMSO | NM_005226 | EDG3 | endothelial differentiation, sphingolipid G-protein-coupled receptor, 3 | -1.009703 | Inlier |
| siRNA-Temozolomide Run2-DMSO | NM_005226 | EDG3 | endothelial differentiation, sphingolipid G-protein-coupled receptor, 3 | -0.684643 | Inlier |
| siRNA-Temozolomide Run1-DMSO | NM_005226 | EDG3 | endothelial differentiation, sphingolipid G-protein-coupled receptor, 3 | -0.67418  | Inlier |
| siRNA Disorazole DMSO Run2   | NM_005226 | EDG3 | endothelial differentiation, sphingolipid G-protein-coupled receptor, 3 | -0.103574 | Inlier |
| siRNA Disorazole DMSO Run1   | NM_005226 | EDG3 | endothelial differentiation, sphingolipid G-protein-coupled receptor, 3 | 0.103574  | Inlier |

Identification of Survival Genes in Human Glioblastoma Cells Using siRNA Screening  
 Nikhil G Thaker, Fang Zhang, Peter R. McDonald, Tong Ying Shun, Michael D Lewen, Ian F. Pollack, and John S. Lazo  
 Molecular Pharmacology

|                                  |               |      |                                                                                                              |           |        |
|----------------------------------|---------------|------|--------------------------------------------------------------------------------------------------------------|-----------|--------|
| siRNA Disorazole DMSO Run3       | NM_0052<br>26 | EDG3 | endothelial<br>differentiat<br>ion,<br>sphingolipi<br>d G-<br>protein-<br>coupled<br>receptor, 3             | 0.187888  | Inlier |
| siRNA-Vinblastine Run2-<br>DMSO  | NM_0052<br>26 | EDG3 | endothelial<br>differentiat<br>ion,<br>sphingolipi<br>d G-<br>protein-<br>coupled<br>receptor, 3             | 0.67482   | Inlier |
| siRNA-Vinblastine Run1-<br>DMSO  | NM_0052<br>26 | EDG3 | endothelial<br>differentiat<br>ion,<br>sphingolipi<br>d G-<br>protein-<br>coupled<br>receptor, 3             | 0.948642  | Inlier |
| siRNA Disorazole DMSO Run2       | NM_0047<br>20 | EDG4 | endothelial<br>differentiat<br>ion,<br>lysospho<br>phatidic<br>acid G-<br>protein-<br>coupled<br>receptor, 4 | -2.110489 | Inlier |
| siRNA-Temozolomide Run3-<br>DMSO | NM_0047<br>20 | EDG4 | endothelial<br>differentiat<br>ion,<br>lysospho<br>phatidic<br>acid G-<br>protein-<br>coupled<br>receptor, 4 | -1.459377 | Inlier |

Identification of Survival Genes in Human Glioblastoma Cells Using siRNA Screening

Nikhil G Thaker, Fang Zhang, Peter R. McDonald, Tong Ying Shun, Michael D Lewen, Ian F. Pollack, and John S. Lazo

Molecular Pharmacology

|                              |               |      |                                                                                                                   |           |        |
|------------------------------|---------------|------|-------------------------------------------------------------------------------------------------------------------|-----------|--------|
| siRNA-Temozolomide Run2-DMSO | NM_0047<br>20 | EDG4 | endothelial<br>differentiat<br>ion,<br>lysospho<br>sp<br>hatidic<br>acid G-<br>protein-<br>coupled<br>receptor, 4 | -1.028566 | Inlier |
| siRNA-Temozolomide Run1-DMSO | NM_0047<br>20 | EDG4 | endothelial<br>differentiat<br>ion,<br>lysospho<br>sp<br>hatidic<br>acid G-<br>protein-<br>coupled<br>receptor, 4 | -0.355983 | Inlier |
| siRNA Disorazole DMSO Run3   | NM_0047<br>20 | EDG4 | endothelial<br>differentiat<br>ion,<br>lysospho<br>sp<br>hatidic<br>acid G-<br>protein-<br>coupled<br>receptor, 4 | 0.355982  | Inlier |
| siRNA Disorazole DMSO Run1   | NM_0047<br>20 | EDG4 | endothelial<br>differentiat<br>ion,<br>lysospho<br>sp<br>hatidic<br>acid G-<br>protein-<br>coupled<br>receptor, 4 | 0.415261  | Inlier |

Identification of Survival Genes in Human Glioblastoma Cells Using siRNA Screening

Nikhil G Thaker, Fang Zhang, Peter R. McDonald, Tong Ying Shun, Michael D Lewen, Ian F. Pollack, and John S.

Lazo

Molecular Pharmacology

|                              |               |      |                                                                                                              |           |        |
|------------------------------|---------------|------|--------------------------------------------------------------------------------------------------------------|-----------|--------|
| siRNA-Vinblastine Run1-DMSO  | NM_0047<br>20 | EDG4 | endothelial<br>differentiat<br>ion,<br>lysospho<br>phatidic<br>acid G-<br>protein-<br>coupled<br>receptor, 4 | 0.536461  | Inlier |
| siRNA-Vinblastine Run2-DMSO  | NM_0047<br>20 | EDG4 | endothelial<br>differentiat<br>ion,<br>lysospho<br>phatidic<br>acid G-<br>protein-<br>coupled<br>receptor, 4 | 0.812539  | Inlier |
| siRNA-Temozolomide Run3-DMSO | NM_0042<br>30 | EDG5 | endothelial<br>differentiat<br>ion,<br>sphingolipi<br>d G-<br>protein-<br>coupled<br>receptor, 5             | -2.202189 | Inlier |
| siRNA Disorazole DMSO Run2   | NM_0042<br>30 | EDG5 | endothelial<br>differentiat<br>ion,<br>sphingolipi<br>d G-<br>protein-<br>coupled<br>receptor, 5             | -1.111348 | Inlier |
| siRNA-Temozolomide Run1-DMSO | NM_0042<br>30 | EDG5 | endothelial<br>differentiat<br>ion,<br>sphingolipi<br>d G-<br>protein-<br>coupled<br>receptor, 5             | -0.444751 | Inlier |

Identification of Survival Genes in Human Glioblastoma Cells Using siRNA Screening

Nikhil G Thaker, Fang Zhang, Peter R. McDonald, Tong Ying Shun, Michael D Lewen, Ian F. Pollack, and John S. Lazo

Molecular Pharmacology

|                                  |               |      |                                                                                                  |           |        |
|----------------------------------|---------------|------|--------------------------------------------------------------------------------------------------|-----------|--------|
| siRNA Disorazole DMSO Run1       | NM_0042<br>30 | EDG5 | endothelial<br>differentiat<br>ion,<br>sphingolipi<br>d G-<br>protein-<br>coupled<br>receptor, 5 | -0.241732 | Inlier |
| siRNA Disorazole DMSO Run3       | NM_0042<br>30 | EDG5 | endothelial<br>differentiat<br>ion,<br>sphingolipi<br>d G-<br>protein-<br>coupled<br>receptor, 5 | 0.241731  | Inlier |
| siRNA-Vinblastine Run1-<br>DMSO  | NM_0042<br>30 | EDG5 | endothelial<br>differentiat<br>ion,<br>sphingolipi<br>d G-<br>protein-<br>coupled<br>receptor, 5 | 0.562853  | Inlier |
| siRNA-Temozolomide Run2-<br>DMSO | NM_0042<br>30 | EDG5 | endothelial<br>differentiat<br>ion,<br>sphingolipi<br>d G-<br>protein-<br>coupled<br>receptor, 5 | 0.786147  | Inlier |
| siRNA-Vinblastine Run2-<br>DMSO  | NM_0042<br>30 | EDG5 | endothelial<br>differentiat<br>ion,<br>sphingolipi<br>d G-<br>protein-<br>coupled<br>receptor, 5 | 1.043367  | Inlier |

Identification of Survival Genes in Human Glioblastoma Cells Using siRNA Screening

Nikhil G Thaker, Fang Zhang, Peter R. McDonald, Tong Ying Shun, Michael D Lewen, Ian F. Pollack, and John S. Lazo

Molecular Pharmacology

|                              |               |      |                                                                             |           |        |
|------------------------------|---------------|------|-----------------------------------------------------------------------------|-----------|--------|
| siRNA-Temozolomide Run3-DMSO | NM_0037<br>75 | EDG6 | endothelial<br>differentiat<br>ion, G-<br>protein-<br>coupled<br>receptor 6 | -0.896678 | Inlier |
| siRNA Disorazole DMSO Run2   | NM_0037<br>75 | EDG6 | endothelial<br>differentiat<br>ion, G-<br>protein-<br>coupled<br>receptor 6 | -0.589778 | Inlier |
| siRNA-Temozolomide Run2-DMSO | NM_0037<br>75 | EDG6 | endothelial<br>differentiat<br>ion, G-<br>protein-<br>coupled<br>receptor 6 | -0.286946 | Inlier |
| siRNA Disorazole DMSO Run3   | NM_0037<br>75 | EDG6 | endothelial<br>differentiat<br>ion, G-<br>protein-<br>coupled<br>receptor 6 | -0.078015 | Inlier |
| siRNA-Temozolomide Run1-DMSO | NM_0037<br>75 | EDG6 | endothelial<br>differentiat<br>ion, G-<br>protein-<br>coupled<br>receptor 6 | 0.078015  | Inlier |
| siRNA Disorazole DMSO Run1   | NM_0037<br>75 | EDG6 | endothelial<br>differentiat<br>ion, G-<br>protein-<br>coupled<br>receptor 6 | 0.759222  | Inlier |
| siRNA-Vinblastine Run2-DMSO  | NM_0037<br>75 | EDG6 | endothelial<br>differentiat<br>ion, G-<br>protein-<br>coupled<br>receptor 6 | 1.021747  | Inlier |

Identification of Survival Genes in Human Glioblastoma Cells Using siRNA Screening

Nikhil G Thaker, Fang Zhang, Peter R. McDonald, Tong Ying Shun, Michael D Lewen, Ian F. Pollack, and John S.

Lazo

Molecular Pharmacology

|                              |           |      |                                                                                  |           |        |
|------------------------------|-----------|------|----------------------------------------------------------------------------------|-----------|--------|
| siRNA-Vinblastine Run1-DMSO  | NM_003775 | EDG6 | endothelial differentiation, G-protein-coupled receptor 6                        | 1.021912  | Inlier |
| siRNA-Temozolomide Run3-DMSO | NM_012152 | EDG7 | endothelial differentiation, lysophosphatidic acid G-protein-coupled receptor, 7 | -1.953677 | Inlier |
| siRNA Disorazole DMSO Run2   | NM_012152 | EDG7 | endothelial differentiation, lysophosphatidic acid G-protein-coupled receptor, 7 | -1.82498  | Inlier |
| siRNA Disorazole DMSO Run3   | NM_012152 | EDG7 | endothelial differentiation, lysophosphatidic acid G-protein-coupled receptor, 7 | -0.914494 | Inlier |
| siRNA-Temozolomide Run2-DMSO | NM_012152 | EDG7 | endothelial differentiation, lysophosphatidic acid G-protein-coupled receptor, 7 | -0.19841  | Inlier |

Identification of Survival Genes in Human Glioblastoma Cells Using siRNA Screening

Nikhil G Thaker, Fang Zhang, Peter R. McDonald, Tong Ying Shun, Michael D Lewen, Ian F. Pollack, and John S. Lazo

Molecular Pharmacology

|                                  |               |      |                                                                                                               |          |        |
|----------------------------------|---------------|------|---------------------------------------------------------------------------------------------------------------|----------|--------|
| siRNA Disorazole DMSO Run1       | NM_0121<br>52 | EDG7 | endothelial<br>differentiat<br>ion,<br>lysosphosp<br>hatidic<br>acid G-<br>protein-<br>coupled<br>receptor, 7 | 0.198409 | Inlier |
| siRNA-Temozolomide Run1-<br>DMSO | NM_0121<br>52 | EDG7 | endothelial<br>differentiat<br>ion,<br>lysosphosp<br>hatidic<br>acid G-<br>protein-<br>coupled<br>receptor, 7 | 0.424775 | Inlier |
| siRNA-Vinblastine Run2-<br>DMSO  | NM_0121<br>52 | EDG7 | endothelial<br>differentiat<br>ion,<br>lysosphosp<br>hatidic<br>acid G-<br>protein-<br>coupled<br>receptor, 7 | 0.648256 | Inlier |
| siRNA-Vinblastine Run1-<br>DMSO  | NM_0121<br>52 | EDG7 | endothelial<br>differentiat<br>ion,<br>lysosphosp<br>hatidic<br>acid G-<br>protein-<br>coupled<br>receptor, 7 | 0.700744 | Inlier |



Identification of Survival Genes in Human Glioblastoma Cells Using siRNA Screening

Nikhil G Thaker, Fang Zhang, Peter R. McDonald, Tong Ying Shun, Michael D Lewen, Ian F. Pollack, and John S. Lazo

Molecular Pharmacology

|                              |           |      |                                                                         |           |        |
|------------------------------|-----------|------|-------------------------------------------------------------------------|-----------|--------|
| siRNA-Temozolomide Run3-DMSO | NM_030760 | EDG8 | endothelial differentiation, sphingolipid G-protein-coupled receptor, 8 | -1.227726 | Inlier |
| siRNA-Temozolomide Run2-DMSO | NM_030760 | EDG8 | endothelial differentiation, sphingolipid G-protein-coupled receptor, 8 | -0.219493 | Inlier |
| siRNA Disorazole DMSO Run3   | NM_030760 | EDG8 | endothelial differentiation, sphingolipid G-protein-coupled receptor, 8 | -0.080611 | Inlier |
| siRNA Disorazole DMSO Run2   | NM_030760 | EDG8 | endothelial differentiation, sphingolipid G-protein-coupled receptor, 8 | -0.01498  | Inlier |
| siRNA-Temozolomide Run1-DMSO | NM_030760 | EDG8 | endothelial differentiation, sphingolipid G-protein-coupled receptor, 8 | 0.01498   | Inlier |

Identification of Survival Genes in Human Glioblastoma Cells Using siRNA Screening  
 Nikhil G Thaker, Fang Zhang, Peter R. McDonald, Tong Ying Shun, Michael D Lewen, Ian F. Pollack, and John S. Lazo  
 Molecular Pharmacology

|                                  |               |       |                                                                                                  |           |        |
|----------------------------------|---------------|-------|--------------------------------------------------------------------------------------------------|-----------|--------|
| siRNA Disorazole DMSO Run1       | NM_0307<br>60 | EDG8  | endothelial<br>differentiat<br>ion,<br>sphingolipi<br>d G-<br>protein-<br>coupled<br>receptor, 8 | 1.129507  | Inlier |
| siRNA-Vinblastine Run1-<br>DMSO  | NM_0307<br>60 | EDG8  | endothelial<br>differentiat<br>ion,<br>sphingolipi<br>d G-<br>protein-<br>coupled<br>receptor, 8 | 1.755582  | Inlier |
| siRNA-Vinblastine Run2-<br>DMSO  | NM_0307<br>60 | EDG8  | endothelial<br>differentiat<br>ion,<br>sphingolipi<br>d G-<br>protein-<br>coupled<br>receptor, 8 | 2.262941  | Inlier |
| siRNA-Temozolomide Run3-<br>DMSO | NM_0019<br>57 | EDNRA | endothelin<br>receptor<br>type A                                                                 | -2.177286 | Inlier |
| siRNA Disorazole DMSO Run2       | NM_0019<br>57 | EDNRA | endothelin<br>receptor<br>type A                                                                 | -1.091929 | Inlier |
| siRNA-Temozolomide Run2-<br>DMSO | NM_0019<br>57 | EDNRA | endothelin<br>receptor<br>type A                                                                 | -0.657306 | Inlier |
| siRNA Disorazole DMSO Run3       | NM_0019<br>57 | EDNRA | endothelin<br>receptor<br>type A                                                                 | -0.032148 | Inlier |
| siRNA-Temozolomide Run1-<br>DMSO | NM_0019<br>57 | EDNRA | endothelin<br>receptor<br>type A                                                                 | 0.032148  | Inlier |
| siRNA Disorazole DMSO Run1       | NM_0019<br>57 | EDNRA | endothelin<br>receptor<br>type A                                                                 | 0.426714  | Inlier |
| siRNA-Vinblastine Run1-<br>DMSO  | NM_0019<br>57 | EDNRA | endothelin<br>receptor<br>type A                                                                 | 0.691694  | Inlier |

Identification of Survival Genes in Human Glioblastoma Cells Using siRNA Screening  
 Nikhil G Thaker, Fang Zhang, Peter R. McDonald, Tong Ying Shun, Michael D Lewen, Ian F. Pollack, and John S. Lazo

| Condition                                                 | Gene ID       | Gene Symbol | Gene Name                                      | Value     | Category |
|-----------------------------------------------------------|---------------|-------------|------------------------------------------------|-----------|----------|
| Molecular Pharmacology<br>siRNA-Vinblastine Run2-<br>DMSO | NM_0019<br>57 | EDNRA       | endothelin<br>receptor<br>type A               | 1.037839  | Inlier   |
| siRNA-Temozolomide Run3-<br>DMSO                          | NM_0039<br>91 | EDNRB       | endothelin<br>receptor<br>type B               | -1.086504 | Inlier   |
| siRNA Disorazole DMSO Run2                                | NM_0039<br>91 | EDNRB       | endothelin<br>receptor<br>type B               | -1.005485 | Inlier   |
| siRNA Disorazole DMSO Run3                                | NM_0039<br>91 | EDNRB       | endothelin<br>receptor<br>type B               | -0.601109 | Inlier   |
| siRNA-Temozolomide Run2-<br>DMSO                          | NM_0039<br>91 | EDNRB       | endothelin<br>receptor<br>type B               | -0.205049 | Inlier   |
| siRNA-Temozolomide Run1-<br>DMSO                          | NM_0039<br>91 | EDNRB       | endothelin<br>receptor<br>type B               | 0.205049  | Inlier   |
| siRNA Disorazole DMSO Run1                                | NM_0039<br>91 | EDNRB       | endothelin<br>receptor<br>type B               | 0.392494  | Inlier   |
| siRNA-Vinblastine Run1-<br>DMSO                           | NM_0039<br>91 | EDNRB       | endothelin<br>receptor<br>type B               | 0.747891  | Inlier   |
| siRNA-Vinblastine Run2-<br>DMSO                           | NM_0039<br>91 | EDNRB       | endothelin<br>receptor<br>type B               | 0.800271  | Inlier   |
| siRNA-Temozolomide Run3-<br>DMSO                          | NM_0133<br>02 | EEF2K       | eukaryotic<br>elongation<br>factor-2<br>kinase | -1.231143 | Inlier   |
| siRNA-Temozolomide Run2-<br>DMSO                          | NM_0133<br>02 | EEF2K       | eukaryotic<br>elongation<br>factor-2<br>kinase | -0.688527 | Inlier   |
| siRNA Disorazole DMSO Run2                                | NM_0133<br>02 | EEF2K       | eukaryotic<br>elongation<br>factor-2<br>kinase | -0.628505 | Inlier   |
| siRNA Disorazole DMSO Run3                                | NM_0133<br>02 | EEF2K       | eukaryotic<br>elongation<br>factor-2<br>kinase | -0.179431 | Inlier   |
| siRNA-Temozolomide Run1-<br>DMSO                          | NM_0133<br>02 | EEF2K       | eukaryotic<br>elongation<br>factor-2<br>kinase | 0.179431  | Inlier   |

Identification of Survival Genes in Human Glioblastoma Cells Using siRNA Screening  
 Nikhil G Thaker, Fang Zhang, Peter R. McDonald, Tong Ying Shun, Michael D Lewen, Ian F. Pollack, and John S. Lazo  
 Molecular Pharmacology

|                                  |               |       |                                                                                                                                       |           |        |
|----------------------------------|---------------|-------|---------------------------------------------------------------------------------------------------------------------------------------|-----------|--------|
| siRNA Disorazole DMSO Run1       | NM_0133<br>02 | EEF2K | eukaryotic<br>elongation<br>factor-2<br>kinase                                                                                        | 0.660473  | Inlier |
| siRNA-Vinblastine Run2-<br>DMSO  | NM_0133<br>02 | EEF2K | eukaryotic<br>elongation<br>factor-2<br>kinase                                                                                        | 1.887625  | Inlier |
| siRNA-Vinblastine Run1-<br>DMSO  | NM_0133<br>02 | EEF2K | eukaryotic<br>elongation<br>factor-2<br>kinase                                                                                        | 2.109352  | Inlier |
| siRNA Disorazole DMSO Run2       | NM_2012<br>84 | EGFR  | epidermal<br>growth<br>factor<br>receptor<br>(erythrobla<br>stic<br>leukemia<br>viral (v-erb-<br>b)<br>oncogene<br>homolog,<br>avian) | -2.955765 | Inlier |
| siRNA-Temozolomide Run1-<br>DMSO | NM_2012<br>84 | EGFR  | epidermal<br>growth<br>factor<br>receptor<br>(erythrobla<br>stic<br>leukemia<br>viral (v-erb-<br>b)<br>oncogene<br>homolog,<br>avian) | -0.886309 | Inlier |
| siRNA-Temozolomide Run3-<br>DMSO | NM_2012<br>84 | EGFR  | epidermal<br>growth<br>factor<br>receptor<br>(erythrobla<br>stic<br>leukemia<br>viral (v-erb-<br>b)<br>oncogene<br>homolog,<br>avian) | -0.462691 | Inlier |

Identification of Survival Genes in Human Glioblastoma Cells Using siRNA Screening

Nikhil G Thaker, Fang Zhang, Peter R. McDonald, Tong Ying Shun, Michael D Lewen, Ian F. Pollack, and John S. Lazo

Molecular Pharmacology

|                              |               |      |                                                                                                    |          |        |
|------------------------------|---------------|------|----------------------------------------------------------------------------------------------------|----------|--------|
| siRNA-Temozolomide Run2-DMSO | NM_2012<br>84 | EGFR | epidermal growth factor receptor (erythroblastic leukemia viral (v-erb-b) oncogene homolog, avian) | -0.07986 | Inlier |
| siRNA Disorazole DMSO Run3   | NM_2012<br>84 | EGFR | epidermal growth factor receptor (erythroblastic leukemia viral (v-erb-b) oncogene homolog, avian) | 0.07986  | Inlier |
| siRNA-Vinblastine Run1-DMSO  | NM_2012<br>84 | EGFR | epidermal growth factor receptor (erythroblastic leukemia viral (v-erb-b) oncogene homolog, avian) | 0.210419 | Inlier |
| siRNA Disorazole DMSO Run1   | NM_2012<br>84 | EGFR | epidermal growth factor receptor (erythroblastic leukemia viral (v-erb-b) oncogene homolog, avian) | 1.194517 | Inlier |

Identification of Survival Genes in Human Glioblastoma Cells Using siRNA Screening  
 Nikhil G Thaker, Fang Zhang, Peter R. McDonald, Tong Ying Shun, Michael D Lewen, Ian F. Pollack, and John S. Lazo

Molecular Pharmacology

| siRNA Treatment              | Gene  | Accession | Gene                                                                                               | Log Fold Change | Outlier |
|------------------------------|-------|-----------|----------------------------------------------------------------------------------------------------|-----------------|---------|
| siRNA-Vinblastine Run2-DMSO  | EGFR  | NM_201284 | epidermal growth factor receptor (erythroblastic leukemia viral (v-erb-b) oncogene homolog, avian) | 1.678019        | Inlier  |
| siRNA-Temozolomide Run3-DMSO | EGLN1 | NM_022051 | egl nine homolog 1 (C. elegans)                                                                    | -2.852208       | Inlier  |
| siRNA-Temozolomide Run2-DMSO | EGLN1 | NM_022051 | egl nine homolog 1 (C. elegans)                                                                    | -2.823658       | Inlier  |
| siRNA Disorazole DMSO Run1   | EGLN1 | NM_022051 | egl nine homolog 1 (C. elegans)                                                                    | -0.116715       | Inlier  |
| siRNA Disorazole DMSO Run3   | EGLN1 | NM_022051 | egl nine homolog 1 (C. elegans)                                                                    | -0.02798        | Inlier  |
| siRNA-Vinblastine Run2-DMSO  | EGLN1 | NM_022051 | egl nine homolog 1 (C. elegans)                                                                    | 0.027979        | Inlier  |
| siRNA-Temozolomide Run1-DMSO | EGLN1 | NM_022051 | egl nine homolog 1 (C. elegans)                                                                    | 0.079491        | Inlier  |
| siRNA Disorazole DMSO Run2   | EGLN1 | NM_022051 | egl nine homolog 1 (C. elegans)                                                                    | 1.232285        | Inlier  |
| siRNA-Vinblastine Run1-DMSO  | EGLN1 | NM_022051 | egl nine homolog 1 (C. elegans)                                                                    | 1.233651        | Inlier  |
| siRNA-Temozolomide Run3-DMSO | EGLN2 | NM_053046 | egl nine homolog 2 (C. elegans)                                                                    | -1.761814       | Inlier  |
| siRNA-Temozolomide Run2-DMSO | EGLN2 | NM_053046 | egl nine homolog 2 (C. elegans)                                                                    | -0.769421       | Inlier  |

Identification of Survival Genes in Human Glioblastoma Cells Using siRNA Screening  
 Nikhil G Thaker, Fang Zhang, Peter R. McDonald, Tong Ying Shun, Michael D Lewen, Ian F. Pollack, and John S. Lazo

Molecular Pharmacology

|                              |               |       |                                 |           |        |
|------------------------------|---------------|-------|---------------------------------|-----------|--------|
| siRNA-Temozolomide Run1-DMSO | NM_0530<br>46 | EGLN2 | egl nine homolog 2 (C. elegans) | -0.579579 | Inlier |
| siRNA Disorazole DMSO Run1   | NM_0530<br>46 | EGLN2 | egl nine homolog 2 (C. elegans) | -0.041839 | Inlier |
| siRNA-Vinblastine Run2-DMSO  | NM_0530<br>46 | EGLN2 | egl nine homolog 2 (C. elegans) | 0.04184   | Inlier |
| siRNA Disorazole DMSO Run3   | NM_0530<br>46 | EGLN2 | egl nine homolog 2 (C. elegans) | 0.051989  | Inlier |
| siRNA Disorazole DMSO Run2   | NM_0530<br>46 | EGLN2 | egl nine homolog 2 (C. elegans) | 1.096765  | Inlier |
| siRNA-Vinblastine Run1-DMSO  | NM_0530<br>46 | EGLN2 | egl nine homolog 2 (C. elegans) | 2.583827  | Inlier |
| siRNA-Temozolomide Run1-DMSO | NM_0220<br>73 | EGLN3 | egl nine homolog 3 (C. elegans) | -1.342502 | Inlier |
| siRNA Disorazole DMSO Run1   | NM_0220<br>73 | EGLN3 | egl nine homolog 3 (C. elegans) | -1.163387 | Inlier |
| siRNA-Temozolomide Run2-DMSO | NM_0220<br>73 | EGLN3 | egl nine homolog 3 (C. elegans) | -0.775962 | Inlier |
| siRNA-Temozolomide Run3-DMSO | NM_0220<br>73 | EGLN3 | egl nine homolog 3 (C. elegans) | -0.144895 | Inlier |
| siRNA Disorazole DMSO Run3   | NM_0220<br>73 | EGLN3 | egl nine homolog 3 (C. elegans) | 0.144895  | Inlier |
| siRNA-Vinblastine Run1-DMSO  | NM_0220<br>73 | EGLN3 | egl nine homolog 3 (C. elegans) | 0.205977  | Inlier |
| siRNA-Vinblastine Run2-DMSO  | NM_0220<br>73 | EGLN3 | egl nine homolog 3 (C. elegans) | 0.573038  | Inlier |

Identification of Survival Genes in Human Glioblastoma Cells Using siRNA Screening

Nikhil G Thaker, Fang Zhang, Peter R. McDonald, Tong Ying Shun, Michael D Lewen, Ian F. Pollack, and John S. Lazo

Molecular Pharmacology

|                              |               |        |                                                                    |           |        |
|------------------------------|---------------|--------|--------------------------------------------------------------------|-----------|--------|
| siRNA Disorazole DMSO Run2   | NM_0220<br>73 | EGLN3  | egl nine homolog 3 (C. elegans)                                    | 1.786087  | Inlier |
| siRNA-Temozolomide Run3-DMSO | NM_0019<br>66 | EHHADH | enoyl-Coenzyme A, hydratase/3-hydroxyacyl Coenzyme A dehydrogenase | -0.833571 | Inlier |
| siRNA-Temozolomide Run2-DMSO | NM_0019<br>66 | EHHADH | enoyl-Coenzyme A, hydratase/3-hydroxyacyl Coenzyme A dehydrogenase | -0.79808  | Inlier |
| siRNA Disorazole DMSO Run2   | NM_0019<br>66 | EHHADH | enoyl-Coenzyme A, hydratase/3-hydroxyacyl Coenzyme A dehydrogenase | -0.690905 | Inlier |
| siRNA-Temozolomide Run1-DMSO | NM_0019<br>66 | EHHADH | enoyl-Coenzyme A dehydrogenase                                     | -0.024207 | Inlier |



Identification of Survival Genes in Human Glioblastoma Cells Using siRNA Screening

Nikhil G Thaker, Fang Zhang, Peter R. McDonald, Tong Ying Shun, Michael D Lewen, Ian F. Pollack, and John S.

Lazo

Molecular Pharmacology

|                              |               |        |                                                                    |           |        |
|------------------------------|---------------|--------|--------------------------------------------------------------------|-----------|--------|
| siRNA Disorazole DMSO Run1   | NM_0019<br>66 | EHHADH | enoyl-Coenzyme A, hydratase/3-hydroxyacyl Coenzyme A dehydrogenase | 0.024207  | Inlier |
| siRNA Disorazole DMSO Run3   | NM_0019<br>66 | EHHADH | enoyl-Coenzyme A, hydratase/3-hydroxyacyl Coenzyme A dehydrogenase | 0.437085  | Inlier |
| siRNA-Vinblastine Run1-DMSO  | NM_0019<br>66 | EHHADH | enoyl-Coenzyme A, hydratase/3-hydroxyacyl Coenzyme A dehydrogenase | 0.658095  | Inlier |
| siRNA-Vinblastine Run2-DMSO  | NM_0019<br>66 | EHHADH | enoyl-Coenzyme A, hydratase/3-hydroxyacyl Coenzyme A dehydrogenase | 1.02868   | Inlier |
| siRNA-Temozolomide Run1-DMSO | NM_0247<br>57 | EHMT1  | euchromatic histone methyltransferase 1                            | -1.338515 | Inlier |

Identification of Survival Genes in Human Glioblastoma Cells Using siRNA Screening  
 Nikhil G Thaker, Fang Zhang, Peter R. McDonald, Tong Ying Shun, Michael D Lewen, Ian F. Pollack, and John S. Lazo  
 Molecular Pharmacology

|                              |               |         |                                                           |           |        |
|------------------------------|---------------|---------|-----------------------------------------------------------|-----------|--------|
| siRNA-Temozolomide Run2-DMSO | NM_0247<br>57 | EHMT1   | euchromatic histone methyltransferase 1                   | -0.678554 | Inlier |
| siRNA Disorazole DMSO Run3   | NM_0247<br>57 | EHMT1   | euchromatic histone methyltransferase 1                   | -0.507106 | Inlier |
| siRNA Disorazole DMSO Run1   | NM_0247<br>57 | EHMT1   | euchromatic histone methyltransferase 1                   | -0.261647 | Inlier |
| siRNA-Vinblastine Run2-DMSO  | NM_0247<br>57 | EHMT1   | euchromatic histone methyltransferase 1                   | 0.261647  | Inlier |
| siRNA Disorazole DMSO Run2   | NM_0247<br>57 | EHMT1   | euchromatic histone methyltransferase 1                   | 0.670446  | Inlier |
| siRNA-Vinblastine Run1-DMSO  | NM_0247<br>57 | EHMT1   | euchromatic histone methyltransferase 1                   | 0.908068  | Inlier |
| siRNA-Temozolomide Run3-DMSO | NM_0247<br>57 | EHMT1   | euchromatic histone methyltransferase 1                   | 0.957857  | Inlier |
| siRNA-Temozolomide Run3-DMSO | NM_0048<br>36 | EIF2AK3 | eukaryotic translation initiation factor 2-alpha kinase 3 | -0.773356 | Inlier |

Identification of Survival Genes in Human Glioblastoma Cells Using siRNA Screening  
 Nikhil G Thaker, Fang Zhang, Peter R. McDonald, Tong Ying Shun, Michael D Lewen, Ian F. Pollack, and John S. Lazo  
 Molecular Pharmacology

|                              |               |         |                                                           |           |        |
|------------------------------|---------------|---------|-----------------------------------------------------------|-----------|--------|
| siRNA Disorazole DMSO Run2   | NM_0048<br>36 | EIF2AK3 | eukaryotic translation initiation factor 2-alpha kinase 3 | -0.575644 | Inlier |
| siRNA-Temozolomide Run1-DMSO | NM_0048<br>36 | EIF2AK3 | eukaryotic translation initiation factor 2-alpha kinase 3 | -0.428136 | Inlier |
| siRNA Disorazole DMSO Run3   | NM_0048<br>36 | EIF2AK3 | eukaryotic translation initiation factor 2-alpha kinase 3 | -0.023918 | Inlier |
| siRNA-Temozolomide Run2-DMSO | NM_0048<br>36 | EIF2AK3 | eukaryotic translation initiation factor 2-alpha kinase 3 | 0.023917  | Inlier |
| siRNA Disorazole DMSO Run1   | NM_0048<br>36 | EIF2AK3 | eukaryotic translation initiation factor 2-alpha kinase 3 | 1.737587  | Inlier |
| siRNA-Vinblastine Run1-DMSO  | NM_0048<br>36 | EIF2AK3 | eukaryotic translation initiation factor 2-alpha kinase 3 | 2.916706  | Inlier |
| siRNA-Vinblastine Run2-DMSO  | NM_0048<br>36 | EIF2AK3 | eukaryotic translation initiation factor 2-alpha kinase 3 | 2.948291  | Inlier |

Identification of Survival Genes in Human Glioblastoma Cells Using siRNA Screening  
 Nikhil G Thaker, Fang Zhang, Peter R. McDonald, Tong Ying Shun, Michael D Lewen, Ian F. Pollack, and John S. Lazo  
 Molecular Pharmacology

|                                  |               |        |                                                                                       |           |        |
|----------------------------------|---------------|--------|---------------------------------------------------------------------------------------|-----------|--------|
| siRNA Disorazole DMSO Run1       | NM_0203<br>65 | EIF2B3 | eukaryotic<br>translation<br>initiation<br>factor 2B,<br>subunit 3<br>gamma,<br>58kDa | -1.404612 | Inlier |
| siRNA-Temozolomide Run2-<br>DMSO | NM_0203<br>65 | EIF2B3 | eukaryotic<br>translation<br>initiation<br>factor 2B,<br>subunit 3<br>gamma,<br>58kDa | -0.733062 | Inlier |
| siRNA-Temozolomide Run1-<br>DMSO | NM_0203<br>65 | EIF2B3 | eukaryotic<br>translation<br>initiation<br>factor 2B,<br>subunit 3<br>gamma,<br>58kDa | -0.59308  | Inlier |
| siRNA-Temozolomide Run3-<br>DMSO | NM_0203<br>65 | EIF2B3 | eukaryotic<br>translation<br>initiation<br>factor 2B,<br>subunit 3<br>gamma,<br>58kDa | -0.388954 | Inlier |
| siRNA Disorazole DMSO Run3       | NM_0203<br>65 | EIF2B3 | eukaryotic<br>translation<br>initiation<br>factor 2B,<br>subunit 3<br>gamma,<br>58kDa | 0.388955  | Inlier |
| siRNA-Vinblastine Run2-<br>DMSO  | NM_0203<br>65 | EIF2B3 | eukaryotic<br>translation<br>initiation<br>factor 2B,<br>subunit 3<br>gamma,<br>58kDa | 0.615938  | Inlier |

Identification of Survival Genes in Human Glioblastoma Cells Using siRNA Screening  
 Nikhil G Thaker, Fang Zhang, Peter R. McDonald, Tong Ying Shun, Michael D Lewen, Ian F. Pollack, and John S. Lazo  
 Molecular Pharmacology

|                              |               |        |                                                                     |           |         |
|------------------------------|---------------|--------|---------------------------------------------------------------------|-----------|---------|
| siRNA Disorazole DMSO Run2   | NM_0203<br>65 | EIF2B3 | eukaryotic translation initiation factor 2B, subunit 3 gamma, 58kDa | 0.845204  | Inlier  |
| siRNA-Vinblastine Run1-DMSO  | NM_0203<br>65 | EIF2B3 | eukaryotic translation initiation factor 2B, subunit 3 gamma, 58kDa | 2.391334  | Inlier  |
| siRNA Disorazole DMSO Run2   | NM_0019<br>71 | ELA1   | elastase 1, pancreatic                                              | -7.547831 | Outlier |
| siRNA Disorazole DMSO Run1   | NM_0019<br>71 | ELA1   | elastase 1, pancreatic                                              | -5.064006 | Outlier |
| siRNA-Temozolomide Run2-DMSO | NM_0019<br>71 | ELA1   | elastase 1, pancreatic                                              | -0.586774 | Inlier  |
| siRNA-Temozolomide Run3-DMSO | NM_0019<br>71 | ELA1   | elastase 1, pancreatic                                              | -0.155182 | Inlier  |
| siRNA-Vinblastine Run2-DMSO  | NM_0019<br>71 | ELA1   | elastase 1, pancreatic                                              | 0.15518   | Inlier  |
| siRNA-Vinblastine Run1-DMSO  | NM_0019<br>71 | ELA1   | elastase 1, pancreatic                                              | 0.380963  | Inlier  |
| siRNA-Temozolomide Run1-DMSO | NM_0019<br>71 | ELA1   | elastase 1, pancreatic                                              | 0.762226  | Inlier  |
| siRNA Disorazole DMSO Run3   | NM_0019<br>71 | ELA1   | elastase 1, pancreatic                                              | 4.342051  | Outlier |
| siRNA-Temozolomide Run3-DMSO | NM_0019<br>72 | ELA2   | elastase 2, neutrophil                                              | -2.540414 | Inlier  |

Identification of Survival Genes in Human Glioblastoma Cells Using siRNA Screening  
 Nikhil G Thaker, Fang Zhang, Peter R. McDonald, Tong Ying Shun, Michael D Lewen, Ian F. Pollack, and John S. Lazo

Molecular Pharmacology

|                              |               |       |                           |           |        |
|------------------------------|---------------|-------|---------------------------|-----------|--------|
| siRNA Disorazole DMSO Run1   | NM_0019<br>72 | ELA2  | elastase 2,<br>neutrophil | -1.185749 | Inlier |
| siRNA Disorazole DMSO Run2   | NM_0019<br>72 | ELA2  | elastase 2,<br>neutrophil | -0.392838 | Inlier |
| siRNA-Temozolomide Run1-DMSO | NM_0019<br>72 | ELA2  | elastase 2,<br>neutrophil | -0.019622 | Inlier |
| siRNA-Temozolomide Run2-DMSO | NM_0019<br>72 | ELA2  | elastase 2,<br>neutrophil | 0.019622  | Inlier |
| siRNA-Vinblastine Run2-DMSO  | NM_0019<br>72 | ELA2  | elastase 2,<br>neutrophil | 0.65933   | Inlier |
| siRNA-Vinblastine Run1-DMSO  | NM_0019<br>72 | ELA2  | elastase 2,<br>neutrophil | 0.68967   | Inlier |
| siRNA Disorazole DMSO Run3   | NM_0019<br>72 | ELA2  | elastase 2,<br>neutrophil | 2.195357  | Inlier |
| siRNA Disorazole DMSO Run2   | NM_0334<br>40 | ELA2A | ELA2A                     | -0.683573 | Inlier |
| siRNA-Temozolomide Run3-DMSO | NM_0334<br>40 | ELA2A | ELA2A                     | -0.665427 | Inlier |
| siRNA-Temozolomide Run2-DMSO | NM_0334<br>40 | ELA2A | ELA2A                     | -0.282022 | Inlier |
| siRNA Disorazole DMSO Run3   | NM_0334<br>40 | ELA2A | ELA2A                     | -0.001852 | Inlier |
| siRNA Disorazole DMSO Run1   | NM_0334<br>40 | ELA2A | ELA2A                     | 0.001852  | Inlier |
| siRNA-Temozolomide Run1-DMSO | NM_0334<br>40 | ELA2A | ELA2A                     | 0.700757  | Inlier |
| siRNA-Vinblastine Run1-DMSO  | NM_0334<br>40 | ELA2A | ELA2A                     | 1.214583  | Inlier |
| siRNA-Vinblastine Run2-DMSO  | NM_0334<br>40 | ELA2A | ELA2A                     | 1.752833  | Inlier |
| siRNA Disorazole DMSO Run2   | NM_0158<br>49 | ELA2B | ELA2B                     | -0.868738 | Inlier |
| siRNA-Temozolomide Run3-DMSO | NM_0158<br>49 | ELA2B | ELA2B                     | -0.827353 | Inlier |
| siRNA-Temozolomide Run2-DMSO | NM_0158<br>49 | ELA2B | ELA2B                     | -0.660111 | Inlier |
| siRNA Disorazole DMSO Run1   | NM_0158<br>49 | ELA2B | ELA2B                     | -0.311503 | Inlier |
| siRNA-Temozolomide Run1-DMSO | NM_0158<br>49 | ELA2B | ELA2B                     | 0.311503  | Inlier |
| siRNA Disorazole DMSO Run3   | NM_0158<br>49 | ELA2B | ELA2B                     | 0.585139  | Inlier |
| siRNA-Vinblastine Run1-DMSO  | NM_0158<br>49 | ELA2B | ELA2B                     | 0.688889  | Inlier |

Identification of Survival Genes in Human Glioblastoma Cells Using siRNA Screening

Nikhil G Thaker, Fang Zhang, Peter R. McDonald, Tong Ying Shun, Michael D Lewen, Ian F. Pollack, and John S.

Lazo

| siRNA Treatment              | Gene ID       | Gene Symbol | Gene Description                     | Log Fold Change | Category |
|------------------------------|---------------|-------------|--------------------------------------|-----------------|----------|
| siRNA-Vinblastine Run2-DMSO  | NM_0158<br>49 | ELA2B       | ELA2B                                | 0.999724        | Inlier   |
| siRNA-Temozolomide Run3-DMSO | NM_0057<br>47 | ELA3A       | elastase 3A, pancreatic (protease E) | -2.668603       | Inlier   |
| siRNA-Temozolomide Run2-DMSO | NM_0057<br>47 | ELA3A       | elastase 3A, pancreatic (protease E) | -2.492096       | Inlier   |
| siRNA-Temozolomide Run1-DMSO | NM_0057<br>47 | ELA3A       | elastase 3A, pancreatic (protease E) | -0.470147       | Inlier   |
| siRNA Disorazole DMSO Run3   | NM_0057<br>47 | ELA3A       | elastase 3A, pancreatic (protease E) | -0.033686       | Inlier   |
| siRNA Disorazole DMSO Run1   | NM_0057<br>47 | ELA3A       | elastase 3A, pancreatic (protease E) | 0.033686        | Inlier   |
| siRNA Disorazole DMSO Run2   | NM_0057<br>47 | ELA3A       | elastase 3A, pancreatic (protease E) | 0.582983        | Inlier   |
| siRNA-Vinblastine Run1-DMSO  | NM_0057<br>47 | ELA3A       | elastase 3A, pancreatic (protease E) | 0.766017        | Inlier   |
| siRNA-Vinblastine Run2-DMSO  | NM_0057<br>47 | ELA3A       | elastase 3A, pancreatic (protease E) | 1.139589        | Inlier   |

Identification of Survival Genes in Human Glioblastoma Cells Using siRNA Screening  
 Nikhil G Thaker, Fang Zhang, Peter R. McDonald, Tong Ying Shun, Michael D Lewen, Ian F. Pollack, and John S. Lazo

Molecular Pharmacology

|                              |               |        |                                                                                                           |           |        |
|------------------------------|---------------|--------|-----------------------------------------------------------------------------------------------------------|-----------|--------|
| siRNA-Temozolomide Run3-DMSO | NM_0073<br>52 | ELA3B  | elastase<br>3B,<br>pancreatic                                                                             | -1.824157 | Inlier |
| siRNA-Temozolomide Run2-DMSO | NM_0073<br>52 | ELA3B  | elastase<br>3B,<br>pancreatic                                                                             | -1.253003 | Inlier |
| siRNA Disorazole DMSO Run3   | NM_0073<br>52 | ELA3B  | elastase<br>3B,<br>pancreatic                                                                             | -0.082747 | Inlier |
| siRNA Disorazole DMSO Run2   | NM_0073<br>52 | ELA3B  | elastase<br>3B,<br>pancreatic                                                                             | -0.012615 | Inlier |
| siRNA Disorazole DMSO Run1   | NM_0073<br>52 | ELA3B  | elastase<br>3B,<br>pancreatic                                                                             | 0.012614  | Inlier |
| siRNA-Temozolomide Run1-DMSO | NM_0073<br>52 | ELA3B  | elastase<br>3B,<br>pancreatic                                                                             | 0.254269  | Inlier |
| siRNA-Vinblastine Run1-DMSO  | NM_0073<br>52 | ELA3B  | elastase<br>3B,<br>pancreatic                                                                             | 1.094731  | Inlier |
| siRNA-Vinblastine Run2-DMSO  | NM_0073<br>52 | ELA3B  | elastase<br>3B,<br>pancreatic                                                                             | 1.345192  | Inlier |
| siRNA-Temozolomide Run1-DMSO | NM_0228<br>21 | ELOVL1 | elongation<br>of very<br>long chain<br>fatty acids<br>(FEN1/Elo<br>2,<br>SUR4/Elo<br>3, yeast)-<br>like 1 | -1.809826 | Inlier |
| siRNA Disorazole DMSO Run1   | NM_0228<br>21 | ELOVL1 | elongation<br>of very<br>long chain<br>fatty acids<br>(FEN1/Elo<br>2,<br>SUR4/Elo<br>3, yeast)-<br>like 1 | -0.905986 | Inlier |



Identification of Survival Genes in Human Glioblastoma Cells Using siRNA Screening

Nikhil G Thaker, Fang Zhang, Peter R. McDonald, Tong Ying Shun, Michael D Lewen, Ian F. Pollack, and John S. Lazo

Molecular Pharmacology

|                              |               |        |                                                                                  |           |        |
|------------------------------|---------------|--------|----------------------------------------------------------------------------------|-----------|--------|
| siRNA-Temozolomide Run3-DMSO | NM_0228<br>21 | ELOVL1 | elongation of very long chain fatty acids (FEN1/Elo 2, SUR4/Elo 3, yeast)-like 1 | -0.531529 | Inlier |
| siRNA-Temozolomide Run2-DMSO | NM_0228<br>21 | ELOVL1 | elongation of very long chain fatty acids (FEN1/Elo 2, SUR4/Elo 3, yeast)-like 1 | -0.206482 | Inlier |
| siRNA Disorazole DMSO Run2   | NM_0228<br>21 | ELOVL1 | elongation of very long chain fatty acids (FEN1/Elo 2, SUR4/Elo 3, yeast)-like 1 | 0.206482  | Inlier |
| siRNA Disorazole DMSO Run3   | NM_0228<br>21 | ELOVL1 | elongation of very long chain fatty acids (FEN1/Elo 2, SUR4/Elo 3, yeast)-like 1 | 0.276901  | Inlier |
| siRNA-Vinblastine Run2-DMSO  | NM_0228<br>21 | ELOVL1 | elongation of very long chain fatty acids (FEN1/Elo 2, SUR4/Elo 3, yeast)-like 1 | 0.817471  | Inlier |

Identification of Survival Genes in Human Glioblastoma Cells Using siRNA Screening

Nikhil G Thaker, Fang Zhang, Peter R. McDonald, Tong Ying Shun, Michael D Lewen, Ian F. Pollack, and John S. Lazo

Molecular Pharmacology

|                              |           |        |                                                                                |           |        |
|------------------------------|-----------|--------|--------------------------------------------------------------------------------|-----------|--------|
| siRNA-Vinblastine Run1-DMSO  | NM_022821 | ELOVL1 | elongation of very long chain fatty acids (FEN1/Elo2, SUR4/Elo3, yeast)-like 1 | 2.002354  | Inlier |
| siRNA-Temozolomide Run1-DMSO | NM_017770 | ELOVL2 | elongation of very long chain fatty acids (FEN1/Elo2, SUR4/Elo3, yeast)-like 2 | -1.342528 | Inlier |
| siRNA-Temozolomide Run3-DMSO | NM_017770 | ELOVL2 | elongation of very long chain fatty acids (FEN1/Elo2, SUR4/Elo3, yeast)-like 2 | -0.968222 | Inlier |
| siRNA-Temozolomide Run2-DMSO | NM_017770 | ELOVL2 | elongation of very long chain fatty acids (FEN1/Elo2, SUR4/Elo3, yeast)-like 2 | -0.71619  | Inlier |
| siRNA Disorazole DMSO Run1   | NM_017770 | ELOVL2 | elongation of very long chain fatty acids (FEN1/Elo2, SUR4/Elo3, yeast)-like 2 | -0.157259 | Inlier |

Identification of Survival Genes in Human Glioblastoma Cells Using siRNA Screening  
 Nikhil G Thaker, Fang Zhang, Peter R. McDonald, Tong Ying Shun, Michael D Lewen, Ian F. Pollack, and John S. Lazo  
 Molecular Pharmacology

|                                 |               |        |                                                                                                           |           |        |
|---------------------------------|---------------|--------|-----------------------------------------------------------------------------------------------------------|-----------|--------|
| siRNA Disorazole DMSO Run3      | NM_0177<br>70 | ELOVL2 | elongation<br>of very<br>long chain<br>fatty acids<br>(FEN1/Elo<br>2,<br>SUR4/Elo<br>3, yeast)-<br>like 2 | 0.157259  | Inlier |
| siRNA Disorazole DMSO Run2      | NM_0177<br>70 | ELOVL2 | elongation<br>of very<br>long chain<br>fatty acids<br>(FEN1/Elo<br>2,<br>SUR4/Elo<br>3, yeast)-<br>like 2 | 0.514901  | Inlier |
| siRNA-Vinblastine Run1-<br>DMSO | NM_0177<br>70 | ELOVL2 | elongation<br>of very<br>long chain<br>fatty acids<br>(FEN1/Elo<br>2,<br>SUR4/Elo<br>3, yeast)-<br>like 2 | 0.63281   | Inlier |
| siRNA-Vinblastine Run2-<br>DMSO | NM_0177<br>70 | ELOVL2 | elongation<br>of very<br>long chain<br>fatty acids<br>(FEN1/Elo<br>2,<br>SUR4/Elo<br>3, yeast)-<br>like 2 | 0.932065  | Inlier |
| siRNA-Vinblastine Run2-<br>DMSO | NM_1523<br>10 | ELOVL3 | elongation<br>of very<br>long chain<br>fatty acids<br>(FEN1/Elo<br>2,<br>SUR4/Elo<br>3, yeast)-<br>like 3 | -0.951033 | Inlier |

Identification of Survival Genes in Human Glioblastoma Cells Using siRNA Screening

Nikhil G Thaker, Fang Zhang, Peter R. McDonald, Tong Ying Shun, Michael D Lewen, Ian F. Pollack, and John S. Lazo

Molecular Pharmacology

|                              |               |        |                                                                                |           |        |
|------------------------------|---------------|--------|--------------------------------------------------------------------------------|-----------|--------|
| siRNA-Temozolomide Run2-DMSO | NM_1523<br>10 | ELOVL3 | elongation of very long chain fatty acids (FEN1/Elo2, SUR4/Elo3, yeast)-like 3 | -0.781606 | Inlier |
| siRNA Disorazole DMSO Run1   | NM_1523<br>10 | ELOVL3 | elongation of very long chain fatty acids (FEN1/Elo2, SUR4/Elo3, yeast)-like 3 | -0.222684 | Inlier |
| siRNA-Temozolomide Run3-DMSO | NM_1523<br>10 | ELOVL3 | elongation of very long chain fatty acids (FEN1/Elo2, SUR4/Elo3, yeast)-like 3 | -0.185635 | Inlier |
| siRNA Disorazole DMSO Run3   | NM_1523<br>10 | ELOVL3 | elongation of very long chain fatty acids (FEN1/Elo2, SUR4/Elo3, yeast)-like 3 | 0.185635  | Inlier |
| siRNA-Temozolomide Run1-DMSO | NM_1523<br>10 | ELOVL3 | elongation of very long chain fatty acids (FEN1/Elo2, SUR4/Elo3, yeast)-like 3 | 0.567394  | Inlier |

Identification of Survival Genes in Human Glioblastoma Cells Using siRNA Screening

Nikhil G Thaker, Fang Zhang, Peter R. McDonald, Tong Ying Shun, Michael D Lewen, Ian F. Pollack, and John S. Lazo

Molecular Pharmacology

|                                  |               |        |                                                                                                           |                  |
|----------------------------------|---------------|--------|-----------------------------------------------------------------------------------------------------------|------------------|
| siRNA Disorazole DMSO Run2       | NM_1523<br>10 | ELOVL3 | elongation<br>of very<br>long chain<br>fatty acids<br>(FEN1/Elo<br>2,<br>SUR4/Elo<br>3, yeast)-<br>like 3 | 4.149232 Outlier |
| siRNA-Vinblastine Run1-<br>DMSO  | NM_1523<br>10 | ELOVL3 | elongation<br>of very<br>long chain<br>fatty acids<br>(FEN1/Elo<br>2,<br>SUR4/Elo<br>3, yeast)-<br>like 3 | 6.860768 Outlier |
| siRNA-Temozolomide Run3-<br>DMSO | NM_0227<br>26 | ELOVL4 | elongation<br>of very<br>long chain<br>fatty acids<br>(FEN1/Elo<br>2,<br>SUR4/Elo<br>3, yeast)-<br>like 4 | -2.903034 Inlier |
| siRNA-Temozolomide Run2-<br>DMSO | NM_0227<br>26 | ELOVL4 | elongation<br>of very<br>long chain<br>fatty acids<br>(FEN1/Elo<br>2,<br>SUR4/Elo<br>3, yeast)-<br>like 4 | -1.905275 Inlier |
| siRNA-Temozolomide Run1-<br>DMSO | NM_0227<br>26 | ELOVL4 | elongation<br>of very<br>long chain<br>fatty acids<br>(FEN1/Elo<br>2,<br>SUR4/Elo<br>3, yeast)-<br>like 4 | -0.469565 Inlier |

Identification of Survival Genes in Human Glioblastoma Cells Using siRNA Screening

Nikhil G Thaker, Fang Zhang, Peter R. McDonald, Tong Ying Shun, Michael D Lewen, Ian F. Pollack, and John S. Lazo

Molecular Pharmacology

|                                 |               |        |                                                                                                           |           |        |
|---------------------------------|---------------|--------|-----------------------------------------------------------------------------------------------------------|-----------|--------|
| siRNA Disorazole DMSO Run1      | NM_0227<br>26 | ELOVL4 | elongation<br>of very<br>long chain<br>fatty acids<br>(FEN1/Elo<br>2,<br>SUR4/Elo<br>3, yeast)-<br>like 4 | -0.031821 | Inlier |
| siRNA Disorazole DMSO Run3      | NM_0227<br>26 | ELOVL4 | elongation<br>of very<br>long chain<br>fatty acids<br>(FEN1/Elo<br>2,<br>SUR4/Elo<br>3, yeast)-<br>like 4 | 0.031822  | Inlier |
| siRNA Disorazole DMSO Run2      | NM_0227<br>26 | ELOVL4 | elongation<br>of very<br>long chain<br>fatty acids<br>(FEN1/Elo<br>2,<br>SUR4/Elo<br>3, yeast)-<br>like 4 | 0.263684  | Inlier |
| siRNA-Vinblastine Run1-<br>DMSO | NM_0227<br>26 | ELOVL4 | elongation<br>of very<br>long chain<br>fatty acids<br>(FEN1/Elo<br>2,<br>SUR4/Elo<br>3, yeast)-<br>like 4 | 0.879435  | Inlier |
| siRNA-Vinblastine Run2-<br>DMSO | NM_0227<br>26 | ELOVL4 | elongation<br>of very<br>long chain<br>fatty acids<br>(FEN1/Elo<br>2,<br>SUR4/Elo<br>3, yeast)-<br>like 4 | 1.03295   | Inlier |

# Identification of Survival Genes in Human Glioblastoma Cells Using siRNA Screening

Nikhil G Thaker, Fang Zhang, Peter R. McDonald, Tong Ying Shun, Michael D Lewen, Ian F. Pollack, and John S. Lazo

Molecular Pharmacology

|                                  |               |        |                                                                                                                                   |           |        |
|----------------------------------|---------------|--------|-----------------------------------------------------------------------------------------------------------------------------------|-----------|--------|
| siRNA Disorazole DMSO Run1       | NM_0218<br>14 | ELOVL5 | ELOVL<br>family<br>member 5,<br>elongation<br>of long<br>chain fatty<br>acids<br>(FEN1/Elo<br>2,<br>SUR4/Elo<br>3-like,<br>yeast) | -1.415637 | Inlier |
| siRNA-Vinblastine Run2-<br>DMSO  | NM_0218<br>14 | ELOVL5 | ELOVL<br>family<br>member 5,<br>elongation<br>of long<br>chain fatty<br>acids<br>(FEN1/Elo<br>2,<br>SUR4/Elo<br>3-like,<br>yeast) | -0.995034 | Inlier |
| siRNA-Temozolomide Run1-<br>DMSO | NM_0218<br>14 | ELOVL5 | ELOVL<br>family<br>member 5,<br>elongation<br>of long<br>chain fatty<br>acids<br>(FEN1/Elo<br>2,<br>SUR4/Elo<br>3-like,<br>yeast) | -0.353966 | Inlier |

Identification of Survival Genes in Human Glioblastoma Cells Using siRNA Screening

Nikhil G Thaker, Fang Zhang, Peter R. McDonald, Tong Ying Shun, Michael D Lewen, Ian F. Pollack, and John S. Lazo

Molecular Pharmacology

|                                  |               |        |                                                                                                                                   |           |        |
|----------------------------------|---------------|--------|-----------------------------------------------------------------------------------------------------------------------------------|-----------|--------|
| siRNA Disorazole DMSO Run3       | NM_0218<br>14 | ELOVL5 | ELOVL<br>family<br>member 5,<br>elongation<br>of long<br>chain fatty<br>acids<br>(FEN1/Elo<br>2,<br>SUR4/Elo<br>3-like,<br>yeast) | -0.049281 | Inlier |
| siRNA-Temozolomide Run2-<br>DMSO | NM_0218<br>14 | ELOVL5 | ELOVL<br>family<br>member 5,<br>elongation<br>of long<br>chain fatty<br>acids<br>(FEN1/Elo<br>2,<br>SUR4/Elo<br>3-like,<br>yeast) | 0.049281  | Inlier |
| siRNA-Temozolomide Run3-<br>DMSO | NM_0218<br>14 | ELOVL5 | ELOVL<br>family<br>member 5,<br>elongation<br>of long<br>chain fatty<br>acids<br>(FEN1/Elo<br>2,<br>SUR4/Elo<br>3-like,<br>yeast) | 0.077146  | Inlier |



Identification of Survival Genes in Human Glioblastoma Cells Using siRNA Screening

Nikhil G Thaker, Fang Zhang, Peter R. McDonald, Tong Ying Shun, Michael D Lewen, Ian F. Pollack, and John S.

Lazo

Molecular Pharmacology

|                                  |               |        |                                                                                                                                   |           |         |
|----------------------------------|---------------|--------|-----------------------------------------------------------------------------------------------------------------------------------|-----------|---------|
| siRNA Disorazole DMSO Run2       | NM_0218<br>14 | ELOVL5 | ELOVL<br>family<br>member 5,<br>elongation<br>of long<br>chain fatty<br>acids<br>(FEN1/Elo<br>2,<br>SUR4/Elo<br>3-like,<br>yeast) | 3.603581  | Outlier |
| siRNA-Vinblastine Run1-<br>DMSO  | NM_0218<br>14 | ELOVL5 | ELOVL<br>family<br>member 5,<br>elongation<br>of long<br>chain fatty<br>acids<br>(FEN1/Elo<br>2,<br>SUR4/Elo<br>3-like,<br>yeast) | 4.833703  | Outlier |
| siRNA-Temozolomide Run2-<br>DMSO | NM_0240<br>90 | ELOVL6 | ELOVL<br>family<br>member 6,<br>elongation<br>of long<br>chain fatty<br>acids<br>(FEN1/Elo<br>2,<br>SUR4/Elo<br>3-like,<br>yeast) | -1.327823 | Inlier  |

# Identification of Survival Genes in Human Glioblastoma Cells Using siRNA Screening

Nikhil G Thaker, Fang Zhang, Peter R. McDonald, Tong Ying Shun, Michael D Lewen, Ian F. Pollack, and John S. Lazo

Molecular Pharmacology

|                            |               |        |                                                                                                                                   |                 |
|----------------------------|---------------|--------|-----------------------------------------------------------------------------------------------------------------------------------|-----------------|
| siRNA Disorazole DMSO Run1 | NM_0240<br>90 | ELOVL6 | ELOVL<br>family<br>member 6,<br>elongation<br>of long<br>chain fatty<br>acids<br>(FEN1/Elo<br>2,<br>SUR4/Elo<br>3-like,<br>yeast) | -0.66078 Inlier |
|----------------------------|---------------|--------|-----------------------------------------------------------------------------------------------------------------------------------|-----------------|

|                                  |               |        |                                                                                                                                   |                 |
|----------------------------------|---------------|--------|-----------------------------------------------------------------------------------------------------------------------------------|-----------------|
| siRNA-Temozolomide Run1-<br>DMSO | NM_0240<br>90 | ELOVL6 | ELOVL<br>family<br>member 6,<br>elongation<br>of long<br>chain fatty<br>acids<br>(FEN1/Elo<br>2,<br>SUR4/Elo<br>3-like,<br>yeast) | -0.64364 Inlier |
|----------------------------------|---------------|--------|-----------------------------------------------------------------------------------------------------------------------------------|-----------------|

|                                  |               |        |                                                                                                                                   |                 |
|----------------------------------|---------------|--------|-----------------------------------------------------------------------------------------------------------------------------------|-----------------|
| siRNA-Temozolomide Run3-<br>DMSO | NM_0240<br>90 | ELOVL6 | ELOVL<br>family<br>member 6,<br>elongation<br>of long<br>chain fatty<br>acids<br>(FEN1/Elo<br>2,<br>SUR4/Elo<br>3-like,<br>yeast) | -0.40285 Inlier |
|----------------------------------|---------------|--------|-----------------------------------------------------------------------------------------------------------------------------------|-----------------|

Identification of Survival Genes in Human Glioblastoma Cells Using siRNA Screening

Nikhil G Thaker, Fang Zhang, Peter R. McDonald, Tong Ying Shun, Michael D Lewen, Ian F. Pollack, and John S. Lazo

Molecular Pharmacology

|                                 |               |        |                                                                                                                                   |                 |
|---------------------------------|---------------|--------|-----------------------------------------------------------------------------------------------------------------------------------|-----------------|
| siRNA Disorazole DMSO Run2      | NM_0240<br>90 | ELOVL6 | ELOVL<br>family<br>member 6,<br>elongation<br>of long<br>chain fatty<br>acids<br>(FEN1/Elo<br>2,<br>SUR4/Elo<br>3-like,<br>yeast) | 0.402851 Inlier |
| siRNA Disorazole DMSO Run3      | NM_0240<br>90 | ELOVL6 | ELOVL<br>family<br>member 6,<br>elongation<br>of long<br>chain fatty<br>acids<br>(FEN1/Elo<br>2,<br>SUR4/Elo<br>3-like,<br>yeast) | 0.688219 Inlier |
| siRNA-Vinblastine Run2-<br>DMSO | NM_0240<br>90 | ELOVL6 | ELOVL<br>family<br>member 6,<br>elongation<br>of long<br>chain fatty<br>acids<br>(FEN1/Elo<br>2,<br>SUR4/Elo<br>3-like,<br>yeast) | 0.740546 Inlier |

Identification of Survival Genes in Human Glioblastoma Cells Using siRNA Screening

Nikhil G Thaker, Fang Zhang, Peter R. McDonald, Tong Ying Shun, Michael D Lewen, Ian F. Pollack, and John S.

Lazo

Molecular Pharmacology

|                              |           |        |                                                                                                |           |        |
|------------------------------|-----------|--------|------------------------------------------------------------------------------------------------|-----------|--------|
| siRNA-Vinblastine Run1-DMSO  | NM_024090 | ELOVL6 | ELOVL family member 6, elongation of long chain fatty acids (FEN1/Elo2, SUR4/Elo3-like, yeast) | 1.895906  | Inlier |
| siRNA-Temozolomide Run3-DMSO | NM_001974 | EMR1   | egf-like module containing, mucin-like, hormone receptor-like 1                                | -1.770401 | Inlier |
| siRNA Disorazole DMSO Run2   | NM_001974 | EMR1   | egf-like module containing, mucin-like, hormone receptor-like 1                                | -1.593977 | Inlier |
| siRNA-Temozolomide Run2-DMSO | NM_001974 | EMR1   | egf-like module containing, mucin-like, hormone receptor-like 1                                | -0.337307 | Inlier |
| siRNA Disorazole DMSO Run3   | NM_001974 | EMR1   | egf-like module containing, mucin-like, hormone receptor-like 1                                | -0.270848 | Inlier |

Identification of Survival Genes in Human Glioblastoma Cells Using siRNA Screening

Nikhil G Thaker, Fang Zhang, Peter R. McDonald, Tong Ying Shun, Michael D Lewen, Ian F. Pollack, and John S. Lazo

Molecular Pharmacology

|                              |           |      |                                                                 |           |        |
|------------------------------|-----------|------|-----------------------------------------------------------------|-----------|--------|
| siRNA-Temozolomide Run1-DMSO | NM_001974 | EMR1 | egf-like module containing, mucin-like, hormone receptor-like 1 | 0.270848  | Inlier |
| siRNA Disorazole DMSO Run1   | NM_001974 | EMR1 | egf-like module containing, mucin-like, hormone receptor-like 1 | 0.487178  | Inlier |
| siRNA-Vinblastine Run1-DMSO  | NM_001974 | EMR1 | egf-like module containing, mucin-like, hormone receptor-like 1 | 0.861822  | Inlier |
| siRNA-Vinblastine Run2-DMSO  | NM_001974 | EMR1 | egf-like module containing, mucin-like, hormone receptor-like 1 | 0.992994  | Inlier |
| siRNA-Temozolomide Run3-DMSO | NM_152918 | EMR2 | egf-like module containing, mucin-like, hormone receptor-like 2 | -2.486914 | Inlier |
| siRNA Disorazole DMSO Run2   | NM_152918 | EMR2 | egf-like module containing, mucin-like, hormone receptor-like 2 | -1.679341 | Inlier |

Identification of Survival Genes in Human Glioblastoma Cells Using siRNA Screening  
 Nikhil G Thaker, Fang Zhang, Peter R. McDonald, Tong Ying Shun, Michael D Lewen, Ian F. Pollack, and John S. Lazo  
 Molecular Pharmacology

|                                  |               |      |                                                                                    |           |        |
|----------------------------------|---------------|------|------------------------------------------------------------------------------------|-----------|--------|
| siRNA Disorazole DMSO Run3       | NM_1529<br>18 | EMR2 | egf-like<br>module<br>containing,<br>mucin-like,<br>hormone<br>receptor-<br>like 2 | -0.769844 | Inlier |
| siRNA Disorazole DMSO Run1       | NM_1529<br>18 | EMR2 | egf-like<br>module<br>containing,<br>mucin-like,<br>hormone<br>receptor-<br>like 2 | -0.113849 | Inlier |
| siRNA-Temozolomide Run1-<br>DMSO | NM_1529<br>18 | EMR2 | egf-like<br>module<br>containing,<br>mucin-like,<br>hormone<br>receptor-<br>like 2 | 0.113849  | Inlier |
| siRNA-Vinblastine Run1-<br>DMSO  | NM_1529<br>18 | EMR2 | egf-like<br>module<br>containing,<br>mucin-like,<br>hormone<br>receptor-<br>like 2 | 0.606509  | Inlier |
| siRNA-Vinblastine Run2-<br>DMSO  | NM_1529<br>18 | EMR2 | egf-like<br>module<br>containing,<br>mucin-like,<br>hormone<br>receptor-<br>like 2 | 0.652073  | Inlier |
| siRNA-Temozolomide Run2-<br>DMSO | NM_1529<br>18 | EMR2 | egf-like<br>module<br>containing,<br>mucin-like,<br>hormone<br>receptor-<br>like 2 | 0.696927  | Inlier |

Identification of Survival Genes in Human Glioblastoma Cells Using siRNA Screening

Nikhil G Thaker, Fang Zhang, Peter R. McDonald, Tong Ying Shun, Michael D Lewen, Ian F. Pollack, and John S. Lazo

Molecular Pharmacology

|                                  |               |      |                                                                                    |           |        |
|----------------------------------|---------------|------|------------------------------------------------------------------------------------|-----------|--------|
| siRNA Disorazole DMSO Run2       | NM_1529<br>39 | EMR3 | egf-like<br>module<br>containing,<br>mucin-like,<br>hormone<br>receptor-<br>like 3 | -1.788898 | Inlier |
| siRNA-Temozolomide Run3-<br>DMSO | NM_1529<br>39 | EMR3 | egf-like<br>module<br>containing,<br>mucin-like,<br>hormone<br>receptor-<br>like 3 | -0.824977 | Inlier |
| siRNA Disorazole DMSO Run3       | NM_1529<br>39 | EMR3 | egf-like<br>module<br>containing,<br>mucin-like,<br>hormone<br>receptor-<br>like 3 | -0.400648 | Inlier |
| siRNA-Temozolomide Run2-<br>DMSO | NM_1529<br>39 | EMR3 | egf-like<br>module<br>containing,<br>mucin-like,<br>hormone<br>receptor-<br>like 3 | -0.105979 | Inlier |
| siRNA-Temozolomide Run1-<br>DMSO | NM_1529<br>39 | EMR3 | egf-like<br>module<br>containing,<br>mucin-like,<br>hormone<br>receptor-<br>like 3 | 0.10598   | Inlier |
| siRNA Disorazole DMSO Run1       | NM_1529<br>39 | EMR3 | egf-like<br>module<br>containing,<br>mucin-like,<br>hormone<br>receptor-<br>like 3 | 0.52529   | Inlier |

Identification of Survival Genes in Human Glioblastoma Cells Using siRNA Screening  
 Nikhil G Thaker, Fang Zhang, Peter R. McDonald, Tong Ying Shun, Michael D Lewen, Ian F. Pollack, and John S. Lazo  
 Molecular Pharmacology

|                              |               |         |                                                                                    |           |        |
|------------------------------|---------------|---------|------------------------------------------------------------------------------------|-----------|--------|
| siRNA-Vinblastine Run1-DMSO  | NM_1529<br>39 | EMR3    | egf-like<br>module<br>containing,<br>mucin-like,<br>hormone<br>receptor-<br>like 3 | 0.82371   | Inlier |
| siRNA-Vinblastine Run2-DMSO  | NM_1529<br>39 | EMR3    | egf-like<br>module<br>containing,<br>mucin-like,<br>hormone<br>receptor-<br>like 3 | 1.037227  | Inlier |
| siRNA-Temozolomide Run3-DMSO | NM_0044<br>35 | ENDOG   | endonucle<br>ase G                                                                 | -1.4091   | Inlier |
| siRNA-Temozolomide Run2-DMSO | NM_0044<br>35 | ENDOG   | endonucle<br>ase G                                                                 | -0.694212 | Inlier |
| siRNA-Temozolomide Run1-DMSO | NM_0044<br>35 | ENDOG   | endonucle<br>ase G                                                                 | -0.206388 | Inlier |
| siRNA Disorazole DMSO Run3   | NM_0044<br>35 | ENDOG   | endonucle<br>ase G                                                                 | -0.043928 | Inlier |
| siRNA-Vinblastine Run2-DMSO  | NM_0044<br>35 | ENDOG   | endonucle<br>ase G                                                                 | 0.043928  | Inlier |
| siRNA Disorazole DMSO Run1   | NM_0044<br>35 | ENDOG   | endonucle<br>ase G                                                                 | 0.654788  | Inlier |
| siRNA Disorazole DMSO Run2   | NM_0044<br>35 | ENDOG   | endonucle<br>ase G                                                                 | 0.87587   | Inlier |
| siRNA-Vinblastine Run1-DMSO  | NM_0044<br>35 | ENDOG   | endonucle<br>ase G                                                                 | 1.264511  | Inlier |
| siRNA-Vinblastine Run2-DMSO  | NM_0051<br>07 | ENDOGL1 | endonucle<br>ase G-like<br>1                                                       | -1.86986  | Inlier |
| siRNA Disorazole DMSO Run3   | NM_0051<br>07 | ENDOGL1 | endonucle<br>ase G-like<br>1                                                       | -0.976548 | Inlier |
| siRNA-Temozolomide Run3-DMSO | NM_0051<br>07 | ENDOGL1 | endonucle<br>ase G-like<br>1                                                       | -0.380112 | Inlier |
| siRNA-Temozolomide Run2-DMSO | NM_0051<br>07 | ENDOGL1 | endonucle<br>ase G-like<br>1                                                       | -0.044937 | Inlier |
| siRNA Disorazole DMSO Run1   | NM_0051<br>07 | ENDOGL1 | endonucle<br>ase G-like<br>1                                                       | 0.044936  | Inlier |
| siRNA Disorazole DMSO Run2   | NM_0051<br>07 | ENDOGL1 | endonucle<br>ase G-like<br>1                                                       | 0.141766  | Inlier |



Identification of Survival Genes in Human Glioblastoma Cells Using siRNA Screening  
 Nikhil G Thaker, Fang Zhang, Peter R. McDonald, Tong Ying Shun, Michael D Lewen, Ian F. Pollack, and John S. Lazo

| Molecular Pharmacology       |           |         | endonucle                   |                  |
|------------------------------|-----------|---------|-----------------------------|------------------|
| siRNA-Vinblastine Run1-DMSO  | NM_005107 | ENDOGL1 | ase G-like                  | 0.968888 Inlier  |
| siRNA-Temozolomide Run1-DMSO | NM_005107 | ENDOGL1 | ase G-like                  | 1.967873 Inlier  |
| siRNA-Vinblastine Run2-DMSO  | NM_001428 | ENO1    | enolase 1, (alpha)          | -2.438079 Inlier |
| siRNA-Temozolomide Run3-DMSO | NM_001428 | ENO1    | enolase 1, (alpha)          | -1.430734 Inlier |
| siRNA Disorazole DMSO Run1   | NM_001428 | ENO1    | enolase 1, (alpha)          | -0.327832 Inlier |
| siRNA-Vinblastine Run1-DMSO  | NM_001428 | ENO1    | enolase 1, (alpha)          | -0.134798 Inlier |
| siRNA Disorazole DMSO Run2   | NM_001428 | ENO1    | enolase 1, (alpha)          | 0.134798 Inlier  |
| siRNA-Temozolomide Run1-DMSO | NM_001428 | ENO1    | enolase 1, (alpha)          | 0.638191 Inlier  |
| siRNA Disorazole DMSO Run3   | NM_001428 | ENO1    | enolase 1, (alpha)          | 0.710809 Inlier  |
| siRNA-Temozolomide Run2-DMSO | NM_001428 | ENO1    | enolase 1, (alpha)          | 1.249987 Inlier  |
| siRNA-Temozolomide Run3-DMSO | NM_001975 | ENO2    | enolase 2 (gamma, neuronal) | -1.606768 Inlier |
| siRNA-Temozolomide Run1-DMSO | NM_001975 | ENO2    | enolase 2 (gamma, neuronal) | -0.874882 Inlier |
| siRNA-Temozolomide Run2-DMSO | NM_001975 | ENO2    | enolase 2 (gamma, neuronal) | -0.648944 Inlier |
| siRNA Disorazole DMSO Run1   | NM_001975 | ENO2    | enolase 2 (gamma, neuronal) | -0.403533 Inlier |
| siRNA Disorazole DMSO Run2   | NM_001975 | ENO2    | enolase 2 (gamma, neuronal) | 0.403533 Inlier  |
| siRNA-Vinblastine Run2-DMSO  | NM_001975 | ENO2    | enolase 2 (gamma, neuronal) | 0.414683 Inlier  |
| siRNA Disorazole DMSO Run3   | NM_001975 | ENO2    | enolase 2 (gamma, neuronal) | 0.700056 Inlier  |
| siRNA-Vinblastine Run1-DMSO  | NM_001975 | ENO2    | enolase 2 (gamma, neuronal) | 1.088059 Inlier  |
| siRNA-Temozolomide Run3-DMSO | NM_001976 | ENO3    | enolase 3 (beta, muscle)    | -1.841643 Inlier |
| siRNA-Temozolomide Run2-DMSO | NM_001976 | ENO3    | enolase 3 (beta, muscle)    | -1.131717 Inlier |

Identification of Survival Genes in Human Glioblastoma Cells Using siRNA Screening  
 Nikhil G Thaker, Fang Zhang, Peter R. McDonald, Tong Ying Shun, Michael D Lewen, Ian F. Pollack, and John S. Lazo

| Molecular Pharmacology       |               |       |                                                          |           |        |
|------------------------------|---------------|-------|----------------------------------------------------------|-----------|--------|
| siRNA-Temozolomide Run1-DMSO | NM_0019<br>76 | ENO3  | enolase 3<br>(beta,<br>muscle)                           | -0.979205 | Inlier |
| siRNA Disorazole DMSO Run1   | NM_0019<br>76 | ENO3  | enolase 3<br>(beta,<br>muscle)                           | -0.21763  | Inlier |
| siRNA-Vinblastine Run1-DMSO  | NM_0019<br>76 | ENO3  | enolase 3<br>(beta,<br>muscle)                           | 0.21763   | Inlier |
| siRNA Disorazole DMSO Run3   | NM_0019<br>76 | ENO3  | enolase 3<br>(beta,<br>muscle)                           | 0.368798  | Inlier |
| siRNA-Vinblastine Run2-DMSO  | NM_0019<br>76 | ENO3  | enolase 3<br>(beta,<br>muscle)                           | 0.57664   | Inlier |
| siRNA Disorazole DMSO Run2   | NM_0019<br>76 | ENO3  | enolase 3<br>(beta,<br>muscle)                           | 0.77236   | Inlier |
| siRNA-Temozolomide Run3-DMSO | NM_0019<br>77 | ENPEP | glutamyl<br>aminopept<br>idase<br>(aminopep<br>tidase A) | -1.310575 | Inlier |
| siRNA-Temozolomide Run2-DMSO | NM_0019<br>77 | ENPEP | glutamyl<br>aminopept<br>idase<br>(aminopep<br>tidase A) | -1.008142 | Inlier |
| siRNA Disorazole DMSO Run1   | NM_0019<br>77 | ENPEP | glutamyl<br>aminopept<br>idase<br>(aminopep<br>tidase A) | -0.354795 | Inlier |
| siRNA Disorazole DMSO Run3   | NM_0019<br>77 | ENPEP | glutamyl<br>aminopept<br>idase<br>(aminopep<br>tidase A) | -0.054715 | Inlier |
| siRNA-Temozolomide Run1-DMSO | NM_0019<br>77 | ENPEP | glutamyl<br>aminopept<br>idase<br>(aminopep<br>tidase A) | 0.054715  | Inlier |
| siRNA Disorazole DMSO Run2   | NM_0019<br>77 | ENPEP | glutamyl<br>aminopept<br>idase<br>(aminopep<br>tidase A) | 0.420803  | Inlier |

Identification of Survival Genes in Human Glioblastoma Cells Using siRNA Screening  
 Nikhil G Thaker, Fang Zhang, Peter R. McDonald, Tong Ying Shun, Michael D Lewen, Ian F. Pollack, and John S. Lazo

Molecular Pharmacology

| siRNA Treatment              | Gene ID   | Gene Name | Protein Name                                       | Log2 Fold Change | Outlier Status |
|------------------------------|-----------|-----------|----------------------------------------------------|------------------|----------------|
| siRNA-Vinblastine Run2-DMSO  | NM_001977 | ENPEP     | glutamyl aminopeptidase (aminopeptidase A)         | 0.928197         | Inlier         |
| siRNA-Vinblastine Run1-DMSO  | NM_001977 | ENPEP     | glutamyl aminopeptidase (aminopeptidase A)         | 1.074984         | Inlier         |
| siRNA-Temozolomide Run3-DMSO | NM_006208 | ENPP1     | ectonucleotide pyrophosphatase/phosphodiesterase 1 | -1.045963        | Inlier         |
| siRNA Disorazole DMSO Run2   | NM_006208 | ENPP1     | ectonucleotide pyrophosphatase/phosphodiesterase 1 | -0.672041        | Inlier         |
| siRNA Disorazole DMSO Run1   | NM_006208 | ENPP1     | ectonucleotide pyrophosphatase/phosphodiesterase 1 | -0.422035        | Inlier         |
| siRNA Disorazole DMSO Run3   | NM_006208 | ENPP1     | ectonucleotide pyrophosphatase/phosphodiesterase 1 | -0.346307        | Inlier         |
| siRNA-Temozolomide Run1-DMSO | NM_006208 | ENPP1     | ectonucleotide pyrophosphatase/phosphodiesterase 1 | 0.346306         | Inlier         |
| siRNA-Vinblastine Run1-DMSO  | NM_006208 | ENPP1     | ectonucleotide pyrophosphatase/phosphodiesterase 1 | 0.676959         | Inlier         |
| siRNA-Vinblastine Run2-DMSO  | NM_006208 | ENPP1     | ectonucleotide pyrophosphatase/phosphodiesterase 1 | 0.959144         | Inlier         |

Identification of Survival Genes in Human Glioblastoma Cells Using siRNA Screening

Nikhil G Thaker, Fang Zhang, Peter R. McDonald, Tong Ying Shun, Michael D Lewen, Ian F. Pollack, and John S. Lazo

Molecular Pharmacology

|                              |           |       |                                                                |           |         |
|------------------------------|-----------|-------|----------------------------------------------------------------|-----------|---------|
| siRNA-Temozolomide Run2-DMSO | NM_006208 | ENPP1 | ectonucleotide pyrophosphatase/phosphodiesterase 1             | 1.096079  | Inlier  |
| siRNA Disorazole DMSO Run2   | NM_006209 | ENPP2 | ectonucleotide pyrophosphatase/phosphodiesterase 2 (autotaxin) | -3.888675 | Outlier |
| siRNA-Temozolomide Run3-DMSO | NM_006209 | ENPP2 | ectonucleotide pyrophosphatase/phosphodiesterase 2 (autotaxin) | -0.874921 | Inlier  |
| siRNA-Temozolomide Run2-DMSO | NM_006209 | ENPP2 | ectonucleotide pyrophosphatase/phosphodiesterase 2 (autotaxin) | -0.87266  | Inlier  |
| siRNA Disorazole DMSO Run3   | NM_006209 | ENPP2 | ectonucleotide pyrophosphatase/phosphodiesterase 2 (autotaxin) | -0.05864  | Inlier  |
| siRNA-Temozolomide Run1-DMSO | NM_006209 | ENPP2 | ectonucleotide pyrophosphatase/phosphodiesterase 2 (autotaxin) | 0.05864   | Inlier  |

Identification of Survival Genes in Human Glioblastoma Cells Using siRNA Screening  
 Nikhil G Thaker, Fang Zhang, Peter R. McDonald, Tong Ying Shun, Michael D Lewen, Ian F. Pollack, and John S. Lazo  
 Molecular Pharmacology

|                              |           |       |                                                                |           |        |
|------------------------------|-----------|-------|----------------------------------------------------------------|-----------|--------|
| siRNA Disorazole DMSO Run1   | NM_006209 | ENPP2 | ectonucleotide pyrophosphatase/phosphodiesterase 2 (autotaxin) | 0.108385  | Inlier |
| siRNA-Vinblastine Run2-DMSO  | NM_006209 | ENPP2 | ectonucleotide pyrophosphatase/phosphodiesterase 2 (autotaxin) | 0.570657  | Inlier |
| siRNA-Vinblastine Run1-DMSO  | NM_006209 | ENPP2 | ectonucleotide pyrophosphatase/phosphodiesterase 2 (autotaxin) | 0.778343  | Inlier |
| siRNA-Temozolomide Run3-DMSO | NM_005021 | ENPP3 | ectonucleotide pyrophosphatase/phosphodiesterase 3             | -1.341712 | Inlier |
| siRNA Disorazole DMSO Run2   | NM_005021 | ENPP3 | ectonucleotide pyrophosphatase/phosphodiesterase 3             | -1.282641 | Inlier |
| siRNA Disorazole DMSO Run1   | NM_005021 | ENPP3 | ectonucleotide pyrophosphatase/phosphodiesterase 3             | -0.742865 | Inlier |
| siRNA-Temozolomide Run2-DMSO | NM_005021 | ENPP3 | ectonucleotide pyrophosphatase/phosphodiesterase 3             | -0.07475  | Inlier |

Identification of Survival Genes in Human Glioblastoma Cells Using siRNA Screening

Nikhil G Thaker, Fang Zhang, Peter R. McDonald, Tong Ying Shun, Michael D Lewen, Ian F. Pollack, and John S. Lazo

Molecular Pharmacology

|                              |               |       |                                                                              |           |        |
|------------------------------|---------------|-------|------------------------------------------------------------------------------|-----------|--------|
| siRNA-Vinblastine Run2-DMSO  | NM_0050<br>21 | ENPP3 | ectonucleotide<br>pyrophosphatase/phosphodiesterase 3                        | 0.07475   | Inlier |
| siRNA-Vinblastine Run1-DMSO  | NM_0050<br>21 | ENPP3 | ectonucleotide<br>pyrophosphatase/phosphodiesterase 3                        | 0.4521    | Inlier |
| siRNA-Temozolomide Run1-DMSO | NM_0050<br>21 | ENPP3 | ectonucleotide<br>pyrophosphatase/phosphodiesterase 3                        | 0.606135  | Inlier |
| siRNA Disorazole DMSO Run3   | NM_0050<br>21 | ENPP3 | ectonucleotide<br>pyrophosphatase/phosphodiesterase 3                        | 1.017062  | Inlier |
| siRNA-Temozolomide Run3-DMSO | NM_0149<br>36 | ENPP4 | (putative function)<br>ectonucleotide<br>pyrophosphatase/phosphodiesterase 4 | -1.208482 | Inlier |
| siRNA Disorazole DMSO Run2   | NM_0149<br>36 | ENPP4 | (putative function)<br>ectonucleotide<br>pyrophosphatase/phosphodiesterase 4 | -1.011412 | Inlier |
| siRNA Disorazole DMSO Run3   | NM_0149<br>36 | ENPP4 | (putative function)                                                          | -0.668718 | Inlier |

Identification of Survival Genes in Human Glioblastoma Cells Using siRNA Screening

Nikhil G Thaker, Fang Zhang, Peter R. McDonald, Tong Ying Shun, Michael D Lewen, Ian F. Pollack, and John S. Lazo

Molecular Pharmacology

|                              |           |       |                                                                        |           |        |
|------------------------------|-----------|-------|------------------------------------------------------------------------|-----------|--------|
| siRNA-Temozolomide Run2-DMSO | NM_014936 | ENPP4 | ectonucleotide pyrophosphatase/phosphodiesterase 4 (putative function) | -0.011848 | Inlier |
| siRNA-Temozolomide Run1-DMSO | NM_014936 | ENPP4 | ectonucleotide pyrophosphatase/phosphodiesterase 4 (putative function) | 0.011849  | Inlier |
| siRNA Disorazole DMSO Run1   | NM_014936 | ENPP4 | ectonucleotide pyrophosphatase/phosphodiesterase 4 (putative function) | 0.08636   | Inlier |
| siRNA-Vinblastine Run2-DMSO  | NM_014936 | ENPP4 | ectonucleotide pyrophosphatase/phosphodiesterase 4 (putative function) | 0.680282  | Inlier |
| siRNA-Vinblastine Run1-DMSO  | NM_014936 | ENPP4 | ectonucleotide pyrophosphatase/phosphodiesterase 4 (putative function) | 0.688628  | Inlier |
| siRNA-Temozolomide Run3-DMSO | NM_021572 | ENPP5 | ectonucleotide pyrophosphatase/phosphodiesterase 5 (putative function) | -0.8906   | Inlier |

Identification of Survival Genes in Human Glioblastoma Cells Using siRNA Screening

Nikhil G Thaker, Fang Zhang, Peter R. McDonald, Tong Ying Shun, Michael D Lewen, Ian F. Pollack, and John S. Lazo

Molecular Pharmacology

| siRNA                        | Gene      | ENPP5 | Function                                                               | Value     | Category |
|------------------------------|-----------|-------|------------------------------------------------------------------------|-----------|----------|
| siRNA-Temozolomide Run2-DMSO | NM_021572 | ENPP5 | ectonucleotide pyrophosphatase/phosphodiesterase 5 (putative function) | -0.759811 | Inlier   |
| siRNA Disorazole DMSO Run2   | NM_021572 | ENPP5 | ectonucleotide pyrophosphatase/phosphodiesterase 5 (putative function) | -0.589189 | Inlier   |
| siRNA Disorazole DMSO Run3   | NM_021572 | ENPP5 | ectonucleotide pyrophosphatase/phosphodiesterase 5 (putative function) | -0.315321 | Inlier   |
| siRNA-Temozolomide Run1-DMSO | NM_021572 | ENPP5 | ectonucleotide pyrophosphatase/phosphodiesterase 5 (putative function) | 0.315321  | Inlier   |
| siRNA Disorazole DMSO Run1   | NM_021572 | ENPP5 | ectonucleotide pyrophosphatase/phosphodiesterase 5 (putative function) | 0.364196  | Inlier   |
| siRNA-Vinblastine Run1-DMSO  | NM_021572 | ENPP5 | ectonucleotide pyrophosphatase/phosphodiesterase 5 (putative function) | 0.947857  | Inlier   |



Identification of Survival Genes in Human Glioblastoma Cells Using siRNA Screening  
 Nikhil G Thaker, Fang Zhang, Peter R. McDonald, Tong Ying Shun, Michael D Lewen, Ian F. Pollack, and John S. Lazo

Molecular Pharmacology

|                              |           |       |                                                                        |           |        |
|------------------------------|-----------|-------|------------------------------------------------------------------------|-----------|--------|
| siRNA-Vinblastine Run2-DMSO  | NM_021572 | ENPP5 | ectonucleotide pyrophosphatase/phosphodiesterase 5 (putative function) | 0.973218  | Inlier |
| siRNA-Vinblastine Run2-DMSO  | NM_153343 | ENPP6 | ectonucleotide pyrophosphatase/phosphodiesterase 6                     | -1.169512 | Inlier |
| siRNA-Temozolomide Run2-DMSO | NM_153343 | ENPP6 | ectonucleotide pyrophosphatase/phosphodiesterase 6                     | -0.637257 | Inlier |
| siRNA-Temozolomide Run3-DMSO | NM_153343 | ENPP6 | ectonucleotide pyrophosphatase/phosphodiesterase 6                     | -0.588981 | Inlier |
| siRNA Disorazole DMSO Run3   | NM_153343 | ENPP6 | ectonucleotide pyrophosphatase/phosphodiesterase 6                     | -0.417618 | Inlier |
| siRNA-Temozolomide Run1-DMSO | NM_153343 | ENPP6 | ectonucleotide pyrophosphatase/phosphodiesterase 6                     | 0.417619  | Inlier |
| siRNA Disorazole DMSO Run1   | NM_153343 | ENPP6 | ectonucleotide pyrophosphatase/phosphodiesterase 6                     | 0.711743  | Inlier |
| siRNA-Vinblastine Run1-DMSO  | NM_153343 | ENPP6 | ectonucleotide pyrophosphatase/phosphodiesterase 6                     | 1.245542  | Inlier |

Identification of Survival Genes in Human Glioblastoma Cells Using siRNA Screening  
 Nikhil G Thaker, Fang Zhang, Peter R. McDonald, Tong Ying Shun, Michael D Lewen, Ian F. Pollack, and John S. Lazo

Molecular Pharmacology

|                              |               |       |                                                       |           |        |
|------------------------------|---------------|-------|-------------------------------------------------------|-----------|--------|
| siRNA Disorazole DMSO Run2   | NM_1533<br>43 | ENPP6 | ectonucleotide<br>pyrophosphatase/phosphodiesterase 6 | 2.019704  | Inlier |
| siRNA-Temozolomide Run1-DMSO | NM_1785<br>43 | ENPP7 | ectonucleotide<br>pyrophosphatase/phosphodiesterase 7 | -1.084218 | Inlier |
| siRNA-Temozolomide Run3-DMSO | NM_1785<br>43 | ENPP7 | ectonucleotide<br>pyrophosphatase/phosphodiesterase 7 | -0.96633  | Inlier |
| siRNA Disorazole DMSO Run1   | NM_1785<br>43 | ENPP7 | ectonucleotide<br>pyrophosphatase/phosphodiesterase 7 | -0.845881 | Inlier |
| siRNA-Vinblastine Run2-DMSO  | NM_1785<br>43 | ENPP7 | ectonucleotide<br>pyrophosphatase/phosphodiesterase 7 | -0.009634 | Inlier |
| siRNA-Vinblastine Run1-DMSO  | NM_1785<br>43 | ENPP7 | ectonucleotide<br>pyrophosphatase/phosphodiesterase 7 | 0.009635  | Inlier |
| siRNA-Temozolomide Run2-DMSO | NM_1785<br>43 | ENPP7 | ectonucleotide<br>pyrophosphatase/phosphodiesterase 7 | 0.089542  | Inlier |
| siRNA Disorazole DMSO Run2   | NM_1785<br>43 | ENPP7 | ectonucleotide<br>pyrophosphatase/phosphodiesterase 7 | 0.503119  | Inlier |

Identification of Survival Genes in Human Glioblastoma Cells Using siRNA Screening  
 Nikhil G Thaker, Fang Zhang, Peter R. McDonald, Tong Ying Shun, Michael D Lewen, Ian F. Pollack, and John S. Lazo

Molecular Pharmacology

|                              |               |        |                                                                       |           |         |
|------------------------------|---------------|--------|-----------------------------------------------------------------------|-----------|---------|
| siRNA Disorazole DMSO Run3   | NM_1785<br>43 | ENPP7  | ectonucleo<br>tide<br>pyrophosp<br>hatase/ph<br>osphodiesterase 7     | 7.050071  | Outlier |
| siRNA-Temozolomide Run3-DMSO | NM_0017<br>76 | ENTPD1 | ectonucleo<br>side<br>triphospha<br>te<br>diphospho<br>hydrolase<br>1 | -0.909111 | Inlier  |
| siRNA-Temozolomide Run2-DMSO | NM_0017<br>76 | ENTPD1 | ectonucleo<br>side<br>triphospha<br>te<br>diphospho<br>hydrolase<br>1 | -0.716162 | Inlier  |
| siRNA-Vinblastine Run2-DMSO  | NM_0017<br>76 | ENTPD1 | ectonucleo<br>side<br>triphospha<br>te<br>diphospho<br>hydrolase<br>1 | -0.632838 | Inlier  |
| siRNA Disorazole DMSO Run3   | NM_0017<br>76 | ENTPD1 | ectonucleo<br>side<br>triphospha<br>te<br>diphospho<br>hydrolase<br>1 | -0.221517 | Inlier  |
| siRNA-Temozolomide Run1-DMSO | NM_0017<br>76 | ENTPD1 | ectonucleo<br>side<br>triphospha<br>te<br>diphospho<br>hydrolase<br>1 | 0.221516  | Inlier  |
| siRNA Disorazole DMSO Run1   | NM_0017<br>76 | ENTPD1 | ectonucleo<br>side<br>triphospha<br>te<br>diphospho<br>hydrolase<br>1 | 0.554015  | Inlier  |

Identification of Survival Genes in Human Glioblastoma Cells Using siRNA Screening

Nikhil G Thaker, Fang Zhang, Peter R. McDonald, Tong Ying Shun, Michael D Lewen, Ian F. Pollack, and John S. Lazo

Molecular Pharmacology

| siRNA Treatment              | Gene ID   | Gene Name | Accession | Value     | Category |
|------------------------------|-----------|-----------|-----------|-----------|----------|
| siRNA-Vinblastine Run1-DMSO  | NM_001776 | ENTPD1    | 1         | 1.180025  | Inlier   |
| siRNA Disorazole DMSO Run2   | NM_001776 | ENTPD1    | 1         | 1.794836  | Inlier   |
| siRNA-Temozolomide Run3-DMSO | NM_203468 | ENTPD2    | 2         | -0.970918 | Inlier   |
| siRNA-Temozolomide Run2-DMSO | NM_203468 | ENTPD2    | 2         | -0.755947 | Inlier   |
| siRNA-Vinblastine Run2-DMSO  | NM_203468 | ENTPD2    | 2         | -0.426719 | Inlier   |
| siRNA Disorazole DMSO Run3   | NM_203468 | ENTPD2    | 2         | -0.058555 | Inlier   |
| siRNA-Temozolomide Run1-DMSO | NM_203468 | ENTPD2    | 2         | 0.058555  | Inlier   |

Identification of Survival Genes in Human Glioblastoma Cells Using siRNA Screening  
 Nikhil G Thaker, Fang Zhang, Peter R. McDonald, Tong Ying Shun, Michael D Lewen, Ian F. Pollack, and John S. Lazo

Molecular Pharmacology

| siRNA Treatment                  | Gene ID       | Gene Name | Accession                                                             | Value     | Category |
|----------------------------------|---------------|-----------|-----------------------------------------------------------------------|-----------|----------|
| siRNA Disorazole DMSO Run1       | NM_2034<br>68 | ENTPD2    | ectonucleo<br>side<br>triphospha<br>te<br>diphospha<br>hydrolase<br>2 | 0.593053  | Inlier   |
| siRNA-Vinblastine Run1-<br>DMSO  | NM_2034<br>68 | ENTPD2    | ectonucleo<br>side<br>triphospha<br>te<br>diphospha<br>hydrolase<br>2 | 4.377157  | Outlier  |
| siRNA Disorazole DMSO Run2       | NM_2034<br>68 | ENTPD2    | ectonucleo<br>side<br>triphospha<br>te<br>diphospha<br>hydrolase<br>2 | 4.377604  | Outlier  |
| siRNA-Temozolomide Run3-<br>DMSO | NM_0012<br>48 | ENTPD3    | ectonucleo<br>side<br>triphospha<br>te<br>diphospha<br>hydrolase<br>3 | -1.041973 | Inlier   |
| siRNA Disorazole DMSO Run3       | NM_0012<br>48 | ENTPD3    | ectonucleo<br>side<br>triphospha<br>te<br>diphospha<br>hydrolase<br>3 | -0.775528 | Inlier   |
| siRNA-Temozolomide Run2-<br>DMSO | NM_0012<br>48 | ENTPD3    | ectonucleo<br>side<br>triphospha<br>te<br>diphospha<br>hydrolase<br>3 | -0.573472 | Inlier   |
| siRNA-Vinblastine Run2-<br>DMSO  | NM_0012<br>48 | ENTPD3    | ectonucleo<br>side<br>triphospha<br>te<br>diphospha<br>hydrolase<br>3 | -0.001385 | Inlier   |

Identification of Survival Genes in Human Glioblastoma Cells Using siRNA Screening  
 Nikhil G Thaker, Fang Zhang, Peter R. McDonald, Tong Ying Shun, Michael D Lewen, Ian F. Pollack, and John S. Lazo

Molecular Pharmacology

| siRNA Treatment              | Gene   | Accession | Gene                                             | Count | Value     | Category |
|------------------------------|--------|-----------|--------------------------------------------------|-------|-----------|----------|
| siRNA Disorazole DMSO Run1   | ENTPD3 | NM_001248 | ectonucleoside triphosphate diphosphohydrolase 3 | 3     | 0.001385  | Inlier   |
| siRNA-Temozolomide Run1-DMSO | ENTPD3 | NM_001248 | ectonucleoside triphosphate diphosphohydrolase 3 | 3     | 0.028033  | Inlier   |
| siRNA-Vinblastine Run1-DMSO  | ENTPD3 | NM_001248 | ectonucleoside triphosphate diphosphohydrolase 3 | 3     | 2.336284  | Inlier   |
| siRNA Disorazole DMSO Run2   | ENTPD3 | NM_001248 | ectonucleoside triphosphate diphosphohydrolase 3 | 3     | 3.707821  | Outlier  |
| siRNA-Temozolomide Run3-DMSO | ENTPD4 | NM_004901 | ectonucleoside triphosphate diphosphohydrolase 4 | 4     | -1.352246 | Inlier   |
| siRNA-Temozolomide Run2-DMSO | ENTPD4 | NM_004901 | ectonucleoside triphosphate diphosphohydrolase 4 | 4     | -0.5338   | Inlier   |
| siRNA-Temozolomide Run1-DMSO | ENTPD4 | NM_004901 | ectonucleoside triphosphate diphosphohydrolase 4 | 4     | -0.3617   | Inlier   |

Identification of Survival Genes in Human Glioblastoma Cells Using siRNA Screening

Nikhil G Thaker, Fang Zhang, Peter R. McDonald, Tong Ying Shun, Michael D Lewen, Ian F. Pollack, and John S. Lazo

Molecular Pharmacology

|                                  |               |        |                                                                       |           |        |
|----------------------------------|---------------|--------|-----------------------------------------------------------------------|-----------|--------|
| siRNA Disorazole DMSO Run1       | NM_0049<br>01 | ENTPD4 | ectonucleo<br>side<br>triphospha<br>te<br>diphospha<br>hydrolase<br>4 | -0.289964 | Inlier |
| siRNA Disorazole DMSO Run3       | NM_0049<br>01 | ENTPD4 | ectonucleo<br>side<br>triphospha<br>te<br>diphospha<br>hydrolase<br>4 | 0.289964  | Inlier |
| siRNA-Vinblastine Run2-<br>DMSO  | NM_0049<br>01 | ENTPD4 | ectonucleo<br>side<br>triphospha<br>te<br>diphospha<br>hydrolase<br>4 | 0.8152    | Inlier |
| siRNA Disorazole DMSO Run2       | NM_0049<br>01 | ENTPD4 | ectonucleo<br>side<br>triphospha<br>te<br>diphospha<br>hydrolase<br>4 | 0.951374  | Inlier |
| siRNA-Vinblastine Run1-<br>DMSO  | NM_0049<br>01 | ENTPD4 | ectonucleo<br>side<br>triphospha<br>te<br>diphospha<br>hydrolase<br>4 | 2.000621  | Inlier |
| siRNA-Temozolomide Run3-<br>DMSO | NM_0012<br>49 | ENTPD5 | ectonucleo<br>side<br>triphospha<br>te<br>diphospha<br>hydrolase<br>5 | -1.208153 | Inlier |
| siRNA-Temozolomide Run2-<br>DMSO | NM_0012<br>49 | ENTPD5 | ectonucleo<br>side<br>triphospha<br>te<br>diphospha<br>hydrolase<br>5 | -1.007677 | Inlier |

Identification of Survival Genes in Human Glioblastoma Cells Using siRNA Screening

Nikhil G Thaker, Fang Zhang, Peter R. McDonald, Tong Ying Shun, Michael D Lewen, Ian F. Pollack, and John S. Lazo

Molecular Pharmacology

|                              |               |        |                       |           |        |
|------------------------------|---------------|--------|-----------------------|-----------|--------|
| siRNA Disorazole DMSO Run1   | NM_0012<br>49 | ENTPD5 | 5                     | -0.341323 | Inlier |
| siRNA Disorazole DMSO Run3   | NM_0012<br>49 | ENTPD5 | 5                     | -0.069416 | Inlier |
| siRNA-Temozolomide Run1-DMSO | NM_0012<br>49 | ENTPD5 | 5                     | 0.069417  | Inlier |
| siRNA-Vinblastine Run2-DMSO  | NM_0012<br>49 | ENTPD5 | 5                     | 0.125628  | Inlier |
| siRNA-Vinblastine Run1-DMSO  | NM_0012<br>49 | ENTPD5 | 5                     | 1.286584  | Inlier |
| siRNA Disorazole DMSO Run2   | NM_0012<br>49 | ENTPD5 | 5                     | 1.57146   | Inlier |
| siRNA-Temozolomide Run3-DMSO | NM_0012<br>47 | ENTPD6 | 6 (putative function) | -1.129833 | Inlier |



Identification of Survival Genes in Human Glioblastoma Cells Using siRNA Screening

Nikhil G Thaker, Fang Zhang, Peter R. McDonald, Tong Ying Shun, Michael D Lewen, Ian F. Pollack, and John S. Lazo

Molecular Pharmacology

| siRNA Treatment              | Gene ID   | Gene Name | Function                                                             | Value     | Category |
|------------------------------|-----------|-----------|----------------------------------------------------------------------|-----------|----------|
| siRNA-Temozolomide Run2-DMSO | NM_001247 | ENTPD6    | ectonucleoside triphosphate diphosphohydrolase 6 (putative function) | -1.119756 | Inlier   |
| siRNA-Temozolomide Run1-DMSO | NM_001247 | ENTPD6    | ectonucleoside triphosphate diphosphohydrolase 6 (putative function) | -0.311703 | Inlier   |
| siRNA-Vinblastine Run2-DMSO  | NM_001247 | ENTPD6    | ectonucleoside triphosphate diphosphohydrolase 6 (putative function) | -0.0993   | Inlier   |
| siRNA Disorazole DMSO Run3   | NM_001247 | ENTPD6    | ectonucleoside triphosphate diphosphohydrolase 6 (putative function) | 0.099301  | Inlier   |
| siRNA Disorazole DMSO Run1   | NM_001247 | ENTPD6    | ectonucleoside triphosphate diphosphohydrolase 6 (putative function) | 0.387952  | Inlier   |
| siRNA-Vinblastine Run1-DMSO  | NM_001247 | ENTPD6    | ectonucleoside triphosphate diphosphohydrolase 6 (putative function) | 0.961048  | Inlier   |

Identification of Survival Genes in Human Glioblastoma Cells Using siRNA Screening  
 Nikhil G Thaker, Fang Zhang, Peter R. McDonald, Tong Ying Shun, Michael D Lewen, Ian F. Pollack, and John S. Lazo

Molecular Pharmacology

| siRNA                        | Condition | Gene   | Gene ID   | Gene Name                                                                                      | Value     | Outlier Status |
|------------------------------|-----------|--------|-----------|------------------------------------------------------------------------------------------------|-----------|----------------|
| siRNA Disorazole DMSO Run2   |           | ENTPD6 | NM_001247 | ectonucleoside triphosphatase diphosphohydrolase 6 (putative calcium activated nucleotidase 1) | 1.030989  | Inlier         |
| siRNA-Temozolomide Run3-DMSO |           | ENTPD8 | NM_138793 | ectonucleoside triphosphatase diphosphohydrolase 8 (putative calcium activated nucleotidase 1) | -1.362317 | Inlier         |
| siRNA-Temozolomide Run2-DMSO |           | ENTPD8 | NM_138793 | ectonucleoside triphosphatase diphosphohydrolase 8 (putative calcium activated nucleotidase 1) | -1.131482 | Inlier         |
| siRNA Disorazole DMSO Run2   |           | ENTPD8 | NM_138793 | ectonucleoside triphosphatase diphosphohydrolase 8 (putative calcium activated nucleotidase 1) | -0.890272 | Inlier         |
| siRNA-Temozolomide Run1-DMSO |           | ENTPD8 | NM_138793 | ectonucleoside triphosphatase diphosphohydrolase 8 (putative calcium activated nucleotidase 1) | -0.143323 | Inlier         |
| siRNA Disorazole DMSO Run1   |           | ENTPD8 | NM_138793 | ectonucleoside triphosphatase diphosphohydrolase 8 (putative calcium activated nucleotidase 1) | 0.143323  | Inlier         |
| siRNA Disorazole DMSO Run3   |           | ENTPD8 | NM_138793 | ectonucleoside triphosphatase diphosphohydrolase 8 (putative calcium activated nucleotidase 1) | 0.197718  | Inlier         |
| siRNA-Vinblastine Run1-DMSO  |           | ENTPD8 | NM_138793 | ectonucleoside triphosphatase diphosphohydrolase 8 (putative calcium activated nucleotidase 1) | 0.540462  | Inlier         |
| siRNA-Vinblastine Run2-DMSO  |           | ENTPD8 | NM_138793 | ectonucleoside triphosphatase diphosphohydrolase 8 (putative calcium activated nucleotidase 1) | 0.808538  | Inlier         |
| siRNA-Temozolomide Run1-DMSO |           | EP300  | NM_001429 | E1A binding protein p300                                                                       | -0.886199 | Inlier         |
| siRNA Disorazole DMSO Run3   |           | EP300  | NM_001429 | E1A binding protein p300                                                                       | -0.462801 | Inlier         |
| siRNA-Temozolomide Run2-DMSO |           | EP300  | NM_001429 | E1A binding protein p300                                                                       | -0.02208  | Inlier         |

Identification of Survival Genes in Human Glioblastoma Cells Using siRNA Screening  
 Nikhil G Thaker, Fang Zhang, Peter R. McDonald, Tong Ying Shun, Michael D Lewen, Ian F. Pollack, and John S. Lazo

Molecular Pharmacology

|                                  |               |       |                                                      |           |         |
|----------------------------------|---------------|-------|------------------------------------------------------|-----------|---------|
| siRNA Disorazole DMSO Run1       | NM_0014<br>29 | EP300 | E1A<br>binding<br>protein<br>p300                    | -0.012131 | Inlier  |
| siRNA-Vinblastine Run2-<br>DMSO  | NM_0014<br>29 | EP300 | E1A<br>binding<br>protein<br>p300                    | 0.012131  | Inlier  |
| siRNA-Temozolomide Run3-<br>DMSO | NM_0014<br>29 | EP300 | E1A<br>binding<br>protein<br>p300                    | 1.087724  | Inlier  |
| siRNA Disorazole DMSO Run2       | NM_0014<br>29 | EP300 | E1A<br>binding<br>protein<br>p300                    | 7.633186  | Outlier |
| siRNA-Vinblastine Run1-<br>DMSO  | NM_0014<br>29 | EP300 | E1A<br>binding<br>protein<br>p300<br>erythrocyt<br>e | 10.71569  | Outlier |
| siRNA-Temozolomide Run3-<br>DMSO | NM_0001<br>19 | EPB42 | membrane<br>protein<br>band 4.2<br>erythrocyt<br>e   | -2.52843  | Inlier  |
| siRNA-Temozolomide Run2-<br>DMSO | NM_0001<br>19 | EPB42 | membrane<br>protein<br>band 4.2<br>erythrocyt<br>e   | -2.048223 | Inlier  |
| siRNA Disorazole DMSO Run1       | NM_0001<br>19 | EPB42 | membrane<br>protein<br>band 4.2<br>erythrocyt<br>e   | -0.184775 | Inlier  |
| siRNA-Vinblastine Run2-<br>DMSO  | NM_0001<br>19 | EPB42 | membrane<br>protein<br>band 4.2<br>erythrocyt<br>e   | -0.03389  | Inlier  |
| siRNA-Temozolomide Run1-<br>DMSO | NM_0001<br>19 | EPB42 | membrane<br>protein<br>band 4.2<br>erythrocyt<br>e   | 0.03389   | Inlier  |
| siRNA Disorazole DMSO Run3       | NM_0001<br>19 | EPB42 | membrane<br>protein<br>band 4.2                      | 0.201104  | Inlier  |

Identification of Survival Genes in Human Glioblastoma Cells Using siRNA Screening  
 Nikhil G Thaker, Fang Zhang, Peter R. McDonald, Tong Ying Shun, Michael D Lewen, Ian F. Pollack, and John S. Lazo

Molecular Pharmacology

|                                  |               |       |                                                    |           |        |
|----------------------------------|---------------|-------|----------------------------------------------------|-----------|--------|
|                                  |               |       | erythrocyt<br>e<br>membrane<br>protein<br>band 4.2 | 1.147896  | Inlier |
| siRNA-Vinblastine Run1-<br>DMSO  | NM_0001<br>19 | EPB42 | erythrocyt<br>e<br>membrane<br>protein<br>band 4.2 | 1.147896  | Inlier |
| siRNA Disorazole DMSO Run2       | NM_0001<br>19 | EPB42 | erythrocyt<br>e<br>membrane<br>protein<br>band 4.2 | 1.436686  | Inlier |
| siRNA Disorazole DMSO Run2       | NM_0052<br>32 | EPHA1 | EPH<br>receptor<br>A1                              | -1.733758 | Inlier |
| siRNA-Temozolomide Run3-<br>DMSO | NM_0052<br>32 | EPHA1 | EPH<br>receptor<br>A1                              | -0.96648  | Inlier |
| siRNA Disorazole DMSO Run3       | NM_0052<br>32 | EPHA1 | EPH<br>receptor<br>A1                              | -0.724972 | Inlier |
| siRNA-Temozolomide Run1-<br>DMSO | NM_0052<br>32 | EPHA1 | EPH<br>receptor<br>A1                              | -0.078668 | Inlier |
| siRNA-Temozolomide Run2-<br>DMSO | NM_0052<br>32 | EPHA1 | EPH<br>receptor<br>A1                              | 0.078668  | Inlier |
| siRNA Disorazole DMSO Run1       | NM_0052<br>32 | EPHA1 | EPH<br>receptor<br>A1                              | 0.484105  | Inlier |
| siRNA-Vinblastine Run1-<br>DMSO  | NM_0052<br>32 | EPHA1 | EPH<br>receptor<br>A1                              | 0.654214  | Inlier |
| siRNA-Vinblastine Run2-<br>DMSO  | NM_0052<br>32 | EPHA1 | EPH<br>receptor<br>A1                              | 0.694786  | Inlier |
| siRNA-Temozolomide Run1-<br>DMSO | NM_0044<br>31 | EPHA2 | EPH<br>receptor<br>A2                              | -1.034087 | Inlier |
| siRNA-Temozolomide Run2-<br>DMSO | NM_0044<br>31 | EPHA2 | EPH<br>receptor<br>A2                              | -0.828727 | Inlier |
| siRNA-Temozolomide Run3-<br>DMSO | NM_0044<br>31 | EPHA2 | EPH<br>receptor<br>A2                              | -0.520273 | Inlier |
| siRNA-Vinblastine Run1-<br>DMSO  | NM_0044<br>31 | EPHA2 | EPH<br>receptor<br>A2                              | -0.006095 | Inlier |
| siRNA Disorazole DMSO Run1       | NM_0044<br>31 | EPHA2 | EPH<br>receptor<br>A2                              | 0.006094  | Inlier |
| siRNA Disorazole DMSO Run2       | NM_0044<br>31 | EPHA2 | EPH<br>receptor<br>A2                              | 0.463311  | Inlier |

Identification of Survival Genes in Human Glioblastoma Cells Using siRNA Screening  
 Nikhil G Thaker, Fang Zhang, Peter R. McDonald, Tong Ying Shun, Michael D Lewen, Ian F. Pollack, and John S. Lazo

| Molecular Pharmacology           |               |       |                | EPH       |        |
|----------------------------------|---------------|-------|----------------|-----------|--------|
| siRNA Disorazole DMSO Run3       | NM_0044<br>31 | EPHA2 | receptor<br>A2 | 1.394323  | Inlier |
| siRNA-Vinblastine Run2-<br>DMSO  | NM_0044<br>31 | EPHA2 | receptor<br>A2 | 1.522517  | Inlier |
| siRNA-Temozolomide Run3-<br>DMSO | NM_1826<br>44 | EPHA3 | receptor<br>A3 | -0.753694 | Inlier |
| siRNA Disorazole DMSO Run2       | NM_1826<br>44 | EPHA3 | receptor<br>A3 | -0.595306 | Inlier |
| siRNA-Temozolomide Run1-<br>DMSO | NM_1826<br>44 | EPHA3 | receptor<br>A3 | -0.267608 | Inlier |
| siRNA Disorazole DMSO Run3       | NM_1826<br>44 | EPHA3 | receptor<br>A3 | -0.044461 | Inlier |
| siRNA-Temozolomide Run2-<br>DMSO | NM_1826<br>44 | EPHA3 | receptor<br>A3 | 0.044461  | Inlier |
| siRNA Disorazole DMSO Run1       | NM_1826<br>44 | EPHA3 | receptor<br>A3 | 1.381184  | Inlier |
| siRNA-Vinblastine Run1-<br>DMSO  | NM_1826<br>44 | EPHA3 | receptor<br>A3 | 1.536961  | Inlier |
| siRNA-Vinblastine Run2-<br>DMSO  | NM_1826<br>44 | EPHA3 | receptor<br>A3 | 2.286638  | Inlier |
| siRNA Disorazole DMSO Run2       | NM_0044<br>38 | EPHA4 | receptor<br>A4 | -1.505803 | Inlier |
| siRNA-Temozolomide Run3-<br>DMSO | NM_0044<br>38 | EPHA4 | receptor<br>A4 | -0.860774 | Inlier |
| siRNA-Temozolomide Run1-<br>DMSO | NM_0044<br>38 | EPHA4 | receptor<br>A4 | -0.488226 | Inlier |
| siRNA Disorazole DMSO Run3       | NM_0044<br>38 | EPHA4 | receptor<br>A4 | -0.021511 | Inlier |
| siRNA-Temozolomide Run2-<br>DMSO | NM_0044<br>38 | EPHA4 | receptor<br>A4 | 0.021511  | Inlier |
| siRNA Disorazole DMSO Run1       | NM_0044<br>38 | EPHA4 | receptor<br>A4 | 0.484353  | Inlier |
| siRNA-Vinblastine Run1-<br>DMSO  | NM_0044<br>38 | EPHA4 | receptor<br>A4 | 0.861561  | Inlier |

Identification of Survival Genes in Human Glioblastoma Cells Using siRNA Screening  
 Nikhil G Thaker, Fang Zhang, Peter R. McDonald, Tong Ying Shun, Michael D Lewen, Ian F. Pollack, and John S. Lazo

|                              |               |       |                |           |        |
|------------------------------|---------------|-------|----------------|-----------|--------|
| Molecular Pharmacology       |               |       | EPH            |           |        |
| siRNA-Vinblastine Run2-DMSO  | NM_0044<br>38 | EPHA4 | receptor<br>A4 | 1.212257  | Inlier |
| siRNA-Temozolomide Run2-DMSO | NM_0044<br>39 | EPHA5 | receptor<br>A5 | -0.891791 | Inlier |
| siRNA-Temozolomide Run3-DMSO | NM_0044<br>39 | EPHA5 | receptor<br>A5 | -0.781581 | Inlier |
| siRNA-Temozolomide Run1-DMSO | NM_0044<br>39 | EPHA5 | receptor<br>A5 | -0.567419 | Inlier |
| siRNA Disorazole DMSO Run2   | NM_0044<br>39 | EPHA5 | receptor<br>A5 | -0.354671 | Inlier |
| siRNA Disorazole DMSO Run1   | NM_0044<br>39 | EPHA5 | receptor<br>A5 | 0.354671  | Inlier |
| siRNA-Vinblastine Run1-DMSO  | NM_0044<br>39 | EPHA5 | receptor<br>A5 | 0.358517  | Inlier |
| siRNA Disorazole DMSO Run3   | NM_0044<br>39 | EPHA5 | receptor<br>A5 | 0.814311  | Inlier |
| siRNA-Vinblastine Run2-DMSO  | NM_0044<br>39 | EPHA5 | receptor<br>A5 | 1.446383  | Inlier |
| siRNA-Temozolomide Run3-DMSO | NM_0044<br>40 | EPHA7 | receptor<br>A7 | -2.422903 | Inlier |
| siRNA Disorazole DMSO Run2   | NM_0044<br>40 | EPHA7 | receptor<br>A7 | -0.769802 | Inlier |
| siRNA-Temozolomide Run1-DMSO | NM_0044<br>40 | EPHA7 | receptor<br>A7 | -0.668179 | Inlier |
| siRNA-Temozolomide Run2-DMSO | NM_0044<br>40 | EPHA7 | receptor<br>A7 | -0.39529  | Inlier |
| siRNA Disorazole DMSO Run3   | NM_0044<br>40 | EPHA7 | receptor<br>A7 | 0.395291  | Inlier |
| siRNA Disorazole DMSO Run1   | NM_0044<br>40 | EPHA7 | receptor<br>A7 | 0.412915  | Inlier |
| siRNA-Vinblastine Run1-DMSO  | NM_0044<br>40 | EPHA7 | receptor<br>A7 | 0.680821  | Inlier |
| siRNA-Vinblastine Run2-DMSO  | NM_0044<br>40 | EPHA7 | receptor<br>A7 | 1.793908  | Inlier |

Identification of Survival Genes in Human Glioblastoma Cells Using siRNA Screening  
 Nikhil G Thaker, Fang Zhang, Peter R. McDonald, Tong Ying Shun, Michael D Lewen, Ian F. Pollack, and John S. Lazo

Molecular Pharmacology

|                                  |               |       |          |                  |
|----------------------------------|---------------|-------|----------|------------------|
|                                  |               |       | EPH      |                  |
|                                  |               |       | receptor |                  |
| siRNA Disorazole DMSO Run2       | NM_0205<br>26 | EPHA8 | A8       | -2.645842 Inlier |
|                                  |               |       | EPH      |                  |
|                                  |               |       | receptor |                  |
| siRNA Disorazole DMSO Run3       | NM_0205<br>26 | EPHA8 | A8       | -0.671999 Inlier |
|                                  |               |       | EPH      |                  |
|                                  |               |       | receptor |                  |
| siRNA-Temozolomide Run3-<br>DMSO | NM_0205<br>26 | EPHA8 | A8       | -0.583367 Inlier |
|                                  |               |       | EPH      |                  |
|                                  |               |       | receptor |                  |
| siRNA-Temozolomide Run2-<br>DMSO | NM_0205<br>26 | EPHA8 | A8       | -0.163412 Inlier |
|                                  |               |       | EPH      |                  |
|                                  |               |       | receptor |                  |
| siRNA-Vinblastine Run1-<br>DMSO  | NM_0205<br>26 | EPHA8 | A8       | 0.163412 Inlier  |
|                                  |               |       | EPH      |                  |
|                                  |               |       | receptor |                  |
| siRNA-Temozolomide Run1-<br>DMSO | NM_0205<br>26 | EPHA8 | A8       | 0.677001 Inlier  |
|                                  |               |       | EPH      |                  |
|                                  |               |       | receptor |                  |
| siRNA Disorazole DMSO Run1       | NM_0205<br>26 | EPHA8 | A8       | 0.73509 Inlier   |
|                                  |               |       | EPH      |                  |
|                                  |               |       | receptor |                  |
| siRNA-Vinblastine Run2-<br>DMSO  | NM_0205<br>26 | EPHA8 | A8       | 1.102182 Inlier  |
|                                  |               |       | EPH      |                  |
|                                  |               |       | receptor |                  |
| siRNA Disorazole DMSO Run2       | NM_0044<br>41 | EPHB1 | B1       | -1.708882 Inlier |
|                                  |               |       | EPH      |                  |
|                                  |               |       | receptor |                  |
| siRNA-Temozolomide Run3-<br>DMSO | NM_0044<br>41 | EPHB1 | B1       | -1.073681 Inlier |
|                                  |               |       | EPH      |                  |
|                                  |               |       | receptor |                  |
| siRNA-Temozolomide Run2-<br>DMSO | NM_0044<br>41 | EPHB1 | B1       | -0.41912 Inlier  |
|                                  |               |       | EPH      |                  |
|                                  |               |       | receptor |                  |
| siRNA Disorazole DMSO Run3       | NM_0044<br>41 | EPHB1 | B1       | -0.199214 Inlier |
|                                  |               |       | EPH      |                  |
|                                  |               |       | receptor |                  |
| siRNA-Temozolomide Run1-<br>DMSO | NM_0044<br>41 | EPHB1 | B1       | 0.199214 Inlier  |
|                                  |               |       | EPH      |                  |
|                                  |               |       | receptor |                  |
| siRNA Disorazole DMSO Run1       | NM_0044<br>41 | EPHB1 | B1       | 0.576145 Inlier  |
|                                  |               |       | EPH      |                  |
|                                  |               |       | receptor |                  |
| siRNA-Vinblastine Run1-<br>DMSO  | NM_0044<br>41 | EPHB1 | B1       | 0.772855 Inlier  |
|                                  |               |       | EPH      |                  |
|                                  |               |       | receptor |                  |
| siRNA-Vinblastine Run2-<br>DMSO  | NM_0044<br>41 | EPHB1 | B1       | 2.293275 Inlier  |
|                                  |               |       | EPH      |                  |
|                                  |               |       | receptor |                  |
| siRNA-Temozolomide Run3-<br>DMSO | NM_0174<br>49 | EPHB2 | B2       | -1.12776 Inlier  |

Identification of Survival Genes in Human Glioblastoma Cells Using siRNA Screening  
 Nikhil G Thaker, Fang Zhang, Peter R. McDonald, Tong Ying Shun, Michael D Lewen, Ian F. Pollack, and John S. Lazo

Molecular Pharmacology

|                                  |               |       |                |                  |
|----------------------------------|---------------|-------|----------------|------------------|
|                                  |               |       | EPH            |                  |
|                                  |               |       | receptor       |                  |
| siRNA Disorazole DMSO Run2       | NM_0174<br>49 | EPHB2 | B2             | -0.746011 Inlier |
|                                  |               |       | EPH            |                  |
| siRNA-Temozolomide Run2-<br>DMSO | NM_0174<br>49 | EPHB2 | receptor<br>B2 | -0.714749 Inlier |
|                                  |               |       | EPH            |                  |
| siRNA-Vinblastine Run1-<br>DMSO  | NM_0174<br>49 | EPHB2 | receptor<br>B2 | -0.273874 Inlier |
|                                  |               |       | EPH            |                  |
| siRNA Disorazole DMSO Run1       | NM_0174<br>49 | EPHB2 | receptor<br>B2 | 0.273874 Inlier  |
|                                  |               |       | EPH            |                  |
| siRNA Disorazole DMSO Run3       | NM_0174<br>49 | EPHB2 | receptor<br>B2 | 0.315404 Inlier  |
|                                  |               |       | EPH            |                  |
| siRNA-Temozolomide Run1-<br>DMSO | NM_0174<br>49 | EPHB2 | receptor<br>B2 | 0.634251 Inlier  |
|                                  |               |       | EPH            |                  |
| siRNA-Vinblastine Run2-<br>DMSO  | NM_0174<br>49 | EPHB2 | receptor<br>B2 | 1.523393 Inlier  |
|                                  |               |       | EPH            |                  |
| siRNA Disorazole DMSO Run2       | NM_0044<br>43 | EPHB3 | receptor<br>B3 | -1.716053 Inlier |
|                                  |               |       | EPH            |                  |
| siRNA-Temozolomide Run2-<br>DMSO | NM_0044<br>43 | EPHB3 | receptor<br>B3 | -1.332223 Inlier |
|                                  |               |       | EPH            |                  |
| siRNA Disorazole DMSO Run3       | NM_0044<br>43 | EPHB3 | receptor<br>B3 | -1.007555 Inlier |
|                                  |               |       | EPH            |                  |
| siRNA-Temozolomide Run3-<br>DMSO | NM_0044<br>43 | EPHB3 | receptor<br>B3 | -0.105151 Inlier |
|                                  |               |       | EPH            |                  |
| siRNA-Temozolomide Run1-<br>DMSO | NM_0044<br>43 | EPHB3 | receptor<br>B3 | 0.105151 Inlier  |
|                                  |               |       | EPH            |                  |
| siRNA Disorazole DMSO Run1       | NM_0044<br>43 | EPHB3 | receptor<br>B3 | 0.232715 Inlier  |
|                                  |               |       | EPH            |                  |
| siRNA-Vinblastine Run1-<br>DMSO  | NM_0044<br>43 | EPHB3 | receptor<br>B3 | 0.569334 Inlier  |
|                                  |               |       | EPH            |                  |
| siRNA-Vinblastine Run2-<br>DMSO  | NM_0044<br>43 | EPHB3 | receptor<br>B3 | 0.779666 Inlier  |
|                                  |               |       | EPH            |                  |
| siRNA-Temozolomide Run3-<br>DMSO | NM_0044<br>44 | EPHB4 | receptor<br>B4 | -1.085766 Inlier |
|                                  |               |       | EPH            |                  |
| siRNA Disorazole DMSO Run2       | NM_0044<br>44 | EPHB4 | receptor<br>B4 | -0.443281 Inlier |



Identification of Survival Genes in Human Glioblastoma Cells Using siRNA Screening  
 Nikhil G Thaker, Fang Zhang, Peter R. McDonald, Tong Ying Shun, Michael D Lewen, Ian F. Pollack, and John S. Lazo

Molecular Pharmacology

|                                  |               |       |                  |                  |
|----------------------------------|---------------|-------|------------------|------------------|
|                                  |               |       | EPH              |                  |
|                                  |               |       | receptor         |                  |
| siRNA Disorazole DMSO Run3       | NM_0044<br>44 | EPHB4 | B4               | -0.403217 Inlier |
|                                  |               |       | EPH              |                  |
| siRNA-Temozolomide Run2-<br>DMSO | NM_0044<br>44 | EPHB4 | B4               | -0.115257 Inlier |
|                                  |               |       | EPH              |                  |
| siRNA-Temozolomide Run1-<br>DMSO | NM_0044<br>44 | EPHB4 | B4               | 0.115257 Inlier  |
|                                  |               |       | EPH              |                  |
| siRNA Disorazole DMSO Run1       | NM_0044<br>44 | EPHB4 | B4               | 0.905719 Inlier  |
|                                  |               |       | EPH              |                  |
| siRNA-Vinblastine Run1-<br>DMSO  | NM_0044<br>44 | EPHB4 | B4               | 1.544112 Inlier  |
|                                  |               |       | EPH              |                  |
| siRNA-Vinblastine Run2-<br>DMSO  | NM_0044<br>44 | EPHB4 | B4               | 1.554885 Inlier  |
|                                  |               |       | EPH              |                  |
| siRNA-Temozolomide Run3-<br>DMSO | NM_0044<br>45 | EPHB6 | B6               | -1.238562 Inlier |
|                                  |               |       | EPH              |                  |
| siRNA-Temozolomide Run2-<br>DMSO | NM_0044<br>45 | EPHB6 | B6               | -0.696675 Inlier |
|                                  |               |       | EPH              |                  |
| siRNA-Temozolomide Run1-<br>DMSO | NM_0044<br>45 | EPHB6 | B6               | -0.637839 Inlier |
|                                  |               |       | EPH              |                  |
| siRNA Disorazole DMSO Run1       | NM_0044<br>45 | EPHB6 | B6               | -0.298167 Inlier |
|                                  |               |       | EPH              |                  |
| siRNA-Vinblastine Run1-<br>DMSO  | NM_0044<br>45 | EPHB6 | B6               | 0.298167 Inlier  |
|                                  |               |       | EPH              |                  |
| siRNA Disorazole DMSO Run3       | NM_0044<br>45 | EPHB6 | B6               | 0.652324 Inlier  |
|                                  |               |       | EPH              |                  |
| siRNA Disorazole DMSO Run2       | NM_0044<br>45 | EPHB6 | B6               | 0.729788 Inlier  |
|                                  |               |       | EPH              |                  |
| siRNA-Vinblastine Run2-<br>DMSO  | NM_0044<br>45 | EPHB6 | B6               | 0.97693 Inlier   |
|                                  |               |       | epoxide          |                  |
|                                  |               |       | hydrolase        |                  |
|                                  |               |       | 1,               |                  |
|                                  |               |       | microsom         |                  |
|                                  |               |       | al               |                  |
| siRNA-Temozolomide Run2-<br>DMSO | NM_0001<br>20 | EPHX1 | (xenobiotic<br>) | -1.195244 Inlier |

Identification of Survival Genes in Human Glioblastoma Cells Using siRNA Screening

Nikhil G Thaker, Fang Zhang, Peter R. McDonald, Tong Ying Shun, Michael D Lewen, Ian F. Pollack, and John S. Lazo

Molecular Pharmacology

| siRNA Treatment              | Gene ID   | Gene Name | EC Number                                    | Value     | Outlier Status |
|------------------------------|-----------|-----------|----------------------------------------------|-----------|----------------|
| siRNA-Temozolomide Run3-DMSO | NM_000120 | EPHX1     | epoxide hydrolase 1, microsomal (xenobiotic) | -0.923011 | Inlier         |
| siRNA-Temozolomide Run1-DMSO | NM_000120 | EPHX1     | epoxide hydrolase 1, microsomal (xenobiotic) | -0.903738 | Inlier         |
| siRNA-Vinblastine Run2-DMSO  | NM_000120 | EPHX1     | epoxide hydrolase 1, microsomal (xenobiotic) | -0.017185 | Inlier         |
| siRNA Disorazole DMSO Run1   | NM_000120 | EPHX1     | epoxide hydrolase 1, microsomal (xenobiotic) | 0.017185  | Inlier         |
| siRNA-Vinblastine Run1-DMSO  | NM_000120 | EPHX1     | epoxide hydrolase 1, microsomal (xenobiotic) | 0.276063  | Inlier         |
| siRNA Disorazole DMSO Run3   | NM_000120 | EPHX1     | epoxide hydrolase 1, microsomal (xenobiotic) | 0.445262  | Inlier         |
| siRNA Disorazole DMSO Run2   | NM_000120 | EPHX1     | epoxide hydrolase 1, microsomal (xenobiotic) | 1.50382   | Inlier         |

Identification of Survival Genes in Human Glioblastoma Cells Using siRNA Screening

Nikhil G Thaker, Fang Zhang, Peter R. McDonald, Tong Ying Shun, Michael D Lewen, Ian F. Pollack, and John S. Lazo

Molecular Pharmacology

|                              |           |       |                                                                   |           |        |
|------------------------------|-----------|-------|-------------------------------------------------------------------|-----------|--------|
| siRNA-Temozolomide Run3-DMSO | NM_001979 | EPHX2 | epoxide hydrolase 2, cytoplasmic                                  | -1.410734 | Inlier |
| siRNA Disorazole DMSO Run3   | NM_001979 | EPHX2 | epoxide hydrolase 2, cytoplasmic                                  | -0.985538 | Inlier |
| siRNA-Vinblastine Run2-DMSO  | NM_001979 | EPHX2 | epoxide hydrolase 2, cytoplasmic                                  | -0.288437 | Inlier |
| siRNA-Temozolomide Run2-DMSO | NM_001979 | EPHX2 | epoxide hydrolase 2, cytoplasmic                                  | -0.193549 | Inlier |
| siRNA Disorazole DMSO Run1   | NM_001979 | EPHX2 | epoxide hydrolase 2, cytoplasmic                                  | 0.193549  | Inlier |
| siRNA-Temozolomide Run1-DMSO | NM_001979 | EPHX2 | epoxide hydrolase 2, cytoplasmic                                  | 0.363462  | Inlier |
| siRNA-Vinblastine Run1-DMSO  | NM_001979 | EPHX2 | epoxide hydrolase 2, cytoplasmic                                  | 2.468236  | Inlier |
| siRNA Disorazole DMSO Run2   | NM_001979 | EPHX2 | epoxide hydrolase 2, cytoplasmic                                  | 3.259834  | Inlier |
| siRNA-Temozolomide Run3-DMSO | NM_005670 | EPM2A | epilepsy, progressive myoclonus type 2A, Lafora disease (laforin) | -1.52458  | Inlier |

Identification of Survival Genes in Human Glioblastoma Cells Using siRNA Screening

Nikhil G Thaker, Fang Zhang, Peter R. McDonald, Tong Ying Shun, Michael D Lewen, Ian F. Pollack, and John S. Lazo

Molecular Pharmacology

|                              |           |       |                                                                   |           |        |
|------------------------------|-----------|-------|-------------------------------------------------------------------|-----------|--------|
| siRNA-Temozolomide Run2-DMSO | NM_005670 | EPM2A | epilepsy, progressive myoclonus type 2A, Lafora disease (laforin) | -1.241554 | Inlier |
| siRNA Disorazole DMSO Run2   | NM_005670 | EPM2A | epilepsy, progressive myoclonus type 2A, Lafora disease (laforin) | -1.063035 | Inlier |
| siRNA Disorazole DMSO Run3   | NM_005670 | EPM2A | epilepsy, progressive myoclonus type 2A, Lafora disease (laforin) | -0.184101 | Inlier |
| siRNA-Vinblastine Run1-DMSO  | NM_005670 | EPM2A | epilepsy, progressive myoclonus type 2A, Lafora disease (laforin) | 0.184101  | Inlier |
| siRNA-Temozolomide Run1-DMSO | NM_005670 | EPM2A | epilepsy, progressive myoclonus type 2A, Lafora disease (laforin) | 0.218528  | Inlier |
| siRNA Disorazole DMSO Run1   | NM_005670 | EPM2A | epilepsy, progressive myoclonus type 2A, Lafora disease (laforin) | 0.394368  | Inlier |

Identification of Survival Genes in Human Glioblastoma Cells Using siRNA Screening  
 Nikhil G Thaker, Fang Zhang, Peter R. McDonald, Tong Ying Shun, Michael D Lewen, Ian F. Pollack, and John S. Lazo

Molecular Pharmacology

|                              |           |       |                                                                   |           |        |
|------------------------------|-----------|-------|-------------------------------------------------------------------|-----------|--------|
| siRNA-Vinblastine Run2-DMSO  | NM_005670 | EPM2A | epilepsy, progressive myoclonus type 2A, Lafora disease (laforin) | 0.954632  | Inlier |
| siRNA-Vinblastine Run2-DMSO  | NM_000121 | EPOR  | erythropoietin receptor                                           | -2.450086 | Inlier |
| siRNA-Temozolomide Run2-DMSO | NM_000121 | EPOR  | erythropoietin receptor                                           | -0.62789  | Inlier |
| siRNA Disorazole DMSO Run1   | NM_000121 | EPOR  | erythropoietin receptor                                           | -0.137201 | Inlier |
| siRNA Disorazole DMSO Run3   | NM_000121 | EPOR  | erythropoietin receptor                                           | -0.109946 | Inlier |
| siRNA-Temozolomide Run1-DMSO | NM_000121 | EPOR  | erythropoietin receptor                                           | 0.109946  | Inlier |
| siRNA-Temozolomide Run3-DMSO | NM_000121 | EPOR  | erythropoietin receptor                                           | 0.72111   | Inlier |
| siRNA Disorazole DMSO Run2   | NM_000121 | EPOR  | erythropoietin receptor                                           | 2.252104  | Inlier |
| siRNA-Vinblastine Run1-DMSO  | NM_000121 | EPOR  | erythropoietin receptor                                           | 2.652483  | Inlier |
| siRNA-Temozolomide Run2-DMSO | NM_004446 | EPRS  | glutamyl-prolyl-tRNA synthetase                                   | -1.393101 | Inlier |
| siRNA Disorazole DMSO Run1   | NM_004446 | EPRS  | glutamyl-prolyl-tRNA synthetase                                   | -0.72765  | Inlier |
| siRNA-Temozolomide Run3-DMSO | NM_004446 | EPRS  | glutamyl-prolyl-tRNA synthetase                                   | -0.537442 | Inlier |
| siRNA Disorazole DMSO Run3   | NM_004446 | EPRS  | glutamyl-prolyl-tRNA synthetase                                   | -0.252035 | Inlier |

Identification of Survival Genes in Human Glioblastoma Cells Using siRNA Screening  
 Nikhil G Thaker, Fang Zhang, Peter R. McDonald, Tong Ying Shun, Michael D Lewen, Ian F. Pollack, and John S. Lazo  
 Molecular Pharmacology

|                              |               |      |                                 |           |         |
|------------------------------|---------------|------|---------------------------------|-----------|---------|
| siRNA-Vinblastine Run2-DMSO  | NM_0044<br>46 | EPRS | glutamyl-prolyl-tRNA synthetase | 0.252034  | Inlier  |
| siRNA-Temozolomide Run1-DMSO | NM_0044<br>46 | EPRS | glutamyl-prolyl-tRNA synthetase | 0.62135   | Inlier  |
| siRNA-Vinblastine Run1-DMSO  | NM_0044<br>46 | EPRS | glutamyl-prolyl-tRNA synthetase | 3.767645  | Outlier |
| siRNA Disorazole DMSO Run2   | NM_0044<br>46 | EPRS | glutamyl-prolyl-tRNA synthetase | 4.091704  | Outlier |
| siRNA-Temozolomide Run2-DMSO | NM_0005<br>02 | EPX  | eosinophil peroxidase           | -1.532519 | Inlier  |
| siRNA Disorazole DMSO Run3   | NM_0005<br>02 | EPX  | eosinophil peroxidase           | -0.698265 | Inlier  |
| siRNA Disorazole DMSO Run1   | NM_0005<br>02 | EPX  | eosinophil peroxidase           | -0.650735 | Inlier  |
| siRNA-Vinblastine Run2-DMSO  | NM_0005<br>02 | EPX  | eosinophil peroxidase           | -0.116867 | Inlier  |
| siRNA-Temozolomide Run3-DMSO | NM_0005<br>02 | EPX  | eosinophil peroxidase           | 0.116868  | Inlier  |
| siRNA-Temozolomide Run1-DMSO | NM_0005<br>02 | EPX  | eosinophil peroxidase           | 0.162705  | Inlier  |
| siRNA Disorazole DMSO Run2   | NM_0005<br>02 | EPX  | eosinophil peroxidase           | 0.791003  | Inlier  |
| siRNA-Vinblastine Run1-DMSO  | NM_0005<br>02 | EPX  | eosinophil peroxidase           | 1.251979  | Inlier  |

Identification of Survival Genes in Human Glioblastoma Cells Using siRNA Screening

Nikhil G Thaker, Fang Zhang, Peter R. McDonald, Tong Ying Shun, Michael D Lewen, Ian F. Pollack, and John S.

Lazo

Molecular Pharmacology

|                                  |               |       |                                                                                                                                                         |           |        |
|----------------------------------|---------------|-------|---------------------------------------------------------------------------------------------------------------------------------------------------------|-----------|--------|
|                                  |               |       | v-erb-b2<br>erythrobla<br>stic<br>leukemia<br>viral<br>oncogene<br>homolog<br>2,<br>neuro/glio<br>blastoma<br>derived<br>oncogene<br>homolog<br>(avian) | -1.264206 | Inlier |
| siRNA-Temozolomide Run2-<br>DMSO | NM_0044<br>48 | ERBB2 | v-erb-b2<br>erythrobla<br>stic<br>leukemia<br>viral<br>oncogene<br>homolog<br>2,<br>neuro/glio<br>blastoma<br>derived<br>oncogene<br>homolog<br>(avian) | -1.192796 | Inlier |
| siRNA-Temozolomide Run3-<br>DMSO | NM_0044<br>48 | ERBB2 | v-erb-b2<br>erythrobla<br>stic<br>leukemia<br>viral<br>oncogene<br>homolog<br>2,<br>neuro/glio<br>blastoma<br>derived<br>oncogene<br>homolog<br>(avian) | -0.54539  | Inlier |
| siRNA-Temozolomide Run1-<br>DMSO | NM_0044<br>48 | ERBB2 |                                                                                                                                                         |           |        |

Identification of Survival Genes in Human Glioblastoma Cells Using siRNA Screening

Nikhil G Thaker, Fang Zhang, Peter R. McDonald, Tong Ying Shun, Michael D Lewen, Ian F. Pollack, and John S. Lazo

Molecular Pharmacology

|                                 |               |       |  |                                                                                                                                                         |           |        |
|---------------------------------|---------------|-------|--|---------------------------------------------------------------------------------------------------------------------------------------------------------|-----------|--------|
|                                 |               |       |  | v-erb-b2<br>erythrobla<br>stic<br>leukemia<br>viral<br>oncogene<br>homolog<br>2,<br>neuro/glio<br>blastoma<br>derived<br>oncogene<br>homolog<br>(avian) | -0.042056 | Inlier |
| siRNA Disorazole DMSO Run3      | NM_0044<br>48 | ERBB2 |  | v-erb-b2<br>erythrobla<br>stic<br>leukemia<br>viral<br>oncogene<br>homolog<br>2,<br>neuro/glio<br>blastoma<br>derived<br>oncogene<br>homolog<br>(avian) | 0.042057  | Inlier |
| siRNA Disorazole DMSO Run1      | NM_0044<br>48 | ERBB2 |  | v-erb-b2<br>erythrobla<br>stic<br>leukemia<br>viral<br>oncogene<br>homolog<br>2,<br>neuro/glio<br>blastoma<br>derived<br>oncogene<br>homolog<br>(avian) | 0.490455  | Inlier |
| siRNA-Vinblastine Run2-<br>DMSO | NM_0044<br>48 | ERBB2 |  |                                                                                                                                                         |           |        |



Identification of Survival Genes in Human Glioblastoma Cells Using siRNA Screening

Nikhil G Thaker, Fang Zhang, Peter R. McDonald, Tong Ying Shun, Michael D Lewen, Ian F. Pollack, and John S. Lazo

Molecular Pharmacology

|                                  |               |       |  |                                                                                                                                                         |           |        |
|----------------------------------|---------------|-------|--|---------------------------------------------------------------------------------------------------------------------------------------------------------|-----------|--------|
|                                  |               |       |  | v-erb-b2<br>erythrobla<br>stic<br>leukemia<br>viral<br>oncogene<br>homolog<br>2,<br>neuro/glio<br>blastoma<br>derived<br>oncogene<br>homolog<br>(avian) | 0.80361   | Inlier |
| siRNA Disorazole DMSO Run2       | NM_0044<br>48 | ERBB2 |  | v-erb-b2<br>erythrobla<br>stic<br>leukemia<br>viral<br>oncogene<br>homolog<br>2,<br>neuro/glio<br>blastoma<br>derived<br>oncogene<br>homolog<br>(avian) | 1.481031  | Inlier |
| siRNA-Vinblastine Run1-<br>DMSO  | NM_0044<br>48 | ERBB2 |  | v-erb-b2<br>erythrobla<br>stic<br>leukemia<br>viral<br>oncogene<br>homolog<br>3<br>(avian)                                                              | -1.187191 | Inlier |
| siRNA-Temozolomide Run3-<br>DMSO | NM_0019<br>82 | ERBB3 |  | v-erb-b2<br>erythrobla<br>stic<br>leukemia<br>viral<br>oncogene<br>homolog<br>3<br>(avian)                                                              | -0.823491 | Inlier |
| siRNA Disorazole DMSO Run2       | NM_0019<br>82 | ERBB3 |  | v-erb-b2<br>erythrobla<br>stic<br>leukemia<br>viral<br>oncogene<br>homolog<br>3<br>(avian)                                                              | -0.506094 | Inlier |
| siRNA Disorazole DMSO Run3       | NM_0019<br>82 | ERBB3 |  |                                                                                                                                                         |           |        |

Identification of Survival Genes in Human Glioblastoma Cells Using siRNA Screening

Nikhil G Thaker, Fang Zhang, Peter R. McDonald, Tong Ying Shun, Michael D Lewen, Ian F. Pollack, and John S. Lazo

Molecular Pharmacology

|                                  |               |       |  |                                                                                         |                  |
|----------------------------------|---------------|-------|--|-----------------------------------------------------------------------------------------|------------------|
|                                  |               |       |  | v-erb-b2<br>erythrobla<br>stic<br>leukemia<br>viral<br>oncogene<br>homolog 3<br>(avian) |                  |
| siRNA-Temozolomide Run2-<br>DMSO | NM_0019<br>82 | ERBB3 |  | v-erb-b2<br>erythrobla<br>stic<br>leukemia<br>viral<br>oncogene<br>homolog 3<br>(avian) | -0.494434 Inlier |
| siRNA-Temozolomide Run1-<br>DMSO | NM_0019<br>82 | ERBB3 |  | v-erb-b2<br>erythrobla<br>stic<br>leukemia<br>viral<br>oncogene<br>homolog 3<br>(avian) | 0.494434 Inlier  |
| siRNA Disorazole DMSO Run1       | NM_0019<br>82 | ERBB3 |  | v-erb-b2<br>erythrobla<br>stic<br>leukemia<br>viral<br>oncogene<br>homolog 3<br>(avian) | 0.525509 Inlier  |
| siRNA-Vinblastine Run2-<br>DMSO  | NM_0019<br>82 | ERBB3 |  | v-erb-b2<br>erythrobla<br>stic<br>leukemia<br>viral<br>oncogene<br>homolog 3<br>(avian) | 1.312669 Inlier  |
| siRNA-Vinblastine Run1-<br>DMSO  | NM_0019<br>82 | ERBB3 |  | v-erb-a<br>erythrobla<br>stic<br>leukemia<br>viral<br>oncogene<br>homolog 3<br>(avian)  | 1.478355 Inlier  |
| siRNA Disorazole DMSO Run2       | NM_0052<br>35 | ERBB4 |  | oncogene<br>homolog 4<br>(avian)                                                        | -1.566304 Inlier |

Identification of Survival Genes in Human Glioblastoma Cells Using siRNA Screening

Nikhil G Thaker, Fang Zhang, Peter R. McDonald, Tong Ying Shun, Michael D Lewen, Ian F. Pollack, and John S. Lazo

Molecular Pharmacology

| siRNA Treatment              | Gene ID   | Gene Name | Category                                                         | Score     | Outlier Status |
|------------------------------|-----------|-----------|------------------------------------------------------------------|-----------|----------------|
| siRNA-Temozolomide Run1-DMSO | NM_005235 | ERBB4     | v-erb-a erythroblastic leukemia viral oncogene homolog 4 (avian) | -0.611669 | Inlier         |
| siRNA Disorazole DMSO Run1   | NM_005235 | ERBB4     | v-erb-a erythroblastic leukemia viral oncogene homolog 4 (avian) | -0.079753 | Inlier         |
| siRNA-Temozolomide Run2-DMSO | NM_005235 | ERBB4     | v-erb-a erythroblastic leukemia viral oncogene homolog 4 (avian) | -0.031123 | Inlier         |
| siRNA-Temozolomide Run3-DMSO | NM_005235 | ERBB4     | v-erb-a erythroblastic leukemia viral oncogene homolog 4 (avian) | 0.031124  | Inlier         |
| siRNA Disorazole DMSO Run3   | NM_005235 | ERBB4     | v-erb-a erythroblastic leukemia viral oncogene homolog 4 (avian) | 0.737331  | Inlier         |
| siRNA-Vinblastine Run1-DMSO  | NM_005235 | ERBB4     | v-erb-a erythroblastic leukemia viral oncogene homolog 4 (avian) | 0.979285  | Inlier         |

Identification of Survival Genes in Human Glioblastoma Cells Using siRNA Screening

Nikhil G Thaker, Fang Zhang, Peter R. McDonald, Tong Ying Shun, Michael D Lewen, Ian F. Pollack, and John S. Lazo

Molecular Pharmacology

|                                 |               |       |                                                                                        |          |        |
|---------------------------------|---------------|-------|----------------------------------------------------------------------------------------|----------|--------|
|                                 |               |       | v-erb-a<br>erythrobla<br>stic<br>leukemia<br>viral<br>oncogene<br>homolog 4<br>(avian) | 1.289659 | Inlier |
| siRNA-Vinblastine Run2-<br>DMSO | NM_0052<br>35 | ERBB4 |                                                                                        |          |        |

|                                  |               |       |                                                                                                                                                                                  |           |        |
|----------------------------------|---------------|-------|----------------------------------------------------------------------------------------------------------------------------------------------------------------------------------|-----------|--------|
|                                  |               |       | excision<br>repair<br>cross-<br>compleme<br>nting<br>rodent<br>repair<br>deficiency,<br>compleme<br>ntation<br>group 1<br>(includes<br>overlappin<br>g<br>antisense<br>sequence) | -1.918208 | Inlier |
| siRNA-Temozolomide Run2-<br>DMSO | NM_0019<br>83 | ERCC1 |                                                                                                                                                                                  |           |        |

|                                  |               |       |                                                                                                                                                                                  |           |        |
|----------------------------------|---------------|-------|----------------------------------------------------------------------------------------------------------------------------------------------------------------------------------|-----------|--------|
|                                  |               |       | excision<br>repair<br>cross-<br>compleme<br>nting<br>rodent<br>repair<br>deficiency,<br>compleme<br>ntation<br>group 1<br>(includes<br>overlappin<br>g<br>antisense<br>sequence) | -1.664562 | Inlier |
| siRNA-Temozolomide Run3-<br>DMSO | NM_0019<br>83 | ERCC1 |                                                                                                                                                                                  |           |        |

Identification of Survival Genes in Human Glioblastoma Cells Using siRNA Screening

Nikhil G Thaker, Fang Zhang, Peter R. McDonald, Tong Ying Shun, Michael D Lewen, Ian F. Pollack, and John S. Lazo

Molecular Pharmacology

|                                  |               |       |  |                                                                                                                                                                                  |                  |
|----------------------------------|---------------|-------|--|----------------------------------------------------------------------------------------------------------------------------------------------------------------------------------|------------------|
|                                  |               |       |  | excision<br>repair<br>cross-<br>compleme<br>nting<br>rodent<br>repair<br>deficiency,<br>compleme<br>ntation<br>group 1<br>(includes<br>overlappin<br>g<br>antisense<br>sequence) |                  |
| siRNA-Temozolomide Run1-<br>DMSO | NM_0019<br>83 | ERCC1 |  |                                                                                                                                                                                  | -0.387505 Inlier |

|                            |               |       |  |                                                                                                                                                                                  |                  |
|----------------------------|---------------|-------|--|----------------------------------------------------------------------------------------------------------------------------------------------------------------------------------|------------------|
|                            |               |       |  | excision<br>repair<br>cross-<br>compleme<br>nting<br>rodent<br>repair<br>deficiency,<br>compleme<br>ntation<br>group 1<br>(includes<br>overlappin<br>g<br>antisense<br>sequence) |                  |
| siRNA Disorazole DMSO Run3 | NM_0019<br>83 | ERCC1 |  |                                                                                                                                                                                  | -0.009242 Inlier |

Identification of Survival Genes in Human Glioblastoma Cells Using siRNA Screening

Nikhil G Thaker, Fang Zhang, Peter R. McDonald, Tong Ying Shun, Michael D Lewen, Ian F. Pollack, and John S. Lazo

Molecular Pharmacology

|                                 |               |       |                                                                                                                                                        |                 |
|---------------------------------|---------------|-------|--------------------------------------------------------------------------------------------------------------------------------------------------------|-----------------|
|                                 |               |       | excision<br>repair<br>cross-<br>compleme<br>nting<br>rodent<br>repair<br>deficiency,<br>compleme<br>ntation<br>group 1<br>(includes<br>overlappin<br>g |                 |
| siRNA-Vinblastine Run2-<br>DMSO | NM_0019<br>83 | ERCC1 | antisense<br>sequence)                                                                                                                                 | 0.009242 Inlier |

|                            |               |       |                                                                                                                                                        |                 |
|----------------------------|---------------|-------|--------------------------------------------------------------------------------------------------------------------------------------------------------|-----------------|
|                            |               |       | excision<br>repair<br>cross-<br>compleme<br>nting<br>rodent<br>repair<br>deficiency,<br>compleme<br>ntation<br>group 1<br>(includes<br>overlappin<br>g |                 |
| siRNA Disorazole DMSO Run1 | NM_0019<br>83 | ERCC1 | antisense<br>sequence)                                                                                                                                 | 0.147201 Inlier |

Identification of Survival Genes in Human Glioblastoma Cells Using siRNA Screening

Nikhil G Thaker, Fang Zhang, Peter R. McDonald, Tong Ying Shun, Michael D Lewen, Ian F. Pollack, and John S.

Lazo

Molecular Pharmacology

|                                  |               |       |                                                                                                                                                                                  |           |        |
|----------------------------------|---------------|-------|----------------------------------------------------------------------------------------------------------------------------------------------------------------------------------|-----------|--------|
|                                  |               |       | excision<br>repair<br>cross-<br>compleme<br>nting<br>rodent<br>repair<br>deficiency,<br>compleme<br>ntation<br>group 1<br>(includes<br>overlappin<br>g<br>antisense<br>sequence) | 0.961495  | Inlier |
| siRNA Disorazole DMSO Run2       | NM_0019<br>83 | ERCC1 |                                                                                                                                                                                  |           |        |
|                                  |               |       | excision<br>repair<br>cross-<br>compleme<br>nting<br>rodent<br>repair<br>deficiency,<br>compleme<br>ntation<br>group 1<br>(includes<br>overlappin<br>g<br>antisense<br>sequence) | 1.178442  | Inlier |
| siRNA-Vinblastine Run1-<br>DMSO  | NM_0019<br>83 | ERCC1 | Ets2                                                                                                                                                                             |           |        |
| siRNA-Temozolomide Run3-<br>DMSO | NM_0064<br>94 | ERF   | repressor<br>factor                                                                                                                                                              | -1.317998 | Inlier |
|                                  |               |       | Ets2                                                                                                                                                                             |           |        |
| siRNA Disorazole DMSO Run2       | NM_0064<br>94 | ERF   | repressor<br>factor                                                                                                                                                              | -0.986938 | Inlier |
|                                  |               |       | Ets2                                                                                                                                                                             |           |        |
| siRNA-Temozolomide Run2-<br>DMSO | NM_0064<br>94 | ERF   | repressor<br>factor                                                                                                                                                              | -0.15954  | Inlier |
|                                  |               |       | Ets2                                                                                                                                                                             |           |        |
| siRNA-Temozolomide Run1-<br>DMSO | NM_0064<br>94 | ERF   | repressor<br>factor                                                                                                                                                              | -0.052827 | Inlier |
|                                  |               |       | Ets2                                                                                                                                                                             |           |        |
| siRNA Disorazole DMSO Run3       | NM_0064<br>94 | ERF   | repressor<br>factor                                                                                                                                                              | 0.052827  | Inlier |

Identification of Survival Genes in Human Glioblastoma Cells Using siRNA Screening  
 Nikhil G Thaker, Fang Zhang, Peter R. McDonald, Tong Ying Shun, Michael D Lewen, Ian F. Pollack, and John S. Lazo

Molecular Pharmacology

| siRNA Treatment              | Gene ID       | Protein | Function                                 | Log2 Fold Change | Outlier Status |
|------------------------------|---------------|---------|------------------------------------------|------------------|----------------|
| siRNA Disorazole DMSO Run1   | NM_0064<br>94 | ERF     | Ets2 repressor factor                    | 0.477458         | Inlier         |
| siRNA-Vinblastine Run1-DMSO  | NM_0064<br>94 | ERF     | Ets2 repressor factor                    | 0.871542         | Inlier         |
| siRNA-Vinblastine Run2-DMSO  | NM_0064<br>94 | ERF     | Ets2 repressor factor                    | 0.920148         | Inlier         |
| siRNA-Temozolomide Run3-DMSO | NM_1390<br>21 | ERK8    | mitogen-activated protein kinase 15      | -1.472113        | Inlier         |
| siRNA-Temozolomide Run1-DMSO | NM_1390<br>21 | ERK8    | mitogen-activated protein kinase 15      | -0.609884        | Inlier         |
| siRNA Disorazole DMSO Run3   | NM_1390<br>21 | ERK8    | mitogen-activated protein kinase 15      | -0.175417        | Inlier         |
| siRNA Disorazole DMSO Run2   | NM_1390<br>21 | ERK8    | mitogen-activated protein kinase 15      | -0.123878        | Inlier         |
| siRNA-Temozolomide Run2-DMSO | NM_1390<br>21 | ERK8    | mitogen-activated protein kinase 15      | 0.123877         | Inlier         |
| siRNA-Vinblastine Run1-DMSO  | NM_1390<br>21 | ERK8    | mitogen-activated protein kinase 15      | 0.739116         | Inlier         |
| siRNA Disorazole DMSO Run1   | NM_1390<br>21 | ERK8    | mitogen-activated protein kinase 15      | 1.18936          | Inlier         |
| siRNA-Vinblastine Run2-DMSO  | NM_1390<br>21 | ERK8    | mitogen-activated protein kinase 15      | 2.888551         | Inlier         |
| siRNA-Temozolomide Run3-DMSO | NM_0185<br>38 | ERMAP   | erythroblast membrane-associated protein | -1.422117        | Inlier         |



Identification of Survival Genes in Human Glioblastoma Cells Using siRNA Screening  
 Nikhil G Thaker, Fang Zhang, Peter R. McDonald, Tong Ying Shun, Michael D Lewen, Ian F. Pollack, and John S. Lazo  
 Molecular Pharmacology

|                              |           |       |                                               |           |        |
|------------------------------|-----------|-------|-----------------------------------------------|-----------|--------|
| siRNA-Temozolomide Run2-DMSO | NM_018538 | ERMAP | erythroblast membrane-associated protein      | -0.535211 | Inlier |
| siRNA Disorazole DMSO Run3   | NM_018538 | ERMAP | erythroblast membrane-associated protein      | -0.063505 | Inlier |
| siRNA-Temozolomide Run1-DMSO | NM_018538 | ERMAP | erythroblast membrane-associated protein      | -0.061108 | Inlier |
| siRNA-Vinblastine Run2-DMSO  | NM_018538 | ERMAP | erythroblast membrane-associated protein      | 0.061108  | Inlier |
| siRNA Disorazole DMSO Run1   | NM_018538 | ERMAP | erythroblast membrane-associated protein      | 0.813789  | Inlier |
| siRNA Disorazole DMSO Run2   | NM_018538 | ERMAP | erythroblast membrane-associated protein      | 1.818541  | Inlier |
| siRNA-Vinblastine Run1-DMSO  | NM_018538 | ERMAP | erythroblast membrane-associated protein      | 1.974821  | Inlier |
| siRNA Disorazole DMSO Run2   | NM_001433 | ERN1  | endoplasmic reticulum to nucleus signalling 1 | -0.735086 | Inlier |

Identification of Survival Genes in Human Glioblastoma Cells Using siRNA Screening  
 Nikhil G Thaker, Fang Zhang, Peter R. McDonald, Tong Ying Shun, Michael D Lewen, Ian F. Pollack, and John S. Lazo  
 Molecular Pharmacology

|                              |           |      |                                               |           |        |
|------------------------------|-----------|------|-----------------------------------------------|-----------|--------|
| siRNA-Temozolomide Run3-DMSO | NM_001433 | ERN1 | endoplasmic reticulum to nucleus signalling 1 | -0.613914 | Inlier |
| siRNA Disorazole DMSO Run3   | NM_001433 | ERN1 | endoplasmic reticulum to nucleus signalling 1 | -0.371299 | Inlier |
| siRNA-Temozolomide Run2-DMSO | NM_001433 | ERN1 | endoplasmic reticulum to nucleus signalling 1 | -0.113546 | Inlier |
| siRNA-Temozolomide Run1-DMSO | NM_001433 | ERN1 | endoplasmic reticulum to nucleus signalling 1 | 0.113546  | Inlier |
| siRNA Disorazole DMSO Run1   | NM_001433 | ERN1 | endoplasmic reticulum to nucleus signalling 1 | 0.821681  | Inlier |
| siRNA-Vinblastine Run1-DMSO  | NM_001433 | ERN1 | endoplasmic reticulum to nucleus signalling 1 | 1.177664  | Inlier |
| siRNA-Vinblastine Run2-DMSO  | NM_001433 | ERN1 | endoplasmic reticulum to nucleus signalling 1 | 1.206196  | Inlier |

Identification of Survival Genes in Human Glioblastoma Cells Using siRNA Screening  
 Nikhil G Thaker, Fang Zhang, Peter R. McDonald, Tong Ying Shun, Michael D Lewen, Ian F. Pollack, and John S. Lazo  
 Molecular Pharmacology

|                              |               |      |                                               |           |        |
|------------------------------|---------------|------|-----------------------------------------------|-----------|--------|
| siRNA-Temozolomide Run3-DMSO | NM_0332<br>66 | ERN2 | endoplasmic reticulum to nucleus signalling 2 | -1.869957 | Inlier |
| siRNA-Temozolomide Run1-DMSO | NM_0332<br>66 | ERN2 | endoplasmic reticulum to nucleus signalling 2 | -0.881482 | Inlier |
| siRNA-Temozolomide Run2-DMSO | NM_0332<br>66 | ERN2 | endoplasmic reticulum to nucleus signalling 2 | -0.772807 | Inlier |
| siRNA Disorazole DMSO Run2   | NM_0332<br>66 | ERN2 | endoplasmic reticulum to nucleus signalling 2 | -0.188408 | Inlier |
| siRNA-Vinblastine Run1-DMSO  | NM_0332<br>66 | ERN2 | endoplasmic reticulum to nucleus signalling 2 | 0.188408  | Inlier |
| siRNA Disorazole DMSO Run1   | NM_0332<br>66 | ERN2 | endoplasmic reticulum to nucleus signalling 2 | 0.482948  | Inlier |
| siRNA-Vinblastine Run2-DMSO  | NM_0332<br>66 | ERN2 | endoplasmic reticulum to nucleus signalling 2 | 0.576193  | Inlier |

Identification of Survival Genes in Human Glioblastoma Cells Using siRNA Screening  
 Nikhil G Thaker, Fang Zhang, Peter R. McDonald, Tong Ying Shun, Michael D Lewen, Ian F. Pollack, and John S. Lazo  
 Molecular Pharmacology

|                              |               |       |                                                |           |        |
|------------------------------|---------------|-------|------------------------------------------------|-----------|--------|
| siRNA Disorazole DMSO Run3   | NM_0332<br>66 | ERN2  | endoplasmic reticulum to nucleus signalling 2  | 0.819521  | Inlier |
| siRNA-Temozolomide Run3-DMSO | NM_0049<br>11 | ERP70 | protein disulfide isomerase family A, member 4 | -1.431218 | Inlier |
| siRNA Disorazole DMSO Run3   | NM_0049<br>11 | ERP70 | protein disulfide isomerase family A, member 4 | -0.823426 | Inlier |
| siRNA-Vinblastine Run2-DMSO  | NM_0049<br>11 | ERP70 | protein disulfide isomerase family A, member 4 | -0.657107 | Inlier |
| siRNA Disorazole DMSO Run1   | NM_0049<br>11 | ERP70 | protein disulfide isomerase family A, member 4 | -0.050367 | Inlier |
| siRNA-Temozolomide Run2-DMSO | NM_0049<br>11 | ERP70 | protein disulfide isomerase family A, member 4 | 0.050367  | Inlier |
| siRNA-Temozolomide Run1-DMSO | NM_0049<br>11 | ERP70 | protein disulfide isomerase family A, member 4 | 0.396536  | Inlier |
| siRNA-Vinblastine Run1-DMSO  | NM_0049<br>11 | ERP70 | protein disulfide isomerase family A, member 4 | 0.691893  | Inlier |

Identification of Survival Genes in Human Glioblastoma Cells Using siRNA Screening  
 Nikhil G Thaker, Fang Zhang, Peter R. McDonald, Tong Ying Shun, Michael D Lewen, Ian F. Pollack, and John S. Lazo  
 Molecular Pharmacology

|                                  |               |       |                                                            |           |        |
|----------------------------------|---------------|-------|------------------------------------------------------------|-----------|--------|
| siRNA Disorazole DMSO Run2       | NM_0049<br>11 | ERP70 | protein<br>disulfide<br>isomerase<br>family A,<br>member 4 | 1.198048  | Inlier |
| siRNA-Temozolomide Run3-<br>DMSO | NM_0019<br>84 | ESD   | esterase<br>D/formylgl<br>utathione<br>hydrolase           | -0.895916 | Inlier |
| siRNA-Temozolomide Run2-<br>DMSO | NM_0019<br>84 | ESD   | esterase<br>D/formylgl<br>utathione<br>hydrolase           | -0.805276 | Inlier |
| siRNA-Vinblastine Run2-<br>DMSO  | NM_0019<br>84 | ESD   | esterase<br>D/formylgl<br>utathione<br>hydrolase           | -0.157567 | Inlier |
| siRNA Disorazole DMSO Run1       | NM_0019<br>84 | ESD   | esterase<br>D/formylgl<br>utathione<br>hydrolase           | -0.013081 | Inlier |
| siRNA Disorazole DMSO Run3       | NM_0019<br>84 | ESD   | esterase<br>D/formylgl<br>utathione<br>hydrolase           | 0.013081  | Inlier |
| siRNA-Vinblastine Run1-<br>DMSO  | NM_0019<br>84 | ESD   | esterase<br>D/formylgl<br>utathione<br>hydrolase           | 0.543724  | Inlier |
| siRNA-Temozolomide Run1-<br>DMSO | NM_0019<br>84 | ESD   | esterase<br>D/formylgl<br>utathione<br>hydrolase           | 0.991909  | Inlier |
| siRNA Disorazole DMSO Run2       | NM_0019<br>84 | ESD   | esterase<br>D/formylgl<br>utathione<br>hydrolase           | 1.174579  | Inlier |
| siRNA-Temozolomide Run3-<br>DMSO | NM_0122<br>91 | ESPL1 | extra<br>spindle<br>poles like<br>1 (S.<br>cerevisiae)     | -0.880662 | Inlier |
| siRNA-Temozolomide Run2-<br>DMSO | NM_0122<br>91 | ESPL1 | extra<br>spindle<br>poles like<br>1 (S.<br>cerevisiae)     | -0.743293 | Inlier |

Identification of Survival Genes in Human Glioblastoma Cells Using siRNA Screening  
 Nikhil G Thaker, Fang Zhang, Peter R. McDonald, Tong Ying Shun, Michael D Lewen, Ian F. Pollack, and John S. Lazo  
 Molecular Pharmacology

|                              |               |       |                                                        |           |        |
|------------------------------|---------------|-------|--------------------------------------------------------|-----------|--------|
| siRNA-Temozolomide Run1-DMSO | NM_0122<br>91 | ESPL1 | extra<br>spindle<br>poles like<br>1 (S.<br>cerevisiae) | -0.423215 | Inlier |
| siRNA Disorazole DMSO Run3   | NM_0122<br>91 | ESPL1 | extra<br>spindle<br>poles like<br>1 (S.<br>cerevisiae) | -0.241451 | Inlier |
| siRNA Disorazole DMSO Run1   | NM_0122<br>91 | ESPL1 | extra<br>spindle<br>poles like<br>1 (S.<br>cerevisiae) | 0.241451  | Inlier |
| siRNA Disorazole DMSO Run2   | NM_0122<br>91 | ESPL1 | extra<br>spindle<br>poles like<br>1 (S.<br>cerevisiae) | 0.605707  | Inlier |
| siRNA-Vinblastine Run2-DMSO  | NM_0122<br>91 | ESPL1 | extra<br>spindle<br>poles like<br>1 (S.<br>cerevisiae) | 1.210412  | Inlier |
| siRNA-Vinblastine Run1-DMSO  | NM_0122<br>91 | ESPL1 | extra<br>spindle<br>poles like<br>1 (S.<br>cerevisiae) | 1.368994  | Inlier |
| siRNA Disorazole DMSO Run3   | NM_0001<br>25 | ESR1  | estrogen<br>receptor 1                                 | -0.804363 | Inlier |
| siRNA-Temozolomide Run3-DMSO | NM_0001<br>25 | ESR1  | estrogen<br>receptor 1                                 | -0.696092 | Inlier |
| siRNA Disorazole DMSO Run2   | NM_0001<br>25 | ESR1  | estrogen<br>receptor 1                                 | -0.642559 | Inlier |
| siRNA-Temozolomide Run2-DMSO | NM_0001<br>25 | ESR1  | estrogen<br>receptor 1                                 | -0.337183 | Inlier |
| siRNA-Temozolomide Run1-DMSO | NM_0001<br>25 | ESR1  | estrogen<br>receptor 1                                 | 0.337183  | Inlier |
| siRNA Disorazole DMSO Run1   | NM_0001<br>25 | ESR1  | estrogen<br>receptor 1                                 | 0.652908  | Inlier |
| siRNA-Vinblastine Run1-DMSO  | NM_0001<br>25 | ESR1  | estrogen<br>receptor 1                                 | 0.746562  | Inlier |
| siRNA-Vinblastine Run2-DMSO  | NM_0001<br>25 | ESR1  | estrogen<br>receptor 1                                 | 0.976411  | Inlier |

Identification of Survival Genes in Human Glioblastoma Cells Using siRNA Screening  
 Nikhil G Thaker, Fang Zhang, Peter R. McDonald, Tong Ying Shun, Michael D Lewen, Ian F. Pollack, and John S. Lazo

Molecular Pharmacology

|                                  |               |       |                                                 |           |        |
|----------------------------------|---------------|-------|-------------------------------------------------|-----------|--------|
| siRNA Disorazole DMSO Run2       | NM_0014<br>37 | ESR2  | estrogen<br>receptor 2<br>(ER beta)             | -2.394909 | Inlier |
| siRNA-Temozolomide Run3-<br>DMSO | NM_0014<br>37 | ESR2  | estrogen<br>receptor 2<br>(ER beta)             | -2.384701 | Inlier |
| siRNA-Temozolomide Run2-<br>DMSO | NM_0014<br>37 | ESR2  | estrogen<br>receptor 2<br>(ER beta)             | -0.707809 | Inlier |
| siRNA-Vinblastine Run2-<br>DMSO  | NM_0014<br>37 | ESR2  | estrogen<br>receptor 2<br>(ER beta)             | -0.055127 | Inlier |
| siRNA Disorazole DMSO Run1       | NM_0014<br>37 | ESR2  | estrogen<br>receptor 2<br>(ER beta)             | 0.055127  | Inlier |
| siRNA-Temozolomide Run1-<br>DMSO | NM_0014<br>37 | ESR2  | estrogen<br>receptor 2<br>(ER beta)             | 0.102231  | Inlier |
| siRNA Disorazole DMSO Run3       | NM_0014<br>37 | ESR2  | estrogen<br>receptor 2<br>(ER beta)             | 0.641191  | Inlier |
| siRNA-Vinblastine Run1-<br>DMSO  | NM_0014<br>37 | ESR2  | estrogen-<br>related<br>receptor 2<br>(ER beta) | 0.872778  | Inlier |
| siRNA-Temozolomide Run3-<br>DMSO | NM_0044<br>51 | ESRRA | estrogen-<br>related<br>receptor<br>alpha       | -0.966328 | Inlier |
| siRNA-Temozolomide Run2-<br>DMSO | NM_0044<br>51 | ESRRA | estrogen-<br>related<br>receptor<br>alpha       | -0.382672 | Inlier |
| siRNA-Temozolomide Run1-<br>DMSO | NM_0044<br>51 | ESRRA | estrogen-<br>related<br>receptor<br>alpha       | -0.361828 | Inlier |
| siRNA Disorazole DMSO Run3       | NM_0044<br>51 | ESRRA | estrogen-<br>related<br>receptor<br>alpha       | -0.043641 | Inlier |
| siRNA Disorazole DMSO Run1       | NM_0044<br>51 | ESRRA | estrogen-<br>related<br>receptor<br>alpha       | 0.043641  | Inlier |
| siRNA Disorazole DMSO Run2       | NM_0044<br>51 | ESRRA | estrogen-<br>related<br>receptor<br>alpha       | 1.169637  | Inlier |
| siRNA-Vinblastine Run2-<br>DMSO  | NM_0044<br>51 | ESRRA | estrogen-<br>related<br>receptor<br>alpha       | 1.650895  | Inlier |

Identification of Survival Genes in Human Glioblastoma Cells Using siRNA Screening  
 Nikhil G Thaker, Fang Zhang, Peter R. McDonald, Tong Ying Shun, Michael D Lewen, Ian F. Pollack, and John S. Lazo

Molecular Pharmacology

|                              |               |         |                                             |           |        |
|------------------------------|---------------|---------|---------------------------------------------|-----------|--------|
| siRNA-Vinblastine Run1-DMSO  | NM_0044<br>51 | ESRRA   | estrogen-related<br>receptor<br>alpha       | 2.16661   | Inlier |
| siRNA-Temozolomide Run3-DMSO | NM_0044<br>52 | ESRRB   | estrogen-related<br>receptor<br>beta        | -2.131715 | Inlier |
| siRNA-Temozolomide Run2-DMSO | NM_0044<br>52 | ESRRB   | estrogen-related<br>receptor<br>beta        | -1.58208  | Inlier |
| siRNA Disorazole DMSO Run2   | NM_0044<br>52 | ESRRB   | estrogen-related<br>receptor<br>beta        | -1.067808 | Inlier |
| siRNA-Temozolomide Run1-DMSO | NM_0044<br>52 | ESRRB   | estrogen-related<br>receptor<br>beta        | -0.039812 | Inlier |
| siRNA Disorazole DMSO Run3   | NM_0044<br>52 | ESRRB   | estrogen-related<br>receptor<br>beta        | 0.039812  | Inlier |
| siRNA Disorazole DMSO Run1   | NM_0044<br>52 | ESRRB   | estrogen-related<br>receptor<br>beta        | 0.363071  | Inlier |
| siRNA-Vinblastine Run1-DMSO  | NM_0044<br>52 | ESRRB   | estrogen-related<br>receptor<br>beta        | 0.380647  | Inlier |
| siRNA-Vinblastine Run2-DMSO  | NM_0044<br>52 | ESRRB   | estrogen-related<br>receptor<br>beta        | 0.968353  | Inlier |
| siRNA-Vinblastine Run2-DMSO  | NM_0180<br>10 | ESRRBL1 | estrogen-related<br>receptor<br>beta like 1 | -2.206581 | Inlier |
| siRNA-Temozolomide Run2-DMSO | NM_0180<br>10 | ESRRBL1 | estrogen-related<br>receptor<br>beta like 1 | -0.584849 | Inlier |
| siRNA Disorazole DMSO Run3   | NM_0180<br>10 | ESRRBL1 | estrogen-related<br>receptor<br>beta like 1 | -0.584627 | Inlier |



Identification of Survival Genes in Human Glioblastoma Cells Using siRNA Screening  
 Nikhil G Thaker, Fang Zhang, Peter R. McDonald, Tong Ying Shun, Michael D Lewen, Ian F. Pollack, and John S. Lazo  
 Molecular Pharmacology

|                                  |               |         |                                                 |           |         |
|----------------------------------|---------------|---------|-------------------------------------------------|-----------|---------|
| siRNA Disorazole DMSO Run1       | NM_0180<br>10 | ESRRBL1 | estrogen-<br>related<br>receptor<br>beta like 1 | -0.291098 | Inlier  |
| siRNA-Temozolomide Run1-<br>DMSO | NM_0180<br>10 | ESRRBL1 | estrogen-<br>related<br>receptor<br>beta like 1 | 0.291098  | Inlier  |
| siRNA-Temozolomide Run3-<br>DMSO | NM_0180<br>10 | ESRRBL1 | estrogen-<br>related<br>receptor<br>beta like 1 | 0.764151  | Inlier  |
| siRNA Disorazole DMSO Run2       | NM_0180<br>10 | ESRRBL1 | estrogen-<br>related<br>receptor<br>beta like 1 | 1.750882  | Inlier  |
| siRNA-Vinblastine Run1-<br>DMSO  | NM_0180<br>10 | ESRRBL1 | estrogen-<br>related<br>receptor<br>beta like 1 | 3.587308  | Outlier |
| siRNA Disorazole DMSO Run3       | NM_2065<br>95 | ESRRG   | estrogen-<br>related<br>receptor<br>gamma       | -1.025288 | Inlier  |
| siRNA-Temozolomide Run3-<br>DMSO | NM_2065<br>95 | ESRRG   | estrogen-<br>related<br>receptor<br>gamma       | -0.939202 | Inlier  |
| siRNA-Temozolomide Run2-<br>DMSO | NM_2065<br>95 | ESRRG   | estrogen-<br>related<br>receptor<br>gamma       | -0.409798 | Inlier  |
| siRNA Disorazole DMSO Run2       | NM_2065<br>95 | ESRRG   | estrogen-<br>related<br>receptor<br>gamma       | -0.342579 | Inlier  |
| siRNA-Temozolomide Run1-<br>DMSO | NM_2065<br>95 | ESRRG   | estrogen-<br>related<br>receptor<br>gamma       | 0.342579  | Inlier  |
| siRNA Disorazole DMSO Run1       | NM_2065<br>95 | ESRRG   | estrogen-<br>related<br>receptor<br>gamma       | 0.357039  | Inlier  |

Identification of Survival Genes in Human Glioblastoma Cells Using siRNA Screening

Nikhil G Thaker, Fang Zhang, Peter R. McDonald, Tong Ying Shun, Michael D Lewen, Ian F. Pollack, and John S.

Lazo

Molecular Pharmacology

|                              |               |       |                                                                          |           |        |
|------------------------------|---------------|-------|--------------------------------------------------------------------------|-----------|--------|
| siRNA-Vinblastine Run1-DMSO  | NM_2065<br>95 | ESRRG | estrogen-related<br>receptor<br>gamma                                    | 1.254626  | Inlier |
| siRNA-Vinblastine Run2-DMSO  | NM_2065<br>95 | ESRRG | estrogen-related<br>receptor<br>gamma                                    | 1.936331  | Inlier |
| siRNA-Temozolomide Run2-DMSO | NM_1833<br>75 | ESSPL | ESSPL                                                                    | -0.890654 | Inlier |
| siRNA Disorazole DMSO Run1   | NM_1833<br>75 | ESSPL | ESSPL                                                                    | -0.530586 | Inlier |
| siRNA-Vinblastine Run1-DMSO  | NM_1833<br>75 | ESSPL | ESSPL                                                                    | -0.152482 | Inlier |
| siRNA-Temozolomide Run3-DMSO | NM_1833<br>75 | ESSPL | ESSPL                                                                    | -0.028605 | Inlier |
| siRNA-Temozolomide Run1-DMSO | NM_1833<br>75 | ESSPL | ESSPL                                                                    | 0.028605  | Inlier |
| siRNA-Vinblastine Run2-DMSO  | NM_1833<br>75 | ESSPL | ESSPL                                                                    | 0.818414  | Inlier |
| siRNA Disorazole DMSO Run3   | NM_1833<br>75 | ESSPL | ESSPL                                                                    | 1.090733  | Inlier |
| siRNA Disorazole DMSO Run2   | NM_1833<br>75 | ESSPL | ESSPL                                                                    | 2.541432  | Inlier |
| siRNA-Temozolomide Run1-DMSO | NM_0001<br>26 | ETFA  | electron-transfer-flavoprotein, alpha polypeptide (glutaric aciduria II) | -0.725739 | Inlier |
| siRNA-Temozolomide Run2-DMSO | NM_0001<br>26 | ETFA  | electron-transfer-flavoprotein, alpha polypeptide (glutaric aciduria II) | -0.623261 | Inlier |
| siRNA Disorazole DMSO Run1   | NM_0001<br>26 | ETFA  | electron-transfer-flavoprotein, alpha polypeptide (glutaric aciduria II) | -0.421289 | Inlier |
| siRNA-Temozolomide Run3-DMSO | NM_0001<br>26 | ETFA  | electron-transfer-flavoprotein, alpha polypeptide (glutaric aciduria II) | -0.200003 | Inlier |

Identification of Survival Genes in Human Glioblastoma Cells Using siRNA Screening

Nikhil G Thaker, Fang Zhang, Peter R. McDonald, Tong Ying Shun, Michael D Lewen, Ian F. Pollack, and John S. Lazo

Molecular Pharmacology

|                              |           |      |                                                                          |           |        |
|------------------------------|-----------|------|--------------------------------------------------------------------------|-----------|--------|
| siRNA-Vinblastine Run1-DMSO  | NM_000126 | ETFA | electron-transfer-flavoprotein, alpha polypeptide (glutaric aciduria II) | 0.200002  | Inlier |
| siRNA Disorazole DMSO Run3   | NM_000126 | ETFA | electron-transfer-flavoprotein, alpha polypeptide (glutaric aciduria II) | 1.044197  | Inlier |
| siRNA-Vinblastine Run2-DMSO  | NM_000126 | ETFA | electron-transfer-flavoprotein, alpha polypeptide (glutaric aciduria II) | 1.051184  | Inlier |
| siRNA Disorazole DMSO Run2   | NM_000126 | ETFA | electron-transfer-flavoprotein, alpha polypeptide (glutaric aciduria II) | 1.867264  | Inlier |
| siRNA Disorazole DMSO Run3   | NM_001985 | ETFB | electron-transfer-flavoprotein, beta polypeptide                         | -2.25802  | Inlier |
| siRNA-Temozolomide Run3-DMSO | NM_001985 | ETFB | electron-transfer-flavoprotein, beta polypeptide                         | -1.089641 | Inlier |
| siRNA-Temozolomide Run2-DMSO | NM_001985 | ETFB | electron-transfer-flavoprotein, beta polypeptide                         | -0.259359 | Inlier |
| siRNA Disorazole DMSO Run1   | NM_001985 | ETFB | electron-transfer-flavoprotein, beta polypeptide                         | -0.033249 | Inlier |

Identification of Survival Genes in Human Glioblastoma Cells Using siRNA Screening

Nikhil G Thaker, Fang Zhang, Peter R. McDonald, Tong Ying Shun, Michael D Lewen, Ian F. Pollack, and John S. Lazo

Molecular Pharmacology

|                              |           |       |                                                   |           |        |
|------------------------------|-----------|-------|---------------------------------------------------|-----------|--------|
| siRNA-Vinblastine Run2-DMSO  | NM_001985 | ETFB  | electron-transfer-flavoprotein, beta polypeptide  | 0.033249  | Inlier |
| siRNA-Temozolomide Run1-DMSO | NM_001985 | ETFB  | electron-transfer-flavoprotein, beta polypeptide  | 0.150401  | Inlier |
| siRNA Disorazole DMSO Run2   | NM_001985 | ETFB  | electron-transfer-flavoprotein, beta polypeptide  | 2.520216  | Inlier |
| siRNA-Vinblastine Run1-DMSO  | NM_001985 | ETFB  | electron-transfer-flavoprotein, beta polypeptide  | 2.689399  | Inlier |
| siRNA-Temozolomide Run3-DMSO | NM_004453 | ETFDH | electron-transferrin-g-flavoprotein dehydrogenase | -1.24416  | Inlier |
| siRNA-Temozolomide Run2-DMSO | NM_004453 | ETFDH | electron-transferrin-g-flavoprotein dehydrogenase | -1.238271 | Inlier |
| siRNA Disorazole DMSO Run1   | NM_004453 | ETFDH | electron-transferrin-g-flavoprotein dehydrogenase | -0.428315 | Inlier |
| siRNA-Temozolomide Run1-DMSO | NM_004453 | ETFDH | electron-transferrin-g-flavoprotein dehydrogenase | -0.379746 | Inlier |

Identification of Survival Genes in Human Glioblastoma Cells Using siRNA Screening  
 Nikhil G Thaker, Fang Zhang, Peter R. McDonald, Tong Ying Shun, Michael D Lewen, Ian F. Pollack, and John S. Lazo

Molecular Pharmacology

|                              |               |       |                                                             |           |        |
|------------------------------|---------------|-------|-------------------------------------------------------------|-----------|--------|
| siRNA-Vinblastine Run2-DMSO  | NM_0044<br>53 | ETFDH | electron-transferrin<br>g-<br>flavoprotein<br>dehydrogenase | 0.379746  | Inlier |
| siRNA Disorazole DMSO Run3   | NM_0044<br>53 | ETFDH | electron-transferrin<br>g-<br>flavoprotein<br>dehydrogenase | 0.51827   | Inlier |
| siRNA-Vinblastine Run1-DMSO  | NM_0044<br>53 | ETFDH | electron-transferrin<br>g-<br>flavoprotein<br>dehydrogenase | 0.83073   | Inlier |
| siRNA Disorazole DMSO Run2   | NM_0044<br>53 | ETFDH | electron-transferrin<br>g-<br>flavoprotein<br>dehydrogenase | 1.430995  | Inlier |
| siRNA-Temozolomide Run3-DMSO | NM_0186<br>38 | ETNK1 | ethanolamine kinase<br>1                                    | -0.703404 | Inlier |
| siRNA Disorazole DMSO Run2   | NM_0186<br>38 | ETNK1 | ethanolamine kinase<br>1                                    | -0.645596 | Inlier |
| siRNA-Temozolomide Run2-DMSO | NM_0186<br>38 | ETNK1 | ethanolamine kinase<br>1                                    | -0.24012  | Inlier |
| siRNA Disorazole DMSO Run3   | NM_0186<br>38 | ETNK1 | ethanolamine kinase<br>1                                    | -0.007432 | Inlier |
| siRNA-Temozolomide Run1-DMSO | NM_0186<br>38 | ETNK1 | ethanolamine kinase<br>1                                    | 0.007433  | Inlier |
| siRNA Disorazole DMSO Run1   | NM_0186<br>38 | ETNK1 | ethanolamine kinase<br>1                                    | 0.947127  | Inlier |
| siRNA-Vinblastine Run1-DMSO  | NM_0186<br>38 | ETNK1 | ethanolamine kinase<br>1                                    | 1.212041  | Inlier |
| siRNA-Vinblastine Run2-DMSO  | NM_0186<br>38 | ETNK1 | ethanolamine kinase<br>1                                    | 1.26063   | Inlier |

Identification of Survival Genes in Human Glioblastoma Cells Using siRNA Screening  
 Nikhil G Thaker, Fang Zhang, Peter R. McDonald, Tong Ying Shun, Michael D Lewen, Ian F. Pollack, and John S. Lazo

| Molecular Pharmacology       |               |       |   | ethanolam               |                  |
|------------------------------|---------------|-------|---|-------------------------|------------------|
| siRNA-Temozolomide Run3-DMSO | NM_0182<br>08 | ETNK2 | 2 | ine kinase              | -0.74091 Inlier  |
| siRNA-Temozolomide Run1-DMSO | NM_0182<br>08 | ETNK2 | 2 | ethanolam<br>ine kinase | -0.60809 Inlier  |
| siRNA-Temozolomide Run2-DMSO | NM_0182<br>08 | ETNK2 | 2 | ethanolam<br>ine kinase | -0.349518 Inlier |
| siRNA Disorazole DMSO Run2   | NM_0182<br>08 | ETNK2 | 2 | ethanolam<br>ine kinase | -0.054089 Inlier |
| siRNA Disorazole DMSO Run3   | NM_0182<br>08 | ETNK2 | 2 | ethanolam<br>ine kinase | 0.054089 Inlier  |
| siRNA Disorazole DMSO Run1   | NM_0182<br>08 | ETNK2 | 2 | ethanolam<br>ine kinase | 1.760021 Inlier  |
| siRNA-Vinblastine Run2-DMSO  | NM_0182<br>08 | ETNK2 | 2 | ethanolam<br>ine kinase | 2.175256 Inlier  |
| siRNA-Vinblastine Run1-DMSO  | NM_0182<br>08 | ETNK2 | 2 | ethanolam<br>ine kinase | 2.286583 Inlier  |
| siRNA-Temozolomide Run3-DMSO | NM_0060<br>27 | EXO1  | 1 | exonuclea<br>se 1       | -1.305854 Inlier |
| siRNA-Temozolomide Run2-DMSO | NM_0060<br>27 | EXO1  | 1 | exonuclea<br>se 1       | -0.786722 Inlier |
| siRNA-Vinblastine Run2-DMSO  | NM_0060<br>27 | EXO1  | 1 | exonuclea<br>se 1       | -0.356439 Inlier |
| siRNA Disorazole DMSO Run3   | NM_0060<br>27 | EXO1  | 1 | exonuclea<br>se 1       | -0.354079 Inlier |
| siRNA-Temozolomide Run1-DMSO | NM_0060<br>27 | EXO1  | 1 | exonuclea<br>se 1       | 0.354079 Inlier  |
| siRNA Disorazole DMSO Run1   | NM_0060<br>27 | EXO1  | 1 | exonuclea<br>se 1       | 0.562278 Inlier  |
| siRNA Disorazole DMSO Run2   | NM_0060<br>27 | EXO1  | 1 | exonuclea<br>se 1       | 0.815973 Inlier  |
| siRNA-Vinblastine Run1-DMSO  | NM_0060<br>27 | EXO1  | 1 | exonuclea<br>se 1       | 1.098115 Inlier  |
| siRNA-Temozolomide Run2-DMSO | NM_0001<br>27 | EXT1  | 1 | exostoses<br>(multiple) | -0.779628 Inlier |
| siRNA-Temozolomide Run1-DMSO | NM_0001<br>27 | EXT1  | 1 | exostoses<br>(multiple) | -0.569372 Inlier |
| siRNA Disorazole DMSO Run1   | NM_0001<br>27 | EXT1  | 1 | exostoses<br>(multiple) | -0.077489 Inlier |

Identification of Survival Genes in Human Glioblastoma Cells Using siRNA Screening  
 Nikhil G Thaker, Fang Zhang, Peter R. McDonald, Tong Ying Shun, Michael D Lewen, Ian F. Pollack, and John S. Lazo  
 Molecular Pharmacology

|                                  |               |      |                              |           |        |
|----------------------------------|---------------|------|------------------------------|-----------|--------|
| siRNA Disorazole DMSO Run2       | NM_0001<br>27 | EXT1 | exostoses<br>(multiple)<br>1 | -0.000592 | Inlier |
| siRNA-Temozolomide Run3-<br>DMSO | NM_0001<br>27 | EXT1 | exostoses<br>(multiple)<br>1 | 0.000591  | Inlier |
| siRNA-Vinblastine Run2-<br>DMSO  | NM_0001<br>27 | EXT1 | exostoses<br>(multiple)<br>1 | 0.837772  | Inlier |
| siRNA Disorazole DMSO Run3       | NM_0001<br>27 | EXT1 | exostoses<br>(multiple)<br>1 | 0.859645  | Inlier |
| siRNA-Vinblastine Run1-<br>DMSO  | NM_0001<br>27 | EXT1 | exostoses<br>(multiple)<br>1 | 1.011898  | Inlier |
| siRNA-Temozolomide Run2-<br>DMSO | NM_2071<br>22 | EXT2 | exostoses<br>(multiple)<br>2 | -0.868782 | Inlier |
| siRNA Disorazole DMSO Run1       | NM_2071<br>22 | EXT2 | exostoses<br>(multiple)<br>2 | -0.789728 | Inlier |
| siRNA-Temozolomide Run1-<br>DMSO | NM_2071<br>22 | EXT2 | exostoses<br>(multiple)<br>2 | -0.705181 | Inlier |
| siRNA-Vinblastine Run2-<br>DMSO  | NM_2071<br>22 | EXT2 | exostoses<br>(multiple)<br>2 | -0.038376 | Inlier |
| siRNA Disorazole DMSO Run3       | NM_2071<br>22 | EXT2 | exostoses<br>(multiple)<br>2 | 0.038375  | Inlier |
| siRNA-Temozolomide Run3-<br>DMSO | NM_2071<br>22 | EXT2 | exostoses<br>(multiple)<br>2 | 0.075931  | Inlier |
| siRNA Disorazole DMSO Run2       | NM_2071<br>22 | EXT2 | exostoses<br>(multiple)<br>2 | 0.643819  | Inlier |
| siRNA-Vinblastine Run1-<br>DMSO  | NM_2071<br>22 | EXT2 | exostoses<br>(multiple)<br>2 | 1.162881  | Inlier |

Identification of Survival Genes in Human Glioblastoma Cells Using siRNA Screening  
 Nikhil G Thaker, Fang Zhang, Peter R. McDonald, Tong Ying Shun, Michael D Lewen, Ian F. Pollack, and John S. Lazo

Molecular Pharmacology

|                              |               |       |                                    |           |         |
|------------------------------|---------------|-------|------------------------------------|-----------|---------|
| siRNA-Temozolomide Run2-DMSO | NM_0044<br>55 | EXTL1 | exostoses<br>(multiple)-<br>like 1 | -1.531435 | Inlier  |
| siRNA-Temozolomide Run1-DMSO | NM_0044<br>55 | EXTL1 | exostoses<br>(multiple)-<br>like 1 | -1.118803 | Inlier  |
| siRNA Disorazole DMSO Run1   | NM_0044<br>55 | EXTL1 | exostoses<br>(multiple)-<br>like 1 | -0.230197 | Inlier  |
| siRNA-Vinblastine Run2-DMSO  | NM_0044<br>55 | EXTL1 | exostoses<br>(multiple)-<br>like 1 | -0.007902 | Inlier  |
| siRNA Disorazole DMSO Run3   | NM_0044<br>55 | EXTL1 | exostoses<br>(multiple)-<br>like 1 | 0.007902  | Inlier  |
| siRNA-Temozolomide Run3-DMSO | NM_0044<br>55 | EXTL1 | exostoses<br>(multiple)-<br>like 1 | 0.218365  | Inlier  |
| siRNA Disorazole DMSO Run2   | NM_0044<br>55 | EXTL1 | exostoses<br>(multiple)-<br>like 1 | 2.264282  | Inlier  |
| siRNA-Vinblastine Run1-DMSO  | NM_0044<br>55 | EXTL1 | exostoses<br>(multiple)-<br>like 1 | 3.619907  | Outlier |
| siRNA-Temozolomide Run1-DMSO | NM_0014<br>39 | EXTL2 | exostoses<br>(multiple)-<br>like 2 | -1.173764 | Inlier  |
| siRNA Disorazole DMSO Run1   | NM_0014<br>39 | EXTL2 | exostoses<br>(multiple)-<br>like 2 | -0.846819 | Inlier  |
| siRNA-Temozolomide Run2-DMSO | NM_0014<br>39 | EXTL2 | exostoses<br>(multiple)-<br>like 2 | -0.359941 | Inlier  |
| siRNA Disorazole DMSO Run3   | NM_0014<br>39 | EXTL2 | exostoses<br>(multiple)-<br>like 2 | -0.150171 | Inlier  |
| siRNA-Vinblastine Run2-DMSO  | NM_0014<br>39 | EXTL2 | exostoses<br>(multiple)-<br>like 2 | 0.150171  | Inlier  |



Identification of Survival Genes in Human Glioblastoma Cells Using siRNA Screening  
 Nikhil G Thaker, Fang Zhang, Peter R. McDonald, Tong Ying Shun, Michael D Lewen, Ian F. Pollack, and John S. Lazo

Molecular Pharmacology

|                              |               |       |                                                 |           |        |
|------------------------------|---------------|-------|-------------------------------------------------|-----------|--------|
| siRNA-Temozolomide Run3-DMSO | NM_0014<br>39 | EXTL2 | exostoses<br>(multiple)-<br>like 2              | 0.502181  | Inlier |
| siRNA Disorazole DMSO Run2   | NM_0014<br>39 | EXTL2 | exostoses<br>(multiple)-<br>like 2              | 1.663241  | Inlier |
| siRNA-Vinblastine Run1-DMSO  | NM_0014<br>39 | EXTL2 | exostoses<br>(multiple)-<br>like 2              | 3.388213  | Inlier |
| siRNA-Temozolomide Run1-DMSO | NM_0014<br>40 | EXTL3 | exostoses<br>(multiple)-<br>like 3              | -1.269103 | Inlier |
| siRNA-Temozolomide Run2-DMSO | NM_0014<br>40 | EXTL3 | exostoses<br>(multiple)-<br>like 3              | -1.138502 | Inlier |
| siRNA Disorazole DMSO Run1   | NM_0014<br>40 | EXTL3 | exostoses<br>(multiple)-<br>like 3              | -0.430009 | Inlier |
| siRNA Disorazole DMSO Run3   | NM_0014<br>40 | EXTL3 | exostoses<br>(multiple)-<br>like 3              | -0.191302 | Inlier |
| siRNA-Temozolomide Run3-DMSO | NM_0014<br>40 | EXTL3 | exostoses<br>(multiple)-<br>like 3              | 0.191302  | Inlier |
| siRNA Disorazole DMSO Run2   | NM_0014<br>40 | EXTL3 | exostoses<br>(multiple)-<br>like 3              | 0.673724  | Inlier |
| siRNA-Vinblastine Run2-DMSO  | NM_0014<br>40 | EXTL3 | exostoses<br>(multiple)-<br>like 3              | 0.675276  | Inlier |
| siRNA-Vinblastine Run1-DMSO  | NM_0014<br>40 | EXTL3 | exostoses<br>(multiple)-<br>like 3              | 1.578342  | Inlier |
| siRNA-Temozolomide Run2-DMSO | NM_1721<br>12 | EYA2  | eyes<br>absent<br>homolog 2<br>(Drosophil<br>a) | -2.119716 | Inlier |

Identification of Survival Genes in Human Glioblastoma Cells Using siRNA Screening  
 Nikhil G Thaker, Fang Zhang, Peter R. McDonald, Tong Ying Shun, Michael D Lewen, Ian F. Pollack, and John S. Lazo  
 Molecular Pharmacology

|                              |               |      |                                             |                  |
|------------------------------|---------------|------|---------------------------------------------|------------------|
| siRNA-Temozolomide Run1-DMSO | NM_1721<br>12 | EYA2 | eyes<br>absent<br>homolog 2<br>(Drosophila) | -1.355673 Inlier |
| siRNA Disorazole DMSO Run1   | NM_1721<br>12 | EYA2 | eyes<br>absent<br>homolog 2<br>(Drosophila) | -0.499387 Inlier |
| siRNA-Temozolomide Run3-DMSO | NM_1721<br>12 | EYA2 | eyes<br>absent<br>homolog 2<br>(Drosophila) | -0.452354 Inlier |
| siRNA-Vinblastine Run1-DMSO  | NM_1721<br>12 | EYA2 | eyes<br>absent<br>homolog 2<br>(Drosophila) | 0.452353 Inlier  |
| siRNA Disorazole DMSO Run3   | NM_1721<br>12 | EYA2 | eyes<br>absent<br>homolog 2<br>(Drosophila) | 0.562439 Inlier  |
| siRNA-Vinblastine Run2-DMSO  | NM_1721<br>12 | EYA2 | eyes<br>absent<br>homolog 2<br>(Drosophila) | 0.786561 Inlier  |
| siRNA Disorazole DMSO Run2   | NM_1721<br>12 | EYA2 | eyes<br>absent<br>homolog 2<br>(Drosophila) | 1.380496 Inlier  |
| siRNA Disorazole DMSO Run3   | NM_0005<br>04 | F10  | coagulation factor X                        | -2.961857 Inlier |
| siRNA Disorazole DMSO Run2   | NM_0005<br>04 | F10  | coagulation factor X                        | -1.803325 Inlier |
| siRNA-Temozolomide Run2-DMSO | NM_0005<br>04 | F10  | coagulation factor X                        | -0.591677 Inlier |
| siRNA-Temozolomide Run3-DMSO | NM_0005<br>04 | F10  | coagulation factor X                        | -0.359859 Inlier |
| siRNA Disorazole DMSO Run1   | NM_0005<br>04 | F10  | coagulation factor X                        | 0.35986 Inlier   |

Identification of Survival Genes in Human Glioblastoma Cells Using siRNA Screening

Nikhil G Thaker, Fang Zhang, Peter R. McDonald, Tong Ying Shun, Michael D Lewen, Ian F. Pollack, and John S.

Lazo

|                                  |               |     |                                                          |           |        |
|----------------------------------|---------------|-----|----------------------------------------------------------|-----------|--------|
| siRNA-Temozolomide Run1-<br>DMSO | NM_0005<br>04 | F10 | coagulation factor X                                     | 0.518135  | Inlier |
| siRNA-Vinblastine Run1-<br>DMSO  | NM_0005<br>04 | F10 | coagulation factor X                                     | 0.757323  | Inlier |
| siRNA-Vinblastine Run2-<br>DMSO  | NM_0005<br>04 | F10 | coagulation factor X                                     | 1.120118  | Inlier |
| siRNA-Temozolomide Run3-<br>DMSO | NM_0001<br>28 | F11 | coagulation factor XI (plasma thromboplastin antecedent) | -0.990101 | Inlier |
| siRNA-Temozolomide Run2-<br>DMSO | NM_0001<br>28 | F11 | coagulation factor XI (plasma thromboplastin antecedent) | -0.894715 | Inlier |
| siRNA-Temozolomide Run1-<br>DMSO | NM_0001<br>28 | F11 | coagulation factor XI (plasma thromboplastin antecedent) | -0.366783 | Inlier |
| siRNA Disorazole DMSO Run3       | NM_0001<br>28 | F11 | coagulation factor XI (plasma thromboplastin antecedent) | -0.240318 | Inlier |
| siRNA Disorazole DMSO Run1       | NM_0001<br>28 | F11 | coagulation factor XI (plasma thromboplastin antecedent) | 0.240318  | Inlier |
| siRNA Disorazole DMSO Run2       | NM_0001<br>28 | F11 | coagulation factor XI (plasma thromboplastin antecedent) | 0.454285  | Inlier |

Identification of Survival Genes in Human Glioblastoma Cells Using siRNA Screening  
 Nikhil G Thaker, Fang Zhang, Peter R. McDonald, Tong Ying Shun, Michael D Lewen, Ian F. Pollack, and John S. Lazo

Molecular Pharmacology

|                              |           |     |                                                          |           |        |
|------------------------------|-----------|-----|----------------------------------------------------------|-----------|--------|
| siRNA-Vinblastine Run1-DMSO  | NM_000128 | F11 | coagulation factor XI (plasma thromboplastin antecedent) | 1.515088  | Inlier |
| siRNA-Vinblastine Run2-DMSO  | NM_000128 | F11 | coagulation factor XI (plasma thromboplastin antecedent) | 1.704905  | Inlier |
| siRNA-Temozolomide Run3-DMSO | NM_000505 | F12 | coagulation factor XII (Hageman factor)                  | -1.018494 | Inlier |
| siRNA-Temozolomide Run2-DMSO | NM_000505 | F12 | coagulation factor XII (Hageman factor)                  | -0.781407 | Inlier |
| siRNA Disorazole DMSO Run2   | NM_000505 | F12 | coagulation factor XII (Hageman factor)                  | -0.348674 | Inlier |
| siRNA Disorazole DMSO Run3   | NM_000505 | F12 | coagulation factor XII (Hageman factor)                  | -0.194631 | Inlier |
| siRNA-Temozolomide Run1-DMSO | NM_000505 | F12 | coagulation factor XII (Hageman factor)                  | 0.194631  | Inlier |
| siRNA Disorazole DMSO Run1   | NM_000505 | F12 | coagulation factor XII (Hageman factor)                  | 0.567593  | Inlier |
| siRNA-Vinblastine Run1-DMSO  | NM_000505 | F12 | coagulation factor XII (Hageman factor)                  | 1.721697  | Inlier |

Identification of Survival Genes in Human Glioblastoma Cells Using siRNA Screening  
 Nikhil G Thaker, Fang Zhang, Peter R. McDonald, Tong Ying Shun, Michael D Lewen, Ian F. Pollack, and John S. Lazo  
 Molecular Pharmacology

|                              |           |       |                                         |           |        |
|------------------------------|-----------|-------|-----------------------------------------|-----------|--------|
| siRNA-Vinblastine Run2-DMSO  | NM_000505 | F12   | coagulation factor XII (Hageman factor) | 1.978271  | Inlier |
| siRNA Disorazole DMSO Run1   | NM_000129 | F13A1 | coagulation factor XIII, A1 polypeptide | -2.951459 | Inlier |
| siRNA-Temozolomide Run1-DMSO | NM_000129 | F13A1 | coagulation factor XIII, A1 polypeptide | -0.837266 | Inlier |
| siRNA-Temozolomide Run2-DMSO | NM_000129 | F13A1 | coagulation factor XIII, A1 polypeptide | -0.511734 | Inlier |
| siRNA-Temozolomide Run3-DMSO | NM_000129 | F13A1 | coagulation factor XIII, A1 polypeptide | -0.289178 | Inlier |
| siRNA-Vinblastine Run2-DMSO  | NM_000129 | F13A1 | coagulation factor XIII, A1 polypeptide | 0.289178  | Inlier |
| siRNA Disorazole DMSO Run3   | NM_000129 | F13A1 | coagulation factor XIII, A1 polypeptide | 0.431401  | Inlier |
| siRNA Disorazole DMSO Run2   | NM_000129 | F13A1 | coagulation factor XIII, A1 polypeptide | 1.237308  | Inlier |
| siRNA-Vinblastine Run1-DMSO  | NM_000129 | F13A1 | coagulation factor XIII, A1 polypeptide | 2.665678  | Inlier |
| siRNA-Temozolomide Run3-DMSO | NM_000506 | F2    | coagulation factor II (thrombin)        | -0.763445 | Inlier |
| siRNA Disorazole DMSO Run2   | NM_000506 | F2    | coagulation factor II (thrombin)        | -0.585555 | Inlier |

Identification of Survival Genes in Human Glioblastoma Cells Using siRNA Screening  
 Nikhil G Thaker, Fang Zhang, Peter R. McDonald, Tong Ying Shun, Michael D Lewen, Ian F. Pollack, and John S. Lazo

| Molecular Pharmacology       |           |     | coagulation factor II (thrombin) receptor |                  |
|------------------------------|-----------|-----|-------------------------------------------|------------------|
| siRNA-Temozolomide Run2-DMSO | NM_000506 | F2  | coagulation factor II (thrombin) receptor | -0.430541 Inlier |
| siRNA Disorazole DMSO Run3   | NM_000506 | F2  | coagulation factor II (thrombin) receptor | -0.233247 Inlier |
| siRNA-Temozolomide Run1-DMSO | NM_000506 | F2  | coagulation factor II (thrombin) receptor | 0.233246 Inlier  |
| siRNA Disorazole DMSO Run1   | NM_000506 | F2  | coagulation factor II (thrombin) receptor | 2.263733 Inlier  |
| siRNA-Vinblastine Run2-DMSO  | NM_000506 | F2  | coagulation factor II (thrombin) receptor | 4.023744 Outlier |
| siRNA-Vinblastine Run1-DMSO  | NM_000506 | F2  | coagulation factor II (thrombin) receptor | 4.401541 Outlier |
| siRNA-Temozolomide Run2-DMSO | NM_001992 | F2R | coagulation factor II (thrombin) receptor | -0.903798 Inlier |
| siRNA-Temozolomide Run3-DMSO | NM_001992 | F2R | coagulation factor II (thrombin) receptor | -0.892654 Inlier |
| siRNA Disorazole DMSO Run2   | NM_001992 | F2R | coagulation factor II (thrombin) receptor | -0.860962 Inlier |
| siRNA Disorazole DMSO Run1   | NM_001992 | F2R | coagulation factor II (thrombin) receptor | -0.009542 Inlier |
| siRNA-Temozolomide Run1-DMSO | NM_001992 | F2R | coagulation factor II (thrombin) receptor | 0.009542 Inlier  |
| siRNA Disorazole DMSO Run3   | NM_001992 | F2R | coagulation factor II (thrombin) receptor | 0.139655 Inlier  |
| siRNA-Vinblastine Run1-DMSO  | NM_001992 | F2R | coagulation factor II (thrombin) receptor | 0.50272 Inlier   |
| siRNA-Vinblastine Run2-DMSO  | NM_001992 | F2R | coagulation factor II (thrombin) receptor | 0.84628 Inlier   |

Identification of Survival Genes in Human Glioblastoma Cells Using siRNA Screening  
 Nikhil G Thaker, Fang Zhang, Peter R. McDonald, Tong Ying Shun, Michael D Lewen, Ian F. Pollack, and John S. Lazo

Molecular Pharmacology

|                              |               |       |                                                  |           |        |
|------------------------------|---------------|-------|--------------------------------------------------|-----------|--------|
| siRNA-Temozolomide Run3-DMSO | NM_0052<br>42 | F2RL1 | coagulation factor II (thrombin) receptor-like 1 | -1.707006 | Inlier |
| siRNA Disorazole DMSO Run3   | NM_0052<br>42 | F2RL1 | coagulation factor II (thrombin) receptor-like 1 | -1.078242 | Inlier |
| siRNA Disorazole DMSO Run2   | NM_0052<br>42 | F2RL1 | coagulation factor II (thrombin) receptor-like 1 | -0.89076  | Inlier |
| siRNA-Temozolomide Run2-DMSO | NM_0052<br>42 | F2RL1 | coagulation factor II (thrombin) receptor-like 1 | -0.280624 | Inlier |
| siRNA-Temozolomide Run1-DMSO | NM_0052<br>42 | F2RL1 | coagulation factor II (thrombin) receptor-like 1 | 0.280624  | Inlier |
| siRNA Disorazole DMSO Run1   | NM_0052<br>42 | F2RL1 | coagulation factor II (thrombin) receptor-like 1 | 0.290762  | Inlier |
| siRNA-Vinblastine Run1-DMSO  | NM_0052<br>42 | F2RL1 | coagulation factor II (thrombin) receptor-like 1 | 0.588812  | Inlier |
| siRNA-Vinblastine Run2-DMSO  | NM_0052<br>42 | F2RL1 | coagulation factor II (thrombin) receptor-like 1 | 0.760188  | Inlier |
| siRNA-Temozolomide Run3-DMSO | NM_0041<br>01 | F2RL2 | coagulation factor II (thrombin) receptor-like 2 | -1.284526 | Inlier |
| siRNA Disorazole DMSO Run2   | NM_0041<br>01 | F2RL2 | coagulation factor II (thrombin) receptor-like 2 | -0.51387  | Inlier |

Identification of Survival Genes in Human Glioblastoma Cells Using siRNA Screening  
 Nikhil G Thaker, Fang Zhang, Peter R. McDonald, Tong Ying Shun, Michael D Lewen, Ian F. Pollack, and John S. Lazo

Molecular Pharmacology

| siRNA Treatment              | Gene ID   | Gene Name | Gene Description                                 | Value     | Outlier Status |
|------------------------------|-----------|-----------|--------------------------------------------------|-----------|----------------|
| siRNA-Temozolomide Run2-DMSO | NM_004101 | F2RL2     | coagulation factor II (thrombin) receptor-like 2 | -0.324939 | Inlier         |
| siRNA Disorazole DMSO Run3   | NM_004101 | F2RL2     | coagulation factor II (thrombin) receptor-like 2 | -0.181393 | Inlier         |
| siRNA-Temozolomide Run1-DMSO | NM_004101 | F2RL2     | coagulation factor II (thrombin) receptor-like 2 | 0.181393  | Inlier         |
| siRNA Disorazole DMSO Run1   | NM_004101 | F2RL2     | coagulation factor II (thrombin) receptor-like 2 | 0.83513   | Inlier         |
| siRNA-Vinblastine Run1-DMSO  | NM_004101 | F2RL2     | coagulation factor II (thrombin) receptor-like 2 | 1.651924  | Inlier         |
| siRNA-Vinblastine Run2-DMSO  | NM_004101 | F2RL2     | coagulation factor II (thrombin) receptor-like 2 | 1.990717  | Inlier         |
| siRNA-Temozolomide Run3-DMSO | NM_003950 | F2RL3     | coagulation factor II (thrombin) receptor-like 3 | -1.90931  | Inlier         |
| siRNA Disorazole DMSO Run2   | NM_003950 | F2RL3     | coagulation factor II (thrombin) receptor-like 3 | -0.728266 | Inlier         |
| siRNA-Temozolomide Run2-DMSO | NM_003950 | F2RL3     | coagulation factor II (thrombin) receptor-like 3 | -0.589674 | Inlier         |
| siRNA Disorazole DMSO Run3   | NM_003950 | F2RL3     | coagulation factor II (thrombin) receptor-like 3 | -0.570611 | Inlier         |



Identification of Survival Genes in Human Glioblastoma Cells Using siRNA Screening  
 Nikhil G Thaker, Fang Zhang, Peter R. McDonald, Tong Ying Shun, Michael D Lewen, Ian F. Pollack, and John S. Lazo

Molecular Pharmacology

| siRNA              | Condition | Gene    | Accession | Probe | Gene Name                                          | Value     | Category |
|--------------------|-----------|---------|-----------|-------|----------------------------------------------------|-----------|----------|
| siRNA Disorazole   | DMSO Run1 | NM_0039 | 50        | F2RL3 | coagulation factor II (thrombin) receptor-like 3   | 0.570611  | Inlier   |
| siRNA-Temozolomide | Run1-DMSO | NM_0039 | 50        | F2RL3 | coagulation factor II (thrombin) receptor-like 3   | 0.620734  | Inlier   |
| siRNA-Vinblastine  | Run2-DMSO | NM_0039 | 50        | F2RL3 | coagulation factor II (thrombin) receptor-like 3   | 3.422094  | Inlier   |
| siRNA-Vinblastine  | Run1-DMSO | NM_0039 | 50        | F2RL3 | coagulation factor II (thrombin) receptor-like 3   | 3.572448  | Outlier  |
| siRNA-Temozolomide | Run3-DMSO | NM_0001 | 30        | F5    | coagulation factor V (proaccelerin, labile factor) | -1.138489 | Inlier   |
| siRNA-Temozolomide | Run2-DMSO | NM_0001 | 30        | F5    | coagulation factor V (proaccelerin, labile factor) | -0.817469 | Inlier   |
| siRNA Disorazole   | DMSO Run3 | NM_0001 | 30        | F5    | coagulation factor V (proaccelerin, labile factor) | -0.245627 | Inlier   |
| siRNA-Temozolomide | Run1-DMSO | NM_0001 | 30        | F5    | coagulation factor V (proaccelerin, labile factor) | -0.122679 | Inlier   |
| siRNA Disorazole   | DMSO Run1 | NM_0001 | 30        | F5    | coagulation factor V (proaccelerin, labile factor) | 0.122679  | Inlier   |
| siRNA Disorazole   | DMSO Run2 | NM_0001 | 30        | F5    | coagulation factor V (proaccelerin, labile factor) | 0.531531  | Inlier   |

Identification of Survival Genes in Human Glioblastoma Cells Using siRNA Screening

Nikhil G Thaker, Fang Zhang, Peter R. McDonald, Tong Ying Shun, Michael D Lewen, Ian F. Pollack, and John S. Lazo

Molecular Pharmacology

|                              |           |    |                                                                   |           |        |
|------------------------------|-----------|----|-------------------------------------------------------------------|-----------|--------|
| siRNA-Vinblastine Run2-DMSO  | NM_000130 | F5 | coagulation factor V (proaccelerin, labile factor)                | 1.082137  | Inlier |
| siRNA-Vinblastine Run1-DMSO  | NM_000130 | F5 | coagulation factor V (proaccelerin, labile factor)                | 1.24486   | Inlier |
| siRNA-Temozolomide Run3-DMSO | NM_000131 | F7 | coagulation factor VII (serum prothrombin conversion accelerator) | -1.004415 | Inlier |
| siRNA-Temozolomide Run2-DMSO | NM_000131 | F7 | coagulation factor VII (serum prothrombin conversion accelerator) | -0.50922  | Inlier |
| siRNA Disorazole DMSO Run3   | NM_000131 | F7 | coagulation factor VII (serum prothrombin conversion accelerator) | -0.479473 | Inlier |
| siRNA Disorazole DMSO Run2   | NM_000131 | F7 | coagulation factor VII (serum prothrombin conversion accelerator) | -0.236761 | Inlier |

Identification of Survival Genes in Human Glioblastoma Cells Using siRNA Screening

Nikhil G Thaker, Fang Zhang, Peter R. McDonald, Tong Ying Shun, Michael D Lewen, Ian F. Pollack, and John S. Lazo

Molecular Pharmacology

|                              |           |    |                                                                                          |           |        |
|------------------------------|-----------|----|------------------------------------------------------------------------------------------|-----------|--------|
| siRNA-Temozolomide Run1-DMSO | NM_000131 | F7 | coagulation factor VII (serum prothrombin conversion accelerator)                        | 0.236761  | Inlier |
| siRNA Disorazole DMSO Run1   | NM_000131 | F7 | coagulation factor VII (serum prothrombin conversion accelerator)                        | 0.83978   | Inlier |
| siRNA-Vinblastine Run1-DMSO  | NM_000131 | F7 | coagulation factor VII (serum prothrombin conversion accelerator)                        | 2.206599  | Inlier |
| siRNA-Vinblastine Run2-DMSO  | NM_000131 | F7 | coagulation factor VII (serum prothrombin conversion accelerator)                        | 2.61869   | Inlier |
| siRNA-Temozolomide Run3-DMSO | NM_000133 | F9 | coagulation factor IX (plasma thromboplastin component, Christmas disease, hemophilia B) | -1.135646 | Inlier |

Identification of Survival Genes in Human Glioblastoma Cells Using siRNA Screening

Nikhil G Thaker, Fang Zhang, Peter R. McDonald, Tong Ying Shun, Michael D Lewen, Ian F. Pollack, and John S. Lazo

Molecular Pharmacology

| siRNA                 | Gene      | Run  | Condition | Value     | Outlier |
|-----------------------|-----------|------|-----------|-----------|---------|
| siRNA Disorazole DMSO | NM_000133 | Run1 | DMSO      | -0.84175  | Inlier  |
| siRNA-Temozolomide    | NM_000133 | Run2 | DMSO      | -0.50725  | Inlier  |
| siRNA Disorazole DMSO | NM_000133 | Run3 | DMSO      | -0.151473 | Inlier  |
| siRNA-Temozolomide    | NM_000133 | Run1 | DMSO      | 0.151473  | Inlier  |

coagulation factor IX (plasma thromboplastin component, Christmas disease, hemophilia B)  
 coagulation factor IX (plasma thromboplastin component, Christmas disease, hemophilia B)  
 coagulation factor IX (plasma thromboplastin component, Christmas disease, hemophilia B)  
 coagulation factor IX (plasma thromboplastin component, Christmas disease, hemophilia B)

Identification of Survival Genes in Human Glioblastoma Cells Using siRNA Screening  
 Nikhil G Thaker, Fang Zhang, Peter R. McDonald, Tong Ying Shun, Michael D Lewen, Ian F. Pollack, and John S. Lazo

Molecular Pharmacology

|                              |               |      |                                                                                          |           |        |
|------------------------------|---------------|------|------------------------------------------------------------------------------------------|-----------|--------|
| siRNA Disorazole DMSO Run2   | NM_0001<br>33 | F9   | coagulation factor IX (plasma thromboplastin component, Christmas disease, hemophilia B) | 0.233591  | Inlier |
| siRNA-Vinblastine Run1-DMSO  | NM_0001<br>33 | F9   | coagulation factor IX (plasma thromboplastin component, Christmas disease, hemophilia B) | 0.946798  | Inlier |
| siRNA-Vinblastine Run2-DMSO  | NM_0001<br>33 | F9   | coagulation factor IX (plasma thromboplastin component, Christmas disease, hemophilia B) | 1.437382  | Inlier |
| siRNA-Temozolomide Run3-DMSO | NM_0243<br>06 | FA2H | fatty acid 2-hydroxylase                                                                 | -1.705046 | Inlier |
| siRNA Disorazole DMSO Run1   | NM_0243<br>06 | FA2H | fatty acid 2-hydroxylase                                                                 | -0.784404 | Inlier |
| siRNA Disorazole DMSO Run3   | NM_0243<br>06 | FA2H | fatty acid 2-hydroxylase                                                                 | -0.564596 | Inlier |
| siRNA-Vinblastine Run2-DMSO  | NM_0243<br>06 | FA2H | fatty acid 2-hydroxylase                                                                 | -0.022259 | Inlier |

Identification of Survival Genes in Human Glioblastoma Cells Using siRNA Screening  
 Nikhil G Thaker, Fang Zhang, Peter R. McDonald, Tong Ying Shun, Michael D Lewen, Ian F. Pollack, and John S. Lazo

Molecular Pharmacology

|                              |           |       |                                     |           |        |
|------------------------------|-----------|-------|-------------------------------------|-----------|--------|
| siRNA-Temozolomide Run2-DMSO | NM_024306 | FA2H  | fatty acid 2-hydroxylase            | 0.022259  | Inlier |
| siRNA-Temozolomide Run1-DMSO | NM_024306 | FA2H  | fatty acid 2-hydroxylase            | 0.120143  | Inlier |
| siRNA-Vinblastine Run1-DMSO  | NM_024306 | FA2H  | fatty acid 2-hydroxylase            | 0.875463  | Inlier |
| siRNA Disorazole DMSO Run2   | NM_024306 | FA2H  | fatty acid 2-hydroxylase            | 1.490039  | Inlier |
| siRNA-Temozolomide Run3-DMSO | NM_001441 | FAAH  | fatty acid amide hydrolase          | -1.324955 | Inlier |
| siRNA Disorazole DMSO Run1   | NM_001441 | FAAH  | fatty acid amide hydrolase          | -0.802369 | Inlier |
| siRNA-Temozolomide Run2-DMSO | NM_001441 | FAAH  | fatty acid amide hydrolase          | -0.546631 | Inlier |
| siRNA-Vinblastine Run2-DMSO  | NM_001441 | FAAH  | fatty acid amide hydrolase          | -0.136659 | Inlier |
| siRNA-Temozolomide Run1-DMSO | NM_001441 | FAAH  | fatty acid amide hydrolase          | 0.136659  | Inlier |
| siRNA Disorazole DMSO Run3   | NM_001441 | FAAH  | fatty acid amide hydrolase          | 0.365756  | Inlier |
| siRNA-Vinblastine Run1-DMSO  | NM_001441 | FAAH  | fatty acid amide hydrolase          | 2.031819  | Inlier |
| siRNA Disorazole DMSO Run2   | NM_001441 | FAAH  | fatty acid amide hydrolase          | 2.516787  | Inlier |
| siRNA-Temozolomide Run2-DMSO | NM_001443 | FABP1 | fatty acid binding protein 1, liver | -1.232317 | Inlier |
| siRNA-Temozolomide Run1-DMSO | NM_001443 | FABP1 | fatty acid binding protein 1, liver | -0.835702 | Inlier |
| siRNA-Vinblastine Run2-DMSO  | NM_001443 | FABP1 | fatty acid binding protein 1, liver | -0.513298 | Inlier |

Identification of Survival Genes in Human Glioblastoma Cells Using siRNA Screening  
 Nikhil G Thaker, Fang Zhang, Peter R. McDonald, Tong Ying Shun, Michael D Lewen, Ian F. Pollack, and John S. Lazo

Molecular Pharmacology

| siRNA Treatment              | Gene ID       | Gene Name | Protein                                  | Value     | Outlier Status |
|------------------------------|---------------|-----------|------------------------------------------|-----------|----------------|
| siRNA Disorazole DMSO Run1   | NM_0014<br>43 | FABP1     | fatty acid binding protein 1, liver      | -0.05799  | Inlier         |
| siRNA-Temozolomide Run3-DMSO | NM_0014<br>43 | FABP1     | fatty acid binding protein 1, liver      | 0.057991  | Inlier         |
| siRNA Disorazole DMSO Run3   | NM_0014<br>43 | FABP1     | fatty acid binding protein 1, liver      | 0.157651  | Inlier         |
| siRNA-Vinblastine Run1-DMSO  | NM_0014<br>43 | FABP1     | fatty acid binding protein 1, liver      | 0.907583  | Inlier         |
| siRNA Disorazole DMSO Run2   | NM_0014<br>43 | FABP1     | fatty acid binding protein 1, liver      | 2.181043  | Inlier         |
| siRNA-Temozolomide Run2-DMSO | NM_0001<br>34 | FABP2     | protein 2, intestinal fatty acid binding | -0.683585 | Inlier         |
| siRNA-Temozolomide Run3-DMSO | NM_0001<br>34 | FABP2     | protein 2, intestinal fatty acid binding | -0.665415 | Inlier         |
| siRNA-Vinblastine Run2-DMSO  | NM_0001<br>34 | FABP2     | protein 2, intestinal fatty acid binding | -0.357755 | Inlier         |
| siRNA-Temozolomide Run1-DMSO | NM_0001<br>34 | FABP2     | protein 2, intestinal fatty acid binding | -0.103211 | Inlier         |
| siRNA Disorazole DMSO Run3   | NM_0001<br>34 | FABP2     | protein 2, intestinal fatty acid binding | 0.103212  | Inlier         |
| siRNA Disorazole DMSO Run1   | NM_0001<br>34 | FABP2     | protein 2, intestinal fatty acid binding | 0.685997  | Inlier         |
| siRNA-Vinblastine Run1-DMSO  | NM_0001<br>34 | FABP2     | protein 2, intestinal fatty acid binding | 1.320639  | Inlier         |
| siRNA Disorazole DMSO Run2   | NM_0001<br>34 | FABP2     | protein 2, intestinal                    | 2.070667  | Inlier         |

Identification of Survival Genes in Human Glioblastoma Cells Using siRNA Screening

Nikhil G Thaker, Fang Zhang, Peter R. McDonald, Tong Ying Shun, Michael D Lewen, Ian F. Pollack, and John S. Lazo

Molecular Pharmacology

| siRNA Treatment              | Gene ID   | Gene Name | Gene Description                                                                  | Log Fold Change | Outlier Status |
|------------------------------|-----------|-----------|-----------------------------------------------------------------------------------|-----------------|----------------|
| siRNA-Temozolomide Run2-DMSO | NM_004102 | FABP3     | fatty acid binding protein 3, muscle and heart (mammary-derived growth inhibitor) | -0.914201       | Inlier         |
| siRNA Disorazole DMSO Run1   | NM_004102 | FABP3     | fatty acid binding protein 3, muscle and heart (mammary-derived growth inhibitor) | -0.666502       | Inlier         |
| siRNA-Temozolomide Run1-DMSO | NM_004102 | FABP3     | fatty acid binding protein 3, muscle and heart (mammary-derived growth inhibitor) | -0.441891       | Inlier         |
| siRNA-Vinblastine Run2-DMSO  | NM_004102 | FABP3     | fatty acid binding protein 3, muscle and heart (mammary-derived growth inhibitor) | -0.025998       | Inlier         |
| siRNA-Temozolomide Run3-DMSO | NM_004102 | FABP3     | fatty acid binding protein 3, muscle and heart (mammary-derived growth inhibitor) | 0.025999        | Inlier         |



Identification of Survival Genes in Human Glioblastoma Cells Using siRNA Screening

Nikhil G Thaker, Fang Zhang, Peter R. McDonald, Tong Ying Shun, Michael D Lewen, Ian F. Pollack, and John S. Lazo

Molecular Pharmacology

|                              |               |       |                                                                                   |           |        |
|------------------------------|---------------|-------|-----------------------------------------------------------------------------------|-----------|--------|
| siRNA Disorazole DMSO Run3   | NM_0041<br>02 | FABP3 | fatty acid binding protein 3, muscle and heart (mammary-derived growth inhibitor) | 0.682498  | Inlier |
| siRNA-Vinblastine Run1-DMSO  | NM_0041<br>02 | FABP3 | fatty acid binding protein 3, muscle and heart (mammary-derived growth inhibitor) | 1.299469  | Inlier |
| siRNA Disorazole DMSO Run2   | NM_0041<br>02 | FABP3 | fatty acid binding protein 3, muscle and heart (mammary-derived growth inhibitor) | 2.829548  | Inlier |
| siRNA-Temozolomide Run3-DMSO | NM_0014<br>42 | FABP4 | protein 4, adipocyte fatty acid binding                                           | -1.543379 | Inlier |
| siRNA Disorazole DMSO Run1   | NM_0014<br>42 | FABP4 | protein 4, adipocyte fatty acid binding                                           | -0.754065 | Inlier |
| siRNA-Temozolomide Run2-DMSO | NM_0014<br>42 | FABP4 | protein 4, adipocyte fatty acid binding                                           | -0.594935 | Inlier |
| siRNA-Temozolomide Run1-DMSO | NM_0014<br>42 | FABP4 | protein 4, adipocyte fatty acid binding                                           | -0.043135 | Inlier |
| siRNA Disorazole DMSO Run3   | NM_0014<br>42 | FABP4 | protein 4, adipocyte fatty acid binding                                           | 0.043135  | Inlier |
| siRNA-Vinblastine Run2-DMSO  | NM_0014<br>42 | FABP4 | protein 4, adipocyte                                                              | 0.383853  | Inlier |

Identification of Survival Genes in Human Glioblastoma Cells Using siRNA Screening

Nikhil G Thaker, Fang Zhang, Peter R. McDonald, Tong Ying Shun, Michael D Lewen, Ian F. Pollack, and John S. Lazo

Molecular Pharmacology

|                              |               |       |                                                     |           |        |
|------------------------------|---------------|-------|-----------------------------------------------------|-----------|--------|
| siRNA Disorazole DMSO Run2   | NM_0014<br>42 | FABP4 | fatty acid binding protein 4, adipocyte             | 1.712357  | Inlier |
| siRNA-Vinblastine Run1-DMSO  | NM_0014<br>42 | FABP4 | fatty acid binding protein 4, adipocyte             | 1.869487  | Inlier |
| siRNA-Temozolomide Run2-DMSO | NM_0014<br>44 | FABP5 | fatty acid binding protein 5 (psoriasis-associated) | -1.142923 | Inlier |
| siRNA-Temozolomide Run3-DMSO | NM_0014<br>44 | FABP5 | fatty acid binding protein 5 (psoriasis-associated) | -0.737177 | Inlier |
| siRNA Disorazole DMSO Run1   | NM_0014<br>44 | FABP5 | fatty acid binding protein 5 (psoriasis-associated) | -0.691452 | Inlier |
| siRNA-Temozolomide Run1-DMSO | NM_0014<br>44 | FABP5 | fatty acid binding protein 5 (psoriasis-associated) | -0.267599 | Inlier |
| siRNA-Vinblastine Run2-DMSO  | NM_0014<br>44 | FABP5 | fatty acid binding protein 5 (psoriasis-associated) | 0.267599  | Inlier |
| siRNA Disorazole DMSO Run3   | NM_0014<br>44 | FABP5 | fatty acid binding protein 5 (psoriasis-associated) | 0.655695  | Inlier |
| siRNA-Vinblastine Run1-DMSO  | NM_0014<br>44 | FABP5 | fatty acid binding protein 5 (psoriasis-associated) | 0.657548  | Inlier |

Identification of Survival Genes in Human Glioblastoma Cells Using siRNA Screening  
 Nikhil G Thaker, Fang Zhang, Peter R. McDonald, Tong Ying Shun, Michael D Lewen, Ian F. Pollack, and John S. Lazo

Molecular Pharmacology

| siRNA Treatment              | Gene ID   | Gene Name | Gene Description                                    | Value     | Category |
|------------------------------|-----------|-----------|-----------------------------------------------------|-----------|----------|
| siRNA Disorazole DMSO Run2   | NM_001444 | FABP5     | fatty acid binding protein 5 (psoriasis-associated) | 1.174855  | Inlier   |
| siRNA-Temozolomide Run3-DMSO | NM_001445 | FABP6     | fatty acid binding protein 6, ileal (gastrotropin)  | -1.215813 | Inlier   |
| siRNA-Temozolomide Run2-DMSO | NM_001445 | FABP6     | fatty acid binding protein 6, ileal (gastrotropin)  | -0.81754  | Inlier   |
| siRNA Disorazole DMSO Run1   | NM_001445 | FABP6     | fatty acid binding protein 6, ileal (gastrotropin)  | -0.241134 | Inlier   |
| siRNA-Temozolomide Run1-DMSO | NM_001445 | FABP6     | fatty acid binding protein 6, ileal (gastrotropin)  | -0.178639 | Inlier   |
| siRNA-Vinblastine Run2-DMSO  | NM_001445 | FABP6     | fatty acid binding protein 6, ileal (gastrotropin)  | 0.178639  | Inlier   |
| siRNA Disorazole DMSO Run3   | NM_001445 | FABP6     | fatty acid binding protein 6, ileal (gastrotropin)  | 0.53146   | Inlier   |
| siRNA-Vinblastine Run1-DMSO  | NM_001445 | FABP6     | fatty acid binding protein 6, ileal (gastrotropin)  | 0.897086  | Inlier   |

Identification of Survival Genes in Human Glioblastoma Cells Using siRNA Screening  
 Nikhil G Thaker, Fang Zhang, Peter R. McDonald, Tong Ying Shun, Michael D Lewen, Ian F. Pollack, and John S. Lazo

Molecular Pharmacology

|                              |               |       |                                                    |           |        |
|------------------------------|---------------|-------|----------------------------------------------------|-----------|--------|
| siRNA Disorazole DMSO Run2   | NM_0014<br>45 | FABP6 | fatty acid binding protein 6, ileal (gastrotropin) | 1.181556  | Inlier |
| siRNA-Temozolomide Run2-DMSO | NM_0014<br>46 | FABP7 | fatty acid binding protein 7, brain                | -1.45646  | Inlier |
| siRNA-Temozolomide Run3-DMSO | NM_0014<br>46 | FABP7 | fatty acid binding protein 7, brain                | -1.05041  | Inlier |
| siRNA-Temozolomide Run1-DMSO | NM_0014<br>46 | FABP7 | fatty acid binding protein 7, brain                | -0.64373  | Inlier |
| siRNA Disorazole DMSO Run1   | NM_0014<br>46 | FABP7 | fatty acid binding protein 7, brain                | -0.063658 | Inlier |
| siRNA-Vinblastine Run2-DMSO  | NM_0014<br>46 | FABP7 | fatty acid binding protein 7, brain                | 0.063658  | Inlier |
| siRNA Disorazole DMSO Run3   | NM_0014<br>46 | FABP7 | fatty acid binding protein 7, brain                | 0.233852  | Inlier |
| siRNA Disorazole DMSO Run2   | NM_0014<br>46 | FABP7 | fatty acid binding protein 7, brain                | 0.70527   | Inlier |
| siRNA-Vinblastine Run1-DMSO  | NM_0014<br>46 | FABP7 | fatty acid binding protein 7, brain                | 1.054033  | Inlier |
| siRNA Disorazole DMSO Run3   | NM_0134<br>02 | FADS1 | fatty acid desaturase 1                            | -0.930381 | Inlier |
| siRNA-Vinblastine Run2-DMSO  | NM_0134<br>02 | FADS1 | fatty acid desaturase 1                            | -0.71116  | Inlier |
| siRNA-Temozolomide Run2-DMSO | NM_0134<br>02 | FADS1 | fatty acid desaturase 1                            | -0.63784  | Inlier |
| siRNA Disorazole DMSO Run1   | NM_0134<br>02 | FADS1 | fatty acid desaturase 1                            | -0.038308 | Inlier |

Identification of Survival Genes in Human Glioblastoma Cells Using siRNA Screening  
 Nikhil G Thaker, Fang Zhang, Peter R. McDonald, Tong Ying Shun, Michael D Lewen, Ian F. Pollack, and John S. Lazo

Molecular Pharmacology

|                              |               |       |                                                     |           |        |
|------------------------------|---------------|-------|-----------------------------------------------------|-----------|--------|
| siRNA-Temozolomide Run3-DMSO | NM_0134<br>02 | FADS1 | fatty acid desaturase 1                             | 0.038308  | Inlier |
| siRNA Disorazole DMSO Run2   | NM_0134<br>02 | FADS1 | fatty acid desaturase 1                             | 0.359202  | Inlier |
| siRNA-Temozolomide Run1-DMSO | NM_0134<br>02 | FADS1 | fatty acid desaturase 1                             | 0.732316  | Inlier |
| siRNA-Vinblastine Run1-DMSO  | NM_0134<br>02 | FADS1 | fatty acid desaturase 1                             | 0.881363  | Inlier |
| siRNA-Temozolomide Run3-DMSO | NM_0042<br>65 | FADS2 | fatty acid desaturase 2                             | -0.809301 | Inlier |
| siRNA-Vinblastine Run2-DMSO  | NM_0042<br>65 | FADS2 | fatty acid desaturase 2                             | -0.582753 | Inlier |
| siRNA Disorazole DMSO Run3   | NM_0042<br>65 | FADS2 | fatty acid desaturase 2                             | -0.362975 | Inlier |
| siRNA-Temozolomide Run2-DMSO | NM_0042<br>65 | FADS2 | fatty acid desaturase 2                             | -0.260627 | Inlier |
| siRNA-Temozolomide Run1-DMSO | NM_0042<br>65 | FADS2 | fatty acid desaturase 2                             | 0.260627  | Inlier |
| siRNA Disorazole DMSO Run1   | NM_0042<br>65 | FADS2 | fatty acid desaturase 2                             | 0.766247  | Inlier |
| siRNA-Vinblastine Run1-DMSO  | NM_0042<br>65 | FADS2 | fatty acid desaturase 2                             | 1.300931  | Inlier |
| siRNA Disorazole DMSO Run2   | NM_0042<br>65 | FADS2 | fatty acid desaturase 2                             | 1.392682  | Inlier |
| siRNA-Temozolomide Run3-DMSO | NM_0001<br>37 | FAH   | fumarylacetoacetate hydrolase (fumarylacetoacetase) | -1.294752 | Inlier |
| siRNA-Temozolomide Run2-DMSO | NM_0001<br>37 | FAH   | fumarylacetoacetate hydrolase (fumarylacetoacetase) | -0.79037  | Inlier |

Identification of Survival Genes in Human Glioblastoma Cells Using siRNA Screening

Nikhil G Thaker, Fang Zhang, Peter R. McDonald, Tong Ying Shun, Michael D Lewen, Ian F. Pollack, and John S. Lazo

Molecular Pharmacology

|                              |              |       |                                                     |           |        |
|------------------------------|--------------|-------|-----------------------------------------------------|-----------|--------|
| siRNA-Vinblastine Run2-DMSO  | NM_000137    | FAH   | fumarylacetoacetate hydrolase (fumarylacetoacetate) | -0.186993 | Inlier |
| siRNA Disorazole DMSO Run1   | NM_000137    | FAH   | fumarylacetoacetate hydrolase (fumarylacetoacetate) | -0.173777 | Inlier |
| siRNA-Temozolomide Run1-DMSO | NM_000137    | FAH   | fumarylacetoacetate hydrolase (fumarylacetoacetate) | 0.173776  | Inlier |
| siRNA Disorazole DMSO Run3   | NM_000137    | FAH   | fumarylacetoacetate hydrolase (fumarylacetoacetate) | 0.55863   | Inlier |
| siRNA-Vinblastine Run1-DMSO  | NM_000137    | FAH   | fumarylacetoacetate hydrolase (fumarylacetoacetate) | 2.293556  | Inlier |
| siRNA Disorazole DMSO Run2   | NM_000137    | FAH   | fumarylacetoacetate hydrolase (fumarylacetoacetate) | 2.847363  | Inlier |
| siRNA-Temozolomide Run3-DMSO | NM_001018112 | FANCA | Fanconi anemia, complementation group A             | -0.836645 | Inlier |
| siRNA-Temozolomide Run2-DMSO | NM_001018112 | FANCA | Fanconi anemia, complementation group A             | -0.521064 | Inlier |

Identification of Survival Genes in Human Glioblastoma Cells Using siRNA Screening  
 Nikhil G Thaker, Fang Zhang, Peter R. McDonald, Tong Ying Shun, Michael D Lewen, Ian F. Pollack, and John S. Lazo

Molecular Pharmacology

|                              |                  |       |                                         |           |         |
|------------------------------|------------------|-------|-----------------------------------------|-----------|---------|
| siRNA-Vinblastine Run2-DMSO  | NM_0010<br>18112 | FANCA | Fanconi anemia, complementation group A | -0.048385 | Inlier  |
| siRNA Disorazole DMSO Run1   | NM_0010<br>18112 | FANCA | Fanconi anemia, complementation group A | -0.036597 | Inlier  |
| siRNA-Temozolomide Run1-DMSO | NM_0010<br>18112 | FANCA | Fanconi anemia, complementation group A | 0.036597  | Inlier  |
| siRNA Disorazole DMSO Run3   | NM_0010<br>18112 | FANCA | Fanconi anemia, complementation group A | 0.827936  | Inlier  |
| siRNA Disorazole DMSO Run2   | NM_0010<br>18112 | FANCA | Fanconi anemia, complementation group A | 1.469826  | Inlier  |
| siRNA-Vinblastine Run1-DMSO  | NM_0010<br>18112 | FANCA | Fanconi anemia, complementation group A | 1.935963  | Inlier  |
| siRNA-Temozolomide Run3-DMSO | NM_0044<br>60    | FAP   | fibroblast activation protein, alpha    | -5.152659 | Outlier |
| siRNA-Temozolomide Run2-DMSO | NM_0044<br>60    | FAP   | fibroblast activation protein, alpha    | -3.23137  | Inlier  |
| siRNA Disorazole DMSO Run1   | NM_0044<br>60    | FAP   | fibroblast activation protein, alpha    | -0.539921 | Inlier  |
| siRNA-Temozolomide Run1-DMSO | NM_0044<br>60    | FAP   | fibroblast activation protein, alpha    | -0.085545 | Inlier  |
| siRNA Disorazole DMSO Run2   | NM_0044<br>60    | FAP   | fibroblast activation protein, alpha    | 0.085546  | Inlier  |

Identification of Survival Genes in Human Glioblastoma Cells Using siRNA Screening  
 Nikhil G Thaker, Fang Zhang, Peter R. McDonald, Tong Ying Shun, Michael D Lewen, Ian F. Pollack, and John S. Lazo

Molecular Pharmacology

| siRNA                        | Gene | Accession | Gene  | Value     | Outlier |
|------------------------------|------|-----------|-------|-----------|---------|
| siRNA Disorazole DMSO Run3   | 60   | NM_0044   | FAP   | 0.425597  | Inlier  |
| siRNA-Vinblastine Run1-DMSO  | 60   | NM_0044   | FAP   | 0.809079  | Inlier  |
| siRNA-Vinblastine Run2-DMSO  | 60   | NM_0044   | FAP   | 1.741466  | Inlier  |
| siRNA-Temozolomide Run2-DMSO | 67   | NM_0065   | FARS1 | -1.543038 | Inlier  |
| siRNA Disorazole DMSO Run3   | 67   | NM_0065   | FARS1 | -0.819887 | Inlier  |
| siRNA-Vinblastine Run2-DMSO  | 67   | NM_0065   | FARS1 | -0.20899  | Inlier  |
| siRNA Disorazole DMSO Run1   | 67   | NM_0065   | FARS1 | -0.03374  | Inlier  |
| siRNA-Temozolomide Run3-DMSO | 67   | NM_0065   | FARS1 | 0.033739  | Inlier  |
| siRNA-Temozolomide Run1-DMSO | 67   | NM_0065   | FARS1 | 0.529113  | Inlier  |

fibroblast  
 activation  
 protein,  
 alpha  
 fibroblast  
 activation  
 protein,  
 alpha  
 fibroblast  
 activation  
 protein,  
 alpha  
 phenylalan  
 ine-tRNA  
 synthetase  
 2  
 (mitochon  
 drial)  
 phenylalan  
 ine-tRNA  
 synthetase  
 2  
 (mitochon  
 drial)



Identification of Survival Genes in Human Glioblastoma Cells Using siRNA Screening  
 Nikhil G Thaker, Fang Zhang, Peter R. McDonald, Tong Ying Shun, Michael D Lewen, Ian F. Pollack, and John S. Lazo

Molecular Pharmacology

|                              |               |        |                                                   |           |        |
|------------------------------|---------------|--------|---------------------------------------------------|-----------|--------|
| siRNA-Vinblastine Run1-DMSO  | NM_0065<br>67 | FARS1  | phenylalanine-tRNA synthetase 2 (mitochondrial)   | 1.297918  | Inlier |
| siRNA Disorazole DMSO Run2   | NM_0065<br>67 | FARS1  | phenylalanine-tRNA synthetase 2 (mitochondrial)   | 1.56243   | Inlier |
| siRNA-Vinblastine Run2-DMSO  | NM_0044<br>61 | FARSLA | phenylalanine-tRNA synthetase-like, alpha subunit | -0.764091 | Inlier |
| siRNA Disorazole DMSO Run1   | NM_0044<br>61 | FARSLA | phenylalanine-tRNA synthetase-like, alpha subunit | -0.584909 | Inlier |
| siRNA-Temozolomide Run2-DMSO | NM_0044<br>61 | FARSLA | phenylalanine-tRNA synthetase-like, alpha subunit | -0.575137 | Inlier |
| siRNA Disorazole DMSO Run3   | NM_0044<br>61 | FARSLA | phenylalanine-tRNA synthetase-like, alpha subunit | -0.238181 | Inlier |
| siRNA-Temozolomide Run1-DMSO | NM_0044<br>61 | FARSLA | phenylalanine-tRNA synthetase-like, alpha subunit | 0.238181  | Inlier |
| siRNA-Temozolomide Run3-DMSO | NM_0044<br>61 | FARSLA | phenylalanine-tRNA synthetase-like, alpha subunit | 0.833253  | Inlier |

Identification of Survival Genes in Human Glioblastoma Cells Using siRNA Screening  
 Nikhil G Thaker, Fang Zhang, Peter R. McDonald, Tong Ying Shun, Michael D Lewen, Ian F. Pollack, and John S. Lazo  
 Molecular Pharmacology

|                              |               |        |                                                   |           |        |
|------------------------------|---------------|--------|---------------------------------------------------|-----------|--------|
| siRNA Disorazole DMSO Run2   | NM_0044<br>61 | FARSLA | phenylalanine-tRNA synthetase-like, alpha subunit | 2.1176    | Inlier |
| siRNA-Vinblastine Run1-DMSO  | NM_0044<br>61 | FARSLA | phenylalanine-tRNA synthetase-like, alpha subunit | 2.388343  | Inlier |
| siRNA Disorazole DMSO Run1   | NM_0056<br>87 | FARSLB | phenylalanine-tRNA synthetase-like, beta subunit  | -2.382997 | Inlier |
| siRNA-Vinblastine Run2-DMSO  | NM_0056<br>87 | FARSLB | phenylalanine-tRNA synthetase-like, beta subunit  | -0.875229 | Inlier |
| siRNA-Temozolomide Run1-DMSO | NM_0056<br>87 | FARSLB | phenylalanine-tRNA synthetase-like, beta subunit  | -0.473771 | Inlier |
| siRNA-Temozolomide Run3-DMSO | NM_0056<br>87 | FARSLB | phenylalanine-tRNA synthetase-like, beta subunit  | -0.065578 | Inlier |
| siRNA-Temozolomide Run2-DMSO | NM_0056<br>87 | FARSLB | phenylalanine-tRNA synthetase-like, beta subunit  | 0.065576  | Inlier |
| siRNA Disorazole DMSO Run3   | NM_0056<br>87 | FARSLB | phenylalanine-tRNA synthetase-like, beta subunit  | 0.196331  | Inlier |

Identification of Survival Genes in Human Glioblastoma Cells Using siRNA Screening  
 Nikhil G Thaker, Fang Zhang, Peter R. McDonald, Tong Ying Shun, Michael D Lewen, Ian F. Pollack, and John S. Lazo  
 Molecular Pharmacology

|                              |               |        |                                                  |           |         |
|------------------------------|---------------|--------|--------------------------------------------------|-----------|---------|
| siRNA Disorazole DMSO Run2   | NM_0056<br>87 | FARSLB | phenylalanine-tRNA synthetase-like, beta subunit | 3.960869  | Outlier |
| siRNA-Vinblastine Run1-DMSO  | NM_0056<br>87 | FARSLB | phenylalanine-tRNA synthetase-like, beta subunit | 4.378394  | Outlier |
| siRNA-Temozolomide Run3-DMSO | NM_0041<br>04 | FASN   | fatty acid synthase                              | -1.708967 | Inlier  |
| siRNA-Temozolomide Run2-DMSO | NM_0041<br>04 | FASN   | fatty acid synthase                              | -0.96667  | Inlier  |
| siRNA Disorazole DMSO Run1   | NM_0041<br>04 | FASN   | fatty acid synthase                              | -0.38233  | Inlier  |
| siRNA-Vinblastine Run2-DMSO  | NM_0041<br>04 | FASN   | fatty acid synthase                              | -0.186382 | Inlier  |
| siRNA-Temozolomide Run1-DMSO | NM_0041<br>04 | FASN   | fatty acid synthase                              | 0.186382  | Inlier  |
| siRNA Disorazole DMSO Run3   | NM_0041<br>04 | FASN   | fatty acid synthase                              | 0.279564  | Inlier  |
| siRNA-Vinblastine Run1-DMSO  | NM_0041<br>04 | FASN   | fatty acid synthase                              | 1.481424  | Inlier  |
| siRNA Disorazole DMSO Run2   | NM_0041<br>04 | FASN   | fatty acid synthase                              | 2.287551  | Inlier  |
| siRNA Disorazole DMSO Run2   | NM_0250<br>96 | FASTK  | Fas-activated serine/threonine kinase            | -0.804074 | Inlier  |
| siRNA-Temozolomide Run3-DMSO | NM_0250<br>96 | FASTK  | Fas-activated serine/threonine kinase            | -0.544927 | Inlier  |
| siRNA Disorazole DMSO Run3   | NM_0250<br>96 | FASTK  | Fas-activated serine/threonine kinase            | -0.475718 | Inlier  |
| siRNA-Temozolomide Run2-DMSO | NM_0250<br>96 | FASTK  | Fas-activated serine/threonine kinase            | -0.010385 | Inlier  |

Identification of Survival Genes in Human Glioblastoma Cells Using siRNA Screening  
 Nikhil G Thaker, Fang Zhang, Peter R. McDonald, Tong Ying Shun, Michael D Lewen, Ian F. Pollack, and John S. Lazo

Molecular Pharmacology

| siRNA Treatment              | Gene ID   | FASTK | Gene Name                             | Value     | Inlier |
|------------------------------|-----------|-------|---------------------------------------|-----------|--------|
| siRNA-Temozolomide Run1-DMSO | NM_025096 | FASTK | Fas-activated serine/threonine kinase | 0.010385  | Inlier |
| siRNA Disorazole DMSO Run1   | NM_025096 | FASTK | Fas-activated serine/threonine kinase | 0.914701  | Inlier |
| siRNA-Vinblastine Run2-DMSO  | NM_025096 | FASTK | Fas-activated serine/threonine kinase | 2.045838  | Inlier |
| siRNA-Vinblastine Run1-DMSO  | NM_025096 | FASTK | Fas-activated serine/threonine kinase | 2.156618  | Inlier |
| siRNA-Temozolomide Run3-DMSO | NM_000507 | FBP1  | fructose-1,6-bisphosphatase 1         | -0.73255  | Inlier |
| siRNA Disorazole DMSO Run2   | NM_000507 | FBP1  | fructose-1,6-bisphosphatase 1         | -0.676742 | Inlier |
| siRNA-Temozolomide Run2-DMSO | NM_000507 | FBP1  | fructose-1,6-bisphosphatase 1         | -0.672258 | Inlier |
| siRNA Disorazole DMSO Run3   | NM_000507 | FBP1  | fructose-1,6-bisphosphatase 1         | -0.232509 | Inlier |
| siRNA Disorazole DMSO Run1   | NM_000507 | FBP1  | fructose-1,6-bisphosphatase 1         | 0.232509  | Inlier |
| siRNA-Temozolomide Run1-DMSO | NM_000507 | FBP1  | fructose-1,6-bisphosphatase 1         | 0.290247  | Inlier |
| siRNA-Vinblastine Run2-DMSO  | NM_000507 | FBP1  | fructose-1,6-bisphosphatase 1         | 0.892315  | Inlier |
| siRNA-Vinblastine Run1-DMSO  | NM_000507 | FBP1  | fructose-1,6-bisphosphatase 1         | 1.302828  | Inlier |

Identification of Survival Genes in Human Glioblastoma Cells Using siRNA Screening  
 Nikhil G Thaker, Fang Zhang, Peter R. McDonald, Tong Ying Shun, Michael D Lewen, Ian F. Pollack, and John S. Lazo

Molecular Pharmacology

|                              |               |       |                                                                 |           |        |
|------------------------------|---------------|-------|-----------------------------------------------------------------|-----------|--------|
| siRNA-Temozolomide Run3-DMSO | NM_0038<br>37 | FBP2  | fructose-1,6-bisphosphatase 2                                   | -3.379662 | Inlier |
| siRNA Disorazole DMSO Run1   | NM_0038<br>37 | FBP2  | fructose-1,6-bisphosphatase 2                                   | -2.095845 | Inlier |
| siRNA-Temozolomide Run2-DMSO | NM_0038<br>37 | FBP2  | fructose-1,6-bisphosphatase 2                                   | -0.530525 | Inlier |
| siRNA Disorazole DMSO Run2   | NM_0038<br>37 | FBP2  | fructose-1,6-bisphosphatase 2                                   | -0.367147 | Inlier |
| siRNA Disorazole DMSO Run3   | NM_0038<br>37 | FBP2  | fructose-1,6-bisphosphatase 2                                   | 0.367147  | Inlier |
| siRNA-Vinblastine Run1-DMSO  | NM_0038<br>37 | FBP2  | fructose-1,6-bisphosphatase 2                                   | 0.42881   | Inlier |
| siRNA-Vinblastine Run2-DMSO  | NM_0038<br>37 | FBP2  | fructose-1,6-bisphosphatase 2                                   | 0.818475  | Inlier |
| siRNA-Temozolomide Run1-DMSO | NM_0038<br>37 | FBP2  | fructose-1,6-bisphosphatase 2                                   | 1.513026  | Inlier |
| siRNA-Temozolomide Run2-DMSO | NM_0121<br>65 | FBXW3 | split hand/foot malformation (ectrodactyly) type 3 pseudogene 1 | -0.87592  | Inlier |
| siRNA-Temozolomide Run3-DMSO | NM_0121<br>65 | FBXW3 | split hand/foot malformation (ectrodactyly) type 3 pseudogene 1 | -0.638796 | Inlier |

Identification of Survival Genes in Human Glioblastoma Cells Using siRNA Screening

Nikhil G Thaker, Fang Zhang, Peter R. McDonald, Tong Ying Shun, Michael D Lewen, Ian F. Pollack, and John S.

Lazo

Molecular Pharmacology

|                              |               |       |                                                                                         |           |        |
|------------------------------|---------------|-------|-----------------------------------------------------------------------------------------|-----------|--------|
| siRNA-Temozolomide Run1-DMSO | NM_0121<br>65 | FBXW3 | split<br>hand/foot<br>malformati<br>on<br>(ectrodact<br>yly) type 3<br>pseudoge<br>ne 1 | -0.365525 | Inlier |
| siRNA Disorazole DMSO Run1   | NM_0121<br>65 | FBXW3 | split<br>hand/foot<br>malformati<br>on<br>(ectrodact<br>yly) type 3<br>pseudoge<br>ne 1 | -0.183213 | Inlier |
| siRNA Disorazole DMSO Run2   | NM_0121<br>65 | FBXW3 | split<br>hand/foot<br>malformati<br>on<br>(ectrodact<br>yly) type 3<br>pseudoge<br>ne 1 | 0.183213  | Inlier |
| siRNA-Vinblastine Run2-DMSO  | NM_0121<br>65 | FBXW3 | split<br>hand/foot<br>malformati<br>on<br>(ectrodact<br>yly) type 3<br>pseudoge<br>ne 1 | 0.710204  | Inlier |
| siRNA-Vinblastine Run1-DMSO  | NM_0121<br>65 | FBXW3 | split<br>hand/foot<br>malformati<br>on<br>(ectrodact<br>yly) type 3<br>pseudoge<br>ne 1 | 0.951273  | Inlier |

Identification of Survival Genes in Human Glioblastoma Cells Using siRNA Screening  
 Nikhil G Thaker, Fang Zhang, Peter R. McDonald, Tong Ying Shun, Michael D Lewen, Ian F. Pollack, and John S. Lazo  
 Molecular Pharmacology

|                                  |               |       |                                                                                         |           |        |
|----------------------------------|---------------|-------|-----------------------------------------------------------------------------------------|-----------|--------|
| siRNA Disorazole DMSO Run3       | NM_0121<br>65 | FBXW3 | split<br>hand/foot<br>malformati<br>on<br>(ectrodact<br>yly) type 3<br>pseudoge<br>ne 1 | 1.038568  | Inlier |
| siRNA-Vinblastine Run2-<br>DMSO  | NM_1332<br>79 | FCAR  | Fc<br>fragment<br>of IgA,<br>receptor<br>for                                            | -0.803576 | Inlier |
| siRNA-Temozolomide Run3-<br>DMSO | NM_1332<br>79 | FCAR  | Fc<br>fragment<br>of IgA,<br>receptor<br>for                                            | -0.689577 | Inlier |
| siRNA-Temozolomide Run2-<br>DMSO | NM_1332<br>79 | FCAR  | Fc<br>fragment<br>of IgA,<br>receptor<br>for                                            | -0.659423 | Inlier |
| siRNA Disorazole DMSO Run1       | NM_1332<br>79 | FCAR  | Fc<br>fragment<br>of IgA,<br>receptor<br>for                                            | -0.178855 | Inlier |
| siRNA Disorazole DMSO Run3       | NM_1332<br>79 | FCAR  | Fc<br>fragment<br>of IgA,<br>receptor<br>for                                            | 0.178855  | Inlier |
| siRNA-Temozolomide Run1-<br>DMSO | NM_1332<br>79 | FCAR  | Fc<br>fragment<br>of IgA,<br>receptor<br>for                                            | 0.321975  | Inlier |
| siRNA Disorazole DMSO Run2       | NM_1332<br>79 | FCAR  | Fc<br>fragment<br>of IgA,<br>receptor<br>for                                            | 1.862476  | Inlier |
| siRNA-Vinblastine Run1-<br>DMSO  | NM_1332<br>79 | FCAR  | Fc<br>fragment<br>of IgA,<br>receptor<br>for                                            | 2.618878  | Inlier |

Identification of Survival Genes in Human Glioblastoma Cells Using siRNA Screening

Nikhil G Thaker, Fang Zhang, Peter R. McDonald, Tong Ying Shun, Michael D Lewen, Ian F. Pollack, and John S. Lazo

Molecular Pharmacology

|                              |           |        |                                                                      |           |        |
|------------------------------|-----------|--------|----------------------------------------------------------------------|-----------|--------|
| siRNA-Vinblastine Run2-DMSO  | NM_002001 | FCER1A | Fc fragment of IgE, high affinity I, receptor for; alpha polypeptide | -1.359979 | Inlier |
| siRNA-Temozolomide Run2-DMSO | NM_002001 | FCER1A | Fc fragment of IgE, high affinity I, receptor for; alpha polypeptide | -0.94916  | Inlier |
| siRNA Disorazole DMSO Run3   | NM_002001 | FCER1A | Fc fragment of IgE, high affinity I, receptor for; alpha polypeptide | -0.39984  | Inlier |
| siRNA-Temozolomide Run1-DMSO | NM_002001 | FCER1A | Fc fragment of IgE, high affinity I, receptor for; alpha polypeptide | -0.124327 | Inlier |
| siRNA Disorazole DMSO Run1   | NM_002001 | FCER1A | Fc fragment of IgE, high affinity I, receptor for; alpha polypeptide | 0.124327  | Inlier |



Identification of Survival Genes in Human Glioblastoma Cells Using siRNA Screening

Nikhil G Thaker, Fang Zhang, Peter R. McDonald, Tong Ying Shun, Michael D Lewen, Ian F. Pollack, and John S. Lazo

Molecular Pharmacology

|                              |           |        |                                                                      |           |        |
|------------------------------|-----------|--------|----------------------------------------------------------------------|-----------|--------|
| siRNA-Temozolomide Run3-DMSO | NM_002001 | FCER1A | Fc fragment of IgE, high affinity I, receptor for; alpha polypeptide | 0.126667  | Inlier |
| siRNA Disorazole DMSO Run2   | NM_002001 | FCER1A | Fc fragment of IgE, high affinity I, receptor for; alpha polypeptide | 1.393395  | Inlier |
| siRNA-Vinblastine Run1-DMSO  | NM_002001 | FCER1A | Fc fragment of IgE, high affinity I, receptor for; alpha polypeptide | 1.920023  | Inlier |
| siRNA-Vinblastine Run2-DMSO  | NM_004106 | FCER1G | Fc fragment of IgE, high affinity I, receptor for; gamma polypeptide | -0.979243 | Inlier |
| siRNA-Temozolomide Run3-DMSO | NM_004106 | FCER1G | Fc fragment of IgE, high affinity I, receptor for; gamma polypeptide | -0.741646 | Inlier |

Identification of Survival Genes in Human Glioblastoma Cells Using siRNA Screening

Nikhil G Thaker, Fang Zhang, Peter R. McDonald, Tong Ying Shun, Michael D Lewen, Ian F. Pollack, and John S. Lazo

Molecular Pharmacology

| siRNA Treatment              | Gene ID   | Gene Name | Gene Description                                                     | Log2 Fold Change | Outlier Type |
|------------------------------|-----------|-----------|----------------------------------------------------------------------|------------------|--------------|
| siRNA-Temozolomide Run2-DMSO | NM_004106 | FCER1G    | Fc fragment of IgE, high affinity I, receptor for; gamma polypeptide | -0.607354        | Inlier       |
| siRNA Disorazole DMSO Run3   | NM_004106 | FCER1G    | Fc fragment of IgE, high affinity I, receptor for; gamma polypeptide | -0.277246        | Inlier       |
| siRNA Disorazole DMSO Run1   | NM_004106 | FCER1G    | Fc fragment of IgE, high affinity I, receptor for; gamma polypeptide | 0.277246         | Inlier       |
| siRNA-Temozolomide Run1-DMSO | NM_004106 | FCER1G    | Fc fragment of IgE, high affinity I, receptor for; gamma polypeptide | 0.351539         | Inlier       |
| siRNA Disorazole DMSO Run2   | NM_004106 | FCER1G    | Fc fragment of IgE, high affinity I, receptor for; gamma polypeptide | 2.04922          | Inlier       |

Identification of Survival Genes in Human Glioblastoma Cells Using siRNA Screening

Nikhil G Thaker, Fang Zhang, Peter R. McDonald, Tong Ying Shun, Michael D Lewen, Ian F. Pollack, and John S. Lazo

Molecular Pharmacology

|                              |           |        |                                                                      |           |        |
|------------------------------|-----------|--------|----------------------------------------------------------------------|-----------|--------|
| siRNA-Vinblastine Run1-DMSO  | NM_004106 | FCER1G | Fc fragment of IgE, high affinity I, receptor for; gamma polypeptide | 2.198274  | Inlier |
| siRNA-Vinblastine Run2-DMSO  | NM_002002 | FCER2  | Fc fragment of IgE, low affinity II, receptor for (CD23A)            | -2.232574 | Inlier |
| siRNA-Temozolomide Run3-DMSO | NM_002002 | FCER2  | Fc fragment of IgE, low affinity II, receptor for (CD23A)            | -0.769533 | Inlier |
| siRNA-Temozolomide Run2-DMSO | NM_002002 | FCER2  | Fc fragment of IgE, low affinity II, receptor for (CD23A)            | -0.373314 | Inlier |
| siRNA Disorazole DMSO Run1   | NM_002002 | FCER2  | Fc fragment of IgE, low affinity II, receptor for (CD23A)            | -0.13443  | Inlier |
| siRNA Disorazole DMSO Run3   | NM_002002 | FCER2  | Fc fragment of IgE, low affinity II, receptor for (CD23A)            | 0.13443   | Inlier |

Identification of Survival Genes in Human Glioblastoma Cells Using siRNA Screening  
 Nikhil G Thaker, Fang Zhang, Peter R. McDonald, Tong Ying Shun, Michael D Lewen, Ian F. Pollack, and John S. Lazo  
 Molecular Pharmacology

|                              |           |        |                                                           |           |        |
|------------------------------|-----------|--------|-----------------------------------------------------------|-----------|--------|
| siRNA-Temozolomide Run1-DMSO | NM_002002 | FCER2  | Fc fragment of IgE, low affinity II, receptor for (CD23A) | 0.579467  | Inlier |
| siRNA Disorazole DMSO Run2   | NM_002002 | FCER2  | Fc fragment of IgE, low affinity II, receptor for (CD23A) | 2.732956  | Inlier |
| siRNA-Vinblastine Run1-DMSO  | NM_002002 | FCER2  | Fc fragment of IgE, low affinity II, receptor for (CD23A) | 3.364236  | Inlier |
| siRNA-Temozolomide Run2-DMSO | NM_000566 | FCGR1A | Fc fragment of IgG, high affinity Ia, receptor (CD64)     | -1.288394 | Inlier |
| siRNA-Vinblastine Run2-DMSO  | NM_000566 | FCGR1A | Fc fragment of IgG, high affinity Ia, receptor (CD64)     | -0.87324  | Inlier |
| siRNA-Temozolomide Run3-DMSO | NM_000566 | FCGR1A | Fc fragment of IgG, high affinity Ia, receptor (CD64)     | -0.515329 | Inlier |
| siRNA Disorazole DMSO Run1   | NM_000566 | FCGR1A | Fc fragment of IgG, high affinity Ia, receptor (CD64)     | -0.11173  | Inlier |

Identification of Survival Genes in Human Glioblastoma Cells Using siRNA Screening  
 Nikhil G Thaker, Fang Zhang, Peter R. McDonald, Tong Ying Shun, Michael D Lewen, Ian F. Pollack, and John S. Lazo

Molecular Pharmacology

| siRNA Treatment              | Gene   | Gene ID   | Gene Description                                      | Value     | Category |
|------------------------------|--------|-----------|-------------------------------------------------------|-----------|----------|
| siRNA Disorazole DMSO Run3   | FCGR1A | NM_000566 | Fc fragment of IgG, high affinity Ia, receptor (CD64) | 0.111729  | Inlier   |
| siRNA-Temozolomide Run1-DMSO | FCGR1A | NM_000566 | Fc fragment of IgG, high affinity Ia, receptor (CD64) | 0.118663  | Inlier   |
| siRNA Disorazole DMSO Run2   | FCGR1A | NM_000566 | Fc fragment of IgG, high affinity Ia, receptor (CD64) | 0.833671  | Inlier   |
| siRNA-Vinblastine Run1-DMSO  | FCGR1A | NM_000566 | Fc fragment of IgG, high affinity Ia, receptor (CD64) | 1.080436  | Inlier   |
| siRNA-Vinblastine Run2-DMSO  | FCGR2A | NM_021642 | Fc fragment of IgG, low affinity IIa, receptor (CD32) | -0.737878 | Inlier   |
| siRNA-Temozolomide Run3-DMSO | FCGR2A | NM_021642 | Fc fragment of IgG, low affinity IIa, receptor (CD32) | -0.73617  | Inlier   |
| siRNA-Temozolomide Run2-DMSO | FCGR2A | NM_021642 | Fc fragment of IgG, low affinity IIa, receptor (CD32) | -0.61283  | Inlier   |

Identification of Survival Genes in Human Glioblastoma Cells Using siRNA Screening  
 Nikhil G Thaker, Fang Zhang, Peter R. McDonald, Tong Ying Shun, Michael D Lewen, Ian F. Pollack, and John S. Lazo  
 Molecular Pharmacology

|                              |               |        |                                                                      |                  |
|------------------------------|---------------|--------|----------------------------------------------------------------------|------------------|
| siRNA-Temozolomide Run1-DMSO | NM_0216<br>42 | FCGR2A | Fc<br>fragment<br>of IgG, low<br>affinity IIa,<br>receptor<br>(CD32) | -0.028304 Inlier |
| siRNA Disorazole DMSO Run1   | NM_0216<br>42 | FCGR2A | Fc<br>fragment<br>of IgG, low<br>affinity IIa,<br>receptor<br>(CD32) | 0.028304 Inlier  |
| siRNA Disorazole DMSO Run3   | NM_0216<br>42 | FCGR2A | Fc<br>fragment<br>of IgG, low<br>affinity IIa,<br>receptor<br>(CD32) | 0.066393 Inlier  |
| siRNA-Vinblastine Run1-DMSO  | NM_0216<br>42 | FCGR2A | Fc<br>fragment<br>of IgG, low<br>affinity IIa,<br>receptor<br>(CD32) | 1.431755 Inlier  |
| siRNA Disorazole DMSO Run2   | NM_0216<br>42 | FCGR2A | Fc<br>fragment<br>of IgG, low<br>affinity IIa,<br>receptor<br>(CD32) | 1.586406 Inlier  |
| siRNA Disorazole DMSO Run1   | NM_0040<br>01 | FCGR2B | Fc<br>fragment<br>of IgG, low<br>affinity IIb,<br>receptor<br>(CD32) | -1.006165 Inlier |
| siRNA-Vinblastine Run2-DMSO  | NM_0040<br>01 | FCGR2B | Fc<br>fragment<br>of IgG, low<br>affinity IIb,<br>receptor<br>(CD32) | -0.342835 Inlier |

Identification of Survival Genes in Human Glioblastoma Cells Using siRNA Screening  
 Nikhil G Thaker, Fang Zhang, Peter R. McDonald, Tong Ying Shun, Michael D Lewen, Ian F. Pollack, and John S. Lazo  
 Molecular Pharmacology

|                              |           |        |                                                         |           |        |
|------------------------------|-----------|--------|---------------------------------------------------------|-----------|--------|
| siRNA-Temozolomide Run3-DMSO | NM_004001 | FCGR2B | Fc fragment of IgG, low affinity IIb, receptor (CD32)   | -0.253089 | Inlier |
| siRNA-Temozolomide Run1-DMSO | NM_004001 | FCGR2B | Fc fragment of IgG, low affinity IIb, receptor (CD32)   | -0.183997 | Inlier |
| siRNA-Temozolomide Run2-DMSO | NM_004001 | FCGR2B | Fc fragment of IgG, low affinity IIb, receptor (CD32)   | 0.183996  | Inlier |
| siRNA Disorazole DMSO Run3   | NM_004001 | FCGR2B | Fc fragment of IgG, low affinity IIb, receptor (CD32)   | 1.473886  | Inlier |
| siRNA Disorazole DMSO Run2   | NM_004001 | FCGR2B | Fc fragment of IgG, low affinity IIb, receptor (CD32)   | 2.630907  | Inlier |
| siRNA-Vinblastine Run1-DMSO  | NM_004001 | FCGR2B | Fc fragment of IgG, low affinity IIb, receptor (CD32)   | 2.663194  | Inlier |
| siRNA-Vinblastine Run2-DMSO  | NM_000569 | FCGR3A | Fc fragment of IgG, low affinity IIIa, receptor (CD16a) | -2.017775 | Inlier |

Identification of Survival Genes in Human Glioblastoma Cells Using siRNA Screening  
 Nikhil G Thaker, Fang Zhang, Peter R. McDonald, Tong Ying Shun, Michael D Lewen, Ian F. Pollack, and John S. Lazo  
 Molecular Pharmacology

|                              |           |        |                                                         |           |        |
|------------------------------|-----------|--------|---------------------------------------------------------|-----------|--------|
| siRNA-Temozolomide Run2-DMSO | NM_000569 | FCGR3A | Fc fragment of IgG, low affinity IIIa, receptor (CD16a) | -0.829645 | Inlier |
| siRNA Disorazole DMSO Run3   | NM_000569 | FCGR3A | Fc fragment of IgG, low affinity IIIa, receptor (CD16a) | -0.519355 | Inlier |
| siRNA-Temozolomide Run3-DMSO | NM_000569 | FCGR3A | Fc fragment of IgG, low affinity IIIa, receptor (CD16a) | -0.155809 | Inlier |
| siRNA-Temozolomide Run1-DMSO | NM_000569 | FCGR3A | Fc fragment of IgG, low affinity IIIa, receptor (CD16a) | 0.155809  | Inlier |
| siRNA Disorazole DMSO Run1   | NM_000569 | FCGR3A | Fc fragment of IgG, low affinity IIIa, receptor (CD16a) | 0.378635  | Inlier |
| siRNA Disorazole DMSO Run2   | NM_000569 | FCGR3A | Fc fragment of IgG, low affinity IIIa, receptor (CD16a) | 1.369482  | Inlier |



Identification of Survival Genes in Human Glioblastoma Cells Using siRNA Screening  
 Nikhil G Thaker, Fang Zhang, Peter R. McDonald, Tong Ying Shun, Michael D Lewen, Ian F. Pollack, and John S. Lazo  
 Molecular Pharmacology

|                              |           |        |                                                         |           |        |
|------------------------------|-----------|--------|---------------------------------------------------------|-----------|--------|
| siRNA-Vinblastine Run1-DMSO  | NM_000569 | FCGR3A | Fc fragment of IgG, low affinity IIIa, receptor (CD16a) | 1.988297  | Inlier |
| siRNA-Vinblastine Run2-DMSO  | NM_000570 | FCGR3B | Fc fragment of IgG, low affinity IIIb, receptor (CD16b) | -1.744287 | Inlier |
| siRNA-Temozolomide Run2-DMSO | NM_000570 | FCGR3B | Fc fragment of IgG, low affinity IIIb, receptor (CD16b) | -1.183146 | Inlier |
| siRNA Disorazole DMSO Run1   | NM_000570 | FCGR3B | Fc fragment of IgG, low affinity IIIb, receptor (CD16b) | -0.107223 | Inlier |
| siRNA Disorazole DMSO Run3   | NM_000570 | FCGR3B | Fc fragment of IgG, low affinity IIIb, receptor (CD16b) | -0.031219 | Inlier |
| siRNA-Temozolomide Run3-DMSO | NM_000570 | FCGR3B | Fc fragment of IgG, low affinity IIIb, receptor (CD16b) | 0.031218  | Inlier |

Identification of Survival Genes in Human Glioblastoma Cells Using siRNA Screening  
 Nikhil G Thaker, Fang Zhang, Peter R. McDonald, Tong Ying Shun, Michael D Lewen, Ian F. Pollack, and John S. Lazo  
 Molecular Pharmacology

|                              |           |        |                                                         |           |        |
|------------------------------|-----------|--------|---------------------------------------------------------|-----------|--------|
| siRNA-Temozolomide Run1-DMSO | NM_000570 | FCGR3B | Fc fragment of IgG, low affinity IIIb, receptor (CD16b) | 0.165854  | Inlier |
| siRNA-Vinblastine Run1-DMSO  | NM_000570 | FCGR3B | Fc fragment of IgG, low affinity IIIb, receptor (CD16b) | 1.803857  | Inlier |
| siRNA Disorazole DMSO Run2   | NM_000570 | FCGR3B | Fc fragment of IgG, low affinity IIIb, receptor (CD16b) | 2.197371  | Inlier |
| siRNA Disorazole DMSO Run2   | NM_004107 | FCGRT  | Fc fragment of IgG, receptor, transporter, alpha        | -1.011924 | Inlier |
| siRNA-Temozolomide Run3-DMSO | NM_004107 | FCGRT  | Fc fragment of IgG, receptor, transporter, alpha        | -0.88454  | Inlier |
| siRNA-Temozolomide Run1-DMSO | NM_004107 | FCGRT  | Fc fragment of IgG, receptor, transporter, alpha        | -0.30811  | Inlier |
| siRNA-Temozolomide Run2-DMSO | NM_004107 | FCGRT  | Fc fragment of IgG, receptor, transporter, alpha        | -0.241111 | Inlier |

Identification of Survival Genes in Human Glioblastoma Cells Using siRNA Screening

Nikhil G Thaker, Fang Zhang, Peter R. McDonald, Tong Ying Shun, Michael D Lewen, Ian F. Pollack, and John S. Lazo

Molecular Pharmacology

| siRNA Treatment              | Gene ID   | Gene Name | Protein Description                              | Log2 Fold Change | Outlier Status |
|------------------------------|-----------|-----------|--------------------------------------------------|------------------|----------------|
| siRNA Disorazole DMSO Run3   | NM_004107 | FCGRT     | Fc fragment of IgG, receptor, transporter, alpha | 0.241111         | Inlier         |
| siRNA-Vinblastine Run2-DMSO  | NM_004107 | FCGRT     | Fc fragment of IgG, receptor, transporter, alpha | 0.480362         | Inlier         |
| siRNA-Vinblastine Run1-DMSO  | NM_004107 | FCGRT     | Fc fragment of IgG, receptor, transporter, alpha | 0.868638         | Inlier         |
| siRNA Disorazole DMSO Run1   | NM_004107 | FCGRT     | Fc fragment of IgG, receptor, transporter, alpha | 0.986718         | Inlier         |
| siRNA Disorazole DMSO Run3   | NM_002003 | FCN1      | ficolin (collagen/brinogen domain containing) 1  | -1.751139        | Inlier         |
| siRNA-Vinblastine Run2-DMSO  | NM_002003 | FCN1      | ficolin (collagen/brinogen domain containing) 1  | -0.512523        | Inlier         |
| siRNA-Temozolomide Run3-DMSO | NM_002003 | FCN1      | ficolin (collagen/brinogen domain containing) 1  | -0.385972        | Inlier         |
| siRNA-Temozolomide Run2-DMSO | NM_002003 | FCN1      | ficolin (collagen/brinogen domain containing) 1  | -0.086586        | Inlier         |

Identification of Survival Genes in Human Glioblastoma Cells Using siRNA Screening

Nikhil G Thaker, Fang Zhang, Peter R. McDonald, Tong Ying Shun, Michael D Lewen, Ian F. Pollack, and John S. Lazo

Molecular Pharmacology

|                                  |               |      |                                                                                       |           |         |
|----------------------------------|---------------|------|---------------------------------------------------------------------------------------|-----------|---------|
| siRNA Disorazole DMSO Run1       | NM_0020<br>03 | FCN1 | ficolin<br>(collagen/fi<br>brinogen<br>domain<br>containing<br>) 1                    | 0.086586  | Inlier  |
| siRNA-Temozolomide Run1-<br>DMSO | NM_0020<br>03 | FCN1 | ficolin<br>(collagen/fi<br>brinogen<br>domain<br>containing<br>) 1                    | 0.836478  | Inlier  |
| siRNA Disorazole DMSO Run2       | NM_0020<br>03 | FCN1 | ficolin<br>(collagen/fi<br>brinogen<br>domain<br>containing<br>) 1                    | 2.520576  | Inlier  |
| siRNA-Vinblastine Run1-<br>DMSO  | NM_0020<br>03 | FCN1 | ficolin<br>(collagen/fi<br>brinogen<br>domain<br>containing<br>) 1                    | 3.85787   | Outlier |
| siRNA-Temozolomide Run3-<br>DMSO | NM_0158<br>37 | FCN2 | ficolin<br>(collagen/fi<br>brinogen<br>domain<br>containing<br>lectin) 2<br>(hucolin) | -6.186482 | Outlier |
| siRNA Disorazole DMSO Run3       | NM_0158<br>37 | FCN2 | ficolin<br>(collagen/fi<br>brinogen<br>domain<br>containing<br>lectin) 2<br>(hucolin) | -0.393147 | Inlier  |
| siRNA-Temozolomide Run2-<br>DMSO | NM_0158<br>37 | FCN2 | ficolin<br>(collagen/fi<br>brinogen<br>domain<br>containing<br>lectin) 2<br>(hucolin) | -0.214562 | Inlier  |
| siRNA Disorazole DMSO Run1       | NM_0158<br>37 | FCN2 | ficolin<br>(collagen/fi<br>brinogen<br>domain<br>containing<br>lectin) 2<br>(hucolin) | -0.19392  | Inlier  |

Identification of Survival Genes in Human Glioblastoma Cells Using siRNA Screening

Nikhil G Thaker, Fang Zhang, Peter R. McDonald, Tong Ying Shun, Michael D Lewen, Ian F. Pollack, and John S. Lazo

Molecular Pharmacology

|                              |               |      |                                                                        |           |        |
|------------------------------|---------------|------|------------------------------------------------------------------------|-----------|--------|
| siRNA-Vinblastine Run2-DMSO  | NM_0158<br>37 | FCN2 | ficolin<br>(collagen/fibrinogen domain containing lectin) 2 (hucolin)  | 0.19392   | Inlier |
| siRNA Disorazole DMSO Run2   | NM_0158<br>37 | FCN2 | ficolin<br>(collagen/fibrinogen domain containing lectin) 2 (hucolin)  | 0.955853  | Inlier |
| siRNA-Temozolomide Run1-DMSO | NM_0158<br>37 | FCN2 | ficolin<br>(collagen/fibrinogen domain containing lectin) 2 (hucolin)  | 1.267627  | Inlier |
| siRNA-Vinblastine Run1-DMSO  | NM_0158<br>37 | FCN2 | ficolin<br>(collagen/fibrinogen domain containing lectin) 2 (hucolin)  | 2.630486  | Inlier |
| siRNA-Vinblastine Run2-DMSO  | NM_1734<br>52 | FCN3 | (Hakata antigen) ficolin<br>(collagen/fibrinogen domain containing ) 3 | -0.698739 | Inlier |
| siRNA Disorazole DMSO Run3   | NM_1734<br>52 | FCN3 | (Hakata antigen) ficolin<br>(collagen/fibrinogen domain containing ) 3 | -0.650261 | Inlier |
| siRNA-Temozolomide Run1-DMSO | NM_1734<br>52 | FCN3 | (Hakata antigen)                                                       | -0.437706 | Inlier |

Identification of Survival Genes in Human Glioblastoma Cells Using siRNA Screening

Nikhil G Thaker, Fang Zhang, Peter R. McDonald, Tong Ying Shun, Michael D Lewen, Ian F. Pollack, and John S. Lazo

Molecular Pharmacology

|                              |               |       |                                                                               |           |         |
|------------------------------|---------------|-------|-------------------------------------------------------------------------------|-----------|---------|
| siRNA-Temozolomide Run3-DMSO | NM_1734<br>52 | FCN3  | ficolin<br>(collagen/fibrinogen domain containing)<br>) 3<br>(Hakata antigen) | -0.403745 | Inlier  |
| siRNA-Temozolomide Run2-DMSO | NM_1734<br>52 | FCN3  | ficolin<br>(collagen/fibrinogen domain containing)<br>) 3<br>(Hakata antigen) | 0.403746  | Inlier  |
| siRNA Disorazole DMSO Run1   | NM_1734<br>52 | FCN3  | ficolin<br>(collagen/fibrinogen domain containing)<br>) 3<br>(Hakata antigen) | 1.337101  | Inlier  |
| siRNA Disorazole DMSO Run2   | NM_1734<br>52 | FCN3  | ficolin<br>(collagen/fibrinogen domain containing)<br>) 3<br>(Hakata antigen) | 5.131422  | Outlier |
| siRNA-Vinblastine Run1-DMSO  | NM_1734<br>52 | FCN3  | ficolin<br>(collagen/fibrinogen domain containing)<br>) 3<br>(Hakata antigen) | 8.659146  | Outlier |
| siRNA-Temozolomide Run1-DMSO | NM_0044<br>62 | FDFT1 | farnesyl-diphosphate farnesyltransferase 1                                    | -1.190112 | Inlier  |
| siRNA Disorazole DMSO Run1   | NM_0044<br>62 | FDFT1 | farnesyl-diphosphate farnesyltransferase 1                                    | -0.910898 | Inlier  |

Identification of Survival Genes in Human Glioblastoma Cells Using siRNA Screening  
 Nikhil G Thaker, Fang Zhang, Peter R. McDonald, Tong Ying Shun, Michael D Lewen, Ian F. Pollack, and John S. Lazo  
 Molecular Pharmacology

|                              |           |       |                                                                                                                 |           |        |
|------------------------------|-----------|-------|-----------------------------------------------------------------------------------------------------------------|-----------|--------|
| siRNA-Temozolomide Run2-DMSO | NM_004462 | FDFT1 | farnesyl-diphosphate farnesyltransferase 1                                                                      | -0.728063 | Inlier |
| siRNA-Temozolomide Run3-DMSO | NM_004462 | FDFT1 | farnesyl-diphosphate farnesyltransferase 1                                                                      | -0.058041 | Inlier |
| siRNA-Vinblastine Run2-DMSO  | NM_004462 | FDFT1 | farnesyl-diphosphate farnesyltransferase 1                                                                      | 0.058041  | Inlier |
| siRNA Disorazole DMSO Run3   | NM_004462 | FDFT1 | farnesyl-diphosphate farnesyltransferase 1                                                                      | 0.55416   | Inlier |
| siRNA-Vinblastine Run1-DMSO  | NM_004462 | FDFT1 | farnesyl-diphosphate farnesyltransferase 1                                                                      | 0.620937  | Inlier |
| siRNA Disorazole DMSO Run2   | NM_004462 | FDFT1 | farnesyl-diphosphate farnesyltransferase 1                                                                      | 1.098063  | Inlier |
| siRNA-Temozolomide Run3-DMSO | NM_002004 | FDPS  | farnesyl diphosphate synthase (farnesyl pyrophosphate synthetase, dimethylallyltransferase, geranyltransferase) | -1.060063 | Inlier |

Identification of Survival Genes in Human Glioblastoma Cells Using siRNA Screening

Nikhil G Thaker, Fang Zhang, Peter R. McDonald, Tong Ying Shun, Michael D Lewen, Ian F. Pollack, and John S.

Lazo

Molecular Pharmacology

|                                  |               |      |  |                                                                                                                                                                            |                  |
|----------------------------------|---------------|------|--|----------------------------------------------------------------------------------------------------------------------------------------------------------------------------|------------------|
|                                  |               |      |  | farnesyl<br>diphospha<br>te<br>synthase<br>(farnesyl<br>pyrophosp<br>hate<br>synthetase<br>,<br>dimethylall<br>yltranstran<br>sferase,<br>geranyltra<br>nstransfer<br>ase) |                  |
| siRNA-Temozolomide Run2-<br>DMSO | NM_0020<br>04 | FDPS |  |                                                                                                                                                                            | -0.742024 Inlier |
|                                  |               |      |  | farnesyl<br>diphospha<br>te<br>synthase<br>(farnesyl<br>pyrophosp<br>hate<br>synthetase<br>,<br>dimethylall<br>yltranstran<br>sferase,<br>geranyltra<br>nstransfer<br>ase) |                  |
| siRNA-Temozolomide Run1-<br>DMSO | NM_0020<br>04 | FDPS |  |                                                                                                                                                                            | -0.367985 Inlier |
|                                  |               |      |  | farnesyl<br>diphospha<br>te<br>synthase<br>(farnesyl<br>pyrophosp<br>hate<br>synthetase<br>,<br>dimethylall<br>yltranstran<br>sferase,<br>geranyltra<br>nstransfer<br>ase) |                  |
| siRNA Disorazole DMSO Run1       | NM_0020<br>04 | FDPS |  |                                                                                                                                                                            | -0.276178 Inlier |



Identification of Survival Genes in Human Glioblastoma Cells Using siRNA Screening

Nikhil G Thaker, Fang Zhang, Peter R. McDonald, Tong Ying Shun, Michael D Lewen, Ian F. Pollack, and John S. Lazo

Molecular Pharmacology

|                                 |               |      |                                                                                                                                                                            |          |        |
|---------------------------------|---------------|------|----------------------------------------------------------------------------------------------------------------------------------------------------------------------------|----------|--------|
| siRNA Disorazole DMSO Run3      | NM_0020<br>04 | FDPS | farnesyl<br>diphospha<br>te<br>synthase<br>(farnesyl<br>pyrophosp<br>hate<br>synthetase<br>,<br>dimethylall<br>yltranstran<br>sferase,<br>geranyltra<br>nstransfer<br>ase) | 0.276177 | Inlier |
| siRNA-Vinblastine Run2-<br>DMSO | NM_0020<br>04 | FDPS | farnesyl<br>diphospha<br>te<br>synthase<br>(farnesyl<br>pyrophosp<br>hate<br>synthetase<br>,<br>dimethylall<br>yltranstran<br>sferase,<br>geranyltra<br>nstransfer<br>ase) | 0.606976 | Inlier |
| siRNA Disorazole DMSO Run2      | NM_0020<br>04 | FDPS | farnesyl<br>diphospha<br>te<br>synthase<br>(farnesyl<br>pyrophosp<br>hate<br>synthetase<br>,<br>dimethylall<br>yltranstran<br>sferase,<br>geranyltra<br>nstransfer<br>ase) | 1.090399 | Inlier |

Identification of Survival Genes in Human Glioblastoma Cells Using siRNA Screening  
 Nikhil G Thaker, Fang Zhang, Peter R. McDonald, Tong Ying Shun, Michael D Lewen, Ian F. Pollack, and John S. Lazo

Molecular Pharmacology

|                              |              |      |                                                                   |                  |
|------------------------------|--------------|------|-------------------------------------------------------------------|------------------|
|                              |              |      | farnesyl diphosphate synthase (farnesyl pyrophosphate synthetase) |                  |
|                              |              |      | , dimethylallyltransferase, geranyltransferase)                   |                  |
| siRNA-Vinblastine Run1-DMSO  | NM_002004    | FDPS | ferredoxin 1                                                      | 1.395556 Inlier  |
| siRNA-Temozolomide Run3-DMSO | NM_004109    | FDX1 | ferredoxin 1                                                      | -0.715141 Inlier |
| siRNA Disorazole DMSO Run3   | NM_004109    | FDX1 | ferredoxin 1                                                      | -0.633859 Inlier |
| siRNA-Vinblastine Run2-DMSO  | NM_004109    | FDX1 | ferredoxin 1                                                      | -0.375939 Inlier |
| siRNA Disorazole DMSO Run1   | NM_004109    | FDX1 | ferredoxin 1                                                      | -0.299346 Inlier |
| siRNA-Temozolomide Run2-DMSO | NM_004109    | FDX1 | ferredoxin 1                                                      | 0.299346 Inlier  |
| siRNA-Temozolomide Run1-DMSO | NM_004109    | FDX1 | ferredoxin 1                                                      | 0.775299 Inlier  |
| siRNA-Vinblastine Run1-DMSO  | NM_004109    | FDX1 | ferredoxin 1                                                      | 1.860966 Inlier  |
| siRNA Disorazole DMSO Run2   | NM_004109    | FDX1 | ferredoxin 1                                                      | 1.97833 Inlier   |
| siRNA-Temozolomide Run2-DMSO | NM_024417    | FDXR | ferredoxin reductase                                              | -0.812119 Inlier |
| siRNA-Temozolomide Run3-DMSO | NM_024417    | FDXR | ferredoxin reductase                                              | -0.799078 Inlier |
| siRNA Disorazole DMSO Run3   | NM_024417    | FDXR | ferredoxin reductase                                              | -0.305037 Inlier |
| siRNA-Vinblastine Run2-DMSO  | NM_024417    | FDXR | ferredoxin reductase                                              | -0.120924 Inlier |
| siRNA Disorazole DMSO Run1   | NM_024417    | FDXR | ferredoxin reductase                                              | 0.120924 Inlier  |
| siRNA-Temozolomide Run1-DMSO | NM_024417    | FDXR | ferredoxin reductase                                              | 0.549922 Inlier  |
| siRNA Disorazole DMSO Run2   | NM_024417    | FDXR | ferredoxin reductase                                              | 1.396903 Inlier  |
| siRNA-Vinblastine Run1-DMSO  | NM_024417    | FDXR | ferredoxin reductase                                              | 1.579951 Inlier  |
| siRNA-Temozolomide Run3-DMSO | NM_001012515 | FECH | ferrochelatase (protoporphyrin)                                   | -1.485357 Inlier |

Identification of Survival Genes in Human Glioblastoma Cells Using siRNA Screening  
 Nikhil G Thaker, Fang Zhang, Peter R. McDonald, Tong Ying Shun, Michael D Lewen, Ian F. Pollack, and John S. Lazo

Molecular Pharmacology

|                              |                  |      |                                        |           |         |
|------------------------------|------------------|------|----------------------------------------|-----------|---------|
| siRNA-Temozolomide Run1-DMSO | NM_0010<br>12515 | FECH | ferrochelatase<br>(protoporphyrin)     | -1.147787 | Inlier  |
| siRNA-Temozolomide Run2-DMSO | NM_0010<br>12515 | FECH | ferrochelatase<br>(protoporphyrin)     | -1.120851 | Inlier  |
| siRNA Disorazole DMSO Run1   | NM_0010<br>12515 | FECH | ferrochelatase<br>(protoporphyrin)     | -0.1613   | Inlier  |
| siRNA-Vinblastine Run2-DMSO  | NM_0010<br>12515 | FECH | ferrochelatase<br>(protoporphyrin)     | 0.161299  | Inlier  |
| siRNA Disorazole DMSO Run2   | NM_0010<br>12515 | FECH | ferrochelatase<br>(protoporphyrin)     | 0.314221  | Inlier  |
| siRNA Disorazole DMSO Run3   | NM_0010<br>12515 | FECH | ferrochelatase<br>(protoporphyrin)     | 0.331017  | Inlier  |
| siRNA-Vinblastine Run1-DMSO  | NM_0010<br>12515 | FECH | flap structure-specific endonuclease 1 | 1.017983  | Inlier  |
| siRNA-Temozolomide Run3-DMSO | NM_0041<br>11    | FEN1 | flap structure-specific endonuclease 1 | -3.54756  | Outlier |
| siRNA Disorazole DMSO Run3   | NM_0041<br>11    | FEN1 | flap structure-specific endonuclease 1 | -0.722123 | Inlier  |
| siRNA-Vinblastine Run2-DMSO  | NM_0041<br>11    | FEN1 | flap structure-specific endonuclease 1 | -0.626877 | Inlier  |
| siRNA-Temozolomide Run2-DMSO | NM_0041<br>11    | FEN1 | flap structure-specific endonuclease 1 | -0.021282 | Inlier  |

Identification of Survival Genes in Human Glioblastoma Cells Using siRNA Screening  
 Nikhil G Thaker, Fang Zhang, Peter R. McDonald, Tong Ying Shun, Michael D Lewen, Ian F. Pollack, and John S. Lazo

Molecular Pharmacology

|                                  |               |      |                                                                                 |           |        |
|----------------------------------|---------------|------|---------------------------------------------------------------------------------|-----------|--------|
| siRNA Disorazole DMSO Run1       | NM_0041<br>11 | FEN1 | flap<br>structure-<br>specific<br>endonucle<br>ase 1                            | 0.021282  | Inlier |
| siRNA-Temozolomide Run1-<br>DMSO | NM_0041<br>11 | FEN1 | flap<br>structure-<br>specific<br>endonucle<br>ase 1                            | 0.580839  | Inlier |
| siRNA-Vinblastine Run1-<br>DMSO  | NM_0041<br>11 | FEN1 | flap<br>structure-<br>specific<br>endonucle<br>ase 1                            | 1.655329  | Inlier |
| siRNA Disorazole DMSO Run2       | NM_0041<br>11 | FEN1 | flap<br>structure-<br>specific<br>endonucle<br>ase 1                            | 3.37194   | Inlier |
| siRNA Disorazole DMSO Run2       | NM_0052<br>46 | FER  | fer (fps/fes<br>related)<br>tyrosine<br>kinase<br>(phosphop<br>rotein<br>NCP94) | -2.665918 | Inlier |
| siRNA-Temozolomide Run3-<br>DMSO | NM_0052<br>46 | FER  | fer (fps/fes<br>related)<br>tyrosine<br>kinase<br>(phosphop<br>rotein<br>NCP94) | -1.396593 | Inlier |
| siRNA-Temozolomide Run1-<br>DMSO | NM_0052<br>46 | FER  | fer (fps/fes<br>related)<br>tyrosine<br>kinase<br>(phosphop<br>rotein<br>NCP94) | -0.760297 | Inlier |
| siRNA-Vinblastine Run1-<br>DMSO  | NM_0052<br>46 | FER  | fer (fps/fes<br>related)<br>tyrosine<br>kinase<br>(phosphop<br>rotein<br>NCP94) | -0.053716 | Inlier |

Identification of Survival Genes in Human Glioblastoma Cells Using siRNA Screening  
 Nikhil G Thaker, Fang Zhang, Peter R. McDonald, Tong Ying Shun, Michael D Lewen, Ian F. Pollack, and John S. Lazo  
 Molecular Pharmacology

|                              |               |     |                                                                    |           |        |
|------------------------------|---------------|-----|--------------------------------------------------------------------|-----------|--------|
| siRNA Disorazole DMSO Run3   | NM_0052<br>46 | FER | fer (fps/fes related)<br>tyrosine kinase<br>(phosphoprotein NCP94) | 0.053716  | Inlier |
| siRNA-Temozolomide Run2-DMSO | NM_0052<br>46 | FER | fer (fps/fes related)<br>tyrosine kinase<br>(phosphoprotein NCP94) | 0.10743   | Inlier |
| siRNA Disorazole DMSO Run1   | NM_0052<br>46 | FER | fer (fps/fes related)<br>tyrosine kinase<br>(phosphoprotein NCP94) | 0.588703  | Inlier |
| siRNA-Vinblastine Run2-DMSO  | NM_0052<br>46 | FER | fer (fps/fes related)<br>tyrosine kinase<br>(phosphoprotein NCP94) | 1.811822  | Inlier |
| siRNA Disorazole DMSO Run2   | NM_0020<br>05 | FES | feline sarcoma oncogene                                            | -0.894462 | Inlier |
| siRNA-Temozolomide Run3-DMSO | NM_0020<br>05 | FES | feline sarcoma oncogene                                            | -0.517877 | Inlier |
| siRNA Disorazole DMSO Run3   | NM_0020<br>05 | FES | feline sarcoma oncogene                                            | -0.310108 | Inlier |
| siRNA-Temozolomide Run2-DMSO | NM_0020<br>05 | FES | feline sarcoma oncogene                                            | -0.088358 | Inlier |
| siRNA-Temozolomide Run1-DMSO | NM_0020<br>05 | FES | feline sarcoma oncogene                                            | 0.088358  | Inlier |
| siRNA-Vinblastine Run1-DMSO  | NM_0020<br>05 | FES | feline sarcoma oncogene                                            | 0.831123  | Inlier |

Identification of Survival Genes in Human Glioblastoma Cells Using siRNA Screening  
 Nikhil G Thaker, Fang Zhang, Peter R. McDonald, Tong Ying Shun, Michael D Lewen, Ian F. Pollack, and John S. Lazo

Molecular Pharmacology

|                                  |               |     |                                           |           |        |
|----------------------------------|---------------|-----|-------------------------------------------|-----------|--------|
| siRNA Disorazole DMSO Run1       | NM_0020<br>05 | FES | feline<br>sarcoma<br>oncogene             | 0.897705  | Inlier |
| siRNA-Vinblastine Run2-<br>DMSO  | NM_0020<br>05 | FES | feline<br>sarcoma<br>oncogene             | 2.312589  | Inlier |
| siRNA-Temozolomide Run3-<br>DMSO | NM_0218<br>71 | FGA | fibrinogen,<br>A alpha<br>polypeptid<br>e | -1.01549  | Inlier |
| siRNA-Temozolomide Run2-<br>DMSO | NM_0218<br>71 | FGA | fibrinogen,<br>A alpha<br>polypeptid<br>e | -0.654971 | Inlier |
| siRNA-Vinblastine Run2-<br>DMSO  | NM_0218<br>71 | FGA | fibrinogen,<br>A alpha<br>polypeptid<br>e | -0.361687 | Inlier |
| siRNA Disorazole DMSO Run3       | NM_0218<br>71 | FGA | fibrinogen,<br>A alpha<br>polypeptid<br>e | -0.206817 | Inlier |
| siRNA Disorazole DMSO Run1       | NM_0218<br>71 | FGA | fibrinogen,<br>A alpha<br>polypeptid<br>e | 0.206817  | Inlier |
| siRNA-Temozolomide Run1-<br>DMSO | NM_0218<br>71 | FGA | fibrinogen,<br>A alpha<br>polypeptid<br>e | 0.694029  | Inlier |
| siRNA-Vinblastine Run1-<br>DMSO  | NM_0218<br>71 | FGA | fibrinogen,<br>A alpha<br>polypeptid<br>e | 1.523709  | Inlier |
| siRNA Disorazole DMSO Run2       | NM_0218<br>71 | FGA | fibrinogen,<br>A alpha<br>polypeptid<br>e | 1.842086  | Inlier |
| siRNA-Vinblastine Run2-<br>DMSO  | NM_0051<br>41 | FGB | fibrinogen,<br>B beta<br>polypeptid<br>e  | -1.135513 | Inlier |
| siRNA-Temozolomide Run3-<br>DMSO | NM_0051<br>41 | FGB | fibrinogen,<br>B beta<br>polypeptid<br>e  | -0.987901 | Inlier |
| siRNA Disorazole DMSO Run3       | NM_0051<br>41 | FGB | fibrinogen,<br>B beta<br>polypeptid<br>e  | -0.685119 | Inlier |

Identification of Survival Genes in Human Glioblastoma Cells Using siRNA Screening  
 Nikhil G Thaker, Fang Zhang, Peter R. McDonald, Tong Ying Shun, Michael D Lewen, Ian F. Pollack, and John S. Lazo

Molecular Pharmacology

|                              |               |      |                                                                           |           |        |
|------------------------------|---------------|------|---------------------------------------------------------------------------|-----------|--------|
| siRNA-Temozolomide Run2-DMSO | NM_0051<br>41 | FGB  | fibrinogen, B beta polypeptide                                            | -0.057599 | Inlier |
| siRNA Disorazole DMSO Run2   | NM_0051<br>41 | FGB  | fibrinogen, B beta polypeptide                                            | 0.057599  | Inlier |
| siRNA Disorazole DMSO Run1   | NM_0051<br>41 | FGB  | fibrinogen, B beta polypeptide                                            | 0.277645  | Inlier |
| siRNA-Temozolomide Run1-DMSO | NM_0051<br>41 | FGB  | fibrinogen, B beta polypeptide                                            | 0.663881  | Inlier |
| siRNA-Vinblastine Run1-DMSO  | NM_0051<br>41 | FGB  | fibrinogen, B beta polypeptide<br>FYVE, RhoGEF and PH domain containing 1 | 1.055914  | Inlier |
| siRNA-Temozolomide Run3-DMSO | NM_0044<br>63 | FGD1 | (faciogenital dysplasia)<br>FYVE, RhoGEF and PH domain containing 1       | -0.839511 | Inlier |
| siRNA-Temozolomide Run2-DMSO | NM_0044<br>63 | FGD1 | (faciogenital dysplasia)<br>FYVE, RhoGEF and PH domain containing 1       | -0.788362 | Inlier |
| siRNA-Vinblastine Run2-DMSO  | NM_0044<br>63 | FGD1 | (faciogenital dysplasia)                                                  | -0.560638 | Inlier |

Identification of Survival Genes in Human Glioblastoma Cells Using siRNA Screening

Nikhil G Thaker, Fang Zhang, Peter R. McDonald, Tong Ying Shun, Michael D Lewen, Ian F. Pollack, and John S. Lazo

Molecular Pharmacology

|                                  |               |      |                                                                                           |           |        |
|----------------------------------|---------------|------|-------------------------------------------------------------------------------------------|-----------|--------|
| siRNA Disorazole DMSO Run3       | NM_0044<br>63 | FGD1 | FYVE,<br>RhoGEF<br>and PH<br>domain<br>containing<br>1<br>(faciogenit<br>al<br>dysplasia) | -0.216691 | Inlier |
| siRNA-Temozolomide Run1-<br>DMSO | NM_0044<br>63 | FGD1 | FYVE,<br>RhoGEF<br>and PH<br>domain<br>containing<br>1<br>(faciogenit<br>al<br>dysplasia) | 0.216691  | Inlier |
| siRNA Disorazole DMSO Run1       | NM_0044<br>63 | FGD1 | FYVE,<br>RhoGEF<br>and PH<br>domain<br>containing<br>1<br>(faciogenit<br>al<br>dysplasia) | 0.411215  | Inlier |
| siRNA-Vinblastine Run1-<br>DMSO  | NM_0044<br>63 | FGD1 | FYVE,<br>RhoGEF<br>and PH<br>domain<br>containing<br>1<br>(faciogenit<br>al<br>dysplasia) | 1.541897  | Inlier |
| siRNA Disorazole DMSO Run2       | NM_0044<br>63 | FGD1 | FYVE,<br>RhoGEF<br>and PH<br>domain<br>containing<br>1<br>(faciogenit<br>al<br>dysplasia) | 2.651839  | Inlier |
| siRNA-Temozolomide Run3-<br>DMSO | NM_1735<br>58 | FGD2 | 2                                                                                         | -1.185015 | Inlier |



Identification of Survival Genes in Human Glioblastoma Cells Using siRNA Screening  
 Nikhil G Thaker, Fang Zhang, Peter R. McDonald, Tong Ying Shun, Michael D Lewen, Ian F. Pollack, and John S. Lazo

Molecular Pharmacology

|                              |               |      |                                                        |           |        |
|------------------------------|---------------|------|--------------------------------------------------------|-----------|--------|
| siRNA-Temozolomide Run2-DMSO | NM_1735<br>58 | FGD2 | FYVE,<br>RhoGEF<br>and PH<br>domain<br>containing<br>2 | -0.76819  | Inlier |
| siRNA-Temozolomide Run1-DMSO | NM_1735<br>58 | FGD2 | FYVE,<br>RhoGEF<br>and PH<br>domain<br>containing<br>2 | -0.58081  | Inlier |
| siRNA-Vinblastine Run2-DMSO  | NM_1735<br>58 | FGD2 | FYVE,<br>RhoGEF<br>and PH<br>domain<br>containing<br>2 | -0.020934 | Inlier |
| siRNA Disorazole DMSO Run3   | NM_1735<br>58 | FGD2 | FYVE,<br>RhoGEF<br>and PH<br>domain<br>containing<br>2 | 0.020934  | Inlier |
| siRNA Disorazole DMSO Run1   | NM_1735<br>58 | FGD2 | FYVE,<br>RhoGEF<br>and PH<br>domain<br>containing<br>2 | 0.336008  | Inlier |
| siRNA Disorazole DMSO Run2   | NM_1735<br>58 | FGD2 | FYVE,<br>RhoGEF<br>and PH<br>domain<br>containing<br>2 | 1.558894  | Inlier |
| siRNA-Vinblastine Run1-DMSO  | NM_1735<br>58 | FGD2 | FGD1<br>family,<br>member 3                            | 1.828795  | Inlier |
| siRNA-Temozolomide Run3-DMSO | NM_0330<br>86 | FGD3 | FGD1<br>family,<br>member 3                            | -2.120347 | Inlier |
| siRNA-Temozolomide Run2-DMSO | NM_0330<br>86 | FGD3 | FGD1<br>family,<br>member 3                            | -1.341386 | Inlier |
| siRNA Disorazole DMSO Run3   | NM_0330<br>86 | FGD3 | FGD1<br>family,<br>member 3                            | -0.574579 | Inlier |

Identification of Survival Genes in Human Glioblastoma Cells Using siRNA Screening  
 Nikhil G Thaker, Fang Zhang, Peter R. McDonald, Tong Ying Shun, Michael D Lewen, Ian F. Pollack, and John S. Lazo

| Condition                                                 | Gene    | Accession | Gene ID | Protein Description                     | Log Fold Change | Outlier Status |
|-----------------------------------------------------------|---------|-----------|---------|-----------------------------------------|-----------------|----------------|
| Molecular Pharmacology<br>siRNA-Vinblastine Run2-<br>DMSO | NM_0330 | 86        | FGD3    | FGD1 family, member 3                   | -0.160921       | Inlier         |
| siRNA-Temozolomide Run1-<br>DMSO                          | NM_0330 | 86        | FGD3    | FGD1 family, member 3                   | 0.160922        | Inlier         |
| siRNA Disorazole DMSO Run2                                | NM_0330 | 86        | FGD3    | FGD1 family, member 3                   | 0.664923        | Inlier         |
| siRNA Disorazole DMSO Run1                                | NM_0330 | 86        | FGD3    | FGD1 family, member 3                   | 0.684077        | Inlier         |
| siRNA-Vinblastine Run1-<br>DMSO                           | NM_0330 | 86        | FGD3    | FGD1 family, member 3                   | 1.660033        | Inlier         |
| siRNA-Temozolomide Run3-<br>DMSO                          | NM_1392 | 41        | FGD4    | FYVE, RhoGEF and PH domain containing 4 | -2.011295       | Inlier         |
| siRNA-Temozolomide Run2-<br>DMSO                          | NM_1392 | 41        | FGD4    | FYVE, RhoGEF and PH domain containing 4 | -0.870891       | Inlier         |
| siRNA Disorazole DMSO Run3                                | NM_1392 | 41        | FGD4    | FYVE, RhoGEF and PH domain containing 4 | -0.34114        | Inlier         |
| siRNA-Vinblastine Run2-<br>DMSO                           | NM_1392 | 41        | FGD4    | FYVE, RhoGEF and PH domain containing 4 | -0.159159       | Inlier         |
| siRNA-Temozolomide Run1-<br>DMSO                          | NM_1392 | 41        | FGD4    | FYVE, RhoGEF and PH domain containing 4 | 0.15916         | Inlier         |
| siRNA Disorazole DMSO Run1                                | NM_1392 | 41        | FGD4    | FYVE, RhoGEF and PH domain containing 4 | 0.558385        | Inlier         |

Identification of Survival Genes in Human Glioblastoma Cells Using siRNA Screening

Nikhil G Thaker, Fang Zhang, Peter R. McDonald, Tong Ying Shun, Michael D Lewen, Ian F. Pollack, and John S. Lazo

Molecular Pharmacology

| siRNA Treatment              | Gene ID   | Gene Name | Protein Description                                                                    | Correlation Coefficient | Inlier Status |
|------------------------------|-----------|-----------|----------------------------------------------------------------------------------------|-------------------------|---------------|
| siRNA-Vinblastine Run1-DMSO  | NM_139241 | FGD4      | FYVE, RhoGEF and PH domain containing 4                                                | 0.790614                | Inlier        |
| siRNA Disorazole DMSO Run2   | NM_139241 | FGD4      | FYVE, RhoGEF and PH domain containing 4                                                | 0.888326                | Inlier        |
| siRNA-Temozolomide Run3-DMSO | NM_023108 | FGFR1     | fibroblast growth factor receptor 1 (fms-related tyrosine kinase 2, Pfeiffer syndrome) | -0.98867                | Inlier        |
| siRNA-Temozolomide Run1-DMSO | NM_023108 | FGFR1     | fibroblast growth factor receptor 1 (fms-related tyrosine kinase 2, Pfeiffer syndrome) | -0.422998               | Inlier        |
| siRNA Disorazole DMSO Run3   | NM_023108 | FGFR1     | fibroblast growth factor receptor 1 (fms-related tyrosine kinase 2, Pfeiffer syndrome) | -0.069598               | Inlier        |

Identification of Survival Genes in Human Glioblastoma Cells Using siRNA Screening

Nikhil G Thaker, Fang Zhang, Peter R. McDonald, Tong Ying Shun, Michael D Lewen, Ian F. Pollack, and John S. Lazo

Molecular Pharmacology

|                                  |               |       |                                                                                                                    |           |        |
|----------------------------------|---------------|-------|--------------------------------------------------------------------------------------------------------------------|-----------|--------|
| siRNA Disorazole DMSO Run2       | NM_0231<br>08 | FGFR1 | fibroblast<br>growth<br>factor<br>receptor 1<br>(fms-<br>related<br>tyrosine<br>kinase 2,<br>Pfeiffer<br>syndrome) | -0.022394 | Inlier |
| siRNA-Temozolomide Run2-<br>DMSO | NM_0231<br>08 | FGFR1 | fibroblast<br>growth<br>factor<br>receptor 1<br>(fms-<br>related<br>tyrosine<br>kinase 2,<br>Pfeiffer<br>syndrome) | 0.022394  | Inlier |
| siRNA Disorazole DMSO Run1       | NM_0231<br>08 | FGFR1 | fibroblast<br>growth<br>factor<br>receptor 1<br>(fms-<br>related<br>tyrosine<br>kinase 2,<br>Pfeiffer<br>syndrome) | 0.926002  | Inlier |
| siRNA-Vinblastine Run2-<br>DMSO  | NM_0231<br>08 | FGFR1 | fibroblast<br>growth<br>factor<br>receptor 1<br>(fms-<br>related<br>tyrosine<br>kinase 2,<br>Pfeiffer<br>syndrome) | 1.166295  | Inlier |

Identification of Survival Genes in Human Glioblastoma Cells Using siRNA Screening

Nikhil G Thaker, Fang Zhang, Peter R. McDonald, Tong Ying Shun, Michael D Lewen, Ian F. Pollack, and John S. Lazo

Molecular Pharmacology

|                             |           |       |                                                                                        |          |        |
|-----------------------------|-----------|-------|----------------------------------------------------------------------------------------|----------|--------|
| siRNA-Vinblastine Run1-DMSO | NM_023108 | FGFR1 | fibroblast growth factor receptor 1 (fms-related tyrosine kinase 2, Pfeiffer syndrome) | 1.784753 | Inlier |
|-----------------------------|-----------|-------|----------------------------------------------------------------------------------------|----------|--------|

|                              |           |       |                                                                                                                                                                                              |           |        |
|------------------------------|-----------|-------|----------------------------------------------------------------------------------------------------------------------------------------------------------------------------------------------|-----------|--------|
| siRNA-Temozolomide Run3-DMSO | NM_023029 | FGFR2 | fibroblast growth factor receptor 2 (bacteria-expressed kinase, keratinocyte growth factor receptor, craniofacial dysostosis 1, Crouzon syndrome, Pfeiffer syndrome, Jackson-Weiss syndrome) | -1.965442 | Inlier |
|------------------------------|-----------|-------|----------------------------------------------------------------------------------------------------------------------------------------------------------------------------------------------|-----------|--------|

Identification of Survival Genes in Human Glioblastoma Cells Using siRNA Screening

Nikhil G Thaker, Fang Zhang, Peter R. McDonald, Tong Ying Shun, Michael D Lewen, Ian F. Pollack, and John S. Lazo

Molecular Pharmacology

|                                  |               |       |                                                                                                                                                                                                                                                              |                  |
|----------------------------------|---------------|-------|--------------------------------------------------------------------------------------------------------------------------------------------------------------------------------------------------------------------------------------------------------------|------------------|
| siRNA-Temozolomide Run1-<br>DMSO | NM_0230<br>29 | FGFR2 | fibroblast<br>growth<br>factor<br>receptor 2<br>(bacteria-<br>expressed<br>kinase,<br>keratinocyt<br>e growth<br>factor<br>receptor,<br>craniofacia<br>l<br>dysostosis<br>1, Crouzon<br>syndrome,<br>Pfeiffer<br>syndrome,<br>Jackson-<br>Weiss<br>syndrome) | -0.769455 Inlier |
|----------------------------------|---------------|-------|--------------------------------------------------------------------------------------------------------------------------------------------------------------------------------------------------------------------------------------------------------------|------------------|

|                            |               |       |                                                                                                                                                                                                                                                              |                  |
|----------------------------|---------------|-------|--------------------------------------------------------------------------------------------------------------------------------------------------------------------------------------------------------------------------------------------------------------|------------------|
| siRNA Disorazole DMSO Run1 | NM_0230<br>29 | FGFR2 | fibroblast<br>growth<br>factor<br>receptor 2<br>(bacteria-<br>expressed<br>kinase,<br>keratinocyt<br>e growth<br>factor<br>receptor,<br>craniofacia<br>l<br>dysostosis<br>1, Crouzon<br>syndrome,<br>Pfeiffer<br>syndrome,<br>Jackson-<br>Weiss<br>syndrome) | -0.553232 Inlier |
|----------------------------|---------------|-------|--------------------------------------------------------------------------------------------------------------------------------------------------------------------------------------------------------------------------------------------------------------|------------------|

Identification of Survival Genes in Human Glioblastoma Cells Using siRNA Screening

Nikhil G Thaker, Fang Zhang, Peter R. McDonald, Tong Ying Shun, Michael D Lewen, Ian F. Pollack, and John S. Lazo

Molecular Pharmacology

|                                  |               |       |                                                                                                                                                                                                                                                              |           |        |
|----------------------------------|---------------|-------|--------------------------------------------------------------------------------------------------------------------------------------------------------------------------------------------------------------------------------------------------------------|-----------|--------|
|                                  |               |       | fibroblast<br>growth<br>factor<br>receptor 2<br>(bacteria-<br>expressed<br>kinase,<br>keratinocyt<br>e growth<br>factor<br>receptor,<br>craniofacia<br>l<br>dysostosis<br>1, Crouzon<br>syndrome,<br>Pfeiffer<br>syndrome,<br>Jackson-<br>Weiss<br>syndrome) | -0.449588 | Inlier |
| siRNA-Temozolomide Run2-<br>DMSO | NM_0230<br>29 | FGFR2 |                                                                                                                                                                                                                                                              |           |        |

|                            |               |       |                                                                                                                                                                                                                                                              |          |        |
|----------------------------|---------------|-------|--------------------------------------------------------------------------------------------------------------------------------------------------------------------------------------------------------------------------------------------------------------|----------|--------|
|                            |               |       | fibroblast<br>growth<br>factor<br>receptor 2<br>(bacteria-<br>expressed<br>kinase,<br>keratinocyt<br>e growth<br>factor<br>receptor,<br>craniofacia<br>l<br>dysostosis<br>1, Crouzon<br>syndrome,<br>Pfeiffer<br>syndrome,<br>Jackson-<br>Weiss<br>syndrome) | 0.449589 | Inlier |
| siRNA Disorazole DMSO Run3 | NM_0230<br>29 | FGFR2 |                                                                                                                                                                                                                                                              |          |        |

Identification of Survival Genes in Human Glioblastoma Cells Using siRNA Screening

Nikhil G Thaker, Fang Zhang, Peter R. McDonald, Tong Ying Shun, Michael D Lewen, Ian F. Pollack, and John S. Lazo

Molecular Pharmacology

|                            |         |    |       |                                                                                                                                                                                              |          |        |
|----------------------------|---------|----|-------|----------------------------------------------------------------------------------------------------------------------------------------------------------------------------------------------|----------|--------|
| siRNA Disorazole DMSO Run2 | NM_0230 | 29 | FGFR2 | fibroblast growth factor receptor 2 (bacteria-expressed kinase, keratinocyte growth factor receptor, craniofacial dysostosis 1, Crouzon syndrome, Pfeiffer syndrome, Jackson-Weiss syndrome) | 0.579545 | Inlier |
|----------------------------|---------|----|-------|----------------------------------------------------------------------------------------------------------------------------------------------------------------------------------------------|----------|--------|

|                             |         |    |       |                                                                                                                                                                                              |          |        |
|-----------------------------|---------|----|-------|----------------------------------------------------------------------------------------------------------------------------------------------------------------------------------------------|----------|--------|
| siRNA-Vinblastine Run2-DMSO | NM_0230 | 29 | FGFR2 | fibroblast growth factor receptor 2 (bacteria-expressed kinase, keratinocyte growth factor receptor, craniofacial dysostosis 1, Crouzon syndrome, Pfeiffer syndrome, Jackson-Weiss syndrome) | 0.794675 | Inlier |
|-----------------------------|---------|----|-------|----------------------------------------------------------------------------------------------------------------------------------------------------------------------------------------------|----------|--------|



Identification of Survival Genes in Human Glioblastoma Cells Using siRNA Screening  
 Nikhil G Thaker, Fang Zhang, Peter R. McDonald, Tong Ying Shun, Michael D Lewen, Ian F. Pollack, and John S. Lazo  
 Molecular Pharmacology

|                              |           |       |                                                                                                                                                                                              |           |        |
|------------------------------|-----------|-------|----------------------------------------------------------------------------------------------------------------------------------------------------------------------------------------------|-----------|--------|
| siRNA-Vinblastine Run1-DMSO  | NM_023029 | FGFR2 | fibroblast growth factor receptor 2 (bacteria-expressed kinase, keratinocyte growth factor receptor, craniofacial dysostosis 1, Crouzon syndrome, Pfeiffer syndrome, Jackson-Weiss syndrome) | 2.088796  | Inlier |
| siRNA-Temozolomide Run1-DMSO | NM_000142 | FGFR3 | fibroblast growth factor receptor 3 (achondroplasia, thanatophoric dwarfism)                                                                                                                 | -0.97916  | Inlier |
| siRNA-Temozolomide Run2-DMSO | NM_000142 | FGFR3 | fibroblast growth factor receptor 3 (achondroplasia, thanatophoric dwarfism)                                                                                                                 | -0.860711 | Inlier |
| siRNA-Temozolomide Run3-DMSO | NM_000142 | FGFR3 | fibroblast growth factor receptor 3 (achondroplasia, thanatophoric dwarfism)                                                                                                                 | -0.635027 | Inlier |

Identification of Survival Genes in Human Glioblastoma Cells Using siRNA Screening

Nikhil G Thaker, Fang Zhang, Peter R. McDonald, Tong Ying Shun, Michael D Lewen, Ian F. Pollack, and John S. Lazo

Molecular Pharmacology

| siRNA             | Condition | Run  | Gene  | Value     | Category |
|-------------------|-----------|------|-------|-----------|----------|
| siRNA Disorazole  | DMSO      | Run1 | FGFR3 | -0.008292 | Inlier   |
| siRNA Disorazole  | DMSO      | Run2 | FGFR3 | 0.008292  | Inlier   |
| siRNA-Vinblastine | DMSO      | Run1 | FGFR3 | 0.486839  | Inlier   |
| siRNA-Vinblastine | DMSO      | Run2 | FGFR3 | 0.713973  | Inlier   |
| siRNA Disorazole  | DMSO      | Run3 | FGFR3 | 0.890745  | Inlier   |
| siRNA Disorazole  | DMSO      | Run2 | FGFR4 | -1.407192 | Inlier   |

fibroblast growth factor receptor 3 (achondroplasia, thanatophoric dwarfism) fibroblast growth factor receptor 4

Identification of Survival Genes in Human Glioblastoma Cells Using siRNA Screening  
 Nikhil G Thaker, Fang Zhang, Peter R. McDonald, Tong Ying Shun, Michael D Lewen, Ian F. Pollack, and John S. Lazo

Molecular Pharmacology

|                              |               |        |                                                       |           |        |
|------------------------------|---------------|--------|-------------------------------------------------------|-----------|--------|
| siRNA-Temozolomide Run3-DMSO | NM_0229<br>63 | FGFR4  | fibroblast<br>growth<br>factor<br>receptor 4          | -0.759035 | Inlier |
| siRNA-Temozolomide Run1-DMSO | NM_0229<br>63 | FGFR4  | fibroblast<br>growth<br>factor<br>receptor 4          | -0.750943 | Inlier |
| siRNA Disorazole DMSO Run1   | NM_0229<br>63 | FGFR4  | fibroblast<br>growth<br>factor<br>receptor 4          | -0.247951 | Inlier |
| siRNA-Temozolomide Run2-DMSO | NM_0229<br>63 | FGFR4  | fibroblast<br>growth<br>factor<br>receptor 4          | 0.247952  | Inlier |
| siRNA Disorazole DMSO Run3   | NM_0229<br>63 | FGFR4  | fibroblast<br>growth<br>factor<br>receptor 4          | 0.53567   | Inlier |
| siRNA-Vinblastine Run1-DMSO  | NM_0229<br>63 | FGFR4  | fibroblast<br>growth<br>factor<br>receptor 4          | 0.598057  | Inlier |
| siRNA-Vinblastine Run2-DMSO  | NM_0229<br>63 | FGFR4  | fibroblast<br>growth<br>factor<br>receptor 4          | 2.831184  | Inlier |
| siRNA-Vinblastine Run2-DMSO  | NM_0219<br>23 | FGFRL1 | fibroblast<br>growth<br>factor<br>receptor-<br>like 1 | -2.787138 | Inlier |
| siRNA-Temozolomide Run3-DMSO | NM_0219<br>23 | FGFRL1 | fibroblast<br>growth<br>factor<br>receptor-<br>like 1 | -0.910016 | Inlier |
| siRNA Disorazole DMSO Run1   | NM_0219<br>23 | FGFRL1 | fibroblast<br>growth<br>factor<br>receptor-<br>like 1 | -0.438984 | Inlier |
| siRNA Disorazole DMSO Run3   | NM_0219<br>23 | FGFRL1 | fibroblast<br>growth<br>factor<br>receptor-<br>like 1 | -0.032704 | Inlier |

Identification of Survival Genes in Human Glioblastoma Cells Using siRNA Screening  
 Nikhil G Thaker, Fang Zhang, Peter R. McDonald, Tong Ying Shun, Michael D Lewen, Ian F. Pollack, and John S. Lazo

Molecular Pharmacology

| siRNA Treatment              | Gene      | Gene ID | Gene Symbol | Gene Description                         | Value     | Category |
|------------------------------|-----------|---------|-------------|------------------------------------------|-----------|----------|
| siRNA-Temozolomide Run1-DMSO | NM_021923 | FGFRL1  | FGFRL1      | fibroblast growth factor receptor-like 1 | 0.032702  | Inlier   |
| siRNA-Temozolomide Run2-DMSO | NM_021923 | FGFRL1  | FGFRL1      | fibroblast growth factor receptor-like 1 | 0.296744  | Inlier   |
| siRNA Disorazole DMSO Run2   | NM_021923 | FGFRL1  | FGFRL1      | fibroblast growth factor receptor-like 1 | 2.915008  | Inlier   |
| siRNA-Vinblastine Run1-DMSO  | NM_021923 | FGFRL1  | FGFRL1      | fibroblast growth factor receptor-like 1 | 3.721481  | Outlier  |
| siRNA-Temozolomide Run3-DMSO | NM_021870 | FGG     | FGG         | fibrinogen, gamma polypeptide            | -1.70217  | Inlier   |
| siRNA-Temozolomide Run2-DMSO | NM_021870 | FGG     | FGG         | fibrinogen, gamma polypeptide            | -1.067657 | Inlier   |
| siRNA Disorazole DMSO Run3   | NM_021870 | FGG     | FGG         | fibrinogen, gamma polypeptide            | -0.148571 | Inlier   |
| siRNA Disorazole DMSO Run1   | NM_021870 | FGG     | FGG         | fibrinogen, gamma polypeptide            | -0.062252 | Inlier   |
| siRNA-Vinblastine Run2-DMSO  | NM_021870 | FGG     | FGG         | fibrinogen, gamma polypeptide            | 0.062252  | Inlier   |
| siRNA-Temozolomide Run1-DMSO | NM_021870 | FGG     | FGG         | fibrinogen, gamma polypeptide            | 0.281343  | Inlier   |
| siRNA Disorazole DMSO Run2   | NM_021870 | FGG     | FGG         | fibrinogen, gamma polypeptide            | 1.237824  | Inlier   |
| siRNA-Vinblastine Run1-DMSO  | NM_021870 | FGG     | FGG         | fibrinogen, gamma polypeptide            | 1.298535  | Inlier   |

Identification of Survival Genes in Human Glioblastoma Cells Using siRNA Screening  
 Nikhil G Thaker, Fang Zhang, Peter R. McDonald, Tong Ying Shun, Michael D Lewen, Ian F. Pollack, and John S. Lazo

|                              |         |      |                                                               |                  |
|------------------------------|---------|------|---------------------------------------------------------------|------------------|
| Molecular Pharmacology       | NM_2015 |      | fibrinogen-like 1                                             |                  |
| siRNA Disorazole DMSO Run3   | 53      | FGL1 |                                                               | -1.780632 Inlier |
| siRNA-Vinblastine Run2-DMSO  | NM_2015 |      | fibrinogen-like 1                                             |                  |
|                              | 53      | FGL1 |                                                               | -0.769687 Inlier |
| siRNA Disorazole DMSO Run1   | NM_2015 |      | fibrinogen-like 1                                             |                  |
|                              | 53      | FGL1 |                                                               | -0.737588 Inlier |
| siRNA Disorazole DMSO Run2   | NM_2015 |      | fibrinogen-like 1                                             |                  |
|                              | 53      | FGL1 |                                                               | -0.400586 Inlier |
| siRNA-Temozolomide Run1-DMSO | NM_2015 |      | fibrinogen-like 1                                             |                  |
|                              | 53      | FGL1 |                                                               | 0.400586 Inlier  |
| siRNA-Vinblastine Run1-DMSO  | NM_2015 |      | fibrinogen-like 1                                             |                  |
|                              | 53      | FGL1 |                                                               | 0.495848 Inlier  |
| siRNA-Temozolomide Run3-DMSO | NM_2015 |      | fibrinogen-like 1                                             |                  |
|                              | 53      | FGL1 |                                                               | 0.611412 Inlier  |
| siRNA-Temozolomide Run2-DMSO | NM_2015 |      | fibrinogen-like 1                                             |                  |
|                              | 53      | FGL1 |                                                               | 0.816461 Inlier  |
| siRNA-Temozolomide Run3-DMSO | NM_0066 |      | fibrinogen-like 2                                             |                  |
|                              | 82      | FGL2 |                                                               | -1.568715 Inlier |
| siRNA-Temozolomide Run2-DMSO | NM_0066 |      | fibrinogen-like 2                                             |                  |
|                              | 82      | FGL2 |                                                               | -1.091932 Inlier |
| siRNA Disorazole DMSO Run2   | NM_0066 |      | fibrinogen-like 2                                             |                  |
|                              | 82      | FGL2 |                                                               | -0.170471 Inlier |
| siRNA Disorazole DMSO Run3   | NM_0066 |      | fibrinogen-like 2                                             |                  |
|                              | 82      | FGL2 |                                                               | -0.017452 Inlier |
| siRNA-Temozolomide Run1-DMSO | NM_0066 |      | fibrinogen-like 2                                             |                  |
|                              | 82      | FGL2 |                                                               | 0.017453 Inlier  |
| siRNA Disorazole DMSO Run1   | NM_0066 |      | fibrinogen-like 2                                             |                  |
|                              | 82      | FGL2 |                                                               | 0.257068 Inlier  |
| siRNA-Vinblastine Run1-DMSO  | NM_0066 |      | fibrinogen-like 2                                             |                  |
|                              | 82      | FGL2 |                                                               | 2.467466 Inlier  |
| siRNA-Vinblastine Run2-DMSO  | NM_0066 |      | fibrinogen-like 2                                             |                  |
|                              | 82      | FGL2 |                                                               | 2.576873 Inlier  |
| siRNA-Temozolomide Run3-DMSO | NM_0052 |      | Gardner-Rasheed feline sarcoma viral (v-fgr) oncogene homolog |                  |
|                              | 48      | FGR  |                                                               | -1.180511 Inlier |
| siRNA-Temozolomide Run1-DMSO | NM_0052 |      | Gardner-Rasheed feline sarcoma viral (v-fgr) oncogene homolog |                  |
|                              | 48      | FGR  |                                                               | -0.760011 Inlier |

Identification of Survival Genes in Human Glioblastoma Cells Using siRNA Screening

Nikhil G Thaker, Fang Zhang, Peter R. McDonald, Tong Ying Shun, Michael D Lewen, Ian F. Pollack, and John S. Lazo

Molecular Pharmacology

|                              |               |     |                                                               |           |        |
|------------------------------|---------------|-----|---------------------------------------------------------------|-----------|--------|
| siRNA-Temozolomide Run2-DMSO | NM_0052<br>48 | FGR | Gardner-Rasheed feline sarcoma viral (v-fgr) oncogene homolog | -0.588989 | Inlier |
| siRNA Disorazole DMSO Run1   | NM_0052<br>48 | FGR | Gardner-Rasheed feline sarcoma viral (v-fgr) oncogene homolog | -0.050104 | Inlier |
| siRNA-Vinblastine Run1-DMSO  | NM_0052<br>48 | FGR | Gardner-Rasheed feline sarcoma viral (v-fgr) oncogene homolog | 0.050104  | Inlier |
| siRNA-Vinblastine Run2-DMSO  | NM_0052<br>48 | FGR | Gardner-Rasheed feline sarcoma viral (v-fgr) oncogene homolog | 0.4215    | Inlier |
| siRNA Disorazole DMSO Run2   | NM_0052<br>48 | FGR | Gardner-Rasheed feline sarcoma viral (v-fgr) oncogene homolog | 0.849251  | Inlier |
| siRNA Disorazole DMSO Run3   | NM_0052<br>48 | FGR | oncogene homolog                                              | 0.915878  | Inlier |
| siRNA-Temozolomide Run3-DMSO | NM_0001<br>43 | FH  | fumarate hydratase                                            | -1.351998 | Inlier |
| siRNA-Temozolomide Run2-DMSO | NM_0001<br>43 | FH  | fumarate hydratase                                            | -1.01424  | Inlier |
| siRNA-Temozolomide Run1-DMSO | NM_0001<br>43 | FH  | fumarate hydratase                                            | -0.290207 | Inlier |
| siRNA Disorazole DMSO Run3   | NM_0001<br>43 | FH  | fumarate hydratase                                            | -0.200453 | Inlier |
| siRNA Disorazole DMSO Run1   | NM_0001<br>43 | FH  | fumarate hydratase                                            | 0.200453  | Inlier |

Identification of Survival Genes in Human Glioblastoma Cells Using siRNA Screening  
 Nikhil G Thaker, Fang Zhang, Peter R. McDonald, Tong Ying Shun, Michael D Lewen, Ian F. Pollack, and John S. Lazo

|                                  |               |        |                                           |           |        |
|----------------------------------|---------------|--------|-------------------------------------------|-----------|--------|
| siRNA-Vinblastine Run1-<br>DMSO  | NM_0001<br>43 | FH     | fumarate<br>hydratase                     | 0.571236  | Inlier |
| siRNA-Vinblastine Run2-<br>DMSO  | NM_0001<br>43 | FH     | fumarate<br>hydratase                     | 0.777764  | Inlier |
| siRNA Disorazole DMSO Run2       | NM_0001<br>43 | FH     | fumarate<br>hydratase                     | 0.982162  | Inlier |
| siRNA-Temozolomide Run3-<br>DMSO | NM_0328<br>43 | FIBCD1 | fibrinogen<br>C domain<br>containing<br>1 | -1.042578 | Inlier |
| siRNA Disorazole DMSO Run3       | NM_0328<br>43 | FIBCD1 | fibrinogen<br>C domain<br>containing<br>1 | -0.817595 | Inlier |
| siRNA-Temozolomide Run2-<br>DMSO | NM_0328<br>43 | FIBCD1 | fibrinogen<br>C domain<br>containing<br>1 | -0.665921 | Inlier |
| siRNA-Vinblastine Run2-<br>DMSO  | NM_0328<br>43 | FIBCD1 | fibrinogen<br>C domain<br>containing<br>1 | -0.003883 | Inlier |
| siRNA Disorazole DMSO Run1       | NM_0328<br>43 | FIBCD1 | fibrinogen<br>C domain<br>containing<br>1 | 0.003882  | Inlier |
| siRNA-Temozolomide Run1-<br>DMSO | NM_0328<br>43 | FIBCD1 | fibrinogen<br>C domain<br>containing<br>1 | 0.213176  | Inlier |
| siRNA Disorazole DMSO Run2       | NM_0328<br>43 | FIBCD1 | fibrinogen<br>C domain<br>containing<br>1 | 0.683079  | Inlier |
| siRNA-Vinblastine Run1-<br>DMSO  | NM_0328<br>43 | FIBCD1 | fibrinogen<br>C domain<br>containing<br>1 | 0.935498  | Inlier |
| siRNA Disorazole DMSO Run1       | NM_0319<br>35 | FIBL-6 | hemicentin<br>1                           | -1.410839 | Inlier |
| siRNA-Temozolomide Run3-<br>DMSO | NM_0319<br>35 | FIBL-6 | hemicentin<br>1                           | -1.117188 | Inlier |
| siRNA-Temozolomide Run1-<br>DMSO | NM_0319<br>35 | FIBL-6 | hemicentin<br>1                           | -0.17889  | Inlier |
| siRNA-Temozolomide Run2-<br>DMSO | NM_0319<br>35 | FIBL-6 | hemicentin<br>1                           | -0.076475 | Inlier |
| siRNA-Vinblastine Run2-<br>DMSO  | NM_0319<br>35 | FIBL-6 | hemicentin<br>1                           | 0.076474  | Inlier |
| siRNA Disorazole DMSO Run2       | NM_0319<br>35 | FIBL-6 | hemicentin<br>1                           | 0.421172  | Inlier |
| siRNA-Vinblastine Run1-<br>DMSO  | NM_0319<br>35 | FIBL-6 | hemicentin<br>1                           | 0.927828  | Inlier |

Identification of Survival Genes in Human Glioblastoma Cells Using siRNA Screening

Nikhil G Thaker, Fang Zhang, Peter R. McDonald, Tong Ying Shun, Michael D Lewen, Ian F. Pollack, and John S.

Lazo

|                                                      |               |        |                                           |           |        |
|------------------------------------------------------|---------------|--------|-------------------------------------------|-----------|--------|
| Molecular Pharmacology<br>siRNA Disorazole DMSO Run3 | NM_0319<br>35 | FIBL-6 | hemicentin<br>1                           | 1.301307  | Inlier |
| siRNA-Temozolomide Run2-<br>DMSO                     | NM_0219<br>39 | FKBP10 | FK506<br>binding<br>protein 10,<br>65 kDa | -1.613526 | Inlier |
| siRNA-Temozolomide Run3-<br>DMSO                     | NM_0219<br>39 | FKBP10 | FK506<br>binding<br>protein 10,<br>65 kDa | -0.533882 | Inlier |
| siRNA-Temozolomide Run1-<br>DMSO                     | NM_0219<br>39 | FKBP10 | FK506<br>binding<br>protein 10,<br>65 kDa | -0.428661 | Inlier |
| siRNA Disorazole DMSO Run1                           | NM_0219<br>39 | FKBP10 | FK506<br>binding<br>protein 10,<br>65 kDa | -0.353906 | Inlier |
| siRNA Disorazole DMSO Run3                           | NM_0219<br>39 | FKBP10 | FK506<br>binding<br>protein 10,<br>65 kDa | 0.353906  | Inlier |
| siRNA-Vinblastine Run2-<br>DMSO                      | NM_0219<br>39 | FKBP10 | FK506<br>binding<br>protein 10,<br>65 kDa | 0.815118  | Inlier |
| siRNA-Vinblastine Run1-<br>DMSO                      | NM_0219<br>39 | FKBP10 | FK506<br>binding<br>protein 10,<br>65 kDa | 1.994798  | Inlier |
| siRNA Disorazole DMSO Run2                           | NM_0219<br>39 | FKBP10 | FK506<br>binding<br>protein 10,<br>65 kDa | 2.577432  | Inlier |
| siRNA-Temozolomide Run2-<br>DMSO                     | NM_0165<br>94 | FKBP11 | FK506<br>binding<br>protein 11,<br>19 kDa | -0.969006 | Inlier |
| siRNA-Temozolomide Run3-<br>DMSO                     | NM_0165<br>94 | FKBP11 | FK506<br>binding<br>protein 11,<br>19 kDa | -0.696657 | Inlier |



Identification of Survival Genes in Human Glioblastoma Cells Using siRNA Screening  
 Nikhil G Thaker, Fang Zhang, Peter R. McDonald, Tong Ying Shun, Michael D Lewen, Ian F. Pollack, and John S. Lazo  
 Molecular Pharmacology

|                              |               |        |                                           |           |        |
|------------------------------|---------------|--------|-------------------------------------------|-----------|--------|
| siRNA-Temozolomide Run1-DMSO | NM_0165<br>94 | FKBP11 | FK506<br>binding<br>protein 11,<br>19 kDa | -0.546809 | Inlier |
| siRNA Disorazole DMSO Run1   | NM_0165<br>94 | FKBP11 | FK506<br>binding<br>protein 11,<br>19 kDa | -0.213796 | Inlier |
| siRNA-Vinblastine Run2-DMSO  | NM_0165<br>94 | FKBP11 | FK506<br>binding<br>protein 11,<br>19 kDa | 0.213796  | Inlier |
| siRNA Disorazole DMSO Run3   | NM_0165<br>94 | FKBP11 | FK506<br>binding<br>protein 11,<br>19 kDa | 0.652343  | Inlier |
| siRNA Disorazole DMSO Run2   | NM_0165<br>94 | FKBP11 | FK506<br>binding<br>protein 11,<br>19 kDa | 1.51      | Inlier |
| siRNA-Vinblastine Run1-DMSO  | NM_0165<br>94 | FKBP11 | FK506<br>binding<br>protein 11,<br>19 kDa | 1.705592  | Inlier |
| siRNA-Temozolomide Run2-DMSO | NM_0179<br>46 | FKBP14 | FK506<br>binding<br>protein 14,<br>22 kDa | -3.002008 | Inlier |
| siRNA-Temozolomide Run3-DMSO | NM_0179<br>46 | FKBP14 | FK506<br>binding<br>protein 14,<br>22 kDa | -1.47083  | Inlier |
| siRNA-Vinblastine Run2-DMSO  | NM_0179<br>46 | FKBP14 | FK506<br>binding<br>protein 14,<br>22 kDa | -0.554062 | Inlier |
| siRNA Disorazole DMSO Run1   | NM_0179<br>46 | FKBP14 | FK506<br>binding<br>protein 14,<br>22 kDa | -0.060908 | Inlier |

Identification of Survival Genes in Human Glioblastoma Cells Using siRNA Screening  
 Nikhil G Thaker, Fang Zhang, Peter R. McDonald, Tong Ying Shun, Michael D Lewen, Ian F. Pollack, and John S. Lazo  
 Molecular Pharmacology

|                              |               |        |                                           |                  |
|------------------------------|---------------|--------|-------------------------------------------|------------------|
| siRNA-Temozolomide Run1-DMSO | NM_0179<br>46 | FKBP14 | FK506<br>binding<br>protein 14,<br>22 kDa | 0.060908 Inlier  |
| siRNA Disorazole DMSO Run3   | NM_0179<br>46 | FKBP14 | FK506<br>binding<br>protein 14,<br>22 kDa | 0.574583 Inlier  |
| siRNA-Vinblastine Run1-DMSO  | NM_0179<br>46 | FKBP14 | FK506<br>binding<br>protein 14,<br>22 kDa | 0.774417 Inlier  |
| siRNA Disorazole DMSO Run2   | NM_0179<br>46 | FKBP14 | FK506<br>binding<br>protein 14,<br>22 kDa | 0.877131 Inlier  |
| siRNA-Temozolomide Run1-DMSO | NM_0540<br>14 | FKBP1A | FK506<br>binding<br>protein 1A,<br>12kDa  | -1.131198 Inlier |
| siRNA-Temozolomide Run3-DMSO | NM_0540<br>14 | FKBP1A | FK506<br>binding<br>protein 1A,<br>12kDa  | -0.959199 Inlier |
| siRNA-Vinblastine Run2-DMSO  | NM_0540<br>14 | FKBP1A | FK506<br>binding<br>protein 1A,<br>12kDa  | -0.04211 Inlier  |
| siRNA-Temozolomide Run2-DMSO | NM_0540<br>14 | FKBP1A | FK506<br>binding<br>protein 1A,<br>12kDa  | -0.029857 Inlier |
| siRNA Disorazole DMSO Run3   | NM_0540<br>14 | FKBP1A | FK506<br>binding<br>protein 1A,<br>12kDa  | 0.029857 Inlier  |
| siRNA Disorazole DMSO Run1   | NM_0540<br>14 | FKBP1A | FK506<br>binding<br>protein 1A,<br>12kDa  | 0.411115 Inlier  |

Identification of Survival Genes in Human Glioblastoma Cells Using siRNA Screening  
 Nikhil G Thaker, Fang Zhang, Peter R. McDonald, Tong Ying Shun, Michael D Lewen, Ian F. Pollack, and John S. Lazo  
 Molecular Pharmacology

|                              |               |        |                                    |           |        |
|------------------------------|---------------|--------|------------------------------------|-----------|--------|
| siRNA-Vinblastine Run1-DMSO  | NM_0540<br>14 | FKBP1A | FK506 binding protein 1A, 12kDa    | 0.937885  | Inlier |
| siRNA Disorazole DMSO Run2   | NM_0540<br>14 | FKBP1A | FK506 binding protein 1A, 12kDa    | 1.409677  | Inlier |
| siRNA-Temozolomide Run2-DMSO | NM_0041<br>16 | FKBP1B | FK506 binding protein 1B, 12.6 kDa | -1.181616 | Inlier |
| siRNA-Temozolomide Run3-DMSO | NM_0041<br>16 | FKBP1B | FK506 binding protein 1B, 12.6 kDa | -0.992682 | Inlier |
| siRNA-Vinblastine Run2-DMSO  | NM_0041<br>16 | FKBP1B | FK506 binding protein 1B, 12.6 kDa | -0.356318 | Inlier |
| siRNA-Temozolomide Run1-DMSO | NM_0041<br>16 | FKBP1B | FK506 binding protein 1B, 12.6 kDa | -0.024823 | Inlier |
| siRNA Disorazole DMSO Run3   | NM_0041<br>16 | FKBP1B | FK506 binding protein 1B, 12.6 kDa | 0.024823  | Inlier |
| siRNA Disorazole DMSO Run1   | NM_0041<br>16 | FKBP1B | FK506 binding protein 1B, 12.6 kDa | 0.066625  | Inlier |
| siRNA Disorazole DMSO Run2   | NM_0041<br>16 | FKBP1B | FK506 binding protein 1B, 12.6 kDa | 1.645302  | Inlier |
| siRNA-Vinblastine Run1-DMSO  | NM_0041<br>16 | FKBP1B | FK506 binding protein 1B, 12.6 kDa | 1.863644  | Inlier |

Identification of Survival Genes in Human Glioblastoma Cells Using siRNA Screening  
 Nikhil G Thaker, Fang Zhang, Peter R. McDonald, Tong Ying Shun, Michael D Lewen, Ian F. Pollack, and John S. Lazo

Molecular Pharmacology

|                              |               |       |                                         |           |        |
|------------------------------|---------------|-------|-----------------------------------------|-----------|--------|
| siRNA-Temozolomide Run2-DMSO | NM_0570<br>92 | FKBP2 | FK506<br>binding<br>protein 2,<br>13kDa | -0.889213 | Inlier |
| siRNA-Temozolomide Run1-DMSO | NM_0570<br>92 | FKBP2 | FK506<br>binding<br>protein 2,<br>13kDa | -0.820975 | Inlier |
| siRNA-Temozolomide Run3-DMSO | NM_0570<br>92 | FKBP2 | FK506<br>binding<br>protein 2,<br>13kDa | -0.814759 | Inlier |
| siRNA Disorazole DMSO Run3   | NM_0570<br>92 | FKBP2 | FK506<br>binding<br>protein 2,<br>13kDa | -0.000673 | Inlier |
| siRNA Disorazole DMSO Run1   | NM_0570<br>92 | FKBP2 | FK506<br>binding<br>protein 2,<br>13kDa | 0.000673  | Inlier |
| siRNA-Vinblastine Run2-DMSO  | NM_0570<br>92 | FKBP2 | FK506<br>binding<br>protein 2,<br>13kDa | 0.33335   | Inlier |
| siRNA-Vinblastine Run1-DMSO  | NM_0570<br>92 | FKBP2 | FK506<br>binding<br>protein 2,<br>13kDa | 0.534241  | Inlier |
| siRNA Disorazole DMSO Run2   | NM_0570<br>92 | FKBP2 | FK506<br>binding<br>protein 2,<br>13kDa | 0.82406   | Inlier |
| siRNA-Temozolomide Run3-DMSO | NM_0020<br>13 | FKBP3 | FK506<br>binding<br>protein 3,<br>25kDa | -3.374402 | Inlier |
| siRNA Disorazole DMSO Run3   | NM_0020<br>13 | FKBP3 | FK506<br>binding<br>protein 3,<br>25kDa | -0.898029 | Inlier |
| siRNA-Vinblastine Run2-DMSO  | NM_0020<br>13 | FKBP3 | FK506<br>binding<br>protein 3,<br>25kDa | -0.332123 | Inlier |
| siRNA-Temozolomide Run2-DMSO | NM_0020<br>13 | FKBP3 | FK506<br>binding<br>protein 3,<br>25kDa | -0.173449 | Inlier |
| siRNA Disorazole DMSO Run1   | NM_0020<br>13 | FKBP3 | FK506<br>binding<br>protein 3,<br>25kDa | 0.173449  | Inlier |

Identification of Survival Genes in Human Glioblastoma Cells Using siRNA Screening  
 Nikhil G Thaker, Fang Zhang, Peter R. McDonald, Tong Ying Shun, Michael D Lewen, Ian F. Pollack, and John S. Lazo

Molecular Pharmacology

|                              |               |       |                                |           |        |
|------------------------------|---------------|-------|--------------------------------|-----------|--------|
| siRNA-Vinblastine Run1-DMSO  | NM_0020<br>13 | FKBP3 | FK506 binding protein 3, 25kDa | 0.560775  | Inlier |
| siRNA-Temozolomide Run1-DMSO | NM_0020<br>13 | FKBP3 | FK506 binding protein 3, 25kDa | 0.788225  | Inlier |
| siRNA Disorazole DMSO Run2   | NM_0020<br>13 | FKBP3 | FK506 binding protein 3, 25kDa | 1.617142  | Inlier |
| siRNA-Temozolomide Run2-DMSO | NM_0020<br>14 | FKBP4 | FK506 binding protein 4, 59kDa | -0.874955 | Inlier |
| siRNA-Temozolomide Run3-DMSO | NM_0020<br>14 | FKBP4 | FK506 binding protein 4, 59kDa | -0.806367 | Inlier |
| siRNA-Temozolomide Run1-DMSO | NM_0020<br>14 | FKBP4 | FK506 binding protein 4, 59kDa | -0.542633 | Inlier |
| siRNA Disorazole DMSO Run1   | NM_0020<br>14 | FKBP4 | FK506 binding protein 4, 59kDa | -0.184606 | Inlier |
| siRNA Disorazole DMSO Run3   | NM_0020<br>14 | FKBP4 | FK506 binding protein 4, 59kDa | 0.184606  | Inlier |
| siRNA-Vinblastine Run2-DMSO  | NM_0020<br>14 | FKBP4 | FK506 binding protein 4, 59kDa | 0.338813  | Inlier |
| siRNA-Vinblastine Run1-DMSO  | NM_0020<br>14 | FKBP4 | FK506 binding protein 4, 59kDa | 0.904208  | Inlier |
| siRNA Disorazole DMSO Run2   | NM_0020<br>14 | FKBP4 | FK506 binding protein 4, 59kDa | 1.036726  | Inlier |
| siRNA-Temozolomide Run2-DMSO | NM_0041<br>17 | FKBP5 | FK506 binding protein 5        | -3.141324 | Inlier |
| siRNA-Temozolomide Run3-DMSO | NM_0041<br>17 | FKBP5 | FK506 binding protein 5        | -1.753519 | Inlier |

Identification of Survival Genes in Human Glioblastoma Cells Using siRNA Screening  
 Nikhil G Thaker, Fang Zhang, Peter R. McDonald, Tong Ying Shun, Michael D Lewen, Ian F. Pollack, and John S. Lazo

Molecular Pharmacology

| siRNA                        | Gene    | Accession | Protein | Weight                         | Score     | Outlier |
|------------------------------|---------|-----------|---------|--------------------------------|-----------|---------|
| siRNA Disorazole DMSO Run1   | NM_0041 | 17        | FKBP5   | FK506 binding protein 5        | -0.837514 | Inlier  |
| siRNA-Vinblastine Run1-DMSO  | NM_0041 | 17        | FKBP5   | FK506 binding protein 5        | -0.038217 | Inlier  |
| siRNA-Temozolomide Run1-DMSO | NM_0041 | 17        | FKBP5   | FK506 binding protein 5        | 0.038217  | Inlier  |
| siRNA-Vinblastine Run2-DMSO  | NM_0041 | 17        | FKBP5   | FK506 binding protein 5        | 0.509256  | Inlier  |
| siRNA Disorazole DMSO Run3   | NM_0041 | 17        | FKBP5   | FK506 binding protein 5        | 0.511486  | Inlier  |
| siRNA Disorazole DMSO Run2   | NM_0041 | 17        | FKBP5   | FK506 binding protein 5        | 1.141609  | Inlier  |
| siRNA-Temozolomide Run3-DMSO | NM_0036 | 02        | FKBP6   | FK506 binding protein 6, 36kDa | -1.717582 | Inlier  |
| siRNA-Temozolomide Run2-DMSO | NM_0036 | 02        | FKBP6   | FK506 binding protein 6, 36kDa | -1.411245 | Inlier  |
| siRNA-Temozolomide Run1-DMSO | NM_0036 | 02        | FKBP6   | FK506 binding protein 6, 36kDa | -0.821804 | Inlier  |
| siRNA-Vinblastine Run2-DMSO  | NM_0036 | 02        | FKBP6   | FK506 binding protein 6, 36kDa | -0.039139 | Inlier  |
| siRNA Disorazole DMSO Run1   | NM_0036 | 02        | FKBP6   | FK506 binding protein 6, 36kDa | 0.039139  | Inlier  |
| siRNA Disorazole DMSO Run2   | NM_0036 | 02        | FKBP6   | FK506 binding protein 6, 36kDa | 0.334302  | Inlier  |
| siRNA Disorazole DMSO Run3   | NM_0036 | 02        | FKBP6   | FK506 binding protein 6, 36kDa | 0.637155  | Inlier  |
| siRNA-Vinblastine Run1-DMSO  | NM_0036 | 02        | FKBP6   | FK506 binding protein 6, 36kDa | 0.711845  | Inlier  |

Identification of Survival Genes in Human Glioblastoma Cells Using siRNA Screening  
 Nikhil G Thaker, Fang Zhang, Peter R. McDonald, Tong Ying Shun, Michael D Lewen, Ian F. Pollack, and John S. Lazo

| Molecular Pharmacology       |               |       |                          | FK506 |                  |
|------------------------------|---------------|-------|--------------------------|-------|------------------|
| siRNA-Temozolomide Run2-DMSO | NM_1813<br>42 | FKBP7 | binding protein 7        | FK506 | -1.070947 Inlier |
| siRNA-Temozolomide Run3-DMSO | NM_1813<br>42 | FKBP7 | binding protein 7        | FK506 | -0.866621 Inlier |
| siRNA-Vinblastine Run2-DMSO  | NM_1813<br>42 | FKBP7 | binding protein 7        | FK506 | -0.482379 Inlier |
| siRNA Disorazole DMSO Run3   | NM_1813<br>42 | FKBP7 | binding protein 7        | FK506 | -0.089106 Inlier |
| siRNA Disorazole DMSO Run1   | NM_1813<br>42 | FKBP7 | binding protein 7        | FK506 | 0.089106 Inlier  |
| siRNA-Temozolomide Run1-DMSO | NM_1813<br>42 | FKBP7 | binding protein 7        | FK506 | 0.105459 Inlier  |
| siRNA Disorazole DMSO Run2   | NM_1813<br>42 | FKBP7 | binding protein 7        | FK506 | 3.032528 Inlier  |
| siRNA-Vinblastine Run1-DMSO  | NM_1813<br>42 | FKBP7 | binding protein 7        | FK506 | 3.224243 Inlier  |
| siRNA-Temozolomide Run2-DMSO | NM_0121<br>81 | FKBP8 | binding protein 8, 38kDa | FK506 | -1.022636 Inlier |
| siRNA-Temozolomide Run3-DMSO | NM_0121<br>81 | FKBP8 | binding protein 8, 38kDa | FK506 | -0.820086 Inlier |
| siRNA-Temozolomide Run1-DMSO | NM_0121<br>81 | FKBP8 | binding protein 8, 38kDa | FK506 | -0.528914 Inlier |
| siRNA Disorazole DMSO Run3   | NM_0121<br>81 | FKBP8 | binding protein 8, 38kDa | FK506 | -0.012176 Inlier |
| siRNA Disorazole DMSO Run1   | NM_0121<br>81 | FKBP8 | binding protein 8, 38kDa | FK506 | 0.012175 Inlier  |
| siRNA-Vinblastine Run2-DMSO  | NM_0121<br>81 | FKBP8 | binding protein 8, 38kDa | FK506 | 0.018911 Inlier  |
| siRNA-Vinblastine Run1-DMSO  | NM_0121<br>81 | FKBP8 | binding protein 8, 38kDa | FK506 | 1.186684 Inlier  |

Identification of Survival Genes in Human Glioblastoma Cells Using siRNA Screening  
 Nikhil G Thaker, Fang Zhang, Peter R. McDonald, Tong Ying Shun, Michael D Lewen, Ian F. Pollack, and John S. Lazo

Molecular Pharmacology

|                              |               |  |        |                                 |           |        |
|------------------------------|---------------|--|--------|---------------------------------|-----------|--------|
|                              |               |  | FKBP8  | FK506 binding protein 8, 38kDa  | 1.540958  | Inlier |
| siRNA Disorazole DMSO Run2   | NM_0121<br>81 |  |        |                                 |           |        |
| siRNA-Temozolomide Run2-DMSO | NM_0072<br>70 |  | FKBP9  | FK506 binding protein 9, 63 kDa | -1.473106 | Inlier |
| siRNA-Temozolomide Run3-DMSO | NM_0072<br>70 |  | FKBP9  | FK506 binding protein 9, 63 kDa | -1.388708 | Inlier |
| siRNA Disorazole DMSO Run1   | NM_0072<br>70 |  | FKBP9  | FK506 binding protein 9, 63 kDa | -0.180181 | Inlier |
| siRNA-Vinblastine Run2-DMSO  | NM_0072<br>70 |  | FKBP9  | FK506 binding protein 9, 63 kDa | -0.121122 | Inlier |
| siRNA Disorazole DMSO Run3   | NM_0072<br>70 |  | FKBP9  | FK506 binding protein 9, 63 kDa | 0.121122  | Inlier |
| siRNA-Temozolomide Run1-DMSO | NM_0072<br>70 |  | FKBP9  | FK506 binding protein 9, 63 kDa | 0.173983  | Inlier |
| siRNA-Vinblastine Run1-DMSO  | NM_0072<br>70 |  | FKBP9  | FK506 binding protein 9, 63 kDa | 1.168819  | Inlier |
| siRNA Disorazole DMSO Run2   | NM_0072<br>70 |  | FKBP9  | FK506 binding protein 9, 63 kDa | 1.611013  | Inlier |
| siRNA-Temozolomide Run3-DMSO | NM_0320<br>30 |  | FKSG83 | FKSG83                          | -2.18155  | Inlier |
| siRNA-Temozolomide Run2-DMSO | NM_0320<br>30 |  | FKSG83 | FKSG83                          | -1.723086 | Inlier |
| siRNA-Temozolomide Run1-DMSO | NM_0320<br>30 |  | FKSG83 | FKSG83                          | -0.615103 | Inlier |
| siRNA-Vinblastine Run2-DMSO  | NM_0320<br>30 |  | FKSG83 | FKSG83                          | -0.036705 | Inlier |
| siRNA Disorazole DMSO Run3   | NM_0320<br>30 |  | FKSG83 | FKSG83                          | 0.036705  | Inlier |
| siRNA Disorazole DMSO Run1   | NM_0320<br>30 |  | FKSG83 | FKSG83                          | 0.491993  | Inlier |
| siRNA Disorazole DMSO Run2   | NM_0320<br>30 |  | FKSG83 | FKSG83                          | 0.733897  | Inlier |
| siRNA-Vinblastine Run1-DMSO  | NM_0320<br>30 |  | FKSG83 | FKSG83                          | 1.570258  | Inlier |



Identification of Survival Genes in Human Glioblastoma Cells Using siRNA Screening  
 Nikhil G Thaker, Fang Zhang, Peter R. McDonald, Tong Ying Shun, Michael D Lewen, Ian F. Pollack, and John S. Lazo

Molecular Pharmacology

|                                  |               |          |                                                                                                   |           |        |
|----------------------------------|---------------|----------|---------------------------------------------------------------------------------------------------|-----------|--------|
| siRNA Disorazole DMSO Run2       | NM_0179<br>88 | FLJ10074 | SCY1-like<br>2 (S.<br>cerevisiae)                                                                 | -1.289062 | Inlier |
| siRNA-Temozolomide Run3-<br>DMSO | NM_0179<br>88 | FLJ10074 | SCY1-like<br>2 (S.<br>cerevisiae)                                                                 | -0.957432 | Inlier |
| siRNA Disorazole DMSO Run3       | NM_0179<br>88 | FLJ10074 | SCY1-like<br>2 (S.<br>cerevisiae)                                                                 | -0.85414  | Inlier |
| siRNA-Temozolomide Run2-<br>DMSO | NM_0179<br>88 | FLJ10074 | SCY1-like<br>2 (S.<br>cerevisiae)                                                                 | -0.05544  | Inlier |
| siRNA-Temozolomide Run1-<br>DMSO | NM_0179<br>88 | FLJ10074 | SCY1-like<br>2 (S.<br>cerevisiae)                                                                 | 0.055439  | Inlier |
| siRNA Disorazole DMSO Run1       | NM_0179<br>88 | FLJ10074 | SCY1-like<br>2 (S.<br>cerevisiae)                                                                 | 0.282442  | Inlier |
| siRNA-Vinblastine Run2-<br>DMSO  | NM_0179<br>88 | FLJ10074 | SCY1-like<br>2 (S.<br>cerevisiae)                                                                 | 0.653739  | Inlier |
| siRNA-Vinblastine Run1-<br>DMSO  | NM_0179<br>88 | FLJ10074 | SCY1-like<br>2 (S.<br>cerevisiae)                                                                 | 0.695261  | Inlier |
| siRNA-Temozolomide Run2-<br>DMSO | NM_0180<br>60 | FLJ10326 | SCY1-like<br>2 (S.<br>cerevisiae)<br>isoleucine-<br>tRNA<br>synthetase<br>2,<br>mitochond<br>rial | -2.584747 | Inlier |
| siRNA Disorazole DMSO Run1       | NM_0180<br>60 | FLJ10326 | SCY1-like<br>2 (S.<br>cerevisiae)<br>isoleucine-<br>tRNA<br>synthetase<br>2,<br>mitochond<br>rial | -0.721892 | Inlier |
| siRNA Disorazole DMSO Run3       | NM_0180<br>60 | FLJ10326 | SCY1-like<br>2 (S.<br>cerevisiae)<br>isoleucine-<br>tRNA<br>synthetase<br>2,<br>mitochond<br>rial | -0.55669  | Inlier |

Identification of Survival Genes in Human Glioblastoma Cells Using siRNA Screening  
 Nikhil G Thaker, Fang Zhang, Peter R. McDonald, Tong Ying Shun, Michael D Lewen, Ian F. Pollack, and John S. Lazo

Molecular Pharmacology

|                              |               |          |                                             |           |         |
|------------------------------|---------------|----------|---------------------------------------------|-----------|---------|
| siRNA-Vinblastine Run2-DMSO  | NM_0180<br>60 | FLJ10326 | isoleucine-tRNA synthetase 2, mitochondrial | -0.163941 | Inlier  |
| siRNA-Temozolomide Run1-DMSO | NM_0180<br>60 | FLJ10326 | isoleucine-tRNA synthetase 2, mitochondrial | 0.16394   | Inlier  |
| siRNA-Temozolomide Run3-DMSO | NM_0180<br>60 | FLJ10326 | isoleucine-tRNA synthetase 2, mitochondrial | 0.627108  | Inlier  |
| siRNA Disorazole DMSO Run2   | NM_0180<br>60 | FLJ10326 | isoleucine-tRNA synthetase 2, mitochondrial | 3.221877  | Inlier  |
| siRNA-Vinblastine Run1-DMSO  | NM_0180<br>60 | FLJ10326 | isoleucine-tRNA synthetase 2, mitochondrial | 4.073235  | Outlier |
| siRNA Disorazole DMSO Run3   | NM_0181<br>46 | FLJ10581 | RNA methyltransferase like 1                | -0.765191 | Inlier  |
| siRNA-Temozolomide Run3-DMSO | NM_0181<br>46 | FLJ10581 | RNA methyltransferase like 1                | -0.727734 | Inlier  |
| siRNA-Temozolomide Run2-DMSO | NM_0181<br>46 | FLJ10581 | RNA methyltransferase like 1                | -0.621266 | Inlier  |
| siRNA-Vinblastine Run2-DMSO  | NM_0181<br>46 | FLJ10581 | RNA methyltransferase like 1                | -0.125175 | Inlier  |
| siRNA Disorazole DMSO Run1   | NM_0181<br>46 | FLJ10581 | RNA methyltransferase like 1                | 0.125175  | Inlier  |

Identification of Survival Genes in Human Glioblastoma Cells Using siRNA Screening  
 Nikhil G Thaker, Fang Zhang, Peter R. McDonald, Tong Ying Shun, Michael D Lewen, Ian F. Pollack, and John S. Lazo

Molecular Pharmacology

| siRNA Treatment              | Gene ID   | Accession | Gene Name                           | Value     | Category |
|------------------------------|-----------|-----------|-------------------------------------|-----------|----------|
| siRNA-Temozolomide Run1-DMSO | NM_018146 | FLJ10581  | RNA methyltransferase like 1        | 0.483899  | Inlier   |
| siRNA-Vinblastine Run1-DMSO  | NM_018146 | FLJ10581  | RNA methyltransferase like 1        | 3.378531  | Inlier   |
| siRNA Disorazole DMSO Run2   | NM_018146 | FLJ10581  | RNA methyltransferase like 1        | 4.093724  | Outlier  |
| siRNA-Temozolomide Run3-DMSO | NM_018155 | FLJ10618  | solute carrier family 25, member 36 | -0.715907 | Inlier   |
| siRNA-Temozolomide Run1-DMSO | NM_018155 | FLJ10618  | solute carrier family 25, member 36 | -0.633093 | Inlier   |
| siRNA-Temozolomide Run2-DMSO | NM_018155 | FLJ10618  | solute carrier family 25, member 36 | -0.473479 | Inlier   |
| siRNA Disorazole DMSO Run1   | NM_018155 | FLJ10618  | solute carrier family 25, member 36 | -0.278968 | Inlier   |
| siRNA-Vinblastine Run2-DMSO  | NM_018155 | FLJ10618  | solute carrier family 25, member 36 | 0.278968  | Inlier   |
| siRNA Disorazole DMSO Run3   | NM_018155 | FLJ10618  | solute carrier family 25, member 36 | 1.146356  | Inlier   |
| siRNA-Vinblastine Run1-DMSO  | NM_018155 | FLJ10618  | solute carrier family 25, member 36 | 2.115272  | Inlier   |
| siRNA Disorazole DMSO Run2   | NM_018155 | FLJ10618  | solute carrier family 25, member 36 | 2.15572   | Inlier   |

Identification of Survival Genes in Human Glioblastoma Cells Using siRNA Screening  
 Nikhil G Thaker, Fang Zhang, Peter R. McDonald, Tong Ying Shun, Michael D Lewen, Ian F. Pollack, and John S. Lazo

Molecular Pharmacology

| siRNA Treatment              | Gene ID | Accession | Gene Name                              | Score     | Outlier Status |
|------------------------------|---------|-----------|----------------------------------------|-----------|----------------|
| siRNA Disorazole DMSO Run2   | NM_0182 | FLJ10842  | kinase multiple substrate lipid        | -0.944446 | Inlier         |
| siRNA-Temozolomide Run3-DMSO | NM_0182 | FLJ10842  | kinase multiple substrate lipid        | -0.738084 | Inlier         |
| siRNA Disorazole DMSO Run3   | NM_0182 | FLJ10842  | kinase multiple substrate lipid        | -0.371341 | Inlier         |
| siRNA-Temozolomide Run2-DMSO | NM_0182 | FLJ10842  | kinase multiple substrate lipid        | -0.345201 | Inlier         |
| siRNA Disorazole DMSO Run1   | NM_0182 | FLJ10842  | kinase multiple substrate lipid        | 0.345201  | Inlier         |
| siRNA-Temozolomide Run1-DMSO | NM_0182 | FLJ10842  | kinase multiple substrate lipid        | 0.610916  | Inlier         |
| siRNA-Vinblastine Run2-DMSO  | NM_0182 | FLJ10842  | kinase multiple substrate lipid        | 1.443673  | Inlier         |
| siRNA-Vinblastine Run1-DMSO  | NM_0182 | FLJ10842  | kinase multiple substrate lipid        | 1.622856  | Inlier         |
| siRNA-Temozolomide Run3-DMSO | NM_0182 | FLJ10858  | nei endonuclease VIII-like 3 (E. coli) | -1.927401 | Inlier         |
| siRNA-Vinblastine Run1-DMSO  | NM_0182 | FLJ10858  | nei endonuclease VIII-like 3 (E. coli) | -0.811748 | Inlier         |
| siRNA-Temozolomide Run2-DMSO | NM_0182 | FLJ10858  | nei endonuclease VIII-like 3 (E. coli) | -0.537252 | Inlier         |
| siRNA-Vinblastine Run2-DMSO  | NM_0182 | FLJ10858  | nei endonuclease VIII-like 3 (E. coli) | -0.353146 | Inlier         |

Identification of Survival Genes in Human Glioblastoma Cells Using siRNA Screening  
 Nikhil G Thaker, Fang Zhang, Peter R. McDonald, Tong Ying Shun, Michael D Lewen, Ian F. Pollack, and John S. Lazo

Molecular Pharmacology

|                                  |               |          |                                                                  |           |        |
|----------------------------------|---------------|----------|------------------------------------------------------------------|-----------|--------|
| siRNA Disorazole DMSO Run1       | NM_0182<br>48 | FLJ10858 | nei<br>endonucle<br>ase VIII-<br>like 3 (E.<br>coli)             | 0.353146  | Inlier |
| siRNA Disorazole DMSO Run2       | NM_0182<br>48 | FLJ10858 | nei<br>endonucle<br>ase VIII-<br>like 3 (E.<br>coli)             | 0.533712  | Inlier |
| siRNA-Temozolomide Run1-<br>DMSO | NM_0182<br>48 | FLJ10858 | nei<br>endonucle<br>ase VIII-<br>like 3 (E.<br>coli)             | 0.83709   | Inlier |
| siRNA Disorazole DMSO Run3       | NM_0182<br>48 | FLJ10858 | nei<br>endonucle<br>ase VIII-<br>like 3 (E.<br>coli)             | 3.249472  | Inlier |
| siRNA-Temozolomide Run2-<br>DMSO | NM_0182<br>81 | FLJ10948 | enoyl<br>Coenzyme<br>A<br>hydratase<br>domain<br>containing<br>2 | -1.071811 | Inlier |
| siRNA-Temozolomide Run3-<br>DMSO | NM_0182<br>81 | FLJ10948 | enoyl<br>Coenzyme<br>A<br>hydratase<br>domain<br>containing<br>2 | -1.041878 | Inlier |
| siRNA Disorazole DMSO Run3       | NM_0182<br>81 | FLJ10948 | enoyl<br>Coenzyme<br>A<br>hydratase<br>domain<br>containing<br>2 | -0.016137 | Inlier |
| siRNA-Temozolomide Run1-<br>DMSO | NM_0182<br>81 | FLJ10948 | enoyl<br>Coenzyme<br>A<br>hydratase<br>domain<br>containing<br>2 | -0.003873 | Inlier |

Identification of Survival Genes in Human Glioblastoma Cells Using siRNA Screening  
 Nikhil G Thaker, Fang Zhang, Peter R. McDonald, Tong Ying Shun, Michael D Lewen, Ian F. Pollack, and John S. Lazo

Molecular Pharmacology

| siRNA Treatment              | Gene ID     | Accession | Domain                                         | Score     | Outlier |
|------------------------------|-------------|-----------|------------------------------------------------|-----------|---------|
| siRNA-Vinblastine Run2-DMSO  | NM_018281   | FLJ10948  | enoyl Coenzyme A hydratase domain containing 2 | 0.003873  | Inlier  |
| siRNA Disorazole DMSO Run1   | NM_018281   | FLJ10948  | enoyl Coenzyme A hydratase domain containing 2 | 0.31677   | Inlier  |
| siRNA Disorazole DMSO Run2   | NM_018281   | FLJ10948  | enoyl Coenzyme A hydratase domain containing 2 | 1.03223   | Inlier  |
| siRNA-Vinblastine Run1-DMSO  | NM_018281   | FLJ10948  | enoyl Coenzyme A hydratase domain containing 2 | 1.386996  | Inlier  |
| siRNA-Temozolomide Run3-DMSO | NM_00101482 | FLJ11011  | FLJ11011                                       | -0.911028 | Inlier  |
| siRNA-Vinblastine Run2-DMSO  | NM_00101482 | FLJ11011  | FLJ11011                                       | -0.764316 | Inlier  |
| siRNA Disorazole DMSO Run3   | NM_00101482 | FLJ11011  | FLJ11011                                       | -0.634458 | Inlier  |
| siRNA-Temozolomide Run2-DMSO | NM_00101482 | FLJ11011  | FLJ11011                                       | -0.092174 | Inlier  |
| siRNA Disorazole DMSO Run2   | NM_00101482 | FLJ11011  | FLJ11011                                       | 0.092174  | Inlier  |
| siRNA-Vinblastine Run1-DMSO  | NM_00101482 | FLJ11011  | FLJ11011                                       | 0.525708  | Inlier  |
| siRNA Disorazole DMSO Run1   | NM_00101482 | FLJ11011  | FLJ11011                                       | 0.714542  | Inlier  |
| siRNA-Temozolomide Run1-DMSO | NM_00101482 | FLJ11011  | FLJ11011                                       | 0.719062  | Inlier  |
| siRNA-Temozolomide Run3-DMSO | NM_018309   | FLJ11046  | FLJ11046                                       | -0.884373 | Inlier  |
| siRNA Disorazole DMSO Run3   | NM_018309   | FLJ11046  | FLJ11046                                       | -0.464627 | Inlier  |
| siRNA-Vinblastine Run2-DMSO  | NM_018309   | FLJ11046  | FLJ11046                                       | -0.030059 | Inlier  |
| siRNA-Temozolomide Run2-DMSO | NM_018309   | FLJ11046  | FLJ11046                                       | -0.01659  | Inlier  |

Identification of Survival Genes in Human Glioblastoma Cells Using siRNA Screening  
 Nikhil G Thaker, Fang Zhang, Peter R. McDonald, Tong Ying Shun, Michael D Lewen, Ian F. Pollack, and John S. Lazo

|                              |               |          |               |           |        |
|------------------------------|---------------|----------|---------------|-----------|--------|
| Molecular Pharmacology       | NM_0183       |          |               |           |        |
| siRNA Disorazole DMSO Run1   | 09            | FLJ11046 | FLJ11046      | 0.016591  | Inlier |
| siRNA-Vinblastine Run1-DMSO  | NM_0183<br>09 | FLJ11046 | FLJ11046      | 1.393215  | Inlier |
| siRNA-Temozolomide Run1-DMSO | NM_0183<br>09 | FLJ11046 | FLJ11046      | 1.607342  | Inlier |
| siRNA Disorazole DMSO Run2   | NM_0183<br>09 | FLJ11046 | FLJ11046      | 1.623061  | Inlier |
|                              |               |          | chromosome 15 |           |        |
|                              |               |          | open reading  |           |        |
| siRNA-Temozolomide Run3-DMSO | NM_0249<br>70 | FLJ11722 | frame 28      | -1.228449 | Inlier |
|                              |               |          | chromosome 15 |           |        |
|                              |               |          | open reading  |           |        |
| siRNA-Temozolomide Run2-DMSO | NM_0249<br>70 | FLJ11722 | frame 28      | -1.226751 | Inlier |
|                              |               |          | chromosome 15 |           |        |
|                              |               |          | open reading  |           |        |
| siRNA Disorazole DMSO Run1   | NM_0249<br>70 | FLJ11722 | frame 28      | -0.803892 | Inlier |
|                              |               |          | chromosome 15 |           |        |
|                              |               |          | open reading  |           |        |
| siRNA Disorazole DMSO Run3   | NM_0249<br>70 | FLJ11722 | frame 28      | -0.105174 | Inlier |
|                              |               |          | chromosome 15 |           |        |
|                              |               |          | open reading  |           |        |
| siRNA-Vinblastine Run2-DMSO  | NM_0249<br>70 | FLJ11722 | frame 28      | 0.105174  | Inlier |
|                              |               |          | chromosome 15 |           |        |
|                              |               |          | open reading  |           |        |
| siRNA-Temozolomide Run1-DMSO | NM_0249<br>70 | FLJ11722 | frame 28      | 0.370984  | Inlier |
|                              |               |          | chromosome 15 |           |        |
|                              |               |          | open reading  |           |        |
| siRNA Disorazole DMSO Run2   | NM_0249<br>70 | FLJ11722 | frame 28      | 0.545108  | Inlier |
|                              |               |          | chromosome 15 |           |        |
|                              |               |          | open reading  |           |        |
| siRNA-Vinblastine Run1-DMSO  | NM_0249<br>70 | FLJ11722 | frame 28      | 0.881554  | Inlier |

Identification of Survival Genes in Human Glioblastoma Cells Using siRNA Screening  
 Nikhil G Thaker, Fang Zhang, Peter R. McDonald, Tong Ying Shun, Michael D Lewen, Ian F. Pollack, and John S. Lazo  
 Molecular Pharmacology

|                              |           |          |                                          |           |         |
|------------------------------|-----------|----------|------------------------------------------|-----------|---------|
| siRNA-Temozolomide Run3-DMSO | NM_024606 | FLJ11756 | dynein, cytoplasmic, heavy polypeptide 2 | -2.34622  | Inlier  |
| siRNA-Temozolomide Run2-DMSO | NM_024606 | FLJ11756 | dynein, cytoplasmic, heavy polypeptide 2 | -1.051375 | Inlier  |
| siRNA Disorazole DMSO Run1   | NM_024606 | FLJ11756 | dynein, cytoplasmic, heavy polypeptide 2 | -0.297625 | Inlier  |
| siRNA Disorazole DMSO Run3   | NM_024606 | FLJ11756 | dynein, cytoplasmic, heavy polypeptide 2 | -0.167338 | Inlier  |
| siRNA-Vinblastine Run2-DMSO  | NM_024606 | FLJ11756 | dynein, cytoplasmic, heavy polypeptide 2 | 0.167336  | Inlier  |
| siRNA-Temozolomide Run1-DMSO | NM_024606 | FLJ11756 | dynein, cytoplasmic, heavy polypeptide 2 | 0.258761  | Inlier  |
| siRNA Disorazole DMSO Run2   | NM_024606 | FLJ11756 | dynein, cytoplasmic, heavy polypeptide 2 | 1.720331  | Inlier  |
| siRNA-Vinblastine Run1-DMSO  | NM_024606 | FLJ11756 | dynein, cytoplasmic, heavy polypeptide 2 | 4.090857  | Outlier |



Identification of Survival Genes in Human Glioblastoma Cells Using siRNA Screening  
 Nikhil G Thaker, Fang Zhang, Peter R. McDonald, Tong Ying Shun, Michael D Lewen, Ian F. Pollack, and John S. Lazo  
 Molecular Pharmacology

|                              |               |          |                                                                           |           |        |
|------------------------------|---------------|----------|---------------------------------------------------------------------------|-----------|--------|
| siRNA-Temozolomide Run3-DMSO | NM_0246<br>81 | FLJ12242 | potassium<br>channel<br>tetrameris<br>ation<br>domain<br>containing<br>17 | -1.376597 | Inlier |
| siRNA Disorazole DMSO Run2   | NM_0246<br>81 | FLJ12242 | potassium<br>channel<br>tetrameris<br>ation<br>domain<br>containing<br>17 | -0.62074  | Inlier |
| siRNA-Temozolomide Run2-DMSO | NM_0246<br>81 | FLJ12242 | potassium<br>channel<br>tetrameris<br>ation<br>domain<br>containing<br>17 | -0.421124 | Inlier |
| siRNA Disorazole DMSO Run3   | NM_0246<br>81 | FLJ12242 | potassium<br>channel<br>tetrameris<br>ation<br>domain<br>containing<br>17 | -0.162111 | Inlier |
| siRNA Disorazole DMSO Run1   | NM_0246<br>81 | FLJ12242 | potassium<br>channel<br>tetrameris<br>ation<br>domain<br>containing<br>17 | 0.162111  | Inlier |
| siRNA-Temozolomide Run1-DMSO | NM_0246<br>81 | FLJ12242 | potassium<br>channel<br>tetrameris<br>ation<br>domain<br>containing<br>17 | 0.72826   | Inlier |

Identification of Survival Genes in Human Glioblastoma Cells Using siRNA Screening  
 Nikhil G Thaker, Fang Zhang, Peter R. McDonald, Tong Ying Shun, Michael D Lewen, Ian F. Pollack, and John S. Lazo  
 Molecular Pharmacology

|                              |               |          |                                                                           |           |         |
|------------------------------|---------------|----------|---------------------------------------------------------------------------|-----------|---------|
| siRNA-Vinblastine Run1-DMSO  | NM_0246<br>81 | FLJ12242 | potassium<br>channel<br>tetrameris<br>ation<br>domain<br>containing<br>17 | 1.46272   | Inlier  |
| siRNA-Vinblastine Run2-DMSO  | NM_0246<br>81 | FLJ12242 | potassium<br>channel<br>tetrameris<br>ation<br>domain<br>containing<br>17 | 1.658948  | Inlier  |
| siRNA Disorazole DMSO Run1   | NM_0227<br>84 | FLJ12476 | FLJ12476                                                                  | -1.051948 | Inlier  |
| siRNA-Vinblastine Run2-DMSO  | NM_0227<br>84 | FLJ12476 | FLJ12476                                                                  | -0.629443 | Inlier  |
| siRNA-Temozolomide Run1-DMSO | NM_0227<br>84 | FLJ12476 | FLJ12476                                                                  | -0.621883 | Inlier  |
| siRNA-Temozolomide Run2-DMSO | NM_0227<br>84 | FLJ12476 | FLJ12476                                                                  | -0.108069 | Inlier  |
| siRNA-Temozolomide Run3-DMSO | NM_0227<br>84 | FLJ12476 | FLJ12476                                                                  | 0.108069  | Inlier  |
| siRNA-Vinblastine Run1-DMSO  | NM_0227<br>84 | FLJ12476 | FLJ12476                                                                  | 0.719557  | Inlier  |
| siRNA Disorazole DMSO Run2   | NM_0227<br>84 | FLJ12476 | FLJ12476                                                                  | 1.620852  | Inlier  |
| siRNA Disorazole DMSO Run3   | NM_0321<br>84 | FLJ12476 | FLJ12476                                                                  | 2.945738  | Inlier  |
| siRNA Disorazole DMSO Run1   | NM_0321<br>69 | FLJ12592 | FLJ12592                                                                  | -3.544322 | Outlier |
| siRNA-Vinblastine Run1-DMSO  | NM_0321<br>69 | FLJ12592 | FLJ12592                                                                  | -3.014283 | Inlier  |
| siRNA-Temozolomide Run3-DMSO | NM_0321<br>69 | FLJ12592 | FLJ12592                                                                  | -0.59764  | Inlier  |
| siRNA-Temozolomide Run1-DMSO | NM_0321<br>69 | FLJ12592 | FLJ12592                                                                  | -0.126588 | Inlier  |
| siRNA-Temozolomide Run2-DMSO | NM_0321<br>69 | FLJ12592 | FLJ12592                                                                  | 0.12659   | Inlier  |
| siRNA-Vinblastine Run2-DMSO  | NM_0321<br>69 | FLJ12592 | FLJ12592                                                                  | 0.240402  | Inlier  |
| siRNA Disorazole DMSO Run3   | NM_0321<br>69 | FLJ12592 | FLJ12592                                                                  | 0.75136   | Inlier  |
| siRNA Disorazole DMSO Run2   | NM_0230<br>69 | FLJ12592 | FLJ12592                                                                  | 2.68046   | Inlier  |
| siRNA Disorazole DMSO Run2   | NM_0230<br>18 | FLJ13052 | kinase<br>NAD                                                             | -2.825996 | Inlier  |
| siRNA Disorazole DMSO Run3   | NM_0230<br>18 | FLJ13052 | kinase                                                                    | -0.644572 | Inlier  |

Identification of Survival Genes in Human Glioblastoma Cells Using siRNA Screening  
 Nikhil G Thaker, Fang Zhang, Peter R. McDonald, Tong Ying Shun, Michael D Lewen, Ian F. Pollack, and John S. Lazo

|                                  |               |          |               |           |        |
|----------------------------------|---------------|----------|---------------|-----------|--------|
| siRNA-Temozolomide Run3-<br>DMSO | NM_0230<br>18 | FLJ13052 | NAD<br>kinase | -0.446088 | Inlier |
| siRNA-Temozolomide Run2-<br>DMSO | NM_0230<br>18 | FLJ13052 | NAD<br>kinase | -0.282696 | Inlier |
| siRNA Disorazole DMSO Run1       | NM_0230<br>18 | FLJ13052 | NAD<br>kinase | 0.282696  | Inlier |
| siRNA-Temozolomide Run1-<br>DMSO | NM_0230<br>18 | FLJ13052 | NAD<br>kinase | 0.704427  | Inlier |
| siRNA-Vinblastine Run1-<br>DMSO  | NM_0230<br>18 | FLJ13052 | NAD<br>kinase | 1.382981  | Inlier |
| siRNA-Vinblastine Run2-<br>DMSO  | NM_0230<br>18 | FLJ13052 | NAD<br>kinase | 1.542607  | Inlier |
| siRNA-Temozolomide Run3-<br>DMSO | NM_0245<br>92 | FLJ13352 | FLJ13352      | -1.907997 | Inlier |
| siRNA-Temozolomide Run2-<br>DMSO | NM_0245<br>92 | FLJ13352 | FLJ13352      | -1.39882  | Inlier |
| siRNA Disorazole DMSO Run3       | NM_0245<br>92 | FLJ13352 | FLJ13352      | -0.591181 | Inlier |
| siRNA-Vinblastine Run2-<br>DMSO  | NM_0245<br>92 | FLJ13352 | FLJ13352      | -0.233675 | Inlier |
| siRNA Disorazole DMSO Run2       | NM_0245<br>92 | FLJ13352 | FLJ13352      | 0.233675  | Inlier |
| siRNA-Temozolomide Run1-<br>DMSO | NM_0245<br>92 | FLJ13352 | FLJ13352      | 0.344162  | Inlier |
| siRNA Disorazole DMSO Run1       | NM_0245<br>92 | FLJ13352 | FLJ13352      | 0.757819  | Inlier |
| siRNA-Vinblastine Run1-<br>DMSO  | NM_0245<br>92 | FLJ13352 | FLJ13352      | 1.389953  | Inlier |
| siRNA-Temozolomide Run3-<br>DMSO | NM_0248<br>17 | FLJ13710 | FLJ13710      | -1.10389  | Inlier |
| siRNA-Temozolomide Run2-<br>DMSO | NM_0248<br>17 | FLJ13710 | FLJ13710      | -0.678009 | Inlier |
| siRNA Disorazole DMSO Run1       | NM_0248<br>17 | FLJ13710 | FLJ13710      | -0.670991 | Inlier |
| siRNA-Temozolomide Run1-<br>DMSO | NM_0248<br>17 | FLJ13710 | FLJ13710      | -0.370942 | Inlier |
| siRNA Disorazole DMSO Run3       | NM_0248<br>17 | FLJ13710 | FLJ13710      | 0.370941  | Inlier |
| siRNA Disorazole DMSO Run2       | NM_0248<br>17 | FLJ13710 | FLJ13710      | 0.62139   | Inlier |
| siRNA-Vinblastine Run2-<br>DMSO  | NM_0248<br>17 | FLJ13710 | FLJ13710      | 1.213906  | Inlier |
| siRNA-Vinblastine Run1-<br>DMSO  | NM_0248<br>17 | FLJ13710 | FLJ13710      | 1.266508  | Inlier |
| siRNA-Temozolomide Run3-<br>DMSO | NM_0230<br>79 | FLJ13855 | FLJ13855      | -0.867818 | Inlier |
| siRNA-Temozolomide Run2-<br>DMSO | NM_0230<br>79 | FLJ13855 | FLJ13855      | -0.806607 | Inlier |
| siRNA Disorazole DMSO Run3       | NM_0230<br>79 | FLJ13855 | FLJ13855      | -0.190537 | Inlier |
| siRNA-Vinblastine Run2-<br>DMSO  | NM_0230<br>79 | FLJ13855 | FLJ13855      | -0.018202 | Inlier |

Identification of Survival Genes in Human Glioblastoma Cells Using siRNA Screening  
 Nikhil G Thaker, Fang Zhang, Peter R. McDonald, Tong Ying Shun, Michael D Lewen, Ian F. Pollack, and John S. Lazo

| siRNA-Temozolomide Run1-<br>DMSO | NM_0230<br>79 | FLJ13855 | FLJ13855                                 | 0.018202  | Inlier  |
|----------------------------------|---------------|----------|------------------------------------------|-----------|---------|
| siRNA Disorazole DMSO Run1       | NM_0230<br>79 | FLJ13855 | FLJ13855                                 | 0.542393  | Inlier  |
| siRNA Disorazole DMSO Run2       | NM_0230<br>79 | FLJ13855 | FLJ13855                                 | 0.941029  | Inlier  |
| siRNA-Vinblastine Run1-<br>DMSO  | NM_0230<br>79 | FLJ13855 | FLJ13855                                 | 0.947733  | Inlier  |
| siRNA Disorazole DMSO Run1       | NM_0327<br>85 | FLJ14442 | ATP/GTP<br>binding<br>protein-<br>like 4 | -1.555841 | Inlier  |
| siRNA-Temozolomide Run3-<br>DMSO | NM_0327<br>85 | FLJ14442 | ATP/GTP<br>binding<br>protein-<br>like 4 | -0.8459   | Inlier  |
| siRNA-Temozolomide Run1-<br>DMSO | NM_0327<br>85 | FLJ14442 | ATP/GTP<br>binding<br>protein-<br>like 4 | -0.243288 | Inlier  |
| siRNA-Temozolomide Run2-<br>DMSO | NM_0327<br>85 | FLJ14442 | ATP/GTP<br>binding<br>protein-<br>like 4 | -0.088518 | Inlier  |
| siRNA-Vinblastine Run2-<br>DMSO  | NM_0327<br>85 | FLJ14442 | ATP/GTP<br>binding<br>protein-<br>like 4 | 0.088517  | Inlier  |
| siRNA-Vinblastine Run1-<br>DMSO  | NM_0327<br>85 | FLJ14442 | ATP/GTP<br>binding<br>protein-<br>like 4 | 0.5031    | Inlier  |
| siRNA Disorazole DMSO Run3       | NM_0327<br>85 | FLJ14442 | ATP/GTP<br>binding<br>protein-<br>like 4 | 2.346647  | Inlier  |
| siRNA Disorazole DMSO Run2       | NM_0327<br>85 | FLJ14442 | ATP/GTP<br>binding<br>protein-<br>like 4 | 3.659475  | Outlier |
| siRNA-Temozolomide Run3-<br>DMSO | NM_0328<br>24 | FLJ14681 | FLJ14681                                 | -2.464196 | Inlier  |
| siRNA-Temozolomide Run1-<br>DMSO | NM_0328<br>24 | FLJ14681 | FLJ14681                                 | -0.855047 | Inlier  |
| siRNA-Temozolomide Run2-<br>DMSO | NM_0328<br>24 | FLJ14681 | FLJ14681                                 | -0.493953 | Inlier  |
| siRNA Disorazole DMSO Run1       | NM_0328<br>24 | FLJ14681 | FLJ14681                                 | -0.056104 | Inlier  |
| siRNA-Vinblastine Run2-<br>DMSO  | NM_0328<br>24 | FLJ14681 | FLJ14681                                 | 0.056105  | Inlier  |
| siRNA Disorazole DMSO Run3       | NM_0328<br>24 | FLJ14681 | FLJ14681                                 | 0.05877   | Inlier  |

Identification of Survival Genes in Human Glioblastoma Cells Using siRNA Screening

Nikhil G Thaker, Fang Zhang, Peter R. McDonald, Tong Ying Shun, Michael D Lewen, Ian F. Pollack, and John S. Lazo

| siRNA Treatment              | Gene ID | Accession 1 | Accession 2 | Log Fold Change                                                  | Outlier Status   |
|------------------------------|---------|-------------|-------------|------------------------------------------------------------------|------------------|
| siRNA-Vinblastine Run1-DMSO  | NM_0328 | 24          | FLJ14681    | FLJ14681                                                         | 1.079466 Inlier  |
| siRNA Disorazole DMSO Run2   | NM_0328 | 24          | FLJ14681    | FLJ14681                                                         | 1.311197 Inlier  |
| siRNA-Temozolomide Run1-DMSO | NM_0177 | 22          | FLJ20244    | FLJ20244                                                         | -0.91783 Inlier  |
| siRNA Disorazole DMSO Run1   | NM_0177 | 22          | FLJ20244    | FLJ20244                                                         | -0.875981 Inlier |
| siRNA-Temozolomide Run2-DMSO | NM_0177 | 22          | FLJ20244    | FLJ20244                                                         | -0.473019 Inlier |
| siRNA-Vinblastine Run2-DMSO  | NM_0177 | 22          | FLJ20244    | FLJ20244                                                         | -0.05655 Inlier  |
| siRNA Disorazole DMSO Run2   | NM_0177 | 22          | FLJ20244    | FLJ20244                                                         | 0.05655 Inlier   |
| siRNA-Temozolomide Run3-DMSO | NM_0177 | 22          | FLJ20244    | FLJ20244                                                         | 0.449556 Inlier  |
| siRNA Disorazole DMSO Run3   | NM_0177 | 22          | FLJ20244    | FLJ20244                                                         | 1.519155 Inlier  |
| siRNA-Vinblastine Run1-DMSO  | NM_0177 | 22          | FLJ20244    | FLJ20244                                                         | 3.483107 Inlier  |
| siRNA-Temozolomide Run2-DMSO | NM_0177 | 39          | FLJ20277    | protein O-linked mannose beta1,2-N-acetylglucosaminyltransferase | -0.980375 Inlier |
| siRNA-Temozolomide Run3-DMSO | NM_0177 | 39          | FLJ20277    | protein O-linked mannose beta1,2-N-acetylglucosaminyltransferase | -0.845926 Inlier |
| siRNA-Temozolomide Run1-DMSO | NM_0177 | 39          | FLJ20277    | protein O-linked mannose beta1,2-N-acetylglucosaminyltransferase | -0.16892 Inlier  |
| siRNA-Vinblastine Run2-DMSO  | NM_0177 | 39          | FLJ20277    | protein O-linked mannose beta1,2-N-acetylglucosaminyltransferase | -0.029519 Inlier |

Identification of Survival Genes in Human Glioblastoma Cells Using siRNA Screening  
 Nikhil G Thaker, Fang Zhang, Peter R. McDonald, Tong Ying Shun, Michael D Lewen, Ian F. Pollack, and John S. Lazo  
 Molecular Pharmacology

|                              |               |          |                                                                                |           |        |
|------------------------------|---------------|----------|--------------------------------------------------------------------------------|-----------|--------|
| siRNA Disorazole DMSO Run1   | NM_0177<br>39 | FLJ20277 | protein O-linked<br>mannose<br>beta1,2-N-acetylgluc<br>osaminyltr<br>ansferase | 0.029519  | Inlier |
| siRNA Disorazole DMSO Run3   | NM_0177<br>39 | FLJ20277 | protein O-linked<br>mannose<br>beta1,2-N-acetylgluc<br>osaminyltr<br>ansferase | 0.503074  | Inlier |
| siRNA-Vinblastine Run1-DMSO  | NM_0177<br>39 | FLJ20277 | protein O-linked<br>mannose<br>beta1,2-N-acetylgluc<br>osaminyltr<br>ansferase | 2.172468  | Inlier |
| siRNA Disorazole DMSO Run2   | NM_0177<br>39 | FLJ20277 | protein O-linked<br>mannose<br>beta1,2-N-acetylgluc<br>osaminyltr<br>ansferase | 2.959639  | Inlier |
| siRNA-Temozolomide Run3-DMSO | NM_0178<br>86 | FLJ20574 | unc-51-like kinase<br>4 (C. elegans)                                           | -1.415349 | Inlier |
| siRNA-Temozolomide Run1-DMSO | NM_0178<br>86 | FLJ20574 | unc-51-like kinase<br>4 (C. elegans)                                           | -0.769129 | Inlier |
| siRNA-Temozolomide Run2-DMSO | NM_0178<br>86 | FLJ20574 | unc-51-like kinase<br>4 (C. elegans)                                           | -0.352169 | Inlier |
| siRNA Disorazole DMSO Run2   | NM_0178<br>86 | FLJ20574 | unc-51-like kinase<br>4 (C. elegans)                                           | -0.342781 | Inlier |

Identification of Survival Genes in Human Glioblastoma Cells Using siRNA Screening  
 Nikhil G Thaker, Fang Zhang, Peter R. McDonald, Tong Ying Shun, Michael D Lewen, Ian F. Pollack, and John S. Lazo  
 Molecular Pharmacology

|                                  |               |          |                                             |           |         |
|----------------------------------|---------------|----------|---------------------------------------------|-----------|---------|
| siRNA Disorazole DMSO Run3       | NM_0178<br>86 | FLJ20574 | unc-51-<br>like kinase<br>4 (C.<br>elegans) | 0.342781  | Inlier  |
| siRNA-Vinblastine Run2-<br>DMSO  | NM_0178<br>86 | FLJ20574 | unc-51-<br>like kinase<br>4 (C.<br>elegans) | 0.640296  | Inlier  |
| siRNA-Vinblastine Run1-<br>DMSO  | NM_0178<br>86 | FLJ20574 | unc-51-<br>like kinase<br>4 (C.<br>elegans) | 0.708704  | Inlier  |
| siRNA Disorazole DMSO Run1       | NM_0178<br>86 | FLJ20574 | unc-51-<br>like kinase<br>4 (C.<br>elegans) | 0.729827  | Inlier  |
| siRNA Disorazole DMSO Run3       | NM_0179<br>10 | FLJ20628 | FLJ20628                                    | -0.964149 | Inlier  |
| siRNA-Vinblastine Run2-<br>DMSO  | NM_0179<br>10 | FLJ20628 | FLJ20628                                    | -0.812116 | Inlier  |
| siRNA Disorazole DMSO Run1       | NM_0179<br>10 | FLJ20628 | FLJ20628                                    | -0.536884 | Inlier  |
| siRNA-Temozolomide Run2-<br>DMSO | NM_0179<br>10 | FLJ20628 | FLJ20628                                    | -0.013438 | Inlier  |
| siRNA-Temozolomide Run1-<br>DMSO | NM_0179<br>10 | FLJ20628 | FLJ20628                                    | 0.013438  | Inlier  |
| siRNA-Temozolomide Run3-<br>DMSO | NM_0179<br>10 | FLJ20628 | FLJ20628                                    | 0.077073  | Inlier  |
| siRNA Disorazole DMSO Run2       | NM_0179<br>10 | FLJ20628 | FLJ20628                                    | 1.967394  | Inlier  |
| siRNA-Vinblastine Run1-<br>DMSO  | NM_0179<br>10 | FLJ20628 | FLJ20628                                    | 4.080725  | Outlier |
| siRNA-Temozolomide Run3-<br>DMSO | NM_0249<br>22 | FLJ21736 | FLJ21736                                    | -0.842982 | Inlier  |
| siRNA Disorazole DMSO Run3       | NM_0249<br>22 | FLJ21736 | FLJ21736                                    | -0.638954 | Inlier  |
| siRNA-Temozolomide Run2-<br>DMSO | NM_0249<br>22 | FLJ21736 | FLJ21736                                    | -0.511468 | Inlier  |
| siRNA-Vinblastine Run2-<br>DMSO  | NM_0249<br>22 | FLJ21736 | FLJ21736                                    | -0.331075 | Inlier  |
| siRNA-Temozolomide Run1-<br>DMSO | NM_0249<br>22 | FLJ21736 | FLJ21736                                    | 0.331075  | Inlier  |
| siRNA Disorazole DMSO Run1       | NM_0249<br>22 | FLJ21736 | FLJ21736                                    | 0.710046  | Inlier  |
| siRNA Disorazole DMSO Run2       | NM_0249<br>22 | FLJ21736 | FLJ21736                                    | 1.632119  | Inlier  |
| siRNA-Vinblastine Run1-<br>DMSO  | NM_0249<br>22 | FLJ21736 | FLJ21736                                    | 1.998079  | Inlier  |

Identification of Survival Genes in Human Glioblastoma Cells Using siRNA Screening  
 Nikhil G Thaker, Fang Zhang, Peter R. McDonald, Tong Ying Shun, Michael D Lewen, Ian F. Pollack, and John S. Lazo

|                                  |               |          |                                   |           |        |
|----------------------------------|---------------|----------|-----------------------------------|-----------|--------|
| siRNA-Temozolomide Run3-<br>DMSO | NM_0218<br>31 | FLJ21839 | FLJ21839                          | -1.723508 | Inlier |
| siRNA-Temozolomide Run2-<br>DMSO | NM_0218<br>31 | FLJ21839 | FLJ21839                          | -1.662352 | Inlier |
| siRNA Disorazole DMSO Run3       | NM_0218<br>31 | FLJ21839 | FLJ21839                          | -0.205614 | Inlier |
| siRNA Disorazole DMSO Run1       | NM_0218<br>31 | FLJ21839 | FLJ21839                          | -0.124193 | Inlier |
| siRNA-Temozolomide Run1-<br>DMSO | NM_0218<br>31 | FLJ21839 | FLJ21839                          | 0.124193  | Inlier |
| siRNA Disorazole DMSO Run2       | NM_0218<br>31 | FLJ21839 | FLJ21839                          | 0.378972  | Inlier |
| siRNA-Vinblastine Run1-<br>DMSO  | NM_0218<br>31 | FLJ21839 | FLJ21839                          | 0.970028  | Inlier |
| siRNA-Vinblastine Run2-<br>DMSO  | NM_0218<br>31 | FLJ21839 | FLJ21839                          | 0.972794  | Inlier |
| siRNA-Vinblastine Run2-<br>DMSO  | NM_0245<br>60 | FLJ21963 | FLJ21963                          | -0.687634 | Inlier |
| siRNA-Temozolomide Run2-<br>DMSO | NM_0245<br>60 | FLJ21963 | FLJ21963                          | -0.661367 | Inlier |
| siRNA Disorazole DMSO Run1       | NM_0245<br>60 | FLJ21963 | FLJ21963                          | -0.592944 | Inlier |
| siRNA Disorazole DMSO Run3       | NM_0245<br>60 | FLJ21963 | FLJ21963                          | -0.412192 | Inlier |
| siRNA-Temozolomide Run1-<br>DMSO | NM_0245<br>60 | FLJ21963 | FLJ21963                          | 0.412192  | Inlier |
| siRNA-Temozolomide Run3-<br>DMSO | NM_0245<br>60 | FLJ21963 | FLJ21963                          | 0.979278  | Inlier |
| siRNA Disorazole DMSO Run2       | NM_0245<br>60 | FLJ21963 | FLJ21963                          | 1.739765  | Inlier |
| siRNA-Vinblastine Run1-<br>DMSO  | NM_0245<br>60 | FLJ21963 | FLJ21963                          | 1.878923  | Inlier |
| siRNA-Temozolomide Run3-<br>DMSO | NM_0248<br>54 | FLJ22028 | FLJ22028                          | -1.413181 | Inlier |
| siRNA Disorazole DMSO Run1       | NM_0248<br>54 | FLJ22028 | FLJ22028                          | -0.890978 | Inlier |
| siRNA-Temozolomide Run2-<br>DMSO | NM_0248<br>54 | FLJ22028 | FLJ22028                          | -0.458022 | Inlier |
| siRNA-Temozolomide Run1-<br>DMSO | NM_0248<br>54 | FLJ22028 | FLJ22028                          | -0.019342 | Inlier |
| siRNA-Vinblastine Run2-<br>DMSO  | NM_0248<br>54 | FLJ22028 | FLJ22028                          | 0.019343  | Inlier |
| siRNA Disorazole DMSO Run3       | NM_0248<br>54 | FLJ22028 | FLJ22028                          | 0.13698   | Inlier |
| siRNA-Vinblastine Run1-<br>DMSO  | NM_0248<br>54 | FLJ22028 | FLJ22028                          | 1.606579  | Inlier |
| siRNA Disorazole DMSO Run2       | NM_0248<br>54 | FLJ22028 | FLJ22028                          | 2.324284  | Inlier |
| siRNA-Temozolomide Run3-<br>DMSO | NM_0250<br>47 | FLJ22595 | ADP-<br>ribosylatio<br>n factor 7 | -1.377206 | Inlier |



Identification of Survival Genes in Human Glioblastoma Cells Using siRNA Screening

Nikhil G Thaker, Fang Zhang, Peter R. McDonald, Tong Ying Shun, Michael D Lewen, Ian F. Pollack, and John S.

Lazo

Molecular Pharmacology

|                              |               |          |                                                            |           |        |
|------------------------------|---------------|----------|------------------------------------------------------------|-----------|--------|
| siRNA-Temozolomide Run2-DMSO | NM_0250<br>47 | FLJ22595 | ADP-ribosylation factor 7                                  | -0.790998 | Inlier |
| siRNA-Vinblastine Run2-DMSO  | NM_0250<br>47 | FLJ22595 | ADP-ribosylation factor 7                                  | -0.327511 | Inlier |
| siRNA Disorazole DMSO Run3   | NM_0250<br>47 | FLJ22595 | ADP-ribosylation factor 7                                  | -0.268434 | Inlier |
| siRNA-Temozolomide Run1-DMSO | NM_0250<br>47 | FLJ22595 | ADP-ribosylation factor 7                                  | 0.268434  | Inlier |
| siRNA Disorazole DMSO Run1   | NM_0250<br>47 | FLJ22595 | ADP-ribosylation factor 7                                  | 0.558002  | Inlier |
| siRNA Disorazole DMSO Run2   | NM_0250<br>47 | FLJ22595 | ADP-ribosylation factor 7                                  | 0.961243  | Inlier |
| siRNA-Vinblastine Run1-DMSO  | NM_0250<br>47 | FLJ22595 | ADP-ribosylation factor 7                                  | 1.328549  | Inlier |
| siRNA-Temozolomide Run2-DMSO | NM_0219<br>28 | FLJ22649 | signal peptidase complex subunit 3 homolog (S. cerevisiae) | -1.339529 | Inlier |
| siRNA-Temozolomide Run3-DMSO | NM_0219<br>28 | FLJ22649 | signal peptidase complex subunit 3 homolog (S. cerevisiae) | -0.63299  | Inlier |
| siRNA Disorazole DMSO Run2   | NM_0219<br>28 | FLJ22649 | signal peptidase complex subunit 3 homolog (S. cerevisiae) | -0.5392   | Inlier |

Identification of Survival Genes in Human Glioblastoma Cells Using siRNA Screening  
 Nikhil G Thaker, Fang Zhang, Peter R. McDonald, Tong Ying Shun, Michael D Lewen, Ian F. Pollack, and John S. Lazo  
 Molecular Pharmacology

|                                  |               |          |                                                                              |           |        |
|----------------------------------|---------------|----------|------------------------------------------------------------------------------|-----------|--------|
| siRNA Disorazole DMSO Run1       | NM_0219<br>28 | FLJ22649 | signal<br>peptidase<br>complex<br>subunit 3<br>homolog<br>(S.<br>cerevisiae) | -0.455901 | Inlier |
| siRNA-Temozolomide Run1-<br>DMSO | NM_0219<br>28 | FLJ22649 | signal<br>peptidase<br>complex<br>subunit 3<br>homolog<br>(S.<br>cerevisiae) | 0.455901  | Inlier |
| siRNA-Vinblastine Run2-<br>DMSO  | NM_0219<br>28 | FLJ22649 | signal<br>peptidase<br>complex<br>subunit 3<br>homolog<br>(S.<br>cerevisiae) | 0.71601   | Inlier |
| siRNA-Vinblastine Run1-<br>DMSO  | NM_0219<br>28 | FLJ22649 | signal<br>peptidase<br>complex<br>subunit 3<br>homolog<br>(S.<br>cerevisiae) | 2.133855  | Inlier |
| siRNA Disorazole DMSO Run3       | NM_0219<br>28 | FLJ22649 | signal<br>peptidase<br>complex<br>subunit 3<br>homolog<br>(S.<br>cerevisiae) | 3.096646  | Inlier |
| siRNA-Temozolomide Run3-<br>DMSO | NM_0247<br>30 | FLJ22655 | FLJ22655                                                                     | -1.231738 | Inlier |
| siRNA-Vinblastine Run2-<br>DMSO  | NM_0247<br>30 | FLJ22655 | FLJ22655                                                                     | -0.826869 | Inlier |
| siRNA Disorazole DMSO Run3       | NM_0247<br>30 | FLJ22655 | FLJ22655                                                                     | -0.522131 | Inlier |
| siRNA-Temozolomide Run1-<br>DMSO | NM_0247<br>30 | FLJ22655 | FLJ22655                                                                     | -0.086271 | Inlier |
| siRNA-Temozolomide Run2-<br>DMSO | NM_0247<br>30 | FLJ22655 | FLJ22655                                                                     | 0.086271  | Inlier |
| siRNA Disorazole DMSO Run1       | NM_0247<br>30 | FLJ22655 | FLJ22655                                                                     | 0.452842  | Inlier |

Identification of Survival Genes in Human Glioblastoma Cells Using siRNA Screening  
 Nikhil G Thaker, Fang Zhang, Peter R. McDonald, Tong Ying Shun, Michael D Lewen, Ian F. Pollack, and John S. Lazo

| siRNA Treatment              | Gene ID | Accession | Accession | Log Fold Change | Outlier Status |
|------------------------------|---------|-----------|-----------|-----------------|----------------|
| siRNA-Vinblastine Run1-DMSO  | NM_0247 | FLJ22655  | FLJ22655  | 1.058857        | Inlier         |
| siRNA Disorazole DMSO Run2   | NM_0247 | FLJ22655  | FLJ22655  | 1.433039        | Inlier         |
| siRNA-Temozolomide Run3-DMSO | NM_0251 | FLJ22761  | 1         | -0.841535       | Inlier         |
| siRNA-Temozolomide Run2-DMSO | NM_0251 | FLJ22761  | 1         | -0.631851       | Inlier         |
| siRNA-Temozolomide Run1-DMSO | NM_0251 | FLJ22761  | 1         | -0.310902       | Inlier         |
| siRNA Disorazole DMSO Run3   | NM_0251 | FLJ22761  | 1         | -0.178952       | Inlier         |
| siRNA Disorazole DMSO Run1   | NM_0251 | FLJ22761  | 1         | 0.178952        | Inlier         |
| siRNA Disorazole DMSO Run2   | NM_0251 | FLJ22761  | 1         | 0.717149        | Inlier         |
| siRNA-Vinblastine Run2-DMSO  | NM_0251 | FLJ22761  | 1         | 0.765564        | Inlier         |
| siRNA-Vinblastine Run1-DMSO  | NM_0251 | FLJ22761  | 1         | 1.027377        | Inlier         |
| siRNA Disorazole DMSO Run2   | NM_0010 | FLJ23074  | 1         | -1.850866       | Inlier         |
| siRNA-Temozolomide Run3-DMSO | NM_0010 | FLJ23074  | 1         | -0.958453       | Inlier         |

Yeast  
 Sps1/Ste2  
 0-related  
 kinase 4  
 (S.

Yeast  
 Sps1/Ste2  
 0-related  
 kinase 4  
 (S.

Identification of Survival Genes in Human Glioblastoma Cells Using siRNA Screening  
 Nikhil G Thaker, Fang Zhang, Peter R. McDonald, Tong Ying Shun, Michael D Lewen, Ian F. Pollack, and John S. Lazo  
 Molecular Pharmacology

|                              |                  |          |                                                                   |           |        |
|------------------------------|------------------|----------|-------------------------------------------------------------------|-----------|--------|
| siRNA-Temozolomide Run2-DMSO | NM_0010<br>18046 | FLJ23074 | Yeast<br>Sps1/Ste2<br>0-related<br>kinase 4<br>(S.<br>cerevisiae) | -0.421347 | Inlier |
| siRNA-Temozolomide Run1-DMSO | NM_0010<br>18046 | FLJ23074 | Yeast<br>Sps1/Ste2<br>0-related<br>kinase 4<br>(S.<br>cerevisiae) | -0.115273 | Inlier |
| siRNA-Vinblastine Run1-DMSO  | NM_0010<br>18046 | FLJ23074 | Yeast<br>Sps1/Ste2<br>0-related<br>kinase 4<br>(S.<br>cerevisiae) | 0.115273  | Inlier |
| siRNA Disorazole DMSO Run3   | NM_0010<br>18046 | FLJ23074 | Yeast<br>Sps1/Ste2<br>0-related<br>kinase 4<br>(S.<br>cerevisiae) | 0.414396  | Inlier |
| siRNA-Vinblastine Run2-DMSO  | NM_0010<br>18046 | FLJ23074 | Yeast<br>Sps1/Ste2<br>0-related<br>kinase 4<br>(S.<br>cerevisiae) | 0.927653  | Inlier |
| siRNA Disorazole DMSO Run1   | NM_0010<br>18046 | FLJ23074 | Yeast<br>Sps1/Ste2<br>0-related<br>kinase 4<br>(S.<br>cerevisiae) | 0.97901   | Inlier |
| siRNA-Temozolomide Run3-DMSO | NM_0249<br>55    | FLJ23322 | FLJ23322                                                          | -1.148886 | Inlier |
| siRNA-Temozolomide Run2-DMSO | NM_0249<br>55    | FLJ23322 | FLJ23322                                                          | -0.260239 | Inlier |
| siRNA Disorazole DMSO Run3   | NM_0249<br>55    | FLJ23322 | FLJ23322                                                          | -0.142114 | Inlier |
| siRNA-Vinblastine Run2-DMSO  | NM_0249<br>55    | FLJ23322 | FLJ23322                                                          | -0.070327 | Inlier |
| siRNA Disorazole DMSO Run1   | NM_0249<br>55    | FLJ23322 | FLJ23322                                                          | 0.070327  | Inlier |

Identification of Survival Genes in Human Glioblastoma Cells Using siRNA Screening

Nikhil G Thaker, Fang Zhang, Peter R. McDonald, Tong Ying Shun, Michael D Lewen, Ian F. Pollack, and John S.

Lazo

|                                  |               |          |                                          |           |        |
|----------------------------------|---------------|----------|------------------------------------------|-----------|--------|
| siRNA-Temozolomide Run1-<br>DMSO | NM_0249<br>55 | FLJ23322 | FLJ23322                                 | 1.088761  | Inlier |
| siRNA-Vinblastine Run1-<br>DMSO  | NM_0249<br>55 | FLJ23322 | FLJ23322                                 | 2.846498  | Inlier |
| siRNA Disorazole DMSO Run2       | NM_0249<br>55 | FLJ23322 | FLJ23322                                 | 3.26923   | Inlier |
| siRNA-Temozolomide Run3-<br>DMSO | NM_0322<br>37 | FLJ23356 | FLJ23356                                 | -0.981344 | Inlier |
| siRNA Disorazole DMSO Run1       | NM_0322<br>37 | FLJ23356 | FLJ23356                                 | -0.570585 | Inlier |
| siRNA-Temozolomide Run2-<br>DMSO | NM_0322<br>37 | FLJ23356 | FLJ23356                                 | -0.448022 | Inlier |
| siRNA-Temozolomide Run1-<br>DMSO | NM_0322<br>37 | FLJ23356 | FLJ23356                                 | -0.164781 | Inlier |
| siRNA Disorazole DMSO Run3       | NM_0322<br>37 | FLJ23356 | FLJ23356                                 | 0.164781  | Inlier |
| siRNA-Vinblastine Run1-<br>DMSO  | NM_0322<br>37 | FLJ23356 | FLJ23356                                 | 0.778415  | Inlier |
| siRNA-Vinblastine Run2-<br>DMSO  | NM_0322<br>37 | FLJ23356 | FLJ23356                                 | 0.824862  | Inlier |
| siRNA Disorazole DMSO Run2       | NM_0322<br>37 | FLJ23356 | FLJ23356                                 | 1.629833  | Inlier |
| siRNA-Temozolomide Run2-<br>DMSO | NM_0247<br>83 | FLJ23598 | ATP/GTP<br>binding<br>protein-<br>like 2 | -1.377162 | Inlier |
| siRNA-Temozolomide Run3-<br>DMSO | NM_0247<br>83 | FLJ23598 | ATP/GTP<br>binding<br>protein-<br>like 2 | -1.336906 | Inlier |
| siRNA-Temozolomide Run1-<br>DMSO | NM_0247<br>83 | FLJ23598 | ATP/GTP<br>binding<br>protein-<br>like 2 | -0.543516 | Inlier |
| siRNA Disorazole DMSO Run1       | NM_0247<br>83 | FLJ23598 | ATP/GTP<br>binding<br>protein-<br>like 2 | -0.296069 | Inlier |
| siRNA Disorazole DMSO Run2       | NM_0247<br>83 | FLJ23598 | ATP/GTP<br>binding<br>protein-<br>like 2 | 0.29607   | Inlier |
| siRNA Disorazole DMSO Run3       | NM_0247<br>83 | FLJ23598 | ATP/GTP<br>binding<br>protein-<br>like 2 | 0.44258   | Inlier |
| siRNA-Vinblastine Run1-<br>DMSO  | NM_0247<br>83 | FLJ23598 | ATP/GTP<br>binding<br>protein-<br>like 2 | 0.805484  | Inlier |

Identification of Survival Genes in Human Glioblastoma Cells Using siRNA Screening  
 Nikhil G Thaker, Fang Zhang, Peter R. McDonald, Tong Ying Shun, Michael D Lewen, Ian F. Pollack, and John S. Lazo

| Molecular Pharmacology       |               | ATP/GTP binding protein-like 2 |                         |                   |
|------------------------------|---------------|--------------------------------|-------------------------|-------------------|
| siRNA-Vinblastine Run2-DMSO  | NM_0247<br>83 | FLJ23598                       | like 2                  | 0.812338 Inlier   |
| siRNA-Temozolomide Run3-DMSO | NM_1522<br>71 | FLJ23749                       | FLJ23749                | -1.571317 Inlier  |
| siRNA-Temozolomide Run1-DMSO | NM_1522<br>71 | FLJ23749                       | FLJ23749                | -0.959692 Inlier  |
| siRNA-Temozolomide Run2-DMSO | NM_1522<br>71 | FLJ23749                       | FLJ23749                | -0.956303 Inlier  |
| siRNA Disorazole DMSO Run1   | NM_1522<br>71 | FLJ23749                       | FLJ23749                | -0.169105 Inlier  |
| siRNA Disorazole DMSO Run2   | NM_1522<br>71 | FLJ23749                       | FLJ23749                | 0.169106 Inlier   |
| siRNA-Vinblastine Run2-DMSO  | NM_1522<br>71 | FLJ23749                       | FLJ23749                | 0.258873 Inlier   |
| siRNA Disorazole DMSO Run3   | NM_1522<br>71 | FLJ23749                       | FLJ23749                | 0.392697 Inlier   |
| siRNA-Vinblastine Run1-DMSO  | NM_1522<br>71 | FLJ23749                       | FLJ23749                | 2.080458 Inlier   |
| siRNA-Temozolomide Run3-DMSO | NM_1522<br>82 | FLJ23751                       | acid phosphatase-like 2 | -3.564546 Outlier |
| siRNA-Vinblastine Run2-DMSO  | NM_1522<br>82 | FLJ23751                       | acid phosphatase-like 2 | -1.611808 Inlier  |
| siRNA-Temozolomide Run2-DMSO | NM_1522<br>82 | FLJ23751                       | acid phosphatase-like 2 | -0.273863 Inlier  |
| siRNA-Vinblastine Run1-DMSO  | NM_1522<br>82 | FLJ23751                       | acid phosphatase-like 2 | -0.061257 Inlier  |
| siRNA Disorazole DMSO Run3   | NM_1522<br>82 | FLJ23751                       | acid phosphatase-like 2 | 0.061257 Inlier   |
| siRNA Disorazole DMSO Run1   | NM_1522<br>82 | FLJ23751                       | acid phosphatase-like 2 | 0.579725 Inlier   |
| siRNA-Temozolomide Run1-DMSO | NM_1522<br>82 | FLJ23751                       | acid phosphatase-like 2 | 0.769275 Inlier   |
| siRNA Disorazole DMSO Run2   | NM_1522<br>82 | FLJ23751                       | acid phosphatase-like 2 | 1.736447 Inlier   |
| siRNA-Temozolomide Run1-DMSO | NM_1446<br>10 | FLJ25006                       | FLJ25006                | -1.739675 Inlier  |
| siRNA Disorazole DMSO Run2   | NM_1446<br>10 | FLJ25006                       | FLJ25006                | -0.848476 Inlier  |
| siRNA-Temozolomide Run3-DMSO | NM_1446<br>10 | FLJ25006                       | FLJ25006                | -0.371249 Inlier  |
| siRNA-Temozolomide Run2-DMSO | NM_1446<br>10 | FLJ25006                       | FLJ25006                | -0.026876 Inlier  |

Identification of Survival Genes in Human Glioblastoma Cells Using siRNA Screening  
 Nikhil G Thaker, Fang Zhang, Peter R. McDonald, Tong Ying Shun, Michael D Lewen, Ian F. Pollack, and John S. Lazo

|                              |         |          |          |           |        |
|------------------------------|---------|----------|----------|-----------|--------|
| Molecular Pharmacology       | NM_1446 |          |          |           |        |
| siRNA Disorazole DMSO Run1   | 10      | FLJ25006 | FLJ25006 | 0.026875  | Inlier |
|                              | NM_1446 |          |          |           |        |
| siRNA Disorazole DMSO Run3   | 10      | FLJ25006 | FLJ25006 | 0.500524  | Inlier |
| siRNA-Vinblastine Run1-DMSO  | NM_1446 |          |          |           |        |
|                              | 10      | FLJ25006 | FLJ25006 | 2.359371  | Inlier |
| siRNA-Vinblastine Run2-DMSO  | NM_1446 |          |          |           |        |
|                              | 10      | FLJ25006 | FLJ25006 | 2.9918    | Inlier |
|                              | NM_1449 |          |          |           |        |
| siRNA Disorazole DMSO Run1   | 81      | FLJ25059 | FLJ25059 | -1.059186 | Inlier |
| siRNA-Temozolomide Run3-DMSO | NM_1449 |          |          |           |        |
|                              | 81      | FLJ25059 | FLJ25059 | -0.763162 | Inlier |
| siRNA-Temozolomide Run2-DMSO | NM_1449 |          |          |           |        |
|                              | 81      | FLJ25059 | FLJ25059 | -0.268765 | Inlier |
| siRNA-Temozolomide Run1-DMSO | NM_1449 |          |          |           |        |
|                              | 81      | FLJ25059 | FLJ25059 | -0.010277 | Inlier |
| siRNA-Vinblastine Run2-DMSO  | NM_1449 |          |          |           |        |
|                              | 81      | FLJ25059 | FLJ25059 | 0.010278  | Inlier |
| siRNA-Vinblastine Run1-DMSO  | NM_1449 |          |          |           |        |
|                              | 81      | FLJ25059 | FLJ25059 | 0.621609  | Inlier |
|                              | NM_1449 |          |          |           |        |
| siRNA Disorazole DMSO Run2   | 81      | FLJ25059 | FLJ25059 | 0.727391  | Inlier |
|                              | NM_1449 |          |          |           |        |
| siRNA Disorazole DMSO Run3   | 81      | FLJ25059 | FLJ25059 | 2.016348  | Inlier |
| siRNA-Temozolomide Run1-DMSO | NM_1446 |          |          |           |        |
|                              | 51      | FLJ25471 | FLJ25471 | -1.594419 | Inlier |
|                              | NM_1446 |          |          |           |        |
| siRNA Disorazole DMSO Run1   | 51      | FLJ25471 | FLJ25471 | -1.12841  | Inlier |
|                              | NM_1446 |          |          |           |        |
| siRNA Disorazole DMSO Run3   | 51      | FLJ25471 | FLJ25471 | -0.696939 | Inlier |
| siRNA-Temozolomide Run2-DMSO | NM_1446 |          |          |           |        |
|                              | 51      | FLJ25471 | FLJ25471 | -0.39104  | Inlier |
| siRNA-Vinblastine Run2-DMSO  | NM_1446 |          |          |           |        |
|                              | 51      | FLJ25471 | FLJ25471 | 0.39104   | Inlier |
| siRNA-Vinblastine Run1-DMSO  | NM_1446 |          |          |           |        |
|                              | 51      | FLJ25471 | FLJ25471 | 0.396501  | Inlier |
| siRNA-Temozolomide Run3-DMSO | NM_1446 |          |          |           |        |
|                              | 51      | FLJ25471 | FLJ25471 | 0.652061  | Inlier |
|                              | NM_1446 |          |          |           |        |
| siRNA Disorazole DMSO Run2   | 51      | FLJ25471 | FLJ25471 | 1.173478  | Inlier |
| siRNA-Temozolomide Run2-DMSO | NM_1735 |          |          |           |        |
|                              | 53      | FLJ25801 | FLJ25801 | -1.984724 | Inlier |
| siRNA-Temozolomide Run1-DMSO | NM_1735 |          |          |           |        |
|                              | 53      | FLJ25801 | FLJ25801 | -0.757028 | Inlier |
| siRNA-Temozolomide Run3-DMSO | NM_1735 |          |          |           |        |
|                              | 53      | FLJ25801 | FLJ25801 | -0.591971 | Inlier |
|                              | NM_1735 |          |          |           |        |
| siRNA Disorazole DMSO Run1   | 53      | FLJ25801 | FLJ25801 | -0.362231 | Inlier |
| siRNA-Vinblastine Run2-DMSO  | NM_1735 |          |          |           |        |
|                              | 53      | FLJ25801 | FLJ25801 | 0.362233  | Inlier |
|                              | NM_1735 |          |          |           |        |
| siRNA Disorazole DMSO Run3   | 53      | FLJ25801 | FLJ25801 | 0.581793  | Inlier |

Identification of Survival Genes in Human Glioblastoma Cells Using siRNA Screening  
 Nikhil G Thaker, Fang Zhang, Peter R. McDonald, Tong Ying Shun, Michael D Lewen, Ian F. Pollack, and John S. Lazo

|                              |                  |          |                                |           |         |
|------------------------------|------------------|----------|--------------------------------|-----------|---------|
| Molecular Pharmacology       | NM_1735          |          |                                |           |         |
| siRNA Disorazole DMSO Run2   | 53               | FLJ25801 | FLJ25801                       | 2.152831  | Inlier  |
| siRNA-Vinblastine Run1-DMSO  | NM_1735<br>53    | FLJ25801 | FLJ25801                       | 4.575435  | Outlier |
| siRNA-Temozolomide Run2-DMSO | NM_0010<br>18060 | FLJ30473 | FLJ30473                       | -1.659878 | Inlier  |
| siRNA Disorazole DMSO Run3   | NM_0010<br>18060 | FLJ30473 | FLJ30473                       | -1.1141   | Inlier  |
| siRNA-Vinblastine Run2-DMSO  | NM_0010<br>18060 | FLJ30473 | FLJ30473                       | -0.410489 | Inlier  |
| siRNA-Temozolomide Run3-DMSO | NM_0010<br>18060 | FLJ30473 | FLJ30473                       | -0.08738  | Inlier  |
| siRNA Disorazole DMSO Run1   | NM_0010<br>18060 | FLJ30473 | FLJ30473                       | 0.08738   | Inlier  |
| siRNA-Temozolomide Run1-DMSO | NM_0010<br>18060 | FLJ30473 | FLJ30473                       | 0.598732  | Inlier  |
| siRNA Disorazole DMSO Run2   | NM_0010<br>18060 | FLJ30473 | FLJ30473                       | 0.750268  | Inlier  |
| siRNA-Vinblastine Run1-DMSO  | NM_0010<br>18060 | FLJ30473 | FLJ30473                       | 1.419879  | Inlier  |
| siRNA-Temozolomide Run2-DMSO | NM_1532<br>10    | FLJ30626 | ubiquitin specific protease 43 | -0.955015 | Inlier  |
| siRNA-Vinblastine Run2-DMSO  | NM_1532<br>10    | FLJ30626 | ubiquitin specific protease 43 | -0.724037 | Inlier  |
| siRNA Disorazole DMSO Run3   | NM_1532<br>10    | FLJ30626 | ubiquitin specific protease 43 | -0.397966 | Inlier  |
| siRNA-Temozolomide Run3-DMSO | NM_1532<br>10    | FLJ30626 | ubiquitin specific protease 43 | -0.099105 | Inlier  |
| siRNA-Temozolomide Run1-DMSO | NM_1532<br>10    | FLJ30626 | ubiquitin specific protease 43 | 0.099105  | Inlier  |
| siRNA Disorazole DMSO Run2   | NM_1532<br>10    | FLJ30626 | ubiquitin specific protease 43 | 0.624963  | Inlier  |
| siRNA Disorazole DMSO Run1   | NM_1532<br>10    | FLJ30626 | ubiquitin specific protease 43 | 0.778071  | Inlier  |
| siRNA-Vinblastine Run1-DMSO  | NM_1532<br>10    | FLJ30626 | ubiquitin specific protease 43 | 1.229461  | Inlier  |



Identification of Survival Genes in Human Glioblastoma Cells Using siRNA Screening

Nikhil G Thaker, Fang Zhang, Peter R. McDonald, Tong Ying Shun, Michael D Lewen, Ian F. Pollack, and John S.

Lazo

|                                  |               |          |          |           |        |
|----------------------------------|---------------|----------|----------|-----------|--------|
| siRNA-Temozolomide Run2-<br>DMSO | NM_1450<br>24 | FLJ31547 | FLJ31547 | -0.96951  | Inlier |
| siRNA-Temozolomide Run3-<br>DMSO | NM_1450<br>24 | FLJ31547 | FLJ31547 | -0.783635 | Inlier |
| siRNA-Vinblastine Run2-<br>DMSO  | NM_1450<br>24 | FLJ31547 | FLJ31547 | -0.16024  | Inlier |
| siRNA Disorazole DMSO Run1       | NM_1450<br>24 | FLJ31547 | FLJ31547 | -0.026027 | Inlier |
| siRNA-Temozolomide Run1-<br>DMSO | NM_1450<br>24 | FLJ31547 | FLJ31547 | 0.026026  | Inlier |
| siRNA Disorazole DMSO Run3       | NM_1450<br>24 | FLJ31547 | FLJ31547 | 0.565364  | Inlier |
| siRNA-Vinblastine Run1-<br>DMSO  | NM_1450<br>24 | FLJ31547 | FLJ31547 | 1.528663  | Inlier |
| siRNA Disorazole DMSO Run2       | NM_1450<br>24 | FLJ31547 | FLJ31547 | 1.812518  | Inlier |
| siRNA-Temozolomide Run2-<br>DMSO | NM_1523<br>36 | FLJ32310 | FLJ32310 | -0.675995 | Inlier |
| siRNA-Temozolomide Run3-<br>DMSO | NM_1523<br>36 | FLJ32310 | FLJ32310 | -0.673005 | Inlier |
| siRNA-Temozolomide Run1-<br>DMSO | NM_1523<br>36 | FLJ32310 | FLJ32310 | -0.480093 | Inlier |
| siRNA Disorazole DMSO Run1       | NM_1523<br>36 | FLJ32310 | FLJ32310 | -0.195551 | Inlier |
| siRNA Disorazole DMSO Run3       | NM_1523<br>36 | FLJ32310 | FLJ32310 | 0.195551  | Inlier |
| siRNA Disorazole DMSO Run2       | NM_1523<br>36 | FLJ32310 | FLJ32310 | 0.853017  | Inlier |
| siRNA-Vinblastine Run2-<br>DMSO  | NM_1523<br>36 | FLJ32310 | FLJ32310 | 0.98066   | Inlier |
| siRNA-Vinblastine Run1-<br>DMSO  | NM_1523<br>36 | FLJ32310 | FLJ32310 | 1.072171  | Inlier |
| siRNA-Temozolomide Run3-<br>DMSO | NM_1446<br>41 | FLJ32332 | )        | -1.765176 | Inlier |
| siRNA-Temozolomide Run2-<br>DMSO | NM_1446<br>41 | FLJ32332 | )        | -1.03039  | Inlier |

protein  
phosphata  
se 1M  
(PP2C  
domain  
containing  
)  
protein  
phosphata  
se 1M  
(PP2C  
domain  
containing  
)

Identification of Survival Genes in Human Glioblastoma Cells Using siRNA Screening

Nikhil G Thaker, Fang Zhang, Peter R. McDonald, Tong Ying Shun, Michael D Lewen, Ian F. Pollack, and John S. Lazo

Molecular Pharmacology

|                              |               |          |                                                  |           |        |
|------------------------------|---------------|----------|--------------------------------------------------|-----------|--------|
| siRNA-Temozolomide Run1-DMSO | NM_1446<br>41 | FLJ32332 | protein phosphatase 1M (PP2C domain containing)  | -0.280961 | Inlier |
| siRNA Disorazole DMSO Run1   | NM_1446<br>41 | FLJ32332 | protein phosphatase 1M (PP2C domain containing)  | -0.18504  | Inlier |
| siRNA Disorazole DMSO Run2   | NM_1446<br>41 | FLJ32332 | protein phosphatase 1M (PP2C domain containing)  | 0.18504   | Inlier |
| siRNA-Vinblastine Run2-DMSO  | NM_1446<br>41 | FLJ32332 | protein phosphatase 1M (PP2C domain containing)  | 0.567279  | Inlier |
| siRNA-Vinblastine Run1-DMSO  | NM_1446<br>41 | FLJ32332 | protein phosphatase 1M (PP2C domain containing)  | 0.781721  | Inlier |
| siRNA Disorazole DMSO Run3   | NM_1446<br>41 | FLJ32332 | protein phosphatase 1M (PP2C domain containing)  | 0.891603  | Inlier |
| siRNA Disorazole DMSO Run2   | NM_1525<br>34 | FLJ32685 | NIMA (never in mitosis gene a)-related kinase 10 | -1.172734 | Inlier |

Identification of Survival Genes in Human Glioblastoma Cells Using siRNA Screening  
 Nikhil G Thaker, Fang Zhang, Peter R. McDonald, Tong Ying Shun, Michael D Lewen, Ian F. Pollack, and John S. Lazo

Molecular Pharmacology

| siRNA Treatment              | Gene ID   | Accession | Gene Name                                        | Value     | Category |
|------------------------------|-----------|-----------|--------------------------------------------------|-----------|----------|
| siRNA-Temozolomide Run3-DMSO | NM_152534 | FLJ32685  | NIMA (never in mitosis gene a)-related kinase 10 | -0.920323 | Inlier   |
| siRNA Disorazole DMSO Run3   | NM_152534 | FLJ32685  | NIMA (never in mitosis gene a)-related kinase 10 | -0.18259  | Inlier   |
| siRNA-Temozolomide Run1-DMSO | NM_152534 | FLJ32685  | NIMA (never in mitosis gene a)-related kinase 10 | -0.136071 | Inlier   |
| siRNA-Temozolomide Run2-DMSO | NM_152534 | FLJ32685  | NIMA (never in mitosis gene a)-related kinase 10 | 0.136071  | Inlier   |
| siRNA Disorazole DMSO Run1   | NM_152534 | FLJ32685  | NIMA (never in mitosis gene a)-related kinase 10 | 0.457314  | Inlier   |
| siRNA-Vinblastine Run2-DMSO  | NM_152534 | FLJ32685  | NIMA (never in mitosis gene a)-related kinase 10 | 0.891686  | Inlier   |
| siRNA-Vinblastine Run1-DMSO  | NM_152534 | FLJ32685  | NIMA (never in mitosis gene a)-related kinase 10 | 0.921578  | Inlier   |
| siRNA-Temozolomide Run2-DMSO | NM_173641 | FLJ33655  | EPH receptor A10                                 | -1.265023 | Inlier   |
| siRNA-Temozolomide Run3-DMSO | NM_173641 | FLJ33655  | EPH receptor A10                                 | -0.759008 | Inlier   |
| siRNA Disorazole DMSO Run1   | NM_173641 | FLJ33655  | EPH receptor A10                                 | -0.584375 | Inlier   |

Identification of Survival Genes in Human Glioblastoma Cells Using siRNA Screening

Nikhil G Thaker, Fang Zhang, Peter R. McDonald, Tong Ying Shun, Michael D Lewen, Ian F. Pollack, and John S.

Lazo

| Molecular Pharmacology       |               |          | EPH                              |           |        |
|------------------------------|---------------|----------|----------------------------------|-----------|--------|
| siRNA-Vinblastine Run2-DMSO  | NM_1736<br>41 | FLJ33655 | receptor<br>A10                  | -0.183411 | Inlier |
| siRNA Disorazole DMSO Run3   | NM_1736<br>41 | FLJ33655 | receptor<br>A10                  | 0.183411  | Inlier |
| siRNA Disorazole DMSO Run2   | NM_1736<br>41 | FLJ33655 | receptor<br>A10                  | 0.589992  | Inlier |
| siRNA-Vinblastine Run1-DMSO  | NM_1736<br>41 | FLJ33655 | receptor<br>A10                  | 1.468855  | Inlier |
| siRNA-Temozolomide Run1-DMSO | NM_1736<br>41 | FLJ33655 | receptor<br>A10                  | 1.598641  | Inlier |
| siRNA-Temozolomide Run3-DMSO | NM_1526<br>49 | FLJ34389 | mixed lineage kinase domain-like | -1.151503 | Inlier |
| siRNA-Temozolomide Run2-DMSO | NM_1526<br>49 | FLJ34389 | mixed lineage kinase domain-like | -0.448873 | Inlier |
| siRNA Disorazole DMSO Run2   | NM_1526<br>49 | FLJ34389 | mixed lineage kinase domain-like | -0.184205 | Inlier |
| siRNA-Temozolomide Run1-DMSO | NM_1526<br>49 | FLJ34389 | mixed lineage kinase domain-like | -0.124247 | Inlier |
| siRNA-Vinblastine Run1-DMSO  | NM_1526<br>49 | FLJ34389 | mixed lineage kinase domain-like | 0.124247  | Inlier |
| siRNA Disorazole DMSO Run3   | NM_1526<br>49 | FLJ34389 | mixed lineage kinase domain-like | 0.900127  | Inlier |
| siRNA-Vinblastine Run2-DMSO  | NM_1526<br>49 | FLJ34389 | mixed lineage kinase domain-like | 1.061901  | Inlier |

Identification of Survival Genes in Human Glioblastoma Cells Using siRNA Screening

Nikhil G Thaker, Fang Zhang, Peter R. McDonald, Tong Ying Shun, Michael D Lewen, Ian F. Pollack, and John S. Lazo

Molecular Pharmacology

|                              |         |    |          |          |           | mixed lineage kinase domain-            |
|------------------------------|---------|----|----------|----------|-----------|-----------------------------------------|
| siRNA Disorazole DMSO Run1   | NM_1526 | 49 | FLJ34389 | like     | 1.286893  | Inlier                                  |
| siRNA-Temozolomide Run1-DMSO | NM_1524 | 04 | FLJ34658 | FLJ34658 | -1.356358 | Inlier                                  |
| siRNA-Temozolomide Run2-DMSO | NM_1524 | 04 | FLJ34658 | FLJ34658 | -1.27324  | Inlier                                  |
| siRNA Disorazole DMSO Run1   | NM_1524 | 04 | FLJ34658 | FLJ34658 | -0.717472 | Inlier                                  |
| siRNA Disorazole DMSO Run3   | NM_1524 | 04 | FLJ34658 | FLJ34658 | -0.109822 | Inlier                                  |
| siRNA-Temozolomide Run3-DMSO | NM_1524 | 04 | FLJ34658 | FLJ34658 | 0.109822  | Inlier                                  |
| siRNA-Vinblastine Run2-DMSO  | NM_1524 | 04 | FLJ34658 | FLJ34658 | 0.237184  | Inlier                                  |
| siRNA Disorazole DMSO Run2   | NM_1524 | 04 | FLJ34658 | FLJ34658 | 0.631528  | Inlier                                  |
| siRNA-Vinblastine Run1-DMSO  | NM_1524 | 04 | FLJ34658 | FLJ34658 | 1.397365  | Inlier                                  |
|                              |         |    |          |          |           | glycerophosphodiester domain containing |
| siRNA-Temozolomide Run3-DMSO | NM_1825 | 69 | FLJ37451 | 1        | -0.86476  | Inlier                                  |
|                              |         |    |          |          |           | glycerophosphodiester domain containing |
| siRNA-Temozolomide Run1-DMSO | NM_1825 | 69 | FLJ37451 | 1        | -0.540391 | Inlier                                  |
|                              |         |    |          |          |           | glycerophosphodiester domain containing |
| siRNA-Temozolomide Run2-DMSO | NM_1825 | 69 | FLJ37451 | 1        | -0.318632 | Inlier                                  |

Identification of Survival Genes in Human Glioblastoma Cells Using siRNA Screening  
 Nikhil G Thaker, Fang Zhang, Peter R. McDonald, Tong Ying Shun, Michael D Lewen, Ian F. Pollack, and John S. Lazo

Molecular Pharmacology

|                              |               |          |          |                                            |                  |
|------------------------------|---------------|----------|----------|--------------------------------------------|------------------|
|                              |               |          |          | glycerophosphodiesterase domain containing |                  |
| siRNA Disorazole DMSO Run2   | NM_1825<br>69 | FLJ37451 | 1        | glycerophosphodiesterase domain containing | -0.293522 Inlier |
| siRNA Disorazole DMSO Run1   | NM_1825<br>69 | FLJ37451 | 1        | glycerophosphodiesterase domain containing | 0.293522 Inlier  |
| siRNA-Vinblastine Run1-DMSO  | NM_1825<br>69 | FLJ37451 | 1        | glycerophosphodiesterase domain containing | 0.808609 Inlier  |
| siRNA-Vinblastine Run2-DMSO  | NM_1825<br>69 | FLJ37451 | 1        | glycerophosphodiesterase domain containing | 1.523519 Inlier  |
| siRNA Disorazole DMSO Run3   | NM_1825<br>69 | FLJ37451 | 1        | glycerophosphodiesterase domain containing | 2.9917 Inlier    |
| siRNA-Temozolomide Run3-DMSO | NM_1738<br>15 | FLJ37464 | FLJ37464 |                                            | -1.167117 Inlier |
| siRNA-Temozolomide Run2-DMSO | NM_1738<br>15 | FLJ37464 | FLJ37464 |                                            | -1.131055 Inlier |
| siRNA-Temozolomide Run1-DMSO | NM_1738<br>15 | FLJ37464 | FLJ37464 |                                            | -0.845453 Inlier |
| siRNA-Vinblastine Run2-DMSO  | NM_1738<br>15 | FLJ37464 | FLJ37464 |                                            | -0.058639 Inlier |
| siRNA Disorazole DMSO Run1   | NM_1738<br>15 | FLJ37464 | FLJ37464 |                                            | 0.058639 Inlier  |
| siRNA Disorazole DMSO Run3   | NM_1738<br>15 | FLJ37464 | FLJ37464 |                                            | 0.101833 Inlier  |

Identification of Survival Genes in Human Glioblastoma Cells Using siRNA Screening  
 Nikhil G Thaker, Fang Zhang, Peter R. McDonald, Tong Ying Shun, Michael D Lewen, Ian F. Pollack, and John S. Lazo

| siRNA Treatment              | Run | Gene ID | FLJ ID   | FLJ ID   | Value     | Category |
|------------------------------|-----|---------|----------|----------|-----------|----------|
| siRNA-Vinblastine Run1-DMSO  |     | NM_1738 |          |          |           |          |
|                              | 15  | 15      | FLJ37464 | FLJ37464 | 0.503547  | Inlier   |
|                              |     | NM_1738 |          |          |           |          |
| siRNA Disorazole DMSO Run2   | 15  | 15      | FLJ37464 | FLJ37464 | 1.486595  | Inlier   |
| siRNA-Temozolomide Run1-DMSO |     | NM_1785 |          |          |           |          |
|                              | 57  | 57      | FLJ37478 | FLJ37478 | -2.198166 | Inlier   |
| siRNA-Temozolomide Run2-DMSO |     | NM_1785 |          |          |           |          |
|                              | 57  | 57      | FLJ37478 | FLJ37478 | -0.711677 | Inlier   |
|                              |     | NM_1785 |          |          |           |          |
| siRNA Disorazole DMSO Run1   | 57  | 57      | FLJ37478 | FLJ37478 | -0.245716 | Inlier   |
|                              |     | NM_1785 |          |          |           |          |
| siRNA Disorazole DMSO Run3   | 57  | 57      | FLJ37478 | FLJ37478 | -0.228412 | Inlier   |
| siRNA-Temozolomide Run3-DMSO |     | NM_1785 |          |          |           |          |
|                              | 57  | 57      | FLJ37478 | FLJ37478 | 0.228412  | Inlier   |
| siRNA-Vinblastine Run2-DMSO  |     | NM_1785 |          |          |           |          |
|                              | 57  | 57      | FLJ37478 | FLJ37478 | 0.637323  | Inlier   |
| siRNA-Vinblastine Run1-DMSO  |     | NM_1785 |          |          |           |          |
|                              | 57  | 57      | FLJ37478 | FLJ37478 | 1.179703  | Inlier   |
|                              |     | NM_1785 |          |          |           |          |
| siRNA Disorazole DMSO Run2   | 57  | 57      | FLJ37478 | FLJ37478 | 1.801595  | Inlier   |
| siRNA-Temozolomide Run3-DMSO |     | NM_1735 |          |          |           |          |
|                              | 27  | 27      | FLJ38964 | FLJ38964 | -2.535043 | Inlier   |
| siRNA-Temozolomide Run2-DMSO |     | NM_1735 |          |          |           |          |
|                              | 27  | 27      | FLJ38964 | FLJ38964 | -0.84553  | Inlier   |
| siRNA-Vinblastine Run2-DMSO  |     | NM_1735 |          |          |           |          |
|                              | 27  | 27      | FLJ38964 | FLJ38964 | -0.50347  | Inlier   |
|                              |     | NM_1735 |          |          |           |          |
| siRNA Disorazole DMSO Run3   | 27  | 27      | FLJ38964 | FLJ38964 | -0.008343 | Inlier   |
|                              |     | NM_1735 |          |          |           |          |
| siRNA Disorazole DMSO Run1   | 27  | 27      | FLJ38964 | FLJ38964 | 0.008343  | Inlier   |
| siRNA-Temozolomide Run1-DMSO |     | NM_1735 |          |          |           |          |
|                              | 27  | 27      | FLJ38964 | FLJ38964 | 0.460361  | Inlier   |
| siRNA-Vinblastine Run1-DMSO  |     | NM_1735 |          |          |           |          |
|                              | 27  | 27      | FLJ38964 | FLJ38964 | 2.98289   | Inlier   |
|                              |     | NM_1735 |          |          |           |          |
| siRNA Disorazole DMSO Run2   | 27  | 27      | FLJ38964 | FLJ38964 | 3.24496   | Inlier   |
| siRNA-Temozolomide Run2-DMSO |     | NM_1734 |          |          |           |          |
|                              | 83  | 83      | FLJ39501 | FLJ39501 | -1.277282 | Inlier   |
| siRNA-Temozolomide Run3-DMSO |     | NM_1734 |          |          |           |          |
|                              | 83  | 83      | FLJ39501 | FLJ39501 | -1.023928 | Inlier   |
| siRNA-Temozolomide Run1-DMSO |     | NM_1734 |          |          |           |          |
|                              | 83  | 83      | FLJ39501 | FLJ39501 | -0.226195 | Inlier   |
|                              |     | NM_1734 |          |          |           |          |
| siRNA Disorazole DMSO Run1   | 83  | 83      | FLJ39501 | FLJ39501 | -0.053663 | Inlier   |
|                              |     | NM_1734 |          |          |           |          |
| siRNA Disorazole DMSO Run3   | 83  | 83      | FLJ39501 | FLJ39501 | 0.053663  | Inlier   |
| siRNA-Vinblastine Run1-DMSO  |     | NM_1734 |          |          |           |          |
|                              | 83  | 83      | FLJ39501 | FLJ39501 | 0.325072  | Inlier   |
| siRNA-Vinblastine Run2-DMSO  |     | NM_1734 |          |          |           |          |
|                              | 83  | 83      | FLJ39501 | FLJ39501 | 1.114116  | Inlier   |
|                              |     | NM_1734 |          |          |           |          |
| siRNA Disorazole DMSO Run2   | 83  | 83      | FLJ39501 | FLJ39501 | 1.533813  | Inlier   |

Identification of Survival Genes in Human Glioblastoma Cells Using siRNA Screening  
 Nikhil G Thaker, Fang Zhang, Peter R. McDonald, Tong Ying Shun, Michael D Lewen, Ian F. Pollack, and John S. Lazo

| siRNA-Temozolomide Run2-DMSO | NM_1735<br>12 | FLJ39822 | FLJ39822  | -0.940648 | Inlier  |
|------------------------------|---------------|----------|-----------|-----------|---------|
| siRNA-Temozolomide Run3-DMSO | NM_1735<br>12 | FLJ39822 | FLJ39822  | -0.408352 | Inlier  |
| siRNA Disorazole DMSO Run2   | NM_1735<br>12 | FLJ39822 | FLJ39822  | -0.346568 | Inlier  |
| siRNA-Temozolomide Run1-DMSO | NM_1735<br>12 | FLJ39822 | FLJ39822  | -0.176174 | Inlier  |
| siRNA Disorazole DMSO Run1   | NM_1735<br>12 | FLJ39822 | FLJ39822  | 0.176174  | Inlier  |
| siRNA-Vinblastine Run1-DMSO  | NM_1735<br>12 | FLJ39822 | FLJ39822  | 1.029248  | Inlier  |
| siRNA Disorazole DMSO Run3   | NM_1735<br>12 | FLJ39822 | FLJ39822  | 2.863845  | Inlier  |
| siRNA-Vinblastine Run2-DMSO  | NM_1735<br>12 | FLJ39822 | FLJ39822  | 4.204536  | Outlier |
| siRNA-Temozolomide Run1-DMSO | NM_1523<br>07 | FLJ40452 | frame 172 | -1.921613 | Inlier  |
| siRNA-Temozolomide Run2-DMSO | NM_1523<br>07 | FLJ40452 | frame 172 | -1.263895 | Inlier  |
| siRNA Disorazole DMSO Run1   | NM_1523<br>07 | FLJ40452 | frame 172 | -0.359338 | Inlier  |
| siRNA Disorazole DMSO Run3   | NM_1523<br>07 | FLJ40452 | frame 172 | -0.148095 | Inlier  |
| siRNA-Temozolomide Run3-DMSO | NM_1523<br>07 | FLJ40452 | frame 172 | 0.148096  | Inlier  |
| siRNA Disorazole DMSO Run2   | NM_1523<br>07 | FLJ40452 | frame 172 | 0.341857  | Inlier  |
| siRNA-Vinblastine Run2-DMSO  | NM_1523<br>07 | FLJ40452 | frame 172 | 0.989662  | Inlier  |



Identification of Survival Genes in Human Glioblastoma Cells Using siRNA Screening  
 Nikhil G Thaker, Fang Zhang, Peter R. McDonald, Tong Ying Shun, Michael D Lewen, Ian F. Pollack, and John S. Lazo

Molecular Pharmacology

chromosome 14  
 open reading

|                              |           |          |           |           |        |
|------------------------------|-----------|----------|-----------|-----------|--------|
| siRNA-Vinblastine Run1-DMSO  | NM_152307 | FLJ40452 | frame 172 | 2.850044  | Inlier |
|                              | NM_1988   |          |           |           |        |
| siRNA Disorazole DMSO Run2   | 57        | FLJ43855 | FLJ43855  | -0.844885 | Inlier |
| siRNA-Temozolomide Run1-DMSO | NM_198857 | FLJ43855 | FLJ43855  | -0.504115 | Inlier |
| siRNA-Temozolomide Run3-DMSO | NM_198857 | FLJ43855 | FLJ43855  | -0.310798 | Inlier |
| siRNA-Temozolomide Run2-DMSO | NM_198857 | FLJ43855 | FLJ43855  | -0.043754 | Inlier |
|                              | NM_1988   |          |           |           |        |
| siRNA Disorazole DMSO Run3   | 57        | FLJ43855 | FLJ43855  | 0.043754  | Inlier |
|                              | NM_1988   |          |           |           |        |
| siRNA Disorazole DMSO Run1   | 57        | FLJ43855 | FLJ43855  | 1.097174  | Inlier |
| siRNA-Vinblastine Run1-DMSO  | NM_198857 | FLJ43855 | FLJ43855  | 1.605579  | Inlier |
| siRNA-Vinblastine Run2-DMSO  | NM_198857 | FLJ43855 | FLJ43855  | 2.228802  | Inlier |
| siRNA-Temozolomide Run3-DMSO | NM_198577 | FLJ46361 | FLJ46361  | -1.003409 | Inlier |
| siRNA-Temozolomide Run2-DMSO | NM_198577 | FLJ46361 | FLJ46361  | -0.871762 | Inlier |
| siRNA-Vinblastine Run2-DMSO  | NM_198577 | FLJ46361 | FLJ46361  | -0.1814   | Inlier |
|                              | NM_1985   |          |           |           |        |
| siRNA Disorazole DMSO Run3   | 77        | FLJ46361 | FLJ46361  | -0.066353 | Inlier |
|                              | NM_1985   |          |           |           |        |
| siRNA Disorazole DMSO Run1   | 77        | FLJ46361 | FLJ46361  | 0.066353  | Inlier |
| siRNA-Temozolomide Run1-DMSO | NM_198577 | FLJ46361 | FLJ46361  | 0.477238  | Inlier |
|                              | NM_1985   |          |           |           |        |
| siRNA Disorazole DMSO Run2   | 77        | FLJ46361 | FLJ46361  | 1.130836  | Inlier |
| siRNA-Vinblastine Run1-DMSO  | NM_198577 | FLJ46361 | FLJ46361  | 1.560107  | Inlier |
| siRNA-Temozolomide Run3-DMSO | NM_173800 | FLJ90650 | FLJ90650  | -2.790267 | Inlier |
|                              | NM_1738   |          |           |           |        |
| siRNA Disorazole DMSO Run1   | 00        | FLJ90650 | FLJ90650  | -0.352146 | Inlier |
| siRNA-Temozolomide Run1-DMSO | NM_173800 | FLJ90650 | FLJ90650  | -0.295558 | Inlier |
| siRNA-Temozolomide Run2-DMSO | NM_173800 | FLJ90650 | FLJ90650  | -0.167372 | Inlier |
|                              | NM_1738   |          |           |           |        |
| siRNA Disorazole DMSO Run3   | 00        | FLJ90650 | FLJ90650  | 0.167373  | Inlier |
|                              | NM_1738   |          |           |           |        |
| siRNA Disorazole DMSO Run2   | 00        | FLJ90650 | FLJ90650  | 0.996854  | Inlier |
| siRNA-Vinblastine Run2-DMSO  | NM_173800 | FLJ90650 | FLJ90650  | 1.880764  | Inlier |

Identification of Survival Genes in Human Glioblastoma Cells Using siRNA Screening

Nikhil G Thaker, Fang Zhang, Peter R. McDonald, Tong Ying Shun, Michael D Lewen, Ian F. Pollack, and John S.

Lazo

|                                  |               |          |                                  |           |        |
|----------------------------------|---------------|----------|----------------------------------|-----------|--------|
| siRNA-Vinblastine Run1-<br>DMSO  | NM_1738<br>00 | FLJ90650 | FLJ90650                         | 1.913429  | Inlier |
| siRNA-Temozolomide Run3-<br>DMSO | NM_1735<br>02 | FLJ90661 | protease,<br>serine, 36          | -2.022179 | Inlier |
| siRNA-Temozolomide Run2-<br>DMSO | NM_1735<br>02 | FLJ90661 | protease,<br>serine, 36          | -1.520236 | Inlier |
| siRNA Disorazole DMSO Run2       | NM_1735<br>02 | FLJ90661 | protease,<br>serine, 36          | -0.644006 | Inlier |
| siRNA Disorazole DMSO Run3       | NM_1735<br>02 | FLJ90661 | protease,<br>serine, 36          | -0.309307 | Inlier |
| siRNA-Temozolomide Run1-<br>DMSO | NM_1735<br>02 | FLJ90661 | protease,<br>serine, 36          | 0.309307  | Inlier |
| siRNA Disorazole DMSO Run1       | NM_1735<br>02 | FLJ90661 | protease,<br>serine, 36          | 0.401319  | Inlier |
| siRNA-Vinblastine Run1-<br>DMSO  | NM_1735<br>02 | FLJ90661 | protease,<br>serine, 36          | 0.704994  | Inlier |
| siRNA-Vinblastine Run2-<br>DMSO  | NM_1735<br>02 | FLJ90661 | protease,<br>serine, 36          | 1.302442  | Inlier |
| siRNA-Temozolomide Run3-<br>DMSO | NM_1536<br>92 | FLJ90724 | HtrA<br>serine<br>peptidase<br>4 | -0.942483 | Inlier |
| siRNA-Temozolomide Run2-<br>DMSO | NM_1536<br>92 | FLJ90724 | HtrA<br>serine<br>peptidase<br>4 | -0.684283 | Inlier |
| siRNA Disorazole DMSO Run2       | NM_1536<br>92 | FLJ90724 | HtrA<br>serine<br>peptidase<br>4 | -0.258501 | Inlier |
| siRNA Disorazole DMSO Run3       | NM_1536<br>92 | FLJ90724 | HtrA<br>serine<br>peptidase<br>4 | -0.217229 | Inlier |
| siRNA-Temozolomide Run1-<br>DMSO | NM_1536<br>92 | FLJ90724 | HtrA<br>serine<br>peptidase<br>4 | 0.217229  | Inlier |
| siRNA Disorazole DMSO Run1       | NM_1536<br>92 | FLJ90724 | HtrA<br>serine<br>peptidase<br>4 | 0.664717  | Inlier |
| siRNA-Vinblastine Run1-<br>DMSO  | NM_1536<br>92 | FLJ90724 | HtrA<br>serine<br>peptidase<br>4 | 0.932998  | Inlier |
| siRNA-Vinblastine Run2-<br>DMSO  | NM_1536<br>92 | FLJ90724 | HtrA<br>serine<br>peptidase<br>4 | 1.180648  | Inlier |
| siRNA-Temozolomide Run3-<br>DMSO | NM_0044<br>75 | FLOT2    | flotillin 2                      | -1.468831 | Inlier |

Identification of Survival Genes in Human Glioblastoma Cells Using siRNA Screening

Nikhil G Thaker, Fang Zhang, Peter R. McDonald, Tong Ying Shun, Michael D Lewen, Ian F. Pollack, and John S.

Lazo

|                              |               |       |                                                                    |           |        |
|------------------------------|---------------|-------|--------------------------------------------------------------------|-----------|--------|
| siRNA-Temozolomide Run2-DMSO | NM_0044<br>75 | FLOT2 | flotillin 2                                                        | -0.852671 | Inlier |
| siRNA-Temozolomide Run1-DMSO | NM_0044<br>75 | FLOT2 | flotillin 2                                                        | -0.360435 | Inlier |
| siRNA Disorazole DMSO Run1   | NM_0044<br>75 | FLOT2 | flotillin 2                                                        | -0.207174 | Inlier |
| siRNA Disorazole DMSO Run3   | NM_0044<br>75 | FLOT2 | flotillin 2                                                        | 0.207174  | Inlier |
| siRNA Disorazole DMSO Run2   | NM_0044<br>75 | FLOT2 | flotillin 2                                                        | 0.496329  | Inlier |
| siRNA-Vinblastine Run2-DMSO  | NM_0044<br>75 | FLOT2 | flotillin 2                                                        | 1.257157  | Inlier |
| siRNA-Vinblastine Run1-DMSO  | NM_0044<br>75 | FLOT2 | flotillin 2<br>fibronectin<br>leucine<br>rich<br>transmem<br>brane | 2.420487  | Inlier |
| siRNA-Temozolomide Run3-DMSO | NM_0132<br>80 | FLRT1 | protein 1<br>fibronectin<br>leucine<br>rich<br>transmem<br>brane   | -1.391677 | Inlier |
| siRNA-Temozolomide Run2-DMSO | NM_0132<br>80 | FLRT1 | protein 1<br>fibronectin<br>leucine<br>rich<br>transmem<br>brane   | -0.814637 | Inlier |
| siRNA Disorazole DMSO Run3   | NM_0132<br>80 | FLRT1 | protein 1<br>fibronectin<br>leucine<br>rich<br>transmem<br>brane   | -0.507815 | Inlier |
| siRNA-Vinblastine Run2-DMSO  | NM_0132<br>80 | FLRT1 | protein 1<br>fibronectin<br>leucine<br>rich<br>transmem<br>brane   | -0.138911 | Inlier |
| siRNA Disorazole DMSO Run1   | NM_0132<br>80 | FLRT1 | protein 1<br>fibronectin<br>leucine<br>rich<br>transmem<br>brane   | 0.138911  | Inlier |
| siRNA-Temozolomide Run1-DMSO | NM_0132<br>80 | FLRT1 | protein 1                                                          | 0.534363  | Inlier |

Identification of Survival Genes in Human Glioblastoma Cells Using siRNA Screening  
 Nikhil G Thaker, Fang Zhang, Peter R. McDonald, Tong Ying Shun, Michael D Lewen, Ian F. Pollack, and John S. Lazo

Molecular Pharmacology

|                              |               |       |                                                                  |           |        |
|------------------------------|---------------|-------|------------------------------------------------------------------|-----------|--------|
| siRNA-Vinblastine Run1-DMSO  | NM_0132<br>80 | FLRT1 | fibronectin<br>leucine<br>rich<br>transmem<br>brane<br>protein 1 | 1.14766   | Inlier |
| siRNA Disorazole DMSO Run2   | NM_0132<br>80 | FLRT1 | fibronectin<br>leucine<br>rich<br>transmem<br>brane<br>protein 1 | 1.368636  | Inlier |
| siRNA-Temozolomide Run3-DMSO | NM_0132<br>31 | FLRT2 | fibronectin<br>leucine<br>rich<br>transmem<br>brane<br>protein 2 | -2.193761 | Inlier |
| siRNA-Temozolomide Run2-DMSO | NM_0132<br>31 | FLRT2 | fibronectin<br>leucine<br>rich<br>transmem<br>brane<br>protein 2 | -1.080951 | Inlier |
| siRNA-Temozolomide Run1-DMSO | NM_0132<br>31 | FLRT2 | fibronectin<br>leucine<br>rich<br>transmem<br>brane<br>protein 2 | -0.427574 | Inlier |
| siRNA Disorazole DMSO Run1   | NM_0132<br>31 | FLRT2 | fibronectin<br>leucine<br>rich<br>transmem<br>brane<br>protein 2 | -0.356553 | Inlier |
| siRNA Disorazole DMSO Run3   | NM_0132<br>31 | FLRT2 | fibronectin<br>leucine<br>rich<br>transmem<br>brane<br>protein 2 | 0.356553  | Inlier |
| siRNA Disorazole DMSO Run2   | NM_0132<br>31 | FLRT2 | fibronectin<br>leucine<br>rich<br>transmem<br>brane<br>protein 2 | 0.422039  | Inlier |

Identification of Survival Genes in Human Glioblastoma Cells Using siRNA Screening  
 Nikhil G Thaker, Fang Zhang, Peter R. McDonald, Tong Ying Shun, Michael D Lewen, Ian F. Pollack, and John S. Lazo

Molecular Pharmacology

|                              |               |       |                                                                  |           |        |
|------------------------------|---------------|-------|------------------------------------------------------------------|-----------|--------|
| siRNA-Vinblastine Run2-DMSO  | NM_0132<br>31 | FLRT2 | fibronectin<br>leucine<br>rich<br>transmem<br>brane<br>protein 2 | 0.921426  | Inlier |
| siRNA-Vinblastine Run1-DMSO  | NM_0132<br>31 | FLRT2 | fibronectin<br>leucine<br>rich<br>transmem<br>brane<br>protein 2 | 1.472297  | Inlier |
| siRNA-Temozolomide Run3-DMSO | NM_1983<br>91 | FLRT3 | fibronectin<br>leucine<br>rich<br>transmem<br>brane<br>protein 3 | -1.3695   | Inlier |
| siRNA-Temozolomide Run2-DMSO | NM_1983<br>91 | FLRT3 | fibronectin<br>leucine<br>rich<br>transmem<br>brane<br>protein 3 | -0.863532 | Inlier |
| siRNA-Temozolomide Run1-DMSO | NM_1983<br>91 | FLRT3 | fibronectin<br>leucine<br>rich<br>transmem<br>brane<br>protein 3 | -0.355032 | Inlier |
| siRNA Disorazole DMSO Run1   | NM_1983<br>91 | FLRT3 | fibronectin<br>leucine<br>rich<br>transmem<br>brane<br>protein 3 | -0.156781 | Inlier |
| siRNA Disorazole DMSO Run3   | NM_1983<br>91 | FLRT3 | fibronectin<br>leucine<br>rich<br>transmem<br>brane<br>protein 3 | 0.156781  | Inlier |
| siRNA Disorazole DMSO Run2   | NM_1983<br>91 | FLRT3 | fibronectin<br>leucine<br>rich<br>transmem<br>brane<br>protein 3 | 0.486166  | Inlier |

Identification of Survival Genes in Human Glioblastoma Cells Using siRNA Screening

Nikhil G Thaker, Fang Zhang, Peter R. McDonald, Tong Ying Shun, Michael D Lewen, Ian F. Pollack, and John S. Lazo

Molecular Pharmacology

|                              |           |       |                                                                                                                                              |           |        |
|------------------------------|-----------|-------|----------------------------------------------------------------------------------------------------------------------------------------------|-----------|--------|
| siRNA-Vinblastine Run2-DMSO  | NM_198391 | FLRT3 | fibronectin<br>leucine<br>rich<br>transmem<br>brane<br>protein 3<br>fibronectin<br>leucine<br>rich<br>transmem<br>brane<br>protein 3         | 0.862834  | Inlier |
| siRNA-Vinblastine Run1-DMSO  | NM_198391 | FLRT3 | fms-<br>related<br>tyrosine<br>kinase 1<br>(vascular<br>endothelial<br>growth<br>factor/vasc<br>ular<br>permeabili<br>ty factor<br>receptor) | 1.279532  | Inlier |
| siRNA-Temozolomide Run3-DMSO | NM_002019 | FLT1  | fms-<br>related<br>tyrosine<br>kinase 1<br>(vascular<br>endothelial<br>growth<br>factor/vasc<br>ular<br>permeabili<br>ty factor<br>receptor) | -0.856704 | Inlier |
| siRNA-Temozolomide Run1-DMSO | NM_002019 | FLT1  | fms-<br>related<br>tyrosine<br>kinase 1<br>(vascular<br>endothelial<br>growth<br>factor/vasc<br>ular<br>permeabili<br>ty factor<br>receptor) | -0.492296 | Inlier |
| siRNA Disorazole DMSO Run3   | NM_002019 | FLT1  | permeabili<br>ty factor<br>receptor)                                                                                                         | -0.261956 | Inlier |

Identification of Survival Genes in Human Glioblastoma Cells Using siRNA Screening

Nikhil G Thaker, Fang Zhang, Peter R. McDonald, Tong Ying Shun, Michael D Lewen, Ian F. Pollack, and John S.

Lazo

Molecular Pharmacology

| siRNA                   | Run     | Gene | Gene ID   | Gene Name                                                                                                | Value     | Outlier |
|-------------------------|---------|------|-----------|----------------------------------------------------------------------------------------------------------|-----------|---------|
| siRNA-Temozolomide DMSO | Run2-19 | FLT1 | NM_002019 | fms-related tyrosine kinase 1 (vascular endothelial growth factor/vascular permeability factor receptor) | -0.181677 | Inlier  |
| siRNA Disorazole DMSO   | Run2-19 | FLT1 | NM_002019 | fms-related tyrosine kinase 1 (vascular endothelial growth factor/vascular permeability factor receptor) | 0.181677  | Inlier  |
| siRNA Disorazole DMSO   | Run1-19 | FLT1 | NM_002019 | fms-related tyrosine kinase 1 (vascular endothelial growth factor/vascular permeability factor receptor) | 1.764674  | Inlier  |
| siRNA-Vinblastine DMSO  | Run1-19 | FLT1 | NM_002019 | fms-related tyrosine kinase 1 (vascular endothelial growth factor/vascular permeability factor receptor) | 2.009168  | Inlier  |

Identification of Survival Genes in Human Glioblastoma Cells Using siRNA Screening  
 Nikhil G Thaker, Fang Zhang, Peter R. McDonald, Tong Ying Shun, Michael D Lewen, Ian F. Pollack, and John S. Lazo

Molecular Pharmacology

|                              |           |        |                                                                                                          |           |         |
|------------------------------|-----------|--------|----------------------------------------------------------------------------------------------------------|-----------|---------|
| siRNA-Vinblastine Run2-DMSO  | NM_002019 | FLT1   | fms-related tyrosine kinase 1 (vascular endothelial growth factor/vascular permeability factor receptor) | 3.545351  | Outlier |
| siRNA-Temozolomide Run3-DMSO | NM_004119 | FLT3   | fms-related tyrosine kinase 3                                                                            | -1.780417 | Inlier  |
| siRNA-Temozolomide Run1-DMSO | NM_004119 | FLT3   | fms-related tyrosine kinase 3                                                                            | -1.237755 | Inlier  |
| siRNA-Temozolomide Run2-DMSO | NM_004119 | FLT3   | fms-related tyrosine kinase 3                                                                            | -0.591526 | Inlier  |
| siRNA-Vinblastine Run1-DMSO  | NM_004119 | FLT3   | fms-related tyrosine kinase 3                                                                            | -0.180835 | Inlier  |
| siRNA Disorazole DMSO Run1   | NM_004119 | FLT3   | fms-related tyrosine kinase 3                                                                            | 0.180835  | Inlier  |
| siRNA Disorazole DMSO Run2   | NM_004119 | FLT3   | fms-related tyrosine kinase 3                                                                            | 0.638254  | Inlier  |
| siRNA-Vinblastine Run2-DMSO  | NM_004119 | FLT3   | fms-related tyrosine kinase 3                                                                            | 0.710746  | Inlier  |
| siRNA Disorazole DMSO Run3   | NM_004119 | FLT3   | fms-related tyrosine kinase 3                                                                            | 0.972706  | Inlier  |
| siRNA-Temozolomide Run1-DMSO | NM_001459 | FLT3LG | fms-related tyrosine kinase 3 ligand                                                                     | -0.914734 | Inlier  |



Identification of Survival Genes in Human Glioblastoma Cells Using siRNA Screening  
 Nikhil G Thaker, Fang Zhang, Peter R. McDonald, Tong Ying Shun, Michael D Lewen, Ian F. Pollack, and John S. Lazo

Molecular Pharmacology

|                                  |               |        |                                                   |           |        |
|----------------------------------|---------------|--------|---------------------------------------------------|-----------|--------|
| siRNA Disorazole DMSO Run1       | NM_0014<br>59 | FLT3LG | fms-<br>related<br>tyrosine<br>kinase 3<br>ligand | -0.46136  | Inlier |
| siRNA-Vinblastine Run1-<br>DMSO  | NM_0014<br>59 | FLT3LG | fms-<br>related<br>tyrosine<br>kinase 3<br>ligand | -0.400001 | Inlier |
| siRNA-Vinblastine Run2-<br>DMSO  | NM_0014<br>59 | FLT3LG | fms-<br>related<br>tyrosine<br>kinase 3<br>ligand | -0.12242  | Inlier |
| siRNA-Temozolomide Run2-<br>DMSO | NM_0014<br>59 | FLT3LG | fms-<br>related<br>tyrosine<br>kinase 3<br>ligand | 0.12242   | Inlier |
| siRNA-Temozolomide Run3-<br>DMSO | NM_0014<br>59 | FLT3LG | fms-<br>related<br>tyrosine<br>kinase 3<br>ligand | 0.88764   | Inlier |
| siRNA Disorazole DMSO Run2       | NM_0014<br>59 | FLT3LG | fms-<br>related<br>tyrosine<br>kinase 3<br>ligand | 2.080148  | Inlier |
| siRNA Disorazole DMSO Run3       | NM_0014<br>59 | FLT3LG | fms-<br>related<br>tyrosine<br>kinase 3<br>ligand | 3.208698  | Inlier |
| siRNA-Temozolomide Run3-<br>DMSO | NM_1829<br>25 | FLT4   | fms-<br>related<br>tyrosine<br>kinase 4           | -1.12594  | Inlier |
| siRNA-Temozolomide Run2-<br>DMSO | NM_1829<br>25 | FLT4   | fms-<br>related<br>tyrosine<br>kinase 4           | -0.717517 | Inlier |
| siRNA-Temozolomide Run1-<br>DMSO | NM_1829<br>25 | FLT4   | fms-<br>related<br>tyrosine<br>kinase 4           | -0.332053 | Inlier |
| siRNA-Vinblastine Run1-<br>DMSO  | NM_1829<br>25 | FLT4   | fms-<br>related<br>tyrosine<br>kinase 4           | -0.19634  | Inlier |

Identification of Survival Genes in Human Glioblastoma Cells Using siRNA Screening  
 Nikhil G Thaker, Fang Zhang, Peter R. McDonald, Tong Ying Shun, Michael D Lewen, Ian F. Pollack, and John S. Lazo

Molecular Pharmacology

|                                  |               |       |                                             |           |        |
|----------------------------------|---------------|-------|---------------------------------------------|-----------|--------|
| siRNA Disorazole DMSO Run1       | NM_1829<br>25 | FLT4  | fms-<br>related<br>tyrosine<br>kinase 4     | 0.19634   | Inlier |
| siRNA Disorazole DMSO Run2       | NM_1829<br>25 | FLT4  | fms-<br>related<br>tyrosine<br>kinase 4     | 0.631483  | Inlier |
| siRNA-Vinblastine Run2-<br>DMSO  | NM_1829<br>25 | FLT4  | fms-<br>related<br>tyrosine<br>kinase 4     | 1.030516  | Inlier |
| siRNA Disorazole DMSO Run3       | NM_1829<br>25 | FLT4  | fms-<br>related<br>tyrosine<br>kinase 4     | 1.523033  | Inlier |
| siRNA-Temozolomide Run3-<br>DMSO | NM_0058<br>92 | FMNL1 | formin-like<br>1                            | -1.200793 | Inlier |
| siRNA Disorazole DMSO Run2       | NM_0058<br>92 | FMNL1 | formin-like<br>1                            | -0.814301 | Inlier |
| siRNA-Temozolomide Run2-<br>DMSO | NM_0058<br>92 | FMNL1 | formin-like<br>1                            | -0.534699 | Inlier |
| siRNA Disorazole DMSO Run3       | NM_0058<br>92 | FMNL1 | formin-like<br>1                            | -0.204047 | Inlier |
| siRNA Disorazole DMSO Run1       | NM_0058<br>92 | FMNL1 | formin-like<br>1                            | 0.204047  | Inlier |
| siRNA-Temozolomide Run1-<br>DMSO | NM_0058<br>92 | FMNL1 | formin-like<br>1                            | 0.255279  | Inlier |
| siRNA-Vinblastine Run2-<br>DMSO  | NM_0058<br>92 | FMNL1 | formin-like<br>1                            | 1.202608  | Inlier |
| siRNA-Vinblastine Run1-<br>DMSO  | NM_0058<br>92 | FMNL1 | formin-like<br>1                            | 1.292472  | Inlier |
| siRNA-Temozolomide Run3-<br>DMSO | NM_0020<br>21 | FMO1  | flavin<br>containing<br>monooxyg<br>enase 1 | -2.678574 | Inlier |
| siRNA Disorazole DMSO Run1       | NM_0020<br>21 | FMO1  | flavin<br>containing<br>monooxyg<br>enase 1 | -0.982166 | Inlier |
| siRNA-Temozolomide Run1-<br>DMSO | NM_0020<br>21 | FMO1  | flavin<br>containing<br>monooxyg<br>enase 1 | -0.366834 | Inlier |
| siRNA-Temozolomide Run2-<br>DMSO | NM_0020<br>21 | FMO1  | flavin<br>containing<br>monooxyg<br>enase 1 | -0.214887 | Inlier |
| siRNA Disorazole DMSO Run3       | NM_0020<br>21 | FMO1  | flavin<br>containing<br>monooxyg<br>enase 1 | 0.214887  | Inlier |

Identification of Survival Genes in Human Glioblastoma Cells Using siRNA Screening  
 Nikhil G Thaker, Fang Zhang, Peter R. McDonald, Tong Ying Shun, Michael D Lewen, Ian F. Pollack, and John S. Lazo

Molecular Pharmacology

|                              |               |      |                                             |           |         |
|------------------------------|---------------|------|---------------------------------------------|-----------|---------|
| siRNA-Vinblastine Run2-DMSO  | NM_0020<br>21 | FMO1 | flavin<br>containing<br>monooxyg<br>enase 1 | 0.226888  | Inlier  |
| siRNA-Vinblastine Run1-DMSO  | NM_0020<br>21 | FMO1 | flavin<br>containing<br>monooxyg<br>enase 1 | 1.983597  | Inlier  |
| siRNA Disorazole DMSO Run2   | NM_0020<br>21 | FMO1 | flavin<br>containing<br>monooxyg<br>enase 1 | 2.208444  | Inlier  |
| siRNA-Temozolomide Run3-DMSO | NM_0014<br>60 | FMO2 | flavin<br>containing<br>monooxyg<br>enase 2 | -5.783439 | Outlier |
| siRNA Disorazole DMSO Run3   | NM_0014<br>60 | FMO2 | flavin<br>containing<br>monooxyg<br>enase 2 | -2.517483 | Inlier  |
| siRNA Disorazole DMSO Run1   | NM_0014<br>60 | FMO2 | flavin<br>containing<br>monooxyg<br>enase 2 | -0.618942 | Inlier  |
| siRNA-Vinblastine Run2-DMSO  | NM_0014<br>60 | FMO2 | flavin<br>containing<br>monooxyg<br>enase 2 | -0.407773 | Inlier  |
| siRNA-Vinblastine Run1-DMSO  | NM_0014<br>60 | FMO2 | flavin<br>containing<br>monooxyg<br>enase 2 | 0.407775  | Inlier  |
| siRNA-Temozolomide Run1-DMSO | NM_0014<br>60 | FMO2 | flavin<br>containing<br>monooxyg<br>enase 2 | 0.626599  | Inlier  |
| siRNA-Temozolomide Run2-DMSO | NM_0014<br>60 | FMO2 | flavin<br>containing<br>monooxyg<br>enase 2 | 0.722401  | Inlier  |
| siRNA Disorazole DMSO Run2   | NM_0014<br>60 | FMO2 | flavin<br>containing<br>monooxyg<br>enase 2 | 1.366854  | Inlier  |
| siRNA-Temozolomide Run3-DMSO | NM_0068<br>94 | FMO3 | flavin<br>containing<br>monooxyg<br>enase 3 | -2.647407 | Inlier  |
| siRNA Disorazole DMSO Run1   | NM_0068<br>94 | FMO3 | flavin<br>containing<br>monooxyg<br>enase 3 | -0.810257 | Inlier  |

Identification of Survival Genes in Human Glioblastoma Cells Using siRNA Screening  
 Nikhil G Thaker, Fang Zhang, Peter R. McDonald, Tong Ying Shun, Michael D Lewen, Ian F. Pollack, and John S. Lazo

Molecular Pharmacology

|                                  |               |      |                                             |           |         |
|----------------------------------|---------------|------|---------------------------------------------|-----------|---------|
| siRNA Disorazole DMSO Run3       | NM_0068<br>94 | FMO3 | flavin<br>containing<br>monooxyg<br>enase 3 | -0.571553 | Inlier  |
| siRNA-Temozolomide Run2-<br>DMSO | NM_0068<br>94 | FMO3 | flavin<br>containing<br>monooxyg<br>enase 3 | -0.087122 | Inlier  |
| siRNA-Temozolomide Run1-<br>DMSO | NM_0068<br>94 | FMO3 | flavin<br>containing<br>monooxyg<br>enase 3 | 0.087122  | Inlier  |
| siRNA-Vinblastine Run2-<br>DMSO  | NM_0068<br>94 | FMO3 | flavin<br>containing<br>monooxyg<br>enase 3 | 0.56691   | Inlier  |
| siRNA-Vinblastine Run1-<br>DMSO  | NM_0068<br>94 | FMO3 | flavin<br>containing<br>monooxyg<br>enase 3 | 0.777448  | Inlier  |
| siRNA Disorazole DMSO Run2       | NM_0068<br>94 | FMO3 | flavin<br>containing<br>monooxyg<br>enase 3 | 1.468584  | Inlier  |
| siRNA-Temozolomide Run3-<br>DMSO | NM_0020<br>22 | FMO4 | flavin<br>containing<br>monooxyg<br>enase 4 | -4.698639 | Outlier |
| siRNA Disorazole DMSO Run1       | NM_0020<br>22 | FMO4 | flavin<br>containing<br>monooxyg<br>enase 4 | -1.138766 | Inlier  |
| siRNA Disorazole DMSO Run3       | NM_0020<br>22 | FMO4 | flavin<br>containing<br>monooxyg<br>enase 4 | -0.780787 | Inlier  |
| siRNA-Temozolomide Run2-<br>DMSO | NM_0020<br>22 | FMO4 | flavin<br>containing<br>monooxyg<br>enase 4 | -0.030212 | Inlier  |
| siRNA-Temozolomide Run1-<br>DMSO | NM_0020<br>22 | FMO4 | flavin<br>containing<br>monooxyg<br>enase 4 | 0.030212  | Inlier  |
| siRNA-Vinblastine Run2-<br>DMSO  | NM_0020<br>22 | FMO4 | flavin<br>containing<br>monooxyg<br>enase 4 | 0.373576  | Inlier  |
| siRNA Disorazole DMSO Run2       | NM_0020<br>22 | FMO4 | flavin<br>containing<br>monooxyg<br>enase 4 | 0.568213  | Inlier  |

Identification of Survival Genes in Human Glioblastoma Cells Using siRNA Screening  
 Nikhil G Thaker, Fang Zhang, Peter R. McDonald, Tong Ying Shun, Michael D Lewen, Ian F. Pollack, and John S. Lazo

Molecular Pharmacology

|                              |           |      |                                   |           |        |
|------------------------------|-----------|------|-----------------------------------|-----------|--------|
| siRNA-Vinblastine Run1-DMSO  | NM_002022 | FMO4 | flavin containing monooxygenase 4 | 3.087674  | Inlier |
| siRNA Disorazole DMSO Run3   | NM_001461 | FMO5 | flavin containing monooxygenase 5 | -0.935312 | Inlier |
| siRNA Disorazole DMSO Run1   | NM_001461 | FMO5 | flavin containing monooxygenase 5 | -0.715126 | Inlier |
| siRNA-Vinblastine Run2-DMSO  | NM_001461 | FMO5 | flavin containing monooxygenase 5 | -0.633874 | Inlier |
| siRNA-Temozolomide Run1-DMSO | NM_001461 | FMO5 | flavin containing monooxygenase 5 | -0.011447 | Inlier |
| siRNA-Temozolomide Run2-DMSO | NM_001461 | FMO5 | flavin containing monooxygenase 5 | 0.011448  | Inlier |
| siRNA-Temozolomide Run3-DMSO | NM_001461 | FMO5 | flavin containing monooxygenase 5 | 0.590649  | Inlier |
| siRNA-Vinblastine Run1-DMSO  | NM_001461 | FMO5 | flavin containing monooxygenase 5 | 0.927211  | Inlier |
| siRNA Disorazole DMSO Run2   | NM_001461 | FMO5 | flavin containing monooxygenase 5 | 0.956726  | Inlier |
| siRNA-Temozolomide Run3-DMSO | NM_022158 | FN3K | fructosaminase 3 kinase           | -1.052776 | Inlier |
| siRNA Disorazole DMSO Run2   | NM_022158 | FN3K | fructosaminase 3 kinase           | -0.729043 | Inlier |
| siRNA-Temozolomide Run1-DMSO | NM_022158 | FN3K | fructosaminase 3 kinase           | -0.147167 | Inlier |
| siRNA Disorazole DMSO Run1   | NM_022158 | FN3K | fructosaminase 3 kinase           | -0.099505 | Inlier |
| siRNA-Temozolomide Run2-DMSO | NM_022158 | FN3K | fructosaminase 3 kinase           | 0.099505  | Inlier |

Identification of Survival Genes in Human Glioblastoma Cells Using siRNA Screening  
 Nikhil G Thaker, Fang Zhang, Peter R. McDonald, Tong Ying Shun, Michael D Lewen, Ian F. Pollack, and John S. Lazo

|                                                           |                  |        |                                                |           |         |
|-----------------------------------------------------------|------------------|--------|------------------------------------------------|-----------|---------|
| Molecular Pharmacology<br>siRNA-Vinblastine Run2-<br>DMSO | NM_0221<br>58    | FN3K   | fructosami<br>ne 3<br>kinase                   | 0.619957  | Inlier  |
| siRNA-Vinblastine Run1-<br>DMSO                           | NM_0221<br>58    | FN3K   | fructosami<br>ne 3<br>kinase                   | 1.748098  | Inlier  |
| siRNA Disorazole DMSO Run3                                | NM_0221<br>58    | FN3K   | fructosami<br>ne 3<br>kinase                   | 3.557744  | Outlier |
| siRNA-Temozolomide Run1-<br>DMSO                          | NM_0246<br>19    | FN3KRP | FN3KRP                                         | -1.059114 | Inlier  |
| siRNA Disorazole DMSO Run2                                | NM_0246<br>19    | FN3KRP | FN3KRP                                         | -0.874872 | Inlier  |
| siRNA-Temozolomide Run3-<br>DMSO                          | NM_0246<br>19    | FN3KRP | FN3KRP                                         | -0.667344 | Inlier  |
| siRNA-Temozolomide Run2-<br>DMSO                          | NM_0246<br>19    | FN3KRP | FN3KRP                                         | -0.367974 | Inlier  |
| siRNA Disorazole DMSO Run1                                | NM_0246<br>19    | FN3KRP | FN3KRP                                         | 0.367975  | Inlier  |
| siRNA-Vinblastine Run2-<br>DMSO                           | NM_0246<br>19    | FN3KRP | FN3KRP                                         | 0.663925  | Inlier  |
| siRNA-Vinblastine Run1-<br>DMSO                           | NM_0246<br>19    | FN3KRP | FN3KRP                                         | 0.681656  | Inlier  |
| siRNA Disorazole DMSO Run3                                | NM_0246<br>19    | FN3KRP | FN3KRP                                         | 2.7458    | Inlier  |
| siRNA-Temozolomide Run3-<br>DMSO                          | NM_0010<br>18677 | FNTA   | farnesyltra<br>nsferase,<br>CAAX<br>box, alpha | -0.847974 | Inlier  |
| siRNA-Temozolomide Run2-<br>DMSO                          | NM_0010<br>18677 | FNTA   | farnesyltra<br>nsferase,<br>CAAX<br>box, alpha | -0.83897  | Inlier  |
| siRNA Disorazole DMSO Run1                                | NM_0010<br>18677 | FNTA   | farnesyltra<br>nsferase,<br>CAAX<br>box, alpha | -0.51003  | Inlier  |
| siRNA-Temozolomide Run1-<br>DMSO                          | NM_0010<br>18677 | FNTA   | farnesyltra<br>nsferase,<br>CAAX<br>box, alpha | -0.222162 | Inlier  |
| siRNA-Vinblastine Run2-<br>DMSO                           | NM_0010<br>18677 | FNTA   | farnesyltra<br>nsferase,<br>CAAX<br>box, alpha | 0.222162  | Inlier  |

Identification of Survival Genes in Human Glioblastoma Cells Using siRNA Screening  
 Nikhil G Thaker, Fang Zhang, Peter R. McDonald, Tong Ying Shun, Michael D Lewen, Ian F. Pollack, and John S. Lazo  
 Molecular Pharmacology

|                                  |                  |      |                                                |           |        |
|----------------------------------|------------------|------|------------------------------------------------|-----------|--------|
| siRNA Disorazole DMSO Run3       | NM_0010<br>18677 | FNTA | farnesyltra<br>nsferase,<br>CAAX<br>box, alpha | 0.484343  | Inlier |
| siRNA-Vinblastine Run1-<br>DMSO  | NM_0010<br>18677 | FNTA | farnesyltra<br>nsferase,<br>CAAX<br>box, alpha | 2.030203  | Inlier |
| siRNA Disorazole DMSO Run2       | NM_0010<br>18677 | FNTA | farnesyltra<br>nsferase,<br>CAAX<br>box, alpha | 2.105836  | Inlier |
| siRNA-Temozolomide Run3-<br>DMSO | NM_0020<br>28    | FNTB | farnesyltra<br>nsferase,<br>CAAX<br>box, beta  | -0.763226 | Inlier |
| siRNA-Temozolomide Run2-<br>DMSO | NM_0020<br>28    | FNTB | farnesyltra<br>nsferase,<br>CAAX<br>box, beta  | -0.610225 | Inlier |
| siRNA Disorazole DMSO Run3       | NM_0020<br>28    | FNTB | farnesyltra<br>nsferase,<br>CAAX<br>box, beta  | -0.501823 | Inlier |
| siRNA-Vinblastine Run2-<br>DMSO  | NM_0020<br>28    | FNTB | farnesyltra<br>nsferase,<br>CAAX<br>box, beta  | -0.311977 | Inlier |
| siRNA Disorazole DMSO Run1       | NM_0020<br>28    | FNTB | farnesyltra<br>nsferase,<br>CAAX<br>box, beta  | 0.311977  | Inlier |
| siRNA-Temozolomide Run1-<br>DMSO | NM_0020<br>28    | FNTB | farnesyltra<br>nsferase,<br>CAAX<br>box, beta  | 0.738775  | Inlier |
| siRNA Disorazole DMSO Run2       | NM_0020<br>28    | FNTB | farnesyltra<br>nsferase,<br>CAAX<br>box, beta  | 2.458198  | Inlier |
| siRNA-Vinblastine Run1-<br>DMSO  | NM_0020<br>28    | FNTB | farnesyltra<br>nsferase,<br>CAAX<br>box, beta  | 2.807467  | Inlier |

Identification of Survival Genes in Human Glioblastoma Cells Using siRNA Screening  
 Nikhil G Thaker, Fang Zhang, Peter R. McDonald, Tong Ying Shun, Michael D Lewen, Ian F. Pollack, and John S. Lazo  
 Molecular Pharmacology

|                              |               |       |                                                                         |           |        |
|------------------------------|---------------|-------|-------------------------------------------------------------------------|-----------|--------|
| siRNA-Temozolomide Run2-DMSO | NM_0044<br>76 | FOLH1 | folate<br>hydrolase<br>(prostate-<br>specific<br>membrane<br>antigen) 1 | -1.152627 | Inlier |
| siRNA Disorazole DMSO Run1   | NM_0044<br>76 | FOLH1 | folate<br>hydrolase<br>(prostate-<br>specific<br>membrane<br>antigen) 1 | -0.643638 | Inlier |
| siRNA-Temozolomide Run3-DMSO | NM_0044<br>76 | FOLH1 | folate<br>hydrolase<br>(prostate-<br>specific<br>membrane<br>antigen) 1 | -0.423005 | Inlier |
| siRNA Disorazole DMSO Run2   | NM_0044<br>76 | FOLH1 | folate<br>hydrolase<br>(prostate-<br>specific<br>membrane<br>antigen) 1 | -0.380577 | Inlier |
| siRNA-Temozolomide Run1-DMSO | NM_0044<br>76 | FOLH1 | folate<br>hydrolase<br>(prostate-<br>specific<br>membrane<br>antigen) 1 | 0.380577  | Inlier |
| siRNA-Vinblastine Run2-DMSO  | NM_0044<br>76 | FOLH1 | folate<br>hydrolase<br>(prostate-<br>specific<br>membrane<br>antigen) 1 | 0.705362  | Inlier |
| siRNA-Vinblastine Run1-DMSO  | NM_0044<br>76 | FOLH1 | folate<br>hydrolase<br>(prostate-<br>specific<br>membrane<br>antigen) 1 | 0.783914  | Inlier |



Identification of Survival Genes in Human Glioblastoma Cells Using siRNA Screening  
 Nikhil G Thaker, Fang Zhang, Peter R. McDonald, Tong Ying Shun, Michael D Lewen, Ian F. Pollack, and John S. Lazo  
 Molecular Pharmacology

|                                  |               |       |                                                                         |           |        |
|----------------------------------|---------------|-------|-------------------------------------------------------------------------|-----------|--------|
| siRNA Disorazole DMSO Run3       | NM_0044<br>76 | FOLH1 | folate<br>hydrolase<br>(prostate-<br>specific<br>membrane<br>antigen) 1 | 2.057613  | Inlier |
| siRNA-Temozolomide Run2-<br>DMSO | NM_0167<br>29 | FOLR1 | folate<br>receptor 1<br>(adult)                                         | -1.461762 | Inlier |
| siRNA Disorazole DMSO Run1       | NM_0167<br>29 | FOLR1 | folate<br>receptor 1<br>(adult)                                         | -1.032134 | Inlier |
| siRNA-Temozolomide Run3-<br>DMSO | NM_0167<br>29 | FOLR1 | folate<br>receptor 1<br>(adult)                                         | -0.53777  | Inlier |
| siRNA-Temozolomide Run1-<br>DMSO | NM_0167<br>29 | FOLR1 | folate<br>receptor 1<br>(adult)                                         | -0.231384 | Inlier |
| siRNA Disorazole DMSO Run3       | NM_0167<br>29 | FOLR1 | folate<br>receptor 1<br>(adult)                                         | 0.231384  | Inlier |
| siRNA-Vinblastine Run1-<br>DMSO  | NM_0167<br>29 | FOLR1 | folate<br>receptor 1<br>(adult)                                         | 0.405419  | Inlier |
| siRNA Disorazole DMSO Run2       | NM_0167<br>29 | FOLR1 | folate<br>receptor 1<br>(adult)                                         | 0.81123   | Inlier |
| siRNA-Vinblastine Run2-<br>DMSO  | NM_0167<br>29 | FOLR1 | folate<br>receptor 1<br>(adult)                                         | 1.483828  | Inlier |
| siRNA Disorazole DMSO Run2       | NM_0008<br>03 | FOLR2 | folate<br>receptor 2<br>(fetal)                                         | -0.780274 | Inlier |
| siRNA-Temozolomide Run1-<br>DMSO | NM_0008<br>03 | FOLR2 | folate<br>receptor 2<br>(fetal)                                         | -0.568726 | Inlier |
| siRNA-Temozolomide Run3-<br>DMSO | NM_0008<br>03 | FOLR2 | folate<br>receptor 2<br>(fetal)                                         | -0.182682 | Inlier |
| siRNA-Temozolomide Run2-<br>DMSO | NM_0008<br>03 | FOLR2 | folate<br>receptor 2<br>(fetal)                                         | -0.05512  | Inlier |
| siRNA Disorazole DMSO Run3       | NM_0008<br>03 | FOLR2 | folate<br>receptor 2<br>(fetal)                                         | 0.05512   | Inlier |
| siRNA-Vinblastine Run1-<br>DMSO  | NM_0008<br>03 | FOLR2 | folate<br>receptor 2<br>(fetal)                                         | 0.938489  | Inlier |
| siRNA Disorazole DMSO Run1       | NM_0008<br>03 | FOLR2 | folate<br>receptor 2<br>(fetal)                                         | 1.118047  | Inlier |

Identification of Survival Genes in Human Glioblastoma Cells Using siRNA Screening  
 Nikhil G Thaker, Fang Zhang, Peter R. McDonald, Tong Ying Shun, Michael D Lewen, Ian F. Pollack, and John S. Lazo

| Molecular Pharmacology       |              |       |                             | folate    |        |
|------------------------------|--------------|-------|-----------------------------|-----------|--------|
| siRNA-Vinblastine Run2-DMSO  | NM_000803    | FOLR2 | receptor 2 (fetal)          | 1.379234  | Inlier |
| siRNA-Temozolomide Run3-DMSO | NM_000804    | FOLR3 | receptor 3 (gamma)          | -1.706243 | Inlier |
| siRNA Disorazole DMSO Run3   | NM_000804    | FOLR3 | receptor 3 (gamma)          | -0.759487 | Inlier |
| siRNA-Temozolomide Run2-DMSO | NM_000804    | FOLR3 | receptor 3 (gamma)          | -0.589513 | Inlier |
| siRNA-Temozolomide Run1-DMSO | NM_000804    | FOLR3 | receptor 3 (gamma)          | -0.189204 | Inlier |
| siRNA Disorazole DMSO Run2   | NM_000804    | FOLR3 | receptor 3 (gamma)          | 0.189204  | Inlier |
| siRNA Disorazole DMSO Run1   | NM_000804    | FOLR3 | receptor 3 (gamma)          | 0.336571  | Inlier |
| siRNA-Vinblastine Run1-DMSO  | NM_000804    | FOLR3 | receptor 3 (gamma)          | 1.089426  | Inlier |
| siRNA-Vinblastine Run2-DMSO  | NM_000804    | FOLR3 | receptor 3 (gamma)          | 1.230343  | Inlier |
| siRNA-Temozolomide Run3-DMSO | NM_001018078 | FPGS  | folylpolyglutamate synthase | -1.491406 | Inlier |
| siRNA Disorazole DMSO Run1   | NM_001018078 | FPGS  | folylpolyglutamate synthase | -0.624124 | Inlier |
| siRNA Disorazole DMSO Run3   | NM_001018078 | FPGS  | folylpolyglutamate synthase | -0.363692 | Inlier |
| siRNA-Vinblastine Run2-DMSO  | NM_001018078 | FPGS  | folylpolyglutamate synthase | -0.017311 | Inlier |
| siRNA-Temozolomide Run2-DMSO | NM_001018078 | FPGS  | folylpolyglutamate synthase | 0.01731   | Inlier |
| siRNA-Vinblastine Run1-DMSO  | NM_001018078 | FPGS  | folylpolyglutamate synthase | 0.724876  | Inlier |
| siRNA Disorazole DMSO Run2   | NM_001018078 | FPGS  | folylpolyglutamate synthase | 0.784102  | Inlier |
| siRNA-Temozolomide Run1-DMSO | NM_001018078 | FPGS  | folylpolyglutamate synthase | 0.816065  | Inlier |

Identification of Survival Genes in Human Glioblastoma Cells Using siRNA Screening  
 Nikhil G Thaker, Fang Zhang, Peter R. McDonald, Tong Ying Shun, Michael D Lewen, Ian F. Pollack, and John S. Lazo  
 Molecular Pharmacology

|                              |               |      |                                           |           |        |
|------------------------------|---------------|------|-------------------------------------------|-----------|--------|
| siRNA-Temozolomide Run1-DMSO | NM_0038<br>38 | FPGT | fucose-1-phosphate<br>guanylyltransferase | -1.570091 | Inlier |
| siRNA Disorazole DMSO Run1   | NM_0038<br>38 | FPGT | fucose-1-phosphate<br>guanylyltransferase | -0.960339 | Inlier |
| siRNA-Temozolomide Run2-DMSO | NM_0038<br>38 | FPGT | fucose-1-phosphate<br>guanylyltransferase | -0.418958 | Inlier |
| siRNA-Temozolomide Run3-DMSO | NM_0038<br>38 | FPGT | fucose-1-phosphate<br>guanylyltransferase | -0.168265 | Inlier |
| siRNA-Vinblastine Run2-DMSO  | NM_0038<br>38 | FPGT | fucose-1-phosphate<br>guanylyltransferase | 0.168265  | Inlier |
| siRNA Disorazole DMSO Run3   | NM_0038<br>38 | FPGT | fucose-1-phosphate<br>guanylyltransferase | 0.608604  | Inlier |
| siRNA-Vinblastine Run1-DMSO  | NM_0038<br>38 | FPGT | fucose-1-phosphate<br>guanylyltransferase | 0.740396  | Inlier |
| siRNA Disorazole DMSO Run2   | NM_0038<br>38 | FPGT | fucose-1-phosphate<br>guanylyltransferase | 1.085986  | Inlier |
| siRNA Disorazole DMSO Run1   | NM_0020<br>29 | FPR1 | formyl<br>peptide<br>receptor 1           | -0.762418 | Inlier |
| siRNA Disorazole DMSO Run2   | NM_0020<br>29 | FPR1 | formyl<br>peptide<br>receptor 1           | -0.586582 | Inlier |
| siRNA Disorazole DMSO Run3   | NM_0020<br>29 | FPR1 | formyl<br>peptide<br>receptor 1           | -0.575937 | Inlier |
| siRNA-Temozolomide Run3-DMSO | NM_0020<br>29 | FPR1 | formyl<br>peptide<br>receptor 1           | -0.455423 | Inlier |

Identification of Survival Genes in Human Glioblastoma Cells Using siRNA Screening  
 Nikhil G Thaker, Fang Zhang, Peter R. McDonald, Tong Ying Shun, Michael D Lewen, Ian F. Pollack, and John S. Lazo

| Molecular Pharmacology       |               |       |  | formyl peptide receptor 1 |         |
|------------------------------|---------------|-------|--|---------------------------|---------|
| siRNA-Temozolomide Run1-DMSO | NM_0020<br>29 | FPR1  |  | 0.455423                  | Inlier  |
| siRNA-Vinblastine Run1-DMSO  | NM_0020<br>29 | FPR1  |  | 0.83355                   | Inlier  |
| siRNA-Temozolomide Run2-DMSO | NM_0020<br>29 | FPR1  |  | 0.843779                  | Inlier  |
| siRNA-Vinblastine Run2-DMSO  | NM_0020<br>29 | FPR1  |  | 1.102359                  | Inlier  |
| siRNA Disorazole DMSO Run2   | NM_0014<br>62 | FPRL1 |  | -3.673311                 | Outlier |
| siRNA-Temozolomide Run2-DMSO | NM_0014<br>62 | FPRL1 |  | -1.26282                  | Inlier  |
| siRNA-Temozolomide Run3-DMSO | NM_0014<br>62 | FPRL1 |  | -0.889275                 | Inlier  |
| siRNA Disorazole DMSO Run3   | NM_0014<br>62 | FPRL1 |  | -0.225721                 | Inlier  |
| siRNA-Temozolomide Run1-DMSO | NM_0014<br>62 | FPRL1 |  | 0.225719                  | Inlier  |
| siRNA-Vinblastine Run2-DMSO  | NM_0014<br>62 | FPRL1 |  | 0.258644                  | Inlier  |
| siRNA Disorazole DMSO Run1   | NM_0014<br>62 | FPRL1 |  | 0.459725                  | Inlier  |
| siRNA-Vinblastine Run1-DMSO  | NM_0014<br>62 | FPRL1 |  | 1.377014                  | Inlier  |
| siRNA-Temozolomide Run3-DMSO | NM_0020<br>30 | FPRL2 |  | -1.228019                 | Inlier  |
| siRNA Disorazole DMSO Run2   | NM_0020<br>30 | FPRL2 |  | -0.75759                  | Inlier  |

Identification of Survival Genes in Human Glioblastoma Cells Using siRNA Screening  
 Nikhil G Thaker, Fang Zhang, Peter R. McDonald, Tong Ying Shun, Michael D Lewen, Ian F. Pollack, and John S. Lazo

Molecular Pharmacology

|                              |               |       |                                                         |           |        |
|------------------------------|---------------|-------|---------------------------------------------------------|-----------|--------|
| siRNA-Temozolomide Run2-DMSO | NM_0020<br>30 | FPRL2 | formyl peptide receptor-like 2                          | -0.59141  | Inlier |
| siRNA Disorazole DMSO Run3   | NM_0020<br>30 | FPRL2 | formyl peptide receptor-like 2                          | -0.092417 | Inlier |
| siRNA Disorazole DMSO Run1   | NM_0020<br>30 | FPRL2 | formyl peptide receptor-like 2                          | 0.092417  | Inlier |
| siRNA-Temozolomide Run1-DMSO | NM_0020<br>30 | FPRL2 | formyl peptide receptor-like 2                          | 0.588722  | Inlier |
| siRNA-Vinblastine Run2-DMSO  | NM_0020<br>30 | FPRL2 | formyl peptide receptor-like 2                          | 1.449618  | Inlier |
| siRNA-Vinblastine Run1-DMSO  | NM_0020<br>30 | FPRL2 | formyl peptide receptor-like 2                          | 1.564374  | Inlier |
| siRNA-Temozolomide Run3-DMSO | NM_0049<br>58 | FRAP1 | FK506 binding protein 12-rapamycin associated protein 1 | -0.882869 | Inlier |
| siRNA Disorazole DMSO Run2   | NM_0049<br>58 | FRAP1 | FK506 binding protein 12-rapamycin associated protein 1 | -0.725933 | Inlier |
| siRNA-Temozolomide Run1-DMSO | NM_0049<br>58 | FRAP1 | FK506 binding protein 12-rapamycin associated protein 1 | -0.485842 | Inlier |

Identification of Survival Genes in Human Glioblastoma Cells Using siRNA Screening  
 Nikhil G Thaker, Fang Zhang, Peter R. McDonald, Tong Ying Shun, Michael D Lewen, Ian F. Pollack, and John S. Lazo  
 Molecular Pharmacology

|                                  |               |       |                                                                         |           |        |
|----------------------------------|---------------|-------|-------------------------------------------------------------------------|-----------|--------|
| siRNA Disorazole DMSO Run3       | NM_0049<br>58 | FRAP1 | FK506<br>binding<br>protein 12-<br>rapamycin<br>associated<br>protein 1 | -0.376237 | Inlier |
| siRNA-Temozolomide Run2-<br>DMSO | NM_0049<br>58 | FRAP1 | FK506<br>binding<br>protein 12-<br>rapamycin<br>associated<br>protein 1 | 0.376237  | Inlier |
| siRNA Disorazole DMSO Run1       | NM_0049<br>58 | FRAP1 | FK506<br>binding<br>protein 12-<br>rapamycin<br>associated<br>protein 1 | 0.623067  | Inlier |
| siRNA-Vinblastine Run2-<br>DMSO  | NM_0049<br>58 | FRAP1 | FK506<br>binding<br>protein 12-<br>rapamycin<br>associated<br>protein 1 | 1.078468  | Inlier |
| siRNA-Vinblastine Run1-<br>DMSO  | NM_0049<br>58 | FRAP1 | FK506<br>binding<br>protein 12-<br>rapamycin<br>associated<br>protein 1 | 1.225481  | Inlier |
| siRNA-Vinblastine Run2-<br>DMSO  | NM_0327<br>38 | FREB  | Fc<br>receptor-<br>like and<br>mucin-like<br>1                          | -0.931762 | Inlier |
| siRNA-Temozolomide Run3-<br>DMSO | NM_0327<br>38 | FREB  | Fc<br>receptor-<br>like and<br>mucin-like<br>1                          | -0.769431 | Inlier |

Identification of Survival Genes in Human Glioblastoma Cells Using siRNA Screening  
 Nikhil G Thaker, Fang Zhang, Peter R. McDonald, Tong Ying Shun, Michael D Lewen, Ian F. Pollack, and John S. Lazo

Molecular Pharmacology

|                              |               |      |                                                |           |        |
|------------------------------|---------------|------|------------------------------------------------|-----------|--------|
| siRNA-Temozolomide Run1-DMSO | NM_0327<br>38 | FREB | Fc<br>receptor-<br>like and<br>mucin-like<br>1 | -0.357301 | Inlier |
| siRNA-Temozolomide Run2-DMSO | NM_0327<br>38 | FREB | Fc<br>receptor-<br>like and<br>mucin-like<br>1 | -0.103297 | Inlier |
| siRNA Disorazole DMSO Run1   | NM_0327<br>38 | FREB | Fc<br>receptor-<br>like and<br>mucin-like<br>1 | 0.103297  | Inlier |
| siRNA Disorazole DMSO Run3   | NM_0327<br>38 | FREB | Fc<br>receptor-<br>like and<br>mucin-like<br>1 | 0.579569  | Inlier |
| siRNA-Vinblastine Run1-DMSO  | NM_0327<br>38 | FREB | Fc<br>receptor-<br>like and<br>mucin-like<br>1 | 1.437405  | Inlier |
| siRNA Disorazole DMSO Run2   | NM_0327<br>38 | FREB | Fc<br>receptor-<br>like and<br>mucin-like<br>1 | 1.877581  | Inlier |
| siRNA-Temozolomide Run3-DMSO | NM_0020<br>31 | FRK  | fyn-related<br>kinase                          | -0.703663 | Inlier |
| siRNA-Temozolomide Run2-DMSO | NM_0020<br>31 | FRK  | fyn-related<br>kinase                          | -0.698238 | Inlier |
| siRNA-Temozolomide Run1-DMSO | NM_0020<br>31 | FRK  | fyn-related<br>kinase                          | -0.650762 | Inlier |
| siRNA-Vinblastine Run1-DMSO  | NM_0020<br>31 | FRK  | fyn-related<br>kinase                          | -0.36132  | Inlier |
| siRNA-Vinblastine Run2-DMSO  | NM_0020<br>31 | FRK  | fyn-related<br>kinase                          | 0.36132   | Inlier |
| siRNA Disorazole DMSO Run1   | NM_0020<br>31 | FRK  | fyn-related<br>kinase                          | 0.537118  | Inlier |
| siRNA Disorazole DMSO Run3   | NM_0020<br>31 | FRK  | fyn-related<br>kinase                          | 1.364291  | Inlier |

Identification of Survival Genes in Human Glioblastoma Cells Using siRNA Screening  
 Nikhil G Thaker, Fang Zhang, Peter R. McDonald, Tong Ying Shun, Michael D Lewen, Ian F. Pollack, and John S. Lazo

Molecular Pharmacology

|                                  |               |      |                                                                |           |        |
|----------------------------------|---------------|------|----------------------------------------------------------------|-----------|--------|
| siRNA Disorazole DMSO Run2       | NM_0020<br>31 | FRK  | fyn-related<br>kinase                                          | 1.488405  | Inlier |
| siRNA-Temozolomide Run3-<br>DMSO | NM_0243<br>33 | FSD1 | fibronectin<br>type 3 and<br>SPRY<br>domain<br>containing<br>1 | -1.648489 | Inlier |
| siRNA-Temozolomide Run2-<br>DMSO | NM_0243<br>33 | FSD1 | fibronectin<br>type 3 and<br>SPRY<br>domain<br>containing<br>1 | -0.700749 | Inlier |
| siRNA-Temozolomide Run1-<br>DMSO | NM_0243<br>33 | FSD1 | fibronectin<br>type 3 and<br>SPRY<br>domain<br>containing<br>1 | -0.311179 | Inlier |
| siRNA Disorazole DMSO Run1       | NM_0243<br>33 | FSD1 | fibronectin<br>type 3 and<br>SPRY<br>domain<br>containing<br>1 | -0.185167 | Inlier |
| siRNA Disorazole DMSO Run3       | NM_0243<br>33 | FSD1 | fibronectin<br>type 3 and<br>SPRY<br>domain<br>containing<br>1 | 0.185167  | Inlier |
| siRNA-Vinblastine Run2-<br>DMSO  | NM_0243<br>33 | FSD1 | fibronectin<br>type 3 and<br>SPRY<br>domain<br>containing<br>1 | 0.648251  | Inlier |
| siRNA-Vinblastine Run1-<br>DMSO  | NM_0243<br>33 | FSD1 | fibronectin<br>type 3 and<br>SPRY<br>domain<br>containing<br>1 | 1.231697  | Inlier |



Identification of Survival Genes in Human Glioblastoma Cells Using siRNA Screening  
 Nikhil G Thaker, Fang Zhang, Peter R. McDonald, Tong Ying Shun, Michael D Lewen, Ian F. Pollack, and John S. Lazo  
 Molecular Pharmacology

|                                  |               |      |                                                                |           |        |
|----------------------------------|---------------|------|----------------------------------------------------------------|-----------|--------|
| siRNA Disorazole DMSO Run2       | NM_0243<br>33 | FSD1 | fibronectin<br>type 3 and<br>SPRY<br>domain<br>containing<br>1 | 1.263951  | Inlier |
| siRNA-Temozolomide Run3-<br>DMSO | NM_1814<br>46 | FSHR | follicle<br>stimulating<br>hormone<br>receptor                 | -1.239569 | Inlier |
| siRNA Disorazole DMSO Run2       | NM_1814<br>46 | FSHR | follicle<br>stimulating<br>hormone<br>receptor                 | -0.713593 | Inlier |
| siRNA-Temozolomide Run2-<br>DMSO | NM_1814<br>46 | FSHR | follicle<br>stimulating<br>hormone<br>receptor                 | -0.635407 | Inlier |
| siRNA Disorazole DMSO Run3       | NM_1814<br>46 | FSHR | follicle<br>stimulating<br>hormone<br>receptor                 | -0.263876 | Inlier |
| siRNA-Temozolomide Run1-<br>DMSO | NM_1814<br>46 | FSHR | follicle<br>stimulating<br>hormone<br>receptor                 | 0.263876  | Inlier |
| siRNA Disorazole DMSO Run1       | NM_1814<br>46 | FSHR | follicle<br>stimulating<br>hormone<br>receptor                 | 0.471643  | Inlier |
| siRNA-Vinblastine Run1-<br>DMSO  | NM_1814<br>46 | FSHR | follicle<br>stimulating<br>hormone<br>receptor                 | 0.908791  | Inlier |
| siRNA-Vinblastine Run2-<br>DMSO  | NM_1814<br>46 | FSHR | follicle<br>stimulating<br>hormone<br>receptor                 | 0.995299  | Inlier |
| siRNA-Temozolomide Run1-<br>DMSO | NM_0066<br>57 | FTCD | formiminot<br>ransferase<br>cyclodeam<br>inase                 | -0.851347 | Inlier |

Identification of Survival Genes in Human Glioblastoma Cells Using siRNA Screening  
 Nikhil G Thaker, Fang Zhang, Peter R. McDonald, Tong Ying Shun, Michael D Lewen, Ian F. Pollack, and John S. Lazo  
 Molecular Pharmacology

|                              |               |       |                                            |           |         |
|------------------------------|---------------|-------|--------------------------------------------|-----------|---------|
| siRNA Disorazole DMSO Run3   | NM_0066<br>57 | FTCD  | formiminotransferase cyclodeaminase        | -0.497653 | Inlier  |
| siRNA-Temozolomide Run2-DMSO | NM_0066<br>57 | FTCD  | formiminotransferase cyclodeaminase        | -0.306559 | Inlier  |
| siRNA-Vinblastine Run2-DMSO  | NM_0066<br>57 | FTCD  | formiminotransferase cyclodeaminase        | -0.198442 | Inlier  |
| siRNA Disorazole DMSO Run1   | NM_0066<br>57 | FTCD  | formiminotransferase cyclodeaminase        | 0.198441  | Inlier  |
| siRNA-Temozolomide Run3-DMSO | NM_0066<br>57 | FTCD  | formiminotransferase cyclodeaminase        | 1.268973  | Inlier  |
| siRNA-Vinblastine Run1-DMSO  | NM_0066<br>57 | FTCD  | formiminotransferase cyclodeaminase        | 1.758137  | Inlier  |
| siRNA Disorazole DMSO Run2   | NM_0066<br>57 | FTCD  | formiminotransferase cyclodeaminase        | 2.046555  | Inlier  |
| siRNA-Temozolomide Run3-DMSO | NM_1447<br>76 | FTHFD | aldehyde dehydrogenase 1 family, member L1 | -4.980712 | Outlier |
| siRNA-Temozolomide Run2-DMSO | NM_1447<br>76 | FTHFD | aldehyde dehydrogenase 1 family, member L1 | -1.28782  | Inlier  |

Identification of Survival Genes in Human Glioblastoma Cells Using siRNA Screening

Nikhil G Thaker, Fang Zhang, Peter R. McDonald, Tong Ying Shun, Michael D Lewen, Ian F. Pollack, and John S. Lazo

Molecular Pharmacology

|                                  |               |              |                                                                                           |           |        |
|----------------------------------|---------------|--------------|-------------------------------------------------------------------------------------------|-----------|--------|
| siRNA Disorazole DMSO Run1       | NM_1447<br>76 | FTHFD        | aldehyde<br>dehydroge<br>nase 1<br>family,<br>member<br>L1                                | -0.470363 | Inlier |
| siRNA-Temozolomide Run1-<br>DMSO | NM_1447<br>76 | FTHFD        | aldehyde<br>dehydroge<br>nase 1<br>family,<br>member<br>L1                                | -0.070141 | Inlier |
| siRNA Disorazole DMSO Run3       | NM_1447<br>76 | FTHFD        | aldehyde<br>dehydroge<br>nase 1<br>family,<br>member<br>L1                                | 0.07014   | Inlier |
| siRNA Disorazole DMSO Run2       | NM_1447<br>76 | FTHFD        | aldehyde<br>dehydroge<br>nase 1<br>family,<br>member<br>L1                                | 0.126918  | Inlier |
| siRNA-Vinblastine Run1-<br>DMSO  | NM_1447<br>76 | FTHFD        | aldehyde<br>dehydroge<br>nase 1<br>family,<br>member<br>L1                                | 0.878637  | Inlier |
| siRNA-Vinblastine Run2-<br>DMSO  | NM_1447<br>76 | FTHFD        | aldehyde<br>dehydroge<br>nase 1<br>family,<br>member<br>L1                                | 1.673155  | Inlier |
| siRNA-Vinblastine Run2-<br>DMSO  | NM_0154<br>40 | FTHFSDC<br>1 | methylenet<br>etrahydrof<br>olate<br>dehydroge<br>nase<br>(NADP+<br>dependent<br>) 1-like | -3.19978  | Inlier |
| siRNA-Vinblastine Run1-<br>DMSO  | NM_0154<br>40 | FTHFSDC<br>1 | methylenet<br>etrahydrof<br>olate<br>dehydroge<br>nase<br>(NADP+<br>dependent<br>) 1-like | -0.453472 | Inlier |

Identification of Survival Genes in Human Glioblastoma Cells Using siRNA Screening

Nikhil G Thaker, Fang Zhang, Peter R. McDonald, Tong Ying Shun, Michael D Lewen, Ian F. Pollack, and John S. Lazo

Molecular Pharmacology

|                              |               |              |                                                                  |           |         |
|------------------------------|---------------|--------------|------------------------------------------------------------------|-----------|---------|
| siRNA-Temozolomide Run3-DMSO | NM_0154<br>40 | FTHFSDC<br>1 | methylenetetrahydrofolate dehydrogenase (NADP+ dependent) 1-like | -0.334828 | Inlier  |
| siRNA Disorazole DMSO Run3   | NM_0154<br>40 | FTHFSDC<br>1 | methylenetetrahydrofolate dehydrogenase (NADP+ dependent) 1-like | -0.135595 | Inlier  |
| siRNA-Temozolomide Run1-DMSO | NM_0154<br>40 | FTHFSDC<br>1 | methylenetetrahydrofolate dehydrogenase (NADP+ dependent) 1-like | 0.135595  | Inlier  |
| siRNA Disorazole DMSO Run1   | NM_0154<br>40 | FTHFSDC<br>1 | methylenetetrahydrofolate dehydrogenase (NADP+ dependent) 1-like | 0.895528  | Inlier  |
| siRNA-Temozolomide Run2-DMSO | NM_0154<br>40 | FTHFSDC<br>1 | methylenetetrahydrofolate dehydrogenase (NADP+ dependent) 1-like | 3.610548  | Outlier |
| siRNA Disorazole DMSO Run2   | NM_0154<br>40 | FTHFSDC<br>1 | methylenetetrahydrofolate dehydrogenase (NADP+ dependent) 1-like | 6.455312  | Outlier |
| siRNA-Temozolomide Run3-DMSO | NM_0224<br>76 | FTS          | fused toes homolog (mouse)                                       | -2.712764 | Inlier  |

Identification of Survival Genes in Human Glioblastoma Cells Using siRNA Screening  
 Nikhil G Thaker, Fang Zhang, Peter R. McDonald, Tong Ying Shun, Michael D Lewen, Ian F. Pollack, and John S. Lazo

Molecular Pharmacology

|                              |               |       |                                |                  |
|------------------------------|---------------|-------|--------------------------------|------------------|
| siRNA-Temozolomide Run2-DMSO | NM_0224<br>76 | FTS   | fused toes homolog (mouse)     | -1.457208 Inlier |
| siRNA-Vinblastine Run2-DMSO  | NM_0224<br>76 | FTS   | fused toes homolog (mouse)     | -0.213463 Inlier |
| siRNA-Temozolomide Run1-DMSO | NM_0224<br>76 | FTS   | fused toes homolog (mouse)     | -0.056892 Inlier |
| siRNA Disorazole DMSO Run3   | NM_0224<br>76 | FTS   | fused toes homolog (mouse)     | 0.056892 Inlier  |
| siRNA Disorazole DMSO Run1   | NM_0224<br>76 | FTS   | fused toes homolog (mouse)     | 0.215769 Inlier  |
| siRNA Disorazole DMSO Run2   | NM_0224<br>76 | FTS   | fused toes homolog (mouse)     | 1.133231 Inlier  |
| siRNA-Vinblastine Run1-DMSO  | NM_0224<br>76 | FTS   | fused toes homolog (mouse)     | 1.668755 Inlier  |
| siRNA-Vinblastine Run2-DMSO  | NM_0001<br>47 | FUCA1 | fucosidase , alpha-L-1, tissue | -0.791648 Inlier |
| siRNA Disorazole DMSO Run3   | NM_0001<br>47 | FUCA1 | fucosidase , alpha-L-1, tissue | -0.557352 Inlier |
| siRNA-Temozolomide Run2-DMSO | NM_0001<br>47 | FUCA1 | fucosidase , alpha-L-1, tissue | -0.434184 Inlier |
| siRNA-Temozolomide Run3-DMSO | NM_0001<br>47 | FUCA1 | fucosidase , alpha-L-1, tissue | -0.162534 Inlier |
| siRNA-Temozolomide Run1-DMSO | NM_0001<br>47 | FUCA1 | fucosidase , alpha-L-1, tissue | 0.162534 Inlier  |
| siRNA Disorazole DMSO Run1   | NM_0001<br>47 | FUCA1 | fucosidase , alpha-L-1, tissue | 0.816276 Inlier  |
| siRNA-Vinblastine Run1-DMSO  | NM_0001<br>47 | FUCA1 | fucosidase , alpha-L-1, tissue | 1.633055 Inlier  |
| siRNA Disorazole DMSO Run2   | NM_0001<br>47 | FUCA1 | fucosidase , alpha-L-1, tissue | 2.392205 Inlier  |

Identification of Survival Genes in Human Glioblastoma Cells Using siRNA Screening  
 Nikhil G Thaker, Fang Zhang, Peter R. McDonald, Tong Ying Shun, Michael D Lewen, Ian F. Pollack, and John S. Lazo

| Molecular Pharmacology       |               |       |                                                                |           |         |
|------------------------------|---------------|-------|----------------------------------------------------------------|-----------|---------|
| siRNA-Temozolomide Run3-DMSO | NM_0320<br>20 | FUCA2 | fucosidase<br>, alpha-L-<br>2, plasma                          | -0.746711 | Inlier  |
| siRNA-Temozolomide Run2-DMSO | NM_0320<br>20 | FUCA2 | fucosidase<br>, alpha-L-<br>2, plasma                          | -0.602289 | Inlier  |
| siRNA Disorazole DMSO Run3   | NM_0320<br>20 | FUCA2 | fucosidase<br>, alpha-L-<br>2, plasma                          | -0.139419 | Inlier  |
| siRNA-Temozolomide Run1-DMSO | NM_0320<br>20 | FUCA2 | fucosidase<br>, alpha-L-<br>2, plasma                          | -0.039199 | Inlier  |
| siRNA-Vinblastine Run2-DMSO  | NM_0320<br>20 | FUCA2 | fucosidase<br>, alpha-L-<br>2, plasma                          | 0.039199  | Inlier  |
| siRNA Disorazole DMSO Run1   | NM_0320<br>20 | FUCA2 | fucosidase<br>, alpha-L-<br>2, plasma                          | 2.79052   | Inlier  |
| siRNA Disorazole DMSO Run2   | NM_0320<br>20 | FUCA2 | fucosidase<br>, alpha-L-<br>2, plasma                          | 3.499646  | Inlier  |
| siRNA-Vinblastine Run1-DMSO  | NM_0320<br>20 | FUCA2 | fucosidase<br>, alpha-L-<br>2, plasma                          | 3.795189  | Outlier |
| siRNA-Temozolomide Run3-DMSO | NM_1450<br>59 | FUK   | fucokinase                                                     | -0.764483 | Inlier  |
| siRNA-Temozolomide Run2-DMSO | NM_1450<br>59 | FUK   | fucokinase                                                     | -0.584517 | Inlier  |
| siRNA Disorazole DMSO Run3   | NM_1450<br>59 | FUK   | fucokinase                                                     | -0.40607  | Inlier  |
| siRNA-Temozolomide Run1-DMSO | NM_1450<br>59 | FUK   | fucokinase                                                     | -0.381216 | Inlier  |
| siRNA Disorazole DMSO Run1   | NM_1450<br>59 | FUK   | fucokinase                                                     | 0.381216  | Inlier  |
| siRNA Disorazole DMSO Run2   | NM_1450<br>59 | FUK   | fucokinase                                                     | 2.815974  | Inlier  |
| siRNA-Vinblastine Run2-DMSO  | NM_1450<br>59 | FUK   | fucokinase                                                     | 2.925554  | Inlier  |
| siRNA-Vinblastine Run1-DMSO  | NM_1450<br>59 | FUK   | fucokinase                                                     | 3.89541   | Outlier |
| siRNA-Temozolomide Run3-DMSO | NM_0025<br>69 | FURIN | furin<br>(paired<br>basic<br>amino acid<br>cleaving<br>enzyme) | -2.888726 | Inlier  |

Identification of Survival Genes in Human Glioblastoma Cells Using siRNA Screening  
 Nikhil G Thaker, Fang Zhang, Peter R. McDonald, Tong Ying Shun, Michael D Lewen, Ian F. Pollack, and John S. Lazo  
 Molecular Pharmacology

|                              |               |       |                                                                |           |        |
|------------------------------|---------------|-------|----------------------------------------------------------------|-----------|--------|
| siRNA-Temozolomide Run2-DMSO | NM_0025<br>69 | FURIN | furin<br>(paired<br>basic<br>amino acid<br>cleaving<br>enzyme) | -1.986871 | Inlier |
| siRNA Disorazole DMSO Run3   | NM_0025<br>69 | FURIN | furin<br>(paired<br>basic<br>amino acid<br>cleaving<br>enzyme) | -0.425389 | Inlier |
| siRNA Disorazole DMSO Run1   | NM_0025<br>69 | FURIN | furin<br>(paired<br>basic<br>amino acid<br>cleaving<br>enzyme) | -0.108086 | Inlier |
| siRNA Disorazole DMSO Run2   | NM_0025<br>69 | FURIN | furin<br>(paired<br>basic<br>amino acid<br>cleaving<br>enzyme) | 0.108086  | Inlier |
| siRNA-Temozolomide Run1-DMSO | NM_0025<br>69 | FURIN | furin<br>(paired<br>basic<br>amino acid<br>cleaving<br>enzyme) | 0.386199  | Inlier |
| siRNA-Vinblastine Run1-DMSO  | NM_0025<br>69 | FURIN | furin<br>(paired<br>basic<br>amino acid<br>cleaving<br>enzyme) | 0.923611  | Inlier |
| siRNA-Vinblastine Run2-DMSO  | NM_0025<br>69 | FURIN | furin<br>(paired<br>basic<br>amino acid<br>cleaving<br>enzyme) | 0.990134  | Inlier |

Identification of Survival Genes in Human Glioblastoma Cells Using siRNA Screening

Nikhil G Thaker, Fang Zhang, Peter R. McDonald, Tong Ying Shun, Michael D Lewen, Ian F. Pollack, and John S. Lazo

Molecular Pharmacology

|                              |               |      |                                                                    |           |        |
|------------------------------|---------------|------|--------------------------------------------------------------------|-----------|--------|
| siRNA Disorazole DMSO Run1   | NM_0001<br>48 | FUT1 | fucosyltransferase 1<br>(galactoside 2-alpha-L-fucosyltransferase) | -2.907033 | Inlier |
| siRNA-Temozolomide Run1-DMSO | NM_0001<br>48 | FUT1 | fucosyltransferase 1<br>(galactoside 2-alpha-L-fucosyltransferase) | -2.516654 | Inlier |
| siRNA-Temozolomide Run2-DMSO | NM_0001<br>48 | FUT1 | fucosyltransferase 1<br>(galactoside 2-alpha-L-fucosyltransferase) | -0.742202 | Inlier |
| siRNA Disorazole DMSO Run3   | NM_0001<br>48 | FUT1 | fucosyltransferase 1<br>(galactoside 2-alpha-L-fucosyltransferase) | -0.255344 | Inlier |
| siRNA-Vinblastine Run2-DMSO  | NM_0001<br>48 | FUT1 | fucosyltransferase 1<br>(galactoside 2-alpha-L-fucosyltransferase) | 0.255344  | Inlier |
| siRNA Disorazole DMSO Run2   | NM_0001<br>48 | FUT1 | fucosyltransferase 1<br>(galactoside 2-alpha-L-fucosyltransferase) | 0.40211   | Inlier |



Identification of Survival Genes in Human Glioblastoma Cells Using siRNA Screening  
 Nikhil G Thaker, Fang Zhang, Peter R. McDonald, Tong Ying Shun, Michael D Lewen, Ian F. Pollack, and John S. Lazo  
 Molecular Pharmacology

|                              |           |       |                                                                 |           |        |
|------------------------------|-----------|-------|-----------------------------------------------------------------|-----------|--------|
| siRNA-Vinblastine Run1-DMSO  | NM_000148 | FUT1  | fucosyltransferase 1 (galactoside 2-alpha-L-fucosyltransferase) | 0.606798  | Inlier |
| siRNA-Temozolomide Run3-DMSO | NM_000148 | FUT1  | fucosyltransferase 1 (galactoside 2-alpha-L-fucosyltransferase) | 0.829773  | Inlier |
| siRNA-Temozolomide Run2-DMSO | NM_032664 | FUT10 | fucosyltransferase 10 (alpha (1,3) fucosyltransferase)          | -1.452832 | Inlier |
| siRNA-Temozolomide Run3-DMSO | NM_032664 | FUT10 | fucosyltransferase 10 (alpha (1,3) fucosyltransferase)          | -0.543656 | Inlier |
| siRNA-Temozolomide Run1-DMSO | NM_032664 | FUT10 | fucosyltransferase 10 (alpha (1,3) fucosyltransferase)          | -0.482123 | Inlier |
| siRNA Disorazole DMSO Run3   | NM_032664 | FUT10 | fucosyltransferase 10 (alpha (1,3) fucosyltransferase)          | -0.1554   | Inlier |
| siRNA-Vinblastine Run2-DMSO  | NM_032664 | FUT10 | fucosyltransferase 10 (alpha (1,3) fucosyltransferase)          | 0.155401  | Inlier |
| siRNA Disorazole DMSO Run1   | NM_032664 | FUT10 | fucosyltransferase 10 (alpha (1,3) fucosyltransferase)          | 0.805344  | Inlier |

Identification of Survival Genes in Human Glioblastoma Cells Using siRNA Screening  
 Nikhil G Thaker, Fang Zhang, Peter R. McDonald, Tong Ying Shun, Michael D Lewen, Ian F. Pollack, and John S. Lazo

Molecular Pharmacology

| siRNA Treatment              | Gene ID       | Gene Name | Expression Value | Classification |
|------------------------------|---------------|-----------|------------------|----------------|
| siRNA Disorazole DMSO Run2   | NM_0326<br>64 | FUT10     | 4.033586         | Outlier        |
| siRNA-Vinblastine Run1-DMSO  | NM_0326<br>64 | FUT10     | 4.382823         | Outlier        |
| siRNA-Temozolomide Run1-DMSO | NM_1735<br>40 | FUT11     | -1.267169        | Inlier         |
| siRNA-Temozolomide Run3-DMSO | NM_1735<br>40 | FUT11     | -0.510121        | Inlier         |
| siRNA Disorazole DMSO Run1   | NM_1735<br>40 | FUT11     | -0.277652        | Inlier         |
| siRNA-Temozolomide Run2-DMSO | NM_1735<br>40 | FUT11     | -0.274994        | Inlier         |
| siRNA-Vinblastine Run2-DMSO  | NM_1735<br>40 | FUT11     | 0.274993         | Inlier         |
| siRNA Disorazole DMSO Run3   | NM_1735<br>40 | FUT11     | 0.838879         | Inlier         |

Identification of Survival Genes in Human Glioblastoma Cells Using siRNA Screening  
 Nikhil G Thaker, Fang Zhang, Peter R. McDonald, Tong Ying Shun, Michael D Lewen, Ian F. Pollack, and John S. Lazo

Molecular Pharmacology

|                                  |               |       |                                                                         |                  |
|----------------------------------|---------------|-------|-------------------------------------------------------------------------|------------------|
|                                  |               |       | fucosyltran<br>sferase 11<br>(alpha<br>(1,3)                            |                  |
| siRNA-Vinblastine Run1-<br>DMSO  | NM_1735<br>40 | FUT11 | fucosyltran<br>sferase)<br>fucosyltran<br>sferase 11<br>(alpha<br>(1,3) | 1.024405 Inlier  |
| siRNA Disorazole DMSO Run2       | NM_1735<br>40 | FUT11 | fucosyltran<br>sferase)                                                 | 1.267721 Inlier  |
| siRNA-Temozolomide Run2-<br>DMSO | NM_0005<br>11 | FUT2  | fucosyltran<br>sferase 2<br>(secretor<br>status<br>included)            | -0.773925 Inlier |
| siRNA-Temozolomide Run3-<br>DMSO | NM_0005<br>11 | FUT2  | fucosyltran<br>sferase 2<br>(secretor<br>status<br>included)            | -0.683119 Inlier |
| siRNA Disorazole DMSO Run3       | NM_0005<br>11 | FUT2  | fucosyltran<br>sferase 2<br>(secretor<br>status<br>included)            | -0.665881 Inlier |
| siRNA Disorazole DMSO Run1       | NM_0005<br>11 | FUT2  | fucosyltran<br>sferase 2<br>(secretor<br>status<br>included)            | -0.120331 Inlier |
| siRNA-Vinblastine Run2-<br>DMSO  | NM_0005<br>11 | FUT2  | fucosyltran<br>sferase 2<br>(secretor<br>status<br>included)            | 0.120331 Inlier  |
| siRNA-Temozolomide Run1-<br>DMSO | NM_0005<br>11 | FUT2  | fucosyltran<br>sferase 2<br>(secretor<br>status<br>included)            | 0.254809 Inlier  |

Identification of Survival Genes in Human Glioblastoma Cells Using siRNA Screening  
 Nikhil G Thaker, Fang Zhang, Peter R. McDonald, Tong Ying Shun, Michael D Lewen, Ian F. Pollack, and John S. Lazo  
 Molecular Pharmacology

|                                  |               |      |                                                                                                                         |           |        |
|----------------------------------|---------------|------|-------------------------------------------------------------------------------------------------------------------------|-----------|--------|
| siRNA Disorazole DMSO Run2       | NM_0005<br>11 | FUT2 | fucosyltran<br>sferase 2<br>(secretor<br>status<br>included)                                                            | 0.854629  | Inlier |
| siRNA-Vinblastine Run1-<br>DMSO  | NM_0005<br>11 | FUT2 | fucosyltran<br>sferase 2<br>(secretor<br>status<br>included)                                                            | 1.110445  | Inlier |
| siRNA-Temozolomide Run3-<br>DMSO | NM_0001<br>49 | FUT3 | fucosyltran<br>sferase 3<br>(galactosid<br>e 3(4)-L-<br>fucosyltran<br>sferase,<br>Lewis<br>blood<br>group<br>included) | -1.658031 | Inlier |
| siRNA-Temozolomide Run2-<br>DMSO | NM_0001<br>49 | FUT3 | fucosyltran<br>sferase 3<br>(galactosid<br>e 3(4)-L-<br>fucosyltran<br>sferase,<br>Lewis<br>blood<br>group<br>included) | -0.473817 | Inlier |
| siRNA Disorazole DMSO Run1       | NM_0001<br>49 | FUT3 | fucosyltran<br>sferase 3<br>(galactosid<br>e 3(4)-L-<br>fucosyltran<br>sferase,<br>Lewis<br>blood<br>group<br>included) | -0.226112 | Inlier |

Identification of Survival Genes in Human Glioblastoma Cells Using siRNA Screening

Nikhil G Thaker, Fang Zhang, Peter R. McDonald, Tong Ying Shun, Michael D Lewen, Ian F. Pollack, and John S. Lazo

Molecular Pharmacology

|                              |               |      |                                                                                          |           |        |
|------------------------------|---------------|------|------------------------------------------------------------------------------------------|-----------|--------|
| siRNA Disorazole DMSO Run3   | NM_0001<br>49 | FUT3 | fucosyltransferase 3 (galactoside 3(4)-L-fucosyltransferase, Lewis blood group included) | -0.031546 | Inlier |
| siRNA-Vinblastine Run2-DMSO  | NM_0001<br>49 | FUT3 | fucosyltransferase 3 (galactoside 3(4)-L-fucosyltransferase, Lewis blood group included) | 0.031546  | Inlier |
| siRNA-Temozolomide Run1-DMSO | NM_0001<br>49 | FUT3 | fucosyltransferase 3 (galactoside 3(4)-L-fucosyltransferase, Lewis blood group included) | 0.875183  | Inlier |
| siRNA-Vinblastine Run1-DMSO  | NM_0001<br>49 | FUT3 | fucosyltransferase 3 (galactoside 3(4)-L-fucosyltransferase, Lewis blood group included) | 1.622739  | Inlier |

Identification of Survival Genes in Human Glioblastoma Cells Using siRNA Screening

Nikhil G Thaker, Fang Zhang, Peter R. McDonald, Tong Ying Shun, Michael D Lewen, Ian F. Pollack, and John S. Lazo

Molecular Pharmacology

|                              |    |         |      |                                                                                            |           |        |
|------------------------------|----|---------|------|--------------------------------------------------------------------------------------------|-----------|--------|
| siRNA Disorazole DMSO Run2   | 49 | NM_0001 | FUT3 | fucosyltransferase 3 (galactosidase 3(4)-L-fucosyltransferase, Lewis blood group included) | 2.845711  | Inlier |
| siRNA-Vinblastine Run2-DMSO  | 33 | NM_0020 | FUT4 | fucosyltransferase 4 (alpha (1,3) fucosyltransferase, myeloid-specific)                    | -0.958884 | Inlier |
| siRNA Disorazole DMSO Run1   | 33 | NM_0020 | FUT4 | fucosyltransferase 4 (alpha (1,3) fucosyltransferase, myeloid-specific)                    | -0.85884  | Inlier |
| siRNA-Temozolomide Run2-DMSO | 33 | NM_0020 | FUT4 | fucosyltransferase 4 (alpha (1,3) fucosyltransferase, myeloid-specific)                    | -0.311972 | Inlier |
| siRNA-Temozolomide Run1-DMSO | 33 | NM_0020 | FUT4 | fucosyltransferase 4 (alpha (1,3) fucosyltransferase, myeloid-specific)                    | -0.09477  | Inlier |
| siRNA-Temozolomide Run3-DMSO | 33 | NM_0020 | FUT4 | fucosyltransferase 4 (alpha (1,3) fucosyltransferase, myeloid-specific)                    | 0.09477   | Inlier |

Identification of Survival Genes in Human Glioblastoma Cells Using siRNA Screening

Nikhil G Thaker, Fang Zhang, Peter R. McDonald, Tong Ying Shun, Michael D Lewen, Ian F. Pollack, and John S. Lazo

Molecular Pharmacology

|                                  |               |      |                                                                                                 |           |        |
|----------------------------------|---------------|------|-------------------------------------------------------------------------------------------------|-----------|--------|
| siRNA Disorazole DMSO Run3       | NM_0020<br>33 | FUT4 | fucosyltran<br>sferase 4<br>(alpha<br>(1,3)<br>fucosyltran<br>sferase,<br>myeloid-<br>specific) | 0.49016   | Inlier |
| siRNA-Vinblastine Run1-<br>DMSO  | NM_0020<br>33 | FUT4 | fucosyltran<br>sferase 4<br>(alpha<br>(1,3)<br>fucosyltran<br>sferase,<br>myeloid-<br>specific) | 0.955714  | Inlier |
| siRNA Disorazole DMSO Run2       | NM_0020<br>33 | FUT4 | fucosyltran<br>sferase 4<br>(alpha<br>(1,3)<br>fucosyltran<br>sferase,<br>myeloid-<br>specific) | 1.137797  | Inlier |
| siRNA-Temozolomide Run3-<br>DMSO | NM_0020<br>34 | FUT5 | fucosyltran<br>sferase 5<br>(alpha<br>(1,3)<br>fucosyltran<br>sferase)                          | -1.414569 | Inlier |
| siRNA-Vinblastine Run2-<br>DMSO  | NM_0020<br>34 | FUT5 | fucosyltran<br>sferase 5<br>(alpha<br>(1,3)<br>fucosyltran<br>sferase)                          | -0.66978  | Inlier |
| siRNA-Temozolomide Run1-<br>DMSO | NM_0020<br>34 | FUT5 | fucosyltran<br>sferase 5<br>(alpha<br>(1,3)<br>fucosyltran<br>sferase)                          | -0.215698 | Inlier |
| siRNA Disorazole DMSO Run3       | NM_0020<br>34 | FUT5 | fucosyltran<br>sferase)                                                                         | -0.029931 | Inlier |

Identification of Survival Genes in Human Glioblastoma Cells Using siRNA Screening  
 Nikhil G Thaker, Fang Zhang, Peter R. McDonald, Tong Ying Shun, Michael D Lewen, Ian F. Pollack, and John S. Lazo

Molecular Pharmacology

|                                  |               |      |                                                                        |           |        |
|----------------------------------|---------------|------|------------------------------------------------------------------------|-----------|--------|
| siRNA Disorazole DMSO Run1       | NM_0020<br>34 | FUT5 | fucosyltran<br>sferase 5<br>(alpha<br>(1,3)<br>fucosyltran<br>sferase) | 0.029932  | Inlier |
| siRNA-Temozolomide Run2-<br>DMSO | NM_0020<br>34 | FUT5 | fucosyltran<br>sferase 5<br>(alpha<br>(1,3)<br>fucosyltran<br>sferase) | 0.67922   | Inlier |
| siRNA Disorazole DMSO Run2       | NM_0020<br>34 | FUT5 | fucosyltran<br>sferase 5<br>(alpha<br>(1,3)<br>fucosyltran<br>sferase) | 1.011469  | Inlier |
| siRNA-Vinblastine Run1-<br>DMSO  | NM_0020<br>34 | FUT5 | fucosyltran<br>sferase 6<br>(alpha<br>(1,3)<br>fucosyltran<br>sferase) | 2.309372  | Inlier |
| siRNA Disorazole DMSO Run1       | NM_0001<br>50 | FUT6 | fucosyltran<br>sferase 6<br>(alpha<br>(1,3)<br>fucosyltran<br>sferase) | -1.16887  | Inlier |
| siRNA-Temozolomide Run3-<br>DMSO | NM_0001<br>50 | FUT6 | fucosyltran<br>sferase 6<br>(alpha<br>(1,3)<br>fucosyltran<br>sferase) | -1.04272  | Inlier |
| siRNA Disorazole DMSO Run3       | NM_0001<br>50 | FUT6 | fucosyltran<br>sferase 6<br>(alpha<br>(1,3)<br>fucosyltran<br>sferase) | -0.803613 | Inlier |
| siRNA-Vinblastine Run2-<br>DMSO  | NM_0001<br>50 | FUT6 | fucosyltran<br>sferase)                                                | -0.44258  | Inlier |



Identification of Survival Genes in Human Glioblastoma Cells Using siRNA Screening

Nikhil G Thaker, Fang Zhang, Peter R. McDonald, Tong Ying Shun, Michael D Lewen, Ian F. Pollack, and John S. Lazo

Molecular Pharmacology

|                                  |               |      |  |                                                                        |                  |
|----------------------------------|---------------|------|--|------------------------------------------------------------------------|------------------|
|                                  |               |      |  | fucosyltran<br>sferase 6<br>(alpha<br>(1,3)                            |                  |
| siRNA Disorazole DMSO Run2       | NM_0001<br>50 | FUT6 |  | fucosyltran<br>sferase)<br>fucosyltran<br>sferase 6<br>(alpha<br>(1,3) | 0.44258 Inlier   |
| siRNA-Temozolomide Run1-<br>DMSO | NM_0001<br>50 | FUT6 |  | fucosyltran<br>sferase)<br>fucosyltran<br>sferase 6<br>(alpha<br>(1,3) | 0.446933 Inlier  |
| siRNA-Temozolomide Run2-<br>DMSO | NM_0001<br>50 | FUT6 |  | fucosyltran<br>sferase)<br>fucosyltran<br>sferase 6<br>(alpha<br>(1,3) | 0.545387 Inlier  |
| siRNA-Vinblastine Run1-<br>DMSO  | NM_0001<br>50 | FUT6 |  | fucosyltran<br>sferase)<br>fucosyltran<br>sferase 7<br>(alpha<br>(1,3) | 0.879111 Inlier  |
| siRNA-Temozolomide Run3-<br>DMSO | NM_0044<br>79 | FUT7 |  | fucosyltran<br>sferase)<br>fucosyltran<br>sferase 7<br>(alpha<br>(1,3) | -1.347239 Inlier |
| siRNA-Temozolomide Run1-<br>DMSO | NM_0044<br>79 | FUT7 |  | fucosyltran<br>sferase)<br>fucosyltran<br>sferase 7<br>(alpha<br>(1,3) | -0.542653 Inlier |
| siRNA Disorazole DMSO Run1       | NM_0044<br>79 | FUT7 |  | fucosyltran<br>sferase)<br>fucosyltran<br>sferase 7<br>(alpha<br>(1,3) | -0.483984 Inlier |
| siRNA-Temozolomide Run2-<br>DMSO | NM_0044<br>79 | FUT7 |  | fucosyltran<br>sferase)                                                | -0.109502 Inlier |

Identification of Survival Genes in Human Glioblastoma Cells Using siRNA Screening

Nikhil G Thaker, Fang Zhang, Peter R. McDonald, Tong Ying Shun, Michael D Lewen, Ian F. Pollack, and John S. Lazo

Molecular Pharmacology

|                                  |               |      |  |                                                                        |                  |
|----------------------------------|---------------|------|--|------------------------------------------------------------------------|------------------|
|                                  |               |      |  | fucosyltran<br>sferase 7<br>(alpha<br>(1,3)                            |                  |
| siRNA Disorazole DMSO Run3       | NM_0044<br>79 | FUT7 |  | fucosyltran<br>sferase)<br>fucosyltran<br>sferase 7<br>(alpha<br>(1,3) | 0.109502 Inlier  |
| siRNA-Vinblastine Run2-<br>DMSO  | NM_0044<br>79 | FUT7 |  | fucosyltran<br>sferase)<br>fucosyltran<br>sferase 7<br>(alpha<br>(1,3) | 0.806347 Inlier  |
| siRNA-Vinblastine Run1-<br>DMSO  | NM_0044<br>79 | FUT7 |  | fucosyltran<br>sferase)<br>fucosyltran<br>sferase 7<br>(alpha<br>(1,3) | 2.760847 Inlier  |
| siRNA Disorazole DMSO Run2       | NM_0044<br>79 | FUT7 |  | fucosyltran<br>sferase)<br>fucosyltran<br>sferase 8<br>(alpha<br>(1,6) | 3.24771 Inlier   |
| siRNA-Vinblastine Run2-<br>DMSO  | NM_1781<br>55 | FUT8 |  | fucosyltran<br>sferase)<br>fucosyltran<br>sferase 8<br>(alpha<br>(1,6) | -0.965526 Inlier |
| siRNA-Temozolomide Run2-<br>DMSO | NM_1781<br>55 | FUT8 |  | fucosyltran<br>sferase)<br>fucosyltran<br>sferase 8<br>(alpha<br>(1,6) | -0.752789 Inlier |
| siRNA-Temozolomide Run3-<br>DMSO | NM_1781<br>55 | FUT8 |  | fucosyltran<br>sferase)<br>fucosyltran<br>sferase 8<br>(alpha<br>(1,6) | -0.410192 Inlier |
| siRNA Disorazole DMSO Run3       | NM_1781<br>55 | FUT8 |  | fucosyltran<br>sferase)                                                | -0.164863 Inlier |

Identification of Survival Genes in Human Glioblastoma Cells Using siRNA Screening  
 Nikhil G Thaker, Fang Zhang, Peter R. McDonald, Tong Ying Shun, Michael D Lewen, Ian F. Pollack, and John S. Lazo

Molecular Pharmacology

| siRNA Treatment              | Gene ID   | Enzyme | Enzyme Name                                           | Value     | Category |
|------------------------------|-----------|--------|-------------------------------------------------------|-----------|----------|
| siRNA-Temozolomide Run1-DMSO | NM_178155 | FUT8   | fucosyltransferase 8 (alpha (1,6) fucosyltransferase) | 0.164864  | Inlier   |
| siRNA Disorazole DMSO Run1   | NM_178155 | FUT8   | fucosyltransferase 8 (alpha (1,6) fucosyltransferase) | 0.596211  | Inlier   |
| siRNA Disorazole DMSO Run2   | NM_178155 | FUT8   | fucosyltransferase 8 (alpha (1,6) fucosyltransferase) | 2.857335  | Inlier   |
| siRNA-Vinblastine Run1-DMSO  | NM_178155 | FUT8   | fucosyltransferase 8 (alpha (1,6) fucosyltransferase) | 3.777242  | Outlier  |
| siRNA Disorazole DMSO Run1   | NM_006581 | FUT9   | fucosyltransferase 9 (alpha (1,3) fucosyltransferase) | -3.14086  | Inlier   |
| siRNA-Temozolomide Run1-DMSO | NM_006581 | FUT9   | fucosyltransferase 9 (alpha (1,3) fucosyltransferase) | -0.726886 | Inlier   |
| siRNA-Temozolomide Run3-DMSO | NM_006581 | FUT9   | fucosyltransferase 9 (alpha (1,3) fucosyltransferase) | -0.622114 | Inlier   |
| siRNA-Temozolomide Run2-DMSO | NM_006581 | FUT9   | fucosyltransferase 9 (alpha (1,3) fucosyltransferase) | -0.239185 | Inlier   |

Identification of Survival Genes in Human Glioblastoma Cells Using siRNA Screening  
 Nikhil G Thaker, Fang Zhang, Peter R. McDonald, Tong Ying Shun, Michael D Lewen, Ian F. Pollack, and John S. Lazo

Molecular Pharmacology

|                                  |               |      |                                             |                  |
|----------------------------------|---------------|------|---------------------------------------------|------------------|
|                                  |               |      | fucosyltran<br>sferase 9<br>(alpha<br>(1,3) |                  |
| siRNA-Vinblastine Run2-<br>DMSO  | NM_0065<br>81 | FUT9 | fucosyltran<br>sferase)                     | 0.239185 Inlier  |
|                                  |               |      | fucosyltran<br>sferase 9<br>(alpha<br>(1,3) |                  |
| siRNA Disorazole DMSO Run3       | NM_0065<br>81 | FUT9 | fucosyltran<br>sferase)                     | 0.39579 Inlier   |
|                                  |               |      | fucosyltran<br>sferase 9<br>(alpha<br>(1,3) |                  |
| siRNA Disorazole DMSO Run2       | NM_0065<br>81 | FUT9 | fucosyltran<br>sferase)                     | 2.322204 Inlier  |
|                                  |               |      | fucosyltran<br>sferase 9<br>(alpha<br>(1,3) |                  |
| siRNA-Vinblastine Run1-<br>DMSO  | NM_0065<br>81 | FUT9 | fucosyltran<br>sferase)                     | 2.761707 Inlier  |
|                                  |               |      | follicular<br>lymphoma<br>variant           |                  |
| siRNA-Temozolomide Run3-<br>DMSO | NM_0020<br>35 | FVT1 | translocati<br>on 1                         | -1.153052 Inlier |
|                                  |               |      | follicular<br>lymphoma<br>variant           |                  |
| siRNA-Temozolomide Run2-<br>DMSO | NM_0020<br>35 | FVT1 | translocati<br>on 1                         | -0.773614 Inlier |
|                                  |               |      | follicular<br>lymphoma<br>variant           |                  |
| siRNA Disorazole DMSO Run1       | NM_0020<br>35 | FVT1 | translocati<br>on 1                         | -0.144413 Inlier |
|                                  |               |      | follicular<br>lymphoma<br>variant           |                  |
| siRNA-Vinblastine Run2-<br>DMSO  | NM_0020<br>35 | FVT1 | translocati<br>on 1                         | -0.036371 Inlier |
|                                  |               |      | follicular<br>lymphoma<br>variant           |                  |
| siRNA-Temozolomide Run1-<br>DMSO | NM_0020<br>35 | FVT1 | translocati<br>on 1                         | 0.036371 Inlier  |

Identification of Survival Genes in Human Glioblastoma Cells Using siRNA Screening  
 Nikhil G Thaker, Fang Zhang, Peter R. McDonald, Tong Ying Shun, Michael D Lewen, Ian F. Pollack, and John S. Lazo

Molecular Pharmacology

|                              |               |      |                                             |           |        |
|------------------------------|---------------|------|---------------------------------------------|-----------|--------|
| siRNA Disorazole DMSO Run3   | NM_0020<br>35 | FVT1 | follicular lymphoma variant translocation 1 | 0.575386  | Inlier |
| siRNA Disorazole DMSO Run2   | NM_0020<br>35 | FVT1 | follicular lymphoma variant translocation 1 | 1.378063  | Inlier |
| siRNA-Vinblastine Run1-DMSO  | NM_0020<br>35 | FVT1 | follicular lymphoma variant translocation 1 | 1.93912   | Inlier |
| siRNA-Temozolomide Run3-DMSO | NM_0121<br>92 | FXC1 | fracture callus 1 homolog (rat)             | -1.38815  | Inlier |
| siRNA-Temozolomide Run2-DMSO | NM_0121<br>92 | FXC1 | fracture callus 1 homolog (rat)             | -0.82526  | Inlier |
| siRNA-Temozolomide Run1-DMSO | NM_0121<br>92 | FXC1 | fracture callus 1 homolog (rat)             | -0.160855 | Inlier |
| siRNA Disorazole DMSO Run3   | NM_0121<br>92 | FXC1 | fracture callus 1 homolog (rat)             | -0.053206 | Inlier |
| siRNA Disorazole DMSO Run1   | NM_0121<br>92 | FXC1 | fracture callus 1 homolog (rat)             | 0.053206  | Inlier |
| siRNA Disorazole DMSO Run2   | NM_0121<br>92 | FXC1 | fracture callus 1 homolog (rat)             | 0.52374   | Inlier |
| siRNA-Vinblastine Run1-DMSO  | NM_0121<br>92 | FXC1 | fracture callus 1 homolog (rat)             | 1.383206  | Inlier |
| siRNA-Vinblastine Run2-DMSO  | NM_0121<br>92 | FXC1 | fracture callus 1 homolog (rat)             | 1.488397  | Inlier |

Identification of Survival Genes in Human Glioblastoma Cells Using siRNA Screening

Nikhil G Thaker, Fang Zhang, Peter R. McDonald, Tong Ying Shun, Michael D Lewen, Ian F. Pollack, and John S. Lazo

Molecular Pharmacology

|                                  |               |       |                                                                                        |           |        |
|----------------------------------|---------------|-------|----------------------------------------------------------------------------------------|-----------|--------|
| siRNA Disorazole DMSO Run2       | NM_0219<br>02 | FXYD1 | FXYD<br>domain<br>containing<br>ion<br>transport<br>regulator 1<br>(phosphol<br>emman) | -1.258133 | Inlier |
| siRNA-Temozolomide Run3-<br>DMSO | NM_0219<br>02 | FXYD1 | FXYD<br>domain<br>containing<br>ion<br>transport<br>regulator 1<br>(phosphol<br>emman) | -1.083627 | Inlier |
| siRNA Disorazole DMSO Run3       | NM_0219<br>02 | FXYD1 | FXYD<br>domain<br>containing<br>ion<br>transport<br>regulator 1<br>(phosphol<br>emman) | -0.612105 | Inlier |
| siRNA Disorazole DMSO Run1       | NM_0219<br>02 | FXYD1 | FXYD<br>domain<br>containing<br>ion<br>transport<br>regulator 1<br>(phosphol<br>emman) | -0.014698 | Inlier |
| siRNA-Temozolomide Run2-<br>DMSO | NM_0219<br>02 | FXYD1 | FXYD<br>domain<br>containing<br>ion<br>transport<br>regulator 1<br>(phosphol<br>emman) | 0.014698  | Inlier |

Identification of Survival Genes in Human Glioblastoma Cells Using siRNA Screening  
 Nikhil G Thaker, Fang Zhang, Peter R. McDonald, Tong Ying Shun, Michael D Lewen, Ian F. Pollack, and John S. Lazo  
 Molecular Pharmacology

|                              |           |       |                                                                   |           |        |
|------------------------------|-----------|-------|-------------------------------------------------------------------|-----------|--------|
| siRNA-Temozolomide Run1-DMSO | NM_021902 | FXYD1 | FXYD domain containing ion transport regulator 1 (phosphol emman) | 0.361391  | Inlier |
| siRNA-Vinblastine Run2-DMSO  | NM_021902 | FXYD1 | FXYD domain containing ion transport regulator 1 (phosphol emman) | 0.736895  | Inlier |
| siRNA-Vinblastine Run1-DMSO  | NM_021902 | FXYD1 | FXYD domain containing ion transport regulator 1 (phosphol emman) | 1.521666  | Inlier |
| siRNA Disorazole DMSO Run1   | NM_001680 | FXYD2 | FXYD domain containing ion transport regulator 2                  | -3.014937 | Inlier |
| siRNA-Temozolomide Run3-DMSO | NM_001680 | FXYD2 | FXYD domain containing ion transport regulator 2                  | -2.807492 | Inlier |
| siRNA-Temozolomide Run2-DMSO | NM_001680 | FXYD2 | FXYD domain containing ion transport regulator 2                  | -0.794213 | Inlier |

Identification of Survival Genes in Human Glioblastoma Cells Using siRNA Screening  
 Nikhil G Thaker, Fang Zhang, Peter R. McDonald, Tong Ying Shun, Michael D Lewen, Ian F. Pollack, and John S. Lazo  
 Molecular Pharmacology

|                              |               |       |                                                                 |           |         |
|------------------------------|---------------|-------|-----------------------------------------------------------------|-----------|---------|
| siRNA-Temozolomide Run1-DMSO | NM_0016<br>80 | FXYD2 | FXYD<br>domain<br>containing<br>ion<br>transport<br>regulator 2 | -0.096721 | Inlier  |
| siRNA Disorazole DMSO Run3   | NM_0016<br>80 | FXYD2 | FXYD<br>domain<br>containing<br>ion<br>transport<br>regulator 2 | 0.096721  | Inlier  |
| siRNA-Vinblastine Run1-DMSO  | NM_0016<br>80 | FXYD2 | FXYD<br>domain<br>containing<br>ion<br>transport<br>regulator 2 | 0.489832  | Inlier  |
| siRNA-Vinblastine Run2-DMSO  | NM_0016<br>80 | FXYD2 | FXYD<br>domain<br>containing<br>ion<br>transport<br>regulator 2 | 0.554787  | Inlier  |
| siRNA Disorazole DMSO Run2   | NM_0016<br>80 | FXYD2 | FXYD<br>domain<br>containing<br>ion<br>transport<br>regulator 2 | 3.531054  | Outlier |
| siRNA Disorazole DMSO Run2   | NM_0219<br>10 | FXYD3 | FXYD<br>domain<br>containing<br>ion<br>transport<br>regulator 3 | -1.731431 | Inlier  |
| siRNA Disorazole DMSO Run3   | NM_0219<br>10 | FXYD3 | FXYD<br>domain<br>containing<br>ion<br>transport<br>regulator 3 | -1.06192  | Inlier  |



Identification of Survival Genes in Human Glioblastoma Cells Using siRNA Screening  
 Nikhil G Thaker, Fang Zhang, Peter R. McDonald, Tong Ying Shun, Michael D Lewen, Ian F. Pollack, and John S. Lazo  
 Molecular Pharmacology

|                              |               |       |                                                                 |           |        |
|------------------------------|---------------|-------|-----------------------------------------------------------------|-----------|--------|
| siRNA-Temozolomide Run3-DMSO | NM_0219<br>10 | FXYD3 | FXYD<br>domain<br>containing<br>ion<br>transport<br>regulator 3 | -0.344368 | Inlier |
| siRNA-Vinblastine Run2-DMSO  | NM_0219<br>10 | FXYD3 | FXYD<br>domain<br>containing<br>ion<br>transport<br>regulator 3 | -0.2192   | Inlier |
| siRNA-Temozolomide Run2-DMSO | NM_0219<br>10 | FXYD3 | FXYD<br>domain<br>containing<br>ion<br>transport<br>regulator 3 | 0.2192    | Inlier |
| siRNA-Vinblastine Run1-DMSO  | NM_0219<br>10 | FXYD3 | FXYD<br>domain<br>containing<br>ion<br>transport<br>regulator 3 | 0.221215  | Inlier |
| siRNA Disorazole DMSO Run1   | NM_0219<br>10 | FXYD3 | FXYD<br>domain<br>containing<br>ion<br>transport<br>regulator 3 | 1.004632  | Inlier |
| siRNA-Temozolomide Run1-DMSO | NM_0219<br>10 | FXYD3 | FXYD<br>domain<br>containing<br>ion<br>transport<br>regulator 3 | 1.066929  | Inlier |
| siRNA-Temozolomide Run3-DMSO | NM_1447<br>79 | FXYD5 | FXYD<br>domain<br>containing<br>ion<br>transport<br>regulator 5 | -1.235952 | Inlier |

Identification of Survival Genes in Human Glioblastoma Cells Using siRNA Screening  
 Nikhil G Thaker, Fang Zhang, Peter R. McDonald, Tong Ying Shun, Michael D Lewen, Ian F. Pollack, and John S. Lazo  
 Molecular Pharmacology

|                              |               |       |                                                                 |           |        |
|------------------------------|---------------|-------|-----------------------------------------------------------------|-----------|--------|
| siRNA Disorazole DMSO Run1   | NM_1447<br>79 | FXVD5 | FXVD<br>domain<br>containing<br>ion<br>transport<br>regulator 5 | -0.811467 | Inlier |
| siRNA-Temozolomide Run1-DMSO | NM_1447<br>79 | FXVD5 | FXVD<br>domain<br>containing<br>ion<br>transport<br>regulator 5 | -0.495044 | Inlier |
| siRNA-Temozolomide Run2-DMSO | NM_1447<br>79 | FXVD5 | FXVD<br>domain<br>containing<br>ion<br>transport<br>regulator 5 | -0.210104 | Inlier |
| siRNA Disorazole DMSO Run3   | NM_1447<br>79 | FXVD5 | FXVD<br>domain<br>containing<br>ion<br>transport<br>regulator 5 | 0.210104  | Inlier |
| siRNA Disorazole DMSO Run2   | NM_1447<br>79 | FXVD5 | FXVD<br>domain<br>containing<br>ion<br>transport<br>regulator 5 | 0.537533  | Inlier |
| siRNA-Vinblastine Run2-DMSO  | NM_1447<br>79 | FXVD5 | FXVD<br>domain<br>containing<br>ion<br>transport<br>regulator 5 | 0.890589  | Inlier |
| siRNA-Vinblastine Run1-DMSO  | NM_1447<br>79 | FXVD5 | FXVD<br>domain<br>containing<br>ion<br>transport<br>regulator 5 | 1.369831  | Inlier |

Identification of Survival Genes in Human Glioblastoma Cells Using siRNA Screening  
 Nikhil G Thaker, Fang Zhang, Peter R. McDonald, Tong Ying Shun, Michael D Lewen, Ian F. Pollack, and John S. Lazo  
 Molecular Pharmacology

|                                  |               |       |                                                                 |           |        |
|----------------------------------|---------------|-------|-----------------------------------------------------------------|-----------|--------|
| siRNA Disorazole DMSO Run1       | NM_0220<br>06 | FXYD7 | FXYD<br>domain<br>containing<br>ion<br>transport<br>regulator 7 | -2.374578 | Inlier |
| siRNA-Temozolomide Run3-<br>DMSO | NM_0220<br>06 | FXYD7 | FXYD<br>domain<br>containing<br>ion<br>transport<br>regulator 7 | -2.02648  | Inlier |
| siRNA-Temozolomide Run2-<br>DMSO | NM_0220<br>06 | FXYD7 | FXYD<br>domain<br>containing<br>ion<br>transport<br>regulator 7 | -0.990759 | Inlier |
| siRNA-Temozolomide Run1-<br>DMSO | NM_0220<br>06 | FXYD7 | FXYD<br>domain<br>containing<br>ion<br>transport<br>regulator 7 | -0.267669 | Inlier |
| siRNA Disorazole DMSO Run2       | NM_0220<br>06 | FXYD7 | FXYD<br>domain<br>containing<br>ion<br>transport<br>regulator 7 | 0.267669  | Inlier |
| siRNA-Vinblastine Run2-<br>DMSO  | NM_0220<br>06 | FXYD7 | FXYD<br>domain<br>containing<br>ion<br>transport<br>regulator 7 | 0.278079  | Inlier |
| siRNA-Vinblastine Run1-<br>DMSO  | NM_0220<br>06 | FXYD7 | FXYD<br>domain<br>containing<br>ion<br>transport<br>regulator 7 | 0.35824   | Inlier |

Identification of Survival Genes in Human Glioblastoma Cells Using siRNA Screening  
 Nikhil G Thaker, Fang Zhang, Peter R. McDonald, Tong Ying Shun, Michael D Lewen, Ian F. Pollack, and John S. Lazo  
 Molecular Pharmacology

|                                  |               |       |                                                                 |           |        |
|----------------------------------|---------------|-------|-----------------------------------------------------------------|-----------|--------|
| siRNA Disorazole DMSO Run3       | NM_0220<br>06 | FXYD7 | FXYD<br>domain<br>containing<br>ion<br>transport<br>regulator 7 | 2.166084  | Inlier |
| siRNA-Temozolomide Run3-<br>DMSO | NM_0020<br>36 | FY    | Duffy<br>blood<br>group                                         | -1.017869 | Inlier |
| siRNA Disorazole DMSO Run2       | NM_0020<br>36 | FY    | Duffy<br>blood<br>group                                         | -0.696724 | Inlier |
| siRNA Disorazole DMSO Run3       | NM_0020<br>36 | FY    | Duffy<br>blood<br>group                                         | -0.135238 | Inlier |
| siRNA-Temozolomide Run2-<br>DMSO | NM_0020<br>36 | FY    | Duffy<br>blood<br>group                                         | -0.130368 | Inlier |
| siRNA-Temozolomide Run1-<br>DMSO | NM_0020<br>36 | FY    | Duffy<br>blood<br>group                                         | 0.130368  | Inlier |
| siRNA-Vinblastine Run2-<br>DMSO  | NM_0020<br>36 | FY    | Duffy<br>blood<br>group                                         | 0.652276  | Inlier |
| siRNA Disorazole DMSO Run1       | NM_0020<br>36 | FY    | Duffy<br>blood<br>group                                         | 0.720516  | Inlier |
| siRNA-Vinblastine Run1-<br>DMSO  | NM_0020<br>36 | FY    | Duffy<br>blood<br>group                                         | 0.826553  | Inlier |
| siRNA-Temozolomide Run1-<br>DMSO | NM_1530<br>47 | FYN   | FYN<br>oncogene<br>related to<br>SRC,<br>FGR, YES               | -1.750829 | Inlier |
| siRNA-Temozolomide Run3-<br>DMSO | NM_1530<br>47 | FYN   | FYN<br>oncogene<br>related to<br>SRC,<br>FGR, YES               | -1.308393 | Inlier |
| siRNA-Temozolomide Run2-<br>DMSO | NM_1530<br>47 | FYN   | FYN<br>oncogene<br>related to<br>SRC,<br>FGR, YES               | -0.38647  | Inlier |

Identification of Survival Genes in Human Glioblastoma Cells Using siRNA Screening  
 Nikhil G Thaker, Fang Zhang, Peter R. McDonald, Tong Ying Shun, Michael D Lewen, Ian F. Pollack, and John S. Lazo  
 Molecular Pharmacology

|                                  |               |      |                                                   |           |        |
|----------------------------------|---------------|------|---------------------------------------------------|-----------|--------|
| siRNA Disorazole DMSO Run3       | NM_1530<br>47 | FYN  | FYN<br>oncogene<br>related to<br>SRC,<br>FGR, YES | -0.292731 | Inlier |
| siRNA Disorazole DMSO Run2       | NM_1530<br>47 | FYN  | FYN<br>oncogene<br>related to<br>SRC,<br>FGR, YES | 0.292731  | Inlier |
| siRNA Disorazole DMSO Run1       | NM_1530<br>47 | FYN  | FYN<br>oncogene<br>related to<br>SRC,<br>FGR, YES | 0.61297   | Inlier |
| siRNA-Vinblastine Run1-<br>DMSO  | NM_1530<br>47 | FYN  | FYN<br>oncogene<br>related to<br>SRC,<br>FGR, YES | 0.73603   | Inlier |
| siRNA-Vinblastine Run2-<br>DMSO  | NM_1530<br>47 | FYN  | FYN<br>oncogene<br>related to<br>SRC,<br>FGR, YES | 0.944205  | Inlier |
| siRNA-Temozolomide Run3-<br>DMSO | NM_0035<br>05 | FZD1 | frizzled<br>homolog 1<br>(Drosophil<br>a)         | -1.043777 | Inlier |
| siRNA-Temozolomide Run2-<br>DMSO | NM_0035<br>05 | FZD1 | frizzled<br>homolog 1<br>(Drosophil<br>a)         | -0.803066 | Inlier |
| siRNA Disorazole DMSO Run2       | NM_0035<br>05 | FZD1 | frizzled<br>homolog 1<br>(Drosophil<br>a)         | -0.545934 | Inlier |
| siRNA Disorazole DMSO Run3       | NM_0035<br>05 | FZD1 | frizzled<br>homolog 1<br>(Drosophil<br>a)         | -0.413424 | Inlier |

Identification of Survival Genes in Human Glioblastoma Cells Using siRNA Screening  
 Nikhil G Thaker, Fang Zhang, Peter R. McDonald, Tong Ying Shun, Michael D Lewen, Ian F. Pollack, and John S. Lazo  
 Molecular Pharmacology

|                              |           |       |                                  |           |        |
|------------------------------|-----------|-------|----------------------------------|-----------|--------|
| siRNA-Temozolomide Run1-DMSO | NM_003505 | FZD1  | frizzled homolog 1 (Drosophila)  | 0.413424  | Inlier |
| siRNA Disorazole DMSO Run1   | NM_003505 | FZD1  | frizzled homolog 1 (Drosophila)  | 0.502003  | Inlier |
| siRNA-Vinblastine Run2-DMSO  | NM_003505 | FZD1  | frizzled homolog 1 (Drosophila)  | 0.935183  | Inlier |
| siRNA-Vinblastine Run1-DMSO  | NM_003505 | FZD1  | frizzled homolog 1 (Drosophila)  | 0.983834  | Inlier |
| siRNA Disorazole DMSO Run2   | NM_007197 | FZD10 | frizzled homolog 10 (Drosophila) | -0.74934  | Inlier |
| siRNA-Temozolomide Run2-DMSO | NM_007197 | FZD10 | frizzled homolog 10 (Drosophila) | -0.59966  | Inlier |
| siRNA-Temozolomide Run1-DMSO | NM_007197 | FZD10 | frizzled homolog 10 (Drosophila) | -0.419854 | Inlier |
| siRNA-Temozolomide Run3-DMSO | NM_007197 | FZD10 | frizzled homolog 10 (Drosophila) | -0.078271 | Inlier |
| siRNA Disorazole DMSO Run1   | NM_007197 | FZD10 | frizzled homolog 10 (Drosophila) | 0.07827   | Inlier |
| siRNA-Vinblastine Run1-DMSO  | NM_007197 | FZD10 | frizzled homolog 10 (Drosophila) | 0.886883  | Inlier |

Identification of Survival Genes in Human Glioblastoma Cells Using siRNA Screening  
 Nikhil G Thaker, Fang Zhang, Peter R. McDonald, Tong Ying Shun, Michael D Lewen, Ian F. Pollack, and John S. Lazo

Molecular Pharmacology

|                              |               |       |                                               |                  |
|------------------------------|---------------|-------|-----------------------------------------------|------------------|
| siRNA-Vinblastine Run2-DMSO  | NM_0071<br>97 | FZD10 | frizzled<br>homolog<br>10<br>(Drosophil<br>a) | 1.171233 Inlier  |
| siRNA Disorazole DMSO Run3   | NM_0071<br>97 | FZD10 | frizzled<br>homolog<br>10<br>(Drosophil<br>a) | 1.445844 Inlier  |
| siRNA-Temozolomide Run3-DMSO | NM_0014<br>66 | FZD2  | frizzled<br>homolog 2<br>(Drosophil<br>a)     | -1.326349 Inlier |
| siRNA-Temozolomide Run2-DMSO | NM_0014<br>66 | FZD2  | frizzled<br>homolog 2<br>(Drosophil<br>a)     | -0.876216 Inlier |
| siRNA-Temozolomide Run1-DMSO | NM_0014<br>66 | FZD2  | frizzled<br>homolog 2<br>(Drosophil<br>a)     | -0.571041 Inlier |
| siRNA Disorazole DMSO Run2   | NM_0014<br>66 | FZD2  | frizzled<br>homolog 2<br>(Drosophil<br>a)     | -0.167436 Inlier |
| siRNA Disorazole DMSO Run1   | NM_0014<br>66 | FZD2  | frizzled<br>homolog 2<br>(Drosophil<br>a)     | 0.167436 Inlier  |
| siRNA-Vinblastine Run1-DMSO  | NM_0014<br>66 | FZD2  | frizzled<br>homolog 2<br>(Drosophil<br>a)     | 0.647961 Inlier  |
| siRNA-Vinblastine Run2-DMSO  | NM_0014<br>66 | FZD2  | frizzled<br>homolog 2<br>(Drosophil<br>a)     | 0.701039 Inlier  |
| siRNA Disorazole DMSO Run3   | NM_0014<br>66 | FZD2  | frizzled<br>homolog 2<br>(Drosophil<br>a)     | 0.702679 Inlier  |

Identification of Survival Genes in Human Glioblastoma Cells Using siRNA Screening  
 Nikhil G Thaker, Fang Zhang, Peter R. McDonald, Tong Ying Shun, Michael D Lewen, Ian F. Pollack, and John S. Lazo  
 Molecular Pharmacology

|                              |               |      |                                           |                  |
|------------------------------|---------------|------|-------------------------------------------|------------------|
| siRNA-Temozolomide Run3-DMSO | NM_0174<br>12 | FZD3 | frizzled<br>homolog 3<br>(Drosophil<br>a) | -1.30199 Inlier  |
| siRNA-Temozolomide Run2-DMSO | NM_0174<br>12 | FZD3 | frizzled<br>homolog 3<br>(Drosophil<br>a) | -0.788151 Inlier |
| siRNA Disorazole DMSO Run1   | NM_0174<br>12 | FZD3 | frizzled<br>homolog 3<br>(Drosophil<br>a) | -0.560849 Inlier |
| siRNA-Temozolomide Run1-DMSO | NM_0174<br>12 | FZD3 | frizzled<br>homolog 3<br>(Drosophil<br>a) | -0.322741 Inlier |
| siRNA-Vinblastine Run2-DMSO  | NM_0174<br>12 | FZD3 | frizzled<br>homolog 3<br>(Drosophil<br>a) | 0.32274 Inlier   |
| siRNA Disorazole DMSO Run2   | NM_0174<br>12 | FZD3 | frizzled<br>homolog 3<br>(Drosophil<br>a) | 0.35117 Inlier   |
| siRNA-Vinblastine Run1-DMSO  | NM_0174<br>12 | FZD3 | frizzled<br>homolog 3<br>(Drosophil<br>a) | 0.90228 Inlier   |
| siRNA Disorazole DMSO Run3   | NM_0174<br>12 | FZD3 | frizzled<br>homolog 3<br>(Drosophil<br>a) | 1.645838 Inlier  |
| siRNA-Temozolomide Run3-DMSO | NM_0121<br>93 | FZD4 | frizzled<br>homolog 4<br>(Drosophil<br>a) | -0.696292 Inlier |
| siRNA-Temozolomide Run2-DMSO | NM_0121<br>93 | FZD4 | frizzled<br>homolog 4<br>(Drosophil<br>a) | -0.652708 Inlier |



Identification of Survival Genes in Human Glioblastoma Cells Using siRNA Screening  
 Nikhil G Thaker, Fang Zhang, Peter R. McDonald, Tong Ying Shun, Michael D Lewen, Ian F. Pollack, and John S. Lazo  
 Molecular Pharmacology

|                              |               |      |                                       |           |        |
|------------------------------|---------------|------|---------------------------------------|-----------|--------|
| siRNA-Temozolomide Run1-DMSO | NM_0121<br>93 | FZD4 | frizzled<br>homolog 4<br>(Drosophila) | -0.175184 | Inlier |
| siRNA Disorazole DMSO Run2   | NM_0121<br>93 | FZD4 | frizzled<br>homolog 4<br>(Drosophila) | -0.002704 | Inlier |
| siRNA Disorazole DMSO Run1   | NM_0121<br>93 | FZD4 | frizzled<br>homolog 4<br>(Drosophila) | 0.002704  | Inlier |
| siRNA-Vinblastine Run1-DMSO  | NM_0121<br>93 | FZD4 | frizzled<br>homolog 4<br>(Drosophila) | 1.365481  | Inlier |
| siRNA Disorazole DMSO Run3   | NM_0121<br>93 | FZD4 | frizzled<br>homolog 4<br>(Drosophila) | 1.37192   | Inlier |
| siRNA-Vinblastine Run2-DMSO  | NM_0121<br>93 | FZD4 | frizzled<br>homolog 4<br>(Drosophila) | 1.655358  | Inlier |
| siRNA Disorazole DMSO Run2   | NM_0034<br>68 | FZD5 | frizzled<br>homolog 5<br>(Drosophila) | -1.677129 | Inlier |
| siRNA-Temozolomide Run3-DMSO | NM_0034<br>68 | FZD5 | frizzled<br>homolog 5<br>(Drosophila) | -0.720767 | Inlier |
| siRNA-Temozolomide Run2-DMSO | NM_0034<br>68 | FZD5 | frizzled<br>homolog 5<br>(Drosophila) | -0.577315 | Inlier |
| siRNA Disorazole DMSO Run1   | NM_0034<br>68 | FZD5 | frizzled<br>homolog 5<br>(Drosophila) | -0.089521 | Inlier |

Identification of Survival Genes in Human Glioblastoma Cells Using siRNA Screening  
 Nikhil G Thaker, Fang Zhang, Peter R. McDonald, Tong Ying Shun, Michael D Lewen, Ian F. Pollack, and John S. Lazo  
 Molecular Pharmacology

|                              |           |      |                                 |           |        |
|------------------------------|-----------|------|---------------------------------|-----------|--------|
| siRNA-Temozolomide Run1-DMSO | NM_003468 | FZD5 | frizzled homolog 5 (Drosophila) | 0.089522  | Inlier |
| siRNA-Vinblastine Run2-DMSO  | NM_003468 | FZD5 | frizzled homolog 5 (Drosophila) | 0.628233  | Inlier |
| siRNA-Vinblastine Run1-DMSO  | NM_003468 | FZD5 | frizzled homolog 5 (Drosophila) | 0.89514   | Inlier |
| siRNA Disorazole DMSO Run3   | NM_003468 | FZD5 | frizzled homolog 5 (Drosophila) | 1.175126  | Inlier |
| siRNA-Temozolomide Run2-DMSO | NM_003506 | FZD6 | frizzled homolog 6 (Drosophila) | -0.987432 | Inlier |
| siRNA-Temozolomide Run3-DMSO | NM_003506 | FZD6 | frizzled homolog 6 (Drosophila) | -0.851435 | Inlier |
| siRNA Disorazole DMSO Run1   | NM_003506 | FZD6 | frizzled homolog 6 (Drosophila) | -0.427399 | Inlier |
| siRNA-Temozolomide Run1-DMSO | NM_003506 | FZD6 | frizzled homolog 6 (Drosophila) | -0.156694 | Inlier |
| siRNA Disorazole DMSO Run3   | NM_003506 | FZD6 | frizzled homolog 6 (Drosophila) | 0.156694  | Inlier |
| siRNA-Vinblastine Run1-DMSO  | NM_003506 | FZD6 | frizzled homolog 6 (Drosophila) | 0.601576  | Inlier |

Identification of Survival Genes in Human Glioblastoma Cells Using siRNA Screening  
 Nikhil G Thaker, Fang Zhang, Peter R. McDonald, Tong Ying Shun, Michael D Lewen, Ian F. Pollack, and John S. Lazo  
 Molecular Pharmacology

|                              |           |      |                                 |           |        |
|------------------------------|-----------|------|---------------------------------|-----------|--------|
| siRNA-Vinblastine Run2-DMSO  | NM_003506 | FZD6 | frizzled homolog 6 (Drosophila) | 0.747424  | Inlier |
| siRNA Disorazole DMSO Run2   | NM_003506 | FZD6 | frizzled homolog 6 (Drosophila) | 1.175498  | Inlier |
| siRNA-Temozolomide Run3-DMSO | NM_003507 | FZD7 | frizzled homolog 7 (Drosophila) | -2.573268 | Inlier |
| siRNA-Temozolomide Run2-DMSO | NM_003507 | FZD7 | frizzled homolog 7 (Drosophila) | -0.56059  | Inlier |
| siRNA Disorazole DMSO Run3   | NM_003507 | FZD7 | frizzled homolog 7 (Drosophila) | -0.283092 | Inlier |
| siRNA Disorazole DMSO Run2   | NM_003507 | FZD7 | frizzled homolog 7 (Drosophila) | -0.012847 | Inlier |
| siRNA-Temozolomide Run1-DMSO | NM_003507 | FZD7 | frizzled homolog 7 (Drosophila) | 0.012847  | Inlier |
| siRNA Disorazole DMSO Run1   | NM_003507 | FZD7 | frizzled homolog 7 (Drosophila) | 0.78841   | Inlier |
| siRNA-Vinblastine Run2-DMSO  | NM_003507 | FZD7 | frizzled homolog 7 (Drosophila) | 0.916358  | Inlier |
| siRNA-Vinblastine Run1-DMSO  | NM_003507 | FZD7 | frizzled homolog 7 (Drosophila) | 0.969761  | Inlier |

Identification of Survival Genes in Human Glioblastoma Cells Using siRNA Screening  
 Nikhil G Thaker, Fang Zhang, Peter R. McDonald, Tong Ying Shun, Michael D Lewen, Ian F. Pollack, and John S. Lazo  
 Molecular Pharmacology

|                              |               |      |                                           |                  |
|------------------------------|---------------|------|-------------------------------------------|------------------|
| siRNA-Temozolomide Run3-DMSO | NM_0318<br>66 | FZD8 | frizzled<br>homolog 8<br>(Drosophil<br>a) | -1.879494 Inlier |
| siRNA-Temozolomide Run2-DMSO | NM_0318<br>66 | FZD8 | frizzled<br>homolog 8<br>(Drosophil<br>a) | -0.603311 Inlier |
| siRNA Disorazole DMSO Run1   | NM_0318<br>66 | FZD8 | frizzled<br>homolog 8<br>(Drosophil<br>a) | -0.342213 Inlier |
| siRNA Disorazole DMSO Run2   | NM_0318<br>66 | FZD8 | frizzled<br>homolog 8<br>(Drosophil<br>a) | -0.040789 Inlier |
| siRNA-Temozolomide Run1-DMSO | NM_0318<br>66 | FZD8 | frizzled<br>homolog 8<br>(Drosophil<br>a) | 0.04079 Inlier   |
| siRNA Disorazole DMSO Run3   | NM_0318<br>66 | FZD8 | frizzled<br>homolog 8<br>(Drosophil<br>a) | 0.745689 Inlier  |
| siRNA-Vinblastine Run2-DMSO  | NM_0318<br>66 | FZD8 | frizzled<br>homolog 8<br>(Drosophil<br>a) | 0.806123 Inlier  |
| siRNA-Vinblastine Run1-DMSO  | NM_0318<br>66 | FZD8 | frizzled<br>homolog 8<br>(Drosophil<br>a) | 1.385193 Inlier  |
| siRNA-Temozolomide Run3-DMSO | NM_0035<br>08 | FZD9 | frizzled<br>homolog 9<br>(Drosophil<br>a) | -2.851039 Inlier |
| siRNA Disorazole DMSO Run2   | NM_0035<br>08 | FZD9 | frizzled<br>homolog 9<br>(Drosophil<br>a) | -1.837201 Inlier |

Identification of Survival Genes in Human Glioblastoma Cells Using siRNA Screening  
 Nikhil G Thaker, Fang Zhang, Peter R. McDonald, Tong Ying Shun, Michael D Lewen, Ian F. Pollack, and John S. Lazo  
 Molecular Pharmacology

|                              |           |      |                                                                                        |           |        |
|------------------------------|-----------|------|----------------------------------------------------------------------------------------|-----------|--------|
| siRNA-Temozolomide Run2-DMSO | NM_003508 | FZD9 | frizzled homolog 9 (Drosophila)                                                        | -0.542972 | Inlier |
| siRNA-Temozolomide Run1-DMSO | NM_003508 | FZD9 | frizzled homolog 9 (Drosophila)                                                        | -0.542592 | Inlier |
| siRNA-Vinblastine Run2-DMSO  | NM_003508 | FZD9 | frizzled homolog 9 (Drosophila)                                                        | 0.542592  | Inlier |
| siRNA Disorazole DMSO Run3   | NM_003508 | FZD9 | frizzled homolog 9 (Drosophila)                                                        | 0.578306  | Inlier |
| siRNA Disorazole DMSO Run1   | NM_003508 | FZD9 | frizzled homolog 9 (Drosophila)                                                        | 0.770694  | Inlier |
| siRNA-Vinblastine Run1-DMSO  | NM_003508 | FZD9 | frizzled homolog 9 (Drosophila)                                                        | 0.934199  | Inlier |
| siRNA-Temozolomide Run3-DMSO | NM_000151 | G6PC | glucose-6-phosphatase, catalytic (glycogen storage disease type I, von Gierke disease) | -2.045344 | Inlier |
| siRNA Disorazole DMSO Run2   | NM_000151 | G6PC | glucose-6-phosphatase, catalytic (glycogen storage disease type I, von Gierke disease) | -1.1274   | Inlier |

Identification of Survival Genes in Human Glioblastoma Cells Using siRNA Screening

Nikhil G Thaker, Fang Zhang, Peter R. McDonald, Tong Ying Shun, Michael D Lewen, Ian F. Pollack, and John S. Lazo

Molecular Pharmacology

| siRNA Treatment              | Gene ID   | Cell Line | Gene Name                                                                              | Log Fold Change | Annotation |
|------------------------------|-----------|-----------|----------------------------------------------------------------------------------------|-----------------|------------|
| siRNA-Temozolomide Run2-DMSO | NM_000151 | G6PC      | glucose-6-phosphatase, catalytic (glycogen storage disease type I, von Gierke disease) | -1.093815       | Inlier     |
| siRNA-Temozolomide Run1-DMSO | NM_000151 | G6PC      | glucose-6-phosphatase, catalytic (glycogen storage disease type I, von Gierke disease) | -0.320967       | Inlier     |
| siRNA Disorazole DMSO Run3   | NM_000151 | G6PC      | glucose-6-phosphatase, catalytic (glycogen storage disease type I, von Gierke disease) | 0.320967        | Inlier     |
| siRNA Disorazole DMSO Run1   | NM_000151 | G6PC      | glucose-6-phosphatase, catalytic (glycogen storage disease type I, von Gierke disease) | 0.397796        | Inlier     |
| siRNA-Vinblastine Run1-DMSO  | NM_000151 | G6PC      | glucose-6-phosphatase, catalytic (glycogen storage disease type I, von Gierke disease) | 0.63804         | Inlier     |

Identification of Survival Genes in Human Glioblastoma Cells Using siRNA Screening  
 Nikhil G Thaker, Fang Zhang, Peter R. McDonald, Tong Ying Shun, Michael D Lewen, Ian F. Pollack, and John S. Lazo

Molecular Pharmacology

|                              |           |       |                                                                                        |           |        |
|------------------------------|-----------|-------|----------------------------------------------------------------------------------------|-----------|--------|
| siRNA-Vinblastine Run2-DMSO  | NM_000151 | G6PC  | glucose-6-phosphatase, catalytic (glycogen storage disease type I, von Gierke disease) | 0.71096   | Inlier |
| siRNA-Temozolomide Run2-DMSO | NM_021176 | G6PC2 | glucose-6-phosphatase, catalytic, 2                                                    | -1.774933 | Inlier |
| siRNA-Temozolomide Run3-DMSO | NM_021176 | G6PC2 | glucose-6-phosphatase, catalytic, 2                                                    | -0.80015  | Inlier |
| siRNA Disorazole DMSO Run2   | NM_021176 | G6PC2 | glucose-6-phosphatase, catalytic, 2                                                    | -0.539811 | Inlier |
| siRNA Disorazole DMSO Run3   | NM_021176 | G6PC2 | glucose-6-phosphatase, catalytic, 2                                                    | -0.21573  | Inlier |
| siRNA-Vinblastine Run1-DMSO  | NM_021176 | G6PC2 | glucose-6-phosphatase, catalytic, 2                                                    | 0.21573   | Inlier |
| siRNA-Temozolomide Run1-DMSO | NM_021176 | G6PC2 | glucose-6-phosphatase, catalytic, 2                                                    | 0.54885   | Inlier |
| siRNA-Vinblastine Run2-DMSO  | NM_021176 | G6PC2 | glucose-6-phosphatase, catalytic, 2                                                    | 0.949062  | Inlier |
| siRNA Disorazole DMSO Run1   | NM_021176 | G6PC2 | glucose-6-phosphatase, catalytic, 2                                                    | 1.351036  | Inlier |

Identification of Survival Genes in Human Glioblastoma Cells Using siRNA Screening  
 Nikhil G Thaker, Fang Zhang, Peter R. McDonald, Tong Ying Shun, Michael D Lewen, Ian F. Pollack, and John S. Lazo  
 Molecular Pharmacology

|                              |               |       |                                               |           |        |
|------------------------------|---------------|-------|-----------------------------------------------|-----------|--------|
| siRNA-Temozolomide Run2-DMSO | NM_1383<br>87 | G6PC3 | glucose 6<br>phosphata<br>se,<br>catalytic, 3 | -2.20418  | Inlier |
| siRNA Disorazole DMSO Run3   | NM_1383<br>87 | G6PC3 | glucose 6<br>phosphata<br>se,<br>catalytic, 3 | -0.798056 | Inlier |
| siRNA-Temozolomide Run3-DMSO | NM_1383<br>87 | G6PC3 | glucose 6<br>phosphata<br>se,<br>catalytic, 3 | -0.68953  | Inlier |
| siRNA Disorazole DMSO Run2   | NM_1383<br>87 | G6PC3 | glucose 6<br>phosphata<br>se,<br>catalytic, 3 | -0.331994 | Inlier |
| siRNA-Vinblastine Run1-DMSO  | NM_1383<br>87 | G6PC3 | glucose 6<br>phosphata<br>se,<br>catalytic, 3 | 0.331994  | Inlier |
| siRNA-Vinblastine Run2-DMSO  | NM_1383<br>87 | G6PC3 | glucose 6<br>phosphata<br>se,<br>catalytic, 3 | 0.640424  | Inlier |
| siRNA Disorazole DMSO Run1   | NM_1383<br>87 | G6PC3 | glucose 6<br>phosphata<br>se,<br>catalytic, 3 | 0.65947   | Inlier |
| siRNA-Temozolomide Run1-DMSO | NM_1383<br>87 | G6PC3 | glucose 6<br>phosphata<br>se,<br>catalytic, 3 | 0.978076  | Inlier |
| siRNA-Temozolomide Run3-DMSO | NM_0004<br>02 | G6PD  | glucose-6-<br>phosphate<br>dehydroge<br>nase  | -1.162824 | Inlier |
| siRNA-Temozolomide Run2-DMSO | NM_0004<br>02 | G6PD  | glucose-6-<br>phosphate<br>dehydroge<br>nase  | -0.976683 | Inlier |



Identification of Survival Genes in Human Glioblastoma Cells Using siRNA Screening  
 Nikhil G Thaker, Fang Zhang, Peter R. McDonald, Tong Ying Shun, Michael D Lewen, Ian F. Pollack, and John S. Lazo  
 Molecular Pharmacology

|                              |           |      |                                                                            |           |        |
|------------------------------|-----------|------|----------------------------------------------------------------------------|-----------|--------|
| siRNA-Temozolomide Run1-DMSO | NM_000402 | G6PD | glucose-6-phosphate dehydrogenase                                          | -0.593101 | Inlier |
| siRNA Disorazole DMSO Run3   | NM_000402 | G6PD | glucose-6-phosphate dehydrogenase                                          | -0.055013 | Inlier |
| siRNA Disorazole DMSO Run1   | NM_000402 | G6PD | glucose-6-phosphate dehydrogenase                                          | 0.055013  | Inlier |
| siRNA-Vinblastine Run1-DMSO  | NM_000402 | G6PD | glucose-6-phosphate dehydrogenase                                          | 0.584445  | Inlier |
| siRNA-Vinblastine Run2-DMSO  | NM_000402 | G6PD | glucose-6-phosphate dehydrogenase                                          | 0.755899  | Inlier |
| siRNA Disorazole DMSO Run2   | NM_000402 | G6PD | glucose-6-phosphate dehydrogenase                                          | 1.662     | Inlier |
| siRNA-Vinblastine Run2-DMSO  | NM_000152 | GAA  | glucosidase, alpha; acid (Pompe disease, glycogen storage disease type II) | -0.934166 | Inlier |
| siRNA-Temozolomide Run2-DMSO | NM_000152 | GAA  | glucosidase, alpha; acid (Pompe disease, glycogen storage disease type II) | -0.79849  | Inlier |

Identification of Survival Genes in Human Glioblastoma Cells Using siRNA Screening

Nikhil G Thaker, Fang Zhang, Peter R. McDonald, Tong Ying Shun, Michael D Lewen, Ian F. Pollack, and John S.

Lazo

Molecular Pharmacology

| siRNA Treatment              | Gene ID   | Condition | Value     | Outlier Status |
|------------------------------|-----------|-----------|-----------|----------------|
| siRNA-Temozolomide Run3-DMSO | NM_000152 | GAA       | -0.794711 | Inlier         |
| siRNA Disorazole DMSO Run3   | NM_000152 | GAA       | -0.116734 | Inlier         |
| siRNA Disorazole DMSO Run1   | NM_000152 | GAA       | 0.116734  | Inlier         |
| siRNA-Vinblastine Run1-DMSO  | NM_000152 | GAA       | 0.643251  | Inlier         |
| siRNA-Temozolomide Run1-DMSO | NM_000152 | GAA       | 0.656662  | Inlier         |

glucosidas  
e, alpha;  
acid  
(Pompe  
disease,  
glycogen  
storage  
disease  
type II)  
glucosidas  
e, alpha;  
acid  
(Pompe  
disease,  
glycogen  
storage  
disease  
type II)  
glucosidas  
e, alpha;  
acid  
(Pompe  
disease,  
glycogen  
storage  
disease  
type II)  
glucosidas  
e, alpha;  
acid  
(Pompe  
disease,  
glycogen  
storage  
disease  
type II)

Identification of Survival Genes in Human Glioblastoma Cells Using siRNA Screening

Nikhil G Thaker, Fang Zhang, Peter R. McDonald, Tong Ying Shun, Michael D Lewen, Ian F. Pollack, and John S. Lazo

Molecular Pharmacology

|                                  |               |               |  |                                                                                                     |                  |
|----------------------------------|---------------|---------------|--|-----------------------------------------------------------------------------------------------------|------------------|
|                                  |               |               |  | glucosidas<br>e, alpha;<br>acid<br>(Pompe<br>disease,<br>glycogen<br>storage<br>disease<br>type II) |                  |
| siRNA Disorazole DMSO Run2       | NM_0001<br>52 | GAA           |  | GABA(A)<br>receptor-<br>associated                                                                  | 0.692338 Inlier  |
| siRNA-Temozolomide Run3-<br>DMSO | NM_0072<br>85 | GABARAP<br>L2 |  | protein-<br>like 2<br>GABA(A)<br>receptor-<br>associated                                            | -2.038348 Inlier |
| siRNA-Temozolomide Run2-<br>DMSO | NM_0072<br>85 | GABARAP<br>L2 |  | protein-<br>like 2<br>GABA(A)<br>receptor-<br>associated                                            | -0.757334 Inlier |
| siRNA Disorazole DMSO Run1       | NM_0072<br>85 | GABARAP<br>L2 |  | protein-<br>like 2<br>GABA(A)<br>receptor-<br>associated                                            | -0.357323 Inlier |
| siRNA-Temozolomide Run1-<br>DMSO | NM_0072<br>85 | GABARAP<br>L2 |  | protein-<br>like 2<br>GABA(A)<br>receptor-<br>associated                                            | -0.189032 Inlier |
| siRNA Disorazole DMSO Run3       | NM_0072<br>85 | GABARAP<br>L2 |  | protein-<br>like 2<br>GABA(A)<br>receptor-<br>associated                                            | 0.189032 Inlier  |
| siRNA-Vinblastine Run2-<br>DMSO  | NM_0072<br>85 | GABARAP<br>L2 |  | protein-<br>like 2<br>GABA(A)<br>receptor-<br>associated                                            | 0.591666 Inlier  |
| siRNA Disorazole DMSO Run2       | NM_0072<br>85 | GABARAP<br>L2 |  | protein-<br>like 2<br>GABA(A)<br>receptor-<br>associated                                            | 2.158201 Inlier  |
| siRNA-Vinblastine Run1-<br>DMSO  | NM_0072<br>85 | GABARAP<br>L2 |  | protein-<br>like 2                                                                                  | 2.195844 Inlier  |

Identification of Survival Genes in Human Glioblastoma Cells Using siRNA Screening

Nikhil G Thaker, Fang Zhang, Peter R. McDonald, Tong Ying Shun, Michael D Lewen, Ian F. Pollack, and John S. Lazo

Molecular Pharmacology

|                              |           |        |                                              |           |        |
|------------------------------|-----------|--------|----------------------------------------------|-----------|--------|
| siRNA-Temozolomide Run3-DMSO | NM_021905 | GABBR1 | gamma-aminobutyric acid (GABA) B receptor, 1 | -1.302902 | Inlier |
| siRNA-Temozolomide Run2-DMSO | NM_021905 | GABBR1 | gamma-aminobutyric acid (GABA) B receptor, 1 | -0.636437 | Inlier |
| siRNA-Temozolomide Run1-DMSO | NM_021905 | GABBR1 | gamma-aminobutyric acid (GABA) B receptor, 1 | -0.426201 | Inlier |
| siRNA Disorazole DMSO Run1   | NM_021905 | GABBR1 | gamma-aminobutyric acid (GABA) B receptor, 1 | -0.360301 | Inlier |
| siRNA Disorazole DMSO Run2   | NM_021905 | GABBR1 | gamma-aminobutyric acid (GABA) B receptor, 1 | 0.360301  | Inlier |
| siRNA-Vinblastine Run1-DMSO  | NM_021905 | GABBR1 | gamma-aminobutyric acid (GABA) B receptor, 1 | 0.712563  | Inlier |
| siRNA-Vinblastine Run2-DMSO  | NM_021905 | GABBR1 | gamma-aminobutyric acid (GABA) B receptor, 1 | 0.801825  | Inlier |
| siRNA Disorazole DMSO Run3   | NM_021905 | GABBR1 | gamma-aminobutyric acid (GABA) B receptor, 1 | 1.426018  | Inlier |

Identification of Survival Genes in Human Glioblastoma Cells Using siRNA Screening

Nikhil G Thaker, Fang Zhang, Peter R. McDonald, Tong Ying Shun, Michael D Lewen, Ian F. Pollack, and John S. Lazo

Molecular Pharmacology

| siRNA Treatment              | Gene ID   | Gene Name | Gene Description                                   | Log Fold Change | Category |
|------------------------------|-----------|-----------|----------------------------------------------------|-----------------|----------|
| siRNA-Temozolomide Run3-DMSO | NM_000806 | GABRA1    | gamma-aminobutyric acid (GABA) A receptor, alpha 1 | -1.235837       | Inlier   |
| siRNA Disorazole DMSO Run1   | NM_000806 | GABRA1    | gamma-aminobutyric acid (GABA) A receptor, alpha 1 | -0.504769       | Inlier   |
| siRNA-Vinblastine Run2-DMSO  | NM_000806 | GABRA1    | gamma-aminobutyric acid (GABA) A receptor, alpha 1 | -0.483615       | Inlier   |
| siRNA-Temozolomide Run2-DMSO | NM_000806 | GABRA1    | gamma-aminobutyric acid (GABA) A receptor, alpha 1 | -0.052826       | Inlier   |
| siRNA Disorazole DMSO Run3   | NM_000806 | GABRA1    | gamma-aminobutyric acid (GABA) A receptor, alpha 1 | 0.052826        | Inlier   |
| siRNA-Temozolomide Run1-DMSO | NM_000806 | GABRA1    | gamma-aminobutyric acid (GABA) A receptor, alpha 1 | 0.844231        | Inlier   |
| siRNA-Vinblastine Run1-DMSO  | NM_000806 | GABRA1    | gamma-aminobutyric acid (GABA) A receptor, alpha 1 | 3.530018        | Outlier  |
| siRNA Disorazole DMSO Run2   | NM_000806 | GABRA1    | gamma-aminobutyric acid (GABA) A receptor, alpha 1 | 3.671898        | Outlier  |

Identification of Survival Genes in Human Glioblastoma Cells Using siRNA Screening  
 Nikhil G Thaker, Fang Zhang, Peter R. McDonald, Tong Ying Shun, Michael D Lewen, Ian F. Pollack, and John S. Lazo

Molecular Pharmacology

| siRNA Treatment              | Gene ID   | Gene Name | Protein Name                                       | Log Fold Change | Classification |
|------------------------------|-----------|-----------|----------------------------------------------------|-----------------|----------------|
| siRNA-Temozolomide Run3-DMSO | NM_000807 | GABRA2    | gamma-aminobutyric acid (GABA) A receptor, alpha 2 | -8.600896       | Outlier        |
| siRNA-Vinblastine Run2-DMSO  | NM_000807 | GABRA2    | gamma-aminobutyric acid (GABA) A receptor, alpha 2 | -0.646897       | Inlier         |
| siRNA-Temozolomide Run1-DMSO | NM_000807 | GABRA2    | gamma-aminobutyric acid (GABA) A receptor, alpha 2 | -0.383136       | Inlier         |
| siRNA Disorazole DMSO Run3   | NM_000807 | GABRA2    | gamma-aminobutyric acid (GABA) A receptor, alpha 2 | -0.089372       | Inlier         |
| siRNA Disorazole DMSO Run1   | NM_000807 | GABRA2    | gamma-aminobutyric acid (GABA) A receptor, alpha 2 | 0.089375        | Inlier         |
| siRNA-Temozolomide Run2-DMSO | NM_000807 | GABRA2    | gamma-aminobutyric acid (GABA) A receptor, alpha 2 | 0.702102        | Inlier         |
| siRNA-Vinblastine Run1-DMSO  | NM_000807 | GABRA2    | gamma-aminobutyric acid (GABA) A receptor, alpha 2 | 11.20094        | Outlier        |
| siRNA Disorazole DMSO Run2   | NM_000807 | GABRA2    | gamma-aminobutyric acid (GABA) A receptor, alpha 2 | 11.58093        | Outlier        |

Identification of Survival Genes in Human Glioblastoma Cells Using siRNA Screening  
 Nikhil G Thaker, Fang Zhang, Peter R. McDonald, Tong Ying Shun, Michael D Lewen, Ian F. Pollack, and John S. Lazo

Molecular Pharmacology

| siRNA Treatment              | Gene ID   | Gene Name | Gene Description                                   | Log2 Fold Change | Outlier Status |
|------------------------------|-----------|-----------|----------------------------------------------------|------------------|----------------|
| siRNA-Temozolomide Run3-DMSO | NM_000808 | GABRA3    | gamma-aminobutyric acid (GABA) A receptor, alpha 3 | -1.061516        | Inlier         |
| siRNA Disorazole DMSO Run1   | NM_000808 | GABRA3    | gamma-aminobutyric acid (GABA) A receptor, alpha 3 | -0.698605        | Inlier         |
| siRNA-Temozolomide Run1-DMSO | NM_000808 | GABRA3    | gamma-aminobutyric acid (GABA) A receptor, alpha 3 | -0.650395        | Inlier         |
| siRNA-Vinblastine Run2-DMSO  | NM_000808 | GABRA3    | gamma-aminobutyric acid (GABA) A receptor, alpha 3 | -0.067145        | Inlier         |
| siRNA Disorazole DMSO Run3   | NM_000808 | GABRA3    | gamma-aminobutyric acid (GABA) A receptor, alpha 3 | 0.067146         | Inlier         |
| siRNA-Temozolomide Run2-DMSO | NM_000808 | GABRA3    | gamma-aminobutyric acid (GABA) A receptor, alpha 3 | 0.182251         | Inlier         |
| siRNA Disorazole DMSO Run2   | NM_000808 | GABRA3    | gamma-aminobutyric acid (GABA) A receptor, alpha 3 | 1.610317         | Inlier         |
| siRNA-Vinblastine Run1-DMSO  | NM_000808 | GABRA3    | gamma-aminobutyric acid (GABA) A receptor, alpha 3 | 1.785506         | Inlier         |

Identification of Survival Genes in Human Glioblastoma Cells Using siRNA Screening  
 Nikhil G Thaker, Fang Zhang, Peter R. McDonald, Tong Ying Shun, Michael D Lewen, Ian F. Pollack, and John S. Lazo

Molecular Pharmacology

| siRNA Treatment              | Gene ID   | Gene Name | Gene Description                                   | Log Fold Change | Outlier Status |
|------------------------------|-----------|-----------|----------------------------------------------------|-----------------|----------------|
| siRNA-Temozolomide Run3-DMSO | NM_000809 | GABRA4    | gamma-aminobutyric acid (GABA) A receptor, alpha 4 | -2.481362       | Inlier         |
| siRNA Disorazole DMSO Run1   | NM_000809 | GABRA4    | gamma-aminobutyric acid (GABA) A receptor, alpha 4 | -0.782531       | Inlier         |
| siRNA-Temozolomide Run1-DMSO | NM_000809 | GABRA4    | gamma-aminobutyric acid (GABA) A receptor, alpha 4 | -0.566469       | Inlier         |
| siRNA Disorazole DMSO Run3   | NM_000809 | GABRA4    | gamma-aminobutyric acid (GABA) A receptor, alpha 4 | -0.094738       | Inlier         |
| siRNA-Temozolomide Run2-DMSO | NM_000809 | GABRA4    | gamma-aminobutyric acid (GABA) A receptor, alpha 4 | 0.094738        | Inlier         |
| siRNA-Vinblastine Run2-DMSO  | NM_000809 | GABRA4    | gamma-aminobutyric acid (GABA) A receptor, alpha 4 | 0.43862         | Inlier         |
| siRNA-Vinblastine Run1-DMSO  | NM_000809 | GABRA4    | gamma-aminobutyric acid (GABA) A receptor, alpha 4 | 1.916079        | Inlier         |
| siRNA Disorazole DMSO Run2   | NM_000809 | GABRA4    | gamma-aminobutyric acid (GABA) A receptor, alpha 4 | 2.223237        | Inlier         |



Identification of Survival Genes in Human Glioblastoma Cells Using siRNA Screening  
 Nikhil G Thaker, Fang Zhang, Peter R. McDonald, Tong Ying Shun, Michael D Lewen, Ian F. Pollack, and John S. Lazo

Molecular Pharmacology

| siRNA Treatment              | Gene   | Gene ID   | Gene Name                                          | Value     | Outlier Status |
|------------------------------|--------|-----------|----------------------------------------------------|-----------|----------------|
| siRNA-Temozolomide Run3-DMSO | GABRA5 | NM_000810 | gamma-aminobutyric acid (GABA) A receptor, alpha 5 | -1.380697 | Inlier         |
| siRNA-Temozolomide Run2-DMSO | GABRA5 | NM_000810 | gamma-aminobutyric acid (GABA) A receptor, alpha 5 | -0.917974 | Inlier         |
| siRNA Disorazole DMSO Run1   | GABRA5 | NM_000810 | gamma-aminobutyric acid (GABA) A receptor, alpha 5 | -0.128881 | Inlier         |
| siRNA Disorazole DMSO Run3   | GABRA5 | NM_000810 | gamma-aminobutyric acid (GABA) A receptor, alpha 5 | -0.008188 | Inlier         |
| siRNA-Temozolomide Run1-DMSO | GABRA5 | NM_000810 | gamma-aminobutyric acid (GABA) A receptor, alpha 5 | 0.008188  | Inlier         |
| siRNA-Vinblastine Run2-DMSO  | GABRA5 | NM_000810 | gamma-aminobutyric acid (GABA) A receptor, alpha 5 | 0.431026  | Inlier         |
| siRNA-Vinblastine Run1-DMSO  | GABRA5 | NM_000810 | gamma-aminobutyric acid (GABA) A receptor, alpha 5 | 1.983726  | Inlier         |
| siRNA Disorazole DMSO Run2   | GABRA5 | NM_000810 | gamma-aminobutyric acid (GABA) A receptor, alpha 5 | 2.402849  | Inlier         |

Identification of Survival Genes in Human Glioblastoma Cells Using siRNA Screening

Nikhil G Thaker, Fang Zhang, Peter R. McDonald, Tong Ying Shun, Michael D Lewen, Ian F. Pollack, and John S. Lazo

Molecular Pharmacology

| siRNA Treatment              | Gene   | Gene ID   | Gene Name                                          | Log Fold Change | Outlier Status |
|------------------------------|--------|-----------|----------------------------------------------------|-----------------|----------------|
| siRNA-Temozolomide Run2-DMSO | GABRA6 | NM_000811 | gamma-aminobutyric acid (GABA) A receptor, alpha 6 | -2.077118       | Inlier         |
| siRNA-Temozolomide Run3-DMSO | GABRA6 | NM_000811 | gamma-aminobutyric acid (GABA) A receptor, alpha 6 | -1.755405       | Inlier         |
| siRNA Disorazole DMSO Run2   | GABRA6 | NM_000811 | gamma-aminobutyric acid (GABA) A receptor, alpha 6 | -0.1889         | Inlier         |
| siRNA Disorazole DMSO Run1   | GABRA6 | NM_000811 | gamma-aminobutyric acid (GABA) A receptor, alpha 6 | -0.112819       | Inlier         |
| siRNA-Temozolomide Run1-DMSO | GABRA6 | NM_000811 | gamma-aminobutyric acid (GABA) A receptor, alpha 6 | 0.112819        | Inlier         |
| siRNA Disorazole DMSO Run3   | GABRA6 | NM_000811 | gamma-aminobutyric acid (GABA) A receptor, alpha 6 | 0.275256        | Inlier         |
| siRNA-Vinblastine Run2-DMSO  | GABRA6 | NM_000811 | gamma-aminobutyric acid (GABA) A receptor, alpha 6 | 1.073744        | Inlier         |
| siRNA-Vinblastine Run1-DMSO  | GABRA6 | NM_000811 | gamma-aminobutyric acid (GABA) A receptor, alpha 6 | 1.165962        | Inlier         |

Identification of Survival Genes in Human Glioblastoma Cells Using siRNA Screening  
 Nikhil G Thaker, Fang Zhang, Peter R. McDonald, Tong Ying Shun, Michael D Lewen, Ian F. Pollack, and John S. Lazo

Molecular Pharmacology

| siRNA Treatment              | Gene   | Gene ID   | Gene Description                                  | Log2 Fold Change | Outlier Status |
|------------------------------|--------|-----------|---------------------------------------------------|------------------|----------------|
| siRNA Disorazole DMSO Run1   | GABRB1 | NM_000812 | gamma-aminobutyric acid (GABA) A receptor, beta 1 | -1.438676        | Inlier         |
| siRNA-Temozolomide Run1-DMSO | GABRB1 | NM_000812 | gamma-aminobutyric acid (GABA) A receptor, beta 1 | -0.839254        | Inlier         |
| siRNA Disorazole DMSO Run3   | GABRB1 | NM_000812 | gamma-aminobutyric acid (GABA) A receptor, beta 1 | -0.24816         | Inlier         |
| siRNA-Temozolomide Run2-DMSO | GABRB1 | NM_000812 | gamma-aminobutyric acid (GABA) A receptor, beta 1 | -0.165297        | Inlier         |
| siRNA-Vinblastine Run2-DMSO  | GABRB1 | NM_000812 | gamma-aminobutyric acid (GABA) A receptor, beta 1 | 0.165298         | Inlier         |
| siRNA-Temozolomide Run3-DMSO | GABRB1 | NM_000812 | gamma-aminobutyric acid (GABA) A receptor, beta 1 | 0.509746         | Inlier         |
| siRNA-Vinblastine Run1-DMSO  | GABRB1 | NM_000812 | gamma-aminobutyric acid (GABA) A receptor, beta 1 | 1.029508         | Inlier         |
| siRNA Disorazole DMSO Run2   | GABRB1 | NM_000812 | gamma-aminobutyric acid (GABA) A receptor, beta 1 | 2.100756         | Inlier         |



Identification of Survival Genes in Human Glioblastoma Cells Using siRNA Screening

Nikhil G Thaker, Fang Zhang, Peter R. McDonald, Tong Ying Shun, Michael D Lewen, Ian F. Pollack, and John S. Lazo

Molecular Pharmacology

| siRNA Treatment              | Gene ID   | Gene Name | Gene Description                                  | Log Fold Change | Category |
|------------------------------|-----------|-----------|---------------------------------------------------|-----------------|----------|
| siRNA-Temozolomide Run3-DMSO | NM_000814 | GABRB3    | gamma-aminobutyric acid (GABA) A receptor, beta 3 | -1.328993       | Inlier   |
| siRNA Disorazole DMSO Run1   | NM_000814 | GABRB3    | gamma-aminobutyric acid (GABA) A receptor, beta 3 | -0.818404       | Inlier   |
| siRNA Disorazole DMSO Run3   | NM_000814 | GABRB3    | gamma-aminobutyric acid (GABA) A receptor, beta 3 | -0.329081       | Inlier   |
| siRNA-Vinblastine Run2-DMSO  | NM_000814 | GABRB3    | gamma-aminobutyric acid (GABA) A receptor, beta 3 | -0.194492       | Inlier   |
| siRNA-Temozolomide Run2-DMSO | NM_000814 | GABRB3    | gamma-aminobutyric acid (GABA) A receptor, beta 3 | 0.194492        | Inlier   |
| siRNA-Temozolomide Run1-DMSO | NM_000814 | GABRB3    | gamma-aminobutyric acid (GABA) A receptor, beta 3 | 0.530596        | Inlier   |
| siRNA-Vinblastine Run1-DMSO  | NM_000814 | GABRB3    | gamma-aminobutyric acid (GABA) A receptor, beta 3 | 5.018931        | Outlier  |
| siRNA Disorazole DMSO Run2   | NM_000814 | GABRB3    | gamma-aminobutyric acid (GABA) A receptor, beta 3 | 5.714111        | Outlier  |

Identification of Survival Genes in Human Glioblastoma Cells Using siRNA Screening

Nikhil G Thaker, Fang Zhang, Peter R. McDonald, Tong Ying Shun, Michael D Lewen, Ian F. Pollack, and John S. Lazo

Molecular Pharmacology

|                              |           |       |                                                  |           |        |
|------------------------------|-----------|-------|--------------------------------------------------|-----------|--------|
| siRNA-Temozolomide Run3-DMSO | NM_000815 | GABRD | gamma-aminobutyric acid (GABA) A receptor, delta | -1.008534 | Inlier |
| siRNA-Temozolomide Run2-DMSO | NM_000815 | GABRD | gamma-aminobutyric acid (GABA) A receptor, delta | -0.795457 | Inlier |
| siRNA-Vinblastine Run2-DMSO  | NM_000815 | GABRD | gamma-aminobutyric acid (GABA) A receptor, delta | -0.314702 | Inlier |
| siRNA-Temozolomide Run1-DMSO | NM_000815 | GABRD | gamma-aminobutyric acid (GABA) A receptor, delta | -0.154904 | Inlier |
| siRNA-Vinblastine Run1-DMSO  | NM_000815 | GABRD | gamma-aminobutyric acid (GABA) A receptor, delta | 0.154904  | Inlier |
| siRNA Disorazole DMSO Run1   | NM_000815 | GABRD | gamma-aminobutyric acid (GABA) A receptor, delta | 0.553543  | Inlier |
| siRNA Disorazole DMSO Run2   | NM_000815 | GABRD | gamma-aminobutyric acid (GABA) A receptor, delta | 1.134513  | Inlier |
| siRNA Disorazole DMSO Run3   | NM_000815 | GABRD | gamma-aminobutyric acid (GABA) A receptor, delta | 1.831554  | Inlier |

Identification of Survival Genes in Human Glioblastoma Cells Using siRNA Screening  
 Nikhil G Thaker, Fang Zhang, Peter R. McDonald, Tong Ying Shun, Michael D Lewen, Ian F. Pollack, and John S. Lazo

Molecular Pharmacology

|                              |               |       |                                                    |           |        |
|------------------------------|---------------|-------|----------------------------------------------------|-----------|--------|
| siRNA Disorazole DMSO Run2   | NM_0219<br>84 | GABRE | gamma-aminobutyric acid (GABA) A receptor, epsilon | -1.043142 | Inlier |
| siRNA-Temozolomide Run3-DMSO | NM_0219<br>84 | GABRE | gamma-aminobutyric acid (GABA) A receptor, epsilon | -0.720624 | Inlier |
| siRNA Disorazole DMSO Run3   | NM_0219<br>84 | GABRE | gamma-aminobutyric acid (GABA) A receptor, epsilon | -0.454496 | Inlier |
| siRNA-Temozolomide Run2-DMSO | NM_0219<br>84 | GABRE | gamma-aminobutyric acid (GABA) A receptor, epsilon | -0.329723 | Inlier |
| siRNA-Temozolomide Run1-DMSO | NM_0219<br>84 | GABRE | gamma-aminobutyric acid (GABA) A receptor, epsilon | 0.329723  | Inlier |
| siRNA Disorazole DMSO Run1   | NM_0219<br>84 | GABRE | gamma-aminobutyric acid (GABA) A receptor, epsilon | 0.628376  | Inlier |
| siRNA-Vinblastine Run2-DMSO  | NM_0219<br>84 | GABRE | gamma-aminobutyric acid (GABA) A receptor, epsilon | 1.261538  | Inlier |
| siRNA-Vinblastine Run1-DMSO  | NM_0219<br>84 | GABRE | gamma-aminobutyric acid (GABA) A receptor, epsilon | 1.368035  | Inlier |





Identification of Survival Genes in Human Glioblastoma Cells Using siRNA Screening

Nikhil G Thaker, Fang Zhang, Peter R. McDonald, Tong Ying Shun, Michael D Lewen, Ian F. Pollack, and John S. Lazo

Molecular Pharmacology

| siRNA Treatment              | Gene   | Gene ID   | Gene Name                                          | Log Fold Change | Outlier Status |
|------------------------------|--------|-----------|----------------------------------------------------|-----------------|----------------|
| siRNA-Temozolomide Run3-DMSO | GABRG2 | NM_198904 | gamma-aminobutyric acid (GABA) A receptor, gamma 2 | -2.250787       | Inlier         |
| siRNA-Temozolomide Run2-DMSO | GABRG2 | NM_198904 | gamma-aminobutyric acid (GABA) A receptor, gamma 2 | -1.193745       | Inlier         |
| siRNA-Temozolomide Run1-DMSO | GABRG2 | NM_198904 | gamma-aminobutyric acid (GABA) A receptor, gamma 2 | -0.349462       | Inlier         |
| siRNA Disorazole DMSO Run1   | GABRG2 | NM_198904 | gamma-aminobutyric acid (GABA) A receptor, gamma 2 | -0.149198       | Inlier         |
| siRNA Disorazole DMSO Run3   | GABRG2 | NM_198904 | gamma-aminobutyric acid (GABA) A receptor, gamma 2 | 0.149197        | Inlier         |
| siRNA-Vinblastine Run1-DMSO  | GABRG2 | NM_198904 | gamma-aminobutyric acid (GABA) A receptor, gamma 2 | 0.595227        | Inlier         |
| siRNA-Vinblastine Run2-DMSO  | GABRG2 | NM_198904 | gamma-aminobutyric acid (GABA) A receptor, gamma 2 | 0.753773        | Inlier         |
| siRNA Disorazole DMSO Run2   | GABRG2 | NM_198904 | gamma-aminobutyric acid (GABA) A receptor, gamma 2 | 1.207272        | Inlier         |

Identification of Survival Genes in Human Glioblastoma Cells Using siRNA Screening  
 Nikhil G Thaker, Fang Zhang, Peter R. McDonald, Tong Ying Shun, Michael D Lewen, Ian F. Pollack, and John S. Lazo

Molecular Pharmacology

| siRNA Treatment              | Gene   | Gene ID   | Gene Name                                          | Log Fold Change | Outlier Status |
|------------------------------|--------|-----------|----------------------------------------------------|-----------------|----------------|
| siRNA-Temozolomide Run1-DMSO | GABRG3 | NM_033223 | gamma-aminobutyric acid (GABA) A receptor, gamma 3 | -0.781497       | Inlier         |
| siRNA Disorazole DMSO Run1   | GABRG3 | NM_033223 | gamma-aminobutyric acid (GABA) A receptor, gamma 3 | -0.567503       | Inlier         |
| siRNA Disorazole DMSO Run2   | GABRG3 | NM_033223 | gamma-aminobutyric acid (GABA) A receptor, gamma 3 | -0.184255       | Inlier         |
| siRNA-Temozolomide Run3-DMSO | GABRG3 | NM_033223 | gamma-aminobutyric acid (GABA) A receptor, gamma 3 | -0.028867       | Inlier         |
| siRNA-Temozolomide Run2-DMSO | GABRG3 | NM_033223 | gamma-aminobutyric acid (GABA) A receptor, gamma 3 | 0.028869        | Inlier         |
| siRNA Disorazole DMSO Run3   | GABRG3 | NM_033223 | gamma-aminobutyric acid (GABA) A receptor, gamma 3 | 1.889409        | Inlier         |
| siRNA-Vinblastine Run2-DMSO  | GABRG3 | NM_033223 | gamma-aminobutyric acid (GABA) A receptor, gamma 3 | 2.387124        | Inlier         |
| siRNA-Vinblastine Run1-DMSO  | GABRG3 | NM_033223 | gamma-aminobutyric acid (GABA) A receptor, gamma 3 | 2.713682        | Inlier         |

Identification of Survival Genes in Human Glioblastoma Cells Using siRNA Screening  
 Nikhil G Thaker, Fang Zhang, Peter R. McDonald, Tong Ying Shun, Michael D Lewen, Ian F. Pollack, and John S. Lazo

Molecular Pharmacology

|                              |               |       |                                               |           |        |
|------------------------------|---------------|-------|-----------------------------------------------|-----------|--------|
| siRNA-Temozolomide Run3-DMSO | NM_0142<br>11 | GABRP | gamma-aminobutyric acid (GABA) A receptor, pi | -1.660051 | Inlier |
| siRNA-Temozolomide Run1-DMSO | NM_0142<br>11 | GABRP | gamma-aminobutyric acid (GABA) A receptor, pi | -0.724416 | Inlier |
| siRNA Disorazole DMSO Run1   | NM_0142<br>11 | GABRP | gamma-aminobutyric acid (GABA) A receptor, pi | -0.555225 | Inlier |
| siRNA-Temozolomide Run2-DMSO | NM_0142<br>11 | GABRP | gamma-aminobutyric acid (GABA) A receptor, pi | -0.377123 | Inlier |
| siRNA-Vinblastine Run2-DMSO  | NM_0142<br>11 | GABRP | gamma-aminobutyric acid (GABA) A receptor, pi | 0.377124  | Inlier |
| siRNA Disorazole DMSO Run3   | NM_0142<br>11 | GABRP | gamma-aminobutyric acid (GABA) A receptor, pi | 0.624584  | Inlier |
| siRNA Disorazole DMSO Run2   | NM_0142<br>11 | GABRP | gamma-aminobutyric acid (GABA) A receptor, pi | 1.258679  | Inlier |
| siRNA-Vinblastine Run1-DMSO  | NM_0142<br>11 | GABRP | gamma-aminobutyric acid (GABA) A receptor, pi | 1.291783  | Inlier |

Identification of Survival Genes in Human Glioblastoma Cells Using siRNA Screening

Nikhil G Thaker, Fang Zhang, Peter R. McDonald, Tong Ying Shun, Michael D Lewen, Ian F. Pollack, and John S. Lazo

Molecular Pharmacology

|                              |           |       |                                                |           |        |
|------------------------------|-----------|-------|------------------------------------------------|-----------|--------|
| siRNA-Temozolomide Run1-DMSO | NM_018558 | GABRQ | gamma-aminobutyric acid (GABA) receptor, theta | -0.706085 | Inlier |
| siRNA-Temozolomide Run3-DMSO | NM_018558 | GABRQ | gamma-aminobutyric acid (GABA) receptor, theta | -0.701019 | Inlier |
| siRNA-Temozolomide Run2-DMSO | NM_018558 | GABRQ | gamma-aminobutyric acid (GABA) receptor, theta | -0.601841 | Inlier |
| siRNA Disorazole DMSO Run1   | NM_018558 | GABRQ | gamma-aminobutyric acid (GABA) receptor, theta | -0.295064 | Inlier |
| siRNA-Vinblastine Run2-DMSO  | NM_018558 | GABRQ | gamma-aminobutyric acid (GABA) receptor, theta | 0.295065  | Inlier |
| siRNA Disorazole DMSO Run3   | NM_018558 | GABRQ | gamma-aminobutyric acid (GABA) receptor, theta | 0.647981  | Inlier |
| siRNA Disorazole DMSO Run2   | NM_018558 | GABRQ | gamma-aminobutyric acid (GABA) receptor, theta | 1.234201  | Inlier |
| siRNA-Vinblastine Run1-DMSO  | NM_018558 | GABRQ | gamma-aminobutyric acid (GABA) receptor, theta | 2.399222  | Inlier |

Identification of Survival Genes in Human Glioblastoma Cells Using siRNA Screening  
 Nikhil G Thaker, Fang Zhang, Peter R. McDonald, Tong Ying Shun, Michael D Lewen, Ian F. Pollack, and John S. Lazo

Molecular Pharmacology

|                              |           |        |                                                |           |        |
|------------------------------|-----------|--------|------------------------------------------------|-----------|--------|
| siRNA-Temozolomide Run3-DMSO | NM_002042 | GABRR1 | gamma-aminobutyric acid (GABA) receptor, rho 1 | -1.362593 | Inlier |
| siRNA-Temozolomide Run2-DMSO | NM_002042 | GABRR1 | gamma-aminobutyric acid (GABA) receptor, rho 1 | -0.980933 | Inlier |
| siRNA Disorazole DMSO Run3   | NM_002042 | GABRR1 | gamma-aminobutyric acid (GABA) receptor, rho 1 | -0.383209 | Inlier |
| siRNA-Vinblastine Run2-DMSO  | NM_002042 | GABRR1 | gamma-aminobutyric acid (GABA) receptor, rho 1 | -0.171006 | Inlier |
| siRNA-Temozolomide Run1-DMSO | NM_002042 | GABRR1 | gamma-aminobutyric acid (GABA) receptor, rho 1 | 0.171006  | Inlier |
| siRNA Disorazole DMSO Run1   | NM_002042 | GABRR1 | gamma-aminobutyric acid (GABA) receptor, rho 1 | 0.295576  | Inlier |
| siRNA Disorazole DMSO Run2   | NM_002042 | GABRR1 | gamma-aminobutyric acid (GABA) receptor, rho 1 | 0.965791  | Inlier |
| siRNA-Vinblastine Run1-DMSO  | NM_002042 | GABRR1 | gamma-aminobutyric acid (GABA) receptor, rho 1 | 2.576436  | Inlier |

Identification of Survival Genes in Human Glioblastoma Cells Using siRNA Screening  
 Nikhil G Thaker, Fang Zhang, Peter R. McDonald, Tong Ying Shun, Michael D Lewen, Ian F. Pollack, and John S. Lazo

Molecular Pharmacology

|                              |           |        |                                                |           |        |
|------------------------------|-----------|--------|------------------------------------------------|-----------|--------|
| siRNA-Temozolomide Run3-DMSO | NM_002043 | GABRR2 | gamma-aminobutyric acid (GABA) receptor, rho 2 | -2.100221 | Inlier |
| siRNA-Temozolomide Run2-DMSO | NM_002043 | GABRR2 | gamma-aminobutyric acid (GABA) receptor, rho 2 | -0.766197 | Inlier |
| siRNA-Temozolomide Run1-DMSO | NM_002043 | GABRR2 | gamma-aminobutyric acid (GABA) receptor, rho 2 | -0.439842 | Inlier |
| siRNA-Vinblastine Run2-DMSO  | NM_002043 | GABRR2 | gamma-aminobutyric acid (GABA) receptor, rho 2 | -0.278824 | Inlier |
| siRNA Disorazole DMSO Run3   | NM_002043 | GABRR2 | gamma-aminobutyric acid (GABA) receptor, rho 2 | 0.278823  | Inlier |
| siRNA Disorazole DMSO Run1   | NM_002043 | GABRR2 | gamma-aminobutyric acid (GABA) receptor, rho 2 | 0.582803  | Inlier |
| siRNA Disorazole DMSO Run2   | NM_002043 | GABRR2 | gamma-aminobutyric acid (GABA) receptor, rho 2 | 1.226024  | Inlier |
| siRNA-Vinblastine Run1-DMSO  | NM_002043 | GABRR2 | gamma-aminobutyric acid (GABA) receptor, rho 2 | 1.290233  | Inlier |

Identification of Survival Genes in Human Glioblastoma Cells Using siRNA Screening

Nikhil G Thaker, Fang Zhang, Peter R. McDonald, Tong Ying Shun, Michael D Lewen, Ian F. Pollack, and John S. Lazo

Molecular Pharmacology

|                              |               |      |                                                                                   |           |        |
|------------------------------|---------------|------|-----------------------------------------------------------------------------------|-----------|--------|
| siRNA-Temozolomide Run3-DMSO | NM_0134<br>45 | GAD1 | glutamate<br>decarboxyl<br>ase 1<br>(brain,<br>67kDa)                             | -1.9822   | Inlier |
| siRNA Disorazole DMSO Run1   | NM_0134<br>45 | GAD1 | glutamate<br>decarboxyl<br>ase 1<br>(brain,<br>67kDa)                             | -0.877977 | Inlier |
| siRNA Disorazole DMSO Run3   | NM_0134<br>45 | GAD1 | glutamate<br>decarboxyl<br>ase 1<br>(brain,<br>67kDa)                             | -0.471023 | Inlier |
| siRNA-Vinblastine Run2-DMSO  | NM_0134<br>45 | GAD1 | glutamate<br>decarboxyl<br>ase 1<br>(brain,<br>67kDa)                             | -0.023636 | Inlier |
| siRNA-Temozolomide Run2-DMSO | NM_0134<br>45 | GAD1 | glutamate<br>decarboxyl<br>ase 1<br>(brain,<br>67kDa)                             | 0.023636  | Inlier |
| siRNA-Temozolomide Run1-DMSO | NM_0134<br>45 | GAD1 | glutamate<br>decarboxyl<br>ase 1<br>(brain,<br>67kDa)                             | 0.446702  | Inlier |
| siRNA Disorazole DMSO Run2   | NM_0134<br>45 | GAD1 | glutamate<br>decarboxyl<br>ase 1<br>(brain,<br>67kDa)                             | 2.478359  | Inlier |
| siRNA-Vinblastine Run1-DMSO  | NM_0134<br>45 | GAD1 | glutamate<br>decarboxyl<br>ase 1<br>(brain,<br>67kDa)                             | 3.229664  | Inlier |
| siRNA-Temozolomide Run3-DMSO | NM_0008<br>18 | GAD2 | glutamate<br>decarboxyl<br>ase 2<br>(pancreatic<br>islets<br>and brain,<br>65kDa) | -1.26184  | Inlier |

Identification of Survival Genes in Human Glioblastoma Cells Using siRNA Screening  
 Nikhil G Thaker, Fang Zhang, Peter R. McDonald, Tong Ying Shun, Michael D Lewen, Ian F. Pollack, and John S. Lazo

Molecular Pharmacology

|                              |           |      |                                                                |           |        |
|------------------------------|-----------|------|----------------------------------------------------------------|-----------|--------|
| siRNA-Vinblastine Run2-DMSO  | NM_000818 | GAD2 | glutamate decarboxylase 2 (pancreatic islets and brain, 65kDa) | -0.394857 | Inlier |
| siRNA-Temozolomide Run2-DMSO | NM_000818 | GAD2 | glutamate decarboxylase 2 (pancreatic islets and brain, 65kDa) | -0.346931 | Inlier |
| siRNA Disorazole DMSO Run3   | NM_000818 | GAD2 | glutamate decarboxylase 2 (pancreatic islets and brain, 65kDa) | -0.136702 | Inlier |
| siRNA Disorazole DMSO Run1   | NM_000818 | GAD2 | glutamate decarboxylase 2 (pancreatic islets and brain, 65kDa) | 0.136702  | Inlier |
| siRNA-Temozolomide Run1-DMSO | NM_000818 | GAD2 | glutamate decarboxylase 2 (pancreatic islets and brain, 65kDa) | 0.954143  | Inlier |
| siRNA Disorazole DMSO Run2   | NM_000818 | GAD2 | glutamate decarboxylase 2 (pancreatic islets and brain, 65kDa) | 2.103468  | Inlier |
| siRNA-Vinblastine Run1-DMSO  | NM_000818 | GAD2 | glutamate decarboxylase 2 (pancreatic islets and brain, 65kDa) | 2.862458  | Inlier |
| siRNA-Temozolomide Run3-DMSO | NM_005255 | GAK  | cyclin G associated kinase                                     | -0.823917 | Inlier |



Identification of Survival Genes in Human Glioblastoma Cells Using siRNA Screening  
 Nikhil G Thaker, Fang Zhang, Peter R. McDonald, Tong Ying Shun, Michael D Lewen, Ian F. Pollack, and John S. Lazo

| Molecular Pharmacology       |               |         |                                  |           |         |
|------------------------------|---------------|---------|----------------------------------|-----------|---------|
| siRNA-Temozolomide Run2-DMSO | NM_0052<br>55 | GAK     | cyclin G associated kinase       | -0.525083 | Inlier  |
| siRNA Disorazole DMSO Run3   | NM_0052<br>55 | GAK     | cyclin G associated kinase       | -0.225185 | Inlier  |
| siRNA-Vinblastine Run2-DMSO  | NM_0052<br>55 | GAK     | cyclin G associated kinase       | -0.092324 | Inlier  |
| siRNA-Temozolomide Run1-DMSO | NM_0052<br>55 | GAK     | cyclin G associated kinase       | 0.092325  | Inlier  |
| siRNA Disorazole DMSO Run1   | NM_0052<br>55 | GAK     | cyclin G associated kinase       | 1.487046  | Inlier  |
| siRNA Disorazole DMSO Run2   | NM_0052<br>55 | GAK     | cyclin G associated kinase       | 3.106297  | Inlier  |
| siRNA-Vinblastine Run1-DMSO  | NM_0052<br>55 | GAK     | cyclin G associated kinase       | 3.107737  | Inlier  |
| siRNA-Temozolomide Run3-DMSO | NM_0048<br>61 | GAL3ST1 | galactose-3-O-sulfotransferase 1 | -2.907641 | Inlier  |
| siRNA-Temozolomide Run1-DMSO | NM_0048<br>61 | GAL3ST1 | galactose-3-O-sulfotransferase 1 | -0.759974 | Inlier  |
| siRNA Disorazole DMSO Run3   | NM_0048<br>61 | GAL3ST1 | galactose-3-O-sulfotransferase 1 | -0.562234 | Inlier  |
| siRNA Disorazole DMSO Run1   | NM_0048<br>61 | GAL3ST1 | galactose-3-O-sulfotransferase 1 | -0.141588 | Inlier  |
| siRNA-Temozolomide Run2-DMSO | NM_0048<br>61 | GAL3ST1 | galactose-3-O-sulfotransferase 1 | 0.14159   | Inlier  |
| siRNA-Vinblastine Run2-DMSO  | NM_0048<br>61 | GAL3ST1 | galactose-3-O-sulfotransferase 1 | 0.589026  | Inlier  |
| siRNA Disorazole DMSO Run2   | NM_0048<br>61 | GAL3ST1 | galactose-3-O-sulfotransferase 1 | 5.189335  | Outlier |

Identification of Survival Genes in Human Glioblastoma Cells Using siRNA Screening  
 Nikhil G Thaker, Fang Zhang, Peter R. McDonald, Tong Ying Shun, Michael D Lewen, Ian F. Pollack, and John S. Lazo

Molecular Pharmacology

|                              |           |         |                                     |           |         |
|------------------------------|-----------|---------|-------------------------------------|-----------|---------|
| siRNA-Vinblastine Run1-DMSO  | NM_004861 | GAL3ST1 | galactose-3-O-sulfotransferase 1    | 5.845398  | Outlier |
| siRNA-Temozolomide Run2-DMSO | NM_000153 | GALC    | galactosylceramide (Krabbe disease) | -0.917046 | Inlier  |
| siRNA-Temozolomide Run3-DMSO | NM_000153 | GALC    | galactosylceramide (Krabbe disease) | -0.818197 | Inlier  |
| siRNA-Temozolomide Run1-DMSO | NM_000153 | GALC    | galactosylceramide (Krabbe disease) | -0.530803 | Inlier  |
| siRNA-Vinblastine Run2-DMSO  | NM_000153 | GALC    | galactosylceramide (Krabbe disease) | -0.015754 | Inlier  |
| siRNA Disorazole DMSO Run3   | NM_000153 | GALC    | galactosylceramide (Krabbe disease) | 0.015754  | Inlier  |
| siRNA Disorazole DMSO Run1   | NM_000153 | GALC    | galactosylceramide (Krabbe disease) | 0.503141  | Inlier  |
| siRNA-Vinblastine Run1-DMSO  | NM_000153 | GALC    | galactosylceramide (Krabbe disease) | 1.387479  | Inlier  |
| siRNA Disorazole DMSO Run2   | NM_000153 | GALC    | galactosylceramide (Krabbe disease) | 1.429082  | Inlier  |
| siRNA-Temozolomide Run2-DMSO | NM_000403 | GALE    | UDP-galactose-4-epimerase           | -1.107444 | Inlier  |

Identification of Survival Genes in Human Glioblastoma Cells Using siRNA Screening

Nikhil G Thaker, Fang Zhang, Peter R. McDonald, Tong Ying Shun, Michael D Lewen, Ian F. Pollack, and John S. Lazo

Molecular Pharmacology

|                              |           |       |                                                                                                                                  |           |        |
|------------------------------|-----------|-------|----------------------------------------------------------------------------------------------------------------------------------|-----------|--------|
| siRNA-Temozolomide Run3-DMSO | NM_000403 | GALE  | UDP-galactose-4-epimerase                                                                                                        | -1.020082 | Inlier |
| siRNA-Temozolomide Run1-DMSO | NM_000403 | GALE  | UDP-galactose-4-epimerase                                                                                                        | -0.73436  | Inlier |
| siRNA Disorazole DMSO Run1   | NM_000403 | GALE  | UDP-galactose-4-epimerase                                                                                                        | -0.056224 | Inlier |
| siRNA Disorazole DMSO Run3   | NM_000403 | GALE  | UDP-galactose-4-epimerase                                                                                                        | 0.056224  | Inlier |
| siRNA-Vinblastine Run2-DMSO  | NM_000403 | GALE  | UDP-galactose-4-epimerase                                                                                                        | 0.329449  | Inlier |
| siRNA Disorazole DMSO Run2   | NM_000403 | GALE  | UDP-galactose-4-epimerase                                                                                                        | 0.61464   | Inlier |
| siRNA-Vinblastine Run1-DMSO  | NM_000403 | GALE  | UDP-galactose-4-epimerase                                                                                                        | 1.018891  | Inlier |
| siRNA Disorazole DMSO Run1   | NM_001478 | GALGT | UDP-N-acetyl-alpha-D-galactosamine:(N-acetylneuraminyl)-galactosylglucosylceramide N-acetylgalactosaminyl transferase (GalNAc-T) | -0.72076  | Inlier |

Identification of Survival Genes in Human Glioblastoma Cells Using siRNA Screening

Nikhil G Thaker, Fang Zhang, Peter R. McDonald, Tong Ying Shun, Michael D Lewen, Ian F. Pollack, and John S. Lazo

Molecular Pharmacology

|                              |           |       |                                                                                                                                  |                  |
|------------------------------|-----------|-------|----------------------------------------------------------------------------------------------------------------------------------|------------------|
| siRNA-Temozolomide Run1-DMSO | NM_001478 | GALGT | UDP-N-acetyl-alpha-D-galactosamine:(N-acetylneuraminyl)-galactosylglucosylceramide N-acetylgalactosaminyl transferase (GalNAc-T) | -0.62824 Inlier  |
| siRNA-Temozolomide Run2-DMSO | NM_001478 | GALGT | UDP-N-acetyl-alpha-D-galactosamine:(N-acetylneuraminyl)-galactosylglucosylceramide N-acetylgalactosaminyl transferase (GalNAc-T) | -0.400236 Inlier |
| siRNA-Temozolomide Run3-DMSO | NM_001478 | GALGT | UDP-N-acetyl-alpha-D-galactosamine:(N-acetylneuraminyl)-galactosylglucosylceramide N-acetylgalactosaminyl transferase (GalNAc-T) | -0.344137 Inlier |

Identification of Survival Genes in Human Glioblastoma Cells Using siRNA Screening

Nikhil G Thaker, Fang Zhang, Peter R. McDonald, Tong Ying Shun, Michael D Lewen, Ian F. Pollack, and John S. Lazo

Molecular Pharmacology

|                             |           |       |                                                                                                                                  |          |        |
|-----------------------------|-----------|-------|----------------------------------------------------------------------------------------------------------------------------------|----------|--------|
| siRNA-Vinblastine Run2-DMSO | NM_001478 | GALGT | UDP-N-acetyl-alpha-D-galactosamine:(N-acetylneuraminyl)-galactosylglucosylceramide N-acetylgalactosaminyl transferase (GalNAc-T) | 0.344138 | Inlier |
| siRNA-Vinblastine Run1-DMSO | NM_001478 | GALGT | UDP-N-acetyl-alpha-D-galactosamine:(N-acetylneuraminyl)-galactosylglucosylceramide N-acetylgalactosaminyl transferase (GalNAc-T) | 0.933841 | Inlier |
| siRNA Disorazole DMSO Run2  | NM_001478 | GALGT | UDP-N-acetyl-alpha-D-galactosamine:(N-acetylneuraminyl)-galactosylglucosylceramide N-acetylgalactosaminyl transferase (GalNAc-T) | 1.010484 | Inlier |

Identification of Survival Genes in Human Glioblastoma Cells Using siRNA Screening

Nikhil G Thaker, Fang Zhang, Peter R. McDonald, Tong Ying Shun, Michael D Lewen, Ian F. Pollack, and John S. Lazo

Molecular Pharmacology

|                              |               |        |                                                                                                                                  |           |        |
|------------------------------|---------------|--------|----------------------------------------------------------------------------------------------------------------------------------|-----------|--------|
| siRNA Disorazole DMSO Run3   | NM_0014<br>78 | GALGT  | UDP-N-acetyl-alpha-D-galactosamine:(N-acetylneuraminyl)-galactosylglucosylceramide N-acetylgalactosaminyl transferase (GalNAc-T) | 1.387387  | Inlier |
| siRNA-Temozolomide Run2-DMSO | NM_1534<br>46 | GALGT2 | UDP-GalNAc:Neu5Ac(alpha2-3Galbeta-R beta1,4-N-acetylgalactosaminyl transferase                                                   | -1.018399 | Inlier |
| siRNA-Temozolomide Run3-DMSO | NM_1534<br>46 | GALGT2 | UDP-GalNAc:Neu5Ac(alpha2-3Galbeta-R beta1,4-N-acetylgalactosaminyl transferase                                                   | -0.966983 | Inlier |
| siRNA-Temozolomide Run1-DMSO | NM_1534<br>46 | GALGT2 | UDP-GalNAc:Neu5Ac(alpha2-3Galbeta-R beta1,4-N-acetylgalactosaminyl transferase                                                   | -0.382017 | Inlier |

Identification of Survival Genes in Human Glioblastoma Cells Using siRNA Screening

Nikhil G Thaker, Fang Zhang, Peter R. McDonald, Tong Ying Shun, Michael D Lewen, Ian F. Pollack, and John S. Lazo

Molecular Pharmacology

| siRNA             | Condition | Run  | Gene | Enzyme  | Value  | Category  |        |
|-------------------|-----------|------|------|---------|--------|-----------|--------|
| siRNA Disorazole  | DMSO      | Run3 | 46   | NM_1534 | GALGT2 | -0.057642 | Inlier |
| siRNA Disorazole  | DMSO      | Run1 | 46   | NM_1534 | GALGT2 | 0.057642  | Inlier |
| siRNA-Vinblastine | Run2-DMSO |      | 46   | NM_1534 | GALGT2 | 0.202918  | Inlier |
| siRNA Disorazole  | DMSO      | Run2 | 46   | NM_1534 | GALGT2 | 1.807761  | Inlier |

UDP-GalNAc:Neu5Ac $\alpha$ 2-3Gal $\beta$ 1,4-N-acetylglucosaminyl transferase

Identification of Survival Genes in Human Glioblastoma Cells Using siRNA Screening  
 Nikhil G Thaker, Fang Zhang, Peter R. McDonald, Tong Ying Shun, Michael D Lewen, Ian F. Pollack, and John S. Lazo

Molecular Pharmacology

| siRNA Treatment              | Gene ID   | Gene Name | Enzyme Name                                                                    | Log Fold Change | Outlier Status |
|------------------------------|-----------|-----------|--------------------------------------------------------------------------------|-----------------|----------------|
| siRNA-Vinblastine Run1-DMSO  | NM_153446 | GALGT2    | UDP-GalNAc:Neu5AcpHase 2-3Galbeta-R beta1,4-N-acetylgalactosaminyl transferase | 2.06184         | Inlier         |
| siRNA Disorazole DMSO Run1   | NM_000154 | GALK1     | galactokinase 1                                                                | -1.431952       | Inlier         |
| siRNA Disorazole DMSO Run2   | NM_000154 | GALK1     | galactokinase 1                                                                | -0.794936       | Inlier         |
| siRNA-Temozolomide Run3-DMSO | NM_000154 | GALK1     | galactokinase 1                                                                | -0.467031       | Inlier         |
| siRNA-Temozolomide Run1-DMSO | NM_000154 | GALK1     | galactokinase 1                                                                | -0.389189       | Inlier         |
| siRNA-Vinblastine Run1-DMSO  | NM_000154 | GALK1     | galactokinase 1                                                                | 0.38919         | Inlier         |
| siRNA-Vinblastine Run2-DMSO  | NM_000154 | GALK1     | galactokinase 1                                                                | 0.554064        | Inlier         |
| siRNA-Temozolomide Run2-DMSO | NM_000154 | GALK1     | galactokinase 1                                                                | 1.109794        | Inlier         |
| siRNA Disorazole DMSO Run3   | NM_000154 | GALK1     | galactokinase 1                                                                | 4.217556        | Outlier        |
| siRNA-Temozolomide Run1-DMSO | NM_002044 | GALK2     | galactokinase 2                                                                | -1.212578       | Inlier         |
| siRNA Disorazole DMSO Run1   | NM_002044 | GALK2     | galactokinase 2                                                                | -1.204254       | Inlier         |
| siRNA-Temozolomide Run2-DMSO | NM_002044 | GALK2     | galactokinase 2                                                                | -1.028831       | Inlier         |
| siRNA-Temozolomide Run3-DMSO | NM_002044 | GALK2     | galactokinase 2                                                                | -0.124237       | Inlier         |
| siRNA-Vinblastine Run2-DMSO  | NM_002044 | GALK2     | galactokinase 2                                                                | 0.124237        | Inlier         |
| siRNA Disorazole DMSO Run2   | NM_002044 | GALK2     | galactokinase 2                                                                | 0.142792        | Inlier         |
| siRNA-Vinblastine Run1-DMSO  | NM_002044 | GALK2     | galactokinase 2                                                                | 0.320169        | Inlier         |
| siRNA Disorazole DMSO Run3   | NM_002044 | GALK2     | galactokinase 2                                                                | 4.463359        | Outlier        |
| siRNA-Temozolomide Run2-DMSO | NM_138801 | GALM      | galactose mutarotase (aldose 1-epimerase)                                      | -1.190207       | Inlier         |



Identification of Survival Genes in Human Glioblastoma Cells Using siRNA Screening  
 Nikhil G Thaker, Fang Zhang, Peter R. McDonald, Tong Ying Shun, Michael D Lewen, Ian F. Pollack, and John S. Lazo

Molecular Pharmacology

| siRNA Treatment              | Gene ID   | Gene Name | Log Fold Change | Classification |
|------------------------------|-----------|-----------|-----------------|----------------|
| siRNA-Temozolomide Run3-DMSO | NM_138801 | GALM      | -1.039958       | Inlier         |
| siRNA-Temozolomide Run1-DMSO | NM_138801 | GALM      | -0.309042       | Inlier         |
| siRNA Disorazole DMSO Run1   | NM_138801 | GALM      | -0.035077       | Inlier         |
| siRNA Disorazole DMSO Run3   | NM_138801 | GALM      | 0.035077        | Inlier         |
| siRNA-Vinblastine Run2-DMSO  | NM_138801 | GALM      | 0.082861        | Inlier         |
| siRNA Disorazole DMSO Run2   | NM_138801 | GALM      | 3.380214        | Inlier         |
| siRNA-Vinblastine Run1-DMSO  | NM_138801 | GALM      | 3.817188        | Outlier        |

Identification of Survival Genes in Human Glioblastoma Cells Using siRNA Screening

Nikhil G Thaker, Fang Zhang, Peter R. McDonald, Tong Ying Shun, Michael D Lewen, Ian F. Pollack, and John S. Lazo

Molecular Pharmacology

|                              |           |       |                                                                                                  |           |        |
|------------------------------|-----------|-------|--------------------------------------------------------------------------------------------------|-----------|--------|
| siRNA-Temozolomide Run3-DMSO | NM_000512 | GALNS | galactosamine (N-acetyl)-6-sulfate sulfatase (Morquio syndrome, mucopolysaccharidos is type IVA) | -1.049904 | Inlier |
| siRNA-Temozolomide Run2-DMSO | NM_000512 | GALNS | galactosamine (N-acetyl)-6-sulfate sulfatase (Morquio syndrome, mucopolysaccharidos is type IVA) | -0.299095 | Inlier |
| siRNA-Vinblastine Run2-DMSO  | NM_000512 | GALNS | galactosamine (N-acetyl)-6-sulfate sulfatase (Morquio syndrome, mucopolysaccharidos is type IVA) | -0.21802  | Inlier |
| siRNA Disorazole DMSO Run3   | NM_000512 | GALNS | galactosamine (N-acetyl)-6-sulfate sulfatase (Morquio syndrome, mucopolysaccharidos is type IVA) | -0.20031  | Inlier |

Identification of Survival Genes in Human Glioblastoma Cells Using siRNA Screening

Nikhil G Thaker, Fang Zhang, Peter R. McDonald, Tong Ying Shun, Michael D Lewen, Ian F. Pollack, and John S. Lazo

Molecular Pharmacology

|                              |           |       |                                                                                                 |          |         |
|------------------------------|-----------|-------|-------------------------------------------------------------------------------------------------|----------|---------|
| siRNA-Temozolomide Run1-DMSO | NM_000512 | GALNS | galactosamine (N-acetyl)-6-sulfate sulfatase (Morquio syndrome, mucopolysaccharidosis type IVA) | 0.20031  | Inlier  |
| siRNA Disorazole DMSO Run1   | NM_000512 | GALNS | galactosamine (N-acetyl)-6-sulfate sulfatase (Morquio syndrome, mucopolysaccharidosis type IVA) | 1.166817 | Inlier  |
| siRNA-Vinblastine Run1-DMSO  | NM_000512 | GALNS | galactosamine (N-acetyl)-6-sulfate sulfatase (Morquio syndrome, mucopolysaccharidosis type IVA) | 4.835337 | Outlier |
| siRNA Disorazole DMSO Run2   | NM_000512 | GALNS | galactosamine (N-acetyl)-6-sulfate sulfatase (Morquio syndrome, mucopolysaccharidosis type IVA) | 5.195991 | Outlier |

Identification of Survival Genes in Human Glioblastoma Cells Using siRNA Screening

Nikhil G Thaker, Fang Zhang, Peter R. McDonald, Tong Ying Shun, Michael D Lewen, Ian F. Pollack, and John S.

Lazo

Molecular Pharmacology

| siRNA Treatment              | Gene ID   | Gene Name | Enzyme Name                                                                                     | Log Fold Change | Outlier Status |
|------------------------------|-----------|-----------|-------------------------------------------------------------------------------------------------|-----------------|----------------|
| siRNA-Temozolomide Run2-DMSO | NM_020474 | GALNT1    | UDP-N-acetyl-alpha-D-galactosamine:polypeptide N-acetylgalactosaminyl transferase 1 (GalNAc-T1) | -0.873499       | Inlier         |
| siRNA-Temozolomide Run3-DMSO | NM_020474 | GALNT1    | UDP-N-acetyl-alpha-D-galactosamine:polypeptide N-acetylgalactosaminyl transferase 1 (GalNAc-T1) | -0.675964       | Inlier         |
| siRNA-Temozolomide Run1-DMSO | NM_020474 | GALNT1    | UDP-N-acetyl-alpha-D-galactosamine:polypeptide N-acetylgalactosaminyl transferase 1 (GalNAc-T1) | -0.610723       | Inlier         |
| siRNA Disorazole DMSO Run1   | NM_020474 | GALNT1    | UDP-N-acetyl-alpha-D-galactosamine:polypeptide N-acetylgalactosaminyl transferase 1 (GalNAc-T1) | -0.566082       | Inlier         |

Identification of Survival Genes in Human Glioblastoma Cells Using siRNA Screening

Nikhil G Thaker, Fang Zhang, Peter R. McDonald, Tong Ying Shun, Michael D Lewen, Ian F. Pollack, and John S.

Lazo

Molecular Pharmacology

| siRNA                  | Run  | Gene   | Accession | Value    | Category |
|------------------------|------|--------|-----------|----------|----------|
| siRNA Disorazole DMSO  | Run3 | GALNT1 | NM_020474 | 0.566083 | Inlier   |
| siRNA-Vinblastine DMSO | Run1 | GALNT1 | NM_020474 | 0.673036 | Inlier   |
| siRNA-Vinblastine DMSO | Run2 | GALNT1 | NM_020474 | 0.681423 | Inlier   |
| siRNA Disorazole DMSO  | Run2 | GALNT1 | NM_020474 | 1.405483 | Inlier   |

UDP-N-acetyl-alpha-D-galactosamine:polypeptide N-acetylgalactosaminyl transferase 1 (GalNAc-T1)

Identification of Survival Genes in Human Glioblastoma Cells Using siRNA Screening

Nikhil G Thaker, Fang Zhang, Peter R. McDonald, Tong Ying Shun, Michael D Lewen, Ian F. Pollack, and John S.

Lazo

Molecular Pharmacology

| siRNA                        | Gene    | Gene ID   | Gene Name                                                                                         | Log2 Fold Change | Category |
|------------------------------|---------|-----------|---------------------------------------------------------------------------------------------------|------------------|----------|
| siRNA-Temozolomide Run3-DMSO | GALNT10 | NM_198321 | UDP-N-acetyl-alpha-D-galactosamine:polypeptide N-acetylgalactosaminyl transferase 10 (GalNAc-T10) | -0.842852        | Inlier   |
| siRNA-Temozolomide Run1-DMSO | GALNT10 | NM_198321 | UDP-N-acetyl-alpha-D-galactosamine:polypeptide N-acetylgalactosaminyl transferase 10 (GalNAc-T10) | -0.506148        | Inlier   |
| siRNA-Temozolomide Run2-DMSO | GALNT10 | NM_198321 | UDP-N-acetyl-alpha-D-galactosamine:polypeptide N-acetylgalactosaminyl transferase 10 (GalNAc-T10) | -0.359113        | Inlier   |
| siRNA Disorazole DMSO Run3   | GALNT10 | NM_198321 | UDP-N-acetyl-alpha-D-galactosamine:polypeptide N-acetylgalactosaminyl transferase 10 (GalNAc-T10) | -0.088987        | Inlier   |

Identification of Survival Genes in Human Glioblastoma Cells Using siRNA Screening

Nikhil G Thaker, Fang Zhang, Peter R. McDonald, Tong Ying Shun, Michael D Lewen, Ian F. Pollack, and John S.

Lazo

Molecular Pharmacology

| siRNA             | Condition | Run  | Gene    | Accession | Value    | Category |
|-------------------|-----------|------|---------|-----------|----------|----------|
| siRNA Disorazole  | DMSO      | Run1 | GALNT10 | NM_198321 | 0.088987 | Inlier   |
| siRNA-Vinblastine | DMSO      | Run2 | GALNT10 | NM_198321 | 0.897882 | Inlier   |
| siRNA-Vinblastine | DMSO      | Run1 | GALNT10 | NM_198321 | 2.156162 | Inlier   |
| siRNA Disorazole  | DMSO      | Run2 | GALNT10 | NM_198321 | 2.642215 | Inlier   |

UDP-N-acetyl-alpha-D-galactosamine:polypeptide N-acetylgalactosaminyl transferase 10 (GalNAc-T10)

Identification of Survival Genes in Human Glioblastoma Cells Using siRNA Screening

Nikhil G Thaker, Fang Zhang, Peter R. McDonald, Tong Ying Shun, Michael D Lewen, Ian F. Pollack, and John S. Lazo

Molecular Pharmacology

| siRNA                        | Gene      | Accession | Gene Name                                                                                         | Value     | Category |
|------------------------------|-----------|-----------|---------------------------------------------------------------------------------------------------|-----------|----------|
| siRNA-Temozolomide Run1-DMSO | NM_022087 | GALNT11   | UDP-N-acetyl-alpha-D-galactosamine:polypeptide N-acetylgalactosaminyl transferase 11 (GalNAc-T11) | -0.851515 | Inlier   |
| siRNA Disorazole DMSO Run1   | NM_022087 | GALNT11   | UDP-N-acetyl-alpha-D-galactosamine:polypeptide N-acetylgalactosaminyl transferase 11 (GalNAc-T11) | -0.841004 | Inlier   |
| siRNA-Temozolomide Run3-DMSO | NM_022087 | GALNT11   | UDP-N-acetyl-alpha-D-galactosamine:polypeptide N-acetylgalactosaminyl transferase 11 (GalNAc-T11) | -0.34151  | Inlier   |
| siRNA-Temozolomide Run2-DMSO | NM_022087 | GALNT11   | UDP-N-acetyl-alpha-D-galactosamine:polypeptide N-acetylgalactosaminyl transferase 11 (GalNAc-T11) | -0.144505 | Inlier   |



Identification of Survival Genes in Human Glioblastoma Cells Using siRNA Screening

Nikhil G Thaker, Fang Zhang, Peter R. McDonald, Tong Ying Shun, Michael D Lewen, Ian F. Pollack, and John S.

Lazo

Molecular Pharmacology

| siRNA             | Condition | Run  | Gene    | Accession | Value    | Outlier |
|-------------------|-----------|------|---------|-----------|----------|---------|
| siRNA Disorazole  | DMSO      | Run3 | GALNT11 | NM_022087 | 0.144505 | Inlier  |
| siRNA-Vinblastine | DMSO      | Run2 | GALNT11 | NM_022087 | 0.650678 | Inlier  |
| siRNA-Vinblastine | DMSO      | Run1 | GALNT11 | NM_022087 | 0.698322 | Inlier  |
| siRNA Disorazole  | DMSO      | Run2 | GALNT11 | NM_022087 | 0.786996 | Inlier  |

UDP-N-acetyl-alpha-D-galactosamine:polypeptide N-acetylgalactosaminyl transferase 11

(GalNAc-T11)

Identification of Survival Genes in Human Glioblastoma Cells Using siRNA Screening

Nikhil G Thaker, Fang Zhang, Peter R. McDonald, Tong Ying Shun, Michael D Lewen, Ian F. Pollack, and John S.

Lazo

Molecular Pharmacology

| siRNA              | Condition | Run  | Gene    | Log2 Fold Change | Category |
|--------------------|-----------|------|---------|------------------|----------|
| siRNA Disorazole   | DMSO      | Run3 | GALNT12 | -1.047126        | Inlier   |
| siRNA-Vinblastine  | DMSO      | Run2 | GALNT12 | -0.745362        | Inlier   |
| siRNA-Temozolomide | DMSO      | Run3 | GALNT12 | -0.603638        | Inlier   |
| siRNA Disorazole   | DMSO      | Run1 | GALNT12 | -0.095846        | Inlier   |

UDP-N-acetyl-alpha-D-galactosamine:polypeptide N-acetylgalactosaminyl transferase 12

(GalNAc-T12)

Identification of Survival Genes in Human Glioblastoma Cells Using siRNA Screening

Nikhil G Thaker, Fang Zhang, Peter R. McDonald, Tong Ying Shun, Michael D Lewen, Ian F. Pollack, and John S.

Lazo

Molecular Pharmacology

| siRNA Treatment              | Gene ID   | Gene Name | Enzyme Name                                                                                       | Value    | Category |
|------------------------------|-----------|-----------|---------------------------------------------------------------------------------------------------|----------|----------|
| siRNA-Temozolomide Run1-DMSO | NM_024642 | GALNT12   | UDP-N-acetyl-alpha-D-galactosamine:polypeptide N-acetylgalactosaminyl transferase 12 (GalNAc-T12) | 0.095846 | Inlier   |
| siRNA-Temozolomide Run2-DMSO | NM_024642 | GALNT12   | UDP-N-acetyl-alpha-D-galactosamine:polypeptide N-acetylgalactosaminyl transferase 12 (GalNAc-T12) | 0.349831 | Inlier   |
| siRNA-Vinblastine Run1-DMSO  | NM_024642 | GALNT12   | UDP-N-acetyl-alpha-D-galactosamine:polypeptide N-acetylgalactosaminyl transferase 12 (GalNAc-T12) | 6.314521 | Outlier  |
| siRNA Disorazole DMSO Run2   | NM_024642 | GALNT12   | UDP-N-acetyl-alpha-D-galactosamine:polypeptide N-acetylgalactosaminyl transferase 12 (GalNAc-T12) | 7.495233 | Outlier  |

Identification of Survival Genes in Human Glioblastoma Cells Using siRNA Screening

Nikhil G Thaker, Fang Zhang, Peter R. McDonald, Tong Ying Shun, Michael D Lewen, Ian F. Pollack, and John S.

Lazo

Molecular Pharmacology

| siRNA              | Condition | Run  | Gene    | Log2 Fold Change | Annotation |
|--------------------|-----------|------|---------|------------------|------------|
| siRNA Disorazole   | DMSO      | Run1 | GALNT14 | -2.394558        | Inlier     |
| siRNA-Temozolomide | DMSO      | Run1 | GALNT14 | -2.084012        | Inlier     |
| siRNA-Vinblastine  | DMSO      | Run2 | GALNT14 | -0.620082        | Inlier     |
| siRNA Disorazole   | DMSO      | Run3 | GALNT14 | -0.004954        | Inlier     |

UDP-N-acetyl-alpha-D-galactosamine:polypeptide N-acetylgalactosaminyl transferase 14

(GalNAc-T14)

Identification of Survival Genes in Human Glioblastoma Cells Using siRNA Screening

Nikhil G Thaker, Fang Zhang, Peter R. McDonald, Tong Ying Shun, Michael D Lewen, Ian F. Pollack, and John S. Lazo

Molecular Pharmacology

| siRNA Treatment              | Gene ID   | Gene Name | Enzyme Name                                                                                       | p-value  | Outlier Status |
|------------------------------|-----------|-----------|---------------------------------------------------------------------------------------------------|----------|----------------|
| siRNA-Temozolomide Run3-DMSO | NM_024572 | GALNT14   | UDP-N-acetyl-alpha-D-galactosamine:polypeptide N-acetylgalactosaminyl transferase 14 (GalNAc-T14) | 0.004954 | Inlier         |
| siRNA-Temozolomide Run2-DMSO | NM_024572 | GALNT14   | UDP-N-acetyl-alpha-D-galactosamine:polypeptide N-acetylgalactosaminyl transferase 14 (GalNAc-T14) | 0.122516 | Inlier         |
| siRNA-Vinblastine Run1-DMSO  | NM_024572 | GALNT14   | UDP-N-acetyl-alpha-D-galactosamine:polypeptide N-acetylgalactosaminyl transferase 14 (GalNAc-T14) | 0.728918 | Inlier         |
| siRNA Disorazole DMSO Run2   | NM_024572 | GALNT14   | UDP-N-acetyl-alpha-D-galactosamine:polypeptide N-acetylgalactosaminyl transferase 14 (GalNAc-T14) | 1.083644 | Inlier         |

Identification of Survival Genes in Human Glioblastoma Cells Using siRNA Screening

Nikhil G Thaker, Fang Zhang, Peter R. McDonald, Tong Ying Shun, Michael D Lewen, Ian F. Pollack, and John S. Lazo

Molecular Pharmacology

| siRNA Treatment              | Gene ID   | Gene Name | Enzyme Name                                                                                     | Log Fold Change | Outlier Status |
|------------------------------|-----------|-----------|-------------------------------------------------------------------------------------------------|-----------------|----------------|
| siRNA-Temozolomide Run3-DMSO | NM_004481 | GALNT2    | UDP-N-acetyl-alpha-D-galactosamine:polypeptide N-acetylgalactosaminyl transferase 2 (GalNAc-T2) | -1.354395       | Inlier         |
| siRNA-Temozolomide Run1-DMSO | NM_004481 | GALNT2    | UDP-N-acetyl-alpha-D-galactosamine:polypeptide N-acetylgalactosaminyl transferase 2 (GalNAc-T2) | -0.933845       | Inlier         |
| siRNA-Temozolomide Run2-DMSO | NM_004481 | GALNT2    | UDP-N-acetyl-alpha-D-galactosamine:polypeptide N-acetylgalactosaminyl transferase 2 (GalNAc-T2) | -0.427534       | Inlier         |
| siRNA Disorazole DMSO Run1   | NM_004481 | GALNT2    | UDP-N-acetyl-alpha-D-galactosamine:polypeptide N-acetylgalactosaminyl transferase 2 (GalNAc-T2) | -0.15682        | Inlier         |

Identification of Survival Genes in Human Glioblastoma Cells Using siRNA Screening

Nikhil G Thaker, Fang Zhang, Peter R. McDonald, Tong Ying Shun, Michael D Lewen, Ian F. Pollack, and John S. Lazo

Molecular Pharmacology

| siRNA Treatment             | Gene ID   | Gene Name | Enzyme Name                                                                                     | Value    | Category |
|-----------------------------|-----------|-----------|-------------------------------------------------------------------------------------------------|----------|----------|
| siRNA-Vinblastine Run2-DMSO | NM_004481 | GALNT2    | UDP-N-acetyl-alpha-D-galactosamine:polypeptide N-acetylgalactosaminyl transferase 2 (GalNAc-T2) | 0.15682  | Inlier   |
| siRNA Disorazole DMSO Run3  | NM_004481 | GALNT2    | UDP-N-acetyl-alpha-D-galactosamine:polypeptide N-acetylgalactosaminyl transferase 2 (GalNAc-T2) | 0.223311 | Inlier   |
| siRNA-Vinblastine Run1-DMSO | NM_004481 | GALNT2    | UDP-N-acetyl-alpha-D-galactosamine:polypeptide N-acetylgalactosaminyl transferase 2 (GalNAc-T2) | 0.921466 | Inlier   |
| siRNA Disorazole DMSO Run2  | NM_004481 | GALNT2    | UDP-N-acetyl-alpha-D-galactosamine:polypeptide N-acetylgalactosaminyl transferase 2 (GalNAc-T2) | 1.214192 | Inlier   |

Identification of Survival Genes in Human Glioblastoma Cells Using siRNA Screening

Nikhil G Thaker, Fang Zhang, Peter R. McDonald, Tong Ying Shun, Michael D Lewen, Ian F. Pollack, and John S. Lazo

Molecular Pharmacology

| siRNA                        | Gene   | Accession | Gene Name                                                                                       | Log Fold Change | Outlier |
|------------------------------|--------|-----------|-------------------------------------------------------------------------------------------------|-----------------|---------|
| siRNA Disorazole DMSO Run1   | GALNT3 | NM_004482 | UDP-N-acetyl-alpha-D-galactosamine:polypeptide N-acetylgalactosaminyl transferase 3 (GalNAc-T3) | -1.490575       | Inlier  |
| siRNA-Temozolomide Run1-DMSO | GALNT3 | NM_004482 | UDP-N-acetyl-alpha-D-galactosamine:polypeptide N-acetylgalactosaminyl transferase 3 (GalNAc-T3) | -1.148998       | Inlier  |
| siRNA-Temozolomide Run2-DMSO | GALNT3 | NM_004482 | UDP-N-acetyl-alpha-D-galactosamine:polypeptide N-acetylgalactosaminyl transferase 3 (GalNAc-T3) | -0.533675       | Inlier  |
| siRNA-Temozolomide Run3-DMSO | GALNT3 | NM_004482 | UDP-N-acetyl-alpha-D-galactosamine:polypeptide N-acetylgalactosaminyl transferase 3 (GalNAc-T3) | -0.039235       | Inlier  |



Identification of Survival Genes in Human Glioblastoma Cells Using siRNA Screening

Nikhil G Thaker, Fang Zhang, Peter R. McDonald, Tong Ying Shun, Michael D Lewen, Ian F. Pollack, and John S. Lazo

Molecular Pharmacology

| siRNA Treatment             | Gene ID   | Gene Name | Enzyme Name                                                                                     | p-value  | Outlier Status |
|-----------------------------|-----------|-----------|-------------------------------------------------------------------------------------------------|----------|----------------|
| siRNA-Vinblastine Run2-DMSO | NM_004482 | GALNT3    | UDP-N-acetyl-alpha-D-galactosamine:polypeptide N-acetylgalactosaminyl transferase 3 (GalNAc-T3) | 0.039235 | Inlier         |
| siRNA Disorazole DMSO Run2  | NM_004482 | GALNT3    | UDP-N-acetyl-alpha-D-galactosamine:polypeptide N-acetylgalactosaminyl transferase 3 (GalNAc-T3) | 0.446255 | Inlier         |
| siRNA Disorazole DMSO Run3  | NM_004482 | GALNT3    | UDP-N-acetyl-alpha-D-galactosamine:polypeptide N-acetylgalactosaminyl transferase 3 (GalNAc-T3) | 0.815325 | Inlier         |
| siRNA-Vinblastine Run1-DMSO | NM_004482 | GALNT3    | UDP-N-acetyl-alpha-D-galactosamine:polypeptide N-acetylgalactosaminyl transferase 3 (GalNAc-T3) | 2.642189 | Inlier         |

Identification of Survival Genes in Human Glioblastoma Cells Using siRNA Screening

Nikhil G Thaker, Fang Zhang, Peter R. McDonald, Tong Ying Shun, Michael D Lewen, Ian F. Pollack, and John S.

Lazo

Molecular Pharmacology

| siRNA              | Condition | Run  | Gene   | Log Fold Change | Outlier |
|--------------------|-----------|------|--------|-----------------|---------|
| siRNA Disorazole   | DMSO      | Run1 | GALNT4 | -1.443676       | Inlier  |
| siRNA Disorazole   | DMSO      | Run2 | GALNT4 | -0.636456       | Inlier  |
| siRNA Disorazole   | DMSO      | Run3 | GALNT4 | -0.5811         | Inlier  |
| siRNA-Temozolomide | DMSO      | Run1 | GALNT4 | -0.164564       | Inlier  |

UDP-N-acetyl-alpha-D-galactosamine:polypeptide N-acetylgalactosaminyl transferase 4

(GalNAc-T4)

Identification of Survival Genes in Human Glioblastoma Cells Using siRNA Screening

Nikhil G Thaker, Fang Zhang, Peter R. McDonald, Tong Ying Shun, Michael D Lewen, Ian F. Pollack, and John S. Lazo

Molecular Pharmacology

|                              |           |        |                                                                                                 |          |        |
|------------------------------|-----------|--------|-------------------------------------------------------------------------------------------------|----------|--------|
| siRNA-Temozolomide Run2-DMSO | NM_003774 | GALNT4 | UDP-N-acetyl-alpha-D-galactosamine:polypeptide N-acetylgalactosaminyl transferase 4 (GalNAc-T4) | 0.164565 | Inlier |
| siRNA-Vinblastine Run2-DMSO  | NM_003774 | GALNT4 | UDP-N-acetyl-alpha-D-galactosamine:polypeptide N-acetylgalactosaminyl transferase 4 (GalNAc-T4) | 0.712544 | Inlier |
| siRNA-Vinblastine Run1-DMSO  | NM_003774 | GALNT4 | UDP-N-acetyl-alpha-D-galactosamine:polypeptide N-acetylgalactosaminyl transferase 4 (GalNAc-T4) | 0.87965  | Inlier |
| siRNA-Temozolomide Run3-DMSO | NM_003774 | GALNT4 | UDP-N-acetyl-alpha-D-galactosamine:polypeptide N-acetylgalactosaminyl transferase 4 (GalNAc-T4) | 1.087345 | Inlier |

Identification of Survival Genes in Human Glioblastoma Cells Using siRNA Screening

Nikhil G Thaker, Fang Zhang, Peter R. McDonald, Tong Ying Shun, Michael D Lewen, Ian F. Pollack, and John S.

Lazo

Molecular Pharmacology

| siRNA Treatment              | Gene ID   | Gene Name | Log Fold Change | Outlier Status |
|------------------------------|-----------|-----------|-----------------|----------------|
| siRNA-Temozolomide Run3-DMSO | NM_014568 | GALNT5    | -1.398857       | Inlier         |
| siRNA-Temozolomide Run1-DMSO | NM_014568 | GALNT5    | -0.611032       | Inlier         |
| siRNA-Temozolomide Run2-DMSO | NM_014568 | GALNT5    | -0.591109       | Inlier         |
| siRNA Disorazole DMSO Run1   | NM_014568 | GALNT5    | -0.435366       | Inlier         |

UDP-N-acetyl-alpha-D-galactosamine:polypeptide N-acetylgalactosaminyl transferase 5 (GalNAc-T5)  
 UDP-N-acetyl-alpha-D-galactosamine:polypeptide N-acetylgalactosaminyl transferase 5 (GalNAc-T5)  
 UDP-N-acetyl-alpha-D-galactosamine:polypeptide N-acetylgalactosaminyl transferase 5 (GalNAc-T5)  
 UDP-N-acetyl-alpha-D-galactosamine:polypeptide N-acetylgalactosaminyl transferase 5 (GalNAc-T5)

Identification of Survival Genes in Human Glioblastoma Cells Using siRNA Screening

Nikhil G Thaker, Fang Zhang, Peter R. McDonald, Tong Ying Shun, Michael D Lewen, Ian F. Pollack, and John S. Lazo

Molecular Pharmacology

| siRNA                  | Run  | Gene   | Accession | Value    | Category |
|------------------------|------|--------|-----------|----------|----------|
| siRNA Disorazole DMSO  | Run3 | GALNT5 | NM_014568 | 0.435366 | Inlier   |
| siRNA-Vinblastine DMSO | Run2 | GALNT5 | NM_014568 | 0.737968 | Inlier   |
| siRNA-Vinblastine DMSO | Run1 | GALNT5 | NM_014568 | 0.770407 | Inlier   |
| siRNA Disorazole DMSO  | Run2 | GALNT5 | NM_014568 | 0.970203 | Inlier   |

UDP-N-acetyl-alpha-D-galactosamine:polypeptide N-acetylgalactosaminyl transferase 5 (GalNAc-T5)

Identification of Survival Genes in Human Glioblastoma Cells Using siRNA Screening

Nikhil G Thaker, Fang Zhang, Peter R. McDonald, Tong Ying Shun, Michael D Lewen, Ian F. Pollack, and John S.

Lazo

Molecular Pharmacology

| siRNA Treatment              | Gene   | Gene ID   | Gene Name                                                                                       | Log Fold Change | Outlier Status |
|------------------------------|--------|-----------|-------------------------------------------------------------------------------------------------|-----------------|----------------|
| siRNA-Temozolomide Run3-DMSO | GALNT6 | NM_007210 | UDP-N-acetyl-alpha-D-galactosamine:polypeptide N-acetylgalactosaminyl transferase 6 (GalNAc-T6) | -1.127607       | Inlier         |
| siRNA-Temozolomide Run1-DMSO | GALNT6 | NM_007210 | UDP-N-acetyl-alpha-D-galactosamine:polypeptide N-acetylgalactosaminyl transferase 6 (GalNAc-T6) | -0.898858       | Inlier         |
| siRNA Disorazole DMSO Run1   | GALNT6 | NM_007210 | UDP-N-acetyl-alpha-D-galactosamine:polypeptide N-acetylgalactosaminyl transferase 6 (GalNAc-T6) | -0.653999       | Inlier         |
| siRNA-Temozolomide Run2-DMSO | GALNT6 | NM_007210 | UDP-N-acetyl-alpha-D-galactosamine:polypeptide N-acetylgalactosaminyl transferase 6 (GalNAc-T6) | -0.128445       | Inlier         |

Identification of Survival Genes in Human Glioblastoma Cells Using siRNA Screening

Nikhil G Thaker, Fang Zhang, Peter R. McDonald, Tong Ying Shun, Michael D Lewen, Ian F. Pollack, and John S. Lazo

Molecular Pharmacology

| siRNA Treatment             | Gene   | Gene ID   | Gene Name                                                                                       | Value    | Outlier |
|-----------------------------|--------|-----------|-------------------------------------------------------------------------------------------------|----------|---------|
| siRNA-Vinblastine Run2-DMSO | GALNT6 | NM_007210 | UDP-N-acetyl-alpha-D-galactosamine:polypeptide N-acetylgalactosaminyl transferase 6 (GalNAc-T6) | 0.128444 | Inlier  |
| siRNA Disorazole DMSO Run3  | GALNT6 | NM_007210 | UDP-N-acetyl-alpha-D-galactosamine:polypeptide N-acetylgalactosaminyl transferase 6 (GalNAc-T6) | 0.527482 | Inlier  |
| siRNA-Vinblastine Run1-DMSO | GALNT6 | NM_007210 | UDP-N-acetyl-alpha-D-galactosamine:polypeptide N-acetylgalactosaminyl transferase 6 (GalNAc-T6) | 0.695001 | Inlier  |
| siRNA Disorazole DMSO Run2  | GALNT6 | NM_007210 | UDP-N-acetyl-alpha-D-galactosamine:polypeptide N-acetylgalactosaminyl transferase 6 (GalNAc-T6) | 1.297864 | Inlier  |

Identification of Survival Genes in Human Glioblastoma Cells Using siRNA Screening

Nikhil G Thaker, Fang Zhang, Peter R. McDonald, Tong Ying Shun, Michael D Lewen, Ian F. Pollack, and John S.

Lazo

Molecular Pharmacology

| siRNA Treatment              | Gene ID   | Gene Name | Log Fold Change | Inlier |
|------------------------------|-----------|-----------|-----------------|--------|
| siRNA-Temozolomide Run3-DMSO | NM_017423 | GALNT7    | -1.369385       | Inlier |
| siRNA-Temozolomide Run1-DMSO | NM_017423 | GALNT7    | -0.732685       | Inlier |
| siRNA Disorazole DMSO Run1   | NM_017423 | GALNT7    | -0.57446        | Inlier |
| siRNA-Temozolomide Run2-DMSO | NM_017423 | GALNT7    | -0.272804       | Inlier |

UDP-N-acetyl-alpha-D-galactosamine:polypeptide N-acetylgalactosaminyl transferase 7

(GalNAc-T7)



Identification of Survival Genes in Human Glioblastoma Cells Using siRNA Screening

Nikhil G Thaker, Fang Zhang, Peter R. McDonald, Tong Ying Shun, Michael D Lewen, Ian F. Pollack, and John S. Lazo

Molecular Pharmacology

| siRNA             | Condition | Run  | Gene   | Accession | Enzyme                                                                                          | Value    | Outlier |
|-------------------|-----------|------|--------|-----------|-------------------------------------------------------------------------------------------------|----------|---------|
| siRNA Disorazole  | DMSO      | Run2 | GALNT7 | NM_017423 | UDP-N-acetyl-alpha-D-galactosamine:polypeptide N-acetylgalactosaminyl transferase 7 (GalNAc-T7) | 0.272803 | Inlier  |
| siRNA Disorazole  | DMSO      | Run3 | GALNT7 | NM_017423 | UDP-N-acetyl-alpha-D-galactosamine:polypeptide N-acetylgalactosaminyl transferase 7 (GalNAc-T7) | 0.616315 | Inlier  |
| siRNA-Vinblastine | Run2-DMSO |      | GALNT7 | NM_017423 | UDP-N-acetyl-alpha-D-galactosamine:polypeptide N-acetylgalactosaminyl transferase 7 (GalNAc-T7) | 0.740871 | Inlier  |
| siRNA-Vinblastine | Run1-DMSO |      | GALNT7 | NM_017423 | UDP-N-acetyl-alpha-D-galactosamine:polypeptide N-acetylgalactosaminyl transferase 7 (GalNAc-T7) | 1.262931 | Inlier  |

Identification of Survival Genes in Human Glioblastoma Cells Using siRNA Screening

Nikhil G Thaker, Fang Zhang, Peter R. McDonald, Tong Ying Shun, Michael D Lewen, Ian F. Pollack, and John S.

Lazo

Molecular Pharmacology

| siRNA                        | Gene   | Gene ID   | Gene Name                                                                                       | Log Fold Change | Outlier |
|------------------------------|--------|-----------|-------------------------------------------------------------------------------------------------|-----------------|---------|
| siRNA-Temozolomide Run1-DMSO | GALNT8 | NM_017417 | UDP-N-acetyl-alpha-D-galactosamine:polypeptide N-acetylgalactosaminyl transferase 8 (GalNAc-T8) | -1.373902       | Inlier  |
| siRNA Disorazole DMSO Run1   | GALNT8 | NM_017417 | UDP-N-acetyl-alpha-D-galactosamine:polypeptide N-acetylgalactosaminyl transferase 8 (GalNAc-T8) | -1.060325       | Inlier  |
| siRNA-Temozolomide Run3-DMSO | GALNT8 | NM_017417 | UDP-N-acetyl-alpha-D-galactosamine:polypeptide N-acetylgalactosaminyl transferase 8 (GalNAc-T8) | -0.219058       | Inlier  |
| siRNA-Vinblastine Run2-DMSO  | GALNT8 | NM_017417 | UDP-N-acetyl-alpha-D-galactosamine:polypeptide N-acetylgalactosaminyl transferase 8 (GalNAc-T8) | -0.124148       | Inlier  |

Identification of Survival Genes in Human Glioblastoma Cells Using siRNA Screening

Nikhil G Thaker, Fang Zhang, Peter R. McDonald, Tong Ying Shun, Michael D Lewen, Ian F. Pollack, and John S.

Lazo

Molecular Pharmacology

| siRNA              | Run       | Gene   | Accession | Enzyme                                                                                          | Value    | Category |
|--------------------|-----------|--------|-----------|-------------------------------------------------------------------------------------------------|----------|----------|
| siRNA-Temozolomide | Run2-DMSO | GALNT8 | NM_017417 | UDP-N-acetyl-alpha-D-galactosamine:polypeptide N-acetylgalactosaminyl transferase 8 (GalNAc-T8) | 0.124148 | Inlier   |
| siRNA Disorazole   | DMSO Run3 | GALNT8 | NM_017417 | UDP-N-acetyl-alpha-D-galactosamine:polypeptide N-acetylgalactosaminyl transferase 8 (GalNAc-T8) | 0.288675 | Inlier   |
| siRNA-Vinblastine  | Run1-DMSO | GALNT8 | NM_017417 | UDP-N-acetyl-alpha-D-galactosamine:polypeptide N-acetylgalactosaminyl transferase 8 (GalNAc-T8) | 1.214591 | Inlier   |
| siRNA Disorazole   | DMSO Run2 | GALNT8 | NM_017417 | UDP-N-acetyl-alpha-D-galactosamine:polypeptide N-acetylgalactosaminyl transferase 8 (GalNAc-T8) | 1.294875 | Inlier   |

Identification of Survival Genes in Human Glioblastoma Cells Using siRNA Screening

Nikhil G Thaker, Fang Zhang, Peter R. McDonald, Tong Ying Shun, Michael D Lewen, Ian F. Pollack, and John S.

Lazo

Molecular Pharmacology

|                              |           |        |                                                                                                 |           |        |
|------------------------------|-----------|--------|-------------------------------------------------------------------------------------------------|-----------|--------|
| siRNA-Temozolomide Run3-DMSO | NM_021808 | GALNT9 | UDP-N-acetyl-alpha-D-galactosamine:polypeptide N-acetylgalactosaminyl transferase 9 (GalNAc-T9) | -1.21699  | Inlier |
| siRNA-Temozolomide Run2-DMSO | NM_021808 | GALNT9 | UDP-N-acetyl-alpha-D-galactosamine:polypeptide N-acetylgalactosaminyl transferase 9 (GalNAc-T9) | -0.681217 | Inlier |
| siRNA Disorazole DMSO Run1   | NM_021808 | GALNT9 | UDP-N-acetyl-alpha-D-galactosamine:polypeptide N-acetylgalactosaminyl transferase 9 (GalNAc-T9) | -0.667783 | Inlier |
| siRNA-Temozolomide Run1-DMSO | NM_021808 | GALNT9 | UDP-N-acetyl-alpha-D-galactosamine:polypeptide N-acetylgalactosaminyl transferase 9 (GalNAc-T9) | -0.649927 | Inlier |

Identification of Survival Genes in Human Glioblastoma Cells Using siRNA Screening

Nikhil G Thaker, Fang Zhang, Peter R. McDonald, Tong Ying Shun, Michael D Lewen, Ian F. Pollack, and John S.

Lazo

Molecular Pharmacology

| siRNA                       | Gene      | Gene Symbol | Enzyme                                                                                          | Value    | Outlier |
|-----------------------------|-----------|-------------|-------------------------------------------------------------------------------------------------|----------|---------|
| siRNA-Vinblastine Run2-DMSO | NM_021808 | GALNT9      | UDP-N-acetyl-alpha-D-galactosamine:polypeptide N-acetylgalactosaminyl transferase 9 (GalNAc-T9) | 0.649927 | Inlier  |
| siRNA Disorazole DMSO Run3  | NM_021808 | GALNT9      | UDP-N-acetyl-alpha-D-galactosamine:polypeptide N-acetylgalactosaminyl transferase 9 (GalNAc-T9) | 0.662362 | Inlier  |
| siRNA-Vinblastine Run1-DMSO | NM_021808 | GALNT9      | UDP-N-acetyl-alpha-D-galactosamine:polypeptide N-acetylgalactosaminyl transferase 9 (GalNAc-T9) | 2.689433 | Inlier  |
| siRNA Disorazole DMSO Run2  | NM_021808 | GALNT9      | UDP-N-acetyl-alpha-D-galactosamine:polypeptide N-acetylgalactosaminyl transferase 9 (GalNAc-T9) | 2.756337 | Inlier  |

Identification of Survival Genes in Human Glioblastoma Cells Using siRNA Screening

Nikhil G Thaker, Fang Zhang, Peter R. McDonald, Tong Ying Shun, Michael D Lewen, Ian F. Pollack, and John S.

Lazo

Molecular Pharmacology

| siRNA                        | Gene    | Gene ID   | Gene Name                                                                                | Log2 Fold Change | Outlier Status |
|------------------------------|---------|-----------|------------------------------------------------------------------------------------------|------------------|----------------|
| siRNA-Temozolomide Run3-DMSO | GALNTL2 | NM_054110 | UDP-N-acetyl-alpha-D-galactosamine:polypeptide N-acetylgalactosaminyl transferase-like 2 | -2.951532        | Inlier         |
| siRNA Disorazole DMSO Run3   | GALNTL2 | NM_054110 | UDP-N-acetyl-alpha-D-galactosamine:polypeptide N-acetylgalactosaminyl transferase-like 2 | -0.710625        | Inlier         |
| siRNA-Temozolomide Run1-DMSO | GALNTL2 | NM_054110 | UDP-N-acetyl-alpha-D-galactosamine:polypeptide N-acetylgalactosaminyl transferase-like 2 | -0.638375        | Inlier         |
| siRNA Disorazole DMSO Run1   | GALNTL2 | NM_054110 | UDP-N-acetyl-alpha-D-galactosamine:polypeptide N-acetylgalactosaminyl transferase-like 2 | -0.111574        | Inlier         |
| siRNA-Temozolomide Run2-DMSO | GALNTL2 | NM_054110 | UDP-N-acetyl-alpha-D-galactosamine:polypeptide N-acetylgalactosaminyl transferase-like 2 | 0.111574         | Inlier         |

Identification of Survival Genes in Human Glioblastoma Cells Using siRNA Screening

Nikhil G Thaker, Fang Zhang, Peter R. McDonald, Tong Ying Shun, Michael D Lewen, Ian F. Pollack, and John S.

Lazo

Molecular Pharmacology

|                              |               |         |                                                                                          |           |        |
|------------------------------|---------------|---------|------------------------------------------------------------------------------------------|-----------|--------|
| siRNA-Vinblastine Run2-DMSO  | NM_0541<br>10 | GALNTL2 | UDP-N-acetyl-alpha-D-galactosamine:polypeptide N-acetylgalactosaminyl transferase-like 2 | 0.573517  | Inlier |
| siRNA Disorazole DMSO Run2   | NM_0541<br>10 | GALNTL2 | UDP-N-acetyl-alpha-D-galactosamine:polypeptide N-acetylgalactosaminyl transferase-like 2 | 1.757884  | Inlier |
| siRNA-Vinblastine Run1-DMSO  | NM_0541<br>10 | GALNTL2 | UDP-N-acetyl-alpha-D-galactosamine:polypeptide N-acetylgalactosaminyl transferase-like 2 | 2.434441  | Inlier |
| siRNA-Temozolomide Run3-DMSO | NM_1452<br>92 | GALNTL5 | UDP-N-acetyl-alpha-D-galactosamine:polypeptide N-acetylgalactosaminyl transferase-like 5 | -1.189192 | Inlier |
| siRNA-Temozolomide Run1-DMSO | NM_1452<br>92 | GALNTL5 | UDP-N-acetyl-alpha-D-galactosamine:polypeptide N-acetylgalactosaminyl transferase-like 5 | -0.763306 | Inlier |

Identification of Survival Genes in Human Glioblastoma Cells Using siRNA Screening

Nikhil G Thaker, Fang Zhang, Peter R. McDonald, Tong Ying Shun, Michael D Lewen, Ian F. Pollack, and John S.

Lazo

Molecular Pharmacology

|                              |               |         |                                                                                          |           |        |
|------------------------------|---------------|---------|------------------------------------------------------------------------------------------|-----------|--------|
| siRNA Disorazole DMSO Run1   | NM_1452<br>92 | GALNTL5 | UDP-N-acetyl-alpha-D-galactosamine:polypeptide N-acetylgalactosaminyl transferase-like 5 | -0.585694 | Inlier |
| siRNA-Temozolomide Run2-DMSO | NM_1452<br>92 | GALNTL5 | UDP-N-acetyl-alpha-D-galactosamine:polypeptide N-acetylgalactosaminyl transferase-like 5 | -0.359958 | Inlier |
| siRNA-Vinblastine Run2-DMSO  | NM_1452<br>92 | GALNTL5 | UDP-N-acetyl-alpha-D-galactosamine:polypeptide N-acetylgalactosaminyl transferase-like 5 | 0.359958  | Inlier |
| siRNA Disorazole DMSO Run3   | NM_1452<br>92 | GALNTL5 | UDP-N-acetyl-alpha-D-galactosamine:polypeptide N-acetylgalactosaminyl transferase-like 5 | 0.469276  | Inlier |
| siRNA Disorazole DMSO Run2   | NM_1452<br>92 | GALNTL5 | UDP-N-acetyl-alpha-D-galactosamine:polypeptide N-acetylgalactosaminyl transferase-like 5 | 1.51965   | Inlier |



Identification of Survival Genes in Human Glioblastoma Cells Using siRNA Screening  
 Nikhil G Thaker, Fang Zhang, Peter R. McDonald, Tong Ying Shun, Michael D Lewen, Ian F. Pollack, and John S. Lazo

Molecular Pharmacology

UDP-N-acetyl-alpha-D-galactosamine:polypeptide N-acetylgalactosaminyl transferase-like 5

|                              |               |         |            |           |        |
|------------------------------|---------------|---------|------------|-----------|--------|
| siRNA-Vinblastine Run1-DMSO  | NM_1452<br>92 | GALNTL5 | e-like 5   | 1.72601   | Inlier |
| siRNA-Temozolomide Run3-DMSO | NM_0014<br>80 | GALR1   | receptor 1 | -1.362805 | Inlier |
| siRNA-Temozolomide Run1-DMSO | NM_0014<br>80 | GALR1   | receptor 1 | -0.519531 | Inlier |
| siRNA-Temozolomide Run2-DMSO | NM_0014<br>80 | GALR1   | receptor 1 | -0.41952  | Inlier |
| siRNA Disorazole DMSO Run2   | NM_0014<br>80 | GALR1   | receptor 1 | -0.236301 | Inlier |
| siRNA Disorazole DMSO Run1   | NM_0014<br>80 | GALR1   | receptor 1 | 0.2363    | Inlier |
| siRNA Disorazole DMSO Run3   | NM_0014<br>80 | GALR1   | receptor 1 | 0.829469  | Inlier |
| siRNA-Vinblastine Run1-DMSO  | NM_0014<br>80 | GALR1   | receptor 1 | 1.133519  | Inlier |
| siRNA-Vinblastine Run2-DMSO  | NM_0014<br>80 | GALR1   | receptor 1 | 1.430534  | Inlier |
| siRNA-Temozolomide Run3-DMSO | NM_0038<br>57 | GALR2   | receptor 2 | -1.006858 | Inlier |
| siRNA-Temozolomide Run2-DMSO | NM_0038<br>57 | GALR2   | receptor 2 | -0.782344 | Inlier |
| siRNA-Temozolomide Run1-DMSO | NM_0038<br>57 | GALR2   | receptor 2 | -0.512239 | Inlier |
| siRNA Disorazole DMSO Run2   | NM_0038<br>57 | GALR2   | receptor 2 | -0.041574 | Inlier |
| siRNA Disorazole DMSO Run3   | NM_0038<br>57 | GALR2   | receptor 2 | 0.041574  | Inlier |
| siRNA Disorazole DMSO Run1   | NM_0038<br>57 | GALR2   | receptor 2 | 0.566656  | Inlier |
| siRNA-Vinblastine Run1-DMSO  | NM_0038<br>57 | GALR2   | receptor 2 | 1.216404  | Inlier |
| siRNA-Vinblastine Run2-DMSO  | NM_0038<br>57 | GALR2   | receptor 2 | 1.917015  | Inlier |
| siRNA-Temozolomide Run3-DMSO | NM_0036<br>14 | GALR3   | receptor 3 | -1.165894 | Inlier |
| siRNA Disorazole DMSO Run2   | NM_0036<br>14 | GALR3   | receptor 3 | -0.589323 | Inlier |
| siRNA-Temozolomide Run1-DMSO | NM_0036<br>14 | GALR3   | receptor 3 | -0.262285 | Inlier |
| siRNA-Temozolomide Run2-DMSO | NM_0036<br>14 | GALR3   | receptor 3 | -0.223679 | Inlier |
| siRNA Disorazole DMSO Run1   | NM_0036<br>14 | GALR3   | receptor 3 | 0.223679  | Inlier |

Identification of Survival Genes in Human Glioblastoma Cells Using siRNA Screening  
 Nikhil G Thaker, Fang Zhang, Peter R. McDonald, Tong Ying Shun, Michael D Lewen, Ian F. Pollack, and John S. Lazo

|                            |         |       |              |                  |
|----------------------------|---------|-------|--------------|------------------|
| Molecular Pharmacology     | NM_0036 |       | galanin      |                  |
| siRNA Disorazole DMSO Run3 | 14      | GALR3 | receptor 3   | 0.759677 Inlier  |
| siRNA-Vinblastine Run2-    | NM_0036 |       | galanin      |                  |
| DMSO                       | 14      | GALR3 | receptor 3   | 1.440339 Inlier  |
| siRNA-Vinblastine Run1-    | NM_0036 |       | galanin      |                  |
| DMSO                       | 14      | GALR3 | receptor 3   | 1.509846 Inlier  |
|                            |         |       | galactose-   |                  |
|                            |         |       | 1-           |                  |
|                            |         |       | phosphate    |                  |
| siRNA-Temozolomide Run3-   | NM_1471 |       | uridylyltran |                  |
| DMSO                       | 32      | GALT  | sferase      | -1.008912 Inlier |
|                            |         |       | galactose-   |                  |
|                            |         |       | 1-           |                  |
|                            |         |       | phosphate    |                  |
|                            | NM_1471 |       | uridylyltran |                  |
| siRNA Disorazole DMSO Run1 | 32      | GALT  | sferase      | -0.581618 Inlier |
|                            |         |       | galactose-   |                  |
|                            |         |       | 1-           |                  |
|                            |         |       | phosphate    |                  |
| siRNA-Temozolomide Run1-   | NM_1471 |       | uridylyltran |                  |
| DMSO                       | 32      | GALT  | sferase      | -0.115404 Inlier |
|                            |         |       | galactose-   |                  |
|                            |         |       | 1-           |                  |
|                            |         |       | phosphate    |                  |
|                            | NM_1471 |       | uridylyltran |                  |
| siRNA Disorazole DMSO Run3 | 32      | GALT  | sferase      | -0.098578 Inlier |
|                            |         |       | galactose-   |                  |
|                            |         |       | 1-           |                  |
|                            |         |       | phosphate    |                  |
| siRNA-Vinblastine Run2-    | NM_1471 |       | uridylyltran |                  |
| DMSO                       | 32      | GALT  | sferase      | 0.098578 Inlier  |
|                            |         |       | galactose-   |                  |
|                            |         |       | 1-           |                  |
|                            |         |       | phosphate    |                  |
| siRNA-Temozolomide Run2-   | NM_1471 |       | uridylyltran |                  |
| DMSO                       | 32      | GALT  | sferase      | 0.767382 Inlier  |
|                            |         |       | galactose-   |                  |
|                            |         |       | 1-           |                  |
|                            |         |       | phosphate    |                  |
| siRNA-Vinblastine Run1-    | NM_1471 |       | uridylyltran |                  |
| DMSO                       | 32      | GALT  | sferase      | 0.921357 Inlier  |

Identification of Survival Genes in Human Glioblastoma Cells Using siRNA Screening  
 Nikhil G Thaker, Fang Zhang, Peter R. McDonald, Tong Ying Shun, Michael D Lewen, Ian F. Pollack, and John S. Lazo  
 Molecular Pharmacology

|                              |               |       |                                           |           |         |
|------------------------------|---------------|-------|-------------------------------------------|-----------|---------|
| siRNA Disorazole DMSO Run2   | NM_1471<br>32 | GALT  | galactose-1-phosphate uridylyltransferase | 1.017389  | Inlier  |
| siRNA Disorazole DMSO Run1   | NM_0001<br>56 | GAMT  | guanidinoacetate N-methyltransferase      | -1.295202 | Inlier  |
| siRNA-Vinblastine Run2-DMSO  | NM_0001<br>56 | GAMT  | guanidinoacetate N-methyltransferase      | -0.698057 | Inlier  |
| siRNA-Temozolomide Run1-DMSO | NM_0001<br>56 | GAMT  | guanidinoacetate N-methyltransferase      | -0.650943 | Inlier  |
| siRNA Disorazole DMSO Run3   | NM_0001<br>56 | GAMT  | guanidinoacetate N-methyltransferase      | -0.286186 | Inlier  |
| siRNA-Temozolomide Run2-DMSO | NM_0001<br>56 | GAMT  | guanidinoacetate N-methyltransferase      | 0.286186  | Inlier  |
| siRNA-Temozolomide Run3-DMSO | NM_0001<br>56 | GAMT  | guanidinoacetate N-methyltransferase      | 0.575693  | Inlier  |
| siRNA-Vinblastine Run1-DMSO  | NM_0001<br>56 | GAMT  | guanidinoacetate N-methyltransferase      | 2.350659  | Inlier  |
| siRNA Disorazole DMSO Run2   | NM_0001<br>56 | GAMT  | guanidinoacetate N-methyltransferase      | 3.525514  | Outlier |
| siRNA-Temozolomide Run3-DMSO | NM_1983<br>34 | GANAB | glucosidase, alpha; neutral AB            | -1.208765 | Inlier  |
| siRNA-Vinblastine Run2-DMSO  | NM_1983<br>34 | GANAB | glucosidase, alpha; neutral AB            | -0.733366 | Inlier  |
| siRNA-Temozolomide Run2-DMSO | NM_1983<br>34 | GANAB | glucosidase, alpha; neutral AB            | -0.615633 | Inlier  |

Identification of Survival Genes in Human Glioblastoma Cells Using siRNA Screening  
 Nikhil G Thaker, Fang Zhang, Peter R. McDonald, Tong Ying Shun, Michael D Lewen, Ian F. Pollack, and John S. Lazo  
 Molecular Pharmacology

|                                  |               |       |                                                         |           |         |
|----------------------------------|---------------|-------|---------------------------------------------------------|-----------|---------|
| siRNA Disorazole DMSO Run1       | NM_1983<br>34 | GANAB | glucosidas<br>e, alpha;<br>neutral AB                   | -0.052334 | Inlier  |
| siRNA-Temozolomide Run1-<br>DMSO | NM_1983<br>34 | GANAB | glucosidas<br>e, alpha;<br>neutral AB                   | 0.052332  | Inlier  |
| siRNA Disorazole DMSO Run3       | NM_1983<br>34 | GANAB | glucosidas<br>e, alpha;<br>neutral AB                   | 0.510786  | Inlier  |
| siRNA Disorazole DMSO Run2       | NM_1983<br>34 | GANAB | glucosidas<br>e, alpha;<br>neutral AB                   | 4.244536  | Outlier |
| siRNA-Vinblastine Run1-<br>DMSO  | NM_1983<br>34 | GANAB | glucosidas<br>e, alpha;<br>neutral AB                   | 5.280899  | Outlier |
| siRNA-Temozolomide Run3-<br>DMSO | NM_1981<br>41 | GANC  | glucosidas<br>e, alpha;<br>neutral C                    | -0.987957 | Inlier  |
| siRNA-Temozolomide Run2-<br>DMSO | NM_1981<br>41 | GANC  | glucosidas<br>e, alpha;<br>neutral C                    | -0.932911 | Inlier  |
| siRNA-Vinblastine Run2-<br>DMSO  | NM_1981<br>41 | GANC  | glucosidas<br>e, alpha;<br>neutral C                    | -0.085618 | Inlier  |
| siRNA Disorazole DMSO Run3       | NM_1981<br>41 | GANC  | glucosidas<br>e, alpha;<br>neutral C                    | -0.036312 | Inlier  |
| siRNA Disorazole DMSO Run1       | NM_1981<br>41 | GANC  | glucosidas<br>e, alpha;<br>neutral C                    | 0.036312  | Inlier  |
| siRNA-Temozolomide Run1-<br>DMSO | NM_1981<br>41 | GANC  | glucosidas<br>e, alpha;<br>neutral C                    | 0.416089  | Inlier  |
| siRNA-Vinblastine Run1-<br>DMSO  | NM_1981<br>41 | GANC  | glucosidas<br>e, alpha;<br>neutral C                    | 0.988674  | Inlier  |
| siRNA Disorazole DMSO Run2       | NM_1981<br>41 | GANC  | glucosidas<br>e, alpha;<br>neutral C                    | 1.164666  | Inlier  |
| siRNA-Temozolomide Run3-<br>DMSO | NM_0020<br>46 | GAPD  | glyceralde<br>hyde-3-<br>phosphate<br>dehydroge<br>nase | -1.609126 | Inlier  |

Identification of Survival Genes in Human Glioblastoma Cells Using siRNA Screening  
 Nikhil G Thaker, Fang Zhang, Peter R. McDonald, Tong Ying Shun, Michael D Lewen, Ian F. Pollack, and John S. Lazo  
 Molecular Pharmacology

|                                  |               |       |                                                                               |           |        |
|----------------------------------|---------------|-------|-------------------------------------------------------------------------------|-----------|--------|
| siRNA Disorazole DMSO Run2       | NM_0020<br>46 | GAPD  | glyceralde<br>hyde-3-<br>phosphate<br>dehydroge<br>nase                       | -1.352446 | Inlier |
| siRNA-Temozolomide Run2-<br>DMSO | NM_0020<br>46 | GAPD  | glyceralde<br>hyde-3-<br>phosphate<br>dehydroge<br>nase                       | -1.205817 | Inlier |
| siRNA-Temozolomide Run1-<br>DMSO | NM_0020<br>46 | GAPD  | glyceralde<br>hyde-3-<br>phosphate<br>dehydroge<br>nase                       | -0.099674 | Inlier |
| siRNA Disorazole DMSO Run1       | NM_0020<br>46 | GAPD  | glyceralde<br>hyde-3-<br>phosphate<br>dehydroge<br>nase                       | 0.099674  | Inlier |
| siRNA-Vinblastine Run1-<br>DMSO  | NM_0020<br>46 | GAPD  | glyceralde<br>hyde-3-<br>phosphate<br>dehydroge<br>nase                       | 0.477622  | Inlier |
| siRNA-Vinblastine Run2-<br>DMSO  | NM_0020<br>46 | GAPD  | glyceralde<br>hyde-3-<br>phosphate<br>dehydroge<br>nase                       | 0.674349  | Inlier |
| siRNA Disorazole DMSO Run3       | NM_0020<br>46 | GAPD  | glyceralde<br>hyde-3-<br>phosphate<br>dehydroge<br>nase                       | 0.674651  | Inlier |
| siRNA-Temozolomide Run3-<br>DMSO | NM_0143<br>64 | GAPDS | glyceralde<br>hyde-3-<br>phosphate<br>dehydroge<br>nase,<br>spermatog<br>enic | -2.045077 | Inlier |

Identification of Survival Genes in Human Glioblastoma Cells Using siRNA Screening

Nikhil G Thaker, Fang Zhang, Peter R. McDonald, Tong Ying Shun, Michael D Lewen, Ian F. Pollack, and John S. Lazo

Molecular Pharmacology

|                              |               |       |                                                                               |                  |
|------------------------------|---------------|-------|-------------------------------------------------------------------------------|------------------|
| siRNA-Temozolomide Run2-DMSO | NM_0143<br>64 | GAPDS | glyceralde<br>hyde-3-<br>phosphate<br>dehydroge<br>nase,<br>spermatog<br>enic | -0.863019 Inlier |
| siRNA Disorazole DMSO Run2   | NM_0143<br>64 | GAPDS | glyceralde<br>hyde-3-<br>phosphate<br>dehydroge<br>nase,<br>spermatog<br>enic | -0.151531 Inlier |
| siRNA-Temozolomide Run1-DMSO | NM_0143<br>64 | GAPDS | glyceralde<br>hyde-3-<br>phosphate<br>dehydroge<br>nase,<br>spermatog<br>enic | -0.084025 Inlier |
| siRNA Disorazole DMSO Run1   | NM_0143<br>64 | GAPDS | glyceralde<br>hyde-3-<br>phosphate<br>dehydroge<br>nase,<br>spermatog<br>enic | 0.084025 Inlier  |
| siRNA-Vinblastine Run2-DMSO  | NM_0143<br>64 | GAPDS | glyceralde<br>hyde-3-<br>phosphate<br>dehydroge<br>nase,<br>spermatog<br>enic | 0.485981 Inlier  |
| siRNA-Vinblastine Run1-DMSO  | NM_0143<br>64 | GAPDS | glyceralde<br>hyde-3-<br>phosphate<br>dehydroge<br>nase,<br>spermatog<br>enic | 1.620034 Inlier  |

Identification of Survival Genes in Human Glioblastoma Cells Using siRNA Screening  
 Nikhil G Thaker, Fang Zhang, Peter R. McDonald, Tong Ying Shun, Michael D Lewen, Ian F. Pollack, and John S. Lazo  
 Molecular Pharmacology

|                                  |               |       |                                                                               |           |        |
|----------------------------------|---------------|-------|-------------------------------------------------------------------------------|-----------|--------|
| siRNA Disorazole DMSO Run3       | NM_0143<br>64 | GAPDS | glyceralde<br>hyde-3-<br>phosphate<br>dehydroge<br>nase,<br>spermatog<br>enic | 2.32093   | Inlier |
| siRNA Disorazole DMSO Run1       | NM_0020<br>47 | GARS  | glycyl-<br>tRNA<br>synthetase                                                 | -0.733263 | Inlier |
| siRNA-Temozolomide Run3-<br>DMSO | NM_0020<br>47 | GARS  | glycyl-<br>tRNA<br>synthetase                                                 | -0.615737 | Inlier |
| siRNA-Temozolomide Run2-<br>DMSO | NM_0020<br>47 | GARS  | glycyl-<br>tRNA<br>synthetase                                                 | -0.525633 | Inlier |
| siRNA-Temozolomide Run1-<br>DMSO | NM_0020<br>47 | GARS  | glycyl-<br>tRNA<br>synthetase                                                 | -0.200165 | Inlier |
| siRNA Disorazole DMSO Run3       | NM_0020<br>47 | GARS  | glycyl-<br>tRNA<br>synthetase                                                 | 0.200165  | Inlier |
| siRNA-Vinblastine Run2-<br>DMSO  | NM_0020<br>47 | GARS  | glycyl-<br>tRNA<br>synthetase                                                 | 0.768648  | Inlier |
| siRNA-Vinblastine Run1-<br>DMSO  | NM_0020<br>47 | GARS  | glycyl-<br>tRNA<br>synthetase                                                 | 1.411261  | Inlier |
| siRNA Disorazole DMSO Run2       | NM_0020<br>47 | GARS  | glycyl-<br>tRNA<br>synthetase                                                 | 1.784083  | Inlier |

Identification of Survival Genes in Human Glioblastoma Cells Using siRNA Screening

Nikhil G Thaker, Fang Zhang, Peter R. McDonald, Tong Ying Shun, Michael D Lewen, Ian F. Pollack, and John S.

Lazo

Molecular Pharmacology

|                              |           |      |                                                                                                                           |           |        |
|------------------------------|-----------|------|---------------------------------------------------------------------------------------------------------------------------|-----------|--------|
| siRNA-Temozolomide Run3-DMSO | NM_175085 | GART | phosphoribosylglycinamide formyltransferase, phosphoribosylglycinamide synthetase, phosphoribosylaminimidazole synthetase | -2.131359 | Inlier |
| siRNA Disorazole DMSO Run1   | NM_175085 | GART | phosphoribosylglycinamide formyltransferase, phosphoribosylglycinamide synthetase, phosphoribosylaminimidazole synthetase | -0.68501  | Inlier |
| siRNA-Vinblastine Run2-DMSO  | NM_175085 | GART | phosphoribosylglycinamide formyltransferase, phosphoribosylglycinamide synthetase, phosphoribosylaminimidazole synthetase | -0.334084 | Inlier |



Identification of Survival Genes in Human Glioblastoma Cells Using siRNA Screening

Nikhil G Thaker, Fang Zhang, Peter R. McDonald, Tong Ying Shun, Michael D Lewen, Ian F. Pollack, and John S. Lazo

Molecular Pharmacology

|                              |           |      |                                                                                                                           |           |        |
|------------------------------|-----------|------|---------------------------------------------------------------------------------------------------------------------------|-----------|--------|
| siRNA-Temozolomide Run2-DMSO | NM_175085 | GART | phosphoribosylglycinamide formyltransferase, phosphoribosylglycinamide synthetase, phosphoribosylaminimidazole synthetase | -0.251152 | Inlier |
| siRNA Disorazole DMSO Run3   | NM_175085 | GART | phosphoribosylglycinamide formyltransferase, phosphoribosylglycinamide synthetase, phosphoribosylaminimidazole synthetase | 0.251152  | Inlier |
| siRNA-Temozolomide Run1-DMSO | NM_175085 | GART | phosphoribosylglycinamide formyltransferase, phosphoribosylglycinamide synthetase, phosphoribosylaminimidazole synthetase | 0.66399   | Inlier |

Identification of Survival Genes in Human Glioblastoma Cells Using siRNA Screening  
 Nikhil G Thaker, Fang Zhang, Peter R. McDonald, Tong Ying Shun, Michael D Lewen, Ian F. Pollack, and John S. Lazo  
 Molecular Pharmacology

|                              |               |      |                                                                                                                                                                           |           |         |
|------------------------------|---------------|------|---------------------------------------------------------------------------------------------------------------------------------------------------------------------------|-----------|---------|
| siRNA-Vinblastine Run1-DMSO  | NM_1750<br>85 | GART | phosphori<br>bosylglycin<br>amide<br>formyltran<br>sferase,<br>phosphori<br>bosylglycin<br>amide<br>synthetase<br>,<br>phosphori<br>bosylamin<br>oimidazole<br>synthetase | 14.04803  | Outlier |
| siRNA Disorazole DMSO Run2   | NM_1750<br>85 | GART | phosphori<br>bosylglycin<br>amide<br>formyltran<br>sferase,<br>phosphori<br>bosylglycin<br>amide<br>synthetase<br>,<br>phosphori<br>bosylamin<br>oimidazole<br>synthetase | 16.63868  | Outlier |
| siRNA Disorazole DMSO Run2   | NM_0008<br>20 | GAS6 | growth<br>arrest-<br>specific 6                                                                                                                                           | -4.261928 | Outlier |
| siRNA Disorazole DMSO Run1   | NM_0008<br>20 | GAS6 | growth<br>arrest-<br>specific 6                                                                                                                                           | -0.676865 | Inlier  |
| siRNA-Vinblastine Run1-DMSO  | NM_0008<br>20 | GAS6 | growth<br>arrest-<br>specific 6                                                                                                                                           | -0.364417 | Inlier  |
| siRNA-Temozolomide Run2-DMSO | NM_0008<br>20 | GAS6 | growth<br>arrest-<br>specific 6                                                                                                                                           | -0.182858 | Inlier  |
| siRNA-Vinblastine Run2-DMSO  | NM_0008<br>20 | GAS6 | growth<br>arrest-<br>specific 6                                                                                                                                           | 0.182855  | Inlier  |
| siRNA-Temozolomide Run3-DMSO | NM_0008<br>20 | GAS6 | growth<br>arrest-<br>specific 6                                                                                                                                           | 0.672135  | Inlier  |

Identification of Survival Genes in Human Glioblastoma Cells Using siRNA Screening  
 Nikhil G Thaker, Fang Zhang, Peter R. McDonald, Tong Ying Shun, Michael D Lewen, Ian F. Pollack, and John S. Lazo

Molecular Pharmacology

|                                  |               |      |                                                                                             |           |         |
|----------------------------------|---------------|------|---------------------------------------------------------------------------------------------|-----------|---------|
| siRNA Disorazole DMSO Run3       | NM_0008<br>20 | GAS6 | growth<br>arrest-<br>specific 6                                                             | 1.10456   | Inlier  |
| siRNA-Temozolomide Run1-<br>DMSO | NM_0008<br>20 | GAS6 | growth<br>arrest-<br>specific 6                                                             | 3.86471   | Outlier |
| siRNA-Temozolomide Run2-<br>DMSO | NM_0014<br>82 | GATM | glycine<br>amidinotra<br>nsferase<br>(L-<br>arginine:gl<br>ycine<br>amidinotra<br>nsferase) | -1.488945 | Inlier  |
| siRNA-Temozolomide Run3-<br>DMSO | NM_0014<br>82 | GATM | glycine<br>amidinotra<br>nsferase<br>(L-<br>arginine:gl<br>ycine<br>amidinotra<br>nsferase) | -1.076456 | Inlier  |
| siRNA-Temozolomide Run1-<br>DMSO | NM_0014<br>82 | GATM | glycine<br>amidinotra<br>nsferase<br>(L-<br>arginine:gl<br>ycine<br>amidinotra<br>nsferase) | -0.272544 | Inlier  |
| siRNA Disorazole DMSO Run1       | NM_0014<br>82 | GATM | glycine<br>amidinotra<br>nsferase<br>(L-<br>arginine:gl<br>ycine<br>amidinotra<br>nsferase) | -0.185839 | Inlier  |
| siRNA Disorazole DMSO Run3       | NM_0014<br>82 | GATM | glycine<br>amidinotra<br>nsferase<br>(L-<br>arginine:gl<br>ycine<br>amidinotra<br>nsferase) | 0.18584   | Inlier  |

Identification of Survival Genes in Human Glioblastoma Cells Using siRNA Screening

Nikhil G Thaker, Fang Zhang, Peter R. McDonald, Tong Ying Shun, Michael D Lewen, Ian F. Pollack, and John S.

Lazo

Molecular Pharmacology

|                              |              |      |                                                                    |           |        |
|------------------------------|--------------|------|--------------------------------------------------------------------|-----------|--------|
| siRNA-Vinblastine Run2-DMSO  | NM_001482    | GATM | glycine amidinotransferase (L-arginine:glycine amidinotransferase) | 0.252705  | Inlier |
| siRNA-Vinblastine Run1-DMSO  | NM_001482    | GATM | glycine amidinotransferase (L-arginine:glycine amidinotransferase) | 1.38053   | Inlier |
| siRNA Disorazole DMSO Run2   | NM_001482    | GATM | glycine amidinotransferase (L-arginine:glycine amidinotransferase) | 1.536908  | Inlier |
| siRNA-Temozolomide Run3-DMSO | NM_001005742 | GBA  | glucosidase, beta; acid (includes glucosylceramidase)              | -1.753081 | Inlier |
| siRNA-Temozolomide Run2-DMSO | NM_001005742 | GBA  | glucosidase, beta; acid (includes glucosylceramidase)              | -0.89974  | Inlier |
| siRNA-Vinblastine Run2-DMSO  | NM_001005742 | GBA  | glucosidase, beta; acid (includes glucosylceramidase)              | -0.449259 | Inlier |

Identification of Survival Genes in Human Glioblastoma Cells Using siRNA Screening  
 Nikhil G Thaker, Fang Zhang, Peter R. McDonald, Tong Ying Shun, Michael D Lewen, Ian F. Pollack, and John S. Lazo  
 Molecular Pharmacology

|                              |                  |      |                                                       |           |        |
|------------------------------|------------------|------|-------------------------------------------------------|-----------|--------|
| siRNA Disorazole DMSO Run1   | NM_0010<br>05742 | GBA  | glucosidase, beta; acid (includes glucosylceramidase) | -0.007752 | Inlier |
| siRNA-Temozolomide Run1-DMSO | NM_0010<br>05742 | GBA  | glucosidase, beta; acid (includes glucosylceramidase) | 0.007752  | Inlier |
| siRNA Disorazole DMSO Run3   | NM_0010<br>05742 | GBA  | glucosidase, beta; acid (includes glucosylceramidase) | 0.289381  | Inlier |
| siRNA Disorazole DMSO Run2   | NM_0010<br>05742 | GBA  | glucosidase, beta; acid (includes glucosylceramidase) | 1.647321  | Inlier |
| siRNA-Vinblastine Run1-DMSO  | NM_0010<br>05742 | GBA  | glucosidase, beta; acid (includes glucosylceramidase) | 2.007663  | Inlier |
| siRNA-Temozolomide Run3-DMSO | NM_0209<br>44    | GBA2 | glucosidase, beta (bile acid) 2                       | -1.073593 | Inlier |
| siRNA-Temozolomide Run2-DMSO | NM_0209<br>44    | GBA2 | glucosidase, beta (bile acid) 2                       | -0.730667 | Inlier |
| siRNA Disorazole DMSO Run1   | NM_0209<br>44    | GBA2 | glucosidase, beta (bile acid) 2                       | -0.351122 | Inlier |
| siRNA-Temozolomide Run1-DMSO | NM_0209<br>44    | GBA2 | glucosidase, beta (bile acid) 2                       | -0.30902  | Inlier |

Identification of Survival Genes in Human Glioblastoma Cells Using siRNA Screening  
 Nikhil G Thaker, Fang Zhang, Peter R. McDonald, Tong Ying Shun, Michael D Lewen, Ian F. Pollack, and John S. Lazo

Molecular Pharmacology

|                              |               |      |                                                 |           |        |
|------------------------------|---------------|------|-------------------------------------------------|-----------|--------|
| siRNA-Vinblastine Run2-DMSO  | NM_0209<br>44 | GBA2 | glucosidas<br>e, beta<br>(bile acid)<br>2       | 0.30902   | Inlier |
| siRNA Disorazole DMSO Run3   | NM_0209<br>44 | GBA2 | glucosidas<br>e, beta<br>(bile acid)<br>2       | 0.618333  | Inlier |
| siRNA-Vinblastine Run1-DMSO  | NM_0209<br>44 | GBA2 | glucosidas<br>e, beta<br>(bile acid)<br>2       | 1.31085   | Inlier |
| siRNA Disorazole DMSO Run2   | NM_0209<br>44 | GBA2 | glucosidas<br>e, beta<br>(bile acid)<br>2       | 1.594561  | Inlier |
| siRNA-Temozolomide Run3-DMSO | NM_0209<br>73 | GBA3 | glucosidas<br>e, beta,<br>acid 3<br>(cytosolic) | -2.526213 | Inlier |
| siRNA-Temozolomide Run2-DMSO | NM_0209<br>73 | GBA3 | glucosidas<br>e, beta,<br>acid 3<br>(cytosolic) | -2.260226 | Inlier |
| siRNA Disorazole DMSO Run3   | NM_0209<br>73 | GBA3 | glucosidas<br>e, beta,<br>acid 3<br>(cytosolic) | -0.25604  | Inlier |
| siRNA-Vinblastine Run2-DMSO  | NM_0209<br>73 | GBA3 | glucosidas<br>e, beta,<br>acid 3<br>(cytosolic) | -0.177351 | Inlier |
| siRNA-Temozolomide Run1-DMSO | NM_0209<br>73 | GBA3 | glucosidas<br>e, beta,<br>acid 3<br>(cytosolic) | 0.177351  | Inlier |
| siRNA Disorazole DMSO Run1   | NM_0209<br>73 | GBA3 | glucosidas<br>e, beta,<br>acid 3<br>(cytosolic) | 0.455877  | Inlier |
| siRNA-Vinblastine Run1-DMSO  | NM_0209<br>73 | GBA3 | glucosidas<br>e, beta,<br>acid 3<br>(cytosolic) | 0.893123  | Inlier |

Identification of Survival Genes in Human Glioblastoma Cells Using siRNA Screening  
 Nikhil G Thaker, Fang Zhang, Peter R. McDonald, Tong Ying Shun, Michael D Lewen, Ian F. Pollack, and John S. Lazo  
 Molecular Pharmacology

|                              |               |      |                                                                        |           |        |
|------------------------------|---------------|------|------------------------------------------------------------------------|-----------|--------|
| siRNA Disorazole DMSO Run2   | NM_0209<br>73 | GBA3 | glucosidase, beta, acid 3 (cytosolic)                                  | 1.410659  | Inlier |
| siRNA-Temozolomide Run1-DMSO | NM_0142<br>91 | GCAT | glycine C-acetyltransferase (2-amino-3-ketobutyrate coenzyme A ligase) | -0.840469 | Inlier |
| siRNA-Temozolomide Run3-DMSO | NM_0142<br>91 | GCAT | glycine C-acetyltransferase (2-amino-3-ketobutyrate coenzyme A ligase) | -0.703212 | Inlier |
| siRNA Disorazole DMSO Run1   | NM_0142<br>91 | GCAT | glycine C-acetyltransferase (2-amino-3-ketobutyrate coenzyme A ligase) | -0.631175 | Inlier |
| siRNA-Temozolomide Run2-DMSO | NM_0142<br>91 | GCAT | glycine C-acetyltransferase (2-amino-3-ketobutyrate coenzyme A ligase) | -0.430475 | Inlier |
| siRNA Disorazole DMSO Run2   | NM_0142<br>91 | GCAT | glycine C-acetyltransferase (2-amino-3-ketobutyrate coenzyme A ligase) | 0.430475  | Inlier |

Identification of Survival Genes in Human Glioblastoma Cells Using siRNA Screening

Nikhil G Thaker, Fang Zhang, Peter R. McDonald, Tong Ying Shun, Michael D Lewen, Ian F. Pollack, and John S.

Lazo

Molecular Pharmacology

|                                  |               |      |                                                                                                  |           |        |
|----------------------------------|---------------|------|--------------------------------------------------------------------------------------------------|-----------|--------|
| siRNA Disorazole DMSO Run3       | NM_0142<br>91 | GCAT | glycine C-<br>acetyltrans<br>ferase (2-<br>amino-3-<br>ketobutyr<br>ate<br>coenzyme<br>A ligase) | 0.645788  | Inlier |
| siRNA-Vinblastine Run2-<br>DMSO  | NM_0142<br>91 | GCAT | glycine C-<br>acetyltrans<br>ferase (2-<br>amino-3-<br>ketobutyr<br>ate<br>coenzyme<br>A ligase) | 0.730271  | Inlier |
| siRNA-Vinblastine Run1-<br>DMSO  | NM_0142<br>91 | GCAT | glycine C-<br>acetyltrans<br>ferase (2-<br>amino-3-<br>ketobutyr<br>ate<br>coenzyme<br>A ligase) | 1.351842  | Inlier |
| siRNA-Temozolomide Run2-<br>DMSO | NM_0139<br>76 | GCDH | glutaryl-<br>Coenzyme<br>A<br>dehydroge<br>nase                                                  | -3.439355 | Inlier |
| siRNA-Temozolomide Run1-<br>DMSO | NM_0139<br>76 | GCDH | glutaryl-<br>Coenzyme<br>A<br>dehydroge<br>nase                                                  | -1.383237 | Inlier |
| siRNA-Temozolomide Run3-<br>DMSO | NM_0139<br>76 | GCDH | glutaryl-<br>Coenzyme<br>A<br>dehydroge<br>nase                                                  | -0.480765 | Inlier |
| siRNA Disorazole DMSO Run1       | NM_0139<br>76 | GCDH | glutaryl-<br>Coenzyme<br>A<br>dehydroge<br>nase                                                  | -0.142106 | Inlier |
| siRNA Disorazole DMSO Run3       | NM_0139<br>76 | GCDH | glutaryl-<br>Coenzyme<br>A<br>dehydroge<br>nase                                                  | 0.142108  | Inlier |



Identification of Survival Genes in Human Glioblastoma Cells Using siRNA Screening  
 Nikhil G Thaker, Fang Zhang, Peter R. McDonald, Tong Ying Shun, Michael D Lewen, Ian F. Pollack, and John S. Lazo

Molecular Pharmacology

|                              |               |      |                                                  |           |        |
|------------------------------|---------------|------|--------------------------------------------------|-----------|--------|
| siRNA-Vinblastine Run2-DMSO  | NM_0139<br>76 | GCDH | glutaryl-Coenzyme A dehydrogenase                | 0.491871  | Inlier |
| siRNA Disorazole DMSO Run2   | NM_0139<br>76 | GCDH | glutaryl-Coenzyme A dehydrogenase                | 0.857129  | Inlier |
| siRNA-Vinblastine Run1-DMSO  | NM_0139<br>76 | GCDH | glutaryl-Coenzyme A dehydrogenase                | 0.973866  | Inlier |
| siRNA-Temozolomide Run3-DMSO | NM_0001<br>60 | GCGR | glucagon receptor                                | -1.785625 | Inlier |
| siRNA-Temozolomide Run2-DMSO | NM_0001<br>60 | GCGR | glucagon receptor                                | -1.28475  | Inlier |
| siRNA-Temozolomide Run1-DMSO | NM_0001<br>60 | GCGR | glucagon receptor                                | -0.420531 | Inlier |
| siRNA Disorazole DMSO Run2   | NM_0001<br>60 | GCGR | glucagon receptor                                | -0.116727 | Inlier |
| siRNA Disorazole DMSO Run3   | NM_0001<br>60 | GCGR | glucagon receptor                                | 0.116726  | Inlier |
| siRNA Disorazole DMSO Run1   | NM_0001<br>60 | GCGR | glucagon receptor                                | 0.576334  | Inlier |
| siRNA-Vinblastine Run2-DMSO  | NM_0001<br>60 | GCGR | glucagon receptor                                | 0.772665  | Inlier |
| siRNA-Vinblastine Run1-DMSO  | NM_0001<br>60 | GCGR | glucagon receptor                                | 0.875094  | Inlier |
| siRNA-Temozolomide Run3-DMSO | NM_0001<br>61 | GCH1 | GTP cyclohydro lase 1 (dopa-responsive dystonia) | -1.351442 | Inlier |
| siRNA-Vinblastine Run2-DMSO  | NM_0001<br>61 | GCH1 | GTP cyclohydro lase 1 (dopa-responsive dystonia) | -0.858809 | Inlier |
| siRNA-Temozolomide Run2-DMSO | NM_0001<br>61 | GCH1 | GTP cyclohydro lase 1 (dopa-responsive dystonia) | -0.318489 | Inlier |

Identification of Survival Genes in Human Glioblastoma Cells Using siRNA Screening

Nikhil G Thaker, Fang Zhang, Peter R. McDonald, Tong Ying Shun, Michael D Lewen, Ian F. Pollack, and John S. Lazo

Molecular Pharmacology

|                                  |               |       |                                                                  |           |        |
|----------------------------------|---------------|-------|------------------------------------------------------------------|-----------|--------|
| siRNA Disorazole DMSO Run3       | NM_0001<br>61 | GCH1  | GTP<br>cyclohydro<br>lase 1<br>(dopa-<br>responsive<br>dystonia) | -0.096914 | Inlier |
| siRNA-Temozolomide Run1-<br>DMSO | NM_0001<br>61 | GCH1  | GTP<br>cyclohydro<br>lase 1<br>(dopa-<br>responsive<br>dystonia) | 0.096913  | Inlier |
| siRNA Disorazole DMSO Run1       | NM_0001<br>61 | GCH1  | GTP<br>cyclohydro<br>lase 1<br>(dopa-<br>responsive<br>dystonia) | 0.490191  | Inlier |
| siRNA-Vinblastine Run1-<br>DMSO  | NM_0001<br>61 | GCH1  | GTP<br>cyclohydro<br>lase 1<br>(dopa-<br>responsive<br>dystonia) | 0.884789  | Inlier |
| siRNA Disorazole DMSO Run2       | NM_0001<br>61 | GCH1  | GTP<br>cyclohydro<br>lase 1<br>(dopa-<br>responsive<br>dystonia) | 1.030409  | Inlier |
| siRNA-Temozolomide Run3-<br>DMSO | NM_0052<br>58 | GCHFR | GTP<br>cyclohydro<br>lase I<br>feedback<br>regulator             | -0.731226 | Inlier |
| siRNA-Temozolomide Run1-<br>DMSO | NM_0052<br>58 | GCHFR | GTP<br>cyclohydro<br>lase I<br>feedback<br>regulator             | -0.617774 | Inlier |
| siRNA-Vinblastine Run2-<br>DMSO  | NM_0052<br>58 | GCHFR | GTP<br>cyclohydro<br>lase I<br>feedback<br>regulator             | -0.529069 | Inlier |

Identification of Survival Genes in Human Glioblastoma Cells Using siRNA Screening

Nikhil G Thaker, Fang Zhang, Peter R. McDonald, Tong Ying Shun, Michael D Lewen, Ian F. Pollack, and John S. Lazo

Molecular Pharmacology

| siRNA                        | Gene  | Gene ID   | Gene Name                                                                                                      | Log Fold Change | Outlier Status |
|------------------------------|-------|-----------|----------------------------------------------------------------------------------------------------------------|-----------------|----------------|
| siRNA-Temozolomide Run2-DMSO | GCHFR | NM_005258 | GTP cyclohydro lase I feedback regulator                                                                       | -0.321138       | Inlier         |
| siRNA Disorazole DMSO Run3   | GCHFR | NM_005258 | GTP cyclohydro lase I feedback regulator                                                                       | 0.321138        | Inlier         |
| siRNA Disorazole DMSO Run1   | GCHFR | NM_005258 | GTP cyclohydro lase I feedback regulator                                                                       | 1.268124        | Inlier         |
| siRNA-Vinblastine Run1-DMSO  | GCHFR | NM_005258 | GTP cyclohydro lase I feedback regulator                                                                       | 2.240199        | Inlier         |
| siRNA Disorazole DMSO Run2   | GCHFR | NM_005258 | GTP cyclohydro lase I feedback regulator<br>glucokinase (hexokinase 4, maturity onset diabetes of the young 2) | 2.377079        | Inlier         |
| siRNA-Temozolomide Run3-DMSO | GCK   | NM_033508 | glucokinase (hexokinase 4, maturity onset diabetes of the young 2)                                             | -2.19489        | Inlier         |
| siRNA Disorazole DMSO Run2   | GCK   | NM_033508 | glucokinase (hexokinase 4, maturity onset diabetes of the young 2)                                             | -0.872926       | Inlier         |
| siRNA-Temozolomide Run1-DMSO | GCK   | NM_033508 | glucokinase (hexokinase 4, maturity onset diabetes of the young 2)                                             | -0.115765       | Inlier         |

Identification of Survival Genes in Human Glioblastoma Cells Using siRNA Screening  
 Nikhil G Thaker, Fang Zhang, Peter R. McDonald, Tong Ying Shun, Michael D Lewen, Ian F. Pollack, and John S. Lazo

Molecular Pharmacology

| siRNA Treatment              | Gene ID   | Gene Name | Log Fold Change | Outlier Status |
|------------------------------|-----------|-----------|-----------------|----------------|
| siRNA Disorazole DMSO Run1   | NM_033508 | GCK       | -0.018421       | Inlier         |
| siRNA-Temozolomide Run2-DMSO | NM_033508 | GCK       | 0.018421        | Inlier         |
| siRNA-Vinblastine Run1-DMSO  | NM_033508 | GCK       | 0.476074        | Inlier         |
| siRNA Disorazole DMSO Run3   | NM_033508 | GCK       | 1.060502        | Inlier         |
| siRNA-Vinblastine Run2-DMSO  | NM_033508 | GCK       | 1.455248        | Inlier         |
| siRNA-Temozolomide Run3-DMSO | NM_001486 | GCKR      | -0.826738       | Inlier         |

glucokinase  
 (hexokinase 4, maturity onset diabetes of the young 2)  
 glucokinase  
 (hexokinase 4, maturity onset diabetes of the young 2)  
 glucokinase  
 (hexokinase 4, maturity onset diabetes of the young 2)  
 glucokinase  
 (hexokinase 4, maturity onset diabetes of the young 2)  
 glucokinase  
 (hexokinase 4)  
 regulator

Identification of Survival Genes in Human Glioblastoma Cells Using siRNA Screening  
 Nikhil G Thaker, Fang Zhang, Peter R. McDonald, Tong Ying Shun, Michael D Lewen, Ian F. Pollack, and John S. Lazo

Molecular Pharmacology

|                              |               |      |                                                       |                  |
|------------------------------|---------------|------|-------------------------------------------------------|------------------|
|                              |               |      | glucokinase<br>(hexokinase 4)<br>regulator            |                  |
| siRNA-Temozolomide Run1-DMSO | NM_0014<br>86 | GCKR | glucokinase<br>(hexokinase 4)<br>regulator            | -0.738851 Inlier |
| siRNA Disorazole DMSO Run2   | NM_0014<br>86 | GCKR | glucokinase<br>(hexokinase 4)<br>regulator            | -0.506854 Inlier |
| siRNA-Temozolomide Run2-DMSO | NM_0014<br>86 | GCKR | glucokinase<br>(hexokinase 4)<br>regulator            | -0.34157 Inlier  |
| siRNA Disorazole DMSO Run1   | NM_0014<br>86 | GCKR | glucokinase<br>(hexokinase 4)<br>regulator            | 0.341571 Inlier  |
| siRNA-Vinblastine Run1-DMSO  | NM_0014<br>86 | GCKR | glucokinase<br>(hexokinase 4)<br>regulator            | 0.610149 Inlier  |
| siRNA-Vinblastine Run2-DMSO  | NM_0014<br>86 | GCKR | glucokinase<br>(hexokinase 4)<br>regulator            | 1.889168 Inlier  |
| siRNA Disorazole DMSO Run3   | NM_0014<br>86 | GCKR | glutamate-cysteine<br>ligase,<br>catalytic<br>subunit | 3.039832 Inlier  |
| siRNA-Temozolomide Run3-DMSO | NM_0014<br>98 | GCLC | glutamate-cysteine<br>ligase,<br>catalytic<br>subunit | -1.309559 Inlier |
| siRNA-Temozolomide Run2-DMSO | NM_0014<br>98 | GCLC | glutamate-cysteine<br>ligase,<br>catalytic<br>subunit | -0.925333 Inlier |
| siRNA Disorazole DMSO Run1   | NM_0014<br>98 | GCLC | glutamate-cysteine<br>ligase,<br>catalytic<br>subunit | -0.423667 Inlier |

Identification of Survival Genes in Human Glioblastoma Cells Using siRNA Screening  
 Nikhil G Thaker, Fang Zhang, Peter R. McDonald, Tong Ying Shun, Michael D Lewen, Ian F. Pollack, and John S. Lazo

Molecular Pharmacology

|                                  |               |      |                                                           |           |        |
|----------------------------------|---------------|------|-----------------------------------------------------------|-----------|--------|
| siRNA Disorazole DMSO Run3       | NM_0014<br>98 | GCLC | glutamate-<br>cysteine<br>ligase,<br>catalytic<br>subunit | -0.120675 | Inlier |
| siRNA-Vinblastine Run2-<br>DMSO  | NM_0014<br>98 | GCLC | glutamate-<br>cysteine<br>ligase,<br>catalytic<br>subunit | 0.120674  | Inlier |
| siRNA-Temozolomide Run1-<br>DMSO | NM_0014<br>98 | GCLC | glutamate-<br>cysteine<br>ligase,<br>catalytic<br>subunit | 0.254218  | Inlier |
| siRNA Disorazole DMSO Run2       | NM_0014<br>98 | GCLC | glutamate-<br>cysteine<br>ligase,<br>catalytic<br>subunit | 1.759699  | Inlier |
| siRNA-Vinblastine Run1-<br>DMSO  | NM_0014<br>98 | GCLC | glutamate-<br>cysteine<br>ligase,<br>catalytic<br>subunit | 2.301183  | Inlier |
| siRNA Disorazole DMSO Run3       | NM_0020<br>61 | GCLM | glutamate-<br>cysteine<br>ligase,<br>modifier<br>subunit  | -0.676658 | Inlier |
| siRNA-Vinblastine Run2-<br>DMSO  | NM_0020<br>61 | GCLM | glutamate-<br>cysteine<br>ligase,<br>modifier<br>subunit  | -0.672342 | Inlier |
| siRNA-Temozolomide Run1-<br>DMSO | NM_0020<br>61 | GCLM | glutamate-<br>cysteine<br>ligase,<br>modifier<br>subunit  | -0.608686 | Inlier |
| siRNA Disorazole DMSO Run1       | NM_0020<br>61 | GCLM | glutamate-<br>cysteine<br>ligase,<br>modifier<br>subunit  | -0.309329 | Inlier |
| siRNA-Temozolomide Run2-<br>DMSO | NM_0020<br>61 | GCLM | glutamate-<br>cysteine<br>ligase,<br>modifier<br>subunit  | 0.309328  | Inlier |

Identification of Survival Genes in Human Glioblastoma Cells Using siRNA Screening  
 Nikhil G Thaker, Fang Zhang, Peter R. McDonald, Tong Ying Shun, Michael D Lewen, Ian F. Pollack, and John S. Lazo

Molecular Pharmacology

|                              |               |        |                                                               |           |        |
|------------------------------|---------------|--------|---------------------------------------------------------------|-----------|--------|
| siRNA-Temozolomide Run3-DMSO | NM_0020<br>61 | GCLM   | glutamate-cysteine ligase, modifier subunit                   | 0.699375  | Inlier |
| siRNA-Vinblastine Run1-DMSO  | NM_0020<br>61 | GCLM   | glutamate-cysteine ligase, modifier subunit                   | 0.888414  | Inlier |
| siRNA Disorazole DMSO Run2   | NM_0020<br>61 | GCLM   | glutamate-cysteine ligase, modifier subunit                   | 1.109095  | Inlier |
| siRNA Disorazole DMSO Run1   | NM_0210<br>78 | GCN5L2 | GCN5 general control of amino-acid synthesis 5-like 2 (yeast) | -2.725679 | Inlier |
| siRNA-Temozolomide Run1-DMSO | NM_0210<br>78 | GCN5L2 | GCN5 general control of amino-acid synthesis 5-like 2 (yeast) | -0.57795  | Inlier |
| siRNA-Temozolomide Run2-DMSO | NM_0210<br>78 | GCN5L2 | GCN5 general control of amino-acid synthesis 5-like 2 (yeast) | -0.553432 | Inlier |
| siRNA-Vinblastine Run2-DMSO  | NM_0210<br>78 | GCN5L2 | GCN5 general control of amino-acid synthesis 5-like 2 (yeast) | -0.16006  | Inlier |

Identification of Survival Genes in Human Glioblastoma Cells Using siRNA Screening

Nikhil G Thaker, Fang Zhang, Peter R. McDonald, Tong Ying Shun, Michael D Lewen, Ian F. Pollack, and John S. Lazo

Molecular Pharmacology

| siRNA              | Drug | Run  | Gene   | Accession | Gene Description                                                                         | Score     | Category |
|--------------------|------|------|--------|-----------|------------------------------------------------------------------------------------------|-----------|----------|
| siRNA Disorazole   | DMSO | Run3 | GCN5L2 | NM_021078 | GCN5 general control of amino-acid synthesis 5-like 2 (yeast)                            | 0.16006   | Inlier   |
| siRNA-Temozolomide | DMSO | Run3 | GCN5L2 | NM_021078 | GCN5 general control of amino-acid synthesis 5-like 2 (yeast)                            | 0.77105   | Inlier   |
| siRNA Disorazole   | DMSO | Run2 | GCN5L2 | NM_021078 | GCN5 general control of amino-acid synthesis 5-like 2 (yeast)                            | 2.878626  | Inlier   |
| siRNA-Vinblastine  | DMSO | Run1 | GCN5L2 | NM_021078 | GCN5 general control of amino-acid synthesis 5-like 2 (yeast)                            | 4.197134  | Outlier  |
| siRNA-Temozolomide | DMSO | Run2 | GCNT1  | NM_001490 | glucosaminyl (N-acetyl) transferase 1, core 2 (beta-1,6-N-acetylglucosaminyltransferase) | -0.959592 | Inlier   |



Identification of Survival Genes in Human Glioblastoma Cells Using siRNA Screening

Nikhil G Thaker, Fang Zhang, Peter R. McDonald, Tong Ying Shun, Michael D Lewen, Ian F. Pollack, and John S. Lazo

Molecular Pharmacology

|                              |           |       |                                                                                          |           |        |
|------------------------------|-----------|-------|------------------------------------------------------------------------------------------|-----------|--------|
| siRNA-Temozolomide Run3-DMSO | NM_001490 | GCNT1 | glucosaminyl (N-acetyl) transferase 1, core 2 (beta-1,6-N-acetylglucosaminyltransferase) | -0.821281 | Inlier |
| siRNA-Temozolomide Run1-DMSO | NM_001490 | GCNT1 | glucosaminyl (N-acetyl) transferase 1, core 2 (beta-1,6-N-acetylglucosaminyltransferase) | -0.661515 | Inlier |
| siRNA Disorazole DMSO Run1   | NM_001490 | GCNT1 | glucosaminyl (N-acetyl) transferase 1, core 2 (beta-1,6-N-acetylglucosaminyltransferase) | -0.184662 | Inlier |
| siRNA-Vinblastine Run2-DMSO  | NM_001490 | GCNT1 | glucosaminyl (N-acetyl) transferase 1, core 2 (beta-1,6-N-acetylglucosaminyltransferase) | 0.184661  | Inlier |

Identification of Survival Genes in Human Glioblastoma Cells Using siRNA Screening  
 Nikhil G Thaker, Fang Zhang, Peter R. McDonald, Tong Ying Shun, Michael D Lewen, Ian F. Pollack, and John S. Lazo  
 Molecular Pharmacology

|                             |               |       |                                                                                          |           |        |
|-----------------------------|---------------|-------|------------------------------------------------------------------------------------------|-----------|--------|
| siRNA Disorazole DMSO Run3  | NM_0014<br>90 | GCNT1 | glucosaminyl (N-acetyl) transferase 1, core 2 (beta-1,6-N-acetylglucosaminyltransferase) | 0.405543  | Inlier |
| siRNA Disorazole DMSO Run2  | NM_0014<br>90 | GCNT1 | glucosaminyl (N-acetyl) transferase 1, core 2 (beta-1,6-N-acetylglucosaminyltransferase) | 0.687485  | Inlier |
| siRNA-Vinblastine Run1-DMSO | NM_0014<br>90 | GCNT1 | glucosaminyl (N-acetyl) transferase 1, core 2 (beta-1,6-N-acetylglucosaminyltransferase) | 1.32257   | Inlier |
| siRNA Disorazole DMSO Run3  | NM_0014<br>91 | GCNT2 | glucosaminyl (N-acetyl) transferase 2, I-branching enzyme                                | -0.858905 | Inlier |
| siRNA-Vinblastine Run2-DMSO | NM_0014<br>91 | GCNT2 | glucosaminyl (N-acetyl) transferase 2, I-branching enzyme                                | -0.544259 | Inlier |

Identification of Survival Genes in Human Glioblastoma Cells Using siRNA Screening  
 Nikhil G Thaker, Fang Zhang, Peter R. McDonald, Tong Ying Shun, Michael D Lewen, Ian F. Pollack, and John S. Lazo

Molecular Pharmacology

|                              |               |       |                                                           |           |         |
|------------------------------|---------------|-------|-----------------------------------------------------------|-----------|---------|
| siRNA Disorazole DMSO Run1   | NM_0014<br>91 | GCNT2 | glucosaminyl (N-acetyl) transferase 2, I-branching enzyme | -0.519211 | Inlier  |
| siRNA-Temozolomide Run1-DMSO | NM_0014<br>91 | GCNT2 | glucosaminyl (N-acetyl) transferase 2, I-branching enzyme | -0.331353 | Inlier  |
| siRNA-Temozolomide Run3-DMSO | NM_0014<br>91 | GCNT2 | glucosaminyl (N-acetyl) transferase 2, I-branching enzyme | 0.331353  | Inlier  |
| siRNA-Temozolomide Run2-DMSO | NM_0014<br>91 | GCNT2 | glucosaminyl (N-acetyl) transferase 2, I-branching enzyme | 0.804741  | Inlier  |
| siRNA-Vinblastine Run1-DMSO  | NM_0014<br>91 | GCNT2 | glucosaminyl (N-acetyl) transferase 2, I-branching enzyme | 4.399483  | Outlier |
| siRNA Disorazole DMSO Run2   | NM_0014<br>91 | GCNT2 | glucosaminyl (N-acetyl) transferase 2, I-branching enzyme | 5.089423  | Outlier |
| siRNA-Temozolomide Run3-DMSO | NM_0047<br>51 | GCNT3 | glucosaminyl (N-acetyl) transferase 3, mucin type         | -1.201783 | Inlier  |

Identification of Survival Genes in Human Glioblastoma Cells Using siRNA Screening  
 Nikhil G Thaker, Fang Zhang, Peter R. McDonald, Tong Ying Shun, Michael D Lewen, Ian F. Pollack, and John S. Lazo  
 Molecular Pharmacology

|                              |               |       |                                                   |           |         |
|------------------------------|---------------|-------|---------------------------------------------------|-----------|---------|
| siRNA Disorazole DMSO Run3   | NM_0047<br>51 | GCNT3 | glucosaminyl (N-acetyl) transferase 3, mucin type | -0.689039 | Inlier  |
| siRNA-Temozolomide Run2-DMSO | NM_0047<br>51 | GCNT3 | glucosaminyl (N-acetyl) transferase 3, mucin type | -0.659961 | Inlier  |
| siRNA-Vinblastine Run2-DMSO  | NM_0047<br>51 | GCNT3 | glucosaminyl (N-acetyl) transferase 3, mucin type | -0.115714 | Inlier  |
| siRNA-Temozolomide Run1-DMSO | NM_0047<br>51 | GCNT3 | glucosaminyl (N-acetyl) transferase 3, mucin type | 0.115714  | Inlier  |
| siRNA Disorazole DMSO Run1   | NM_0047<br>51 | GCNT3 | glucosaminyl (N-acetyl) transferase 3, mucin type | 0.157268  | Inlier  |
| siRNA Disorazole DMSO Run2   | NM_0047<br>51 | GCNT3 | glucosaminyl (N-acetyl) transferase 3, mucin type | 4.27228   | Outlier |
| siRNA-Vinblastine Run1-DMSO  | NM_0047<br>51 | GCNT3 | glucosaminyl (N-acetyl) transferase 3, mucin type | 4.700145  | Outlier |
| siRNA-Vinblastine Run2-DMSO  | NM_0063<br>02 | GCS1  | GCS1                                              | -0.680526 | Inlier  |

Identification of Survival Genes in Human Glioblastoma Cells Using siRNA Screening

Nikhil G Thaker, Fang Zhang, Peter R. McDonald, Tong Ying Shun, Michael D Lewen, Ian F. Pollack, and John S.

Lazo

|                              |           |       |                                                          |           |         |
|------------------------------|-----------|-------|----------------------------------------------------------|-----------|---------|
| siRNA-Temozolomide Run2-DMSO | NM_006302 | GCS1  | GCS1                                                     | -0.668474 | Inlier  |
| siRNA-Temozolomide Run3-DMSO | NM_006302 | GCS1  | GCS1                                                     | -0.56835  | Inlier  |
| siRNA Disorazole DMSO Run3   | NM_006302 | GCS1  | GCS1                                                     | -0.077768 | Inlier  |
| siRNA Disorazole DMSO Run1   | NM_006302 | GCS1  | GCS1                                                     | 0.077768  | Inlier  |
| siRNA-Temozolomide Run1-DMSO | NM_006302 | GCS1  | GCS1                                                     | 1.681122  | Inlier  |
| siRNA Disorazole DMSO Run2   | NM_006302 | GCS1  | GCS1                                                     | 3.535314  | Outlier |
| siRNA-Vinblastine Run1-DMSO  | NM_006302 | GCS1  | GCS1                                                     | 4.219269  | Outlier |
| siRNA-Temozolomide Run2-DMSO | NM_004293 | GDA   | guanine deaminase                                        | -3.290163 | Inlier  |
| siRNA-Temozolomide Run1-DMSO | NM_004293 | GDA   | guanine deaminase                                        | -3.117082 | Inlier  |
| siRNA-Vinblastine Run2-DMSO  | NM_004293 | GDA   | guanine deaminase                                        | -2.043349 | Inlier  |
| siRNA Disorazole DMSO Run3   | NM_004293 | GDA   | guanine deaminase                                        | -0.038341 | Inlier  |
| siRNA Disorazole DMSO Run1   | NM_004293 | GDA   | guanine deaminase                                        | 0.038343  | Inlier  |
| siRNA-Temozolomide Run3-DMSO | NM_004293 | GDA   | guanine deaminase                                        | 0.093842  | Inlier  |
| siRNA-Vinblastine Run1-DMSO  | NM_004293 | GDA   | guanine deaminase                                        | 0.274756  | Inlier  |
| siRNA Disorazole DMSO Run2   | NM_004293 | GDA   | guanine deaminase                                        | 1.074244  | Inlier  |
| siRNA Disorazole DMSO Run3   | NM_017686 | GDAP2 | ganglioside induced differentiation associated protein 2 | -0.816451 | Inlier  |
| siRNA-Temozolomide Run3-DMSO | NM_017686 | GDAP2 | ganglioside induced differentiation associated protein 2 | -0.743451 | Inlier  |

Identification of Survival Genes in Human Glioblastoma Cells Using siRNA Screening  
 Nikhil G Thaker, Fang Zhang, Peter R. McDonald, Tong Ying Shun, Michael D Lewen, Ian F. Pollack, and John S. Lazo  
 Molecular Pharmacology

|                              |           |       |                                                          |           |        |
|------------------------------|-----------|-------|----------------------------------------------------------|-----------|--------|
| siRNA-Vinblastine Run2-DMSO  | NM_017686 | GDAP2 | ganglioside induced differentiation associated protein 2 | -0.605549 | Inlier |
| siRNA-Temozolomide Run2-DMSO | NM_017686 | GDAP2 | ganglioside induced differentiation associated protein 2 | -0.183882 | Inlier |
| siRNA Disorazole DMSO Run1   | NM_017686 | GDAP2 | ganglioside induced differentiation associated protein 2 | 0.183882  | Inlier |
| siRNA-Temozolomide Run1-DMSO | NM_017686 | GDAP2 | ganglioside induced differentiation associated protein 2 | 0.585168  | Inlier |
| siRNA-Vinblastine Run1-DMSO  | NM_017686 | GDAP2 | ganglioside induced differentiation associated protein 2 | 1.506629  | Inlier |
| siRNA Disorazole DMSO Run2   | NM_017686 | GDAP2 | ganglioside induced differentiation associated protein 2 | 1.608663  | Inlier |
| siRNA-Temozolomide Run3-DMSO | NM_001493 | GDI1  | GDP dissociation inhibitor 1                             | -1.245825 | Inlier |
| siRNA Disorazole DMSO Run1   | NM_001493 | GDI1  | GDP dissociation inhibitor 1                             | -0.766396 | Inlier |

Identification of Survival Genes in Human Glioblastoma Cells Using siRNA Screening  
 Nikhil G Thaker, Fang Zhang, Peter R. McDonald, Tong Ying Shun, Michael D Lewen, Ian F. Pollack, and John S. Lazo

Molecular Pharmacology

|                              |               |      |                                       |           |        |
|------------------------------|---------------|------|---------------------------------------|-----------|--------|
| siRNA-Temozolomide Run2-DMSO | NM_0014<br>93 | GDI1 | GDP<br>dissociation<br>inhibitor<br>1 | -0.575366 | Inlier |
| siRNA-Vinblastine Run2-DMSO  | NM_0014<br>93 | GDI1 | GDP<br>dissociation<br>inhibitor<br>1 | -0.454017 | Inlier |
| siRNA Disorazole DMSO Run3   | NM_0014<br>93 | GDI1 | GDP<br>dissociation<br>inhibitor<br>1 | 0.454017  | Inlier |
| siRNA-Temozolomide Run1-DMSO | NM_0014<br>93 | GDI1 | GDP<br>dissociation<br>inhibitor<br>1 | 0.582604  | Inlier |
| siRNA-Vinblastine Run1-DMSO  | NM_0014<br>93 | GDI1 | GDP<br>dissociation<br>inhibitor<br>1 | 1.278021  | Inlier |
| siRNA Disorazole DMSO Run2   | NM_0014<br>93 | GDI1 | GDP<br>dissociation<br>inhibitor<br>1 | 1.975721  | Inlier |
| siRNA-Temozolomide Run3-DMSO | NM_0014<br>94 | GDI2 | GDP<br>dissociation<br>inhibitor<br>2 | -1.92362  | Inlier |
| siRNA-Vinblastine Run2-DMSO  | NM_0014<br>94 | GDI2 | GDP<br>dissociation<br>inhibitor<br>2 | -0.640811 | Inlier |
| siRNA Disorazole DMSO Run1   | NM_0014<br>94 | GDI2 | GDP<br>dissociation<br>inhibitor<br>2 | -0.260482 | Inlier |
| siRNA Disorazole DMSO Run3   | NM_0014<br>94 | GDI2 | GDP<br>dissociation<br>inhibitor<br>2 | -0.022629 | Inlier |
| siRNA-Temozolomide Run2-DMSO | NM_0014<br>94 | GDI2 | GDP<br>dissociation<br>inhibitor<br>2 | 0.022629  | Inlier |
| siRNA-Temozolomide Run1-DMSO | NM_0014<br>94 | GDI2 | GDP<br>dissociation<br>inhibitor<br>2 | 0.708189  | Inlier |
| siRNA-Vinblastine Run1-DMSO  | NM_0014<br>94 | GDI2 | GDP<br>dissociation<br>inhibitor<br>2 | 1.602776  | Inlier |

Identification of Survival Genes in Human Glioblastoma Cells Using siRNA Screening

Nikhil G Thaker, Fang Zhang, Peter R. McDonald, Tong Ying Shun, Michael D Lewen, Ian F. Pollack, and John S. Lazo

Molecular Pharmacology

| siRNA              | Condition | Run  | Gene      | Protein | Score     | Outlier |
|--------------------|-----------|------|-----------|---------|-----------|---------|
| siRNA Disorazole   | DMSO      | Run2 | NM_001494 | GDI2    | 2.549589  | Inlier  |
| siRNA-Temozolomide | Run3-DMSO | Run3 | NM_017711 | GDPD2   | -0.888025 | Inlier  |
| siRNA-Temozolomide | Run1-DMSO | Run1 | NM_017711 | GDPD2   | -0.587049 | Inlier  |
| siRNA Disorazole   | DMSO      | Run1 | NM_017711 | GDPD2   | -0.374093 | Inlier  |
| siRNA-Temozolomide | Run2-DMSO | Run2 | NM_017711 | GDPD2   | -0.064815 | Inlier  |
| siRNA-Vinblastine  | Run1-DMSO | Run1 | NM_017711 | GDPD2   | 0.064815  | Inlier  |
| siRNA-Vinblastine  | Run2-DMSO | Run2 | NM_017711 | GDPD2   | 0.761951  | Inlier  |

GDP dissociation inhibitor

glycerophosphodiesterase domain containing



Identification of Survival Genes in Human Glioblastoma Cells Using siRNA Screening  
 Nikhil G Thaker, Fang Zhang, Peter R. McDonald, Tong Ying Shun, Michael D Lewen, Ian F. Pollack, and John S. Lazo

Molecular Pharmacology

|                              |               |       |                                                      |           |        |
|------------------------------|---------------|-------|------------------------------------------------------|-----------|--------|
| siRNA Disorazole DMSO Run3   | NM_0177<br>11 | GDPD2 | glycerophosphodiesterase domain containing 2         | 0.829675  | Inlier |
| siRNA Disorazole DMSO Run2   | NM_0177<br>11 | GDPD2 | glycerophosphodiesterase domain containing 2         | 1.059809  | Inlier |
| siRNA-Temozolomide Run3-DMSO | NM_1817<br>02 | GEM   | GTP binding protein overexpressed in skeletal muscle | -1.255744 | Inlier |
| siRNA-Temozolomide Run2-DMSO | NM_1817<br>02 | GEM   | GTP binding protein overexpressed in skeletal muscle | -0.675407 | Inlier |
| siRNA-Temozolomide Run1-DMSO | NM_1817<br>02 | GEM   | GTP binding protein overexpressed in skeletal muscle | -0.405271 | Inlier |
| siRNA Disorazole DMSO Run3   | NM_1817<br>02 | GEM   | GTP binding protein overexpressed in skeletal muscle | -0.009545 | Inlier |
| siRNA-Vinblastine Run2-DMSO  | NM_1817<br>02 | GEM   | GTP binding protein overexpressed in skeletal muscle | 0.009545  | Inlier |

Identification of Survival Genes in Human Glioblastoma Cells Using siRNA Screening  
 Nikhil G Thaker, Fang Zhang, Peter R. McDonald, Tong Ying Shun, Michael D Lewen, Ian F. Pollack, and John S. Lazo

Molecular Pharmacology

|                              |               |       |                                                      |           |        |
|------------------------------|---------------|-------|------------------------------------------------------|-----------|--------|
| siRNA Disorazole DMSO Run1   | NM_1817<br>02 | GEM   | GTP binding protein overexpressed in skeletal muscle | 0.673593  | Inlier |
| siRNA Disorazole DMSO Run2   | NM_1817<br>02 | GEM   | GTP binding protein overexpressed in skeletal muscle | 1.63116   | Inlier |
| siRNA-Vinblastine Run1-DMSO  | NM_1817<br>02 | GEM   | GTP binding protein overexpressed in skeletal muscle | 1.643097  | Inlier |
| siRNA-Temozolomide Run1-DMSO | NM_0189<br>88 | GFOD1 | glucose-fructose oxidoreductase domain containing 1  | -0.889697 | Inlier |
| siRNA-Temozolomide Run3-DMSO | NM_0189<br>88 | GFOD1 | glucose-fructose oxidoreductase domain containing 1  | -0.459303 | Inlier |
| siRNA-Temozolomide Run2-DMSO | NM_0189<br>88 | GFOD1 | glucose-fructose oxidoreductase domain containing 1  | -0.451364 | Inlier |
| siRNA Disorazole DMSO Run3   | NM_0189<br>88 | GFOD1 | glucose-fructose oxidoreductase domain containing 1  | -0.236101 | Inlier |

Identification of Survival Genes in Human Glioblastoma Cells Using siRNA Screening

Nikhil G Thaker, Fang Zhang, Peter R. McDonald, Tong Ying Shun, Michael D Lewen, Ian F. Pollack, and John S. Lazo

Molecular Pharmacology

|                              |               |       |                                                     |           |        |
|------------------------------|---------------|-------|-----------------------------------------------------|-----------|--------|
| siRNA Disorazole DMSO Run1   | NM_0189<br>88 | GFOD1 | glucose-fructose oxidoreductase domain containing 1 | 0.2361    | Inlier |
| siRNA-Vinblastine Run1-DMSO  | NM_0189<br>88 | GFOD1 | glucose-fructose oxidoreductase domain containing 1 | 1.186173  | Inlier |
| siRNA-Vinblastine Run2-DMSO  | NM_0189<br>88 | GFOD1 | glucose-fructose oxidoreductase domain containing 1 | 1.212163  | Inlier |
| siRNA Disorazole DMSO Run2   | NM_0189<br>88 | GFOD1 | glucose-fructose oxidoreductase domain containing 1 | 1.753341  | Inlier |
| siRNA-Vinblastine Run2-DMSO  | NM_0020<br>56 | GFPT1 | glutamine-fructose-6-phosphate transaminase 1       | -0.720015 | Inlier |
| siRNA-Temozolomide Run2-DMSO | NM_0020<br>56 | GFPT1 | glutamine-fructose-6-phosphate transaminase 1       | -0.628985 | Inlier |
| siRNA Disorazole DMSO Run1   | NM_0020<br>56 | GFPT1 | glutamine-fructose-6-phosphate transaminase 1       | -0.480413 | Inlier |
| siRNA Disorazole DMSO Run3   | NM_0020<br>56 | GFPT1 | glutamine-fructose-6-phosphate transaminase 1       | -0.446515 | Inlier |

Identification of Survival Genes in Human Glioblastoma Cells Using siRNA Screening  
 Nikhil G Thaker, Fang Zhang, Peter R. McDonald, Tong Ying Shun, Michael D Lewen, Ian F. Pollack, and John S. Lazo  
 Molecular Pharmacology

|                              |           |       |                                               |           |        |
|------------------------------|-----------|-------|-----------------------------------------------|-----------|--------|
| siRNA-Temozolomide Run3-DMSO | NM_002056 | GFPT1 | glutamine-fructose-6-phosphate transaminase 1 | 0.446515  | Inlier |
| siRNA-Temozolomide Run1-DMSO | NM_002056 | GFPT1 | glutamine-fructose-6-phosphate transaminase 1 | 0.725205  | Inlier |
| siRNA Disorazole DMSO Run2   | NM_002056 | GFPT1 | glutamine-fructose-6-phosphate transaminase 1 | 1.141946  | Inlier |
| siRNA-Vinblastine Run1-DMSO  | NM_002056 | GFPT1 | glutamine-fructose-6-phosphate transaminase 1 | 2.845189  | Inlier |
| siRNA Disorazole DMSO Run1   | NM_005110 | GFPT2 | glutamine-fructose-6-phosphate transaminase 2 | -1.68769  | Inlier |
| siRNA-Temozolomide Run1-DMSO | NM_005110 | GFPT2 | glutamine-fructose-6-phosphate transaminase 2 | -0.857543 | Inlier |
| siRNA Disorazole DMSO Run3   | NM_005110 | GFPT2 | glutamine-fructose-6-phosphate transaminase 2 | -0.491457 | Inlier |
| siRNA Disorazole DMSO Run2   | NM_005110 | GFPT2 | glutamine-fructose-6-phosphate transaminase 2 | -0.413944 | Inlier |

Identification of Survival Genes in Human Glioblastoma Cells Using siRNA Screening  
 Nikhil G Thaker, Fang Zhang, Peter R. McDonald, Tong Ying Shun, Michael D Lewen, Ian F. Pollack, and John S. Lazo  
 Molecular Pharmacology

|                              |               |       |                                               |                  |
|------------------------------|---------------|-------|-----------------------------------------------|------------------|
| siRNA-Temozolomide Run2-DMSO | NM_0051<br>10 | GFPT2 | glutamine-fructose-6-phosphate transaminase 2 | 0.413943 Inlier  |
| siRNA-Temozolomide Run3-DMSO | NM_0051<br>10 | GFPT2 | glutamine-fructose-6-phosphate transaminase 2 | 0.422941 Inlier  |
| siRNA-Vinblastine Run2-DMSO  | NM_0051<br>10 | GFPT2 | glutamine-fructose-6-phosphate transaminase 2 | 1.017555 Inlier  |
| siRNA-Vinblastine Run1-DMSO  | NM_0051<br>10 | GFPT2 | glutamine-fructose-6-phosphate transaminase 2 | 3.839047 Outlier |
| siRNA-Temozolomide Run3-DMSO | NM_1457<br>93 | GFRA1 | GDNF family receptor alpha 1                  | -1.408845 Inlier |
| siRNA-Temozolomide Run2-DMSO | NM_1457<br>93 | GFRA1 | GDNF family receptor alpha 1                  | -0.844017 Inlier |
| siRNA-Vinblastine Run2-DMSO  | NM_1457<br>93 | GFRA1 | GDNF family receptor alpha 1                  | -0.504983 Inlier |
| siRNA-Temozolomide Run1-DMSO | NM_1457<br>93 | GFRA1 | GDNF family receptor alpha 1                  | -0.140602 Inlier |
| siRNA Disorazole DMSO Run1   | NM_1457<br>93 | GFRA1 | GDNF family receptor alpha 1                  | 0.140601 Inlier  |
| siRNA Disorazole DMSO Run3   | NM_1457<br>93 | GFRA1 | GDNF family receptor alpha 1                  | 0.409993 Inlier  |
| siRNA-Vinblastine Run1-DMSO  | NM_1457<br>93 | GFRA1 | GDNF family receptor alpha 1                  | 2.532399 Inlier  |

Identification of Survival Genes in Human Glioblastoma Cells Using siRNA Screening  
 Nikhil G Thaker, Fang Zhang, Peter R. McDonald, Tong Ying Shun, Michael D Lewen, Ian F. Pollack, and John S. Lazo

Molecular Pharmacology

| siRNA                        | Gene    | Accession | Target | Family                | Value     | Outlier |
|------------------------------|---------|-----------|--------|-----------------------|-----------|---------|
| siRNA Disorazole DMSO Run2   | NM_1457 | 93        | GFRA1  | GDNF receptor alpha 1 | 3.442716  | Inlier  |
| siRNA-Vinblastine Run2-DMSO  | NM_0014 | 95        | GFRA2  | GDNF receptor alpha 2 | -0.903967 | Inlier  |
| siRNA-Temozolomide Run1-DMSO | NM_0014 | 95        | GFRA2  | GDNF receptor alpha 2 | -0.445033 | Inlier  |
| siRNA Disorazole DMSO Run1   | NM_0014 | 95        | GFRA2  | GDNF receptor alpha 2 | -0.194007 | Inlier  |
| siRNA-Temozolomide Run2-DMSO | NM_0014 | 95        | GFRA2  | GDNF receptor alpha 2 | -0.017421 | Inlier  |
| siRNA-Temozolomide Run3-DMSO | NM_0014 | 95        | GFRA2  | GDNF receptor alpha 2 | 0.01742   | Inlier  |
| siRNA Disorazole DMSO Run3   | NM_0014 | 95        | GFRA2  | GDNF receptor alpha 2 | 2.050004  | Inlier  |
| siRNA-Vinblastine Run1-DMSO  | NM_0014 | 95        | GFRA2  | GDNF receptor alpha 2 | 2.199774  | Inlier  |
| siRNA Disorazole DMSO Run2   | NM_0014 | 95        | GFRA2  | GDNF receptor alpha 2 | 2.489216  | Inlier  |
| siRNA-Vinblastine Run2-DMSO  | NM_0014 | 96        | GFRA3  | GDNF receptor alpha 3 | -1.288851 | Inlier  |
| siRNA Disorazole DMSO Run3   | NM_0014 | 96        | GFRA3  | GDNF receptor alpha 3 | -0.705364 | Inlier  |
| siRNA-Temozolomide Run2-DMSO | NM_0014 | 96        | GFRA3  | GDNF receptor alpha 3 | -0.643636 | Inlier  |
| siRNA Disorazole DMSO Run1   | NM_0014 | 96        | GFRA3  | GDNF receptor alpha 3 | -0.358366 | Inlier  |

Identification of Survival Genes in Human Glioblastoma Cells Using siRNA Screening  
 Nikhil G Thaker, Fang Zhang, Peter R. McDonald, Tong Ying Shun, Michael D Lewen, Ian F. Pollack, and John S. Lazo

Molecular Pharmacology

| siRNA Treatment              | Gene ID   | Gene Name | Family                       | Value     | Outlier Status |
|------------------------------|-----------|-----------|------------------------------|-----------|----------------|
| siRNA-Temozolomide Run3-DMSO | NM_001496 | GFRA3     | GDNF family receptor alpha 3 | 0.358365  | Inlier         |
| siRNA-Temozolomide Run1-DMSO | NM_001496 | GFRA3     | GDNF family receptor alpha 3 | 0.452427  | Inlier         |
| siRNA Disorazole DMSO Run2   | NM_001496 | GFRA3     | GDNF family receptor alpha 3 | 1.375217  | Inlier         |
| siRNA-Vinblastine Run1-DMSO  | NM_001496 | GFRA3     | GDNF family receptor alpha 3 | 3.010569  | Inlier         |
| siRNA-Temozolomide Run3-DMSO | NM_145763 | GFRA4     | GDNF family receptor alpha 4 | -2.302713 | Inlier         |
| siRNA-Temozolomide Run2-DMSO | NM_145763 | GFRA4     | GDNF family receptor alpha 4 | -0.92202  | Inlier         |
| siRNA Disorazole DMSO Run1   | NM_145763 | GFRA4     | GDNF family receptor alpha 4 | -0.379037 | Inlier         |
| siRNA Disorazole DMSO Run3   | NM_145763 | GFRA4     | GDNF family receptor alpha 4 | -0.212666 | Inlier         |
| siRNA-Temozolomide Run1-DMSO | NM_145763 | GFRA4     | GDNF family receptor alpha 4 | 0.212667  | Inlier         |
| siRNA-Vinblastine Run2-DMSO  | NM_145763 | GFRA4     | GDNF family receptor alpha 4 | 0.42698   | Inlier         |
| siRNA-Vinblastine Run1-DMSO  | NM_145763 | GFRA4     | GDNF family receptor alpha 4 | 2.994414  | Inlier         |
| siRNA Disorazole DMSO Run2   | NM_145763 | GFRA4     | GDNF family receptor alpha 4 | 4.041918  | Outlier        |
| siRNA-Temozolomide Run3-DMSO | NM_000821 | GGCX      | gamma-glutamyl carboxylase   | -0.909791 | Inlier         |

Identification of Survival Genes in Human Glioblastoma Cells Using siRNA Screening  
 Nikhil G Thaker, Fang Zhang, Peter R. McDonald, Tong Ying Shun, Michael D Lewen, Ian F. Pollack, and John S. Lazo

Molecular Pharmacology

|                              |               |      |                                                                       |           |         |
|------------------------------|---------------|------|-----------------------------------------------------------------------|-----------|---------|
| siRNA-Temozolomide Run1-DMSO | NM_0008<br>21 | GGCX | gamma-glutamyl carboxylase                                            | -0.43921  | Inlier  |
| siRNA-Vinblastine Run2-DMSO  | NM_0008<br>21 | GGCX | gamma-glutamyl carboxylase                                            | -0.252181 | Inlier  |
| siRNA Disorazole DMSO Run3   | NM_0008<br>21 | GGCX | gamma-glutamyl carboxylase                                            | -0.112442 | Inlier  |
| siRNA Disorazole DMSO Run1   | NM_0008<br>21 | GGCX | gamma-glutamyl carboxylase                                            | 0.112442  | Inlier  |
| siRNA-Temozolomide Run2-DMSO | NM_0008<br>21 | GGCX | gamma-glutamyl carboxylase                                            | 1.155324  | Inlier  |
| siRNA-Vinblastine Run1-DMSO  | NM_0008<br>21 | GGCX | gamma-glutamyl carboxylase                                            | 3.779191  | Outlier |
| siRNA Disorazole DMSO Run2   | NM_0008<br>21 | GGCX | gamma-glutamyl carboxylase                                            | 5.384613  | Outlier |
| siRNA Disorazole DMSO Run1   | NM_0038<br>78 | GGH  | gamma-glutamyl hydrolase (conjugase, foylpolygammaglutamyl hydrolase) | -0.985823 | Inlier  |
| siRNA-Temozolomide Run3-DMSO | NM_0038<br>78 | GGH  | gamma-glutamyl hydrolase (conjugase, foylpolygammaglutamyl hydrolase) | -0.736657 | Inlier  |



Identification of Survival Genes in Human Glioblastoma Cells Using siRNA Screening

Nikhil G Thaker, Fang Zhang, Peter R. McDonald, Tong Ying Shun, Michael D Lewen, Ian F. Pollack, and John S. Lazo

Molecular Pharmacology

|                              |               |     |                                                                       |           |        |
|------------------------------|---------------|-----|-----------------------------------------------------------------------|-----------|--------|
| siRNA Disorazole DMSO Run3   | NM_0038<br>78 | GGH | gamma-glutamyl hydrolase (conjugase, foylpolygammaglutamyl hydrolase) | -0.356483 | Inlier |
| siRNA-Temozolomide Run1-DMSO | NM_0038<br>78 | GGH | gamma-glutamyl hydrolase (conjugase, foylpolygammaglutamyl hydrolase) | -0.337454 | Inlier |
| siRNA-Temozolomide Run2-DMSO | NM_0038<br>78 | GGH | gamma-glutamyl hydrolase (conjugase, foylpolygammaglutamyl hydrolase) | 0.337454  | Inlier |
| siRNA-Vinblastine Run2-DMSO  | NM_0038<br>78 | GGH | gamma-glutamyl hydrolase (conjugase, foylpolygammaglutamyl hydrolase) | 0.612343  | Inlier |
| siRNA-Vinblastine Run1-DMSO  | NM_0038<br>78 | GGH | gamma-glutamyl hydrolase (conjugase, foylpolygammaglutamyl hydrolase) | 0.862287  | Inlier |

Identification of Survival Genes in Human Glioblastoma Cells Using siRNA Screening  
 Nikhil G Thaker, Fang Zhang, Peter R. McDonald, Tong Ying Shun, Michael D Lewen, Ian F. Pollack, and John S. Lazo  
 Molecular Pharmacology

|                              |               |       |                                                                    |           |        |
|------------------------------|---------------|-------|--------------------------------------------------------------------|-----------|--------|
| siRNA Disorazole DMSO Run2   | NM_0038<br>78 | GGH   | gamma-glutamyl hydrolase (conjugase, foylpolymaglutamyl hydrolase) | 1.414231  | Inlier |
| siRNA-Temozolomide Run1-DMSO | NM_0048<br>37 | GGPS1 | geranylgeranyl diphosphate synthase 1                              | -1.709684 | Inlier |
| siRNA-Temozolomide Run2-DMSO | NM_0048<br>37 | GGPS1 | geranylgeranyl diphosphate synthase 1                              | -1.263046 | Inlier |
| siRNA Disorazole DMSO Run1   | NM_0048<br>37 | GGPS1 | geranylgeranyl diphosphate synthase 1                              | -0.343767 | Inlier |
| siRNA-Temozolomide Run3-DMSO | NM_0048<br>37 | GGPS1 | geranylgeranyl diphosphate synthase 1                              | -0.249185 | Inlier |
| siRNA Disorazole DMSO Run3   | NM_0048<br>37 | GGPS1 | geranylgeranyl diphosphate synthase 1                              | 0.249186  | Inlier |
| siRNA Disorazole DMSO Run2   | NM_0048<br>37 | GGPS1 | geranylgeranyl diphosphate synthase 1                              | 0.432252  | Inlier |
| siRNA-Vinblastine Run2-DMSO  | NM_0048<br>37 | GGPS1 | geranylgeranyl diphosphate synthase 1                              | 0.916748  | Inlier |

Identification of Survival Genes in Human Glioblastoma Cells Using siRNA Screening  
 Nikhil G Thaker, Fang Zhang, Peter R. McDonald, Tong Ying Shun, Michael D Lewen, Ian F. Pollack, and John S. Lazo  
 Molecular Pharmacology

|                              |           |       |                                       |           |        |
|------------------------------|-----------|-------|---------------------------------------|-----------|--------|
| siRNA-Vinblastine Run1-DMSO  | NM_004837 | GGPS1 | geranylgeranyl diphosphate synthase 1 | 2.129918  | Inlier |
| siRNA-Temozolomide Run2-DMSO | NM_013430 | GGT1  | gamma-glutamyltransferase 1           | -0.895193 | Inlier |
| siRNA-Temozolomide Run3-DMSO | NM_013430 | GGT1  | gamma-glutamyltransferase 1           | -0.579846 | Inlier |
| siRNA Disorazole DMSO Run1   | NM_013430 | GGT1  | gamma-glutamyltransferase 1           | -0.458396 | Inlier |
| siRNA-Temozolomide Run1-DMSO | NM_013430 | GGT1  | gamma-glutamyltransferase 1           | -0.123607 | Inlier |
| siRNA-Vinblastine Run2-DMSO  | NM_013430 | GGT1  | gamma-glutamyltransferase 1           | 0.123607  | Inlier |
| siRNA-Vinblastine Run1-DMSO  | NM_013430 | GGT1  | gamma-glutamyltransferase 1           | 0.769154  | Inlier |
| siRNA Disorazole DMSO Run2   | NM_013430 | GGT1  | gamma-glutamyltransferase 1           | 1.311186  | Inlier |
| siRNA Disorazole DMSO Run3   | NM_013430 | GGT1  | gamma-glutamyltransferase 1           | 1.33454   | Inlier |
| siRNA Disorazole DMSO Run1   | XM_371427 | GGT2  | gamma-glutamyltransferase 2           | -1.912539 | Inlier |
| siRNA-Temozolomide Run1-DMSO | XM_371427 | GGT2  | gamma-glutamyltransferase 2           | -1.393428 | Inlier |
| siRNA-Temozolomide Run2-DMSO | XM_371427 | GGT2  | gamma-glutamyltransferase 2           | -1.310614 | Inlier |

Identification of Survival Genes in Human Glioblastoma Cells Using siRNA Screening  
 Nikhil G Thaker, Fang Zhang, Peter R. McDonald, Tong Ying Shun, Michael D Lewen, Ian F. Pollack, and John S. Lazo  
 Molecular Pharmacology

|                              |               |       |                                  |           |        |
|------------------------------|---------------|-------|----------------------------------|-----------|--------|
| siRNA Disorazole DMSO Run3   | XM_37142<br>7 | GGT2  | gamma-glutamyltransferase 2      | -0.186387 | Inlier |
| siRNA-Vinblastine Run2-DMSO  | XM_37142<br>7 | GGT2  | gamma-glutamyltransferase 2      | 0.186386  | Inlier |
| siRNA-Temozolomide Run3-DMSO | XM_37142<br>7 | GGT2  | gamma-glutamyltransferase 2      | 0.557373  | Inlier |
| siRNA-Vinblastine Run1-DMSO  | XM_37142<br>7 | GGT2  | gamma-glutamyltransferase 2      | 0.600603  | Inlier |
| siRNA Disorazole DMSO Run2   | XM_37142<br>7 | GGT2  | gamma-glutamyltransferase 2      | 0.748397  | Inlier |
| siRNA-Temozolomide Run3-DMSO | NM_0528<br>30 | GGTL3 | gamma-glutamyltransferase-like 3 | -1.337965 | Inlier |
| siRNA-Temozolomide Run2-DMSO | NM_0528<br>30 | GGTL3 | gamma-glutamyltransferase-like 3 | -0.747794 | Inlier |
| siRNA Disorazole DMSO Run2   | NM_0528<br>30 | GGTL3 | gamma-glutamyltransferase-like 3 | -0.229947 | Inlier |
| siRNA Disorazole DMSO Run1   | NM_0528<br>30 | GGTL3 | gamma-glutamyltransferase-like 3 | -0.04319  | Inlier |
| siRNA-Temozolomide Run1-DMSO | NM_0528<br>30 | GGTL3 | gamma-glutamyltransferase-like 3 | 0.04319   | Inlier |
| siRNA Disorazole DMSO Run3   | NM_0528<br>30 | GGTL3 | gamma-glutamyltransferase-like 3 | 0.601206  | Inlier |
| siRNA-Vinblastine Run1-DMSO  | NM_0528<br>30 | GGTL3 | gamma-glutamyltransferase-like 3 | 0.930206  | Inlier |
| siRNA-Vinblastine Run2-DMSO  | NM_0528<br>30 | GGTL3 | gamma-glutamyltransferase-like 3 | 1.416658  | Inlier |

Identification of Survival Genes in Human Glioblastoma Cells Using siRNA Screening  
 Nikhil G Thaker, Fang Zhang, Peter R. McDonald, Tong Ying Shun, Michael D Lewen, Ian F. Pollack, and John S. Lazo

Molecular Pharmacology

|                              |               |        |                                           |           |        |
|------------------------------|---------------|--------|-------------------------------------------|-----------|--------|
| siRNA-Temozolomide Run3-DMSO | NM_0808<br>39 | GGTL4  | gamma-glutamyltransferase-like 4          | -1.45591  | Inlier |
| siRNA-Temozolomide Run2-DMSO | NM_0808<br>39 | GGTL4  | gamma-glutamyltransferase-like 4          | -1.027712 | Inlier |
| siRNA Disorazole DMSO Run2   | NM_0808<br>39 | GGTL4  | gamma-glutamyltransferase-like 4          | -0.167129 | Inlier |
| siRNA Disorazole DMSO Run1   | NM_0808<br>39 | GGTL4  | gamma-glutamyltransferase-like 4          | -0.069751 | Inlier |
| siRNA-Temozolomide Run1-DMSO | NM_0808<br>39 | GGTL4  | gamma-glutamyltransferase-like 4          | 0.069751  | Inlier |
| siRNA-Vinblastine Run2-DMSO  | NM_0808<br>39 | GGTL4  | gamma-glutamyltransferase-like 4          | 0.580271  | Inlier |
| siRNA-Vinblastine Run1-DMSO  | NM_0808<br>39 | GGTL4  | gamma-glutamyltransferase-like 4          | 0.768729  | Inlier |
| siRNA Disorazole DMSO Run3   | NM_0808<br>39 | GGTL4  | gamma-glutamyltransferase-like 4          | 0.908176  | Inlier |
| siRNA-Temozolomide Run3-DMSO | NM_0041<br>21 | GGTLA1 | gamma-glutamyltransferase-like activity 1 | -1.196936 | Inlier |
| siRNA-Temozolomide Run2-DMSO | NM_0041<br>21 | GGTLA1 | gamma-glutamyltransferase-like activity 1 | -0.71768  | Inlier |
| siRNA Disorazole DMSO Run1   | NM_0041<br>21 | GGTLA1 | gamma-glutamyltransferase-like activity 1 | -0.63132  | Inlier |
| siRNA Disorazole DMSO Run2   | NM_0041<br>21 | GGTLA1 | gamma-glutamyltransferase-like activity 1 | -0.069665 | Inlier |

Identification of Survival Genes in Human Glioblastoma Cells Using siRNA Screening  
 Nikhil G Thaker, Fang Zhang, Peter R. McDonald, Tong Ying Shun, Michael D Lewen, Ian F. Pollack, and John S. Lazo

Molecular Pharmacology

| siRNA Treatment              | Gene ID   | Gene Name | Activity                                  | Value     | Outlier Status |
|------------------------------|-----------|-----------|-------------------------------------------|-----------|----------------|
| siRNA-Vinblastine Run2-DMSO  | NM_004121 | GGTLA1    | gamma-glutamyltransferase-like activity 1 | 0.069664  | Inlier         |
| siRNA-Temozolomide Run1-DMSO | NM_004121 | GGTLA1    | gamma-glutamyltransferase-like activity 1 | 0.560486  | Inlier         |
| siRNA-Vinblastine Run1-DMSO  | NM_004121 | GGTLA1    | gamma-glutamyltransferase-like activity 1 | 1.328282  | Inlier         |
| siRNA Disorazole DMSO Run3   | NM_004121 | GGTLA1    | gamma-glutamyltransferase-like activity 1 | 2.530609  | Inlier         |
| siRNA-Temozolomide Run3-DMSO | NM_178311 | GGTLA4    | gamma-glutamyltransferase-like activity 4 | -1.41986  | Inlier         |
| siRNA-Temozolomide Run2-DMSO | NM_178311 | GGTLA4    | gamma-glutamyltransferase-like activity 4 | -1.403993 | Inlier         |
| siRNA-Temozolomide Run1-DMSO | NM_178311 | GGTLA4    | gamma-glutamyltransferase-like activity 4 | -0.579327 | Inlier         |
| siRNA Disorazole DMSO Run1   | NM_178311 | GGTLA4    | gamma-glutamyltransferase-like activity 4 | -0.216228 | Inlier         |
| siRNA Disorazole DMSO Run2   | NM_178311 | GGTLA4    | gamma-glutamyltransferase-like activity 4 | 0.216229  | Inlier         |
| siRNA-Vinblastine Run2-DMSO  | NM_178311 | GGTLA4    | gamma-glutamyltransferase-like activity 4 | 0.262584  | Inlier         |

Identification of Survival Genes in Human Glioblastoma Cells Using siRNA Screening  
 Nikhil G Thaker, Fang Zhang, Peter R. McDonald, Tong Ying Shun, Michael D Lewen, Ian F. Pollack, and John S. Lazo

Molecular Pharmacology

| siRNA Treatment              | Gene ID      | Gene Name | Value | Category          |
|------------------------------|--------------|-----------|-------|-------------------|
| siRNA-Vinblastine Run1-DMSO  | NM_178311    | GGTLA4    | 4     | 0.769673 Inlier   |
| siRNA Disorazole DMSO Run3   | NM_178311    | GGTLA4    | 4     | 0.957707 Inlier   |
| siRNA Disorazole DMSO Run1   | NM_000163    | GHR       | 4     | -1.892229 Inlier  |
| siRNA-Temozolomide Run1-DMSO | NM_000163    | GHR       | 4     | -0.835516 Inlier  |
| siRNA-Temozolomide Run2-DMSO | NM_000163    | GHR       | 4     | -0.513484 Inlier  |
| siRNA-Vinblastine Run2-DMSO  | NM_000163    | GHR       | 4     | -0.139831 Inlier  |
| siRNA Disorazole DMSO Run3   | NM_000163    | GHR       | 4     | 0.139831 Inlier   |
| siRNA-Temozolomide Run3-DMSO | NM_000163    | GHR       | 4     | 0.283423 Inlier   |
| siRNA-Vinblastine Run1-DMSO  | NM_000163    | GHR       | 4     | 2.020803 Inlier   |
| siRNA Disorazole DMSO Run2   | NM_000163    | GHR       | 4     | 3.567796 Outlier  |
| siRNA-Temozolomide Run3-DMSO | NM_001009824 | GHRHR     | 4     | -3.729492 Outlier |
| siRNA Disorazole DMSO Run2   | NM_001009824 | GHRHR     | 4     | -0.79905 Inlier   |
| siRNA-Temozolomide Run2-DMSO | NM_001009824 | GHRHR     | 4     | -0.52766 Inlier   |

Identification of Survival Genes in Human Glioblastoma Cells Using siRNA Screening  
 Nikhil G Thaker, Fang Zhang, Peter R. McDonald, Tong Ying Shun, Michael D Lewen, Ian F. Pollack, and John S. Lazo

Molecular Pharmacology

|                              |                  |       |                                           |           |        |
|------------------------------|------------------|-------|-------------------------------------------|-----------|--------|
| siRNA-Temozolomide Run1-DMSO | NM_0010<br>09824 | GHRHR | growth hormone releasing hormone receptor | -0.029223 | Inlier |
| siRNA Disorazole DMSO Run3   | NM_0010<br>09824 | GHRHR | growth hormone releasing hormone receptor | 0.029223  | Inlier |
| siRNA Disorazole DMSO Run1   | NM_0010<br>09824 | GHRHR | growth hormone releasing hormone receptor | 0.54995   | Inlier |
| siRNA-Vinblastine Run2-DMSO  | NM_0010<br>09824 | GHRHR | growth hormone releasing hormone receptor | 2.149181  | Inlier |
| siRNA-Vinblastine Run1-DMSO  | NM_0010<br>09824 | GHRHR | growth hormone releasing hormone receptor | 2.23058   | Inlier |
| siRNA-Temozolomide Run3-DMSO | NM_1984<br>07    | GHSR  | growth hormone secretagogue receptor      | -0.756874 | Inlier |
| siRNA-Temozolomide Run2-DMSO | NM_1984<br>07    | GHSR  | growth hormone secretagogue receptor      | -0.67453  | Inlier |
| siRNA Disorazole DMSO Run2   | NM_1984<br>07    | GHSR  | growth hormone secretagogue receptor      | -0.67447  | Inlier |
| siRNA Disorazole DMSO Run3   | NM_1984<br>07    | GHSR  | growth hormone secretagogue receptor      | -0.282466 | Inlier |
| siRNA-Temozolomide Run1-DMSO | NM_1984<br>07    | GHSR  | growth hormone secretagogue receptor      | 0.282465  | Inlier |



Identification of Survival Genes in Human Glioblastoma Cells Using siRNA Screening  
 Nikhil G Thaker, Fang Zhang, Peter R. McDonald, Tong Ying Shun, Michael D Lewen, Ian F. Pollack, and John S. Lazo

Molecular Pharmacology

| siRNA Treatment              | Gene ID   | Gene Name | Gene Description                        | Value     | Outlier Status |
|------------------------------|-----------|-----------|-----------------------------------------|-----------|----------------|
| siRNA Disorazole DMSO Run1   | NM_198407 | GHSR      | growth hormone secretagogue receptor    | 0.661789  | Inlier         |
| siRNA-Vinblastine Run2-DMSO  | NM_198407 | GHSR      | growth hormone secretagogue receptor    | 1.552503  | Inlier         |
| siRNA-Vinblastine Run1-DMSO  | NM_198407 | GHSR      | growth hormone secretagogue receptor    | 2.115117  | Inlier         |
| siRNA-Temozolomide Run3-DMSO | NM_000164 | GIPR      | gastric inhibitory polypeptide receptor | -1.2148   | Inlier         |
| siRNA-Temozolomide Run2-DMSO | NM_000164 | GIPR      | gastric inhibitory polypeptide receptor | -0.935724 | Inlier         |
| siRNA Disorazole DMSO Run3   | NM_000164 | GIPR      | gastric inhibitory polypeptide receptor | -0.686843 | Inlier         |
| siRNA-Temozolomide Run1-DMSO | NM_000164 | GIPR      | gastric inhibitory polypeptide receptor | -0.235428 | Inlier         |
| siRNA Disorazole DMSO Run2   | NM_000164 | GIPR      | gastric inhibitory polypeptide receptor | 0.235428  | Inlier         |
| siRNA-Vinblastine Run1-DMSO  | NM_000164 | GIPR      | gastric inhibitory polypeptide receptor | 0.640926  | Inlier         |
| siRNA Disorazole DMSO Run1   | NM_000164 | GIPR      | gastric inhibitory polypeptide receptor | 0.662157  | Inlier         |
| siRNA-Vinblastine Run2-DMSO  | NM_000164 | GIPR      | gastric inhibitory polypeptide receptor | 0.808976  | Inlier         |

Identification of Survival Genes in Human Glioblastoma Cells Using siRNA Screening

Nikhil G Thaker, Fang Zhang, Peter R. McDonald, Tong Ying Shun, Michael D Lewen, Ian F. Pollack, and John S. Lazo

Molecular Pharmacology

| siRNA Treatment              | Gene      | Cell Line | Gene                                           | Value     | Outlier Status |
|------------------------------|-----------|-----------|------------------------------------------------|-----------|----------------|
| siRNA-Temozolomide Run3-DMSO | NM_014030 | GIT1      | G protein-coupled receptor kinase interactor 1 | -0.922724 | Inlier         |
| siRNA Disorazole DMSO Run2   | NM_014030 | GIT1      | G protein-coupled receptor kinase interactor 1 | -0.678974 | Inlier         |
| siRNA Disorazole DMSO Run3   | NM_014030 | GIT1      | G protein-coupled receptor kinase interactor 1 | -0.670026 | Inlier         |
| siRNA-Temozolomide Run2-DMSO | NM_014030 | GIT1      | G protein-coupled receptor kinase interactor 1 | -0.285585 | Inlier         |
| siRNA-Temozolomide Run1-DMSO | NM_014030 | GIT1      | G protein-coupled receptor kinase interactor 1 | 0.285585  | Inlier         |
| siRNA Disorazole DMSO Run1   | NM_014030 | GIT1      | G protein-coupled receptor kinase interactor 1 | 0.429341  | Inlier         |
| siRNA-Vinblastine Run2-DMSO  | NM_014030 | GIT1      | G protein-coupled receptor kinase interactor 1 | 0.928153  | Inlier         |
| siRNA-Vinblastine Run1-DMSO  | NM_014030 | GIT1      | G protein-coupled receptor kinase interactor 1 | 0.997282  | Inlier         |

Identification of Survival Genes in Human Glioblastoma Cells Using siRNA Screening

Nikhil G Thaker, Fang Zhang, Peter R. McDonald, Tong Ying Shun, Michael D Lewen, Ian F. Pollack, and John S.

Lazo

Molecular Pharmacology

|                              |               |      |                                                |           |        |
|------------------------------|---------------|------|------------------------------------------------|-----------|--------|
| siRNA-Temozolomide Run3-DMSO | NM_0571<br>70 | GIT2 | G protein-coupled receptor kinase interactor 2 | -2.660418 | Inlier |
| siRNA-Temozolomide Run2-DMSO | NM_0571<br>70 | GIT2 | G protein-coupled receptor kinase interactor 2 | -0.861478 | Inlier |
| siRNA-Temozolomide Run1-DMSO | NM_0571<br>70 | GIT2 | G protein-coupled receptor kinase interactor 2 | -0.581114 | Inlier |
| siRNA Disorazole DMSO Run2   | NM_0571<br>70 | GIT2 | G protein-coupled receptor kinase interactor 2 | -0.056918 | Inlier |
| siRNA Disorazole DMSO Run1   | NM_0571<br>70 | GIT2 | G protein-coupled receptor kinase interactor 2 | 0.056918  | Inlier |
| siRNA Disorazole DMSO Run3   | NM_0571<br>70 | GIT2 | G protein-coupled receptor kinase interactor 2 | 0.649364  | Inlier |
| siRNA-Vinblastine Run2-DMSO  | NM_0571<br>70 | GIT2 | G protein-coupled receptor kinase interactor 2 | 0.699636  | Inlier |
| siRNA-Vinblastine Run1-DMSO  | NM_0571<br>70 | GIT2 | G protein-coupled receptor kinase interactor 2 | 0.839626  | Inlier |
| siRNA-Temozolomide Run3-DMSO | NM_2033<br>91 | GK   | glycerol kinase                                | -1.187842 | Inlier |
| siRNA Disorazole DMSO Run2   | NM_2033<br>91 | GK   | glycerol kinase                                | -1.018726 | Inlier |

Identification of Survival Genes in Human Glioblastoma Cells Using siRNA Screening

Nikhil G Thaker, Fang Zhang, Peter R. McDonald, Tong Ying Shun, Michael D Lewen, Ian F. Pollack, and John S.

Lazo

|                              |               |       |                                    |           |         |
|------------------------------|---------------|-------|------------------------------------|-----------|---------|
| siRNA-Temozolomide Run2-DMSO | NM_2033<br>91 | GK    | glycerol<br>kinase                 | -0.365678 | Inlier  |
| siRNA-Temozolomide Run1-DMSO | NM_2033<br>91 | GK    | glycerol<br>kinase                 | -0.321802 | Inlier  |
| siRNA Disorazole DMSO Run1   | NM_2033<br>91 | GK    | glycerol<br>kinase                 | 0.321802  | Inlier  |
| siRNA-Vinblastine Run1-DMSO  | NM_2033<br>91 | GK    | glycerol<br>kinase                 | 0.645794  | Inlier  |
| siRNA-Vinblastine Run2-DMSO  | NM_2033<br>91 | GK    | glycerol<br>kinase                 | 0.703206  | Inlier  |
| siRNA Disorazole DMSO Run3   | NM_2033<br>91 | GK    | glycerol<br>kinase                 | 1.060078  | Inlier  |
| siRNA-Temozolomide Run3-DMSO | NM_0332<br>14 | GK2   | glycerol<br>kinase 2               | -2.448657 | Inlier  |
| siRNA Disorazole DMSO Run2   | NM_0332<br>14 | GK2   | glycerol<br>kinase 2               | -0.814538 | Inlier  |
| siRNA-Temozolomide Run1-DMSO | NM_0332<br>14 | GK2   | glycerol<br>kinase 2               | -0.534462 | Inlier  |
| siRNA-Temozolomide Run2-DMSO | NM_0332<br>14 | GK2   | glycerol<br>kinase 2               | -0.205059 | Inlier  |
| siRNA Disorazole DMSO Run1   | NM_0332<br>14 | GK2   | glycerol<br>kinase 2               | 0.205059  | Inlier  |
| siRNA-Vinblastine Run1-DMSO  | NM_0332<br>14 | GK2   | glycerol<br>kinase 2               | 0.474717  | Inlier  |
| siRNA-Vinblastine Run2-DMSO  | NM_0332<br>14 | GK2   | glycerol<br>kinase 2               | 2.183182  | Inlier  |
| siRNA Disorazole DMSO Run3   | NM_0332<br>14 | GK2   | glycerol<br>kinase 2               | 3.832396  | Outlier |
| siRNA-Temozolomide Run3-DMSO | NM_0252<br>11 | GKAP1 | G kinase<br>anchoring<br>protein 1 | -2.161602 | Inlier  |
| siRNA Disorazole DMSO Run1   | NM_0252<br>11 | GKAP1 | G kinase<br>anchoring<br>protein 1 | -1.170423 | Inlier  |
| siRNA-Temozolomide Run2-DMSO | NM_0252<br>11 | GKAP1 | G kinase<br>anchoring<br>protein 1 | -0.178577 | Inlier  |
| siRNA Disorazole DMSO Run3   | NM_0252<br>11 | GKAP1 | G kinase<br>anchoring<br>protein 1 | -0.013474 | Inlier  |
| siRNA-Temozolomide Run1-DMSO | NM_0252<br>11 | GKAP1 | G kinase<br>anchoring<br>protein 1 | 0.013473  | Inlier  |
| siRNA-Vinblastine Run2-DMSO  | NM_0252<br>11 | GKAP1 | G kinase<br>anchoring<br>protein 1 | 0.030665  | Inlier  |
| siRNA-Vinblastine Run1-DMSO  | NM_0252<br>11 | GKAP1 | G kinase<br>anchoring<br>protein 1 | 1.60925   | Inlier  |
| siRNA Disorazole DMSO Run2   | NM_0252<br>11 | GKAP1 | G kinase<br>anchoring<br>protein 1 | 2.241193  | Inlier  |

Identification of Survival Genes in Human Glioblastoma Cells Using siRNA Screening  
 Nikhil G Thaker, Fang Zhang, Peter R. McDonald, Tong Ying Shun, Michael D Lewen, Ian F. Pollack, and John S. Lazo

Molecular Pharmacology

|                              |               |      |                          |           |        |
|------------------------------|---------------|------|--------------------------|-----------|--------|
| siRNA-Vinblastine Run2-DMSO  | NM_0001<br>69 | GLA  | galactosidase, alpha     | -0.84119  | Inlier |
| siRNA Disorazole DMSO Run3   | NM_0001<br>69 | GLA  | galactosidase, alpha     | -0.690905 | Inlier |
| siRNA-Temozolomide Run3-DMSO | NM_0001<br>69 | GLA  | galactosidase, alpha     | -0.552653 | Inlier |
| siRNA-Temozolomide Run2-DMSO | NM_0001<br>69 | GLA  | galactosidase, alpha     | -0.538407 | Inlier |
| siRNA Disorazole DMSO Run1   | NM_0001<br>69 | GLA  | galactosidase, alpha     | 0.538407  | Inlier |
| siRNA-Temozolomide Run1-DMSO | NM_0001<br>69 | GLA  | galactosidase, alpha     | 0.658095  | Inlier |
| siRNA-Vinblastine Run1-DMSO  | NM_0001<br>69 | GLA  | galactosidase, alpha     | 3.30357   | Inlier |
| siRNA Disorazole DMSO Run2   | NM_0001<br>69 | GLA  | galactosidase, alpha     | 3.482457  | Inlier |
| siRNA-Temozolomide Run3-DMSO | NM_0004<br>04 | GLB1 | galactosidase, beta<br>1 | -0.980333 | Inlier |
| siRNA-Temozolomide Run2-DMSO | NM_0004<br>04 | GLB1 | galactosidase, beta<br>1 | -0.948581 | Inlier |
| siRNA Disorazole DMSO Run3   | NM_0004<br>04 | GLB1 | galactosidase, beta<br>1 | -0.0475   | Inlier |
| siRNA-Vinblastine Run2-DMSO  | NM_0004<br>04 | GLB1 | galactosidase, beta<br>1 | -0.042119 | Inlier |
| siRNA Disorazole DMSO Run1   | NM_0004<br>04 | GLB1 | galactosidase, beta<br>1 | 0.042119  | Inlier |
| siRNA-Temozolomide Run1-DMSO | NM_0004<br>04 | GLB1 | galactosidase, beta<br>1 | 0.400419  | Inlier |
| siRNA Disorazole DMSO Run2   | NM_0004<br>04 | GLB1 | galactosidase, beta<br>1 | 1.115915  | Inlier |
| siRNA-Vinblastine Run1-DMSO  | NM_0004<br>04 | GLB1 | galactosidase, beta<br>1 | 1.284543  | Inlier |
| siRNA-Temozolomide Run3-DMSO | NM_0155<br>54 | GLCE | GLCE                     | -0.906944 | Inlier |
| siRNA-Temozolomide Run2-DMSO | NM_0155<br>54 | GLCE | GLCE                     | -0.802198 | Inlier |

Identification of Survival Genes in Human Glioblastoma Cells Using siRNA Screening

Nikhil G Thaker, Fang Zhang, Peter R. McDonald, Tong Ying Shun, Michael D Lewen, Ian F. Pollack, and John S.

Lazo

|                                  |               |      |                                                                                                                                       |           |        |
|----------------------------------|---------------|------|---------------------------------------------------------------------------------------------------------------------------------------|-----------|--------|
| siRNA-Temozolomide Run1-<br>DMSO | NM_0155<br>54 | GLCE | GLCE                                                                                                                                  | -0.621201 | Inlier |
| siRNA Disorazole DMSO Run1       | NM_0155<br>54 | GLCE | GLCE                                                                                                                                  | -0.134369 | Inlier |
| siRNA Disorazole DMSO Run3       | NM_0155<br>54 | GLCE | GLCE                                                                                                                                  | 0.134369  | Inlier |
| siRNA-Vinblastine Run2-<br>DMSO  | NM_0155<br>54 | GLCE | GLCE                                                                                                                                  | 0.192895  | Inlier |
| siRNA Disorazole DMSO Run2       | NM_0155<br>54 | GLCE | GLCE                                                                                                                                  | 0.727799  | Inlier |
| siRNA-Vinblastine Run1-<br>DMSO  | NM_0155<br>54 | GLCE | GLCE                                                                                                                                  | 0.73709   | Inlier |
| siRNA-Temozolomide Run3-<br>DMSO | NM_0001<br>70 | GLDC | glycine<br>dehydroge<br>nase<br>(decarbox<br>ylating;<br>glycine<br>decarboxyl<br>ase,<br>glycine<br>cleavage<br>system<br>protein P) | -1.869565 | Inlier |
| siRNA-Temozolomide Run2-<br>DMSO | NM_0001<br>70 | GLDC | glycine<br>dehydroge<br>nase<br>(decarbox<br>ylating;<br>glycine<br>decarboxyl<br>ase,<br>glycine<br>cleavage<br>system<br>protein P) | -1.748279 | Inlier |
| siRNA Disorazole DMSO Run1       | NM_0001<br>70 | GLDC | glycine<br>dehydroge<br>nase<br>(decarbox<br>ylating;<br>glycine<br>decarboxyl<br>ase,<br>glycine<br>cleavage<br>system<br>protein P) | -1.263296 | Inlier |

Identification of Survival Genes in Human Glioblastoma Cells Using siRNA Screening

Nikhil G Thaker, Fang Zhang, Peter R. McDonald, Tong Ying Shun, Michael D Lewen, Ian F. Pollack, and John S. Lazo

Molecular Pharmacology

|                              |           |      |                                                                                                   |           |        |
|------------------------------|-----------|------|---------------------------------------------------------------------------------------------------|-----------|--------|
| siRNA-Temozolomide Run1-DMSO | NM_000170 | GLDC | glycine dehydrogenase (decarboxylating; glycine decarboxylase, glycine cleavage system protein P) | -0.382618 | Inlier |
| siRNA-Vinblastine Run1-DMSO  | NM_000170 | GLDC | glycine dehydrogenase (decarboxylating; glycine decarboxylase, glycine cleavage system protein P) | 0.382618  | Inlier |
| siRNA Disorazole DMSO Run2   | NM_000170 | GLDC | glycine dehydrogenase (decarboxylating; glycine decarboxylase, glycine cleavage system protein P) | 0.413769  | Inlier |
| siRNA-Vinblastine Run2-DMSO  | NM_000170 | GLDC | glycine dehydrogenase (decarboxylating; glycine decarboxylase, glycine cleavage system protein P) | 0.490447  | Inlier |

Identification of Survival Genes in Human Glioblastoma Cells Using siRNA Screening

Nikhil G Thaker, Fang Zhang, Peter R. McDonald, Tong Ying Shun, Michael D Lewen, Ian F. Pollack, and John S. Lazo

Molecular Pharmacology

|                              |               |      |                                                                                                   |           |        |
|------------------------------|---------------|------|---------------------------------------------------------------------------------------------------|-----------|--------|
| siRNA Disorazole DMSO Run3   | NM_0001<br>70 | GLDC | glycine dehydrogenase (decarboxylating; glycine decarboxylase, glycine cleavage system protein P) | 0.858553  | Inlier |
| siRNA-Temozolomide Run3-DMSO | NM_0052<br>69 | GLI  | glioma-associated oncogene homolog 1 (zinc finger protein)                                        | -1.802889 | Inlier |
| siRNA-Temozolomide Run2-DMSO | NM_0052<br>69 | GLI  | glioma-associated oncogene homolog 1 (zinc finger protein)                                        | -0.649694 | Inlier |
| siRNA Disorazole DMSO Run1   | NM_0052<br>69 | GLI  | glioma-associated oncogene homolog 1 (zinc finger protein)                                        | -0.413694 | Inlier |
| siRNA-Temozolomide Run1-DMSO | NM_0052<br>69 | GLI  | glioma-associated oncogene homolog 1 (zinc finger protein)                                        | -0.009935 | Inlier |
| siRNA Disorazole DMSO Run3   | NM_0052<br>69 | GLI  | glioma-associated oncogene homolog 1 (zinc finger protein)                                        | 0.009934  | Inlier |



Identification of Survival Genes in Human Glioblastoma Cells Using siRNA Screening  
 Nikhil G Thaker, Fang Zhang, Peter R. McDonald, Tong Ying Shun, Michael D Lewen, Ian F. Pollack, and John S. Lazo  
 Molecular Pharmacology

|                              |               |       |                                                            |           |        |
|------------------------------|---------------|-------|------------------------------------------------------------|-----------|--------|
| siRNA-Vinblastine Run2-DMSO  | NM_0052<br>69 | GLI   | glioma-associated oncogene homolog 1 (zinc finger protein) | 0.699306  | Inlier |
| siRNA Disorazole DMSO Run2   | NM_0052<br>69 | GLI   | glioma-associated oncogene homolog 1 (zinc finger protein) | 1.227994  | Inlier |
| siRNA-Vinblastine Run1-DMSO  | NM_0052<br>69 | GLI   | glioma-associated oncogene homolog 1 (zinc finger protein) | 2.2259    | Inlier |
| siRNA-Temozolomide Run2-DMSO | NM_0067<br>08 | GLO1  | glyoxalase I                                               | -1.283864 | Inlier |
| siRNA-Temozolomide Run3-DMSO | NM_0067<br>08 | GLO1  | glyoxalase I                                               | -1.221423 | Inlier |
| siRNA-Temozolomide Run1-DMSO | NM_0067<br>08 | GLO1  | glyoxalase I                                               | -1.201705 | Inlier |
| siRNA Disorazole DMSO Run1   | NM_0067<br>08 | GLO1  | glyoxalase I                                               | -0.154661 | Inlier |
| siRNA Disorazole DMSO Run3   | NM_0067<br>08 | GLO1  | glyoxalase I                                               | 0.154661  | Inlier |
| siRNA-Vinblastine Run2-DMSO  | NM_0067<br>08 | GLO1  | glyoxalase I                                               | 0.370582  | Inlier |
| siRNA Disorazole DMSO Run2   | NM_0067<br>08 | GLO1  | glyoxalase I                                               | 0.519962  | Inlier |
| siRNA-Vinblastine Run1-DMSO  | NM_0067<br>08 | GLO1  | glyoxalase I                                               | 0.829038  | Inlier |
| siRNA-Temozolomide Run3-DMSO | NM_0020<br>62 | GLP1R | glucagon-like peptide 1 receptor                           | -1.241492 | Inlier |
| siRNA-Temozolomide Run1-DMSO | NM_0020<br>62 | GLP1R | glucagon-like peptide 1 receptor                           | -0.673561 | Inlier |
| siRNA-Temozolomide Run2-DMSO | NM_0020<br>62 | GLP1R | glucagon-like peptide 1 receptor                           | -0.447999 | Inlier |

Identification of Survival Genes in Human Glioblastoma Cells Using siRNA Screening  
 Nikhil G Thaker, Fang Zhang, Peter R. McDonald, Tong Ying Shun, Michael D Lewen, Ian F. Pollack, and John S. Lazo

Molecular Pharmacology

|                              |               |       |                                  |           |        |
|------------------------------|---------------|-------|----------------------------------|-----------|--------|
| siRNA Disorazole DMSO Run3   | NM_0020<br>62 | GLP1R | glucagon-like peptide 1 receptor | -0.100868 | Inlier |
| siRNA Disorazole DMSO Run2   | NM_0020<br>62 | GLP1R | glucagon-like peptide 1 receptor | 0.100868  | Inlier |
| siRNA Disorazole DMSO Run1   | NM_0020<br>62 | GLP1R | glucagon-like peptide 1 receptor | 0.675439  | Inlier |
| siRNA-Vinblastine Run1-DMSO  | NM_0020<br>62 | GLP1R | glucagon-like peptide 1 receptor | 2.782705  | Inlier |
| siRNA-Vinblastine Run2-DMSO  | NM_0020<br>62 | GLP1R | glucagon-like peptide 1 receptor | 3.119543  | Inlier |
| siRNA-Temozolomide Run2-DMSO | NM_0042<br>46 | GLP2R | glucagon-like peptide 2 receptor | -1.157842 | Inlier |
| siRNA-Temozolomide Run3-DMSO | NM_0042<br>46 | GLP2R | glucagon-like peptide 2 receptor | -0.669506 | Inlier |
| siRNA Disorazole DMSO Run2   | NM_0042<br>46 | GLP2R | glucagon-like peptide 2 receptor | -0.504812 | Inlier |
| siRNA Disorazole DMSO Run3   | NM_0042<br>46 | GLP2R | glucagon-like peptide 2 receptor | -0.003903 | Inlier |
| siRNA-Temozolomide Run1-DMSO | NM_0042<br>46 | GLP2R | glucagon-like peptide 2 receptor | 0.003903  | Inlier |
| siRNA-Vinblastine Run1-DMSO  | NM_0042<br>46 | GLP2R | glucagon-like peptide 2 receptor | 0.679494  | Inlier |
| siRNA Disorazole DMSO Run1   | NM_0042<br>46 | GLP2R | glucagon-like peptide 2 receptor | 0.687652  | Inlier |
| siRNA-Vinblastine Run2-DMSO  | NM_0042<br>46 | GLP2R | glucagon-like peptide 2 receptor | 0.726458  | Inlier |

Identification of Survival Genes in Human Glioblastoma Cells Using siRNA Screening

Nikhil G Thaker, Fang Zhang, Peter R. McDonald, Tong Ying Shun, Michael D Lewen, Ian F. Pollack, and John S. Lazo

Molecular Pharmacology

|                              |               |       |                                                                               |           |         |
|------------------------------|---------------|-------|-------------------------------------------------------------------------------|-----------|---------|
| siRNA Disorazole DMSO Run2   | NM_0001<br>71 | GLRA1 | glycine receptor, alpha 1 (startle disease/hyperekplexia, stiff man syndrome) | -3.743204 | Outlier |
| siRNA-Temozolomide Run2-DMSO | NM_0001<br>71 | GLRA1 | glycine receptor, alpha 1 (startle disease/hyperekplexia, stiff man syndrome) | -0.718523 | Inlier  |
| siRNA Disorazole DMSO Run1   | NM_0001<br>71 | GLRA1 | glycine receptor, alpha 1 (startle disease/hyperekplexia, stiff man syndrome) | -0.400959 | Inlier  |
| siRNA-Vinblastine Run2-DMSO  | NM_0001<br>71 | GLRA1 | glycine receptor, alpha 1 (startle disease/hyperekplexia, stiff man syndrome) | -0.280491 | Inlier  |
| siRNA-Temozolomide Run3-DMSO | NM_0001<br>71 | GLRA1 | glycine receptor, alpha 1 (startle disease/hyperekplexia, stiff man syndrome) | 0.280491  | Inlier  |

Identification of Survival Genes in Human Glioblastoma Cells Using siRNA Screening

Nikhil G Thaker, Fang Zhang, Peter R. McDonald, Tong Ying Shun, Michael D Lewen, Ian F. Pollack, and John S. Lazo

Molecular Pharmacology

|                              |               |       |                                                                               |           |        |
|------------------------------|---------------|-------|-------------------------------------------------------------------------------|-----------|--------|
| siRNA Disorazole DMSO Run3   | NM_0001<br>71 | GLRA1 | glycine receptor, alpha 1 (startle disease/hyperekplexia, stiff man syndrome) | 0.673623  | Inlier |
| siRNA-Temozolomide Run1-DMSO | NM_0001<br>71 | GLRA1 | glycine receptor, alpha 1 (startle disease/hyperekplexia, stiff man syndrome) | 0.675377  | Inlier |
| siRNA-Vinblastine Run1-DMSO  | NM_0001<br>71 | GLRA1 | glycine receptor, alpha 1 (startle disease/hyperekplexia, stiff man syndrome) | 1.099013  | Inlier |
| siRNA-Temozolomide Run3-DMSO | NM_0020<br>63 | GLRA2 | glycine receptor, alpha 2                                                     | -1.83159  | Inlier |
| siRNA-Temozolomide Run2-DMSO | NM_0020<br>63 | GLRA2 | glycine receptor, alpha 2                                                     | -1.304019 | Inlier |
| siRNA Disorazole DMSO Run2   | NM_0020<br>63 | GLRA2 | glycine receptor, alpha 2                                                     | -0.746748 | Inlier |
| siRNA-Temozolomide Run1-DMSO | NM_0020<br>63 | GLRA2 | glycine receptor, alpha 2                                                     | -0.249898 | Inlier |
| siRNA Disorazole DMSO Run1   | NM_0020<br>63 | GLRA2 | glycine receptor, alpha 2                                                     | 0.249898  | Inlier |
| siRNA Disorazole DMSO Run3   | NM_0020<br>63 | GLRA2 | glycine receptor, alpha 2                                                     | 0.292445  | Inlier |
| siRNA-Vinblastine Run1-DMSO  | NM_0020<br>63 | GLRA2 | glycine receptor, alpha 2                                                     | 0.602252  | Inlier |

Identification of Survival Genes in Human Glioblastoma Cells Using siRNA Screening  
 Nikhil G Thaker, Fang Zhang, Peter R. McDonald, Tong Ying Shun, Michael D Lewen, Ian F. Pollack, and John S. Lazo

| Condition                                                 | Gene          | Gene ID | Gene Name                       | Value     | Category |
|-----------------------------------------------------------|---------------|---------|---------------------------------|-----------|----------|
| Molecular Pharmacology<br>siRNA-Vinblastine Run2-<br>DMSO | NM_0020<br>63 | GLRA2   | glycine<br>receptor,<br>alpha 2 | 1.03103   | Inlier   |
| siRNA Disorazole DMSO Run2                                | NM_0065<br>29 | GLRA3   | glycine<br>receptor,<br>alpha 3 | -1.404753 | Inlier   |
| siRNA-Temozolomide Run3-<br>DMSO                          | NM_0065<br>29 | GLRA3   | glycine<br>receptor,<br>alpha 3 | -1.031994 | Inlier   |
| siRNA-Temozolomide Run2-<br>DMSO                          | NM_0065<br>29 | GLRA3   | glycine<br>receptor,<br>alpha 3 | -0.651181 | Inlier   |
| siRNA-Temozolomide Run1-<br>DMSO                          | NM_0065<br>29 | GLRA3   | glycine<br>receptor,<br>alpha 3 | -0.091155 | Inlier   |
| siRNA Disorazole DMSO Run1                                | NM_0065<br>29 | GLRA3   | glycine<br>receptor,<br>alpha 3 | 0.091155  | Inlier   |
| siRNA Disorazole DMSO Run3                                | NM_0065<br>29 | GLRA3   | glycine<br>receptor,<br>alpha 3 | 0.192142  | Inlier   |
| siRNA-Vinblastine Run1-<br>DMSO                           | NM_0065<br>29 | GLRA3   | glycine<br>receptor,<br>alpha 3 | 0.697819  | Inlier   |
| siRNA-Vinblastine Run2-<br>DMSO                           | NM_0065<br>29 | GLRA3   | glycine<br>receptor,<br>alpha 3 | 1.235096  | Inlier   |
| siRNA Disorazole DMSO Run2                                | NM_0008<br>24 | GLRB    | glycine<br>receptor,<br>beta    | -3.140222 | Inlier   |
| siRNA-Temozolomide Run3-<br>DMSO                          | NM_0008<br>24 | GLRB    | glycine<br>receptor,<br>beta    | -0.8844   | Inlier   |
| siRNA-Temozolomide Run2-<br>DMSO                          | NM_0008<br>24 | GLRB    | glycine<br>receptor,<br>beta    | -0.727882 | Inlier   |
| siRNA-Vinblastine Run1-<br>DMSO                           | NM_0008<br>24 | GLRB    | glycine<br>receptor,<br>beta    | -0.137587 | Inlier   |
| siRNA Disorazole DMSO Run1                                | NM_0008<br>24 | GLRB    | glycine<br>receptor,<br>beta    | 0.137587  | Inlier   |
| siRNA-Temozolomide Run1-<br>DMSO                          | NM_0008<br>24 | GLRB    | glycine<br>receptor,<br>beta    | 0.423266  | Inlier   |
| siRNA Disorazole DMSO Run3                                | NM_0008<br>24 | GLRB    | glycine<br>receptor,<br>beta    | 0.621118  | Inlier   |
| siRNA-Vinblastine Run2-<br>DMSO                           | NM_0008<br>24 | GLRB    | glycine<br>receptor,<br>beta    | 1.020719  | Inlier   |

Identification of Survival Genes in Human Glioblastoma Cells Using siRNA Screening  
 Nikhil G Thaker, Fang Zhang, Peter R. McDonald, Tong Ying Shun, Michael D Lewen, Ian F. Pollack, and John S. Lazo

Molecular Pharmacology

|                              |               |       |                                            |           |         |
|------------------------------|---------------|-------|--------------------------------------------|-----------|---------|
| siRNA-Temozolomide Run2-DMSO | NM_0020<br>64 | GLRX  | glutaredox<br>in<br>(thioltransf<br>erase) | -0.783636 | Inlier  |
| siRNA Disorazole DMSO Run3   | NM_0020<br>64 | GLRX  | glutaredox<br>in<br>(thioltransf<br>erase) | -0.723274 | Inlier  |
| siRNA-Temozolomide Run3-DMSO | NM_0020<br>64 | GLRX  | glutaredox<br>in<br>(thioltransf<br>erase) | -0.719478 | Inlier  |
| siRNA-Vinblastine Run2-DMSO  | NM_0020<br>64 | GLRX  | glutaredox<br>in<br>(thioltransf<br>erase) | -0.292136 | Inlier  |
| siRNA-Temozolomide Run1-DMSO | NM_0020<br>64 | GLRX  | glutaredox<br>in<br>(thioltransf<br>erase) | 0.292136  | Inlier  |
| siRNA Disorazole DMSO Run1   | NM_0020<br>64 | GLRX  | glutaredox<br>in<br>(thioltransf<br>erase) | 0.345827  | Inlier  |
| siRNA-Vinblastine Run1-DMSO  | NM_0020<br>64 | GLRX  | glutaredox<br>in<br>(thioltransf<br>erase) | 0.673743  | Inlier  |
| siRNA Disorazole DMSO Run2   | NM_0020<br>64 | GLRX  | glutaredox<br>in<br>(thioltransf<br>erase) | 0.675257  | Inlier  |
| siRNA-Temozolomide Run3-DMSO | NM_0149<br>05 | GLS   | glutaminas<br>e                            | -2.228743 | Inlier  |
| siRNA-Temozolomide Run2-DMSO | NM_0149<br>05 | GLS   | glutaminas<br>e                            | -0.936476 | Inlier  |
| siRNA-Vinblastine Run2-DMSO  | NM_0149<br>05 | GLS   | glutaminas<br>e                            | -0.412524 | Inlier  |
| siRNA-Temozolomide Run1-DMSO | NM_0149<br>05 | GLS   | glutaminas<br>e                            | -0.072631 | Inlier  |
| siRNA Disorazole DMSO Run1   | NM_0149<br>05 | GLS   | glutaminas<br>e                            | 0.07263   | Inlier  |
| siRNA Disorazole DMSO Run3   | NM_0149<br>05 | GLS   | glutaminas<br>e                            | 0.203767  | Inlier  |
| siRNA Disorazole DMSO Run2   | NM_0149<br>05 | GLS   | glutaminas<br>e                            | 2.47452   | Inlier  |
| siRNA-Vinblastine Run1-DMSO  | NM_0149<br>05 | GLS   | glutaminas<br>e                            | 3.757828  | Outlier |
| siRNA-Temozolomide Run1-DMSO | NM_0052<br>71 | GLUD1 | glutamate<br>dehydroge<br>nase 1           | -0.792767 | Inlier  |

Identification of Survival Genes in Human Glioblastoma Cells Using siRNA Screening  
 Nikhil G Thaker, Fang Zhang, Peter R. McDonald, Tong Ying Shun, Michael D Lewen, Ian F. Pollack, and John S. Lazo

Molecular Pharmacology

|                                  |               |       |                                                            |           |         |
|----------------------------------|---------------|-------|------------------------------------------------------------|-----------|---------|
| siRNA Disorazole DMSO Run1       | NM_0052<br>71 | GLUD1 | glutamate<br>dehydroge<br>nase 1                           | -0.63695  | Inlier  |
| siRNA-Temozolomide Run2-<br>DMSO | NM_0052<br>71 | GLUD1 | glutamate<br>dehydroge<br>nase 1                           | -0.486924 | Inlier  |
| siRNA Disorazole DMSO Run3       | NM_0052<br>71 | GLUD1 | glutamate<br>dehydroge<br>nase 1                           | -0.186188 | Inlier  |
| siRNA-Temozolomide Run3-<br>DMSO | NM_0052<br>71 | GLUD1 | glutamate<br>dehydroge<br>nase 1                           | 0.18619   | Inlier  |
| siRNA-Vinblastine Run2-<br>DMSO  | NM_0052<br>71 | GLUD1 | glutamate<br>dehydroge<br>nase 1                           | 0.71205   | Inlier  |
| siRNA Disorazole DMSO Run2       | NM_0052<br>71 | GLUD1 | glutamate<br>dehydroge<br>nase 1                           | 3.893185  | Outlier |
| siRNA-Vinblastine Run1-<br>DMSO  | NM_0052<br>71 | GLUD1 | glutamate<br>dehydroge<br>nase 1                           | 4.363806  | Outlier |
| siRNA-Temozolomide Run3-<br>DMSO | NM_0120<br>84 | GLUD2 | glutamate<br>dehydroge<br>nase 2                           | -1.491882 | Inlier  |
| siRNA-Temozolomide Run2-<br>DMSO | NM_0120<br>84 | GLUD2 | glutamate<br>dehydroge<br>nase 2                           | -0.875509 | Inlier  |
| siRNA Disorazole DMSO Run1       | NM_0120<br>84 | GLUD2 | glutamate<br>dehydroge<br>nase 2                           | -0.391364 | Inlier  |
| siRNA Disorazole DMSO Run3       | NM_0120<br>84 | GLUD2 | glutamate<br>dehydroge<br>nase 2                           | -0.198521 | Inlier  |
| siRNA-Vinblastine Run2-<br>DMSO  | NM_0120<br>84 | GLUD2 | glutamate<br>dehydroge<br>nase 2                           | 0.19852   | Inlier  |
| siRNA-Temozolomide Run1-<br>DMSO | NM_0120<br>84 | GLUD2 | glutamate<br>dehydroge<br>nase 2                           | 0.473491  | Inlier  |
| siRNA-Vinblastine Run1-<br>DMSO  | NM_0120<br>84 | GLUD2 | glutamate<br>dehydroge<br>nase 2                           | 2.061242  | Inlier  |
| siRNA Disorazole DMSO Run2       | NM_0120<br>84 | GLUD2 | glutamate<br>dehydroge<br>nase 2                           | 2.995756  | Inlier  |
| siRNA-Temozolomide Run3-<br>DMSO | NM_0020<br>65 | GLUL  | glutamate-<br>ammonia<br>ligase<br>(glutamine<br>synthase) | -1.006141 | Inlier  |

Identification of Survival Genes in Human Glioblastoma Cells Using siRNA Screening  
 Nikhil G Thaker, Fang Zhang, Peter R. McDonald, Tong Ying Shun, Michael D Lewen, Ian F. Pollack, and John S. Lazo  
 Molecular Pharmacology

|                              |               |        |                                                                   |           |         |
|------------------------------|---------------|--------|-------------------------------------------------------------------|-----------|---------|
| siRNA-Vinblastine Run2-DMSO  | NM_0020<br>65 | GLUL   | glutamate-ammonia ligase (glutamine synthase)                     | -0.347605 | Inlier  |
| siRNA Disorazole DMSO Run1   | NM_0020<br>65 | GLUL   | glutamate-ammonia ligase (glutamine synthase)                     | -0.341428 | Inlier  |
| siRNA Disorazole DMSO Run3   | NM_0020<br>65 | GLUL   | glutamate-ammonia ligase (glutamine synthase)                     | -0.275696 | Inlier  |
| siRNA-Temozolomide Run2-DMSO | NM_0020<br>65 | GLUL   | glutamate-ammonia ligase (glutamine synthase)                     | 0.275696  | Inlier  |
| siRNA-Temozolomide Run1-DMSO | NM_0020<br>65 | GLUL   | glutamate-ammonia ligase (glutamine synthase)                     | 1.001395  | Inlier  |
| siRNA Disorazole DMSO Run2   | NM_0020<br>65 | GLUL   | glutamate-ammonia ligase (glutamine synthase)                     | 2.714973  | Inlier  |
| siRNA-Vinblastine Run1-DMSO  | NM_0020<br>65 | GLUL   | glutamate-ammonia ligase (glutamine synthase)                     | 2.769778  | Inlier  |
| siRNA-Temozolomide Run3-DMSO | NM_0165<br>71 | GLULD1 | glutamate-ammonia ligase (glutamine synthase) domain containing 1 | -4.687999 | Outlier |



Identification of Survival Genes in Human Glioblastoma Cells Using siRNA Screening

Nikhil G Thaker, Fang Zhang, Peter R. McDonald, Tong Ying Shun, Michael D Lewen, Ian F. Pollack, and John S. Lazo

Molecular Pharmacology

|                              |               |        |   |                                                                 |                  |
|------------------------------|---------------|--------|---|-----------------------------------------------------------------|------------------|
| siRNA Disorazole DMSO Run3   | NM_0165<br>71 | GLULD1 | 1 | glutamate-ammonia ligase (glutamine synthase) domain containing | -0.949111 Inlier |
| siRNA-Temozolomide Run2-DMSO | NM_0165<br>71 | GLULD1 | 1 | glutamate-ammonia ligase (glutamine synthase) domain containing | -0.249326 Inlier |
| siRNA-Vinblastine Run2-DMSO  | NM_0165<br>71 | GLULD1 | 1 | glutamate-ammonia ligase (glutamine synthase) domain containing | -0.148377 Inlier |
| siRNA-Temozolomide Run1-DMSO | NM_0165<br>71 | GLULD1 | 1 | glutamate-ammonia ligase (glutamine synthase) domain containing | 0.148375 Inlier  |
| siRNA Disorazole DMSO Run1   | NM_0165<br>71 | GLULD1 | 1 | glutamate-ammonia ligase (glutamine synthase) domain containing | 0.399889 Inlier  |

Identification of Survival Genes in Human Glioblastoma Cells Using siRNA Screening  
 Nikhil G Thaker, Fang Zhang, Peter R. McDonald, Tong Ying Shun, Michael D Lewen, Ian F. Pollack, and John S. Lazo  
 Molecular Pharmacology

|                              |               |        |                                                                   |           |         |
|------------------------------|---------------|--------|-------------------------------------------------------------------|-----------|---------|
| siRNA-Vinblastine Run1-DMSO  | NM_0165<br>71 | GLULD1 | glutamate-ammonia ligase (glutamine synthase) domain containing 1 | 2.910726  | Inlier  |
| siRNA Disorazole DMSO Run2   | NM_0165<br>71 | GLULD1 | glutamate-ammonia ligase (glutamine synthase) domain containing 1 | 5.494907  | Outlier |
| siRNA-Temozolomide Run3-DMSO | NM_0058<br>38 | GLYAT  | glycine-N-acyltransferase                                         | -1.747029 | Inlier  |
| siRNA-Temozolomide Run2-DMSO | NM_0058<br>38 | GLYAT  | glycine-N-acyltransferase                                         | -0.802947 | Inlier  |
| siRNA-Temozolomide Run1-DMSO | NM_0058<br>38 | GLYAT  | glycine-N-acyltransferase                                         | -0.546053 | Inlier  |
| siRNA Disorazole DMSO Run1   | NM_0058<br>38 | GLYAT  | glycine-N-acyltransferase                                         | -0.184659 | Inlier  |
| siRNA-Vinblastine Run2-DMSO  | NM_0058<br>38 | GLYAT  | glycine-N-acyltransferase                                         | 0.184659  | Inlier  |
| siRNA Disorazole DMSO Run3   | NM_0058<br>38 | GLYAT  | glycine-N-acyltransferase                                         | 0.40725   | Inlier  |
| siRNA-Vinblastine Run1-DMSO  | NM_0058<br>38 | GLYAT  | glycine-N-acyltransferase                                         | 1.660131  | Inlier  |
| siRNA Disorazole DMSO Run2   | NM_0058<br>38 | GLYAT  | glycine-N-acyltransferase                                         | 1.739267  | Inlier  |
| siRNA-Temozolomide Run3-DMSO | NM_0015<br>00 | GMDS   | GDP-mannose 4,6-dehydratase                                       | -2.0761   | Inlier  |
| siRNA-Temozolomide Run2-DMSO | NM_0015<br>00 | GMDS   | GDP-mannose 4,6-dehydratase                                       | -1.077111 | Inlier  |

Identification of Survival Genes in Human Glioblastoma Cells Using siRNA Screening  
 Nikhil G Thaker, Fang Zhang, Peter R. McDonald, Tong Ying Shun, Michael D Lewen, Ian F. Pollack, and John S. Lazo

Molecular Pharmacology

|                              |           |      |                             |           |        |
|------------------------------|-----------|------|-----------------------------|-----------|--------|
| siRNA-Temozolomide Run1-DMSO | NM_001500 | GMDS | GDP-mannose 4,6-dehydratase | -0.796928 | Inlier |
| siRNA Disorazole DMSO Run3   | NM_001500 | GMDS | GDP-mannose 4,6-dehydratase | -0.068504 | Inlier |
| siRNA Disorazole DMSO Run1   | NM_001500 | GMDS | GDP-mannose 4,6-dehydratase | 0.068504  | Inlier |
| siRNA-Vinblastine Run2-DMSO  | NM_001500 | GMDS | GDP-mannose 4,6-dehydratase | 0.308081  | Inlier |
| siRNA-Vinblastine Run1-DMSO  | NM_001500 | GMDS | GDP-mannose 4,6-dehydratase | 0.552072  | Inlier |
| siRNA Disorazole DMSO Run2   | NM_001500 | GMDS | GDP-mannose 4,6-dehydratase | 0.835554  | Inlier |
| siRNA-Temozolomide Run3-DMSO | NM_016573 | GMIP | GEM interacting protein     | -1.070101 | Inlier |
| siRNA-Temozolomide Run2-DMSO | NM_016573 | GMIP | GEM interacting protein     | -0.423117 | Inlier |
| siRNA Disorazole DMSO Run1   | NM_016573 | GMIP | GEM interacting protein     | -0.246988 | Inlier |
| siRNA-Temozolomide Run1-DMSO | NM_016573 | GMIP | GEM interacting protein     | -0.140943 | Inlier |
| siRNA-Vinblastine Run2-DMSO  | NM_016573 | GMIP | GEM interacting protein     | 0.140943  | Inlier |
| siRNA Disorazole DMSO Run3   | NM_016573 | GMIP | GEM interacting protein     | 0.925882  | Inlier |
| siRNA-Vinblastine Run1-DMSO  | NM_016573 | GMIP | GEM interacting protein     | 3.430678  | Inlier |

Identification of Survival Genes in Human Glioblastoma Cells Using siRNA Screening  
 Nikhil G Thaker, Fang Zhang, Peter R. McDonald, Tong Ying Shun, Michael D Lewen, Ian F. Pollack, and John S. Lazo

Molecular Pharmacology

|                              |               |       |                                   |           |         |
|------------------------------|---------------|-------|-----------------------------------|-----------|---------|
| siRNA Disorazole DMSO Run2   | NM_0165<br>73 | GMIP  | GEM interacting protein           | 4.032787  | Outlier |
| siRNA Disorazole DMSO Run1   | NM_0219<br>71 | GMPPB | GDP-mannose pyrophosphorylase B   | -1.202542 | Inlier  |
| siRNA Disorazole DMSO Run3   | NM_0219<br>71 | GMPPB | GDP-mannose pyrophosphorylase B   | -0.67066  | Inlier  |
| siRNA-Temozolomide Run1-DMSO | NM_0219<br>71 | GMPPB | GDP-mannose pyrophosphorylase B   | -0.656775 | Inlier  |
| siRNA-Vinblastine Run2-DMSO  | NM_0219<br>71 | GMPPB | GDP-mannose pyrophosphorylase B   | -0.135239 | Inlier  |
| siRNA-Temozolomide Run2-DMSO | NM_0219<br>71 | GMPPB | GDP-mannose pyrophosphorylase B   | 0.13524   | Inlier  |
| siRNA-Temozolomide Run3-DMSO | NM_0219<br>71 | GMPPB | GDP-mannose pyrophosphorylase B   | 0.67834   | Inlier  |
| siRNA Disorazole DMSO Run2   | NM_0219<br>71 | GMPPB | GDP-mannose pyrophosphorylase B   | 0.989155  | Inlier  |
| siRNA-Vinblastine Run1-DMSO  | NM_0219<br>71 | GMPPB | GDP-mannose pyrophosphorylase B   | 2.536144  | Inlier  |
| siRNA-Temozolomide Run3-DMSO | NM_0068<br>77 | GMPR  | guanosine monophosphate reductase | -0.921533 | Inlier  |
| siRNA-Temozolomide Run2-DMSO | NM_0068<br>77 | GMPR  | guanosine monophosphate reductase | -0.780774 | Inlier  |

Identification of Survival Genes in Human Glioblastoma Cells Using siRNA Screening  
 Nikhil G Thaker, Fang Zhang, Peter R. McDonald, Tong Ying Shun, Michael D Lewen, Ian F. Pollack, and John S. Lazo

Molecular Pharmacology

|                                  |               |       |                                                  |           |        |
|----------------------------------|---------------|-------|--------------------------------------------------|-----------|--------|
| siRNA Disorazole DMSO Run1       | NM_0068<br>77 | GMPR  | guanosine<br>monophos<br>phate<br>reductase      | -0.760409 | Inlier |
| siRNA-Temozolomide Run1-<br>DMSO | NM_0068<br>77 | GMPR  | guanosine<br>monophos<br>phate<br>reductase      | -0.045436 | Inlier |
| siRNA-Vinblastine Run2-<br>DMSO  | NM_0068<br>77 | GMPR  | guanosine<br>monophos<br>phate<br>reductase      | 0.045436  | Inlier |
| siRNA-Vinblastine Run1-<br>DMSO  | NM_0068<br>77 | GMPR  | guanosine<br>monophos<br>phate<br>reductase      | 0.582406  | Inlier |
| siRNA Disorazole DMSO Run2       | NM_0068<br>77 | GMPR  | guanosine<br>monophos<br>phate<br>reductase      | 0.618756  | Inlier |
| siRNA Disorazole DMSO Run3       | NM_0068<br>77 | GMPR  | guanosine<br>monophos<br>phate<br>reductase      | 0.730244  | Inlier |
| siRNA-Vinblastine Run2-<br>DMSO  | NM_0165<br>76 | GMPR2 | guanosine<br>monophos<br>phate<br>reductase<br>2 | -0.870598 | Inlier |
| siRNA-Temozolomide Run3-<br>DMSO | NM_0165<br>76 | GMPR2 | guanosine<br>monophos<br>phate<br>reductase<br>2 | -0.850545 | Inlier |
| siRNA-Temozolomide Run2-<br>DMSO | NM_0165<br>76 | GMPR2 | guanosine<br>monophos<br>phate<br>reductase<br>2 | -0.688276 | Inlier |
| siRNA Disorazole DMSO Run1       | NM_0165<br>76 | GMPR2 | guanosine<br>monophos<br>phate<br>reductase<br>2 | -0.092462 | Inlier |
| siRNA-Temozolomide Run1-<br>DMSO | NM_0165<br>76 | GMPR2 | guanosine<br>monophos<br>phate<br>reductase<br>2 | 0.092462  | Inlier |

Identification of Survival Genes in Human Glioblastoma Cells Using siRNA Screening  
 Nikhil G Thaker, Fang Zhang, Peter R. McDonald, Tong Ying Shun, Michael D Lewen, Ian F. Pollack, and John S. Lazo

Molecular Pharmacology

|                              |               |       |                                              |           |        |
|------------------------------|---------------|-------|----------------------------------------------|-----------|--------|
| siRNA Disorazole DMSO Run3   | NM_0165<br>76 | GMPR2 | guanosine<br>monophosphate<br>reductase<br>2 | 0.12258   | Inlier |
| siRNA Disorazole DMSO Run2   | NM_0165<br>76 | GMPR2 | guanosine<br>monophosphate<br>reductase<br>2 | 0.660724  | Inlier |
| siRNA-Vinblastine Run1-DMSO  | NM_0165<br>76 | GMPR2 | guanosine<br>monophosphate<br>reductase<br>2 | 1.436024  | Inlier |
| siRNA-Temozolomide Run2-DMSO | NM_0038<br>75 | GMPS  | guanine<br>monophosphate<br>synthetase       | -2.193903 | Inlier |
| siRNA-Temozolomide Run1-DMSO | NM_0038<br>75 | GMPS  | guanine<br>monophosphate<br>synthetase       | -1.284946 | Inlier |
| siRNA-Temozolomide Run3-DMSO | NM_0038<br>75 | GMPS  | guanine<br>monophosphate<br>synthetase       | -0.625896 | Inlier |
| siRNA Disorazole DMSO Run1   | NM_0038<br>75 | GMPS  | guanine<br>monophosphate<br>synthetase       | -0.005741 | Inlier |
| siRNA-Vinblastine Run2-DMSO  | NM_0038<br>75 | GMPS  | guanine<br>monophosphate<br>synthetase       | 0.00574   | Inlier |
| siRNA Disorazole DMSO Run3   | NM_0038<br>75 | GMPS  | guanine<br>monophosphate<br>synthetase       | 0.126015  | Inlier |
| siRNA Disorazole DMSO Run2   | NM_0038<br>75 | GMPS  | guanine<br>monophosphate<br>synthetase       | 0.723104  | Inlier |

Identification of Survival Genes in Human Glioblastoma Cells Using siRNA Screening  
 Nikhil G Thaker, Fang Zhang, Peter R. McDonald, Tong Ying Shun, Michael D Lewen, Ian F. Pollack, and John S. Lazo  
 Molecular Pharmacology

|                              |               |        |                                                                                       |           |        |
|------------------------------|---------------|--------|---------------------------------------------------------------------------------------|-----------|--------|
| siRNA-Vinblastine Run1-DMSO  | NM_0038<br>75 | GMP5   | guanine<br>monphosp<br>hate<br>synthetase                                             | 2.488556  | Inlier |
| siRNA-Temozolomide Run3-DMSO | NM_0323<br>20 | GMRP-1 | GMRP-1                                                                                | -1.587366 | Inlier |
| siRNA-Temozolomide Run2-DMSO | NM_0323<br>20 | GMRP-1 | GMRP-1                                                                                | -1.37296  | Inlier |
| siRNA Disorazole DMSO Run2   | NM_0323<br>20 | GMRP-1 | GMRP-1                                                                                | -0.349501 | Inlier |
| siRNA Disorazole DMSO Run1   | NM_0323<br>20 | GMRP-1 | GMRP-1                                                                                | -0.091426 | Inlier |
| siRNA-Temozolomide Run1-DMSO | NM_0323<br>20 | GMRP-1 | GMRP-1                                                                                | 0.091425  | Inlier |
| siRNA Disorazole DMSO Run3   | NM_0323<br>20 | GMRP-1 | GMRP-1                                                                                | 0.301757  | Inlier |
| siRNA-Vinblastine Run1-DMSO  | NM_0323<br>20 | GMRP-1 | GMRP-1                                                                                | 0.999499  | Inlier |
| siRNA-Vinblastine Run2-DMSO  | NM_0323<br>20 | GMRP-1 | GMRP-1                                                                                | 1.665412  | Inlier |
| siRNA-Temozolomide Run3-DMSO | NM_0020<br>67 | GNA11  | guanine<br>nucleotide<br>binding<br>protein (G<br>protein),<br>alpha 11<br>(Gq class) | -1.901567 | Inlier |
| siRNA Disorazole DMSO Run3   | NM_0020<br>67 | GNA11  | guanine<br>nucleotide<br>binding<br>protein (G<br>protein),<br>alpha 11<br>(Gq class) | -1.551753 | Inlier |
| siRNA-Vinblastine Run2-DMSO  | NM_0020<br>67 | GNA11  | guanine<br>nucleotide<br>binding<br>protein (G<br>protein),<br>alpha 11<br>(Gq class) | -1.322667 | Inlier |

Identification of Survival Genes in Human Glioblastoma Cells Using siRNA Screening

Nikhil G Thaker, Fang Zhang, Peter R. McDonald, Tong Ying Shun, Michael D Lewen, Ian F. Pollack, and John S. Lazo

Molecular Pharmacology

|                              |           |       |                                                                     |           |        |
|------------------------------|-----------|-------|---------------------------------------------------------------------|-----------|--------|
| siRNA-Temozolomide Run2-DMSO | NM_002067 | GNA11 | guanine nucleotide binding protein (G protein), alpha 11 (Gq class) | -0.169804 | Inlier |
| siRNA Disorazole DMSO Run1   | NM_002067 | GNA11 | guanine nucleotide binding protein (G protein), alpha 11 (Gq class) | 0.169803  | Inlier |
| siRNA Disorazole DMSO Run2   | NM_002067 | GNA11 | guanine nucleotide binding protein (G protein), alpha 11 (Gq class) | 0.4326    | Inlier |
| siRNA-Temozolomide Run1-DMSO | NM_002067 | GNA11 | guanine nucleotide binding protein (G protein), alpha 11 (Gq class) | 0.654857  | Inlier |
| siRNA-Vinblastine Run1-DMSO  | NM_002067 | GNA11 | guanine nucleotide binding protein (G protein), alpha 11 (Gq class) | 0.694143  | Inlier |
| siRNA-Temozolomide Run3-DMSO | NM_007353 | GNA12 | guanine nucleotide binding protein (G protein) alpha 12             | -2.287089 | Inlier |
| siRNA-Temozolomide Run2-DMSO | NM_007353 | GNA12 | guanine nucleotide binding protein (G protein) alpha 12             | -0.959961 | Inlier |



Identification of Survival Genes in Human Glioblastoma Cells Using siRNA Screening

Nikhil G Thaker, Fang Zhang, Peter R. McDonald, Tong Ying Shun, Michael D Lewen, Ian F. Pollack, and John S. Lazo

Molecular Pharmacology

|                              |               |       |                                                          |           |        |
|------------------------------|---------------|-------|----------------------------------------------------------|-----------|--------|
| siRNA-Temozolomide Run1-DMSO | NM_0073<br>53 | GNA12 | guanine nucleotide binding protein (G protein) alpha 12  | -0.503075 | Inlier |
| siRNA-Vinblastine Run2-DMSO  | NM_0073<br>53 | GNA12 | guanine nucleotide binding protein (G protein) alpha 12  | -0.27208  | Inlier |
| siRNA Disorazole DMSO Run2   | NM_0073<br>53 | GNA12 | guanine nucleotide binding protein (G protein) alpha 12  | 0.272079  | Inlier |
| siRNA Disorazole DMSO Run3   | NM_0073<br>53 | GNA12 | guanine nucleotide binding protein (G protein) alpha 12  | 0.373354  | Inlier |
| siRNA Disorazole DMSO Run1   | NM_0073<br>53 | GNA12 | guanine nucleotide binding protein (G protein) alpha 12  | 0.845925  | Inlier |
| siRNA-Vinblastine Run1-DMSO  | NM_0073<br>53 | GNA12 | guanine nucleotide binding protein (G protein) alpha 12  | 0.914072  | Inlier |
| siRNA-Temozolomide Run3-DMSO | NM_0065<br>72 | GNA13 | guanine nucleotide binding protein (G protein), alpha 13 | -3.236652 | Inlier |
| siRNA-Vinblastine Run2-DMSO  | NM_0065<br>72 | GNA13 | guanine nucleotide binding protein (G protein), alpha 13 | -1.641925 | Inlier |

Identification of Survival Genes in Human Glioblastoma Cells Using siRNA Screening

Nikhil G Thaker, Fang Zhang, Peter R. McDonald, Tong Ying Shun, Michael D Lewen, Ian F. Pollack, and John S. Lazo

Molecular Pharmacology

| siRNA Treatment              | Gene ID | Accession | Protein | Value     | Outlier Type |
|------------------------------|---------|-----------|---------|-----------|--------------|
| siRNA Disorazole DMSO Run3   | NM_0065 | 72        | GNA13   | -0.662738 | Inlier       |
| siRNA-Temozolomide Run2-DMSO | NM_0065 | 72        | GNA13   | -0.362714 | Inlier       |
| siRNA-Temozolomide Run1-DMSO | NM_0065 | 72        | GNA13   | 0.362714  | Inlier       |
| siRNA Disorazole DMSO Run1   | NM_0065 | 72        | GNA13   | 0.526116  | Inlier       |
| siRNA Disorazole DMSO Run2   | NM_0065 | 72        | GNA13   | 0.686262  | Inlier       |
| siRNA-Vinblastine Run1-DMSO  | NM_0065 | 72        | GNA13   | 1.652973  | Inlier       |
| siRNA-Temozolomide Run3-DMSO | NM_0042 | 97        | GNA14   | -0.815328 | Inlier       |
| siRNA-Temozolomide Run2-DMSO | NM_0042 | 97        | GNA14   | -0.631592 | Inlier       |

guanine nucleotide binding protein (G protein), alpha 13  
 guanine nucleotide binding protein (G protein), alpha 14  
 guanine nucleotide binding protein (G protein), alpha 14

Identification of Survival Genes in Human Glioblastoma Cells Using siRNA Screening

Nikhil G Thaker, Fang Zhang, Peter R. McDonald, Tong Ying Shun, Michael D Lewen, Ian F. Pollack, and John S. Lazo

Molecular Pharmacology

|                              |               |       |                                                                     |           |        |
|------------------------------|---------------|-------|---------------------------------------------------------------------|-----------|--------|
| siRNA-Temozolomide Run1-DMSO | NM_0042<br>97 | GNA14 | guanine nucleotide binding protein (G protein), alpha 14            | -0.18626  | Inlier |
| siRNA-Vinblastine Run2-DMSO  | NM_0042<br>97 | GNA14 | guanine nucleotide binding protein (G protein), alpha 14            | -0.170367 | Inlier |
| siRNA Disorazole DMSO Run3   | NM_0042<br>97 | GNA14 | guanine nucleotide binding protein (G protein), alpha 14            | 0.170366  | Inlier |
| siRNA Disorazole DMSO Run1   | NM_0042<br>97 | GNA14 | guanine nucleotide binding protein (G protein), alpha 14            | 0.717408  | Inlier |
| siRNA Disorazole DMSO Run2   | NM_0042<br>97 | GNA14 | guanine nucleotide binding protein (G protein), alpha 14            | 0.779849  | Inlier |
| siRNA-Vinblastine Run1-DMSO  | NM_0042<br>97 | GNA14 | guanine nucleotide binding protein (G protein), alpha 14            | 0.898953  | Inlier |
| siRNA-Temozolomide Run3-DMSO | NM_0020<br>68 | GNA15 | guanine nucleotide binding protein (G protein), alpha 15 (Gq class) | -2.984797 | Inlier |
| siRNA-Vinblastine Run2-DMSO  | NM_0020<br>68 | GNA15 | guanine nucleotide binding protein (G protein), alpha 15 (Gq class) | -0.748801 | Inlier |

Identification of Survival Genes in Human Glioblastoma Cells Using siRNA Screening

Nikhil G Thaker, Fang Zhang, Peter R. McDonald, Tong Ying Shun, Michael D Lewen, Ian F. Pollack, and John S. Lazo

Molecular Pharmacology

|                              |           |       |                                                                     |           |         |
|------------------------------|-----------|-------|---------------------------------------------------------------------|-----------|---------|
| siRNA-Temozolomide Run2-DMSO | NM_002068 | GNA15 | guanine nucleotide binding protein (G protein), alpha 15 (Gq class) | -0.600199 | Inlier  |
| siRNA Disorazole DMSO Run3   | NM_002068 | GNA15 | guanine nucleotide binding protein (G protein), alpha 15 (Gq class) | -0.372225 | Inlier  |
| siRNA-Temozolomide Run1-DMSO | NM_002068 | GNA15 | guanine nucleotide binding protein (G protein), alpha 15 (Gq class) | 0.372225  | Inlier  |
| siRNA Disorazole DMSO Run1   | NM_002068 | GNA15 | guanine nucleotide binding protein (G protein), alpha 15 (Gq class) | 0.494206  | Inlier  |
| siRNA Disorazole DMSO Run2   | NM_002068 | GNA15 | guanine nucleotide binding protein (G protein), alpha 15 (Gq class) | 3.448635  | Inlier  |
| siRNA-Vinblastine Run1-DMSO  | NM_002068 | GNA15 | guanine nucleotide binding protein (G protein), alpha 15 (Gq class) | 5.088827  | Outlier |

Identification of Survival Genes in Human Glioblastoma Cells Using siRNA Screening

Nikhil G Thaker, Fang Zhang, Peter R. McDonald, Tong Ying Shun, Michael D Lewen, Ian F. Pollack, and John S. Lazo

Molecular Pharmacology

|                              |           |       |                                                                                         |           |        |
|------------------------------|-----------|-------|-----------------------------------------------------------------------------------------|-----------|--------|
| siRNA-Temozolomide Run3-DMSO | NM_002069 | GNAI1 | guanine nucleotide binding protein (G protein), alpha inhibiting activity polypeptide 1 | -2.089317 | Inlier |
| siRNA-Temozolomide Run2-DMSO | NM_002069 | GNAI1 | guanine nucleotide binding protein (G protein), alpha inhibiting activity polypeptide 1 | -1.759573 | Inlier |
| siRNA-Temozolomide Run1-DMSO | NM_002069 | GNAI1 | guanine nucleotide binding protein (G protein), alpha inhibiting activity polypeptide 1 | -1.536089 | Inlier |
| siRNA-Vinblastine Run2-DMSO  | NM_002069 | GNAI1 | guanine nucleotide binding protein (G protein), alpha inhibiting activity polypeptide 1 | -0.208582 | Inlier |
| siRNA Disorazole DMSO Run1   | NM_002069 | GNAI1 | guanine nucleotide binding protein (G protein), alpha inhibiting activity polypeptide 1 | 0.208582  | Inlier |

Identification of Survival Genes in Human Glioblastoma Cells Using siRNA Screening

Nikhil G Thaker, Fang Zhang, Peter R. McDonald, Tong Ying Shun, Michael D Lewen, Ian F. Pollack, and John S. Lazo

Molecular Pharmacology

|                              |               |       |                                                                                         |           |        |
|------------------------------|---------------|-------|-----------------------------------------------------------------------------------------|-----------|--------|
| siRNA Disorazole DMSO Run3   | NM_0020<br>69 | GNAI1 | guanine nucleotide binding protein (G protein), alpha inhibiting activity polypeptide 1 | 0.333045  | Inlier |
| siRNA Disorazole DMSO Run2   | NM_0020<br>69 | GNAI1 | guanine nucleotide binding protein (G protein), alpha inhibiting activity polypeptide 1 | 0.359813  | Inlier |
| siRNA-Vinblastine Run1-DMSO  | NM_0020<br>69 | GNAI1 | guanine nucleotide binding protein (G protein), alpha inhibiting activity polypeptide 1 | 0.989187  | Inlier |
| siRNA-Temozolomide Run3-DMSO | NM_0020<br>70 | GNAI2 | guanine nucleotide binding protein (G protein), alpha inhibiting activity polypeptide 2 | -2.64063  | Inlier |
| siRNA-Vinblastine Run2-DMSO  | NM_0020<br>70 | GNAI2 | guanine nucleotide binding protein (G protein), alpha inhibiting activity polypeptide 2 | -1.431752 | Inlier |

Identification of Survival Genes in Human Glioblastoma Cells Using siRNA Screening

Nikhil G Thaker, Fang Zhang, Peter R. McDonald, Tong Ying Shun, Michael D Lewen, Ian F. Pollack, and John S. Lazo

Molecular Pharmacology

|                              |           |       |                                                                                         |           |        |
|------------------------------|-----------|-------|-----------------------------------------------------------------------------------------|-----------|--------|
| siRNA-Temozolomide Run2-DMSO | NM_002070 | GNAI2 | guanine nucleotide binding protein (G protein), alpha inhibiting activity polypeptide 2 | -0.938068 | Inlier |
| siRNA Disorazole DMSO Run1   | NM_002070 | GNAI2 | guanine nucleotide binding protein (G protein), alpha inhibiting activity polypeptide 2 | -0.044322 | Inlier |
| siRNA-Temozolomide Run1-DMSO | NM_002070 | GNAI2 | guanine nucleotide binding protein (G protein), alpha inhibiting activity polypeptide 2 | 0.044322  | Inlier |
| siRNA Disorazole DMSO Run3   | NM_002070 | GNAI2 | guanine nucleotide binding protein (G protein), alpha inhibiting activity polypeptide 2 | 0.145928  | Inlier |
| siRNA-Vinblastine Run1-DMSO  | NM_002070 | GNAI2 | guanine nucleotide binding protein (G protein), alpha inhibiting activity polypeptide 2 | 0.426199  | Inlier |

Identification of Survival Genes in Human Glioblastoma Cells Using siRNA Screening

Nikhil G Thaker, Fang Zhang, Peter R. McDonald, Tong Ying Shun, Michael D Lewen, Ian F. Pollack, and John S. Lazo

Molecular Pharmacology

|                              |               |       |                                                                                         |           |        |
|------------------------------|---------------|-------|-----------------------------------------------------------------------------------------|-----------|--------|
| siRNA Disorazole DMSO Run2   | NM_0020<br>70 | GNAI2 | guanine nucleotide binding protein (G protein), alpha inhibiting activity polypeptide 2 | 0.922801  | Inlier |
| siRNA-Temozolomide Run2-DMSO | NM_0064<br>96 | GNAI3 | guanine nucleotide binding protein (G protein), alpha inhibiting activity polypeptide 3 | -0.695227 | Inlier |
| siRNA-Temozolomide Run3-DMSO | NM_0064<br>96 | GNAI3 | guanine nucleotide binding protein (G protein), alpha inhibiting activity polypeptide 3 | -0.653773 | Inlier |
| siRNA Disorazole DMSO Run3   | NM_0064<br>96 | GNAI3 | guanine nucleotide binding protein (G protein), alpha inhibiting activity polypeptide 3 | -0.145699 | Inlier |
| siRNA-Temozolomide Run1-DMSO | NM_0064<br>96 | GNAI3 | guanine nucleotide binding protein (G protein), alpha inhibiting activity polypeptide 3 | -0.002887 | Inlier |



Identification of Survival Genes in Human Glioblastoma Cells Using siRNA Screening

Nikhil G Thaker, Fang Zhang, Peter R. McDonald, Tong Ying Shun, Michael D Lewen, Ian F. Pollack, and John S. Lazo

Molecular Pharmacology

|                              |               |       |                                                                                                       |           |        |
|------------------------------|---------------|-------|-------------------------------------------------------------------------------------------------------|-----------|--------|
| siRNA-Vinblastine Run2-DMSO  | NM_0064<br>96 | GNAI3 | guanine nucleotide binding protein (G protein), alpha inhibiting activity polypeptide 3               | 0.002887  | Inlier |
| siRNA Disorazole DMSO Run1   | NM_0064<br>96 | GNAI3 | guanine nucleotide binding protein (G protein), alpha inhibiting activity polypeptide 3               | 0.700543  | Inlier |
| siRNA Disorazole DMSO Run2   | NM_0064<br>96 | GNAI3 | guanine nucleotide binding protein (G protein), alpha inhibiting activity polypeptide 3               | 1.702054  | Inlier |
| siRNA-Vinblastine Run1-DMSO  | NM_0064<br>96 | GNAI3 | guanine nucleotide binding protein (G protein), alpha inhibiting activity polypeptide 3               | 2.269009  | Inlier |
| siRNA-Temozolomide Run3-DMSO | NM_1829<br>78 | GNAL  | guanine nucleotide binding protein (G protein), alpha activating activity polypeptide, olfactory type | -3.301639 | Inlier |

Identification of Survival Genes in Human Glioblastoma Cells Using siRNA Screening

Nikhil G Thaker, Fang Zhang, Peter R. McDonald, Tong Ying Shun, Michael D Lewen, Ian F. Pollack, and John S. Lazo

Molecular Pharmacology

|                              |           |      |                                                                                                       |                  |
|------------------------------|-----------|------|-------------------------------------------------------------------------------------------------------|------------------|
| siRNA-Vinblastine Run1-DMSO  | NM_182978 | GNAL | guanine nucleotide binding protein (G protein), alpha activating activity polypeptide, olfactory type | -2.57124 Inlier  |
| siRNA-Temozolomide Run2-DMSO | NM_182978 | GNAL | guanine nucleotide binding protein (G protein), alpha activating activity polypeptide, olfactory type | -1.326783 Inlier |
| siRNA-Vinblastine Run2-DMSO  | NM_182978 | GNAL | guanine nucleotide binding protein (G protein), alpha activating activity polypeptide, olfactory type | -0.069156 Inlier |
| siRNA-Temozolomide Run1-DMSO | NM_182978 | GNAL | guanine nucleotide binding protein (G protein), alpha activating activity polypeptide, olfactory type | 0.069156 Inlier  |

Identification of Survival Genes in Human Glioblastoma Cells Using siRNA Screening

Nikhil G Thaker, Fang Zhang, Peter R. McDonald, Tong Ying Shun, Michael D Lewen, Ian F. Pollack, and John S. Lazo

Molecular Pharmacology

|                              |               |       |                                                                                                       |           |        |
|------------------------------|---------------|-------|-------------------------------------------------------------------------------------------------------|-----------|--------|
| siRNA Disorazole DMSO Run3   | NM_1829<br>78 | GNAL  | guanine nucleotide binding protein (G protein), alpha activating activity polypeptide, olfactory type | 0.167457  | Inlier |
| siRNA Disorazole DMSO Run2   | NM_1829<br>78 | GNAL  | guanine nucleotide binding protein (G protein), alpha activating activity polypeptide, olfactory type | 0.533337  | Inlier |
| siRNA Disorazole DMSO Run1   | NM_1829<br>78 | GNAL  | guanine nucleotide binding protein (G protein), alpha activating activity polypeptide, olfactory type | 0.815663  | Inlier |
| siRNA-Temozolomide Run3-DMSO | NM_0209<br>88 | GNAO1 | guanine nucleotide binding protein (G protein), alpha activating activity polypeptide O               | -1.070404 | Inlier |

Identification of Survival Genes in Human Glioblastoma Cells Using siRNA Screening

Nikhil G Thaker, Fang Zhang, Peter R. McDonald, Tong Ying Shun, Michael D Lewen, Ian F. Pollack, and John S. Lazo

Molecular Pharmacology

|                              |           |       |                                                                                         |           |        |
|------------------------------|-----------|-------|-----------------------------------------------------------------------------------------|-----------|--------|
| siRNA-Temozolomide Run2-DMSO | NM_020988 | GNAO1 | guanine nucleotide binding protein (G protein), alpha activating activity polypeptide O | -0.859426 | Inlier |
| siRNA-Temozolomide Run1-DMSO | NM_020988 | GNAO1 | guanine nucleotide binding protein (G protein), alpha activating activity polypeptide O | -0.839764 | Inlier |
| siRNA-Vinblastine Run2-DMSO  | NM_020988 | GNAO1 | guanine nucleotide binding protein (G protein), alpha activating activity polypeptide O | -0.000795 | Inlier |
| siRNA Disorazole DMSO Run3   | NM_020988 | GNAO1 | guanine nucleotide binding protein (G protein), alpha activating activity polypeptide O | 0.000795  | Inlier |
| siRNA Disorazole DMSO Run2   | NM_020988 | GNAO1 | guanine nucleotide binding protein (G protein), alpha activating activity polypeptide O | 0.496683  | Inlier |

Identification of Survival Genes in Human Glioblastoma Cells Using siRNA Screening

Nikhil G Thaker, Fang Zhang, Peter R. McDonald, Tong Ying Shun, Michael D Lewen, Ian F. Pollack, and John S. Lazo

Molecular Pharmacology

|                              |               |       |                                                                                         |           |        |
|------------------------------|---------------|-------|-----------------------------------------------------------------------------------------|-----------|--------|
| siRNA Disorazole DMSO Run1   | NM_0209<br>88 | GNAO1 | guanine nucleotide binding protein (G protein), alpha activating activity polypeptide O | 0.509236  | Inlier |
| siRNA-Vinblastine Run1-DMSO  | NM_0209<br>88 | GNAO1 | guanine nucleotide binding protein (G protein), alpha activating activity polypeptide O | 0.945006  | Inlier |
| siRNA-Temozolomide Run3-DMSO | NM_0020<br>72 | GNAQ  | guanine nucleotide binding protein (G protein), q polypeptide                           | -1.583011 | Inlier |
| siRNA-Temozolomide Run2-DMSO | NM_0020<br>72 | GNAQ  | guanine nucleotide binding protein (G protein), q polypeptide                           | -0.977113 | Inlier |
| siRNA-Vinblastine Run2-DMSO  | NM_0020<br>72 | GNAQ  | guanine nucleotide binding protein (G protein), q polypeptide                           | -0.148737 | Inlier |
| siRNA Disorazole DMSO Run3   | NM_0020<br>72 | GNAQ  | guanine nucleotide binding protein (G protein), q polypeptide                           | -0.06548  | Inlier |

Identification of Survival Genes in Human Glioblastoma Cells Using siRNA Screening

Nikhil G Thaker, Fang Zhang, Peter R. McDonald, Tong Ying Shun, Michael D Lewen, Ian F. Pollack, and John S. Lazo

Molecular Pharmacology

|                              |           |      |                                                               |           |        |
|------------------------------|-----------|------|---------------------------------------------------------------|-----------|--------|
| siRNA-Temozolomide Run1-DMSO | NM_002072 | GNAQ | guanine nucleotide binding protein (G protein), q polypeptide | 0.06548   | Inlier |
| siRNA Disorazole DMSO Run1   | NM_002072 | GNAQ | guanine nucleotide binding protein (G protein), q polypeptide | 0.371887  | Inlier |
| siRNA Disorazole DMSO Run2   | NM_002072 | GNAQ | guanine nucleotide binding protein (G protein), q polypeptide | 1.145525  | Inlier |
| siRNA-Vinblastine Run1-DMSO  | NM_002072 | GNAQ | guanine nucleotide binding protein (G protein), q polypeptide | 1.936675  | Inlier |
| siRNA-Temozolomide Run2-DMSO | NM_080426 | GNAS | GNAS complex locus                                            | -1.282563 | Inlier |
| siRNA-Temozolomide Run3-DMSO | NM_080426 | GNAS | GNAS complex locus                                            | -0.996719 | Inlier |
| siRNA-Temozolomide Run1-DMSO | NM_080426 | GNAS | GNAS complex locus                                            | -0.929974 | Inlier |
| siRNA Disorazole DMSO Run1   | NM_080426 | GNAS | GNAS complex locus                                            | -0.153448 | Inlier |
| siRNA Disorazole DMSO Run3   | NM_080426 | GNAS | GNAS complex locus                                            | 0.153448  | Inlier |
| siRNA Disorazole DMSO Run2   | NM_080426 | GNAS | GNAS complex locus                                            | 0.310427  | Inlier |
| siRNA-Vinblastine Run1-DMSO  | NM_080426 | GNAS | GNAS complex locus                                            | 0.445996  | Inlier |
| siRNA-Vinblastine Run2-DMSO  | NM_080426 | GNAS | GNAS complex locus                                            | 0.903004  | Inlier |

Identification of Survival Genes in Human Glioblastoma Cells Using siRNA Screening

Nikhil G Thaker, Fang Zhang, Peter R. McDonald, Tong Ying Shun, Michael D Lewen, Ian F. Pollack, and John S. Lazo

Molecular Pharmacology

|                              |           |       |                                                                                          |           |        |
|------------------------------|-----------|-------|------------------------------------------------------------------------------------------|-----------|--------|
| siRNA-Temozolomide Run3-DMSO | NM_000172 | GNAT1 | guanine nucleotide binding protein (G protein), alpha transducing activity polypeptide 1 | -1.57308  | Inlier |
| siRNA-Vinblastine Run1-DMSO  | NM_000172 | GNAT1 | guanine nucleotide binding protein (G protein), alpha transducing activity polypeptide 1 | -0.841128 | Inlier |
| siRNA-Temozolomide Run2-DMSO | NM_000172 | GNAT1 | guanine nucleotide binding protein (G protein), alpha transducing activity polypeptide 1 | -0.507872 | Inlier |
| siRNA Disorazole DMSO Run3   | NM_000172 | GNAT1 | guanine nucleotide binding protein (G protein), alpha transducing activity polypeptide 1 | -0.313363 | Inlier |
| siRNA Disorazole DMSO Run2   | NM_000172 | GNAT1 | guanine nucleotide binding protein (G protein), alpha transducing activity polypeptide 1 | 0.313363  | Inlier |

Identification of Survival Genes in Human Glioblastoma Cells Using siRNA Screening

Nikhil G Thaker, Fang Zhang, Peter R. McDonald, Tong Ying Shun, Michael D Lewen, Ian F. Pollack, and John S. Lazo

Molecular Pharmacology

|                              |           |       |                                                                                          |           |        |
|------------------------------|-----------|-------|------------------------------------------------------------------------------------------|-----------|--------|
| siRNA-Vinblastine Run2-DMSO  | NM_000172 | GNAT1 | guanine nucleotide binding protein (G protein), alpha transducing activity polypeptide 1 | 0.507808  | Inlier |
| siRNA-Temozolomide Run1-DMSO | NM_000172 | GNAT1 | guanine nucleotide binding protein (G protein), alpha transducing activity polypeptide 1 | 0.875364  | Inlier |
| siRNA Disorazole DMSO Run1   | NM_000172 | GNAT1 | guanine nucleotide binding protein (G protein), alpha transducing activity polypeptide 1 | 1.573093  | Inlier |
| siRNA-Temozolomide Run3-DMSO | NM_005272 | GNAT2 | guanine nucleotide binding protein (G protein), alpha transducing activity polypeptide 2 | -0.991809 | Inlier |
| siRNA-Temozolomide Run2-DMSO | NM_005272 | GNAT2 | guanine nucleotide binding protein (G protein), alpha transducing activity polypeptide 2 | -0.768703 | Inlier |



Identification of Survival Genes in Human Glioblastoma Cells Using siRNA Screening

Nikhil G Thaker, Fang Zhang, Peter R. McDonald, Tong Ying Shun, Michael D Lewen, Ian F. Pollack, and John S. Lazo

Molecular Pharmacology

|                              |           |       |                                                                                          |           |        |
|------------------------------|-----------|-------|------------------------------------------------------------------------------------------|-----------|--------|
| siRNA-Temozolomide Run1-DMSO | NM_005272 | GNAT2 | guanine nucleotide binding protein (G protein), alpha transducing activity polypeptide 2 | -0.580297 | Inlier |
| siRNA Disorazole DMSO Run2   | NM_005272 | GNAT2 | guanine nucleotide binding protein (G protein), alpha transducing activity polypeptide 2 | -0.033281 | Inlier |
| siRNA Disorazole DMSO Run1   | NM_005272 | GNAT2 | guanine nucleotide binding protein (G protein), alpha transducing activity polypeptide 2 | 0.033281  | Inlier |
| siRNA Disorazole DMSO Run3   | NM_005272 | GNAT2 | guanine nucleotide binding protein (G protein), alpha transducing activity polypeptide 2 | 0.529145  | Inlier |
| siRNA-Vinblastine Run2-DMSO  | NM_005272 | GNAT2 | guanine nucleotide binding protein (G protein), alpha transducing activity polypeptide 2 | 0.775713  | Inlier |

Identification of Survival Genes in Human Glioblastoma Cells Using siRNA Screening

Nikhil G Thaker, Fang Zhang, Peter R. McDonald, Tong Ying Shun, Michael D Lewen, Ian F. Pollack, and John S.

Lazo

Molecular Pharmacology

|                              |           |       |                                                                                          |           |        |
|------------------------------|-----------|-------|------------------------------------------------------------------------------------------|-----------|--------|
| siRNA-Vinblastine Run1-DMSO  | NM_005272 | GNAT2 | guanine nucleotide binding protein (G protein), alpha transducing activity polypeptide 2 | 0.869119  | Inlier |
| siRNA-Temozolomide Run3-DMSO | NM_002073 | GNAZ  | guanine nucleotide binding protein (G protein), alpha z polypeptide                      | -2.478438 | Inlier |
| siRNA-Temozolomide Run1-DMSO | NM_002073 | GNAZ  | guanine nucleotide binding protein (G protein), alpha z polypeptide                      | -0.716077 | Inlier |
| siRNA-Temozolomide Run2-DMSO | NM_002073 | GNAZ  | guanine nucleotide binding protein (G protein), alpha z polypeptide                      | -0.282884 | Inlier |
| siRNA Disorazole DMSO Run3   | NM_002073 | GNAZ  | guanine nucleotide binding protein (G protein), alpha z polypeptide                      | -0.058847 | Inlier |
| siRNA-Vinblastine Run2-DMSO  | NM_002073 | GNAZ  | guanine nucleotide binding protein (G protein), alpha z polypeptide                      | 0.058847  | Inlier |

Identification of Survival Genes in Human Glioblastoma Cells Using siRNA Screening

Nikhil G Thaker, Fang Zhang, Peter R. McDonald, Tong Ying Shun, Michael D Lewen, Ian F. Pollack, and John S. Lazo

Molecular Pharmacology

|                              |               |      |                                                                     |           |        |
|------------------------------|---------------|------|---------------------------------------------------------------------|-----------|--------|
| siRNA Disorazole DMSO Run2   | NM_0020<br>73 | GNAZ | guanine nucleotide binding protein (G protein), alpha z polypeptide | 0.632923  | Inlier |
| siRNA-Vinblastine Run1-DMSO  | NM_0020<br>73 | GNAZ | guanine nucleotide binding protein (G protein), alpha z polypeptide | 2.219738  | Inlier |
| siRNA Disorazole DMSO Run1   | NM_0020<br>73 | GNAZ | guanine nucleotide binding protein (G protein), alpha z polypeptide | 2.33747   | Inlier |
| siRNA-Temozolomide Run3-DMSO | NM_0054<br>76 | GNE  | glucosamine (UDP-N-acetyl)-2-epimerase /N-acetylman nosamine kinase | -1.324748 | Inlier |
| siRNA-Temozolomide Run2-DMSO | NM_0054<br>76 | GNE  | glucosamine (UDP-N-acetyl)-2-epimerase /N-acetylman nosamine kinase | -0.729509 | Inlier |
| siRNA Disorazole DMSO Run2   | NM_0054<br>76 | GNE  | glucosamine (UDP-N-acetyl)-2-epimerase /N-acetylman nosamine kinase | -0.597974 | Inlier |

Identification of Survival Genes in Human Glioblastoma Cells Using siRNA Screening

Nikhil G Thaker, Fang Zhang, Peter R. McDonald, Tong Ying Shun, Michael D Lewen, Ian F. Pollack, and John S. Lazo

Molecular Pharmacology

|                              |           |      |                                                                    |           |        |
|------------------------------|-----------|------|--------------------------------------------------------------------|-----------|--------|
| siRNA-Temozolomide Run1-DMSO | NM_005476 | GNE  | glucosamine (UDP-N-acetyl)-2-epimerase /N-acetylmannosamine kinase | -0.057407 | Inlier |
| siRNA Disorazole DMSO Run3   | NM_005476 | GNE  | glucosamine (UDP-N-acetyl)-2-epimerase /N-acetylmannosamine kinase | 0.057407  | Inlier |
| siRNA Disorazole DMSO Run1   | NM_005476 | GNE  | glucosamine (UDP-N-acetyl)-2-epimerase /N-acetylmannosamine kinase | 0.619491  | Inlier |
| siRNA-Vinblastine Run1-DMSO  | NM_005476 | GNE  | glucosamine (UDP-N-acetyl)-2-epimerase /N-acetylmannosamine kinase | 0.915174  | Inlier |
| siRNA-Vinblastine Run2-DMSO  | NM_005476 | GNE  | glucosamine (UDP-N-acetyl)-2-epimerase /N-acetylmannosamine kinase | 1.312404  | Inlier |
| siRNA-Temozolomide Run3-DMSO | NM_004485 | GNG4 | guanine nucleotide binding protein (G protein), gamma 4            | -1.059411 | Inlier |

Identification of Survival Genes in Human Glioblastoma Cells Using siRNA Screening

Nikhil G Thaker, Fang Zhang, Peter R. McDonald, Tong Ying Shun, Michael D Lewen, Ian F. Pollack, and John S. Lazo

Molecular Pharmacology

|                              |               |      |                                                         |           |        |
|------------------------------|---------------|------|---------------------------------------------------------|-----------|--------|
| siRNA Disorazole DMSO Run2   | NM_0044<br>85 | GNG4 | guanine nucleotide binding protein (G protein), gamma 4 | -1.015935 | Inlier |
| siRNA-Temozolomide Run2-DMSO | NM_0044<br>85 | GNG4 | guanine nucleotide binding protein (G protein), gamma 4 | -0.131764 | Inlier |
| siRNA-Temozolomide Run1-DMSO | NM_0044<br>85 | GNG4 | guanine nucleotide binding protein (G protein), gamma 4 | -0.085384 | Inlier |
| siRNA Disorazole DMSO Run3   | NM_0044<br>85 | GNG4 | guanine nucleotide binding protein (G protein), gamma 4 | 0.085384  | Inlier |
| siRNA Disorazole DMSO Run1   | NM_0044<br>85 | GNG4 | guanine nucleotide binding protein (G protein), gamma 4 | 0.358903  | Inlier |
| siRNA-Vinblastine Run1-DMSO  | NM_0044<br>85 | GNG4 | guanine nucleotide binding protein (G protein), gamma 4 | 0.990097  | Inlier |
| siRNA-Vinblastine Run2-DMSO  | NM_0044<br>85 | GNG4 | guanine nucleotide binding protein (G protein), gamma 4 | 1.255875  | Inlier |
| siRNA-Temozolomide Run3-DMSO | NM_0528<br>47 | GNG7 | guanine nucleotide binding protein (G protein), gamma 7 | -1.40392  | Inlier |

Identification of Survival Genes in Human Glioblastoma Cells Using siRNA Screening

Nikhil G Thaker, Fang Zhang, Peter R. McDonald, Tong Ying Shun, Michael D Lewen, Ian F. Pollack, and John S. Lazo

Molecular Pharmacology

|                              |               |      |                                                         |           |        |
|------------------------------|---------------|------|---------------------------------------------------------|-----------|--------|
| siRNA Disorazole DMSO Run2   | NM_0528<br>47 | GNG7 | guanine nucleotide binding protein (G protein), gamma 7 | -0.68007  | Inlier |
| siRNA-Temozolomide Run2-DMSO | NM_0528<br>47 | GNG7 | guanine nucleotide binding protein (G protein), gamma 7 | -0.650168 | Inlier |
| siRNA-Temozolomide Run1-DMSO | NM_0528<br>47 | GNG7 | guanine nucleotide binding protein (G protein), gamma 7 | -0.351194 | Inlier |
| siRNA Disorazole DMSO Run3   | NM_0528<br>47 | GNG7 | guanine nucleotide binding protein (G protein), gamma 7 | 0.351194  | Inlier |
| siRNA-Vinblastine Run2-DMSO  | NM_0528<br>47 | GNG7 | guanine nucleotide binding protein (G protein), gamma 7 | 0.66893   | Inlier |
| siRNA Disorazole DMSO Run1   | NM_0528<br>47 | GNG7 | guanine nucleotide binding protein (G protein), gamma 7 | 0.747448  | Inlier |
| siRNA-Vinblastine Run1-DMSO  | NM_0528<br>47 | GNG7 | guanine nucleotide binding protein (G protein), gamma 7 | 0.840678  | Inlier |
| siRNA-Temozolomide Run2-DMSO | NM_0189<br>60 | GNMT | glycine N-methyltransferase                             | -0.904376 | Inlier |
| siRNA-Temozolomide Run1-DMSO | NM_0189<br>60 | GNMT | glycine N-methyltransferase                             | -0.444624 | Inlier |
| siRNA Disorazole DMSO Run1   | NM_0189<br>60 | GNMT | glycine N-methyltransferase                             | -0.243886 | Inlier |

Identification of Survival Genes in Human Glioblastoma Cells Using siRNA Screening  
 Nikhil G Thaker, Fang Zhang, Peter R. McDonald, Tong Ying Shun, Michael D Lewen, Ian F. Pollack, and John S. Lazo

| Molecular Pharmacology       |               |       |                                      |           |         |
|------------------------------|---------------|-------|--------------------------------------|-----------|---------|
| siRNA-Vinblastine Run2-DMSO  | NM_0189<br>60 | GNMT  | glycine N-methyltransferase          | -0.105135 | Inlier  |
| siRNA Disorazole DMSO Run3   | NM_0189<br>60 | GNMT  | glycine N-methyltransferase          | 0.105134  | Inlier  |
| siRNA-Temozolomide Run3-DMSO | NM_0189<br>60 | GNMT  | glycine N-methyltransferase          | 2.530285  | Inlier  |
| siRNA Disorazole DMSO Run2   | NM_0189<br>60 | GNMT  | glycine N-methyltransferase          | 3.689663  | Outlier |
| siRNA-Vinblastine Run1-DMSO  | NM_0189<br>60 | GNMT  | glycine N-methyltransferase          | 3.725149  | Outlier |
| siRNA-Temozolomide Run1-DMSO | NM_0142<br>36 | GNPAT | glyceronephosphate O-acyltransferase | -1.371387 | Inlier  |
| siRNA Disorazole DMSO Run1   | NM_0142<br>36 | GNPAT | glyceronephosphate O-acyltransferase | -0.64558  | Inlier  |
| siRNA-Temozolomide Run3-DMSO | NM_0142<br>36 | GNPAT | glyceronephosphate O-acyltransferase | -0.524531 | Inlier  |
| siRNA-Temozolomide Run2-DMSO | NM_0142<br>36 | GNPAT | glyceronephosphate O-acyltransferase | -0.175003 | Inlier  |
| siRNA Disorazole DMSO Run3   | NM_0142<br>36 | GNPAT | glyceronephosphate O-acyltransferase | 0.175002  | Inlier  |
| siRNA-Vinblastine Run2-DMSO  | NM_0142<br>36 | GNPAT | glyceronephosphate O-acyltransferase | 0.70342   | Inlier  |
| siRNA-Vinblastine Run1-DMSO  | NM_0142<br>36 | GNPAT | glyceronephosphate O-acyltransferase | 1.272041  | Inlier  |

Identification of Survival Genes in Human Glioblastoma Cells Using siRNA Screening

Nikhil G Thaker, Fang Zhang, Peter R. McDonald, Tong Ying Shun, Michael D Lewen, Ian F. Pollack, and John S. Lazo

Molecular Pharmacology

|                              |               |        |                                         |           |        |
|------------------------------|---------------|--------|-----------------------------------------|-----------|--------|
| siRNA Disorazole DMSO Run2   | NM_0142<br>36 | GNPAT  | glyceronephosphate<br>O-acyltransferase | 1.40778   | Inlier |
| siRNA-Temozolomide Run2-DMSO | NM_0054<br>71 | GNPDA1 | glucosamine-6-phosphate deaminase 1     | -1.062368 | Inlier |
| siRNA-Temozolomide Run3-DMSO | NM_0054<br>71 | GNPDA1 | glucosamine-6-phosphate deaminase 1     | -0.79784  | Inlier |
| siRNA Disorazole DMSO Run1   | NM_0054<br>71 | GNPDA1 | glucosamine-6-phosphate deaminase 1     | -0.431899 | Inlier |
| siRNA-Vinblastine Run2-DMSO  | NM_0054<br>71 | GNPDA1 | glucosamine-6-phosphate deaminase 1     | -0.197684 | Inlier |
| siRNA-Temozolomide Run1-DMSO | NM_0054<br>71 | GNPDA1 | glucosamine-6-phosphate deaminase 1     | 0.197684  | Inlier |
| siRNA Disorazole DMSO Run3   | NM_0054<br>71 | GNPDA1 | glucosamine-6-phosphate deaminase 1     | 0.55116   | Inlier |
| siRNA-Vinblastine Run1-DMSO  | NM_0054<br>71 | GNPDA1 | glucosamine-6-phosphate deaminase 1     | 3.020657  | Inlier |



Identification of Survival Genes in Human Glioblastoma Cells Using siRNA Screening  
 Nikhil G Thaker, Fang Zhang, Peter R. McDonald, Tong Ying Shun, Michael D Lewen, Ian F. Pollack, and John S. Lazo  
 Molecular Pharmacology

|                              |               |        |                                     |           |        |
|------------------------------|---------------|--------|-------------------------------------|-----------|--------|
| siRNA Disorazole DMSO Run2   | NM_0054<br>71 | GNPDA1 | glucosamine-6-phosphate deaminase 1 | 3.248352  | Inlier |
| siRNA-Temozolomide Run3-DMSO | NM_1383<br>35 | GNPDA2 | glucosamine-6-phosphate deaminase 2 | -3.237398 | Inlier |
| siRNA Disorazole DMSO Run1   | NM_1383<br>35 | GNPDA2 | glucosamine-6-phosphate deaminase 2 | -0.689579 | Inlier |
| siRNA-Temozolomide Run2-DMSO | NM_1383<br>35 | GNPDA2 | glucosamine-6-phosphate deaminase 2 | -0.659421 | Inlier |
| siRNA-Temozolomide Run1-DMSO | NM_1383<br>35 | GNPDA2 | glucosamine-6-phosphate deaminase 2 | -0.304331 | Inlier |
| siRNA-Vinblastine Run2-DMSO  | NM_1383<br>35 | GNPDA2 | glucosamine-6-phosphate deaminase 2 | 0.30433   | Inlier |
| siRNA Disorazole DMSO Run3   | NM_1383<br>35 | GNPDA2 | glucosamine-6-phosphate deaminase 2 | 0.397557  | Inlier |
| siRNA Disorazole DMSO Run2   | NM_1383<br>35 | GNPDA2 | glucosamine-6-phosphate deaminase 2 | 1.956931  | Inlier |

Identification of Survival Genes in Human Glioblastoma Cells Using siRNA Screening  
 Nikhil G Thaker, Fang Zhang, Peter R. McDonald, Tong Ying Shun, Michael D Lewen, Ian F. Pollack, and John S. Lazo  
 Molecular Pharmacology

|                              |           |         |                                             |           |         |
|------------------------------|-----------|---------|---------------------------------------------|-----------|---------|
| siRNA-Vinblastine Run1-DMSO  | NM_138335 | GNPDA2  | glucosamine-6-phosphate deaminase 2         | 3.327654  | Inlier  |
| siRNA-Temozolomide Run2-DMSO | NM_198066 | GNPNAT1 | glucosamine-phosphate N-acetyltransferase 1 | -0.721203 | Inlier  |
| siRNA-Temozolomide Run1-DMSO | NM_198066 | GNPNAT1 | glucosamine-phosphate N-acetyltransferase 1 | -0.627797 | Inlier  |
| siRNA-Temozolomide Run3-DMSO | NM_198066 | GNPNAT1 | glucosamine-phosphate N-acetyltransferase 1 | -0.572639 | Inlier  |
| siRNA-Vinblastine Run2-DMSO  | NM_198066 | GNPNAT1 | glucosamine-phosphate N-acetyltransferase 1 | -0.317313 | Inlier  |
| siRNA Disorazole DMSO Run1   | NM_198066 | GNPNAT1 | glucosamine-phosphate N-acetyltransferase 1 | 0.317313  | Inlier  |
| siRNA Disorazole DMSO Run3   | NM_198066 | GNPNAT1 | glucosamine-phosphate N-acetyltransferase 1 | 1.325099  | Inlier  |
| siRNA Disorazole DMSO Run2   | NM_198066 | GNPNAT1 | glucosamine-phosphate N-acetyltransferase 1 | 4.353708  | Outlier |

Identification of Survival Genes in Human Glioblastoma Cells Using siRNA Screening  
 Nikhil G Thaker, Fang Zhang, Peter R. McDonald, Tong Ying Shun, Michael D Lewen, Ian F. Pollack, and John S. Lazo

Molecular Pharmacology

| siRNA Treatment              | Gene ID   | Gene Name | Gene Description                           | Log Fold Change | Classification |
|------------------------------|-----------|-----------|--------------------------------------------|-----------------|----------------|
| siRNA-Vinblastine Run1-DMSO  | NM_198066 | GNPNAT1   | glucosaminophosphate N-acetyltransferase 1 | 4.452856        | Outlier        |
| siRNA-Temozolomide Run3-DMSO | NM_000406 | GNRHR     | gonadotropin-releasing hormone receptor    | -1.102602       | Inlier         |
| siRNA-Temozolomide Run2-DMSO | NM_000406 | GNRHR     | gonadotropin-releasing hormone receptor    | -0.645715       | Inlier         |
| siRNA Disorazole DMSO Run2   | NM_000406 | GNRHR     | gonadotropin-releasing hormone receptor    | -0.362591       | Inlier         |
| siRNA Disorazole DMSO Run1   | NM_000406 | GNRHR     | gonadotropin-releasing hormone receptor    | -0.170055       | Inlier         |
| siRNA-Temozolomide Run1-DMSO | NM_000406 | GNRHR     | gonadotropin-releasing hormone receptor    | 0.170055        | Inlier         |
| siRNA Disorazole DMSO Run3   | NM_000406 | GNRHR     | gonadotropin-releasing hormone receptor    | 0.703285        | Inlier         |
| siRNA-Vinblastine Run1-DMSO  | NM_000406 | GNRHR     | gonadotropin-releasing hormone receptor    | 1.706605        | Inlier         |
| siRNA-Vinblastine Run2-DMSO  | NM_000406 | GNRHR     | gonadotropin-releasing hormone receptor    | 1.815267        | Inlier         |

Identification of Survival Genes in Human Glioblastoma Cells Using siRNA Screening

Nikhil G Thaker, Fang Zhang, Peter R. McDonald, Tong Ying Shun, Michael D Lewen, Ian F. Pollack, and John S. Lazo

Molecular Pharmacology

|                              |           |     |                                                              |           |        |
|------------------------------|-----------|-----|--------------------------------------------------------------|-----------|--------|
| siRNA-Temozolomide Run3-DMSO | NM_002076 | GNS | glucosamine (N-acetyl)-6-sulfatase (Sanfilippo disease IIID) | -1.027557 | Inlier |
| siRNA-Temozolomide Run2-DMSO | NM_002076 | GNS | glucosamine (N-acetyl)-6-sulfatase (Sanfilippo disease IIID) | -0.955361 | Inlier |
| siRNA-Vinblastine Run2-DMSO  | NM_002076 | GNS | glucosamine (N-acetyl)-6-sulfatase (Sanfilippo disease IIID) | -0.512963 | Inlier |
| siRNA-Temozolomide Run1-DMSO | NM_002076 | GNS | glucosamine (N-acetyl)-6-sulfatase (Sanfilippo disease IIID) | -0.224719 | Inlier |
| siRNA Disorazole DMSO Run3   | NM_002076 | GNS | glucosamine (N-acetyl)-6-sulfatase (Sanfilippo disease IIID) | 0.224719  | Inlier |
| siRNA Disorazole DMSO Run1   | NM_002076 | GNS | glucosamine (N-acetyl)-6-sulfatase (Sanfilippo disease IIID) | 0.432672  | Inlier |
| siRNA-Vinblastine Run1-DMSO  | NM_002076 | GNS | glucosamine (N-acetyl)-6-sulfatase (Sanfilippo disease IIID) | 0.836037  | Inlier |

Identification of Survival Genes in Human Glioblastoma Cells Using siRNA Screening

Nikhil G Thaker, Fang Zhang, Peter R. McDonald, Tong Ying Shun, Michael D Lewen, Ian F. Pollack, and John S. Lazo

Molecular Pharmacology

|                              |               |       |                                                              |           |         |
|------------------------------|---------------|-------|--------------------------------------------------------------|-----------|---------|
| siRNA Disorazole DMSO Run2   | NM_0020<br>76 | GNS   | glucosamine (N-acetyl)-6-sulfatase (Sanfilippo disease IIID) | 1.258848  | Inlier  |
| siRNA-Temozolomide Run3-DMSO | NM_0048<br>71 | GOSR1 | golgi SNAP receptor complex member 1                         | -0.714279 | Inlier  |
| siRNA-Vinblastine Run2-DMSO  | NM_0048<br>71 | GOSR1 | golgi SNAP receptor complex member 1                         | -0.651446 | Inlier  |
| siRNA-Temozolomide Run2-DMSO | NM_0048<br>71 | GOSR1 | golgi SNAP receptor complex member 1                         | -0.203255 | Inlier  |
| siRNA Disorazole DMSO Run1   | NM_0048<br>71 | GOSR1 | golgi SNAP receptor complex member 1                         | -0.192077 | Inlier  |
| siRNA Disorazole DMSO Run3   | NM_0048<br>71 | GOSR1 | golgi SNAP receptor complex member 1                         | 0.192077  | Inlier  |
| siRNA-Temozolomide Run1-DMSO | NM_0048<br>71 | GOSR1 | golgi SNAP receptor complex member 1                         | 0.697554  | Inlier  |
| siRNA-Vinblastine Run1-DMSO  | NM_0048<br>71 | GOSR1 | golgi SNAP receptor complex member 1                         | 4.46591   | Outlier |
| siRNA Disorazole DMSO Run2   | NM_0048<br>71 | GOSR1 | golgi SNAP receptor complex member 1                         | 4.537095  | Outlier |
| siRNA-Temozolomide Run2-DMSO | NM_0042<br>87 | GOSR2 | golgi SNAP receptor complex member 2                         | -0.712267 | Inlier  |

Identification of Survival Genes in Human Glioblastoma Cells Using siRNA Screening  
 Nikhil G Thaker, Fang Zhang, Peter R. McDonald, Tong Ying Shun, Michael D Lewen, Ian F. Pollack, and John S. Lazo

Molecular Pharmacology

|                                  |               |       |                                                                                                         |           |        |
|----------------------------------|---------------|-------|---------------------------------------------------------------------------------------------------------|-----------|--------|
| siRNA Disorazole DMSO Run1       | NM_0042<br>87 | GOSR2 | golgi<br>SNAP<br>receptor<br>complex<br>member 2                                                        | -0.654319 | Inlier |
| siRNA-Temozolomide Run3-<br>DMSO | NM_0042<br>87 | GOSR2 | golgi<br>SNAP<br>receptor<br>complex<br>member 2                                                        | -0.096321 | Inlier |
| siRNA-Vinblastine Run2-<br>DMSO  | NM_0042<br>87 | GOSR2 | golgi<br>SNAP<br>receptor<br>complex<br>member 2                                                        | -0.055319 | Inlier |
| siRNA-Temozolomide Run1-<br>DMSO | NM_0042<br>87 | GOSR2 | golgi<br>SNAP<br>receptor<br>complex<br>member 2                                                        | 0.055319  | Inlier |
| siRNA Disorazole DMSO Run3       | NM_0042<br>87 | GOSR2 | golgi<br>SNAP<br>receptor<br>complex<br>member 2                                                        | 0.694681  | Inlier |
| siRNA-Vinblastine Run1-<br>DMSO  | NM_0042<br>87 | GOSR2 | golgi<br>SNAP<br>receptor<br>complex<br>member 2                                                        | 1.502151  | Inlier |
| siRNA Disorazole DMSO Run2       | NM_0042<br>87 | GOSR2 | golgi<br>SNAP<br>receptor<br>complex<br>member 2                                                        | 1.518246  | Inlier |
| siRNA-Temozolomide Run2-<br>DMSO | NM_0020<br>79 | GOT1  | glutamic-<br>oxaloaceti<br>c<br>transamin<br>ase 1,<br>soluble<br>(aspartate<br>aminotran<br>sferase 1) | -0.719843 | Inlier |

Identification of Survival Genes in Human Glioblastoma Cells Using siRNA Screening

Nikhil G Thaker, Fang Zhang, Peter R. McDonald, Tong Ying Shun, Michael D Lewen, Ian F. Pollack, and John S.

Lazo

Molecular Pharmacology

|                              |           |      |                                                                             |           |        |
|------------------------------|-----------|------|-----------------------------------------------------------------------------|-----------|--------|
| siRNA-Temozolomide Run3-DMSO | NM_002079 | GOT1 | glutamic-oxaloacetic transaminase 1, soluble (aspartate aminotransferase 1) | -0.672805 | Inlier |
| siRNA Disorazole DMSO Run1   | NM_002079 | GOT1 | glutamic-oxaloacetic transaminase 1, soluble (aspartate aminotransferase 1) | -0.31438  | Inlier |
| siRNA-Temozolomide Run1-DMSO | NM_002079 | GOT1 | glutamic-oxaloacetic transaminase 1, soluble (aspartate aminotransferase 1) | -0.281507 | Inlier |
| siRNA Disorazole DMSO Run3   | NM_002079 | GOT1 | glutamic-oxaloacetic transaminase 1, soluble (aspartate aminotransferase 1) | 0.281507  | Inlier |
| siRNA-Vinblastine Run2-DMSO  | NM_002079 | GOT1 | glutamic-oxaloacetic transaminase 1, soluble (aspartate aminotransferase 1) | 0.676195  | Inlier |

Identification of Survival Genes in Human Glioblastoma Cells Using siRNA Screening

Nikhil G Thaker, Fang Zhang, Peter R. McDonald, Tong Ying Shun, Michael D Lewen, Ian F. Pollack, and John S.

Lazo

Molecular Pharmacology

|                              |               |      |                                                                                   |           |        |
|------------------------------|---------------|------|-----------------------------------------------------------------------------------|-----------|--------|
| siRNA Disorazole DMSO Run2   | NM_0020<br>79 | GOT1 | glutamic-oxaloacetic transaminase 1, soluble (aspartate aminotransferase 1)       | 1.267478  | Inlier |
| siRNA-Vinblastine Run1-DMSO  | NM_0020<br>79 | GOT1 | glutamic-oxaloacetic transaminase 1, soluble (aspartate aminotransferase 1)       | 1.522817  | Inlier |
| siRNA-Temozolomide Run1-DMSO | NM_0020<br>80 | GOT2 | glutamic-oxaloacetic transaminase 2, mitochondrial (aspartate aminotransferase 2) | -1.112819 | Inlier |
| siRNA-Temozolomide Run3-DMSO | NM_0020<br>80 | GOT2 | glutamic-oxaloacetic transaminase 2, mitochondrial (aspartate aminotransferase 2) | -0.993982 | Inlier |
| siRNA-Temozolomide Run2-DMSO | NM_0020<br>80 | GOT2 | glutamic-oxaloacetic transaminase 2, mitochondrial (aspartate aminotransferase 2) | -0.588071 | Inlier |



Identification of Survival Genes in Human Glioblastoma Cells Using siRNA Screening

Nikhil G Thaker, Fang Zhang, Peter R. McDonald, Tong Ying Shun, Michael D Lewen, Ian F. Pollack, and John S. Lazo

Molecular Pharmacology

|                             |               |      |                                                                                   |           |        |
|-----------------------------|---------------|------|-----------------------------------------------------------------------------------|-----------|--------|
| siRNA Disorazole DMSO Run1  | NM_0020<br>80 | GOT2 | glutamic-oxaloacetic transaminase 2, mitochondrial (aspartate aminotransferase 2) | -0.042735 | Inlier |
| siRNA-Vinblastine Run2-DMSO | NM_0020<br>80 | GOT2 | glutamic-oxaloacetic transaminase 2, mitochondrial (aspartate aminotransferase 2) | 0.042736  | Inlier |
| siRNA Disorazole DMSO Run3  | NM_0020<br>80 | GOT2 | glutamic-oxaloacetic transaminase 2, mitochondrial (aspartate aminotransferase 2) | 0.230049  | Inlier |
| siRNA Disorazole DMSO Run2  | NM_0020<br>80 | GOT2 | glutamic-oxaloacetic transaminase 2, mitochondrial (aspartate aminotransferase 2) | 0.760929  | Inlier |
| siRNA-Vinblastine Run1-DMSO | NM_0020<br>80 | GOT2 | glutamic-oxaloacetic transaminase 2, mitochondrial (aspartate aminotransferase 2) | 1.617771  | Inlier |

Identification of Survival Genes in Human Glioblastoma Cells Using siRNA Screening  
 Nikhil G Thaker, Fang Zhang, Peter R. McDonald, Tong Ying Shun, Michael D Lewen, Ian F. Pollack, and John S. Lazo  
 Molecular Pharmacology

|                              |               |      |                                                     |           |        |
|------------------------------|---------------|------|-----------------------------------------------------|-----------|--------|
| siRNA-Temozolomide Run3-DMSO | NM_0209<br>18 | GPAM | glycerol-3-phosphate acyltransferase, mitochondrial | -2.872282 | Inlier |
| siRNA-Temozolomide Run2-DMSO | NM_0209<br>18 | GPAM | glycerol-3-phosphate acyltransferase, mitochondrial | -0.709246 | Inlier |
| siRNA Disorazole DMSO Run3   | NM_0209<br>18 | GPAM | glycerol-3-phosphate acyltransferase, mitochondrial | -0.639754 | Inlier |
| siRNA-Temozolomide Run1-DMSO | NM_0209<br>18 | GPAM | glycerol-3-phosphate acyltransferase, mitochondrial | -0.294615 | Inlier |
| siRNA-Vinblastine Run2-DMSO  | NM_0209<br>18 | GPAM | glycerol-3-phosphate acyltransferase, mitochondrial | 0.294615  | Inlier |
| siRNA Disorazole DMSO Run1   | NM_0209<br>18 | GPAM | glycerol-3-phosphate acyltransferase, mitochondrial | 0.464677  | Inlier |
| siRNA Disorazole DMSO Run2   | NM_0209<br>18 | GPAM | glycerol-3-phosphate acyltransferase, mitochondrial | 1.924706  | Inlier |

Identification of Survival Genes in Human Glioblastoma Cells Using siRNA Screening  
 Nikhil G Thaker, Fang Zhang, Peter R. McDonald, Tong Ying Shun, Michael D Lewen, Ian F. Pollack, and John S. Lazo  
 Molecular Pharmacology

|                              |              |        |                                                     |           |        |
|------------------------------|--------------|--------|-----------------------------------------------------|-----------|--------|
| siRNA-Vinblastine Run1-DMSO  | NM_020918    | GPAM   | glycerol-3-phosphate acyltransferase, mitochondrial | 2.185621  | Inlier |
| siRNA-Temozolomide Run3-DMSO | NM_170699    | GPBAR1 | G protein-coupled bile acid receptor 1              | -1.508436 | Inlier |
| siRNA-Temozolomide Run1-DMSO | NM_170699    | GPBAR1 | G protein-coupled bile acid receptor 1              | -0.959433 | Inlier |
| siRNA-Temozolomide Run2-DMSO | NM_170699    | GPBAR1 | G protein-coupled bile acid receptor 1              | -0.913161 | Inlier |
| siRNA Disorazole DMSO Run2   | NM_170699    | GPBAR1 | G protein-coupled bile acid receptor 1              | -0.209499 | Inlier |
| siRNA-Vinblastine Run1-DMSO  | NM_170699    | GPBAR1 | G protein-coupled bile acid receptor 1              | 0.209499  | Inlier |
| siRNA-Vinblastine Run2-DMSO  | NM_170699    | GPBAR1 | G protein-coupled bile acid receptor 1              | 0.289522  | Inlier |
| siRNA Disorazole DMSO Run1   | NM_170699    | GPBAR1 | G protein-coupled bile acid receptor 1              | 0.435839  | Inlier |
| siRNA Disorazole DMSO Run3   | NM_170699    | GPBAR1 | G protein-coupled bile acid receptor 1              | 2.47744   | Inlier |
| siRNA Disorazole DMSO Run2   | NM_001025075 | GPCR   | -                                                   | -1.071222 | Inlier |
| siRNA-Temozolomide Run3-DMSO | NM_001025075 | GPCR   | -                                                   | -1.058806 | Inlier |
| siRNA-Temozolomide Run2-DMSO | NM_001025075 | GPCR   | -                                                   | -0.290194 | Inlier |
| siRNA Disorazole DMSO Run3   | NM_001025075 | GPCR   | -                                                   | -0.17429  | Inlier |
| siRNA-Temozolomide Run1-DMSO | NM_001025075 | GPCR   | -                                                   | 0.174289  | Inlier |
| siRNA Disorazole DMSO Run1   | NM_001025075 | GPCR   | -                                                   | 0.255089  | Inlier |

Identification of Survival Genes in Human Glioblastoma Cells Using siRNA Screening

Nikhil G Thaker, Fang Zhang, Peter R. McDonald, Tong Ying Shun, Michael D Lewen, Ian F. Pollack, and John S.

Lazo

|                                  |                  |      |                                                |           |        |
|----------------------------------|------------------|------|------------------------------------------------|-----------|--------|
| siRNA-Vinblastine Run1-<br>DMSO  | NM_0010<br>25075 | GPCR | -                                              | 1.068495  | Inlier |
| siRNA-Vinblastine Run2-<br>DMSO  | NM_0010<br>25075 | GPCR | -                                              | 1.258665  | Inlier |
| siRNA-Temozolomide Run2-<br>DMSO | NM_0052<br>76    | GPD1 | glycerol-3-phosphate dehydrogenase 1 (soluble) | -2.069932 | Inlier |
| siRNA-Temozolomide Run3-<br>DMSO | NM_0052<br>76    | GPD1 | glycerol-3-phosphate dehydrogenase 1 (soluble) | -1.385477 | Inlier |
| siRNA Disorazole DMSO Run1       | NM_0052<br>76    | GPD1 | glycerol-3-phosphate dehydrogenase 1 (soluble) | -0.498678 | Inlier |
| siRNA-Temozolomide Run1-<br>DMSO | NM_0052<br>76    | GPD1 | glycerol-3-phosphate dehydrogenase 1 (soluble) | -0.07797  | Inlier |
| siRNA Disorazole DMSO Run3       | NM_0052<br>76    | GPD1 | glycerol-3-phosphate dehydrogenase 1 (soluble) | 0.07797   | Inlier |
| siRNA-Vinblastine Run2-<br>DMSO  | NM_0052<br>76    | GPD1 | glycerol-3-phosphate dehydrogenase 1 (soluble) | 0.614369  | Inlier |
| siRNA-Vinblastine Run1-<br>DMSO  | NM_0052<br>76    | GPD1 | glycerol-3-phosphate dehydrogenase 1 (soluble) | 0.734631  | Inlier |
| siRNA Disorazole DMSO Run2       | NM_0052<br>76    | GPD1 | glycerol-3-phosphate dehydrogenase 1 (soluble) | 1.041006  | Inlier |

Identification of Survival Genes in Human Glioblastoma Cells Using siRNA Screening  
 Nikhil G Thaker, Fang Zhang, Peter R. McDonald, Tong Ying Shun, Michael D Lewen, Ian F. Pollack, and John S. Lazo  
 Molecular Pharmacology

|                              |               |       |                                           |           |        |
|------------------------------|---------------|-------|-------------------------------------------|-----------|--------|
| siRNA-Temozolomide Run2-DMSO | NM_0151<br>41 | GPD1L | glycerol-3-phosphate dehydrogenase 1-like | -1.218023 | Inlier |
| siRNA-Vinblastine Run2-DMSO  | NM_0151<br>41 | GPD1L | glycerol-3-phosphate dehydrogenase 1-like | -1.022873 | Inlier |
| siRNA-Temozolomide Run3-DMSO | NM_0151<br>41 | GPD1L | glycerol-3-phosphate dehydrogenase 1-like | -0.844334 | Inlier |
| siRNA Disorazole DMSO Run3   | NM_0151<br>41 | GPD1L | glycerol-3-phosphate dehydrogenase 1-like | -0.121344 | Inlier |
| siRNA Disorazole DMSO Run1   | NM_0151<br>41 | GPD1L | glycerol-3-phosphate dehydrogenase 1-like | 0.121344  | Inlier |
| siRNA-Temozolomide Run1-DMSO | NM_0151<br>41 | GPD1L | glycerol-3-phosphate dehydrogenase 1-like | 0.224727  | Inlier |
| siRNA Disorazole DMSO Run2   | NM_0151<br>41 | GPD1L | glycerol-3-phosphate dehydrogenase 1-like | 0.504666  | Inlier |
| siRNA-Vinblastine Run1-DMSO  | NM_0151<br>41 | GPD1L | glycerol-3-phosphate dehydrogenase 1-like | 1.356921  | Inlier |

Identification of Survival Genes in Human Glioblastoma Cells Using siRNA Screening  
 Nikhil G Thaker, Fang Zhang, Peter R. McDonald, Tong Ying Shun, Michael D Lewen, Ian F. Pollack, and John S. Lazo  
 Molecular Pharmacology

|                              |           |      |                                                      |           |        |
|------------------------------|-----------|------|------------------------------------------------------|-----------|--------|
| siRNA-Temozolomide Run2-DMSO | NM_000408 | GPD2 | glycerol-3-phosphate dehydrogenase 2 (mitochondrial) | -2.272242 | Inlier |
| siRNA-Temozolomide Run3-DMSO | NM_000408 | GPD2 | glycerol-3-phosphate dehydrogenase 2 (mitochondrial) | -1.056174 | Inlier |
| siRNA Disorazole DMSO Run1   | NM_000408 | GPD2 | glycerol-3-phosphate dehydrogenase 2 (mitochondrial) | -0.684326 | Inlier |
| siRNA Disorazole DMSO Run2   | NM_000408 | GPD2 | glycerol-3-phosphate dehydrogenase 2 (mitochondrial) | -0.057425 | Inlier |
| siRNA-Temozolomide Run1-DMSO | NM_000408 | GPD2 | glycerol-3-phosphate dehydrogenase 2 (mitochondrial) | 0.057424  | Inlier |
| siRNA Disorazole DMSO Run3   | NM_000408 | GPD2 | glycerol-3-phosphate dehydrogenase 2 (mitochondrial) | 0.43367   | Inlier |
| siRNA-Vinblastine Run2-DMSO  | NM_000408 | GPD2 | glycerol-3-phosphate dehydrogenase 2 (mitochondrial) | 0.664674  | Inlier |

Identification of Survival Genes in Human Glioblastoma Cells Using siRNA Screening  
 Nikhil G Thaker, Fang Zhang, Peter R. McDonald, Tong Ying Shun, Michael D Lewen, Ian F. Pollack, and John S. Lazo  
 Molecular Pharmacology

|                              |           |       |                                                      |           |         |
|------------------------------|-----------|-------|------------------------------------------------------|-----------|---------|
| siRNA-Vinblastine Run1-DMSO  | NM_000408 | GPD2  | glycerol-3-phosphate dehydrogenase 2 (mitochondrial) | 2.565209  | Inlier  |
| siRNA Disorazole DMSO Run3   | NM_145171 | GPHB5 | glycoprotein hormone beta 5                          | -1.851932 | Inlier  |
| siRNA-Vinblastine Run2-DMSO  | NM_145171 | GPHB5 | glycoprotein hormone beta 5                          | -0.956368 | Inlier  |
| siRNA-Temozolomide Run3-DMSO | NM_145171 | GPHB5 | glycoprotein hormone beta 5                          | -0.392632 | Inlier  |
| siRNA-Temozolomide Run2-DMSO | NM_145171 | GPHB5 | glycoprotein hormone beta 5                          | -0.25546  | Inlier  |
| siRNA Disorazole DMSO Run1   | NM_145171 | GPHB5 | glycoprotein hormone beta 5                          | 0.25546   | Inlier  |
| siRNA-Temozolomide Run1-DMSO | NM_145171 | GPHB5 | glycoprotein hormone beta 5                          | 0.335457  | Inlier  |
| siRNA Disorazole DMSO Run2   | NM_145171 | GPHB5 | glycoprotein hormone beta 5                          | 5.047228  | Outlier |
| siRNA-Vinblastine Run1-DMSO  | NM_145171 | GPHB5 | glycoprotein hormone beta 5                          | 5.412968  | Outlier |
| siRNA-Temozolomide Run3-DMSO | NM_000175 | GPI   | glucose phosphate isomerase                          | -1.592174 | Inlier  |
| siRNA Disorazole DMSO Run3   | NM_000175 | GPI   | glucose phosphate isomerase                          | -1.276802 | Inlier  |

Identification of Survival Genes in Human Glioblastoma Cells Using siRNA Screening  
 Nikhil G Thaker, Fang Zhang, Peter R. McDonald, Tong Ying Shun, Michael D Lewen, Ian F. Pollack, and John S. Lazo  
 Molecular Pharmacology

|                              |               |       |                                                                          |                  |
|------------------------------|---------------|-------|--------------------------------------------------------------------------|------------------|
| siRNA Disorazole DMSO Run1   | NM_0001<br>75 | GPI   | glucose<br>phosphate<br>isomerase                                        | -0.534053 Inlier |
| siRNA-Vinblastine Run2-DMSO  | NM_0001<br>75 | GPI   | glucose<br>phosphate<br>isomerase                                        | -0.050641 Inlier |
| siRNA-Temozolomide Run2-DMSO | NM_0001<br>75 | GPI   | glucose<br>phosphate<br>isomerase                                        | 0.050642 Inlier  |
| siRNA-Vinblastine Run1-DMSO  | NM_0001<br>75 | GPI   | glucose<br>phosphate<br>isomerase                                        | 0.269663 Inlier  |
| siRNA-Temozolomide Run1-DMSO | NM_0001<br>75 | GPI   | glucose<br>phosphate<br>isomerase                                        | 0.814947 Inlier  |
| siRNA Disorazole DMSO Run2   | NM_0001<br>75 | GPI   | glucose<br>phosphate<br>isomerase                                        | 1.042309 Inlier  |
| siRNA-Temozolomide Run2-DMSO | NM_0015<br>03 | GPLD1 | glycosylph<br>osphatidyli<br>nositol<br>specific<br>phospholip<br>ase D1 | -0.68273 Inlier  |
| siRNA-Temozolomide Run1-DMSO | NM_0015<br>03 | GPLD1 | glycosylph<br>osphatidyli<br>nositol<br>specific<br>phospholip<br>ase D1 | -0.66627 Inlier  |
| siRNA-Vinblastine Run2-DMSO  | NM_0015<br>03 | GPLD1 | glycosylph<br>osphatidyli<br>nositol<br>specific<br>phospholip<br>ase D1 | -0.144345 Inlier |



Identification of Survival Genes in Human Glioblastoma Cells Using siRNA Screening  
 Nikhil G Thaker, Fang Zhang, Peter R. McDonald, Tong Ying Shun, Michael D Lewen, Ian F. Pollack, and John S. Lazo

Molecular Pharmacology

|                              |           |       |                                                        |           |         |
|------------------------------|-----------|-------|--------------------------------------------------------|-----------|---------|
| siRNA-Vinblastine Run1-DMSO  | NM_001503 | GPLD1 | glycosylphosphatidylinositol specific phospholipase D1 | -0.049167 | Inlier  |
| siRNA Disorazole DMSO Run3   | NM_001503 | GPLD1 | glycosylphosphatidylinositol specific phospholipase D1 | 0.049167  | Inlier  |
| siRNA-Temozolomide Run3-DMSO | NM_001503 | GPLD1 | glycosylphosphatidylinositol specific phospholipase D1 | 0.858453  | Inlier  |
| siRNA Disorazole DMSO Run2   | NM_001503 | GPLD1 | glycosylphosphatidylinositol specific phospholipase D1 | 1.947742  | Inlier  |
| siRNA Disorazole DMSO Run1   | NM_001503 | GPLD1 | glycosylphosphatidylinositol specific phospholipase D1 | 4.162905  | Outlier |
| siRNA-Temozolomide Run3-DMSO | NM_007223 | GPR   | GPR                                                    | -1.478741 | Inlier  |
| siRNA-Temozolomide Run2-DMSO | NM_007223 | GPR   | GPR                                                    | -0.754362 | Inlier  |
| siRNA-Temozolomide Run1-DMSO | NM_007223 | GPR   | GPR                                                    | -0.594638 | Inlier  |
| siRNA Disorazole DMSO Run1   | NM_007223 | GPR   | GPR                                                    | -0.145799 | Inlier  |
| siRNA-Vinblastine Run2-DMSO  | NM_007223 | GPR   | GPR                                                    | 0.145799  | Inlier  |
| siRNA-Vinblastine Run1-DMSO  | NM_007223 | GPR   | GPR                                                    | 0.41753   | Inlier  |
| siRNA Disorazole DMSO Run2   | NM_007223 | GPR   | GPR                                                    | 1.052683  | Inlier  |
| siRNA Disorazole DMSO Run3   | NM_007223 | GPR   | GPR                                                    | 1.052911  | Inlier  |
| siRNA-Temozolomide Run3-DMSO | NM_005279 | GPR1  | G protein-coupled receptor 1                           | -1.203661 | Inlier  |
| siRNA-Temozolomide Run2-DMSO | NM_005279 | GPR1  | G protein-coupled receptor 1                           | -0.745885 | Inlier  |

Identification of Survival Genes in Human Glioblastoma Cells Using siRNA Screening  
 Nikhil G Thaker, Fang Zhang, Peter R. McDonald, Tong Ying Shun, Michael D Lewen, Ian F. Pollack, and John S. Lazo

Molecular Pharmacology

|                              |               |        |                               |           |        |
|------------------------------|---------------|--------|-------------------------------|-----------|--------|
| siRNA Disorazole DMSO Run2   | NM_0052<br>79 | GPR1   | G protein-coupled receptor 1  | -0.646677 | Inlier |
| siRNA Disorazole DMSO Run3   | NM_0052<br>79 | GPR1   | G protein-coupled receptor 1  | -0.044938 | Inlier |
| siRNA-Temozolomide Run1-DMSO | NM_0052<br>79 | GPR1   | G protein-coupled receptor 1  | 0.044938  | Inlier |
| siRNA Disorazole DMSO Run1   | NM_0052<br>79 | GPR1   | G protein-coupled receptor 1  | 0.313892  | Inlier |
| siRNA-Vinblastine Run2-DMSO  | NM_0052<br>79 | GPR1   | G protein-coupled receptor 1  | 0.702323  | Inlier |
| siRNA-Vinblastine Run1-DMSO  | NM_0052<br>79 | GPR1   | G protein-coupled receptor 1  | 0.747407  | Inlier |
| siRNA-Temozolomide Run3-DMSO | NM_0042<br>48 | GPR10  | G protein-coupled receptor 10 | -2.624378 | Inlier |
| siRNA-Temozolomide Run2-DMSO | NM_0042<br>48 | GPR10  | G protein-coupled receptor 10 | -1.352558 | Inlier |
| siRNA Disorazole DMSO Run2   | NM_0042<br>48 | GPR10  | G protein-coupled receptor 10 | -0.837865 | Inlier |
| siRNA-Temozolomide Run1-DMSO | NM_0042<br>48 | GPR10  | G protein-coupled receptor 10 | -0.035578 | Inlier |
| siRNA Disorazole DMSO Run1   | NM_0042<br>48 | GPR10  | G protein-coupled receptor 10 | 0.035578  | Inlier |
| siRNA-Vinblastine Run2-DMSO  | NM_0042<br>48 | GPR10  | G protein-coupled receptor 10 | 0.498824  | Inlier |
| siRNA Disorazole DMSO Run3   | NM_0042<br>48 | GPR10  | G protein-coupled receptor 10 | 0.511135  | Inlier |
| siRNA-Vinblastine Run1-DMSO  | NM_0042<br>48 | GPR10  | G protein-coupled receptor 10 | 1.166923  | Inlier |
| siRNA-Temozolomide Run3-DMSO | NM_1818<br>85 | GPR100 | relaxin 3 receptor 2          | -1.498242 | Inlier |

Identification of Survival Genes in Human Glioblastoma Cells Using siRNA Screening

Nikhil G Thaker, Fang Zhang, Peter R. McDonald, Tong Ying Shun, Michael D Lewen, Ian F. Pollack, and John S.

Lazo

|                              |               |        |                                      |           |        |
|------------------------------|---------------|--------|--------------------------------------|-----------|--------|
| siRNA-Temozolomide Run2-DMSO | NM_1818<br>85 | GPR100 | relaxin 3<br>receptor 2              | -1.104332 | Inlier |
| siRNA-Temozolomide Run1-DMSO | NM_1818<br>85 | GPR100 | relaxin 3<br>receptor 2              | -0.296519 | Inlier |
| siRNA Disorazole DMSO Run2   | NM_1818<br>85 | GPR100 | relaxin 3<br>receptor 2              | -0.109799 | Inlier |
| siRNA Disorazole DMSO Run3   | NM_1818<br>85 | GPR100 | relaxin 3<br>receptor 2              | 0.109799  | Inlier |
| siRNA Disorazole DMSO Run1   | 85            | GPR100 | receptor 2                           | 0.385214  | Inlier |
| siRNA-Vinblastine Run1-DMSO  | NM_1818<br>85 | GPR100 | relaxin 3<br>receptor 2              | 0.963786  | Inlier |
| siRNA-Vinblastine Run2-DMSO  | NM_1818<br>85 | GPR100 | relaxin 3<br>receptor 2              | 1.009933  | Inlier |
| siRNA-Temozolomide Run3-DMSO | NM_0540<br>21 | GPR101 | G protein-coupled<br>receptor<br>101 | -0.883    | Inlier |
| siRNA Disorazole DMSO Run2   | NM_0540<br>21 | GPR101 | G protein-coupled<br>receptor<br>101 | -0.466    | Inlier |
| siRNA-Temozolomide Run1-DMSO | NM_0540<br>21 | GPR101 | G protein-coupled<br>receptor<br>101 | -0.233803 | Inlier |
| siRNA-Temozolomide Run2-DMSO | NM_0540<br>21 | GPR101 | G protein-coupled<br>receptor<br>101 | -0.073245 | Inlier |
| siRNA Disorazole DMSO Run3   | NM_0540<br>21 | GPR101 | G protein-coupled<br>receptor<br>101 | 0.073245  | Inlier |
| siRNA Disorazole DMSO Run1   | NM_0540<br>21 | GPR101 | G protein-coupled<br>receptor<br>101 | 0.898316  | Inlier |
| siRNA-Vinblastine Run2-DMSO  | NM_0540<br>21 | GPR101 | G protein-coupled<br>receptor<br>101 | 1.355747  | Inlier |
| siRNA-Vinblastine Run1-DMSO  | NM_0540<br>21 | GPR101 | G protein-coupled<br>receptor<br>101 | 1.812641  | Inlier |
| siRNA-Temozolomide Run2-DMSO | NM_1981<br>79 | GPR103 | G protein-coupled<br>receptor<br>103 | -1.111325 | Inlier |

Identification of Survival Genes in Human Glioblastoma Cells Using siRNA Screening  
 Nikhil G Thaker, Fang Zhang, Peter R. McDonald, Tong Ying Shun, Michael D Lewen, Ian F. Pollack, and John S. Lazo

Molecular Pharmacology

| siRNA Treatment              | Gene ID   | Receptor | Protein                        | Correlation | Outlier Status |
|------------------------------|-----------|----------|--------------------------------|-------------|----------------|
| siRNA-Vinblastine Run2-DMSO  | NM_198179 | GPR103   | G protein-coupled receptor 103 | -0.929877   | Inlier         |
| siRNA-Temozolomide Run1-DMSO | NM_198179 | GPR103   | G protein-coupled receptor 103 | -0.341138   | Inlier         |
| siRNA-Temozolomide Run3-DMSO | NM_198179 | GPR103   | G protein-coupled receptor 103 | -0.103101   | Inlier         |
| siRNA Disorazole DMSO Run3   | NM_198179 | GPR103   | G protein-coupled receptor 103 | 0.103101    | Inlier         |
| siRNA Disorazole DMSO Run1   | NM_198179 | GPR103   | G protein-coupled receptor 103 | 0.419123    | Inlier         |
| siRNA-Vinblastine Run1-DMSO  | NM_198179 | GPR103   | G protein-coupled receptor 103 | 1.42458     | Inlier         |
| siRNA Disorazole DMSO Run2   | NM_198179 | GPR103   | G protein-coupled receptor 103 | 1.498656    | Inlier         |
| siRNA-Temozolomide Run2-DMSO | NM_020960 | GPR107   | G protein-coupled receptor 107 | -0.737505   | Inlier         |
| siRNA Disorazole DMSO Run1   | NM_020960 | GPR107   | G protein-coupled receptor 107 | -0.611495   | Inlier         |
| siRNA-Temozolomide Run3-DMSO | NM_020960 | GPR107   | G protein-coupled receptor 107 | -0.179022   | Inlier         |
| siRNA-Vinblastine Run2-DMSO  | NM_020960 | GPR107   | G protein-coupled receptor 107 | -0.112848   | Inlier         |
| siRNA-Temozolomide Run1-DMSO | NM_020960 | GPR107   | G protein-coupled receptor 107 | 0.112849    | Inlier         |
| siRNA Disorazole DMSO Run3   | NM_020960 | GPR107   | G protein-coupled receptor 107 | 0.841008    | Inlier         |

Identification of Survival Genes in Human Glioblastoma Cells Using siRNA Screening  
 Nikhil G Thaker, Fang Zhang, Peter R. McDonald, Tong Ying Shun, Michael D Lewen, Ian F. Pollack, and John S. Lazo

Molecular Pharmacology

| siRNA                        | Gene     | Accession | Protein | Value     | Category |
|------------------------------|----------|-----------|---------|-----------|----------|
| siRNA Disorazole DMSO Run2   | NM_0209  | 60        | GPR107  | 1.239808  | Inlier   |
| siRNA-Vinblastine Run1-DMSO  | NM_0209  | 60        | GPR107  | 1.243145  | Inlier   |
| siRNA Disorazole DMSO Run1   | XM_29085 | 4         | GPR108  | -2.145959 | Inlier   |
| siRNA-Temozolomide Run3-DMSO | XM_29085 | 4         | GPR108  | -0.609755 | Inlier   |
| siRNA-Temozolomide Run1-DMSO | XM_29085 | 4         | GPR108  | -0.606153 | Inlier   |
| siRNA-Temozolomide Run2-DMSO | XM_29085 | 4         | GPR108  | -0.442839 | Inlier   |
| siRNA-Vinblastine Run2-DMSO  | XM_29085 | 4         | GPR108  | 0.442839  | Inlier   |
| siRNA Disorazole DMSO Run3   | XM_29085 | 4         | GPR108  | 0.739245  | Inlier   |
| siRNA-Vinblastine Run1-DMSO  | XM_29085 | 4         | GPR108  | 1.13713   | Inlier   |
| siRNA Disorazole DMSO Run2   | XM_29085 | 4         | GPR108  | 2.42215   | Inlier   |
| siRNA-Temozolomide Run3-DMSO | NM_1775  | 51        | GPR109A | -1.642652 | Inlier   |
| siRNA-Temozolomide Run2-DMSO | NM_1775  | 51        | GPR109A | -0.852198 | Inlier   |
| siRNA Disorazole DMSO Run2   | NM_1775  | 51        | GPR109A | -0.11357  | Inlier   |

Identification of Survival Genes in Human Glioblastoma Cells Using siRNA Screening  
 Nikhil G Thaker, Fang Zhang, Peter R. McDonald, Tong Ying Shun, Michael D Lewen, Ian F. Pollack, and John S. Lazo

Molecular Pharmacology

| siRNA Treatment              | Gene ID | Accession | Gene Name | Protein Name | Value     | Category |
|------------------------------|---------|-----------|-----------|--------------|-----------|----------|
| siRNA-Temozolomide Run1-DMSO | NM_1775 | 51        | GPR109A   | 109A         | -0.047749 | Inlier   |
| siRNA Disorazole DMSO Run3   | NM_1775 | 51        | GPR109A   | 109A         | 0.047749  | Inlier   |
| siRNA Disorazole DMSO Run1   | NM_1775 | 51        | GPR109A   | 109A         | 0.496802  | Inlier   |
| siRNA-Vinblastine Run1-DMSO  | NM_1775 | 51        | GPR109A   | 109A         | 0.969719  | Inlier   |
| siRNA-Vinblastine Run2-DMSO  | NM_1775 | 51        | GPR109A   | 109A         | 1.602446  | Inlier   |
| siRNA-Temozolomide Run3-DMSO | NM_1538 | 40        | GPR110    | 110          | -1.093491 | Inlier   |
| siRNA Disorazole DMSO Run2   | NM_1538 | 40        | GPR110    | 110          | -0.731952 | Inlier   |
| siRNA-Temozolomide Run2-DMSO | NM_1538 | 40        | GPR110    | 110          | -0.324686 | Inlier   |
| siRNA-Temozolomide Run1-DMSO | NM_1538 | 40        | GPR110    | 110          | -0.172304 | Inlier   |
| siRNA Disorazole DMSO Run3   | NM_1538 | 40        | GPR110    | 110          | 0.172304  | Inlier   |
| siRNA Disorazole DMSO Run1   | NM_1538 | 40        | GPR110    | 110          | 0.617047  | Inlier   |
| siRNA-Vinblastine Run2-DMSO  | NM_1538 | 40        | GPR110    | 110          | 0.843368  | Inlier   |
| siRNA-Vinblastine Run1-DMSO  | NM_1538 | 40        | GPR110    | 110          | 0.968864  | Inlier   |

Identification of Survival Genes in Human Glioblastoma Cells Using siRNA Screening  
 Nikhil G Thaker, Fang Zhang, Peter R. McDonald, Tong Ying Shun, Michael D Lewen, Ian F. Pollack, and John S. Lazo

Molecular Pharmacology

| siRNA Treatment              | Gene ID    | Receptor | Value | Outlier Status   |
|------------------------------|------------|----------|-------|------------------|
| siRNA-Temozolomide Run2-DMSO | NM_1538 39 | GPR111   | 111   | -1.372552 Inlier |
| siRNA-Temozolomide Run3-DMSO | NM_1538 39 | GPR111   | 111   | -1.104434 Inlier |
| siRNA Disorazole DMSO Run2   | NM_1538 39 | GPR111   | 111   | -0.436203 Inlier |
| siRNA-Temozolomide Run1-DMSO | NM_1538 39 | GPR111   | 111   | -0.328117 Inlier |
| siRNA Disorazole DMSO Run3   | NM_1538 39 | GPR111   | 111   | 0.328117 Inlier  |
| siRNA Disorazole DMSO Run1   | NM_1538 39 | GPR111   | 111   | 0.525392 Inlier  |
| siRNA-Vinblastine Run2-DMSO  | NM_1538 39 | GPR111   | 111   | 0.823608 Inlier  |
| siRNA-Vinblastine Run1-DMSO  | NM_1538 39 | GPR111   | 111   | 0.872803 Inlier  |
| siRNA Disorazole DMSO Run2   | NM_1538 34 | GPR112   | 112   | -1.633827 Inlier |
| siRNA-Temozolomide Run3-DMSO | NM_1538 34 | GPR112   | 112   | -1.462444 Inlier |
| siRNA-Temozolomide Run2-DMSO | NM_1538 34 | GPR112   | 112   | -0.087219 Inlier |
| siRNA Disorazole DMSO Run3   | NM_1538 34 | GPR112   | 112   | -0.042858 Inlier |
| siRNA-Temozolomide Run1-DMSO | NM_1538 34 | GPR112   | 112   | 0.042858 Inlier  |

Identification of Survival Genes in Human Glioblastoma Cells Using siRNA Screening  
 Nikhil G Thaker, Fang Zhang, Peter R. McDonald, Tong Ying Shun, Michael D Lewen, Ian F. Pollack, and John S. Lazo

Molecular Pharmacology

| siRNA                        | Gene    | Accession | Protein | Value     | Category |
|------------------------------|---------|-----------|---------|-----------|----------|
| siRNA Disorazole DMSO Run1   | NM_1538 | 34        | GPR112  | 0.170991  | Inlier   |
| siRNA-Vinblastine Run2-DMSO  | NM_1538 | 34        | GPR112  | 1.178009  | Inlier   |
| siRNA-Vinblastine Run1-DMSO  | NM_1538 | 34        | GPR112  | 1.404752  | Inlier   |
| siRNA-Temozolomide Run3-DMSO | NM_1538 | 35        | GPR113  | -1.841733 | Inlier   |
| siRNA Disorazole DMSO Run2   | NM_1538 | 35        | GPR113  | -0.960251 | Inlier   |
| siRNA Disorazole DMSO Run3   | NM_1538 | 35        | GPR113  | -0.388749 | Inlier   |
| siRNA-Temozolomide Run2-DMSO | NM_1538 | 35        | GPR113  | -0.160549 | Inlier   |
| siRNA-Temozolomide Run1-DMSO | NM_1538 | 35        | GPR113  | 0.160549  | Inlier   |
| siRNA Disorazole DMSO Run1   | NM_1538 | 35        | GPR113  | 0.176449  | Inlier   |
| siRNA-Vinblastine Run2-DMSO  | NM_1538 | 35        | GPR113  | 1.06714   | Inlier   |
| siRNA-Vinblastine Run1-DMSO  | NM_1538 | 35        | GPR113  | 1.148786  | Inlier   |
| siRNA-Temozolomide Run3-DMSO | NM_1538 | 37        | GPR114  | -1.566707 | Inlier   |
| siRNA Disorazole DMSO Run2   | NM_1538 | 37        | GPR114  | -1.431229 | Inlier   |



Identification of Survival Genes in Human Glioblastoma Cells Using siRNA Screening  
 Nikhil G Thaker, Fang Zhang, Peter R. McDonald, Tong Ying Shun, Michael D Lewen, Ian F. Pollack, and John S. Lazo

Molecular Pharmacology

| siRNA                        | Gene          | Receptor | Value | Outlier          |
|------------------------------|---------------|----------|-------|------------------|
| siRNA-Temozolomide Run2-DMSO | NM_1538<br>37 | GPR114   | 114   | -0.499488 Inlier |
| siRNA Disorazole DMSO Run3   | NM_1538<br>37 | GPR114   | 114   | -0.237644 Inlier |
| siRNA Disorazole DMSO Run1   | NM_1538<br>37 | GPR114   | 114   | 0.237644 Inlier  |
| siRNA-Temozolomide Run1-DMSO | NM_1538<br>37 | GPR114   | 114   | 0.30178 Inlier   |
| siRNA-Vinblastine Run1-DMSO  | NM_1538<br>37 | GPR114   | 114   | 0.849512 Inlier  |
| siRNA-Vinblastine Run2-DMSO  | NM_1538<br>37 | GPR114   | 114   | 0.994891 Inlier  |
| siRNA-Temozolomide Run3-DMSO | NM_1538<br>38 | GPR115   | 115   | -1.76583 Inlier  |
| siRNA-Temozolomide Run2-DMSO | NM_1538<br>38 | GPR115   | 115   | -0.934903 Inlier |
| siRNA Disorazole DMSO Run2   | NM_1538<br>38 | GPR115   | 115   | -0.414097 Inlier |
| siRNA-Temozolomide Run1-DMSO | NM_1538<br>38 | GPR115   | 115   | -0.24914 Inlier  |
| siRNA Disorazole DMSO Run3   | NM_1538<br>38 | GPR115   | 115   | 0.24914 Inlier   |
| siRNA Disorazole DMSO Run1   | NM_1538<br>38 | GPR115   | 115   | 0.2627 Inlier    |
| siRNA-Vinblastine Run2-DMSO  | NM_1538<br>38 | GPR115   | 115   | 1.069825 Inlier  |

Identification of Survival Genes in Human Glioblastoma Cells Using siRNA Screening  
 Nikhil G Thaker, Fang Zhang, Peter R. McDonald, Tong Ying Shun, Michael D Lewen, Ian F. Pollack, and John S. Lazo

Molecular Pharmacology

| siRNA                        | Gene          | Protein | Value     | Category |
|------------------------------|---------------|---------|-----------|----------|
| siRNA-Vinblastine Run1-DMSO  | NM_1538<br>38 | GPR115  | 1.115957  | Inlier   |
| siRNA-Temozolomide Run3-DMSO | NM_0152<br>34 | GPR116  | -1.212318 | Inlier   |
| siRNA-Temozolomide Run1-DMSO | NM_0152<br>34 | GPR116  | -0.608547 | Inlier   |
| siRNA-Temozolomide Run2-DMSO | NM_0152<br>34 | GPR116  | -0.370836 | Inlier   |
| siRNA Disorazole DMSO Run2   | NM_0152<br>34 | GPR116  | -0.295253 | Inlier   |
| siRNA Disorazole DMSO Run1   | NM_0152<br>34 | GPR116  | 0.295253  | Inlier   |
| siRNA Disorazole DMSO Run3   | NM_0152<br>34 | GPR116  | 0.740453  | Inlier   |
| siRNA-Vinblastine Run1-DMSO  | NM_0152<br>34 | GPR116  | 1.104506  | Inlier   |
| siRNA-Vinblastine Run2-DMSO  | NM_0152<br>34 | GPR116  | 1.341761  | Inlier   |
| siRNA-Temozolomide Run3-DMSO | NM_1784<br>71 | GPR119  | -0.786984 | Inlier   |
| siRNA Disorazole DMSO Run1   | NM_1784<br>71 | GPR119  | -0.562016 | Inlier   |
| siRNA-Temozolomide Run1-DMSO | NM_1784<br>71 | GPR119  | -0.038982 | Inlier   |
| siRNA-Temozolomide Run2-DMSO | NM_1784<br>71 | GPR119  | -0.01152  | Inlier   |

Identification of Survival Genes in Human Glioblastoma Cells Using siRNA Screening  
 Nikhil G Thaker, Fang Zhang, Peter R. McDonald, Tong Ying Shun, Michael D Lewen, Ian F. Pollack, and John S. Lazo

Molecular Pharmacology

| siRNA Treatment              | Gene ID       | Receptor | Protein                        | Value     | Outlier |
|------------------------------|---------------|----------|--------------------------------|-----------|---------|
| siRNA-Vinblastine Run2-DMSO  | NM_1784<br>71 | GPR119   | G protein-coupled receptor 119 | 0.01152   | Inlier  |
| siRNA Disorazole DMSO Run3   | NM_1784<br>71 | GPR119   | G protein-coupled receptor 119 | 0.953606  | Inlier  |
| siRNA-Vinblastine Run1-DMSO  | NM_1784<br>71 | GPR119   | G protein-coupled receptor 119 | 1.532417  | Inlier  |
| siRNA Disorazole DMSO Run2   | NM_1784<br>71 | GPR119   | G protein-coupled receptor 119 | 2.499776  | Inlier  |
| siRNA Disorazole DMSO Run2   | NM_0052<br>88 | GPR12    | G protein-coupled receptor 12  | -0.914102 | Inlier  |
| siRNA-Temozolomide Run3-DMSO | NM_0052<br>88 | GPR12    | G protein-coupled receptor 12  | -0.738668 | Inlier  |
| siRNA-Temozolomide Run2-DMSO | NM_0052<br>88 | GPR12    | G protein-coupled receptor 12  | -0.547268 | Inlier  |
| siRNA Disorazole DMSO Run3   | NM_0052<br>88 | GPR12    | G protein-coupled receptor 12  | -0.113456 | Inlier  |
| siRNA-Temozolomide Run1-DMSO | NM_0052<br>88 | GPR12    | G protein-coupled receptor 12  | 0.113456  | Inlier  |
| siRNA Disorazole DMSO Run1   | NM_0052<br>88 | GPR12    | G protein-coupled receptor 12  | 0.610332  | Inlier  |
| siRNA-Vinblastine Run1-DMSO  | NM_0052<br>88 | GPR12    | G protein-coupled receptor 12  | 1.29502   | Inlier  |
| siRNA-Vinblastine Run2-DMSO  | NM_0052<br>88 | GPR12    | G protein-coupled receptor 12  | 1.299143  | Inlier  |
| siRNA-Temozolomide Run3-DMSO | NM_1817<br>45 | GPR120   | G protein-coupled receptor 120 | -1.144656 | Inlier  |

Identification of Survival Genes in Human Glioblastoma Cells Using siRNA Screening  
 Nikhil G Thaker, Fang Zhang, Peter R. McDonald, Tong Ying Shun, Michael D Lewen, Ian F. Pollack, and John S. Lazo

Molecular Pharmacology

| siRNA                        | Gene    | Accession | Protein | Value | Outlier          |
|------------------------------|---------|-----------|---------|-------|------------------|
| siRNA Disorazole DMSO Run3   | NM_1817 | 45        | GPR120  | 120   | -0.73284 Inlier  |
| siRNA Disorazole DMSO Run2   | NM_1817 | 45        | GPR120  | 120   | -0.726332 Inlier |
| siRNA-Temozolomide Run2-DMSO | NM_1817 | 45        | GPR120  | 120   | -0.265191 Inlier |
| siRNA-Temozolomide Run1-DMSO | NM_1817 | 45        | GPR120  | 120   | 0.265191 Inlier  |
| siRNA Disorazole DMSO Run1   | NM_1817 | 45        | GPR120  | 120   | 0.31738 Inlier   |
| siRNA-Vinblastine Run2-DMSO  | NM_1817 | 45        | GPR120  | 120   | 0.622667 Inlier  |
| siRNA-Vinblastine Run1-DMSO  | NM_1817 | 45        | GPR120  | 120   | 0.922256 Inlier  |
| siRNA Disorazole DMSO Run1   | NM_0324 | 22        | GPR123  | 123   | -1.001732 Inlier |
| siRNA-Temozolomide Run3-DMSO | NM_0324 | 22        | GPR123  | 123   | -0.943162 Inlier |
| siRNA-Temozolomide Run1-DMSO | NM_0324 | 22        | GPR123  | 123   | -0.567923 Inlier |
| siRNA-Temozolomide Run2-DMSO | NM_0324 | 22        | GPR123  | 123   | -0.117912 Inlier |
| siRNA-Vinblastine Run2-DMSO  | NM_0324 | 22        | GPR123  | 123   | 0.117912 Inlier  |
| siRNA-Vinblastine Run1-DMSO  | NM_0324 | 22        | GPR123  | 123   | 0.577645 Inlier  |

Identification of Survival Genes in Human Glioblastoma Cells Using siRNA Screening  
 Nikhil G Thaker, Fang Zhang, Peter R. McDonald, Tong Ying Shun, Michael D Lewen, Ian F. Pollack, and John S. Lazo

Molecular Pharmacology

| siRNA                        | Gene     | Accession | Gene   | Accession | Value     | Category |
|------------------------------|----------|-----------|--------|-----------|-----------|----------|
| siRNA Disorazole DMSO Run2   | NM_0324  | 22        | GPR123 | 123       | 0.771355  | Inlier   |
| siRNA Disorazole DMSO Run3   | NM_0324  | 22        | GPR123 | 123       | 1.079397  | Inlier   |
| siRNA-Temozolomide Run3-DMSO | NM_0327  | 77        | GPR124 | 124       | -0.814882 | Inlier   |
| siRNA-Temozolomide Run2-DMSO | NM_0327  | 77        | GPR124 | 124       | -0.534118 | Inlier   |
| siRNA Disorazole DMSO Run2   | NM_0327  | 77        | GPR124 | 124       | -0.211376 | Inlier   |
| siRNA Disorazole DMSO Run3   | NM_0327  | 77        | GPR124 | 124       | -0.067589 | Inlier   |
| siRNA-Temozolomide Run1-DMSO | NM_0327  | 77        | GPR124 | 124       | 0.067589  | Inlier   |
| siRNA Disorazole DMSO Run1   | NM_0327  | 77        | GPR124 | 124       | 1.759945  | Inlier   |
| siRNA-Vinblastine Run2-DMSO  | NM_0327  | 77        | GPR124 | 124       | 2.471221  | Inlier   |
| siRNA-Vinblastine Run1-DMSO  | NM_0327  | 77        | GPR124 | 124       | 2.479812  | Inlier   |
| siRNA Disorazole DMSO Run1   | XM_29111 | 1         | GPR125 | 125       | -1.495692 | Inlier   |
| siRNA-Vinblastine Run2-DMSO  | XM_29111 | 1         | GPR125 | 125       | -0.479607 | Inlier   |
| siRNA-Temozolomide Run3-DMSO | XM_29111 | 1         | GPR125 | 125       | -0.25569  | Inlier   |

Identification of Survival Genes in Human Glioblastoma Cells Using siRNA Screening  
 Nikhil G Thaker, Fang Zhang, Peter R. McDonald, Tong Ying Shun, Michael D Lewen, Ian F. Pollack, and John S. Lazo

Molecular Pharmacology

| siRNA                        | Gene     | Accession | Protein | Value | Outlier   |        |
|------------------------------|----------|-----------|---------|-------|-----------|--------|
| siRNA-Temozolomide Run1-DMSO | XM_29111 | 1         | GPR125  | 125   | -0.072189 | Inlier |
| siRNA Disorazole DMSO Run3   | XM_29111 | 1         | GPR125  | 125   | 0.07219   | Inlier |
| siRNA-Temozolomide Run2-DMSO | XM_29111 | 1         | GPR125  | 125   | 0.869393  | Inlier |
| siRNA-Vinblastine Run1-DMSO  | XM_29111 | 1         | GPR125  | 125   | 2.155207  | Inlier |
| siRNA Disorazole DMSO Run2   | XM_29111 | 1         | GPR125  | 125   | 2.807147  | Inlier |
| siRNA-Temozolomide Run3-DMSO | NM_0204  | 55        | GPR126  | 126   | -2.114812 | Inlier |
| siRNA Disorazole DMSO Run3   | NM_0204  | 55        | GPR126  | 126   | -1.02604  | Inlier |
| siRNA-Temozolomide Run2-DMSO | NM_0204  | 55        | GPR126  | 126   | -0.271903 | Inlier |
| siRNA Disorazole DMSO Run2   | NM_0204  | 55        | GPR126  | 126   | -0.24868  | Inlier |
| siRNA-Temozolomide Run1-DMSO | NM_0204  | 55        | GPR126  | 126   | 0.248681  | Inlier |
| siRNA Disorazole DMSO Run1   | NM_0204  | 55        | GPR126  | 126   | 0.32296   | Inlier |
| siRNA-Vinblastine Run2-DMSO  | NM_0204  | 55        | GPR126  | 126   | 1.235028  | Inlier |
| siRNA-Vinblastine Run1-DMSO  | NM_0204  | 55        | GPR126  | 126   | 1.289584  | Inlier |

Identification of Survival Genes in Human Glioblastoma Cells Using siRNA Screening  
 Nikhil G Thaker, Fang Zhang, Peter R. McDonald, Tong Ying Shun, Michael D Lewen, Ian F. Pollack, and John S. Lazo

Molecular Pharmacology

| siRNA Treatment              | Gene ID       | Receptor | Protein                        | Value     | Outlier Status |
|------------------------------|---------------|----------|--------------------------------|-----------|----------------|
| siRNA-Temozolomide Run3-DMSO | NM_0327<br>87 | GPR128   | G protein-coupled receptor 128 | -1.107737 | Inlier         |
| siRNA-Temozolomide Run2-DMSO | NM_0327<br>87 | GPR128   | G protein-coupled receptor 128 | -0.621755 | Inlier         |
| siRNA Disorazole DMSO Run2   | NM_0327<br>87 | GPR128   | G protein-coupled receptor 128 | -0.422452 | Inlier         |
| siRNA-Temozolomide Run1-DMSO | NM_0327<br>87 | GPR128   | G protein-coupled receptor 128 | -0.206437 | Inlier         |
| siRNA Disorazole DMSO Run3   | NM_0327<br>87 | GPR128   | G protein-coupled receptor 128 | 0.206437  | Inlier         |
| siRNA Disorazole DMSO Run1   | NM_0327<br>87 | GPR128   | G protein-coupled receptor 128 | 0.727245  | Inlier         |
| siRNA-Vinblastine Run1-DMSO  | NM_0327<br>87 | GPR128   | G protein-coupled receptor 128 | 1.848689  | Inlier         |
| siRNA-Vinblastine Run2-DMSO  | NM_0327<br>87 | GPR128   | G protein-coupled receptor 128 | 2.018384  | Inlier         |
| siRNA-Temozolomide Run3-DMSO | NM_0133<br>45 | GPR132   | G protein-coupled receptor 132 | -0.693428 | Inlier         |
| siRNA-Temozolomide Run2-DMSO | NM_0133<br>45 | GPR132   | G protein-coupled receptor 132 | -0.655572 | Inlier         |
| siRNA Disorazole DMSO Run2   | NM_0133<br>45 | GPR132   | G protein-coupled receptor 132 | -0.466169 | Inlier         |
| siRNA-Temozolomide Run1-DMSO | NM_0133<br>45 | GPR132   | G protein-coupled receptor 132 | -0.090845 | Inlier         |
| siRNA Disorazole DMSO Run3   | NM_0133<br>45 | GPR132   | G protein-coupled receptor 132 | 0.090845  | Inlier         |

Identification of Survival Genes in Human Glioblastoma Cells Using siRNA Screening  
 Nikhil G Thaker, Fang Zhang, Peter R. McDonald, Tong Ying Shun, Michael D Lewen, Ian F. Pollack, and John S. Lazo

Molecular Pharmacology

| siRNA                        | Gene    | Accession | Protein | Value | Outlier          |
|------------------------------|---------|-----------|---------|-------|------------------|
| siRNA Disorazole DMSO Run1   | NM_0133 | 45        | GPR132  | 132   | 1.815982 Inlier  |
| siRNA-Vinblastine Run1-DMSO  | NM_0133 | 45        | GPR132  | 132   | 2.815266 Inlier  |
| siRNA-Vinblastine Run2-DMSO  | NM_0133 | 45        | GPR132  | 132   | 2.892189 Inlier  |
| siRNA-Temozolomide Run3-DMSO | NM_1988 | 27        | GPR133  | 133   | -1.280133 Inlier |
| siRNA-Temozolomide Run2-DMSO | NM_1988 | 27        | GPR133  | 133   | -1.189355 Inlier |
| siRNA-Temozolomide Run1-DMSO | NM_1988 | 27        | GPR133  | 133   | -1.025752 Inlier |
| siRNA Disorazole DMSO Run1   | NM_1988 | 27        | GPR133  | 133   | -0.360132 Inlier |
| siRNA-Vinblastine Run2-DMSO  | NM_1988 | 27        | GPR133  | 133   | 0.360132 Inlier  |
| siRNA-Vinblastine Run1-DMSO  | NM_1988 | 27        | GPR133  | 133   | 0.41345 Inlier   |
| siRNA Disorazole DMSO Run2   | NM_1988 | 27        | GPR133  | 133   | 0.610368 Inlier  |
| siRNA Disorazole DMSO Run3   | NM_1988 | 27        | GPR133  | 133   | 0.738632 Inlier  |
| siRNA-Temozolomide Run3-DMSO | NM_0225 | 71        | GPR135  | 135   | -1.653437 Inlier |
| siRNA Disorazole DMSO Run3   | NM_0225 | 71        | GPR135  | 135   | -0.708841 Inlier |



Identification of Survival Genes in Human Glioblastoma Cells Using siRNA Screening  
 Nikhil G Thaker, Fang Zhang, Peter R. McDonald, Tong Ying Shun, Michael D Lewen, Ian F. Pollack, and John S. Lazo

Molecular Pharmacology

| siRNA                        | Gene    | Accession | Protein | Value     | Category |
|------------------------------|---------|-----------|---------|-----------|----------|
| siRNA Disorazole DMSO Run2   | NM_0225 | 71        | GPR135  | -0.323161 | Inlier   |
| siRNA-Temozolomide Run2-DMSO | NM_0225 | 71        | GPR135  | -0.2668   | Inlier   |
| siRNA-Temozolomide Run1-DMSO | NM_0225 | 71        | GPR135  | 0.2668    | Inlier   |
| siRNA Disorazole DMSO Run1   | NM_0225 | 71        | GPR135  | 0.640159  | Inlier   |
| siRNA-Vinblastine Run2-DMSO  | NM_0225 | 71        | GPR135  | 1.209514  | Inlier   |
| siRNA-Vinblastine Run1-DMSO  | NM_0225 | 71        | GPR135  | 1.910199  | Inlier   |
| siRNA-Temozolomide Run3-DMSO | NM_0010 | 02911     | GPR139  | -2.585955 | Inlier   |
| siRNA-Temozolomide Run2-DMSO | NM_0010 | 02911     | GPR139  | -2.298877 | Inlier   |
| siRNA-Temozolomide Run1-DMSO | NM_0010 | 02911     | GPR139  | -0.677901 | Inlier   |
| siRNA Disorazole DMSO Run1   | NM_0010 | 02911     | GPR139  | -0.037608 | Inlier   |
| siRNA Disorazole DMSO Run2   | NM_0010 | 02911     | GPR139  | 0.037608  | Inlier   |
| siRNA-Vinblastine Run2-DMSO  | NM_0010 | 02911     | GPR139  | 0.314907  | Inlier   |
| siRNA-Vinblastine Run1-DMSO  | NM_0010 | 02911     | GPR139  | 0.671099  | Inlier   |

Identification of Survival Genes in Human Glioblastoma Cells Using siRNA Screening  
 Nikhil G Thaker, Fang Zhang, Peter R. McDonald, Tong Ying Shun, Michael D Lewen, Ian F. Pollack, and John S. Lazo

Molecular Pharmacology

| siRNA                        | Gene             | Protein | Value | Category          |
|------------------------------|------------------|---------|-------|-------------------|
| siRNA Disorazole DMSO Run3   | NM_0010<br>02911 | GPR139  | 139   | 0.780993 Inlier   |
| siRNA-Temozolomide Run3-DMSO | NM_1817<br>91    | GPR141  | 141   | -0.768579 Inlier  |
| siRNA-Temozolomide Run1-DMSO | NM_1817<br>91    | GPR141  | 141   | -0.756012 Inlier  |
| siRNA-Temozolomide Run2-DMSO | NM_1817<br>91    | GPR141  | 141   | -0.520812 Inlier  |
| siRNA Disorazole DMSO Run1   | NM_1817<br>91    | GPR141  | 141   | -0.504979 Inlier  |
| siRNA Disorazole DMSO Run2   | NM_1817<br>91    | GPR141  | 141   | 0.504979 Inlier   |
| siRNA-Vinblastine Run2-DMSO  | NM_1817<br>91    | GPR141  | 141   | 0.592988 Inlier   |
| siRNA-Vinblastine Run1-DMSO  | NM_1817<br>91    | GPR141  | 141   | 1.235455 Inlier   |
| siRNA Disorazole DMSO Run3   | NM_1817<br>91    | GPR141  | 141   | 2.861024 Inlier   |
| siRNA-Temozolomide Run3-DMSO | NM_1817<br>90    | GPR142  | 142   | -3.880608 Outlier |
| siRNA-Temozolomide Run1-DMSO | NM_1817<br>90    | GPR142  | 142   | -0.798877 Inlier  |
| siRNA-Temozolomide Run2-DMSO | NM_1817<br>90    | GPR142  | 142   | -0.218211 Inlier  |
| siRNA Disorazole DMSO Run1   | NM_1817<br>90    | GPR142  | 142   | -0.141834 Inlier  |

Identification of Survival Genes in Human Glioblastoma Cells Using siRNA Screening  
 Nikhil G Thaker, Fang Zhang, Peter R. McDonald, Tong Ying Shun, Michael D Lewen, Ian F. Pollack, and John S. Lazo

Molecular Pharmacology

| siRNA                        | Gene          | Receptor | Value     | Category |
|------------------------------|---------------|----------|-----------|----------|
| siRNA Disorazole DMSO Run3   | NM_1817<br>90 | GPR142   | 0.141835  | Inlier   |
| siRNA-Vinblastine Run2-DMSO  | NM_1817<br>90 | GPR142   | 0.550123  | Inlier   |
| siRNA-Vinblastine Run1-DMSO  | NM_1817<br>90 | GPR142   | 2.202158  | Inlier   |
| siRNA Disorazole DMSO Run2   | NM_1817<br>90 | GPR142   | 3.704977  | Outlier  |
| siRNA-Temozolomide Run3-DMSO | NM_0002<br>73 | GPR143   | -1.531376 | Inlier   |
| siRNA-Temozolomide Run2-DMSO | NM_0002<br>73 | GPR143   | -1.056699 | Inlier   |
| siRNA-Temozolomide Run1-DMSO | NM_0002<br>73 | GPR143   | -0.188077 | Inlier   |
| siRNA Disorazole DMSO Run1   | NM_0002<br>73 | GPR143   | -0.094281 | Inlier   |
| siRNA Disorazole DMSO Run2   | NM_0002<br>73 | GPR143   | 0.09428   | Inlier   |
| siRNA-Vinblastine Run2-DMSO  | NM_0002<br>73 | GPR143   | 0.536566  | Inlier   |
| siRNA Disorazole DMSO Run3   | NM_0002<br>73 | GPR143   | 0.812434  | Inlier   |
| siRNA-Vinblastine Run1-DMSO  | NM_0002<br>73 | GPR143   | 0.883064  | Inlier   |
| siRNA-Temozolomide Run3-DMSO | NM_1826<br>11 | GPR144   | -1.320593 | Inlier   |

Identification of Survival Genes in Human Glioblastoma Cells Using siRNA Screening  
 Nikhil G Thaker, Fang Zhang, Peter R. McDonald, Tong Ying Shun, Michael D Lewen, Ian F. Pollack, and John S. Lazo

Molecular Pharmacology

| siRNA                        | Gene    | Accession | Protein | Value | Category         |
|------------------------------|---------|-----------|---------|-------|------------------|
| siRNA Disorazole DMSO Run1   | NM_1826 | 11        | GPR144  | 144   | -0.516655 Inlier |
| siRNA-Temozolomide Run2-DMSO | NM_1826 | 11        | GPR144  | 144   | -0.383107 Inlier |
| siRNA Disorazole DMSO Run3   | NM_1826 | 11        | GPR144  | 144   | -0.085761 Inlier |
| siRNA-Vinblastine Run2-DMSO  | NM_1826 | 11        | GPR144  | 144   | 0.08576 Inlier   |
| siRNA-Temozolomide Run1-DMSO | NM_1826 | 11        | GPR144  | 144   | 0.832345 Inlier  |
| siRNA-Vinblastine Run1-DMSO  | NM_1826 | 11        | GPR144  | 144   | 12.22797 Outlier |
| siRNA Disorazole DMSO Run2   | NM_1826 | 11        | GPR144  | 144   | 13.7116 Outlier  |
| siRNA-Temozolomide Run3-DMSO | NM_0325 | 03        | GPR145  | 145   | -1.336817 Inlier |
| siRNA Disorazole DMSO Run2   | NM_0325 | 03        | GPR145  | 145   | -0.927526 Inlier |
| siRNA-Temozolomide Run1-DMSO | NM_0325 | 03        | GPR145  | 145   | -0.017355 Inlier |
| siRNA Disorazole DMSO Run3   | NM_0325 | 03        | GPR145  | 145   | -0.011009 Inlier |
| siRNA-Temozolomide Run2-DMSO | NM_0325 | 03        | GPR145  | 145   | 0.011009 Inlier  |
| siRNA Disorazole DMSO Run1   | NM_0325 | 03        | GPR145  | 145   | 0.421474 Inlier  |

Identification of Survival Genes in Human Glioblastoma Cells Using siRNA Screening  
 Nikhil G Thaker, Fang Zhang, Peter R. McDonald, Tong Ying Shun, Michael D Lewen, Ian F. Pollack, and John S. Lazo

Molecular Pharmacology

| siRNA Treatment              | Gene ID   | Receptor | Protein                        | Score     | Outlier Status |
|------------------------------|-----------|----------|--------------------------------|-----------|----------------|
| siRNA-Vinblastine Run2-DMSO  | NM_032503 | GPR145   | G protein-coupled receptor 145 | 1.211844  | Inlier         |
| siRNA-Vinblastine Run1-DMSO  | NM_032503 | GPR145   | G protein-coupled receptor 145 | 1.457641  | Inlier         |
| siRNA-Temozolomide Run3-DMSO | NM_138445 | GPR146   | G protein-coupled receptor 146 | -0.779312 | Inlier         |
| siRNA Disorazole DMSO Run2   | NM_138445 | GPR146   | G protein-coupled receptor 146 | -0.569688 | Inlier         |
| siRNA-Temozolomide Run1-DMSO | NM_138445 | GPR146   | G protein-coupled receptor 146 | -0.240864 | Inlier         |
| siRNA-Temozolomide Run2-DMSO | NM_138445 | GPR146   | G protein-coupled receptor 146 | -0.141723 | Inlier         |
| siRNA Disorazole DMSO Run3   | NM_138445 | GPR146   | G protein-coupled receptor 146 | 0.141723  | Inlier         |
| siRNA Disorazole DMSO Run1   | NM_138445 | GPR146   | G protein-coupled receptor 146 | 1.604665  | Inlier         |
| siRNA-Vinblastine Run2-DMSO  | NM_138445 | GPR146   | G protein-coupled receptor 146 | 3.242954  | Inlier         |
| siRNA-Vinblastine Run1-DMSO  | NM_138445 | GPR146   | G protein-coupled receptor 146 | 3.327715  | Inlier         |
| siRNA-Temozolomide Run3-DMSO | NM_022146 | GPR147   | G protein-coupled receptor 147 | -3.098603 | Inlier         |
| siRNA-Temozolomide Run2-DMSO | NM_022146 | GPR147   | G protein-coupled receptor 147 | -0.667788 | Inlier         |
| siRNA Disorazole DMSO Run1   | NM_022146 | GPR147   | G protein-coupled receptor 147 | -0.218984 | Inlier         |

Identification of Survival Genes in Human Glioblastoma Cells Using siRNA Screening  
 Nikhil G Thaker, Fang Zhang, Peter R. McDonald, Tong Ying Shun, Michael D Lewen, Ian F. Pollack, and John S. Lazo

Molecular Pharmacology

| siRNA Treatment              | Gene ID       | Receptor | Gene Name                      | Value     | Outlier Status |
|------------------------------|---------------|----------|--------------------------------|-----------|----------------|
| siRNA-Temozolomide Run1-DMSO | NM_0221<br>46 | GPR147   | G protein-coupled receptor 147 | -0.079885 | Inlier         |
| siRNA Disorazole DMSO Run2   | NM_0221<br>46 | GPR147   | G protein-coupled receptor 147 | 0.079885  | Inlier         |
| siRNA Disorazole DMSO Run3   | NM_0221<br>46 | GPR147   | G protein-coupled receptor 147 | 0.681212  | Inlier         |
| siRNA-Vinblastine Run2-DMSO  | NM_0221<br>46 | GPR147   | G protein-coupled receptor 147 | 1.384203  | Inlier         |
| siRNA-Vinblastine Run1-DMSO  | NM_0221<br>46 | GPR147   | G protein-coupled receptor 147 | 1.963098  | Inlier         |
| siRNA-Temozolomide Run3-DMSO | NM_2073<br>64 | GPR148   | G protein-coupled receptor 148 | -0.993233 | Inlier         |
| siRNA Disorazole DMSO Run3   | NM_2073<br>64 | GPR148   | G protein-coupled receptor 148 | -0.355767 | Inlier         |
| siRNA Disorazole DMSO Run2   | NM_2073<br>64 | GPR148   | G protein-coupled receptor 148 | -0.317848 | Inlier         |
| siRNA-Temozolomide Run2-DMSO | NM_2073<br>64 | GPR148   | G protein-coupled receptor 148 | -0.163077 | Inlier         |
| siRNA-Temozolomide Run1-DMSO | NM_2073<br>64 | GPR148   | G protein-coupled receptor 148 | 0.163077  | Inlier         |
| siRNA Disorazole DMSO Run1   | NM_2073<br>64 | GPR148   | G protein-coupled receptor 148 | 1.133699  | Inlier         |
| siRNA-Vinblastine Run1-DMSO  | NM_2073<br>64 | GPR148   | G protein-coupled receptor 148 | 1.301112  | Inlier         |
| siRNA-Vinblastine Run2-DMSO  | NM_2073<br>64 | GPR148   | G protein-coupled receptor 148 | 1.450337  | Inlier         |

Identification of Survival Genes in Human Glioblastoma Cells Using siRNA Screening  
 Nikhil G Thaker, Fang Zhang, Peter R. McDonald, Tong Ying Shun, Michael D Lewen, Ian F. Pollack, and John S. Lazo

Molecular Pharmacology

| siRNA Treatment              | Gene ID       | Receptor | Protein | Value     | Category |
|------------------------------|---------------|----------|---------|-----------|----------|
| siRNA-Temozolomide Run3-DMSO | NM_0052<br>90 | GPR15    | 15      | -2.599226 | Inlier   |
| siRNA-Temozolomide Run2-DMSO | NM_0052<br>90 | GPR15    | 15      | -0.745627 | Inlier   |
| siRNA-Temozolomide Run1-DMSO | NM_0052<br>90 | GPR15    | 15      | -0.603373 | Inlier   |
| siRNA Disorazole DMSO Run1   | NM_0052<br>90 | GPR15    | 15      | -0.312109 | Inlier   |
| siRNA Disorazole DMSO Run3   | NM_0052<br>90 | GPR15    | 15      | 0.312109  | Inlier   |
| siRNA Disorazole DMSO Run2   | NM_0052<br>90 | GPR15    | 15      | 0.508692  | Inlier   |
| siRNA-Vinblastine Run1-DMSO  | NM_0052<br>90 | GPR15    | 15      | 0.902155  | Inlier   |
| siRNA-Vinblastine Run2-DMSO  | NM_0052<br>90 | GPR15    | 15      | 0.979527  | Inlier   |
| siRNA-Temozolomide Run3-DMSO | NM_1992<br>43 | GPR150   | 150     | -2.35384  | Inlier   |
| siRNA-Temozolomide Run2-DMSO | NM_1992<br>43 | GPR150   | 150     | -1.437952 | Inlier   |
| siRNA-Temozolomide Run1-DMSO | NM_1992<br>43 | GPR150   | 150     | -0.603854 | Inlier   |
| siRNA Disorazole DMSO Run1   | NM_1992<br>43 | GPR150   | 150     | -0.512343 | Inlier   |
| siRNA Disorazole DMSO Run3   | NM_1992<br>43 | GPR150   | 150     | 0.512343  | Inlier   |

Identification of Survival Genes in Human Glioblastoma Cells Using siRNA Screening  
 Nikhil G Thaker, Fang Zhang, Peter R. McDonald, Tong Ying Shun, Michael D Lewen, Ian F. Pollack, and John S. Lazo

Molecular Pharmacology

| siRNA Treatment              | Gene ID       | Receptor | Value | Outlier Status   |
|------------------------------|---------------|----------|-------|------------------|
| siRNA-Vinblastine Run2-DMSO  | NM_1992<br>43 | GPR150   | 150   | 0.637176 Inlier  |
| siRNA Disorazole DMSO Run2   | NM_1992<br>43 | GPR150   | 150   | 0.711824 Inlier  |
| siRNA-Vinblastine Run1-DMSO  | NM_1992<br>43 | GPR150   | 150   | 0.844921 Inlier  |
| siRNA-Temozolomide Run3-DMSO | NM_1942<br>51 | GPR151   | 151   | -2.764394 Inlier |
| siRNA-Temozolomide Run1-DMSO | NM_1942<br>51 | GPR151   | 151   | -1.180399 Inlier |
| siRNA-Temozolomide Run2-DMSO | NM_1942<br>51 | GPR151   | 151   | -1.084949 Inlier |
| siRNA Disorazole DMSO Run2   | NM_1942<br>51 | GPR151   | 151   | -0.148783 Inlier |
| siRNA Disorazole DMSO Run1   | NM_1942<br>51 | GPR151   | 151   | 0.148784 Inlier  |
| siRNA-Vinblastine Run1-DMSO  | NM_1942<br>51 | GPR151   | 151   | 0.420708 Inlier  |
| siRNA-Vinblastine Run2-DMSO  | NM_1942<br>51 | GPR151   | 151   | 0.559908 Inlier  |
| siRNA Disorazole DMSO Run3   | NM_1942<br>51 | GPR151   | 151   | 0.789092 Inlier  |
| siRNA-Temozolomide Run3-DMSO | NM_2069<br>97 | GPR152   | 152   | -1.153141 Inlier |
| siRNA-Temozolomide Run2-DMSO | NM_2069<br>97 | GPR152   | 152   | -0.666858 Inlier |



Identification of Survival Genes in Human Glioblastoma Cells Using siRNA Screening  
 Nikhil G Thaker, Fang Zhang, Peter R. McDonald, Tong Ying Shun, Michael D Lewen, Ian F. Pollack, and John S. Lazo

Molecular Pharmacology

| siRNA Treatment              | Gene ID | Accession | Gene Name | Value | Category          |
|------------------------------|---------|-----------|-----------|-------|-------------------|
| siRNA-Temozolomide Run1-DMSO | NM_2069 | 97        | GPR152    | 152   | -0.48701 Inlier   |
| siRNA Disorazole DMSO Run2   | NM_2069 | 97        | GPR152    | 152   | -0.384534 Inlier  |
| siRNA Disorazole DMSO Run3   | NM_2069 | 97        | GPR152    | 152   | 0.384534 Inlier   |
| siRNA Disorazole DMSO Run1   | NM_2069 | 97        | GPR152    | 152   | 0.682142 Inlier   |
| siRNA-Vinblastine Run2-DMSO  | NM_2069 | 97        | GPR152    | 152   | 1.033744 Inlier   |
| siRNA-Vinblastine Run1-DMSO  | NM_2069 | 97        | GPR152    | 152   | 1.481632 Inlier   |
| siRNA-Temozolomide Run3-DMSO | NM_2073 | 70        | GPR153    | 153   | -5.742466 Outlier |
| siRNA Disorazole DMSO Run3   | NM_2073 | 70        | GPR153    | 153   | -0.746049 Inlier  |
| siRNA-Temozolomide Run2-DMSO | NM_2073 | 70        | GPR153    | 153   | -0.361965 Inlier  |
| siRNA-Temozolomide Run1-DMSO | NM_2073 | 70        | GPR153    | 153   | -0.062525 Inlier  |
| siRNA Disorazole DMSO Run2   | NM_2073 | 70        | GPR153    | 153   | 0.062526 Inlier   |
| siRNA Disorazole DMSO Run1   | NM_2073 | 70        | GPR153    | 153   | 0.602951 Inlier   |
| siRNA-Vinblastine Run1-DMSO  | NM_2073 | 70        | GPR153    | 153   | 4.265888 Outlier  |

Identification of Survival Genes in Human Glioblastoma Cells Using siRNA Screening  
 Nikhil G Thaker, Fang Zhang, Peter R. McDonald, Tong Ying Shun, Michael D Lewen, Ian F. Pollack, and John S. Lazo

Molecular Pharmacology

| siRNA                        | Gene          | Protein | Value | Category         |
|------------------------------|---------------|---------|-------|------------------|
| siRNA-Vinblastine Run2-DMSO  | NM_2073<br>70 | GPR153  | 153   | 4.736226 Outlier |
| siRNA-Temozolomide Run3-DMSO | NM_2071<br>73 | GPR154  | 154   | -2.478187 Inlier |
| siRNA-Temozolomide Run1-DMSO | NM_2071<br>73 | GPR154  | 154   | -0.613229 Inlier |
| siRNA-Temozolomide Run2-DMSO | NM_2071<br>73 | GPR154  | 154   | -0.592237 Inlier |
| siRNA Disorazole DMSO Run2   | NM_2071<br>73 | GPR154  | 154   | -0.175994 Inlier |
| siRNA Disorazole DMSO Run1   | NM_2071<br>73 | GPR154  | 154   | 0.175994 Inlier  |
| siRNA-Vinblastine Run1-DMSO  | NM_2071<br>73 | GPR154  | 154   | 0.735771 Inlier  |
| siRNA Disorazole DMSO Run3   | NM_2071<br>73 | GPR154  | 154   | 0.776963 Inlier  |
| siRNA-Vinblastine Run2-DMSO  | NM_2071<br>73 | GPR154  | 154   | 0.985418 Inlier  |
| siRNA-Temozolomide Run3-DMSO | NM_1525<br>29 | GPR155  | 155   | -2.381301 Inlier |
| siRNA-Temozolomide Run2-DMSO | NM_1525<br>29 | GPR155  | 155   | -0.951574 Inlier |
| siRNA-Temozolomide Run1-DMSO | NM_1525<br>29 | GPR155  | 155   | -0.187818 Inlier |
| siRNA Disorazole DMSO Run2   | NM_1525<br>29 | GPR155  | 155   | -0.012112 Inlier |

Identification of Survival Genes in Human Glioblastoma Cells Using siRNA Screening  
 Nikhil G Thaker, Fang Zhang, Peter R. McDonald, Tong Ying Shun, Michael D Lewen, Ian F. Pollack, and John S. Lazo

Molecular Pharmacology

| siRNA                        | Gene          | Protein | Value     | Category |
|------------------------------|---------------|---------|-----------|----------|
| siRNA Disorazole DMSO Run3   | NM_1525<br>29 | GPR155  | 0.012112  | Inlier   |
| siRNA Disorazole DMSO Run1   | NM_1525<br>29 | GPR155  | 0.397426  | Inlier   |
| siRNA-Vinblastine Run1-DMSO  | NM_1525<br>29 | GPR155  | 1.455853  | Inlier   |
| siRNA-Vinblastine Run2-DMSO  | NM_1525<br>29 | GPR155  | 1.778665  | Inlier   |
| siRNA-Temozolomide Run3-DMSO | NM_1530<br>02 | GPR156  | -1.658001 | Inlier   |
| siRNA Disorazole DMSO Run2   | NM_1530<br>02 | GPR156  | -0.486604 | Inlier   |
| siRNA-Temozolomide Run1-DMSO | NM_1530<br>02 | GPR156  | -0.420842 | Inlier   |
| siRNA-Temozolomide Run2-DMSO | NM_1530<br>02 | GPR156  | -0.340443 | Inlier   |
| siRNA Disorazole DMSO Run1   | NM_1530<br>02 | GPR156  | 0.340443  | Inlier   |
| siRNA-Vinblastine Run2-DMSO  | NM_1530<br>02 | GPR156  | 0.862396  | Inlier   |
| siRNA Disorazole DMSO Run3   | NM_1530<br>02 | GPR156  | 1.074206  | Inlier   |
| siRNA-Vinblastine Run1-DMSO  | NM_1530<br>02 | GPR156  | 1.249113  | Inlier   |
| siRNA-Temozolomide Run3-DMSO | NM_0249<br>80 | GPR157  | -2.916912 | Inlier   |

Identification of Survival Genes in Human Glioblastoma Cells Using siRNA Screening  
 Nikhil G Thaker, Fang Zhang, Peter R. McDonald, Tong Ying Shun, Michael D Lewen, Ian F. Pollack, and John S. Lazo

Molecular Pharmacology

| siRNA Treatment              | Gene ID       | Gene Name | Protein                        | Value     | Outlier Status |
|------------------------------|---------------|-----------|--------------------------------|-----------|----------------|
| siRNA-Temozolomide Run1-DMSO | NM_0249<br>80 | GPR157    | G protein-coupled receptor 157 | -0.740915 | Inlier         |
| siRNA-Temozolomide Run2-DMSO | NM_0249<br>80 | GPR157    | G protein-coupled receptor 157 | -0.568935 | Inlier         |
| siRNA Disorazole DMSO Run2   | NM_0249<br>80 | GPR157    | G protein-coupled receptor 157 | -0.163281 | Inlier         |
| siRNA Disorazole DMSO Run1   | NM_0249<br>80 | GPR157    | G protein-coupled receptor 157 | 0.163281  | Inlier         |
| siRNA Disorazole DMSO Run3   | NM_0249<br>80 | GPR157    | G protein-coupled receptor 157 | 0.608085  | Inlier         |
| siRNA-Vinblastine Run1-DMSO  | NM_0249<br>80 | GPR157    | G protein-coupled receptor 157 | 1.067807  | Inlier         |
| siRNA-Vinblastine Run2-DMSO  | NM_0249<br>80 | GPR157    | G protein-coupled receptor 157 | 1.802481  | Inlier         |
| siRNA-Temozolomide Run3-DMSO | NM_0207<br>52 | GPR158    | G protein-coupled receptor 158 | -2.019689 | Inlier         |
| siRNA Disorazole DMSO Run2   | NM_0207<br>52 | GPR158    | G protein-coupled receptor 158 | -0.672976 | Inlier         |
| siRNA-Temozolomide Run1-DMSO | NM_0207<br>52 | GPR158    | G protein-coupled receptor 158 | -0.059996 | Inlier         |
| siRNA-Temozolomide Run2-DMSO | NM_0207<br>52 | GPR158    | G protein-coupled receptor 158 | -0.001086 | Inlier         |
| siRNA Disorazole DMSO Run1   | NM_0207<br>52 | GPR158    | G protein-coupled receptor 158 | 0.001086  | Inlier         |
| siRNA-Vinblastine Run1-DMSO  | NM_0207<br>52 | GPR158    | G protein-coupled receptor 158 | 0.676024  | Inlier         |

Identification of Survival Genes in Human Glioblastoma Cells Using siRNA Screening  
 Nikhil G Thaker, Fang Zhang, Peter R. McDonald, Tong Ying Shun, Michael D Lewen, Ian F. Pollack, and John S. Lazo

Molecular Pharmacology

| siRNA                        | Gene    | Accession | Gene    | Accession     | Value     | Category |
|------------------------------|---------|-----------|---------|---------------|-----------|----------|
| siRNA Disorazole DMSO Run3   | NM_0207 | 52        | GPR158  | 158           | 0.735824  | Inlier   |
| siRNA-Vinblastine Run2-DMSO  | NM_0207 | 52        | GPR158  | 158           | 1.035201  | Inlier   |
| siRNA-Temozolomide Run3-DMSO | NM_0010 | 04334     | GPR158L | GPR158-like 1 | -1.079597 | Inlier   |
| siRNA Disorazole DMSO Run3   | NM_0010 | 04334     | GPR158L | GPR158-like 1 | -0.677437 | Inlier   |
| siRNA Disorazole DMSO Run2   | NM_0010 | 04334     | GPR158L | GPR158-like 1 | -0.671563 | Inlier   |
| siRNA-Temozolomide Run1-DMSO | NM_0010 | 04334     | GPR158L | GPR158-like 1 | -0.05488  | Inlier   |
| siRNA-Temozolomide Run2-DMSO | NM_0010 | 04334     | GPR158L | GPR158-like 1 | 0.05488   | Inlier   |
| siRNA Disorazole DMSO Run1   | NM_0010 | 04334     | GPR158L | GPR158-like 1 | 0.342782  | Inlier   |
| siRNA-Vinblastine Run1-DMSO  | NM_0010 | 04334     | GPR158L | GPR158-like 1 | 0.886307  | Inlier   |
| siRNA-Vinblastine Run2-DMSO  | NM_0010 | 04334     | GPR158L | GPR158-like 1 | 1.098048  | Inlier   |
| siRNA-Temozolomide Run3-DMSO | NM_0143 | 73        | GPR160  | 160           | -1.982099 | Inlier   |
| siRNA Disorazole DMSO Run2   | NM_0143 | 73        | GPR160  | 160           | -1.398793 | Inlier   |
| siRNA-Temozolomide Run2-DMSO | NM_0143 | 73        | GPR160  | 160           | -0.424225 | Inlier   |
| siRNA-Temozolomide Run1-DMSO | NM_0143 | 73        | GPR160  | 160           | -0.061741 | Inlier   |
| siRNA Disorazole DMSO Run3   | NM_0143 | 73        | GPR160  | 160           | 0.061741  | Inlier   |
| siRNA Disorazole DMSO Run1   | NM_0143 | 73        | GPR160  | 160           | 0.264012  | Inlier   |
| siRNA-Vinblastine Run1-DMSO  | NM_0143 | 73        | GPR160  | 160           | 0.924775  | Inlier   |

Identification of Survival Genes in Human Glioblastoma Cells Using siRNA Screening  
 Nikhil G Thaker, Fang Zhang, Peter R. McDonald, Tong Ying Shun, Michael D Lewen, Ian F. Pollack, and John S. Lazo

Molecular Pharmacology

| siRNA                        | Gene          | Protein | Receptor | Value     | Outlier |
|------------------------------|---------------|---------|----------|-----------|---------|
| siRNA-Vinblastine Run2-DMSO  | NM_0143<br>73 | GPR160  | 160      | 0.929943  | Inlier  |
| siRNA-Temozolomide Run3-DMSO | NM_1538<br>32 | GPR161  | 161      | -2.158877 | Inlier  |
| siRNA-Temozolomide Run1-DMSO | NM_1538<br>32 | GPR161  | 161      | -0.8239   | Inlier  |
| siRNA Disorazole DMSO Run3   | NM_1538<br>32 | GPR161  | 161      | -0.442314 | Inlier  |
| siRNA-Temozolomide Run2-DMSO | NM_1538<br>32 | GPR161  | 161      | -0.113839 | Inlier  |
| siRNA Disorazole DMSO Run2   | NM_1538<br>32 | GPR161  | 161      | 0.113838  | Inlier  |
| siRNA Disorazole DMSO Run1   | NM_1538<br>32 | GPR161  | 161      | 0.5251    | Inlier  |
| siRNA-Vinblastine Run2-DMSO  | NM_1538<br>32 | GPR161  | 161      | 1.328553  | Inlier  |
| siRNA-Vinblastine Run1-DMSO  | NM_1538<br>32 | GPR161  | 161      | 1.48464   | Inlier  |
| siRNA-Temozolomide Run3-DMSO | NM_0052<br>91 | GPR17   | 17       | -1.766076 | Inlier  |
| siRNA Disorazole DMSO Run2   | NM_0052<br>91 | GPR17   | 17       | -1.254958 | Inlier  |
| siRNA-Temozolomide Run2-DMSO | NM_0052<br>91 | GPR17   | 17       | -0.372762 | Inlier  |
| siRNA Disorazole DMSO Run3   | NM_0052<br>91 | GPR17   | 17       | -0.249162 | Inlier  |

Identification of Survival Genes in Human Glioblastoma Cells Using siRNA Screening  
 Nikhil G Thaker, Fang Zhang, Peter R. McDonald, Tong Ying Shun, Michael D Lewen, Ian F. Pollack, and John S. Lazo

Molecular Pharmacology

| siRNA Treatment              | Gene ID   | Receptor | Gene Name                       | Value     | Outlier Status |
|------------------------------|-----------|----------|---------------------------------|-----------|----------------|
| siRNA-Temozolomide Run1-DMSO | NM_005291 | GPR17    | G protein-coupled receptor 17   | 0.249162  | Inlier         |
| siRNA Disorazole DMSO Run1   | NM_005291 | GPR17    | G protein-coupled receptor 17   | 0.256452  | Inlier         |
| siRNA-Vinblastine Run1-DMSO  | NM_005291 | GPR17    | G protein-coupled receptor 17   | 0.976238  | Inlier         |
| siRNA-Vinblastine Run2-DMSO  | NM_005291 | GPR17    | G protein-coupled receptor 17   | 1.058335  | Inlier         |
| siRNA-Temozolomide Run3-DMSO | NM_013308 | GPR171   | G protein-coupled receptor 171  | -0.972052 | Inlier         |
| siRNA Disorazole DMSO Run2   | NM_013308 | GPR171   | G protein-coupled receptor 171  | -0.745381 | Inlier         |
| siRNA Disorazole DMSO Run3   | NM_013308 | GPR171   | G protein-coupled receptor 171  | -0.554538 | Inlier         |
| siRNA-Temozolomide Run2-DMSO | NM_013308 | GPR171   | G protein-coupled receptor 171  | -0.098325 | Inlier         |
| siRNA-Temozolomide Run1-DMSO | NM_013308 | GPR171   | G protein-coupled receptor 171  | 0.098325  | Inlier         |
| siRNA Disorazole DMSO Run1   | NM_013308 | GPR171   | G protein-coupled receptor 171  | 0.603619  | Inlier         |
| siRNA-Vinblastine Run2-DMSO  | NM_013308 | GPR171   | G protein-coupled receptor 171  | 1.074029  | Inlier         |
| siRNA-Vinblastine Run1-DMSO  | NM_013308 | GPR171   | G protein-coupled receptor 171  | 1.177911  | Inlier         |
| siRNA-Temozolomide Run3-DMSO | NM_024531 | GPR172A  | G protein-coupled receptor 172A | -2.058405 | Inlier         |

Identification of Survival Genes in Human Glioblastoma Cells Using siRNA Screening  
 Nikhil G Thaker, Fang Zhang, Peter R. McDonald, Tong Ying Shun, Michael D Lewen, Ian F. Pollack, and John S. Lazo

Molecular Pharmacology

| siRNA Treatment              | Gene ID       | Receptor | Protein                         | Value     | Category |
|------------------------------|---------------|----------|---------------------------------|-----------|----------|
| siRNA-Temozolomide Run2-DMSO | NM_0245<br>31 | GPR172A  | G protein-coupled receptor 172A | -0.71185  | Inlier   |
| siRNA-Temozolomide Run1-DMSO | NM_0245<br>31 | GPR172A  | G protein-coupled receptor 172A | -0.709212 | Inlier   |
| siRNA Disorazole DMSO Run2   | NM_0245<br>31 | GPR172A  | G protein-coupled receptor 172A | -0.101473 | Inlier   |
| siRNA Disorazole DMSO Run3   | NM_0245<br>31 | GPR172A  | G protein-coupled receptor 172A | 0.101472  | Inlier   |
| siRNA Disorazole DMSO Run1   | NM_0245<br>31 | GPR172A  | G protein-coupled receptor 172A | 0.386703  | Inlier   |
| siRNA-Vinblastine Run1-DMSO  | NM_0245<br>31 | GPR172A  | G protein-coupled receptor 172A | 0.64649   | Inlier   |
| siRNA-Vinblastine Run2-DMSO  | NM_0245<br>31 | GPR172A  | G protein-coupled receptor 172A | 0.70251   | Inlier   |
| siRNA Disorazole DMSO Run2   | NM_0179<br>86 | GPR172B  | G protein-coupled receptor 172B | -1.005765 | Inlier   |
| siRNA-Temozolomide Run3-DMSO | NM_0179<br>86 | GPR172B  | G protein-coupled receptor 172B | -0.913892 | Inlier   |
| siRNA-Temozolomide Run1-DMSO | NM_0179<br>86 | GPR172B  | G protein-coupled receptor 172B | -0.107237 | Inlier   |
| siRNA Disorazole DMSO Run3   | NM_0179<br>86 | GPR172B  | G protein-coupled receptor 172B | -0.02985  | Inlier   |
| siRNA-Temozolomide Run2-DMSO | NM_0179<br>86 | GPR172B  | G protein-coupled receptor 172B | 0.02985   | Inlier   |
| siRNA Disorazole DMSO Run1   | NM_0179<br>86 | GPR172B  | G protein-coupled receptor 172B | 0.515683  | Inlier   |



Identification of Survival Genes in Human Glioblastoma Cells Using siRNA Screening  
 Nikhil G Thaker, Fang Zhang, Peter R. McDonald, Tong Ying Shun, Michael D Lewen, Ian F. Pollack, and John S. Lazo

Molecular Pharmacology

| siRNA                        | Gene    | Accession | Gene    | Accession | Value     | Outlier |
|------------------------------|---------|-----------|---------|-----------|-----------|---------|
| siRNA-Vinblastine Run2-DMSO  | NM_0179 | 86        | GPR172B | 172B      | 0.833317  | Inlier  |
| siRNA-Vinblastine Run1-DMSO  | NM_0179 | 86        | GPR172B | 172B      | 0.92299   | Inlier  |
| siRNA-Temozolomide Run1-DMSO | NM_0189 | 69        | GPR173  | 173       | -1.498926 | Inlier  |
| siRNA-Temozolomide Run3-DMSO | NM_0189 | 69        | GPR173  | 173       | -1.442548 | Inlier  |
| siRNA-Temozolomide Run2-DMSO | NM_0189 | 69        | GPR173  | 173       | -0.274832 | Inlier  |
| siRNA Disorazole DMSO Run2   | NM_0189 | 69        | GPR173  | 173       | -0.057731 | Inlier  |
| siRNA Disorazole DMSO Run1   | NM_0189 | 69        | GPR173  | 173       | 0.057732  | Inlier  |
| siRNA-Vinblastine Run1-DMSO  | NM_0189 | 69        | GPR173  | 173       | 0.612752  | Inlier  |
| siRNA-Vinblastine Run2-DMSO  | NM_0189 | 69        | GPR173  | 173       | 0.736248  | Inlier  |
| siRNA Disorazole DMSO Run3   | NM_0189 | 69        | GPR173  | 173       | 1.714354  | Inlier  |
| siRNA-Temozolomide Run3-DMSO | NM_0325 | 53        | GPR174  | 174       | -1.203503 | Inlier  |
| siRNA Disorazole DMSO Run2   | NM_0325 | 53        | GPR174  | 174       | -0.798997 | Inlier  |
| siRNA Disorazole DMSO Run3   | NM_0325 | 53        | GPR174  | 174       | -0.276288 | Inlier  |

Identification of Survival Genes in Human Glioblastoma Cells Using siRNA Screening  
 Nikhil G Thaker, Fang Zhang, Peter R. McDonald, Tong Ying Shun, Michael D Lewen, Ian F. Pollack, and John S. Lazo

Molecular Pharmacology

| siRNA Treatment              | Gene ID       | Receptor | Protein                        | Value     | Outlier |
|------------------------------|---------------|----------|--------------------------------|-----------|---------|
| siRNA-Temozolomide Run1-DMSO | NM_0325<br>53 | GPR174   | G protein-coupled receptor 174 | -0.023291 | Inlier  |
| siRNA-Temozolomide Run2-DMSO | NM_0325<br>53 | GPR174   | G protein-coupled receptor 174 | 0.023291  | Inlier  |
| siRNA Disorazole DMSO Run1   | NM_0325<br>53 | GPR174   | G protein-coupled receptor 174 | 0.550003  | Inlier  |
| siRNA-Vinblastine Run2-DMSO  | NM_0325<br>53 | GPR174   | G protein-coupled receptor 174 | 0.939024  | Inlier  |
| siRNA-Vinblastine Run1-DMSO  | NM_0325<br>53 | GPR174   | G protein-coupled receptor 174 | 0.964185  | Inlier  |
| siRNA-Temozolomide Run3-DMSO | NM_0052<br>92 | GPR18    | G protein-coupled receptor 18  | -1.674798 | Inlier  |
| siRNA-Temozolomide Run2-DMSO | NM_0052<br>92 | GPR18    | G protein-coupled receptor 18  | -0.726359 | Inlier  |
| siRNA-Temozolomide Run1-DMSO | NM_0052<br>92 | GPR18    | G protein-coupled receptor 18  | -0.242286 | Inlier  |
| siRNA Disorazole DMSO Run2   | NM_0052<br>92 | GPR18    | G protein-coupled receptor 18  | -0.023393 | Inlier  |
| siRNA Disorazole DMSO Run1   | NM_0052<br>92 | GPR18    | G protein-coupled receptor 18  | 0.023392  | Inlier  |
| siRNA-Vinblastine Run2-DMSO  | NM_0052<br>92 | GPR18    | G protein-coupled receptor 18  | 0.651494  | Inlier  |
| siRNA Disorazole DMSO Run3   | NM_0052<br>92 | GPR18    | G protein-coupled receptor 18  | 0.697506  | Inlier  |
| siRNA-Vinblastine Run1-DMSO  | NM_0052<br>92 | GPR18    | G protein-coupled receptor 18  | 0.906136  | Inlier  |

Identification of Survival Genes in Human Glioblastoma Cells Using siRNA Screening  
 Nikhil G Thaker, Fang Zhang, Peter R. McDonald, Tong Ying Shun, Michael D Lewen, Ian F. Pollack, and John S. Lazo

Molecular Pharmacology

|                              |               |       |                                      |                  |
|------------------------------|---------------|-------|--------------------------------------|------------------|
| siRNA-Temozolomide Run3-DMSO | NM_0061<br>43 | GPR19 | G protein-coupled receptor<br>19     | -0.995427 Inlier |
| siRNA-Temozolomide Run1-DMSO | NM_0061<br>43 | GPR19 | G protein-coupled receptor<br>19     | -0.578522 Inlier |
| siRNA-Temozolomide Run2-DMSO | NM_0061<br>43 | GPR19 | G protein-coupled receptor<br>19     | -0.319086 Inlier |
| siRNA Disorazole DMSO Run2   | NM_0061<br>43 | GPR19 | G protein-coupled receptor<br>19     | -0.085185 Inlier |
| siRNA Disorazole DMSO Run1   | NM_0061<br>43 | GPR19 | G protein-coupled receptor<br>19     | 0.085185 Inlier  |
| siRNA Disorazole DMSO Run3   | NM_0061<br>43 | GPR19 | G protein-coupled receptor<br>19     | 0.770478 Inlier  |
| siRNA-Vinblastine Run2-DMSO  | NM_0061<br>43 | GPR19 | G protein-coupled receptor<br>19     | 1.083813 Inlier  |
| siRNA-Vinblastine Run1-DMSO  | NM_0061<br>43 | GPR19 | G protein-coupled receptor<br>19     | 1.15162 Inlier   |
| siRNA-Temozolomide Run3-DMSO | NM_0166<br>02 | GPR2  | chemokine (C-C motif) receptor<br>10 | -1.01332 Inlier  |
| siRNA-Temozolomide Run2-DMSO | NM_0166<br>02 | GPR2  | chemokine (C-C motif) receptor<br>10 | -0.557034 Inlier |
| siRNA Disorazole DMSO Run2   | NM_0166<br>02 | GPR2  | chemokine (C-C motif) receptor<br>10 | -0.062441 Inlier |
| siRNA Disorazole DMSO Run3   | NM_0166<br>02 | GPR2  | chemokine (C-C motif) receptor<br>10 | -0.028952 Inlier |

Identification of Survival Genes in Human Glioblastoma Cells Using siRNA Screening  
 Nikhil G Thaker, Fang Zhang, Peter R. McDonald, Tong Ying Shun, Michael D Lewen, Ian F. Pollack, and John S. Lazo

Molecular Pharmacology

|                              |           |       |                                   |           |        |
|------------------------------|-----------|-------|-----------------------------------|-----------|--------|
| siRNA-Temozolomide Run1-DMSO | NM_016602 | GPR2  | chemokine (C-C motif) receptor 10 | 0.028952  | Inlier |
| siRNA Disorazole DMSO Run1   | NM_016602 | GPR2  | chemokine (C-C motif) receptor 10 | 0.791966  | Inlier |
| siRNA-Vinblastine Run1-DMSO  | NM_016602 | GPR2  | chemokine (C-C motif) receptor 10 | 1.531656  | Inlier |
| siRNA-Vinblastine Run2-DMSO  | NM_016602 | GPR2  | chemokine (C-C motif) receptor 10 | 1.533498  | Inlier |
| siRNA-Temozolomide Run3-DMSO | NM_005293 | GPR20 | G protein-coupled receptor 20     | -2.271656 | Inlier |
| siRNA Disorazole DMSO Run2   | NM_005293 | GPR20 | G protein-coupled receptor 20     | -1.491919 | Inlier |
| siRNA-Temozolomide Run1-DMSO | NM_005293 | GPR20 | G protein-coupled receptor 20     | -0.243724 | Inlier |
| siRNA Disorazole DMSO Run3   | NM_005293 | GPR20 | G protein-coupled receptor 20     | -0.027808 | Inlier |
| siRNA-Temozolomide Run2-DMSO | NM_005293 | GPR20 | G protein-coupled receptor 20     | 0.027808  | Inlier |
| siRNA Disorazole DMSO Run1   | NM_005293 | GPR20 | G protein-coupled receptor 20     | 0.279697  | Inlier |
| siRNA-Vinblastine Run1-DMSO  | NM_005293 | GPR20 | G protein-coupled receptor 20     | 1.069303  | Inlier |
| siRNA-Vinblastine Run2-DMSO  | NM_005293 | GPR20 | G protein-coupled receptor 20     | 1.082986  | Inlier |

Identification of Survival Genes in Human Glioblastoma Cells Using siRNA Screening  
 Nikhil G Thaker, Fang Zhang, Peter R. McDonald, Tong Ying Shun, Michael D Lewen, Ian F. Pollack, and John S. Lazo

Molecular Pharmacology

| siRNA Treatment              | Gene ID   | Receptor | Protein                       | Value     | Outlier Status |
|------------------------------|-----------|----------|-------------------------------|-----------|----------------|
| siRNA-Temozolomide Run3-DMSO | NM_005294 | GPR21    | G protein-coupled receptor 21 | -2.349732 | Inlier         |
| siRNA-Temozolomide Run2-DMSO | NM_005294 | GPR21    | G protein-coupled receptor 21 | -0.492629 | Inlier         |
| siRNA Disorazole DMSO Run3   | NM_005294 | GPR21    | G protein-coupled receptor 21 | -0.268341 | Inlier         |
| siRNA Disorazole DMSO Run2   | NM_005294 | GPR21    | G protein-coupled receptor 21 | -0.18699  | Inlier         |
| siRNA-Temozolomide Run1-DMSO | NM_005294 | GPR21    | G protein-coupled receptor 21 | 0.186989  | Inlier         |
| siRNA Disorazole DMSO Run1   | NM_005294 | GPR21    | G protein-coupled receptor 21 | 0.856371  | Inlier         |
| siRNA-Vinblastine Run1-DMSO  | NM_005294 | GPR21    | G protein-coupled receptor 21 | 1.231434  | Inlier         |
| siRNA-Vinblastine Run2-DMSO  | NM_005294 | GPR21    | G protein-coupled receptor 21 | 1.302036  | Inlier         |
| siRNA-Temozolomide Run3-DMSO | NM_005295 | GPR22    | G protein-coupled receptor 22 | -1.329245 | Inlier         |
| siRNA Disorazole DMSO Run2   | NM_005295 | GPR22    | G protein-coupled receptor 22 | -0.190309 | Inlier         |
| siRNA Disorazole DMSO Run3   | NM_005295 | GPR22    | G protein-coupled receptor 22 | -0.153965 | Inlier         |
| siRNA-Temozolomide Run1-DMSO | NM_005295 | GPR22    | G protein-coupled receptor 22 | -0.015262 | Inlier         |
| siRNA-Temozolomide Run2-DMSO | NM_005295 | GPR22    | G protein-coupled receptor 22 | 0.015262  | Inlier         |

Identification of Survival Genes in Human Glioblastoma Cells Using siRNA Screening  
 Nikhil G Thaker, Fang Zhang, Peter R. McDonald, Tong Ying Shun, Michael D Lewen, Ian F. Pollack, and John S. Lazo

Molecular Pharmacology

| siRNA                        | Gene          | Receptor | Value | Outlier          |
|------------------------------|---------------|----------|-------|------------------|
| siRNA Disorazole DMSO Run1   | NM_0052<br>95 | GPR22    | 22    | 1.158691 Inlier  |
| siRNA-Vinblastine Run2-DMSO  | NM_0052<br>95 | GPR22    | 22    | 1.5619 Inlier    |
| siRNA-Vinblastine Run1-DMSO  | NM_0052<br>95 | GPR22    | 22    | 1.922878 Inlier  |
| siRNA-Temozolomide Run3-DMSO | NM_0052<br>96 | GPR23    | 23    | -2.599257 Inlier |
| siRNA Disorazole DMSO Run2   | NM_0052<br>96 | GPR23    | 23    | -0.808573 Inlier |
| siRNA-Temozolomide Run1-DMSO | NM_0052<br>96 | GPR23    | 23    | -0.540427 Inlier |
| siRNA-Temozolomide Run2-DMSO | NM_0052<br>96 | GPR23    | 23    | -0.102238 Inlier |
| siRNA Disorazole DMSO Run3   | NM_0052<br>96 | GPR23    | 23    | 0.102238 Inlier  |
| siRNA Disorazole DMSO Run1   | NM_0052<br>96 | GPR23    | 23    | 0.331464 Inlier  |
| siRNA-Vinblastine Run2-DMSO  | NM_0052<br>96 | GPR23    | 23    | 1.279757 Inlier  |
| siRNA-Vinblastine Run1-DMSO  | NM_0052<br>96 | GPR23    | 23    | 1.471774 Inlier  |
| siRNA-Temozolomide Run3-DMSO | NM_0052<br>97 | GPR24    | 24    | -2.427604 Inlier |
| siRNA Disorazole DMSO Run3   | NM_0052<br>97 | GPR24    | 24    | -0.769079 Inlier |

Identification of Survival Genes in Human Glioblastoma Cells Using siRNA Screening  
 Nikhil G Thaker, Fang Zhang, Peter R. McDonald, Tong Ying Shun, Michael D Lewen, Ian F. Pollack, and John S. Lazo

Molecular Pharmacology

| siRNA                        | Gene          | Receptor | Value | Outlier          |
|------------------------------|---------------|----------|-------|------------------|
| siRNA Disorazole DMSO Run2   | NM_0052<br>97 | GPR24    | 24    | -0.259641 Inlier |
| siRNA-Temozolomide Run1-DMSO | NM_0052<br>97 | GPR24    | 24    | -0.187484 Inlier |
| siRNA-Temozolomide Run2-DMSO | NM_0052<br>97 | GPR24    | 24    | 0.187484 Inlier  |
| siRNA Disorazole DMSO Run1   | NM_0052<br>97 | GPR24    | 24    | 0.579921 Inlier  |
| siRNA-Vinblastine Run2-DMSO  | NM_0052<br>97 | GPR24    | 24    | 1.135979 Inlier  |
| siRNA-Vinblastine Run1-DMSO  | NM_0052<br>97 | GPR24    | 24    | 1.641198 Inlier  |
| siRNA-Temozolomide Run3-DMSO | NM_0052<br>98 | GPR25    | 25    | -2.470882 Inlier |
| siRNA-Temozolomide Run2-DMSO | NM_0052<br>98 | GPR25    | 25    | -0.861656 Inlier |
| siRNA Disorazole DMSO Run1   | NM_0052<br>98 | GPR25    | 25    | -0.364322 Inlier |
| siRNA-Temozolomide Run1-DMSO | NM_0052<br>98 | GPR25    | 25    | -0.066736 Inlier |
| siRNA Disorazole DMSO Run2   | NM_0052<br>98 | GPR25    | 25    | 0.066736 Inlier  |
| siRNA Disorazole DMSO Run3   | NM_0052<br>98 | GPR25    | 25    | 0.487344 Inlier  |
| siRNA-Vinblastine Run2-DMSO  | NM_0052<br>98 | GPR25    | 25    | 1.493851 Inlier  |

Identification of Survival Genes in Human Glioblastoma Cells Using siRNA Screening  
 Nikhil G Thaker, Fang Zhang, Peter R. McDonald, Tong Ying Shun, Michael D Lewen, Ian F. Pollack, and John S. Lazo

Molecular Pharmacology

| siRNA                        | Gene      | Receptor | Value | Outlier          |
|------------------------------|-----------|----------|-------|------------------|
| siRNA-Vinblastine Run1-DMSO  | NM_005298 | GPR25    | 25    | 1.8993 Inlier    |
| siRNA-Temozolomide Run3-DMSO | NM_153442 | GPR26    | 26    | -1.7774 Inlier   |
| siRNA Disorazole DMSO Run2   | NM_153442 | GPR26    | 26    | -1.114837 Inlier |
| siRNA Disorazole DMSO Run3   | NM_153442 | GPR26    | 26    | -0.39994 Inlier  |
| siRNA-Temozolomide Run1-DMSO | NM_153442 | GPR26    | 26    | -0.055419 Inlier |
| siRNA-Temozolomide Run2-DMSO | NM_153442 | GPR26    | 26    | 0.055419 Inlier  |
| siRNA Disorazole DMSO Run1   | NM_153442 | GPR26    | 26    | 0.161683 Inlier  |
| siRNA-Vinblastine Run2-DMSO  | NM_153442 | GPR26    | 26    | 0.94906 Inlier   |
| siRNA-Vinblastine Run1-DMSO  | NM_153442 | GPR26    | 26    | 1.145336 Inlier  |
| siRNA Disorazole DMSO Run2   | NM_018971 | GPR27    | 27    | -1.723399 Inlier |
| siRNA-Temozolomide Run3-DMSO | NM_018971 | GPR27    | 27    | -1.300905 Inlier |
| siRNA Disorazole DMSO Run3   | NM_018971 | GPR27    | 27    | -0.205564 Inlier |
| siRNA Disorazole DMSO Run1   | NM_018971 | GPR27    | 27    | -0.037954 Inlier |



Identification of Survival Genes in Human Glioblastoma Cells Using siRNA Screening  
 Nikhil G Thaker, Fang Zhang, Peter R. McDonald, Tong Ying Shun, Michael D Lewen, Ian F. Pollack, and John S. Lazo

Molecular Pharmacology

| siRNA-Treatment              | Gene          | Protein | Receptor                      | Value     | Outlier |
|------------------------------|---------------|---------|-------------------------------|-----------|---------|
| siRNA-Temozolomide Run2-DMSO | NM_0189<br>71 | GPR27   | G protein-coupled receptor 27 | 0.037954  | Inlier  |
| siRNA-Temozolomide Run1-DMSO | NM_0189<br>71 | GPR27   | G protein-coupled receptor 27 | 0.269191  | Inlier  |
| siRNA-Vinblastine Run2-DMSO  | NM_0189<br>71 | GPR27   | G protein-coupled receptor 27 | 1.079809  | Inlier  |
| siRNA-Vinblastine Run1-DMSO  | NM_0189<br>71 | GPR27   | G protein-coupled receptor 27 | 1.21843   | Inlier  |
| siRNA-Temozolomide Run2-DMSO | NM_0052<br>81 | GPR3    | G protein-coupled receptor 3  | -0.836305 | Inlier  |
| siRNA Disorazole DMSO Run1   | NM_0052<br>81 | GPR3    | G protein-coupled receptor 3  | -0.512695 | Inlier  |
| siRNA Disorazole DMSO Run2   | NM_0052<br>81 | GPR3    | G protein-coupled receptor 3  | -0.363071 | Inlier  |
| siRNA Disorazole DMSO Run3   | NM_0052<br>81 | GPR3    | G protein-coupled receptor 3  | -0.05493  | Inlier  |
| siRNA-Temozolomide Run1-DMSO | NM_0052<br>81 | GPR3    | G protein-coupled receptor 3  | 0.054928  | Inlier  |
| siRNA-Vinblastine Run1-DMSO  | NM_0052<br>81 | GPR3    | G protein-coupled receptor 3  | 1.684315  | Inlier  |
| siRNA-Temozolomide Run3-DMSO | NM_0052<br>81 | GPR3    | G protein-coupled receptor 3  | 1.687685  | Inlier  |
| siRNA-Vinblastine Run2-DMSO  | NM_0052<br>81 | GPR3    | G protein-coupled receptor 3  | 1.690586  | Inlier  |
| siRNA-Temozolomide Run3-DMSO | NM_0015<br>05 | GPR30   | G protein-coupled receptor 30 | -0.930837 | Inlier  |
| siRNA Disorazole DMSO Run3   | NM_0015<br>05 | GPR30   | G protein-coupled receptor 30 | -0.556713 | Inlier  |
| siRNA Disorazole DMSO Run2   | NM_0015<br>05 | GPR30   | G protein-coupled receptor 30 | -0.487652 | Inlier  |

Identification of Survival Genes in Human Glioblastoma Cells Using siRNA Screening  
 Nikhil G Thaker, Fang Zhang, Peter R. McDonald, Tong Ying Shun, Michael D Lewen, Ian F. Pollack, and John S. Lazo

Molecular Pharmacology

| siRNA Treatment              | Gene ID   | Receptor | Value | Outlier Status   |
|------------------------------|-----------|----------|-------|------------------|
| siRNA-Temozolomide Run2-DMSO | NM_001505 | GPR30    | 30    | -0.329112 Inlier |
| siRNA-Temozolomide Run1-DMSO | NM_001505 | GPR30    | 30    | 0.329112 Inlier  |
| siRNA Disorazole DMSO Run1   | NM_001505 | GPR30    | 30    | 0.792287 Inlier  |
| siRNA-Vinblastine Run2-DMSO  | NM_001505 | GPR30    | 30    | 1.287723 Inlier  |
| siRNA-Vinblastine Run1-DMSO  | NM_001505 | GPR30    | 30    | 1.387524 Inlier  |
| siRNA-Temozolomide Run3-DMSO | NM_005299 | GPR31    | 31    | -2.898365 Inlier |
| siRNA-Temozolomide Run2-DMSO | NM_005299 | GPR31    | 31    | -1.590724 Inlier |
| siRNA-Temozolomide Run1-DMSO | NM_005299 | GPR31    | 31    | -0.955996 Inlier |
| siRNA Disorazole DMSO Run1   | NM_005299 | GPR31    | 31    | -0.013213 Inlier |
| siRNA Disorazole DMSO Run3   | NM_005299 | GPR31    | 31    | 0.013214 Inlier  |
| siRNA-Vinblastine Run2-DMSO  | NM_005299 | GPR31    | 31    | 0.349966 Inlier  |
| siRNA-Vinblastine Run1-DMSO  | NM_005299 | GPR31    | 31    | 0.393004 Inlier  |
| siRNA Disorazole DMSO Run2   | NM_005299 | GPR31    | 31    | 2.115212 Inlier  |

Identification of Survival Genes in Human Glioblastoma Cells Using siRNA Screening  
 Nikhil G Thaker, Fang Zhang, Peter R. McDonald, Tong Ying Shun, Michael D Lewen, Ian F. Pollack, and John S. Lazo

Molecular Pharmacology

| siRNA                        | Gene      | Target | Value     | Outlier |
|------------------------------|-----------|--------|-----------|---------|
| siRNA Disorazole DMSO Run2   | NM_001506 | GPR32  | -0.760452 | Inlier  |
| siRNA-Temozolomide Run2-DMSO | NM_001506 | GPR32  | -0.588548 | Inlier  |
| siRNA Disorazole DMSO Run1   | NM_001506 | GPR32  | -0.483962 | Inlier  |
| siRNA-Temozolomide Run1-DMSO | NM_001506 | GPR32  | -0.231688 | Inlier  |
| siRNA-Temozolomide Run3-DMSO | NM_001506 | GPR32  | 0.231689  | Inlier  |
| siRNA-Vinblastine Run1-DMSO  | NM_001506 | GPR32  | 0.780042  | Inlier  |
| siRNA Disorazole DMSO Run3   | NM_001506 | GPR32  | 0.799392  | Inlier  |
| siRNA-Vinblastine Run2-DMSO  | NM_001506 | GPR32  | 0.799985  | Inlier  |
| siRNA-Temozolomide Run3-DMSO | NM_005300 | GPR34  | -2.335283 | Inlier  |
| siRNA-Temozolomide Run2-DMSO | NM_005300 | GPR34  | -1.252679 | Inlier  |
| siRNA Disorazole DMSO Run2   | NM_005300 | GPR34  | -0.577559 | Inlier  |
| siRNA-Temozolomide Run1-DMSO | NM_005300 | GPR34  | -0.235464 | Inlier  |
| siRNA Disorazole DMSO Run3   | NM_005300 | GPR34  | 0.235464  | Inlier  |

G protein-coupled receptor

Identification of Survival Genes in Human Glioblastoma Cells Using siRNA Screening  
 Nikhil G Thaker, Fang Zhang, Peter R. McDonald, Tong Ying Shun, Michael D Lewen, Ian F. Pollack, and John S. Lazo

Molecular Pharmacology

|                              |               |       |                                                                 |           |        |
|------------------------------|---------------|-------|-----------------------------------------------------------------|-----------|--------|
| siRNA Disorazole DMSO Run1   | NM_0053<br>00 | GPR34 | G protein-coupled receptor 34                                   | 0.238831  | Inlier |
| siRNA-Vinblastine Run2-DMSO  | NM_0053<br>00 | GPR34 | G protein-coupled receptor 34                                   | 0.771441  | Inlier |
| siRNA-Vinblastine Run1-DMSO  | NM_0053<br>00 | GPR34 | G protein-coupled receptor 34                                   | 1.404649  | Inlier |
| siRNA-Temozolomide Run3-DMSO | NM_0053<br>01 | GPR35 | G protein-coupled receptor 35                                   | -1.55642  | Inlier |
| siRNA-Temozolomide Run2-DMSO | NM_0053<br>01 | GPR35 | G protein-coupled receptor 35                                   | -1.216997 | Inlier |
| siRNA-Temozolomide Run1-DMSO | NM_0053<br>01 | GPR35 | G protein-coupled receptor 35                                   | -0.141377 | Inlier |
| siRNA Disorazole DMSO Run2   | NM_0053<br>01 | GPR35 | G protein-coupled receptor 35                                   | -0.118955 | Inlier |
| siRNA Disorazole DMSO Run1   | NM_0053<br>01 | GPR35 | G protein-coupled receptor 35                                   | 0.118955  | Inlier |
| siRNA Disorazole DMSO Run3   | NM_0053<br>01 | GPR35 | G protein-coupled receptor 35                                   | 0.367663  | Inlier |
| siRNA-Vinblastine Run2-DMSO  | NM_0053<br>01 | GPR35 | G protein-coupled receptor 35                                   | 0.981337  | Inlier |
| siRNA-Vinblastine Run1-DMSO  | NM_0053<br>01 | GPR35 | G protein-coupled receptor 35                                   | 1.238292  | Inlier |
| siRNA-Temozolomide Run3-DMSO | NM_0053<br>02 | GPR37 | G protein-coupled receptor 37 (endothelin receptor type B-like) | -1.794913 | Inlier |

Identification of Survival Genes in Human Glioblastoma Cells Using siRNA Screening

Nikhil G Thaker, Fang Zhang, Peter R. McDonald, Tong Ying Shun, Michael D Lewen, Ian F. Pollack, and John S. Lazo

Molecular Pharmacology

| siRNA Treatment              | Gene ID   | Gene Name | Gene Description                                                | Value     | Category |
|------------------------------|-----------|-----------|-----------------------------------------------------------------|-----------|----------|
| siRNA-Temozolomide Run2-DMSO | NM_005302 | GPR37     | G protein-coupled receptor 37 (endothelin receptor type B-like) | -0.902822 | Inlier   |
| siRNA-Temozolomide Run1-DMSO | NM_005302 | GPR37     | G protein-coupled receptor 37 (endothelin receptor type B-like) | -0.48328  | Inlier   |
| siRNA Disorazole DMSO Run1   | NM_005302 | GPR37     | G protein-coupled receptor 37 (endothelin receptor type B-like) | -0.146772 | Inlier   |
| siRNA Disorazole DMSO Run3   | NM_005302 | GPR37     | G protein-coupled receptor 37 (endothelin receptor type B-like) | 0.146772  | Inlier   |
| siRNA Disorazole DMSO Run2   | NM_005302 | GPR37     | G protein-coupled receptor 37 (endothelin receptor type B-like) | 0.642556  | Inlier   |
| siRNA-Vinblastine Run2-DMSO  | NM_005302 | GPR37     | G protein-coupled receptor 37 (endothelin receptor type B-like) | 0.706444  | Inlier   |

Identification of Survival Genes in Human Glioblastoma Cells Using siRNA Screening  
 Nikhil G Thaker, Fang Zhang, Peter R. McDonald, Tong Ying Shun, Michael D Lewen, Ian F. Pollack, and John S. Lazo

Molecular Pharmacology

| siRNA Treatment              | Gene ID   | Gene Name | Gene Description                                                | Log2 Fold Change | Inlier Status |
|------------------------------|-----------|-----------|-----------------------------------------------------------------|------------------|---------------|
| siRNA-Vinblastine Run1-DMSO  | NM_005302 | GPR37     | G protein-coupled receptor 37 (endothelin receptor type B-like) | 1.113643         | Inlier        |
| siRNA-Temozolomide Run3-DMSO | NM_004767 | GPR37L1   | G-protein coupled receptor 37 like 1                            | -1.84587         | Inlier        |
| siRNA-Temozolomide Run2-DMSO | NM_004767 | GPR37L1   | G-protein coupled receptor 37 like 1                            | -0.775836        | Inlier        |
| siRNA-Temozolomide Run1-DMSO | NM_004767 | GPR37L1   | G-protein coupled receptor 37 like 1                            | -0.534973        | Inlier        |
| siRNA Disorazole DMSO Run1   | NM_004767 | GPR37L1   | G-protein coupled receptor 37 like 1                            | -0.196741        | Inlier        |
| siRNA Disorazole DMSO Run2   | NM_004767 | GPR37L1   | G-protein coupled receptor 37 like 1                            | 0.196741         | Inlier        |
| siRNA Disorazole DMSO Run3   | NM_004767 | GPR37L1   | G-protein coupled receptor 37 like 1                            | 0.573164         | Inlier        |
| siRNA-Vinblastine Run2-DMSO  | NM_004767 | GPR37L1   | G-protein coupled receptor 37 like 1                            | 0.972928         | Inlier        |
| siRNA-Vinblastine Run1-DMSO  | NM_004767 | GPR37L1   | G-protein coupled receptor 37 like 1                            | 1.252064         | Inlier        |
| siRNA-Temozolomide Run3-DMSO | NM_001508 | GPR39     | G protein-coupled receptor 39                                   | -2.797336        | Inlier        |
| siRNA-Temozolomide Run2-DMSO | NM_001508 | GPR39     | G protein-coupled receptor 39                                   | -1.524915        | Inlier        |
| siRNA-Temozolomide Run1-DMSO | NM_001508 | GPR39     | G protein-coupled receptor 39                                   | -0.61852         | Inlier        |

Identification of Survival Genes in Human Glioblastoma Cells Using siRNA Screening  
 Nikhil G Thaker, Fang Zhang, Peter R. McDonald, Tong Ying Shun, Michael D Lewen, Ian F. Pollack, and John S. Lazo

Molecular Pharmacology

| siRNA                        | Gene  | Accession | Protein                       | Value     | Category |
|------------------------------|-------|-----------|-------------------------------|-----------|----------|
| siRNA Disorazole DMSO Run1   | GPR39 | NM_001508 | G protein-coupled receptor 39 | -0.063464 | Inlier   |
| siRNA-Vinblastine Run2-DMSO  | GPR39 | NM_001508 | G protein-coupled receptor 39 | 0.063464  | Inlier   |
| siRNA Disorazole DMSO Run2   | GPR39 | NM_001508 | G protein-coupled receptor 39 | 0.582443  | Inlier   |
| siRNA-Vinblastine Run1-DMSO  | GPR39 | NM_001508 | G protein-coupled receptor 39 | 0.73048   | Inlier   |
| siRNA Disorazole DMSO Run3   | GPR39 | NM_001508 | G protein-coupled receptor 39 | 1.626264  | Inlier   |
| siRNA-Temozolomide Run3-DMSO | GPR4  | NM_005282 | G protein-coupled receptor 4  | -1.251292 | Inlier   |
| siRNA Disorazole DMSO Run2   | GPR4  | NM_005282 | G protein-coupled receptor 4  | -0.510331 | Inlier   |
| siRNA-Temozolomide Run1-DMSO | GPR4  | NM_005282 | G protein-coupled receptor 4  | -0.378646 | Inlier   |
| siRNA-Temozolomide Run2-DMSO | GPR4  | NM_005282 | G protein-coupled receptor 4  | -0.333253 | Inlier   |
| siRNA Disorazole DMSO Run3   | GPR4  | NM_005282 | G protein-coupled receptor 4  | 0.333254  | Inlier   |
| siRNA Disorazole DMSO Run1   | GPR4  | NM_005282 | G protein-coupled receptor 4  | 0.838669  | Inlier   |
| siRNA-Vinblastine Run2-DMSO  | GPR4  | NM_005282 | G protein-coupled receptor 4  | 0.879037  | Inlier   |
| siRNA-Vinblastine Run1-DMSO  | GPR4  | NM_005282 | G protein-coupled receptor 4  | 1.66749   | Inlier   |
| siRNA-Temozolomide Run3-DMSO | GPR40 | NM_005303 | G protein-coupled receptor 40 | -0.999835 | Inlier   |
| siRNA-Temozolomide Run2-DMSO | GPR40 | NM_005303 | G protein-coupled receptor 40 | -0.349165 | Inlier   |

Identification of Survival Genes in Human Glioblastoma Cells Using siRNA Screening  
 Nikhil G Thaker, Fang Zhang, Peter R. McDonald, Tong Ying Shun, Michael D Lewen, Ian F. Pollack, and John S. Lazo

Molecular Pharmacology

| siRNA                        | Gene       | Protein | Value | Category         |
|------------------------------|------------|---------|-------|------------------|
| siRNA Disorazole DMSO Run3   | NM_0053 03 | GPR40   | 40    | -0.308951 Inlier |
| siRNA-Temozolomide Run1-DMSO | NM_0053 03 | GPR40   | 40    | -0.037376 Inlier |
| siRNA Disorazole DMSO Run2   | NM_0053 03 | GPR40   | 40    | 0.037376 Inlier  |
| siRNA Disorazole DMSO Run1   | NM_0053 03 | GPR40   | 40    | 1.06138 Inlier   |
| siRNA-Vinblastine Run1-DMSO  | NM_0053 03 | GPR40   | 40    | 2.092385 Inlier  |
| siRNA-Vinblastine Run2-DMSO  | NM_0053 03 | GPR40   | 40    | 2.479848 Inlier  |
| siRNA-Temozolomide Run3-DMSO | NM_0053 04 | GPR41   | 41    | -2.897538 Inlier |
| siRNA-Temozolomide Run2-DMSO | NM_0053 04 | GPR41   | 41    | -0.879137 Inlier |
| siRNA Disorazole DMSO Run2   | NM_0053 04 | GPR41   | 41    | -0.263829 Inlier |
| siRNA-Temozolomide Run1-DMSO | NM_0053 04 | GPR41   | 41    | -0.167816 Inlier |
| siRNA Disorazole DMSO Run3   | NM_0053 04 | GPR41   | 41    | 0.167817 Inlier  |
| siRNA Disorazole DMSO Run1   | NM_0053 04 | GPR41   | 41    | 0.469863 Inlier  |
| siRNA-Vinblastine Run1-DMSO  | NM_0053 04 | GPR41   | 41    | 1.774564 Inlier  |



Identification of Survival Genes in Human Glioblastoma Cells Using siRNA Screening  
 Nikhil G Thaker, Fang Zhang, Peter R. McDonald, Tong Ying Shun, Michael D Lewen, Ian F. Pollack, and John S. Lazo

Molecular Pharmacology

| siRNA Treatment              | Gene ID   | Gene Name | Receptor                      | Value     | Outlier Status |
|------------------------------|-----------|-----------|-------------------------------|-----------|----------------|
| siRNA-Vinblastine Run2-DMSO  | NM_005304 | GPR41     | G protein-coupled receptor 41 | 2.258134  | Inlier         |
| siRNA-Temozolomide Run3-DMSO | NM_005305 | GPR42     | G protein-coupled receptor 42 | -1.066854 | Inlier         |
| siRNA-Temozolomide Run2-DMSO | NM_005305 | GPR42     | G protein-coupled receptor 42 | -0.696851 | Inlier         |
| siRNA-Vinblastine Run2-DMSO  | NM_005305 | GPR42     | G protein-coupled receptor 42 | -0.652149 | Inlier         |
| siRNA Disorazole DMSO Run3   | NM_005305 | GPR42     | G protein-coupled receptor 42 | -0.052651 | Inlier         |
| siRNA-Temozolomide Run1-DMSO | NM_005305 | GPR42     | G protein-coupled receptor 42 | 0.052651  | Inlier         |
| siRNA Disorazole DMSO Run1   | NM_005305 | GPR42     | G protein-coupled receptor 42 | 0.3451    | Inlier         |
| siRNA-Vinblastine Run1-DMSO  | NM_005305 | GPR42     | G protein-coupled receptor 42 | 2.324713  | Inlier         |
| siRNA Disorazole DMSO Run2   | NM_005305 | GPR42     | G protein-coupled receptor 42 | 2.597645  | Inlier         |
| siRNA-Temozolomide Run2-DMSO | NM_005306 | GPR43     | G protein-coupled receptor 43 | -0.861262 | Inlier         |
| siRNA-Temozolomide Run3-DMSO | NM_005306 | GPR43     | G protein-coupled receptor 43 | -0.64984  | Inlier         |
| siRNA-Temozolomide Run1-DMSO | NM_005306 | GPR43     | G protein-coupled receptor 43 | -0.649168 | Inlier         |
| siRNA Disorazole DMSO Run1   | NM_005306 | GPR43     | G protein-coupled receptor 43 | -0.415436 | Inlier         |

Identification of Survival Genes in Human Glioblastoma Cells Using siRNA Screening  
 Nikhil G Thaker, Fang Zhang, Peter R. McDonald, Tong Ying Shun, Michael D Lewen, Ian F. Pollack, and John S. Lazo

Molecular Pharmacology

| siRNA                        | Gene          | Receptor | Value | Outlier          |
|------------------------------|---------------|----------|-------|------------------|
| siRNA Disorazole DMSO Run2   | NM_0053<br>06 | GPR43    | 43    | 0.415436 Inlier  |
| siRNA-Vinblastine Run2-DMSO  | NM_0053<br>06 | GPR43    | 43    | 0.69916 Inlier   |
| siRNA-Vinblastine Run1-DMSO  | NM_0053<br>06 | GPR43    | 43    | 1.462392 Inlier  |
| siRNA Disorazole DMSO Run3   | NM_0053<br>06 | GPR43    | 43    | 2.039936 Inlier  |
| siRNA-Temozolomide Run1-DMSO | NM_0047<br>78 | GPR44    | 44    | -0.720342 Inlier |
| siRNA-Temozolomide Run2-DMSO | NM_0047<br>78 | GPR44    | 44    | -0.716855 Inlier |
| siRNA-Temozolomide Run3-DMSO | NM_0047<br>78 | GPR44    | 44    | -0.632145 Inlier |
| siRNA Disorazole DMSO Run1   | NM_0047<br>78 | GPR44    | 44    | -0.247385 Inlier |
| siRNA-Vinblastine Run2-DMSO  | NM_0047<br>78 | GPR44    | 44    | 0.247386 Inlier  |
| siRNA-Vinblastine Run1-DMSO  | NM_0047<br>78 | GPR44    | 44    | 0.386365 Inlier  |
| siRNA Disorazole DMSO Run3   | NM_0047<br>78 | GPR44    | 44    | 1.325622 Inlier  |
| siRNA Disorazole DMSO Run2   | NM_0047<br>78 | GPR44    | 44    | 1.352616 Inlier  |
| siRNA-Temozolomide Run3-DMSO | NM_0072<br>27 | GPR45    | 45    | -1.672767 Inlier |

Identification of Survival Genes in Human Glioblastoma Cells Using siRNA Screening  
 Nikhil G Thaker, Fang Zhang, Peter R. McDonald, Tong Ying Shun, Michael D Lewen, Ian F. Pollack, and John S. Lazo

Molecular Pharmacology

|                              |               |       |                                                             |           |        |
|------------------------------|---------------|-------|-------------------------------------------------------------|-----------|--------|
| siRNA-Temozolomide Run1-DMSO | NM_0072<br>27 | GPR45 | G protein-coupled receptor 45                               | -1.317563 | Inlier |
| siRNA-Temozolomide Run2-DMSO | NM_0072<br>27 | GPR45 | G protein-coupled receptor 45                               | -1.140809 | Inlier |
| siRNA Disorazole DMSO Run2   | NM_0072<br>27 | GPR45 | G protein-coupled receptor 45                               | -0.1261   | Inlier |
| siRNA Disorazole DMSO Run3   | NM_0072<br>27 | GPR45 | G protein-coupled receptor 45                               | 0.1261    | Inlier |
| siRNA Disorazole DMSO Run1   | NM_0072<br>27 | GPR45 | G protein-coupled receptor 45                               | 0.250124  | Inlier |
| siRNA-Vinblastine Run2-DMSO  | NM_0072<br>27 | GPR45 | G protein-coupled receptor 45                               | 0.539023  | Inlier |
| siRNA-Vinblastine Run1-DMSO  | NM_0072<br>27 | GPR45 | G protein-coupled receptor 45                               | 0.809977  | Inlier |
| siRNA-Temozolomide Run3-DMSO | NM_0184<br>90 | GPR48 | leucine-rich repeat-containing G protein-coupled receptor 4 | -3.264713 | Inlier |
| siRNA-Temozolomide Run2-DMSO | NM_0184<br>90 | GPR48 | leucine-rich repeat-containing G protein-coupled receptor 4 | -0.479931 | Inlier |
| siRNA Disorazole DMSO Run2   | NM_0184<br>90 | GPR48 | leucine-rich repeat-containing G protein-coupled receptor 4 | -0.467878 | Inlier |

Identification of Survival Genes in Human Glioblastoma Cells Using siRNA Screening  
 Nikhil G Thaker, Fang Zhang, Peter R. McDonald, Tong Ying Shun, Michael D Lewen, Ian F. Pollack, and John S. Lazo  
 Molecular Pharmacology

|                              |               |       |                                                             |           |        |
|------------------------------|---------------|-------|-------------------------------------------------------------|-----------|--------|
| siRNA-Temozolomide Run1-DMSO | NM_0184<br>90 | GPR48 | leucine-rich repeat-containing G protein-coupled receptor 4 | -0.024912 | Inlier |
| siRNA Disorazole DMSO Run3   | NM_0184<br>90 | GPR48 | leucine-rich repeat-containing G protein-coupled receptor 4 | 0.024912  | Inlier |
| siRNA Disorazole DMSO Run1   | NM_0184<br>90 | GPR48 | leucine-rich repeat-containing G protein-coupled receptor 4 | 0.869069  | Inlier |
| siRNA-Vinblastine Run1-DMSO  | NM_0184<br>90 | GPR48 | leucine-rich repeat-containing G protein-coupled receptor 4 | 2.239034  | Inlier |
| siRNA-Vinblastine Run2-DMSO  | NM_0184<br>90 | GPR48 | leucine-rich repeat-containing G protein-coupled receptor 4 | 2.514153  | Inlier |
| siRNA-Temozolomide Run3-DMSO | NM_0036<br>67 | GPR49 | leucine-rich repeat-containing G protein-coupled receptor 5 | -1.380097 | Inlier |
| siRNA-Temozolomide Run1-DMSO | NM_0036<br>67 | GPR49 | leucine-rich repeat-containing G protein-coupled receptor 5 | -0.53357  | Inlier |

Identification of Survival Genes in Human Glioblastoma Cells Using siRNA Screening

Nikhil G Thaker, Fang Zhang, Peter R. McDonald, Tong Ying Shun, Michael D Lewen, Ian F. Pollack, and John S. Lazo

Molecular Pharmacology

|                              |               |       |                                                              |           |        |
|------------------------------|---------------|-------|--------------------------------------------------------------|-----------|--------|
| siRNA-Temozolomide Run2-DMSO | NM_0036<br>67 | GPR49 | leucine-rich repeat-containing G protein-coupled receptor 5  | -0.315732 | Inlier |
| siRNA Disorazole DMSO Run2   | NM_0036<br>67 | GPR49 | leucine-rich repeat-containing G protein-coupled receptor 5  | -0.259182 | Inlier |
| siRNA-Vinblastine Run2-DMSO  | NM_0036<br>67 | GPR49 | leucine-rich repeat-containing G protein-coupled receptor 5  | 0.259183  | Inlier |
| siRNA Disorazole DMSO Run3   | NM_0036<br>67 | GPR49 | leucine-rich repeat-containing G protein-coupled receptor 5  | 0.81543   | Inlier |
| siRNA Disorazole DMSO Run1   | NM_0036<br>67 | GPR49 | leucine-rich repeat-containing G protein-coupled receptor 5  | 1.01308   | Inlier |
| siRNA-Vinblastine Run1-DMSO  | NM_0036<br>67 | GPR49 | leucine-rich repeat-containing G protein-coupled receptor 5  | 1.080781  | Inlier |
| siRNA-Temozolomide Run3-DMSO | NM_0042<br>24 | GPR50 | leucine-rich repeat-containing G protein-coupled receptor 50 | -0.867624 | Inlier |
| siRNA-Temozolomide Run2-DMSO | NM_0042<br>24 | GPR50 | leucine-rich repeat-containing G protein-coupled receptor 50 | -0.703962 | Inlier |

Identification of Survival Genes in Human Glioblastoma Cells Using siRNA Screening  
 Nikhil G Thaker, Fang Zhang, Peter R. McDonald, Tong Ying Shun, Michael D Lewen, Ian F. Pollack, and John S. Lazo

Molecular Pharmacology

|                              |               |       |                                  |           |        |
|------------------------------|---------------|-------|----------------------------------|-----------|--------|
| siRNA-Temozolomide Run1-DMSO | NM_0042<br>24 | GPR50 | G protein-coupled receptor<br>50 | -0.645038 | Inlier |
| siRNA Disorazole DMSO Run2   | NM_0042<br>24 | GPR50 | G protein-coupled receptor<br>50 | -0.05811  | Inlier |
| siRNA Disorazole DMSO Run1   | NM_0042<br>24 | GPR50 | G protein-coupled receptor<br>50 | 0.058111  | Inlier |
| siRNA-Vinblastine Run2-DMSO  | NM_0042<br>24 | GPR50 | G protein-coupled receptor<br>50 | 0.387828  | Inlier |
| siRNA-Vinblastine Run1-DMSO  | NM_0042<br>24 | GPR50 | G protein-coupled receptor<br>50 | 0.889096  | Inlier |
| siRNA Disorazole DMSO Run3   | NM_0042<br>24 | GPR50 | G protein-coupled receptor<br>50 | 1.213497  | Inlier |
| siRNA-Temozolomide Run3-DMSO | NM_0054<br>58 | GPR51 | G protein-coupled receptor<br>51 | -1.843356 | Inlier |
| siRNA Disorazole DMSO Run1   | NM_0054<br>58 | GPR51 | G protein-coupled receptor<br>51 | -0.505359 | Inlier |
| siRNA-Temozolomide Run1-DMSO | NM_0054<br>58 | GPR51 | G protein-coupled receptor<br>51 | -0.446519 | Inlier |
| siRNA-Temozolomide Run2-DMSO | NM_0054<br>58 | GPR51 | G protein-coupled receptor<br>51 | -0.300253 | Inlier |
| siRNA-Vinblastine Run2-DMSO  | NM_0054<br>58 | GPR51 | G protein-coupled receptor<br>51 | 0.300253  | Inlier |
| siRNA-Vinblastine Run1-DMSO  | NM_0054<br>58 | GPR51 | G protein-coupled receptor<br>51 | 0.843641  | Inlier |
| siRNA Disorazole DMSO Run3   | NM_0054<br>58 | GPR51 | G protein-coupled receptor<br>51 | 1.857032  | Inlier |

Identification of Survival Genes in Human Glioblastoma Cells Using siRNA Screening  
 Nikhil G Thaker, Fang Zhang, Peter R. McDonald, Tong Ying Shun, Michael D Lewen, Ian F. Pollack, and John S. Lazo

Molecular Pharmacology

| siRNA Treatment              | Gene ID | Gene Name | Accession | Value     | Outlier Status |
|------------------------------|---------|-----------|-----------|-----------|----------------|
| siRNA Disorazole DMSO Run2   | NM_0054 | GPR51     | 51        | 2.679982  | Inlier         |
| siRNA-Temozolomide Run3-DMSO | NM_0056 | GPR52     | 52        | -2.366004 | Inlier         |
| siRNA-Temozolomide Run1-DMSO | NM_0056 | GPR52     | 52        | -0.994771 | Inlier         |
| siRNA-Temozolomide Run2-DMSO | NM_0056 | GPR52     | 52        | -0.494874 | Inlier         |
| siRNA Disorazole DMSO Run2   | NM_0056 | GPR52     | 52        | -0.097999 | Inlier         |
| siRNA Disorazole DMSO Run1   | NM_0056 | GPR52     | 52        | 0.098     | Inlier         |
| siRNA Disorazole DMSO Run3   | NM_0056 | GPR52     | 52        | 0.443904  | Inlier         |
| siRNA-Vinblastine Run2-DMSO  | NM_0056 | GPR52     | 52        | 0.854126  | Inlier         |
| siRNA-Vinblastine Run1-DMSO  | NM_0056 | GPR52     | 52        | 1.119338  | Inlier         |
| siRNA-Temozolomide Run3-DMSO | NM_0325 | GPR54     | 54        | -2.571759 | Inlier         |
| siRNA-Temozolomide Run2-DMSO | NM_0325 | GPR54     | 54        | -0.984933 | Inlier         |
| siRNA Disorazole DMSO Run2   | NM_0325 | GPR54     | 54        | -0.141678 | Inlier         |
| siRNA Disorazole DMSO Run1   | NM_0325 | GPR54     | 54        | -0.028098 | Inlier         |

Identification of Survival Genes in Human Glioblastoma Cells Using siRNA Screening  
 Nikhil G Thaker, Fang Zhang, Peter R. McDonald, Tong Ying Shun, Michael D Lewen, Ian F. Pollack, and John S. Lazo

Molecular Pharmacology

| siRNA Treatment              | Gene ID       | Receptor | Protein                          | Value     | Category |
|------------------------------|---------------|----------|----------------------------------|-----------|----------|
| siRNA-Temozolomide Run1-DMSO | NM_0325<br>51 | GPR54    | G protein-coupled receptor<br>54 | 0.028098  | Inlier   |
| siRNA Disorazole DMSO Run3   | NM_0325<br>51 | GPR54    | G protein-coupled receptor<br>54 | 0.418002  | Inlier   |
| siRNA-Vinblastine Run2-DMSO  | NM_0325<br>51 | GPR54    | G protein-coupled receptor<br>54 | 0.930998  | Inlier   |
| siRNA-Vinblastine Run1-DMSO  | NM_0325<br>51 | GPR54    | G protein-coupled receptor<br>54 | 0.972473  | Inlier   |
| siRNA-Temozolomide Run3-DMSO | NM_0056<br>83 | GPR55    | G protein-coupled receptor<br>55 | -4.059987 | Outlier  |
| siRNA-Temozolomide Run2-DMSO | NM_0056<br>83 | GPR55    | G protein-coupled receptor<br>55 | -1.280228 | Inlier   |
| siRNA-Temozolomide Run1-DMSO | NM_0056<br>83 | GPR55    | G protein-coupled receptor<br>55 | -0.64256  | Inlier   |
| siRNA Disorazole DMSO Run2   | NM_0056<br>83 | GPR55    | G protein-coupled receptor<br>55 | -0.310902 | Inlier   |
| siRNA Disorazole DMSO Run1   | NM_0056<br>83 | GPR55    | G protein-coupled receptor<br>55 | 0.310902  | Inlier   |
| siRNA-Vinblastine Run2-DMSO  | NM_0056<br>83 | GPR55    | G protein-coupled receptor<br>55 | 0.406849  | Inlier   |
| siRNA-Vinblastine Run1-DMSO  | NM_0056<br>83 | GPR55    | G protein-coupled receptor<br>55 | 0.70644   | Inlier   |
| siRNA Disorazole DMSO Run3   | NM_0056<br>83 | GPR55    | G protein-coupled receptor<br>55 | 2.258905  | Inlier   |
| siRNA-Temozolomide Run3-DMSO | NM_2015<br>24 | GPR56    | G protein-coupled receptor<br>56 | -1.42469  | Inlier   |



Identification of Survival Genes in Human Glioblastoma Cells Using siRNA Screening  
 Nikhil G Thaker, Fang Zhang, Peter R. McDonald, Tong Ying Shun, Michael D Lewen, Ian F. Pollack, and John S. Lazo

Molecular Pharmacology

| siRNA                        | Run           | Gene  | Receptor                      | Value     | Outlier |
|------------------------------|---------------|-------|-------------------------------|-----------|---------|
| siRNA-Temozolomide Run1-DMSO | NM_2015<br>24 | GPR56 | G protein-coupled receptor 56 | -0.734713 | Inlier  |
| siRNA-Temozolomide Run2-DMSO | NM_2015<br>24 | GPR56 | G protein-coupled receptor 56 | -0.614287 | Inlier  |
| siRNA Disorazole DMSO Run1   | NM_2015<br>24 | GPR56 | G protein-coupled receptor 56 | -0.003077 | Inlier  |
| siRNA-Vinblastine Run2-DMSO  | NM_2015<br>24 | GPR56 | G protein-coupled receptor 56 | 0.003077  | Inlier  |
| siRNA Disorazole DMSO Run2   | NM_2015<br>24 | GPR56 | G protein-coupled receptor 56 | 0.280757  | Inlier  |
| siRNA-Vinblastine Run1-DMSO  | NM_2015<br>24 | GPR56 | G protein-coupled receptor 56 | 1.028636  | Inlier  |
| siRNA Disorazole DMSO Run3   | NM_2015<br>24 | GPR56 | G protein-coupled receptor 56 | 1.333631  | Inlier  |
| siRNA-Temozolomide Run3-DMSO | NM_0146<br>26 | GPR58 | G protein-coupled receptor 58 | -2.84432  | Inlier  |
| siRNA Disorazole DMSO Run2   | NM_0146<br>26 | GPR58 | G protein-coupled receptor 58 | -0.931462 | Inlier  |
| siRNA-Temozolomide Run1-DMSO | NM_0146<br>26 | GPR58 | G protein-coupled receptor 58 | -0.344054 | Inlier  |
| siRNA Disorazole DMSO Run3   | NM_0146<br>26 | GPR58 | G protein-coupled receptor 58 | -0.125124 | Inlier  |
| siRNA Disorazole DMSO Run1   | NM_0146<br>26 | GPR58 | G protein-coupled receptor 58 | 0.125125  | Inlier  |
| siRNA-Temozolomide Run2-DMSO | NM_0146<br>26 | GPR58 | G protein-coupled receptor 58 | 0.417538  | Inlier  |

Identification of Survival Genes in Human Glioblastoma Cells Using siRNA Screening  
 Nikhil G Thaker, Fang Zhang, Peter R. McDonald, Tong Ying Shun, Michael D Lewen, Ian F. Pollack, and John S. Lazo

Molecular Pharmacology

| siRNA Treatment              | Gene ID       | Gene Name | Protein Name                  | Value     | Category |
|------------------------------|---------------|-----------|-------------------------------|-----------|----------|
| siRNA-Vinblastine Run2-DMSO  | NM_0146<br>26 | GPR58     | G protein-coupled receptor 58 | 1.219547  | Inlier   |
| siRNA-Vinblastine Run1-DMSO  | NM_0146<br>26 | GPR58     | G protein-coupled receptor 58 | 1.917957  | Inlier   |
| siRNA-Temozolomide Run1-DMSO | NM_0052<br>84 | GPR6      | G protein-coupled receptor 6  | -3.636243 | Outlier  |
| siRNA-Temozolomide Run3-DMSO | NM_0052<br>84 | GPR6      | G protein-coupled receptor 6  | -1.729073 | Inlier   |
| siRNA Disorazole DMSO Run2   | NM_0052<br>84 | GPR6      | G protein-coupled receptor 6  | -0.394636 | Inlier   |
| siRNA-Temozolomide Run2-DMSO | NM_0052<br>84 | GPR6      | G protein-coupled receptor 6  | -0.251604 | Inlier   |
| siRNA-Vinblastine Run2-DMSO  | NM_0052<br>84 | GPR6      | G protein-coupled receptor 6  | 0.251604  | Inlier   |
| siRNA-Vinblastine Run1-DMSO  | NM_0052<br>84 | GPR6      | G protein-coupled receptor 6  | 0.58518   | Inlier   |
| siRNA Disorazole DMSO Run1   | NM_0052<br>84 | GPR6      | G protein-coupled receptor 6  | 0.76382   | Inlier   |
| siRNA Disorazole DMSO Run3   | NM_0052<br>84 | GPR6      | G protein-coupled receptor 6  | 6.760107  | Outlier  |
| siRNA-Temozolomide Run3-DMSO | NM_0319<br>36 | GPR61     | G protein-coupled receptor 61 | -0.75473  | Inlier   |
| siRNA Disorazole DMSO Run2   | NM_0319<br>36 | GPR61     | G protein-coupled receptor 61 | -0.59427  | Inlier   |
| siRNA-Temozolomide Run2-DMSO | NM_0319<br>36 | GPR61     | G protein-coupled receptor 61 | -0.333482 | Inlier   |
| siRNA-Temozolomide Run1-DMSO | NM_0319<br>36 | GPR61     | G protein-coupled receptor 61 | -0.192321 | Inlier   |
| siRNA Disorazole DMSO Run3   | NM_0319<br>36 | GPR61     | G protein-coupled receptor 61 | 0.192321  | Inlier   |

Identification of Survival Genes in Human Glioblastoma Cells Using siRNA Screening  
 Nikhil G Thaker, Fang Zhang, Peter R. McDonald, Tong Ying Shun, Michael D Lewen, Ian F. Pollack, and John S. Lazo

Molecular Pharmacology

| siRNA                        | Gene          | Protein | Receptor                         | Value     | Category |
|------------------------------|---------------|---------|----------------------------------|-----------|----------|
| siRNA Disorazole DMSO Run1   | NM_0319<br>36 | GPR61   | G protein-coupled receptor<br>61 | 2.060714  | Inlier   |
| siRNA-Vinblastine Run2-DMSO  | NM_0319<br>36 | GPR61   | G protein-coupled receptor<br>61 | 3.064924  | Inlier   |
| siRNA-Vinblastine Run1-DMSO  | NM_0319<br>36 | GPR61   | G protein-coupled receptor<br>61 | 3.186304  | Inlier   |
| siRNA Disorazole DMSO Run2   | NM_0808<br>65 | GPR62   | G protein-coupled receptor<br>62 | -0.850126 | Inlier   |
| siRNA-Temozolomide Run3-DMSO | NM_0808<br>65 | GPR62   | G protein-coupled receptor<br>62 | -0.797575 | Inlier   |
| siRNA-Temozolomide Run1-DMSO | NM_0808<br>65 | GPR62   | G protein-coupled receptor<br>62 | -0.098904 | Inlier   |
| siRNA-Temozolomide Run2-DMSO | NM_0808<br>65 | GPR62   | G protein-coupled receptor<br>62 | -0.084658 | Inlier   |
| siRNA Disorazole DMSO Run3   | NM_0808<br>65 | GPR62   | G protein-coupled receptor<br>62 | 0.084658  | Inlier   |
| siRNA Disorazole DMSO Run1   | NM_0808<br>65 | GPR62   | G protein-coupled receptor<br>62 | 0.551425  | Inlier   |
| siRNA-Vinblastine Run1-DMSO  | NM_0808<br>65 | GPR62   | G protein-coupled receptor<br>62 | 1.265476  | Inlier   |
| siRNA-Vinblastine Run2-DMSO  | NM_0808<br>65 | GPR62   | G protein-coupled receptor<br>62 | 1.307757  | Inlier   |
| siRNA-Temozolomide Run3-DMSO | NM_0307<br>84 | GPR63   | G protein-coupled receptor<br>63 | -0.896673 | Inlier   |
| siRNA-Temozolomide Run1-DMSO | NM_0307<br>84 | GPR63   | G protein-coupled receptor<br>63 | -0.842094 | Inlier   |

Identification of Survival Genes in Human Glioblastoma Cells Using siRNA Screening  
 Nikhil G Thaker, Fang Zhang, Peter R. McDonald, Tong Ying Shun, Michael D Lewen, Ian F. Pollack, and John S. Lazo

Molecular Pharmacology

| siRNA                        | Gene    | Accession | Gene  | Accession | Value     | Category |
|------------------------------|---------|-----------|-------|-----------|-----------|----------|
| siRNA Disorazole DMSO Run2   | NM_0307 | 84        | GPR63 | 63        | -0.638836 | Inlier   |
| siRNA-Temozolomide Run2-DMSO | NM_0307 | 84        | GPR63 | 63        | -0.315255 | Inlier   |
| siRNA Disorazole DMSO Run1   | NM_0307 | 84        | GPR63 | 63        | 0.315255  | Inlier   |
| siRNA Disorazole DMSO Run3   | NM_0307 | 84        | GPR63 | 63        | 0.493686  | Inlier   |
| siRNA-Vinblastine Run1-DMSO  | NM_0307 | 84        | GPR63 | 63        | 0.710164  | Inlier   |
| siRNA-Vinblastine Run2-DMSO  | NM_0307 | 84        | GPR63 | 63        | 0.916359  | Inlier   |
| siRNA Disorazole DMSO Run2   | NM_0057 | 56        | GPR64 | 64        | -0.726736 | Inlier   |
| siRNA-Temozolomide Run2-DMSO | NM_0057 | 56        | GPR64 | 64        | -0.720103 | Inlier   |
| siRNA-Temozolomide Run1-DMSO | NM_0057 | 56        | GPR64 | 64        | -0.60342  | Inlier   |
| siRNA-Temozolomide Run3-DMSO | NM_0057 | 56        | GPR64 | 64        | -0.582613 | Inlier   |
| siRNA-Vinblastine Run1-DMSO  | NM_0057 | 56        | GPR64 | 64        | 0.582613  | Inlier   |
| siRNA Disorazole DMSO Run3   | NM_0057 | 56        | GPR64 | 64        | 0.628897  | Inlier   |
| siRNA-Vinblastine Run2-DMSO  | NM_0057 | 56        | GPR64 | 64        | 0.741407  | Inlier   |

Identification of Survival Genes in Human Glioblastoma Cells Using siRNA Screening  
 Nikhil G Thaker, Fang Zhang, Peter R. McDonald, Tong Ying Shun, Michael D Lewen, Ian F. Pollack, and John S. Lazo

Molecular Pharmacology

| siRNA Treatment              | Gene ID       | Receptor | Value | Outlier Status   |
|------------------------------|---------------|----------|-------|------------------|
| siRNA Disorazole DMSO Run1   | NM_0057<br>56 | GPR64    | 64    | 0.764939 Inlier  |
| siRNA-Temozolomide Run3-DMSO | NM_0036<br>08 | GPR65    | 65    | -0.960209 Inlier |
| siRNA Disorazole DMSO Run3   | NM_0036<br>08 | GPR65    | 65    | -0.692092 Inlier |
| siRNA Disorazole DMSO Run2   | NM_0036<br>08 | GPR65    | 65    | -0.626512 Inlier |
| siRNA-Temozolomide Run2-DMSO | NM_0036<br>08 | GPR65    | 65    | -0.006119 Inlier |
| siRNA-Temozolomide Run1-DMSO | NM_0036<br>08 | GPR65    | 65    | 0.006119 Inlier  |
| siRNA Disorazole DMSO Run1   | NM_0036<br>08 | GPR65    | 65    | 0.656908 Inlier  |
| siRNA-Vinblastine Run1-DMSO  | NM_0036<br>08 | GPR65    | 65    | 1.26177 Inlier   |
| siRNA-Vinblastine Run2-DMSO  | NM_0036<br>08 | GPR65    | 65    | 1.288008 Inlier  |
| siRNA-Temozolomide Run1-DMSO | NM_0034<br>85 | GPR68    | 68    | -0.982505 Inlier |
| siRNA-Temozolomide Run3-DMSO | NM_0034<br>85 | GPR68    | 68    | -0.859864 Inlier |
| siRNA-Vinblastine Run2-DMSO  | NM_0034<br>85 | GPR68    | 68    | -0.080445 Inlier |
| siRNA-Temozolomide Run2-DMSO | NM_0034<br>85 | GPR68    | 68    | -0.073275 Inlier |

Identification of Survival Genes in Human Glioblastoma Cells Using siRNA Screening  
 Nikhil G Thaker, Fang Zhang, Peter R. McDonald, Tong Ying Shun, Michael D Lewen, Ian F. Pollack, and John S. Lazo

Molecular Pharmacology

| siRNA                        | Gene    | Accession | Gene  | Gene                          | Value     | Category |
|------------------------------|---------|-----------|-------|-------------------------------|-----------|----------|
| siRNA Disorazole DMSO Run2   | NM_0034 | 85        | GPR68 | G protein-coupled receptor 68 | 0.073275  | Inlier   |
| siRNA-Vinblastine Run1-DMSO  | NM_0034 | 85        | GPR68 | G protein-coupled receptor 68 | 0.490885  | Inlier   |
| siRNA Disorazole DMSO Run1   | NM_0034 | 85        | GPR68 | G protein-coupled receptor 68 | 0.858115  | Inlier   |
| siRNA Disorazole DMSO Run3   | NM_0034 | 85        | GPR68 | G protein-coupled receptor 68 | 0.969417  | Inlier   |
| siRNA-Temozolomide Run3-DMSO | NM_0052 | 85        | GPR7  | G protein-coupled receptor 7  | -1.118169 | Inlier   |
| siRNA Disorazole DMSO Run3   | NM_0052 | 85        | GPR7  | G protein-coupled receptor 7  | -0.230831 | Inlier   |
| siRNA-Temozolomide Run2-DMSO | NM_0052 | 85        | GPR7  | G protein-coupled receptor 7  | -0.150897 | Inlier   |
| siRNA Disorazole DMSO Run2   | NM_0052 | 85        | GPR7  | G protein-coupled receptor 7  | -0.060612 | Inlier   |
| siRNA-Temozolomide Run1-DMSO | NM_0052 | 85        | GPR7  | G protein-coupled receptor 7  | 0.060612  | Inlier   |
| siRNA Disorazole DMSO Run1   | NM_0052 | 85        | GPR7  | G protein-coupled receptor 7  | 2.298504  | Inlier   |
| siRNA-Vinblastine Run1-DMSO  | NM_0052 | 85        | GPR7  | G protein-coupled receptor 7  | 4.151987  | Outlier  |
| siRNA-Vinblastine Run2-DMSO  | NM_0052 | 85        | GPR7  | G protein-coupled receptor 7  | 4.346103  | Outlier  |
| siRNA-Temozolomide Run3-DMSO | NM_1389 | 64        | GPR73 | G protein-coupled receptor 73 | -1.956843 | Inlier   |
| siRNA Disorazole DMSO Run2   | NM_1389 | 64        | GPR73 | G protein-coupled receptor 73 | -1.041819 | Inlier   |
| siRNA-Temozolomide Run2-DMSO | NM_1389 | 64        | GPR73 | G protein-coupled receptor 73 | -0.541775 | Inlier   |

Identification of Survival Genes in Human Glioblastoma Cells Using siRNA Screening  
 Nikhil G Thaker, Fang Zhang, Peter R. McDonald, Tong Ying Shun, Michael D Lewen, Ian F. Pollack, and John S. Lazo

Molecular Pharmacology

| siRNA Treatment              | Gene ID       | Gene Name | Protein Name                         | Value     | Outlier Status |
|------------------------------|---------------|-----------|--------------------------------------|-----------|----------------|
| siRNA-Temozolomide Run1-DMSO | NM_1389<br>64 | GPR73     | G protein-coupled receptor 73        | -0.54043  | Inlier         |
| siRNA-Vinblastine Run1-DMSO  | NM_1389<br>64 | GPR73     | G protein-coupled receptor 73        | 0.54043   | Inlier         |
| siRNA-Vinblastine Run2-DMSO  | NM_1389<br>64 | GPR73     | G protein-coupled receptor 73        | 0.657195  | Inlier         |
| siRNA Disorazole DMSO Run3   | NM_1389<br>64 | GPR73     | G protein-coupled receptor 73        | 0.691805  | Inlier         |
| siRNA Disorazole DMSO Run1   | NM_1389<br>64 | GPR73     | G protein-coupled receptor 73        | 0.697379  | Inlier         |
| siRNA-Temozolomide Run3-DMSO | NM_1447<br>73 | GPR73L1   | G protein-coupled receptor 73-like 1 | -1.847574 | Inlier         |
| siRNA Disorazole DMSO Run2   | NM_1447<br>73 | GPR73L1   | G protein-coupled receptor 73-like 1 | -1.41943  | Inlier         |
| siRNA Disorazole DMSO Run3   | NM_1447<br>73 | GPR73L1   | G protein-coupled receptor 73-like 1 | -0.345511 | Inlier         |
| siRNA-Temozolomide Run1-DMSO | NM_1447<br>73 | GPR73L1   | G protein-coupled receptor 73-like 1 | -0.120747 | Inlier         |
| siRNA-Temozolomide Run2-DMSO | NM_1447<br>73 | GPR73L1   | G protein-coupled receptor 73-like 1 | 0.120747  | Inlier         |
| siRNA Disorazole DMSO Run1   | NM_1447<br>73 | GPR73L1   | G protein-coupled receptor 73-like 1 | 0.528458  | Inlier         |
| siRNA-Vinblastine Run2-DMSO  | NM_1447<br>73 | GPR73L1   | G protein-coupled receptor 73-like 1 | 0.820542  | Inlier         |
| siRNA-Vinblastine Run1-DMSO  | NM_1447<br>73 | GPR73L1   | G protein-coupled receptor 73-like 1 | 1.127706  | Inlier         |

Identification of Survival Genes in Human Glioblastoma Cells Using siRNA Screening  
 Nikhil G Thaker, Fang Zhang, Peter R. McDonald, Tong Ying Shun, Michael D Lewen, Ian F. Pollack, and John S. Lazo

Molecular Pharmacology

| siRNA Treatment              | Gene ID       | Gene Name | Protein ID | Protein Name               | Value     | Outlier Status |
|------------------------------|---------------|-----------|------------|----------------------------|-----------|----------------|
| siRNA-Temozolomide Run3-DMSO | NM_0530<br>36 | GPR74     | 74         | G protein-coupled receptor | -2.739818 | Inlier         |
| siRNA-Temozolomide Run1-DMSO | NM_0530<br>36 | GPR74     | 74         | G protein-coupled receptor | -0.914851 | Inlier         |
| siRNA-Temozolomide Run2-DMSO | NM_0530<br>36 | GPR74     | 74         | G protein-coupled receptor | -0.387394 | Inlier         |
| siRNA Disorazole DMSO Run2   | NM_0530<br>36 | GPR74     | 74         | G protein-coupled receptor | -0.121072 | Inlier         |
| siRNA Disorazole DMSO Run3   | NM_0530<br>36 | GPR74     | 74         | G protein-coupled receptor | 0.121072  | Inlier         |
| siRNA Disorazole DMSO Run1   | NM_0530<br>36 | GPR74     | 74         | G protein-coupled receptor | 0.434148  | Inlier         |
| siRNA-Vinblastine Run1-DMSO  | NM_0530<br>36 | GPR74     | 74         | G protein-coupled receptor | 1.295163  | Inlier         |
| siRNA-Vinblastine Run2-DMSO  | NM_0530<br>36 | GPR74     | 74         | G protein-coupled receptor | 1.481166  | Inlier         |
| siRNA-Temozolomide Run3-DMSO | NM_0067<br>94 | GPR75     | 75         | G protein-coupled receptor | -1.407745 | Inlier         |
| siRNA Disorazole DMSO Run2   | NM_0067<br>94 | GPR75     | 75         | G protein-coupled receptor | -0.624735 | Inlier         |
| siRNA-Temozolomide Run1-DMSO | NM_0067<br>94 | GPR75     | 75         | G protein-coupled receptor | -0.410402 | Inlier         |
| siRNA-Temozolomide Run2-DMSO | NM_0067<br>94 | GPR75     | 75         | G protein-coupled receptor | -0.355906 | Inlier         |
| siRNA Disorazole DMSO Run3   | NM_0067<br>94 | GPR75     | 75         | G protein-coupled receptor | 0.355906  | Inlier         |



Identification of Survival Genes in Human Glioblastoma Cells Using siRNA Screening  
 Nikhil G Thaker, Fang Zhang, Peter R. McDonald, Tong Ying Shun, Michael D Lewen, Ian F. Pollack, and John S. Lazo

Molecular Pharmacology

| siRNA                        | Gene          | Protein | Value | Outlier          |
|------------------------------|---------------|---------|-------|------------------|
| siRNA Disorazole DMSO Run1   | NM_0067<br>94 | GPR75   | 75    | 0.724265 Inlier  |
| siRNA-Vinblastine Run1-DMSO  | NM_0067<br>94 | GPR75   | 75    | 1.779273 Inlier  |
| siRNA-Vinblastine Run2-DMSO  | NM_0067<br>94 | GPR75   | 75    | 2.014008 Inlier  |
| siRNA-Temozolomide Run3-DMSO | NM_0184<br>85 | GPR77   | 77    | -1.491871 Inlier |
| siRNA Disorazole DMSO Run2   | NM_0184<br>85 | GPR77   | 77    | -0.742624 Inlier |
| siRNA Disorazole DMSO Run1   | NM_0184<br>85 | GPR77   | 77    | -0.031915 Inlier |
| siRNA-Temozolomide Run1-DMSO | NM_0184<br>85 | GPR77   | 77    | -0.000101 Inlier |
| siRNA Disorazole DMSO Run3   | NM_0184<br>85 | GPR77   | 77    | 0.000102 Inlier  |
| siRNA-Temozolomide Run2-DMSO | NM_0184<br>85 | GPR77   | 77    | 0.606376 Inlier  |
| siRNA-Vinblastine Run1-DMSO  | NM_0184<br>85 | GPR77   | 77    | 2.378351 Inlier  |
| siRNA-Vinblastine Run2-DMSO  | NM_0184<br>85 | GPR77   | 77    | 2.389222 Inlier  |
| siRNA-Temozolomide Run3-DMSO | NM_0808<br>19 | GPR78   | 78    | -3.404814 Inlier |
| siRNA Disorazole DMSO Run2   | NM_0808<br>19 | GPR78   | 78    | -0.742976 Inlier |

Identification of Survival Genes in Human Glioblastoma Cells Using siRNA Screening

Nikhil G Thaker, Fang Zhang, Peter R. McDonald, Tong Ying Shun, Michael D Lewen, Ian F. Pollack, and John S.

Lazo

Molecular Pharmacology

| siRNA Treatment              | Gene ID       | Receptor | Protein                       | Value     | Category |
|------------------------------|---------------|----------|-------------------------------|-----------|----------|
| siRNA-Temozolomide Run1-DMSO | NM_0808<br>19 | GPR78    | G protein-coupled receptor 78 | -0.606024 | Inlier   |
| siRNA-Temozolomide Run2-DMSO | NM_0808<br>19 | GPR78    | G protein-coupled receptor 78 | -0.349697 | Inlier   |
| siRNA Disorazole DMSO Run1   | NM_0808<br>19 | GPR78    | G protein-coupled receptor 78 | 0.349698  | Inlier   |
| siRNA Disorazole DMSO Run3   | NM_0808<br>19 | GPR78    | G protein-coupled receptor 78 | 0.414938  | Inlier   |
| siRNA-Vinblastine Run2-DMSO  | NM_0808<br>19 | GPR78    | G protein-coupled receptor 78 | 1.35513   | Inlier   |
| siRNA-Vinblastine Run1-DMSO  | NM_0808<br>19 | GPR78    | G protein-coupled receptor 78 | 2.515388  | Inlier   |
| siRNA-Temozolomide Run3-DMSO | NM_0052<br>86 | GPR8     | G protein-coupled receptor 8  | -3.575534 | Outlier  |
| siRNA Disorazole DMSO Run2   | NM_0052<br>86 | GPR8     | G protein-coupled receptor 8  | -0.749099 | Inlier   |
| siRNA-Temozolomide Run1-DMSO | NM_0052<br>86 | GPR8     | G protein-coupled receptor 8  | -0.599901 | Inlier   |
| siRNA-Temozolomide Run2-DMSO | NM_0052<br>86 | GPR8     | G protein-coupled receptor 8  | -0.13707  | Inlier   |
| siRNA Disorazole DMSO Run1   | NM_0052<br>86 | GPR8     | G protein-coupled receptor 8  | 0.137071  | Inlier   |
| siRNA Disorazole DMSO Run3   | NM_0052<br>86 | GPR8     | G protein-coupled receptor 8  | 0.172965  | Inlier   |
| siRNA-Vinblastine Run1-DMSO  | NM_0052<br>86 | GPR8     | G protein-coupled receptor 8  | 2.968745  | Inlier   |
| siRNA-Vinblastine Run2-DMSO  | NM_0052<br>86 | GPR8     | G protein-coupled receptor 8  | 3.654775  | Outlier  |
| siRNA-Temozolomide Run3-DMSO | NM_0325<br>54 | GPR81    | G protein-coupled receptor 81 | -1.358861 | Inlier   |

Identification of Survival Genes in Human Glioblastoma Cells Using siRNA Screening  
 Nikhil G Thaker, Fang Zhang, Peter R. McDonald, Tong Ying Shun, Michael D Lewen, Ian F. Pollack, and John S. Lazo

Molecular Pharmacology

| siRNA                        | Gene          | Protein | Value | Outlier          |
|------------------------------|---------------|---------|-------|------------------|
| siRNA Disorazole DMSO Run2   | NM_0325<br>54 | GPR81   | 81    | -1.129589 Inlier |
| siRNA Disorazole DMSO Run3   | NM_0325<br>54 | GPR81   | 81    | -0.380371 Inlier |
| siRNA-Temozolomide Run1-DMSO | NM_0325<br>54 | GPR81   | 81    | -0.013044 Inlier |
| siRNA-Temozolomide Run2-DMSO | NM_0325<br>54 | GPR81   | 81    | 0.013044 Inlier  |
| siRNA Disorazole DMSO Run1   | NM_0325<br>54 | GPR81   | 81    | 0.096377 Inlier  |
| siRNA-Vinblastine Run1-DMSO  | NM_0325<br>54 | GPR81   | 81    | 0.968629 Inlier  |
| siRNA-Vinblastine Run2-DMSO  | NM_0325<br>54 | GPR81   | 81    | 1.167309 Inlier  |
| siRNA-Temozolomide Run3-DMSO | NM_0808<br>17 | GPR82   | 82    | -1.813599 Inlier |
| siRNA Disorazole DMSO Run2   | NM_0808<br>17 | GPR82   | 82    | -0.89578 Inlier  |
| siRNA-Temozolomide Run1-DMSO | NM_0808<br>17 | GPR82   | 82    | -0.290792 Inlier |
| siRNA-Temozolomide Run2-DMSO | NM_0808<br>17 | GPR82   | 82    | -0.01448 Inlier  |
| siRNA Disorazole DMSO Run3   | NM_0808<br>17 | GPR82   | 82    | 0.01448 Inlier   |
| siRNA Disorazole DMSO Run1   | NM_0808<br>17 | GPR82   | 82    | 0.45322 Inlier   |

Identification of Survival Genes in Human Glioblastoma Cells Using siRNA Screening  
 Nikhil G Thaker, Fang Zhang, Peter R. McDonald, Tong Ying Shun, Michael D Lewen, Ian F. Pollack, and John S. Lazo

Molecular Pharmacology

| siRNA                        | Gene          | Receptor | Protein                          | Value     | Category |
|------------------------------|---------------|----------|----------------------------------|-----------|----------|
| siRNA-Vinblastine Run2-DMSO  | NM_0808<br>17 | GPR82    | G protein-coupled receptor<br>82 | 1.80607   | Inlier   |
| siRNA-Vinblastine Run1-DMSO  | NM_0808<br>17 | GPR82    | G protein-coupled receptor<br>82 | 2.246784  | Inlier   |
| siRNA-Temozolomide Run3-DMSO | NM_0165<br>40 | GPR83    | G protein-coupled receptor<br>83 | -2.294597 | Inlier   |
| siRNA-Temozolomide Run2-DMSO | NM_0165<br>40 | GPR83    | G protein-coupled receptor<br>83 | -0.687064 | Inlier   |
| siRNA Disorazole DMSO Run2   | NM_0165<br>40 | GPR83    | G protein-coupled receptor<br>83 | -0.661936 | Inlier   |
| siRNA-Temozolomide Run1-DMSO | NM_0165<br>40 | GPR83    | G protein-coupled receptor<br>83 | -0.154651 | Inlier   |
| siRNA Disorazole DMSO Run1   | NM_0165<br>40 | GPR83    | G protein-coupled receptor<br>83 | 0.154651  | Inlier   |
| siRNA Disorazole DMSO Run3   | NM_0165<br>40 | GPR83    | G protein-coupled receptor<br>83 | 0.316655  | Inlier   |
| siRNA-Vinblastine Run2-DMSO  | NM_0165<br>40 | GPR83    | G protein-coupled receptor<br>83 | 0.86019   | Inlier   |
| siRNA-Vinblastine Run1-DMSO  | NM_0165<br>40 | GPR83    | G protein-coupled receptor<br>83 | 1.301739  | Inlier   |
| siRNA Disorazole DMSO Run2   | NM_0203<br>70 | GPR84    | G protein-coupled receptor<br>84 | -1.12389  | Inlier   |
| siRNA-Temozolomide Run3-DMSO | NM_0203<br>70 | GPR84    | G protein-coupled receptor<br>84 | -0.810156 | Inlier   |
| siRNA Disorazole DMSO Run3   | NM_0203<br>70 | GPR84    | G protein-coupled receptor<br>84 | -0.556844 | Inlier   |

Identification of Survival Genes in Human Glioblastoma Cells Using siRNA Screening  
 Nikhil G Thaker, Fang Zhang, Peter R. McDonald, Tong Ying Shun, Michael D Lewen, Ian F. Pollack, and John S. Lazo

Molecular Pharmacology

| siRNA                        | Gene      | Target | Receptor                      | Value     | Category |
|------------------------------|-----------|--------|-------------------------------|-----------|----------|
| siRNA-Temozolomide Run2-DMSO | NM_020370 | GPR84  | G protein-coupled receptor 84 | -0.132327 | Inlier   |
| siRNA-Temozolomide Run1-DMSO | NM_020370 | GPR84  | G protein-coupled receptor 84 | 0.132327  | Inlier   |
| siRNA Disorazole DMSO Run1   | NM_020370 | GPR84  | G protein-coupled receptor 84 | 0.384128  | Inlier   |
| siRNA-Vinblastine Run2-DMSO  | NM_020370 | GPR84  | G protein-coupled receptor 84 | 0.792156  | Inlier   |
| siRNA-Vinblastine Run1-DMSO  | NM_020370 | GPR84  | G protein-coupled receptor 84 | 0.79673   | Inlier   |
| siRNA-Temozolomide Run3-DMSO | NM_018970 | GPR85  | G protein-coupled receptor 85 | -7.444452 | Outlier  |
| siRNA Disorazole DMSO Run2   | NM_018970 | GPR85  | G protein-coupled receptor 85 | -5.370107 | Outlier  |
| siRNA-Temozolomide Run1-DMSO | NM_018970 | GPR85  | G protein-coupled receptor 85 | -3.335863 | Inlier   |
| siRNA-Vinblastine Run1-DMSO  | NM_018970 | GPR85  | G protein-coupled receptor 85 | -0.052231 | Inlier   |
| siRNA-Temozolomide Run2-DMSO | NM_018970 | GPR85  | G protein-coupled receptor 85 | 0.052234  | Inlier   |
| siRNA Disorazole DMSO Run1   | NM_018970 | GPR85  | G protein-coupled receptor 85 | 0.15097   | Inlier   |
| siRNA Disorazole DMSO Run3   | NM_018970 | GPR85  | G protein-coupled receptor 85 | 0.535592  | Inlier   |
| siRNA-Vinblastine Run2-DMSO  | NM_018970 | GPR85  | G protein-coupled receptor 85 | 0.813408  | Inlier   |

Identification of Survival Genes in Human Glioblastoma Cells Using siRNA Screening

Nikhil G Thaker, Fang Zhang, Peter R. McDonald, Tong Ying Shun, Michael D Lewen, Ian F. Pollack, and John S. Lazo

Molecular Pharmacology

| siRNA                        | Gene    | Accession | Receptor | Value | Outlier   |        |
|------------------------------|---------|-----------|----------|-------|-----------|--------|
| siRNA-Temozolomide Run3-DMSO | NM_0239 | 15        | GPR87    | 87    | -0.721729 | Inlier |
| siRNA Disorazole DMSO Run3   | NM_0239 | 15        | GPR87    | 87    | -0.627271 | Inlier |
| siRNA Disorazole DMSO Run2   | NM_0239 | 15        | GPR87    | 87    | -0.387781 | Inlier |
| siRNA-Temozolomide Run2-DMSO | NM_0239 | 15        | GPR87    | 87    | -0.362954 | Inlier |
| siRNA-Temozolomide Run1-DMSO | NM_0239 | 15        | GPR87    | 87    | 0.362954  | Inlier |
| siRNA Disorazole DMSO Run1   | NM_0239 | 15        | GPR87    | 87    | 1.004352  | Inlier |
| siRNA-Vinblastine Run2-DMSO  | NM_0239 | 15        | GPR87    | 87    | 1.825324  | Inlier |
| siRNA-Vinblastine Run1-DMSO  | NM_0239 | 15        | GPR87    | 87    | 1.836837  | Inlier |
| siRNA-Temozolomide Run3-DMSO | NM_0220 | 49        | GPR88    | 88    | -1.300433 | Inlier |
| siRNA Disorazole DMSO Run2   | NM_0220 | 49        | GPR88    | 88    | -0.7963   | Inlier |
| siRNA Disorazole DMSO Run3   | NM_0220 | 49        | GPR88    | 88    | -0.202991 | Inlier |
| siRNA-Temozolomide Run2-DMSO | NM_0220 | 49        | GPR88    | 88    | -0.108815 | Inlier |
| siRNA-Temozolomide Run1-DMSO | NM_0220 | 49        | GPR88    | 88    | 0.108815  | Inlier |

Identification of Survival Genes in Human Glioblastoma Cells Using siRNA Screening  
 Nikhil G Thaker, Fang Zhang, Peter R. McDonald, Tong Ying Shun, Michael D Lewen, Ian F. Pollack, and John S. Lazo

Molecular Pharmacology

| siRNA                        | Gene    | Accession | Receptor | Value | Outlier          |
|------------------------------|---------|-----------|----------|-------|------------------|
| siRNA Disorazole DMSO Run1   | NM_0220 | 49        | GPR88    | 88    | 0.5527 Inlier    |
| siRNA-Vinblastine Run1-DMSO  | NM_0220 | 49        | GPR88    | 88    | 1.023498 Inlier  |
| siRNA-Vinblastine Run2-DMSO  | NM_0220 | 49        | GPR88    | 88    | 1.180082 Inlier  |
| siRNA-Temozolomide Run3-DMSO | NM_0163 | 34        | GPR89    | 89    | -1.702794 Inlier |
| siRNA-Temozolomide Run2-DMSO | NM_0163 | 34        | GPR89    | 89    | -1.142168 Inlier |
| siRNA Disorazole DMSO Run1   | NM_0163 | 34        | GPR89    | 89    | -0.473525 Inlier |
| siRNA-Temozolomide Run1-DMSO | NM_0163 | 34        | GPR89    | 89    | -0.006356 Inlier |
| siRNA-Vinblastine Run2-DMSO  | NM_0163 | 34        | GPR89    | 89    | 0.006356 Inlier  |
| siRNA Disorazole DMSO Run3   | NM_0163 | 34        | GPR89    | 89    | 0.538669 Inlier  |
| siRNA Disorazole DMSO Run2   | NM_0163 | 34        | GPR89    | 89    | 0.810331 Inlier  |
| siRNA-Vinblastine Run1-DMSO  | NM_0163 | 34        | GPR89    | 89    | 1.072685 Inlier  |
| siRNA Disorazole DMSO Run2   | NM_0204 | 00        | GPR92    | 92    | -3.071153 Inlier |
| siRNA Disorazole DMSO Run1   | NM_0204 | 00        | GPR92    | 92    | -1.958095 Inlier |

Identification of Survival Genes in Human Glioblastoma Cells Using siRNA Screening  
 Nikhil G Thaker, Fang Zhang, Peter R. McDonald, Tong Ying Shun, Michael D Lewen, Ian F. Pollack, and John S. Lazo

Molecular Pharmacology

| siRNA Treatment              | Gene ID   | Receptor | Protein                       | Value     | Outlier |
|------------------------------|-----------|----------|-------------------------------|-----------|---------|
| siRNA-Temozolomide Run1-DMSO | NM_020400 | GPR92    | G protein-coupled receptor 92 | -0.672417 | Inlier  |
| siRNA-Temozolomide Run2-DMSO | NM_020400 | GPR92    | G protein-coupled receptor 92 | -0.661872 | Inlier  |
| siRNA-Vinblastine Run1-DMSO  | NM_020400 | GPR92    | G protein-coupled receptor 92 | 0.661871  | Inlier  |
| siRNA-Vinblastine Run2-DMSO  | NM_020400 | GPR92    | G protein-coupled receptor 92 | 0.663114  | Inlier  |
| siRNA-Temozolomide Run3-DMSO | NM_020400 | GPR92    | G protein-coupled receptor 92 | 0.676583  | Inlier  |
| siRNA Disorazole DMSO Run3   | NM_020400 | GPR92    | G protein-coupled receptor 92 | 2.86985   | Inlier  |
| siRNA-Temozolomide Run3-DMSO | NM_170776 | GPR97    | G protein-coupled receptor 97 | -2.816879 | Inlier  |
| siRNA-Temozolomide Run2-DMSO | NM_170776 | GPR97    | G protein-coupled receptor 97 | -0.833017 | Inlier  |
| siRNA-Temozolomide Run1-DMSO | NM_170776 | GPR97    | G protein-coupled receptor 97 | -0.47098  | Inlier  |
| siRNA Disorazole DMSO Run2   | NM_170776 | GPR97    | G protein-coupled receptor 97 | -0.159251 | Inlier  |
| siRNA Disorazole DMSO Run1   | NM_170776 | GPR97    | G protein-coupled receptor 97 | 0.15925   | Inlier  |
| siRNA-Vinblastine Run2-DMSO  | NM_170776 | GPR97    | G protein-coupled receptor 97 | 0.638414  | Inlier  |
| siRNA-Vinblastine Run1-DMSO  | NM_170776 | GPR97    | G protein-coupled receptor 97 | 0.710586  | Inlier  |



Identification of Survival Genes in Human Glioblastoma Cells Using siRNA Screening  
 Nikhil G Thaker, Fang Zhang, Peter R. McDonald, Tong Ying Shun, Michael D Lewen, Ian F. Pollack, and John S. Lazo

Molecular Pharmacology

| siRNA              | Drug      | Run  | Gene          | Protein | Z-score                                                 | Inlier    |        |
|--------------------|-----------|------|---------------|---------|---------------------------------------------------------|-----------|--------|
| siRNA Disorazole   | DMSO      | Run3 | NM_1707<br>76 | GPR97   | 97                                                      | 1.402664  | Inlier |
| siRNA-Temozolomide | Run3-DMSO |      | NM_0162<br>35 | GPRC5B  | G protein-coupled receptor, family C, group 5, member B | -1.668426 | Inlier |
| siRNA-Temozolomide | Run2-DMSO |      | NM_0162<br>35 | GPRC5B  | G protein-coupled receptor, family C, group 5, member B | -0.695034 | Inlier |
| siRNA Disorazole   | DMSO      | Run3 | NM_0162<br>35 | GPRC5B  | G protein-coupled receptor, family C, group 5, member B | -0.559602 | Inlier |
| siRNA-Temozolomide | Run1-DMSO |      | NM_0162<br>35 | GPRC5B  | G protein-coupled receptor, family C, group 5, member B | -0.262484 | Inlier |
| siRNA Disorazole   | DMSO      | Run2 | NM_0162<br>35 | GPRC5B  | G protein-coupled receptor, family C, group 5, member B | 0.262484  | Inlier |
| siRNA Disorazole   | DMSO      | Run1 | NM_0162<br>35 | GPRC5B  | G protein-coupled receptor, family C, group 5, member B | 0.653966  | Inlier |

Identification of Survival Genes in Human Glioblastoma Cells Using siRNA Screening  
 Nikhil G Thaker, Fang Zhang, Peter R. McDonald, Tong Ying Shun, Michael D Lewen, Ian F. Pollack, and John S. Lazo  
 Molecular Pharmacology

|                              |           |        |                                                         |           |        |
|------------------------------|-----------|--------|---------------------------------------------------------|-----------|--------|
| siRNA-Vinblastine Run1-DMSO  | NM_016235 | GPRC5B | G protein-coupled receptor, family C, group 5, member B | 2.187615  | Inlier |
| siRNA-Vinblastine Run2-DMSO  | NM_016235 | GPRC5B | G protein-coupled receptor, family C, group 5, member B | 2.66407   | Inlier |
| siRNA-Temozolomide Run3-DMSO | NM_022036 | GPRC5C | G protein-coupled receptor, family C, group 5, member C | -2.055237 | Inlier |
| siRNA-Temozolomide Run1-DMSO | NM_022036 | GPRC5C | G protein-coupled receptor, family C, group 5, member C | -0.29429  | Inlier |
| siRNA Disorazole DMSO Run3   | NM_022036 | GPRC5C | G protein-coupled receptor, family C, group 5, member C | -0.206816 | Inlier |
| siRNA Disorazole DMSO Run2   | NM_022036 | GPRC5C | G protein-coupled receptor, family C, group 5, member C | -0.201036 | Inlier |
| siRNA-Temozolomide Run2-DMSO | NM_022036 | GPRC5C | G protein-coupled receptor, family C, group 5, member C | 0.201037  | Inlier |

Identification of Survival Genes in Human Glioblastoma Cells Using siRNA Screening  
 Nikhil G Thaker, Fang Zhang, Peter R. McDonald, Tong Ying Shun, Michael D Lewen, Ian F. Pollack, and John S. Lazo  
 Molecular Pharmacology

|                              |               |        |                                                         |           |        |
|------------------------------|---------------|--------|---------------------------------------------------------|-----------|--------|
| siRNA Disorazole DMSO Run1   | NM_0220<br>36 | GPRC5C | G protein-coupled receptor, family C, group 5, member C | 1.05471   | Inlier |
| siRNA-Vinblastine Run2-DMSO  | NM_0220<br>36 | GPRC5C | G protein-coupled receptor, family C, group 5, member C | 2.992378  | Inlier |
| siRNA-Vinblastine Run1-DMSO  | NM_0220<br>36 | GPRC5C | G protein-coupled receptor, family C, group 5, member C | 3.062538  | Inlier |
| siRNA-Temozolomide Run3-DMSO | NM_0186<br>54 | GPRC5D | G protein-coupled receptor, family C, group 5, member D | -2.459371 | Inlier |
| siRNA-Temozolomide Run2-DMSO | NM_0186<br>54 | GPRC5D | G protein-coupled receptor, family C, group 5, member D | -1.927414 | Inlier |
| siRNA-Temozolomide Run1-DMSO | NM_0186<br>54 | GPRC5D | G protein-coupled receptor, family C, group 5, member D | -0.776365 | Inlier |
| siRNA Disorazole DMSO Run1   | NM_0186<br>54 | GPRC5D | G protein-coupled receptor, family C, group 5, member D | -0.457184 | Inlier |

Identification of Survival Genes in Human Glioblastoma Cells Using siRNA Screening  
 Nikhil G Thaker, Fang Zhang, Peter R. McDonald, Tong Ying Shun, Michael D Lewen, Ian F. Pollack, and John S. Lazo  
 Molecular Pharmacology

|                              |               |        |                                                         |           |        |
|------------------------------|---------------|--------|---------------------------------------------------------|-----------|--------|
| siRNA-Vinblastine Run1-DMSO  | NM_0186<br>54 | GPRC5D | G protein-coupled receptor, family C, group 5, member D | 0.457184  | Inlier |
| siRNA Disorazole DMSO Run2   | NM_0186<br>54 | GPRC5D | G protein-coupled receptor, family C, group 5, member D | 0.489208  | Inlier |
| siRNA Disorazole DMSO Run3   | NM_0186<br>54 | GPRC5D | G protein-coupled receptor, family C, group 5, member D | 0.580293  | Inlier |
| siRNA-Vinblastine Run2-DMSO  | NM_0186<br>54 | GPRC5D | G protein-coupled receptor, family C, group 5, member D | 0.768707  | Inlier |
| siRNA-Temozolomide Run3-DMSO | NM_1489<br>63 | GPRC6A | G protein-coupled receptor, family C, group 6, member A | -1.997134 | Inlier |
| siRNA-Temozolomide Run2-DMSO | NM_1489<br>63 | GPRC6A | G protein-coupled receptor, family C, group 6, member A | -0.446958 | Inlier |
| siRNA Disorazole DMSO Run2   | NM_1489<br>63 | GPRC6A | G protein-coupled receptor, family C, group 6, member A | -0.155809 | Inlier |

Identification of Survival Genes in Human Glioblastoma Cells Using siRNA Screening  
 Nikhil G Thaker, Fang Zhang, Peter R. McDonald, Tong Ying Shun, Michael D Lewen, Ian F. Pollack, and John S. Lazo  
 Molecular Pharmacology

|                              |               |        |                                                           |           |        |
|------------------------------|---------------|--------|-----------------------------------------------------------|-----------|--------|
| siRNA Disorazole DMSO Run1   | NM_1489<br>63 | GPRC6A | G protein-coupled receptor, family C, group 6, member A   | -0.072035 | Inlier |
| siRNA-Temozolomide Run1-DMSO | NM_1489<br>63 | GPRC6A | G protein-coupled receptor, family C, group 6, member A   | 0.072035  | Inlier |
| siRNA-Vinblastine Run1-DMSO  | NM_1489<br>63 | GPRC6A | G protein-coupled receptor, family C, group 6, member A   | 0.902042  | Inlier |
| siRNA-Vinblastine Run2-DMSO  | NM_1489<br>63 | GPRC6A | G protein-coupled receptor, family C, group 6, member A   | 1.076     | Inlier |
| siRNA Disorazole DMSO Run3   | NM_1489<br>63 | GPRC6A | G protein-coupled receptor, family C, group 6, member A   | 1.144251  | Inlier |
| siRNA-Temozolomide Run1-DMSO | NM_0053<br>09 | GPT    | glutamic-pyruvate transaminase (alanine aminotransferase) | -1.302068 | Inlier |
| siRNA Disorazole DMSO Run1   | NM_0053<br>09 | GPT    | glutamic-pyruvate transaminase (alanine aminotransferase) | -0.702734 | Inlier |

Identification of Survival Genes in Human Glioblastoma Cells Using siRNA Screening

Nikhil G Thaker, Fang Zhang, Peter R. McDonald, Tong Ying Shun, Michael D Lewen, Ian F. Pollack, and John S.

Lazo

Molecular Pharmacology

|                              |           |      |                                                             |           |        |
|------------------------------|-----------|------|-------------------------------------------------------------|-----------|--------|
| siRNA-Temozolomide Run2-DMSO | NM_005309 | GPT  | glutamic-pyruvate transaminase (alanine aminotransferase)   | -0.565925 | Inlier |
| siRNA-Vinblastine Run2-DMSO  | NM_005309 | GPT  | glutamic-pyruvate transaminase (alanine aminotransferase)   | -0.164847 | Inlier |
| siRNA-Temozolomide Run3-DMSO | NM_005309 | GPT  | glutamic-pyruvate transaminase (alanine aminotransferase)   | 0.164846  | Inlier |
| siRNA Disorazole DMSO Run3   | NM_005309 | GPT  | glutamic-pyruvate transaminase (alanine aminotransferase)   | 0.646266  | Inlier |
| siRNA Disorazole DMSO Run2   | NM_005309 | GPT  | glutamic-pyruvate transaminase (alanine aminotransferase)   | 1.499354  | Inlier |
| siRNA-Vinblastine Run1-DMSO  | NM_005309 | GPT  | glutamic pyruvate transaminase (alanine aminotransferase)   | 2.126428  | Inlier |
| siRNA-Temozolomide Run2-DMSO | NM_133443 | GPT2 | glutamic pyruvate transaminase (alanine aminotransferase) 2 | -1.283084 | Inlier |

Identification of Survival Genes in Human Glioblastoma Cells Using siRNA Screening  
 Nikhil G Thaker, Fang Zhang, Peter R. McDonald, Tong Ying Shun, Michael D Lewen, Ian F. Pollack, and John S. Lazo

Molecular Pharmacology

|                              |               |      |                                                                                 |           |        |
|------------------------------|---------------|------|---------------------------------------------------------------------------------|-----------|--------|
| siRNA-Temozolomide Run3-DMSO | NM_1334<br>43 | GPT2 | glutamic<br>pyruvate<br>transamin<br>ase<br>(alanine<br>aminotran<br>sferase) 2 | -1.146939 | Inlier |
| siRNA-Temozolomide Run1-DMSO | NM_1334<br>43 | GPT2 | glutamic<br>pyruvate<br>transamin<br>ase<br>(alanine<br>aminotran<br>sferase) 2 | -0.471057 | Inlier |
| siRNA Disorazole DMSO Run3   | NM_1334<br>43 | GPT2 | glutamic<br>pyruvate<br>transamin<br>ase<br>(alanine<br>aminotran<br>sferase) 2 | -0.033114 | Inlier |
| siRNA Disorazole DMSO Run1   | NM_1334<br>43 | GPT2 | glutamic<br>pyruvate<br>transamin<br>ase<br>(alanine<br>aminotran<br>sferase) 2 | 0.033114  | Inlier |
| siRNA-Vinblastine Run2-DMSO  | NM_1334<br>43 | GPT2 | glutamic<br>pyruvate<br>transamin<br>ase<br>(alanine<br>aminotran<br>sferase) 2 | 0.154892  | Inlier |
| siRNA Disorazole DMSO Run2   | NM_1334<br>43 | GPT2 | glutamic<br>pyruvate<br>transamin<br>ase<br>(alanine<br>aminotran<br>sferase) 2 | 0.877943  | Inlier |
| siRNA-Vinblastine Run1-DMSO  | NM_1334<br>43 | GPT2 | glutamic<br>pyruvate<br>transamin<br>ase<br>(alanine<br>aminotran<br>sferase) 2 | 1.424131  | Inlier |

Identification of Survival Genes in Human Glioblastoma Cells Using siRNA Screening  
 Nikhil G Thaker, Fang Zhang, Peter R. McDonald, Tong Ying Shun, Michael D Lewen, Ian F. Pollack, and John S. Lazo

Molecular Pharmacology

|                              |               |      |                                             |           |         |
|------------------------------|---------------|------|---------------------------------------------|-----------|---------|
| siRNA-Temozolomide Run3-DMSO | NM_2013<br>97 | GPX1 | glutathione peroxidase 1                    | -1.051022 | Inlier  |
| siRNA Disorazole DMSO Run3   | NM_2013<br>97 | GPX1 | glutathione peroxidase 1                    | -0.542199 | Inlier  |
| siRNA Disorazole DMSO Run1   | NM_2013<br>97 | GPX1 | glutathione peroxidase 1                    | -0.222231 | Inlier  |
| siRNA-Temozolomide Run2-DMSO | NM_2013<br>97 | GPX1 | glutathione peroxidase 1                    | -0.135598 | Inlier  |
| siRNA-Temozolomide Run1-DMSO | NM_2013<br>97 | GPX1 | glutathione peroxidase 1                    | 0.135598  | Inlier  |
| siRNA-Vinblastine Run2-DMSO  | NM_2013<br>97 | GPX1 | glutathione peroxidase 1                    | 0.806801  | Inlier  |
| siRNA-Vinblastine Run1-DMSO  | NM_2013<br>97 | GPX1 | glutathione peroxidase 1                    | 3.932418  | Outlier |
| siRNA Disorazole DMSO Run2   | NM_2013<br>97 | GPX1 | glutathione peroxidase 1                    | 4.822381  | Outlier |
| siRNA-Temozolomide Run3-DMSO | NM_0020<br>83 | GPX2 | glutathione peroxidase 2 (gastrointestinal) | -0.759831 | Inlier  |
| siRNA-Temozolomide Run2-DMSO | NM_0020<br>83 | GPX2 | glutathione peroxidase 2 (gastrointestinal) | -0.589169 | Inlier  |
| siRNA Disorazole DMSO Run3   | NM_0020<br>83 | GPX2 | glutathione peroxidase 2 (gastrointestinal) | -0.158193 | Inlier  |



Identification of Survival Genes in Human Glioblastoma Cells Using siRNA Screening  
 Nikhil G Thaker, Fang Zhang, Peter R. McDonald, Tong Ying Shun, Michael D Lewen, Ian F. Pollack, and John S. Lazo  
 Molecular Pharmacology

|                              |               |      |                                             |           |         |
|------------------------------|---------------|------|---------------------------------------------|-----------|---------|
| siRNA Disorazole DMSO Run1   | NM_0020<br>83 | GPX2 | glutathione peroxidase 2 (gastrointestinal) | -0.077931 | Inlier  |
| siRNA-Vinblastine Run2-DMSO  | NM_0020<br>83 | GPX2 | glutathione peroxidase 2 (gastrointestinal) | 0.077931  | Inlier  |
| siRNA-Temozolomide Run1-DMSO | NM_0020<br>83 | GPX2 | glutathione peroxidase 2 (gastrointestinal) | 0.997276  | Inlier  |
| siRNA Disorazole DMSO Run2   | NM_0020<br>83 | GPX2 | glutathione peroxidase 2 (gastrointestinal) | 5.364081  | Outlier |
| siRNA-Vinblastine Run1-DMSO  | NM_0020<br>83 | GPX2 | glutathione peroxidase 2 (gastrointestinal) | 6.271825  | Outlier |
| siRNA Disorazole DMSO Run1   | NM_0020<br>84 | GPX3 | glutathione peroxidase 3 (plasma)           | -0.712218 | Inlier  |
| siRNA-Vinblastine Run2-DMSO  | NM_0020<br>84 | GPX3 | glutathione peroxidase 3 (plasma)           | -0.636782 | Inlier  |
| siRNA-Temozolomide Run3-DMSO | NM_0020<br>84 | GPX3 | glutathione peroxidase 3 (plasma)           | -0.508283 | Inlier  |
| siRNA Disorazole DMSO Run3   | NM_0020<br>84 | GPX3 | glutathione peroxidase 3 (plasma)           | -0.348283 | Inlier  |

Identification of Survival Genes in Human Glioblastoma Cells Using siRNA Screening  
 Nikhil G Thaker, Fang Zhang, Peter R. McDonald, Tong Ying Shun, Michael D Lewen, Ian F. Pollack, and John S. Lazo  
 Molecular Pharmacology

|                              |           |      |                                                         |           |        |
|------------------------------|-----------|------|---------------------------------------------------------|-----------|--------|
| siRNA-Temozolomide Run2-DMSO | NM_002084 | GPX3 | glutathione peroxidase 3 (plasma)                       | 0.348283  | Inlier |
| siRNA-Temozolomide Run1-DMSO | NM_002084 | GPX3 | glutathione peroxidase 3 (plasma)                       | 1.931797  | Inlier |
| siRNA-Vinblastine Run1-DMSO  | NM_002084 | GPX3 | glutathione peroxidase 3 (plasma)                       | 2.779262  | Inlier |
| siRNA Disorazole DMSO Run2   | NM_002084 | GPX3 | glutathione peroxidase 3 (plasma)                       | 3.179245  | Inlier |
| siRNA-Temozolomide Run3-DMSO | NM_002085 | GPX4 | glutathione peroxidase 4 (phospholipid hydroperoxidase) | -0.899735 | Inlier |
| siRNA-Temozolomide Run2-DMSO | NM_002085 | GPX4 | glutathione peroxidase 4 (phospholipid hydroperoxidase) | -0.831377 | Inlier |
| siRNA Disorazole DMSO Run1   | NM_002085 | GPX4 | glutathione peroxidase 4 (phospholipid hydroperoxidase) | -0.811524 | Inlier |
| siRNA-Vinblastine Run2-DMSO  | NM_002085 | GPX4 | glutathione peroxidase 4 (phospholipid hydroperoxidase) | -0.066184 | Inlier |

Identification of Survival Genes in Human Glioblastoma Cells Using siRNA Screening

Nikhil G Thaker, Fang Zhang, Peter R. McDonald, Tong Ying Shun, Michael D Lewen, Ian F. Pollack, and John S. Lazo

Molecular Pharmacology

|                              |           |      |                                                                |           |        |
|------------------------------|-----------|------|----------------------------------------------------------------|-----------|--------|
| siRNA-Vinblastine Run1-DMSO  | NM_002085 | GPX4 | glutathione peroxidase 4 (phospholipid hydroperoxidase)        | 0.066184  | Inlier |
| siRNA Disorazole DMSO Run3   | NM_002085 | GPX4 | glutathione peroxidase 4 (phospholipid hydroperoxidase)        | 0.225458  | Inlier |
| siRNA Disorazole DMSO Run2   | NM_002085 | GPX4 | glutathione peroxidase 4 (phospholipid hydroperoxidase)        | 0.53978   | Inlier |
| siRNA-Temozolomide Run1-DMSO | NM_002085 | GPX4 | glutathione peroxidase 4 (phospholipid hydroperoxidase)        | 0.80922   | Inlier |
| siRNA-Temozolomide Run3-DMSO | NM_003996 | GPX5 | glutathione peroxidase 5 (epididymal androgen-related protein) | -0.860811 | Inlier |
| siRNA-Vinblastine Run2-DMSO  | NM_003996 | GPX5 | glutathione peroxidase 5 (epididymal androgen-related protein) | -0.488189 | Inlier |

Identification of Survival Genes in Human Glioblastoma Cells Using siRNA Screening  
 Nikhil G Thaker, Fang Zhang, Peter R. McDonald, Tong Ying Shun, Michael D Lewen, Ian F. Pollack, and John S. Lazo  
 Molecular Pharmacology

|                              |               |      |                                                                |                  |
|------------------------------|---------------|------|----------------------------------------------------------------|------------------|
| siRNA Disorazole DMSO Run1   | NM_0039<br>96 | GPX5 | glutathione peroxidase 5 (epididymal androgen-related protein) | -0.416611 Inlier |
| siRNA-Temozolomide Run2-DMSO | NM_0039<br>96 | GPX5 | glutathione peroxidase 5 (epididymal androgen-related protein) | -0.193041 Inlier |
| siRNA Disorazole DMSO Run3   | NM_0039<br>96 | GPX5 | glutathione peroxidase 5 (epididymal androgen-related protein) | 0.193041 Inlier  |
| siRNA-Temozolomide Run1-DMSO | NM_0039<br>96 | GPX5 | glutathione peroxidase 5 (epididymal androgen-related protein) | 0.936002 Inlier  |
| siRNA-Vinblastine Run1-DMSO  | NM_0039<br>96 | GPX5 | glutathione peroxidase 5 (epididymal androgen-related protein) | 2.119858 Inlier  |

Identification of Survival Genes in Human Glioblastoma Cells Using siRNA Screening  
 Nikhil G Thaker, Fang Zhang, Peter R. McDonald, Tong Ying Shun, Michael D Lewen, Ian F. Pollack, and John S. Lazo  
 Molecular Pharmacology

|                              |               |      |                                                                |           |        |
|------------------------------|---------------|------|----------------------------------------------------------------|-----------|--------|
| siRNA Disorazole DMSO Run2   | NM_0039<br>96 | GPX5 | glutathione peroxidase 5 (epididymal androgen-related protein) | 2.818218  | Inlier |
| siRNA Disorazole DMSO Run1   | NM_0156<br>96 | GPX7 | glutathione peroxidase 7                                       | -1.094114 | Inlier |
| siRNA Disorazole DMSO Run3   | NM_0156<br>96 | GPX7 | glutathione peroxidase 7                                       | -0.8344   | Inlier |
| siRNA-Temozolomide Run3-DMSO | NM_0156<br>96 | GPX7 | glutathione peroxidase 7                                       | -0.5146   | Inlier |
| siRNA-Vinblastine Run2-DMSO  | NM_0156<br>96 | GPX7 | glutathione peroxidase 7                                       | -0.124377 | Inlier |
| siRNA-Temozolomide Run2-DMSO | NM_0156<br>96 | GPX7 | glutathione peroxidase 7                                       | 0.124377  | Inlier |
| siRNA-Temozolomide Run1-DMSO | NM_0156<br>96 | GPX7 | glutathione peroxidase 7                                       | 0.315367  | Inlier |
| siRNA-Vinblastine Run1-DMSO  | NM_0156<br>96 | GPX7 | glutathione peroxidase 7                                       | 1.177288  | Inlier |
| siRNA Disorazole DMSO Run2   | NM_0156<br>96 | GPX7 | glutathione peroxidase 7                                       | 1.748469  | Inlier |
| siRNA-Temozolomide Run3-DMSO | NM_0198<br>58 | GRCA | GRCA                                                           | -0.984787 | Inlier |
| siRNA-Temozolomide Run1-DMSO | NM_0198<br>58 | GRCA | GRCA                                                           | -0.753539 | Inlier |
| siRNA-Temozolomide Run2-DMSO | NM_0198<br>58 | GRCA | GRCA                                                           | -0.595461 | Inlier |
| siRNA Disorazole DMSO Run1   | NM_0198<br>58 | GRCA | GRCA                                                           | -0.528016 | Inlier |
| siRNA-Vinblastine Run2-DMSO  | NM_0198<br>58 | GRCA | GRCA                                                           | 0.528015  | Inlier |

Identification of Survival Genes in Human Glioblastoma Cells Using siRNA Screening

Nikhil G Thaker, Fang Zhang, Peter R. McDonald, Tong Ying Shun, Michael D Lewen, Ian F. Pollack, and John S.

Lazo

|                                  |               |       |                                                          |           |         |
|----------------------------------|---------------|-------|----------------------------------------------------------|-----------|---------|
| siRNA-Vinblastine Run1-<br>DMSO  | NM_0198<br>58 | GRCA  | GRCA                                                     | 0.554365  | Inlier  |
| siRNA Disorazole DMSO Run2       | NM_0198<br>58 | GRCA  | GRCA                                                     | 1.470745  | Inlier  |
| siRNA Disorazole DMSO Run3       | NM_0198<br>58 | GRCA  | GRCA                                                     | 1.59015   | Inlier  |
| siRNA-Temozolomide Run3-<br>DMSO | NM_0326<br>41 | GRCC9 | GRCC9                                                    | -0.981021 | Inlier  |
| siRNA-Temozolomide Run2-<br>DMSO | NM_0326<br>41 | GRCC9 | GRCC9                                                    | -0.919542 | Inlier  |
| siRNA-Temozolomide Run1-<br>DMSO | NM_0326<br>41 | GRCC9 | GRCC9                                                    | -0.429457 | Inlier  |
| siRNA Disorazole DMSO Run3       | NM_0326<br>41 | GRCC9 | GRCC9                                                    | -0.355718 | Inlier  |
| siRNA-Vinblastine Run2-<br>DMSO  | NM_0326<br>41 | GRCC9 | GRCC9                                                    | 0.355718  | Inlier  |
| siRNA Disorazole DMSO Run1       | NM_0326<br>41 | GRCC9 | GRCC9                                                    | 0.379463  | Inlier  |
| siRNA Disorazole DMSO Run2       | NM_0326<br>41 | GRCC9 | GRCC9                                                    | 2.699507  | Inlier  |
| siRNA-Vinblastine Run1-<br>DMSO  | NM_0326<br>41 | GRCC9 | GRCC9                                                    | 4.665256  | Outlier |
| siRNA-Temozolomide Run3-<br>DMSO | NM_0122<br>03 | GRHPR | glyoxylate<br>reductase/<br>hydroxypyruvate<br>reductase | -0.70602  | Inlier  |
| siRNA-Vinblastine Run2-<br>DMSO  | NM_0122<br>03 | GRHPR | glyoxylate<br>reductase/<br>hydroxypyruvate<br>reductase | -0.64298  | Inlier  |
| siRNA-Temozolomide Run2-<br>DMSO | NM_0122<br>03 | GRHPR | glyoxylate<br>reductase/<br>hydroxypyruvate<br>reductase | -0.495146 | Inlier  |
| siRNA Disorazole DMSO Run1       | NM_0122<br>03 | GRHPR | glyoxylate<br>reductase/<br>hydroxypyruvate<br>reductase | -0.306178 | Inlier  |
| siRNA-Temozolomide Run1-<br>DMSO | NM_0122<br>03 | GRHPR | glyoxylate<br>reductase/<br>hydroxypyruvate<br>reductase | 0.306178  | Inlier  |
| siRNA Disorazole DMSO Run3       | NM_0122<br>03 | GRHPR | glyoxylate<br>reductase                                  | 0.757591  | Inlier  |

Identification of Survival Genes in Human Glioblastoma Cells Using siRNA Screening  
 Nikhil G Thaker, Fang Zhang, Peter R. McDonald, Tong Ying Shun, Michael D Lewen, Ian F. Pollack, and John S. Lazo

Molecular Pharmacology

| siRNA Treatment              | Gene ID   | Gene Name | Expression Value | Classification |
|------------------------------|-----------|-----------|------------------|----------------|
| siRNA Disorazole DMSO Run2   | NM_012203 | GRHPR     | 4.820274         | Outlier        |
| siRNA-Vinblastine Run1-DMSO  | NM_012203 | GRHPR     | 7.179737         | Outlier        |
| siRNA-Temozolomide Run3-DMSO | NM_000827 | GRIA1     | -3.723888        | Outlier        |
| siRNA Disorazole DMSO Run1   | NM_000827 | GRIA1     | -1.150165        | Inlier         |
| siRNA Disorazole DMSO Run3   | NM_000827 | GRIA1     | -0.535029        | Inlier         |
| siRNA-Temozolomide Run2-DMSO | NM_000827 | GRIA1     | -0.195124        | Inlier         |
| siRNA-Temozolomide Run1-DMSO | NM_000827 | GRIA1     | 0.195124         | Inlier         |
| siRNA Disorazole DMSO Run2   | NM_000827 | GRIA1     | 0.284888         | Inlier         |
| siRNA-Vinblastine Run2-DMSO  | NM_000827 | GRIA1     | 0.813971         | Inlier         |
| siRNA-Vinblastine Run1-DMSO  | NM_000827 | GRIA1     | 1.001182         | Inlier         |
| siRNA-Temozolomide Run3-DMSO | NM_000826 | GRIA2     | -1.325794        | Inlier         |
| siRNA Disorazole DMSO Run2   | NM_000826 | GRIA2     | -1.199158        | Inlier         |

glyoxylate  
 reductase/  
 hydroxypyruvate

reductase  
 glyoxylate  
 reductase/  
 hydroxypyruvate

reductase  
 glutamate  
 receptor,  
 ionotropic,  
 AMPA 1

glutamate  
 receptor,  
 ionotropic,  
 AMPA 2

glutamate  
 receptor,  
 ionotropic,  
 AMPA 2

Identification of Survival Genes in Human Glioblastoma Cells Using siRNA Screening  
 Nikhil G Thaker, Fang Zhang, Peter R. McDonald, Tong Ying Shun, Michael D Lewen, Ian F. Pollack, and John S. Lazo

Molecular Pharmacology

|                              |               |       |                                        |           |        |
|------------------------------|---------------|-------|----------------------------------------|-----------|--------|
| siRNA Disorazole DMSO Run3   | NM_0008<br>26 | GRIA2 | glutamate receptor, ionotropic, AMPA 2 | -0.665733 | Inlier |
| siRNA-Temozolomide Run2-DMSO | NM_0008<br>26 | GRIA2 | glutamate receptor, ionotropic, AMPA 2 | -0.025264 | Inlier |
| siRNA Disorazole DMSO Run1   | NM_0008<br>26 | GRIA2 | glutamate receptor, ionotropic, AMPA 2 | 0.025264  | Inlier |
| siRNA-Vinblastine Run2-DMSO  | NM_0008<br>26 | GRIA2 | glutamate receptor, ionotropic, AMPA 2 | 0.565266  | Inlier |
| siRNA-Temozolomide Run1-DMSO | NM_0008<br>26 | GRIA2 | glutamate receptor, ionotropic, AMPA 2 | 0.683267  | Inlier |
| siRNA-Vinblastine Run1-DMSO  | NM_0008<br>26 | GRIA2 | glutamate receptor, ionotropic, AMPA 2 | 0.688239  | Inlier |
| siRNA-Temozolomide Run3-DMSO | NM_1818<br>94 | GRIA3 | glutamate receptor, ionotropic, AMPA 3 | -2.28865  | Inlier |
| siRNA-Temozolomide Run2-DMSO | NM_1818<br>94 | GRIA3 | glutamate receptor, ionotropic, AMPA 3 | -1.812004 | Inlier |
| siRNA Disorazole DMSO Run3   | NM_1818<br>94 | GRIA3 | glutamate receptor, ionotropic, AMPA 3 | -0.490669 | Inlier |
| siRNA Disorazole DMSO Run2   | NM_1818<br>94 | GRIA3 | glutamate receptor, ionotropic, AMPA 3 | -0.485125 | Inlier |
| siRNA-Vinblastine Run1-DMSO  | NM_1818<br>94 | GRIA3 | glutamate receptor, ionotropic, AMPA 3 | 0.485125  | Inlier |



Identification of Survival Genes in Human Glioblastoma Cells Using siRNA Screening  
 Nikhil G Thaker, Fang Zhang, Peter R. McDonald, Tong Ying Shun, Michael D Lewen, Ian F. Pollack, and John S. Lazo  
 Molecular Pharmacology

|                                  |               |       |                                                   |                  |
|----------------------------------|---------------|-------|---------------------------------------------------|------------------|
| siRNA Disorazole DMSO Run1       | NM_1818<br>94 | GRIA3 | glutamate<br>receptor,<br>ionotrophi<br>c, AMPA 3 | 0.542189 Inlier  |
| siRNA-Temozolomide Run1-<br>DMSO | NM_1818<br>94 | GRIA3 | glutamate<br>receptor,<br>ionotrophi<br>c, AMPA 3 | 0.806811 Inlier  |
| siRNA-Vinblastine Run2-<br>DMSO  | NM_1818<br>94 | GRIA3 | glutamate<br>receptor,<br>ionotrophi<br>c, AMPA 3 | 1.083985 Inlier  |
| siRNA Disorazole DMSO Run3       | NM_0008<br>29 | GRIA4 | glutamate<br>receptor,<br>ionotrophi<br>c, AMPA 4 | -2.067808 Inlier |
| siRNA-Temozolomide Run3-<br>DMSO | NM_0008<br>29 | GRIA4 | glutamate<br>receptor,<br>ionotrophi<br>c, AMPA 4 | -1.066797 Inlier |
| siRNA-Vinblastine Run2-<br>DMSO  | NM_0008<br>29 | GRIA4 | glutamate<br>receptor,<br>ionotrophi<br>c, AMPA 4 | -0.632571 Inlier |
| siRNA-Temozolomide Run2-<br>DMSO | NM_0008<br>29 | GRIA4 | glutamate<br>receptor,<br>ionotrophi<br>c, AMPA 4 | -0.421581 Inlier |
| siRNA Disorazole DMSO Run2       | NM_0008<br>29 | GRIA4 | glutamate<br>receptor,<br>ionotrophi<br>c, AMPA 4 | 0.42158 Inlier   |
| siRNA-Temozolomide Run1-<br>DMSO | NM_0008<br>29 | GRIA4 | glutamate<br>receptor,<br>ionotrophi<br>c, AMPA 4 | 0.617336 Inlier  |
| siRNA Disorazole DMSO Run1       | NM_0008<br>29 | GRIA4 | glutamate<br>receptor,<br>ionotrophi<br>c, AMPA 4 | 0.716429 Inlier  |

Identification of Survival Genes in Human Glioblastoma Cells Using siRNA Screening  
 Nikhil G Thaker, Fang Zhang, Peter R. McDonald, Tong Ying Shun, Michael D Lewen, Ian F. Pollack, and John S. Lazo  
 Molecular Pharmacology

|                              |               |       |                                                            |           |         |
|------------------------------|---------------|-------|------------------------------------------------------------|-----------|---------|
| siRNA-Vinblastine Run1-DMSO  | NM_0008<br>29 | GRIA4 | glutamate receptor, ionotropic, AMPA 4 glutamate receptor, | 0.877744  | Inlier  |
| siRNA-Temozolomide Run3-DMSO | XM_04361<br>3 | GRID1 | ionotropic, delta 1 glutamate receptor,                    | -1.357739 | Inlier  |
| siRNA-Temozolomide Run2-DMSO | XM_04361<br>3 | GRID1 | ionotropic, delta 1 glutamate receptor,                    | -1.246304 | Inlier  |
| siRNA Disorazole DMSO Run1   | XM_04361<br>3 | GRID1 | ionotropic, delta 1 glutamate receptor,                    | -0.135174 | Inlier  |
| siRNA-Vinblastine Run2-DMSO  | XM_04361<br>3 | GRID1 | ionotropic, delta 1 glutamate receptor,                    | -0.084285 | Inlier  |
| siRNA-Temozolomide Run1-DMSO | XM_04361<br>3 | GRID1 | ionotropic, delta 1 glutamate receptor,                    | 0.084285  | Inlier  |
| siRNA Disorazole DMSO Run3   | XM_04361<br>3 | GRID1 | ionotropic, delta 1 glutamate receptor,                    | 0.171621  | Inlier  |
| siRNA-Vinblastine Run1-DMSO  | XM_04361<br>3 | GRID1 | ionotropic, delta 1 glutamate receptor,                    | 1.177379  | Inlier  |
| siRNA Disorazole DMSO Run2   | XM_04361<br>3 | GRID1 | ionotropic, delta 1 glutamate receptor,                    | 1.589554  | Inlier  |
| siRNA-Temozolomide Run3-DMSO | NM_0015<br>10 | GRID2 | ionotropic, delta 2 glutamate receptor,                    | -7.629692 | Outlier |
| siRNA-Temozolomide Run2-DMSO | NM_0015<br>10 | GRID2 | ionotropic, delta 2 glutamate receptor,                    | -0.773593 | Inlier  |
| siRNA-Vinblastine Run2-DMSO  | NM_0015<br>10 | GRID2 | ionotropic, delta 2                                        | -0.186666 | Inlier  |

Identification of Survival Genes in Human Glioblastoma Cells Using siRNA Screening  
 Nikhil G Thaker, Fang Zhang, Peter R. McDonald, Tong Ying Shun, Michael D Lewen, Ian F. Pollack, and John S. Lazo

Molecular Pharmacology

|                              |               |       |                                           |           |         |
|------------------------------|---------------|-------|-------------------------------------------|-----------|---------|
| siRNA Disorazole DMSO Run3   | NM_0015<br>10 | GRID2 | glutamate receptor, ionotropic, delta 2   | -0.153107 | Inlier  |
| siRNA-Temozolomide Run1-DMSO | NM_0015<br>10 | GRID2 | glutamate receptor, ionotropic, delta 2   | 0.153104  | Inlier  |
| siRNA Disorazole DMSO Run1   | NM_0015<br>10 | GRID2 | glutamate receptor, ionotropic, delta 2   | 0.575406  | Inlier  |
| siRNA-Vinblastine Run1-DMSO  | NM_0015<br>10 | GRID2 | glutamate receptor, ionotropic, delta 2   | 7.534623  | Outlier |
| siRNA Disorazole DMSO Run2   | NM_0015<br>10 | GRID2 | glutamate receptor, ionotropic, delta 2   | 7.716054  | Outlier |
| siRNA-Temozolomide Run3-DMSO | NM_1756<br>11 | GRIK1 | glutamate receptor, ionotropic, kainate 1 | -1.360518 | Inlier  |
| siRNA Disorazole DMSO Run3   | NM_1756<br>11 | GRIK1 | glutamate receptor, ionotropic, kainate 1 | -1.124275 | Inlier  |
| siRNA Disorazole DMSO Run2   | NM_1756<br>11 | GRIK1 | glutamate receptor, ionotropic, kainate 1 | -0.704231 | Inlier  |
| siRNA-Temozolomide Run2-DMSO | NM_1756<br>11 | GRIK1 | glutamate receptor, ionotropic, kainate 1 | -0.220593 | Inlier  |
| siRNA-Temozolomide Run1-DMSO | NM_1756<br>11 | GRIK1 | glutamate receptor, ionotropic, kainate 1 | 0.220594  | Inlier  |
| siRNA Disorazole DMSO Run1   | NM_1756<br>11 | GRIK1 | glutamate receptor, ionotropic, kainate 1 | 0.328619  | Inlier  |

Identification of Survival Genes in Human Glioblastoma Cells Using siRNA Screening  
 Nikhil G Thaker, Fang Zhang, Peter R. McDonald, Tong Ying Shun, Michael D Lewen, Ian F. Pollack, and John S. Lazo  
 Molecular Pharmacology

|                              |               |       |                                           |                  |
|------------------------------|---------------|-------|-------------------------------------------|------------------|
| siRNA-Vinblastine Run1-DMSO  | NM_1756<br>11 | GRIK1 | glutamate receptor, ionotropic, kainate 1 | 0.644769 Inlier  |
| siRNA-Vinblastine Run2-DMSO  | NM_1756<br>11 | GRIK1 | glutamate receptor, ionotropic, kainate 1 | 1.007102 Inlier  |
| siRNA-Temozolomide Run3-DMSO | NM_1757<br>68 | GRIK2 | glutamate receptor, ionotropic, kainate 2 | -0.786489 Inlier |
| siRNA-Temozolomide Run2-DMSO | NM_1757<br>68 | GRIK2 | glutamate receptor, ionotropic, kainate 2 | -0.746918 Inlier |
| siRNA-Vinblastine Run2-DMSO  | NM_1757<br>68 | GRIK2 | glutamate receptor, ionotropic, kainate 2 | -0.170044 Inlier |
| siRNA Disorazole DMSO Run1   | NM_1757<br>68 | GRIK2 | glutamate receptor, ionotropic, kainate 2 | -0.048377 Inlier |
| siRNA Disorazole DMSO Run3   | NM_1757<br>68 | GRIK2 | glutamate receptor, ionotropic, kainate 2 | 0.048377 Inlier  |
| siRNA-Temozolomide Run1-DMSO | NM_1757<br>68 | GRIK2 | glutamate receptor, ionotropic, kainate 2 | 0.602082 Inlier  |
| siRNA Disorazole DMSO Run2   | NM_1757<br>68 | GRIK2 | glutamate receptor, ionotropic, kainate 2 | 3.087685 Inlier  |
| siRNA-Vinblastine Run1-DMSO  | NM_1757<br>68 | GRIK2 | glutamate receptor, ionotropic, kainate 2 | 3.130141 Inlier  |

Identification of Survival Genes in Human Glioblastoma Cells Using siRNA Screening  
 Nikhil G Thaker, Fang Zhang, Peter R. McDonald, Tong Ying Shun, Michael D Lewen, Ian F. Pollack, and John S. Lazo  
 Molecular Pharmacology

|                              |               |       |                                           |           |        |
|------------------------------|---------------|-------|-------------------------------------------|-----------|--------|
| siRNA-Temozolomide Run3-DMSO | NM_0008<br>31 | GRIK3 | glutamate receptor, ionotropic, kainate 3 | -1.439304 | Inlier |
| siRNA Disorazole DMSO Run3   | NM_0008<br>31 | GRIK3 | glutamate receptor, ionotropic, kainate 3 | -0.491835 | Inlier |
| siRNA-Vinblastine Run2-DMSO  | NM_0008<br>31 | GRIK3 | glutamate receptor, ionotropic, kainate 3 | -0.190104 | Inlier |
| siRNA-Temozolomide Run2-DMSO | NM_0008<br>31 | GRIK3 | glutamate receptor, ionotropic, kainate 3 | -0.135689 | Inlier |
| siRNA Disorazole DMSO Run1   | NM_0008<br>31 | GRIK3 | glutamate receptor, ionotropic, kainate 3 | 0.135689  | Inlier |
| siRNA-Temozolomide Run1-DMSO | NM_0008<br>31 | GRIK3 | glutamate receptor, ionotropic, kainate 3 | 0.857165  | Inlier |
| siRNA-Vinblastine Run1-DMSO  | NM_0008<br>31 | GRIK3 | glutamate receptor, ionotropic, kainate 3 | 2.101838  | Inlier |
| siRNA Disorazole DMSO Run2   | NM_0008<br>31 | GRIK3 | glutamate receptor, ionotropic, kainate 3 | 2.258132  | Inlier |
| siRNA-Temozolomide Run3-DMSO | NM_0146<br>19 | GRIK4 | glutamate receptor, ionotropic, kainate 4 | -1.730704 | Inlier |
| siRNA-Temozolomide Run2-DMSO | NM_0146<br>19 | GRIK4 | glutamate receptor, ionotropic, kainate 4 | -1.014052 | Inlier |

Identification of Survival Genes in Human Glioblastoma Cells Using siRNA Screening  
 Nikhil G Thaker, Fang Zhang, Peter R. McDonald, Tong Ying Shun, Michael D Lewen, Ian F. Pollack, and John S. Lazo  
 Molecular Pharmacology

|                                  |               |       |                                                    |           |        |
|----------------------------------|---------------|-------|----------------------------------------------------|-----------|--------|
| siRNA Disorazole DMSO Run2       | NM_0146<br>19 | GRIK4 | glutamate<br>receptor,<br>ionotropic,<br>kainate 4 | -0.808896 | Inlier |
| siRNA Disorazole DMSO Run3       | NM_0146<br>19 | GRIK4 | glutamate<br>receptor,<br>ionotropic,<br>kainate 4 | -0.459499 | Inlier |
| siRNA-Temozolomide Run1-<br>DMSO | NM_0146<br>19 | GRIK4 | glutamate<br>receptor,<br>ionotropic,<br>kainate 4 | 0.4595    | Inlier |
| siRNA Disorazole DMSO Run1       | NM_0146<br>19 | GRIK4 | glutamate<br>receptor,<br>ionotropic,<br>kainate 4 | 0.536809  | Inlier |
| siRNA-Vinblastine Run2-<br>DMSO  | NM_0146<br>19 | GRIK4 | glutamate<br>receptor,<br>ionotropic,<br>kainate 4 | 0.540104  | Inlier |
| siRNA-Vinblastine Run1-<br>DMSO  | NM_0146<br>19 | GRIK4 | glutamate<br>receptor,<br>ionotropic,<br>kainate 4 | 0.884619  | Inlier |
| siRNA-Temozolomide Run3-<br>DMSO | NM_0020<br>88 | GRIK5 | glutamate<br>receptor,<br>ionotropic,<br>kainate 5 | -1.737097 | Inlier |
| siRNA Disorazole DMSO Run1       | NM_0020<br>88 | GRIK5 | glutamate<br>receptor,<br>ionotropic,<br>kainate 5 | -0.843877 | Inlier |
| siRNA-Vinblastine Run2-<br>DMSO  | NM_0020<br>88 | GRIK5 | glutamate<br>receptor,<br>ionotropic,<br>kainate 5 | -0.29355  | Inlier |
| siRNA Disorazole DMSO Run3       | NM_0020<br>88 | GRIK5 | glutamate<br>receptor,<br>ionotropic,<br>kainate 5 | -0.213133 | Inlier |

Identification of Survival Genes in Human Glioblastoma Cells Using siRNA Screening  
 Nikhil G Thaker, Fang Zhang, Peter R. McDonald, Tong Ying Shun, Michael D Lewen, Ian F. Pollack, and John S. Lazo  
 Molecular Pharmacology

|                              |               |       |                                                        |           |         |
|------------------------------|---------------|-------|--------------------------------------------------------|-----------|---------|
| siRNA-Temozolomide Run1-DMSO | NM_0020<br>88 | GRIK5 | glutamate receptor, ionotropic, kainate 5              | 0.213133  | Inlier  |
| siRNA-Temozolomide Run2-DMSO | NM_0020<br>88 | GRIK5 | glutamate receptor, ionotropic, kainate 5              | 0.505123  | Inlier  |
| siRNA Disorazole DMSO Run2   | NM_0020<br>88 | GRIK5 | glutamate receptor, ionotropic, kainate 5              | 4.440151  | Outlier |
| siRNA-Vinblastine Run1-DMSO  | NM_0020<br>88 | GRIK5 | glutamate receptor, ionotropic, kainate 5              | 4.949374  | Outlier |
| siRNA-Temozolomide Run3-DMSO | NM_0073<br>27 | GRIN1 | glutamate receptor, ionotropic, N-methyl D-aspartate 1 | -0.703019 | Inlier  |
| siRNA-Temozolomide Run2-DMSO | NM_0073<br>27 | GRIN1 | glutamate receptor, ionotropic, N-methyl D-aspartate 1 | -0.645981 | Inlier  |
| siRNA Disorazole DMSO Run3   | NM_0073<br>27 | GRIN1 | glutamate receptor, ionotropic, N-methyl D-aspartate 1 | -0.343427 | Inlier  |
| siRNA-Temozolomide Run1-DMSO | NM_0073<br>27 | GRIN1 | glutamate receptor, ionotropic, N-methyl D-aspartate 1 | -0.312053 | Inlier  |

Identification of Survival Genes in Human Glioblastoma Cells Using siRNA Screening  
 Nikhil G Thaker, Fang Zhang, Peter R. McDonald, Tong Ying Shun, Michael D Lewen, Ian F. Pollack, and John S. Lazo

Molecular Pharmacology

|                                  |               |        |                                                                            |           |        |
|----------------------------------|---------------|--------|----------------------------------------------------------------------------|-----------|--------|
| siRNA Disorazole DMSO Run2       | NM_0073<br>27 | GRIN1  | glutamate<br>receptor,<br>ionotropic,<br>N-methyl<br>D-<br>aspartate<br>1  | 0.312053  | Inlier |
| siRNA Disorazole DMSO Run1       | NM_0073<br>27 | GRIN1  | glutamate<br>receptor,<br>ionotropic,<br>N-methyl<br>D-<br>aspartate<br>1  | 1.028999  | Inlier |
| siRNA-Vinblastine Run1-<br>DMSO  | NM_0073<br>27 | GRIN1  | glutamate<br>receptor,<br>ionotropic,<br>N-methyl<br>D-<br>aspartate<br>1  | 2.029724  | Inlier |
| siRNA-Vinblastine Run2-<br>DMSO  | NM_0073<br>27 | GRIN1  | glutamate<br>receptor,<br>ionotropic,<br>N-methyl<br>D-<br>aspartate<br>1  | 3.415735  | Inlier |
| siRNA-Temozolomide Run3-<br>DMSO | NM_0008<br>33 | GRIN2A | glutamate<br>receptor,<br>ionotropic,<br>N-methyl<br>D-<br>aspartate<br>2A | -1.509203 | Inlier |
| siRNA-Temozolomide Run2-<br>DMSO | NM_0008<br>33 | GRIN2A | glutamate<br>receptor,<br>ionotropic,<br>N-methyl<br>D-<br>aspartate<br>2A | -0.740106 | Inlier |
| siRNA Disorazole DMSO Run2       | NM_0008<br>33 | GRIN2A | glutamate<br>receptor,<br>ionotropic,<br>N-methyl<br>D-<br>aspartate<br>2A | -0.588739 | Inlier |



Identification of Survival Genes in Human Glioblastoma Cells Using siRNA Screening  
 Nikhil G Thaker, Fang Zhang, Peter R. McDonald, Tong Ying Shun, Michael D Lewen, Ian F. Pollack, and John S. Lazo

Molecular Pharmacology

|                                  |               |        |                                                                            |           |        |
|----------------------------------|---------------|--------|----------------------------------------------------------------------------|-----------|--------|
| siRNA Disorazole DMSO Run1       | NM_0008<br>33 | GRIN2A | glutamate<br>receptor,<br>ionotropic,<br>N-methyl<br>D-<br>aspartate<br>2A | -0.059763 | Inlier |
| siRNA Disorazole DMSO Run3       | NM_0008<br>33 | GRIN2A | glutamate<br>receptor,<br>ionotropic,<br>N-methyl<br>D-<br>aspartate<br>2A | 0.059763  | Inlier |
| siRNA-Temozolomide Run1-<br>DMSO | NM_0008<br>33 | GRIN2A | glutamate<br>receptor,<br>ionotropic,<br>N-methyl<br>D-<br>aspartate<br>2A | 0.608894  | Inlier |
| siRNA-Vinblastine Run2-<br>DMSO  | NM_0008<br>33 | GRIN2A | glutamate<br>receptor,<br>ionotropic,<br>N-methyl<br>D-<br>aspartate<br>2A | 1.0879    | Inlier |
| siRNA-Vinblastine Run1-<br>DMSO  | NM_0008<br>33 | GRIN2A | glutamate<br>receptor,<br>ionotropic,<br>N-methyl<br>D-<br>aspartate<br>2A | 1.447878  | Inlier |
| siRNA-Temozolomide Run3-<br>DMSO | NM_0008<br>34 | GRIN2B | glutamate<br>receptor,<br>ionotropic,<br>N-methyl<br>D-<br>aspartate<br>2B | -2.193571 | Inlier |
| siRNA Disorazole DMSO Run3       | NM_0008<br>34 | GRIN2B | glutamate<br>receptor,<br>ionotropic,<br>N-methyl<br>D-<br>aspartate<br>2B | -1.150539 | Inlier |

Identification of Survival Genes in Human Glioblastoma Cells Using siRNA Screening  
 Nikhil G Thaker, Fang Zhang, Peter R. McDonald, Tong Ying Shun, Michael D Lewen, Ian F. Pollack, and John S. Lazo

Molecular Pharmacology

|                                  |               |        |                                                                            |           |         |
|----------------------------------|---------------|--------|----------------------------------------------------------------------------|-----------|---------|
| siRNA Disorazole DMSO Run1       | NM_0008<br>34 | GRIN2B | glutamate<br>receptor,<br>ionotropic,<br>N-methyl<br>D-<br>aspartate<br>2B | -0.694948 | Inlier  |
| siRNA Disorazole DMSO Run2       | NM_0008<br>34 | GRIN2B | glutamate<br>receptor,<br>ionotropic,<br>N-methyl<br>D-<br>aspartate<br>2B | -0.248019 | Inlier  |
| siRNA-Temozolomide Run1-<br>DMSO | NM_0008<br>34 | GRIN2B | glutamate<br>receptor,<br>ionotropic,<br>N-methyl<br>D-<br>aspartate<br>2B | 0.248019  | Inlier  |
| siRNA-Temozolomide Run2-<br>DMSO | NM_0008<br>34 | GRIN2B | glutamate<br>receptor,<br>ionotropic,<br>N-methyl<br>D-<br>aspartate<br>2B | 0.573153  | Inlier  |
| siRNA-Vinblastine Run1-<br>DMSO  | NM_0008<br>34 | GRIN2B | glutamate<br>receptor,<br>ionotropic,<br>N-methyl<br>D-<br>aspartate<br>2B | 0.654052  | Inlier  |
| siRNA-Vinblastine Run2-<br>DMSO  | NM_0008<br>34 | GRIN2B | glutamate<br>receptor,<br>ionotropic,<br>N-methyl<br>D-<br>aspartate<br>2B | 1.088954  | Inlier  |
| siRNA-Temozolomide Run3-<br>DMSO | NM_0008<br>35 | GRIN2C | glutamate<br>receptor,<br>ionotropic,<br>N-methyl<br>D-<br>aspartate<br>2C | -4.511389 | Outlier |

Identification of Survival Genes in Human Glioblastoma Cells Using siRNA Screening  
 Nikhil G Thaker, Fang Zhang, Peter R. McDonald, Tong Ying Shun, Michael D Lewen, Ian F. Pollack, and John S. Lazo

Molecular Pharmacology

|                              |           |        |                                                         |           |         |
|------------------------------|-----------|--------|---------------------------------------------------------|-----------|---------|
| siRNA-Vinblastine Run2-DMSO  | NM_000835 | GRIN2C | glutamate receptor, ionotropic, N-methyl D-aspartate 2C | -0.697437 | Inlier  |
| siRNA Disorazole DMSO Run1   | NM_000835 | GRIN2C | glutamate receptor, ionotropic, N-methyl D-aspartate 2C | -0.651563 | Inlier  |
| siRNA Disorazole DMSO Run3   | NM_000835 | GRIN2C | glutamate receptor, ionotropic, N-methyl D-aspartate 2C | -0.207133 | Inlier  |
| siRNA-Temozolomide Run1-DMSO | NM_000835 | GRIN2C | glutamate receptor, ionotropic, N-methyl D-aspartate 2C | 0.207131  | Inlier  |
| siRNA-Temozolomide Run2-DMSO | NM_000835 | GRIN2C | glutamate receptor, ionotropic, N-methyl D-aspartate 2C | 0.454805  | Inlier  |
| siRNA-Vinblastine Run1-DMSO  | NM_000835 | GRIN2C | glutamate receptor, ionotropic, N-methyl D-aspartate 2C | 2.78931   | Inlier  |
| siRNA Disorazole DMSO Run2   | NM_000835 | GRIN2C | glutamate receptor, ionotropic, N-methyl D-aspartate 2C | 4.236544  | Outlier |

Identification of Survival Genes in Human Glioblastoma Cells Using siRNA Screening  
 Nikhil G Thaker, Fang Zhang, Peter R. McDonald, Tong Ying Shun, Michael D Lewen, Ian F. Pollack, and John S. Lazo

Molecular Pharmacology

|                                  |               |        |                                                                            |           |        |
|----------------------------------|---------------|--------|----------------------------------------------------------------------------|-----------|--------|
| siRNA Disorazole DMSO Run2       | NM_0008<br>36 | GRIN2D | glutamate<br>receptor,<br>ionotropic,<br>N-methyl<br>D-<br>aspartate<br>2D | -0.845454 | Inlier |
| siRNA-Temozolomide Run3-<br>DMSO | NM_0008<br>36 | GRIN2D | glutamate<br>receptor,<br>ionotropic,<br>N-methyl<br>D-<br>aspartate<br>2D | -0.831381 | Inlier |
| siRNA-Temozolomide Run2-<br>DMSO | NM_0008<br>36 | GRIN2D | glutamate<br>receptor,<br>ionotropic,<br>N-methyl<br>D-<br>aspartate<br>2D | -0.061629 | Inlier |
| siRNA Disorazole DMSO Run1       | NM_0008<br>36 | GRIN2D | glutamate<br>receptor,<br>ionotropic,<br>N-methyl<br>D-<br>aspartate<br>2D | -0.041826 | Inlier |
| siRNA Disorazole DMSO Run3       | NM_0008<br>36 | GRIN2D | glutamate<br>receptor,<br>ionotropic,<br>N-methyl<br>D-<br>aspartate<br>2D | 0.041826  | Inlier |
| siRNA-Temozolomide Run1-<br>DMSO | NM_0008<br>36 | GRIN2D | glutamate<br>receptor,<br>ionotropic,<br>N-methyl<br>D-<br>aspartate<br>2D | 0.517619  | Inlier |
| siRNA-Vinblastine Run2-<br>DMSO  | NM_0008<br>36 | GRIN2D | glutamate<br>receptor,<br>ionotropic,<br>N-methyl<br>D-<br>aspartate<br>2D | 1.183994  | Inlier |

Identification of Survival Genes in Human Glioblastoma Cells Using siRNA Screening  
 Nikhil G Thaker, Fang Zhang, Peter R. McDonald, Tong Ying Shun, Michael D Lewen, Ian F. Pollack, and John S. Lazo

Molecular Pharmacology

|                              |           |        |                                                         |           |        |
|------------------------------|-----------|--------|---------------------------------------------------------|-----------|--------|
| siRNA-Vinblastine Run1-DMSO  | NM_000836 | GRIN2D | glutamate receptor, ionotropic, N-methyl-D-aspartate 2D | 2.077217  | Inlier |
| siRNA Disorazole DMSO Run1   | NM_133445 | GRIN3A | glutamate receptor, ionotropic, N-methyl-D-aspartate 3A | -1.374355 | Inlier |
| siRNA-Temozolomide Run1-DMSO | NM_133445 | GRIN3A | glutamate receptor, ionotropic, N-methyl-D-aspartate 3A | -0.74279  | Inlier |
| siRNA-Temozolomide Run3-DMSO | NM_133445 | GRIN3A | glutamate receptor, ionotropic, N-methyl-D-aspartate 3A | -0.575272 | Inlier |
| siRNA Disorazole DMSO Run3   | NM_133445 | GRIN3A | glutamate receptor, ionotropic, N-methyl-D-aspartate 3A | -0.464414 | Inlier |
| siRNA-Temozolomide Run2-DMSO | NM_133445 | GRIN3A | glutamate receptor, ionotropic, N-methyl-D-aspartate 3A | 0.464412  | Inlier |
| siRNA-Vinblastine Run2-DMSO  | NM_133445 | GRIN3A | glutamate receptor, ionotropic, N-methyl-D-aspartate 3A | 0.60621   | Inlier |

Identification of Survival Genes in Human Glioblastoma Cells Using siRNA Screening  
 Nikhil G Thaker, Fang Zhang, Peter R. McDonald, Tong Ying Shun, Michael D Lewen, Ian F. Pollack, and John S. Lazo

Molecular Pharmacology

|                              |                  |        |                                                                                               |           |         |
|------------------------------|------------------|--------|-----------------------------------------------------------------------------------------------|-----------|---------|
| siRNA-Vinblastine Run1-DMSO  | NM_1334<br>45    | GRIN3A | glutamate receptor, ionotropic, N-methyl-D-aspartate 3A                                       | 3.475687  | Inlier  |
| siRNA Disorazole DMSO Run2   | NM_1334<br>45    | GRIN3A | glutamate receptor, ionotropic, N-methyl-D-aspartate 3A                                       | 4.389807  | Outlier |
| siRNA-Temozolomide Run1-DMSO | NM_0010<br>09184 | GRINA  | glutamate receptor, ionotropic, N-methyl D-aspartate-associated protein 1 (glutamate binding) | -0.705586 | Inlier  |
| siRNA Disorazole DMSO Run1   | NM_0010<br>09184 | GRINA  | glutamate receptor, ionotropic, N-methyl D-aspartate-associated protein 1 (glutamate binding) | -0.643414 | Inlier  |
| siRNA-Temozolomide Run3-DMSO | NM_0010<br>09184 | GRINA  | glutamate receptor, ionotropic, N-methyl D-aspartate-associated protein 1 (glutamate binding) | -0.641675 | Inlier  |

Identification of Survival Genes in Human Glioblastoma Cells Using siRNA Screening

Nikhil G Thaker, Fang Zhang, Peter R. McDonald, Tong Ying Shun, Michael D Lewen, Ian F. Pollack, and John S. Lazo

Molecular Pharmacology

|                              |              |       |                                                                                               |           |        |
|------------------------------|--------------|-------|-----------------------------------------------------------------------------------------------|-----------|--------|
| siRNA-Temozolomide Run2-DMSO | NM_001009184 | GRINA | glutamate receptor, ionotropic, N-methyl D-aspartate-associated protein 1 (glutamate binding) | -0.189116 | Inlier |
| siRNA Disorazole DMSO Run3   | NM_001009184 | GRINA | glutamate receptor, ionotropic, N-methyl D-aspartate-associated protein 1 (glutamate binding) | 0.189117  | Inlier |
| siRNA-Vinblastine Run2-DMSO  | NM_001009184 | GRINA | glutamate receptor, ionotropic, N-methyl D-aspartate-associated protein 1 (glutamate binding) | 0.958263  | Inlier |
| siRNA-Vinblastine Run1-DMSO  | NM_001009184 | GRINA | glutamate receptor, ionotropic, N-methyl D-aspartate-associated protein 1 (glutamate binding) | 1.112837  | Inlier |

Identification of Survival Genes in Human Glioblastoma Cells Using siRNA Screening

Nikhil G Thaker, Fang Zhang, Peter R. McDonald, Tong Ying Shun, Michael D Lewen, Ian F. Pollack, and John S. Lazo

Molecular Pharmacology

|                              |                  |         |                                                                                               |           |        |
|------------------------------|------------------|---------|-----------------------------------------------------------------------------------------------|-----------|--------|
| siRNA Disorazole DMSO Run2   | NM_0010<br>09184 | GRINA   | glutamate receptor, ionotropic, N-methyl D-aspartate-associated protein 1 (glutamate binding) | 2.386292  | Inlier |
| siRNA-Temozolomide Run3-DMSO | NM_0010<br>18103 | GRINL1A | glutamate receptor, ionotropic, N-methyl D-aspartate-like 1A                                  | -1.169002 | Inlier |
| siRNA-Vinblastine Run2-DMSO  | NM_0010<br>18103 | GRINL1A | glutamate receptor, ionotropic, N-methyl D-aspartate-like 1A                                  | -0.773898 | Inlier |
| siRNA-Temozolomide Run2-DMSO | NM_0010<br>18103 | GRINL1A | glutamate receptor, ionotropic, N-methyl D-aspartate-like 1A                                  | -0.123123 | Inlier |
| siRNA Disorazole DMSO Run3   | NM_0010<br>18103 | GRINL1A | glutamate receptor, ionotropic, N-methyl D-aspartate-like 1A                                  | -0.097932 | Inlier |
| siRNA Disorazole DMSO Run1   | NM_0010<br>18103 | GRINL1A | glutamate receptor, ionotropic, N-methyl D-aspartate-like 1A                                  | 0.097931  | Inlier |



Identification of Survival Genes in Human Glioblastoma Cells Using siRNA Screening  
 Nikhil G Thaker, Fang Zhang, Peter R. McDonald, Tong Ying Shun, Michael D Lewen, Ian F. Pollack, and John S. Lazo

Molecular Pharmacology

| siRNA Treatment              | Gene ID      | Gene Name | Gene Description                                             | Value     | Category |
|------------------------------|--------------|-----------|--------------------------------------------------------------|-----------|----------|
| siRNA-Temozolomide Run1-DMSO | NM_001018103 | GRINL1A   | glutamate receptor, ionotropic, N-methyl D-aspartate-like 1A | 0.575102  | Inlier   |
| siRNA-Vinblastine Run1-DMSO  | NM_001018103 | GRINL1A   | glutamate receptor, ionotropic, N-methyl D-aspartate-like 1A | 4.780657  | Outlier  |
| siRNA Disorazole DMSO Run2   | NM_001018103 | GRINL1A   | glutamate receptor, ionotropic, N-methyl D-aspartate-like 1A | 4.927367  | Outlier  |
| siRNA-Temozolomide Run3-DMSO | NM_002929    | GRK1      | G protein-coupled receptor kinase 1                          | -3.420247 | Inlier   |
| siRNA Disorazole DMSO Run1   | NM_002929    | GRK1      | G protein-coupled receptor kinase 1                          | -0.761841 | Inlier   |
| siRNA-Temozolomide Run2-DMSO | NM_002929    | GRK1      | G protein-coupled receptor kinase 1                          | -0.705667 | Inlier   |
| siRNA-Temozolomide Run1-DMSO | NM_002929    | GRK1      | G protein-coupled receptor kinase 1                          | -0.281752 | Inlier   |
| siRNA Disorazole DMSO Run3   | NM_002929    | GRK1      | G protein-coupled receptor kinase 1                          | 0.281751  | Inlier   |
| siRNA Disorazole DMSO Run2   | NM_002929    | GRK1      | G protein-coupled receptor kinase 1                          | 0.562832  | Inlier   |
| siRNA-Vinblastine Run2-DMSO  | NM_002929    | GRK1      | G protein-coupled receptor kinase 1                          | 0.643333  | Inlier   |

Identification of Survival Genes in Human Glioblastoma Cells Using siRNA Screening  
 Nikhil G Thaker, Fang Zhang, Peter R. McDonald, Tong Ying Shun, Michael D Lewen, Ian F. Pollack, and John S. Lazo

Molecular Pharmacology

| siRNA Treatment              | Gene ID      | Gene Name | Protein                             | Value     | Category |
|------------------------------|--------------|-----------|-------------------------------------|-----------|----------|
| siRNA-Vinblastine Run1-DMSO  | NM_002929    | GRK1      | G protein-coupled receptor kinase 1 | 1.110669  | Inlier   |
| siRNA-Temozolomide Run2-DMSO | NM_001004056 | GRK4      | G protein-coupled receptor kinase 4 | -0.888931 | Inlier   |
| siRNA-Temozolomide Run3-DMSO | NM_001004056 | GRK4      | G protein-coupled receptor kinase 4 | -0.460069 | Inlier   |
| siRNA-Temozolomide Run1-DMSO | NM_001004056 | GRK4      | G protein-coupled receptor kinase 4 | -0.279019 | Inlier   |
| siRNA Disorazole DMSO Run2   | NM_001004056 | GRK4      | G protein-coupled receptor kinase 4 | -0.192285 | Inlier   |
| siRNA Disorazole DMSO Run3   | NM_001004056 | GRK4      | G protein-coupled receptor kinase 4 | 0.192285  | Inlier   |
| siRNA Disorazole DMSO Run1   | NM_001004056 | GRK4      | G protein-coupled receptor kinase 4 | 2.574428  | Inlier   |
| siRNA-Vinblastine Run2-DMSO  | NM_001004056 | GRK4      | G protein-coupled receptor kinase 4 | 3.523822  | Outlier  |
| siRNA-Vinblastine Run1-DMSO  | NM_001004056 | GRK4      | G protein-coupled receptor kinase 4 | 3.795175  | Outlier  |
| siRNA-Temozolomide Run3-DMSO | NM_005308    | GRK5      | G protein-coupled receptor kinase 5 | -1.992816 | Inlier   |
| siRNA Disorazole DMSO Run3   | NM_005308    | GRK5      | G protein-coupled receptor kinase 5 | -0.779165 | Inlier   |
| siRNA-Temozolomide Run2-DMSO | NM_005308    | GRK5      | G protein-coupled receptor kinase 5 | -0.628598 | Inlier   |
| siRNA-Temozolomide Run1-DMSO | NM_005308    | GRK5      | G protein-coupled receptor kinase 5 | -0.312966 | Inlier   |

Identification of Survival Genes in Human Glioblastoma Cells Using siRNA Screening  
 Nikhil G Thaker, Fang Zhang, Peter R. McDonald, Tong Ying Shun, Michael D Lewen, Ian F. Pollack, and John S. Lazo

Molecular Pharmacology

|                              |               |      |                                     |           |        |
|------------------------------|---------------|------|-------------------------------------|-----------|--------|
| siRNA Disorazole DMSO Run1   | NM_0053<br>08 | GRK5 | G protein-coupled receptor kinase 5 | 0.312966  | Inlier |
| siRNA Disorazole DMSO Run2   | NM_0053<br>08 | GRK5 | G protein-coupled receptor kinase 5 | 0.380996  | Inlier |
| siRNA-Vinblastine Run1-DMSO  | NM_0053<br>08 | GRK5 | G protein-coupled receptor kinase 5 | 0.720402  | Inlier |
| siRNA-Vinblastine Run2-DMSO  | NM_0053<br>08 | GRK5 | G protein-coupled receptor kinase 5 | 2.360258  | Inlier |
| siRNA Disorazole DMSO Run2   | NM_0020<br>82 | GRK6 | G protein-coupled receptor kinase 6 | -2.397207 | Inlier |
| siRNA-Temozolomide Run3-DMSO | NM_0020<br>82 | GRK6 | G protein-coupled receptor kinase 6 | -0.339501 | Inlier |
| siRNA Disorazole DMSO Run3   | NM_0020<br>82 | GRK6 | G protein-coupled receptor kinase 6 | -0.184818 | Inlier |
| siRNA-Temozolomide Run1-DMSO | NM_0020<br>82 | GRK6 | G protein-coupled receptor kinase 6 | -0.017734 | Inlier |
| siRNA-Temozolomide Run2-DMSO | NM_0020<br>82 | GRK6 | G protein-coupled receptor kinase 6 | 0.017734  | Inlier |
| siRNA-Vinblastine Run1-DMSO  | NM_0020<br>82 | GRK6 | G protein-coupled receptor kinase 6 | 1.009499  | Inlier |
| siRNA-Vinblastine Run2-DMSO  | NM_0020<br>82 | GRK6 | G protein-coupled receptor kinase 6 | 1.011546  | Inlier |
| siRNA Disorazole DMSO Run1   | NM_0020<br>82 | GRK6 | G protein-coupled receptor kinase 6 | 1.127509  | Inlier |
| siRNA-Temozolomide Run3-DMSO | NM_1392<br>09 | GRK7 | G protein-coupled receptor kinase 7 | -1.558835 | Inlier |

Identification of Survival Genes in Human Glioblastoma Cells Using siRNA Screening  
 Nikhil G Thaker, Fang Zhang, Peter R. McDonald, Tong Ying Shun, Michael D Lewen, Ian F. Pollack, and John S. Lazo

Molecular Pharmacology

|                              |           |       |                                                                |           |        |
|------------------------------|-----------|-------|----------------------------------------------------------------|-----------|--------|
| siRNA-Temozolomide Run1-DMSO | NM_139209 | GRK7  | G protein-coupled receptor kinase 7                            | -0.728915 | Inlier |
| siRNA Disorazole DMSO Run3   | NM_139209 | GRK7  | G protein-coupled receptor kinase 7                            | -0.439012 | Inlier |
| siRNA Disorazole DMSO Run2   | NM_139209 | GRK7  | G protein-coupled receptor kinase 7                            | -0.160155 | Inlier |
| siRNA-Temozolomide Run2-DMSO | NM_139209 | GRK7  | G protein-coupled receptor kinase 7                            | 0.160155  | Inlier |
| siRNA Disorazole DMSO Run1   | NM_139209 | GRK7  | G protein-coupled receptor kinase 7                            | 0.620085  | Inlier |
| siRNA-Vinblastine Run1-DMSO  | NM_139209 | GRK7  | G protein-coupled receptor kinase 7                            | 1.170161  | Inlier |
| siRNA-Vinblastine Run2-DMSO  | NM_139209 | GRK7  | G protein-coupled receptor kinase 7<br>glucocorticoid receptor | 1.792493  | Inlier |
| siRNA-Vinblastine Run2-DMSO  | NM_024342 | GRLF1 | DNA binding factor 1<br>glucocorticoid receptor                | -0.94603  | Inlier |
| siRNA Disorazole DMSO Run3   | NM_024342 | GRLF1 | DNA binding factor 1<br>glucocorticoid receptor                | -0.878548 | Inlier |
| siRNA Disorazole DMSO Run1   | NM_024342 | GRLF1 | DNA binding factor 1<br>glucocorticoid receptor                | -0.470452 | Inlier |
| siRNA-Temozolomide Run2-DMSO | NM_024342 | GRLF1 | DNA binding factor 1                                           | -0.159226 | Inlier |

Identification of Survival Genes in Human Glioblastoma Cells Using siRNA Screening  
 Nikhil G Thaker, Fang Zhang, Peter R. McDonald, Tong Ying Shun, Michael D Lewen, Ian F. Pollack, and John S. Lazo

Molecular Pharmacology

|                              |               |       |                                              |           |        |
|------------------------------|---------------|-------|----------------------------------------------|-----------|--------|
| siRNA-Temozolomide Run1-DMSO | NM_0243<br>42 | GRLF1 | glucocorticoid receptor DNA binding factor 1 | 0.159226  | Inlier |
| siRNA-Temozolomide Run3-DMSO | NM_0243<br>42 | GRLF1 | glucocorticoid receptor DNA binding factor 1 | 0.275157  | Inlier |
| siRNA-Vinblastine Run1-DMSO  | NM_0243<br>42 | GRLF1 | glucocorticoid receptor DNA binding factor 1 | 2.626603  | Inlier |
| siRNA Disorazole DMSO Run2   | NM_0243<br>42 | GRLF1 | glucocorticoid receptor DNA binding factor 1 | 3.361241  | Inlier |
| siRNA-Temozolomide Run3-DMSO | NM_0008<br>38 | GRM1  | glutamate receptor, metabotropic 1           | -1.763354 | Inlier |
| siRNA-Temozolomide Run2-DMSO | NM_0008<br>38 | GRM1  | glutamate receptor, metabotropic 1           | -0.708212 | Inlier |
| siRNA-Temozolomide Run1-DMSO | NM_0008<br>38 | GRM1  | glutamate receptor, metabotropic 1           | -0.564151 | Inlier |
| siRNA Disorazole DMSO Run1   | NM_0008<br>38 | GRM1  | glutamate receptor, metabotropic 1           | -0.092847 | Inlier |
| siRNA Disorazole DMSO Run2   | NM_0008<br>38 | GRM1  | glutamate receptor, metabotropic 1           | 0.092847  | Inlier |
| siRNA-Vinblastine Run1-DMSO  | NM_0008<br>38 | GRM1  | glutamate receptor, metabotropic 1           | 0.640788  | Inlier |
| siRNA-Vinblastine Run2-DMSO  | NM_0008<br>38 | GRM1  | glutamate receptor, metabotropic 1           | 0.811771  | Inlier |

Identification of Survival Genes in Human Glioblastoma Cells Using siRNA Screening  
 Nikhil G Thaker, Fang Zhang, Peter R. McDonald, Tong Ying Shun, Michael D Lewen, Ian F. Pollack, and John S. Lazo

Molecular Pharmacology

|                                  |               |      |                                              |           |        |
|----------------------------------|---------------|------|----------------------------------------------|-----------|--------|
| siRNA Disorazole DMSO Run3       | NM_0008<br>38 | GRM1 | glutamate<br>receptor,<br>metabotro<br>pic 1 | 0.94313   | Inlier |
| siRNA-Temozolomide Run3-<br>DMSO | NM_0008<br>39 | GRM2 | glutamate<br>receptor,<br>metabotro<br>pic 2 | -1.715515 | Inlier |
| siRNA-Temozolomide Run2-<br>DMSO | NM_0008<br>39 | GRM2 | glutamate<br>receptor,<br>metabotro<br>pic 2 | -0.753206 | Inlier |
| siRNA Disorazole DMSO Run1       | NM_0008<br>39 | GRM2 | glutamate<br>receptor,<br>metabotro<br>pic 2 | -0.559275 | Inlier |
| siRNA-Temozolomide Run1-<br>DMSO | NM_0008<br>39 | GRM2 | glutamate<br>receptor,<br>metabotro<br>pic 2 | -0.500196 | Inlier |
| siRNA-Vinblastine Run2-<br>DMSO  | NM_0008<br>39 | GRM2 | glutamate<br>receptor,<br>metabotro<br>pic 2 | 0.500195  | Inlier |
| siRNA-Vinblastine Run1-<br>DMSO  | NM_0008<br>39 | GRM2 | glutamate<br>receptor,<br>metabotro<br>pic 2 | 0.595794  | Inlier |
| siRNA Disorazole DMSO Run2       | NM_0008<br>39 | GRM2 | glutamate<br>receptor,<br>metabotro<br>pic 2 | 0.809072  | Inlier |
| siRNA Disorazole DMSO Run3       | NM_0008<br>39 | GRM2 | glutamate<br>receptor,<br>metabotro<br>pic 2 | 2.259777  | Inlier |
| siRNA-Temozolomide Run3-<br>DMSO | NM_0008<br>40 | GRM3 | glutamate<br>receptor,<br>metabotro<br>pic 3 | -1.837713 | Inlier |
| siRNA-Temozolomide Run2-<br>DMSO | NM_0008<br>40 | GRM3 | glutamate<br>receptor,<br>metabotro<br>pic 3 | -1.012112 | Inlier |
| siRNA-Temozolomide Run1-<br>DMSO | NM_0008<br>40 | GRM3 | glutamate<br>receptor,<br>metabotro<br>pic 3 | -0.784261 | Inlier |
| siRNA Disorazole DMSO Run2       | NM_0008<br>40 | GRM3 | glutamate<br>receptor,<br>metabotro<br>pic 3 | -0.052704 | Inlier |

Identification of Survival Genes in Human Glioblastoma Cells Using siRNA Screening  
 Nikhil G Thaker, Fang Zhang, Peter R. McDonald, Tong Ying Shun, Michael D Lewen, Ian F. Pollack, and John S. Lazo

Molecular Pharmacology

|                                  |               |      |                                              |           |        |
|----------------------------------|---------------|------|----------------------------------------------|-----------|--------|
| siRNA Disorazole DMSO Run1       | NM_0008<br>40 | GRM3 | glutamate<br>receptor,<br>metabotro<br>pic 3 | 0.052704  | Inlier |
| siRNA Disorazole DMSO Run3       | NM_0008<br>40 | GRM3 | glutamate<br>receptor,<br>metabotro<br>pic 3 | 0.607346  | Inlier |
| siRNA-Vinblastine Run1-<br>DMSO  | NM_0008<br>40 | GRM3 | glutamate<br>receptor,<br>metabotro<br>pic 3 | 0.641438  | Inlier |
| siRNA-Vinblastine Run2-<br>DMSO  | NM_0008<br>40 | GRM3 | glutamate<br>receptor,<br>metabotro<br>pic 3 | 0.707562  | Inlier |
| siRNA-Temozolomide Run3-<br>DMSO | NM_0008<br>41 | GRM4 | glutamate<br>receptor,<br>metabotro<br>pic 4 | -1.005578 | Inlier |
| siRNA Disorazole DMSO Run2       | NM_0008<br>41 | GRM4 | glutamate<br>receptor,<br>metabotro<br>pic 4 | -0.776466 | Inlier |
| siRNA-Temozolomide Run2-<br>DMSO | NM_0008<br>41 | GRM4 | glutamate<br>receptor,<br>metabotro<br>pic 4 | -0.513446 | Inlier |
| siRNA Disorazole DMSO Run3       | NM_0008<br>41 | GRM4 | glutamate<br>receptor,<br>metabotro<br>pic 4 | -0.1186   | Inlier |
| siRNA-Temozolomide Run1-<br>DMSO | NM_0008<br>41 | GRM4 | glutamate<br>receptor,<br>metabotro<br>pic 4 | 0.118601  | Inlier |
| siRNA Disorazole DMSO Run1       | NM_0008<br>41 | GRM4 | glutamate<br>receptor,<br>metabotro<br>pic 4 | 0.572534  | Inlier |
| siRNA-Vinblastine Run1-<br>DMSO  | NM_0008<br>41 | GRM4 | glutamate<br>receptor,<br>metabotro<br>pic 4 | 0.789526  | Inlier |
| siRNA-Vinblastine Run2-<br>DMSO  | NM_0008<br>41 | GRM4 | glutamate<br>receptor,<br>metabotro<br>pic 4 | 0.971896  | Inlier |
| siRNA-Temozolomide Run3-<br>DMSO | NM_0008<br>42 | GRM5 | glutamate<br>receptor,<br>metabotro<br>pic 5 | -1.49149  | Inlier |

Identification of Survival Genes in Human Glioblastoma Cells Using siRNA Screening  
 Nikhil G Thaker, Fang Zhang, Peter R. McDonald, Tong Ying Shun, Michael D Lewen, Ian F. Pollack, and John S. Lazo

Molecular Pharmacology

|                              |               |      |                                    |           |        |
|------------------------------|---------------|------|------------------------------------|-----------|--------|
| siRNA-Temozolomide Run1-DMSO | NM_0008<br>42 | GRM5 | glutamate receptor, metabotropic 5 | -0.483213 | Inlier |
| siRNA Disorazole DMSO Run2   | NM_0008<br>42 | GRM5 | glutamate receptor, metabotropic 5 | -0.322761 | Inlier |
| siRNA-Temozolomide Run2-DMSO | NM_0008<br>42 | GRM5 | glutamate receptor, metabotropic 5 | -0.188086 | Inlier |
| siRNA Disorazole DMSO Run1   | NM_0008<br>42 | GRM5 | glutamate receptor, metabotropic 5 | 0.188086  | Inlier |
| siRNA-Vinblastine Run2-DMSO  | NM_0008<br>42 | GRM5 | glutamate receptor, metabotropic 5 | 0.865787  | Inlier |
| siRNA-Vinblastine Run1-DMSO  | NM_0008<br>42 | GRM5 | glutamate receptor, metabotropic 5 | 0.955367  | Inlier |
| siRNA Disorazole DMSO Run3   | NM_0008<br>42 | GRM5 | glutamate receptor, metabotropic 5 | 0.9649    | Inlier |
| siRNA-Temozolomide Run3-DMSO | NM_0008<br>43 | GRM6 | glutamate receptor, metabotropic 6 | -1.08793  | Inlier |
| siRNA-Temozolomide Run2-DMSO | NM_0008<br>43 | GRM6 | glutamate receptor, metabotropic 6 | -0.809593 | Inlier |
| siRNA Disorazole DMSO Run2   | NM_0008<br>43 | GRM6 | glutamate receptor, metabotropic 6 | -0.512006 | Inlier |
| siRNA-Temozolomide Run1-DMSO | NM_0008<br>43 | GRM6 | glutamate receptor, metabotropic 6 | -0.31785  | Inlier |
| siRNA Disorazole DMSO Run1   | NM_0008<br>43 | GRM6 | glutamate receptor, metabotropic 6 | 0.31785   | Inlier |
| siRNA-Vinblastine Run1-DMSO  | NM_0008<br>43 | GRM6 | glutamate receptor, metabotropic 6 | 0.637825  | Inlier |



Identification of Survival Genes in Human Glioblastoma Cells Using siRNA Screening  
 Nikhil G Thaker, Fang Zhang, Peter R. McDonald, Tong Ying Shun, Michael D Lewen, Ian F. Pollack, and John S. Lazo

Molecular Pharmacology

|                                  |               |      |                                              |           |        |
|----------------------------------|---------------|------|----------------------------------------------|-----------|--------|
| siRNA Disorazole DMSO Run3       | NM_0008<br>43 | GRM6 | glutamate<br>receptor,<br>metabotro<br>pic 6 | 0.711175  | Inlier |
| siRNA-Vinblastine Run2-<br>DMSO  | NM_0008<br>43 | GRM6 | glutamate<br>receptor,<br>metabotro<br>pic 6 | 1.098305  | Inlier |
| siRNA-Temozolomide Run3-<br>DMSO | NM_1818<br>74 | GRM7 | glutamate<br>receptor,<br>metabotro<br>pic 7 | -1.571322 | Inlier |
| siRNA Disorazole DMSO Run2       | NM_1818<br>74 | GRM7 | glutamate<br>receptor,<br>metabotro<br>pic 7 | -1.060776 | Inlier |
| siRNA-Temozolomide Run2-<br>DMSO | NM_1818<br>74 | GRM7 | glutamate<br>receptor,<br>metabotro<br>pic 7 | -0.314061 | Inlier |
| siRNA-Temozolomide Run1-<br>DMSO | NM_1818<br>74 | GRM7 | glutamate<br>receptor,<br>metabotro<br>pic 7 | -0.207678 | Inlier |
| siRNA Disorazole DMSO Run3       | NM_1818<br>74 | GRM7 | glutamate<br>receptor,<br>metabotro<br>pic 7 | 0.207677  | Inlier |
| siRNA Disorazole DMSO Run1       | NM_1818<br>74 | GRM7 | glutamate<br>receptor,<br>metabotro<br>pic 7 | 0.621014  | Inlier |
| siRNA-Vinblastine Run1-<br>DMSO  | NM_1818<br>74 | GRM7 | glutamate<br>receptor,<br>metabotro<br>pic 7 | 0.727986  | Inlier |
| siRNA-Vinblastine Run2-<br>DMSO  | NM_1818<br>74 | GRM7 | glutamate<br>receptor,<br>metabotro<br>pic 7 | 1.196789  | Inlier |
| siRNA-Temozolomide Run3-<br>DMSO | NM_0008<br>45 | GRM8 | glutamate<br>receptor,<br>metabotro<br>pic 8 | -1.994275 | Inlier |
| siRNA-Temozolomide Run2-<br>DMSO | NM_0008<br>45 | GRM8 | glutamate<br>receptor,<br>metabotro<br>pic 8 | -0.761807 | Inlier |
| siRNA Disorazole DMSO Run1       | NM_0008<br>45 | GRM8 | glutamate<br>receptor,<br>metabotro<br>pic 8 | -0.587193 | Inlier |

Identification of Survival Genes in Human Glioblastoma Cells Using siRNA Screening  
 Nikhil G Thaker, Fang Zhang, Peter R. McDonald, Tong Ying Shun, Michael D Lewen, Ian F. Pollack, and John S. Lazo

Molecular Pharmacology

|                              |               |      |                                    |           |        |
|------------------------------|---------------|------|------------------------------------|-----------|--------|
| siRNA-Temozolomide Run1-DMSO | NM_0008<br>45 | GRM8 | glutamate receptor, metabotropic 8 | -0.478108 | Inlier |
| siRNA Disorazole DMSO Run2   | NM_0008<br>45 | GRM8 | glutamate receptor, metabotropic 8 | 0.47811   | Inlier |
| siRNA-Vinblastine Run2-DMSO  | NM_0008<br>45 | GRM8 | glutamate receptor, metabotropic 8 | 0.550857  | Inlier |
| siRNA-Vinblastine Run1-DMSO  | NM_0008<br>45 | GRM8 | glutamate receptor, metabotropic 8 | 1.499985  | Inlier |
| siRNA Disorazole DMSO Run3   | NM_0008<br>45 | GRM8 | glutamate receptor, metabotropic 8 | 2.760054  | Inlier |
| siRNA-Vinblastine Run2-DMSO  | NM_0020<br>87 | GRN  | granulin                           | -0.896613 | Inlier |
| siRNA-Temozolomide Run3-DMSO | NM_0020<br>87 | GRN  | granulin                           | -0.775408 | Inlier |
| siRNA Disorazole DMSO Run3   | NM_0020<br>87 | GRN  | granulin                           | -0.573592 | Inlier |
| siRNA-Temozolomide Run2-DMSO | NM_0020<br>87 | GRN  | granulin                           | -0.438852 | Inlier |
| siRNA Disorazole DMSO Run1   | NM_0020<br>87 | GRN  | granulin                           | 0.438852  | Inlier |
| siRNA-Temozolomide Run1-DMSO | NM_0020<br>87 | GRN  | granulin                           | 0.563083  | Inlier |
| siRNA-Vinblastine Run1-DMSO  | NM_0020<br>87 | GRN  | granulin                           | 1.265697  | Inlier |
| siRNA Disorazole DMSO Run2   | NM_0020<br>87 | GRN  | granulin                           | 1.917343  | Inlier |
| siRNA-Temozolomide Run2-DMSO | NM_0053<br>14 | GRPR | gastrin-releasing peptide receptor | -1.031692 | Inlier |
| siRNA-Temozolomide Run3-DMSO | NM_0053<br>14 | GRPR | gastrin-releasing peptide receptor | -0.775843 | Inlier |
| siRNA-Temozolomide Run1-DMSO | NM_0053<br>14 | GRPR | gastrin-releasing peptide receptor | -0.328015 | Inlier |
| siRNA-Vinblastine Run2-DMSO  | NM_0053<br>14 | GRPR | gastrin-releasing peptide receptor | -0.137249 | Inlier |

Identification of Survival Genes in Human Glioblastoma Cells Using siRNA Screening  
 Nikhil G Thaker, Fang Zhang, Peter R. McDonald, Tong Ying Shun, Michael D Lewen, Ian F. Pollack, and John S. Lazo

Molecular Pharmacology

|                              |               |       |                                    |           |        |
|------------------------------|---------------|-------|------------------------------------|-----------|--------|
| siRNA Disorazole DMSO Run1   | NM_0053<br>14 | GRPR  | gastrin-releasing peptide receptor | 0.137248  | Inlier |
| siRNA-Vinblastine Run1-DMSO  | NM_0053<br>14 | GRPR  | gastrin-releasing peptide receptor | 0.573157  | Inlier |
| siRNA Disorazole DMSO Run2   | NM_0053<br>14 | GRPR  | gastrin-releasing peptide receptor | 0.834326  | Inlier |
| siRNA Disorazole DMSO Run3   | NM_0053<br>14 | GRPR  | gastrin-releasing peptide receptor | 2.528537  | Inlier |
| siRNA Disorazole DMSO Run2   | NM_0319<br>65 | GSG2  | germ cell associated 2 (haspin)    | -0.802326 | Inlier |
| siRNA-Temozolomide Run3-DMSO | NM_0319<br>65 | GSG2  | germ cell associated 2 (haspin)    | -0.776169 | Inlier |
| siRNA Disorazole DMSO Run3   | NM_0319<br>65 | GSG2  | germ cell associated 2 (haspin)    | -0.031313 | Inlier |
| siRNA-Temozolomide Run2-DMSO | NM_0319<br>65 | GSG2  | germ cell associated 2 (haspin)    | -0.023513 | Inlier |
| siRNA-Temozolomide Run1-DMSO | NM_0319<br>65 | GSG2  | germ cell associated 2 (haspin)    | 0.023513  | Inlier |
| siRNA Disorazole DMSO Run1   | NM_0319<br>65 | GSG2  | germ cell associated 2 (haspin)    | 0.656608  | Inlier |
| siRNA-Vinblastine Run1-DMSO  | NM_0319<br>65 | GSG2  | germ cell associated 2 (haspin)    | 0.692392  | Inlier |
| siRNA-Vinblastine Run2-DMSO  | NM_0319<br>65 | GSG2  | germ cell associated 2 (haspin)    | 0.920965  | Inlier |
| siRNA-Temozolomide Run3-DMSO | NM_0198<br>84 | GSK3A | glycogen synthase kinase 3 alpha   | -0.986594 | Inlier |

Identification of Survival Genes in Human Glioblastoma Cells Using siRNA Screening  
 Nikhil G Thaker, Fang Zhang, Peter R. McDonald, Tong Ying Shun, Michael D Lewen, Ian F. Pollack, and John S. Lazo

Molecular Pharmacology

|                              |               |       |                                  |           |        |
|------------------------------|---------------|-------|----------------------------------|-----------|--------|
| siRNA-Temozolomide Run2-DMSO | NM_0198<br>84 | GSK3A | glycogen synthase kinase 3 alpha | -0.405043 | Inlier |
| siRNA Disorazole DMSO Run1   | NM_0198<br>84 | GSK3A | glycogen synthase kinase 3 alpha | -0.159997 | Inlier |
| siRNA Disorazole DMSO Run3   | NM_0198<br>84 | GSK3A | glycogen synthase kinase 3 alpha | -0.046763 | Inlier |
| siRNA-Temozolomide Run1-DMSO | NM_0198<br>84 | GSK3A | glycogen synthase kinase 3 alpha | 0.046763  | Inlier |
| siRNA Disorazole DMSO Run2   | NM_0198<br>84 | GSK3A | glycogen synthase kinase 3 alpha | 0.943957  | Inlier |
| siRNA-Vinblastine Run2-DMSO  | NM_0198<br>84 | GSK3A | glycogen synthase kinase 3 alpha | 1.360954  | Inlier |
| siRNA-Vinblastine Run1-DMSO  | NM_0198<br>84 | GSK3A | glycogen synthase kinase 3 alpha | 1.714399  | Inlier |
| siRNA Disorazole DMSO Run2   | NM_0020<br>93 | GSK3B | glycogen synthase kinase 3 beta  | -2.459193 | Inlier |
| siRNA-Temozolomide Run3-DMSO | NM_0020<br>93 | GSK3B | glycogen synthase kinase 3 beta  | -2.318178 | Inlier |
| siRNA Disorazole DMSO Run3   | NM_0020<br>93 | GSK3B | glycogen synthase kinase 3 beta  | -0.880955 | Inlier |
| siRNA-Temozolomide Run1-DMSO | NM_0020<br>93 | GSK3B | glycogen synthase kinase 3 beta  | -0.322024 | Inlier |
| siRNA-Temozolomide Run2-DMSO | NM_0020<br>93 | GSK3B | glycogen synthase kinase 3 beta  | 0.322024  | Inlier |
| siRNA-Vinblastine Run1-DMSO  | NM_0020<br>93 | GSK3B | glycogen synthase kinase 3 beta  | 0.416593  | Inlier |

Identification of Survival Genes in Human Glioblastoma Cells Using siRNA Screening  
 Nikhil G Thaker, Fang Zhang, Peter R. McDonald, Tong Ying Shun, Michael D Lewen, Ian F. Pollack, and John S. Lazo

Molecular Pharmacology

|                                  |               |       |                                          |           |        |
|----------------------------------|---------------|-------|------------------------------------------|-----------|--------|
| siRNA Disorazole DMSO Run1       | NM_0020<br>93 | GSK3B | glycogen<br>synthase<br>kinase 3<br>beta | 0.468045  | Inlier |
| siRNA-Vinblastine Run2-<br>DMSO  | NM_0020<br>93 | GSK3B | glycogen<br>synthase<br>kinase 3<br>beta | 2.557368  | Inlier |
| siRNA Disorazole DMSO Run3       | NM_0006<br>37 | GSR   | glutathione<br>reductase                 | -1.429031 | Inlier |
| siRNA-Temozolomide Run3-<br>DMSO | NM_0006<br>37 | GSR   | glutathione<br>reductase                 | -1.382599 | Inlier |
| siRNA Disorazole DMSO Run1       | NM_0006<br>37 | GSR   | glutathione<br>reductase                 | -0.676475 | Inlier |
| siRNA-Vinblastine Run1-<br>DMSO  | NM_0006<br>37 | GSR   | glutathione<br>reductase                 | -0.356262 | Inlier |
| siRNA Disorazole DMSO Run2       | NM_0006<br>37 | GSR   | glutathione<br>reductase                 | 0.356262  | Inlier |
| siRNA-Vinblastine Run2-<br>DMSO  | NM_0006<br>37 | GSR   | glutathione<br>reductase                 | 0.507549  | Inlier |
| siRNA-Temozolomide Run2-<br>DMSO | NM_0006<br>37 | GSR   | glutathione<br>reductase                 | 0.672525  | Inlier |
| siRNA-Temozolomide Run1-<br>DMSO | NM_0006<br>37 | GSR   | glutathione<br>reductase                 | 0.69125   | Inlier |
| siRNA Disorazole DMSO Run1       | NM_0001<br>78 | GSS   | glutathione<br>synthetase                | -1.632541 | Inlier |
| siRNA-Temozolomide Run1-<br>DMSO | NM_0001<br>78 | GSS   | glutathione<br>synthetase                | -0.787596 | Inlier |
| siRNA-Temozolomide Run3-<br>DMSO | NM_0001<br>78 | GSS   | glutathione<br>synthetase                | -0.561404 | Inlier |
| siRNA Disorazole DMSO Run3       | NM_0001<br>78 | GSS   | glutathione<br>synthetase                | -0.139332 | Inlier |
| siRNA-Temozolomide Run2-<br>DMSO | NM_0001<br>78 | GSS   | glutathione<br>synthetase                | 0.139332  | Inlier |

Identification of Survival Genes in Human Glioblastoma Cells Using siRNA Screening  
 Nikhil G Thaker, Fang Zhang, Peter R. McDonald, Tong Ying Shun, Michael D Lewen, Ian F. Pollack, and John S. Lazo  
 Molecular Pharmacology

|                              |               |       |                              |           |        |
|------------------------------|---------------|-------|------------------------------|-----------|--------|
| siRNA-Vinblastine Run1-DMSO  | NM_0001<br>78 | GSS   | glutathione synthetase       | 0.548036  | Inlier |
| siRNA Disorazole DMSO Run2   | NM_0001<br>78 | GSS   | glutathione synthetase       | 0.849204  | Inlier |
| siRNA-Vinblastine Run2-DMSO  | NM_0001<br>78 | GSS   | glutathione synthetase       | 1.173311  | Inlier |
| siRNA-Temozolomide Run2-DMSO | NM_1457<br>40 | GSTA1 | glutathione S-transferase A1 | -1.258128 | Inlier |
| siRNA-Temozolomide Run3-DMSO | NM_1457<br>40 | GSTA1 | glutathione S-transferase A1 | -1.12398  | Inlier |
| siRNA Disorazole DMSO Run3   | NM_1457<br>40 | GSTA1 | glutathione S-transferase A1 | -0.180856 | Inlier |
| siRNA-Temozolomide Run1-DMSO | NM_1457<br>40 | GSTA1 | glutathione S-transferase A1 | -0.009636 | Inlier |
| siRNA Disorazole DMSO Run1   | NM_1457<br>40 | GSTA1 | glutathione S-transferase A1 | 0.009636  | Inlier |
| siRNA-Vinblastine Run2-DMSO  | NM_1457<br>40 | GSTA1 | glutathione S-transferase A1 | 0.22502   | Inlier |
| siRNA Disorazole DMSO Run2   | NM_1457<br>40 | GSTA1 | glutathione S-transferase A1 | 1.553883  | Inlier |
| siRNA-Vinblastine Run1-DMSO  | NM_1457<br>40 | GSTA1 | glutathione S-transferase A1 | 1.862936  | Inlier |
| siRNA-Temozolomide Run3-DMSO | NM_0008<br>46 | GSTA2 | glutathione S-transferase A2 | -1.671579 | Inlier |
| siRNA Disorazole DMSO Run1   | NM_0008<br>46 | GSTA2 | glutathione S-transferase A2 | -0.507051 | Inlier |

Identification of Survival Genes in Human Glioblastoma Cells Using siRNA Screening  
 Nikhil G Thaker, Fang Zhang, Peter R. McDonald, Tong Ying Shun, Michael D Lewen, Ian F. Pollack, and John S. Lazo

Molecular Pharmacology

| siRNA                        | Gene  | Accession | Run | Condition | Log2FC    | Outlier |
|------------------------------|-------|-----------|-----|-----------|-----------|---------|
| siRNA Disorazole DMSO Run3   | GSTA2 | NM_000846 | 46  | DMSO      | -0.429652 | Inlier  |
| siRNA-Vinblastine Run2-DMSO  | GSTA2 | NM_000846 | 46  | DMSO      | -0.13549  | Inlier  |
| siRNA-Temozolomide Run1-DMSO | GSTA2 | NM_000846 | 46  | DMSO      | 0.13549   | Inlier  |
| siRNA-Temozolomide Run2-DMSO | GSTA2 | NM_000846 | 46  | DMSO      | 0.841949  | Inlier  |
| siRNA-Vinblastine Run1-DMSO  | GSTA2 | NM_000846 | 46  | DMSO      | 3.052933  | Inlier  |
| siRNA Disorazole DMSO Run2   | GSTA2 | NM_000846 | 46  | DMSO      | 3.417035  | Inlier  |
| siRNA-Temozolomide Run2-DMSO | GSTA3 | NM_000847 | 47  | DMSO      | -0.816938 | Inlier  |
| siRNA Disorazole DMSO Run1   | GSTA3 | NM_000847 | 47  | DMSO      | -0.768796 | Inlier  |
| siRNA-Temozolomide Run3-DMSO | GSTA3 | NM_000847 | 47  | DMSO      | -0.580204 | Inlier  |
| siRNA-Temozolomide Run1-DMSO | GSTA3 | NM_000847 | 47  | DMSO      | -0.38921  | Inlier  |
| siRNA Disorazole DMSO Run3   | GSTA3 | NM_000847 | 47  | DMSO      | 0.38921   | Inlier  |
| siRNA-Vinblastine Run2-DMSO  | GSTA3 | NM_000847 | 47  | DMSO      | 0.445713  | Inlier  |
| siRNA Disorazole DMSO Run2   | GSTA3 | NM_000847 | 47  | DMSO      | 3.341103  | Inlier  |

Identification of Survival Genes in Human Glioblastoma Cells Using siRNA Screening  
 Nikhil G Thaker, Fang Zhang, Peter R. McDonald, Tong Ying Shun, Michael D Lewen, Ian F. Pollack, and John S. Lazo

Molecular Pharmacology

| siRNA Treatment              | Gene ID   | Gene Name | Protein Name                 | Log2 Fold Change | Classification |
|------------------------------|-----------|-----------|------------------------------|------------------|----------------|
| siRNA-Vinblastine Run1-DMSO  | NM_000847 | GSTA3     | glutathione S-transferase A3 | 3.604254         | Outlier        |
| siRNA-Temozolomide Run3-DMSO | NM_001512 | GSTA4     | glutathione S-transferase A4 | -4.857361        | Outlier        |
| siRNA Disorazole DMSO Run3   | NM_001512 | GSTA4     | glutathione S-transferase A4 | -0.7294          | Inlier         |
| siRNA-Vinblastine Run2-DMSO  | NM_001512 | GSTA4     | glutathione S-transferase A4 | -0.134959        | Inlier         |
| siRNA-Temozolomide Run1-DMSO | NM_001512 | GSTA4     | glutathione S-transferase A4 | -0.085642        | Inlier         |
| siRNA-Temozolomide Run2-DMSO | NM_001512 | GSTA4     | glutathione S-transferase A4 | 0.085642         | Inlier         |
| siRNA Disorazole DMSO Run1   | NM_001512 | GSTA4     | glutathione S-transferase A4 | 0.6196           | Inlier         |
| siRNA Disorazole DMSO Run2   | NM_001512 | GSTA4     | glutathione S-transferase A4 | 3.292755         | Inlier         |
| siRNA-Vinblastine Run1-DMSO  | NM_001512 | GSTA4     | glutathione S-transferase A4 | 4.402587         | Outlier        |
| siRNA Disorazole DMSO Run1   | NM_153699 | GSTA5     | glutathione S-transferase A5 | -0.694757        | Inlier         |
| siRNA-Temozolomide Run3-DMSO | NM_153699 | GSTA5     | glutathione S-transferase A5 | -0.654243        | Inlier         |
| siRNA-Temozolomide Run1-DMSO | NM_153699 | GSTA5     | glutathione S-transferase A5 | -0.405554        | Inlier         |
| siRNA-Vinblastine Run2-DMSO  | NM_153699 | GSTA5     | glutathione S-transferase A5 | -0.203945        | Inlier         |



Identification of Survival Genes in Human Glioblastoma Cells Using siRNA Screening  
 Nikhil G Thaker, Fang Zhang, Peter R. McDonald, Tong Ying Shun, Michael D Lewen, Ian F. Pollack, and John S. Lazo

Molecular Pharmacology

|                                  |               |       |                                              |           |         |
|----------------------------------|---------------|-------|----------------------------------------------|-----------|---------|
| siRNA Disorazole DMSO Run3       | NM_1536<br>99 | GSTA5 | glutathione<br>S-<br>transferas<br>e A5      | 0.203945  | Inlier  |
| siRNA-Temozolomide Run2-<br>DMSO | NM_1536<br>99 | GSTA5 | glutathione<br>S-<br>transferas<br>e A5      | 0.990195  | Inlier  |
| siRNA-Vinblastine Run1-<br>DMSO  | NM_1536<br>99 | GSTA5 | glutathione<br>S-<br>transferas<br>e A5      | 4.567202  | Outlier |
| siRNA Disorazole DMSO Run2       | NM_1536<br>99 | GSTA5 | glutathione<br>S-<br>transferas<br>e A5      | 4.773218  | Outlier |
| siRNA Disorazole DMSO Run1       | NM_0159<br>17 | GSTK1 | glutathione<br>S-<br>transferas<br>e kappa 1 | -1.190774 | Inlier  |
| siRNA-Temozolomide Run1-<br>DMSO | NM_0159<br>17 | GSTK1 | glutathione<br>S-<br>transferas<br>e kappa 1 | -0.741901 | Inlier  |
| siRNA-Vinblastine Run2-<br>DMSO  | NM_0159<br>17 | GSTK1 | glutathione<br>S-<br>transferas<br>e kappa 1 | -0.607099 | Inlier  |
| siRNA-Temozolomide Run3-<br>DMSO | NM_0159<br>17 | GSTK1 | glutathione<br>S-<br>transferas<br>e kappa 1 | -0.036295 | Inlier  |
| siRNA Disorazole DMSO Run3       | NM_0159<br>17 | GSTK1 | glutathione<br>S-<br>transferas<br>e kappa 1 | 0.036296  | Inlier  |
| siRNA-Temozolomide Run2-<br>DMSO | NM_0159<br>17 | GSTK1 | glutathione<br>S-<br>transferas<br>e kappa 1 | 0.420114  | Inlier  |
| siRNA-Vinblastine Run1-<br>DMSO  | NM_0159<br>17 | GSTK1 | glutathione<br>S-<br>transferas<br>e kappa 1 | 1.374718  | Inlier  |
| siRNA Disorazole DMSO Run2       | NM_0159<br>17 | GSTK1 | glutathione<br>S-<br>transferas<br>e kappa 1 | 1.418013  | Inlier  |
| siRNA Disorazole DMSO Run1       | NM_1464<br>21 | GSTM1 | glutathione<br>S-<br>transferas<br>e M1      | -0.780767 | Inlier  |

Identification of Survival Genes in Human Glioblastoma Cells Using siRNA Screening  
 Nikhil G Thaker, Fang Zhang, Peter R. McDonald, Tong Ying Shun, Michael D Lewen, Ian F. Pollack, and John S. Lazo

Molecular Pharmacology

| siRNA Treatment              | Gene ID       | Gene Name | Log2 Fold Change | Classification |
|------------------------------|---------------|-----------|------------------|----------------|
| siRNA Disorazole DMSO Run3   | NM_1464<br>21 | GSTM1     | -0.655567        | Inlier         |
| siRNA-Vinblastine Run2-DMSO  | NM_1464<br>21 | GSTM1     | -0.375752        | Inlier         |
| siRNA-Temozolomide Run3-DMSO | NM_1464<br>21 | GSTM1     | -0.200698        | Inlier         |
| siRNA-Temozolomide Run2-DMSO | NM_1464<br>21 | GSTM1     | 0.200698         | Inlier         |
| siRNA-Temozolomide Run1-DMSO | NM_1464<br>21 | GSTM1     | 0.693433         | Inlier         |
| siRNA-Vinblastine Run1-DMSO  | NM_1464<br>21 | GSTM1     | 4.05402          | Outlier        |
| siRNA Disorazole DMSO Run2   | NM_1464<br>21 | GSTM1     | 4.340309         | Outlier        |
| siRNA Disorazole DMSO Run1   | NM_0008<br>48 | GSTM2     | -1.263072        | Inlier         |
| siRNA-Vinblastine Run2-DMSO  | NM_0008<br>48 | GSTM2     | -1.180597        | Inlier         |
| siRNA-Temozolomide Run1-DMSO | NM_0008<br>48 | GSTM2     | -0.796914        | Inlier         |
| siRNA-Temozolomide Run3-DMSO | NM_0008<br>48 | GSTM2     | -0.077772        | Inlier         |

Identification of Survival Genes in Human Glioblastoma Cells Using siRNA Screening

Nikhil G Thaker, Fang Zhang, Peter R. McDonald, Tong Ying Shun, Michael D Lewen, Ian F. Pollack, and John S. Lazo

Molecular Pharmacology

| siRNA Treatment              | Gene ID   | Gene Name | Source                                | Value     | Outlier Status |
|------------------------------|-----------|-----------|---------------------------------------|-----------|----------------|
| siRNA-Temozolomide Run2-DMSO | NM_000848 | GSTM2     | glutathione S-transferase M2 (muscle) | 0.077772  | Inlier         |
| siRNA Disorazole DMSO Run3   | NM_000848 | GSTM2     | glutathione S-transferase M2 (muscle) | 0.277125  | Inlier         |
| siRNA Disorazole DMSO Run2   | NM_000848 | GSTM2     | glutathione S-transferase M2 (muscle) | 0.552085  | Inlier         |
| siRNA-Vinblastine Run1-DMSO  | NM_000848 | GSTM2     | glutathione S-transferase M2 (muscle) | 0.883454  | Inlier         |
| siRNA-Temozolomide Run3-DMSO | NM_000849 | GSTM3     | glutathione S-transferase M3 (brain)  | -1.492422 | Inlier         |
| siRNA-Temozolomide Run1-DMSO | NM_000849 | GSTM3     | glutathione S-transferase M3 (brain)  | -0.850315 | Inlier         |
| siRNA-Temozolomide Run2-DMSO | NM_000849 | GSTM3     | glutathione S-transferase M3 (brain)  | -0.202371 | Inlier         |
| siRNA Disorazole DMSO Run1   | NM_000849 | GSTM3     | glutathione S-transferase M3 (brain)  | -0.107839 | Inlier         |
| siRNA Disorazole DMSO Run3   | NM_000849 | GSTM3     | glutathione S-transferase M3 (brain)  | 0.107839  | Inlier         |
| siRNA-Vinblastine Run2-DMSO  | NM_000849 | GSTM3     | glutathione S-transferase M3 (brain)  | 0.498685  | Inlier         |

Identification of Survival Genes in Human Glioblastoma Cells Using siRNA Screening  
 Nikhil G Thaker, Fang Zhang, Peter R. McDonald, Tong Ying Shun, Michael D Lewen, Ian F. Pollack, and John S. Lazo

Molecular Pharmacology

| siRNA Treatment              | Gene ID       | Gene Name | Expression Value | Classification |
|------------------------------|---------------|-----------|------------------|----------------|
| siRNA Disorazole DMSO Run2   | NM_0008<br>49 | GSTM3     | 1.252612         | Inlier         |
| siRNA-Vinblastine Run1-DMSO  | NM_0008<br>49 | GSTM3     | 1.568785         | Inlier         |
| siRNA-Temozolomide Run1-DMSO | NM_1471<br>49 | GSTM4     | -0.721898        | Inlier         |
| siRNA Disorazole DMSO Run3   | NM_1471<br>49 | GSTM4     | -0.627102        | Inlier         |
| siRNA-Temozolomide Run2-DMSO | NM_1471<br>49 | GSTM4     | -0.575643        | Inlier         |
| siRNA-Vinblastine Run2-DMSO  | NM_1471<br>49 | GSTM4     | -0.337575        | Inlier         |
| siRNA-Temozolomide Run3-DMSO | NM_1471<br>49 | GSTM4     | 0.337575         | Inlier         |
| siRNA Disorazole DMSO Run1   | NM_1471<br>49 | GSTM4     | 1.163327         | Inlier         |
| siRNA Disorazole DMSO Run2   | NM_1471<br>49 | GSTM4     | 7.504129         | Outlier        |
| siRNA-Vinblastine Run1-DMSO  | NM_1471<br>49 | GSTM4     | 8.403131         | Outlier        |
| siRNA Disorazole DMSO Run1   | NM_0008<br>51 | GSTM5     | -1.510247        | Inlier         |
| siRNA-Temozolomide Run3-DMSO | NM_0008<br>51 | GSTM5     | -1.14548         | Inlier         |

Identification of Survival Genes in Human Glioblastoma Cells Using siRNA Screening  
 Nikhil G Thaker, Fang Zhang, Peter R. McDonald, Tong Ying Shun, Michael D Lewen, Ian F. Pollack, and John S. Lazo

Molecular Pharmacology

|                                  |               |       |                                              |           |        |
|----------------------------------|---------------|-------|----------------------------------------------|-----------|--------|
| siRNA Disorazole DMSO Run3       | NM_0008<br>51 | GSTM5 | glutathione<br>S-<br>transferas<br>e M5      | -0.20352  | Inlier |
| siRNA-Temozolomide Run1-<br>DMSO | NM_0008<br>51 | GSTM5 | glutathione<br>S-<br>transferas<br>e M5      | -0.040457 | Inlier |
| siRNA-Vinblastine Run2-<br>DMSO  | NM_0008<br>51 | GSTM5 | glutathione<br>S-<br>transferas<br>e M5      | 0.040458  | Inlier |
| siRNA-Temozolomide Run2-<br>DMSO | NM_0008<br>51 | GSTM5 | glutathione<br>S-<br>transferas<br>e M5      | 0.128564  | Inlier |
| siRNA-Vinblastine Run1-<br>DMSO  | NM_0008<br>51 | GSTM5 | glutathione<br>S-<br>transferas<br>e M5      | 2.443737  | Inlier |
| siRNA Disorazole DMSO Run2       | NM_0008<br>51 | GSTM5 | glutathione<br>S-<br>transferas<br>e M5      | 2.816029  | Inlier |
| siRNA Disorazole DMSO Run1       | NM_0048<br>32 | GSTO1 | glutathione<br>S-<br>transferas<br>e omega 1 | -1.708662 | Inlier |
| siRNA Disorazole DMSO Run3       | NM_0048<br>32 | GSTO1 | glutathione<br>S-<br>transferas<br>e omega 1 | -0.861219 | Inlier |
| siRNA-Vinblastine Run2-<br>DMSO  | NM_0048<br>32 | GSTO1 | glutathione<br>S-<br>transferas<br>e omega 1 | -0.693933 | Inlier |
| siRNA-Temozolomide Run1-<br>DMSO | NM_0048<br>32 | GSTO1 | glutathione<br>S-<br>transferas<br>e omega 1 | -0.047503 | Inlier |
| siRNA-Temozolomide Run2-<br>DMSO | NM_0048<br>32 | GSTO1 | glutathione<br>S-<br>transferas<br>e omega 1 | 0.047503  | Inlier |

Identification of Survival Genes in Human Glioblastoma Cells Using siRNA Screening  
 Nikhil G Thaker, Fang Zhang, Peter R. McDonald, Tong Ying Shun, Michael D Lewen, Ian F. Pollack, and John S. Lazo  
 Molecular Pharmacology

|                              |               |       |                                              |           |        |
|------------------------------|---------------|-------|----------------------------------------------|-----------|--------|
| siRNA-Vinblastine Run1-DMSO  | NM_0048<br>32 | GSTO1 | glutathione<br>S-<br>transferas<br>e omega 1 | 0.138002  | Inlier |
| siRNA Disorazole DMSO Run2   | NM_0048<br>32 | GSTO1 | glutathione<br>S-<br>transferas<br>e omega 1 | 0.655067  | Inlier |
| siRNA-Temozolomide Run3-DMSO | NM_0048<br>32 | GSTO1 | glutathione<br>S-<br>transferas<br>e omega 1 | 1.046389  | Inlier |
| siRNA-Temozolomide Run2-DMSO | NM_1832<br>39 | GSTO2 | glutathione<br>S-<br>transferas<br>e omega 2 | -1.778639 | Inlier |
| siRNA Disorazole DMSO Run1   | NM_1832<br>39 | GSTO2 | glutathione<br>S-<br>transferas<br>e omega 2 | -0.872958 | Inlier |
| siRNA-Temozolomide Run1-DMSO | NM_1832<br>39 | GSTO2 | glutathione<br>S-<br>transferas<br>e omega 2 | -0.443963 | Inlier |
| siRNA-Vinblastine Run2-DMSO  | NM_1832<br>39 | GSTO2 | glutathione<br>S-<br>transferas<br>e omega 2 | -0.189858 | Inlier |
| siRNA Disorazole DMSO Run3   | NM_1832<br>39 | GSTO2 | glutathione<br>S-<br>transferas<br>e omega 2 | 0.189859  | Inlier |
| siRNA-Temozolomide Run3-DMSO | NM_1832<br>39 | GSTO2 | glutathione<br>S-<br>transferas<br>e omega 2 | 0.476042  | Inlier |
| siRNA-Vinblastine Run1-DMSO  | NM_1832<br>39 | GSTO2 | glutathione<br>S-<br>transferas<br>e omega 2 | 2.189415  | Inlier |

Identification of Survival Genes in Human Glioblastoma Cells Using siRNA Screening  
 Nikhil G Thaker, Fang Zhang, Peter R. McDonald, Tong Ying Shun, Michael D Lewen, Ian F. Pollack, and John S. Lazo  
 Molecular Pharmacology

|                              |         |    |       |                                   |           |         |
|------------------------------|---------|----|-------|-----------------------------------|-----------|---------|
| siRNA Disorazole DMSO Run2   | NM_1832 | 39 | GSTO2 | glutathione S-transferase omega 2 | 2.675414  | Inlier  |
| siRNA Disorazole DMSO Run1   | NM_0008 | 52 | GSTP1 | glutathione S-transferase pi      | -0.948759 | Inlier  |
| siRNA-Temozolomide Run2-DMSO | NM_0008 | 52 | GSTP1 | glutathione S-transferase pi      | -0.635882 | Inlier  |
| siRNA Disorazole DMSO Run3   | NM_0008 | 52 | GSTP1 | glutathione S-transferase pi      | -0.508104 | Inlier  |
| siRNA-Vinblastine Run2-DMSO  | NM_0008 | 52 | GSTP1 | glutathione S-transferase pi      | -0.253003 | Inlier  |
| siRNA-Temozolomide Run1-DMSO | NM_0008 | 52 | GSTP1 | glutathione S-transferase pi      | 0.253003  | Inlier  |
| siRNA-Temozolomide Run3-DMSO | NM_0008 | 52 | GSTP1 | glutathione S-transferase pi      | 0.713118  | Inlier  |
| siRNA-Vinblastine Run1-DMSO  | NM_0008 | 52 | GSTP1 | glutathione S-transferase pi      | 4.334286  | Outlier |
| siRNA Disorazole DMSO Run2   | NM_0008 | 52 | GSTP1 | glutathione S-transferase pi      | 4.75641   | Outlier |
| siRNA Disorazole DMSO Run1   | NM_0008 | 53 | GSTT1 | glutathione S-transferase theta 1 | -1.150538 | Inlier  |
| siRNA-Temozolomide Run1-DMSO | NM_0008 | 53 | GSTT1 | glutathione S-transferase theta 1 | -0.882057 | Inlier  |
| siRNA-Temozolomide Run3-DMSO | NM_0008 | 53 | GSTT1 | glutathione S-transferase theta 1 | -0.541018 | Inlier  |

Identification of Survival Genes in Human Glioblastoma Cells Using siRNA Screening  
 Nikhil G Thaker, Fang Zhang, Peter R. McDonald, Tong Ying Shun, Michael D Lewen, Ian F. Pollack, and John S. Lazo

Molecular Pharmacology

|                              |               |       |                                   |           |        |
|------------------------------|---------------|-------|-----------------------------------|-----------|--------|
| siRNA-Temozolomide Run2-DMSO | NM_0008<br>53 | GSTT1 | glutathione S-transferase theta 1 | -0.150136 | Inlier |
| siRNA Disorazole DMSO Run3   | NM_0008<br>53 | GSTT1 | glutathione S-transferase theta 1 | 0.150136  | Inlier |
| siRNA-Vinblastine Run2-DMSO  | NM_0008<br>53 | GSTT1 | glutathione S-transferase theta 1 | 0.360773  | Inlier |
| siRNA-Vinblastine Run1-DMSO  | NM_0008<br>53 | GSTT1 | glutathione S-transferase theta 1 | 0.807982  | Inlier |
| siRNA Disorazole DMSO Run2   | NM_0008<br>53 | GSTT1 | glutathione S-transferase theta 1 | 1.292143  | Inlier |
| siRNA Disorazole DMSO Run1   | NM_0008<br>54 | GSTT2 | glutathione S-transferase theta 2 | -1.382354 | Inlier |
| siRNA-Temozolomide Run1-DMSO | NM_0008<br>54 | GSTT2 | glutathione S-transferase theta 2 | -0.882491 | Inlier |
| siRNA-Temozolomide Run2-DMSO | NM_0008<br>54 | GSTT2 | glutathione S-transferase theta 2 | -0.466509 | Inlier |
| siRNA-Temozolomide Run3-DMSO | NM_0008<br>54 | GSTT2 | glutathione S-transferase theta 2 | -0.360698 | Inlier |
| siRNA-Vinblastine Run2-DMSO  | NM_0008<br>54 | GSTT2 | glutathione S-transferase theta 2 | 0.360699  | Inlier |
| siRNA Disorazole DMSO Run3   | NM_0008<br>54 | GSTT2 | glutathione S-transferase theta 2 | 0.439379  | Inlier |
| siRNA-Vinblastine Run1-DMSO  | NM_0008<br>54 | GSTT2 | glutathione S-transferase theta 2 | 1.315416  | Inlier |
| siRNA Disorazole DMSO Run2   | NM_0008<br>54 | GSTT2 | glutathione S-transferase theta 2 | 1.87311   | Inlier |



Identification of Survival Genes in Human Glioblastoma Cells Using siRNA Screening  
 Nikhil G Thaker, Fang Zhang, Peter R. McDonald, Tong Ying Shun, Michael D Lewen, Ian F. Pollack, and John S. Lazo  
 Molecular Pharmacology

|                              |               |       |                                                          |                   |
|------------------------------|---------------|-------|----------------------------------------------------------|-------------------|
| siRNA-Temozolomide Run3-DMSO | NM_1458<br>70 | GSTZ1 | glutathione transferase zeta 1 (maleylacetate isomerase) | -3.819593 Outlier |
| siRNA Disorazole DMSO Run3   | NM_1458<br>70 | GSTZ1 | glutathione transferase zeta 1 (maleylacetate isomerase) | -1.042414 Inlier  |
| siRNA-Temozolomide Run2-DMSO | NM_1458<br>70 | GSTZ1 | glutathione transferase zeta 1 (maleylacetate isomerase) | -0.066116 Inlier  |
| siRNA-Vinblastine Run2-DMSO  | NM_1458<br>70 | GSTZ1 | glutathione transferase zeta 1 (maleylacetate isomerase) | -0.003452 Inlier  |
| siRNA-Temozolomide Run1-DMSO | NM_1458<br>70 | GSTZ1 | glutathione transferase zeta 1 (maleylacetate isomerase) | 0.003453 Inlier   |

Identification of Survival Genes in Human Glioblastoma Cells Using siRNA Screening

Nikhil G Thaker, Fang Zhang, Peter R. McDonald, Tong Ying Shun, Michael D Lewen, Ian F. Pollack, and John S. Lazo

Molecular Pharmacology

|                                  |               |        |                                                                                    |           |        |
|----------------------------------|---------------|--------|------------------------------------------------------------------------------------|-----------|--------|
| siRNA Disorazole DMSO Run1       | NM_1458<br>70 | GSTZ1  | glutathione<br>transferas<br>e zeta 1<br>(maleylace<br>toacetate<br>isomerase<br>) | 0.306586  | Inlier |
| siRNA-Vinblastine Run1-<br>DMSO  | NM_1458<br>70 | GSTZ1  | glutathione<br>transferas<br>e zeta 1<br>(maleylace<br>toacetate<br>isomerase<br>) | 1.277599  | Inlier |
| siRNA Disorazole DMSO Run2       | NM_1458<br>70 | GSTZ1  | glutathione<br>transferas<br>e zeta 1<br>(maleylace<br>toacetate<br>isomerase<br>) | 2.548388  | Inlier |
| siRNA-Vinblastine Run2-<br>DMSO  | NM_0004<br>09 | GUCA1A | guanylate<br>cyclase<br>activator<br>1A (retina)                                   | -2.043149 | Inlier |
| siRNA-Temozolomide Run2-<br>DMSO | NM_0004<br>09 | GUCA1A | guanylate<br>cyclase<br>activator<br>1A (retina)                                   | -0.798811 | Inlier |
| siRNA Disorazole DMSO Run3       | NM_0004<br>09 | GUCA1A | guanylate<br>cyclase<br>activator<br>1A (retina)                                   | -0.501846 | Inlier |
| siRNA-Temozolomide Run3-<br>DMSO | NM_0004<br>09 | GUCA1A | guanylate<br>cyclase<br>activator<br>1A (retina)                                   | -0.436938 | Inlier |
| siRNA-Temozolomide Run1-<br>DMSO | NM_0004<br>09 | GUCA1A | guanylate<br>cyclase<br>activator<br>1A (retina)                                   | 0.436938  | Inlier |

Identification of Survival Genes in Human Glioblastoma Cells Using siRNA Screening  
 Nikhil G Thaker, Fang Zhang, Peter R. McDonald, Tong Ying Shun, Michael D Lewen, Ian F. Pollack, and John S. Lazo  
 Molecular Pharmacology

|                                  |               |        |                                                  |           |         |
|----------------------------------|---------------|--------|--------------------------------------------------|-----------|---------|
| siRNA Disorazole DMSO Run1       | NM_0004<br>09 | GUCA1A | guanylate<br>cyclase<br>activator<br>1A (retina) | 0.550189  | Inlier  |
| siRNA Disorazole DMSO Run2       | NM_0004<br>09 | GUCA1A | guanylate<br>cyclase<br>activator<br>1A (retina) | 3.017549  | Inlier  |
| siRNA-Vinblastine Run1-<br>DMSO  | NM_0004<br>09 | GUCA1A | guanylate<br>cyclase<br>activator<br>1A (retina) | 3.802841  | Outlier |
| siRNA-Temozolomide Run2-<br>DMSO | NM_0020<br>98 | GUCA1B | guanylate<br>cyclase<br>activator<br>1B (retina) | -1.300493 | Inlier  |
| siRNA-Temozolomide Run1-<br>DMSO | NM_0020<br>98 | GUCA1B | guanylate<br>cyclase<br>activator<br>1B (retina) | -0.882585 | Inlier  |
| siRNA-Vinblastine Run2-<br>DMSO  | NM_0020<br>98 | GUCA1B | guanylate<br>cyclase<br>activator<br>1B (retina) | -0.686233 | Inlier  |
| siRNA Disorazole DMSO Run3       | NM_0020<br>98 | GUCA1B | guanylate<br>cyclase<br>activator<br>1B (retina) | -0.3019   | Inlier  |
| siRNA-Temozolomide Run3-<br>DMSO | NM_0020<br>98 | GUCA1B | guanylate<br>cyclase<br>activator<br>1B (retina) | 0.3019    | Inlier  |
| siRNA Disorazole DMSO Run1       | NM_0020<br>98 | GUCA1B | guanylate<br>cyclase<br>activator<br>1B (retina) | 0.560849  | Inlier  |
| siRNA Disorazole DMSO Run2       | NM_0020<br>98 | GUCA1B | guanylate<br>cyclase<br>activator<br>1B (retina) | 0.662767  | Inlier  |

Identification of Survival Genes in Human Glioblastoma Cells Using siRNA Screening  
 Nikhil G Thaker, Fang Zhang, Peter R. McDonald, Tong Ying Shun, Michael D Lewen, Ian F. Pollack, and John S. Lazo  
 Molecular Pharmacology

|                              |               |        |                                           |           |        |
|------------------------------|---------------|--------|-------------------------------------------|-----------|--------|
| siRNA-Vinblastine Run1-DMSO  | NM_0020<br>98 | GUCA1B | guanylate cyclase activator 1B (retina)   | 0.864607  | Inlier |
| siRNA-Temozolomide Run3-DMSO | NM_0054<br>59 | GUCA1C | guanylate cyclase activator 1C            | -1.217408 | Inlier |
| siRNA-Temozolomide Run2-DMSO | NM_0054<br>59 | GUCA1C | guanylate cyclase activator 1C            | -1.052787 | Inlier |
| siRNA-Temozolomide Run1-DMSO | NM_0054<br>59 | GUCA1C | guanylate cyclase activator 1C            | -0.131728 | Inlier |
| siRNA Disorazole DMSO Run3   | NM_0054<br>59 | GUCA1C | guanylate cyclase activator 1C            | -0.043976 | Inlier |
| siRNA-Vinblastine Run2-DMSO  | NM_0054<br>59 | GUCA1C | guanylate cyclase activator 1C            | 0.043976  | Inlier |
| siRNA Disorazole DMSO Run1   | NM_0054<br>59 | GUCA1C | guanylate cyclase activator 1C            | 0.296213  | Inlier |
| siRNA Disorazole DMSO Run2   | NM_0054<br>59 | GUCA1C | guanylate cyclase activator 1C            | 1.425854  | Inlier |
| siRNA-Vinblastine Run1-DMSO  | NM_0054<br>59 | GUCA1C | guanylate cyclase activator 1C            | 1.548316  | Inlier |
| siRNA-Temozolomide Run3-DMSO | NM_0335<br>53 | GUCA2A | guanylate cyclase activator 2A (guanylin) | -0.941666 | Inlier |
| siRNA-Vinblastine Run2-DMSO  | NM_0335<br>53 | GUCA2A | guanylate cyclase activator 2A (guanylin) | -0.407334 | Inlier |
| siRNA-Temozolomide Run2-DMSO | NM_0335<br>53 | GUCA2A | guanylate cyclase activator 2A (guanylin) | -0.325392 | Inlier |

Identification of Survival Genes in Human Glioblastoma Cells Using siRNA Screening  
 Nikhil G Thaker, Fang Zhang, Peter R. McDonald, Tong Ying Shun, Michael D Lewen, Ian F. Pollack, and John S. Lazo

Molecular Pharmacology

| siRNA                        | Gene    | Accession | Gene   | Protein                                   | Log2FC    | Outlier |
|------------------------------|---------|-----------|--------|-------------------------------------------|-----------|---------|
| siRNA Disorazole DMSO Run3   | NM_0335 | 53        | GUCA2A | guanylate cyclase activator 2A (guanylin) | -0.173154 | Inlier  |
| siRNA-Temozolomide Run1-DMSO | NM_0335 | 53        | GUCA2A | guanylate cyclase activator 2A (guanylin) | 0.173154  | Inlier  |
| siRNA Disorazole DMSO Run1   | NM_0335 | 53        | GUCA2A | guanylate cyclase activator 2A (guanylin) | 1.637609  | Inlier  |
| siRNA Disorazole DMSO Run2   | NM_0335 | 53        | GUCA2A | guanylate cyclase activator 2A (guanylin) | 2.26079   | Inlier  |
| siRNA-Vinblastine Run1-DMSO  | NM_0335 | 53        | GUCA2A | guanylate cyclase activator 2A (guanylin) | 2.63283   | Inlier  |
| siRNA-Temozolomide Run3-DMSO | NM_0071 | 02        | GUCA2B | (uroguanylin)                             | -0.811994 | Inlier  |
| siRNA-Temozolomide Run2-DMSO | NM_0071 | 02        | GUCA2B | (uroguanylin)                             | -0.794766 | Inlier  |
| siRNA Disorazole DMSO Run3   | NM_0071 | 02        | GUCA2B | (uroguanylin)                             | -0.225914 | Inlier  |
| siRNA-Vinblastine Run2-DMSO  | NM_0071 | 02        | GUCA2B | (uroguanylin)                             | -0.217044 | Inlier  |

Identification of Survival Genes in Human Glioblastoma Cells Using siRNA Screening

Nikhil G Thaker, Fang Zhang, Peter R. McDonald, Tong Ying Shun, Michael D Lewen, Ian F. Pollack, and John S. Lazo

Molecular Pharmacology

|                              |           |         |                                              |           |        |
|------------------------------|-----------|---------|----------------------------------------------|-----------|--------|
| siRNA-Temozolomide Run1-DMSO | NM_007102 | GUCA2B  | guanylate cyclase activator 2B (uroguanylin) | 0.217044  | Inlier |
| siRNA Disorazole DMSO Run1   | NM_007102 | GUCA2B  | guanylate cyclase activator 2B (uroguanylin) | 0.648985  | Inlier |
| siRNA-Vinblastine Run1-DMSO  | NM_007102 | GUCA2B  | guanylate cyclase activator 2B (uroguanylin) | 0.700015  | Inlier |
| siRNA Disorazole DMSO Run2   | NM_007102 | GUCA2B  | guanylate cyclase activator 2B (uroguanylin) | 0.844056  | Inlier |
| siRNA-Vinblastine Run2-DMSO  | NM_000855 | GUCY1A2 | guanylate cyclase 1, soluble, alpha 2        | -0.890652 | Inlier |
| siRNA-Temozolomide Run3-DMSO | NM_000855 | GUCY1A2 | guanylate cyclase 1, soluble, alpha 2        | -0.698506 | Inlier |
| siRNA Disorazole DMSO Run3   | NM_000855 | GUCY1A2 | guanylate cyclase 1, soluble, alpha 2        | -0.541136 | Inlier |
| siRNA-Temozolomide Run2-DMSO | NM_000855 | GUCY1A2 | guanylate cyclase 1, soluble, alpha 2        | -0.228207 | Inlier |
| siRNA-Temozolomide Run1-DMSO | NM_000855 | GUCY1A2 | guanylate cyclase 1, soluble, alpha 2        | 0.228207  | Inlier |

Identification of Survival Genes in Human Glioblastoma Cells Using siRNA Screening  
 Nikhil G Thaker, Fang Zhang, Peter R. McDonald, Tong Ying Shun, Michael D Lewen, Ian F. Pollack, and John S. Lazo  
 Molecular Pharmacology

|                              |               |         |                                       |           |         |
|------------------------------|---------------|---------|---------------------------------------|-----------|---------|
| siRNA Disorazole DMSO Run1   | NM_0008<br>55 | GUCY1A2 | guanylate cyclase 1, soluble, alpha 2 | 0.650494  | Inlier  |
| siRNA Disorazole DMSO Run2   | NM_0008<br>55 | GUCY1A2 | guanylate cyclase 1, soluble, alpha 2 | 5.308463  | Outlier |
| siRNA-Vinblastine Run1-DMSO  | NM_0008<br>55 | GUCY1A2 | guanylate cyclase 1, soluble, alpha 2 | 5.398683  | Outlier |
| siRNA-Temozolomide Run3-DMSO | NM_0008<br>56 | GUCY1A3 | guanylate cyclase 1, soluble, alpha 3 | -0.844651 | Inlier  |
| siRNA Disorazole DMSO Run3   | NM_0008<br>56 | GUCY1A3 | guanylate cyclase 1, soluble, alpha 3 | -0.504349 | Inlier  |
| siRNA-Vinblastine Run2-DMSO  | NM_0008<br>56 | GUCY1A3 | guanylate cyclase 1, soluble, alpha 3 | -0.495567 | Inlier  |
| siRNA-Temozolomide Run1-DMSO | NM_0008<br>56 | GUCY1A3 | guanylate cyclase 1, soluble, alpha 3 | -0.139391 | Inlier  |
| siRNA-Temozolomide Run2-DMSO | NM_0008<br>56 | GUCY1A3 | guanylate cyclase 1, soluble, alpha 3 | 0.139391  | Inlier  |
| siRNA Disorazole DMSO Run1   | NM_0008<br>56 | GUCY1A3 | guanylate cyclase 1, soluble, alpha 3 | 1.622572  | Inlier  |
| siRNA-Vinblastine Run1-DMSO  | NM_0008<br>56 | GUCY1A3 | guanylate cyclase 1, soluble, alpha 3 | 2.850219  | Inlier  |

Identification of Survival Genes in Human Glioblastoma Cells Using siRNA Screening  
 Nikhil G Thaker, Fang Zhang, Peter R. McDonald, Tong Ying Shun, Michael D Lewen, Ian F. Pollack, and John S. Lazo  
 Molecular Pharmacology

|                              |               |         |                                       |           |        |
|------------------------------|---------------|---------|---------------------------------------|-----------|--------|
| siRNA Disorazole DMSO Run2   | NM_0008<br>56 | GUCY1A3 | guanylate cyclase 1, soluble, alpha 3 | 3.184819  | Inlier |
| siRNA Disorazole DMSO Run1   | NM_0041<br>29 | GUCY1B2 | guanylate cyclase 1, soluble, beta 2  | -1.223771 | Inlier |
| siRNA-Vinblastine Run2-DMSO  | NM_0041<br>29 | GUCY1B2 | guanylate cyclase 1, soluble, beta 2  | -0.937203 | Inlier |
| siRNA-Temozolomide Run3-DMSO | NM_0041<br>29 | GUCY1B2 | guanylate cyclase 1, soluble, beta 2  | -0.77596  | Inlier |
| siRNA-Temozolomide Run2-DMSO | NM_0041<br>29 | GUCY1B2 | guanylate cyclase 1, soluble, beta 2  | -0.223617 | Inlier |
| siRNA Disorazole DMSO Run3   | NM_0041<br>29 | GUCY1B2 | guanylate cyclase 1, soluble, beta 2  | 0.223617  | Inlier |
| siRNA Disorazole DMSO Run2   | NM_0041<br>29 | GUCY1B2 | guanylate cyclase 1, soluble, beta 2  | 0.298184  | Inlier |
| siRNA-Temozolomide Run1-DMSO | NM_0041<br>29 | GUCY1B2 | guanylate cyclase 1, soluble, beta 2  | 0.648373  | Inlier |
| siRNA-Vinblastine Run1-DMSO  | NM_0041<br>29 | GUCY1B2 | guanylate cyclase 1, soluble, beta 2  | 0.700627  | Inlier |
| siRNA-Temozolomide Run2-DMSO | NM_0008<br>57 | GUCY1B3 | guanylate cyclase 1, soluble, beta 3  | -1.027514 | Inlier |



Identification of Survival Genes in Human Glioblastoma Cells Using siRNA Screening  
 Nikhil G Thaker, Fang Zhang, Peter R. McDonald, Tong Ying Shun, Michael D Lewen, Ian F. Pollack, and John S. Lazo  
 Molecular Pharmacology

|                              |               |         |                                                         |           |        |
|------------------------------|---------------|---------|---------------------------------------------------------|-----------|--------|
| siRNA-Temozolomide Run3-DMSO | NM_0008<br>57 | GUCY1B3 | guanylate cyclase 1, soluble, beta 3                    | -0.648567 | Inlier |
| siRNA-Vinblastine Run2-DMSO  | NM_0008<br>57 | GUCY1B3 | guanylate cyclase 1, soluble, beta 3                    | -0.201204 | Inlier |
| siRNA Disorazole DMSO Run3   | NM_0008<br>57 | GUCY1B3 | guanylate cyclase 1, soluble, beta 3                    | -0.101774 | Inlier |
| siRNA Disorazole DMSO Run1   | NM_0008<br>57 | GUCY1B3 | guanylate cyclase 1, soluble, beta 3                    | 0.101774  | Inlier |
| siRNA-Vinblastine Run1-DMSO  | NM_0008<br>57 | GUCY1B3 | guanylate cyclase 1, soluble, beta 3                    | 0.700433  | Inlier |
| siRNA Disorazole DMSO Run2   | NM_0008<br>57 | GUCY1B3 | guanylate cyclase 1, soluble, beta 3                    | 1.199766  | Inlier |
| siRNA-Temozolomide Run1-DMSO | NM_0008<br>57 | GUCY1B3 | guanylate cyclase 1, soluble, beta 3                    | 1.646264  | Inlier |
| siRNA Disorazole DMSO Run2   | NM_0049<br>63 | GUCY2C  | guanylate cyclase 2C (heat stable enterotoxin receptor) | -0.879875 | Inlier |
| siRNA-Temozolomide Run3-DMSO | NM_0049<br>63 | GUCY2C  | guanylate cyclase 2C (heat stable enterotoxin receptor) | -0.723571 | Inlier |

Identification of Survival Genes in Human Glioblastoma Cells Using siRNA Screening  
 Nikhil G Thaker, Fang Zhang, Peter R. McDonald, Tong Ying Shun, Michael D Lewen, Ian F. Pollack, and John S. Lazo  
 Molecular Pharmacology

|                              |               |        |                                                         |           |        |
|------------------------------|---------------|--------|---------------------------------------------------------|-----------|--------|
| siRNA-Temozolomide Run2-DMSO | NM_0049<br>63 | GUCY2C | guanylate cyclase 2C (heat stable enterotoxin receptor) | -0.572526 | Inlier |
| siRNA Disorazole DMSO Run3   | NM_0049<br>63 | GUCY2C | guanylate cyclase 2C (heat stable enterotoxin receptor) | -0.444856 | Inlier |
| siRNA-Temozolomide Run1-DMSO | NM_0049<br>63 | GUCY2C | guanylate cyclase 2C (heat stable enterotoxin receptor) | 0.444856  | Inlier |
| siRNA Disorazole DMSO Run1   | NM_0049<br>63 | GUCY2C | guanylate cyclase 2C (heat stable enterotoxin receptor) | 0.625429  | Inlier |
| siRNA-Vinblastine Run1-DMSO  | NM_0049<br>63 | GUCY2C | guanylate cyclase 2C (heat stable enterotoxin receptor) | 1.145408  | Inlier |
| siRNA-Vinblastine Run2-DMSO  | NM_0049<br>63 | GUCY2C | guanylate cyclase 2C (heat stable enterotoxin receptor) | 1.179373  | Inlier |
| siRNA Disorazole DMSO Run2   | NM_0001<br>80 | GUCY2D | guanylate cyclase 2D, membrane (retina-specific)        | -2.759481 | Inlier |

Identification of Survival Genes in Human Glioblastoma Cells Using siRNA Screening  
 Nikhil G Thaker, Fang Zhang, Peter R. McDonald, Tong Ying Shun, Michael D Lewen, Ian F. Pollack, and John S. Lazo

Molecular Pharmacology

|                              |               |        |                                                  |           |        |
|------------------------------|---------------|--------|--------------------------------------------------|-----------|--------|
| siRNA Disorazole DMSO Run3   | NM_0001<br>80 | GUCY2D | guanylate cyclase 2D, membrane (retina-specific) | -1.398094 | Inlier |
| siRNA-Temozolomide Run1-DMSO | NM_0001<br>80 | GUCY2D | guanylate cyclase 2D, membrane (retina-specific) | -0.881346 | Inlier |
| siRNA-Temozolomide Run3-DMSO | NM_0001<br>80 | GUCY2D | guanylate cyclase 2D, membrane (retina-specific) | -0.345051 | Inlier |
| siRNA Disorazole DMSO Run1   | NM_0001<br>80 | GUCY2D | guanylate cyclase 2D, membrane (retina-specific) | 0.345052  | Inlier |
| siRNA-Vinblastine Run1-DMSO  | NM_0001<br>80 | GUCY2D | guanylate cyclase 2D, membrane (retina-specific) | 0.453644  | Inlier |
| siRNA-Temozolomide Run2-DMSO | NM_0001<br>80 | GUCY2D | guanylate cyclase 2D, membrane (retina-specific) | 0.520373  | Inlier |
| siRNA-Vinblastine Run2-DMSO  | NM_0001<br>80 | GUCY2D | guanylate cyclase 2D, membrane (retina-specific) | 0.828627  | Inlier |
| siRNA-Temozolomide Run3-DMSO | NM_0015<br>22 | GUCY2F | guanylate cyclase 2F, retinal                    | -1.052231 | Inlier |
| siRNA-Temozolomide Run2-DMSO | NM_0015<br>22 | GUCY2F | guanylate cyclase 2F, retinal                    | -0.600394 | Inlier |
| siRNA Disorazole DMSO Run2   | NM_0015<br>22 | GUCY2F | guanylate cyclase 2F, retinal                    | -0.277031 | Inlier |

Identification of Survival Genes in Human Glioblastoma Cells Using siRNA Screening

Nikhil G Thaker, Fang Zhang, Peter R. McDonald, Tong Ying Shun, Michael D Lewen, Ian F. Pollack, and John S.

Lazo

| siRNA Treatment                                            | Gene    | Accession | Gene   | Function                                                            | Value     | Outlier |
|------------------------------------------------------------|---------|-----------|--------|---------------------------------------------------------------------|-----------|---------|
| Molecular Pharmacology<br>siRNA-Temozolomide Run1-<br>DMSO | NM_0015 | 22        | GUCY2F | guanylate cyclase<br>2F, retinal                                    | -0.019185 | Inlier  |
| siRNA Disorazole DMSO Run3                                 | NM_0015 | 22        | GUCY2F | guanylate cyclase<br>2F, retinal                                    | 0.019186  | Inlier  |
| siRNA Disorazole DMSO Run1                                 | NM_0015 | 22        | GUCY2F | guanylate cyclase<br>2F, retinal                                    | 0.748606  | Inlier  |
| siRNA-Vinblastine Run2-<br>DMSO                            | NM_0015 | 22        | GUCY2F | guanylate cyclase<br>2F, retinal                                    | 0.799805  | Inlier  |
| siRNA-Vinblastine Run1-<br>DMSO                            | NM_0015 | 22        | GUCY2F | guanylate cyclase<br>2F, retinal                                    | 1.157213  | Inlier  |
| siRNA-Temozolomide Run3-<br>DMSO                           | NM_0008 | 58        | GUK1   | guanylate kinase 1                                                  | -0.761386 | Inlier  |
| siRNA-Temozolomide Run1-<br>DMSO                           | NM_0008 | 58        | GUK1   | guanylate kinase 1                                                  | -0.750936 | Inlier  |
| siRNA Disorazole DMSO Run2                                 | NM_0008 | 58        | GUK1   | guanylate kinase 1                                                  | -0.598064 | Inlier  |
| siRNA-Temozolomide Run2-<br>DMSO                           | NM_0008 | 58        | GUK1   | guanylate kinase 1                                                  | -0.402805 | Inlier  |
| siRNA Disorazole DMSO Run3                                 | NM_0008 | 58        | GUK1   | guanylate kinase 1                                                  | 0.402804  | Inlier  |
| siRNA Disorazole DMSO Run1                                 | NM_0008 | 58        | GUK1   | guanylate kinase 1                                                  | 0.478928  | Inlier  |
| siRNA-Vinblastine Run2-<br>DMSO                            | NM_0008 | 58        | GUK1   | guanylate kinase 1                                                  | 1.288295  | Inlier  |
| siRNA-Vinblastine Run1-<br>DMSO                            | NM_0008 | 58        | GUK1   | guanylate kinase 1                                                  | 2.125132  | Inlier  |
| siRNA-Temozolomide Run3-<br>DMSO                           | NM_0163 | 15        | GULP1  | GULP,<br>engulfmen<br>t adaptor<br>PTB<br>domain<br>containing<br>1 | -1.984896 | Inlier  |
| siRNA-Temozolomide Run2-<br>DMSO                           | NM_0163 | 15        | GULP1  | GULP,<br>engulfmen<br>t adaptor<br>PTB<br>domain<br>containing<br>1 | -1.330481 | Inlier  |
| siRNA-Temozolomide Run1-<br>DMSO                           | NM_0163 | 15        | GULP1  | GULP,<br>engulfmen<br>t adaptor<br>PTB<br>domain<br>containing<br>1 | -0.572978 | Inlier  |

Identification of Survival Genes in Human Glioblastoma Cells Using siRNA Screening  
 Nikhil G Thaker, Fang Zhang, Peter R. McDonald, Tong Ying Shun, Michael D Lewen, Ian F. Pollack, and John S. Lazo

Molecular Pharmacology

|                                  |               |       |                                                                     |           |        |
|----------------------------------|---------------|-------|---------------------------------------------------------------------|-----------|--------|
| siRNA Disorazole DMSO Run3       | NM_0163<br>15 | GULP1 | GULP,<br>engulfmen<br>t adaptor<br>PTB<br>domain<br>containing<br>1 | -0.176313 | Inlier |
| siRNA Disorazole DMSO Run1       | NM_0163<br>15 | GULP1 | GULP,<br>engulfmen<br>t adaptor<br>PTB<br>domain<br>containing<br>1 | 0.176313  | Inlier |
| siRNA-Vinblastine Run2-<br>DMSO  | NM_0163<br>15 | GULP1 | GULP,<br>engulfmen<br>t adaptor<br>PTB<br>domain<br>containing<br>1 | 0.3538    | Inlier |
| siRNA Disorazole DMSO Run2       | NM_0163<br>15 | GULP1 | GULP,<br>engulfmen<br>t adaptor<br>PTB<br>domain<br>containing<br>1 | 0.776022  | Inlier |
| siRNA-Vinblastine Run1-<br>DMSO  | NM_0163<br>15 | GULP1 | GULP,<br>engulfmen<br>t adaptor<br>PTB<br>domain<br>containing<br>1 | 1.404686  | Inlier |
| siRNA-Temozolomide Run2-<br>DMSO | NM_0001<br>81 | GUSB  | glucuronid<br>ase, beta                                             | -0.79013  | Inlier |
| siRNA-Temozolomide Run3-<br>DMSO | NM_0001<br>81 | GUSB  | glucuronid<br>ase, beta                                             | -0.55887  | Inlier |
| siRNA-Temozolomide Run1-<br>DMSO | NM_0001<br>81 | GUSB  | glucuronid<br>ase, beta                                             | -0.298912 | Inlier |
| siRNA Disorazole DMSO Run3       | NM_0001<br>81 | GUSB  | glucuronid<br>ase, beta                                             | -0.108681 | Inlier |
| siRNA-Vinblastine Run2-<br>DMSO  | NM_0001<br>81 | GUSB  | glucuronid<br>ase, beta                                             | 0.108681  | Inlier |
| siRNA Disorazole DMSO Run1       | NM_0001<br>81 | GUSB  | glucuronid<br>ase, beta                                             | 0.837214  | Inlier |
| siRNA-Vinblastine Run1-<br>DMSO  | NM_0001<br>81 | GUSB  | glucuronid<br>ase, beta                                             | 2.894703  | Inlier |
| siRNA Disorazole DMSO Run2       | NM_0001<br>81 | GUSB  | glucuronid<br>ase, beta                                             | 2.965525  | Inlier |

Identification of Survival Genes in Human Glioblastoma Cells Using siRNA Screening  
 Nikhil G Thaker, Fang Zhang, Peter R. McDonald, Tong Ying Shun, Michael D Lewen, Ian F. Pollack, and John S. Lazo

|                              |               |      |                                    |           |        |
|------------------------------|---------------|------|------------------------------------|-----------|--------|
| Molecular Pharmacology       | NM_0041       |      |                                    |           |        |
| siRNA Disorazole DMSO Run1   | 30            | GYG  | glycogenin                         | -2.214658 | Inlier |
| siRNA-Temozolomide Run1-DMSO | NM_0041<br>30 | GYG  | glycogenin                         | -1.067375 | Inlier |
| siRNA-Temozolomide Run2-DMSO | NM_0041<br>30 | GYG  | glycogenin                         | -0.827779 | Inlier |
| siRNA Disorazole DMSO Run3   | NM_0041<br>30 | GYG  | glycogenin                         | -0.070974 | Inlier |
| siRNA-Vinblastine Run2-DMSO  | NM_0041<br>30 | GYG  | glycogenin                         | 0.070974  | Inlier |
| siRNA Disorazole DMSO Run2   | NM_0041<br>30 | GYG  | glycogenin                         | 0.184986  | Inlier |
| siRNA-Temozolomide Run3-DMSO | NM_0041<br>30 | GYG  | glycogenin                         | 0.521221  | Inlier |
| siRNA-Vinblastine Run1-DMSO  | NM_0041<br>30 | GYG  | glycogenin                         | 2.732123  | Inlier |
| siRNA-Temozolomide Run2-DMSO | NM_0039<br>18 | GYG2 | glycogenin<br>2                    | -1.050265 | Inlier |
| siRNA-Vinblastine Run2-DMSO  | NM_0039<br>18 | GYG2 | glycogenin<br>2                    | -0.796693 | Inlier |
| siRNA Disorazole DMSO Run3   | NM_0039<br>18 | GYG2 | glycogenin<br>2                    | -0.613973 | Inlier |
| siRNA-Temozolomide Run3-DMSO | NM_0039<br>18 | GYG2 | glycogenin<br>2                    | -0.22727  | Inlier |
| siRNA-Temozolomide Run1-DMSO | NM_0039<br>18 | GYG2 | glycogenin<br>2                    | 0.22727   | Inlier |
| siRNA Disorazole DMSO Run1   | NM_0039<br>18 | GYG2 | glycogenin<br>2                    | 0.397131  | Inlier |
| siRNA Disorazole DMSO Run2   | NM_0039<br>18 | GYG2 | glycogenin<br>2                    | 0.735027  | Inlier |
| siRNA-Vinblastine Run1-DMSO  | NM_0039<br>18 | GYG2 | glycogenin<br>2                    | 2.737396  | Inlier |
| siRNA Disorazole DMSO Run3   | NM_0021<br>03 | GYS1 | glycogen<br>synthase 1<br>(muscle) | -1.503193 | Inlier |
| siRNA-Vinblastine Run2-DMSO  | NM_0021<br>03 | GYS1 | glycogen<br>synthase 1<br>(muscle) | -1.221473 | Inlier |
| siRNA-Temozolomide Run1-DMSO | NM_0021<br>03 | GYS1 | glycogen<br>synthase 1<br>(muscle) | -0.384051 | Inlier |
| siRNA-Temozolomide Run2-DMSO | NM_0021<br>03 | GYS1 | glycogen<br>synthase 1<br>(muscle) | -0.017382 | Inlier |
| siRNA Disorazole DMSO Run1   | NM_0021<br>03 | GYS1 | glycogen<br>synthase 1<br>(muscle) | 0.017382  | Inlier |

Identification of Survival Genes in Human Glioblastoma Cells Using siRNA Screening  
 Nikhil G Thaker, Fang Zhang, Peter R. McDonald, Tong Ying Shun, Michael D Lewen, Ian F. Pollack, and John S. Lazo

Molecular Pharmacology

|                              |           |      |                                                                              |                  |
|------------------------------|-----------|------|------------------------------------------------------------------------------|------------------|
| siRNA-Temozolomide Run3-DMSO | NM_002103 | GYS1 | glycogen synthase 1 (muscle)                                                 | 0.530912 Inlier  |
| siRNA-Vinblastine Run1-DMSO  | NM_002103 | GYS1 | glycogen synthase 1 (muscle)                                                 | 0.818088 Inlier  |
| siRNA Disorazole DMSO Run2   | NM_002103 | GYS1 | glycogen synthase 1 (muscle)                                                 | 1.101016 Inlier  |
| siRNA-Temozolomide Run2-DMSO | NM_021957 | GYS2 | glycogen synthase 2 (liver)                                                  | -1.368181 Inlier |
| siRNA Disorazole DMSO Run1   | NM_021957 | GYS2 | glycogen synthase 2 (liver)                                                  | -0.518089 Inlier |
| siRNA Disorazole DMSO Run3   | NM_021957 | GYS2 | glycogen synthase 2 (liver)                                                  | -0.46725 Inlier  |
| siRNA-Vinblastine Run2-DMSO  | NM_021957 | GYS2 | glycogen synthase 2 (liver)                                                  | -0.063392 Inlier |
| siRNA-Temozolomide Run3-DMSO | NM_021957 | GYS2 | glycogen synthase 2 (liver)                                                  | 0.063392 Inlier  |
| siRNA-Temozolomide Run1-DMSO | NM_021957 | GYS2 | glycogen synthase 2 (liver)                                                  | 0.830911 Inlier  |
| siRNA Disorazole DMSO Run2   | NM_021957 | GYS2 | glycogen synthase 2 (liver)                                                  | 1.476763 Inlier  |
| siRNA-Vinblastine Run1-DMSO  | NM_021957 | GYS2 | glycogen synthase 2 (liver)                                                  | 3.574825 Outlier |
| siRNA-Temozolomide Run3-DMSO | NM_006144 | GZMA | granzyme A (granzyme 1, cytotoxic T-lymphocyte-associated serine esterase 3) | -1.269802 Inlier |

Identification of Survival Genes in Human Glioblastoma Cells Using siRNA Screening  
 Nikhil G Thaker, Fang Zhang, Peter R. McDonald, Tong Ying Shun, Michael D Lewen, Ian F. Pollack, and John S. Lazo  
 Molecular Pharmacology

|                                  |               |      |                                                                                                               |           |        |
|----------------------------------|---------------|------|---------------------------------------------------------------------------------------------------------------|-----------|--------|
| siRNA Disorazole DMSO Run2       | NM_0061<br>44 | GZMA | granzyme<br>A<br>(granzyme<br>1,<br>cytotoxic T-<br>lymphocyt<br>e-<br>associated<br>serine<br>esterase<br>3) | -0.877128 | Inlier |
| siRNA-Temozolomide Run2-<br>DMSO | NM_0061<br>44 | GZMA | granzyme<br>A<br>(granzyme<br>1,<br>cytotoxic T-<br>lymphocyt<br>e-<br>associated<br>serine<br>esterase<br>3) | -0.33063  | Inlier |
| siRNA Disorazole DMSO Run1       | NM_0061<br>44 | GZMA | granzyme<br>A<br>(granzyme<br>1,<br>cytotoxic T-<br>lymphocyt<br>e-<br>associated<br>serine<br>esterase<br>3) | -0.042105 | Inlier |
| siRNA-Temozolomide Run1-<br>DMSO | NM_0061<br>44 | GZMA | granzyme<br>A<br>(granzyme<br>1,<br>cytotoxic T-<br>lymphocyt<br>e-<br>associated<br>serine<br>esterase<br>3) | 0.042105  | Inlier |



Identification of Survival Genes in Human Glioblastoma Cells Using siRNA Screening

Nikhil G Thaker, Fang Zhang, Peter R. McDonald, Tong Ying Shun, Michael D Lewen, Ian F. Pollack, and John S. Lazo

Molecular Pharmacology

|                                  |               |      |                                                                                                               |           |        |
|----------------------------------|---------------|------|---------------------------------------------------------------------------------------------------------------|-----------|--------|
| siRNA Disorazole DMSO Run3       | NM_0061<br>44 | GZMA | granzyme<br>A<br>(granzyme<br>1,<br>cytotoxic T-<br>lymphocyt<br>e-<br>associated<br>serine<br>esterase<br>3) | 0.471872  | Inlier |
| siRNA-Vinblastine Run1-<br>DMSO  | NM_0061<br>44 | GZMA | granzyme<br>A<br>(granzyme<br>1,<br>cytotoxic T-<br>lymphocyt<br>e-<br>associated<br>serine<br>esterase<br>3) | 0.968502  | Inlier |
| siRNA-Vinblastine Run2-<br>DMSO  | NM_0061<br>44 | GZMA | granzyme<br>A<br>(granzyme<br>1,<br>cytotoxic T-<br>lymphocyt<br>e-<br>associated<br>serine<br>esterase<br>3) | 1.3486    | Inlier |
| siRNA-Temozolomide Run3-<br>DMSO | NM_0041<br>31 | GZMB | granzyme<br>B<br>(granzyme<br>2,<br>cytotoxic T-<br>lymphocyt<br>e-<br>associated<br>serine<br>esterase<br>1) | -1.219766 | Inlier |

Identification of Survival Genes in Human Glioblastoma Cells Using siRNA Screening

Nikhil G Thaker, Fang Zhang, Peter R. McDonald, Tong Ying Shun, Michael D Lewen, Ian F. Pollack, and John S. Lazo

Molecular Pharmacology

|                              |               |      |                                                                                    |           |        |
|------------------------------|---------------|------|------------------------------------------------------------------------------------|-----------|--------|
| siRNA Disorazole DMSO Run1   | NM_0041<br>31 | GZMB | granzyme B<br>(granzyme 2,<br>cytotoxic T-lymphocyte-associated serine esterase 1) | -0.211579 | Inlier |
| siRNA Disorazole DMSO Run3   | NM_0041<br>31 | GZMB | granzyme B<br>(granzyme 2,<br>cytotoxic T-lymphocyte-associated serine esterase 1) | -0.107496 | Inlier |
| siRNA Disorazole DMSO Run2   | NM_0041<br>31 | GZMB | granzyme B<br>(granzyme 2,<br>cytotoxic T-lymphocyte-associated serine esterase 1) | -0.071846 | Inlier |
| siRNA-Temozolomide Run2-DMSO | NM_0041<br>31 | GZMB | granzyme B<br>(granzyme 2,<br>cytotoxic T-lymphocyte-associated serine esterase 1) | 0.071845  | Inlier |

Identification of Survival Genes in Human Glioblastoma Cells Using siRNA Screening

Nikhil G Thaker, Fang Zhang, Peter R. McDonald, Tong Ying Shun, Michael D Lewen, Ian F. Pollack, and John S. Lazo

Molecular Pharmacology

|                              |           |      |                                                                                 |           |        |
|------------------------------|-----------|------|---------------------------------------------------------------------------------|-----------|--------|
| siRNA-Temozolomide Run1-DMSO | NM_004131 | GZMB | granzyme B<br>(granzyme 2, cytotoxic T-lymphocyte-associated serine esterase 1) | 1.137421  | Inlier |
| siRNA-Vinblastine Run2-DMSO  | NM_004131 | GZMB | granzyme B<br>(granzyme 2, cytotoxic T-lymphocyte-associated serine esterase 1) | 2.653852  | Inlier |
| siRNA-Vinblastine Run1-DMSO  | NM_004131 | GZMB | granzyme B<br>(granzyme 2, cytotoxic T-lymphocyte-associated serine esterase 1) | 3.148715  | Inlier |
| siRNA-Temozolomide Run3-DMSO | NM_033423 | GZMH | granzyme H<br>(cathepsin G-like 2, protein h-CCPX)                              | -2.670359 | Inlier |
| siRNA-Temozolomide Run1-DMSO | NM_033423 | GZMH | granzyme H<br>(cathepsin G-like 2, protein h-CCPX)                              | -0.697893 | Inlier |

Identification of Survival Genes in Human Glioblastoma Cells Using siRNA Screening

Nikhil G Thaker, Fang Zhang, Peter R. McDonald, Tong Ying Shun, Michael D Lewen, Ian F. Pollack, and John S. Lazo

Molecular Pharmacology

|                                  |               |      |                                                                      |           |        |
|----------------------------------|---------------|------|----------------------------------------------------------------------|-----------|--------|
| siRNA Disorazole DMSO Run1       | NM_0334<br>23 | GZMH | granzyme<br>H<br>(cathepsin<br>G-like 2,<br>protein h-<br>CCPX)      | -0.60778  | Inlier |
| siRNA-Temozolomide Run2-<br>DMSO | NM_0334<br>23 | GZMH | granzyme<br>H<br>(cathepsin<br>G-like 2,<br>protein h-<br>CCPX)      | -0.114737 | Inlier |
| siRNA Disorazole DMSO Run2       | NM_0334<br>23 | GZMH | granzyme<br>H<br>(cathepsin<br>G-like 2,<br>protein h-<br>CCPX)      | 0.114737  | Inlier |
| siRNA Disorazole DMSO Run3       | NM_0334<br>23 | GZMH | granzyme<br>H<br>(cathepsin<br>G-like 2,<br>protein h-<br>CCPX)      | 0.651107  | Inlier |
| siRNA-Vinblastine Run2-<br>DMSO  | NM_0334<br>23 | GZMH | granzyme<br>H<br>(cathepsin<br>G-like 2,<br>protein h-<br>CCPX)      | 1.210424  | Inlier |
| siRNA-Vinblastine Run1-<br>DMSO  | NM_0334<br>23 | GZMH | granzyme<br>H<br>(cathepsin<br>G-like 2,<br>protein h-<br>CCPX)      | 2.38056   | Inlier |
| siRNA-Temozolomide Run3-<br>DMSO | NM_0021<br>04 | GZMK | granzyme<br>K (serine<br>protease,<br>granzyme<br>3; tryptase<br>II) | -1.161322 | Inlier |
| siRNA Disorazole DMSO Run2       | NM_0021<br>04 | GZMK | granzyme<br>K (serine<br>protease,<br>granzyme<br>3; tryptase<br>II) | -0.70323  | Inlier |

Identification of Survival Genes in Human Glioblastoma Cells Using siRNA Screening  
 Nikhil G Thaker, Fang Zhang, Peter R. McDonald, Tong Ying Shun, Michael D Lewen, Ian F. Pollack, and John S. Lazo  
 Molecular Pharmacology

|                              |           |      |                                                       |           |         |
|------------------------------|-----------|------|-------------------------------------------------------|-----------|---------|
| siRNA-Temozolomide Run2-DMSO | NM_002104 | GZMK | granzyme K (serine protease, granzyme 3; tryptase II) | -0.375495 | Inlier  |
| siRNA Disorazole DMSO Run3   | NM_002104 | GZMK | granzyme K (serine protease, granzyme 3; tryptase II) | -0.143036 | Inlier  |
| siRNA Disorazole DMSO Run1   | NM_002104 | GZMK | granzyme K (serine protease, granzyme 3; tryptase II) | 0.143036  | Inlier  |
| siRNA-Temozolomide Run1-DMSO | NM_002104 | GZMK | granzyme K (serine protease, granzyme 3; tryptase II) | 0.64577   | Inlier  |
| siRNA-Vinblastine Run2-DMSO  | NM_002104 | GZMK | granzyme K (serine protease, granzyme 3; tryptase II) | 1.058941  | Inlier  |
| siRNA-Vinblastine Run1-DMSO  | NM_002104 | GZMK | granzyme K (serine protease, granzyme 3; tryptase II) | 1.44159   | Inlier  |
| siRNA-Temozolomide Run3-DMSO | NM_005317 | GZMM | granzyme M (lymphocyte met-ase 1)                     | -6.07914  | Outlier |
| siRNA-Temozolomide Run2-DMSO | NM_005317 | GZMM | granzyme M (lymphocyte met-ase 1)                     | -5.014609 | Outlier |

Identification of Survival Genes in Human Glioblastoma Cells Using siRNA Screening

Nikhil G Thaker, Fang Zhang, Peter R. McDonald, Tong Ying Shun, Michael D Lewen, Ian F. Pollack, and John S. Lazo

Molecular Pharmacology

|                                  |               |      |                                                                                  |           |        |
|----------------------------------|---------------|------|----------------------------------------------------------------------------------|-----------|--------|
| siRNA Disorazole DMSO Run1       | NM_0053<br>17 | GZMM | granzyme<br>M<br>(lymphocyte<br>met-ase<br>1)                                    | -1.40581  | Inlier |
| siRNA-Temozolomide Run1-<br>DMSO | NM_0053<br>17 | GZMM | granzyme<br>M<br>(lymphocyte<br>met-ase<br>1)                                    | -0.173016 | Inlier |
| siRNA-Vinblastine Run2-<br>DMSO  | NM_0053<br>17 | GZMM | granzyme<br>M<br>(lymphocyte<br>met-ase<br>1)                                    | 0.173016  | Inlier |
| siRNA Disorazole DMSO Run3       | NM_0053<br>17 | GZMM | granzyme<br>M<br>(lymphocyte<br>met-ase<br>1)                                    | 0.435602  | Inlier |
| siRNA-Vinblastine Run1-<br>DMSO  | NM_0053<br>17 | GZMM | granzyme<br>M<br>(lymphocyte<br>met-ase<br>1)                                    | 0.479725  | Inlier |
| siRNA Disorazole DMSO Run2       | NM_0053<br>17 | GZMM | granzyme<br>M<br>(lymphocyte<br>met-ase<br>1)                                    | 0.869275  | Inlier |
| siRNA-Temozolomide Run2-<br>DMSO | NM_0042<br>85 | H6PD | hexose-6-<br>phosphate<br>dehydroge<br>nase<br>(glucose 1-<br>dehydroge<br>nase) | -1.541111 | Inlier |
| siRNA Disorazole DMSO Run1       | NM_0042<br>85 | H6PD | hexose-6-<br>phosphate<br>dehydroge<br>nase<br>(glucose 1-<br>dehydroge<br>nase) | -0.825455 | Inlier |

Identification of Survival Genes in Human Glioblastoma Cells Using siRNA Screening  
 Nikhil G Thaker, Fang Zhang, Peter R. McDonald, Tong Ying Shun, Michael D Lewen, Ian F. Pollack, and John S. Lazo  
 Molecular Pharmacology

|                              |           |      |                                                            |           |        |
|------------------------------|-----------|------|------------------------------------------------------------|-----------|--------|
| siRNA-Temozolomide Run1-DMSO | NM_004285 | H6PD | hexose-6-phosphate dehydrogenase (glucose 1-dehydrogenase) | -0.500339 | Inlier |
| siRNA-Temozolomide Run3-DMSO | NM_004285 | H6PD | hexose-6-phosphate dehydrogenase (glucose 1-dehydrogenase) | -0.159633 | Inlier |
| siRNA-Vinblastine Run1-DMSO  | NM_004285 | H6PD | hexose-6-phosphate dehydrogenase (glucose 1-dehydrogenase) | 0.159633  | Inlier |
| siRNA-Vinblastine Run2-DMSO  | NM_004285 | H6PD | hexose-6-phosphate dehydrogenase (glucose 1-dehydrogenase) | 0.523545  | Inlier |
| siRNA Disorazole DMSO Run3   | NM_004285 | H6PD | hexose-6-phosphate dehydrogenase (glucose 1-dehydrogenase) | 2.493978  | Inlier |

Identification of Survival Genes in Human Glioblastoma Cells Using siRNA Screening  
 Nikhil G Thaker, Fang Zhang, Peter R. McDonald, Tong Ying Shun, Michael D Lewen, Ian F. Pollack, and John S. Lazo  
 Molecular Pharmacology

|                              |               |      |                                                            |           |         |
|------------------------------|---------------|------|------------------------------------------------------------|-----------|---------|
| siRNA Disorazole DMSO Run2   | NM_0042<br>85 | H6PD | hexose-6-phosphate dehydrogenase (glucose 1-dehydrogenase) | 8.014344  | Outlier |
| siRNA-Temozolomide Run3-DMSO | NM_0122<br>05 | HAAO | 3-hydroxyanthranilate 3,4-dioxygenase                      | -1.160812 | Inlier  |
| siRNA-Vinblastine Run2-DMSO  | NM_0122<br>05 | HAAO | 3-hydroxyanthranilate 3,4-dioxygenase                      | -0.707166 | Inlier  |
| siRNA-Temozolomide Run2-DMSO | NM_0122<br>05 | HAAO | 3-hydroxyanthranilate 3,4-dioxygenase                      | -0.641833 | Inlier  |
| siRNA Disorazole DMSO Run3   | NM_0122<br>05 | HAAO | 3-hydroxyanthranilate 3,4-dioxygenase                      | -0.090519 | Inlier  |
| siRNA-Temozolomide Run1-DMSO | NM_0122<br>05 | HAAO | 3-hydroxyanthranilate 3,4-dioxygenase                      | 0.090519  | Inlier  |
| siRNA Disorazole DMSO Run1   | NM_0122<br>05 | HAAO | 3-hydroxyanthranilate 3,4-dioxygenase                      | 0.194897  | Inlier  |
| siRNA Disorazole DMSO Run2   | NM_0122<br>05 | HAAO | 3-hydroxyanthranilate 3,4-dioxygenase                      | 0.958374  | Inlier  |



Identification of Survival Genes in Human Glioblastoma Cells Using siRNA Screening  
 Nikhil G Thaker, Fang Zhang, Peter R. McDonald, Tong Ying Shun, Michael D Lewen, Ian F. Pollack, and John S. Lazo

Molecular Pharmacology

|                              |           |       |                                               |           |        |
|------------------------------|-----------|-------|-----------------------------------------------|-----------|--------|
| siRNA-Vinblastine Run1-DMSO  | NM_012205 | HAAO  | 3-hydroxyanthranilate 3,4-dioxygenase         | 1.24104   | Inlier |
| siRNA-Temozolomide Run3-DMSO | NM_004132 | HABP2 | hyaluronan binding protein 2                  | -1.763776 | Inlier |
| siRNA-Temozolomide Run2-DMSO | NM_004132 | HABP2 | hyaluronan binding protein 2                  | -0.877076 | Inlier |
| siRNA Disorazole DMSO Run2   | NM_004132 | HABP2 | hyaluronan binding protein 2                  | -0.471924 | Inlier |
| siRNA Disorazole DMSO Run3   | NM_004132 | HABP2 | hyaluronan binding protein 2                  | -0.296523 | Inlier |
| siRNA Disorazole DMSO Run1   | NM_004132 | HABP2 | hyaluronan binding protein 2                  | 0.296523  | Inlier |
| siRNA-Temozolomide Run1-DMSO | NM_004132 | HABP2 | hyaluronan binding protein 2                  | 0.428731  | Inlier |
| siRNA-Vinblastine Run1-DMSO  | NM_004132 | HABP2 | hyaluronan binding protein 2                  | 1.277946  | Inlier |
| siRNA-Vinblastine Run2-DMSO  | NM_004132 | HABP2 | hyaluronan binding protein 2                  | 1.792836  | Inlier |
| siRNA-Temozolomide Run3-DMSO | NM_004493 | HADH2 | hydroxyacyl-Coenzyme A dehydrogenase, type II | -3.329773 | Inlier |
| siRNA-Temozolomide Run2-DMSO | NM_004493 | HADH2 | hydroxyacyl-Coenzyme A dehydrogenase, type II | -2.624106 | Inlier |
| siRNA-Temozolomide Run1-DMSO | NM_004493 | HADH2 | hydroxyacyl-Coenzyme A dehydrogenase, type II | -0.370205 | Inlier |

Identification of Survival Genes in Human Glioblastoma Cells Using siRNA Screening

Nikhil G Thaker, Fang Zhang, Peter R. McDonald, Tong Ying Shun, Michael D Lewen, Ian F. Pollack, and John S. Lazo

Molecular Pharmacology

|                                 |               |       |                                                                    |           |        |
|---------------------------------|---------------|-------|--------------------------------------------------------------------|-----------|--------|
| siRNA Disorazole DMSO Run1      | NM_0044<br>93 | HADH2 | hydroxyac<br>yl-<br>Coenzyme<br>A<br>dehydroge<br>nase, type<br>II | -0.294408 | Inlier |
| siRNA Disorazole DMSO Run2      | NM_0044<br>93 | HADH2 | hydroxyac<br>yl-<br>Coenzyme<br>A<br>dehydroge<br>nase, type<br>II | 0.294408  | Inlier |
| siRNA-Vinblastine Run2-<br>DMSO | NM_0044<br>93 | HADH2 | hydroxyac<br>yl-<br>Coenzyme<br>A<br>dehydroge<br>nase, type<br>II | 0.637185  | Inlier |
| siRNA-Vinblastine Run1-<br>DMSO | NM_0044<br>93 | HADH2 | hydroxyac<br>yl-<br>Coenzyme<br>A<br>dehydroge<br>nase, type<br>II | 0.711815  | Inlier |
| siRNA Disorazole DMSO Run3      | NM_0044<br>93 | HADH2 | hydroxyac<br>yl-<br>Coenzyme<br>A<br>dehydroge<br>nase, type<br>II | 2.362011  | Inlier |

Identification of Survival Genes in Human Glioblastoma Cells Using siRNA Screening

Nikhil G Thaker, Fang Zhang, Peter R. McDonald, Tong Ying Shun, Michael D Lewen, Ian F. Pollack, and John S.

Lazo

Molecular Pharmacology

|                              |           |       |                                                                                                                                       |           |        |
|------------------------------|-----------|-------|---------------------------------------------------------------------------------------------------------------------------------------|-----------|--------|
| siRNA-Vinblastine Run2-DMSO  | NM_000182 | HADHA | hydroxyacyl-Coenzyme A dehydrogenase/3-ketoacyl-Coenzyme A thiolase/enoyl-Coenzyme A hydratase (trifunctional protein), alpha subunit | -0.809003 | Inlier |
| siRNA-Temozolomide Run2-DMSO | NM_000182 | HADHA | hydroxyacyl-Coenzyme A dehydrogenase/3-ketoacyl-Coenzyme A thiolase/enoyl-Coenzyme A hydratase (trifunctional protein), alpha subunit | -0.678186 | Inlier |

Identification of Survival Genes in Human Glioblastoma Cells Using siRNA Screening

Nikhil G Thaker, Fang Zhang, Peter R. McDonald, Tong Ying Shun, Michael D Lewen, Ian F. Pollack, and John S. Lazo

Molecular Pharmacology

|                            |         |       |                                                                                                                                       |           |        |
|----------------------------|---------|-------|---------------------------------------------------------------------------------------------------------------------------------------|-----------|--------|
| siRNA Disorazole DMSO Run2 | NM_0001 | HADHA | hydroxyacyl-Coenzyme A dehydrogenase/3-ketoacyl-Coenzyme A thiolase/enoyl-Coenzyme A hydratase (trifunctional protein), alpha subunit | -0.588279 | Inlier |
| siRNA Disorazole DMSO Run1 | NM_0001 | HADHA | hydroxyacyl-Coenzyme A dehydrogenase/3-ketoacyl-Coenzyme A thiolase/enoyl-Coenzyme A hydratase (trifunctional protein), alpha subunit | -0.54768  | Inlier |

Identification of Survival Genes in Human Glioblastoma Cells Using siRNA Screening

Nikhil G Thaker, Fang Zhang, Peter R. McDonald, Tong Ying Shun, Michael D Lewen, Ian F. Pollack, and John S.

Lazo

Molecular Pharmacology

|                              |           |       |                                                                                                                                       |          |        |
|------------------------------|-----------|-------|---------------------------------------------------------------------------------------------------------------------------------------|----------|--------|
| siRNA-Temozolomide Run1-DMSO | NM_000182 | HADHA | hydroxyacyl-Coenzyme A dehydrogenase/3-ketoacyl-Coenzyme A thiolase/enoyl-Coenzyme A hydratase (trifunctional protein), alpha subunit | 0.547683 | Inlier |
| siRNA-Vinblastine Run1-DMSO  | NM_000182 | HADHA | hydroxyacyl-Coenzyme A dehydrogenase/3-ketoacyl-Coenzyme A thiolase/enoyl-Coenzyme A hydratase (trifunctional protein), alpha subunit | 0.670814 | Inlier |

Identification of Survival Genes in Human Glioblastoma Cells Using siRNA Screening

Nikhil G Thaker, Fang Zhang, Peter R. McDonald, Tong Ying Shun, Michael D Lewen, Ian F. Pollack, and John S. Lazo

Molecular Pharmacology

|                              |           |       |                                                                                                                                       |          |         |
|------------------------------|-----------|-------|---------------------------------------------------------------------------------------------------------------------------------------|----------|---------|
| siRNA-Temozolomide Run3-DMSO | NM_000182 | HADHA | hydroxyacyl-Coenzyme A dehydrogenase/3-ketoacyl-Coenzyme A thiolase/enoyl-Coenzyme A hydratase (trifunctional protein), alpha subunit | 6.906344 | Outlier |
| siRNA Disorazole DMSO Run3   | NM_000182 | HADHA | hydroxyacyl-Coenzyme A dehydrogenase/3-ketoacyl-Coenzyme A thiolase/enoyl-Coenzyme A hydratase (trifunctional protein), alpha subunit | 12.44652 | Outlier |

Identification of Survival Genes in Human Glioblastoma Cells Using siRNA Screening

Nikhil G Thaker, Fang Zhang, Peter R. McDonald, Tong Ying Shun, Michael D Lewen, Ian F. Pollack, and John S. Lazo

Molecular Pharmacology

|                              |           |       |                                                                                                                                      |           |        |
|------------------------------|-----------|-------|--------------------------------------------------------------------------------------------------------------------------------------|-----------|--------|
| siRNA-Temozolomide Run3-DMSO | NM_000183 | HADHB | hydroxyacyl-Coenzyme A dehydrogenase/3-ketoacyl-Coenzyme A thiolase/enoyl-Coenzyme A hydratase (trifunctional protein), beta subunit | -1.816058 | Inlier |
| siRNA-Temozolomide Run2-DMSO | NM_000183 | HADHB | hydroxyacyl-Coenzyme A dehydrogenase/3-ketoacyl-Coenzyme A thiolase/enoyl-Coenzyme A hydratase (trifunctional protein), beta subunit | -1.450355 | Inlier |

Identification of Survival Genes in Human Glioblastoma Cells Using siRNA Screening

Nikhil G Thaker, Fang Zhang, Peter R. McDonald, Tong Ying Shun, Michael D Lewen, Ian F. Pollack, and John S. Lazo

Molecular Pharmacology

|                              |               |       |                                                                                                                                      |           |        |
|------------------------------|---------------|-------|--------------------------------------------------------------------------------------------------------------------------------------|-----------|--------|
| siRNA Disorazole DMSO Run1   | NM_0001<br>83 | HADHB | hydroxyacyl-Coenzyme A dehydrogenase/3-ketoacyl-Coenzyme A thiolase/enoyl-Coenzyme A hydratase (trifunctional protein), beta subunit | -0.818563 | Inlier |
| siRNA-Temozolomide Run1-DMSO | NM_0001<br>83 | HADHB | hydroxyacyl-Coenzyme A dehydrogenase/3-ketoacyl-Coenzyme A thiolase/enoyl-Coenzyme A hydratase (trifunctional protein), beta subunit | -0.188976 | Inlier |



Identification of Survival Genes in Human Glioblastoma Cells Using siRNA Screening

Nikhil G Thaker, Fang Zhang, Peter R. McDonald, Tong Ying Shun, Michael D Lewen, Ian F. Pollack, and John S. Lazo

Molecular Pharmacology

|                             |               |       |                                                                                                                                      |          |        |
|-----------------------------|---------------|-------|--------------------------------------------------------------------------------------------------------------------------------------|----------|--------|
| siRNA Disorazole DMSO Run3  | NM_0001<br>83 | HADHB | hydroxyacyl-Coenzyme A dehydrogenase/3-ketoacyl-Coenzyme A thiolase/enoyl-Coenzyme A hydratase (trifunctional protein), beta subunit | 0.188976 | Inlier |
| siRNA-Vinblastine Run1-DMSO | NM_0001<br>83 | HADHB | hydroxyacyl-Coenzyme A dehydrogenase/3-ketoacyl-Coenzyme A thiolase/enoyl-Coenzyme A hydratase (trifunctional protein), beta subunit | 0.30413  | Inlier |

Identification of Survival Genes in Human Glioblastoma Cells Using siRNA Screening

Nikhil G Thaker, Fang Zhang, Peter R. McDonald, Tong Ying Shun, Michael D Lewen, Ian F. Pollack, and John S.

Lazo

Molecular Pharmacology

|                              |           |        |                                                                                                                                      |          |        |
|------------------------------|-----------|--------|--------------------------------------------------------------------------------------------------------------------------------------|----------|--------|
| siRNA-Vinblastine Run2-DMSO  | NM_000183 | HADHB  | hydroxyacyl-Coenzyme A dehydrogenase/3-ketoacyl-Coenzyme A thiolase/enoyl-Coenzyme A hydratase (trifunctional protein), beta subunit | 0.530437 | Inlier |
| siRNA Disorazole DMSO Run2   | NM_000183 | HADHB  | hydroxyacyl-Coenzyme A dehydrogenase/3-ketoacyl-Coenzyme A thiolase/enoyl-Coenzyme A hydratase (trifunctional protein), beta subunit | 2.097203 | Inlier |
| siRNA-Temozolomide Run3-DMSO | NM_005327 | HADHSC | L-3-hydroxyacyl-Coenzyme A dehydrogenase, short chain                                                                                | -1.03151 | Inlier |

Identification of Survival Genes in Human Glioblastoma Cells Using siRNA Screening

Nikhil G Thaker, Fang Zhang, Peter R. McDonald, Tong Ying Shun, Michael D Lewen, Ian F. Pollack, and John S.

Lazo

Molecular Pharmacology

| siRNA Treatment              | Gene ID   | Gene Name | Log2 Fold Change | Outlier Status |
|------------------------------|-----------|-----------|------------------|----------------|
| siRNA-Temozolomide Run2-DMSO | NM_005327 | HADHSC    | -0.675845        | Inlier         |
| siRNA Disorazole DMSO Run3   | NM_005327 | HADHSC    | -0.673155        | Inlier         |
| siRNA-Temozolomide Run1-DMSO | NM_005327 | HADHSC    | -0.029349        | Inlier         |
| siRNA Disorazole DMSO Run1   | NM_005327 | HADHSC    | 0.029349         | Inlier         |
| siRNA Disorazole DMSO Run2   | NM_005327 | HADHSC    | 0.451846         | Inlier         |

L-3-hydroxyacyl-Coenzyme A dehydrogenase, short chain

Identification of Survival Genes in Human Glioblastoma Cells Using siRNA Screening  
 Nikhil G Thaker, Fang Zhang, Peter R. McDonald, Tong Ying Shun, Michael D Lewen, Ian F. Pollack, and John S. Lazo

Molecular Pharmacology

| siRNA Treatment              | Gene ID   | Gene Name | Enzyme Name                                           | Value     | Category |
|------------------------------|-----------|-----------|-------------------------------------------------------|-----------|----------|
| siRNA-Vinblastine Run2-DMSO  | NM_005327 | HADHSC    | L-3-hydroxyacyl-Coenzyme A dehydrogenase, short chain | 0.931651  | Inlier   |
| siRNA-Vinblastine Run1-DMSO  | NM_005327 | HADHSC    | L-3-hydroxyacyl-Coenzyme A dehydrogenase, short chain | 1.019745  | Inlier   |
| siRNA-Temozolomide Run1-DMSO | NM_005326 | HAGH      | hydroxyacylglutathione hydrolase                      | -1.129166 | Inlier   |
| siRNA-Vinblastine Run2-DMSO  | NM_005326 | HAGH      | hydroxyacylglutathione hydrolase                      | -0.698003 | Inlier   |
| siRNA-Temozolomide Run3-DMSO | NM_005326 | HAGH      | hydroxyacylglutathione hydrolase                      | -0.650997 | Inlier   |
| siRNA-Temozolomide Run2-DMSO | NM_005326 | HAGH      | hydroxyacylglutathione hydrolase                      | -0.079265 | Inlier   |
| siRNA Disorazole DMSO Run3   | NM_005326 | HAGH      | hydroxyacylglutathione hydrolase                      | 0.079265  | Inlier   |
| siRNA Disorazole DMSO Run1   | NM_005326 | HAGH      | hydroxyacylglutathione hydrolase                      | 0.311986  | Inlier   |
| siRNA-Vinblastine Run1-DMSO  | NM_005326 | HAGH      | hydroxyacylglutathione hydrolase                      | 1.139942  | Inlier   |
| siRNA Disorazole DMSO Run2   | NM_005326 | HAGH      | hydroxyacylglutathione hydrolase                      | 1.750099  | Inlier   |

Identification of Survival Genes in Human Glioblastoma Cells Using siRNA Screening  
 Nikhil G Thaker, Fang Zhang, Peter R. McDonald, Tong Ying Shun, Michael D Lewen, Ian F. Pollack, and John S. Lazo

Molecular Pharmacology

|                              |               |       |                                                      |           |         |
|------------------------------|---------------|-------|------------------------------------------------------|-----------|---------|
| siRNA-Temozolomide Run1-DMSO | NM_2071<br>12 | HAGHL | hydroxyac<br>ylglutathio<br>ne<br>hydrolase-<br>like | -1.781531 | Inlier  |
| siRNA Disorazole DMSO Run1   | NM_2071<br>12 | HAGHL | hydroxyac<br>ylglutathio<br>ne<br>hydrolase-<br>like | -0.789418 | Inlier  |
| siRNA-Temozolomide Run2-DMSO | NM_2071<br>12 | HAGHL | hydroxyac<br>ylglutathio<br>ne<br>hydrolase-<br>like | -0.278465 | Inlier  |
| siRNA Disorazole DMSO Run3   | NM_2071<br>12 | HAGHL | hydroxyac<br>ylglutathio<br>ne<br>hydrolase-<br>like | -0.240124 | Inlier  |
| siRNA-Temozolomide Run3-DMSO | NM_2071<br>12 | HAGHL | hydroxyac<br>ylglutathio<br>ne<br>hydrolase-<br>like | 0.240122  | Inlier  |
| siRNA-Vinblastine Run2-DMSO  | NM_2071<br>12 | HAGHL | hydroxyac<br>ylglutathio<br>ne<br>hydrolase-<br>like | 0.559582  | Inlier  |
| siRNA Disorazole DMSO Run2   | NM_2071<br>12 | HAGHL | hydroxyac<br>ylglutathio<br>ne<br>hydrolase-<br>like | 4.665649  | Outlier |
| siRNA-Vinblastine Run1-DMSO  | NM_2071<br>12 | HAGHL | hydroxyac<br>ylglutathio<br>ne<br>hydrolase-<br>like | 6.51706   | Outlier |
| siRNA Disorazole DMSO Run2   | NM_0529<br>47 | HAK   | alpha-<br>kinase 2                                   | -2.983174 | Inlier  |
| siRNA Disorazole DMSO Run3   | NM_0529<br>47 | HAK   | alpha-<br>kinase 2                                   | -2.087055 | Inlier  |
| siRNA-Temozolomide Run1-DMSO | NM_0529<br>47 | HAK   | alpha-<br>kinase 2                                   | -0.569225 | Inlier  |
| siRNA-Temozolomide Run2-DMSO | NM_0529<br>47 | HAK   | alpha-<br>kinase 2                                   | -0.470785 | Inlier  |
| siRNA-Temozolomide Run3-DMSO | NM_0529<br>47 | HAK   | alpha-<br>kinase 2                                   | 0.470785  | Inlier  |
| siRNA-Vinblastine Run1-DMSO  | NM_0529<br>47 | HAK   | alpha-<br>kinase 2                                   | 0.626025  | Inlier  |

Identification of Survival Genes in Human Glioblastoma Cells Using siRNA Screening  
 Nikhil G Thaker, Fang Zhang, Peter R. McDonald, Tong Ying Shun, Michael D Lewen, Ian F. Pollack, and John S. Lazo

|                            |         |      |            |           |         |
|----------------------------|---------|------|------------|-----------|---------|
| Molecular Pharmacology     | NM_0529 |      | alpha-     |           |         |
| siRNA Disorazole DMSO Run1 | 47      | HAK  | kinase 2   | 0.722975  | Inlier  |
| siRNA-Vinblastine Run2-    | NM_0529 |      | alpha-     |           |         |
| DMSO                       | 47      | HAK  | kinase 2   | 2.275443  | Inlier  |
| siRNA-Temozolomide Run3-   | NM_0021 |      | histidine  |           |         |
| DMSO                       | 08      | HAL  | ammonia-   | -1.521797 | Inlier  |
|                            | NM_0021 |      | lyase      |           |         |
| siRNA Disorazole DMSO Run3 | 08      | HAL  | histidine  | -0.643452 | Inlier  |
|                            | NM_0021 |      | ammonia-   |           |         |
| siRNA Disorazole DMSO Run1 | 08      | HAL  | lyase      | -0.151661 | Inlier  |
|                            | NM_0021 |      | histidine  |           |         |
| siRNA-Temozolomide Run2-   | NM_0021 |      | ammonia-   |           |         |
| DMSO                       | 08      | HAL  | lyase      | -0.131345 | Inlier  |
|                            | NM_0021 |      | histidine  |           |         |
| siRNA-Temozolomide Run1-   | NM_0021 |      | ammonia-   |           |         |
| DMSO                       | 08      | HAL  | lyase      | 0.131345  | Inlier  |
|                            | NM_0021 |      | histidine  |           |         |
| siRNA-Vinblastine Run2-    | NM_0021 |      | ammonia-   |           |         |
| DMSO                       | 08      | HAL  | lyase      | 0.705548  | Inlier  |
|                            | NM_0021 |      | histidine  |           |         |
| siRNA Disorazole DMSO Run2 | 08      | HAL  | ammonia-   | 1.19414   | Inlier  |
|                            | NM_0021 |      | lyase      |           |         |
| siRNA-Vinblastine Run1-    | NM_0021 |      | histidine  |           |         |
| DMSO                       | 08      | HAL  | ammonia-   | 1.939287  | Inlier  |
|                            | NM_0021 |      | lyase      |           |         |
| siRNA-Vinblastine Run2-    | NM_0175 |      | hydroxyaci |           |         |
| DMSO                       | 45      | HAO1 | d oxidase  | -5.431018 | Outlier |
|                            | NM_0175 |      | (glycolate |           |         |
| siRNA-Temozolomide Run2-   | NM_0175 |      | oxidase) 1 | -1.169513 | Inlier  |
| DMSO                       | 45      | HAO1 | hydroxyaci |           |         |
|                            | NM_0175 |      | d oxidase  |           |         |
| siRNA Disorazole DMSO Run3 | 45      | HAO1 | (glycolate | -0.800951 | Inlier  |
|                            | NM_0175 |      | oxidase) 1 |           |         |
| siRNA Disorazole DMSO Run1 | 45      | HAO1 | hydroxyaci | -0.247931 | Inlier  |
|                            | NM_0175 |      | d oxidase  |           |         |
|                            | NM_0175 |      | (glycolate |           |         |
|                            | 45      | HAO1 | oxidase) 1 |           |         |

Identification of Survival Genes in Human Glioblastoma Cells Using siRNA Screening  
 Nikhil G Thaker, Fang Zhang, Peter R. McDonald, Tong Ying Shun, Michael D Lewen, Ian F. Pollack, and John S. Lazo  
 Molecular Pharmacology

|                              |               |      |                                           |           |        |
|------------------------------|---------------|------|-------------------------------------------|-----------|--------|
| siRNA Disorazole DMSO Run2   | NM_0175<br>45 | HAO1 | hydroxyacid oxidase (glycolate oxidase) 1 | 0.247931  | Inlier |
| siRNA-Temozolomide Run1-DMSO | NM_0175<br>45 | HAO1 | hydroxyacid oxidase (glycolate oxidase) 1 | 0.396101  | Inlier |
| siRNA-Temozolomide Run3-DMSO | NM_0175<br>45 | HAO1 | hydroxyacid oxidase (glycolate oxidase) 1 | 0.54805   | Inlier |
| siRNA-Vinblastine Run1-DMSO  | NM_0175<br>45 | HAO1 | hydroxyacid oxidase (glycolate oxidase) 1 | 2.725399  | Inlier |
| siRNA-Temozolomide Run2-DMSO | NM_0165<br>27 | HAO2 | hydroxyacid oxidase 2 (long chain)        | -1.12311  | Inlier |
| siRNA-Vinblastine Run2-DMSO  | NM_0165<br>27 | HAO2 | hydroxyacid oxidase 2 (long chain)        | -0.419031 | Inlier |
| siRNA-Temozolomide Run3-DMSO | NM_0165<br>27 | HAO2 | hydroxyacid oxidase 2 (long chain)        | -0.389806 | Inlier |
| siRNA Disorazole DMSO Run1   | NM_0165<br>27 | HAO2 | hydroxyacid oxidase 2 (long chain)        | -0.284649 | Inlier |
| siRNA-Temozolomide Run1-DMSO | NM_0165<br>27 | HAO2 | hydroxyacid oxidase 2 (long chain)        | 0.284649  | Inlier |

Identification of Survival Genes in Human Glioblastoma Cells Using siRNA Screening  
 Nikhil G Thaker, Fang Zhang, Peter R. McDonald, Tong Ying Shun, Michael D Lewen, Ian F. Pollack, and John S. Lazo  
 Molecular Pharmacology

|                              |                  |       |                                                         |           |         |
|------------------------------|------------------|-------|---------------------------------------------------------|-----------|---------|
| siRNA Disorazole DMSO Run3   | NM_0165<br>27    | HAO2  | hydroxyacid oxidase 2 (long chain)                      | 0.929969  | Inlier  |
| siRNA Disorazole DMSO Run2   | NM_0165<br>27    | HAO2  | hydroxyacid oxidase 2 (long chain)                      | 2.407136  | Inlier  |
| siRNA-Vinblastine Run1-DMSO  | NM_0165<br>27    | HAO2  | hydroxyacid oxidase 2 (long chain)                      | 4.078115  | Outlier |
| siRNA-Temozolomide Run3-DMSO | NM_0039<br>47    | HAPIP | huntingtin-associated protein interacting protein (duo) | -1.614318 | Inlier  |
| siRNA-Temozolomide Run2-DMSO | NM_0039<br>47    | HAPIP | huntingtin-associated protein interacting protein (duo) | -0.712174 | Inlier  |
| siRNA-Temozolomide Run3-DMSO | NM_0010<br>24660 | HAPIP | huntingtin-associated protein interacting protein (duo) | -1.799736 | Inlier  |
| siRNA-Vinblastine Run2-DMSO  | NM_0039<br>47    | HAPIP | huntingtin-associated protein interacting protein (duo) | -0.30364  | Inlier  |
| siRNA Disorazole DMSO Run3   | NM_0039<br>47    | HAPIP | huntingtin-associated protein interacting protein (duo) | -0.19303  | Inlier  |
| siRNA-Temozolomide Run1-DMSO | NM_0039<br>47    | HAPIP | huntingtin-associated protein interacting protein (duo) | 0.19303   | Inlier  |



Identification of Survival Genes in Human Glioblastoma Cells Using siRNA Screening  
 Nikhil G Thaker, Fang Zhang, Peter R. McDonald, Tong Ying Shun, Michael D Lewen, Ian F. Pollack, and John S. Lazo

Molecular Pharmacology

|                              |                  |       |                                                         |           |        |
|------------------------------|------------------|-------|---------------------------------------------------------|-----------|--------|
| siRNA-Temozolomide Run2-DMSO | NM_0010<br>24660 | HAPIP | huntingtin-associated protein interacting protein (duo) | -0.881884 | Inlier |
| siRNA Disorazole DMSO Run2   | NM_0010<br>24660 | HAPIP | huntingtin-associated protein interacting protein (duo) | -0.692407 | Inlier |
| siRNA Disorazole DMSO Run1   | NM_0039<br>47    | HAPIP | huntingtin-associated protein interacting protein (duo) | 0.636826  | Inlier |
| siRNA-Temozolomide Run1-DMSO | NM_0010<br>24660 | HAPIP | huntingtin-associated protein interacting protein (duo) | -0.199801 | Inlier |
| siRNA-Vinblastine Run2-DMSO  | NM_0010<br>24660 | HAPIP | huntingtin-associated protein interacting protein (duo) | 0.1998    | Inlier |
| siRNA-Vinblastine Run1-DMSO  | NM_0010<br>24660 | HAPIP | huntingtin-associated protein interacting protein (duo) | 0.223411  | Inlier |
| siRNA Disorazole DMSO Run3   | NM_0010<br>24660 | HAPIP | huntingtin-associated protein interacting protein (duo) | 0.656593  | Inlier |
| siRNA Disorazole DMSO Run1   | NM_0010<br>24660 | HAPIP | huntingtin-associated protein interacting protein (duo) | 0.800741  | Inlier |

Identification of Survival Genes in Human Glioblastoma Cells Using siRNA Screening  
 Nikhil G Thaker, Fang Zhang, Peter R. McDonald, Tong Ying Shun, Michael D Lewen, Ian F. Pollack, and John S. Lazo

Molecular Pharmacology

|                              |               |       |                                                         |           |        |
|------------------------------|---------------|-------|---------------------------------------------------------|-----------|--------|
| siRNA-Vinblastine Run1-DMSO  | NM_0039<br>47 | HAPIP | huntingtin-associated protein interacting protein (duo) | 1.695011  | Inlier |
| siRNA Disorazole DMSO Run2   | NM_0039<br>47 | HAPIP | huntingtin-associated protein interacting protein (duo) | 2.224047  | Inlier |
| siRNA Disorazole DMSO Run1   | NM_0021<br>09 | HARS  | histidyl-tRNA synthetase                                | -0.773215 | Inlier |
| siRNA Disorazole DMSO Run3   | NM_0021<br>09 | HARS  | histidyl-tRNA synthetase                                | -0.62863  | Inlier |
| siRNA-Temozolomide Run1-DMSO | NM_0021<br>09 | HARS  | histidyl-tRNA synthetase                                | -0.112996 | Inlier |
| siRNA-Temozolomide Run2-DMSO | NM_0021<br>09 | HARS  | histidyl-tRNA synthetase                                | -0.00726  | Inlier |
| siRNA-Vinblastine Run2-DMSO  | NM_0021<br>09 | HARS  | histidyl-tRNA synthetase                                | 0.00726   | Inlier |
| siRNA-Temozolomide Run3-DMSO | NM_0021<br>09 | HARS  | histidyl-tRNA synthetase                                | 0.72037   | Inlier |
| siRNA-Vinblastine Run1-DMSO  | NM_0021<br>09 | HARS  | histidyl-tRNA synthetase                                | 1.689412  | Inlier |
| siRNA Disorazole DMSO Run2   | NM_0021<br>09 | HARS  | histidyl-tRNA synthetase                                | 3.219618  | Inlier |
| siRNA Disorazole DMSO Run1   | NM_0808<br>20 | HARS2 | histidyl-tRNA synthetase 2                              | -0.760476 | Inlier |
| siRNA Disorazole DMSO Run3   | NM_0808<br>20 | HARS2 | histidyl-tRNA synthetase 2                              | -0.588524 | Inlier |

Identification of Survival Genes in Human Glioblastoma Cells Using siRNA Screening  
 Nikhil G Thaker, Fang Zhang, Peter R. McDonald, Tong Ying Shun, Michael D Lewen, Ian F. Pollack, and John S. Lazo

Molecular Pharmacology

|                              |               |       |                               |           |        |
|------------------------------|---------------|-------|-------------------------------|-----------|--------|
| siRNA-Temozolomide Run2-DMSO | NM_0808<br>20 | HARS2 | histidyl-tRNA synthetase<br>2 | -0.516513 | Inlier |
| siRNA-Vinblastine Run2-DMSO  | NM_0808<br>20 | HARS2 | histidyl-tRNA synthetase<br>2 | -0.250335 | Inlier |
| siRNA-Temozolomide Run1-DMSO | NM_0808<br>20 | HARS2 | histidyl-tRNA synthetase<br>2 | 0.250335  | Inlier |
| siRNA-Temozolomide Run3-DMSO | NM_0808<br>20 | HARS2 | histidyl-tRNA synthetase<br>2 | 0.859063  | Inlier |
| siRNA-Vinblastine Run1-DMSO  | NM_0808<br>20 | HARS2 | histidyl-tRNA synthetase<br>2 | 1.211888  | Inlier |
| siRNA Disorazole DMSO Run2   | NM_0808<br>20 | HARS2 | histidyl-tRNA synthetase<br>2 | 1.291164  | Inlier |
| siRNA Disorazole DMSO Run1   | NM_0122<br>08 | HARSL | histidyl-tRNA synthetase-like | -0.996273 | Inlier |
| siRNA Disorazole DMSO Run3   | NM_0122<br>08 | HARSL | histidyl-tRNA synthetase-like | -0.48356  | Inlier |
| siRNA-Temozolomide Run2-DMSO | NM_0122<br>08 | HARSL | histidyl-tRNA synthetase-like | -0.209964 | Inlier |
| siRNA-Temozolomide Run1-DMSO | NM_0122<br>08 | HARSL | histidyl-tRNA synthetase-like | -0.067414 | Inlier |
| siRNA-Vinblastine Run2-DMSO  | NM_0122<br>08 | HARSL | histidyl-tRNA synthetase-like | 0.067414  | Inlier |
| siRNA Disorazole DMSO Run2   | NM_0122<br>08 | HARSL | histidyl-tRNA synthetase-like | 0.86544   | Inlier |
| siRNA-Vinblastine Run1-DMSO  | NM_0122<br>08 | HARSL | histidyl-tRNA synthetase-like | 0.873149  | Inlier |

Identification of Survival Genes in Human Glioblastoma Cells Using siRNA Screening  
 Nikhil G Thaker, Fang Zhang, Peter R. McDonald, Tong Ying Shun, Michael D Lewen, Ian F. Pollack, and John S. Lazo

Molecular Pharmacology

|                              |           |       |                               |           |        |
|------------------------------|-----------|-------|-------------------------------|-----------|--------|
| siRNA-Temozolomide Run3-DMSO | NM_012208 | HARSL | histidyl-tRNA synthetase-like | 1.054841  | Inlier |
| siRNA-Temozolomide Run2-DMSO | NM_001523 | HAS1  | hyaluronan synthase 1         | -1.06214  | Inlier |
| siRNA-Vinblastine Run2-DMSO  | NM_001523 | HAS1  | hyaluronan synthase 1         | -0.62489  | Inlier |
| siRNA Disorazole DMSO Run1   | NM_001523 | HAS1  | hyaluronan synthase 1         | -0.469897 | Inlier |
| siRNA Disorazole DMSO Run3   | NM_001523 | HAS1  | hyaluronan synthase 1         | -0.165246 | Inlier |
| siRNA-Temozolomide Run1-DMSO | NM_001523 | HAS1  | hyaluronan synthase 1         | 0.165246  | Inlier |
| siRNA-Temozolomide Run3-DMSO | NM_001523 | HAS1  | hyaluronan synthase 1         | 0.72411   | Inlier |
| siRNA Disorazole DMSO Run2   | NM_001523 | HAS1  | hyaluronan synthase 1         | 1.989367  | Inlier |
| siRNA-Vinblastine Run1-DMSO  | NM_001523 | HAS1  | hyaluronan synthase 1         | 3.366402  | Inlier |
| siRNA-Temozolomide Run2-DMSO | NM_005328 | HAS2  | hyaluronan synthase 2         | -1.744423 | Inlier |
| siRNA-Vinblastine Run2-DMSO  | NM_005328 | HAS2  | hyaluronan synthase 2         | -0.726628 | Inlier |
| siRNA Disorazole DMSO Run3   | NM_005328 | HAS2  | hyaluronan synthase 2         | -0.556714 | Inlier |
| siRNA Disorazole DMSO Run1   | NM_005328 | HAS2  | hyaluronan synthase 2         | -0.179922 | Inlier |

Identification of Survival Genes in Human Glioblastoma Cells Using siRNA Screening  
 Nikhil G Thaker, Fang Zhang, Peter R. McDonald, Tong Ying Shun, Michael D Lewen, Ian F. Pollack, and John S. Lazo

Molecular Pharmacology

|                              |               |      |                          |                  |
|------------------------------|---------------|------|--------------------------|------------------|
| siRNA-Temozolomide Run1-DMSO | NM_0053<br>28 | HAS2 | hyaluronan synthase<br>2 | 0.179922 Inlier  |
| siRNA-Temozolomide Run3-DMSO | NM_0053<br>28 | HAS2 | hyaluronan synthase<br>2 | 0.622372 Inlier  |
| siRNA Disorazole DMSO Run2   | NM_0053<br>28 | HAS2 | hyaluronan synthase<br>2 | 2.275322 Inlier  |
| siRNA-Vinblastine Run1-DMSO  | NM_0053<br>28 | HAS2 | hyaluronan synthase<br>2 | 2.370057 Inlier  |
| siRNA Disorazole DMSO Run1   | NM_0053<br>29 | HAS3 | hyaluronan synthase<br>3 | -0.876185 Inlier |
| siRNA-Vinblastine Run2-DMSO  | NM_0053<br>29 | HAS3 | hyaluronan synthase<br>3 | -0.472815 Inlier |
| siRNA-Temozolomide Run2-DMSO | NM_0053<br>29 | HAS3 | hyaluronan synthase<br>3 | -0.457006 Inlier |
| siRNA Disorazole DMSO Run3   | NM_0053<br>29 | HAS3 | hyaluronan synthase<br>3 | -0.069649 Inlier |
| siRNA-Temozolomide Run1-DMSO | NM_0053<br>29 | HAS3 | hyaluronan synthase<br>3 | 0.069649 Inlier  |
| siRNA-Temozolomide Run3-DMSO | NM_0053<br>29 | HAS3 | hyaluronan synthase<br>3 | 1.024595 Inlier  |
| siRNA Disorazole DMSO Run2   | NM_0053<br>29 | HAS3 | hyaluronan synthase<br>3 | 1.609307 Inlier  |
| siRNA-Vinblastine Run1-DMSO  | NM_0053<br>29 | HAS3 | hyaluronan synthase<br>3 | 3.226888 Inlier  |

Identification of Survival Genes in Human Glioblastoma Cells Using siRNA Screening  
 Nikhil G Thaker, Fang Zhang, Peter R. McDonald, Tong Ying Shun, Michael D Lewen, Ian F. Pollack, and John S. Lazo  
 Molecular Pharmacology

|                              |               |      |                                          |           |        |
|------------------------------|---------------|------|------------------------------------------|-----------|--------|
| siRNA-Temozolomide Run3-DMSO | NM_0042<br>62 | HAT  | transmembrane<br>protease,<br>serine 11D | -1.956449 | Inlier |
| siRNA Disorazole DMSO Run2   | NM_0042<br>62 | HAT  | transmembrane<br>protease,<br>serine 11D | -0.695565 | Inlier |
| siRNA-Temozolomide Run2-DMSO | NM_0042<br>62 | HAT  | transmembrane<br>protease,<br>serine 11D | -0.653435 | Inlier |
| siRNA-Temozolomide Run1-DMSO | NM_0042<br>62 | HAT  | transmembrane<br>protease,<br>serine 11D | -0.017986 | Inlier |
| siRNA Disorazole DMSO Run3   | NM_0042<br>62 | HAT  | transmembrane<br>protease,<br>serine 11D | 0.017986  | Inlier |
| siRNA Disorazole DMSO Run1   | NM_0042<br>62 | HAT  | transmembrane<br>protease,<br>serine 11D | 0.05414   | Inlier |
| siRNA-Vinblastine Run1-DMSO  | NM_0042<br>62 | HAT  | transmembrane<br>protease,<br>serine 11D | 1.121053  | Inlier |
| siRNA-Vinblastine Run2-DMSO  | NM_0042<br>62 | HAT  | transmembrane<br>protease,<br>serine 11D | 1.565454  | Inlier |
| siRNA Disorazole DMSO Run1   | NM_0036<br>42 | HAT1 | histone<br>acetyltransferase 1           | -2.256854 | Inlier |
| siRNA-Temozolomide Run1-DMSO | NM_0036<br>42 | HAT1 | histone<br>acetyltransferase 1           | -0.526911 | Inlier |
| siRNA-Vinblastine Run2-DMSO  | NM_0036<br>42 | HAT1 | histone<br>acetyltransferase 1           | -0.279747 | Inlier |
| siRNA-Temozolomide Run2-DMSO | NM_0036<br>42 | HAT1 | histone<br>acetyltransferase 1           | -0.085303 | Inlier |

Identification of Survival Genes in Human Glioblastoma Cells Using siRNA Screening  
 Nikhil G Thaker, Fang Zhang, Peter R. McDonald, Tong Ying Shun, Michael D Lewen, Ian F. Pollack, and John S. Lazo

|                                                           |               |        |                                                |           |         |
|-----------------------------------------------------------|---------------|--------|------------------------------------------------|-----------|---------|
| Molecular Pharmacology<br>siRNA-Vinblastine Run1-<br>DMSO | NM_0036<br>42 | HAT1   | histone<br>acetyltrans<br>ferase 1             | 0.085304  | Inlier  |
| siRNA Disorazole DMSO Run3                                | NM_0036<br>42 | HAT1   | histone<br>acetyltrans<br>ferase 1             | 0.822088  | Inlier  |
| siRNA Disorazole DMSO Run2                                | NM_0036<br>42 | HAT1   | histone<br>acetyltrans<br>ferase 1             | 1.214954  | Inlier  |
| siRNA-Temozolomide Run3-<br>DMSO                          | NM_0036<br>42 | HAT1   | histone<br>acetyltrans<br>ferase 1             | 1.754571  | Inlier  |
| siRNA-Temozolomide Run3-<br>DMSO                          | NM_0122<br>06 | HAVCR1 | hepatitis A<br>virus<br>cellular<br>receptor 1 | -1.095432 | Inlier  |
| siRNA-Temozolomide Run2-<br>DMSO                          | NM_0122<br>06 | HAVCR1 | hepatitis A<br>virus<br>cellular<br>receptor 1 | -0.694293 | Inlier  |
| siRNA-Temozolomide Run1-<br>DMSO                          | NM_0122<br>06 | HAVCR1 | hepatitis A<br>virus<br>cellular<br>receptor 1 | -0.654707 | Inlier  |
| siRNA Disorazole DMSO Run1                                | NM_0122<br>06 | HAVCR1 | hepatitis A<br>virus<br>cellular<br>receptor 1 | -0.087955 | Inlier  |
| siRNA Disorazole DMSO Run3                                | NM_0122<br>06 | HAVCR1 | hepatitis A<br>virus<br>cellular<br>receptor 1 | 0.087955  | Inlier  |
| siRNA-Vinblastine Run2-<br>DMSO                           | NM_0122<br>06 | HAVCR1 | hepatitis A<br>virus<br>cellular<br>receptor 1 | 0.557429  | Inlier  |
| siRNA-Vinblastine Run1-<br>DMSO                           | NM_0122<br>06 | HAVCR1 | hepatitis A<br>virus<br>cellular<br>receptor 1 | 3.580944  | Outlier |
| siRNA Disorazole DMSO Run2                                | NM_0122<br>06 | HAVCR1 | hepatitis A<br>virus<br>cellular<br>receptor 1 | 4.14728   | Outlier |
| siRNA-Temozolomide Run3-<br>DMSO                          | NM_0327<br>82 | HAVCR2 | hepatitis A<br>virus<br>cellular<br>receptor 2 | -1.628309 | Inlier  |
| siRNA Disorazole DMSO Run1                                | NM_0327<br>82 | HAVCR2 | hepatitis A<br>virus<br>cellular<br>receptor 2 | -0.697508 | Inlier  |

Identification of Survival Genes in Human Glioblastoma Cells Using siRNA Screening  
 Nikhil G Thaker, Fang Zhang, Peter R. McDonald, Tong Ying Shun, Michael D Lewen, Ian F. Pollack, and John S. Lazo

Molecular Pharmacology

| siRNA Treatment              | Gene ID   | Gene Name | Gene Description                                                      | Value     | Category |
|------------------------------|-----------|-----------|-----------------------------------------------------------------------|-----------|----------|
| siRNA-Temozolomide Run1-DMSO | NM_032782 | HAVCR2    | hepatitis A virus cellular receptor 2                                 | -0.202451 | Inlier   |
| siRNA-Temozolomide Run2-DMSO | NM_032782 | HAVCR2    | hepatitis A virus cellular receptor 2                                 | -0.165049 | Inlier   |
| siRNA-Vinblastine Run2-DMSO  | NM_032782 | HAVCR2    | hepatitis A virus cellular receptor 2                                 | 0.165049  | Inlier   |
| siRNA Disorazole DMSO Run3   | NM_032782 | HAVCR2    | hepatitis A virus cellular receptor 2                                 | 0.651492  | Inlier   |
| siRNA-Vinblastine Run1-DMSO  | NM_032782 | HAVCR2    | hepatitis A virus cellular receptor 2                                 | 1.092178  | Inlier   |
| siRNA Disorazole DMSO Run2   | NM_032782 | HAVCR2    | hepatitis A virus holocytochrome c synthase (cytochrome c heme-lyase) | 1.325655  | Inlier   |
| siRNA Disorazole DMSO Run1   | NM_005333 | HCCS      | hepatitis A virus holocytochrome c synthase (cytochrome c heme-lyase) | -2.776595 | Inlier   |
| siRNA Disorazole DMSO Run3   | NM_005333 | HCCS      | hepatitis A virus holocytochrome c synthase (cytochrome c heme-lyase) | -0.667229 | Inlier   |
| siRNA-Temozolomide Run1-DMSO | NM_005333 | HCCS      | hepatitis A virus holocytochrome c synthase (cytochrome c heme-lyase) | -0.234152 | Inlier   |
| siRNA-Temozolomide Run2-DMSO | NM_005333 | HCCS      | hepatitis A virus holocytochrome c synthase (cytochrome c heme-lyase) | -0.151868 | Inlier   |



Identification of Survival Genes in Human Glioblastoma Cells Using siRNA Screening  
 Nikhil G Thaker, Fang Zhang, Peter R. McDonald, Tong Ying Shun, Michael D Lewen, Ian F. Pollack, and John S. Lazo

Molecular Pharmacology

| siRNA Treatment              | Gene ID   | Cell Line | Gene Name                                           | Value     | Category |
|------------------------------|-----------|-----------|-----------------------------------------------------|-----------|----------|
| siRNA-Temozolomide Run3-DMSO | NM_005333 | HCCS      | holocytochrome c synthase (cytochrome c heme-lyase) | 0.151868  | Inlier   |
| siRNA-Vinblastine Run2-DMSO  | NM_005333 | HCCS      | holocytochrome c synthase (cytochrome c heme-lyase) | 0.681771  | Inlier   |
| siRNA-Vinblastine Run1-DMSO  | NM_005333 | HCCS      | holocytochrome c synthase (cytochrome c heme-lyase) | 3.516842  | Outlier  |
| siRNA Disorazole DMSO Run2   | NM_005333 | HCCS      | holocytochrome c synthase (cytochrome c heme-lyase) | 3.547612  | Outlier  |
| siRNA Disorazole DMSO Run2   | NM_002110 | HCK       | hemopoietic cell kinase                             | -0.79738  | Inlier   |
| siRNA-Temozolomide Run3-DMSO | NM_002110 | HCK       | hemopoietic cell kinase                             | -0.55162  | Inlier   |
| siRNA-Temozolomide Run1-DMSO | NM_002110 | HCK       | hemopoietic cell kinase                             | -0.460594 | Inlier   |
| siRNA-Temozolomide Run2-DMSO | NM_002110 | HCK       | hemopoietic cell kinase                             | -0.077722 | Inlier   |
| siRNA Disorazole DMSO Run3   | NM_002110 | HCK       | hemopoietic cell kinase                             | 0.077722  | Inlier   |
| siRNA Disorazole DMSO Run1   | NM_002110 | HCK       | hemopoietic cell kinase                             | 2.267586  | Inlier   |
| siRNA-Vinblastine Run1-DMSO  | NM_002110 | HCK       | hemopoietic cell kinase                             | 2.640935  | Inlier   |
| siRNA-Vinblastine Run2-DMSO  | NM_002110 | HCK       | hemopoietic cell kinase                             | 3.661876  | Outlier  |

Identification of Survival Genes in Human Glioblastoma Cells Using siRNA Screening  
 Nikhil G Thaker, Fang Zhang, Peter R. McDonald, Tong Ying Shun, Michael D Lewen, Ian F. Pollack, and John S. Lazo  
 Molecular Pharmacology

|                              |               |      |                                                                                        |           |        |
|------------------------------|---------------|------|----------------------------------------------------------------------------------------|-----------|--------|
| siRNA Disorazole DMSO Run2   | NM_0210<br>72 | HCN1 | hyperpolarization<br>activated<br>cyclic<br>nucleotide-gated<br>potassium<br>channel 1 | -2.391071 | Inlier |
| siRNA-Temozolomide Run3-DMSO | NM_0210<br>72 | HCN1 | hyperpolarization<br>activated<br>cyclic<br>nucleotide-gated<br>potassium<br>channel 1 | -1.989    | Inlier |
| siRNA Disorazole DMSO Run1   | NM_0210<br>72 | HCN1 | hyperpolarization<br>activated<br>cyclic<br>nucleotide-gated<br>potassium<br>channel 1 | -0.48858  | Inlier |
| siRNA-Temozolomide Run2-DMSO | NM_0210<br>72 | HCN1 | hyperpolarization<br>activated<br>cyclic<br>nucleotide-gated<br>potassium<br>channel 1 | -0.008008 | Inlier |
| siRNA Disorazole DMSO Run3   | NM_0210<br>72 | HCN1 | hyperpolarization<br>activated<br>cyclic<br>nucleotide-gated<br>potassium<br>channel 1 | 0.008008  | Inlier |

Identification of Survival Genes in Human Glioblastoma Cells Using siRNA Screening

Nikhil G Thaker, Fang Zhang, Peter R. McDonald, Tong Ying Shun, Michael D Lewen, Ian F. Pollack, and John S. Lazo

Molecular Pharmacology

|                              |           |      |                                                                                        |          |        |
|------------------------------|-----------|------|----------------------------------------------------------------------------------------|----------|--------|
| siRNA-Temozolomide Run1-DMSO | NM_021072 | HCN1 | hyperpolarization<br>activated<br>cyclic<br>nucleotide-gated<br>potassium<br>channel 1 | 0.341218 | Inlier |
| siRNA-Vinblastine Run2-DMSO  | NM_021072 | HCN1 | hyperpolarization<br>activated<br>cyclic<br>nucleotide-gated<br>potassium<br>channel 1 | 0.86042  | Inlier |
| siRNA-Vinblastine Run1-DMSO  | NM_021072 | HCN1 | hyperpolarization<br>activated<br>cyclic<br>nucleotide-gated<br>potassium<br>channel 1 | 0.950935 | Inlier |
| siRNA-Temozolomide Run2-DMSO | NM_001194 | HCN2 | hyperpolarization<br>activated<br>cyclic<br>nucleotide-gated<br>potassium<br>channel 2 | -1.18844 | Inlier |
| siRNA Disorazole DMSO Run1   | NM_001194 | HCN2 | hyperpolarization<br>activated<br>cyclic<br>nucleotide-gated<br>potassium<br>channel 2 | -0.59888 | Inlier |

Identification of Survival Genes in Human Glioblastoma Cells Using siRNA Screening  
 Nikhil G Thaker, Fang Zhang, Peter R. McDonald, Tong Ying Shun, Michael D Lewen, Ian F. Pollack, and John S. Lazo  
 Molecular Pharmacology

|                              |               |      |                                                                                        |           |        |
|------------------------------|---------------|------|----------------------------------------------------------------------------------------|-----------|--------|
| siRNA-Temozolomide Run3-DMSO | NM_0011<br>94 | HCN2 | hyperpolarization<br>activated<br>cyclic<br>nucleotide-gated<br>potassium<br>channel 2 | -0.539801 | Inlier |
| siRNA Disorazole DMSO Run2   | NM_0011<br>94 | HCN2 | hyperpolarization<br>activated<br>cyclic<br>nucleotide-gated<br>potassium<br>channel 2 | -0.201021 | Inlier |
| siRNA Disorazole DMSO Run3   | NM_0011<br>94 | HCN2 | hyperpolarization<br>activated<br>cyclic<br>nucleotide-gated<br>potassium<br>channel 2 | 0.201021  | Inlier |
| siRNA-Temozolomide Run1-DMSO | NM_0011<br>94 | HCN2 | hyperpolarization<br>activated<br>cyclic<br>nucleotide-gated<br>potassium<br>channel 2 | 0.75012   | Inlier |
| siRNA-Vinblastine Run1-DMSO  | NM_0011<br>94 | HCN2 | hyperpolarization<br>activated<br>cyclic<br>nucleotide-gated<br>potassium<br>channel 2 | 0.842523  | Inlier |

Identification of Survival Genes in Human Glioblastoma Cells Using siRNA Screening  
 Nikhil G Thaker, Fang Zhang, Peter R. McDonald, Tong Ying Shun, Michael D Lewen, Ian F. Pollack, and John S. Lazo  
 Molecular Pharmacology

|                              |               |      |                                                                                        |           |         |
|------------------------------|---------------|------|----------------------------------------------------------------------------------------|-----------|---------|
| siRNA-Vinblastine Run2-DMSO  | NM_0011<br>94 | HCN2 | hyperpolarization<br>activated<br>cyclic<br>nucleotide-gated<br>potassium<br>channel 2 | 1.254787  | Inlier  |
| siRNA Disorazole DMSO Run2   | NM_0208<br>97 | HCN3 | hyperpolarization<br>activated<br>cyclic<br>nucleotide-gated<br>potassium<br>channel 3 | -6.693305 | Outlier |
| siRNA-Temozolomide Run1-DMSO | NM_0208<br>97 | HCN3 | hyperpolarization<br>activated<br>cyclic<br>nucleotide-gated<br>potassium<br>channel 3 | -0.927534 | Inlier  |
| siRNA Disorazole DMSO Run1   | NM_0208<br>97 | HCN3 | hyperpolarization<br>activated<br>cyclic<br>nucleotide-gated<br>potassium<br>channel 3 | -0.340809 | Inlier  |
| siRNA-Temozolomide Run2-DMSO | NM_0208<br>97 | HCN3 | hyperpolarization<br>activated<br>cyclic<br>nucleotide-gated<br>potassium<br>channel 3 | -0.087728 | Inlier  |

Identification of Survival Genes in Human Glioblastoma Cells Using siRNA Screening  
 Nikhil G Thaker, Fang Zhang, Peter R. McDonald, Tong Ying Shun, Michael D Lewen, Ian F. Pollack, and John S. Lazo  
 Molecular Pharmacology

|                              |           |      |                                                                                        |           |        |
|------------------------------|-----------|------|----------------------------------------------------------------------------------------|-----------|--------|
| siRNA-Temozolomide Run3-DMSO | NM_020897 | HCN3 | hyperpolarization<br>activated<br>cyclic<br>nucleotide-gated<br>potassium<br>channel 3 | 0.087728  | Inlier |
| siRNA-Vinblastine Run1-DMSO  | NM_020897 | HCN3 | hyperpolarization<br>activated<br>cyclic<br>nucleotide-gated<br>potassium<br>channel 3 | 0.421466  | Inlier |
| siRNA-Vinblastine Run2-DMSO  | NM_020897 | HCN3 | hyperpolarization<br>activated<br>cyclic<br>nucleotide-gated<br>potassium<br>channel 3 | 2.330638  | Inlier |
| siRNA Disorazole DMSO Run3   | NM_020897 | HCN3 | hyperpolarization<br>activated<br>cyclic<br>nucleotide-gated<br>potassium<br>channel 3 | 2.345645  | Inlier |
| siRNA-Temozolomide Run3-DMSO | NM_005477 | HCN4 | hyperpolarization<br>activated<br>cyclic<br>nucleotide-gated<br>potassium<br>channel 4 | -1.343012 | Inlier |

Identification of Survival Genes in Human Glioblastoma Cells Using siRNA Screening  
 Nikhil G Thaker, Fang Zhang, Peter R. McDonald, Tong Ying Shun, Michael D Lewen, Ian F. Pollack, and John S. Lazo  
 Molecular Pharmacology

|                              |               |      |                                                                                        |           |        |
|------------------------------|---------------|------|----------------------------------------------------------------------------------------|-----------|--------|
| siRNA-Temozolomide Run2-DMSO | NM_0054<br>77 | HCN4 | hyperpolarization<br>activated<br>cyclic<br>nucleotide-gated<br>potassium<br>channel 4 | -0.783717 | Inlier |
| siRNA Disorazole DMSO Run3   | NM_0054<br>77 | HCN4 | hyperpolarization<br>activated<br>cyclic<br>nucleotide-gated<br>potassium<br>channel 4 | -0.565283 | Inlier |
| siRNA Disorazole DMSO Run2   | NM_0054<br>77 | HCN4 | hyperpolarization<br>activated<br>cyclic<br>nucleotide-gated<br>potassium<br>channel 4 | -0.252066 | Inlier |
| siRNA Disorazole DMSO Run1   | NM_0054<br>77 | HCN4 | hyperpolarization<br>activated<br>cyclic<br>nucleotide-gated<br>potassium<br>channel 4 | 0.252066  | Inlier |
| siRNA-Temozolomide Run1-DMSO | NM_0054<br>77 | HCN4 | hyperpolarization<br>activated<br>cyclic<br>nucleotide-gated<br>potassium<br>channel 4 | 0.390131  | Inlier |

Identification of Survival Genes in Human Glioblastoma Cells Using siRNA Screening  
 Nikhil G Thaker, Fang Zhang, Peter R. McDonald, Tong Ying Shun, Michael D Lewen, Ian F. Pollack, and John S. Lazo  
 Molecular Pharmacology

|                              |           |        |                                                                                        |           |        |
|------------------------------|-----------|--------|----------------------------------------------------------------------------------------|-----------|--------|
| siRNA-Vinblastine Run1-DMSO  | NM_005477 | HCN4   | hyperpolarization<br>activated<br>cyclic<br>nucleotide-gated<br>potassium<br>channel 4 | 0.818395  | Inlier |
| siRNA-Vinblastine Run2-DMSO  | NM_005477 | HCN4   | hyperpolarization<br>activated<br>cyclic<br>nucleotide-gated<br>potassium<br>channel 4 | 1.477796  | Inlier |
| siRNA-Temozolomide Run1-DMSO | NM_001525 | HCRTR1 | hypocretin<br>(orexin)<br>receptor 1                                                   | -1.450705 | Inlier |
| siRNA-Temozolomide Run2-DMSO | NM_001525 | HCRTR1 | hypocretin<br>(orexin)<br>receptor 1                                                   | -1.403319 | Inlier |
| siRNA-Temozolomide Run3-DMSO | NM_001525 | HCRTR1 | hypocretin<br>(orexin)<br>receptor 1                                                   | -0.684443 | Inlier |
| siRNA Disorazole DMSO Run1   | NM_001525 | HCRTR1 | hypocretin<br>(orexin)<br>receptor 1                                                   | -0.178034 | Inlier |
| siRNA-Vinblastine Run2-DMSO  | NM_001525 | HCRTR1 | hypocretin<br>(orexin)<br>receptor 1                                                   | 0.178034  | Inlier |
| siRNA-Vinblastine Run1-DMSO  | NM_001525 | HCRTR1 | hypocretin<br>(orexin)<br>receptor 1                                                   | 0.477362  | Inlier |
| siRNA Disorazole DMSO Run2   | NM_001525 | HCRTR1 | hypocretin<br>(orexin)<br>receptor 1                                                   | 0.664557  | Inlier |
| siRNA Disorazole DMSO Run3   | NM_001525 | HCRTR1 | hypocretin<br>(orexin)<br>receptor 1                                                   | 2.265405  | Inlier |
| siRNA-Temozolomide Run3-DMSO | NM_001526 | HCRTR2 | hypocretin<br>(orexin)<br>receptor 2                                                   | -2.010572 | Inlier |
| siRNA-Temozolomide Run1-DMSO | NM_001526 | HCRTR2 | hypocretin<br>(orexin)<br>receptor 2                                                   | -0.761626 | Inlier |
| siRNA-Temozolomide Run2-DMSO | NM_001526 | HCRTR2 | hypocretin<br>(orexin)<br>receptor 2                                                   | -0.235176 | Inlier |



Identification of Survival Genes in Human Glioblastoma Cells Using siRNA Screening  
 Nikhil G Thaker, Fang Zhang, Peter R. McDonald, Tong Ying Shun, Michael D Lewen, Ian F. Pollack, and John S. Lazo

Molecular Pharmacology

|                              |               |        |                                 |           |        |
|------------------------------|---------------|--------|---------------------------------|-----------|--------|
| siRNA Disorazole DMSO Run1   | NM_0015<br>26 | HCRTR2 | hypocretin (orexin) receptor 2  | -0.152133 | Inlier |
| siRNA Disorazole DMSO Run2   | NM_0015<br>26 | HCRTR2 | hypocretin (orexin) receptor 2  | 0.152133  | Inlier |
| siRNA-Vinblastine Run2-DMSO  | NM_0015<br>26 | HCRTR2 | hypocretin (orexin) receptor 2  | 0.587374  | Inlier |
| siRNA Disorazole DMSO Run3   | NM_0015<br>26 | HCRTR2 | hypocretin (orexin) receptor 2  | 1.242324  | Inlier |
| siRNA-Vinblastine Run1-DMSO  | NM_0015<br>26 | HCRTR2 | hypocretin (orexin) receptor 2  | 1.310338  | Inlier |
| siRNA-Temozolomide Run3-DMSO | NM_0021<br>11 | HD     | huntingtin (Huntington disease) | -0.849355 | Inlier |
| siRNA Disorazole DMSO Run2   | NM_0021<br>11 | HD     | huntingtin (Huntington disease) | -0.763701 | Inlier |
| siRNA Disorazole DMSO Run3   | NM_0021<br>11 | HD     | huntingtin (Huntington disease) | -0.585299 | Inlier |
| siRNA-Temozolomide Run2-DMSO | NM_0021<br>11 | HD     | huntingtin (Huntington disease) | -0.026593 | Inlier |
| siRNA Disorazole DMSO Run1   | NM_0021<br>11 | HD     | huntingtin (Huntington disease) | 0.026593  | Inlier |
| siRNA-Temozolomide Run1-DMSO | NM_0021<br>11 | HD     | huntingtin (Huntington disease) | 0.365247  | Inlier |
| siRNA-Vinblastine Run1-DMSO  | NM_0021<br>11 | HD     | huntingtin (Huntington disease) | 0.771975  | Inlier |
| siRNA-Vinblastine Run2-DMSO  | NM_0021<br>11 | HD     | huntingtin (Huntington disease) | 1.108052  | Inlier |
| siRNA-Temozolomide Run3-DMSO | NM_0049<br>64 | HDAC1  | histone deacetylase 1           | -0.851457 | Inlier |

Identification of Survival Genes in Human Glioblastoma Cells Using siRNA Screening  
 Nikhil G Thaker, Fang Zhang, Peter R. McDonald, Tong Ying Shun, Michael D Lewen, Ian F. Pollack, and John S. Lazo

| Molecular Pharmacology       |               |        |                           | histone   |        |
|------------------------------|---------------|--------|---------------------------|-----------|--------|
| siRNA-Temozolomide Run2-DMSO | NM_0049<br>64 | HDAC1  | histone<br>deacetylase 1  | -0.826184 | Inlier |
| siRNA-Temozolomide Run1-DMSO | NM_0049<br>64 | HDAC1  | histone<br>deacetylase 1  | -0.325278 | Inlier |
| siRNA Disorazole DMSO Run3   | NM_0049<br>64 | HDAC1  | histone<br>deacetylase 1  | -0.113478 | Inlier |
| siRNA Disorazole DMSO Run1   | NM_0049<br>64 | HDAC1  | histone<br>deacetylase 1  | 0.113478  | Inlier |
| siRNA-Vinblastine Run2-DMSO  | NM_0049<br>64 | HDAC1  | histone<br>deacetylase 1  | 0.542112  | Inlier |
| siRNA Disorazole DMSO Run2   | NM_0049<br>64 | HDAC1  | histone<br>deacetylase 1  | 0.806888  | Inlier |
| siRNA-Vinblastine Run1-DMSO  | NM_0049<br>64 | HDAC1  | histone<br>deacetylase 1  | 1.091656  | Inlier |
| siRNA Disorazole DMSO Run1   | NM_0320<br>19 | HDAC10 | histone<br>deacetylase 10 | -2.001267 | Inlier |
| siRNA-Temozolomide Run1-DMSO | NM_0320<br>19 | HDAC10 | histone<br>deacetylase 10 | -0.71724  | Inlier |
| siRNA-Vinblastine Run2-DMSO  | NM_0320<br>19 | HDAC10 | histone<br>deacetylase 10 | -0.337365 | Inlier |
| siRNA-Temozolomide Run2-DMSO | NM_0320<br>19 | HDAC10 | histone<br>deacetylase 10 | -0.324426 | Inlier |
| siRNA Disorazole DMSO Run2   | NM_0320<br>19 | HDAC10 | histone<br>deacetylase 10 | 0.324427  | Inlier |
| siRNA Disorazole DMSO Run3   | NM_0320<br>19 | HDAC10 | histone<br>deacetylase 10 | 0.636267  | Inlier |
| siRNA-Temozolomide Run3-DMSO | NM_0320<br>19 | HDAC10 | histone<br>deacetylase 10 | 0.712733  | Inlier |
| siRNA-Vinblastine Run1-DMSO  | NM_0320<br>19 | HDAC10 | histone<br>deacetylase 10 | 1.193699  | Inlier |
| siRNA-Temozolomide Run3-DMSO | NM_0248<br>27 | HDAC11 | histone<br>deacetylase 11 | -1.4459   | Inlier |
| siRNA Disorazole DMSO Run3   | NM_0248<br>27 | HDAC11 | histone<br>deacetylase 11 | -0.801884 | Inlier |

Identification of Survival Genes in Human Glioblastoma Cells Using siRNA Screening  
 Nikhil G Thaker, Fang Zhang, Peter R. McDonald, Tong Ying Shun, Michael D Lewen, Ian F. Pollack, and John S. Lazo

|                            |         |        |            |           |         |
|----------------------------|---------|--------|------------|-----------|---------|
| Molecular Pharmacology     |         |        | histone    |           |         |
| siRNA-Vinblastine Run2-    | NM_0248 |        | deacetylas |           |         |
| DMSO                       | 27      | HDAC11 | e 11       | -0.519632 | Inlier  |
| siRNA-Temozolomide Run2-   | NM_0248 |        | histone    |           |         |
| DMSO                       | 27      | HDAC11 | deacetylas | -0.381191 | Inlier  |
| siRNA-Temozolomide Run1-   | NM_0248 |        | e 11       |           |         |
| DMSO                       | 27      | HDAC11 | deacetylas | 0.381191  | Inlier  |
| siRNA Disorazole DMSO Run1 | NM_0248 |        | histone    |           |         |
|                            | 27      | HDAC11 | deacetylas | 0.547116  | Inlier  |
| siRNA-Vinblastine Run1-    | NM_0248 |        | e 11       |           |         |
| DMSO                       | 27      | HDAC11 | deacetylas | 2.16409   | Inlier  |
| siRNA Disorazole DMSO Run2 | NM_0248 |        | histone    |           |         |
|                            | 27      | HDAC11 | deacetylas | 2.928697  | Inlier  |
| siRNA-Temozolomide Run3-   | NM_0015 |        | e 11       |           |         |
| DMSO                       | 27      | HDAC2  | deacetylas | -2.407788 | Inlier  |
| siRNA-Temozolomide Run2-   | NM_0015 |        | histone    |           |         |
| DMSO                       | 27      | HDAC2  | deacetylas | -0.829344 | Inlier  |
| siRNA-Temozolomide Run1-   | NM_0015 |        | e 2        |           |         |
| DMSO                       | 27      | HDAC2  | deacetylas | -0.519656 | Inlier  |
| siRNA Disorazole DMSO Run1 | NM_0015 |        | histone    |           |         |
|                            | 27      | HDAC2  | deacetylas | -0.43413  | Inlier  |
| siRNA-Vinblastine Run2-    | NM_0015 |        | e 2        |           |         |
| DMSO                       | 27      | HDAC2  | deacetylas | 0.434129  | Inlier  |
| siRNA Disorazole DMSO Run3 | NM_0015 |        | histone    |           |         |
|                            | 27      | HDAC2  | deacetylas | 0.464152  | Inlier  |
| siRNA-Vinblastine Run1-    | NM_0015 |        | e 2        |           |         |
| DMSO                       | 27      | HDAC2  | deacetylas | 2.876878  | Inlier  |
| siRNA Disorazole DMSO Run2 | NM_0015 |        | histone    |           |         |
|                            | 27      | HDAC2  | deacetylas | 3.702358  | Outlier |
| siRNA Disorazole DMSO Run1 | NM_0038 |        | e 2        |           |         |
|                            | 83      | HDAC3  | deacetylas | -0.891093 | Inlier  |
| siRNA-Temozolomide Run1-   | NM_0038 |        | histone    |           |         |
| DMSO                       | 83      | HDAC3  | deacetylas | -0.457907 | Inlier  |
| siRNA-Vinblastine Run2-    | NM_0038 |        | e 3        |           |         |
| DMSO                       | 83      | HDAC3  | deacetylas | -0.317252 | Inlier  |

Identification of Survival Genes in Human Glioblastoma Cells Using siRNA Screening  
 Nikhil G Thaker, Fang Zhang, Peter R. McDonald, Tong Ying Shun, Michael D Lewen, Ian F. Pollack, and John S. Lazo

| Molecular Pharmacology       |               |       |                       | histone   |        |
|------------------------------|---------------|-------|-----------------------|-----------|--------|
| siRNA-Temozolomide Run2-DMSO | NM_0038<br>83 | HDAC3 | deacetylase 3         | -0.071279 | Inlier |
| siRNA Disorazole DMSO Run3   | NM_0038<br>83 | HDAC3 | histone deacetylase 3 | 0.071279  | Inlier |
| siRNA-Vinblastine Run1-DMSO  | NM_0038<br>83 | HDAC3 | histone deacetylase 3 | 1.111429  | Inlier |
| siRNA Disorazole DMSO Run2   | NM_0038<br>83 | HDAC3 | histone deacetylase 3 | 1.137186  | Inlier |
| siRNA-Temozolomide Run3-DMSO | NM_0038<br>83 | HDAC3 | histone deacetylase 3 | 2.07063   | Inlier |
| siRNA-Temozolomide Run2-DMSO | NM_0060<br>37 | HDAC4 | histone deacetylase 4 | -0.742088 | Inlier |
| siRNA-Temozolomide Run3-DMSO | NM_0060<br>37 | HDAC4 | histone deacetylase 4 | -0.606912 | Inlier |
| siRNA-Vinblastine Run2-DMSO  | NM_0060<br>37 | HDAC4 | histone deacetylase 4 | -0.229447 | Inlier |
| siRNA Disorazole DMSO Run3   | NM_0060<br>37 | HDAC4 | histone deacetylase 4 | -0.000128 | Inlier |
| siRNA-Temozolomide Run1-DMSO | NM_0060<br>37 | HDAC4 | histone deacetylase 4 | 0.000128  | Inlier |
| siRNA Disorazole DMSO Run1   | NM_0060<br>37 | HDAC4 | histone deacetylase 4 | 0.837153  | Inlier |
| siRNA-Vinblastine Run1-DMSO  | NM_0060<br>37 | HDAC4 | histone deacetylase 4 | 2.000936  | Inlier |
| siRNA Disorazole DMSO Run2   | NM_0060<br>37 | HDAC4 | histone deacetylase 4 | 2.415227  | Inlier |
| siRNA-Temozolomide Run3-DMSO | NM_1392<br>05 | HDAC5 | histone deacetylase 5 | -1.80532  | Inlier |
| siRNA-Temozolomide Run2-DMSO | NM_1392<br>05 | HDAC5 | histone deacetylase 5 | -0.927778 | Inlier |
| siRNA-Vinblastine Run2-DMSO  | NM_1392<br>05 | HDAC5 | histone deacetylase 5 | -0.421222 | Inlier |
| siRNA Disorazole DMSO Run3   | NM_1392<br>05 | HDAC5 | histone deacetylase 5 | -0.039006 | Inlier |

Identification of Survival Genes in Human Glioblastoma Cells Using siRNA Screening  
 Nikhil G Thaker, Fang Zhang, Peter R. McDonald, Tong Ying Shun, Michael D Lewen, Ian F. Pollack, and John S. Lazo

| Molecular Pharmacology       |               |       |                       | histone   |        |
|------------------------------|---------------|-------|-----------------------|-----------|--------|
| siRNA-Temozolomide Run1-DMSO | NM_1392<br>05 | HDAC5 | deacetylase 5         | 0.039006  | Inlier |
| siRNA Disorazole DMSO Run1   | NM_1392<br>05 | HDAC5 | histone deacetylase 5 | 0.099419  | Inlier |
| siRNA Disorazole DMSO Run2   | NM_1392<br>05 | HDAC5 | histone deacetylase 5 | 2.475098  | Inlier |
| siRNA-Vinblastine Run1-DMSO  | NM_1392<br>05 | HDAC5 | histone deacetylase 5 | 2.924804  | Inlier |
| siRNA Disorazole DMSO Run3   | NM_0060<br>44 | HDAC6 | histone deacetylase 6 | -0.787199 | Inlier |
| siRNA-Vinblastine Run2-DMSO  | NM_0060<br>44 | HDAC6 | histone deacetylase 6 | -0.561801 | Inlier |
| siRNA Disorazole DMSO Run1   | NM_0060<br>44 | HDAC6 | histone deacetylase 6 | -0.243752 | Inlier |
| siRNA-Temozolomide Run2-DMSO | NM_0060<br>44 | HDAC6 | histone deacetylase 6 | -0.094197 | Inlier |
| siRNA-Temozolomide Run1-DMSO | NM_0060<br>44 | HDAC6 | histone deacetylase 6 | 0.094197  | Inlier |
| siRNA-Temozolomide Run3-DMSO | NM_0060<br>44 | HDAC6 | histone deacetylase 6 | 1.036036  | Inlier |
| siRNA-Vinblastine Run1-DMSO  | NM_0060<br>44 | HDAC6 | histone deacetylase 6 | 1.52141   | Inlier |
| siRNA Disorazole DMSO Run2   | NM_0060<br>44 | HDAC6 | histone deacetylase 6 | 2.373916  | Inlier |
| siRNA-Temozolomide Run2-DMSO | NM_0184<br>86 | HDAC8 | histone deacetylase 8 | -0.895014 | Inlier |
| siRNA Disorazole DMSO Run1   | NM_0184<br>86 | HDAC8 | histone deacetylase 8 | -0.716806 | Inlier |
| siRNA-Temozolomide Run1-DMSO | NM_0184<br>86 | HDAC8 | histone deacetylase 8 | -0.657298 | Inlier |
| siRNA-Vinblastine Run2-DMSO  | NM_0184<br>86 | HDAC8 | histone deacetylase 8 | -0.468088 | Inlier |
| siRNA Disorazole DMSO Run3   | NM_0184<br>86 | HDAC8 | histone deacetylase 8 | 0.468088  | Inlier |

Identification of Survival Genes in Human Glioblastoma Cells Using siRNA Screening  
 Nikhil G Thaker, Fang Zhang, Peter R. McDonald, Tong Ying Shun, Michael D Lewen, Ian F. Pollack, and John S. Lazo

|                              |               |       |                         |           |        |
|------------------------------|---------------|-------|-------------------------|-----------|--------|
| Molecular Pharmacology       |               |       | histone                 |           |        |
| siRNA-Vinblastine Run1-DMSO  | NM_0184<br>86 | HDAC8 | deacetylase 8           | 0.568461  | Inlier |
| siRNA-Temozolomide Run3-DMSO | NM_0184<br>86 | HDAC8 | histone deacetylase 8   | 0.691702  | Inlier |
| siRNA Disorazole DMSO Run2   | NM_0184<br>86 | HDAC8 | histone deacetylase 8   | 0.808488  | Inlier |
| siRNA-Temozolomide Run3-DMSO | NM_0581<br>77 | HDAC9 | histone deacetylase 9   | -1.185383 | Inlier |
| siRNA-Temozolomide Run2-DMSO | NM_0581<br>77 | HDAC9 | histone deacetylase 9   | -0.880483 | Inlier |
| siRNA-Temozolomide Run1-DMSO | NM_0581<br>77 | HDAC9 | histone deacetylase 9   | -0.468517 | Inlier |
| siRNA-Vinblastine Run2-DMSO  | NM_0581<br>77 | HDAC9 | histone deacetylase 9   | -0.112375 | Inlier |
| siRNA Disorazole DMSO Run3   | NM_0581<br>77 | HDAC9 | histone deacetylase 9   | 0.112374  | Inlier |
| siRNA Disorazole DMSO Run1   | NM_0581<br>77 | HDAC9 | histone deacetylase 9   | 0.135829  | Inlier |
| siRNA-Vinblastine Run1-DMSO  | NM_0581<br>77 | HDAC9 | histone deacetylase 9   | 2.917564  | Inlier |
| siRNA Disorazole DMSO Run2   | NM_0581<br>77 | HDAC9 | histone deacetylase 9   | 3.057213  | Inlier |
| siRNA-Temozolomide Run3-DMSO | NM_0021<br>12 | HDC   | histidine decarboxylase | -3.199018 | Inlier |
| siRNA-Temozolomide Run2-DMSO | NM_0021<br>12 | HDC   | histidine decarboxylase | -1.117665 | Inlier |
| siRNA Disorazole DMSO Run1   | NM_0021<br>12 | HDC   | histidine decarboxylase | -0.083404 | Inlier |
| siRNA-Temozolomide Run1-DMSO | NM_0021<br>12 | HDC   | histidine decarboxylase | -0.004144 | Inlier |
| siRNA-Vinblastine Run2-DMSO  | NM_0021<br>12 | HDC   | histidine decarboxylase | 0.004144  | Inlier |
| siRNA Disorazole DMSO Run3   | NM_0021<br>12 | HDC   | histidine decarboxylase | 0.231335  | Inlier |

Identification of Survival Genes in Human Glioblastoma Cells Using siRNA Screening  
 Nikhil G Thaker, Fang Zhang, Peter R. McDonald, Tong Ying Shun, Michael D Lewen, Ian F. Pollack, and John S. Lazo

Molecular Pharmacology

|                                  |               |       |                                                     |           |         |
|----------------------------------|---------------|-------|-----------------------------------------------------|-----------|---------|
| siRNA Disorazole DMSO Run2       | NM_0021<br>12 | HDC   | histidine<br>decarboxyl<br>ase                      | 2.564387  | Inlier  |
| siRNA-Vinblastine Run1-<br>DMSO  | NM_0021<br>12 | HDC   | histidine<br>decarboxyl<br>ase                      | 3.182598  | Inlier  |
| siRNA Disorazole DMSO Run1       | NM_0161<br>73 | HEMK1 | HemK<br>methyltran<br>sferase<br>family<br>member 1 | -1.626218 | Inlier  |
| siRNA-Temozolomide Run2-<br>DMSO | NM_0161<br>73 | HEMK1 | HemK<br>methyltran<br>sferase<br>family<br>member 1 | -0.933008 | Inlier  |
| siRNA-Vinblastine Run2-<br>DMSO  | NM_0161<br>73 | HEMK1 | HemK<br>methyltran<br>sferase<br>family<br>member 1 | -0.415992 | Inlier  |
| siRNA-Temozolomide Run3-<br>DMSO | NM_0161<br>73 | HEMK1 | HemK<br>methyltran<br>sferase<br>family<br>member 1 | -0.019336 | Inlier  |
| siRNA-Temozolomide Run1-<br>DMSO | NM_0161<br>73 | HEMK1 | HemK<br>methyltran<br>sferase<br>family<br>member 1 | 0.019336  | Inlier  |
| siRNA Disorazole DMSO Run3       | NM_0161<br>73 | HEMK1 | HemK<br>methyltran<br>sferase<br>family<br>member 1 | 0.042601  | Inlier  |
| siRNA Disorazole DMSO Run2       | NM_0161<br>73 | HEMK1 | HemK<br>methyltran<br>sferase<br>family<br>member 1 | 2.543718  | Inlier  |
| siRNA-Vinblastine Run1-<br>DMSO  | NM_0161<br>73 | HEMK1 | HemK<br>methyltran<br>sferase<br>family<br>member 1 | 3.988405  | Outlier |
| siRNA Disorazole DMSO Run3       | NM_0005<br>20 | HEXA  | hexosamin<br>idase A<br>(alpha<br>polypeptid<br>e)  | -1.651891 | Inlier  |

Identification of Survival Genes in Human Glioblastoma Cells Using siRNA Screening

Nikhil G Thaker, Fang Zhang, Peter R. McDonald, Tong Ying Shun, Michael D Lewen, Ian F. Pollack, and John S. Lazo

Molecular Pharmacology

|                              |               |      |                                      |           |        |
|------------------------------|---------------|------|--------------------------------------|-----------|--------|
| siRNA-Vinblastine Run2-DMSO  | NM_0005<br>20 | HEXA | hexosaminidase A (alpha polypeptide) | -0.873418 | Inlier |
| siRNA Disorazole DMSO Run1   | NM_0005<br>20 | HEXA | hexosaminidase A (alpha polypeptide) | -0.475582 | Inlier |
| siRNA-Temozolomide Run2-DMSO | NM_0005<br>20 | HEXA | hexosaminidase A (alpha polypeptide) | -0.134272 | Inlier |
| siRNA-Temozolomide Run1-DMSO | NM_0005<br>20 | HEXA | hexosaminidase A (alpha polypeptide) | 0.134273  | Inlier |
| siRNA-Temozolomide Run3-DMSO | NM_0005<br>20 | HEXA | hexosaminidase A (alpha polypeptide) | 0.179551  | Inlier |
| siRNA-Vinblastine Run1-DMSO  | NM_0005<br>20 | HEXA | hexosaminidase A (alpha polypeptide) | 1.049564  | Inlier |
| siRNA Disorazole DMSO Run2   | NM_0005<br>20 | HEXA | hexosaminidase B (beta polypeptide)  | 1.427303  | Inlier |
| siRNA Disorazole DMSO Run1   | NM_0005<br>21 | HEXB | hexosaminidase B (beta polypeptide)  | -1.170042 | Inlier |
| siRNA-Temozolomide Run2-DMSO | NM_0005<br>21 | HEXB | hexosaminidase B (beta polypeptide)  | -0.973415 | Inlier |
| siRNA-Vinblastine Run2-DMSO  | NM_0005<br>21 | HEXB | hexosaminidase B (beta polypeptide)  | -0.549478 | Inlier |



Identification of Survival Genes in Human Glioblastoma Cells Using siRNA Screening

Nikhil G Thaker, Fang Zhang, Peter R. McDonald, Tong Ying Shun, Michael D Lewen, Ian F. Pollack, and John S. Lazo

Molecular Pharmacology

|                              |           |      |                                                       |           |        |
|------------------------------|-----------|------|-------------------------------------------------------|-----------|--------|
| siRNA-Temozolomide Run1-DMSO | NM_000521 | HEXB | hexosaminidase B (beta polypeptide)                   | -0.15311  | Inlier |
| siRNA Disorazole DMSO Run3   | NM_000521 | HEXB | hexosaminidase B (beta polypeptide)                   | 0.153109  | Inlier |
| siRNA-Vinblastine Run1-DMSO  | NM_000521 | HEXB | hexosaminidase B (beta polypeptide)                   | 0.42527   | Inlier |
| siRNA-Temozolomide Run3-DMSO | NM_000521 | HEXB | hexosaminidase B (beta polypeptide)                   | 0.799522  | Inlier |
| siRNA Disorazole DMSO Run2   | NM_000521 | HEXB | homogentisate 1,2-dioxygenase (homogentisate oxidase) | 1.005523  | Inlier |
| siRNA Disorazole DMSO Run3   | NM_000187 | HGD  | homogentisate 1,2-dioxygenase (homogentisate oxidase) | -0.959248 | Inlier |
| siRNA-Temozolomide Run2-DMSO | NM_000187 | HGD  | homogentisate 1,2-dioxygenase (homogentisate oxidase) | -0.389752 | Inlier |
| siRNA-Temozolomide Run3-DMSO | NM_000187 | HGD  | homogentisate oxidase)                                | -0.388053 | Inlier |

Identification of Survival Genes in Human Glioblastoma Cells Using siRNA Screening

Nikhil G Thaker, Fang Zhang, Peter R. McDonald, Tong Ying Shun, Michael D Lewen, Ian F. Pollack, and John S. Lazo

Molecular Pharmacology

|                              |              |     |                                                          |           |         |
|------------------------------|--------------|-----|----------------------------------------------------------|-----------|---------|
| siRNA-Vinblastine Run2-DMSO  | NM_000187    | HGD | homogentisate 1,2-dioxygenase (homogentisate oxidase)    | -0.368473 | Inlier  |
| siRNA Disorazole DMSO Run1   | NM_000187    | HGD | homogentisate 1,2-dioxygenase (homogentisate oxidase)    | 0.368473  | Inlier  |
| siRNA-Temozolomide Run1-DMSO | NM_000187    | HGD | homogentisate 1,2-dioxygenase (homogentisate oxidase)    | 1.887626  | Inlier  |
| siRNA-Vinblastine Run1-DMSO  | NM_000187    | HGD | homogentisate 1,2-dioxygenase (homogentisate oxidase)    | 3.411613  | Inlier  |
| siRNA Disorazole DMSO Run2   | NM_000187    | HGD | hepatocyte growth factor (hepapoietin A; scatter factor) | 4.408014  | Outlier |
| siRNA-Temozolomide Run3-DMSO | NM_001010932 | HGF | hepatocyte growth factor (hepapoietin A; scatter factor) | -1.862213 | Inlier  |
| siRNA-Temozolomide Run2-DMSO | NM_001010932 | HGF | hepatocyte growth factor (hepapoietin A; scatter factor) | -0.920402 | Inlier  |

Identification of Survival Genes in Human Glioblastoma Cells Using siRNA Screening

Nikhil G Thaker, Fang Zhang, Peter R. McDonald, Tong Ying Shun, Michael D Lewen, Ian F. Pollack, and John S. Lazo

Molecular Pharmacology

|                              |                  |       |                                                           |           |        |
|------------------------------|------------------|-------|-----------------------------------------------------------|-----------|--------|
| siRNA Disorazole DMSO Run2   | NM_0010<br>10932 | HGF   | hepatocyte growth factor (hepapoiet in A; scatter factor) | -0.428598 | Inlier |
| siRNA-Temozolomide Run1-DMSO | NM_0010<br>10932 | HGF   | hepatocyte growth factor (hepapoiet in A; scatter factor) | -0.095351 | Inlier |
| siRNA Disorazole DMSO Run1   | NM_0010<br>10932 | HGF   | hepatocyte growth factor (hepapoiet in A; scatter factor) | 0.095351  | Inlier |
| siRNA Disorazole DMSO Run3   | NM_0010<br>10932 | HGF   | hepatocyte growth factor (hepapoiet in A; scatter factor) | 0.115746  | Inlier |
| siRNA-Vinblastine Run1-DMSO  | NM_0010<br>10932 | HGF   | hepatocyte growth factor (hepapoiet in A; scatter factor) | 1.021626  | Inlier |
| siRNA-Vinblastine Run2-DMSO  | NM_0010<br>10932 | HGF   | scatter factor)                                           | 1.080284  | Inlier |
| siRNA-Temozolomide Run3-DMSO | NM_0015<br>28    | HGFAC | HGF activator                                             | -2.464334 | Inlier |
| siRNA-Temozolomide Run2-DMSO | NM_0015<br>28    | HGFAC | HGF activator                                             | -1.413381 | Inlier |
| siRNA Disorazole DMSO Run1   | NM_0015<br>28    | HGFAC | HGF activator                                             | -0.232519 | Inlier |
| siRNA Disorazole DMSO Run2   | NM_0015<br>28    | HGFAC | HGF activator                                             | -0.228934 | Inlier |
| siRNA Disorazole DMSO Run3   | NM_0015<br>28    | HGFAC | HGF activator                                             | 0.228933  | Inlier |

Identification of Survival Genes in Human Glioblastoma Cells Using siRNA Screening

Nikhil G Thaker, Fang Zhang, Peter R. McDonald, Tong Ying Shun, Michael D Lewen, Ian F. Pollack, and John S. Lazo

|                                  |               |               |                                                                                 |           |        |
|----------------------------------|---------------|---------------|---------------------------------------------------------------------------------|-----------|--------|
| siRNA-Temozolomide Run1-<br>DMSO | NM_0015<br>28 | HGFAC         | HGF<br>activator                                                                | 0.343888  | Inlier |
| siRNA-Vinblastine Run1-<br>DMSO  | NM_0015<br>28 | HGFAC         | HGF<br>activator                                                                | 1.005112  | Inlier |
| siRNA-Vinblastine Run2-<br>DMSO  | NM_0015<br>28 | HGFAC         | HGF<br>activator                                                                | 1.583031  | Inlier |
| siRNA Disorazole DMSO Run1       | NM_0132<br>44 | HGNT-IV-<br>H | HGNT-IV-<br>H                                                                   | -1.401347 | Inlier |
| siRNA-Temozolomide Run2-<br>DMSO | NM_0132<br>44 | HGNT-IV-<br>H | HGNT-IV-<br>H                                                                   | -0.869957 | Inlier |
| siRNA-Temozolomide Run1-<br>DMSO | NM_0132<br>44 | HGNT-IV-<br>H | HGNT-IV-<br>H                                                                   | -0.755048 | Inlier |
| siRNA-Temozolomide Run3-<br>DMSO | NM_0132<br>44 | HGNT-IV-<br>H | HGNT-IV-<br>H                                                                   | -0.048192 | Inlier |
| siRNA Disorazole DMSO Run2       | NM_0132<br>44 | HGNT-IV-<br>H | HGNT-IV-<br>H                                                                   | 0.048192  | Inlier |
| siRNA-Vinblastine Run2-<br>DMSO  | NM_0132<br>44 | HGNT-IV-<br>H | HGNT-IV-<br>H                                                                   | 0.449313  | Inlier |
| siRNA Disorazole DMSO Run3       | NM_0132<br>44 | HGNT-IV-<br>H | HGNT-IV-<br>H                                                                   | 0.593952  | Inlier |
| siRNA-Vinblastine Run1-<br>DMSO  | NM_0132<br>44 | HGNT-IV-<br>H | HGNT-IV-<br>H                                                                   | 0.759403  | Inlier |
| siRNA-Temozolomide Run3-<br>DMSO | NM_0047<br>12 | HGS           | hepatocyte<br>growth<br>factor-<br>regulated<br>tyrosine<br>kinase<br>substrate | -1.14633  | Inlier |
| siRNA-Temozolomide Run2-<br>DMSO | NM_0047<br>12 | HGS           | hepatocyte<br>growth<br>factor-<br>regulated<br>tyrosine<br>kinase<br>substrate | -0.713398 | Inlier |
| siRNA-Temozolomide Run1-<br>DMSO | NM_0047<br>12 | HGS           | hepatocyte<br>growth<br>factor-<br>regulated<br>tyrosine<br>kinase<br>substrate | -0.480012 | Inlier |
| siRNA Disorazole DMSO Run2       | NM_0047<br>12 | HGS           | hepatocyte<br>growth<br>factor-<br>regulated<br>tyrosine<br>kinase<br>substrate | -0.241725 | Inlier |

Identification of Survival Genes in Human Glioblastoma Cells Using siRNA Screening  
 Nikhil G Thaker, Fang Zhang, Peter R. McDonald, Tong Ying Shun, Michael D Lewen, Ian F. Pollack, and John S. Lazo

Molecular Pharmacology

|                                  |               |        |                                                                                 |           |        |
|----------------------------------|---------------|--------|---------------------------------------------------------------------------------|-----------|--------|
| siRNA Disorazole DMSO Run1       | NM_0047<br>12 | HGS    | hepatocyte<br>growth<br>factor-<br>regulated<br>tyrosine<br>kinase<br>substrate | 0.241725  | Inlier |
| siRNA-Vinblastine Run1-<br>DMSO  | NM_0047<br>12 | HGS    | hepatocyte<br>growth<br>factor-<br>regulated<br>tyrosine<br>kinase<br>substrate | 0.635602  | Inlier |
| siRNA-Vinblastine Run2-<br>DMSO  | NM_0047<br>12 | HGS    | hepatocyte<br>growth<br>factor-<br>regulated<br>tyrosine<br>kinase<br>substrate | 0.827379  | Inlier |
| siRNA Disorazole DMSO Run3       | NM_0047<br>12 | HGS    | hepatocyte<br>growth<br>factor-<br>regulated<br>tyrosine<br>kinase<br>substrate | 1.025545  | Inlier |
| siRNA-Temozolomide Run2-<br>DMSO | NM_1527<br>40 | HIBADH | 3-<br>hydroxyiso<br>butyrate<br>dehydroge<br>nase                               | -0.809604 | Inlier |
| siRNA-Temozolomide Run3-<br>DMSO | NM_1527<br>40 | HIBADH | 3-<br>hydroxyiso<br>butyrate<br>dehydroge<br>nase                               | -0.680168 | Inlier |
| siRNA-Temozolomide Run1-<br>DMSO | NM_1527<br>40 | HIBADH | 3-<br>hydroxyiso<br>butyrate<br>dehydroge<br>nase                               | -0.668832 | Inlier |
| siRNA Disorazole DMSO Run1       | NM_1527<br>40 | HIBADH | 3-<br>hydroxyiso<br>butyrate<br>dehydroge<br>nase                               | -0.236027 | Inlier |

Identification of Survival Genes in Human Glioblastoma Cells Using siRNA Screening  
 Nikhil G Thaker, Fang Zhang, Peter R. McDonald, Tong Ying Shun, Michael D Lewen, Ian F. Pollack, and John S. Lazo

Molecular Pharmacology

|                              |               |        |                                           |           |        |
|------------------------------|---------------|--------|-------------------------------------------|-----------|--------|
| siRNA-Vinblastine Run2-DMSO  | NM_1527<br>40 | HIBADH | 3-hydroxyiso butyrate dehydrogenase       | 0.236027  | Inlier |
| siRNA Disorazole DMSO Run3   | NM_1527<br>40 | HIBADH | 3-hydroxyiso butyrate dehydrogenase       | 0.64171   | Inlier |
| siRNA-Vinblastine Run1-DMSO  | NM_1527<br>40 | HIBADH | 3-hydroxyiso butyrate dehydrogenase       | 0.957364  | Inlier |
| siRNA Disorazole DMSO Run2   | NM_1527<br>40 | HIBADH | 3-hydroxyiso butyrate dehydrogenase       | 0.972588  | Inlier |
| siRNA-Vinblastine Run2-DMSO  | NM_0143<br>62 | HIBCH  | 3-hydroxyiso butyryl-Coenzyme A hydrolase | -1.658673 | Inlier |
| siRNA-Temozolomide Run2-DMSO | NM_0143<br>62 | HIBCH  | 3-hydroxyiso butyryl-Coenzyme A hydrolase | -0.870174 | Inlier |
| siRNA-Temozolomide Run1-DMSO | NM_0143<br>62 | HIBCH  | 3-hydroxyiso butyryl-Coenzyme A hydrolase | -0.478826 | Inlier |
| siRNA Disorazole DMSO Run3   | NM_0143<br>62 | HIBCH  | 3-hydroxyiso butyryl-Coenzyme A hydrolase | -0.057353 | Inlier |
| siRNA Disorazole DMSO Run1   | NM_0143<br>62 | HIBCH  | 3-hydroxyiso butyryl-Coenzyme A hydrolase | 0.057353  | Inlier |

Identification of Survival Genes in Human Glioblastoma Cells Using siRNA Screening  
 Nikhil G Thaker, Fang Zhang, Peter R. McDonald, Tong Ying Shun, Michael D Lewen, Ian F. Pollack, and John S. Lazo

Molecular Pharmacology

|                              |               |       |                                                        |           |         |
|------------------------------|---------------|-------|--------------------------------------------------------|-----------|---------|
| siRNA-Temozolomide Run3-DMSO | NM_0143<br>62 | HIBCH | 3-hydroxyiso<br>butyryl-<br>Coenzyme<br>A<br>hydrolase | 0.126898  | Inlier  |
| siRNA Disorazole DMSO Run2   | NM_0143<br>62 | HIBCH | 3-hydroxyiso<br>butyryl-<br>Coenzyme<br>A<br>hydrolase | 4.927459  | Outlier |
| siRNA-Vinblastine Run1-DMSO  | NM_0143<br>62 | HIBCH | 3-hydroxyiso<br>butyryl-<br>Coenzyme<br>A<br>hydrolase | 6.002071  | Outlier |
| siRNA Disorazole DMSO Run3   | NM_0053<br>39 | HIP2  | huntingtin<br>interacting<br>protein 2                 | -1.004738 | Inlier  |
| siRNA Disorazole DMSO Run1   | NM_0053<br>39 | HIP2  | huntingtin<br>interacting<br>protein 2                 | -0.796684 | Inlier  |
| siRNA-Temozolomide Run2-DMSO | NM_0053<br>39 | HIP2  | huntingtin<br>interacting<br>protein 2                 | -0.552316 | Inlier  |
| siRNA-Temozolomide Run1-DMSO | NM_0053<br>39 | HIP2  | huntingtin<br>interacting<br>protein 2                 | -0.259107 | Inlier  |
| siRNA-Vinblastine Run2-DMSO  | NM_0053<br>39 | HIP2  | huntingtin<br>interacting<br>protein 2                 | 0.259107  | Inlier  |
| siRNA-Temozolomide Run3-DMSO | NM_0053<br>39 | HIP2  | huntingtin<br>interacting<br>protein 2                 | 0.383902  | Inlier  |
| siRNA Disorazole DMSO Run2   | NM_0053<br>39 | HIP2  | huntingtin<br>interacting<br>protein 2                 | 2.162935  | Inlier  |
| siRNA-Vinblastine Run1-DMSO  | NM_0053<br>39 | HIP2  | huntingtin<br>interacting<br>protein 2                 | 2.562825  | Inlier  |

Identification of Survival Genes in Human Glioblastoma Cells Using siRNA Screening  
 Nikhil G Thaker, Fang Zhang, Peter R. McDonald, Tong Ying Shun, Michael D Lewen, Ian F. Pollack, and John S. Lazo

Molecular Pharmacology

|                              |               |       |                                                       |           |        |
|------------------------------|---------------|-------|-------------------------------------------------------|-----------|--------|
| siRNA-Temozolomide Run3-DMSO | NM_1813<br>58 | HIPK1 | homeodo<br>main<br>interacting<br>protein<br>kinase 1 | -1.650161 | Inlier |
| siRNA-Temozolomide Run2-DMSO | NM_1813<br>58 | HIPK1 | homeodo<br>main<br>interacting<br>protein<br>kinase 1 | -1.216208 | Inlier |
| siRNA Disorazole DMSO Run3   | NM_1813<br>58 | HIPK1 | homeodo<br>main<br>interacting<br>protein<br>kinase 1 | -0.303773 | Inlier |
| siRNA-Temozolomide Run1-DMSO | NM_1813<br>58 | HIPK1 | homeodo<br>main<br>interacting<br>protein<br>kinase 1 | -0.187129 | Inlier |
| siRNA Disorazole DMSO Run1   | NM_1813<br>58 | HIPK1 | homeodo<br>main<br>interacting<br>protein<br>kinase 1 | 0.187128  | Inlier |
| siRNA Disorazole DMSO Run2   | NM_1813<br>58 | HIPK1 | homeodo<br>main<br>interacting<br>protein<br>kinase 1 | 0.32721   | Inlier |
| siRNA-Vinblastine Run2-DMSO  | NM_1813<br>58 | HIPK1 | homeodo<br>main<br>interacting<br>protein<br>kinase 1 | 1.02179   | Inlier |
| siRNA-Vinblastine Run1-DMSO  | NM_1813<br>58 | HIPK1 | homeodo<br>main<br>interacting<br>protein<br>kinase 1 | 2.304356  | Inlier |
| siRNA-Temozolomide Run1-DMSO | NM_0227<br>40 | HIPK2 | homeodo<br>main<br>interacting<br>protein<br>kinase 2 | -1.056503 | Inlier |
| siRNA-Temozolomide Run2-DMSO | NM_0227<br>40 | HIPK2 | homeodo<br>main<br>interacting<br>protein<br>kinase 2 | -0.914308 | Inlier |



Identification of Survival Genes in Human Glioblastoma Cells Using siRNA Screening  
 Nikhil G Thaker, Fang Zhang, Peter R. McDonald, Tong Ying Shun, Michael D Lewen, Ian F. Pollack, and John S. Lazo

Molecular Pharmacology

|                              |               |       |                                                       |           |        |
|------------------------------|---------------|-------|-------------------------------------------------------|-----------|--------|
| siRNA-Vinblastine Run1-DMSO  | NM_0227<br>40 | HIPK2 | homeodo<br>main<br>interacting<br>protein<br>kinase 2 | -0.222626 | Inlier |
| siRNA Disorazole DMSO Run3   | NM_0227<br>40 | HIPK2 | homeodo<br>main<br>interacting<br>protein<br>kinase 2 | -0.091775 | Inlier |
| siRNA-Temozolomide Run3-DMSO | NM_0227<br>40 | HIPK2 | homeodo<br>main<br>interacting<br>protein<br>kinase 2 | 0.091775  | Inlier |
| siRNA Disorazole DMSO Run1   | NM_0227<br>40 | HIPK2 | homeodo<br>main<br>interacting<br>protein<br>kinase 2 | 0.434692  | Inlier |
| siRNA-Vinblastine Run2-DMSO  | NM_0227<br>40 | HIPK2 | homeodo<br>main<br>interacting<br>protein<br>kinase 2 | 1.837688  | Inlier |
| siRNA Disorazole DMSO Run2   | NM_0227<br>40 | HIPK2 | homeodo<br>main<br>interacting<br>protein<br>kinase 2 | 2.803763  | Inlier |
| siRNA-Temozolomide Run3-DMSO | NM_0057<br>34 | HIPK3 | homeodo<br>main<br>interacting<br>protein<br>kinase 3 | -1.330534 | Inlier |
| siRNA-Temozolomide Run1-DMSO | NM_0057<br>34 | HIPK3 | homeodo<br>main<br>interacting<br>protein<br>kinase 3 | -0.643858 | Inlier |
| siRNA-Temozolomide Run2-DMSO | NM_0057<br>34 | HIPK3 | homeodo<br>main<br>interacting<br>protein<br>kinase 3 | -0.481428 | Inlier |
| siRNA Disorazole DMSO Run1   | NM_0057<br>34 | HIPK3 | homeodo<br>main<br>interacting<br>protein<br>kinase 3 | -0.311532 | Inlier |

Identification of Survival Genes in Human Glioblastoma Cells Using siRNA Screening  
 Nikhil G Thaker, Fang Zhang, Peter R. McDonald, Tong Ying Shun, Michael D Lewen, Ian F. Pollack, and John S. Lazo

Molecular Pharmacology

|                              |               |       |                                                       |           |        |
|------------------------------|---------------|-------|-------------------------------------------------------|-----------|--------|
| siRNA-Vinblastine Run1-DMSO  | NM_0057<br>34 | HIPK3 | homeodo<br>main<br>interacting<br>protein<br>kinase 3 | 0.311532  | Inlier |
| siRNA-Vinblastine Run2-DMSO  | NM_0057<br>34 | HIPK3 | homeodo<br>main<br>interacting<br>protein<br>kinase 3 | 0.705142  | Inlier |
| siRNA Disorazole DMSO Run3   | NM_0057<br>34 | HIPK3 | homeodo<br>main<br>interacting<br>protein<br>kinase 3 | 0.99634   | Inlier |
| siRNA Disorazole DMSO Run2   | NM_0057<br>34 | HIPK3 | homeodo<br>main<br>interacting<br>protein<br>kinase 3 | 1.59702   | Inlier |
| siRNA-Vinblastine Run1-DMSO  | NM_1446<br>85 | HIPK4 | homeodo<br>main<br>interacting<br>protein<br>kinase 4 | -1.15364  | Inlier |
| siRNA-Temozolomide Run3-DMSO | NM_1446<br>85 | HIPK4 | homeodo<br>main<br>interacting<br>protein<br>kinase 4 | -0.797715 | Inlier |
| siRNA Disorazole DMSO Run1   | NM_1446<br>85 | HIPK4 | homeodo<br>main<br>interacting<br>protein<br>kinase 4 | -0.354144 | Inlier |
| siRNA-Temozolomide Run2-DMSO | NM_1446<br>85 | HIPK4 | homeodo<br>main<br>interacting<br>protein<br>kinase 4 | -0.070582 | Inlier |
| siRNA-Temozolomide Run1-DMSO | NM_1446<br>85 | HIPK4 | homeodo<br>main<br>interacting<br>protein<br>kinase 4 | 0.070581  | Inlier |
| siRNA Disorazole DMSO Run3   | NM_1446<br>85 | HIPK4 | homeodo<br>main<br>interacting<br>protein<br>kinase 4 | 0.551285  | Inlier |

Identification of Survival Genes in Human Glioblastoma Cells Using siRNA Screening

Nikhil G Thaker, Fang Zhang, Peter R. McDonald, Tong Ying Shun, Michael D Lewen, Ian F. Pollack, and John S. Lazo

Molecular Pharmacology

|                              |               |        |                                                                                   |           |         |
|------------------------------|---------------|--------|-----------------------------------------------------------------------------------|-----------|---------|
| siRNA-Vinblastine Run2-DMSO  | NM_1446<br>85 | HIPK4  | homeodo<br>main<br>interacting<br>protein<br>kinase 4                             | 0.928129  | Inlier  |
| siRNA Disorazole DMSO Run2   | NM_1446<br>85 | HIPK4  | homeodo<br>main<br>interacting<br>protein<br>kinase 4                             | 2.482185  | Inlier  |
| siRNA-Temozolomide Run3-DMSO | NM_0245<br>03 | HIVEP3 | human<br>immunode<br>ficiency<br>virus type I<br>enhancer<br>binding<br>protein 3 | -3.813028 | Outlier |
| siRNA Disorazole DMSO Run3   | NM_0245<br>03 | HIVEP3 | human<br>immunode<br>ficiency<br>virus type I<br>enhancer<br>binding<br>protein 3 | -0.976785 | Inlier  |
| siRNA Disorazole DMSO Run1   | NM_0245<br>03 | HIVEP3 | human<br>immunode<br>ficiency<br>virus type I<br>enhancer<br>binding<br>protein 3 | -0.759939 | Inlier  |
| siRNA-Temozolomide Run2-DMSO | NM_0245<br>03 | HIVEP3 | human<br>immunode<br>ficiency<br>virus type I<br>enhancer<br>binding<br>protein 3 | -0.274773 | Inlier  |
| siRNA-Temozolomide Run1-DMSO | NM_0245<br>03 | HIVEP3 | human<br>immunode<br>ficiency<br>virus type I<br>enhancer<br>binding<br>protein 3 | 0.274773  | Inlier  |

Identification of Survival Genes in Human Glioblastoma Cells Using siRNA Screening  
 Nikhil G Thaker, Fang Zhang, Peter R. McDonald, Tong Ying Shun, Michael D Lewen, Ian F. Pollack, and John S. Lazo  
 Molecular Pharmacology

|                              |           |        |                                                                |           |        |
|------------------------------|-----------|--------|----------------------------------------------------------------|-----------|--------|
| siRNA-Vinblastine Run2-DMSO  | NM_024503 | HIVEP3 | human immunodeficiency virus type I enhancer binding protein 3 | 0.485371  | Inlier |
| siRNA-Vinblastine Run1-DMSO  | NM_024503 | HIVEP3 | human immunodeficiency virus type I enhancer binding protein 3 | 0.589061  | Inlier |
| siRNA Disorazole DMSO Run2   | NM_024503 | HIVEP3 | human immunodeficiency virus type I enhancer binding protein 3 | 1.215488  | Inlier |
| siRNA-Temozolomide Run3-DMSO | NM_033496 | HK1    | hexokinase 1                                                   | -1.752296 | Inlier |
| siRNA-Temozolomide Run2-DMSO | NM_033496 | HK1    | hexokinase 1                                                   | -0.999041 | Inlier |
| siRNA-Temozolomide Run1-DMSO | NM_033496 | HK1    | hexokinase 1                                                   | -0.036114 | Inlier |
| siRNA Disorazole DMSO Run1   | NM_033496 | HK1    | hexokinase 1                                                   | -0.015124 | Inlier |
| siRNA Disorazole DMSO Run3   | NM_033496 | HK1    | hexokinase 1                                                   | 0.015124  | Inlier |
| siRNA Disorazole DMSO Run2   | NM_033496 | HK1    | hexokinase 1                                                   | 0.349959  | Inlier |
| siRNA-Vinblastine Run2-DMSO  | NM_033496 | HK1    | hexokinase 1                                                   | 1.166834  | Inlier |
| siRNA-Vinblastine Run1-DMSO  | NM_033496 | HK1    | hexokinase 1                                                   | 1.239829  | Inlier |
| siRNA-Temozolomide Run3-DMSO | NM_000189 | HK2    | hexokinase 2                                                   | -1.34929  | Inlier |
| siRNA-Temozolomide Run1-DMSO | NM_000189 | HK2    | hexokinase 2                                                   | -0.477049 | Inlier |
| siRNA Disorazole DMSO Run2   | NM_000189 | HK2    | hexokinase 2                                                   | -0.272167 | Inlier |
| siRNA-Temozolomide Run2-DMSO | NM_000189 | HK2    | hexokinase 2                                                   | -0.202467 | Inlier |
| siRNA Disorazole DMSO Run1   | NM_000189 | HK2    | hexokinase 2                                                   | 0.202467  | Inlier |
| siRNA-Vinblastine Run1-DMSO  | NM_000189 | HK2    | hexokinase 2                                                   | 0.871951  | Inlier |

Identification of Survival Genes in Human Glioblastoma Cells Using siRNA Screening

Nikhil G Thaker, Fang Zhang, Peter R. McDonald, Tong Ying Shun, Michael D Lewen, Ian F. Pollack, and John S.

Lazo

|                            |         |      |                  |                  |
|----------------------------|---------|------|------------------|------------------|
| Molecular Pharmacology     | NM_0001 |      | hexokinas        |                  |
| siRNA Disorazole DMSO Run3 | 89      | HK2  | e 2              | 1.030331 Inlier  |
| siRNA-Vinblastine Run2-    | NM_0001 |      | hexokinas        |                  |
| DMSO                       | 89      | HK2  | e 2              | 1.427599 Inlier  |
| siRNA-Temozolomide Run3-   | NM_0021 |      | hexokinas        |                  |
| DMSO                       | 15      | HK3  | e 3 (white cell) | -0.965787 Inlier |
| siRNA Disorazole DMSO Run2 | NM_0021 |      | hexokinas        |                  |
|                            | 15      | HK3  | e 3 (white cell) | -0.746987 Inlier |
| siRNA-Temozolomide Run1-   | NM_0021 |      | hexokinas        |                  |
| DMSO                       | 15      | HK3  | e 3 (white cell) | -0.132822 Inlier |
| siRNA Disorazole DMSO Run1 | NM_0021 |      | hexokinas        |                  |
|                            | 15      | HK3  | e 3 (white cell) | -0.070342 Inlier |
| siRNA-Temozolomide Run2-   | NM_0021 |      | hexokinas        |                  |
| DMSO                       | 15      | HK3  | e 3 (white cell) | 0.070342 Inlier  |
| siRNA Disorazole DMSO Run3 | NM_0021 |      | hexokinas        |                  |
|                            | 15      | HK3  | e 3 (white cell) | 0.62716 Inlier   |
| siRNA-Vinblastine Run2-    | NM_0021 |      | hexokinas        |                  |
| DMSO                       | 15      | HK3  | e 3 (white cell) | 0.72184 Inlier   |
| siRNA-Vinblastine Run1-    | NM_0021 |      | hexokinas        |                  |
| DMSO                       | 15      | HK3  | e 3 (white cell) | 0.847755 Inlier  |
| siRNA-Vinblastine Run2-    | NM_0004 |      | holocarbo        |                  |
| DMSO                       | 11      | HLCS | xylase           |                  |
|                            |         |      | synthetase       |                  |
|                            |         |      | (biotin-         |                  |
|                            |         |      | [propionyl-      |                  |
|                            |         |      | Coenzyme         |                  |
|                            |         |      | A-               |                  |
|                            |         |      | carboxylas       |                  |
|                            |         |      | e (ATP-          |                  |
|                            |         |      | hydrolysin       |                  |
|                            |         |      | g)] ligase)      | -0.740576 Inlier |
| siRNA-Temozolomide Run2-   | NM_0004 |      | holocarbo        |                  |
| DMSO                       | 11      | HLCS | xylase           |                  |
|                            |         |      | synthetase       |                  |
|                            |         |      | (biotin-         |                  |
|                            |         |      | [propionyl-      |                  |
|                            |         |      | Coenzyme         |                  |
|                            |         |      | A-               |                  |
|                            |         |      | carboxylas       |                  |
|                            |         |      | e (ATP-          |                  |
|                            |         |      | hydrolysin       |                  |
|                            |         |      | g)] ligase)      | -0.608424 Inlier |

Identification of Survival Genes in Human Glioblastoma Cells Using siRNA Screening

Nikhil G Thaker, Fang Zhang, Peter R. McDonald, Tong Ying Shun, Michael D Lewen, Ian F. Pollack, and John S. Lazo

Molecular Pharmacology

|                                  |               |      |                                                                                                                                      |           |        |
|----------------------------------|---------------|------|--------------------------------------------------------------------------------------------------------------------------------------|-----------|--------|
| siRNA Disorazole DMSO Run3       | NM_0004<br>11 | HLCS | holocarbo<br>xylase<br>synthetase<br>(biotin-<br>[propionyl-<br>Coenzyme<br>A-<br>carboxylas<br>e (ATP-<br>hydrolysin<br>g)] ligase) | -0.187916 | Inlier |
| siRNA Disorazole DMSO Run1       | NM_0004<br>11 | HLCS | holocarbo<br>xylase<br>synthetase<br>(biotin-<br>[propionyl-<br>Coenzyme<br>A-<br>carboxylas<br>e (ATP-<br>hydrolysin<br>g)] ligase) | -0.016527 | Inlier |
| siRNA-Temozolomide Run1-<br>DMSO | NM_0004<br>11 | HLCS | holocarbo<br>xylase<br>synthetase<br>(biotin-<br>[propionyl-<br>Coenzyme<br>A-<br>carboxylas<br>e (ATP-<br>hydrolysin<br>g)] ligase) | 0.016527  | Inlier |
| siRNA-Temozolomide Run3-<br>DMSO | NM_0004<br>11 | HLCS | holocarbo<br>xylase<br>synthetase<br>(biotin-<br>[propionyl-<br>Coenzyme<br>A-<br>carboxylas<br>e (ATP-<br>hydrolysin<br>g)] ligase) | 2.071453  | Inlier |

Identification of Survival Genes in Human Glioblastoma Cells Using siRNA Screening  
 Nikhil G Thaker, Fang Zhang, Peter R. McDonald, Tong Ying Shun, Michael D Lewen, Ian F. Pollack, and John S. Lazo  
 Molecular Pharmacology

|                                  |               |      |                                                                                                                                      |           |         |
|----------------------------------|---------------|------|--------------------------------------------------------------------------------------------------------------------------------------|-----------|---------|
| siRNA Disorazole DMSO Run2       | NM_0004<br>11 | HLCS | holocarbo<br>xylase<br>synthetase<br>(biotin-<br>[propionyl-<br>Coenzyme<br>A-<br>carboxylas<br>e (ATP-<br>hydrolysin<br>g)] ligase) | 7.910415  | Outlier |
| siRNA-Vinblastine Run1-<br>DMSO  | NM_0004<br>11 | HLCS | holocarbo<br>xylase<br>synthetase<br>(biotin-<br>[propionyl-<br>Coenzyme<br>A-<br>carboxylas<br>e (ATP-<br>hydrolysin<br>g)] ligase) | 11.5615   | Outlier |
| siRNA-Temozolomide Run3-<br>DMSO | NM_1785<br>82 | HM13 | histocomp<br>atibility<br>(minor) 13                                                                                                 | -0.96749  | Inlier  |
| siRNA Disorazole DMSO Run2       | NM_1785<br>82 | HM13 | histocomp<br>atibility<br>(minor) 13                                                                                                 | -0.702346 | Inlier  |
| siRNA-Temozolomide Run1-<br>DMSO | NM_1785<br>82 | HM13 | histocomp<br>atibility<br>(minor) 13                                                                                                 | -0.646654 | Inlier  |
| siRNA Disorazole DMSO Run3       | NM_1785<br>82 | HM13 | histocomp<br>atibility<br>(minor) 13                                                                                                 | -0.020689 | Inlier  |
| siRNA-Temozolomide Run2-<br>DMSO | NM_1785<br>82 | HM13 | histocomp<br>atibility<br>(minor) 13                                                                                                 | 0.020689  | Inlier  |
| siRNA Disorazole DMSO Run1       | NM_1785<br>82 | HM13 | histocomp<br>atibility<br>(minor) 13                                                                                                 | 0.561596  | Inlier  |
| siRNA-Vinblastine Run1-<br>DMSO  | NM_1785<br>82 | HM13 | histocomp<br>atibility<br>(minor) 13                                                                                                 | 1.025782  | Inlier  |
| siRNA-Vinblastine Run2-<br>DMSO  | NM_1785<br>82 | HM13 | histocomp<br>atibility<br>(minor) 13                                                                                                 | 1.137289  | Inlier  |
| siRNA Disorazole DMSO Run3       | NM_0001<br>90 | HMBS | hydroxyme<br>thylbilane<br>synthase                                                                                                  | -0.755507 | Inlier  |

Identification of Survival Genes in Human Glioblastoma Cells Using siRNA Screening  
 Nikhil G Thaker, Fang Zhang, Peter R. McDonald, Tong Ying Shun, Michael D Lewen, Ian F. Pollack, and John S. Lazo

Molecular Pharmacology

|                              |           |       |                               |           |        |
|------------------------------|-----------|-------|-------------------------------|-----------|--------|
| siRNA-Temozolomide Run2-DMSO | NM_000190 | HMBS  | hydroxyme thylbilane synthase | -0.593493 | Inlier |
| siRNA-Temozolomide Run1-DMSO | NM_000190 | HMBS  | hydroxyme thylbilane synthase | -0.05302  | Inlier |
| siRNA-Vinblastine Run2-DMSO  | NM_000190 | HMBS  | hydroxyme thylbilane synthase | -0.022842 | Inlier |
| siRNA Disorazole DMSO Run1   | NM_000190 | HMBS  | hydroxyme thylbilane synthase | 0.022842  | Inlier |
| siRNA-Temozolomide Run3-DMSO | NM_000190 | HMBS  | hydroxyme thylbilane synthase | 0.894806  | Inlier |
| siRNA Disorazole DMSO Run2   | NM_000190 | HMBS  | hydroxyme thylbilane synthase | 1.656736  | Inlier |
| siRNA-Vinblastine Run1-DMSO  | NM_000190 | HMBS  | hydroxyme thylbilane synthase | 1.858519  | Inlier |
| siRNA Disorazole DMSO Run3   | NM_145901 | HMGA1 | high mobility group AT-hook 1 | -1.028612 | Inlier |
| siRNA-Temozolomide Run3-DMSO | NM_145901 | HMGA1 | high mobility group AT-hook 1 | -0.576788 | Inlier |
| siRNA-Temozolomide Run1-DMSO | NM_145901 | HMGA1 | high mobility group AT-hook 1 | -0.218452 | Inlier |
| siRNA Disorazole DMSO Run2   | NM_145901 | HMGA1 | high mobility group AT-hook 1 | -0.001072 | Inlier |
| siRNA-Temozolomide Run2-DMSO | NM_145901 | HMGA1 | high mobility group AT-hook 1 | 0.001072  | Inlier |
| siRNA Disorazole DMSO Run1   | NM_145901 | HMGA1 | high mobility group AT-hook 1 | 0.772212  | Inlier |



Identification of Survival Genes in Human Glioblastoma Cells Using siRNA Screening  
 Nikhil G Thaker, Fang Zhang, Peter R. McDonald, Tong Ying Shun, Michael D Lewen, Ian F. Pollack, and John S. Lazo

Molecular Pharmacology

|                              |           |        |                                                                                       |           |        |
|------------------------------|-----------|--------|---------------------------------------------------------------------------------------|-----------|--------|
| siRNA-Vinblastine Run1-DMSO  | NM_145901 | HMGGA1 | high mobility group AT-hook 1                                                         | 1.377016  | Inlier |
| siRNA-Vinblastine Run2-DMSO  | NM_145901 | HMGGA1 | high mobility group AT-hook 1                                                         | 1.714147  | Inlier |
| siRNA-Temozolomide Run2-DMSO | NM_000191 | HMGCL  | 3-hydroxyme thyl-3-methylglut aryl-Coenzyme A lyase (hydroxym ethylglutari caciduria) | -1.689796 | Inlier |
| siRNA-Temozolomide Run3-DMSO | NM_000191 | HMGCL  | 3-hydroxyme thyl-3-methylglut aryl-Coenzyme A lyase (hydroxym ethylglutari caciduria) | -1.46427  | Inlier |
| siRNA Disorazole DMSO Run3   | NM_000191 | HMGCL  | 3-hydroxyme thyl-3-methylglut aryl-Coenzyme A lyase (hydroxym ethylglutari caciduria) | -0.607017 | Inlier |
| siRNA-Vinblastine Run2-DMSO  | NM_000191 | HMGCL  | 3-hydroxyme thyl-3-methylglut aryl-Coenzyme A lyase (hydroxym ethylglutari caciduria) | -0.340416 | Inlier |

Identification of Survival Genes in Human Glioblastoma Cells Using siRNA Screening  
 Nikhil G Thaker, Fang Zhang, Peter R. McDonald, Tong Ying Shun, Michael D Lewen, Ian F. Pollack, and John S. Lazo  
 Molecular Pharmacology

|                                  |               |       |                                                                                                                     |           |        |
|----------------------------------|---------------|-------|---------------------------------------------------------------------------------------------------------------------|-----------|--------|
| siRNA Disorazole DMSO Run1       | NM_0001<br>91 | HMGCL | 3-<br>hydroxyme<br>thyl-3-<br>methylglut<br>aryl-<br>Coenzyme<br>A lyase<br>(hydroxym<br>ethylglutari<br>caciduria) | 0.340416  | Inlier |
| siRNA-Vinblastine Run1-<br>DMSO  | NM_0001<br>91 | HMGCL | 3-<br>hydroxyme<br>thyl-3-<br>methylglut<br>aryl-<br>Coenzyme<br>A lyase<br>(hydroxym<br>ethylglutari<br>caciduria) | 0.468042  | Inlier |
| siRNA Disorazole DMSO Run2       | NM_0001<br>91 | HMGCL | 3-<br>hydroxyme<br>thyl-3-<br>methylglut<br>aryl-<br>Coenzyme<br>A lyase<br>(hydroxym<br>ethylglutari<br>caciduria) | 0.741983  | Inlier |
| siRNA-Temozolomide Run1-<br>DMSO | NM_0001<br>91 | HMGCL | 3-<br>hydroxyme<br>thyl-3-<br>methylglut<br>aryl-<br>Coenzyme<br>A lyase<br>(hydroxym<br>ethylglutari<br>caciduria) | 1.089791  | Inlier |
| siRNA-Temozolomide Run3-<br>DMSO | NM_0008<br>59 | HMGCR | 3-hydroxy-<br>3-<br>methylglut<br>aryl-<br>Coenzyme<br>A<br>reductase                                               | -1.385737 | Inlier |

Identification of Survival Genes in Human Glioblastoma Cells Using siRNA Screening

Nikhil G Thaker, Fang Zhang, Peter R. McDonald, Tong Ying Shun, Michael D Lewen, Ian F. Pollack, and John S. Lazo

Molecular Pharmacology

|                              |               |       |                                                 |           |        |
|------------------------------|---------------|-------|-------------------------------------------------|-----------|--------|
| siRNA Disorazole DMSO Run3   | NM_0008<br>59 | HMGCR | 3-hydroxy-3-methylglutaryl-Coenzyme A reductase | -0.680757 | Inlier |
| siRNA Disorazole DMSO Run1   | NM_0008<br>59 | HMGCR | 3-hydroxy-3-methylglutaryl-Coenzyme A reductase | -0.668243 | Inlier |
| siRNA-Temozolomide Run2-DMSO | NM_0008<br>59 | HMGCR | 3-hydroxy-3-methylglutaryl-Coenzyme A reductase | -0.29748  | Inlier |
| siRNA-Vinblastine Run2-DMSO  | NM_0008<br>59 | HMGCR | 3-hydroxy-3-methylglutaryl-Coenzyme A reductase | 0.29748   | Inlier |
| siRNA-Temozolomide Run1-DMSO | NM_0008<br>59 | HMGCR | 3-hydroxy-3-methylglutaryl-Coenzyme A reductase | 0.314672  | Inlier |
| siRNA-Vinblastine Run1-DMSO  | NM_0008<br>59 | HMGCR | 3-hydroxy-3-methylglutaryl-Coenzyme A reductase | 1.37232   | Inlier |
| siRNA Disorazole DMSO Run2   | NM_0008<br>59 | HMGCR | 3-hydroxy-3-methylglutaryl-Coenzyme A reductase | 1.492156  | Inlier |

Identification of Survival Genes in Human Glioblastoma Cells Using siRNA Screening

Nikhil G Thaker, Fang Zhang, Peter R. McDonald, Tong Ying Shun, Michael D Lewen, Ian F. Pollack, and John S. Lazo

Molecular Pharmacology

|                              |               |        |                                                            |           |        |
|------------------------------|---------------|--------|------------------------------------------------------------|-----------|--------|
| siRNA-Temozolomide Run2-DMSO | NM_0021<br>30 | HMGCS1 | 3-hydroxy-3-methylglutaryl-Coenzyme A synthase 1 (soluble) | -0.894081 | Inlier |
| siRNA Disorazole DMSO Run1   | NM_0021<br>30 | HMGCS1 | 3-hydroxy-3-methylglutaryl-Coenzyme A synthase 1 (soluble) | -0.695836 | Inlier |
| siRNA-Vinblastine Run2-DMSO  | NM_0021<br>30 | HMGCS1 | 3-hydroxy-3-methylglutaryl-Coenzyme A synthase 1 (soluble) | -0.653164 | Inlier |
| siRNA-Temozolomide Run3-DMSO | NM_0021<br>30 | HMGCS1 | 3-hydroxy-3-methylglutaryl-Coenzyme A synthase 1 (soluble) | -0.237573 | Inlier |
| siRNA Disorazole DMSO Run3   | NM_0021<br>30 | HMGCS1 | 3-hydroxy-3-methylglutaryl-Coenzyme A synthase 1 (soluble) | 0.237573  | Inlier |

Identification of Survival Genes in Human Glioblastoma Cells Using siRNA Screening

Nikhil G Thaker, Fang Zhang, Peter R. McDonald, Tong Ying Shun, Michael D Lewen, Ian F. Pollack, and John S. Lazo

Molecular Pharmacology

|                              |               |        |                                                                  |           |         |
|------------------------------|---------------|--------|------------------------------------------------------------------|-----------|---------|
| siRNA-Temozolomide Run1-DMSO | NM_0021<br>30 | HMGCS1 | 3-hydroxy-3-methylglutaryl-Coenzyme A synthase 1 (soluble)       | 0.547479  | Inlier  |
| siRNA Disorazole DMSO Run2   | NM_0021<br>30 | HMGCS1 | 3-hydroxy-3-methylglutaryl-Coenzyme A synthase 1 (soluble)       | 3.011273  | Inlier  |
| siRNA-Vinblastine Run1-DMSO  | NM_0021<br>30 | HMGCS1 | 3-hydroxy-3-methylglutaryl-Coenzyme A synthase 1 (soluble)       | 3.86662   | Outlier |
| siRNA-Temozolomide Run2-DMSO | NM_0055<br>18 | HMGCS2 | 3-hydroxy-3-methylglutaryl-Coenzyme A synthase 2 (mitochondrial) | -1.772507 | Inlier  |
| siRNA Disorazole DMSO Run1   | NM_0055<br>18 | HMGCS2 | 3-hydroxy-3-methylglutaryl-Coenzyme A synthase 2 (mitochondrial) | -1.038278 | Inlier  |

Identification of Survival Genes in Human Glioblastoma Cells Using siRNA Screening

Nikhil G Thaker, Fang Zhang, Peter R. McDonald, Tong Ying Shun, Michael D Lewen, Ian F. Pollack, and John S. Lazo

Molecular Pharmacology

|                              |           |        |                                                                  |           |        |
|------------------------------|-----------|--------|------------------------------------------------------------------|-----------|--------|
| siRNA-Vinblastine Run2-DMSO  | NM_005518 | HMGCS2 | 3-hydroxy-3-methylglutaryl-Coenzyme A synthase 2 (mitochondrial) | -0.310722 | Inlier |
| siRNA-Temozolomide Run1-DMSO | NM_005518 | HMGCS2 | 3-hydroxy-3-methylglutaryl-Coenzyme A synthase 2 (mitochondrial) | -0.125267 | Inlier |
| siRNA Disorazole DMSO Run3   | NM_005518 | HMGCS2 | 3-hydroxy-3-methylglutaryl-Coenzyme A synthase 2 (mitochondrial) | 0.125267  | Inlier |
| siRNA-Temozolomide Run3-DMSO | NM_005518 | HMGCS2 | 3-hydroxy-3-methylglutaryl-Coenzyme A synthase 2 (mitochondrial) | 0.270439  | Inlier |
| siRNA Disorazole DMSO Run2   | NM_005518 | HMGCS2 | 3-hydroxy-3-methylglutaryl-Coenzyme A synthase 2 (mitochondrial) | 1.390978  | Inlier |

Identification of Survival Genes in Human Glioblastoma Cells Using siRNA Screening  
 Nikhil G Thaker, Fang Zhang, Peter R. McDonald, Tong Ying Shun, Michael D Lewen, Ian F. Pollack, and John S. Lazo  
 Molecular Pharmacology

|                              |           |        |                                                                  |           |        |
|------------------------------|-----------|--------|------------------------------------------------------------------|-----------|--------|
| siRNA-Vinblastine Run1-DMSO  | NM_005518 | HMGCS2 | 3-hydroxy-3-methylglutaryl-Coenzyme A synthase 2 (mitochondrial) | 2.124737  | Inlier |
| siRNA-Temozolomide Run3-DMSO | NM_012484 | HMMR   | hyaluronan-mediated motility receptor (RHAMM)                    | -1.641489 | Inlier |
| siRNA-Temozolomide Run2-DMSO | NM_012484 | HMMR   | hyaluronan-mediated motility receptor (RHAMM)                    | -0.77407  | Inlier |
| siRNA-Vinblastine Run2-DMSO  | NM_012484 | HMMR   | hyaluronan-mediated motility receptor (RHAMM)                    | -0.279545 | Inlier |
| siRNA Disorazole DMSO Run1   | NM_012484 | HMMR   | hyaluronan-mediated motility receptor (RHAMM)                    | -0.183336 | Inlier |
| siRNA-Temozolomide Run1-DMSO | NM_012484 | HMMR   | hyaluronan-mediated motility receptor (RHAMM)                    | 0.183336  | Inlier |
| siRNA Disorazole DMSO Run3   | NM_012484 | HMMR   | hyaluronan-mediated motility receptor (RHAMM)                    | 0.57493   | Inlier |
| siRNA Disorazole DMSO Run2   | NM_012484 | HMMR   | hyaluronan-mediated motility receptor (RHAMM)                    | 2.159506  | Inlier |

Identification of Survival Genes in Human Glioblastoma Cells Using siRNA Screening  
 Nikhil G Thaker, Fang Zhang, Peter R. McDonald, Tong Ying Shun, Michael D Lewen, Ian F. Pollack, and John S. Lazo

Molecular Pharmacology

|                              |           |       |                                               |           |        |
|------------------------------|-----------|-------|-----------------------------------------------|-----------|--------|
| siRNA-Vinblastine Run1-DMSO  | NM_012484 | HMMR  | hyaluronan-mediated motility receptor (RHAMM) | 2.581923  | Inlier |
| siRNA-Temozolomide Run3-DMSO | NM_002133 | HMOX1 | heme oxygenase (decycling) 1                  | -2.19554  | Inlier |
| siRNA-Temozolomide Run2-DMSO | NM_002133 | HMOX1 | heme oxygenase (decycling) 1                  | -1.62894  | Inlier |
| siRNA-Temozolomide Run1-DMSO | NM_002133 | HMOX1 | heme oxygenase (decycling) 1                  | -0.630038 | Inlier |
| siRNA Disorazole DMSO Run3   | NM_002133 | HMOX1 | heme oxygenase (decycling) 1                  | -0.12468  | Inlier |
| siRNA Disorazole DMSO Run1   | NM_002133 | HMOX1 | heme oxygenase (decycling) 1                  | 0.12468   | Inlier |
| siRNA-Vinblastine Run2-DMSO  | NM_002133 | HMOX1 | heme oxygenase (decycling) 1                  | 0.63296   | Inlier |
| siRNA-Vinblastine Run1-DMSO  | NM_002133 | HMOX1 | heme oxygenase (decycling) 1                  | 0.71604   | Inlier |
| siRNA Disorazole DMSO Run2   | NM_002133 | HMOX1 | heme oxygenase (decycling) 1                  | 0.802198  | Inlier |
| siRNA-Vinblastine Run2-DMSO  | NM_002134 | HMOX2 | heme oxygenase (decycling) 2                  | -1.857625 | Inlier |



Identification of Survival Genes in Human Glioblastoma Cells Using siRNA Screening  
 Nikhil G Thaker, Fang Zhang, Peter R. McDonald, Tong Ying Shun, Michael D Lewen, Ian F. Pollack, and John S. Lazo  
 Molecular Pharmacology

|                              |               |       |                                             |           |        |
|------------------------------|---------------|-------|---------------------------------------------|-----------|--------|
| siRNA-Temozolomide Run2-DMSO | NM_0021<br>34 | HMOX2 | heme<br>oxygenase<br>(decycling)<br>2       | -0.929424 | Inlier |
| siRNA Disorazole DMSO Run1   | NM_0021<br>34 | HMOX2 | heme<br>oxygenase<br>(decycling)<br>2       | -0.419576 | Inlier |
| siRNA Disorazole DMSO Run3   | NM_0021<br>34 | HMOX2 | heme<br>oxygenase<br>(decycling)<br>2       | -0.095167 | Inlier |
| siRNA-Temozolomide Run1-DMSO | NM_0021<br>34 | HMOX2 | heme<br>oxygenase<br>(decycling)<br>2       | 0.095167  | Inlier |
| siRNA-Temozolomide Run3-DMSO | NM_0021<br>34 | HMOX2 | heme<br>oxygenase<br>(decycling)<br>2       | 0.393491  | Inlier |
| siRNA Disorazole DMSO Run2   | NM_0021<br>34 | HMOX2 | heme<br>oxygenase<br>(decycling)<br>2       | 1.208952  | Inlier |
| siRNA-Vinblastine Run1-DMSO  | NM_0021<br>34 | HMOX2 | heme<br>oxygenase<br>(decycling)<br>2       | 3.228492  | Inlier |
| siRNA-Temozolomide Run3-DMSO | NM_1788<br>50 | HNF4A | hepatocyte<br>nuclear<br>factor 4,<br>alpha | -0.925027 | Inlier |
| siRNA Disorazole DMSO Run3   | NM_1788<br>50 | HNF4A | hepatocyte<br>nuclear<br>factor 4,<br>alpha | -0.48359  | Inlier |
| siRNA-Temozolomide Run2-DMSO | NM_1788<br>50 | HNF4A | hepatocyte<br>nuclear<br>factor 4,<br>alpha | -0.222647 | Inlier |
| siRNA Disorazole DMSO Run2   | NM_1788<br>50 | HNF4A | hepatocyte<br>nuclear<br>factor 4,<br>alpha | -0.045737 | Inlier |

Identification of Survival Genes in Human Glioblastoma Cells Using siRNA Screening  
 Nikhil G Thaker, Fang Zhang, Peter R. McDonald, Tong Ying Shun, Michael D Lewen, Ian F. Pollack, and John S. Lazo

Molecular Pharmacology

| siRNA                        | Gene    | Gene ID | Gene Name | Value     | Category |
|------------------------------|---------|---------|-----------|-----------|----------|
| siRNA-Temozolomide Run1-DMSO | NM_1788 | 50      | HNF4A     | 0.045737  | Inlier   |
| siRNA Disorazole DMSO Run1   | NM_1788 | 50      | HNF4A     | 0.86541   | Inlier   |
| siRNA-Vinblastine Run2-DMSO  | NM_1788 | 50      | HNF4A     | 2.085175  | Inlier   |
| siRNA-Vinblastine Run1-DMSO  | NM_1788 | 50      | HNF4A     | 2.502751  | Inlier   |
| siRNA-Temozolomide Run3-DMSO | NM_0041 | 33      | HNF4G     | -3.642396 | Outlier  |
| siRNA Disorazole DMSO Run1   | NM_0041 | 33      | HNF4G     | -2.728594 | Inlier   |
| siRNA-Temozolomide Run1-DMSO | NM_0041 | 33      | HNF4G     | -0.864828 | Inlier   |
| siRNA Disorazole DMSO Run3   | NM_0041 | 33      | HNF4G     | -0.144151 | Inlier   |
| siRNA-Temozolomide Run2-DMSO | NM_0041 | 33      | HNF4G     | 0.144151  | Inlier   |
| siRNA Disorazole DMSO Run2   | NM_0041 | 33      | HNF4G     | 0.253347  | Inlier   |
| siRNA-Vinblastine Run2-DMSO  | NM_0041 | 33      | HNF4G     | 0.484172  | Inlier   |
| siRNA-Vinblastine Run1-DMSO  | NM_0041 | 33      | HNF4G     | 1.117144  | Inlier   |

Identification of Survival Genes in Human Glioblastoma Cells Using siRNA Screening

Nikhil G Thaker, Fang Zhang, Peter R. McDonald, Tong Ying Shun, Michael D Lewen, Ian F. Pollack, and John S. Lazo

Molecular Pharmacology

| siRNA Treatment              | Gene ID   | Gene Name | GO Term                                                   | Score     | Outlier Status |
|------------------------------|-----------|-----------|-----------------------------------------------------------|-----------|----------------|
| siRNA-Temozolomide Run2-DMSO | NM_182547 | HNLF      | transmembrane emp24 protein transport domain containing 4 | -0.809513 | Inlier         |
| siRNA-Temozolomide Run1-DMSO | NM_182547 | HNLF      | transmembrane emp24 protein transport domain containing 4 | -0.736402 | Inlier         |
| siRNA-Temozolomide Run3-DMSO | NM_182547 | HNLF      | transmembrane emp24 protein transport domain containing 4 | -0.392765 | Inlier         |
| siRNA-Vinblastine Run2-DMSO  | NM_182547 | HNLF      | transmembrane emp24 protein transport domain containing 4 | -0.220822 | Inlier         |
| siRNA Disorazole DMSO Run1   | NM_182547 | HNLF      | transmembrane emp24 protein transport domain containing 4 | 0.220823  | Inlier         |
| siRNA Disorazole DMSO Run3   | NM_182547 | HNLF      | transmembrane emp24 protein transport domain containing 4 | 0.612598  | Inlier         |

Identification of Survival Genes in Human Glioblastoma Cells Using siRNA Screening  
 Nikhil G Thaker, Fang Zhang, Peter R. McDonald, Tong Ying Shun, Michael D Lewen, Ian F. Pollack, and John S. Lazo

Molecular Pharmacology

| siRNA Treatment              | Gene    | Accession | Gene | Gene                                                      | Value     | Category |
|------------------------------|---------|-----------|------|-----------------------------------------------------------|-----------|----------|
| siRNA Disorazole DMSO Run2   | NM_1825 | 47        | HNLF | transmembrane emp24 protein transport domain containing 4 | 1.14455   | Inlier   |
| siRNA-Vinblastine Run1-DMSO  | NM_1825 | 47        | HNLF | transmembrane emp24 protein transport domain containing 4 | 1.181001  | Inlier   |
| siRNA Disorazole DMSO Run1   | NM_0068 | 95        | HNMT | histamine N-methyltransferase                             | -1.098999 | Inlier   |
| siRNA-Temozolomide Run2-DMSO | NM_0068 | 95        | HNMT | histamine N-methyltransferase                             | -0.700219 | Inlier   |
| siRNA-Temozolomide Run3-DMSO | NM_0068 | 95        | HNMT | histamine N-methyltransferase                             | -0.648781 | Inlier   |
| siRNA-Temozolomide Run1-DMSO | NM_0068 | 95        | HNMT | histamine N-methyltransferase                             | -0.48672  | Inlier   |
| siRNA-Vinblastine Run1-DMSO  | NM_0068 | 95        | HNMT | histamine N-methyltransferase                             | 0.48672   | Inlier   |
| siRNA-Vinblastine Run2-DMSO  | NM_0068 | 95        | HNMT | histamine N-methyltransferase                             | 0.514819  | Inlier   |
| siRNA Disorazole DMSO Run3   | NM_0068 | 95        | HNMT | histamine N-methyltransferase                             | 0.874891  | Inlier   |
| siRNA Disorazole DMSO Run2   | NM_0068 | 95        | HNMT | histamine N-methyltransferase                             | 1.573836  | Inlier   |

Identification of Survival Genes in Human Glioblastoma Cells Using siRNA Screening  
 Nikhil G Thaker, Fang Zhang, Peter R. McDonald, Tong Ying Shun, Michael D Lewen, Ian F. Pollack, and John S. Lazo

Molecular Pharmacology

|                              |               |        |                                                                       |           |         |
|------------------------------|---------------|--------|-----------------------------------------------------------------------|-----------|---------|
| siRNA-Temozolomide Run3-DMSO | NM_0311<br>57 | HNRPA1 | heterogeneous<br>nuclear<br>ribonucleo<br>protein A1<br>heterogeneous | -1.204601 | Inlier  |
| siRNA-Temozolomide Run2-DMSO | NM_0311<br>57 | HNRPA1 | heterogeneous<br>nuclear<br>ribonucleo<br>protein A1<br>heterogeneous | -0.74027  | Inlier  |
| siRNA Disorazole DMSO Run3   | NM_0311<br>57 | HNRPA1 | heterogeneous<br>nuclear<br>ribonucleo<br>protein A1<br>heterogeneous | -0.355393 | Inlier  |
| siRNA Disorazole DMSO Run1   | NM_0311<br>57 | HNRPA1 | heterogeneous<br>nuclear<br>ribonucleo<br>protein A1<br>heterogeneous | -0.185845 | Inlier  |
| siRNA-Vinblastine Run2-DMSO  | NM_0311<br>57 | HNRPA1 | heterogeneous<br>nuclear<br>ribonucleo<br>protein A1<br>heterogeneous | 0.185845  | Inlier  |
| siRNA-Temozolomide Run1-DMSO | NM_0311<br>57 | HNRPA1 | heterogeneous<br>nuclear<br>ribonucleo<br>protein A1<br>heterogeneous | 0.60873   | Inlier  |
| siRNA-Vinblastine Run1-DMSO  | NM_0311<br>57 | HNRPA1 | heterogeneous<br>nuclear<br>ribonucleo<br>protein A1<br>heterogeneous | 1.767802  | Inlier  |
| siRNA Disorazole DMSO Run2   | NM_0311<br>57 | HNRPA1 | heterogeneous<br>nuclear<br>ribonucleo<br>protein A1                  | 1.982398  | Inlier  |
| siRNA-Temozolomide Run3-DMSO | NM_0051<br>43 | HP     | haptoglobin                                                           | -3.636357 | Outlier |
| siRNA-Temozolomide Run2-DMSO | NM_0051<br>43 | HP     | haptoglobin                                                           | -2.612985 | Inlier  |
| siRNA Disorazole DMSO Run3   | NM_0051<br>43 | HP     | haptoglobin                                                           | -0.420566 | Inlier  |
| siRNA Disorazole DMSO Run1   | NM_0051<br>43 | HP     | haptoglobin                                                           | -0.060021 | Inlier  |
| siRNA-Temozolomide Run1-DMSO | NM_0051<br>43 | HP     | haptoglobin                                                           | 0.060022  | Inlier  |
| siRNA Disorazole DMSO Run2   | NM_0051<br>43 | HP     | haptoglobin                                                           | 0.511364  | Inlier  |

Identification of Survival Genes in Human Glioblastoma Cells Using siRNA Screening

Nikhil G Thaker, Fang Zhang, Peter R. McDonald, Tong Ying Shun, Michael D Lewen, Ian F. Pollack, and John S.

Lazo

|                              |         |    |     |                                                        |           |         |
|------------------------------|---------|----|-----|--------------------------------------------------------|-----------|---------|
| siRNA-Vinblastine Run2-DMSO  | NM_0051 | 43 | HP  | haptoglobi<br>n                                        | 0.837636  | Inlier  |
| siRNA-Vinblastine Run1-DMSO  | NM_0051 | 43 | HP  | haptoglobi<br>n                                        | 1.831055  | Inlier  |
| siRNA-Vinblastine Run2-DMSO  | NM_0021 | 50 | HPD | 4-<br>hydroxyph<br>enylpyruva<br>te<br>dioxygena<br>se | -3.507116 | Outlier |
| siRNA Disorazole DMSO Run3   | NM_0021 | 50 | HPD | 4-<br>hydroxyph<br>enylpyruva<br>te<br>dioxygena<br>se | -0.796923 | Inlier  |
| siRNA-Temozolomide Run2-DMSO | NM_0021 | 50 | HPD | 4-<br>hydroxyph<br>enylpyruva<br>te<br>dioxygena<br>se | -0.552077 | Inlier  |
| siRNA-Temozolomide Run1-DMSO | NM_0021 | 50 | HPD | 4-<br>hydroxyph<br>enylpyruva<br>te<br>dioxygena<br>se | -0.303038 | Inlier  |
| siRNA-Temozolomide Run3-DMSO | NM_0021 | 50 | HPD | 4-<br>hydroxyph<br>enylpyruva<br>te<br>dioxygena<br>se | 0.303038  | Inlier  |
| siRNA Disorazole DMSO Run1   | NM_0021 | 50 | HPD | 4-<br>hydroxyph<br>enylpyruva<br>te<br>dioxygena<br>se | 0.404772  | Inlier  |
| siRNA Disorazole DMSO Run2   | NM_0021 | 50 | HPD | 4-<br>hydroxyph<br>enylpyruva<br>te<br>dioxygena<br>se | 1.332849  | Inlier  |
| siRNA-Vinblastine Run1-DMSO  | NM_0021 | 50 | HPD | 4-<br>hydroxyph<br>enylpyruva<br>te<br>dioxygena<br>se | 1.807608  | Inlier  |

Identification of Survival Genes in Human Glioblastoma Cells Using siRNA Screening

Nikhil G Thaker, Fang Zhang, Peter R. McDonald, Tong Ying Shun, Michael D Lewen, Ian F. Pollack, and John S. Lazo

Molecular Pharmacology

| siRNA Treatment              | Gene ID   | HPGD | Gene Name                                   | Value     | Outlier Status |
|------------------------------|-----------|------|---------------------------------------------|-----------|----------------|
| siRNA-Temozolomide Run2-DMSO | NM_000860 | HPGD | hydroxyprostaglandin dehydrogenase 15-(NAD) | -0.999214 | Inlier         |
| siRNA-Temozolomide Run1-DMSO | NM_000860 | HPGD | hydroxyprostaglandin dehydrogenase 15-(NAD) | -0.834184 | Inlier         |
| siRNA Disorazole DMSO Run1   | NM_000860 | HPGD | hydroxyprostaglandin dehydrogenase 15-(NAD) | -0.246296 | Inlier         |
| siRNA-Temozolomide Run3-DMSO | NM_000860 | HPGD | hydroxyprostaglandin dehydrogenase 15-(NAD) | -0.133859 | Inlier         |
| siRNA-Vinblastine Run1-DMSO  | NM_000860 | HPGD | hydroxyprostaglandin dehydrogenase 15-(NAD) | 0.133859  | Inlier         |
| siRNA Disorazole DMSO Run3   | NM_000860 | HPGD | hydroxyprostaglandin dehydrogenase 15-(NAD) | 0.590364  | Inlier         |
| siRNA Disorazole DMSO Run2   | NM_000860 | HPGD | hydroxyprostaglandin dehydrogenase 15-(NAD) | 0.758636  | Inlier         |
| siRNA-Vinblastine Run2-DMSO  | NM_000860 | HPGD | hydroxyprostaglandin dehydrogenase 15-(NAD) | 0.783955  | Inlier         |

Identification of Survival Genes in Human Glioblastoma Cells Using siRNA Screening  
 Nikhil G Thaker, Fang Zhang, Peter R. McDonald, Tong Ying Shun, Michael D Lewen, Ian F. Pollack, and John S. Lazo

Molecular Pharmacology

|                              |               |     |                                                    |           |        |
|------------------------------|---------------|-----|----------------------------------------------------|-----------|--------|
| siRNA-Temozolomide Run3-DMSO | NM_1829<br>83 | HPN | hepsin<br>(transmembrane<br>protease,<br>serine 1) | -1.72541  | Inlier |
| siRNA-Temozolomide Run2-DMSO | NM_1829<br>83 | HPN | hepsin<br>(transmembrane<br>protease,<br>serine 1) | -1.482119 | Inlier |
| siRNA Disorazole DMSO Run3   | NM_1829<br>83 | HPN | hepsin<br>(transmembrane<br>protease,<br>serine 1) | -0.058125 | Inlier |
| siRNA Disorazole DMSO Run2   | NM_1829<br>83 | HPN | hepsin<br>(transmembrane<br>protease,<br>serine 1) | -0.014394 | Inlier |
| siRNA Disorazole DMSO Run1   | NM_1829<br>83 | HPN | hepsin<br>(transmembrane<br>protease,<br>serine 1) | 0.014394  | Inlier |
| siRNA-Temozolomide Run1-DMSO | NM_1829<br>83 | HPN | hepsin<br>(transmembrane<br>protease,<br>serine 1) | 0.381851  | Inlier |
| siRNA-Vinblastine Run1-DMSO  | NM_1829<br>83 | HPN | hepsin<br>(transmembrane<br>protease,<br>serine 1) | 0.967149  | Inlier |
| siRNA-Vinblastine Run2-DMSO  | NM_1829<br>83 | HPN | hepsin<br>(transmembrane<br>protease,<br>serine 1) | 2.177763  | Inlier |
| siRNA Disorazole DMSO Run2   | NM_0209<br>95 | HPR | haptoglobin-related<br>protein                     | -0.815802 | Inlier |
| siRNA-Temozolomide Run3-DMSO | NM_0209<br>95 | HPR | haptoglobin-related<br>protein                     | -0.745058 | Inlier |
| siRNA-Temozolomide Run2-DMSO | NM_0209<br>95 | HPR | haptoglobin-related<br>protein                     | -0.375019 | Inlier |
| siRNA Disorazole DMSO Run3   | NM_0209<br>95 | HPR | haptoglobin-related<br>protein                     | -0.331298 | Inlier |



Identification of Survival Genes in Human Glioblastoma Cells Using siRNA Screening

Nikhil G Thaker, Fang Zhang, Peter R. McDonald, Tong Ying Shun, Michael D Lewen, Ian F. Pollack, and John S. Lazo

Molecular Pharmacology

|                                  |               |       |                                                                                          |           |        |
|----------------------------------|---------------|-------|------------------------------------------------------------------------------------------|-----------|--------|
| siRNA Disorazole DMSO Run1       | NM_0209<br>95 | HPR   | haptoglobi<br>n-related<br>protein                                                       | 0.331298  | Inlier |
| siRNA-Temozolomide Run1-<br>DMSO | NM_0209<br>95 | HPR   | haptoglobi<br>n-related<br>protein                                                       | 0.603942  | Inlier |
| siRNA-Vinblastine Run2-<br>DMSO  | NM_0209<br>95 | HPR   | haptoglobi<br>n-related<br>protein                                                       | 1.193485  | Inlier |
| siRNA-Vinblastine Run1-<br>DMSO  | NM_0209<br>95 | HPR   | haptoglobi<br>n-related<br>protein                                                       | 1.484861  | Inlier |
| siRNA Disorazole DMSO Run1       | NM_0001<br>94 | HPRT1 | hypoxanthi<br>ne<br>phosphori<br>bosyltransf<br>erase 1<br>(Lesch-<br>Nyhan<br>syndrome) | -0.86762  | Inlier |
| siRNA-Temozolomide Run3-<br>DMSO | NM_0001<br>94 | HPRT1 | hypoxanthi<br>ne<br>phosphori<br>bosyltransf<br>erase 1<br>(Lesch-<br>Nyhan<br>syndrome) | -0.572006 | Inlier |
| siRNA-Temozolomide Run1-<br>DMSO | NM_0001<br>94 | HPRT1 | hypoxanthi<br>ne<br>phosphori<br>bosyltransf<br>erase 1<br>(Lesch-<br>Nyhan<br>syndrome) | -0.562476 | Inlier |
| siRNA-Temozolomide Run2-<br>DMSO | NM_0001<br>94 | HPRT1 | hypoxanthi<br>ne<br>phosphori<br>bosyltransf<br>erase 1<br>(Lesch-<br>Nyhan<br>syndrome) | -0.2437   | Inlier |

Identification of Survival Genes in Human Glioblastoma Cells Using siRNA Screening  
 Nikhil G Thaker, Fang Zhang, Peter R. McDonald, Tong Ying Shun, Michael D Lewen, Ian F. Pollack, and John S. Lazo  
 Molecular Pharmacology

|                              |           |       |                                                                 |           |         |
|------------------------------|-----------|-------|-----------------------------------------------------------------|-----------|---------|
| siRNA-Vinblastine Run2-DMSO  | NM_000194 | HPRT1 | hypoxanthine phosphoribosyltransferase 1 (Lesch-Nyhan syndrome) | 0.2437    | Inlier  |
| siRNA Disorazole DMSO Run3   | NM_000194 | HPRT1 | hypoxanthine phosphoribosyltransferase 1 (Lesch-Nyhan syndrome) | 0.776994  | Inlier  |
| siRNA-Vinblastine Run1-DMSO  | NM_000194 | HPRT1 | hypoxanthine phosphoribosyltransferase 1 (Lesch-Nyhan syndrome) | 2.541486  | Inlier  |
| siRNA Disorazole DMSO Run2   | NM_000194 | HPRT1 | hypoxanthine phosphoribosyltransferase 1 (Lesch-Nyhan syndrome) | 3.695293  | Outlier |
| siRNA-Temozolomide Run3-DMSO | NM_006665 | HPSE  | heparanase                                                      | -1.942106 | Inlier  |
| siRNA-Temozolomide Run1-DMSO | NM_006665 | HPSE  | heparanase                                                      | -0.691004 | Inlier  |
| siRNA-Vinblastine Run2-DMSO  | NM_006665 | HPSE  | heparanase                                                      | -0.540754 | Inlier  |
| siRNA-Temozolomide Run2-DMSO | NM_006665 | HPSE  | heparanase                                                      | -0.351073 | Inlier  |
| siRNA Disorazole DMSO Run1   | NM_006665 | HPSE  | heparanase                                                      | 0.351073  | Inlier  |
| siRNA Disorazole DMSO Run3   | NM_006665 | HPSE  | heparanase                                                      | 0.657996  | Inlier  |
| siRNA-Vinblastine Run1-DMSO  | NM_006665 | HPSE  | heparanase                                                      | 1.291827  | Inlier  |
| siRNA Disorazole DMSO Run2   | NM_006665 | HPSE  | heparanase                                                      | 2.313629  | Inlier  |

Identification of Survival Genes in Human Glioblastoma Cells Using siRNA Screening  
 Nikhil G Thaker, Fang Zhang, Peter R. McDonald, Tong Ying Shun, Michael D Lewen, Ian F. Pollack, and John S. Lazo

Molecular Pharmacology

|                                  |               |      |                                            |                  |
|----------------------------------|---------------|------|--------------------------------------------|------------------|
|                                  |               |      | v-Ha-ras<br>Harvey rat<br>sarcoma<br>viral |                  |
| siRNA-Temozolomide Run2-<br>DMSO | NM_1767<br>95 | HRAS | oncogene<br>homolog                        | -1.783541 Inlier |
|                                  |               |      | v-Ha-ras<br>Harvey rat<br>sarcoma<br>viral |                  |
| siRNA Disorazole DMSO Run3       | NM_1767<br>95 | HRAS | oncogene<br>homolog                        | -0.715752 Inlier |
|                                  |               |      | v-Ha-ras<br>Harvey rat<br>sarcoma<br>viral |                  |
| siRNA Disorazole DMSO Run1       | NM_1767<br>95 | HRAS | oncogene<br>homolog                        | -0.633248 Inlier |
|                                  |               |      | v-Ha-ras<br>Harvey rat<br>sarcoma<br>viral |                  |
| siRNA-Temozolomide Run1-<br>DMSO | NM_1767<br>95 | HRAS | oncogene<br>homolog                        | -0.06322 Inlier  |
|                                  |               |      | v-Ha-ras<br>Harvey rat<br>sarcoma<br>viral |                  |
| siRNA-Temozolomide Run3-<br>DMSO | NM_1767<br>95 | HRAS | oncogene<br>homolog                        | 0.06322 Inlier   |
|                                  |               |      | v-Ha-ras<br>Harvey rat<br>sarcoma<br>viral |                  |
| siRNA-Vinblastine Run2-<br>DMSO  | NM_1767<br>95 | HRAS | oncogene<br>homolog                        | 0.139883 Inlier  |
|                                  |               |      | v-Ha-ras<br>Harvey rat<br>sarcoma<br>viral |                  |
| siRNA-Vinblastine Run1-<br>DMSO  | NM_1767<br>95 | HRAS | oncogene<br>homolog                        | 1.83582 Inlier   |
|                                  |               |      | v-Ha-ras<br>Harvey rat<br>sarcoma<br>viral |                  |
| siRNA Disorazole DMSO Run2       | NM_1767<br>95 | HRAS | oncogene<br>homolog                        | 1.921006 Inlier  |
|                                  |               |      | histamine<br>receptor                      |                  |
| siRNA Disorazole DMSO Run2       | NM_0008<br>61 | HRH1 | H1                                         | -1.191726 Inlier |

Identification of Survival Genes in Human Glioblastoma Cells Using siRNA Screening  
 Nikhil G Thaker, Fang Zhang, Peter R. McDonald, Tong Ying Shun, Michael D Lewen, Ian F. Pollack, and John S. Lazo

| Molecular Pharmacology       |               |      |    | histamine receptor |        |
|------------------------------|---------------|------|----|--------------------|--------|
| siRNA-Temozolomide Run3-DMSO | NM_0008<br>61 | HRH1 | H1 | -0.829795          | Inlier |
| siRNA-Temozolomide Run1-DMSO | NM_0008<br>61 | HRH1 | H1 | -0.522872          | Inlier |
| siRNA-Temozolomide Run2-DMSO | NM_0008<br>61 | HRH1 | H1 | -0.430424          | Inlier |
| siRNA-Vinblastine Run2-DMSO  | NM_0008<br>61 | HRH1 | H1 | 0.430423           | Inlier |
| siRNA Disorazole DMSO Run1   | NM_0008<br>61 | HRH1 | H1 | 0.566817           | Inlier |
| siRNA-Vinblastine Run1-DMSO  | NM_0008<br>61 | HRH1 | H1 | 0.782183           | Inlier |
| siRNA Disorazole DMSO Run3   | NM_0008<br>61 | HRH1 | H1 | 0.819935           | Inlier |
| siRNA-Temozolomide Run3-DMSO | NM_0223<br>04 | HRH2 | H2 | -1.38882           | Inlier |
| siRNA-Temozolomide Run1-DMSO | NM_0223<br>04 | HRH2 | H2 | -0.562801          | Inlier |
| siRNA Disorazole DMSO Run2   | NM_0223<br>04 | HRH2 | H2 | -0.537237          | Inlier |
| siRNA Disorazole DMSO Run1   | NM_0223<br>04 | HRH2 | H2 | -0.184371          | Inlier |
| siRNA-Temozolomide Run2-DMSO | NM_0223<br>04 | HRH2 | H2 | 0.184371           | Inlier |
| siRNA Disorazole DMSO Run3   | NM_0223<br>04 | HRH2 | H2 | 0.786198           | Inlier |
| siRNA-Vinblastine Run1-DMSO  | NM_0223<br>04 | HRH2 | H2 | 1.004062           | Inlier |
| siRNA-Vinblastine Run2-DMSO  | NM_0223<br>04 | HRH2 | H2 | 1.12387            | Inlier |
| siRNA-Temozolomide Run3-DMSO | NM_0072<br>32 | HRH3 | H3 | -0.874566          | Inlier |
| siRNA-Temozolomide Run1-DMSO | NM_0072<br>32 | HRH3 | H3 | -0.474434          | Inlier |

Identification of Survival Genes in Human Glioblastoma Cells Using siRNA Screening  
 Nikhil G Thaker, Fang Zhang, Peter R. McDonald, Tong Ying Shun, Michael D Lewen, Ian F. Pollack, and John S. Lazo

| Molecular Pharmacology           |               |      |                                                                           | histamine |        |
|----------------------------------|---------------|------|---------------------------------------------------------------------------|-----------|--------|
| siRNA-Temozolomide Run2-<br>DMSO | NM_0072<br>32 | HRH3 | receptor<br>H3                                                            | -0.432952 | Inlier |
| siRNA Disorazole DMSO Run1       | NM_0072<br>32 | HRH3 | receptor<br>H3                                                            | -0.071724 | Inlier |
| siRNA Disorazole DMSO Run2       | NM_0072<br>32 | HRH3 | receptor<br>H3                                                            | 0.071724  | Inlier |
| siRNA-Vinblastine Run1-<br>DMSO  | NM_0072<br>32 | HRH3 | receptor<br>H3                                                            | 1.053772  | Inlier |
| siRNA-Vinblastine Run2-<br>DMSO  | NM_0072<br>32 | HRH3 | receptor<br>H3                                                            | 1.320998  | Inlier |
| siRNA Disorazole DMSO Run3       | NM_0072<br>32 | HRH3 | receptor<br>H3                                                            | 2.022962  | Inlier |
| siRNA-Temozolomide Run3-<br>DMSO | NM_0216<br>24 | HRH4 | receptor<br>H4                                                            | -1.478641 | Inlier |
| siRNA Disorazole DMSO Run2       | NM_0216<br>24 | HRH4 | receptor<br>H4                                                            | -0.521214 | Inlier |
| siRNA-Temozolomide Run1-<br>DMSO | NM_0216<br>24 | HRH4 | receptor<br>H4                                                            | -0.372219 | Inlier |
| siRNA Disorazole DMSO Run1       | NM_0216<br>24 | HRH4 | receptor<br>H4                                                            | -0.153542 | Inlier |
| siRNA-Temozolomide Run2-<br>DMSO | NM_0216<br>24 | HRH4 | receptor<br>H4                                                            | 0.153542  | Inlier |
| siRNA-Vinblastine Run2-<br>DMSO  | NM_0216<br>24 | HRH4 | receptor<br>H4                                                            | 0.827786  | Inlier |
| siRNA Disorazole DMSO Run3       | NM_0216<br>24 | HRH4 | receptor<br>H4                                                            | 1.547015  | Inlier |
| siRNA-Vinblastine Run1-<br>DMSO  | NM_0216<br>24 | HRH4 | receptor<br>H4                                                            | 1.808651  | Inlier |
| siRNA Disorazole DMSO Run2       | NM_0144<br>13 | HRI  | eukaryotic<br>translation<br>initiation<br>factor 2-<br>alpha<br>kinase 1 | -0.754129 | Inlier |

Identification of Survival Genes in Human Glioblastoma Cells Using siRNA Screening  
 Nikhil G Thaker, Fang Zhang, Peter R. McDonald, Tong Ying Shun, Michael D Lewen, Ian F. Pollack, and John S. Lazo  
 Molecular Pharmacology

|                              |               |     |                                                           |           |        |
|------------------------------|---------------|-----|-----------------------------------------------------------|-----------|--------|
| siRNA-Temozolomide Run3-DMSO | NM_0144<br>13 | HRI | eukaryotic translation initiation factor 2-alpha kinase 1 | -0.594871 | Inlier |
| siRNA Disorazole DMSO Run3   | NM_0144<br>13 | HRI | eukaryotic translation initiation factor 2-alpha kinase 1 | -0.532064 | Inlier |
| siRNA-Temozolomide Run1-DMSO | NM_0144<br>13 | HRI | eukaryotic translation initiation factor 2-alpha kinase 1 | -0.019644 | Inlier |
| siRNA-Temozolomide Run2-DMSO | NM_0144<br>13 | HRI | eukaryotic translation initiation factor 2-alpha kinase 1 | 0.019644  | Inlier |
| siRNA Disorazole DMSO Run1   | NM_0144<br>13 | HRI | eukaryotic translation initiation factor 2-alpha kinase 1 | 1.266906  | Inlier |
| siRNA-Vinblastine Run2-DMSO  | NM_0144<br>13 | HRI | eukaryotic translation initiation factor 2-alpha kinase 1 | 1.440254  | Inlier |
| siRNA-Vinblastine Run1-DMSO  | NM_0144<br>13 | HRI | eukaryotic translation initiation factor 2-alpha kinase 1 | 1.480195  | Inlier |

Identification of Survival Genes in Human Glioblastoma Cells Using siRNA Screening

Nikhil G Thaker, Fang Zhang, Peter R. McDonald, Tong Ying Shun, Michael D Lewen, Ian F. Pollack, and John S. Lazo

Molecular Pharmacology

|                                  |               |     |                                                                                 |           |        |
|----------------------------------|---------------|-----|---------------------------------------------------------------------------------|-----------|--------|
| siRNA Disorazole DMSO Run3       | NM_0038<br>06 | HRK | harakiri,<br>BCL2<br>interacting<br>protein<br>(contains<br>only BH3<br>domain) | -0.935225 | Inlier |
| siRNA-Vinblastine Run2-<br>DMSO  | NM_0038<br>06 | HRK | harakiri,<br>BCL2<br>interacting<br>protein<br>(contains<br>only BH3<br>domain) | -0.905794 | Inlier |
| siRNA Disorazole DMSO Run1       | NM_0038<br>06 | HRK | harakiri,<br>BCL2<br>interacting<br>protein<br>(contains<br>only BH3<br>domain) | -0.874774 | Inlier |
| siRNA-Temozolomide Run2-<br>DMSO | NM_0038<br>06 | HRK | harakiri,<br>BCL2<br>interacting<br>protein<br>(contains<br>only BH3<br>domain) | -0.048666 | Inlier |
| siRNA-Temozolomide Run3-<br>DMSO | NM_0038<br>06 | HRK | harakiri,<br>BCL2<br>interacting<br>protein<br>(contains<br>only BH3<br>domain) | 0.048666  | Inlier |
| siRNA-Temozolomide Run1-<br>DMSO | NM_0038<br>06 | HRK | harakiri,<br>BCL2<br>interacting<br>protein<br>(contains<br>only BH3<br>domain) | 0.199868  | Inlier |
| siRNA-Vinblastine Run1-<br>DMSO  | NM_0038<br>06 | HRK | harakiri,<br>BCL2<br>interacting<br>protein<br>(contains<br>only BH3<br>domain) | 0.650577  | Inlier |

Identification of Survival Genes in Human Glioblastoma Cells Using siRNA Screening  
 Nikhil G Thaker, Fang Zhang, Peter R. McDonald, Tong Ying Shun, Michael D Lewen, Ian F. Pollack, and John S. Lazo

Molecular Pharmacology

|                                  |               |         |                                                                                 |           |        |
|----------------------------------|---------------|---------|---------------------------------------------------------------------------------|-----------|--------|
| siRNA Disorazole DMSO Run2       | NM_0038<br>06 | HRK     | harakiri,<br>BCL2<br>interacting<br>protein<br>(contains<br>only BH3<br>domain) | 0.698423  | Inlier |
| siRNA-Temozolomide Run1-<br>DMSO | NM_2069<br>62 | HRMT1L1 | HMT1<br>hnRNP<br>methyltran<br>sferase-<br>like 1 (S.<br>cerevisiae)            | -1.000956 | Inlier |
| siRNA-Temozolomide Run2-<br>DMSO | NM_2069<br>62 | HRMT1L1 | HMT1<br>hnRNP<br>methyltran<br>sferase-<br>like 1 (S.<br>cerevisiae)            | -0.807253 | Inlier |
| siRNA Disorazole DMSO Run1       | NM_2069<br>62 | HRMT1L1 | HMT1<br>hnRNP<br>methyltran<br>sferase-<br>like 1 (S.<br>cerevisiae)            | -0.379665 | Inlier |
| siRNA Disorazole DMSO Run3       | NM_2069<br>62 | HRMT1L1 | HMT1<br>hnRNP<br>methyltran<br>sferase-<br>like 1 (S.<br>cerevisiae)            | -0.058521 | Inlier |
| siRNA-Vinblastine Run2-<br>DMSO  | NM_2069<br>62 | HRMT1L1 | HMT1<br>hnRNP<br>methyltran<br>sferase-<br>like 1 (S.<br>cerevisiae)            | 0.058521  | Inlier |
| siRNA-Temozolomide Run3-<br>DMSO | NM_2069<br>62 | HRMT1L1 | HMT1<br>hnRNP<br>methyltran<br>sferase-<br>like 1 (S.<br>cerevisiae)            | 0.541747  | Inlier |



Identification of Survival Genes in Human Glioblastoma Cells Using siRNA Screening  
 Nikhil G Thaker, Fang Zhang, Peter R. McDonald, Tong Ying Shun, Michael D Lewen, Ian F. Pollack, and John S. Lazo  
 Molecular Pharmacology

|                              |               |         |                                                                      |           |        |
|------------------------------|---------------|---------|----------------------------------------------------------------------|-----------|--------|
| siRNA-Vinblastine Run1-DMSO  | NM_2069<br>62 | HRMT1L1 | HMT1<br>hnRNP<br>methyltran<br>sferase-<br>like 1 (S.<br>cerevisiae) | 2.442011  | Inlier |
| siRNA Disorazole DMSO Run2   | NM_2069<br>62 | HRMT1L1 | HMT1<br>hnRNP<br>methyltran<br>sferase-<br>like 1 (S.<br>cerevisiae) | 2.866734  | Inlier |
| siRNA Disorazole DMSO Run1   | NM_1983<br>19 | HRMT1L2 | HMT1<br>hnRNP<br>methyltran<br>sferase-<br>like 2 (S.<br>cerevisiae) | -2.259804 | Inlier |
| siRNA-Temozolomide Run1-DMSO | NM_1983<br>19 | HRMT1L2 | HMT1<br>hnRNP<br>methyltran<br>sferase-<br>like 2 (S.<br>cerevisiae) | -1.276497 | Inlier |
| siRNA-Temozolomide Run2-DMSO | NM_1983<br>19 | HRMT1L2 | HMT1<br>hnRNP<br>methyltran<br>sferase-<br>like 2 (S.<br>cerevisiae) | -0.693728 | Inlier |
| siRNA Disorazole DMSO Run3   | NM_1983<br>19 | HRMT1L2 | HMT1<br>hnRNP<br>methyltran<br>sferase-<br>like 2 (S.<br>cerevisiae) | -0.028764 | Inlier |
| siRNA-Vinblastine Run2-DMSO  | NM_1983<br>19 | HRMT1L2 | HMT1<br>hnRNP<br>methyltran<br>sferase-<br>like 2 (S.<br>cerevisiae) | 0.028764  | Inlier |

Identification of Survival Genes in Human Glioblastoma Cells Using siRNA Screening  
 Nikhil G Thaker, Fang Zhang, Peter R. McDonald, Tong Ying Shun, Michael D Lewen, Ian F. Pollack, and John S. Lazo  
 Molecular Pharmacology

|                              |           |         |                                                                      |           |        |
|------------------------------|-----------|---------|----------------------------------------------------------------------|-----------|--------|
| siRNA-Temozolomide Run3-DMSO | NM_198319 | HRMT1L2 | HMT1<br>hnRNP<br>methyltran<br>sferase-<br>like 2 (S.<br>cerevisiae) | 0.091095  | Inlier |
| siRNA-Vinblastine Run1-DMSO  | NM_198319 | HRMT1L2 | HMT1<br>hnRNP<br>methyltran<br>sferase-<br>like 2 (S.<br>cerevisiae) | 0.655272  | Inlier |
| siRNA Disorazole DMSO Run2   | NM_198319 | HRMT1L2 | HMT1<br>hnRNP<br>methyltran<br>sferase-<br>like 2 (S.<br>cerevisiae) | 1.811105  | Inlier |
| siRNA-Temozolomide Run1-DMSO | NM_005788 | HRMT1L3 | HMT1<br>hnRNP<br>methyltran<br>sferase-<br>like 3 (S.<br>cerevisiae) | -0.705703 | Inlier |
| siRNA Disorazole DMSO Run1   | NM_005788 | HRMT1L3 | HMT1<br>hnRNP<br>methyltran<br>sferase-<br>like 3 (S.<br>cerevisiae) | -0.643297 | Inlier |
| siRNA-Temozolomide Run2-DMSO | NM_005788 | HRMT1L3 | HMT1<br>hnRNP<br>methyltran<br>sferase-<br>like 3 (S.<br>cerevisiae) | -0.479957 | Inlier |
| siRNA-Temozolomide Run3-DMSO | NM_005788 | HRMT1L3 | HMT1<br>hnRNP<br>methyltran<br>sferase-<br>like 3 (S.<br>cerevisiae) | -0.027112 | Inlier |

Identification of Survival Genes in Human Glioblastoma Cells Using siRNA Screening  
 Nikhil G Thaker, Fang Zhang, Peter R. McDonald, Tong Ying Shun, Michael D Lewen, Ian F. Pollack, and John S. Lazo  
 Molecular Pharmacology

|                                  |               |         |                                                                      |           |        |
|----------------------------------|---------------|---------|----------------------------------------------------------------------|-----------|--------|
| siRNA Disorazole DMSO Run3       | NM_0057<br>88 | HRMT1L3 | HMT1<br>hnRNP<br>methyltran<br>sferase-<br>like 3 (S.<br>cerevisiae) | 0.027112  | Inlier |
| siRNA-Vinblastine Run2-<br>DMSO  | NM_0057<br>88 | HRMT1L3 | HMT1<br>hnRNP<br>methyltran<br>sferase-<br>like 3 (S.<br>cerevisiae) | 0.707326  | Inlier |
| siRNA-Vinblastine Run1-<br>DMSO  | NM_0057<br>88 | HRMT1L3 | HMT1<br>hnRNP<br>methyltran<br>sferase-<br>like 3 (S.<br>cerevisiae) | 0.933352  | Inlier |
| siRNA Disorazole DMSO Run2       | NM_0057<br>88 | HRMT1L3 | HMT1<br>hnRNP<br>methyltran<br>sferase-<br>like 3 (S.<br>cerevisiae) | 1.531458  | Inlier |
| siRNA-Temozolomide Run2-<br>DMSO | NM_0198<br>54 | HRMT1L4 | HMT1<br>hnRNP<br>methyltran<br>sferase-<br>like 4 (S.<br>cerevisiae) | -1.955169 | Inlier |
| siRNA Disorazole DMSO Run1       | NM_0198<br>54 | HRMT1L4 | HMT1<br>hnRNP<br>methyltran<br>sferase-<br>like 4 (S.<br>cerevisiae) | -1.018337 | Inlier |
| siRNA-Temozolomide Run3-<br>DMSO | NM_0198<br>54 | HRMT1L4 | HMT1<br>hnRNP<br>methyltran<br>sferase-<br>like 4 (S.<br>cerevisiae) | -0.272922 | Inlier |

Identification of Survival Genes in Human Glioblastoma Cells Using siRNA Screening  
 Nikhil G Thaker, Fang Zhang, Peter R. McDonald, Tong Ying Shun, Michael D Lewen, Ian F. Pollack, and John S. Lazo  
 Molecular Pharmacology

|                              |               |         |                                                                      |           |        |
|------------------------------|---------------|---------|----------------------------------------------------------------------|-----------|--------|
| siRNA-Vinblastine Run2-DMSO  | NM_0198<br>54 | HRMT1L4 | HMT1<br>hnRNP<br>methyltran<br>sferase-<br>like 4 (S.<br>cerevisiae) | -0.200031 | Inlier |
| siRNA Disorazole DMSO Run3   | NM_0198<br>54 | HRMT1L4 | HMT1<br>hnRNP<br>methyltran<br>sferase-<br>like 4 (S.<br>cerevisiae) | 0.200031  | Inlier |
| siRNA-Temozolomide Run1-DMSO | NM_0198<br>54 | HRMT1L4 | HMT1<br>hnRNP<br>methyltran<br>sferase-<br>like 4 (S.<br>cerevisiae) | 0.330663  | Inlier |
| siRNA Disorazole DMSO Run2   | NM_0198<br>54 | HRMT1L4 | HMT1<br>hnRNP<br>methyltran<br>sferase-<br>like 4 (S.<br>cerevisiae) | 2.05521   | Inlier |
| siRNA-Vinblastine Run1-DMSO  | NM_0198<br>54 | HRMT1L4 | HMT1<br>hnRNP<br>methyltran<br>sferase-<br>like 4 (S.<br>cerevisiae) | 2.126935  | Inlier |
| siRNA-Temozolomide Run2-DMSO | NM_0181<br>37 | HRMT1L6 | HMT1<br>hnRNP<br>methyltran<br>sferase-<br>like 6 (S.<br>cerevisiae) | -1.038821 | Inlier |
| siRNA-Temozolomide Run3-DMSO | NM_0181<br>37 | HRMT1L6 | HMT1<br>hnRNP<br>methyltran<br>sferase-<br>like 6 (S.<br>cerevisiae) | -0.576745 | Inlier |

Identification of Survival Genes in Human Glioblastoma Cells Using siRNA Screening  
 Nikhil G Thaker, Fang Zhang, Peter R. McDonald, Tong Ying Shun, Michael D Lewen, Ian F. Pollack, and John S. Lazo  
 Molecular Pharmacology

|                                  |               |         |                                                                      |           |        |
|----------------------------------|---------------|---------|----------------------------------------------------------------------|-----------|--------|
| siRNA Disorazole DMSO Run1       | NM_0181<br>37 | HRMT1L6 | HMT1<br>hnRNP<br>methyltran<br>sferase-<br>like 6 (S.<br>cerevisiae) | -0.348074 | Inlier |
| siRNA-Temozolomide Run1-<br>DMSO | NM_0181<br>37 | HRMT1L6 | HMT1<br>hnRNP<br>methyltran<br>sferase-<br>like 6 (S.<br>cerevisiae) | -0.266361 | Inlier |
| siRNA Disorazole DMSO Run3       | NM_0181<br>37 | HRMT1L6 | HMT1<br>hnRNP<br>methyltran<br>sferase-<br>like 6 (S.<br>cerevisiae) | 0.266362  | Inlier |
| siRNA-Vinblastine Run2-<br>DMSO  | NM_0181<br>37 | HRMT1L6 | HMT1<br>hnRNP<br>methyltran<br>sferase-<br>like 6 (S.<br>cerevisiae) | 0.772255  | Inlier |
| siRNA-Vinblastine Run1-<br>DMSO  | NM_0181<br>37 | HRMT1L6 | HMT1<br>hnRNP<br>methyltran<br>sferase-<br>like 6 (S.<br>cerevisiae) | 1.951328  | Inlier |
| siRNA Disorazole DMSO Run2       | NM_0181<br>37 | HRMT1L6 | HMT1<br>hnRNP<br>methyltran<br>sferase-<br>like 6 (S.<br>cerevisiae) | 2.397689  | Inlier |
| siRNA-Temozolomide Run2-<br>DMSO | NM_0122<br>62 | HS2ST1  | heparan<br>sulfate 2-<br>O-<br>sulfotransf<br>erase 1                | -1.340206 | Inlier |
| siRNA-Temozolomide Run3-<br>DMSO | NM_0122<br>62 | HS2ST1  | heparan<br>sulfate 2-<br>O-<br>sulfotransf<br>erase 1                | -0.748986 | Inlier |

Identification of Survival Genes in Human Glioblastoma Cells Using siRNA Screening

Nikhil G Thaker, Fang Zhang, Peter R. McDonald, Tong Ying Shun, Michael D Lewen, Ian F. Pollack, and John S. Lazo

Molecular Pharmacology

|                              |               |        |                                                      |           |        |
|------------------------------|---------------|--------|------------------------------------------------------|-----------|--------|
| siRNA-Temozolomide Run1-DMSO | NM_0122<br>62 | HS2ST1 | heparan sulfate 2-O-sulfotransferase 1               | -0.600014 | Inlier |
| siRNA-Vinblastine Run2-DMSO  | NM_0122<br>62 | HS2ST1 | heparan sulfate 2-O-sulfotransferase 1               | -0.01362  | Inlier |
| siRNA Disorazole DMSO Run3   | NM_0122<br>62 | HS2ST1 | heparan sulfate 2-O-sulfotransferase 1               | 0.01362   | Inlier |
| siRNA Disorazole DMSO Run1   | NM_0122<br>62 | HS2ST1 | heparan sulfate 2-O-sulfotransferase 1               | 0.069716  | Inlier |
| siRNA-Vinblastine Run1-DMSO  | NM_0122<br>62 | HS2ST1 | heparan sulfate 2-O-sulfotransferase 1               | 1.216792  | Inlier |
| siRNA Disorazole DMSO Run2   | NM_0122<br>62 | HS2ST1 | heparan sulfate (glucosamine) 3-O-sulfotransferase 1 | 1.266137  | Inlier |
| siRNA-Temozolomide Run3-DMSO | NM_0051<br>14 | HS3ST1 | heparan sulfate (glucosamine) 3-O-sulfotransferase 1 | -1.834009 | Inlier |
| siRNA Disorazole DMSO Run2   | NM_0051<br>14 | HS3ST1 | heparan sulfate (glucosamine) 3-O-sulfotransferase 1 | -0.897854 | Inlier |
| siRNA-Temozolomide Run2-DMSO | NM_0051<br>14 | HS3ST1 | heparan sulfate (glucosamine) 3-O-sulfotransferase 1 | -0.451146 | Inlier |

Identification of Survival Genes in Human Glioblastoma Cells Using siRNA Screening  
 Nikhil G Thaker, Fang Zhang, Peter R. McDonald, Tong Ying Shun, Michael D Lewen, Ian F. Pollack, and John S. Lazo

Molecular Pharmacology

| siRNA              | Condition | Run  | Gene    | Accession | Gene      | Value     | Category |
|--------------------|-----------|------|---------|-----------|-----------|-----------|----------|
| siRNA Disorazole   | DMSO      | Run3 | 14      | NM_0051   | HS3ST1    | -0.046035 | Inlier   |
| siRNA-Temozolomide | Run1-DMSO | 14   | NM_0051 | HS3ST1    | 0.046036  | Inlier    |          |
| siRNA Disorazole   | DMSO      | Run1 | 14      | NM_0051   | HS3ST1    | 0.355314  | Inlier   |
| siRNA-Vinblastine  | Run2-DMSO | 14   | NM_0051 | HS3ST1    | 3.534343  | Outlier   |          |
| siRNA-Vinblastine  | Run1-DMSO | 14   | NM_0051 | HS3ST1    | 3.60472   | Outlier   |          |
| siRNA Disorazole   | DMSO      | Run2 | 43      | NM_0060   | HS3ST2    | -3.462863 | Inlier   |
| siRNA-Temozolomide | Run3-DMSO | 43   | NM_0060 | HS3ST2    | -1.577778 | Inlier    |          |
| siRNA Disorazole   | DMSO      | Run1 | 43      | NM_0060   | HS3ST2    | -0.703672 | Inlier   |

heparan sulfate (glucosamine) 3-O-sulfotransferase 1  
 heparan sulfate (glucosamine) 3-O-sulfotransferase 2  
 heparan sulfate (glucosamine) 3-O-sulfotransferase 2  
 heparan sulfate (glucosamine) 3-O-sulfotransferase 2

Identification of Survival Genes in Human Glioblastoma Cells Using siRNA Screening  
 Nikhil G Thaker, Fang Zhang, Peter R. McDonald, Tong Ying Shun, Michael D Lewen, Ian F. Pollack, and John S. Lazo

Molecular Pharmacology

|                              |               |          |                                                        |           |        |
|------------------------------|---------------|----------|--------------------------------------------------------|-----------|--------|
| siRNA Disorazole DMSO Run3   | NM_0060<br>43 | HS3ST2   | heparan sulfate (glucosamine) 3-O-sulfotransferase 2   | -0.155548 | Inlier |
| siRNA-Temozolomide Run2-DMSO | NM_0060<br>43 | HS3ST2   | heparan sulfate (glucosamine) 3-O-sulfotransferase 2   | 0.155548  | Inlier |
| siRNA-Temozolomide Run1-DMSO | NM_0060<br>43 | HS3ST2   | heparan sulfate (glucosamine) 3-O-sulfotransferase 2   | 0.384576  | Inlier |
| siRNA-Vinblastine Run1-DMSO  | NM_0060<br>43 | HS3ST2   | heparan sulfate (glucosamine) 3-O-sulfotransferase 2   | 0.645328  | Inlier |
| siRNA-Vinblastine Run2-DMSO  | NM_0060<br>43 | HS3ST2   | heparan sulfate (glucosamine) 3-O-sulfotransferase 2   | 1.635488  | Inlier |
| siRNA Disorazole DMSO Run1   | NM_0060<br>42 | HS3ST3A1 | heparan sulfate (glucosamine) 3-O-sulfotransferase 3A1 | -3.405191 | Inlier |
| siRNA-Temozolomide Run3-DMSO | NM_0060<br>42 | HS3ST3A1 | heparan sulfate (glucosamine) 3-O-sulfotransferase 3A1 | -1.076846 | Inlier |
| siRNA-Temozolomide Run2-DMSO | NM_0060<br>42 | HS3ST3A1 | heparan sulfate (glucosamine) 3-O-sulfotransferase 3A1 | -0.476344 | Inlier |



Identification of Survival Genes in Human Glioblastoma Cells Using siRNA Screening  
 Nikhil G Thaker, Fang Zhang, Peter R. McDonald, Tong Ying Shun, Michael D Lewen, Ian F. Pollack, and John S. Lazo

Molecular Pharmacology

| siRNA                        | Gene      | Accession | Count | Gene Name                                              | Value     | Category |
|------------------------------|-----------|-----------|-------|--------------------------------------------------------|-----------|----------|
| siRNA-Temozolomide Run1-DMSO | NM_006042 | HS3ST3A   | 1     | heparan sulfate (glucosamine) 3-O-sulfotransferase 3A1 | -0.354025 | Inlier   |
| siRNA-Vinblastine Run2-DMSO  | NM_006042 | HS3ST3A   | 1     | heparan sulfate (glucosamine) 3-O-sulfotransferase 3A1 | 0.354025  | Inlier   |
| siRNA-Vinblastine Run1-DMSO  | NM_006042 | HS3ST3A   | 1     | heparan sulfate (glucosamine) 3-O-sulfotransferase 3A1 | 0.398673  | Inlier   |
| siRNA Disorazole DMSO Run2   | NM_006042 | HS3ST3A   | 1     | heparan sulfate (glucosamine) 3-O-sulfotransferase 3A1 | 0.872656  | Inlier   |
| siRNA Disorazole DMSO Run3   | NM_006042 | HS3ST3A   | 1     | heparan sulfate (glucosamine) 3-O-sulfotransferase 3A1 | 3.802438  | Outlier  |
| siRNA-Temozolomide Run3-DMSO | NM_006041 | HS3ST3B   | 1     | heparan sulfate (glucosamine) 3-O-sulfotransferase 3B1 | -2.525677 | Inlier   |
| siRNA Disorazole DMSO Run1   | NM_006041 | HS3ST3B   | 1     | heparan sulfate (glucosamine) 3-O-sulfotransferase 3B1 | -1.595327 | Inlier   |
| siRNA Disorazole DMSO Run2   | NM_006041 | HS3ST3B   | 1     | heparan sulfate (glucosamine) 3-O-sulfotransferase 3B1 | -0.741092 | Inlier   |

Identification of Survival Genes in Human Glioblastoma Cells Using siRNA Screening  
 Nikhil G Thaker, Fang Zhang, Peter R. McDonald, Tong Ying Shun, Michael D Lewen, Ian F. Pollack, and John S. Lazo

Molecular Pharmacology

| siRNA Treatment              | Gene ID   | Gene Name | Enzyme                                                 | Value     | Outlier Status |
|------------------------------|-----------|-----------|--------------------------------------------------------|-----------|----------------|
| siRNA-Temozolomide Run2-DMSO | NM_006041 | HS3ST3B   | heparan sulfate (glucosamine) 3-O-sulfotransferase 3B1 | -0.089388 | Inlier         |
| siRNA-Temozolomide Run1-DMSO | NM_006041 | HS3ST3B   | heparan sulfate (glucosamine) 3-O-sulfotransferase 3B1 | 0.089388  | Inlier         |
| siRNA-Vinblastine Run1-DMSO  | NM_006041 | HS3ST3B   | heparan sulfate (glucosamine) 3-O-sulfotransferase 3B1 | 0.135729  | Inlier         |
| siRNA Disorazole DMSO Run3   | NM_006041 | HS3ST3B   | heparan sulfate (glucosamine) 3-O-sulfotransferase 3B1 | 0.607908  | Inlier         |
| siRNA-Vinblastine Run2-DMSO  | NM_006041 | HS3ST3B   | heparan sulfate (glucosamine) 3-O-sulfotransferase 3B1 | 0.966881  | Inlier         |
| siRNA-Temozolomide Run2-DMSO | NM_006040 | HS3ST4    | heparan sulfate (glucosamine) 3-O-sulfotransferase 4   | -1.18501  | Inlier         |
| siRNA-Temozolomide Run3-DMSO | NM_006040 | HS3ST4    | heparan sulfate (glucosamine) 3-O-sulfotransferase 4   | -1.010617 | Inlier         |
| siRNA-Temozolomide Run1-DMSO | NM_006040 | HS3ST4    | heparan sulfate (glucosamine) 3-O-sulfotransferase 4   | -0.284551 | Inlier         |

Identification of Survival Genes in Human Glioblastoma Cells Using siRNA Screening  
 Nikhil G Thaker, Fang Zhang, Peter R. McDonald, Tong Ying Shun, Michael D Lewen, Ian F. Pollack, and John S. Lazo

Molecular Pharmacology

|                              |               |        |                                                      |           |        |
|------------------------------|---------------|--------|------------------------------------------------------|-----------|--------|
| siRNA Disorazole DMSO Run3   | NM_0060<br>40 | HS3ST4 | heparan sulfate (glucosamine) 3-O-sulfotransferase 4 | -0.078733 | Inlier |
| siRNA-Vinblastine Run2-DMSO  | NM_0060<br>40 | HS3ST4 | heparan sulfate (glucosamine) 3-O-sulfotransferase 4 | 0.078733  | Inlier |
| siRNA Disorazole DMSO Run1   | NM_0060<br>40 | HS3ST4 | heparan sulfate (glucosamine) 3-O-sulfotransferase 4 | 0.338383  | Inlier |
| siRNA-Vinblastine Run1-DMSO  | NM_0060<br>40 | HS3ST4 | heparan sulfate (glucosamine) 3-O-sulfotransferase 4 | 1.441771  | Inlier |
| siRNA Disorazole DMSO Run2   | NM_0060<br>40 | HS3ST4 | heparan sulfate (glucosamine) 3-O-sulfotransferase 4 | 1.728292  | Inlier |
| siRNA Disorazole DMSO Run1   | NM_1536<br>12 | HS3ST5 | heparan sulfate (glucosamine) 3-O-sulfotransferase 5 | -1.343462 | Inlier |
| siRNA-Temozolomide Run3-DMSO | NM_1536<br>12 | HS3ST5 | heparan sulfate (glucosamine) 3-O-sulfotransferase 5 | -0.652867 | Inlier |
| siRNA Disorazole DMSO Run2   | NM_1536<br>12 | HS3ST5 | heparan sulfate (glucosamine) 3-O-sulfotransferase 5 | -0.485982 | Inlier |

Identification of Survival Genes in Human Glioblastoma Cells Using siRNA Screening  
 Nikhil G Thaker, Fang Zhang, Peter R. McDonald, Tong Ying Shun, Michael D Lewen, Ian F. Pollack, and John S. Lazo

Molecular Pharmacology

| siRNA Treatment              | Gene ID   | Gene Name | Enzyme                                               | Value     | Category |
|------------------------------|-----------|-----------|------------------------------------------------------|-----------|----------|
| siRNA-Temozolomide Run2-DMSO | NM_153612 | HS3ST5    | heparan sulfate (glucosamine) 3-O-sulfotransferase 5 | -0.063879 | Inlier   |
| siRNA-Temozolomide Run1-DMSO | NM_153612 | HS3ST5    | heparan sulfate (glucosamine) 3-O-sulfotransferase 5 | 0.063879  | Inlier   |
| siRNA-Vinblastine Run1-DMSO  | NM_153612 | HS3ST5    | heparan sulfate (glucosamine) 3-O-sulfotransferase 5 | 0.696133  | Inlier   |
| siRNA-Vinblastine Run2-DMSO  | NM_153612 | HS3ST5    | heparan sulfate (glucosamine) 3-O-sulfotransferase 5 | 0.775222  | Inlier   |
| siRNA Disorazole DMSO Run3   | NM_153612 | HS3ST5    | heparan sulfate 6-O-sulfotransferase 5               | 2.440419  | Inlier   |
| siRNA Disorazole DMSO Run1   | NM_004807 | HS6ST1    | heparan sulfate 6-O-sulfotransferase 1               | -1.716736 | Inlier   |
| siRNA-Temozolomide Run2-DMSO | NM_004807 | HS6ST1    | heparan sulfate 6-O-sulfotransferase 1               | -0.823528 | Inlier   |
| siRNA-Temozolomide Run1-DMSO | NM_004807 | HS6ST1    | heparan sulfate 6-O-sulfotransferase 1               | -0.525472 | Inlier   |
| siRNA Disorazole DMSO Run3   | NM_004807 | HS6ST1    | heparan sulfate 6-O-sulfotransferase 1               | -0.275539 | Inlier   |

Identification of Survival Genes in Human Glioblastoma Cells Using siRNA Screening  
 Nikhil G Thaker, Fang Zhang, Peter R. McDonald, Tong Ying Shun, Michael D Lewen, Ian F. Pollack, and John S. Lazo

Molecular Pharmacology

|                              |           |        |                                        |           |        |
|------------------------------|-----------|--------|----------------------------------------|-----------|--------|
| siRNA-Vinblastine Run2-DMSO  | NM_004807 | HS6ST1 | heparan sulfate 6-O-sulfotransferase 1 | 0.275539  | Inlier |
| siRNA-Temozolomide Run3-DMSO | NM_004807 | HS6ST1 | heparan sulfate 6-O-sulfotransferase 1 | 0.393447  | Inlier |
| siRNA-Vinblastine Run1-DMSO  | NM_004807 | HS6ST1 | heparan sulfate 6-O-sulfotransferase 1 | 1.735843  | Inlier |
| siRNA Disorazole DMSO Run2   | NM_004807 | HS6ST1 | heparan sulfate 6-O-sulfotransferase 1 | 2.394072  | Inlier |
| siRNA Disorazole DMSO Run1   | NM_147175 | HS6ST2 | heparan sulfate 6-O-sulfotransferase 2 | -1.574785 | Inlier |
| siRNA-Temozolomide Run1-DMSO | NM_147175 | HS6ST2 | heparan sulfate 6-O-sulfotransferase 2 | -0.687642 | Inlier |
| siRNA-Temozolomide Run2-DMSO | NM_147175 | HS6ST2 | heparan sulfate 6-O-sulfotransferase 2 | -0.661358 | Inlier |
| siRNA Disorazole DMSO Run3   | NM_147175 | HS6ST2 | heparan sulfate 6-O-sulfotransferase 2 | -0.280461 | Inlier |
| siRNA-Vinblastine Run2-DMSO  | NM_147175 | HS6ST2 | heparan sulfate 6-O-sulfotransferase 2 | 0.28046   | Inlier |
| siRNA-Temozolomide Run3-DMSO | NM_147175 | HS6ST2 | heparan sulfate 6-O-sulfotransferase 2 | 0.566528  | Inlier |

Identification of Survival Genes in Human Glioblastoma Cells Using siRNA Screening  
 Nikhil G Thaker, Fang Zhang, Peter R. McDonald, Tong Ying Shun, Michael D Lewen, Ian F. Pollack, and John S. Lazo

Molecular Pharmacology

|                              |               |         |                                        |           |        |
|------------------------------|---------------|---------|----------------------------------------|-----------|--------|
| siRNA-Vinblastine Run1-DMSO  | NM_1471<br>75 | HS6ST2  | heparan sulfate 6-O-sulfotransferase 2 | 0.785076  | Inlier |
| siRNA Disorazole DMSO Run2   | NM_1471<br>75 | HS6ST2  | heparan sulfate 6-O-sulfotransferase 2 | 1.303762  | Inlier |
| siRNA-Temozolomide Run3-DMSO | NM_1534<br>56 | HS6ST3  | heparan sulfate 6-O-sulfotransferase 3 | -1.307833 | Inlier |
| siRNA-Temozolomide Run2-DMSO | NM_1534<br>56 | HS6ST3  | heparan sulfate 6-O-sulfotransferase 3 | -0.805431 | Inlier |
| siRNA-Temozolomide Run1-DMSO | NM_1534<br>56 | HS6ST3  | heparan sulfate 6-O-sulfotransferase 3 | -0.543569 | Inlier |
| siRNA Disorazole DMSO Run1   | NM_1534<br>56 | HS6ST3  | heparan sulfate 6-O-sulfotransferase 3 | -0.24226  | Inlier |
| siRNA-Vinblastine Run2-DMSO  | NM_1534<br>56 | HS6ST3  | heparan sulfate 6-O-sulfotransferase 3 | 0.24226   | Inlier |
| siRNA Disorazole DMSO Run3   | NM_1534<br>56 | HS6ST3  | heparan sulfate 6-O-sulfotransferase 3 | 0.392219  | Inlier |
| siRNA-Vinblastine Run1-DMSO  | NM_1534<br>56 | HS6ST3  | heparan sulfate 6-O-sulfotransferase 3 | 1.747949  | Inlier |
| siRNA Disorazole DMSO Run2   | NM_1534<br>56 | HS6ST3  | heparan sulfate 6-O-sulfotransferase 3 | 2.146038  | Inlier |
| siRNA Disorazole DMSO Run3   | NM_0144<br>73 | HSA9761 | HSA9761                                | -1.334694 | Inlier |

Identification of Survival Genes in Human Glioblastoma Cells Using siRNA Screening  
 Nikhil G Thaker, Fang Zhang, Peter R. McDonald, Tong Ying Shun, Michael D Lewen, Ian F. Pollack, and John S. Lazo

|                              |               |         |                                                         |           |         |
|------------------------------|---------------|---------|---------------------------------------------------------|-----------|---------|
| Molecular Pharmacology       | NM_0144       |         |                                                         |           |         |
| siRNA Disorazole DMSO Run1   | 73            | HSA9761 | HSA9761                                                 | -0.588057 | Inlier  |
| siRNA-Temozolomide Run2-DMSO | NM_0144<br>73 | HSA9761 | HSA9761                                                 | -0.55835  | Inlier  |
| siRNA-Vinblastine Run2-DMSO  | NM_0144<br>73 | HSA9761 | HSA9761                                                 | -0.55729  | Inlier  |
| siRNA-Temozolomide Run1-DMSO | NM_0144<br>73 | HSA9761 | HSA9761                                                 | 0.557289  | Inlier  |
| siRNA-Temozolomide Run3-DMSO | NM_0144<br>73 | HSA9761 | HSA9761                                                 | 0.760943  | Inlier  |
| siRNA-Vinblastine Run1-DMSO  | NM_0144<br>73 | HSA9761 | HSA9761                                                 | 6.270607  | Outlier |
| siRNA Disorazole DMSO Run2   | NM_0144<br>73 | HSA9761 | HSA9761                                                 | 8.026018  | Outlier |
| siRNA-Temozolomide Run2-DMSO | NM_0220<br>89 | HSA9947 | ATPase<br>type 13A2                                     | -1.517605 | Inlier  |
| siRNA-Temozolomide Run3-DMSO | NM_0220<br>89 | HSA9947 | ATPase<br>type 13A2                                     | -0.87976  | Inlier  |
| siRNA-Vinblastine Run2-DMSO  | NM_0220<br>89 | HSA9947 | ATPase<br>type 13A2                                     | -0.46924  | Inlier  |
| siRNA-Temozolomide Run1-DMSO | NM_0220<br>89 | HSA9947 | ATPase<br>type 13A2                                     | -0.106537 | Inlier  |
| siRNA Disorazole DMSO Run3   | NM_0220<br>89 | HSA9947 | ATPase<br>type 13A2                                     | 0.106537  | Inlier  |
| siRNA Disorazole DMSO Run1   | NM_0220<br>89 | HSA9947 | ATPase<br>type 13A2                                     | 0.316103  | Inlier  |
| siRNA Disorazole DMSO Run2   | NM_0220<br>89 | HSA9947 | ATPase<br>type 13A2                                     | 1.072358  | Inlier  |
| siRNA-Vinblastine Run1-DMSO  | NM_0220<br>89 | HSA9947 | ATPase<br>type 13A2                                     | 1.433779  | Inlier  |
| siRNA-Temozolomide Run2-DMSO | NM_0055<br>25 | HSD11B1 | hydroxyste<br>roid (11-<br>beta)<br>dehydroge<br>nase 1 | -1.385226 | Inlier  |
| siRNA-Temozolomide Run3-DMSO | NM_0055<br>25 | HSD11B1 | hydroxyste<br>roid (11-<br>beta)<br>dehydroge<br>nase 1 | -1.1964   | Inlier  |
| siRNA Disorazole DMSO Run1   | NM_0055<br>25 | HSD11B1 | hydroxyste<br>roid (11-<br>beta)<br>dehydroge<br>nase 1 | -0.560295 | Inlier  |
| siRNA-Temozolomide Run1-DMSO | NM_0055<br>25 | HSD11B1 | hydroxyste<br>roid (11-<br>beta)<br>dehydroge<br>nase 1 | -0.21914  | Inlier  |

Identification of Survival Genes in Human Glioblastoma Cells Using siRNA Screening  
 Nikhil G Thaker, Fang Zhang, Peter R. McDonald, Tong Ying Shun, Michael D Lewen, Ian F. Pollack, and John S. Lazo

Molecular Pharmacology

|                              |               |         |                                          |           |        |
|------------------------------|---------------|---------|------------------------------------------|-----------|--------|
| siRNA Disorazole DMSO Run3   | NM_0055<br>25 | HSD11B1 | hydroxysteroid (11-beta) dehydrogenase 1 | 0.21914   | Inlier |
| siRNA Disorazole DMSO Run2   | NM_0055<br>25 | HSD11B1 | hydroxysteroid (11-beta) dehydrogenase 1 | 0.572422  | Inlier |
| siRNA-Vinblastine Run2-DMSO  | NM_0055<br>25 | HSD11B1 | hydroxysteroid (11-beta) dehydrogenase 1 | 0.776578  | Inlier |
| siRNA-Vinblastine Run1-DMSO  | NM_0055<br>25 | HSD11B1 | hydroxysteroid (11-beta) dehydrogenase 1 | 1.066888  | Inlier |
| siRNA-Temozolomide Run2-DMSO | NM_0001<br>96 | HSD11B2 | hydroxysteroid (11-beta) dehydrogenase 2 | -1.658616 | Inlier |
| siRNA-Temozolomide Run3-DMSO | NM_0001<br>96 | HSD11B2 | hydroxysteroid (11-beta) dehydrogenase 2 | -1.372422 | Inlier |
| siRNA Disorazole DMSO Run1   | NM_0001<br>96 | HSD11B2 | hydroxysteroid (11-beta) dehydrogenase 2 | -0.218329 | Inlier |
| siRNA Disorazole DMSO Run3   | NM_0001<br>96 | HSD11B2 | hydroxysteroid (11-beta) dehydrogenase 2 | -0.029877 | Inlier |
| siRNA-Temozolomide Run1-DMSO | NM_0001<br>96 | HSD11B2 | hydroxysteroid (11-beta) dehydrogenase 2 | 0.029877  | Inlier |
| siRNA Disorazole DMSO Run2   | NM_0001<br>96 | HSD11B2 | hydroxysteroid (11-beta) dehydrogenase 2 | 0.211015  | Inlier |



Identification of Survival Genes in Human Glioblastoma Cells Using siRNA Screening  
 Nikhil G Thaker, Fang Zhang, Peter R. McDonald, Tong Ying Shun, Michael D Lewen, Ian F. Pollack, and John S. Lazo

Molecular Pharmacology

|                              |           |         |                                          |           |        |
|------------------------------|-----------|---------|------------------------------------------|-----------|--------|
| siRNA-Vinblastine Run2-DMSO  | NM_000196 | HSD11B2 | hydroxysteroid (11-beta) dehydrogenase 2 | 1.13067   | Inlier |
| siRNA-Vinblastine Run1-DMSO  | NM_000196 | HSD11B2 | hydroxysteroid (11-beta) dehydrogenase 2 | 1.205835  | Inlier |
| siRNA-Temozolomide Run2-DMSO | NM_000413 | HSD17B1 | hydroxysteroid (17-beta) dehydrogenase 1 | -1.332376 | Inlier |
| siRNA-Temozolomide Run3-DMSO | NM_000413 | HSD17B1 | hydroxysteroid (17-beta) dehydrogenase 1 | -1.056129 | Inlier |
| siRNA Disorazole DMSO Run1   | NM_000413 | HSD17B1 | hydroxysteroid (17-beta) dehydrogenase 1 | -0.731753 | Inlier |
| siRNA-Temozolomide Run1-DMSO | NM_000413 | HSD17B1 | hydroxysteroid (17-beta) dehydrogenase 1 | -0.055719 | Inlier |
| siRNA Disorazole DMSO Run3   | NM_000413 | HSD17B1 | hydroxysteroid (17-beta) dehydrogenase 1 | 0.055719  | Inlier |
| siRNA-Vinblastine Run2-DMSO  | NM_000413 | HSD17B1 | hydroxysteroid (17-beta) dehydrogenase 1 | 0.151493  | Inlier |
| siRNA Disorazole DMSO Run2   | NM_000413 | HSD17B1 | hydroxysteroid (17-beta) dehydrogenase 1 | 0.617247  | Inlier |
| siRNA-Vinblastine Run1-DMSO  | NM_000413 | HSD17B1 | hydroxysteroid (17-beta) dehydrogenase 1 | 0.793164  | Inlier |

Identification of Survival Genes in Human Glioblastoma Cells Using siRNA Screening  
 Nikhil G Thaker, Fang Zhang, Peter R. McDonald, Tong Ying Shun, Michael D Lewen, Ian F. Pollack, and John S. Lazo

Molecular Pharmacology

| siRNA Treatment              | Gene ID       | Gene Name    | Enzyme                                    | Value     | Outlier Status |
|------------------------------|---------------|--------------|-------------------------------------------|-----------|----------------|
| siRNA Disorazole DMSO Run3   | NM_0161<br>42 | HSD17B1<br>2 | hydroxysteroid (17-beta) dehydrogenase 12 | -1.766488 | Inlier         |
| siRNA-Temozolomide Run2-DMSO | NM_0161<br>42 | HSD17B1<br>2 | hydroxysteroid (17-beta) dehydrogenase 12 | -0.691401 | Inlier         |
| siRNA-Temozolomide Run3-DMSO | NM_0161<br>42 | HSD17B1<br>2 | hydroxysteroid (17-beta) dehydrogenase 12 | -0.164655 | Inlier         |
| siRNA Disorazole DMSO Run1   | NM_0161<br>42 | HSD17B1<br>2 | hydroxysteroid (17-beta) dehydrogenase 12 | -0.037924 | Inlier         |
| siRNA-Temozolomide Run1-DMSO | NM_0161<br>42 | HSD17B1<br>2 | hydroxysteroid (17-beta) dehydrogenase 12 | 0.037925  | Inlier         |
| siRNA-Vinblastine Run2-DMSO  | NM_0161<br>42 | HSD17B1<br>2 | hydroxysteroid (17-beta) dehydrogenase 12 | 0.657599  | Inlier         |
| siRNA-Vinblastine Run1-DMSO  | NM_0161<br>42 | HSD17B1<br>2 | hydroxysteroid (17-beta) dehydrogenase 12 | 1.909315  | Inlier         |
| siRNA Disorazole DMSO Run2   | NM_0161<br>42 | HSD17B1<br>2 | hydroxysteroid (17-beta) dehydrogenase 12 | 2.268849  | Inlier         |
| siRNA Disorazole DMSO Run3   | NM_0021<br>53 | HSD17B2      | hydroxysteroid (17-beta) dehydrogenase 2  | -0.966954 | Inlier         |
| siRNA-Temozolomide Run2-DMSO | NM_0021<br>53 | HSD17B2      | hydroxysteroid (17-beta) dehydrogenase 2  | -0.692461 | Inlier         |

Identification of Survival Genes in Human Glioblastoma Cells Using siRNA Screening  
 Nikhil G Thaker, Fang Zhang, Peter R. McDonald, Tong Ying Shun, Michael D Lewen, Ian F. Pollack, and John S. Lazo

Molecular Pharmacology

| siRNA              | Condition | Run  | Gene ID       | Gene Name                                           | Value     | Outlier |
|--------------------|-----------|------|---------------|-----------------------------------------------------|-----------|---------|
| siRNA Disorazole   | DMSO      | Run2 | NM_0021<br>53 | HSD17B2<br>hydroxysteroid (17-beta) dehydrogenase 2 | -0.656539 | Inlier  |
| siRNA-Temozolomide | Run3-DMSO |      | NM_0021<br>53 | HSD17B2<br>hydroxysteroid (17-beta) dehydrogenase 2 | -0.610555 | Inlier  |
| siRNA Disorazole   | DMSO      | Run1 | NM_0021<br>53 | HSD17B2<br>hydroxysteroid (17-beta) dehydrogenase 2 | 0.610555  | Inlier  |
| siRNA-Temozolomide | Run1-DMSO |      | NM_0021<br>53 | HSD17B2<br>hydroxysteroid (17-beta) dehydrogenase 2 | 0.619385  | Inlier  |
| siRNA-Vinblastine  | Run2-DMSO |      | NM_0021<br>53 | HSD17B2<br>hydroxysteroid (17-beta) dehydrogenase 2 | 1.305707  | Inlier  |
| siRNA-Vinblastine  | Run1-DMSO |      | NM_0021<br>53 | HSD17B2<br>hydroxysteroid (17-beta) dehydrogenase 2 | 1.991449  | Inlier  |
| siRNA-Temozolomide | Run3-DMSO |      | NM_0001<br>97 | HSD17B3<br>hydroxysteroid (17-beta) dehydrogenase 3 | -1.146177 | Inlier  |
| siRNA-Temozolomide | Run2-DMSO |      | NM_0001<br>97 | HSD17B3<br>hydroxysteroid (17-beta) dehydrogenase 3 | -0.947785 | Inlier  |
| siRNA Disorazole   | DMSO      | Run3 | NM_0001<br>97 | HSD17B3<br>hydroxysteroid (17-beta) dehydrogenase 3 | -0.401215 | Inlier  |
| siRNA Disorazole   | DMSO      | Run2 | NM_0001<br>97 | HSD17B3<br>hydroxysteroid (17-beta) dehydrogenase 3 | -0.049232 | Inlier  |

Identification of Survival Genes in Human Glioblastoma Cells Using siRNA Screening  
 Nikhil G Thaker, Fang Zhang, Peter R. McDonald, Tong Ying Shun, Michael D Lewen, Ian F. Pollack, and John S. Lazo

Molecular Pharmacology

|                              |           |         |                                          |           |        |
|------------------------------|-----------|---------|------------------------------------------|-----------|--------|
| siRNA-Temozolomide Run1-DMSO | NM_000197 | HSD17B3 | hydroxysteroid (17-beta) dehydrogenase 3 | 0.049232  | Inlier |
| siRNA Disorazole DMSO Run1   | NM_000197 | HSD17B3 | hydroxysteroid (17-beta) dehydrogenase 3 | 0.37749   | Inlier |
| siRNA-Vinblastine Run2-DMSO  | NM_000197 | HSD17B3 | hydroxysteroid (17-beta) dehydrogenase 3 | 2.524269  | Inlier |
| siRNA-Vinblastine Run1-DMSO  | NM_000197 | HSD17B3 | hydroxysteroid (17-beta) dehydrogenase 3 | 3.431477  | Inlier |
| siRNA-Temozolomide Run2-DMSO | NM_000414 | HSD17B4 | hydroxysteroid (17-beta) dehydrogenase 4 | -1.712476 | Inlier |
| siRNA-Temozolomide Run3-DMSO | NM_000414 | HSD17B4 | hydroxysteroid (17-beta) dehydrogenase 4 | -1.231694 | Inlier |
| siRNA Disorazole DMSO Run3   | NM_000414 | HSD17B4 | hydroxysteroid (17-beta) dehydrogenase 4 | -1.043149 | Inlier |
| siRNA-Vinblastine Run2-DMSO  | NM_000414 | HSD17B4 | hydroxysteroid (17-beta) dehydrogenase 4 | -0.055663 | Inlier |
| siRNA-Temozolomide Run1-DMSO | NM_000414 | HSD17B4 | hydroxysteroid (17-beta) dehydrogenase 4 | 0.055664  | Inlier |
| siRNA Disorazole DMSO Run2   | NM_000414 | HSD17B4 | hydroxysteroid (17-beta) dehydrogenase 4 | 0.114549  | Inlier |

Identification of Survival Genes in Human Glioblastoma Cells Using siRNA Screening  
 Nikhil G Thaker, Fang Zhang, Peter R. McDonald, Tong Ying Shun, Michael D Lewen, Ian F. Pollack, and John S. Lazo

Molecular Pharmacology

| siRNA Treatment              | Gene ID       | Gene Name | Enzyme                                   | Value     | Outlier Status |
|------------------------------|---------------|-----------|------------------------------------------|-----------|----------------|
| siRNA Disorazole DMSO Run1   | NM_0004<br>14 | HSD17B4   | hydroxysteroid (17-beta) dehydrogenase 4 | 0.30585   | Inlier         |
| siRNA-Vinblastine Run1-DMSO  | NM_0004<br>14 | HSD17B4   | hydroxysteroid (17-beta) dehydrogenase 4 | 1.276299  | Inlier         |
| siRNA-Temozolomide Run3-DMSO | NM_0163<br>71 | HSD17B7   | hydroxysteroid (17-beta) dehydrogenase 7 | -0.696807 | Inlier         |
| siRNA-Temozolomide Run2-DMSO | NM_0163<br>71 | HSD17B7   | hydroxysteroid (17-beta) dehydrogenase 7 | -0.652193 | Inlier         |
| siRNA-Temozolomide Run1-DMSO | NM_0163<br>71 | HSD17B7   | hydroxysteroid (17-beta) dehydrogenase 7 | -0.550324 | Inlier         |
| siRNA Disorazole DMSO Run3   | NM_0163<br>71 | HSD17B7   | hydroxysteroid (17-beta) dehydrogenase 7 | -0.043245 | Inlier         |
| siRNA Disorazole DMSO Run2   | NM_0163<br>71 | HSD17B7   | hydroxysteroid (17-beta) dehydrogenase 7 | 0.043245  | Inlier         |
| siRNA Disorazole DMSO Run1   | NM_0163<br>71 | HSD17B7   | hydroxysteroid (17-beta) dehydrogenase 7 | 0.749384  | Inlier         |
| siRNA-Vinblastine Run1-DMSO  | NM_0163<br>71 | HSD17B7   | hydroxysteroid (17-beta) dehydrogenase 7 | 1.908606  | Inlier         |
| siRNA-Vinblastine Run2-DMSO  | NM_0163<br>71 | HSD17B7   | hydroxysteroid (17-beta) dehydrogenase 7 | 2.980184  | Inlier         |

Identification of Survival Genes in Human Glioblastoma Cells Using siRNA Screening

Nikhil G Thaker, Fang Zhang, Peter R. McDonald, Tong Ying Shun, Michael D Lewen, Ian F. Pollack, and John S. Lazo

Molecular Pharmacology

|                              |               |         |                                                                   |           |        |
|------------------------------|---------------|---------|-------------------------------------------------------------------|-----------|--------|
| siRNA-Temozolomide Run3-DMSO | NM_0142<br>34 | HSD17B8 | hydroxysteroid (17-beta) dehydrogenase 8                          | -0.874902 | Inlier |
| siRNA Disorazole DMSO Run1   | NM_0142<br>34 | HSD17B8 | hydroxysteroid (17-beta) dehydrogenase 8                          | -0.474098 | Inlier |
| siRNA-Temozolomide Run2-DMSO | NM_0142<br>34 | HSD17B8 | hydroxysteroid (17-beta) dehydrogenase 8                          | -0.275738 | Inlier |
| siRNA-Temozolomide Run1-DMSO | NM_0142<br>34 | HSD17B8 | hydroxysteroid (17-beta) dehydrogenase 8                          | -0.225219 | Inlier |
| siRNA-Vinblastine Run1-DMSO  | NM_0142<br>34 | HSD17B8 | hydroxysteroid (17-beta) dehydrogenase 8                          | 0.225219  | Inlier |
| siRNA-Vinblastine Run2-DMSO  | NM_0142<br>34 | HSD17B8 | hydroxysteroid (17-beta) dehydrogenase 8                          | 0.966724  | Inlier |
| siRNA Disorazole DMSO Run3   | NM_0142<br>34 | HSD17B8 | hydroxysteroid (17-beta) dehydrogenase 8                          | 1.249898  | Inlier |
| siRNA Disorazole DMSO Run2   | NM_0142<br>34 | HSD17B8 | hydroxy-delta-5-steroid dehydrogenase, 3 beta- and steroid delta- | 1.711692  | Inlier |
| siRNA-Temozolomide Run3-DMSO | NM_0008<br>62 | HSD3B1  | isomerase 1                                                       | -0.904283 | Inlier |

Identification of Survival Genes in Human Glioblastoma Cells Using siRNA Screening

Nikhil G Thaker, Fang Zhang, Peter R. McDonald, Tong Ying Shun, Michael D Lewen, Ian F. Pollack, and John S. Lazo

Molecular Pharmacology

|                              |           |        |                                                                            |           |        |
|------------------------------|-----------|--------|----------------------------------------------------------------------------|-----------|--------|
| siRNA-Temozolomide Run2-DMSO | NM_000862 | HSD3B1 | 1                                                                          | -0.773149 | Inlier |
|                              |           |        | hydroxy-delta-5-steroid dehydrogenase, 3 beta- and steroid delta-isomerase |           |        |
| siRNA Disorazole DMSO Run2   | NM_000862 | HSD3B1 | 1                                                                          | -0.575851 | Inlier |
|                              |           |        | hydroxy-delta-5-steroid dehydrogenase, 3 beta- and steroid delta-isomerase |           |        |
| siRNA Disorazole DMSO Run3   | NM_000862 | HSD3B1 | 1                                                                          | -0.16384  | Inlier |
|                              |           |        | hydroxy-delta-5-steroid dehydrogenase, 3 beta- and steroid delta-isomerase |           |        |
| siRNA Disorazole DMSO Run1   | NM_000862 | HSD3B1 | 1                                                                          | 0.163839  | Inlier |
|                              |           |        | hydroxy-delta-5-steroid dehydrogenase, 3 beta- and steroid delta-isomerase |           |        |
| siRNA-Temozolomide Run1-DMSO | NM_000862 | HSD3B1 | 1                                                                          | 0.324907  | Inlier |
|                              |           |        | hydroxy-delta-5-steroid dehydrogenase, 3 beta- and steroid delta-isomerase |           |        |

Identification of Survival Genes in Human Glioblastoma Cells Using siRNA Screening

Nikhil G Thaker, Fang Zhang, Peter R. McDonald, Tong Ying Shun, Michael D Lewen, Ian F. Pollack, and John S. Lazo

Molecular Pharmacology

|                              |           |        |                                                                              |           |        |
|------------------------------|-----------|--------|------------------------------------------------------------------------------|-----------|--------|
| siRNA-Vinblastine Run1-DMSO  | NM_000862 | HSD3B1 | hydroxy-delta-5-steroid dehydrogenase, 3 beta- and steroid delta-isomerase 1 | 1.575111  | Inlier |
| siRNA-Vinblastine Run2-DMSO  | NM_000862 | HSD3B1 | hydroxy-delta-5-steroid dehydrogenase, 3 beta- and steroid delta-isomerase 1 | 1.602871  | Inlier |
| siRNA-Temozolomide Run2-DMSO | NM_000198 | HSD3B2 | hydroxy-delta-5-steroid dehydrogenase, 3 beta- and steroid delta-isomerase 2 | -0.892139 | Inlier |
| siRNA-Temozolomide Run3-DMSO | NM_000198 | HSD3B2 | hydroxy-delta-5-steroid dehydrogenase, 3 beta- and steroid delta-isomerase 2 | -0.865621 | Inlier |
| siRNA Disorazole DMSO Run2   | NM_000198 | HSD3B2 | hydroxy-delta-5-steroid dehydrogenase, 3 beta- and steroid delta-isomerase 2 | -0.255167 | Inlier |



Identification of Survival Genes in Human Glioblastoma Cells Using siRNA Screening

Nikhil G Thaker, Fang Zhang, Peter R. McDonald, Tong Ying Shun, Michael D Lewen, Ian F. Pollack, and John S. Lazo

Molecular Pharmacology

|                              |               |        |   |           |        |
|------------------------------|---------------|--------|---|-----------|--------|
| siRNA Disorazole DMSO Run1   | NM_0001<br>98 | HSD3B2 | 2 | -0.098182 | Inlier |
| siRNA-Temozolomide Run1-DMSO | NM_0001<br>98 | HSD3B2 | 2 | 0.098183  | Inlier |
| siRNA Disorazole DMSO Run3   | NM_0001<br>98 | HSD3B2 | 2 | 0.483379  | Inlier |
| siRNA-Vinblastine Run1-DMSO  | NM_0001<br>98 | HSD3B2 | 2 | 1.024486  | Inlier |
| siRNA-Vinblastine Run2-DMSO  | NM_0001<br>98 | HSD3B2 | 2 | 1.192966  | Inlier |

hydroxy-  
delta-5-  
steroid  
dehydroge  
nase, 3  
beta- and  
steroid  
delta-  
isomerase

hydroxy-  
delta-5-  
steroid  
dehydroge  
nase, 3  
beta- and  
steroid  
delta-  
isomerase

hydroxy-  
delta-5-  
steroid  
dehydroge  
nase, 3  
beta- and  
steroid  
delta-  
isomerase

hydroxy-  
delta-5-  
steroid  
dehydroge  
nase, 3  
beta- and  
steroid  
delta-  
isomerase

hydroxy-  
delta-5-  
steroid  
dehydroge  
nase, 3  
beta- and  
steroid  
delta-  
isomerase

Identification of Survival Genes in Human Glioblastoma Cells Using siRNA Screening

Nikhil G Thaker, Fang Zhang, Peter R. McDonald, Tong Ying Shun, Michael D Lewen, Ian F. Pollack, and John S. Lazo

Molecular Pharmacology

|                              |           |        |   |                                                                            |           |        |
|------------------------------|-----------|--------|---|----------------------------------------------------------------------------|-----------|--------|
| siRNA-Temozolomide Run2-DMSO | NM_025193 | HSD3B7 | 7 | hydroxy-delta-5-steroid dehydrogenase, 3 beta- and steroid delta-isomerase | -3.427177 | Inlier |
| siRNA-Temozolomide Run3-DMSO | NM_025193 | HSD3B7 | 7 | hydroxy-delta-5-steroid dehydrogenase, 3 beta- and steroid delta-isomerase | -2.352351 | Inlier |
| siRNA Disorazole DMSO Run3   | NM_025193 | HSD3B7 | 7 | hydroxy-delta-5-steroid dehydrogenase, 3 beta- and steroid delta-isomerase | -0.320739 | Inlier |
| siRNA-Temozolomide Run1-DMSO | NM_025193 | HSD3B7 | 7 | hydroxy-delta-5-steroid dehydrogenase, 3 beta- and steroid delta-isomerase | -0.11415  | Inlier |
| siRNA Disorazole DMSO Run2   | NM_025193 | HSD3B7 | 7 | hydroxy-delta-5-steroid dehydrogenase, 3 beta- and steroid delta-isomerase | 0.11415   | Inlier |

Identification of Survival Genes in Human Glioblastoma Cells Using siRNA Screening  
 Nikhil G Thaker, Fang Zhang, Peter R. McDonald, Tong Ying Shun, Michael D Lewen, Ian F. Pollack, and John S. Lazo  
 Molecular Pharmacology

|                                  |               |        |   |                                                                                                        |           |        |
|----------------------------------|---------------|--------|---|--------------------------------------------------------------------------------------------------------|-----------|--------|
| siRNA Disorazole DMSO Run1       | NM_0251<br>93 | HSD3B7 | 7 | hydroxy-<br>delta-5-<br>steroid<br>dehydroge<br>nase, 3<br>beta- and<br>steroid<br>delta-<br>isomerase | 0.220354  | Inlier |
| siRNA-Vinblastine Run2-<br>DMSO  | NM_0251<br>93 | HSD3B7 | 7 | hydroxy-<br>delta-5-<br>steroid<br>dehydroge<br>nase, 3<br>beta- and<br>steroid<br>delta-<br>isomerase | 1.028261  | Inlier |
| siRNA-Vinblastine Run1-<br>DMSO  | NM_0251<br>93 | HSD3B7 | 7 | hydroxy-<br>delta-5-<br>steroid<br>dehydroge<br>nase, 3<br>beta- and<br>steroid<br>delta-<br>isomerase | 1.543466  | Inlier |
| siRNA Disorazole DMSO Run2       | NM_0143<br>65 | HSPB8  | 8 | heat shock<br>22kDa<br>protein 8                                                                       | -0.882181 | Inlier |
| siRNA-Temozolomide Run3-<br>DMSO | NM_0143<br>65 | HSPB8  | 8 | heat shock<br>22kDa<br>protein 8                                                                       | -0.788403 | Inlier |
| siRNA Disorazole DMSO Run3       | NM_0143<br>65 | HSPB8  | 8 | heat shock<br>22kDa<br>protein 8                                                                       | -0.595316 | Inlier |
| siRNA-Temozolomide Run1-<br>DMSO | NM_0143<br>65 | HSPB8  | 8 | heat shock<br>22kDa<br>protein 8                                                                       | -0.172234 | Inlier |
| siRNA Disorazole DMSO Run1       | NM_0143<br>65 | HSPB8  | 8 | heat shock<br>22kDa<br>protein 8                                                                       | 0.172234  | Inlier |

Identification of Survival Genes in Human Glioblastoma Cells Using siRNA Screening  
 Nikhil G Thaker, Fang Zhang, Peter R. McDonald, Tong Ying Shun, Michael D Lewen, Ian F. Pollack, and John S. Lazo

Molecular Pharmacology

|                              |               |         |                                  |           |        |
|------------------------------|---------------|---------|----------------------------------|-----------|--------|
| siRNA-Temozolomide Run2-DMSO | NM_0143<br>65 | HSPB8   | heat shock<br>22kDa<br>protein 8 | 0.303885  | Inlier |
| siRNA-Vinblastine Run2-DMSO  | NM_0143<br>65 | HSPB8   | heat shock<br>22kDa<br>protein 8 | 0.753684  | Inlier |
| siRNA-Vinblastine Run1-DMSO  | NM_0143<br>65 | HSPB8   | heat shock<br>22kDa<br>protein 8 | 0.936273  | Inlier |
| siRNA-Temozolomide Run3-DMSO | NM_0133<br>87 | HSPC051 | HSPC051                          | -0.755691 | Inlier |
| siRNA-Temozolomide Run2-DMSO | NM_0133<br>87 | HSPC051 | HSPC051                          | -0.617814 | Inlier |
| siRNA Disorazole DMSO Run3   | NM_0133<br>87 | HSPC051 | HSPC051                          | -0.169215 | Inlier |
| siRNA Disorazole DMSO Run1   | NM_0133<br>87 | HSPC051 | HSPC051                          | -0.093375 | Inlier |
| siRNA-Vinblastine Run2-DMSO  | NM_0133<br>87 | HSPC051 | HSPC051                          | 0.093375  | Inlier |
| siRNA-Temozolomide Run1-DMSO | NM_0133<br>87 | HSPC051 | HSPC051                          | 0.731186  | Inlier |
| siRNA Disorazole DMSO Run2   | NM_0133<br>87 | HSPC051 | HSPC051                          | 2.198267  | Inlier |
| siRNA-Vinblastine Run1-DMSO  | NM_0133<br>87 | HSPC051 | HSPC051                          | 2.592547  | Inlier |
| siRNA-Temozolomide Run3-DMSO | NM_1451<br>68 | HSPC105 | HSPC105                          | -1.417081 | Inlier |
| siRNA Disorazole DMSO Run1   | NM_1451<br>68 | HSPC105 | HSPC105                          | -0.921514 | Inlier |
| siRNA-Temozolomide Run2-DMSO | NM_1451<br>68 | HSPC105 | HSPC105                          | -0.688564 | Inlier |
| siRNA-Temozolomide Run1-DMSO | NM_1451<br>68 | HSPC105 | HSPC105                          | -0.048692 | Inlier |
| siRNA-Vinblastine Run1-DMSO  | NM_1451<br>68 | HSPC105 | HSPC105                          | 0.048692  | Inlier |
| siRNA Disorazole DMSO Run3   | NM_1451<br>68 | HSPC105 | HSPC105                          | 0.448827  | Inlier |
| siRNA-Vinblastine Run2-DMSO  | NM_1451<br>68 | HSPC105 | HSPC105                          | 0.660436  | Inlier |
| siRNA Disorazole DMSO Run2   | NM_1451<br>68 | HSPC105 | HSPC105                          | 1.043423  | Inlier |
| siRNA-Temozolomide Run3-DMSO | NM_0141<br>68 | HSPC133 | methyltran<br>sferase<br>like 5  | -1.788054 | Inlier |
| siRNA-Temozolomide Run2-DMSO | NM_0141<br>68 | HSPC133 | methyltran<br>sferase<br>like 5  | -0.68611  | Inlier |

Identification of Survival Genes in Human Glioblastoma Cells Using siRNA Screening  
 Nikhil G Thaker, Fang Zhang, Peter R. McDonald, Tong Ying Shun, Michael D Lewen, Ian F. Pollack, and John S. Lazo

Molecular Pharmacology

|                                  |         |         |                                             |                  |
|----------------------------------|---------|---------|---------------------------------------------|------------------|
|                                  | NM_0141 |         | methyltran<br>sferase                       |                  |
| siRNA Disorazole DMSO Run1       | 68      | HSPC133 | like 5                                      | -0.66289 Inlier  |
|                                  | NM_0141 |         | methyltran<br>sferase                       |                  |
| siRNA-Vinblastine Run2-<br>DMSO  | 68      | HSPC133 | like 5                                      | -0.054976 Inlier |
|                                  | NM_0141 |         | methyltran<br>sferase                       |                  |
| siRNA Disorazole DMSO Run3       | 68      | HSPC133 | like 5                                      | 0.054976 Inlier  |
|                                  | NM_0141 |         | methyltran<br>sferase                       |                  |
| siRNA-Temozolomide Run1-<br>DMSO | 68      | HSPC133 | like 5                                      | 0.504184 Inlier  |
|                                  | NM_0141 |         | methyltran<br>sferase                       |                  |
| siRNA Disorazole DMSO Run2       | 68      | HSPC133 | like 5                                      | 1.291264 Inlier  |
|                                  | NM_0141 |         | methyltran<br>sferase                       |                  |
| siRNA-Vinblastine Run1-<br>DMSO  | 68      | HSPC133 | like 5                                      | 1.502503 Inlier  |
|                                  | NM_0141 |         | ubiquitin-<br>conjugatin<br>g enzyme<br>E2T |                  |
| siRNA-Temozolomide Run3-<br>DMSO | 76      | HSPC150 | (putative)                                  | -0.729828 Inlier |
|                                  | NM_0141 |         | ubiquitin-<br>conjugatin<br>g enzyme<br>E2T |                  |
| siRNA Disorazole DMSO Run3       | 76      | HSPC150 | (putative)                                  | -0.619172 Inlier |
|                                  | NM_0141 |         | ubiquitin-<br>conjugatin<br>g enzyme<br>E2T |                  |
| siRNA-Vinblastine Run2-<br>DMSO  | 76      | HSPC150 | (putative)                                  | -0.501429 Inlier |
|                                  | NM_0141 |         | ubiquitin-<br>conjugatin<br>g enzyme<br>E2T |                  |
| siRNA-Temozolomide Run2-<br>DMSO | 76      | HSPC150 | (putative)                                  | -0.313448 Inlier |
|                                  | NM_0141 |         | ubiquitin-<br>conjugatin<br>g enzyme<br>E2T |                  |
| siRNA Disorazole DMSO Run1       | 76      | HSPC150 | (putative)                                  | 0.313449 Inlier  |
|                                  | NM_0141 |         | ubiquitin-<br>conjugatin<br>g enzyme<br>E2T |                  |
| siRNA-Temozolomide Run1-<br>DMSO | 76      | HSPC150 | (putative)                                  | 3.16113 Inlier   |

Identification of Survival Genes in Human Glioblastoma Cells Using siRNA Screening  
 Nikhil G Thaker, Fang Zhang, Peter R. McDonald, Tong Ying Shun, Michael D Lewen, Ian F. Pollack, and John S. Lazo

Molecular Pharmacology

|                                  |               |         |                                                           |           |         |
|----------------------------------|---------------|---------|-----------------------------------------------------------|-----------|---------|
| siRNA Disorazole DMSO Run2       | NM_0141<br>76 | HSPC150 | ubiquitin-<br>conjugatin<br>g enzyme<br>E2T<br>(putative) | 8.130071  | Outlier |
| siRNA-Vinblastine Run1-<br>DMSO  | NM_0141<br>76 | HSPC150 | ubiquitin-<br>conjugatin<br>g enzyme<br>E2T<br>(putative) | 9.165037  | Outlier |
| siRNA-Vinblastine Run2-<br>DMSO  | NM_0073<br>55 | HSPCB   | heat shock<br>90kDa<br>protein 1,<br>beta                 | -0.940545 | Inlier  |
| siRNA Disorazole DMSO Run3       | NM_0073<br>55 | HSPCB   | heat shock<br>90kDa<br>protein 1,<br>beta                 | -0.697565 | Inlier  |
| siRNA-Temozolomide Run3-<br>DMSO | NM_0073<br>55 | HSPCB   | heat shock<br>90kDa<br>protein 1,<br>beta                 | -0.651435 | Inlier  |
| siRNA-Temozolomide Run1-<br>DMSO | NM_0073<br>55 | HSPCB   | heat shock<br>90kDa<br>protein 1,<br>beta                 | -0.260577 | Inlier  |
| siRNA Disorazole DMSO Run1       | NM_0073<br>55 | HSPCB   | heat shock<br>90kDa<br>protein 1,<br>beta                 | 0.260577  | Inlier  |
| siRNA-Temozolomide Run2-<br>DMSO | NM_0073<br>55 | HSPCB   | heat shock<br>90kDa<br>protein 1,<br>beta                 | 0.435622  | Inlier  |
| siRNA Disorazole DMSO Run2       | NM_0073<br>55 | HSPCB   | heat shock<br>90kDa<br>protein 1,<br>beta                 | 1.713497  | Inlier  |
| siRNA-Vinblastine Run1-<br>DMSO  | NM_0073<br>55 | HSPCB   | heat shock<br>90kDa<br>protein 1,<br>beta                 | 1.989304  | Inlier  |

Identification of Survival Genes in Human Glioblastoma Cells Using siRNA Screening  
 Nikhil G Thaker, Fang Zhang, Peter R. McDonald, Tong Ying Shun, Michael D Lewen, Ian F. Pollack, and John S. Lazo

Molecular Pharmacology

|                              |               |               |                                        |           |        |
|------------------------------|---------------|---------------|----------------------------------------|-----------|--------|
| siRNA-Temozolomide Run3-DMSO | NM_2027<br>58 | HSRTSBE<br>TA | enolase<br>superfamil<br>y member<br>1 | -1.420669 | Inlier |
| siRNA Disorazole DMSO Run3   | NM_2027<br>58 | HSRTSBE<br>TA | enolase<br>superfamil<br>y member<br>1 | -0.864208 | Inlier |
| siRNA-Vinblastine Run2-DMSO  | NM_2027<br>58 | HSRTSBE<br>TA | enolase<br>superfamil<br>y member<br>1 | -0.481286 | Inlier |
| siRNA Disorazole DMSO Run1   | NM_2027<br>58 | HSRTSBE<br>TA | enolase<br>superfamil<br>y member<br>1 | -0.228294 | Inlier |
| siRNA-Temozolomide Run1-DMSO | NM_2027<br>58 | HSRTSBE<br>TA | enolase<br>superfamil<br>y member<br>1 | 0.228294  | Inlier |
| siRNA-Temozolomide Run2-DMSO | NM_2027<br>58 | HSRTSBE<br>TA | enolase<br>superfamil<br>y member<br>1 | 0.484792  | Inlier |
| siRNA-Vinblastine Run1-DMSO  | NM_2027<br>58 | HSRTSBE<br>TA | enolase<br>superfamil<br>y member<br>1 | 1.466117  | Inlier |
| siRNA Disorazole DMSO Run2   | NM_2027<br>58 | HSRTSBE<br>TA | enolase<br>superfamil<br>y member<br>1 | 2.709108  | Inlier |
| siRNA-Temozolomide Run3-DMSO | NM_1814<br>29 | hT2R55        | hT2R55                                 | -2.418686 | Inlier |
| siRNA-Temozolomide Run1-DMSO | NM_1814<br>29 | hT2R55        | hT2R55                                 | -0.835783 | Inlier |
| siRNA Disorazole DMSO Run3   | NM_1814<br>29 | hT2R55        | hT2R55                                 | -0.410149 | Inlier |
| siRNA-Temozolomide Run2-DMSO | NM_1814<br>29 | hT2R55        | hT2R55                                 | -0.141915 | Inlier |
| siRNA Disorazole DMSO Run2   | NM_1814<br>29 | hT2R55        | hT2R55                                 | 0.141915  | Inlier |
| siRNA Disorazole DMSO Run1   | NM_1814<br>29 | hT2R55        | hT2R55                                 | 0.513217  | Inlier |
| siRNA-Vinblastine Run1-DMSO  | NM_1814<br>29 | hT2R55        | hT2R55                                 | 1.127888  | Inlier |
| siRNA-Vinblastine Run2-DMSO  | NM_1814<br>29 | hT2R55        | hT2R55                                 | 1.554782  | Inlier |
| siRNA-Temozolomide Run2-DMSO | NM_0227<br>27 | HTF9C         | HTF9C                                  | -0.800517 | Inlier |
| siRNA-Vinblastine Run2-DMSO  | NM_0227<br>27 | HTF9C         | HTF9C                                  | -0.548483 | Inlier |

Identification of Survival Genes in Human Glioblastoma Cells Using siRNA Screening  
 Nikhil G Thaker, Fang Zhang, Peter R. McDonald, Tong Ying Shun, Michael D Lewen, Ian F. Pollack, and John S. Lazo

|                              |         |       |                                          |           |         |
|------------------------------|---------|-------|------------------------------------------|-----------|---------|
| Molecular Pharmacology       | NM_0227 |       |                                          |           |         |
| siRNA Disorazole DMSO Run1   | 27      | HTF9C | HTF9C                                    | -0.465688 | Inlier  |
|                              | NM_0227 |       |                                          |           |         |
| siRNA Disorazole DMSO Run3   | 27      | HTF9C | HTF9C                                    | -0.123594 | Inlier  |
| siRNA-Temozolomide Run1-DMSO | NM_0227 |       |                                          |           |         |
|                              | 27      | HTF9C | HTF9C                                    | 0.123594  | Inlier  |
|                              | NM_0227 |       |                                          |           |         |
| siRNA Disorazole DMSO Run2   | 27      | HTF9C | HTF9C                                    | 1.361466  | Inlier  |
| siRNA-Temozolomide Run3-DMSO | NM_0227 |       |                                          |           |         |
|                              | 27      | HTF9C | HTF9C                                    | 1.528423  | Inlier  |
| siRNA-Vinblastine Run1-DMSO  | NM_0227 |       |                                          |           |         |
|                              | 27      | HTF9C | HTF9C                                    | 4.540172  | Outlier |
|                              |         |       | 5-hydroxytryptamine (serotonin) receptor |           |         |
| siRNA-Temozolomide Run3-DMSO | NM_0005 |       |                                          |           |         |
|                              | 24      | HTR1A | 1A                                       | -0.919846 | Inlier  |
|                              |         |       | 5-hydroxytryptamine (serotonin) receptor |           |         |
| siRNA-Temozolomide Run1-DMSO | NM_0005 |       |                                          |           |         |
|                              | 24      | HTR1A | 1A                                       | -0.864301 | Inlier  |
|                              |         |       | 5-hydroxytryptamine (serotonin) receptor |           |         |
| siRNA Disorazole DMSO Run1   | NM_0005 |       |                                          |           |         |
|                              | 24      | HTR1A | 1A                                       | -0.514563 | Inlier  |
|                              |         |       | 5-hydroxytryptamine (serotonin) receptor |           |         |
| siRNA-Vinblastine Run2-DMSO  | NM_0005 |       |                                          |           |         |
|                              | 24      | HTR1A | 1A                                       | -0.099417 | Inlier  |
|                              |         |       | 5-hydroxytryptamine (serotonin) receptor |           |         |
| siRNA-Temozolomide Run2-DMSO | NM_0005 |       |                                          |           |         |
|                              | 24      | HTR1A | 1A                                       | 0.099417  | Inlier  |
|                              |         |       | 5-hydroxytryptamine (serotonin) receptor |           |         |
| siRNA-Vinblastine Run1-DMSO  | NM_0005 |       |                                          |           |         |
|                              | 24      | HTR1A | 1A                                       | 0.604169  | Inlier  |



Identification of Survival Genes in Human Glioblastoma Cells Using siRNA Screening  
 Nikhil G Thaker, Fang Zhang, Peter R. McDonald, Tong Ying Shun, Michael D Lewen, Ian F. Pollack, and John S. Lazo

Molecular Pharmacology

|                                  |               |       |                                                              |           |        |
|----------------------------------|---------------|-------|--------------------------------------------------------------|-----------|--------|
| siRNA Disorazole DMSO Run3       | NM_0005<br>24 | HTR1A | 5-<br>hydroxytry<br>ptamine<br>(serotonin)<br>receptor<br>1A | 0.744831  | Inlier |
| siRNA Disorazole DMSO Run2       | NM_0005<br>24 | HTR1A | 5-<br>hydroxytry<br>ptamine<br>(serotonin)<br>receptor<br>1A | 0.987757  | Inlier |
| siRNA-Temozolomide Run3-<br>DMSO | NM_0008<br>63 | HTR1B | 5-<br>hydroxytry<br>ptamine<br>(serotonin)<br>receptor<br>1B | -2.220438 | Inlier |
| siRNA-Temozolomide Run2-<br>DMSO | NM_0008<br>63 | HTR1B | 5-<br>hydroxytry<br>ptamine<br>(serotonin)<br>receptor<br>1B | -1.342569 | Inlier |
| siRNA-Temozolomide Run1-<br>DMSO | NM_0008<br>63 | HTR1B | 5-<br>hydroxytry<br>ptamine<br>(serotonin)<br>receptor<br>1B | -1.151745 | Inlier |
| siRNA Disorazole DMSO Run1       | NM_0008<br>63 | HTR1B | 5-<br>hydroxytry<br>ptamine<br>(serotonin)<br>receptor<br>1B | -0.229529 | Inlier |
| siRNA-Vinblastine Run1-<br>DMSO  | NM_0008<br>63 | HTR1B | 5-<br>hydroxytry<br>ptamine<br>(serotonin)<br>receptor<br>1B | 0.229529  | Inlier |
| siRNA-Vinblastine Run2-<br>DMSO  | NM_0008<br>63 | HTR1B | 5-<br>hydroxytry<br>ptamine<br>(serotonin)<br>receptor<br>1B | 0.266314  | Inlier |

Identification of Survival Genes in Human Glioblastoma Cells Using siRNA Screening  
 Nikhil G Thaker, Fang Zhang, Peter R. McDonald, Tong Ying Shun, Michael D Lewen, Ian F. Pollack, and John S. Lazo

Molecular Pharmacology

| siRNA                        | Drug | Run | Gene    | Accession | Gene                                        | Gene | Value     | Outlier |
|------------------------------|------|-----|---------|-----------|---------------------------------------------|------|-----------|---------|
| siRNA Disorazole DMSO Run3   | DMSO | 63  | NM_0008 | HTR1B     | 5-hydroxytryptamine (serotonin) receptor 1B | 1B   | 0.531548  | Inlier  |
| siRNA Disorazole DMSO Run2   | DMSO | 63  | NM_0008 | HTR1B     | 5-hydroxytryptamine (serotonin) receptor 1B | 1B   | 0.817452  | Inlier  |
| siRNA-Temozolomide DMSO Run3 | DMSO | 64  | NM_0008 | HTR1D     | 5-hydroxytryptamine (serotonin) receptor 1D | 1D   | -2.723969 | Inlier  |
| siRNA Disorazole DMSO Run1   | DMSO | 64  | NM_0008 | HTR1D     | 5-hydroxytryptamine (serotonin) receptor 1D | 1D   | -0.378088 | Inlier  |
| siRNA Disorazole DMSO Run2   | DMSO | 64  | NM_0008 | HTR1D     | 5-hydroxytryptamine (serotonin) receptor 1D | 1D   | -0.269985 | Inlier  |
| siRNA-Temozolomide DMSO Run2 | DMSO | 64  | NM_0008 | HTR1D     | 5-hydroxytryptamine (serotonin) receptor 1D | 1D   | -0.021348 | Inlier  |
| siRNA-Temozolomide DMSO Run1 | DMSO | 64  | NM_0008 | HTR1D     | 5-hydroxytryptamine (serotonin) receptor 1D | 1D   | 0.021349  | Inlier  |
| siRNA-Vinblastine DMSO Run2  | DMSO | 64  | NM_0008 | HTR1D     | 5-hydroxytryptamine (serotonin) receptor 1D | 1D   | 0.970912  | Inlier  |

Identification of Survival Genes in Human Glioblastoma Cells Using siRNA Screening  
 Nikhil G Thaker, Fang Zhang, Peter R. McDonald, Tong Ying Shun, Michael D Lewen, Ian F. Pollack, and John S. Lazo

Molecular Pharmacology

|                              |               |       |                                                |           |        |
|------------------------------|---------------|-------|------------------------------------------------|-----------|--------|
| siRNA-Vinblastine Run1-DMSO  | NM_0008<br>64 | HTR1D | 5-hydroxytryptamine (serotonin) receptor<br>1D | 1.719825  | Inlier |
| siRNA Disorazole DMSO Run3   | NM_0008<br>64 | HTR1D | 5-hydroxytryptamine (serotonin) receptor<br>1D | 1.791891  | Inlier |
| siRNA-Temozolomide Run1-DMSO | NM_0008<br>65 | HTR1E | 5-hydroxytryptamine (serotonin) receptor<br>1E | -1.197329 | Inlier |
| siRNA-Temozolomide Run3-DMSO | NM_0008<br>65 | HTR1E | 5-hydroxytryptamine (serotonin) receptor<br>1E | -1.122454 | Inlier |
| siRNA-Temozolomide Run2-DMSO | NM_0008<br>65 | HTR1E | 5-hydroxytryptamine (serotonin) receptor<br>1E | -0.604854 | Inlier |
| siRNA Disorazole DMSO Run1   | NM_0008<br>65 | HTR1E | 5-hydroxytryptamine (serotonin) receptor<br>1E | -0.400197 | Inlier |
| siRNA-Vinblastine Run2-DMSO  | NM_0008<br>65 | HTR1E | 5-hydroxytryptamine (serotonin) receptor<br>1E | 0.400198  | Inlier |
| siRNA Disorazole DMSO Run2   | NM_0008<br>65 | HTR1E | 5-hydroxytryptamine (serotonin) receptor<br>1E | 0.48326   | Inlier |

Identification of Survival Genes in Human Glioblastoma Cells Using siRNA Screening  
 Nikhil G Thaker, Fang Zhang, Peter R. McDonald, Tong Ying Shun, Michael D Lewen, Ian F. Pollack, and John S. Lazo

Molecular Pharmacology

| siRNA Treatment              | Gene ID   | Gene Name | Probe                                       | Value     | Outlier Status |
|------------------------------|-----------|-----------|---------------------------------------------|-----------|----------------|
| siRNA-Vinblastine Run1-DMSO  | NM_000865 | HTR1E     | 5-hydroxytryptamine (serotonin) receptor 1E | 0.744146  | Inlier         |
| siRNA Disorazole DMSO Run3   | NM_000865 | HTR1E     | 5-hydroxytryptamine (serotonin) receptor 1E | 1.510775  | Inlier         |
| siRNA-Temozolomide Run3-DMSO | NM_000866 | HTR1F     | 5-hydroxytryptamine (serotonin) receptor 1F | -1.447711 | Inlier         |
| siRNA-Temozolomide Run1-DMSO | NM_000866 | HTR1F     | 5-hydroxytryptamine (serotonin) receptor 1F | -0.876802 | Inlier         |
| siRNA Disorazole DMSO Run2   | NM_000866 | HTR1F     | 5-hydroxytryptamine (serotonin) receptor 1F | -0.554378 | Inlier         |
| siRNA Disorazole DMSO Run1   | NM_000866 | HTR1F     | 5-hydroxytryptamine (serotonin) receptor 1F | -0.124647 | Inlier         |
| siRNA-Temozolomide Run2-DMSO | NM_000866 | HTR1F     | 5-hydroxytryptamine (serotonin) receptor 1F | 0.124647  | Inlier         |
| siRNA Disorazole DMSO Run3   | NM_000866 | HTR1F     | 5-hydroxytryptamine (serotonin) receptor 1F | 0.628026  | Inlier         |

Identification of Survival Genes in Human Glioblastoma Cells Using siRNA Screening  
 Nikhil G Thaker, Fang Zhang, Peter R. McDonald, Tong Ying Shun, Michael D Lewen, Ian F. Pollack, and John S. Lazo

Molecular Pharmacology

|                              |           |       |                                             |           |        |
|------------------------------|-----------|-------|---------------------------------------------|-----------|--------|
| siRNA-Vinblastine Run1-DMSO  | NM_000866 | HTR1F | 5-hydroxytryptamine (serotonin) receptor 1F | 0.720974  | Inlier |
| siRNA-Vinblastine Run2-DMSO  | NM_000866 | HTR1F | 5-hydroxytryptamine (serotonin) receptor 1F | 0.949666  | Inlier |
| siRNA-Temozolomide Run3-DMSO | NM_000621 | HTR2A | 5-hydroxytryptamine (serotonin) receptor 2A | -1.009773 | Inlier |
| siRNA-Temozolomide Run1-DMSO | NM_000621 | HTR2A | 5-hydroxytryptamine (serotonin) receptor 2A | -0.840973 | Inlier |
| siRNA-Temozolomide Run2-DMSO | NM_000621 | HTR2A | 5-hydroxytryptamine (serotonin) receptor 2A | -0.251253 | Inlier |
| siRNA Disorazole DMSO Run1   | NM_000621 | HTR2A | 5-hydroxytryptamine (serotonin) receptor 2A | -0.08291  | Inlier |
| siRNA Disorazole DMSO Run2   | NM_000621 | HTR2A | 5-hydroxytryptamine (serotonin) receptor 2A | 0.08291   | Inlier |
| siRNA-Vinblastine Run2-DMSO  | NM_000621 | HTR2A | 5-hydroxytryptamine (serotonin) receptor 2A | 0.579301  | Inlier |

Identification of Survival Genes in Human Glioblastoma Cells Using siRNA Screening  
 Nikhil G Thaker, Fang Zhang, Peter R. McDonald, Tong Ying Shun, Michael D Lewen, Ian F. Pollack, and John S. Lazo

Molecular Pharmacology

| siRNA                        | Gene      | Gene ID | Receptor                                    | Value     | Outlier |
|------------------------------|-----------|---------|---------------------------------------------|-----------|---------|
| siRNA-Vinblastine Run1-DMSO  | NM_000621 | HTR2A   | 5-hydroxytryptamine (serotonin) receptor 2A | 0.769699  | Inlier  |
| siRNA Disorazole DMSO Run3   | NM_000621 | HTR2A   | 5-hydroxytryptamine (serotonin) receptor 2A | 0.897825  | Inlier  |
| siRNA-Temozolomide Run3-DMSO | NM_000867 | HTR2B   | 5-hydroxytryptamine (serotonin) receptor 2B | -0.956075 | Inlier  |
| siRNA Disorazole DMSO Run2   | NM_000867 | HTR2B   | 5-hydroxytryptamine (serotonin) receptor 2B | -0.89048  | Inlier  |
| siRNA-Temozolomide Run2-DMSO | NM_000867 | HTR2B   | 5-hydroxytryptamine (serotonin) receptor 2B | -0.113141 | Inlier  |
| siRNA-Temozolomide Run1-DMSO | NM_000867 | HTR2B   | 5-hydroxytryptamine (serotonin) receptor 2B | -0.084673 | Inlier  |
| siRNA Disorazole DMSO Run3   | NM_000867 | HTR2B   | 5-hydroxytryptamine (serotonin) receptor 2B | 0.084673  | Inlier  |
| siRNA Disorazole DMSO Run1   | NM_000867 | HTR2B   | 5-hydroxytryptamine (serotonin) receptor 2B | 0.465115  | Inlier  |

Identification of Survival Genes in Human Glioblastoma Cells Using siRNA Screening  
 Nikhil G Thaker, Fang Zhang, Peter R. McDonald, Tong Ying Shun, Michael D Lewen, Ian F. Pollack, and John S. Lazo

Molecular Pharmacology

|                              |           |       |                                             |           |        |
|------------------------------|-----------|-------|---------------------------------------------|-----------|--------|
| siRNA-Vinblastine Run2-DMSO  | NM_000867 | HTR2B | 5-hydroxytryptamine (serotonin) receptor 2B | 0.883884  | Inlier |
| siRNA-Vinblastine Run1-DMSO  | NM_000867 | HTR2B | 5-hydroxytryptamine (serotonin) receptor 2B | 0.940005  | Inlier |
| siRNA-Temozolomide Run3-DMSO | NM_000868 | HTR2C | 5-hydroxytryptamine (serotonin) receptor 2C | -2.673818 | Inlier |
| siRNA Disorazole DMSO Run2   | NM_000868 | HTR2C | 5-hydroxytryptamine (serotonin) receptor 2C | -0.952351 | Inlier |
| siRNA-Temozolomide Run1-DMSO | NM_000868 | HTR2C | 5-hydroxytryptamine (serotonin) receptor 2C | -0.36754  | Inlier |
| siRNA-Temozolomide Run2-DMSO | NM_000868 | HTR2C | 5-hydroxytryptamine (serotonin) receptor 2C | -0.22689  | Inlier |
| siRNA Disorazole DMSO Run1   | NM_000868 | HTR2C | 5-hydroxytryptamine (serotonin) receptor 2C | 0.22689   | Inlier |
| siRNA Disorazole DMSO Run3   | NM_000868 | HTR2C | 5-hydroxytryptamine (serotonin) receptor 2C | 0.396649  | Inlier |

Identification of Survival Genes in Human Glioblastoma Cells Using siRNA Screening  
 Nikhil G Thaker, Fang Zhang, Peter R. McDonald, Tong Ying Shun, Michael D Lewen, Ian F. Pollack, and John S. Lazo

Molecular Pharmacology

|                              |           |       |                                             |           |        |
|------------------------------|-----------|-------|---------------------------------------------|-----------|--------|
| siRNA-Vinblastine Run1-DMSO  | NM_000868 | HTR2C | 5-hydroxytryptamine (serotonin) receptor 2C | 1.549126  | Inlier |
| siRNA-Vinblastine Run2-DMSO  | NM_000868 | HTR2C | 5-hydroxytryptamine (serotonin) receptor 2C | 2.064102  | Inlier |
| siRNA-Temozolomide Run3-DMSO | NM_213621 | HTR3A | 5-hydroxytryptamine (serotonin) receptor 3A | -1.272575 | Inlier |
| siRNA Disorazole DMSO Run2   | NM_213621 | HTR3A | 5-hydroxytryptamine (serotonin) receptor 3A | -0.696273 | Inlier |
| siRNA-Temozolomide Run2-DMSO | NM_213621 | HTR3A | 5-hydroxytryptamine (serotonin) receptor 3A | -0.443955 | Inlier |
| siRNA-Temozolomide Run1-DMSO | NM_213621 | HTR3A | 5-hydroxytryptamine (serotonin) receptor 3A | -0.176078 | Inlier |
| siRNA Disorazole DMSO Run1   | NM_213621 | HTR3A | 5-hydroxytryptamine (serotonin) receptor 3A | 0.176078  | Inlier |
| siRNA-Vinblastine Run1-DMSO  | NM_213621 | HTR3A | 5-hydroxytryptamine (serotonin) receptor 3A | 0.665091  | Inlier |



Identification of Survival Genes in Human Glioblastoma Cells Using siRNA Screening  
 Nikhil G Thaker, Fang Zhang, Peter R. McDonald, Tong Ying Shun, Michael D Lewen, Ian F. Pollack, and John S. Lazo

Molecular Pharmacology

| siRNA              | Condition | Run  | Gene  | Accession | Probe | Value     | Outlier |
|--------------------|-----------|------|-------|-----------|-------|-----------|---------|
| siRNA Disorazole   | DMSO      | Run3 | HTR3A | NM_2136   | 3A    | 0.683909  | Inlier  |
| siRNA-Vinblastine  | Run2-DMSO |      | HTR3A | NM_2136   | 3A    | 0.826144  | Inlier  |
| siRNA-Temozolomide | Run3-DMSO |      | HTR3B | NM_0060   | 3B    | -1.848705 | Inlier  |
| siRNA Disorazole   | DMSO      | Run2 | HTR3B | NM_0060   | 3B    | -1.280982 | Inlier  |
| siRNA Disorazole   | DMSO      | Run3 | HTR3B | NM_0060   | 3B    | -0.622664 | Inlier  |
| siRNA-Temozolomide | Run2-DMSO |      | HTR3B | NM_0060   | 3B    | -0.107249 | Inlier  |
| siRNA-Temozolomide | Run1-DMSO |      | HTR3B | NM_0060   | 3B    | 0.107249  | Inlier  |
| siRNA Disorazole   | DMSO      | Run1 | HTR3B | NM_0060   | 3B    | 0.329509  | Inlier  |

Identification of Survival Genes in Human Glioblastoma Cells Using siRNA Screening

Nikhil G Thaker, Fang Zhang, Peter R. McDonald, Tong Ying Shun, Michael D Lewen, Ian F. Pollack, and John S. Lazo

Molecular Pharmacology

|                              |           |       |                                                             |           |        |
|------------------------------|-----------|-------|-------------------------------------------------------------|-----------|--------|
| siRNA-Vinblastine Run2-DMSO  | NM_006028 | HTR3B | 5-hydroxytryptamine (serotonin) receptor 3B                 | 0.726336  | Inlier |
| siRNA-Vinblastine Run1-DMSO  | NM_006028 | HTR3B | 5-hydroxytryptamine (serotonin) receptor 3B                 | 0.749209  | Inlier |
| siRNA Disorazole DMSO Run2   | NM_130770 | HTR3C | 5-hydroxytryptamine (serotonin) receptor 3, family member C | -1.1576   | Inlier |
| siRNA-Temozolomide Run2-DMSO | NM_130770 | HTR3C | 5-hydroxytryptamine (serotonin) receptor 3, family member C | -0.931283 | Inlier |
| siRNA Disorazole DMSO Run3   | NM_130770 | HTR3C | 5-hydroxytryptamine (serotonin) receptor 3, family member C | -0.799216 | Inlier |
| siRNA-Temozolomide Run3-DMSO | NM_130770 | HTR3C | 5-hydroxytryptamine (serotonin) receptor 3, family member C | -0.065547 | Inlier |
| siRNA Disorazole DMSO Run1   | NM_130770 | HTR3C | 5-hydroxytryptamine (serotonin) receptor 3, family member C | 0.065547  | Inlier |

Identification of Survival Genes in Human Glioblastoma Cells Using siRNA Screening

Nikhil G Thaker, Fang Zhang, Peter R. McDonald, Tong Ying Shun, Michael D Lewen, Ian F. Pollack, and John S. Lazo

Molecular Pharmacology

|                              |           |       |                                                             |           |        |
|------------------------------|-----------|-------|-------------------------------------------------------------|-----------|--------|
| siRNA-Vinblastine Run1-DMSO  | NM_130770 | HTR3C | 5-hydroxytryptamine (serotonin) receptor 3, family member C | 0.510627  | Inlier |
| siRNA-Temozolomide Run1-DMSO | NM_130770 | HTR3C | 5-hydroxytryptamine (serotonin) receptor 3, family member C | 0.549784  | Inlier |
| siRNA-Vinblastine Run2-DMSO  | NM_130770 | HTR3C | 5-hydroxytryptamine (serotonin) receptor 3, family member C | 0.874742  | Inlier |
| siRNA-Temozolomide Run3-DMSO | NM_182537 | HTR3D | 5-hydroxytryptamine (serotonin) receptor 3 family member D  | -1.069417 | Inlier |
| siRNA-Temozolomide Run2-DMSO | NM_182537 | HTR3D | 5-hydroxytryptamine (serotonin) receptor 3 family member D  | -0.960961 | Inlier |
| siRNA Disorazole DMSO Run2   | NM_182537 | HTR3D | 5-hydroxytryptamine (serotonin) receptor 3 family member D  | -0.388039 | Inlier |

Identification of Survival Genes in Human Glioblastoma Cells Using siRNA Screening

Nikhil G Thaker, Fang Zhang, Peter R. McDonald, Tong Ying Shun, Michael D Lewen, Ian F. Pollack, and John S. Lazo

Molecular Pharmacology

|                              |               |       |                                                             |           |        |
|------------------------------|---------------|-------|-------------------------------------------------------------|-----------|--------|
| siRNA-Temozolomide Run1-DMSO | NM_1825<br>37 | HTR3D | 5-hydroxytryptamine (serotonin) receptor 3 family member D  | -0.167342 | Inlier |
| siRNA Disorazole DMSO Run3   | NM_1825<br>37 | HTR3D | 5-hydroxytryptamine (serotonin) receptor 3 family member D  | 0.167343  | Inlier |
| siRNA Disorazole DMSO Run1   | NM_1825<br>37 | HTR3D | 5-hydroxytryptamine (serotonin) receptor 3 family member D  | 0.312704  | Inlier |
| siRNA-Vinblastine Run1-DMSO  | NM_1825<br>37 | HTR3D | 5-hydroxytryptamine (serotonin) receptor 3 family member D  | 1.39801   | Inlier |
| siRNA-Vinblastine Run2-DMSO  | NM_1825<br>37 | HTR3D | 5-hydroxytryptamine (serotonin) receptor 3 family member D  | 1.735717  | Inlier |
| siRNA Disorazole DMSO Run2   | NM_1983<br>13 | HTR3E | 5-hydroxytryptamine (serotonin) receptor 3, family member E | -1.719786 | Inlier |

Identification of Survival Genes in Human Glioblastoma Cells Using siRNA Screening

Nikhil G Thaker, Fang Zhang, Peter R. McDonald, Tong Ying Shun, Michael D Lewen, Ian F. Pollack, and John S. Lazo

Molecular Pharmacology

|                              |               |       |                                                             |           |        |
|------------------------------|---------------|-------|-------------------------------------------------------------|-----------|--------|
| siRNA-Temozolomide Run3-DMSO | NM_1983<br>13 | HTR3E | 5-hydroxytryptamine (serotonin) receptor 3, family member E | -1.056654 | Inlier |
| siRNA Disorazole DMSO Run1   | NM_1983<br>13 | HTR3E | 5-hydroxytryptamine (serotonin) receptor 3, family member E | -0.87224  | Inlier |
| siRNA-Temozolomide Run2-DMSO | NM_1983<br>13 | HTR3E | 5-hydroxytryptamine (serotonin) receptor 3, family member E | -0.217327 | Inlier |
| siRNA-Vinblastine Run2-DMSO  | NM_1983<br>13 | HTR3E | 5-hydroxytryptamine (serotonin) receptor 3, family member E | 0.217328  | Inlier |
| siRNA-Temozolomide Run1-DMSO | NM_1983<br>13 | HTR3E | 5-hydroxytryptamine (serotonin) receptor 3, family member E | 0.282827  | Inlier |
| siRNA-Vinblastine Run1-DMSO  | NM_1983<br>13 | HTR3E | 5-hydroxytryptamine (serotonin) receptor 3, family member E | 0.47676   | Inlier |

Identification of Survival Genes in Human Glioblastoma Cells Using siRNA Screening  
 Nikhil G Thaker, Fang Zhang, Peter R. McDonald, Tong Ying Shun, Michael D Lewen, Ian F. Pollack, and John S. Lazo  
 Molecular Pharmacology

|                                  |               |       |                                                                                 |           |         |
|----------------------------------|---------------|-------|---------------------------------------------------------------------------------|-----------|---------|
| siRNA Disorazole DMSO Run3       | NM_1983<br>13 | HTR3E | 5-<br>hydroxytry<br>ptamine<br>(serotonin)<br>receptor 3,<br>family<br>member E | 2.26068   | Inlier  |
| siRNA-Temozolomide Run3-<br>DMSO | NM_0008<br>70 | HTR4  | 5-<br>hydroxytry<br>ptamine<br>(serotonin)<br>receptor 4                        | -3.760412 | Outlier |
| siRNA Disorazole DMSO Run2       | NM_0008<br>70 | HTR4  | 5-<br>hydroxytry<br>ptamine<br>(serotonin)<br>receptor 4                        | -0.699397 | Inlier  |
| siRNA-Temozolomide Run2-<br>DMSO | NM_0008<br>70 | HTR4  | 5-<br>hydroxytry<br>ptamine<br>(serotonin)<br>receptor 4                        | -0.649603 | Inlier  |
| siRNA-Temozolomide Run1-<br>DMSO | NM_0008<br>70 | HTR4  | 5-<br>hydroxytry<br>ptamine<br>(serotonin)<br>receptor 4                        | -0.22497  | Inlier  |
| siRNA Disorazole DMSO Run1       | NM_0008<br>70 | HTR4  | 5-<br>hydroxytry<br>ptamine<br>(serotonin)<br>receptor 4                        | 0.224969  | Inlier  |
| siRNA-Vinblastine Run2-<br>DMSO  | NM_0008<br>70 | HTR4  | 5-<br>hydroxytry<br>ptamine<br>(serotonin)<br>receptor 4                        | 0.569712  | Inlier  |
| siRNA-Vinblastine Run1-<br>DMSO  | NM_0008<br>70 | HTR4  | 5-<br>hydroxytry<br>ptamine<br>(serotonin)<br>receptor 4                        | 1.074115  | Inlier  |

Identification of Survival Genes in Human Glioblastoma Cells Using siRNA Screening  
 Nikhil G Thaker, Fang Zhang, Peter R. McDonald, Tong Ying Shun, Michael D Lewen, Ian F. Pollack, and John S. Lazo  
 Molecular Pharmacology

|                                  |               |       |                                                              |           |        |
|----------------------------------|---------------|-------|--------------------------------------------------------------|-----------|--------|
| siRNA Disorazole DMSO Run3       | NM_0008<br>70 | HTR4  | 5-<br>hydroxytry<br>ptamine<br>(serotonin)<br>receptor 4     | 2.041296  | Inlier |
| siRNA-Temozolomide Run3-<br>DMSO | NM_0240<br>12 | HTR5A | 5-<br>hydroxytry<br>ptamine<br>(serotonin)<br>receptor<br>5A | -2.088867 | Inlier |
| siRNA-Temozolomide Run2-<br>DMSO | NM_0240<br>12 | HTR5A | 5-<br>hydroxytry<br>ptamine<br>(serotonin)<br>receptor<br>5A | -1.272234 | Inlier |
| siRNA-Temozolomide Run1-<br>DMSO | NM_0240<br>12 | HTR5A | 5-<br>hydroxytry<br>ptamine<br>(serotonin)<br>receptor<br>5A | -0.48052  | Inlier |
| siRNA Disorazole DMSO Run2       | NM_0240<br>12 | HTR5A | 5-<br>hydroxytry<br>ptamine<br>(serotonin)<br>receptor<br>5A | -0.0636   | Inlier |
| siRNA Disorazole DMSO Run3       | NM_0240<br>12 | HTR5A | 5-<br>hydroxytry<br>ptamine<br>(serotonin)<br>receptor<br>5A | 0.0636    | Inlier |
| siRNA Disorazole DMSO Run1       | NM_0240<br>12 | HTR5A | 5-<br>hydroxytry<br>ptamine<br>(serotonin)<br>receptor<br>5A | 0.176534  | Inlier |
| siRNA-Vinblastine Run1-<br>DMSO  | NM_0240<br>12 | HTR5A | 5-<br>hydroxytry<br>ptamine<br>(serotonin)<br>receptor<br>5A | 0.86848   | Inlier |

Identification of Survival Genes in Human Glioblastoma Cells Using siRNA Screening  
 Nikhil G Thaker, Fang Zhang, Peter R. McDonald, Tong Ying Shun, Michael D Lewen, Ian F. Pollack, and John S. Lazo

Molecular Pharmacology

|                              |               |       |                                             |           |        |
|------------------------------|---------------|-------|---------------------------------------------|-----------|--------|
| siRNA-Vinblastine Run2-DMSO  | NM_0240<br>12 | HTR5A | 5-hydroxytryptamine (serotonin) receptor 5A | 1.054367  | Inlier |
| siRNA-Temozolomide Run3-DMSO | NM_0008<br>71 | HTR6  | 5-hydroxytryptamine (serotonin) receptor 6  | -1.233274 | Inlier |
| siRNA-Vinblastine Run2-DMSO  | NM_0008<br>71 | HTR6  | 5-hydroxytryptamine (serotonin) receptor 6  | -0.712157 | Inlier |
| siRNA-Temozolomide Run2-DMSO | NM_0008<br>71 | HTR6  | 5-hydroxytryptamine (serotonin) receptor 6  | -0.402432 | Inlier |
| siRNA Disorazole DMSO Run1   | NM_0008<br>71 | HTR6  | 5-hydroxytryptamine (serotonin) receptor 6  | -0.116207 | Inlier |
| siRNA-Temozolomide Run1-DMSO | NM_0008<br>71 | HTR6  | 5-hydroxytryptamine (serotonin) receptor 6  | 0.116207  | Inlier |
| siRNA Disorazole DMSO Run3   | NM_0008<br>71 | HTR6  | 5-hydroxytryptamine (serotonin) receptor 6  | 0.636843  | Inlier |
| siRNA-Vinblastine Run1-DMSO  | NM_0008<br>71 | HTR6  | 5-hydroxytryptamine (serotonin) receptor 6  | 1.599462  | Inlier |



Identification of Survival Genes in Human Glioblastoma Cells Using siRNA Screening  
 Nikhil G Thaker, Fang Zhang, Peter R. McDonald, Tong Ying Shun, Michael D Lewen, Ian F. Pollack, and John S. Lazo  
 Molecular Pharmacology

|                                  |               |      |                                                                                                |                  |
|----------------------------------|---------------|------|------------------------------------------------------------------------------------------------|------------------|
| siRNA Disorazole DMSO Run2       | NM_0008<br>71 | HTR6 | 5-<br>hydroxytry<br>ptamine<br>(serotonin)<br>receptor 6                                       | 1.719594 Inlier  |
| siRNA-Temozolomide Run3-<br>DMSO | NM_0198<br>60 | HTR7 | 5-<br>hydroxytry<br>ptamine<br>(serotonin)<br>receptor 7<br>(adenylate<br>cyclase-<br>coupled) | -1.170531 Inlier |
| siRNA-Temozolomide Run1-<br>DMSO | NM_0198<br>60 | HTR7 | 5-<br>hydroxytry<br>ptamine<br>(serotonin)<br>receptor 7<br>(adenylate<br>cyclase-<br>coupled) | -0.690974 Inlier |
| siRNA Disorazole DMSO Run2       | NM_0198<br>60 | HTR7 | 5-<br>hydroxytry<br>ptamine<br>(serotonin)<br>receptor 7<br>(adenylate<br>cyclase-<br>coupled) | -0.658026 Inlier |
| siRNA-Temozolomide Run2-<br>DMSO | NM_0198<br>60 | HTR7 | 5-<br>hydroxytry<br>ptamine<br>(serotonin)<br>receptor 7<br>(adenylate<br>cyclase-<br>coupled) | -0.269688 Inlier |
| siRNA Disorazole DMSO Run3       | NM_0198<br>60 | HTR7 | 5-<br>hydroxytry<br>ptamine<br>(serotonin)<br>receptor 7<br>(adenylate<br>cyclase-<br>coupled) | 0.269688 Inlier  |

Identification of Survival Genes in Human Glioblastoma Cells Using siRNA Screening  
 Nikhil G Thaker, Fang Zhang, Peter R. McDonald, Tong Ying Shun, Michael D Lewen, Ian F. Pollack, and John S. Lazo  
 Molecular Pharmacology

|                                  |               |       |                                                                                                        |           |        |
|----------------------------------|---------------|-------|--------------------------------------------------------------------------------------------------------|-----------|--------|
| siRNA Disorazole DMSO Run1       | NM_0198<br>60 | HTR7  | 5-<br>hydroxytry<br>ptamine<br>(serotonin)<br>receptor 7<br>(adenylate<br>cyclase-<br>coupled)         | 0.545309  | Inlier |
| siRNA-Vinblastine Run1-<br>DMSO  | NM_0198<br>60 | HTR7  | 5-<br>hydroxytry<br>ptamine<br>(serotonin)<br>receptor 7<br>(adenylate<br>cyclase-<br>coupled)         | 1.515474  | Inlier |
| siRNA-Vinblastine Run2-<br>DMSO  | NM_0198<br>60 | HTR7  | 5-<br>hydroxytry<br>ptamine<br>(serotonin)<br>receptor 7<br>(adenylate<br>cyclase-<br>coupled)<br>HtrA | 1.649295  | Inlier |
| siRNA-Temozolomide Run3-<br>DMSO | NM_0530<br>44 | HTRA3 | serine<br>peptidase<br>3<br>HtrA                                                                       | -0.994199 | Inlier |
| siRNA-Temozolomide Run2-<br>DMSO | NM_0530<br>44 | HTRA3 | serine<br>peptidase<br>3<br>HtrA                                                                       | -0.895239 | Inlier |
| siRNA Disorazole DMSO Run3       | NM_0530<br>44 | HTRA3 | serine<br>peptidase<br>3<br>HtrA                                                                       | -0.453761 | Inlier |
| siRNA Disorazole DMSO Run2       | NM_0530<br>44 | HTRA3 | serine<br>peptidase<br>3<br>HtrA                                                                       | -0.042475 | Inlier |
| siRNA-Temozolomide Run1-<br>DMSO | NM_0530<br>44 | HTRA3 | serine<br>peptidase<br>3<br>HtrA                                                                       | 0.042475  | Inlier |
| siRNA Disorazole DMSO Run1       | NM_0530<br>44 | HTRA3 | serine<br>peptidase<br>3                                                                               | 0.396526  | Inlier |

Identification of Survival Genes in Human Glioblastoma Cells Using siRNA Screening  
 Nikhil G Thaker, Fang Zhang, Peter R. McDonald, Tong Ying Shun, Michael D Lewen, Ian F. Pollack, and John S. Lazo

Molecular Pharmacology

| siRNA                        | Gene          | siRNA   | Gene    | Gene                                         | Log2FC    | Inlier |
|------------------------------|---------------|---------|---------|----------------------------------------------|-----------|--------|
| siRNA-Vinblastine Run2-DMSO  | NM_0530<br>44 | HTRA3   | HTRA3   | HtrA serine peptidase<br>3                   | 1.237215  | Inlier |
| siRNA-Vinblastine Run1-DMSO  | NM_0530<br>44 | HTRA3   | HTRA3   | HtrA serine peptidase<br>3                   | 1.497646  | Inlier |
| siRNA-Temozolomide Run3-DMSO | NM_0158<br>60 | HUMRTVL | HUMRTVL | HUMRTVL<br>H3                                | -0.753864 | Inlier |
| siRNA-Temozolomide Run2-DMSO | NM_0158<br>60 | HUMRTVL | HUMRTVL | HUMRTVL<br>H3                                | -0.595136 | Inlier |
| siRNA Disorazole DMSO Run1   | NM_0158<br>60 | HUMRTVL | HUMRTVL | HUMRTVL<br>H3                                | -0.041708 | Inlier |
| siRNA Disorazole DMSO Run2   | NM_0158<br>60 | HUMRTVL | HUMRTVL | HUMRTVL<br>H3                                | -0.040663 | Inlier |
| siRNA-Temozolomide Run1-DMSO | NM_0158<br>60 | HUMRTVL | HUMRTVL | HUMRTVL<br>H3                                | 0.040663  | Inlier |
| siRNA Disorazole DMSO Run3   | NM_0158<br>60 | HUMRTVL | HUMRTVL | HUMRTVL<br>H3                                | 0.843291  | Inlier |
| siRNA-Vinblastine Run2-DMSO  | NM_0158<br>60 | HUMRTVL | HUMRTVL | HUMRTVL<br>H3                                | 1.174436  | Inlier |
| siRNA-Vinblastine Run1-DMSO  | NM_0158<br>60 | HUMRTVL | HUMRTVL | HUMRTVL<br>H3                                | 1.41863   | Inlier |
| siRNA Disorazole DMSO Run2   | NM_0145<br>86 | HUNK    | HUNK    | hormonally upregulated Neu-associated kinase | -1.407481 | Inlier |
| siRNA Disorazole DMSO Run3   | NM_0145<br>86 | HUNK    | HUNK    | hormonally upregulated Neu-associated kinase | -0.855509 | Inlier |
| siRNA-Temozolomide Run2-DMSO | NM_0145<br>86 | HUNK    | HUNK    | hormonally upregulated Neu-associated kinase | -0.487205 | Inlier |
| siRNA-Temozolomide Run3-DMSO | NM_0145<br>86 | HUNK    | HUNK    | hormonally upregulated Neu-associated kinase | -0.151305 | Inlier |

Identification of Survival Genes in Human Glioblastoma Cells Using siRNA Screening  
 Nikhil G Thaker, Fang Zhang, Peter R. McDonald, Tong Ying Shun, Michael D Lewen, Ian F. Pollack, and John S. Lazo  
 Molecular Pharmacology

|                              |           |       |                                              |           |         |
|------------------------------|-----------|-------|----------------------------------------------|-----------|---------|
| siRNA-Temozolomide Run1-DMSO | NM_014586 | HUNK  | hormonally upregulated Neu-associated kinase | 0.151304  | Inlier  |
| siRNA Disorazole DMSO Run1   | NM_014586 | HUNK  | hormonally upregulated Neu-associated kinase | 0.509935  | Inlier  |
| siRNA-Vinblastine Run1-DMSO  | NM_014586 | HUNK  | hormonally upregulated Neu-associated kinase | 0.839065  | Inlier  |
| siRNA-Vinblastine Run2-DMSO  | NM_014586 | HUNK  | hormonally upregulated Neu-associated kinase | 1.313664  | Inlier  |
| siRNA-Temozolomide Run3-DMSO | NM_153281 | HYAL1 | hyaluronoglucosaminidase 1                   | -1.352625 | Inlier  |
| siRNA Disorazole DMSO Run3   | NM_153281 | HYAL1 | hyaluronoglucosaminidase 1                   | -0.515978 | Inlier  |
| siRNA-Vinblastine Run2-DMSO  | NM_153281 | HYAL1 | hyaluronoglucosaminidase 1                   | -0.479508 | Inlier  |
| siRNA Disorazole DMSO Run1   | NM_153281 | HYAL1 | hyaluronoglucosaminidase 1                   | -0.3876   | Inlier  |
| siRNA-Temozolomide Run1-DMSO | NM_153281 | HYAL1 | hyaluronoglucosaminidase 1                   | 0.387599  | Inlier  |
| siRNA-Temozolomide Run2-DMSO | NM_153281 | HYAL1 | hyaluronoglucosaminidase 1                   | 0.833022  | Inlier  |
| siRNA-Vinblastine Run1-DMSO  | NM_153281 | HYAL1 | hyaluronoglucosaminidase 1                   | 5.36901   | Outlier |
| siRNA Disorazole DMSO Run2   | NM_153281 | HYAL1 | hyaluronoglucosaminidase 1                   | 6.854156  | Outlier |
| siRNA Disorazole DMSO Run1   | NM_033158 | HYAL2 | hyaluronoglucosaminidase 2                   | -1.10449  | Inlier  |

Identification of Survival Genes in Human Glioblastoma Cells Using siRNA Screening  
 Nikhil G Thaker, Fang Zhang, Peter R. McDonald, Tong Ying Shun, Michael D Lewen, Ian F. Pollack, and John S. Lazo

| Molecular Pharmacology           |               |       |  | hyalurono<br>glucosami<br>nidase 2 |        |
|----------------------------------|---------------|-------|--|------------------------------------|--------|
| siRNA-Temozolomide Run2-<br>DMSO | NM_0331<br>58 | HYAL2 |  | -0.843405                          | Inlier |
| siRNA-Vinblastine Run2-<br>DMSO  | NM_0331<br>58 | HYAL2 |  | -0.363629                          | Inlier |
| siRNA-Temozolomide Run1-<br>DMSO | NM_0331<br>58 | HYAL2 |  | -0.084943                          | Inlier |
| siRNA-Temozolomide Run3-<br>DMSO | NM_0331<br>58 | HYAL2 |  | 0.084944                           | Inlier |
| siRNA Disorazole DMSO Run3       | NM_0331<br>58 | HYAL2 |  | 0.575436                           | Inlier |
| siRNA-Vinblastine Run1-<br>DMSO  | NM_0331<br>58 | HYAL2 |  | 0.773564                           | Inlier |
| siRNA Disorazole DMSO Run2       | NM_0331<br>58 | HYAL2 |  | 1.829801                           | Inlier |
| siRNA-Vinblastine Run2-<br>DMSO  | NM_0035<br>49 | HYAL3 |  | -1.117951                          | Inlier |
| siRNA Disorazole DMSO Run1       | NM_0035<br>49 | HYAL3 |  | -1.00423                           | Inlier |
| siRNA-Temozolomide Run1-<br>DMSO | NM_0035<br>49 | HYAL3 |  | -0.056103                          | Inlier |
| siRNA-Temozolomide Run2-<br>DMSO | NM_0035<br>49 | HYAL3 |  | -0.007821                          | Inlier |
| siRNA Disorazole DMSO Run3       | NM_0035<br>49 | HYAL3 |  | 0.007821                           | Inlier |
| siRNA-Temozolomide Run3-<br>DMSO | NM_0035<br>49 | HYAL3 |  | 0.34477                            | Inlier |
| siRNA-Vinblastine Run1-<br>DMSO  | NM_0035<br>49 | HYAL3 |  | 1.606265                           | Inlier |
| siRNA Disorazole DMSO Run2       | NM_0035<br>49 | HYAL3 |  | 2.573413                           | Inlier |
| siRNA-Temozolomide Run3-<br>DMSO | NM_0122<br>69 | HYAL4 |  | -1.311345                          | Inlier |
| siRNA-Temozolomide Run2-<br>DMSO | NM_0122<br>69 | HYAL4 |  | -0.735279                          | Inlier |

Identification of Survival Genes in Human Glioblastoma Cells Using siRNA Screening

Nikhil G Thaker, Fang Zhang, Peter R. McDonald, Tong Ying Shun, Michael D Lewen, Ian F. Pollack, and John S.

Lazo

Molecular Pharmacology

|                              |               |       |                                                                                             |           |        |
|------------------------------|---------------|-------|---------------------------------------------------------------------------------------------|-----------|--------|
| siRNA-Vinblastine Run2-DMSO  | NM_0122<br>69 | HYAL4 | hyalurono<br>glucosami<br>nidase 4                                                          | -0.283448 | Inlier |
| siRNA-Temozolomide Run1-DMSO | NM_0122<br>69 | HYAL4 | hyalurono<br>glucosami<br>nidase 4                                                          | -0.210904 | Inlier |
| siRNA Disorazole DMSO Run1   | NM_0122<br>69 | HYAL4 | hyalurono<br>glucosami<br>nidase 4                                                          | 0.210903  | Inlier |
| siRNA Disorazole DMSO Run3   | NM_0122<br>69 | HYAL4 | hyalurono<br>glucosami<br>nidase 4                                                          | 0.613721  | Inlier |
| siRNA-Vinblastine Run1-DMSO  | NM_0122<br>69 | HYAL4 | hyalurono<br>glucosami<br>nidase 4                                                          | 1.341598  | Inlier |
| siRNA Disorazole DMSO Run2   | NM_0122<br>69 | HYAL4 | hyalurono<br>glucosami<br>nidase 4                                                          | 1.659995  | Inlier |
| siRNA-Temozolomide Run2-DMSO | NM_0252<br>10 | I-4   | protein<br>phosphata<br>se 1,<br>regulatory<br>(inhibitor)<br>subunit 2<br>pseudoge<br>ne 9 | -3.064104 | Inlier |
| siRNA Disorazole DMSO Run3   | NM_0252<br>10 | I-4   | protein<br>phosphata<br>se 1,<br>regulatory<br>(inhibitor)<br>subunit 2<br>pseudoge<br>ne 9 | -0.743471 | Inlier |
| siRNA-Temozolomide Run3-DMSO | NM_0252<br>10 | I-4   | protein<br>phosphata<br>se 1,<br>regulatory<br>(inhibitor)<br>subunit 2<br>pseudoge<br>ne 9 | -0.47881  | Inlier |
| siRNA-Vinblastine Run1-DMSO  | NM_0252<br>10 | I-4   | protein<br>phosphata<br>se 1,<br>regulatory<br>(inhibitor)<br>subunit 2<br>pseudoge<br>ne 9 | -0.333007 | Inlier |

Identification of Survival Genes in Human Glioblastoma Cells Using siRNA Screening  
 Nikhil G Thaker, Fang Zhang, Peter R. McDonald, Tong Ying Shun, Michael D Lewen, Ian F. Pollack, and John S. Lazo

Molecular Pharmacology

|                              |               |      |                                                                      |           |        |
|------------------------------|---------------|------|----------------------------------------------------------------------|-----------|--------|
| siRNA-Temozolomide Run1-DMSO | NM_0252<br>10 | I-4  | protein phosphatase 1, regulatory (inhibitor) subunit 2 pseudogene 9 | 0.333007  | Inlier |
| siRNA Disorazole DMSO Run2   | NM_0252<br>10 | I-4  | protein phosphatase 1, regulatory (inhibitor) subunit 2 pseudogene 9 | 0.605529  | Inlier |
| siRNA-Vinblastine Run2-DMSO  | NM_0252<br>10 | I-4  | protein phosphatase 1, regulatory (inhibitor) subunit 2 pseudogene 9 | 1.130211  | Inlier |
| siRNA Disorazole DMSO Run1   | NM_0252<br>10 | I-4  | protein phosphatase 1, regulatory (inhibitor) subunit 2 pseudogene 9 | 1.31087   | Inlier |
| siRNA Disorazole DMSO Run1   | NM_0134<br>17 | IARS | isoleucine-tRNA synthetase                                           | -1.325048 | Inlier |
| siRNA-Vinblastine Run2-DMSO  | NM_0134<br>17 | IARS | isoleucine-tRNA synthetase                                           | -0.740564 | Inlier |
| siRNA Disorazole DMSO Run3   | NM_0134<br>17 | IARS | isoleucine-tRNA synthetase                                           | -0.608436 | Inlier |
| siRNA-Temozolomide Run1-DMSO | NM_0134<br>17 | IARS | isoleucine-tRNA synthetase                                           | -0.002384 | Inlier |
| siRNA-Temozolomide Run2-DMSO | NM_0134<br>17 | IARS | isoleucine-tRNA synthetase                                           | 0.002384  | Inlier |

Identification of Survival Genes in Human Glioblastoma Cells Using siRNA Screening  
 Nikhil G Thaker, Fang Zhang, Peter R. McDonald, Tong Ying Shun, Michael D Lewen, Ian F. Pollack, and John S. Lazo

Molecular Pharmacology

|                              |               |      |                                                                         |           |        |
|------------------------------|---------------|------|-------------------------------------------------------------------------|-----------|--------|
| siRNA-Temozolomide Run3-DMSO | NM_0134<br>17 | IARS | isoleucine-tRNA synthetase                                              | 0.109361  | Inlier |
| siRNA-Vinblastine Run1-DMSO  | NM_0134<br>17 | IARS | isoleucine-tRNA synthetase                                              | 1.226429  | Inlier |
| siRNA Disorazole DMSO Run2   | NM_0134<br>17 | IARS | isoleucine-tRNA synthetase                                              | 1.360436  | Inlier |
| siRNA Disorazole DMSO Run3   | NM_0049<br>67 | IBSP | integrin-binding sialoprotein (bone sialoprotein, bone sialoprotein II) | -1.083435 | Inlier |
| siRNA-Vinblastine Run2-DMSO  | NM_0049<br>67 | IBSP | integrin-binding sialoprotein (bone sialoprotein, bone sialoprotein II) | -0.959074 | Inlier |
| siRNA-Temozolomide Run3-DMSO | NM_0049<br>67 | IBSP | integrin-binding sialoprotein (bone sialoprotein, bone sialoprotein II) | -0.655825 | Inlier |
| siRNA Disorazole DMSO Run1   | NM_0049<br>67 | IBSP | integrin-binding sialoprotein (bone sialoprotein, bone sialoprotein II) | -0.071341 | Inlier |
| siRNA-Temozolomide Run2-DMSO | NM_0049<br>67 | IBSP | integrin-binding sialoprotein (bone sialoprotein, bone sialoprotein II) | 0.071341  | Inlier |



Identification of Survival Genes in Human Glioblastoma Cells Using siRNA Screening  
 Nikhil G Thaker, Fang Zhang, Peter R. McDonald, Tong Ying Shun, Michael D Lewen, Ian F. Pollack, and John S. Lazo

Molecular Pharmacology

|                              |               |         |                                                                         |           |        |
|------------------------------|---------------|---------|-------------------------------------------------------------------------|-----------|--------|
| siRNA-Temozolomide Run1-DMSO | NM_0049<br>67 | IBSP    | integrin-binding sialoprotein (bone sialoprotein, bone sialoprotein II) | 0.120964  | Inlier |
| siRNA Disorazole DMSO Run2   | NM_0049<br>67 | IBSP    | integrin-binding sialoprotein (bone sialoprotein, bone sialoprotein II) | 0.693175  | Inlier |
| siRNA-Vinblastine Run1-DMSO  | NM_0049<br>67 | IBSP    | integrin-binding sialoprotein (bone sialoprotein, bone sialoprotein II) | 1.067823  | Inlier |
| siRNA-Temozolomide Run3-DMSO | NM_0215<br>71 | ICEBERG | ICEBERG                                                                 | -2.046918 | Inlier |
| siRNA-Temozolomide Run2-DMSO | NM_0215<br>71 | ICEBERG | ICEBERG                                                                 | -1.081823 | Inlier |
| siRNA Disorazole DMSO Run1   | NM_0215<br>71 | ICEBERG | ICEBERG                                                                 | -0.348088 | Inlier |
| siRNA-Temozolomide Run1-DMSO | NM_0215<br>71 | ICEBERG | ICEBERG                                                                 | -0.171007 | Inlier |
| siRNA-Vinblastine Run1-DMSO  | NM_0215<br>71 | ICEBERG | ICEBERG                                                                 | 0.171007  | Inlier |
| siRNA Disorazole DMSO Run2   | NM_0215<br>71 | ICEBERG | ICEBERG                                                                 | 0.334847  | Inlier |
| siRNA-Vinblastine Run2-DMSO  | NM_0215<br>71 | ICEBERG | ICEBERG                                                                 | 1.000912  | Inlier |
| siRNA Disorazole DMSO Run3   | NM_0215<br>71 | ICEBERG | ICEBERG                                                                 | 1.900343  | Inlier |
| siRNA Disorazole DMSO Run3   | NM_1730<br>41 | ICK     | intestinal cell (MAK-like) kinase                                       | -2.17785  | Inlier |
| siRNA-Vinblastine Run1-DMSO  | NM_1730<br>41 | ICK     | intestinal cell (MAK-like) kinase                                       | -0.668113 | Inlier |
| siRNA-Temozolomide Run2-DMSO | NM_1730<br>41 | ICK     | intestinal cell (MAK-like) kinase                                       | -0.5673   | Inlier |

Identification of Survival Genes in Human Glioblastoma Cells Using siRNA Screening  
 Nikhil G Thaker, Fang Zhang, Peter R. McDonald, Tong Ying Shun, Michael D Lewen, Ian F. Pollack, and John S. Lazo

Molecular Pharmacology

|                                  |               |      |                                                                                  |           |        |
|----------------------------------|---------------|------|----------------------------------------------------------------------------------|-----------|--------|
| siRNA Disorazole DMSO Run2       | NM_1730<br>41 | ICK  | intestinal<br>cell (MAK-<br>like)<br>kinase                                      | -0.123937 | Inlier |
| siRNA-Temozolomide Run1-<br>DMSO | NM_1730<br>41 | ICK  | intestinal<br>cell (MAK-<br>like)<br>kinase                                      | 0.123938  | Inlier |
| siRNA-Temozolomide Run3-<br>DMSO | NM_1730<br>41 | ICK  | intestinal<br>cell (MAK-<br>like)<br>kinase                                      | 0.680887  | Inlier |
| siRNA Disorazole DMSO Run1       | NM_1730<br>41 | ICK  | intestinal<br>cell (MAK-<br>like)<br>kinase                                      | 1.044558  | Inlier |
| siRNA-Vinblastine Run2-<br>DMSO  | NM_1730<br>41 | ICK  | intestinal<br>cell (MAK-<br>like)<br>kinase<br>isoprenylc<br>ysteine<br>carboxyl | 3.439053  | Inlier |
| siRNA Disorazole DMSO Run1       | NM_1707<br>05 | ICMT | methyltran<br>sferase<br>isoprenylc<br>ysteine<br>carboxyl                       | -1.834006 | Inlier |
| siRNA Disorazole DMSO Run3       | NM_1707<br>05 | ICMT | methyltran<br>sferase<br>isoprenylc<br>ysteine<br>carboxyl                       | -0.578475 | Inlier |
| siRNA-Temozolomide Run1-<br>DMSO | NM_1707<br>05 | ICMT | methyltran<br>sferase<br>isoprenylc<br>ysteine<br>carboxyl                       | -0.3497   | Inlier |
| siRNA-Temozolomide Run2-<br>DMSO | NM_1707<br>05 | ICMT | methyltran<br>sferase<br>isoprenylc<br>ysteine<br>carboxyl                       | -0.315759 | Inlier |
| siRNA-Vinblastine Run2-<br>DMSO  | NM_1707<br>05 | ICMT | methyltran<br>sferase<br>isoprenylc<br>ysteine<br>carboxyl                       | 0.31576   | Inlier |
| siRNA-Vinblastine Run1-<br>DMSO  | NM_1707<br>05 | ICMT | methyltran<br>sferase                                                            | 0.770525  | Inlier |

Identification of Survival Genes in Human Glioblastoma Cells Using siRNA Screening  
 Nikhil G Thaker, Fang Zhang, Peter R. McDonald, Tong Ying Shun, Michael D Lewen, Ian F. Pollack, and John S. Lazo

Molecular Pharmacology

|                                  |               |      |                                                            |           |        |
|----------------------------------|---------------|------|------------------------------------------------------------|-----------|--------|
| siRNA Disorazole DMSO Run2       | NM_1707<br>05 | ICMT | isoprenylc<br>ysteine<br>carboxyl<br>methyltran<br>sferase | 1.45742   | Inlier |
| siRNA-Temozolomide Run3-<br>DMSO | NM_1707<br>05 | ICMT | isoprenylc<br>ysteine<br>carboxyl<br>methyltran<br>sferase | 1.814197  | Inlier |
| siRNA-Temozolomide Run3-<br>DMSO | NM_0049<br>69 | IDE  | insulin-<br>degrading<br>enzyme                            | -0.938385 | Inlier |
| siRNA-Temozolomide Run2-<br>DMSO | NM_0049<br>69 | IDE  | insulin-<br>degrading<br>enzyme                            | -0.633428 | Inlier |
| siRNA Disorazole DMSO Run3       | NM_0049<br>69 | IDE  | insulin-<br>degrading<br>enzyme                            | -0.048646 | Inlier |
| siRNA-Temozolomide Run1-<br>DMSO | NM_0049<br>69 | IDE  | insulin-<br>degrading<br>enzyme                            | -0.03605  | Inlier |
| siRNA Disorazole DMSO Run1       | NM_0049<br>69 | IDE  | insulin-<br>degrading<br>enzyme                            | 0.03605   | Inlier |
| siRNA Disorazole DMSO Run2       | NM_0049<br>69 | IDE  | insulin-<br>degrading<br>enzyme                            | 0.715572  | Inlier |
| siRNA-Vinblastine Run2-<br>DMSO  | NM_0049<br>69 | IDE  | insulin-<br>degrading<br>enzyme                            | 0.885481  | Inlier |
| siRNA-Vinblastine Run1-<br>DMSO  | NM_0049<br>69 | IDE  | insulin-<br>degrading<br>enzyme                            | 0.996845  | Inlier |
| siRNA-Temozolomide Run3-<br>DMSO | NM_0058<br>96 | IDH1 | isocitrate<br>dehydroge<br>nase 1<br>(NADP+),<br>soluble   | -0.996126 | Inlier |
| siRNA Disorazole DMSO Run2       | NM_0058<br>96 | IDH1 | isocitrate<br>dehydroge<br>nase 1<br>(NADP+),<br>soluble   | -0.702737 | Inlier |
| siRNA-Temozolomide Run2-<br>DMSO | NM_0058<br>96 | IDH1 | isocitrate<br>dehydroge<br>nase 1<br>(NADP+),<br>soluble   | -0.646263 | Inlier |

Identification of Survival Genes in Human Glioblastoma Cells Using siRNA Screening  
 Nikhil G Thaker, Fang Zhang, Peter R. McDonald, Tong Ying Shun, Michael D Lewen, Ian F. Pollack, and John S. Lazo

Molecular Pharmacology

| siRNA Treatment              | Gene ID       | Enzyme | Gene Name                                         | Log Fold Change | Classification |
|------------------------------|---------------|--------|---------------------------------------------------|-----------------|----------------|
| siRNA Disorazole DMSO Run3   | NM_0058<br>96 | IDH1   | isocitrate dehydrogenase 1 (NADP+), soluble       | -0.276136       | Inlier         |
| siRNA-Temozolomide Run1-DMSO | NM_0058<br>96 | IDH1   | isocitrate dehydrogenase 1 (NADP+), soluble       | 0.276136        | Inlier         |
| siRNA Disorazole DMSO Run1   | NM_0058<br>96 | IDH1   | isocitrate dehydrogenase 1 (NADP+), soluble       | 0.424304        | Inlier         |
| siRNA-Vinblastine Run1-DMSO  | NM_0058<br>96 | IDH1   | isocitrate dehydrogenase 1 (NADP+), soluble       | 0.949582        | Inlier         |
| siRNA-Vinblastine Run2-DMSO  | NM_0058<br>96 | IDH1   | isocitrate dehydrogenase 1 (NADP+), soluble       | 1.10074         | Inlier         |
| siRNA-Temozolomide Run3-DMSO | NM_0021<br>68 | IDH2   | isocitrate dehydrogenase 2 (NADP+), mitochondrial | -3.837298       | Outlier        |
| siRNA-Temozolomide Run2-DMSO | NM_0021<br>68 | IDH2   | isocitrate dehydrogenase 2 (NADP+), mitochondrial | -3.061841       | Inlier         |
| siRNA-Temozolomide Run1-DMSO | NM_0021<br>68 | IDH2   | isocitrate dehydrogenase 2 (NADP+), mitochondrial | -0.592315       | Inlier         |
| siRNA Disorazole DMSO Run1   | NM_0021<br>68 | IDH2   | isocitrate dehydrogenase 2 (NADP+), mitochondrial | -0.067276       | Inlier         |

Identification of Survival Genes in Human Glioblastoma Cells Using siRNA Screening

Nikhil G Thaker, Fang Zhang, Peter R. McDonald, Tong Ying Shun, Michael D Lewen, Ian F. Pollack, and John S. Lazo

Molecular Pharmacology

|                              |               |       |                                                   |           |        |
|------------------------------|---------------|-------|---------------------------------------------------|-----------|--------|
| siRNA Disorazole DMSO Run2   | NM_0021<br>68 | IDH2  | isocitrate dehydrogenase 2 (NADP+), mitochondrial | 0.067277  | Inlier |
| siRNA-Vinblastine Run2-DMSO  | NM_0021<br>68 | IDH2  | isocitrate dehydrogenase 2 (NADP+), mitochondrial | 0.652172  | Inlier |
| siRNA Disorazole DMSO Run3   | NM_0021<br>68 | IDH2  | isocitrate dehydrogenase 2 (NADP+), mitochondrial | 0.696828  | Inlier |
| siRNA-Vinblastine Run1-DMSO  | NM_0021<br>68 | IDH2  | isocitrate dehydrogenase 2 (NADP+), mitochondrial | 0.703386  | Inlier |
| siRNA Disorazole DMSO Run1   | NM_0055<br>30 | IDH3A | isocitrate dehydrogenase 3 (NAD+) alpha           | -1.399772 | Inlier |
| siRNA-Temozolomide Run2-DMSO | NM_0055<br>30 | IDH3A | isocitrate dehydrogenase 3 (NAD+) alpha           | -1.179531 | Inlier |
| siRNA-Temozolomide Run3-DMSO | NM_0055<br>30 | IDH3A | isocitrate dehydrogenase 3 (NAD+) alpha           | -0.630315 | Inlier |
| siRNA-Temozolomide Run1-DMSO | NM_0055<br>30 | IDH3A | isocitrate dehydrogenase 3 (NAD+) alpha           | -0.031902 | Inlier |
| siRNA Disorazole DMSO Run3   | NM_0055<br>30 | IDH3A | isocitrate dehydrogenase 3 (NAD+) alpha           | 0.031901  | Inlier |

Identification of Survival Genes in Human Glioblastoma Cells Using siRNA Screening  
 Nikhil G Thaker, Fang Zhang, Peter R. McDonald, Tong Ying Shun, Michael D Lewen, Ian F. Pollack, and John S. Lazo

Molecular Pharmacology

|                              |               |       |                                         |           |         |
|------------------------------|---------------|-------|-----------------------------------------|-----------|---------|
| siRNA-Vinblastine Run2-DMSO  | NM_0055<br>30 | IDH3A | isocitrate dehydrogenase 3 (NAD+) alpha | 0.128253  | Inlier  |
| siRNA Disorazole DMSO Run2   | NM_0055<br>30 | IDH3A | isocitrate dehydrogenase 3 (NAD+) alpha | 0.718685  | Inlier  |
| siRNA-Vinblastine Run1-DMSO  | NM_0055<br>30 | IDH3A | isocitrate dehydrogenase 3 (NAD+) alpha | 1.068019  | Inlier  |
| siRNA-Temozolomide Run2-DMSO | NM_1748<br>56 | IDH3B | isocitrate dehydrogenase 3 (NAD+) beta  | -1.290109 | Inlier  |
| siRNA-Temozolomide Run3-DMSO | NM_1748<br>56 | IDH3B | isocitrate dehydrogenase 3 (NAD+) beta  | -0.666165 | Inlier  |
| siRNA-Temozolomide Run1-DMSO | NM_1748<br>56 | IDH3B | isocitrate dehydrogenase 3 (NAD+) beta  | -0.354154 | Inlier  |
| siRNA Disorazole DMSO Run2   | NM_1748<br>56 | IDH3B | isocitrate dehydrogenase 3 (NAD+) beta  | -0.165697 | Inlier  |
| siRNA Disorazole DMSO Run3   | NM_1748<br>56 | IDH3B | isocitrate dehydrogenase 3 (NAD+) beta  | 0.165697  | Inlier  |
| siRNA Disorazole DMSO Run1   | NM_1748<br>56 | IDH3B | isocitrate dehydrogenase 3 (NAD+) beta  | 0.682835  | Inlier  |
| siRNA-Vinblastine Run2-DMSO  | NM_1748<br>56 | IDH3B | isocitrate dehydrogenase 3 (NAD+) beta  | 5.068442  | Outlier |

Identification of Survival Genes in Human Glioblastoma Cells Using siRNA Screening  
 Nikhil G Thaker, Fang Zhang, Peter R. McDonald, Tong Ying Shun, Michael D Lewen, Ian F. Pollack, and John S. Lazo

Molecular Pharmacology

|                              |               |       |                                         |           |         |
|------------------------------|---------------|-------|-----------------------------------------|-----------|---------|
| siRNA-Vinblastine Run1-DMSO  | NM_1748<br>56 | IDH3B | isocitrate dehydrogenase 3 (NAD+) beta  | 5.400916  | Outlier |
| siRNA Disorazole DMSO Run1   | NM_1748<br>69 | IDH3G | isocitrate dehydrogenase 3 (NAD+) gamma | -1.17315  | Inlier  |
| siRNA Disorazole DMSO Run3   | NM_1748<br>69 | IDH3G | isocitrate dehydrogenase 3 (NAD+) gamma | -0.8223   | Inlier  |
| siRNA-Temozolomide Run2-DMSO | NM_1748<br>69 | IDH3G | isocitrate dehydrogenase 3 (NAD+) gamma | -0.816178 | Inlier  |
| siRNA-Temozolomide Run1-DMSO | NM_1748<br>69 | IDH3G | isocitrate dehydrogenase 3 (NAD+) gamma | -0.158115 | Inlier  |
| siRNA-Temozolomide Run3-DMSO | NM_1748<br>69 | IDH3G | isocitrate dehydrogenase 3 (NAD+) gamma | 0.158115  | Inlier  |
| siRNA-Vinblastine Run2-DMSO  | NM_1748<br>69 | IDH3G | isocitrate dehydrogenase 3 (NAD+) gamma | 0.332983  | Inlier  |
| siRNA-Vinblastine Run1-DMSO  | NM_1748<br>69 | IDH3G | isocitrate dehydrogenase 3 (NAD+) gamma | 0.532822  | Inlier  |
| siRNA Disorazole DMSO Run2   | NM_1748<br>69 | IDH3G | isocitrate dehydrogenase 3 (NAD+) gamma | 2.51368   | Inlier  |
| siRNA Disorazole DMSO Run3   | NM_0045<br>08 | IDI1  | isopentenyl diphosphate delta isomerase | -1.204424 | Inlier  |

Identification of Survival Genes in Human Glioblastoma Cells Using siRNA Screening  
 Nikhil G Thaker, Fang Zhang, Peter R. McDonald, Tong Ying Shun, Michael D Lewen, Ian F. Pollack, and John S. Lazo  
 Molecular Pharmacology

|                              |           |      |                                           |           |        |
|------------------------------|-----------|------|-------------------------------------------|-----------|--------|
| siRNA-Temozolomide Run3-DMSO | NM_004508 | IDI1 | isopentenyl-diphosphate delta isomerase   | -1.016034 | Inlier |
| siRNA Disorazole DMSO Run1   | NM_004508 | IDI1 | isopentenyl-diphosphate delta isomerase   | -0.332965 | Inlier |
| siRNA-Temozolomide Run2-DMSO | NM_004508 | IDI1 | isopentenyl-diphosphate delta isomerase   | -0.235883 | Inlier |
| siRNA-Temozolomide Run1-DMSO | NM_004508 | IDI1 | isopentenyl-diphosphate delta isomerase   | 0.235883  | Inlier |
| siRNA-Vinblastine Run2-DMSO  | NM_004508 | IDI1 | isopentenyl-diphosphate delta isomerase   | 0.262594  | Inlier |
| siRNA-Vinblastine Run1-DMSO  | NM_004508 | IDI1 | isopentenyl-diphosphate delta isomerase   | 1.184681  | Inlier |
| siRNA Disorazole DMSO Run2   | NM_004508 | IDI1 | isopentenyl-diphosphate delta isomerase   | 2.39551   | Inlier |
| siRNA-Temozolomide Run3-DMSO | NM_033261 | IDI2 | isopentenyl-diphosphate delta isomerase 2 | -1.118916 | Inlier |



Identification of Survival Genes in Human Glioblastoma Cells Using siRNA Screening  
 Nikhil G Thaker, Fang Zhang, Peter R. McDonald, Tong Ying Shun, Michael D Lewen, Ian F. Pollack, and John S. Lazo

Molecular Pharmacology

|                                  |               |      |                                                             |           |        |
|----------------------------------|---------------|------|-------------------------------------------------------------|-----------|--------|
| siRNA Disorazole DMSO Run1       | NM_0332<br>61 | IDI2 | isopentenyl<br>l-<br>diphosphate<br>delta<br>isomerase<br>2 | -0.562341 | Inlier |
| siRNA Disorazole DMSO Run3       | NM_0332<br>61 | IDI2 | isopentenyl<br>l-<br>diphosphate<br>delta<br>isomerase<br>2 | -0.405326 | Inlier |
| siRNA-Vinblastine Run2-<br>DMSO  | NM_0332<br>61 | IDI2 | isopentenyl<br>l-<br>diphosphate<br>delta<br>isomerase<br>2 | -0.251829 | Inlier |
| siRNA-Temozolomide Run2-<br>DMSO | NM_0332<br>61 | IDI2 | isopentenyl<br>l-<br>diphosphate<br>delta<br>isomerase<br>2 | 0.251828  | Inlier |
| siRNA-Temozolomide Run1-<br>DMSO | NM_0332<br>61 | IDI2 | isopentenyl<br>l-<br>diphosphate<br>delta<br>isomerase<br>2 | 0.786659  | Inlier |
| siRNA-Vinblastine Run1-<br>DMSO  | NM_0332<br>61 | IDI2 | isopentenyl<br>l-<br>diphosphate<br>delta<br>isomerase<br>2 | 1.049372  | Inlier |
| siRNA Disorazole DMSO Run2       | NM_0332<br>61 | IDI2 | isopentenyl<br>l-<br>diphosphate<br>delta<br>isomerase<br>2 | 1.525087  | Inlier |
| siRNA-Temozolomide Run3-<br>DMSO | NM_0002<br>02 | IDS  | iduronate<br>2-<br>sulfatase<br>(Hunter<br>syndrome)        | -2.097375 | Inlier |

Identification of Survival Genes in Human Glioblastoma Cells Using siRNA Screening  
 Nikhil G Thaker, Fang Zhang, Peter R. McDonald, Tong Ying Shun, Michael D Lewen, Ian F. Pollack, and John S. Lazo  
 Molecular Pharmacology

|                              |           |      |                                         |           |        |
|------------------------------|-----------|------|-----------------------------------------|-----------|--------|
| siRNA-Temozolomide Run2-DMSO | NM_000202 | IDS  | iduronate 2-sulfatase (Hunter syndrome) | -0.959337 | Inlier |
| siRNA-Vinblastine Run2-DMSO  | NM_000202 | IDS  | iduronate 2-sulfatase (Hunter syndrome) | -0.812799 | Inlier |
| siRNA-Temozolomide Run1-DMSO | NM_000202 | IDS  | iduronate 2-sulfatase (Hunter syndrome) | -0.124968 | Inlier |
| siRNA Disorazole DMSO Run1   | NM_000202 | IDS  | iduronate 2-sulfatase (Hunter syndrome) | 0.124968  | Inlier |
| siRNA Disorazole DMSO Run3   | NM_000202 | IDS  | iduronate 2-sulfatase (Hunter syndrome) | 0.393759  | Inlier |
| siRNA-Vinblastine Run1-DMSO  | NM_000202 | IDS  | iduronate 2-sulfatase (Hunter syndrome) | 0.536201  | Inlier |
| siRNA Disorazole DMSO Run2   | NM_000202 | IDS  | iduronate 2-sulfatase (Hunter syndrome) | 1.189056  | Inlier |
| siRNA Disorazole DMSO Run1   | NM_000203 | IDUA | iduronidas e, alpha-L-                  | -1.797923 | Inlier |
| siRNA-Vinblastine Run2-DMSO  | NM_000203 | IDUA | iduronidas e, alpha-L-                  | -1.219084 | Inlier |
| siRNA Disorazole DMSO Run3   | NM_000203 | IDUA | iduronidas e, alpha-L-                  | -0.86613  | Inlier |
| siRNA-Temozolomide Run3-DMSO | NM_000203 | IDUA | iduronidas e, alpha-L-                  | -0.044495 | Inlier |
| siRNA-Temozolomide Run1-DMSO | NM_000203 | IDUA | iduronidas e, alpha-L-                  | 0.044495  | Inlier |

Identification of Survival Genes in Human Glioblastoma Cells Using siRNA Screening  
 Nikhil G Thaker, Fang Zhang, Peter R. McDonald, Tong Ying Shun, Michael D Lewen, Ian F. Pollack, and John S. Lazo

|                                  |               |        |                                                           |           |        |
|----------------------------------|---------------|--------|-----------------------------------------------------------|-----------|--------|
| siRNA-Temozolomide Run2-<br>DMSO | NM_0002<br>03 | IDUA   | iduronidas<br>e, alpha-L-                                 | 0.252013  | Inlier |
| siRNA-Vinblastine Run1-<br>DMSO  | NM_0002<br>03 | IDUA   | iduronidas<br>e, alpha-L-                                 | 0.48287   | Inlier |
| siRNA Disorazole DMSO Run2       | NM_0002<br>03 | IDUA   | iduronidas<br>e, alpha-L-                                 | 1.73141   | Inlier |
| siRNA Disorazole DMSO Run2       | NM_0002<br>04 | IF     | l factor<br>(complem<br>ent)                              | -1.293779 | Inlier |
| siRNA-Temozolomide Run3-<br>DMSO | NM_0002<br>04 | IF     | l factor<br>(complem<br>ent)                              | -1.220172 | Inlier |
| siRNA-Temozolomide Run2-<br>DMSO | NM_0002<br>04 | IF     | l factor<br>(complem<br>ent)                              | -0.505431 | Inlier |
| siRNA Disorazole DMSO Run3       | NM_0002<br>04 | IF     | l factor<br>(complem<br>ent)                              | -0.426594 | Inlier |
| siRNA-Temozolomide Run1-<br>DMSO | NM_0002<br>04 | IF     | l factor<br>(complem<br>ent)                              | 0.426594  | Inlier |
| siRNA Disorazole DMSO Run1       | NM_0002<br>04 | IF     | l factor<br>(complem<br>ent)                              | 0.645996  | Inlier |
| siRNA-Vinblastine Run1-<br>DMSO  | NM_0002<br>04 | IF     | l factor<br>(complem<br>ent)                              | 0.703004  | Inlier |
| siRNA-Vinblastine Run2-<br>DMSO  | NM_0002<br>04 | IF     | l factor<br>(complem<br>ent)                              | 0.864163  | Inlier |
| siRNA-Temozolomide Run3-<br>DMSO | NM_0006<br>29 | IFNAR1 | interferon<br>(alpha,<br>beta and<br>omega)<br>receptor 1 | -1.772334 | Inlier |
| siRNA-Temozolomide Run2-<br>DMSO | NM_0006<br>29 | IFNAR1 | interferon<br>(alpha,<br>beta and<br>omega)<br>receptor 1 | -0.909174 | Inlier |
| siRNA Disorazole DMSO Run3       | NM_0006<br>29 | IFNAR1 | interferon<br>(alpha,<br>beta and<br>omega)<br>receptor 1 | -0.439826 | Inlier |
| siRNA-Temozolomide Run1-<br>DMSO | NM_0006<br>29 | IFNAR1 | interferon<br>(alpha,<br>beta and<br>omega)<br>receptor 1 | -0.014826 | Inlier |

Identification of Survival Genes in Human Glioblastoma Cells Using siRNA Screening

Nikhil G Thaker, Fang Zhang, Peter R. McDonald, Tong Ying Shun, Michael D Lewen, Ian F. Pollack, and John S. Lazo

Molecular Pharmacology

|                                  |               |        |                                                           |           |        |
|----------------------------------|---------------|--------|-----------------------------------------------------------|-----------|--------|
| siRNA Disorazole DMSO Run1       | NM_0006<br>29 | IFNAR1 | interferon<br>(alpha,<br>beta and<br>omega)<br>receptor 1 | 0.014826  | Inlier |
| siRNA-Vinblastine Run2-<br>DMSO  | NM_0006<br>29 | IFNAR1 | interferon<br>(alpha,<br>beta and<br>omega)<br>receptor 1 | 0.226114  | Inlier |
| siRNA-Vinblastine Run1-<br>DMSO  | NM_0006<br>29 | IFNAR1 | interferon<br>(alpha,<br>beta and<br>omega)<br>receptor 1 | 2.252223  | Inlier |
| siRNA Disorazole DMSO Run2       | NM_0006<br>29 | IFNAR1 | interferon<br>(alpha,<br>beta and<br>omega)<br>receptor 1 | 2.333422  | Inlier |
| siRNA-Temozolomide Run3-<br>DMSO | NM_2075<br>85 | IFNAR2 | interferon<br>(alpha,<br>beta and<br>omega)<br>receptor 2 | -1.034534 | Inlier |
| siRNA Disorazole DMSO Run1       | NM_2075<br>85 | IFNAR2 | interferon<br>(alpha,<br>beta and<br>omega)<br>receptor 2 | -0.772178 | Inlier |
| siRNA-Vinblastine Run2-<br>DMSO  | NM_2075<br>85 | IFNAR2 | interferon<br>(alpha,<br>beta and<br>omega)<br>receptor 2 | -0.576822 | Inlier |
| siRNA-Temozolomide Run1-<br>DMSO | NM_2075<br>85 | IFNAR2 | interferon<br>(alpha,<br>beta and<br>omega)<br>receptor 2 | -0.330023 | Inlier |
| siRNA-Temozolomide Run2-<br>DMSO | NM_2075<br>85 | IFNAR2 | interferon<br>(alpha,<br>beta and<br>omega)<br>receptor 2 | 0.330023  | Inlier |
| siRNA Disorazole DMSO Run3       | NM_2075<br>85 | IFNAR2 | interferon<br>(alpha,<br>beta and<br>omega)<br>receptor 2 | 0.435814  | Inlier |

Identification of Survival Genes in Human Glioblastoma Cells Using siRNA Screening  
 Nikhil G Thaker, Fang Zhang, Peter R. McDonald, Tong Ying Shun, Michael D Lewen, Ian F. Pollack, and John S. Lazo

Molecular Pharmacology

|                              |               |        |                                               |           |        |
|------------------------------|---------------|--------|-----------------------------------------------|-----------|--------|
| siRNA-Vinblastine Run1-DMSO  | NM_2075<br>85 | IFNAR2 | interferon (alpha, beta and omega) receptor 2 | 1.21762   | Inlier |
| siRNA Disorazole DMSO Run2   | NM_2075<br>85 | IFNAR2 | interferon (alpha, beta and omega) receptor 2 | 1.247718  | Inlier |
| siRNA-Temozolomide Run3-DMSO | NM_0021<br>76 | IFNB1  | interferon, beta 1, fibroblast                | -1.089571 | Inlier |
| siRNA-Temozolomide Run2-DMSO | NM_0021<br>76 | IFNB1  | interferon, beta 1, fibroblast                | -0.652828 | Inlier |
| siRNA Disorazole DMSO Run3   | NM_0021<br>76 | IFNB1  | interferon, beta 1, fibroblast                | -0.552522 | Inlier |
| siRNA Disorazole DMSO Run1   | NM_0021<br>76 | IFNB1  | interferon, beta 1, fibroblast                | -0.3538   | Inlier |
| siRNA-Temozolomide Run1-DMSO | NM_0021<br>76 | IFNB1  | interferon, beta 1, fibroblast                | 0.3538    | Inlier |
| siRNA Disorazole DMSO Run2   | NM_0021<br>76 | IFNB1  | interferon, beta 1, fibroblast                | 0.696172  | Inlier |
| siRNA-Vinblastine Run1-DMSO  | NM_0021<br>76 | IFNB1  | interferon, beta 1, fibroblast                | 1.764053  | Inlier |
| siRNA-Vinblastine Run2-DMSO  | NM_0021<br>76 | IFNB1  | interferon, beta 1, fibroblast                | 2.274814  | Inlier |
| siRNA Disorazole DMSO Run1   | NM_0004<br>16 | IFNGR1 | interferon gamma receptor 1                   | -0.821318 | Inlier |
| siRNA-Temozolomide Run3-DMSO | NM_0004<br>16 | IFNGR1 | interferon gamma receptor 1                   | -0.75253  | Inlier |
| siRNA-Vinblastine Run2-DMSO  | NM_0004<br>16 | IFNGR1 | interferon gamma receptor 1                   | -0.524274 | Inlier |
| siRNA Disorazole DMSO Run3   | NM_0004<br>16 | IFNGR1 | interferon gamma receptor 1                   | -0.167079 | Inlier |
| siRNA-Temozolomide Run2-DMSO | NM_0004<br>16 | IFNGR1 | interferon gamma receptor 1                   | 0.167079  | Inlier |
| siRNA-Temozolomide Run1-DMSO | NM_0004<br>16 | IFNGR1 | interferon gamma receptor 1                   | 0.59647   | Inlier |

Identification of Survival Genes in Human Glioblastoma Cells Using siRNA Screening  
 Nikhil G Thaker, Fang Zhang, Peter R. McDonald, Tong Ying Shun, Michael D Lewen, Ian F. Pollack, and John S. Lazo

| siRNA Treatment                                           | Gene          | Accession | Gene Name                                                                     | Log Fold Change | Outlier Status |
|-----------------------------------------------------------|---------------|-----------|-------------------------------------------------------------------------------|-----------------|----------------|
| Molecular Pharmacology<br>siRNA-Vinblastine Run1-<br>DMSO | NM_0004<br>16 | IFNGR1    | interferon<br>gamma<br>receptor 1                                             | 2.955455        | Inlier         |
| siRNA Disorazole DMSO Run2                                | NM_0004<br>16 | IFNGR1    | interferon<br>gamma<br>receptor 1                                             | 3.015488        | Inlier         |
| siRNA-Temozolomide Run3-<br>DMSO                          | NM_0055<br>34 | IFNGR2    | interferon<br>gamma<br>receptor 2<br>(interferon<br>gamma<br>transducer<br>1) | -2.761801       | Inlier         |
| siRNA-Temozolomide Run1-<br>DMSO                          | NM_0055<br>34 | IFNGR2    | interferon<br>gamma<br>receptor 2<br>(interferon<br>gamma<br>transducer<br>1) | -2.628362       | Inlier         |
| siRNA-Temozolomide Run2-<br>DMSO                          | NM_0055<br>34 | IFNGR2    | interferon<br>gamma<br>receptor 2<br>(interferon<br>gamma<br>transducer<br>1) | -1.519892       | Inlier         |
| siRNA-Vinblastine Run2-<br>DMSO                           | NM_0055<br>34 | IFNGR2    | interferon<br>gamma<br>receptor 2<br>(interferon<br>gamma<br>transducer<br>1) | -0.082854       | Inlier         |
| siRNA Disorazole DMSO Run3                                | NM_0055<br>34 | IFNGR2    | interferon<br>gamma<br>receptor 2<br>(interferon<br>gamma<br>transducer<br>1) | 0.082852        | Inlier         |
| siRNA Disorazole DMSO Run1                                | NM_0055<br>34 | IFNGR2    | interferon<br>gamma<br>receptor 2<br>(interferon<br>gamma<br>transducer<br>1) | 0.351556        | Inlier         |

Identification of Survival Genes in Human Glioblastoma Cells Using siRNA Screening  
 Nikhil G Thaker, Fang Zhang, Peter R. McDonald, Tong Ying Shun, Michael D Lewen, Ian F. Pollack, and John S. Lazo

Molecular Pharmacology

|                                  |               |        |                                                                               |           |        |
|----------------------------------|---------------|--------|-------------------------------------------------------------------------------|-----------|--------|
| siRNA Disorazole DMSO Run2       | NM_0055<br>34 | IFNGR2 | interferon<br>gamma<br>receptor 2<br>(interferon<br>gamma<br>transducer<br>1) | 0.616431  | Inlier |
| siRNA-Vinblastine Run1-<br>DMSO  | NM_0055<br>34 | IFNGR2 | interferon<br>gamma<br>receptor 2<br>(interferon<br>gamma<br>transducer<br>1) | 0.732569  | Inlier |
| siRNA Disorazole DMSO Run3       | NM_0008<br>75 | IGF1R  | insulin-like<br>growth<br>factor 1<br>receptor                                | -1.736467 | Inlier |
| siRNA-Temozolomide Run3-<br>DMSO | NM_0008<br>75 | IGF1R  | insulin-like<br>growth<br>factor 1<br>receptor                                | -0.683138 | Inlier |
| siRNA Disorazole DMSO Run1       | NM_0008<br>75 | IGF1R  | insulin-like<br>growth<br>factor 1<br>receptor                                | -0.665862 | Inlier |
| siRNA-Temozolomide Run2-<br>DMSO | NM_0008<br>75 | IGF1R  | insulin-like<br>growth<br>factor 1<br>receptor                                | -0.430855 | Inlier |
| siRNA-Vinblastine Run1-<br>DMSO  | NM_0008<br>75 | IGF1R  | insulin-like<br>growth<br>factor 1<br>receptor                                | 0.430855  | Inlier |
| siRNA-Temozolomide Run1-<br>DMSO | NM_0008<br>75 | IGF1R  | insulin-like<br>growth<br>factor 1<br>receptor                                | 0.641522  | Inlier |
| siRNA-Vinblastine Run2-<br>DMSO  | NM_0008<br>75 | IGF1R  | insulin-like<br>growth<br>factor 1<br>receptor                                | 1.05316   | Inlier |

Identification of Survival Genes in Human Glioblastoma Cells Using siRNA Screening  
 Nikhil G Thaker, Fang Zhang, Peter R. McDonald, Tong Ying Shun, Michael D Lewen, Ian F. Pollack, and John S. Lazo  
 Molecular Pharmacology

|                                  |               |        |                                                     |           |        |
|----------------------------------|---------------|--------|-----------------------------------------------------|-----------|--------|
| siRNA Disorazole DMSO Run2       | NM_0008<br>75 | IGF1R  | insulin-like<br>growth<br>factor 1<br>receptor      | 1.688368  | Inlier |
| siRNA-Temozolomide Run3-<br>DMSO | NM_0008<br>76 | IGF2R  | insulin-like<br>growth<br>factor 2<br>receptor      | -1.812348 | Inlier |
| siRNA-Temozolomide Run2-<br>DMSO | NM_0008<br>76 | IGF2R  | insulin-like<br>growth<br>factor 2<br>receptor      | -1.366442 | Inlier |
| siRNA-Temozolomide Run1-<br>DMSO | NM_0008<br>76 | IGF2R  | insulin-like<br>growth<br>factor 2<br>receptor      | -0.465223 | Inlier |
| siRNA Disorazole DMSO Run1       | NM_0008<br>76 | IGF2R  | insulin-like<br>growth<br>factor 2<br>receptor      | -0.105394 | Inlier |
| siRNA-Vinblastine Run2-<br>DMSO  | NM_0008<br>76 | IGF2R  | insulin-like<br>growth<br>factor 2<br>receptor      | 0.105395  | Inlier |
| siRNA Disorazole DMSO Run3       | NM_0008<br>76 | IGF2R  | insulin-like<br>growth<br>factor 2<br>receptor      | 0.380838  | Inlier |
| siRNA Disorazole DMSO Run2       | NM_0008<br>76 | IGF2R  | insulin-like<br>growth<br>factor 2<br>receptor      | 0.883776  | Inlier |
| siRNA-Vinblastine Run1-<br>DMSO  | NM_0008<br>76 | IGF2R  | insulin-like<br>growth<br>factor 2<br>receptor      | 1.610718  | Inlier |
| siRNA Disorazole DMSO Run3       | NM_1788<br>22 | IGSF10 | immunogl<br>obulin<br>superfamil<br>y, member<br>10 | -0.829873 | Inlier |



Identification of Survival Genes in Human Glioblastoma Cells Using siRNA Screening  
 Nikhil G Thaker, Fang Zhang, Peter R. McDonald, Tong Ying Shun, Michael D Lewen, Ian F. Pollack, and John S. Lazo  
 Molecular Pharmacology

|                              |               |        |                                       |           |        |
|------------------------------|---------------|--------|---------------------------------------|-----------|--------|
| siRNA-Vinblastine Run2-DMSO  | NM_1788<br>22 | IGSF10 | immunoglobulin superfamily, member 10 | -0.708461 | Inlier |
| siRNA-Temozolomide Run2-DMSO | NM_1788<br>22 | IGSF10 | immunoglobulin superfamily, member 10 | -0.640539 | Inlier |
| siRNA Disorazole DMSO Run1   | NM_1788<br>22 | IGSF10 | immunoglobulin superfamily, member 10 | -0.178115 | Inlier |
| siRNA-Temozolomide Run1-DMSO | NM_1788<br>22 | IGSF10 | immunoglobulin superfamily, member 10 | 0.178115  | Inlier |
| siRNA-Temozolomide Run3-DMSO | NM_1788<br>22 | IGSF10 | immunoglobulin superfamily, member 10 | 0.322424  | Inlier |
| siRNA Disorazole DMSO Run2   | NM_1788<br>22 | IGSF10 | immunoglobulin superfamily, member 10 | 1.054504  | Inlier |
| siRNA-Vinblastine Run1-DMSO  | NM_1788<br>22 | IGSF10 | immunoglobulin superfamily, member 10 | 1.325094  | Inlier |
| siRNA-Temozolomide Run1-DMSO | NM_1532<br>73 | IHPK1  | inositol hexaphosphate kinase 1       | -0.83824  | Inlier |
| siRNA-Temozolomide Run3-DMSO | NM_1532<br>73 | IHPK1  | inositol hexaphosphate kinase 1       | -0.51076  | Inlier |

Identification of Survival Genes in Human Glioblastoma Cells Using siRNA Screening  
 Nikhil G Thaker, Fang Zhang, Peter R. McDonald, Tong Ying Shun, Michael D Lewen, Ian F. Pollack, and John S. Lazo

Molecular Pharmacology

|                                  |               |       |                                           |           |        |
|----------------------------------|---------------|-------|-------------------------------------------|-----------|--------|
| siRNA Disorazole DMSO Run3       | NM_1532<br>73 | IHPK1 | inositol<br>hexaphos<br>phate<br>kinase 1 | -0.226544 | Inlier |
| siRNA Disorazole DMSO Run2       | NM_1532<br>73 | IHPK1 | inositol<br>hexaphos<br>phate<br>kinase 1 | -0.010299 | Inlier |
| siRNA-Temozolomide Run2-<br>DMSO | NM_1532<br>73 | IHPK1 | inositol<br>hexaphos<br>phate<br>kinase 1 | 0.010299  | Inlier |
| siRNA Disorazole DMSO Run1       | NM_1532<br>73 | IHPK1 | inositol<br>hexaphos<br>phate<br>kinase 1 | 1.263213  | Inlier |
| siRNA-Vinblastine Run1-<br>DMSO  | NM_1532<br>73 | IHPK1 | inositol<br>hexaphos<br>phate<br>kinase 1 | 2.287353  | Inlier |
| siRNA-Vinblastine Run2-<br>DMSO  | NM_1532<br>73 | IHPK1 | inositol<br>hexaphos<br>phate<br>kinase 1 | 2.807553  | Inlier |
| siRNA-Temozolomide Run3-<br>DMSO | NM_0162<br>91 | IHPK2 | inositol<br>hexaphos<br>phate<br>kinase 2 | -2.327709 | Inlier |
| siRNA-Temozolomide Run2-<br>DMSO | NM_0162<br>91 | IHPK2 | inositol<br>hexaphos<br>phate<br>kinase 2 | -0.795582 | Inlier |
| siRNA-Temozolomide Run1-<br>DMSO | NM_0162<br>91 | IHPK2 | inositol<br>hexaphos<br>phate<br>kinase 2 | -0.678264 | Inlier |
| siRNA Disorazole DMSO Run2       | NM_0162<br>91 | IHPK2 | inositol<br>hexaphos<br>phate<br>kinase 2 | -0.009907 | Inlier |
| siRNA Disorazole DMSO Run1       | NM_0162<br>91 | IHPK2 | inositol<br>hexaphos<br>phate<br>kinase 2 | 0.009907  | Inlier |
| siRNA-Vinblastine Run1-<br>DMSO  | NM_0162<br>91 | IHPK2 | inositol<br>hexaphos<br>phate<br>kinase 2 | 0.384065  | Inlier |
| siRNA-Vinblastine Run2-<br>DMSO  | NM_0162<br>91 | IHPK2 | inositol<br>hexaphos<br>phate<br>kinase 2 | 0.670736  | Inlier |

Identification of Survival Genes in Human Glioblastoma Cells Using siRNA Screening

Nikhil G Thaker, Fang Zhang, Peter R. McDonald, Tong Ying Shun, Michael D Lewen, Ian F. Pollack, and John S. Lazo

Molecular Pharmacology

|                                  |               |        |                                                                                                                               |           |         |
|----------------------------------|---------------|--------|-------------------------------------------------------------------------------------------------------------------------------|-----------|---------|
| siRNA Disorazole DMSO Run3       | NM_0162<br>91 | IHPK2  | inositol<br>hexaphos<br>phate<br>kinase 2                                                                                     | 1.584705  | Inlier  |
| siRNA Disorazole DMSO Run2       | NM_0541<br>11 | IHPK3  | inositol<br>hexaphos<br>phate<br>kinase 3                                                                                     | -1.160169 | Inlier  |
| siRNA-Temozolomide Run1-<br>DMSO | NM_0541<br>11 | IHPK3  | inositol<br>hexaphos<br>phate<br>kinase 3                                                                                     | -0.737344 | Inlier  |
| siRNA-Vinblastine Run1-<br>DMSO  | NM_0541<br>11 | IHPK3  | inositol<br>hexaphos<br>phate<br>kinase 3                                                                                     | -0.117635 | Inlier  |
| siRNA-Temozolomide Run2-<br>DMSO | NM_0541<br>11 | IHPK3  | inositol<br>hexaphos<br>phate<br>kinase 3                                                                                     | -0.096798 | Inlier  |
| siRNA-Temozolomide Run3-<br>DMSO | NM_0541<br>11 | IHPK3  | inositol<br>hexaphos<br>phate<br>kinase 3                                                                                     | 0.096798  | Inlier  |
| siRNA-Vinblastine Run2-<br>DMSO  | NM_0541<br>11 | IHPK3  | inositol<br>hexaphos<br>phate<br>kinase 3                                                                                     | 0.611656  | Inlier  |
| siRNA Disorazole DMSO Run1       | NM_0541<br>11 | IHPK3  | inositol<br>hexaphos<br>phate<br>kinase 3                                                                                     | 1.162008  | Inlier  |
| siRNA Disorazole DMSO Run3       | NM_0541<br>11 | IHPK3  | inositol<br>hexaphos<br>phate<br>kinase 3                                                                                     | 3.606883  | Outlier |
| siRNA-Temozolomide Run3-<br>DMSO | NM_0036<br>40 | IKBKAP | inhibitor of<br>kappa light<br>polypeptid<br>e gene<br>enhancer<br>in B-cells,<br>kinase<br>complex-<br>associated<br>protein | -1.935872 | Inlier  |

Identification of Survival Genes in Human Glioblastoma Cells Using siRNA Screening

Nikhil G Thaker, Fang Zhang, Peter R. McDonald, Tong Ying Shun, Michael D Lewen, Ian F. Pollack, and John S. Lazo

Molecular Pharmacology

|                               |    |         |        |                                                                                                  |           |        |
|-------------------------------|----|---------|--------|--------------------------------------------------------------------------------------------------|-----------|--------|
| siRNA Disorazole DMSO Run1    | 40 | NM_0036 | IKBKAP | inhibitor of kappa light polypeptide gene enhancer in B-cells, kinase complex-associated protein | -0.803267 | Inlier |
| siRNA Disorazole DMSO Run2    | 40 | NM_0036 | IKBKAP | inhibitor of kappa light polypeptide gene enhancer in B-cells, kinase complex-associated protein | -0.678944 | Inlier |
| siRNA-Temozolomide DMSO Run1- | 40 | NM_0036 | IKBKAP | inhibitor of kappa light polypeptide gene enhancer in B-cells, kinase complex-associated protein | -0.027251 | Inlier |
| siRNA Disorazole DMSO Run3    | 40 | NM_0036 | IKBKAP | inhibitor of kappa light polypeptide gene enhancer in B-cells, kinase complex-associated protein | 0.027252  | Inlier |

Identification of Survival Genes in Human Glioblastoma Cells Using siRNA Screening

Nikhil G Thaker, Fang Zhang, Peter R. McDonald, Tong Ying Shun, Michael D Lewen, Ian F. Pollack, and John S. Lazo

Molecular Pharmacology

|                              |           |        |                                                                                                  |           |        |
|------------------------------|-----------|--------|--------------------------------------------------------------------------------------------------|-----------|--------|
| siRNA-Temozolomide Run2-DMSO | NM_003640 | IKBKAP | inhibitor of kappa light polypeptide gene enhancer in B-cells, kinase complex-associated protein | 0.227355  | Inlier |
| siRNA-Vinblastine Run1-DMSO  | NM_003640 | IKBKAP | inhibitor of kappa light polypeptide gene enhancer in B-cells, kinase complex-associated protein | 0.670056  | Inlier |
| siRNA-Vinblastine Run2-DMSO  | NM_003640 | IKBKAP | inhibitor of kappa light polypeptide gene enhancer in B-cells, kinase complex-associated protein | 1.424407  | Inlier |
| siRNA Disorazole DMSO Run2   | NM_001556 | IKBKB  | inhibitor of kappa light polypeptide gene enhancer in B-cells, kinase beta                       | -0.801866 | Inlier |
| siRNA-Temozolomide Run3-DMSO | NM_001556 | IKBKB  | inhibitor of kappa light polypeptide gene enhancer in B-cells, kinase beta                       | -0.792698 | Inlier |

Identification of Survival Genes in Human Glioblastoma Cells Using siRNA Screening

Nikhil G Thaker, Fang Zhang, Peter R. McDonald, Tong Ying Shun, Michael D Lewen, Ian F. Pollack, and John S. Lazo

Molecular Pharmacology

|                              |           |       |                                                                            |           |        |
|------------------------------|-----------|-------|----------------------------------------------------------------------------|-----------|--------|
| siRNA-Temozolomide Run1-DMSO | NM_001556 | IKBKB | inhibitor of kappa light polypeptide gene enhancer in B-cells, kinase beta | -0.435935 | Inlier |
| siRNA-Vinblastine Run1-DMSO  | NM_001556 | IKBKB | inhibitor of kappa light polypeptide gene enhancer in B-cells, kinase beta | -0.005821 | Inlier |
| siRNA-Temozolomide Run2-DMSO | NM_001556 | IKBKB | inhibitor of kappa light polypeptide gene enhancer in B-cells, kinase beta | 0.00582   | Inlier |
| siRNA Disorazole DMSO Run1   | NM_001556 | IKBKB | inhibitor of kappa light polypeptide gene enhancer in B-cells, kinase beta | 0.556302  | Inlier |
| siRNA-Vinblastine Run2-DMSO  | NM_001556 | IKBKB | inhibitor of kappa light polypeptide gene enhancer in B-cells, kinase beta | 0.845015  | Inlier |

Identification of Survival Genes in Human Glioblastoma Cells Using siRNA Screening

Nikhil G Thaker, Fang Zhang, Peter R. McDonald, Tong Ying Shun, Michael D Lewen, Ian F. Pollack, and John S.

Lazo

Molecular Pharmacology

|                                  |               |       |                                                                                                     |           |        |
|----------------------------------|---------------|-------|-----------------------------------------------------------------------------------------------------|-----------|--------|
| siRNA Disorazole DMSO Run3       | NM_0015<br>56 | IKBKB | inhibitor of<br>kappa light<br>polypeptid<br>e gene<br>enhancer<br>in B-cells,<br>kinase<br>beta    | 2.627906  | Inlier |
| siRNA Disorazole DMSO Run1       | NM_0140<br>02 | IKBKE | inhibitor of<br>kappa light<br>polypeptid<br>e gene<br>enhancer<br>in B-cells,<br>kinase<br>epsilon | -0.731472 | Inlier |
| siRNA-Temozolomide Run1-<br>DMSO | NM_0140<br>02 | IKBKE | inhibitor of<br>kappa light<br>polypeptid<br>e gene<br>enhancer<br>in B-cells,<br>kinase<br>epsilon | -0.617528 | Inlier |
| siRNA-Temozolomide Run3-<br>DMSO | NM_0140<br>02 | IKBKE | inhibitor of<br>kappa light<br>polypeptid<br>e gene<br>enhancer<br>in B-cells,<br>kinase<br>epsilon | -0.316167 | Inlier |
| siRNA-Temozolomide Run2-<br>DMSO | NM_0140<br>02 | IKBKE | inhibitor of<br>kappa light<br>polypeptid<br>e gene<br>enhancer<br>in B-cells,<br>kinase<br>epsilon | -0.073769 | Inlier |

Identification of Survival Genes in Human Glioblastoma Cells Using siRNA Screening

Nikhil G Thaker, Fang Zhang, Peter R. McDonald, Tong Ying Shun, Michael D Lewen, Ian F. Pollack, and John S. Lazo

Molecular Pharmacology

|                                  |               |       |                                                                                                     |           |         |
|----------------------------------|---------------|-------|-----------------------------------------------------------------------------------------------------|-----------|---------|
| siRNA Disorazole DMSO Run2       | NM_0140<br>02 | IKBKE | inhibitor of<br>kappa light<br>polypeptid<br>e gene<br>enhancer<br>in B-cells,<br>kinase<br>epsilon | 0.073768  | Inlier  |
| siRNA-Vinblastine Run2-<br>DMSO  | NM_0140<br>02 | IKBKE | inhibitor of<br>kappa light<br>polypeptid<br>e gene<br>enhancer<br>in B-cells,<br>kinase<br>epsilon | 0.776941  | Inlier  |
| siRNA-Vinblastine Run1-<br>DMSO  | NM_0140<br>02 | IKBKE | inhibitor of<br>kappa light<br>polypeptid<br>e gene<br>enhancer<br>in B-cells,<br>kinase<br>epsilon | 0.975584  | Inlier  |
| siRNA Disorazole DMSO Run3       | NM_0140<br>02 | IKBKE | inhibitor of<br>kappa light<br>polypeptid<br>e gene<br>enhancer<br>in B-cells,<br>kinase<br>epsilon | 1.692718  | Inlier  |
| siRNA-Temozolomide Run3-<br>DMSO | NM_0036<br>39 | IKBKG | inhibitor of<br>kappa light<br>polypeptid<br>e gene<br>enhancer<br>in B-cells,<br>kinase<br>gamma   | -10.52699 | Outlier |



Identification of Survival Genes in Human Glioblastoma Cells Using siRNA Screening

Nikhil G Thaker, Fang Zhang, Peter R. McDonald, Tong Ying Shun, Michael D Lewen, Ian F. Pollack, and John S. Lazo

Molecular Pharmacology

|                              |           |       |                                                                             |           |        |
|------------------------------|-----------|-------|-----------------------------------------------------------------------------|-----------|--------|
| siRNA-Temozolomide Run1-DMSO | NM_003639 | IKBKG | inhibitor of kappa light polypeptide gene enhancer in B-cells, kinase gamma | -0.434338 | Inlier |
| siRNA-Temozolomide Run2-DMSO | NM_003639 | IKBKG | inhibitor of kappa light polypeptide gene enhancer in B-cells, kinase gamma | -0.310547 | Inlier |
| siRNA Disorazole DMSO Run2   | NM_003639 | IKBKG | inhibitor of kappa light polypeptide gene enhancer in B-cells, kinase gamma | -0.239673 | Inlier |
| siRNA Disorazole DMSO Run1   | NM_003639 | IKBKG | inhibitor of kappa light polypeptide gene enhancer in B-cells, kinase gamma | 0.239673  | Inlier |
| siRNA-Vinblastine Run1-DMSO  | NM_003639 | IKBKG | inhibitor of kappa light polypeptide gene enhancer in B-cells, kinase gamma | 0.914662  | Inlier |

Identification of Survival Genes in Human Glioblastoma Cells Using siRNA Screening  
 Nikhil G Thaker, Fang Zhang, Peter R. McDonald, Tong Ying Shun, Michael D Lewen, Ian F. Pollack, and John S. Lazo  
 Molecular Pharmacology

|                              |               |        |                                                                             |           |         |
|------------------------------|---------------|--------|-----------------------------------------------------------------------------|-----------|---------|
| siRNA-Vinblastine Run2-DMSO  | NM_0036<br>39 | IKBKG  | inhibitor of kappa light polypeptide gene enhancer in B-cells, kinase gamma | 6.095284  | Outlier |
| siRNA Disorazole DMSO Run3   | NM_0036<br>39 | IKBKG  | inhibitor of kappa light polypeptide gene enhancer in B-cells, kinase gamma | 11.62721  | Outlier |
| siRNA-Temozolomide Run3-DMSO | NM_0015<br>58 | IL10RA | interleukin 10 receptor, alpha                                              | -1.308653 | Inlier  |
| siRNA Disorazole DMSO Run1   | NM_0015<br>58 | IL10RA | interleukin 10 receptor, alpha                                              | -0.490674 | Inlier  |
| siRNA-Vinblastine Run2-DMSO  | NM_0015<br>58 | IL10RA | interleukin 10 receptor, alpha                                              | -0.434787 | Inlier  |
| siRNA-Temozolomide Run2-DMSO | NM_0015<br>58 | IL10RA | interleukin 10 receptor, alpha                                              | -0.215898 | Inlier  |
| siRNA-Temozolomide Run1-DMSO | NM_0015<br>58 | IL10RA | interleukin 10 receptor, alpha                                              | 0.215898  | Inlier  |
| siRNA Disorazole DMSO Run3   | NM_0015<br>58 | IL10RA | interleukin 10 receptor, alpha                                              | 0.858326  | Inlier  |
| siRNA Disorazole DMSO Run2   | NM_0015<br>58 | IL10RA | interleukin 10 receptor, alpha                                              | 1.389788  | Inlier  |
| siRNA-Vinblastine Run1-DMSO  | NM_0015<br>58 | IL10RA | interleukin 10 receptor, alpha                                              | 1.522295  | Inlier  |

Identification of Survival Genes in Human Glioblastoma Cells Using siRNA Screening  
 Nikhil G Thaker, Fang Zhang, Peter R. McDonald, Tong Ying Shun, Michael D Lewen, Ian F. Pollack, and John S. Lazo

Molecular Pharmacology

|                                  |               |        |                                         |                   |
|----------------------------------|---------------|--------|-----------------------------------------|-------------------|
|                                  |               |        | interleukin<br>10<br>receptor,<br>beta  |                   |
| siRNA-Vinblastine Run2-<br>DMSO  | NM_0006<br>28 | IL10RB | interleukin<br>10<br>receptor,<br>beta  | -2.022883 Inlier  |
| siRNA-Temozolomide Run3-<br>DMSO | NM_0006<br>28 | IL10RB | interleukin<br>10<br>receptor,<br>beta  | -0.957052 Inlier  |
| siRNA-Temozolomide Run2-<br>DMSO | NM_0006<br>28 | IL10RB | interleukin<br>10<br>receptor,<br>beta  | -0.70423 Inlier   |
| siRNA Disorazole DMSO Run3       | NM_0006<br>28 | IL10RB | interleukin<br>10<br>receptor,<br>beta  | -0.08586 Inlier   |
| siRNA Disorazole DMSO Run1       | NM_0006<br>28 | IL10RB | interleukin<br>10<br>receptor,<br>beta  | 0.08586 Inlier    |
| siRNA Disorazole DMSO Run2       | NM_0006<br>28 | IL10RB | interleukin<br>10<br>receptor,<br>beta  | 0.482079 Inlier   |
| siRNA-Temozolomide Run1-<br>DMSO | NM_0006<br>28 | IL10RB | interleukin<br>10<br>receptor,<br>beta  | 0.64477 Inlier    |
| siRNA-Vinblastine Run1-<br>DMSO  | NM_0006<br>28 | IL10RB | interleukin<br>10<br>receptor,<br>beta  | 1.701235 Inlier   |
| siRNA-Vinblastine Run2-<br>DMSO  | NM_1471<br>62 | IL11RA | interleukin<br>11<br>receptor,<br>alpha | -3.939042 Outlier |
| siRNA Disorazole DMSO Run1       | NM_1471<br>62 | IL11RA | interleukin<br>11<br>receptor,<br>alpha | -0.929861 Inlier  |
| siRNA-Temozolomide Run2-<br>DMSO | NM_1471<br>62 | IL11RA | interleukin<br>11<br>receptor,<br>alpha | -0.622242 Inlier  |
| siRNA Disorazole DMSO Run3       | NM_1471<br>62 | IL11RA | interleukin<br>11<br>receptor,<br>alpha | -0.574607 Inlier  |
| siRNA-Temozolomide Run3-<br>DMSO | NM_1471<br>62 | IL11RA | interleukin<br>11<br>receptor,<br>alpha | 0.574607 Inlier   |

Identification of Survival Genes in Human Glioblastoma Cells Using siRNA Screening  
 Nikhil G Thaker, Fang Zhang, Peter R. McDonald, Tong Ying Shun, Michael D Lewen, Ian F. Pollack, and John S. Lazo

Molecular Pharmacology

|                                  |               |         |                                          |                  |
|----------------------------------|---------------|---------|------------------------------------------|------------------|
|                                  |               |         | interleukin<br>11                        |                  |
| siRNA Disorazole DMSO Run2       | NM_1471<br>62 | IL11RA  | receptor,<br>alpha<br>interleukin<br>11  | 0.600646 Inlier  |
| siRNA-Temozolomide Run1-<br>DMSO | NM_1471<br>62 | IL11RA  | receptor,<br>alpha<br>interleukin<br>11  | 0.726758 Inlier  |
| siRNA-Vinblastine Run1-<br>DMSO  | NM_1471<br>62 | IL11RA  | receptor,<br>alpha<br>interleukin<br>12  | 2.288682 Inlier  |
| siRNA-Temozolomide Run3-<br>DMSO | NM_1537<br>01 | IL12RB1 | receptor,<br>beta 1<br>interleukin<br>12 | -0.868763 Inlier |
| siRNA-Temozolomide Run2-<br>DMSO | NM_1537<br>01 | IL12RB1 | receptor,<br>beta 1<br>interleukin<br>12 | -0.810323 Inlier |
| siRNA-Vinblastine Run2-<br>DMSO  | NM_1537<br>01 | IL12RB1 | receptor,<br>beta 1<br>interleukin<br>12 | -0.450748 Inlier |
| siRNA Disorazole DMSO Run1       | NM_1537<br>01 | IL12RB1 | receptor,<br>beta 1<br>interleukin<br>12 | -0.271979 Inlier |
| siRNA Disorazole DMSO Run3       | NM_1537<br>01 | IL12RB1 | receptor,<br>beta 1<br>interleukin<br>12 | 0.271979 Inlier  |
| siRNA-Temozolomide Run1-<br>DMSO | NM_1537<br>01 | IL12RB1 | receptor,<br>beta 1<br>interleukin<br>12 | 0.538677 Inlier  |
| siRNA Disorazole DMSO Run2       | NM_1537<br>01 | IL12RB1 | receptor,<br>beta 1<br>interleukin<br>12 | 1.189566 Inlier  |
| siRNA-Vinblastine Run1-<br>DMSO  | NM_1537<br>01 | IL12RB1 | receptor,<br>beta 1<br>interleukin<br>12 | 1.821008 Inlier  |
| siRNA-Vinblastine Run2-<br>DMSO  | NM_0015<br>59 | IL12RB2 | receptor,<br>beta 2<br>interleukin<br>12 | -2.21316 Inlier  |
| siRNA Disorazole DMSO Run3       | NM_0015<br>59 | IL12RB2 | receptor,<br>beta 2                      | -0.913324 Inlier |

Identification of Survival Genes in Human Glioblastoma Cells Using siRNA Screening  
 Nikhil G Thaker, Fang Zhang, Peter R. McDonald, Tong Ying Shun, Michael D Lewen, Ian F. Pollack, and John S. Lazo

Molecular Pharmacology

| siRNA Treatment              | Gene ID   | Gene Name | Value     | Category |
|------------------------------|-----------|-----------|-----------|----------|
| siRNA Disorazole DMSO Run1   | NM_001559 | IL12RB2   | -0.435676 | Inlier   |
| siRNA-Temozolomide Run2-DMSO | NM_001559 | IL12RB2   | -0.006763 | Inlier   |
| siRNA-Temozolomide Run3-DMSO | NM_001559 | IL12RB2   | 0.006763  | Inlier   |
| siRNA-Temozolomide Run1-DMSO | NM_001559 | IL12RB2   | 0.139263  | Inlier   |
| siRNA Disorazole DMSO Run2   | NM_001559 | IL12RB2   | 3.682951  | Outlier  |
| siRNA-Vinblastine Run1-DMSO  | NM_001559 | IL12RB2   | 5.827459  | Outlier  |
| siRNA-Vinblastine Run2-DMSO  | NM_001560 | IL13RA1   | -0.940238 | Inlier   |
| siRNA-Temozolomide Run2-DMSO | NM_001560 | IL13RA1   | -0.408762 | Inlier   |
| siRNA Disorazole DMSO Run3   | NM_001560 | IL13RA1   | -0.374383 | Inlier   |
| siRNA Disorazole DMSO Run1   | NM_001560 | IL13RA1   | -0.273849 | Inlier   |
| siRNA-Temozolomide Run1-DMSO | NM_001560 | IL13RA1   | 0.27385   | Inlier   |
| siRNA-Temozolomide Run3-DMSO | NM_001560 | IL13RA1   | 1.036256  | Inlier   |
| siRNA Disorazole DMSO Run2   | NM_001560 | IL13RA1   | 2.38596   | Inlier   |

Identification of Survival Genes in Human Glioblastoma Cells Using siRNA Screening  
 Nikhil G Thaker, Fang Zhang, Peter R. McDonald, Tong Ying Shun, Michael D Lewen, Ian F. Pollack, and John S. Lazo

Molecular Pharmacology

|                                  |               |         |                      |                  |
|----------------------------------|---------------|---------|----------------------|------------------|
|                                  |               |         | interleukin<br>13    |                  |
| siRNA-Vinblastine Run1-<br>DMSO  | NM_0015<br>60 | IL13RA1 | receptor,<br>alpha 1 | 4.056911 Outlier |
|                                  |               |         | interleukin<br>13    |                  |
| siRNA-Vinblastine Run2-<br>DMSO  | NM_0006<br>40 | IL13RA2 | receptor,<br>alpha 2 | -0.866301 Inlier |
|                                  |               |         | interleukin<br>13    |                  |
| siRNA-Temozolomide Run2-<br>DMSO | NM_0006<br>40 | IL13RA2 | receptor,<br>alpha 2 | -0.683048 Inlier |
|                                  |               |         | interleukin<br>13    |                  |
| siRNA Disorazole DMSO Run3       | NM_0006<br>40 | IL13RA2 | receptor,<br>alpha 2 | -0.180214 Inlier |
|                                  |               |         | interleukin<br>13    |                  |
| siRNA Disorazole DMSO Run1       | NM_0006<br>40 | IL13RA2 | receptor,<br>alpha 2 | -0.052084 Inlier |
|                                  |               |         | interleukin<br>13    |                  |
| siRNA-Temozolomide Run1-<br>DMSO | NM_0006<br>40 | IL13RA2 | receptor,<br>alpha 2 | 0.052084 Inlier  |
|                                  |               |         | interleukin<br>13    |                  |
| siRNA Disorazole DMSO Run2       | NM_0006<br>40 | IL13RA2 | receptor,<br>alpha 2 | 0.665952 Inlier  |
|                                  |               |         | interleukin<br>13    |                  |
| siRNA-Vinblastine Run1-<br>DMSO  | NM_0006<br>40 | IL13RA2 | receptor,<br>alpha 2 | 0.843546 Inlier  |
|                                  |               |         | interleukin<br>13    |                  |
| siRNA-Temozolomide Run3-<br>DMSO | NM_0006<br>40 | IL13RA2 | receptor,<br>alpha 2 | 0.888039 Inlier  |
|                                  |               |         | interleukin<br>15    |                  |
| siRNA-Vinblastine Run2-<br>DMSO  | NM_0021<br>89 | IL15RA  | receptor,<br>alpha   | -1.052533 Inlier |
|                                  |               |         | interleukin<br>15    |                  |
| siRNA-Temozolomide Run2-<br>DMSO | NM_0021<br>89 | IL15RA  | receptor,<br>alpha   | -0.780425 Inlier |
|                                  |               |         | interleukin<br>15    |                  |
| siRNA Disorazole DMSO Run1       | NM_0021<br>89 | IL15RA  | receptor,<br>alpha   | -0.420701 Inlier |
|                                  |               |         | interleukin<br>15    |                  |
| siRNA-Temozolomide Run1-<br>DMSO | NM_0021<br>89 | IL15RA  | receptor,<br>alpha   | -0.025942 Inlier |

Identification of Survival Genes in Human Glioblastoma Cells Using siRNA Screening  
 Nikhil G Thaker, Fang Zhang, Peter R. McDonald, Tong Ying Shun, Michael D Lewen, Ian F. Pollack, and John S. Lazo

Molecular Pharmacology

|                                  |               |        |                                         |                  |
|----------------------------------|---------------|--------|-----------------------------------------|------------------|
|                                  |               |        | interleukin<br>15                       |                  |
| siRNA Disorazole DMSO Run3       | NM_0021<br>89 | IL15RA | receptor,<br>alpha<br>interleukin<br>15 | 0.025942 Inlier  |
| siRNA-Temozolomide Run3-<br>DMSO | NM_0021<br>89 | IL15RA | receptor,<br>alpha<br>interleukin<br>15 | 0.568575 Inlier  |
| siRNA Disorazole DMSO Run2       | NM_0021<br>89 | IL15RA | receptor,<br>alpha<br>interleukin<br>15 | 0.894221 Inlier  |
| siRNA-Vinblastine Run1-<br>DMSO  | NM_0021<br>89 | IL15RA | receptor,<br>alpha<br>interleukin<br>17 | 1.315369 Inlier  |
| siRNA-Vinblastine Run2-<br>DMSO  | NM_0143<br>39 | IL17R  | receptor<br>interleukin<br>17           | -1.890808 Inlier |
| siRNA Disorazole DMSO Run1       | NM_0143<br>39 | IL17R  | receptor<br>interleukin<br>17           | -0.781216 Inlier |
| siRNA Disorazole DMSO Run3       | NM_0143<br>39 | IL17R  | receptor<br>interleukin<br>17           | -0.567784 Inlier |
| siRNA-Temozolomide Run1-<br>DMSO | NM_0143<br>39 | IL17R  | receptor<br>interleukin<br>17           | -0.010135 Inlier |
| siRNA-Temozolomide Run2-<br>DMSO | NM_0143<br>39 | IL17R  | receptor<br>interleukin<br>17           | 0.010134 Inlier  |
| siRNA-Temozolomide Run3-<br>DMSO | NM_0143<br>39 | IL17R  | receptor<br>interleukin<br>17           | 0.391777 Inlier  |
| siRNA Disorazole DMSO Run2       | NM_0143<br>39 | IL17R  | receptor<br>interleukin<br>17           | 0.884887 Inlier  |
| siRNA-Vinblastine Run1-<br>DMSO  | NM_0143<br>39 | IL17R  | receptor                                | 1.518329 Inlier  |
| siRNA-Vinblastine Run2-<br>DMSO  | NM_1722<br>34 | IL17RB | interleukin<br>17<br>receptor B         | -1.020195 Inlier |
| siRNA-Temozolomide Run2-<br>DMSO | NM_1722<br>34 | IL17RB | interleukin<br>17<br>receptor B         | -0.761803 Inlier |
| siRNA-Temozolomide Run1-<br>DMSO | NM_1722<br>34 | IL17RB | interleukin<br>17<br>receptor B         | -0.285059 Inlier |

Identification of Survival Genes in Human Glioblastoma Cells Using siRNA Screening  
 Nikhil G Thaker, Fang Zhang, Peter R. McDonald, Tong Ying Shun, Michael D Lewen, Ian F. Pollack, and John S. Lazo  
 Molecular Pharmacology

|                                  |               |         |                                                       |           |        |
|----------------------------------|---------------|---------|-------------------------------------------------------|-----------|--------|
| siRNA Disorazole DMSO Run1       | NM_1722<br>34 | IL17RB  | interleukin<br>17<br>receptor B                       | -0.063904 | Inlier |
| siRNA Disorazole DMSO Run3       | NM_1722<br>34 | IL17RB  | interleukin<br>17<br>receptor B                       | 0.063904  | Inlier |
| siRNA-Temozolomide Run3-<br>DMSO | NM_1722<br>34 | IL17RB  | interleukin<br>17<br>receptor B                       | 0.587197  | Inlier |
| siRNA Disorazole DMSO Run2       | NM_1722<br>34 | IL17RB  | interleukin<br>17<br>receptor B                       | 1.416044  | Inlier |
| siRNA-Vinblastine Run1-<br>DMSO  | NM_1722<br>34 | IL17RB  | interleukin<br>17<br>receptor B                       | 1.732584  | Inlier |
| siRNA-Vinblastine Run2-<br>DMSO  | NM_0038<br>55 | IL18R1  | interleukin<br>18<br>receptor 1                       | -0.761712 | Inlier |
| siRNA Disorazole DMSO Run3       | NM_0038<br>55 | IL18R1  | interleukin<br>18<br>receptor 1                       | -0.587288 | Inlier |
| siRNA-Temozolomide Run2-<br>DMSO | NM_0038<br>55 | IL18R1  | interleukin<br>18<br>receptor 1                       | -0.566939 | Inlier |
| siRNA Disorazole DMSO Run1       | NM_0038<br>55 | IL18R1  | interleukin<br>18<br>receptor 1                       | -0.414549 | Inlier |
| siRNA-Temozolomide Run1-<br>DMSO | NM_0038<br>55 | IL18R1  | interleukin<br>18<br>receptor 1                       | 0.414549  | Inlier |
| siRNA-Temozolomide Run3-<br>DMSO | NM_0038<br>55 | IL18R1  | interleukin<br>18<br>receptor 1                       | 0.872482  | Inlier |
| siRNA Disorazole DMSO Run2       | NM_0038<br>55 | IL18R1  | interleukin<br>18<br>receptor 1                       | 2.021656  | Inlier |
| siRNA-Vinblastine Run1-<br>DMSO  | NM_0038<br>55 | IL18R1  | interleukin<br>18<br>receptor 1                       | 2.630082  | Inlier |
| siRNA-Vinblastine Run2-<br>DMSO  | NM_0038<br>53 | IL18RAP | interleukin<br>18<br>receptor<br>accessory<br>protein | -2.950668 | Inlier |



Identification of Survival Genes in Human Glioblastoma Cells Using siRNA Screening  
 Nikhil G Thaker, Fang Zhang, Peter R. McDonald, Tong Ying Shun, Michael D Lewen, Ian F. Pollack, and John S. Lazo

Molecular Pharmacology

|                                  |               |         |                                                       |                  |
|----------------------------------|---------------|---------|-------------------------------------------------------|------------------|
|                                  |               |         | interleukin<br>18<br>receptor<br>accessory<br>protein |                  |
| siRNA Disorazole DMSO Run1       | NM_0038<br>53 | IL18RAP | interleukin<br>18<br>receptor<br>accessory<br>protein | -0.777432 Inlier |
| siRNA-Temozolomide Run1-<br>DMSO | NM_0038<br>53 | IL18RAP | interleukin<br>18<br>receptor<br>accessory<br>protein | -0.585332 Inlier |
| siRNA Disorazole DMSO Run3       | NM_0038<br>53 | IL18RAP | interleukin<br>18<br>receptor<br>accessory<br>protein | -0.231893 Inlier |
| siRNA-Temozolomide Run3-<br>DMSO | NM_0038<br>53 | IL18RAP | interleukin<br>18<br>receptor<br>accessory<br>protein | 0.231894 Inlier  |
| siRNA-Temozolomide Run2-<br>DMSO | NM_0038<br>53 | IL18RAP | interleukin<br>18<br>receptor<br>accessory<br>protein | 0.662598 Inlier  |
| siRNA-Vinblastine Run1-<br>DMSO  | NM_0038<br>53 | IL18RAP | interleukin<br>18<br>receptor<br>accessory<br>protein | 0.686402 Inlier  |
| siRNA Disorazole DMSO Run2       | NM_0038<br>53 | IL18RAP | interleukin<br>18<br>receptor<br>accessory<br>protein | 1.147855 Inlier  |
| siRNA Disorazole DMSO Run1       | NM_0005<br>75 | IL1A    | interleukin<br>1, alpha                               | -0.974508 Inlier |
| siRNA-Temozolomide Run3-<br>DMSO | NM_0005<br>75 | IL1A    | interleukin<br>1, alpha                               | -0.745479 Inlier |
| siRNA Disorazole DMSO Run3       | NM_0005<br>75 | IL1A    | interleukin<br>1, alpha                               | -0.603521 Inlier |
| siRNA-Vinblastine Run2-<br>DMSO  | NM_0005<br>75 | IL1A    | interleukin<br>1, alpha                               | -0.219699 Inlier |
| siRNA-Temozolomide Run2-<br>DMSO | NM_0005<br>75 | IL1A    | interleukin<br>1, alpha                               | 0.219699 Inlier  |
| siRNA-Temozolomide Run1-<br>DMSO | NM_0005<br>75 | IL1A    | interleukin<br>1, alpha                               | 0.286638 Inlier  |
| siRNA Disorazole DMSO Run2       | NM_0005<br>75 | IL1A    | interleukin<br>1, alpha                               | 0.905895 Inlier  |
| siRNA-Vinblastine Run1-<br>DMSO  | NM_0005<br>75 | IL1A    | interleukin<br>1, alpha                               | 1.449558 Inlier  |

Identification of Survival Genes in Human Glioblastoma Cells Using siRNA Screening  
 Nikhil G Thaker, Fang Zhang, Peter R. McDonald, Tong Ying Shun, Michael D Lewen, Ian F. Pollack, and John S. Lazo

Molecular Pharmacology

|                              |               |       |                                       |                  |
|------------------------------|---------------|-------|---------------------------------------|------------------|
| siRNA-Vinblastine Run2-DMSO  | NM_0008<br>77 | IL1R1 | interleukin<br>1 receptor,<br>type I  | -1.521074 Inlier |
| siRNA-Temozolomide Run2-DMSO | NM_0008<br>77 | IL1R1 | interleukin<br>1 receptor,<br>type I  | -1.039533 Inlier |
| siRNA-Temozolomide Run1-DMSO | NM_0008<br>77 | IL1R1 | interleukin<br>1 receptor,<br>type I  | -0.446475 Inlier |
| siRNA Disorazole DMSO Run3   | NM_0008<br>77 | IL1R1 | interleukin<br>1 receptor,<br>type I  | -0.123091 Inlier |
| siRNA Disorazole DMSO Run1   | NM_0008<br>77 | IL1R1 | interleukin<br>1 receptor,<br>type I  | 0.123091 Inlier  |
| siRNA-Temozolomide Run3-DMSO | NM_0008<br>77 | IL1R1 | interleukin<br>1 receptor,<br>type I  | 0.449068 Inlier  |
| siRNA Disorazole DMSO Run2   | NM_0008<br>77 | IL1R1 | interleukin<br>1 receptor,<br>type I  | 0.899932 Inlier  |
| siRNA-Vinblastine Run1-DMSO  | NM_0008<br>77 | IL1R1 | interleukin<br>1 receptor,<br>type I  | 1.589016 Inlier  |
| siRNA-Temozolomide Run2-DMSO | NM_1733<br>43 | IL1R2 | interleukin<br>1 receptor,<br>type II | -1.795756 Inlier |
| siRNA-Temozolomide Run3-DMSO | NM_1733<br>43 | IL1R2 | interleukin<br>1 receptor,<br>type II | -0.810915 Inlier |
| siRNA-Vinblastine Run2-DMSO  | NM_1733<br>43 | IL1R2 | interleukin<br>1 receptor,<br>type II | -0.589552 Inlier |
| siRNA Disorazole DMSO Run3   | NM_1733<br>43 | IL1R2 | interleukin<br>1 receptor,<br>type II | -0.009747 Inlier |
| siRNA-Temozolomide Run1-DMSO | NM_1733<br>43 | IL1R2 | interleukin<br>1 receptor,<br>type II | 0.009747 Inlier  |

Identification of Survival Genes in Human Glioblastoma Cells Using siRNA Screening  
 Nikhil G Thaker, Fang Zhang, Peter R. McDonald, Tong Ying Shun, Michael D Lewen, Ian F. Pollack, and John S. Lazo

Molecular Pharmacology

|                                  |               |        |                                                   |           |        |
|----------------------------------|---------------|--------|---------------------------------------------------|-----------|--------|
| siRNA Disorazole DMSO Run1       | NM_1733<br>43 | IL1R2  | interleukin<br>1 receptor,<br>type II             | 0.182271  | Inlier |
| siRNA Disorazole DMSO Run2       | NM_1733<br>43 | IL1R2  | interleukin<br>1 receptor,<br>type II             | 0.759448  | Inlier |
| siRNA-Vinblastine Run1-<br>DMSO  | NM_1733<br>43 | IL1R2  | interleukin<br>1 receptor,<br>type II             | 0.919382  | Inlier |
| siRNA-Temozolomide Run2-<br>DMSO | NM_0021<br>82 | IL1RAP | interleukin<br>1 receptor<br>accessory<br>protein | -0.752797 | Inlier |
| siRNA-Temozolomide Run3-<br>DMSO | NM_0021<br>82 | IL1RAP | interleukin<br>1 receptor<br>accessory<br>protein | -0.721101 | Inlier |
| siRNA-Vinblastine Run2-<br>DMSO  | NM_0021<br>82 | IL1RAP | interleukin<br>1 receptor<br>accessory<br>protein | -0.627899 | Inlier |
| siRNA Disorazole DMSO Run1       | NM_0021<br>82 | IL1RAP | interleukin<br>1 receptor<br>accessory<br>protein | -0.276256 | Inlier |
| siRNA-Temozolomide Run1-<br>DMSO | NM_0021<br>82 | IL1RAP | interleukin<br>1 receptor<br>accessory<br>protein | 0.276256  | Inlier |
| siRNA Disorazole DMSO Run3       | NM_0021<br>82 | IL1RAP | interleukin<br>1 receptor<br>accessory<br>protein | 0.557291  | Inlier |
| siRNA-Vinblastine Run1-<br>DMSO  | NM_0021<br>82 | IL1RAP | interleukin<br>1 receptor<br>accessory<br>protein | 1.428144  | Inlier |
| siRNA Disorazole DMSO Run2       | NM_0021<br>82 | IL1RAP | interleukin<br>1 receptor<br>accessory<br>protein | 1.604849  | Inlier |
| siRNA-Temozolomide Run2-<br>DMSO | NM_0162<br>32 | IL1RL1 | interleukin<br>1 receptor-<br>like 1              | -1.015247 | Inlier |
| siRNA-Vinblastine Run2-<br>DMSO  | NM_0162<br>32 | IL1RL1 | interleukin<br>1 receptor-<br>like 1              | -0.932168 | Inlier |

Identification of Survival Genes in Human Glioblastoma Cells Using siRNA Screening  
 Nikhil G Thaker, Fang Zhang, Peter R. McDonald, Tong Ying Shun, Michael D Lewen, Ian F. Pollack, and John S. Lazo

Molecular Pharmacology

|                              |               |        |                                         |           |        |
|------------------------------|---------------|--------|-----------------------------------------|-----------|--------|
| siRNA-Temozolomide Run1-DMSO | NM_0162<br>32 | IL1RL1 | interleukin<br>1 receptor-<br>like 1    | -0.416832 | Inlier |
| siRNA Disorazole DMSO Run3   | NM_0162<br>32 | IL1RL1 | interleukin<br>1 receptor-<br>like 1    | -0.124603 | Inlier |
| siRNA Disorazole DMSO Run1   | NM_0162<br>32 | IL1RL1 | interleukin<br>1 receptor-<br>like 1    | 0.124602  | Inlier |
| siRNA-Temozolomide Run3-DMSO | NM_0162<br>32 | IL1RL1 | interleukin<br>1 receptor-<br>like 1    | 0.152262  | Inlier |
| siRNA Disorazole DMSO Run2   | NM_0162<br>32 | IL1RL1 | interleukin<br>1 receptor-<br>like 1    | 1.829042  | Inlier |
| siRNA-Vinblastine Run1-DMSO  | NM_0162<br>32 | IL1RL1 | interleukin<br>1 receptor-<br>like 1    | 2.259166  | Inlier |
| siRNA-Temozolomide Run2-DMSO | NM_0038<br>54 | IL1RL2 | interleukin<br>1 receptor-<br>like 2    | -1.222186 | Inlier |
| siRNA-Vinblastine Run2-DMSO  | NM_0038<br>54 | IL1RL2 | interleukin<br>1 receptor-<br>like 2    | -0.751161 | Inlier |
| siRNA Disorazole DMSO Run1   | NM_0038<br>54 | IL1RL2 | interleukin<br>1 receptor-<br>like 2    | -0.574944 | Inlier |
| siRNA Disorazole DMSO Run3   | NM_0038<br>54 | IL1RL2 | interleukin<br>1 receptor-<br>like 2    | -0.034154 | Inlier |
| siRNA-Temozolomide Run3-DMSO | NM_0038<br>54 | IL1RL2 | interleukin<br>1 receptor-<br>like 2    | 0.034154  | Inlier |
| siRNA-Temozolomide Run1-DMSO | NM_0038<br>54 | IL1RL2 | interleukin<br>1 receptor-<br>like 2    | 0.597839  | Inlier |
| siRNA-Vinblastine Run1-DMSO  | NM_0038<br>54 | IL1RL2 | interleukin<br>1 receptor-<br>like 2    | 1.592713  | Inlier |
| siRNA Disorazole DMSO Run2   | NM_0038<br>54 | IL1RL2 | interleukin<br>1 receptor-<br>like 2    | 2.039048  | Inlier |
| siRNA-Vinblastine Run2-DMSO  | NM_1738<br>43 | IL1RN  | interleukin<br>1 receptor<br>antagonist | -1.060184 | Inlier |
| siRNA Disorazole DMSO Run3   | NM_1738<br>43 | IL1RN  | interleukin<br>1 receptor<br>antagonist | -0.288816 | Inlier |

Identification of Survival Genes in Human Glioblastoma Cells Using siRNA Screening  
 Nikhil G Thaker, Fang Zhang, Peter R. McDonald, Tong Ying Shun, Michael D Lewen, Ian F. Pollack, and John S. Lazo

Molecular Pharmacology

|                                  |               |        |                                         |           |         |
|----------------------------------|---------------|--------|-----------------------------------------|-----------|---------|
| siRNA Disorazole DMSO Run1       | NM_1738<br>43 | IL1RN  | interleukin<br>1 receptor<br>antagonist | -0.059475 | Inlier  |
| siRNA-Temozolomide Run2-<br>DMSO | NM_1738<br>43 | IL1RN  | interleukin<br>1 receptor<br>antagonist | -0.028358 | Inlier  |
| siRNA-Temozolomide Run1-<br>DMSO | NM_1738<br>43 | IL1RN  | interleukin<br>1 receptor<br>antagonist | 0.028358  | Inlier  |
| siRNA-Temozolomide Run3-<br>DMSO | NM_1738<br>43 | IL1RN  | interleukin<br>1 receptor<br>antagonist | 2.260279  | Inlier  |
| siRNA-Vinblastine Run1-<br>DMSO  | NM_1738<br>43 | IL1RN  | interleukin<br>1 receptor<br>antagonist | 2.813097  | Inlier  |
| siRNA Disorazole DMSO Run2       | NM_1738<br>43 | IL1RN  | interleukin<br>1 receptor<br>antagonist | 4.116807  | Outlier |
| siRNA-Temozolomide Run2-<br>DMSO | NM_0144<br>32 | IL20RA | interleukin<br>20<br>receptor,<br>alpha | -2.348697 | Inlier  |
| siRNA-Vinblastine Run2-<br>DMSO  | NM_0144<br>32 | IL20RA | interleukin<br>20<br>receptor,<br>alpha | -0.85221  | Inlier  |
| siRNA-Temozolomide Run3-<br>DMSO | NM_0144<br>32 | IL20RA | interleukin<br>20<br>receptor,<br>alpha | -0.336387 | Inlier  |
| siRNA-Temozolomide Run1-<br>DMSO | NM_0144<br>32 | IL20RA | interleukin<br>20<br>receptor,<br>alpha | -0.20144  | Inlier  |
| siRNA Disorazole DMSO Run3       | NM_0144<br>32 | IL20RA | interleukin<br>20<br>receptor,<br>alpha | 0.20144   | Inlier  |
| siRNA Disorazole DMSO Run1       | NM_0144<br>32 | IL20RA | interleukin<br>20<br>receptor,<br>alpha | 0.49679   | Inlier  |
| siRNA Disorazole DMSO Run2       | NM_0144<br>32 | IL20RA | interleukin<br>20<br>receptor,<br>alpha | 1.714202  | Inlier  |

Identification of Survival Genes in Human Glioblastoma Cells Using siRNA Screening  
 Nikhil G Thaker, Fang Zhang, Peter R. McDonald, Tong Ying Shun, Michael D Lewen, Ian F. Pollack, and John S. Lazo

Molecular Pharmacology

|                                  |               |         |                                           |                  |
|----------------------------------|---------------|---------|-------------------------------------------|------------------|
|                                  |               |         | interleukin<br>20                         |                  |
| siRNA-Vinblastine Run1-<br>DMSO  | NM_0144<br>32 | IL20RA  | receptor,<br>alpha                        | 2.353626 Inlier  |
| siRNA-Vinblastine Run2-<br>DMSO  | NM_1810<br>79 | IL21R   | interleukin<br>21                         | -0.963764 Inlier |
| siRNA Disorazole DMSO Run1       | NM_1810<br>79 | IL21R   | receptor<br>interleukin<br>21             | -0.912882 Inlier |
| siRNA-Temozolomide Run1-<br>DMSO | NM_1810<br>79 | IL21R   | receptor<br>interleukin<br>21             | -0.276972 Inlier |
| siRNA-Temozolomide Run3-<br>DMSO | NM_1810<br>79 | IL21R   | receptor<br>interleukin<br>21             | -0.124867 Inlier |
| siRNA Disorazole DMSO Run3       | NM_1810<br>79 | IL21R   | receptor<br>interleukin<br>21             | 0.124866 Inlier  |
| siRNA-Temozolomide Run2-<br>DMSO | NM_1810<br>79 | IL21R   | receptor<br>interleukin<br>21             | 0.436118 Inlier  |
| siRNA-Vinblastine Run1-<br>DMSO  | NM_1810<br>79 | IL21R   | receptor<br>interleukin<br>21             | 1.367043 Inlier  |
| siRNA Disorazole DMSO Run2       | NM_1810<br>79 | IL21R   | receptor<br>interleukin<br>21             | 1.856345 Inlier  |
| siRNA-Temozolomide Run2-<br>DMSO | NM_0212<br>58 | IL22RA1 | receptor,<br>alpha 1<br>interleukin<br>22 | -0.84217 Inlier  |
| siRNA Disorazole DMSO Run1       | NM_0212<br>58 | IL22RA1 | receptor,<br>alpha 1<br>interleukin<br>22 | -0.70552 Inlier  |
| siRNA-Vinblastine Run2-<br>DMSO  | NM_0212<br>58 | IL22RA1 | receptor,<br>alpha 1<br>interleukin<br>22 | -0.64348 Inlier  |
| siRNA-Temozolomide Run1-<br>DMSO | NM_0212<br>58 | IL22RA1 | receptor,<br>alpha 1<br>interleukin<br>22 | -0.010513 Inlier |
| siRNA Disorazole DMSO Run3       | NM_0212<br>58 | IL22RA1 | receptor,<br>alpha 1<br>interleukin<br>22 | 0.010513 Inlier  |
| siRNA-Temozolomide Run3-<br>DMSO | NM_0212<br>58 | IL22RA1 | receptor,<br>alpha 1                      | 0.157002 Inlier  |

Identification of Survival Genes in Human Glioblastoma Cells Using siRNA Screening  
 Nikhil G Thaker, Fang Zhang, Peter R. McDonald, Tong Ying Shun, Michael D Lewen, Ian F. Pollack, and John S. Lazo

Molecular Pharmacology

|                                  |               |         |                                           |                  |
|----------------------------------|---------------|---------|-------------------------------------------|------------------|
|                                  |               |         | interleukin<br>22                         |                  |
| siRNA Disorazole DMSO Run2       | NM_0212<br>58 | IL22RA1 | receptor,<br>alpha 1<br>interleukin<br>22 | 1.780912 Inlier  |
| siRNA-Vinblastine Run1-<br>DMSO  | NM_0212<br>58 | IL22RA1 | receptor,<br>alpha 1<br>interleukin<br>22 | 1.958617 Inlier  |
| siRNA-Temozolomide Run2-<br>DMSO | NM_0529<br>62 | IL22RA2 | receptor,<br>alpha 2<br>interleukin<br>22 | -0.82814 Inlier  |
| siRNA-Vinblastine Run2-<br>DMSO  | NM_0529<br>62 | IL22RA2 | receptor,<br>alpha 2<br>interleukin<br>22 | -0.823329 Inlier |
| siRNA Disorazole DMSO Run3       | NM_0529<br>62 | IL22RA2 | receptor,<br>alpha 2<br>interleukin<br>22 | -0.362321 Inlier |
| siRNA Disorazole DMSO Run1       | NM_0529<br>62 | IL22RA2 | receptor,<br>alpha 2<br>interleukin<br>22 | -0.281955 Inlier |
| siRNA-Temozolomide Run1-<br>DMSO | NM_0529<br>62 | IL22RA2 | receptor,<br>alpha 2<br>interleukin<br>22 | 0.281955 Inlier  |
| siRNA-Temozolomide Run3-<br>DMSO | NM_0529<br>62 | IL22RA2 | receptor,<br>alpha 2<br>interleukin<br>22 | 0.525671 Inlier  |
| siRNA-Vinblastine Run1-<br>DMSO  | NM_0529<br>62 | IL22RA2 | receptor,<br>alpha 2<br>interleukin<br>22 | 1.884465 Inlier  |
| siRNA Disorazole DMSO Run2       | NM_0529<br>62 | IL22RA2 | receptor,<br>alpha 2<br>interleukin<br>22 | 2.317018 Inlier  |
| siRNA-Vinblastine Run2-<br>DMSO  | NM_1447<br>01 | IL23R   | receptor<br>interleukin<br>23             | -0.774961 Inlier |
| siRNA-Temozolomide Run2-<br>DMSO | NM_1447<br>01 | IL23R   | receptor<br>interleukin<br>23             | -0.719426 Inlier |
| siRNA Disorazole DMSO Run3       | NM_1447<br>01 | IL23R   | receptor<br>interleukin<br>23             | -0.36526 Inlier  |
| siRNA Disorazole DMSO Run1       | NM_1447<br>01 | IL23R   | receptor                                  | -0.31039 Inlier  |

Identification of Survival Genes in Human Glioblastoma Cells Using siRNA Screening  
 Nikhil G Thaker, Fang Zhang, Peter R. McDonald, Tong Ying Shun, Michael D Lewen, Ian F. Pollack, and John S. Lazo

| Molecular Pharmacology       |               |        |                                                                                |           |        |
|------------------------------|---------------|--------|--------------------------------------------------------------------------------|-----------|--------|
| siRNA-Temozolomide Run3-DMSO | NM_1447<br>01 | IL23R  | interleukin<br>23<br>receptor                                                  | 0.31039   | Inlier |
| siRNA-Temozolomide Run1-DMSO | NM_1447<br>01 | IL23R  | interleukin<br>23<br>receptor                                                  | 0.629574  | Inlier |
| siRNA-Vinblastine Run1-DMSO  | NM_1447<br>01 | IL23R  | interleukin<br>23<br>receptor                                                  | 1.271206  | Inlier |
| siRNA Disorazole DMSO Run2   | NM_1447<br>01 | IL23R  | interleukin<br>23<br>receptor                                                  | 1.750762  | Inlier |
| siRNA-Vinblastine Run2-DMSO  | NM_0048<br>43 | IL27RA | interleukin<br>27<br>receptor,<br>alpha                                        | -1.305506 | Inlier |
| siRNA Disorazole DMSO Run1   | NM_0048<br>43 | IL27RA | interleukin<br>27<br>receptor,<br>alpha                                        | -0.468599 | Inlier |
| siRNA-Temozolomide Run2-DMSO | NM_0048<br>43 | IL27RA | interleukin<br>27<br>receptor,<br>alpha                                        | -0.450581 | Inlier |
| siRNA-Temozolomide Run1-DMSO | NM_0048<br>43 | IL27RA | interleukin<br>27<br>receptor,<br>alpha                                        | -0.013359 | Inlier |
| siRNA Disorazole DMSO Run3   | NM_0048<br>43 | IL27RA | interleukin<br>27<br>receptor,<br>alpha                                        | 0.013359  | Inlier |
| siRNA-Temozolomide Run3-DMSO | NM_0048<br>43 | IL27RA | interleukin<br>27<br>receptor,<br>alpha                                        | 0.880401  | Inlier |
| siRNA-Vinblastine Run1-DMSO  | NM_0048<br>43 | IL27RA | interleukin<br>27<br>receptor,<br>alpha                                        | 2.61794   | Inlier |
| siRNA Disorazole DMSO Run2   | NM_0048<br>43 | IL27RA | interleukin<br>27<br>receptor,<br>alpha                                        | 2.699458  | Inlier |
| siRNA Disorazole DMSO Run3   | NM_1707<br>43 | IL28RA | interleukin<br>28<br>receptor,<br>alpha<br>(interferon,<br>lambda<br>receptor) | -1.014305 | Inlier |





Identification of Survival Genes in Human Glioblastoma Cells Using siRNA Screening  
 Nikhil G Thaker, Fang Zhang, Peter R. McDonald, Tong Ying Shun, Michael D Lewen, Ian F. Pollack, and John S. Lazo

Molecular Pharmacology

|                              |               |       |                                     |           |        |
|------------------------------|---------------|-------|-------------------------------------|-----------|--------|
| siRNA-Vinblastine Run2-DMSO  | NM_0004<br>17 | IL2RA | interleukin<br>2 receptor,<br>alpha | -2.055537 | Inlier |
| siRNA Disorazole DMSO Run1   | NM_0004<br>17 | IL2RA | interleukin<br>2 receptor,<br>alpha | -1.793786 | Inlier |
| siRNA Disorazole DMSO Run3   | NM_0004<br>17 | IL2RA | interleukin<br>2 receptor,<br>alpha | -0.509748 | Inlier |
| siRNA-Temozolomide Run1-DMSO | NM_0004<br>17 | IL2RA | interleukin<br>2 receptor,<br>alpha | -0.09998  | Inlier |
| siRNA-Temozolomide Run2-DMSO | NM_0004<br>17 | IL2RA | interleukin<br>2 receptor,<br>alpha | 0.099981  | Inlier |
| siRNA-Temozolomide Run3-DMSO | NM_0004<br>17 | IL2RA | interleukin<br>2 receptor,<br>alpha | 0.574477  | Inlier |
| siRNA-Vinblastine Run1-DMSO  | NM_0004<br>17 | IL2RA | interleukin<br>2 receptor,<br>alpha | 0.774523  | Inlier |
| siRNA Disorazole DMSO Run2   | NM_0004<br>17 | IL2RA | interleukin<br>2 receptor,<br>alpha | 1.152831  | Inlier |
| siRNA Disorazole DMSO Run1   | NM_0008<br>78 | IL2RB | interleukin<br>2 receptor,<br>beta  | -2.100361 | Inlier |
| siRNA-Vinblastine Run2-DMSO  | NM_0008<br>78 | IL2RB | interleukin<br>2 receptor,<br>beta  | -1.273327 | Inlier |
| siRNA-Temozolomide Run1-DMSO | NM_0008<br>78 | IL2RB | interleukin<br>2 receptor,<br>beta  | -0.371316 | Inlier |
| siRNA-Temozolomide Run2-DMSO | NM_0008<br>78 | IL2RB | interleukin<br>2 receptor,<br>beta  | -0.069319 | Inlier |
| siRNA Disorazole DMSO Run3   | NM_0008<br>78 | IL2RB | interleukin<br>2 receptor,<br>beta  | 0.069321  | Inlier |

Identification of Survival Genes in Human Glioblastoma Cells Using siRNA Screening  
 Nikhil G Thaker, Fang Zhang, Peter R. McDonald, Tong Ying Shun, Michael D Lewen, Ian F. Pollack, and John S. Lazo

Molecular Pharmacology

|                              |           |       |                                                                  |           |        |
|------------------------------|-----------|-------|------------------------------------------------------------------|-----------|--------|
| siRNA-Temozolomide Run3-DMSO | NM_000878 | IL2RB | interleukin 2 receptor, beta                                     | 0.167216  | Inlier |
| siRNA-Vinblastine Run1-DMSO  | NM_000878 | IL2RB | interleukin 2 receptor, beta                                     | 0.977684  | Inlier |
| siRNA Disorazole DMSO Run2   | NM_000878 | IL2RB | interleukin 2 receptor, beta                                     | 2.346564  | Inlier |
| siRNA Disorazole DMSO Run1   | NM_000206 | IL2RG | interleukin 2 receptor, gamma (severe combined immunodeficiency) | -1.306205 | Inlier |
| siRNA-Temozolomide Run3-DMSO | NM_000206 | IL2RG | interleukin 2 receptor, gamma (severe combined immunodeficiency) | -0.679117 | Inlier |
| siRNA-Temozolomide Run1-DMSO | NM_000206 | IL2RG | interleukin 2 receptor, gamma (severe combined immunodeficiency) | -0.669883 | Inlier |
| siRNA-Temozolomide Run2-DMSO | NM_000206 | IL2RG | interleukin 2 receptor, gamma (severe combined immunodeficiency) | -0.452141 | Inlier |
| siRNA Disorazole DMSO Run3   | NM_000206 | IL2RG | interleukin 2 receptor, gamma (severe combined immunodeficiency) | 0.452141  | Inlier |

Identification of Survival Genes in Human Glioblastoma Cells Using siRNA Screening  
 Nikhil G Thaker, Fang Zhang, Peter R. McDonald, Tong Ying Shun, Michael D Lewen, Ian F. Pollack, and John S. Lazo  
 Molecular Pharmacology

|                              |           |       |                                                                  |           |        |
|------------------------------|-----------|-------|------------------------------------------------------------------|-----------|--------|
| siRNA-Vinblastine Run2-DMSO  | NM_000206 | IL2RG | interleukin 2 receptor, gamma (severe combined immunodeficiency) | 0.647044  | Inlier |
| siRNA-Vinblastine Run1-DMSO  | NM_000206 | IL2RG | interleukin 2 receptor, gamma (severe combined immunodeficiency) | 1.742486  | Inlier |
| siRNA Disorazole DMSO Run2   | NM_000206 | IL2RG | interleukin 2 receptor, gamma (severe combined immunodeficiency) | 2.621543  | Inlier |
| siRNA-Vinblastine Run2-DMSO  | NM_002183 | IL3RA | interleukin 3 receptor, alpha (low affinity)                     | -1.715936 | Inlier |
| siRNA-Temozolomide Run1-DMSO | NM_002183 | IL3RA | interleukin 3 receptor, alpha (low affinity)                     | -0.600328 | Inlier |
| siRNA Disorazole DMSO Run1   | NM_002183 | IL3RA | interleukin 3 receptor, alpha (low affinity)                     | -0.338658 | Inlier |
| siRNA-Temozolomide Run2-DMSO | NM_002183 | IL3RA | interleukin 3 receptor, alpha (low affinity)                     | -0.128422 | Inlier |
| siRNA Disorazole DMSO Run3   | NM_002183 | IL3RA | interleukin 3 receptor, alpha (low affinity)                     | 0.128423  | Inlier |

Identification of Survival Genes in Human Glioblastoma Cells Using siRNA Screening  
 Nikhil G Thaker, Fang Zhang, Peter R. McDonald, Tong Ying Shun, Michael D Lewen, Ian F. Pollack, and John S. Lazo

Molecular Pharmacology

|                              |                  |       |                                                       |           |        |
|------------------------------|------------------|-------|-------------------------------------------------------|-----------|--------|
| siRNA-Temozolomide Run3-DMSO | NM_0021<br>83    | IL3RA | interleukin<br>3 receptor,<br>alpha (low<br>affinity) | 0.748672  | Inlier |
| siRNA Disorazole DMSO Run2   | NM_0021<br>83    | IL3RA | interleukin<br>3 receptor,<br>alpha (low<br>affinity) | 2.800721  | Inlier |
| siRNA-Vinblastine Run1-DMSO  | NM_0021<br>83    | IL3RA | interleukin<br>3 receptor,<br>alpha (low<br>affinity) | 2.847159  | Inlier |
| siRNA-Temozolomide Run3-DMSO | NM_1723<br>74    | IL4I1 | interleukin<br>4 induced<br>1                         | -2.532229 | Inlier |
| siRNA Disorazole DMSO Run1   | NM_1723<br>74    | IL4I1 | interleukin<br>4 induced<br>1                         | -0.364074 | Inlier |
| siRNA-Temozolomide Run1-DMSO | NM_1723<br>74    | IL4I1 | interleukin<br>4 induced<br>1                         | -0.283654 | Inlier |
| siRNA Disorazole DMSO Run3   | NM_1723<br>74    | IL4I1 | interleukin<br>4 induced<br>1                         | -0.041442 | Inlier |
| siRNA-Temozolomide Run2-DMSO | NM_1723<br>74    | IL4I1 | interleukin<br>4 induced<br>1                         | 0.041442  | Inlier |
| siRNA-Vinblastine Run2-DMSO  | NM_1723<br>74    | IL4I1 | interleukin<br>4 induced<br>1                         | 0.984926  | Inlier |
| siRNA-Vinblastine Run1-DMSO  | NM_1723<br>74    | IL4I1 | interleukin<br>4 induced<br>1                         | 1.5702    | Inlier |
| siRNA Disorazole DMSO Run2   | NM_1723<br>74    | IL4I1 | interleukin<br>4 induced<br>1                         | 2.249122  | Inlier |
| siRNA Disorazole DMSO Run1   | NM_0010<br>08699 | IL4R  | interleukin<br>4 receptor                             | -0.923024 | Inlier |
| siRNA-Temozolomide Run1-DMSO | NM_0010<br>08699 | IL4R  | interleukin<br>4 receptor                             | -0.492322 | Inlier |
| siRNA-Temozolomide Run3-DMSO | NM_0010<br>08699 | IL4R  | interleukin<br>4 receptor                             | -0.24336  | Inlier |
| siRNA-Vinblastine Run2-DMSO  | NM_0010<br>08699 | IL4R  | interleukin<br>4 receptor                             | -0.195285 | Inlier |
| siRNA-Temozolomide Run2-DMSO | NM_0010<br>08699 | IL4R  | interleukin<br>4 receptor                             | 0.195285  | Inlier |
| siRNA Disorazole DMSO Run3   | NM_0010<br>08699 | IL4R  | interleukin<br>4 receptor                             | 0.856678  | Inlier |

Identification of Survival Genes in Human Glioblastoma Cells Using siRNA Screening  
 Nikhil G Thaker, Fang Zhang, Peter R. McDonald, Tong Ying Shun, Michael D Lewen, Ian F. Pollack, and John S. Lazo

| siRNA Treatment              | Gene ID      | Gene Name | Gene Description              | Value     | Category |
|------------------------------|--------------|-----------|-------------------------------|-----------|----------|
| siRNA-Vinblastine Run1-DMSO  | NM_001008699 | IL4R      | interleukin 4 receptor        | 1.560457  | Inlier   |
| siRNA Disorazole DMSO Run2   | NM_001008699 | IL4R      | interleukin 4 receptor        | 1.856801  | Inlier   |
| siRNA-Temozolomide Run2-DMSO | NM_175728    | IL5RA     | interleukin 5 receptor, alpha | -1.776716 | Inlier   |
| siRNA-Temozolomide Run3-DMSO | NM_175728    | IL5RA     | interleukin 5 receptor, alpha | -1.01696  | Inlier   |
| siRNA Disorazole DMSO Run3   | NM_175728    | IL5RA     | interleukin 5 receptor, alpha | -0.33204  | Inlier   |
| siRNA-Temozolomide Run1-DMSO | NM_175728    | IL5RA     | interleukin 5 receptor, alpha | -0.031978 | Inlier   |
| siRNA-Vinblastine Run2-DMSO  | NM_175728    | IL5RA     | interleukin 5 receptor, alpha | 0.031978  | Inlier   |
| siRNA Disorazole DMSO Run1   | NM_175728    | IL5RA     | interleukin 5 receptor, alpha | 0.267769  | Inlier   |
| siRNA Disorazole DMSO Run2   | NM_175728    | IL5RA     | interleukin 5 receptor, alpha | 1.418573  | Inlier   |
| siRNA-Vinblastine Run1-DMSO  | NM_175728    | IL5RA     | interleukin 5 receptor, alpha | 1.624507  | Inlier   |
| siRNA-Temozolomide Run1-DMSO | NM_181359    | IL6R      | interleukin 6 receptor        | -1.014279 | Inlier   |
| siRNA-Temozolomide Run2-DMSO | NM_181359    | IL6R      | interleukin 6 receptor        | -0.860824 | Inlier   |
| siRNA Disorazole DMSO Run1   | NM_181359    | IL6R      | interleukin 6 receptor        | -0.472725 | Inlier   |
| siRNA-Vinblastine Run2-DMSO  | NM_181359    | IL6R      | interleukin 6 receptor        | -0.229826 | Inlier   |
| siRNA-Temozolomide Run3-DMSO | NM_181359    | IL6R      | interleukin 6 receptor        | 0.229826  | Inlier   |
| siRNA Disorazole DMSO Run3   | NM_181359    | IL6R      | interleukin 6 receptor        | 0.488176  | Inlier   |
| siRNA-Vinblastine Run1-DMSO  | NM_181359    | IL6R      | interleukin 6 receptor        | 5.57703   | Outlier  |
| siRNA Disorazole DMSO Run2   | NM_181359    | IL6R      | interleukin 6 receptor        | 6.572692  | Outlier  |

Identification of Survival Genes in Human Glioblastoma Cells Using siRNA Screening

Nikhil G Thaker, Fang Zhang, Peter R. McDonald, Tong Ying Shun, Michael D Lewen, Ian F. Pollack, and John S. Lazo

Molecular Pharmacology

| siRNA Treatment              | Gene ID       | Gene Name | Gene Description                                               | Log Fold Change | Classification |
|------------------------------|---------------|-----------|----------------------------------------------------------------|-----------------|----------------|
| siRNA Disorazole DMSO Run1   | NM_1757<br>67 | IL6ST     | interleukin 6 signal transducer (gp130, oncostatin M receptor) | -0.863768       | Inlier         |
| siRNA-Temozolomide Run3-DMSO | NM_1757<br>67 | IL6ST     | interleukin 6 signal transducer (gp130, oncostatin M receptor) | -0.485232       | Inlier         |
| siRNA Disorazole DMSO Run3   | NM_1757<br>67 | IL6ST     | interleukin 6 signal transducer (gp130, oncostatin M receptor) | -0.3732         | Inlier         |
| siRNA-Temozolomide Run1-DMSO | NM_1757<br>67 | IL6ST     | interleukin 6 signal transducer (gp130, oncostatin M receptor) | -0.125003       | Inlier         |
| siRNA-Temozolomide Run2-DMSO | NM_1757<br>67 | IL6ST     | interleukin 6 signal transducer (gp130, oncostatin M receptor) | 0.125005        | Inlier         |
| siRNA-Vinblastine Run2-DMSO  | NM_1757<br>67 | IL6ST     | interleukin 6 signal transducer (gp130, oncostatin M receptor) | 1.39503         | Inlier         |
| siRNA-Vinblastine Run1-DMSO  | NM_1757<br>67 | IL6ST     | interleukin 6 signal transducer (gp130, oncostatin M receptor) | 3.745896        | Outlier        |

Identification of Survival Genes in Human Glioblastoma Cells Using siRNA Screening  
 Nikhil G Thaker, Fang Zhang, Peter R. McDonald, Tong Ying Shun, Michael D Lewen, Ian F. Pollack, and John S. Lazo

Molecular Pharmacology

|                                  |               |       |                                                                     |                  |
|----------------------------------|---------------|-------|---------------------------------------------------------------------|------------------|
|                                  |               |       | interleukin<br>6 signal<br>transducer<br>(gp130,<br>oncostatin<br>M |                  |
| siRNA Disorazole DMSO Run2       | NM_1757<br>67 | IL6ST | receptor)                                                           | 4.754883 Outlier |
| siRNA-Vinblastine Run2-<br>DMSO  | NM_0021<br>85 | IL7R  | interleukin<br>7 receptor                                           | -0.803785 Inlier |
| siRNA Disorazole DMSO Run1       | NM_0021<br>85 | IL7R  | interleukin<br>7 receptor                                           | -0.545215 Inlier |
| siRNA-Temozolomide Run3-<br>DMSO | NM_0021<br>85 | IL7R  | interleukin<br>7 receptor                                           | -0.2634 Inlier   |
| siRNA Disorazole DMSO Run3       | NM_0021<br>85 | IL7R  | interleukin<br>7 receptor                                           | -0.099785 Inlier |
| siRNA-Temozolomide Run1-<br>DMSO | NM_0021<br>85 | IL7R  | interleukin<br>7 receptor                                           | 0.099786 Inlier  |
| siRNA-Vinblastine Run1-<br>DMSO  | NM_0021<br>85 | IL7R  | interleukin<br>7 receptor                                           | 0.952495 Inlier  |
| siRNA-Temozolomide Run2-<br>DMSO | NM_0021<br>85 | IL7R  | interleukin<br>7 receptor                                           | 0.976849 Inlier  |
| siRNA Disorazole DMSO Run2       | NM_0021<br>85 | IL7R  | interleukin<br>7 receptor                                           | 1.239312 Inlier  |
| siRNA-Temozolomide Run3-<br>DMSO | NM_0006<br>34 | IL8RA | interleukin<br>8 receptor,<br>alpha                                 | -0.747601 Inlier |
| siRNA-Temozolomide Run1-<br>DMSO | NM_0006<br>34 | IL8RA | interleukin<br>8 receptor,<br>alpha                                 | -0.670331 Inlier |
| siRNA-Temozolomide Run2-<br>DMSO | NM_0006<br>34 | IL8RA | interleukin<br>8 receptor,<br>alpha                                 | -0.337758 Inlier |
| siRNA Disorazole DMSO Run1       | NM_0006<br>34 | IL8RA | interleukin<br>8 receptor,<br>alpha                                 | -0.011582 Inlier |
| siRNA Disorazole DMSO Run2       | NM_0006<br>34 | IL8RA | interleukin<br>8 receptor,<br>alpha                                 | 0.011582 Inlier  |
| siRNA Disorazole DMSO Run3       | NM_0006<br>34 | IL8RA | interleukin<br>8 receptor,<br>alpha                                 | 0.678669 Inlier  |
| siRNA-Vinblastine Run1-<br>DMSO  | NM_0006<br>34 | IL8RA | interleukin<br>8 receptor,<br>alpha                                 | 1.069342 Inlier  |



Identification of Survival Genes in Human Glioblastoma Cells Using siRNA Screening  
 Nikhil G Thaker, Fang Zhang, Peter R. McDonald, Tong Ying Shun, Michael D Lewen, Ian F. Pollack, and John S. Lazo

Molecular Pharmacology

|                              |               |       |                                     |                  |
|------------------------------|---------------|-------|-------------------------------------|------------------|
| siRNA-Vinblastine Run2-DMSO  | NM_0006<br>34 | IL8RA | interleukin<br>8 receptor,<br>alpha | 1.302844 Inlier  |
| siRNA-Temozolomide Run3-DMSO | NM_0015<br>57 | IL8RB | interleukin<br>8 receptor,<br>beta  | -1.710577 Inlier |
| siRNA Disorazole DMSO Run2   | NM_0015<br>57 | IL8RB | interleukin<br>8 receptor,<br>beta  | -0.860504 Inlier |
| siRNA-Temozolomide Run2-DMSO | NM_0015<br>57 | IL8RB | interleukin<br>8 receptor,<br>beta  | -0.378329 Inlier |
| siRNA-Temozolomide Run1-DMSO | NM_0015<br>57 | IL8RB | interleukin<br>8 receptor,<br>beta  | -0.222016 Inlier |
| siRNA Disorazole DMSO Run1   | NM_0015<br>57 | IL8RB | interleukin<br>8 receptor,<br>beta  | 0.222017 Inlier  |
| siRNA Disorazole DMSO Run3   | NM_0015<br>57 | IL8RB | interleukin<br>8 receptor,<br>beta  | 0.525661 Inlier  |
| siRNA-Vinblastine Run1-DMSO  | NM_0015<br>57 | IL8RB | interleukin<br>8 receptor,<br>beta  | 0.823339 Inlier  |
| siRNA-Vinblastine Run2-DMSO  | NM_0015<br>57 | IL8RB | interleukin<br>8 receptor,<br>beta  | 0.935064 Inlier  |
| siRNA-Vinblastine Run2-DMSO  | NM_1767<br>86 | IL9R  | interleukin<br>9 receptor           | -1.484011 Inlier |
| siRNA Disorazole DMSO Run1   | NM_1767<br>86 | IL9R  | interleukin<br>9 receptor           | -0.679992 Inlier |
| siRNA-Temozolomide Run2-DMSO | NM_1767<br>86 | IL9R  | interleukin<br>9 receptor           | -0.424343 Inlier |
| siRNA-Temozolomide Run1-DMSO | NM_1767<br>86 | IL9R  | interleukin<br>9 receptor           | -0.228388 Inlier |
| siRNA-Temozolomide Run3-DMSO | NM_1767<br>86 | IL9R  | interleukin<br>9 receptor           | 0.228387 Inlier  |
| siRNA Disorazole DMSO Run3   | NM_1767<br>86 | IL9R  | interleukin<br>9 receptor           | 0.669008 Inlier  |
| siRNA-Vinblastine Run1-DMSO  | NM_1767<br>86 | IL9R  | interleukin<br>9 receptor           | 1.301138 Inlier  |
| siRNA Disorazole DMSO Run2   | NM_1767<br>86 | IL9R  | interleukin<br>9 receptor           | 1.642383 Inlier  |

Identification of Survival Genes in Human Glioblastoma Cells Using siRNA Screening  
 Nikhil G Thaker, Fang Zhang, Peter R. McDonald, Tong Ying Shun, Michael D Lewen, Ian F. Pollack, and John S. Lazo

Molecular Pharmacology

|                              |               |       |                                                               |           |        |
|------------------------------|---------------|-------|---------------------------------------------------------------|-----------|--------|
| siRNA-Temozolomide Run1-DMSO | NM_1759<br>24 | ILDR1 | immunogl<br>obulin-like<br>domain<br>containing<br>receptor 1 | -2.622343 | Inlier |
| siRNA-Temozolomide Run2-DMSO | NM_1759<br>24 | ILDR1 | immunogl<br>obulin-like<br>domain<br>containing<br>receptor 1 | -1.320191 | Inlier |
| siRNA Disorazole DMSO Run2   | NM_1759<br>24 | ILDR1 | immunogl<br>obulin-like<br>domain<br>containing<br>receptor 1 | -0.406003 | Inlier |
| siRNA Disorazole DMSO Run1   | NM_1759<br>24 | ILDR1 | immunogl<br>obulin-like<br>domain<br>containing<br>receptor 1 | -0.245265 | Inlier |
| siRNA-Temozolomide Run3-DMSO | NM_1759<br>24 | ILDR1 | immunogl<br>obulin-like<br>domain<br>containing<br>receptor 1 | 0.245265  | Inlier |
| siRNA-Vinblastine Run1-DMSO  | NM_1759<br>24 | ILDR1 | immunogl<br>obulin-like<br>domain<br>containing<br>receptor 1 | 0.335945  | Inlier |
| siRNA Disorazole DMSO Run3   | NM_1759<br>24 | ILDR1 | immunogl<br>obulin-like<br>domain<br>containing<br>receptor 1 | 0.942997  | Inlier |
| siRNA-Vinblastine Run2-DMSO  | NM_1759<br>24 | ILDR1 | immunogl<br>obulin-like<br>domain<br>containing<br>receptor 1 | 1.337795  | Inlier |
| siRNA-Vinblastine Run2-DMSO  | NM_0045<br>15 | ILF2  | interleukin<br>enhancer<br>binding<br>factor 2,<br>45kDa      | -1.041509 | Inlier |
| siRNA Disorazole DMSO Run1   | NM_0045<br>15 | ILF2  | interleukin<br>enhancer<br>binding<br>factor 2,<br>45kDa      | -0.858141 | Inlier |

Identification of Survival Genes in Human Glioblastoma Cells Using siRNA Screening  
 Nikhil G Thaker, Fang Zhang, Peter R. McDonald, Tong Ying Shun, Michael D Lewen, Ian F. Pollack, and John S. Lazo

Molecular Pharmacology

| siRNA Treatment              | Gene ID | Accession | Protein | Weight | Log2FC    | Outlier |
|------------------------------|---------|-----------|---------|--------|-----------|---------|
| siRNA Disorazole DMSO Run3   | NM_0045 | 15        | ILF2    | 45kDa  | -0.490859 | Inlier  |
| siRNA-Temozolomide Run3-DMSO | NM_0045 | 15        | ILF2    | 45kDa  | -0.126705 | Inlier  |
| siRNA-Temozolomide Run2-DMSO | NM_0045 | 15        | ILF2    | 45kDa  | 0.126705  | Inlier  |
| siRNA-Temozolomide Run1-DMSO | NM_0045 | 15        | ILF2    | 45kDa  | 0.224725  | Inlier  |
| siRNA Disorazole DMSO Run2   | NM_0045 | 15        | ILF2    | 45kDa  | 2.481479  | Inlier  |
| siRNA-Vinblastine Run1-DMSO  | NM_0045 | 15        | ILF2    | 45kDa  | 2.63179   | Inlier  |
| siRNA-Temozolomide Run2-DMSO | NM_0010 | 14795     | ILK     | kinase | -0.989887 | Inlier  |
| siRNA-Vinblastine Run1-DMSO  | NM_0010 | 14795     | ILK     | kinase | -0.778506 | Inlier  |
| siRNA-Temozolomide Run1-DMSO | NM_0010 | 14795     | ILK     | kinase | -0.551534 | Inlier  |
| siRNA-Temozolomide Run3-DMSO | NM_0010 | 14795     | ILK     | kinase | -0.427873 | Inlier  |
| siRNA Disorazole DMSO Run1   | NM_0010 | 14795     | ILK     | kinase | 0.427873  | Inlier  |
| siRNA Disorazole DMSO Run3   | NM_0010 | 14795     | ILK     | kinase | 0.570494  | Inlier  |
| siRNA-Vinblastine Run2-DMSO  | NM_0010 | 14795     | ILK     | kinase | 0.846858  | Inlier  |

Identification of Survival Genes in Human Glioblastoma Cells Using siRNA Screening

Nikhil G Thaker, Fang Zhang, Peter R. McDonald, Tong Ying Shun, Michael D Lewen, Ian F. Pollack, and John S. Lazo

Molecular Pharmacology

|                              |                  |       |                                                                   |           |        |
|------------------------------|------------------|-------|-------------------------------------------------------------------|-----------|--------|
| siRNA Disorazole DMSO Run2   | NM_0010<br>14795 | ILK   | integrin-linked kinase                                            | 1.043387  | Inlier |
| siRNA-Temozolomide Run3-DMSO | NM_1767<br>99    | ILKAP | integrin-linked kinase-associated serine/threonine phosphatase 2C | -1.649384 | Inlier |
| siRNA-Temozolomide Run2-DMSO | NM_1767<br>99    | ILKAP | integrin-linked kinase-associated serine/threonine phosphatase 2C | -1.600712 | Inlier |
| siRNA Disorazole DMSO Run2   | NM_1767<br>99    | ILKAP | integrin-linked kinase-associated serine/threonine phosphatase 2C | -0.935496 | Inlier |
| siRNA Disorazole DMSO Run3   | NM_1767<br>99    | ILKAP | integrin-linked kinase-associated serine/threonine phosphatase 2C | -0.239686 | Inlier |
| siRNA-Temozolomide Run1-DMSO | NM_1767<br>99    | ILKAP | integrin-linked kinase-associated serine/threonine phosphatase 2C | 0.239687  | Inlier |

Identification of Survival Genes in Human Glioblastoma Cells Using siRNA Screening  
 Nikhil G Thaker, Fang Zhang, Peter R. McDonald, Tong Ying Shun, Michael D Lewen, Ian F. Pollack, and John S. Lazo  
 Molecular Pharmacology

|                              |               |       |                                                                   |           |        |
|------------------------------|---------------|-------|-------------------------------------------------------------------|-----------|--------|
| siRNA-Vinblastine Run1-DMSO  | NM_1767<br>99 | ILKAP | integrin-linked kinase-associated serine/threonine phosphatase 2C | 0.517366  | Inlier |
| siRNA Disorazole DMSO Run1   | NM_1767<br>99 | ILKAP | integrin-linked kinase-associated serine/threonine phosphatase 2C | 0.519539  | Inlier |
| siRNA-Vinblastine Run2-DMSO  | NM_1767<br>99 | ILKAP | integrin-linked kinase-associated serine/threonine phosphatase 2C | 0.829461  | Inlier |
| siRNA-Temozolomide Run1-DMSO | NM_0068<br>44 | ILVBL | ilvB (bacterial acetolactate synthase)-like                       | -0.775276 | Inlier |
| siRNA-Temozolomide Run2-DMSO | NM_0068<br>44 | ILVBL | ilvB (bacterial acetolactate synthase)-like                       | -0.748056 | Inlier |
| siRNA Disorazole DMSO Run1   | NM_0068<br>44 | ILVBL | ilvB (bacterial acetolactate synthase)-like                       | -0.600944 | Inlier |
| siRNA Disorazole DMSO Run3   | NM_0068<br>44 | ILVBL | ilvB (bacterial acetolactate synthase)-like                       | -0.145873 | Inlier |

Identification of Survival Genes in Human Glioblastoma Cells Using siRNA Screening  
 Nikhil G Thaker, Fang Zhang, Peter R. McDonald, Tong Ying Shun, Michael D Lewen, Ian F. Pollack, and John S. Lazo

Molecular Pharmacology

|                                  |               |                   |                                                                                     |           |        |
|----------------------------------|---------------|-------------------|-------------------------------------------------------------------------------------|-----------|--------|
|                                  |               |                   | ilvB<br>(bacterial<br>acetolactat<br>e<br>synthase)-<br>like                        | 0.145873  | Inlier |
| siRNA-Vinblastine Run2-<br>DMSO  | NM_0068<br>44 | ILVBL             | ilvB<br>(bacterial<br>acetolactat<br>e<br>synthase)-<br>like                        | 0.381768  | Inlier |
| siRNA-Temozolomide Run3-<br>DMSO | NM_0068<br>44 | ILVBL             | ilvB<br>(bacterial<br>acetolactat<br>e<br>synthase)-<br>like                        | 2.788134  | Inlier |
| siRNA-Vinblastine Run1-<br>DMSO  | NM_0068<br>44 | ILVBL             | ilvB<br>(bacterial<br>acetolactat<br>e<br>synthase)-<br>like                        | 3.053388  | Inlier |
| siRNA Disorazole DMSO Run2       | NM_0068<br>44 | ILVBL             | like                                                                                | -1.348004 | Inlier |
| siRNA Disorazole DMSO Run1       | NM_1387<br>06 | IMAGE:49<br>07098 | IMAGE:49<br>07098                                                                   | -0.66265  | Inlier |
| siRNA-Temozolomide Run1-<br>DMSO | NM_1387<br>06 | IMAGE:49<br>07098 | IMAGE:49<br>07098                                                                   | -0.265723 | Inlier |
| siRNA-Temozolomide Run2-<br>DMSO | NM_1387<br>06 | IMAGE:49<br>07098 | IMAGE:49<br>07098                                                                   | -0.225293 | Inlier |
| siRNA Disorazole DMSO Run3       | NM_1387<br>06 | IMAGE:49<br>07098 | IMAGE:49<br>07098                                                                   | 0.225293  | Inlier |
| siRNA-Vinblastine Run2-<br>DMSO  | NM_1387<br>06 | IMAGE:49<br>07098 | IMAGE:49<br>07098                                                                   | 0.68635   | Inlier |
| siRNA-Vinblastine Run1-<br>DMSO  | NM_1387<br>06 | IMAGE:49<br>07098 | IMAGE:49<br>07098                                                                   | 0.844497  | Inlier |
| siRNA-Temozolomide Run3-<br>DMSO | NM_1387<br>06 | IMAGE:49<br>07098 | IMAGE:49<br>07098                                                                   | 1.214532  | Inlier |
| siRNA Disorazole DMSO Run2       | NM_1387<br>06 | IMAGE:49<br>07098 | IMAGE:49<br>07098                                                                   |           |        |
|                                  |               |                   | IMP2 inner<br>mitochond<br>rial<br>membrane<br>protease-<br>like (S.<br>cerevisiae) | -1.433241 | Inlier |
| siRNA Disorazole DMSO Run1       | NM_0325<br>49 | IMMP2L            |                                                                                     |           |        |

Identification of Survival Genes in Human Glioblastoma Cells Using siRNA Screening

Nikhil G Thaker, Fang Zhang, Peter R. McDonald, Tong Ying Shun, Michael D Lewen, Ian F. Pollack, and John S. Lazo

Molecular Pharmacology

|                              |               |        |                                                                 |           |        |
|------------------------------|---------------|--------|-----------------------------------------------------------------|-----------|--------|
| siRNA-Temozolomide Run2-DMSO | NM_0325<br>49 | IMMP2L | IMP2 inner mitochondrial membrane protease-like (S. cerevisiae) | -1.355398 | Inlier |
| siRNA-Temozolomide Run3-DMSO | NM_0325<br>49 | IMMP2L | IMP2 inner mitochondrial membrane protease-like (S. cerevisiae) | -1.055235 | Inlier |
| siRNA-Temozolomide Run1-DMSO | NM_0325<br>49 | IMMP2L | IMP2 inner mitochondrial membrane protease-like (S. cerevisiae) | -0.214367 | Inlier |
| siRNA Disorazole DMSO Run2   | NM_0325<br>49 | IMMP2L | IMP2 inner mitochondrial membrane protease-like (S. cerevisiae) | 0.214367  | Inlier |
| siRNA-Vinblastine Run1-DMSO  | NM_0325<br>49 | IMMP2L | IMP2 inner mitochondrial membrane protease-like (S. cerevisiae) | 0.257516  | Inlier |

Identification of Survival Genes in Human Glioblastoma Cells Using siRNA Screening  
 Nikhil G Thaker, Fang Zhang, Peter R. McDonald, Tong Ying Shun, Michael D Lewen, Ian F. Pollack, and John S. Lazo  
 Molecular Pharmacology

|                              |               |        |                                                                 |           |         |
|------------------------------|---------------|--------|-----------------------------------------------------------------|-----------|---------|
| siRNA-Vinblastine Run2-DMSO  | NM_0325<br>49 | IMMP2L | IMP2 inner mitochondrial membrane protease-like (S. cerevisiae) | 0.293765  | Inlier  |
| siRNA Disorazole DMSO Run3   | NM_0325<br>49 | IMMP2L | IMP2 inner mitochondrial membrane protease-like (S. cerevisiae) | 1.163749  | Inlier  |
| siRNA Disorazole DMSO Run2   | NM_1758<br>82 | IMP5   | IMP5                                                            | -1.909027 | Inlier  |
| siRNA-Temozolomide Run3-DMSO | NM_1758<br>82 | IMP5   | IMP5                                                            | -1.519559 | Inlier  |
| siRNA Disorazole DMSO Run1   | NM_1758<br>82 | IMP5   | IMP5                                                            | -0.889828 | Inlier  |
| siRNA-Temozolomide Run2-DMSO | NM_1758<br>82 | IMP5   | IMP5                                                            | -0.28652  | Inlier  |
| siRNA-Temozolomide Run1-DMSO | NM_1758<br>82 | IMP5   | IMP5                                                            | 0.28652   | Inlier  |
| siRNA-Vinblastine Run2-DMSO  | NM_1758<br>82 | IMP5   | IMP5                                                            | 0.3998    | Inlier  |
| siRNA-Vinblastine Run1-DMSO  | NM_1758<br>82 | IMP5   | IMP5                                                            | 0.459172  | Inlier  |
| siRNA Disorazole DMSO Run3   | NM_1758<br>82 | IMP5   | IMP5                                                            | 3.824639  | Outlier |
| siRNA-Temozolomide Run2-DMSO | NM_0055<br>36 | IMPA1  | inositol(myo)-1(or 4)-monophosphate 1                           | -0.980819 | Inlier  |
| siRNA-Temozolomide Run3-DMSO | NM_0055<br>36 | IMPA1  | inositol(myo)-1(or 4)-monophosphate 1                           | -0.597677 | Inlier  |
| siRNA Disorazole DMSO Run2   | NM_0055<br>36 | IMPA1  | inositol(myo)-1(or 4)-monophosphate 1                           | -0.324359 | Inlier  |



Identification of Survival Genes in Human Glioblastoma Cells Using siRNA Screening  
 Nikhil G Thaker, Fang Zhang, Peter R. McDonald, Tong Ying Shun, Michael D Lewen, Ian F. Pollack, and John S. Lazo  
 Molecular Pharmacology

|                              |               |       |                                        |           |        |
|------------------------------|---------------|-------|----------------------------------------|-----------|--------|
| siRNA-Vinblastine Run1-DMSO  | NM_0055<br>36 | IMPA1 | inositol(my o)-1(or 4)-monophosphate 1 | -0.049252 | Inlier |
| siRNA Disorazole DMSO Run3   | NM_0055<br>36 | IMPA1 | inositol(my o)-1(or 4)-monophosphate 1 | 0.049253  | Inlier |
| siRNA-Vinblastine Run2-DMSO  | NM_0055<br>36 | IMPA1 | inositol(my o)-1(or 4)-monophosphate 1 | 0.751323  | Inlier |
| siRNA-Temozolomide Run1-DMSO | NM_0055<br>36 | IMPA1 | inositol(my o)-1(or 4)-monophosphate 1 | 0.972637  | Inlier |
| siRNA Disorazole DMSO Run1   | NM_0055<br>36 | IMPA1 | inositol(my o)-1(or 4)-monophosphate 1 | 1.032591  | Inlier |
| siRNA-Temozolomide Run3-DMSO | NM_0142<br>14 | IMPA2 | inositol(my o)-1(or 4)-monophosphate 2 | -0.763909 | Inlier |
| siRNA-Temozolomide Run2-DMSO | NM_0142<br>14 | IMPA2 | inositol(my o)-1(or 4)-monophosphate 2 | -0.585091 | Inlier |
| siRNA Disorazole DMSO Run3   | NM_0142<br>14 | IMPA2 | inositol(my o)-1(or 4)-monophosphate 2 | -0.205042 | Inlier |
| siRNA Disorazole DMSO Run2   | NM_0142<br>14 | IMPA2 | inositol(my o)-1(or 4)-monophosphate 2 | -0.18432  | Inlier |
| siRNA-Temozolomide Run1-DMSO | NM_0142<br>14 | IMPA2 | inositol(my o)-1(or 4)-monophosphate 2 | 0.18432   | Inlier |

Identification of Survival Genes in Human Glioblastoma Cells Using siRNA Screening  
 Nikhil G Thaker, Fang Zhang, Peter R. McDonald, Tong Ying Shun, Michael D Lewen, Ian F. Pollack, and John S. Lazo  
 Molecular Pharmacology

|                                  |               |        |                                                              |           |        |
|----------------------------------|---------------|--------|--------------------------------------------------------------|-----------|--------|
| siRNA Disorazole DMSO Run1       | NM_0142<br>14 | IMPA2  | inositol(my<br>o)-1(or 4)-<br>monophos<br>phatase 2          | 0.846223  | Inlier |
| siRNA-Vinblastine Run1-<br>DMSO  | NM_0142<br>14 | IMPA2  | inositol(my<br>o)-1(or 4)-<br>monophos<br>phatase 2          | 1.134487  | Inlier |
| siRNA-Vinblastine Run2-<br>DMSO  | NM_0142<br>14 | IMPA2  | inositol(my<br>o)-1(or 4)-<br>monophos<br>phatase 2          | 1.24488   | Inlier |
| siRNA Disorazole DMSO Run3       | NM_0008<br>83 | IMPDH1 | IMP<br>(inosine<br>monophos<br>phate)<br>dehydroge<br>nase 1 | -0.717298 | Inlier |
| siRNA-Temozolomide Run2-<br>DMSO | NM_0008<br>83 | IMPDH1 | IMP<br>(inosine<br>monophos<br>phate)<br>dehydroge<br>nase 1 | -0.679159 | Inlier |
| siRNA-Temozolomide Run3-<br>DMSO | NM_0008<br>83 | IMPDH1 | IMP<br>(inosine<br>monophos<br>phate)<br>dehydroge<br>nase 1 | -0.669841 | Inlier |
| siRNA Disorazole DMSO Run2       | NM_0008<br>83 | IMPDH1 | IMP<br>(inosine<br>monophos<br>phate)<br>dehydroge<br>nase 1 | -0.059542 | Inlier |
| siRNA-Temozolomide Run1-<br>DMSO | NM_0008<br>83 | IMPDH1 | IMP<br>(inosine<br>monophos<br>phate)<br>dehydroge<br>nase 1 | 0.059542  | Inlier |
| siRNA Disorazole DMSO Run1       | NM_0008<br>83 | IMPDH1 | IMP<br>(inosine<br>monophos<br>phate)<br>dehydroge<br>nase 1 | 0.358528  | Inlier |

Identification of Survival Genes in Human Glioblastoma Cells Using siRNA Screening  
 Nikhil G Thaker, Fang Zhang, Peter R. McDonald, Tong Ying Shun, Michael D Lewen, Ian F. Pollack, and John S. Lazo

Molecular Pharmacology

|                              |           |        |                                                   |           |        |
|------------------------------|-----------|--------|---------------------------------------------------|-----------|--------|
| siRNA-Vinblastine Run1-DMSO  | NM_000883 | IMPDH1 | IMP<br>(inosine monophosphate)<br>dehydrogenase 1 | 0.923707  | Inlier |
| siRNA-Vinblastine Run2-DMSO  | NM_000883 | IMPDH1 | IMP<br>(inosine monophosphate)<br>dehydrogenase 1 | 1.073508  | Inlier |
| siRNA Disorazole DMSO Run1   | NM_000884 | IMPDH2 | IMP<br>(inosine monophosphate)<br>dehydrogenase 2 | -0.828444 | Inlier |
| siRNA Disorazole DMSO Run2   | NM_000884 | IMPDH2 | IMP<br>(inosine monophosphate)<br>dehydrogenase 2 | -0.700203 | Inlier |
| siRNA-Temozolomide Run2-DMSO | NM_000884 | IMPDH2 | IMP<br>(inosine monophosphate)<br>dehydrogenase 2 | -0.648797 | Inlier |
| siRNA-Temozolomide Run3-DMSO | NM_000884 | IMPDH2 | IMP<br>(inosine monophosphate)<br>dehydrogenase 2 | -0.559772 | Inlier |
| siRNA Disorazole DMSO Run3   | NM_000884 | IMPDH2 | IMP<br>(inosine monophosphate)<br>dehydrogenase 2 | 0.559771  | Inlier |
| siRNA-Temozolomide Run1-DMSO | NM_000884 | IMPDH2 | IMP<br>(inosine monophosphate)<br>dehydrogenase 2 | 0.608505  | Inlier |

Identification of Survival Genes in Human Glioblastoma Cells Using siRNA Screening

Nikhil G Thaker, Fang Zhang, Peter R. McDonald, Tong Ying Shun, Michael D Lewen, Ian F. Pollack, and John S. Lazo

Molecular Pharmacology

| siRNA Treatment              | Gene ID   | Gene Name | Enzyme                                      | Value     | Category |
|------------------------------|-----------|-----------|---------------------------------------------|-----------|----------|
| siRNA-Vinblastine Run1-DMSO  | NM_000884 | IMPDH2    | IMP (inosine monophosphate) dehydrogenase 2 | 1.152079  | Inlier   |
| siRNA-Vinblastine Run2-DMSO  | NM_000884 | IMPDH2    | IMP (inosine monophosphate) dehydrogenase 2 | 1.310625  | Inlier   |
| siRNA-Vinblastine Run2-DMSO  | NM_002164 | INDO      | indoleamine 2,3-dioxygenase                 | -1.167953 | Inlier   |
| siRNA-Temozolomide Run2-DMSO | NM_002164 | INDO      | indoleamine 2,3-dioxygenase                 | -0.781679 | Inlier   |
| siRNA Disorazole DMSO Run3   | NM_002164 | INDO      | indoleamine 2,3-dioxygenase                 | -0.499006 | Inlier   |
| siRNA Disorazole DMSO Run1   | NM_002164 | INDO      | indoleamine 2,3-dioxygenase                 | -0.203541 | Inlier   |
| siRNA-Temozolomide Run3-DMSO | NM_002164 | INDO      | indoleamine 2,3-dioxygenase                 | 0.203541  | Inlier   |
| siRNA-Temozolomide Run1-DMSO | NM_002164 | INDO      | indoleamine 2,3-dioxygenase                 | 0.567321  | Inlier   |
| siRNA Disorazole DMSO Run2   | NM_002164 | INDO      | indoleamine 2,3-dioxygenase                 | 3.176361  | Inlier   |
| siRNA-Vinblastine Run1-DMSO  | NM_002164 | INDO      | indoleamine 2,3-dioxygenase                 | 4.959085  | Outlier  |

Identification of Survival Genes in Human Glioblastoma Cells Using siRNA Screening  
 Nikhil G Thaker, Fang Zhang, Peter R. McDonald, Tong Ying Shun, Michael D Lewen, Ian F. Pollack, and John S. Lazo

Molecular Pharmacology

|                              |               |       |                                      |           |        |
|------------------------------|---------------|-------|--------------------------------------|-----------|--------|
| siRNA Disorazole DMSO Run1   | NM_1982<br>17 | ING1  | inhibitor of growth family, member 1 | -1.896655 | Inlier |
| siRNA-Vinblastine Run2-DMSO  | NM_1982<br>17 | ING1  | inhibitor of growth family, member 1 | -1.224144 | Inlier |
| siRNA Disorazole DMSO Run3   | NM_1982<br>17 | ING1  | inhibitor of growth family, member 1 | -0.54058  | Inlier |
| siRNA-Temozolomide Run1-DMSO | NM_1982<br>17 | ING1  | inhibitor of growth family, member 1 | -0.168175 | Inlier |
| siRNA-Temozolomide Run2-DMSO | NM_1982<br>17 | ING1  | inhibitor of growth family, member 1 | 0.168175  | Inlier |
| siRNA-Temozolomide Run3-DMSO | NM_1982<br>17 | ING1  | inhibitor of growth family, member 1 | 0.567054  | Inlier |
| siRNA Disorazole DMSO Run2   | NM_1982<br>17 | ING1  | inhibitor of growth family, member 1 | 0.781946  | Inlier |
| siRNA-Vinblastine Run1-DMSO  | NM_1982<br>17 | ING1  | inhibitor of growth family, member 1 | 1.249717  | Inlier |
| siRNA-Temozolomide Run1-DMSO | NM_0015<br>64 | ING1L | inhibitor of growth family, member 2 | -1.105938 | Inlier |
| siRNA Disorazole DMSO Run3   | NM_0015<br>64 | ING1L | inhibitor of growth family, member 2 | -0.972905 | Inlier |
| siRNA-Temozolomide Run2-DMSO | NM_0015<br>64 | ING1L | inhibitor of growth family, member 2 | -0.71049  | Inlier |
| siRNA-Temozolomide Run3-DMSO | NM_0015<br>64 | ING1L | inhibitor of growth family, member 2 | -0.193274 | Inlier |
| siRNA-Vinblastine Run2-DMSO  | NM_0015<br>64 | ING1L | inhibitor of growth family, member 2 | 0.193274  | Inlier |

Identification of Survival Genes in Human Glioblastoma Cells Using siRNA Screening  
 Nikhil G Thaker, Fang Zhang, Peter R. McDonald, Tong Ying Shun, Michael D Lewen, Ian F. Pollack, and John S. Lazo

Molecular Pharmacology

|                              |               |       |                                      |           |        |
|------------------------------|---------------|-------|--------------------------------------|-----------|--------|
| siRNA Disorazole DMSO Run1   | NM_0015<br>64 | ING1L | inhibitor of growth family, member 2 | 0.337773  | Inlier |
| siRNA Disorazole DMSO Run2   | NM_0015<br>64 | ING1L | inhibitor of growth family, member 2 | 0.63851   | Inlier |
| siRNA-Vinblastine Run1-DMSO  | NM_0015<br>64 | ING1L | inhibitor of growth family, member 2 | 0.921453  | Inlier |
| siRNA-Temozolomide Run3-DMSO | NM_0067<br>74 | INMT  | indolethylamine N-methyltransferase  | -0.859247 | Inlier |
| siRNA Disorazole DMSO Run1   | NM_0067<br>74 | INMT  | indolethylamine N-methyltransferase  | -0.621152 | Inlier |
| siRNA-Temozolomide Run1-DMSO | NM_0067<br>74 | INMT  | indolethylamine N-methyltransferase  | -0.59758  | Inlier |
| siRNA-Temozolomide Run2-DMSO | NM_0067<br>74 | INMT  | indolethylamine N-methyltransferase  | -0.348569 | Inlier |
| siRNA Disorazole DMSO Run3   | NM_0067<br>74 | INMT  | indolethylamine N-methyltransferase  | 0.348569  | Inlier |
| siRNA-Vinblastine Run2-DMSO  | NM_0067<br>74 | INMT  | indolethylamine N-methyltransferase  | 0.727848  | Inlier |
| siRNA-Vinblastine Run1-DMSO  | NM_0067<br>74 | INMT  | indolethylamine N-methyltransferase  | 1.541404  | Inlier |
| siRNA Disorazole DMSO Run2   | NM_0067<br>74 | INMT  | indolethylamine N-methyltransferase  | 1.762838  | Inlier |
| siRNA-Temozolomide Run2-DMSO | NM_0021<br>94 | INPP1 | inositol polyphosphate-1-phosphatase | -1.605515 | Inlier |

Identification of Survival Genes in Human Glioblastoma Cells Using siRNA Screening

Nikhil G Thaker, Fang Zhang, Peter R. McDonald, Tong Ying Shun, Michael D Lewen, Ian F. Pollack, and John S. Lazo

Molecular Pharmacology

|                              |               |        |                                                      |           |        |
|------------------------------|---------------|--------|------------------------------------------------------|-----------|--------|
| siRNA-Vinblastine Run1-DMSO  | NM_0021<br>94 | INPP1  | inositol polyphosphate-1-phosphatase                 | -0.677635 | Inlier |
| siRNA-Temozolomide Run3-DMSO | NM_0021<br>94 | INPP1  | inositol polyphosphate-1-phosphatase                 | -0.459155 | Inlier |
| siRNA Disorazole DMSO Run1   | NM_0021<br>94 | INPP1  | inositol polyphosphate-1-phosphatase                 | -0.384197 | Inlier |
| siRNA-Vinblastine Run2-DMSO  | NM_0021<br>94 | INPP1  | inositol polyphosphate-1-phosphatase                 | 0.384197  | Inlier |
| siRNA-Temozolomide Run1-DMSO | NM_0021<br>94 | INPP1  | inositol polyphosphate-1-phosphatase                 | 0.671364  | Inlier |
| siRNA Disorazole DMSO Run3   | NM_0021<br>94 | INPP1  | inositol polyphosphate-1-phosphatase                 | 0.689592  | Inlier |
| siRNA Disorazole DMSO Run2   | NM_0021<br>94 | INPP1  | inositol polyphosphate-1-phosphatase                 | 0.939735  | Inlier |
| siRNA-Temozolomide Run3-DMSO | NM_0015<br>66 | INPP4A | inositol polyphosphate-4-phosphatase, type I, 107kDa | -1.136148 | Inlier |
| siRNA Disorazole DMSO Run2   | NM_0015<br>66 | INPP4A | inositol polyphosphate-4-phosphatase, type I, 107kDa | -0.744169 | Inlier |

Identification of Survival Genes in Human Glioblastoma Cells Using siRNA Screening  
 Nikhil G Thaker, Fang Zhang, Peter R. McDonald, Tong Ying Shun, Michael D Lewen, Ian F. Pollack, and John S. Lazo

Molecular Pharmacology

| siRNA Treatment              | Gene ID   | Gene Name | Protein Name                                          | Log2 Fold Change | Outlier Status |
|------------------------------|-----------|-----------|-------------------------------------------------------|------------------|----------------|
| siRNA-Temozolomide Run2-DMSO | NM_001566 | INPP4A    | inositol polyphosphate-4-phosphatase, type I, 107kDa  | -0.434919        | Inlier         |
| siRNA-Temozolomide Run1-DMSO | NM_001566 | INPP4A    | inositol polyphosphate-4-phosphatase, type I, 107kDa  | -0.123937        | Inlier         |
| siRNA Disorazole DMSO Run1   | NM_001566 | INPP4A    | inositol polyphosphate-4-phosphatase, type I, 107kDa  | 0.123937         | Inlier         |
| siRNA Disorazole DMSO Run3   | NM_001566 | INPP4A    | inositol polyphosphate-4-phosphatase, type I, 107kDa  | 0.604831         | Inlier         |
| siRNA-Vinblastine Run1-DMSO  | NM_001566 | INPP4A    | inositol polyphosphate-4-phosphatase, type I, 107kDa  | 0.765255         | Inlier         |
| siRNA-Vinblastine Run2-DMSO  | NM_001566 | INPP4A    | inositol polyphosphate-4-phosphatase, type I, 107kDa  | 0.796705         | Inlier         |
| siRNA-Temozolomide Run2-DMSO | NM_003866 | INPP4B    | inositol polyphosphate-4-phosphatase, type II, 105kDa | -2.672859        | Inlier         |
| siRNA-Temozolomide Run3-DMSO | NM_003866 | INPP4B    | inositol polyphosphate-4-phosphatase, type II, 105kDa | -2.228578        | Inlier         |



Identification of Survival Genes in Human Glioblastoma Cells Using siRNA Screening  
 Nikhil G Thaker, Fang Zhang, Peter R. McDonald, Tong Ying Shun, Michael D Lewen, Ian F. Pollack, and John S. Lazo

Molecular Pharmacology

| siRNA Treatment              | Gene ID   | Gene Name | Protein Name                                          | Log2 Fold Change | Category |
|------------------------------|-----------|-----------|-------------------------------------------------------|------------------|----------|
| siRNA-Temozolomide Run1-DMSO | NM_003866 | INPP4B    | inositol polyphosphate-4-phosphatase, type II, 105kDa | -0.844841        | Inlier   |
| siRNA Disorazole DMSO Run3   | NM_003866 | INPP4B    | inositol polyphosphate-4-phosphatase, type II, 105kDa | -0.018567        | Inlier   |
| siRNA Disorazole DMSO Run1   | NM_003866 | INPP4B    | inositol polyphosphate-4-phosphatase, type II, 105kDa | 0.018567         | Inlier   |
| siRNA-Vinblastine Run1-DMSO  | NM_003866 | INPP4B    | inositol polyphosphate-4-phosphatase, type II, 105kDa | 0.478326         | Inlier   |
| siRNA Disorazole DMSO Run2   | NM_003866 | INPP4B    | inositol polyphosphate-4-phosphatase, type II, 105kDa | 0.504159         | Inlier   |
| siRNA-Vinblastine Run2-DMSO  | NM_003866 | INPP4B    | inositol polyphosphate-4-phosphatase, type II, 105kDa | 1.047965         | Inlier   |
| siRNA-Temozolomide Run2-DMSO | NM_005539 | INPP5A    | inositol polyphosphate-5-phosphatase, 40kDa           | -0.751725        | Inlier   |
| siRNA-Temozolomide Run3-DMSO | NM_005539 | INPP5A    | inositol polyphosphate-5-phosphatase, 40kDa           | -0.72575         | Inlier   |

Identification of Survival Genes in Human Glioblastoma Cells Using siRNA Screening  
 Nikhil G Thaker, Fang Zhang, Peter R. McDonald, Tong Ying Shun, Michael D Lewen, Ian F. Pollack, and John S. Lazo  
 Molecular Pharmacology

|                                  |               |        |                                                            |           |        |
|----------------------------------|---------------|--------|------------------------------------------------------------|-----------|--------|
| siRNA Disorazole DMSO Run3       | NM_0055<br>39 | INPP5A | inositol<br>polyphosph<br>ate-5-<br>phosphata<br>se, 40kDa | -0.380089 | Inlier |
| siRNA-Temozolomide Run1-<br>DMSO | NM_0055<br>39 | INPP5A | inositol<br>polyphosph<br>ate-5-<br>phosphata<br>se, 40kDa | -0.039973 | Inlier |
| siRNA Disorazole DMSO Run2       | NM_0055<br>39 | INPP5A | inositol<br>polyphosph<br>ate-5-<br>phosphata<br>se, 40kDa | 0.039973  | Inlier |
| siRNA Disorazole DMSO Run1       | NM_0055<br>39 | INPP5A | inositol<br>polyphosph<br>ate-5-<br>phosphata<br>se, 40kDa | 0.62325   | Inlier |
| siRNA-Vinblastine Run1-<br>DMSO  | NM_0055<br>39 | INPP5A | inositol<br>polyphosph<br>ate-5-<br>phosphata<br>se, 40kDa | 0.812183  | Inlier |
| siRNA-Vinblastine Run2-<br>DMSO  | NM_0055<br>39 | INPP5A | inositol<br>polyphosph<br>ate-5-<br>phosphata<br>se, 40kDa | 1.354988  | Inlier |
| siRNA-Temozolomide Run2-<br>DMSO | NM_0055<br>40 | INPP5B | inositol<br>polyphosph<br>ate-5-<br>phosphata<br>se, 75kDa | -1.676527 | Inlier |
| siRNA-Temozolomide Run3-<br>DMSO | NM_0055<br>40 | INPP5B | inositol<br>polyphosph<br>ate-5-<br>phosphata<br>se, 75kDa | -1.302695 | Inlier |

Identification of Survival Genes in Human Glioblastoma Cells Using siRNA Screening  
 Nikhil G Thaker, Fang Zhang, Peter R. McDonald, Tong Ying Shun, Michael D Lewen, Ian F. Pollack, and John S. Lazo  
 Molecular Pharmacology

|                                  |                  |        |                                                                |           |        |
|----------------------------------|------------------|--------|----------------------------------------------------------------|-----------|--------|
| siRNA Disorazole DMSO Run3       | NM_0055<br>40    | INPP5B | inositol<br>polyphosp<br>hate-5-<br>phosphata<br>se, 75kDa     | -0.580267 | Inlier |
| siRNA Disorazole DMSO Run2       | NM_0055<br>40    | INPP5B | inositol<br>polyphosp<br>hate-5-<br>phosphata<br>se, 75kDa     | -0.398715 | Inlier |
| siRNA-Vinblastine Run1-<br>DMSO  | NM_0055<br>40    | INPP5B | inositol<br>polyphosp<br>hate-5-<br>phosphata<br>se, 75kDa     | 0.398716  | Inlier |
| siRNA Disorazole DMSO Run1       | NM_0055<br>40    | INPP5B | inositol<br>polyphosp<br>hate-5-<br>phosphata<br>se, 75kDa     | 0.537342  | Inlier |
| siRNA-Temozolomide Run1-<br>DMSO | NM_0055<br>40    | INPP5B | inositol<br>polyphosp<br>hate-5-<br>phosphata<br>se, 75kDa     | 0.768733  | Inlier |
| siRNA-Vinblastine Run2-<br>DMSO  | NM_0055<br>40    | INPP5B | inositol<br>polyphosp<br>hate-5-<br>phosphata<br>se, 75kDa     | 1.782609  | Inlier |
| siRNA-Temozolomide Run2-<br>DMSO | NM_0010<br>17915 | INPP5D | inositol<br>polyphosp<br>hate-5-<br>phosphata<br>se,<br>145kDa | -0.728186 | Inlier |
| siRNA-Temozolomide Run3-<br>DMSO | NM_0010<br>17915 | INPP5D | inositol<br>polyphosp<br>hate-5-<br>phosphata<br>se,<br>145kDa | -0.620814 | Inlier |

Identification of Survival Genes in Human Glioblastoma Cells Using siRNA Screening  
 Nikhil G Thaker, Fang Zhang, Peter R. McDonald, Tong Ying Shun, Michael D Lewen, Ian F. Pollack, and John S. Lazo

Molecular Pharmacology

| siRNA Treatment              | Gene ID      | Accession | Protein Name                          | MW     | Log2FC    | Category |
|------------------------------|--------------|-----------|---------------------------------------|--------|-----------|----------|
| siRNA-Temozolomide Run1-DMSO | NM_001017915 | INPP5D    | inositol polyphosphate-5-phosphatase, | 145kDa | -0.153392 | Inlier   |
| siRNA Disorazole DMSO Run3   | NM_001017915 | INPP5D    | inositol polyphosphate-5-phosphatase, | 145kDa | -0.061667 | Inlier   |
| siRNA Disorazole DMSO Run2   | NM_001017915 | INPP5D    | inositol polyphosphate-5-phosphatase, | 145kDa | 0.061667  | Inlier   |
| siRNA Disorazole DMSO Run1   | NM_001017915 | INPP5D    | inositol polyphosphate-5-phosphatase, | 145kDa | 0.845236  | Inlier   |
| siRNA-Vinblastine Run1-DMSO  | NM_001017915 | INPP5D    | inositol polyphosphate-5-phosphatase, | 145kDa | 1.029934  | Inlier   |
| siRNA-Vinblastine Run2-DMSO  | NM_001017915 | INPP5D    | inositol polyphosphate-5-phosphatase, | 145kDa | 1.35882   | Inlier   |
| siRNA-Temozolomide Run2-DMSO | NM_019892    | INPP5E    | inositol polyphosphate-5-phosphatase, | 72 kDa | -2.214679 | Inlier   |
| siRNA-Temozolomide Run3-DMSO | NM_019892    | INPP5E    | inositol polyphosphate-5-phosphatase, | 72 kDa | -1.942265 | Inlier   |

Identification of Survival Genes in Human Glioblastoma Cells Using siRNA Screening  
 Nikhil G Thaker, Fang Zhang, Peter R. McDonald, Tong Ying Shun, Michael D Lewen, Ian F. Pollack, and John S. Lazo  
 Molecular Pharmacology

|                                  |               |        |                                                              |           |        |
|----------------------------------|---------------|--------|--------------------------------------------------------------|-----------|--------|
| siRNA Disorazole DMSO Run1       | NM_0198<br>92 | INPP5E | inositol<br>polyphosph<br>hate-5-<br>phosphata<br>se, 72 kDa | -0.673605 | Inlier |
| siRNA-Temozolomide Run1-<br>DMSO | NM_0198<br>92 | INPP5E | inositol<br>polyphosph<br>hate-5-<br>phosphata<br>se, 72 kDa | -0.449314 | Inlier |
| siRNA-Vinblastine Run1-<br>DMSO  | NM_0198<br>92 | INPP5E | inositol<br>polyphosph<br>hate-5-<br>phosphata<br>se, 72 kDa | 0.449314  | Inlier |
| siRNA Disorazole DMSO Run3       | NM_0198<br>92 | INPP5E | inositol<br>polyphosph<br>hate-5-<br>phosphata<br>se, 72 kDa | 0.571675  | Inlier |
| siRNA-Vinblastine Run2-<br>DMSO  | NM_0198<br>92 | INPP5E | inositol<br>polyphosph<br>hate-5-<br>phosphata<br>se, 72 kDa | 0.675395  | Inlier |
| siRNA Disorazole DMSO Run2       | NM_0198<br>92 | INPP5E | inositol<br>polyphosph<br>hate-5-<br>phosphata<br>se, 72 kDa | 1.63434   | Inlier |
| siRNA-Temozolomide Run2-<br>DMSO | NM_0015<br>67 | INPPL1 | inositol<br>polyphosph<br>hate<br>phosphata<br>se-like 1     | -3.234244 | Inlier |
| siRNA Disorazole DMSO Run2       | NM_0015<br>67 | INPPL1 | inositol<br>polyphosph<br>hate<br>phosphata<br>se-like 1     | -1.604263 | Inlier |
| siRNA-Vinblastine Run1-<br>DMSO  | NM_0015<br>67 | INPPL1 | inositol<br>polyphosph<br>hate<br>phosphata<br>se-like 1     | -0.087745 | Inlier |

Identification of Survival Genes in Human Glioblastoma Cells Using siRNA Screening  
 Nikhil G Thaker, Fang Zhang, Peter R. McDonald, Tong Ying Shun, Michael D Lewen, Ian F. Pollack, and John S. Lazo

Molecular Pharmacology

|                              |               |        |                                                          |           |        |
|------------------------------|---------------|--------|----------------------------------------------------------|-----------|--------|
| siRNA-Temozolomide Run3-DMSO | NM_0015<br>67 | INPPL1 | inositol<br>polyphosph<br>hate<br>phosphata<br>se-like 1 | -0.060471 | Inlier |
| siRNA-Temozolomide Run1-DMSO | NM_0015<br>67 | INPPL1 | inositol<br>polyphosph<br>hate<br>phosphata<br>se-like 1 | 0.060472  | Inlier |
| siRNA Disorazole DMSO Run1   | NM_0015<br>67 | INPPL1 | inositol<br>polyphosph<br>hate<br>phosphata<br>se-like 1 | 0.613785  | Inlier |
| siRNA Disorazole DMSO Run3   | NM_0015<br>67 | INPPL1 | inositol<br>polyphosph<br>hate<br>phosphata<br>se-like 1 | 0.735215  | Inlier |
| siRNA-Vinblastine Run2-DMSO  | NM_0015<br>67 | INPPL1 | phosphata<br>se-like 1                                   | 1.713674  | Inlier |
| siRNA-Temozolomide Run3-DMSO | NM_0002<br>08 | INSR   | insulin<br>receptor                                      | -1.74865  | Inlier |
| siRNA-Temozolomide Run2-DMSO | NM_0002<br>08 | INSR   | insulin<br>receptor                                      | -0.719707 | Inlier |
| siRNA-Temozolomide Run1-DMSO | NM_0002<br>08 | INSR   | insulin<br>receptor                                      | -0.629293 | Inlier |
| siRNA Disorazole DMSO Run1   | NM_0002<br>08 | INSR   | insulin<br>receptor                                      | -0.075011 | Inlier |
| siRNA-Vinblastine Run1-DMSO  | NM_0002<br>08 | INSR   | insulin<br>receptor                                      | 0.075011  | Inlier |
| siRNA Disorazole DMSO Run3   | NM_0002<br>08 | INSR   | insulin<br>receptor                                      | 0.59015   | Inlier |
| siRNA Disorazole DMSO Run2   | NM_0002<br>08 | INSR   | insulin<br>receptor                                      | 1.129128  | Inlier |
| siRNA-Vinblastine Run2-DMSO  | NM_0002<br>08 | INSR   | insulin<br>receptor                                      | 1.679131  | Inlier |
| siRNA Disorazole DMSO Run3   | NM_0142<br>15 | INSRR  | insulin<br>receptor-<br>related<br>receptor<br>insulin   | -0.799385 | Inlier |
| siRNA-Vinblastine Run2-DMSO  | NM_0142<br>15 | INSRR  | insulin<br>receptor-<br>related<br>receptor              | -0.728566 | Inlier |

Identification of Survival Genes in Human Glioblastoma Cells Using siRNA Screening  
 Nikhil G Thaker, Fang Zhang, Peter R. McDonald, Tong Ying Shun, Michael D Lewen, Ian F. Pollack, and John S. Lazo

Molecular Pharmacology

|                                  |               |                  |                  |                                                  |                  |
|----------------------------------|---------------|------------------|------------------|--------------------------------------------------|------------------|
|                                  |               |                  |                  | insulin<br>receptor-<br>related                  |                  |
| siRNA Disorazole DMSO Run1       | NM_0142<br>15 | INSRR            |                  | receptor<br>insulin                              | -0.620434 Inlier |
| siRNA-Temozolomide Run2-<br>DMSO | NM_0142<br>15 | INSRR            |                  | receptor-<br>related<br>receptor<br>insulin      | -0.291457 Inlier |
| siRNA-Temozolomide Run1-<br>DMSO | NM_0142<br>15 | INSRR            |                  | receptor-<br>related<br>receptor<br>insulin      | 0.291457 Inlier  |
| siRNA-Temozolomide Run3-<br>DMSO | NM_0142<br>15 | INSRR            |                  | receptor-<br>related<br>receptor<br>insulin      | 0.4962 Inlier    |
| siRNA-Vinblastine Run1-<br>DMSO  | NM_0142<br>15 | INSRR            |                  | receptor-<br>related<br>receptor<br>insulin      | 1.37242 Inlier   |
| siRNA Disorazole DMSO Run2       | NM_0142<br>15 | INSRR            |                  | receptor-<br>related<br>receptor                 | 1.449954 Inlier  |
| siRNA Disorazole DMSO Run3       | XM_29124<br>1 | IPLA2(GA<br>MMA) | IPLA2(GA<br>MMA) |                                                  | -1.010545 Inlier |
| siRNA-Temozolomide Run1-<br>DMSO | XM_29124<br>1 | IPLA2(GA<br>MMA) | IPLA2(GA<br>MMA) |                                                  | -0.763159 Inlier |
| siRNA-Vinblastine Run2-<br>DMSO  | XM_29124<br>1 | IPLA2(GA<br>MMA) | IPLA2(GA<br>MMA) |                                                  | -0.585841 Inlier |
| siRNA-Temozolomide Run2-<br>DMSO | XM_29124<br>1 | IPLA2(GA<br>MMA) | IPLA2(GA<br>MMA) |                                                  | -0.256771 Inlier |
| siRNA-Vinblastine Run1-<br>DMSO  | XM_29124<br>1 | IPLA2(GA<br>MMA) | IPLA2(GA<br>MMA) |                                                  | 0.256771 Inlier  |
| siRNA-Temozolomide Run3-<br>DMSO | XM_29124<br>1 | IPLA2(GA<br>MMA) | IPLA2(GA<br>MMA) |                                                  | 0.46692 Inlier   |
| siRNA Disorazole DMSO Run1       | XM_29124<br>1 | IPLA2(GA<br>MMA) | IPLA2(GA<br>MMA) |                                                  | 0.885226 Inlier  |
| siRNA Disorazole DMSO Run2       | XM_29124<br>1 | IPLA2(GA<br>MMA) | IPLA2(GA<br>MMA) |                                                  | 1.055523 Inlier  |
|                                  |               |                  |                  | inositol<br>polyphosp<br>hate                    |                  |
| siRNA Disorazole DMSO Run2       | NM_1522<br>30 | IPMK             |                  | multikinas<br>e                                  | -2.622471 Inlier |
| siRNA-Temozolomide Run1-<br>DMSO | NM_1522<br>30 | IPMK             |                  | inositol<br>polyphosp<br>hate<br>multikinas<br>e | -1.13842 Inlier  |

Identification of Survival Genes in Human Glioblastoma Cells Using siRNA Screening

Nikhil G Thaker, Fang Zhang, Peter R. McDonald, Tong Ying Shun, Michael D Lewen, Ian F. Pollack, and John S. Lazo

Molecular Pharmacology

|                              |               |        |                                                   |           |        |
|------------------------------|---------------|--------|---------------------------------------------------|-----------|--------|
| siRNA-Temozolomide Run3-DMSO | NM_1522<br>30 | IPMK   | inositol<br>polyphosph<br>hate<br>multikinas<br>e | -1.098832 | Inlier |
| siRNA-Temozolomide Run2-DMSO | NM_1522<br>30 | IPMK   | inositol<br>polyphosph<br>hate<br>multikinas<br>e | -0.224742 | Inlier |
| siRNA Disorazole DMSO Run3   | NM_1522<br>30 | IPMK   | inositol<br>polyphosph<br>hate<br>multikinas<br>e | 0.224742  | Inlier |
| siRNA Disorazole DMSO Run1   | NM_1522<br>30 | IPMK   | inositol<br>polyphosph<br>hate<br>multikinas<br>e | 0.569264  | Inlier |
| siRNA-Vinblastine Run1-DMSO  | NM_1522<br>30 | IPMK   | inositol<br>polyphosph<br>hate<br>multikinas<br>e | 0.574651  | Inlier |
| siRNA-Vinblastine Run2-DMSO  | NM_1522<br>30 | IPMK   | inositol<br>polyphosph<br>hate<br>multikinas<br>e | 0.774349  | Inlier |
| siRNA-Temozolomide Run3-DMSO | NM_0246<br>58 | IPO4   | importin 4                                        | -1.307541 | Inlier |
| siRNA Disorazole DMSO Run3   | NM_0246<br>58 | IPO4   | importin 4                                        | -0.684203 | Inlier |
| siRNA-Temozolomide Run2-DMSO | NM_0246<br>58 | IPO4   | importin 4                                        | -0.4896   | Inlier |
| siRNA-Temozolomide Run1-DMSO | NM_0246<br>58 | IPO4   | importin 4                                        | -0.028498 | Inlier |
| siRNA Disorazole DMSO Run2   | NM_0246<br>58 | IPO4   | importin 4                                        | 0.028498  | Inlier |
| siRNA Disorazole DMSO Run1   | NM_0246<br>58 | IPO4   | importin 4                                        | 0.664797  | Inlier |
| siRNA-Vinblastine Run2-DMSO  | NM_0246<br>58 | IPO4   | importin 4                                        | 0.862187  | Inlier |
| siRNA-Vinblastine Run1-DMSO  | NM_0246<br>58 | IPO4   | importin 4<br>IQ motif<br>containing<br>GTPase    | 1.737112  | Inlier |
| siRNA-Temozolomide Run3-DMSO | NM_0038<br>70 | IQGAP1 | activating<br>protein 1                           | -1.160668 | Inlier |



Identification of Survival Genes in Human Glioblastoma Cells Using siRNA Screening  
 Nikhil G Thaker, Fang Zhang, Peter R. McDonald, Tong Ying Shun, Michael D Lewen, Ian F. Pollack, and John S. Lazo

Molecular Pharmacology

|                              |               |        |                                                 |           |        |
|------------------------------|---------------|--------|-------------------------------------------------|-----------|--------|
| siRNA-Temozolomide Run1-DMSO | NM_0038<br>70 | IQGAP1 | IQ motif containing GTPase activating protein 1 | -0.860964 | Inlier |
| siRNA Disorazole DMSO Run3   | NM_0038<br>70 | IQGAP1 | IQ motif containing GTPase activating protein 1 | -0.385737 | Inlier |
| siRNA-Vinblastine Run2-DMSO  | NM_0038<br>70 | IQGAP1 | IQ motif containing GTPase activating protein 1 | -0.207183 | Inlier |
| siRNA-Temozolomide Run2-DMSO | NM_0038<br>70 | IQGAP1 | IQ motif containing GTPase activating protein 1 | 0.207183  | Inlier |
| siRNA Disorazole DMSO Run1   | NM_0038<br>70 | IQGAP1 | IQ motif containing GTPase activating protein 1 | 0.488036  | Inlier |
| siRNA-Vinblastine Run1-DMSO  | NM_0038<br>70 | IQGAP1 | IQ motif containing GTPase activating protein 1 | 1.184477  | Inlier |
| siRNA Disorazole DMSO Run2   | NM_0038<br>70 | IQGAP1 | IQ motif containing GTPase activating protein 1 | 1.56085   | Inlier |
| siRNA Disorazole DMSO Run3   | NM_0066<br>33 | IQGAP2 | IQ motif containing GTPase activating protein 2 | -0.861117 | Inlier |
| siRNA-Temozolomide Run2-DMSO | NM_0066<br>33 | IQGAP2 | IQ motif containing GTPase activating protein 2 | -0.487883 | Inlier |
| siRNA-Vinblastine Run2-DMSO  | NM_0066<br>33 | IQGAP2 | IQ motif containing GTPase activating protein 2 | -0.284446 | Inlier |

Identification of Survival Genes in Human Glioblastoma Cells Using siRNA Screening  
 Nikhil G Thaker, Fang Zhang, Peter R. McDonald, Tong Ying Shun, Michael D Lewen, Ian F. Pollack, and John S. Lazo

Molecular Pharmacology

|                              |               |        |                                                 |           |         |
|------------------------------|---------------|--------|-------------------------------------------------|-----------|---------|
| siRNA-Temozolomide Run1-DMSO | NM_0066<br>33 | IQGAP2 | IQ motif containing GTPase activating protein 2 | -0.020587 | Inlier  |
| siRNA-Temozolomide Run3-DMSO | NM_0066<br>33 | IQGAP2 | IQ motif containing GTPase activating protein 2 | 0.020586  | Inlier  |
| siRNA Disorazole DMSO Run1   | NM_0066<br>33 | IQGAP2 | IQ motif containing GTPase activating protein 2 | 2.753752  | Inlier  |
| siRNA Disorazole DMSO Run2   | NM_0066<br>33 | IQGAP2 | IQ motif containing GTPase activating protein 2 | 3.440976  | Inlier  |
| siRNA-Vinblastine Run1-DMSO  | NM_0066<br>33 | IQGAP2 | IQ motif containing GTPase activating protein 2 | 3.773987  | Outlier |
| siRNA Disorazole DMSO Run3   | NM_1782<br>29 | IQGAP3 | IQ motif containing GTPase activating protein 3 | -0.776812 | Inlier  |
| siRNA-Vinblastine Run2-DMSO  | NM_1782<br>29 | IQGAP3 | IQ motif containing GTPase activating protein 3 | -0.742244 | Inlier  |
| siRNA-Temozolomide Run1-DMSO | NM_1782<br>29 | IQGAP3 | IQ motif containing GTPase activating protein 3 | -0.358111 | Inlier  |
| siRNA Disorazole DMSO Run1   | NM_1782<br>29 | IQGAP3 | IQ motif containing GTPase activating protein 3 | -0.074317 | Inlier  |
| siRNA-Temozolomide Run2-DMSO | NM_1782<br>29 | IQGAP3 | IQ motif containing GTPase activating protein 3 | 0.074317  | Inlier  |

Identification of Survival Genes in Human Glioblastoma Cells Using siRNA Screening  
 Nikhil G Thaker, Fang Zhang, Peter R. McDonald, Tong Ying Shun, Michael D Lewen, Ian F. Pollack, and John S. Lazo

Molecular Pharmacology

|                              |                  |        |                                                 |           |        |
|------------------------------|------------------|--------|-------------------------------------------------|-----------|--------|
| siRNA-Temozolomide Run3-DMSO | NM_1782<br>29    | IQGAP3 | IQ motif containing GTPase activating protein 3 | 0.606756  | Inlier |
| siRNA-Vinblastine Run1-DMSO  | NM_1782<br>29    | IQGAP3 | IQ motif containing GTPase activating protein 3 | 0.882135  | Inlier |
| siRNA Disorazole DMSO Run2   | NM_1782<br>29    | IQGAP3 | IQ motif containing GTPase activating protein 3 | 0.913728  | Inlier |
| siRNA-Temozolomide Run3-DMSO | NM_0010<br>25243 | IRAK1  | interleukin-1 receptor-associated kinase 1      | -1.260635 | Inlier |
| siRNA-Temozolomide Run2-DMSO | NM_0010<br>25243 | IRAK1  | interleukin-1 receptor-associated kinase 1      | -1.147827 | Inlier |
| siRNA-Temozolomide Run1-DMSO | NM_0010<br>25243 | IRAK1  | interleukin-1 receptor-associated kinase 1      | -0.436438 | Inlier |
| siRNA Disorazole DMSO Run3   | NM_0010<br>25243 | IRAK1  | interleukin-1 receptor-associated kinase 1      | -0.046324 | Inlier |
| siRNA Disorazole DMSO Run2   | NM_0010<br>25243 | IRAK1  | interleukin-1 receptor-associated kinase 1      | 0.046324  | Inlier |
| siRNA-Vinblastine Run2-DMSO  | NM_0010<br>25243 | IRAK1  | interleukin-1 receptor-associated kinase 1      | 0.59438   | Inlier |
| siRNA Disorazole DMSO Run1   | NM_0010<br>25243 | IRAK1  | interleukin-1 receptor-associated kinase 1      | 0.75462   | Inlier |

Identification of Survival Genes in Human Glioblastoma Cells Using siRNA Screening  
 Nikhil G Thaker, Fang Zhang, Peter R. McDonald, Tong Ying Shun, Michael D Lewen, Ian F. Pollack, and John S. Lazo  
 Molecular Pharmacology

|                              |                  |       |                                            |           |         |
|------------------------------|------------------|-------|--------------------------------------------|-----------|---------|
| siRNA-Vinblastine Run1-DMSO  | NM_0010<br>25243 | IRAK1 | interleukin-1 receptor-associated kinase 1 | 0.94917   | Inlier  |
| siRNA-Temozolomide Run3-DMSO | NM_0015<br>70    | IRAK2 | interleukin-1 receptor-associated kinase 2 | -3.239783 | Inlier  |
| siRNA Disorazole DMSO Run2   | NM_0015<br>70    | IRAK2 | interleukin-1 receptor-associated kinase 2 | -3.235914 | Inlier  |
| siRNA-Temozolomide Run1-DMSO | NM_0015<br>70    | IRAK2 | interleukin-1 receptor-associated kinase 2 | -0.542153 | Inlier  |
| siRNA-Temozolomide Run2-DMSO | NM_0015<br>70    | IRAK2 | interleukin-1 receptor-associated kinase 2 | -0.190183 | Inlier  |
| siRNA Disorazole DMSO Run3   | NM_0015<br>70    | IRAK2 | interleukin-1 receptor-associated kinase 2 | 0.190183  | Inlier  |
| siRNA Disorazole DMSO Run1   | NM_0015<br>70    | IRAK2 | interleukin-1 receptor-associated kinase 2 | 0.249786  | Inlier  |
| siRNA-Vinblastine Run1-DMSO  | NM_0015<br>70    | IRAK2 | interleukin-1 receptor-associated kinase 2 | 0.806847  | Inlier  |
| siRNA-Vinblastine Run2-DMSO  | NM_0015<br>70    | IRAK2 | interleukin-1 receptor-associated kinase 2 | 2.980711  | Inlier  |
| siRNA-Temozolomide Run3-DMSO | NM_0071<br>99    | IRAK3 | interleukin-1 receptor-associated kinase 3 | -4.429146 | Outlier |

Identification of Survival Genes in Human Glioblastoma Cells Using siRNA Screening  
 Nikhil G Thaker, Fang Zhang, Peter R. McDonald, Tong Ying Shun, Michael D Lewen, Ian F. Pollack, and John S. Lazo  
 Molecular Pharmacology

|                              |               |       |                                            |           |        |
|------------------------------|---------------|-------|--------------------------------------------|-----------|--------|
| siRNA-Temozolomide Run2-DMSO | NM_0071<br>99 | IRAK3 | interleukin-1 receptor-associated kinase 3 | -0.684229 | Inlier |
| siRNA Disorazole DMSO Run2   | NM_0071<br>99 | IRAK3 | interleukin-1 receptor-associated kinase 3 | -0.664771 | Inlier |
| siRNA Disorazole DMSO Run3   | NM_0071<br>99 | IRAK3 | interleukin-1 receptor-associated kinase 3 | -0.005222 | Inlier |
| siRNA-Temozolomide Run1-DMSO | NM_0071<br>99 | IRAK3 | interleukin-1 receptor-associated kinase 3 | 0.005222  | Inlier |
| siRNA-Vinblastine Run1-DMSO  | NM_0071<br>99 | IRAK3 | interleukin-1 receptor-associated kinase 3 | 0.588212  | Inlier |
| siRNA-Vinblastine Run2-DMSO  | NM_0071<br>99 | IRAK3 | interleukin-1 receptor-associated kinase 3 | 1.080288  | Inlier |
| siRNA Disorazole DMSO Run1   | NM_0071<br>99 | IRAK3 | interleukin-1 receptor-associated kinase 3 | 1.701819  | Inlier |
| siRNA-Temozolomide Run3-DMSO | NM_0161<br>23 | IRAK4 | interleukin-1 receptor-associated kinase 4 | -1.426394 | Inlier |
| siRNA-Temozolomide Run2-DMSO | NM_0161<br>23 | IRAK4 | interleukin-1 receptor-associated kinase 4 | -0.812039 | Inlier |
| siRNA-Temozolomide Run1-DMSO | NM_0161<br>23 | IRAK4 | interleukin-1 receptor-associated kinase 4 | -0.23064  | Inlier |

Identification of Survival Genes in Human Glioblastoma Cells Using siRNA Screening  
 Nikhil G Thaker, Fang Zhang, Peter R. McDonald, Tong Ying Shun, Michael D Lewen, Ian F. Pollack, and John S. Lazo  
 Molecular Pharmacology

|                              |               |       |                                            |           |        |
|------------------------------|---------------|-------|--------------------------------------------|-----------|--------|
| siRNA Disorazole DMSO Run3   | NM_0161<br>23 | IRAK4 | interleukin-1 receptor-associated kinase 4 | -0.121067 | Inlier |
| siRNA Disorazole DMSO Run1   | NM_0161<br>23 | IRAK4 | interleukin-1 receptor-associated kinase 4 | 0.121066  | Inlier |
| siRNA Disorazole DMSO Run2   | NM_0161<br>23 | IRAK4 | interleukin-1 receptor-associated kinase 4 | 0.536961  | Inlier |
| siRNA-Vinblastine Run2-DMSO  | NM_0161<br>23 | IRAK4 | interleukin-1 receptor-associated kinase 4 | 1.261389  | Inlier |
| siRNA-Vinblastine Run1-DMSO  | NM_0161<br>23 | IRAK4 | interleukin-1 receptor-associated kinase 4 | 1.646257  | Inlier |
| siRNA-Vinblastine Run2-DMSO  | NM_1814<br>49 | IREM2 | CD300 antigen like family member E         | -1.273044 | Inlier |
| siRNA-Temozolomide Run2-DMSO | NM_1814<br>49 | IREM2 | CD300 antigen like family member E         | -0.804227 | Inlier |
| siRNA Disorazole DMSO Run1   | NM_1814<br>49 | IREM2 | CD300 antigen like family member E         | -0.544773 | Inlier |
| siRNA Disorazole DMSO Run3   | NM_1814<br>49 | IREM2 | CD300 antigen like family member E         | -0.031595 | Inlier |
| siRNA-Temozolomide Run3-DMSO | NM_1814<br>49 | IREM2 | CD300 antigen like family member E         | 0.031596  | Inlier |

Identification of Survival Genes in Human Glioblastoma Cells Using siRNA Screening  
 Nikhil G Thaker, Fang Zhang, Peter R. McDonald, Tong Ying Shun, Michael D Lewen, Ian F. Pollack, and John S. Lazo  
 Molecular Pharmacology

|                              |               |        |                                             |           |         |
|------------------------------|---------------|--------|---------------------------------------------|-----------|---------|
| siRNA-Temozolomide Run1-DMSO | NM_1814<br>49 | IREM2  | CD300<br>antigen<br>like family<br>member E | 0.361808  | Inlier  |
| siRNA Disorazole DMSO Run2   | NM_1814<br>49 | IREM2  | CD300<br>antigen<br>like family<br>member E | 5.004722  | Outlier |
| siRNA-Vinblastine Run1-DMSO  | NM_1814<br>49 | IREM2  | CD300<br>antigen<br>like family<br>member E | 5.488974  | Outlier |
| siRNA Disorazole DMSO Run3   | NM_0022<br>01 | ISG20  | interferon<br>stimulated<br>gene<br>20kDa   | -1.620396 | Inlier  |
| siRNA-Vinblastine Run2-DMSO  | NM_0022<br>01 | ISG20  | interferon<br>stimulated<br>gene<br>20kDa   | -1.006318 | Inlier  |
| siRNA-Temozolomide Run2-DMSO | NM_0022<br>01 | ISG20  | interferon<br>stimulated<br>gene<br>20kDa   | -0.464007 | Inlier  |
| siRNA-Vinblastine Run1-DMSO  | NM_0022<br>01 | ISG20  | interferon<br>stimulated<br>gene<br>20kDa   | -0.010919 | Inlier  |
| siRNA-Temozolomide Run3-DMSO | NM_0022<br>01 | ISG20  | interferon<br>stimulated<br>gene<br>20kDa   | 0.01092   | Inlier  |
| siRNA-Temozolomide Run1-DMSO | NM_0022<br>01 | ISG20  | interferon<br>stimulated<br>gene<br>20kDa   | 0.624602  | Inlier  |
| siRNA Disorazole DMSO Run2   | NM_0022<br>01 | ISG20  | interferon<br>stimulated<br>gene<br>20kDa   | 0.724398  | Inlier  |
| siRNA Disorazole DMSO Run1   | NM_0022<br>01 | ISG20  | interferon<br>stimulated<br>gene<br>20kDa   | 1.228657  | Inlier  |
| siRNA-Temozolomide Run3-DMSO | NM_0163<br>68 | ISYNA1 | ISYNA1                                      | -0.88482  | Inlier  |
| siRNA-Temozolomide Run2-DMSO | NM_0163<br>68 | ISYNA1 | ISYNA1                                      | -0.65095  | Inlier  |

Identification of Survival Genes in Human Glioblastoma Cells Using siRNA Screening

Nikhil G Thaker, Fang Zhang, Peter R. McDonald, Tong Ying Shun, Michael D Lewen, Ian F. Pollack, and John S. Lazo

|                                  |               |        |                                                                     |           |        |
|----------------------------------|---------------|--------|---------------------------------------------------------------------|-----------|--------|
| siRNA-Vinblastine Run2-<br>DMSO  | NM_0163<br>68 | ISYNA1 | ISYNA1                                                              | -0.079222 | Inlier |
| siRNA-Temozolomide Run1-<br>DMSO | NM_0163<br>68 | ISYNA1 | ISYNA1                                                              | -0.019625 | Inlier |
| siRNA Disorazole DMSO Run1       | NM_0163<br>68 | ISYNA1 | ISYNA1                                                              | 0.019625  | Inlier |
| siRNA Disorazole DMSO Run3       | NM_0163<br>68 | ISYNA1 | ISYNA1                                                              | 0.69805   | Inlier |
| siRNA-Vinblastine Run1-<br>DMSO  | NM_0163<br>68 | ISYNA1 | ISYNA1                                                              | 0.761012  | Inlier |
| siRNA Disorazole DMSO Run2       | NM_0163<br>68 | ISYNA1 | ISYNA1                                                              | 0.932817  | Inlier |
| siRNA Disorazole DMSO Run2       | NM_0314<br>83 | ITCH   | itchy<br>homolog<br>E3<br>ubiquitin<br>protein<br>ligase<br>(mouse) | -1.331071 | Inlier |
| siRNA Disorazole DMSO Run3       | NM_0314<br>83 | ITCH   | itchy<br>homolog<br>E3<br>ubiquitin<br>protein<br>ligase<br>(mouse) | -0.877455 | Inlier |
| siRNA Disorazole DMSO Run1       | NM_0314<br>83 | ITCH   | itchy<br>homolog<br>E3<br>ubiquitin<br>protein<br>ligase<br>(mouse) | -0.312847 | Inlier |
| siRNA-Temozolomide Run2-<br>DMSO | NM_0314<br>83 | ITCH   | itchy<br>homolog<br>E3<br>ubiquitin<br>protein<br>ligase<br>(mouse) | -0.040783 | Inlier |
| siRNA-Temozolomide Run3-<br>DMSO | NM_0314<br>83 | ITCH   | itchy<br>homolog<br>E3<br>ubiquitin<br>protein<br>ligase<br>(mouse) | 0.040781  | Inlier |



Identification of Survival Genes in Human Glioblastoma Cells Using siRNA Screening  
 Nikhil G Thaker, Fang Zhang, Peter R. McDonald, Tong Ying Shun, Michael D Lewen, Ian F. Pollack, and John S. Lazo

Molecular Pharmacology

|                                  |               |        |                                                          |                  |
|----------------------------------|---------------|--------|----------------------------------------------------------|------------------|
|                                  |               |        | itchy<br>homolog<br>E3<br>ubiquitin<br>protein<br>ligase |                  |
| siRNA-Vinblastine Run2-<br>DMSO  | NM_0314<br>83 | ITCH   | (mouse)                                                  | 0.471545 Inlier  |
|                                  |               |        | itchy<br>homolog<br>E3<br>ubiquitin<br>protein<br>ligase |                  |
| siRNA-Temozolomide Run1-<br>DMSO | NM_0314<br>83 | ITCH   | (mouse)                                                  | 2.050092 Inlier  |
|                                  |               |        | itchy<br>homolog<br>E3<br>ubiquitin<br>protein<br>ligase |                  |
| siRNA-Vinblastine Run1-<br>DMSO  | NM_0314<br>83 | ITCH   | (mouse)                                                  | 5.709263 Outlier |
| siRNA-Temozolomide Run3-<br>DMSO | NM_1815<br>01 | ITGA1  | integrin,<br>alpha 1                                     | -1.069614 Inlier |
| siRNA-Temozolomide Run2-<br>DMSO | NM_1815<br>01 | ITGA1  | integrin,<br>alpha 1                                     | -0.848863 Inlier |
| siRNA-Vinblastine Run2-<br>DMSO  | NM_1815<br>01 | ITGA1  | integrin,<br>alpha 1                                     | -0.462864 Inlier |
| siRNA Disorazole DMSO Run3       | NM_1815<br>01 | ITGA1  | integrin,<br>alpha 1                                     | -0.461548 Inlier |
| siRNA Disorazole DMSO Run1       | NM_1815<br>01 | ITGA1  | integrin,<br>alpha 1                                     | 0.461548 Inlier  |
| siRNA-Temozolomide Run1-<br>DMSO | NM_1815<br>01 | ITGA1  | integrin,<br>alpha 1                                     | 0.500137 Inlier  |
| siRNA-Vinblastine Run1-<br>DMSO  | NM_1815<br>01 | ITGA1  | integrin,<br>alpha 1                                     | 1.994318 Inlier  |
| siRNA Disorazole DMSO Run2       | NM_1815<br>01 | ITGA1  | integrin,<br>alpha 1                                     | 2.167845 Inlier  |
| siRNA-Temozolomide Run3-<br>DMSO | NM_0036<br>37 | ITGA10 | integrin,<br>alpha 10                                    | -1.285047 Inlier |
| siRNA-Temozolomide Run2-<br>DMSO | NM_0036<br>37 | ITGA10 | integrin,<br>alpha 10                                    | -0.927775 Inlier |
| siRNA-Vinblastine Run2-<br>DMSO  | NM_0036<br>37 | ITGA10 | integrin,<br>alpha 10                                    | -0.463345 Inlier |
| siRNA Disorazole DMSO Run3       | NM_0036<br>37 | ITGA10 | integrin,<br>alpha 10                                    | -0.227324 Inlier |
| siRNA-Temozolomide Run1-<br>DMSO | NM_0036<br>37 | ITGA10 | integrin,<br>alpha 10                                    | 0.227325 Inlier  |
| siRNA-Vinblastine Run1-<br>DMSO  | NM_0036<br>37 | ITGA10 | integrin,<br>alpha 10                                    | 0.543236 Inlier  |
| siRNA Disorazole DMSO Run1       | NM_0036<br>37 | ITGA10 | integrin,<br>alpha 10                                    | 0.805764 Inlier  |

Identification of Survival Genes in Human Glioblastoma Cells Using siRNA Screening

Nikhil G Thaker, Fang Zhang, Peter R. McDonald, Tong Ying Shun, Michael D Lewen, Ian F. Pollack, and John S.

Lazo

|                            |         |        |            |                  |
|----------------------------|---------|--------|------------|------------------|
| Molecular Pharmacology     | NM_0036 |        | integrin,  |                  |
| siRNA Disorazole DMSO Run2 | 37      | ITGA10 | alpha 10   | 1.069896 Inlier  |
| siRNA-Temozolomide Run3-   | NM_0122 |        | integrin,  |                  |
| DMSO                       | 11      | ITGA11 | alpha 11   | -1.430663 Inlier |
| siRNA-Vinblastine Run2-    | NM_0122 |        | integrin,  |                  |
| DMSO                       | 11      | ITGA11 | alpha 11   | -1.016697 Inlier |
| siRNA-Temozolomide Run2-   | NM_0122 |        | integrin,  |                  |
| DMSO                       | 11      | ITGA11 | alpha 11   | -0.316192 Inlier |
| siRNA-Temozolomide Run1-   | NM_0122 |        | integrin,  |                  |
| DMSO                       | 11      | ITGA11 | alpha 11   | -0.085166 Inlier |
|                            | NM_0122 |        | integrin,  |                  |
| siRNA Disorazole DMSO Run3 | 11      | ITGA11 | alpha 11   | 0.085166 Inlier  |
|                            | NM_0122 |        | integrin,  |                  |
| siRNA Disorazole DMSO Run1 | 11      | ITGA11 | alpha 11   | 0.332303 Inlier  |
| siRNA-Vinblastine Run1-    | NM_0122 |        | integrin,  |                  |
| DMSO                       | 11      | ITGA11 | alpha 11   | 2.252822 Inlier  |
|                            | NM_0122 |        | integrin,  |                  |
| siRNA Disorazole DMSO Run2 | 11      | ITGA11 | alpha 11   | 2.566166 Inlier  |
|                            |         |        | integrin,  |                  |
|                            |         |        | alpha 2    |                  |
|                            |         |        | (CD49B,    |                  |
|                            |         |        | alpha 2    |                  |
|                            |         |        | subunit of |                  |
| siRNA-Temozolomide Run2-   | NM_0022 |        | VLA-2      |                  |
| DMSO                       | 03      | ITGA2  | receptor)  | -0.951346 Inlier |
|                            |         |        | integrin,  |                  |
|                            |         |        | alpha 2    |                  |
|                            |         |        | (CD49B,    |                  |
|                            |         |        | alpha 2    |                  |
|                            |         |        | subunit of |                  |
| siRNA-Temozolomide Run3-   | NM_0022 |        | VLA-2      |                  |
| DMSO                       | 03      | ITGA2  | receptor)  | -0.830189 Inlier |
|                            |         |        | integrin,  |                  |
|                            |         |        | alpha 2    |                  |
|                            |         |        | (CD49B,    |                  |
|                            |         |        | alpha 2    |                  |
|                            |         |        | subunit of |                  |
| siRNA-Temozolomide Run1-   | NM_0022 |        | VLA-2      |                  |
| DMSO                       | 03      | ITGA2  | receptor)  | -0.293501 Inlier |
|                            |         |        | integrin,  |                  |
|                            |         |        | alpha 2    |                  |
|                            |         |        | (CD49B,    |                  |
|                            |         |        | alpha 2    |                  |
|                            |         |        | subunit of |                  |
|                            | NM_0022 |        | VLA-2      |                  |
| siRNA Disorazole DMSO Run1 | 03      | ITGA2  | receptor)  | -0.257489 Inlier |

Identification of Survival Genes in Human Glioblastoma Cells Using siRNA Screening

Nikhil G Thaker, Fang Zhang, Peter R. McDonald, Tong Ying Shun, Michael D Lewen, Ian F. Pollack, and John S. Lazo

Molecular Pharmacology

|                                  |               |        |                                                                                                            |           |        |
|----------------------------------|---------------|--------|------------------------------------------------------------------------------------------------------------|-----------|--------|
| siRNA Disorazole DMSO Run3       | NM_0022<br>03 | ITGA2  | integrin,<br>alpha 2<br>(CD49B,<br>alpha 2<br>subunit of<br>VLA-2<br>receptor)                             | 0.257489  | Inlier |
| siRNA-Vinblastine Run2-<br>DMSO  | NM_0022<br>03 | ITGA2  | integrin,<br>alpha 2<br>(CD49B,<br>alpha 2<br>subunit of<br>VLA-2<br>receptor)                             | 0.518811  | Inlier |
| siRNA Disorazole DMSO Run2       | NM_0022<br>03 | ITGA2  | integrin,<br>alpha 2<br>(CD49B,<br>alpha 2<br>subunit of<br>VLA-2<br>receptor)                             | 1.411577  | Inlier |
| siRNA-Vinblastine Run1-<br>DMSO  | NM_0022<br>03 | ITGA2  | integrin,<br>alpha 2b<br>(platelet<br>glycoprotei<br>n IIb of<br>IIb/IIIa<br>complex,<br>antigen<br>CD41B) | 1.741928  | Inlier |
| siRNA-Temozolomide Run3-<br>DMSO | NM_0004<br>19 | ITGA2B | integrin,<br>alpha 2b<br>(platelet<br>glycoprotei<br>n IIb of<br>IIb/IIIa<br>complex,<br>antigen<br>CD41B) | -0.99412  | Inlier |
| siRNA-Temozolomide Run2-<br>DMSO | NM_0004<br>19 | ITGA2B | integrin,<br>alpha 2b<br>(platelet<br>glycoprotei<br>n IIb of<br>IIb/IIIa<br>complex,<br>antigen<br>CD41B) | -0.684491 | Inlier |

Identification of Survival Genes in Human Glioblastoma Cells Using siRNA Screening

Nikhil G Thaker, Fang Zhang, Peter R. McDonald, Tong Ying Shun, Michael D Lewen, Ian F. Pollack, and John S. Lazo

Molecular Pharmacology

| siRNA Treatment              | Gene ID   | Gene Name | Log Fold Change | Outlier Status |
|------------------------------|-----------|-----------|-----------------|----------------|
| siRNA-Temozolomide Run1-DMSO | NM_000419 | ITGA2B    | -0.081103       | Inlier         |
| siRNA Disorazole DMSO Run3   | NM_000419 | ITGA2B    | -0.023556       | Inlier         |
| siRNA Disorazole DMSO Run1   | NM_000419 | ITGA2B    | 0.023556        | Inlier         |
| siRNA Disorazole DMSO Run2   | NM_000419 | ITGA2B    | 0.664509        | Inlier         |
| siRNA-Vinblastine Run2-DMSO  | NM_000419 | ITGA2B    | 1.316605        | Inlier         |

integrin, alpha 2b (platelet glycoprotein IIb of IIb/IIIa complex, antigen CD41B)

Identification of Survival Genes in Human Glioblastoma Cells Using siRNA Screening  
 Nikhil G Thaker, Fang Zhang, Peter R. McDonald, Tong Ying Shun, Michael D Lewen, Ian F. Pollack, and John S. Lazo

Molecular Pharmacology

|                              |           |        |                                                                                   |           |        |
|------------------------------|-----------|--------|-----------------------------------------------------------------------------------|-----------|--------|
| siRNA-Vinblastine Run1-DMSO  | NM_000419 | ITGA2B | integrin, alpha 2b (platelet glycoprotein IIb of IIb/IIIa complex, antigen CD41B) | 1.329993  | Inlier |
| siRNA-Vinblastine Run2-DMSO  | NM_002204 | ITGA3  | integrin, alpha 3 (antigen CD49C, alpha 3 subunit of VLA-3 receptor)              | -0.7895   | Inlier |
| siRNA-Temozolomide Run2-DMSO | NM_002204 | ITGA3  | integrin, alpha 3 (antigen CD49C, alpha 3 subunit of VLA-3 receptor)              | -0.5595   | Inlier |
| siRNA Disorazole DMSO Run3   | NM_002204 | ITGA3  | integrin, alpha 3 (antigen CD49C, alpha 3 subunit of VLA-3 receptor)              | -0.387058 | Inlier |
| siRNA Disorazole DMSO Run1   | NM_002204 | ITGA3  | integrin, alpha 3 (antigen CD49C, alpha 3 subunit of VLA-3 receptor)              | -0.207519 | Inlier |
| siRNA-Temozolomide Run3-DMSO | NM_002204 | ITGA3  | integrin, alpha 3 (antigen CD49C, alpha 3 subunit of VLA-3 receptor)              | 0.207519  | Inlier |

Identification of Survival Genes in Human Glioblastoma Cells Using siRNA Screening

Nikhil G Thaker, Fang Zhang, Peter R. McDonald, Tong Ying Shun, Michael D Lewen, Ian F. Pollack, and John S. Lazo

Molecular Pharmacology

|                              |           |       |                                                                      |           |         |
|------------------------------|-----------|-------|----------------------------------------------------------------------|-----------|---------|
| siRNA-Temozolomide Run1-DMSO | NM_002204 | ITGA3 | integrin, alpha 3 (antigen CD49C, alpha 3 subunit of VLA-3 receptor) | 1.367448  | Inlier  |
| siRNA-Vinblastine Run1-DMSO  | NM_002204 | ITGA3 | integrin, alpha 3 (antigen CD49C, alpha 3 subunit of VLA-3 receptor) | 10.04125  | Outlier |
| siRNA Disorazole DMSO Run2   | NM_002204 | ITGA3 | integrin, alpha 4 (antigen CD49D, alpha 4 subunit of VLA-4 receptor) | 10.4236   | Outlier |
| siRNA-Vinblastine Run2-DMSO  | NM_000885 | ITGA4 | integrin, alpha 4 (antigen CD49D, alpha 4 subunit of VLA-4 receptor) | -0.701365 | Inlier  |
| siRNA-Temozolomide Run2-DMSO | NM_000885 | ITGA4 | integrin, alpha 4 (antigen CD49D, alpha 4 subunit of VLA-4 receptor) | -0.647635 | Inlier  |
| siRNA Disorazole DMSO Run1   | NM_000885 | ITGA4 | integrin, alpha 4 (antigen CD49D, alpha 4 subunit of VLA-4 receptor) | -0.247297 | Inlier  |

Identification of Survival Genes in Human Glioblastoma Cells Using siRNA Screening

Nikhil G Thaker, Fang Zhang, Peter R. McDonald, Tong Ying Shun, Michael D Lewen, Ian F. Pollack, and John S. Lazo

Molecular Pharmacology

|                              |           |       |                                                                      |           |        |
|------------------------------|-----------|-------|----------------------------------------------------------------------|-----------|--------|
| siRNA-Temozolomide Run3-DMSO | NM_000885 | ITGA4 | integrin, alpha 4 (antigen CD49D, alpha 4 subunit of VLA-4 receptor) | -0.183344 | Inlier |
| siRNA Disorazole DMSO Run3   | NM_000885 | ITGA4 | integrin, alpha 4 (antigen CD49D, alpha 4 subunit of VLA-4 receptor) | 0.183344  | Inlier |
| siRNA-Temozolomide Run1-DMSO | NM_000885 | ITGA4 | integrin, alpha 4 (antigen CD49D, alpha 4 subunit of VLA-4 receptor) | 1.212539  | Inlier |
| siRNA-Vinblastine Run1-DMSO  | NM_000885 | ITGA4 | integrin, alpha 4 (antigen CD49D, alpha 4 subunit of VLA-4 receptor) | 2.950203  | Inlier |
| siRNA Disorazole DMSO Run2   | NM_000885 | ITGA4 | integrin, alpha 4 (antigen CD49D, alpha 4 subunit of VLA-4 receptor) | 2.95237   | Inlier |
| siRNA-Temozolomide Run2-DMSO | NM_002205 | ITGA5 | integrin, alpha 5 (fibronectin receptor, alpha polypeptide)          | -1.653205 | Inlier |

Identification of Survival Genes in Human Glioblastoma Cells Using siRNA Screening

Nikhil G Thaker, Fang Zhang, Peter R. McDonald, Tong Ying Shun, Michael D Lewen, Ian F. Pollack, and John S. Lazo

Molecular Pharmacology

|                              |           |       |                                                             |           |        |
|------------------------------|-----------|-------|-------------------------------------------------------------|-----------|--------|
| siRNA-Temozolomide Run3-DMSO | NM_002205 | ITGA5 | integrin, alpha 5 (fibronectin receptor, alpha polypeptide) | -0.722189 | Inlier |
| siRNA-Temozolomide Run1-DMSO | NM_002205 | ITGA5 | integrin, alpha 5 (fibronectin receptor, alpha polypeptide) | -0.626811 | Inlier |
| siRNA-Vinblastine Run2-DMSO  | NM_002205 | ITGA5 | integrin, alpha 5 (fibronectin receptor, alpha polypeptide) | -0.223774 | Inlier |
| siRNA Disorazole DMSO Run3   | NM_002205 | ITGA5 | integrin, alpha 5 (fibronectin receptor, alpha polypeptide) | 0.223774  | Inlier |
| siRNA Disorazole DMSO Run1   | NM_002205 | ITGA5 | integrin, alpha 5 (fibronectin receptor, alpha polypeptide) | 0.313726  | Inlier |
| siRNA-Vinblastine Run1-DMSO  | NM_002205 | ITGA5 | integrin, alpha 5 (fibronectin receptor, alpha polypeptide) | 0.950637  | Inlier |



Identification of Survival Genes in Human Glioblastoma Cells Using siRNA Screening  
 Nikhil G Thaker, Fang Zhang, Peter R. McDonald, Tong Ying Shun, Michael D Lewen, Ian F. Pollack, and John S. Lazo  
 Molecular Pharmacology

|                                  |               |       |                                                                            |                  |
|----------------------------------|---------------|-------|----------------------------------------------------------------------------|------------------|
|                                  |               |       | integrin,<br>alpha 5<br>(fibronectin<br>receptor,<br>alpha<br>polypeptide) |                  |
| siRNA Disorazole DMSO Run2       | NM_0022<br>05 | ITGA5 |                                                                            | 0.993128 Inlier  |
| siRNA-Temozolomide Run3-<br>DMSO | NM_0002<br>10 | ITGA6 | integrin,<br>alpha 6                                                       | -1.591697 Inlier |
| siRNA-Temozolomide Run2-<br>DMSO | NM_0002<br>10 | ITGA6 | integrin,<br>alpha 6                                                       | -0.903577 Inlier |
| siRNA Disorazole DMSO Run3       | NM_0002<br>10 | ITGA6 | integrin,<br>alpha 6                                                       | -0.445423 Inlier |
| siRNA-Vinblastine Run2-<br>DMSO  | NM_0002<br>10 | ITGA6 | integrin,<br>alpha 6                                                       | -0.23438 Inlier  |
| siRNA Disorazole DMSO Run1       | NM_0002<br>10 | ITGA6 | integrin,<br>alpha 6                                                       | 0.23438 Inlier   |
| siRNA-Temozolomide Run1-<br>DMSO | NM_0002<br>10 | ITGA6 | integrin,<br>alpha 6                                                       | 0.425533 Inlier  |
| siRNA-Vinblastine Run1-<br>DMSO  | NM_0002<br>10 | ITGA6 | integrin,<br>alpha 6                                                       | 1.082456 Inlier  |
| siRNA Disorazole DMSO Run2       | NM_0002<br>10 | ITGA6 | integrin,<br>alpha 6                                                       | 1.112583 Inlier  |
| siRNA-Temozolomide Run3-<br>DMSO | NM_0022<br>06 | ITGA7 | integrin,<br>alpha 7                                                       | -1.558001 Inlier |
| siRNA-Temozolomide Run2-<br>DMSO | NM_0022<br>06 | ITGA7 | integrin,<br>alpha 7                                                       | -1.049184 Inlier |
| siRNA-Temozolomide Run1-<br>DMSO | NM_0022<br>06 | ITGA7 | integrin,<br>alpha 7                                                       | -0.299816 Inlier |
| siRNA Disorazole DMSO Run3       | NM_0022<br>06 | ITGA7 | integrin,<br>alpha 7                                                       | -0.055305 Inlier |
| siRNA-Vinblastine Run2-<br>DMSO  | NM_0022<br>06 | ITGA7 | integrin,<br>alpha 7                                                       | 0.055305 Inlier  |
| siRNA Disorazole DMSO Run1       | NM_0022<br>06 | ITGA7 | integrin,<br>alpha 7                                                       | 0.245843 Inlier  |
| siRNA-Vinblastine Run1-<br>DMSO  | NM_0022<br>06 | ITGA7 | integrin,<br>alpha 7                                                       | 1.113985 Inlier  |
| siRNA Disorazole DMSO Run2       | NM_0022<br>06 | ITGA7 | integrin,<br>alpha 7                                                       | 1.487203 Inlier  |
| siRNA-Temozolomide Run3-<br>DMSO | NM_0022<br>07 | ITGA9 | integrin,<br>alpha 9                                                       | -1.58097 Inlier  |
| siRNA-Temozolomide Run2-<br>DMSO | NM_0022<br>07 | ITGA9 | integrin,<br>alpha 9                                                       | -0.916546 Inlier |
| siRNA-Temozolomide Run1-<br>DMSO | NM_0022<br>07 | ITGA9 | integrin,<br>alpha 9                                                       | -0.698642 Inlier |
| siRNA-Vinblastine Run2-<br>DMSO  | NM_0022<br>07 | ITGA9 | integrin,<br>alpha 9                                                       | -0.044782 Inlier |
| siRNA Disorazole DMSO Run3       | NM_0022<br>07 | ITGA9 | integrin,<br>alpha 9                                                       | 0.044782 Inlier  |
| siRNA Disorazole DMSO Run1       | NM_0022<br>07 | ITGA9 | integrin,<br>alpha 9                                                       | 0.210761 Inlier  |

Identification of Survival Genes in Human Glioblastoma Cells Using siRNA Screening

Nikhil G Thaker, Fang Zhang, Peter R. McDonald, Tong Ying Shun, Michael D Lewen, Ian F. Pollack, and John S. Lazo

| siRNA Treatment              | Gene ID   | Gene Name | Log Fold Change | Classification |
|------------------------------|-----------|-----------|-----------------|----------------|
| siRNA-Vinblastine Run1-DMSO  | NM_002207 | ITGA9     | 0.650358        | Inlier         |
| siRNA-Disorazole DMSO Run2   | NM_002207 | ITGA9     | 1.031039        | Inlier         |
| siRNA-Temozolomide Run3-DMSO | NM_002208 | ITGAE     | -1.617152       | Inlier         |
| siRNA-Temozolomide Run2-DMSO | NM_002208 | ITGAE     | -0.783339       | Inlier         |
| siRNA-Temozolomide Run1-DMSO | NM_002208 | ITGAE     | -0.638951       | Inlier         |
| siRNA-Vinblastine Run2-DMSO  | NM_002208 | ITGAE     | -0.045414       | Inlier         |

Identification of Survival Genes in Human Glioblastoma Cells Using siRNA Screening

Nikhil G Thaker, Fang Zhang, Peter R. McDonald, Tong Ying Shun, Michael D Lewen, Ian F. Pollack, and John S. Lazo

Molecular Pharmacology

|                                 |               |       |                                                                                                                          |          |        |
|---------------------------------|---------------|-------|--------------------------------------------------------------------------------------------------------------------------|----------|--------|
| siRNA Disorazole DMSO Run3      | NM_0022<br>08 | ITGAE | integrin,<br>alpha E<br>(antigen<br>CD103,<br>human<br>mucosal<br>lymphocyt<br>e antigen<br>1; alpha<br>polypeptid<br>e) | 0.045414 | Inlier |
| siRNA Disorazole DMSO Run1      | NM_0022<br>08 | ITGAE | integrin,<br>alpha E<br>(antigen<br>CD103,<br>human<br>mucosal<br>lymphocyt<br>e antigen<br>1; alpha<br>polypeptid<br>e) | 0.445398 | Inlier |
| siRNA-Vinblastine Run1-<br>DMSO | NM_0022<br>08 | ITGAE | integrin,<br>alpha E<br>(antigen<br>CD103,<br>human<br>mucosal<br>lymphocyt<br>e antigen<br>1; alpha<br>polypeptid<br>e) | 0.710048 | Inlier |
| siRNA Disorazole DMSO Run2      | NM_0022<br>08 | ITGAE | integrin,<br>alpha E<br>(antigen<br>CD103,<br>human<br>mucosal<br>lymphocyt<br>e antigen<br>1; alpha<br>polypeptid<br>e) | 1.085652 | Inlier |

Identification of Survival Genes in Human Glioblastoma Cells Using siRNA Screening

Nikhil G Thaker, Fang Zhang, Peter R. McDonald, Tong Ying Shun, Michael D Lewen, Ian F. Pollack, and John S. Lazo

Molecular Pharmacology

|                              |           |       |                                                                                                       |           |        |
|------------------------------|-----------|-------|-------------------------------------------------------------------------------------------------------|-----------|--------|
| siRNA-Temozolomide Run3-DMSO | NM_002209 | ITGAL | integrin, alpha L (antigen CD11A (p180), lymphocyte function-associated antigen 1; alpha polypeptide) | -0.809894 | Inlier |
| siRNA-Temozolomide Run2-DMSO | NM_002209 | ITGAL | integrin, alpha L (antigen CD11A (p180), lymphocyte function-associated antigen 1; alpha polypeptide) | -0.793388 | Inlier |
| siRNA-Vinblastine Run2-DMSO  | NM_002209 | ITGAL | integrin, alpha L (antigen CD11A (p180), lymphocyte function-associated antigen 1; alpha polypeptide) | -0.160295 | Inlier |
| siRNA Disorazole DMSO Run3   | NM_002209 | ITGAL | integrin, alpha L (antigen CD11A (p180), lymphocyte function-associated antigen 1; alpha polypeptide) | -0.063341 | Inlier |

Identification of Survival Genes in Human Glioblastoma Cells Using siRNA Screening

Nikhil G Thaker, Fang Zhang, Peter R. McDonald, Tong Ying Shun, Michael D Lewen, Ian F. Pollack, and John S. Lazo

Molecular Pharmacology

|                                  |               |       |                                                                                                                                           |          |        |
|----------------------------------|---------------|-------|-------------------------------------------------------------------------------------------------------------------------------------------|----------|--------|
| siRNA Disorazole DMSO Run1       | NM_0022<br>09 | ITGAL | integrin,<br>alpha L<br>(antigen<br>CD11A<br>(p180),<br>lymphocyt<br>e function-<br>associated<br>antigen 1;<br>alpha<br>polypeptid<br>e) | 0.063341 | Inlier |
| siRNA-Temozolomide Run1-<br>DMSO | NM_0022<br>09 | ITGAL | integrin,<br>alpha L<br>(antigen<br>CD11A<br>(p180),<br>lymphocyt<br>e function-<br>associated<br>antigen 1;<br>alpha<br>polypeptid<br>e) | 0.555612 | Inlier |
| siRNA Disorazole DMSO Run2       | NM_0022<br>09 | ITGAL | integrin,<br>alpha L<br>(antigen<br>CD11A<br>(p180),<br>lymphocyt<br>e function-<br>associated<br>antigen 1;<br>alpha<br>polypeptid<br>e) | 1.726491 | Inlier |
| siRNA-Vinblastine Run1-<br>DMSO  | NM_0022<br>09 | ITGAL | integrin,<br>alpha L<br>(antigen<br>CD11A<br>(p180),<br>lymphocyt<br>e function-<br>associated<br>antigen 1;<br>alpha<br>polypeptid<br>e) | 2.540754 | Inlier |

Identification of Survival Genes in Human Glioblastoma Cells Using siRNA Screening

Nikhil G Thaker, Fang Zhang, Peter R. McDonald, Tong Ying Shun, Michael D Lewen, Ian F. Pollack, and John S. Lazo

Molecular Pharmacology

|                              |           |       |                                                                                                                              |           |        |
|------------------------------|-----------|-------|------------------------------------------------------------------------------------------------------------------------------|-----------|--------|
| siRNA-Temozolomide Run3-DMSO | NM_000632 | ITGAM | integrin, alpha M (complement component receptor 3, alpha; also known as CD11b (p170), macrophage antigen alpha polypeptide) | -0.987627 | Inlier |
|------------------------------|-----------|-------|------------------------------------------------------------------------------------------------------------------------------|-----------|--------|

|                              |           |       |                                                                                                                              |          |        |
|------------------------------|-----------|-------|------------------------------------------------------------------------------------------------------------------------------|----------|--------|
| siRNA-Temozolomide Run2-DMSO | NM_000632 | ITGAM | integrin, alpha M (complement component receptor 3, alpha; also known as CD11b (p170), macrophage antigen alpha polypeptide) | -0.82455 | Inlier |
|------------------------------|-----------|-------|------------------------------------------------------------------------------------------------------------------------------|----------|--------|

Identification of Survival Genes in Human Glioblastoma Cells Using siRNA Screening

Nikhil G Thaker, Fang Zhang, Peter R. McDonald, Tong Ying Shun, Michael D Lewen, Ian F. Pollack, and John S. Lazo

Molecular Pharmacology

|                              |           |       |                                                                                                                              |           |        |
|------------------------------|-----------|-------|------------------------------------------------------------------------------------------------------------------------------|-----------|--------|
| siRNA-Temozolomide Run1-DMSO | NM_000632 | ITGAM | integrin, alpha M (complement component receptor 3, alpha; also known as CD11b (p170), macrophage antigen alpha polypeptide) | -0.622698 | Inlier |
|------------------------------|-----------|-------|------------------------------------------------------------------------------------------------------------------------------|-----------|--------|

|                            |           |       |                                                                                                                              |           |        |
|----------------------------|-----------|-------|------------------------------------------------------------------------------------------------------------------------------|-----------|--------|
| siRNA Disorazole DMSO Run3 | NM_000632 | ITGAM | integrin, alpha M (complement component receptor 3, alpha; also known as CD11b (p170), macrophage antigen alpha polypeptide) | -0.005142 | Inlier |
|----------------------------|-----------|-------|------------------------------------------------------------------------------------------------------------------------------|-----------|--------|

Identification of Survival Genes in Human Glioblastoma Cells Using siRNA Screening

Nikhil G Thaker, Fang Zhang, Peter R. McDonald, Tong Ying Shun, Michael D Lewen, Ian F. Pollack, and John S.

Lazo

Molecular Pharmacology

|                                 |               |       |                                                                                                                                                                            |          |        |
|---------------------------------|---------------|-------|----------------------------------------------------------------------------------------------------------------------------------------------------------------------------|----------|--------|
| siRNA Disorazole DMSO Run1      | NM_0006<br>32 | ITGAM | integrin,<br>alpha M<br>(complemen<br>ent<br>componen<br>t receptor<br>3, alpha;<br>also<br>known as<br>CD11b<br>(p170),<br>macrophage<br>antigen<br>alpha<br>polypeptide) | 0.005142 | Inlier |
| siRNA-Vinblastine Run2-<br>DMSO | NM_0006<br>32 | ITGAM | integrin,<br>alpha M<br>(complemen<br>ent<br>componen<br>t receptor<br>3, alpha;<br>also<br>known as<br>CD11b<br>(p170),<br>macrophage<br>antigen<br>alpha<br>polypeptide) | 0.517265 | Inlier |



Identification of Survival Genes in Human Glioblastoma Cells Using siRNA Screening

Nikhil G Thaker, Fang Zhang, Peter R. McDonald, Tong Ying Shun, Michael D Lewen, Ian F. Pollack, and John S. Lazo

Molecular Pharmacology

|                                  |               |       |                                                                                                                                                                                |           |        |
|----------------------------------|---------------|-------|--------------------------------------------------------------------------------------------------------------------------------------------------------------------------------|-----------|--------|
| siRNA Disorazole DMSO Run2       | NM_0006<br>32 | ITGAM | integrin,<br>alpha M<br>(complemen<br>ent<br>componen<br>t receptor<br>3, alpha;<br>also<br>known as<br>CD11b<br>(p170),<br>macrophage<br>antigen<br>alpha<br>polypeptid<br>e) | 0.726302  | Inlier |
| siRNA-Vinblastine Run1-<br>DMSO  | NM_0006<br>32 | ITGAM | integrin,<br>alpha M<br>(complemen<br>ent<br>componen<br>t receptor<br>3, alpha;<br>also<br>known as<br>CD11b<br>(p170),<br>macrophage<br>antigen<br>alpha<br>polypeptid<br>e) | 1.211353  | Inlier |
| siRNA-Temozolomide Run2-<br>DMSO | NM_0022<br>10 | ITGAV | integrin,<br>alpha V<br>(vitronecti<br>n receptor,<br>alpha<br>polypeptid<br>e, antigen<br>CD51)                                                                               | -0.803682 | Inlier |

Identification of Survival Genes in Human Glioblastoma Cells Using siRNA Screening

Nikhil G Thaker, Fang Zhang, Peter R. McDonald, Tong Ying Shun, Michael D Lewen, Ian F. Pollack, and John S. Lazo

Molecular Pharmacology

|                              |               |       |                                                                                                |           |        |
|------------------------------|---------------|-------|------------------------------------------------------------------------------------------------|-----------|--------|
| siRNA-Vinblastine Run2-DMSO  | NM_0022<br>10 | ITGAV | integrin,<br>alpha V<br>(vitronectin<br>receptor,<br>alpha<br>polypeptide,<br>antigen<br>CD51) | -0.545318 | Inlier |
| siRNA Disorazole DMSO Run3   | NM_0022<br>10 | ITGAV | integrin,<br>alpha V<br>(vitronectin<br>receptor,<br>alpha<br>polypeptide,<br>antigen<br>CD51) | -0.318987 | Inlier |
| siRNA-Temozolomide Run3-DMSO | NM_0022<br>10 | ITGAV | integrin,<br>alpha V<br>(vitronectin<br>receptor,<br>alpha<br>polypeptide,<br>antigen<br>CD51) | -0.121104 | Inlier |
| siRNA Disorazole DMSO Run1   | NM_0022<br>10 | ITGAV | integrin,<br>alpha V<br>(vitronectin<br>receptor,<br>alpha<br>polypeptide,<br>antigen<br>CD51) | 0.121104  | Inlier |
| siRNA-Temozolomide Run1-DMSO | NM_0022<br>10 | ITGAV | integrin,<br>alpha V<br>(vitronectin<br>receptor,<br>alpha<br>polypeptide,<br>antigen<br>CD51) | 2.159859  | Inlier |

Identification of Survival Genes in Human Glioblastoma Cells Using siRNA Screening

Nikhil G Thaker, Fang Zhang, Peter R. McDonald, Tong Ying Shun, Michael D Lewen, Ian F. Pollack, and John S. Lazo

Molecular Pharmacology

|                                  |               |       |                                                                                                |           |         |
|----------------------------------|---------------|-------|------------------------------------------------------------------------------------------------|-----------|---------|
| siRNA Disorazole DMSO Run2       | NM_0022<br>10 | ITGAV | integrin,<br>alpha V<br>(vitronectin<br>receptor,<br>alpha<br>polypeptide,<br>antigen<br>CD51) | 9.311929  | Outlier |
| siRNA-Vinblastine Run1-<br>DMSO  | NM_0022<br>10 | ITGAV | integrin,<br>alpha V<br>(vitronectin<br>receptor,<br>alpha<br>polypeptide,<br>antigen<br>CD51) | 10.09203  | Outlier |
| siRNA-Temozolomide Run3-<br>DMSO | NM_0008<br>87 | ITGAX | integrin,<br>alpha X<br>(antigen<br>CD11C<br>(p150),<br>alpha<br>polypeptide)                  | -1.450116 | Inlier  |
| siRNA-Temozolomide Run2-<br>DMSO | NM_0008<br>87 | ITGAX | integrin,<br>alpha X<br>(antigen<br>CD11C<br>(p150),<br>alpha<br>polypeptide)                  | -0.7527   | Inlier  |
| siRNA-Temozolomide Run1-<br>DMSO | NM_0008<br>87 | ITGAX | integrin,<br>alpha X<br>(antigen<br>CD11C<br>(p150),<br>alpha<br>polypeptide)                  | -0.5963   | Inlier  |
| siRNA-Vinblastine Run2-<br>DMSO  | NM_0008<br>87 | ITGAX | integrin,<br>alpha X<br>(antigen<br>CD11C<br>(p150),<br>alpha<br>polypeptide)                  | -0.128835 | Inlier  |

Identification of Survival Genes in Human Glioblastoma Cells Using siRNA Screening

Nikhil G Thaker, Fang Zhang, Peter R. McDonald, Tong Ying Shun, Michael D Lewen, Ian F. Pollack, and John S. Lazo

Molecular Pharmacology

|                                  |               |       |                                                                                                                              |           |        |
|----------------------------------|---------------|-------|------------------------------------------------------------------------------------------------------------------------------|-----------|--------|
| siRNA Disorazole DMSO Run3       | NM_0008<br>87 | ITGAX | integrin,<br>alpha X<br>(antigen<br>CD11C<br>(p150),<br>alpha<br>polypeptid<br>e)                                            | 0.128835  | Inlier |
| siRNA Disorazole DMSO Run1       | NM_0008<br>87 | ITGAX | integrin,<br>alpha X<br>(antigen<br>CD11C<br>(p150),<br>alpha<br>polypeptid<br>e)                                            | 0.187843  | Inlier |
| siRNA-Vinblastine Run1-<br>DMSO  | NM_0008<br>87 | ITGAX | integrin,<br>alpha X<br>(antigen<br>CD11C<br>(p150),<br>alpha<br>polypeptid<br>e)                                            | 0.827513  | Inlier |
| siRNA Disorazole DMSO Run2       | NM_0008<br>87 | ITGAX | integrin,<br>alpha X<br>(antigen<br>CD11C<br>(p150),<br>alpha<br>polypeptid<br>e)                                            | 1.5675    | Inlier |
| siRNA-Temozolomide Run3-<br>DMSO | NM_0336<br>69 | ITGB1 | integrin,<br>beta 1<br>(fibronecti<br>n receptor,<br>beta<br>polypeptid<br>e, antigen<br>CD29<br>includes<br>MDF2,<br>MSK12) | -0.758375 | Inlier |

Identification of Survival Genes in Human Glioblastoma Cells Using siRNA Screening

Nikhil G Thaker, Fang Zhang, Peter R. McDonald, Tong Ying Shun, Michael D Lewen, Ian F. Pollack, and John S. Lazo

Molecular Pharmacology

|                              |           |       |                                                                                              |           |        |
|------------------------------|-----------|-------|----------------------------------------------------------------------------------------------|-----------|--------|
| siRNA-Temozolomide Run2-DMSO | NM_033669 | ITGB1 | integrin, beta 1 (fibronectin receptor, beta polypeptide, antigen CD29 includes MDF2, MSK12) | -0.661361 | Inlier |
| siRNA Disorazole DMSO Run3   | NM_033669 | ITGB1 | integrin, beta 1 (fibronectin receptor, beta polypeptide, antigen CD29 includes MDF2, MSK12) | -0.147532 | Inlier |
| siRNA-Vinblastine Run2-DMSO  | NM_033669 | ITGB1 | integrin, beta 1 (fibronectin receptor, beta polypeptide, antigen CD29 includes MDF2, MSK12) | -0.064073 | Inlier |
| siRNA-Temozolomide Run1-DMSO | NM_033669 | ITGB1 | integrin, beta 1 (fibronectin receptor, beta polypeptide, antigen CD29 includes MDF2, MSK12) | 0.064073  | Inlier |

Identification of Survival Genes in Human Glioblastoma Cells Using siRNA Screening  
 Nikhil G Thaker, Fang Zhang, Peter R. McDonald, Tong Ying Shun, Michael D Lewen, Ian F. Pollack, and John S. Lazo  
 Molecular Pharmacology

|                                 |               |       |                                                                                                                            |          |        |
|---------------------------------|---------------|-------|----------------------------------------------------------------------------------------------------------------------------|----------|--------|
| siRNA Disorazole DMSO Run1      | NM_0336<br>69 | ITGB1 | integrin,<br>beta 1<br>(fibronectin<br>receptor,<br>beta<br>polypeptide,<br>antigen<br>CD29<br>includes<br>MDF2,<br>MSK12) | 0.687639 | Inlier |
| siRNA-Vinblastine Run1-<br>DMSO | NM_0336<br>69 | ITGB1 | integrin,<br>beta 1<br>(fibronectin<br>receptor,<br>beta<br>polypeptide,<br>antigen<br>CD29<br>includes<br>MDF2,<br>MSK12) | 1.768976 | Inlier |
| siRNA Disorazole DMSO Run2      | NM_0336<br>69 | ITGB1 | integrin,<br>beta 1<br>(fibronectin<br>receptor,<br>beta<br>polypeptide,<br>antigen<br>CD29<br>includes<br>MDF2,<br>MSK12) | 1.828022 | Inlier |

Identification of Survival Genes in Human Glioblastoma Cells Using siRNA Screening

Nikhil G Thaker, Fang Zhang, Peter R. McDonald, Tong Ying Shun, Michael D Lewen, Ian F. Pollack, and John S. Lazo

Molecular Pharmacology

|                              |           |       |                                                                                                                            |           |        |
|------------------------------|-----------|-------|----------------------------------------------------------------------------------------------------------------------------|-----------|--------|
| siRNA-Temozolomide Run3-DMSO | NM_000211 | ITGB2 | integrin, beta 2 (antigen CD18 (p95), lymphocyte function-associated antigen 1; macrophage antigen 1 (mac-1) beta subunit) | -0.828932 | Inlier |
| siRNA-Vinblastine Run1-DMSO  | NM_000211 | ITGB2 | integrin, beta 2 (antigen CD18 (p95), lymphocyte function-associated antigen 1; macrophage antigen 1 (mac-1) beta subunit) | -0.774856 | Inlier |
| siRNA-Temozolomide Run2-DMSO | NM_000211 | ITGB2 | integrin, beta 2 (antigen CD18 (p95), lymphocyte function-associated antigen 1; macrophage antigen 1 (mac-1) beta subunit) | -0.602269 | Inlier |

Identification of Survival Genes in Human Glioblastoma Cells Using siRNA Screening

Nikhil G Thaker, Fang Zhang, Peter R. McDonald, Tong Ying Shun, Michael D Lewen, Ian F. Pollack, and John S. Lazo

Molecular Pharmacology

|                              |           |       |                                                                                                                            |           |        |
|------------------------------|-----------|-------|----------------------------------------------------------------------------------------------------------------------------|-----------|--------|
| siRNA-Vinblastine Run2-DMSO  | NM_000211 | ITGB2 | integrin, beta 2 (antigen CD18 (p95), lymphocyte function-associated antigen 1; macrophage antigen 1 (mac-1) beta subunit) | -0.297238 | Inlier |
| siRNA Disorazole DMSO Run3   | NM_000211 | ITGB2 | integrin, beta 2 (antigen CD18 (p95), lymphocyte function-associated antigen 1; macrophage antigen 1 (mac-1) beta subunit) | 0.297238  | Inlier |
| siRNA-Temozolomide Run1-DMSO | NM_000211 | ITGB2 | integrin, beta 2 (antigen CD18 (p95), lymphocyte function-associated antigen 1; macrophage antigen 1 (mac-1) beta subunit) | 0.604568  | Inlier |



Identification of Survival Genes in Human Glioblastoma Cells Using siRNA Screening

Nikhil G Thaker, Fang Zhang, Peter R. McDonald, Tong Ying Shun, Michael D Lewen, Ian F. Pollack, and John S. Lazo

Molecular Pharmacology

|                                  |               |       |                                                                                                                                                                     |                  |
|----------------------------------|---------------|-------|---------------------------------------------------------------------------------------------------------------------------------------------------------------------|------------------|
| siRNA Disorazole DMSO Run1       | NM_0002<br>11 | ITGB2 | integrin,<br>beta 2<br>(antigen<br>CD18<br>(p95),<br>lymphocyt<br>e function-<br>associated<br>antigen 1;<br>macroph<br>ge antigen<br>1 (mac-1)<br>beta<br>subunit) | 0.744432 Inlier  |
| siRNA Disorazole DMSO Run2       | NM_0002<br>11 | ITGB2 | integrin,<br>beta 2<br>(antigen<br>CD18<br>(p95),<br>lymphocyt<br>e function-<br>associated<br>antigen 1;<br>macroph<br>ge antigen<br>1 (mac-1)<br>beta<br>subunit) | 1.252078 Inlier  |
| siRNA-Temozolomide Run1-<br>DMSO | NM_0002<br>12 | ITGB3 | integrin,<br>beta 3<br>(platelet<br>glycoprotei<br>n IIIa,<br>antigen<br>CD61)                                                                                      | -0.816915 Inlier |
| siRNA-Temozolomide Run2-<br>DMSO | NM_0002<br>12 | ITGB3 | integrin,<br>beta 3<br>(platelet<br>glycoprotei<br>n IIIa,<br>antigen<br>CD61)                                                                                      | -0.532085 Inlier |

Identification of Survival Genes in Human Glioblastoma Cells Using siRNA Screening

Nikhil G Thaker, Fang Zhang, Peter R. McDonald, Tong Ying Shun, Michael D Lewen, Ian F. Pollack, and John S. Lazo

Molecular Pharmacology

|                                  |                  |       |                                                                                |                  |
|----------------------------------|------------------|-------|--------------------------------------------------------------------------------|------------------|
|                                  |                  |       | integrin,<br>beta 3<br>(platelet<br>glycoprotei<br>n IIIa,<br>antigen<br>CD61) |                  |
| siRNA-Vinblastine Run2-<br>DMSO  | NM_0002<br>12    | ITGB3 |                                                                                | -0.389281 Inlier |
| siRNA-Temozolomide Run3-<br>DMSO | NM_0002<br>12    | ITGB3 | integrin,<br>beta 3<br>(platelet<br>glycoprotei<br>n IIIa,<br>antigen<br>CD61) | -0.073767 Inlier |
| siRNA Disorazole DMSO Run1       | NM_0002<br>12    | ITGB3 | integrin,<br>beta 3<br>(platelet<br>glycoprotei<br>n IIIa,<br>antigen<br>CD61) | 0.073766 Inlier  |
| siRNA Disorazole DMSO Run3       | NM_0002<br>12    | ITGB3 | integrin,<br>beta 3<br>(platelet<br>glycoprotei<br>n IIIa,<br>antigen<br>CD61) | 1.062038 Inlier  |
| siRNA Disorazole DMSO Run2       | NM_0002<br>12    | ITGB3 | integrin,<br>beta 3<br>(platelet<br>glycoprotei<br>n IIIa,<br>antigen<br>CD61) | 5.441092 Outlier |
| siRNA-Vinblastine Run1-<br>DMSO  | NM_0002<br>12    | ITGB3 | antigen<br>CD61)                                                               | 7.33174 Outlier  |
| siRNA-Temozolomide Run3-<br>DMSO | NM_0010<br>05619 | ITGB4 | integrin,<br>beta 4                                                            | -0.84838 Inlier  |
| siRNA-Temozolomide Run2-<br>DMSO | NM_0010<br>05619 | ITGB4 | integrin,<br>beta 4                                                            | -0.531508 Inlier |
| siRNA-Vinblastine Run2-<br>DMSO  | NM_0010<br>05619 | ITGB4 | integrin,<br>beta 4                                                            | -0.43038 Inlier  |
| siRNA Disorazole DMSO Run3       | NM_0010<br>05619 | ITGB4 | integrin,<br>beta 4                                                            | -0.364047 Inlier |
| siRNA-Temozolomide Run1-<br>DMSO | NM_0010<br>05619 | ITGB4 | integrin,<br>beta 4                                                            | 0.364047 Inlier  |

Identification of Survival Genes in Human Glioblastoma Cells Using siRNA Screening  
 Nikhil G Thaker, Fang Zhang, Peter R. McDonald, Tong Ying Shun, Michael D Lewen, Ian F. Pollack, and John S. Lazo

|                              |         |         |                 |           |         |
|------------------------------|---------|---------|-----------------|-----------|---------|
| Molecular Pharmacology       | NM_0010 |         | integrin,       |           |         |
| siRNA Disorazole DMSO Run1   | 05619   | ITGB4   | beta 4          | 0.817492  | Inlier  |
| siRNA-Vinblastine Run1-DMSO  | NM_0010 |         | integrin,       |           |         |
|                              | 05619   | ITGB4   | beta 4          | 1.645125  | Inlier  |
| siRNA Disorazole DMSO Run2   | NM_0010 |         | integrin,       |           |         |
|                              | 05619   | ITGB4   | beta 4          | 1.656692  | Inlier  |
|                              |         |         | integrin        |           |         |
|                              |         |         | beta 4          |           |         |
| siRNA-Temozolomide Run3-DMSO | NM_1814 | ITGB4BP | binding protein | -1.326424 | Inlier  |
|                              | 68      |         | integrin        |           |         |
|                              |         |         | beta 4          |           |         |
| siRNA-Temozolomide Run2-DMSO | NM_1814 | ITGB4BP | binding protein | -0.982414 | Inlier  |
|                              | 68      |         | integrin        |           |         |
|                              |         |         | beta 4          |           |         |
|                              | NM_1814 |         | binding protein |           |         |
| siRNA Disorazole DMSO Run3   | 68      | ITGB4BP | integrin        | -0.601034 | Inlier  |
|                              |         |         | beta 4          |           |         |
| siRNA-Temozolomide Run1-DMSO | NM_1814 | ITGB4BP | binding protein | -0.062337 | Inlier  |
|                              | 68      |         | integrin        |           |         |
|                              |         |         | beta 4          |           |         |
| siRNA-Vinblastine Run2-DMSO  | NM_1814 | ITGB4BP | binding protein | 0.062337  | Inlier  |
|                              | 68      |         | integrin        |           |         |
|                              |         |         | beta 4          |           |         |
|                              | NM_1814 |         | binding protein |           |         |
| siRNA Disorazole DMSO Run1   | 68      | ITGB4BP | integrin        | 0.293256  | Inlier  |
|                              |         |         | beta 4          |           |         |
| siRNA-Vinblastine Run1-DMSO  | NM_1814 | ITGB4BP | binding protein | 0.747966  | Inlier  |
|                              | 68      |         | integrin        |           |         |
|                              |         |         | beta 4          |           |         |
|                              | NM_1814 |         | binding protein |           |         |
| siRNA Disorazole DMSO Run2   | 68      | ITGB4BP | integrin,       | 1.460783  | Inlier  |
| siRNA-Temozolomide Run2-DMSO | NM_0022 | ITGB5   | beta 5          | -3.621485 | Outlier |
|                              | 13      |         | integrin,       |           |         |
| siRNA-Temozolomide Run3-DMSO | NM_0022 | ITGB5   | beta 5          | -2.4359   | Inlier  |
|                              | 13      |         | integrin,       |           |         |
|                              | NM_0022 |         | beta 5          |           |         |
| siRNA Disorazole DMSO Run3   | 13      | ITGB5   | beta 5          | -0.224856 | Inlier  |
| siRNA-Temozolomide Run1-DMSO | NM_0022 | ITGB5   | integrin,       | -0.134368 | Inlier  |
|                              | 13      |         | beta 5          |           |         |
| siRNA-Vinblastine Run2-DMSO  | NM_0022 | ITGB5   | integrin,       | 0.134368  | Inlier  |
|                              | 13      |         | beta 5          |           |         |
| siRNA-Vinblastine Run1-DMSO  | NM_0022 | ITGB5   | integrin,       | 0.601783  | Inlier  |
|                              | 13      |         | beta 5          |           |         |
|                              | NM_0022 |         | integrin,       |           |         |
| siRNA Disorazole DMSO Run2   | 13      | ITGB5   | beta 5          | 0.747217  | Inlier  |

Identification of Survival Genes in Human Glioblastoma Cells Using siRNA Screening  
 Nikhil G Thaker, Fang Zhang, Peter R. McDonald, Tong Ying Shun, Michael D Lewen, Ian F. Pollack, and John S. Lazo

|                              |         |       |           |                  |
|------------------------------|---------|-------|-----------|------------------|
| Molecular Pharmacology       | NM_0022 |       | integrin, |                  |
| siRNA Disorazole DMSO Run1   | 13      | ITGB5 | beta 5    | 1.432409 Inlier  |
| siRNA-Temozolomide Run3-DMSO | NM_0008 |       | integrin, |                  |
|                              | 88      | ITGB6 | beta 6    | -1.541667 Inlier |
| siRNA-Temozolomide Run2-DMSO | NM_0008 |       | integrin, |                  |
|                              | 88      | ITGB6 | beta 6    | -0.795771 Inlier |
| siRNA-Temozolomide Run1-DMSO | NM_0008 |       | integrin, |                  |
|                              | 88      | ITGB6 | beta 6    | -0.596118 Inlier |
|                              | NM_0008 |       | integrin, |                  |
| siRNA Disorazole DMSO Run3   | 88      | ITGB6 | beta 6    | -0.042651 Inlier |
| siRNA-Vinblastine Run1-DMSO  | NM_0008 |       | integrin, |                  |
|                              | 88      | ITGB6 | beta 6    | 0.042651 Inlier  |
| siRNA-Vinblastine Run2-DMSO  | NM_0008 |       | integrin, |                  |
|                              | 88      | ITGB6 | beta 6    | 0.143221 Inlier  |
|                              | NM_0008 |       | integrin, |                  |
| siRNA Disorazole DMSO Run2   | 88      | ITGB6 | beta 6    | 0.752882 Inlier  |
|                              | NM_0008 |       | integrin, |                  |
| siRNA Disorazole DMSO Run1   | 88      | ITGB6 | beta 6    | 0.899186 Inlier  |
| siRNA-Temozolomide Run3-DMSO | NM_0008 |       | integrin, |                  |
|                              | 89      | ITGB7 | beta 7    | -0.985921 Inlier |
|                              | NM_0008 |       | integrin, |                  |
| siRNA Disorazole DMSO Run3   | 89      | ITGB7 | beta 7    | -0.701993 Inlier |
| siRNA-Temozolomide Run2-DMSO | NM_0008 |       | integrin, |                  |
|                              | 89      | ITGB7 | beta 7    | -0.498984 Inlier |
| siRNA-Vinblastine Run2-DMSO  | NM_0008 |       | integrin, |                  |
|                              | 89      | ITGB7 | beta 7    | -0.336361 Inlier |
| siRNA-Temozolomide Run1-DMSO | NM_0008 |       | integrin, |                  |
|                              | 89      | ITGB7 | beta 7    | 0.336361 Inlier  |
|                              | NM_0008 |       | integrin, |                  |
| siRNA Disorazole DMSO Run1   | 89      | ITGB7 | beta 7    | 0.647007 Inlier  |
| siRNA-Vinblastine Run1-DMSO  | NM_0008 |       | integrin, |                  |
|                              | 89      | ITGB7 | beta 7    | 0.826591 Inlier  |
|                              | NM_0008 |       | integrin, |                  |
| siRNA Disorazole DMSO Run2   | 89      | ITGB7 | beta 7    | 1.326177 Inlier  |
| siRNA-Temozolomide Run3-DMSO | NM_0022 |       | integrin, |                  |
|                              | 14      | ITGB8 | beta 8    | -1.706465 Inlier |
| siRNA-Temozolomide Run2-DMSO | NM_0022 |       | integrin, |                  |
|                              | 14      | ITGB8 | beta 8    | -0.486207 Inlier |
| siRNA-Vinblastine Run2-DMSO  | NM_0022 |       | integrin, |                  |
|                              | 14      | ITGB8 | beta 8    | -0.313483 Inlier |
| siRNA-Temozolomide Run1-DMSO | NM_0022 |       | integrin, |                  |
|                              | 14      | ITGB8 | beta 8    | -0.065669 Inlier |
|                              | NM_0022 |       | integrin, |                  |
| siRNA Disorazole DMSO Run3   | 14      | ITGB8 | beta 8    | 0.065668 Inlier  |
| siRNA-Vinblastine Run1-DMSO  | NM_0022 |       | integrin, |                  |
|                              | 14      | ITGB8 | beta 8    | 0.862793 Inlier  |
|                              | NM_0022 |       | integrin, |                  |
| siRNA Disorazole DMSO Run2   | 14      | ITGB8 | beta 8    | 1.13052 Inlier   |
|                              | NM_0022 |       | integrin, |                  |
| siRNA Disorazole DMSO Run1   | 14      | ITGB8 | beta 8    | 1.150953 Inlier  |

Identification of Survival Genes in Human Glioblastoma Cells Using siRNA Screening  
 Nikhil G Thaker, Fang Zhang, Peter R. McDonald, Tong Ying Shun, Michael D Lewen, Ian F. Pollack, and John S. Lazo

Molecular Pharmacology

|                              |               |       |                                        |           |        |
|------------------------------|---------------|-------|----------------------------------------|-----------|--------|
| siRNA-Temozolomide Run3-DMSO | NM_0055<br>46 | ITK   | IL2-inducible T-cell kinase            | -1.308629 | Inlier |
| siRNA-Temozolomide Run1-DMSO | NM_0055<br>46 | ITK   | IL2-inducible T-cell kinase            | -1.287093 | Inlier |
| siRNA-Temozolomide Run2-DMSO | NM_0055<br>46 | ITK   | IL2-inducible T-cell kinase            | -0.402437 | Inlier |
| siRNA Disorazole DMSO Run3   | NM_0055<br>46 | ITK   | IL2-inducible T-cell kinase            | -0.118609 | Inlier |
| siRNA Disorazole DMSO Run2   | NM_0055<br>46 | ITK   | IL2-inducible T-cell kinase            | 0.118609  | Inlier |
| siRNA-Vinblastine Run1-DMSO  | NM_0055<br>46 | ITK   | IL2-inducible T-cell kinase            | 0.608838  | Inlier |
| siRNA Disorazole DMSO Run1   | NM_0055<br>46 | ITK   | IL2-inducible T-cell kinase            | 0.740162  | Inlier |
| siRNA-Vinblastine Run2-DMSO  | NM_0055<br>46 | ITK   | IL2-inducible T-cell kinase            | 2.111112  | Inlier |
| siRNA-Temozolomide Run3-DMSO | NM_0176<br>25 | ITLN1 | intelectin 1 (galactofuranose binding) | -0.951943 | Inlier |
| siRNA-Temozolomide Run2-DMSO | NM_0176<br>25 | ITLN1 | intelectin 1 (galactofuranose binding) | -0.65418  | Inlier |
| siRNA Disorazole DMSO Run3   | NM_0176<br>25 | ITLN1 | intelectin 1 (galactofuranose binding) | -0.449966 | Inlier |
| siRNA-Vinblastine Run2-DMSO  | NM_0176<br>25 | ITLN1 | intelectin 1 (galactofuranose binding) | -0.329992 | Inlier |

Identification of Survival Genes in Human Glioblastoma Cells Using siRNA Screening

Nikhil G Thaker, Fang Zhang, Peter R. McDonald, Tong Ying Shun, Michael D Lewen, Ian F. Pollack, and John S. Lazo

Molecular Pharmacology

|                                  |               |       |                                                                                      |           |        |
|----------------------------------|---------------|-------|--------------------------------------------------------------------------------------|-----------|--------|
| siRNA Disorazole DMSO Run1       | NM_0176<br>25 | ITLN1 | intelectin 1<br>(galactofur<br>anose<br>binding)                                     | 0.329992  | Inlier |
| siRNA Disorazole DMSO Run2       | NM_0176<br>25 | ITLN1 | intelectin 1<br>(galactofur<br>anose<br>binding)                                     | 0.69482   | Inlier |
| siRNA-Temozolomide Run1-<br>DMSO | NM_0176<br>25 | ITLN1 | intelectin 1<br>(galactofur<br>anose<br>binding)                                     | 0.778779  | Inlier |
| siRNA-Vinblastine Run1-<br>DMSO  | NM_0176<br>25 | ITLN1 | intelectin 1<br>(galactofur<br>anose<br>binding)                                     | 1.381132  | Inlier |
| siRNA Disorazole DMSO Run1       | NM_0808<br>78 | ITLN2 | intelectin 2                                                                         | -1.575791 | Inlier |
| siRNA-Temozolomide Run2-<br>DMSO | NM_0808<br>78 | ITLN2 | intelectin 2                                                                         | -1.086132 | Inlier |
| siRNA Disorazole DMSO Run3       | NM_0808<br>78 | ITLN2 | intelectin 2                                                                         | -0.992056 | Inlier |
| siRNA-Vinblastine Run2-<br>DMSO  | NM_0808<br>78 | ITLN2 | intelectin 2                                                                         | -0.242192 | Inlier |
| siRNA-Temozolomide Run3-<br>DMSO | NM_0808<br>78 | ITLN2 | intelectin 2                                                                         | 0.242191  | Inlier |
| siRNA-Vinblastine Run1-<br>DMSO  | NM_0808<br>78 | ITLN2 | intelectin 2                                                                         | 0.309064  | Inlier |
| siRNA-Temozolomide Run1-<br>DMSO | NM_0808<br>78 | ITLN2 | intelectin 2                                                                         | 0.356944  | Inlier |
| siRNA Disorazole DMSO Run2       | NM_0808<br>78 | ITLN2 | intelectin 2<br>inosine<br>triphospha<br>tase<br>(nucleosid<br>e<br>triphospha<br>te | 1.587297  | Inlier |
| siRNA-Temozolomide Run3-<br>DMSO | NM_0334<br>53 | ITPA  | pyrophosp<br>hatase)                                                                 | -1.714104 | Inlier |

Identification of Survival Genes in Human Glioblastoma Cells Using siRNA Screening

Nikhil G Thaker, Fang Zhang, Peter R. McDonald, Tong Ying Shun, Michael D Lewen, Ian F. Pollack, and John S. Lazo

Molecular Pharmacology

|                              |               |      |                                                                |           |        |
|------------------------------|---------------|------|----------------------------------------------------------------|-----------|--------|
| siRNA-Temozolomide Run2-DMSO | NM_0334<br>53 | ITPA | inosine triphosphate (nucleoside triphosphate pyrophosphatase) | -1.422762 | Inlier |
| siRNA Disorazole DMSO Run3   | NM_0334<br>53 | ITPA | inosine triphosphate (nucleoside triphosphate pyrophosphatase) | -1.007183 | Inlier |
| siRNA-Temozolomide Run1-DMSO | NM_0334<br>53 | ITPA | inosine triphosphate (nucleoside triphosphate pyrophosphatase) | -0.134071 | Inlier |
| siRNA Disorazole DMSO Run1   | NM_0334<br>53 | ITPA | inosine triphosphate (nucleoside triphosphate pyrophosphatase) | 0.134071  | Inlier |
| siRNA Disorazole DMSO Run2   | NM_0334<br>53 | ITPA | inosine triphosphate (nucleoside triphosphate pyrophosphatase) | 0.286755  | Inlier |

Identification of Survival Genes in Human Glioblastoma Cells Using siRNA Screening

Nikhil G Thaker, Fang Zhang, Peter R. McDonald, Tong Ying Shun, Michael D Lewen, Ian F. Pollack, and John S.

Lazo

Molecular Pharmacology

|                              |           |       |                                                                  |           |        |
|------------------------------|-----------|-------|------------------------------------------------------------------|-----------|--------|
| siRNA-Vinblastine Run1-DMSO  | NM_033453 | ITPA  | inosine triphosphatase (nucleoside triphosphate pyrophosphatase) | 0.341817  | Inlier |
| siRNA-Vinblastine Run2-DMSO  | NM_033453 | ITPA  | inosine triphosphatase (nucleoside triphosphate pyrophosphatase) | 1.187969  | Inlier |
| siRNA-Temozolomide Run3-DMSO | NM_014216 | ITPK1 | inositol 1,3,4-triphosphate 5/6 kinase                           | -0.865241 | Inlier |
| siRNA-Temozolomide Run2-DMSO | NM_014216 | ITPK1 | inositol 1,3,4-triphosphate 5/6 kinase                           | -0.538832 | Inlier |
| siRNA-Temozolomide Run1-DMSO | NM_014216 | ITPK1 | inositol 1,3,4-triphosphate 5/6 kinase                           | -0.496015 | Inlier |
| siRNA Disorazole DMSO Run1   | NM_014216 | ITPK1 | inositol 1,3,4-triphosphate 5/6 kinase                           | -0.117251 | Inlier |
| siRNA-Vinblastine Run1-DMSO  | NM_014216 | ITPK1 | inositol 1,3,4-triphosphate 5/6 kinase                           | 0.117252  | Inlier |
| siRNA-Vinblastine Run2-DMSO  | NM_014216 | ITPK1 | inositol 1,3,4-triphosphate 5/6 kinase                           | 0.810168  | Inlier |



Identification of Survival Genes in Human Glioblastoma Cells Using siRNA Screening  
 Nikhil G Thaker, Fang Zhang, Peter R. McDonald, Tong Ying Shun, Michael D Lewen, Ian F. Pollack, and John S. Lazo

Molecular Pharmacology

|                                  |         |    |       |                                                        |           |        |
|----------------------------------|---------|----|-------|--------------------------------------------------------|-----------|--------|
| siRNA Disorazole DMSO Run2       | NM_0142 | 16 | ITPK1 | inositol<br>1,3,4-<br>triphospha<br>te 5/6<br>kinase   | 1.869593  | Inlier |
| siRNA Disorazole DMSO Run3       | NM_0142 | 16 | ITPK1 | inositol<br>1,3,4-<br>triphospha<br>te 5/6<br>kinase   | 3.428004  | Inlier |
| siRNA-Temozolomide Run3-<br>DMSO | NM_0022 | 20 | ITPKA | inositol<br>1,4,5-<br>trisphosph<br>ate 3-<br>kinase A | -0.972646 | Inlier |
| siRNA-Temozolomide Run1-<br>DMSO | NM_0022 | 20 | ITPKA | inositol<br>1,4,5-<br>trisphosph<br>ate 3-<br>kinase A | -0.756674 | Inlier |
| siRNA-Temozolomide Run2-<br>DMSO | NM_0022 | 20 | ITPKA | inositol<br>1,4,5-<br>trisphosph<br>ate 3-<br>kinase A | -0.551855 | Inlier |
| siRNA Disorazole DMSO Run2       | NM_0022 | 20 | ITPKA | inositol<br>1,4,5-<br>trisphosph<br>ate 3-<br>kinase A | -0.44125  | Inlier |
| siRNA Disorazole DMSO Run1       | NM_0022 | 20 | ITPKA | inositol<br>1,4,5-<br>trisphosph<br>ate 3-<br>kinase A | 0.44125   | Inlier |
| siRNA-Vinblastine Run1-<br>DMSO  | NM_0022 | 20 | ITPKA | inositol<br>1,4,5-<br>trisphosph<br>ate 3-<br>kinase A | 0.592326  | Inlier |
| siRNA Disorazole DMSO Run3       | NM_0022 | 20 | ITPKA | inositol<br>1,4,5-<br>trisphosph<br>ate 3-<br>kinase A | 0.954176  | Inlier |
| siRNA-Vinblastine Run2-<br>DMSO  | NM_0022 | 20 | ITPKA | inositol<br>1,4,5-<br>trisphosph<br>ate 3-<br>kinase A | 1.100928  | Inlier |

Identification of Survival Genes in Human Glioblastoma Cells Using siRNA Screening  
 Nikhil G Thaker, Fang Zhang, Peter R. McDonald, Tong Ying Shun, Michael D Lewen, Ian F. Pollack, and John S. Lazo

Molecular Pharmacology

|                              |               |       |                                                        |                   |
|------------------------------|---------------|-------|--------------------------------------------------------|-------------------|
| siRNA-Temozolomide Run3-DMSO | NM_0022<br>21 | ITPKB | inositol<br>1,4,5-<br>trisphosph<br>ate 3-<br>kinase B | -4.172682 Outlier |
| siRNA Disorazole DMSO Run2   | NM_0022<br>21 | ITPKB | inositol<br>1,4,5-<br>trisphosph<br>ate 3-<br>kinase B | -2.146744 Inlier  |
| siRNA-Temozolomide Run2-DMSO | NM_0022<br>21 | ITPKB | inositol<br>1,4,5-<br>trisphosph<br>ate 3-<br>kinase B | -0.866814 Inlier  |
| siRNA Disorazole DMSO Run3   | NM_0022<br>21 | ITPKB | inositol<br>1,4,5-<br>trisphosph<br>ate 3-<br>kinase B | -0.031206 Inlier  |
| siRNA Disorazole DMSO Run1   | NM_0022<br>21 | ITPKB | inositol<br>1,4,5-<br>trisphosph<br>ate 3-<br>kinase B | 0.031206 Inlier   |
| siRNA-Temozolomide Run1-DMSO | NM_0022<br>21 | ITPKB | inositol<br>1,4,5-<br>trisphosph<br>ate 3-<br>kinase B | 0.151971 Inlier   |
| siRNA-Vinblastine Run1-DMSO  | NM_0022<br>21 | ITPKB | inositol<br>1,4,5-<br>trisphosph<br>ate 3-<br>kinase B | 0.482185 Inlier   |
| siRNA-Vinblastine Run2-DMSO  | NM_0022<br>21 | ITPKB | inositol<br>1,4,5-<br>trisphosph<br>ate 3-<br>kinase B | 0.986592 Inlier   |
| siRNA-Temozolomide Run3-DMSO | NM_0251<br>94 | ITPKC | inositol<br>1,4,5-<br>trisphosph<br>ate 3-<br>kinase C | -1.669794 Inlier  |
| siRNA Disorazole DMSO Run2   | NM_0251<br>94 | ITPKC | inositol<br>1,4,5-<br>trisphosph<br>ate 3-<br>kinase C | -1.545527 Inlier  |

Identification of Survival Genes in Human Glioblastoma Cells Using siRNA Screening

Nikhil G Thaker, Fang Zhang, Peter R. McDonald, Tong Ying Shun, Michael D Lewen, Ian F. Pollack, and John S. Lazo

Molecular Pharmacology

|                                  |               |       |                                                               |           |         |
|----------------------------------|---------------|-------|---------------------------------------------------------------|-----------|---------|
| siRNA Disorazole DMSO Run1       | NM_0251<br>94 | ITPKC | inositol<br>1,4,5-<br>trisphosph<br>ate 3-<br>kinase C        | -0.36566  | Inlier  |
| siRNA-Temozolomide Run1-<br>DMSO | NM_0251<br>94 | ITPKC | inositol<br>1,4,5-<br>trisphosph<br>ate 3-<br>kinase C        | -0.038145 | Inlier  |
| siRNA-Temozolomide Run2-<br>DMSO | NM_0251<br>94 | ITPKC | inositol<br>1,4,5-<br>trisphosph<br>ate 3-<br>kinase C        | 0.038145  | Inlier  |
| siRNA-Vinblastine Run1-<br>DMSO  | NM_0251<br>94 | ITPKC | inositol<br>1,4,5-<br>trisphosph<br>ate 3-<br>kinase C        | 0.4041    | Inlier  |
| siRNA Disorazole DMSO Run3       | NM_0251<br>94 | ITPKC | inositol<br>1,4,5-<br>trisphosph<br>ate 3-<br>kinase C        | 0.9449    | Inlier  |
| siRNA-Vinblastine Run2-<br>DMSO  | NM_0251<br>94 | ITPKC | inositol<br>1,4,5-<br>trisphosph<br>ate 3-<br>kinase C        | 1.545647  | Inlier  |
| siRNA-Temozolomide Run2-<br>DMSO | NM_0022<br>22 | ITPR1 | inositol<br>1,4,5-<br>triphospha<br>te<br>receptor,<br>type 1 | -4.838973 | Outlier |
| siRNA-Temozolomide Run3-<br>DMSO | NM_0022<br>22 | ITPR1 | inositol<br>1,4,5-<br>triphospha<br>te<br>receptor,<br>type 1 | -1.653711 | Inlier  |
| siRNA Disorazole DMSO Run1       | NM_0022<br>22 | ITPR1 | inositol<br>1,4,5-<br>triphospha<br>te<br>receptor,<br>type 1 | -0.486476 | Inlier  |

Identification of Survival Genes in Human Glioblastoma Cells Using siRNA Screening

Nikhil G Thaker, Fang Zhang, Peter R. McDonald, Tong Ying Shun, Michael D Lewen, Ian F. Pollack, and John S. Lazo

Molecular Pharmacology

|                              |           |       |                                              |           |        |
|------------------------------|-----------|-------|----------------------------------------------|-----------|--------|
| siRNA-Temozolomide Run1-DMSO | NM_002222 | ITPR1 | inositol 1,4,5-triphosphate receptor, type 1 | -0.013691 | Inlier |
| siRNA Disorazole DMSO Run3   | NM_002222 | ITPR1 | inositol 1,4,5-triphosphate receptor, type 1 | 0.013691  | Inlier |
| siRNA-Vinblastine Run2-DMSO  | NM_002222 | ITPR1 | inositol 1,4,5-triphosphate receptor, type 1 | 0.428935  | Inlier |
| siRNA Disorazole DMSO Run2   | NM_002222 | ITPR1 | inositol 1,4,5-triphosphate receptor, type 1 | 0.862524  | Inlier |
| siRNA-Vinblastine Run1-DMSO  | NM_002222 | ITPR1 | inositol 1,4,5-triphosphate receptor, type 1 | 1.526478  | Inlier |
| siRNA-Vinblastine Run2-DMSO  | NM_002223 | ITPR2 | inositol 1,4,5-triphosphate receptor, type 2 | -1.011906 | Inlier |
| siRNA-Temozolomide Run3-DMSO | NM_002223 | ITPR2 | inositol 1,4,5-triphosphate receptor, type 2 | -0.947091 | Inlier |
| siRNA-Temozolomide Run2-DMSO | NM_002223 | ITPR2 | inositol 1,4,5-triphosphate receptor, type 2 | -0.697925 | Inlier |

Identification of Survival Genes in Human Glioblastoma Cells Using siRNA Screening

Nikhil G Thaker, Fang Zhang, Peter R. McDonald, Tong Ying Shun, Michael D Lewen, Ian F. Pollack, and John S. Lazo

Molecular Pharmacology

|                                  |               |       |                                                               |           |        |
|----------------------------------|---------------|-------|---------------------------------------------------------------|-----------|--------|
| siRNA Disorazole DMSO Run3       | NM_0022<br>23 | ITPR2 | inositol<br>1,4,5-<br>triphospha<br>te<br>receptor,<br>type 2 | -0.055629 | Inlier |
| siRNA Disorazole DMSO Run1       | NM_0022<br>23 | ITPR2 | inositol<br>1,4,5-<br>triphospha<br>te<br>receptor,<br>type 2 | 0.055629  | Inlier |
| siRNA-Temozolomide Run1-<br>DMSO | NM_0022<br>23 | ITPR2 | inositol<br>1,4,5-<br>triphospha<br>te<br>receptor,<br>type 2 | 0.083681  | Inlier |
| siRNA-Vinblastine Run1-<br>DMSO  | NM_0022<br>23 | ITPR2 | inositol<br>1,4,5-<br>triphospha<br>te<br>receptor,<br>type 2 | 0.651075  | Inlier |
| siRNA Disorazole DMSO Run2       | NM_0022<br>23 | ITPR2 | inositol<br>1,4,5-<br>triphospha<br>te<br>receptor,<br>type 2 | 0.960352  | Inlier |
| siRNA-Vinblastine Run2-<br>DMSO  | NM_0022<br>24 | ITPR3 | inositol<br>1,4,5-<br>triphospha<br>te<br>receptor,<br>type 3 | -1.368764 | Inlier |
| siRNA-Temozolomide Run2-<br>DMSO | NM_0022<br>24 | ITPR3 | inositol<br>1,4,5-<br>triphospha<br>te<br>receptor,<br>type 3 | -0.747759 | Inlier |
| siRNA-Temozolomide Run3-<br>DMSO | NM_0022<br>24 | ITPR3 | inositol<br>1,4,5-<br>triphospha<br>te<br>receptor,<br>type 3 | -0.601241 | Inlier |

Identification of Survival Genes in Human Glioblastoma Cells Using siRNA Screening  
 Nikhil G Thaker, Fang Zhang, Peter R. McDonald, Tong Ying Shun, Michael D Lewen, Ian F. Pollack, and John S. Lazo

Molecular Pharmacology

|                                  |               |       |                                                                                              |           |        |
|----------------------------------|---------------|-------|----------------------------------------------------------------------------------------------|-----------|--------|
| siRNA Disorazole DMSO Run3       | NM_0022<br>24 | ITPR3 | inositol<br>1,4,5-<br>triphospha<br>te<br>receptor,<br>type 3                                | -0.103945 | Inlier |
| siRNA Disorazole DMSO Run1       | NM_0022<br>24 | ITPR3 | inositol<br>1,4,5-<br>triphospha<br>te<br>receptor,<br>type 3                                | 0.103945  | Inlier |
| siRNA-Temozolomide Run1-<br>DMSO | NM_0022<br>24 | ITPR3 | inositol<br>1,4,5-<br>triphospha<br>te<br>receptor,<br>type 3                                | 0.365529  | Inlier |
| siRNA Disorazole DMSO Run2       | NM_0022<br>24 | ITPR3 | inositol<br>1,4,5-<br>triphospha<br>te<br>receptor,<br>type 3                                | 0.926968  | Inlier |
| siRNA-Vinblastine Run1-<br>DMSO  | NM_0022<br>24 | ITPR3 | inositol<br>1,4,5-<br>triphospha<br>te<br>receptor,<br>type 3<br>isovaleryl<br>Coenzyme<br>A | 1.861191  | Inlier |
| siRNA-Temozolomide Run2-<br>DMSO | NM_0022<br>25 | IVD   | dehydroge<br>nase<br>isovaleryl<br>Coenzyme<br>A                                             | -0.920063 | Inlier |
| siRNA-Temozolomide Run3-<br>DMSO | NM_0022<br>25 | IVD   | dehydroge<br>nase<br>isovaleryl<br>Coenzyme<br>A                                             | -0.897274 | Inlier |
| siRNA Disorazole DMSO Run3       | NM_0022<br>25 | IVD   | dehydroge<br>nase<br>isovaleryl<br>Coenzyme<br>A                                             | -0.451726 | Inlier |
| siRNA Disorazole DMSO Run2       | NM_0022<br>25 | IVD   | dehydroge<br>nase                                                                            | -0.200579 | Inlier |

Identification of Survival Genes in Human Glioblastoma Cells Using siRNA Screening  
 Nikhil G Thaker, Fang Zhang, Peter R. McDonald, Tong Ying Shun, Michael D Lewen, Ian F. Pollack, and John S. Lazo

Molecular Pharmacology

|                                  |               |      |                                                        |           |        |
|----------------------------------|---------------|------|--------------------------------------------------------|-----------|--------|
| siRNA Disorazole DMSO Run1       | NM_0022<br>25 | IVD  | isovaleryl<br>Coenzyme<br>A<br>dehydroge<br>nase       | 0.200579  | Inlier |
| siRNA-Temozolomide Run1-<br>DMSO | NM_0022<br>25 | IVD  | isovaleryl<br>Coenzyme<br>A<br>dehydroge<br>nase       | 0.418399  | Inlier |
| siRNA-Vinblastine Run2-<br>DMSO  | NM_0022<br>25 | IVD  | isovaleryl<br>Coenzyme<br>A<br>dehydroge<br>nase       | 1.176076  | Inlier |
| siRNA-Vinblastine Run1-<br>DMSO  | NM_0022<br>25 | IVD  | isovaleryl<br>Coenzyme<br>A<br>dehydroge<br>nase       | 1.274061  | Inlier |
| siRNA-Temozolomide Run3-<br>DMSO | NM_0022<br>27 | JAK1 | Janus<br>kinase 1<br>(a protein<br>tyrosine<br>kinase) | -1.666691 | Inlier |
| siRNA-Temozolomide Run1-<br>DMSO | NM_0022<br>27 | JAK1 | Janus<br>kinase 1<br>(a protein<br>tyrosine<br>kinase) | -0.36389  | Inlier |
| siRNA Disorazole DMSO Run3       | NM_0022<br>27 | JAK1 | Janus<br>kinase 1<br>(a protein<br>tyrosine<br>kinase) | -0.3015   | Inlier |
| siRNA-Temozolomide Run2-<br>DMSO | NM_0022<br>27 | JAK1 | Janus<br>kinase 1<br>(a protein<br>tyrosine<br>kinase) | -0.157518 | Inlier |
| siRNA-Vinblastine Run1-<br>DMSO  | NM_0022<br>27 | JAK1 | Janus<br>kinase 1<br>(a protein<br>tyrosine<br>kinase) | 0.157518  | Inlier |
| siRNA Disorazole DMSO Run2       | NM_0022<br>27 | JAK1 | Janus<br>kinase 1<br>(a protein<br>tyrosine<br>kinase) | 0.98511   | Inlier |

Identification of Survival Genes in Human Glioblastoma Cells Using siRNA Screening  
 Nikhil G Thaker, Fang Zhang, Peter R. McDonald, Tong Ying Shun, Michael D Lewen, Ian F. Pollack, and John S. Lazo

Molecular Pharmacology

| siRNA Treatment              | Gene ID       | Gene Name | Protein Name                               | Log2 Fold Change | Outlier Status |
|------------------------------|---------------|-----------|--------------------------------------------|------------------|----------------|
| siRNA Disorazole DMSO Run1   | NM_0022<br>27 | JAK1      | Janus kinase 1 (a protein tyrosine kinase) | 1.195432         | Inlier         |
| siRNA-Vinblastine Run2-DMSO  | NM_0022<br>27 | JAK1      | Janus kinase 1 (a protein tyrosine kinase) | 1.479584         | Inlier         |
| siRNA-Temozolomide Run3-DMSO | NM_0049<br>72 | JAK2      | Janus kinase 2 (a protein tyrosine kinase) | -1.464984        | Inlier         |
| siRNA Disorazole DMSO Run2   | NM_0049<br>72 | JAK2      | Janus kinase 2 (a protein tyrosine kinase) | -0.60729         | Inlier         |
| siRNA-Temozolomide Run2-DMSO | NM_0049<br>72 | JAK2      | Janus kinase 2 (a protein tyrosine kinase) | -0.19843         | Inlier         |
| siRNA-Temozolomide Run1-DMSO | NM_0049<br>72 | JAK2      | Janus kinase 2 (a protein tyrosine kinase) | -0.185181        | Inlier         |
| siRNA Disorazole DMSO Run3   | NM_0049<br>72 | JAK2      | Janus kinase 2 (a protein tyrosine kinase) | 0.18518          | Inlier         |
| siRNA Disorazole DMSO Run1   | NM_0049<br>72 | JAK2      | Janus kinase 2 (a protein tyrosine kinase) | 0.74171          | Inlier         |
| siRNA-Vinblastine Run1-DMSO  | NM_0049<br>72 | JAK2      | Janus kinase 2 (a protein tyrosine kinase) | 0.79859          | Inlier         |
| siRNA-Vinblastine Run2-DMSO  | NM_0049<br>72 | JAK2      | Janus kinase 2 (a protein tyrosine kinase) | 1.55834          | Inlier         |



Identification of Survival Genes in Human Glioblastoma Cells Using siRNA Screening  
 Nikhil G Thaker, Fang Zhang, Peter R. McDonald, Tong Ying Shun, Michael D Lewen, Ian F. Pollack, and John S. Lazo  
 Molecular Pharmacology

|                              |           |      |                                                       |           |        |
|------------------------------|-----------|------|-------------------------------------------------------|-----------|--------|
| siRNA-Temozolomide Run3-DMSO | NM_000215 | JAK3 | Janus kinase 3 (a protein tyrosine kinase, leukocyte) | -1.148603 | Inlier |
| siRNA-Temozolomide Run2-DMSO | NM_000215 | JAK3 | Janus kinase 3 (a protein tyrosine kinase, leukocyte) | -0.421032 | Inlier |
| siRNA-Vinblastine Run1-DMSO  | NM_000215 | JAK3 | Janus kinase 3 (a protein tyrosine kinase, leukocyte) | -0.379809 | Inlier |
| siRNA Disorazole DMSO Run2   | NM_000215 | JAK3 | Janus kinase 3 (a protein tyrosine kinase, leukocyte) | -0.199993 | Inlier |
| siRNA-Temozolomide Run1-DMSO | NM_000215 | JAK3 | Janus kinase 3 (a protein tyrosine kinase, leukocyte) | 0.199993  | Inlier |
| siRNA Disorazole DMSO Run3   | NM_000215 | JAK3 | Janus kinase 3 (a protein tyrosine kinase, leukocyte) | 0.927968  | Inlier |
| siRNA Disorazole DMSO Run1   | NM_000215 | JAK3 | Janus kinase 3 (a protein tyrosine kinase, leukocyte) | 0.981172  | Inlier |

Identification of Survival Genes in Human Glioblastoma Cells Using siRNA Screening  
 Nikhil G Thaker, Fang Zhang, Peter R. McDonald, Tong Ying Shun, Michael D Lewen, Ian F. Pollack, and John S. Lazo  
 Molecular Pharmacology

|                              |               |        |                                                                      |           |         |
|------------------------------|---------------|--------|----------------------------------------------------------------------|-----------|---------|
| siRNA-Vinblastine Run2-DMSO  | NM_0002<br>15 | JAK3   | Janus<br>kinase 3<br>(a protein<br>tyrosine<br>kinase,<br>leukocyte) | 1.171902  | Inlier  |
| siRNA Disorazole DMSO Run2   | NM_0162<br>81 | JIK    | TAO<br>kinase 3                                                      | -6.952189 | Outlier |
| siRNA-Temozolomide Run2-DMSO | NM_0162<br>81 | JIK    | TAO<br>kinase 3                                                      | -2.651117 | Inlier  |
| siRNA-Vinblastine Run1-DMSO  | NM_0162<br>81 | JIK    | TAO<br>kinase 3                                                      | -0.560658 | Inlier  |
| siRNA Disorazole DMSO Run1   | NM_0162<br>81 | JIK    | TAO<br>kinase 3                                                      | -0.190101 | Inlier  |
| siRNA Disorazole DMSO Run3   | NM_0162<br>81 | JIK    | TAO<br>kinase 3                                                      | 0.190101  | Inlier  |
| siRNA-Temozolomide Run1-DMSO | NM_0162<br>81 | JIK    | TAO<br>kinase 3                                                      | 0.386154  | Inlier  |
| siRNA-Temozolomide Run3-DMSO | NM_0162<br>81 | JIK    | TAO<br>kinase 3                                                      | 0.788342  | Inlier  |
| siRNA-Vinblastine Run2-DMSO  | NM_0162<br>81 | JIK    | TAO<br>kinase 3                                                      | 3.111851  | Inlier  |
| siRNA-Temozolomide Run3-DMSO | NM_0042<br>41 | JMJD1C | jumonji<br>domain<br>containing<br>1C                                | -4.282458 | Outlier |
| siRNA-Temozolomide Run1-DMSO | NM_0042<br>41 | JMJD1C | jumonji<br>domain<br>containing<br>1C                                | -0.709055 | Inlier  |
| siRNA Disorazole DMSO Run1   | NM_0042<br>41 | JMJD1C | jumonji<br>domain<br>containing<br>1C                                | -0.415626 | Inlier  |
| siRNA-Temozolomide Run2-DMSO | NM_0042<br>41 | JMJD1C | jumonji<br>domain<br>containing<br>1C                                | -0.284986 | Inlier  |
| siRNA-Vinblastine Run1-DMSO  | NM_0042<br>41 | JMJD1C | jumonji<br>domain<br>containing<br>1C                                | 0.284985  | Inlier  |
| siRNA-Vinblastine Run2-DMSO  | NM_0042<br>41 | JMJD1C | jumonji<br>domain<br>containing<br>1C                                | 0.639945  | Inlier  |
| siRNA Disorazole DMSO Run2   | NM_0042<br>41 | JMJD1C | jumonji<br>domain<br>containing<br>1C                                | 2.448169  | Inlier  |

Identification of Survival Genes in Human Glioblastoma Cells Using siRNA Screening  
 Nikhil G Thaker, Fang Zhang, Peter R. McDonald, Tong Ying Shun, Michael D Lewen, Ian F. Pollack, and John S. Lazo

Molecular Pharmacology

| siRNA Treatment              | Gene          | Gene      | Gene                         | Value     | Category |
|------------------------------|---------------|-----------|------------------------------|-----------|----------|
| siRNA Disorazole DMSO Run3   | NM_0042<br>41 | JMJD1C    | jumonji domain containing 1C | 8.531105  | Outlier  |
| siRNA-Temozolomide Run3-DMSO | NM_0002<br>16 | KAL1      | Kallmann syndrome 1 sequence | -0.817416 | Inlier   |
| siRNA-Temozolomide Run2-DMSO | NM_0002<br>16 | KAL1      | Kallmann syndrome 1 sequence | -0.807443 | Inlier   |
| siRNA-Temozolomide Run1-DMSO | NM_0002<br>16 | KAL1      | Kallmann syndrome 1 sequence | -0.541557 | Inlier   |
| siRNA Disorazole DMSO Run1   | NM_0002<br>16 | KAL1      | Kallmann syndrome 1 sequence | -0.135504 | Inlier   |
| siRNA Disorazole DMSO Run3   | NM_0002<br>16 | KAL1      | Kallmann syndrome 1 sequence | 0.135505  | Inlier   |
| siRNA Disorazole DMSO Run2   | NM_0002<br>16 | KAL1      | Kallmann syndrome 1 sequence | 0.476047  | Inlier   |
| siRNA-Vinblastine Run2-DMSO  | NM_0002<br>16 | KAL1      | Kallmann syndrome 1 sequence | 1.019905  | Inlier   |
| siRNA-Vinblastine Run1-DMSO  | NM_0002<br>16 | KAL1      | Kallmann syndrome 1 sequence | 1.158167  | Inlier   |
| siRNA-Temozolomide Run2-DMSO | NM_0060<br>82 | K-ALPHA-1 | K-ALPHA-1                    | -1.191732 | Inlier   |
| siRNA Disorazole DMSO Run3   | NM_0060<br>82 | K-ALPHA-1 | K-ALPHA-1                    | -0.833937 | Inlier   |
| siRNA-Temozolomide Run1-DMSO | NM_0060<br>82 | K-ALPHA-1 | K-ALPHA-1                    | -0.377997 | Inlier   |
| siRNA-Vinblastine Run2-DMSO  | NM_0060<br>82 | K-ALPHA-1 | K-ALPHA-1                    | -0.001025 | Inlier   |
| siRNA-Temozolomide Run3-DMSO | NM_0060<br>82 | K-ALPHA-1 | K-ALPHA-1                    | 0.001025  | Inlier   |
| siRNA Disorazole DMSO Run1   | NM_0060<br>82 | K-ALPHA-1 | K-ALPHA-1                    | 0.515063  | Inlier   |
| siRNA Disorazole DMSO Run2   | NM_0060<br>82 | K-ALPHA-1 | K-ALPHA-1                    | 13.52092  | Outlier  |
| siRNA-Vinblastine Run1-DMSO  | NM_0060<br>82 | K-ALPHA-1 | K-ALPHA-1                    | 13.97989  | Outlier  |

Identification of Survival Genes in Human Glioblastoma Cells Using siRNA Screening  
 Nikhil G Thaker, Fang Zhang, Peter R. McDonald, Tong Ying Shun, Michael D Lewen, Ian F. Pollack, and John S. Lazo  
 Molecular Pharmacology

|                                  |               |       |                                                                                                                                     |           |        |
|----------------------------------|---------------|-------|-------------------------------------------------------------------------------------------------------------------------------------|-----------|--------|
| siRNA Disorazole DMSO Run1       | NM_0055<br>48 | KARS  | lysyl-tRNA<br>synthetase                                                                                                            | -1.261124 | Inlier |
| siRNA Disorazole DMSO Run3       | NM_0055<br>48 | KARS  | lysyl-tRNA<br>synthetase                                                                                                            | -0.41389  | Inlier |
| siRNA-Temozolomide Run1-<br>DMSO | NM_0055<br>48 | KARS  | lysyl-tRNA<br>synthetase                                                                                                            | -0.074753 | Inlier |
| siRNA-Vinblastine Run2-<br>DMSO  | NM_0055<br>48 | KARS  | lysyl-tRNA<br>synthetase                                                                                                            | -0.0323   | Inlier |
| siRNA-Temozolomide Run2-<br>DMSO | NM_0055<br>48 | KARS  | lysyl-tRNA<br>synthetase                                                                                                            | 0.032299  | Inlier |
| siRNA-Temozolomide Run3-<br>DMSO | NM_0055<br>48 | KARS  | lysyl-tRNA<br>synthetase                                                                                                            | 0.93511   | Inlier |
| siRNA Disorazole DMSO Run2       | NM_0055<br>48 | KARS  | lysyl-tRNA<br>synthetase                                                                                                            | 1.061818  | Inlier |
| siRNA-Vinblastine Run1-<br>DMSO  | NM_0055<br>48 | KARS  | lysyl-tRNA<br>synthetase                                                                                                            | 1.744403  | Inlier |
| siRNA-Temozolomide Run3-<br>DMSO | NM_0002<br>17 | KCNA1 | potassium<br>voltage-<br>gated<br>channel,<br>shaker-<br>related<br>subfamily,<br>member 1<br>(episodic<br>ataxia with<br>myokymia) | -1.144665 | Inlier |

Identification of Survival Genes in Human Glioblastoma Cells Using siRNA Screening  
 Nikhil G Thaker, Fang Zhang, Peter R. McDonald, Tong Ying Shun, Michael D Lewen, Ian F. Pollack, and John S. Lazo  
 Molecular Pharmacology

|                              |           |       |                                                                                                     |           |        |
|------------------------------|-----------|-------|-----------------------------------------------------------------------------------------------------|-----------|--------|
| siRNA-Temozolomide Run2-DMSO | NM_000217 | KCNA1 | potassium voltage-gated channel, shaker-related subfamily, member 1 (episodic ataxia with myokymia) | -0.905881 | Inlier |
| siRNA Disorazole DMSO Run2   | NM_000217 | KCNA1 | potassium voltage-gated channel, shaker-related subfamily, member 1 (episodic ataxia with myokymia) | -0.306343 | Inlier |
| siRNA Disorazole DMSO Run3   | NM_000217 | KCNA1 | potassium voltage-gated channel, shaker-related subfamily, member 1 (episodic ataxia with myokymia) | -0.212533 | Inlier |
| siRNA-Temozolomide Run1-DMSO | NM_000217 | KCNA1 | potassium voltage-gated channel, shaker-related subfamily, member 1 (episodic ataxia with myokymia) | 0.212533  | Inlier |

Identification of Survival Genes in Human Glioblastoma Cells Using siRNA Screening

Nikhil G Thaker, Fang Zhang, Peter R. McDonald, Tong Ying Shun, Michael D Lewen, Ian F. Pollack, and John S. Lazo

Molecular Pharmacology

|                              |               |        |                                                                                                     |           |        |
|------------------------------|---------------|--------|-----------------------------------------------------------------------------------------------------|-----------|--------|
| siRNA Disorazole DMSO Run1   | NM_0002<br>17 | KCNA1  | potassium voltage-gated channel, shaker-related subfamily, member 1 (episodic ataxia with myokymia) | 0.443119  | Inlier |
| siRNA-Vinblastine Run2-DMSO  | NM_0002<br>17 | KCNA1  | potassium voltage-gated channel, shaker-related subfamily, member 1 (episodic ataxia with myokymia) | 1.197302  | Inlier |
| siRNA-Vinblastine Run1-DMSO  | NM_0002<br>17 | KCNA1  | potassium voltage-gated channel, shaker-related subfamily, member 1 (episodic ataxia with myokymia) | 1.644455  | Inlier |
| siRNA-Temozolomide Run3-DMSO | NM_0055<br>49 | KCNA10 | potassium voltage-gated channel, shaker-related subfamily, member 10                                | -1.930312 | Inlier |

Identification of Survival Genes in Human Glioblastoma Cells Using siRNA Screening

Nikhil G Thaker, Fang Zhang, Peter R. McDonald, Tong Ying Shun, Michael D Lewen, Ian F. Pollack, and John S.

Lazo

Molecular Pharmacology

|                              |               |        |    |                                                                   |           |        |
|------------------------------|---------------|--------|----|-------------------------------------------------------------------|-----------|--------|
| siRNA-Temozolomide Run2-DMSO | NM_0055<br>49 | KCNA10 | 10 | potassium voltage-gated channel, shaker-related subfamily, member | -0.930512 | Inlier |
| siRNA Disorazole DMSO Run3   | NM_0055<br>49 | KCNA10 | 10 | potassium voltage-gated channel, shaker-related subfamily, member | -0.675848 | Inlier |
| siRNA-Temozolomide Run1-DMSO | NM_0055<br>49 | KCNA10 | 10 | potassium voltage-gated channel, shaker-related subfamily, member | -0.124937 | Inlier |
| siRNA Disorazole DMSO Run1   | NM_0055<br>49 | KCNA10 | 10 | potassium voltage-gated channel, shaker-related subfamily, member | 0.124937  | Inlier |
| siRNA-Vinblastine Run1-DMSO  | NM_0055<br>49 | KCNA10 | 10 | potassium voltage-gated channel, shaker-related subfamily, member | 0.462553  | Inlier |

Identification of Survival Genes in Human Glioblastoma Cells Using siRNA Screening

Nikhil G Thaker, Fang Zhang, Peter R. McDonald, Tong Ying Shun, Michael D Lewen, Ian F. Pollack, and John S.

Lazo

Molecular Pharmacology

|                              |               |        |                                                                      |           |        |
|------------------------------|---------------|--------|----------------------------------------------------------------------|-----------|--------|
| siRNA-Vinblastine Run2-DMSO  | NM_0055<br>49 | KCNA10 | potassium voltage-gated channel, shaker-related subfamily, member 10 | 0.673152  | Inlier |
| siRNA Disorazole DMSO Run2   | NM_0055<br>49 | KCNA10 | potassium voltage-gated channel, shaker-related subfamily, member 10 | 0.750378  | Inlier |
| siRNA-Temozolomide Run3-DMSO | NM_0049<br>74 | KCNA2  | potassium voltage-gated channel, shaker-related subfamily, member 2  | -1.298045 | Inlier |
| siRNA Disorazole DMSO Run3   | NM_0049<br>74 | KCNA2  | potassium voltage-gated channel, shaker-related subfamily, member 2  | -0.99046  | Inlier |
| siRNA-Temozolomide Run2-DMSO | NM_0049<br>74 | KCNA2  | potassium voltage-gated channel, shaker-related subfamily, member 2  | -0.622745 | Inlier |
| siRNA-Temozolomide Run1-DMSO | NM_0049<br>74 | KCNA2  | potassium voltage-gated channel, shaker-related subfamily, member 2  | -0.034948 | Inlier |



Identification of Survival Genes in Human Glioblastoma Cells Using siRNA Screening

Nikhil G Thaker, Fang Zhang, Peter R. McDonald, Tong Ying Shun, Michael D Lewen, Ian F. Pollack, and John S. Lazo

Molecular Pharmacology

|                              |               |       |                                                                     |           |        |
|------------------------------|---------------|-------|---------------------------------------------------------------------|-----------|--------|
| siRNA Disorazole DMSO Run1   | NM_0049<br>74 | KCNA2 | potassium voltage-gated channel, shaker-related subfamily, member 2 | 0.034948  | Inlier |
| siRNA Disorazole DMSO Run2   | NM_0049<br>74 | KCNA2 | potassium voltage-gated channel, shaker-related subfamily, member 2 | 0.138549  | Inlier |
| siRNA-Vinblastine Run2-DMSO  | NM_0049<br>74 | KCNA2 | potassium voltage-gated channel, shaker-related subfamily, member 2 | 0.726255  | Inlier |
| siRNA-Vinblastine Run1-DMSO  | NM_0049<br>74 | KCNA2 | potassium voltage-gated channel, shaker-related subfamily, member 2 | 0.833737  | Inlier |
| siRNA-Temozolomide Run3-DMSO | NM_0022<br>32 | KCNA3 | potassium voltage-gated channel, shaker-related subfamily, member 3 | -1.317591 | Inlier |
| siRNA-Temozolomide Run2-DMSO | NM_0022<br>32 | KCNA3 | potassium voltage-gated channel, shaker-related subfamily, member 3 | -1.046972 | Inlier |

Identification of Survival Genes in Human Glioblastoma Cells Using siRNA Screening

Nikhil G Thaker, Fang Zhang, Peter R. McDonald, Tong Ying Shun, Michael D Lewen, Ian F. Pollack, and John S. Lazo

Molecular Pharmacology

|                              |               |       |                                                                     |           |        |
|------------------------------|---------------|-------|---------------------------------------------------------------------|-----------|--------|
| siRNA Disorazole DMSO Run2   | NM_0022<br>32 | KCNA3 | potassium voltage-gated channel, shaker-related subfamily, member 3 | -0.455482 | Inlier |
| siRNA Disorazole DMSO Run1   | NM_0022<br>32 | KCNA3 | potassium voltage-gated channel, shaker-related subfamily, member 3 | -0.03584  | Inlier |
| siRNA Disorazole DMSO Run3   | NM_0022<br>32 | KCNA3 | potassium voltage-gated channel, shaker-related subfamily, member 3 | 0.03584   | Inlier |
| siRNA-Temozolomide Run1-DMSO | NM_0022<br>32 | KCNA3 | potassium voltage-gated channel, shaker-related subfamily, member 3 | 0.665101  | Inlier |
| siRNA-Vinblastine Run1-DMSO  | NM_0022<br>32 | KCNA3 | potassium voltage-gated channel, shaker-related subfamily, member 3 | 0.683899  | Inlier |
| siRNA-Vinblastine Run2-DMSO  | NM_0022<br>32 | KCNA3 | potassium voltage-gated channel, shaker-related subfamily, member 3 | 1.406713  | Inlier |

Identification of Survival Genes in Human Glioblastoma Cells Using siRNA Screening

Nikhil G Thaker, Fang Zhang, Peter R. McDonald, Tong Ying Shun, Michael D Lewen, Ian F. Pollack, and John S. Lazo

Molecular Pharmacology

|                              |               |       |                                                                     |           |        |
|------------------------------|---------------|-------|---------------------------------------------------------------------|-----------|--------|
| siRNA Disorazole DMSO Run2   | NM_0022<br>33 | KCNA4 | potassium voltage-gated channel, shaker-related subfamily, member 4 | -0.938535 | Inlier |
| siRNA-Temozolomide Run3-DMSO | NM_0022<br>33 | KCNA4 | potassium voltage-gated channel, shaker-related subfamily, member 4 | -0.815852 | Inlier |
| siRNA-Temozolomide Run2-DMSO | NM_0022<br>33 | KCNA4 | potassium voltage-gated channel, shaker-related subfamily, member 4 | -0.533148 | Inlier |
| siRNA Disorazole DMSO Run3   | NM_0022<br>33 | KCNA4 | potassium voltage-gated channel, shaker-related subfamily, member 4 | -0.053163 | Inlier |
| siRNA Disorazole DMSO Run1   | NM_0022<br>33 | KCNA4 | potassium voltage-gated channel, shaker-related subfamily, member 4 | 0.053163  | Inlier |
| siRNA-Temozolomide Run1-DMSO | NM_0022<br>33 | KCNA4 | potassium voltage-gated channel, shaker-related subfamily, member 4 | 0.402284  | Inlier |

Identification of Survival Genes in Human Glioblastoma Cells Using siRNA Screening

Nikhil G Thaker, Fang Zhang, Peter R. McDonald, Tong Ying Shun, Michael D Lewen, Ian F. Pollack, and John S. Lazo

Molecular Pharmacology

|                              |               |       |                                                                     |           |        |
|------------------------------|---------------|-------|---------------------------------------------------------------------|-----------|--------|
| siRNA-Vinblastine Run2-DMSO  | NM_0022<br>33 | KCNA4 | potassium voltage-gated channel, shaker-related subfamily, member 4 | 0.830388  | Inlier |
| siRNA-Vinblastine Run1-DMSO  | NM_0022<br>33 | KCNA4 | potassium voltage-gated channel, shaker-related subfamily, member 4 | 0.882499  | Inlier |
| siRNA-Temozolomide Run2-DMSO | NM_0022<br>34 | KCNA5 | potassium voltage-gated channel, shaker-related subfamily, member 5 | -2.044783 | Inlier |
| siRNA Disorazole DMSO Run2   | NM_0022<br>34 | KCNA5 | potassium voltage-gated channel, shaker-related subfamily, member 5 | -0.709476 | Inlier |
| siRNA Disorazole DMSO Run1   | NM_0022<br>34 | KCNA5 | potassium voltage-gated channel, shaker-related subfamily, member 5 | -0.428328 | Inlier |
| siRNA-Temozolomide Run3-DMSO | NM_0022<br>34 | KCNA5 | potassium voltage-gated channel, shaker-related subfamily, member 5 | -0.008113 | Inlier |

Identification of Survival Genes in Human Glioblastoma Cells Using siRNA Screening  
 Nikhil G Thaker, Fang Zhang, Peter R. McDonald, Tong Ying Shun, Michael D Lewen, Ian F. Pollack, and John S. Lazo

Molecular Pharmacology

|                              |           |       |                                                                     |           |        |
|------------------------------|-----------|-------|---------------------------------------------------------------------|-----------|--------|
| siRNA-Temozolomide Run1-DMSO | NM_002234 | KCNA5 | potassium voltage-gated channel, shaker-related subfamily, member 5 | 0.008115  | Inlier |
| siRNA-Vinblastine Run1-DMSO  | NM_002234 | KCNA5 | potassium voltage-gated channel, shaker-related subfamily, member 5 | 0.639524  | Inlier |
| siRNA-Vinblastine Run2-DMSO  | NM_002234 | KCNA5 | potassium voltage-gated channel, shaker-related subfamily, member 5 | 1.074038  | Inlier |
| siRNA Disorazole DMSO Run3   | NM_002234 | KCNA5 | potassium voltage-gated channel, shaker-related subfamily, member 5 | 1.647801  | Inlier |
| siRNA-Temozolomide Run3-DMSO | NM_002235 | KCNA6 | potassium voltage-gated channel, shaker-related subfamily, member 6 | -1.215751 | Inlier |
| siRNA Disorazole DMSO Run2   | NM_002235 | KCNA6 | potassium voltage-gated channel, shaker-related subfamily, member 6 | -0.788639 | Inlier |

Identification of Survival Genes in Human Glioblastoma Cells Using siRNA Screening

Nikhil G Thaker, Fang Zhang, Peter R. McDonald, Tong Ying Shun, Michael D Lewen, Ian F. Pollack, and John S. Lazo

Molecular Pharmacology

|                              |               |       |                                                                     |           |        |
|------------------------------|---------------|-------|---------------------------------------------------------------------|-----------|--------|
| siRNA-Temozolomide Run2-DMSO | NM_0022<br>35 | KCNA6 | potassium voltage-gated channel, shaker-related subfamily, member 6 | -0.731406 | Inlier |
| siRNA Disorazole DMSO Run3   | NM_0022<br>35 | KCNA6 | potassium voltage-gated channel, shaker-related subfamily, member 6 | -0.087263 | Inlier |
| siRNA Disorazole DMSO Run1   | NM_0022<br>35 | KCNA6 | potassium voltage-gated channel, shaker-related subfamily, member 6 | 0.087263  | Inlier |
| siRNA-Temozolomide Run1-DMSO | NM_0022<br>35 | KCNA6 | potassium voltage-gated channel, shaker-related subfamily, member 6 | 0.243967  | Inlier |
| siRNA-Vinblastine Run1-DMSO  | NM_0022<br>35 | KCNA6 | potassium voltage-gated channel, shaker-related subfamily, member 6 | 0.617594  | Inlier |
| siRNA-Vinblastine Run2-DMSO  | NM_0022<br>35 | KCNA6 | potassium voltage-gated channel, shaker-related subfamily, member 6 | 0.80923   | Inlier |

Identification of Survival Genes in Human Glioblastoma Cells Using siRNA Screening

Nikhil G Thaker, Fang Zhang, Peter R. McDonald, Tong Ying Shun, Michael D Lewen, Ian F. Pollack, and John S. Lazo

Molecular Pharmacology

|                              |               |       |                                                                     |           |        |
|------------------------------|---------------|-------|---------------------------------------------------------------------|-----------|--------|
| siRNA-Temozolomide Run3-DMSO | NM_0318<br>86 | KCNA7 | potassium voltage-gated channel, shaker-related subfamily, member 7 | -0.801351 | Inlier |
| siRNA-Temozolomide Run2-DMSO | NM_0318<br>86 | KCNA7 | potassium voltage-gated channel, shaker-related subfamily, member 7 | -0.573008 | Inlier |
| siRNA Disorazole DMSO Run3   | NM_0318<br>86 | KCNA7 | potassium voltage-gated channel, shaker-related subfamily, member 7 | -0.411434 | Inlier |
| siRNA Disorazole DMSO Run2   | NM_0318<br>86 | KCNA7 | potassium voltage-gated channel, shaker-related subfamily, member 7 | -0.237733 | Inlier |
| siRNA Disorazole DMSO Run1   | NM_0318<br>86 | KCNA7 | potassium voltage-gated channel, shaker-related subfamily, member 7 | 0.237733  | Inlier |
| siRNA-Temozolomide Run1-DMSO | NM_0318<br>86 | KCNA7 | potassium voltage-gated channel, shaker-related subfamily, member 7 | 0.775992  | Inlier |

Identification of Survival Genes in Human Glioblastoma Cells Using siRNA Screening

Nikhil G Thaker, Fang Zhang, Peter R. McDonald, Tong Ying Shun, Michael D Lewen, Ian F. Pollack, and John S. Lazo

Molecular Pharmacology

|                              |               |        |                                                                          |           |        |
|------------------------------|---------------|--------|--------------------------------------------------------------------------|-----------|--------|
| siRNA-Vinblastine Run1-DMSO  | NM_0318<br>86 | KCNA7  | potassium voltage-gated channel, shaker-related subfamily, member 7      | 0.789417  | Inlier |
| siRNA-Vinblastine Run2-DMSO  | NM_0318<br>86 | KCNA7  | potassium voltage-gated channel, shaker-related subfamily, member 7      | 0.984126  | Inlier |
| siRNA Disorazole DMSO Run2   | NM_1721<br>59 | KCNAB1 | potassium voltage-gated channel, shaker-related subfamily, beta member 1 | -1.324932 | Inlier |
| siRNA-Temozolomide Run3-DMSO | NM_1721<br>59 | KCNAB1 | potassium voltage-gated channel, shaker-related subfamily, beta member 1 | -1.265366 | Inlier |
| siRNA Disorazole DMSO Run3   | NM_1721<br>59 | KCNAB1 | potassium voltage-gated channel, shaker-related subfamily, beta member 1 | -0.794742 | Inlier |
| siRNA-Temozolomide Run2-DMSO | NM_1721<br>59 | KCNAB1 | potassium voltage-gated channel, shaker-related subfamily, beta member 1 | -0.359539 | Inlier |



Identification of Survival Genes in Human Glioblastoma Cells Using siRNA Screening

Nikhil G Thaker, Fang Zhang, Peter R. McDonald, Tong Ying Shun, Michael D Lewen, Ian F. Pollack, and John S. Lazo

Molecular Pharmacology

| siRNA Treatment              | Gene    | Accession | Gene Name | Description                                                              | Score     | Category |
|------------------------------|---------|-----------|-----------|--------------------------------------------------------------------------|-----------|----------|
| siRNA-Temozolomide Run1-DMSO | NM_1721 | 59        | KCNAB1    | potassium voltage-gated channel, shaker-related subfamily, beta member 1 | 0.359539  | Inlier   |
| siRNA Disorazole DMSO Run1   | NM_1721 | 59        | KCNAB1    | potassium voltage-gated channel, shaker-related subfamily, beta member 1 | 0.401978  | Inlier   |
| siRNA-Vinblastine Run1-DMSO  | NM_1721 | 59        | KCNAB1    | potassium voltage-gated channel, shaker-related subfamily, beta member 1 | 0.554258  | Inlier   |
| siRNA-Vinblastine Run2-DMSO  | NM_1721 | 59        | KCNAB1    | potassium voltage-gated channel, shaker-related subfamily, beta member 1 | 0.872453  | Inlier   |
| siRNA-Temozolomide Run2-DMSO | NM_1721 | 30        | KCNAB2    | potassium voltage-gated channel, shaker-related subfamily, beta member 2 | -3.932552 | Outlier  |

Identification of Survival Genes in Human Glioblastoma Cells Using siRNA Screening

Nikhil G Thaker, Fang Zhang, Peter R. McDonald, Tong Ying Shun, Michael D Lewen, Ian F. Pollack, and John S.

Lazo

Molecular Pharmacology

| siRNA Treatment              | Gene    | Gene ID | Gene Name                                                                | Log Fold Change | Outlier Status |
|------------------------------|---------|---------|--------------------------------------------------------------------------|-----------------|----------------|
| siRNA-Temozolomide Run3-DMSO | NM_1721 | KCNAB2  | potassium voltage-gated channel, shaker-related subfamily, beta member 2 | -2.667016       | Inlier         |
| siRNA Disorazole DMSO Run1   | NM_1721 | KCNAB2  | potassium voltage-gated channel, shaker-related subfamily, beta member 2 | -1.215425       | Inlier         |
| siRNA Disorazole DMSO Run2   | NM_1721 | KCNAB2  | potassium voltage-gated channel, shaker-related subfamily, beta member 2 | -0.120889       | Inlier         |
| siRNA-Vinblastine Run1-DMSO  | NM_1721 | KCNAB2  | potassium voltage-gated channel, shaker-related subfamily, beta member 2 | 0.120892        | Inlier         |
| siRNA-Temozolomide Run1-DMSO | NM_1721 | KCNAB2  | potassium voltage-gated channel, shaker-related subfamily, beta member 2 | 0.127884        | Inlier         |

Identification of Survival Genes in Human Glioblastoma Cells Using siRNA Screening

Nikhil G Thaker, Fang Zhang, Peter R. McDonald, Tong Ying Shun, Michael D Lewen, Ian F. Pollack, and John S. Lazo

Molecular Pharmacology

|                              |               |        |                                                                          |           |        |
|------------------------------|---------------|--------|--------------------------------------------------------------------------|-----------|--------|
| siRNA Disorazole DMSO Run3   | NM_1721<br>30 | KCNAB2 | potassium voltage-gated channel, shaker-related subfamily, beta member 2 | 0.133575  | Inlier |
| siRNA-Vinblastine Run2-DMSO  | NM_1721<br>30 | KCNAB2 | potassium voltage-gated channel, shaker-related subfamily, beta member 2 | 1.721034  | Inlier |
| siRNA-Temozolomide Run3-DMSO | NM_0047<br>32 | KCNAB3 | potassium voltage-gated channel, shaker-related subfamily, beta member 3 | -0.843101 | Inlier |
| siRNA Disorazole DMSO Run2   | NM_0047<br>32 | KCNAB3 | potassium voltage-gated channel, shaker-related subfamily, beta member 3 | -0.732239 | Inlier |
| siRNA Disorazole DMSO Run3   | NM_0047<br>32 | KCNAB3 | potassium voltage-gated channel, shaker-related subfamily, beta member 3 | -0.616761 | Inlier |

Identification of Survival Genes in Human Glioblastoma Cells Using siRNA Screening

Nikhil G Thaker, Fang Zhang, Peter R. McDonald, Tong Ying Shun, Michael D Lewen, Ian F. Pollack, and John S. Lazo

Molecular Pharmacology

| siRNA Treatment              | Gene ID   | Gene Name | Gene Description                                                         | Value     | Category |
|------------------------------|-----------|-----------|--------------------------------------------------------------------------|-----------|----------|
| siRNA-Temozolomide Run2-DMSO | NM_004732 | KCNAB3    | potassium voltage-gated channel, shaker-related subfamily, beta member 3 | -0.193945 | Inlier   |
| siRNA-Temozolomide Run1-DMSO | NM_004732 | KCNAB3    | potassium voltage-gated channel, shaker-related subfamily, beta member 3 | 0.193946  | Inlier   |
| siRNA Disorazole DMSO Run1   | NM_004732 | KCNAB3    | potassium voltage-gated channel, shaker-related subfamily, beta member 3 | 0.281097  | Inlier   |
| siRNA-Vinblastine Run1-DMSO  | NM_004732 | KCNAB3    | potassium voltage-gated channel, shaker-related subfamily, beta member 3 | 0.88539   | Inlier   |
| siRNA-Vinblastine Run2-DMSO  | NM_004732 | KCNAB3    | potassium voltage-gated channel, shaker-related subfamily, beta member 3 | 1.048775  | Inlier   |

Identification of Survival Genes in Human Glioblastoma Cells Using siRNA Screening

Nikhil G Thaker, Fang Zhang, Peter R. McDonald, Tong Ying Shun, Michael D Lewen, Ian F. Pollack, and John S. Lazo

Molecular Pharmacology

|                              |               |       |                                                                   |           |        |
|------------------------------|---------------|-------|-------------------------------------------------------------------|-----------|--------|
| siRNA Disorazole DMSO Run3   | NM_0049<br>75 | KCNB1 | potassium voltage-gated channel, Shab-related subfamily, member 1 | -0.852388 | Inlier |
| siRNA-Temozolomide Run2-DMSO | NM_0049<br>75 | KCNB1 | potassium voltage-gated channel, Shab-related subfamily, member 1 | -0.802258 | Inlier |
| siRNA Disorazole DMSO Run1   | NM_0049<br>75 | KCNB1 | potassium voltage-gated channel, Shab-related subfamily, member 1 | -0.658618 | Inlier |
| siRNA-Temozolomide Run1-DMSO | NM_0049<br>75 | KCNB1 | potassium voltage-gated channel, Shab-related subfamily, member 1 | -0.299377 | Inlier |
| siRNA Disorazole DMSO Run2   | NM_0049<br>75 | KCNB1 | potassium voltage-gated channel, Shab-related subfamily, member 1 | 0.299378  | Inlier |
| siRNA-Vinblastine Run2-DMSO  | NM_0049<br>75 | KCNB1 | potassium voltage-gated channel, Shab-related subfamily, member 1 | 0.442476  | Inlier |

Identification of Survival Genes in Human Glioblastoma Cells Using siRNA Screening

Nikhil G Thaker, Fang Zhang, Peter R. McDonald, Tong Ying Shun, Michael D Lewen, Ian F. Pollack, and John S. Lazo

Molecular Pharmacology

|                              |           |       |                                                                   |           |        |
|------------------------------|-----------|-------|-------------------------------------------------------------------|-----------|--------|
| siRNA-Temozolomide Run3-DMSO | NM_004975 | KCNB1 | potassium voltage-gated channel, Shab-related subfamily, member 1 | 0.690382  | Inlier |
| siRNA-Vinblastine Run1-DMSO  | NM_004975 | KCNB1 | potassium voltage-gated channel, Shab-related subfamily, member 1 | 0.814642  | Inlier |
| siRNA-Temozolomide Run2-DMSO | NM_004770 | KCNB2 | potassium voltage-gated channel, Shab-related subfamily, member 2 | -1.987814 | Inlier |
| siRNA Disorazole DMSO Run1   | NM_004770 | KCNB2 | potassium voltage-gated channel, Shab-related subfamily, member 2 | -0.847759 | Inlier |
| siRNA-Temozolomide Run1-DMSO | NM_004770 | KCNB2 | potassium voltage-gated channel, Shab-related subfamily, member 2 | -0.345037 | Inlier |
| siRNA Disorazole DMSO Run3   | NM_004770 | KCNB2 | potassium voltage-gated channel, Shab-related subfamily, member 2 | -0.095337 | Inlier |

Identification of Survival Genes in Human Glioblastoma Cells Using siRNA Screening

Nikhil G Thaker, Fang Zhang, Peter R. McDonald, Tong Ying Shun, Michael D Lewen, Ian F. Pollack, and John S. Lazo

Molecular Pharmacology

|                              |               |       |                                                                   |           |        |
|------------------------------|---------------|-------|-------------------------------------------------------------------|-----------|--------|
| siRNA-Temozolomide Run3-DMSO | NM_0047<br>70 | KCNB2 | potassium voltage-gated channel, Shab-related subfamily, member 2 | 0.095337  | Inlier |
| siRNA Disorazole DMSO Run2   | NM_0047<br>70 | KCNB2 | potassium voltage-gated channel, Shab-related subfamily, member 2 | 0.501241  | Inlier |
| siRNA-Vinblastine Run2-DMSO  | NM_0047<br>70 | KCNB2 | potassium voltage-gated channel, Shab-related subfamily, member 2 | 0.934898  | Inlier |
| siRNA-Vinblastine Run1-DMSO  | NM_0047<br>70 | KCNB2 | potassium voltage-gated channel, Shaw-related subfamily, member 2 | 2.509799  | Inlier |
| siRNA-Temozolomide Run3-DMSO | NM_0049<br>76 | KCNC1 | potassium voltage-gated channel, Shaw-related subfamily, member 1 | -0.879055 | Inlier |
| siRNA-Temozolomide Run2-DMSO | NM_0049<br>76 | KCNC1 | potassium voltage-gated channel, Shaw-related subfamily, member 1 | -0.830937 | Inlier |

Identification of Survival Genes in Human Glioblastoma Cells Using siRNA Screening

Nikhil G Thaker, Fang Zhang, Peter R. McDonald, Tong Ying Shun, Michael D Lewen, Ian F. Pollack, and John S. Lazo

Molecular Pharmacology

|                              |               |       |                                                                   |           |        |
|------------------------------|---------------|-------|-------------------------------------------------------------------|-----------|--------|
| siRNA Disorazole DMSO Run2   | NM_0049<br>76 | KCNC1 | potassium voltage-gated channel, Shaw-related subfamily, member 1 | -0.518063 | Inlier |
| siRNA Disorazole DMSO Run3   | NM_0049<br>76 | KCNC1 | potassium voltage-gated channel, Shaw-related subfamily, member 1 | -0.01351  | Inlier |
| siRNA Disorazole DMSO Run1   | NM_0049<br>76 | KCNC1 | potassium voltage-gated channel, Shaw-related subfamily, member 1 | 0.01351   | Inlier |
| siRNA-Temozolomide Run1-DMSO | NM_0049<br>76 | KCNC1 | potassium voltage-gated channel, Shaw-related subfamily, member 1 | 0.022968  | Inlier |
| siRNA-Vinblastine Run2-DMSO  | NM_0049<br>76 | KCNC1 | potassium voltage-gated channel, Shaw-related subfamily, member 1 | 1.290763  | Inlier |
| siRNA-Vinblastine Run1-DMSO  | NM_0049<br>76 | KCNC1 | potassium voltage-gated channel, Shaw-related subfamily, member 1 | 1.331644  | Inlier |



Identification of Survival Genes in Human Glioblastoma Cells Using siRNA Screening  
 Nikhil G Thaker, Fang Zhang, Peter R. McDonald, Tong Ying Shun, Michael D Lewen, Ian F. Pollack, and John S. Lazo

Molecular Pharmacology

|                              |               |       |                                                                   |           |        |
|------------------------------|---------------|-------|-------------------------------------------------------------------|-----------|--------|
| siRNA Disorazole DMSO Run2   | NM_1537<br>48 | KCNC2 | potassium voltage-gated channel, Shaw-related subfamily, member 2 | -1.157    | Inlier |
| siRNA Disorazole DMSO Run3   | NM_1537<br>48 | KCNC2 | potassium voltage-gated channel, Shaw-related subfamily, member 2 | -0.688028 | Inlier |
| siRNA-Temozolomide Run2-DMSO | NM_1537<br>48 | KCNC2 | potassium voltage-gated channel, Shaw-related subfamily, member 2 | -0.494458 | Inlier |
| siRNA Disorazole DMSO Run1   | NM_1537<br>48 | KCNC2 | potassium voltage-gated channel, Shaw-related subfamily, member 2 | -0.400948 | Inlier |
| siRNA-Temozolomide Run3-DMSO | NM_1537<br>48 | KCNC2 | potassium voltage-gated channel, Shaw-related subfamily, member 2 | 0.400948  | Inlier |
| siRNA-Temozolomide Run1-DMSO | NM_1537<br>48 | KCNC2 | potassium voltage-gated channel, Shaw-related subfamily, member 2 | 0.660972  | Inlier |

Identification of Survival Genes in Human Glioblastoma Cells Using siRNA Screening

Nikhil G Thaker, Fang Zhang, Peter R. McDonald, Tong Ying Shun, Michael D Lewen, Ian F. Pollack, and John S. Lazo

Molecular Pharmacology

|                              |               |       |                                                                   |           |        |
|------------------------------|---------------|-------|-------------------------------------------------------------------|-----------|--------|
| siRNA-Vinblastine Run2-DMSO  | NM_1537<br>48 | KCNC2 | potassium voltage-gated channel, Shaw-related subfamily, member 2 | 1.164737  | Inlier |
| siRNA-Vinblastine Run1-DMSO  | NM_1537<br>48 | KCNC2 | potassium voltage-gated channel, Shaw-related subfamily, member 2 | 2.073818  | Inlier |
| siRNA-Temozolomide Run3-DMSO | NM_0049<br>77 | KCNC3 | potassium voltage-gated channel, Shaw-related subfamily, member 3 | -2.972522 | Inlier |
| siRNA-Temozolomide Run2-DMSO | NM_0049<br>77 | KCNC3 | potassium voltage-gated channel, Shaw-related subfamily, member 3 | -2.107266 | Inlier |
| siRNA-Temozolomide Run1-DMSO | NM_0049<br>77 | KCNC3 | potassium voltage-gated channel, Shaw-related subfamily, member 3 | -0.051423 | Inlier |
| siRNA Disorazole DMSO Run1   | NM_0049<br>77 | KCNC3 | potassium voltage-gated channel, Shaw-related subfamily, member 3 | -0.017227 | Inlier |

Identification of Survival Genes in Human Glioblastoma Cells Using siRNA Screening

Nikhil G Thaker, Fang Zhang, Peter R. McDonald, Tong Ying Shun, Michael D Lewen, Ian F. Pollack, and John S. Lazo

Molecular Pharmacology

|                              |               |       |                                                                   |          |        |
|------------------------------|---------------|-------|-------------------------------------------------------------------|----------|--------|
| siRNA Disorazole DMSO Run3   | NM_0049<br>77 | KCNC3 | potassium voltage-gated channel, Shaw-related subfamily, member 3 | 0.017227 | Inlier |
| siRNA Disorazole DMSO Run2   | NM_0049<br>77 | KCNC3 | potassium voltage-gated channel, Shaw-related subfamily, member 3 | 0.545452 | Inlier |
| siRNA-Vinblastine Run2-DMSO  | NM_0049<br>77 | KCNC3 | potassium voltage-gated channel, Shaw-related subfamily, member 3 | 0.803548 | Inlier |
| siRNA-Vinblastine Run1-DMSO  | NM_0049<br>77 | KCNC3 | potassium voltage-gated channel, Shaw-related subfamily, member 3 | 2.389048 | Inlier |
| siRNA-Temozolomide Run2-DMSO | NM_0049<br>78 | KCNC4 | potassium voltage-gated channel, Shaw-related subfamily, member 4 | -1.14788 | Inlier |
| siRNA-Temozolomide Run3-DMSO | NM_0049<br>78 | KCNC4 | potassium voltage-gated channel, Shaw-related subfamily, member 4 | -0.20112 | Inlier |

Identification of Survival Genes in Human Glioblastoma Cells Using siRNA Screening

Nikhil G Thaker, Fang Zhang, Peter R. McDonald, Tong Ying Shun, Michael D Lewen, Ian F. Pollack, and John S. Lazo

Molecular Pharmacology

| siRNA Treatment              | Gene ID   | Gene Name | Annotation                                                        | Value     | Category |
|------------------------------|-----------|-----------|-------------------------------------------------------------------|-----------|----------|
| siRNA Disorazole DMSO Run1   | NM_004978 | KCNC4     | potassium voltage-gated channel, Shaw-related subfamily, member 4 | -0.069099 | Inlier   |
| siRNA-Vinblastine Run2-DMSO  | NM_004978 | KCNC4     | potassium voltage-gated channel, Shaw-related subfamily, member 4 | -0.031062 | Inlier   |
| siRNA Disorazole DMSO Run2   | NM_004978 | KCNC4     | potassium voltage-gated channel, Shaw-related subfamily, member 4 | 0.031064  | Inlier   |
| siRNA Disorazole DMSO Run3   | NM_004978 | KCNC4     | potassium voltage-gated channel, Shaw-related subfamily, member 4 | 1.632873  | Inlier   |
| siRNA-Temozolomide Run1-DMSO | NM_004978 | KCNC4     | potassium voltage-gated channel, Shaw-related subfamily, member 4 | 3.117544  | Inlier   |
| siRNA-Vinblastine Run1-DMSO  | NM_004978 | KCNC4     | potassium voltage-gated channel, Shaw-related subfamily, member 4 | 6.531421  | Outlier  |

Identification of Survival Genes in Human Glioblastoma Cells Using siRNA Screening

Nikhil G Thaker, Fang Zhang, Peter R. McDonald, Tong Ying Shun, Michael D Lewen, Ian F. Pollack, and John S. Lazo

Molecular Pharmacology

|                              |           |       |                                                                   |           |        |
|------------------------------|-----------|-------|-------------------------------------------------------------------|-----------|--------|
| siRNA-Temozolomide Run2-DMSO | NM_004979 | KCND1 | potassium voltage-gated channel, Shal-related subfamily, member 1 | -2.41202  | Inlier |
| siRNA-Temozolomide Run3-DMSO | NM_004979 | KCND1 | potassium voltage-gated channel, Shal-related subfamily, member 1 | -0.522938 | Inlier |
| siRNA Disorazole DMSO Run1   | NM_004979 | KCND1 | potassium voltage-gated channel, Shal-related subfamily, member 1 | -0.407736 | Inlier |
| siRNA-Temozolomide Run1-DMSO | NM_004979 | KCND1 | potassium voltage-gated channel, Shal-related subfamily, member 1 | -0.073149 | Inlier |
| siRNA Disorazole DMSO Run3   | NM_004979 | KCND1 | potassium voltage-gated channel, Shal-related subfamily, member 1 | 0.073149  | Inlier |
| siRNA-Vinblastine Run1-DMSO  | NM_004979 | KCND1 | potassium voltage-gated channel, Shal-related subfamily, member 1 | 0.826062  | Inlier |

Identification of Survival Genes in Human Glioblastoma Cells Using siRNA Screening

Nikhil G Thaker, Fang Zhang, Peter R. McDonald, Tong Ying Shun, Michael D Lewen, Ian F. Pollack, and John S. Lazo

Molecular Pharmacology

|                              |               |       |                                                                   |           |        |
|------------------------------|---------------|-------|-------------------------------------------------------------------|-----------|--------|
| siRNA-Vinblastine Run2-DMSO  | NM_0049<br>79 | KCND1 | potassium voltage-gated channel, Shal-related subfamily, member 1 | 1.253967  | Inlier |
| siRNA Disorazole DMSO Run2   | NM_0049<br>79 | KCND1 | potassium voltage-gated channel, Shal-related subfamily, member 1 | 1.478524  | Inlier |
| siRNA-Temozolomide Run2-DMSO | NM_0122<br>81 | KCND2 | potassium voltage-gated channel, Shal-related subfamily, member 2 | -0.840148 | Inlier |
| siRNA-Temozolomide Run3-DMSO | NM_0122<br>81 | KCND2 | potassium voltage-gated channel, Shal-related subfamily, member 2 | -0.620919 | Inlier |
| siRNA Disorazole DMSO Run3   | NM_0122<br>81 | KCND2 | potassium voltage-gated channel, Shal-related subfamily, member 2 | -0.279559 | Inlier |
| siRNA Disorazole DMSO Run1   | NM_0122<br>81 | KCND2 | potassium voltage-gated channel, Shal-related subfamily, member 2 | -0.140329 | Inlier |

Identification of Survival Genes in Human Glioblastoma Cells Using siRNA Screening

Nikhil G Thaker, Fang Zhang, Peter R. McDonald, Tong Ying Shun, Michael D Lewen, Ian F. Pollack, and John S. Lazo

Molecular Pharmacology

|                              |               |       |                                                                   |           |        |
|------------------------------|---------------|-------|-------------------------------------------------------------------|-----------|--------|
| siRNA-Temozolomide Run1-DMSO | NM_0122<br>81 | KCND2 | potassium voltage-gated channel, Shal-related subfamily, member 2 | 0.140329  | Inlier |
| siRNA-Vinblastine Run1-DMSO  | NM_0122<br>81 | KCND2 | potassium voltage-gated channel, Shal-related subfamily, member 2 | 0.728081  | Inlier |
| siRNA-Vinblastine Run2-DMSO  | NM_0122<br>81 | KCND2 | potassium voltage-gated channel, Shal-related subfamily, member 2 | 0.808776  | Inlier |
| siRNA Disorazole DMSO Run2   | NM_0122<br>81 | KCND2 | potassium voltage-gated channel, Shal-related subfamily, member 2 | 1.264008  | Inlier |
| siRNA-Temozolomide Run3-DMSO | NM_1721<br>98 | KCND3 | potassium voltage-gated channel, Shal-related subfamily, member 3 | -1.499533 | Inlier |
| siRNA-Temozolomide Run2-DMSO | NM_1721<br>98 | KCND3 | potassium voltage-gated channel, Shal-related subfamily, member 3 | -0.678788 | Inlier |

Identification of Survival Genes in Human Glioblastoma Cells Using siRNA Screening

Nikhil G Thaker, Fang Zhang, Peter R. McDonald, Tong Ying Shun, Michael D Lewen, Ian F. Pollack, and John S. Lazo

Molecular Pharmacology

|                              |               |       |                                                                   |           |        |
|------------------------------|---------------|-------|-------------------------------------------------------------------|-----------|--------|
| siRNA-Temozolomide Run1-DMSO | NM_1721<br>98 | KCND3 | potassium voltage-gated channel, Shal-related subfamily, member 3 | -0.670212 | Inlier |
| siRNA Disorazole DMSO Run3   | NM_1721<br>98 | KCND3 | potassium voltage-gated channel, Shal-related subfamily, member 3 | -0.308662 | Inlier |
| siRNA Disorazole DMSO Run2   | NM_1721<br>98 | KCND3 | potassium voltage-gated channel, Shal-related subfamily, member 3 | 0.308662  | Inlier |
| siRNA Disorazole DMSO Run1   | NM_1721<br>98 | KCND3 | potassium voltage-gated channel, Shal-related subfamily, member 3 | 0.512658  | Inlier |
| siRNA-Vinblastine Run1-DMSO  | NM_1721<br>98 | KCND3 | potassium voltage-gated channel, Shal-related subfamily, member 3 | 1.759227  | Inlier |
| siRNA-Vinblastine Run2-DMSO  | NM_1721<br>98 | KCND3 | potassium voltage-gated channel, Shal-related subfamily, member 3 | 2.06791   | Inlier |



Identification of Survival Genes in Human Glioblastoma Cells Using siRNA Screening

Nikhil G Thaker, Fang Zhang, Peter R. McDonald, Tong Ying Shun, Michael D Lewen, Ian F. Pollack, and John S. Lazo

Molecular Pharmacology

|                              |           |       |                                                               |           |        |
|------------------------------|-----------|-------|---------------------------------------------------------------|-----------|--------|
| siRNA-Temozolomide Run3-DMSO | NM_000219 | KCNE1 | potassium voltage-gated channel, Isk-related family, member 1 | -1.151215 | Inlier |
| siRNA-Temozolomide Run2-DMSO | NM_000219 | KCNE1 | potassium voltage-gated channel, Isk-related family, member 1 | -0.721912 | Inlier |
| siRNA Disorazole DMSO Run1   | NM_000219 | KCNE1 | potassium voltage-gated channel, Isk-related family, member 1 | -0.627088 | Inlier |
| siRNA-Vinblastine Run2-DMSO  | NM_000219 | KCNE1 | potassium voltage-gated channel, Isk-related family, member 1 | -0.25999  | Inlier |
| siRNA-Temozolomide Run1-DMSO | NM_000219 | KCNE1 | potassium voltage-gated channel, Isk-related family, member 1 | 0.25999   | Inlier |
| siRNA-Vinblastine Run1-DMSO  | NM_000219 | KCNE1 | potassium voltage-gated channel, Isk-related family, member 1 | 0.565386  | Inlier |

Identification of Survival Genes in Human Glioblastoma Cells Using siRNA Screening  
 Nikhil G Thaker, Fang Zhang, Peter R. McDonald, Tong Ying Shun, Michael D Lewen, Ian F. Pollack, and John S. Lazo  
 Molecular Pharmacology

|                              |               |       |                                                               |           |        |
|------------------------------|---------------|-------|---------------------------------------------------------------|-----------|--------|
| siRNA Disorazole DMSO Run3   | NM_0002<br>19 | KCNE1 | potassium voltage-gated channel, Isk-related family, member 1 | 1.496438  | Inlier |
| siRNA Disorazole DMSO Run2   | NM_0002<br>19 | KCNE1 | potassium voltage-gated channel, Isk-related family, member 1 | 1.518962  | Inlier |
| siRNA Disorazole DMSO Run2   | NM_1722<br>01 | KCNE2 | potassium voltage-gated channel, Isk-related family, member 2 | -1.013956 | Inlier |
| siRNA-Temozolomide Run3-DMSO | NM_1722<br>01 | KCNE2 | potassium voltage-gated channel, Isk-related family, member 2 | -0.880469 | Inlier |
| siRNA Disorazole DMSO Run3   | NM_1722<br>01 | KCNE2 | potassium voltage-gated channel, Isk-related family, member 2 | -0.340574 | Inlier |
| siRNA-Temozolomide Run2-DMSO | NM_1722<br>01 | KCNE2 | potassium voltage-gated channel, Isk-related family, member 2 | -0.19188  | Inlier |

Identification of Survival Genes in Human Glioblastoma Cells Using siRNA Screening

Nikhil G Thaker, Fang Zhang, Peter R. McDonald, Tong Ying Shun, Michael D Lewen, Ian F. Pollack, and John S. Lazo

Molecular Pharmacology

|                              |               |       |                                                               |           |        |
|------------------------------|---------------|-------|---------------------------------------------------------------|-----------|--------|
| siRNA-Temozolomide Run1-DMSO | NM_1722<br>01 | KCNE2 | potassium voltage-gated channel, Isk-related family, member 2 | 0.19188   | Inlier |
| siRNA Disorazole DMSO Run1   | NM_1722<br>01 | KCNE2 | potassium voltage-gated channel, Isk-related family, member 2 | 0.468531  | Inlier |
| siRNA-Vinblastine Run2-DMSO  | NM_1722<br>01 | KCNE2 | potassium voltage-gated channel, Isk-related family, member 2 | 1.538809  | Inlier |
| siRNA-Vinblastine Run1-DMSO  | NM_1722<br>01 | KCNE2 | potassium voltage-gated channel, Isk-related family, member 2 | 1.673449  | Inlier |
| siRNA Disorazole DMSO Run2   | NM_0054<br>72 | KCNE3 | potassium voltage-gated channel, Isk-related family, member 3 | -1.296441 | Inlier |
| siRNA-Temozolomide Run3-DMSO | NM_0054<br>72 | KCNE3 | potassium voltage-gated channel, Isk-related family, member 3 | -0.747775 | Inlier |

Identification of Survival Genes in Human Glioblastoma Cells Using siRNA Screening

Nikhil G Thaker, Fang Zhang, Peter R. McDonald, Tong Ying Shun, Michael D Lewen, Ian F. Pollack, and John S. Lazo

Molecular Pharmacology

|                              |               |       |                                                               |           |        |
|------------------------------|---------------|-------|---------------------------------------------------------------|-----------|--------|
| siRNA-Temozolomide Run2-DMSO | NM_0054<br>72 | KCNE3 | potassium voltage-gated channel, Isk-related family, member 3 | -0.701806 | Inlier |
| siRNA Disorazole DMSO Run3   | NM_0054<br>72 | KCNE3 | potassium voltage-gated channel, Isk-related family, member 3 | -0.076641 | Inlier |
| siRNA Disorazole DMSO Run1   | NM_0054<br>72 | KCNE3 | potassium voltage-gated channel, Isk-related family, member 3 | 0.076642  | Inlier |
| siRNA-Temozolomide Run1-DMSO | NM_0054<br>72 | KCNE3 | potassium voltage-gated channel, Isk-related family, member 3 | 0.171523  | Inlier |
| siRNA-Vinblastine Run1-DMSO  | NM_0054<br>72 | KCNE3 | potassium voltage-gated channel, Isk-related family, member 3 | 0.647194  | Inlier |
| siRNA-Vinblastine Run2-DMSO  | NM_0054<br>72 | KCNE3 | potassium voltage-gated channel, Isk-related family, member 3 | 0.916042  | Inlier |

Identification of Survival Genes in Human Glioblastoma Cells Using siRNA Screening

Nikhil G Thaker, Fang Zhang, Peter R. McDonald, Tong Ying Shun, Michael D Lewen, Ian F. Pollack, and John S. Lazo

Molecular Pharmacology

|                              |               |       |                                                               |           |        |
|------------------------------|---------------|-------|---------------------------------------------------------------|-----------|--------|
| siRNA-Temozolomide Run3-DMSO | NM_0806<br>71 | KCNE4 | potassium voltage-gated channel, Isk-related family, member 4 | -1.013214 | Inlier |
| siRNA-Temozolomide Run2-DMSO | NM_0806<br>71 | KCNE4 | potassium voltage-gated channel, Isk-related family, member 4 | -0.939815 | Inlier |
| siRNA Disorazole DMSO Run2   | NM_0806<br>71 | KCNE4 | potassium voltage-gated channel, Isk-related family, member 4 | -0.409185 | Inlier |
| siRNA Disorazole DMSO Run3   | NM_0806<br>71 | KCNE4 | potassium voltage-gated channel, Isk-related family, member 4 | -0.012509 | Inlier |
| siRNA-Temozolomide Run1-DMSO | NM_0806<br>71 | KCNE4 | potassium voltage-gated channel, Isk-related family, member 4 | 0.012509  | Inlier |
| siRNA Disorazole DMSO Run1   | NM_0806<br>71 | KCNE4 | potassium voltage-gated channel, Isk-related family, member 4 | 0.398715  | Inlier |

Identification of Survival Genes in Human Glioblastoma Cells Using siRNA Screening  
 Nikhil G Thaker, Fang Zhang, Peter R. McDonald, Tong Ying Shun, Michael D Lewen, Ian F. Pollack, and John S. Lazo  
 Molecular Pharmacology

|                              |           |       |                                                               |           |        |
|------------------------------|-----------|-------|---------------------------------------------------------------|-----------|--------|
| siRNA-Vinblastine Run1-DMSO  | NM_080671 | KCNE4 | potassium voltage-gated channel, Isk-related family, member 4 | 1.364497  | Inlier |
| siRNA-Vinblastine Run2-DMSO  | NM_080671 | KCNE4 | potassium voltage-gated channel, Isk-related family, member 4 | 1.476722  | Inlier |
| siRNA Disorazole DMSO Run2   | NM_002236 | KCNF1 | potassium voltage-gated channel, subfamily F, member 1        | -1.492279 | Inlier |
| siRNA-Temozolomide Run3-DMSO | NM_002236 | KCNF1 | potassium voltage-gated channel, subfamily F, member 1        | -1.269519 | Inlier |
| siRNA Disorazole DMSO Run3   | NM_002236 | KCNF1 | potassium voltage-gated channel, subfamily F, member 1        | -0.491419 | Inlier |
| siRNA-Temozolomide Run2-DMSO | NM_002236 | KCNF1 | potassium voltage-gated channel, subfamily F, member 1        | -0.234058 | Inlier |
| siRNA Disorazole DMSO Run1   | NM_002236 | KCNF1 | potassium voltage-gated channel, subfamily F, member 1        | 0.234059  | Inlier |

Identification of Survival Genes in Human Glioblastoma Cells Using siRNA Screening

Nikhil G Thaker, Fang Zhang, Peter R. McDonald, Tong Ying Shun, Michael D Lewen, Ian F. Pollack, and John S. Lazo

Molecular Pharmacology

|                              |           |       |                                                        |           |        |
|------------------------------|-----------|-------|--------------------------------------------------------|-----------|--------|
| siRNA-Temozolomide Run1-DMSO | NM_002236 | KCNF1 | potassium voltage-gated channel, subfamily F, member 1 | 0.330316  | Inlier |
| siRNA-Vinblastine Run1-DMSO  | NM_002236 | KCNF1 | potassium voltage-gated channel, subfamily F, member 1 | 0.857581  | Inlier |
| siRNA-Vinblastine Run2-DMSO  | NM_002236 | KCNF1 | potassium voltage-gated channel, subfamily F, member 1 | 0.965017  | Inlier |
| siRNA Disorazole DMSO Run2   | NM_002237 | KCNG1 | potassium voltage-gated channel, subfamily G, member 1 | -0.847272 | Inlier |
| siRNA-Temozolomide Run3-DMSO | NM_002237 | KCNG1 | potassium voltage-gated channel, subfamily G, member 1 | -0.501728 | Inlier |
| siRNA Disorazole DMSO Run1   | NM_002237 | KCNG1 | potassium voltage-gated channel, subfamily G, member 1 | -0.253868 | Inlier |
| siRNA-Temozolomide Run2-DMSO | NM_002237 | KCNG1 | potassium voltage-gated channel, subfamily G, member 1 | -0.220607 | Inlier |

Identification of Survival Genes in Human Glioblastoma Cells Using siRNA Screening

Nikhil G Thaker, Fang Zhang, Peter R. McDonald, Tong Ying Shun, Michael D Lewen, Ian F. Pollack, and John S. Lazo

Molecular Pharmacology

|                              |               |       |                                                        |           |        |
|------------------------------|---------------|-------|--------------------------------------------------------|-----------|--------|
| siRNA Disorazole DMSO Run3   | NM_0022<br>37 | KCNG1 | potassium voltage-gated channel, subfamily G, member 1 | 0.220607  | Inlier |
| siRNA-Temozolomide Run1-DMSO | NM_0022<br>37 | KCNG1 | potassium voltage-gated channel, subfamily G, member 1 | 0.880755  | Inlier |
| siRNA-Vinblastine Run2-DMSO  | NM_0022<br>37 | KCNG1 | potassium voltage-gated channel, subfamily G, member 1 | 1.2465    | Inlier |
| siRNA-Vinblastine Run1-DMSO  | NM_0022<br>37 | KCNG1 | potassium voltage-gated channel, subfamily G, member 1 | 1.410919  | Inlier |
| siRNA-Temozolomide Run3-DMSO | NM_0122<br>83 | KCNG2 | potassium voltage-gated channel, subfamily G, member 2 | -1.297546 | Inlier |
| siRNA Disorazole DMSO Run2   | NM_0122<br>83 | KCNG2 | potassium voltage-gated channel, subfamily G, member 2 | -1.08071  | Inlier |
| siRNA-Temozolomide Run2-DMSO | NM_0122<br>83 | KCNG2 | potassium voltage-gated channel, subfamily G, member 2 | -0.328405 | Inlier |



Identification of Survival Genes in Human Glioblastoma Cells Using siRNA Screening

Nikhil G Thaker, Fang Zhang, Peter R. McDonald, Tong Ying Shun, Michael D Lewen, Ian F. Pollack, and John S. Lazo

Molecular Pharmacology

|                                  |               |       |                                                                           |           |        |
|----------------------------------|---------------|-------|---------------------------------------------------------------------------|-----------|--------|
| siRNA Disorazole DMSO Run3       | NM_0122<br>83 | KCNG2 | potassium<br>voltage-<br>gated<br>channel,<br>subfamily<br>G,<br>member 2 | -0.211923 | Inlier |
| siRNA Disorazole DMSO Run1       | NM_0122<br>83 | KCNG2 | potassium<br>voltage-<br>gated<br>channel,<br>subfamily<br>G,<br>member 2 | 0.211923  | Inlier |
| siRNA-Temozolomide Run1-<br>DMSO | NM_0122<br>83 | KCNG2 | potassium<br>voltage-<br>gated<br>channel,<br>subfamily<br>G,<br>member 2 | 0.623543  | Inlier |
| siRNA-Vinblastine Run2-<br>DMSO  | NM_0122<br>83 | KCNG2 | potassium<br>voltage-<br>gated<br>channel,<br>subfamily<br>G,<br>member 2 | 0.725457  | Inlier |
| siRNA-Vinblastine Run1-<br>DMSO  | NM_0122<br>83 | KCNG2 | potassium<br>voltage-<br>gated<br>channel,<br>subfamily<br>G,<br>member 2 | 1.239524  | Inlier |
| siRNA-Temozolomide Run3-<br>DMSO | NM_1333<br>29 | KCNG3 | potassium<br>voltage-<br>gated<br>channel,<br>subfamily<br>G,<br>member 3 | -1.133536 | Inlier |
| siRNA-Temozolomide Run2-<br>DMSO | NM_1333<br>29 | KCNG3 | potassium<br>voltage-<br>gated<br>channel,<br>subfamily<br>G,<br>member 3 | -0.984572 | Inlier |

Identification of Survival Genes in Human Glioblastoma Cells Using siRNA Screening

Nikhil G Thaker, Fang Zhang, Peter R. McDonald, Tong Ying Shun, Michael D Lewen, Ian F. Pollack, and John S. Lazo

Molecular Pharmacology

|                                  |               |       |                                                                           |           |        |
|----------------------------------|---------------|-------|---------------------------------------------------------------------------|-----------|--------|
| siRNA Disorazole DMSO Run2       | NM_1333<br>29 | KCNG3 | potassium<br>voltage-<br>gated<br>channel,<br>subfamily<br>G,<br>member 3 | -0.469585 | Inlier |
| siRNA-Temozolomide Run1-<br>DMSO | NM_1333<br>29 | KCNG3 | potassium<br>voltage-<br>gated<br>channel,<br>subfamily<br>G,<br>member 3 | -0.016296 | Inlier |
| siRNA Disorazole DMSO Run3       | NM_1333<br>29 | KCNG3 | potassium<br>voltage-<br>gated<br>channel,<br>subfamily<br>G,<br>member 3 | 0.016296  | Inlier |
| siRNA Disorazole DMSO Run1       | NM_1333<br>29 | KCNG3 | potassium<br>voltage-<br>gated<br>channel,<br>subfamily<br>G,<br>member 3 | 0.285361  | Inlier |
| siRNA-Vinblastine Run1-<br>DMSO  | NM_1333<br>29 | KCNG3 | potassium<br>voltage-<br>gated<br>channel,<br>subfamily<br>G,<br>member 3 | 0.879415  | Inlier |
| siRNA-Vinblastine Run2-<br>DMSO  | NM_1333<br>29 | KCNG3 | potassium<br>voltage-<br>gated<br>channel,<br>subfamily<br>G,<br>member 3 | 1.067868  | Inlier |
| siRNA-Temozolomide Run3-<br>DMSO | NM_1723<br>47 | KCNG4 | potassium<br>voltage-<br>gated<br>channel,<br>subfamily<br>G,<br>member 4 | -2.368753 | Inlier |

Identification of Survival Genes in Human Glioblastoma Cells Using siRNA Screening

Nikhil G Thaker, Fang Zhang, Peter R. McDonald, Tong Ying Shun, Michael D Lewen, Ian F. Pollack, and John S. Lazo

Molecular Pharmacology

|                              |               |       |                                                        |           |        |
|------------------------------|---------------|-------|--------------------------------------------------------|-----------|--------|
| siRNA-Temozolomide Run2-DMSO | NM_1723<br>47 | KCNG4 | potassium voltage-gated channel, subfamily G, member 4 | -1.34011  | Inlier |
| siRNA Disorazole DMSO Run3   | NM_1723<br>47 | KCNG4 | potassium voltage-gated channel, subfamily G, member 4 | -0.564071 | Inlier |
| siRNA Disorazole DMSO Run1   | NM_1723<br>47 | KCNG4 | potassium voltage-gated channel, subfamily G, member 4 | -0.068367 | Inlier |
| siRNA Disorazole DMSO Run2   | NM_1723<br>47 | KCNG4 | potassium voltage-gated channel, subfamily G, member 4 | 0.068368  | Inlier |
| siRNA-Temozolomide Run1-DMSO | NM_1723<br>47 | KCNG4 | potassium voltage-gated channel, subfamily G, member 4 | 0.252413  | Inlier |
| siRNA-Vinblastine Run2-DMSO  | NM_1723<br>47 | KCNG4 | potassium voltage-gated channel, subfamily G, member 4 | 0.784929  | Inlier |
| siRNA-Vinblastine Run1-DMSO  | NM_1723<br>47 | KCNG4 | potassium voltage-gated channel, subfamily G, member 4 | 1.090847  | Inlier |

Identification of Survival Genes in Human Glioblastoma Cells Using siRNA Screening

Nikhil G Thaker, Fang Zhang, Peter R. McDonald, Tong Ying Shun, Michael D Lewen, Ian F. Pollack, and John S. Lazo

Molecular Pharmacology

|                              |               |       |                                                                      |           |        |
|------------------------------|---------------|-------|----------------------------------------------------------------------|-----------|--------|
| siRNA-Temozolomide Run3-DMSO | NM_1723<br>62 | KCNH1 | potassium voltage-gated channel, subfamily H (eag-related), member 1 | -0.993211 | Inlier |
| siRNA-Temozolomide Run2-DMSO | NM_1723<br>62 | KCNH1 | potassium voltage-gated channel, subfamily H (eag-related), member 1 | -0.796486 | Inlier |
| siRNA Disorazole DMSO Run2   | NM_1723<br>62 | KCNH1 | potassium voltage-gated channel, subfamily H (eag-related), member 1 | -0.552514 | Inlier |
| siRNA Disorazole DMSO Run3   | NM_1723<br>62 | KCNH1 | potassium voltage-gated channel, subfamily H (eag-related), member 1 | -0.261099 | Inlier |
| siRNA-Temozolomide Run1-DMSO | NM_1723<br>62 | KCNH1 | potassium voltage-gated channel, subfamily H (eag-related), member 1 | 0.261099  | Inlier |
| siRNA Disorazole DMSO Run1   | NM_1723<br>62 | KCNH1 | potassium voltage-gated channel, subfamily H (eag-related), member 1 | 0.49364   | Inlier |

Identification of Survival Genes in Human Glioblastoma Cells Using siRNA Screening

Nikhil G Thaker, Fang Zhang, Peter R. McDonald, Tong Ying Shun, Michael D Lewen, Ian F. Pollack, and John S. Lazo

Molecular Pharmacology

|                              |               |       |                                                                      |           |        |
|------------------------------|---------------|-------|----------------------------------------------------------------------|-----------|--------|
| siRNA-Vinblastine Run1-DMSO  | NM_1723<br>62 | KCNH1 | potassium voltage-gated channel, subfamily H (eag-related), member 1 | 0.902589  | Inlier |
| siRNA-Vinblastine Run2-DMSO  | NM_1723<br>62 | KCNH1 | potassium voltage-gated channel, subfamily H (eag-related), member 1 | 1.243928  | Inlier |
| siRNA-Temozolomide Run3-DMSO | NM_0002<br>38 | KCNH2 | potassium voltage-gated channel, subfamily H (eag-related), member 2 | -2.061096 | Inlier |
| siRNA Disorazole DMSO Run1   | NM_0002<br>38 | KCNH2 | potassium voltage-gated channel, subfamily H (eag-related), member 2 | -1.74415  | Inlier |
| siRNA Disorazole DMSO Run3   | NM_0002<br>38 | KCNH2 | potassium voltage-gated channel, subfamily H (eag-related), member 2 | -0.334543 | Inlier |
| siRNA-Vinblastine Run2-DMSO  | NM_0002<br>38 | KCNH2 | potassium voltage-gated channel, subfamily H (eag-related), member 2 | -0.157923 | Inlier |

Identification of Survival Genes in Human Glioblastoma Cells Using siRNA Screening

Nikhil G Thaker, Fang Zhang, Peter R. McDonald, Tong Ying Shun, Michael D Lewen, Ian F. Pollack, and John S. Lazo

Molecular Pharmacology

|                              |               |       |                                                                      |           |        |
|------------------------------|---------------|-------|----------------------------------------------------------------------|-----------|--------|
| siRNA Disorazole DMSO Run2   | NM_0002<br>38 | KCNH2 | potassium voltage-gated channel, subfamily H (eag-related), member 2 | 0.157922  | Inlier |
| siRNA-Temozolomide Run2-DMSO | NM_0002<br>38 | KCNH2 | potassium voltage-gated channel, subfamily H (eag-related), member 2 | 0.570841  | Inlier |
| siRNA-Temozolomide Run1-DMSO | NM_0002<br>38 | KCNH2 | potassium voltage-gated channel, subfamily H (eag-related), member 2 | 0.778159  | Inlier |
| siRNA-Vinblastine Run1-DMSO  | NM_0002<br>38 | KCNH2 | potassium voltage-gated channel, subfamily H (eag-related), member 2 | 0.910112  | Inlier |
| siRNA Disorazole DMSO Run2   | NM_0122<br>84 | KCNH3 | potassium voltage-gated channel, subfamily H (eag-related), member 3 | -0.918068 | Inlier |
| siRNA-Temozolomide Run3-DMSO | NM_0122<br>84 | KCNH3 | potassium voltage-gated channel, subfamily H (eag-related), member 3 | -0.649304 | Inlier |

Identification of Survival Genes in Human Glioblastoma Cells Using siRNA Screening

Nikhil G Thaker, Fang Zhang, Peter R. McDonald, Tong Ying Shun, Michael D Lewen, Ian F. Pollack, and John S. Lazo

Molecular Pharmacology

|                              |               |       |                                                                      |           |        |
|------------------------------|---------------|-------|----------------------------------------------------------------------|-----------|--------|
| siRNA Disorazole DMSO Run3   | NM_0122<br>84 | KCNH3 | potassium voltage-gated channel, subfamily H (eag-related), member 3 | -0.471993 | Inlier |
| siRNA-Temozolomide Run2-DMSO | NM_0122<br>84 | KCNH3 | potassium voltage-gated channel, subfamily H (eag-related), member 3 | -0.357349 | Inlier |
| siRNA Disorazole DMSO Run1   | NM_0122<br>84 | KCNH3 | potassium voltage-gated channel, subfamily H (eag-related), member 3 | 0.357348  | Inlier |
| siRNA-Temozolomide Run1-DMSO | NM_0122<br>84 | KCNH3 | potassium voltage-gated channel, subfamily H (eag-related), member 3 | 0.699696  | Inlier |
| siRNA-Vinblastine Run1-DMSO  | NM_0122<br>84 | KCNH3 | potassium voltage-gated channel, subfamily H (eag-related), member 3 | 1.411593  | Inlier |
| siRNA-Vinblastine Run2-DMSO  | NM_0122<br>84 | KCNH3 | potassium voltage-gated channel, subfamily H (eag-related), member 3 | 1.478303  | Inlier |

Identification of Survival Genes in Human Glioblastoma Cells Using siRNA Screening

Nikhil G Thaker, Fang Zhang, Peter R. McDonald, Tong Ying Shun, Michael D Lewen, Ian F. Pollack, and John S. Lazo

Molecular Pharmacology

| siRNA Treatment              | Gene      | Accession | Gene Name                                                            | Log Fold Change | Outlier Status |
|------------------------------|-----------|-----------|----------------------------------------------------------------------|-----------------|----------------|
| siRNA-Temozolomide Run3-DMSO | NM_012285 | KCNH4     | potassium voltage-gated channel, subfamily H (eag-related), member 4 | -2.33019        | Inlier         |
| siRNA Disorazole DMSO Run2   | NM_012285 | KCNH4     | potassium voltage-gated channel, subfamily H (eag-related), member 4 | -1.961476       | Inlier         |
| siRNA Disorazole DMSO Run1   | NM_012285 | KCNH4     | potassium voltage-gated channel, subfamily H (eag-related), member 4 | -0.694956       | Inlier         |
| siRNA-Temozolomide Run2-DMSO | NM_012285 | KCNH4     | potassium voltage-gated channel, subfamily H (eag-related), member 4 | -0.334294       | Inlier         |
| siRNA-Temozolomide Run1-DMSO | NM_012285 | KCNH4     | potassium voltage-gated channel, subfamily H (eag-related), member 4 | 0.334294        | Inlier         |
| siRNA Disorazole DMSO Run3   | NM_012285 | KCNH4     | potassium voltage-gated channel, subfamily H (eag-related), member 4 | 0.55253         | Inlier         |



Identification of Survival Genes in Human Glioblastoma Cells Using siRNA Screening

Nikhil G Thaker, Fang Zhang, Peter R. McDonald, Tong Ying Shun, Michael D Lewen, Ian F. Pollack, and John S. Lazo

Molecular Pharmacology

|                              |           |       |                                                                      |           |        |
|------------------------------|-----------|-------|----------------------------------------------------------------------|-----------|--------|
| siRNA-Vinblastine Run2-DMSO  | NM_012285 | KCNH4 | potassium voltage-gated channel, subfamily H (eag-related), member 4 | 0.654044  | Inlier |
| siRNA-Vinblastine Run1-DMSO  | NM_012285 | KCNH4 | potassium voltage-gated channel, subfamily H (eag-related), member 4 | 1.012909  | Inlier |
| siRNA-Temozolomide Run3-DMSO | NM_172376 | KCNH5 | potassium voltage-gated channel, subfamily H (eag-related), member 5 | -1.055931 | Inlier |
| siRNA Disorazole DMSO Run3   | NM_172376 | KCNH5 | potassium voltage-gated channel, subfamily H (eag-related), member 5 | -0.731086 | Inlier |
| siRNA Disorazole DMSO Run2   | NM_172376 | KCNH5 | potassium voltage-gated channel, subfamily H (eag-related), member 5 | -0.617914 | Inlier |
| siRNA-Temozolomide Run2-DMSO | NM_172376 | KCNH5 | potassium voltage-gated channel, subfamily H (eag-related), member 5 | -0.431719 | Inlier |

Identification of Survival Genes in Human Glioblastoma Cells Using siRNA Screening

Nikhil G Thaker, Fang Zhang, Peter R. McDonald, Tong Ying Shun, Michael D Lewen, Ian F. Pollack, and John S. Lazo

Molecular Pharmacology

|                              |               |       |                                                                      |           |        |
|------------------------------|---------------|-------|----------------------------------------------------------------------|-----------|--------|
| siRNA Disorazole DMSO Run1   | NM_1723<br>76 | KCNH5 | potassium voltage-gated channel, subfamily H (eag-related), member 5 | 0.431719  | Inlier |
| siRNA-Temozolomide Run1-DMSO | NM_1723<br>76 | KCNH5 | potassium voltage-gated channel, subfamily H (eag-related), member 5 | 0.506764  | Inlier |
| siRNA-Vinblastine Run2-DMSO  | NM_1723<br>76 | KCNH5 | potassium voltage-gated channel, subfamily H (eag-related), member 5 | 1.012858  | Inlier |
| siRNA-Vinblastine Run1-DMSO  | NM_1723<br>76 | KCNH5 | potassium voltage-gated channel, subfamily H (eag-related), member 5 | 1.763268  | Inlier |
| siRNA-Temozolomide Run3-DMSO | NM_0307<br>79 | KCNH6 | potassium voltage-gated channel, subfamily H (eag-related), member 6 | -1.26676  | Inlier |
| siRNA Disorazole DMSO Run2   | NM_0307<br>79 | KCNH6 | potassium voltage-gated channel, subfamily H (eag-related), member 6 | -1.147721 | Inlier |

Identification of Survival Genes in Human Glioblastoma Cells Using siRNA Screening

Nikhil G Thaker, Fang Zhang, Peter R. McDonald, Tong Ying Shun, Michael D Lewen, Ian F. Pollack, and John S. Lazo

Molecular Pharmacology

|                              |               |       |                                                                      |           |        |
|------------------------------|---------------|-------|----------------------------------------------------------------------|-----------|--------|
| siRNA Disorazole DMSO Run3   | NM_0307<br>79 | KCNH6 | potassium voltage-gated channel, subfamily H (eag-related), member 6 | -0.234471 | Inlier |
| siRNA Disorazole DMSO Run1   | NM_0307<br>79 | KCNH6 | potassium voltage-gated channel, subfamily H (eag-related), member 6 | -0.176091 | Inlier |
| siRNA-Temozolomide Run2-DMSO | NM_0307<br>79 | KCNH6 | potassium voltage-gated channel, subfamily H (eag-related), member 6 | 0.176091  | Inlier |
| siRNA-Vinblastine Run2-DMSO  | NM_0307<br>79 | KCNH6 | potassium voltage-gated channel, subfamily H (eag-related), member 6 | 0.608046  | Inlier |
| siRNA-Temozolomide Run1-DMSO | NM_0307<br>79 | KCNH6 | potassium voltage-gated channel, subfamily H (eag-related), member 6 | 0.740954  | Inlier |
| siRNA-Vinblastine Run1-DMSO  | NM_0307<br>79 | KCNH6 | potassium voltage-gated channel, subfamily H (eag-related), member 6 | 0.994093  | Inlier |

Identification of Survival Genes in Human Glioblastoma Cells Using siRNA Screening

Nikhil G Thaker, Fang Zhang, Peter R. McDonald, Tong Ying Shun, Michael D Lewen, Ian F. Pollack, and John S. Lazo

Molecular Pharmacology

|                              |           |       |                                                                      |           |        |
|------------------------------|-----------|-------|----------------------------------------------------------------------|-----------|--------|
| siRNA-Temozolomide Run2-DMSO | NM_033272 | KCNH7 | potassium voltage-gated channel, subfamily H (eag-related), member 7 | -1.016495 | Inlier |
| siRNA-Temozolomide Run3-DMSO | NM_033272 | KCNH7 | potassium voltage-gated channel, subfamily H (eag-related), member 7 | -0.886473 | Inlier |
| siRNA Disorazole DMSO Run3   | NM_033272 | KCNH7 | potassium voltage-gated channel, subfamily H (eag-related), member 7 | -0.229057 | Inlier |
| siRNA Disorazole DMSO Run2   | NM_033272 | KCNH7 | potassium voltage-gated channel, subfamily H (eag-related), member 7 | -0.224241 | Inlier |
| siRNA-Temozolomide Run1-DMSO | NM_033272 | KCNH7 | potassium voltage-gated channel, subfamily H (eag-related), member 7 | 0.224241  | Inlier |
| siRNA Disorazole DMSO Run1   | NM_033272 | KCNH7 | potassium voltage-gated channel, subfamily H (eag-related), member 7 | 0.462527  | Inlier |

Identification of Survival Genes in Human Glioblastoma Cells Using siRNA Screening

Nikhil G Thaker, Fang Zhang, Peter R. McDonald, Tong Ying Shun, Michael D Lewen, Ian F. Pollack, and John S. Lazo

Molecular Pharmacology

|                              |               |       |                                                                      |           |         |
|------------------------------|---------------|-------|----------------------------------------------------------------------|-----------|---------|
| siRNA-Vinblastine Run1-DMSO  | NM_0332<br>72 | KCNH7 | potassium voltage-gated channel, subfamily H (eag-related), member 7 | 3.865435  | Outlier |
| siRNA-Vinblastine Run2-DMSO  | NM_0332<br>72 | KCNH7 | potassium voltage-gated channel, subfamily H (eag-related), member 7 | 4.490892  | Outlier |
| siRNA-Temozolomide Run2-DMSO | NM_1446<br>33 | KCNH8 | potassium voltage-gated channel, subfamily H (eag-related), member 8 | -1.162379 | Inlier  |
| siRNA-Temozolomide Run3-DMSO | NM_1446<br>33 | KCNH8 | potassium voltage-gated channel, subfamily H (eag-related), member 8 | -0.995366 | Inlier  |
| siRNA Disorazole DMSO Run2   | NM_1446<br>33 | KCNH8 | potassium voltage-gated channel, subfamily H (eag-related), member 8 | -0.440534 | Inlier  |
| siRNA Disorazole DMSO Run3   | NM_1446<br>33 | KCNH8 | potassium voltage-gated channel, subfamily H (eag-related), member 8 | -0.191638 | Inlier  |

Identification of Survival Genes in Human Glioblastoma Cells Using siRNA Screening  
 Nikhil G Thaker, Fang Zhang, Peter R. McDonald, Tong Ying Shun, Michael D Lewen, Ian F. Pollack, and John S. Lazo

Molecular Pharmacology

|                              |               |        |                                                                      |           |         |
|------------------------------|---------------|--------|----------------------------------------------------------------------|-----------|---------|
| siRNA-Vinblastine Run2-DMSO  | NM_1446<br>33 | KCNH8  | potassium voltage-gated channel, subfamily H (eag-related), member 8 | 0.191637  | Inlier  |
| siRNA Disorazole DMSO Run1   | NM_1446<br>33 | KCNH8  | potassium voltage-gated channel, subfamily H (eag-related), member 8 | 0.669688  | Inlier  |
| siRNA-Temozolomide Run1-DMSO | NM_1446<br>33 | KCNH8  | potassium voltage-gated channel, subfamily H (eag-related), member 8 | 0.679312  | Inlier  |
| siRNA-Vinblastine Run1-DMSO  | NM_1446<br>33 | KCNH8  | potassium voltage-gated channel, subfamily H (eag-related), member 8 | 1.043207  | Inlier  |
| siRNA-Temozolomide Run3-DMSO | NM_0145<br>91 | KCNIP2 | Kv channel interacting protein 2                                     | -3.772603 | Outlier |
| siRNA Disorazole DMSO Run2   | NM_0145<br>91 | KCNIP2 | Kv channel interacting protein 2                                     | -0.871872 | Inlier  |
| siRNA Disorazole DMSO Run3   | NM_0145<br>91 | KCNIP2 | Kv channel interacting protein 2                                     | -0.131368 | Inlier  |
| siRNA Disorazole DMSO Run1   | NM_0145<br>91 | KCNIP2 | Kv channel interacting protein 2                                     | -0.109383 | Inlier  |

Identification of Survival Genes in Human Glioblastoma Cells Using siRNA Screening  
 Nikhil G Thaker, Fang Zhang, Peter R. McDonald, Tong Ying Shun, Michael D Lewen, Ian F. Pollack, and John S. Lazo  
 Molecular Pharmacology

|                              |           |        |                                                              |           |        |
|------------------------------|-----------|--------|--------------------------------------------------------------|-----------|--------|
| siRNA-Temozolomide Run2-DMSO | NM_014591 | KCNIP2 | Kv channel interacting protein 2                             | 0.109384  | Inlier |
| siRNA-Temozolomide Run1-DMSO | NM_014591 | KCNIP2 | Kv channel interacting protein 2                             | 0.477128  | Inlier |
| siRNA-Vinblastine Run1-DMSO  | NM_014591 | KCNIP2 | Kv channel interacting protein 2                             | 1.444616  | Inlier |
| siRNA-Vinblastine Run2-DMSO  | NM_014591 | KCNIP2 | Kv channel interacting protein 2                             | 2.798596  | Inlier |
| siRNA-Temozolomide Run2-DMSO | NM_153764 | KCNJ1  | potassium inwardly-rectifying channel, subfamily J, member 1 | -0.89632  | Inlier |
| siRNA Disorazole DMSO Run1   | NM_153764 | KCNJ1  | potassium inwardly-rectifying channel, subfamily J, member 1 | -0.895587 | Inlier |
| siRNA Disorazole DMSO Run2   | NM_153764 | KCNJ1  | potassium inwardly-rectifying channel, subfamily J, member 1 | -0.879364 | Inlier |
| siRNA-Temozolomide Run1-DMSO | NM_153764 | KCNJ1  | potassium inwardly-rectifying channel, subfamily J, member 1 | -0.084614 | Inlier |

Identification of Survival Genes in Human Glioblastoma Cells Using siRNA Screening  
 Nikhil G Thaker, Fang Zhang, Peter R. McDonald, Tong Ying Shun, Michael D Lewen, Ian F. Pollack, and John S. Lazo  
 Molecular Pharmacology

|                              |               |        |                                                               |           |        |
|------------------------------|---------------|--------|---------------------------------------------------------------|-----------|--------|
| siRNA-Temozolomide Run3-DMSO | NM_1537<br>64 | KCNJ1  | potassium inwardly-rectifying channel, subfamily J, member 1  | 0.084614  | Inlier |
| siRNA-Vinblastine Run2-DMSO  | NM_1537<br>64 | KCNJ1  | potassium inwardly-rectifying channel, subfamily J, member 1  | 0.326038  | Inlier |
| siRNA Disorazole DMSO Run3   | NM_1537<br>64 | KCNJ1  | potassium inwardly-rectifying channel, subfamily J, member 1  | 0.469636  | Inlier |
| siRNA-Vinblastine Run1-DMSO  | NM_1537<br>64 | KCNJ1  | potassium inwardly-rectifying channel, subfamily J, member 1  | 0.935809  | Inlier |
| siRNA Disorazole DMSO Run2   | NM_0022<br>41 | KCNJ10 | potassium inwardly-rectifying channel, subfamily J, member 10 | -1.257228 | Inlier |
| siRNA-Temozolomide Run3-DMSO | NM_0022<br>41 | KCNJ10 | potassium inwardly-rectifying channel, subfamily J, member 10 | -0.767411 | Inlier |



Identification of Survival Genes in Human Glioblastoma Cells Using siRNA Screening  
 Nikhil G Thaker, Fang Zhang, Peter R. McDonald, Tong Ying Shun, Michael D Lewen, Ian F. Pollack, and John S. Lazo  
 Molecular Pharmacology

|                              |               |        |                                                               |           |        |
|------------------------------|---------------|--------|---------------------------------------------------------------|-----------|--------|
| siRNA-Temozolomide Run2-DMSO | NM_0022<br>41 | KCNJ10 | potassium inwardly-rectifying channel, subfamily J, member 10 | -0.547799 | Inlier |
| siRNA Disorazole DMSO Run3   | NM_0022<br>41 | KCNJ10 | potassium inwardly-rectifying channel, subfamily J, member 10 | -0.365444 | Inlier |
| siRNA Disorazole DMSO Run1   | NM_0022<br>41 | KCNJ10 | potassium inwardly-rectifying channel, subfamily J, member 10 | 0.365444  | Inlier |
| siRNA-Temozolomide Run1-DMSO | NM_0022<br>41 | KCNJ10 | potassium inwardly-rectifying channel, subfamily J, member 10 | 0.581589  | Inlier |
| siRNA-Vinblastine Run2-DMSO  | NM_0022<br>41 | KCNJ10 | potassium inwardly-rectifying channel, subfamily J, member 10 | 0.84418   | Inlier |

Identification of Survival Genes in Human Glioblastoma Cells Using siRNA Screening  
 Nikhil G Thaker, Fang Zhang, Peter R. McDonald, Tong Ying Shun, Michael D Lewen, Ian F. Pollack, and John S. Lazo  
 Molecular Pharmacology

|                              |               |        |    |                                                            |                  |
|------------------------------|---------------|--------|----|------------------------------------------------------------|------------------|
| siRNA-Vinblastine Run1-DMSO  | NM_0022<br>41 | KCNJ10 | 10 | potassium inwardly-rectifying channel, subfamily J, member | 1.146368 Inlier  |
| siRNA-Temozolomide Run3-DMSO | NM_0005<br>25 | KCNJ11 | 11 | potassium inwardly-rectifying channel, subfamily J, member | -1.624601 Inlier |
| siRNA-Temozolomide Run2-DMSO | NM_0005<br>25 | KCNJ11 | 11 | potassium inwardly-rectifying channel, subfamily J, member | -1.178978 Inlier |
| siRNA Disorazole DMSO Run2   | NM_0005<br>25 | KCNJ11 | 11 | potassium inwardly-rectifying channel, subfamily J, member | -0.483166 Inlier |
| siRNA Disorazole DMSO Run3   | NM_0005<br>25 | KCNJ11 | 11 | potassium inwardly-rectifying channel, subfamily J, member | -0.105908 Inlier |

Identification of Survival Genes in Human Glioblastoma Cells Using siRNA Screening  
 Nikhil G Thaker, Fang Zhang, Peter R. McDonald, Tong Ying Shun, Michael D Lewen, Ian F. Pollack, and John S. Lazo  
 Molecular Pharmacology

|                              |               |        |                                                               |                  |
|------------------------------|---------------|--------|---------------------------------------------------------------|------------------|
| siRNA-Temozolomide Run1-DMSO | NM_0005<br>25 | KCNJ11 | potassium inwardly-rectifying channel, subfamily J, member 11 | 0.105908 Inlier  |
| siRNA Disorazole DMSO Run1   | NM_0005<br>25 | KCNJ11 | potassium inwardly-rectifying channel, subfamily J, member 11 | 0.143172 Inlier  |
| siRNA-Vinblastine Run1-DMSO  | NM_0005<br>25 | KCNJ11 | potassium inwardly-rectifying channel, subfamily J, member 11 | 0.865834 Inlier  |
| siRNA-Vinblastine Run2-DMSO  | NM_0005<br>25 | KCNJ11 | potassium inwardly-rectifying channel, subfamily J, member 11 | 1.409994 Inlier  |
| siRNA-Temozolomide Run2-DMSO | NM_0210<br>12 | KCNJ12 | potassium inwardly-rectifying channel, subfamily J, member 12 | -1.663347 Inlier |

Identification of Survival Genes in Human Glioblastoma Cells Using siRNA Screening  
 Nikhil G Thaker, Fang Zhang, Peter R. McDonald, Tong Ying Shun, Michael D Lewen, Ian F. Pollack, and John S. Lazo  
 Molecular Pharmacology

|                              |               |        |    |                                                            |                  |
|------------------------------|---------------|--------|----|------------------------------------------------------------|------------------|
| siRNA-Temozolomide Run3-DMSO | NM_0210<br>12 | KCNJ12 | 12 | potassium inwardly-rectifying channel, subfamily J, member | -1.198224 Inlier |
| siRNA Disorazole DMSO Run2   | NM_0210<br>12 | KCNJ12 | 12 | potassium inwardly-rectifying channel, subfamily J, member | -0.784462 Inlier |
| siRNA-Temozolomide Run1-DMSO | NM_0210<br>12 | KCNJ12 | 12 | potassium inwardly-rectifying channel, subfamily J, member | -0.09865 Inlier  |
| siRNA Disorazole DMSO Run3   | NM_0210<br>12 | KCNJ12 | 12 | potassium inwardly-rectifying channel, subfamily J, member | 0.09865 Inlier   |
| siRNA-Vinblastine Run2-DMSO  | NM_0210<br>12 | KCNJ12 | 12 | potassium inwardly-rectifying channel, subfamily J, member | 0.268453 Inlier  |

Identification of Survival Genes in Human Glioblastoma Cells Using siRNA Screening  
 Nikhil G Thaker, Fang Zhang, Peter R. McDonald, Tong Ying Shun, Michael D Lewen, Ian F. Pollack, and John S. Lazo  
 Molecular Pharmacology

|                              |               |        |    |                                                            |                  |
|------------------------------|---------------|--------|----|------------------------------------------------------------|------------------|
| siRNA Disorazole DMSO Run1   | NM_0210<br>12 | KCNJ12 | 12 | potassium inwardly-rectifying channel, subfamily J, member | 0.564538 Inlier  |
| siRNA-Vinblastine Run1-DMSO  | NM_0210<br>12 | KCNJ12 | 12 | potassium inwardly-rectifying channel, subfamily J, member | 1.371133 Inlier  |
| siRNA-Temozolomide Run3-DMSO | NM_0022<br>42 | KCNJ13 | 13 | potassium inwardly-rectifying channel, subfamily J, member | -1.030712 Inlier |
| siRNA Disorazole DMSO Run2   | NM_0022<br>42 | KCNJ13 | 13 | potassium inwardly-rectifying channel, subfamily J, member | -0.702398 Inlier |
| siRNA-Temozolomide Run2-DMSO | NM_0022<br>42 | KCNJ13 | 13 | potassium inwardly-rectifying channel, subfamily J, member | -0.646602 Inlier |

Identification of Survival Genes in Human Glioblastoma Cells Using siRNA Screening  
 Nikhil G Thaker, Fang Zhang, Peter R. McDonald, Tong Ying Shun, Michael D Lewen, Ian F. Pollack, and John S. Lazo  
 Molecular Pharmacology

|                              |               |        |    |                                                            |                  |
|------------------------------|---------------|--------|----|------------------------------------------------------------|------------------|
| siRNA Disorazole DMSO Run3   | NM_0022<br>42 | KCNJ13 | 13 | potassium inwardly-rectifying channel, subfamily J, member | -0.034929 Inlier |
| siRNA-Temozolomide Run1-DMSO | NM_0022<br>42 | KCNJ13 | 13 | potassium inwardly-rectifying channel, subfamily J, member | 0.034929 Inlier  |
| siRNA Disorazole DMSO Run1   | NM_0022<br>42 | KCNJ13 | 13 | potassium inwardly-rectifying channel, subfamily J, member | 0.429904 Inlier  |
| siRNA-Vinblastine Run1-DMSO  | NM_0022<br>42 | KCNJ13 | 13 | potassium inwardly-rectifying channel, subfamily J, member | 1.786 Inlier     |
| siRNA-Vinblastine Run2-DMSO  | NM_0022<br>42 | KCNJ13 | 13 | potassium inwardly-rectifying channel, subfamily J, member | 1.804499 Inlier  |

Identification of Survival Genes in Human Glioblastoma Cells Using siRNA Screening  
 Nikhil G Thaker, Fang Zhang, Peter R. McDonald, Tong Ying Shun, Michael D Lewen, Ian F. Pollack, and John S. Lazo  
 Molecular Pharmacology

|                              |               |        |    |                                                            |                  |
|------------------------------|---------------|--------|----|------------------------------------------------------------|------------------|
| siRNA Disorazole DMSO Run2   | NM_1707<br>20 | KCNJ14 | 14 | potassium inwardly-rectifying channel, subfamily J, member | -1.818792 Inlier |
| siRNA-Temozolomide Run3-DMSO | NM_1707<br>20 | KCNJ14 | 14 | potassium inwardly-rectifying channel, subfamily J, member | -1.424188 Inlier |
| siRNA-Temozolomide Run2-DMSO | NM_1707<br>20 | KCNJ14 | 14 | potassium inwardly-rectifying channel, subfamily J, member | -0.588208 Inlier |
| siRNA Disorazole DMSO Run3   | NM_1707<br>20 | KCNJ14 | 14 | potassium inwardly-rectifying channel, subfamily J, member | -0.332013 Inlier |
| siRNA-Temozolomide Run1-DMSO | NM_1707<br>20 | KCNJ14 | 14 | potassium inwardly-rectifying channel, subfamily J, member | 0.332013 Inlier  |

Identification of Survival Genes in Human Glioblastoma Cells Using siRNA Screening  
 Nikhil G Thaker, Fang Zhang, Peter R. McDonald, Tong Ying Shun, Michael D Lewen, Ian F. Pollack, and John S. Lazo  
 Molecular Pharmacology

|                              |               |        |                                                               |           |        |
|------------------------------|---------------|--------|---------------------------------------------------------------|-----------|--------|
| siRNA-Vinblastine Run2-DMSO  | NM_1707<br>20 | KCNJ14 | potassium inwardly-rectifying channel, subfamily J, member 14 | 0.428617  | Inlier |
| siRNA Disorazole DMSO Run1   | NM_1707<br>20 | KCNJ14 | potassium inwardly-rectifying channel, subfamily J, member 14 | 0.760792  | Inlier |
| siRNA-Vinblastine Run1-DMSO  | NM_1707<br>20 | KCNJ14 | potassium inwardly-rectifying channel, subfamily J, member 14 | 1.059064  | Inlier |
| siRNA-Temozolomide Run3-DMSO | NM_1707<br>37 | KCNJ15 | potassium inwardly-rectifying channel, subfamily J, member 15 | -1.225282 | Inlier |
| siRNA Disorazole DMSO Run3   | NM_1707<br>37 | KCNJ15 | potassium inwardly-rectifying channel, subfamily J, member 15 | -0.851088 | Inlier |



Identification of Survival Genes in Human Glioblastoma Cells Using siRNA Screening  
 Nikhil G Thaker, Fang Zhang, Peter R. McDonald, Tong Ying Shun, Michael D Lewen, Ian F. Pollack, and John S. Lazo  
 Molecular Pharmacology

|                              |               |        |    |                                                            |                  |
|------------------------------|---------------|--------|----|------------------------------------------------------------|------------------|
| siRNA Disorazole DMSO Run2   | NM_1707<br>37 | KCNJ15 | 15 | potassium inwardly-rectifying channel, subfamily J, member | -0.763608 Inlier |
| siRNA-Temozolomide Run2-DMSO | NM_1707<br>37 | KCNJ15 | 15 | potassium inwardly-rectifying channel, subfamily J, member | -0.204362 Inlier |
| siRNA Disorazole DMSO Run1   | NM_1707<br>37 | KCNJ15 | 15 | potassium inwardly-rectifying channel, subfamily J, member | 0.204362 Inlier  |
| siRNA-Temozolomide Run1-DMSO | NM_1707<br>37 | KCNJ15 | 15 | potassium inwardly-rectifying channel, subfamily J, member | 0.306614 Inlier  |
| siRNA-Vinblastine Run2-DMSO  | NM_1707<br>37 | KCNJ15 | 15 | potassium inwardly-rectifying channel, subfamily J, member | 0.585392 Inlier  |

Identification of Survival Genes in Human Glioblastoma Cells Using siRNA Screening  
 Nikhil G Thaker, Fang Zhang, Peter R. McDonald, Tong Ying Shun, Michael D Lewen, Ian F. Pollack, and John S. Lazo  
 Molecular Pharmacology

|                              |               |        |                                                               |                  |
|------------------------------|---------------|--------|---------------------------------------------------------------|------------------|
| siRNA-Vinblastine Run1-DMSO  | NM_1707<br>37 | KCNJ15 | potassium inwardly-rectifying channel, subfamily J, member 15 | 1.150503 Inlier  |
| siRNA Disorazole DMSO Run2   | NM_1707<br>42 | KCNJ16 | potassium inwardly-rectifying channel, subfamily J, member 16 | -3.57853 Outlier |
| siRNA Disorazole DMSO Run3   | NM_1707<br>42 | KCNJ16 | potassium inwardly-rectifying channel, subfamily J, member 16 | -1.313609 Inlier |
| siRNA-Temozolomide Run3-DMSO | NM_1707<br>42 | KCNJ16 | potassium inwardly-rectifying channel, subfamily J, member 16 | -1.09125 Inlier  |
| siRNA-Vinblastine Run2-DMSO  | NM_1707<br>42 | KCNJ16 | potassium inwardly-rectifying channel, subfamily J, member 16 | -0.02372 Inlier  |

Identification of Survival Genes in Human Glioblastoma Cells Using siRNA Screening  
 Nikhil G Thaker, Fang Zhang, Peter R. McDonald, Tong Ying Shun, Michael D Lewen, Ian F. Pollack, and John S. Lazo  
 Molecular Pharmacology

|                              |               |        |                                                               |           |         |
|------------------------------|---------------|--------|---------------------------------------------------------------|-----------|---------|
| siRNA-Temozolomide Run2-DMSO | NM_1707<br>42 | KCNJ16 | potassium inwardly-rectifying channel, subfamily J, member 16 | 0.023719  | Inlier  |
| siRNA-Temozolomide Run1-DMSO | NM_1707<br>42 | KCNJ16 | potassium inwardly-rectifying channel, subfamily J, member 16 | 0.116023  | Inlier  |
| siRNA-Vinblastine Run1-DMSO  | NM_1707<br>42 | KCNJ16 | potassium inwardly-rectifying channel, subfamily J, member 16 | 0.577598  | Inlier  |
| siRNA Disorazole DMSO Run1   | NM_1707<br>42 | KCNJ16 | potassium inwardly-rectifying channel, subfamily J, member 16 | 0.771402  | Inlier  |
| siRNA-Temozolomide Run3-DMSO | NM_0008<br>91 | KCNJ2  | potassium inwardly-rectifying channel, subfamily J, member 2  | -3.926239 | Outlier |
| siRNA Disorazole DMSO Run2   | NM_0008<br>91 | KCNJ2  | potassium inwardly-rectifying channel, subfamily J, member 2  | -2.204657 | Inlier  |

Identification of Survival Genes in Human Glioblastoma Cells Using siRNA Screening  
 Nikhil G Thaker, Fang Zhang, Peter R. McDonald, Tong Ying Shun, Michael D Lewen, Ian F. Pollack, and John S. Lazo  
 Molecular Pharmacology

|                              |           |       |                                                              |           |        |
|------------------------------|-----------|-------|--------------------------------------------------------------|-----------|--------|
| siRNA-Temozolomide Run2-DMSO | NM_000891 | KCNJ2 | potassium inwardly-rectifying channel, subfamily J, member 2 | -0.793788 | Inlier |
| siRNA Disorazole DMSO Run3   | NM_000891 | KCNJ2 | potassium inwardly-rectifying channel, subfamily J, member 2 | -0.445022 | Inlier |
| siRNA-Vinblastine Run2-DMSO  | NM_000891 | KCNJ2 | potassium inwardly-rectifying channel, subfamily J, member 2 | 0.445023  | Inlier |
| siRNA-Temozolomide Run1-DMSO | NM_000891 | KCNJ2 | potassium inwardly-rectifying channel, subfamily J, member 2 | 0.523363  | Inlier |
| siRNA Disorazole DMSO Run1   | NM_000891 | KCNJ2 | potassium inwardly-rectifying channel, subfamily J, member 2 | 0.555212  | Inlier |
| siRNA-Vinblastine Run1-DMSO  | NM_000891 | KCNJ2 | potassium inwardly-rectifying channel, subfamily J, member 2 | 1.91183   | Inlier |

Identification of Survival Genes in Human Glioblastoma Cells Using siRNA Screening

Nikhil G Thaker, Fang Zhang, Peter R. McDonald, Tong Ying Shun, Michael D Lewen, Ian F. Pollack, and John S. Lazo

Molecular Pharmacology

|                              |               |       |                                                              |           |        |
|------------------------------|---------------|-------|--------------------------------------------------------------|-----------|--------|
| siRNA-Temozolomide Run3-DMSO | NM_0022<br>39 | KCNJ3 | potassium inwardly-rectifying channel, subfamily J, member 3 | -2.058876 | Inlier |
| siRNA Disorazole DMSO Run3   | NM_0022<br>39 | KCNJ3 | potassium inwardly-rectifying channel, subfamily J, member 3 | -0.692952 | Inlier |
| siRNA Disorazole DMSO Run2   | NM_0022<br>39 | KCNJ3 | potassium inwardly-rectifying channel, subfamily J, member 3 | -0.656048 | Inlier |
| siRNA-Temozolomide Run2-DMSO | NM_0022<br>39 | KCNJ3 | potassium inwardly-rectifying channel, subfamily J, member 3 | -0.237366 | Inlier |
| siRNA-Temozolomide Run1-DMSO | NM_0022<br>39 | KCNJ3 | potassium inwardly-rectifying channel, subfamily J, member 3 | 0.237366  | Inlier |
| siRNA Disorazole DMSO Run1   | NM_0022<br>39 | KCNJ3 | potassium inwardly-rectifying channel, subfamily J, member 3 | 0.526388  | Inlier |

Identification of Survival Genes in Human Glioblastoma Cells Using siRNA Screening  
 Nikhil G Thaker, Fang Zhang, Peter R. McDonald, Tong Ying Shun, Michael D Lewen, Ian F. Pollack, and John S. Lazo  
 Molecular Pharmacology

|                              |           |       |                                                              |           |        |
|------------------------------|-----------|-------|--------------------------------------------------------------|-----------|--------|
| siRNA-Vinblastine Run1-DMSO  | NM_002239 | KCNJ3 | potassium inwardly-rectifying channel, subfamily J, member 3 | 0.864026  | Inlier |
| siRNA-Vinblastine Run2-DMSO  | NM_002239 | KCNJ3 | potassium inwardly-rectifying channel, subfamily J, member 3 | 1.065102  | Inlier |
| siRNA Disorazole DMSO Run2   | NM_152868 | KCNJ4 | potassium inwardly-rectifying channel, subfamily J, member 4 | -2.234769 | Inlier |
| siRNA-Temozolomide Run3-DMSO | NM_152868 | KCNJ4 | potassium inwardly-rectifying channel, subfamily J, member 4 | -1.012915 | Inlier |
| siRNA-Temozolomide Run2-DMSO | NM_152868 | KCNJ4 | potassium inwardly-rectifying channel, subfamily J, member 4 | -0.701976 | Inlier |
| siRNA-Temozolomide Run1-DMSO | NM_152868 | KCNJ4 | potassium inwardly-rectifying channel, subfamily J, member 4 | -0.05772  | Inlier |

Identification of Survival Genes in Human Glioblastoma Cells Using siRNA Screening  
 Nikhil G Thaker, Fang Zhang, Peter R. McDonald, Tong Ying Shun, Michael D Lewen, Ian F. Pollack, and John S. Lazo  
 Molecular Pharmacology

|                             |               |       |                                                              |           |        |
|-----------------------------|---------------|-------|--------------------------------------------------------------|-----------|--------|
| siRNA Disorazole DMSO Run3  | NM_1528<br>68 | KCNJ4 | potassium inwardly-rectifying channel, subfamily J, member 4 | 0.057721  | Inlier |
| siRNA-Vinblastine Run2-DMSO | NM_1528<br>68 | KCNJ4 | potassium inwardly-rectifying channel, subfamily J, member 4 | 0.624241  | Inlier |
| siRNA Disorazole DMSO Run1  | NM_1528<br>68 | KCNJ4 | potassium inwardly-rectifying channel, subfamily J, member 4 | 0.647024  | Inlier |
| siRNA-Vinblastine Run1-DMSO | NM_1528<br>68 | KCNJ4 | potassium inwardly-rectifying channel, subfamily J, member 4 | 1.111349  | Inlier |
| siRNA Disorazole DMSO Run3  | NM_0008<br>90 | KCNJ5 | potassium inwardly-rectifying channel, subfamily J, member 5 | -0.842528 | Inlier |
| siRNA Disorazole DMSO Run2  | NM_0008<br>90 | KCNJ5 | potassium inwardly-rectifying channel, subfamily J, member 5 | -0.77395  | Inlier |

Identification of Survival Genes in Human Glioblastoma Cells Using siRNA Screening

Nikhil G Thaker, Fang Zhang, Peter R. McDonald, Tong Ying Shun, Michael D Lewen, Ian F. Pollack, and John S. Lazo

Molecular Pharmacology

|                              |           |       |                                                              |           |        |
|------------------------------|-----------|-------|--------------------------------------------------------------|-----------|--------|
| siRNA-Temozolomide Run3-DMSO | NM_000890 | KCNJ5 | potassium inwardly-rectifying channel, subfamily J, member 5 | -0.57505  | Inlier |
| siRNA-Temozolomide Run2-DMSO | NM_000890 | KCNJ5 | potassium inwardly-rectifying channel, subfamily J, member 5 | -0.512217 | Inlier |
| siRNA Disorazole DMSO Run1   | NM_000890 | KCNJ5 | potassium inwardly-rectifying channel, subfamily J, member 5 | 0.512216  | Inlier |
| siRNA-Temozolomide Run1-DMSO | NM_000890 | KCNJ5 | potassium inwardly-rectifying channel, subfamily J, member 5 | 0.571888  | Inlier |
| siRNA-Vinblastine Run2-DMSO  | NM_000890 | KCNJ5 | potassium inwardly-rectifying channel, subfamily J, member 5 | 1.192211  | Inlier |
| siRNA-Vinblastine Run1-DMSO  | NM_000890 | KCNJ5 | potassium inwardly-rectifying channel, subfamily J, member 5 | 1.434188  | Inlier |



Identification of Survival Genes in Human Glioblastoma Cells Using siRNA Screening

Nikhil G Thaker, Fang Zhang, Peter R. McDonald, Tong Ying Shun, Michael D Lewen, Ian F. Pollack, and John S. Lazo

Molecular Pharmacology

|                              |               |       |                                                              |           |        |
|------------------------------|---------------|-------|--------------------------------------------------------------|-----------|--------|
| siRNA-Temozolomide Run3-DMSO | NM_0022<br>40 | KCNJ6 | potassium inwardly-rectifying channel, subfamily J, member 6 | -0.728214 | Inlier |
| siRNA-Temozolomide Run2-DMSO | NM_0022<br>40 | KCNJ6 | potassium inwardly-rectifying channel, subfamily J, member 6 | -0.692731 | Inlier |
| siRNA Disorazole DMSO Run2   | NM_0022<br>40 | KCNJ6 | potassium inwardly-rectifying channel, subfamily J, member 6 | -0.656269 | Inlier |
| siRNA Disorazole DMSO Run3   | NM_0022<br>40 | KCNJ6 | potassium inwardly-rectifying channel, subfamily J, member 6 | -0.284178 | Inlier |
| siRNA Disorazole DMSO Run1   | NM_0022<br>40 | KCNJ6 | potassium inwardly-rectifying channel, subfamily J, member 6 | 0.284178  | Inlier |
| siRNA-Temozolomide Run1-DMSO | NM_0022<br>40 | KCNJ6 | potassium inwardly-rectifying channel, subfamily J, member 6 | 0.603519  | Inlier |

Identification of Survival Genes in Human Glioblastoma Cells Using siRNA Screening

Nikhil G Thaker, Fang Zhang, Peter R. McDonald, Tong Ying Shun, Michael D Lewen, Ian F. Pollack, and John S. Lazo

Molecular Pharmacology

|                              |               |       |                                                              |           |        |
|------------------------------|---------------|-------|--------------------------------------------------------------|-----------|--------|
| siRNA-Vinblastine Run2-DMSO  | NM_0022<br>40 | KCNJ6 | potassium inwardly-rectifying channel, subfamily J, member 6 | 1.142104  | Inlier |
| siRNA-Vinblastine Run1-DMSO  | NM_0022<br>40 | KCNJ6 | potassium inwardly-rectifying channel, subfamily J, member 6 | 1.542686  | Inlier |
| siRNA Disorazole DMSO Run2   | NM_0049<br>82 | KCNJ8 | potassium inwardly-rectifying channel, subfamily J, member 8 | -1.073121 | Inlier |
| siRNA-Temozolomide Run3-DMSO | NM_0049<br>82 | KCNJ8 | potassium inwardly-rectifying channel, subfamily J, member 8 | -0.930781 | Inlier |
| siRNA-Temozolomide Run2-DMSO | NM_0049<br>82 | KCNJ8 | potassium inwardly-rectifying channel, subfamily J, member 8 | -0.451368 | Inlier |
| siRNA Disorazole DMSO Run3   | NM_0049<br>82 | KCNJ8 | potassium inwardly-rectifying channel, subfamily J, member 8 | -0.184238 | Inlier |

Identification of Survival Genes in Human Glioblastoma Cells Using siRNA Screening

Nikhil G Thaker, Fang Zhang, Peter R. McDonald, Tong Ying Shun, Michael D Lewen, Ian F. Pollack, and John S. Lazo

Molecular Pharmacology

|                              |               |       |                                                              |                  |
|------------------------------|---------------|-------|--------------------------------------------------------------|------------------|
| siRNA-Temozolomide Run1-DMSO | NM_0049<br>82 | KCNJ8 | potassium inwardly-rectifying channel, subfamily J, member 8 | 0.184238 Inlier  |
| siRNA Disorazole DMSO Run1   | NM_0049<br>82 | KCNJ8 | potassium inwardly-rectifying channel, subfamily J, member 8 | 0.461699 Inlier  |
| siRNA-Vinblastine Run2-DMSO  | NM_0049<br>82 | KCNJ8 | potassium inwardly-rectifying channel, subfamily J, member 8 | 0.887301 Inlier  |
| siRNA-Vinblastine Run1-DMSO  | NM_0049<br>82 | KCNJ8 | potassium inwardly-rectifying channel, subfamily J, member 8 | 1.181681 Inlier  |
| siRNA-Temozolomide Run2-DMSO | NM_0049<br>83 | KCNJ9 | potassium inwardly-rectifying channel, subfamily J, member 9 | -1.07198 Inlier  |
| siRNA-Temozolomide Run3-DMSO | NM_0049<br>83 | KCNJ9 | potassium inwardly-rectifying channel, subfamily J, member 9 | -0.896105 Inlier |

Identification of Survival Genes in Human Glioblastoma Cells Using siRNA Screening

Nikhil G Thaker, Fang Zhang, Peter R. McDonald, Tong Ying Shun, Michael D Lewen, Ian F. Pollack, and John S. Lazo

Molecular Pharmacology

|                              |               |       |                                                              |           |        |
|------------------------------|---------------|-------|--------------------------------------------------------------|-----------|--------|
| siRNA Disorazole DMSO Run2   | NM_0049<br>83 | KCNJ9 | potassium inwardly-rectifying channel, subfamily J, member 9 | -0.558633 | Inlier |
| siRNA Disorazole DMSO Run3   | NM_0049<br>83 | KCNJ9 | potassium inwardly-rectifying channel, subfamily J, member 9 | -0.214276 | Inlier |
| siRNA Disorazole DMSO Run1   | NM_0049<br>83 | KCNJ9 | potassium inwardly-rectifying channel, subfamily J, member 9 | 0.214276  | Inlier |
| siRNA-Temozolomide Run1-DMSO | NM_0049<br>83 | KCNJ9 | potassium inwardly-rectifying channel, subfamily J, member 9 | 0.407744  | Inlier |
| siRNA-Vinblastine Run2-DMSO  | NM_0049<br>83 | KCNJ9 | potassium inwardly-rectifying channel, subfamily J, member 9 | 0.790367  | Inlier |
| siRNA-Vinblastine Run1-DMSO  | NM_0049<br>83 | KCNJ9 | potassium inwardly-rectifying channel, subfamily J, member 9 | 1.117059  | Inlier |

Identification of Survival Genes in Human Glioblastoma Cells Using siRNA Screening  
 Nikhil G Thaker, Fang Zhang, Peter R. McDonald, Tong Ying Shun, Michael D Lewen, Ian F. Pollack, and John S. Lazo  
 Molecular Pharmacology

|                                  |               |       |                                                      |           |        |
|----------------------------------|---------------|-------|------------------------------------------------------|-----------|--------|
| siRNA Disorazole DMSO Run2       | NM_0022<br>45 | KCNK1 | potassium<br>channel,<br>subfamily<br>K,<br>member 1 | -1.123404 | Inlier |
| siRNA Disorazole DMSO Run3       | NM_0022<br>45 | KCNK1 | potassium<br>channel,<br>subfamily<br>K,<br>member 1 | -1.107286 | Inlier |
| siRNA-Temozolomide Run3-<br>DMSO | NM_0022<br>45 | KCNK1 | potassium<br>channel,<br>subfamily<br>K,<br>member 1 | -0.746244 | Inlier |
| siRNA Disorazole DMSO Run1       | NM_0022<br>45 | KCNK1 | potassium<br>channel,<br>subfamily<br>K,<br>member 1 | -0.136289 | Inlier |
| siRNA-Temozolomide Run2-<br>DMSO | NM_0022<br>45 | KCNK1 | potassium<br>channel,<br>subfamily<br>K,<br>member 1 | 0.136289  | Inlier |
| siRNA-Temozolomide Run1-<br>DMSO | NM_0022<br>45 | KCNK1 | potassium<br>channel,<br>subfamily<br>K,<br>member 1 | 0.592376  | Inlier |
| siRNA-Vinblastine Run2-<br>DMSO  | NM_0022<br>45 | KCNK1 | potassium<br>channel,<br>subfamily<br>K,<br>member 1 | 0.602756  | Inlier |
| siRNA-Vinblastine Run1-<br>DMSO  | NM_0022<br>45 | KCNK1 | potassium<br>channel,<br>subfamily<br>K,<br>member 1 | 1.06973   | Inlier |

Identification of Survival Genes in Human Glioblastoma Cells Using siRNA Screening  
 Nikhil G Thaker, Fang Zhang, Peter R. McDonald, Tong Ying Shun, Michael D Lewen, Ian F. Pollack, and John S. Lazo  
 Molecular Pharmacology

|                              |               |        |                                              |           |        |
|------------------------------|---------------|--------|----------------------------------------------|-----------|--------|
| siRNA-Temozolomide Run3-DMSO | NM_1383<br>18 | KCNK10 | potassium channel, subfamily K, member<br>10 | -1.203415 | Inlier |
| siRNA Disorazole DMSO Run2   | NM_1383<br>18 | KCNK10 | potassium channel, subfamily K, member<br>10 | -0.524258 | Inlier |
| siRNA Disorazole DMSO Run3   | NM_1383<br>18 | KCNK10 | potassium channel, subfamily K, member<br>10 | -0.41249  | Inlier |
| siRNA Disorazole DMSO Run1   | NM_1383<br>18 | KCNK10 | potassium channel, subfamily K, member<br>10 | -0.28875  | Inlier |
| siRNA-Temozolomide Run2-DMSO | NM_1383<br>18 | KCNK10 | potassium channel, subfamily K, member<br>10 | 0.288751  | Inlier |
| siRNA-Temozolomide Run1-DMSO | NM_1383<br>18 | KCNK10 | potassium channel, subfamily K, member<br>10 | 0.824742  | Inlier |
| siRNA-Vinblastine Run1-DMSO  | NM_1383<br>18 | KCNK10 | potassium channel, subfamily K, member<br>10 | 0.939548  | Inlier |

Identification of Survival Genes in Human Glioblastoma Cells Using siRNA Screening  
 Nikhil G Thaker, Fang Zhang, Peter R. McDonald, Tong Ying Shun, Michael D Lewen, Ian F. Pollack, and John S. Lazo  
 Molecular Pharmacology

|                              |               |        |    |                                        |                  |
|------------------------------|---------------|--------|----|----------------------------------------|------------------|
| siRNA-Vinblastine Run2-DMSO  | NM_1383<br>18 | KCNK10 | 10 | potassium channel, subfamily K, member | 1.319595 Inlier  |
| siRNA-Temozolomide Run3-DMSO | NM_0220<br>55 | KCNK12 | 12 | potassium channel, subfamily K, member | -1.41935 Inlier  |
| siRNA-Temozolomide Run2-DMSO | NM_0220<br>55 | KCNK12 | 12 | potassium channel, subfamily K, member | -0.685949 Inlier |
| siRNA Disorazole DMSO Run3   | NM_0220<br>55 | KCNK12 | 12 | potassium channel, subfamily K, member | -0.663051 Inlier |
| siRNA Disorazole DMSO Run2   | NM_0220<br>55 | KCNK12 | 12 | potassium channel, subfamily K, member | -0.284928 Inlier |
| siRNA Disorazole DMSO Run1   | NM_0220<br>55 | KCNK12 | 12 | potassium channel, subfamily K, member | 0.284929 Inlier  |
| siRNA-Temozolomide Run1-DMSO | NM_0220<br>55 | KCNK12 | 12 | potassium channel, subfamily K, member | 0.451194 Inlier  |

Identification of Survival Genes in Human Glioblastoma Cells Using siRNA Screening  
 Nikhil G Thaker, Fang Zhang, Peter R. McDonald, Tong Ying Shun, Michael D Lewen, Ian F. Pollack, and John S. Lazo  
 Molecular Pharmacology

|                              |               |        |                                           |                  |
|------------------------------|---------------|--------|-------------------------------------------|------------------|
| siRNA-Vinblastine Run2-DMSO  | NM_0220<br>55 | KCNK12 | potassium channel, subfamily K, member 12 | 1.377904 Inlier  |
| siRNA-Vinblastine Run1-DMSO  | NM_0220<br>55 | KCNK12 | potassium channel, subfamily K, member 12 | 1.65582 Inlier   |
| siRNA-Temozolomide Run3-DMSO | NM_0220<br>54 | KCNK13 | potassium channel, subfamily K, member 13 | -4.05451 Outlier |
| siRNA Disorazole DMSO Run1   | NM_0220<br>54 | KCNK13 | potassium channel, subfamily K, member 13 | -1.219316 Inlier |
| siRNA-Temozolomide Run2-DMSO | NM_0220<br>54 | KCNK13 | potassium channel, subfamily K, member 13 | -0.634559 Inlier |
| siRNA-Vinblastine Run2-DMSO  | NM_0220<br>54 | KCNK13 | potassium channel, subfamily K, member 13 | -0.21089 Inlier  |
| siRNA-Temozolomide Run1-DMSO | NM_0220<br>54 | KCNK13 | potassium channel, subfamily K, member 13 | 0.21089 Inlier   |



Identification of Survival Genes in Human Glioblastoma Cells Using siRNA Screening  
 Nikhil G Thaker, Fang Zhang, Peter R. McDonald, Tong Ying Shun, Michael D Lewen, Ian F. Pollack, and John S. Lazo  
 Molecular Pharmacology

|                              |               |        |    |                                        |                   |
|------------------------------|---------------|--------|----|----------------------------------------|-------------------|
| siRNA Disorazole DMSO Run3   | NM_0220<br>54 | KCNK13 | 13 | potassium channel, subfamily K, member | 0.517452 Inlier   |
| siRNA Disorazole DMSO Run2   | NM_0220<br>54 | KCNK13 | 13 | potassium channel, subfamily K, member | 0.714441 Inlier   |
| siRNA-Vinblastine Run1-DMSO  | NM_0220<br>54 | KCNK13 | 13 | potassium channel, subfamily K, member | 1.222788 Inlier   |
| siRNA-Temozolomide Run3-DMSO | NM_0223<br>58 | KCNK15 | 15 | potassium channel, subfamily K, member | -3.858009 Outlier |
| siRNA Disorazole DMSO Run1   | NM_0223<br>58 | KCNK15 | 15 | potassium channel, subfamily K, member | -0.813812 Inlier  |
| siRNA-Temozolomide Run2-DMSO | NM_0223<br>58 | KCNK15 | 15 | potassium channel, subfamily K, member | -0.535188 Inlier  |
| siRNA-Temozolomide Run1-DMSO | NM_0223<br>58 | KCNK15 | 15 | potassium channel, subfamily K, member | -0.503613 Inlier  |

Identification of Survival Genes in Human Glioblastoma Cells Using siRNA Screening  
 Nikhil G Thaker, Fang Zhang, Peter R. McDonald, Tong Ying Shun, Michael D Lewen, Ian F. Pollack, and John S. Lazo  
 Molecular Pharmacology

|                              |               |        |                                              |                  |
|------------------------------|---------------|--------|----------------------------------------------|------------------|
| siRNA-Vinblastine Run1-DMSO  | NM_0223<br>58 | KCNK15 | potassium channel, subfamily K, member<br>15 | 0.503612 Inlier  |
| siRNA Disorazole DMSO Run2   | NM_0223<br>58 | KCNK15 | potassium channel, subfamily K, member<br>15 | 0.511635 Inlier  |
| siRNA Disorazole DMSO Run3   | NM_0223<br>58 | KCNK15 | potassium channel, subfamily K, member<br>15 | 2.867706 Inlier  |
| siRNA-Vinblastine Run2-DMSO  | NM_0223<br>58 | KCNK15 | potassium channel, subfamily K, member<br>15 | 3.509209 Outlier |
| siRNA Disorazole DMSO Run1   | NM_0321<br>15 | KCNK16 | potassium channel, subfamily K, member<br>16 | -1.978176 Inlier |
| siRNA-Temozolomide Run3-DMSO | NM_0321<br>15 | KCNK16 | potassium channel, subfamily K, member<br>16 | -1.571408 Inlier |
| siRNA-Temozolomide Run2-DMSO | NM_0321<br>15 | KCNK16 | potassium channel, subfamily K, member<br>16 | -0.690442 Inlier |

Identification of Survival Genes in Human Glioblastoma Cells Using siRNA Screening  
 Nikhil G Thaker, Fang Zhang, Peter R. McDonald, Tong Ying Shun, Michael D Lewen, Ian F. Pollack, and John S. Lazo  
 Molecular Pharmacology

|                              |               |        |                                           |           |        |
|------------------------------|---------------|--------|-------------------------------------------|-----------|--------|
| siRNA-Vinblastine Run2-DMSO  | NM_0321<br>15 | KCNK16 | potassium channel, subfamily K, member 16 | -0.134777 | Inlier |
| siRNA Disorazole DMSO Run3   | NM_0321<br>15 | KCNK16 | potassium channel, subfamily K, member 16 | 0.134777  | Inlier |
| siRNA-Temozolomide Run1-DMSO | NM_0321<br>15 | KCNK16 | potassium channel, subfamily K, member 16 | 0.349592  | Inlier |
| siRNA-Vinblastine Run1-DMSO  | NM_0321<br>15 | KCNK16 | potassium channel, subfamily K, member 16 | 0.658558  | Inlier |
| siRNA Disorazole DMSO Run2   | NM_0321<br>15 | KCNK16 | potassium channel, subfamily K, member 16 | 3.164594  | Inlier |
| siRNA-Temozolomide Run3-DMSO | NM_0314<br>60 | KCNK17 | potassium channel, subfamily K, member 17 | -1.244301 | Inlier |
| siRNA-Temozolomide Run2-DMSO | NM_0314<br>60 | KCNK17 | potassium channel, subfamily K, member 17 | -0.91605  | Inlier |

Identification of Survival Genes in Human Glioblastoma Cells Using siRNA Screening

Nikhil G Thaker, Fang Zhang, Peter R. McDonald, Tong Ying Shun, Michael D Lewen, Ian F. Pollack, and John S. Lazo

Molecular Pharmacology

|                              |                  |        |          |                                          |           |        |
|------------------------------|------------------|--------|----------|------------------------------------------|-----------|--------|
| siRNA Disorazole DMSO Run3   | NM_0314<br>60    | KCNK17 | 17       | potassium channel, subfamily K, member   | -0.081757 | Inlier |
| siRNA Disorazole DMSO Run2   | NM_0314<br>60    | KCNK17 | 17       | potassium channel, subfamily K, member   | -0.001488 | Inlier |
| siRNA-Temozolomide Run1-DMSO | NM_0314<br>60    | KCNK17 | 17       | potassium channel, subfamily K, member   | 0.001488  | Inlier |
| siRNA Disorazole DMSO Run1   | NM_0314<br>60    | KCNK17 | 17       | potassium channel, subfamily K, member   | 0.43295   | Inlier |
| siRNA-Vinblastine Run1-DMSO  | NM_0314<br>60    | KCNK17 | 17       | potassium channel, subfamily K, member   | 2.591245  | Inlier |
| siRNA-Vinblastine Run2-DMSO  | NM_0314<br>60    | KCNK17 | 17       | potassium channel, subfamily K, member   | 3.329672  | Inlier |
| siRNA-Temozolomide Run3-DMSO | NM_0010<br>17424 | KCNK2  | member 2 | potassium channel, subfamily K, member 2 | -3.07907  | Inlier |

Identification of Survival Genes in Human Glioblastoma Cells Using siRNA Screening  
 Nikhil G Thaker, Fang Zhang, Peter R. McDonald, Tong Ying Shun, Michael D Lewen, Ian F. Pollack, and John S. Lazo  
 Molecular Pharmacology

|                              |                  |       |                                          |           |        |
|------------------------------|------------------|-------|------------------------------------------|-----------|--------|
| siRNA-Temozolomide Run2-DMSO | NM_0010<br>17424 | KCNK2 | potassium channel, subfamily K, member 2 | -0.564886 | Inlier |
| siRNA Disorazole DMSO Run2   | NM_0010<br>17424 | KCNK2 | potassium channel, subfamily K, member 2 | -0.51463  | Inlier |
| siRNA Disorazole DMSO Run1   | NM_0010<br>17424 | KCNK2 | potassium channel, subfamily K, member 2 | -0.458742 | Inlier |
| siRNA-Temozolomide Run1-DMSO | NM_0010<br>17424 | KCNK2 | potassium channel, subfamily K, member 2 | 0.458743  | Inlier |
| siRNA Disorazole DMSO Run3   | NM_0010<br>17424 | KCNK2 | potassium channel, subfamily K, member 2 | 0.784114  | Inlier |
| siRNA-Vinblastine Run2-DMSO  | NM_0010<br>17424 | KCNK2 | potassium channel, subfamily K, member 2 | 0.982125  | Inlier |
| siRNA-Vinblastine Run1-DMSO  | NM_0010<br>17424 | KCNK2 | potassium channel, subfamily K, member 2 | 1.218199  | Inlier |
| siRNA-Temozolomide Run3-DMSO | NM_0022<br>46    | KCNK3 | potassium channel, subfamily K, member 3 | -1.937793 | Inlier |

Identification of Survival Genes in Human Glioblastoma Cells Using siRNA Screening  
 Nikhil G Thaker, Fang Zhang, Peter R. McDonald, Tong Ying Shun, Michael D Lewen, Ian F. Pollack, and John S. Lazo  
 Molecular Pharmacology

|                              |               |       |                                          |                  |
|------------------------------|---------------|-------|------------------------------------------|------------------|
| siRNA-Temozolomide Run2-DMSO | NM_0022<br>46 | KCNK3 | potassium channel, subfamily K, member 3 | -0.76097 Inlier  |
| siRNA-Temozolomide Run1-DMSO | NM_0022<br>46 | KCNK3 | potassium channel, subfamily K, member 3 | -0.220153 Inlier |
| siRNA Disorazole DMSO Run3   | NM_0022<br>46 | KCNK3 | potassium channel, subfamily K, member 3 | -0.093448 Inlier |
| siRNA Disorazole DMSO Run1   | NM_0022<br>46 | KCNK3 | potassium channel, subfamily K, member 3 | 0.093448 Inlier  |
| siRNA-Vinblastine Run1-DMSO  | NM_0022<br>46 | KCNK3 | potassium channel, subfamily K, member 3 | 0.58803 Inlier   |
| siRNA-Vinblastine Run2-DMSO  | NM_0022<br>46 | KCNK3 | potassium channel, subfamily K, member 3 | 1.109002 Inlier  |
| siRNA Disorazole DMSO Run2   | NM_0022<br>46 | KCNK3 | potassium channel, subfamily K, member 3 | 2.169047 Inlier  |
| siRNA-Temozolomide Run3-DMSO | NM_0333<br>10 | KCNK4 | potassium channel, subfamily K, member 4 | -0.863426 Inlier |

Identification of Survival Genes in Human Glioblastoma Cells Using siRNA Screening  
 Nikhil G Thaker, Fang Zhang, Peter R. McDonald, Tong Ying Shun, Michael D Lewen, Ian F. Pollack, and John S. Lazo  
 Molecular Pharmacology

|                                  |               |       |                                                      |           |        |
|----------------------------------|---------------|-------|------------------------------------------------------|-----------|--------|
| siRNA Disorazole DMSO Run1       | NM_0333<br>10 | KCNK4 | potassium<br>channel,<br>subfamily<br>K,<br>member 4 | -0.485574 | Inlier |
| siRNA-Temozolomide Run2-<br>DMSO | NM_0333<br>10 | KCNK4 | potassium<br>channel,<br>subfamily<br>K,<br>member 4 | -0.276469 | Inlier |
| siRNA-Vinblastine Run2-<br>DMSO  | NM_0333<br>10 | KCNK4 | potassium<br>channel,<br>subfamily<br>K,<br>member 4 | -0.048007 | Inlier |
| siRNA-Temozolomide Run1-<br>DMSO | NM_0333<br>10 | KCNK4 | potassium<br>channel,<br>subfamily<br>K,<br>member 4 | 0.048007  | Inlier |
| siRNA Disorazole DMSO Run3       | NM_0333<br>10 | KCNK4 | potassium<br>channel,<br>subfamily<br>K,<br>member 4 | 0.908002  | Inlier |
| siRNA-Vinblastine Run1-<br>DMSO  | NM_0333<br>10 | KCNK4 | potassium<br>channel,<br>subfamily<br>K,<br>member 4 | 1.207066  | Inlier |
| siRNA Disorazole DMSO Run2       | NM_0333<br>10 | KCNK4 | potassium<br>channel,<br>subfamily<br>K,<br>member 4 | 1.96558   | Inlier |
| siRNA Disorazole DMSO Run1       | NM_0037<br>40 | KCNK5 | potassium<br>channel,<br>subfamily<br>K,<br>member 5 | -1.585536 | Inlier |

Identification of Survival Genes in Human Glioblastoma Cells Using siRNA Screening  
 Nikhil G Thaker, Fang Zhang, Peter R. McDonald, Tong Ying Shun, Michael D Lewen, Ian F. Pollack, and John S. Lazo  
 Molecular Pharmacology

|                              |               |       |                                          |           |         |
|------------------------------|---------------|-------|------------------------------------------|-----------|---------|
| siRNA-Vinblastine Run2-DMSO  | NM_0037<br>40 | KCNK5 | potassium channel, subfamily K, member 5 | -0.676781 | Inlier  |
| siRNA-Temozolomide Run2-DMSO | NM_0037<br>40 | KCNK5 | potassium channel, subfamily K, member 5 | -0.672219 | Inlier  |
| siRNA-Temozolomide Run3-DMSO | NM_0037<br>40 | KCNK5 | potassium channel, subfamily K, member 5 | -0.15875  | Inlier  |
| siRNA-Vinblastine Run1-DMSO  | NM_0037<br>40 | KCNK5 | potassium channel, subfamily K, member 5 | 0.158751  | Inlier  |
| siRNA-Temozolomide Run1-DMSO | NM_0037<br>40 | KCNK5 | potassium channel, subfamily K, member 5 | 0.454769  | Inlier  |
| siRNA Disorazole DMSO Run3   | NM_0037<br>40 | KCNK5 | potassium channel, subfamily K, member 5 | 1.098756  | Inlier  |
| siRNA Disorazole DMSO Run2   | NM_0037<br>40 | KCNK5 | potassium channel, subfamily K, member 5 | 4.622574  | Outlier |
| siRNA-Temozolomide Run3-DMSO | NM_0048<br>23 | KCNK6 | potassium channel, subfamily K, member 6 | -0.922084 | Inlier  |



Identification of Survival Genes in Human Glioblastoma Cells Using siRNA Screening  
 Nikhil G Thaker, Fang Zhang, Peter R. McDonald, Tong Ying Shun, Michael D Lewen, Ian F. Pollack, and John S. Lazo  
 Molecular Pharmacology

|                              |               |       |                                          |           |        |
|------------------------------|---------------|-------|------------------------------------------|-----------|--------|
| siRNA Disorazole DMSO Run1   | NM_0048<br>23 | KCNK6 | potassium channel, subfamily K, member 6 | -0.819192 | Inlier |
| siRNA Disorazole DMSO Run3   | NM_0048<br>23 | KCNK6 | potassium channel, subfamily K, member 6 | -0.529808 | Inlier |
| siRNA-Temozolomide Run1-DMSO | NM_0048<br>23 | KCNK6 | potassium channel, subfamily K, member 6 | -0.038841 | Inlier |
| siRNA-Temozolomide Run2-DMSO | NM_0048<br>23 | KCNK6 | potassium channel, subfamily K, member 6 | 0.038841  | Inlier |
| siRNA-Vinblastine Run2-DMSO  | NM_0048<br>23 | KCNK6 | potassium channel, subfamily K, member 6 | 0.186797  | Inlier |
| siRNA-Vinblastine Run1-DMSO  | NM_0048<br>23 | KCNK6 | potassium channel, subfamily K, member 6 | 0.840537  | Inlier |
| siRNA Disorazole DMSO Run2   | NM_0048<br>23 | KCNK6 | potassium channel, subfamily K, member 6 | 1.958397  | Inlier |
| siRNA-Temozolomide Run3-DMSO | NM_0334<br>56 | KCNK7 | potassium channel, subfamily K, member 7 | -1.752138 | Inlier |

Identification of Survival Genes in Human Glioblastoma Cells Using siRNA Screening  
 Nikhil G Thaker, Fang Zhang, Peter R. McDonald, Tong Ying Shun, Michael D Lewen, Ian F. Pollack, and John S. Lazo  
 Molecular Pharmacology

|                                  |               |       |                                                      |           |        |
|----------------------------------|---------------|-------|------------------------------------------------------|-----------|--------|
| siRNA Disorazole DMSO Run1       | NM_0334<br>56 | KCNK7 | potassium<br>channel,<br>subfamily<br>K,<br>member 7 | -1.632769 | Inlier |
| siRNA-Vinblastine Run2-<br>DMSO  | NM_0334<br>56 | KCNK7 | potassium<br>channel,<br>subfamily<br>K,<br>member 7 | -0.652736 | Inlier |
| siRNA-Temozolomide Run1-<br>DMSO | NM_0334<br>56 | KCNK7 | potassium<br>channel,<br>subfamily<br>K,<br>member 7 | -0.106537 | Inlier |
| siRNA-Temozolomide Run2-<br>DMSO | NM_0334<br>56 | KCNK7 | potassium<br>channel,<br>subfamily<br>K,<br>member 7 | 0.106537  | Inlier |
| siRNA Disorazole DMSO Run3       | NM_0334<br>56 | KCNK7 | potassium<br>channel,<br>subfamily<br>K,<br>member 7 | 0.661841  | Inlier |
| siRNA-Vinblastine Run1-<br>DMSO  | NM_0334<br>56 | KCNK7 | potassium<br>channel,<br>subfamily<br>K,<br>member 7 | 0.687159  | Inlier |
| siRNA Disorazole DMSO Run2       | NM_0334<br>56 | KCNK7 | potassium<br>channel,<br>subfamily<br>K,<br>member 7 | 2.586727  | Inlier |
| siRNA Disorazole DMSO Run1       | NM_0166<br>01 | KCNK9 | potassium<br>channel,<br>subfamily<br>K,<br>member 9 | -1.42858  | Inlier |

Identification of Survival Genes in Human Glioblastoma Cells Using siRNA Screening  
 Nikhil G Thaker, Fang Zhang, Peter R. McDonald, Tong Ying Shun, Michael D Lewen, Ian F. Pollack, and John S. Lazo  
 Molecular Pharmacology

|                              |              |        |                                                                                    |           |        |
|------------------------------|--------------|--------|------------------------------------------------------------------------------------|-----------|--------|
| siRNA-Temozolomide Run3-DMSO | NM_016601    | KCNK9  | potassium channel, subfamily K, member 9                                           | -1.057626 | Inlier |
| siRNA-Vinblastine Run2-DMSO  | NM_016601    | KCNK9  | potassium channel, subfamily K, member 9                                           | -0.747268 | Inlier |
| siRNA-Vinblastine Run1-DMSO  | NM_016601    | KCNK9  | potassium channel, subfamily K, member 9                                           | -0.106809 | Inlier |
| siRNA-Temozolomide Run2-DMSO | NM_016601    | KCNK9  | potassium channel, subfamily K, member 9                                           | 0.106809  | Inlier |
| siRNA-Temozolomide Run1-DMSO | NM_016601    | KCNK9  | potassium channel, subfamily K, member 9                                           | 0.170249  | Inlier |
| siRNA Disorazole DMSO Run3   | NM_016601    | KCNK9  | potassium channel, subfamily K, member 9                                           | 0.601732  | Inlier |
| siRNA Disorazole DMSO Run2   | NM_016601    | KCNK9  | potassium channel, subfamily K, member 9                                           | 2.175709  | Inlier |
| siRNA Disorazole DMSO Run3   | NM_001014797 | KCNMA1 | potassium large conductance calcium-activated channel, subfamily M, alpha member 1 | -2.393301 | Inlier |

Identification of Survival Genes in Human Glioblastoma Cells Using siRNA Screening

Nikhil G Thaker, Fang Zhang, Peter R. McDonald, Tong Ying Shun, Michael D Lewen, Ian F. Pollack, and John S. Lazo

Molecular Pharmacology

|                                  |                  |        |                                                                                                              |           |        |
|----------------------------------|------------------|--------|--------------------------------------------------------------------------------------------------------------|-----------|--------|
| siRNA Disorazole DMSO Run2       | NM_0010<br>14797 | KCNMA1 | potassium<br>large<br>conductan<br>ce calcium-<br>activated<br>channel,<br>subfamily<br>M, alpha<br>member 1 | -2.182922 | Inlier |
| siRNA-Temozolomide Run2-<br>DMSO | NM_0010<br>14797 | KCNMA1 | potassium<br>large<br>conductan<br>ce calcium-<br>activated<br>channel,<br>subfamily<br>M, alpha<br>member 1 | -0.682919 | Inlier |
| siRNA-Temozolomide Run3-<br>DMSO | NM_0010<br>14797 | KCNMA1 | potassium<br>large<br>conductan<br>ce calcium-<br>activated<br>channel,<br>subfamily<br>M, alpha<br>member 1 | -0.359444 | Inlier |
| siRNA Disorazole DMSO Run1       | NM_0010<br>14797 | KCNMA1 | potassium<br>large<br>conductan<br>ce calcium-<br>activated<br>channel,<br>subfamily<br>M, alpha<br>member 1 | 0.359445  | Inlier |
| siRNA-Vinblastine Run2-<br>DMSO  | NM_0010<br>14797 | KCNMA1 | potassium<br>large<br>conductan<br>ce calcium-<br>activated<br>channel,<br>subfamily<br>M, alpha<br>member 1 | 0.437467  | Inlier |

Identification of Survival Genes in Human Glioblastoma Cells Using siRNA Screening

Nikhil G Thaker, Fang Zhang, Peter R. McDonald, Tong Ying Shun, Michael D Lewen, Ian F. Pollack, and John S. Lazo

Molecular Pharmacology

|                              |              |        |                                                                                    |           |        |
|------------------------------|--------------|--------|------------------------------------------------------------------------------------|-----------|--------|
| siRNA-Temozolomide Run1-DMSO | NM_001014797 | KCNMA1 | potassium large conductance calcium-activated channel, subfamily M, alpha member 1 | 0.666081  | Inlier |
| siRNA-Vinblastine Run1-DMSO  | NM_001014797 | KCNMA1 | potassium large conductance calcium-activated channel, subfamily M, alpha member 1 | 0.970426  | Inlier |
| siRNA-Temozolomide Run2-DMSO | NM_004137    | KCNMB1 | potassium large conductance calcium-activated channel, subfamily M, beta member 1  | -0.942213 | Inlier |
| siRNA-Temozolomide Run3-DMSO | NM_004137    | KCNMB1 | potassium large conductance calcium-activated channel, subfamily M, beta member 1  | -0.739913 | Inlier |
| siRNA Disorazole DMSO Run2   | NM_004137    | KCNMB1 | potassium large conductance calcium-activated channel, subfamily M, beta member 1  | -0.609087 | Inlier |

Identification of Survival Genes in Human Glioblastoma Cells Using siRNA Screening

Nikhil G Thaker, Fang Zhang, Peter R. McDonald, Tong Ying Shun, Michael D Lewen, Ian F. Pollack, and John S. Lazo

Molecular Pharmacology

|                                  |               |        |                                                                                                             |           |        |
|----------------------------------|---------------|--------|-------------------------------------------------------------------------------------------------------------|-----------|--------|
| siRNA Disorazole DMSO Run3       | NM_0041<br>37 | KCNMB1 | potassium<br>large<br>conductan<br>ce calcium-<br>activated<br>channel,<br>subfamily<br>M, beta<br>member 1 | -0.370014 | Inlier |
| siRNA Disorazole DMSO Run1       | NM_0041<br>37 | KCNMB1 | potassium<br>large<br>conductan<br>ce calcium-<br>activated<br>channel,<br>subfamily<br>M, beta<br>member 1 | 0.370014  | Inlier |
| siRNA-Temozolomide Run1-<br>DMSO | NM_0041<br>37 | KCNMB1 | potassium<br>large<br>conductan<br>ce calcium-<br>activated<br>channel,<br>subfamily<br>M, beta<br>member 1 | 0.454513  | Inlier |
| siRNA-Vinblastine Run1-<br>DMSO  | NM_0041<br>37 | KCNMB1 | potassium<br>large<br>conductan<br>ce calcium-<br>activated<br>channel,<br>subfamily<br>M, beta<br>member 1 | 1.148688  | Inlier |
| siRNA-Vinblastine Run2-<br>DMSO  | NM_0041<br>37 | KCNMB1 | potassium<br>large<br>conductan<br>ce calcium-<br>activated<br>channel,<br>subfamily<br>M, beta<br>member 1 | 1.243385  | Inlier |

Identification of Survival Genes in Human Glioblastoma Cells Using siRNA Screening  
 Nikhil G Thaker, Fang Zhang, Peter R. McDonald, Tong Ying Shun, Michael D Lewen, Ian F. Pollack, and John S. Lazo  
 Molecular Pharmacology

|                                  |               |        |                                                                                                             |           |        |
|----------------------------------|---------------|--------|-------------------------------------------------------------------------------------------------------------|-----------|--------|
| siRNA Disorazole DMSO Run2       | NM_1813<br>61 | KCNMB2 | potassium<br>large<br>conductan<br>ce calcium-<br>activated<br>channel,<br>subfamily<br>M, beta<br>member 2 | -2.156196 | Inlier |
| siRNA-Temozolomide Run2-<br>DMSO | NM_1813<br>61 | KCNMB2 | potassium<br>large<br>conductan<br>ce calcium-<br>activated<br>channel,<br>subfamily<br>M, beta<br>member 2 | -0.79544  | Inlier |
| siRNA-Vinblastine Run2-<br>DMSO  | NM_1813<br>61 | KCNMB2 | potassium<br>large<br>conductan<br>ce calcium-<br>activated<br>channel,<br>subfamily<br>M, beta<br>member 2 | -0.139273 | Inlier |
| siRNA Disorazole DMSO Run1       | NM_1813<br>61 | KCNMB2 | potassium<br>large<br>conductan<br>ce calcium-<br>activated<br>channel,<br>subfamily<br>M, beta<br>member 2 | -0.137082 | Inlier |
| siRNA-Temozolomide Run3-<br>DMSO | NM_1813<br>61 | KCNMB2 | potassium<br>large<br>conductan<br>ce calcium-<br>activated<br>channel,<br>subfamily<br>M, beta<br>member 2 | 0.137083  | Inlier |

Identification of Survival Genes in Human Glioblastoma Cells Using siRNA Screening

Nikhil G Thaker, Fang Zhang, Peter R. McDonald, Tong Ying Shun, Michael D Lewen, Ian F. Pollack, and John S. Lazo

Molecular Pharmacology

|                              |           |        |                                                                                   |           |        |
|------------------------------|-----------|--------|-----------------------------------------------------------------------------------|-----------|--------|
| siRNA-Temozolomide Run1-DMSO | NM_181361 | KCNMB2 | potassium large conductance calcium-activated channel, subfamily M, beta member 2 | 0.604715  | Inlier |
| siRNA-Vinblastine Run1-DMSO  | NM_181361 | KCNMB2 | potassium large conductance calcium-activated channel, subfamily M, beta member 2 | 0.744285  | Inlier |
| siRNA Disorazole DMSO Run3   | NM_181361 | KCNMB2 | potassium large conductance calcium-activated channel, subfamily M, beta member 2 | 1.661695  | Inlier |
| siRNA-Temozolomide Run3-DMSO | NM_014407 | KCNMB3 | potassium large conductance calcium-activated channel, subfamily M beta member 3  | -0.802546 | Inlier |
| siRNA Disorazole DMSO Run3   | NM_014407 | KCNMB3 | potassium large conductance calcium-activated channel, subfamily M beta member 3  | -0.734818 | Inlier |



Identification of Survival Genes in Human Glioblastoma Cells Using siRNA Screening

Nikhil G Thaker, Fang Zhang, Peter R. McDonald, Tong Ying Shun, Michael D Lewen, Ian F. Pollack, and John S. Lazo

Molecular Pharmacology

|                              |           |        |                                                                                  |           |        |
|------------------------------|-----------|--------|----------------------------------------------------------------------------------|-----------|--------|
| siRNA-Temozolomide Run2-DMSO | NM_014407 | KCNMB3 | potassium large conductance calcium-activated channel, subfamily M beta member 3 | -0.614182 | Inlier |
| siRNA Disorazole DMSO Run2   | NM_014407 | KCNMB3 | potassium large conductance calcium-activated channel, subfamily M beta member 3 | -0.159004 | Inlier |
| siRNA-Temozolomide Run1-DMSO | NM_014407 | KCNMB3 | potassium large conductance calcium-activated channel, subfamily M beta member 3 | 0.159004  | Inlier |
| siRNA Disorazole DMSO Run1   | NM_014407 | KCNMB3 | potassium large conductance calcium-activated channel, subfamily M beta member 3 | 0.494575  | Inlier |
| siRNA-Vinblastine Run2-DMSO  | NM_014407 | KCNMB3 | potassium large conductance calcium-activated channel, subfamily M beta member 3 | 1.069305  | Inlier |

Identification of Survival Genes in Human Glioblastoma Cells Using siRNA Screening

Nikhil G Thaker, Fang Zhang, Peter R. McDonald, Tong Ying Shun, Michael D Lewen, Ian F. Pollack, and John S. Lazo

Molecular Pharmacology

|                              |           |        |                                                                                   |           |        |
|------------------------------|-----------|--------|-----------------------------------------------------------------------------------|-----------|--------|
| siRNA-Vinblastine Run1-DMSO  | NM_014407 | KCNMB3 | potassium large conductance calcium-activated channel, subfamily M beta member 3  | 1.10641   | Inlier |
| siRNA-Temozolomide Run3-DMSO | NM_014505 | KCNMB4 | potassium large conductance calcium-activated channel, subfamily M, beta member 4 | -0.856964 | Inlier |
| siRNA-Temozolomide Run2-DMSO | NM_014505 | KCNMB4 | potassium large conductance calcium-activated channel, subfamily M, beta member 4 | -0.581982 | Inlier |
| siRNA Disorazole DMSO Run2   | NM_014505 | KCNMB4 | potassium large conductance calcium-activated channel, subfamily M, beta member 4 | -0.359503 | Inlier |
| siRNA Disorazole DMSO Run3   | NM_014505 | KCNMB4 | potassium large conductance calcium-activated channel, subfamily M, beta member 4 | -0.358246 | Inlier |

Identification of Survival Genes in Human Glioblastoma Cells Using siRNA Screening

Nikhil G Thaker, Fang Zhang, Peter R. McDonald, Tong Ying Shun, Michael D Lewen, Ian F. Pollack, and John S. Lazo

Molecular Pharmacology

|                              |           |        |                                                                                           |           |        |
|------------------------------|-----------|--------|-------------------------------------------------------------------------------------------|-----------|--------|
| siRNA-Temozolomide Run1-DMSO | NM_014505 | KCNMB4 | potassium large conductance calcium-activated channel, subfamily M, beta member 4         | 0.358245  | Inlier |
| siRNA Disorazole DMSO Run1   | NM_014505 | KCNMB4 | potassium large conductance calcium-activated channel, subfamily M, beta member 4         | 0.767018  | Inlier |
| siRNA-Vinblastine Run2-DMSO  | NM_014505 | KCNMB4 | potassium large conductance calcium-activated channel, subfamily M, beta member 4         | 1.138058  | Inlier |
| siRNA-Vinblastine Run1-DMSO  | NM_014505 | KCNMB4 | potassium large conductance calcium-activated channel, subfamily M, beta member 4         | 1.774428  | Inlier |
| siRNA-Temozolomide Run3-DMSO | NM_002248 | KCNN1  | potassium intermediate/small conductance calcium-activated channel, subfamily N, member 1 | -1.180753 | Inlier |

Identification of Survival Genes in Human Glioblastoma Cells Using siRNA Screening

Nikhil G Thaker, Fang Zhang, Peter R. McDonald, Tong Ying Shun, Michael D Lewen, Ian F. Pollack, and John S.

Lazo

Molecular Pharmacology

|                              |               |       |                                                                                           |           |        |
|------------------------------|---------------|-------|-------------------------------------------------------------------------------------------|-----------|--------|
| siRNA-Temozolomide Run2-DMSO | NM_0022<br>48 | KCNN1 | potassium intermediate/small conductance calcium-activated channel, subfamily N, member 1 | -0.974347 | Inlier |
| siRNA Disorazole DMSO Run3   | NM_0022<br>48 | KCNN1 | potassium intermediate/small conductance calcium-activated channel, subfamily N, member 1 | -0.374653 | Inlier |
| siRNA-Temozolomide Run1-DMSO | NM_0022<br>48 | KCNN1 | potassium intermediate/small conductance calcium-activated channel, subfamily N, member 1 | -0.026815 | Inlier |
| siRNA Disorazole DMSO Run2   | NM_0022<br>48 | KCNN1 | potassium intermediate/small conductance calcium-activated channel, subfamily N, member 1 | 0.026815  | Inlier |

Identification of Survival Genes in Human Glioblastoma Cells Using siRNA Screening

Nikhil G Thaker, Fang Zhang, Peter R. McDonald, Tong Ying Shun, Michael D Lewen, Ian F. Pollack, and John S.

Lazo

Molecular Pharmacology

|                                  |               |       |                                                                                                                         |           |        |
|----------------------------------|---------------|-------|-------------------------------------------------------------------------------------------------------------------------|-----------|--------|
| siRNA Disorazole DMSO Run1       | NM_0022<br>48 | KCNN1 | potassium<br>intermedia<br>te/small<br>conductan<br>ce calcium-<br>activated<br>channel,<br>subfamily<br>N,<br>member 1 | 0.19862   | Inlier |
| siRNA-Vinblastine Run1-<br>DMSO  | NM_0022<br>48 | KCNN1 | potassium<br>intermedia<br>te/small<br>conductan<br>ce calcium-<br>activated<br>channel,<br>subfamily<br>N,<br>member 1 | 1.545992  | Inlier |
| siRNA-Vinblastine Run2-<br>DMSO  | NM_0022<br>48 | KCNN1 | potassium<br>intermedia<br>te/small<br>conductan<br>ce calcium-<br>activated<br>channel,<br>subfamily<br>N,<br>member 1 | 2.517196  | Inlier |
| siRNA-Temozolomide Run3-<br>DMSO | NM_1707<br>75 | KCNN2 | potassium<br>intermedia<br>te/small<br>conductan<br>ce calcium-<br>activated<br>channel,<br>subfamily<br>N,<br>member 2 | -1.532714 | Inlier |

Identification of Survival Genes in Human Glioblastoma Cells Using siRNA Screening

Nikhil G Thaker, Fang Zhang, Peter R. McDonald, Tong Ying Shun, Michael D Lewen, Ian F. Pollack, and John S.

Lazo

Molecular Pharmacology

|                              |               |       |                                                                                           |           |        |
|------------------------------|---------------|-------|-------------------------------------------------------------------------------------------|-----------|--------|
| siRNA-Temozolomide Run2-DMSO | NM_1707<br>75 | KCNN2 | potassium intermediate/small conductance calcium-activated channel, subfamily N, member 2 | -1.105019 | Inlier |
| siRNA Disorazole DMSO Run3   | NM_1707<br>75 | KCNN2 | potassium intermediate/small conductance calcium-activated channel, subfamily N, member 2 | -0.022653 | Inlier |
| siRNA Disorazole DMSO Run1   | NM_1707<br>75 | KCNN2 | potassium intermediate/small conductance calcium-activated channel, subfamily N, member 2 | -0.000463 | Inlier |
| siRNA-Temozolomide Run1-DMSO | NM_1707<br>75 | KCNN2 | potassium intermediate/small conductance calcium-activated channel, subfamily N, member 2 | 0.000463  | Inlier |

Identification of Survival Genes in Human Glioblastoma Cells Using siRNA Screening

Nikhil G Thaker, Fang Zhang, Peter R. McDonald, Tong Ying Shun, Michael D Lewen, Ian F. Pollack, and John S.

Lazo

Molecular Pharmacology

|                              |               |       |                                                                                           |           |        |
|------------------------------|---------------|-------|-------------------------------------------------------------------------------------------|-----------|--------|
| siRNA-Vinblastine Run1-DMSO  | NM_1707<br>75 | KCNN2 | potassium intermediate/small conductance calcium-activated channel, subfamily N, member 2 | 0.383317  | Inlier |
| siRNA Disorazole DMSO Run2   | NM_1707<br>75 | KCNN2 | potassium intermediate/small conductance calcium-activated channel, subfamily N, member 2 | 0.965683  | Inlier |
| siRNA-Vinblastine Run2-DMSO  | NM_1707<br>75 | KCNN2 | potassium intermediate/small conductance calcium-activated channel, subfamily N, member 2 | 1.075379  | Inlier |
| siRNA-Temozolomide Run3-DMSO | NM_1707<br>82 | KCNN3 | potassium intermediate/small conductance calcium-activated channel, subfamily N, member 3 | -1.408653 | Inlier |

Identification of Survival Genes in Human Glioblastoma Cells Using siRNA Screening

Nikhil G Thaker, Fang Zhang, Peter R. McDonald, Tong Ying Shun, Michael D Lewen, Ian F. Pollack, and John S.

Lazo

Molecular Pharmacology

|                                  |               |       |                                                                                                                         |                  |
|----------------------------------|---------------|-------|-------------------------------------------------------------------------------------------------------------------------|------------------|
|                                  |               |       | potassium<br>intermedia<br>te/small<br>conductan<br>ce calcium-<br>activated<br>channel,<br>subfamily<br>N,<br>member 3 |                  |
| siRNA-Temozolomide Run2-<br>DMSO | NM_1707<br>82 | KCNN3 |                                                                                                                         | -1.006532 Inlier |

|                            |               |       |                                                                                                                         |                  |
|----------------------------|---------------|-------|-------------------------------------------------------------------------------------------------------------------------|------------------|
|                            |               |       | potassium<br>intermedia<br>te/small<br>conductan<br>ce calcium-<br>activated<br>channel,<br>subfamily<br>N,<br>member 3 |                  |
| siRNA Disorazole DMSO Run3 | NM_1707<br>82 | KCNN3 |                                                                                                                         | -0.342468 Inlier |

|                                  |               |       |                                                                                                                         |                  |
|----------------------------------|---------------|-------|-------------------------------------------------------------------------------------------------------------------------|------------------|
|                                  |               |       | potassium<br>intermedia<br>te/small<br>conductan<br>ce calcium-<br>activated<br>channel,<br>subfamily<br>N,<br>member 3 |                  |
| siRNA-Temozolomide Run1-<br>DMSO | NM_1707<br>82 | KCNN3 |                                                                                                                         | -0.008806 Inlier |

|                            |               |       |                                                                                                                         |                 |
|----------------------------|---------------|-------|-------------------------------------------------------------------------------------------------------------------------|-----------------|
|                            |               |       | potassium<br>intermedia<br>te/small<br>conductan<br>ce calcium-<br>activated<br>channel,<br>subfamily<br>N,<br>member 3 |                 |
| siRNA Disorazole DMSO Run2 | NM_1707<br>82 | KCNN3 |                                                                                                                         | 0.008806 Inlier |



Identification of Survival Genes in Human Glioblastoma Cells Using siRNA Screening  
 Nikhil G Thaker, Fang Zhang, Peter R. McDonald, Tong Ying Shun, Michael D Lewen, Ian F. Pollack, and John S. Lazo  
 Molecular Pharmacology

|                              |               |       |                                                                                           |           |        |
|------------------------------|---------------|-------|-------------------------------------------------------------------------------------------|-----------|--------|
| siRNA Disorazole DMSO Run1   | NM_1707<br>82 | KCNN3 | potassium intermediate/small conductance calcium-activated channel, subfamily N, member 3 | 0.3261    | Inlier |
| siRNA-Vinblastine Run2-DMSO  | NM_1707<br>82 | KCNN3 | potassium intermediate/small conductance calcium-activated channel, subfamily N, member 3 | 1.608747  | Inlier |
| siRNA-Vinblastine Run1-DMSO  | NM_1707<br>82 | KCNN3 | potassium intermediate/small conductance calcium-activated channel, subfamily N, member 3 | 1.768914  | Inlier |
| siRNA-Temozolomide Run3-DMSO | NM_0022<br>50 | KCNN4 | potassium intermediate/small conductance calcium-activated channel, subfamily N, member 4 | -2.033381 | Inlier |

Identification of Survival Genes in Human Glioblastoma Cells Using siRNA Screening

Nikhil G Thaker, Fang Zhang, Peter R. McDonald, Tong Ying Shun, Michael D Lewen, Ian F. Pollack, and John S.

Lazo

Molecular Pharmacology

|                              |               |       |                                                                                           |           |        |
|------------------------------|---------------|-------|-------------------------------------------------------------------------------------------|-----------|--------|
| siRNA-Temozolomide Run2-DMSO | NM_0022<br>50 | KCNN4 | potassium intermediate/small conductance calcium-activated channel, subfamily N, member 4 | -1.545928 | Inlier |
| siRNA Disorazole DMSO Run1   | NM_0022<br>50 | KCNN4 | potassium intermediate/small conductance calcium-activated channel, subfamily N, member 4 | -0.601158 | Inlier |
| siRNA Disorazole DMSO Run3   | NM_0022<br>50 | KCNN4 | potassium intermediate/small conductance calcium-activated channel, subfamily N, member 4 | -0.157116 | Inlier |
| siRNA-Vinblastine Run2-DMSO  | NM_0022<br>50 | KCNN4 | potassium intermediate/small conductance calcium-activated channel, subfamily N, member 4 | 0.157116  | Inlier |

Identification of Survival Genes in Human Glioblastoma Cells Using siRNA Screening  
 Nikhil G Thaker, Fang Zhang, Peter R. McDonald, Tong Ying Shun, Michael D Lewen, Ian F. Pollack, and John S. Lazo  
 Molecular Pharmacology

|                              |               |       |                                                                                           |           |        |
|------------------------------|---------------|-------|-------------------------------------------------------------------------------------------|-----------|--------|
| siRNA-Temozolomide Run1-DMSO | NM_0022<br>50 | KCNN4 | potassium intermediate/small conductance calcium-activated channel, subfamily N, member 4 | 0.450619  | Inlier |
| siRNA Disorazole DMSO Run2   | NM_0022<br>50 | KCNN4 | potassium intermediate/small conductance calcium-activated channel, subfamily N, member 4 | 0.747842  | Inlier |
| siRNA-Vinblastine Run1-DMSO  | NM_0022<br>50 | KCNN4 | potassium intermediate/small conductance calcium-activated channel, subfamily N, member 4 | 1.134111  | Inlier |
| siRNA-Temozolomide Run3-DMSO | NM_1817<br>97 | KCNQ1 | potassium voltage-gated channel, KQT-like subfamily, member 1                             | -1.561186 | Inlier |
| siRNA-Temozolomide Run2-DMSO | NM_1817<br>97 | KCNQ1 | potassium voltage-gated channel, KQT-like subfamily, member 1                             | -1.125999 | Inlier |

Identification of Survival Genes in Human Glioblastoma Cells Using siRNA Screening

Nikhil G Thaker, Fang Zhang, Peter R. McDonald, Tong Ying Shun, Michael D Lewen, Ian F. Pollack, and John S. Lazo

Molecular Pharmacology

|                              |               |       |                                                               |           |        |
|------------------------------|---------------|-------|---------------------------------------------------------------|-----------|--------|
| siRNA-Temozolomide Run1-DMSO | NM_1817<br>97 | KCNQ1 | potassium voltage-gated channel, KQT-like subfamily, member 1 | -0.477257 | Inlier |
| siRNA Disorazole DMSO Run1   | NM_1817<br>97 | KCNQ1 | potassium voltage-gated channel, KQT-like subfamily, member 1 | -0.299537 | Inlier |
| siRNA-Vinblastine Run2-DMSO  | NM_1817<br>97 | KCNQ1 | potassium voltage-gated channel, KQT-like subfamily, member 1 | 0.299537  | Inlier |
| siRNA Disorazole DMSO Run3   | NM_1817<br>97 | KCNQ1 | potassium voltage-gated channel, KQT-like subfamily, member 1 | 0.547342  | Inlier |
| siRNA-Vinblastine Run1-DMSO  | NM_1817<br>97 | KCNQ1 | potassium voltage-gated channel, KQT-like subfamily, member 1 | 0.801658  | Inlier |
| siRNA Disorazole DMSO Run2   | NM_1817<br>97 | KCNQ1 | potassium voltage-gated channel, KQT-like subfamily, member 1 | 1.380249  | Inlier |
| siRNA-Temozolomide Run3-DMSO | NM_1721<br>09 | KCNQ2 | potassium voltage-gated channel, KQT-like subfamily, member 2 | -1.71081  | Inlier |

Identification of Survival Genes in Human Glioblastoma Cells Using siRNA Screening

Nikhil G Thaker, Fang Zhang, Peter R. McDonald, Tong Ying Shun, Michael D Lewen, Ian F. Pollack, and John S. Lazo

Molecular Pharmacology

|                              |               |       |                                                               |           |         |
|------------------------------|---------------|-------|---------------------------------------------------------------|-----------|---------|
| siRNA Disorazole DMSO Run3   | NM_1721<br>09 | KCNQ2 | potassium voltage-gated channel, KQT-like subfamily, member 2 | -0.72555  | Inlier  |
| siRNA-Temozolomide Run2-DMSO | NM_1721<br>09 | KCNQ2 | potassium voltage-gated channel, KQT-like subfamily, member 2 | -0.542491 | Inlier  |
| siRNA Disorazole DMSO Run1   | NM_1721<br>09 | KCNQ2 | potassium voltage-gated channel, KQT-like subfamily, member 2 | -0.496241 | Inlier  |
| siRNA-Vinblastine Run2-DMSO  | NM_1721<br>09 | KCNQ2 | potassium voltage-gated channel, KQT-like subfamily, member 2 | 0.496241  | Inlier  |
| siRNA-Temozolomide Run1-DMSO | NM_1721<br>09 | KCNQ2 | potassium voltage-gated channel, KQT-like subfamily, member 2 | 0.642026  | Inlier  |
| siRNA-Vinblastine Run1-DMSO  | NM_1721<br>09 | KCNQ2 | potassium voltage-gated channel, KQT-like subfamily, member 2 | 0.706974  | Inlier  |
| siRNA Disorazole DMSO Run2   | NM_1721<br>09 | KCNQ2 | potassium voltage-gated channel, KQT-like subfamily, member 2 | 5.217957  | Outlier |

Identification of Survival Genes in Human Glioblastoma Cells Using siRNA Screening

Nikhil G Thaker, Fang Zhang, Peter R. McDonald, Tong Ying Shun, Michael D Lewen, Ian F. Pollack, and John S. Lazo

Molecular Pharmacology

|                              |               |       |                                                               |           |        |
|------------------------------|---------------|-------|---------------------------------------------------------------|-----------|--------|
| siRNA-Temozolomide Run3-DMSO | NM_0045<br>19 | KCNQ3 | potassium voltage-gated channel, KQT-like subfamily, member 3 | -2.409057 | Inlier |
| siRNA Disorazole DMSO Run2   | NM_0045<br>19 | KCNQ3 | potassium voltage-gated channel, KQT-like subfamily, member 3 | -1.204423 | Inlier |
| siRNA Disorazole DMSO Run1   | NM_0045<br>19 | KCNQ3 | potassium voltage-gated channel, KQT-like subfamily, member 3 | -1.046622 | Inlier |
| siRNA-Temozolomide Run2-DMSO | NM_0045<br>19 | KCNQ3 | potassium voltage-gated channel, KQT-like subfamily, member 3 | -0.275253 | Inlier |
| siRNA-Temozolomide Run1-DMSO | NM_0045<br>19 | KCNQ3 | potassium voltage-gated channel, KQT-like subfamily, member 3 | 0.275253  | Inlier |
| siRNA-Vinblastine Run2-DMSO  | NM_0045<br>19 | KCNQ3 | potassium voltage-gated channel, KQT-like subfamily, member 3 | 0.539664  | Inlier |
| siRNA-Vinblastine Run1-DMSO  | NM_0045<br>19 | KCNQ3 | potassium voltage-gated channel, KQT-like subfamily, member 3 | 0.588963  | Inlier |

Identification of Survival Genes in Human Glioblastoma Cells Using siRNA Screening

Nikhil G Thaker, Fang Zhang, Peter R. McDonald, Tong Ying Shun, Michael D Lewen, Ian F. Pollack, and John S. Lazo

Molecular Pharmacology

|                              |               |       |                                                               |           |        |
|------------------------------|---------------|-------|---------------------------------------------------------------|-----------|--------|
| siRNA Disorazole DMSO Run3   | NM_0045<br>19 | KCNQ3 | potassium voltage-gated channel, KQT-like subfamily, member 3 | 0.760037  | Inlier |
| siRNA-Temozolomide Run3-DMSO | NM_1721<br>63 | KCNQ4 | potassium voltage-gated channel, KQT-like subfamily, member 4 | -2.377954 | Inlier |
| siRNA Disorazole DMSO Run1   | NM_1721<br>63 | KCNQ4 | potassium voltage-gated channel, KQT-like subfamily, member 4 | -0.766993 | Inlier |
| siRNA-Temozolomide Run1-DMSO | NM_1721<br>63 | KCNQ4 | potassium voltage-gated channel, KQT-like subfamily, member 4 | -0.582007 | Inlier |
| siRNA-Temozolomide Run2-DMSO | NM_1721<br>63 | KCNQ4 | potassium voltage-gated channel, KQT-like subfamily, member 4 | -0.408037 | Inlier |
| siRNA Disorazole DMSO Run3   | NM_1721<br>63 | KCNQ4 | potassium voltage-gated channel, KQT-like subfamily, member 4 | 0.408037  | Inlier |
| siRNA-Vinblastine Run2-DMSO  | NM_1721<br>63 | KCNQ4 | potassium voltage-gated channel, KQT-like subfamily, member 4 | 0.578623  | Inlier |

Identification of Survival Genes in Human Glioblastoma Cells Using siRNA Screening

Nikhil G Thaker, Fang Zhang, Peter R. McDonald, Tong Ying Shun, Michael D Lewen, Ian F. Pollack, and John S. Lazo

Molecular Pharmacology

|                              |               |       |                                                               |           |        |
|------------------------------|---------------|-------|---------------------------------------------------------------|-----------|--------|
| siRNA-Vinblastine Run1-DMSO  | NM_1721<br>63 | KCNQ4 | potassium voltage-gated channel, KQT-like subfamily, member 4 | 0.902698  | Inlier |
| siRNA Disorazole DMSO Run2   | NM_1721<br>63 | KCNQ4 | potassium voltage-gated channel, KQT-like subfamily, member 4 | 2.920381  | Inlier |
| siRNA-Temozolomide Run3-DMSO | NM_0198<br>42 | KCNQ5 | potassium voltage-gated channel, KQT-like subfamily, member 5 | -2.268236 | Inlier |
| siRNA Disorazole DMSO Run1   | NM_0198<br>42 | KCNQ5 | potassium voltage-gated channel, KQT-like subfamily, member 5 | -0.581237 | Inlier |
| siRNA-Temozolomide Run2-DMSO | NM_0198<br>42 | KCNQ5 | potassium voltage-gated channel, KQT-like subfamily, member 5 | -0.520477 | Inlier |
| siRNA Disorazole DMSO Run2   | NM_0198<br>42 | KCNQ5 | potassium voltage-gated channel, KQT-like subfamily, member 5 | -0.065758 | Inlier |
| siRNA-Temozolomide Run1-DMSO | NM_0198<br>42 | KCNQ5 | potassium voltage-gated channel, KQT-like subfamily, member 5 | 0.065758  | Inlier |



Identification of Survival Genes in Human Glioblastoma Cells Using siRNA Screening

Nikhil G Thaker, Fang Zhang, Peter R. McDonald, Tong Ying Shun, Michael D Lewen, Ian F. Pollack, and John S. Lazo

Molecular Pharmacology

|                              |               |       |                                                                           |           |        |
|------------------------------|---------------|-------|---------------------------------------------------------------------------|-----------|--------|
| siRNA-Vinblastine Run2-DMSO  | NM_0198<br>42 | KCNQ5 | potassium voltage-gated channel, KQT-like subfamily, member 5             | 0.767763  | Inlier |
| siRNA Disorazole DMSO Run3   | NM_0198<br>42 | KCNQ5 | potassium voltage-gated channel, KQT-like subfamily, member 5             | 0.911609  | Inlier |
| siRNA-Vinblastine Run1-DMSO  | NM_0198<br>42 | KCNQ5 | potassium voltage-gated channel, KQT-like subfamily, member 5             | 2.58281   | Inlier |
| siRNA-Temozolomide Run3-DMSO | NM_0022<br>51 | KCNS1 | potassium voltage-gated channel, delayed-rectifier, subfamily S, member 1 | -2.786475 | Inlier |
| siRNA Disorazole DMSO Run1   | NM_0022<br>51 | KCNS1 | potassium voltage-gated channel, delayed-rectifier, subfamily S, member 1 | -0.61041  | Inlier |
| siRNA-Temozolomide Run2-DMSO | NM_0022<br>51 | KCNS1 | potassium voltage-gated channel, delayed-rectifier, subfamily S, member 1 | -0.324321 | Inlier |

Identification of Survival Genes in Human Glioblastoma Cells Using siRNA Screening

Nikhil G Thaker, Fang Zhang, Peter R. McDonald, Tong Ying Shun, Michael D Lewen, Ian F. Pollack, and John S. Lazo

Molecular Pharmacology

|                              |               |       |                                                                           |           |        |
|------------------------------|---------------|-------|---------------------------------------------------------------------------|-----------|--------|
| siRNA Disorazole DMSO Run3   | NM_0022<br>51 | KCNS1 | potassium voltage-gated channel, delayed-rectifier, subfamily S, member 1 | -0.254561 | Inlier |
| siRNA-Vinblastine Run2-DMSO  | NM_0022<br>51 | KCNS1 | potassium voltage-gated channel, delayed-rectifier, subfamily S, member 1 | 0.254561  | Inlier |
| siRNA-Temozolomide Run1-DMSO | NM_0022<br>51 | KCNS1 | potassium voltage-gated channel, delayed-rectifier, subfamily S, member 1 | 0.73859   | Inlier |
| siRNA Disorazole DMSO Run2   | NM_0022<br>51 | KCNS1 | potassium voltage-gated channel, delayed-rectifier, subfamily S, member 1 | 1.637779  | Inlier |
| siRNA-Vinblastine Run1-DMSO  | NM_0022<br>51 | KCNS1 | potassium voltage-gated channel, delayed-rectifier, subfamily S, member 1 | 1.670739  | Inlier |

Identification of Survival Genes in Human Glioblastoma Cells Using siRNA Screening

Nikhil G Thaker, Fang Zhang, Peter R. McDonald, Tong Ying Shun, Michael D Lewen, Ian F. Pollack, and John S.

Lazo

Molecular Pharmacology

|                              |           |       |                                                                           |           |        |
|------------------------------|-----------|-------|---------------------------------------------------------------------------|-----------|--------|
| siRNA-Temozolomide Run3-DMSO | NM_020697 | KCNS2 | potassium voltage-gated channel, delayed-rectifier, subfamily S, member 2 | -1.438259 | Inlier |
| siRNA-Temozolomide Run2-DMSO | NM_020697 | KCNS2 | potassium voltage-gated channel, delayed-rectifier, subfamily S, member 2 | -0.998079 | Inlier |
| siRNA-Temozolomide Run1-DMSO | NM_020697 | KCNS2 | potassium voltage-gated channel, delayed-rectifier, subfamily S, member 2 | -0.707259 | Inlier |
| siRNA Disorazole DMSO Run2   | NM_020697 | KCNS2 | potassium voltage-gated channel, delayed-rectifier, subfamily S, member 2 | -0.054954 | Inlier |
| siRNA Disorazole DMSO Run3   | NM_020697 | KCNS2 | potassium voltage-gated channel, delayed-rectifier, subfamily S, member 2 | 0.054954  | Inlier |

Identification of Survival Genes in Human Glioblastoma Cells Using siRNA Screening

Nikhil G Thaker, Fang Zhang, Peter R. McDonald, Tong Ying Shun, Michael D Lewen, Ian F. Pollack, and John S.

Lazo

Molecular Pharmacology

|                              |               |       |                                                                           |           |        |
|------------------------------|---------------|-------|---------------------------------------------------------------------------|-----------|--------|
| siRNA-Vinblastine Run2-DMSO  | NM_0206<br>97 | KCNS2 | potassium voltage-gated channel, delayed-rectifier, subfamily S, member 2 | 0.475761  | Inlier |
| siRNA Disorazole DMSO Run1   | NM_0206<br>97 | KCNS2 | potassium voltage-gated channel, delayed-rectifier, subfamily S, member 2 | 0.656246  | Inlier |
| siRNA-Vinblastine Run1-DMSO  | NM_0206<br>97 | KCNS2 | potassium voltage-gated channel, delayed-rectifier, subfamily S, member 2 | 0.692754  | Inlier |
| siRNA-Temozolomide Run3-DMSO | NM_0022<br>52 | KCNS3 | potassium voltage-gated channel, delayed-rectifier, subfamily S, member 3 | -1.190983 | Inlier |
| siRNA-Temozolomide Run2-DMSO | NM_0022<br>52 | KCNS3 | potassium voltage-gated channel, delayed-rectifier, subfamily S, member 3 | -0.76074  | Inlier |

Identification of Survival Genes in Human Glioblastoma Cells Using siRNA Screening

Nikhil G Thaker, Fang Zhang, Peter R. McDonald, Tong Ying Shun, Michael D Lewen, Ian F. Pollack, and John S. Lazo

Molecular Pharmacology

|                              |               |       |                                                                           |           |        |
|------------------------------|---------------|-------|---------------------------------------------------------------------------|-----------|--------|
| siRNA Disorazole DMSO Run3   | NM_0022<br>52 | KCNS3 | potassium voltage-gated channel, delayed-rectifier, subfamily S, member 3 | -0.58826  | Inlier |
| siRNA-Temozolomide Run1-DMSO | NM_0022<br>52 | KCNS3 | potassium voltage-gated channel, delayed-rectifier, subfamily S, member 3 | -0.109344 | Inlier |
| siRNA Disorazole DMSO Run1   | NM_0022<br>52 | KCNS3 | potassium voltage-gated channel, delayed-rectifier, subfamily S, member 3 | 0.109344  | Inlier |
| siRNA Disorazole DMSO Run2   | NM_0022<br>52 | KCNS3 | potassium voltage-gated channel, delayed-rectifier, subfamily S, member 3 | 0.578666  | Inlier |
| siRNA-Vinblastine Run2-DMSO  | NM_0022<br>52 | KCNS3 | potassium voltage-gated channel, delayed-rectifier, subfamily S, member 3 | 0.847862  | Inlier |

Identification of Survival Genes in Human Glioblastoma Cells Using siRNA Screening  
 Nikhil G Thaker, Fang Zhang, Peter R. McDonald, Tong Ying Shun, Michael D Lewen, Ian F. Pollack, and John S. Lazo

Molecular Pharmacology

|                              |           |       |                                                                           |           |        |
|------------------------------|-----------|-------|---------------------------------------------------------------------------|-----------|--------|
| siRNA-Vinblastine Run1-DMSO  | NM_002252 | KCNS3 | potassium voltage-gated channel, delayed-rectifier, subfamily S, member 3 | 1.273707  | Inlier |
| siRNA Disorazole DMSO Run1   | NM_014379 | KCNV1 | potassium channel, subfamily V, member 1                                  | -0.884646 | Inlier |
| siRNA-Temozolomide Run2-DMSO | NM_014379 | KCNV1 | potassium channel, subfamily V, member 1                                  | -0.779559 | Inlier |
| siRNA-Temozolomide Run3-DMSO | NM_014379 | KCNV1 | potassium channel, subfamily V, member 1                                  | -0.569441 | Inlier |
| siRNA-Vinblastine Run2-DMSO  | NM_014379 | KCNV1 | potassium channel, subfamily V, member 1                                  | -0.309694 | Inlier |
| siRNA-Temozolomide Run1-DMSO | NM_014379 | KCNV1 | potassium channel, subfamily V, member 1                                  | 0.309693  | Inlier |
| siRNA Disorazole DMSO Run3   | NM_014379 | KCNV1 | potassium channel, subfamily V, member 1                                  | 0.4351    | Inlier |
| siRNA-Vinblastine Run1-DMSO  | NM_014379 | KCNV1 | potassium channel, subfamily V, member 1                                  | 1.184807  | Inlier |

Identification of Survival Genes in Human Glioblastoma Cells Using siRNA Screening  
 Nikhil G Thaker, Fang Zhang, Peter R. McDonald, Tong Ying Shun, Michael D Lewen, Ian F. Pollack, and John S. Lazo  
 Molecular Pharmacology

|                              |               |       |                                          |           |        |
|------------------------------|---------------|-------|------------------------------------------|-----------|--------|
| siRNA Disorazole DMSO Run2   | NM_0143<br>79 | KCNV1 | potassium channel, subfamily V, member 1 | 1.599713  | Inlier |
| siRNA-Temozolomide Run3-DMSO | NM_1334<br>97 | KCNV2 | potassium channel, subfamily V, member 2 | -2.688842 | Inlier |
| siRNA Disorazole DMSO Run2   | NM_1334<br>97 | KCNV2 | potassium channel, subfamily V, member 2 | -1.623048 | Inlier |
| siRNA Disorazole DMSO Run1   | NM_1334<br>97 | KCNV2 | potassium channel, subfamily V, member 2 | -0.562821 | Inlier |
| siRNA-Temozolomide Run2-DMSO | NM_1334<br>97 | KCNV2 | potassium channel, subfamily V, member 2 | -0.134885 | Inlier |
| siRNA-Temozolomide Run1-DMSO | NM_1334<br>97 | KCNV2 | potassium channel, subfamily V, member 2 | 0.134885  | Inlier |
| siRNA Disorazole DMSO Run3   | NM_1334<br>97 | KCNV2 | potassium channel, subfamily V, member 2 | 0.393682  | Inlier |
| siRNA-Vinblastine Run1-DMSO  | NM_1334<br>97 | KCNV2 | potassium channel, subfamily V, member 2 | 0.786179  | Inlier |

Identification of Survival Genes in Human Glioblastoma Cells Using siRNA Screening  
 Nikhil G Thaker, Fang Zhang, Peter R. McDonald, Tong Ying Shun, Michael D Lewen, Ian F. Pollack, and John S. Lazo  
 Molecular Pharmacology

|                              |           |        |                                                        |           |        |
|------------------------------|-----------|--------|--------------------------------------------------------|-----------|--------|
| siRNA-Vinblastine Run2-DMSO  | NM_133497 | KCNV2  | potassium channel, subfamily V, member 2               | 1.4371    | Inlier |
| siRNA-Temozolomide Run3-DMSO | NM_031954 | KCTD10 | potassium channel tetramerisation domain containing 10 | -1.340229 | Inlier |
| siRNA Disorazole DMSO Run2   | NM_031954 | KCTD10 | potassium channel tetramerisation domain containing 10 | -0.697601 | Inlier |
| siRNA Disorazole DMSO Run3   | NM_031954 | KCTD10 | potassium channel tetramerisation domain containing 10 | -0.651399 | Inlier |
| siRNA-Temozolomide Run2-DMSO | NM_031954 | KCTD10 | potassium channel tetramerisation domain containing 10 | -0.302675 | Inlier |
| siRNA Disorazole DMSO Run1   | NM_031954 | KCTD10 | potassium channel tetramerisation domain containing 10 | 0.302676  | Inlier |



Identification of Survival Genes in Human Glioblastoma Cells Using siRNA Screening  
 Nikhil G Thaker, Fang Zhang, Peter R. McDonald, Tong Ying Shun, Michael D Lewen, Ian F. Pollack, and John S. Lazo  
 Molecular Pharmacology

|                              |               |        |                                                                           |                  |
|------------------------------|---------------|--------|---------------------------------------------------------------------------|------------------|
| siRNA-Temozolomide Run1-DMSO | NM_0319<br>54 | KCTD10 | potassium<br>channel<br>tetrameris<br>ation<br>domain<br>containing<br>10 | 0.638931 Inlier  |
| siRNA-Vinblastine Run1-DMSO  | NM_0319<br>54 | KCTD10 | potassium<br>channel<br>tetrameris<br>ation<br>domain<br>containing<br>10 | 1.158149 Inlier  |
| siRNA-Vinblastine Run2-DMSO  | NM_0319<br>54 | KCTD10 | potassium<br>channel<br>tetrameris<br>ation<br>domain<br>containing<br>10 | 1.260359 Inlier  |
| siRNA Disorazole DMSO Run1   | NM_1788<br>63 | KCTD13 | potassium<br>channel<br>tetrameris<br>ation<br>domain<br>containing<br>13 | -3.082411 Inlier |
| siRNA-Temozolomide Run3-DMSO | NM_1788<br>63 | KCTD13 | potassium<br>channel<br>tetrameris<br>ation<br>domain<br>containing<br>13 | -2.034697 Inlier |
| siRNA-Vinblastine Run2-DMSO  | NM_1788<br>63 | KCTD13 | potassium<br>channel<br>tetrameris<br>ation<br>domain<br>containing<br>13 | -0.685173 Inlier |

Identification of Survival Genes in Human Glioblastoma Cells Using siRNA Screening  
 Nikhil G Thaker, Fang Zhang, Peter R. McDonald, Tong Ying Shun, Michael D Lewen, Ian F. Pollack, and John S. Lazo  
 Molecular Pharmacology

|                              |               |        |                                                        |           |        |
|------------------------------|---------------|--------|--------------------------------------------------------|-----------|--------|
| siRNA-Temozolomide Run1-DMSO | NM_1788<br>63 | KCTD13 | potassium channel tetramerisation domain containing 13 | -0.020581 | Inlier |
| siRNA-Temozolomide Run2-DMSO | NM_1788<br>63 | KCTD13 | potassium channel tetramerisation domain containing 13 | 0.020581  | Inlier |
| siRNA Disorazole DMSO Run3   | NM_1788<br>63 | KCTD13 | potassium channel tetramerisation domain containing 13 | 0.173785  | Inlier |
| siRNA-Vinblastine Run1-DMSO  | NM_1788<br>63 | KCTD13 | potassium channel tetramerisation domain containing 13 | 0.663827  | Inlier |
| siRNA Disorazole DMSO Run2   | NM_1788<br>63 | KCTD13 | potassium channel tetramerisation domain containing 13 | 2.615287  | Inlier |
| siRNA-Temozolomide Run3-DMSO | NM_0189<br>92 | KCTD5  | potassium channel tetramerisation domain containing 5  | -1.860977 | Inlier |

Identification of Survival Genes in Human Glioblastoma Cells Using siRNA Screening  
 Nikhil G Thaker, Fang Zhang, Peter R. McDonald, Tong Ying Shun, Michael D Lewen, Ian F. Pollack, and John S. Lazo  
 Molecular Pharmacology

|                              |               |       |                                                                          |           |        |
|------------------------------|---------------|-------|--------------------------------------------------------------------------|-----------|--------|
| siRNA-Temozolomide Run2-DMSO | NM_0189<br>92 | KCTD5 | potassium<br>channel<br>tetrameris<br>ation<br>domain<br>containing<br>5 | -1.439688 | Inlier |
| siRNA Disorazole DMSO Run1   | NM_0189<br>92 | KCTD5 | potassium<br>channel<br>tetrameris<br>ation<br>domain<br>containing<br>5 | -0.275934 | Inlier |
| siRNA-Temozolomide Run1-DMSO | NM_0189<br>92 | KCTD5 | potassium<br>channel<br>tetrameris<br>ation<br>domain<br>containing<br>5 | -0.011661 | Inlier |
| siRNA Disorazole DMSO Run3   | NM_0189<br>92 | KCTD5 | potassium<br>channel<br>tetrameris<br>ation<br>domain<br>containing<br>5 | 0.011661  | Inlier |
| siRNA Disorazole DMSO Run2   | NM_0189<br>92 | KCTD5 | potassium<br>channel<br>tetrameris<br>ation<br>domain<br>containing<br>5 | 0.055991  | Inlier |
| siRNA-Vinblastine Run1-DMSO  | NM_0189<br>92 | KCTD5 | potassium<br>channel<br>tetrameris<br>ation<br>domain<br>containing<br>5 | 1.073066  | Inlier |

Identification of Survival Genes in Human Glioblastoma Cells Using siRNA Screening

Nikhil G Thaker, Fang Zhang, Peter R. McDonald, Tong Ying Shun, Michael D Lewen, Ian F. Pollack, and John S.

Lazo

Molecular Pharmacology

|                              |           |        |                                                                                                                                    |           |        |
|------------------------------|-----------|--------|------------------------------------------------------------------------------------------------------------------------------------|-----------|--------|
| siRNA-Vinblastine Run2-DMSO  | NM_018992 | KCTD5  | potassium channel tetramerisation domain containing 5<br>KDEL (Lys-Asp-Glu-Leu) endoplasmic reticulum protein retention receptor 1 | 1.318883  | Inlier |
| siRNA-Temozolomide Run3-DMSO | NM_006801 | KDELR1 | KDEL (Lys-Asp-Glu-Leu) endoplasmic reticulum protein retention receptor 1                                                          | -1.414231 | Inlier |
| siRNA-Vinblastine Run2-DMSO  | NM_006801 | KDELR1 | KDEL (Lys-Asp-Glu-Leu) endoplasmic reticulum protein retention receptor 1                                                          | -1.321658 | Inlier |
| siRNA-Temozolomide Run2-DMSO | NM_006801 | KDELR1 | KDEL (Lys-Asp-Glu-Leu) endoplasmic reticulum protein retention receptor 1                                                          | -0.412919 | Inlier |
| siRNA Disorazole DMSO Run3   | NM_006801 | KDELR1 | protein retention receptor 1                                                                                                       | -0.03786  | Inlier |

Identification of Survival Genes in Human Glioblastoma Cells Using siRNA Screening

Nikhil G Thaker, Fang Zhang, Peter R. McDonald, Tong Ying Shun, Michael D Lewen, Ian F. Pollack, and John S. Lazo

Molecular Pharmacology

| siRNA Treatment              | Gene ID   | Gene Name | Protein Description                                                       | Log2 Fold Change | Outlier Status |
|------------------------------|-----------|-----------|---------------------------------------------------------------------------|------------------|----------------|
| siRNA-Temozolomide Run1-DMSO | NM_006801 | KDELR1    | KDEL (Lys-Asp-Glu-Leu) endoplasmic reticulum protein retention receptor 1 | 0.03786          | Inlier         |
| siRNA Disorazole DMSO Run1   | NM_006801 | KDELR1    | KDEL (Lys-Asp-Glu-Leu) endoplasmic reticulum protein retention receptor 1 | 0.661723         | Inlier         |
| siRNA Disorazole DMSO Run2   | NM_006801 | KDELR1    | KDEL (Lys-Asp-Glu-Leu) endoplasmic reticulum protein retention receptor 1 | 0.687277         | Inlier         |
| siRNA-Vinblastine Run1-DMSO  | NM_006801 | KDELR1    | KDEL (Lys-Asp-Glu-Leu) endoplasmic reticulum protein retention receptor 1 | 1.780239         | Inlier         |
| siRNA-Vinblastine Run2-DMSO  | NM_006854 | KDELR2    | KDEL (Lys-Asp-Glu-Leu) endoplasmic reticulum protein retention receptor 2 | -2.533822        | Inlier         |

Identification of Survival Genes in Human Glioblastoma Cells Using siRNA Screening

Nikhil G Thaker, Fang Zhang, Peter R. McDonald, Tong Ying Shun, Michael D Lewen, Ian F. Pollack, and John S. Lazo

Molecular Pharmacology

| siRNA                        | Gene  | Gene ID   | Gene Name                                                                 | Score     | Outlier |
|------------------------------|-------|-----------|---------------------------------------------------------------------------|-----------|---------|
| siRNA Disorazole DMSO Run1   | KDEL2 | NM_006854 | KDEL (Lys-Asp-Glu-Leu) endoplasmic reticulum protein retention receptor 2 | -0.506222 | Inlier  |
| siRNA-Temozolomide Run2-DMSO | KDEL2 | NM_006854 | KDEL (Lys-Asp-Glu-Leu) endoplasmic reticulum protein retention receptor 2 | -0.398371 | Inlier  |
| siRNA Disorazole DMSO Run3   | KDEL2 | NM_006854 | KDEL (Lys-Asp-Glu-Leu) endoplasmic reticulum protein retention receptor 2 | -0.0778   | Inlier  |
| siRNA-Temozolomide Run1-DMSO | KDEL2 | NM_006854 | KDEL (Lys-Asp-Glu-Leu) endoplasmic reticulum protein retention receptor 2 | 0.0778    | Inlier  |
| siRNA-Temozolomide Run3-DMSO | KDEL2 | NM_006854 | KDEL (Lys-Asp-Glu-Leu) endoplasmic reticulum protein retention receptor 2 | 0.842778  | Inlier  |

Identification of Survival Genes in Human Glioblastoma Cells Using siRNA Screening

Nikhil G Thaker, Fang Zhang, Peter R. McDonald, Tong Ying Shun, Michael D Lewen, Ian F. Pollack, and John S.

Lazo

Molecular Pharmacology

|                              |               |        |                                                                           |           |        |
|------------------------------|---------------|--------|---------------------------------------------------------------------------|-----------|--------|
| siRNA Disorazole DMSO Run2   | NM_0068<br>54 | KDELR2 | KDEL (Lys-Asp-Glu-Leu) endoplasmic reticulum protein retention receptor 2 | 2.91285   | Inlier |
| siRNA-Vinblastine Run1-DMSO  | NM_0068<br>54 | KDELR2 | KDEL (Lys-Asp-Glu-Leu) endoplasmic reticulum protein retention receptor 2 | 3.295166  | Inlier |
| siRNA-Vinblastine Run2-DMSO  | NM_0166<br>57 | KDELR3 | KDEL (Lys-Asp-Glu-Leu) endoplasmic reticulum protein retention receptor 3 | -2.273493 | Inlier |
| siRNA-Temozolomide Run2-DMSO | NM_0166<br>57 | KDELR3 | KDEL (Lys-Asp-Glu-Leu) endoplasmic reticulum protein retention receptor 3 | -0.695716 | Inlier |
| siRNA Disorazole DMSO Run1   | NM_0166<br>57 | KDELR3 | KDEL (Lys-Asp-Glu-Leu) endoplasmic reticulum protein retention receptor 3 | -0.253477 | Inlier |

Identification of Survival Genes in Human Glioblastoma Cells Using siRNA Screening

Nikhil G Thaker, Fang Zhang, Peter R. McDonald, Tong Ying Shun, Michael D Lewen, Ian F. Pollack, and John S. Lazo

Molecular Pharmacology

|                              |               |       |  |                                                                           |                 |
|------------------------------|---------------|-------|--|---------------------------------------------------------------------------|-----------------|
|                              |               |       |  | KDEL (Lys-Asp-Glu-Leu) endoplasmic reticulum protein retention receptor 3 |                 |
| siRNA Disorazole DMSO Run3   | NM_0166<br>57 | KDEL3 |  |                                                                           | -0.14328 Inlier |
| siRNA-Temozolomide Run1-DMSO | NM_0166<br>57 | KDEL3 |  | KDEL (Lys-Asp-Glu-Leu) endoplasmic reticulum protein retention receptor 3 | 0.14328 Inlier  |
| siRNA-Temozolomide Run3-DMSO | NM_0166<br>57 | KDEL3 |  | KDEL (Lys-Asp-Glu-Leu) endoplasmic reticulum protein retention receptor 3 | 0.653284 Inlier |
| siRNA Disorazole DMSO Run2   | NM_0166<br>57 | KDEL3 |  | KDEL (Lys-Asp-Glu-Leu) endoplasmic reticulum protein retention receptor 3 | 1.249102 Inlier |
| siRNA-Vinblastine Run1-DMSO  | NM_0166<br>57 | KDEL3 |  | KDEL (Lys-Asp-Glu-Leu) endoplasmic reticulum protein retention receptor 3 | 2.672014 Inlier |



Identification of Survival Genes in Human Glioblastoma Cells Using siRNA Screening

Nikhil G Thaker, Fang Zhang, Peter R. McDonald, Tong Ying Shun, Michael D Lewen, Ian F. Pollack, and John S. Lazo

Molecular Pharmacology

|                              |               |     |                                                                                          |           |        |
|------------------------------|---------------|-----|------------------------------------------------------------------------------------------|-----------|--------|
| siRNA-Temozolomide Run2-DMSO | NM_0022<br>53 | KDR | kinase<br>insert<br>domain<br>receptor (a<br>type III<br>receptor<br>tyrosine<br>kinase) | -1.348639 | Inlier |
| siRNA-Temozolomide Run3-DMSO | NM_0022<br>53 | KDR | kinase<br>insert<br>domain<br>receptor (a<br>type III<br>receptor<br>tyrosine<br>kinase) | -1.035821 | Inlier |
| siRNA-Temozolomide Run1-DMSO | NM_0022<br>53 | KDR | kinase<br>insert<br>domain<br>receptor (a<br>type III<br>receptor<br>tyrosine<br>kinase) | -0.82293  | Inlier |
| siRNA-Vinblastine Run1-DMSO  | NM_0022<br>53 | KDR | kinase<br>insert<br>domain<br>receptor (a<br>type III<br>receptor<br>tyrosine<br>kinase) | -0.378832 | Inlier |
| siRNA Disorazole DMSO Run3   | NM_0022<br>53 | KDR | kinase<br>insert<br>domain<br>receptor (a<br>type III<br>receptor<br>tyrosine<br>kinase) | 0.378832  | Inlier |
| siRNA Disorazole DMSO Run1   | NM_0022<br>53 | KDR | kinase<br>insert<br>domain<br>receptor (a<br>type III<br>receptor<br>tyrosine<br>kinase) | 0.503229  | Inlier |

Identification of Survival Genes in Human Glioblastoma Cells Using siRNA Screening  
 Nikhil G Thaker, Fang Zhang, Peter R. McDonald, Tong Ying Shun, Michael D Lewen, Ian F. Pollack, and John S. Lazo

Molecular Pharmacology

|                                  |               |     |                                                                                          |           |        |
|----------------------------------|---------------|-----|------------------------------------------------------------------------------------------|-----------|--------|
| siRNA Disorazole DMSO Run2       | NM_0022<br>53 | KDR | kinase<br>insert<br>domain<br>receptor (a<br>type III<br>receptor<br>tyrosine<br>kinase) | 0.670988  | Inlier |
| siRNA-Vinblastine Run2-<br>DMSO  | NM_0022<br>53 | KDR | kinase<br>insert<br>domain<br>receptor (a<br>type III<br>receptor<br>tyrosine<br>kinase) | 0.678012  | Inlier |
| siRNA-Temozolomide Run3-<br>DMSO | NM_0004<br>20 | KEL | Kell blood<br>group                                                                      | -0.785904 | Inlier |
| siRNA-Temozolomide Run1-<br>DMSO | NM_0004<br>20 | KEL | Kell blood<br>group                                                                      | -0.69169  | Inlier |
| siRNA-Temozolomide Run2-<br>DMSO | NM_0004<br>20 | KEL | Kell blood<br>group                                                                      | -0.374064 | Inlier |
| siRNA Disorazole DMSO Run3       | NM_0004<br>20 | KEL | Kell blood<br>group                                                                      | -0.146908 | Inlier |
| siRNA Disorazole DMSO Run1       | NM_0004<br>20 | KEL | Kell blood<br>group                                                                      | 0.146908  | Inlier |
| siRNA-Vinblastine Run1-<br>DMSO  | NM_0004<br>20 | KEL | Kell blood<br>group                                                                      | 0.65731   | Inlier |
| siRNA-Vinblastine Run2-<br>DMSO  | NM_0004<br>20 | KEL | Kell blood<br>group                                                                      | 0.899231  | Inlier |
| siRNA Disorazole DMSO Run2       | NM_0004<br>20 | KEL | Kell blood<br>group                                                                      | 1.874993  | Inlier |
| siRNA-Temozolomide Run3-<br>DMSO | NM_0064<br>88 | KHK | ketohehexoki<br>nase<br>(fructokina<br>se)                                               | -2.492566 | Inlier |
| siRNA-Temozolomide Run2-<br>DMSO | NM_0064<br>88 | KHK | ketohehexoki<br>nase<br>(fructokina<br>se)                                               | -0.646143 | Inlier |
| siRNA Disorazole DMSO Run2       | NM_0064<br>88 | KHK | ketohehexoki<br>nase<br>(fructokina<br>se)                                               | -0.578166 | Inlier |
| siRNA-Vinblastine Run1-<br>DMSO  | NM_0064<br>88 | KHK | ketohehexoki<br>nase<br>(fructokina<br>se)                                               | -0.509275 | Inlier |
| siRNA Disorazole DMSO Run1       | NM_0064<br>88 | KHK | ketohehexoki<br>nase<br>(fructokina<br>se)                                               | 0.509273  | Inlier |

Identification of Survival Genes in Human Glioblastoma Cells Using siRNA Screening  
 Nikhil G Thaker, Fang Zhang, Peter R. McDonald, Tong Ying Shun, Michael D Lewen, Ian F. Pollack, and John S. Lazo

Molecular Pharmacology

|                              |           |       |                                                              |           |         |
|------------------------------|-----------|-------|--------------------------------------------------------------|-----------|---------|
| siRNA-Temozolomide Run1-DMSO | NM_006488 | KHK   | ketoheokinase (fructokinase)                                 | 0.702857  | Inlier  |
| siRNA-Vinblastine Run2-DMSO  | NM_006488 | KHK   | ketoheokinase (fructokinase)                                 | 2.844096  | Inlier  |
| siRNA Disorazole DMSO Run3   | NM_006488 | KHK   | ketoheokinase (fructokinase)                                 | 8.046178  | Outlier |
| siRNA-Temozolomide Run3-DMSO | NM_003685 | KHSRP | KH-type splicing regulatory protein (FUSE binding protein 2) | -1.961622 | Inlier  |
| siRNA-Temozolomide Run2-DMSO | NM_003685 | KHSRP | KH-type splicing regulatory protein (FUSE binding protein 2) | -1.507532 | Inlier  |
| siRNA-Temozolomide Run1-DMSO | NM_003685 | KHSRP | KH-type splicing regulatory protein (FUSE binding protein 2) | -0.712297 | Inlier  |
| siRNA Disorazole DMSO Run3   | NM_003685 | KHSRP | KH-type splicing regulatory protein (FUSE binding protein 2) | -0.010089 | Inlier  |
| siRNA-Vinblastine Run2-DMSO  | NM_003685 | KHSRP | KH-type splicing regulatory protein (FUSE binding protein 2) | 0.010089  | Inlier  |

Identification of Survival Genes in Human Glioblastoma Cells Using siRNA Screening

Nikhil G Thaker, Fang Zhang, Peter R. McDonald, Tong Ying Shun, Michael D Lewen, Ian F. Pollack, and John S. Lazo

Molecular Pharmacology

| siRNA Treatment              | Gene ID | Accession | Protein Name | Score     | Outlier Type |
|------------------------------|---------|-----------|--------------|-----------|--------------|
| siRNA Disorazole DMSO Run1   | NM_0036 | 85        | KHSRP        | 0.406491  | Inlier       |
| siRNA-Vinblastine Run1-DMSO  | NM_0036 | 85        | KHSRP        | 0.636703  | Inlier       |
| siRNA Disorazole DMSO Run2   | NM_0036 | 85        | KHSRP        | 0.944774  | Inlier       |
| siRNA-Temozolomide Run3-DMSO | NM_0153 | 42        | KIAA0073     | -1.228047 | Inlier       |
| siRNA-Temozolomide Run2-DMSO | NM_0153 | 42        | KIAA0073     | -0.660727 | Inlier       |
| siRNA-Temozolomide Run1-DMSO | NM_0153 | 42        | KIAA0073     | -0.580258 | Inlier       |

KH-type splicing regulatory protein (FUSE binding protein 2)  
 KH-type splicing regulatory protein (FUSE binding protein 2)  
 KH-type splicing regulatory protein (FUSE binding protein 2)  
 peptidylprolyl isomerase domain and WD repeat containing 1  
 peptidylprolyl isomerase domain and WD repeat containing 1  
 peptidylprolyl isomerase domain and WD repeat containing 1

Identification of Survival Genes in Human Glioblastoma Cells Using siRNA Screening  
 Nikhil G Thaker, Fang Zhang, Peter R. McDonald, Tong Ying Shun, Michael D Lewen, Ian F. Pollack, and John S. Lazo

Molecular Pharmacology

| siRNA Treatment              | Gene ID       | Accession | Protein Domain                                           | Score     | Outlier Status |
|------------------------------|---------------|-----------|----------------------------------------------------------|-----------|----------------|
| siRNA-Vinblastine Run2-DMSO  | NM_0153<br>42 | KIAA0073  | peptidylprolyl isomerase domain and WD repeat containing | -0.083428 | Inlier         |
| siRNA Disorazole DMSO Run3   | NM_0153<br>42 | KIAA0073  | peptidylprolyl isomerase domain and WD repeat containing | 0.083428  | Inlier         |
| siRNA Disorazole DMSO Run1   | NM_0153<br>42 | KIAA0073  | peptidylprolyl isomerase domain and WD repeat containing | 0.688273  | Inlier         |
| siRNA Disorazole DMSO Run2   | NM_0153<br>42 | KIAA0073  | peptidylprolyl isomerase domain and WD repeat containing | 0.909919  | Inlier         |
| siRNA-Vinblastine Run1-DMSO  | NM_0153<br>42 | KIAA0073  | peptidylprolyl isomerase domain and WD repeat containing | 1.023167  | Inlier         |
| siRNA-Temozolomide Run3-DMSO | NM_0150<br>27 | KIAA0251  | KIAA0251                                                 | -2.082602 | Inlier         |
| siRNA-Temozolomide Run2-DMSO | NM_0150<br>27 | KIAA0251  | KIAA0251                                                 | -1.187779 | Inlier         |
| siRNA Disorazole DMSO Run3   | NM_0150<br>27 | KIAA0251  | KIAA0251                                                 | -0.479292 | Inlier         |
| siRNA-Temozolomide Run1-DMSO | NM_0150<br>27 | KIAA0251  | KIAA0251                                                 | -0.071357 | Inlier         |
| siRNA-Vinblastine Run2-DMSO  | NM_0150<br>27 | KIAA0251  | KIAA0251                                                 | 0.071357  | Inlier         |
| siRNA Disorazole DMSO Run1   | NM_0150<br>27 | KIAA0251  | KIAA0251                                                 | 0.267653  | Inlier         |

Identification of Survival Genes in Human Glioblastoma Cells Using siRNA Screening  
 Nikhil G Thaker, Fang Zhang, Peter R. McDonald, Tong Ying Shun, Michael D Lewen, Ian F. Pollack, and John S. Lazo

|                              |               |          |                           |           |        |
|------------------------------|---------------|----------|---------------------------|-----------|--------|
| Molecular Pharmacology       | NM_0150       |          |                           |           |        |
| siRNA Disorazole DMSO Run2   | 27            | KIAA0251 | KIAA0251                  | 0.869708  | Inlier |
| siRNA-Vinblastine Run1-DMSO  | NM_0150<br>27 | KIAA0251 | KIAA0251                  | 1.155153  | Inlier |
| siRNA-Temozolomide Run3-DMSO | XM_37133<br>2 | KIAA0449 | kinesin family member 21B | -1.324294 | Inlier |
| siRNA Disorazole DMSO Run3   | XM_37133<br>2 | KIAA0449 | kinesin family member 21B | -0.712116 | Inlier |
| siRNA-Temozolomide Run2-DMSO | XM_37133<br>2 | KIAA0449 | kinesin family member 21B | -0.583887 | Inlier |
| siRNA-Vinblastine Run2-DMSO  | XM_37133<br>2 | KIAA0449 | kinesin family member 21B | -0.43703  | Inlier |
| siRNA Disorazole DMSO Run1   | XM_37133<br>2 | KIAA0449 | kinesin family member 21B | 0.43703   | Inlier |
| siRNA-Temozolomide Run1-DMSO | XM_37133<br>2 | KIAA0449 | kinesin family member 21B | 0.636884  | Inlier |
| siRNA Disorazole DMSO Run2   | XM_37133<br>2 | KIAA0449 | kinesin family member 21B | 2.894955  | Inlier |
| siRNA-Vinblastine Run1-DMSO  | XM_37133<br>2 | KIAA0449 | kinesin family member 21B | 3.048224  | Inlier |
| siRNA-Temozolomide Run2-DMSO | NM_0152<br>84 | KIAA0467 | KIAA0467                  | -0.684146 | Inlier |
| siRNA-Temozolomide Run3-DMSO | NM_0152<br>84 | KIAA0467 | KIAA0467                  | -0.664854 | Inlier |
| siRNA Disorazole DMSO Run3   | NM_0152<br>84 | KIAA0467 | KIAA0467                  | -0.401387 | Inlier |
| siRNA-Vinblastine Run2-DMSO  | NM_0152<br>84 | KIAA0467 | KIAA0467                  | -0.045537 | Inlier |
| siRNA Disorazole DMSO Run1   | NM_0152<br>84 | KIAA0467 | KIAA0467                  | 0.045537  | Inlier |
| siRNA Disorazole DMSO Run2   | NM_0152<br>84 | KIAA0467 | KIAA0467                  | 0.697547  | Inlier |
| siRNA-Temozolomide Run1-DMSO | NM_0152<br>84 | KIAA0467 | KIAA0467                  | 0.703156  | Inlier |
| siRNA-Vinblastine Run1-DMSO  | NM_0152<br>84 | KIAA0467 | KIAA0467                  | 0.946604  | Inlier |

Identification of Survival Genes in Human Glioblastoma Cells Using siRNA Screening  
 Nikhil G Thaker, Fang Zhang, Peter R. McDonald, Tong Ying Shun, Michael D Lewen, Ian F. Pollack, and John S. Lazo

Molecular Pharmacology

|                                  |          |    |          |                                           |           |        |
|----------------------------------|----------|----|----------|-------------------------------------------|-----------|--------|
| siRNA Disorazole DMSO Run2       | XM_03979 | 6  | KIAA0551 | TRAF2<br>and NCK<br>interacting<br>kinase | -0.867142 | Inlier |
| siRNA Disorazole DMSO Run3       | XM_03979 | 6  | KIAA0551 | TRAF2<br>and NCK<br>interacting<br>kinase | -0.654908 | Inlier |
| siRNA-Temozolomide Run3-<br>DMSO | XM_03979 | 6  | KIAA0551 | TRAF2<br>and NCK<br>interacting<br>kinase | -0.585765 | Inlier |
| siRNA-Temozolomide Run2-<br>DMSO | XM_03979 | 6  | KIAA0551 | TRAF2<br>and NCK<br>interacting<br>kinase | -0.219581 | Inlier |
| siRNA-Temozolomide Run1-<br>DMSO | XM_03979 | 6  | KIAA0551 | TRAF2<br>and NCK<br>interacting<br>kinase | 0.219581  | Inlier |
| siRNA Disorazole DMSO Run1       | XM_03979 | 6  | KIAA0551 | TRAF2<br>and NCK<br>interacting<br>kinase | 0.694092  | Inlier |
| siRNA-Vinblastine Run1-<br>DMSO  | XM_03979 | 6  | KIAA0551 | TRAF2<br>and NCK<br>interacting<br>kinase | 1.175979  | Inlier |
| siRNA-Vinblastine Run2-<br>DMSO  | XM_03979 | 6  | KIAA0551 | TRAF2<br>and NCK<br>interacting<br>kinase | 1.689924  | Inlier |
| siRNA-Temozolomide Run3-<br>DMSO | NM_0146  | 94 | KIAA0605 | ADAMTS-<br>like 2                         | -1.526029 | Inlier |
| siRNA Disorazole DMSO Run1       | NM_0146  | 94 | KIAA0605 | ADAMTS-<br>like 2                         | -0.816789 | Inlier |
| siRNA-Temozolomide Run1-<br>DMSO | NM_0146  | 94 | KIAA0605 | ADAMTS-<br>like 2                         | -0.532211 | Inlier |
| siRNA-Temozolomide Run2-<br>DMSO | NM_0146  | 94 | KIAA0605 | ADAMTS-<br>like 2                         | -0.382789 | Inlier |
| siRNA Disorazole DMSO Run2       | NM_0146  | 94 | KIAA0605 | ADAMTS-<br>like 2                         | 0.38279   | Inlier |
| siRNA-Vinblastine Run2-<br>DMSO  | NM_0146  | 94 | KIAA0605 | ADAMTS-<br>like 2                         | 0.455324  | Inlier |
| siRNA-Vinblastine Run1-<br>DMSO  | NM_0146  | 94 | KIAA0605 | ADAMTS-<br>like 2                         | 0.983361  | Inlier |
| siRNA Disorazole DMSO Run3       | NM_0146  | 94 | KIAA0605 | ADAMTS-<br>like 2                         | 1.954406  | Inlier |

Identification of Survival Genes in Human Glioblastoma Cells Using siRNA Screening  
 Nikhil G Thaker, Fang Zhang, Peter R. McDonald, Tong Ying Shun, Michael D Lewen, Ian F. Pollack, and John S. Lazo

Molecular Pharmacology

|                              |               |          |                                          |           |        |
|------------------------------|---------------|----------|------------------------------------------|-----------|--------|
| siRNA-Temozolomide Run3-DMSO | NM_0216<br>47 | KIAA0626 | microfibrillar-associated protein 3-like | -1.261512 | Inlier |
| siRNA-Temozolomide Run1-DMSO | NM_0216<br>47 | KIAA0626 | microfibrillar-associated protein 3-like | -0.735006 | Inlier |
| siRNA-Temozolomide Run2-DMSO | NM_0216<br>47 | KIAA0626 | microfibrillar-associated protein 3-like | -0.502552 | Inlier |
| siRNA Disorazole DMSO Run2   | NM_0216<br>47 | KIAA0626 | microfibrillar-associated protein 3-like | -0.284628 | Inlier |
| siRNA Disorazole DMSO Run3   | NM_0216<br>47 | KIAA0626 | microfibrillar-associated protein 3-like | 0.284628  | Inlier |
| siRNA Disorazole DMSO Run1   | NM_0216<br>47 | KIAA0626 | microfibrillar-associated protein 3-like | 0.613994  | Inlier |
| siRNA-Vinblastine Run1-DMSO  | NM_0216<br>47 | KIAA0626 | microfibrillar-associated protein 3-like | 0.783788  | Inlier |
| siRNA-Vinblastine Run2-DMSO  | NM_0216<br>47 | KIAA0626 | microfibrillar-associated protein 3-like | 1.681152  | Inlier |
| siRNA-Temozolomide Run3-DMSO | NM_0152<br>29 | KIAA0664 | KIAA0664                                 | -1.493239 | Inlier |
| siRNA-Temozolomide Run2-DMSO | NM_0152<br>29 | KIAA0664 | KIAA0664                                 | -1.004938 | Inlier |
| siRNA-Temozolomide Run1-DMSO | NM_0152<br>29 | KIAA0664 | KIAA0664                                 | -0.344062 | Inlier |
| siRNA Disorazole DMSO Run3   | NM_0152<br>29 | KIAA0664 | KIAA0664                                 | -0.038336 | Inlier |
| siRNA Disorazole DMSO Run1   | NM_0152<br>29 | KIAA0664 | KIAA0664                                 | 0.038336  | Inlier |
| siRNA-Vinblastine Run2-DMSO  | NM_0152<br>29 | KIAA0664 | KIAA0664                                 | 0.29304   | Inlier |



Identification of Survival Genes in Human Glioblastoma Cells Using siRNA Screening  
 Nikhil G Thaker, Fang Zhang, Peter R. McDonald, Tong Ying Shun, Michael D Lewen, Ian F. Pollack, and John S. Lazo

|                              |               |          |                                                                          |           |         |
|------------------------------|---------------|----------|--------------------------------------------------------------------------|-----------|---------|
| Molecular Pharmacology       | NM_0152       |          |                                                                          |           |         |
| siRNA Disorazole DMSO Run2   | 29            | KIAA0664 | KIAA0664                                                                 | 1.421456  | Inlier  |
| siRNA-Vinblastine Run1-DMSO  | NM_0152<br>29 | KIAA0664 | KIAA0664                                                                 | 1.442014  | Inlier  |
| siRNA-Vinblastine Run2-DMSO  | NM_0153<br>28 | KIAA0828 | KIAA0828                                                                 | -2.188941 | Inlier  |
| siRNA-Temozolomide Run3-DMSO | NM_0153<br>28 | KIAA0828 | KIAA0828                                                                 | -0.624091 | Inlier  |
| siRNA Disorazole DMSO Run3   | NM_0153<br>28 | KIAA0828 | KIAA0828                                                                 | -0.208087 | Inlier  |
| siRNA Disorazole DMSO Run1   | 28            | KIAA0828 | KIAA0828                                                                 | -0.172564 | Inlier  |
| siRNA-Temozolomide Run2-DMSO | NM_0153<br>28 | KIAA0828 | KIAA0828                                                                 | 0.172565  | Inlier  |
| siRNA-Temozolomide Run1-DMSO | NM_0153<br>28 | KIAA0828 | KIAA0828                                                                 | 0.724909  | Inlier  |
| siRNA-Vinblastine Run1-DMSO  | NM_0153<br>28 | KIAA0828 | KIAA0828                                                                 | 3.850284  | Outlier |
| siRNA Disorazole DMSO Run2   | NM_0153<br>28 | KIAA0828 | KIAA0828                                                                 | 5.344507  | Outlier |
|                              |               |          | MCF.2 cell<br>line<br>derived<br>transformi<br>ng<br>sequence-<br>like 2 |           |         |
| siRNA-Temozolomide Run3-DMSO | NM_0150<br>78 | KIAA0861 | MCF.2 cell<br>line<br>derived<br>transformi<br>ng<br>sequence-<br>like 2 | -1.473876 | Inlier  |
| siRNA-Vinblastine Run2-DMSO  | NM_0150<br>78 | KIAA0861 | MCF.2 cell<br>line<br>derived<br>transformi<br>ng<br>sequence-<br>like 2 | -0.402298 | Inlier  |
| siRNA-Temozolomide Run1-DMSO | NM_0150<br>78 | KIAA0861 | MCF.2 cell<br>line<br>derived<br>transformi<br>ng<br>sequence-<br>like 2 | -0.262554 | Inlier  |
| siRNA-Temozolomide Run2-DMSO | NM_0150<br>78 | KIAA0861 | sequence-<br>like 2                                                      | -0.218244 | Inlier  |

Identification of Survival Genes in Human Glioblastoma Cells Using siRNA Screening  
 Nikhil G Thaker, Fang Zhang, Peter R. McDonald, Tong Ying Shun, Michael D Lewen, Ian F. Pollack, and John S. Lazo

Molecular Pharmacology

|                                  |               |          |                                                   |                                                   |         |
|----------------------------------|---------------|----------|---------------------------------------------------|---------------------------------------------------|---------|
|                                  |               |          |                                                   | MCF.2 cell<br>line<br>derived<br>transformi<br>ng |         |
| siRNA Disorazole DMSO Run3       | NM_0150<br>78 | KIAA0861 | sequence-<br>like 2                               | 0.218244                                          | Inlier  |
|                                  |               |          | MCF.2 cell<br>line<br>derived<br>transformi<br>ng |                                                   |         |
| siRNA Disorazole DMSO Run1       | NM_0150<br>78 | KIAA0861 | sequence-<br>like 2                               | 0.946702                                          | Inlier  |
|                                  |               |          | MCF.2 cell<br>line<br>derived<br>transformi<br>ng |                                                   |         |
| siRNA Disorazole DMSO Run2       | NM_0150<br>78 | KIAA0861 | sequence-<br>like 2                               | 1.792658                                          | Inlier  |
|                                  |               |          | MCF.2 cell<br>line<br>derived<br>transformi<br>ng |                                                   |         |
| siRNA-Vinblastine Run1-<br>DMSO  | NM_0150<br>78 | KIAA0861 | sequence-<br>like 2                               | 2.169206                                          | Inlier  |
| siRNA-Temozolomide Run1-<br>DMSO | NM_0251<br>64 | KIAA0999 | KIAA0999                                          | -1.191625                                         | Inlier  |
| siRNA-Temozolomide Run3-<br>DMSO | NM_0251<br>64 | KIAA0999 | KIAA0999                                          | -0.762704                                         | Inlier  |
|                                  | NM_0251<br>64 | KIAA0999 | KIAA0999                                          | -0.388365                                         | Inlier  |
| siRNA Disorazole DMSO Run2       | NM_0251<br>64 | KIAA0999 | KIAA0999                                          | -0.321231                                         | Inlier  |
| siRNA Disorazole DMSO Run3       | NM_0251<br>64 | KIAA0999 | KIAA0999                                          | 0.32123                                           | Inlier  |
| siRNA-Temozolomide Run2-<br>DMSO | NM_0251<br>64 | KIAA0999 | KIAA0999                                          | 0.586296                                          | Inlier  |
| siRNA-Vinblastine Run1-<br>DMSO  | NM_0251<br>64 | KIAA0999 | KIAA0999                                          | 1.265548                                          | Inlier  |
| siRNA Disorazole DMSO Run1       | NM_0251<br>64 | KIAA0999 | KIAA0999                                          | 4.824164                                          | Outlier |
| siRNA-Vinblastine Run2-<br>DMSO  | NM_0251<br>64 | KIAA0999 | KIAA0999                                          |                                                   |         |
|                                  |               |          | family with<br>sequence<br>similarity             |                                                   |         |
| siRNA-Vinblastine Run2-<br>DMSO  | NM_0190<br>92 | KIAA1164 | 63,<br>member B                                   | -1.617421                                         | Inlier  |

Identification of Survival Genes in Human Glioblastoma Cells Using siRNA Screening  
 Nikhil G Thaker, Fang Zhang, Peter R. McDonald, Tong Ying Shun, Michael D Lewen, Ian F. Pollack, and John S. Lazo  
 Molecular Pharmacology

|                                  |               |          |                                                          |           |        |
|----------------------------------|---------------|----------|----------------------------------------------------------|-----------|--------|
| siRNA Disorazole DMSO Run3       | NM_0190<br>92 | KIAA1164 | family with<br>sequence<br>similarity<br>63,<br>member B | -1.119339 | Inlier |
| siRNA-Temozolomide Run3-<br>DMSO | NM_0190<br>92 | KIAA1164 | family with<br>sequence<br>similarity<br>63,<br>member B | -0.431022 | Inlier |
| siRNA Disorazole DMSO Run1       | NM_0190<br>92 | KIAA1164 | family with<br>sequence<br>similarity<br>63,<br>member B | -0.184498 | Inlier |
| siRNA-Temozolomide Run2-<br>DMSO | NM_0190<br>92 | KIAA1164 | family with<br>sequence<br>similarity<br>63,<br>member B | 0.184498  | Inlier |
| siRNA Disorazole DMSO Run2       | NM_0190<br>92 | KIAA1164 | family with<br>sequence<br>similarity<br>63,<br>member B | 0.599457  | Inlier |
| siRNA-Vinblastine Run1-<br>DMSO  | NM_0190<br>92 | KIAA1164 | family with<br>sequence<br>similarity<br>63,<br>member B | 0.749543  | Inlier |
| siRNA-Temozolomide Run1-<br>DMSO | NM_0190<br>92 | KIAA1164 | family with<br>sequence<br>similarity<br>63,<br>member B | 1.162263  | Inlier |
| siRNA-Temozolomide Run3-<br>DMSO | NM_0195<br>93 | KIAA1434 | KIAA1434                                                 | -1.384997 | Inlier |

Identification of Survival Genes in Human Glioblastoma Cells Using siRNA Screening  
 Nikhil G Thaker, Fang Zhang, Peter R. McDonald, Tong Ying Shun, Michael D Lewen, Ian F. Pollack, and John S. Lazo

|                                  |               |          |          |           |         |
|----------------------------------|---------------|----------|----------|-----------|---------|
| siRNA-Temozolomide Run1-<br>DMSO | NM_0195<br>93 | KIAA1434 | KIAA1434 | -1.198614 | Inlier  |
| siRNA Disorazole DMSO Run2       | NM_0195<br>93 | KIAA1434 | KIAA1434 | -0.396109 | Inlier  |
| siRNA Disorazole DMSO Run1       | NM_0195<br>93 | KIAA1434 | KIAA1434 | -0.287521 | Inlier  |
| siRNA-Vinblastine Run1-<br>DMSO  | NM_0195<br>93 | KIAA1434 | KIAA1434 | 0.28752   | Inlier  |
| siRNA-Temozolomide Run2-<br>DMSO | NM_0195<br>93 | KIAA1434 | KIAA1434 | 0.421368  | Inlier  |
| siRNA-Vinblastine Run2-<br>DMSO  | NM_0195<br>93 | KIAA1434 | KIAA1434 | 0.927632  | Inlier  |
| siRNA Disorazole DMSO Run3       | NM_0195<br>93 | KIAA1434 | KIAA1434 | 1.125717  | Inlier  |
| siRNA Disorazole DMSO Run2       | NM_0208<br>36 | KIAA1446 | KIAA1446 | -1.010008 | Inlier  |
| siRNA-Temozolomide Run1-<br>DMSO | NM_0208<br>36 | KIAA1446 | KIAA1446 | -0.919091 | Inlier  |
| siRNA-Temozolomide Run3-<br>DMSO | NM_0208<br>36 | KIAA1446 | KIAA1446 | -0.896947 | Inlier  |
| siRNA-Temozolomide Run2-<br>DMSO | NM_0208<br>36 | KIAA1446 | KIAA1446 | -0.232627 | Inlier  |
| siRNA Disorazole DMSO Run3       | NM_0208<br>36 | KIAA1446 | KIAA1446 | 0.232627  | Inlier  |
| siRNA Disorazole DMSO Run1       | NM_0208<br>36 | KIAA1446 | KIAA1446 | 0.266998  | Inlier  |
| siRNA-Vinblastine Run1-<br>DMSO  | NM_0208<br>36 | KIAA1446 | KIAA1446 | 0.648209  | Inlier  |
| siRNA-Vinblastine Run2-<br>DMSO  | NM_0208<br>36 | KIAA1446 | KIAA1446 | 0.700791  | Inlier  |
| siRNA Disorazole DMSO Run2       | NM_0209<br>25 | KIAA1573 | KIAA1573 | -1.363119 | Inlier  |
| siRNA Disorazole DMSO Run3       | NM_0209<br>25 | KIAA1573 | KIAA1573 | -0.779362 | Inlier  |
| siRNA-Temozolomide Run2-<br>DMSO | NM_0209<br>25 | KIAA1573 | KIAA1573 | -0.569638 | Inlier  |
| siRNA-Temozolomide Run3-<br>DMSO | NM_0209<br>25 | KIAA1573 | KIAA1573 | -0.190716 | Inlier  |
| siRNA-Temozolomide Run1-<br>DMSO | NM_0209<br>25 | KIAA1573 | KIAA1573 | 0.190716  | Inlier  |
| siRNA Disorazole DMSO Run1       | NM_0209<br>25 | KIAA1573 | KIAA1573 | 0.431349  | Inlier  |
| siRNA-Vinblastine Run2-<br>DMSO  | NM_0209<br>25 | KIAA1573 | KIAA1573 | 1.011971  | Inlier  |
| siRNA-Vinblastine Run1-<br>DMSO  | NM_0209<br>25 | KIAA1573 | KIAA1573 | 1.77691   | Inlier  |
| siRNA-Vinblastine Run2-<br>DMSO  | NM_0209<br>27 | KIAA1576 | KIAA1576 | -4.928568 | Outlier |
| siRNA-Temozolomide Run1-<br>DMSO | NM_0209<br>27 | KIAA1576 | KIAA1576 | -1.245096 | Inlier  |
| siRNA Disorazole DMSO Run3       | NM_0209<br>27 | KIAA1576 | KIAA1576 | -0.794333 | Inlier  |

Identification of Survival Genes in Human Glioblastoma Cells Using siRNA Screening  
 Nikhil G Thaker, Fang Zhang, Peter R. McDonald, Tong Ying Shun, Michael D Lewen, Ian F. Pollack, and John S. Lazo

|                              |               |          |                                            |           |         |
|------------------------------|---------------|----------|--------------------------------------------|-----------|---------|
| Molecular Pharmacology       | NM_0209       |          |                                            |           |         |
| siRNA Disorazole DMSO Run1   | 27            | KIAA1576 | KIAA1576                                   | -0.500036 | Inlier  |
| siRNA-Temozolomide Run3-DMSO | NM_0209<br>27 | KIAA1576 | KIAA1576                                   | 0.500036  | Inlier  |
| siRNA-Temozolomide Run2-DMSO | NM_0209<br>27 | KIAA1576 | KIAA1576                                   | 0.517923  | Inlier  |
| siRNA Disorazole DMSO Run2   | NM_0209<br>27 | KIAA1576 | KIAA1576                                   | 0.554667  | Inlier  |
| siRNA-Vinblastine Run1-DMSO  | NM_0209<br>27 | KIAA1576 | KIAA1576                                   | 3.871778  | Outlier |
|                              |               |          | doublecort<br>in and<br>CaM<br>kinase-like |           |         |
| siRNA Disorazole DMSO Run2   | XM_04735<br>5 | KIAA1765 | 3                                          | -1.337285 | Inlier  |
|                              |               |          | doublecort<br>in and<br>CaM<br>kinase-like |           |         |
| siRNA-Temozolomide Run3-DMSO | XM_04735<br>5 | KIAA1765 | 3                                          | -1.104856 | Inlier  |
|                              |               |          | doublecort<br>in and<br>CaM<br>kinase-like |           |         |
| siRNA-Temozolomide Run1-DMSO | XM_04735<br>5 | KIAA1765 | 3                                          | -0.221183 | Inlier  |
|                              |               |          | doublecort<br>in and<br>CaM<br>kinase-like |           |         |
| siRNA Disorazole DMSO Run3   | XM_04735<br>5 | KIAA1765 | 3                                          | -0.007572 | Inlier  |
|                              |               |          | doublecort<br>in and<br>CaM<br>kinase-like |           |         |
| siRNA-Temozolomide Run2-DMSO | XM_04735<br>5 | KIAA1765 | 3                                          | 0.007572  | Inlier  |
|                              |               |          | doublecort<br>in and<br>CaM<br>kinase-like |           |         |
| siRNA Disorazole DMSO Run1   | XM_04735<br>5 | KIAA1765 | 3                                          | 0.495647  | Inlier  |
|                              |               |          | doublecort<br>in and<br>CaM<br>kinase-like |           |         |
| siRNA-Vinblastine Run1-DMSO  | XM_04735<br>5 | KIAA1765 | 3                                          | 0.853353  | Inlier  |
|                              |               |          | doublecort<br>in and<br>CaM<br>kinase-like |           |         |
| siRNA-Vinblastine Run2-DMSO  | XM_04735<br>5 | KIAA1765 | 3                                          | 0.938989  | Inlier  |
| siRNA-Temozolomide Run2-DMSO | NM_0324<br>35 | KIAA1804 | KIAA1804                                   | -3.087065 | Inlier  |

Identification of Survival Genes in Human Glioblastoma Cells Using siRNA Screening  
 Nikhil G Thaker, Fang Zhang, Peter R. McDonald, Tong Ying Shun, Michael D Lewen, Ian F. Pollack, and John S. Lazo

|                                  |               |          |                                               |           |        |
|----------------------------------|---------------|----------|-----------------------------------------------|-----------|--------|
| siRNA-Vinblastine Run1-<br>DMSO  | NM_0324<br>35 | KIAA1804 | KIAA1804                                      | -1.35809  | Inlier |
| siRNA-Temozolomide Run3-<br>DMSO | NM_0324<br>35 | KIAA1804 | KIAA1804                                      | -0.706767 | Inlier |
| siRNA Disorazole DMSO Run3       | NM_0324<br>35 | KIAA1804 | KIAA1804                                      | -0.004422 | Inlier |
| siRNA Disorazole DMSO Run1       | NM_0324<br>35 | KIAA1804 | KIAA1804                                      | 0.00442   | Inlier |
| siRNA-Vinblastine Run2-<br>DMSO  | NM_0324<br>35 | KIAA1804 | KIAA1804                                      | 0.493419  | Inlier |
| siRNA-Temozolomide Run1-<br>DMSO | NM_0324<br>35 | KIAA1804 | KIAA1804                                      | 0.642233  | Inlier |
| siRNA Disorazole DMSO Run2       | NM_0324<br>35 | KIAA1804 | KIAA1804                                      | 1.203327  | Inlier |
| siRNA Disorazole DMSO Run2       | NM_0324<br>30 | KIAA1811 | BR<br>kinase 1<br>serine/thre<br>onine        | -0.890703 | Inlier |
| siRNA-Temozolomide Run2-<br>DMSO | NM_0324<br>30 | KIAA1811 | BR<br>kinase 1<br>serine/thre<br>onine        | -0.734996 | Inlier |
| siRNA-Temozolomide Run3-<br>DMSO | NM_0324<br>30 | KIAA1811 | BR<br>kinase 1<br>serine/thre<br>onine        | -0.657111 | Inlier |
| siRNA Disorazole DMSO Run3       | NM_0324<br>30 | KIAA1811 | BR<br>kinase 1<br>serine/thre<br>onine        | -0.382    | Inlier |
| siRNA-Temozolomide Run1-<br>DMSO | NM_0324<br>30 | KIAA1811 | BR<br>kinase 1<br>serine/thre<br>onine        | 0.382     | Inlier |
| siRNA-Vinblastine Run1-<br>DMSO  | NM_0324<br>30 | KIAA1811 | BR<br>kinase 1<br>serine/thre<br>onine        | 0.583011  | Inlier |
| siRNA Disorazole DMSO Run1       | NM_0324<br>30 | KIAA1811 | BR<br>kinase 1<br>serine/thre<br>onine        | 0.691889  | Inlier |
| siRNA-Vinblastine Run2-<br>DMSO  | NM_0324<br>30 | KIAA1811 | BR<br>kinase 1<br>kinesin<br>family<br>member | 0.811282  | Inlier |
| siRNA-Temozolomide Run2-<br>DMSO | NM_0045<br>23 | KIF11    | 11                                            | -0.704715 | Inlier |

Identification of Survival Genes in Human Glioblastoma Cells Using siRNA Screening  
 Nikhil G Thaker, Fang Zhang, Peter R. McDonald, Tong Ying Shun, Michael D Lewen, Ian F. Pollack, and John S. Lazo

Molecular Pharmacology

|                              |               |       |                                   |           |        |
|------------------------------|---------------|-------|-----------------------------------|-----------|--------|
| siRNA-Temozolomide Run3-DMSO | NM_0045<br>23 | KIF11 | kinesin<br>family<br>member<br>11 | -0.644285 | Inlier |
| siRNA-Temozolomide Run1-DMSO | NM_0045<br>23 | KIF11 | kinesin<br>family<br>member<br>11 | -0.382038 | Inlier |
| siRNA Disorazole DMSO Run3   | NM_0045<br>23 | KIF11 | kinesin<br>family<br>member<br>11 | -0.362427 | Inlier |
| siRNA Disorazole DMSO Run1   | NM_0045<br>23 | KIF11 | kinesin<br>family<br>member<br>11 | 0.362427  | Inlier |
| siRNA-Vinblastine Run2-DMSO  | NM_0045<br>23 | KIF11 | kinesin<br>family<br>member<br>11 | 1.07685   | Inlier |
| siRNA Disorazole DMSO Run2   | NM_0045<br>23 | KIF11 | kinesin<br>family<br>member<br>11 | 1.143841  | Inlier |
| siRNA-Vinblastine Run1-DMSO  | NM_0045<br>23 | KIF11 | kinesin<br>family<br>member<br>11 | 1.199392  | Inlier |
| siRNA-Temozolomide Run3-DMSO | NM_1384<br>24 | KIF12 | kinesin<br>family<br>member<br>12 | -1.101342 | Inlier |
| siRNA-Temozolomide Run2-DMSO | NM_1384<br>24 | KIF12 | kinesin<br>family<br>member<br>12 | -0.646587 | Inlier |
| siRNA-Vinblastine Run2-DMSO  | NM_1384<br>24 | KIF12 | kinesin<br>family<br>member<br>12 | -0.624006 | Inlier |
| siRNA Disorazole DMSO Run1   | NM_1384<br>24 | KIF12 | kinesin<br>family<br>member<br>12 | -0.094236 | Inlier |
| siRNA Disorazole DMSO Run3   | NM_1384<br>24 | KIF12 | kinesin<br>family<br>member<br>12 | 0.094236  | Inlier |
| siRNA-Temozolomide Run1-DMSO | NM_1384<br>24 | KIF12 | kinesin<br>family<br>member<br>12 | 0.702413  | Inlier |

Identification of Survival Genes in Human Glioblastoma Cells Using siRNA Screening  
 Nikhil G Thaker, Fang Zhang, Peter R. McDonald, Tong Ying Shun, Michael D Lewen, Ian F. Pollack, and John S. Lazo

Molecular Pharmacology

|                              |               |        |                                    |           |        |
|------------------------------|---------------|--------|------------------------------------|-----------|--------|
| siRNA-Vinblastine Run1-DMSO  | NM_1384<br>24 | KIF12  | kinesin<br>family<br>member<br>12  | 1.821126  | Inlier |
| siRNA Disorazole DMSO Run2   | NM_1384<br>24 | KIF12  | kinesin<br>family<br>member<br>12  | 2.108425  | Inlier |
| siRNA-Temozolomide Run3-DMSO | NM_0221<br>13 | KIF13A | kinesin<br>family<br>member<br>13A | -1.589992 | Inlier |
| siRNA-Temozolomide Run2-DMSO | NM_0221<br>13 | KIF13A | kinesin<br>family<br>member<br>13A | -0.910289 | Inlier |
| siRNA Disorazole DMSO Run3   | NM_0221<br>13 | KIF13A | kinesin<br>family<br>member<br>13A | -0.408318 | Inlier |
| siRNA Disorazole DMSO Run1   | NM_0221<br>13 | KIF13A | kinesin<br>family<br>member<br>13A | -0.364164 | Inlier |
| siRNA-Temozolomide Run1-DMSO | NM_0221<br>13 | KIF13A | kinesin<br>family<br>member<br>13A | 0.364165  | Inlier |
| siRNA-Vinblastine Run2-DMSO  | NM_0221<br>13 | KIF13A | kinesin<br>family<br>member<br>13A | 0.438711  | Inlier |
| siRNA Disorazole DMSO Run2   | NM_0221<br>13 | KIF13A | kinesin<br>family<br>member<br>13A | 2.107805  | Inlier |
| siRNA-Vinblastine Run1-DMSO  | NM_0221<br>13 | KIF13A | kinesin<br>family<br>member<br>13A | 2.340962  | Inlier |
| siRNA-Temozolomide Run3-DMSO | NM_0152<br>54 | KIF13B | kinesin<br>family<br>member<br>13B | -1.028766 | Inlier |
| siRNA-Temozolomide Run2-DMSO | NM_0152<br>54 | KIF13B | kinesin<br>family<br>member<br>13B | -0.629216 | Inlier |
| siRNA Disorazole DMSO Run3   | NM_0152<br>54 | KIF13B | kinesin<br>family<br>member<br>13B | -0.487435 | Inlier |



Identification of Survival Genes in Human Glioblastoma Cells Using siRNA Screening  
 Nikhil G Thaker, Fang Zhang, Peter R. McDonald, Tong Ying Shun, Michael D Lewen, Ian F. Pollack, and John S. Lazo

Molecular Pharmacology

|                              |               |        |                           |           |        |
|------------------------------|---------------|--------|---------------------------|-----------|--------|
| siRNA-Vinblastine Run2-DMSO  | NM_0152<br>54 | KIF13B | kinesin family member 13B | -0.388248 | Inlier |
| siRNA-Temozolomide Run1-DMSO | NM_0152<br>54 | KIF13B | kinesin family member 13B | 0.388248  | Inlier |
| siRNA Disorazole DMSO Run1   | NM_0152<br>54 | KIF13B | kinesin family member 13B | 0.719784  | Inlier |
| siRNA Disorazole DMSO Run2   | NM_0152<br>54 | KIF13B | kinesin family member 13B | 2.288031  | Inlier |
| siRNA-Vinblastine Run1-DMSO  | NM_0152<br>54 | KIF13B | kinesin family member 13B | 2.550917  | Inlier |
| siRNA-Temozolomide Run3-DMSO | NM_0148<br>75 | KIF14  | kinesin family member 14  | -2.268062 | Inlier |
| siRNA-Vinblastine Run2-DMSO  | NM_0148<br>75 | KIF14  | kinesin family member 14  | -0.743752 | Inlier |
| siRNA Disorazole DMSO Run2   | NM_0148<br>75 | KIF14  | kinesin family member 14  | -0.605248 | Inlier |
| siRNA Disorazole DMSO Run3   | NM_0148<br>75 | KIF14  | kinesin family member 14  | -0.143427 | Inlier |
| siRNA-Temozolomide Run2-DMSO | NM_0148<br>75 | KIF14  | kinesin family member 14  | 0.143428  | Inlier |
| siRNA-Temozolomide Run1-DMSO | NM_0148<br>75 | KIF14  | kinesin family member 14  | 0.369929  | Inlier |
| siRNA Disorazole DMSO Run1   | NM_0148<br>75 | KIF14  | kinesin family member 14  | 1.342128  | Inlier |
| siRNA-Vinblastine Run1-DMSO  | NM_0148<br>75 | KIF14  | kinesin family member 14  | 3.023339  | Inlier |

Identification of Survival Genes in Human Glioblastoma Cells Using siRNA Screening  
 Nikhil G Thaker, Fang Zhang, Peter R. McDonald, Tong Ying Shun, Michael D Lewen, Ian F. Pollack, and John S. Lazo

Molecular Pharmacology

|                              |               |        |                                    |                  |
|------------------------------|---------------|--------|------------------------------------|------------------|
| siRNA-Temozolomide Run3-DMSO | NM_0208<br>16 | KIF17  | kinesin<br>family<br>member<br>17  | -3.459946 Inlier |
| siRNA-Vinblastine Run2-DMSO  | NM_0208<br>16 | KIF17  | kinesin<br>family<br>member<br>17  | -1.103734 Inlier |
| siRNA Disorazole DMSO Run3   | NM_0208<br>16 | KIF17  | kinesin<br>family<br>member<br>17  | -0.209039 Inlier |
| siRNA Disorazole DMSO Run1   | NM_0208<br>16 | KIF17  | kinesin<br>family<br>member<br>17  | -0.207454 Inlier |
| siRNA-Temozolomide Run2-DMSO | NM_0208<br>16 | KIF17  | kinesin<br>family<br>member<br>17  | 0.207454 Inlier  |
| siRNA-Temozolomide Run1-DMSO | NM_0208<br>16 | KIF17  | kinesin<br>family<br>member<br>17  | 0.245266 Inlier  |
| siRNA-Vinblastine Run1-DMSO  | NM_0208<br>16 | KIF17  | kinesin<br>family<br>member<br>17  | 2.879083 Inlier  |
| siRNA Disorazole DMSO Run2   | NM_0208<br>16 | KIF17  | kinesin<br>family<br>member<br>17  | 3.462935 Inlier  |
| siRNA-Temozolomide Run3-DMSO | NM_0312<br>17 | KIF18A | kinesin<br>family<br>member<br>18A | -0.697047 Inlier |
| siRNA-Vinblastine Run2-DMSO  | NM_0312<br>17 | KIF18A | kinesin<br>family<br>member<br>18A | -0.651953 Inlier |
| siRNA Disorazole DMSO Run3   | NM_0312<br>17 | KIF18A | kinesin<br>family<br>member<br>18A | -0.327087 Inlier |
| siRNA-Temozolomide Run2-DMSO | NM_0312<br>17 | KIF18A | kinesin<br>family<br>member<br>18A | -0.259746 Inlier |
| siRNA Disorazole DMSO Run1   | NM_0312<br>17 | KIF18A | kinesin<br>family<br>member<br>18A | 0.259747 Inlier  |

Identification of Survival Genes in Human Glioblastoma Cells Using siRNA Screening  
 Nikhil G Thaker, Fang Zhang, Peter R. McDonald, Tong Ying Shun, Michael D Lewen, Ian F. Pollack, and John S. Lazo

Molecular Pharmacology

| siRNA Treatment              | Gene ID       | Gene Name | Family                    | Value     | Category |
|------------------------------|---------------|-----------|---------------------------|-----------|----------|
| siRNA-Temozolomide Run1-DMSO | NM_0312<br>17 | KIF18A    | kinesin family member 18A | 4.489262  | Outlier  |
| siRNA Disorazole DMSO Run2   | NM_0312<br>17 | KIF18A    | kinesin family member 18A | 7.920432  | Outlier  |
| siRNA-Vinblastine Run1-DMSO  | NM_0312<br>17 | KIF18A    | kinesin family member 18A | 8.324604  | Outlier  |
| siRNA-Temozolomide Run3-DMSO | NM_0150<br>74 | KIF1B     | kinesin family member 1B  | -3.815166 | Outlier  |
| siRNA-Temozolomide Run2-DMSO | NM_0150<br>74 | KIF1B     | kinesin family member 1B  | -0.909134 | Inlier   |
| siRNA-Vinblastine Run2-DMSO  | NM_0150<br>74 | KIF1B     | kinesin family member 1B  | -0.439866 | Inlier   |
| siRNA Disorazole DMSO Run1   | NM_0150<br>74 | KIF1B     | kinesin family member 1B  | -0.13486  | Inlier   |
| siRNA Disorazole DMSO Run3   | NM_0150<br>74 | KIF1B     | kinesin family member 1B  | 0.13486   | Inlier   |
| siRNA-Temozolomide Run1-DMSO | NM_0150<br>74 | KIF1B     | kinesin family member 1B  | 0.137742  | Inlier   |
| siRNA-Vinblastine Run1-DMSO  | NM_0150<br>74 | KIF1B     | kinesin family member 1B  | 2.440941  | Inlier   |
| siRNA Disorazole DMSO Run2   | NM_0150<br>74 | KIF1B     | kinesin family member 1B  | 2.966372  | Inlier   |
| siRNA-Temozolomide Run3-DMSO | NM_0066<br>12 | KIF1C     | kinesin family member 1C  | -1.037384 | Inlier   |
| siRNA Disorazole DMSO Run3   | NM_0066<br>12 | KIF1C     | kinesin family member 1C  | -0.767218 | Inlier   |

Identification of Survival Genes in Human Glioblastoma Cells Using siRNA Screening  
 Nikhil G Thaker, Fang Zhang, Peter R. McDonald, Tong Ying Shun, Michael D Lewen, Ian F. Pollack, and John S. Lazo

Molecular Pharmacology

|                              |               |       |                              |           |        |
|------------------------------|---------------|-------|------------------------------|-----------|--------|
| siRNA-Temozolomide Run2-DMSO | NM_0066<br>12 | KIF1C | kinesin family member 1C     | -0.338828 | Inlier |
| siRNA-Vinblastine Run2-DMSO  | NM_0066<br>12 | KIF1C | kinesin family member 1C     | -0.197106 | Inlier |
| siRNA-Temozolomide Run1-DMSO | NM_0066<br>12 | KIF1C | kinesin family member 1C     | 0.197106  | Inlier |
| siRNA Disorazole DMSO Run1   | NM_0066<br>12 | KIF1C | kinesin family member 1C     | 0.581782  | Inlier |
| siRNA-Vinblastine Run1-DMSO  | NM_0066<br>12 | KIF1C | kinesin family member 1C     | 3.384905  | Inlier |
| siRNA Disorazole DMSO Run2   | NM_0066<br>12 | KIF1C | kinesin family member 1C     | 3.497039  | Inlier |
| siRNA Disorazole DMSO Run3   | NM_0045<br>20 | KIF2  | kinesin heavy chain member 2 | -3.188994 | Inlier |
| siRNA-Vinblastine Run2-DMSO  | NM_0045<br>20 | KIF2  | kinesin heavy chain member 2 | -1.308551 | Inlier |
| siRNA Disorazole DMSO Run1   | NM_0045<br>20 | KIF2  | kinesin heavy chain member 2 | -0.698074 | Inlier |
| siRNA Disorazole DMSO Run2   | NM_0045<br>20 | KIF2  | kinesin heavy chain member 2 | -0.157425 | Inlier |
| siRNA-Temozolomide Run2-DMSO | NM_0045<br>20 | KIF2  | kinesin heavy chain member 2 | 0.157426  | Inlier |
| siRNA-Temozolomide Run1-DMSO | NM_0045<br>20 | KIF2  | kinesin heavy chain member 2 | 0.518837  | Inlier |
| siRNA-Temozolomide Run3-DMSO | NM_0045<br>20 | KIF2  | kinesin heavy chain member 2 | 0.650926  | Inlier |

Identification of Survival Genes in Human Glioblastoma Cells Using siRNA Screening  
 Nikhil G Thaker, Fang Zhang, Peter R. McDonald, Tong Ying Shun, Michael D Lewen, Ian F. Pollack, and John S. Lazo

Molecular Pharmacology

|                              |               |        |                              |           |        |
|------------------------------|---------------|--------|------------------------------|-----------|--------|
| siRNA-Vinblastine Run1-DMSO  | NM_0045<br>20 | KIF2   | kinesin heavy chain member 2 | 2.624815  | Inlier |
| siRNA-Temozolomide Run3-DMSO | NM_0057<br>33 | KIF20A | kinesin family member 20A    | -2.159906 | Inlier |
| siRNA-Temozolomide Run2-DMSO | NM_0057<br>33 | KIF20A | kinesin family member 20A    | -1.097609 | Inlier |
| siRNA Disorazole DMSO Run1   | NM_0057<br>33 | KIF20A | kinesin family member 20A    | -0.118292 | Inlier |
| siRNA Disorazole DMSO Run3   | NM_0057<br>33 | KIF20A | kinesin family member 20A    | -0.004734 | Inlier |
| siRNA-Vinblastine Run2-DMSO  | NM_0057<br>33 | KIF20A | kinesin family member 20A    | 0.004734  | Inlier |
| siRNA-Temozolomide Run1-DMSO | NM_0057<br>33 | KIF20A | kinesin family member 20A    | 0.251391  | Inlier |
| siRNA-Vinblastine Run1-DMSO  | NM_0057<br>33 | KIF20A | kinesin family member 20A    | 1.955762  | Inlier |
| siRNA Disorazole DMSO Run2   | NM_0057<br>33 | KIF20A | kinesin family member 20A    | 2.065058  | Inlier |
| siRNA-Vinblastine Run2-DMSO  | NM_0176<br>41 | KIF21A | kinesin family member 21A    | -0.676838 | Inlier |
| siRNA Disorazole DMSO Run3   | NM_0176<br>41 | KIF21A | kinesin family member 21A    | -0.672162 | Inlier |
| siRNA-Temozolomide Run3-DMSO | NM_0176<br>41 | KIF21A | kinesin family member 21A    | -0.649761 | Inlier |
| siRNA-Temozolomide Run1-DMSO | NM_0176<br>41 | KIF21A | kinesin family member 21A    | -0.221658 | Inlier |

Identification of Survival Genes in Human Glioblastoma Cells Using siRNA Screening  
 Nikhil G Thaker, Fang Zhang, Peter R. McDonald, Tong Ying Shun, Michael D Lewen, Ian F. Pollack, and John S. Lazo

Molecular Pharmacology

| siRNA Treatment              | Gene   | Accession | Family                    | Member | Value     | Outlier |
|------------------------------|--------|-----------|---------------------------|--------|-----------|---------|
| siRNA-Temozolomide Run2-DMSO | KIF21A | NM_017641 | kinesin family member 21A | 21A    | 0.221658  | Inlier  |
| siRNA Disorazole DMSO Run1   | KIF21A | NM_017641 | kinesin family member 21A | 21A    | 2.126789  | Inlier  |
| siRNA Disorazole DMSO Run2   | KIF21A | NM_017641 | kinesin family member 21A | 21A    | 3.227076  | Inlier  |
| siRNA-Vinblastine Run1-DMSO  | KIF21A | NM_017641 | kinesin family member 21A | 21A    | 3.45541   | Inlier  |
| siRNA Disorazole DMSO Run3   | KIF22  | NM_007317 | kinesin family member 22  | 22     | -1.604521 | Inlier  |
| siRNA-Vinblastine Run2-DMSO  | KIF22  | NM_007317 | kinesin family member 22  | 22     | -0.937051 | Inlier  |
| siRNA-Temozolomide Run2-DMSO | KIF22  | NM_007317 | kinesin family member 22  | 22     | -0.411949 | Inlier  |
| siRNA-Temozolomide Run1-DMSO | KIF22  | NM_007317 | kinesin family member 22  | 22     | -0.160979 | Inlier  |
| siRNA Disorazole DMSO Run1   | KIF22  | NM_007317 | kinesin family member 22  | 22     | 0.160979  | Inlier  |
| siRNA-Temozolomide Run3-DMSO | KIF22  | NM_007317 | kinesin family member 22  | 22     | 0.20153   | Inlier  |
| siRNA-Vinblastine Run1-DMSO  | KIF22  | NM_007317 | kinesin family member 22  | 22     | 1.380822  | Inlier  |
| siRNA Disorazole DMSO Run2   | KIF22  | NM_007317 | kinesin family member 22  | 22     | 1.927028  | Inlier  |
| siRNA-Temozolomide Run3-DMSO | KIF23  | NM_004856 | kinesin family member 23  | 23     | -0.900422 | Inlier  |

Identification of Survival Genes in Human Glioblastoma Cells Using siRNA Screening  
 Nikhil G Thaker, Fang Zhang, Peter R. McDonald, Tong Ying Shun, Michael D Lewen, Ian F. Pollack, and John S. Lazo

Molecular Pharmacology

| siRNA Treatment              | Gene ID       | Gene Name | Family                | Member | Value     | Outlier |
|------------------------------|---------------|-----------|-----------------------|--------|-----------|---------|
| siRNA-Temozolomide Run2-DMSO | NM_0048<br>56 | KIF23     | kinesin family member | 23     | -0.587483 | Inlier  |
| siRNA-Vinblastine Run2-DMSO  | NM_0048<br>56 | KIF23     | kinesin family member | 23     | -0.279994 | Inlier  |
| siRNA Disorazole DMSO Run3   | NM_0048<br>56 | KIF23     | kinesin family member | 23     | -0.078173 | Inlier  |
| siRNA-Temozolomide Run1-DMSO | NM_0048<br>56 | KIF23     | kinesin family member | 23     | 0.078173  | Inlier  |
| siRNA Disorazole DMSO Run1   | NM_0048<br>56 | KIF23     | kinesin family member | 23     | 0.761517  | Inlier  |
| siRNA Disorazole DMSO Run2   | NM_0048<br>56 | KIF23     | kinesin family member | 23     | 1.760053  | Inlier  |
| siRNA-Vinblastine Run1-DMSO  | NM_0048<br>56 | KIF23     | kinesin family member | 23     | 2.092773  | Inlier  |
| siRNA-Temozolomide Run3-DMSO | NM_0182<br>78 | KIF24     | kinesin family member | 24     | -1.130207 | Inlier  |
| siRNA Disorazole DMSO Run1   | NM_0182<br>78 | KIF24     | kinesin family member | 24     | -0.763137 | Inlier  |
| siRNA-Vinblastine Run2-DMSO  | NM_0182<br>78 | KIF24     | kinesin family member | 24     | -0.238181 | Inlier  |
| siRNA Disorazole DMSO Run3   | NM_0182<br>78 | KIF24     | kinesin family member | 24     | -0.013804 | Inlier  |
| siRNA-Temozolomide Run2-DMSO | NM_0182<br>78 | KIF24     | kinesin family member | 24     | 0.013804  | Inlier  |
| siRNA-Temozolomide Run1-DMSO | NM_0182<br>78 | KIF24     | kinesin family member | 24     | 0.585863  | Inlier  |

Identification of Survival Genes in Human Glioblastoma Cells Using siRNA Screening  
 Nikhil G Thaker, Fang Zhang, Peter R. McDonald, Tong Ying Shun, Michael D Lewen, Ian F. Pollack, and John S. Lazo

Molecular Pharmacology

|                              |               |        |                                    |           |        |
|------------------------------|---------------|--------|------------------------------------|-----------|--------|
| siRNA-Vinblastine Run1-DMSO  | NM_0182<br>78 | KIF24  | kinesin<br>family<br>member<br>24  | 1.115374  | Inlier |
| siRNA Disorazole DMSO Run2   | NM_0182<br>78 | KIF24  | kinesin<br>family<br>member<br>24  | 1.173376  | Inlier |
| siRNA-Temozolomide Run3-DMSO | NM_0306<br>15 | KIF25  | kinesin<br>family<br>member<br>25  | -1.860934 | Inlier |
| siRNA-Temozolomide Run2-DMSO | NM_0306<br>15 | KIF25  | kinesin<br>family<br>member<br>25  | -0.922257 | Inlier |
| siRNA-Vinblastine Run2-DMSO  | NM_0306<br>15 | KIF25  | kinesin<br>family<br>member<br>25  | -0.291092 | Inlier |
| siRNA Disorazole DMSO Run3   | NM_0306<br>15 | KIF25  | kinesin<br>family<br>member<br>25  | -0.104701 | Inlier |
| siRNA-Temozolomide Run1-DMSO | NM_0306<br>15 | KIF25  | kinesin<br>family<br>member<br>25  | 0.104701  | Inlier |
| siRNA Disorazole DMSO Run1   | NM_0306<br>15 | KIF25  | kinesin<br>family<br>member<br>25  | 0.426743  | Inlier |
| siRNA Disorazole DMSO Run2   | NM_0306<br>15 | KIF25  | kinesin<br>family<br>member<br>25  | 1.090984  | Inlier |
| siRNA-Vinblastine Run1-DMSO  | NM_0306<br>15 | KIF25  | kinesin<br>family<br>member<br>25  | 1.299822  | Inlier |
| siRNA-Temozolomide Run3-DMSO | XM_05027<br>8 | KIF26A | kinesin<br>family<br>member<br>26A | -1.42116  | Inlier |
| siRNA Disorazole DMSO Run1   | XM_05027<br>8 | KIF26A | kinesin<br>family<br>member<br>26A | -0.633835 | Inlier |
| siRNA Disorazole DMSO Run3   | XM_05027<br>8 | KIF26A | kinesin<br>family<br>member<br>26A | -0.362875 | Inlier |



Identification of Survival Genes in Human Glioblastoma Cells Using siRNA Screening  
 Nikhil G Thaker, Fang Zhang, Peter R. McDonald, Tong Ying Shun, Michael D Lewen, Ian F. Pollack, and John S. Lazo

Molecular Pharmacology

|                              |               |        |                           |                  |
|------------------------------|---------------|--------|---------------------------|------------------|
| siRNA-Vinblastine Run2-DMSO  | XM_05027<br>8 | KIF26A | kinesin family member 26A | -0.134982 Inlier |
| siRNA-Temozolomide Run2-DMSO | XM_05027<br>8 | KIF26A | kinesin family member 26A | 0.134983 Inlier  |
| siRNA-Temozolomide Run1-DMSO | XM_05027<br>8 | KIF26A | kinesin family member 26A | 0.715165 Inlier  |
| siRNA Disorazole DMSO Run2   | XM_05027<br>8 | KIF26A | kinesin family member 26A | 1.301533 Inlier  |
| siRNA-Vinblastine Run1-DMSO  | XM_05027<br>8 | KIF26A | kinesin family member 26A | 2.633376 Inlier  |
| siRNA-Vinblastine Run2-DMSO  | NM_0175<br>76 | KIF27  | kinesin family member 27  | -0.838388 Inlier |
| siRNA Disorazole DMSO Run3   | NM_0175<br>76 | KIF27  | kinesin family member 27  | -0.559777 Inlier |
| siRNA-Temozolomide Run2-DMSO | NM_0175<br>76 | KIF27  | kinesin family member 27  | -0.227833 Inlier |
| siRNA-Temozolomide Run1-DMSO | NM_0175<br>76 | KIF27  | kinesin family member 27  | -0.075156 Inlier |
| siRNA-Temozolomide Run3-DMSO | NM_0175<br>76 | KIF27  | kinesin family member 27  | 0.075156 Inlier  |
| siRNA Disorazole DMSO Run1   | NM_0175<br>76 | KIF27  | kinesin family member 27  | 0.789223 Inlier  |
| siRNA-Vinblastine Run1-DMSO  | NM_0175<br>76 | KIF27  | kinesin family member 27  | 4.101085 Outlier |
| siRNA Disorazole DMSO Run2   | NM_0175<br>76 | KIF27  | kinesin family member 27  | 4.192748 Outlier |

Identification of Survival Genes in Human Glioblastoma Cells Using siRNA Screening  
 Nikhil G Thaker, Fang Zhang, Peter R. McDonald, Tong Ying Shun, Michael D Lewen, Ian F. Pollack, and John S. Lazo

Molecular Pharmacology

|                              |               |       |                                   |           |        |
|------------------------------|---------------|-------|-----------------------------------|-----------|--------|
| siRNA-Temozolomide Run3-DMSO | NM_0068<br>45 | KIF2C | kinesin<br>family<br>member<br>2C | -1.425831 | Inlier |
| siRNA-Temozolomide Run2-DMSO | NM_0068<br>45 | KIF2C | kinesin<br>family<br>member<br>2C | -0.722073 | Inlier |
| siRNA Disorazole DMSO Run3   | NM_0068<br>45 | KIF2C | kinesin<br>family<br>member<br>2C | -0.626927 | Inlier |
| siRNA Disorazole DMSO Run1   | NM_0068<br>45 | KIF2C | kinesin<br>family<br>member<br>2C | -0.102277 | Inlier |
| siRNA-Vinblastine Run2-DMSO  | NM_0068<br>45 | KIF2C | kinesin<br>family<br>member<br>2C | 0.102277  | Inlier |
| siRNA-Temozolomide Run1-DMSO | NM_0068<br>45 | KIF2C | kinesin<br>family<br>member<br>2C | 0.411409  | Inlier |
| siRNA Disorazole DMSO Run2   | NM_0068<br>45 | KIF2C | kinesin<br>family<br>member<br>2C | 1.767375  | Inlier |
| siRNA-Vinblastine Run1-DMSO  | NM_0068<br>45 | KIF2C | kinesin<br>family<br>member<br>2C | 2.140254  | Inlier |
| siRNA-Temozolomide Run3-DMSO | NM_0070<br>54 | KIF3A | kinesin<br>family<br>member<br>3A | -1.374863 | Inlier |
| siRNA-Temozolomide Run2-DMSO | NM_0070<br>54 | KIF3A | kinesin<br>family<br>member<br>3A | -0.997346 | Inlier |
| siRNA Disorazole DMSO Run3   | NM_0070<br>54 | KIF3A | kinesin<br>family<br>member<br>3A | -0.351654 | Inlier |
| siRNA-Temozolomide Run1-DMSO | NM_0070<br>54 | KIF3A | kinesin<br>family<br>member<br>3A | -0.161932 | Inlier |
| siRNA Disorazole DMSO Run1   | NM_0070<br>54 | KIF3A | kinesin<br>family<br>member<br>3A | 0.161931  | Inlier |

Identification of Survival Genes in Human Glioblastoma Cells Using siRNA Screening  
 Nikhil G Thaker, Fang Zhang, Peter R. McDonald, Tong Ying Shun, Michael D Lewen, Ian F. Pollack, and John S. Lazo

Molecular Pharmacology

|                              |               |       |                          |           |        |
|------------------------------|---------------|-------|--------------------------|-----------|--------|
| siRNA-Vinblastine Run2-DMSO  | NM_0070<br>54 | KIF3A | kinesin family member 3A | 0.217069  | Inlier |
| siRNA-Vinblastine Run1-DMSO  | NM_0070<br>54 | KIF3A | kinesin family member 3A | 1.295675  | Inlier |
| siRNA Disorazole DMSO Run2   | NM_0070<br>54 | KIF3A | kinesin family member 3A | 1.500504  | Inlier |
| siRNA-Temozolomide Run2-DMSO | NM_0047<br>98 | KIF3B | kinesin family member 3B | -1.403824 | Inlier |
| siRNA Disorazole DMSO Run1   | NM_0047<br>98 | KIF3B | kinesin family member 3B | -1.333213 | Inlier |
| siRNA-Vinblastine Run2-DMSO  | NM_0047<br>98 | KIF3B | kinesin family member 3B | -0.385417 | Inlier |
| siRNA-Temozolomide Run3-DMSO | NM_0047<br>98 | KIF3B | kinesin family member 3B | -0.008082 | Inlier |
| siRNA Disorazole DMSO Run3   | NM_0047<br>98 | KIF3B | kinesin family member 3B | 0.008082  | Inlier |
| siRNA-Temozolomide Run1-DMSO | NM_0047<br>98 | KIF3B | kinesin family member 3B | 0.436666  | Inlier |
| siRNA Disorazole DMSO Run2   | NM_0047<br>98 | KIF3B | kinesin family member 3B | 0.912334  | Inlier |
| siRNA-Vinblastine Run1-DMSO  | NM_0047<br>98 | KIF3B | kinesin family member 3B | 1.079738  | Inlier |
| siRNA-Temozolomide Run3-DMSO | NM_0022<br>54 | KIF3C | kinesin family member 3C | -1.894371 | Inlier |
| siRNA-Temozolomide Run2-DMSO | NM_0022<br>54 | KIF3C | kinesin family member 3C | -1.667165 | Inlier |

Identification of Survival Genes in Human Glioblastoma Cells Using siRNA Screening  
 Nikhil G Thaker, Fang Zhang, Peter R. McDonald, Tong Ying Shun, Michael D Lewen, Ian F. Pollack, and John S. Lazo

Molecular Pharmacology

|                                  |               |       |                                   |           |        |
|----------------------------------|---------------|-------|-----------------------------------|-----------|--------|
| siRNA Disorazole DMSO Run3       | NM_0022<br>54 | KIF3C | kinesin<br>family<br>member<br>3C | -0.487872 | Inlier |
| siRNA-Temozolomide Run1-<br>DMSO | NM_0022<br>54 | KIF3C | kinesin<br>family<br>member<br>3C | -0.008887 | Inlier |
| siRNA-Vinblastine Run2-<br>DMSO  | NM_0022<br>54 | KIF3C | kinesin<br>family<br>member<br>3C | 0.008887  | Inlier |
| siRNA Disorazole DMSO Run1       | NM_0022<br>54 | KIF3C | kinesin<br>family<br>member<br>3C | 0.403329  | Inlier |
| siRNA Disorazole DMSO Run2       | NM_0022<br>54 | KIF3C | kinesin<br>family<br>member<br>3C | 0.861128  | Inlier |
| siRNA-Vinblastine Run1-<br>DMSO  | NM_0022<br>54 | KIF3C | kinesin<br>family<br>member<br>3C | 1.222576  | Inlier |
| siRNA Disorazole DMSO Run1       | NM_0123<br>10 | KIF4A | kinesin<br>family<br>member<br>4A | -2.075477 | Inlier |
| siRNA-Temozolomide Run3-<br>DMSO | NM_0123<br>10 | KIF4A | kinesin<br>family<br>member<br>4A | -2.020877 | Inlier |
| siRNA-Temozolomide Run2-<br>DMSO | NM_0123<br>10 | KIF4A | kinesin<br>family<br>member<br>4A | -0.933651 | Inlier |
| siRNA-Temozolomide Run1-<br>DMSO | NM_0123<br>10 | KIF4A | kinesin<br>family<br>member<br>4A | -0.166438 | Inlier |
| siRNA-Vinblastine Run2-<br>DMSO  | NM_0123<br>10 | KIF4A | kinesin<br>family<br>member<br>4A | 0.166438  | Inlier |
| siRNA Disorazole DMSO Run3       | NM_0123<br>10 | KIF4A | kinesin<br>family<br>member<br>4A | 0.350543  | Inlier |
| siRNA-Vinblastine Run1-<br>DMSO  | NM_0123<br>10 | KIF4A | kinesin<br>family<br>member<br>4A | 0.601667  | Inlier |

Identification of Survival Genes in Human Glioblastoma Cells Using siRNA Screening  
 Nikhil G Thaker, Fang Zhang, Peter R. McDonald, Tong Ying Shun, Michael D Lewen, Ian F. Pollack, and John S. Lazo

Molecular Pharmacology

| siRNA Treatment              | Gene  | Gene ID   | Gene Family              | Value     | Inlier |
|------------------------------|-------|-----------|--------------------------|-----------|--------|
| siRNA Disorazole DMSO Run2   | KIF4A | NM_012310 | kinesin family member 4A | 0.747333  | Inlier |
| siRNA-Temozolomide Run3-DMSO | KIF5A | NM_004984 | kinesin family member 5A | -1.189574 | Inlier |
| siRNA-Temozolomide Run2-DMSO | KIF5A | NM_004984 | kinesin family member 5A | -0.856475 | Inlier |
| siRNA Disorazole DMSO Run3   | KIF5A | NM_004984 | kinesin family member 5A | -0.522933 | Inlier |
| siRNA Disorazole DMSO Run1   | KIF5A | NM_004984 | kinesin family member 5A | -0.101485 | Inlier |
| siRNA-Vinblastine Run2-DMSO  | KIF5A | NM_004984 | kinesin family member 5A | 0.101485  | Inlier |
| siRNA-Temozolomide Run1-DMSO | KIF5A | NM_004984 | kinesin family member 5A | 0.419468  | Inlier |
| siRNA Disorazole DMSO Run2   | KIF5A | NM_004984 | kinesin family member 5A | 0.826067  | Inlier |
| siRNA-Vinblastine Run1-DMSO  | KIF5A | NM_004984 | kinesin family member 5A | 0.911464  | Inlier |
| siRNA-Temozolomide Run3-DMSO | KIF5B | NM_004521 | kinesin family member 5B | -1.309018 | Inlier |
| siRNA-Temozolomide Run2-DMSO | KIF5B | NM_004521 | kinesin family member 5B | -0.741716 | Inlier |
| siRNA-Vinblastine Run2-DMSO  | KIF5B | NM_004521 | kinesin family member 5B | -0.607284 | Inlier |
| siRNA Disorazole DMSO Run1   | KIF5B | NM_004521 | kinesin family member 5B | -0.053842 | Inlier |

Identification of Survival Genes in Human Glioblastoma Cells Using siRNA Screening  
 Nikhil G Thaker, Fang Zhang, Peter R. McDonald, Tong Ying Shun, Michael D Lewen, Ian F. Pollack, and John S. Lazo

Molecular Pharmacology

|                              |               |       |                       |                  |
|------------------------------|---------------|-------|-----------------------|------------------|
|                              |               |       | kinesin family member |                  |
| siRNA Disorazole DMSO Run3   | NM_0045<br>21 | KIF5B | 5B                    | 0.053842 Inlier  |
| siRNA-Temozolomide Run1-DMSO | NM_0045<br>21 | KIF5B | 5B                    | 0.467857 Inlier  |
| siRNA Disorazole DMSO Run2   | NM_0045<br>21 | KIF5B | 5B                    | 1.004233 Inlier  |
| siRNA-Vinblastine Run1-DMSO  | NM_0045<br>21 | KIF5B | 5B                    | 1.954827 Inlier  |
| siRNA-Temozolomide Run2-DMSO | NM_0045<br>22 | KIF5C | 5C                    | -0.996101 Inlier |
| siRNA-Vinblastine Run2-DMSO  | NM_0045<br>22 | KIF5C | 5C                    | -0.634042 Inlier |
| siRNA Disorazole DMSO Run1   | NM_0045<br>22 | KIF5C | 5C                    | -0.174249 Inlier |
| siRNA Disorazole DMSO Run3   | NM_0045<br>22 | KIF5C | 5C                    | -0.122873 Inlier |
| siRNA-Temozolomide Run1-DMSO | NM_0045<br>22 | KIF5C | 5C                    | 0.122873 Inlier  |
| siRNA-Temozolomide Run3-DMSO | NM_0045<br>22 | KIF5C | 5C                    | 0.714958 Inlier  |
| siRNA Disorazole DMSO Run2   | NM_0045<br>22 | KIF5C | 5C                    | 1.050462 Inlier  |
| siRNA-Vinblastine Run1-DMSO  | NM_0045<br>22 | KIF5C | 5C                    | 2.023213 Inlier  |
| siRNA-Temozolomide Run2-DMSO | NM_1829<br>03 | KIF9  | member 9              | -1.080164 Inlier |

Identification of Survival Genes in Human Glioblastoma Cells Using siRNA Screening  
 Nikhil G Thaker, Fang Zhang, Peter R. McDonald, Tong Ying Shun, Michael D Lewen, Ian F. Pollack, and John S. Lazo

| Molecular Pharmacology       |               |        |                                     |           |        |
|------------------------------|---------------|--------|-------------------------------------|-----------|--------|
| siRNA-Temozolomide Run3-DMSO | NM_1829<br>03 | KIF9   | kinesin<br>family<br>member 9       | -0.9723   | Inlier |
| siRNA-Vinblastine Run2-DMSO  | NM_1829<br>03 | KIF9   | kinesin<br>family<br>member 9       | -0.3767   | Inlier |
| siRNA-Temozolomide Run1-DMSO | NM_1829<br>03 | KIF9   | kinesin<br>family<br>member 9       | -0.127346 | Inlier |
| siRNA Disorazole DMSO Run1   | NM_1829<br>03 | KIF9   | kinesin<br>family<br>member 9       | 0.127346  | Inlier |
| siRNA Disorazole DMSO Run3   | NM_1829<br>03 | KIF9   | kinesin<br>family<br>member 9       | 0.312481  | Inlier |
| siRNA-Vinblastine Run1-DMSO  | NM_1829<br>03 | KIF9   | kinesin<br>family<br>member 9       | 1.544318  | Inlier |
| siRNA Disorazole DMSO Run2   | NM_1829<br>03 | KIF9   | kinesin<br>family<br>member 9       | 1.988455  | Inlier |
| siRNA-Temozolomide Run2-DMSO | NM_0149<br>70 | KIFAP3 | kinesin-<br>associated<br>protein 3 | -0.943631 | Inlier |
| siRNA-Temozolomide Run3-DMSO | NM_0149<br>70 | KIFAP3 | kinesin-<br>associated<br>protein 3 | -0.405369 | Inlier |
| siRNA-Vinblastine Run2-DMSO  | NM_0149<br>70 | KIFAP3 | kinesin-<br>associated<br>protein 3 | -0.242631 | Inlier |
| siRNA Disorazole DMSO Run3   | NM_0149<br>70 | KIFAP3 | kinesin-<br>associated<br>protein 3 | -0.175361 | Inlier |
| siRNA-Temozolomide Run1-DMSO | NM_0149<br>70 | KIFAP3 | kinesin-<br>associated<br>protein 3 | 0.175361  | Inlier |
| siRNA Disorazole DMSO Run2   | NM_0149<br>70 | KIFAP3 | kinesin-<br>associated<br>protein 3 | 1.005085  | Inlier |
| siRNA Disorazole DMSO Run1   | NM_0149<br>70 | KIFAP3 | kinesin-<br>associated<br>protein 3 | 1.007043  | Inlier |

Identification of Survival Genes in Human Glioblastoma Cells Using siRNA Screening  
 Nikhil G Thaker, Fang Zhang, Peter R. McDonald, Tong Ying Shun, Michael D Lewen, Ian F. Pollack, and John S. Lazo

Molecular Pharmacology

|                              |               |        |                              |           |        |
|------------------------------|---------------|--------|------------------------------|-----------|--------|
| siRNA-Vinblastine Run1-DMSO  | NM_0149<br>70 | KIFAP3 | kinesin-associated protein 3 | 1.044125  | Inlier |
| siRNA-Temozolomide Run3-DMSO | XM_37181<br>3 | KIFC1  | kinesin family member C1     | -1.70192  | Inlier |
| siRNA-Temozolomide Run2-DMSO | XM_37181<br>3 | KIFC1  | kinesin family member C1     | -1.165868 | Inlier |
| siRNA Disorazole DMSO Run1   | XM_37181<br>3 | KIFC1  | kinesin family member C1     | -0.226009 | Inlier |
| siRNA Disorazole DMSO Run3   | XM_37181<br>3 | KIFC1  | kinesin family member C1     | -0.125483 | Inlier |
| siRNA-Temozolomide Run1-DMSO | XM_37181<br>3 | KIFC1  | kinesin family member C1     | 0.125483  | Inlier |
| siRNA-Vinblastine Run2-DMSO  | XM_37181<br>3 | KIFC1  | kinesin family member C1     | 0.46531   | Inlier |
| siRNA-Vinblastine Run1-DMSO  | XM_37181<br>3 | KIFC1  | kinesin family member C1     | 0.88369   | Inlier |
| siRNA Disorazole DMSO Run2   | XM_37181<br>3 | KIFC1  | kinesin family member C1     | 1.481573  | Inlier |
| siRNA-Temozolomide Run2-DMSO | NM_1457<br>54 | KIFC2  | kinesin family member C2     | -0.989964 | Inlier |
| siRNA-Temozolomide Run3-DMSO | NM_1457<br>54 | KIFC2  | kinesin family member C2     | -0.935901 | Inlier |
| siRNA Disorazole DMSO Run3   | NM_1457<br>54 | KIFC2  | kinesin family member C2     | -0.413099 | Inlier |
| siRNA-Vinblastine Run2-DMSO  | NM_1457<br>54 | KIFC2  | kinesin family member C2     | -0.200156 | Inlier |



Identification of Survival Genes in Human Glioblastoma Cells Using siRNA Screening  
 Nikhil G Thaker, Fang Zhang, Peter R. McDonald, Tong Ying Shun, Michael D Lewen, Ian F. Pollack, and John S. Lazo

Molecular Pharmacology

|                              |               |       |                                   |           |        |
|------------------------------|---------------|-------|-----------------------------------|-----------|--------|
| siRNA-Temozolomide Run1-DMSO | NM_1457<br>54 | KIFC2 | kinesin<br>family<br>member<br>C2 | 0.200156  | Inlier |
| siRNA Disorazole DMSO Run1   | NM_1457<br>54 | KIFC2 | kinesin<br>family<br>member<br>C2 | 0.33841   | Inlier |
| siRNA Disorazole DMSO Run2   | NM_1457<br>54 | KIFC2 | kinesin<br>family<br>member<br>C2 | 1.952309  | Inlier |
| siRNA-Vinblastine Run1-DMSO  | NM_1457<br>54 | KIFC2 | kinesin<br>family<br>member<br>C2 | 2.039049  | Inlier |
| siRNA-Temozolomide Run3-DMSO | NM_0055<br>50 | KIFC3 | kinesin<br>family<br>member<br>C3 | -1.023136 | Inlier |
| siRNA-Temozolomide Run2-DMSO | NM_0055<br>50 | KIFC3 | kinesin<br>family<br>member<br>C3 | -0.830878 | Inlier |
| siRNA-Temozolomide Run1-DMSO | NM_0055<br>50 | KIFC3 | kinesin<br>family<br>member<br>C3 | -0.43743  | Inlier |
| siRNA Disorazole DMSO Run3   | NM_0055<br>50 | KIFC3 | kinesin<br>family<br>member<br>C3 | -0.192222 | Inlier |
| siRNA-Vinblastine Run2-DMSO  | NM_0055<br>50 | KIFC3 | kinesin<br>family<br>member<br>C3 | 0.192222  | Inlier |
| siRNA Disorazole DMSO Run1   | NM_0055<br>50 | KIFC3 | kinesin<br>family<br>member<br>C3 | 0.518122  | Inlier |
| siRNA Disorazole DMSO Run2   | NM_0055<br>50 | KIFC3 | kinesin<br>family<br>member<br>C3 | 1.278622  | Inlier |
| siRNA-Vinblastine Run1-DMSO  | NM_0055<br>50 | KIFC3 | kinesin<br>family<br>member<br>C3 | 1.391701  | Inlier |

Identification of Survival Genes in Human Glioblastoma Cells Using siRNA Screening

Nikhil G Thaker, Fang Zhang, Peter R. McDonald, Tong Ying Shun, Michael D Lewen, Ian F. Pollack, and John S.

Lazo

Molecular Pharmacology

|                              |               |         |                                                                                 |           |        |
|------------------------------|---------------|---------|---------------------------------------------------------------------------------|-----------|--------|
| siRNA-Vinblastine Run2-DMSO  | NM_0142<br>18 | KIR2DL1 | killer cell immunoglobulin-like receptor, two domains, long cytoplasmic tail, 1 | -1.399196 | Inlier |
| siRNA Disorazole DMSO Run1   | NM_0142<br>18 | KIR2DL1 | killer cell immunoglobulin-like receptor, two domains, long cytoplasmic tail, 1 | -1.058206 | Inlier |
| siRNA Disorazole DMSO Run3   | NM_0142<br>18 | KIR2DL1 | killer cell immunoglobulin-like receptor, two domains, long cytoplasmic tail, 1 | -0.226319 | Inlier |
| siRNA-Temozolomide Run2-DMSO | NM_0142<br>18 | KIR2DL1 | killer cell immunoglobulin-like receptor, two domains, long cytoplasmic tail, 1 | -0.155347 | Inlier |
| siRNA-Temozolomide Run1-DMSO | NM_0142<br>18 | KIR2DL1 | killer cell immunoglobulin-like receptor, two domains, long cytoplasmic tail, 1 | 0.155347  | Inlier |

Identification of Survival Genes in Human Glioblastoma Cells Using siRNA Screening

Nikhil G Thaker, Fang Zhang, Peter R. McDonald, Tong Ying Shun, Michael D Lewen, Ian F. Pollack, and John S.

Lazo

Molecular Pharmacology

|                              |               |         |                                                                                 |           |        |
|------------------------------|---------------|---------|---------------------------------------------------------------------------------|-----------|--------|
| siRNA-Temozolomide Run3-DMSO | NM_0142<br>18 | KIR2DL1 | killer cell immunoglobulin-like receptor, two domains, long cytoplasmic tail, 1 | 0.365113  | Inlier |
| siRNA Disorazole DMSO Run2   | NM_0142<br>18 | KIR2DL1 | killer cell immunoglobulin-like receptor, two domains, long cytoplasmic tail, 1 | 0.983887  | Inlier |
| siRNA-Vinblastine Run1-DMSO  | NM_0142<br>18 | KIR2DL1 | killer cell immunoglobulin-like receptor, two domains, long cytoplasmic tail, 1 | 1.456572  | Inlier |
| siRNA-Vinblastine Run2-DMSO  | NM_0142<br>19 | KIR2DL2 | killer cell immunoglobulin-like receptor, two domains, long cytoplasmic tail, 2 | -1.851257 | Inlier |
| siRNA-Temozolomide Run2-DMSO | NM_0142<br>19 | KIR2DL2 | killer cell immunoglobulin-like receptor, two domains, long cytoplasmic tail, 2 | -0.938188 | Inlier |

Identification of Survival Genes in Human Glioblastoma Cells Using siRNA Screening

Nikhil G Thaker, Fang Zhang, Peter R. McDonald, Tong Ying Shun, Michael D Lewen, Ian F. Pollack, and John S. Lazo

Molecular Pharmacology

| siRNA              | Condition | Run  | Gene    | Log2FC    | Inlier |
|--------------------|-----------|------|---------|-----------|--------|
| siRNA Disorazole   | DMSO      | Run1 | KIR2DL2 | -0.410812 | Inlier |
| siRNA-Temozolomide | Run3-DMSO |      | KIR2DL2 | -0.021259 | Inlier |
| siRNA Disorazole   | DMSO      | Run3 | KIR2DL2 | 0.021259  | Inlier |
| siRNA-Temozolomide | Run1-DMSO |      | KIR2DL2 | 0.049537  | Inlier |
| siRNA Disorazole   | DMSO      | Run2 | KIR2DL2 | 2.959966  | Inlier |

killer cell immunoglobulin-like receptor, two domains, long cytoplasmic tail, 2

Identification of Survival Genes in Human Glioblastoma Cells Using siRNA Screening

Nikhil G Thaker, Fang Zhang, Peter R. McDonald, Tong Ying Shun, Michael D Lewen, Ian F. Pollack, and John S.

Lazo

Molecular Pharmacology

|                              |           |         |                                                                                 |           |         |
|------------------------------|-----------|---------|---------------------------------------------------------------------------------|-----------|---------|
| siRNA-Vinblastine Run1-DMSO  | NM_014219 | KIR2DL2 | killer cell immunoglobulin-like receptor, two domains, long cytoplasmic tail, 2 | 4.19688   | Outlier |
| siRNA-Vinblastine Run2-DMSO  | NM_015868 | KIR2DL3 | killer cell immunoglobulin-like receptor, two domains, long cytoplasmic tail, 3 | -0.977509 | Inlier  |
| siRNA-Temozolomide Run2-DMSO | NM_015868 | KIR2DL3 | killer cell immunoglobulin-like receptor, two domains, long cytoplasmic tail, 3 | -0.864754 | Inlier  |
| siRNA Disorazole DMSO Run3   | NM_015868 | KIR2DL3 | killer cell immunoglobulin-like receptor, two domains, long cytoplasmic tail, 3 | -0.37182  | Inlier  |
| siRNA Disorazole DMSO Run1   | NM_015868 | KIR2DL3 | killer cell immunoglobulin-like receptor, two domains, long cytoplasmic tail, 3 | -0.351928 | Inlier  |

Identification of Survival Genes in Human Glioblastoma Cells Using siRNA Screening

Nikhil G Thaker, Fang Zhang, Peter R. McDonald, Tong Ying Shun, Michael D Lewen, Ian F. Pollack, and John S. Lazo

Molecular Pharmacology

|                              |           |         |                                                                                 |          |         |
|------------------------------|-----------|---------|---------------------------------------------------------------------------------|----------|---------|
| siRNA-Temozolomide Run3-DMSO | NM_015868 | KIR2DL3 | killer cell immunoglobulin-like receptor, two domains, long cytoplasmic tail, 3 | 0.351928 | Inlier  |
| siRNA-Temozolomide Run1-DMSO | NM_015868 | KIR2DL3 | killer cell immunoglobulin-like receptor, two domains, long cytoplasmic tail, 3 | 0.484246 | Inlier  |
| siRNA Disorazole DMSO Run2   | NM_015868 | KIR2DL3 | killer cell immunoglobulin-like receptor, two domains, long cytoplasmic tail, 3 | 3.88461  | Outlier |
| siRNA-Vinblastine Run1-DMSO  | NM_015868 | KIR2DL3 | killer cell immunoglobulin-like receptor, two domains, long cytoplasmic tail, 3 | 4.126935 | Outlier |
| siRNA-Vinblastine Run2-DMSO  | NM_002255 | KIR2DL4 | cytoplasmic tail, 4                                                             | -3.36399 | Inlier  |

Identification of Survival Genes in Human Glioblastoma Cells Using siRNA Screening

Nikhil G Thaker, Fang Zhang, Peter R. McDonald, Tong Ying Shun, Michael D Lewen, Ian F. Pollack, and John S.

Lazo

Molecular Pharmacology

| siRNA Treatment              | Gene ID   | Gene Name | Expression Value | Outlier Status | Description                                                                     |
|------------------------------|-----------|-----------|------------------|----------------|---------------------------------------------------------------------------------|
| siRNA-Temozolomide Run2-DMSO | NM_002255 | KIR2DL4   | -0.969601        | Inlier         | killer cell immunoglobulin-like receptor, two domains, long cytoplasmic tail, 4 |
| siRNA Disorazole DMSO Run3   | NM_002255 | KIR2DL4   | -0.379399        | Inlier         | killer cell immunoglobulin-like receptor, two domains, long cytoplasmic tail, 4 |
| siRNA-Temozolomide Run1-DMSO | NM_002255 | KIR2DL4   | -0.218857        | Inlier         | killer cell immunoglobulin-like receptor, two domains, long cytoplasmic tail, 4 |
| siRNA-Temozolomide Run3-DMSO | NM_002255 | KIR2DL4   | 0.218857         | Inlier         | killer cell immunoglobulin-like receptor, two domains, long cytoplasmic tail, 4 |
| siRNA Disorazole DMSO Run1   | NM_002255 | KIR2DL4   | 0.268733         | Inlier         | killer cell immunoglobulin-like receptor, two domains, long cytoplasmic tail, 4 |

Identification of Survival Genes in Human Glioblastoma Cells Using siRNA Screening

Nikhil G Thaker, Fang Zhang, Peter R. McDonald, Tong Ying Shun, Michael D Lewen, Ian F. Pollack, and John S.

Lazo

Molecular Pharmacology

|                              |               |         |                                                                                  |           |        |
|------------------------------|---------------|---------|----------------------------------------------------------------------------------|-----------|--------|
| siRNA Disorazole DMSO Run2   | NM_0022<br>55 | KIR2DL4 | killer cell immunoglobulin-like receptor, two domains, long cytoplasmic tail, 4  | 2.452539  | Inlier |
| siRNA-Vinblastine Run1-DMSO  | NM_0022<br>55 | KIR2DL4 | killer cell immunoglobulin-like receptor, two domains, long cytoplasmic tail, 4  | 2.589347  | Inlier |
| siRNA-Vinblastine Run2-DMSO  | NM_0145<br>12 | KIR2DS1 | killer cell immunoglobulin-like receptor, two domains, short cytoplasmic tail, 1 | -2.169169 | Inlier |
| siRNA Disorazole DMSO Run3   | NM_0145<br>12 | KIR2DS1 | killer cell immunoglobulin-like receptor, two domains, short cytoplasmic tail, 1 | -0.812598 | Inlier |
| siRNA-Temozolomide Run2-DMSO | NM_0145<br>12 | KIR2DS1 | killer cell immunoglobulin-like receptor, two domains, short cytoplasmic tail, 1 | -0.536402 | Inlier |



Identification of Survival Genes in Human Glioblastoma Cells Using siRNA Screening

Nikhil G Thaker, Fang Zhang, Peter R. McDonald, Tong Ying Shun, Michael D Lewen, Ian F. Pollack, and John S.

Lazo

Molecular Pharmacology

|                              |               |         |                                                                                  |           |        |
|------------------------------|---------------|---------|----------------------------------------------------------------------------------|-----------|--------|
| siRNA Disorazole DMSO Run1   | NM_0145<br>12 | KIR2DS1 | killer cell immunoglobulin-like receptor, two domains, short cytoplasmic tail, 1 | -0.234194 | Inlier |
| siRNA-Temozolomide Run3-DMSO | NM_0145<br>12 | KIR2DS1 | killer cell immunoglobulin-like receptor, two domains, short cytoplasmic tail, 1 | 0.234194  | Inlier |
| siRNA-Temozolomide Run1-DMSO | NM_0145<br>12 | KIR2DS1 | killer cell immunoglobulin-like receptor, two domains, short cytoplasmic tail, 1 | 0.374793  | Inlier |
| siRNA Disorazole DMSO Run2   | NM_0145<br>12 | KIR2DS1 | killer cell immunoglobulin-like receptor, two domains, short cytoplasmic tail, 1 | 1.090659  | Inlier |
| siRNA-Vinblastine Run1-DMSO  | NM_0145<br>12 | KIR2DS1 | killer cell immunoglobulin-like receptor, two domains, short cytoplasmic tail, 1 | 1.194197  | Inlier |

Identification of Survival Genes in Human Glioblastoma Cells Using siRNA Screening

Nikhil G Thaker, Fang Zhang, Peter R. McDonald, Tong Ying Shun, Michael D Lewen, Ian F. Pollack, and John S. Lazo

Molecular Pharmacology

|                              |               |         |                                                                                  |           |        |
|------------------------------|---------------|---------|----------------------------------------------------------------------------------|-----------|--------|
| siRNA-Temozolomide Run2-DMSO | NM_0123<br>12 | KIR2DS2 | killer cell immunoglobulin-like receptor, two domains, short cytoplasmic tail, 2 | -0.825102 | Inlier |
| siRNA-Vinblastine Run2-DMSO  | NM_0123<br>12 | KIR2DS2 | killer cell immunoglobulin-like receptor, two domains, short cytoplasmic tail, 2 | -0.742277 | Inlier |
| siRNA-Temozolomide Run3-DMSO | NM_0123<br>12 | KIR2DS2 | killer cell immunoglobulin-like receptor, two domains, short cytoplasmic tail, 2 | -0.606723 | Inlier |
| siRNA Disorazole DMSO Run3   | NM_0123<br>12 | KIR2DS2 | killer cell immunoglobulin-like receptor, two domains, short cytoplasmic tail, 2 | -0.052661 | Inlier |
| siRNA Disorazole DMSO Run1   | NM_0123<br>12 | KIR2DS2 | killer cell immunoglobulin-like receptor, two domains, short cytoplasmic tail, 2 | 0.052661  | Inlier |

Identification of Survival Genes in Human Glioblastoma Cells Using siRNA Screening

Nikhil G Thaker, Fang Zhang, Peter R. McDonald, Tong Ying Shun, Michael D Lewen, Ian F. Pollack, and John S.

Lazo

Molecular Pharmacology

|                              |               |         |                                                                                  |           |        |
|------------------------------|---------------|---------|----------------------------------------------------------------------------------|-----------|--------|
| siRNA-Temozolomide Run1-DMSO | NM_0123<br>12 | KIR2DS2 | killer cell immunoglobulin-like receptor, two domains, short cytoplasmic tail, 2 | 0.2975    | Inlier |
| siRNA-Vinblastine Run1-DMSO  | NM_0123<br>12 | KIR2DS2 | killer cell immunoglobulin-like receptor, two domains, short cytoplasmic tail, 2 | 1.228661  | Inlier |
| siRNA Disorazole DMSO Run2   | NM_0123<br>12 | KIR2DS2 | killer cell immunoglobulin-like receptor, two domains, short cytoplasmic tail, 2 | 1.23689   | Inlier |
| siRNA-Vinblastine Run2-DMSO  | NM_0123<br>13 | KIR2DS3 | killer cell immunoglobulin-like receptor, two domains, short cytoplasmic tail, 3 | -1.898656 | Inlier |
| siRNA-Temozolomide Run2-DMSO | NM_0123<br>13 | KIR2DS3 | killer cell immunoglobulin-like receptor, two domains, short cytoplasmic tail, 3 | -0.775493 | Inlier |

Identification of Survival Genes in Human Glioblastoma Cells Using siRNA Screening

Nikhil G Thaker, Fang Zhang, Peter R. McDonald, Tong Ying Shun, Michael D Lewen, Ian F. Pollack, and John S.

Lazo

Molecular Pharmacology

|                              |               |         |                                                                                   |           |        |
|------------------------------|---------------|---------|-----------------------------------------------------------------------------------|-----------|--------|
| siRNA Disorazole DMSO Run3   | NM_0123<br>13 | KIR2DS3 | killer cell immunogl obulin-like receptor, two domains, short cytoplasmic tail, 3 | -0.573507 | Inlier |
| siRNA Disorazole DMSO Run1   | NM_0123<br>13 | KIR2DS3 | killer cell immunogl obulin-like receptor, two domains, short cytoplasmic tail, 3 | -0.271938 | Inlier |
| siRNA-Temozolomide Run3-DMSO | NM_0123<br>13 | KIR2DS3 | killer cell immunogl obulin-like receptor, two domains, short cytoplasmic tail, 3 | 0.271938  | Inlier |
| siRNA-Temozolomide Run1-DMSO | NM_0123<br>13 | KIR2DS3 | killer cell immunogl obulin-like receptor, two domains, short cytoplasmic tail, 3 | 0.522411  | Inlier |
| siRNA Disorazole DMSO Run2   | NM_0123<br>13 | KIR2DS3 | killer cell immunogl obulin-like receptor, two domains, short cytoplasmic tail, 3 | 2.011022  | Inlier |

Identification of Survival Genes in Human Glioblastoma Cells Using siRNA Screening

Nikhil G Thaker, Fang Zhang, Peter R. McDonald, Tong Ying Shun, Michael D Lewen, Ian F. Pollack, and John S.

Lazo

Molecular Pharmacology

|                              |           |         |                                                                                  |           |        |
|------------------------------|-----------|---------|----------------------------------------------------------------------------------|-----------|--------|
| siRNA-Vinblastine Run1-DMSO  | NM_012313 | KIR2DS3 | killer cell immunoglobulin-like receptor, two domains, short cytoplasmic tail, 3 | 2.241097  | Inlier |
| siRNA-Vinblastine Run2-DMSO  | NM_178228 | KIR2DS4 | killer cell immunoglobulin-like receptor, two domains, short cytoplasmic tail, 4 | -3.079828 | Inlier |
| siRNA-Temozolomide Run2-DMSO | NM_178228 | KIR2DS4 | killer cell immunoglobulin-like receptor, two domains, short cytoplasmic tail, 4 | -0.714333 | Inlier |
| siRNA Disorazole DMSO Run1   | NM_178228 | KIR2DS4 | killer cell immunoglobulin-like receptor, two domains, short cytoplasmic tail, 4 | -0.634668 | Inlier |
| siRNA-Temozolomide Run1-DMSO | NM_178228 | KIR2DS4 | killer cell immunoglobulin-like receptor, two domains, short cytoplasmic tail, 4 | -0.251307 | Inlier |

Identification of Survival Genes in Human Glioblastoma Cells Using siRNA Screening

Nikhil G Thaker, Fang Zhang, Peter R. McDonald, Tong Ying Shun, Michael D Lewen, Ian F. Pollack, and John S.

Lazo

Molecular Pharmacology

|                              |               |         |                                                                                  |           |         |
|------------------------------|---------------|---------|----------------------------------------------------------------------------------|-----------|---------|
| siRNA Disorazole DMSO Run3   | NM_1782<br>28 | KIR2DS4 | killer cell immunoglobulin-like receptor, two domains, short cytoplasmic tail, 4 | 0.251307  | Inlier  |
| siRNA-Temozolomide Run3-DMSO | NM_1782<br>28 | KIR2DS4 | killer cell immunoglobulin-like receptor, two domains, short cytoplasmic tail, 4 | 0.36547   | Inlier  |
| siRNA Disorazole DMSO Run2   | NM_1782<br>28 | KIR2DS4 | killer cell immunoglobulin-like receptor, two domains, short cytoplasmic tail, 4 | 3.945313  | Outlier |
| siRNA-Vinblastine Run1-DMSO  | NM_1782<br>28 | KIR2DS4 | killer cell immunoglobulin-like receptor, two domains, short cytoplasmic tail, 4 | 4.931567  | Outlier |
| siRNA-Temozolomide Run3-DMSO | NM_0145<br>13 | KIR2DS5 | cytoplasmic tail, 5                                                              | -1.268944 | Inlier  |

Identification of Survival Genes in Human Glioblastoma Cells Using siRNA Screening

Nikhil G Thaker, Fang Zhang, Peter R. McDonald, Tong Ying Shun, Michael D Lewen, Ian F. Pollack, and John S.

Lazo

Molecular Pharmacology

|                              |               |         |                                                                                  |           |        |
|------------------------------|---------------|---------|----------------------------------------------------------------------------------|-----------|--------|
| siRNA-Temozolomide Run2-DMSO | NM_0145<br>13 | KIR2DS5 | killer cell immunoglobulin-like receptor, two domains, short cytoplasmic tail, 5 | -0.858067 | Inlier |
| siRNA Disorazole DMSO Run1   | NM_0145<br>13 | KIR2DS5 | killer cell immunoglobulin-like receptor, two domains, short cytoplasmic tail, 5 | -0.394395 | Inlier |
| siRNA-Vinblastine Run2-DMSO  | NM_0145<br>13 | KIR2DS5 | killer cell immunoglobulin-like receptor, two domains, short cytoplasmic tail, 5 | -0.381251 | Inlier |
| siRNA Disorazole DMSO Run3   | NM_0145<br>13 | KIR2DS5 | killer cell immunoglobulin-like receptor, two domains, short cytoplasmic tail, 5 | 0.381251  | Inlier |
| siRNA-Temozolomide Run1-DMSO | NM_0145<br>13 | KIR2DS5 | killer cell immunoglobulin-like receptor, two domains, short cytoplasmic tail, 5 | 0.490933  | Inlier |

Identification of Survival Genes in Human Glioblastoma Cells Using siRNA Screening

Nikhil G Thaker, Fang Zhang, Peter R. McDonald, Tong Ying Shun, Michael D Lewen, Ian F. Pollack, and John S.

Lazo

Molecular Pharmacology

|                              |               |         |                                                                                   |           |        |
|------------------------------|---------------|---------|-----------------------------------------------------------------------------------|-----------|--------|
| siRNA-Vinblastine Run1-DMSO  | NM_0145<br>13 | KIR2DS5 | killer cell immunoglobulin-like receptor, two domains, short cytoplasmic tail, 5  | 1.532678  | Inlier |
| siRNA Disorazole DMSO Run2   | NM_0145<br>13 | KIR2DS5 | killer cell immunoglobulin-like receptor, two domains, short cytoplasmic tail, 5  | 1.544825  | Inlier |
| siRNA-Vinblastine Run2-DMSO  | NM_0132<br>89 | KIR3DL1 | killer cell immunoglobulin-like receptor, three domains, long cytoplasmic tail, 1 | -2.257511 | Inlier |
| siRNA Disorazole DMSO Run1   | NM_0132<br>89 | KIR3DL1 | killer cell immunoglobulin-like receptor, three domains, long cytoplasmic tail, 1 | -0.751111 | Inlier |
| siRNA-Temozolomide Run2-DMSO | NM_0132<br>89 | KIR3DL1 | killer cell immunoglobulin-like receptor, three domains, long cytoplasmic tail, 1 | -0.437759 | Inlier |



Identification of Survival Genes in Human Glioblastoma Cells Using siRNA Screening

Nikhil G Thaker, Fang Zhang, Peter R. McDonald, Tong Ying Shun, Michael D Lewen, Ian F. Pollack, and John S.

Lazo

Molecular Pharmacology

| siRNA              | Run       | Gene    | Accession | Protein Description                                                               | Log2FC   | Inlier |
|--------------------|-----------|---------|-----------|-----------------------------------------------------------------------------------|----------|--------|
| Disorazole         | Run3      | KIR3DL1 | NM_013289 | killer cell immunoglobulin-like receptor, three domains, long cytoplasmic tail, 1 | -0.01468 | Inlier |
| siRNA-Temozolomide | Run1-DMSO | KIR3DL1 | NM_013289 | killer cell immunoglobulin-like receptor, three domains, long cytoplasmic tail, 1 | 0.01468  | Inlier |
| siRNA-Temozolomide | Run3-DMSO | KIR3DL1 | NM_013289 | killer cell immunoglobulin-like receptor, three domains, long cytoplasmic tail, 1 | 0.597889 | Inlier |
| siRNA-Vinblastine  | Run1-DMSO | KIR3DL1 | NM_013289 | killer cell immunoglobulin-like receptor, three domains, long cytoplasmic tail, 1 | 1.388882 | Inlier |
| Disorazole         | Run2      | KIR3DL1 | NM_013289 | killer cell immunoglobulin-like receptor, three domains, long cytoplasmic tail, 1 | 2.346034 | Inlier |

Identification of Survival Genes in Human Glioblastoma Cells Using siRNA Screening

Nikhil G Thaker, Fang Zhang, Peter R. McDonald, Tong Ying Shun, Michael D Lewen, Ian F. Pollack, and John S.

Lazo

Molecular Pharmacology

|                              |               |         |                                                                                   |           |        |
|------------------------------|---------------|---------|-----------------------------------------------------------------------------------|-----------|--------|
| siRNA-Vinblastine Run2-DMSO  | NM_0067<br>37 | KIR3DL2 | killer cell immunoglobulin-like receptor, three domains, long cytoplasmic tail, 2 | -1.174938 | Inlier |
| siRNA-Temozolomide Run2-DMSO | NM_0067<br>37 | KIR3DL2 | killer cell immunoglobulin-like receptor, three domains, long cytoplasmic tail, 2 | -0.860514 | Inlier |
| siRNA Disorazole DMSO Run1   | NM_0067<br>37 | KIR3DL2 | killer cell immunoglobulin-like receptor, three domains, long cytoplasmic tail, 2 | -0.488485 | Inlier |
| siRNA-Temozolomide Run3-DMSO | NM_0067<br>37 | KIR3DL2 | killer cell immunoglobulin-like receptor, three domains, long cytoplasmic tail, 2 | -0.011822 | Inlier |
| siRNA Disorazole DMSO Run3   | NM_0067<br>37 | KIR3DL2 | killer cell immunoglobulin-like receptor, three domains, long cytoplasmic tail, 2 | 0.011822  | Inlier |

Identification of Survival Genes in Human Glioblastoma Cells Using siRNA Screening

Nikhil G Thaker, Fang Zhang, Peter R. McDonald, Tong Ying Shun, Michael D Lewen, Ian F. Pollack, and John S. Lazo

Molecular Pharmacology

|                              |               |         |                                                                                    |           |        |
|------------------------------|---------------|---------|------------------------------------------------------------------------------------|-----------|--------|
| siRNA-Temozolomide Run1-DMSO | NM_0067<br>37 | KIR3DL2 | killer cell immunoglobulin-like receptor, three domains, long cytoplasmic tail, 2  | 0.256659  | Inlier |
| siRNA Disorazole DMSO Run2   | NM_0067<br>37 | KIR3DL2 | killer cell immunoglobulin-like receptor, three domains, long cytoplasmic tail, 2  | 1.38836   | Inlier |
| siRNA-Vinblastine Run1-DMSO  | NM_0067<br>37 | KIR3DL2 | killer cell immunoglobulin-like receptor, three domains, long cytoplasmic tail, 2  | 1.521687  | Inlier |
| siRNA-Vinblastine Run2-DMSO  | NM_0145<br>14 | KIR3DS1 | killer cell immunoglobulin-like receptor, three domains, short cytoplasmic tail, 1 | -1.804599 | Inlier |
| siRNA Disorazole DMSO Run1   | NM_0145<br>14 | KIR3DS1 | killer cell immunoglobulin-like receptor, three domains, short cytoplasmic tail, 1 | -0.746015 | Inlier |

Identification of Survival Genes in Human Glioblastoma Cells Using siRNA Screening

Nikhil G Thaker, Fang Zhang, Peter R. McDonald, Tong Ying Shun, Michael D Lewen, Ian F. Pollack, and John S.

Lazo

Molecular Pharmacology

|                              |               |         |                                                                                    |           |        |
|------------------------------|---------------|---------|------------------------------------------------------------------------------------|-----------|--------|
| siRNA-Temozolomide Run2-DMSO | NM_0145<br>14 | KIR3DS1 | killer cell immunoglobulin-like receptor, three domains, short cytoplasmic tail, 1 | -0.602985 | Inlier |
| siRNA-Temozolomide Run1-DMSO | NM_0145<br>14 | KIR3DS1 | killer cell immunoglobulin-like receptor, three domains, short cytoplasmic tail, 1 | -0.108804 | Inlier |
| siRNA Disorazole DMSO Run3   | NM_0145<br>14 | KIR3DS1 | killer cell immunoglobulin-like receptor, three domains, short cytoplasmic tail, 1 | 0.108805  | Inlier |
| siRNA-Temozolomide Run3-DMSO | NM_0145<br>14 | KIR3DS1 | killer cell immunoglobulin-like receptor, three domains, short cytoplasmic tail, 1 | 0.110828  | Inlier |
| siRNA-Vinblastine Run1-DMSO  | NM_0145<br>14 | KIR3DS1 | killer cell immunoglobulin-like receptor, three domains, short cytoplasmic tail, 1 | 1.428159  | Inlier |

Identification of Survival Genes in Human Glioblastoma Cells Using siRNA Screening

Nikhil G Thaker, Fang Zhang, Peter R. McDonald, Tong Ying Shun, Michael D Lewen, Ian F. Pollack, and John S. Lazo

Molecular Pharmacology

|                              |               |         |  |                                                                                    |           |        |
|------------------------------|---------------|---------|--|------------------------------------------------------------------------------------|-----------|--------|
|                              |               |         |  | killer cell immunoglobulin-like receptor, three domains, short cytoplasmic tail, 1 |           |        |
| siRNA Disorazole DMSO Run2   | NM_0145<br>14 | KIR3DS1 |  | U2AF homology motif (UHM)                                                          | 2.615011  | Inlier |
| siRNA-Temozolomide Run3-DMSO | NM_1446<br>24 | KIS     |  | kinase 1                                                                           | -1.158205 | Inlier |
| siRNA Disorazole DMSO Run2   | NM_1446<br>24 | KIS     |  | U2AF homology motif (UHM)                                                          | -1.094107 | Inlier |
| siRNA-Temozolomide Run1-DMSO | NM_1446<br>24 | KIS     |  | kinase 1                                                                           | -0.769925 | Inlier |
| siRNA-Temozolomide Run2-DMSO | NM_1446<br>24 | KIS     |  | U2AF homology motif (UHM)                                                          | -0.32138  | Inlier |
| siRNA Disorazole DMSO Run3   | NM_1446<br>24 | KIS     |  | kinase 1                                                                           | 0.32138   | Inlier |
| siRNA Disorazole DMSO Run1   | NM_1446<br>24 | KIS     |  | U2AF homology motif (UHM)                                                          | 0.516207  | Inlier |
| siRNA-Vinblastine Run2-DMSO  | NM_1446<br>24 | KIS     |  | kinase 1                                                                           | 0.579075  | Inlier |
| siRNA-Vinblastine Run1-DMSO  | NM_1446<br>24 | KIS     |  | U2AF homology motif (UHM)                                                          | 0.973091  | Inlier |

Identification of Survival Genes in Human Glioblastoma Cells Using siRNA Screening  
 Nikhil G Thaker, Fang Zhang, Peter R. McDonald, Tong Ying Shun, Michael D Lewen, Ian F. Pollack, and John S. Lazo  
 Molecular Pharmacology

|                              |           |     |                                                               |           |        |
|------------------------------|-----------|-----|---------------------------------------------------------------|-----------|--------|
| siRNA Disorazole DMSO Run2   | NM_000222 | KIT | v-kit Hardy-Zuckerman 4 feline sarcoma viral oncogene homolog | -1.216888 | Inlier |
| siRNA-Temozolomide Run3-DMSO | NM_000222 | KIT | v-kit Hardy-Zuckerman 4 feline sarcoma viral oncogene homolog | -0.973002 | Inlier |
| siRNA-Temozolomide Run2-DMSO | NM_000222 | KIT | v-kit Hardy-Zuckerman 4 feline sarcoma viral oncogene homolog | -0.561571 | Inlier |
| siRNA-Temozolomide Run1-DMSO | NM_000222 | KIT | v-kit Hardy-Zuckerman 4 feline sarcoma viral oncogene homolog | -0.335381 | Inlier |
| siRNA-Vinblastine Run1-DMSO  | NM_000222 | KIT | v-kit Hardy-Zuckerman 4 feline sarcoma viral oncogene homolog | 0.335381  | Inlier |
| siRNA Disorazole DMSO Run3   | NM_000222 | KIT | v-kit Hardy-Zuckerman 4 feline sarcoma viral oncogene homolog | 0.487441  | Inlier |

Identification of Survival Genes in Human Glioblastoma Cells Using siRNA Screening  
 Nikhil G Thaker, Fang Zhang, Peter R. McDonald, Tong Ying Shun, Michael D Lewen, Ian F. Pollack, and John S. Lazo  
 Molecular Pharmacology

|                              |               |       |                                                               |           |        |
|------------------------------|---------------|-------|---------------------------------------------------------------|-----------|--------|
| siRNA Disorazole DMSO Run1   | NM_0002<br>22 | KIT   | v-kit Hardy-Zuckerman 4 feline sarcoma viral oncogene homolog | 0.787429  | Inlier |
| siRNA-Vinblastine Run2-DMSO  | NM_0002<br>22 | KIT   | v-kit Hardy-Zuckerman 4 feline sarcoma viral oncogene homolog | 1.362171  | Inlier |
| siRNA-Temozolomide Run3-DMSO | NM_0228<br>22 | KLC2  | KLC2                                                          | -1.287099 | Inlier |
| siRNA-Temozolomide Run2-DMSO | NM_0228<br>22 | KLC2  | KLC2                                                          | -0.865177 | Inlier |
| siRNA Disorazole DMSO Run3   | NM_0228<br>22 | KLC2  | KLC2                                                          | -0.483823 | Inlier |
| siRNA Disorazole DMSO Run1   | NM_0228<br>22 | KLC2  | KLC2                                                          | -0.089036 | Inlier |
| siRNA-Vinblastine Run2-DMSO  | NM_0228<br>22 | KLC2  | KLC2                                                          | 0.089036  | Inlier |
| siRNA-Temozolomide Run1-DMSO | NM_0228<br>22 | KLC2  | KLC2                                                          | 0.475921  | Inlier |
| siRNA Disorazole DMSO Run2   | NM_0228<br>22 | KLC2  | KLC2                                                          | 1.947319  | Inlier |
| siRNA-Vinblastine Run1-DMSO  | NM_0228<br>22 | KLC2  | KLC2                                                          | 2.0159    | Inlier |
| siRNA-Temozolomide Run3-DMSO | NM_1774<br>17 | KLC2L | KLC2L                                                         | -1.450416 | Inlier |
| siRNA Disorazole DMSO Run3   | NM_1774<br>17 | KLC2L | KLC2L                                                         | -0.901041 | Inlier |
| siRNA-Vinblastine Run2-DMSO  | NM_1774<br>17 | KLC2L | KLC2L                                                         | -0.90074  | Inlier |
| siRNA-Temozolomide Run2-DMSO | NM_1774<br>17 | KLC2L | KLC2L                                                         | -0.195156 | Inlier |
| siRNA Disorazole DMSO Run2   | NM_1774<br>17 | KLC2L | KLC2L                                                         | 0.195156  | Inlier |
| siRNA Disorazole DMSO Run1   | NM_1774<br>17 | KLC2L | KLC2L                                                         | 0.336373  | Inlier |
| siRNA-Temozolomide Run1-DMSO | NM_1774<br>17 | KLC2L | KLC2L                                                         | 0.44826   | Inlier |
| siRNA-Vinblastine Run1-DMSO  | NM_1774<br>17 | KLC2L | KLC2L                                                         | 1.003989  | Inlier |

Identification of Survival Genes in Human Glioblastoma Cells Using siRNA Screening  
 Nikhil G Thaker, Fang Zhang, Peter R. McDonald, Tong Ying Shun, Michael D Lewen, Ian F. Pollack, and John S. Lazo

Molecular Pharmacology

|                                  |               |       |                                               |                  |
|----------------------------------|---------------|-------|-----------------------------------------------|------------------|
|                                  |               |       | kallikrein<br>1,<br>renal/panc<br>reas/saliva |                  |
| siRNA-Temozolomide Run3-<br>DMSO | NM_0022<br>57 | KLK1  | ry                                            | -1.531033 Inlier |
|                                  |               |       | kallikrein<br>1,<br>renal/panc<br>reas/saliva |                  |
| siRNA-Temozolomide Run2-<br>DMSO | NM_0022<br>57 | KLK1  | ry                                            | -0.752203 Inlier |
|                                  |               |       | kallikrein<br>1,<br>renal/panc<br>reas/saliva |                  |
| siRNA Disorazole DMSO Run3       | NM_0022<br>57 | KLK1  | ry                                            | -0.65145 Inlier  |
|                                  |               |       | kallikrein<br>1,<br>renal/panc<br>reas/saliva |                  |
| siRNA Disorazole DMSO Run2       | NM_0022<br>57 | KLK1  | ry                                            | -0.037128 Inlier |
|                                  |               |       | kallikrein<br>1,<br>renal/panc<br>reas/saliva |                  |
| siRNA-Temozolomide Run1-<br>DMSO | NM_0022<br>57 | KLK1  | ry                                            | 0.037128 Inlier  |
|                                  |               |       | kallikrein<br>1,<br>renal/panc<br>reas/saliva |                  |
| siRNA Disorazole DMSO Run1       | NM_0022<br>57 | KLK1  | ry                                            | 0.133048 Inlier  |
|                                  |               |       | kallikrein<br>1,<br>renal/panc<br>reas/saliva |                  |
| siRNA-Vinblastine Run1-<br>DMSO  | NM_0022<br>57 | KLK1  | ry                                            | 0.69755 Inlier   |
|                                  |               |       | kallikrein<br>1,<br>renal/panc<br>reas/saliva |                  |
| siRNA-Vinblastine Run2-<br>DMSO  | NM_0022<br>57 | KLK1  | ry                                            | 1.051033 Inlier  |
| siRNA-Temozolomide Run3-<br>DMSO | NM_1458<br>88 | KLK10 | 10                                            | -0.969597 Inlier |
|                                  |               |       | kallikrein                                    |                  |
| siRNA Disorazole DMSO Run2       | NM_1458<br>88 | KLK10 | 10                                            | -0.677373 Inlier |
| siRNA-Temozolomide Run2-<br>DMSO | NM_1458<br>88 | KLK10 | 10                                            | -0.671627 Inlier |
|                                  |               |       | kallikrein                                    |                  |
| siRNA Disorazole DMSO Run3       | NM_1458<br>88 | KLK10 | 10                                            | -0.512011 Inlier |
| siRNA-Temozolomide Run1-<br>DMSO | NM_1458<br>88 | KLK10 | 10                                            | 0.512011 Inlier  |
|                                  |               |       | kallikrein                                    |                  |
| siRNA Disorazole DMSO Run1       | NM_1458<br>88 | KLK10 | 10                                            | 0.587487 Inlier  |



Identification of Survival Genes in Human Glioblastoma Cells Using siRNA Screening  
 Nikhil G Thaker, Fang Zhang, Peter R. McDonald, Tong Ying Shun, Michael D Lewen, Ian F. Pollack, and John S. Lazo

|                                  |               |       |                  |           |        |
|----------------------------------|---------------|-------|------------------|-----------|--------|
| siRNA-Vinblastine Run2-<br>DMSO  | NM_1458<br>88 | KLK10 | kallikrein<br>10 | 1.1641    | Inlier |
| siRNA-Vinblastine Run1-<br>DMSO  | NM_1458<br>88 | KLK10 | kallikrein<br>10 | 1.40427   | Inlier |
| siRNA-Temozolomide Run3-<br>DMSO | NM_1449<br>47 | KLK11 | kallikrein<br>11 | -0.82103  | Inlier |
| siRNA-Temozolomide Run2-<br>DMSO | NM_1449<br>47 | KLK11 | kallikrein<br>11 | -0.75487  | Inlier |
| siRNA-Temozolomide Run1-<br>DMSO | NM_1449<br>47 | KLK11 | kallikrein<br>11 | -0.656464 | Inlier |
| siRNA Disorazole DMSO Run3       | NM_1449<br>47 | KLK11 | kallikrein<br>11 | -0.003033 | Inlier |
| siRNA Disorazole DMSO Run2       | NM_1449<br>47 | KLK11 | kallikrein<br>11 | 0.003033  | Inlier |
| siRNA Disorazole DMSO Run1       | NM_1449<br>47 | KLK11 | kallikrein<br>11 | 0.005663  | Inlier |
| siRNA-Vinblastine Run1-<br>DMSO  | NM_1449<br>47 | KLK11 | kallikrein<br>11 | 0.692536  | Inlier |
| siRNA-Vinblastine Run2-<br>DMSO  | NM_1449<br>47 | KLK11 | kallikrein<br>11 | 0.887395  | Inlier |
| siRNA Disorazole DMSO Run2       | NM_0195<br>98 | KLK12 | kallikrein<br>12 | -0.76537  | Inlier |
| siRNA-Temozolomide Run3-<br>DMSO | NM_0195<br>98 | KLK12 | kallikrein<br>12 | -0.734834 | Inlier |
| siRNA Disorazole DMSO Run3       | NM_0195<br>98 | KLK12 | kallikrein<br>12 | -0.480124 | Inlier |
| siRNA-Temozolomide Run2-<br>DMSO | NM_0195<br>98 | KLK12 | kallikrein<br>12 | -0.451614 | Inlier |
| siRNA Disorazole DMSO Run1       | NM_0195<br>98 | KLK12 | kallikrein<br>12 | 0.451614  | Inlier |
| siRNA-Temozolomide Run1-<br>DMSO | NM_0195<br>98 | KLK12 | kallikrein<br>12 | 0.614166  | Inlier |
| siRNA-Vinblastine Run2-<br>DMSO  | NM_0195<br>98 | KLK12 | kallikrein<br>12 | 0.934048  | Inlier |
| siRNA-Vinblastine Run1-<br>DMSO  | NM_0195<br>98 | KLK12 | kallikrein<br>12 | 1.016858  | Inlier |
| siRNA-Temozolomide Run2-<br>DMSO | NM_0155<br>96 | KLK13 | kallikrein<br>13 | -1.190468 | Inlier |
| siRNA Disorazole DMSO Run1       | NM_0155<br>96 | KLK13 | kallikrein<br>13 | -0.897898 | Inlier |
| siRNA-Temozolomide Run3-<br>DMSO | NM_0155<br>96 | KLK13 | kallikrein<br>13 | -0.624154 | Inlier |
| siRNA-Temozolomide Run1-<br>DMSO | NM_0155<br>96 | KLK13 | kallikrein<br>13 | -0.074941 | Inlier |
| siRNA Disorazole DMSO Run3       | NM_0155<br>96 | KLK13 | kallikrein<br>13 | 0.07494   | Inlier |
| siRNA-Vinblastine Run1-<br>DMSO  | NM_0155<br>96 | KLK13 | kallikrein<br>13 | 0.179032  | Inlier |
| siRNA-Vinblastine Run2-<br>DMSO  | NM_0155<br>96 | KLK13 | kallikrein<br>13 | 0.724845  | Inlier |
| siRNA Disorazole DMSO Run2       | NM_0155<br>96 | KLK13 | kallikrein<br>13 | 2.059351  | Inlier |

Identification of Survival Genes in Human Glioblastoma Cells Using siRNA Screening  
 Nikhil G Thaker, Fang Zhang, Peter R. McDonald, Tong Ying Shun, Michael D Lewen, Ian F. Pollack, and John S. Lazo

|                                  |               |       |                               |           |         |
|----------------------------------|---------------|-------|-------------------------------|-----------|---------|
| siRNA-Temozolomide Run3-<br>DMSO | NM_0220<br>46 | KLK14 | kallikrein<br>14              | -4.493825 | Outlier |
| siRNA-Temozolomide Run2-<br>DMSO | NM_0220<br>46 | KLK14 | kallikrein<br>14              | -2.470981 | Inlier  |
| siRNA Disorazole DMSO Run1       | NM_0220<br>46 | KLK14 | kallikrein<br>14              | -1.001679 | Inlier  |
| siRNA Disorazole DMSO Run2       | NM_0220<br>46 | KLK14 | kallikrein<br>14              | -0.252233 | Inlier  |
| siRNA-Vinblastine Run2-<br>DMSO  | NM_0220<br>46 | KLK14 | kallikrein<br>14              | 0.252233  | Inlier  |
| siRNA-Temozolomide Run1-<br>DMSO | NM_0220<br>46 | KLK14 | kallikrein<br>14              | 0.259333  | Inlier  |
| siRNA Disorazole DMSO Run3       | NM_0220<br>46 | KLK14 | kallikrein<br>14              | 0.347321  | Inlier  |
| siRNA-Vinblastine Run1-<br>DMSO  | NM_0220<br>46 | KLK14 | kallikrein<br>14              | 1.372172  | Inlier  |
| siRNA-Temozolomide Run3-<br>DMSO | NM_1385<br>63 | KLK15 | kallikrein<br>15              | -3.282229 | Inlier  |
| siRNA-Temozolomide Run2-<br>DMSO | NM_1385<br>63 | KLK15 | kallikrein<br>15              | -3.115446 | Inlier  |
| siRNA Disorazole DMSO Run2       | NM_1385<br>63 | KLK15 | kallikrein<br>15              | -0.744044 | Inlier  |
| siRNA Disorazole DMSO Run1       | NM_1385<br>63 | KLK15 | kallikrein<br>15              | -0.192249 | Inlier  |
| siRNA Disorazole DMSO Run3       | NM_1385<br>63 | KLK15 | kallikrein<br>15              | 0.192249  | Inlier  |
| siRNA-Temozolomide Run1-<br>DMSO | NM_1385<br>63 | KLK15 | kallikrein<br>15              | 0.234198  | Inlier  |
| siRNA-Vinblastine Run2-<br>DMSO  | NM_1385<br>63 | KLK15 | kallikrein<br>15              | 0.604957  | Inlier  |
| siRNA-Vinblastine Run1-<br>DMSO  | NM_1385<br>63 | KLK15 | kallikrein<br>15              | 1.023604  | Inlier  |
| siRNA-Temozolomide Run3-<br>DMSO | NM_0055<br>51 | KLK2  | kallikrein<br>2,<br>prostatic | -1.285134 | Inlier  |
| siRNA-Temozolomide Run2-<br>DMSO | NM_0055<br>51 | KLK2  | kallikrein<br>2,<br>prostatic | -0.743456 | Inlier  |
| siRNA Disorazole DMSO Run3       | NM_0055<br>51 | KLK2  | kallikrein<br>2,<br>prostatic | -0.701925 | Inlier  |
| siRNA Disorazole DMSO Run2       | NM_0055<br>51 | KLK2  | kallikrein<br>2,<br>prostatic | -0.296889 | Inlier  |
| siRNA-Temozolomide Run1-<br>DMSO | NM_0055<br>51 | KLK2  | kallikrein<br>2,<br>prostatic | 0.296889  | Inlier  |
| siRNA Disorazole DMSO Run1       | NM_0055<br>51 | KLK2  | kallikrein<br>2,<br>prostatic | 0.319943  | Inlier  |

Identification of Survival Genes in Human Glioblastoma Cells Using siRNA Screening

Nikhil G Thaker, Fang Zhang, Peter R. McDonald, Tong Ying Shun, Michael D Lewen, Ian F. Pollack, and John S.

Lazo

|                            |         |      |              |                  |
|----------------------------|---------|------|--------------|------------------|
| Molecular Pharmacology     |         |      | kallikrein   |                  |
| siRNA-Vinblastine Run2-    | NM_0055 |      | 2,           |                  |
| DMSO                       | 51      | KLK2 | prostatic    | 0.647075 Inlier  |
|                            |         |      | kallikrein   |                  |
| siRNA-Vinblastine Run1-    | NM_0055 |      | 2,           |                  |
| DMSO                       | 51      | KLK2 | prostatic    | 1.191784 Inlier  |
|                            |         |      | kallikrein   |                  |
|                            | NM_0016 |      | 3,           |                  |
| siRNA Disorazole DMSO Run2 | 48      | KLK3 | (prostate    | -1.719498 Inlier |
|                            |         |      | specific     |                  |
|                            |         |      | antigen)     |                  |
|                            |         |      | kallikrein   |                  |
|                            |         |      | 3,           |                  |
|                            | NM_0016 |      | (prostate    |                  |
| siRNA Disorazole DMSO Run3 | 48      | KLK3 | specific     | -1.358151 Inlier |
|                            |         |      | antigen)     |                  |
|                            |         |      | kallikrein   |                  |
|                            |         |      | 3,           |                  |
|                            |         |      | (prostate    |                  |
| siRNA-Temozolomide Run3-   | NM_0016 |      | specific     |                  |
| DMSO                       | 48      | KLK3 | antigen)     | -0.799418 Inlier |
|                            |         |      | kallikrein   |                  |
|                            |         |      | 3,           |                  |
|                            |         |      | (prostate    |                  |
|                            | NM_0016 |      | specific     |                  |
| siRNA Disorazole DMSO Run1 | 48      | KLK3 | antigen)     | -0.017132 Inlier |
|                            |         |      | kallikrein   |                  |
|                            |         |      | 3,           |                  |
|                            |         |      | (prostate    |                  |
|                            |         |      | specific     |                  |
| siRNA-Temozolomide Run2-   | NM_0016 |      | antigen)     |                  |
| DMSO                       | 48      | KLK3 | kallikrein   | 0.017132 Inlier  |
|                            |         |      | 3,           |                  |
|                            |         |      | (prostate    |                  |
|                            |         |      | specific     |                  |
| siRNA-Vinblastine Run1-    | NM_0016 |      | antigen)     |                  |
| DMSO                       | 48      | KLK3 | kallikrein   | 0.513827 Inlier  |
|                            |         |      | 3,           |                  |
|                            |         |      | (prostate    |                  |
|                            |         |      | specific     |                  |
| siRNA-Temozolomide Run1-   | NM_0016 |      | antigen)     |                  |
| DMSO                       | 48      | KLK3 | kallikrein   | 0.549582 Inlier  |
|                            |         |      | 3,           |                  |
|                            |         |      | (prostate    |                  |
|                            |         |      | specific     |                  |
| siRNA-Vinblastine Run2-    | NM_0016 |      | antigen)     |                  |
| DMSO                       | 48      | KLK3 | kallikrein   | 0.947114 Inlier  |
|                            |         |      | 3,           |                  |
|                            |         |      | (prostate    |                  |
|                            |         |      | specific     |                  |
|                            |         |      | antigen)     |                  |
|                            |         |      | kallikrein 4 |                  |
|                            |         |      | (prostase,   |                  |
| siRNA-Temozolomide Run3-   | NM_0049 |      | enamel       |                  |
| DMSO                       | 17      | KLK4 | matrix,      | -1.447707 Inlier |
|                            |         |      | prostate)    |                  |

Identification of Survival Genes in Human Glioblastoma Cells Using siRNA Screening  
 Nikhil G Thaker, Fang Zhang, Peter R. McDonald, Tong Ying Shun, Michael D Lewen, Ian F. Pollack, and John S. Lazo  
 Molecular Pharmacology

|                                  |               |      |                                                              |           |        |
|----------------------------------|---------------|------|--------------------------------------------------------------|-----------|--------|
| siRNA Disorazole DMSO Run1       | NM_0049<br>17 | KLK4 | kallikrein 4<br>(prostase,<br>enamel<br>matrix,<br>prostate) | -0.779226 | Inlier |
| siRNA-Temozolomide Run2-<br>DMSO | NM_0049<br>17 | KLK4 | kallikrein 4<br>(prostase,<br>enamel<br>matrix,<br>prostate) | -0.284843 | Inlier |
| siRNA Disorazole DMSO Run2       | NM_0049<br>17 | KLK4 | kallikrein 4<br>(prostase,<br>enamel<br>matrix,<br>prostate) | -0.02706  | Inlier |
| siRNA-Temozolomide Run1-<br>DMSO | NM_0049<br>17 | KLK4 | kallikrein 4<br>(prostase,<br>enamel<br>matrix,<br>prostate) | 0.02706   | Inlier |
| siRNA Disorazole DMSO Run3       | NM_0049<br>17 | KLK4 | kallikrein 4<br>(prostase,<br>enamel<br>matrix,<br>prostate) | 0.569774  | Inlier |
| siRNA-Vinblastine Run2-<br>DMSO  | NM_0049<br>17 | KLK4 | kallikrein 4<br>(prostase,<br>enamel<br>matrix,<br>prostate) | 0.813574  | Inlier |
| siRNA-Vinblastine Run1-<br>DMSO  | NM_0049<br>17 | KLK4 | kallikrein 4<br>(prostase,<br>enamel<br>matrix,<br>prostate) | 0.918283  | Inlier |
| siRNA Disorazole DMSO Run3       | NM_0124<br>27 | KLK5 | kallikrein 5                                                 | -1.413812 | Inlier |
| siRNA Disorazole DMSO Run2       | NM_0124<br>27 | KLK5 | kallikrein 5                                                 | -0.964464 | Inlier |
| siRNA-Temozolomide Run3-<br>DMSO | NM_0124<br>27 | KLK5 | kallikrein 5                                                 | -0.28783  | Inlier |
| siRNA Disorazole DMSO Run1       | NM_0124<br>27 | KLK5 | kallikrein 5                                                 | -0.188504 | Inlier |
| siRNA-Temozolomide Run2-<br>DMSO | NM_0124<br>27 | KLK5 | kallikrein 5                                                 | 0.188503  | Inlier |

Identification of Survival Genes in Human Glioblastoma Cells Using siRNA Screening

Nikhil G Thaker, Fang Zhang, Peter R. McDonald, Tong Ying Shun, Michael D Lewen, Ian F. Pollack, and John S.

Lazo

|                                  |                  |      |                                                           |           |        |
|----------------------------------|------------------|------|-----------------------------------------------------------|-----------|--------|
| siRNA-Temozolomide Run1-<br>DMSO | NM_0124<br>27    | KLK5 | kallikrein 5                                              | 0.587503  | Inlier |
| siRNA-Vinblastine Run2-<br>DMSO  | NM_0124<br>27    | KLK5 | kallikrein 5                                              | 0.761497  | Inlier |
| siRNA-Vinblastine Run1-<br>DMSO  | NM_0124<br>27    | KLK5 | kallikrein 5                                              | 0.991531  | Inlier |
| siRNA Disorazole DMSO Run2       | NM_0010<br>12964 | KLK6 | kallikrein 6<br>(neurosin,<br>zyme)                       | -1.239605 | Inlier |
| siRNA-Temozolomide Run3-<br>DMSO | NM_0010<br>12964 | KLK6 | kallikrein 6<br>(neurosin,<br>zyme)                       | -0.574693 | Inlier |
| siRNA Disorazole DMSO Run1       | NM_0010<br>12964 | KLK6 | kallikrein 6<br>(neurosin,<br>zyme)                       | -0.309283 | Inlier |
| siRNA-Temozolomide Run1-<br>DMSO | NM_0010<br>12964 | KLK6 | kallikrein 6<br>(neurosin,<br>zyme)                       | -0.097678 | Inlier |
| siRNA-Temozolomide Run2-<br>DMSO | NM_0010<br>12964 | KLK6 | kallikrein 6<br>(neurosin,<br>zyme)                       | 0.097677  | Inlier |
| siRNA-Vinblastine Run1-<br>DMSO  | NM_0010<br>12964 | KLK6 | kallikrein 6<br>(neurosin,<br>zyme)                       | 0.774307  | Inlier |
| siRNA Disorazole DMSO Run3       | NM_0010<br>12964 | KLK6 | kallikrein 6<br>(neurosin,<br>zyme)                       | 0.865707  | Inlier |
| siRNA-Vinblastine Run2-<br>DMSO  | NM_0010<br>12964 | KLK6 | kallikrein 6<br>(neurosin,<br>zyme)                       | 1.347311  | Inlier |
| siRNA Disorazole DMSO Run1       | NM_1392<br>77    | KLK7 | kallikrein 7<br>(chymotry<br>ptic,<br>stratum<br>corneum) | -0.995559 | Inlier |
| siRNA-Temozolomide Run3-<br>DMSO | NM_1392<br>77    | KLK7 | kallikrein 7<br>(chymotry<br>ptic,<br>stratum<br>corneum) | -0.832943 | Inlier |

Identification of Survival Genes in Human Glioblastoma Cells Using siRNA Screening  
 Nikhil G Thaker, Fang Zhang, Peter R. McDonald, Tong Ying Shun, Michael D Lewen, Ian F. Pollack, and John S. Lazo  
 Molecular Pharmacology

|                              |               |      |                                                       |           |        |
|------------------------------|---------------|------|-------------------------------------------------------|-----------|--------|
| siRNA-Temozolomide Run2-DMSO | NM_1392<br>77 | KLK7 | kallikrein 7<br>(chymotryptic,<br>stratum<br>corneum) | -0.720487 | Inlier |
| siRNA Disorazole DMSO Run3   | NM_1392<br>77 | KLK7 | kallikrein 7<br>(chymotryptic,<br>stratum<br>corneum) | -0.332318 | Inlier |
| siRNA-Temozolomide Run1-DMSO | NM_1392<br>77 | KLK7 | kallikrein 7<br>(chymotryptic,<br>stratum<br>corneum) | 0.332318  | Inlier |
| siRNA-Vinblastine Run1-DMSO  | NM_1392<br>77 | KLK7 | kallikrein 7<br>(chymotryptic,<br>stratum<br>corneum) | 0.48359   | Inlier |
| siRNA Disorazole DMSO Run2   | NM_1392<br>77 | KLK7 | kallikrein 7<br>(chymotryptic,<br>stratum<br>corneum) | 0.628513  | Inlier |
| siRNA-Vinblastine Run2-DMSO  | NM_1392<br>77 | KLK7 | kallikrein 7<br>(chymotryptic,<br>stratum<br>corneum) | 1.461668  | Inlier |
| siRNA-Temozolomide Run3-DMSO | NM_0071<br>96 | KLK8 | kallikrein 8<br>(neuropsin<br>/ovasin)                | -1.522849 | Inlier |
| siRNA Disorazole DMSO Run2   | NM_0071<br>96 | KLK8 | kallikrein 8<br>(neuropsin<br>/ovasin)                | -1.082617 | Inlier |
| siRNA-Temozolomide Run2-DMSO | NM_0071<br>96 | KLK8 | kallikrein 8<br>(neuropsin<br>/ovasin)                | -0.84471  | Inlier |
| siRNA Disorazole DMSO Run3   | NM_0071<br>96 | KLK8 | kallikrein 8<br>(neuropsin<br>/ovasin)                | -0.170362 | Inlier |

Identification of Survival Genes in Human Glioblastoma Cells Using siRNA Screening  
 Nikhil G Thaker, Fang Zhang, Peter R. McDonald, Tong Ying Shun, Michael D Lewen, Ian F. Pollack, and John S. Lazo

Molecular Pharmacology

|                              |               |       |                                                   |           |        |
|------------------------------|---------------|-------|---------------------------------------------------|-----------|--------|
| siRNA-Temozolomide Run1-DMSO | NM_0071<br>96 | KLK8  | kallikrein 8<br>(neuropsin /ovasin)               | 0.170362  | Inlier |
| siRNA Disorazole DMSO Run1   | NM_0071<br>96 | KLK8  | kallikrein 8<br>(neuropsin /ovasin)               | 0.250896  | Inlier |
| siRNA-Vinblastine Run2-DMSO  | NM_0071<br>96 | KLK8  | kallikrein 8<br>(neuropsin /ovasin)               | 0.50429   | Inlier |
| siRNA-Vinblastine Run1-DMSO  | NM_0071<br>96 | KLK8  | kallikrein 8<br>(neuropsin /ovasin)               | 1.157619  | Inlier |
| siRNA-Temozolomide Run3-DMSO | NM_0123<br>15 | KLK9  | kallikrein 9                                      | -1.748027 | Inlier |
| siRNA Disorazole DMSO Run3   | NM_0123<br>15 | KLK9  | kallikrein 9                                      | -0.700196 | Inlier |
| siRNA-Temozolomide Run2-DMSO | NM_0123<br>15 | KLK9  | kallikrein 9                                      | -0.700071 | Inlier |
| siRNA Disorazole DMSO Run2   | NM_0123<br>15 | KLK9  | kallikrein 9                                      | -0.277732 | Inlier |
| siRNA Disorazole DMSO Run1   | NM_0123<br>15 | KLK9  | kallikrein 9                                      | 0.277732  | Inlier |
| siRNA-Temozolomide Run1-DMSO | NM_0123<br>15 | KLK9  | kallikrein 9                                      | 0.278937  | Inlier |
| siRNA-Vinblastine Run1-DMSO  | NM_0123<br>15 | KLK9  | kallikrein 9                                      | 0.648929  | Inlier |
| siRNA-Vinblastine Run2-DMSO  | NM_0123<br>15 | KLK9  | kallikrein 9                                      | 1.092676  | Inlier |
| siRNA-Temozolomide Run3-DMSO | NM_0008<br>92 | KLKB1 | kallikrein<br>B, plasma<br>(Fletcher<br>factor) 1 | -1.065944 | Inlier |
| siRNA Disorazole DMSO Run3   | NM_0008<br>92 | KLKB1 | kallikrein<br>B, plasma<br>(Fletcher<br>factor) 1 | -0.824205 | Inlier |
| siRNA Disorazole DMSO Run2   | NM_0008<br>92 | KLKB1 | kallikrein<br>B, plasma<br>(Fletcher<br>factor) 1 | -0.723639 | Inlier |
| siRNA-Temozolomide Run2-DMSO | NM_0008<br>92 | KLKB1 | kallikrein<br>B, plasma<br>(Fletcher<br>factor) 1 | -0.258676 | Inlier |
| siRNA-Temozolomide Run1-DMSO | NM_0008<br>92 | KLKB1 | kallikrein<br>B, plasma<br>(Fletcher<br>factor) 1 | 0.258676  | Inlier |

Identification of Survival Genes in Human Glioblastoma Cells Using siRNA Screening  
 Nikhil G Thaker, Fang Zhang, Peter R. McDonald, Tong Ying Shun, Michael D Lewen, Ian F. Pollack, and John S. Lazo

Molecular Pharmacology

|                                  |               |       |                                                                       |           |         |
|----------------------------------|---------------|-------|-----------------------------------------------------------------------|-----------|---------|
| siRNA Disorazole DMSO Run1       | NM_0008<br>92 | KLKB1 | kallikrein<br>B, plasma<br>(Fletcher<br>factor) 1                     | 0.393048  | Inlier  |
| siRNA-Vinblastine Run2-<br>DMSO  | NM_0008<br>92 | KLKB1 | kallikrein<br>B, plasma<br>(Fletcher<br>factor) 1                     | 0.625361  | Inlier  |
| siRNA-Vinblastine Run1-<br>DMSO  | NM_0008<br>92 | KLKB1 | kallikrein<br>B, plasma<br>(Fletcher<br>factor) 1                     | 0.937578  | Inlier  |
| siRNA Disorazole DMSO Run1       | NM_0203<br>78 | KLP1  | KLP1                                                                  | -1.305017 | Inlier  |
| siRNA-Temozolomide Run2-<br>DMSO | NM_0203<br>78 | KLP1  | KLP1                                                                  | -0.841818 | Inlier  |
| siRNA-Temozolomide Run1-<br>DMSO | NM_0203<br>78 | KLP1  | KLP1                                                                  | -0.462255 | Inlier  |
| siRNA-Vinblastine Run2-<br>DMSO  | NM_0203<br>78 | KLP1  | KLP1                                                                  | -0.100737 | Inlier  |
| siRNA-Temozolomide Run3-<br>DMSO | NM_0203<br>78 | KLP1  | KLP1                                                                  | 0.100737  | Inlier  |
| siRNA Disorazole DMSO Run3       | NM_0203<br>78 | KLP1  | KLP1                                                                  | 0.507182  | Inlier  |
| siRNA Disorazole DMSO Run2       | NM_0203<br>78 | KLP1  | KLP1                                                                  | 3.759454  | Outlier |
| siRNA-Vinblastine Run1-<br>DMSO  | NM_0203<br>78 | KLP1  | KLP1                                                                  | 4.819689  | Outlier |
| siRNA-Vinblastine Run2-<br>DMSO  | NM_0066<br>11 | KLRA1 | killer cell<br>lectin-like<br>receptor<br>subfamily<br>A,<br>member 1 | -1.348916 | Inlier  |
| siRNA Disorazole DMSO Run1       | NM_0066<br>11 | KLRA1 | killer cell<br>lectin-like<br>receptor<br>subfamily<br>A,<br>member 1 | -0.829724 | Inlier  |
| siRNA Disorazole DMSO Run3       | NM_0066<br>11 | KLRA1 | killer cell<br>lectin-like<br>receptor<br>subfamily<br>A,<br>member 1 | -0.519276 | Inlier  |
| siRNA-Temozolomide Run2-<br>DMSO | NM_0066<br>11 | KLRA1 | killer cell<br>lectin-like<br>receptor<br>subfamily<br>A,<br>member 1 | -0.016688 | Inlier  |



Identification of Survival Genes in Human Glioblastoma Cells Using siRNA Screening

Nikhil G Thaker, Fang Zhang, Peter R. McDonald, Tong Ying Shun, Michael D Lewen, Ian F. Pollack, and John S. Lazo

Molecular Pharmacology

|                              |               |       |                                                                       |                  |
|------------------------------|---------------|-------|-----------------------------------------------------------------------|------------------|
| siRNA-Temozolomide Run3-DMSO | NM_0066<br>11 | KLRA1 | killer cell<br>lectin-like<br>receptor<br>subfamily<br>A,<br>member 1 | 0.016688 Inlier  |
| siRNA-Temozolomide Run1-DMSO | NM_0066<br>11 | KLRA1 | killer cell<br>lectin-like<br>receptor<br>subfamily<br>A,<br>member 1 | 0.428944 Inlier  |
| siRNA Disorazole DMSO Run2   | NM_0066<br>11 | KLRA1 | killer cell<br>lectin-like<br>receptor<br>subfamily<br>A,<br>member 1 | 1.922591 Inlier  |
| siRNA-Vinblastine Run1-DMSO  | NM_0066<br>11 | KLRA1 | killer cell<br>lectin-like<br>receptor<br>subfamily<br>A,<br>member 1 | 2.957596 Inlier  |
| siRNA-Vinblastine Run2-DMSO  | NM_0022<br>58 | KLRB1 | killer cell<br>lectin-like<br>receptor<br>subfamily<br>B,<br>member 1 | -2.637633 Inlier |
| siRNA-Temozolomide Run2-DMSO | NM_0022<br>58 | KLRB1 | killer cell<br>lectin-like<br>receptor<br>subfamily<br>B,<br>member 1 | -0.982407 Inlier |
| siRNA-Temozolomide Run1-DMSO | NM_0022<br>58 | KLRB1 | killer cell<br>lectin-like<br>receptor<br>subfamily<br>B,<br>member 1 | -0.366593 Inlier |
| siRNA Disorazole DMSO Run1   | NM_0022<br>58 | KLRB1 | killer cell<br>lectin-like<br>receptor<br>subfamily<br>B,<br>member 1 | -0.010016 Inlier |

Identification of Survival Genes in Human Glioblastoma Cells Using siRNA Screening  
 Nikhil G Thaker, Fang Zhang, Peter R. McDonald, Tong Ying Shun, Michael D Lewen, Ian F. Pollack, and John S. Lazo

Molecular Pharmacology

| siRNA Treatment              | Gene ID   | Gene Name | Gene Description                                       | Value     | Category |
|------------------------------|-----------|-----------|--------------------------------------------------------|-----------|----------|
| siRNA-Temozolomide Run3-DMSO | NM_002258 | KLRB1     | killer cell lectin-like receptor subfamily B, member 1 | 0.010015  | Inlier   |
| siRNA Disorazole DMSO Run3   | NM_002258 | KLRB1     | killer cell lectin-like receptor subfamily B, member 1 | 0.344807  | Inlier   |
| siRNA Disorazole DMSO Run2   | NM_002258 | KLRB1     | killer cell lectin-like receptor subfamily B, member 1 | 2.276309  | Inlier   |
| siRNA-Vinblastine Run1-DMSO  | NM_002258 | KLRB1     | killer cell lectin-like receptor subfamily B, member 1 | 3.718401  | Outlier  |
| siRNA-Vinblastine Run2-DMSO  | NM_002259 | KLRC1     | killer cell lectin-like receptor subfamily C, member 1 | -2.145133 | Inlier   |
| siRNA-Temozolomide Run1-DMSO | NM_002259 | KLRC1     | killer cell lectin-like receptor subfamily C, member 1 | -0.690786 | Inlier   |
| siRNA-Temozolomide Run2-DMSO | NM_002259 | KLRC1     | killer cell lectin-like receptor subfamily C, member 1 | -0.281632 | Inlier   |
| siRNA Disorazole DMSO Run3   | NM_002259 | KLRC1     | killer cell lectin-like receptor subfamily C, member 1 | -0.084029 | Inlier   |

Identification of Survival Genes in Human Glioblastoma Cells Using siRNA Screening  
 Nikhil G Thaker, Fang Zhang, Peter R. McDonald, Tong Ying Shun, Michael D Lewen, Ian F. Pollack, and John S. Lazo

Molecular Pharmacology

|                                  |               |       |                                                                       |                  |
|----------------------------------|---------------|-------|-----------------------------------------------------------------------|------------------|
| siRNA Disorazole DMSO Run1       | NM_0022<br>59 | KLRC1 | killer cell<br>lectin-like<br>receptor<br>subfamily<br>C,<br>member 1 | 0.084029 Inlier  |
| siRNA-Temozolomide Run3-<br>DMSO | NM_0022<br>59 | KLRC1 | killer cell<br>lectin-like<br>receptor<br>subfamily<br>C,<br>member 1 | 0.658214 Inlier  |
| siRNA-Vinblastine Run1-<br>DMSO  | NM_0022<br>59 | KLRC1 | killer cell<br>lectin-like<br>receptor<br>subfamily<br>C,<br>member 1 | 2.045107 Inlier  |
| siRNA Disorazole DMSO Run2       | NM_0022<br>59 | KLRC1 | killer cell<br>lectin-like<br>receptor<br>subfamily<br>C,<br>member 1 | 2.46077 Inlier   |
| siRNA-Temozolomide Run2-<br>DMSO | NM_0022<br>60 | KLRC2 | killer cell<br>lectin-like<br>receptor<br>subfamily<br>C,<br>member 2 | -0.971646 Inlier |
| siRNA-Temozolomide Run3-<br>DMSO | NM_0022<br>60 | KLRC2 | killer cell<br>lectin-like<br>receptor<br>subfamily<br>C,<br>member 2 | -0.616878 Inlier |
| siRNA-Vinblastine Run2-<br>DMSO  | NM_0022<br>60 | KLRC2 | killer cell<br>lectin-like<br>receptor<br>subfamily<br>C,<br>member 2 | -0.537752 Inlier |
| siRNA-Temozolomide Run1-<br>DMSO | NM_0022<br>60 | KLRC2 | killer cell<br>lectin-like<br>receptor<br>subfamily<br>C,<br>member 2 | -0.517099 Inlier |

Identification of Survival Genes in Human Glioblastoma Cells Using siRNA Screening  
 Nikhil G Thaker, Fang Zhang, Peter R. McDonald, Tong Ying Shun, Michael D Lewen, Ian F. Pollack, and John S. Lazo

Molecular Pharmacology

|                                  |               |       |                                                                       |           |        |
|----------------------------------|---------------|-------|-----------------------------------------------------------------------|-----------|--------|
| siRNA Disorazole DMSO Run1       | NM_0022<br>60 | KLRC2 | killer cell<br>lectin-like<br>receptor<br>subfamily<br>C,<br>member 2 | 0.517099  | Inlier |
| siRNA-Vinblastine Run1-<br>DMSO  | NM_0022<br>60 | KLRC2 | killer cell<br>lectin-like<br>receptor<br>subfamily<br>C,<br>member 2 | 0.732122  | Inlier |
| siRNA Disorazole DMSO Run3       | NM_0022<br>60 | KLRC2 | killer cell<br>lectin-like<br>receptor<br>subfamily<br>C,<br>member 2 | 0.837545  | Inlier |
| siRNA Disorazole DMSO Run2       | NM_0022<br>60 | KLRC2 | killer cell<br>lectin-like<br>receptor<br>subfamily<br>C,<br>member 2 | 1.247035  | Inlier |
| siRNA-Vinblastine Run2-<br>DMSO  | NM_0022<br>61 | KLRC3 | killer cell<br>lectin-like<br>receptor<br>subfamily<br>C,<br>member 3 | -0.898512 | Inlier |
| siRNA Disorazole DMSO Run3       | NM_0022<br>61 | KLRC3 | killer cell<br>lectin-like<br>receptor<br>subfamily<br>C,<br>member 3 | -0.64893  | Inlier |
| siRNA-Temozolomide Run2-<br>DMSO | NM_0022<br>61 | KLRC3 | killer cell<br>lectin-like<br>receptor<br>subfamily<br>C,<br>member 3 | -0.616091 | Inlier |
| siRNA-Temozolomide Run3-<br>DMSO | NM_0022<br>61 | KLRC3 | killer cell<br>lectin-like<br>receptor<br>subfamily<br>C,<br>member 3 | -0.008539 | Inlier |

Identification of Survival Genes in Human Glioblastoma Cells Using siRNA Screening  
 Nikhil G Thaker, Fang Zhang, Peter R. McDonald, Tong Ying Shun, Michael D Lewen, Ian F. Pollack, and John S. Lazo

Molecular Pharmacology

|                                  |               |       |                                                                       |                  |
|----------------------------------|---------------|-------|-----------------------------------------------------------------------|------------------|
| siRNA Disorazole DMSO Run1       | NM_0022<br>61 | KLRC3 | killer cell<br>lectin-like<br>receptor<br>subfamily<br>C,<br>member 3 | 0.008539 Inlier  |
| siRNA-Temozolomide Run1-<br>DMSO | NM_0022<br>61 | KLRC3 | killer cell<br>lectin-like<br>receptor<br>subfamily<br>C,<br>member 3 | 0.70007 Inlier   |
| siRNA-Vinblastine Run1-<br>DMSO  | NM_0022<br>61 | KLRC3 | killer cell<br>lectin-like<br>receptor<br>subfamily<br>C,<br>member 3 | 1.709059 Inlier  |
| siRNA Disorazole DMSO Run2       | NM_0022<br>61 | KLRC3 | killer cell<br>lectin-like<br>receptor<br>subfamily<br>C,<br>member 3 | 1.90725 Inlier   |
| siRNA Disorazole DMSO Run1       | NM_0134<br>31 | KLRC4 | killer cell<br>lectin-like<br>receptor<br>subfamily<br>C,<br>member 4 | -1.992128 Inlier |
| siRNA-Vinblastine Run2-<br>DMSO  | NM_0134<br>31 | KLRC4 | killer cell<br>lectin-like<br>receptor<br>subfamily<br>C,<br>member 4 | -1.08151 Inlier  |
| siRNA-Temozolomide Run2-<br>DMSO | NM_0134<br>31 | KLRC4 | killer cell<br>lectin-like<br>receptor<br>subfamily<br>C,<br>member 4 | -0.019034 Inlier |
| siRNA Disorazole DMSO Run3       | NM_0134<br>31 | KLRC4 | killer cell<br>lectin-like<br>receptor<br>subfamily<br>C,<br>member 4 | -0.009981 Inlier |

Identification of Survival Genes in Human Glioblastoma Cells Using siRNA Screening  
 Nikhil G Thaker, Fang Zhang, Peter R. McDonald, Tong Ying Shun, Michael D Lewen, Ian F. Pollack, and John S. Lazo

Molecular Pharmacology

|                              |               |       |                                                                       |                  |
|------------------------------|---------------|-------|-----------------------------------------------------------------------|------------------|
| siRNA-Temozolomide Run3-DMSO | NM_0134<br>31 | KLRC4 | killer cell<br>lectin-like<br>receptor<br>subfamily<br>C,<br>member 4 | 0.009981 Inlier  |
| siRNA-Temozolomide Run1-DMSO | NM_0134<br>31 | KLRC4 | killer cell<br>lectin-like<br>receptor<br>subfamily<br>C,<br>member 4 | 0.26749 Inlier   |
| siRNA Disorazole DMSO Run2   | NM_0134<br>31 | KLRC4 | killer cell<br>lectin-like<br>receptor<br>subfamily<br>C,<br>member 4 | 1.89536 Inlier   |
| siRNA-Vinblastine Run1-DMSO  | NM_0134<br>31 | KLRC4 | killer cell<br>lectin-like<br>receptor<br>subfamily<br>C,<br>member 4 | 2.362252 Inlier  |
| siRNA-Vinblastine Run2-DMSO  | NM_0073<br>34 | KLRD1 | killer cell<br>lectin-like<br>receptor<br>subfamily<br>D,<br>member 1 | -1.651215 Inlier |
| siRNA Disorazole DMSO Run3   | NM_0073<br>34 | KLRD1 | killer cell<br>lectin-like<br>receptor<br>subfamily<br>D,<br>member 1 | -0.795344 Inlier |
| siRNA Disorazole DMSO Run1   | NM_0073<br>34 | KLRD1 | killer cell<br>lectin-like<br>receptor<br>subfamily<br>D,<br>member 1 | -0.553656 Inlier |
| siRNA-Temozolomide Run2-DMSO | NM_0073<br>34 | KLRD1 | killer cell<br>lectin-like<br>receptor<br>subfamily<br>D,<br>member 1 | -0.141145 Inlier |

Identification of Survival Genes in Human Glioblastoma Cells Using siRNA Screening

Nikhil G Thaker, Fang Zhang, Peter R. McDonald, Tong Ying Shun, Michael D Lewen, Ian F. Pollack, and John S. Lazo

Molecular Pharmacology

|                              |               |       |                                                                       |           |        |
|------------------------------|---------------|-------|-----------------------------------------------------------------------|-----------|--------|
| siRNA-Temozolomide Run3-DMSO | NM_0073<br>34 | KLRD1 | killer cell<br>lectin-like<br>receptor<br>subfamily<br>D,<br>member 1 | 0.141145  | Inlier |
| siRNA-Temozolomide Run1-DMSO | NM_0073<br>34 | KLRD1 | killer cell<br>lectin-like<br>receptor<br>subfamily<br>D,<br>member 1 | 0.398286  | Inlier |
| siRNA-Vinblastine Run1-DMSO  | NM_0073<br>34 | KLRD1 | killer cell<br>lectin-like<br>receptor<br>subfamily<br>D,<br>member 1 | 1.596991  | Inlier |
| siRNA Disorazole DMSO Run2   | NM_0073<br>34 | KLRD1 | killer cell<br>lectin-like<br>receptor<br>subfamily<br>D,<br>member 1 | 2.595978  | Inlier |
| siRNA-Vinblastine Run2-DMSO  | NM_0165<br>23 | KLRF1 | killer cell<br>lectin-like<br>receptor<br>subfamily<br>F,<br>member 1 | -2.084876 | Inlier |
| siRNA Disorazole DMSO Run3   | NM_0165<br>23 | KLRF1 | killer cell<br>lectin-like<br>receptor<br>subfamily<br>F,<br>member 1 | -1.168521 | Inlier |
| siRNA Disorazole DMSO Run1   | NM_0165<br>23 | KLRF1 | killer cell<br>lectin-like<br>receptor<br>subfamily<br>F,<br>member 1 | -0.180479 | Inlier |
| siRNA-Temozolomide Run2-DMSO | NM_0165<br>23 | KLRF1 | killer cell<br>lectin-like<br>receptor<br>subfamily<br>F,<br>member 1 | -0.074519 | Inlier |

Identification of Survival Genes in Human Glioblastoma Cells Using siRNA Screening

Nikhil G Thaker, Fang Zhang, Peter R. McDonald, Tong Ying Shun, Michael D Lewen, Ian F. Pollack, and John S. Lazo

Molecular Pharmacology

|                              |               |       |                                                                       |           |         |
|------------------------------|---------------|-------|-----------------------------------------------------------------------|-----------|---------|
| siRNA-Temozolomide Run3-DMSO | NM_0165<br>23 | KLRF1 | killer cell<br>lectin-like<br>receptor<br>subfamily<br>F,<br>member 1 | 0.074517  | Inlier  |
| siRNA-Temozolomide Run1-DMSO | NM_0165<br>23 | KLRF1 | killer cell<br>lectin-like<br>receptor<br>subfamily<br>F,<br>member 1 | 0.112449  | Inlier  |
| siRNA-Vinblastine Run1-DMSO  | NM_0165<br>23 | KLRF1 | killer cell<br>lectin-like<br>receptor<br>subfamily<br>F,<br>member 1 | 2.277171  | Inlier  |
| siRNA Disorazole DMSO Run2   | NM_0165<br>23 | KLRF1 | killer cell<br>lectin-like<br>receptor<br>subfamily<br>F,<br>member 1 | 3.982291  | Outlier |
| siRNA-Vinblastine Run2-DMSO  | NM_0058<br>10 | KLRG1 | killer cell<br>lectin-like<br>receptor<br>subfamily<br>G,<br>member 1 | -1.095429 | Inlier  |
| siRNA Disorazole DMSO Run3   | NM_0058<br>10 | KLRG1 | killer cell<br>lectin-like<br>receptor<br>subfamily<br>G,<br>member 1 | -0.431379 | Inlier  |
| siRNA-Temozolomide Run2-DMSO | NM_0058<br>10 | KLRG1 | killer cell<br>lectin-like<br>receptor<br>subfamily<br>G,<br>member 1 | -0.336539 | Inlier  |
| siRNA-Temozolomide Run3-DMSO | NM_0058<br>10 | KLRG1 | killer cell<br>lectin-like<br>receptor<br>subfamily<br>G,<br>member 1 | -0.051766 | Inlier  |



Identification of Survival Genes in Human Glioblastoma Cells Using siRNA Screening  
 Nikhil G Thaker, Fang Zhang, Peter R. McDonald, Tong Ying Shun, Michael D Lewen, Ian F. Pollack, and John S. Lazo

Molecular Pharmacology

|                                  |               |       |                                                                                 |           |        |
|----------------------------------|---------------|-------|---------------------------------------------------------------------------------|-----------|--------|
| siRNA Disorazole DMSO Run1       | NM_0058<br>10 | KLRG1 | killer cell<br>lectin-like<br>receptor<br>subfamily<br>G,<br>member 1           | 0.051766  | Inlier |
| siRNA-Temozolomide Run1-<br>DMSO | NM_0058<br>10 | KLRG1 | killer cell<br>lectin-like<br>receptor<br>subfamily<br>G,<br>member 1           | 0.917621  | Inlier |
| siRNA-Vinblastine Run1-<br>DMSO  | NM_0058<br>10 | KLRG1 | killer cell<br>lectin-like<br>receptor<br>subfamily<br>G,<br>member 1           | 2.333082  | Inlier |
| siRNA Disorazole DMSO Run2       | NM_0058<br>10 | KLRG1 | killer cell<br>lectin-like<br>receptor<br>subfamily<br>G,<br>member 1           | 2.477989  | Inlier |
| siRNA-Temozolomide Run3-<br>DMSO | NM_0036<br>79 | KMO   | kynurenine<br>3-<br>monooxyg<br>enase<br>(kynurenin<br>e 3-<br>hydroxylas<br>e) | -2.578841 | Inlier |
| siRNA Disorazole DMSO Run1       | NM_0036<br>79 | KMO   | kynurenine<br>3-<br>monooxyg<br>enase<br>(kynurenin<br>e 3-<br>hydroxylas<br>e) | -0.623447 | Inlier |
| siRNA-Vinblastine Run2-<br>DMSO  | NM_0036<br>79 | KMO   | kynurenine<br>3-<br>monooxyg<br>enase<br>(kynurenin<br>e 3-<br>hydroxylas<br>e) | -0.311493 | Inlier |

Identification of Survival Genes in Human Glioblastoma Cells Using siRNA Screening  
 Nikhil G Thaker, Fang Zhang, Peter R. McDonald, Tong Ying Shun, Michael D Lewen, Ian F. Pollack, and John S. Lazo

Molecular Pharmacology

|                                  |               |      |                                                                                 |           |         |
|----------------------------------|---------------|------|---------------------------------------------------------------------------------|-----------|---------|
| siRNA Disorazole DMSO Run3       | NM_0036<br>79 | KMO  | kynurenine<br>3-<br>monooxyg<br>enase<br>(kynurenin<br>e 3-<br>hydroxylas<br>e) | -0.151335 | Inlier  |
| siRNA-Temozolomide Run2-<br>DMSO | NM_0036<br>79 | KMO  | kynurenine<br>3-<br>monooxyg<br>enase<br>(kynurenin<br>e 3-<br>hydroxylas<br>e) | 0.151335  | Inlier  |
| siRNA-Temozolomide Run1-<br>DMSO | NM_0036<br>79 | KMO  | kynurenine<br>3-<br>monooxyg<br>enase<br>(kynurenin<br>e 3-<br>hydroxylas<br>e) | 0.725553  | Inlier  |
| siRNA-Vinblastine Run1-<br>DMSO  | NM_0036<br>79 | KMO  | kynurenine<br>3-<br>monooxyg<br>enase<br>(kynurenin<br>e 3-<br>hydroxylas<br>e) | 2.291025  | Inlier  |
| siRNA Disorazole DMSO Run2       | NM_0036<br>79 | KMO  | kynurenine<br>3-<br>monooxyg<br>enase<br>(kynurenin<br>e 3-<br>hydroxylas<br>e) | 3.981728  | Outlier |
| siRNA-Temozolomide Run2-<br>DMSO | NM_0008<br>93 | KNG1 | kininogen<br>1                                                                  | -0.841625 | Inlier  |
| siRNA-Temozolomide Run3-<br>DMSO | NM_0008<br>93 | KNG1 | kininogen<br>1                                                                  | -0.753058 | Inlier  |
| siRNA-Temozolomide Run1-<br>DMSO | NM_0008<br>93 | KNG1 | kininogen<br>1                                                                  | -0.247864 | Inlier  |
| siRNA Disorazole DMSO Run3       | NM_0008<br>93 | KNG1 | kininogen<br>1                                                                  | -0.044848 | Inlier  |
| siRNA Disorazole DMSO Run1       | NM_0008<br>93 | KNG1 | kininogen<br>1                                                                  | 0.044848  | Inlier  |
| siRNA-Vinblastine Run2-<br>DMSO  | NM_0008<br>93 | KNG1 | kininogen<br>1                                                                  | 0.595942  | Inlier  |

Identification of Survival Genes in Human Glioblastoma Cells Using siRNA Screening  
 Nikhil G Thaker, Fang Zhang, Peter R. McDonald, Tong Ying Shun, Michael D Lewen, Ian F. Pollack, and John S. Lazo

| siRNA/Vinblastine Run            | Gene  | Accession     | Protein               | Log2FC    | Outlier |
|----------------------------------|-------|---------------|-----------------------|-----------|---------|
| siRNA-Vinblastine Run1-<br>DMSO  | KNG1  | NM_0008<br>93 | kininogen<br>1        | 0.942055  | Inlier  |
| siRNA Disorazole DMSO Run2       | KNG1  | NM_0008<br>93 | kininogen<br>1        | 0.961838  | Inlier  |
| siRNA-Temozolomide Run3-<br>DMSO | KNS2  | NM_1829<br>23 | kinesin 2<br>60/70kDa | -1.581279 | Inlier  |
| siRNA-Vinblastine Run2-<br>DMSO  | KNS2  | NM_1829<br>23 | kinesin 2<br>60/70kDa | -0.971173 | Inlier  |
| siRNA Disorazole DMSO Run3       | KNS2  | NM_1829<br>23 | kinesin 2<br>60/70kDa | -0.879717 | Inlier  |
| siRNA-Temozolomide Run2-<br>DMSO | KNS2  | NM_1829<br>23 | kinesin 2<br>60/70kDa | -0.156884 | Inlier  |
| siRNA Disorazole DMSO Run1       | KNS2  | NM_1829<br>23 | kinesin 2<br>60/70kDa | 0.156884  | Inlier  |
| siRNA-Temozolomide Run1-<br>DMSO | KNS2  | NM_1829<br>23 | kinesin 2<br>60/70kDa | 0.392571  | Inlier  |
| siRNA Disorazole DMSO Run2       | KNS2  | NM_1829<br>23 | kinesin 2<br>60/70kDa | 0.469283  | Inlier  |
| siRNA-Vinblastine Run1-<br>DMSO  | KNS2  | NM_1829<br>23 | kinesin 2<br>60/70kDa | 1.208892  | Inlier  |
| siRNA Disorazole DMSO Run3       | KNSL7 | NM_0202<br>42 | kinesin-<br>like 7    | -0.982347 | Inlier  |
| siRNA-Vinblastine Run2-<br>DMSO  | KNSL7 | NM_0202<br>42 | kinesin-<br>like 7    | -0.625383 | Inlier  |
| siRNA-Temozolomide Run3-<br>DMSO | KNSL7 | NM_0202<br>42 | kinesin-<br>like 7    | -0.459951 | Inlier  |
| siRNA-Temozolomide Run2-<br>DMSO | KNSL7 | NM_0202<br>42 | kinesin-<br>like 7    | -0.405903 | Inlier  |
| siRNA-Temozolomide Run1-<br>DMSO | KNSL7 | NM_0202<br>42 | kinesin-<br>like 7    | 0.405903  | Inlier  |
| siRNA Disorazole DMSO Run2       | KNSL7 | NM_0202<br>42 | kinesin-<br>like 7    | 0.723617  | Inlier  |
| siRNA Disorazole DMSO Run1       | KNSL7 | NM_0202<br>42 | kinesin-<br>like 7    | 0.914991  | Inlier  |
| siRNA-Vinblastine Run1-<br>DMSO  | KNSL7 | NM_0202<br>42 | kinesin-<br>like 7    | 1.918414  | Inlier  |
| siRNA-Temozolomide Run3-<br>DMSO | KNSL8 | NM_2015<br>22 | kinesin-<br>like 8    | -1.303582 | Inlier  |
| siRNA-Temozolomide Run2-<br>DMSO | KNSL8 | NM_2015<br>22 | kinesin-<br>like 8    | -0.980592 | Inlier  |
| siRNA-Vinblastine Run2-<br>DMSO  | KNSL8 | NM_2015<br>22 | kinesin-<br>like 8    | -0.357982 | Inlier  |
| siRNA Disorazole DMSO Run3       | KNSL8 | NM_2015<br>22 | kinesin-<br>like 8    | -0.234219 | Inlier  |
| siRNA-Temozolomide Run1-<br>DMSO | KNSL8 | NM_2015<br>22 | kinesin-<br>like 8    | 0.23422   | Inlier  |
| siRNA Disorazole DMSO Run1       | KNSL8 | NM_2015<br>22 | kinesin-<br>like 8    | 0.368408  | Inlier  |
| siRNA-Vinblastine Run1-<br>DMSO  | KNSL8 | NM_2015<br>22 | kinesin-<br>like 8    | 1.196057  | Inlier  |
| siRNA Disorazole DMSO Run2       | KNSL8 | NM_2015<br>22 | kinesin-<br>like 8    | 1.309452  | Inlier  |

Identification of Survival Genes in Human Glioblastoma Cells Using siRNA Screening  
 Nikhil G Thaker, Fang Zhang, Peter R. McDonald, Tong Ying Shun, Michael D Lewen, Ian F. Pollack, and John S. Lazo  
 Molecular Pharmacology

|                                  |               |       |                                                                     |           |        |
|----------------------------------|---------------|-------|---------------------------------------------------------------------|-----------|--------|
| siRNA Disorazole DMSO Run1       | NM_0333<br>60 | KRAS2 | v-Ki-ras2<br>Kirsten rat<br>sarcoma<br>viral<br>oncogene<br>homolog | -2.07503  | Inlier |
| siRNA Disorazole DMSO Run3       | NM_0333<br>60 | KRAS2 | v-Ki-ras2<br>Kirsten rat<br>sarcoma<br>viral<br>oncogene<br>homolog | -0.716227 | Inlier |
| siRNA-Vinblastine Run2-<br>DMSO  | NM_0333<br>60 | KRAS2 | v-Ki-ras2<br>Kirsten rat<br>sarcoma<br>viral<br>oncogene<br>homolog | -0.632773 | Inlier |
| siRNA-Temozolomide Run1-<br>DMSO | NM_0333<br>60 | KRAS2 | v-Ki-ras2<br>Kirsten rat<br>sarcoma<br>viral<br>oncogene<br>homolog | -0.104912 | Inlier |
| siRNA-Temozolomide Run2-<br>DMSO | NM_0333<br>60 | KRAS2 | v-Ki-ras2<br>Kirsten rat<br>sarcoma<br>viral<br>oncogene<br>homolog | 0.104911  | Inlier |
| siRNA-Temozolomide Run3-<br>DMSO | NM_0333<br>60 | KRAS2 | v-Ki-ras2<br>Kirsten rat<br>sarcoma<br>viral<br>oncogene<br>homolog | 0.233952  | Inlier |
| siRNA Disorazole DMSO Run2       | NM_0333<br>60 | KRAS2 | v-Ki-ras2<br>Kirsten rat<br>sarcoma<br>viral<br>oncogene<br>homolog | 1.385083  | Inlier |

Identification of Survival Genes in Human Glioblastoma Cells Using siRNA Screening

Nikhil G Thaker, Fang Zhang, Peter R. McDonald, Tong Ying Shun, Michael D Lewen, Ian F. Pollack, and John S. Lazo

Molecular Pharmacology

| siRNA Treatment              | Gene ID   | Gene Name | Gene Description                                     | Log Fold Change | Outlier Status |
|------------------------------|-----------|-----------|------------------------------------------------------|-----------------|----------------|
| siRNA-Vinblastine Run1-DMSO  | NM_033360 | KRAS2     | v-Ki-ras2 Kirsten rat sarcoma viral oncogene homolog | 1.649628        | Inlier         |
| siRNA-Temozolomide Run3-DMSO | NM_153379 | KREMEN1   | kringle containing transmembrane protein 1           | -1.395924       | Inlier         |
| siRNA-Temozolomide Run2-DMSO | NM_153379 | KREMEN1   | kringle containing transmembrane protein 1           | -0.800678       | Inlier         |
| siRNA Disorazole DMSO Run1   | NM_153379 | KREMEN1   | kringle containing transmembrane protein 1           | -0.548322       | Inlier         |
| siRNA Disorazole DMSO Run2   | NM_153379 | KREMEN1   | kringle containing transmembrane protein 1           | -0.029929       | Inlier         |
| siRNA-Vinblastine Run1-DMSO  | NM_153379 | KREMEN1   | kringle containing transmembrane protein 1           | 0.029929        | Inlier         |
| siRNA-Temozolomide Run1-DMSO | NM_153379 | KREMEN1   | kringle containing transmembrane protein 1           | 0.097314        | Inlier         |
| siRNA Disorazole DMSO Run3   | NM_153379 | KREMEN1   | kringle containing transmembrane protein 1           | 0.936635        | Inlier         |
| siRNA-Vinblastine Run2-DMSO  | NM_153379 | KREMEN1   | kringle containing transmembrane protein 1           | 1.789449        | Inlier         |
| siRNA-Temozolomide Run3-DMSO | NM_024507 | KREMEN2   | kringle containing transmembrane protein 2           | -1.032613       | Inlier         |

Identification of Survival Genes in Human Glioblastoma Cells Using siRNA Screening  
 Nikhil G Thaker, Fang Zhang, Peter R. McDonald, Tong Ying Shun, Michael D Lewen, Ian F. Pollack, and John S. Lazo

Molecular Pharmacology

|                                  |               |         |                                                         |           |        |
|----------------------------------|---------------|---------|---------------------------------------------------------|-----------|--------|
| siRNA Disorazole DMSO Run3       | NM_0245<br>07 | KREMEN2 | kringle<br>containing<br>transmem<br>brane<br>protein 2 | -0.557715 | Inlier |
| siRNA Disorazole DMSO Run2       | NM_0245<br>07 | KREMEN2 | kringle<br>containing<br>transmem<br>brane<br>protein 2 | -0.552487 | Inlier |
| siRNA-Temozolomide Run2-<br>DMSO | NM_0245<br>07 | KREMEN2 | kringle<br>containing<br>transmem<br>brane<br>protein 2 | -0.543334 | Inlier |
| siRNA-Temozolomide Run1-<br>DMSO | NM_0245<br>07 | KREMEN2 | kringle<br>containing<br>transmem<br>brane<br>protein 2 | 0.543334  | Inlier |
| siRNA Disorazole DMSO Run1       | NM_0245<br>07 | KREMEN2 | kringle<br>containing<br>transmem<br>brane<br>protein 2 | 0.791285  | Inlier |
| siRNA-Vinblastine Run1-<br>DMSO  | NM_0245<br>07 | KREMEN2 | kringle<br>containing<br>transmem<br>brane<br>protein 2 | 1.194681  | Inlier |
| siRNA-Vinblastine Run2-<br>DMSO  | NM_0245<br>07 | KREMEN2 | kringle<br>containing<br>transmem<br>brane<br>protein 2 | 1.228369  | Inlier |
| siRNA-Temozolomide Run3-<br>DMSO | NM_1735<br>98 | KSR2    | kinase<br>suppresso<br>r of ras 2                       | -1.611099 | Inlier |
| siRNA-Temozolomide Run2-<br>DMSO | NM_1735<br>98 | KSR2    | kinase<br>suppresso<br>r of ras 2                       | -1.102095 | Inlier |
| siRNA-Vinblastine Run1-<br>DMSO  | NM_1735<br>98 | KSR2    | kinase<br>suppresso<br>r of ras 2                       | -0.217252 | Inlier |
| siRNA-Temozolomide Run1-<br>DMSO | NM_1735<br>98 | KSR2    | kinase<br>suppresso<br>r of ras 2                       | -0.135778 | Inlier |
| siRNA Disorazole DMSO Run2       | NM_1735<br>98 | KSR2    | kinase<br>suppresso<br>r of ras 2                       | 0.135779  | Inlier |

Identification of Survival Genes in Human Glioblastoma Cells Using siRNA Screening  
 Nikhil G Thaker, Fang Zhang, Peter R. McDonald, Tong Ying Shun, Michael D Lewen, Ian F. Pollack, and John S. Lazo

Molecular Pharmacology

|                                  |               |         |                                                  |           |        |
|----------------------------------|---------------|---------|--------------------------------------------------|-----------|--------|
| siRNA Disorazole DMSO Run1       | NM_1735<br>98 | KSR2    | kinase<br>suppresso<br>r of ras 2                | 0.246905  | Inlier |
| siRNA-Vinblastine Run2-<br>DMSO  | NM_1735<br>98 | KSR2    | kinase<br>suppresso<br>r of ras 2                | 1.139879  | Inlier |
| siRNA Disorazole DMSO Run3       | NM_1735<br>98 | KSR2    | suppresso<br>r of ras 2                          | 1.30641   | Inlier |
| siRNA Disorazole DMSO Run3       | NM_1992<br>03 | Kua-UEV | Kua-UEV                                          | -1.52444  | Inlier |
| siRNA-Temozolomide Run3-<br>DMSO | NM_1992<br>03 | Kua-UEV | Kua-UEV                                          | -1.137617 | Inlier |
| siRNA-Vinblastine Run2-<br>DMSO  | NM_1992<br>03 | Kua-UEV | Kua-UEV                                          | -1.101915 | Inlier |
| siRNA-Temozolomide Run1-<br>DMSO | NM_1992<br>03 | Kua-UEV | Kua-UEV                                          | -0.080291 | Inlier |
| siRNA Disorazole DMSO Run1       | NM_1992<br>03 | Kua-UEV | Kua-UEV                                          | 0.080293  | Inlier |
| siRNA Disorazole DMSO Run2       | NM_1992<br>03 | Kua-UEV | Kua-UEV                                          | 0.148964  | Inlier |
| siRNA-Temozolomide Run2-<br>DMSO | NM_1992<br>03 | Kua-UEV | Kua-UEV                                          | 0.247084  | Inlier |
| siRNA-Vinblastine Run1-<br>DMSO  | NM_1992<br>03 | Kua-UEV | Kua-UEV                                          | 1.383548  | Inlier |
| siRNA-Temozolomide Run3-<br>DMSO | NM_0039<br>37 | KYNU    | kynurenina<br>se (L-<br>kynurenine<br>hydrolase) | -1.083112 | Inlier |
| siRNA-Vinblastine Run2-<br>DMSO  | NM_0039<br>37 | KYNU    | kynurenina<br>se (L-<br>kynurenine<br>hydrolase) | -0.677706 | Inlier |
| siRNA-Temozolomide Run2-<br>DMSO | NM_0039<br>37 | KYNU    | kynurenina<br>se (L-<br>kynurenine<br>hydrolase) | -0.671294 | Inlier |
| siRNA-Temozolomide Run1-<br>DMSO | NM_0039<br>37 | KYNU    | kynurenina<br>se (L-<br>kynurenine<br>hydrolase) | -0.076822 | Inlier |

Identification of Survival Genes in Human Glioblastoma Cells Using siRNA Screening  
 Nikhil G Thaker, Fang Zhang, Peter R. McDonald, Tong Ying Shun, Michael D Lewen, Ian F. Pollack, and John S. Lazo  
 Molecular Pharmacology

|                              |               |        |                                                            |           |         |
|------------------------------|---------------|--------|------------------------------------------------------------|-----------|---------|
| siRNA Disorazole DMSO Run1   | NM_0039<br>37 | KYNU   | kynureninase (L-kynurenine hydrolase)                      | 0.076822  | Inlier  |
| siRNA Disorazole DMSO Run3   | NM_0039<br>37 | KYNU   | kynureninase (L-kynurenine hydrolase)                      | 0.159932  | Inlier  |
| siRNA-Vinblastine Run1-DMSO  | NM_0039<br>37 | KYNU   | kynureninase (L-kynurenine hydrolase)                      | 0.852121  | Inlier  |
| siRNA Disorazole DMSO Run2   | NM_0039<br>37 | KYNU   | kynureninase (L-kynurenine hydrolase)                      | 1.043979  | Inlier  |
| siRNA Disorazole DMSO Run2   | NM_0251<br>44 | LAK    | alpha-kinase 1                                             | -4.321755 | Outlier |
| siRNA-Temozolomide Run3-DMSO | NM_0251<br>44 | LAK    | alpha-kinase 1                                             | -2.653456 | Inlier  |
| siRNA Disorazole DMSO Run3   | NM_0251<br>44 | LAK    | alpha-kinase 1                                             | -1.78293  | Inlier  |
| siRNA Disorazole DMSO Run1   | NM_0251<br>44 | LAK    | alpha-kinase 1                                             | -0.244637 | Inlier  |
| siRNA-Temozolomide Run2-DMSO | NM_0251<br>44 | LAK    | alpha-kinase 1                                             | 0.244637  | Inlier  |
| siRNA-Temozolomide Run1-DMSO | NM_0251<br>44 | LAK    | alpha-kinase 1                                             | 0.299133  | Inlier  |
| siRNA-Vinblastine Run1-DMSO  | NM_0251<br>44 | LAK    | alpha-kinase 1                                             | 0.421564  | Inlier  |
| siRNA-Vinblastine Run2-DMSO  | NM_0251<br>44 | LAK    | alpha-kinase 1                                             | 0.927436  | Inlier  |
| siRNA-Temozolomide Run3-DMSO | NM_0060<br>55 | LANCL1 | LanC lantibiotic synthetase component C-like 1 (bacterial) | -1.968875 | Inlier  |



Identification of Survival Genes in Human Glioblastoma Cells Using siRNA Screening

Nikhil G Thaker, Fang Zhang, Peter R. McDonald, Tong Ying Shun, Michael D Lewen, Ian F. Pollack, and John S. Lazo

Molecular Pharmacology

|                                  |               |        |                                                                            |           |        |
|----------------------------------|---------------|--------|----------------------------------------------------------------------------|-----------|--------|
| siRNA Disorazole DMSO Run2       | NM_0060<br>55 | LANCL1 | LanC<br>lantibiotic<br>synthetase<br>componen<br>t C-like 1<br>(bacterial) | -0.740768 | Inlier |
| siRNA-Temozolomide Run2-<br>DMSO | NM_0060<br>55 | LANCL1 | LanC<br>lantibiotic<br>synthetase<br>componen<br>t C-like 1<br>(bacterial) | -0.170406 | Inlier |
| siRNA Disorazole DMSO Run1       | NM_0060<br>55 | LANCL1 | LanC<br>lantibiotic<br>synthetase<br>componen<br>t C-like 1<br>(bacterial) | -0.01649  | Inlier |
| siRNA-Temozolomide Run1-<br>DMSO | NM_0060<br>55 | LANCL1 | LanC<br>lantibiotic<br>synthetase<br>componen<br>t C-like 1<br>(bacterial) | 0.016491  | Inlier |
| siRNA-Vinblastine Run2-<br>DMSO  | NM_0060<br>55 | LANCL1 | LanC<br>lantibiotic<br>synthetase<br>componen<br>t C-like 1<br>(bacterial) | 0.608232  | Inlier |
| siRNA-Vinblastine Run1-<br>DMSO  | NM_0060<br>55 | LANCL1 | LanC<br>lantibiotic<br>synthetase<br>componen<br>t C-like 1<br>(bacterial) | 1.044434  | Inlier |
| siRNA Disorazole DMSO Run3       | NM_0060<br>55 | LANCL1 | LanC<br>lantibiotic<br>synthetase<br>componen<br>t C-like 1<br>(bacterial) | 1.451118  | Inlier |
| siRNA-Temozolomide Run3-<br>DMSO | NM_0159<br>07 | LAP3   | leucine<br>aminopept<br>idase 3                                            | -1.282743 | Inlier |

Identification of Survival Genes in Human Glioblastoma Cells Using siRNA Screening  
 Nikhil G Thaker, Fang Zhang, Peter R. McDonald, Tong Ying Shun, Michael D Lewen, Ian F. Pollack, and John S. Lazo

Molecular Pharmacology

|                                  |               |       |                                  |           |        |
|----------------------------------|---------------|-------|----------------------------------|-----------|--------|
| siRNA Disorazole DMSO Run2       | NM_0159<br>07 | LAP3  | leucine<br>aminopept<br>idase 3  | -0.68107  | Inlier |
| siRNA-Temozolomide Run2-<br>DMSO | NM_0159<br>07 | LAP3  | leucine<br>aminopept<br>idase 3  | -0.66793  | Inlier |
| siRNA Disorazole DMSO Run3       | NM_0159<br>07 | LAP3  | leucine<br>aminopept<br>idase 3  | -0.052117 | Inlier |
| siRNA-Temozolomide Run1-<br>DMSO | NM_0159<br>07 | LAP3  | leucine<br>aminopept<br>idase 3  | 0.052117  | Inlier |
| siRNA Disorazole DMSO Run1       | NM_0159<br>07 | LAP3  | leucine<br>aminopept<br>idase 3  | 0.284642  | Inlier |
| siRNA-Vinblastine Run2-<br>DMSO  | NM_0159<br>07 | LAP3  | leucine<br>aminopept<br>idase 3  | 1.107346  | Inlier |
| siRNA-Vinblastine Run1-<br>DMSO  | NM_0159<br>07 | LAP3  | leucine<br>aminopept<br>idase 3  | 1.312511  | Inlier |
| siRNA-Temozolomide Run1-<br>DMSO | NM_1336<br>42 | LARGE | like-<br>glycosyltra<br>nsferase | -0.849589 | Inlier |
| siRNA-Temozolomide Run2-<br>DMSO | NM_1336<br>42 | LARGE | like-<br>glycosyltra<br>nsferase | -0.696216 | Inlier |
| siRNA Disorazole DMSO Run1       | NM_1336<br>42 | LARGE | like-<br>glycosyltra<br>nsferase | -0.614868 | Inlier |
| siRNA Disorazole DMSO Run3       | NM_1336<br>42 | LARGE | like-<br>glycosyltra<br>nsferase | -0.071788 | Inlier |
| siRNA-Vinblastine Run2-<br>DMSO  | NM_1336<br>42 | LARGE | like-<br>glycosyltra<br>nsferase | 0.071788  | Inlier |
| siRNA-Temozolomide Run3-<br>DMSO | NM_1336<br>42 | LARGE | like-<br>glycosyltra<br>nsferase | 0.652784  | Inlier |
| siRNA-Vinblastine Run1-<br>DMSO  | NM_1336<br>42 | LARGE | like-<br>glycosyltra<br>nsferase | 0.763781  | Inlier |
| siRNA Disorazole DMSO Run2       | NM_1336<br>42 | LARGE | like-<br>glycosyltra<br>nsferase | 0.841659  | Inlier |
| siRNA-Temozolomide Run3-<br>DMSO | NM_0201<br>17 | LARS  | leucyl-<br>tRNA<br>synthetase    | -0.955005 | Inlier |

Identification of Survival Genes in Human Glioblastoma Cells Using siRNA Screening  
 Nikhil G Thaker, Fang Zhang, Peter R. McDonald, Tong Ying Shun, Michael D Lewen, Ian F. Pollack, and John S. Lazo  
 Molecular Pharmacology

|                                  |               |       |                                                          |           |        |
|----------------------------------|---------------|-------|----------------------------------------------------------|-----------|--------|
| siRNA Disorazole DMSO Run1       | NM_0201<br>17 | LARS  | leucyl-<br>tRNA<br>synthetase                            | -0.393995 | Inlier |
| siRNA Disorazole DMSO Run3       | NM_0201<br>17 | LARS  | leucyl-<br>tRNA<br>synthetase                            | -0.264166 | Inlier |
| siRNA-Temozolomide Run1-<br>DMSO | NM_0201<br>17 | LARS  | leucyl-<br>tRNA<br>synthetase                            | -0.066327 | Inlier |
| siRNA-Temozolomide Run2-<br>DMSO | NM_0201<br>17 | LARS  | leucyl-<br>tRNA<br>synthetase                            | 0.066326  | Inlier |
| siRNA-Vinblastine Run2-<br>DMSO  | NM_0201<br>17 | LARS  | leucyl-<br>tRNA<br>synthetase                            | 1.830522  | Inlier |
| siRNA-Vinblastine Run1-<br>DMSO  | NM_0201<br>17 | LARS  | leucyl-<br>tRNA<br>synthetase                            | 2.011567  | Inlier |
| siRNA Disorazole DMSO Run2       | NM_0201<br>17 | LARS  | leucyl-<br>tRNA<br>synthetase                            | 2.101422  | Inlier |
| siRNA-Temozolomide Run2-<br>DMSO | NM_0153<br>40 | LARS2 | leucyl-<br>tRNA<br>synthetase<br>2,<br>mitochond<br>rial | -1.898921 | Inlier |
| siRNA Disorazole DMSO Run1       | NM_0153<br>40 | LARS2 | leucyl-<br>tRNA<br>synthetase<br>2,<br>mitochond<br>rial | -1.488428 | Inlier |
| siRNA-Temozolomide Run3-<br>DMSO | NM_0153<br>40 | LARS2 | leucyl-<br>tRNA<br>synthetase<br>2,<br>mitochond<br>rial | -0.458468 | Inlier |
| siRNA-Temozolomide Run1-<br>DMSO | NM_0153<br>40 | LARS2 | leucyl-<br>tRNA<br>synthetase<br>2,<br>mitochond<br>rial | -0.432392 | Inlier |

Identification of Survival Genes in Human Glioblastoma Cells Using siRNA Screening  
 Nikhil G Thaker, Fang Zhang, Peter R. McDonald, Tong Ying Shun, Michael D Lewen, Ian F. Pollack, and John S. Lazo

Molecular Pharmacology

|                                  |               |          |                                                                             |           |        |
|----------------------------------|---------------|----------|-----------------------------------------------------------------------------|-----------|--------|
| siRNA Disorazole DMSO Run3       | NM_0153<br>40 | LARS2    | leucyl-<br>tRNA<br>synthetase<br>2,<br>mitochond<br>rial                    | 0.432392  | Inlier |
| siRNA-Vinblastine Run2-<br>DMSO  | NM_0153<br>40 | LARS2    | leucyl-<br>tRNA<br>synthetase<br>2,<br>mitochond<br>rial                    | 0.568434  | Inlier |
| siRNA Disorazole DMSO Run2       | NM_0153<br>40 | LARS2    | leucyl-<br>tRNA<br>synthetase<br>2,<br>mitochond<br>rial                    | 0.780565  | Inlier |
| siRNA-Vinblastine Run1-<br>DMSO  | NM_0153<br>40 | LARS2    | leucyl-<br>tRNA<br>synthetase<br>2,<br>mitochond<br>rial                    | 1.651297  | Inlier |
| siRNA-Temozolomide Run3-<br>DMSO | NM_0312<br>11 | LAT1-3TM | LAT1-3TM                                                                    | -1.25058  | Inlier |
| siRNA Disorazole DMSO Run2       | NM_0312<br>11 | LAT1-3TM | LAT1-3TM                                                                    | -0.775012 | Inlier |
| siRNA Disorazole DMSO Run1       | NM_0312<br>11 | LAT1-3TM | LAT1-3TM                                                                    | -0.573988 | Inlier |
| siRNA-Temozolomide Run2-<br>DMSO | NM_0312<br>11 | LAT1-3TM | LAT1-3TM                                                                    | -0.147814 | Inlier |
| siRNA-Vinblastine Run2-<br>DMSO  | NM_0312<br>11 | LAT1-3TM | LAT1-3TM                                                                    | 0.147814  | Inlier |
| siRNA Disorazole DMSO Run3       | NM_0312<br>11 | LAT1-3TM | LAT1-3TM                                                                    | 0.539728  | Inlier |
| siRNA-Temozolomide Run1-<br>DMSO | NM_0312<br>11 | LAT1-3TM | LAT1-3TM                                                                    | 0.932634  | Inlier |
| siRNA-Vinblastine Run1-<br>DMSO  | NM_0312<br>11 | LAT1-3TM | LAT1-3TM                                                                    | 2.466784  | Inlier |
| siRNA Disorazole DMSO Run2       | NM_0046<br>90 | LATS1    | LATS,<br>large<br>tumor<br>suppresso<br>r, homolog<br>1<br>(Drosophil<br>a) | -0.93385  | Inlier |

Identification of Survival Genes in Human Glioblastoma Cells Using siRNA Screening

Nikhil G Thaker, Fang Zhang, Peter R. McDonald, Tong Ying Shun, Michael D Lewen, Ian F. Pollack, and John S.

Lazo

Molecular Pharmacology

|                                  |               |       |                                                                             |           |        |
|----------------------------------|---------------|-------|-----------------------------------------------------------------------------|-----------|--------|
| siRNA Disorazole DMSO Run3       | NM_0046<br>90 | LATS1 | LATS,<br>large<br>tumor<br>suppresso<br>r, homolog<br>1<br>(Drosophil<br>a) | -0.844419 | Inlier |
| siRNA-Temozolomide Run3-<br>DMSO | NM_0046<br>90 | LATS1 | LATS,<br>large<br>tumor<br>suppresso<br>r, homolog<br>1<br>(Drosophil<br>a) | -0.690831 | Inlier |
| siRNA-Temozolomide Run2-<br>DMSO | NM_0046<br>90 | LATS1 | LATS,<br>large<br>tumor<br>suppresso<br>r, homolog<br>1<br>(Drosophil<br>a) | -0.134358 | Inlier |
| siRNA-Temozolomide Run1-<br>DMSO | NM_0046<br>90 | LATS1 | LATS,<br>large<br>tumor<br>suppresso<br>r, homolog<br>1<br>(Drosophil<br>a) | 0.134358  | Inlier |
| siRNA-Vinblastine Run1-<br>DMSO  | NM_0046<br>90 | LATS1 | LATS,<br>large<br>tumor<br>suppresso<br>r, homolog<br>1<br>(Drosophil<br>a) | 0.574392  | Inlier |

Identification of Survival Genes in Human Glioblastoma Cells Using siRNA Screening  
 Nikhil G Thaker, Fang Zhang, Peter R. McDonald, Tong Ying Shun, Michael D Lewen, Ian F. Pollack, and John S. Lazo  
 Molecular Pharmacology

|                                  |               |       |                                                                             |                   |
|----------------------------------|---------------|-------|-----------------------------------------------------------------------------|-------------------|
| siRNA Disorazole DMSO Run1       | NM_0046<br>90 | LATS1 | LATS,<br>large<br>tumor<br>suppresso<br>r, homolog<br>1<br>(Drosophil<br>a) | 0.658169 Inlier   |
| siRNA-Vinblastine Run2-<br>DMSO  | NM_0046<br>90 | LATS1 | LATS,<br>large<br>tumor<br>suppresso<br>r, homolog<br>1<br>(Drosophil<br>a) | 1.044317 Inlier   |
| siRNA-Temozolomide Run3-<br>DMSO | NM_0145<br>72 | LATS2 | LATS,<br>large<br>tumor<br>suppresso<br>r, homolog<br>2<br>(Drosophil<br>a) | -3.589711 Outlier |
| siRNA-Temozolomide Run1-<br>DMSO | NM_0145<br>72 | LATS2 | LATS,<br>large<br>tumor<br>suppresso<br>r, homolog<br>2<br>(Drosophil<br>a) | -1.55846 Inlier   |
| siRNA Disorazole DMSO Run1       | NM_0145<br>72 | LATS2 | LATS,<br>large<br>tumor<br>suppresso<br>r, homolog<br>2<br>(Drosophil<br>a) | -0.642207 Inlier  |

Identification of Survival Genes in Human Glioblastoma Cells Using siRNA Screening

Nikhil G Thaker, Fang Zhang, Peter R. McDonald, Tong Ying Shun, Michael D Lewen, Ian F. Pollack, and John S.

Lazo

Molecular Pharmacology

|                                  |               |       |                                                                             |           |        |
|----------------------------------|---------------|-------|-----------------------------------------------------------------------------|-----------|--------|
| siRNA Disorazole DMSO Run3       | NM_0145<br>72 | LATS2 | LATS,<br>large<br>tumor<br>suppresso<br>r, homolog<br>2<br>(Drosophil<br>a) | -0.238593 | Inlier |
| siRNA-Temozolomide Run2-<br>DMSO | NM_0145<br>72 | LATS2 | LATS,<br>large<br>tumor<br>suppresso<br>r, homolog<br>2<br>(Drosophil<br>a) | 0.238593  | Inlier |
| siRNA-Vinblastine Run1-<br>DMSO  | NM_0145<br>72 | LATS2 | LATS,<br>large<br>tumor<br>suppresso<br>r, homolog<br>2<br>(Drosophil<br>a) | 0.452987  | Inlier |
| siRNA Disorazole DMSO Run2       | NM_0145<br>72 | LATS2 | LATS,<br>large<br>tumor<br>suppresso<br>r, homolog<br>2<br>(Drosophil<br>a) | 0.706793  | Inlier |
| siRNA-Vinblastine Run2-<br>DMSO  | NM_0145<br>72 | LATS2 | LATS,<br>large<br>tumor<br>suppresso<br>r, homolog<br>2<br>(Drosophil<br>a) | 2.295088  | Inlier |
| siRNA-Temozolomide Run2-<br>DMSO | NM_0041<br>39 | LBP   | lipopolysa<br>ccharide<br>binding<br>protein                                | -0.914311 | Inlier |

Identification of Survival Genes in Human Glioblastoma Cells Using siRNA Screening  
 Nikhil G Thaker, Fang Zhang, Peter R. McDonald, Tong Ying Shun, Michael D Lewen, Ian F. Pollack, and John S. Lazo

Molecular Pharmacology

|                              |               |      |                                      |           |        |
|------------------------------|---------------|------|--------------------------------------|-----------|--------|
| siRNA-Temozolomide Run1-DMSO | NM_0041<br>39 | LBP  | lipopolysaccharide binding protein   | -0.875462 | Inlier |
| siRNA-Vinblastine Run2-DMSO  | NM_0041<br>39 | LBP  | lipopolysaccharide binding protein   | -0.302126 | Inlier |
| siRNA Disorazole DMSO Run3   | NM_0041<br>39 | LBP  | lipopolysaccharide binding protein   | -0.00773  | Inlier |
| siRNA Disorazole DMSO Run1   | NM_0041<br>39 | LBP  | lipopolysaccharide binding protein   | 0.00773   | Inlier |
| siRNA-Temozolomide Run3-DMSO | NM_0041<br>39 | LBP  | lipopolysaccharide binding protein   | 0.473538  | Inlier |
| siRNA-Vinblastine Run1-DMSO  | NM_0041<br>39 | LBP  | lipopolysaccharide binding protein   | 2.217523  | Inlier |
| siRNA Disorazole DMSO Run2   | NM_0041<br>39 | LBP  | lipopolysaccharide binding protein   | 2.482586  | Inlier |
| siRNA-Temozolomide Run3-DMSO | NM_1944<br>42 | LBR  | lamin B receptor                     | -0.899731 | Inlier |
| siRNA-Temozolomide Run2-DMSO | NM_1944<br>42 | LBR  | lamin B receptor                     | -0.789217 | Inlier |
| siRNA-Vinblastine Run2-DMSO  | NM_1944<br>42 | LBR  | lamin B receptor                     | -0.559783 | Inlier |
| siRNA Disorazole DMSO Run1   | NM_1944<br>42 | LBR  | lamin B receptor                     | -0.246451 | Inlier |
| siRNA-Temozolomide Run1-DMSO | NM_1944<br>42 | LBR  | lamin B receptor                     | 0.246451  | Inlier |
| siRNA Disorazole DMSO Run3   | NM_1944<br>42 | LBR  | lamin B receptor                     | 0.291428  | Inlier |
| siRNA-Vinblastine Run1-DMSO  | NM_1944<br>42 | LBR  | lamin B receptor                     | 1.836992  | Inlier |
| siRNA Disorazole DMSO Run2   | NM_1944<br>42 | LBR  | lamin B receptor                     | 1.962777  | Inlier |
| siRNA-Temozolomide Run1-DMSO | NM_0002<br>29 | LCAT | lecithin-cholesterol acyltransferase | -1.144529 | Inlier |



Identification of Survival Genes in Human Glioblastoma Cells Using siRNA Screening  
 Nikhil G Thaker, Fang Zhang, Peter R. McDonald, Tong Ying Shun, Michael D Lewen, Ian F. Pollack, and John S. Lazo  
 Molecular Pharmacology

|                                  |               |      |                                                          |                  |
|----------------------------------|---------------|------|----------------------------------------------------------|------------------|
| siRNA Disorazole DMSO Run1       | NM_0002<br>29 | LCAT | lecithin-<br>cholesterol<br>acyltransfe<br>rase          | -0.70736 Inlier  |
| siRNA-Temozolomide Run3-<br>DMSO | NM_0002<br>29 | LCAT | lecithin-<br>cholesterol<br>acyltransfe<br>rase          | -0.42881 Inlier  |
| siRNA-Temozolomide Run2-<br>DMSO | NM_0002<br>29 | LCAT | lecithin-<br>cholesterol<br>acyltransfe<br>rase          | -0.374682 Inlier |
| siRNA Disorazole DMSO Run3       | NM_0002<br>29 | LCAT | lecithin-<br>cholesterol<br>acyltransfe<br>rase          | 0.374682 Inlier  |
| siRNA-Vinblastine Run2-<br>DMSO  | NM_0002<br>29 | LCAT | lecithin-<br>cholesterol<br>acyltransfe<br>rase          | 0.64164 Inlier   |
| siRNA-Vinblastine Run1-<br>DMSO  | NM_0002<br>29 | LCAT | lecithin-<br>cholesterol<br>acyltransfe<br>rase          | 0.961831 Inlier  |
| siRNA Disorazole DMSO Run2       | NM_0002<br>29 | LCAT | lecithin-<br>cholesterol<br>acyltransfe<br>rase          | 2.085496 Inlier  |
| siRNA Disorazole DMSO Run2       | NM_0053<br>56 | LCK  | lymphocyt<br>e-specific<br>protein<br>tyrosine<br>kinase | -1.217777 Inlier |
| siRNA Disorazole DMSO Run3       | NM_0053<br>56 | LCK  | lymphocyt<br>e-specific<br>protein<br>tyrosine<br>kinase | -0.676575 Inlier |
| siRNA-Temozolomide Run3-<br>DMSO | NM_0053<br>56 | LCK  | lymphocyt<br>e-specific<br>protein<br>tyrosine<br>kinase | -0.564992 Inlier |

Identification of Survival Genes in Human Glioblastoma Cells Using siRNA Screening  
 Nikhil G Thaker, Fang Zhang, Peter R. McDonald, Tong Ying Shun, Michael D Lewen, Ian F. Pollack, and John S. Lazo

Molecular Pharmacology

|                              |               |       |                                                          |           |        |
|------------------------------|---------------|-------|----------------------------------------------------------|-----------|--------|
| siRNA-Temozolomide Run1-DMSO | NM_0053<br>56 | LCK   | lymphocyt<br>e-specific<br>protein<br>tyrosine<br>kinase | -0.428221 | Inlier |
| siRNA Disorazole DMSO Run1   | NM_0053<br>56 | LCK   | lymphocyt<br>e-specific<br>protein<br>tyrosine<br>kinase | 0.428221  | Inlier |
| siRNA-Temozolomide Run2-DMSO | NM_0053<br>56 | LCK   | lymphocyt<br>e-specific<br>protein<br>tyrosine<br>kinase | 0.672425  | Inlier |
| siRNA-Vinblastine Run1-DMSO  | NM_0053<br>56 | LCK   | lymphocyt<br>e-specific<br>protein<br>tyrosine<br>kinase | 1.407009  | Inlier |
| siRNA-Vinblastine Run2-DMSO  | NM_0053<br>56 | LCK   | lymphocyt<br>e-specific<br>protein<br>tyrosine<br>kinase | 1.667143  | Inlier |
| siRNA-Temozolomide Run3-DMSO | NM_0160<br>15 | LCMT1 | leucine<br>carboxyl<br>methyltran<br>sferase 1           | -0.919952 | Inlier |
| siRNA-Temozolomide Run1-DMSO | NM_0160<br>15 | LCMT1 | leucine<br>carboxyl<br>methyltran<br>sferase 1           | -0.429048 | Inlier |
| siRNA Disorazole DMSO Run1   | NM_0160<br>15 | LCMT1 | leucine<br>carboxyl<br>methyltran<br>sferase 1           | -0.330834 | Inlier |
| siRNA-Temozolomide Run2-DMSO | NM_0160<br>15 | LCMT1 | leucine<br>carboxyl<br>methyltran<br>sferase 1           | -0.212811 | Inlier |
| siRNA-Vinblastine Run2-DMSO  | NM_0160<br>15 | LCMT1 | leucine<br>carboxyl<br>methyltran<br>sferase 1           | 0.212811  | Inlier |

Identification of Survival Genes in Human Glioblastoma Cells Using siRNA Screening  
 Nikhil G Thaker, Fang Zhang, Peter R. McDonald, Tong Ying Shun, Michael D Lewen, Ian F. Pollack, and John S. Lazo  
 Molecular Pharmacology

|                                  |               |       |                                                |           |        |
|----------------------------------|---------------|-------|------------------------------------------------|-----------|--------|
| siRNA Disorazole DMSO Run3       | NM_0160<br>15 | LCMT1 | leucine<br>carboxyl<br>methyltran<br>sferase 1 | 0.961473  | Inlier |
| siRNA-Vinblastine Run1-<br>DMSO  | NM_0160<br>15 | LCMT1 | leucine<br>carboxyl<br>methyltran<br>sferase 1 | 1.792057  | Inlier |
| siRNA Disorazole DMSO Run2       | NM_0160<br>15 | LCMT1 | leucine<br>carboxyl<br>methyltran<br>sferase 1 | 2.079806  | Inlier |
| siRNA-Temozolomide Run2-<br>DMSO | NM_0147<br>93 | LCMT2 | leucine<br>carboxyl<br>methyltran<br>sferase 2 | -2.326018 | Inlier |
| siRNA Disorazole DMSO Run1       | NM_0147<br>93 | LCMT2 | leucine<br>carboxyl<br>methyltran<br>sferase 2 | -1.633405 | Inlier |
| siRNA-Temozolomide Run3-<br>DMSO | NM_0147<br>93 | LCMT2 | leucine<br>carboxyl<br>methyltran<br>sferase 2 | -0.874987 | Inlier |
| siRNA-Temozolomide Run1-<br>DMSO | NM_0147<br>93 | LCMT2 | leucine<br>carboxyl<br>methyltran<br>sferase 2 | -0.393587 | Inlier |
| siRNA-Vinblastine Run2-<br>DMSO  | NM_0147<br>93 | LCMT2 | leucine<br>carboxyl<br>methyltran<br>sferase 2 | 0.393587  | Inlier |
| siRNA Disorazole DMSO Run3       | NM_0147<br>93 | LCMT2 | leucine<br>carboxyl<br>methyltran<br>sferase 2 | 0.466457  | Inlier |
| siRNA-Vinblastine Run1-<br>DMSO  | NM_0147<br>93 | LCMT2 | leucine<br>carboxyl<br>methyltran<br>sferase 2 | 0.474013  | Inlier |

Identification of Survival Genes in Human Glioblastoma Cells Using siRNA Screening  
 Nikhil G Thaker, Fang Zhang, Peter R. McDonald, Tong Ying Shun, Michael D Lewen, Ian F. Pollack, and John S. Lazo  
 Molecular Pharmacology

|                                  |               |       |                                                |           |        |
|----------------------------------|---------------|-------|------------------------------------------------|-----------|--------|
| siRNA Disorazole DMSO Run2       | NM_0147<br>93 | LCMT2 | leucine<br>carboxyl<br>methyltran<br>sferase 2 | 1.141132  | Inlier |
| siRNA-Temozolomide Run3-<br>DMSO | NM_0022<br>97 | LCN1  | lipocalin 1<br>(tear<br>prealbumi<br>n)        | -1.31166  | Inlier |
| siRNA-Temozolomide Run2-<br>DMSO | NM_0022<br>97 | LCN1  | lipocalin 1<br>(tear<br>prealbumi<br>n)        | -1.12929  | Inlier |
| siRNA-Temozolomide Run1-<br>DMSO | NM_0022<br>97 | LCN1  | lipocalin 1<br>(tear<br>prealbumi<br>n)        | -0.683676 | Inlier |
| siRNA Disorazole DMSO Run1       | NM_0022<br>97 | LCN1  | lipocalin 1<br>(tear<br>prealbumi<br>n)        | -0.385256 | Inlier |
| siRNA-Vinblastine Run2-<br>DMSO  | NM_0022<br>97 | LCN1  | lipocalin 1<br>(tear<br>prealbumi<br>n)        | 0.385256  | Inlier |
| siRNA-Vinblastine Run1-<br>DMSO  | NM_0022<br>97 | LCN1  | lipocalin 1<br>(tear<br>prealbumi<br>n)        | 0.618662  | Inlier |
| siRNA Disorazole DMSO Run3       | NM_0022<br>97 | LCN1  | lipocalin 1<br>(tear<br>prealbumi<br>n)        | 0.665324  | Inlier |
| siRNA Disorazole DMSO Run2       | NM_0022<br>97 | LCN1  | lipocalin 2<br>(oncogene<br>24p3)              | 1.04994   | Inlier |
| siRNA-Temozolomide Run2-<br>DMSO | NM_0055<br>64 | LCN2  | lipocalin 2<br>(oncogene<br>24p3)              | -0.91006  | Inlier |
| siRNA-Temozolomide Run3-<br>DMSO | NM_0055<br>64 | LCN2  | lipocalin 2<br>(oncogene<br>24p3)              | -0.887275 | Inlier |
| siRNA-Temozolomide Run1-<br>DMSO | NM_0055<br>64 | LCN2  | lipocalin 2<br>(oncogene<br>24p3)              | -0.560842 | Inlier |
| siRNA Disorazole DMSO Run3       | NM_0055<br>64 | LCN2  | lipocalin 2<br>(oncogene<br>24p3)              | -0.108386 | Inlier |
| siRNA Disorazole DMSO Run1       | NM_0055<br>64 | LCN2  | lipocalin 2<br>(oncogene<br>24p3)              | 0.108386  | Inlier |

Identification of Survival Genes in Human Glioblastoma Cells Using siRNA Screening  
 Nikhil G Thaker, Fang Zhang, Peter R. McDonald, Tong Ying Shun, Michael D Lewen, Ian F. Pollack, and John S. Lazo

|                              |               |      |                                   |                  |
|------------------------------|---------------|------|-----------------------------------|------------------|
| Molecular Pharmacology       |               |      | lipocalin 2                       |                  |
| siRNA-Vinblastine Run2-DMSO  | NM_0055<br>64 | LCN2 | (oncogene<br>24p3)                | 0.300203 Inlier  |
| siRNA-Vinblastine Run1-DMSO  | NM_0055<br>64 | LCN2 | lipocalin 2<br>(oncogene<br>24p3) | 0.788158 Inlier  |
| siRNA Disorazole DMSO Run2   | NM_0055<br>64 | LCN2 | lipocalin 2<br>(oncogene<br>24p3) | 1.207854 Inlier  |
| siRNA-Temozolomide Run3-DMSO | NM_0221<br>64 | LCN7 | lipocalin 7                       | -0.840949 Inlier |
| siRNA-Temozolomide Run2-DMSO | NM_0221<br>64 | LCN7 | lipocalin 7                       | -0.613367 Inlier |
| siRNA-Temozolomide Run1-DMSO | NM_0221<br>64 | LCN7 | lipocalin 7                       | -0.442339 Inlier |
| siRNA Disorazole DMSO Run1   | NM_0221<br>64 | LCN7 | lipocalin 7                       | -0.184198 Inlier |
| siRNA Disorazole DMSO Run2   | NM_0221<br>64 | LCN7 | lipocalin 7                       | 0.184198 Inlier  |
| siRNA Disorazole DMSO Run3   | NM_0221<br>64 | LCN7 | lipocalin 7                       | 0.735633 Inlier  |
| siRNA-Vinblastine Run1-DMSO  | NM_0221<br>64 | LCN7 | lipocalin 7                       | 1.741019 Inlier  |
| siRNA-Vinblastine Run2-DMSO  | NM_0221<br>64 | LCN7 | lipocalin 7                       | 2.083202 Inlier  |
| siRNA-Temozolomide Run3-DMSO | NM_0022<br>99 | LCT  | lactase                           | -1.002584 Inlier |
| siRNA-Temozolomide Run2-DMSO | NM_0022<br>99 | LCT  | lactase                           | -0.708154 Inlier |
| siRNA-Vinblastine Run2-DMSO  | NM_0022<br>99 | LCT  | lactase                           | -0.640846 Inlier |
| siRNA Disorazole DMSO Run1   | NM_0022<br>99 | LCT  | lactase                           | -0.052064 Inlier |
| siRNA-Temozolomide Run1-DMSO | NM_0022<br>99 | LCT  | lactase                           | 0.052064 Inlier  |
| siRNA Disorazole DMSO Run3   | NM_0022<br>99 | LCT  | lactase                           | 0.202811 Inlier  |
| siRNA-Vinblastine Run1-DMSO  | NM_0022<br>99 | LCT  | lactase                           | 1.165714 Inlier  |
| siRNA Disorazole DMSO Run2   | NM_0022<br>99 | LCT  | lactase<br>lactate                | 1.271292 Inlier  |
| siRNA-Temozolomide Run3-DMSO | NM_0055<br>66 | LDHA | dehydroge<br>nase A               | -2.277369 Inlier |
| siRNA-Temozolomide Run2-DMSO | NM_0055<br>66 | LDHA | lactate<br>dehydroge<br>nase A    | -2.030167 Inlier |
| siRNA Disorazole DMSO Run2   | NM_0055<br>66 | LDHA | lactate<br>dehydroge<br>nase A    | -0.625164 Inlier |

Identification of Survival Genes in Human Glioblastoma Cells Using siRNA Screening  
 Nikhil G Thaker, Fang Zhang, Peter R. McDonald, Tong Ying Shun, Michael D Lewen, Ian F. Pollack, and John S. Lazo

Molecular Pharmacology

|                                  |               |         |                                            |           |        |
|----------------------------------|---------------|---------|--------------------------------------------|-----------|--------|
| siRNA Disorazole DMSO Run3       | NM_0055<br>66 | LDHA    | lactate<br>dehydroge<br>nase A             | -0.299587 | Inlier |
| siRNA Disorazole DMSO Run1       | NM_0055<br>66 | LDHA    | lactate<br>dehydroge<br>nase A             | 0.299588  | Inlier |
| siRNA-Temozolomide Run1-<br>DMSO | NM_0055<br>66 | LDHA    | lactate<br>dehydroge<br>nase A             | 0.404799  | Inlier |
| siRNA-Vinblastine Run2-<br>DMSO  | NM_0055<br>66 | LDHA    | lactate<br>dehydroge<br>nase A             | 0.723836  | Inlier |
| siRNA-Vinblastine Run1-<br>DMSO  | NM_0055<br>66 | LDHA    | lactate<br>dehydroge<br>nase A             | 1.536041  | Inlier |
| siRNA-Vinblastine Run2-<br>DMSO  | NM_1449<br>72 | LDHAL6A | lactate<br>dehydroge<br>nase A-<br>like 6A | -1.797887 | Inlier |
| siRNA Disorazole DMSO Run1       | NM_1449<br>72 | LDHAL6A | lactate<br>dehydroge<br>nase A-<br>like 6A | -0.519274 | Inlier |
| siRNA Disorazole DMSO Run3       | NM_1449<br>72 | LDHAL6A | lactate<br>dehydroge<br>nase A-<br>like 6A | -0.156229 | Inlier |
| siRNA-Temozolomide Run1-<br>DMSO | NM_1449<br>72 | LDHAL6A | lactate<br>dehydroge<br>nase A-<br>like 6A | -0.077857 | Inlier |
| siRNA-Temozolomide Run3-<br>DMSO | NM_1449<br>72 | LDHAL6A | lactate<br>dehydroge<br>nase A-<br>like 6A | 0.077858  | Inlier |
| siRNA-Temozolomide Run2-<br>DMSO | NM_1449<br>72 | LDHAL6A | lactate<br>dehydroge<br>nase A-<br>like 6A | 0.829726  | Inlier |
| siRNA Disorazole DMSO Run2       | NM_1449<br>72 | LDHAL6A | lactate<br>dehydroge<br>nase A-<br>like 6A | 1.183289  | Inlier |
| siRNA-Vinblastine Run1-<br>DMSO  | NM_1449<br>72 | LDHAL6A | lactate<br>dehydroge<br>nase A-<br>like 6A | 2.157803  | Inlier |
| siRNA-Temozolomide Run2-<br>DMSO | NM_0331<br>95 | LDHAL6B | lactate<br>dehydroge<br>nase A-<br>like 6B | -0.680021 | Inlier |

Identification of Survival Genes in Human Glioblastoma Cells Using siRNA Screening  
 Nikhil G Thaker, Fang Zhang, Peter R. McDonald, Tong Ying Shun, Michael D Lewen, Ian F. Pollack, and John S. Lazo

Molecular Pharmacology

|                              |               |         |                                 |           |        |
|------------------------------|---------------|---------|---------------------------------|-----------|--------|
| siRNA-Temozolomide Run3-DMSO | NM_0331<br>95 | LDHAL6B | lactate dehydrogenase A-like 6B | -0.668979 | Inlier |
| siRNA Disorazole DMSO Run2   | NM_0331<br>95 | LDHAL6B | lactate dehydrogenase A-like 6B | -0.511175 | Inlier |
| siRNA Disorazole DMSO Run3   | NM_0331<br>95 | LDHAL6B | lactate dehydrogenase A-like 6B | -0.352645 | Inlier |
| siRNA Disorazole DMSO Run1   | NM_0331<br>95 | LDHAL6B | lactate dehydrogenase A-like 6B | 0.352645  | Inlier |
| siRNA-Temozolomide Run1-DMSO | NM_0331<br>95 | LDHAL6B | lactate dehydrogenase A-like 6B | 0.713308  | Inlier |
| siRNA-Vinblastine Run1-DMSO  | NM_0331<br>95 | LDHAL6B | lactate dehydrogenase A-like 6B | 1.473682  | Inlier |
| siRNA-Vinblastine Run2-DMSO  | NM_0331<br>95 | LDHAL6B | lactate dehydrogenase A-like 6B | 1.524282  | Inlier |
| siRNA-Temozolomide Run3-DMSO | NM_0023<br>00 | LDHB    | lactate dehydrogenase B         | -1.686426 | Inlier |
| siRNA-Temozolomide Run2-DMSO | NM_0023<br>00 | LDHB    | lactate dehydrogenase B         | -1.232841 | Inlier |
| siRNA Disorazole DMSO Run2   | NM_0023<br>00 | LDHB    | lactate dehydrogenase B         | -1.158665 | Inlier |
| siRNA Disorazole DMSO Run1   | NM_0023<br>00 | LDHB    | lactate dehydrogenase B         | -0.33     | Inlier |
| siRNA-Temozolomide Run1-DMSO | NM_0023<br>00 | LDHB    | lactate dehydrogenase B         | 0.329999  | Inlier |
| siRNA Disorazole DMSO Run3   | NM_0023<br>00 | LDHB    | lactate dehydrogenase B         | 0.380376  | Inlier |
| siRNA-Vinblastine Run1-DMSO  | NM_0023<br>00 | LDHB    | lactate dehydrogenase B         | 0.55525   | Inlier |
| siRNA-Vinblastine Run2-DMSO  | NM_0023<br>00 | LDHB    | lactate dehydrogenase B         | 0.79375   | Inlier |

Identification of Survival Genes in Human Glioblastoma Cells Using siRNA Screening  
 Nikhil G Thaker, Fang Zhang, Peter R. McDonald, Tong Ying Shun, Michael D Lewen, Ian F. Pollack, and John S. Lazo

| Molecular Pharmacology       |               |      |                                |           |        |
|------------------------------|---------------|------|--------------------------------|-----------|--------|
| siRNA-Temozolomide Run2-DMSO | NM_0023<br>01 | LDHC | lactate<br>dehydroge<br>nase C | -1.00621  | Inlier |
| siRNA Disorazole DMSO Run3   | NM_0023<br>01 | LDHC | lactate<br>dehydroge<br>nase C | -0.712379 | Inlier |
| siRNA-Temozolomide Run3-DMSO | NM_0023<br>01 | LDHC | lactate<br>dehydroge<br>nase C | -0.429459 | Inlier |
| siRNA Disorazole DMSO Run2   | NM_0023<br>01 | LDHC | lactate<br>dehydroge<br>nase C | -0.252505 | Inlier |
| siRNA Disorazole DMSO Run1   | NM_0023<br>01 | LDHC | lactate<br>dehydroge<br>nase C | 0.252505  | Inlier |
| siRNA-Temozolomide Run1-DMSO | NM_0023<br>01 | LDHC | lactate<br>dehydroge<br>nase C | 0.636621  | Inlier |
| siRNA-Vinblastine Run1-DMSO  | NM_0023<br>01 | LDHC | lactate<br>dehydroge<br>nase C | 1.682914  | Inlier |
| siRNA-Vinblastine Run2-DMSO  | NM_0023<br>01 | LDHC | lactate<br>dehydroge<br>nase C | 1.901255  | Inlier |
| siRNA-Temozolomide Run3-DMSO | NM_1944<br>36 | LDHD | lactate<br>dehydroge<br>nase D | -1.283519 | Inlier |
| siRNA-Temozolomide Run2-DMSO | NM_1944<br>36 | LDHD | lactate<br>dehydroge<br>nase D | -1.280505 | Inlier |
| siRNA-Temozolomide Run1-DMSO | NM_1944<br>36 | LDHD | lactate<br>dehydroge<br>nase D | -0.902326 | Inlier |
| siRNA Disorazole DMSO Run3   | NM_1944<br>36 | LDHD | lactate<br>dehydroge<br>nase D | -0.074864 | Inlier |
| siRNA Disorazole DMSO Run1   | NM_1944<br>36 | LDHD | lactate<br>dehydroge<br>nase D | 0.074864  | Inlier |
| siRNA-Vinblastine Run2-DMSO  | NM_1944<br>36 | LDHD | lactate<br>dehydroge<br>nase D | 0.211249  | Inlier |
| siRNA-Vinblastine Run1-DMSO  | NM_1944<br>36 | LDHD | lactate<br>dehydroge<br>nase D | 0.446674  | Inlier |
| siRNA Disorazole DMSO Run2   | NM_1944<br>36 | LDHD | lactate<br>dehydroge<br>nase D | 1.775582  | Inlier |



Identification of Survival Genes in Human Glioblastoma Cells Using siRNA Screening

Nikhil G Thaker, Fang Zhang, Peter R. McDonald, Tong Ying Shun, Michael D Lewen, Ian F. Pollack, and John S. Lazo

Molecular Pharmacology

|                              |           |      |                                                                  |           |        |
|------------------------------|-----------|------|------------------------------------------------------------------|-----------|--------|
| siRNA-Vinblastine Run2-DMSO  | NM_000527 | LDLR | low density lipoprotein receptor (familial hypercholesterolemia) | -1.446128 | Inlier |
| siRNA Disorazole DMSO Run1   | NM_000527 | LDLR | low density lipoprotein receptor (familial hypercholesterolemia) | -0.659916 | Inlier |
| siRNA-Temozolomide Run3-DMSO | NM_000527 | LDLR | low density lipoprotein receptor (familial hypercholesterolemia) | -0.615819 | Inlier |
| siRNA-Temozolomide Run2-DMSO | NM_000527 | LDLR | low density lipoprotein receptor (familial hypercholesterolemia) | -0.19755  | Inlier |
| siRNA Disorazole DMSO Run3   | NM_000527 | LDLR | low density lipoprotein receptor (familial hypercholesterolemia) | 0.197549  | Inlier |
| siRNA-Temozolomide Run1-DMSO | NM_000527 | LDLR | low density lipoprotein receptor (familial hypercholesterolemia) | 0.689084  | Inlier |

Identification of Survival Genes in Human Glioblastoma Cells Using siRNA Screening  
 Nikhil G Thaker, Fang Zhang, Peter R. McDonald, Tong Ying Shun, Michael D Lewen, Ian F. Pollack, and John S. Lazo

Molecular Pharmacology

|                              |               |       |                                                                  |           |        |
|------------------------------|---------------|-------|------------------------------------------------------------------|-----------|--------|
| siRNA-Vinblastine Run1-DMSO  | NM_0005<br>27 | LDLR  | low density lipoprotein receptor (familial hypercholesterolemia) | 2.017721  | Inlier |
| siRNA Disorazole DMSO Run2   | NM_0005<br>27 | LDLR  | low density lipoprotein receptor (familial hypercholesterolemia) | 2.860694  | Inlier |
| siRNA-Vinblastine Run2-DMSO  | NM_0242<br>98 | LENG4 | leukocyte receptor cluster (LRC) member 4                        | -1.517554 | Inlier |
| siRNA Disorazole DMSO Run1   | NM_0242<br>98 | LENG4 | leukocyte receptor cluster (LRC) member 4                        | -0.728001 | Inlier |
| siRNA Disorazole DMSO Run3   | NM_0242<br>98 | LENG4 | leukocyte receptor cluster (LRC) member 4                        | -0.620999 | Inlier |
| siRNA-Temozolomide Run2-DMSO | NM_0242<br>98 | LENG4 | leukocyte receptor cluster (LRC) member 4                        | -0.114799 | Inlier |
| siRNA-Temozolomide Run3-DMSO | NM_0242<br>98 | LENG4 | leukocyte receptor cluster (LRC) member 4                        | 0.114799  | Inlier |
| siRNA-Temozolomide Run1-DMSO | NM_0242<br>98 | LENG4 | leukocyte receptor cluster (LRC) member 4                        | 0.404324  | Inlier |
| siRNA Disorazole DMSO Run2   | NM_0242<br>98 | LENG4 | leukocyte receptor cluster (LRC) member 4                        | 2.517672  | Inlier |

Identification of Survival Genes in Human Glioblastoma Cells Using siRNA Screening  
 Nikhil G Thaker, Fang Zhang, Peter R. McDonald, Tong Ying Shun, Michael D Lewen, Ian F. Pollack, and John S. Lazo

Molecular Pharmacology

| siRNA                        | Gene    | Gene    | Gene                                      | Value     | Category |
|------------------------------|---------|---------|-------------------------------------------|-----------|----------|
| siRNA-Vinblastine Run1-DMSO  | NM_0242 | LENG4   | leukocyte receptor cluster (LRC) member 4 | 2.70981   | Inlier   |
| siRNA Disorazole DMSO Run1   | NM_0023 | LEPR    | leptin receptor                           | -1.469409 | Inlier   |
| siRNA-Temozolomide Run2-DMSO | NM_0023 | LEPR    | leptin receptor                           | -0.898023 | Inlier   |
| siRNA-Vinblastine Run2-DMSO  | NM_0023 | LEPR    | leptin receptor                           | -0.450977 | Inlier   |
| siRNA-Temozolomide Run1-DMSO | NM_0023 | LEPR    | leptin receptor                           | -0.287727 | Inlier   |
| siRNA Disorazole DMSO Run3   | NM_0023 | LEPR    | leptin receptor                           | 0.287727  | Inlier   |
| siRNA-Temozolomide Run3-DMSO | NM_0023 | LEPR    | leptin receptor                           | 0.365364  | Inlier   |
| siRNA-Vinblastine Run1-DMSO  | NM_0023 | LEPR    | leptin receptor                           | 7.786614  | Outlier  |
| siRNA Disorazole DMSO Run2   | NM_0023 | LEPR    | leptin receptor                           | 7.957044  | Outlier  |
| siRNA-Temozolomide Run3-DMSO | NM_0181 | LEPREL1 | leprecan-like 1                           | -4.29684  | Outlier  |
| siRNA Disorazole DMSO Run3   | NM_0181 | LEPREL1 | leprecan-like 1                           | -0.991264 | Inlier   |
| siRNA-Temozolomide Run1-DMSO | NM_0181 | LEPREL1 | leprecan-like 1                           | -0.137692 | Inlier   |
| siRNA-Temozolomide Run2-DMSO | NM_0181 | LEPREL1 | leprecan-like 1                           | -0.028392 | Inlier   |
| siRNA-Vinblastine Run2-DMSO  | NM_0181 | LEPREL1 | leprecan-like 1                           | 0.028393  | Inlier   |
| siRNA Disorazole DMSO Run1   | NM_0181 | LEPREL1 | leprecan-like 1                           | 0.357736  | Inlier   |
| siRNA Disorazole DMSO Run2   | NM_0181 | LEPREL1 | leprecan-like 1                           | 4.812466  | Outlier  |
| siRNA-Vinblastine Run1-DMSO  | NM_0181 | LEPREL1 | leprecan-like 1                           | 6.638997  | Outlier  |
| siRNA-Temozolomide Run3-DMSO | NM_0142 | LEPREL2 | leprecan-like 2                           | -1.518762 | Inlier   |
| siRNA Disorazole DMSO Run3   | NM_0142 | LEPREL2 | leprecan-like 2                           | -0.842253 | Inlier   |
| siRNA-Temozolomide Run2-DMSO | NM_0142 | LEPREL2 | leprecan-like 2                           | -0.506747 | Inlier   |
| siRNA Disorazole DMSO Run1   | NM_0142 | LEPREL2 | leprecan-like 2                           | -0.014096 | Inlier   |
| siRNA-Vinblastine Run2-DMSO  | NM_0142 | LEPREL2 | leprecan-like 2                           | 0.014096  | Inlier   |
| siRNA-Temozolomide Run1-DMSO | NM_0142 | LEPREL2 | leprecan-like 2                           | 0.014912  | Inlier   |
| siRNA Disorazole DMSO Run2   | NM_0142 | LEPREL2 | leprecan-like 2                           | 1.278671  | Inlier   |

Identification of Survival Genes in Human Glioblastoma Cells Using siRNA Screening

Nikhil G Thaker, Fang Zhang, Peter R. McDonald, Tong Ying Shun, Michael D Lewen, Ian F. Pollack, and John S.

Lazo

| siRNA/Condition              | Gene ID   | Gene Name | Protein Name                                             | Score     | Outlier Status |
|------------------------------|-----------|-----------|----------------------------------------------------------|-----------|----------------|
| siRNA-Vinblastine Run1-DMSO  | NM_014262 | LEPREL2   | leprecan-like 2                                          | 1.661993  | Inlier         |
| siRNA-Temozolomide Run2-DMSO | NM_005567 | LGALS3BP  | lectin, galactosid e-binding, soluble, 3 binding protein | -1.335043 | Inlier         |
| siRNA-Temozolomide Run1-DMSO | NM_005567 | LGALS3BP  | lectin, galactosid e-binding, soluble, 3 binding protein | -0.717055 | Inlier         |
| siRNA-Temozolomide Run3-DMSO | NM_005567 | LGALS3BP  | lectin, galactosid e-binding, soluble, 3 binding protein | -0.631945 | Inlier         |
| siRNA Disorazole DMSO Run3   | NM_005567 | LGALS3BP  | lectin, galactosid e-binding, soluble, 3 binding protein | -0.332977 | Inlier         |
| siRNA Disorazole DMSO Run2   | NM_005567 | LGALS3BP  | lectin, galactosid e-binding, soluble, 3 binding protein | 0.332978  | Inlier         |
| siRNA Disorazole DMSO Run1   | NM_005567 | LGALS3BP  | lectin, galactosid e-binding, soluble, 3 binding protein | 0.40233   | Inlier         |
| siRNA-Vinblastine Run1-DMSO  | NM_005567 | LGALS3BP  | lectin, galactosid e-binding, soluble, 3 binding protein | 2.207593  | Inlier         |
| siRNA-Vinblastine Run2-DMSO  | NM_005567 | LGALS3BP  | lectin, galactosid e-binding, soluble, 3 binding protein | 2.350198  | Inlier         |
| siRNA Disorazole DMSO Run2   | NM_180990 | LGICZ     | LGICZ                                                    | -1.156221 | Inlier         |

Identification of Survival Genes in Human Glioblastoma Cells Using siRNA Screening

Nikhil G Thaker, Fang Zhang, Peter R. McDonald, Tong Ying Shun, Michael D Lewen, Ian F. Pollack, and John S.

Lazo

|                                  |               |       |                                                                               |           |         |
|----------------------------------|---------------|-------|-------------------------------------------------------------------------------|-----------|---------|
| siRNA-Temozolomide Run3-<br>DMSO | NM_1809<br>90 | LGICZ | LGICZ                                                                         | -0.662135 | Inlier  |
|                                  | NM_1809       |       |                                                                               |           |         |
| siRNA Disorazole DMSO Run3       | 90            | LGICZ | LGICZ                                                                         | -0.524617 | Inlier  |
|                                  | NM_1809       |       |                                                                               |           |         |
| siRNA Disorazole DMSO Run1       | 90            | LGICZ | LGICZ                                                                         | -0.237658 | Inlier  |
| siRNA-Vinblastine Run1-<br>DMSO  | NM_1809<br>90 | LGICZ | LGICZ                                                                         | 0.237658  | Inlier  |
| siRNA-Temozolomide Run2-<br>DMSO | NM_1809<br>90 | LGICZ | LGICZ                                                                         | 0.686865  | Inlier  |
| siRNA-Temozolomide Run1-<br>DMSO | NM_1809<br>90 | LGICZ | LGICZ                                                                         | 1.003542  | Inlier  |
| siRNA-Vinblastine Run2-<br>DMSO  | NM_1809<br>90 | LGICZ | LGICZ                                                                         | 1.416717  | Inlier  |
| siRNA-Temozolomide Run3-<br>DMSO | NM_0056<br>06 | LGMN  | legumain                                                                      | -1.280191 | Inlier  |
|                                  | NM_0056       |       |                                                                               |           |         |
| siRNA Disorazole DMSO Run1       | 06            | LGMN  | legumain                                                                      | -0.721674 | Inlier  |
| siRNA-Temozolomide Run2-<br>DMSO | NM_0056<br>06 | LGMN  | legumain                                                                      | -0.627326 | Inlier  |
|                                  | NM_0056       |       |                                                                               |           |         |
| siRNA Disorazole DMSO Run2       | 06            | LGMN  | legumain                                                                      | -0.154237 | Inlier  |
| siRNA-Temozolomide Run1-<br>DMSO | NM_0056<br>06 | LGMN  | legumain                                                                      | 0.154237  | Inlier  |
| siRNA-Vinblastine Run1-<br>DMSO  | NM_0056<br>06 | LGMN  | legumain                                                                      | 0.470732  | Inlier  |
| siRNA-Vinblastine Run2-<br>DMSO  | NM_0056<br>06 | LGMN  | legumain                                                                      | 1.171781  | Inlier  |
|                                  | NM_0056       |       |                                                                               |           |         |
| siRNA Disorazole DMSO Run3       | 06            | LGMN  | legumain                                                                      | 4.475868  | Outlier |
|                                  |               |       | leucine-<br>rich repeat-<br>containing<br>G protein-<br>coupled<br>receptor 6 |           |         |
| siRNA-Temozolomide Run3-<br>DMSO | NM_0216<br>36 | LGR6  |                                                                               | -2.873057 | Inlier  |
|                                  | NM_0216       |       | leucine-<br>rich repeat-<br>containing<br>G protein-<br>coupled<br>receptor 6 |           |         |
| siRNA Disorazole DMSO Run2       | 36            | LGR6  |                                                                               | -1.956639 | Inlier  |
|                                  | NM_0216       |       | leucine-<br>rich repeat-<br>containing<br>G protein-<br>coupled<br>receptor 6 |           |         |
| siRNA-Temozolomide Run1-<br>DMSO | NM_0216<br>36 | LGR6  |                                                                               | -0.820006 | Inlier  |

Identification of Survival Genes in Human Glioblastoma Cells Using siRNA Screening  
 Nikhil G Thaker, Fang Zhang, Peter R. McDonald, Tong Ying Shun, Michael D Lewen, Ian F. Pollack, and John S. Lazo  
 Molecular Pharmacology

|                              |               |      |                                                             |           |        |
|------------------------------|---------------|------|-------------------------------------------------------------|-----------|--------|
| siRNA-Temozolomide Run2-DMSO | NM_0216<br>36 | LGR6 | leucine-rich repeat-containing G protein-coupled receptor 6 | -0.120922 | Inlier |
| siRNA Disorazole DMSO Run3   | NM_0216<br>36 | LGR6 | leucine-rich repeat-containing G protein-coupled receptor 6 | 0.120922  | Inlier |
| siRNA Disorazole DMSO Run1   | NM_0216<br>36 | LGR6 | leucine-rich repeat-containing G protein-coupled receptor 6 | 0.206794  | Inlier |
| siRNA-Vinblastine Run2-DMSO  | NM_0216<br>36 | LGR6 | leucine-rich repeat-containing G protein-coupled receptor 6 | 0.613647  | Inlier |
| siRNA-Vinblastine Run1-DMSO  | NM_0216<br>36 | LGR6 | leucine-rich repeat-containing G protein-coupled receptor 6 | 0.735353  | Inlier |
| siRNA-Temozolomide Run3-DMSO | NM_0216<br>34 | LGR7 | leucine-rich repeat-containing G protein-coupled receptor 7 | -1.006143 | Inlier |
| siRNA Disorazole DMSO Run3   | NM_0216<br>34 | LGR7 | leucine-rich repeat-containing G protein-coupled receptor 7 | -0.342857 | Inlier |

Identification of Survival Genes in Human Glioblastoma Cells Using siRNA Screening  
 Nikhil G Thaker, Fang Zhang, Peter R. McDonald, Tong Ying Shun, Michael D Lewen, Ian F. Pollack, and John S. Lazo  
 Molecular Pharmacology

|                              |               |      |                                                             |           |        |
|------------------------------|---------------|------|-------------------------------------------------------------|-----------|--------|
| siRNA Disorazole DMSO Run2   | NM_0216<br>34 | LGR7 | leucine-rich repeat-containing G protein-coupled receptor 7 | -0.267198 | Inlier |
| siRNA-Temozolomide Run1-DMSO | NM_0216<br>34 | LGR7 | leucine-rich repeat-containing G protein-coupled receptor 7 | -0.0687   | Inlier |
| siRNA-Temozolomide Run2-DMSO | NM_0216<br>34 | LGR7 | leucine-rich repeat-containing G protein-coupled receptor 7 | 0.0687    | Inlier |
| siRNA Disorazole DMSO Run1   | NM_0216<br>34 | LGR7 | leucine-rich repeat-containing G protein-coupled receptor 7 | 1.148911  | Inlier |
| siRNA-Vinblastine Run1-DMSO  | NM_0216<br>34 | LGR7 | leucine-rich repeat-containing G protein-coupled receptor 7 | 1.235408  | Inlier |
| siRNA-Vinblastine Run2-DMSO  | NM_0216<br>34 | LGR7 | leucine-rich repeat-containing G protein-coupled receptor 7 | 1.685481  | Inlier |
| siRNA-Temozolomide Run3-DMSO | NM_1308<br>06 | LGR8 | leucine-rich repeat-containing G protein-coupled receptor 8 | -0.705616 | Inlier |

Identification of Survival Genes in Human Glioblastoma Cells Using siRNA Screening

Nikhil G Thaker, Fang Zhang, Peter R. McDonald, Tong Ying Shun, Michael D Lewen, Ian F. Pollack, and John S. Lazo

Molecular Pharmacology

|                              |               |      |                                                             |           |        |
|------------------------------|---------------|------|-------------------------------------------------------------|-----------|--------|
| siRNA Disorazole DMSO Run2   | NM_1308<br>06 | LGR8 | leucine-rich repeat-containing G protein-coupled receptor 8 | -0.687833 | Inlier |
| siRNA Disorazole DMSO Run3   | NM_1308<br>06 | LGR8 | leucine-rich repeat-containing G protein-coupled receptor 8 | -0.414193 | Inlier |
| siRNA-Temozolomide Run2-DMSO | NM_1308<br>06 | LGR8 | leucine-rich repeat-containing G protein-coupled receptor 8 | -0.286862 | Inlier |
| siRNA-Temozolomide Run1-DMSO | NM_1308<br>06 | LGR8 | leucine-rich repeat-containing G protein-coupled receptor 8 | 0.286863  | Inlier |
| siRNA-Vinblastine Run2-DMSO  | NM_1308<br>06 | LGR8 | leucine-rich repeat-containing G protein-coupled receptor 8 | 0.661167  | Inlier |
| siRNA Disorazole DMSO Run1   | NM_1308<br>06 | LGR8 | leucine-rich repeat-containing G protein-coupled receptor 8 | 0.702723  | Inlier |
| siRNA-Vinblastine Run1-DMSO  | NM_1308<br>06 | LGR8 | leucine-rich repeat-containing G protein-coupled receptor 8 | 0.790781  | Inlier |



Identification of Survival Genes in Human Glioblastoma Cells Using siRNA Screening  
 Nikhil G Thaker, Fang Zhang, Peter R. McDonald, Tong Ying Shun, Michael D Lewen, Ian F. Pollack, and John S. Lazo

Molecular Pharmacology

|                              |               |       |                                                   |           |        |
|------------------------------|---------------|-------|---------------------------------------------------|-----------|--------|
| siRNA-Temozolomide Run3-DMSO | NM_0002<br>33 | LHCGR | luteinizing hormone/c horiogona dotropin receptor | -1.125303 | Inlier |
| siRNA Disorazole DMSO Run2   | NM_0002<br>33 | LHCGR | luteinizing hormone/c horiogona dotropin receptor | -0.223697 | Inlier |
| siRNA-Temozolomide Run2-DMSO | NM_0002<br>33 | LHCGR | luteinizing hormone/c horiogona dotropin receptor | -0.186702 | Inlier |
| siRNA-Temozolomide Run1-DMSO | NM_0002<br>33 | LHCGR | luteinizing hormone/c horiogona dotropin receptor | -0.093351 | Inlier |
| siRNA Disorazole DMSO Run3   | NM_0002<br>33 | LHCGR | luteinizing hormone/c horiogona dotropin receptor | 0.093351  | Inlier |
| siRNA Disorazole DMSO Run1   | NM_0002<br>33 | LHCGR | luteinizing hormone/c horiogona dotropin receptor | 1.173728  | Inlier |
| siRNA-Vinblastine Run2-DMSO  | NM_0002<br>33 | LHCGR | luteinizing hormone/c horiogona dotropin receptor | 1.538514  | Inlier |
| siRNA-Vinblastine Run1-DMSO  | NM_0002<br>33 | LHCGR | luteinizing hormone/c horiogona dotropin receptor | 1.845302  | Inlier |
| siRNA Disorazole DMSO Run2   | NM_0221<br>26 | LHPP  | LHPP                                              | -1.557518 | Inlier |
| siRNA-Temozolomide Run3-DMSO | NM_0221<br>26 | LHPP  | LHPP                                              | -1.325508 | Inlier |
| siRNA-Temozolomide Run2-DMSO | NM_0221<br>26 | LHPP  | LHPP                                              | -1.207979 | Inlier |
| siRNA Disorazole DMSO Run3   | NM_0221<br>26 | LHPP  | LHPP                                              | -0.585903 | Inlier |
| siRNA-Vinblastine Run2-DMSO  | NM_0221<br>26 | LHPP  | LHPP                                              | 0.585903  | Inlier |
| siRNA Disorazole DMSO Run1   | NM_0221<br>26 | LHPP  | LHPP                                              | 0.640638  | Inlier |

Identification of Survival Genes in Human Glioblastoma Cells Using siRNA Screening

Nikhil G Thaker, Fang Zhang, Peter R. McDonald, Tong Ying Shun, Michael D Lewen, Ian F. Pollack, and John S.

Lazo

|                                  |               |      |                                                                                     |           |        |
|----------------------------------|---------------|------|-------------------------------------------------------------------------------------|-----------|--------|
| siRNA-Vinblastine Run1-<br>DMSO  | NM_0221<br>26 | LHPP | LHPP                                                                                | 0.657181  | Inlier |
| siRNA-Temozolomide Run1-<br>DMSO | NM_0221<br>26 | LHPP | LHPP                                                                                | 0.691819  | Inlier |
| siRNA Disorazole DMSO Run1       | NM_1944<br>51 | LIAS | lipoic acid<br>synthetase                                                           | -1.052873 | Inlier |
| siRNA-Vinblastine Run2-<br>DMSO  | NM_1944<br>51 | LIAS | lipoic acid<br>synthetase                                                           | -1.005159 | Inlier |
| siRNA Disorazole DMSO Run3       | NM_1944<br>51 | LIAS | lipoic acid<br>synthetase                                                           | -0.343841 | Inlier |
| siRNA-Temozolomide Run2-<br>DMSO | NM_1944<br>51 | LIAS | lipoic acid<br>synthetase                                                           | -0.052961 | Inlier |
| siRNA-Temozolomide Run3-<br>DMSO | NM_1944<br>51 | LIAS | lipoic acid<br>synthetase                                                           | 0.052963  | Inlier |
| siRNA-Temozolomide Run1-<br>DMSO | NM_1944<br>51 | LIAS | lipoic acid<br>synthetase                                                           | 0.207448  | Inlier |
| siRNA Disorazole DMSO Run2       | NM_1944<br>51 | LIAS | lipoic acid<br>synthetase                                                           | 3.012912  | Inlier |
| siRNA-Vinblastine Run1-<br>DMSO  | NM_1944<br>51 | LIAS | lipoic acid<br>synthetase<br>leukemia<br>inhibitory<br>factor<br>(cholinergi<br>c   | 3.451624  | Inlier |
| siRNA-Temozolomide Run3-<br>DMSO | NM_0023<br>09 | LIF  | differentiat<br>ion factor)<br>leukemia<br>inhibitory<br>factor<br>(cholinergi<br>c | -0.846724 | Inlier |
| siRNA-Temozolomide Run2-<br>DMSO | NM_0023<br>09 | LIF  | differentiat<br>ion factor)<br>leukemia<br>inhibitory<br>factor<br>(cholinergi<br>c | -0.502276 | Inlier |
| siRNA Disorazole DMSO Run3       | NM_0023<br>09 | LIF  | differentiat<br>ion factor)                                                         | -0.333192 | Inlier |

Identification of Survival Genes in Human Glioblastoma Cells Using siRNA Screening

Nikhil G Thaker, Fang Zhang, Peter R. McDonald, Tong Ying Shun, Michael D Lewen, Ian F. Pollack, and John S. Lazo

Molecular Pharmacology

|                                  |               |      |                                                      |                  |
|----------------------------------|---------------|------|------------------------------------------------------|------------------|
|                                  |               |      | leukemia<br>inhibitory<br>factor<br>(cholinergi<br>c |                  |
| siRNA-Vinblastine Run2-<br>DMSO  | NM_0023<br>09 | LIF  | differentiat<br>ion factor)                          | -0.247574 Inlier |
|                                  |               |      | leukemia<br>inhibitory<br>factor<br>(cholinergi<br>c |                  |
| siRNA-Temozolomide Run1-<br>DMSO | NM_0023<br>09 | LIF  | differentiat<br>ion factor)                          | 0.247574 Inlier  |
|                                  |               |      | leukemia<br>inhibitory<br>factor<br>(cholinergi<br>c |                  |
| siRNA Disorazole DMSO Run1       | NM_0023<br>09 | LIF  | differentiat<br>ion factor)                          | 1.023087 Inlier  |
|                                  |               |      | leukemia<br>inhibitory<br>factor<br>(cholinergi<br>c |                  |
| siRNA Disorazole DMSO Run2       | NM_0023<br>09 | LIF  | differentiat<br>ion factor)                          | 4.954322 Outlier |
|                                  |               |      | leukemia<br>inhibitory<br>factor<br>(cholinergi<br>c |                  |
| siRNA-Vinblastine Run1-<br>DMSO  | NM_0023<br>09 | LIF  | differentiat<br>ion factor)                          | 5.365467 Outlier |
|                                  |               |      | leukemia<br>inhibitory<br>factor                     |                  |
| siRNA-Temozolomide Run2-<br>DMSO | NM_0023<br>10 | LIFR | receptor                                             | -2.312479 Inlier |
|                                  |               |      | leukemia<br>inhibitory<br>factor                     |                  |
| siRNA-Temozolomide Run3-<br>DMSO | NM_0023<br>10 | LIFR | receptor                                             | -0.630757 Inlier |
|                                  |               |      | leukemia<br>inhibitory<br>factor                     |                  |
| siRNA Disorazole DMSO Run1       | NM_0023<br>10 | LIFR | receptor                                             | -0.518702 Inlier |
|                                  |               |      | leukemia<br>inhibitory<br>factor                     |                  |
| siRNA-Vinblastine Run2-<br>DMSO  | NM_0023<br>10 | LIFR | receptor                                             | -0.190936 Inlier |

Identification of Survival Genes in Human Glioblastoma Cells Using siRNA Screening  
 Nikhil G Thaker, Fang Zhang, Peter R. McDonald, Tong Ying Shun, Michael D Lewen, Ian F. Pollack, and John S. Lazo

Molecular Pharmacology

|                              |               |      |                                              |           |        |
|------------------------------|---------------|------|----------------------------------------------|-----------|--------|
| siRNA-Temozolomide Run1-DMSO | NM_0023<br>10 | LIFR | leukemia<br>inhibitory<br>factor<br>receptor | 0.190936  | Inlier |
| siRNA Disorazole DMSO Run3   | NM_0023<br>10 | LIFR | leukemia<br>inhibitory<br>factor<br>receptor | 0.718243  | Inlier |
| siRNA-Vinblastine Run1-DMSO  | NM_0023<br>10 | LIFR | leukemia<br>inhibitory<br>factor<br>receptor | 1.94287   | Inlier |
| siRNA Disorazole DMSO Run2   | NM_0023<br>10 | LIFR | leukemia<br>inhibitory<br>factor<br>receptor | 2.705601  | Inlier |
| siRNA Disorazole DMSO Run3   | NM_0002<br>34 | LIG1 | ligase I,<br>DNA, ATP-<br>dependent          | -0.700103 | Inlier |
| siRNA-Temozolomide Run3-DMSO | NM_0002<br>34 | LIG1 | ligase I,<br>DNA, ATP-<br>dependent          | -0.648897 | Inlier |
| siRNA-Vinblastine Run2-DMSO  | NM_0002<br>34 | LIG1 | ligase I,<br>DNA, ATP-<br>dependent          | -0.623841 | Inlier |
| siRNA-Temozolomide Run2-DMSO | NM_0002<br>34 | LIG1 | ligase I,<br>DNA, ATP-<br>dependent          | -0.005777 | Inlier |
| siRNA-Temozolomide Run1-DMSO | NM_0002<br>34 | LIG1 | ligase I,<br>DNA, ATP-<br>dependent          | 0.005777  | Inlier |
| siRNA Disorazole DMSO Run1   | NM_0002<br>34 | LIG1 | ligase I,<br>DNA, ATP-<br>dependent          | 1.663437  | Inlier |
| siRNA-Vinblastine Run1-DMSO  | NM_0002<br>34 | LIG1 | ligase I,<br>DNA, ATP-<br>dependent          | 2.455412  | Inlier |

Identification of Survival Genes in Human Glioblastoma Cells Using siRNA Screening  
 Nikhil G Thaker, Fang Zhang, Peter R. McDonald, Tong Ying Shun, Michael D Lewen, Ian F. Pollack, and John S. Lazo  
 Molecular Pharmacology

|                                  |               |      |                                       |           |        |
|----------------------------------|---------------|------|---------------------------------------|-----------|--------|
| siRNA Disorazole DMSO Run2       | NM_0002<br>34 | LIG1 | ligase I,<br>DNA, ATP-<br>dependent   | 2.571606  | Inlier |
| siRNA-Temozolomide Run3-<br>DMSO | NM_0023<br>11 | LIG3 | ligase III,<br>DNA, ATP-<br>dependent | -2.074184 | Inlier |
| siRNA-Temozolomide Run2-<br>DMSO | NM_0023<br>11 | LIG3 | ligase III,<br>DNA, ATP-<br>dependent | -0.979374 | Inlier |
| siRNA-Vinblastine Run2-<br>DMSO  | NM_0023<br>11 | LIG3 | ligase III,<br>DNA, ATP-<br>dependent | -0.335352 | Inlier |
| siRNA-Temozolomide Run1-<br>DMSO | NM_0023<br>11 | LIG3 | ligase III,<br>DNA, ATP-<br>dependent | -0.137016 | Inlier |
| siRNA Disorazole DMSO Run1       | NM_0023<br>11 | LIG3 | ligase III,<br>DNA, ATP-<br>dependent | 0.137016  | Inlier |
| siRNA Disorazole DMSO Run3       | NM_0023<br>11 | LIG3 | ligase III,<br>DNA, ATP-<br>dependent | 0.369626  | Inlier |
| siRNA-Vinblastine Run1-<br>DMSO  | NM_0023<br>11 | LIG3 | ligase III,<br>DNA, ATP-<br>dependent | 1.313387  | Inlier |
| siRNA Disorazole DMSO Run2       | NM_0023<br>11 | LIG3 | ligase III,<br>DNA, ATP-<br>dependent | 1.846521  | Inlier |
| siRNA-Temozolomide Run3-<br>DMSO | NM_0023<br>12 | LIG4 | ligase IV,<br>DNA, ATP-<br>dependent  | -1.268489 | Inlier |

Identification of Survival Genes in Human Glioblastoma Cells Using siRNA Screening  
 Nikhil G Thaker, Fang Zhang, Peter R. McDonald, Tong Ying Shun, Michael D Lewen, Ian F. Pollack, and John S. Lazo  
 Molecular Pharmacology

|                              |               |        |                                                                                                      |                  |
|------------------------------|---------------|--------|------------------------------------------------------------------------------------------------------|------------------|
| siRNA-Temozolomide Run2-DMSO | NM_0023<br>12 | LIG4   | ligase IV,<br>DNA, ATP-<br>dependent                                                                 | -0.662019 Inlier |
| siRNA-Vinblastine Run2-DMSO  | NM_0023<br>12 | LIG4   | ligase IV,<br>DNA, ATP-<br>dependent                                                                 | -0.236645 Inlier |
| siRNA-Temozolomide Run1-DMSO | NM_0023<br>12 | LIG4   | ligase IV,<br>DNA, ATP-<br>dependent                                                                 | -0.162315 Inlier |
| siRNA Disorazole DMSO Run3   | NM_0023<br>12 | LIG4   | ligase IV,<br>DNA, ATP-<br>dependent                                                                 | 0.162316 Inlier  |
| siRNA Disorazole DMSO Run2   | NM_0023<br>12 | LIG4   | ligase IV,<br>DNA, ATP-<br>dependent                                                                 | 0.686981 Inlier  |
| siRNA Disorazole DMSO Run1   | NM_0023<br>12 | LIG4   | ligase IV,<br>DNA, ATP-<br>dependent                                                                 | 0.938275 Inlier  |
| siRNA-Vinblastine Run1-DMSO  | NM_0023<br>12 | LIG4   | ligase IV,<br>DNA, ATP-<br>dependent                                                                 | 1.289939 Inlier  |
| siRNA Disorazole DMSO Run1   | NM_0068<br>63 | LILRA1 | leukocyte<br>immunogl<br>obulin-like<br>receptor,<br>subfamily<br>A (with TM<br>domain),<br>member 1 | -0.811869 Inlier |

Identification of Survival Genes in Human Glioblastoma Cells Using siRNA Screening

Nikhil G Thaker, Fang Zhang, Peter R. McDonald, Tong Ying Shun, Michael D Lewen, Ian F. Pollack, and John S.

Lazo

Molecular Pharmacology

|                              |           |        |                                                                                |           |        |
|------------------------------|-----------|--------|--------------------------------------------------------------------------------|-----------|--------|
| siRNA-Vinblastine Run2-DMSO  | NM_006863 | LILRA1 | leukocyte immunoglobulin-like receptor, subfamily A (with TM domain), member 1 | -0.800085 | Inlier |
| siRNA-Temozolomide Run3-DMSO | NM_006863 | LILRA1 | leukocyte immunoglobulin-like receptor, subfamily A (with TM domain), member 1 | -0.306569 | Inlier |
| siRNA-Temozolomide Run2-DMSO | NM_006863 | LILRA1 | leukocyte immunoglobulin-like receptor, subfamily A (with TM domain), member 1 | -0.162869 | Inlier |
| siRNA-Temozolomide Run1-DMSO | NM_006863 | LILRA1 | leukocyte immunoglobulin-like receptor, subfamily A (with TM domain), member 1 | 0.162869  | Inlier |
| siRNA Disorazole DMSO Run3   | NM_006863 | LILRA1 | leukocyte immunoglobulin-like receptor, subfamily A (with TM domain), member 1 | 0.548915  | Inlier |

Identification of Survival Genes in Human Glioblastoma Cells Using siRNA Screening

Nikhil G Thaker, Fang Zhang, Peter R. McDonald, Tong Ying Shun, Michael D Lewen, Ian F. Pollack, and John S. Lazo

Molecular Pharmacology

|                              |               |        |                                                                                |           |        |
|------------------------------|---------------|--------|--------------------------------------------------------------------------------|-----------|--------|
| siRNA-Vinblastine Run1-DMSO  | NM_0068<br>63 | LILRA1 | leukocyte immunoglobulin-like receptor, subfamily A (with TM domain), member 1 | 1.110858  | Inlier |
| siRNA Disorazole DMSO Run2   | NM_0068<br>63 | LILRA1 | leukocyte immunoglobulin-like receptor, subfamily A (with TM domain), member 1 | 1.631025  | Inlier |
| siRNA Disorazole DMSO Run1   | NM_0068<br>66 | LILRA2 | leukocyte immunoglobulin-like receptor, subfamily A (with TM domain), member 2 | -0.937884 | Inlier |
| siRNA-Temozolomide Run2-DMSO | NM_0068<br>66 | LILRA2 | leukocyte immunoglobulin-like receptor, subfamily A (with TM domain), member 2 | -0.411116 | Inlier |
| siRNA-Temozolomide Run3-DMSO | NM_0068<br>66 | LILRA2 | leukocyte immunoglobulin-like receptor, subfamily A (with TM domain), member 2 | -0.382364 | Inlier |



Identification of Survival Genes in Human Glioblastoma Cells Using siRNA Screening

Nikhil G Thaker, Fang Zhang, Peter R. McDonald, Tong Ying Shun, Michael D Lewen, Ian F. Pollack, and John S. Lazo

Molecular Pharmacology

|                              |           |        |                                                                                |           |         |
|------------------------------|-----------|--------|--------------------------------------------------------------------------------|-----------|---------|
| siRNA-Vinblastine Run2-DMSO  | NM_006866 | LILRA2 | leukocyte immunoglobulin-like receptor, subfamily A (with TM domain), member 2 | -0.013086 | Inlier  |
| siRNA Disorazole DMSO Run3   | NM_006866 | LILRA2 | leukocyte immunoglobulin-like receptor, subfamily A (with TM domain), member 2 | 0.013086  | Inlier  |
| siRNA-Temozolomide Run1-DMSO | NM_006866 | LILRA2 | leukocyte immunoglobulin-like receptor, subfamily A (with TM domain), member 2 | 1.76649   | Inlier  |
| siRNA-Vinblastine Run1-DMSO  | NM_006866 | LILRA2 | leukocyte immunoglobulin-like receptor, subfamily A (with TM domain), member 2 | 3.613957  | Outlier |
| siRNA Disorazole DMSO Run2   | NM_006866 | LILRA2 | leukocyte immunoglobulin-like receptor, subfamily A (with TM domain), member 2 | 4.268029  | Outlier |

Identification of Survival Genes in Human Glioblastoma Cells Using siRNA Screening

Nikhil G Thaker, Fang Zhang, Peter R. McDonald, Tong Ying Shun, Michael D Lewen, Ian F. Pollack, and John S. Lazo

Molecular Pharmacology

|                              |               |        |                                                                                   |           |        |
|------------------------------|---------------|--------|-----------------------------------------------------------------------------------|-----------|--------|
| siRNA-Temozolomide Run3-DMSO | NM_0068<br>65 | LILRA3 | leukocyte immunoglobulin-like receptor, subfamily A (without TM domain), member 3 | -0.938968 | Inlier |
| siRNA Disorazole DMSO Run1   | NM_0068<br>65 | LILRA3 | leukocyte immunoglobulin-like receptor, subfamily A (without TM domain), member 3 | -0.505636 | Inlier |
| siRNA-Temozolomide Run2-DMSO | NM_0068<br>65 | LILRA3 | leukocyte immunoglobulin-like receptor, subfamily A (without TM domain), member 3 | -0.264227 | Inlier |
| siRNA Disorazole DMSO Run3   | NM_0068<br>65 | LILRA3 | leukocyte immunoglobulin-like receptor, subfamily A (without TM domain), member 3 | -0.168339 | Inlier |
| siRNA-Vinblastine Run2-DMSO  | NM_0068<br>65 | LILRA3 | leukocyte immunoglobulin-like receptor, subfamily A (without TM domain), member 3 | 0.16834   | Inlier |

Identification of Survival Genes in Human Glioblastoma Cells Using siRNA Screening

Nikhil G Thaker, Fang Zhang, Peter R. McDonald, Tong Ying Shun, Michael D Lewen, Ian F. Pollack, and John S. Lazo

Molecular Pharmacology

|                              |           |        |                                                                                          |           |         |
|------------------------------|-----------|--------|------------------------------------------------------------------------------------------|-----------|---------|
| siRNA-Temozolomide Run1-DMSO | NM_006865 | LILRA3 | leukocyte immunoglobulin-like receptor, subfamily A (without TM domain), member 3        | 0.843364  | Inlier  |
| siRNA-Vinblastine Run1-DMSO  | NM_006865 | LILRA3 | leukocyte immunoglobulin-like receptor, subfamily A (without TM domain), member 3        | 2.331044  | Inlier  |
| siRNA Disorazole DMSO Run2   | NM_006865 | LILRA3 | leukocyte immunoglobulin-like receptor, subfamily A (without TM domain), member 3        | 3.766683  | Outlier |
| siRNA-Temozolomide Run3-DMSO | NM_006669 | LILRB1 | leukocyte immunoglobulin-like receptor, subfamily B (with TM and ITIM domains), member 1 | -0.970111 | Inlier  |
| siRNA-Temozolomide Run2-DMSO | NM_006669 | LILRB1 | leukocyte immunoglobulin-like receptor, subfamily B (with TM and ITIM domains), member 1 | -0.883522 | Inlier  |

Identification of Survival Genes in Human Glioblastoma Cells Using siRNA Screening  
 Nikhil G Thaker, Fang Zhang, Peter R. McDonald, Tong Ying Shun, Michael D Lewen, Ian F. Pollack, and John S. Lazo  
 Molecular Pharmacology

|                              |               |        |                                                                                          |           |        |
|------------------------------|---------------|--------|------------------------------------------------------------------------------------------|-----------|--------|
| siRNA Disorazole DMSO Run1   | NM_0066<br>69 | LILRB1 | leukocyte immunoglobulin-like receptor, subfamily B (with TM and ITIM domains), member 1 | -0.297948 | Inlier |
| siRNA-Vinblastine Run2-DMSO  | NM_0066<br>69 | LILRB1 | leukocyte immunoglobulin-like receptor, subfamily B (with TM and ITIM domains), member 1 | -0.073578 | Inlier |
| siRNA-Temozolomide Run1-DMSO | NM_0066<br>69 | LILRB1 | leukocyte immunoglobulin-like receptor, subfamily B (with TM and ITIM domains), member 1 | 0.073578  | Inlier |
| siRNA Disorazole DMSO Run3   | NM_0066<br>69 | LILRB1 | leukocyte immunoglobulin-like receptor, subfamily B (with TM and ITIM domains), member 1 | 0.465478  | Inlier |
| siRNA-Vinblastine Run1-DMSO  | NM_0066<br>69 | LILRB1 | leukocyte immunoglobulin-like receptor, subfamily B (with TM and ITIM domains), member 1 | 1.416007  | Inlier |

Identification of Survival Genes in Human Glioblastoma Cells Using siRNA Screening

Nikhil G Thaker, Fang Zhang, Peter R. McDonald, Tong Ying Shun, Michael D Lewen, Ian F. Pollack, and John S. Lazo

Molecular Pharmacology

|                              |               |        |                                                                                          |           |        |
|------------------------------|---------------|--------|------------------------------------------------------------------------------------------|-----------|--------|
| siRNA Disorazole DMSO Run2   | NM_0066<br>69 | LILRB1 | leukocyte immunoglobulin-like receptor, subfamily B (with TM and ITIM domains), member 1 | 1.697704  | Inlier |
| siRNA-Vinblastine Run2-DMSO  | NM_0058<br>74 | LILRB2 | leukocyte immunoglobulin-like receptor, subfamily B (with TM and ITIM domains), member 2 | -0.879098 | Inlier |
| siRNA Disorazole DMSO Run1   | NM_0058<br>74 | LILRB2 | leukocyte immunoglobulin-like receptor, subfamily B (with TM and ITIM domains), member 2 | -0.707816 | Inlier |
| siRNA-Temozolomide Run2-DMSO | NM_0058<br>74 | LILRB2 | leukocyte immunoglobulin-like receptor, subfamily B (with TM and ITIM domains), member 2 | -0.394869 | Inlier |
| siRNA-Temozolomide Run3-DMSO | NM_0058<br>74 | LILRB2 | leukocyte immunoglobulin-like receptor, subfamily B (with TM and ITIM domains), member 2 | -0.321943 | Inlier |

Identification of Survival Genes in Human Glioblastoma Cells Using siRNA Screening

Nikhil G Thaker, Fang Zhang, Peter R. McDonald, Tong Ying Shun, Michael D Lewen, Ian F. Pollack, and John S. Lazo

Molecular Pharmacology

|                              |               |        |                                                                                          |           |        |
|------------------------------|---------------|--------|------------------------------------------------------------------------------------------|-----------|--------|
| siRNA Disorazole DMSO Run3   | NM_0058<br>74 | LILRB2 | leukocyte immunoglobulin-like receptor, subfamily B (with TM and ITIM domains), member 2 | 0.321943  | Inlier |
| siRNA-Temozolomide Run1-DMSO | NM_0058<br>74 | LILRB2 | leukocyte immunoglobulin-like receptor, subfamily B (with TM and ITIM domains), member 2 | 0.641184  | Inlier |
| siRNA-Vinblastine Run1-DMSO  | NM_0058<br>74 | LILRB2 | leukocyte immunoglobulin-like receptor, subfamily B (with TM and ITIM domains), member 2 | 1.366377  | Inlier |
| siRNA Disorazole DMSO Run2   | NM_0058<br>74 | LILRB2 | leukocyte immunoglobulin-like receptor, subfamily B (with TM and ITIM domains), member 2 | 1.718168  | Inlier |
| siRNA-Vinblastine Run2-DMSO  | NM_0068<br>64 | LILRB3 | leukocyte immunoglobulin-like receptor, subfamily B (with TM and ITIM domains), member 3 | -1.974693 | Inlier |

Identification of Survival Genes in Human Glioblastoma Cells Using siRNA Screening

Nikhil G Thaker, Fang Zhang, Peter R. McDonald, Tong Ying Shun, Michael D Lewen, Ian F. Pollack, and John S. Lazo

Molecular Pharmacology

|                              |           |        |                                                                                          |           |        |
|------------------------------|-----------|--------|------------------------------------------------------------------------------------------|-----------|--------|
| siRNA-Temozolomide Run2-DMSO | NM_006864 | LILRB3 | leukocyte immunoglobulin-like receptor, subfamily B (with TM and ITIM domains), member 3 | -0.727524 | Inlier |
| siRNA-Temozolomide Run3-DMSO | NM_006864 | LILRB3 | leukocyte immunoglobulin-like receptor, subfamily B (with TM and ITIM domains), member 3 | -0.621476 | Inlier |
| siRNA Disorazole DMSO Run3   | NM_006864 | LILRB3 | leukocyte immunoglobulin-like receptor, subfamily B (with TM and ITIM domains), member 3 | -0.332522 | Inlier |
| siRNA-Temozolomide Run1-DMSO | NM_006864 | LILRB3 | leukocyte immunoglobulin-like receptor, subfamily B (with TM and ITIM domains), member 3 | 0.332522  | Inlier |
| siRNA Disorazole DMSO Run1   | NM_006864 | LILRB3 | leukocyte immunoglobulin-like receptor, subfamily B (with TM and ITIM domains), member 3 | 0.533005  | Inlier |

Identification of Survival Genes in Human Glioblastoma Cells Using siRNA Screening

Nikhil G Thaker, Fang Zhang, Peter R. McDonald, Tong Ying Shun, Michael D Lewen, Ian F. Pollack, and John S. Lazo

Molecular Pharmacology

|                              |               |        |                                                                                          |           |         |
|------------------------------|---------------|--------|------------------------------------------------------------------------------------------|-----------|---------|
| siRNA-Vinblastine Run1-DMSO  | NM_0068<br>64 | LILRB3 | leukocyte immunoglobulin-like receptor, subfamily B (with TM and ITIM domains), member 3 | 3.424487  | Inlier  |
| siRNA Disorazole DMSO Run2   | NM_0068<br>64 | LILRB3 | leukocyte immunoglobulin-like receptor, subfamily B (with TM and ITIM domains), member 3 | 3.581538  | Outlier |
| siRNA Disorazole DMSO Run1   | NM_0068<br>47 | LILRB4 | leukocyte immunoglobulin-like receptor, subfamily B (with TM and ITIM domains), member 4 | -1.182862 | Inlier  |
| siRNA-Temozolomide Run2-DMSO | NM_0068<br>47 | LILRB4 | leukocyte immunoglobulin-like receptor, subfamily B (with TM and ITIM domains), member 4 | -0.166138 | Inlier  |
| siRNA-Temozolomide Run3-DMSO | NM_0068<br>47 | LILRB4 | leukocyte immunoglobulin-like receptor, subfamily B (with TM and ITIM domains), member 4 | -0.140449 | Inlier  |



Identification of Survival Genes in Human Glioblastoma Cells Using siRNA Screening

Nikhil G Thaker, Fang Zhang, Peter R. McDonald, Tong Ying Shun, Michael D Lewen, Ian F. Pollack, and John S. Lazo

Molecular Pharmacology

|                              |               |        |                                                                                          |           |        |
|------------------------------|---------------|--------|------------------------------------------------------------------------------------------|-----------|--------|
| siRNA Disorazole DMSO Run3   | NM_0068<br>47 | LILRB4 | leukocyte immunoglobulin-like receptor, subfamily B (with TM and ITIM domains), member 4 | -0.022544 | Inlier |
| siRNA-Vinblastine Run2-DMSO  | NM_0068<br>47 | LILRB4 | leukocyte immunoglobulin-like receptor, subfamily B (with TM and ITIM domains), member 4 | 0.022544  | Inlier |
| siRNA-Temozolomide Run1-DMSO | NM_0068<br>47 | LILRB4 | leukocyte immunoglobulin-like receptor, subfamily B (with TM and ITIM domains), member 4 | 1.33803   | Inlier |
| siRNA-Vinblastine Run1-DMSO  | NM_0068<br>47 | LILRB4 | leukocyte immunoglobulin-like receptor, subfamily B (with TM and ITIM domains), member 4 | 2.57458   | Inlier |
| siRNA Disorazole DMSO Run2   | NM_0068<br>47 | LILRB4 | leukocyte immunoglobulin-like receptor, subfamily B (with TM and ITIM domains), member 4 | 2.935718  | Inlier |

Identification of Survival Genes in Human Glioblastoma Cells Using siRNA Screening

Nikhil G Thaker, Fang Zhang, Peter R. McDonald, Tong Ying Shun, Michael D Lewen, Ian F. Pollack, and John S. Lazo

Molecular Pharmacology

|                              |           |        |                                                                                          |           |        |
|------------------------------|-----------|--------|------------------------------------------------------------------------------------------|-----------|--------|
| siRNA-Temozolomide Run2-DMSO | NM_006840 | LILRB5 | leukocyte immunoglobulin-like receptor, subfamily B (with TM and ITIM domains), member 5 | -1.090506 | Inlier |
| siRNA-Temozolomide Run3-DMSO | NM_006840 | LILRB5 | leukocyte immunoglobulin-like receptor, subfamily B (with TM and ITIM domains), member 5 | -0.952997 | Inlier |
| siRNA-Vinblastine Run2-DMSO  | NM_006840 | LILRB5 | leukocyte immunoglobulin-like receptor, subfamily B (with TM and ITIM domains), member 5 | -0.3481   | Inlier |
| siRNA-Temozolomide Run1-DMSO | NM_006840 | LILRB5 | leukocyte immunoglobulin-like receptor, subfamily B (with TM and ITIM domains), member 5 | -0.078499 | Inlier |
| siRNA Disorazole DMSO Run1   | NM_006840 | LILRB5 | leukocyte immunoglobulin-like receptor, subfamily B (with TM and ITIM domains), member 5 | 0.078499  | Inlier |

Identification of Survival Genes in Human Glioblastoma Cells Using siRNA Screening

Nikhil G Thaker, Fang Zhang, Peter R. McDonald, Tong Ying Shun, Michael D Lewen, Ian F. Pollack, and John S. Lazo

Molecular Pharmacology

|                              |                  |        |                                                                                          |           |        |
|------------------------------|------------------|--------|------------------------------------------------------------------------------------------|-----------|--------|
| siRNA Disorazole DMSO Run3   | NM_0068<br>40    | LILRB5 | leukocyte immunoglobulin-like receptor, subfamily B (with TM and ITIM domains), member 5 | 0.396003  | Inlier |
| siRNA-Vinblastine Run1-DMSO  | NM_0068<br>40    | LILRB5 | leukocyte immunoglobulin-like receptor, subfamily B (with TM and ITIM domains), member 5 | 1.445577  | Inlier |
| siRNA Disorazole DMSO Run2   | NM_0068<br>40    | LILRB5 | leukocyte immunoglobulin-like receptor, subfamily B (with TM and ITIM domains), member 5 | 1.522978  | Inlier |
| siRNA-Temozolomide Run3-DMSO | NM_0010<br>11513 | LIM    | PDZ and LIM domain 5                                                                     | -0.875694 | Inlier |
| siRNA Disorazole DMSO Run3   | NM_0010<br>11513 | LIM    | PDZ and LIM domain 5                                                                     | -0.721912 | Inlier |
| siRNA Disorazole DMSO Run2   | NM_0010<br>11513 | LIM    | PDZ and LIM domain 5                                                                     | -0.646842 | Inlier |
| siRNA-Temozolomide Run1-DMSO | NM_0010<br>11513 | LIM    | PDZ and LIM domain 5                                                                     | -0.055436 | Inlier |
| siRNA-Temozolomide Run2-DMSO | NM_0010<br>11513 | LIM    | PDZ and LIM domain 5                                                                     | 0.055436  | Inlier |
| siRNA-Vinblastine Run1-DMSO  | NM_0010<br>11513 | LIM    | PDZ and LIM domain 5                                                                     | 0.587847  | Inlier |
| siRNA Disorazole DMSO Run1   | NM_0010<br>11513 | LIM    | PDZ and LIM domain 5                                                                     | 0.702158  | Inlier |

Identification of Survival Genes in Human Glioblastoma Cells Using siRNA Screening  
 Nikhil G Thaker, Fang Zhang, Peter R. McDonald, Tong Ying Shun, Michael D Lewen, Ian F. Pollack, and John S. Lazo

| Molecular Pharmacology       | Gene ID      | Gene Name | Protein Domain       | Score     | Inlier |
|------------------------------|--------------|-----------|----------------------|-----------|--------|
| siRNA-Vinblastine Run2-DMSO  | NM_001011513 | LIM       | PDZ and LIM domain 5 | 0.863007  | Inlier |
| siRNA-Temozolomide Run3-DMSO | NM_002314    | LIMK1     | LIM domain kinase 1  | -0.766764 | Inlier |
| siRNA Disorazole DMSO Run2   | NM_002314    | LIMK1     | LIM domain kinase 1  | -0.582236 | Inlier |
| siRNA Disorazole DMSO Run3   | NM_002314    | LIMK1     | LIM domain kinase 1  | -0.577886 | Inlier |
| siRNA-Temozolomide Run2-DMSO | NM_002314    | LIMK1     | LIM domain kinase 1  | -0.424993 | Inlier |
| siRNA-Temozolomide Run1-DMSO | NM_002314    | LIMK1     | LIM domain kinase 1  | 0.424993  | Inlier |
| siRNA Disorazole DMSO Run1   | NM_002314    | LIMK1     | LIM domain kinase 1  | 0.866354  | Inlier |
| siRNA-Vinblastine Run1-DMSO  | NM_002314    | LIMK1     | LIM domain kinase 1  | 1.316367  | Inlier |
| siRNA-Vinblastine Run2-DMSO  | NM_002314    | LIMK1     | LIM domain kinase 1  | 1.605518  | Inlier |
| siRNA Disorazole DMSO Run3   | NM_016733    | LIMK2     | LIM domain kinase 2  | -0.840046 | Inlier |
| siRNA-Temozolomide Run3-DMSO | NM_016733    | LIMK2     | LIM domain kinase 2  | -0.793244 | Inlier |
| siRNA Disorazole DMSO Run1   | NM_016733    | LIMK2     | LIM domain kinase 2  | -0.397835 | Inlier |
| siRNA-Vinblastine Run2-DMSO  | NM_016733    | LIMK2     | LIM domain kinase 2  | -0.31718  | Inlier |
| siRNA-Temozolomide Run2-DMSO | NM_016733    | LIMK2     | LIM domain kinase 2  | 0.31718   | Inlier |
| siRNA-Temozolomide Run1-DMSO | NM_016733    | LIMK2     | LIM domain kinase 2  | 0.555756  | Inlier |
| siRNA Disorazole DMSO Run2   | NM_016733    | LIMK2     | LIM domain kinase 2  | 0.840677  | Inlier |
| siRNA-Vinblastine Run1-DMSO  | NM_016733    | LIMK2     | LIM domain kinase 2  | 1.98341   | Inlier |

Identification of Survival Genes in Human Glioblastoma Cells Using siRNA Screening

Nikhil G Thaker, Fang Zhang, Peter R. McDonald, Tong Ying Shun, Michael D Lewen, Ian F. Pollack, and John S. Lazo

Molecular Pharmacology

|                              |           |      |                                                                 |           |        |
|------------------------------|-----------|------|-----------------------------------------------------------------|-----------|--------|
| siRNA-Temozolomide Run3-DMSO | NM_000235 | LIPA | lipase A, lysosomal acid, cholesterol esterase (Wolman disease) | -1.327728 | Inlier |
| siRNA-Temozolomide Run2-DMSO | NM_000235 | LIPA | lipase A, lysosomal acid, cholesterol esterase (Wolman disease) | -1.206808 | Inlier |
| siRNA-Temozolomide Run1-DMSO | NM_000235 | LIPA | lipase A, lysosomal acid, cholesterol esterase (Wolman disease) | -0.264419 | Inlier |
| siRNA Disorazole DMSO Run1   | NM_000235 | LIPA | lipase A, lysosomal acid, cholesterol esterase (Wolman disease) | -0.032094 | Inlier |
| siRNA Disorazole DMSO Run3   | NM_000235 | LIPA | lipase A, lysosomal acid, cholesterol esterase (Wolman disease) | 0.032094  | Inlier |
| siRNA-Vinblastine Run2-DMSO  | NM_000235 | LIPA | lipase A, lysosomal acid, cholesterol esterase (Wolman disease) | 0.149812  | Inlier |

Identification of Survival Genes in Human Glioblastoma Cells Using siRNA Screening  
 Nikhil G Thaker, Fang Zhang, Peter R. McDonald, Tong Ying Shun, Michael D Lewen, Ian F. Pollack, and John S. Lazo  
 Molecular Pharmacology

|                              |           |      |                                                                 |           |        |
|------------------------------|-----------|------|-----------------------------------------------------------------|-----------|--------|
| siRNA-Vinblastine Run1-DMSO  | NM_000235 | LIPA | lipase A, lysosomal acid, cholesterol esterase (Wolman disease) | 1.084581  | Inlier |
| siRNA Disorazole DMSO Run2   | NM_000235 | LIPA | lipase A, lysosomal acid, cholesterol esterase (Wolman disease) | 1.273017  | Inlier |
| siRNA-Temozolomide Run3-DMSO | NM_000236 | LIPC | lipase, hepatic                                                 | -1.989606 | Inlier |
| siRNA-Temozolomide Run2-DMSO | NM_000236 | LIPC | lipase, hepatic                                                 | -1.15467  | Inlier |
| siRNA-Temozolomide Run1-DMSO | NM_000236 | LIPC | lipase, hepatic                                                 | -0.930401 | Inlier |
| siRNA Disorazole DMSO Run3   | NM_000236 | LIPC | lipase, hepatic                                                 | -0.260929 | Inlier |
| siRNA-Vinblastine Run1-DMSO  | NM_000236 | LIPC | lipase, hepatic                                                 | 0.260929  | Inlier |
| siRNA-Vinblastine Run2-DMSO  | NM_000236 | LIPC | lipase, hepatic                                                 | 0.403841  | Inlier |
| siRNA Disorazole DMSO Run1   | NM_000236 | LIPC | lipase, hepatic                                                 | 0.555165  | Inlier |
| siRNA Disorazole DMSO Run2   | NM_000236 | LIPC | lipase, hepatic                                                 | 0.793835  | Inlier |
| siRNA-Temozolomide Run3-DMSO | NM_005357 | LIPE | hormone-sensitive lipase,                                       | -1.643549 | Inlier |
| siRNA Disorazole DMSO Run1   | NM_005357 | LIPE | hormone-sensitive lipase,                                       | -0.820605 | Inlier |
| siRNA-Temozolomide Run1-DMSO | NM_005357 | LIPE | hormone-sensitive lipase,                                       | -0.479105 | Inlier |
| siRNA-Temozolomide Run2-DMSO | NM_005357 | LIPE | hormone-sensitive lipase,                                       | -0.281289 | Inlier |
| siRNA Disorazole DMSO Run3   | NM_005357 | LIPE | hormone-sensitive lipase,                                       | 0.281289  | Inlier |
| siRNA-Vinblastine Run2-DMSO  | NM_005357 | LIPE | hormone-sensitive                                               | 0.542772  | Inlier |

Identification of Survival Genes in Human Glioblastoma Cells Using siRNA Screening  
 Nikhil G Thaker, Fang Zhang, Peter R. McDonald, Tong Ying Shun, Michael D Lewen, Ian F. Pollack, and John S. Lazo

|                                                           |               |      |                                  |           |        |
|-----------------------------------------------------------|---------------|------|----------------------------------|-----------|--------|
| Molecular Pharmacology<br>siRNA-Vinblastine Run1-<br>DMSO | NM_0053<br>57 | LIPE | lipase,<br>hormone-<br>sensitive | 0.806228  | Inlier |
| siRNA Disorazole DMSO Run2                                | NM_0053<br>57 | LIPE | lipase,<br>hormone-<br>sensitive | 0.827516  | Inlier |
| siRNA-Temozolomide Run3-<br>DMSO                          | NM_0041<br>90 | LIPF | lipase,<br>gastric               | -1.535192 | Inlier |
| siRNA-Temozolomide Run1-<br>DMSO                          | NM_0041<br>90 | LIPF | lipase,<br>gastric               | -0.958196 | Inlier |
| siRNA-Temozolomide Run2-<br>DMSO                          | NM_0041<br>90 | LIPF | lipase,<br>gastric               | -0.23367  | Inlier |
| siRNA Disorazole DMSO Run3                                | NM_0041<br>90 | LIPF | lipase,<br>gastric               | -0.044528 | Inlier |
| siRNA-Vinblastine Run2-<br>DMSO                           | NM_0041<br>90 | LIPF | lipase,<br>gastric               | 0.044529  | Inlier |
| siRNA Disorazole DMSO Run1                                | NM_0041<br>90 | LIPF | lipase,<br>gastric               | 0.566221  | Inlier |
| siRNA Disorazole DMSO Run2                                | NM_0041<br>90 | LIPF | lipase,<br>gastric               | 0.782779  | Inlier |
| siRNA-Vinblastine Run1-<br>DMSO                           | NM_0041<br>90 | LIPF | lipase,<br>gastric               | 1.131164  | Inlier |
| siRNA Disorazole DMSO Run1                                | NM_0060<br>33 | LIPG | lipase,<br>endothelial           | -1.863219 | Inlier |
| siRNA Disorazole DMSO Run3                                | NM_0060<br>33 | LIPG | lipase,<br>endothelial           | -0.701493 | Inlier |
| siRNA-Vinblastine Run2-<br>DMSO                           | NM_0060<br>33 | LIPG | lipase,<br>endothelial           | -0.459219 | Inlier |
| siRNA-Temozolomide Run1-<br>DMSO                          | NM_0060<br>33 | LIPG | lipase,<br>endothelial           | -0.197916 | Inlier |
| siRNA-Temozolomide Run3-<br>DMSO                          | NM_0060<br>33 | LIPG | lipase,<br>endothelial           | 0.197918  | Inlier |
| siRNA-Temozolomide Run2-<br>DMSO                          | NM_0060<br>33 | LIPG | lipase,<br>endothelial           | 0.647507  | Inlier |
| siRNA-Vinblastine Run1-<br>DMSO                           | NM_0060<br>33 | LIPG | lipase,<br>endothelial           | 2.604545  | Inlier |
| siRNA Disorazole DMSO Run2                                | NM_0060<br>33 | LIPG | lipase,<br>endothelial           | 3.225728  | Inlier |
| siRNA-Temozolomide Run2-<br>DMSO                          | NM_1392<br>48 | LIPH | lipase,<br>member H              | -0.909115 | Inlier |
| siRNA-Temozolomide Run3-<br>DMSO                          | NM_1392<br>48 | LIPH | lipase,<br>member H              | -0.60327  | Inlier |

Identification of Survival Genes in Human Glioblastoma Cells Using siRNA Screening  
 Nikhil G Thaker, Fang Zhang, Peter R. McDonald, Tong Ying Shun, Michael D Lewen, Ian F. Pollack, and John S. Lazo

Molecular Pharmacology

|                              |               |        |                         |           |        |
|------------------------------|---------------|--------|-------------------------|-----------|--------|
| siRNA-Temozolomide Run1-DMSO | NM_1392<br>48 | LIPH   | lipase,<br>member H     | -0.218767 | Inlier |
| siRNA-Vinblastine Run2-DMSO  | NM_1392<br>48 | LIPH   | lipase,<br>member H     | -0.139436 | Inlier |
| siRNA Disorazole DMSO Run3   | NM_1392<br>48 | LIPH   | lipase,<br>member H     | 0.139436  | Inlier |
| siRNA-Vinblastine Run1-DMSO  | NM_1392<br>48 | LIPH   | lipase,<br>member H     | 0.74573   | Inlier |
| siRNA Disorazole DMSO Run2   | NM_1392<br>48 | LIPH   | lipase,<br>member H     | 0.790497  | Inlier |
| siRNA Disorazole DMSO Run1   | NM_1392<br>48 | LIPH   | lipase,<br>member H     | 0.810874  | Inlier |
| siRNA Disorazole DMSO Run1   | NM_1989<br>96 | LIPI   | lipase,<br>member I     | -2.519408 | Inlier |
| siRNA-Temozolomide Run3-DMSO | NM_1989<br>96 | LIPI   | lipase,<br>member I     | -0.772153 | Inlier |
| siRNA-Temozolomide Run1-DMSO | NM_1989<br>96 | LIPI   | lipase,<br>member I     | -0.446522 | Inlier |
| siRNA-Temozolomide Run2-DMSO | NM_1989<br>96 | LIPI   | lipase,<br>member I     | -0.413054 | Inlier |
| siRNA-Vinblastine Run2-DMSO  | NM_1989<br>96 | LIPI   | lipase,<br>member I     | 0.413054  | Inlier |
| siRNA Disorazole DMSO Run3   | NM_1989<br>96 | LIPI   | lipase,<br>member I     | 0.576847  | Inlier |
| siRNA Disorazole DMSO Run2   | NM_1989<br>96 | LIPI   | lipase,<br>member I     | 1.155109  | Inlier |
| siRNA-Vinblastine Run1-DMSO  | NM_1989<br>96 | LIPI   | lipase,<br>member I     | 1.571944  | Inlier |
| siRNA-Temozolomide Run1-DMSO | NM_1451<br>96 | LIPT1  | lipoyltransf<br>erase 1 | -2.389582 | Inlier |
| siRNA-Temozolomide Run2-DMSO | NM_1451<br>96 | LIPT1  | lipoyltransf<br>erase 1 | -0.955773 | Inlier |
| siRNA-Vinblastine Run2-DMSO  | NM_1451<br>96 | LIPT1  | lipoyltransf<br>erase 1 | -0.620312 | Inlier |
| siRNA Disorazole DMSO Run2   | NM_1451<br>96 | LIPT1  | lipoyltransf<br>erase 1 | -0.090801 | Inlier |
| siRNA-Vinblastine Run1-DMSO  | NM_1451<br>96 | LIPT1  | lipoyltransf<br>erase 1 | 0.090799  | Inlier |
| siRNA Disorazole DMSO Run3   | NM_1451<br>96 | LIPT1  | lipoyltransf<br>erase 1 | 0.525888  | Inlier |
| siRNA Disorazole DMSO Run1   | NM_1451<br>96 | LIPT1  | lipoyltransf<br>erase 1 | 0.728688  | Inlier |
| siRNA-Temozolomide Run3-DMSO | NM_1451<br>96 | LIPT1  | lipoyltransf<br>erase 1 | 1.303736  | Inlier |
| siRNA-Temozolomide Run3-DMSO | NM_2058<br>35 | LISCH7 | LISCH7                  | -0.968509 | Inlier |



Identification of Survival Genes in Human Glioblastoma Cells Using siRNA Screening

Nikhil G Thaker, Fang Zhang, Peter R. McDonald, Tong Ying Shun, Michael D Lewen, Ian F. Pollack, and John S.

Lazo

|                                  |               |        |                                                                |           |        |
|----------------------------------|---------------|--------|----------------------------------------------------------------|-----------|--------|
| siRNA-Vinblastine Run2-<br>DMSO  | NM_2058<br>35 | LISCH7 | LISCH7                                                         | -0.698412 | Inlier |
| siRNA-Temozolomide Run2-<br>DMSO | NM_2058<br>35 | LISCH7 | LISCH7                                                         | -0.650588 | Inlier |
| siRNA Disorazole DMSO Run3       | NM_2058<br>35 | LISCH7 | LISCH7                                                         | -0.176497 | Inlier |
| siRNA-Temozolomide Run1-<br>DMSO | NM_2058<br>35 | LISCH7 | LISCH7                                                         | 0.176497  | Inlier |
| siRNA Disorazole DMSO Run1       | NM_2058<br>35 | LISCH7 | LISCH7                                                         | 0.309251  | Inlier |
| siRNA-Vinblastine Run1-<br>DMSO  | NM_2058<br>35 | LISCH7 | LISCH7                                                         | 1.133021  | Inlier |
| siRNA Disorazole DMSO Run2       | NM_2058<br>35 | LISCH7 | LISCH7                                                         | 1.240654  | Inlier |
| siRNA-Temozolomide Run3-<br>DMSO | NM_0330<br>29 | LMLN   | leishmanol<br>ysin-like<br>(metallope<br>ptidase<br>M8 family) | -1.160991 | Inlier |
| siRNA Disorazole DMSO Run1       | NM_0330<br>29 | LMLN   | leishmanol<br>ysin-like<br>(metallope<br>ptidase<br>M8 family) | -0.745552 | Inlier |
| siRNA Disorazole DMSO Run3       | NM_0330<br>29 | LMLN   | leishmanol<br>ysin-like<br>(metallope<br>ptidase<br>M8 family) | -0.603448 | Inlier |
| siRNA-Temozolomide Run1-<br>DMSO | NM_0330<br>29 | LMLN   | leishmanol<br>ysin-like<br>(metallope<br>ptidase<br>M8 family) | -0.102524 | Inlier |
| siRNA-Temozolomide Run2-<br>DMSO | NM_0330<br>29 | LMLN   | leishmanol<br>ysin-like<br>(metallope<br>ptidase<br>M8 family) | 0.102523  | Inlier |
| siRNA Disorazole DMSO Run2       | NM_0330<br>29 | LMLN   | leishmanol<br>ysin-like<br>(metallope<br>ptidase<br>M8 family) | 0.40342   | Inlier |

Identification of Survival Genes in Human Glioblastoma Cells Using siRNA Screening  
 Nikhil G Thaker, Fang Zhang, Peter R. McDonald, Tong Ying Shun, Michael D Lewen, Ian F. Pollack, and John S. Lazo  
 Molecular Pharmacology

|                              |               |       |                                                  |           |        |
|------------------------------|---------------|-------|--------------------------------------------------|-----------|--------|
| siRNA-Vinblastine Run2-DMSO  | NM_0330<br>29 | LMLN  | leishmanolysin-like (metallopeptidase M8 family) | 0.760939  | Inlier |
| siRNA-Vinblastine Run1-DMSO  | NM_0330<br>29 | LMLN  | leishmanolysin-like (metallopeptidase M8 family) | 1.134854  | Inlier |
| siRNA-Temozolomide Run3-DMSO | NM_0149<br>16 | LMTK2 | tyrosine kinase 2<br>lemur                       | -1.408426 | Inlier |
| siRNA-Temozolomide Run2-DMSO | NM_0149<br>16 | LMTK2 | tyrosine kinase 2<br>lemur                       | -0.652054 | Inlier |
| siRNA-Temozolomide Run1-DMSO | NM_0149<br>16 | LMTK2 | tyrosine kinase 2<br>lemur                       | -0.203758 | Inlier |
| siRNA Disorazole DMSO Run1   | NM_0149<br>16 | LMTK2 | tyrosine kinase 2<br>lemur                       | -0.094381 | Inlier |
| siRNA Disorazole DMSO Run2   | NM_0149<br>16 | LMTK2 | tyrosine kinase 2<br>lemur                       | 0.094381  | Inlier |
| siRNA-Vinblastine Run1-DMSO  | NM_0149<br>16 | LMTK2 | tyrosine kinase 2<br>lemur                       | 0.696946  | Inlier |
| siRNA Disorazole DMSO Run3   | NM_0149<br>16 | LMTK2 | tyrosine kinase 2<br>lemur                       | 0.945863  | Inlier |
| siRNA-Vinblastine Run2-DMSO  | NM_0149<br>16 | LMTK2 | tyrosine kinase 2<br>leucyl/cystinyl             | 1.316254  | Inlier |
| siRNA-Temozolomide Run3-DMSO | NM_1759<br>20 | LNPEP | aminopeptidase<br>leucyl/cystinyl                | -0.861802 | Inlier |
| siRNA-Temozolomide Run2-DMSO | NM_1759<br>20 | LNPEP | aminopeptidase<br>leucyl/cystinyl                | -0.78273  | Inlier |
| siRNA-Temozolomide Run1-DMSO | NM_1759<br>20 | LNPEP | aminopeptidase<br>leucyl/cystinyl                | -0.29267  | Inlier |
| siRNA Disorazole DMSO Run2   | NM_1759<br>20 | LNPEP | aminopeptidase                                   | -0.249549 | Inlier |

Identification of Survival Genes in Human Glioblastoma Cells Using siRNA Screening  
 Nikhil G Thaker, Fang Zhang, Peter R. McDonald, Tong Ying Shun, Michael D Lewen, Ian F. Pollack, and John S. Lazo

Molecular Pharmacology

|                                  |               |               | leucyl/cysti<br>nyl<br>aminopept<br>idase |                  |
|----------------------------------|---------------|---------------|-------------------------------------------|------------------|
| siRNA Disorazole DMSO Run3       | NM_1759<br>20 | LNPEP         | leucyl/cysti<br>nyl<br>aminopept<br>idase | 0.249548 Inlier  |
| siRNA Disorazole DMSO Run1       | NM_1759<br>20 | LNPEP         | leucyl/cysti<br>nyl<br>aminopept<br>idase | 0.56627 Inlier   |
| siRNA-Vinblastine Run2-<br>DMSO  | NM_1759<br>20 | LNPEP         | leucyl/cysti<br>nyl<br>aminopept<br>idase | 1.335544 Inlier  |
| siRNA-Vinblastine Run1-<br>DMSO  | NM_1759<br>20 | LNPEP         | leucyl/cysti<br>nyl<br>aminopept<br>idase | 1.63103 Inlier   |
| siRNA-Vinblastine Run2-<br>DMSO  | NM_0529<br>37 | LOC11529<br>4 | LOC11529<br>4                             | -1.388159 Inlier |
| siRNA Disorazole DMSO Run3       | NM_0529<br>37 | LOC11529<br>4 | LOC11529<br>4                             | -0.27076 Inlier  |
| siRNA Disorazole DMSO Run1       | NM_0529<br>37 | LOC11529<br>4 | LOC11529<br>4                             | -0.184167 Inlier |
| siRNA-Temozolomide Run2-<br>DMSO | NM_0529<br>37 | LOC11529<br>4 | LOC11529<br>4                             | -0.176238 Inlier |
| siRNA-Temozolomide Run3-<br>DMSO | NM_0529<br>37 | LOC11529<br>4 | LOC11529<br>4                             | 0.17624 Inlier   |
| siRNA-Temozolomide Run1-<br>DMSO | NM_0529<br>37 | LOC11529<br>4 | LOC11529<br>4                             | 1.07824 Inlier   |
| siRNA Disorazole DMSO Run2       | NM_0529<br>37 | LOC11529<br>4 | LOC11529<br>4                             | 5.985734 Outlier |
| siRNA-Vinblastine Run1-<br>DMSO  | NM_0529<br>37 | LOC11529<br>4 | LOC11529<br>4                             | 7.545624 Outlier |
| siRNA-Vinblastine Run2-<br>DMSO  | NM_1387<br>84 | LOC11612<br>3 | LOC11612<br>3                             | -1.258295 Inlier |
| siRNA-Temozolomide Run2-<br>DMSO | NM_1387<br>84 | LOC11612<br>3 | LOC11612<br>3                             | -0.818965 Inlier |
| siRNA Disorazole DMSO Run3       | NM_1387<br>84 | LOC11612<br>3 | LOC11612<br>3                             | -0.355845 Inlier |
| siRNA Disorazole DMSO Run1       | NM_1387<br>84 | LOC11612<br>3 | LOC11612<br>3                             | -0.127737 Inlier |
| siRNA-Temozolomide Run1-<br>DMSO | NM_1387<br>84 | LOC11612<br>3 | LOC11612<br>3                             | 0.127737 Inlier  |
| siRNA-Temozolomide Run3-<br>DMSO | NM_1387<br>84 | LOC11612<br>3 | LOC11612<br>3                             | 0.530035 Inlier  |
| siRNA-Vinblastine Run1-<br>DMSO  | NM_1387<br>84 | LOC11612<br>3 | LOC11612<br>3                             | 2.904245 Inlier  |
| siRNA Disorazole DMSO Run2       | NM_1387<br>84 | LOC11612<br>3 | LOC11612<br>3                             | 3.275972 Inlier  |
| siRNA-Temozolomide Run2-<br>DMSO | NM_1384<br>58 | LOC11614<br>3 | LOC11614<br>3                             | -0.692089 Inlier |
| siRNA-Temozolomide Run3-<br>DMSO | NM_1384<br>58 | LOC11614<br>3 | LOC11614<br>3                             | -0.656911 Inlier |

Identification of Survival Genes in Human Glioblastoma Cells Using siRNA Screening  
 Nikhil G Thaker, Fang Zhang, Peter R. McDonald, Tong Ying Shun, Michael D Lewen, Ian F. Pollack, and John S. Lazo

|                              |          |          |                                         |           |        |
|------------------------------|----------|----------|-----------------------------------------|-----------|--------|
| Molecular Pharmacology       | NM_1384  | LOC11614 | LOC11614                                |           |        |
| siRNA Disorazole DMSO Run2   | 58       | 3        | 3                                       | -0.387622 | Inlier |
|                              | NM_1384  | LOC11614 | LOC11614                                |           |        |
| siRNA Disorazole DMSO Run3   | 58       | 3        | 3                                       | -0.026555 | Inlier |
| siRNA-Temozolomide Run1-DMSO | NM_1384  | LOC11614 | LOC11614                                |           |        |
|                              | 58       | 3        | 3                                       | 0.026555  | Inlier |
|                              | NM_1384  | LOC11614 | LOC11614                                |           |        |
| siRNA Disorazole DMSO Run1   | 58       | 3        | 3                                       | 0.848589  | Inlier |
| siRNA-Vinblastine Run1-DMSO  | NM_1384  | LOC11614 | LOC11614                                |           |        |
|                              | 58       | 3        | 3                                       | 0.910428  | Inlier |
| siRNA-Vinblastine Run2-DMSO  | NM_1384  | LOC11614 | LOC11614                                |           |        |
|                              | 58       | 3        | 3                                       | 1.231172  | Inlier |
|                              |          |          | olfactory receptor, family 4, subfamily |           |        |
|                              | XM_06417 | LOC12453 | D,                                      |           |        |
| siRNA Disorazole DMSO Run1   | 7        | 8        | member 2                                | -1.901154 | Inlier |
|                              |          |          | olfactory receptor, family 4, subfamily |           |        |
|                              | XM_06417 | LOC12453 | D,                                      |           |        |
| siRNA-Vinblastine Run2-DMSO  | 7        | 8        | member 2                                | -0.721277 | Inlier |
|                              |          |          | olfactory receptor, family 4, subfamily |           |        |
|                              | XM_06417 | LOC12453 | D,                                      |           |        |
| siRNA-Temozolomide Run3-DMSO | 7        | 8        | member 2                                | -0.299507 | Inlier |
|                              |          |          | olfactory receptor, family 4, subfamily |           |        |
|                              | XM_06417 | LOC12453 | D,                                      |           |        |
| siRNA-Temozolomide Run1-DMSO | 7        | 8        | member 2                                | -0.149993 | Inlier |
|                              |          |          | olfactory receptor, family 4, subfamily |           |        |
|                              | XM_06417 | LOC12453 | D,                                      |           |        |
| siRNA-Temozolomide Run2-DMSO | 7        | 8        | member 2                                | 0.149993  | Inlier |
|                              |          |          | olfactory receptor, family 4, subfamily |           |        |
|                              | XM_06417 | LOC12453 | D,                                      |           |        |
| siRNA Disorazole DMSO Run3   | 7        | 8        | member 2                                | 0.627723  | Inlier |

Identification of Survival Genes in Human Glioblastoma Cells Using siRNA Screening  
 Nikhil G Thaker, Fang Zhang, Peter R. McDonald, Tong Ying Shun, Michael D Lewen, Ian F. Pollack, and John S. Lazo

Molecular Pharmacology

|                              |          |          |                                         |                                         |         |
|------------------------------|----------|----------|-----------------------------------------|-----------------------------------------|---------|
|                              |          |          |                                         | olfactory receptor, family 4, subfamily |         |
| siRNA-Vinblastine Run1-DMSO  | XM_06417 | LOC12453 | D, member 2                             | 0.902421                                | Inlier  |
|                              | 7        | 8        |                                         |                                         |         |
|                              |          |          | olfactory receptor, family 4, subfamily |                                         |         |
| siRNA Disorazole DMSO Run2   | XM_06417 | LOC12453 | D, member 2                             | 1.579739                                | Inlier  |
| siRNA-Temozolomide Run2-DMSO | XM_37128 | LOC12810 | LOC12810                                | -2.749809                               | Inlier  |
|                              | 5        | 2        | 2                                       |                                         |         |
| siRNA Disorazole DMSO Run1   | XM_37128 | LOC12810 | LOC12810                                | -0.808416                               | Inlier  |
|                              | 5        | 2        | 2                                       |                                         |         |
| siRNA Disorazole DMSO Run3   | XM_37128 | LOC12810 | LOC12810                                | -0.540584                               | Inlier  |
| siRNA-Vinblastine Run1-DMSO  | XM_37128 | LOC12810 | LOC12810                                | -0.082537                               | Inlier  |
|                              | 5        | 2        | 2                                       |                                         |         |
| siRNA-Vinblastine Run2-DMSO  | XM_37128 | LOC12810 | LOC12810                                | 0.082536                                | Inlier  |
|                              | 5        | 2        | 2                                       |                                         |         |
| siRNA-Temozolomide Run1-DMSO | XM_37128 | LOC12810 | LOC12810                                | 0.271789                                | Inlier  |
|                              | 5        | 2        | 2                                       |                                         |         |
| siRNA-Temozolomide Run3-DMSO | XM_37128 | LOC12810 | LOC12810                                | 1.248963                                | Inlier  |
|                              | 5        | 2        | 2                                       |                                         |         |
| siRNA Disorazole DMSO Run2   | XM_37128 | LOC12810 | LOC12810                                | 7.374589                                | Outlier |
| siRNA-Temozolomide Run2-DMSO | NM_1387  | LOC12953 | LOC12953                                | -1.147397                               | Inlier  |
|                              | 98       | 1        | 1                                       |                                         |         |
| siRNA-Temozolomide Run3-DMSO | NM_1387  | LOC12953 | LOC12953                                | -0.810107                               | Inlier  |
|                              | 98       | 1        | 1                                       |                                         |         |
| siRNA-Temozolomide Run1-DMSO | NM_1387  | LOC12953 | LOC12953                                | -0.538893                               | Inlier  |
|                              | 98       | 1        | 1                                       |                                         |         |
| siRNA Disorazole DMSO Run2   | NM_1387  | LOC12953 | LOC12953                                | -0.080932                               | Inlier  |
|                              | 98       | 1        | 1                                       |                                         |         |
| siRNA Disorazole DMSO Run1   | NM_1387  | LOC12953 | LOC12953                                | 0.080932                                | Inlier  |
|                              | 98       | 1        | 1                                       |                                         |         |
| siRNA Disorazole DMSO Run3   | NM_1387  | LOC12953 | LOC12953                                | 0.472595                                | Inlier  |
|                              | 98       | 1        | 1                                       |                                         |         |
| siRNA-Vinblastine Run1-DMSO  | NM_1387  | LOC12953 | LOC12953                                | 1.263777                                | Inlier  |
|                              | 98       | 1        | 1                                       |                                         |         |
| siRNA-Vinblastine Run2-DMSO  | NM_1387  | LOC12953 | LOC12953                                | 1.279806                                | Inlier  |
|                              | 98       | 1        | 1                                       |                                         |         |
| siRNA-Temozolomide Run2-DMSO | NM_1734  | LOC13428 | LOC13428                                | -1.141569                               | Inlier  |
|                              | 90       | 5        | 5                                       |                                         |         |
| siRNA-Temozolomide Run3-DMSO | NM_1734  | LOC13428 | LOC13428                                | -1.116214                               | Inlier  |
|                              | 90       | 5        | 5                                       |                                         |         |
| siRNA-Temozolomide Run1-DMSO | NM_1734  | LOC13428 | LOC13428                                | -0.259393                               | Inlier  |
|                              | 90       | 5        | 5                                       |                                         |         |
| siRNA Disorazole DMSO Run2   | NM_1734  | LOC13428 | LOC13428                                | -0.249945                               | Inlier  |
|                              | 90       | 5        | 5                                       |                                         |         |

Identification of Survival Genes in Human Glioblastoma Cells Using siRNA Screening  
 Nikhil G Thaker, Fang Zhang, Peter R. McDonald, Tong Ying Shun, Michael D Lewen, Ian F. Pollack, and John S. Lazo

|                              |          |          |                                            |           |        |
|------------------------------|----------|----------|--------------------------------------------|-----------|--------|
| Molecular Pharmacology       | NM_1734  | LOC13428 | LOC13428                                   |           |        |
| siRNA Disorazole DMSO Run1   | 90       | 5        | 5                                          | 0.249944  | Inlier |
|                              | NM_1734  | LOC13428 | LOC13428                                   |           |        |
| siRNA Disorazole DMSO Run3   | 90       | 5        | 5                                          | 0.577002  | Inlier |
| siRNA-Vinblastine Run2-DMSO  | NM_1734  | LOC13428 | LOC13428                                   |           |        |
|                              | 90       | 5        | 5                                          | 0.771997  | Inlier |
| siRNA-Vinblastine Run1-DMSO  | NM_1734  | LOC13428 | LOC13428                                   |           |        |
|                              | 90       | 5        | 5                                          | 0.793274  | Inlier |
|                              |          |          | olfactory receptor, family 4, subfamily F, |           |        |
| siRNA-Temozolomide Run3-DMSO | XM_06959 | LOC13589 | member 29                                  | -1.287417 | Inlier |
|                              | 5        | 6        | olfactory receptor, family 4, subfamily F, |           |        |
| siRNA-Temozolomide Run2-DMSO | XM_06959 | LOC13589 | member 29                                  | -1.18621  | Inlier |
|                              | 5        | 6        | olfactory receptor, family 4, subfamily F, |           |        |
| siRNA-Vinblastine Run2-DMSO  | XM_06959 | LOC13589 | member 29                                  | -0.594333 | Inlier |
|                              | 5        | 6        | olfactory receptor, family 4, subfamily F, |           |        |
| siRNA-Temozolomide Run1-DMSO | XM_06959 | LOC13589 | member 29                                  | -0.067425 | Inlier |
|                              | 5        | 6        | olfactory receptor, family 4, subfamily F, |           |        |
|                              | XM_06959 | LOC13589 | member 29                                  | 0.067425  | Inlier |
| siRNA Disorazole DMSO Run1   | 5        | 6        | olfactory receptor, family 4, subfamily F, |           |        |
|                              | XM_06959 | LOC13589 | member 29                                  | 0.082349  | Inlier |
| siRNA Disorazole DMSO Run3   | 5        | 6        | 29                                         |           |        |

Identification of Survival Genes in Human Glioblastoma Cells Using siRNA Screening  
 Nikhil G Thaker, Fang Zhang, Peter R. McDonald, Tong Ying Shun, Michael D Lewen, Ian F. Pollack, and John S. Lazo

Molecular Pharmacology

| siRNA Treatment              | XM | LOC | Gene Description                                     | Value     | Inlier |
|------------------------------|----|-----|------------------------------------------------------|-----------|--------|
| siRNA Disorazole DMSO Run2   | 5  | 6   | olfactory receptor, family 4, subfamily F, member 29 | 0.754667  | Inlier |
| siRNA-Vinblastine Run1-DMSO  | 5  | 6   | olfactory receptor, family 4, subfamily F, member 29 | 0.865142  | Inlier |
| siRNA-Temozolomide Run3-DMSO | 1  | 6   | olfactory receptor, family 6, subfamily B, member 1  | -1.268288 | Inlier |
| siRNA-Temozolomide Run2-DMSO | 1  | 6   | olfactory receptor, family 6, subfamily B, member 1  | -1.001528 | Inlier |
| siRNA-Temozolomide Run1-DMSO | 1  | 6   | olfactory receptor, family 6, subfamily B, member 1  | -0.165844 | Inlier |
| siRNA-Vinblastine Run2-DMSO  | 1  | 6   | olfactory receptor, family 6, subfamily B, member 1  | -0.076827 | Inlier |
| siRNA Disorazole DMSO Run1   | 1  | 6   | olfactory receptor, family 6, subfamily B, member 1  | 0.076827  | Inlier |
| siRNA Disorazole DMSO Run3   | 1  | 6   | olfactory receptor, family 6, subfamily B, member 1  | 0.601904  | Inlier |

Identification of Survival Genes in Human Glioblastoma Cells Using siRNA Screening  
 Nikhil G Thaker, Fang Zhang, Peter R. McDonald, Tong Ying Shun, Michael D Lewen, Ian F. Pollack, and John S. Lazo

Molecular Pharmacology

|                              |                  |               |                                         |                                         |        |
|------------------------------|------------------|---------------|-----------------------------------------|-----------------------------------------|--------|
|                              |                  |               |                                         | olfactory receptor, family 6, subfamily |        |
| siRNA-Vinblastine Run1-DMSO  | XM_06962<br>1    | LOC13594<br>6 | B,<br>member 1                          | 0.747096                                | Inlier |
|                              |                  |               | olfactory receptor, family 6, subfamily |                                         |        |
| siRNA Disorazole DMSO Run2   | XM_06962<br>1    | LOC13594<br>6 | B,<br>member 1                          | 0.96181                                 | Inlier |
| siRNA-Temozolomide Run3-DMSO | NM_0010<br>08270 | LOC13624<br>2 | LOC13624<br>2                           | -0.750438                               | Inlier |
| siRNA-Temozolomide Run2-DMSO | NM_0010<br>08270 | LOC13624<br>2 | LOC13624<br>2                           | -0.598562                               | Inlier |
| siRNA-Temozolomide Run1-DMSO | NM_0010<br>08270 | LOC13624<br>2 | LOC13624<br>2                           | -0.236048                               | Inlier |
|                              |                  |               |                                         |                                         |        |
| siRNA Disorazole DMSO Run1   | NM_0010<br>08270 | LOC13624<br>2 | LOC13624<br>2                           | -0.089921                               | Inlier |
|                              |                  |               |                                         |                                         |        |
| siRNA Disorazole DMSO Run3   | NM_0010<br>08270 | LOC13624<br>2 | LOC13624<br>2                           | 0.089921                                | Inlier |
|                              |                  |               |                                         |                                         |        |
| siRNA Disorazole DMSO Run2   | NM_0010<br>08270 | LOC13624<br>2 | LOC13624<br>2                           | 0.925607                                | Inlier |
| siRNA-Vinblastine Run2-DMSO  | NM_0010<br>08270 | LOC13624<br>2 | LOC13624<br>2                           | 1.198678                                | Inlier |
| siRNA-Vinblastine Run1-DMSO  | NM_0010<br>08270 | LOC13624<br>2 | LOC13624<br>2                           | 1.473829                                | Inlier |
|                              |                  |               | lipase-like, ab-hydrolase domain        |                                         |        |
| siRNA-Temozolomide Run3-DMSO | XM_08437<br>7    | LOC14291<br>0 | containing<br>1                         | -1.044276                               | Inlier |
|                              |                  |               | lipase-like, ab-hydrolase domain        |                                         |        |
| siRNA Disorazole DMSO Run1   | XM_08437<br>7    | LOC14291<br>0 | containing<br>1                         | -0.679281                               | Inlier |
|                              |                  |               | lipase-like, ab-hydrolase domain        |                                         |        |
| siRNA-Temozolomide Run1-DMSO | XM_08437<br>7    | LOC14291<br>0 | containing<br>1                         | -0.669719                               | Inlier |
|                              |                  |               | lipase-like, ab-hydrolase domain        |                                         |        |
| siRNA-Vinblastine Run2-DMSO  | XM_08437<br>7    | LOC14291<br>0 | containing<br>1                         | -0.013711                               | Inlier |



Identification of Survival Genes in Human Glioblastoma Cells Using siRNA Screening  
 Nikhil G Thaker, Fang Zhang, Peter R. McDonald, Tong Ying Shun, Michael D Lewen, Ian F. Pollack, and John S. Lazo

Molecular Pharmacology

|                              |               |               |                                                                     |           |        |
|------------------------------|---------------|---------------|---------------------------------------------------------------------|-----------|--------|
| siRNA-Temozolomide Run2-DMSO | XM_08437<br>7 | LOC14291<br>0 | lipase-like,<br>ab-<br>hydrolase<br>domain<br>containing<br>1       | 0.013711  | Inlier |
| siRNA Disorazole DMSO Run3   | XM_08437<br>7 | LOC14291<br>0 | lipase-like,<br>ab-<br>hydrolase<br>domain<br>containing<br>1       | 0.024843  | Inlier |
| siRNA-Vinblastine Run1-DMSO  | XM_08437<br>7 | LOC14291<br>0 | lipase-like,<br>ab-<br>hydrolase<br>domain<br>containing<br>1       | 0.993057  | Inlier |
| siRNA Disorazole DMSO Run2   | XM_08437<br>7 | LOC14291<br>0 | lipase-like,<br>ab-<br>hydrolase<br>domain<br>containing<br>1       | 1.18026   | Inlier |
| siRNA-Vinblastine Run2-DMSO  | XM_09020<br>3 | LOC14412<br>5 | olfactory<br>receptor,<br>family 2,<br>subfamily<br>AG,<br>member 1 | -0.809887 | Inlier |
| siRNA-Temozolomide Run2-DMSO | XM_09020<br>3 | LOC14412<br>5 | olfactory<br>receptor,<br>family 2,<br>subfamily<br>AG,<br>member 1 | -0.539113 | Inlier |
| siRNA Disorazole DMSO Run1   | XM_09020<br>3 | LOC14412<br>5 | olfactory<br>receptor,<br>family 2,<br>subfamily<br>AG,<br>member 1 | -0.043191 | Inlier |
| siRNA Disorazole DMSO Run3   | XM_09020<br>3 | LOC14412<br>5 | olfactory<br>receptor,<br>family 2,<br>subfamily<br>AG,<br>member 1 | -0.01594  | Inlier |

Identification of Survival Genes in Human Glioblastoma Cells Using siRNA Screening  
 Nikhil G Thaker, Fang Zhang, Peter R. McDonald, Tong Ying Shun, Michael D Lewen, Ian F. Pollack, and John S. Lazo

Molecular Pharmacology

| siRNA Treatment              | XM            | LOC           | Description                                          | Value     | Category |
|------------------------------|---------------|---------------|------------------------------------------------------|-----------|----------|
| siRNA-Temozolomide Run3-DMSO | XM_09020<br>3 | LOC14412<br>5 | olfactory receptor, family 2, subfamily AG, member 1 | 0.01594   | Inlier   |
| siRNA-Temozolomide Run1-DMSO | XM_09020<br>3 | LOC14412<br>5 | olfactory receptor, family 2, subfamily AG, member 1 | 3.1988    | Inlier   |
| siRNA Disorazole DMSO Run2   | XM_09020<br>3 | LOC14412<br>5 | olfactory receptor, family 2, subfamily AG, member 1 | 9.172321  | Outlier  |
| siRNA-Vinblastine Run1-DMSO  | XM_09020<br>3 | LOC14412<br>5 | PDLIM1 interacting AG, member 1                      | 11.90461  | Outlier  |
| siRNA-Temozolomide Run3-DMSO | NM_1528<br>35 | LOC14942<br>0 | kinase 1 like PDLIM1 interacting                     | -0.77146  | Inlier   |
| siRNA Disorazole DMSO Run2   | NM_1528<br>35 | LOC14942<br>0 | kinase 1 like PDLIM1 interacting                     | -0.57754  | Inlier   |
| siRNA-Temozolomide Run2-DMSO | NM_1528<br>35 | LOC14942<br>0 | kinase 1 like PDLIM1 interacting                     | -0.326721 | Inlier   |
| siRNA Disorazole DMSO Run3   | NM_1528<br>35 | LOC14942<br>0 | kinase 1 like PDLIM1 interacting                     | -0.223432 | Inlier   |
| siRNA-Temozolomide Run1-DMSO | NM_1528<br>35 | LOC14942<br>0 | kinase 1 like PDLIM1 interacting                     | 0.223432  | Inlier   |
| siRNA Disorazole DMSO Run1   | NM_1528<br>35 | LOC14942<br>0 | kinase 1 like PDLIM1 interacting                     | 0.99139   | Inlier   |
| siRNA-Vinblastine Run1-DMSO  | NM_1528<br>35 | LOC14942<br>0 | kinase 1 like                                        | 1.059039  | Inlier   |

Identification of Survival Genes in Human Glioblastoma Cells Using siRNA Screening  
 Nikhil G Thaker, Fang Zhang, Peter R. McDonald, Tong Ying Shun, Michael D Lewen, Ian F. Pollack, and John S. Lazo

Molecular Pharmacology

PDLIM1  
interacting

|                                  |               |               |                  |           |         |
|----------------------------------|---------------|---------------|------------------|-----------|---------|
| siRNA-Vinblastine Run2-<br>DMSO  | NM_1528<br>35 | LOC14942<br>0 | kinase 1<br>like | 1.213584  | Inlier  |
| siRNA-Temozolomide Run1-<br>DMSO | XM_09268<br>1 | LOC15157<br>5 | LOC15157<br>5    | -0.742708 | Inlier  |
| siRNA Disorazole DMSO Run3       | XM_09268<br>1 | LOC15157<br>5 | LOC15157<br>5    | -0.606292 | Inlier  |
| siRNA Disorazole DMSO Run1       | XM_09268<br>1 | LOC15157<br>5 | LOC15157<br>5    | -0.525818 | Inlier  |
| siRNA-Temozolomide Run2-<br>DMSO | XM_09268<br>1 | LOC15157<br>5 | LOC15157<br>5    | -0.072019 | Inlier  |
| siRNA-Vinblastine Run2-<br>DMSO  | XM_09268<br>1 | LOC15157<br>5 | LOC15157<br>5    | 0.072019  | Inlier  |
| siRNA-Temozolomide Run3-<br>DMSO | XM_09268<br>1 | LOC15157<br>5 | LOC15157<br>5    | 0.858319  | Inlier  |
| siRNA Disorazole DMSO Run2       | XM_09268<br>1 | LOC15157<br>5 | LOC15157<br>5    | 1.692835  | Inlier  |
| siRNA-Vinblastine Run1-<br>DMSO  | XM_09268<br>1 | LOC15157<br>5 | LOC15157<br>5    | 1.865997  | Inlier  |
| siRNA-Temozolomide Run2-<br>DMSO | NM_1828<br>29 | LOC15816<br>0 | LOC15816<br>0    | -0.686526 | Inlier  |
| siRNA-Temozolomide Run3-<br>DMSO | NM_1828<br>29 | LOC15816<br>0 | LOC15816<br>0    | -0.662474 | Inlier  |
| siRNA-Vinblastine Run2-<br>DMSO  | NM_1828<br>29 | LOC15816<br>0 | LOC15816<br>0    | -0.632315 | Inlier  |
| siRNA-Temozolomide Run1-<br>DMSO | NM_1828<br>29 | LOC15816<br>0 | LOC15816<br>0    | -0.105741 | Inlier  |
| siRNA Disorazole DMSO Run1       | NM_1828<br>29 | LOC15816<br>0 | LOC15816<br>0    | 0.105741  | Inlier  |
| siRNA Disorazole DMSO Run3       | NM_1828<br>29 | LOC15816<br>0 | LOC15816<br>0    | 0.735745  | Inlier  |
| siRNA Disorazole DMSO Run2       | NM_1828<br>29 | LOC15816<br>0 | LOC15816<br>0    | 1.821583  | Inlier  |
| siRNA-Vinblastine Run1-<br>DMSO  | NM_1828<br>29 | LOC15816<br>0 | LOC15816<br>0    | 2.12576   | Inlier  |
| siRNA Disorazole DMSO Run3       | XM_09115<br>6 | LOC16182<br>3 | LOC16182<br>3    | -1.126876 | Inlier  |
| siRNA-Temozolomide Run3-<br>DMSO | XM_09115<br>6 | LOC16182<br>3 | LOC16182<br>3    | -0.770059 | Inlier  |
| siRNA-Vinblastine Run2-<br>DMSO  | XM_09115<br>6 | LOC16182<br>3 | LOC16182<br>3    | -0.569822 | Inlier  |
| siRNA-Temozolomide Run2-<br>DMSO | XM_09115<br>6 | LOC16182<br>3 | LOC16182<br>3    | -0.526089 | Inlier  |
| siRNA Disorazole DMSO Run1       | XM_09115<br>6 | LOC16182<br>3 | LOC16182<br>3    | 0.526089  | Inlier  |
| siRNA-Temozolomide Run1-<br>DMSO | XM_09115<br>6 | LOC16182<br>3 | LOC16182<br>3    | 0.578941  | Inlier  |
| siRNA Disorazole DMSO Run2       | XM_09115<br>6 | LOC16182<br>3 | LOC16182<br>3    | 2.765023  | Inlier  |
| siRNA-Vinblastine Run1-<br>DMSO  | XM_09115<br>6 | LOC16182<br>3 | LOC16182<br>3    | 3.934223  | Outlier |

Identification of Survival Genes in Human Glioblastoma Cells Using siRNA Screening

Nikhil G Thaker, Fang Zhang, Peter R. McDonald, Tong Ying Shun, Michael D Lewen, Ian F. Pollack, and John S.

Lazo

|                                  |               |               |                                              |           |        |
|----------------------------------|---------------|---------------|----------------------------------------------|-----------|--------|
| siRNA-Vinblastine Run2-<br>DMSO  | NM_1942<br>94 | LOC16935<br>5 | LOC16935<br>5                                | -0.875177 | Inlier |
| siRNA-Temozolomide Run1-<br>DMSO | NM_1942<br>94 | LOC16935<br>5 | LOC16935<br>5                                | -0.473823 | Inlier |
| siRNA-Temozolomide Run2-<br>DMSO | NM_1942<br>94 | LOC16935<br>5 | LOC16935<br>5                                | -0.171304 | Inlier |
| siRNA Disorazole DMSO Run1       | NM_1942<br>94 | LOC16935<br>5 | LOC16935<br>5                                | -0.07189  | Inlier |
| siRNA Disorazole DMSO Run3       | NM_1942<br>94 | LOC16935<br>5 | LOC16935<br>5                                | 0.071889  | Inlier |
| siRNA-Temozolomide Run3-<br>DMSO | NM_1942<br>94 | LOC16935<br>5 | LOC16935<br>5                                | 0.964712  | Inlier |
| siRNA-Vinblastine Run1-<br>DMSO  | NM_1942<br>94 | LOC16935<br>5 | LOC16935<br>5                                | 1.787277  | Inlier |
| siRNA Disorazole DMSO Run2       | NM_1942<br>94 | LOC16935<br>5 | LOC16935<br>5                                | 2.134109  | Inlier |
| siRNA-Temozolomide Run3-<br>DMSO | NM_1768<br>15 | LOC20089<br>5 | reductase-<br>like 1<br>dihydrofola<br>te    | -1.198344 | Inlier |
| siRNA-Vinblastine Run2-<br>DMSO  | NM_1768<br>15 | LOC20089<br>5 | reductase-<br>like 1<br>dihydrofola<br>te    | -0.772442 | Inlier |
| siRNA-Temozolomide Run2-<br>DMSO | NM_1768<br>15 | LOC20089<br>5 | reductase-<br>like 1<br>dihydrofola<br>te    | -0.576558 | Inlier |
| siRNA Disorazole DMSO Run1       | NM_1768<br>15 | LOC20089<br>5 | reductase-<br>like 1<br>dihydrofola<br>te    | -0.010095 | Inlier |
| siRNA Disorazole DMSO Run3       | NM_1768<br>15 | LOC20089<br>5 | reductase-<br>like 1<br>dihydrofola<br>te    | 0.010095  | Inlier |
| siRNA-Temozolomide Run1-<br>DMSO | NM_1768<br>15 | LOC20089<br>5 | reductase-<br>like 1<br>dihydrofola<br>te    | 0.387301  | Inlier |
| siRNA Disorazole DMSO Run2       | NM_1768<br>15 | LOC20089<br>5 | reductase-<br>like 1<br>dihydrofola<br>te    | 1.84709   | Inlier |
| siRNA-Vinblastine Run1-<br>DMSO  | NM_1768<br>15 | LOC20089<br>5 | reductase-<br>like 1<br>tripartite<br>motif- | 2.63253   | Inlier |
| siRNA-Temozolomide Run3-<br>DMSO | NM_1735<br>47 | LOC20129<br>2 | containing<br>65                             | -1.271676 | Inlier |

Identification of Survival Genes in Human Glioblastoma Cells Using siRNA Screening  
 Nikhil G Thaker, Fang Zhang, Peter R. McDonald, Tong Ying Shun, Michael D Lewen, Ian F. Pollack, and John S. Lazo

Molecular Pharmacology

|                              |               |               | tripartite motif-containing |                  |
|------------------------------|---------------|---------------|-----------------------------|------------------|
| siRNA-Temozolomide Run2-DMSO | NM_1735<br>47 | LOC20129<br>2 | 65                          | -0.749992 Inlier |
| siRNA Disorazole DMSO Run1   | NM_1735<br>47 | LOC20129<br>2 | 65                          | -0.035704 Inlier |
| siRNA-Vinblastine Run2-DMSO  | NM_1735<br>47 | LOC20129<br>2 | 65                          | -0.008782 Inlier |
| siRNA-Temozolomide Run1-DMSO | NM_1735<br>47 | LOC20129<br>2 | 65                          | 0.008782 Inlier  |
| siRNA Disorazole DMSO Run3   | NM_1735<br>47 | LOC20129<br>2 | 65                          | 0.599008 Inlier  |
| siRNA Disorazole DMSO Run2   | NM_1735<br>47 | LOC20129<br>2 | 65                          | 2.101599 Inlier  |
| siRNA-Vinblastine Run1-DMSO  | NM_1735<br>47 | LOC20129<br>2 | 65                          | 2.208734 Inlier  |
| siRNA-Temozolomide Run3-DMSO | XM_11662<br>3 | LOC20278<br>9 | LOC20278<br>9               | -2.456115 Inlier |
| siRNA Disorazole DMSO Run1   | XM_11662<br>3 | LOC20278<br>9 | LOC20278<br>9               | -0.876087 Inlier |
| siRNA Disorazole DMSO Run3   | XM_11662<br>3 | LOC20278<br>9 | LOC20278<br>9               | -0.472913 Inlier |
| siRNA-Temozolomide Run2-DMSO | XM_11662<br>3 | LOC20278<br>9 | LOC20278<br>9               | -0.22466 Inlier  |
| siRNA-Temozolomide Run1-DMSO | XM_11662<br>3 | LOC20278<br>9 | LOC20278<br>9               | 0.22466 Inlier   |
| siRNA-Vinblastine Run2-DMSO  | XM_11662<br>3 | LOC20278<br>9 | LOC20278<br>9               | 0.357483 Inlier  |
| siRNA-Vinblastine Run1-DMSO  | XM_11662<br>3 | LOC20278<br>9 | LOC20278<br>9               | 1.375751 Inlier  |
| siRNA Disorazole DMSO Run2   | XM_11662<br>3 | LOC20278<br>9 | LOC20278<br>9               | 2.662535 Inlier  |
| siRNA-Temozolomide Run3-DMSO | NM_1453<br>05 | LOC20342<br>7 | LOC20342<br>7               | -1.047524 Inlier |
| siRNA-Vinblastine Run2-DMSO  | NM_1453<br>05 | LOC20342<br>7 | LOC20342<br>7               | -0.685426 Inlier |
| siRNA Disorazole DMSO Run3   | NM_1453<br>05 | LOC20342<br>7 | LOC20342<br>7               | -0.587779 Inlier |
| siRNA-Temozolomide Run1-DMSO | NM_1453<br>05 | LOC20342<br>7 | LOC20342<br>7               | -0.058555 Inlier |

Identification of Survival Genes in Human Glioblastoma Cells Using siRNA Screening

Nikhil G Thaker, Fang Zhang, Peter R. McDonald, Tong Ying Shun, Michael D Lewen, Ian F. Pollack, and John S. Lazo

|                                  |               |               |                                 |           |         |
|----------------------------------|---------------|---------------|---------------------------------|-----------|---------|
| siRNA-Temozolomide Run2-<br>DMSO | NM_1453<br>05 | LOC20342<br>7 | LOC20342<br>7                   | 0.058555  | Inlier  |
| siRNA Disorazole DMSO Run1       | NM_1453<br>05 | LOC20342<br>7 | LOC20342<br>7                   | 0.663574  | Inlier  |
| siRNA Disorazole DMSO Run2       | NM_1453<br>05 | LOC20342<br>7 | LOC20342<br>7                   | 4.642407  | Outlier |
| siRNA-Vinblastine Run1-<br>DMSO  | NM_1453<br>05 | LOC20342<br>7 | LOC20342<br>7                   | 5.040227  | Outlier |
|                                  |               |               | glycerophosphodiesterase domain |           |         |
| siRNA-Temozolomide Run3-<br>DMSO | NM_1828<br>33 | LOC22003<br>2 | containing<br>4                 | -1.203102 | Inlier  |
|                                  |               |               | glycerophosphodiesterase domain |           |         |
| siRNA-Temozolomide Run2-<br>DMSO | NM_1828<br>33 | LOC22003<br>2 | containing<br>4                 | -0.831462 | Inlier  |
|                                  |               |               | glycerophosphodiesterase domain |           |         |
| siRNA-Temozolomide Run1-<br>DMSO | NM_1828<br>33 | LOC22003<br>2 | containing<br>4                 | -0.648883 | Inlier  |
|                                  |               |               | glycerophosphodiesterase domain |           |         |
| siRNA Disorazole DMSO Run1       | NM_1828<br>33 | LOC22003<br>2 | containing<br>4                 | -0.126561 | Inlier  |
|                                  |               |               | glycerophosphodiesterase domain |           |         |
| siRNA Disorazole DMSO Run2       | NM_1828<br>33 | LOC22003<br>2 | containing<br>4                 | 0.126561  | Inlier  |

Identification of Survival Genes in Human Glioblastoma Cells Using siRNA Screening  
 Nikhil G Thaker, Fang Zhang, Peter R. McDonald, Tong Ying Shun, Michael D Lewen, Ian F. Pollack, and John S. Lazo

Molecular Pharmacology

|                              |           |           | glycerophosphodiesterase domain containing |           |         |
|------------------------------|-----------|-----------|--------------------------------------------|-----------|---------|
| siRNA-Vinblastine Run1-DMSO  | NM_182833 | LOC220032 | 4                                          | 0.350486  | Inlier  |
|                              |           |           | glycerophosphodiesterase domain containing |           |         |
| siRNA-Vinblastine Run2-DMSO  | NM_182833 | LOC220032 | 4                                          | 0.700117  | Inlier  |
|                              |           |           | glycerophosphodiesterase domain containing |           |         |
| siRNA Disorazole DMSO Run3   | NM_182833 | LOC220032 | 4                                          | 1.345482  | Inlier  |
| siRNA Disorazole DMSO Run1   | NM_145809 | LOC220594 | 4                                          | -0.976332 | Inlier  |
| siRNA Disorazole DMSO Run2   | NM_145809 | LOC220594 | 4                                          | -0.758709 | Inlier  |
| siRNA-Temozolomide Run2-DMSO | NM_145809 | LOC220594 | 4                                          | -0.221168 | Inlier  |
| siRNA-Vinblastine Run1-DMSO  | NM_145809 | LOC220594 | 4                                          | -0.000397 | Inlier  |
| siRNA-Temozolomide Run3-DMSO | NM_145809 | LOC220594 | 4                                          | 0.000396  | Inlier  |
| siRNA-Vinblastine Run2-DMSO  | NM_145809 | LOC220594 | 4                                          | 0.590291  | Inlier  |
| siRNA-Temozolomide Run1-DMSO | NM_145809 | LOC220594 | 4                                          | 0.848642  | Inlier  |
| siRNA Disorazole DMSO Run3   | NM_145809 | LOC220594 | 4                                          | 3.79277   | Outlier |
| siRNA-Temozolomide Run3-DMSO | NM_199283 | LOC220686 | 6                                          | -0.677853 | Inlier  |
| siRNA Disorazole DMSO Run3   | NM_199283 | LOC220686 | 6                                          | -0.671147 | Inlier  |
| siRNA-Temozolomide Run2-DMSO | NM_199283 | LOC220686 | 6                                          | -0.537576 | Inlier  |
| siRNA Disorazole DMSO Run1   | NM_199283 | LOC220686 | 6                                          | -0.070046 | Inlier  |
| siRNA-Temozolomide Run1-DMSO | NM_199283 | LOC220686 | 6                                          | 0.070046  | Inlier  |
| siRNA-Vinblastine Run1-DMSO  | NM_199283 | LOC220686 | 6                                          | 1.701898  | Inlier  |

Identification of Survival Genes in Human Glioblastoma Cells Using siRNA Screening  
 Nikhil G Thaker, Fang Zhang, Peter R. McDonald, Tong Ying Shun, Michael D Lewen, Ian F. Pollack, and John S. Lazo

|                                  |               |               |                                           |           |         |
|----------------------------------|---------------|---------------|-------------------------------------------|-----------|---------|
| siRNA-Vinblastine Run2-<br>DMSO  | NM_1992<br>83 | LOC22068<br>6 | LOC22068<br>6                             | 2.019953  | Inlier  |
| siRNA Disorazole DMSO Run2       | NM_1992<br>83 | LOC22068<br>6 | LOC22068<br>6                             | 2.562071  | Inlier  |
| siRNA-Temozolomide Run3-<br>DMSO | XM_16713<br>4 | LOC22156<br>7 | LOC22156<br>7                             | -1.127913 | Inlier  |
| siRNA-Temozolomide Run2-<br>DMSO | XM_16713<br>4 | LOC22156<br>7 | LOC22156<br>7                             | -0.892395 | Inlier  |
| siRNA Disorazole DMSO Run1       | XM_16713<br>4 | LOC22156<br>7 | LOC22156<br>7                             | -0.444576 | Inlier  |
| siRNA-Temozolomide Run1-<br>DMSO | XM_16713<br>4 | LOC22156<br>7 | LOC22156<br>7                             | -0.029827 | Inlier  |
| siRNA-Vinblastine Run2-<br>DMSO  | XM_16713<br>4 | LOC22156<br>7 | LOC22156<br>7                             | 0.029827  | Inlier  |
| siRNA Disorazole DMSO Run3       | XM_16713<br>4 | LOC22156<br>7 | LOC22156<br>7                             | 0.456605  | Inlier  |
| siRNA Disorazole DMSO Run2       | XM_16713<br>4 | LOC22156<br>7 | LOC22156<br>7                             | 1.280003  | Inlier  |
| siRNA-Vinblastine Run1-<br>DMSO  | XM_16713<br>4 | LOC22156<br>7 | LOC22156<br>7                             | 2.065236  | Inlier  |
| siRNA-Temozolomide Run3-<br>DMSO | XM_16714<br>0 | LOC22157<br>1 | LOC22157<br>1                             | -1.014934 | Inlier  |
| siRNA-Vinblastine Run2-<br>DMSO  | XM_16714<br>0 | LOC22157<br>1 | LOC22157<br>1                             | -0.82483  | Inlier  |
| siRNA-Temozolomide Run2-<br>DMSO | XM_16714<br>0 | LOC22157<br>1 | LOC22157<br>1                             | -0.805916 | Inlier  |
| siRNA-Temozolomide Run1-<br>DMSO | XM_16714<br>0 | LOC22157<br>1 | LOC22157<br>1                             | -0.028337 | Inlier  |
| siRNA Disorazole DMSO Run3       | XM_16714<br>0 | LOC22157<br>1 | LOC22157<br>1                             | 0.028337  | Inlier  |
| siRNA Disorazole DMSO Run1       | XM_16714<br>0 | LOC22157<br>1 | LOC22157<br>1                             | 0.390787  | Inlier  |
| siRNA Disorazole DMSO Run2       | XM_16714<br>0 | LOC22157<br>1 | LOC22157<br>1                             | 0.543084  | Inlier  |
| siRNA-Vinblastine Run1-<br>DMSO  | XM_16714<br>0 | LOC22157<br>1 | LOC22157<br>1                             | 1.352345  | Inlier  |
| siRNA-Temozolomide Run3-<br>DMSO | NM_1817<br>20 | LOC25710<br>6 | Rho<br>GTPase<br>activating<br>protein 30 | -4.531858 | Outlier |
| siRNA Disorazole DMSO Run3       | NM_1817<br>20 | LOC25710<br>6 | Rho<br>GTPase<br>activating<br>protein 30 | -0.290348 | Inlier  |
| siRNA-Temozolomide Run1-<br>DMSO | NM_1817<br>20 | LOC25710<br>6 | Rho<br>GTPase<br>activating<br>protein 30 | -0.237617 | Inlier  |
| siRNA-Temozolomide Run2-<br>DMSO | NM_1817<br>20 | LOC25710<br>6 | Rho<br>GTPase<br>activating<br>protein 30 | -0.154568 | Inlier  |



Identification of Survival Genes in Human Glioblastoma Cells Using siRNA Screening  
 Nikhil G Thaker, Fang Zhang, Peter R. McDonald, Tong Ying Shun, Michael D Lewen, Ian F. Pollack, and John S. Lazo

Molecular Pharmacology

|                                  |               |               | Rho<br>GTPase                                             |                   |
|----------------------------------|---------------|---------------|-----------------------------------------------------------|-------------------|
| siRNA-Vinblastine Run2-<br>DMSO  | NM_1817<br>20 | LOC25710<br>6 | activating<br>protein 30                                  | 0.154568 Inlier   |
| siRNA Disorazole DMSO Run1       | NM_1817<br>20 | LOC25710<br>6 | activating<br>protein 30                                  | 1.058652 Inlier   |
| siRNA-Vinblastine Run1-<br>DMSO  | NM_1817<br>20 | LOC25710<br>6 | activating<br>protein 30                                  | 3.601076 Outlier  |
| siRNA Disorazole DMSO Run2       | NM_1817<br>20 | LOC25710<br>6 | activating<br>protein 30                                  | 5.343372 Outlier  |
| siRNA Disorazole DMSO Run2       | NM_1992<br>84 | LOC28384<br>6 | LOC28384<br>6                                             | -4.153573 Outlier |
| siRNA-Temozolomide Run3-<br>DMSO | NM_1992<br>84 | LOC28384<br>6 | LOC28384<br>6                                             | -2.628573 Inlier  |
| siRNA-Temozolomide Run1-<br>DMSO | NM_1992<br>84 | LOC28384<br>6 | LOC28384<br>6                                             | -0.764794 Inlier  |
| siRNA-Temozolomide Run2-<br>DMSO | NM_1992<br>84 | LOC28384<br>6 | LOC28384<br>6                                             | -0.232628 Inlier  |
| siRNA Disorazole DMSO Run3       | NM_1992<br>84 | LOC28384<br>6 | LOC28384<br>6                                             | 0.232626 Inlier   |
| siRNA Disorazole DMSO Run1       | NM_1992<br>84 | LOC28384<br>6 | LOC28384<br>6                                             | 0.504857 Inlier   |
| siRNA-Vinblastine Run1-<br>DMSO  | NM_1992<br>84 | LOC28384<br>6 | LOC28384<br>6                                             | 0.584206 Inlier   |
| siRNA-Vinblastine Run2-<br>DMSO  | NM_1992<br>84 | LOC28384<br>6 | LOC28384<br>6                                             | 3.728215 Outlier  |
| siRNA Disorazole DMSO Run1       | NM_1781<br>28 | LOC28398<br>5 | fatty acid<br>desaturase<br>domain<br>family,<br>member 6 | -2.124659 Inlier  |
| siRNA Disorazole DMSO Run3       | NM_1781<br>28 | LOC28398<br>5 | fatty acid<br>desaturase<br>domain<br>family,<br>member 6 | -1.11459 Inlier   |
| siRNA-Temozolomide Run3-<br>DMSO | NM_1781<br>28 | LOC28398<br>5 | fatty acid<br>desaturase<br>domain<br>family,<br>member 6 | -0.23441 Inlier   |
| siRNA-Temozolomide Run1-<br>DMSO | NM_1781<br>28 | LOC28398<br>5 | fatty acid<br>desaturase<br>domain<br>family,<br>member 6 | -0.10305 Inlier   |

Identification of Survival Genes in Human Glioblastoma Cells Using siRNA Screening  
 Nikhil G Thaker, Fang Zhang, Peter R. McDonald, Tong Ying Shun, Michael D Lewen, Ian F. Pollack, and John S. Lazo

Molecular Pharmacology

| siRNA Treatment              | Gene ID   | LOC ID    | Protein Description                                    | Score     | Category |
|------------------------------|-----------|-----------|--------------------------------------------------------|-----------|----------|
| siRNA-Vinblastine Run2-DMSO  | NM_178128 | LOC283985 | fatty acid desaturase domain family, member 6          | 0.10305   | Inlier   |
| siRNA-Temozolomide Run2-DMSO | NM_178128 | LOC283985 | fatty acid desaturase domain family, member 6          | 0.165693  | Inlier   |
| siRNA Disorazole DMSO Run2   | NM_178128 | LOC283985 | fatty acid desaturase domain family, member 6          | 3.01948   | Inlier   |
| siRNA-Vinblastine Run1-DMSO  | NM_178128 | LOC283985 | cytochrome P450, family 4, subfamily A,                | 3.942097  | Outlier  |
| siRNA-Temozolomide Run3-DMSO | XM_208213 | LOC284541 | polypeptide 22 cytochrome P450, family 4, subfamily A, | -1.592036 | Inlier   |
| siRNA-Temozolomide Run2-DMSO | XM_208213 | LOC284541 | polypeptide 22 cytochrome P450, family 4, subfamily A, | -0.756411 | Inlier   |
| siRNA Disorazole DMSO Run3   | XM_208213 | LOC284541 | polypeptide 22 cytochrome P450, family 4, subfamily A, | -0.307212 | Inlier   |
| siRNA Disorazole DMSO Run1   | XM_208213 | LOC284541 | polypeptide 22                                         | -0.054592 | Inlier   |

Identification of Survival Genes in Human Glioblastoma Cells Using siRNA Screening  
 Nikhil G Thaker, Fang Zhang, Peter R. McDonald, Tong Ying Shun, Michael D Lewen, Ian F. Pollack, and John S. Lazo

Molecular Pharmacology

| siRNA Treatment              | XM       | LOC      | Gene Name                                              | Value     | Category |
|------------------------------|----------|----------|--------------------------------------------------------|-----------|----------|
| siRNA-Vinblastine Run2-DMSO  | XM_20821 | LOC28454 | cytochrome P450, family 4, subfamily A, polypeptide 22 | 0.054592  | Inlier   |
| siRNA-Temozolomide Run1-DMSO | XM_20821 | LOC28454 | cytochrome P450, family 4, subfamily A, polypeptide 22 | 0.592589  | Inlier   |
| siRNA-Vinblastine Run1-DMSO  | XM_20821 | LOC28454 | cytochrome P450, family 4, subfamily A, polypeptide 22 | 1.510326  | Inlier   |
| siRNA Disorazole DMSO Run2   | XM_20821 | LOC28454 | polypeptide 22                                         | 1.672894  | Inlier   |
| siRNA-Temozolomide Run3-DMSO | XM_20969 | LOC28564 | LOC28564                                               | -2.177818 | Inlier   |
| siRNA Disorazole DMSO Run1   | XM_20969 | LOC28564 | LOC28564                                               | -0.39226  | Inlier   |
| siRNA Disorazole DMSO Run3   | XM_20969 | LOC28564 | LOC28564                                               | -0.24719  | Inlier   |
| siRNA-Vinblastine Run2-DMSO  | XM_20969 | LOC28564 | LOC28564                                               | -0.18795  | Inlier   |
| siRNA Disorazole DMSO Run2   | XM_20969 | LOC28564 | LOC28564                                               | 0.18795   | Inlier   |
| siRNA-Temozolomide Run2-DMSO | XM_20969 | LOC28564 | LOC28564                                               | 0.95674   | Inlier   |
| siRNA-Temozolomide Run1-DMSO | XM_20969 | LOC28564 | LOC28564                                               | 1.017485  | Inlier   |
| siRNA-Vinblastine Run1-DMSO  | XM_20969 | LOC28564 | LOC28564                                               | 3.925282  | Outlier  |
| siRNA-Temozolomide Run3-DMSO | XM_29257 | LOC33913 | LOC33913                                               | -1.09013  | Inlier   |
| siRNA-Temozolomide Run2-DMSO | XM_29257 | LOC33913 | LOC33913                                               | -0.952628 | Inlier   |
| siRNA-Vinblastine Run2-DMSO  | XM_29257 | LOC33913 | LOC33913                                               | -0.374242 | Inlier   |
| siRNA Disorazole DMSO Run3   | XM_29257 | LOC33913 | LOC33913                                               | -0.173459 | Inlier   |

Identification of Survival Genes in Human Glioblastoma Cells Using siRNA Screening  
 Nikhil G Thaker, Fang Zhang, Peter R. McDonald, Tong Ying Shun, Michael D Lewen, Ian F. Pollack, and John S. Lazo

| siRNA              | Condition | Run   | XM_29257   | LOC33913   | LOC33913             | Value     | Inlier |
|--------------------|-----------|-------|------------|------------|----------------------|-----------|--------|
| siRNA-Temozolomide | DMSO      | Run1- | 3          | 3          | 3                    | 0.173459  | Inlier |
| siRNA Disorazole   | DMSO      | Run1  | 3          | 3          | 3                    | 0.396372  | Inlier |
| siRNA-Vinblastine  | DMSO      | Run1- | 3          | 3          | 3                    | 0.986666  | Inlier |
| siRNA Disorazole   | DMSO      | Run2  | 3          | 3          | 3                    | 1.001419  | Inlier |
|                    |           |       |            |            | transmembrane        |           |        |
| siRNA Disorazole   | DMSO      | Run2  | NM_1826 06 | LOC33996 7 | protease, serine 11A | -1.034009 | Inlier |
|                    |           |       |            |            | transmembrane        |           |        |
| siRNA Disorazole   | DMSO      | Run1  | NM_1826 06 | LOC33996 7 | protease, serine 11A | -0.768237 | Inlier |
|                    |           |       |            |            | transmembrane        |           |        |
| siRNA-Temozolomide | DMSO      | Run2- | NM_1826 06 | LOC33996 7 | protease, serine 11A | -0.374815 | Inlier |
|                    |           |       |            |            | transmembrane        |           |        |
| siRNA-Temozolomide | DMSO      | Run3- | NM_1826 06 | LOC33996 7 | protease, serine 11A | -0.125629 | Inlier |
|                    |           |       |            |            | transmembrane        |           |        |
| siRNA-Temozolomide | DMSO      | Run1- | NM_1826 06 | LOC33996 7 | protease, serine 11A | 0.125629  | Inlier |
|                    |           |       |            |            | transmembrane        |           |        |
| siRNA-Vinblastine  | DMSO      | Run1- | NM_1826 06 | LOC33996 7 | protease, serine 11A | 0.580763  | Inlier |
|                    |           |       |            |            | transmembrane        |           |        |
| siRNA-Vinblastine  | DMSO      | Run2- | NM_1826 06 | LOC33996 7 | protease, serine 11A | 1.082323  | Inlier |
|                    |           |       |            |            | transmembrane        |           |        |
| siRNA Disorazole   | DMSO      | Run3  | NM_1826 06 | LOC33996 7 | protease, serine 11A | 1.146609  | Inlier |

Identification of Survival Genes in Human Glioblastoma Cells Using siRNA Screening  
 Nikhil G Thaker, Fang Zhang, Peter R. McDonald, Tong Ying Shun, Michael D Lewen, Ian F. Pollack, and John S. Lazo

Molecular Pharmacology

| siRNA Treatment              | XM            | LOC           | Gene Name                                                     | Value     | Outlier Type |
|------------------------------|---------------|---------------|---------------------------------------------------------------|-----------|--------------|
| siRNA-Temozolomide Run3-DMSO | XM_29111<br>7 | LOC34002<br>6 | succinate dehydrogenase complex, subunit A, flavoprotein-like | -0.940965 | Inlier       |
| siRNA-Temozolomide Run2-DMSO | XM_29111<br>7 | LOC34002<br>6 | succinate dehydrogenase complex, subunit A, flavoprotein-like | -0.718441 | Inlier       |
| siRNA Disorazole DMSO Run3   | XM_29111<br>7 | LOC34002<br>6 | succinate dehydrogenase complex, subunit A, flavoprotein-like | -0.249089 | Inlier       |
| siRNA-Temozolomide Run1-DMSO | XM_29111<br>7 | LOC34002<br>6 | succinate dehydrogenase complex, subunit A, flavoprotein-like | -0.130218 | Inlier       |
| siRNA Disorazole DMSO Run1   | XM_29111<br>7 | LOC34002<br>6 | succinate dehydrogenase complex, subunit A, flavoprotein-like | 0.130218  | Inlier       |
| siRNA-Vinblastine Run2-DMSO  | XM_29111<br>7 | LOC34002<br>6 | succinate dehydrogenase complex, subunit A, flavoprotein-like | 0.630559  | Inlier       |
| siRNA-Vinblastine Run1-DMSO  | XM_29111<br>7 | LOC34002<br>6 | succinate dehydrogenase complex, subunit A, flavoprotein-like | 0.814699  | Inlier       |

Identification of Survival Genes in Human Glioblastoma Cells Using siRNA Screening  
 Nikhil G Thaker, Fang Zhang, Peter R. McDonald, Tong Ying Shun, Michael D Lewen, Ian F. Pollack, and John S. Lazo

Molecular Pharmacology

|                              |          |          |    | succinate dehydrogenase complex, subunit A, flavoprotein-like |                  |
|------------------------------|----------|----------|----|---------------------------------------------------------------|------------------|
| siRNA Disorazole DMSO Run2   | XM_29111 | LOC34002 | 6  |                                                               | 1.266906 Inlier  |
| siRNA-Temozolomide Run3-DMSO | XM_29038 | LOC34024 | 9  | LOC34024                                                      | -2.142631 Inlier |
| siRNA-Temozolomide Run2-DMSO | XM_29038 | LOC34024 | 9  | LOC34024                                                      | -1.299769 Inlier |
| siRNA Disorazole DMSO Run2   | XM_29038 | LOC34024 | 9  | LOC34024                                                      | -0.389772 Inlier |
| siRNA-Temozolomide Run1-DMSO | XM_29038 | LOC34024 | 9  | LOC34024                                                      | -0.037773 Inlier |
| siRNA Disorazole DMSO Run3   | XM_29038 | LOC34024 | 9  | LOC34024                                                      | 0.037772 Inlier  |
| siRNA Disorazole DMSO Run1   | XM_29038 | LOC34024 | 9  | LOC34024                                                      | 0.196091 Inlier  |
| siRNA-Vinblastine Run1-DMSO  | XM_29038 | LOC34024 | 9  | LOC34024                                                      | 0.959228 Inlier  |
| siRNA-Vinblastine Run2-DMSO  | XM_29038 | LOC34024 | 9  | LOC34024                                                      | 1.51176 Inlier   |
|                              |          |          |    | nuclear receptor binding protein 2                            |                  |
| siRNA-Temozolomide Run3-DMSO | NM_1785  | LOC34037 | 64 | 1                                                             | -0.722588 Inlier |
| siRNA Disorazole DMSO Run3   | NM_1785  | LOC34037 | 64 | 1                                                             | -0.626411 Inlier |
| siRNA-Temozolomide Run2-DMSO | NM_1785  | LOC34037 | 64 | 1                                                             | -0.344791 Inlier |
| siRNA Disorazole DMSO Run1   | NM_1785  | LOC34037 | 64 | 1                                                             | -0.311251 Inlier |
| siRNA-Temozolomide Run1-DMSO | NM_1785  | LOC34037 | 64 | 1                                                             | 0.311251 Inlier  |
| siRNA-Vinblastine Run2-DMSO  | NM_1785  | LOC34037 | 64 | 1                                                             | 1.03683 Inlier   |
| siRNA Disorazole DMSO Run2   | NM_1785  | LOC34037 | 64 | 1                                                             | 1.539413 Inlier  |

Identification of Survival Genes in Human Glioblastoma Cells Using siRNA Screening  
 Nikhil G Thaker, Fang Zhang, Peter R. McDonald, Tong Ying Shun, Michael D Lewen, Ian F. Pollack, and John S. Lazo

Molecular Pharmacology

| siRNA Treatment              | Gene ID   | LOC ID    | Gene Name                                     | Score     | Category |
|------------------------------|-----------|-----------|-----------------------------------------------|-----------|----------|
| siRNA-Vinblastine Run1-DMSO  | NM_178564 | LOC340371 | nuclear receptor binding protein 2            | 1.84481   | Inlier   |
| siRNA-Temozolomide Run3-DMSO | XM_291663 | LOC340654 | lipase-like, ab-hydrolase domain containing 3 | -3.038895 | Inlier   |
| siRNA-Temozolomide Run2-DMSO | XM_291663 | LOC340654 | lipase-like, ab-hydrolase domain containing 3 | -1.514028 | Inlier   |
| siRNA Disorazole DMSO Run1   | XM_291663 | LOC340654 | lipase-like, ab-hydrolase domain containing 3 | -0.593347 | Inlier   |
| siRNA-Temozolomide Run1-DMSO | XM_291663 | LOC340654 | lipase-like, ab-hydrolase domain containing 3 | -0.393887 | Inlier   |
| siRNA-Vinblastine Run2-DMSO  | XM_291663 | LOC340654 | lipase-like, ab-hydrolase domain containing 3 | 0.393888  | Inlier   |
| siRNA Disorazole DMSO Run3   | XM_291663 | LOC340654 | lipase-like, ab-hydrolase domain containing 3 | 0.531672  | Inlier   |
| siRNA Disorazole DMSO Run2   | XM_291663 | LOC340654 | lipase-like, ab-hydrolase domain containing 3 | 0.755653  | Inlier   |
| siRNA-Vinblastine Run1-DMSO  | XM_291663 | LOC340654 | lipase-like, ab-hydrolase domain containing 3 | 1.151581  | Inlier   |

Identification of Survival Genes in Human Glioblastoma Cells Using siRNA Screening  
 Nikhil G Thaker, Fang Zhang, Peter R. McDonald, Tong Ying Shun, Michael D Lewen, Ian F. Pollack, and John S. Lazo

| siRNA-Temozolomide Run3-<br>DMSO | XM_29266 | LOC34265 | LOC34265 |                  |
|----------------------------------|----------|----------|----------|------------------|
|                                  | 4        | 9        | 9        | -0.926338 Inlier |
| siRNA Disorazole DMSO Run1       | 4        | 9        | 9        | -0.484251 Inlier |
| siRNA Disorazole DMSO Run3       | 4        | 9        | 9        | -0.479537 Inlier |
| siRNA-Vinblastine Run2-<br>DMSO  | 4        | 9        | 9        | -0.453812 Inlier |
| siRNA-Temozolomide Run2-<br>DMSO | 4        | 9        | 9        | 0.453812 Inlier  |
| siRNA-Temozolomide Run1-<br>DMSO | 4        | 9        | 9        | 0.864749 Inlier  |
| siRNA-Vinblastine Run1-<br>DMSO  | 4        | 9        | 9        | 1.779974 Inlier  |
| siRNA Disorazole DMSO Run2       | 4        | 9        | 9        | 2.846476 Inlier  |
| siRNA-Temozolomide Run3-<br>DMSO | 0        | 5        | 5        | -1.06148 Inlier  |
| siRNA-Temozolomide Run2-<br>DMSO | 0        | 5        | 5        | -0.889773 Inlier |
| siRNA Disorazole DMSO Run2       | 0        | 5        | 5        | -0.459227 Inlier |
| siRNA Disorazole DMSO Run3       | 0        | 5        | 5        | -0.154214 Inlier |
| siRNA Disorazole DMSO Run1       | 0        | 5        | 5        | 0.154214 Inlier  |
| siRNA-Temozolomide Run1-<br>DMSO | 0        | 5        | 5        | 0.322706 Inlier  |
| siRNA-Vinblastine Run1-<br>DMSO  | 0        | 5        | 5        | 1.00291 Inlier   |
| siRNA-Vinblastine Run2-<br>DMSO  | 0        | 5        | 5        | 1.615432 Inlier  |
| siRNA Disorazole DMSO Run2       | 0        | 5        | 5        | -1.034226 Inlier |
| siRNA-Temozolomide Run3-<br>DMSO | 0        | 5        | 5        | -0.846301 Inlier |
| siRNA-Temozolomide Run2-<br>DMSO | 0        | 5        | 5        | -0.582552 Inlier |
| siRNA Disorazole DMSO Run3       | 0        | 5        | 5        | -0.110148 Inlier |
| siRNA-Temozolomide Run1-<br>DMSO | 0        | 5        | 5        | 0.110148 Inlier  |
| siRNA Disorazole DMSO Run1       | 0        | 5        | 5        | 0.148926 Inlier  |
| siRNA-Vinblastine Run2-<br>DMSO  | 0        | 5        | 5        | 0.766448 Inlier  |
| siRNA-Vinblastine Run1-<br>DMSO  | 0        | 5        | 5        | 1.107792 Inlier  |
| siRNA-Temozolomide Run3-<br>DMSO | 7        | 9        | 9        | -2.707062 Inlier |
| siRNA-Temozolomide Run2-<br>DMSO | 7        | 9        | 9        | -1.000809 Inlier |



Identification of Survival Genes in Human Glioblastoma Cells Using siRNA Screening  
 Nikhil G Thaker, Fang Zhang, Peter R. McDonald, Tong Ying Shun, Michael D Lewen, Ian F. Pollack, and John S. Lazo

|                                  |          |          |                    |           |         |
|----------------------------------|----------|----------|--------------------|-----------|---------|
| siRNA-Vinblastine Run2-<br>DMSO  | XM_37077 | LOC37456 | LOC37456           |           |         |
|                                  | 7        | 9        | 9                  | -0.348191 | Inlier  |
|                                  | XM_37077 | LOC37456 | LOC37456           |           |         |
| siRNA Disorazole DMSO Run3       | 7        | 9        | 9                  | -0.029208 | Inlier  |
| siRNA-Temozolomide Run1-<br>DMSO | XM_37077 | LOC37456 | LOC37456           |           |         |
|                                  | 7        | 9        | 9                  | 0.029207  | Inlier  |
|                                  | XM_37077 | LOC37456 | LOC37456           |           |         |
| siRNA Disorazole DMSO Run1       | 7        | 9        | 9                  | 0.325706  | Inlier  |
|                                  | XM_37077 | LOC37456 | LOC37456           |           |         |
| siRNA Disorazole DMSO Run2       | 7        | 9        | 9                  | 1.095107  | Inlier  |
| siRNA-Vinblastine Run1-<br>DMSO  | XM_37077 | LOC37456 | LOC37456           |           |         |
|                                  | 7        | 9        | 9                  | 1.168326  | Inlier  |
|                                  |          |          | kinesin            |           |         |
| siRNA-Temozolomide Run3-<br>DMSO | NM_1985  | LOC37465 | family<br>member 7 | -1.2779   | Inlier  |
|                                  | 25       | 4        | kinesin            |           |         |
|                                  | NM_1985  | LOC37465 | family<br>member 7 | -0.932463 | Inlier  |
| siRNA Disorazole DMSO Run3       | 25       | 4        | kinesin            |           |         |
|                                  | NM_1985  | LOC37465 | family<br>member 7 | -0.416537 | Inlier  |
| siRNA-Temozolomide Run2-<br>DMSO | 25       | 4        | kinesin            |           |         |
|                                  | NM_1985  | LOC37465 | family<br>member 7 | -0.116702 | Inlier  |
| siRNA Disorazole DMSO Run2       | 25       | 4        | kinesin            |           |         |
|                                  | NM_1985  | LOC37465 | family<br>member 7 | 0.116702  | Inlier  |
| siRNA-Vinblastine Run2-<br>DMSO  | 25       | 4        | kinesin            |           |         |
|                                  | NM_1985  | LOC37465 | family<br>member 7 | 0.209345  | Inlier  |
| siRNA Disorazole DMSO Run1       | 25       | 4        | kinesin            |           |         |
|                                  | NM_1985  | LOC37465 | family<br>member 7 | 2.611589  | Inlier  |
| siRNA-Temozolomide Run1-<br>DMSO | 25       | 4        | kinesin            |           |         |
|                                  | NM_1985  | LOC37465 | family<br>member 7 | 3.5464    | Outlier |
|                                  | NM_1993  | LOC37513 | LOC37513           |           |         |
| siRNA Disorazole DMSO Run1       | 45       | 3        | 3                  | -0.986041 | Inlier  |
|                                  | NM_1993  | LOC37513 | LOC37513           |           |         |
| siRNA Disorazole DMSO Run2       | 45       | 3        | 3                  | -0.886268 | Inlier  |
| siRNA-Temozolomide Run3-<br>DMSO | NM_1993  | LOC37513 | LOC37513           |           |         |
|                                  | 45       | 3        | 3                  | -0.794966 | Inlier  |
| siRNA-Temozolomide Run1-<br>DMSO | NM_1993  | LOC37513 | LOC37513           |           |         |
|                                  | 45       | 3        | 3                  | -0.203392 | Inlier  |
|                                  | NM_1993  | LOC37513 | LOC37513           |           |         |
| siRNA Disorazole DMSO Run3       | 45       | 3        | 3                  | 0.203392  | Inlier  |
| siRNA-Temozolomide Run2-<br>DMSO | NM_1993  | LOC37513 | LOC37513           |           |         |
|                                  | 45       | 3        | 3                  | 0.45269   | Inlier  |
| siRNA-Vinblastine Run1-<br>DMSO  | NM_1993  | LOC37513 | LOC37513           |           |         |
|                                  | 45       | 3        | 3                  | 0.554034  | Inlier  |
| siRNA-Vinblastine Run2-<br>DMSO  | NM_1993  | LOC37513 | LOC37513           |           |         |
|                                  | 45       | 3        | 3                  | 1.679481  | Inlier  |

Identification of Survival Genes in Human Glioblastoma Cells Using siRNA Screening  
 Nikhil G Thaker, Fang Zhang, Peter R. McDonald, Tong Ying Shun, Michael D Lewen, Ian F. Pollack, and John S. Lazo

|                                  |               |                      |                      |           |        |
|----------------------------------|---------------|----------------------|----------------------|-----------|--------|
| siRNA-Temozolomide Run2-<br>DMSO | NM_1993<br>47 | LOC37532<br>8        | LOC37532<br>8        | -0.734302 | Inlier |
| siRNA-Temozolomide Run3-<br>DMSO | NM_1993<br>47 | LOC37532<br>8        | LOC37532<br>8        | -0.614698 | Inlier |
| siRNA Disorazole DMSO Run3       | NM_1993<br>47 | LOC37532<br>8        | LOC37532<br>8        | -0.521154 | Inlier |
| siRNA-Temozolomide Run1-<br>DMSO | NM_1993<br>47 | LOC37532<br>8        | LOC37532<br>8        | -0.181463 | Inlier |
| siRNA Disorazole DMSO Run1       | NM_1993<br>47 | LOC37532<br>8        | LOC37532<br>8        | 0.181463  | Inlier |
| siRNA Disorazole DMSO Run2       | NM_1993<br>47 | LOC37532<br>8        | LOC37532<br>8        | 0.849651  | Inlier |
| siRNA-Vinblastine Run2-<br>DMSO  | NM_1993<br>47 | LOC37532<br>8        | LOC37532<br>8        | 1.161333  | Inlier |
| siRNA-Vinblastine Run1-<br>DMSO  | NM_1993<br>47 | LOC37532<br>8        | LOC37532<br>8        | 2.040506  | Inlier |
| siRNA Disorazole DMSO Run1       | XM_35157<br>4 | LOC37538<br>6        | LOC37538<br>6        | -1.787573 | Inlier |
| siRNA-Temozolomide Run2-<br>DMSO | XM_35157<br>4 | LOC37538<br>6        | LOC37538<br>6        | -0.726613 | Inlier |
| siRNA-Vinblastine Run2-<br>DMSO  | XM_35157<br>4 | LOC37538<br>6        | LOC37538<br>6        | -0.622387 | Inlier |
| siRNA-Temozolomide Run3-<br>DMSO | XM_35157<br>4 | LOC37538<br>6        | LOC37538<br>6        | -0.044244 | Inlier |
| siRNA-Temozolomide Run1-<br>DMSO | XM_35157<br>4 | LOC37538<br>6        | LOC37538<br>6        | 0.044245  | Inlier |
| siRNA-Vinblastine Run1-<br>DMSO  | XM_35157<br>4 | LOC37538<br>6        | LOC37538<br>6        | 0.17278   | Inlier |
| siRNA Disorazole DMSO Run3       | XM_35157<br>4 | LOC37538<br>6        | LOC37538<br>6        | 1.204643  | Inlier |
| siRNA Disorazole DMSO Run2       | XM_35157<br>4 | LOC37538<br>6        | LOC37538<br>6        | 1.363261  | Inlier |
| siRNA-Temozolomide Run3-<br>DMSO | NM_1988<br>28 | LOC37544<br>9        | LOC37544<br>9        | -1.68996  | Inlier |
| siRNA Disorazole DMSO Run2       | NM_1988<br>28 | LOC37544<br>9        | LOC37544<br>9        | -1.135994 | Inlier |
| siRNA-Temozolomide Run1-<br>DMSO | NM_1988<br>28 | LOC37544<br>9        | LOC37544<br>9        | -0.393876 | Inlier |
| siRNA Disorazole DMSO Run3       | NM_1988<br>28 | LOC37544<br>9        | LOC37544<br>9        | -0.176281 | Inlier |
| siRNA-Temozolomide Run2-<br>DMSO | NM_1988<br>28 | LOC37544<br>9        | LOC37544<br>9        | 0.176281  | Inlier |
| siRNA-Vinblastine Run1-<br>DMSO  | NM_1988<br>28 | LOC37544<br>9        | LOC37544<br>9        | 0.65395   | Inlier |
| siRNA Disorazole DMSO Run1       | NM_1988<br>28 | LOC37544<br>9        | LOC37544<br>9        | 0.69505   | Inlier |
| siRNA-Vinblastine Run2-<br>DMSO  | NM_1988<br>28 | LOC37544<br>9        | LOC37544<br>9        | 1.080403  | Inlier |
| siRNA-Vinblastine Run2-<br>DMSO  | NM_0158<br>54 | LOC51036<br>LOC51036 | LOC51036<br>LOC51036 | -1.132372 | Inlier |
| siRNA-Temozolomide Run2-<br>DMSO | NM_0158<br>54 | LOC51036<br>LOC51036 | LOC51036<br>LOC51036 | -0.839564 | Inlier |

Identification of Survival Genes in Human Glioblastoma Cells Using siRNA Screening

Nikhil G Thaker, Fang Zhang, Peter R. McDonald, Tong Ying Shun, Michael D Lewen, Ian F. Pollack, and John S.

Lazo

|                                  |               |          |                                                             |           |        |
|----------------------------------|---------------|----------|-------------------------------------------------------------|-----------|--------|
| siRNA-Temozolomide Run3-<br>DMSO | NM_0158<br>54 | LOC51036 | LOC51036                                                    | -0.509436 | Inlier |
| siRNA-Temozolomide Run1-<br>DMSO | NM_0158<br>54 | LOC51036 | LOC51036                                                    | -0.124769 | Inlier |
| siRNA Disorazole DMSO Run1       | NM_0158<br>54 | LOC51036 | LOC51036                                                    | 0.124769  | Inlier |
| siRNA Disorazole DMSO Run3       | NM_0158<br>54 | LOC51036 | LOC51036                                                    | 0.364412  | Inlier |
| siRNA-Vinblastine Run1-<br>DMSO  | NM_0158<br>54 | LOC51036 | LOC51036                                                    | 2.096836  | Inlier |
| siRNA Disorazole DMSO Run2       | NM_0158<br>54 | LOC51036 | LOC51036                                                    | 2.260064  | Inlier |
| siRNA-Temozolomide Run3-<br>DMSO | NM_0159<br>83 | LOC51619 | ubiquitin-<br>conjugatin<br>g enzyme<br>E2D 4<br>(putative) | -0.690213 | Inlier |
| siRNA Disorazole DMSO Run3       | NM_0159<br>83 | LOC51619 | ubiquitin-<br>conjugatin<br>g enzyme<br>E2D 4<br>(putative) | -0.679329 | Inlier |
| siRNA-Temozolomide Run2-<br>DMSO | NM_0159<br>83 | LOC51619 | ubiquitin-<br>conjugatin<br>g enzyme<br>E2D 4<br>(putative) | -0.669671 | Inlier |
| siRNA-Vinblastine Run2-<br>DMSO  | NM_0159<br>83 | LOC51619 | ubiquitin-<br>conjugatin<br>g enzyme<br>E2D 4<br>(putative) | -0.110005 | Inlier |
| siRNA Disorazole DMSO Run1       | NM_0159<br>83 | LOC51619 | ubiquitin-<br>conjugatin<br>g enzyme<br>E2D 4<br>(putative) | 0.110005  | Inlier |
| siRNA-Temozolomide Run1-<br>DMSO | NM_0159<br>83 | LOC51619 | ubiquitin-<br>conjugatin<br>g enzyme<br>E2D 4<br>(putative) | 0.279165  | Inlier |
| siRNA Disorazole DMSO Run2       | NM_0159<br>83 | LOC51619 | ubiquitin-<br>conjugatin<br>g enzyme<br>E2D 4<br>(putative) | 0.848296  | Inlier |
| siRNA-Vinblastine Run1-<br>DMSO  | NM_0159<br>83 | LOC51619 | ubiquitin-<br>conjugatin<br>g enzyme<br>E2D 4<br>(putative) | 1.232991  | Inlier |

Identification of Survival Genes in Human Glioblastoma Cells Using siRNA Screening

Nikhil G Thaker, Fang Zhang, Peter R. McDonald, Tong Ying Shun, Michael D Lewen, Ian F. Pollack, and John S.

Lazo

|                                  |               |               |          |           |         |
|----------------------------------|---------------|---------------|----------|-----------|---------|
| siRNA-Temozolomide Run3-<br>DMSO | NM_1813<br>34 | LOC55315<br>8 | -        | -2.073397 | Inlier  |
| siRNA-Temozolomide Run1-<br>DMSO | NM_1813<br>34 | LOC55315<br>8 | -        | -1.122569 | Inlier  |
| siRNA-Temozolomide Run2-<br>DMSO | NM_1813<br>34 | LOC55315<br>8 | -        | -0.588235 | Inlier  |
| siRNA Disorazole DMSO Run3       | NM_1813<br>34 | LOC55315<br>8 | -        | -0.005256 | Inlier  |
| siRNA-Vinblastine Run2-<br>DMSO  | NM_1813<br>34 | LOC55315<br>8 | -        | 0.005255  | Inlier  |
| siRNA Disorazole DMSO Run2       | NM_1813<br>34 | LOC55315<br>8 | -        | 0.633012  | Inlier  |
| siRNA-Vinblastine Run1-<br>DMSO  | NM_1813<br>34 | LOC55315<br>8 | -        | 0.715988  | Inlier  |
| siRNA Disorazole DMSO Run1       | NM_1813<br>34 | LOC55315<br>8 | -        | 1.089344  | Inlier  |
| siRNA-Temozolomide Run3-<br>DMSO | NM_0201<br>42 | LOC56901      | LOC56901 | -1.794198 | Inlier  |
| siRNA Disorazole DMSO Run3       | NM_0201<br>42 | LOC56901      | LOC56901 | -0.64801  | Inlier  |
| siRNA-Temozolomide Run2-<br>DMSO | NM_0201<br>42 | LOC56901      | LOC56901 | -0.536514 | Inlier  |
| siRNA Disorazole DMSO Run1       | NM_0201<br>42 | LOC56901      | LOC56901 | -0.53557  | Inlier  |
| siRNA-Temozolomide Run1-<br>DMSO | NM_0201<br>42 | LOC56901      | LOC56901 | 0.535569  | Inlier  |
| siRNA-Vinblastine Run2-<br>DMSO  | NM_0201<br>42 | LOC56901      | LOC56901 | 0.70099   | Inlier  |
| siRNA-Vinblastine Run1-<br>DMSO  | NM_0201<br>42 | LOC56901      | LOC56901 | 1.243516  | Inlier  |
| siRNA Disorazole DMSO Run2       | NM_0201<br>42 | LOC56901      | LOC56901 | 2.648598  | Inlier  |
| siRNA-Temozolomide Run2-<br>DMSO | NM_0204<br>37 | LOC57168      | LOC57168 | -0.917809 | Inlier  |
| siRNA Disorazole DMSO Run3       | NM_0204<br>37 | LOC57168      | LOC57168 | -0.431191 | Inlier  |
| siRNA-Temozolomide Run3-<br>DMSO | NM_0204<br>37 | LOC57168      | LOC57168 | -0.366208 | Inlier  |
| siRNA Disorazole DMSO Run1       | NM_0204<br>37 | LOC57168      | LOC57168 | -0.036301 | Inlier  |
| siRNA-Vinblastine Run2-<br>DMSO  | NM_0204<br>37 | LOC57168      | LOC57168 | 0.036301  | Inlier  |
| siRNA-Temozolomide Run1-<br>DMSO | NM_0204<br>37 | LOC57168      | LOC57168 | 1.163151  | Inlier  |
| siRNA-Vinblastine Run1-<br>DMSO  | NM_0204<br>37 | LOC57168      | LOC57168 | 3.605097  | Outlier |
| siRNA Disorazole DMSO Run2       | NM_0204<br>37 | LOC57168      | LOC57168 | 3.92819   | Outlier |
| siRNA-Vinblastine Run2-<br>DMSO  | NM_0220<br>98 | LOC63929      | LOC63929 | -0.994998 | Inlier  |
| siRNA Disorazole DMSO Run3       | NM_0220<br>98 | LOC63929      | LOC63929 | -0.963984 | Inlier  |

Identification of Survival Genes in Human Glioblastoma Cells Using siRNA Screening

Nikhil G Thaker, Fang Zhang, Peter R. McDonald, Tong Ying Shun, Michael D Lewen, Ian F. Pollack, and John S. Lazo

| siRNA Treatment              | Gene ID   | Accession | Score     | Category |
|------------------------------|-----------|-----------|-----------|----------|
| siRNA-Temozolomide Run2-DMSO | NM_022098 | LOC63929  | -0.385016 | Inlier   |
| siRNA-Temozolomide Run1-DMSO | NM_022098 | LOC63929  | -0.009376 | Inlier   |
| siRNA Disorazole DMSO Run1   | NM_022098 | LOC63929  | 0.009376  | Inlier   |
| siRNA-Temozolomide Run3-DMSO | NM_022098 | LOC63929  | 0.140471  | Inlier   |
| siRNA Disorazole DMSO Run2   | NM_022098 | LOC63929  | 2.207091  | Inlier   |
| siRNA-Vinblastine Run1-DMSO  | NM_022098 | LOC63929  | 3.771221  | Outlier  |
| siRNA-Temozolomide Run2-DMSO | NM_031302 | LOC83468  | -0.962328 | Inlier   |
| siRNA-Temozolomide Run3-DMSO | NM_031302 | LOC83468  | -0.823224 | Inlier   |
| siRNA-Temozolomide Run1-DMSO | NM_031302 | LOC83468  | -0.523956 | Inlier   |
| siRNA Disorazole DMSO Run1   | NM_031302 | LOC83468  | -0.110951 | Inlier   |
| siRNA Disorazole DMSO Run3   | NM_031302 | LOC83468  | 0.110951  | Inlier   |
| siRNA-Vinblastine Run2-DMSO  | NM_031302 | LOC83468  | 0.525776  | Inlier   |
| siRNA-Vinblastine Run1-DMSO  | NM_031302 | LOC83468  | 0.875787  | Inlier   |
| siRNA Disorazole DMSO Run2   | NM_031302 | LOC83468  | 1.002304  | Inlier   |

glycosyltransferase 8 domain containing

Identification of Survival Genes in Human Glioblastoma Cells Using siRNA Screening  
 Nikhil G Thaker, Fang Zhang, Peter R. McDonald, Tong Ying Shun, Michael D Lewen, Ian F. Pollack, and John S. Lazo  
 Molecular Pharmacology

|                              |               |          |                                     |           |        |
|------------------------------|---------------|----------|-------------------------------------|-----------|--------|
| siRNA-Temozolomide Run3-DMSO | NM_0314<br>63 | LOC83693 | hydroxysteroid dehydrogenase like 1 | -1.200143 | Inlier |
| siRNA-Temozolomide Run2-DMSO | NM_0314<br>63 | LOC83693 | hydroxysteroid dehydrogenase like 1 | -0.846582 | Inlier |
| siRNA Disorazole DMSO Run3   | NM_0314<br>63 | LOC83693 | hydroxysteroid dehydrogenase like 1 | -0.502418 | Inlier |
| siRNA Disorazole DMSO Run2   | NM_0314<br>63 | LOC83693 | hydroxysteroid dehydrogenase like 1 | -0.3731   | Inlier |
| siRNA-Temozolomide Run1-DMSO | NM_0314<br>63 | LOC83693 | hydroxysteroid dehydrogenase like 1 | 0.3731    | Inlier |
| siRNA Disorazole DMSO Run1   | NM_0314<br>63 | LOC83693 | hydroxysteroid dehydrogenase like 1 | 0.386303  | Inlier |
| siRNA-Vinblastine Run2-DMSO  | NM_0314<br>63 | LOC83693 | hydroxysteroid dehydrogenase like 1 | 1.29636   | Inlier |
| siRNA-Vinblastine Run1-DMSO  | NM_0314<br>63 | LOC83693 | hydroxysteroid dehydrogenase like 1 | 1.382635  | Inlier |
| siRNA-Temozolomide Run3-DMSO | NM_0325<br>59 | LOC84643 | kinesin family member 2B            | -1.077931 | Inlier |
| siRNA-Temozolomide Run2-DMSO | NM_0325<br>59 | LOC84643 | kinesin family member 2B            | -0.539418 | Inlier |
| siRNA Disorazole DMSO Run3   | NM_0325<br>59 | LOC84643 | kinesin family member 2B            | -0.516403 | Inlier |

Identification of Survival Genes in Human Glioblastoma Cells Using siRNA Screening  
 Nikhil G Thaker, Fang Zhang, Peter R. McDonald, Tong Ying Shun, Michael D Lewen, Ian F. Pollack, and John S. Lazo

Molecular Pharmacology

|                              |               |          |                              |           |         |
|------------------------------|---------------|----------|------------------------------|-----------|---------|
| siRNA-Vinblastine Run2-DMSO  | NM_0325<br>59 | LOC84643 | kinesin family member<br>2B  | -0.484932 | Inlier  |
| siRNA Disorazole DMSO Run1   | NM_0325<br>59 | LOC84643 | kinesin family member<br>2B  | 0.484932  | Inlier  |
| siRNA-Temozolomide Run1-DMSO | NM_0325<br>59 | LOC84643 | kinesin family member<br>2B  | 0.809582  | Inlier  |
| siRNA Disorazole DMSO Run2   | NM_0325<br>59 | LOC84643 | kinesin family member<br>2B  | 1.988881  | Inlier  |
| siRNA-Vinblastine Run1-DMSO  | NM_0325<br>59 | LOC84643 | kinesin family member<br>2B  | 3.940901  | Outlier |
| siRNA-Temozolomide Run3-DMSO | NM_0332<br>80 | LOC90701 | SEC11-like 3 (S. cerevisiae) | -1.262576 | Inlier  |
| siRNA-Temozolomide Run2-DMSO | NM_0332<br>80 | LOC90701 | SEC11-like 3 (S. cerevisiae) | -1.102435 | Inlier  |
| siRNA-Temozolomide Run1-DMSO | NM_0332<br>80 | LOC90701 | SEC11-like 3 (S. cerevisiae) | -0.127996 | Inlier  |
| siRNA Disorazole DMSO Run2   | NM_0332<br>80 | LOC90701 | SEC11-like 3 (S. cerevisiae) | -0.058444 | Inlier  |
| siRNA Disorazole DMSO Run3   | NM_0332<br>80 | LOC90701 | SEC11-like 3 (S. cerevisiae) | 0.058444  | Inlier  |
| siRNA Disorazole DMSO Run1   | NM_0332<br>80 | LOC90701 | SEC11-like 3 (S. cerevisiae) | 0.277729  | Inlier  |
| siRNA-Vinblastine Run1-DMSO  | NM_0332<br>80 | LOC90701 | SEC11-like 3 (S. cerevisiae) | 1.071271  | Inlier  |
| siRNA-Vinblastine Run2-DMSO  | NM_0332<br>80 | LOC90701 | SEC11-like 3 (S. cerevisiae) | 1.125355  | Inlier  |

Identification of Survival Genes in Human Glioblastoma Cells Using siRNA Screening  
 Nikhil G Thaker, Fang Zhang, Peter R. McDonald, Tong Ying Shun, Michael D Lewen, Ian F. Pollack, and John S. Lazo

|                                  |               |          |          |           |         |
|----------------------------------|---------------|----------|----------|-----------|---------|
| Molecular Pharmacology           | NM_1383       |          |          |           |         |
| siRNA Disorazole DMSO Run1       | 64            | LOC90826 | LOC90826 | -1.323576 | Inlier  |
| siRNA-Temozolomide Run2-<br>DMSO | NM_1383<br>64 | LOC90826 | LOC90826 | -1.305835 | Inlier  |
| siRNA-Vinblastine Run2-<br>DMSO  | NM_1383<br>64 | LOC90826 | LOC90826 | -0.134613 | Inlier  |
| siRNA Disorazole DMSO Run3       | NM_1383<br>64 | LOC90826 | LOC90826 | -0.022558 | Inlier  |
| siRNA-Temozolomide Run3-<br>DMSO | NM_1383<br>64 | LOC90826 | LOC90826 | 0.022558  | Inlier  |
| siRNA-Temozolomide Run1-<br>DMSO | NM_1383<br>64 | LOC90826 | LOC90826 | 0.153067  | Inlier  |
| siRNA Disorazole DMSO Run2       | NM_1383<br>64 | LOC90826 | LOC90826 | 1.195933  | Inlier  |
| siRNA-Vinblastine Run1-<br>DMSO  | NM_1383<br>64 | LOC90826 | LOC90826 | 1.687193  | Inlier  |
| siRNA-Temozolomide Run3-<br>DMSO | NM_1824<br>93 | LOC91807 | LOC91807 | -3.027225 | Inlier  |
| siRNA-Temozolomide Run2-<br>DMSO | NM_1824<br>93 | LOC91807 | LOC91807 | -0.870302 | Inlier  |
| siRNA-Vinblastine Run2-<br>DMSO  | NM_1824<br>93 | LOC91807 | LOC91807 | -0.42891  | Inlier  |
| siRNA Disorazole DMSO Run3       | NM_1824<br>93 | LOC91807 | LOC91807 | -0.336577 | Inlier  |
| siRNA Disorazole DMSO Run2       | NM_1824<br>93 | LOC91807 | LOC91807 | 0.336578  | Inlier  |
| siRNA-Vinblastine Run1-<br>DMSO  | NM_1824<br>93 | LOC91807 | LOC91807 | 0.478698  | Inlier  |
| siRNA Disorazole DMSO Run1       | NM_1824<br>93 | LOC91807 | LOC91807 | 1.514663  | Inlier  |
| siRNA-Temozolomide Run1-<br>DMSO | NM_1824<br>93 | LOC91807 | LOC91807 | 1.837935  | Inlier  |
| siRNA-Vinblastine Run2-<br>DMSO  | NM_1734<br>69 | LOC92912 | LOC92912 | -1.976848 | Inlier  |
| siRNA-Temozolomide Run1-<br>DMSO | NM_1734<br>69 | LOC92912 | LOC92912 | -0.657261 | Inlier  |
| siRNA Disorazole DMSO Run1       | NM_1734<br>69 | LOC92912 | LOC92912 | -0.577173 | Inlier  |
| siRNA-Temozolomide Run2-<br>DMSO | NM_1734<br>69 | LOC92912 | LOC92912 | -0.224203 | Inlier  |
| siRNA-Temozolomide Run3-<br>DMSO | NM_1734<br>69 | LOC92912 | LOC92912 | 0.224203  | Inlier  |
| siRNA Disorazole DMSO Run3       | NM_1734<br>69 | LOC92912 | LOC92912 | 0.691739  | Inlier  |
| siRNA Disorazole DMSO Run2       | NM_1734<br>69 | LOC92912 | LOC92912 | 3.993931  | Outlier |
| siRNA-Vinblastine Run1-<br>DMSO  | NM_1734<br>69 | LOC92912 | LOC92912 | 5.389536  | Outlier |
| siRNA-Temozolomide Run3-<br>DMSO | NM_0314<br>90 | LONP     | LONP     | -1.823248 | Inlier  |
| siRNA Disorazole DMSO Run2       | NM_0314<br>90 | LONP     | LONP     | -0.366349 | Inlier  |



Identification of Survival Genes in Human Glioblastoma Cells Using siRNA Screening

Nikhil G Thaker, Fang Zhang, Peter R. McDonald, Tong Ying Shun, Michael D Lewen, Ian F. Pollack, and John S. Lazo

|                                  |               |       |                    |           |        |
|----------------------------------|---------------|-------|--------------------|-----------|--------|
| siRNA-Temozolomide Run2-<br>DMSO | NM_0314<br>90 | LONP  | LONP               | -0.365796 | Inlier |
|                                  | NM_0314       |       |                    |           |        |
| siRNA Disorazole DMSO Run1       | 90            | LONP  | LONP               | -0.099278 | Inlier |
|                                  | NM_0314       |       |                    |           |        |
| siRNA Disorazole DMSO Run3       | 90            | LONP  | LONP               | 0.099278  | Inlier |
| siRNA-Temozolomide Run1-<br>DMSO | NM_0314<br>90 | LONP  | LONP               | 0.982651  | Inlier |
| siRNA-Vinblastine Run1-<br>DMSO  | NM_0314<br>90 | LONP  | LONP               | 1.89583   | Inlier |
| siRNA-Vinblastine Run2-<br>DMSO  | NM_0314<br>90 | LONP  | LONP               | 2.366214  | Inlier |
|                                  | NM_0023       |       | lysyl              |           |        |
| siRNA Disorazole DMSO Run1       | 17            | LOX   | oxidase            | -1.425891 | Inlier |
| siRNA-Temozolomide Run1-<br>DMSO | NM_0023<br>17 | LOX   | lysyl<br>oxidase   | -1.301323 | Inlier |
| siRNA-Temozolomide Run3-<br>DMSO | NM_0023<br>17 | LOX   | lysyl<br>oxidase   | -0.967254 | Inlier |
| siRNA-Temozolomide Run2-<br>DMSO | NM_0023<br>17 | LOX   | lysyl<br>oxidase   | -0.129364 | Inlier |
|                                  | NM_0023       |       | lysyl              |           |        |
| siRNA Disorazole DMSO Run3       | 17            | LOX   | oxidase            | 0.129364  | Inlier |
| siRNA-Vinblastine Run1-<br>DMSO  | NM_0023<br>17 | LOX   | lysyl<br>oxidase   | 0.372066  | Inlier |
| siRNA-Vinblastine Run2-<br>DMSO  | NM_0023<br>17 | LOX   | lysyl<br>oxidase   | 0.381746  | Inlier |
|                                  | NM_0023       |       | lysyl              |           |        |
| siRNA Disorazole DMSO Run2       | 17            | LOX   | oxidase            | 3.022554  | Inlier |
|                                  |               |       | lysyl              |           |        |
| siRNA-Temozolomide Run3-<br>DMSO | NM_0055<br>76 | LOXL1 | oxidase-<br>like 1 | -2.175305 | Inlier |
|                                  |               |       | lysyl              |           |        |
| siRNA-Temozolomide Run2-<br>DMSO | NM_0055<br>76 | LOXL1 | oxidase-<br>like 1 | -1.906786 | Inlier |
|                                  |               |       | lysyl              |           |        |
| siRNA Disorazole DMSO Run3       | NM_0055<br>76 | LOXL1 | oxidase-<br>like 1 | -0.180861 | Inlier |
|                                  |               |       | lysyl              |           |        |
| siRNA Disorazole DMSO Run1       | NM_0055<br>76 | LOXL1 | oxidase-<br>like 1 | -0.100652 | Inlier |
|                                  |               |       | lysyl              |           |        |
| siRNA-Temozolomide Run1-<br>DMSO | NM_0055<br>76 | LOXL1 | oxidase-<br>like 1 | 0.100652  | Inlier |
|                                  |               |       | lysyl              |           |        |
| siRNA-Vinblastine Run2-<br>DMSO  | NM_0055<br>76 | LOXL1 | oxidase-<br>like 1 | 0.271204  | Inlier |
|                                  |               |       | lysyl              |           |        |
| siRNA-Vinblastine Run1-<br>DMSO  | NM_0055<br>76 | LOXL1 | oxidase-<br>like 1 | 1.077796  | Inlier |
|                                  |               |       | lysyl              |           |        |
| siRNA Disorazole DMSO Run2       | NM_0055<br>76 | LOXL1 | oxidase-<br>like 1 | 2.371189  | Inlier |

Identification of Survival Genes in Human Glioblastoma Cells Using siRNA Screening  
 Nikhil G Thaker, Fang Zhang, Peter R. McDonald, Tong Ying Shun, Michael D Lewen, Ian F. Pollack, and John S. Lazo

| Molecular Pharmacology       |               |       |  | lysyl oxidase-like 2 |        |
|------------------------------|---------------|-------|--|----------------------|--------|
| siRNA-Temozolomide Run3-DMSO | NM_0023<br>18 | LOXL2 |  | -0.859162            | Inlier |
| siRNA Disorazole DMSO Run1   | NM_0023<br>18 | LOXL2 |  | -0.853222            | Inlier |
| siRNA Disorazole DMSO Run3   | NM_0023<br>18 | LOXL2 |  | -0.186315            | Inlier |
| siRNA-Temozolomide Run1-DMSO | NM_0023<br>18 | LOXL2 |  | -0.131111            | Inlier |
| siRNA-Vinblastine Run2-DMSO  | NM_0023<br>18 | LOXL2 |  | 0.131111             | Inlier |
| siRNA-Temozolomide Run2-DMSO | NM_0023<br>18 | LOXL2 |  | 0.495778             | Inlier |
| siRNA Disorazole DMSO Run2   | NM_0023<br>18 | LOXL2 |  | 0.996617             | Inlier |
| siRNA-Vinblastine Run1-DMSO  | NM_0023<br>18 | LOXL2 |  | 1.310368             | Inlier |
| siRNA-Temozolomide Run3-DMSO | NM_0326<br>03 | LOXL3 |  | -1.945326            | Inlier |
| siRNA-Temozolomide Run2-DMSO | NM_0326<br>03 | LOXL3 |  | -1.609145            | Inlier |
| siRNA-Vinblastine Run2-DMSO  | NM_0326<br>03 | LOXL3 |  | -0.317621            | Inlier |
| siRNA Disorazole DMSO Run1   | NM_0326<br>03 | LOXL3 |  | -0.213417            | Inlier |
| siRNA-Temozolomide Run1-DMSO | NM_0326<br>03 | LOXL3 |  | 0.213418             | Inlier |
| siRNA Disorazole DMSO Run3   | NM_0326<br>03 | LOXL3 |  | 0.240313             | Inlier |
| siRNA-Vinblastine Run1-DMSO  | NM_0326<br>03 | LOXL3 |  | 1.031379             | Inlier |
| siRNA Disorazole DMSO Run2   | NM_0326<br>03 | LOXL3 |  | 1.536662             | Inlier |
| siRNA-Temozolomide Run3-DMSO | NM_0322<br>11 | LOXL4 |  | -1.743988            | Inlier |

Identification of Survival Genes in Human Glioblastoma Cells Using siRNA Screening  
 Nikhil G Thaker, Fang Zhang, Peter R. McDonald, Tong Ying Shun, Michael D Lewen, Ian F. Pollack, and John S. Lazo

Molecular Pharmacology

|                                  |               |         |                                                                                                                                            |           |         |
|----------------------------------|---------------|---------|--------------------------------------------------------------------------------------------------------------------------------------------|-----------|---------|
| siRNA Disorazole DMSO Run2       | NM_0322<br>11 | LOXL4   | lysyl<br>oxidase-<br>like 4                                                                                                                | -1.15292  | Inlier  |
| siRNA Disorazole DMSO Run3       | NM_0322<br>11 | LOXL4   | lysyl<br>oxidase-<br>like 4                                                                                                                | -0.596991 | Inlier  |
| siRNA-Temozolomide Run1-<br>DMSO | NM_0322<br>11 | LOXL4   | lysyl<br>oxidase-<br>like 4                                                                                                                | -0.367214 | Inlier  |
| siRNA-Temozolomide Run2-<br>DMSO | NM_0322<br>11 | LOXL4   | lysyl<br>oxidase-<br>like 4                                                                                                                | 0.367214  | Inlier  |
| siRNA-Vinblastine Run1-<br>DMSO  | NM_0322<br>11 | LOXL4   | lysyl<br>oxidase-<br>like 4                                                                                                                | 0.669342  | Inlier  |
| siRNA-Vinblastine Run2-<br>DMSO  | NM_0322<br>11 | LOXL4   | lysyl<br>oxidase-<br>like 4                                                                                                                | 0.679658  | Inlier  |
| siRNA Disorazole DMSO Run1       | NM_0322<br>11 | LOXL4   | lysyl<br>oxidase-<br>like 4                                                                                                                | 0.941561  | Inlier  |
| siRNA-Temozolomide Run2-<br>DMSO | NM_0055<br>77 | LPA     | lipoprotein,<br>Lp(a)                                                                                                                      | -3.026075 | Inlier  |
| siRNA Disorazole DMSO Run2       | NM_0055<br>77 | LPA     | lipoprotein,<br>Lp(a)                                                                                                                      | -1.191947 | Inlier  |
| siRNA-Temozolomide Run3-<br>DMSO | NM_0055<br>77 | LPA     | lipoprotein,<br>Lp(a)                                                                                                                      | -0.071227 | Inlier  |
| siRNA-Temozolomide Run1-<br>DMSO | NM_0055<br>77 | LPA     | lipoprotein,<br>Lp(a)                                                                                                                      | -0.046718 | Inlier  |
| siRNA Disorazole DMSO Run3       | NM_0055<br>77 | LPA     | lipoprotein,<br>Lp(a)                                                                                                                      | 0.046718  | Inlier  |
| siRNA Disorazole DMSO Run1       | NM_0055<br>77 | LPA     | lipoprotein,<br>Lp(a)                                                                                                                      | 0.157053  | Inlier  |
| siRNA-Vinblastine Run1-<br>DMSO  | NM_0055<br>77 | LPA     | lipoprotein,<br>Lp(a)                                                                                                                      | 3.028432  | Inlier  |
| siRNA-Vinblastine Run2-<br>DMSO  | NM_0055<br>77 | LPA     | lipoprotein,<br>Lp(a)                                                                                                                      | 3.565828  | Outlier |
| siRNA-Temozolomide Run2-<br>DMSO | NM_0183<br>61 | LPAAT-e | 1-<br>acylglycer<br>ol-3-<br>phosphate<br>O-<br>acyltransfe<br>rase 5<br>(lysospho<br>phatidic<br>acid<br>acyltransfe<br>rase,<br>epsilon) | -1.069126 | Inlier  |

Identification of Survival Genes in Human Glioblastoma Cells Using siRNA Screening

Nikhil G Thaker, Fang Zhang, Peter R. McDonald, Tong Ying Shun, Michael D Lewen, Ian F. Pollack, and John S. Lazo

Molecular Pharmacology

|                              |               |         |                                                                                                 |           |        |
|------------------------------|---------------|---------|-------------------------------------------------------------------------------------------------|-----------|--------|
| siRNA Disorazole DMSO Run3   | NM_0183<br>61 | LPAAT-e | 1-acylglycerol-3-phosphate O-acyltransferase 5 (lysophosphatidic acid acyltransferase, epsilon) | -0.854488 | Inlier |
| siRNA-Temozolomide Run3-DMSO | NM_0183<br>61 | LPAAT-e | 1-acylglycerol-3-phosphate O-acyltransferase 5 (lysophosphatidic acid acyltransferase, epsilon) | -0.390034 | Inlier |
| siRNA-Vinblastine Run2-DMSO  | NM_0183<br>61 | LPAAT-e | 1-acylglycerol-3-phosphate O-acyltransferase 5 (lysophosphatidic acid acyltransferase, epsilon) | -0.216881 | Inlier |
| siRNA-Temozolomide Run1-DMSO | NM_0183<br>61 | LPAAT-e | 1-acylglycerol-3-phosphate O-acyltransferase 5 (lysophosphatidic acid acyltransferase, epsilon) | 0.216881  | Inlier |

Identification of Survival Genes in Human Glioblastoma Cells Using siRNA Screening

Nikhil G Thaker, Fang Zhang, Peter R. McDonald, Tong Ying Shun, Michael D Lewen, Ian F. Pollack, and John S.

Lazo

Molecular Pharmacology

|                              |               |         |                                                                                                 |           |        |
|------------------------------|---------------|---------|-------------------------------------------------------------------------------------------------|-----------|--------|
|                              |               |         | 1-acylglycerol-3-phosphate O-acyltransferase 5 (lysophosphatidic acid acyltransferase, epsilon) | 0.494512  | Inlier |
| siRNA Disorazole DMSO Run1   | NM_0183<br>61 | LPAAT-e |                                                                                                 |           |        |
|                              |               |         | 1-acylglycerol-3-phosphate O-acyltransferase 5 (lysophosphatidic acid acyltransferase, epsilon) | 2.471575  | Inlier |
| siRNA Disorazole DMSO Run2   | NM_0183<br>61 | LPAAT-e |                                                                                                 |           |        |
|                              |               |         | 1-acylglycerol-3-phosphate O-acyltransferase 5 (lysophosphatidic acid acyltransferase, epsilon) | 2.629908  | Inlier |
| siRNA-Vinblastine Run1-DMSO  | NM_0183<br>61 | LPAAT-e |                                                                                                 |           |        |
|                              |               |         | lipoprotein, Lp(a)-like 2                                                                       | -0.936092 | Inlier |
| siRNA Disorazole DMSO Run1   | NM_1457<br>27 | LPAL2   |                                                                                                 |           |        |
|                              |               |         | lipoprotein, Lp(a)-like 2                                                                       | -0.814113 | Inlier |
| siRNA-Temozolomide Run3-DMSO | NM_1457<br>27 | LPAL2   |                                                                                                 |           |        |
|                              |               |         | lipoprotein, Lp(a)-like 2                                                                       | -0.568037 | Inlier |
| siRNA Disorazole DMSO Run2   | NM_1457<br>27 | LPAL2   |                                                                                                 |           |        |
|                              |               |         | lipoprotein, Lp(a)-like 2                                                                       | -0.157714 | Inlier |
| siRNA-Temozolomide Run1-DMSO | NM_1457<br>27 | LPAL2   |                                                                                                 |           |        |

Identification of Survival Genes in Human Glioblastoma Cells Using siRNA Screening  
 Nikhil G Thaker, Fang Zhang, Peter R. McDonald, Tong Ying Shun, Michael D Lewen, Ian F. Pollack, and John S. Lazo

| Molecular Pharmacology           |               |       |   | lipoprotein,<br>Lp(a)-like |        |
|----------------------------------|---------------|-------|---|----------------------------|--------|
| siRNA-Temozolomide Run2-<br>DMSO | NM_1457<br>27 | LPAL2 | 2 | 0.157714                   | Inlier |
| siRNA-Vinblastine Run1-<br>DMSO  | NM_1457<br>27 | LPAL2 | 2 | 0.506966                   | Inlier |
| siRNA-Vinblastine Run2-<br>DMSO  | NM_1457<br>27 | LPAL2 | 2 | 0.780963                   | Inlier |
| siRNA Disorazole DMSO Run3       | NM_1457<br>27 | LPAL2 | 2 | 1.459298                   | Inlier |
| siRNA Disorazole DMSO Run2       | NM_0149<br>21 | LPHN1 | 1 | -2.022687                  | Inlier |
| siRNA-Temozolomide Run1-<br>DMSO | NM_0149<br>21 | LPHN1 | 1 | -0.445421                  | Inlier |
| siRNA-Temozolomide Run2-<br>DMSO | NM_0149<br>21 | LPHN1 | 1 | -0.425702                  | Inlier |
| siRNA-Temozolomide Run3-<br>DMSO | NM_0149<br>21 | LPHN1 | 1 | -0.223602                  | Inlier |
| siRNA Disorazole DMSO Run1       | NM_0149<br>21 | LPHN1 | 1 | 0.223602                   | Inlier |
| siRNA Disorazole DMSO Run3       | NM_0149<br>21 | LPHN1 | 1 | 0.903579                   | Inlier |
| siRNA-Vinblastine Run2-<br>DMSO  | NM_0149<br>21 | LPHN1 | 1 | 0.9376                     | Inlier |
| siRNA-Vinblastine Run1-<br>DMSO  | NM_0149<br>21 | LPHN1 | 1 | 1.144122                   | Inlier |
| siRNA-Temozolomide Run3-<br>DMSO | NM_0123<br>02 | LPHN2 | 2 | -2.262206                  | Inlier |
| siRNA-Temozolomide Run2-<br>DMSO | NM_0123<br>02 | LPHN2 | 2 | -1.54154                   | Inlier |
| siRNA-Temozolomide Run1-<br>DMSO | NM_0123<br>02 | LPHN2 | 2 | -0.504213                  | Inlier |
| siRNA Disorazole DMSO Run1       | NM_0123<br>02 | LPHN2 | 2 | -0.081505                  | Inlier |
| siRNA Disorazole DMSO Run2       | NM_0123<br>02 | LPHN2 | 2 | 0.081506                   | Inlier |
| siRNA-Vinblastine Run1-<br>DMSO  | NM_0123<br>02 | LPHN2 | 2 | 0.643285                   | Inlier |
| siRNA-Vinblastine Run2-<br>DMSO  | NM_0123<br>02 | LPHN2 | 2 | 0.705715                   | Inlier |
| siRNA Disorazole DMSO Run3       | NM_0123<br>02 | LPHN2 | 2 | 0.776072                   | Inlier |
| siRNA-Temozolomide Run3-<br>DMSO | NM_0152<br>36 | LPHN3 | 3 | -2.773625                  | Inlier |
| siRNA-Temozolomide Run2-<br>DMSO | NM_0152<br>36 | LPHN3 | 3 | -2.076046                  | Inlier |
| siRNA-Temozolomide Run1-<br>DMSO | NM_0152<br>36 | LPHN3 | 3 | -0.532998                  | Inlier |
| siRNA Disorazole DMSO Run2       | NM_0152<br>36 | LPHN3 | 3 | -0.238452                  | Inlier |

Identification of Survival Genes in Human Glioblastoma Cells Using siRNA Screening  
 Nikhil G Thaker, Fang Zhang, Peter R. McDonald, Tong Ying Shun, Michael D Lewen, Ian F. Pollack, and John S. Lazo

|                              |         |       |             |                  |
|------------------------------|---------|-------|-------------|------------------|
| Molecular Pharmacology       | NM_0152 |       | latrophilin |                  |
| siRNA Disorazole DMSO Run3   | 36      | LPHN3 | 3           | 0.238452 Inlier  |
|                              | NM_0152 |       | latrophilin |                  |
| siRNA Disorazole DMSO Run1   | 36      | LPHN3 | 3           | 0.297415 Inlier  |
| siRNA-Vinblastine Run2-DMSO  | NM_0152 |       | latrophilin |                  |
|                              | 36      | LPHN3 | 3           | 0.816002 Inlier  |
| siRNA-Vinblastine Run1-DMSO  | NM_0152 |       | latrophilin |                  |
|                              | 36      | LPHN3 | 3           | 1.370069 Inlier  |
| siRNA-Temozolomide Run3-DMSO | NM_0002 |       | lipoprotein |                  |
|                              | 37      | LPL   | lipase      | -1.514807 Inlier |
| siRNA-Temozolomide Run2-DMSO | NM_0002 |       | lipoprotein |                  |
|                              | 37      | LPL   | lipase      | -1.484097 Inlier |
| siRNA-Temozolomide Run1-DMSO | NM_0002 |       | lipoprotein |                  |
|                              | 37      | LPL   | lipase      | -0.555414 Inlier |
|                              | NM_0002 |       | lipoprotein |                  |
| siRNA Disorazole DMSO Run3   | 37      | LPL   | lipase      | -0.033482 Inlier |
| siRNA-Vinblastine Run2-DMSO  | NM_0002 |       | lipoprotein |                  |
|                              | 37      | LPL   | lipase      | 0.033482 Inlier  |
|                              | NM_0002 |       | lipoprotein |                  |
| siRNA Disorazole DMSO Run1   | 37      | LPL   | lipase      | 0.624004 Inlier  |
|                              | NM_0002 |       | lipoprotein |                  |
| siRNA Disorazole DMSO Run2   | 37      | LPL   | lipase      | 0.724996 Inlier  |
| siRNA-Vinblastine Run1-DMSO  | NM_0002 |       | lipoprotein |                  |
|                              | 37      | LPL   | lipase      | 0.849737 Inlier  |
| siRNA-Temozolomide Run3-DMSO | NM_0061 |       | lactoperoxi |                  |
|                              | 51      | LPO   | dase        | -0.841259 Inlier |
|                              | NM_0061 |       | lactoperoxi |                  |
| siRNA Disorazole DMSO Run3   | 51      | LPO   | dase        | -0.507741 Inlier |
| siRNA-Vinblastine Run2-DMSO  | NM_0061 |       | lactoperoxi |                  |
|                              | 51      | LPO   | dase        | -0.485803 Inlier |
| siRNA-Temozolomide Run2-DMSO | NM_0061 |       | lactoperoxi |                  |
|                              | 51      | LPO   | dase        | -0.068052 Inlier |
|                              | NM_0061 |       | lactoperoxi |                  |
| siRNA Disorazole DMSO Run1   | 51      | LPO   | dase        | 0.068052 Inlier  |
| siRNA-Temozolomide Run1-DMSO | NM_0061 |       | lactoperoxi |                  |
|                              | 51      | LPO   | dase        | 1.366634 Inlier  |
| siRNA-Vinblastine Run1-DMSO  | NM_0061 |       | lactoperoxi |                  |
|                              | 51      | LPO   | dase        | 2.280668 Inlier  |
|                              | NM_0061 |       | lactoperoxi |                  |
| siRNA Disorazole DMSO Run2   | 51      | LPO   | dase        | 2.778257 Inlier  |
| siRNA-Temozolomide Run3-DMSO | NM_0227 |       | LPPR2       |                  |
|                              | 37      | LPPR2 | LPPR2       | -3.461136 Inlier |
| siRNA-Temozolomide Run2-DMSO | NM_0227 |       | LPPR2       |                  |
|                              | 37      | LPPR2 | LPPR2       | -2.286901 Inlier |
|                              | NM_0227 |       |             |                  |
| siRNA Disorazole DMSO Run3   | 37      | LPPR2 | LPPR2       | -0.82487 Inlier  |
| siRNA-Vinblastine Run1-DMSO  | NM_0227 |       |             |                  |
|                              | 37      | LPPR2 | LPPR2       | -0.484829 Inlier |
| siRNA-Vinblastine Run2-DMSO  | NM_0227 |       |             |                  |
|                              | 37      | LPPR2 | LPPR2       | 0.484829 Inlier  |
|                              | NM_0227 |       |             |                  |
| siRNA Disorazole DMSO Run2   | 37      | LPPR2 | LPPR2       | 0.602788 Inlier  |

Identification of Survival Genes in Human Glioblastoma Cells Using siRNA Screening

Nikhil G Thaker, Fang Zhang, Peter R. McDonald, Tong Ying Shun, Michael D Lewen, Ian F. Pollack, and John S.

Lazo

|                                  |               |       |                                                                                                                |           |        |
|----------------------------------|---------------|-------|----------------------------------------------------------------------------------------------------------------|-----------|--------|
| siRNA-Temozolomide Run1-<br>DMSO | NM_0227<br>37 | LPPR2 | LPPR2                                                                                                          | 0.671854  | Inlier |
|                                  | NM_0227       |       |                                                                                                                |           |        |
| siRNA Disorazole DMSO Run1       | 37            | LPPR2 | LPPR2                                                                                                          | 0.677146  | Inlier |
| siRNA-Temozolomide Run3-<br>DMSO | NM_0048<br>11 | LPXN  | leupaxin                                                                                                       | -1.47941  | Inlier |
| siRNA-Temozolomide Run2-<br>DMSO | NM_0048<br>11 | LPXN  | leupaxin                                                                                                       | -0.725012 | Inlier |
| siRNA-Temozolomide Run1-<br>DMSO | NM_0048<br>11 | LPXN  | leupaxin                                                                                                       | -0.476814 | Inlier |
|                                  | NM_0048       |       |                                                                                                                |           |        |
| siRNA Disorazole DMSO Run1       | 11            | LPXN  | leupaxin                                                                                                       | -0.035706 | Inlier |
|                                  | NM_0048       |       |                                                                                                                |           |        |
| siRNA Disorazole DMSO Run3       | 11            | LPXN  | leupaxin                                                                                                       | 0.035706  | Inlier |
|                                  | NM_0048       |       |                                                                                                                |           |        |
| siRNA Disorazole DMSO Run2       | 11            | LPXN  | leupaxin                                                                                                       | 0.623988  | Inlier |
| siRNA-Vinblastine Run2-<br>DMSO  | NM_0048<br>11 | LPXN  | leupaxin                                                                                                       | 1.149244  | Inlier |
| siRNA-Vinblastine Run1-<br>DMSO  | NM_0048<br>11 | LPXN  | leupaxin                                                                                                       | 1.537187  | Inlier |
| siRNA-Temozolomide Run3-<br>DMSO | NM_0223<br>50 | LRAP  | LRAP                                                                                                           | -1.537986 | Inlier |
| siRNA-Temozolomide Run2-<br>DMSO | NM_0223<br>50 | LRAP  | LRAP                                                                                                           | -0.581456 | Inlier |
|                                  | NM_0223       |       |                                                                                                                |           |        |
| siRNA Disorazole DMSO Run3       | 50            | LRAP  | LRAP                                                                                                           | -0.538385 | Inlier |
|                                  | NM_0223       |       |                                                                                                                |           |        |
| siRNA Disorazole DMSO Run2       | 50            | LRAP  | LRAP                                                                                                           | -0.288388 | Inlier |
| siRNA-Temozolomide Run1-<br>DMSO | NM_0223<br>50 | LRAP  | LRAP                                                                                                           | 0.288388  | Inlier |
|                                  | NM_0223       |       |                                                                                                                |           |        |
| siRNA Disorazole DMSO Run1       | 50            | LRAP  | LRAP                                                                                                           | 0.767544  | Inlier |
| siRNA-Vinblastine Run2-<br>DMSO  | NM_0223<br>50 | LRAP  | LRAP                                                                                                           | 1.844596  | Inlier |
| siRNA-Vinblastine Run1-<br>DMSO  | NM_0223<br>50 | LRAP  | LRAP                                                                                                           | 2.032042  | Inlier |
|                                  |               |       |                                                                                                                |           |        |
|                                  |               |       | lecithin<br>retinol<br>acyltransfe<br>rase<br>(phosphati<br>dylcholine--<br>retinol O-<br>acyltransfe<br>rase) |           |        |
| siRNA-Temozolomide Run2-<br>DMSO | NM_0047<br>44 | LRAT  |                                                                                                                | -1.285641 | Inlier |



Identification of Survival Genes in Human Glioblastoma Cells Using siRNA Screening

Nikhil G Thaker, Fang Zhang, Peter R. McDonald, Tong Ying Shun, Michael D Lewen, Ian F. Pollack, and John S. Lazo

Molecular Pharmacology

|                              |               |      |                                                                                                                |           |        |
|------------------------------|---------------|------|----------------------------------------------------------------------------------------------------------------|-----------|--------|
| siRNA-Temozolomide Run3-DMSO | NM_0047<br>44 | LRAT | lecithin<br>retinol<br>acyltransfe<br>rase<br>(phosphati<br>dylcholine--<br>retinol O-<br>acyltransfe<br>rase) | -0.955502 | Inlier |
| siRNA-Temozolomide Run1-DMSO | NM_0047<br>44 | LRAT | lecithin<br>retinol<br>acyltransfe<br>rase<br>(phosphati<br>dylcholine--<br>retinol O-<br>acyltransfe<br>rase) | -0.393498 | Inlier |
| siRNA-Vinblastine Run2-DMSO  | NM_0047<br>44 | LRAT | lecithin<br>retinol<br>acyltransfe<br>rase<br>(phosphati<br>dylcholine--<br>retinol O-<br>acyltransfe<br>rase) | -0.007672 | Inlier |
| siRNA Disorazole DMSO Run1   | NM_0047<br>44 | LRAT | lecithin<br>retinol<br>acyltransfe<br>rase<br>(phosphati<br>dylcholine--<br>retinol O-<br>acyltransfe<br>rase) | 0.007672  | Inlier |
| siRNA Disorazole DMSO Run3   | NM_0047<br>44 | LRAT | lecithin<br>retinol<br>acyltransfe<br>rase<br>(phosphati<br>dylcholine--<br>retinol O-<br>acyltransfe<br>rase) | 0.357057  | Inlier |

Identification of Survival Genes in Human Glioblastoma Cells Using siRNA Screening

Nikhil G Thaker, Fang Zhang, Peter R. McDonald, Tong Ying Shun, Michael D Lewen, Ian F. Pollack, and John S. Lazo

Molecular Pharmacology

|                              |               |      |                                                                                                                |           |        |
|------------------------------|---------------|------|----------------------------------------------------------------------------------------------------------------|-----------|--------|
| siRNA-Vinblastine Run1-DMSO  | NM_0047<br>44 | LRAT | lecithin<br>retinol<br>acyltransfe<br>rase<br>(phosphati<br>dylcholine--<br>retinol O-<br>acyltransfe<br>rase) | 1.183474  | Inlier |
| siRNA Disorazole DMSO Run2   | NM_0047<br>44 | LRAT | lecithin<br>retinol<br>acyltransfe<br>rase<br>(phosphati<br>dylcholine--<br>retinol O-<br>acyltransfe<br>rase) | 1.241951  | Inlier |
| siRNA-Temozolomide Run3-DMSO | NM_0023<br>32 | LRP1 | low<br>density<br>lipoprotein-<br>related<br>protein 1<br>(alpha-2-<br>macroglob<br>ulin<br>receptor)          | -1.074088 | Inlier |
| siRNA-Vinblastine Run2-DMSO  | NM_0023<br>32 | LRP1 | low<br>density<br>lipoprotein-<br>related<br>protein 1<br>(alpha-2-<br>macroglob<br>ulin<br>receptor)          | -0.912104 | Inlier |
| siRNA-Temozolomide Run2-DMSO | NM_0023<br>32 | LRP1 | low<br>density<br>lipoprotein-<br>related<br>protein 1<br>(alpha-2-<br>macroglob<br>ulin<br>receptor)          | -0.410225 | Inlier |

Identification of Survival Genes in Human Glioblastoma Cells Using siRNA Screening

Nikhil G Thaker, Fang Zhang, Peter R. McDonald, Tong Ying Shun, Michael D Lewen, Ian F. Pollack, and John S. Lazo

Molecular Pharmacology

|                              |               |       |                                                                            |           |        |
|------------------------------|---------------|-------|----------------------------------------------------------------------------|-----------|--------|
| siRNA Disorazole DMSO Run3   | NM_0023<br>32 | LRP1  | low density lipoprotein-related protein 1 (alpha-2-macroglobulin receptor) | -0.182317 | Inlier |
| siRNA Disorazole DMSO Run1   | NM_0023<br>32 | LRP1  | low density lipoprotein-related protein 1 (alpha-2-macroglobulin receptor) | 0.182318  | Inlier |
| siRNA-Temozolomide Run1-DMSO | NM_0023<br>32 | LRP1  | low density lipoprotein-related protein 1 (alpha-2-macroglobulin receptor) | 0.436896  | Inlier |
| siRNA Disorazole DMSO Run2   | NM_0023<br>32 | LRP1  | low density lipoprotein-related protein 1 (alpha-2-macroglobulin receptor) | 1.74967   | Inlier |
| siRNA-Vinblastine Run1-DMSO  | NM_0023<br>32 | LRP1  | low density lipoprotein-related protein 1 (alpha-2-macroglobulin receptor) | 2.736651  | Inlier |
| siRNA-Temozolomide Run3-DMSO | NM_0134<br>37 | LRP12 | protein 12                                                                 | -1.25821  | Inlier |

Identification of Survival Genes in Human Glioblastoma Cells Using siRNA Screening

Nikhil G Thaker, Fang Zhang, Peter R. McDonald, Tong Ying Shun, Michael D Lewen, Ian F. Pollack, and John S. Lazo

Molecular Pharmacology

|                              |               |       |                                                    |           |        |
|------------------------------|---------------|-------|----------------------------------------------------|-----------|--------|
| siRNA-Temozolomide Run2-DMSO | NM_0134<br>37 | LRP12 | low density lipoprotein-related protein 12         | -1.085801 | Inlier |
| siRNA-Temozolomide Run1-DMSO | NM_0134<br>37 | LRP12 | low density lipoprotein-related protein 12         | -0.238016 | Inlier |
| siRNA Disorazole DMSO Run1   | NM_0134<br>37 | LRP12 | low density lipoprotein-related protein 12         | -0.037699 | Inlier |
| siRNA Disorazole DMSO Run3   | NM_0134<br>37 | LRP12 | low density lipoprotein-related protein 12         | 0.037699  | Inlier |
| siRNA Disorazole DMSO Run2   | NM_0134<br>37 | LRP12 | low density lipoprotein-related protein 12         | 0.498552  | Inlier |
| siRNA-Vinblastine Run2-DMSO  | NM_0134<br>37 | LRP12 | low density lipoprotein-related protein 12         | 0.850448  | Inlier |
| siRNA-Vinblastine Run1-DMSO  | NM_0134<br>37 | LRP12 | low density lipoprotein-related protein 12         | 0.90085   | Inlier |
| siRNA-Vinblastine Run2-DMSO  | NM_0023<br>33 | LRP3  | low density lipoprotein receptor-related protein 3 | -1.622876 | Inlier |
| siRNA-Temozolomide Run2-DMSO | NM_0023<br>33 | LRP3  | low density lipoprotein receptor-related protein 3 | -1.146216 | Inlier |

Identification of Survival Genes in Human Glioblastoma Cells Using siRNA Screening  
 Nikhil G Thaker, Fang Zhang, Peter R. McDonald, Tong Ying Shun, Michael D Lewen, Ian F. Pollack, and John S. Lazo

Molecular Pharmacology

|                                  |               |      |                                                                    |           |         |
|----------------------------------|---------------|------|--------------------------------------------------------------------|-----------|---------|
| siRNA Disorazole DMSO Run3       | NM_0023<br>33 | LRP3 | low<br>density<br>lipoprotein<br>receptor-<br>related<br>protein 3 | -0.544027 | Inlier  |
| siRNA Disorazole DMSO Run1       | NM_0023<br>33 | LRP3 | low<br>density<br>lipoprotein<br>receptor-<br>related<br>protein 3 | -0.084931 | Inlier  |
| siRNA-Temozolomide Run1-<br>DMSO | NM_0023<br>33 | LRP3 | low<br>density<br>lipoprotein<br>receptor-<br>related<br>protein 3 | 0.084931  | Inlier  |
| siRNA-Temozolomide Run3-<br>DMSO | NM_0023<br>33 | LRP3 | low<br>density<br>lipoprotein<br>receptor-<br>related<br>protein 3 | 0.539609  | Inlier  |
| siRNA Disorazole DMSO Run2       | NM_0023<br>33 | LRP3 | low<br>density<br>lipoprotein<br>receptor-<br>related<br>protein 3 | 0.804973  | Inlier  |
| siRNA-Vinblastine Run1-<br>DMSO  | NM_0023<br>33 | LRP3 | low<br>density<br>lipoprotein<br>receptor-<br>related<br>protein 3 | 1.735232  | Inlier  |
| siRNA-Vinblastine Run2-<br>DMSO  | XM_03503<br>7 | LRP4 | low<br>density<br>lipoprotein<br>receptor-<br>related<br>protein 4 | -4.570962 | Outlier |
| siRNA Disorazole DMSO Run3       | XM_03503<br>7 | LRP4 | low<br>density<br>lipoprotein<br>receptor-<br>related<br>protein 4 | -2.020087 | Inlier  |

Identification of Survival Genes in Human Glioblastoma Cells Using siRNA Screening  
 Nikhil G Thaker, Fang Zhang, Peter R. McDonald, Tong Ying Shun, Michael D Lewen, Ian F. Pollack, and John S. Lazo

Molecular Pharmacology

|                              |               |      |                                                    |           |        |
|------------------------------|---------------|------|----------------------------------------------------|-----------|--------|
| siRNA-Temozolomide Run1-DMSO | XM_03503<br>7 | LRP4 | low density lipoprotein receptor-related protein 4 | -0.516171 | Inlier |
| siRNA-Temozolomide Run2-DMSO | XM_03503<br>7 | LRP4 | low density lipoprotein receptor-related protein 4 | -0.212815 | Inlier |
| siRNA Disorazole DMSO Run2   | XM_03503<br>7 | LRP4 | low density lipoprotein receptor-related protein 4 | 0.212816  | Inlier |
| siRNA-Temozolomide Run3-DMSO | XM_03503<br>7 | LRP4 | low density lipoprotein receptor-related protein 4 | 0.631584  | Inlier |
| siRNA Disorazole DMSO Run1   | XM_03503<br>7 | LRP4 | low density lipoprotein receptor-related protein 4 | 0.717416  | Inlier |
| siRNA-Vinblastine Run1-DMSO  | XM_03503<br>7 | LRP4 | low density lipoprotein receptor-related protein 4 | 1.549597  | Inlier |
| siRNA Disorazole DMSO Run1   | NM_0023<br>35 | LRP5 | low density lipoprotein receptor-related protein 5 | -0.684372 | Inlier |
| siRNA-Vinblastine Run2-DMSO  | NM_0023<br>35 | LRP5 | low density lipoprotein receptor-related protein 5 | -0.676423 | Inlier |

Identification of Survival Genes in Human Glioblastoma Cells Using siRNA Screening  
 Nikhil G Thaker, Fang Zhang, Peter R. McDonald, Tong Ying Shun, Michael D Lewen, Ian F. Pollack, and John S. Lazo

Molecular Pharmacology

|                              |               |      |                                                    |           |         |
|------------------------------|---------------|------|----------------------------------------------------|-----------|---------|
| siRNA-Temozolomide Run2-DMSO | NM_0023<br>35 | LRP5 | low density lipoprotein receptor-related protein 5 | -0.672577 | Inlier  |
| siRNA Disorazole DMSO Run3   | NM_0023<br>35 | LRP5 | low density lipoprotein receptor-related protein 5 | -0.195819 | Inlier  |
| siRNA-Temozolomide Run1-DMSO | NM_0023<br>35 | LRP5 | low density lipoprotein receptor-related protein 5 | 0.195819  | Inlier  |
| siRNA-Temozolomide Run3-DMSO | NM_0023<br>35 | LRP5 | low density lipoprotein receptor-related protein 5 | 0.550599  | Inlier  |
| siRNA Disorazole DMSO Run2   | NM_0023<br>35 | LRP5 | low density lipoprotein receptor-related protein 5 | 1.585161  | Inlier  |
| siRNA-Vinblastine Run1-DMSO  | NM_0023<br>35 | LRP5 | low density lipoprotein receptor-related protein 5 | 2.423937  | Inlier  |
| siRNA-Vinblastine Run2-DMSO  | NM_0023<br>36 | LRP6 | low density lipoprotein receptor-related protein 6 | -3.709863 | Outlier |
| siRNA Disorazole DMSO Run3   | NM_0023<br>36 | LRP6 | low density lipoprotein receptor-related protein 6 | -0.748304 | Inlier  |

Identification of Survival Genes in Human Glioblastoma Cells Using siRNA Screening

Nikhil G Thaker, Fang Zhang, Peter R. McDonald, Tong Ying Shun, Michael D Lewen, Ian F. Pollack, and John S. Lazo

Molecular Pharmacology

|                                  |               |      |                                                                                                         |           |        |
|----------------------------------|---------------|------|---------------------------------------------------------------------------------------------------------|-----------|--------|
| siRNA Disorazole DMSO Run1       | NM_0023<br>36 | LRP6 | low<br>density<br>lipoprotein<br>receptor-<br>related<br>protein 6                                      | -0.724764 | Inlier |
| siRNA-Temozolomide Run1-<br>DMSO | NM_0023<br>36 | LRP6 | low<br>density<br>lipoprotein<br>receptor-<br>related<br>protein 6                                      | -0.209866 | Inlier |
| siRNA-Temozolomide Run2-<br>DMSO | NM_0023<br>36 | LRP6 | low<br>density<br>lipoprotein<br>receptor-<br>related<br>protein 6                                      | 0.209866  | Inlier |
| siRNA-Temozolomide Run3-<br>DMSO | NM_0023<br>36 | LRP6 | low<br>density<br>lipoprotein<br>receptor-<br>related<br>protein 6                                      | 0.246426  | Inlier |
| siRNA Disorazole DMSO Run2       | NM_0023<br>36 | LRP6 | low<br>density<br>lipoprotein<br>receptor-<br>related<br>protein 6                                      | 0.624236  | Inlier |
| siRNA-Vinblastine Run1-<br>DMSO  | NM_0023<br>36 | LRP6 | low<br>density<br>lipoprotein<br>receptor-<br>related<br>protein 6                                      | 1.729447  | Inlier |
| siRNA-Vinblastine Run2-<br>DMSO  | NM_0333<br>00 | LRP8 | low<br>density<br>lipoprotein<br>receptor-<br>related<br>protein 8,<br>apolipopro<br>tein e<br>receptor | -1.523474 | Inlier |



Identification of Survival Genes in Human Glioblastoma Cells Using siRNA Screening

Nikhil G Thaker, Fang Zhang, Peter R. McDonald, Tong Ying Shun, Michael D Lewen, Ian F. Pollack, and John S.

Lazo

Molecular Pharmacology

| siRNA Treatment              | Gene ID   | Gene Name | Protein Name                                                                  | Value     | Category |
|------------------------------|-----------|-----------|-------------------------------------------------------------------------------|-----------|----------|
| siRNA-Temozolomide Run2-DMSO | NM_033300 | LRP8      | low density lipoprotein receptor-related protein 8, apolipoprotein e receptor | -0.814472 | Inlier   |
| siRNA Disorazole DMSO Run3   | NM_033300 | LRP8      | low density lipoprotein receptor-related protein 8, apolipoprotein e receptor | -0.292866 | Inlier   |
| siRNA Disorazole DMSO Run1   | NM_033300 | LRP8      | low density lipoprotein receptor-related protein 8, apolipoprotein e receptor | -0.261405 | Inlier   |
| siRNA-Temozolomide Run1-DMSO | NM_033300 | LRP8      | low density lipoprotein receptor-related protein 8, apolipoprotein e receptor | 0.261405  | Inlier   |
| siRNA-Temozolomide Run3-DMSO | NM_033300 | LRP8      | low density lipoprotein receptor-related protein 8, apolipoprotein e receptor | 0.534528  | Inlier   |

Identification of Survival Genes in Human Glioblastoma Cells Using siRNA Screening  
 Nikhil G Thaker, Fang Zhang, Peter R. McDonald, Tong Ying Shun, Michael D Lewen, Ian F. Pollack, and John S. Lazo

Molecular Pharmacology

|                              |           |       |                                                                               |           |        |
|------------------------------|-----------|-------|-------------------------------------------------------------------------------|-----------|--------|
| siRNA Disorazole DMSO Run2   | NM_033300 | LRP8  | low density lipoprotein receptor-related protein 8, apolipoprotein e receptor | 0.970826  | Inlier |
| siRNA-Vinblastine Run1-DMSO  | NM_033300 | LRP8  | low density lipoprotein receptor-related protein 8, apolipoprotein e receptor | 1.916299  | Inlier |
| siRNA-Temozolomide Run2-DMSO | NM_024652 | LRRK1 | leucine-rich repeat kinase 1                                                  | -2.637419 | Inlier |
| siRNA-Temozolomide Run3-DMSO | NM_024652 | LRRK1 | leucine-rich repeat kinase 1                                                  | -2.601715 | Inlier |
| siRNA Disorazole DMSO Run2   | NM_024652 | LRRK1 | leucine-rich repeat kinase 1                                                  | -0.558206 | Inlier |
| siRNA-Temozolomide Run1-DMSO | NM_024652 | LRRK1 | leucine-rich repeat kinase 1                                                  | -0.347692 | Inlier |
| siRNA Disorazole DMSO Run3   | NM_024652 | LRRK1 | leucine-rich repeat kinase 1                                                  | 0.347692  | Inlier |
| siRNA Disorazole DMSO Run1   | NM_024652 | LRRK1 | leucine-rich repeat kinase 1                                                  | 0.537978  | Inlier |
| siRNA-Vinblastine Run2-DMSO  | NM_024652 | LRRK1 | leucine-rich repeat kinase 1                                                  | 0.790794  | Inlier |
| siRNA-Vinblastine Run1-DMSO  | NM_024652 | LRRK1 | leucine-rich repeat kinase 1                                                  | 0.844035  | Inlier |



Identification of Survival Genes in Human Glioblastoma Cells Using siRNA Screening  
 Nikhil G Thaker, Fang Zhang, Peter R. McDonald, Tong Ying Shun, Michael D Lewen, Ian F. Pollack, and John S. Lazo

Molecular Pharmacology

|                              |               |        |  |                                                            |                  |
|------------------------------|---------------|--------|--|------------------------------------------------------------|------------------|
|                              |               |        |  | lanosterol synthase (2,3-oxidosqualene-lanosterol cyclase) |                  |
| siRNA Disorazole DMSO Run2   | NM_0023<br>40 | LSS    |  | leukotriene A4 hydrolase                                   | 3.03055 Inlier   |
| siRNA Disorazole DMSO Run1   | NM_0008<br>95 | LTA4H  |  | leukotriene A4 hydrolase                                   | -1.337426 Inlier |
| siRNA-Vinblastine Run2-DMSO  | NM_0008<br>95 | LTA4H  |  | leukotriene A4 hydrolase                                   | -0.681478 Inlier |
| siRNA Disorazole DMSO Run3   | NM_0008<br>95 | LTA4H  |  | leukotriene A4 hydrolase                                   | -0.667522 Inlier |
| siRNA-Temozolomide Run2-DMSO | NM_0008<br>95 | LTA4H  |  | leukotriene A4 hydrolase                                   | -0.300231 Inlier |
| siRNA-Temozolomide Run3-DMSO | NM_0008<br>95 | LTA4H  |  | leukotriene A4 hydrolase                                   | 0.300231 Inlier  |
| siRNA-Temozolomide Run1-DMSO | NM_0008<br>95 | LTA4H  |  | leukotriene A4 hydrolase                                   | 0.373889 Inlier  |
| siRNA-Vinblastine Run1-DMSO  | NM_0008<br>95 | LTA4H  |  | leukotriene A4 hydrolase                                   | 0.836161 Inlier  |
| siRNA Disorazole DMSO Run2   | NM_0008<br>95 | LTA4H  |  | leukotriene B4 12-hydroxydehydrogenase                     | 1.534407 Inlier  |
| siRNA-Temozolomide Run3-DMSO | NM_0122<br>12 | LTB4DH |  | leukotriene B4 12-hydroxydehydrogenase                     | -0.92441 Inlier  |
| siRNA Disorazole DMSO Run1   | NM_0122<br>12 | LTB4DH |  | leukotriene B4 12-hydroxydehydrogenase                     | -0.42459 Inlier  |
| siRNA Disorazole DMSO Run2   | NM_0122<br>12 | LTB4DH |  | leukotriene B4 12-hydroxydehydrogenase                     | -0.316264 Inlier |
| siRNA Disorazole DMSO Run3   | NM_0122<br>12 | LTB4DH |  | leukotriene B4 12-hydroxydehydrogenase                     | -0.269767 Inlier |

Identification of Survival Genes in Human Glioblastoma Cells Using siRNA Screening  
 Nikhil G Thaker, Fang Zhang, Peter R. McDonald, Tong Ying Shun, Michael D Lewen, Ian F. Pollack, and John S. Lazo

Molecular Pharmacology

|                              |               |        |                                                        |                   |
|------------------------------|---------------|--------|--------------------------------------------------------|-------------------|
| siRNA-Temozolomide Run2-DMSO | NM_0122<br>12 | LTB4DH | leukotrien<br>e B4 12-<br>hydroxyde<br>hydrogena<br>se | 0.269766 Inlier   |
| siRNA-Temozolomide Run1-DMSO | NM_0122<br>12 | LTB4DH | leukotrien<br>e B4 12-<br>hydroxyde<br>hydrogena<br>se | 2.114538 Inlier   |
| siRNA-Vinblastine Run2-DMSO  | NM_0122<br>12 | LTB4DH | leukotrien<br>e B4 12-<br>hydroxyde<br>hydrogena<br>se | 2.228099 Inlier   |
| siRNA-Vinblastine Run1-DMSO  | NM_0122<br>12 | LTB4DH | leukotrien<br>e B4 12-<br>hydroxyde<br>hydrogena<br>se | 2.367766 Inlier   |
| siRNA-Temozolomide Run3-DMSO | NM_1816<br>57 | LTB4R  | leukotrien<br>e B4<br>receptor                         | -1.127306 Inlier  |
| siRNA-Temozolomide Run2-DMSO | NM_1816<br>57 | LTB4R  | leukotrien<br>e B4<br>receptor                         | -0.912151 Inlier  |
| siRNA-Temozolomide Run1-DMSO | NM_1816<br>57 | LTB4R  | leukotrien<br>e B4<br>receptor                         | -0.780011 Inlier  |
| siRNA Disorazole DMSO Run1   | NM_1816<br>57 | LTB4R  | leukotrien<br>e B4<br>receptor                         | -0.099593 Inlier  |
| siRNA Disorazole DMSO Run2   | NM_1816<br>57 | LTB4R  | leukotrien<br>e B4<br>receptor                         | 0.099593 Inlier   |
| siRNA Disorazole DMSO Run3   | NM_1816<br>57 | LTB4R  | leukotrien<br>e B4<br>receptor                         | 0.315581 Inlier   |
| siRNA-Vinblastine Run1-DMSO  | NM_1816<br>57 | LTB4R  | leukotrien<br>e B4<br>receptor                         | 0.609197 Inlier   |
| siRNA-Vinblastine Run2-DMSO  | NM_1816<br>57 | LTB4R  | leukotrien<br>e B4<br>receptor                         | 0.739803 Inlier   |
| siRNA-Temozolomide Run3-DMSO | NM_0198<br>39 | LTB4R2 | leukotrien<br>e B4<br>receptor 2                       | -5.563097 Outlier |
| siRNA-Temozolomide Run2-DMSO | NM_0198<br>39 | LTB4R2 | leukotrien<br>e B4<br>receptor 2                       | -2.851498 Inlier  |

Identification of Survival Genes in Human Glioblastoma Cells Using siRNA Screening

Nikhil G Thaker, Fang Zhang, Peter R. McDonald, Tong Ying Shun, Michael D Lewen, Ian F. Pollack, and John S.

Lazo

Molecular Pharmacology

|                              |               |        |                                                                            |           |        |
|------------------------------|---------------|--------|----------------------------------------------------------------------------|-----------|--------|
| siRNA-Temozolomide Run1-DMSO | NM_0198<br>39 | LTB4R2 | leukotrien<br>e B4<br>receptor 2                                           | -2.034069 | Inlier |
| siRNA-Vinblastine Run2-DMSO  | NM_0198<br>39 | LTB4R2 | leukotrien<br>e B4<br>receptor 2                                           | -0.111178 | Inlier |
| siRNA Disorazole DMSO Run1   | NM_0198<br>39 | LTB4R2 | leukotrien<br>e B4<br>receptor 2                                           | 0.111178  | Inlier |
| siRNA Disorazole DMSO Run2   | NM_0198<br>39 | LTB4R2 | leukotrien<br>e B4<br>receptor 2                                           | 0.231844  | Inlier |
| siRNA-Vinblastine Run1-DMSO  | NM_0198<br>39 | LTB4R2 | leukotrien<br>e B4<br>receptor 2                                           | 0.423735  | Inlier |
| siRNA Disorazole DMSO Run3   | NM_0198<br>39 | LTB4R2 | leukotrien<br>e B4<br>receptor 2                                           | 0.925265  | Inlier |
| siRNA-Vinblastine Run2-DMSO  | NM_0023<br>42 | LTBR   | lymphotoxi<br>n beta<br>receptor<br>(TNFR<br>superfamil<br>y, member<br>3) | -1.021193 | Inlier |
| siRNA-Temozolomide Run2-DMSO | NM_0023<br>42 | LTBR   | lymphotoxi<br>n beta<br>receptor<br>(TNFR<br>superfamil<br>y, member<br>3) | -0.60433  | Inlier |
| siRNA Disorazole DMSO Run3   | NM_0023<br>42 | LTBR   | lymphotoxi<br>n beta<br>receptor<br>(TNFR<br>superfamil<br>y, member<br>3) | -0.472498 | Inlier |
| siRNA-Temozolomide Run3-DMSO | NM_0023<br>42 | LTBR   | lymphotoxi<br>n beta<br>receptor<br>(TNFR<br>superfamil<br>y, member<br>3) | -0.076766 | Inlier |

Identification of Survival Genes in Human Glioblastoma Cells Using siRNA Screening  
 Nikhil G Thaker, Fang Zhang, Peter R. McDonald, Tong Ying Shun, Michael D Lewen, Ian F. Pollack, and John S. Lazo  
 Molecular Pharmacology

|                              |               |       |                                                        |           |        |
|------------------------------|---------------|-------|--------------------------------------------------------|-----------|--------|
| siRNA Disorazole DMSO Run1   | NM_0023<br>42 | LTBR  | lymphotoxin beta receptor (TNFR superfamily, member 3) | 0.076766  | Inlier |
| siRNA-Temozolomide Run1-DMSO | NM_0023<br>42 | LTBR  | lymphotoxin beta receptor (TNFR superfamily, member 3) | 0.74467   | Inlier |
| siRNA Disorazole DMSO Run2   | NM_0023<br>42 | LTBR  | lymphotoxin beta receptor (TNFR superfamily, member 3) | 1.879297  | Inlier |
| siRNA-Vinblastine Run1-DMSO  | NM_0023<br>42 | LTBR  | lymphotoxin beta receptor (TNFR superfamily, member 3) | 2.412388  | Inlier |
| siRNA-Temozolomide Run1-DMSO | NM_1458<br>67 | LTC4S | leukotriene C4 synthase                                | -1.073002 | Inlier |
| siRNA-Temozolomide Run2-DMSO | NM_1458<br>67 | LTC4S | leukotriene C4 synthase                                | -1.031078 | Inlier |
| siRNA Disorazole DMSO Run1   | NM_1458<br>67 | LTC4S | leukotriene C4 synthase                                | -0.317922 | Inlier |
| siRNA-Vinblastine Run2-DMSO  | NM_1458<br>67 | LTC4S | leukotriene C4 synthase                                | -0.015949 | Inlier |
| siRNA-Temozolomide Run3-DMSO | NM_1458<br>67 | LTC4S | leukotriene C4 synthase                                | 0.015949  | Inlier |
| siRNA Disorazole DMSO Run3   | NM_1458<br>67 | LTC4S | leukotriene C4 synthase                                | 0.085703  | Inlier |

Identification of Survival Genes in Human Glioblastoma Cells Using siRNA Screening  
 Nikhil G Thaker, Fang Zhang, Peter R. McDonald, Tong Ying Shun, Michael D Lewen, Ian F. Pollack, and John S. Lazo

| Condition                                                 | Gene    | Gene ID | Gene Symbol | Gene Description                                  | Log Fold Change | Classification |
|-----------------------------------------------------------|---------|---------|-------------|---------------------------------------------------|-----------------|----------------|
| Molecular Pharmacology<br>siRNA-Vinblastine Run1-<br>DMSO | NM_1458 | 67      | LTC4S       | leukotrien<br>e C4<br>synthase                    | 1.095376        | Inlier         |
| siRNA Disorazole DMSO Run2                                | NM_1458 | 67      | LTC4S       | leukotrien<br>e C4<br>synthase                    | 1.811631        | Inlier         |
| siRNA-Temozolomide Run3-<br>DMSO                          | NM_0023 | 43      | LTF         | lactotransf<br>errin                              | -1.235299       | Inlier         |
| siRNA-Temozolomide Run2-<br>DMSO                          | NM_0023 | 43      | LTF         | lactotransf<br>errin                              | -0.706621       | Inlier         |
| siRNA Disorazole DMSO Run3                                | NM_0023 | 43      | LTF         | lactotransf<br>errin                              | -0.543544       | Inlier         |
| siRNA-Vinblastine Run2-<br>DMSO                           | NM_0023 | 43      | LTF         | lactotransf<br>errin                              | -0.467985       | Inlier         |
| siRNA Disorazole DMSO Run1                                | NM_0023 | 43      | LTF         | lactotransf<br>errin                              | 0.467984        | Inlier         |
| siRNA-Temozolomide Run1-<br>DMSO                          | NM_0023 | 43      | LTF         | lactotransf<br>errin                              | 0.642379        | Inlier         |
| siRNA-Vinblastine Run1-<br>DMSO                           | NM_0023 | 43      | LTF         | lactotransf<br>errin                              | 3.165164        | Inlier         |
| siRNA Disorazole DMSO Run2                                | NM_0023 | 43      | LTF         | lactotransf<br>errin                              | 4.292596        | Outlier        |
| siRNA-Vinblastine Run1-<br>DMSO                           | NM_2069 | 61      | LTK         | leukocyte<br>tyrosine<br>kinase                   | -1.066036       | Inlier         |
| siRNA Disorazole DMSO Run1                                | NM_2069 | 61      | LTK         | leukocyte<br>tyrosine<br>kinase                   | -0.430854       | Inlier         |
| siRNA-Temozolomide Run2-<br>DMSO                          | NM_2069 | 61      | LTK         | leukocyte<br>tyrosine<br>kinase                   | -0.370637       | Inlier         |
| siRNA-Temozolomide Run3-<br>DMSO                          | NM_2069 | 61      | LTK         | leukocyte<br>tyrosine<br>kinase                   | -0.115181       | Inlier         |
| siRNA-Temozolomide Run1-<br>DMSO                          | NM_2069 | 61      | LTK         | leukocyte<br>tyrosine<br>kinase                   | 0.115181        | Inlier         |
| siRNA-Vinblastine Run2-<br>DMSO                           | NM_2069 | 61      | LTK         | leukocyte<br>tyrosine<br>kinase                   | 0.918146        | Inlier         |
| siRNA Disorazole DMSO Run3                                | NM_2069 | 61      | LTK         | leukocyte<br>tyrosine<br>kinase                   | 1.163108        | Inlier         |
| siRNA Disorazole DMSO Run2                                | NM_2069 | 61      | LTK         | leukocyte<br>tyrosine<br>kinase                   | 2.380973        | Inlier         |
| siRNA Disorazole DMSO Run2                                | NM_0212 | 21      | LY6G5B      | lymphocyt<br>e antigen<br>6 complex,<br>locus G5B | -1.046769       | Inlier         |



Identification of Survival Genes in Human Glioblastoma Cells Using siRNA Screening  
 Nikhil G Thaker, Fang Zhang, Peter R. McDonald, Tong Ying Shun, Michael D Lewen, Ian F. Pollack, and John S. Lazo  
 Molecular Pharmacology

|                              |               |        |                                         |           |        |
|------------------------------|---------------|--------|-----------------------------------------|-----------|--------|
| siRNA-Temozolomide Run3-DMSO | NM_0212<br>21 | LY6G5B | lymphocyte antigen 6 complex, locus G5B | -0.846579 | Inlier |
| siRNA Disorazole DMSO Run3   | NM_0212<br>21 | LY6G5B | lymphocyte antigen 6 complex, locus G5B | -0.753685 | Inlier |
| siRNA-Temozolomide Run2-DMSO | NM_0212<br>21 | LY6G5B | lymphocyte antigen 6 complex, locus G5B | -0.016862 | Inlier |
| siRNA-Temozolomide Run1-DMSO | NM_0212<br>21 | LY6G5B | lymphocyte antigen 6 complex, locus G5B | 0.016862  | Inlier |
| siRNA Disorazole DMSO Run1   | NM_0212<br>21 | LY6G5B | lymphocyte antigen 6 complex, locus G5B | 0.254458  | Inlier |
| siRNA-Vinblastine Run2-DMSO  | NM_0212<br>21 | LY6G5B | lymphocyte antigen 6 complex, locus G5B | 0.646644  | Inlier |
| siRNA-Vinblastine Run1-DMSO  | NM_0212<br>21 | LY6G5B | lymphocyte antigen 6 complex, locus G5B | 0.702356  | Inlier |
| siRNA-Temozolomide Run3-DMSO | NM_0023<br>48 | LY9    | lymphocyte antigen 9                    | -1.501221 | Inlier |
| siRNA-Temozolomide Run2-DMSO | NM_0023<br>48 | LY9    | lymphocyte antigen 9                    | -0.692606 | Inlier |
| siRNA Disorazole DMSO Run1   | NM_0023<br>48 | LY9    | lymphocyte antigen 9                    | -0.465177 | Inlier |

Identification of Survival Genes in Human Glioblastoma Cells Using siRNA Screening  
 Nikhil G Thaker, Fang Zhang, Peter R. McDonald, Tong Ying Shun, Michael D Lewen, Ian F. Pollack, and John S. Lazo

| Molecular Pharmacology       |               |      |                                                          |           |        |
|------------------------------|---------------|------|----------------------------------------------------------|-----------|--------|
| siRNA-Temozolomide Run1-DMSO | NM_0023<br>48 | LY9  | lymphocyte antigen 9                                     | -0.026498 | Inlier |
| siRNA Disorazole DMSO Run3   | NM_0023<br>48 | LY9  | lymphocyte antigen 9                                     | 0.026499  | Inlier |
| siRNA-Vinblastine Run2-DMSO  | NM_0023<br>48 | LY9  | lymphocyte antigen 9                                     | 0.656394  | Inlier |
| siRNA Disorazole DMSO Run2   | NM_0023<br>48 | LY9  | lymphocyte antigen 9                                     | 1.177847  | Inlier |
| siRNA-Vinblastine Run1-DMSO  | NM_0023<br>48 | LY9  | lymphocyte antigen 9                                     | 1.615832  | Inlier |
| siRNA Disorazole DMSO Run2   | NM_1533<br>35 | LYK5 | LYK5                                                     | -1.509025 | Inlier |
| siRNA Disorazole DMSO Run3   | NM_1533<br>35 | LYK5 | LYK5                                                     | -1.275514 | Inlier |
| siRNA-Temozolomide Run3-DMSO | NM_1533<br>35 | LYK5 | LYK5                                                     | -0.569358 | Inlier |
| siRNA-Temozolomide Run2-DMSO | NM_1533<br>35 | LYK5 | LYK5                                                     | -0.26324  | Inlier |
| siRNA-Temozolomide Run1-DMSO | NM_1533<br>35 | LYK5 | LYK5                                                     | 0.26324   | Inlier |
| siRNA Disorazole DMSO Run1   | NM_1533<br>35 | LYK5 | LYK5                                                     | 0.490789  | Inlier |
| siRNA-Vinblastine Run2-DMSO  | NM_1533<br>35 | LYK5 | LYK5                                                     | 0.779642  | Inlier |
| siRNA-Vinblastine Run1-DMSO  | NM_1533<br>35 | LYK5 | LYK5                                                     | 0.816809  | Inlier |
| siRNA-Temozolomide Run3-DMSO | NM_0023<br>50 | LYN  | v-yes-1 Yamaguchi sarcoma viral related oncogene homolog | -1.404301 | Inlier |
| siRNA-Temozolomide Run2-DMSO | NM_0023<br>50 | LYN  | v-yes-1 Yamaguchi sarcoma viral related oncogene homolog | -0.545661 | Inlier |

Identification of Survival Genes in Human Glioblastoma Cells Using siRNA Screening  
 Nikhil G Thaker, Fang Zhang, Peter R. McDonald, Tong Ying Shun, Michael D Lewen, Ian F. Pollack, and John S. Lazo  
 Molecular Pharmacology

|                              |               |        |                                                             |           |        |
|------------------------------|---------------|--------|-------------------------------------------------------------|-----------|--------|
| siRNA-Temozolomide Run1-DMSO | NM_0023<br>50 | LYN    | v-yes-1<br>Yamaguchi sarcoma viral related oncogene homolog | -0.470849 | Inlier |
| siRNA-Vinblastine Run1-DMSO  | NM_0023<br>50 | LYN    | v-yes-1<br>Yamaguchi sarcoma viral related oncogene homolog | -0.231386 | Inlier |
| siRNA Disorazole DMSO Run1   | NM_0023<br>50 | LYN    | v-yes-1<br>Yamaguchi sarcoma viral related oncogene homolog | 0.231387  | Inlier |
| siRNA Disorazole DMSO Run2   | NM_0023<br>50 | LYN    | v-yes-1<br>Yamaguchi sarcoma viral related oncogene homolog | 0.803339  | Inlier |
| siRNA-Vinblastine Run2-DMSO  | NM_0023<br>50 | LYN    | v-yes-1<br>Yamaguchi sarcoma viral related oncogene homolog | 1.220666  | Inlier |
| siRNA Disorazole DMSO Run3   | NM_0023<br>50 | LYN    | v-yes-1<br>Yamaguchi sarcoma viral related oncogene homolog | 1.7822    | Inlier |
| siRNA-Temozolomide Run3-DMSO | NM_0063<br>30 | LYPLA1 | lysophospholipase I                                         | -0.99192  | Inlier |
| siRNA-Vinblastine Run2-DMSO  | NM_0063<br>30 | LYPLA1 | lysophospholipase I                                         | -0.565265 | Inlier |

Identification of Survival Genes in Human Glioblastoma Cells Using siRNA Screening

Nikhil G Thaker, Fang Zhang, Peter R. McDonald, Tong Ying Shun, Michael D Lewen, Ian F. Pollack, and John S.

Lazo

|                                  |               |        |                                                                |           |        |
|----------------------------------|---------------|--------|----------------------------------------------------------------|-----------|--------|
| siRNA-Temozolomide Run2-<br>DMSO | NM_0063<br>30 | LYPLA1 | lysophosp<br>holipase I                                        | -0.465174 | Inlier |
|                                  | NM_0063       |        | lysophosp                                                      |           |        |
| siRNA Disorazole DMSO Run3       | 30            | LYPLA1 | holipase I                                                     | -0.248028 | Inlier |
| siRNA-Temozolomide Run1-<br>DMSO | NM_0063<br>30 | LYPLA1 | lysophosp<br>holipase I                                        | 0.248028  | Inlier |
| siRNA-Vinblastine Run1-<br>DMSO  | NM_0063<br>30 | LYPLA1 | lysophosp<br>holipase I                                        | 0.783735  | Inlier |
|                                  | NM_0063       |        | lysophosp                                                      |           |        |
| siRNA Disorazole DMSO Run1       | 30            | LYPLA1 | holipase I                                                     | 1.029775  | Inlier |
|                                  | NM_0063       |        | lysophosp                                                      |           |        |
| siRNA Disorazole DMSO Run2       | 30            | LYPLA1 | holipase I                                                     | 1.442455  | Inlier |
| siRNA-Temozolomide Run3-<br>DMSO | NM_0072<br>60 | LYPLA2 | lysophosp<br>holipase II                                       | -1.612954 | Inlier |
| siRNA-Vinblastine Run2-<br>DMSO  | NM_0072<br>60 | LYPLA2 | lysophosp<br>holipase II                                       | -0.786491 | Inlier |
| siRNA-Temozolomide Run2-<br>DMSO | NM_0072<br>60 | LYPLA2 | lysophosp<br>holipase II                                       | -0.562509 | Inlier |
|                                  | NM_0072       |        | lysophosp                                                      |           |        |
| siRNA Disorazole DMSO Run3       | 60            | LYPLA2 | holipase II                                                    | -0.431173 | Inlier |
| siRNA-Temozolomide Run1-<br>DMSO | NM_0072<br>60 | LYPLA2 | lysophosp<br>holipase II                                       | 0.431173  | Inlier |
|                                  | NM_0072       |        | lysophosp                                                      |           |        |
| siRNA Disorazole DMSO Run1       | 60            | LYPLA2 | holipase II                                                    | 0.541474  | Inlier |
| siRNA-Vinblastine Run1-<br>DMSO  | NM_0072<br>60 | LYPLA2 | lysophosp<br>holipase II                                       | 2.180202  | Inlier |
|                                  | NM_0072       |        | lysophosp                                                      |           |        |
| siRNA Disorazole DMSO Run2       | 60            | LYPLA2 | holipase II                                                    | 2.596537  | Inlier |
|                                  |               |        | lysophosp<br>holipase 3<br>(lysosomal<br>phospholip<br>ase A2) |           |        |
| siRNA-Temozolomide Run3-<br>DMSO | NM_0123<br>20 | LYPLA3 | ase A2)                                                        | -0.839648 | Inlier |
|                                  |               |        | lysophosp<br>holipase 3<br>(lysosomal<br>phospholip<br>ase A2) |           |        |
| siRNA-Vinblastine Run2-<br>DMSO  | NM_0123<br>20 | LYPLA3 | ase A2)                                                        | -0.558115 | Inlier |
|                                  |               |        | lysophosp<br>holipase 3<br>(lysosomal<br>phospholip<br>ase A2) |           |        |
| siRNA Disorazole DMSO Run3       | NM_0123<br>20 | LYPLA3 | ase A2)                                                        | -0.324122 | Inlier |
|                                  |               |        | lysophosp<br>holipase 3<br>(lysosomal<br>phospholip<br>ase A2) |           |        |
| siRNA-Temozolomide Run2-<br>DMSO | NM_0123<br>20 | LYPLA3 | ase A2)                                                        | -0.060082 | Inlier |

Identification of Survival Genes in Human Glioblastoma Cells Using siRNA Screening  
 Nikhil G Thaker, Fang Zhang, Peter R. McDonald, Tong Ying Shun, Michael D Lewen, Ian F. Pollack, and John S. Lazo  
 Molecular Pharmacology

|                              |               |         |                                                  |           |        |
|------------------------------|---------------|---------|--------------------------------------------------|-----------|--------|
| siRNA-Temozolomide Run1-DMSO | NM_0123<br>20 | LYPLA3  | lysophospholipase 3 (lysosomal phospholipase A2) | 0.060082  | Inlier |
| siRNA Disorazole DMSO Run1   | NM_0123<br>20 | LYPLA3  | lysophospholipase 3 (lysosomal phospholipase A2) | 0.790885  | Inlier |
| siRNA-Vinblastine Run1-DMSO  | NM_0123<br>20 | LYPLA3  | lysophospholipase 3 (lysosomal phospholipase A2) | 0.918928  | Inlier |
| siRNA Disorazole DMSO Run2   | NM_0123<br>20 | LYPLA3  | lysophospholipase 3 (lysosomal phospholipase A2) | 1.432463  | Inlier |
| siRNA-Temozolomide Run3-DMSO | NM_1387<br>94 | LYPLAL1 | lysophospholipase-like 1                         | -1.177123 | Inlier |
| siRNA-Vinblastine Run2-DMSO  | NM_1387<br>94 | LYPLAL1 | lysophospholipase-like 1                         | -0.55125  | Inlier |
| siRNA-Temozolomide Run2-DMSO | NM_1387<br>94 | LYPLAL1 | lysophospholipase-like 1                         | -0.548242 | Inlier |
| siRNA-Temozolomide Run1-DMSO | NM_1387<br>94 | LYPLAL1 | lysophospholipase-like 1                         | -0.155575 | Inlier |
| siRNA Disorazole DMSO Run3   | NM_1387<br>94 | LYPLAL1 | lysophospholipase-like 1                         | 0.155576  | Inlier |
| siRNA Disorazole DMSO Run1   | NM_1387<br>94 | LYPLAL1 | lysophospholipase-like 1                         | 0.79775   | Inlier |
| siRNA-Vinblastine Run1-DMSO  | NM_1387<br>94 | LYPLAL1 | lysophospholipase-like 1                         | 1.695648  | Inlier |
| siRNA Disorazole DMSO Run2   | NM_1387<br>94 | LYPLAL1 | lysophospholipase-like 1                         | 2.099911  | Inlier |
| siRNA-Vinblastine Run2-DMSO  | NM_1749<br>41 | M160    | M160                                             | -0.734144 | Inlier |
| siRNA-Temozolomide Run2-DMSO | NM_1749<br>41 | M160    | M160                                             | -0.614856 | Inlier |

Identification of Survival Genes in Human Glioblastoma Cells Using siRNA Screening

Nikhil G Thaker, Fang Zhang, Peter R. McDonald, Tong Ying Shun, Michael D Lewen, Ian F. Pollack, and John S.

Lazo

|                              |         |      |                                                  |           |        |
|------------------------------|---------|------|--------------------------------------------------|-----------|--------|
| Molecular Pharmacology       | NM_1749 |      |                                                  |           |        |
| siRNA Disorazole DMSO Run1   | 41      | M160 | M160                                             | -0.224626 | Inlier |
|                              | NM_1749 |      |                                                  |           |        |
| siRNA Disorazole DMSO Run3   | 41      | M160 | M160                                             | -0.00473  | Inlier |
| siRNA-Temozolomide Run3-DMSO | NM_1749 |      |                                                  |           |        |
|                              | 41      | M160 | M160                                             | 0.00473   | Inlier |
| siRNA-Temozolomide Run1-DMSO | NM_1749 |      |                                                  |           |        |
|                              | 41      | M160 | M160                                             | 1.42225   | Inlier |
|                              | NM_1749 |      |                                                  |           |        |
| siRNA Disorazole DMSO Run2   | 41      | M160 | M160                                             | 2.64967   | Inlier |
| siRNA-Vinblastine Run1-DMSO  | NM_1749 |      |                                                  |           |        |
|                              | 41      | M160 | M160                                             | 3.387087  | Inlier |
|                              |         |      | mannose-6-phosphate receptor (cation dependent ) |           |        |
| siRNA-Vinblastine Run2-DMSO  | NM_0023 |      |                                                  |           |        |
|                              | 55      | M6PR | )                                                | -1.577633 | Inlier |
|                              |         |      | mannose-6-phosphate receptor (cation dependent ) |           |        |
| siRNA-Temozolomide Run2-DMSO | NM_0023 |      |                                                  |           |        |
|                              | 55      | M6PR | )                                                | -0.761526 | Inlier |
|                              |         |      | mannose-6-phosphate receptor (cation dependent ) |           |        |
| siRNA Disorazole DMSO Run1   | NM_0023 |      |                                                  |           |        |
|                              | 55      | M6PR | )                                                | -0.294932 | Inlier |
|                              |         |      | mannose-6-phosphate receptor (cation dependent ) |           |        |
| siRNA Disorazole DMSO Run3   | NM_0023 |      |                                                  |           |        |
|                              | 55      | M6PR | )                                                | -0.08127  | Inlier |
|                              |         |      | mannose-6-phosphate receptor (cation dependent ) |           |        |
| siRNA-Temozolomide Run1-DMSO | NM_0023 |      |                                                  |           |        |
|                              | 55      | M6PR | )                                                | 0.08127   | Inlier |

Identification of Survival Genes in Human Glioblastoma Cells Using siRNA Screening

Nikhil G Thaker, Fang Zhang, Peter R. McDonald, Tong Ying Shun, Michael D Lewen, Ian F. Pollack, and John S. Lazo

Molecular Pharmacology

|                              |               |      |                                                  |           |        |
|------------------------------|---------------|------|--------------------------------------------------|-----------|--------|
| siRNA-Temozolomide Run3-DMSO | NM_0023<br>55 | M6PR | mannose-6-phosphate receptor (cation dependent ) | 0.587474  | Inlier |
| siRNA Disorazole DMSO Run2   | NM_0023<br>55 | M6PR | mannose-6-phosphate receptor (cation dependent ) | 1.509681  | Inlier |
| siRNA-Vinblastine Run1-DMSO  | NM_0023<br>55 | M6PR | mannose-6-phosphate receptor (cation dependent ) | 2.414937  | Inlier |
| siRNA-Temozolomide Run3-DMSO | NM_1304<br>73 | MADD | MAP-kinase activating death domain               | -1.986854 | Inlier |
| siRNA-Temozolomide Run2-DMSO | NM_1304<br>73 | MADD | MAP-kinase activating death domain               | -1.374546 | Inlier |
| siRNA-Temozolomide Run1-DMSO | NM_1304<br>73 | MADD | MAP-kinase activating death domain               | -0.669737 | Inlier |
| siRNA Disorazole DMSO Run3   | NM_1304<br>73 | MADD | MAP-kinase activating death domain               | -0.204098 | Inlier |
| siRNA Disorazole DMSO Run1   | NM_1304<br>73 | MADD | MAP-kinase activating death domain               | 0.204098  | Inlier |
| siRNA-Vinblastine Run2-DMSO  | NM_1304<br>73 | MADD | MAP-kinase activating death domain               | 0.481436  | Inlier |

Identification of Survival Genes in Human Glioblastoma Cells Using siRNA Screening  
 Nikhil G Thaker, Fang Zhang, Peter R. McDonald, Tong Ying Shun, Michael D Lewen, Ian F. Pollack, and John S. Lazo

Molecular Pharmacology

|                              |               |       |                                                                 |           |        |
|------------------------------|---------------|-------|-----------------------------------------------------------------|-----------|--------|
| siRNA Disorazole DMSO Run2   | NM_1304<br>73 | MADD  | MAP-kinase activating death domain                              | 0.679263  | Inlier |
| siRNA-Vinblastine Run1-DMSO  | NM_1304<br>73 | MADD  | MAP-kinase activating death domain                              | 1.231081  | Inlier |
| siRNA Disorazole DMSO Run2   | NM_1735<br>15 | MAG11 | membrane associated guanylate kinase interacting protein-like 1 | -0.728287 | Inlier |
| siRNA-Temozolomide Run3-DMSO | NM_1735<br>15 | MAG11 | membrane associated guanylate kinase interacting protein-like 1 | -0.620713 | Inlier |
| siRNA Disorazole DMSO Run3   | NM_1735<br>15 | MAG11 | membrane associated guanylate kinase interacting protein-like 1 | -0.588403 | Inlier |
| siRNA-Temozolomide Run2-DMSO | NM_1735<br>15 | MAG11 | membrane associated guanylate kinase interacting protein-like 1 | -0.123081 | Inlier |



Identification of Survival Genes in Human Glioblastoma Cells Using siRNA Screening

Nikhil G Thaker, Fang Zhang, Peter R. McDonald, Tong Ying Shun, Michael D Lewen, Ian F. Pollack, and John S. Lazo

Molecular Pharmacology

|                              |               |        |                                                                      |           |        |
|------------------------------|---------------|--------|----------------------------------------------------------------------|-----------|--------|
| siRNA-Temozolomide Run1-DMSO | NM_1735<br>15 | MAG11  | membrane associated guanylate kinase interacting protein-like 1      | 0.123081  | Inlier |
| siRNA Disorazole DMSO Run1   | NM_1735<br>15 | MAG11  | membrane associated guanylate kinase interacting protein-like 1      | 0.969888  | Inlier |
| siRNA-Vinblastine Run2-DMSO  | NM_1735<br>15 | MAG11  | membrane associated guanylate kinase interacting protein-like 1      | 1.212059  | Inlier |
| siRNA-Vinblastine Run1-DMSO  | NM_1735<br>15 | MAG11  | membrane associated guanylate kinase interacting protein-like 1      | 1.696404  | Inlier |
| siRNA Disorazole DMSO Run2   | NM_0209<br>65 | MAGI-3 | membrane associated guanylate kinase, WW and PDZ domain containing 3 | -1.032413 | Inlier |

Identification of Survival Genes in Human Glioblastoma Cells Using siRNA Screening

Nikhil G Thaker, Fang Zhang, Peter R. McDonald, Tong Ying Shun, Michael D Lewen, Ian F. Pollack, and John S. Lazo

Molecular Pharmacology

|                              |               |        |                                                                      |           |        |
|------------------------------|---------------|--------|----------------------------------------------------------------------|-----------|--------|
| siRNA-Temozolomide Run3-DMSO | NM_0209<br>65 | MAGI-3 | membrane associated guanylate kinase, WW and PDZ domain containing 3 | -0.873583 | Inlier |
| siRNA Disorazole DMSO Run3   | NM_0209<br>65 | MAGI-3 | membrane associated guanylate kinase, WW and PDZ domain containing 3 | -0.174909 | Inlier |
| siRNA-Temozolomide Run2-DMSO | NM_0209<br>65 | MAGI-3 | membrane associated guanylate kinase, WW and PDZ domain containing 3 | -0.124268 | Inlier |
| siRNA-Temozolomide Run1-DMSO | NM_0209<br>65 | MAGI-3 | membrane associated guanylate kinase, WW and PDZ domain containing 3 | 0.124268  | Inlier |

Identification of Survival Genes in Human Glioblastoma Cells Using siRNA Screening  
 Nikhil G Thaker, Fang Zhang, Peter R. McDonald, Tong Ying Shun, Michael D Lewen, Ian F. Pollack, and John S. Lazo  
 Molecular Pharmacology

|                              |               |        |   |                                                                    |           |        |
|------------------------------|---------------|--------|---|--------------------------------------------------------------------|-----------|--------|
| siRNA Disorazole DMSO Run1   | NM_0209<br>65 | MAGI-3 | 3 | membrane associated guanylate kinase, WW and PDZ domain containing | 0.475417  | Inlier |
| siRNA-Vinblastine Run1-DMSO  | NM_0209<br>65 | MAGI-3 | 3 | membrane associated guanylate kinase, WW and PDZ domain containing | 1.560183  | Inlier |
| siRNA-Vinblastine Run2-DMSO  | NM_0209<br>65 | MAGI-3 | 3 | membrane associated guanylate kinase, WW and PDZ domain containing | 1.662718  | Inlier |
| siRNA-Temozolomide Run3-DMSO | NM_0059<br>06 | MAK    | 3 | male germ cell-associated kinase                                   | -1.920081 | Inlier |
| siRNA Disorazole DMSO Run2   | NM_0059<br>06 | MAK    | 3 | male germ cell-associated kinase                                   | -1.82641  | Inlier |
| siRNA-Temozolomide Run1-DMSO | NM_0059<br>06 | MAK    | 3 | male germ cell-associated kinase                                   | -0.639055 | Inlier |
| siRNA-Temozolomide Run2-DMSO | NM_0059<br>06 | MAK    | 3 | male germ cell-associated kinase                                   | -0.334507 | Inlier |

Identification of Survival Genes in Human Glioblastoma Cells Using siRNA Screening  
 Nikhil G Thaker, Fang Zhang, Peter R. McDonald, Tong Ying Shun, Michael D Lewen, Ian F. Pollack, and John S. Lazo

Molecular Pharmacology

|                              |               |       |                                                                 |           |        |
|------------------------------|---------------|-------|-----------------------------------------------------------------|-----------|--------|
| siRNA Disorazole DMSO Run3   | NM_0059<br>06 | MAK   | male germ cell-associated kinase                                | 0.334507  | Inlier |
| siRNA-Vinblastine Run1-DMSO  | NM_0059<br>06 | MAK   | male germ cell-associated kinase                                | 0.607564  | Inlier |
| siRNA Disorazole DMSO Run1   | NM_0059<br>06 | MAK   | male germ cell-associated kinase                                | 0.709945  | Inlier |
| siRNA-Vinblastine Run2-DMSO  | NM_0059<br>06 | MAK   | male germ cell-associated kinase                                | 3.079996  | Inlier |
| siRNA-Temozolomide Run3-DMSO | NM_1738<br>44 | MALT1 | mucosa associated lymphoid tissue lymphoma translocation gene 1 | -2.343401 | Inlier |
| siRNA Disorazole DMSO Run2   | NM_1738<br>44 | MALT1 | mucosa associated lymphoid tissue lymphoma translocation gene 1 | -1.10966  | Inlier |
| siRNA-Temozolomide Run1-DMSO | NM_1738<br>44 | MALT1 | mucosa associated lymphoid tissue lymphoma translocation gene 1 | -0.415979 | Inlier |

Identification of Survival Genes in Human Glioblastoma Cells Using siRNA Screening  
 Nikhil G Thaker, Fang Zhang, Peter R. McDonald, Tong Ying Shun, Michael D Lewen, Ian F. Pollack, and John S. Lazo  
 Molecular Pharmacology

|                              |               |       |                                                                 |           |        |
|------------------------------|---------------|-------|-----------------------------------------------------------------|-----------|--------|
| siRNA-Temozolomide Run2-DMSO | NM_1738<br>44 | MALT1 | mucosa associated lymphoid tissue lymphoma translocation gene 1 | -0.413868 | Inlier |
| siRNA Disorazole DMSO Run3   | NM_1738<br>44 | MALT1 | mucosa associated lymphoid tissue lymphoma translocation gene 1 | 0.413868  | Inlier |
| siRNA Disorazole DMSO Run1   | NM_1738<br>44 | MALT1 | mucosa associated lymphoid tissue lymphoma translocation gene 1 | 0.57372   | Inlier |
| siRNA-Vinblastine Run2-DMSO  | NM_1738<br>44 | MALT1 | mucosa associated lymphoid tissue lymphoma translocation gene 1 | 0.77528   | Inlier |
| siRNA-Vinblastine Run1-DMSO  | NM_1738<br>44 | MALT1 | mucosa associated lymphoid tissue lymphoma translocation gene 1 | 0.932732  | Inlier |

Identification of Survival Genes in Human Glioblastoma Cells Using siRNA Screening  
 Nikhil G Thaker, Fang Zhang, Peter R. McDonald, Tong Ying Shun, Michael D Lewen, Ian F. Pollack, and John S. Lazo

Molecular Pharmacology

|                              |           |        |                                        |           |        |
|------------------------------|-----------|--------|----------------------------------------|-----------|--------|
| siRNA-Temozolomide Run3-DMSO | NM_005907 | MAN1A1 | mannosidase, alpha, class 1A, member 1 | -1.519275 | Inlier |
| siRNA-Temozolomide Run2-DMSO | NM_005907 | MAN1A1 | mannosidase, alpha, class 1A, member 1 | -1.293264 | Inlier |
| siRNA-Vinblastine Run2-DMSO  | NM_005907 | MAN1A1 | mannosidase, alpha, class 1A, member 1 | -0.484968 | Inlier |
| siRNA-Temozolomide Run1-DMSO | NM_005907 | MAN1A1 | mannosidase, alpha, class 1A, member 1 | -0.094766 | Inlier |
| siRNA Disorazole DMSO Run3   | NM_005907 | MAN1A1 | mannosidase, alpha, class 1A, member 1 | 0.094766  | Inlier |
| siRNA Disorazole DMSO Run1   | NM_005907 | MAN1A1 | mannosidase, alpha, class 1A, member 1 | 0.13103   | Inlier |
| siRNA-Vinblastine Run1-DMSO  | NM_005907 | MAN1A1 | mannosidase, alpha, class 1A, member 1 | 0.864031  | Inlier |
| siRNA Disorazole DMSO Run2   | NM_005907 | MAN1A1 | mannosidase, alpha, class 1A, member 1 | 1.335753  | Inlier |
| siRNA-Temozolomide Run2-DMSO | NM_006699 | MAN1A2 | mannosidase, alpha, class 1A, member 2 | -1.60438  | Inlier |
| siRNA-Temozolomide Run3-DMSO | NM_006699 | MAN1A2 | mannosidase, alpha, class 1A, member 2 | -0.790288 | Inlier |

Identification of Survival Genes in Human Glioblastoma Cells Using siRNA Screening  
 Nikhil G Thaker, Fang Zhang, Peter R. McDonald, Tong Ying Shun, Michael D Lewen, Ian F. Pollack, and John S. Lazo

Molecular Pharmacology

|                              |           |        |                                        |           |        |
|------------------------------|-----------|--------|----------------------------------------|-----------|--------|
| siRNA-Vinblastine Run2-DMSO  | NM_006699 | MAN1A2 | mannosidase, alpha, class 1A, member 2 | -0.456252 | Inlier |
| siRNA-Temozolomide Run1-DMSO | NM_006699 | MAN1A2 | mannosidase, alpha, class 1A, member 2 | -0.014191 | Inlier |
| siRNA Disorazole DMSO Run1   | NM_006699 | MAN1A2 | mannosidase, alpha, class 1A, member 2 | 0.014192  | Inlier |
| siRNA Disorazole DMSO Run3   | NM_006699 | MAN1A2 | mannosidase, alpha, class 1A, member 2 | 0.558712  | Inlier |
| siRNA-Vinblastine Run1-DMSO  | NM_006699 | MAN1A2 | mannosidase, alpha, class 1A, member 2 | 1.586461  | Inlier |
| siRNA Disorazole DMSO Run2   | NM_006699 | MAN1A2 | mannosidase, alpha, class 1A, member 2 | 2.337234  | Inlier |
| siRNA-Temozolomide Run3-DMSO | NM_016219 | MAN1B1 | mannosidase, alpha, class 1B, member 1 | -0.792542 | Inlier |
| siRNA-Vinblastine Run2-DMSO  | NM_016219 | MAN1B1 | mannosidase, alpha, class 1B, member 1 | -0.732398 | Inlier |
| siRNA Disorazole DMSO Run3   | NM_016219 | MAN1B1 | mannosidase, alpha, class 1B, member 1 | -0.616602 | Inlier |
| siRNA-Temozolomide Run2-DMSO | NM_016219 | MAN1B1 | mannosidase, alpha, class 1B, member 1 | -0.14562  | Inlier |

Identification of Survival Genes in Human Glioblastoma Cells Using siRNA Screening  
 Nikhil G Thaker, Fang Zhang, Peter R. McDonald, Tong Ying Shun, Michael D Lewen, Ian F. Pollack, and John S. Lazo

Molecular Pharmacology

|                              |               |        |                                        |           |        |
|------------------------------|---------------|--------|----------------------------------------|-----------|--------|
| siRNA-Temozolomide Run1-DMSO | NM_0162<br>19 | MAN1B1 | mannosidase, alpha, class 1B, member 1 | 0.14562   | Inlier |
| siRNA Disorazole DMSO Run1   | NM_0162<br>19 | MAN1B1 | mannosidase, alpha, class 1B, member 1 | 0.248896  | Inlier |
| siRNA Disorazole DMSO Run2   | NM_0162<br>19 | MAN1B1 | mannosidase, alpha, class 1B, member 1 | 1.10924   | Inlier |
| siRNA-Vinblastine Run1-DMSO  | NM_0162<br>19 | MAN1B1 | mannosidase, alpha, class 1B, member 1 | 1.378986  | Inlier |
| siRNA-Temozolomide Run3-DMSO | NM_0023<br>72 | MAN2A1 | mannosidase, alpha, class 2A, member 1 | -1.093138 | Inlier |
| siRNA-Temozolomide Run2-DMSO | NM_0023<br>72 | MAN2A1 | mannosidase, alpha, class 2A, member 1 | -0.882395 | Inlier |
| siRNA Disorazole DMSO Run3   | NM_0023<br>72 | MAN2A1 | mannosidase, alpha, class 2A, member 1 | -0.544082 | Inlier |
| siRNA-Vinblastine Run2-DMSO  | NM_0023<br>72 | MAN2A1 | mannosidase, alpha, class 2A, member 1 | -0.039418 | Inlier |
| siRNA-Temozolomide Run1-DMSO | NM_0023<br>72 | MAN2A1 | mannosidase, alpha, class 2A, member 1 | 0.039418  | Inlier |
| siRNA Disorazole DMSO Run1   | NM_0023<br>72 | MAN2A1 | mannosidase, alpha, class 2A, member 1 | 0.411185  | Inlier |



Identification of Survival Genes in Human Glioblastoma Cells Using siRNA Screening  
 Nikhil G Thaker, Fang Zhang, Peter R. McDonald, Tong Ying Shun, Michael D Lewen, Ian F. Pollack, and John S. Lazo

Molecular Pharmacology

| siRNA Treatment              | Gene ID   | Gene Name | Protein Name                           | Log2 Fold Change | Outlier Status |
|------------------------------|-----------|-----------|----------------------------------------|------------------|----------------|
| siRNA Disorazole DMSO Run2   | NM_002372 | MAN2A1    | mannosidase, alpha, class 2A, member 1 | 0.804918         | Inlier         |
| siRNA-Vinblastine Run1-DMSO  | NM_002372 | MAN2A1    | mannosidase, alpha, class 2A, member 1 | 1.583498         | Inlier         |
| siRNA-Temozolomide Run3-DMSO | NM_006122 | MAN2A2    | mannosidase, alpha, class 2A, member 2 | -1.196533        | Inlier         |
| siRNA-Temozolomide Run2-DMSO | NM_006122 | MAN2A2    | mannosidase, alpha, class 2A, member 2 | -0.795068        | Inlier         |
| siRNA Disorazole DMSO Run3   | NM_006122 | MAN2A2    | mannosidase, alpha, class 2A, member 2 | -0.553932        | Inlier         |
| siRNA-Temozolomide Run1-DMSO | NM_006122 | MAN2A2    | mannosidase, alpha, class 2A, member 2 | -0.076459        | Inlier         |
| siRNA-Vinblastine Run2-DMSO  | NM_006122 | MAN2A2    | mannosidase, alpha, class 2A, member 2 | 0.076459         | Inlier         |
| siRNA Disorazole DMSO Run1   | NM_006122 | MAN2A2    | mannosidase, alpha, class 2A, member 2 | 0.082624         | Inlier         |
| siRNA-Vinblastine Run1-DMSO  | NM_006122 | MAN2A2    | mannosidase, alpha, class 2A, member 2 | 3.166621         | Inlier         |
| siRNA Disorazole DMSO Run2   | NM_006122 | MAN2A2    | mannosidase, alpha, class 2A, member 2 | 3.491221         | Inlier         |

Identification of Survival Genes in Human Glioblastoma Cells Using siRNA Screening  
 Nikhil G Thaker, Fang Zhang, Peter R. McDonald, Tong Ying Shun, Michael D Lewen, Ian F. Pollack, and John S. Lazo

Molecular Pharmacology

|                              |           |        |                                        |           |        |
|------------------------------|-----------|--------|----------------------------------------|-----------|--------|
| siRNA-Temozolomide Run3-DMSO | NM_000528 | MAN2B1 | mannosidase, alpha, class 2B, member 1 | -1.92995  | Inlier |
| siRNA-Temozolomide Run2-DMSO | NM_000528 | MAN2B1 | mannosidase, alpha, class 2B, member 1 | -1.148928 | Inlier |
| siRNA Disorazole DMSO Run1   | NM_000528 | MAN2B1 | mannosidase, alpha, class 2B, member 1 | -0.782601 | Inlier |
| siRNA-Temozolomide Run1-DMSO | NM_000528 | MAN2B1 | mannosidase, alpha, class 2B, member 1 | -0.098869 | Inlier |
| siRNA-Vinblastine Run2-DMSO  | NM_000528 | MAN2B1 | mannosidase, alpha, class 2B, member 1 | 0.098869  | Inlier |
| siRNA Disorazole DMSO Run3   | NM_000528 | MAN2B1 | mannosidase, alpha, class 2B, member 1 | 0.433014  | Inlier |
| siRNA Disorazole DMSO Run2   | NM_000528 | MAN2B1 | mannosidase, alpha, class 2B, member 1 | 0.566399  | Inlier |
| siRNA-Vinblastine Run1-DMSO  | NM_000528 | MAN2B1 | mannosidase, alpha, class 2B, member 1 | 0.929244  | Inlier |
| siRNA-Temozolomide Run1-DMSO | NM_006715 | MAN2C1 | mannosidase, alpha, class 2C, member 1 | -0.904721 | Inlier |
| siRNA-Temozolomide Run2-DMSO | NM_006715 | MAN2C1 | mannosidase, alpha, class 2C, member 1 | -0.444279 | Inlier |

Identification of Survival Genes in Human Glioblastoma Cells Using siRNA Screening  
 Nikhil G Thaker, Fang Zhang, Peter R. McDonald, Tong Ying Shun, Michael D Lewen, Ian F. Pollack, and John S. Lazo

Molecular Pharmacology

| siRNA Treatment              | Gene ID   | Gene Name | Protein Name                           | Log2 Fold Change | Category |
|------------------------------|-----------|-----------|----------------------------------------|------------------|----------|
| siRNA-Temozolomide Run3-DMSO | NM_006715 | MAN2C1    | mannosidase, alpha, class 2C, member 1 | -0.232093        | Inlier   |
| siRNA Disorazole DMSO Run1   | NM_006715 | MAN2C1    | mannosidase, alpha, class 2C, member 1 | -0.082803        | Inlier   |
| siRNA-Vinblastine Run2-DMSO  | NM_006715 | MAN2C1    | mannosidase, alpha, class 2C, member 1 | 0.082803         | Inlier   |
| siRNA Disorazole DMSO Run3   | NM_006715 | MAN2C1    | mannosidase, alpha, class 2C, member 1 | 1.928633         | Inlier   |
| siRNA-Vinblastine Run1-DMSO  | NM_006715 | MAN2C1    | mannosidase, alpha, class 2C, member 1 | 5.282377         | Outlier  |
| siRNA Disorazole DMSO Run2   | NM_006715 | MAN2C1    | mannosidase, alpha, class 2C, member 1 | 8.057325         | Outlier  |
| siRNA-Vinblastine Run2-DMSO  | NM_005908 | MANBA     | lysosomal mannosidase, beta A,         | -0.965771        | Inlier   |
| siRNA Disorazole DMSO Run3   | NM_005908 | MANBA     | lysosomal mannosidase, beta A,         | -0.716316        | Inlier   |
| siRNA-Temozolomide Run1-DMSO | NM_005908 | MANBA     | lysosomal mannosidase, beta A,         | -0.632684        | Inlier   |
| siRNA Disorazole DMSO Run1   | NM_005908 | MANBA     | lysosomal mannosidase, beta A,         | -0.350354        | Inlier   |
| siRNA-Temozolomide Run2-DMSO | NM_005908 | MANBA     | lysosomal mannosidase, beta A,         | 0.350354         | Inlier   |

Identification of Survival Genes in Human Glioblastoma Cells Using siRNA Screening  
 Nikhil G Thaker, Fang Zhang, Peter R. McDonald, Tong Ying Shun, Michael D Lewen, Ian F. Pollack, and John S. Lazo

Molecular Pharmacology

|                              |           |       |                                |           |        |
|------------------------------|-----------|-------|--------------------------------|-----------|--------|
| siRNA-Vinblastine Run1-DMSO  | NM_005908 | MANBA | mannosidase, beta A, lysosomal | 0.50667   | Inlier |
| siRNA-Temozolomide Run3-DMSO | NM_005908 | MANBA | mannosidase, beta A, lysosomal | 2.453161  | Inlier |
| siRNA Disorazole DMSO Run2   | NM_005908 | MANBA | mannosidase, beta A, lysosomal | 2.652652  | Inlier |
| siRNA-Temozolomide Run3-DMSO | NM_000240 | MAOA  | monoamine oxidase A            | -1.981771 | Inlier |
| siRNA-Temozolomide Run2-DMSO | NM_000240 | MAOA  | monoamine oxidase A            | -1.565263 | Inlier |
| siRNA Disorazole DMSO Run1   | NM_000240 | MAOA  | monoamine oxidase A            | -0.60872  | Inlier |
| siRNA-Temozolomide Run1-DMSO | NM_000240 | MAOA  | monoamine oxidase A            | -0.038284 | Inlier |
| siRNA-Vinblastine Run2-DMSO  | NM_000240 | MAOA  | monoamine oxidase A            | 0.038284  | Inlier |
| siRNA Disorazole DMSO Run3   | NM_000240 | MAOA  | monoamine oxidase A            | 0.25824   | Inlier |
| siRNA-Vinblastine Run1-DMSO  | NM_000240 | MAOA  | monoamine oxidase A            | 0.74028   | Inlier |
| siRNA Disorazole DMSO Run2   | NM_000240 | MAOA  | monoamine oxidase A            | 1.451669  | Inlier |
| siRNA-Temozolomide Run3-DMSO | NM_000898 | MAOB  | monoamine oxidase B            | -0.987195 | Inlier |
| siRNA-Temozolomide Run2-DMSO | NM_000898 | MAOB  | monoamine oxidase B            | -0.393353 | Inlier |
| siRNA-Temozolomide Run1-DMSO | NM_000898 | MAOB  | monoamine oxidase B            | -0.302945 | Inlier |
| siRNA Disorazole DMSO Run1   | NM_000898 | MAOB  | monoamine oxidase B            | -0.281176 | Inlier |
| siRNA Disorazole DMSO Run3   | NM_000898 | MAOB  | monoamine oxidase B            | 0.281177  | Inlier |

Identification of Survival Genes in Human Glioblastoma Cells Using siRNA Screening  
 Nikhil G Thaker, Fang Zhang, Peter R. McDonald, Tong Ying Shun, Michael D Lewen, Ian F. Pollack, and John S. Lazo

|                                                           |               |        |                                                        |           |        |
|-----------------------------------------------------------|---------------|--------|--------------------------------------------------------|-----------|--------|
| Molecular Pharmacology<br>siRNA-Vinblastine Run2-<br>DMSO | NM_0008<br>98 | MAOB   | monoamin<br>e oxidase<br>B                             | 0.955647  | Inlier |
| siRNA-Vinblastine Run1-<br>DMSO                           | NM_0008<br>98 | MAOB   | monoamin<br>e oxidase<br>B                             | 2.477293  | Inlier |
| siRNA Disorazole DMSO Run2                                | NM_0008<br>98 | MAOB   | monoamin<br>e oxidase<br>B                             | 3.460705  | Inlier |
| siRNA-Temozolomide Run3-<br>DMSO                          | NM_1992<br>27 | MAP1D  | MAP1D                                                  | -2.021703 | Inlier |
| siRNA-Temozolomide Run2-<br>DMSO                          | NM_1992<br>27 | MAP1D  | MAP1D                                                  | -1.651653 | Inlier |
| siRNA Disorazole DMSO Run3                                | NM_1992<br>27 | MAP1D  | MAP1D                                                  | -0.489225 | Inlier |
| siRNA Disorazole DMSO Run1                                | NM_1992<br>27 | MAP1D  | MAP1D                                                  | -0.097833 | Inlier |
| siRNA-Temozolomide Run1-<br>DMSO                          | NM_1992<br>27 | MAP1D  | MAP1D                                                  | 0.097833  | Inlier |
| siRNA Disorazole DMSO Run2                                | NM_1992<br>27 | MAP1D  | MAP1D                                                  | 0.162962  | Inlier |
| siRNA-Vinblastine Run2-<br>DMSO                           | NM_1992<br>27 | MAP1D  | MAP1D                                                  | 0.859775  | Inlier |
| siRNA-Vinblastine Run1-<br>DMSO                           | NM_1992<br>27 | MAP1D  | MAP1D                                                  | 0.962174  | Inlier |
| siRNA Disorazole DMSO Run2                                | NM_0027<br>55 | MAP2K1 | mitogen-<br>activated<br>protein<br>kinase<br>kinase 1 | -1.796638 | Inlier |
| siRNA-Temozolomide Run3-<br>DMSO                          | NM_0027<br>55 | MAP2K1 | mitogen-<br>activated<br>protein<br>kinase<br>kinase 1 | -0.838676 | Inlier |
| siRNA Disorazole DMSO Run3                                | NM_0027<br>55 | MAP2K1 | mitogen-<br>activated<br>protein<br>kinase<br>kinase 1 | -0.34192  | Inlier |
| siRNA-Temozolomide Run2-<br>DMSO                          | NM_0027<br>55 | MAP2K1 | mitogen-<br>activated<br>protein<br>kinase<br>kinase 1 | -0.124436 | Inlier |
| siRNA-Temozolomide Run1-<br>DMSO                          | NM_0027<br>55 | MAP2K1 | mitogen-<br>activated<br>protein<br>kinase<br>kinase 1 | 0.124437  | Inlier |

Identification of Survival Genes in Human Glioblastoma Cells Using siRNA Screening

Nikhil G Thaker, Fang Zhang, Peter R. McDonald, Tong Ying Shun, Michael D Lewen, Ian F. Pollack, and John S. Lazo

Molecular Pharmacology

|                              |               |               |                       |                                    |           |        |
|------------------------------|---------------|---------------|-----------------------|------------------------------------|-----------|--------|
| siRNA Disorazole DMSO Run1   | NM_0027<br>55 | MAP2K1        | kinase 1              | mitogen-activated protein kinase 1 | 0.635458  | Inlier |
| siRNA-Vinblastine Run2-DMSO  | NM_0027<br>55 | MAP2K1        | kinase 1              | mitogen-activated protein kinase 1 | 0.713542  | Inlier |
| siRNA-Vinblastine Run1-DMSO  | NM_0027<br>55 | MAP2K1        | kinase 1              | mitogen-activated protein kinase 1 | 1.609699  | Inlier |
| siRNA-Temozolomide Run1-DMSO | NM_0219<br>70 | MAP2K1IP<br>1 | interacting protein 1 | mitogen-activated protein kinase 1 | -0.840682 | Inlier |
| siRNA-Temozolomide Run3-DMSO | NM_0219<br>70 | MAP2K1IP<br>1 | interacting protein 1 | mitogen-activated protein kinase 1 | -0.508318 | Inlier |
| siRNA Disorazole DMSO Run2   | NM_0219<br>70 | MAP2K1IP<br>1 | interacting protein 1 | mitogen-activated protein kinase 1 | -0.102042 | Inlier |
| siRNA Disorazole DMSO Run3   | NM_0219<br>70 | MAP2K1IP<br>1 | interacting protein 1 | mitogen-activated protein kinase 1 | -0.024832 | Inlier |

Identification of Survival Genes in Human Glioblastoma Cells Using siRNA Screening  
 Nikhil G Thaker, Fang Zhang, Peter R. McDonald, Tong Ying Shun, Michael D Lewen, Ian F. Pollack, and John S. Lazo  
 Molecular Pharmacology

|                              |               |               |                                                                 |           |        |
|------------------------------|---------------|---------------|-----------------------------------------------------------------|-----------|--------|
| siRNA-Temozolomide Run2-DMSO | NM_0219<br>70 | MAP2K1IP<br>1 | mitogen-activated protein kinase kinase 1 interacting protein 1 | 0.024832  | Inlier |
| siRNA Disorazole DMSO Run1   | NM_0219<br>70 | MAP2K1IP<br>1 | mitogen-activated protein kinase kinase 1 interacting protein 1 | 1.502364  | Inlier |
| siRNA-Vinblastine Run2-DMSO  | NM_0219<br>70 | MAP2K1IP<br>1 | mitogen-activated protein kinase kinase 1 interacting protein 1 | 3.043567  | Inlier |
| siRNA-Vinblastine Run1-DMSO  | NM_0219<br>70 | MAP2K1IP<br>1 | mitogen-activated protein kinase kinase 1 interacting protein 1 | 3.46741   | Inlier |
| siRNA Disorazole DMSO Run2   | NM_0306<br>62 | MAP2K2        | mitogen-activated protein kinase kinase 2                       | -1.226475 | Inlier |
| siRNA-Temozolomide Run3-DMSO | NM_0306<br>62 | MAP2K2        | mitogen-activated protein kinase kinase 2                       | -0.812504 | Inlier |
| siRNA Disorazole DMSO Run3   | NM_0306<br>62 | MAP2K2        | mitogen-activated protein kinase kinase 2                       | -0.513674 | Inlier |
| siRNA-Temozolomide Run2-DMSO | NM_0306<br>62 | MAP2K2        | mitogen-activated protein kinase kinase 2                       | -0.248995 | Inlier |

Identification of Survival Genes in Human Glioblastoma Cells Using siRNA Screening  
 Nikhil G Thaker, Fang Zhang, Peter R. McDonald, Tong Ying Shun, Michael D Lewen, Ian F. Pollack, and John S. Lazo

Molecular Pharmacology

| siRNA Treatment              | Gene ID   | Gene Name | Gene Description                   | Value     | Outlier Status |
|------------------------------|-----------|-----------|------------------------------------|-----------|----------------|
| siRNA-Temozolomide Run1-DMSO | NM_030662 | MAP2K2    | mitogen-activated protein kinase 2 | 0.248995  | Inlier         |
| siRNA Disorazole DMSO Run1   | NM_030662 | MAP2K2    | mitogen-activated protein kinase 2 | 0.575936  | Inlier         |
| siRNA-Vinblastine Run2-DMSO  | NM_030662 | MAP2K2    | mitogen-activated protein kinase 2 | 0.773064  | Inlier         |
| siRNA-Vinblastine Run1-DMSO  | NM_030662 | MAP2K2    | mitogen-activated protein kinase 2 | 0.918953  | Inlier         |
| siRNA-Temozolomide Run3-DMSO | NM_145109 | MAP2K3    | mitogen-activated protein kinase 3 | -1.620149 | Inlier         |
| siRNA-Temozolomide Run2-DMSO | NM_145109 | MAP2K3    | mitogen-activated protein kinase 3 | -1.030273 | Inlier         |
| siRNA-Temozolomide Run1-DMSO | NM_145109 | MAP2K3    | mitogen-activated protein kinase 3 | -0.599612 | Inlier         |
| siRNA Disorazole DMSO Run1   | NM_145109 | MAP2K3    | mitogen-activated protein kinase 3 | -0.212462 | Inlier         |
| siRNA Disorazole DMSO Run3   | NM_145109 | MAP2K3    | mitogen-activated protein kinase 3 | 0.212462  | Inlier         |
| siRNA Disorazole DMSO Run2   | NM_145109 | MAP2K3    | mitogen-activated protein kinase 3 | 0.215231  | Inlier         |



Identification of Survival Genes in Human Glioblastoma Cells Using siRNA Screening

Nikhil G Thaker, Fang Zhang, Peter R. McDonald, Tong Ying Shun, Michael D Lewen, Ian F. Pollack, and John S. Lazo

Molecular Pharmacology

| siRNA Treatment              | Gene ID   | Gene Name | Protein Name                       | Log2 Fold Change | Category |
|------------------------------|-----------|-----------|------------------------------------|------------------|----------|
| siRNA-Vinblastine Run2-DMSO  | NM_145109 | MAP2K3    | mitogen-activated protein kinase 3 | 0.749388         | Inlier   |
| siRNA-Vinblastine Run1-DMSO  | NM_145109 | MAP2K3    | mitogen-activated protein kinase 3 | 1.829174         | Inlier   |
| siRNA-Temozolomide Run2-DMSO | NM_003010 | MAP2K4    | mitogen-activated protein kinase 4 | -1.081508        | Inlier   |
| siRNA-Temozolomide Run1-DMSO | NM_003010 | MAP2K4    | mitogen-activated protein kinase 4 | -0.710862        | Inlier   |
| siRNA-Temozolomide Run3-DMSO | NM_003010 | MAP2K4    | mitogen-activated protein kinase 4 | -0.638138        | Inlier   |
| siRNA Disorazole DMSO Run3   | NM_003010 | MAP2K4    | mitogen-activated protein kinase 4 | -0.085157        | Inlier   |
| siRNA Disorazole DMSO Run1   | NM_003010 | MAP2K4    | mitogen-activated protein kinase 4 | 0.085157         | Inlier   |
| siRNA Disorazole DMSO Run2   | NM_003010 | MAP2K4    | mitogen-activated protein kinase 4 | 0.58953          | Inlier   |
| siRNA-Vinblastine Run2-DMSO  | NM_003010 | MAP2K4    | mitogen-activated protein kinase 4 | 2.054783         | Inlier   |
| siRNA-Vinblastine Run1-DMSO  | NM_003010 | MAP2K4    | mitogen-activated protein kinase 4 | 2.717515         | Inlier   |

Identification of Survival Genes in Human Glioblastoma Cells Using siRNA Screening  
 Nikhil G Thaker, Fang Zhang, Peter R. McDonald, Tong Ying Shun, Michael D Lewen, Ian F. Pollack, and John S. Lazo

Molecular Pharmacology

| siRNA Treatment              | Gene ID   | Gene Name | Protein Name                       | Log Fold Change | Outlier Status |
|------------------------------|-----------|-----------|------------------------------------|-----------------|----------------|
| siRNA-Temozolomide Run3-DMSO | NM_145160 | MAP2K5    | mitogen-activated protein kinase 5 | -0.942767       | Inlier         |
| siRNA-Temozolomide Run2-DMSO | NM_145160 | MAP2K5    | mitogen-activated protein kinase 5 | -0.779451       | Inlier         |
| siRNA-Temozolomide Run1-DMSO | NM_145160 | MAP2K5    | mitogen-activated protein kinase 5 | -0.223175       | Inlier         |
| siRNA Disorazole DMSO Run1   | NM_145160 | MAP2K5    | mitogen-activated protein kinase 5 | -0.040926       | Inlier         |
| siRNA Disorazole DMSO Run3   | NM_145160 | MAP2K5    | mitogen-activated protein kinase 5 | 0.040927        | Inlier         |
| siRNA Disorazole DMSO Run2   | NM_145160 | MAP2K5    | mitogen-activated protein kinase 5 | 0.569549        | Inlier         |
| siRNA-Vinblastine Run2-DMSO  | NM_145160 | MAP2K5    | mitogen-activated protein kinase 5 | 0.786452        | Inlier         |
| siRNA-Vinblastine Run1-DMSO  | NM_145160 | MAP2K5    | mitogen-activated protein kinase 5 | 1.072086        | Inlier         |
| siRNA-Temozolomide Run3-DMSO | NM_031988 | MAP2K6    | mitogen-activated protein kinase 6 | -0.963246       | Inlier         |
| siRNA-Temozolomide Run2-DMSO | NM_031988 | MAP2K6    | mitogen-activated protein kinase 6 | -0.801614       | Inlier         |

Identification of Survival Genes in Human Glioblastoma Cells Using siRNA Screening  
 Nikhil G Thaker, Fang Zhang, Peter R. McDonald, Tong Ying Shun, Michael D Lewen, Ian F. Pollack, and John S. Lazo

Molecular Pharmacology

| siRNA Treatment              | Gene ID   | Gene Name | Protein Name                       | Log Fold Change | Outlier Status |
|------------------------------|-----------|-----------|------------------------------------|-----------------|----------------|
| siRNA-Temozolomide Run1-DMSO | NM_031988 | MAP2K6    | mitogen-activated protein kinase 6 | -0.546376       | Inlier         |
| siRNA Disorazole DMSO Run1   | NM_031988 | MAP2K6    | mitogen-activated protein kinase 6 | -0.117076       | Inlier         |
| siRNA Disorazole DMSO Run3   | NM_031988 | MAP2K6    | mitogen-activated protein kinase 6 | 0.117076        | Inlier         |
| siRNA Disorazole DMSO Run2   | NM_031988 | MAP2K6    | mitogen-activated protein kinase 6 | 0.547386        | Inlier         |
| siRNA-Vinblastine Run1-DMSO  | NM_031988 | MAP2K6    | mitogen-activated protein kinase 6 | 1.015946        | Inlier         |
| siRNA-Vinblastine Run2-DMSO  | NM_031988 | MAP2K6    | mitogen-activated protein kinase 6 | 1.06508         | Inlier         |
| siRNA Disorazole DMSO Run2   | NM_145185 | MAP2K7    | mitogen-activated protein kinase 7 | -3.054744       | Inlier         |
| siRNA-Temozolomide Run3-DMSO | NM_145185 | MAP2K7    | mitogen-activated protein kinase 7 | -1.697023       | Inlier         |
| siRNA Disorazole DMSO Run3   | NM_145185 | MAP2K7    | mitogen-activated protein kinase 7 | -0.67582        | Inlier         |
| siRNA-Temozolomide Run2-DMSO | NM_145185 | MAP2K7    | mitogen-activated protein kinase 7 | -0.133481       | Inlier         |

Identification of Survival Genes in Human Glioblastoma Cells Using siRNA Screening  
 Nikhil G Thaker, Fang Zhang, Peter R. McDonald, Tong Ying Shun, Michael D Lewen, Ian F. Pollack, and John S. Lazo

Molecular Pharmacology

|                              |               |        |                                    |           |        |
|------------------------------|---------------|--------|------------------------------------|-----------|--------|
| siRNA-Vinblastine Run2-DMSO  | NM_1451<br>85 | MAP2K7 | mitogen-activated protein kinase 7 | 0.133481  | Inlier |
| siRNA-Temozolomide Run1-DMSO | NM_1451<br>85 | MAP2K7 | mitogen-activated protein kinase 7 | 0.16329   | Inlier |
| siRNA Disorazole DMSO Run1   | NM_1451<br>85 | MAP2K7 | mitogen-activated protein kinase 7 | 0.67318   | Inlier |
| siRNA-Vinblastine Run1-DMSO  | NM_1451<br>85 | MAP2K7 | mitogen-activated protein kinase 7 | 1.716019  | Inlier |
| siRNA-Temozolomide Run3-DMSO | XM_04206<br>6 | MAP3K1 | mitogen-activated protein kinase 1 | -1.835474 | Inlier |
| siRNA-Temozolomide Run1-DMSO | XM_04206<br>6 | MAP3K1 | mitogen-activated protein kinase 1 | -1.685503 | Inlier |
| siRNA Disorazole DMSO Run2   | XM_04206<br>6 | MAP3K1 | mitogen-activated protein kinase 1 | -0.161158 | Inlier |
| siRNA-Temozolomide Run2-DMSO | XM_04206<br>6 | MAP3K1 | mitogen-activated protein kinase 1 | -0.041164 | Inlier |
| siRNA Disorazole DMSO Run1   | XM_04206<br>6 | MAP3K1 | mitogen-activated protein kinase 1 | 0.041163  | Inlier |

Identification of Survival Genes in Human Glioblastoma Cells Using siRNA Screening

Nikhil G Thaker, Fang Zhang, Peter R. McDonald, Tong Ying Shun, Michael D Lewen, Ian F. Pollack, and John S. Lazo

Molecular Pharmacology

| siRNA Treatment              | Gene ID   | Gene Name | Gene Description                           | Value     | Outlier Status |
|------------------------------|-----------|-----------|--------------------------------------------|-----------|----------------|
| siRNA-Vinblastine Run2-DMSO  | XM_042066 | MAP3K1    | mitogen-activated protein kinase kinase 1  | 0.606316  | Inlier         |
| siRNA-Vinblastine Run1-DMSO  | XM_042066 | MAP3K1    | mitogen-activated protein kinase kinase 1  | 0.742684  | Inlier         |
| siRNA Disorazole DMSO Run3   | XM_042066 | MAP3K1    | mitogen-activated protein kinase kinase 1  | 2.102037  | Inlier         |
| siRNA-Temozolomide Run3-DMSO | NM_002446 | MAP3K10   | mitogen-activated protein kinase kinase 10 | -1.661698 | Inlier         |
| siRNA Disorazole DMSO Run2   | NM_002446 | MAP3K10   | mitogen-activated protein kinase kinase 10 | -0.812799 | Inlier         |
| siRNA-Temozolomide Run2-DMSO | NM_002446 | MAP3K10   | mitogen-activated protein kinase kinase 10 | -0.583536 | Inlier         |
| siRNA-Temozolomide Run1-DMSO | NM_002446 | MAP3K10   | mitogen-activated protein kinase kinase 10 | -0.11823  | Inlier         |
| siRNA-Vinblastine Run1-DMSO  | NM_002446 | MAP3K10   | mitogen-activated protein kinase kinase 10 | 0.118231  | Inlier         |

Identification of Survival Genes in Human Glioblastoma Cells Using siRNA Screening  
 Nikhil G Thaker, Fang Zhang, Peter R. McDonald, Tong Ying Shun, Michael D Lewen, Ian F. Pollack, and John S. Lazo

Molecular Pharmacology

| siRNA Treatment              | Gene | Accession | Gene    | Gene                                          | Value     | Category |
|------------------------------|------|-----------|---------|-----------------------------------------------|-----------|----------|
| siRNA Disorazole DMSO Run1   | 46   | NM_0024   | MAP3K10 | kinase 10<br>mitogen-activated protein kinase | 0.212414  | Inlier   |
| siRNA Disorazole DMSO Run3   | 46   | NM_0024   | MAP3K10 | kinase 10<br>mitogen-activated protein kinase | 0.765464  | Inlier   |
| siRNA-Vinblastine Run2-DMSO  | 46   | NM_0024   | MAP3K10 | kinase 10<br>mitogen-activated protein kinase | 1.335959  | Inlier   |
| siRNA-Temozolomide Run3-DMSO | 19   | NM_0024   | MAP3K11 | kinase 11<br>mitogen-activated protein kinase | -0.982016 | Inlier   |
| siRNA-Vinblastine Run1-DMSO  | 19   | NM_0024   | MAP3K11 | kinase 11<br>mitogen-activated protein kinase | -0.676226 | Inlier   |
| siRNA-Temozolomide Run2-DMSO | 19   | NM_0024   | MAP3K11 | kinase 11<br>mitogen-activated protein kinase | -0.582153 | Inlier   |
| siRNA Disorazole DMSO Run1   | 19   | NM_0024   | MAP3K11 | kinase 11<br>mitogen-activated protein kinase | -0.142241 | Inlier   |
| siRNA-Temozolomide Run1-DMSO | 19   | NM_0024   | MAP3K11 | kinase 11                                     | 0.142241  | Inlier   |

Identification of Survival Genes in Human Glioblastoma Cells Using siRNA Screening

Nikhil G Thaker, Fang Zhang, Peter R. McDonald, Tong Ying Shun, Michael D Lewen, Ian F. Pollack, and John S. Lazo

Molecular Pharmacology

| siRNA Treatment              | Gene ID       | Gene Name | Accession                                     | Value     | Outlier Status |
|------------------------------|---------------|-----------|-----------------------------------------------|-----------|----------------|
| siRNA Disorazole DMSO Run2   | NM_0024<br>19 | MAP3K11   | kinase 11<br>mitogen-activated protein kinase | 0.672774  | Inlier         |
| siRNA-Vinblastine Run2-DMSO  | NM_0024<br>19 | MAP3K11   | kinase 11<br>mitogen-activated protein kinase | 1.395561  | Inlier         |
| siRNA Disorazole DMSO Run3   | NM_0024<br>19 | MAP3K11   | kinase 11<br>mitogen-activated protein kinase | 2.185581  | Inlier         |
| siRNA Disorazole DMSO Run2   | NM_0063<br>01 | MAP3K12   | kinase 12<br>mitogen-activated protein kinase | -1.017499 | Inlier         |
| siRNA-Temozolomide Run3-DMSO | NM_0063<br>01 | MAP3K12   | kinase 12<br>mitogen-activated protein kinase | -0.750244 | Inlier         |
| siRNA Disorazole DMSO Run3   | NM_0063<br>01 | MAP3K12   | kinase 12<br>mitogen-activated protein kinase | -0.598756 | Inlier         |
| siRNA-Temozolomide Run2-DMSO | NM_0063<br>01 | MAP3K12   | kinase 12<br>mitogen-activated protein kinase | -0.390117 | Inlier         |
| siRNA-Temozolomide Run1-DMSO | NM_0063<br>01 | MAP3K12   | kinase 12                                     | 0.390117  | Inlier         |

Identification of Survival Genes in Human Glioblastoma Cells Using siRNA Screening  
 Nikhil G Thaker, Fang Zhang, Peter R. McDonald, Tong Ying Shun, Michael D Lewen, Ian F. Pollack, and John S. Lazo

Molecular Pharmacology

| siRNA Treatment              | Gene ID   | Gene Name | Accession | Value     | Category |
|------------------------------|-----------|-----------|-----------|-----------|----------|
| siRNA Disorazole DMSO Run1   | NM_006301 | MAP3K12   | kinase 12 | 0.478627  | Inlier   |
| siRNA-Vinblastine Run1-DMSO  | NM_006301 | MAP3K12   | kinase 12 | 1.137849  | Inlier   |
| siRNA-Vinblastine Run2-DMSO  | NM_006301 | MAP3K12   | kinase 12 | 1.275473  | Inlier   |
| siRNA Disorazole DMSO Run2   | NM_004721 | MAP3K13   | kinase 13 | -1.519311 | Inlier   |
| siRNA Disorazole DMSO Run3   | NM_004721 | MAP3K13   | kinase 13 | -0.747885 | Inlier   |
| siRNA-Temozolomide Run3-DMSO | NM_004721 | MAP3K13   | kinase 13 | -0.601115 | Inlier   |
| siRNA-Temozolomide Run2-DMSO | NM_004721 | MAP3K13   | kinase 13 | -0.127613 | Inlier   |
| siRNA-Temozolomide Run1-DMSO | NM_004721 | MAP3K13   | kinase 13 | 0.127614  | Inlier   |



Identification of Survival Genes in Human Glioblastoma Cells Using siRNA Screening  
 Nikhil G Thaker, Fang Zhang, Peter R. McDonald, Tong Ying Shun, Michael D Lewen, Ian F. Pollack, and John S. Lazo

Molecular Pharmacology

| siRNA Treatment              | Gene ID       | Gene Name | Accession                                     | Value     | Category |
|------------------------------|---------------|-----------|-----------------------------------------------|-----------|----------|
| siRNA Disorazole DMSO Run1   | NM_0047<br>21 | MAP3K13   | kinase 13<br>mitogen-activated protein kinase | 0.36188   | Inlier   |
| siRNA-Vinblastine Run1-DMSO  | NM_0047<br>21 | MAP3K13   | kinase 13<br>mitogen-activated protein kinase | 0.940483  | Inlier   |
| siRNA-Vinblastine Run2-DMSO  | NM_0047<br>21 | MAP3K13   | kinase 13<br>mitogen-activated protein kinase | 1.245812  | Inlier   |
| siRNA-Temozolomide Run3-DMSO | NM_0039<br>54 | MAP3K14   | kinase 14<br>mitogen-activated protein kinase | -1.322897 | Inlier   |
| siRNA-Temozolomide Run2-DMSO | NM_0039<br>54 | MAP3K14   | kinase 14<br>mitogen-activated protein kinase | -0.626623 | Inlier   |
| siRNA-Temozolomide Run1-DMSO | NM_0039<br>54 | MAP3K14   | kinase 14<br>mitogen-activated protein kinase | -0.381784 | Inlier   |
| siRNA Disorazole DMSO Run3   | NM_0039<br>54 | MAP3K14   | kinase 14<br>mitogen-activated protein kinase | -0.033228 | Inlier   |
| siRNA Disorazole DMSO Run1   | NM_0039<br>54 | MAP3K14   | kinase 14                                     | 0.033228  | Inlier   |

Identification of Survival Genes in Human Glioblastoma Cells Using siRNA Screening  
 Nikhil G Thaker, Fang Zhang, Peter R. McDonald, Tong Ying Shun, Michael D Lewen, Ian F. Pollack, and John S. Lazo

Molecular Pharmacology

|                              |               |         |                                               |           |        |
|------------------------------|---------------|---------|-----------------------------------------------|-----------|--------|
| siRNA Disorazole DMSO Run2   | NM_0039<br>54 | MAP3K14 | kinase 14<br>mitogen-activated protein kinase | 0.722377  | Inlier |
| siRNA-Vinblastine Run2-DMSO  | NM_0039<br>54 | MAP3K14 | kinase 14<br>mitogen-activated protein kinase | 1.17602   | Inlier |
| siRNA-Vinblastine Run1-DMSO  | NM_0039<br>54 | MAP3K14 | kinase 14<br>mitogen-activated protein kinase | 2.657131  | Inlier |
| siRNA Disorazole DMSO Run2   | NM_0066<br>09 | MAP3K2  | kinase 2<br>mitogen-activated protein kinase  | -0.739997 | Inlier |
| siRNA-Temozolomide Run3-DMSO | NM_0066<br>09 | MAP3K2  | kinase 2<br>mitogen-activated protein kinase  | -0.609003 | Inlier |
| siRNA Disorazole DMSO Run3   | NM_0066<br>09 | MAP3K2  | kinase 2<br>mitogen-activated protein kinase  | -0.57413  | Inlier |
| siRNA-Temozolomide Run1-DMSO | NM_0066<br>09 | MAP3K2  | kinase 2<br>mitogen-activated protein kinase  | -0.028363 | Inlier |
| siRNA-Temozolomide Run2-DMSO | NM_0066<br>09 | MAP3K2  | kinase 2                                      | 0.028363  | Inlier |

Identification of Survival Genes in Human Glioblastoma Cells Using siRNA Screening

Nikhil G Thaker, Fang Zhang, Peter R. McDonald, Tong Ying Shun, Michael D Lewen, Ian F. Pollack, and John S. Lazo

Molecular Pharmacology

|                              |           |        |                                              |           |        |
|------------------------------|-----------|--------|----------------------------------------------|-----------|--------|
| siRNA Disorazole DMSO Run1   | NM_006609 | MAP3K2 | kinase 2<br>mitogen-activated protein kinase | 1.238449  | Inlier |
| siRNA-Vinblastine Run2-DMSO  | NM_006609 | MAP3K2 | kinase 2<br>mitogen-activated protein kinase | 1.372691  | Inlier |
| siRNA-Vinblastine Run1-DMSO  | NM_006609 | MAP3K2 | kinase 2<br>mitogen-activated protein kinase | 1.64213   | Inlier |
| siRNA-Temozolomide Run3-DMSO | NM_203351 | MAP3K3 | kinase 3<br>mitogen-activated protein kinase | -0.732856 | Inlier |
| siRNA-Temozolomide Run1-DMSO | NM_203351 | MAP3K3 | kinase 3<br>mitogen-activated protein kinase | -0.708047 | Inlier |
| siRNA-Temozolomide Run2-DMSO | NM_203351 | MAP3K3 | kinase 3<br>mitogen-activated protein kinase | -0.344399 | Inlier |
| siRNA Disorazole DMSO Run1   | NM_203351 | MAP3K3 | kinase 3<br>mitogen-activated protein kinase | -0.281832 | Inlier |
| siRNA-Vinblastine Run1-DMSO  | NM_203351 | MAP3K3 | kinase 3                                     | 0.281832  | Inlier |

Identification of Survival Genes in Human Glioblastoma Cells Using siRNA Screening  
 Nikhil G Thaker, Fang Zhang, Peter R. McDonald, Tong Ying Shun, Michael D Lewen, Ian F. Pollack, and John S. Lazo

Molecular Pharmacology

|                              |               |        |                                           |           |        |
|------------------------------|---------------|--------|-------------------------------------------|-----------|--------|
| siRNA-Vinblastine Run2-DMSO  | NM_2033<br>51 | MAP3K3 | mitogen-activated protein kinase kinase 3 | 0.640953  | Inlier |
| siRNA Disorazole DMSO Run3   | NM_2033<br>51 | MAP3K3 | mitogen-activated protein kinase kinase 3 | 0.929329  | Inlier |
| siRNA Disorazole DMSO Run2   | NM_2033<br>51 | MAP3K3 | mitogen-activated protein kinase kinase 3 | 1.212743  | Inlier |
| siRNA-Temozolomide Run3-DMSO | NM_0067<br>24 | MAP3K4 | mitogen-activated protein kinase kinase 4 | -0.94268  | Inlier |
| siRNA-Temozolomide Run2-DMSO | NM_0067<br>24 | MAP3K4 | mitogen-activated protein kinase kinase 4 | -0.894926 | Inlier |
| siRNA Disorazole DMSO Run1   | NM_0067<br>24 | MAP3K4 | mitogen-activated protein kinase kinase 4 | -0.238677 | Inlier |
| siRNA-Temozolomide Run1-DMSO | NM_0067<br>24 | MAP3K4 | mitogen-activated protein kinase kinase 4 | -0.196866 | Inlier |
| siRNA Disorazole DMSO Run3   | NM_0067<br>24 | MAP3K4 | mitogen-activated protein kinase kinase 4 | 0.196866  | Inlier |

Identification of Survival Genes in Human Glioblastoma Cells Using siRNA Screening  
 Nikhil G Thaker, Fang Zhang, Peter R. McDonald, Tong Ying Shun, Michael D Lewen, Ian F. Pollack, and John S. Lazo

Molecular Pharmacology

| siRNA Treatment              | Gene ID       | Gene Name | Accession | Category                         | Value     | Outlier Status |
|------------------------------|---------------|-----------|-----------|----------------------------------|-----------|----------------|
| siRNA Disorazole DMSO Run2   | NM_0067<br>24 | MAP3K4    | kinase 4  | mitogen-activated protein kinase | 0.454074  | Inlier         |
| siRNA-Vinblastine Run2-DMSO  | NM_0067<br>24 | MAP3K4    | kinase 4  | mitogen-activated protein kinase | 1.021206  | Inlier         |
| siRNA-Vinblastine Run1-DMSO  | NM_0067<br>24 | MAP3K4    | kinase 4  | mitogen-activated protein kinase | 1.222331  | Inlier         |
| siRNA-Temozolomide Run3-DMSO | NM_0059<br>23 | MAP3K5    | kinase 5  | mitogen-activated protein kinase | -1.747716 | Inlier         |
| siRNA Disorazole DMSO Run2   | NM_0059<br>23 | MAP3K5    | kinase 5  | mitogen-activated protein kinase | -1.500867 | Inlier         |
| siRNA Disorazole DMSO Run3   | NM_0059<br>23 | MAP3K5    | kinase 5  | mitogen-activated protein kinase | -1.399739 | Inlier         |
| siRNA-Temozolomide Run2-DMSO | NM_0059<br>23 | MAP3K5    | kinase 5  | mitogen-activated protein kinase | -0.173138 | Inlier         |
| siRNA-Temozolomide Run1-DMSO | NM_0059<br>23 | MAP3K5    | kinase 5  | mitogen-activated protein kinase | 0.173139  | Inlier         |

Identification of Survival Genes in Human Glioblastoma Cells Using siRNA Screening  
 Nikhil G Thaker, Fang Zhang, Peter R. McDonald, Tong Ying Shun, Michael D Lewen, Ian F. Pollack, and John S. Lazo

Molecular Pharmacology

| siRNA Treatment              | Gene ID       | Gene Name | Accession                                    | Value     | Category |
|------------------------------|---------------|-----------|----------------------------------------------|-----------|----------|
| siRNA Disorazole DMSO Run1   | NM_0059<br>23 | MAP3K5    | kinase 5<br>mitogen-activated protein kinase | 0.424015  | Inlier   |
| siRNA-Vinblastine Run1-DMSO  | NM_0059<br>23 | MAP3K5    | kinase 5<br>mitogen-activated protein kinase | 0.466579  | Inlier   |
| siRNA-Vinblastine Run2-DMSO  | NM_0059<br>23 | MAP3K5    | kinase 5<br>mitogen-activated protein kinase | 0.882421  | Inlier   |
| siRNA-Temozolomide Run3-DMSO | NM_1453<br>19 | MAP3K6    | kinase 6<br>mitogen-activated protein kinase | -1.940145 | Inlier   |
| siRNA-Temozolomide Run2-DMSO | NM_1453<br>19 | MAP3K6    | kinase 6<br>mitogen-activated protein kinase | -1.142532 | Inlier   |
| siRNA-Temozolomide Run1-DMSO | NM_1453<br>19 | MAP3K6    | kinase 6<br>mitogen-activated protein kinase | -0.281398 | Inlier   |
| siRNA Disorazole DMSO Run2   | NM_1453<br>19 | MAP3K6    | kinase 6<br>mitogen-activated protein kinase | -0.032677 | Inlier   |
| siRNA Disorazole DMSO Run1   | NM_1453<br>19 | MAP3K6    | kinase 6                                     | 0.032677  | Inlier   |

Identification of Survival Genes in Human Glioblastoma Cells Using siRNA Screening  
 Nikhil G Thaker, Fang Zhang, Peter R. McDonald, Tong Ying Shun, Michael D Lewen, Ian F. Pollack, and John S. Lazo

Molecular Pharmacology

| siRNA              | siRNA | siRNA | siRNA | siRNA   | siRNA  | siRNA    | siRNA     | siRNA  |
|--------------------|-------|-------|-------|---------|--------|----------|-----------|--------|
| siRNA Disorazole   | DMSO  | Run3  | 19    | NM_1453 | MAP3K6 | kinase 6 | 0.181664  | Inlier |
| siRNA-Vinblastine  | Run2- | DMSO  | 19    | NM_1453 | MAP3K6 | kinase 6 | 1.067602  | Inlier |
| siRNA-Vinblastine  | Run1- | DMSO  | 19    | NM_1453 | MAP3K6 | kinase 6 | 1.262879  | Inlier |
| siRNA Disorazole   | DMSO  | Run2  | 33    | NM_1453 | MAP3K7 | kinase 7 | -1.771412 | Inlier |
| siRNA Disorazole   | DMSO  | Run3  | 33    | NM_1453 | MAP3K7 | kinase 7 | -0.841103 | Inlier |
| siRNA-Temozolomide | Run2- | DMSO  | 33    | NM_1453 | MAP3K7 | kinase 7 | -0.507897 | Inlier |
| siRNA-Temozolomide | Run3- | DMSO  | 33    | NM_1453 | MAP3K7 | kinase 7 | -0.304251 | Inlier |
| siRNA Disorazole   | DMSO  | Run1  | 33    | NM_1453 | MAP3K7 | kinase 7 | 0.304251  | Inlier |

Identification of Survival Genes in Human Glioblastoma Cells Using siRNA Screening

Nikhil G Thaker, Fang Zhang, Peter R. McDonald, Tong Ying Shun, Michael D Lewen, Ian F. Pollack, and John S. Lazo

Molecular Pharmacology

|                              |           |           |                                                                 |           |        |
|------------------------------|-----------|-----------|-----------------------------------------------------------------|-----------|--------|
| siRNA-Temozolomide Run1-DMSO | NM_145333 | MAP3K7    | mitogen-activated protein kinase kinase 7                       | 0.451454  | Inlier |
| siRNA-Vinblastine Run1-DMSO  | NM_145333 | MAP3K7    | mitogen-activated protein kinase kinase 7                       | 1.158008  | Inlier |
| siRNA-Vinblastine Run2-DMSO  | NM_145333 | MAP3K7    | mitogen-activated protein kinase kinase 7                       | 1.808801  | Inlier |
| siRNA-Temozolomide Run3-DMSO | NM_153497 | MAP3K7IP1 | mitogen-activated protein kinase kinase 7 interacting protein 1 | -2.329214 | Inlier |
| siRNA-Temozolomide Run2-DMSO | NM_153497 | MAP3K7IP1 | mitogen-activated protein kinase kinase 7 interacting protein 1 | -0.608764 | Inlier |
| siRNA-Temozolomide Run1-DMSO | NM_153497 | MAP3K7IP1 | mitogen-activated protein kinase kinase 7 interacting protein 1 | -0.601706 | Inlier |



Identification of Survival Genes in Human Glioblastoma Cells Using siRNA Screening

Nikhil G Thaker, Fang Zhang, Peter R. McDonald, Tong Ying Shun, Michael D Lewen, Ian F. Pollack, and John S. Lazo

Molecular Pharmacology

|                             |               |               |                                                                        |          |         |
|-----------------------------|---------------|---------------|------------------------------------------------------------------------|----------|---------|
| siRNA Disorazole DMSO Run1  | NM_1534<br>97 | MAP3K7IP<br>1 | mitogen-activated protein kinase kinase kinase 7 interacting protein 1 | -0.50911 | Inlier  |
| siRNA Disorazole DMSO Run2  | NM_1534<br>97 | MAP3K7IP<br>1 | mitogen-activated protein kinase kinase kinase 7 interacting protein 1 | 0.509111 | Inlier  |
| siRNA-Vinblastine Run2-DMSO | NM_1534<br>97 | MAP3K7IP<br>1 | mitogen-activated protein kinase kinase kinase 7 interacting protein 1 | 0.740235 | Inlier  |
| siRNA-Vinblastine Run1-DMSO | NM_1534<br>97 | MAP3K7IP<br>1 | mitogen-activated protein kinase kinase kinase 7 interacting protein 1 | 1.032055 | Inlier  |
| siRNA Disorazole DMSO Run3  | NM_1534<br>97 | MAP3K7IP<br>1 | mitogen-activated protein kinase kinase kinase 7 interacting protein 1 | 5.326671 | Outlier |

Identification of Survival Genes in Human Glioblastoma Cells Using siRNA Screening  
 Nikhil G Thaker, Fang Zhang, Peter R. McDonald, Tong Ying Shun, Michael D Lewen, Ian F. Pollack, and John S. Lazo  
 Molecular Pharmacology

|                              |               |               |                                                                 |           |        |
|------------------------------|---------------|---------------|-----------------------------------------------------------------|-----------|--------|
| siRNA-Temozolomide Run3-DMSO | NM_1453<br>42 | MAP3K7IP<br>2 | mitogen-activated protein kinase kinase 7 interacting protein 2 | -1.4511   | Inlier |
| siRNA-Temozolomide Run1-DMSO | NM_1453<br>42 | MAP3K7IP<br>2 | mitogen-activated protein kinase kinase 7 interacting protein 2 | -0.686806 | Inlier |
| siRNA Disorazole DMSO Run2   | NM_1453<br>42 | MAP3K7IP<br>2 | mitogen-activated protein kinase kinase 7 interacting protein 2 | -0.647855 | Inlier |
| siRNA-Temozolomide Run2-DMSO | NM_1453<br>42 | MAP3K7IP<br>2 | mitogen-activated protein kinase kinase 7 interacting protein 2 | -0.274988 | Inlier |
| siRNA Disorazole DMSO Run1   | NM_1453<br>42 | MAP3K7IP<br>2 | mitogen-activated protein kinase kinase 7 interacting protein 2 | 0.274988  | Inlier |

Identification of Survival Genes in Human Glioblastoma Cells Using siRNA Screening  
 Nikhil G Thaker, Fang Zhang, Peter R. McDonald, Tong Ying Shun, Michael D Lewen, Ian F. Pollack, and John S. Lazo  
 Molecular Pharmacology

|                              |               |               |                                                                 |           |        |
|------------------------------|---------------|---------------|-----------------------------------------------------------------|-----------|--------|
| siRNA Disorazole DMSO Run3   | NM_1453<br>42 | MAP3K7IP<br>2 | mitogen-activated protein kinase kinase 7 interacting protein 2 | 0.662194  | Inlier |
| siRNA-Vinblastine Run2-DMSO  | NM_1453<br>42 | MAP3K7IP<br>2 | mitogen-activated protein kinase kinase 7 interacting protein 2 | 0.967854  | Inlier |
| siRNA-Vinblastine Run1-DMSO  | NM_1453<br>42 | MAP3K7IP<br>2 | mitogen-activated protein kinase kinase 7 interacting protein 2 | 1.334995  | Inlier |
| siRNA-Temozolomide Run3-DMSO | NM_0052<br>04 | MAP3K8        | mitogen-activated protein kinase kinase 8                       | -1.019567 | Inlier |
| siRNA-Temozolomide Run2-DMSO | NM_0052<br>04 | MAP3K8        | mitogen-activated protein kinase kinase 8                       | -0.797062 | Inlier |
| siRNA-Temozolomide Run1-DMSO | NM_0052<br>04 | MAP3K8        | mitogen-activated protein kinase kinase 8                       | -0.086715 | Inlier |
| siRNA Disorazole DMSO Run1   | NM_0052<br>04 | MAP3K8        | mitogen-activated protein kinase kinase 8                       | -0.052393 | Inlier |

Identification of Survival Genes in Human Glioblastoma Cells Using siRNA Screening  
 Nikhil G Thaker, Fang Zhang, Peter R. McDonald, Tong Ying Shun, Michael D Lewen, Ian F. Pollack, and John S. Lazo

Molecular Pharmacology

| siRNA              | Condition | Run   | Gene   | Accession | Protein                                      | Value     | Type   |
|--------------------|-----------|-------|--------|-----------|----------------------------------------------|-----------|--------|
| siRNA Disorazole   | DMSO      | Run3  | MAP3K8 | NM_005204 | kinase 8<br>mitogen-activated protein kinase | 0.052393  | Inlier |
| siRNA Disorazole   | DMSO      | Run2  | MAP3K8 | NM_005204 | kinase 8<br>mitogen-activated protein kinase | 0.551938  | Inlier |
| siRNA-Vinblastine  | DMSO      | Run2- | MAP3K8 | NM_005204 | kinase 8<br>mitogen-activated protein kinase | 1.117643  | Inlier |
| siRNA-Vinblastine  | DMSO      | Run1- | MAP3K8 | NM_005204 | kinase 8<br>mitogen-activated protein kinase | 2.046291  | Inlier |
| siRNA-Temozolomide | DMSO      | Run3- | MAP3K9 | NM_033141 | kinase 9<br>mitogen-activated protein kinase | -0.753942 | Inlier |
| siRNA-Temozolomide | DMSO      | Run2- | MAP3K9 | NM_033141 | kinase 9<br>mitogen-activated protein kinase | -0.753941 | Inlier |
| siRNA-Temozolomide | DMSO      | Run1- | MAP3K9 | NM_033141 | kinase 9<br>mitogen-activated protein kinase | -0.595059 | Inlier |
| siRNA Disorazole   | DMSO      | Run2  | MAP3K9 | NM_033141 | kinase 9                                     | -0.412943 | Inlier |

Identification of Survival Genes in Human Glioblastoma Cells Using siRNA Screening

Nikhil G Thaker, Fang Zhang, Peter R. McDonald, Tong Ying Shun, Michael D Lewen, Ian F. Pollack, and John S. Lazo

Molecular Pharmacology

|                              |               |        |                                              |           |        |
|------------------------------|---------------|--------|----------------------------------------------|-----------|--------|
| siRNA Disorazole DMSO Run3   | NM_0331<br>41 | MAP3K9 | kinase 9<br>mitogen-activated protein kinase | 0.412943  | Inlier |
| siRNA Disorazole DMSO Run1   | NM_0331<br>41 | MAP3K9 | kinase 9<br>mitogen-activated protein kinase | 0.580594  | Inlier |
| siRNA-Vinblastine Run2-DMSO  | NM_0331<br>41 | MAP3K9 | kinase 9<br>mitogen-activated protein kinase | 0.924261  | Inlier |
| siRNA-Vinblastine Run1-DMSO  | NM_0331<br>41 | MAP3K9 | kinase 9<br>mitogen-activated protein kinase | 1.06771   | Inlier |
| siRNA-Temozolomide Run2-DMSO | NM_0071<br>81 | MAP4K1 | kinase 1<br>mitogen-activated protein kinase | -1.074121 | Inlier |
| siRNA-Temozolomide Run3-DMSO | NM_0071<br>81 | MAP4K1 | kinase 1<br>mitogen-activated protein kinase | -0.999255 | Inlier |
| siRNA Disorazole DMSO Run1   | NM_0071<br>81 | MAP4K1 | kinase 1<br>mitogen-activated protein kinase | -0.32121  | Inlier |
| siRNA-Temozolomide Run1-DMSO | NM_0071<br>81 | MAP4K1 | kinase 1                                     | -0.169035 | Inlier |

Identification of Survival Genes in Human Glioblastoma Cells Using siRNA Screening

Nikhil G Thaker, Fang Zhang, Peter R. McDonald, Tong Ying Shun, Michael D Lewen, Ian F. Pollack, and John S. Lazo

Molecular Pharmacology

|                              |               |        |                                                            |           |        |
|------------------------------|---------------|--------|------------------------------------------------------------|-----------|--------|
| siRNA Disorazole DMSO Run2   | NM_0071<br>81 | MAP4K1 | kinase 1<br>mitogen-activated protein kinase kinase kinase | 0.169034  | Inlier |
| siRNA Disorazole DMSO Run3   | NM_0071<br>81 | MAP4K1 | kinase 1<br>mitogen-activated protein kinase kinase kinase | 0.349745  | Inlier |
| siRNA-Vinblastine Run2-DMSO  | NM_0071<br>81 | MAP4K1 | kinase 1<br>mitogen-activated protein kinase kinase kinase | 1.486921  | Inlier |
| siRNA-Vinblastine Run1-DMSO  | NM_0071<br>81 | MAP4K1 | kinase 1<br>mitogen-activated protein kinase kinase kinase | 1.971021  | Inlier |
| siRNA Disorazole DMSO Run2   | NM_0045<br>79 | MAP4K2 | kinase 2<br>mitogen-activated protein kinase kinase kinase | -2.162781 | Inlier |
| siRNA-Temozolomide Run1-DMSO | NM_0045<br>79 | MAP4K2 | kinase 2<br>mitogen-activated protein kinase kinase kinase | -1.008992 | Inlier |
| siRNA Disorazole DMSO Run1   | NM_0045<br>79 | MAP4K2 | kinase 2                                                   | -0.340008 | Inlier |

Identification of Survival Genes in Human Glioblastoma Cells Using siRNA Screening  
 Nikhil G Thaker, Fang Zhang, Peter R. McDonald, Tong Ying Shun, Michael D Lewen, Ian F. Pollack, and John S. Lazo

Molecular Pharmacology

| siRNA Treatment              | Gene ID   | Gene Name | Gene Description                                 | Log Fold Change | Outlier Status |
|------------------------------|-----------|-----------|--------------------------------------------------|-----------------|----------------|
| siRNA Disorazole DMSO Run3   | NM_004579 | MAP4K2    | mitogen-activated protein kinase kinase kinase 2 | -0.048714       | Inlier         |
| siRNA-Temozolomide Run3-DMSO | NM_004579 | MAP4K2    | mitogen-activated protein kinase kinase kinase 2 | 0.048714        | Inlier         |
| siRNA-Temozolomide Run2-DMSO | NM_004579 | MAP4K2    | mitogen-activated protein kinase kinase kinase 2 | 0.071222        | Inlier         |
| siRNA-Vinblastine Run1-DMSO  | NM_004579 | MAP4K2    | mitogen-activated protein kinase kinase kinase 2 | 1.728913        | Inlier         |
| siRNA-Vinblastine Run2-DMSO  | NM_004579 | MAP4K2    | mitogen-activated protein kinase kinase kinase 2 | 4.801328        | Outlier        |
| siRNA-Temozolomide Run3-DMSO | NM_003618 | MAP4K3    | mitogen-activated protein kinase kinase kinase 3 | -1.287003       | Inlier         |
| siRNA-Temozolomide Run1-DMSO | NM_003618 | MAP4K3    | mitogen-activated protein kinase kinase kinase 3 | -0.355868       | Inlier         |

Identification of Survival Genes in Human Glioblastoma Cells Using siRNA Screening  
 Nikhil G Thaker, Fang Zhang, Peter R. McDonald, Tong Ying Shun, Michael D Lewen, Ian F. Pollack, and John S. Lazo

Molecular Pharmacology

|                              |               |        |                                                            |           |         |
|------------------------------|---------------|--------|------------------------------------------------------------|-----------|---------|
| siRNA Disorazole DMSO Run2   | NM_0036<br>18 | MAP4K3 | kinase 3<br>mitogen-activated protein kinase kinase kinase | -0.095937 | Inlier  |
| siRNA-Temozolomide Run2-DMSO | NM_0036<br>18 | MAP4K3 | kinase 3<br>mitogen-activated protein kinase kinase kinase | -0.049749 | Inlier  |
| siRNA Disorazole DMSO Run1   | NM_0036<br>18 | MAP4K3 | kinase 3<br>mitogen-activated protein kinase kinase kinase | 0.049749  | Inlier  |
| siRNA-Vinblastine Run2-DMSO  | NM_0036<br>18 | MAP4K3 | kinase 3<br>mitogen-activated protein kinase kinase kinase | 0.993132  | Inlier  |
| siRNA Disorazole DMSO Run3   | NM_0036<br>18 | MAP4K3 | kinase 3<br>mitogen-activated protein kinase kinase kinase | 1.318462  | Inlier  |
| siRNA-Vinblastine Run1-DMSO  | NM_0036<br>18 | MAP4K3 | kinase 3<br>mitogen-activated protein kinase kinase kinase | 2.444143  | Inlier  |
| siRNA Disorazole DMSO Run2   | NM_1456<br>87 | MAP4K4 | kinase 4                                                   | -7.088983 | Outlier |



Identification of Survival Genes in Human Glioblastoma Cells Using siRNA Screening

Nikhil G Thaker, Fang Zhang, Peter R. McDonald, Tong Ying Shun, Michael D Lewen, Ian F. Pollack, and John S. Lazo

Molecular Pharmacology

| siRNA                        | Gene    | Gene ID | Gene Name | Gene Description                                           | Log Fold Change | Outlier Status |
|------------------------------|---------|---------|-----------|------------------------------------------------------------|-----------------|----------------|
| siRNA Disorazole DMSO Run3   | NM_1456 | 87      | MAP4K4    | kinase 4<br>mitogen-activated protein kinase kinase kinase | -2.900227       | Inlier         |
| siRNA-Temozolomide Run1-DMSO | NM_1456 | 87      | MAP4K4    | kinase 4<br>mitogen-activated protein kinase kinase kinase | -0.574601       | Inlier         |
| siRNA Disorazole DMSO Run1   | NM_1456 | 87      | MAP4K4    | kinase 4<br>mitogen-activated protein kinase kinase kinase | -0.096804       | Inlier         |
| siRNA-Temozolomide Run2-DMSO | NM_1456 | 87      | MAP4K4    | kinase 4<br>mitogen-activated protein kinase kinase kinase | 0.096806        | Inlier         |
| siRNA-Temozolomide Run3-DMSO | NM_1456 | 87      | MAP4K4    | kinase 4<br>mitogen-activated protein kinase kinase kinase | 0.301756        | Inlier         |
| siRNA-Vinblastine Run1-DMSO  | NM_1456 | 87      | MAP4K4    | kinase 4<br>mitogen-activated protein kinase kinase kinase | 0.774399        | Inlier         |
| siRNA-Vinblastine Run2-DMSO  | NM_1456 | 87      | MAP4K4    | kinase 4<br>mitogen-activated protein kinase kinase kinase | 1.308908        | Inlier         |

Identification of Survival Genes in Human Glioblastoma Cells Using siRNA Screening  
 Nikhil G Thaker, Fang Zhang, Peter R. McDonald, Tong Ying Shun, Michael D Lewen, Ian F. Pollack, and John S. Lazo

Molecular Pharmacology

| siRNA Treatment              | Gene ID   | Gene Name | Gene Description                                 | Log Fold Change | Outlier Status |
|------------------------------|-----------|-----------|--------------------------------------------------|-----------------|----------------|
| siRNA-Temozolomide Run1-DMSO | NM_198794 | MAP4K5    | mitogen-activated protein kinase kinase kinase 5 | -1.633066       | Inlier         |
| siRNA-Temozolomide Run3-DMSO | NM_198794 | MAP4K5    | mitogen-activated protein kinase kinase kinase 5 | -0.410266       | Inlier         |
| siRNA Disorazole DMSO Run1   | NM_198794 | MAP4K5    | mitogen-activated protein kinase kinase kinase 5 | -0.319839       | Inlier         |
| siRNA-Temozolomide Run2-DMSO | NM_198794 | MAP4K5    | mitogen-activated protein kinase kinase kinase 5 | -0.147356       | Inlier         |
| siRNA Disorazole DMSO Run3   | NM_198794 | MAP4K5    | mitogen-activated protein kinase kinase kinase 5 | 0.147357        | Inlier         |
| siRNA Disorazole DMSO Run2   | NM_198794 | MAP4K5    | mitogen-activated protein kinase kinase kinase 5 | 0.938734        | Inlier         |
| siRNA-Vinblastine Run1-DMSO  | NM_198794 | MAP4K5    | mitogen-activated protein kinase kinase kinase 5 | 0.97587         | Inlier         |

Identification of Survival Genes in Human Glioblastoma Cells Using siRNA Screening  
 Nikhil G Thaker, Fang Zhang, Peter R. McDonald, Tong Ying Shun, Michael D Lewen, Ian F. Pollack, and John S. Lazo

Molecular Pharmacology

| siRNA Treatment              | Gene ID   | Gene Name | Protein Name                              | Value     | Outlier Status |
|------------------------------|-----------|-----------|-------------------------------------------|-----------|----------------|
| siRNA-Vinblastine Run2-DMSO  | NM_198794 | MAP4K5    | mitogen-activated protein kinase kinase 5 | 1.034772  | Inlier         |
| siRNA-Temozolomide Run3-DMSO | NM_138957 | MAPK1     | mitogen-activated protein kinase 1        | -0.831811 | Inlier         |
| siRNA-Temozolomide Run2-DMSO | NM_138957 | MAPK1     | mitogen-activated protein kinase 1        | -0.517189 | Inlier         |
| siRNA-Temozolomide Run1-DMSO | NM_138957 | MAPK1     | mitogen-activated protein kinase 1        | -0.377823 | Inlier         |
| siRNA Disorazole DMSO Run3   | NM_138957 | MAPK1     | mitogen-activated protein kinase 1        | -0.339258 | Inlier         |
| siRNA Disorazole DMSO Run1   | NM_138957 | MAPK1     | mitogen-activated protein kinase 1        | 0.339258  | Inlier         |
| siRNA-Vinblastine Run2-DMSO  | NM_138957 | MAPK1     | mitogen-activated protein kinase 1        | 1.183099  | Inlier         |
| siRNA-Vinblastine Run1-DMSO  | NM_138957 | MAPK1     | mitogen-activated protein kinase 1        | 1.522558  | Inlier         |
| siRNA Disorazole DMSO Run2   | NM_138957 | MAPK1     | mitogen-activated protein kinase 1        | 1.613683  | Inlier         |
| siRNA-Temozolomide Run3-DMSO | NM_138982 | MAPK10    | mitogen-activated protein kinase 10       | -0.766656 | Inlier         |
| siRNA-Temozolomide Run2-DMSO | NM_138982 | MAPK10    | mitogen-activated protein kinase 10       | -0.582344 | Inlier         |
| siRNA Disorazole DMSO Run3   | NM_138982 | MAPK10    | mitogen-activated protein kinase 10       | -0.444452 | Inlier         |

Identification of Survival Genes in Human Glioblastoma Cells Using siRNA Screening  
 Nikhil G Thaker, Fang Zhang, Peter R. McDonald, Tong Ying Shun, Michael D Lewen, Ian F. Pollack, and John S. Lazo

Molecular Pharmacology

| siRNA Treatment              | Gene ID       | Gene Name | Protein Name                        | Value     | Category |
|------------------------------|---------------|-----------|-------------------------------------|-----------|----------|
| siRNA-Temozolomide Run1-DMSO | NM_1389<br>82 | MAPK10    | mitogen-activated protein kinase 10 | -0.245359 | Inlier   |
| siRNA Disorazole DMSO Run1   | NM_1389<br>82 | MAPK10    | mitogen-activated protein kinase 10 | 0.245359  | Inlier   |
| siRNA Disorazole DMSO Run2   | NM_1389<br>82 | MAPK10    | mitogen-activated protein kinase 10 | 0.852528  | Inlier   |
| siRNA-Vinblastine Run2-DMSO  | NM_1389<br>82 | MAPK10    | mitogen-activated protein kinase 10 | 0.946984  | Inlier   |
| siRNA-Vinblastine Run1-DMSO  | NM_1389<br>82 | MAPK10    | mitogen-activated protein kinase 10 | 1.240977  | Inlier   |
| siRNA-Vinblastine Run2-DMSO  | NM_0027<br>51 | MAPK11    | mitogen-activated protein kinase 11 | -1.250271 | Inlier   |
| siRNA-Temozolomide Run3-DMSO | NM_0027<br>51 | MAPK11    | mitogen-activated protein kinase 11 | -0.761898 | Inlier   |
| siRNA-Temozolomide Run1-DMSO | NM_0027<br>51 | MAPK11    | mitogen-activated protein kinase 11 | -0.555173 | Inlier   |
| siRNA-Vinblastine Run1-DMSO  | NM_0027<br>51 | MAPK11    | mitogen-activated protein kinase 11 | -0.080449 | Inlier   |
| siRNA-Temozolomide Run2-DMSO | NM_0027<br>51 | MAPK11    | mitogen-activated protein kinase 11 | 0.080448  | Inlier   |
| siRNA Disorazole DMSO Run1   | NM_0027<br>51 | MAPK11    | mitogen-activated protein kinase 11 | 0.587102  | Inlier   |
| siRNA Disorazole DMSO Run3   | NM_0027<br>51 | MAPK11    | mitogen-activated protein kinase 11 | 1.956368  | Inlier   |
| siRNA Disorazole DMSO Run2   | NM_0027<br>51 | MAPK11    | mitogen-activated protein kinase 11 | 3.889143  | Outlier  |

Identification of Survival Genes in Human Glioblastoma Cells Using siRNA Screening  
 Nikhil G Thaker, Fang Zhang, Peter R. McDonald, Tong Ying Shun, Michael D Lewen, Ian F. Pollack, and John S. Lazo

Molecular Pharmacology

| siRNA Treatment              | Gene ID   | Gene Name | Protein Name                        | Log Fold Change | Outlier Status |
|------------------------------|-----------|-----------|-------------------------------------|-----------------|----------------|
| siRNA-Temozolomide Run3-DMSO | NM_002969 | MAPK12    | mitogen-activated protein kinase 12 | -2.134958       | Inlier         |
| siRNA-Temozolomide Run2-DMSO | NM_002969 | MAPK12    | mitogen-activated protein kinase 12 | -1.666998       | Inlier         |
| siRNA-Temozolomide Run1-DMSO | NM_002969 | MAPK12    | mitogen-activated protein kinase 12 | -1.369916       | Inlier         |
| siRNA Disorazole DMSO Run1   | NM_002969 | MAPK12    | mitogen-activated protein kinase 12 | -0.351755       | Inlier         |
| siRNA-Vinblastine Run1-DMSO  | NM_002969 | MAPK12    | mitogen-activated protein kinase 12 | 0.351755        | Inlier         |
| siRNA Disorazole DMSO Run3   | NM_002969 | MAPK12    | mitogen-activated protein kinase 12 | 0.412894        | Inlier         |
| siRNA Disorazole DMSO Run2   | NM_002969 | MAPK12    | mitogen-activated protein kinase 12 | 0.500545        | Inlier         |
| siRNA-Vinblastine Run2-DMSO  | NM_002969 | MAPK12    | mitogen-activated protein kinase 12 | 0.848455        | Inlier         |
| siRNA-Temozolomide Run3-DMSO | NM_002754 | MAPK13    | mitogen-activated protein kinase 13 | -1.065852       | Inlier         |
| siRNA-Temozolomide Run2-DMSO | NM_002754 | MAPK13    | mitogen-activated protein kinase 13 | -0.852045       | Inlier         |
| siRNA Disorazole DMSO Run3   | NM_002754 | MAPK13    | mitogen-activated protein kinase 13 | -0.677136       | Inlier         |
| siRNA-Temozolomide Run1-DMSO | NM_002754 | MAPK13    | mitogen-activated protein kinase 13 | -0.054884       | Inlier         |
| siRNA Disorazole DMSO Run2   | NM_002754 | MAPK13    | mitogen-activated protein kinase 13 | 0.054883        | Inlier         |

Identification of Survival Genes in Human Glioblastoma Cells Using siRNA Screening  
 Nikhil G Thaker, Fang Zhang, Peter R. McDonald, Tong Ying Shun, Michael D Lewen, Ian F. Pollack, and John S. Lazo

Molecular Pharmacology

|                              |               |        |                                     |           |        |
|------------------------------|---------------|--------|-------------------------------------|-----------|--------|
| siRNA Disorazole DMSO Run1   | NM_0027<br>54 | MAPK13 | mitogen-activated protein kinase 13 | 0.257429  | Inlier |
| siRNA-Vinblastine Run1-DMSO  | NM_0027<br>54 | MAPK13 | mitogen-activated protein kinase 13 | 0.671864  | Inlier |
| siRNA-Vinblastine Run2-DMSO  | NM_0027<br>54 | MAPK13 | mitogen-activated protein kinase 13 | 2.727085  | Inlier |
| siRNA-Temozolomide Run3-DMSO | NM_1390<br>13 | MAPK14 | mitogen-activated protein kinase 14 | -1.2185   | Inlier |
| siRNA-Temozolomide Run2-DMSO | NM_1390<br>13 | MAPK14 | mitogen-activated protein kinase 14 | -1.042293 | Inlier |
| siRNA-Temozolomide Run1-DMSO | NM_1390<br>13 | MAPK14 | mitogen-activated protein kinase 14 | -0.725718 | Inlier |
| siRNA Disorazole DMSO Run3   | NM_1390<br>13 | MAPK14 | mitogen-activated protein kinase 14 | -0.099437 | Inlier |
| siRNA Disorazole DMSO Run1   | NM_1390<br>13 | MAPK14 | mitogen-activated protein kinase 14 | 0.099436  | Inlier |
| siRNA Disorazole DMSO Run2   | NM_1390<br>13 | MAPK14 | mitogen-activated protein kinase 14 | 0.123476  | Inlier |
| siRNA-Vinblastine Run2-DMSO  | NM_1390<br>13 | MAPK14 | mitogen-activated protein kinase 14 | 0.623282  | Inlier |
| siRNA-Vinblastine Run1-DMSO  | NM_1390<br>13 | MAPK14 | mitogen-activated protein kinase 14 | 0.919441  | Inlier |
| siRNA-Temozolomide Run3-DMSO | NM_0027<br>46 | MAPK3  | mitogen-activated protein kinase 3  | -0.828525 | Inlier |
| siRNA-Temozolomide Run2-DMSO | NM_0027<br>46 | MAPK3  | mitogen-activated protein kinase 3  | -0.738541 | Inlier |

Identification of Survival Genes in Human Glioblastoma Cells Using siRNA Screening  
 Nikhil G Thaker, Fang Zhang, Peter R. McDonald, Tong Ying Shun, Michael D Lewen, Ian F. Pollack, and John S. Lazo

Molecular Pharmacology

|                              |               |       |                                    |           |        |
|------------------------------|---------------|-------|------------------------------------|-----------|--------|
| siRNA-Temozolomide Run1-DMSO | NM_0027<br>46 | MAPK3 | mitogen-activated protein kinase 3 | -0.333361 | Inlier |
| siRNA Disorazole DMSO Run3   | NM_0027<br>46 | MAPK3 | mitogen-activated protein kinase 3 | -0.159453 | Inlier |
| siRNA Disorazole DMSO Run1   | NM_0027<br>46 | MAPK3 | mitogen-activated protein kinase 3 | 0.159453  | Inlier |
| siRNA Disorazole DMSO Run2   | NM_0027<br>46 | MAPK3 | mitogen-activated protein kinase 3 | 0.610459  | Inlier |
| siRNA-Vinblastine Run2-DMSO  | NM_0027<br>46 | MAPK3 | mitogen-activated protein kinase 3 | 0.918628  | Inlier |
| siRNA-Vinblastine Run1-DMSO  | NM_0027<br>46 | MAPK3 | mitogen-activated protein kinase 3 | 1.083729  | Inlier |
| siRNA-Temozolomide Run3-DMSO | NM_0027<br>47 | MAPK4 | mitogen-activated protein kinase 4 | -1.148354 | Inlier |
| siRNA-Temozolomide Run1-DMSO | NM_0027<br>47 | MAPK4 | mitogen-activated protein kinase 4 | -0.698566 | Inlier |
| siRNA-Temozolomide Run2-DMSO | NM_0027<br>47 | MAPK4 | mitogen-activated protein kinase 4 | -0.204938 | Inlier |
| siRNA Disorazole DMSO Run3   | NM_0027<br>47 | MAPK4 | mitogen-activated protein kinase 4 | -0.000395 | Inlier |
| siRNA Disorazole DMSO Run2   | NM_0027<br>47 | MAPK4 | mitogen-activated protein kinase 4 | 0.000395  | Inlier |
| siRNA-Vinblastine Run1-DMSO  | NM_0027<br>47 | MAPK4 | mitogen-activated protein kinase 4 | 0.650434  | Inlier |
| siRNA Disorazole DMSO Run1   | NM_0027<br>47 | MAPK4 | mitogen-activated protein kinase 4 | 0.728565  | Inlier |

Identification of Survival Genes in Human Glioblastoma Cells Using siRNA Screening  
 Nikhil G Thaker, Fang Zhang, Peter R. McDonald, Tong Ying Shun, Michael D Lewen, Ian F. Pollack, and John S. Lazo

Molecular Pharmacology

|                              |               |       |                                    |                  |
|------------------------------|---------------|-------|------------------------------------|------------------|
| siRNA-Vinblastine Run2-DMSO  | NM_0027<br>47 | MAPK4 | mitogen-activated protein kinase 4 | 1.99569 Inlier   |
| siRNA-Temozolomide Run2-DMSO | NM_0027<br>48 | MAPK6 | mitogen-activated protein kinase 6 | -0.81747 Inlier  |
| siRNA-Temozolomide Run3-DMSO | NM_0027<br>48 | MAPK6 | mitogen-activated protein kinase 6 | -0.809731 Inlier |
| siRNA Disorazole DMSO Run3   | NM_0027<br>48 | MAPK6 | mitogen-activated protein kinase 6 | -0.378118 Inlier |
| siRNA-Vinblastine Run2-DMSO  | NM_0027<br>48 | MAPK6 | mitogen-activated protein kinase 6 | -0.169318 Inlier |
| siRNA Disorazole DMSO Run1   | NM_0027<br>48 | MAPK6 | mitogen-activated protein kinase 6 | 0.169318 Inlier  |
| siRNA-Temozolomide Run1-DMSO | NM_0027<br>48 | MAPK6 | mitogen-activated protein kinase 6 | 0.539269 Inlier  |
| siRNA Disorazole DMSO Run2   | NM_0027<br>48 | MAPK6 | mitogen-activated protein kinase 6 | 1.785423 Inlier  |
| siRNA-Vinblastine Run1-DMSO  | NM_0027<br>48 | MAPK6 | mitogen-activated protein kinase 6 | 2.020005 Inlier  |
| siRNA-Temozolomide Run3-DMSO | NM_1390<br>32 | MAPK7 | mitogen-activated protein kinase 7 | -1.924873 Inlier |
| siRNA-Temozolomide Run2-DMSO | NM_1390<br>32 | MAPK7 | mitogen-activated protein kinase 7 | -1.359833 Inlier |
| siRNA-Temozolomide Run1-DMSO | NM_1390<br>32 | MAPK7 | mitogen-activated protein kinase 7 | -0.69634 Inlier  |
| siRNA Disorazole DMSO Run2   | NM_1390<br>32 | MAPK7 | mitogen-activated protein kinase 7 | -0.0529 Inlier   |



Identification of Survival Genes in Human Glioblastoma Cells Using siRNA Screening  
 Nikhil G Thaker, Fang Zhang, Peter R. McDonald, Tong Ying Shun, Michael D Lewen, Ian F. Pollack, and John S. Lazo

Molecular Pharmacology

| siRNA                        | Gene    | Gene ID | Gene Name | Protein Name                       | Value     | Category |
|------------------------------|---------|---------|-----------|------------------------------------|-----------|----------|
| siRNA Disorazole DMSO Run1   | NM_1390 | 32      | MAPK7     | mitogen-activated protein kinase 7 | 0.0529    | Inlier   |
| siRNA-Vinblastine Run1-DMSO  | NM_1390 | 32      | MAPK7     | mitogen-activated protein kinase 7 | 0.637681  | Inlier   |
| siRNA Disorazole DMSO Run3   | NM_1390 | 32      | MAPK7     | mitogen-activated protein kinase 7 | 0.65266   | Inlier   |
| siRNA-Vinblastine Run2-DMSO  | NM_1390 | 32      | MAPK7     | mitogen-activated protein kinase 7 | 1.105337  | Inlier   |
| siRNA Disorazole DMSO Run2   | NM_0027 | 50      | MAPK8     | mitogen-activated protein kinase 8 | -1.052472 | Inlier   |
| siRNA Disorazole DMSO Run3   | NM_0027 | 50      | MAPK8     | mitogen-activated protein kinase 8 | -0.828878 | Inlier   |
| siRNA-Temozolomide Run3-DMSO | NM_0027 | 50      | MAPK8     | mitogen-activated protein kinase 8 | -0.624148 | Inlier   |
| siRNA-Temozolomide Run2-DMSO | NM_0027 | 50      | MAPK8     | mitogen-activated protein kinase 8 | -0.248581 | Inlier   |
| siRNA-Temozolomide Run1-DMSO | NM_0027 | 50      | MAPK8     | mitogen-activated protein kinase 8 | 0.248581  | Inlier   |
| siRNA Disorazole DMSO Run1   | NM_0027 | 50      | MAPK8     | mitogen-activated protein kinase 8 | 0.633979  | Inlier   |
| siRNA-Vinblastine Run1-DMSO  | NM_0027 | 50      | MAPK8     | mitogen-activated protein kinase 8 | 0.715021  | Inlier   |
| siRNA-Vinblastine Run2-DMSO  | NM_0027 | 50      | MAPK8     | mitogen-activated protein kinase 8 | 2.017705  | Inlier   |

Identification of Survival Genes in Human Glioblastoma Cells Using siRNA Screening

Nikhil G Thaker, Fang Zhang, Peter R. McDonald, Tong Ying Shun, Michael D Lewen, Ian F. Pollack, and John S. Lazo

Molecular Pharmacology

|                              |           |          |                                                          |           |        |
|------------------------------|-----------|----------|----------------------------------------------------------|-----------|--------|
| siRNA-Temozolomide Run3-DMSO | NM_005456 | MAPK8IP1 | mitogen-activated protein kinase 8 interacting protein 1 | -1.495051 | Inlier |
| siRNA-Temozolomide Run2-DMSO | NM_005456 | MAPK8IP1 | mitogen-activated protein kinase 8 interacting protein 1 | -0.579009 | Inlier |
| siRNA-Temozolomide Run1-DMSO | NM_005456 | MAPK8IP1 | mitogen-activated protein kinase 8 interacting protein 1 | -0.515538 | Inlier |
| siRNA Disorazole DMSO Run2   | NM_005456 | MAPK8IP1 | mitogen-activated protein kinase 8 interacting protein 1 | -0.116514 | Inlier |
| siRNA Disorazole DMSO Run1   | NM_005456 | MAPK8IP1 | mitogen-activated protein kinase 8 interacting protein 1 | 0.116514  | Inlier |
| siRNA-Vinblastine Run2-DMSO  | NM_005456 | MAPK8IP1 | mitogen-activated protein kinase 8 interacting protein 1 | 0.769991  | Inlier |
| siRNA-Vinblastine Run1-DMSO  | NM_005456 | MAPK8IP1 | mitogen-activated protein kinase 8 interacting protein 1 | 0.81332   | Inlier |

Identification of Survival Genes in Human Glioblastoma Cells Using siRNA Screening  
 Nikhil G Thaker, Fang Zhang, Peter R. McDonald, Tong Ying Shun, Michael D Lewen, Ian F. Pollack, and John S. Lazo  
 Molecular Pharmacology

|                              |               |          |                                                          |           |        |
|------------------------------|---------------|----------|----------------------------------------------------------|-----------|--------|
| siRNA Disorazole DMSO Run3   | NM_0054<br>56 | MAPK8IP1 | mitogen-activated protein kinase 8 interacting protein 1 | 1.497456  | Inlier |
| siRNA Disorazole DMSO Run2   | NM_0123<br>24 | MAPK8IP2 | mitogen-activated protein kinase 8 interacting protein 2 | -1.502978 | Inlier |
| siRNA-Temozolomide Run3-DMSO | NM_0123<br>24 | MAPK8IP2 | mitogen-activated protein kinase 8 interacting protein 2 | -1.189788 | Inlier |
| siRNA-Temozolomide Run1-DMSO | NM_0123<br>24 | MAPK8IP2 | mitogen-activated protein kinase 8 interacting protein 2 | -0.286312 | Inlier |
| siRNA-Temozolomide Run2-DMSO | NM_0123<br>24 | MAPK8IP2 | mitogen-activated protein kinase 8 interacting protein 2 | -0.018048 | Inlier |
| siRNA Disorazole DMSO Run1   | NM_0123<br>24 | MAPK8IP2 | mitogen-activated protein kinase 8 interacting protein 2 | 0.018048  | Inlier |
| siRNA-Vinblastine Run1-DMSO  | NM_0123<br>24 | MAPK8IP2 | mitogen-activated protein kinase 8 interacting protein 2 | 0.295905  | Inlier |

Identification of Survival Genes in Human Glioblastoma Cells Using siRNA Screening

Nikhil G Thaker, Fang Zhang, Peter R. McDonald, Tong Ying Shun, Michael D Lewen, Ian F. Pollack, and John S. Lazo

Molecular Pharmacology

|                              |               |          |                                                          |           |        |
|------------------------------|---------------|----------|----------------------------------------------------------|-----------|--------|
| siRNA-Vinblastine Run2-DMSO  | NM_0123<br>24 | MAPK8IP2 | mitogen-activated protein kinase 8 interacting protein 2 | 1.053095  | Inlier |
| siRNA Disorazole DMSO Run3   | NM_0123<br>24 | MAPK8IP2 | mitogen-activated protein kinase 8 interacting protein 2 | 1.249118  | Inlier |
| siRNA-Temozolomide Run3-DMSO | NM_0151<br>33 | MAPK8IP3 | mitogen-activated protein kinase 8 interacting protein 3 | -1.024878 | Inlier |
| siRNA-Temozolomide Run1-DMSO | NM_0151<br>33 | MAPK8IP3 | mitogen-activated protein kinase 8 interacting protein 3 | -0.737201 | Inlier |
| siRNA-Temozolomide Run2-DMSO | NM_0151<br>33 | MAPK8IP3 | mitogen-activated protein kinase 8 interacting protein 3 | -0.611799 | Inlier |
| siRNA Disorazole DMSO Run2   | NM_0151<br>33 | MAPK8IP3 | mitogen-activated protein kinase 8 interacting protein 3 | -0.053773 | Inlier |
| siRNA Disorazole DMSO Run1   | NM_0151<br>33 | MAPK8IP3 | mitogen-activated protein kinase 8 interacting protein 3 | 0.053773  | Inlier |

Identification of Survival Genes in Human Glioblastoma Cells Using siRNA Screening  
 Nikhil G Thaker, Fang Zhang, Peter R. McDonald, Tong Ying Shun, Michael D Lewen, Ian F. Pollack, and John S. Lazo  
 Molecular Pharmacology

|                              |               |          |                                                          |           |        |
|------------------------------|---------------|----------|----------------------------------------------------------|-----------|--------|
| siRNA-Vinblastine Run1-DMSO  | NM_0151<br>33 | MAPK8IP3 | mitogen-activated protein kinase 8 interacting protein 3 | 0.528951  | Inlier |
| siRNA-Vinblastine Run2-DMSO  | NM_0151<br>33 | MAPK8IP3 | mitogen-activated protein kinase 8 interacting protein 3 | 0.851515  | Inlier |
| siRNA Disorazole DMSO Run3   | NM_0151<br>33 | MAPK8IP3 | mitogen-activated protein kinase 8 interacting protein 3 | 1.081007  | Inlier |
| siRNA-Temozolomide Run3-DMSO | NM_0027<br>52 | MAPK9    | mitogen-activated protein kinase 9                       | -2.462051 | Inlier |
| siRNA Disorazole DMSO Run1   | NM_0027<br>52 | MAPK9    | mitogen-activated protein kinase 9                       | -0.725997 | Inlier |
| siRNA-Temozolomide Run1-DMSO | NM_0027<br>52 | MAPK9    | mitogen-activated protein kinase 9                       | -0.623003 | Inlier |
| siRNA-Temozolomide Run2-DMSO | NM_0027<br>52 | MAPK9    | mitogen-activated protein kinase 9                       | -0.380576 | Inlier |
| siRNA Disorazole DMSO Run2   | NM_0027<br>52 | MAPK9    | mitogen-activated protein kinase 9                       | 0.380577  | Inlier |
| siRNA Disorazole DMSO Run3   | NM_0027<br>52 | MAPK9    | mitogen-activated protein kinase 9                       | 0.527545  | Inlier |
| siRNA-Vinblastine Run1-DMSO  | NM_0027<br>52 | MAPK9    | mitogen-activated protein kinase 9                       | 2.086522  | Inlier |

Identification of Survival Genes in Human Glioblastoma Cells Using siRNA Screening

Nikhil G Thaker, Fang Zhang, Peter R. McDonald, Tong Ying Shun, Michael D Lewen, Ian F. Pollack, and John S. Lazo

Molecular Pharmacology

|                              |           |         |                                                       |           |         |
|------------------------------|-----------|---------|-------------------------------------------------------|-----------|---------|
| siRNA-Vinblastine Run2-DMSO  | NM_002752 | MAPK9   | mitogen-activated protein kinase 9                    | 4.064561  | Outlier |
| siRNA-Temozolomide Run3-DMSO | NM_024117 | MAPKAP1 | mitogen-activated protein kinase associated protein 1 | -1.044326 | Inlier  |
| siRNA-Temozolomide Run1-DMSO | NM_024117 | MAPKAP1 | mitogen-activated protein kinase associated protein 1 | -0.835756 | Inlier  |
| siRNA Disorazole DMSO Run2   | NM_024117 | MAPKAP1 | mitogen-activated protein kinase associated protein 1 | -0.651349 | Inlier  |
| siRNA Disorazole DMSO Run1   | NM_024117 | MAPKAP1 | mitogen-activated protein kinase associated protein 1 | -0.04862  | Inlier  |
| siRNA-Temozolomide Run2-DMSO | NM_024117 | MAPKAP1 | mitogen-activated protein kinase associated protein 1 | 0.04862   | Inlier  |
| siRNA Disorazole DMSO Run3   | NM_024117 | MAPKAP1 | mitogen-activated protein kinase associated protein 1 | 0.562175  | Inlier  |

Identification of Survival Genes in Human Glioblastoma Cells Using siRNA Screening  
 Nikhil G Thaker, Fang Zhang, Peter R. McDonald, Tong Ying Shun, Michael D Lewen, Ian F. Pollack, and John S. Lazo  
 Molecular Pharmacology

|                              |               |          |                                                             |           |        |
|------------------------------|---------------|----------|-------------------------------------------------------------|-----------|--------|
| siRNA-Vinblastine Run2-DMSO  | NM_0241<br>17 | MAPKAP1  | mitogen-activated protein kinase associated protein 1       | 0.697651  | Inlier |
| siRNA-Vinblastine Run1-DMSO  | NM_0241<br>17 | MAPKAP1  | mitogen-activated protein kinase associated protein 1       | 0.80088   | Inlier |
| siRNA Disorazole DMSO Run2   | NM_0329<br>60 | MAPKAPK2 | mitogen-activated protein kinase-activated protein kinase 2 | -0.718402 | Inlier |
| siRNA-Temozolomide Run3-DMSO | NM_0329<br>60 | MAPKAPK2 | mitogen-activated protein kinase-activated protein kinase 2 | -0.630598 | Inlier |
| siRNA-Vinblastine Run1-DMSO  | NM_0329<br>60 | MAPKAPK2 | mitogen-activated protein kinase-activated protein kinase 2 | -0.512706 | Inlier |
| siRNA-Temozolomide Run2-DMSO | NM_0329<br>60 | MAPKAPK2 | mitogen-activated protein kinase-activated protein kinase 2 | -0.133649 | Inlier |
| siRNA Disorazole DMSO Run3   | NM_0329<br>60 | MAPKAPK2 | mitogen-activated protein kinase 2                          | 0.13365   | Inlier |

Identification of Survival Genes in Human Glioblastoma Cells Using siRNA Screening  
 Nikhil G Thaker, Fang Zhang, Peter R. McDonald, Tong Ying Shun, Michael D Lewen, Ian F. Pollack, and John S. Lazo

Molecular Pharmacology

| siRNA Treatment              | Gene ID    | Gene Name | Protein Name                                                | Score     | Outlier Status |
|------------------------------|------------|-----------|-------------------------------------------------------------|-----------|----------------|
| siRNA-Temozolomide Run1-DMSO | NM_0329 60 | MAPKAPK 2 | mitogen-activated protein kinase-activated protein kinase 2 | 0.881641  | Inlier         |
| siRNA Disorazole DMSO Run1   | NM_0329 60 | MAPKAPK 2 | mitogen-activated protein kinase-activated protein kinase 2 | 2.426384  | Inlier         |
| siRNA-Vinblastine Run2-DMSO  | NM_0329 60 | MAPKAPK 2 | mitogen-activated protein kinase-activated protein kinase 2 | 3.137349  | Inlier         |
| siRNA-Vinblastine Run2-DMSO  | NM_0046 35 | MAPKAPK 3 | mitogen-activated protein kinase-activated protein kinase 3 | -0.962141 | Inlier         |
| siRNA Disorazole DMSO Run2   | NM_0046 35 | MAPKAPK 3 | mitogen-activated protein kinase-activated protein kinase 3 | -0.386859 | Inlier         |
| siRNA-Temozolomide Run2-DMSO | NM_0046 35 | MAPKAPK 3 | mitogen-activated protein kinase-activated protein kinase 3 | -0.317524 | Inlier         |
| siRNA-Temozolomide Run3-DMSO | NM_0046 35 | MAPKAPK 3 | mitogen-activated protein kinase-activated protein kinase 3 | -0.227342 | Inlier         |



Identification of Survival Genes in Human Glioblastoma Cells Using siRNA Screening

Nikhil G Thaker, Fang Zhang, Peter R. McDonald, Tong Ying Shun, Michael D Lewen, Ian F. Pollack, and John S. Lazo

Molecular Pharmacology

| siRNA Treatment              | Gene ID   | Gene Name | Protein Name                       | Value     | Outlier Status |
|------------------------------|-----------|-----------|------------------------------------|-----------|----------------|
| siRNA-Vinblastine Run1-DMSO  | NM_004635 | MAPKAPK3  | mitogen-activated protein kinase 3 | 0.227343  | Inlier         |
| siRNA-Temozolomide Run1-DMSO | NM_004635 | MAPKAPK3  | mitogen-activated protein kinase 3 | 1.143692  | Inlier         |
| siRNA Disorazole DMSO Run3   | NM_004635 | MAPKAPK3  | mitogen-activated protein kinase 3 | 1.486139  | Inlier         |
| siRNA Disorazole DMSO Run1   | NM_004635 | MAPKAPK3  | mitogen-activated protein kinase 3 | 2.136666  | Inlier         |
| siRNA Disorazole DMSO Run2   | NM_139078 | MAPKAPK5  | mitogen-activated protein kinase 5 | -1.349234 | Inlier         |
| siRNA-Temozolomide Run3-DMSO | NM_139078 | MAPKAPK5  | mitogen-activated protein kinase 5 | -1.044069 | Inlier         |
| siRNA-Temozolomide Run2-DMSO | NM_139078 | MAPKAPK5  | mitogen-activated protein kinase 5 | -0.042435 | Inlier         |

Identification of Survival Genes in Human Glioblastoma Cells Using siRNA Screening  
 Nikhil G Thaker, Fang Zhang, Peter R. McDonald, Tong Ying Shun, Michael D Lewen, Ian F. Pollack, and John S. Lazo

Molecular Pharmacology

|                              |               |              |                                                             |           |         |
|------------------------------|---------------|--------------|-------------------------------------------------------------|-----------|---------|
| siRNA Disorazole DMSO Run3   | NM_1390<br>78 | MAPKAPK<br>5 | mitogen-activated protein kinase-activated protein kinase 5 | -0.027347 | Inlier  |
| siRNA-Temozolomide Run1-DMSO | NM_1390<br>78 | MAPKAPK<br>5 | mitogen-activated protein kinase-activated protein kinase 5 | 0.027347  | Inlier  |
| siRNA-Vinblastine Run1-DMSO  | NM_1390<br>78 | MAPKAPK<br>5 | mitogen-activated protein kinase-activated protein kinase 5 | 0.452518  | Inlier  |
| siRNA Disorazole DMSO Run1   | NM_1390<br>78 | MAPKAPK<br>5 | mitogen-activated protein kinase-activated protein kinase 5 | 0.896482  | Inlier  |
| siRNA-Vinblastine Run2-DMSO  | NM_1390<br>78 | MAPKAPK<br>5 | mitogen-activated protein kinase-activated protein kinase 5 | 1.2459    | Inlier  |
| siRNA Disorazole DMSO Run2   | NM_0023<br>56 | MARCKS       | myristoylated alanine-rich protein kinase C substrate       | -6.815941 | Outlier |
| siRNA-Temozolomide Run3-DMSO | NM_0023<br>56 | MARCKS       | myristoylated alanine-rich protein kinase C substrate       | -0.640122 | Inlier  |

Identification of Survival Genes in Human Glioblastoma Cells Using siRNA Screening  
 Nikhil G Thaker, Fang Zhang, Peter R. McDonald, Tong Ying Shun, Michael D Lewen, Ian F. Pollack, and John S. Lazo  
 Molecular Pharmacology

|                              |           |        |                                                       |           |        |
|------------------------------|-----------|--------|-------------------------------------------------------|-----------|--------|
| siRNA-Temozolomide Run1-DMSO | NM_002356 | MARCKS | myristoylated alanine-rich protein kinase C substrate | -0.625873 | Inlier |
| siRNA Disorazole DMSO Run1   | NM_002356 | MARCKS | myristoylated alanine-rich protein kinase C substrate | -0.387579 | Inlier |
| siRNA-Temozolomide Run2-DMSO | NM_002356 | MARCKS | myristoylated alanine-rich protein kinase C substrate | 0.387579  | Inlier |
| siRNA-Vinblastine Run1-DMSO  | NM_002356 | MARCKS | myristoylated alanine-rich protein kinase C substrate | 0.708878  | Inlier |
| siRNA-Vinblastine Run2-DMSO  | NM_002356 | MARCKS | myristoylated alanine-rich protein kinase C substrate | 1.439131  | Inlier |
| siRNA Disorazole DMSO Run3   | NM_002356 | MARCKS | myristoylated alanine-rich protein kinase C substrate | 3.407505  | Inlier |
| siRNA-Vinblastine Run2-DMSO  | NM_006770 | MARCO  | macrophage receptor with collagenous structure        | -1.958088 | Inlier |

Identification of Survival Genes in Human Glioblastoma Cells Using siRNA Screening  
 Nikhil G Thaker, Fang Zhang, Peter R. McDonald, Tong Ying Shun, Michael D Lewen, Ian F. Pollack, and John S. Lazo  
 Molecular Pharmacology

|                              |               |       |                                                |           |        |
|------------------------------|---------------|-------|------------------------------------------------|-----------|--------|
| siRNA Disorazole DMSO Run1   | NM_0067<br>70 | MARCO | macrophage receptor with collagenous structure | -0.809907 | Inlier |
| siRNA Disorazole DMSO Run3   | NM_0067<br>70 | MARCO | macrophage receptor with collagenous structure | -0.325675 | Inlier |
| siRNA-Temozolomide Run2-DMSO | NM_0067<br>70 | MARCO | macrophage receptor with collagenous structure | -0.186413 | Inlier |
| siRNA-Temozolomide Run1-DMSO | NM_0067<br>70 | MARCO | macrophage receptor with collagenous structure | 0.186412  | Inlier |
| siRNA-Temozolomide Run3-DMSO | NM_0067<br>70 | MARCO | macrophage receptor with collagenous structure | 0.539093  | Inlier |
| siRNA Disorazole DMSO Run2   | NM_0067<br>70 | MARCO | macrophage receptor with collagenous structure | 1.146881  | Inlier |
| siRNA-Vinblastine Run1-DMSO  | NM_0067<br>70 | MARCO | macrophage receptor with collagenous structure | 2.331752  | Inlier |

Identification of Survival Genes in Human Glioblastoma Cells Using siRNA Screening  
 Nikhil G Thaker, Fang Zhang, Peter R. McDonald, Tong Ying Shun, Michael D Lewen, Ian F. Pollack, and John S. Lazo

Molecular Pharmacology

|                                  |               |       |                                                           |           |        |
|----------------------------------|---------------|-------|-----------------------------------------------------------|-----------|--------|
| siRNA Disorazole DMSO Run2       | NM_0186<br>50 | MARK1 | MAP/mic<br>otubule<br>affinity-<br>regulating<br>kinase 1 | -3.319991 | Inlier |
| siRNA Disorazole DMSO Run3       | NM_0186<br>50 | MARK1 | MAP/mic<br>otubule<br>affinity-<br>regulating<br>kinase 1 | -0.730503 | Inlier |
| siRNA-Temozolomide Run3-<br>DMSO | NM_0186<br>50 | MARK1 | MAP/mic<br>otubule<br>affinity-<br>regulating<br>kinase 1 | -0.618497 | Inlier |
| siRNA-Temozolomide Run2-<br>DMSO | NM_0186<br>50 | MARK1 | MAP/mic<br>otubule<br>affinity-<br>regulating<br>kinase 1 | -0.001379 | Inlier |
| siRNA-Vinblastine Run2-<br>DMSO  | NM_0186<br>50 | MARK1 | MAP/mic<br>otubule<br>affinity-<br>regulating<br>kinase 1 | 0.001379  | Inlier |
| siRNA-Temozolomide Run1-<br>DMSO | NM_0186<br>50 | MARK1 | MAP/mic<br>otubule<br>affinity-<br>regulating<br>kinase 1 | 0.088529  | Inlier |
| siRNA-Vinblastine Run1-<br>DMSO  | NM_0186<br>50 | MARK1 | MAP/mic<br>otubule<br>affinity-<br>regulating<br>kinase 1 | 0.932583  | Inlier |
| siRNA Disorazole DMSO Run1       | NM_0186<br>50 | MARK1 | MAP/mic<br>otubule<br>affinity-<br>regulating<br>kinase 1 | 1.790192  | Inlier |
| siRNA Disorazole DMSO Run2       | NM_0174<br>90 | MARK2 | MAP/mic<br>otubule<br>affinity-<br>regulating<br>kinase 2 | -0.702933 | Inlier |
| siRNA-Temozolomide Run3-<br>DMSO | NM_0174<br>90 | MARK2 | MAP/mic<br>otubule<br>affinity-<br>regulating<br>kinase 2 | -0.646067 | Inlier |

Identification of Survival Genes in Human Glioblastoma Cells Using siRNA Screening  
 Nikhil G Thaker, Fang Zhang, Peter R. McDonald, Tong Ying Shun, Michael D Lewen, Ian F. Pollack, and John S. Lazo

Molecular Pharmacology

| siRNA Treatment                  | Gene ID       | Gene Name | MAP/mic<br>otubule<br>affinity-<br>regulating<br>kinase 2 | Value     | Inlier |
|----------------------------------|---------------|-----------|-----------------------------------------------------------|-----------|--------|
| siRNA Disorazole DMSO Run3       | NM_0174<br>90 | MARK2     | MAP/mic<br>otubule<br>affinity-<br>regulating<br>kinase 2 | -0.50116  | Inlier |
| siRNA-Temozolomide Run1-<br>DMSO | NM_0174<br>90 | MARK2     | MAP/mic<br>otubule<br>affinity-<br>regulating<br>kinase 2 | -0.127969 | Inlier |
| siRNA-Temozolomide Run2-<br>DMSO | NM_0174<br>90 | MARK2     | MAP/mic<br>otubule<br>affinity-<br>regulating<br>kinase 2 | 0.127969  | Inlier |
| siRNA Disorazole DMSO Run1       | NM_0174<br>90 | MARK2     | MAP/mic<br>otubule<br>affinity-<br>regulating<br>kinase 2 | 1.172093  | Inlier |
| siRNA-Vinblastine Run1-<br>DMSO  | NM_0174<br>90 | MARK2     | MAP/mic<br>otubule<br>affinity-<br>regulating<br>kinase 2 | 1.759866  | Inlier |
| siRNA-Vinblastine Run2-<br>DMSO  | NM_0174<br>90 | MARK2     | MAP/mic<br>otubule<br>affinity-<br>regulating<br>kinase 2 | 2.785424  | Inlier |
| siRNA Disorazole DMSO Run2       | NM_0023<br>76 | MARK3     | MAP/mic<br>otubule<br>affinity-<br>regulating<br>kinase 3 | -1.218338 | Inlier |
| siRNA-Temozolomide Run3-<br>DMSO | NM_0023<br>76 | MARK3     | MAP/mic<br>otubule<br>affinity-<br>regulating<br>kinase 3 | -0.681767 | Inlier |
| siRNA-Temozolomide Run2-<br>DMSO | NM_0023<br>76 | MARK3     | MAP/mic<br>otubule<br>affinity-<br>regulating<br>kinase 3 | -0.667233 | Inlier |
| siRNA-Temozolomide Run1-<br>DMSO | NM_0023<br>76 | MARK3     | MAP/mic<br>otubule<br>affinity-<br>regulating<br>kinase 3 | -0.183735 | Inlier |

Identification of Survival Genes in Human Glioblastoma Cells Using siRNA Screening  
 Nikhil G Thaker, Fang Zhang, Peter R. McDonald, Tong Ying Shun, Michael D Lewen, Ian F. Pollack, and John S. Lazo

Molecular Pharmacology

| siRNA                        | Gene    | Gene ID | Gene Name | MAP/mic<br>otubule<br>affinity-<br>regulating<br>kinase 3 | Value     | Inlier |
|------------------------------|---------|---------|-----------|-----------------------------------------------------------|-----------|--------|
| siRNA Disorazole DMSO Run1   | NM_0023 | 76      | MARK3     | MAP/mic<br>otubule<br>affinity-<br>regulating<br>kinase 3 | 0.183736  | Inlier |
| siRNA-Vinblastine Run1-DMSO  | NM_0023 | 76      | MARK3     | MAP/mic<br>otubule<br>affinity-<br>regulating<br>kinase 3 | 0.495487  | Inlier |
| siRNA-Vinblastine Run2-DMSO  | NM_0023 | 76      | MARK3     | MAP/mic<br>otubule<br>affinity-<br>regulating<br>kinase 3 | 0.731356  | Inlier |
| siRNA Disorazole DMSO Run3   | NM_0023 | 76      | MARK3     | MAP/mic<br>otubule<br>affinity-<br>regulating<br>kinase 3 | 1.103947  | Inlier |
| siRNA Disorazole DMSO Run2   | NM_0314 | 17      | MARK4     | MAP/mic<br>otubule<br>affinity-<br>regulating<br>kinase 4 | -0.761926 | Inlier |
| siRNA-Temozolomide Run3-DMSO | NM_0314 | 17      | MARK4     | MAP/mic<br>otubule<br>affinity-<br>regulating<br>kinase 4 | -0.587074 | Inlier |
| siRNA Disorazole DMSO Run3   | NM_0314 | 17      | MARK4     | MAP/mic<br>otubule<br>affinity-<br>regulating<br>kinase 4 | -0.258136 | Inlier |
| siRNA-Temozolomide Run1-DMSO | NM_0314 | 17      | MARK4     | MAP/mic<br>otubule<br>affinity-<br>regulating<br>kinase 4 | -0.174751 | Inlier |
| siRNA-Temozolomide Run2-DMSO | NM_0314 | 17      | MARK4     | MAP/mic<br>otubule<br>affinity-<br>regulating<br>kinase 4 | 0.174751  | Inlier |
| siRNA Disorazole DMSO Run1   | NM_0314 | 17      | MARK4     | MAP/mic<br>otubule<br>affinity-<br>regulating<br>kinase 4 | 1.004671  | Inlier |

Identification of Survival Genes in Human Glioblastoma Cells Using siRNA Screening  
 Nikhil G Thaker, Fang Zhang, Peter R. McDonald, Tong Ying Shun, Michael D Lewen, Ian F. Pollack, and John S. Lazo

Molecular Pharmacology

|                              |               |       |                                              |           |        |
|------------------------------|---------------|-------|----------------------------------------------|-----------|--------|
| siRNA-Vinblastine Run1-DMSO  | NM_0314<br>17 | MARK4 | MAP/microtubule affinity-regulating kinase 4 | 1.496436  | Inlier |
| siRNA-Vinblastine Run2-DMSO  | NM_0314<br>17 | MARK4 | MAP/microtubule affinity-regulating kinase 4 | 2.427901  | Inlier |
| siRNA Disorazole DMSO Run1   | NM_0049<br>90 | MARS  | methionin e-tRNA synthetase                  | -1.225094 | Inlier |
| siRNA-Temozolomide Run1-DMSO | NM_0049<br>90 | MARS  | methionin e-tRNA synthetase                  | -0.619611 | Inlier |
| siRNA-Temozolomide Run3-DMSO | NM_0049<br>90 | MARS  | methionin e-tRNA synthetase                  | -0.512667 | Inlier |
| siRNA-Temozolomide Run2-DMSO | NM_0049<br>90 | MARS  | methionin e-tRNA synthetase                  | -0.272147 | Inlier |
| siRNA Disorazole DMSO Run3   | NM_0049<br>90 | MARS  | methionin e-tRNA synthetase                  | 0.272148  | Inlier |
| siRNA-Vinblastine Run2-DMSO  | NM_0049<br>90 | MARS  | methionin e-tRNA synthetase                  | 0.729389  | Inlier |
| siRNA Disorazole DMSO Run2   | NM_0049<br>90 | MARS  | methionin e-tRNA synthetase                  | 0.768359  | Inlier |
| siRNA-Vinblastine Run1-DMSO  | NM_0049<br>90 | MARS  | methionin e-tRNA synthetase                  | 1.402759  | Inlier |
| siRNA-Temozolomide Run3-DMSO | NM_0023<br>77 | MAS1  | MAS1 oncogene                                | -1.885971 | Inlier |
| siRNA-Temozolomide Run1-DMSO | NM_0023<br>77 | MAS1  | MAS1 oncogene                                | -1.19247  | Inlier |
| siRNA-Temozolomide Run2-DMSO | NM_0023<br>77 | MAS1  | MAS1 oncogene                                | -1.188606 | Inlier |
| siRNA Disorazole DMSO Run2   | NM_0023<br>77 | MAS1  | MAS1 oncogene                                | -0.064756 | Inlier |
| siRNA Disorazole DMSO Run1   | NM_0023<br>77 | MAS1  | MAS1 oncogene                                | 0.064757  | Inlier |



Identification of Survival Genes in Human Glioblastoma Cells Using siRNA Screening  
 Nikhil G Thaker, Fang Zhang, Peter R. McDonald, Tong Ying Shun, Michael D Lewen, Ian F. Pollack, and John S. Lazo

|                            |         |       |            |           |        |
|----------------------------|---------|-------|------------|-----------|--------|
| Molecular Pharmacology     | NM_0023 |       | MAS1       |           |        |
| siRNA Disorazole DMSO Run3 | 77      | MAS1  | oncogene   | 0.390915  | Inlier |
| siRNA-Vinblastine Run2-    | NM_0023 |       | MAS1       |           |        |
| DMSO                       | 77      | MAS1  | oncogene   | 0.575388  | Inlier |
| siRNA-Vinblastine Run1-    | NM_0023 |       | MAS1       |           |        |
| DMSO                       | 77      | MAS1  | oncogene   | 0.773612  | Inlier |
| siRNA-Temozolomide Run3-   | NM_0529 |       | oncogene-  |           |        |
| DMSO                       | 67      | MAS1L | like       | -0.957132 | Inlier |
| siRNA Disorazole DMSO Run2 | NM_0529 |       | oncogene-  |           |        |
|                            | 67      | MAS1L | like       | -0.768506 | Inlier |
| siRNA-Temozolomide Run2-   | NM_0529 |       | oncogene-  |           |        |
| DMSO                       | 67      | MAS1L | like       | -0.469335 | Inlier |
| siRNA Disorazole DMSO Run3 | NM_0529 |       | oncogene-  |           |        |
|                            | 67      | MAS1L | like       | -0.189113 | Inlier |
| siRNA-Temozolomide Run1-   | NM_0529 |       | oncogene-  |           |        |
| DMSO                       | 67      | MAS1L | like       | 0.189113  | Inlier |
| siRNA Disorazole DMSO Run1 | NM_0529 |       | oncogene-  |           |        |
|                            | 67      | MAS1L | like       | 0.580494  | Inlier |
| siRNA-Vinblastine Run2-    | NM_0529 |       | oncogene-  |           |        |
| DMSO                       | 67      | MAS1L | like       | 1.283886  | Inlier |
| siRNA-Vinblastine Run1-    | NM_0529 |       | oncogene-  |           |        |
| DMSO                       | 67      | MAS1L | like       | 1.417683  | Inlier |
| siRNA-Temozolomide Run2-   | NM_0018 |       | mannan-    |           |        |
| DMSO                       | 79      | MASP1 | binding    |           |        |
|                            |         |       | lectin     |           |        |
|                            |         |       | serine     |           |        |
|                            |         |       | protease 1 |           |        |
|                            |         |       | (C4/C2     |           |        |
|                            |         |       | activating |           |        |
|                            |         |       | componen   |           |        |
|                            |         |       | t of Ra-   |           |        |
|                            |         |       | reactive   |           |        |
|                            |         |       | factor)    | -0.994287 | Inlier |
|                            |         |       | mannan-    |           |        |
|                            |         |       | binding    |           |        |
|                            |         |       | lectin     |           |        |
|                            |         |       | serine     |           |        |
|                            |         |       | protease 1 |           |        |
|                            |         |       | (C4/C2     |           |        |
|                            |         |       | activating |           |        |
|                            |         |       | componen   |           |        |
|                            |         |       | t of Ra-   |           |        |
|                            |         |       | reactive   |           |        |
|                            |         |       | factor)    | -0.946288 | Inlier |

Identification of Survival Genes in Human Glioblastoma Cells Using siRNA Screening

Nikhil G Thaker, Fang Zhang, Peter R. McDonald, Tong Ying Shun, Michael D Lewen, Ian F. Pollack, and John S. Lazo

Molecular Pharmacology

| siRNA Treatment              | Gene ID   | Gene Name | Log2 Fold Change | Outlier Status |
|------------------------------|-----------|-----------|------------------|----------------|
| siRNA Disorazole DMSO Run2   | NM_001879 | MASP1     | -0.602396        | Inlier         |
| siRNA Disorazole DMSO Run3   | NM_001879 | MASP1     | -0.245042        | Inlier         |
| siRNA Disorazole DMSO Run1   | NM_001879 | MASP1     | 0.245042         | Inlier         |
| siRNA-Temozolomide DMSO Run1 | NM_001879 | MASP1     | 0.458071         | Inlier         |

mannan-binding lectin serine protease 1 (C4/C2 activating component of R-reactive factor) mannan-binding lectin serine protease 1 (C4/C2 activating component of R-reactive factor) mannan-binding lectin serine protease 1 (C4/C2 activating component of R-reactive factor) mannan-binding lectin serine protease 1 (C4/C2 activating component of R-reactive factor)

Identification of Survival Genes in Human Glioblastoma Cells Using siRNA Screening

Nikhil G Thaker, Fang Zhang, Peter R. McDonald, Tong Ying Shun, Michael D Lewen, Ian F. Pollack, and John S. Lazo

Molecular Pharmacology

|                              |           |       |                                                                                         |           |        |
|------------------------------|-----------|-------|-----------------------------------------------------------------------------------------|-----------|--------|
| siRNA-Vinblastine Run2-DMSO  | NM_001879 | MASP1 | mannan-binding lectin serine protease 1 (C4/C2 activating component of Reactive factor) | 0.746604  | Inlier |
| siRNA-Vinblastine Run1-DMSO  | NM_001879 | MASP1 | mannan-binding lectin serine protease 1 (C4/C2 activating component of Reactive factor) | 0.912158  | Inlier |
| siRNA Disorazole DMSO Run2   | NM_006610 | MASP2 | mannan-binding lectin serine protease 2                                                 | -1.479514 | Inlier |
| siRNA-Temozolomide Run2-DMSO | NM_006610 | MASP2 | mannan-binding lectin serine protease 2                                                 | -1.389741 | Inlier |
| siRNA Disorazole DMSO Run1   | NM_006610 | MASP2 | mannan-binding lectin serine protease 2                                                 | -0.160522 | Inlier |
| siRNA-Temozolomide Run3-DMSO | NM_006610 | MASP2 | mannan-binding lectin serine protease 2                                                 | -0.073894 | Inlier |
| siRNA-Temozolomide Run1-DMSO | NM_006610 | MASP2 | mannan-binding lectin serine protease 2                                                 | 0.073893  | Inlier |

Identification of Survival Genes in Human Glioblastoma Cells Using siRNA Screening  
 Nikhil G Thaker, Fang Zhang, Peter R. McDonald, Tong Ying Shun, Michael D Lewen, Ian F. Pollack, and John S. Lazo  
 Molecular Pharmacology

|                              |               |       |                                                                                        |           |        |
|------------------------------|---------------|-------|----------------------------------------------------------------------------------------|-----------|--------|
| siRNA Disorazole DMSO Run3   | NM_0066<br>10 | MASP2 | mannan-binding lectin serine protease 2                                                | 0.230198  | Inlier |
| siRNA-Vinblastine Run1-DMSO  | NM_0066<br>10 | MASP2 | mannan-binding lectin serine protease 2                                                | 1.118802  | Inlier |
| siRNA-Vinblastine Run2-DMSO  | NM_0066<br>10 | MASP2 | mannan-binding lectin serine protease 2 monogenic, audiogenic seizure susceptibility 1 | 1.576801  | Inlier |
| siRNA-Temozolomide Run3-DMSO | NM_0321<br>19 | MASS1 | homolog (mouse) monogenic, audiogenic seizure susceptibility 1                         | -2.132644 | Inlier |
| siRNA Disorazole DMSO Run2   | NM_0321<br>19 | MASS1 | homolog (mouse) monogenic, audiogenic seizure susceptibility 1                         | -1.962502 | Inlier |
| siRNA-Temozolomide Run2-DMSO | NM_0321<br>19 | MASS1 | homolog (mouse) monogenic, audiogenic seizure susceptibility 1                         | -0.600127 | Inlier |
| siRNA-Temozolomide Run1-DMSO | NM_0321<br>19 | MASS1 | homolog (mouse)                                                                        | -0.370759 | Inlier |

Identification of Survival Genes in Human Glioblastoma Cells Using siRNA Screening

Nikhil G Thaker, Fang Zhang, Peter R. McDonald, Tong Ying Shun, Michael D Lewen, Ian F. Pollack, and John S. Lazo

Molecular Pharmacology

|                              |               |       |                                                                   |          |        |
|------------------------------|---------------|-------|-------------------------------------------------------------------|----------|--------|
| siRNA Disorazole DMSO Run1   | NM_0321<br>19 | MASS1 | monogenic,<br>audiogenic seizure susceptibility 1 homolog (mouse) | 0.370759 | Inlier |
| siRNA Disorazole DMSO Run3   | NM_0321<br>19 | MASS1 | monogenic,<br>audiogenic seizure susceptibility 1 homolog (mouse) | 0.376413 | Inlier |
| siRNA-Vinblastine Run2-DMSO  | NM_0321<br>19 | MASS1 | monogenic,<br>audiogenic seizure susceptibility 1 homolog (mouse) | 0.748873 | Inlier |
| siRNA-Vinblastine Run1-DMSO  | NM_0321<br>19 | MASS1 | monogenic,<br>audiogenic seizure susceptibility 1 homolog (mouse) | 1.046323 | Inlier |
| siRNA Disorazole DMSO Run2   | NM_0151<br>12 | MAST2 | microtubule associated serine/threonine kinase 2                  | -0.86597 | Inlier |
| siRNA-Temozolomide Run3-DMSO | NM_0151<br>12 | MAST2 | microtubule associated serine/threonine kinase 2                  | -0.48303 | Inlier |

Identification of Survival Genes in Human Glioblastoma Cells Using siRNA Screening  
 Nikhil G Thaker, Fang Zhang, Peter R. McDonald, Tong Ying Shun, Michael D Lewen, Ian F. Pollack, and John S. Lazo  
 Molecular Pharmacology

|                              |           |       |                                                  |           |        |
|------------------------------|-----------|-------|--------------------------------------------------|-----------|--------|
| siRNA-Temozolomide Run1-DMSO | NM_015112 | MAST2 | microtubule associated serine/threonine kinase 2 | -0.466664 | Inlier |
| siRNA Disorazole DMSO Run3   | NM_015112 | MAST2 | microtubule associated serine/threonine kinase 2 | -0.439198 | Inlier |
| siRNA-Temozolomide Run2-DMSO | NM_015112 | MAST2 | microtubule associated serine/threonine kinase 2 | 0.439198  | Inlier |
| siRNA-Vinblastine Run1-DMSO  | NM_015112 | MAST2 | microtubule associated serine/threonine kinase 2 | 1.822788  | Inlier |
| siRNA Disorazole DMSO Run1   | NM_015112 | MAST2 | microtubule associated serine/threonine kinase 2 | 1.996632  | Inlier |
| siRNA-Vinblastine Run2-DMSO  | NM_015112 | MAST2 | microtubule associated serine/threonine kinase 2 | 3.337256  | Inlier |
| siRNA Disorazole DMSO Run2   | XM_038150 | MAST3 | microtubule associated serine/threonine kinase 3 | -1.464036 | Inlier |

Identification of Survival Genes in Human Glioblastoma Cells Using siRNA Screening  
 Nikhil G Thaker, Fang Zhang, Peter R. McDonald, Tong Ying Shun, Michael D Lewen, Ian F. Pollack, and John S. Lazo  
 Molecular Pharmacology

|                              |           |       |                                                  |           |        |
|------------------------------|-----------|-------|--------------------------------------------------|-----------|--------|
| siRNA-Temozolomide Run3-DMSO | XM_038150 | MAST3 | microtubule associated serine/threonine kinase 3 | -1.073175 | Inlier |
| siRNA-Temozolomide Run1-DMSO | XM_038150 | MAST3 | microtubule associated serine/threonine kinase 3 | -0.204632 | Inlier |
| siRNA Disorazole DMSO Run1   | XM_038150 | MAST3 | microtubule associated serine/threonine kinase 3 | -0.171469 | Inlier |
| siRNA-Vinblastine Run1-DMSO  | XM_038150 | MAST3 | microtubule associated serine/threonine kinase 3 | 0.171469  | Inlier |
| siRNA-Temozolomide Run2-DMSO | XM_038150 | MAST3 | microtubule associated serine/threonine kinase 3 | 0.275825  | Inlier |
| siRNA-Vinblastine Run2-DMSO  | XM_038150 | MAST3 | microtubule associated serine/threonine kinase 3 | 1.244922  | Inlier |
| siRNA Disorazole DMSO Run3   | XM_038150 | MAST3 | microtubule associated serine/threonine kinase 3 | 3.455775  | Inlier |

Identification of Survival Genes in Human Glioblastoma Cells Using siRNA Screening  
 Nikhil G Thaker, Fang Zhang, Peter R. McDonald, Tong Ying Shun, Michael D Lewen, Ian F. Pollack, and John S. Lazo  
 Molecular Pharmacology

|                              |               |       |                                                     |           |        |
|------------------------------|---------------|-------|-----------------------------------------------------|-----------|--------|
| siRNA-Temozolomide Run3-DMSO | NM_0328<br>44 | MASTL | microtubule associated serine/threonine kinase-like | -0.693307 | Inlier |
| siRNA-Temozolomide Run1-DMSO | NM_0328<br>44 | MASTL | microtubule associated serine/threonine kinase-like | -0.655693 | Inlier |
| siRNA-Temozolomide Run2-DMSO | NM_0328<br>44 | MASTL | microtubule associated serine/threonine kinase-like | -0.544927 | Inlier |
| siRNA Disorazole DMSO Run3   | NM_0328<br>44 | MASTL | microtubule associated serine/threonine kinase-like | -0.004229 | Inlier |
| siRNA Disorazole DMSO Run2   | NM_0328<br>44 | MASTL | microtubule associated serine/threonine kinase-like | 0.004229  | Inlier |
| siRNA Disorazole DMSO Run1   | NM_0328<br>44 | MASTL | microtubule associated serine/threonine kinase-like | 0.71156   | Inlier |



Identification of Survival Genes in Human Glioblastoma Cells Using siRNA Screening  
 Nikhil G Thaker, Fang Zhang, Peter R. McDonald, Tong Ying Shun, Michael D Lewen, Ian F. Pollack, and John S. Lazo  
 Molecular Pharmacology

|                              |           |       |                                                                |           |        |
|------------------------------|-----------|-------|----------------------------------------------------------------|-----------|--------|
| siRNA-Vinblastine Run1-DMSO  | NM_032844 | MASTL | microtubule associated serine/threonine kinase-like            | 1.009112  | Inlier |
| siRNA-Vinblastine Run2-DMSO  | NM_032844 | MASTL | microtubule associated serine/threonine kinase-like methionine | 1.220252  | Inlier |
| siRNA-Temozolomide Run1-DMSO | NM_000429 | MAT1A | adenosyltransferase I, alpha methionine                        | -0.687996 | Inlier |
| siRNA-Temozolomide Run2-DMSO | NM_000429 | MAT1A | adenosyltransferase I, alpha methionine                        | -0.683921 | Inlier |
| siRNA Disorazole DMSO Run1   | NM_000429 | MAT1A | adenosyltransferase I, alpha methionine                        | -0.665079 | Inlier |
| siRNA Disorazole DMSO Run3   | NM_000429 | MAT1A | adenosyltransferase I, alpha methionine                        | -0.282214 | Inlier |
| siRNA-Vinblastine Run2-DMSO  | NM_000429 | MAT1A | adenosyltransferase I, alpha methionine                        | 0.282215  | Inlier |
| siRNA-Temozolomide Run3-DMSO | NM_000429 | MAT1A | adenosyltransferase I, alpha methionine                        | 0.411173  | Inlier |
| siRNA Disorazole DMSO Run2   | NM_000429 | MAT1A | adenosyltransferase I, alpha                                   | 0.695378  | Inlier |

Identification of Survival Genes in Human Glioblastoma Cells Using siRNA Screening  
 Nikhil G Thaker, Fang Zhang, Peter R. McDonald, Tong Ying Shun, Michael D Lewen, Ian F. Pollack, and John S. Lazo

Molecular Pharmacology

|                              |           |       |                                          |                  |
|------------------------------|-----------|-------|------------------------------------------|------------------|
|                              |           |       | methionine                               |                  |
| siRNA-Vinblastine Run1-DMSO  | NM_000429 | MAT1A | adenosyltransferase I, alpha methionine  | 0.952814 Inlier  |
| siRNA-Temozolomide Run2-DMSO | NM_005911 | MAT2A | adenosyltransferase II, alpha methionine | -2.611825 Inlier |
| siRNA-Temozolomide Run3-DMSO | NM_005911 | MAT2A | adenosyltransferase II, alpha methionine | -2.149123 Inlier |
| siRNA Disorazole DMSO Run1   | NM_005911 | MAT2A | adenosyltransferase II, alpha methionine | -1.636832 Inlier |
| siRNA-Temozolomide Run1-DMSO | NM_005911 | MAT2A | adenosyltransferase II, alpha methionine | -0.374484 Inlier |
| siRNA-Vinblastine Run1-DMSO  | NM_005911 | MAT2A | adenosyltransferase II, alpha methionine | 0.374484 Inlier  |
| siRNA-Vinblastine Run2-DMSO  | NM_005911 | MAT2A | adenosyltransferase II, alpha methionine | 0.485749 Inlier  |
| siRNA Disorazole DMSO Run2   | NM_005911 | MAT2A | adenosyltransferase II, alpha methionine | 0.660586 Inlier  |
| siRNA Disorazole DMSO Run3   | NM_005911 | MAT2A | adenosyltransferase II, alpha methionine | 0.688414 Inlier  |
| siRNA-Temozolomide Run2-DMSO | NM_182796 | MAT2B | adenosyltransferase II, beta             | -1.123624 Inlier |

Identification of Survival Genes in Human Glioblastoma Cells Using siRNA Screening  
 Nikhil G Thaker, Fang Zhang, Peter R. McDonald, Tong Ying Shun, Michael D Lewen, Ian F. Pollack, and John S. Lazo

Molecular Pharmacology

|                              |               |       |                                          |           |        |
|------------------------------|---------------|-------|------------------------------------------|-----------|--------|
| siRNA-Vinblastine Run2-DMSO  | NM_1827<br>96 | MAT2B | methionine adenosyltransferase II, beta  | -0.676744 | Inlier |
| siRNA-Temozolomide Run3-DMSO | NM_1827<br>96 | MAT2B | methionine adenosyltransferase II, beta  | -0.672256 | Inlier |
| siRNA Disorazole DMSO Run3   | NM_1827<br>96 | MAT2B | methionine adenosyltransferase II, beta  | -0.120321 | Inlier |
| siRNA-Temozolomide Run1-DMSO | NM_1827<br>96 | MAT2B | methionine adenosyltransferase II, beta  | 0.120321  | Inlier |
| siRNA Disorazole DMSO Run1   | NM_1827<br>96 | MAT2B | methionine adenosyltransferase II, beta  | 0.263026  | Inlier |
| siRNA Disorazole DMSO Run2   | NM_1827<br>96 | MAT2B | methionine adenosyltransferase II, beta  | 1.714142  | Inlier |
| siRNA-Vinblastine Run1-DMSO  | NM_1827<br>96 | MAT2B | megakaryocyte-associated tyrosine kinase | 1.861919  | Inlier |
| siRNA-Temozolomide Run3-DMSO | NM_1393<br>55 | MATK  | megakaryocyte-associated tyrosine kinase | -1.503093 | Inlier |
| siRNA-Temozolomide Run1-DMSO | NM_1393<br>55 | MATK  | megakaryocyte-associated tyrosine kinase | -0.841875 | Inlier |
| siRNA-Temozolomide Run2-DMSO | NM_1393<br>55 | MATK  | megakaryocyte-associated tyrosine kinase | -0.79724  | Inlier |

Identification of Survival Genes in Human Glioblastoma Cells Using siRNA Screening  
 Nikhil G Thaker, Fang Zhang, Peter R. McDonald, Tong Ying Shun, Michael D Lewen, Ian F. Pollack, and John S. Lazo

Molecular Pharmacology

|                              |               |      |                                                                      |           |        |
|------------------------------|---------------|------|----------------------------------------------------------------------|-----------|--------|
| siRNA Disorazole DMSO Run2   | NM_1393<br>55 | MATK | megakaryocyte-associated tyrosine kinase                             | -0.070351 | Inlier |
| siRNA-Vinblastine Run1-DMSO  | NM_1393<br>55 | MATK | megakaryocyte-associated tyrosine kinase                             | 0.070352  | Inlier |
| siRNA Disorazole DMSO Run1   | NM_1393<br>55 | MATK | megakaryocyte-associated tyrosine kinase                             | 0.229213  | Inlier |
| siRNA Disorazole DMSO Run3   | NM_1393<br>55 | MATK | megakaryocyte-associated tyrosine kinase                             | 0.55176   | Inlier |
| siRNA-Vinblastine Run2-DMSO  | NM_1393<br>55 | MATK | megakaryocyte-associated tyrosine kinase                             | 0.935514  | Inlier |
| siRNA-Temozolomide Run3-DMSO | NM_0152<br>92 | MBC2 | family with sequence similarity 62 (C2 domain containing ), member A | -1.825939 | Inlier |
| siRNA-Temozolomide Run1-DMSO | NM_0152<br>92 | MBC2 | family with sequence similarity 62 (C2 domain containing ), member A | -0.855832 | Inlier |
| siRNA-Temozolomide Run2-DMSO | NM_0152<br>92 | MBC2 | family with sequence similarity 62 (C2 domain containing ), member A | -0.840604 | Inlier |

Identification of Survival Genes in Human Glioblastoma Cells Using siRNA Screening

Nikhil G Thaker, Fang Zhang, Peter R. McDonald, Tong Ying Shun, Michael D Lewen, Ian F. Pollack, and John S. Lazo

Molecular Pharmacology

|                                  |               |        |                                                                                            |           |        |
|----------------------------------|---------------|--------|--------------------------------------------------------------------------------------------|-----------|--------|
| siRNA Disorazole DMSO Run1       | NM_0152<br>92 | MBC2   | family with<br>sequence<br>similarity<br>62 (C2<br>domain<br>containing<br>) , member<br>A | -0.205631 | Inlier |
| siRNA-Vinblastine Run1-<br>DMSO  | NM_0152<br>92 | MBC2   | family with<br>sequence<br>similarity<br>62 (C2<br>domain<br>containing<br>) , member<br>A | 0.205631  | Inlier |
| siRNA-Vinblastine Run2-<br>DMSO  | NM_0152<br>92 | MBC2   | family with<br>sequence<br>similarity<br>62 (C2<br>domain<br>containing<br>) , member<br>A | 0.281611  | Inlier |
| siRNA Disorazole DMSO Run2       | NM_0152<br>92 | MBC2   | family with<br>sequence<br>similarity<br>62 (C2<br>domain<br>containing<br>) , member<br>A | 0.63491   | Inlier |
| siRNA Disorazole DMSO Run3       | NM_0152<br>92 | MBC2   | family with<br>sequence<br>similarity<br>62 (C2<br>domain<br>containing<br>) , member<br>A | 0.71409   | Inlier |
| siRNA-Temozolomide Run2-<br>DMSO | NM_0037<br>91 | MBTPS1 | membrane-<br>bound<br>transcripti<br>on factor<br>protease,<br>site 1                      | -1.035846 | Inlier |

Identification of Survival Genes in Human Glioblastoma Cells Using siRNA Screening  
 Nikhil G Thaker, Fang Zhang, Peter R. McDonald, Tong Ying Shun, Michael D Lewen, Ian F. Pollack, and John S. Lazo

Molecular Pharmacology

| siRNA Treatment              | Gene ID   | Gene Name | Site   | Value     | Outlier Status |
|------------------------------|-----------|-----------|--------|-----------|----------------|
| siRNA-Temozolomide Run3-DMSO | NM_003791 | MBTPS1    | site 1 | -0.843223 | Inlier         |
| siRNA Disorazole DMSO Run3   | NM_003791 | MBTPS1    | site 1 | -0.291928 | Inlier         |
| siRNA Disorazole DMSO Run1   | NM_003791 | MBTPS1    | site 1 | -0.151401 | Inlier         |
| siRNA-Temozolomide Run1-DMSO | NM_003791 | MBTPS1    | site 1 | 0.151401  | Inlier         |
| siRNA Disorazole DMSO Run2   | NM_003791 | MBTPS1    | site 1 | 0.505777  | Inlier         |
| siRNA-Vinblastine Run1-DMSO  | NM_003791 | MBTPS1    | site 1 | 1.227331  | Inlier         |
| siRNA-Vinblastine Run2-DMSO  | NM_003791 | MBTPS1    | site 1 | 1.373231  | Inlier         |
| siRNA-Temozolomide Run3-DMSO | NM_015884 | MBTPS2    | site 2 | -1.209943 | Inlier         |

Identification of Survival Genes in Human Glioblastoma Cells Using siRNA Screening  
 Nikhil G Thaker, Fang Zhang, Peter R. McDonald, Tong Ying Shun, Michael D Lewen, Ian F. Pollack, and John S. Lazo

Molecular Pharmacology

|                              |               |        |                                                                         |           |        |
|------------------------------|---------------|--------|-------------------------------------------------------------------------|-----------|--------|
| siRNA-Temozolomide Run1-DMSO | NM_0158<br>84 | MBTPS2 | membrane-bound transcription factor protease, site 2                    | -1.02081  | Inlier |
| siRNA-Temozolomide Run2-DMSO | NM_0158<br>84 | MBTPS2 | membrane-bound transcription factor protease, site 2                    | -0.488282 | Inlier |
| siRNA Disorazole DMSO Run1   | NM_0158<br>84 | MBTPS2 | membrane-bound transcription factor protease, site 2                    | -0.418156 | Inlier |
| siRNA-Vinblastine Run1-DMSO  | NM_0158<br>84 | MBTPS2 | membrane-bound transcription factor protease, site 2                    | 0.418156  | Inlier |
| siRNA-Vinblastine Run2-DMSO  | NM_0158<br>84 | MBTPS2 | membrane-bound transcription factor protease, site 2                    | 0.423279  | Inlier |
| siRNA Disorazole DMSO Run3   | NM_0158<br>84 | MBTPS2 | membrane-bound transcription factor protease, site 2                    | 0.860718  | Inlier |
| siRNA Disorazole DMSO Run2   | NM_0158<br>84 | MBTPS2 | membrane-bound transcription factor protease, site 2                    | 0.892104  | Inlier |
| siRNA-Temozolomide Run3-DMSO | NM_0023<br>86 | MC1R   | melanocortin 1 receptor (alpha melanocyte stimulating hormone receptor) | -1.335034 | Inlier |

Identification of Survival Genes in Human Glioblastoma Cells Using siRNA Screening

Nikhil G Thaker, Fang Zhang, Peter R. McDonald, Tong Ying Shun, Michael D Lewen, Ian F. Pollack, and John S. Lazo

Molecular Pharmacology

|                              |           |      |                                                                         |           |        |
|------------------------------|-----------|------|-------------------------------------------------------------------------|-----------|--------|
| siRNA-Temozolomide Run1-DMSO | NM_002386 | MC1R | melanocortin 1 receptor (alpha melanocyte stimulating hormone receptor) | -0.655614 | Inlier |
| siRNA-Temozolomide Run2-DMSO | NM_002386 | MC1R | melanocortin 1 receptor (alpha melanocyte stimulating hormone receptor) | -0.465899 | Inlier |
| siRNA Disorazole DMSO Run1   | NM_002386 | MC1R | melanocortin 1 receptor (alpha melanocyte stimulating hormone receptor) | -0.053502 | Inlier |
| siRNA Disorazole DMSO Run2   | NM_002386 | MC1R | melanocortin 1 receptor (alpha melanocyte stimulating hormone receptor) | 0.053502  | Inlier |
| siRNA Disorazole DMSO Run3   | NM_002386 | MC1R | melanocortin 1 receptor (alpha melanocyte stimulating hormone receptor) | 0.693386  | Inlier |



Identification of Survival Genes in Human Glioblastoma Cells Using siRNA Screening  
 Nikhil G Thaker, Fang Zhang, Peter R. McDonald, Tong Ying Shun, Michael D Lewen, Ian F. Pollack, and John S. Lazo  
 Molecular Pharmacology

|                              |           |      |                                                                         |           |         |
|------------------------------|-----------|------|-------------------------------------------------------------------------|-----------|---------|
| siRNA-Vinblastine Run2-DMSO  | NM_002386 | MC1R | melanocortin 1 receptor (alpha melanocyte stimulating hormone receptor) | 0.708925  | Inlier  |
| siRNA-Vinblastine Run1-DMSO  | NM_002386 | MC1R | melanocortin 1 receptor (alpha melanocyte stimulating hormone receptor) | 0.721349  | Inlier  |
| siRNA Disorazole DMSO Run2   | NM_000529 | MC2R | melanocortin 2 receptor (adrenocorticotrophic hormone)                  | -4.231991 | Outlier |
| siRNA-Temozolomide Run3-DMSO | NM_000529 | MC2R | melanocortin 2 receptor (adrenocorticotrophic hormone)                  | -0.432025 | Inlier  |
| siRNA-Temozolomide Run1-DMSO | NM_000529 | MC2R | melanocortin 2 receptor (adrenocorticotrophic hormone)                  | -0.267014 | Inlier  |
| siRNA-Temozolomide Run2-DMSO | NM_000529 | MC2R | melanocortin 2 receptor (adrenocorticotrophic hormone)                  | -0.266878 | Inlier  |
| siRNA Disorazole DMSO Run1   | NM_000529 | MC2R | melanocortin 2 receptor (adrenocorticotrophic hormone)                  | 0.266879  | Inlier  |

Identification of Survival Genes in Human Glioblastoma Cells Using siRNA Screening  
 Nikhil G Thaker, Fang Zhang, Peter R. McDonald, Tong Ying Shun, Michael D Lewen, Ian F. Pollack, and John S. Lazo

Molecular Pharmacology

|                              |           |      |                                                        |                  |
|------------------------------|-----------|------|--------------------------------------------------------|------------------|
|                              |           |      | melanocortin 2 receptor (adrenocorticotrophic hormone) |                  |
| siRNA-Vinblastine Run2-DMSO  | NM_000529 | MC2R | melanocortin 2 receptor (adrenocorticotrophic hormone) | 0.916975 Inlier  |
| siRNA-Vinblastine Run1-DMSO  | NM_000529 | MC2R | melanocortin 2 receptor (adrenocorticotrophic hormone) | 1.033002 Inlier  |
| siRNA Disorazole DMSO Run3   | NM_000529 | MC2R | melanocortin 3 receptor (adrenocorticotrophic hormone) | 2.786373 Inlier  |
| siRNA-Temozolomide Run3-DMSO | NM_019888 | MC3R | melanocortin 3 receptor                                | -1.520476 Inlier |
| siRNA Disorazole DMSO Run2   | NM_019888 | MC3R | melanocortin 3 receptor                                | -1.254348 Inlier |
| siRNA-Temozolomide Run2-DMSO | NM_019888 | MC3R | melanocortin 3 receptor                                | -0.708729 Inlier |
| siRNA-Temozolomide Run1-DMSO | NM_019888 | MC3R | melanocortin 3 receptor                                | -0.027143 Inlier |
| siRNA Disorazole DMSO Run1   | NM_019888 | MC3R | melanocortin 3 receptor                                | 0.027143 Inlier  |
| siRNA Disorazole DMSO Run3   | NM_019888 | MC3R | melanocortin 3 receptor                                | 0.193006 Inlier  |
| siRNA-Vinblastine Run2-DMSO  | NM_019888 | MC3R | melanocortin 3 receptor                                | 0.647751 Inlier  |
| siRNA-Vinblastine Run1-DMSO  | NM_019888 | MC3R | melanocortin 3 receptor                                | 0.701249 Inlier  |
| siRNA-Temozolomide Run2-DMSO | NM_005912 | MC4R | melanocortin 4 receptor                                | -2.474893 Inlier |
| siRNA-Temozolomide Run1-DMSO | NM_005912 | MC4R | melanocortin 4 receptor                                | -0.566404 Inlier |
| siRNA-Vinblastine Run2-DMSO  | NM_005912 | MC4R | melanocortin 4 receptor                                | -0.334957 Inlier |

Identification of Survival Genes in Human Glioblastoma Cells Using siRNA Screening

Nikhil G Thaker, Fang Zhang, Peter R. McDonald, Tong Ying Shun, Michael D Lewen, Ian F. Pollack, and John S.

Lazo

Molecular Pharmacology

|                              |               |       |                                                 |           |         |
|------------------------------|---------------|-------|-------------------------------------------------|-----------|---------|
| siRNA-Temozolomide Run3-DMSO | NM_0059<br>12 | MC4R  | melanocortin 4 receptor                         | -0.26141  | Inlier  |
| siRNA-Vinblastine Run1-DMSO  | NM_0059<br>12 | MC4R  | melanocortin 4 receptor                         | 0.26141   | Inlier  |
| siRNA Disorazole DMSO Run2   | NM_0059<br>12 | MC4R  | melanocortin 4 receptor                         | 0.782596  | Inlier  |
| siRNA Disorazole DMSO Run1   | NM_0059<br>12 | MC4R  | melanocortin 4 receptor                         | 1.009812  | Inlier  |
| siRNA Disorazole DMSO Run3   | NM_0059<br>12 | MC4R  | melanocortin 4 receptor                         | 3.846931  | Outlier |
| siRNA-Temozolomide Run3-DMSO | NM_0059<br>13 | MC5R  | melanocortin 5 receptor                         | -1.593448 | Inlier  |
| siRNA-Temozolomide Run2-DMSO | NM_0059<br>13 | MC5R  | melanocortin 5 receptor                         | -0.763629 | Inlier  |
| siRNA-Temozolomide Run1-DMSO | NM_0059<br>13 | MC5R  | melanocortin 5 receptor                         | -0.491688 | Inlier  |
| siRNA Disorazole DMSO Run2   | NM_0059<br>13 | MC5R  | melanocortin 5 receptor                         | -0.312877 | Inlier  |
| siRNA Disorazole DMSO Run1   | NM_0059<br>13 | MC5R  | melanocortin 5 receptor                         | 0.312877  | Inlier  |
| siRNA-Vinblastine Run2-DMSO  | NM_0059<br>13 | MC5R  | melanocortin 5 receptor                         | 0.585371  | Inlier  |
| siRNA-Vinblastine Run1-DMSO  | NM_0059<br>13 | MC5R  | melanocortin 5 receptor                         | 0.809628  | Inlier  |
| siRNA Disorazole DMSO Run3   | NM_0059<br>13 | MC5R  | melanocortin 5 receptor                         | 1.234655  | Inlier  |
| siRNA-Temozolomide Run3-DMSO | NM_0201<br>66 | MCCC1 | methylcrotonyl-Coenzyme A carboxylase 1 (alpha) | -1.8233   | Inlier  |

Identification of Survival Genes in Human Glioblastoma Cells Using siRNA Screening  
 Nikhil G Thaker, Fang Zhang, Peter R. McDonald, Tong Ying Shun, Michael D Lewen, Ian F. Pollack, and John S. Lazo  
 Molecular Pharmacology

|                              |           |       |                                                   |           |        |
|------------------------------|-----------|-------|---------------------------------------------------|-----------|--------|
| siRNA-Temozolomide Run2-DMSO | NM_020166 | MCCC1 | methylocrotonoyl-Coenzyme A carboxylase 1 (alpha) | -0.668513 | Inlier |
| siRNA-Temozolomide Run1-DMSO | NM_020166 | MCCC1 | methylocrotonoyl-Coenzyme A carboxylase 1 (alpha) | -0.135278 | Inlier |
| siRNA-Vinblastine Run2-DMSO  | NM_020166 | MCCC1 | methylocrotonoyl-Coenzyme A carboxylase 1 (alpha) | -0.095148 | Inlier |
| siRNA Disorazole DMSO Run1   | NM_020166 | MCCC1 | methylocrotonoyl-Coenzyme A carboxylase 1 (alpha) | 0.095148  | Inlier |
| siRNA Disorazole DMSO Run3   | NM_020166 | MCCC1 | methylocrotonoyl-Coenzyme A carboxylase 1 (alpha) | 0.680487  | Inlier |
| siRNA Disorazole DMSO Run2   | NM_020166 | MCCC1 | methylocrotonoyl-Coenzyme A carboxylase 1 (alpha) | 2.159678  | Inlier |
| siRNA-Vinblastine Run1-DMSO  | NM_020166 | MCCC1 | methylocrotonoyl-Coenzyme A carboxylase 1 (alpha) | 3.309641  | Inlier |

Identification of Survival Genes in Human Glioblastoma Cells Using siRNA Screening  
 Nikhil G Thaker, Fang Zhang, Peter R. McDonald, Tong Ying Shun, Michael D Lewen, Ian F. Pollack, and John S. Lazo  
 Molecular Pharmacology

|                              |           |       |                                                  |           |        |
|------------------------------|-----------|-------|--------------------------------------------------|-----------|--------|
| siRNA-Temozolomide Run2-DMSO | NM_022132 | MCCC2 | methylecrotonoyl-Coenzyme A carboxylase 2 (beta) | -0.691354 | Inlier |
| siRNA-Vinblastine Run2-DMSO  | NM_022132 | MCCC2 | methylecrotonoyl-Coenzyme A carboxylase 2 (beta) | -0.67626  | Inlier |
| siRNA Disorazole DMSO Run3   | NM_022132 | MCCC2 | methylecrotonoyl-Coenzyme A carboxylase 2 (beta) | -0.476808 | Inlier |
| siRNA Disorazole DMSO Run1   | NM_022132 | MCCC2 | methylecrotonoyl-Coenzyme A carboxylase 2 (beta) | -0.445146 | Inlier |
| siRNA-Temozolomide Run1-DMSO | NM_022132 | MCCC2 | methylecrotonoyl-Coenzyme A carboxylase 2 (beta) | 0.445146  | Inlier |
| siRNA-Temozolomide Run3-DMSO | NM_022132 | MCCC2 | methylecrotonoyl-Coenzyme A carboxylase 2 (beta) | 0.67274   | Inlier |
| siRNA Disorazole DMSO Run2   | NM_022132 | MCCC2 | methylecrotonoyl-Coenzyme A carboxylase 2 (beta) | 1.783229  | Inlier |

Identification of Survival Genes in Human Glioblastoma Cells Using siRNA Screening  
 Nikhil G Thaker, Fang Zhang, Peter R. McDonald, Tong Ying Shun, Michael D Lewen, Ian F. Pollack, and John S. Lazo  
 Molecular Pharmacology

|                              |           |       |                                                                                                                                              |           |        |
|------------------------------|-----------|-------|----------------------------------------------------------------------------------------------------------------------------------------------|-----------|--------|
| siRNA-Vinblastine Run1-DMSO  | NM_022132 | MCCC2 | methylecrotonoyl-Coenzyme A carboxylase 2 (beta) MCF.2 cell line derived transforming sequence MCF.2 cell line derived transforming sequence | 2.122957  | Inlier |
| siRNA-Temozolomide Run3-DMSO | NM_005369 | MCF2  | MCF.2 cell line derived transforming sequence MCF.2 cell line derived transforming sequence                                                  | -1.267633 | Inlier |
| siRNA-Temozolomide Run2-DMSO | NM_005369 | MCF2  | MCF.2 cell line derived transforming sequence MCF.2 cell line derived transforming sequence                                                  | -0.940016 | Inlier |
| siRNA-Temozolomide Run1-DMSO | NM_005369 | MCF2  | MCF.2 cell line derived transforming sequence MCF.2 cell line derived transforming sequence                                                  | -0.418912 | Inlier |
| siRNA-Vinblastine Run2-DMSO  | NM_005369 | MCF2  | MCF.2 cell line derived transforming sequence MCF.2 cell line derived transforming sequence                                                  | -0.047782 | Inlier |
| siRNA Disorazole DMSO Run1   | NM_005369 | MCF2  | MCF.2 cell line derived transforming sequence MCF.2 cell line derived transforming sequence                                                  | 0.047781  | Inlier |
| siRNA Disorazole DMSO Run3   | NM_005369 | MCF2  | MCF.2 cell line derived transforming sequence MCF.2 cell line derived transforming sequence                                                  | 0.134535  | Inlier |
| siRNA-Vinblastine Run1-DMSO  | NM_005369 | MCF2  | MCF.2 cell line derived transforming sequence MCF.2 cell line derived transforming sequence                                                  | 0.930088  | Inlier |



Identification of Survival Genes in Human Glioblastoma Cells Using siRNA Screening

Nikhil G Thaker, Fang Zhang, Peter R. McDonald, Tong Ying Shun, Michael D Lewen, Ian F. Pollack, and John S. Lazo

Molecular Pharmacology

| siRNA              | Condition | Run  | Gene          | Cell Line | Value     | Outlier |
|--------------------|-----------|------|---------------|-----------|-----------|---------|
| siRNA Disorazole   | DMSO      | Run2 | NM_0249<br>79 | MCF2L     | 0.824912  | Inlier  |
| siRNA Disorazole   | DMSO      | Run1 | NM_0249<br>79 | MCF2L     | 0.847304  | Inlier  |
| siRNA-Temozolomide | Run3-DMSO |      | NM_1827<br>63 | MCL1      | -1.113444 | Inlier  |
| siRNA Disorazole   | DMSO      | Run3 | NM_1827<br>63 | MCL1      | -0.334165 | Inlier  |
| siRNA-Vinblastine  | Run2-DMSO |      | NM_1827<br>63 | MCL1      | -0.066683 | Inlier  |
| siRNA-Temozolomide | Run1-DMSO |      | NM_1827<br>63 | MCL1      | -0.040379 | Inlier  |
| siRNA-Temozolomide | Run2-DMSO |      | NM_1827<br>63 | MCL1      | 0.040379  | Inlier  |
| siRNA Disorazole   | DMSO      | Run1 | NM_1827<br>63 | MCL1      | 1.014835  | Inlier  |

MCF.2 cell line derived transforming sequence-like MCF.2 cell line derived transforming sequence-like myeloid cell leukemia sequence 1 (BCL2-related) myeloid cell leukemia sequence 1 (BCL2-related)



Identification of Survival Genes in Human Glioblastoma Cells Using siRNA Screening  
 Nikhil G Thaker, Fang Zhang, Peter R. McDonald, Tong Ying Shun, Michael D Lewen, Ian F. Pollack, and John S. Lazo

Molecular Pharmacology

|                              |               |        |                                                 |           |         |
|------------------------------|---------------|--------|-------------------------------------------------|-----------|---------|
| siRNA Disorazole DMSO Run2   | NM_1827<br>63 | MCL1   | myeloid cell leukemia sequence 1 (BCL2-related) | 4.790726  | Outlier |
| siRNA-Vinblastine Run1-DMSO  | NM_1827<br>63 | MCL1   | myeloid cell leukemia sequence 1 (BCL2-related) | 6.006465  | Outlier |
| siRNA-Temozolomide Run3-DMSO | NM_0205<br>33 | MCOLN1 | mucolipin 1                                     | -0.720712 | Inlier  |
| siRNA-Temozolomide Run2-DMSO | NM_0205<br>33 | MCOLN1 | mucolipin 1                                     | -0.628288 | Inlier  |
| siRNA Disorazole DMSO Run2   | NM_0205<br>33 | MCOLN1 | mucolipin 1                                     | -0.446272 | Inlier  |
| siRNA Disorazole DMSO Run3   | NM_0205<br>33 | MCOLN1 | mucolipin 1                                     | -0.018339 | Inlier  |
| siRNA-Temozolomide Run1-DMSO | NM_0205<br>33 | MCOLN1 | mucolipin 1                                     | 0.018339  | Inlier  |
| siRNA Disorazole DMSO Run1   | NM_0205<br>33 | MCOLN1 | mucolipin 1                                     | 1.606461  | Inlier  |
| siRNA-Vinblastine Run1-DMSO  | NM_0205<br>33 | MCOLN1 | mucolipin 1                                     | 1.933853  | Inlier  |
| siRNA-Vinblastine Run2-DMSO  | NM_0205<br>33 | MCOLN1 | mucolipin 1                                     | 2.32833   | Inlier  |
| siRNA-Temozolomide Run2-DMSO | NM_0059<br>17 | MDH1   | malate dehydrogenase 1, NAD (soluble)           | -0.688962 | Inlier  |
| siRNA Disorazole DMSO Run1   | NM_0059<br>17 | MDH1   | malate dehydrogenase 1, NAD (soluble)           | -0.660038 | Inlier  |
| siRNA Disorazole DMSO Run3   | NM_0059<br>17 | MDH1   | malate dehydrogenase 1, NAD (soluble)           | -0.461352 | Inlier  |
| siRNA Disorazole DMSO Run2   | NM_0059<br>17 | MDH1   | malate dehydrogenase 1, NAD (soluble)           | -0.33841  | Inlier  |

Identification of Survival Genes in Human Glioblastoma Cells Using siRNA Screening  
 Nikhil G Thaker, Fang Zhang, Peter R. McDonald, Tong Ying Shun, Michael D Lewen, Ian F. Pollack, and John S. Lazo

Molecular Pharmacology

|                              |               |      |                                             |           |        |
|------------------------------|---------------|------|---------------------------------------------|-----------|--------|
| siRNA-Vinblastine Run2-DMSO  | NM_0059<br>17 | MDH1 | malate dehydrogenase 1, NAD (soluble)       | 0.338409  | Inlier |
| siRNA-Temozolomide Run3-DMSO | NM_0059<br>17 | MDH1 | malate dehydrogenase 1, NAD (soluble)       | 0.831875  | Inlier |
| siRNA-Temozolomide Run1-DMSO | NM_0059<br>17 | MDH1 | malate dehydrogenase 1, NAD (soluble)       | 1.006487  | Inlier |
| siRNA-Vinblastine Run1-DMSO  | NM_0059<br>17 | MDH1 | malate dehydrogenase 1, NAD (soluble)       | 1.039698  | Inlier |
| siRNA-Temozolomide Run3-DMSO | NM_0059<br>18 | MDH2 | malate dehydrogenase 2, NAD (mitochondrial) | -0.77988  | Inlier |
| siRNA Disorazole DMSO Run2   | NM_0059<br>18 | MDH2 | malate dehydrogenase 2, NAD (mitochondrial) | -0.69303  | Inlier |
| siRNA-Temozolomide Run2-DMSO | NM_0059<br>18 | MDH2 | malate dehydrogenase 2, NAD (mitochondrial) | -0.479456 | Inlier |
| siRNA Disorazole DMSO Run1   | NM_0059<br>18 | MDH2 | malate dehydrogenase 2, NAD (mitochondrial) | -0.321851 | Inlier |
| siRNA Disorazole DMSO Run3   | NM_0059<br>18 | MDH2 | malate dehydrogenase 2, NAD (mitochondrial) | 0.321851  | Inlier |

Identification of Survival Genes in Human Glioblastoma Cells Using siRNA Screening

Nikhil G Thaker, Fang Zhang, Peter R. McDonald, Tong Ying Shun, Michael D Lewen, Ian F. Pollack, and John S. Lazo

Molecular Pharmacology

|                              |           |      |                                                                         |           |        |
|------------------------------|-----------|------|-------------------------------------------------------------------------|-----------|--------|
| siRNA-Temozolomide Run1-DMSO | NM_005918 | MDH2 | malate dehydrogenase 2, NAD (mitochondrial)                             | 0.65597   | Inlier |
| siRNA-Vinblastine Run1-DMSO  | NM_005918 | MDH2 | malate dehydrogenase 2, NAD (mitochondrial)                             | 1.161618  | Inlier |
| siRNA-Vinblastine Run2-DMSO  | NM_005918 | MDH2 | malate dehydrogenase 2, NAD (mitochondrial)                             | 1.206277  | Inlier |
| siRNA-Temozolomide Run3-DMSO | NM_006878 | MDM2 | Mdm2, transformed 3T3 cell double minute 2, p53 binding protein (mouse) | -1.501695 | Inlier |
| siRNA-Temozolomide Run1-DMSO | NM_006878 | MDM2 | Mdm2, transformed 3T3 cell double minute 2, p53 binding protein (mouse) | -0.630322 | Inlier |
| siRNA-Temozolomide Run2-DMSO | NM_006878 | MDM2 | Mdm2, transformed 3T3 cell double minute 2, p53 binding protein (mouse) | -0.322641 | Inlier |

Identification of Survival Genes in Human Glioblastoma Cells Using siRNA Screening

Nikhil G Thaker, Fang Zhang, Peter R. McDonald, Tong Ying Shun, Michael D Lewen, Ian F. Pollack, and John S. Lazo

Molecular Pharmacology

|                                 |               |      |                                                                                                  |           |        |
|---------------------------------|---------------|------|--------------------------------------------------------------------------------------------------|-----------|--------|
| siRNA Disorazole DMSO Run1      | NM_0068<br>78 | MDM2 | Mdm2,<br>transforme<br>d 3T3 cell<br>double<br>minute 2,<br>p53<br>binding<br>protein<br>(mouse) | -0.101496 | Inlier |
| siRNA Disorazole DMSO Run3      | NM_0068<br>78 | MDM2 | Mdm2,<br>transforme<br>d 3T3 cell<br>double<br>minute 2,<br>p53<br>binding<br>protein<br>(mouse) | 0.101495  | Inlier |
| siRNA-Vinblastine Run2-<br>DMSO | NM_0068<br>78 | MDM2 | Mdm2,<br>transforme<br>d 3T3 cell<br>double<br>minute 2,<br>p53<br>binding<br>protein<br>(mouse) | 0.718678  | Inlier |
| siRNA-Vinblastine Run1-<br>DMSO | NM_0068<br>78 | MDM2 | Mdm2,<br>transforme<br>d 3T3 cell<br>double<br>minute 2,<br>p53<br>binding<br>protein<br>(mouse) | 1.228328  | Inlier |
| siRNA Disorazole DMSO Run2      | NM_0068<br>78 | MDM2 | Mdm2,<br>transforme<br>d 3T3 cell<br>double<br>minute 2,<br>p53<br>binding<br>protein<br>(mouse) | 1.460186  | Inlier |

Identification of Survival Genes in Human Glioblastoma Cells Using siRNA Screening

Nikhil G Thaker, Fang Zhang, Peter R. McDonald, Tong Ying Shun, Michael D Lewen, Ian F. Pollack, and John S. Lazo

Molecular Pharmacology

|                              |           |      |                                                                         |           |        |
|------------------------------|-----------|------|-------------------------------------------------------------------------|-----------|--------|
| siRNA-Temozolomide Run3-DMSO | NM_002393 | MDM4 | Mdm4, transformed 3T3 cell double minute 4, p53 binding protein (mouse) | -0.686652 | Inlier |
| siRNA-Temozolomide Run2-DMSO | NM_002393 | MDM4 | Mdm4, transformed 3T3 cell double minute 4, p53 binding protein (mouse) | -0.662348 | Inlier |
| siRNA-Temozolomide Run1-DMSO | NM_002393 | MDM4 | Mdm4, transformed 3T3 cell double minute 4, p53 binding protein (mouse) | -0.451614 | Inlier |
| siRNA Disorazole DMSO Run3   | NM_002393 | MDM4 | Mdm4, transformed 3T3 cell double minute 4, p53 binding protein (mouse) | -0.351454 | Inlier |
| siRNA-Vinblastine Run2-DMSO  | NM_002393 | MDM4 | Mdm4, transformed 3T3 cell double minute 4, p53 binding protein (mouse) | 0.351454  | Inlier |

Identification of Survival Genes in Human Glioblastoma Cells Using siRNA Screening

Nikhil G Thaker, Fang Zhang, Peter R. McDonald, Tong Ying Shun, Michael D Lewen, Ian F. Pollack, and John S. Lazo

Molecular Pharmacology

|                                  |               |      |                                                                                                  |           |        |
|----------------------------------|---------------|------|--------------------------------------------------------------------------------------------------|-----------|--------|
| siRNA Disorazole DMSO Run1       | NM_0023<br>93 | MDM4 | Mdm4,<br>transforme<br>d 3T3 cell<br>double<br>minute 4,<br>p53<br>binding<br>protein<br>(mouse) | 1.383655  | Inlier |
| siRNA Disorazole DMSO Run2       | NM_0023<br>93 | MDM4 | Mdm4,<br>transforme<br>d 3T3 cell<br>double<br>minute 4,<br>p53<br>binding<br>protein<br>(mouse) | 2.609808  | Inlier |
| siRNA-Vinblastine Run1-<br>DMSO  | NM_0023<br>93 | MDM4 | Mdm4,<br>transforme<br>d 3T3 cell<br>double<br>minute 4,<br>p53<br>binding<br>protein<br>(mouse) | 2.637763  | Inlier |
| siRNA-Temozolomide Run2-<br>DMSO | NM_0146<br>11 | MDN1 | MDN1,<br>midasin<br>homolog<br>(yeast)                                                           | -0.71512  | Inlier |
| siRNA-Temozolomide Run3-<br>DMSO | NM_0146<br>11 | MDN1 | MDN1,<br>midasin<br>homolog<br>(yeast)                                                           | -0.706927 | Inlier |
| siRNA-Vinblastine Run2-<br>DMSO  | NM_0146<br>11 | MDN1 | MDN1,<br>midasin<br>homolog<br>(yeast)                                                           | -0.400348 | Inlier |
| siRNA Disorazole DMSO Run3       | NM_0146<br>11 | MDN1 | MDN1,<br>midasin<br>homolog<br>(yeast)                                                           | -0.202401 | Inlier |
| siRNA-Temozolomide Run1-<br>DMSO | NM_0146<br>11 | MDN1 | MDN1,<br>midasin<br>homolog<br>(yeast)                                                           | 0.202401  | Inlier |

Identification of Survival Genes in Human Glioblastoma Cells Using siRNA Screening  
 Nikhil G Thaker, Fang Zhang, Peter R. McDonald, Tong Ying Shun, Michael D Lewen, Ian F. Pollack, and John S. Lazo

Molecular Pharmacology

|                                  |               |        |                                                            |           |        |
|----------------------------------|---------------|--------|------------------------------------------------------------|-----------|--------|
| siRNA Disorazole DMSO Run1       | NM_0146<br>11 | MDN1   | MDN1,<br>midasin<br>homolog<br>(yeast)                     | 0.642073  | Inlier |
| siRNA-Vinblastine Run1-<br>DMSO  | NM_0146<br>11 | MDN1   | MDN1,<br>midasin<br>homolog<br>(yeast)                     | 2.738413  | Inlier |
| siRNA Disorazole DMSO Run2       | NM_0146<br>11 | MDN1   | MDN1,<br>midasin<br>homolog<br>(yeast)                     | 3.334224  | Inlier |
| siRNA-Temozolomide Run3-<br>DMSO | NM_0184<br>63 | MDS028 | MDS028                                                     | -0.897863 | Inlier |
| siRNA-Temozolomide Run2-<br>DMSO | NM_0184<br>63 | MDS028 | MDS028                                                     | -0.582809 | Inlier |
| siRNA Disorazole DMSO Run3       | NM_0184<br>63 | MDS028 | MDS028                                                     | -0.090993 | Inlier |
| siRNA-Vinblastine Run2-<br>DMSO  | NM_0184<br>63 | MDS028 | MDS028                                                     | -0.04568  | Inlier |
| siRNA-Temozolomide Run1-<br>DMSO | NM_0184<br>63 | MDS028 | MDS028                                                     | 0.04568   | Inlier |
| siRNA-Vinblastine Run1-<br>DMSO  | NM_0184<br>63 | MDS028 | MDS028                                                     | 0.766191  | Inlier |
| siRNA Disorazole DMSO Run1       | NM_0184<br>63 | MDS028 | MDS028                                                     | 0.969604  | Inlier |
| siRNA Disorazole DMSO Run2       | NM_0184<br>63 | MDS028 | MDS028                                                     | 1.085448  | Inlier |
| siRNA-Vinblastine Run2-<br>DMSO  | NM_0023<br>95 | ME1    | malic<br>enzyme 1,<br>NADP(+)-<br>dependent<br>, cytosolic | -2.609044 | Inlier |
| siRNA-Temozolomide Run3-<br>DMSO | NM_0023<br>95 | ME1    | malic<br>enzyme 1,<br>NADP(+)-<br>dependent<br>, cytosolic | -0.49104  | Inlier |
| siRNA-Temozolomide Run1-<br>DMSO | NM_0023<br>95 | ME1    | malic<br>enzyme 1,<br>NADP(+)-<br>dependent<br>, cytosolic | -0.173013 | Inlier |

Identification of Survival Genes in Human Glioblastoma Cells Using siRNA Screening  
 Nikhil G Thaker, Fang Zhang, Peter R. McDonald, Tong Ying Shun, Michael D Lewen, Ian F. Pollack, and John S. Lazo  
 Molecular Pharmacology

|                                  |               |     |                                                                                                          |                  |
|----------------------------------|---------------|-----|----------------------------------------------------------------------------------------------------------|------------------|
| siRNA Disorazole DMSO Run1       | NM_0023<br>95 | ME1 | malic<br>enzyme 1,<br>NADP(+)-<br>dependent<br>, cytosolic                                               | -0.136978 Inlier |
| siRNA-Temozolomide Run2-<br>DMSO | NM_0023<br>95 | ME1 | malic<br>enzyme 1,<br>NADP(+)-<br>dependent<br>, cytosolic                                               | 0.136979 Inlier  |
| siRNA Disorazole DMSO Run3       | NM_0023<br>95 | ME1 | malic<br>enzyme 1,<br>NADP(+)-<br>dependent<br>, cytosolic                                               | 0.85796 Inlier   |
| siRNA Disorazole DMSO Run2       | NM_0023<br>95 | ME1 | malic<br>enzyme 1,<br>NADP(+)-<br>dependent<br>, cytosolic                                               | 1.976075 Inlier  |
| siRNA-Vinblastine Run1-<br>DMSO  | NM_0023<br>95 | ME1 | malic<br>enzyme 1,<br>NADP(+)-<br>dependent<br>, cytosolic<br>malic<br>enzyme 2,<br>NAD(+)-<br>dependent | 2.629495 Inlier  |
| siRNA-Vinblastine Run2-<br>DMSO  | NM_0023<br>96 | ME2 | , mitochond<br>rial<br>malic<br>enzyme 2,<br>NAD(+)-<br>dependent                                        | -1.203631 Inlier |
| siRNA-Temozolomide Run3-<br>DMSO | NM_0023<br>96 | ME2 | , mitochond<br>rial                                                                                      | -0.995943 Inlier |



Identification of Survival Genes in Human Glioblastoma Cells Using siRNA Screening  
 Nikhil G Thaker, Fang Zhang, Peter R. McDonald, Tong Ying Shun, Michael D Lewen, Ian F. Pollack, and John S. Lazo

Molecular Pharmacology

|                              |              |     |  |                                                 |                  |
|------------------------------|--------------|-----|--|-------------------------------------------------|------------------|
|                              |              |     |  | malic enzyme 2, NAD(+)-dependent                |                  |
| siRNA-Temozolomide Run1-DMSO | NM_002396    | ME2 |  | mitochondrial malic enzyme 2, NAD(+)-dependent  | -0.347072 Inlier |
| siRNA-Temozolomide Run2-DMSO | NM_002396    | ME2 |  | mitochondrial malic enzyme 2, NAD(+)-dependent  | -0.051004 Inlier |
| siRNA Disorazole DMSO Run1   | NM_002396    | ME2 |  | mitochondrial malic enzyme 2, NAD(+)-dependent  | 0.051004 Inlier  |
| siRNA Disorazole DMSO Run3   | NM_002396    | ME2 |  | mitochondrial malic enzyme 2, NAD(+)-dependent  | 0.401384 Inlier  |
| siRNA Disorazole DMSO Run2   | NM_002396    | ME2 |  | mitochondrial malic enzyme 2, NAD(+)-dependent  | 0.947616 Inlier  |
| siRNA-Vinblastine Run1-DMSO  | NM_002396    | ME2 |  | mitochondrial malic enzyme 3, NADP(+)-dependent | 1.5405 Inlier    |
| siRNA-Temozolomide Run2-DMSO | NM_001014811 | ME3 |  | mitochondrial                                   | -1.07114 Inlier  |

Identification of Survival Genes in Human Glioblastoma Cells Using siRNA Screening  
 Nikhil G Thaker, Fang Zhang, Peter R. McDonald, Tong Ying Shun, Michael D Lewen, Ian F. Pollack, and John S. Lazo  
 Molecular Pharmacology

|                              |              |     |  |                                   |                  |
|------------------------------|--------------|-----|--|-----------------------------------|------------------|
|                              |              |     |  | malic enzyme 3, NADP(+)-dependent |                  |
| siRNA-Vinblastine Run2-DMSO  | NM_001014811 | ME3 |  | mitochondrial                     | -0.6681 Inlier   |
|                              |              |     |  | malic enzyme 3, NADP(+)-dependent |                  |
| siRNA-Temozolomide Run1-DMSO | NM_001014811 | ME3 |  | mitochondrial                     | -0.50335 Inlier  |
|                              |              |     |  | malic enzyme 3, NADP(+)-dependent |                  |
| siRNA Disorazole DMSO Run3   | NM_001014811 | ME3 |  | mitochondrial                     | -0.191574 Inlier |
|                              |              |     |  | malic enzyme 3, NADP(+)-dependent |                  |
| siRNA Disorazole DMSO Run1   | NM_001014811 | ME3 |  | mitochondrial                     | 0.191574 Inlier  |
|                              |              |     |  | malic enzyme 3, NADP(+)-dependent |                  |
| siRNA-Temozolomide Run3-DMSO | NM_001014811 | ME3 |  | mitochondrial                     | 0.6809 Inlier    |
|                              |              |     |  | malic enzyme 3, NADP(+)-dependent |                  |
| siRNA Disorazole DMSO Run2   | NM_001014811 | ME3 |  | mitochondrial                     | 2.427857 Inlier  |

Identification of Survival Genes in Human Glioblastoma Cells Using siRNA Screening

Nikhil G Thaker, Fang Zhang, Peter R. McDonald, Tong Ying Shun, Michael D Lewen, Ian F. Pollack, and John S. Lazo

Molecular Pharmacology

|                              |              |      |                                                                                      |                  |
|------------------------------|--------------|------|--------------------------------------------------------------------------------------|------------------|
|                              |              |      | malic enzyme 3, NADP(+)-dependent                                                    |                  |
| siRNA-Vinblastine Run1-DMSO  | NM_001014811 | ME3  | mitochondrial mediator of RNA polymerase II transcription, subunit 8 homolog (yeast) | 3.069518 Inlier  |
| siRNA-Temozolomide Run3-DMSO | NM_001001654 | MED8 | mediator of RNA polymerase II transcription, subunit 8 homolog (yeast)               | -1.106281 Inlier |
| siRNA-Temozolomide Run2-DMSO | NM_001001654 | MED8 | mediator of RNA polymerase II transcription, subunit 8 homolog (yeast)               | -0.694845 Inlier |
| siRNA-Vinblastine Run2-DMSO  | NM_001001654 | MED8 | mediator of RNA polymerase II transcription, subunit 8 homolog (yeast)               | -0.654155 Inlier |
| siRNA Disorazole DMSO Run3   | NM_001001654 | MED8 | subunit 8 homolog (yeast)                                                            | -0.128089 Inlier |

Identification of Survival Genes in Human Glioblastoma Cells Using siRNA Screening

Nikhil G Thaker, Fang Zhang, Peter R. McDonald, Tong Ying Shun, Michael D Lewen, Ian F. Pollack, and John S. Lazo

Molecular Pharmacology

|                              |              |      |                                                                        |           |        |
|------------------------------|--------------|------|------------------------------------------------------------------------|-----------|--------|
| siRNA-Temozolomide Run1-DMSO | NM_001001654 | MED8 | mediator of RNA polymerase II transcription, subunit 8 homolog (yeast) | 0.128089  | Inlier |
| siRNA Disorazole DMSO Run1   | NM_001001654 | MED8 | mediator of RNA polymerase II transcription, subunit 8 homolog (yeast) | 0.620664  | Inlier |
| siRNA-Vinblastine Run1-DMSO  | NM_001001654 | MED8 | mediator of RNA polymerase II transcription, subunit 8 homolog (yeast) | 1.540304  | Inlier |
| siRNA Disorazole DMSO Run2   | NM_001001654 | MED8 | maternal embryonic leucine zipper kinase                               | 1.674242  | Inlier |
| siRNA-Temozolomide Run3-DMSO | NM_014791    | MELK | maternal embryonic leucine zipper kinase                               | -1.360768 | Inlier |
| siRNA Disorazole DMSO Run3   | NM_014791    | MELK | maternal embryonic leucine zipper kinase                               | -1.221484 | Inlier |
| siRNA-Temozolomide Run2-DMSO | NM_014791    | MELK | maternal embryonic leucine zipper kinase                               | -1.191794 | Inlier |

Identification of Survival Genes in Human Glioblastoma Cells Using siRNA Screening  
 Nikhil G Thaker, Fang Zhang, Peter R. McDonald, Tong Ying Shun, Michael D Lewen, Ian F. Pollack, and John S. Lazo

Molecular Pharmacology

|                              |               |       |                                                      |           |        |
|------------------------------|---------------|-------|------------------------------------------------------|-----------|--------|
| siRNA-Temozolomide Run1-DMSO | NM_0147<br>91 | MELK  | maternal<br>embryonic<br>leucine<br>zipper<br>kinase | -0.164991 | Inlier |
| siRNA-Vinblastine Run2-DMSO  | NM_0147<br>91 | MELK  | maternal<br>embryonic<br>leucine<br>zipper<br>kinase | 0.164991  | Inlier |
| siRNA Disorazole DMSO Run1   | NM_0147<br>91 | MELK  | maternal<br>embryonic<br>leucine<br>zipper<br>kinase | 0.27396   | Inlier |
| siRNA Disorazole DMSO Run2   | NM_0147<br>91 | MELK  | maternal<br>embryonic<br>leucine<br>zipper<br>kinase | 0.288091  | Inlier |
| siRNA-Vinblastine Run1-DMSO  | NM_0147<br>91 | MELK  | maternal<br>embryonic<br>leucine<br>zipper<br>kinase | 1.060909  | Inlier |
| siRNA-Temozolomide Run3-DMSO | NM_0055<br>88 | MEP1A | meprin A,<br>alpha<br>(PABA<br>peptide<br>hydrolase) | -1.392128 | Inlier |
| siRNA Disorazole DMSO Run3   | NM_0055<br>88 | MEP1A | meprin A,<br>alpha<br>(PABA<br>peptide<br>hydrolase) | -0.503443 | Inlier |
| siRNA-Temozolomide Run2-DMSO | NM_0055<br>88 | MEP1A | meprin A,<br>alpha<br>(PABA<br>peptide<br>hydrolase) | -0.424898 | Inlier |
| siRNA-Temozolomide Run1-DMSO | NM_0055<br>88 | MEP1A | meprin A,<br>alpha<br>(PABA<br>peptide<br>hydrolase) | -0.190921 | Inlier |

Identification of Survival Genes in Human Glioblastoma Cells Using siRNA Screening  
 Nikhil G Thaker, Fang Zhang, Peter R. McDonald, Tong Ying Shun, Michael D Lewen, Ian F. Pollack, and John S. Lazo  
 Molecular Pharmacology

|                                  |               |       |                                                      |           |        |
|----------------------------------|---------------|-------|------------------------------------------------------|-----------|--------|
| siRNA Disorazole DMSO Run1       | NM_0055<br>88 | MEP1A | meprin A,<br>alpha<br>(PABA<br>peptide<br>hydrolase) | 0.190921  | Inlier |
| siRNA Disorazole DMSO Run2       | NM_0055<br>88 | MEP1A | meprin A,<br>alpha<br>(PABA<br>peptide<br>hydrolase) | 0.845557  | Inlier |
| siRNA-Vinblastine Run2-<br>DMSO  | NM_0055<br>88 | MEP1A | meprin A,<br>alpha<br>(PABA<br>peptide<br>hydrolase) | 0.900187  | Inlier |
| siRNA-Vinblastine Run1-<br>DMSO  | NM_0055<br>88 | MEP1A | meprin A,<br>alpha<br>(PABA<br>peptide<br>hydrolase) | 1.156607  | Inlier |
| siRNA-Temozolomide Run3-<br>DMSO | NM_0059<br>25 | MEP1B | meprin A,<br>beta                                    | -0.943294 | Inlier |
| siRNA-Temozolomide Run1-<br>DMSO | NM_0059<br>25 | MEP1B | meprin A,<br>beta                                    | -0.74585  | Inlier |
| siRNA-Temozolomide Run2-<br>DMSO | NM_0059<br>25 | MEP1B | meprin A,<br>beta                                    | -0.60315  | Inlier |
| siRNA Disorazole DMSO Run1       | NM_0059<br>25 | MEP1B | meprin A,<br>beta                                    | -0.046032 | Inlier |
| siRNA Disorazole DMSO Run2       | NM_0059<br>25 | MEP1B | meprin A,<br>beta                                    | 0.046032  | Inlier |
| siRNA Disorazole DMSO Run3       | NM_0059<br>25 | MEP1B | meprin A,<br>beta                                    | 0.154567  | Inlier |
| siRNA-Vinblastine Run1-<br>DMSO  | NM_0059<br>25 | MEP1B | meprin A,<br>beta                                    | 0.806134  | Inlier |
| siRNA-Vinblastine Run2-<br>DMSO  | NM_0059<br>25 | MEP1B | meprin A,<br>beta                                    | 0.92911   | Inlier |
| siRNA Disorazole DMSO Run2       | NM_0063<br>43 | MERTK | c-mer<br>proto-<br>oncogene<br>tyrosine<br>kinase    | -1.348054 | Inlier |
| siRNA-Temozolomide Run3-<br>DMSO | NM_0063<br>43 | MERTK | c-mer<br>proto-<br>oncogene<br>tyrosine<br>kinase    | -0.636853 | Inlier |

Identification of Survival Genes in Human Glioblastoma Cells Using siRNA Screening  
 Nikhil G Thaker, Fang Zhang, Peter R. McDonald, Tong Ying Shun, Michael D Lewen, Ian F. Pollack, and John S. Lazo

Molecular Pharmacology

|                              |               |       |                                                                                                               |           |        |
|------------------------------|---------------|-------|---------------------------------------------------------------------------------------------------------------|-----------|--------|
| siRNA-Temozolomide Run2-DMSO | NM_0063<br>43 | MERTK | c-mer<br>proto-<br>oncogene<br>tyrosine<br>kinase                                                             | -0.169201 | Inlier |
| siRNA Disorazole DMSO Run3   | NM_0063<br>43 | MERTK | c-mer<br>proto-<br>oncogene<br>tyrosine<br>kinase                                                             | -0.00515  | Inlier |
| siRNA-Temozolomide Run1-DMSO | NM_0063<br>43 | MERTK | c-mer<br>proto-<br>oncogene<br>tyrosine<br>kinase                                                             | 0.00515   | Inlier |
| siRNA Disorazole DMSO Run1   | NM_0063<br>43 | MERTK | c-mer<br>proto-<br>oncogene<br>tyrosine<br>kinase                                                             | 0.712147  | Inlier |
| siRNA-Vinblastine Run1-DMSO  | NM_0063<br>43 | MERTK | c-mer<br>proto-<br>oncogene<br>tyrosine<br>kinase                                                             | 0.775328  | Inlier |
| siRNA-Vinblastine Run2-DMSO  | NM_0063<br>43 | MERTK | c-mer<br>proto-<br>oncogene<br>tyrosine<br>kinase<br>mesoderm<br>specific<br>transcript<br>homolog<br>(mouse) | 1.188359  | Inlier |
| siRNA-Temozolomide Run3-DMSO | NM_1775<br>24 | MEST  | mesoderm<br>specific<br>transcript<br>homolog<br>(mouse)                                                      | -1.062887 | Inlier |
| siRNA Disorazole DMSO Run3   | NM_1775<br>24 | MEST  | mesoderm<br>specific<br>transcript<br>homolog<br>(mouse)                                                      | -0.97162  | Inlier |
| siRNA Disorazole DMSO Run1   | NM_1775<br>24 | MEST  | mesoderm<br>specific<br>transcript<br>homolog<br>(mouse)                                                      | -0.369125 | Inlier |
| siRNA-Vinblastine Run2-DMSO  | NM_1775<br>24 | MEST  | mesoderm<br>specific<br>transcript<br>homolog<br>(mouse)                                                      | -0.353049 | Inlier |

Identification of Survival Genes in Human Glioblastoma Cells Using siRNA Screening  
 Nikhil G Thaker, Fang Zhang, Peter R. McDonald, Tong Ying Shun, Michael D Lewen, Ian F. Pollack, and John S. Lazo

Molecular Pharmacology

|                              |               |      |                                                        |           |        |
|------------------------------|---------------|------|--------------------------------------------------------|-----------|--------|
| siRNA-Temozolomide Run2-DMSO | NM_1775<br>24 | MEST | mesoderm specific transcript homolog (mouse)           | 0.353049  | Inlier |
| siRNA-Temozolomide Run1-DMSO | NM_1775<br>24 | MEST | mesoderm specific transcript homolog (mouse)           | 0.672093  | Inlier |
| siRNA-Vinblastine Run1-DMSO  | NM_1775<br>24 | MEST | mesoderm specific transcript homolog (mouse)           | 0.676907  | Inlier |
| siRNA Disorazole DMSO Run2   | NM_1775<br>24 | MEST | mesoderm specific transcript homolog (mouse)           | 1.27794   | Inlier |
| siRNA-Temozolomide Run3-DMSO | NM_0002<br>45 | MET  | met proto-oncogene (hepatocyte growth factor receptor) | -1.682474 | Inlier |
| siRNA-Temozolomide Run2-DMSO | NM_0002<br>45 | MET  | met proto-oncogene (hepatocyte growth factor receptor) | -1.083836 | Inlier |
| siRNA-Temozolomide Run1-DMSO | NM_0002<br>45 | MET  | met proto-oncogene (hepatocyte growth factor receptor) | -0.632267 | Inlier |
| siRNA Disorazole DMSO Run1   | NM_0002<br>45 | MET  | met proto-oncogene (hepatocyte growth factor receptor) | -0.140182 | Inlier |
| siRNA Disorazole DMSO Run3   | NM_0002<br>45 | MET  | met proto-oncogene (hepatocyte growth factor receptor) | 0.140181  | Inlier |



Identification of Survival Genes in Human Glioblastoma Cells Using siRNA Screening  
 Nikhil G Thaker, Fang Zhang, Peter R. McDonald, Tong Ying Shun, Michael D Lewen, Ian F. Pollack, and John S. Lazo

Molecular Pharmacology

|                              |               |        |                                                        |           |        |
|------------------------------|---------------|--------|--------------------------------------------------------|-----------|--------|
| siRNA Disorazole DMSO Run2   | NM_0002<br>45 | MET    | met proto-oncogene (hepatocyte growth factor receptor) | 0.214475  | Inlier |
| siRNA-Vinblastine Run2-DMSO  | NM_0002<br>45 | MET    | met proto-oncogene (hepatocyte growth factor receptor) | 0.716733  | Inlier |
| siRNA-Vinblastine Run1-DMSO  | NM_0002<br>45 | MET    | methionyl aminopeptidase 1                             | 1.049297  | Inlier |
| siRNA-Temozolomide Run3-DMSO | NM_0151<br>43 | METAP1 | methionyl aminopeptidase 1                             | -1.172796 | Inlier |
| siRNA-Temozolomide Run2-DMSO | NM_0151<br>43 | METAP1 | methionyl aminopeptidase 1                             | -0.840233 | Inlier |
| siRNA-Temozolomide Run1-DMSO | NM_0151<br>43 | METAP1 | methionyl aminopeptidase 1                             | -0.389032 | Inlier |
| siRNA Disorazole DMSO Run2   | NM_0151<br>43 | METAP1 | methionyl aminopeptidase 1                             | -0.105544 | Inlier |
| siRNA Disorazole DMSO Run1   | NM_0151<br>43 | METAP1 | methionyl aminopeptidase 1                             | 0.105543  | Inlier |
| siRNA Disorazole DMSO Run3   | NM_0151<br>43 | METAP1 | methionyl aminopeptidase 1                             | 0.644096  | Inlier |
| siRNA-Vinblastine Run1-DMSO  | NM_0151<br>43 | METAP1 | methionyl aminopeptidase 1                             | 0.704904  | Inlier |
| siRNA-Vinblastine Run2-DMSO  | NM_0151<br>43 | METAP1 | methionyl aminopeptidase 1                             | 0.743609  | Inlier |
| siRNA-Temozolomide Run3-DMSO | NM_0068<br>38 | METAP2 | methionyl aminopeptidase 2                             | -1.936706 | Inlier |
| siRNA-Temozolomide Run2-DMSO | NM_0068<br>38 | METAP2 | methionyl aminopeptidase 2                             | -1.740719 | Inlier |
| siRNA-Temozolomide Run1-DMSO | NM_0068<br>38 | METAP2 | methionyl aminopeptidase 2                             | -0.568602 | Inlier |

Identification of Survival Genes in Human Glioblastoma Cells Using siRNA Screening  
 Nikhil G Thaker, Fang Zhang, Peter R. McDonald, Tong Ying Shun, Michael D Lewen, Ian F. Pollack, and John S. Lazo

Molecular Pharmacology

|                                  |               |        |                                   |           |         |
|----------------------------------|---------------|--------|-----------------------------------|-----------|---------|
| siRNA Disorazole DMSO Run2       | NM_0068<br>38 | METAP2 | methionyl<br>aminopept<br>idase 2 | -0.042565 | Inlier  |
| siRNA Disorazole DMSO Run1       | NM_0068<br>38 | METAP2 | methionyl<br>aminopept<br>idase 2 | 0.042565  | Inlier  |
| siRNA-Vinblastine Run2-<br>DMSO  | NM_0068<br>38 | METAP2 | methionyl<br>aminopept<br>idase 2 | 0.637651  | Inlier  |
| siRNA Disorazole DMSO Run3       | NM_0068<br>38 | METAP2 | methionyl<br>aminopept<br>idase 2 | 0.711349  | Inlier  |
| siRNA-Vinblastine Run1-<br>DMSO  | NM_0068<br>38 | METAP2 | methionyl<br>aminopept<br>idase 2 | 0.907594  | Inlier  |
| siRNA-Temozolomide Run2-<br>DMSO | NM_0230<br>33 | METTL1 | methyltran<br>sferase-<br>like 1  | -5.620366 | Outlier |
| siRNA-Temozolomide Run3-<br>DMSO | NM_0230<br>33 | METTL1 | methyltran<br>sferase-<br>like 1  | -4.109513 | Outlier |
| siRNA-Temozolomide Run1-<br>DMSO | NM_0230<br>33 | METTL1 | methyltran<br>sferase-<br>like 1  | -0.378271 | Inlier  |
| siRNA-Vinblastine Run2-<br>DMSO  | NM_0230<br>33 | METTL1 | methyltran<br>sferase-<br>like 1  | -0.050659 | Inlier  |
| siRNA Disorazole DMSO Run3       | NM_0230<br>33 | METTL1 | methyltran<br>sferase-<br>like 1  | 0.050659  | Inlier  |
| siRNA Disorazole DMSO Run1       | NM_0230<br>33 | METTL1 | methyltran<br>sferase-<br>like 1  | 0.614912  | Inlier  |
| siRNA-Vinblastine Run1-<br>DMSO  | NM_0230<br>33 | METTL1 | methyltran<br>sferase-<br>like 1  | 0.734088  | Inlier  |
| siRNA Disorazole DMSO Run2       | NM_0230<br>33 | METTL1 | methyltran<br>sferase-<br>like 1  | 2.758996  | Inlier  |
| siRNA Disorazole DMSO Run3       | NM_0183<br>96 | METTL2 | methyltran<br>sferase<br>like 2   | -1.989053 | Inlier  |
| siRNA-Temozolomide Run3-<br>DMSO | NM_0183<br>96 | METTL2 | methyltran<br>sferase<br>like 2   | -0.834053 | Inlier  |
| siRNA-Vinblastine Run2-<br>DMSO  | NM_0183<br>96 | METTL2 | methyltran<br>sferase<br>like 2   | -0.514947 | Inlier  |
| siRNA-Temozolomide Run2-<br>DMSO | NM_0183<br>96 | METTL2 | methyltran<br>sferase<br>like 2   | -0.409776 | Inlier  |

Identification of Survival Genes in Human Glioblastoma Cells Using siRNA Screening  
 Nikhil G Thaker, Fang Zhang, Peter R. McDonald, Tong Ying Shun, Michael D Lewen, Ian F. Pollack, and John S. Lazo

| Condition                                                 | Gene   | Gene ID       | Gene Name                                      | Value     | Outlier |
|-----------------------------------------------------------|--------|---------------|------------------------------------------------|-----------|---------|
| Molecular Pharmacology<br>siRNA-Vinblastine Run1-<br>DMSO | METTL2 | NM_0183<br>96 | methyltran<br>sferase<br>like 2                | 0.409778  | Inlier  |
| siRNA Disorazole DMSO Run1                                | METTL2 | NM_0183<br>96 | methyltran<br>sferase<br>like 2                | 0.510069  | Inlier  |
| siRNA-Temozolomide Run1-<br>DMSO                          | METTL2 | NM_0183<br>96 | methyltran<br>sferase<br>like 2                | 1.620822  | Inlier  |
| siRNA Disorazole DMSO Run2                                | METTL2 | NM_0183<br>96 | methyltran<br>sferase<br>like 2                | 2.681851  | Inlier  |
| siRNA-Vinblastine Run2-<br>DMSO                           | MFAP4  | NM_0024<br>04 | microfibrill<br>ar-<br>associated<br>protein 4 | -1.098671 | Inlier  |
| siRNA-Temozolomide Run3-<br>DMSO                          | MFAP4  | NM_0024<br>04 | microfibrill<br>ar-<br>associated<br>protein 4 | -0.575527 | Inlier  |
| siRNA Disorazole DMSO Run3                                | MFAP4  | NM_0024<br>04 | microfibrill<br>ar-<br>associated<br>protein 4 | -0.540278 | Inlier  |
| siRNA-Temozolomide Run2-<br>DMSO                          | MFAP4  | NM_0024<br>04 | microfibrill<br>ar-<br>associated<br>protein 4 | -0.058995 | Inlier  |
| siRNA Disorazole DMSO Run1                                | MFAP4  | NM_0024<br>04 | microfibrill<br>ar-<br>associated<br>protein 4 | 0.058996  | Inlier  |
| siRNA-Temozolomide Run1-<br>DMSO                          | MFAP4  | NM_0024<br>04 | microfibrill<br>ar-<br>associated<br>protein 4 | 0.773473  | Inlier  |
| siRNA-Vinblastine Run1-<br>DMSO                           | MFAP4  | NM_0024<br>04 | microfibrill<br>ar-<br>associated<br>protein 4 | 1.217466  | Inlier  |
| siRNA Disorazole DMSO Run2                                | MFAP4  | NM_0024<br>04 | microfibrill<br>ar-<br>associated<br>protein 4 | 2.232882  | Inlier  |

Identification of Survival Genes in Human Glioblastoma Cells Using siRNA Screening  
 Nikhil G Thaker, Fang Zhang, Peter R. McDonald, Tong Ying Shun, Michael D Lewen, Ian F. Pollack, and John S. Lazo

Molecular Pharmacology

| siRNA Treatment              | Gene   | Gene ID   | Gene Symbol | Cell Line                                           | Log Fold Change | Outlier Status |
|------------------------------|--------|-----------|-------------|-----------------------------------------------------|-----------------|----------------|
| siRNA-Temozolomide Run1-DMSO | MFHAS1 | NM_004225 | MFHAS1      | malignant fibrous histiocytoma amplified sequence 1 | -1.240502       | Inlier         |
| siRNA-Temozolomide Run3-DMSO | MFHAS1 | NM_004225 | MFHAS1      | malignant fibrous histiocytoma amplified sequence 1 | -0.982067       | Inlier         |
| siRNA-Temozolomide Run2-DMSO | MFHAS1 | NM_004225 | MFHAS1      | malignant fibrous histiocytoma amplified sequence 1 | -0.683294       | Inlier         |
| siRNA Disorazole DMSO Run1   | MFHAS1 | NM_004225 | MFHAS1      | malignant fibrous histiocytoma amplified sequence 1 | -0.289934       | Inlier         |
| siRNA Disorazole DMSO Run2   | MFHAS1 | NM_004225 | MFHAS1      | malignant fibrous histiocytoma amplified sequence 1 | 0.289933        | Inlier         |
| siRNA-Vinblastine Run2-DMSO  | MFHAS1 | NM_004225 | MFHAS1      | malignant fibrous histiocytoma amplified sequence 1 | 0.545649        | Inlier         |
| siRNA-Vinblastine Run1-DMSO  | MFHAS1 | NM_004225 | MFHAS1      | malignant fibrous histiocytoma amplified sequence 1 | 0.665706        | Inlier         |

Identification of Survival Genes in Human Glioblastoma Cells Using siRNA Screening

Nikhil G Thaker, Fang Zhang, Peter R. McDonald, Tong Ying Shun, Michael D Lewen, Ian F. Pollack, and John S. Lazo

Molecular Pharmacology

|                              |               |        |   |           |        |
|------------------------------|---------------|--------|---|-----------|--------|
| siRNA Disorazole DMSO Run3   | NM_0042<br>25 | MFHAS1 | 1 | 0.964294  | Inlier |
| siRNA Disorazole DMSO Run1   | NM_0024<br>05 | MFNG   | 1 | -0.808847 | Inlier |
| siRNA-Temozolomide Run1-DMSO | NM_0024<br>05 | MFNG   | 1 | -0.69474  | Inlier |
| siRNA-Temozolomide Run2-DMSO | NM_0024<br>05 | MFNG   | 1 | -0.65426  | Inlier |
| siRNA-Temozolomide Run3-DMSO | NM_0024<br>05 | MFNG   | 1 | -0.397279 | Inlier |
| siRNA-Vinblastine Run2-DMSO  | NM_0024<br>05 | MFNG   | 1 | 0.397279  | Inlier |
| siRNA Disorazole DMSO Run2   | NM_0024<br>05 | MFNG   | 1 | 0.590516  | Inlier |
| siRNA-Vinblastine Run1-DMSO  | NM_0024<br>05 | MFNG   | 1 | 0.723909  | Inlier |
| siRNA Disorazole DMSO Run3   | NM_0024<br>05 | MFNG   | 1 | 0.807965  | Inlier |
| siRNA-Temozolomide Run3-DMSO | NM_0314<br>33 | MFRP   | 1 | -1.498338 | Inlier |

malignant  
fibrous  
histiocyto  
ma  
amplified  
sequence  
manic  
fringe  
homolog  
(Drosophil  
a)  
membrane  
frizzled-  
related  
protein

Identification of Survival Genes in Human Glioblastoma Cells Using siRNA Screening  
 Nikhil G Thaker, Fang Zhang, Peter R. McDonald, Tong Ying Shun, Michael D Lewen, Ian F. Pollack, and John S. Lazo

Molecular Pharmacology

|                              |               |      |                                                          |           |        |
|------------------------------|---------------|------|----------------------------------------------------------|-----------|--------|
| siRNA-Temozolomide Run2-DMSO | NM_0314<br>33 | MFRP | membrane<br>frizzled-<br>related<br>protein              | -0.174867 | Inlier |
| siRNA Disorazole DMSO Run2   | NM_0314<br>33 | MFRP | membrane<br>frizzled-<br>related<br>protein              | -0.086277 | Inlier |
| siRNA-Temozolomide Run1-DMSO | NM_0314<br>33 | MFRP | membrane<br>frizzled-<br>related<br>protein              | -0.013494 | Inlier |
| siRNA Disorazole DMSO Run1   | NM_0314<br>33 | MFRP | membrane<br>frizzled-<br>related<br>protein              | 0.013494  | Inlier |
| siRNA Disorazole DMSO Run3   | NM_0314<br>33 | MFRP | membrane<br>frizzled-<br>related<br>protein              | 1.174133  | Inlier |
| siRNA-Vinblastine Run2-DMSO  | NM_0314<br>33 | MFRP | membrane<br>frizzled-<br>related<br>protein              | 1.47528   | Inlier |
| siRNA-Vinblastine Run1-DMSO  | NM_0314<br>33 | MFRP | membrane<br>frizzled-<br>related<br>protein              | 1.706267  | Inlier |
| siRNA-Temozolomide Run3-DMSO | NM_0307<br>80 | MFTC | MFTC                                                     | -0.948325 | Inlier |
| siRNA Disorazole DMSO Run2   | NM_0307<br>80 | MFTC | MFTC                                                     | -0.580786 | Inlier |
| siRNA-Temozolomide Run2-DMSO | NM_0307<br>80 | MFTC | MFTC                                                     | -0.580333 | Inlier |
| siRNA Disorazole DMSO Run1   | NM_0307<br>80 | MFTC | MFTC                                                     | -0.513098 | Inlier |
| siRNA-Temozolomide Run1-DMSO | NM_0307<br>80 | MFTC | MFTC                                                     | 0.513098  | Inlier |
| siRNA Disorazole DMSO Run3   | NM_0307<br>80 | MFTC | MFTC                                                     | 0.768214  | Inlier |
| siRNA-Vinblastine Run1-DMSO  | NM_0307<br>80 | MFTC | MFTC                                                     | 1.533357  | Inlier |
| siRNA-Vinblastine Run2-DMSO  | NM_0307<br>80 | MFTC | MFTC                                                     | 1.626525  | Inlier |
| siRNA-Temozolomide Run3-DMSO | NM_0046<br>68 | MGAM | maltase-<br>glucoamyl<br>ase (alpha-<br>glucosidas<br>e) | -1.236599 | Inlier |

Identification of Survival Genes in Human Glioblastoma Cells Using siRNA Screening  
 Nikhil G Thaker, Fang Zhang, Peter R. McDonald, Tong Ying Shun, Michael D Lewen, Ian F. Pollack, and John S. Lazo  
 Molecular Pharmacology

|                              |           |       |                                                                             |           |        |
|------------------------------|-----------|-------|-----------------------------------------------------------------------------|-----------|--------|
| siRNA-Temozolomide Run2-DMSO | NM_004668 | MGAM  | maltase-glucoamylase (alpha-glucosidase)                                    | -1.154872 | Inlier |
| siRNA-Vinblastine Run2-DMSO  | NM_004668 | MGAM  | maltase-glucoamylase (alpha-glucosidase)                                    | -0.274192 | Inlier |
| siRNA-Temozolomide Run1-DMSO | NM_004668 | MGAM  | maltase-glucoamylase (alpha-glucosidase)                                    | -0.184254 | Inlier |
| siRNA Disorazole DMSO Run1   | NM_004668 | MGAM  | maltase-glucoamylase (alpha-glucosidase)                                    | 0.184254  | Inlier |
| siRNA Disorazole DMSO Run3   | NM_004668 | MGAM  | maltase-glucoamylase (alpha-glucosidase)                                    | 0.32709   | Inlier |
| siRNA Disorazole DMSO Run2   | NM_004668 | MGAM  | maltase-glucoamylase (alpha-glucosidase)                                    | 1.02191   | Inlier |
| siRNA-Vinblastine Run1-DMSO  | NM_004668 | MGAM  | maltase-glucoamylase (alpha-glucosidase)                                    | 1.106804  | Inlier |
| siRNA-Temozolomide Run3-DMSO | NM_002406 | MGAT1 | mannosyl (alpha-1,3-)-glycoprotein beta-1,2-N-acetylglucosaminyltransferase | -3.238472 | Inlier |

Identification of Survival Genes in Human Glioblastoma Cells Using siRNA Screening

Nikhil G Thaker, Fang Zhang, Peter R. McDonald, Tong Ying Shun, Michael D Lewen, Ian F. Pollack, and John S. Lazo

Molecular Pharmacology

|                              |           |       |                                                                             |           |        |
|------------------------------|-----------|-------|-----------------------------------------------------------------------------|-----------|--------|
| siRNA-Temozolomide Run2-DMSO | NM_002406 | MGAT1 | mannosyl (alpha-1,3-)-glycoprotein beta-1,2-N-acetylglucosaminyltransferase | -2.997429 | Inlier |
| siRNA Disorazole DMSO Run2   | NM_002406 | MGAT1 | mannosyl (alpha-1,3-)-glycoprotein beta-1,2-N-acetylglucosaminyltransferase | -0.383254 | Inlier |
| siRNA Disorazole DMSO Run3   | NM_002406 | MGAT1 | mannosyl (alpha-1,3-)-glycoprotein beta-1,2-N-acetylglucosaminyltransferase | -0.065666 | Inlier |
| siRNA-Vinblastine Run2-DMSO  | NM_002406 | MGAT1 | mannosyl (alpha-1,3-)-glycoprotein beta-1,2-N-acetylglucosaminyltransferase | 0.065665  | Inlier |
| siRNA-Temozolomide Run1-DMSO | NM_002406 | MGAT1 | mannosyl (alpha-1,3-)-glycoprotein beta-1,2-N-acetylglucosaminyltransferase | 0.271429  | Inlier |



Identification of Survival Genes in Human Glioblastoma Cells Using siRNA Screening  
 Nikhil G Thaker, Fang Zhang, Peter R. McDonald, Tong Ying Shun, Michael D Lewen, Ian F. Pollack, and John S. Lazo  
 Molecular Pharmacology

|                                  |                  |       |                                                                                                            |           |        |
|----------------------------------|------------------|-------|------------------------------------------------------------------------------------------------------------|-----------|--------|
| siRNA Disorazole DMSO Run1       | NM_0024<br>06    | MGAT1 | mannosyl<br>(alpha-1,3-<br>)-<br>glycoprotei<br>n beta-1,2-<br>N-<br>acetylgluc<br>osaminyltr<br>ansferase | 0.965746  | Inlier |
| siRNA-Vinblastine Run1-<br>DMSO  | NM_0024<br>06    | MGAT1 | mannosyl<br>(alpha-1,3-<br>)-<br>glycoprotei<br>n beta-1,2-<br>N-<br>acetylgluc<br>osaminyltr<br>ansferase | 3.408566  | Inlier |
| siRNA Disorazole DMSO Run3       | NM_0010<br>15883 | MGAT2 | mannosyl<br>(alpha-1,6-<br>)-<br>glycoprotei<br>n beta-1,2-<br>N-<br>acetylgluc<br>osaminyltr<br>ansferase | -1.627106 | Inlier |
| siRNA-Temozolomide Run3-<br>DMSO | NM_0010<br>15883 | MGAT2 | mannosyl<br>(alpha-1,6-<br>)-<br>glycoprotei<br>n beta-1,2-<br>N-<br>acetylgluc<br>osaminyltr<br>ansferase | -0.929118 | Inlier |
| siRNA-Vinblastine Run2-<br>DMSO  | NM_0010<br>15883 | MGAT2 | mannosyl<br>(alpha-1,6-<br>)-<br>glycoprotei<br>n beta-1,2-<br>N-<br>acetylgluc<br>osaminyltr<br>ansferase | -0.227171 | Inlier |

Identification of Survival Genes in Human Glioblastoma Cells Using siRNA Screening

Nikhil G Thaker, Fang Zhang, Peter R. McDonald, Tong Ying Shun, Michael D Lewen, Ian F. Pollack, and John S. Lazo

Molecular Pharmacology

|                                  |                  |       |                                                                                                            |           |        |
|----------------------------------|------------------|-------|------------------------------------------------------------------------------------------------------------|-----------|--------|
| siRNA Disorazole DMSO Run1       | NM_0010<br>15883 | MGAT2 | mannosyl<br>(alpha-1,6-<br>)-<br>glycoprotei<br>n beta-1,2-<br>N-<br>acetylgluc<br>osaminyltr<br>ansferase | -0.128951 | Inlier |
| siRNA-Temozolomide Run1-<br>DMSO | NM_0010<br>15883 | MGAT2 | mannosyl<br>(alpha-1,6-<br>)-<br>glycoprotei<br>n beta-1,2-<br>N-<br>acetylgluc<br>osaminyltr<br>ansferase | 0.128951  | Inlier |
| siRNA-Temozolomide Run2-<br>DMSO | NM_0010<br>15883 | MGAT2 | mannosyl<br>(alpha-1,6-<br>)-<br>glycoprotei<br>n beta-1,2-<br>N-<br>acetylgluc<br>osaminyltr<br>ansferase | 0.419882  | Inlier |
| siRNA-Vinblastine Run1-<br>DMSO  | NM_0010<br>15883 | MGAT2 | mannosyl<br>(alpha-1,6-<br>)-<br>glycoprotei<br>n beta-1,2-<br>N-<br>acetylgluc<br>osaminyltr<br>ansferase | 1.138676  | Inlier |
| siRNA Disorazole DMSO Run2       | NM_0010<br>15883 | MGAT2 | mannosyl<br>(alpha-1,6-<br>)-<br>glycoprotei<br>n beta-1,2-<br>N-<br>acetylgluc<br>osaminyltr<br>ansferase | 1.81129   | Inlier |

Identification of Survival Genes in Human Glioblastoma Cells Using siRNA Screening

Nikhil G Thaker, Fang Zhang, Peter R. McDonald, Tong Ying Shun, Michael D Lewen, Ian F. Pollack, and John S. Lazo

Molecular Pharmacology

|                              |           |       |                                                                           |           |        |
|------------------------------|-----------|-------|---------------------------------------------------------------------------|-----------|--------|
| siRNA-Vinblastine Run2-DMSO  | NM_002409 | MGAT3 | mannosyl (beta-1,4)-glycoprotein beta-1,4-N-acetylglucosaminyltransferase | -1.350643 | Inlier |
| siRNA Disorazole DMSO Run2   | NM_002409 | MGAT3 | mannosyl (beta-1,4)-glycoprotein beta-1,4-N-acetylglucosaminyltransferase | -0.35815  | Inlier |
| siRNA-Temozolomide Run1-DMSO | NM_002409 | MGAT3 | mannosyl (beta-1,4)-glycoprotein beta-1,4-N-acetylglucosaminyltransferase | -0.224901 | Inlier |
| siRNA Disorazole DMSO Run1   | NM_002409 | MGAT3 | mannosyl (beta-1,4)-glycoprotein beta-1,4-N-acetylglucosaminyltransferase | -0.04811  | Inlier |
| siRNA Disorazole DMSO Run3   | NM_002409 | MGAT3 | mannosyl (beta-1,4)-glycoprotein beta-1,4-N-acetylglucosaminyltransferase | 0.048113  | Inlier |

Identification of Survival Genes in Human Glioblastoma Cells Using siRNA Screening

Nikhil G Thaker, Fang Zhang, Peter R. McDonald, Tong Ying Shun, Michael D Lewen, Ian F. Pollack, and John S. Lazo

Molecular Pharmacology

|                              |           |        |                                                                                          |           |        |
|------------------------------|-----------|--------|------------------------------------------------------------------------------------------|-----------|--------|
| siRNA-Temozolomide Run2-DMSO | NM_002409 | MGAT3  | mannosyl (beta-1,4-)-glycoprotein beta-1,4-N-acetylglucosaminyltransferase               | 0.99085   | Inlier |
| siRNA-Temozolomide Run3-DMSO | NM_002409 | MGAT3  | mannosyl (beta-1,4-)-glycoprotein beta-1,4-N-acetylglucosaminyltransferase               | 1.586351  | Inlier |
| siRNA-Vinblastine Run1-DMSO  | NM_002409 | MGAT3  | mannosyl (beta-1,4-)-glycoprotein beta-1,4-N-acetylglucosaminyltransferase               | 1.902763  | Inlier |
| siRNA-Vinblastine Run2-DMSO  | NM_012214 | MGAT4A | mannosyl (alpha-1,3-)-glycoprotein beta-1,4-N-acetylglucosaminyltransferase, isoenzyme A | -1.224051 | Inlier |
| siRNA-Temozolomide Run2-DMSO | NM_012214 | MGAT4A | mannosyl (alpha-1,3-)-glycoprotein beta-1,4-N-acetylglucosaminyltransferase, isoenzyme A | -1.117264 | Inlier |

Identification of Survival Genes in Human Glioblastoma Cells Using siRNA Screening

Nikhil G Thaker, Fang Zhang, Peter R. McDonald, Tong Ying Shun, Michael D Lewen, Ian F. Pollack, and John S.

Lazo

Molecular Pharmacology

|                              |           |        |                                                                                          |           |        |
|------------------------------|-----------|--------|------------------------------------------------------------------------------------------|-----------|--------|
| siRNA-Temozolomide Run3-DMSO | NM_012214 | MGAT4A | mannosyl (alpha-1,3-)-glycoprotein beta-1,4-N-acetylglucosaminyltransferase, isoenzyme A | -0.05114  | Inlier |
| siRNA-Temozolomide Run1-DMSO | NM_012214 | MGAT4A | mannosyl (alpha-1,3-)-glycoprotein beta-1,4-N-acetylglucosaminyltransferase, isoenzyme A | -0.008334 | Inlier |
| siRNA Disorazole DMSO Run1   | NM_012214 | MGAT4A | mannosyl (alpha-1,3-)-glycoprotein beta-1,4-N-acetylglucosaminyltransferase, isoenzyme A | 0.008334  | Inlier |
| siRNA Disorazole DMSO Run3   | NM_012214 | MGAT4A | mannosyl (alpha-1,3-)-glycoprotein beta-1,4-N-acetylglucosaminyltransferase, isoenzyme A | 0.231736  | Inlier |

Identification of Survival Genes in Human Glioblastoma Cells Using siRNA Screening  
 Nikhil G Thaker, Fang Zhang, Peter R. McDonald, Tong Ying Shun, Michael D Lewen, Ian F. Pollack, and John S. Lazo  
 Molecular Pharmacology

|                                 |               |        |                                                                                                                               |           |        |
|---------------------------------|---------------|--------|-------------------------------------------------------------------------------------------------------------------------------|-----------|--------|
| siRNA Disorazole DMSO Run2      | NM_0122<br>14 | MGAT4A | mannosyl<br>(alpha-1,3-<br>)-<br>glycoprotei<br>n beta-1,4-<br>N-<br>acetylgluc<br>osaminyltr<br>ansferase,<br>isoenzyme<br>A | 1.741706  | Inlier |
| siRNA-Vinblastine Run1-<br>DMSO | NM_0122<br>14 | MGAT4A | mannosyl<br>(alpha-1,3-<br>)-<br>glycoprotei<br>n beta-1,4-<br>N-<br>acetylgluc<br>osaminyltr<br>ansferase,<br>isoenzyme<br>A | 1.977813  | Inlier |
| siRNA Disorazole DMSO Run1      | NM_0142<br>75 | MGAT4B | mannosyl<br>(alpha-1,3-<br>)-<br>glycoprotei<br>n beta-1,4-<br>N-<br>acetylgluc<br>osaminyltr<br>ansferase,<br>isoenzyme<br>B | -0.942964 | Inlier |
| siRNA Disorazole DMSO Run3      | NM_0142<br>75 | MGAT4B | mannosyl<br>(alpha-1,3-<br>)-<br>glycoprotei<br>n beta-1,4-<br>N-<br>acetylgluc<br>osaminyltr<br>ansferase,<br>isoenzyme<br>B | -0.406036 | Inlier |

Identification of Survival Genes in Human Glioblastoma Cells Using siRNA Screening

Nikhil G Thaker, Fang Zhang, Peter R. McDonald, Tong Ying Shun, Michael D Lewen, Ian F. Pollack, and John S.

Lazo

Molecular Pharmacology

|                              |           |        |                                                                                          |           |        |
|------------------------------|-----------|--------|------------------------------------------------------------------------------------------|-----------|--------|
| siRNA-Vinblastine Run2-DMSO  | NM_014275 | MGAT4B | mannosyl (alpha-1,3-)-glycoprotein beta-1,4-N-acetylglucosaminyltransferase, isoenzyme B | -0.135983 | Inlier |
| siRNA-Temozolomide Run1-DMSO | NM_014275 | MGAT4B | mannosyl (alpha-1,3-)-glycoprotein beta-1,4-N-acetylglucosaminyltransferase, isoenzyme B | -0.005277 | Inlier |
| siRNA-Temozolomide Run2-DMSO | NM_014275 | MGAT4B | mannosyl (alpha-1,3-)-glycoprotein beta-1,4-N-acetylglucosaminyltransferase, isoenzyme B | 0.005277  | Inlier |
| siRNA-Temozolomide Run3-DMSO | NM_014275 | MGAT4B | mannosyl (alpha-1,3-)-glycoprotein beta-1,4-N-acetylglucosaminyltransferase, isoenzyme B | 1.586402  | Inlier |

Identification of Survival Genes in Human Glioblastoma Cells Using siRNA Screening

Nikhil G Thaker, Fang Zhang, Peter R. McDonald, Tong Ying Shun, Michael D Lewen, Ian F. Pollack, and John S. Lazo

Molecular Pharmacology

|                                  |               |        |                                                                                                                               |           |        |
|----------------------------------|---------------|--------|-------------------------------------------------------------------------------------------------------------------------------|-----------|--------|
| siRNA Disorazole DMSO Run2       | NM_0142<br>75 | MGAT4B | mannosyl<br>(alpha-1,3-<br>)-<br>glycoprotei<br>n beta-1,4-<br>N-<br>acetylgluc<br>osaminyltr<br>ansferase,<br>isoenzyme<br>B | 2.193356  | Inlier |
| siRNA-Vinblastine Run1-<br>DMSO  | NM_0142<br>75 | MGAT4B | mannosyl<br>(alpha-1,3-<br>)-<br>glycoprotei<br>n beta-1,4-<br>N-<br>acetylgluc<br>osaminyltr<br>ansferase,<br>isoenzyme<br>B | 2.392257  | Inlier |
| siRNA Disorazole DMSO Run1       | NM_0024<br>10 | MGAT5  | mannosyl<br>(alpha-1,6-<br>)-<br>glycoprotei<br>n beta-1,6-<br>N-acetyl-<br>glucosami<br>nyltransfer<br>ase                   | -0.829987 | Inlier |
| siRNA-Temozolomide Run3-<br>DMSO | NM_0024<br>10 | MGAT5  | mannosyl<br>(alpha-1,6-<br>)-<br>glycoprotei<br>n beta-1,6-<br>N-acetyl-<br>glucosami<br>nyltransfer<br>ase                   | -0.725589 | Inlier |



Identification of Survival Genes in Human Glioblastoma Cells Using siRNA Screening

Nikhil G Thaker, Fang Zhang, Peter R. McDonald, Tong Ying Shun, Michael D Lewen, Ian F. Pollack, and John S. Lazo

Molecular Pharmacology

|                                  |    |         |       |                                                                                                             |           |        |
|----------------------------------|----|---------|-------|-------------------------------------------------------------------------------------------------------------|-----------|--------|
| siRNA Disorazole DMSO Run3       | 10 | NM_0024 | MGAT5 | mannosyl<br>(alpha-1,6-<br>)-<br>glycoprotei<br>n beta-1,6-<br>N-acetyl-<br>glucosami<br>nyltransfer<br>ase | -0.589067 | Inlier |
| siRNA-Vinblastine Run2-<br>DMSO  | 10 | NM_0024 | MGAT5 | mannosyl<br>(alpha-1,6-<br>)-<br>glycoprotei<br>n beta-1,6-<br>N-acetyl-<br>glucosami<br>nyltransfer<br>ase | -0.172041 | Inlier |
| siRNA-Temozolomide Run2-<br>DMSO | 10 | NM_0024 | MGAT5 | mannosyl<br>(alpha-1,6-<br>)-<br>glycoprotei<br>n beta-1,6-<br>N-acetyl-<br>glucosami<br>nyltransfer<br>ase | 0.172041  | Inlier |
| siRNA-Temozolomide Run1-<br>DMSO | 10 | NM_0024 | MGAT5 | mannosyl<br>(alpha-1,6-<br>)-<br>glycoprotei<br>n beta-1,6-<br>N-acetyl-<br>glucosami<br>nyltransfer<br>ase | 0.623411  | Inlier |
| siRNA Disorazole DMSO Run2       | 10 | NM_0024 | MGAT5 | mannosyl<br>(alpha-1,6-<br>)-<br>glycoprotei<br>n beta-1,6-<br>N-acetyl-<br>glucosami<br>nyltransfer<br>ase | 1.394018  | Inlier |

Identification of Survival Genes in Human Glioblastoma Cells Using siRNA Screening  
 Nikhil G Thaker, Fang Zhang, Peter R. McDonald, Tong Ying Shun, Michael D Lewen, Ian F. Pollack, and John S. Lazo  
 Molecular Pharmacology

|                              |           |          |                                                                             |           |        |
|------------------------------|-----------|----------|-----------------------------------------------------------------------------|-----------|--------|
| siRNA-Vinblastine Run1-DMSO  | NM_002410 | MGAT5    | mannosyl (alpha-1,6-)-glycoprotein beta-1,6-N-acetylglucosaminyltransferase | 1.447833  | Inlier |
| siRNA-Vinblastine Run2-DMSO  | NM_153329 | MGC10204 | aldehyde dehydrogenase 16 family, member A1                                 | -1.969192 | Inlier |
| siRNA-Temozolomide Run2-DMSO | NM_153329 | MGC10204 | aldehyde dehydrogenase 16 family, member A1                                 | -0.646954 | Inlier |
| siRNA-Temozolomide Run3-DMSO | NM_153329 | MGC10204 | aldehyde dehydrogenase 16 family, member A1                                 | -0.53895  | Inlier |
| siRNA Disorazole DMSO Run1   | NM_153329 | MGC10204 | aldehyde dehydrogenase 16 family, member A1                                 | -0.42329  | Inlier |
| siRNA-Temozolomide Run1-DMSO | NM_153329 | MGC10204 | aldehyde dehydrogenase 16 family, member A1                                 | 0.42329   | Inlier |
| siRNA Disorazole DMSO Run3   | NM_153329 | MGC10204 | aldehyde dehydrogenase 16 family, member A1                                 | 0.702046  | Inlier |
| siRNA Disorazole DMSO Run2   | NM_153329 | MGC10204 | aldehyde dehydrogenase 16 family, member A1                                 | 2.284076  | Inlier |

Identification of Survival Genes in Human Glioblastoma Cells Using siRNA Screening  
 Nikhil G Thaker, Fang Zhang, Peter R. McDonald, Tong Ying Shun, Michael D Lewen, Ian F. Pollack, and John S. Lazo

Molecular Pharmacology

|                                  |               |              | aldehyde<br>dehydroge<br>nase 16<br>family,<br>member |                  |
|----------------------------------|---------------|--------------|-------------------------------------------------------|------------------|
| siRNA-Vinblastine Run1-<br>DMSO  | NM_1533<br>29 | MGC1020<br>4 | A1                                                    | 4.194257 Outlier |
|                                  | NM_0314       | MGC1113      | MGC1113                                               |                  |
| siRNA Disorazole DMSO Run1       | 72            | 4            | 4                                                     | -0.931595 Inlier |
| siRNA-Temozolomide Run2-<br>DMSO | NM_0314<br>72 | MGC1113<br>4 | MGC1113<br>4                                          | -0.824948 Inlier |
| siRNA-Vinblastine Run2-<br>DMSO  | NM_0314<br>72 | MGC1113<br>4 | MGC1113<br>4                                          | -0.524051 Inlier |
| siRNA-Temozolomide Run3-<br>DMSO | NM_0314<br>72 | MGC1113<br>4 | MGC1113<br>4                                          | -0.022123 Inlier |
| siRNA-Temozolomide Run1-<br>DMSO | NM_0314<br>72 | MGC1113<br>4 | MGC1113<br>4                                          | 0.022122 Inlier  |
|                                  | NM_0314       | MGC1113      | MGC1113                                               |                  |
| siRNA Disorazole DMSO Run3       | 72            | 4            | 4                                                     | 0.328379 Inlier  |
| siRNA-Vinblastine Run1-<br>DMSO  | NM_0314<br>72 | MGC1113<br>4 | MGC1113<br>4                                          | 9.999849 Outlier |
|                                  | NM_0314       | MGC1113      | MGC1113                                               |                  |
| siRNA Disorazole DMSO Run2       | 72            | 4            | 4                                                     | 10.01883 Outlier |
|                                  |               |              | dual<br>specificity<br>phosphata<br>se 26             |                  |
| siRNA-Temozolomide Run2-<br>DMSO | NM_0240<br>25 | MGC1136      | (putative)                                            | -0.71684 Inlier  |
|                                  |               |              | dual<br>specificity<br>phosphata<br>se 26             |                  |
| siRNA Disorazole DMSO Run3       | NM_0240<br>25 | MGC1136      | (putative)                                            | -0.63216 Inlier  |
|                                  |               |              | dual<br>specificity<br>phosphata<br>se 26             |                  |
| siRNA-Temozolomide Run3-<br>DMSO | NM_0240<br>25 | MGC1136      | (putative)                                            | -0.455749 Inlier |
|                                  |               |              | dual<br>specificity<br>phosphata<br>se 26             |                  |
| siRNA Disorazole DMSO Run2       | NM_0240<br>25 | MGC1136      | (putative)                                            | -0.214994 Inlier |
|                                  |               |              | dual<br>specificity<br>phosphata<br>se 26             |                  |
| siRNA-Temozolomide Run1-<br>DMSO | NM_0240<br>25 | MGC1136      | (putative)                                            | 0.214994 Inlier  |
|                                  |               |              | dual<br>specificity<br>phosphata<br>se 26             |                  |
| siRNA Disorazole DMSO Run1       | NM_0240<br>25 | MGC1136      | (putative)                                            | 2.7026 Inlier    |

Identification of Survival Genes in Human Glioblastoma Cells Using siRNA Screening  
 Nikhil G Thaker, Fang Zhang, Peter R. McDonald, Tong Ying Shun, Michael D Lewen, Ian F. Pollack, and John S. Lazo

Molecular Pharmacology

|                                  |               |              | dual<br>specificity<br>phosphata<br>se 26 |                  |
|----------------------------------|---------------|--------------|-------------------------------------------|------------------|
| siRNA-Vinblastine Run2-<br>DMSO  | NM_0240<br>25 | MGC1136      | (putative)                                | 3.346534 Inlier  |
| siRNA-Vinblastine Run1-<br>DMSO  | NM_0240<br>25 | MGC1136      | (putative)                                | 3.608267 Outlier |
| siRNA-Temozolomide Run3-<br>DMSO | NM_0323<br>69 | MGC1561<br>9 | MGC1561<br>9                              | -1.461391 Inlier |
| siRNA Disorazole DMSO Run2       | NM_0323<br>69 | MGC1561<br>9 | MGC1561<br>9                              | -0.765743 Inlier |
| siRNA-Temozolomide Run2-<br>DMSO | NM_0323<br>69 | MGC1561<br>9 | MGC1561<br>9                              | -0.583257 Inlier |
| siRNA Disorazole DMSO Run3       | NM_0323<br>69 | MGC1561<br>9 | MGC1561<br>9                              | -0.01999 Inlier  |
| siRNA-Temozolomide Run1-<br>DMSO | NM_0323<br>69 | MGC1561<br>9 | MGC1561<br>9                              | 0.01999 Inlier   |
| siRNA Disorazole DMSO Run1       | NM_0323<br>69 | MGC1561<br>9 | MGC1561<br>9                              | 0.179036 Inlier  |
| siRNA-Vinblastine Run2-<br>DMSO  | NM_0323<br>69 | MGC1561<br>9 | MGC1561<br>9                              | 1.043029 Inlier  |
| siRNA-Vinblastine Run1-<br>DMSO  | NM_0323<br>69 | MGC1561<br>9 | MGC1561<br>9                              | 1.558047 Inlier  |
| siRNA-Vinblastine Run2-<br>DMSO  | NM_0327<br>56 | MGC1566<br>8 | MGC1566<br>8                              | -1.099073 Inlier |
| siRNA-Temozolomide Run2-<br>DMSO | NM_0327<br>56 | MGC1566<br>8 | MGC1566<br>8                              | -0.874581 Inlier |
| siRNA Disorazole DMSO Run1       | NM_0327<br>56 | MGC1566<br>8 | MGC1566<br>8                              | -0.557904 Inlier |
| siRNA Disorazole DMSO Run3       | NM_0327<br>56 | MGC1566<br>8 | MGC1566<br>8                              | -0.194325 Inlier |
| siRNA-Temozolomide Run3-<br>DMSO | NM_0327<br>56 | MGC1566<br>8 | MGC1566<br>8                              | 0.194325 Inlier  |
| siRNA-Temozolomide Run1-<br>DMSO | NM_0327<br>56 | MGC1566<br>8 | MGC1566<br>8                              | 0.209065 Inlier  |
| siRNA Disorazole DMSO Run2       | NM_0327<br>56 | MGC1566<br>8 | MGC1566<br>8                              | 0.791096 Inlier  |
| siRNA-Vinblastine Run1-<br>DMSO  | NM_0327<br>56 | MGC1566<br>8 | MGC1566<br>8                              | 0.950418 Inlier  |
| siRNA Disorazole DMSO Run3       | NM_1383<br>81 | MGC1576<br>3 | MGC1576<br>3                              | -1.416671 Inlier |
| siRNA-Vinblastine Run2-<br>DMSO  | NM_1383<br>81 | MGC1576<br>3 | MGC1576<br>3                              | -0.797549 Inlier |
| siRNA-Temozolomide Run3-<br>DMSO | NM_1383<br>81 | MGC1576<br>3 | MGC1576<br>3                              | -0.270211 Inlier |
| siRNA-Temozolomide Run1-<br>DMSO | NM_1383<br>81 | MGC1576<br>3 | MGC1576<br>3                              | -0.019229 Inlier |
| siRNA-Temozolomide Run2-<br>DMSO | NM_1383<br>81 | MGC1576<br>3 | MGC1576<br>3                              | 0.019229 Inlier  |

Identification of Survival Genes in Human Glioblastoma Cells Using siRNA Screening  
 Nikhil G Thaker, Fang Zhang, Peter R. McDonald, Tong Ying Shun, Michael D Lewen, Ian F. Pollack, and John S. Lazo

|                              |         |         |         |                  |
|------------------------------|---------|---------|---------|------------------|
| Molecular Pharmacology       | NM_1383 | MGC1576 | MGC1576 |                  |
| siRNA Disorazole DMSO Run1   | 81      | 3       | 3       | 0.551451 Inlier  |
|                              | NM_1383 | MGC1576 | MGC1576 |                  |
| siRNA Disorazole DMSO Run2   | 81      | 3       | 3       | 5.434625 Outlier |
| siRNA-Vinblastine Run1-DMSO  | NM_1383 | MGC1576 | MGC1576 |                  |
|                              | 81      | 3       | 3       | 7.560486 Outlier |
|                              | NM_1533 | MGC1587 | MGC1587 |                  |
| siRNA Disorazole DMSO Run1   | 73      | 5       | 5       | -0.817545 Inlier |
|                              | NM_1533 | MGC1587 | MGC1587 |                  |
| siRNA Disorazole DMSO Run3   | 73      | 5       | 5       | -0.531455 Inlier |
| siRNA-Temozolomide Run1-DMSO | NM_1533 | MGC1587 | MGC1587 |                  |
|                              | 73      | 5       | 5       | -0.294884 Inlier |
| siRNA-Temozolomide Run3-DMSO | NM_1533 | MGC1587 | MGC1587 |                  |
|                              | 73      | 5       | 5       | -0.036804 Inlier |
| siRNA-Temozolomide Run2-DMSO | NM_1533 | MGC1587 | MGC1587 |                  |
|                              | 73      | 5       | 5       | 0.036805 Inlier  |
| siRNA-Vinblastine Run2-DMSO  | NM_1533 | MGC1587 | MGC1587 |                  |
|                              | 73      | 5       | 5       | 1.384141 Inlier  |
| siRNA-Vinblastine Run1-DMSO  | NM_1533 | MGC1587 | MGC1587 |                  |
|                              | 73      | 5       | 5       | 1.562764 Inlier  |
|                              | NM_1533 | MGC1587 | MGC1587 |                  |
| siRNA Disorazole DMSO Run2   | 73      | 5       | 5       | 1.629018 Inlier  |
| siRNA-Temozolomide Run3-DMSO | NM_0331 | MGC1616 | MGC1616 |                  |
|                              | 15      | 9       | 9       | -1.40203 Inlier  |
| siRNA-Temozolomide Run1-DMSO | NM_0331 | MGC1616 | MGC1616 |                  |
|                              | 15      | 9       | 9       | -0.866677 Inlier |
| siRNA-Temozolomide Run2-DMSO | NM_0331 | MGC1616 | MGC1616 |                  |
|                              | 15      | 9       | 9       | -0.697797 Inlier |
|                              | NM_0331 | MGC1616 | MGC1616 |                  |
| siRNA Disorazole DMSO Run2   | 15      | 9       | 9       | -0.491994 Inlier |
|                              | NM_0331 | MGC1616 | MGC1616 |                  |
| siRNA Disorazole DMSO Run3   | 15      | 9       | 9       | 0.491994 Inlier  |
|                              | NM_0331 | MGC1616 | MGC1616 |                  |
| siRNA Disorazole DMSO Run1   | 15      | 9       | 9       | 0.522004 Inlier  |
| siRNA-Vinblastine Run1-DMSO  | NM_0331 | MGC1616 | MGC1616 |                  |
|                              | 15      | 9       | 9       | 0.651203 Inlier  |
| siRNA-Vinblastine Run2-DMSO  | NM_0331 | MGC1616 | MGC1616 |                  |
|                              | 15      | 9       | 9       | 0.812065 Inlier  |
|                              | NM_0323 | MGC1618 | MGC1618 |                  |
| siRNA Disorazole DMSO Run2   | 72      | 6       | 6       | -2.022865 Inlier |
|                              | NM_0323 | MGC1618 | MGC1618 |                  |
| siRNA Disorazole DMSO Run3   | 72      | 6       | 6       | -1.46661 Inlier  |
| siRNA-Temozolomide Run1-DMSO | NM_0323 | MGC1618 | MGC1618 |                  |
|                              | 72      | 6       | 6       | -0.629262 Inlier |
|                              | NM_0323 | MGC1618 | MGC1618 |                  |
| siRNA Disorazole DMSO Run1   | 72      | 6       | 6       | -0.32567 Inlier  |
| siRNA-Vinblastine Run2-DMSO  | NM_0323 | MGC1618 | MGC1618 |                  |
|                              | 72      | 6       | 6       | 0.32567 Inlier   |
| siRNA-Temozolomide Run2-DMSO | NM_0323 | MGC1618 | MGC1618 |                  |
|                              | 72      | 6       | 6       | 0.569159 Inlier  |
| siRNA-Temozolomide Run3-DMSO | NM_0323 | MGC1618 | MGC1618 |                  |
|                              | 72      | 6       | 6       | 0.719738 Inlier  |

Identification of Survival Genes in Human Glioblastoma Cells Using siRNA Screening  
 Nikhil G Thaker, Fang Zhang, Peter R. McDonald, Tong Ying Shun, Michael D Lewen, Ian F. Pollack, and John S. Lazo

|                                  |         |         |                                         |           |        |
|----------------------------------|---------|---------|-----------------------------------------|-----------|--------|
| siRNA-Vinblastine Run1-<br>DMSO  | NM_0323 | MGC1618 | MGC1618                                 |           |        |
|                                  | 72      | 6       | 6                                       | 1.767406  | Inlier |
| siRNA-Temozolomide Run3-<br>DMSO | NM_1450 | MGC1670 | MGC1670                                 |           |        |
|                                  | 42      | 3       | 3                                       | -1.217462 | Inlier |
| siRNA-Vinblastine Run2-<br>DMSO  | NM_1450 | MGC1670 | MGC1670                                 |           |        |
|                                  | 42      | 3       | 3                                       | -0.875087 | Inlier |
| siRNA Disorazole DMSO Run3       | NM_1450 | MGC1670 | MGC1670                                 |           |        |
|                                  | 42      | 3       | 3                                       | -0.858005 | Inlier |
| siRNA-Temozolomide Run2-<br>DMSO | NM_1450 | MGC1670 | MGC1670                                 |           |        |
|                                  | 42      | 3       | 3                                       | -0.06169  | Inlier |
| siRNA Disorazole DMSO Run1       | NM_1450 | MGC1670 | MGC1670                                 |           |        |
|                                  | 42      | 3       | 3                                       | 0.06169   | Inlier |
| siRNA-Temozolomide Run1-<br>DMSO | NM_1450 | MGC1670 | MGC1670                                 |           |        |
|                                  | 42      | 3       | 3                                       | 0.207612  | Inlier |
| siRNA Disorazole DMSO Run2       | NM_1450 | MGC1670 | MGC1670                                 |           |        |
|                                  | 42      | 3       | 3                                       | 0.490995  | Inlier |
| siRNA-Vinblastine Run1-<br>DMSO  | NM_1450 | MGC1670 | MGC1670                                 |           |        |
|                                  | 42      | 3       | 3                                       | 0.868683  | Inlier |
| siRNA Disorazole DMSO Run1       | NM_1526 | MGC1730 | MGC1730                                 |           |        |
|                                  | 37      | 1       | 1                                       | -1.112792 | Inlier |
| siRNA-Temozolomide Run2-<br>DMSO | NM_1526 | MGC1730 | MGC1730                                 |           |        |
|                                  | 37      | 1       | 1                                       | -0.558369 | Inlier |
| siRNA-Temozolomide Run3-<br>DMSO | NM_1526 | MGC1730 | MGC1730                                 |           |        |
|                                  | 37      | 1       | 1                                       | -0.432506 | Inlier |
| siRNA-Temozolomide Run1-<br>DMSO | NM_1526 | MGC1730 | MGC1730                                 |           |        |
|                                  | 37      | 1       | 1                                       | -0.379711 | Inlier |
| siRNA-Vinblastine Run2-<br>DMSO  | NM_1526 | MGC1730 | MGC1730                                 |           |        |
|                                  | 37      | 1       | 1                                       | 0.379711  | Inlier |
| siRNA Disorazole DMSO Run3       | NM_1526 | MGC1730 | MGC1730                                 |           |        |
|                                  | 37      | 1       | 1                                       | 0.790631  | Inlier |
| siRNA Disorazole DMSO Run2       | NM_1526 | MGC1730 | MGC1730                                 |           |        |
|                                  | 37      | 1       | 1                                       | 1.895954  | Inlier |
| siRNA-Vinblastine Run1-<br>DMSO  | NM_1526 | MGC1730 | MGC1730                                 |           |        |
|                                  | 37      | 1       | 1                                       | 2.491009  | Inlier |
| siRNA-Temozolomide Run1-<br>DMSO | NM_0185 | MGC2074 | ubiquitin<br>specific<br>protease<br>49 |           |        |
|                                  | 61      | 1       |                                         | -0.759497 | Inlier |
| siRNA-Temozolomide Run3-<br>DMSO | NM_0185 | MGC2074 | ubiquitin<br>specific<br>protease<br>49 |           |        |
|                                  | 61      | 1       |                                         | -0.589503 | Inlier |
| siRNA-Temozolomide Run2-<br>DMSO | NM_0185 | MGC2074 | ubiquitin<br>specific<br>protease<br>49 |           |        |
|                                  | 61      | 1       |                                         | -0.459409 | Inlier |
| siRNA Disorazole DMSO Run2       | NM_0185 | MGC2074 | ubiquitin<br>specific<br>protease<br>49 |           |        |
|                                  | 61      | 1       |                                         | -0.231294 | Inlier |

Identification of Survival Genes in Human Glioblastoma Cells Using siRNA Screening  
 Nikhil G Thaker, Fang Zhang, Peter R. McDonald, Tong Ying Shun, Michael D Lewen, Ian F. Pollack, and John S. Lazo

Molecular Pharmacology

|                              |               |              |                    |           |         |
|------------------------------|---------------|--------------|--------------------|-----------|---------|
|                              |               |              | ubiquitin specific |           |         |
| siRNA Disorazole DMSO Run1   | NM_0185<br>61 | MGC2074<br>1 | protease<br>49     | 0.231294  | Inlier  |
|                              |               |              | ubiquitin specific |           |         |
| siRNA-Vinblastine Run1-DMSO  | NM_0185<br>61 | MGC2074<br>1 | protease<br>49     | 1.764337  | Inlier  |
|                              |               |              | ubiquitin specific |           |         |
| siRNA-Vinblastine Run2-DMSO  | NM_0185<br>61 | MGC2074<br>1 | protease<br>49     | 2.075636  | Inlier  |
|                              |               |              | ubiquitin specific |           |         |
| siRNA Disorazole DMSO Run3   | NM_0185<br>61 | MGC2074<br>1 | protease<br>49     | 3.136664  | Inlier  |
| siRNA-Temozolomide Run2-DMSO | NM_1446<br>83 | MGC2328<br>0 | MGC2328<br>0       | -0.803387 | Inlier  |
| siRNA-Temozolomide Run3-DMSO | NM_1446<br>83 | MGC2328<br>0 | MGC2328<br>0       | -0.676629 | Inlier  |
| siRNA-Temozolomide Run1-DMSO | NM_1446<br>83 | MGC2328<br>0 | MGC2328<br>0       | -0.434315 | Inlier  |
| siRNA-Vinblastine Run2-DMSO  | NM_1446<br>83 | MGC2328<br>0 | MGC2328<br>0       | -0.385759 | Inlier  |
|                              |               |              | MGC2328            |           |         |
| siRNA Disorazole DMSO Run3   | NM_1446<br>83 | MGC2328<br>0 | MGC2328<br>0       | 0.385758  | Inlier  |
|                              |               |              | MGC2328            |           |         |
| siRNA Disorazole DMSO Run1   | NM_1446<br>83 | MGC2328<br>0 | MGC2328<br>0       | 0.672371  | Inlier  |
|                              |               |              | MGC2328            |           |         |
| siRNA Disorazole DMSO Run2   | NM_1446<br>83 | MGC2328<br>0 | MGC2328<br>0       | 2.742006  | Inlier  |
| siRNA-Vinblastine Run1-DMSO  | NM_1446<br>83 | MGC2328<br>0 | MGC2328<br>0       | 3.140042  | Inlier  |
|                              |               |              | MGC2328            |           |         |
| siRNA Disorazole DMSO Run1   | NM_0323<br>31 | MGC2408      | MGC2408            | -6.412959 | Outlier |
| siRNA-Temozolomide Run3-DMSO | NM_0323<br>31 | MGC2408      | MGC2408            | -0.686603 | Inlier  |
| siRNA-Temozolomide Run2-DMSO | NM_0323<br>31 | MGC2408      | MGC2408            | -0.662397 | Inlier  |
| siRNA-Temozolomide Run1-DMSO | NM_0323<br>31 | MGC2408      | MGC2408            | -0.351826 | Inlier  |
| siRNA-Vinblastine Run2-DMSO  | NM_0323<br>31 | MGC2408      | MGC2408            | 0.351826  | Inlier  |
|                              |               |              | MGC2408            |           |         |
| siRNA Disorazole DMSO Run3   | NM_0323<br>31 | MGC2408      | MGC2408            | 0.537154  | Inlier  |
|                              |               |              | MGC2408            |           |         |
| siRNA Disorazole DMSO Run2   | NM_0323<br>31 | MGC2408      | MGC2408            | 1.332572  | Inlier  |
| siRNA-Vinblastine Run1-DMSO  | NM_0323<br>31 | MGC2408      | MGC2408            | 3.342995  | Inlier  |
| siRNA-Temozolomide Run1-DMSO | NM_1527<br>00 | MGC2659<br>7 | MGC2659<br>7       | -1.8469   | Inlier  |
| siRNA-Temozolomide Run3-DMSO | NM_1527<br>00 | MGC2659<br>7 | MGC2659<br>7       | -1.173074 | Inlier  |

Identification of Survival Genes in Human Glioblastoma Cells Using siRNA Screening  
 Nikhil G Thaker, Fang Zhang, Peter R. McDonald, Tong Ying Shun, Michael D Lewen, Ian F. Pollack, and John S. Lazo

|                            |         |         |                                                                       |           |         |
|----------------------------|---------|---------|-----------------------------------------------------------------------|-----------|---------|
| Molecular Pharmacology     | NM_1527 | MGC2659 | MGC2659                                                               |           |         |
| siRNA Disorazole DMSO Run1 | 00      | 7       | 7                                                                     | -0.5303   | Inlier  |
| siRNA-Temozolomide Run2-   | NM_1527 | MGC2659 | MGC2659                                                               |           |         |
| DMSO                       | 00      | 7       | 7                                                                     | -0.315727 | Inlier  |
| siRNA-Vinblastine Run1-    | NM_1527 | MGC2659 | MGC2659                                                               |           |         |
| DMSO                       | 00      | 7       | 7                                                                     | 0.315728  | Inlier  |
| siRNA Disorazole DMSO Run2 | NM_1527 | MGC2659 | MGC2659                                                               |           |         |
| siRNA-Vinblastine Run2-    | NM_1527 | MGC2659 | MGC2659                                                               |           |         |
| DMSO                       | 00      | 7       | 7                                                                     | 0.753337  | Inlier  |
| siRNA Disorazole DMSO Run3 | NM_1527 | MGC2659 | MGC2659                                                               |           |         |
|                            | 00      | 7       | 7                                                                     | 4.690643  | Outlier |
|                            |         |         | proteasom<br>e<br>(prosome,<br>macropain<br>) subunit,<br>alpha type, |           |         |
| siRNA-Temozolomide Run3-   | NM_1446 | MGC2660 | 8                                                                     | -1.844679 | Inlier  |
| DMSO                       | 62      | 5       | 8                                                                     |           |         |
|                            |         |         | proteasom<br>e<br>(prosome,<br>macropain<br>) subunit,<br>alpha type, |           |         |
| siRNA-Temozolomide Run2-   | NM_1446 | MGC2660 | 8                                                                     | -1.471454 | Inlier  |
| DMSO                       | 62      | 5       | 8                                                                     |           |         |
|                            |         |         | proteasom<br>e<br>(prosome,<br>macropain<br>) subunit,<br>alpha type, |           |         |
| siRNA Disorazole DMSO Run1 | NM_1446 | MGC2660 | 8                                                                     | -0.309163 | Inlier  |
|                            | 62      | 5       | 8                                                                     |           |         |
|                            |         |         | proteasom<br>e<br>(prosome,<br>macropain<br>) subunit,<br>alpha type, |           |         |
| siRNA Disorazole DMSO Run3 | NM_1446 | MGC2660 | 8                                                                     | -0.034733 | Inlier  |
|                            | 62      | 5       | 8                                                                     |           |         |
|                            |         |         | proteasom<br>e<br>(prosome,<br>macropain<br>) subunit,<br>alpha type, |           |         |
| siRNA-Temozolomide Run1-   | NM_1446 | MGC2660 | 8                                                                     | 0.034733  | Inlier  |
| DMSO                       | 62      | 5       | 8                                                                     |           |         |



Identification of Survival Genes in Human Glioblastoma Cells Using siRNA Screening  
 Nikhil G Thaker, Fang Zhang, Peter R. McDonald, Tong Ying Shun, Michael D Lewen, Ian F. Pollack, and John S. Lazo  
 Molecular Pharmacology

|                              |           |          |                                                        |           |         |
|------------------------------|-----------|----------|--------------------------------------------------------|-----------|---------|
| siRNA-Vinblastine Run2-DMSO  | NM_144662 | MGC26605 | proteasome (prosome, macropain) subunit, alpha type, 8 | 0.541728  | Inlier  |
| siRNA-Vinblastine Run1-DMSO  | NM_144662 | MGC26605 | proteasome (prosome, macropain) subunit, alpha type, 8 | 0.807272  | Inlier  |
| siRNA Disorazole DMSO Run2   | NM_144662 | MGC26605 | proteasome (prosome, macropain) subunit, alpha type, 8 | 1.106663  | Inlier  |
| siRNA-Temozolomide Run3-DMSO | NM_173824 | MGC26717 | MGC26717                                               | -3.734308 | Outlier |
| siRNA-Temozolomide Run1-DMSO | NM_173824 | MGC26717 | MGC26717                                               | -1.59551  | Inlier  |
| siRNA-Temozolomide Run2-DMSO | NM_173824 | MGC26717 | MGC26717                                               | -0.542793 | Inlier  |
| siRNA Disorazole DMSO Run1   | NM_173824 | MGC26717 | MGC26717                                               | -0.23514  | Inlier  |
| siRNA Disorazole DMSO Run2   | NM_173824 | MGC26717 | MGC26717                                               | 0.23514   | Inlier  |
| siRNA Disorazole DMSO Run3   | NM_173824 | MGC26717 | MGC26717                                               | 0.243321  | Inlier  |
| siRNA-Vinblastine Run2-DMSO  | NM_173824 | MGC26717 | MGC26717                                               | 0.806206  | Inlier  |
| siRNA-Vinblastine Run1-DMSO  | NM_173824 | MGC26717 | MGC26717                                               | 2.283757  | Inlier  |
| siRNA-Temozolomide Run3-DMSO | NM_152779 | MGC26856 | MGC26856                                               | -1.892044 | Inlier  |
| siRNA-Temozolomide Run2-DMSO | NM_152779 | MGC26856 | MGC26856                                               | -0.919792 | Inlier  |
| siRNA Disorazole DMSO Run3   | NM_152779 | MGC26856 | MGC26856                                               | -0.300414 | Inlier  |
| siRNA Disorazole DMSO Run2   | NM_152779 | MGC26856 | MGC26856                                               | -0.123608 | Inlier  |
| siRNA-Temozolomide Run1-DMSO | NM_152779 | MGC26856 | MGC26856                                               | 0.123608  | Inlier  |
| siRNA Disorazole DMSO Run1   | NM_152779 | MGC26856 | MGC26856                                               | 0.429208  | Inlier  |

Identification of Survival Genes in Human Glioblastoma Cells Using siRNA Screening

Nikhil G Thaker, Fang Zhang, Peter R. McDonald, Tong Ying Shun, Michael D Lewen, Ian F. Pollack, and John S.

Lazo

|                                  |               |              |                                                  |           |        |
|----------------------------------|---------------|--------------|--------------------------------------------------|-----------|--------|
| siRNA-Vinblastine Run2-<br>DMSO  | NM_1527<br>79 | MGC2685<br>6 | MGC2685<br>6                                     | 1.624549  | Inlier |
| siRNA-Vinblastine Run1-<br>DMSO  | NM_1527<br>79 | MGC2685<br>6 | MGC2685<br>6                                     | 1.715068  | Inlier |
| siRNA-Temozolomide Run3-<br>DMSO | NM_1738<br>04 | MGC3020<br>8 | MGC3020<br>8                                     | -0.891832 | Inlier |
| siRNA-Temozolomide Run2-<br>DMSO | NM_1738<br>04 | MGC3020<br>8 | MGC3020<br>8                                     | -0.521071 | Inlier |
| siRNA-Temozolomide Run1-<br>DMSO | NM_1738<br>04 | MGC3020<br>8 | MGC3020<br>8                                     | -0.168372 | Inlier |
| siRNA Disorazole DMSO Run2       | NM_1738<br>04 | MGC3020<br>8 | MGC3020<br>8                                     | -0.011297 | Inlier |
| siRNA Disorazole DMSO Run1       | NM_1738<br>04 | MGC3020<br>8 | MGC3020<br>8                                     | 0.011296  | Inlier |
| siRNA-Vinblastine Run2-<br>DMSO  | NM_1738<br>04 | MGC3020<br>8 | MGC3020<br>8                                     | 0.827929  | Inlier |
| siRNA-Vinblastine Run1-<br>DMSO  | NM_1738<br>04 | MGC3020<br>8 | MGC3020<br>8                                     | 1.18917   | Inlier |
| siRNA Disorazole DMSO Run3       | NM_1738<br>04 | MGC3020<br>8 | MGC3020<br>8                                     | 1.816596  | Inlier |
| siRNA Disorazole DMSO Run2       | NM_1532<br>05 | MGC3400<br>7 | chromoso<br>me 10<br>open<br>reading<br>frame 98 | -3.059948 | Inlier |
| siRNA-Temozolomide Run2-<br>DMSO | NM_1532<br>05 | MGC3400<br>7 | chromoso<br>me 10<br>open<br>reading<br>frame 98 | -0.795608 | Inlier |
| siRNA Disorazole DMSO Run1       | NM_1532<br>05 | MGC3400<br>7 | chromoso<br>me 10<br>open<br>reading<br>frame 98 | -0.199085 | Inlier |
| siRNA-Temozolomide Run3-<br>DMSO | NM_1532<br>05 | MGC3400<br>7 | chromoso<br>me 10<br>open<br>reading<br>frame 98 | -0.077716 | Inlier |
| siRNA Disorazole DMSO Run3       | NM_1532<br>05 | MGC3400<br>7 | chromoso<br>me 10<br>open<br>reading<br>frame 98 | 0.077716  | Inlier |
| siRNA-Temozolomide Run1-<br>DMSO | NM_1532<br>05 | MGC3400<br>7 | chromoso<br>me 10<br>open<br>reading<br>frame 98 | 0.553392  | Inlier |

Identification of Survival Genes in Human Glioblastoma Cells Using siRNA Screening  
 Nikhil G Thaker, Fang Zhang, Peter R. McDonald, Tong Ying Shun, Michael D Lewen, Ian F. Pollack, and John S. Lazo

Molecular Pharmacology

|                                  |               |              | chromoso<br>me 10<br>open<br>reading<br>frame 98 |                   |
|----------------------------------|---------------|--------------|--------------------------------------------------|-------------------|
| siRNA-Vinblastine Run1-<br>DMSO  | NM_1532<br>05 | MGC3400<br>7 | chromoso<br>me 10<br>open<br>reading<br>frame 98 | 1.173313 Inlier   |
| siRNA-Vinblastine Run2-<br>DMSO  | NM_1532<br>05 | MGC3400<br>7 | chromoso<br>me 10<br>open<br>reading<br>frame 98 | 2.20551 Inlier    |
| siRNA-Temozolomide Run3-<br>DMSO | NM_1526<br>97 | MGC3403<br>2 | MGC3403<br>2                                     | -4.253118 Outlier |
| siRNA-Temozolomide Run2-<br>DMSO | NM_1526<br>97 | MGC3403<br>2 | MGC3403<br>2                                     | -3.235997 Inlier  |
| siRNA Disorazole DMSO Run2       | NM_1526<br>97 | MGC3403<br>2 | MGC3403<br>2                                     | -3.113135 Inlier  |
| siRNA-Temozolomide Run1-<br>DMSO | NM_1526<br>97 | MGC3403<br>2 | MGC3403<br>2                                     | -0.081002 Inlier  |
| siRNA Disorazole DMSO Run1       | NM_1526<br>97 | MGC3403<br>2 | MGC3403<br>2                                     | 0.081002 Inlier   |
| siRNA-Vinblastine Run1-<br>DMSO  | NM_1526<br>97 | MGC3403<br>2 | MGC3403<br>2                                     | 0.134591 Inlier   |
| siRNA Disorazole DMSO Run3       | NM_1526<br>97 | MGC3403<br>2 | MGC3403<br>2                                     | 0.222197 Inlier   |
| siRNA-Vinblastine Run2-<br>DMSO  | NM_1526<br>97 | MGC3403<br>2 | MGC3403<br>2                                     | 1.126803 Inlier   |
| siRNA-Temozolomide Run3-<br>DMSO | NM_1736<br>37 | MGC3472<br>5 | MGC3472<br>5                                     | -1.034091 Inlier  |
| siRNA-Temozolomide Run2-<br>DMSO | NM_1736<br>37 | MGC3472<br>5 | MGC3472<br>5                                     | -0.757505 Inlier  |
| siRNA-Temozolomide Run1-<br>DMSO | NM_1736<br>37 | MGC3472<br>5 | MGC3472<br>5                                     | -0.591495 Inlier  |
| siRNA Disorazole DMSO Run2       | NM_1736<br>37 | MGC3472<br>5 | MGC3472<br>5                                     | -0.081258 Inlier  |
| siRNA Disorazole DMSO Run3       | NM_1736<br>37 | MGC3472<br>5 | MGC3472<br>5                                     | 0.081258 Inlier   |
| siRNA Disorazole DMSO Run1       | NM_1736<br>37 | MGC3472<br>5 | MGC3472<br>5                                     | 0.327397 Inlier   |
| siRNA-Vinblastine Run2-<br>DMSO  | NM_1736<br>37 | MGC3472<br>5 | MGC3472<br>5                                     | 2.076285 Inlier   |
| siRNA-Vinblastine Run1-<br>DMSO  | NM_1736<br>37 | MGC3472<br>5 | MGC3472<br>5                                     | 2.633668 Inlier   |
| siRNA-Temozolomide Run3-<br>DMSO | NM_1735<br>86 | MGC3482<br>1 | MGC3482<br>1                                     | -1.905183 Inlier  |
| siRNA-Vinblastine Run2-<br>DMSO  | NM_1735<br>86 | MGC3482<br>1 | MGC3482<br>1                                     | -0.483737 Inlier  |
| siRNA Disorazole DMSO Run3       | NM_1735<br>86 | MGC3482<br>1 | MGC3482<br>1                                     | -0.342727 Inlier  |
| siRNA-Temozolomide Run2-<br>DMSO | NM_1735<br>86 | MGC3482<br>1 | MGC3482<br>1                                     | -0.142849 Inlier  |
| siRNA-Temozolomide Run1-<br>DMSO | NM_1735<br>86 | MGC3482<br>1 | MGC3482<br>1                                     | 0.142849 Inlier   |

Identification of Survival Genes in Human Glioblastoma Cells Using siRNA Screening  
 Nikhil G Thaker, Fang Zhang, Peter R. McDonald, Tong Ying Shun, Michael D Lewen, Ian F. Pollack, and John S. Lazo

|                              |         |         |                                                   |           |        |
|------------------------------|---------|---------|---------------------------------------------------|-----------|--------|
| Molecular Pharmacology       | NM_1735 | MGC3482 | MGC3482                                           |           |        |
| siRNA Disorazole DMSO Run1   | 86      | 1       | 1                                                 | 0.865263  | Inlier |
| siRNA-Vinblastine Run1-DMSO  | NM_1735 | MGC3482 | MGC3482                                           |           |        |
|                              | 86      | 1       | 1                                                 | 1.016045  | Inlier |
| siRNA Disorazole DMSO Run2   | NM_1735 | MGC3482 | MGC3482                                           |           |        |
|                              | 86      | 1       | 1                                                 | 1.293863  | Inlier |
| siRNA-Temozolomide Run3-DMSO | NM_1524 | MGC3513 | E2U<br>(putative)<br>ubiquitin-conjugating enzyme | -2.606629 | Inlier |
|                              | 89      | 0       |                                                   |           |        |
| siRNA-Temozolomide Run2-DMSO | NM_1524 | MGC3513 | E2U<br>(putative)<br>ubiquitin-conjugating enzyme | -1.105818 | Inlier |
|                              | 89      | 0       |                                                   |           |        |
| siRNA Disorazole DMSO Run3   | NM_1524 | MGC3513 | E2U<br>(putative)<br>ubiquitin-conjugating enzyme | -0.232682 | Inlier |
|                              | 89      | 0       |                                                   |           |        |
| siRNA-Vinblastine Run2-DMSO  | NM_1524 | MGC3513 | E2U<br>(putative)<br>ubiquitin-conjugating enzyme | -0.057667 | Inlier |
|                              | 89      | 0       |                                                   |           |        |
| siRNA Disorazole DMSO Run1   | NM_1524 | MGC3513 | E2U<br>(putative)<br>ubiquitin-conjugating enzyme | 0.057667  | Inlier |
|                              | 89      | 0       |                                                   |           |        |
| siRNA-Temozolomide Run1-DMSO | NM_1524 | MGC3513 | E2U<br>(putative)<br>ubiquitin-conjugating enzyme | 0.243182  | Inlier |
|                              | 89      | 0       |                                                   |           |        |
| siRNA Disorazole DMSO Run2   | NM_1524 | MGC3513 | E2U<br>(putative)<br>ubiquitin-conjugating enzyme | 1.74742   | Inlier |
|                              | 89      | 0       |                                                   |           |        |
| siRNA-Vinblastine Run1-DMSO  | NM_1524 | MGC3513 | E2U<br>(putative)                                 | 1.833146  | Inlier |
|                              | 89      | 0       |                                                   |           |        |
| siRNA-Temozolomide Run3-DMSO | NM_1524 | MGC3965 | MGC3965                                           | -1.720085 | Inlier |
|                              | 65      | 0       | 0                                                 |           |        |
| siRNA-Temozolomide Run2-DMSO | NM_1524 | MGC3965 | MGC3965                                           | -1.102242 | Inlier |
|                              | 65      | 0       | 0                                                 |           |        |
| siRNA-Vinblastine Run2-DMSO  | NM_1524 | MGC3965 | MGC3965                                           | -0.246758 | Inlier |
|                              | 65      | 0       | 0                                                 |           |        |

Identification of Survival Genes in Human Glioblastoma Cells Using siRNA Screening  
 Nikhil G Thaker, Fang Zhang, Peter R. McDonald, Tong Ying Shun, Michael D Lewen, Ian F. Pollack, and John S. Lazo

| siRNA Treatment              | Gene    | Accession | Accession | Accession                               | Log2FC    | Outlier |
|------------------------------|---------|-----------|-----------|-----------------------------------------|-----------|---------|
| siRNA-Temozolomide Run1-DMSO | NM_1524 | MGC3965   | MGC3965   | MGC3965                                 | -0.022978 | Inlier  |
| siRNA Disorazole DMSO Run1   | NM_1524 | MGC3965   | MGC3965   | MGC3965                                 | 0.022978  | Inlier  |
| siRNA Disorazole DMSO Run3   | NM_1524 | MGC3965   | MGC3965   | MGC3965                                 | 0.086669  | Inlier  |
| siRNA-Vinblastine Run1-DMSO  | NM_1524 | MGC3965   | MGC3965   | MGC3965                                 | 1.127582  | Inlier  |
| siRNA Disorazole DMSO Run2   | NM_1524 | MGC3965   | MGC3965   | MGC3965                                 | 1.769121  | Inlier  |
|                              |         |           |           | olfactory receptor, family 2, subfamily |           |         |
| siRNA-Temozolomide Run3-DMSO | NM_1759 | MGC4004   | MGC4004   | MGC4004                                 | -0.804672 | Inlier  |
|                              |         |           |           | olfactory receptor, family 2, subfamily |           |         |
| siRNA-Temozolomide Run2-DMSO | NM_1759 | MGC4004   | MGC4004   | MGC4004                                 | -0.544328 | Inlier  |
|                              |         |           |           | olfactory receptor, family 2, subfamily |           |         |
| siRNA-Temozolomide Run1-DMSO | NM_1759 | MGC4004   | MGC4004   | MGC4004                                 | -0.381345 | Inlier  |
|                              |         |           |           | olfactory receptor, family 2, subfamily |           |         |
| siRNA Disorazole DMSO Run2   | NM_1759 | MGC4004   | MGC4004   | MGC4004                                 | -0.093816 | Inlier  |
|                              |         |           |           | olfactory receptor, family 2, subfamily |           |         |
| siRNA Disorazole DMSO Run1   | NM_1759 | MGC4004   | MGC4004   | MGC4004                                 | 0.093816  | Inlier  |
|                              |         |           |           | olfactory receptor, family 2, subfamily |           |         |
| siRNA-Vinblastine Run1-DMSO  | NM_1759 | MGC4004   | MGC4004   | MGC4004                                 | 0.893277  | Inlier  |

Identification of Survival Genes in Human Glioblastoma Cells Using siRNA Screening  
 Nikhil G Thaker, Fang Zhang, Peter R. McDonald, Tong Ying Shun, Michael D Lewen, Ian F. Pollack, and John S. Lazo  
 Molecular Pharmacology

|                              |               |              |                                                                     |           |        |
|------------------------------|---------------|--------------|---------------------------------------------------------------------|-----------|--------|
| siRNA-Vinblastine Run2-DMSO  | NM_1759<br>11 | MGC4004<br>7 | olfactory<br>receptor,<br>family 2,<br>subfamily<br>L, member<br>13 | 0.972541  | Inlier |
| siRNA Disorazole DMSO Run3   | NM_1759<br>11 | MGC4004<br>7 | olfactory<br>receptor,<br>family 2,<br>subfamily<br>L, member<br>13 | 0.996488  | Inlier |
| siRNA-Vinblastine Run2-DMSO  | NM_0325<br>25 | MGC4083      | tubulin,<br>beta 6                                                  | -0.961431 | Inlier |
| siRNA Disorazole DMSO Run3   | NM_0325<br>25 | MGC4083      | tubulin,<br>beta 6                                                  | -0.931283 | Inlier |
| siRNA-Temozolomide Run3-DMSO | NM_0325<br>25 | MGC4083      | tubulin,<br>beta 6                                                  | -0.417717 | Inlier |
| siRNA-Temozolomide Run1-DMSO | NM_0325<br>25 | MGC4083      | tubulin,<br>beta 6                                                  | -0.089717 | Inlier |
| siRNA-Temozolomide Run2-DMSO | NM_0325<br>25 | MGC4083      | tubulin,<br>beta 6                                                  | 0.089716  | Inlier |
| siRNA Disorazole DMSO Run1   | NM_0325<br>25 | MGC4083      | tubulin,<br>beta 6                                                  | 0.252731  | Inlier |
| siRNA Disorazole DMSO Run2   | NM_0325<br>25 | MGC4083      | tubulin,<br>beta 6                                                  | 0.934713  | Inlier |
| siRNA-Vinblastine Run1-DMSO  | NM_0325<br>25 | MGC4083      | tubulin,<br>beta 6                                                  | 1.357352  | Inlier |
| siRNA-Temozolomide Run3-DMSO | NM_0243<br>07 | MGC4171      | glycerophosphodiester<br>domain<br>containing<br>3                  | -1.030268 | Inlier |
| siRNA Disorazole DMSO Run1   | NM_0243<br>07 | MGC4171      | glycerophosphodiester<br>domain<br>containing<br>3                  | -0.788956 | Inlier |

Identification of Survival Genes in Human Glioblastoma Cells Using siRNA Screening  
 Nikhil G Thaker, Fang Zhang, Peter R. McDonald, Tong Ying Shun, Michael D Lewen, Ian F. Pollack, and John S. Lazo

Molecular Pharmacology

|                              |           |         |                                            |           |        |
|------------------------------|-----------|---------|--------------------------------------------|-----------|--------|
|                              |           |         | glycerophosphodiesterase domain containing |           |        |
| siRNA-Vinblastine Run1-DMSO  | NM_024307 | MGC4171 | 3                                          | -0.560044 | Inlier |
|                              |           |         | glycerophosphodiesterase domain containing |           |        |
| siRNA-Temozolomide Run2-DMSO | NM_024307 | MGC4171 | 3                                          | -0.11987  | Inlier |
|                              |           |         | glycerophosphodiesterase domain containing |           |        |
| siRNA-Vinblastine Run2-DMSO  | NM_024307 | MGC4171 | 3                                          | 0.11987   | Inlier |
|                              |           |         | glycerophosphodiesterase domain containing |           |        |
| siRNA-Temozolomide Run1-DMSO | NM_024307 | MGC4171 | 3                                          | 0.188554  | Inlier |
|                              |           |         | glycerophosphodiesterase domain containing |           |        |
| siRNA Disorazole DMSO Run2   | NM_024307 | MGC4171 | 3                                          | 0.949221  | Inlier |
|                              |           |         | glycerophosphodiesterase domain containing |           |        |
| siRNA Disorazole DMSO Run3   | NM_024307 | MGC4171 | 3                                          | 2.563936  | Inlier |
| siRNA-Temozolomide Run1-DMSO | NM_024308 | MGC4172 | MGC4172                                    | -0.891882 | Inlier |
| siRNA-Temozolomide Run2-DMSO | NM_024308 | MGC4172 | MGC4172                                    | -0.699277 | Inlier |

Identification of Survival Genes in Human Glioblastoma Cells Using siRNA Screening

Nikhil G Thaker, Fang Zhang, Peter R. McDonald, Tong Ying Shun, Michael D Lewen, Ian F. Pollack, and John S.

Lazo

|                                  |               |              |                                              |           |         |
|----------------------------------|---------------|--------------|----------------------------------------------|-----------|---------|
| siRNA-Temozolomide Run3-<br>DMSO | NM_0243<br>08 | MGC4172      | MGC4172                                      | -0.213951 | Inlier  |
| siRNA Disorazole DMSO Run1       | NM_0243<br>08 | MGC4172      | MGC4172                                      | -0.058215 | Inlier  |
| siRNA-Vinblastine Run2-<br>DMSO  | NM_0243<br>08 | MGC4172      | MGC4172                                      | 0.058215  | Inlier  |
| siRNA Disorazole DMSO Run3       | NM_0243<br>08 | MGC4172      | MGC4172                                      | 0.649723  | Inlier  |
| siRNA Disorazole DMSO Run2       | NM_0243<br>08 | MGC4172      | MGC4172                                      | 2.665997  | Inlier  |
| siRNA-Vinblastine Run1-<br>DMSO  | NM_0243<br>08 | MGC4172      | MGC4172                                      | 3.028544  | Inlier  |
| siRNA-Temozolomide Run3-<br>DMSO | NM_1533<br>61 | MGC4210<br>5 | MGC4210<br>5                                 | -1.289991 | Inlier  |
| siRNA-Temozolomide Run2-<br>DMSO | NM_1533<br>61 | MGC4210<br>5 | MGC4210<br>5                                 | -1.065837 | Inlier  |
| siRNA Disorazole DMSO Run2       | NM_1533<br>61 | MGC4210<br>5 | MGC4210<br>5                                 | -0.611935 | Inlier  |
| siRNA-Temozolomide Run1-<br>DMSO | NM_1533<br>61 | MGC4210<br>5 | MGC4210<br>5                                 | -0.066727 | Inlier  |
| siRNA-Vinblastine Run1-<br>DMSO  | NM_1533<br>61 | MGC4210<br>5 | MGC4210<br>5                                 | 0.066727  | Inlier  |
| siRNA Disorazole DMSO Run3       | NM_1533<br>61 | MGC4210<br>5 | MGC4210<br>5                                 | 0.423197  | Inlier  |
| siRNA Disorazole DMSO Run1       | NM_1533<br>61 | MGC4210<br>5 | MGC4210<br>5                                 | 0.737065  | Inlier  |
| siRNA-Vinblastine Run2-<br>DMSO  | NM_1533<br>61 | MGC4210<br>5 | MGC4210<br>5                                 | 1.268695  | Inlier  |
| siRNA-Temozolomide Run3-<br>DMSO | NM_1785<br>27 | MGC4302<br>6 | solute<br>carrier<br>family 9,<br>isoform 11 | -3.578638 | Outlier |
| siRNA-Temozolomide Run2-<br>DMSO | NM_1785<br>27 | MGC4302<br>6 | solute<br>carrier<br>family 9,<br>isoform 11 | -0.784209 | Inlier  |
| siRNA-Temozolomide Run1-<br>DMSO | NM_1785<br>27 | MGC4302<br>6 | solute<br>carrier<br>family 9,<br>isoform 11 | -0.049883 | Inlier  |
| siRNA Disorazole DMSO Run3       | NM_1785<br>27 | MGC4302<br>6 | solute<br>carrier<br>family 9,<br>isoform 11 | -0.032068 | Inlier  |



Identification of Survival Genes in Human Glioblastoma Cells Using siRNA Screening  
 Nikhil G Thaker, Fang Zhang, Peter R. McDonald, Tong Ying Shun, Michael D Lewen, Ian F. Pollack, and John S. Lazo  
 Molecular Pharmacology

|                              |               |              |                                                           |           |         |
|------------------------------|---------------|--------------|-----------------------------------------------------------|-----------|---------|
| siRNA Disorazole DMSO Run1   | NM_1785<br>27 | MGC4302<br>6 | solute carrier family 9, isoform 11                       | 0.032068  | Inlier  |
| siRNA Disorazole DMSO Run2   | NM_1785<br>27 | MGC4302<br>6 | solute carrier family 9, isoform 11                       | 0.564791  | Inlier  |
| siRNA-Vinblastine Run2-DMSO  | NM_1785<br>27 | MGC4302<br>6 | solute carrier family 9, isoform 11                       | 3.235328  | Inlier  |
| siRNA-Vinblastine Run1-DMSO  | NM_1785<br>27 | MGC4302<br>6 | solute carrier family 9, isoform 11 doublecort in and CaM | 3.797658  | Outlier |
| siRNA-Temozolomide Run3-DMSO | NM_1526<br>19 | MGC4542<br>8 | kinase-like 2 doublecort in and CaM                       | -0.950954 | Inlier  |
| siRNA-Temozolomide Run1-DMSO | NM_1526<br>19 | MGC4542<br>8 | kinase-like 2 doublecort in and CaM                       | -0.398046 | Inlier  |
| siRNA-Temozolomide Run2-DMSO | NM_1526<br>19 | MGC4542<br>8 | kinase-like 2 doublecort in and CaM                       | -0.090484 | Inlier  |
| siRNA Disorazole DMSO Run3   | NM_1526<br>19 | MGC4542<br>8 | kinase-like 2 doublecort in and CaM                       | -0.087869 | Inlier  |
| siRNA Disorazole DMSO Run2   | NM_1526<br>19 | MGC4542<br>8 | kinase-like 2 doublecort in and CaM                       | 0.087869  | Inlier  |
| siRNA-Vinblastine Run1-DMSO  | NM_1526<br>19 | MGC4542<br>8 | kinase-like 2                                             | 1.617201  | Inlier  |

Identification of Survival Genes in Human Glioblastoma Cells Using siRNA Screening  
 Nikhil G Thaker, Fang Zhang, Peter R. McDonald, Tong Ying Shun, Michael D Lewen, Ian F. Pollack, and John S. Lazo

Molecular Pharmacology

|                              |               |              |                                                 |           |        |
|------------------------------|---------------|--------------|-------------------------------------------------|-----------|--------|
| siRNA-Vinblastine Run2-DMSO  | NM_1526<br>19 | MGC4542<br>8 | doublecort<br>in and<br>CaM<br>kinase-like<br>2 | 1.716751  | Inlier |
| siRNA Disorazole DMSO Run1   | NM_1526<br>19 | MGC4542<br>8 | doublecort<br>in and<br>CaM<br>kinase-like<br>2 | 2.221592  | Inlier |
| siRNA-Temozolomide Run1-DMSO | NM_1523<br>04 | MGC4580<br>6 | MGC4580<br>6                                    | -2.408817 | Inlier |
| siRNA Disorazole DMSO Run1   | NM_1523<br>04 | MGC4580<br>6 | MGC4580<br>6                                    | -1.787657 | Inlier |
| siRNA-Temozolomide Run2-DMSO | NM_1523<br>04 | MGC4580<br>6 | MGC4580<br>6                                    | -1.366032 | Inlier |
| siRNA Disorazole DMSO Run3   | NM_1523<br>04 | MGC4580<br>6 | MGC4580<br>6                                    | -0.025279 | Inlier |
| siRNA-Temozolomide Run3-DMSO | NM_1523<br>04 | MGC4580<br>6 | MGC4580<br>6                                    | 0.025277  | Inlier |
| siRNA Disorazole DMSO Run2   | NM_1523<br>04 | MGC4580<br>6 | MGC4580<br>6                                    | 0.172022  | Inlier |
| siRNA-Vinblastine Run1-DMSO  | NM_1523<br>04 | MGC4580<br>6 | MGC4580<br>6                                    | 0.512697  | Inlier |
| siRNA-Vinblastine Run2-DMSO  | NM_1523<br>04 | MGC4580<br>6 | MGC4580<br>6                                    | 0.836303  | Inlier |
| siRNA-Temozolomide Run2-DMSO | NM_0320<br>17 | MGC4796      | serine/thre<br>onine<br>kinase 40               | -1.120461 | Inlier |
| siRNA Disorazole DMSO Run2   | NM_0320<br>17 | MGC4796      | serine/thre<br>onine<br>kinase 40               | -1.094037 | Inlier |
| siRNA-Vinblastine Run1-DMSO  | NM_0320<br>17 | MGC4796      | serine/thre<br>onine<br>kinase 40               | -0.492418 | Inlier |
| siRNA-Temozolomide Run3-DMSO | NM_0320<br>17 | MGC4796      | serine/thre<br>onine<br>kinase 40               | -0.05877  | Inlier |
| siRNA-Temozolomide Run1-DMSO | NM_0320<br>17 | MGC4796      | serine/thre<br>onine<br>kinase 40               | 0.05877   | Inlier |
| siRNA Disorazole DMSO Run3   | NM_0320<br>17 | MGC4796      | serine/thre<br>onine<br>kinase 40               | 0.261992  | Inlier |
| siRNA Disorazole DMSO Run1   | NM_0320<br>17 | MGC4796      | serine/thre<br>onine<br>kinase 40               | 0.856582  | Inlier |
| siRNA-Vinblastine Run2-DMSO  | NM_0320<br>17 | MGC4796      | serine/thre<br>onine<br>kinase 40               | 1.448744  | Inlier |
| siRNA-Temozolomide Run3-DMSO | NM_1738<br>02 | MGC5055<br>9 | MGC5055<br>9                                    | -1.852644 | Inlier |

Identification of Survival Genes in Human Glioblastoma Cells Using siRNA Screening  
 Nikhil G Thaker, Fang Zhang, Peter R. McDonald, Tong Ying Shun, Michael D Lewen, Ian F. Pollack, and John S. Lazo

|                                  |               |              |                                             |           |         |
|----------------------------------|---------------|--------------|---------------------------------------------|-----------|---------|
| siRNA-Temozolomide Run2-<br>DMSO | NM_1738<br>02 | MGC5055<br>9 | MGC5055<br>9                                | -0.969572 | Inlier  |
| siRNA Disorazole DMSO Run3       | NM_1738<br>02 | MGC5055<br>9 | MGC5055<br>9                                | -0.611447 | Inlier  |
| siRNA Disorazole DMSO Run1       | NM_1738<br>02 | MGC5055<br>9 | MGC5055<br>9                                | -0.03039  | Inlier  |
| siRNA-Vinblastine Run2-<br>DMSO  | NM_1738<br>02 | MGC5055<br>9 | MGC5055<br>9                                | 0.03039   | Inlier  |
| siRNA-Temozolomide Run1-<br>DMSO | NM_1738<br>02 | MGC5055<br>9 | MGC5055<br>9                                | 0.269964  | Inlier  |
| siRNA-Vinblastine Run1-<br>DMSO  | NM_1738<br>02 | MGC5055<br>9 | MGC5055<br>9                                | 0.737553  | Inlier  |
| siRNA Disorazole DMSO Run2       | NM_1738<br>02 | MGC5055<br>9 | MGC5055<br>9                                | 0.86075   | Inlier  |
| siRNA Disorazole DMSO Run1       | NM_1785<br>71 | MGC5102<br>5 | MGC5102<br>5                                | -1.189523 | Inlier  |
| siRNA-Temozolomide Run3-<br>DMSO | NM_1785<br>71 | MGC5102<br>5 | MGC5102<br>5                                | -0.736244 | Inlier  |
| siRNA Disorazole DMSO Run2       | NM_1785<br>71 | MGC5102<br>5 | MGC5102<br>5                                | -0.196655 | Inlier  |
| siRNA-Temozolomide Run2-<br>DMSO | NM_1785<br>71 | MGC5102<br>5 | MGC5102<br>5                                | -0.096262 | Inlier  |
| siRNA-Temozolomide Run1-<br>DMSO | NM_1785<br>71 | MGC5102<br>5 | MGC5102<br>5                                | 0.096262  | Inlier  |
| siRNA-Vinblastine Run1-<br>DMSO  | NM_1785<br>71 | MGC5102<br>5 | MGC5102<br>5                                | 0.612756  | Inlier  |
| siRNA-Vinblastine Run2-<br>DMSO  | NM_1785<br>71 | MGC5102<br>5 | MGC5102<br>5                                | 1.420343  | Inlier  |
| siRNA Disorazole DMSO Run3       | NM_1785<br>71 | MGC5102<br>5 | MGC5102<br>5                                | 3.782219  | Outlier |
| siRNA-Temozolomide Run3-<br>DMSO | NM_1784<br>53 | MGC5228<br>2 | MGC5228<br>2                                | -1.220117 | Inlier  |
| siRNA Disorazole DMSO Run2       | NM_1784<br>53 | MGC5228<br>2 | MGC5228<br>2                                | -0.922847 | Inlier  |
| siRNA-Temozolomide Run2-<br>DMSO | NM_1784<br>53 | MGC5228<br>2 | MGC5228<br>2                                | -0.791179 | Inlier  |
| siRNA Disorazole DMSO Run1       | NM_1784<br>53 | MGC5228<br>2 | MGC5228<br>2                                | -0.022687 | Inlier  |
| siRNA-Temozolomide Run1-<br>DMSO | NM_1784<br>53 | MGC5228<br>2 | MGC5228<br>2                                | 0.022687  | Inlier  |
| siRNA Disorazole DMSO Run3       | NM_1784<br>53 | MGC5228<br>2 | MGC5228<br>2                                | 0.061196  | Inlier  |
| siRNA-Vinblastine Run2-<br>DMSO  | NM_1784<br>53 | MGC5228<br>2 | MGC5228<br>2                                | 0.619969  | Inlier  |
| siRNA-Vinblastine Run1-<br>DMSO  | NM_1784<br>53 | MGC5228<br>2 | MGC5228<br>2                                | 0.729031  | Inlier  |
| siRNA-Temozolomide Run2-<br>DMSO | NM_1825<br>59 | MGC5734<br>1 | transmem<br>brane<br>protease,<br>serine 12 | -1.256126 | Inlier  |

Identification of Survival Genes in Human Glioblastoma Cells Using siRNA Screening  
 Nikhil G Thaker, Fang Zhang, Peter R. McDonald, Tong Ying Shun, Michael D Lewen, Ian F. Pollack, and John S. Lazo

Molecular Pharmacology

|                              |               |              |                                    |                  |
|------------------------------|---------------|--------------|------------------------------------|------------------|
|                              |               |              | transmembrane                      |                  |
| siRNA Disorazole DMSO Run3   | NM_1825<br>59 | MGC5734<br>1 | protease, serine 12                | -0.793498 Inlier |
|                              |               |              | transmembrane                      |                  |
| siRNA-Temozolomide Run3-DMSO | NM_1825<br>59 | MGC5734<br>1 | protease, serine 12                | -0.773683 Inlier |
|                              |               |              | transmembrane                      |                  |
| siRNA Disorazole DMSO Run1   | NM_1825<br>59 | MGC5734<br>1 | protease, serine 12                | -0.255598 Inlier |
|                              |               |              | transmembrane                      |                  |
| siRNA-Temozolomide Run1-DMSO | NM_1825<br>59 | MGC5734<br>1 | protease, serine 12                | 0.255599 Inlier  |
|                              |               |              | transmembrane                      |                  |
| siRNA-Vinblastine Run2-DMSO  | NM_1825<br>59 | MGC5734<br>1 | protease, serine 12                | 0.26351 Inlier   |
|                              |               |              | transmembrane                      |                  |
| siRNA-Vinblastine Run1-DMSO  | NM_1825<br>59 | MGC5734<br>1 | protease, serine 12                | 0.575316 Inlier  |
|                              |               |              | transmembrane                      |                  |
| siRNA Disorazole DMSO Run2   | NM_1825<br>59 | MGC5734<br>1 | protease, serine 12                | 1.508514 Inlier  |
|                              |               |              | CaM kinase-like vesicle-associated |                  |
| siRNA Disorazole DMSO Run2   | NM_0240<br>46 | MGC8407      |                                    | -1.92023 Inlier  |
|                              |               |              | CaM kinase-like vesicle-associated |                  |
| siRNA Disorazole DMSO Run3   | NM_0240<br>46 | MGC8407      |                                    | -0.705071 Inlier |
|                              |               |              | CaM kinase-like vesicle-associated |                  |
| siRNA-Temozolomide Run3-DMSO | NM_0240<br>46 | MGC8407      |                                    | -0.27078 Inlier  |
|                              |               |              | CaM kinase-like vesicle-associated |                  |
| siRNA-Temozolomide Run2-DMSO | NM_0240<br>46 | MGC8407      |                                    | -0.197217 Inlier |

Identification of Survival Genes in Human Glioblastoma Cells Using siRNA Screening  
 Nikhil G Thaker, Fang Zhang, Peter R. McDonald, Tong Ying Shun, Michael D Lewen, Ian F. Pollack, and John S. Lazo  
 Molecular Pharmacology

|                              |               |         |                                              |           |        |
|------------------------------|---------------|---------|----------------------------------------------|-----------|--------|
| siRNA-Temozolomide Run1-DMSO | NM_0240<br>46 | MGC8407 | CaM<br>kinase-like<br>vesicle-<br>associated | 0.197217  | Inlier |
| siRNA-Vinblastine Run1-DMSO  | NM_0240<br>46 | MGC8407 | CaM<br>kinase-like<br>vesicle-<br>associated | 0.669347  | Inlier |
| siRNA Disorazole DMSO Run1   | NM_0240<br>46 | MGC8407 | CaM<br>kinase-like<br>vesicle-<br>associated | 0.679653  | Inlier |
| siRNA-Vinblastine Run2-DMSO  | NM_0240<br>46 | MGC8407 | CaM<br>kinase-like<br>vesicle-<br>associated | 0.719307  | Inlier |
| siRNA-Temozolomide Run3-DMSO | NM_1780<br>12 | MGC8685 | MGC8685                                      | -2.627554 | Inlier |
| siRNA Disorazole DMSO Run1   | NM_1780<br>12 | MGC8685 | MGC8685                                      | -1.418226 | Inlier |
| siRNA-Vinblastine Run2-DMSO  | NM_1780<br>12 | MGC8685 | MGC8685                                      | -0.731002 | Inlier |
| siRNA-Temozolomide Run2-DMSO | NM_1780<br>12 | MGC8685 | MGC8685                                      | -0.235966 | Inlier |
| siRNA-Temozolomide Run1-DMSO | NM_1780<br>12 | MGC8685 | MGC8685                                      | 0.235966  | Inlier |
| siRNA Disorazole DMSO Run2   | NM_1780<br>12 | MGC8685 | MGC8685                                      | 0.243611  | Inlier |
| siRNA-Vinblastine Run1-DMSO  | NM_1780<br>12 | MGC8685 | MGC8685                                      | 0.623237  | Inlier |
| siRNA Disorazole DMSO Run3   | NM_1780<br>12 | MGC8685 | MGC8685                                      | 0.725763  | Inlier |
| siRNA-Temozolomide Run3-DMSO | NM_0072<br>83 | MGLL    | monoglyce<br>ride lipase                     | -1.157787 | Inlier |
| siRNA-Temozolomide Run2-DMSO | NM_0072<br>83 | MGLL    | monoglyce<br>ride lipase                     | -0.617748 | Inlier |
| siRNA-Vinblastine Run2-DMSO  | NM_0072<br>83 | MGLL    | monoglyce<br>ride lipase                     | -0.250406 | Inlier |
| siRNA Disorazole DMSO Run3   | NM_0072<br>83 | MGLL    | monoglyce<br>ride lipase                     | -0.188796 | Inlier |

Identification of Survival Genes in Human Glioblastoma Cells Using siRNA Screening  
 Nikhil G Thaker, Fang Zhang, Peter R. McDonald, Tong Ying Shun, Michael D Lewen, Ian F. Pollack, and John S. Lazo

Molecular Pharmacology

|                              |               |      |                                         |           |        |
|------------------------------|---------------|------|-----------------------------------------|-----------|--------|
| siRNA Disorazole DMSO Run1   | NM_0072<br>83 | MGLL | monoglyceride lipase                    | 0.188796  | Inlier |
| siRNA-Temozolomide Run1-DMSO | NM_0072<br>83 | MGLL | monoglyceride lipase                    | 0.731252  | Inlier |
| siRNA-Vinblastine Run1-DMSO  | NM_0072<br>83 | MGLL | monoglyceride lipase                    | 0.78565   | Inlier |
| siRNA Disorazole DMSO Run2   | NM_0072<br>83 | MGLL | monoglyceride lipase                    | 2.392811  | Inlier |
| siRNA Disorazole DMSO Run3   | NM_0024<br>12 | MGMT | O-6-methylguanine-DNA methyltransferase | -1.029561 | Inlier |
| siRNA-Vinblastine Run2-DMSO  | NM_0024<br>12 | MGMT | O-6-methylguanine-DNA methyltransferase | -0.914213 | Inlier |
| siRNA Disorazole DMSO Run1   | NM_0024<br>12 | MGMT | O-6-methylguanine-DNA methyltransferase | -0.434787 | Inlier |
| siRNA-Temozolomide Run3-DMSO | NM_0024<br>12 | MGMT | O-6-methylguanine-DNA methyltransferase | -0.103794 | Inlier |
| siRNA-Temozolomide Run1-DMSO | NM_0024<br>12 | MGMT | O-6-methylguanine-DNA methyltransferase | 0.103794  | Inlier |
| siRNA-Temozolomide Run2-DMSO | NM_0024<br>12 | MGMT | O-6-methylguanine-DNA methyltransferase | 0.237597  | Inlier |

Identification of Survival Genes in Human Glioblastoma Cells Using siRNA Screening

Nikhil G Thaker, Fang Zhang, Peter R. McDonald, Tong Ying Shun, Michael D Lewen, Ian F. Pollack, and John S. Lazo

Molecular Pharmacology

|                              |               |       |                                                                      |           |         |
|------------------------------|---------------|-------|----------------------------------------------------------------------|-----------|---------|
| siRNA-Vinblastine Run1-DMSO  | NM_0024<br>12 | MGMT  | O-6-methylguanine-DNA methyltransferase                              | 0.993618  | Inlier  |
| siRNA Disorazole DMSO Run2   | NM_0024<br>12 | MGMT  | O-6-methylguanine-DNA methyltransferase<br>microsomal glutathione S- | 1.543795  | Inlier  |
| siRNA Disorazole DMSO Run1   | NM_1457<br>92 | MGST1 | transferase 1<br>microsomal glutathione S-                           | -3.821639 | Outlier |
| siRNA-Temozolomide Run2-DMSO | NM_1457<br>92 | MGST1 | transferase 1<br>microsomal glutathione S-                           | -0.961474 | Inlier  |
| siRNA-Temozolomide Run1-DMSO | NM_1457<br>92 | MGST1 | transferase 1<br>microsomal glutathione S-                           | -0.292657 | Inlier  |
| siRNA Disorazole DMSO Run2   | NM_1457<br>92 | MGST1 | transferase 1<br>microsomal glutathione S-                           | -0.024561 | Inlier  |
| siRNA-Temozolomide Run3-DMSO | NM_1457<br>92 | MGST1 | transferase 1<br>microsomal glutathione S-                           | 0.024561  | Inlier  |
| siRNA-Vinblastine Run1-DMSO  | NM_1457<br>92 | MGST1 | transferase 1                                                        | 0.387526  | Inlier  |

Identification of Survival Genes in Human Glioblastoma Cells Using siRNA Screening  
 Nikhil G Thaker, Fang Zhang, Peter R. McDonald, Tong Ying Shun, Michael D Lewen, Ian F. Pollack, and John S. Lazo

Molecular Pharmacology

| siRNA                        | Gene  | Accession | Gene                                   | Value     | Outlier |
|------------------------------|-------|-----------|----------------------------------------|-----------|---------|
| siRNA Disorazole DMSO Run3   | MGST1 | NM_145792 | microsomal glutathione S-transferase 1 | 0.995144  | Inlier  |
| siRNA-Vinblastine Run2-DMSO  | MGST1 | NM_145792 | microsomal glutathione S-transferase 1 | 1.129032  | Inlier  |
| siRNA-Temozolomide Run3-DMSO | MGST2 | NM_002413 | microsomal glutathione S-transferase 2 | -1.924796 | Inlier  |
| siRNA Disorazole DMSO Run3   | MGST2 | NM_002413 | microsomal glutathione S-transferase 2 | -0.694342 | Inlier  |
| siRNA-Temozolomide Run2-DMSO | MGST2 | NM_002413 | microsomal glutathione S-transferase 2 | -0.531989 | Inlier  |
| siRNA-Vinblastine Run2-DMSO  | MGST2 | NM_002413 | microsomal glutathione S-transferase 2 | -0.314828 | Inlier  |
| siRNA Disorazole DMSO Run1   | MGST2 | NM_002413 | microsomal glutathione S-transferase 2 | 0.314828  | Inlier  |
| siRNA-Temozolomide Run1-DMSO | MGST2 | NM_002413 | microsomal glutathione S-transferase 2 | 0.654658  | Inlier  |



Identification of Survival Genes in Human Glioblastoma Cells Using siRNA Screening  
 Nikhil G Thaker, Fang Zhang, Peter R. McDonald, Tong Ying Shun, Michael D Lewen, Ian F. Pollack, and John S. Lazo

Molecular Pharmacology

| siRNA Treatment              | Gene ID   | Gene Name | Expression Value | Classification |
|------------------------------|-----------|-----------|------------------|----------------|
| siRNA Disorazole DMSO Run2   | NM_002413 | MGST2     | 6.320988         | Outlier        |
| siRNA-Vinblastine Run1-DMSO  | NM_002413 | MGST2     | 6.34608          | Outlier        |
| siRNA-Temozolomide Run3-DMSO | NM_004528 | MGST3     | -1.038888        | Inlier         |
| siRNA-Temozolomide Run2-DMSO | NM_004528 | MGST3     | -1.018966        | Inlier         |
| siRNA-Temozolomide Run1-DMSO | NM_004528 | MGST3     | -0.330034        | Inlier         |
| siRNA Disorazole DMSO Run3   | NM_004528 | MGST3     | -0.028613        | Inlier         |
| siRNA-Vinblastine Run2-DMSO  | NM_004528 | MGST3     | 0.028613         | Inlier         |
| siRNA Disorazole DMSO Run1   | NM_004528 | MGST3     | 0.149373         | Inlier         |

Identification of Survival Genes in Human Glioblastoma Cells Using siRNA Screening  
 Nikhil G Thaker, Fang Zhang, Peter R. McDonald, Tong Ying Shun, Michael D Lewen, Ian F. Pollack, and John S. Lazo

Molecular Pharmacology

| siRNA Treatment              | Gene ID   | Gene Name | Protein Description                                                        | Value     | Category |
|------------------------------|-----------|-----------|----------------------------------------------------------------------------|-----------|----------|
| siRNA-Vinblastine Run1-DMSO  | NM_004528 | MGST3     | microsomal glutathione S-transferase 3                                     | 3.874432  | Outlier  |
| siRNA Disorazole DMSO Run2   | NM_004528 | MGST3     | microsomal glutathione S-transferase 3                                     | 4.544595  | Outlier  |
| siRNA-Temozolomide Run1-DMSO | NM_014632 | MICAL2    | microtubule associated monooxygenase, calponin and LIM domain containing 2 | -0.745149 | Inlier   |
| siRNA Disorazole DMSO Run3   | NM_014632 | MICAL2    | microtubule associated monooxygenase, calponin and LIM domain containing 2 | -0.603851 | Inlier   |
| siRNA-Temozolomide Run2-DMSO | NM_014632 | MICAL2    | microtubule associated monooxygenase, calponin and LIM domain containing 2 | -0.269065 | Inlier   |

Identification of Survival Genes in Human Glioblastoma Cells Using siRNA Screening

Nikhil G Thaker, Fang Zhang, Peter R. McDonald, Tong Ying Shun, Michael D Lewen, Ian F. Pollack, and John S. Lazo

Molecular Pharmacology

|                              |               |        |   |                                                                          |           |        |
|------------------------------|---------------|--------|---|--------------------------------------------------------------------------|-----------|--------|
| siRNA-Vinblastine Run2-DMSO  | NM_0146<br>32 | MICAL2 | 2 | microtubule associated monooxygenase, calponin and LIM domain containing | -0.245966 | Inlier |
| siRNA Disorazole DMSO Run1   | NM_0146<br>32 | MICAL2 | 2 | microtubule associated monooxygenase, calponin and LIM domain containing | 0.245966  | Inlier |
| siRNA-Temozolomide Run3-DMSO | NM_0146<br>32 | MICAL2 | 2 | microtubule associated monooxygenase, calponin and LIM domain containing | 2.35037   | Inlier |
| siRNA-Vinblastine Run1-DMSO  | NM_0146<br>32 | MICAL2 | 2 | microtubule associated monooxygenase, calponin and LIM domain containing | 2.396086  | Inlier |

Identification of Survival Genes in Human Glioblastoma Cells Using siRNA Screening

Nikhil G Thaker, Fang Zhang, Peter R. McDonald, Tong Ying Shun, Michael D Lewen, Ian F. Pollack, and John S. Lazo

Molecular Pharmacology

|                              |               |        |   |           |                                                                          |
|------------------------------|---------------|--------|---|-----------|--------------------------------------------------------------------------|
| siRNA Disorazole DMSO Run2   | NM_0146<br>32 | MICAL2 | 2 | 3.335989  | Inlier                                                                   |
|                              |               |        |   |           | microtubule associated monooxygenase, calponin and LIM domain containing |
| siRNA-Temozolomide Run3-DMSO | XM_03299<br>7 | MICAL3 | 3 | -3.151112 | Inlier                                                                   |
|                              |               |        |   |           | microtubule associated monooxygenase, calponin and LIM domain containing |
| siRNA Disorazole DMSO Run1   | XM_03299<br>7 | MICAL3 | 3 | -1.363145 | Inlier                                                                   |
|                              |               |        |   |           | microtubule associated monooxygenase, calponin and LIM domain containing |
| siRNA-Vinblastine Run2-DMSO  | XM_03299<br>7 | MICAL3 | 3 | -0.583916 | Inlier                                                                   |
|                              |               |        |   |           | microtubule associated monooxygenase, calponin and LIM domain containing |

Identification of Survival Genes in Human Glioblastoma Cells Using siRNA Screening

Nikhil G Thaker, Fang Zhang, Peter R. McDonald, Tong Ying Shun, Michael D Lewen, Ian F. Pollack, and John S. Lazo

Molecular Pharmacology

|                              |           |        |   |                                                                          |           |        |
|------------------------------|-----------|--------|---|--------------------------------------------------------------------------|-----------|--------|
| siRNA-Temozolomide Run2-DMSO | XM_032997 | MICAL3 | 3 | microtubule associated monooxygenase, calponin and LIM domain containing | -0.393044 | Inlier |
| siRNA Disorazole DMSO Run3   | XM_032997 | MICAL3 | 3 | microtubule associated monooxygenase, calponin and LIM domain containing | 0.393046  | Inlier |
| siRNA Disorazole DMSO Run2   | XM_032997 | MICAL3 | 3 | microtubule associated monooxygenase, calponin and LIM domain containing | 0.466727  | Inlier |
| siRNA-Temozolomide Run1-DMSO | XM_032997 | MICAL3 | 3 | microtubule associated monooxygenase, calponin and LIM domain containing | 0.765084  | Inlier |

Identification of Survival Genes in Human Glioblastoma Cells Using siRNA Screening  
 Nikhil G Thaker, Fang Zhang, Peter R. McDonald, Tong Ying Shun, Michael D Lewen, Ian F. Pollack, and John S. Lazo  
 Molecular Pharmacology

|                              |           |        |                                                                            |           |         |
|------------------------------|-----------|--------|----------------------------------------------------------------------------|-----------|---------|
| siRNA-Vinblastine Run1-DMSO  | XM_032997 | MICAL3 | microtubule associated monooxygenase, calponin and LIM domain containing 3 | 6.531944  | Outlier |
| siRNA-Temozolomide Run3-DMSO | NM_033290 | MID1   | midline 1 (Opitz/BBB syndrome)                                             | -3.608093 | Outlier |
| siRNA-Temozolomide Run2-DMSO | NM_033290 | MID1   | midline 1 (Opitz/BBB syndrome)                                             | -2.421038 | Inlier  |
| siRNA-Temozolomide Run1-DMSO | NM_033290 | MID1   | midline 1 (Opitz/BBB syndrome)                                             | -1.412225 | Inlier  |
| siRNA Disorazole DMSO Run1   | NM_033290 | MID1   | midline 1 (Opitz/BBB syndrome)                                             | -0.143284 | Inlier  |
| siRNA-Vinblastine Run2-DMSO  | NM_033290 | MID1   | midline 1 (Opitz/BBB syndrome)                                             | 0.143285  | Inlier  |
| siRNA Disorazole DMSO Run2   | NM_033290 | MID1   | midline 1 (Opitz/BBB syndrome)                                             | 0.488551  | Inlier  |
| siRNA-Vinblastine Run1-DMSO  | NM_033290 | MID1   | midline 1 (Opitz/BBB syndrome)                                             | 0.672508  | Inlier  |
| siRNA Disorazole DMSO Run3   | NM_033290 | MID1   | midline 1 (Opitz/BBB syndrome)                                             | 0.676492  | Inlier  |

Identification of Survival Genes in Human Glioblastoma Cells Using siRNA Screening  
 Nikhil G Thaker, Fang Zhang, Peter R. McDonald, Tong Ying Shun, Michael D Lewen, Ian F. Pollack, and John S. Lazo

|                                  |               |        |                                                                                             |           |        |
|----------------------------------|---------------|--------|---------------------------------------------------------------------------------------------|-----------|--------|
| siRNA-Temozolomide Run3-<br>DMSO | NM_0528<br>17 | MID2   | midline 2                                                                                   | -1.567556 | Inlier |
| siRNA Disorazole DMSO Run3       | NM_0528<br>17 | MID2   | midline 2                                                                                   | -0.865682 | Inlier |
| siRNA Disorazole DMSO Run1       | NM_0528<br>17 | MID2   | midline 2                                                                                   | -0.483318 | Inlier |
| siRNA-Temozolomide Run1-<br>DMSO | NM_0528<br>17 | MID2   | midline 2                                                                                   | -0.057011 | Inlier |
| siRNA-Temozolomide Run2-<br>DMSO | NM_0528<br>17 | MID2   | midline 2                                                                                   | 0.057011  | Inlier |
| siRNA-Vinblastine Run2-<br>DMSO  | NM_0528<br>17 | MID2   | midline 2                                                                                   | 0.111478  | Inlier |
| siRNA Disorazole DMSO Run2       | NM_0528<br>17 | MID2   | midline 2                                                                                   | 1.166488  | Inlier |
| siRNA-Vinblastine Run1-<br>DMSO  | NM_0207<br>17 | MID2   | midline 2                                                                                   | 2.171265  | Inlier |
| siRNA Disorazole DMSO Run3       | NM_0207<br>78 | MIDORI | alpha-<br>kinase 3                                                                          | -0.833278 | Inlier |
| siRNA-Temozolomide Run3-<br>DMSO | NM_0207<br>78 | MIDORI | alpha-<br>kinase 3                                                                          | -0.690364 | Inlier |
| siRNA Disorazole DMSO Run2       | NM_0207<br>78 | MIDORI | alpha-<br>kinase 3                                                                          | -0.580585 | Inlier |
| siRNA-Temozolomide Run1-<br>DMSO | NM_0207<br>78 | MIDORI | alpha-<br>kinase 3                                                                          | -0.540751 | Inlier |
| siRNA-Temozolomide Run2-<br>DMSO | NM_0207<br>78 | MIDORI | alpha-<br>kinase 3                                                                          | 0.540751  | Inlier |
| siRNA Disorazole DMSO Run1       | NM_0207<br>78 | MIDORI | alpha-<br>kinase 3                                                                          | 0.658636  | Inlier |
| siRNA-Vinblastine Run2-<br>DMSO  | NM_0207<br>78 | MIDORI | alpha-<br>kinase 3                                                                          | 0.865653  | Inlier |
| siRNA-Vinblastine Run1-<br>DMSO  | NM_0207<br>78 | MIDORI | alpha-<br>kinase 3                                                                          | 0.931306  | Inlier |
| siRNA-Temozolomide Run3-<br>DMSO | NM_0024<br>15 | MIF    | macrophage<br>migration<br>inhibitory<br>factor<br>(glycosylation-<br>inhibiting<br>factor) | -0.700954 | Inlier |
| siRNA-Temozolomide Run2-<br>DMSO | NM_0024<br>15 | MIF    | macrophage<br>migration<br>inhibitory<br>factor<br>(glycosylation-<br>inhibiting<br>factor) | -0.648046 | Inlier |

Identification of Survival Genes in Human Glioblastoma Cells Using siRNA Screening

Nikhil G Thaker, Fang Zhang, Peter R. McDonald, Tong Ying Shun, Michael D Lewen, Ian F. Pollack, and John S. Lazo

Molecular Pharmacology

| siRNA Treatment              | Gene ID   | Condition | Gene Name                                                                   | Value     | Outlier Status |
|------------------------------|-----------|-----------|-----------------------------------------------------------------------------|-----------|----------------|
| siRNA-Temozolomide Run1-DMSO | NM_002415 | MIF       | macrophage migration inhibitory factor (glycosylated ion-inhibiting factor) | -0.113612 | Inlier         |
| siRNA Disorazole DMSO Run3   | NM_002415 | MIF       | macrophage migration inhibitory factor (glycosylated ion-inhibiting factor) | -0.082455 | Inlier         |
| siRNA Disorazole DMSO Run1   | NM_002415 | MIF       | macrophage migration inhibitory factor (glycosylated ion-inhibiting factor) | 0.082455  | Inlier         |
| siRNA-Vinblastine Run1-DMSO  | NM_002415 | MIF       | macrophage migration inhibitory factor (glycosylated ion-inhibiting factor) | 1.48112   | Inlier         |
| siRNA Disorazole DMSO Run2   | NM_002415 | MIF       | macrophage migration inhibitory factor (glycosylated ion-inhibiting factor) | 1.594886  | Inlier         |



Identification of Survival Genes in Human Glioblastoma Cells Using siRNA Screening

Nikhil G Thaker, Fang Zhang, Peter R. McDonald, Tong Ying Shun, Michael D Lewen, Ian F. Pollack, and John S. Lazo

Molecular Pharmacology

| siRNA Treatment              | Gene ID   | Gene Name | Function                                                                 | Score     | Outlier Status |
|------------------------------|-----------|-----------|--------------------------------------------------------------------------|-----------|----------------|
| siRNA-Vinblastine Run2-DMSO  | NM_002415 | MIF       | macrophage migration inhibitory factor (glycosylation-inhibiting factor) | 1.680366  | Inlier         |
| siRNA Disorazole DMSO Run2   | NM_015716 | MINK      | misshapen-like kinase 1 (zebrafish)                                      | -2.190229 | Inlier         |
| siRNA Disorazole DMSO Run3   | NM_015716 | MINK      | misshapen-like kinase 1 (zebrafish)                                      | -0.719934 | Inlier         |
| siRNA-Temozolomide Run1-DMSO | NM_015716 | MINK      | misshapen-like kinase 1 (zebrafish)                                      | -0.629065 | Inlier         |
| siRNA-Temozolomide Run3-DMSO | NM_015716 | MINK      | misshapen-like kinase 1 (zebrafish)                                      | -0.084993 | Inlier         |
| siRNA-Temozolomide Run2-DMSO | NM_015716 | MINK      | misshapen-like kinase 1 (zebrafish)                                      | 0.084993  | Inlier         |
| siRNA-Vinblastine Run1-DMSO  | NM_015716 | MINK      | misshapen-like kinase 1 (zebrafish)                                      | 0.520538  | Inlier         |
| siRNA Disorazole DMSO Run1   | NM_015716 | MINK      | misshapen-like kinase 1 (zebrafish)                                      | 0.869557  | Inlier         |
| siRNA-Vinblastine Run2-DMSO  | NM_015716 | MINK      | misshapen-like kinase 1 (zebrafish)                                      | 2.217461  | Inlier         |



Identification of Survival Genes in Human Glioblastoma Cells Using siRNA Screening  
 Nikhil G Thaker, Fang Zhang, Peter R. McDonald, Tong Ying Shun, Michael D Lewen, Ian F. Pollack, and John S. Lazo

Molecular Pharmacology

|                              |           |        |                                                          |           |        |
|------------------------------|-----------|--------|----------------------------------------------------------|-----------|--------|
| siRNA-Temozolomide Run1-DMSO | NM_004897 | MINPP1 | multiple inositol polyphosphate histidine phosphatase, 1 | 0.782735  | Inlier |
| siRNA-Temozolomide Run3-DMSO | NM_005932 | MIPEP  | mitochondrial intermediate peptidase                     | -1.82256  | Inlier |
| siRNA Disorazole DMSO Run2   | NM_005932 | MIPEP  | mitochondrial intermediate peptidase                     | -0.71571  | Inlier |
| siRNA-Temozolomide Run1-DMSO | NM_005932 | MIPEP  | mitochondrial intermediate peptidase                     | -0.63329  | Inlier |
| siRNA Disorazole DMSO Run1   | NM_005932 | MIPEP  | mitochondrial intermediate peptidase                     | -0.009424 | Inlier |
| siRNA-Temozolomide Run2-DMSO | NM_005932 | MIPEP  | mitochondrial intermediate peptidase                     | 0.009424  | Inlier |
| siRNA-Vinblastine Run2-DMSO  | NM_005932 | MIPEP  | mitochondrial intermediate peptidase                     | 0.351462  | Inlier |
| siRNA-Vinblastine Run1-DMSO  | NM_005932 | MIPEP  | mitochondrial intermediate peptidase                     | 0.765769  | Inlier |
| siRNA Disorazole DMSO Run3   | NM_005932 | MIPEP  | peptidase                                                | 1.571514  | Inlier |
| siRNA-Temozolomide Run3-DMSO | NM_016641 | MIR16  | MIR16                                                    | -1.381776 | Inlier |
| siRNA Disorazole DMSO Run2   | NM_016641 | MIR16  | MIR16                                                    | -0.80327  | Inlier |

Identification of Survival Genes in Human Glioblastoma Cells Using siRNA Screening

Nikhil G Thaker, Fang Zhang, Peter R. McDonald, Tong Ying Shun, Michael D Lewen, Ian F. Pollack, and John S.

Lazo

|                              |               |       |                                                               |           |        |
|------------------------------|---------------|-------|---------------------------------------------------------------|-----------|--------|
| siRNA-Temozolomide Run2-DMSO | NM_0166<br>41 | MIR16 | MIR16                                                         | -0.442346 | Inlier |
| siRNA Disorazole DMSO Run1   | NM_0166<br>41 | MIR16 | MIR16                                                         | -0.111708 | Inlier |
| siRNA-Temozolomide Run1-DMSO | NM_0166<br>41 | MIR16 | MIR16                                                         | 0.111708  | Inlier |
| siRNA-Vinblastine Run1-DMSO  | NM_0166<br>41 | MIR16 | MIR16                                                         | 0.545729  | Inlier |
| siRNA-Vinblastine Run2-DMSO  | NM_0166<br>41 | MIR16 | MIR16                                                         | 0.993923  | Inlier |
| siRNA Disorazole DMSO Run3   | NM_0166<br>41 | MIR16 | MIR16                                                         | 1.288431  | Inlier |
| siRNA-Temozolomide Run3-DMSO | NM_1981<br>77 | MITF  | microphth<br>almia-<br>associated<br>transcripti<br>on factor | -1.431683 | Inlier |
| siRNA Disorazole DMSO Run1   | NM_1981<br>77 | MITF  | microphth<br>almia-<br>associated<br>transcripti<br>on factor | -0.7722   | Inlier |
| siRNA-Temozolomide Run2-DMSO | NM_1981<br>77 | MITF  | microphth<br>almia-<br>associated<br>transcripti<br>on factor | -0.5768   | Inlier |
| siRNA-Temozolomide Run1-DMSO | NM_1981<br>77 | MITF  | microphth<br>almia-<br>associated<br>transcripti<br>on factor | -0.077972 | Inlier |
| siRNA Disorazole DMSO Run3   | NM_1981<br>77 | MITF  | microphth<br>almia-<br>associated<br>transcripti<br>on factor | 0.077972  | Inlier |
| siRNA-Vinblastine Run2-DMSO  | NM_1981<br>77 | MITF  | microphth<br>almia-<br>associated<br>transcripti<br>on factor | 0.311988  | Inlier |

Identification of Survival Genes in Human Glioblastoma Cells Using siRNA Screening

Nikhil G Thaker, Fang Zhang, Peter R. McDonald, Tong Ying Shun, Michael D Lewen, Ian F. Pollack, and John S. Lazo

Molecular Pharmacology

|                              |               |       |                                                                  |                  |
|------------------------------|---------------|-------|------------------------------------------------------------------|------------------|
| siRNA-Vinblastine Run1-DMSO  | NM_1981<br>77 | MITF  | microphth<br>almia-<br>associated<br>transcripti<br>on factor    | 0.99044 Inlier   |
| siRNA Disorazole DMSO Run2   | NM_1981<br>77 | MITF  | microphth<br>almia-<br>associated<br>transcripti<br>on factor    | 2.379755 Inlier  |
| siRNA Disorazole DMSO Run2   | NM_1989<br>73 | MKNK1 | MAP<br>kinase<br>interacting<br>serine/thre<br>onine<br>kinase 1 | -0.805833 Inlier |
| siRNA-Temozolomide Run3-DMSO | NM_1989<br>73 | MKNK1 | MAP<br>kinase<br>interacting<br>serine/thre<br>onine<br>kinase 1 | -0.692576 Inlier |
| siRNA Disorazole DMSO Run3   | NM_1989<br>73 | MKNK1 | MAP<br>kinase<br>interacting<br>serine/thre<br>onine<br>kinase 1 | -0.448675 Inlier |
| siRNA-Temozolomide Run2-DMSO | NM_1989<br>73 | MKNK1 | MAP<br>kinase<br>interacting<br>serine/thre<br>onine<br>kinase 1 | -0.239611 Inlier |
| siRNA-Temozolomide Run1-DMSO | NM_1989<br>73 | MKNK1 | MAP<br>kinase<br>interacting<br>serine/thre<br>onine<br>kinase 1 | 0.239612 Inlier  |

Identification of Survival Genes in Human Glioblastoma Cells Using siRNA Screening  
 Nikhil G Thaker, Fang Zhang, Peter R. McDonald, Tong Ying Shun, Michael D Lewen, Ian F. Pollack, and John S. Lazo  
 Molecular Pharmacology

|                              |               |       |                                                                  |           |        |
|------------------------------|---------------|-------|------------------------------------------------------------------|-----------|--------|
| siRNA-Vinblastine Run1-DMSO  | NM_1989<br>73 | MKNK1 | MAP<br>kinase<br>interacting<br>serine/thre<br>onine<br>kinase 1 | 0.656424  | Inlier |
| siRNA Disorazole DMSO Run1   | NM_1989<br>73 | MKNK1 | MAP<br>kinase<br>interacting<br>serine/thre<br>onine<br>kinase 1 | 0.917347  | Inlier |
| siRNA-Vinblastine Run2-DMSO  | NM_1989<br>73 | MKNK1 | MAP<br>kinase<br>interacting<br>serine/thre<br>onine<br>kinase 1 | 2.074265  | Inlier |
| siRNA-Temozolomide Run2-DMSO | NM_1990<br>54 | MKNK2 | MAP<br>kinase<br>interacting<br>serine/thre<br>onine<br>kinase 2 | -1.78046  | Inlier |
| siRNA Disorazole DMSO Run2   | NM_1990<br>54 | MKNK2 | MAP<br>kinase<br>interacting<br>serine/thre<br>onine<br>kinase 2 | -1.281379 | Inlier |
| siRNA-Temozolomide Run3-DMSO | NM_1990<br>54 | MKNK2 | MAP<br>kinase<br>interacting<br>serine/thre<br>onine<br>kinase 2 | -0.507278 | Inlier |
| siRNA-Temozolomide Run1-DMSO | NM_1990<br>54 | MKNK2 | MAP<br>kinase<br>interacting<br>serine/thre<br>onine<br>kinase 2 | -0.065599 | Inlier |

Identification of Survival Genes in Human Glioblastoma Cells Using siRNA Screening  
 Nikhil G Thaker, Fang Zhang, Peter R. McDonald, Tong Ying Shun, Michael D Lewen, Ian F. Pollack, and John S. Lazo  
 Molecular Pharmacology

|                                  |               |         |                                                                  |           |        |
|----------------------------------|---------------|---------|------------------------------------------------------------------|-----------|--------|
| siRNA Disorazole DMSO Run1       | NM_1990<br>54 | MKMK2   | MAP<br>kinase<br>interacting<br>serine/thre<br>onine<br>kinase 2 | 0.0656    | Inlier |
| siRNA-Vinblastine Run1-<br>DMSO  | NM_1990<br>54 | MKMK2   | MAP<br>kinase<br>interacting<br>serine/thre<br>onine<br>kinase 2 | 0.492079  | Inlier |
| siRNA Disorazole DMSO Run3       | NM_1990<br>54 | MKMK2   | MAP<br>kinase<br>interacting<br>serine/thre<br>onine<br>kinase 2 | 0.841722  | Inlier |
| siRNA-Vinblastine Run2-<br>DMSO  | NM_1990<br>54 | MKMK2   | MAP<br>kinase<br>interacting<br>serine/thre<br>onine<br>kinase 2 | 0.961665  | Inlier |
| siRNA-Temozolomide Run2-<br>DMSO | NM_0160<br>86 | MK-STYX | dual<br>specificity<br>phosphata<br>se 24<br>(putative)<br>dual  | -1.3434   | Inlier |
| siRNA-Temozolomide Run3-<br>DMSO | NM_0160<br>86 | MK-STYX | dual<br>specificity<br>phosphata<br>se 24<br>(putative)<br>dual  | -0.64036  | Inlier |
| siRNA Disorazole DMSO Run3       | NM_0160<br>86 | MK-STYX | dual<br>specificity<br>phosphata<br>se 24<br>(putative)<br>dual  | -0.227077 | Inlier |
| siRNA Disorazole DMSO Run2       | NM_0160<br>86 | MK-STYX | dual<br>specificity<br>phosphata<br>se 24<br>(putative)          | -0.032312 | Inlier |

Identification of Survival Genes in Human Glioblastoma Cells Using siRNA Screening  
 Nikhil G Thaker, Fang Zhang, Peter R. McDonald, Tong Ying Shun, Michael D Lewen, Ian F. Pollack, and John S. Lazo

Molecular Pharmacology

| siRNA                        | Gene      | Target  | Gene Description                                             | Score     | Outlier |
|------------------------------|-----------|---------|--------------------------------------------------------------|-----------|---------|
| siRNA-Temozolomide Run1-DMSO | NM_016086 | MK-STYX | dual specificity phosphatase 24 (putative)                   | 0.032312  | Inlier  |
| siRNA Disorazole DMSO Run1   | NM_016086 | MK-STYX | dual specificity phosphatase 24 (putative)                   | 0.70864   | Inlier  |
| siRNA-Vinblastine Run2-DMSO  | NM_016086 | MK-STYX | dual specificity phosphatase 24 (putative)                   | 1.068932  | Inlier  |
| siRNA-Vinblastine Run1-DMSO  | NM_016086 | MK-STYX | dual specificity phosphatase 24 (putative)                   | 1.288424  | Inlier  |
| siRNA-Temozolomide Run1-DMSO | NM_139202 | MLC1    | megalencephalic leukoencephalopathy with subcortical cysts 1 | -0.760825 | Inlier  |
| siRNA Disorazole DMSO Run2   | NM_139202 | MLC1    | megalencephalic leukoencephalopathy with subcortical cysts 1 | -0.588175 | Inlier  |
| siRNA Disorazole DMSO Run3   | NM_139202 | MLC1    | megalencephalic leukoencephalopathy with subcortical cysts 1 | -0.201673 | Inlier  |
| siRNA-Temozolomide Run2-DMSO | NM_139202 | MLC1    | megalencephalic leukoencephalopathy with subcortical cysts 1 | -0.161601 | Inlier  |



Identification of Survival Genes in Human Glioblastoma Cells Using siRNA Screening  
 Nikhil G Thaker, Fang Zhang, Peter R. McDonald, Tong Ying Shun, Michael D Lewen, Ian F. Pollack, and John S. Lazo

Molecular Pharmacology

|                              |           |        |                                                              |           |         |
|------------------------------|-----------|--------|--------------------------------------------------------------|-----------|---------|
| siRNA-Vinblastine Run2-DMSO  | NM_139202 | MLC1   | megalencephalic leukoencephalopathy with subcortical cysts 1 | 0.161601  | Inlier  |
| siRNA Disorazole DMSO Run1   | NM_139202 | MLC1   | megalencephalic leukoencephalopathy with subcortical cysts 1 | 0.940833  | Inlier  |
| siRNA-Temozolomide Run3-DMSO | NM_139202 | MLC1   | megalencephalic leukoencephalopathy with subcortical cysts 1 | 1.06925   | Inlier  |
| siRNA-Vinblastine Run1-DMSO  | NM_139202 | MLC1   | subcortical cysts 1                                          | 1.715355  | Inlier  |
| siRNA-Temozolomide Run3-DMSO | NM_002475 | MLC1SA | MLC1SA                                                       | -1.976476 | Inlier  |
| siRNA Disorazole DMSO Run3   | NM_002475 | MLC1SA | MLC1SA                                                       | -0.827104 | Inlier  |
| siRNA-Vinblastine Run2-DMSO  | NM_002475 | MLC1SA | MLC1SA                                                       | -0.521896 | Inlier  |
| siRNA-Temozolomide Run2-DMSO | NM_002475 | MLC1SA | MLC1SA                                                       | -0.153258 | Inlier  |
| siRNA-Temozolomide Run1-DMSO | NM_002475 | MLC1SA | MLC1SA                                                       | 0.153258  | Inlier  |
| siRNA Disorazole DMSO Run1   | NM_002475 | MLC1SA | MLC1SA                                                       | 0.496246  | Inlier  |
| siRNA Disorazole DMSO Run2   | NM_002475 | MLC1SA | MLC1SA                                                       | 3.071021  | Inlier  |
| siRNA-Vinblastine Run1-DMSO  | NM_002475 | MLC1SA | MLC1SA                                                       | 4.835214  | Outlier |
| siRNA-Temozolomide Run2-DMSO | NM_000249 | MLH1   | mutL homolog 1, colon cancer, nonpolyposis type 2 (E. coli)  | -2.007203 | Inlier  |

Identification of Survival Genes in Human Glioblastoma Cells Using siRNA Screening

Nikhil G Thaker, Fang Zhang, Peter R. McDonald, Tong Ying Shun, Michael D Lewen, Ian F. Pollack, and John S. Lazo

Molecular Pharmacology

|                              |               |      |                                                                                |           |        |
|------------------------------|---------------|------|--------------------------------------------------------------------------------|-----------|--------|
| siRNA-Temozolomide Run1-DMSO | NM_0002<br>49 | MLH1 | mutL<br>homolog<br>1, colon<br>cancer,<br>nonpolypo<br>sis type 2<br>(E. coli) | -0.633711 | Inlier |
| siRNA Disorazole DMSO Run3   | NM_0002<br>49 | MLH1 | mutL<br>homolog<br>1, colon<br>cancer,<br>nonpolypo<br>sis type 2<br>(E. coli) | -0.444848 | Inlier |
| siRNA-Temozolomide Run3-DMSO | NM_0002<br>49 | MLH1 | mutL<br>homolog<br>1, colon<br>cancer,<br>nonpolypo<br>sis type 2<br>(E. coli) | -0.310464 | Inlier |
| siRNA Disorazole DMSO Run1   | NM_0002<br>49 | MLH1 | mutL<br>homolog<br>1, colon<br>cancer,<br>nonpolypo<br>sis type 2<br>(E. coli) | 0.310465  | Inlier |
| siRNA-Vinblastine Run2-DMSO  | NM_0002<br>49 | MLH1 | mutL<br>homolog<br>1, colon<br>cancer,<br>nonpolypo<br>sis type 2<br>(E. coli) | 0.715289  | Inlier |
| siRNA-Vinblastine Run1-DMSO  | NM_0002<br>49 | MLH1 | mutL<br>homolog<br>1, colon<br>cancer,<br>nonpolypo<br>sis type 2<br>(E. coli) | 1.489667  | Inlier |
| siRNA Disorazole DMSO Run2   | NM_0002<br>49 | MLH1 | mutL<br>homolog<br>1, colon<br>cancer,<br>nonpolypo<br>sis type 2<br>(E. coli) | 3.031955  | Inlier |
| siRNA Disorazole DMSO Run1   | NM_0143<br>81 | MLH3 | mutL<br>homolog 3<br>(E. coli)                                                 | -1.770903 | Inlier |

Identification of Survival Genes in Human Glioblastoma Cells Using siRNA Screening

Nikhil G Thaker, Fang Zhang, Peter R. McDonald, Tong Ying Shun, Michael D Lewen, Ian F. Pollack, and John S.

Lazo

Molecular Pharmacology

|                              |               |      |                                                                                                                                         |           |        |
|------------------------------|---------------|------|-----------------------------------------------------------------------------------------------------------------------------------------|-----------|--------|
| siRNA-Temozolomide Run2-DMSO | NM_0143<br>81 | MLH3 | mutL<br>homolog 3<br>(E. coli)                                                                                                          | -0.679895 | Inlier |
| siRNA-Vinblastine Run2-DMSO  | NM_0143<br>81 | MLH3 | mutL<br>homolog 3<br>(E. coli)                                                                                                          | -0.398692 | Inlier |
| siRNA-Temozolomide Run1-DMSO | NM_0143<br>81 | MLH3 | mutL<br>homolog 3<br>(E. coli)                                                                                                          | -0.264043 | Inlier |
| siRNA-Temozolomide Run3-DMSO | NM_0143<br>81 | MLH3 | mutL<br>homolog 3<br>(E. coli)                                                                                                          | 0.264043  | Inlier |
| siRNA-Vinblastine Run1-DMSO  | NM_0143<br>81 | MLH3 | mutL<br>homolog 3<br>(E. coli)                                                                                                          | 0.669105  | Inlier |
| siRNA Disorazole DMSO Run2   | NM_0143<br>81 | MLH3 | mutL<br>homolog 3<br>(E. coli)                                                                                                          | 1.213603  | Inlier |
| siRNA Disorazole DMSO Run3   | NM_0143<br>81 | MLH3 | mutL<br>homolog 3<br>(E. coli)<br>myeloid/ly<br>mphoid or<br>mixed-<br>lineage<br>leukemia<br>(trithorax<br>homolog,<br>Drosophila<br>) | 1.625007  | Inlier |
| siRNA-Temozolomide Run3-DMSO | NM_0059<br>33 | MLL  | myeloid/ly<br>mphoid or<br>mixed-<br>lineage<br>leukemia<br>(trithorax<br>homolog,<br>Drosophila<br>)                                   | -1.389375 | Inlier |
| siRNA-Temozolomide Run1-DMSO | NM_0059<br>33 | MLL  | myeloid/ly<br>mphoid or<br>mixed-<br>lineage<br>leukemia<br>(trithorax<br>homolog,<br>Drosophila<br>)                                   | -0.657653 | Inlier |
| siRNA-Temozolomide Run2-DMSO | NM_0059<br>33 | MLL  | myeloid/ly<br>mphoid or<br>mixed-<br>lineage<br>leukemia<br>(trithorax<br>homolog,<br>Drosophila<br>)                                   | -0.56529  | Inlier |

Identification of Survival Genes in Human Glioblastoma Cells Using siRNA Screening

Nikhil G Thaker, Fang Zhang, Peter R. McDonald, Tong Ying Shun, Michael D Lewen, Ian F. Pollack, and John S. Lazo

Molecular Pharmacology

|                              |               |      |                                                                             |           |        |
|------------------------------|---------------|------|-----------------------------------------------------------------------------|-----------|--------|
| siRNA Disorazole DMSO Run2   | NM_0059<br>33 | MLL  | myeloid/lymphoid or mixed-lineage leukemia (trithorax homolog, Drosophila ) | -0.249289 | Inlier |
| siRNA Disorazole DMSO Run3   | NM_0059<br>33 | MLL  | myeloid/lymphoid or mixed-lineage leukemia (trithorax homolog, Drosophila ) | 0.249289  | Inlier |
| siRNA Disorazole DMSO Run1   | NM_0059<br>33 | MLL  | myeloid/lymphoid or mixed-lineage leukemia (trithorax homolog, Drosophila ) | 0.691347  | Inlier |
| siRNA-Vinblastine Run1-DMSO  | NM_0059<br>33 | MLL  | myeloid/lymphoid or mixed-lineage leukemia (trithorax homolog, Drosophila ) | 1.79538   | Inlier |
| siRNA-Vinblastine Run2-DMSO  | NM_0059<br>33 | MLL  | myeloid/lymphoid or mixed-lineage leukemia (trithorax homolog, Drosophila ) | 2.808486  | Inlier |
| siRNA-Temozolomide Run3-DMSO | NM_0034<br>82 | MLL2 | myeloid/lymphoid or mixed-lineage leukemia 2                                | -0.690712 | Inlier |

Identification of Survival Genes in Human Glioblastoma Cells Using siRNA Screening  
 Nikhil G Thaker, Fang Zhang, Peter R. McDonald, Tong Ying Shun, Michael D Lewen, Ian F. Pollack, and John S. Lazo  
 Molecular Pharmacology

|                              |               |      |                                              |           |        |
|------------------------------|---------------|------|----------------------------------------------|-----------|--------|
| siRNA-Temozolomide Run2-DMSO | NM_0034<br>82 | MLL2 | myeloid/lymphoid or mixed-lineage leukemia 2 | -0.681284 | Inlier |
| siRNA Disorazole DMSO Run2   | NM_0034<br>82 | MLL2 | myeloid/lymphoid or mixed-lineage leukemia 2 | -0.667716 | Inlier |
| siRNA-Temozolomide Run1-DMSO | NM_0034<br>82 | MLL2 | myeloid/lymphoid or mixed-lineage leukemia 2 | -0.425401 | Inlier |
| siRNA Disorazole DMSO Run1   | NM_0034<br>82 | MLL2 | myeloid/lymphoid or mixed-lineage leukemia 2 | 0.425402  | Inlier |
| siRNA-Vinblastine Run1-DMSO  | NM_0034<br>82 | MLL2 | myeloid/lymphoid or mixed-lineage leukemia 2 | 0.517947  | Inlier |
| siRNA-Vinblastine Run2-DMSO  | NM_0034<br>82 | MLL2 | myeloid/lymphoid or mixed-lineage leukemia 2 | 1.950564  | Inlier |
| siRNA Disorazole DMSO Run3   | NM_0034<br>82 | MLL2 | myeloid/lymphoid or mixed-lineage leukemia 2 | 2.93292   | Inlier |
| siRNA-Temozolomide Run3-DMSO | NM_0015<br>07 | MLNR | motilin receptor                             | -1.07726  | Inlier |
| siRNA-Temozolomide Run2-DMSO | NM_0015<br>07 | MLNR | motilin receptor                             | -0.966708 | Inlier |
| siRNA-Temozolomide Run1-DMSO | NM_0015<br>07 | MLNR | motilin receptor                             | -0.734646 | Inlier |
| siRNA Disorazole DMSO Run1   | NM_0015<br>07 | MLNR | motilin receptor                             | -0.231439 | Inlier |
| siRNA-Vinblastine Run2-DMSO  | NM_0015<br>07 | MLNR | motilin receptor                             | 0.231439  | Inlier |

Identification of Survival Genes in Human Glioblastoma Cells Using siRNA Screening  
 Nikhil G Thaker, Fang Zhang, Peter R. McDonald, Tong Ying Shun, Michael D Lewen, Ian F. Pollack, and John S. Lazo

|                              |               |       |                                                                  |                  |
|------------------------------|---------------|-------|------------------------------------------------------------------|------------------|
| Molecular Pharmacology       | NM_0015       |       | motilin                                                          |                  |
| siRNA Disorazole DMSO Run2   | 07            | MLNR  | receptor                                                         | 0.588188 Inlier  |
| siRNA-Vinblastine Run1-DMSO  | NM_0015<br>07 | MLNR  | motilin<br>receptor                                              | 0.614354 Inlier  |
| siRNA Disorazole DMSO Run3   | NM_0015<br>07 | MLNR  | motilin<br>receptor                                              | 1.660487 Inlier  |
| siRNA-Temozolomide Run3-DMSO | NM_0122<br>13 | MLYCD | malonyl-CoA<br>decarboxylase                                     | -1.818049 Inlier |
| siRNA-Temozolomide Run2-DMSO | NM_0122<br>13 | MLYCD | malonyl-CoA<br>decarboxylase                                     | -0.361161 Inlier |
| siRNA Disorazole DMSO Run3   | NM_0122<br>13 | MLYCD | malonyl-CoA<br>decarboxylase                                     | -0.130287 Inlier |
| siRNA-Temozolomide Run1-DMSO | NM_0122<br>13 | MLYCD | malonyl-CoA<br>decarboxylase                                     | -0.119485 Inlier |
| siRNA-Vinblastine Run2-DMSO  | NM_0122<br>13 | MLYCD | malonyl-CoA<br>decarboxylase                                     | 0.119485 Inlier  |
| siRNA Disorazole DMSO Run1   | NM_0122<br>13 | MLYCD | malonyl-CoA<br>decarboxylase                                     | 0.987839 Inlier  |
| siRNA Disorazole DMSO Run2   | NM_0122<br>13 | MLYCD | malonyl-CoA<br>decarboxylase                                     | 3.50105 Outlier  |
| siRNA-Vinblastine Run1-DMSO  | NM_0122<br>13 | MLYCD | malonyl-CoA<br>decarboxylase                                     | 4.450221 Outlier |
| siRNA-Temozolomide Run3-DMSO | NM_1722<br>50 | MMAA  | methylmalonic<br>aciduria<br>(cobalamin<br>deficiency)<br>type A | -1.554434 Inlier |
| siRNA-Temozolomide Run2-DMSO | NM_1722<br>50 | MMAA  | methylmalonic<br>aciduria<br>(cobalamin<br>deficiency)<br>type A | -0.894601 Inlier |

Identification of Survival Genes in Human Glioblastoma Cells Using siRNA Screening

Nikhil G Thaker, Fang Zhang, Peter R. McDonald, Tong Ying Shun, Michael D Lewen, Ian F. Pollack, and John S. Lazo

Molecular Pharmacology

| siRNA                        | Gene    | Concentration | Drug | Gene                                                 | Value     | Outlier |
|------------------------------|---------|---------------|------|------------------------------------------------------|-----------|---------|
| siRNA-Temozolomide Run1-DMSO | NM_1722 | 50            | MMAA | methylmalonic aciduria (cobalamin deficiency) type A | -0.599429 | Inlier  |
| siRNA Disorazole DMSO Run1   | NM_1722 | 50            | MMAA | methylmalonic aciduria (cobalamin deficiency) type A | -0.202294 | Inlier  |
| siRNA Disorazole DMSO Run3   | NM_1722 | 50            | MMAA | methylmalonic aciduria (cobalamin deficiency) type A | 0.202294  | Inlier  |
| siRNA Disorazole DMSO Run2   | NM_1722 | 50            | MMAA | methylmalonic aciduria (cobalamin deficiency) type A | 0.288088  | Inlier  |
| siRNA-Vinblastine Run2-DMSO  | NM_1722 | 50            | MMAA | methylmalonic aciduria (cobalamin deficiency) type A | 0.749571  | Inlier  |
| siRNA-Vinblastine Run1-DMSO  | NM_1722 | 50            | MMAA | methylmalonic aciduria (cobalamin deficiency) type A | 1.93278   | Inlier  |

Identification of Survival Genes in Human Glioblastoma Cells Using siRNA Screening

Nikhil G Thaker, Fang Zhang, Peter R. McDonald, Tong Ying Shun, Michael D Lewen, Ian F. Pollack, and John S. Lazo

Molecular Pharmacology

| siRNA Treatment         | Gene ID | Run | Condition | Gene Name                                                                          | Log Fold Change | Outlier Status |
|-------------------------|---------|-----|-----------|------------------------------------------------------------------------------------|-----------------|----------------|
| siRNA Disorazole DMSO   | NM_0072 | 89  | MME       | membrane metallo-endopeptidase (neutral endopeptidase, enkephalinase, CALLA, CD10) | -1.102882       | Inlier         |
| siRNA-Temozolomide DMSO | NM_0072 | 89  | MME       | membrane metallo-endopeptidase (neutral endopeptidase, enkephalinase, CALLA, CD10) | -1.068644       | Inlier         |
| siRNA Disorazole DMSO   | NM_0072 | 89  | MME       | membrane metallo-endopeptidase (neutral endopeptidase, enkephalinase, CALLA, CD10) | -0.659821       | Inlier         |
| siRNA-Temozolomide DMSO | NM_0072 | 89  | MME       | membrane metallo-endopeptidase (neutral endopeptidase, enkephalinase, CALLA, CD10) | -0.037709       | Inlier         |



Identification of Survival Genes in Human Glioblastoma Cells Using siRNA Screening

Nikhil G Thaker, Fang Zhang, Peter R. McDonald, Tong Ying Shun, Michael D Lewen, Ian F. Pollack, and John S. Lazo

Molecular Pharmacology

|                              |               |       |                                                                                    |           |        |
|------------------------------|---------------|-------|------------------------------------------------------------------------------------|-----------|--------|
| siRNA Disorazole DMSO Run1   | NM_0072<br>89 | MME   | membrane metallo-endopeptidase (neutral endopeptidase, enkephalinase, CALLA, CD10) | 0.037709  | Inlier |
| siRNA-Temozolomide Run1-DMSO | NM_0072<br>89 | MME   | membrane metallo-endopeptidase (neutral endopeptidase, enkephalinase, CALLA, CD10) | 0.26734   | Inlier |
| siRNA-Vinblastine Run2-DMSO  | NM_0072<br>89 | MME   | membrane metallo-endopeptidase (neutral endopeptidase, enkephalinase, CALLA, CD10) | 0.689179  | Inlier |
| siRNA-Vinblastine Run1-DMSO  | NM_0072<br>89 | MME   | mel transforming oncogene-like 1                                                   | 0.792738  | Inlier |
| siRNA-Temozolomide Run3-DMSO | NM_0334<br>67 | MMEL2 | mel transforming oncogene-like 1                                                   | -1.249358 | Inlier |

Identification of Survival Genes in Human Glioblastoma Cells Using siRNA Screening  
 Nikhil G Thaker, Fang Zhang, Peter R. McDonald, Tong Ying Shun, Michael D Lewen, Ian F. Pollack, and John S. Lazo

Molecular Pharmacology

|                                  |               |       |                                                                        |           |        |
|----------------------------------|---------------|-------|------------------------------------------------------------------------|-----------|--------|
| siRNA Disorazole DMSO Run2       | NM_0334<br>67 | MMEL2 | mel<br>transformi<br>ng<br>oncogene-<br>like 1                         | -1.196932 | Inlier |
| siRNA-Temozolomide Run1-<br>DMSO | NM_0334<br>67 | MMEL2 | mel<br>transformi<br>ng<br>oncogene-<br>like 1                         | -0.388817 | Inlier |
| siRNA Disorazole DMSO Run1       | NM_0334<br>67 | MMEL2 | mel<br>transformi<br>ng<br>oncogene-<br>like 1                         | -0.068617 | Inlier |
| siRNA-Temozolomide Run2-<br>DMSO | NM_0334<br>67 | MMEL2 | mel<br>transformi<br>ng<br>oncogene-<br>like 1                         | 0.068618  | Inlier |
| siRNA Disorazole DMSO Run3       | NM_0334<br>67 | MMEL2 | mel<br>transformi<br>ng<br>oncogene-<br>like 1                         | 0.32358   | Inlier |
| siRNA-Vinblastine Run1-<br>DMSO  | NM_0334<br>67 | MMEL2 | mel<br>transformi<br>ng<br>oncogene-<br>like 1                         | 0.960183  | Inlier |
| siRNA-Vinblastine Run2-<br>DMSO  | NM_0334<br>67 | MMEL2 | mel<br>transformi<br>ng<br>oncogene-<br>like 1                         | 1.01841   | Inlier |
| siRNA-Temozolomide Run3-<br>DMSO | NM_0024<br>21 | MMP1  | matrix<br>metallopro<br>teinase 1<br>(interstitial<br>collagenas<br>e) | -1.744533 | Inlier |
| siRNA Disorazole DMSO Run3       | NM_0024<br>21 | MMP1  | matrix<br>metallopro<br>teinase 1<br>(interstitial<br>collagenas<br>e) | -0.746865 | Inlier |

Identification of Survival Genes in Human Glioblastoma Cells Using siRNA Screening

Nikhil G Thaker, Fang Zhang, Peter R. McDonald, Tong Ying Shun, Michael D Lewen, Ian F. Pollack, and John S. Lazo

Molecular Pharmacology

|                              |               |      |                                                       |           |        |
|------------------------------|---------------|------|-------------------------------------------------------|-----------|--------|
| siRNA Disorazole DMSO Run2   | NM_0024<br>21 | MMP1 | matrix metalloproteinase 1 (interstitial collagenase) | -0.421933 | Inlier |
| siRNA-Temozolomide Run1-DMSO | NM_0024<br>21 | MMP1 | matrix metalloproteinase 1 (interstitial collagenase) | -0.063905 | Inlier |
| siRNA Disorazole DMSO Run1   | NM_0024<br>21 | MMP1 | matrix metalloproteinase 1 (interstitial collagenase) | 0.063905  | Inlier |
| siRNA-Temozolomide Run2-DMSO | NM_0024<br>21 | MMP1 | matrix metalloproteinase 1 (interstitial collagenase) | 0.602135  | Inlier |
| siRNA-Vinblastine Run2-DMSO  | NM_0024<br>21 | MMP1 | matrix metalloproteinase 1 (interstitial collagenase) | 0.803231  | Inlier |
| siRNA-Vinblastine Run1-DMSO  | NM_0024<br>21 | MMP1 | matrix metalloproteinase 1 (interstitial collagenase) | 1.002033  | Inlier |

Identification of Survival Genes in Human Glioblastoma Cells Using siRNA Screening  
 Nikhil G Thaker, Fang Zhang, Peter R. McDonald, Tong Ying Shun, Michael D Lewen, Ian F. Pollack, and John S. Lazo  
 Molecular Pharmacology

|                              |               |       |                                             |           |        |
|------------------------------|---------------|-------|---------------------------------------------|-----------|--------|
| siRNA-Temozolomide Run3-DMSO | NM_0024<br>25 | MMP10 | matrix metalloproteinase 10 (stromelysin 2) | -1.502497 | Inlier |
| siRNA-Temozolomide Run2-DMSO | NM_0024<br>25 | MMP10 | matrix metalloproteinase 10 (stromelysin 2) | -1.069228 | Inlier |
| siRNA-Temozolomide Run1-DMSO | NM_0024<br>25 | MMP10 | matrix metalloproteinase 10 (stromelysin 2) | -0.402746 | Inlier |
| siRNA Disorazole DMSO Run3   | NM_0024<br>25 | MMP10 | matrix metalloproteinase 10 (stromelysin 2) | -0.026342 | Inlier |
| siRNA Disorazole DMSO Run2   | NM_0024<br>25 | MMP10 | matrix metalloproteinase 10 (stromelysin 2) | 0.026342  | Inlier |
| siRNA Disorazole DMSO Run1   | NM_0024<br>25 | MMP10 | matrix metalloproteinase 10 (stromelysin 2) | 0.033325  | Inlier |
| siRNA-Vinblastine Run2-DMSO  | NM_0024<br>25 | MMP10 | matrix metalloproteinase 10 (stromelysin 2) | 0.946254  | Inlier |
| siRNA-Vinblastine Run1-DMSO  | NM_0024<br>25 | MMP10 | matrix metalloproteinase 10 (stromelysin 2) | 1.216937  | Inlier |

Identification of Survival Genes in Human Glioblastoma Cells Using siRNA Screening  
 Nikhil G Thaker, Fang Zhang, Peter R. McDonald, Tong Ying Shun, Michael D Lewen, Ian F. Pollack, and John S. Lazo  
 Molecular Pharmacology

|                              |               |       |                                             |           |        |
|------------------------------|---------------|-------|---------------------------------------------|-----------|--------|
| siRNA-Temozolomide Run3-DMSO | NM_0059<br>40 | MMP11 | matrix metalloproteinase 11 (stromelysin 3) | -2.057319 | Inlier |
| siRNA Disorazole DMSO Run2   | NM_0059<br>40 | MMP11 | matrix metalloproteinase 11 (stromelysin 3) | -1.349337 | Inlier |
| siRNA-Temozolomide Run2-DMSO | NM_0059<br>40 | MMP11 | matrix metalloproteinase 11 (stromelysin 3) | -0.746357 | Inlier |
| siRNA Disorazole DMSO Run1   | NM_0059<br>40 | MMP11 | matrix metalloproteinase 11 (stromelysin 3) | -0.095762 | Inlier |
| siRNA-Temozolomide Run1-DMSO | NM_0059<br>40 | MMP11 | matrix metalloproteinase 11 (stromelysin 3) | 0.095762  | Inlier |
| siRNA Disorazole DMSO Run3   | NM_0059<br>40 | MMP11 | matrix metalloproteinase 11 (stromelysin 3) | 0.572619  | Inlier |
| siRNA-Vinblastine Run2-DMSO  | NM_0059<br>40 | MMP11 | matrix metalloproteinase 11 (stromelysin 3) | 0.602643  | Inlier |
| siRNA-Vinblastine Run1-DMSO  | NM_0059<br>40 | MMP11 | matrix metalloproteinase 11 (stromelysin 3) | 1.318304  | Inlier |

Identification of Survival Genes in Human Glioblastoma Cells Using siRNA Screening  
 Nikhil G Thaker, Fang Zhang, Peter R. McDonald, Tong Ying Shun, Michael D Lewen, Ian F. Pollack, and John S. Lazo  
 Molecular Pharmacology

|                              |               |       |                                                   |           |        |
|------------------------------|---------------|-------|---------------------------------------------------|-----------|--------|
| siRNA-Temozolomide Run3-DMSO | NM_0024<br>26 | MMP12 | matrix metalloproteinase 12 (macrophage elastase) | -3.465892 | Inlier |
| siRNA Disorazole DMSO Run2   | NM_0024<br>26 | MMP12 | matrix metalloproteinase 12 (macrophage elastase) | -0.737905 | Inlier |
| siRNA Disorazole DMSO Run3   | NM_0024<br>26 | MMP12 | matrix metalloproteinase 12 (macrophage elastase) | -0.509007 | Inlier |
| siRNA Disorazole DMSO Run1   | NM_0024<br>26 | MMP12 | matrix metalloproteinase 12 (macrophage elastase) | -0.045821 | Inlier |
| siRNA-Temozolomide Run2-DMSO | NM_0024<br>26 | MMP12 | matrix metalloproteinase 12 (macrophage elastase) | 0.045822  | Inlier |
| siRNA-Temozolomide Run1-DMSO | NM_0024<br>26 | MMP12 | matrix metalloproteinase 12 (macrophage elastase) | 0.611095  | Inlier |
| siRNA-Vinblastine Run2-DMSO  | NM_0024<br>26 | MMP12 | matrix metalloproteinase 12 (macrophage elastase) | 1.955079  | Inlier |

Identification of Survival Genes in Human Glioblastoma Cells Using siRNA Screening  
 Nikhil G Thaker, Fang Zhang, Peter R. McDonald, Tong Ying Shun, Michael D Lewen, Ian F. Pollack, and John S. Lazo  
 Molecular Pharmacology

|                              |               |       |                                                   |           |        |
|------------------------------|---------------|-------|---------------------------------------------------|-----------|--------|
| siRNA-Vinblastine Run1-DMSO  | NM_0024<br>26 | MMP12 | matrix metalloproteinase 12 (macrophage elastase) | 2.786097  | Inlier |
| siRNA-Temozolomide Run3-DMSO | NM_0024<br>27 | MMP13 | matrix metalloproteinase 13 (collagenase 3)       | -1.414936 | Inlier |
| siRNA-Temozolomide Run2-DMSO | NM_0024<br>27 | MMP13 | matrix metalloproteinase 13 (collagenase 3)       | -0.71288  | Inlier |
| siRNA Disorazole DMSO Run2   | NM_0024<br>27 | MMP13 | matrix metalloproteinase 13 (collagenase 3)       | -0.63612  | Inlier |
| siRNA Disorazole DMSO Run1   | NM_0024<br>27 | MMP13 | matrix metalloproteinase 13 (collagenase 3)       | -0.002364 | Inlier |
| siRNA-Temozolomide Run1-DMSO | NM_0024<br>27 | MMP13 | matrix metalloproteinase 13 (collagenase 3)       | 0.002364  | Inlier |
| siRNA Disorazole DMSO Run3   | NM_0024<br>27 | MMP13 | matrix metalloproteinase 13 (collagenase 3)       | 0.055341  | Inlier |
| siRNA-Vinblastine Run1-DMSO  | NM_0024<br>27 | MMP13 | matrix metalloproteinase 13 (collagenase 3)       | 1.084253  | Inlier |

Identification of Survival Genes in Human Glioblastoma Cells Using siRNA Screening  
 Nikhil G Thaker, Fang Zhang, Peter R. McDonald, Tong Ying Shun, Michael D Lewen, Ian F. Pollack, and John S. Lazo  
 Molecular Pharmacology

|                              |               |       |                                                 |           |        |
|------------------------------|---------------|-------|-------------------------------------------------|-----------|--------|
| siRNA-Vinblastine Run2-DMSO  | NM_0024<br>27 | MMP13 | matrix metalloproteinase 13 (collagenase 3)     | 1.358164  | Inlier |
| siRNA-Temozolomide Run3-DMSO | NM_0049<br>95 | MMP14 | matrix metalloproteinase 14 (membrane-inserted) | -1.566511 | Inlier |
| siRNA Disorazole DMSO Run2   | NM_0049<br>95 | MMP14 | matrix metalloproteinase 14 (membrane-inserted) | -0.978245 | Inlier |
| siRNA-Temozolomide Run2-DMSO | NM_0049<br>95 | MMP14 | matrix metalloproteinase 14 (membrane-inserted) | -0.620284 | Inlier |
| siRNA Disorazole DMSO Run3   | NM_0049<br>95 | MMP14 | matrix metalloproteinase 14 (membrane-inserted) | -0.186525 | Inlier |
| siRNA-Temozolomide Run1-DMSO | NM_0049<br>95 | MMP14 | matrix metalloproteinase 14 (membrane-inserted) | 0.186525  | Inlier |
| siRNA Disorazole DMSO Run1   | NM_0049<br>95 | MMP14 | matrix metalloproteinase 14 (membrane-inserted) | 0.620104  | Inlier |



Identification of Survival Genes in Human Glioblastoma Cells Using siRNA Screening  
 Nikhil G Thaker, Fang Zhang, Peter R. McDonald, Tong Ying Shun, Michael D Lewen, Ian F. Pollack, and John S. Lazo  
 Molecular Pharmacology

|                              |           |       |                                                 |           |        |
|------------------------------|-----------|-------|-------------------------------------------------|-----------|--------|
| siRNA-Vinblastine Run2-DMSO  | NM_004995 | MMP14 | matrix metalloproteinase 14 (membrane-inserted) | 0.728716  | Inlier |
| siRNA-Vinblastine Run1-DMSO  | NM_004995 | MMP14 | matrix metalloproteinase 14 (membrane-inserted) | 1.087872  | Inlier |
| siRNA-Temozolomide Run3-DMSO | NM_002428 | MMP15 | matrix metalloproteinase 15 (membrane-inserted) | -2.664169 | Inlier |
| siRNA Disorazole DMSO Run2   | NM_002428 | MMP15 | matrix metalloproteinase 15 (membrane-inserted) | -0.843729 | Inlier |
| siRNA-Temozolomide Run2-DMSO | NM_002428 | MMP15 | matrix metalloproteinase 15 (membrane-inserted) | -0.376089 | Inlier |
| siRNA Disorazole DMSO Run3   | NM_002428 | MMP15 | matrix metalloproteinase 15 (membrane-inserted) | -0.195285 | Inlier |
| siRNA-Temozolomide Run1-DMSO | NM_002428 | MMP15 | matrix metalloproteinase 15 (membrane-inserted) | 0.195284  | Inlier |

Identification of Survival Genes in Human Glioblastoma Cells Using siRNA Screening  
 Nikhil G Thaker, Fang Zhang, Peter R. McDonald, Tong Ying Shun, Michael D Lewen, Ian F. Pollack, and John S. Lazo  
 Molecular Pharmacology

|                              |               |       |                                                 |           |         |
|------------------------------|---------------|-------|-------------------------------------------------|-----------|---------|
| siRNA Disorazole DMSO Run1   | NM_0024<br>28 | MMP15 | matrix metalloproteinase 15 (membrane-inserted) | 0.505271  | Inlier  |
| siRNA-Vinblastine Run2-DMSO  | NM_0024<br>28 | MMP15 | matrix metalloproteinase 15 (membrane-inserted) | 1.607822  | Inlier  |
| siRNA-Vinblastine Run1-DMSO  | NM_0024<br>28 | MMP15 | matrix metalloproteinase 15 (membrane-inserted) | 2.463435  | Inlier  |
| siRNA Disorazole DMSO Run2   | NM_0225<br>64 | MMP16 | matrix metalloproteinase 16 (membrane-inserted) | -5.953117 | Outlier |
| siRNA-Temozolomide Run3-DMSO | NM_0225<br>64 | MMP16 | matrix metalloproteinase 16 (membrane-inserted) | -4.324703 | Outlier |
| siRNA Disorazole DMSO Run3   | NM_0225<br>64 | MMP16 | matrix metalloproteinase 16 (membrane-inserted) | -3.248355 | Inlier  |
| siRNA Disorazole DMSO Run1   | NM_0225<br>64 | MMP16 | matrix metalloproteinase 16 (membrane-inserted) | -0.050814 | Inlier  |

Identification of Survival Genes in Human Glioblastoma Cells Using siRNA Screening  
 Nikhil G Thaker, Fang Zhang, Peter R. McDonald, Tong Ying Shun, Michael D Lewen, Ian F. Pollack, and John S. Lazo  
 Molecular Pharmacology

|                              |           |       |                                                 |           |        |
|------------------------------|-----------|-------|-------------------------------------------------|-----------|--------|
| siRNA-Temozolomide Run2-DMSO | NM_022564 | MMP16 | matrix metalloproteinase 16 (membrane-inserted) | 0.050815  | Inlier |
| siRNA-Temozolomide Run1-DMSO | NM_022564 | MMP16 | matrix metalloproteinase 16 (membrane-inserted) | 0.125701  | Inlier |
| siRNA-Vinblastine Run2-DMSO  | NM_022564 | MMP16 | matrix metalloproteinase 16 (membrane-inserted) | 0.258992  | Inlier |
| siRNA-Vinblastine Run1-DMSO  | NM_022564 | MMP16 | matrix metalloproteinase 16 (membrane-inserted) | 1.090008  | Inlier |
| siRNA Disorazole DMSO Run2   | NM_016155 | MMP17 | matrix metalloproteinase 17 (membrane-inserted) | -1.28212  | Inlier |
| siRNA-Temozolomide Run3-DMSO | NM_016155 | MMP17 | matrix metalloproteinase 17 (membrane-inserted) | -1.118016 | Inlier |
| siRNA-Temozolomide Run2-DMSO | NM_016155 | MMP17 | matrix metalloproteinase 17 (membrane-inserted) | -0.742824 | Inlier |

Identification of Survival Genes in Human Glioblastoma Cells Using siRNA Screening  
 Nikhil G Thaker, Fang Zhang, Peter R. McDonald, Tong Ying Shun, Michael D Lewen, Ian F. Pollack, and John S. Lazo  
 Molecular Pharmacology

|                              |               |       |                                                 |           |        |
|------------------------------|---------------|-------|-------------------------------------------------|-----------|--------|
| siRNA Disorazole DMSO Run3   | NM_0161<br>55 | MMP17 | matrix metalloproteinase 17 (membrane-inserted) | -0.040099 | Inlier |
| siRNA-Temozolomide Run1-DMSO | NM_0161<br>55 | MMP17 | matrix metalloproteinase 17 (membrane-inserted) | 0.040099  | Inlier |
| siRNA Disorazole DMSO Run1   | NM_0161<br>55 | MMP17 | matrix metalloproteinase 17 (membrane-inserted) | 0.126217  | Inlier |
| siRNA-Vinblastine Run2-DMSO  | NM_0161<br>55 | MMP17 | matrix metalloproteinase 17 (membrane-inserted) | 0.606176  | Inlier |
| siRNA-Vinblastine Run1-DMSO  | NM_0161<br>55 | MMP17 | matrix metalloproteinase 17 (membrane-inserted) | 0.756383  | Inlier |
| siRNA-Temozolomide Run3-DMSO | NM_0227<br>92 | MMP19 | matrix metalloproteinase 19                     | -1.196352 | Inlier |
| siRNA-Temozolomide Run2-DMSO | NM_0227<br>92 | MMP19 | matrix metalloproteinase 19                     | -0.657493 | Inlier |
| siRNA Disorazole DMSO Run3   | NM_0227<br>92 | MMP19 | matrix metalloproteinase 19                     | -0.518391 | Inlier |
| siRNA Disorazole DMSO Run2   | NM_0227<br>92 | MMP19 | matrix metalloproteinase 19                     | -0.32367  | Inlier |

Identification of Survival Genes in Human Glioblastoma Cells Using siRNA Screening  
 Nikhil G Thaker, Fang Zhang, Peter R. McDonald, Tong Ying Shun, Michael D Lewen, Ian F. Pollack, and John S. Lazo  
 Molecular Pharmacology

|                              |               |       |                                                                                        |           |        |
|------------------------------|---------------|-------|----------------------------------------------------------------------------------------|-----------|--------|
| siRNA Disorazole DMSO Run1   | NM_0227<br>92 | MMP19 | matrix metalloproteinase 19                                                            | 0.32367   | Inlier |
| siRNA-Temozolomide Run1-DMSO | NM_0227<br>92 | MMP19 | matrix metalloproteinase 19                                                            | 0.691507  | Inlier |
| siRNA-Vinblastine Run1-DMSO  | NM_0227<br>92 | MMP19 | matrix metalloproteinase 19                                                            | 1.272675  | Inlier |
| siRNA-Vinblastine Run2-DMSO  | NM_0227<br>92 | MMP19 | matrix metalloproteinase 19                                                            | 1.401618  | Inlier |
| siRNA-Temozolomide Run3-DMSO | NM_0045<br>30 | MMP2  | matrix metalloproteinase 2 (gelatinase A, 72kDa gelatinase, 72kDa type IV collagenase) | -0.945469 | Inlier |
| siRNA-Temozolomide Run2-DMSO | NM_0045<br>30 | MMP2  | matrix metalloproteinase 2 (gelatinase A, 72kDa gelatinase, 72kDa type IV collagenase) | -0.83693  | Inlier |
| siRNA Disorazole DMSO Run3   | NM_0045<br>30 | MMP2  | matrix metalloproteinase 2 (gelatinase A, 72kDa gelatinase, 72kDa type IV collagenase) | -0.51207  | Inlier |

Identification of Survival Genes in Human Glioblastoma Cells Using siRNA Screening

Nikhil G Thaker, Fang Zhang, Peter R. McDonald, Tong Ying Shun, Michael D Lewen, Ian F. Pollack, and John S.

Lazo

Molecular Pharmacology

|                              |         |      |                                                                                        |           |        |
|------------------------------|---------|------|----------------------------------------------------------------------------------------|-----------|--------|
| siRNA Disorazole DMSO Run2   | NM_0045 | MMP2 | matrix metalloproteinase 2 (gelatinase A, 72kDa gelatinase, 72kDa type IV collagenase) | -0.195259 | Inlier |
| siRNA-Temozolomide Run1-DMSO | NM_0045 | MMP2 | matrix metalloproteinase 2 (gelatinase A, 72kDa gelatinase, 72kDa type IV collagenase) | 0.195259  | Inlier |
| siRNA Disorazole DMSO Run1   | NM_0045 | MMP2 | matrix metalloproteinase 2 (gelatinase A, 72kDa gelatinase, 72kDa type IV collagenase) | 0.241195  | Inlier |
| siRNA-Vinblastine Run1-DMSO  | NM_0045 | MMP2 | matrix metalloproteinase 2 (gelatinase A, 72kDa gelatinase, 72kDa type IV collagenase) | 1.003104  | Inlier |

Identification of Survival Genes in Human Glioblastoma Cells Using siRNA Screening  
 Nikhil G Thaker, Fang Zhang, Peter R. McDonald, Tong Ying Shun, Michael D Lewen, Ian F. Pollack, and John S. Lazo  
 Molecular Pharmacology

|                              |           |       |                                                                                        |           |        |
|------------------------------|-----------|-------|----------------------------------------------------------------------------------------|-----------|--------|
| siRNA-Vinblastine Run2-DMSO  | NM_004530 | MMP2  | matrix metalloproteinase 2 (gelatinase A, 72kDa gelatinase, 72kDa type IV collagenase) | 1.097272  | Inlier |
| siRNA-Temozolomide Run3-DMSO | NM_004771 | MMP20 | matrix metalloproteinase 20 (enamelysin)                                               | -1.209782 | Inlier |
| siRNA Disorazole DMSO Run2   | NM_004771 | MMP20 | matrix metalloproteinase 20 (enamelysin)                                               | -1.087976 | Inlier |
| siRNA Disorazole DMSO Run1   | NM_004771 | MMP20 | matrix metalloproteinase 20 (enamelysin)                                               | -0.444987 | Inlier |
| siRNA-Temozolomide Run2-DMSO | NM_004771 | MMP20 | matrix metalloproteinase 20 (enamelysin)                                               | -0.04294  | Inlier |
| siRNA-Temozolomide Run1-DMSO | NM_004771 | MMP20 | matrix metalloproteinase 20 (enamelysin)                                               | 0.04294   | Inlier |
| siRNA-Vinblastine Run1-DMSO  | NM_004771 | MMP20 | matrix metalloproteinase 20 (enamelysin)                                               | 0.666448  | Inlier |

Identification of Survival Genes in Human Glioblastoma Cells Using siRNA Screening  
 Nikhil G Thaker, Fang Zhang, Peter R. McDonald, Tong Ying Shun, Michael D Lewen, Ian F. Pollack, and John S. Lazo  
 Molecular Pharmacology

|                              |               |        |                                          |           |        |
|------------------------------|---------------|--------|------------------------------------------|-----------|--------|
| siRNA Disorazole DMSO Run3   | NM_0047<br>71 | MMP20  | matrix metalloproteinase 20 (enamelysin) | 0.682552  | Inlier |
| siRNA-Vinblastine Run2-DMSO  | NM_0047<br>71 | MMP20  | matrix metalloproteinase 20 (enamelysin) | 0.964745  | Inlier |
| siRNA Disorazole DMSO Run2   | NM_1471<br>91 | MMP21  | matrix metalloproteinase 21              | -2.139375 | Inlier |
| siRNA-Temozolomide Run3-DMSO | NM_1471<br>91 | MMP21  | matrix metalloproteinase 21              | -0.654963 | Inlier |
| siRNA-Temozolomide Run2-DMSO | NM_1471<br>91 | MMP21  | matrix metalloproteinase 21              | -0.236694 | Inlier |
| siRNA Disorazole DMSO Run1   | NM_1471<br>91 | MMP21  | matrix metalloproteinase 21              | -0.196684 | Inlier |
| siRNA-Temozolomide Run1-DMSO | NM_1471<br>91 | MMP21  | matrix metalloproteinase 21              | 0.196684  | Inlier |
| siRNA Disorazole DMSO Run3   | NM_1471<br>91 | MMP21  | matrix metalloproteinase 21              | 0.694037  | Inlier |
| siRNA-Vinblastine Run1-DMSO  | NM_1471<br>91 | MMP21  | matrix metalloproteinase 21              | 0.749557  | Inlier |
| siRNA-Vinblastine Run2-DMSO  | NM_1471<br>91 | MMP21  | matrix metalloproteinase 21              | 1.13683   | Inlier |
| siRNA-Temozolomide Run3-DMSO | NM_0046<br>59 | MMP23A | matrix metalloproteinase 23A             | -1.663334 | Inlier |
| siRNA-Temozolomide Run2-DMSO | NM_0046<br>59 | MMP23A | matrix metalloproteinase 23A             | -1.22554  | Inlier |



Identification of Survival Genes in Human Glioblastoma Cells Using siRNA Screening  
 Nikhil G Thaker, Fang Zhang, Peter R. McDonald, Tong Ying Shun, Michael D Lewen, Ian F. Pollack, and John S. Lazo

Molecular Pharmacology

|                              |               |        |                              |           |        |
|------------------------------|---------------|--------|------------------------------|-----------|--------|
| siRNA Disorazole DMSO Run2   | NM_0046<br>59 | MMP23A | matrix metalloproteinase 23A | -0.38586  | Inlier |
| siRNA-Temozolomide Run1-DMSO | NM_0046<br>59 | MMP23A | matrix metalloproteinase 23A | -0.232229 | Inlier |
| siRNA Disorazole DMSO Run1   | NM_0046<br>59 | MMP23A | matrix metalloproteinase 23A | 0.232229  | Inlier |
| siRNA Disorazole DMSO Run3   | NM_0046<br>59 | MMP23A | matrix metalloproteinase 23A | 0.422855  | Inlier |
| siRNA-Vinblastine Run1-DMSO  | NM_0046<br>59 | MMP23A | matrix metalloproteinase 23A | 0.926145  | Inlier |
| siRNA-Vinblastine Run2-DMSO  | NM_0046<br>59 | MMP23A | matrix metalloproteinase 23A | 0.927588  | Inlier |
| siRNA-Temozolomide Run3-DMSO | NM_0069<br>83 | MMP23B | matrix metalloproteinase 23B | -1.630738 | Inlier |
| siRNA-Temozolomide Run2-DMSO | NM_0069<br>83 | MMP23B | matrix metalloproteinase 23B | -1.277846 | Inlier |
| siRNA Disorazole DMSO Run1   | NM_0069<br>83 | MMP23B | matrix metalloproteinase 23B | -0.479545 | Inlier |
| siRNA-Temozolomide Run1-DMSO | NM_0069<br>83 | MMP23B | matrix metalloproteinase 23B | -0.121133 | Inlier |
| siRNA Disorazole DMSO Run2   | NM_0069<br>83 | MMP23B | matrix metalloproteinase 23B | 0.121133  | Inlier |
| siRNA-Vinblastine Run2-DMSO  | NM_0069<br>83 | MMP23B | matrix metalloproteinase 23B | 0.38407   | Inlier |
| siRNA-Vinblastine Run1-DMSO  | NM_0069<br>83 | MMP23B | matrix metalloproteinase 23B | 0.869455  | Inlier |

Identification of Survival Genes in Human Glioblastoma Cells Using siRNA Screening  
 Nikhil G Thaker, Fang Zhang, Peter R. McDonald, Tong Ying Shun, Michael D Lewen, Ian F. Pollack, and John S. Lazo

Molecular Pharmacology

|                              |               |        |                                                 |           |        |
|------------------------------|---------------|--------|-------------------------------------------------|-----------|--------|
| siRNA Disorazole DMSO Run3   | NM_0069<br>83 | MMP23B | matrix metalloproteinase 23B                    | 1.202515  | Inlier |
| siRNA-Temozolomide Run3-DMSO | NM_0066<br>90 | MMP24  | matrix metalloproteinase 24 (membrane-inserted) | -1.21795  | Inlier |
| siRNA-Temozolomide Run2-DMSO | NM_0066<br>90 | MMP24  | matrix metalloproteinase 24 (membrane-inserted) | -0.960922 | Inlier |
| siRNA-Temozolomide Run1-DMSO | NM_0066<br>90 | MMP24  | matrix metalloproteinase 24 (membrane-inserted) | -0.114549 | Inlier |
| siRNA Disorazole DMSO Run3   | NM_0066<br>90 | MMP24  | matrix metalloproteinase 24 (membrane-inserted) | -0.026036 | Inlier |
| siRNA Disorazole DMSO Run1   | NM_0066<br>90 | MMP24  | matrix metalloproteinase 24 (membrane-inserted) | 0.026036  | Inlier |
| siRNA Disorazole DMSO Run2   | NM_0066<br>90 | MMP24  | matrix metalloproteinase 24 (membrane-inserted) | 0.457276  | Inlier |

Identification of Survival Genes in Human Glioblastoma Cells Using siRNA Screening  
 Nikhil G Thaker, Fang Zhang, Peter R. McDonald, Tong Ying Shun, Michael D Lewen, Ian F. Pollack, and John S. Lazo  
 Molecular Pharmacology

|                              |           |       |                                                 |           |        |
|------------------------------|-----------|-------|-------------------------------------------------|-----------|--------|
| siRNA-Vinblastine Run2-DMSO  | NM_006690 | MMP24 | matrix metalloproteinase 24 (membrane-inserted) | 0.891724  | Inlier |
| siRNA-Vinblastine Run1-DMSO  | NM_006690 | MMP24 | matrix metalloproteinase 24 (membrane-inserted) | 1.180274  | Inlier |
| siRNA-Temozolomide Run2-DMSO | NM_022718 | MMP25 | matrix metalloproteinase 25                     | -1.09197  | Inlier |
| siRNA-Temozolomide Run3-DMSO | NM_022718 | MMP25 | matrix metalloproteinase 25                     | -0.972442 | Inlier |
| siRNA Disorazole DMSO Run1   | NM_022718 | MMP25 | matrix metalloproteinase 25                     | -0.636721 | Inlier |
| siRNA-Temozolomide Run1-DMSO | NM_022718 | MMP25 | matrix metalloproteinase 25                     | -0.077695 | Inlier |
| siRNA Disorazole DMSO Run2   | NM_022718 | MMP25 | matrix metalloproteinase 25                     | 0.077695  | Inlier |
| siRNA-Vinblastine Run2-DMSO  | NM_022718 | MMP25 | matrix metalloproteinase 25                     | 0.483504  | Inlier |
| siRNA-Vinblastine Run1-DMSO  | NM_022718 | MMP25 | matrix metalloproteinase 25                     | 0.712279  | Inlier |
| siRNA Disorazole DMSO Run3   | NM_022718 | MMP25 | matrix metalloproteinase 25                     | 1.314016  | Inlier |
| siRNA-Temozolomide Run3-DMSO | NM_021801 | MMP26 | matrix metalloproteinase 26                     | -1.418316 | Inlier |

Identification of Survival Genes in Human Glioblastoma Cells Using siRNA Screening  
 Nikhil G Thaker, Fang Zhang, Peter R. McDonald, Tong Ying Shun, Michael D Lewen, Ian F. Pollack, and John S. Lazo

Molecular Pharmacology

|                              |               |       |                                    |           |        |
|------------------------------|---------------|-------|------------------------------------|-----------|--------|
| siRNA-Temozolomide Run2-DMSO | NM_0218<br>01 | MMP26 | matrix<br>metallopro<br>teinase 26 | -0.680498 | Inlier |
| siRNA-Temozolomide Run1-DMSO | NM_0218<br>01 | MMP26 | matrix<br>metallopro<br>teinase 26 | -0.668502 | Inlier |
| siRNA Disorazole DMSO Run1   | NM_0218<br>01 | MMP26 | matrix<br>metallopro<br>teinase 26 | -0.537469 | Inlier |
| siRNA-Vinblastine Run2-DMSO  | NM_0218<br>01 | MMP26 | matrix<br>metallopro<br>teinase 26 | 0.537469  | Inlier |
| siRNA-Vinblastine Run1-DMSO  | NM_0218<br>01 | MMP26 | matrix<br>metallopro<br>teinase 26 | 0.596191  | Inlier |
| siRNA Disorazole DMSO Run3   | NM_0218<br>01 | MMP26 | matrix<br>metallopro<br>teinase 26 | 0.871094  | Inlier |
| siRNA Disorazole DMSO Run2   | NM_0218<br>01 | MMP26 | matrix<br>metallopro<br>teinase 26 | 1.196985  | Inlier |
| siRNA-Temozolomide Run3-DMSO | NM_0221<br>22 | MMP27 | matrix<br>metallopro<br>teinase 27 | -2.054507 | Inlier |
| siRNA-Temozolomide Run2-DMSO | NM_0221<br>22 | MMP27 | matrix<br>metallopro<br>teinase 27 | -0.781805 | Inlier |
| siRNA-Temozolomide Run1-DMSO | NM_0221<br>22 | MMP27 | matrix<br>metallopro<br>teinase 27 | -0.406522 | Inlier |
| siRNA Disorazole DMSO Run1   | NM_0221<br>22 | MMP27 | matrix<br>metallopro<br>teinase 27 | -0.363564 | Inlier |
| siRNA Disorazole DMSO Run3   | NM_0221<br>22 | MMP27 | matrix<br>metallopro<br>teinase 27 | 0.363564  | Inlier |
| siRNA-Vinblastine Run2-DMSO  | NM_0221<br>22 | MMP27 | matrix<br>metallopro<br>teinase 27 | 0.567195  | Inlier |

Identification of Survival Genes in Human Glioblastoma Cells Using siRNA Screening  
 Nikhil G Thaker, Fang Zhang, Peter R. McDonald, Tong Ying Shun, Michael D Lewen, Ian F. Pollack, and John S. Lazo

Molecular Pharmacology

|                              |               |       |                                                           |           |        |
|------------------------------|---------------|-------|-----------------------------------------------------------|-----------|--------|
| siRNA-Vinblastine Run1-DMSO  | NM_0221<br>22 | MMP27 | matrix metalloproteinase 27                               | 1.530945  | Inlier |
| siRNA Disorazole DMSO Run2   | NM_0221<br>22 | MMP27 | matrix metalloproteinase 27                               | 2.78581   | Inlier |
| siRNA-Temozolomide Run3-DMSO | NM_0329<br>50 | MMP28 | matrix metalloproteinase 28                               | -1.20628  | Inlier |
| siRNA-Temozolomide Run2-DMSO | NM_0329<br>50 | MMP28 | matrix metalloproteinase 28                               | -0.934389 | Inlier |
| siRNA Disorazole DMSO Run1   | NM_0329<br>50 | MMP28 | matrix metalloproteinase 28                               | -0.380957 | Inlier |
| siRNA-Temozolomide Run1-DMSO | NM_0329<br>50 | MMP28 | matrix metalloproteinase 28                               | -0.27299  | Inlier |
| siRNA Disorazole DMSO Run2   | NM_0329<br>50 | MMP28 | matrix metalloproteinase 28                               | 0.27299   | Inlier |
| siRNA-Vinblastine Run2-DMSO  | NM_0329<br>50 | MMP28 | matrix metalloproteinase 28                               | 0.585658  | Inlier |
| siRNA Disorazole DMSO Run3   | NM_0329<br>50 | MMP28 | matrix metalloproteinase 28                               | 0.763342  | Inlier |
| siRNA-Vinblastine Run1-DMSO  | NM_0329<br>50 | MMP28 | matrix metalloproteinase 28                               | 0.875393  | Inlier |
| siRNA-Temozolomide Run3-DMSO | NM_0024<br>22 | MMP3  | matrix metalloproteinase 3 (stromelysin 1, progelatinase) | -1.118546 | Inlier |

Identification of Survival Genes in Human Glioblastoma Cells Using siRNA Screening

Nikhil G Thaker, Fang Zhang, Peter R. McDonald, Tong Ying Shun, Michael D Lewen, Ian F. Pollack, and John S. Lazo

Molecular Pharmacology

|                              |           |      |                                                           |           |        |
|------------------------------|-----------|------|-----------------------------------------------------------|-----------|--------|
| siRNA-Temozolomide Run2-DMSO | NM_002422 | MMP3 | matrix metalloproteinase 3 (stromelysin 1, progelatinase) | -0.932299 | Inlier |
| siRNA Disorazole DMSO Run1   | NM_002422 | MMP3 | matrix metalloproteinase 3 (stromelysin 1, progelatinase) | -0.553675 | Inlier |
| siRNA-Temozolomide Run1-DMSO | NM_002422 | MMP3 | matrix metalloproteinase 3 (stromelysin 1, progelatinase) | -0.368132 | Inlier |
| siRNA Disorazole DMSO Run3   | NM_002422 | MMP3 | matrix metalloproteinase 3 (stromelysin 1, progelatinase) | 0.368132  | Inlier |
| siRNA-Vinblastine Run2-DMSO  | NM_002422 | MMP3 | matrix metalloproteinase 3 (stromelysin 1, progelatinase) | 0.631519  | Inlier |
| siRNA-Vinblastine Run1-DMSO  | NM_002422 | MMP3 | matrix metalloproteinase 3 (stromelysin 1, progelatinase) | 0.717481  | Inlier |

Identification of Survival Genes in Human Glioblastoma Cells Using siRNA Screening

Nikhil G Thaker, Fang Zhang, Peter R. McDonald, Tong Ying Shun, Michael D Lewen, Ian F. Pollack, and John S. Lazo

Molecular Pharmacology

|                              |               |      |                                                           |           |        |
|------------------------------|---------------|------|-----------------------------------------------------------|-----------|--------|
| siRNA Disorazole DMSO Run2   | NM_0024<br>22 | MMP3 | matrix metalloproteinase 3 (stromelysin 1, progelatinase) | 0.889655  | Inlier |
| siRNA-Temozolomide Run3-DMSO | NM_0024<br>23 | MMP7 | matrix metalloproteinase 7 (matrilysin, uterine)          | -0.801971 | Inlier |
| siRNA-Temozolomide Run2-DMSO | NM_0024<br>23 | MMP7 | matrix metalloproteinase 7 (matrilysin, uterine)          | -0.690202 | Inlier |
| siRNA Disorazole DMSO Run1   | NM_0024<br>23 | MMP7 | matrix metalloproteinase 7 (matrilysin, uterine)          | -0.099217 | Inlier |
| siRNA Disorazole DMSO Run3   | NM_0024<br>23 | MMP7 | matrix metalloproteinase 7 (matrilysin, uterine)          | -0.034008 | Inlier |
| siRNA-Temozolomide Run1-DMSO | NM_0024<br>23 | MMP7 | matrix metalloproteinase 7 (matrilysin, uterine)          | 0.034008  | Inlier |
| siRNA-Vinblastine Run2-DMSO  | NM_0024<br>23 | MMP7 | matrix metalloproteinase 7 (matrilysin, uterine)          | 0.658798  | Inlier |
| siRNA-Vinblastine Run1-DMSO  | NM_0024<br>23 | MMP7 | matrix metalloproteinase 7 (matrilysin, uterine)          | 0.800388  | Inlier |

Identification of Survival Genes in Human Glioblastoma Cells Using siRNA Screening  
 Nikhil G Thaker, Fang Zhang, Peter R. McDonald, Tong Ying Shun, Michael D Lewen, Ian F. Pollack, and John S. Lazo  
 Molecular Pharmacology

|                              |               |      |                                                     |           |        |
|------------------------------|---------------|------|-----------------------------------------------------|-----------|--------|
| siRNA Disorazole DMSO Run2   | NM_0024<br>23 | MMP7 | matrix metalloproteinase 7 (matrilysin, uterine)    | 1.258502  | Inlier |
| siRNA-Temozolomide Run3-DMSO | NM_0024<br>24 | MMP8 | matrix metalloproteinase 8 (neutrophil collagenase) | -1.05227  | Inlier |
| siRNA-Temozolomide Run2-DMSO | NM_0024<br>24 | MMP8 | matrix metalloproteinase 8 (neutrophil collagenase) | -0.725706 | Inlier |
| siRNA Disorazole DMSO Run1   | NM_0024<br>24 | MMP8 | matrix metalloproteinase 8 (neutrophil collagenase) | -0.341766 | Inlier |
| siRNA Disorazole DMSO Run2   | NM_0024<br>24 | MMP8 | matrix metalloproteinase 8 (neutrophil collagenase) | -0.087297 | Inlier |
| siRNA-Temozolomide Run1-DMSO | NM_0024<br>24 | MMP8 | matrix metalloproteinase 8 (neutrophil collagenase) | 0.087298  | Inlier |



Identification of Survival Genes in Human Glioblastoma Cells Using siRNA Screening

Nikhil G Thaker, Fang Zhang, Peter R. McDonald, Tong Ying Shun, Michael D Lewen, Ian F. Pollack, and John S. Lazo

Molecular Pharmacology

|                              |               |      |                                                                                        |           |        |
|------------------------------|---------------|------|----------------------------------------------------------------------------------------|-----------|--------|
| siRNA Disorazole DMSO Run3   | NM_0024<br>24 | MMP8 | matrix metalloproteinase 8 (neutrophil collagenase)                                    | 0.623294  | Inlier |
| siRNA-Vinblastine Run2-DMSO  | NM_0024<br>24 | MMP8 | matrix metalloproteinase 8 (neutrophil collagenase)                                    | 0.833701  | Inlier |
| siRNA-Vinblastine Run1-DMSO  | NM_0024<br>24 | MMP8 | matrix metalloproteinase 8 (neutrophil collagenase)                                    | 0.936828  | Inlier |
| siRNA Disorazole DMSO Run1   | NM_0049<br>94 | MMP9 | matrix metalloproteinase 9 (gelatinase B, 92kDa gelatinase, 92kDa type IV collagenase) | -1.631812 | Inlier |
| siRNA-Temozolomide Run3-DMSO | NM_0049<br>94 | MMP9 | matrix metalloproteinase 9 (gelatinase B, 92kDa gelatinase, 92kDa type IV collagenase) | -0.99237  | Inlier |

Identification of Survival Genes in Human Glioblastoma Cells Using siRNA Screening  
 Nikhil G Thaker, Fang Zhang, Peter R. McDonald, Tong Ying Shun, Michael D Lewen, Ian F. Pollack, and John S. Lazo  
 Molecular Pharmacology

|                              |               |      |                                                                                        |           |        |
|------------------------------|---------------|------|----------------------------------------------------------------------------------------|-----------|--------|
| siRNA Disorazole DMSO Run2   | NM_0049<br>94 | MMP9 | matrix metalloproteinase 9 (gelatinase B, 92kDa gelatinase, 92kDa type IV collagenase) | -0.373917 | Inlier |
| siRNA-Temozolomide Run2-DMSO | NM_0049<br>94 | MMP9 | matrix metalloproteinase 9 (gelatinase B, 92kDa gelatinase, 92kDa type IV collagenase) | -0.241834 | Inlier |
| siRNA-Temozolomide Run1-DMSO | NM_0049<br>94 | MMP9 | matrix metalloproteinase 9 (gelatinase B, 92kDa gelatinase, 92kDa type IV collagenase) | 0.241834  | Inlier |
| siRNA-Vinblastine Run2-DMSO  | NM_0049<br>94 | MMP9 | matrix metalloproteinase 9 (gelatinase B, 92kDa gelatinase, 92kDa type IV collagenase) | 0.519415  | Inlier |

Identification of Survival Genes in Human Glioblastoma Cells Using siRNA Screening  
 Nikhil G Thaker, Fang Zhang, Peter R. McDonald, Tong Ying Shun, Michael D Lewen, Ian F. Pollack, and John S. Lazo  
 Molecular Pharmacology

|                              |           |       |                                                                                        |           |        |
|------------------------------|-----------|-------|----------------------------------------------------------------------------------------|-----------|--------|
| siRNA-Vinblastine Run1-DMSO  | NM_004994 | MMP9  | matrix metalloproteinase 9 (gelatinase B, 92kDa gelatinase, 92kDa type IV collagenase) | 0.829585  | Inlier |
| siRNA Disorazole DMSO Run3   | NM_004994 | MMP9  | matrix metalloproteinase 9 (gelatinase B, 92kDa gelatinase, 92kDa type IV collagenase) | 2.306507  | Inlier |
| siRNA-Temozolomide Run3-DMSO | NM_004142 | MMPL1 | matrix metalloproteinase-like 1                                                        | -1.764207 | Inlier |
| siRNA-Temozolomide Run2-DMSO | NM_004142 | MMPL1 | matrix metalloproteinase-like 1                                                        | -1.436967 | Inlier |
| siRNA Disorazole DMSO Run1   | NM_004142 | MMPL1 | matrix metalloproteinase-like 1                                                        | -0.43801  | Inlier |
| siRNA-Temozolomide Run1-DMSO | NM_004142 | MMPL1 | matrix metalloproteinase-like 1                                                        | -0.33457  | Inlier |
| siRNA Disorazole DMSO Run3   | NM_004142 | MMPL1 | matrix metalloproteinase-like 1                                                        | 0.334571  | Inlier |
| siRNA Disorazole DMSO Run2   | NM_004142 | MMPL1 | matrix metalloproteinase-like 1                                                        | 0.462989  | Inlier |
| siRNA-Vinblastine Run1-DMSO  | NM_004142 | MMPL1 | matrix metalloproteinase-like 1                                                        | 0.886011  | Inlier |

Identification of Survival Genes in Human Glioblastoma Cells Using siRNA Screening

Nikhil G Thaker, Fang Zhang, Peter R. McDonald, Tong Ying Shun, Michael D Lewen, Ian F. Pollack, and John S. Lazo

Molecular Pharmacology

|                              |               |        |                                           |           |        |
|------------------------------|---------------|--------|-------------------------------------------|-----------|--------|
| siRNA-Vinblastine Run2-DMSO  | NM_0041<br>42 | MMPL1  | matrix metalloproteinase-like 1           | 1.244839  | Inlier |
| siRNA-Temozolomide Run3-DMSO | NM_0223<br>62 | MMS19L | MMS19-like (MET18 homolog, S. cerevisiae) | -1.124286 | Inlier |
| siRNA-Temozolomide Run1-DMSO | NM_0223<br>62 | MMS19L | MMS19-like (MET18 homolog, S. cerevisiae) | -1.088971 | Inlier |
| siRNA Disorazole DMSO Run3   | NM_0223<br>62 | MMS19L | MMS19-like (MET18 homolog, S. cerevisiae) | -0.797721 | Inlier |
| siRNA-Temozolomide Run2-DMSO | NM_0223<br>62 | MMS19L | MMS19-like (MET18 homolog, S. cerevisiae) | -0.117096 | Inlier |
| siRNA Disorazole DMSO Run1   | NM_0223<br>62 | MMS19L | MMS19-like (MET18 homolog, S. cerevisiae) | 0.117096  | Inlier |
| siRNA Disorazole DMSO Run2   | NM_0223<br>62 | MMS19L | MMS19-like (MET18 homolog, S. cerevisiae) | 0.146821  | Inlier |

Identification of Survival Genes in Human Glioblastoma Cells Using siRNA Screening

Nikhil G Thaker, Fang Zhang, Peter R. McDonald, Tong Ying Shun, Michael D Lewen, Ian F. Pollack, and John S. Lazo

Molecular Pharmacology

|                              |           |        |                                           |           |        |
|------------------------------|-----------|--------|-------------------------------------------|-----------|--------|
| siRNA-Vinblastine Run1-DMSO  | NM_022362 | MMS19L | MMS19-like (MET18 homolog, S. cerevisiae) | 0.551279  | Inlier |
| siRNA-Vinblastine Run2-DMSO  | NM_022362 | MMS19L | MMS19-like (MET18 homolog, S. cerevisiae) | 0.941769  | Inlier |
| siRNA-Vinblastine Run2-DMSO  | NM_014484 | MOCS3  | molybdenum cofactor synthesis 3           | -1.145855 | Inlier |
| siRNA Disorazole DMSO Run3   | NM_014484 | MOCS3  | molybdenum cofactor synthesis 3           | -0.84097  | Inlier |
| siRNA Disorazole DMSO Run1   | NM_014484 | MOCS3  | molybdenum cofactor synthesis 3           | -0.638073 | Inlier |
| siRNA-Temozolomide Run2-DMSO | NM_014484 | MOCS3  | molybdenum cofactor synthesis 3           | -0.060659 | Inlier |
| siRNA-Temozolomide Run3-DMSO | NM_014484 | MOCS3  | molybdenum cofactor synthesis 3           | 0.060659  | Inlier |
| siRNA Disorazole DMSO Run2   | NM_014484 | MOCS3  | molybdenum cofactor synthesis 3           | 0.555519  | Inlier |
| siRNA-Temozolomide Run1-DMSO | NM_014484 | MOCS3  | molybdenum cofactor synthesis 3           | 0.710927  | Inlier |

Identification of Survival Genes in Human Glioblastoma Cells Using siRNA Screening  
 Nikhil G Thaker, Fang Zhang, Peter R. McDonald, Tong Ying Shun, Michael D Lewen, Ian F. Pollack, and John S. Lazo  
 Molecular Pharmacology

|                              |               |        |                                      |           |         |
|------------------------------|---------------|--------|--------------------------------------|-----------|---------|
| siRNA-Vinblastine Run1-DMSO  | NM_0144<br>84 | MOCS3  | molybdenum cofactor synthesis<br>3   | 1.116784  | Inlier  |
| siRNA-Temozolomide Run3-DMSO | NM_0581<br>65 | MOGAT1 | monoacylglycerol O-acyltransferase 1 | -1.356812 | Inlier  |
| siRNA Disorazole DMSO Run3   | NM_0581<br>65 | MOGAT1 | monoacylglycerol O-acyltransferase 1 | -1.156801 | Inlier  |
| siRNA-Temozolomide Run2-DMSO | NM_0581<br>65 | MOGAT1 | monoacylglycerol O-acyltransferase 1 | -0.176511 | Inlier  |
| siRNA Disorazole DMSO Run1   | NM_0581<br>65 | MOGAT1 | monoacylglycerol O-acyltransferase 1 | -0.03036  | Inlier  |
| siRNA-Temozolomide Run1-DMSO | NM_0581<br>65 | MOGAT1 | monoacylglycerol O-acyltransferase 1 | 0.03036   | Inlier  |
| siRNA-Vinblastine Run2-DMSO  | NM_0581<br>65 | MOGAT1 | monoacylglycerol O-acyltransferase 1 | 0.192199  | Inlier  |
| siRNA Disorazole DMSO Run2   | NM_0581<br>65 | MOGAT1 | monoacylglycerol O-acyltransferase 1 | 3.652959  | Outlier |
| siRNA-Vinblastine Run1-DMSO  | NM_0581<br>65 | MOGAT1 | monoacylglycerol O-acyltransferase 1 | 3.870701  | Outlier |
| siRNA-Temozolomide Run2-DMSO | NM_0250<br>98 | MOGAT2 | monoacylglycerol O-acyltransferase 2 | -0.896187 | Inlier  |
| siRNA-Temozolomide Run3-DMSO | NM_0250<br>98 | MOGAT2 | monoacylglycerol O-acyltransferase 2 | -0.717331 | Inlier  |
| siRNA-Temozolomide Run1-DMSO | NM_0250<br>98 | MOGAT2 | monoacylglycerol O-acyltransferase 2 | -0.300987 | Inlier  |

Identification of Survival Genes in Human Glioblastoma Cells Using siRNA Screening  
 Nikhil G Thaker, Fang Zhang, Peter R. McDonald, Tong Ying Shun, Michael D Lewen, Ian F. Pollack, and John S. Lazo

Molecular Pharmacology

|                              |               |        |                                      |           |         |
|------------------------------|---------------|--------|--------------------------------------|-----------|---------|
| siRNA Disorazole DMSO Run3   | NM_0250<br>98 | MOGAT2 | monoacylglycerol O-acyltransferase 2 | -0.035182 | Inlier  |
| siRNA Disorazole DMSO Run1   | NM_0250<br>98 | MOGAT2 | monoacylglycerol O-acyltransferase 2 | 0.035182  | Inlier  |
| siRNA-Vinblastine Run2-DMSO  | NM_0250<br>98 | MOGAT2 | monoacylglycerol O-acyltransferase 2 | 0.631669  | Inlier  |
| siRNA-Vinblastine Run1-DMSO  | NM_0250<br>98 | MOGAT2 | monoacylglycerol O-acyltransferase 2 | 1.53246   | Inlier  |
| siRNA Disorazole DMSO Run2   | NM_0250<br>98 | MOGAT2 | monoacylglycerol O-acyltransferase 2 | 1.797937  | Inlier  |
| siRNA-Temozolomide Run3-DMSO | NM_1781<br>76 | MOGAT3 | monoacylglycerol O-acyltransferase 3 | -0.850637 | Inlier  |
| siRNA-Temozolomide Run1-DMSO | NM_1781<br>76 | MOGAT3 | monoacylglycerol O-acyltransferase 3 | -0.498363 | Inlier  |
| siRNA Disorazole DMSO Run1   | NM_1781<br>76 | MOGAT3 | monoacylglycerol O-acyltransferase 3 | -0.404962 | Inlier  |
| siRNA-Temozolomide Run2-DMSO | NM_1781<br>76 | MOGAT3 | monoacylglycerol O-acyltransferase 3 | -0.068747 | Inlier  |
| siRNA-Vinblastine Run2-DMSO  | NM_1781<br>76 | MOGAT3 | monoacylglycerol O-acyltransferase 3 | 0.068747  | Inlier  |
| siRNA Disorazole DMSO Run3   | NM_1781<br>76 | MOGAT3 | monoacylglycerol O-acyltransferase 3 | 1.102008  | Inlier  |
| siRNA-Vinblastine Run1-DMSO  | NM_1781<br>76 | MOGAT3 | monoacylglycerol O-acyltransferase 3 | 3.361984  | Inlier  |
| siRNA Disorazole DMSO Run2   | NM_1781<br>76 | MOGAT3 | monoacylglycerol O-acyltransferase 3 | 3.695861  | Outlier |

Identification of Survival Genes in Human Glioblastoma Cells Using siRNA Screening  
 Nikhil G Thaker, Fang Zhang, Peter R. McDonald, Tong Ying Shun, Michael D Lewen, Ian F. Pollack, and John S. Lazo

Molecular Pharmacology

|                              |               |      |                                                                                       |                  |
|------------------------------|---------------|------|---------------------------------------------------------------------------------------|------------------|
| siRNA-Temozolomide Run3-DMSO | NM_0144<br>29 | MORC | microrchidi<br>a homolog<br>(mouse)                                                   | -2.10806 Inlier  |
| siRNA-Temozolomide Run2-DMSO | NM_0144<br>29 | MORC | microrchidi<br>a homolog<br>(mouse)                                                   | -1.103225 Inlier |
| siRNA-Temozolomide Run1-DMSO | NM_0144<br>29 | MORC | microrchidi<br>a homolog<br>(mouse)                                                   | -0.245775 Inlier |
| siRNA Disorazole DMSO Run1   | NM_0144<br>29 | MORC | microrchidi<br>a homolog<br>(mouse)                                                   | -0.138453 Inlier |
| siRNA Disorazole DMSO Run3   | NM_0144<br>29 | MORC | microrchidi<br>a homolog<br>(mouse)                                                   | 0.138452 Inlier  |
| siRNA-Vinblastine Run2-DMSO  | NM_0144<br>29 | MORC | microrchidi<br>a homolog<br>(mouse)                                                   | 0.235633 Inlier  |
| siRNA-Vinblastine Run1-DMSO  | NM_0144<br>29 | MORC | microrchidi<br>a homolog<br>(mouse)                                                   | 2.13951 Inlier   |
| siRNA Disorazole DMSO Run2   | NM_0144<br>29 | MORC | microrchidi<br>a homolog<br>(mouse)<br>v-mos<br>Moloney<br>murine<br>sarcoma<br>viral | 2.39328 Inlier   |
| siRNA-Temozolomide Run3-DMSO | NM_0053<br>72 | MOS  | oncogene<br>homolog<br>v-mos<br>Moloney<br>murine<br>sarcoma<br>viral                 | -1.968304 Inlier |
| siRNA-Temozolomide Run1-DMSO | NM_0053<br>72 | MOS  | oncogene<br>homolog                                                                   | -0.706032 Inlier |



Identification of Survival Genes in Human Glioblastoma Cells Using siRNA Screening  
 Nikhil G Thaker, Fang Zhang, Peter R. McDonald, Tong Ying Shun, Michael D Lewen, Ian F. Pollack, and John S. Lazo

Molecular Pharmacology

|                                  |               |       |                                                |                   |
|----------------------------------|---------------|-------|------------------------------------------------|-------------------|
|                                  |               |       | v-mos<br>Moloney<br>murine<br>sarcoma<br>viral |                   |
| siRNA-Temozolomide Run2-<br>DMSO | NM_0053<br>72 | MOS   | oncogene<br>homolog                            | -0.677854 Inlier  |
|                                  |               |       | v-mos<br>Moloney<br>murine<br>sarcoma<br>viral |                   |
| siRNA Disorazole DMSO Run3       | NM_0053<br>72 | MOS   | oncogene<br>homolog                            | -0.576454 Inlier  |
|                                  |               |       | v-mos<br>Moloney<br>murine<br>sarcoma<br>viral |                   |
| siRNA Disorazole DMSO Run2       | NM_0053<br>72 | MOS   | oncogene<br>homolog                            | 0.576455 Inlier   |
|                                  |               |       | v-mos<br>Moloney<br>murine<br>sarcoma<br>viral |                   |
| siRNA Disorazole DMSO Run1       | NM_0053<br>72 | MOS   | oncogene<br>homolog                            | 0.587816 Inlier   |
|                                  |               |       | v-mos<br>Moloney<br>murine<br>sarcoma<br>viral |                   |
| siRNA-Vinblastine Run2-<br>DMSO  | NM_0053<br>72 | MOS   | oncogene<br>homolog                            | 0.671146 Inlier   |
|                                  |               |       | v-mos<br>Moloney<br>murine<br>sarcoma<br>viral |                   |
| siRNA-Vinblastine Run1-<br>DMSO  | NM_0053<br>72 | MOS   | oncogene<br>homolog                            | 2.581115 Inlier   |
|                                  |               |       | monooxyg<br>enase,<br>DBH-like 1               |                   |
| siRNA Disorazole DMSO Run3       | NM_0155<br>29 | MOXD1 |                                                | -3.784571 Outlier |
|                                  |               |       | monooxyg<br>enase,<br>DBH-like 1               |                   |
| siRNA Disorazole DMSO Run1       | NM_0155<br>29 | MOXD1 |                                                | -1.115949 Inlier  |

Identification of Survival Genes in Human Glioblastoma Cells Using siRNA Screening  
 Nikhil G Thaker, Fang Zhang, Peter R. McDonald, Tong Ying Shun, Michael D Lewen, Ian F. Pollack, and John S. Lazo

Molecular Pharmacology

|                              |                  |       |                                |           |        |
|------------------------------|------------------|-------|--------------------------------|-----------|--------|
| siRNA-Vinblastine Run2-DMSO  | NM_0155<br>29    | MOXD1 | monooxygenase,<br>DBH-like 1   | -0.262588 | Inlier |
| siRNA-Temozolomide Run3-DMSO | NM_0155<br>29    | MOXD1 | monooxygenase,<br>DBH-like 1   | -0.227404 | Inlier |
| siRNA-Temozolomide Run1-DMSO | NM_0155<br>29    | MOXD1 | monooxygenase,<br>DBH-like 1   | 0.227405  | Inlier |
| siRNA-Vinblastine Run1-DMSO  | NM_0155<br>29    | MOXD1 | monooxygenase,<br>DBH-like 1   | 0.597291  | Inlier |
| siRNA-Temozolomide Run2-DMSO | NM_0155<br>29    | MOXD1 | monooxygenase,<br>DBH-like 1   | 0.751709  | Inlier |
| siRNA Disorazole DMSO Run2   | NM_0155<br>29    | MOXD1 | monooxygenase,<br>DBH-like 1   | 1.515382  | Inlier |
| siRNA-Temozolomide Run3-DMSO | NM_0010<br>15054 | MPG   | N-methylpurine-DNA glycosylase | -0.723375 | Inlier |
| siRNA-Vinblastine Run2-DMSO  | NM_0010<br>15054 | MPG   | N-methylpurine-DNA glycosylase | -0.715165 | Inlier |
| siRNA-Temozolomide Run2-DMSO | NM_0010<br>15054 | MPG   | N-methylpurine-DNA glycosylase | -0.633834 | Inlier |
| siRNA Disorazole DMSO Run1   | NM_0010<br>15054 | MPG   | N-methylpurine-DNA glycosylase | -0.043471 | Inlier |
| siRNA-Temozolomide Run1-DMSO | NM_0010<br>15054 | MPG   | N-methylpurine-DNA glycosylase | 0.043471  | Inlier |

Identification of Survival Genes in Human Glioblastoma Cells Using siRNA Screening  
 Nikhil G Thaker, Fang Zhang, Peter R. McDonald, Tong Ying Shun, Michael D Lewen, Ian F. Pollack, and John S. Lazo

Molecular Pharmacology

|                              |                  |              |                                |           |         |
|------------------------------|------------------|--------------|--------------------------------|-----------|---------|
| siRNA Disorazole DMSO Run3   | NM_0010<br>15054 | MPG          | N-methylpurine-DNA glycosylase | 0.113765  | Inlier  |
| siRNA-Vinblastine Run1-DMSO  | NM_0010<br>15054 | MPG          | N-methylpurine-DNA glycosylase | 0.831009  | Inlier  |
| siRNA Disorazole DMSO Run2   | NM_0010<br>15054 | MPG          | N-methylpurine-DNA glycosylase | 0.861308  | Inlier  |
| siRNA-Temozolomide Run2-DMSO | NM_0161<br>95    | MPHOSP<br>H1 | M-phase phosphoprotein 1       | -0.890888 | Inlier  |
| siRNA-Temozolomide Run3-DMSO | NM_0161<br>95    | MPHOSP<br>H1 | M-phase phosphoprotein 1       | -0.77542  | Inlier  |
| siRNA Disorazole DMSO Run3   | NM_0161<br>95    | MPHOSP<br>H1 | M-phase phosphoprotein 1       | -0.376363 | Inlier  |
| siRNA-Vinblastine Run2-DMSO  | NM_0161<br>95    | MPHOSP<br>H1 | M-phase phosphoprotein 1       | -0.350459 | Inlier  |
| siRNA Disorazole DMSO Run1   | NM_0161<br>95    | MPHOSP<br>H1 | M-phase phosphoprotein 1       | 0.350459  | Inlier  |
| siRNA-Temozolomide Run1-DMSO | NM_0161<br>95    | MPHOSP<br>H1 | M-phase phosphoprotein 1       | 0.57358   | Inlier  |
| siRNA Disorazole DMSO Run2   | NM_0161<br>95    | MPHOSP<br>H1 | M-phase phosphoprotein 1       | 2.864861  | Inlier  |
| siRNA-Vinblastine Run1-DMSO  | NM_0161<br>95    | MPHOSP<br>H1 | M-phase phosphoprotein 1       | 4.751471  | Outlier |
| siRNA Disorazole DMSO Run3   | NM_0024<br>35    | MPI          | mannose phosphate isomerase    | -5.186743 | Outlier |
| siRNA-Temozolomide Run3-DMSO | NM_0024<br>35    | MPI          | mannose phosphate isomerase    | -2.225161 | Inlier  |

Identification of Survival Genes in Human Glioblastoma Cells Using siRNA Screening  
 Nikhil G Thaker, Fang Zhang, Peter R. McDonald, Tong Ying Shun, Michael D Lewen, Ian F. Pollack, and John S. Lazo  
 Molecular Pharmacology

|                              |               |     |                                                                  |           |        |
|------------------------------|---------------|-----|------------------------------------------------------------------|-----------|--------|
| siRNA-Vinblastine Run2-DMSO  | NM_0024<br>35 | MPI | mannose phosphate isomerase                                      | -1.083519 | Inlier |
| siRNA-Vinblastine Run1-DMSO  | NM_0024<br>35 | MPI | mannose phosphate isomerase                                      | -0.045215 | Inlier |
| siRNA-Temozolomide Run2-DMSO | NM_0024<br>35 | MPI | mannose phosphate isomerase                                      | 0.045216  | Inlier |
| siRNA-Temozolomide Run1-DMSO | NM_0024<br>35 | MPI | mannose phosphate isomerase                                      | 0.222233  | Inlier |
| siRNA Disorazole DMSO Run1   | NM_0024<br>35 | MPI | mannose phosphate isomerase                                      | 0.265481  | Inlier |
| siRNA Disorazole DMSO Run2   | NM_0024<br>35 | MPI | mannose phosphate isomerase<br>myeloproliferative leukemia virus | 1.903445  | Inlier |
| siRNA-Temozolomide Run3-DMSO | NM_0053<br>73 | MPL | oncogene myeloproliferative leukemia virus                       | -1.631517 | Inlier |
| siRNA-Temozolomide Run2-DMSO | NM_0053<br>73 | MPL | oncogene myeloproliferative leukemia virus                       | -0.963704 | Inlier |
| siRNA Disorazole DMSO Run3   | NM_0053<br>73 | MPL | oncogene myeloproliferative leukemia virus                       | -0.385296 | Inlier |
| siRNA-Vinblastine Run2-DMSO  | NM_0053<br>73 | MPL | oncogene myeloproliferative leukemia virus                       | -0.030626 | Inlier |

Identification of Survival Genes in Human Glioblastoma Cells Using siRNA Screening  
 Nikhil G Thaker, Fang Zhang, Peter R. McDonald, Tong Ying Shun, Michael D Lewen, Ian F. Pollack, and John S. Lazo

Molecular Pharmacology

|                                  |               |      |                                                         |                  |
|----------------------------------|---------------|------|---------------------------------------------------------|------------------|
|                                  |               |      | myeloprolif<br>erative<br>leukemia<br>virus             |                  |
| siRNA Disorazole DMSO Run1       | NM_0053<br>73 | MPL  | oncogene<br>myeloprolif<br>erative<br>leukemia<br>virus | 0.030626 Inlier  |
| siRNA-Temozolomide Run1-<br>DMSO | NM_0053<br>73 | MPL  | oncogene<br>myeloprolif<br>erative<br>leukemia<br>virus | 0.081368 Inlier  |
| siRNA Disorazole DMSO Run2       | NM_0053<br>73 | MPL  | oncogene<br>myeloprolif<br>erative<br>leukemia<br>virus | 3.33362 Inlier   |
| siRNA-Vinblastine Run1-<br>DMSO  | NM_0053<br>73 | MPL  | oncogene                                                | 4.064394 Outlier |
| siRNA-Temozolomide Run3-<br>DMSO | NM_0319<br>48 | MPN  | protease,<br>serine 27                                  | -1.490479 Inlier |
| siRNA-Temozolomide Run2-<br>DMSO | NM_0319<br>48 | MPN  | protease,<br>serine 27                                  | -1.114111 Inlier |
| siRNA Disorazole DMSO Run2       | NM_0319<br>48 | MPN  | protease,<br>serine 27                                  | -0.568404 Inlier |
| siRNA-Temozolomide Run1-<br>DMSO | NM_0319<br>48 | MPN  | protease,<br>serine 27                                  | -0.232111 Inlier |
| siRNA Disorazole DMSO Run3       | NM_0319<br>48 | MPN  | protease,<br>serine 27                                  | 0.232111 Inlier  |
| siRNA Disorazole DMSO Run1       | NM_0319<br>48 | MPN  | protease,<br>serine 27                                  | 0.50244 Inlier   |
| siRNA-Vinblastine Run1-<br>DMSO  | NM_0319<br>48 | MPN  | protease,<br>serine 27                                  | 0.780596 Inlier  |
| siRNA-Vinblastine Run2-<br>DMSO  | NM_0319<br>48 | MPN  | protease,<br>serine 27                                  | 1.503458 Inlier  |
| siRNA-Temozolomide Run2-<br>DMSO | NM_1830<br>62 | MPN2 | MPN2                                                    | -2.237549 Inlier |
| siRNA-Temozolomide Run3-<br>DMSO | NM_1830<br>62 | MPN2 | MPN2                                                    | -0.886935 Inlier |
| siRNA Disorazole DMSO Run1       | NM_1830<br>62 | MPN2 | MPN2                                                    | -0.504483 Inlier |
| siRNA Disorazole DMSO Run3       | NM_1830<br>62 | MPN2 | MPN2                                                    | -0.212153 Inlier |
| siRNA-Temozolomide Run1-<br>DMSO | NM_1830<br>62 | MPN2 | MPN2                                                    | 0.212153 Inlier  |
| siRNA-Vinblastine Run2-<br>DMSO  | NM_1830<br>62 | MPN2 | MPN2                                                    | 0.529924 Inlier  |
| siRNA Disorazole DMSO Run2       | NM_1830<br>62 | MPN2 | MPN2                                                    | 0.819076 Inlier  |
| siRNA-Vinblastine Run1-<br>DMSO  | NM_1830<br>62 | MPN2 | MPN2                                                    | 0.924095 Inlier  |

Identification of Survival Genes in Human Glioblastoma Cells Using siRNA Screening

Nikhil G Thaker, Fang Zhang, Peter R. McDonald, Tong Ying Shun, Michael D Lewen, Ian F. Pollack, and John S.

Lazo

|                                  |               |      |                                                       |           |         |
|----------------------------------|---------------|------|-------------------------------------------------------|-----------|---------|
| siRNA-Temozolomide Run3-<br>DMSO | NM_0002<br>50 | MPO  | myeloper<br>oxidase                                   | -2.200292 | Inlier  |
| siRNA-Temozolomide Run2-<br>DMSO | NM_0002<br>50 | MPO  | myeloper<br>oxidase                                   | -0.873286 | Inlier  |
| siRNA Disorazole DMSO Run3       | NM_0002<br>50 | MPO  | myeloper<br>oxidase                                   | -0.475714 | Inlier  |
| siRNA Disorazole DMSO Run1       | NM_0002<br>50 | MPO  | myeloper<br>oxidase                                   | -0.223672 | Inlier  |
| siRNA-Temozolomide Run1-<br>DMSO | NM_0002<br>50 | MPO  | myeloper<br>oxidase                                   | 0.223671  | Inlier  |
| siRNA-Vinblastine Run2-<br>DMSO  | NM_0002<br>50 | MPO  | myeloper<br>oxidase                                   | 0.383018  | Inlier  |
| siRNA-Vinblastine Run1-<br>DMSO  | NM_0002<br>50 | MPO  | myeloper<br>oxidase                                   | 2.403519  | Inlier  |
| siRNA Disorazole DMSO Run2       | NM_0002<br>50 | MPO  | myeloper<br>oxidase                                   | 3.710702  | Outlier |
| siRNA-Temozolomide Run3-<br>DMSO | NM_0024<br>36 | MPP1 | membrane<br>protein,<br>palmitoylat<br>ed 1,<br>55kDa | -0.761752 | Inlier  |
| siRNA-Temozolomide Run2-<br>DMSO | NM_0024<br>36 | MPP1 | membrane<br>protein,<br>palmitoylat<br>ed 1,<br>55kDa | -0.587248 | Inlier  |
| siRNA-Temozolomide Run1-<br>DMSO | NM_0024<br>36 | MPP1 | membrane<br>protein,<br>palmitoylat<br>ed 1,<br>55kDa | -0.353158 | Inlier  |
| siRNA Disorazole DMSO Run3       | NM_0024<br>36 | MPP1 | membrane<br>protein,<br>palmitoylat<br>ed 1,<br>55kDa | -0.020006 | Inlier  |
| siRNA Disorazole DMSO Run1       | NM_0024<br>36 | MPP1 | membrane<br>protein,<br>palmitoylat<br>ed 1,<br>55kDa | 0.020005  | Inlier  |
| siRNA Disorazole DMSO Run2       | NM_0024<br>36 | MPP1 | membrane<br>protein,<br>palmitoylat<br>ed 1,<br>55kDa | 0.961542  | Inlier  |
| siRNA-Vinblastine Run2-<br>DMSO  | NM_0024<br>36 | MPP1 | membrane<br>protein,<br>palmitoylat<br>ed 1,<br>55kDa | 1.258515  | Inlier  |



Identification of Survival Genes in Human Glioblastoma Cells Using siRNA Screening

Nikhil G Thaker, Fang Zhang, Peter R. McDonald, Tong Ying Shun, Michael D Lewen, Ian F. Pollack, and John S. Lazo

Molecular Pharmacology

|                              |           |      |                                                                  |           |        |
|------------------------------|-----------|------|------------------------------------------------------------------|-----------|--------|
| siRNA-Vinblastine Run2-DMSO  | NM_005374 | MPP2 | membrane protein, palmitoylated 2 (MAGUK p55 subfamily member 2) | 0.644454  | Inlier |
| siRNA Disorazole DMSO Run2   | NM_005374 | MPP2 | membrane protein, palmitoylated 2 (MAGUK p55 subfamily member 2) | 1.067221  | Inlier |
| siRNA-Vinblastine Run1-DMSO  | NM_005374 | MPP2 | membrane protein, palmitoylated 5 (MAGUK p55 subfamily member 2) | 1.510172  | Inlier |
| siRNA-Temozolomide Run3-DMSO | NM_022474 | MPP5 | membrane protein, palmitoylated 5 (MAGUK p55 subfamily member 5) | -0.915743 | Inlier |
| siRNA-Temozolomide Run2-DMSO | NM_022474 | MPP5 | membrane protein, palmitoylated 5 (MAGUK p55 subfamily member 5) | -0.433257 | Inlier |



Identification of Survival Genes in Human Glioblastoma Cells Using siRNA Screening

Nikhil G Thaker, Fang Zhang, Peter R. McDonald, Tong Ying Shun, Michael D Lewen, Ian F. Pollack, and John S. Lazo

Molecular Pharmacology

| siRNA Treatment              | Gene ID   | Gene Name | Protein Description                                              | Score     | Category |
|------------------------------|-----------|-----------|------------------------------------------------------------------|-----------|----------|
| siRNA-Temozolomide Run1-DMSO | NM_022474 | MPP5      | membrane protein, palmitoylated 5 (MAGUK p55 subfamily member 5) | -0.283536 | Inlier   |
| siRNA Disorazole DMSO Run3   | NM_022474 | MPP5      | membrane protein, palmitoylated 5 (MAGUK p55 subfamily member 5) | -0.027246 | Inlier   |
| siRNA Disorazole DMSO Run1   | NM_022474 | MPP5      | membrane protein, palmitoylated 5 (MAGUK p55 subfamily member 5) | 0.027247  | Inlier   |
| siRNA-Vinblastine Run2-DMSO  | NM_022474 | MPP5      | membrane protein, palmitoylated 5 (MAGUK p55 subfamily member 5) | 5.805946  | Outlier  |
| siRNA Disorazole DMSO Run2   | NM_022474 | MPP5      | membrane protein, palmitoylated 5 (MAGUK p55 subfamily member 5) | 9.468903  | Outlier  |

Identification of Survival Genes in Human Glioblastoma Cells Using siRNA Screening

Nikhil G Thaker, Fang Zhang, Peter R. McDonald, Tong Ying Shun, Michael D Lewen, Ian F. Pollack, and John S. Lazo

Molecular Pharmacology

|                              |           |      |                                                                  |           |         |
|------------------------------|-----------|------|------------------------------------------------------------------|-----------|---------|
| siRNA-Vinblastine Run1-DMSO  | NM_022474 | MPP5 | membrane protein, palmitoylated 5 (MAGUK p55 subfamily member 5) | 11.3871   | Outlier |
| siRNA-Temozolomide Run3-DMSO | NM_016447 | MPP6 | membrane protein, palmitoylated 6 (MAGUK p55 subfamily member 6) | -0.92978  | Inlier  |
| siRNA-Temozolomide Run2-DMSO | NM_016447 | MPP6 | membrane protein, palmitoylated 6 (MAGUK p55 subfamily member 6) | -0.41922  | Inlier  |
| siRNA-Temozolomide Run1-DMSO | NM_016447 | MPP6 | membrane protein, palmitoylated 6 (MAGUK p55 subfamily member 6) | -0.410692 | Inlier  |
| siRNA Disorazole DMSO Run3   | NM_016447 | MPP6 | membrane protein, palmitoylated 6 (MAGUK p55 subfamily member 6) | -0.177374 | Inlier  |

Identification of Survival Genes in Human Glioblastoma Cells Using siRNA Screening

Nikhil G Thaker, Fang Zhang, Peter R. McDonald, Tong Ying Shun, Michael D Lewen, Ian F. Pollack, and John S. Lazo

Molecular Pharmacology

|                              |               |      |                                                                  |           |        |
|------------------------------|---------------|------|------------------------------------------------------------------|-----------|--------|
| siRNA Disorazole DMSO Run1   | NM_0164<br>47 | MPP6 | membrane protein, palmitoylated 6 (MAGUK p55 subfamily member 6) | 0.177374  | Inlier |
| siRNA Disorazole DMSO Run2   | NM_0164<br>47 | MPP6 | membrane protein, palmitoylated 6 (MAGUK p55 subfamily member 6) | 1.067585  | Inlier |
| siRNA-Vinblastine Run2-DMSO  | NM_0164<br>47 | MPP6 | membrane protein, palmitoylated 6 (MAGUK p55 subfamily member 6) | 1.48564   | Inlier |
| siRNA-Vinblastine Run1-DMSO  | NM_0164<br>47 | MPP6 | membrane protein, palmitoylated 7 (MAGUK p55 subfamily member 6) | 1.902428  | Inlier |
| siRNA-Temozolomide Run2-DMSO | NM_1734<br>96 | MPP7 | membrane protein, palmitoylated 7 (MAGUK p55 subfamily member 7) | -1.046564 | Inlier |

Identification of Survival Genes in Human Glioblastoma Cells Using siRNA Screening

Nikhil G Thaker, Fang Zhang, Peter R. McDonald, Tong Ying Shun, Michael D Lewen, Ian F. Pollack, and John S. Lazo

Molecular Pharmacology

|                              |               |      |                                                                  |          |        |
|------------------------------|---------------|------|------------------------------------------------------------------|----------|--------|
| siRNA-Temozolomide Run3-DMSO | NM_1734<br>96 | MPP7 | membrane protein, palmitoylated 7 (MAGUK p55 subfamily member 7) | -0.70772 | Inlier |
| siRNA-Temozolomide Run1-DMSO | NM_1734<br>96 | MPP7 | membrane protein, palmitoylated 7 (MAGUK p55 subfamily member 7) | -0.64128 | Inlier |
| siRNA Disorazole DMSO Run1   | NM_1734<br>96 | MPP7 | membrane protein, palmitoylated 7 (MAGUK p55 subfamily member 7) | -0.08564 | Inlier |
| siRNA Disorazole DMSO Run3   | NM_1734<br>96 | MPP7 | membrane protein, palmitoylated 7 (MAGUK p55 subfamily member 7) | 0.08564  | Inlier |
| siRNA-Vinblastine Run2-DMSO  | NM_1734<br>96 | MPP7 | membrane protein, palmitoylated 7 (MAGUK p55 subfamily member 7) | 0.352317 | Inlier |

Identification of Survival Genes in Human Glioblastoma Cells Using siRNA Screening

Nikhil G Thaker, Fang Zhang, Peter R. McDonald, Tong Ying Shun, Michael D Lewen, Ian F. Pollack, and John S. Lazo

Molecular Pharmacology

|                              |            |       |                                                               |                  |
|------------------------------|------------|-------|---------------------------------------------------------------|------------------|
|                              |            |       | membrane protein, palmitoylated 7 (MAGUK p55 subfamily member |                  |
| siRNA Disorazole DMSO Run2   | NM_1734 96 | MPP7  | 7)                                                            | 0.846413 Inlier  |
|                              |            |       | membrane protein, palmitoylated 7 (MAGUK p55 subfamily member |                  |
| siRNA-Vinblastine Run1-DMSO  | NM_1734 96 | MPP7  | 7)                                                            | 0.95775 Inlier   |
| siRNA-Vinblastine Run2-DMSO  | NM_1386 08 | MPPE1 | metallophosphoesterase 1                                      | -1.391854 Inlier |
| siRNA-Vinblastine Run1-DMSO  | NM_1386 08 | MPPE1 | metallophosphoesterase 1                                      | -0.906097 Inlier |
| siRNA Disorazole DMSO Run3   | NM_1386 08 | MPPE1 | metallophosphoesterase 1                                      | -0.550675 Inlier |
| siRNA-Temozolomide Run2-DMSO | NM_1386 08 | MPPE1 | metallophosphoesterase 1                                      | -0.088944 Inlier |
| siRNA Disorazole DMSO Run1   | NM_1386 08 | MPPE1 | metallophosphoesterase 1                                      | 0.088945 Inlier  |
| siRNA Disorazole DMSO Run2   | NM_1386 08 | MPPE1 | metallophosphoesterase 1                                      | 0.46772 Inlier   |
| siRNA-Temozolomide Run3-DMSO | NM_1386 08 | MPPE1 | metallophosphoesterase 1                                      | 0.798325 Inlier  |
| siRNA-Temozolomide Run1-DMSO | NM_1386 08 | MPPE1 | metallophosphoesterase 1                                      | 1.228907 Inlier  |
| siRNA-Temozolomide Run2-DMSO | NM_1784 22 | MPRA  | progesterin and adipoQ receptor family member VII             | -1.299709 Inlier |

Identification of Survival Genes in Human Glioblastoma Cells Using siRNA Screening  
 Nikhil G Thaker, Fang Zhang, Peter R. McDonald, Tong Ying Shun, Michael D Lewen, Ian F. Pollack, and John S. Lazo

Molecular Pharmacology

| siRNA Treatment              | Gene ID   | Method | Gene Name                                               | Score     | Outlier Status |
|------------------------------|-----------|--------|---------------------------------------------------------|-----------|----------------|
| siRNA-Vinblastine Run2-DMSO  | NM_178422 | MPRA   | progesterone and adiponectin receptor family member VII | -0.791696 | Inlier         |
| siRNA Disorazole DMSO Run3   | NM_178422 | MPRA   | progesterone and adiponectin receptor family member VII | -0.298989 | Inlier         |
| siRNA Disorazole DMSO Run1   | NM_178422 | MPRA   | progesterone and adiponectin receptor family member VII | -0.161957 | Inlier         |
| siRNA-Temozolomide Run3-DMSO | NM_178422 | MPRA   | progesterone and adiponectin receptor family member VII | 0.161956  | Inlier         |
| siRNA-Temozolomide Run1-DMSO | NM_178422 | MPRA   | progesterone and adiponectin receptor family member VII | 0.557304  | Inlier         |
| siRNA Disorazole DMSO Run2   | NM_178422 | MPRA   | progesterone and adiponectin receptor family member VII | 1.280333  | Inlier         |
| siRNA-Vinblastine Run1-DMSO  | NM_178422 | MPRA   | progesterone and adiponectin receptor family member VII | 2.118669  | Inlier         |

Identification of Survival Genes in Human Glioblastoma Cells Using siRNA Screening  
 Nikhil G Thaker, Fang Zhang, Peter R. McDonald, Tong Ying Shun, Michael D Lewen, Ian F. Pollack, and John S. Lazo  
 Molecular Pharmacology

|                              |           |      |                                                       |           |        |
|------------------------------|-----------|------|-------------------------------------------------------|-----------|--------|
| siRNA-Vinblastine Run2-DMSO  | NM_017705 | MPRG | progesterone and adiponectin receptor family member V | -1.462368 | Inlier |
| siRNA-Temozolomide Run2-DMSO | NM_017705 | MPRG | progesterone and adiponectin receptor family member V | -1.114514 | Inlier |
| siRNA-Temozolomide Run1-DMSO | NM_017705 | MPRG | progesterone and adiponectin receptor family member V | -0.232397 | Inlier |
| siRNA-Temozolomide Run3-DMSO | NM_017705 | MPRG | progesterone and adiponectin receptor family member V | -0.047859 | Inlier |
| siRNA Disorazole DMSO Run3   | NM_017705 | MPRG | progesterone and adiponectin receptor family member V | 0.047859  | Inlier |
| siRNA Disorazole DMSO Run1   | NM_017705 | MPRG | progesterone and adiponectin receptor family member V | 0.234486  | Inlier |
| siRNA Disorazole DMSO Run2   | NM_017705 | MPRG | progesterone and adiponectin receptor family member V | 1.534847  | Inlier |

Identification of Survival Genes in Human Glioblastoma Cells Using siRNA Screening

Nikhil G Thaker, Fang Zhang, Peter R. McDonald, Tong Ying Shun, Michael D Lewen, Ian F. Pollack, and John S. Lazo

Molecular Pharmacology

|                              |           |        |                                                       |           |        |
|------------------------------|-----------|--------|-------------------------------------------------------|-----------|--------|
| siRNA-Vinblastine Run1-DMSO  | NM_017705 | MPRG   | progesterone and adiponectin receptor family member V | 1.595581  | Inlier |
| siRNA-Temozolomide Run3-DMSO | NM_145243 | MPRP-1 | OMA1 homolog, zinc metalloproteinase (S. cerevisiae)  | -1.246755 | Inlier |
| siRNA-Temozolomide Run2-DMSO | NM_145243 | MPRP-1 | OMA1 homolog, zinc metalloproteinase (S. cerevisiae)  | -0.761146 | Inlier |
| siRNA-Temozolomide Run1-DMSO | NM_145243 | MPRP-1 | OMA1 homolog, zinc metalloproteinase (S. cerevisiae)  | -0.207422 | Inlier |
| siRNA Disorazole DMSO Run2   | NM_145243 | MPRP-1 | OMA1 homolog, zinc metalloproteinase (S. cerevisiae)  | -0.024744 | Inlier |
| siRNA Disorazole DMSO Run1   | NM_145243 | MPRP-1 | OMA1 homolog, zinc metalloproteinase (S. cerevisiae)  | 0.024744  | Inlier |



Identification of Survival Genes in Human Glioblastoma Cells Using siRNA Screening  
 Nikhil G Thaker, Fang Zhang, Peter R. McDonald, Tong Ying Shun, Michael D Lewen, Ian F. Pollack, and John S. Lazo  
 Molecular Pharmacology

|                              |                  |        |                                                                     |           |        |
|------------------------------|------------------|--------|---------------------------------------------------------------------|-----------|--------|
| siRNA-Vinblastine Run1-DMSO  | NM_1452<br>43    | MPRP-1 | OMA1<br>homolog,<br>zinc<br>metallope<br>ptidase (S.<br>cerevisiae) | 0.659521  | Inlier |
| siRNA-Vinblastine Run2-DMSO  | NM_1452<br>43    | MPRP-1 | OMA1<br>homolog,<br>zinc<br>metallope<br>ptidase (S.<br>cerevisiae) | 0.689479  | Inlier |
| siRNA Disorazole DMSO Run3   | NM_1452<br>43    | MPRP-1 | OMA1<br>homolog,<br>zinc<br>metallope<br>ptidase (S.<br>cerevisiae) | 0.836959  | Inlier |
| siRNA-Temozolomide Run2-DMSO | NM_0010<br>13440 | MPST   | mercaptopyruvate<br>sulfurtransferase                               | -1.299205 | Inlier |
| siRNA-Temozolomide Run3-DMSO | NM_0010<br>13440 | MPST   | mercaptopyruvate<br>sulfurtransferase                               | -0.885793 | Inlier |
| siRNA Disorazole DMSO Run3   | NM_0010<br>13440 | MPST   | mercaptopyruvate<br>sulfurtransferase                               | -0.463207 | Inlier |
| siRNA-Temozolomide Run1-DMSO | NM_0010<br>13440 | MPST   | mercaptopyruvate<br>sulfurtransferase                               | -0.099574 | Inlier |
| siRNA Disorazole DMSO Run1   | NM_0010<br>13440 | MPST   | mercaptopyruvate<br>sulfurtransferase                               | 0.099574  | Inlier |
| siRNA-Vinblastine Run2-DMSO  | NM_0010<br>13440 | MPST   | mercaptopyruvate<br>sulfurtransferase                               | 0.28931   | Inlier |
| siRNA Disorazole DMSO Run2   | NM_0010<br>13440 | MPST   | mercaptopyruvate<br>sulfurtransferase                               | 2.174135  | Inlier |

Identification of Survival Genes in Human Glioblastoma Cells Using siRNA Screening  
 Nikhil G Thaker, Fang Zhang, Peter R. McDonald, Tong Ying Shun, Michael D Lewen, Ian F. Pollack, and John S. Lazo

Molecular Pharmacology

|                              |                  |      |                                               |           |         |
|------------------------------|------------------|------|-----------------------------------------------|-----------|---------|
| siRNA-Vinblastine Run1-DMSO  | NM_0010<br>13440 | MPST | mercaptopyruvate sulfurtransferase muscle RAS | 3.67108   | Outlier |
| siRNA-Temozolomide Run2-DMSO | NM_0122<br>19    | MRAS | oncogene homolog muscle RAS                   | -3.780994 | Outlier |
| siRNA Disorazole DMSO Run1   | NM_0122<br>19    | MRAS | oncogene homolog muscle RAS                   | -0.769257 | Inlier  |
| siRNA Disorazole DMSO Run3   | NM_0122<br>19    | MRAS | oncogene homolog muscle RAS                   | -0.458018 | Inlier  |
| siRNA-Temozolomide Run3-DMSO | NM_0122<br>19    | MRAS | oncogene homolog muscle RAS                   | -0.078631 | Inlier  |
| siRNA-Temozolomide Run1-DMSO | NM_0122<br>19    | MRAS | oncogene homolog muscle RAS                   | 0.078632  | Inlier  |
| siRNA-Vinblastine Run2-DMSO  | NM_0122<br>19    | MRAS | oncogene homolog muscle RAS                   | 0.579742  | Inlier  |
| siRNA Disorazole DMSO Run2   | NM_0122<br>19    | MRAS | oncogene homolog muscle RAS                   | 2.105334  | Inlier  |
| siRNA-Vinblastine Run1-DMSO  | NM_0122<br>19    | MRAS | oncogene homolog                              | 3.67197   | Outlier |
| siRNA-Vinblastine Run2-DMSO  | NM_0024<br>38    | MRC1 | mannose receptor, C type 1                    | -0.813124 | Inlier  |
| siRNA-Temozolomide Run2-DMSO | NM_0024<br>38    | MRC1 | mannose receptor, C type 1                    | -0.693331 | Inlier  |
| siRNA Disorazole DMSO Run3   | NM_0024<br>38    | MRC1 | mannose receptor, C type 1                    | -0.655669 | Inlier  |
| siRNA-Temozolomide Run3-DMSO | NM_0024<br>38    | MRC1 | mannose receptor, C type 1                    | -0.099284 | Inlier  |
| siRNA-Temozolomide Run1-DMSO | NM_0024<br>38    | MRC1 | mannose receptor, C type 1                    | 0.099284  | Inlier  |

Identification of Survival Genes in Human Glioblastoma Cells Using siRNA Screening  
 Nikhil G Thaker, Fang Zhang, Peter R. McDonald, Tong Ying Shun, Michael D Lewen, Ian F. Pollack, and John S. Lazo

Molecular Pharmacology

|                                  |               |        |                                                                             |           |        |
|----------------------------------|---------------|--------|-----------------------------------------------------------------------------|-----------|--------|
| siRNA Disorazole DMSO Run1       | NM_0024<br>38 | MRC1   | mannose<br>receptor,<br>C type 1                                            | 0.237234  | Inlier |
| siRNA-Vinblastine Run1-<br>DMSO  | NM_0024<br>38 | MRC1   | mannose<br>receptor,<br>C type 1                                            | 1.59056   | Inlier |
| siRNA Disorazole DMSO Run2       | NM_0024<br>38 | MRC1   | mannose<br>receptor,<br>C type 1                                            | 1.865975  | Inlier |
| siRNA-Temozolomide Run1-<br>DMSO | NM_0060<br>39 | MRC2   | mannose<br>receptor,<br>C type 2                                            | -2.033023 | Inlier |
| siRNA Disorazole DMSO Run1       | NM_0060<br>39 | MRC2   | mannose<br>receptor,<br>C type 2                                            | -0.937861 | Inlier |
| siRNA-Temozolomide Run3-<br>DMSO | NM_0060<br>39 | MRC2   | mannose<br>receptor,<br>C type 2                                            | -0.48632  | Inlier |
| siRNA-Temozolomide Run2-<br>DMSO | NM_0060<br>39 | MRC2   | mannose<br>receptor,<br>C type 2                                            | -0.346718 | Inlier |
| siRNA Disorazole DMSO Run2       | NM_0060<br>39 | MRC2   | mannose<br>receptor,<br>C type 2                                            | 0.346718  | Inlier |
| siRNA-Vinblastine Run1-<br>DMSO  | NM_0060<br>39 | MRC2   | mannose<br>receptor,<br>C type 2                                            | 0.623358  | Inlier |
| siRNA-Vinblastine Run2-<br>DMSO  | NM_0060<br>39 | MRC2   | mannose<br>receptor,<br>C type 2                                            | 0.725642  | Inlier |
| siRNA Disorazole DMSO Run3       | NM_0060<br>39 | MRC2   | mannose<br>receptor,<br>C type 2                                            | 3.01879   | Inlier |
| siRNA-Temozolomide Run3-<br>DMSO | NM_0055<br>90 | MRE11A | MRE11<br>meiotic<br>recombina<br>tion 11<br>homolog A<br>(S.<br>cerevisiae) | -0.822101 | Inlier |
| siRNA-Temozolomide Run2-<br>DMSO | NM_0055<br>90 | MRE11A | MRE11<br>meiotic<br>recombina<br>tion 11<br>homolog A<br>(S.<br>cerevisiae) | -0.703413 | Inlier |

Identification of Survival Genes in Human Glioblastoma Cells Using siRNA Screening

Nikhil G Thaker, Fang Zhang, Peter R. McDonald, Tong Ying Shun, Michael D Lewen, Ian F. Pollack, and John S. Lazo

Molecular Pharmacology

|                                  |               |        |                                                                             |           |        |
|----------------------------------|---------------|--------|-----------------------------------------------------------------------------|-----------|--------|
| siRNA Disorazole DMSO Run1       | NM_0055<br>90 | MRE11A | MRE11<br>meiotic<br>recombina<br>tion 11<br>homolog A<br>(S.<br>cerevisiae) | -0.099527 | Inlier |
| siRNA-Vinblastine Run2-<br>DMSO  | NM_0055<br>90 | MRE11A | MRE11<br>meiotic<br>recombina<br>tion 11<br>homolog A<br>(S.<br>cerevisiae) | -0.07529  | Inlier |
| siRNA Disorazole DMSO Run3       | NM_0055<br>90 | MRE11A | MRE11<br>meiotic<br>recombina<br>tion 11<br>homolog A<br>(S.<br>cerevisiae) | 0.075291  | Inlier |
| siRNA-Temozolomide Run1-<br>DMSO | NM_0055<br>90 | MRE11A | MRE11<br>meiotic<br>recombina<br>tion 11<br>homolog A<br>(S.<br>cerevisiae) | 0.645587  | Inlier |
| siRNA-Vinblastine Run1-<br>DMSO  | NM_0055<br>90 | MRE11A | MRE11<br>meiotic<br>recombina<br>tion 11<br>homolog A<br>(S.<br>cerevisiae) | 1.504345  | Inlier |
| siRNA Disorazole DMSO Run2       | NM_0055<br>90 | MRE11A | MRE11<br>meiotic<br>recombina<br>tion 11<br>homolog A<br>(S.<br>cerevisiae) | 2.195635  | Inlier |

Identification of Survival Genes in Human Glioblastoma Cells Using siRNA Screening  
 Nikhil G Thaker, Fang Zhang, Peter R. McDonald, Tong Ying Shun, Michael D Lewen, Ian F. Pollack, and John S. Lazo  
 Molecular Pharmacology

|                              |               |        |                                 |           |         |
|------------------------------|---------------|--------|---------------------------------|-----------|---------|
| siRNA-Temozolomide Run3-DMSO | NM_1989<br>23 | MRGPRD | MAS-related<br>GPR,<br>member D | -0.721275 | Inlier  |
| siRNA-Vinblastine Run2-DMSO  | NM_1989<br>23 | MRGPRD | MAS-related<br>GPR,<br>member D | -0.627725 | Inlier  |
| siRNA Disorazole DMSO Run3   | NM_1989<br>23 | MRGPRD | MAS-related<br>GPR,<br>member D | -0.609683 | Inlier  |
| siRNA Disorazole DMSO Run1   | NM_1989<br>23 | MRGPRD | MAS-related<br>GPR,<br>member D | -0.058271 | Inlier  |
| siRNA-Temozolomide Run2-DMSO | NM_1989<br>23 | MRGPRD | MAS-related<br>GPR,<br>member D | 0.058271  | Inlier  |
| siRNA-Temozolomide Run1-DMSO | NM_1989<br>23 | MRGPRD | MAS-related<br>GPR,<br>member D | 0.816192  | Inlier  |
| siRNA Disorazole DMSO Run2   | NM_1989<br>23 | MRGPRD | MAS-related<br>GPR,<br>member D | 6.407352  | Outlier |
| siRNA-Vinblastine Run1-DMSO  | NM_1989<br>23 | MRGPRD | MAS-related<br>GPR,<br>member D | 6.693929  | Outlier |
| siRNA-Temozolomide Run3-DMSO | NM_1450<br>15 | MRGPRF | MAS-related<br>GPR,<br>member F | -1.133617 | Inlier  |
| siRNA Disorazole DMSO Run2   | NM_1450<br>15 | MRGPRF | MAS-related<br>GPR,<br>member F | -0.543655 | Inlier  |
| siRNA-Temozolomide Run2-DMSO | NM_1450<br>15 | MRGPRF | MAS-related<br>GPR,<br>member F | -0.492458 | Inlier  |

Identification of Survival Genes in Human Glioblastoma Cells Using siRNA Screening  
 Nikhil G Thaker, Fang Zhang, Peter R. McDonald, Tong Ying Shun, Michael D Lewen, Ian F. Pollack, and John S. Lazo

Molecular Pharmacology

| siRNA Treatment              | Gene ID       | Gene Name | Category                   | Value     | Outlier Status |
|------------------------------|---------------|-----------|----------------------------|-----------|----------------|
| siRNA-Temozolomide Run1-DMSO | NM_1450<br>15 | MRGPRF    | MAS-related GPR, member F  | -0.189583 | Inlier         |
| siRNA Disorazole DMSO Run1   | NM_1450<br>15 | MRGPRF    | MAS-related GPR, member F  | 0.189582  | Inlier         |
| siRNA-Vinblastine Run2-DMSO  | NM_1450<br>15 | MRGPRF    | MAS-related GPR, member F  | 0.805345  | Inlier         |
| siRNA Disorazole DMSO Run3   | NM_1450<br>15 | MRGPRF    | MAS-related GPR, member F  | 0.886137  | Inlier         |
| siRNA-Vinblastine Run1-DMSO  | NM_1450<br>15 | MRGPRF    | MAS-related GPR, member F  | 0.967417  | Inlier         |
| siRNA Disorazole DMSO Run1   | NM_1471<br>99 | MRGX1     | MAS-related GPR, member X1 | -1.05619  | Inlier         |
| siRNA-Temozolomide Run3-DMSO | NM_1471<br>99 | MRGX1     | MAS-related GPR, member X1 | -0.744605 | Inlier         |
| siRNA-Temozolomide Run1-DMSO | NM_1471<br>99 | MRGX1     | MAS-related GPR, member X1 | -0.486921 | Inlier         |
| siRNA-Temozolomide Run2-DMSO | NM_1471<br>99 | MRGX1     | MAS-related GPR, member X1 | -0.077665 | Inlier         |
| siRNA-Vinblastine Run2-DMSO  | NM_1471<br>99 | MRGX1     | MAS-related GPR, member X1 | 0.077665  | Inlier         |
| siRNA Disorazole DMSO Run2   | NM_1471<br>99 | MRGX1     | MAS-related GPR, member X1 | 0.604395  | Inlier         |

Identification of Survival Genes in Human Glioblastoma Cells Using siRNA Screening  
 Nikhil G Thaker, Fang Zhang, Peter R. McDonald, Tong Ying Shun, Michael D Lewen, Ian F. Pollack, and John S. Lazo

Molecular Pharmacology

|                              |               |       |                                     |                  |
|------------------------------|---------------|-------|-------------------------------------|------------------|
| siRNA-Vinblastine Run1-DMSO  | NM_1471<br>99 | MRGX1 | MAS-related<br>GPR,<br>member<br>X1 | 0.830677 Inlier  |
| siRNA Disorazole DMSO Run3   | NM_1471<br>99 | MRGX1 | MAS-related<br>GPR,<br>member<br>X1 | 1.852396 Inlier  |
| siRNA-Temozolomide Run3-DMSO | NM_0540<br>30 | MRGX2 | MAS-related<br>GPR,<br>member<br>X2 | -2.176262 Inlier |
| siRNA Disorazole DMSO Run2   | NM_0540<br>30 | MRGX2 | MAS-related<br>GPR,<br>member<br>X2 | -1.732393 Inlier |
| siRNA-Temozolomide Run2-DMSO | NM_0540<br>30 | MRGX2 | MAS-related<br>GPR,<br>member<br>X2 | -0.154348 Inlier |
| siRNA Disorazole DMSO Run3   | NM_0540<br>30 | MRGX2 | MAS-related<br>GPR,<br>member<br>X2 | -0.00193 Inlier  |
| siRNA Disorazole DMSO Run1   | NM_0540<br>30 | MRGX2 | MAS-related<br>GPR,<br>member<br>X2 | 0.00193 Inlier   |
| siRNA-Temozolomide Run1-DMSO | NM_0540<br>30 | MRGX2 | MAS-related<br>GPR,<br>member<br>X2 | 0.082315 Inlier  |
| siRNA-Vinblastine Run2-DMSO  | NM_0540<br>30 | MRGX2 | MAS-related<br>GPR,<br>member<br>X2 | 1.194652 Inlier  |
| siRNA-Vinblastine Run1-DMSO  | NM_0540<br>30 | MRGX2 | MAS-related<br>GPR,<br>member<br>X2 | 1.268224 Inlier  |

Identification of Survival Genes in Human Glioblastoma Cells Using siRNA Screening  
 Nikhil G Thaker, Fang Zhang, Peter R. McDonald, Tong Ying Shun, Michael D Lewen, Ian F. Pollack, and John S. Lazo

Molecular Pharmacology

|                              |               |       |                                     |                  |
|------------------------------|---------------|-------|-------------------------------------|------------------|
| siRNA-Temozolomide Run3-DMSO | NM_0540<br>31 | MRGX3 | MAS-related<br>GPR,<br>member<br>X3 | -1.545907 Inlier |
| siRNA Disorazole DMSO Run2   | NM_0540<br>31 | MRGX3 | MAS-related<br>GPR,<br>member<br>X3 | -1.376423 Inlier |
| siRNA-Temozolomide Run1-DMSO | NM_0540<br>31 | MRGX3 | MAS-related<br>GPR,<br>member<br>X3 | -0.5523 Inlier   |
| siRNA-Temozolomide Run2-DMSO | NM_0540<br>31 | MRGX3 | MAS-related<br>GPR,<br>member<br>X3 | -0.254056 Inlier |
| siRNA Disorazole DMSO Run1   | NM_0540<br>31 | MRGX3 | MAS-related<br>GPR,<br>member<br>X3 | 0.254055 Inlier  |
| siRNA Disorazole DMSO Run3   | NM_0540<br>31 | MRGX3 | MAS-related<br>GPR,<br>member<br>X3 | 0.355317 Inlier  |
| siRNA-Vinblastine Run2-DMSO  | NM_0540<br>31 | MRGX3 | MAS-related<br>GPR,<br>member<br>X3 | 0.7967 Inlier    |
| siRNA-Vinblastine Run1-DMSO  | NM_0540<br>31 | MRGX3 | MAS-related<br>GPR,<br>member<br>X3 | 0.952203 Inlier  |
| siRNA-Temozolomide Run3-DMSO | NM_0540<br>32 | MRGX4 | MAS-related<br>GPR,<br>member<br>X4 | -2.936108 Inlier |
| siRNA-Temozolomide Run2-DMSO | NM_0540<br>32 | MRGX4 | MAS-related<br>GPR,<br>member<br>X4 | -0.623393 Inlier |



Identification of Survival Genes in Human Glioblastoma Cells Using siRNA Screening  
 Nikhil G Thaker, Fang Zhang, Peter R. McDonald, Tong Ying Shun, Michael D Lewen, Ian F. Pollack, and John S. Lazo

Molecular Pharmacology

|                                  |               |        |                                                |           |        |
|----------------------------------|---------------|--------|------------------------------------------------|-----------|--------|
| siRNA Disorazole DMSO Run2       | NM_0540<br>32 | MRGX4  | MAS-related<br>GPR,<br>member<br>X4            | -0.264167 | Inlier |
| siRNA-Temozolomide Run1-<br>DMSO | NM_0540<br>32 | MRGX4  | MAS-related<br>GPR,<br>member<br>X4            | -0.018769 | Inlier |
| siRNA Disorazole DMSO Run1       | NM_0540<br>32 | MRGX4  | MAS-related<br>GPR,<br>member<br>X4            | 0.018769  | Inlier |
| siRNA Disorazole DMSO Run3       | NM_0540<br>32 | MRGX4  | MAS-related<br>GPR,<br>member<br>X4            | 0.725607  | Inlier |
| siRNA-Vinblastine Run2-<br>DMSO  | NM_0540<br>32 | MRGX4  | MAS-related<br>GPR,<br>member<br>X4            | 0.945252  | Inlier |
| siRNA-Vinblastine Run1-<br>DMSO  | NM_0540<br>32 | MRGX4  | MAS-related<br>GPR,<br>member<br>X4            | 1.997724  | Inlier |
| siRNA-Temozolomide Run2-<br>DMSO | NM_0151<br>34 | M-RIP  | M-RIP                                          | -1.089931 | Inlier |
| siRNA Disorazole DMSO Run2       | NM_0151<br>34 | M-RIP  | M-RIP                                          | -0.886386 | Inlier |
| siRNA-Temozolomide Run3-<br>DMSO | NM_0151<br>34 | M-RIP  | M-RIP                                          | -0.729839 | Inlier |
| siRNA Disorazole DMSO Run1       | NM_0151<br>34 | M-RIP  | M-RIP                                          | -0.062105 | Inlier |
| siRNA-Vinblastine Run1-<br>DMSO  | NM_0151<br>34 | M-RIP  | M-RIP                                          | 0.062105  | Inlier |
| siRNA Disorazole DMSO Run3       | NM_0151<br>34 | M-RIP  | M-RIP                                          | 0.423445  | Inlier |
| siRNA-Temozolomide Run1-<br>DMSO | NM_0151<br>34 | M-RIP  | M-RIP                                          | 0.619161  | Inlier |
| siRNA-Vinblastine Run2-<br>DMSO  | NM_0151<br>34 | M-RIP  | M-RIP<br>mitochondrial<br>ribosomal<br>protein | 1.021144  | Inlier |
| siRNA Disorazole DMSO Run2       | NM_0224<br>97 | MRPS25 | S25                                            | -0.960392 | Inlier |

Identification of Survival Genes in Human Glioblastoma Cells Using siRNA Screening  
 Nikhil G Thaker, Fang Zhang, Peter R. McDonald, Tong Ying Shun, Michael D Lewen, Ian F. Pollack, and John S. Lazo

Molecular Pharmacology

|                              |               |        |                                                                                                                          |           |        |
|------------------------------|---------------|--------|--------------------------------------------------------------------------------------------------------------------------|-----------|--------|
| siRNA Disorazole DMSO Run3   | NM_0224<br>97 | MRPS25 | mitochondrial ribosomal protein S25                                                                                      | -0.823858 | Inlier |
| siRNA-Temozolomide Run3-DMSO | NM_0224<br>97 | MRPS25 | mitochondrial ribosomal protein S25                                                                                      | -0.683382 | Inlier |
| siRNA Disorazole DMSO Run1   | NM_0224<br>97 | MRPS25 | mitochondrial ribosomal protein S25                                                                                      | -0.024043 | Inlier |
| siRNA-Temozolomide Run2-DMSO | NM_0224<br>97 | MRPS25 | mitochondrial ribosomal protein S25                                                                                      | 0.024043  | Inlier |
| siRNA-Temozolomide Run1-DMSO | NM_0224<br>97 | MRPS25 | mitochondrial ribosomal protein S25                                                                                      | 0.311745  | Inlier |
| siRNA-Vinblastine Run2-DMSO  | NM_0224<br>97 | MRPS25 | mitochondrial ribosomal protein S25                                                                                      | 0.665618  | Inlier |
| siRNA-Vinblastine Run1-DMSO  | NM_0224<br>97 | MRPS25 | mitochondrial ribosomal protein S25                                                                                      | 0.766922  | Inlier |
| siRNA-Vinblastine Run2-DMSO  | NM_0001<br>39 | MS4A2  | membrane-spanning 4-domains, subfamily A, member 2 (Fc fragment of IgE, high affinity I, receptor for; beta polypeptide) | -1.651529 | Inlier |

Identification of Survival Genes in Human Glioblastoma Cells Using siRNA Screening

Nikhil G Thaker, Fang Zhang, Peter R. McDonald, Tong Ying Shun, Michael D Lewen, Ian F. Pollack, and John S. Lazo

Molecular Pharmacology

|                              |           |       |                                                                                                                          |           |        |
|------------------------------|-----------|-------|--------------------------------------------------------------------------------------------------------------------------|-----------|--------|
| siRNA-Temozolomide Run2-DMSO | NM_000139 | MS4A2 | membrane-spanning 4-domains, subfamily A, member 2 (Fc fragment of IgE, high affinity I, receptor for; beta polypeptide) | -0.821799 | Inlier |
| siRNA-Temozolomide Run3-DMSO | NM_000139 | MS4A2 | membrane-spanning 4-domains, subfamily A, member 2 (Fc fragment of IgE, high affinity I, receptor for; beta polypeptide) | -0.527201 | Inlier |
| siRNA Disorazole DMSO Run3   | NM_000139 | MS4A2 | membrane-spanning 4-domains, subfamily A, member 2 (Fc fragment of IgE, high affinity I, receptor for; beta polypeptide) | -0.004632 | Inlier |

Identification of Survival Genes in Human Glioblastoma Cells Using siRNA Screening

Nikhil G Thaker, Fang Zhang, Peter R. McDonald, Tong Ying Shun, Michael D Lewen, Ian F. Pollack, and John S. Lazo

Molecular Pharmacology

|                              |               |       |                                                                                                                          |          |        |
|------------------------------|---------------|-------|--------------------------------------------------------------------------------------------------------------------------|----------|--------|
| siRNA Disorazole DMSO Run1   | NM_0001<br>39 | MS4A2 | membrane-spanning 4-domains, subfamily A, member 2 (Fc fragment of IgE, high affinity I, receptor for; beta polypeptide) | 0.004632 | Inlier |
| siRNA-Temozolomide Run1-DMSO | NM_0001<br>39 | MS4A2 | membrane-spanning 4-domains, subfamily A, member 2 (Fc fragment of IgE, high affinity I, receptor for; beta polypeptide) | 0.284536 | Inlier |
| siRNA Disorazole DMSO Run2   | NM_0001<br>39 | MS4A2 | membrane-spanning 4-domains, subfamily A, member 2 (Fc fragment of IgE, high affinity I, receptor for; beta polypeptide) | 2.14842  | Inlier |

Identification of Survival Genes in Human Glioblastoma Cells Using siRNA Screening

Nikhil G Thaker, Fang Zhang, Peter R. McDonald, Tong Ying Shun, Michael D Lewen, Ian F. Pollack, and John S.

Lazo

Molecular Pharmacology

|                              |           |        |                                                                                                                          |           |        |
|------------------------------|-----------|--------|--------------------------------------------------------------------------------------------------------------------------|-----------|--------|
| siRNA-Vinblastine Run1-DMSO  | NM_000139 | MS4A2  | membrane-spanning 4-domains, subfamily A, member 2 (Fc fragment of IgE, high affinity I, receptor for; beta polypeptide) | 2.582356  | Inlier |
| siRNA-Temozolomide Run2-DMSO | NM_031457 | MS4A8B | membrane-spanning 4-domains, subfamily A, member 8B                                                                      | -1.214534 | Inlier |
| siRNA-Temozolomide Run3-DMSO | NM_031457 | MS4A8B | membrane-spanning 4-domains, subfamily A, member 8B                                                                      | -0.625252 | Inlier |
| siRNA Disorazole DMSO Run1   | NM_031457 | MS4A8B | membrane-spanning 4-domains, subfamily A, member 8B                                                                      | -0.620018 | Inlier |

Identification of Survival Genes in Human Glioblastoma Cells Using siRNA Screening  
 Nikhil G Thaker, Fang Zhang, Peter R. McDonald, Tong Ying Shun, Michael D Lewen, Ian F. Pollack, and John S. Lazo  
 Molecular Pharmacology

|                              |               |        |                                                                        |                  |
|------------------------------|---------------|--------|------------------------------------------------------------------------|------------------|
| siRNA-Temozolomide Run1-DMSO | NM_0314<br>57 | MS4A8B | membrane-spanning<br>4-<br>domains,<br>subfamily<br>A,<br>member<br>8B | -0.406558 Inlier |
| siRNA-Vinblastine Run1-DMSO  | NM_0314<br>57 | MS4A8B | membrane-spanning<br>4-<br>domains,<br>subfamily<br>A,<br>member<br>8B | 0.406558 Inlier  |
| siRNA-Vinblastine Run2-DMSO  | NM_0314<br>57 | MS4A8B | membrane-spanning<br>4-<br>domains,<br>subfamily<br>A,<br>member<br>8B | 0.723748 Inlier  |
| siRNA Disorazole DMSO Run2   | NM_0314<br>57 | MS4A8B | membrane-spanning<br>4-<br>domains,<br>subfamily<br>A,<br>member<br>8B | 1.360752 Inlier  |
| siRNA Disorazole DMSO Run3   | NM_0314<br>57 | MS4A8B | membrane-spanning<br>4-<br>domains,<br>subfamily<br>A,<br>member<br>8B | 1.650721 Inlier  |
| siRNA-Temozolomide Run3-DMSO | NM_0320<br>46 | MSP    | transmembrane<br>protease,<br>serine 13                                | -0.73931 Inlier  |

Identification of Survival Genes in Human Glioblastoma Cells Using siRNA Screening  
 Nikhil G Thaker, Fang Zhang, Peter R. McDonald, Tong Ying Shun, Michael D Lewen, Ian F. Pollack, and John S. Lazo

Molecular Pharmacology

|                              |               |      |                                   |           |         |
|------------------------------|---------------|------|-----------------------------------|-----------|---------|
| siRNA-Temozolomide Run2-DMSO | NM_0320<br>46 | MSP  | transmembrane protease, serine 13 | -0.60969  | Inlier  |
| siRNA Disorazole DMSO Run2   | NM_0320<br>46 | MSP  | transmembrane protease, serine 13 | -0.37498  | Inlier  |
| siRNA Disorazole DMSO Run3   | NM_0320<br>46 | MSP  | transmembrane protease, serine 13 | -0.196595 | Inlier  |
| siRNA-Temozolomide Run1-DMSO | NM_0320<br>46 | MSP  | transmembrane protease, serine 13 | 0.196595  | Inlier  |
| siRNA Disorazole DMSO Run1   | NM_0320<br>46 | MSP  | transmembrane protease, serine 13 | 0.847891  | Inlier  |
| siRNA-Vinblastine Run2-DMSO  | NM_0320<br>46 | MSP  | transmembrane protease, serine 13 | 1.975205  | Inlier  |
| siRNA-Vinblastine Run1-DMSO  | NM_0320<br>46 | MSP  | transmembrane protease, serine 13 | 1.984465  | Inlier  |
| siRNA-Vinblastine Run2-DMSO  | NM_1387<br>16 | MSR1 | macrophage scavenger receptor 1   | -3.966848 | Outlier |
| siRNA Disorazole DMSO Run3   | NM_1387<br>16 | MSR1 | macrophage scavenger receptor 1   | -0.674811 | Inlier  |
| siRNA Disorazole DMSO Run1   | NM_1387<br>16 | MSR1 | macrophage scavenger receptor 1   | -0.674189 | Inlier  |
| siRNA-Temozolomide Run1-DMSO | NM_1387<br>16 | MSR1 | macrophage scavenger receptor 1   | -0.035023 | Inlier  |
| siRNA-Temozolomide Run2-DMSO | NM_1387<br>16 | MSR1 | macrophage scavenger receptor 1   | 0.035025  | Inlier  |
| siRNA-Temozolomide Run3-DMSO | NM_1387<br>16 | MSR1 | macrophage scavenger receptor 1   | 0.520933  | Inlier  |

Identification of Survival Genes in Human Glioblastoma Cells Using siRNA Screening  
 Nikhil G Thaker, Fang Zhang, Peter R. McDonald, Tong Ying Shun, Michael D Lewen, Ian F. Pollack, and John S. Lazo

Molecular Pharmacology

| siRNA Treatment              | Gene ID       | Gene Name | Gene Description                 | Log2 Fold Change | Significance |
|------------------------------|---------------|-----------|----------------------------------|------------------|--------------|
| siRNA Disorazole DMSO Run2   | NM_1387<br>16 | MSR1      | macrophage scavenger receptor 1  | 2.027266         | Inlier       |
| siRNA-Vinblastine Run1-DMSO  | NM_1387<br>16 | MSR1      | macrophage scavenger receptor 1  | 2.941626         | Inlier       |
| siRNA-Temozolomide Run3-DMSO | NM_0123<br>31 | MSRA      | methionine sulfoxide reductase A | -3.879631        | Outlier      |
| siRNA Disorazole DMSO Run1   | NM_0123<br>31 | MSRA      | methionine sulfoxide reductase A | -0.739532        | Inlier       |
| siRNA Disorazole DMSO Run3   | NM_0123<br>31 | MSRA      | methionine sulfoxide reductase A | -0.609468        | Inlier       |
| siRNA-Vinblastine Run2-DMSO  | NM_0123<br>31 | MSRA      | methionine sulfoxide reductase A | -0.195699        | Inlier       |
| siRNA-Temozolomide Run2-DMSO | NM_0123<br>31 | MSRA      | methionine sulfoxide reductase A | 0.195699         | Inlier       |
| siRNA-Temozolomide Run1-DMSO | NM_0123<br>31 | MSRA      | methionine sulfoxide reductase A | 0.196206         | Inlier       |
| siRNA-Vinblastine Run1-DMSO  | NM_0123<br>31 | MSRA      | methionine sulfoxide reductase A | 2.681819         | Inlier       |
| siRNA Disorazole DMSO Run2   | NM_0123<br>31 | MSRA      | methionine sulfoxide reductase A | 5.170175         | Outlier      |



Identification of Survival Genes in Human Glioblastoma Cells Using siRNA Screening

Nikhil G Thaker, Fang Zhang, Peter R. McDonald, Tong Ying Shun, Michael D Lewen, Ian F. Pollack, and John S. Lazo

Molecular Pharmacology

|                              |           |      |                                                          |           |        |
|------------------------------|-----------|------|----------------------------------------------------------|-----------|--------|
| siRNA-Temozolomide Run3-DMSO | NM_020998 | MST1 | macrophage stimulating 1 (hepatocyte growth factor-like) | -1.129983 | Inlier |
| siRNA-Temozolomide Run2-DMSO | NM_020998 | MST1 | macrophage stimulating 1 (hepatocyte growth factor-like) | -0.566139 | Inlier |
| siRNA Disorazole DMSO Run1   | NM_020998 | MST1 | macrophage stimulating 1 (hepatocyte growth factor-like) | -0.239066 | Inlier |
| siRNA Disorazole DMSO Run2   | NM_020998 | MST1 | macrophage stimulating 1 (hepatocyte growth factor-like) | -0.142999 | Inlier |
| siRNA-Temozolomide Run1-DMSO | NM_020998 | MST1 | macrophage stimulating 1 (hepatocyte growth factor-like) | 0.142999  | Inlier |
| siRNA Disorazole DMSO Run3   | NM_020998 | MST1 | macrophage stimulating 1 (hepatocyte growth factor-like) | 0.782861  | Inlier |

Identification of Survival Genes in Human Glioblastoma Cells Using siRNA Screening  
 Nikhil G Thaker, Fang Zhang, Peter R. McDonald, Tong Ying Shun, Michael D Lewen, Ian F. Pollack, and John S. Lazo  
 Molecular Pharmacology

|                              |           |       |                                                                   |           |        |
|------------------------------|-----------|-------|-------------------------------------------------------------------|-----------|--------|
| siRNA-Vinblastine Run2-DMSO  | NM_020998 | MST1  | macrophage stimulating 1 (hepatocyte growth factor-like)          | 0.825324  | Inlier |
| siRNA-Vinblastine Run1-DMSO  | NM_020998 | MST1  | macrophage stimulating 1 (hepatocyte growth factor-like)          | 1.040533  | Inlier |
| siRNA-Temozolomide Run3-DMSO | NM_002447 | MST1R | macrophage stimulating 1 receptor (c-met-related tyrosine kinase) | -2.540883 | Inlier |
| siRNA-Temozolomide Run2-DMSO | NM_002447 | MST1R | macrophage stimulating 1 receptor (c-met-related tyrosine kinase) | -0.863593 | Inlier |
| siRNA-Temozolomide Run1-DMSO | NM_002447 | MST1R | macrophage stimulating 1 receptor (c-met-related tyrosine kinase) | -0.719424 | Inlier |
| siRNA Disorazole DMSO Run1   | NM_002447 | MST1R | macrophage stimulating 1 receptor (c-met-related tyrosine kinase) | -0.133588 | Inlier |

Identification of Survival Genes in Human Glioblastoma Cells Using siRNA Screening  
 Nikhil G Thaker, Fang Zhang, Peter R. McDonald, Tong Ying Shun, Michael D Lewen, Ian F. Pollack, and John S. Lazo  
 Molecular Pharmacology

|                              |               |       |                                                                   |           |        |
|------------------------------|---------------|-------|-------------------------------------------------------------------|-----------|--------|
| siRNA-Vinblastine Run2-DMSO  | NM_0024<br>47 | MST1R | macrophage stimulating 1 receptor (c-met-related tyrosine kinase) | 0.133588  | Inlier |
| siRNA-Vinblastine Run1-DMSO  | NM_0024<br>47 | MST1R | macrophage stimulating 1 receptor (c-met-related tyrosine kinase) | 0.206556  | Inlier |
| siRNA Disorazole DMSO Run2   | NM_0024<br>47 | MST1R | macrophage stimulating 1 receptor (c-met-related tyrosine kinase) | 0.629576  | Inlier |
| siRNA Disorazole DMSO Run3   | NM_0024<br>47 | MST1R | macrophage stimulating 1 receptor (c-met-related tyrosine kinase) | 1.148526  | Inlier |
| siRNA Disorazole DMSO Run2   | NM_0165<br>42 | MST4  | MST4                                                              | -0.766619 | Inlier |
| siRNA-Temozolomide Run3-DMSO | NM_0165<br>42 | MST4  | MST4                                                              | -0.582381 | Inlier |
| siRNA-Temozolomide Run1-DMSO | NM_0165<br>42 | MST4  | MST4                                                              | -0.475155 | Inlier |
| siRNA Disorazole DMSO Run3   | NM_0165<br>42 | MST4  | MST4                                                              | -0.257014 | Inlier |
| siRNA-Temozolomide Run2-DMSO | NM_0165<br>42 | MST4  | MST4                                                              | 0.257014  | Inlier |
| siRNA Disorazole DMSO Run1   | NM_0165<br>42 | MST4  | MST4                                                              | 2.048672  | Inlier |
| siRNA-Vinblastine Run1-DMSO  | NM_0165<br>42 | MST4  | MST4                                                              | 2.361907  | Inlier |
| siRNA-Vinblastine Run2-DMSO  | NM_0165<br>42 | MST4  | MST4                                                              | 3.314512  | Inlier |

Identification of Survival Genes in Human Glioblastoma Cells Using siRNA Screening  
 Nikhil G Thaker, Fang Zhang, Peter R. McDonald, Tong Ying Shun, Michael D Lewen, Ian F. Pollack, and John S. Lazo

|                                  |               |      |                                              |           |         |
|----------------------------------|---------------|------|----------------------------------------------|-----------|---------|
| siRNA-Temozolomide Run2-<br>DMSO | NM_0145<br>07 | MT   | MT                                           | -1.140959 | Inlier  |
| siRNA Disorazole DMSO Run1       | NM_0145<br>07 | MT   | MT                                           | -0.315068 | Inlier  |
| siRNA-Vinblastine Run2-<br>DMSO  | NM_0145<br>07 | MT   | MT                                           | -0.231632 | Inlier  |
| siRNA Disorazole DMSO Run2       | NM_0145<br>07 | MT   | MT                                           | -0.073509 | Inlier  |
| siRNA-Temozolomide Run3-<br>DMSO | NM_0145<br>07 | MT   | MT                                           | 0.073509  | Inlier  |
| siRNA-Temozolomide Run1-<br>DMSO | NM_0145<br>07 | MT   | MT                                           | 1.033932  | Inlier  |
| siRNA-Vinblastine Run1-<br>DMSO  | NM_0145<br>07 | MT   | MT                                           | 1.62326   | Inlier  |
| siRNA Disorazole DMSO Run3       | NM_0145<br>07 | MT   | MT                                           | 3.964054  | Outlier |
| siRNA Disorazole DMSO Run1       | NM_0024<br>51 | MTAP | methylthio<br>adenosine<br>phosphoryl<br>ase | -1.636605 | Inlier  |
| siRNA-Vinblastine Run2-<br>DMSO  | NM_0024<br>51 | MTAP | methylthio<br>adenosine<br>phosphoryl<br>ase | -1.055624 | Inlier  |
| siRNA Disorazole DMSO Run3       | NM_0024<br>51 | MTAP | methylthio<br>adenosine<br>phosphoryl<br>ase | -0.671126 | Inlier  |
| siRNA-Temozolomide Run3-<br>DMSO | NM_0024<br>51 | MTAP | methylthio<br>adenosine<br>phosphoryl<br>ase | -0.03544  | Inlier  |
| siRNA-Temozolomide Run2-<br>DMSO | NM_0024<br>51 | MTAP | methylthio<br>adenosine<br>phosphoryl<br>ase | 0.03544   | Inlier  |
| siRNA-Temozolomide Run1-<br>DMSO | NM_0024<br>51 | MTAP | methylthio<br>adenosine<br>phosphoryl<br>ase | 0.220892  | Inlier  |
| siRNA Disorazole DMSO Run2       | NM_0024<br>51 | MTAP | methylthio<br>adenosine<br>phosphoryl<br>ase | 0.677874  | Inlier  |

Identification of Survival Genes in Human Glioblastoma Cells Using siRNA Screening  
 Nikhil G Thaker, Fang Zhang, Peter R. McDonald, Tong Ying Shun, Michael D Lewen, Ian F. Pollack, and John S. Lazo  
 Molecular Pharmacology

|                              |           |        |                                   |           |        |
|------------------------------|-----------|--------|-----------------------------------|-----------|--------|
| siRNA-Vinblastine Run1-DMSO  | NM_002451 | MTAP   | methylthioadenosine phosphorylase | 2.375905  | Inlier |
| siRNA Disorazole DMSO Run2   | NM_173702 | MTATP6 | ATP synthase 6                    | -1.885869 | Inlier |
| siRNA Disorazole DMSO Run3   | NM_173702 | MTATP6 | ATP synthase 6                    | -0.918297 | Inlier |
| siRNA Disorazole DMSO Run1   | NM_173702 | MTATP6 | ATP synthase 6                    | -0.430703 | Inlier |
| siRNA-Temozolomide Run2-DMSO | NM_173702 | MTATP6 | ATP synthase 6                    | -0.110315 | Inlier |
| siRNA-Temozolomide Run3-DMSO | NM_173702 | MTATP6 | ATP synthase 6                    | 0.110316  | Inlier |
| siRNA-Vinblastine Run1-DMSO  | NM_173702 | MTATP6 | ATP synthase 6                    | 0.14925   | Inlier |
| siRNA-Vinblastine Run2-DMSO  | NM_173702 | MTATP6 | ATP synthase 6                    | 1.771152  | Inlier |
| siRNA-Temozolomide Run1-DMSO | NM_173702 | MTATP6 | ATP synthase 6                    | 2.068507  | Inlier |
| siRNA Disorazole DMSO Run2   | NM_173703 | MTATP8 | ATP synthase 8                    | -2.237302 | Inlier |
| siRNA Disorazole DMSO Run3   | NM_173703 | MTATP8 | ATP synthase 8                    | -0.682957 | Inlier |
| siRNA-Temozolomide Run2-DMSO | NM_173703 | MTATP8 | ATP synthase 8                    | -0.224578 | Inlier |
| siRNA Disorazole DMSO Run1   | NM_173703 | MTATP8 | ATP synthase 8                    | -0.068645 | Inlier |
| siRNA-Temozolomide Run3-DMSO | NM_173703 | MTATP8 | ATP synthase 8                    | 0.068645  | Inlier |
| siRNA-Vinblastine Run2-DMSO  | NM_173703 | MTATP8 | ATP synthase 8                    | 0.666043  | Inlier |
| siRNA-Temozolomide Run1-DMSO | NM_173703 | MTATP8 | ATP synthase 8                    | 0.698927  | Inlier |

Identification of Survival Genes in Human Glioblastoma Cells Using siRNA Screening  
 Nikhil G Thaker, Fang Zhang, Peter R. McDonald, Tong Ying Shun, Michael D Lewen, Ian F. Pollack, and John S. Lazo

Molecular Pharmacology

|                              |               |        |                              |           |        |
|------------------------------|---------------|--------|------------------------------|-----------|--------|
| siRNA-Vinblastine Run1-DMSO  | NM_1737<br>03 | MTATP8 | ATP synthase 8 cytochrom e c | 1.377785  | Inlier |
| siRNA-Temozolomide Run2-DMSO | NM_1737<br>04 | MTCO1  | oxidase I cytochrom e c      | -0.771838 | Inlier |
| siRNA Disorazole DMSO Run1   | NM_1737<br>04 | MTCO1  | oxidase I cytochrom e c      | -0.577162 | Inlier |
| siRNA-Temozolomide Run3-DMSO | NM_1737<br>04 | MTCO1  | oxidase I cytochrom e c      | -0.053768 | Inlier |
| siRNA Disorazole DMSO Run3   | NM_1737<br>04 | MTCO1  | oxidase I cytochrom e c      | -0.021945 | Inlier |
| siRNA-Temozolomide Run1-DMSO | NM_1737<br>04 | MTCO1  | oxidase I cytochrom e c      | 0.021945  | Inlier |
| siRNA-Vinblastine Run2-DMSO  | NM_1737<br>04 | MTCO1  | oxidase I cytochrom e c      | 0.855766  | Inlier |
| siRNA-Vinblastine Run1-DMSO  | NM_1737<br>04 | MTCO1  | oxidase I cytochrom e c      | 1.211327  | Inlier |
| siRNA Disorazole DMSO Run2   | NM_1737<br>04 | MTCO1  | oxidase I cytochrom e c      | 2.831322  | Inlier |
| siRNA-Temozolomide Run2-DMSO | NM_1737<br>05 | MTCO2  | oxidase II cytochrom e c     | -0.820245 | Inlier |
| siRNA-Temozolomide Run1-DMSO | NM_1737<br>05 | MTCO2  | oxidase II cytochrom e c     | -0.774144 | Inlier |
| siRNA-Temozolomide Run3-DMSO | NM_1737<br>05 | MTCO2  | oxidase II cytochrom e c     | -0.574856 | Inlier |
| siRNA Disorazole DMSO Run1   | NM_1737<br>05 | MTCO2  | oxidase II cytochrom e c     | -0.486451 | Inlier |
| siRNA-Vinblastine Run1-DMSO  | NM_1737<br>05 | MTCO2  | oxidase II cytochrom e c     | 0.486451  | Inlier |
| siRNA-Vinblastine Run2-DMSO  | NM_1737<br>05 | MTCO2  | oxidase II cytochrom e c     | 0.572152  | Inlier |
| siRNA Disorazole DMSO Run3   | NM_1737<br>05 | MTCO2  | oxidase II cytochrom e c     | 1.061474  | Inlier |
| siRNA Disorazole DMSO Run2   | NM_1737<br>05 | MTCO2  | oxidase II                   | 2.084725  | Inlier |

Identification of Survival Genes in Human Glioblastoma Cells Using siRNA Screening  
 Nikhil G Thaker, Fang Zhang, Peter R. McDonald, Tong Ying Shun, Michael D Lewen, Ian F. Pollack, and John S. Lazo

|                              |         |        |            |           |         |                                                                                                                               |
|------------------------------|---------|--------|------------|-----------|---------|-------------------------------------------------------------------------------------------------------------------------------|
| Molecular Pharmacology       | NM_1392 |        |            |           |         |                                                                                                                               |
| siRNA Disorazole DMSO Run2   | 42      | MtFMT  | MtFMT      | -2.100767 | Inlier  |                                                                                                                               |
|                              | NM_1392 |        |            |           |         |                                                                                                                               |
| siRNA Disorazole DMSO Run1   | 42      | MtFMT  | MtFMT      | -0.934906 | Inlier  |                                                                                                                               |
|                              | NM_1392 |        |            |           |         |                                                                                                                               |
| siRNA Disorazole DMSO Run3   | 42      | MtFMT  | MtFMT      | -0.668166 | Inlier  |                                                                                                                               |
| siRNA-Temozolomide Run3-DMSO | NM_1392 |        |            |           |         |                                                                                                                               |
|                              | 42      | MtFMT  | MtFMT      | -0.069893 | Inlier  |                                                                                                                               |
| siRNA-Temozolomide Run1-DMSO | NM_1392 |        |            |           |         |                                                                                                                               |
|                              | 42      | MtFMT  | MtFMT      | 0.069894  | Inlier  |                                                                                                                               |
| siRNA-Temozolomide Run2-DMSO | NM_1392 |        |            |           |         |                                                                                                                               |
|                              | 42      | MtFMT  | MtFMT      | 0.558971  | Inlier  |                                                                                                                               |
| siRNA-Vinblastine Run2-DMSO  | NM_1392 |        |            |           |         |                                                                                                                               |
|                              | 42      | MtFMT  | MtFMT      | 0.680834  | Inlier  |                                                                                                                               |
| siRNA-Vinblastine Run1-DMSO  | NM_1392 |        |            |           |         |                                                                                                                               |
|                              | 42      | MtFMT  | MtFMT      | 2.305223  | Inlier  |                                                                                                                               |
|                              |         |        |            |           |         | methylenetetrahydrofolate dehydrogenase (NADP+ dependent) 1, methylenetetrahydrofolate cyclohydrolase, formyltetrahydrofolate |
| siRNA-Temozolomide Run2-DMSO | NM_0059 |        |            |           |         |                                                                                                                               |
|                              | 56      | MTHFD1 | synthetase | -4.153223 | Outlier |                                                                                                                               |
|                              |         |        |            |           |         | methylenetetrahydrofolate dehydrogenase (NADP+ dependent) 1, methylenetetrahydrofolate cyclohydrolase, formyltetrahydrofolate |
|                              | NM_0059 |        |            |           |         |                                                                                                                               |
| siRNA Disorazole DMSO Run1   | 56      | MTHFD1 | synthetase | -2.196988 | Inlier  |                                                                                                                               |

Identification of Survival Genes in Human Glioblastoma Cells Using siRNA Screening

Nikhil G Thaker, Fang Zhang, Peter R. McDonald, Tong Ying Shun, Michael D Lewen, Ian F. Pollack, and John S. Lazo

Molecular Pharmacology

|                              |           |        |                                                                                                                                         |           |        |
|------------------------------|-----------|--------|-----------------------------------------------------------------------------------------------------------------------------------------|-----------|--------|
| siRNA-Vinblastine Run2-DMSO  | NM_005956 | MTHFD1 | methylenetetrahydrofolate dehydrogenase (NADP+ dependent) 1, methenyltetrahydrofolate cyclohydrolase, formyltetrahydrofolate synthetase | -0.538598 | Inlier |
| siRNA-Temozolomide Run3-DMSO | NM_005956 | MTHFD1 | methylenetetrahydrofolate dehydrogenase (NADP+ dependent) 1, methenyltetrahydrofolate cyclohydrolase, formyltetrahydrofolate synthetase | -0.332417 | Inlier |



Identification of Survival Genes in Human Glioblastoma Cells Using siRNA Screening

Nikhil G Thaker, Fang Zhang, Peter R. McDonald, Tong Ying Shun, Michael D Lewen, Ian F. Pollack, and John S.

Lazo

Molecular Pharmacology

|                                  |               |        |                                                                                                                                                                                    |                 |
|----------------------------------|---------------|--------|------------------------------------------------------------------------------------------------------------------------------------------------------------------------------------|-----------------|
|                                  |               |        | methylenet<br>etrahydrof<br>olate<br>dehydroge<br>nase<br>(NADP+<br>dependent<br>) 1,<br>methenylte<br>trahydrofol<br>ate<br>cyclohydro<br>lase,<br>formyltetra<br>hydrofolat<br>e |                 |
| siRNA-Temozolomide Run1-<br>DMSO | NM_0059<br>56 | MTHFD1 | synthetase                                                                                                                                                                         | 0.332416 Inlier |

|                            |               |        |                                                                                                                                                                                    |                 |
|----------------------------|---------------|--------|------------------------------------------------------------------------------------------------------------------------------------------------------------------------------------|-----------------|
|                            |               |        | methylenet<br>etrahydrof<br>olate<br>dehydroge<br>nase<br>(NADP+<br>dependent<br>) 1,<br>methenylte<br>trahydrofol<br>ate<br>cyclohydro<br>lase,<br>formyltetra<br>hydrofolat<br>e |                 |
| siRNA Disorazole DMSO Run3 | NM_0059<br>56 | MTHFD1 | synthetase                                                                                                                                                                         | 0.343795 Inlier |

Identification of Survival Genes in Human Glioblastoma Cells Using siRNA Screening

Nikhil G Thaker, Fang Zhang, Peter R. McDonald, Tong Ying Shun, Michael D Lewen, Ian F. Pollack, and John S.

Lazo

Molecular Pharmacology

|                              |               |        |                                                                                                       |           |         |
|------------------------------|---------------|--------|-------------------------------------------------------------------------------------------------------|-----------|---------|
| siRNA Disorazole DMSO Run2   | NM_0059<br>56 | MTHFD1 | methylenetetrahydrofolate dehydrogenase (NADP+ dependent) 1, methylenetetrahydrofolate synthetase     | 0.810402  | Inlier  |
| siRNA-Vinblastine Run1-DMSO  | NM_0059<br>56 | MTHFD1 | methylenetetrahydrofolate dehydrogenase (NADP+ dependent) 1, methylenetetrahydrofolate synthetase     | 1.367724  | Inlier  |
| siRNA-Temozolomide Run2-DMSO | NM_0066<br>36 | MTHFD2 | methylenetetrahydrofolate dehydrogenase (NADP+ dependent) 2, methylenetetrahydrofolate cyclohydrolase | -3.880093 | Outlier |

Identification of Survival Genes in Human Glioblastoma Cells Using siRNA Screening

Nikhil G Thaker, Fang Zhang, Peter R. McDonald, Tong Ying Shun, Michael D Lewen, Ian F. Pollack, and John S.

Lazo

Molecular Pharmacology

| siRNA Treatment              | Gene ID   | Gene Name | Log Fold Change | Category |
|------------------------------|-----------|-----------|-----------------|----------|
| siRNA Disorazole DMSO Run1   | NM_006636 | MTHFD2    | -1.071281       | Inlier   |
| siRNA-Vinblastine Run1-DMSO  | NM_006636 | MTHFD2    | -0.277719       | Inlier   |
| siRNA-Vinblastine Run2-DMSO  | NM_006636 | MTHFD2    | -0.110384       | Inlier   |
| siRNA-Temozolomide Run1-DMSO | NM_006636 | MTHFD2    | 0.110381        | Inlier   |

methylenet  
etrahydrof  
olate  
dehydroge  
nase  
(NADP+  
dependent  
) 2,  
methenylte  
trahydrofol  
ate  
cyclohydro  
lase  
methylenet  
etrahydrof  
olate  
dehydroge  
nase  
(NADP+  
dependent  
) 2,  
methenylte  
trahydrofol  
ate  
cyclohydro  
lase  
methylenet  
etrahydrof  
olate  
dehydroge  
nase  
(NADP+  
dependent  
) 2,  
methenylte  
trahydrofol  
ate  
cyclohydro  
lase  
methylenet  
etrahydrof  
olate  
dehydroge  
nase  
(NADP+  
dependent  
) 2,  
methenylte  
trahydrofol  
ate  
cyclohydro  
lase

Identification of Survival Genes in Human Glioblastoma Cells Using siRNA Screening

Nikhil G Thaker, Fang Zhang, Peter R. McDonald, Tong Ying Shun, Michael D Lewen, Ian F. Pollack, and John S. Lazo

Molecular Pharmacology

|                              |           |        |  |                                                                                        |                  |
|------------------------------|-----------|--------|--|----------------------------------------------------------------------------------------|------------------|
|                              |           |        |  | methylenetetrahydrofolate dehydrogenase (NADP+ dependent) 2, methylenetetrahydrofolate |                  |
| siRNA-Temozolomide Run3-DMSO | NM_006636 | MTHFD2 |  | cyclohydrolase                                                                         | 0.166326 Inlier  |
|                              |           |        |  | methylenetetrahydrofolate dehydrogenase (NADP+ dependent) 2, methylenetetrahydrofolate |                  |
| siRNA Disorazole DMSO Run2   | NM_006636 | MTHFD2 |  | cyclohydrolase                                                                         | 2.902317 Inlier  |
|                              |           |        |  | methylenetetrahydrofolate dehydrogenase (NADP+ dependent) 2, methylenetetrahydrofolate |                  |
| siRNA Disorazole DMSO Run3   | NM_006636 | MTHFD2 |  | cyclohydrolase                                                                         | 4.885131 Outlier |
|                              |           |        |  | 5,10-methylenetetrahydrofolate reductase (NADPH)                                       |                  |
| siRNA Disorazole DMSO Run3   | NM_005957 | MTHFR  |  | 5,10-methylenetetrahydrofolate reductase (NADPH)                                       | -1.107719 Inlier |
| siRNA-Temozolomide Run3-DMSO | NM_005957 | MTHFR  |  | 5,10-methylenetetrahydrofolate reductase (NADPH)                                       | -0.816884 Inlier |

Identification of Survival Genes in Human Glioblastoma Cells Using siRNA Screening  
 Nikhil G Thaker, Fang Zhang, Peter R. McDonald, Tong Ying Shun, Michael D Lewen, Ian F. Pollack, and John S. Lazo

Molecular Pharmacology

|                              |               |       |                                                                                   |           |        |
|------------------------------|---------------|-------|-----------------------------------------------------------------------------------|-----------|--------|
| siRNA Disorazole DMSO Run1   | NM_0059<br>57 | MTHFR | 5,10-methylenetetrahydrofolate reductase (NADPH)                                  | -0.532116 | Inlier |
| siRNA-Temozolomide Run2-DMSO | NM_0059<br>57 | MTHFR | 5,10-methylenetetrahydrofolate reductase (NADPH)                                  | -0.237434 | Inlier |
| siRNA-Vinblastine Run2-DMSO  | NM_0059<br>57 | MTHFR | 5,10-methylenetetrahydrofolate reductase (NADPH)                                  | 0.237433  | Inlier |
| siRNA-Temozolomide Run1-DMSO | NM_0059<br>57 | MTHFR | 5,10-methylenetetrahydrofolate reductase (NADPH)                                  | 0.488693  | Inlier |
| siRNA-Vinblastine Run1-DMSO  | NM_0059<br>57 | MTHFR | 5,10-methylenetetrahydrofolate reductase (NADPH)                                  | 1.427209  | Inlier |
| siRNA Disorazole DMSO Run2   | NM_0059<br>57 | MTHFR | 5,10-methylenetetrahydrofolate reductase (NADPH)                                  | 1.633595  | Inlier |
| siRNA Disorazole DMSO Run1   | NM_0064<br>41 | MTHFS | 5,10-methylenetetrahydrofolate synthetase (5-formyltetrahydrofolate cyclo-ligase) | -2.892202 | Inlier |

Identification of Survival Genes in Human Glioblastoma Cells Using siRNA Screening

Nikhil G Thaker, Fang Zhang, Peter R. McDonald, Tong Ying Shun, Michael D Lewen, Ian F. Pollack, and John S. Lazo

Molecular Pharmacology

| siRNA                        | Gene      | Gene ID | Gene Name                                                                        | Log Fold Change | Category |
|------------------------------|-----------|---------|----------------------------------------------------------------------------------|-----------------|----------|
| siRNA-Temozolomide Run1-DMSO | NM_006441 | MTHFS   | 5,10-methenyltetrahydrofolate synthetase (5-formyltetrahydrofolate cyclo-ligase) | -0.796498       | Inlier   |
| siRNA-Temozolomide Run3-DMSO | NM_006441 | MTHFS   | 5,10-methenyltetrahydrofolate synthetase (5-formyltetrahydrofolate cyclo-ligase) | -0.166081       | Inlier   |
| siRNA-Temozolomide Run2-DMSO | NM_006441 | MTHFS   | 5,10-methenyltetrahydrofolate synthetase (5-formyltetrahydrofolate cyclo-ligase) | -0.019172       | Inlier   |
| siRNA Disorazole DMSO Run3   | NM_006441 | MTHFS   | 5,10-methenyltetrahydrofolate synthetase (5-formyltetrahydrofolate cyclo-ligase) | 0.019171        | Inlier   |
| siRNA-Vinblastine Run2-DMSO  | NM_006441 | MTHFS   | 5,10-methenyltetrahydrofolate cyclo-ligase)                                      | 0.552502        | Inlier   |

Identification of Survival Genes in Human Glioblastoma Cells Using siRNA Screening  
 Nikhil G Thaker, Fang Zhang, Peter R. McDonald, Tong Ying Shun, Michael D Lewen, Ian F. Pollack, and John S. Lazo

Molecular Pharmacology

|                              |               |       |                                                                           |                  |
|------------------------------|---------------|-------|---------------------------------------------------------------------------|------------------|
|                              |               |       | 5,10-methenyltetrahydrofolate synthetase (5-formyltetrahydrofolate cyclo- |                  |
| siRNA-Vinblastine Run1-DMSO  | NM_0064<br>41 | MTHFS | ligase)                                                                   | 1.141971 Inlier  |
|                              |               |       | 5,10-methenyltetrahydrofolate synthetase (5-formyltetrahydrofolate cyclo- |                  |
| siRNA Disorazole DMSO Run2   | NM_0064<br>41 | MTHFS | ligase)                                                                   | 1.56809 Inlier   |
| siRNA-Temozolomide Run2-DMSO | NM_0002<br>52 | MTM1  | myotubularin 1                                                            | -0.80271 Inlier  |
| siRNA-Temozolomide Run3-DMSO | NM_0002<br>52 | MTM1  | myotubularin 1                                                            | -0.787928 Inlier |
| siRNA Disorazole DMSO Run3   | NM_0002<br>52 | MTM1  | myotubularin 1                                                            | -0.644176 Inlier |
| siRNA Disorazole DMSO Run2   | NM_0002<br>52 | MTM1  | myotubularin 1                                                            | -0.007121 Inlier |
| siRNA-Temozolomide Run1-DMSO | NM_0002<br>52 | MTM1  | myotubularin 1                                                            | 0.007121 Inlier  |
| siRNA Disorazole DMSO Run1   | NM_0002<br>52 | MTM1  | myotubularin 1                                                            | 0.440807 Inlier  |
| siRNA-Vinblastine Run1-DMSO  | NM_0002<br>52 | MTM1  | myotubularin 1                                                            | 0.704824 Inlier  |
| siRNA-Vinblastine Run2-DMSO  | NM_0002<br>52 | MTM1  | myotubularin 1                                                            | 0.771278 Inlier  |
|                              |               |       | myotubularin related protein 1                                            |                  |
| siRNA-Temozolomide Run2-DMSO | NM_1767<br>89 | MTMR1 | myotubularin related protein 1                                            | -0.825736 Inlier |
|                              |               |       | myotubularin related protein 1                                            |                  |
| siRNA-Temozolomide Run3-DMSO | NM_1767<br>89 | MTMR1 | myotubularin related protein 1                                            | -0.606668 Inlier |
|                              |               |       | myotubularin related protein 1                                            |                  |
| siRNA Disorazole DMSO Run3   | NM_1767<br>89 | MTMR1 | myotubularin related protein 1                                            | -0.439146 Inlier |
|                              |               |       | myotubularin related protein 1                                            |                  |
| siRNA-Temozolomide Run1-DMSO | NM_1767<br>89 | MTMR1 | myotubularin related protein 1                                            | -0.304933 Inlier |

Identification of Survival Genes in Human Glioblastoma Cells Using siRNA Screening  
 Nikhil G Thaker, Fang Zhang, Peter R. McDonald, Tong Ying Shun, Michael D Lewen, Ian F. Pollack, and John S. Lazo  
 Molecular Pharmacology

|                              |               |       |                                |           |        |
|------------------------------|---------------|-------|--------------------------------|-----------|--------|
| siRNA Disorazole DMSO Run2   | NM_1767<br>89 | MTMR1 | myotubularin related protein 1 | 0.304933  | Inlier |
| siRNA Disorazole DMSO Run1   | NM_1767<br>89 | MTMR1 | myotubularin related protein 1 | 0.742332  | Inlier |
| siRNA-Vinblastine Run1-DMSO  | NM_1767<br>89 | MTMR1 | myotubularin related protein 1 | 1.559179  | Inlier |
| siRNA-Vinblastine Run2-DMSO  | NM_1767<br>89 | MTMR1 | myotubularin related protein 1 | 1.807144  | Inlier |
| siRNA Disorazole DMSO Run2   | NM_2012<br>78 | MTMR2 | myotubularin related protein 2 | -1.183362 | Inlier |
| siRNA-Temozolomide Run1-DMSO | NM_2012<br>78 | MTMR2 | myotubularin related protein 2 | -1.028937 | Inlier |
| siRNA-Temozolomide Run2-DMSO | NM_2012<br>78 | MTMR2 | myotubularin related protein 2 | -0.831141 | Inlier |
| siRNA-Vinblastine Run2-DMSO  | NM_2012<br>78 | MTMR2 | myotubularin related protein 2 | -0.337618 | Inlier |
| siRNA-Temozolomide Run3-DMSO | NM_2012<br>78 | MTMR2 | myotubularin related protein 2 | 0.337617  | Inlier |
| siRNA Disorazole DMSO Run3   | NM_2012<br>78 | MTMR2 | myotubularin related protein 2 | 0.361376  | Inlier |
| siRNA-Vinblastine Run1-DMSO  | NM_2012<br>78 | MTMR2 | myotubularin related protein 2 | 0.65313   | Inlier |
| siRNA Disorazole DMSO Run1   | NM_2012<br>78 | MTMR2 | myotubularin related protein 2 | 0.69587   | Inlier |
| siRNA-Temozolomide Run3-DMSO | NM_1530<br>51 | MTMR3 | myotubularin related protein 3 | -1.375071 | Inlier |



Identification of Survival Genes in Human Glioblastoma Cells Using siRNA Screening  
 Nikhil G Thaker, Fang Zhang, Peter R. McDonald, Tong Ying Shun, Michael D Lewen, Ian F. Pollack, and John S. Lazo  
 Molecular Pharmacology

|                              |               |       |                                |           |        |
|------------------------------|---------------|-------|--------------------------------|-----------|--------|
| siRNA Disorazole DMSO Run2   | NM_1530<br>51 | MTMR3 | myotubularin related protein 3 | -0.788347 | Inlier |
| siRNA-Temozolomide Run2-DMSO | NM_1530<br>51 | MTMR3 | myotubularin related protein 3 | -0.362694 | Inlier |
| siRNA-Vinblastine Run1-DMSO  | NM_1530<br>51 | MTMR3 | myotubularin related protein 3 | -0.000644 | Inlier |
| siRNA Disorazole DMSO Run1   | NM_1530<br>51 | MTMR3 | myotubularin related protein 3 | 0.000644  | Inlier |
| siRNA-Temozolomide Run1-DMSO | NM_1530<br>51 | MTMR3 | myotubularin related protein 3 | 0.631668  | Inlier |
| siRNA-Vinblastine Run2-DMSO  | NM_1530<br>51 | MTMR3 | myotubularin related protein 3 | 0.717332  | Inlier |
| siRNA Disorazole DMSO Run3   | NM_1530<br>51 | MTMR3 | myotubularin related protein 3 | 0.892637  | Inlier |
| siRNA-Temozolomide Run2-DMSO | NM_0046<br>87 | MTMR4 | myotubularin related protein 4 | -0.906159 | Inlier |
| siRNA-Temozolomide Run1-DMSO | NM_0046<br>87 | MTMR4 | myotubularin related protein 4 | -0.442841 | Inlier |
| siRNA-Temozolomide Run3-DMSO | NM_0046<br>87 | MTMR4 | myotubularin related protein 4 | -0.355884 | Inlier |
| siRNA Disorazole DMSO Run3   | NM_0046<br>87 | MTMR4 | myotubularin related protein 4 | -0.198511 | Inlier |
| siRNA Disorazole DMSO Run1   | NM_0046<br>87 | MTMR4 | myotubularin related protein 4 | 0.198511  | Inlier |
| siRNA-Vinblastine Run1-DMSO  | NM_0046<br>87 | MTMR4 | myotubularin related protein 4 | 1.331533  | Inlier |

Identification of Survival Genes in Human Glioblastoma Cells Using siRNA Screening  
 Nikhil G Thaker, Fang Zhang, Peter R. McDonald, Tong Ying Shun, Michael D Lewen, Ian F. Pollack, and John S. Lazo

Molecular Pharmacology

|                              |               |       |                                |           |         |
|------------------------------|---------------|-------|--------------------------------|-----------|---------|
| siRNA-Vinblastine Run2-DMSO  | NM_0046<br>87 | MTMR4 | myotubularin related protein 4 | 1.343572  | Inlier  |
| siRNA Disorazole DMSO Run2   | NM_0046<br>87 | MTMR4 | myotubularin related protein 4 | 1.398876  | Inlier  |
| siRNA-Temozolomide Run2-DMSO | NM_0046<br>85 | MTMR6 | myotubularin related protein 6 | -4.95296  | Outlier |
| siRNA-Temozolomide Run3-DMSO | NM_0046<br>85 | MTMR6 | myotubularin related protein 6 | -4.604959 | Outlier |
| siRNA Disorazole DMSO Run1   | NM_0046<br>85 | MTMR6 | myotubularin related protein 6 | -0.370833 | Inlier  |
| siRNA Disorazole DMSO Run3   | NM_0046<br>85 | MTMR6 | myotubularin related protein 6 | -0.259226 | Inlier  |
| siRNA Disorazole DMSO Run2   | NM_0046<br>85 | MTMR6 | myotubularin related protein 6 | 0.259225  | Inlier  |
| siRNA-Vinblastine Run1-DMSO  | NM_0046<br>85 | MTMR6 | myotubularin related protein 6 | 0.346446  | Inlier  |
| siRNA-Temozolomide Run1-DMSO | NM_0046<br>85 | MTMR6 | myotubularin related protein 6 | 0.978167  | Inlier  |
| siRNA-Vinblastine Run2-DMSO  | NM_0046<br>85 | MTMR6 | myotubularin related protein 6 | 1.578041  | Inlier  |
| siRNA-Temozolomide Run2-DMSO | NM_0046<br>86 | MTMR7 | myotubularin related protein 7 | -1.026036 | Inlier  |
| siRNA-Temozolomide Run1-DMSO | NM_0046<br>86 | MTMR7 | myotubularin related protein 7 | -0.855546 | Inlier  |
| siRNA Disorazole DMSO Run2   | NM_0046<br>86 | MTMR7 | myotubularin related protein 7 | -0.216718 | Inlier  |

Identification of Survival Genes in Human Glioblastoma Cells Using siRNA Screening  
 Nikhil G Thaker, Fang Zhang, Peter R. McDonald, Tong Ying Shun, Michael D Lewen, Ian F. Pollack, and John S. Lazo

Molecular Pharmacology

|                              |               |       |                                |           |        |
|------------------------------|---------------|-------|--------------------------------|-----------|--------|
| siRNA-Vinblastine Run2-DMSO  | NM_0046<br>86 | MTMR7 | myotubularin related protein 7 | -0.155182 | Inlier |
| siRNA-Vinblastine Run1-DMSO  | NM_0046<br>86 | MTMR7 | myotubularin related protein 7 | 0.155182  | Inlier |
| siRNA Disorazole DMSO Run1   | NM_0046<br>86 | MTMR7 | myotubularin related protein 7 | 0.625338  | Inlier |
| siRNA-Temozolomide Run3-DMSO | NM_0046<br>86 | MTMR7 | myotubularin related protein 7 | 0.723662  | Inlier |
| siRNA Disorazole DMSO Run3   | NM_0046<br>86 | MTMR7 | myotubularin related protein 7 | 1.358179  | Inlier |
| siRNA Disorazole DMSO Run2   | NM_0176<br>77 | MTMR8 | myotubularin related protein 8 | -0.851033 | Inlier |
| siRNA-Temozolomide Run3-DMSO | NM_0176<br>77 | MTMR8 | myotubularin related protein 8 | -0.816135 | Inlier |
| siRNA-Temozolomide Run2-DMSO | NM_0176<br>77 | MTMR8 | myotubularin related protein 8 | -0.612201 | Inlier |
| siRNA Disorazole DMSO Run1   | NM_0176<br>77 | MTMR8 | myotubularin related protein 8 | -0.203894 | Inlier |
| siRNA Disorazole DMSO Run3   | NM_0176<br>77 | MTMR8 | myotubularin related protein 8 | 0.203894  | Inlier |
| siRNA-Vinblastine Run1-DMSO  | NM_0176<br>77 | MTMR8 | myotubularin related protein 8 | 0.658568  | Inlier |
| siRNA-Temozolomide Run1-DMSO | NM_0176<br>77 | MTMR8 | myotubularin related protein 8 | 0.690432  | Inlier |
| siRNA-Vinblastine Run2-DMSO  | NM_0176<br>77 | MTMR8 | myotubularin related protein 8 | 0.926833  | Inlier |

Identification of Survival Genes in Human Glioblastoma Cells Using siRNA Screening  
 Nikhil G Thaker, Fang Zhang, Peter R. McDonald, Tong Ying Shun, Michael D Lewen, Ian F. Pollack, and John S. Lazo

Molecular Pharmacology

|                              |               |       |                                |           |        |
|------------------------------|---------------|-------|--------------------------------|-----------|--------|
| siRNA-Temozolomide Run2-DMSO | NM_0154<br>58 | MTMR9 | myotubularin related protein 9 | -0.73236  | Inlier |
| siRNA-Temozolomide Run3-DMSO | NM_0154<br>58 | MTMR9 | myotubularin related protein 9 | -0.61664  | Inlier |
| siRNA-Temozolomide Run1-DMSO | NM_0154<br>58 | MTMR9 | myotubularin related protein 9 | -0.066183 | Inlier |
| siRNA Disorazole DMSO Run2   | NM_0154<br>58 | MTMR9 | myotubularin related protein 9 | -0.009955 | Inlier |
| siRNA Disorazole DMSO Run3   | NM_0154<br>58 | MTMR9 | myotubularin related protein 9 | 0.009955  | Inlier |
| siRNA Disorazole DMSO Run1   | NM_0154<br>58 | MTMR9 | myotubularin related protein 9 | 0.990321  | Inlier |
| siRNA-Vinblastine Run2-DMSO  | NM_0154<br>58 | MTMR9 | myotubularin related protein 9 | 1.521816  | Inlier |
| siRNA-Vinblastine Run1-DMSO  | NM_0154<br>58 | MTMR9 | myotubularin related protein 9 | 1.74125   | Inlier |
| siRNA Disorazole DMSO Run1   | NM_1737<br>08 | MTND1 | NADH dehydrogenase 1           | -1.208132 | Inlier |
| siRNA-Temozolomide Run2-DMSO | NM_1737<br>08 | MTND1 | NADH dehydrogenase 1           | -0.94107  | Inlier |
| siRNA Disorazole DMSO Run2   | NM_1737<br>08 | MTND1 | NADH dehydrogenase 1           | -0.464008 | Inlier |
| siRNA-Temozolomide Run1-DMSO | NM_1737<br>08 | MTND1 | NADH dehydrogenase 1           | -0.067542 | Inlier |
| siRNA-Vinblastine Run2-DMSO  | NM_1737<br>08 | MTND1 | NADH dehydrogenase 1           | 0.067542  | Inlier |
| siRNA Disorazole DMSO Run3   | NM_1737<br>08 | MTND1 | NADH dehydrogenase 1           | 0.195728  | Inlier |

Identification of Survival Genes in Human Glioblastoma Cells Using siRNA Screening  
 Nikhil G Thaker, Fang Zhang, Peter R. McDonald, Tong Ying Shun, Michael D Lewen, Ian F. Pollack, and John S. Lazo

| Molecular Pharmacology       | siRNA     | Gene  | MTND   | NADH dehydrogenase | Value  | Inlier |
|------------------------------|-----------|-------|--------|--------------------|--------|--------|
| siRNA-Vinblastine Run1-DMSO  | NM_173708 | MTND1 | nase 1 | 0.884992           | Inlier |        |
| siRNA-Temozolomide Run3-DMSO | NM_173708 | MTND1 | nase 1 | 1.060581           | Inlier |        |
| siRNA-Temozolomide Run2-DMSO | NM_173709 | MTND2 | nase 2 | -1.609229          | Inlier |        |
| siRNA-Temozolomide Run3-DMSO | NM_173709 | MTND2 | nase 2 | -0.979505          | Inlier |        |
| siRNA Disorazole DMSO Run3   | NM_173709 | MTND2 | nase 2 | -0.220338          | Inlier |        |
| siRNA Disorazole DMSO Run1   | NM_173709 | MTND2 | nase 2 | -0.13633           | Inlier |        |
| siRNA-Temozolomide Run1-DMSO | NM_173709 | MTND2 | nase 2 | 0.13633            | Inlier |        |
| siRNA-Vinblastine Run2-DMSO  | NM_173709 | MTND2 | nase 2 | 0.607024           | Inlier |        |
| siRNA Disorazole DMSO Run2   | NM_173709 | MTND2 | nase 2 | 0.741976           | Inlier |        |
| siRNA-Vinblastine Run1-DMSO  | NM_173709 | MTND2 | nase 2 | 0.824029           | Inlier |        |
| siRNA Disorazole DMSO Run1   | NM_173710 | MTND3 | nase 3 | -2.416955          | Inlier |        |
| siRNA-Temozolomide Run2-DMSO | NM_173710 | MTND3 | nase 3 | -0.973848          | Inlier |        |
| siRNA-Temozolomide Run3-DMSO | NM_173710 | MTND3 | nase 3 | -0.544046          | Inlier |        |
| siRNA Disorazole DMSO Run3   | NM_173710 | MTND3 | nase 3 | -0.248377          | Inlier |        |
| siRNA-Vinblastine Run2-DMSO  | NM_173710 | MTND3 | nase 3 | 0.248377           | Inlier |        |
| siRNA-Vinblastine Run1-DMSO  | NM_173710 | MTND3 | nase 3 | 0.458216           | Inlier |        |
| siRNA Disorazole DMSO Run2   | NM_173710 | MTND3 | nase 3 | 0.804954           | Inlier |        |

Identification of Survival Genes in Human Glioblastoma Cells Using siRNA Screening  
 Nikhil G Thaker, Fang Zhang, Peter R. McDonald, Tong Ying Shun, Michael D Lewen, Ian F. Pollack, and John S. Lazo

| Molecular Pharmacology       |               |        | NADH dehydrogenase 3  |           |        |
|------------------------------|---------------|--------|-----------------------|-----------|--------|
| siRNA-Temozolomide Run1-DMSO | NM_1737<br>10 | MTND3  | NADH dehydrogenase 3  | 1.111167  | Inlier |
| siRNA-Temozolomide Run2-DMSO | NM_1737<br>11 | MTND4  | NADH dehydrogenase 4  | -1.487355 | Inlier |
| siRNA-Temozolomide Run3-DMSO | NM_1737<br>11 | MTND4  | NADH dehydrogenase 4  | -1.171222 | Inlier |
| siRNA Disorazole DMSO Run1   | NM_1737<br>11 | MTND4  | NADH dehydrogenase 4  | -0.945415 | Inlier |
| siRNA Disorazole DMSO Run2   | NM_1737<br>11 | MTND4  | NADH dehydrogenase 4  | -0.085288 | Inlier |
| siRNA Disorazole DMSO Run3   | NM_1737<br>11 | MTND4  | NADH dehydrogenase 4  | 0.085288  | Inlier |
| siRNA-Temozolomide Run1-DMSO | NM_1737<br>11 | MTND4  | NADH dehydrogenase 4  | 0.185911  | Inlier |
| siRNA-Vinblastine Run2-DMSO  | NM_1737<br>11 | MTND4  | NADH dehydrogenase 4  | 0.637195  | Inlier |
| siRNA-Vinblastine Run1-DMSO  | NM_1737<br>11 | MTND4  | NADH dehydrogenase 4  | 0.711805  | Inlier |
| siRNA-Temozolomide Run2-DMSO | NM_1737<br>12 | MTND4L | NADH dehydrogenase 4L | -2.308192 | Inlier |
| siRNA Disorazole DMSO Run1   | NM_1737<br>12 | MTND4L | NADH dehydrogenase 4L | -1.191804 | Inlier |
| siRNA Disorazole DMSO Run3   | NM_1737<br>12 | MTND4L | NADH dehydrogenase 4L | -0.194869 | Inlier |
| siRNA-Temozolomide Run3-DMSO | NM_1737<br>12 | MTND4L | NADH dehydrogenase 4L | -0.048685 | Inlier |
| siRNA-Temozolomide Run1-DMSO | NM_1737<br>12 | MTND4L | NADH dehydrogenase 4L | 0.048685  | Inlier |
| siRNA-Vinblastine Run1-DMSO  | NM_1737<br>12 | MTND4L | NADH dehydrogenase 4L | 0.642604  | Inlier |
| siRNA-Vinblastine Run2-DMSO  | NM_1737<br>12 | MTND4L | NADH dehydrogenase 4L | 0.706396  | Inlier |
| siRNA Disorazole DMSO Run2   | NM_1737<br>12 | MTND4L | NADH dehydrogenase 4L | 1.864758  | Inlier |

Identification of Survival Genes in Human Glioblastoma Cells Using siRNA Screening  
 Nikhil G Thaker, Fang Zhang, Peter R. McDonald, Tong Ying Shun, Michael D Lewen, Ian F. Pollack, and John S. Lazo

Molecular Pharmacology

|                                  |               |        |                             |           |        |
|----------------------------------|---------------|--------|-----------------------------|-----------|--------|
| siRNA Disorazole DMSO Run1       | NM_1737<br>13 | MTND5  | NADH<br>dehydroge<br>nase 5 | -1.866618 | Inlier |
| siRNA-Temozolomide Run3-<br>DMSO | NM_1737<br>13 | MTND5  | NADH<br>dehydroge<br>nase 5 | -1.039276 | Inlier |
| siRNA-Temozolomide Run2-<br>DMSO | NM_1737<br>13 | MTND5  | NADH<br>dehydroge<br>nase 5 | -0.910147 | Inlier |
| siRNA-Vinblastine Run2-<br>DMSO  | NM_1737<br>13 | MTND5  | NADH<br>dehydroge<br>nase 5 | -0.019432 | Inlier |
| siRNA Disorazole DMSO Run3       | NM_1737<br>13 | MTND5  | NADH<br>dehydroge<br>nase 5 | 0.019432  | Inlier |
| siRNA Disorazole DMSO Run2       | NM_1737<br>13 | MTND5  | NADH<br>dehydroge<br>nase 5 | 0.581899  | Inlier |
| siRNA-Temozolomide Run1-<br>DMSO | NM_1737<br>13 | MTND5  | NADH<br>dehydroge<br>nase 5 | 0.593567  | Inlier |
| siRNA-Vinblastine Run1-<br>DMSO  | NM_1737<br>13 | MTND5  | NADH<br>dehydroge<br>nase 5 | 0.755433  | Inlier |
| siRNA-Temozolomide Run2-<br>DMSO | NM_1737<br>14 | MTND6  | NADH<br>dehydroge<br>nase 6 | -1.211594 | Inlier |
| siRNA-Temozolomide Run3-<br>DMSO | NM_1737<br>14 | MTND6  | NADH<br>dehydroge<br>nase 6 | -0.653155 | Inlier |
| siRNA Disorazole DMSO Run1       | NM_1737<br>14 | MTND6  | NADH<br>dehydroge<br>nase 6 | -0.581481 | Inlier |
| siRNA Disorazole DMSO Run3       | NM_1737<br>14 | MTND6  | NADH<br>dehydroge<br>nase 6 | -0.320611 | Inlier |
| siRNA-Temozolomide Run1-<br>DMSO | NM_1737<br>14 | MTND6  | NADH<br>dehydroge<br>nase 6 | 0.320611  | Inlier |
| siRNA-Vinblastine Run1-<br>DMSO  | NM_1737<br>14 | MTND6  | NADH<br>dehydroge<br>nase 6 | 0.695845  | Inlier |
| siRNA-Vinblastine Run2-<br>DMSO  | NM_1737<br>14 | MTND6  | NADH<br>dehydroge<br>nase 6 | 0.739166  | Inlier |
| siRNA Disorazole DMSO Run2       | NM_1737<br>14 | MTND6  | NADH<br>dehydroge<br>nase 6 | 1.349365  | Inlier |
| siRNA-Temozolomide Run3-<br>DMSO | NM_0059<br>58 | MTNR1A | melatonin<br>receptor<br>1A | -1.719368 | Inlier |

Identification of Survival Genes in Human Glioblastoma Cells Using siRNA Screening  
 Nikhil G Thaker, Fang Zhang, Peter R. McDonald, Tong Ying Shun, Michael D Lewen, Ian F. Pollack, and John S. Lazo

| Molecular Pharmacology       |               |        |    | melatonin receptor |                  |
|------------------------------|---------------|--------|----|--------------------|------------------|
| siRNA-Temozolomide Run2-DMSO | NM_0059<br>58 | MTNR1A | 1A | melatonin receptor | -0.606366 Inlier |
| siRNA-Temozolomide Run1-DMSO | NM_0059<br>58 | MTNR1A | 1A | melatonin receptor | -0.558856 Inlier |
| siRNA Disorazole DMSO Run2   | NM_0059<br>58 | MTNR1A | 1A | melatonin receptor | -0.002743 Inlier |
| siRNA Disorazole DMSO Run1   | NM_0059<br>58 | MTNR1A | 1A | melatonin receptor | 0.002743 Inlier  |
| siRNA-Vinblastine Run1-DMSO  | NM_0059<br>58 | MTNR1A | 1A | melatonin receptor | 0.742634 Inlier  |
| siRNA Disorazole DMSO Run3   | NM_0059<br>58 | MTNR1A | 1A | melatonin receptor | 0.752382 Inlier  |
| siRNA-Vinblastine Run2-DMSO  | NM_0059<br>58 | MTNR1A | 1A | melatonin receptor | 0.854906 Inlier  |
| siRNA-Temozolomide Run3-DMSO | NM_0059<br>59 | MTNR1B | 1B | melatonin receptor | -1.576641 Inlier |
| siRNA Disorazole DMSO Run2   | NM_0059<br>59 | MTNR1B | 1B | melatonin receptor | -0.673566 Inlier |
| siRNA-Temozolomide Run1-DMSO | NM_0059<br>59 | MTNR1B | 1B | melatonin receptor | -0.390503 Inlier |
| siRNA-Temozolomide Run2-DMSO | NM_0059<br>59 | MTNR1B | 1B | melatonin receptor | -0.315346 Inlier |
| siRNA Disorazole DMSO Run1   | NM_0059<br>59 | MTNR1B | 1B | melatonin receptor | 0.315346 Inlier  |
| siRNA Disorazole DMSO Run3   | NM_0059<br>59 | MTNR1B | 1B | melatonin receptor | 0.675434 Inlier  |
| siRNA-Vinblastine Run2-DMSO  | NM_0059<br>59 | MTNR1B | 1B | melatonin receptor | 0.821741 Inlier  |
| siRNA-Vinblastine Run1-DMSO  | NM_0059<br>59 | MTNR1B | 1B | melatonin receptor | 0.851568 Inlier  |



Identification of Survival Genes in Human Glioblastoma Cells Using siRNA Screening

Nikhil G Thaker, Fang Zhang, Peter R. McDonald, Tong Ying Shun, Michael D Lewen, Ian F. Pollack, and John S. Lazo

Molecular Pharmacology

|                              |               |      |                                                                  |           |        |
|------------------------------|---------------|------|------------------------------------------------------------------|-----------|--------|
| siRNA-Temozolomide Run3-DMSO | NM_1336<br>45 | MTO1 | mitochondrial translation optimization 1 homolog (S. cerevisiae) | -1.848007 | Inlier |
| siRNA-Temozolomide Run2-DMSO | NM_1336<br>45 | MTO1 | mitochondrial translation optimization 1 homolog (S. cerevisiae) | -0.915663 | Inlier |
| siRNA Disorazole DMSO Run1   | NM_1336<br>45 | MTO1 | mitochondrial translation optimization 1 homolog (S. cerevisiae) | -0.433337 | Inlier |
| siRNA Disorazole DMSO Run3   | NM_1336<br>45 | MTO1 | mitochondrial translation optimization 1 homolog (S. cerevisiae) | -0.170344 | Inlier |
| siRNA-Temozolomide Run1-DMSO | NM_1336<br>45 | MTO1 | mitochondrial translation optimization 1 homolog (S. cerevisiae) | 0.170344  | Inlier |

Identification of Survival Genes in Human Glioblastoma Cells Using siRNA Screening

Nikhil G Thaker, Fang Zhang, Peter R. McDonald, Tong Ying Shun, Michael D Lewen, Ian F. Pollack, and John S.

Lazo

Molecular Pharmacology

|                              |               |      |                                                                     |                  |
|------------------------------|---------------|------|---------------------------------------------------------------------|------------------|
| siRNA-Vinblastine Run2-DMSO  | NM_1336<br>45 | MTO1 | mitochondrial translation optimization 1 homolog (S. cerevisiae)    | 0.400226 Inlier  |
| siRNA-Vinblastine Run1-DMSO  | NM_1336<br>45 | MTO1 | mitochondrial translation optimization 1 homolog (S. cerevisiae)    | 2.125785 Inlier  |
| siRNA Disorazole DMSO Run2   | NM_1336<br>45 | MTO1 | mitochondrial translation optimization 1 homolog (S. cerevisiae)    | 2.648657 Inlier  |
| siRNA-Temozolomide Run2-DMSO | NM_0002<br>53 | MTP  | microsomal triglyceride transfer protein (large polypeptide, 88kDa) | -1.663343 Inlier |
| siRNA Disorazole DMSO Run1   | NM_0002<br>53 | MTP  | microsomal triglyceride transfer protein (large polypeptide, 88kDa) | -0.510302 Inlier |

Identification of Survival Genes in Human Glioblastoma Cells Using siRNA Screening

Nikhil G Thaker, Fang Zhang, Peter R. McDonald, Tong Ying Shun, Michael D Lewen, Ian F. Pollack, and John S. Lazo

Molecular Pharmacology

| siRNA Treatment              | Gene ID   | Method | Protein Name                                                        | Value     | Category |
|------------------------------|-----------|--------|---------------------------------------------------------------------|-----------|----------|
| siRNA-Temozolomide Run3-DMSO | NM_000253 | MTP    | microsomal triglyceride transfer protein (large polypeptide, 88kDa) | -0.325854 | Inlier   |
| siRNA-Temozolomide Run1-DMSO | NM_000253 | MTP    | microsomal triglyceride transfer protein (large polypeptide, 88kDa) | -0.070114 | Inlier   |
| siRNA-Vinblastine Run2-DMSO  | NM_000253 | MTP    | microsomal triglyceride transfer protein (large polypeptide, 88kDa) | 0.070114  | Inlier   |
| siRNA Disorazole DMSO Run3   | NM_000253 | MTP    | microsomal triglyceride transfer protein (large polypeptide, 88kDa) | 0.838698  | Inlier   |
| siRNA Disorazole DMSO Run2   | NM_000253 | MTP    | microsomal triglyceride transfer protein (large polypeptide, 88kDa) | 2.023572  | Inlier   |
| siRNA-Vinblastine Run1-DMSO  | NM_000253 | MTP    | microsomal triglyceride transfer protein (large polypeptide, 88kDa) | 2.028742  | Inlier   |

Identification of Survival Genes in Human Glioblastoma Cells Using siRNA Screening

Nikhil G Thaker, Fang Zhang, Peter R. McDonald, Tong Ying Shun, Michael D Lewen, Ian F. Pollack, and John S. Lazo

Molecular Pharmacology

|                              |               |     |                                                             |           |         |
|------------------------------|---------------|-----|-------------------------------------------------------------|-----------|---------|
| siRNA Disorazole DMSO Run1   | NM_0002<br>54 | MTR | 5-<br>methyltetrahydrofolate-homocysteine methyltransferase | -4.620965 | Outlier |
| siRNA-Vinblastine Run2-DMSO  | NM_0002<br>54 | MTR | 5-<br>methyltetrahydrofolate-homocysteine methyltransferase | -1.023719 | Inlier  |
| siRNA Disorazole DMSO Run3   | NM_0002<br>54 | MTR | 5-<br>methyltetrahydrofolate-homocysteine methyltransferase | -0.958021 | Inlier  |
| siRNA-Temozolomide Run2-DMSO | NM_0002<br>54 | MTR | 5-<br>methyltetrahydrofolate-homocysteine methyltransferase | -0.092264 | Inlier  |
| siRNA-Vinblastine Run1-DMSO  | NM_0002<br>54 | MTR | 5-<br>methyltetrahydrofolate-homocysteine methyltransferase | 0.092264  | Inlier  |
| siRNA Disorazole DMSO Run2   | NM_0002<br>54 | MTR | 5-<br>methyltetrahydrofolate-homocysteine methyltransferase | 0.270344  | Inlier  |

Identification of Survival Genes in Human Glioblastoma Cells Using siRNA Screening

Nikhil G Thaker, Fang Zhang, Peter R. McDonald, Tong Ying Shun, Michael D Lewen, Ian F. Pollack, and John S. Lazo

Molecular Pharmacology

|                              |           |      |                                                                   |           |        |
|------------------------------|-----------|------|-------------------------------------------------------------------|-----------|--------|
| siRNA-Temozolomide Run3-DMSO | NM_000254 | MTR  | 5-methyltetrahydrofolate-homocysteine methyltransferase           | 0.390979  | Inlier |
| siRNA-Temozolomide Run1-DMSO | NM_000254 | MTR  | 5-methyltetrahydrofolate-homocysteine methyltransferase           | 1.397129  | Inlier |
| siRNA-Temozolomide Run3-DMSO | NM_002454 | MTRR | 5-methyltetrahydrofolate-homocysteine methyltransferase reductase | -1.057207 | Inlier |
| siRNA Disorazole DMSO Run1   | NM_002454 | MTRR | 5-methyltetrahydrofolate-homocysteine methyltransferase reductase | -1.007555 | Inlier |
| siRNA Disorazole DMSO Run3   | NM_002454 | MTRR | 5-methyltetrahydrofolate-homocysteine methyltransferase reductase | -0.459529 | Inlier |
| siRNA-Temozolomide Run2-DMSO | NM_002454 | MTRR | 5-methyltetrahydrofolate-homocysteine methyltransferase reductase | -0.226772 | Inlier |

Identification of Survival Genes in Human Glioblastoma Cells Using siRNA Screening

Nikhil G Thaker, Fang Zhang, Peter R. McDonald, Tong Ying Shun, Michael D Lewen, Ian F. Pollack, and John S.

Lazo

Molecular Pharmacology

|                              |           |      |                                                                                              |           |        |
|------------------------------|-----------|------|----------------------------------------------------------------------------------------------|-----------|--------|
| siRNA-Temozolomide Run1-DMSO | NM_002454 | MTRR | 5-methyltetrahydrofolate-homocysteine methyltransferase reductase                            | 0.226771  | Inlier |
| siRNA-Vinblastine Run2-DMSO  | NM_002454 | MTRR | 5-methyltetrahydrofolate-homocysteine methyltransferase reductase                            | 0.432367  | Inlier |
| siRNA-Vinblastine Run1-DMSO  | NM_002454 | MTRR | 5-methyltetrahydrofolate-homocysteine methyltransferase reductase                            | 0.889471  | Inlier |
| siRNA Disorazole DMSO Run2   | NM_002454 | MTRR | 5-methyltetrahydrofolate-homocysteine methyltransferase reductase muscle, skeletal, receptor | 2.757794  | Inlier |
| siRNA-Temozolomide Run3-DMSO | NM_005592 | MUSK | tyrosine kinase muscle, skeletal, receptor                                                   | -2.379472 | Inlier |
| siRNA-Temozolomide Run1-DMSO | NM_005592 | MUSK | tyrosine kinase muscle, skeletal, receptor                                                   | -1.556463 | Inlier |
| siRNA-Temozolomide Run2-DMSO | NM_005592 | MUSK | tyrosine kinase                                                                              | -0.965916 | Inlier |

Identification of Survival Genes in Human Glioblastoma Cells Using siRNA Screening  
 Nikhil G Thaker, Fang Zhang, Peter R. McDonald, Tong Ying Shun, Michael D Lewen, Ian F. Pollack, and John S. Lazo

Molecular Pharmacology

|                                  |               |      |                                                        |           |        |
|----------------------------------|---------------|------|--------------------------------------------------------|-----------|--------|
| siRNA Disorazole DMSO Run2       | NM_0055<br>92 | MUSK | muscle,<br>skeletal,<br>receptor<br>tyrosine<br>kinase | -0.018251 | Inlier |
| siRNA-Vinblastine Run1-<br>DMSO  | NM_0055<br>92 | MUSK | muscle,<br>skeletal,<br>receptor<br>tyrosine<br>kinase | 0.018252  | Inlier |
| siRNA Disorazole DMSO Run1       | NM_0055<br>92 | MUSK | muscle,<br>skeletal,<br>receptor<br>tyrosine<br>kinase | 0.246075  | Inlier |
| siRNA Disorazole DMSO Run3       | NM_0055<br>92 | MUSK | muscle,<br>skeletal,<br>receptor<br>tyrosine<br>kinase | 0.383084  | Inlier |
| siRNA-Vinblastine Run2-<br>DMSO  | NM_0055<br>92 | MUSK | tyrosine<br>kinase                                     | 1.001059  | Inlier |
| siRNA-Temozolomide Run3-<br>DMSO | NM_0002<br>55 | MUT  | methylmal<br>onyl<br>Coenzyme<br>A mutase              | -1.134446 | Inlier |
| siRNA-Temozolomide Run2-<br>DMSO | NM_0002<br>55 | MUT  | methylmal<br>onyl<br>Coenzyme<br>A mutase              | -0.939457 | Inlier |
| siRNA-Temozolomide Run1-<br>DMSO | NM_0002<br>55 | MUT  | methylmal<br>onyl<br>Coenzyme<br>A mutase              | -0.237221 | Inlier |
| siRNA Disorazole DMSO Run1       | NM_0002<br>55 | MUT  | methylmal<br>onyl<br>Coenzyme<br>A mutase              | -0.0923   | Inlier |
| siRNA-Vinblastine Run2-<br>DMSO  | NM_0002<br>55 | MUT  | methylmal<br>onyl<br>Coenzyme<br>A mutase              | 0.0923    | Inlier |

Identification of Survival Genes in Human Glioblastoma Cells Using siRNA Screening  
 Nikhil G Thaker, Fang Zhang, Peter R. McDonald, Tong Ying Shun, Michael D Lewen, Ian F. Pollack, and John S. Lazo  
 Molecular Pharmacology

|                                  |               |     |                                                        |           |        |
|----------------------------------|---------------|-----|--------------------------------------------------------|-----------|--------|
| siRNA Disorazole DMSO Run3       | NM_0002<br>55 | MUT | methylmal<br>onyl<br>Coenzyme<br>A mutase              | 0.547688  | Inlier |
| siRNA Disorazole DMSO Run2       | NM_0002<br>55 | MUT | methylmal<br>onyl<br>Coenzyme<br>A mutase              | 0.801312  | Inlier |
| siRNA-Vinblastine Run1-<br>DMSO  | NM_0002<br>55 | MUT | methylmal<br>onyl<br>Coenzyme<br>A mutase              | 1.100749  | Inlier |
| siRNA-Temozolomide Run3-<br>DMSO | NM_0024<br>61 | MVD | mevalonat<br>e<br>(diphosph<br>o)<br>decarboxyl<br>ase | -1.428795 | Inlier |
| siRNA-Temozolomide Run1-<br>DMSO | NM_0024<br>61 | MVD | mevalonat<br>e<br>(diphosph<br>o)<br>decarboxyl<br>ase | -0.743291 | Inlier |
| siRNA-Temozolomide Run2-<br>DMSO | NM_0024<br>61 | MVD | mevalonat<br>e<br>(diphosph<br>o)<br>decarboxyl<br>ase | -0.706765 | Inlier |
| siRNA Disorazole DMSO Run3       | NM_0024<br>61 | MVD | mevalonat<br>e<br>(diphosph<br>o)<br>decarboxyl<br>ase | -0.028186 | Inlier |
| siRNA-Vinblastine Run2-<br>DMSO  | NM_0024<br>61 | MVD | mevalonat<br>e<br>(diphosph<br>o)<br>decarboxyl<br>ase | 0.028186  | Inlier |
| siRNA Disorazole DMSO Run1       | NM_0024<br>61 | MVD | mevalonat<br>e<br>(diphosph<br>o)<br>decarboxyl<br>ase | 0.108645  | Inlier |



Identification of Survival Genes in Human Glioblastoma Cells Using siRNA Screening  
 Nikhil G Thaker, Fang Zhang, Peter R. McDonald, Tong Ying Shun, Michael D Lewen, Ian F. Pollack, and John S. Lazo

Molecular Pharmacology

|                              |               |     |  |                                                        |           |        |
|------------------------------|---------------|-----|--|--------------------------------------------------------|-----------|--------|
|                              |               |     |  | mevalonat<br>e<br>(diphosph<br>o)<br>decarboxyl<br>ase | 0.642235  | Inlier |
| siRNA Disorazole DMSO Run2   | NM_0024<br>61 | MVD |  | mevalonat<br>e<br>(diphosph<br>o)<br>decarboxyl<br>ase | 0.794744  | Inlier |
| siRNA-Vinblastine Run1-DMSO  | NM_0024<br>61 | MVD |  | mevalonat<br>e kinase<br>(mevalonic<br>aciduria)       | -1.011861 | Inlier |
| siRNA-Temozolomide Run1-DMSO | NM_0004<br>31 | MVK |  | mevalonat<br>e kinase<br>(mevalonic<br>aciduria)       | -1.002545 | Inlier |
| siRNA-Temozolomide Run3-DMSO | NM_0004<br>31 | MVK |  | mevalonat<br>e kinase<br>(mevalonic<br>aciduria)       | -0.530497 | Inlier |
| siRNA Disorazole DMSO Run2   | NM_0004<br>31 | MVK |  | mevalonat<br>e kinase<br>(mevalonic<br>aciduria)       | -0.025684 | Inlier |
| siRNA-Temozolomide Run2-DMSO | NM_0004<br>31 | MVK |  | mevalonat<br>e kinase<br>(mevalonic<br>aciduria)       | 0.025684  | Inlier |
| siRNA Disorazole DMSO Run1   | NM_0004<br>31 | MVK |  | mevalonat<br>e kinase<br>(mevalonic<br>aciduria)       | 0.451548  | Inlier |
| siRNA-Vinblastine Run1-DMSO  | NM_0004<br>31 | MVK |  | mevalonat<br>e kinase<br>(mevalonic<br>aciduria)       | 0.818503  | Inlier |
| siRNA-Vinblastine Run2-DMSO  | NM_0004<br>31 | MVK |  | mevalonat<br>e kinase<br>(mevalonic<br>aciduria)       | 1.319461  | Inlier |
| siRNA Disorazole DMSO Run3   | NM_0004<br>31 | MVK |  |                                                        |           |        |

Identification of Survival Genes in Human Glioblastoma Cells Using siRNA Screening  
 Nikhil G Thaker, Fang Zhang, Peter R. McDonald, Tong Ying Shun, Michael D Lewen, Ian F. Pollack, and John S. Lazo

Molecular Pharmacology

|                              |           |        |                                     |           |        |
|------------------------------|-----------|--------|-------------------------------------|-----------|--------|
| siRNA-Temozolomide Run3-DMSO | NM_031300 | MXD3   | MAX dimerization protein 3          | -0.807255 | Inlier |
| siRNA Disorazole DMSO Run3   | NM_031300 | MXD3   | MAX dimerization protein 3          | -0.541745 | Inlier |
| siRNA-Temozolomide Run1-DMSO | NM_031300 | MXD3   | MAX dimerization protein 3          | -0.222617 | Inlier |
| siRNA-Temozolomide Run2-DMSO | NM_031300 | MXD3   | MAX dimerization protein 3          | -0.115067 | Inlier |
| siRNA Disorazole DMSO Run1   | NM_031300 | MXD3   | MAX dimerization protein 3          | 0.115067  | Inlier |
| siRNA Disorazole DMSO Run2   | NM_031300 | MXD3   | MAX dimerization protein 3          | 1.04744   | Inlier |
| siRNA-Vinblastine Run2-DMSO  | NM_031300 | MXD3   | MAX dimerization protein 3          | 1.214509  | Inlier |
| siRNA-Vinblastine Run1-DMSO  | NM_031300 | MXD3   | MAX dimerization protein 3          | 1.553518  | Inlier |
| siRNA-Temozolomide Run3-DMSO | NM_206821 | MYBPC1 | myosin binding protein C, slow type | -1.055796 | Inlier |
| siRNA-Vinblastine Run2-DMSO  | NM_206821 | MYBPC1 | myosin binding protein C, slow type | -0.739661 | Inlier |
| siRNA Disorazole DMSO Run3   | NM_206821 | MYBPC1 | myosin binding protein C, slow type | -0.574353 | Inlier |
| siRNA Disorazole DMSO Run1   | NM_206821 | MYBPC1 | myosin binding protein C, slow type | -0.116071 | Inlier |
| siRNA-Temozolomide Run1-DMSO | NM_206821 | MYBPC1 | myosin binding protein C, slow type | 0.116071  | Inlier |

Identification of Survival Genes in Human Glioblastoma Cells Using siRNA Screening  
 Nikhil G Thaker, Fang Zhang, Peter R. McDonald, Tong Ying Shun, Michael D Lewen, Ian F. Pollack, and John S. Lazo

Molecular Pharmacology

|                              |               |        |                                     |           |        |
|------------------------------|---------------|--------|-------------------------------------|-----------|--------|
| siRNA-Temozolomide Run2-DMSO | NM_2068<br>21 | MYBPC1 | myosin binding protein C, slow type | 0.609339  | Inlier |
| siRNA Disorazole DMSO Run2   | NM_2068<br>21 | MYBPC1 | myosin binding protein C, slow type | 1.056646  | Inlier |
| siRNA-Vinblastine Run1-DMSO  | NM_2068<br>21 | MYBPC1 | myosin binding protein C, slow type | 2.201358  | Inlier |
| siRNA-Temozolomide Run3-DMSO | NM_0045<br>33 | MYBPC2 | myosin binding protein C, fast type | -1.052678 | Inlier |
| siRNA-Temozolomide Run2-DMSO | NM_0045<br>33 | MYBPC2 | myosin binding protein C, fast type | -0.648376 | Inlier |
| siRNA Disorazole DMSO Run3   | NM_0045<br>33 | MYBPC2 | myosin binding protein C, fast type | -0.45141  | Inlier |
| siRNA-Vinblastine Run2-DMSO  | NM_0045<br>33 | MYBPC2 | myosin binding protein C, fast type | -0.244172 | Inlier |
| siRNA Disorazole DMSO Run1   | NM_0045<br>33 | MYBPC2 | myosin binding protein C, fast type | 0.244172  | Inlier |
| siRNA-Temozolomide Run1-DMSO | NM_0045<br>33 | MYBPC2 | myosin binding protein C, fast type | 0.700624  | Inlier |
| siRNA Disorazole DMSO Run2   | NM_0045<br>33 | MYBPC2 | myosin binding protein C, fast type | 1.830985  | Inlier |
| siRNA-Vinblastine Run1-DMSO  | NM_0045<br>33 | MYBPC2 | myosin binding protein C, fast type | 2.672778  | Inlier |
| siRNA-Temozolomide Run3-DMSO | NM_0002<br>56 | MYBPC3 | myosin binding protein C, cardiac   | -1.006887 | Inlier |
| siRNA-Temozolomide Run2-DMSO | NM_0002<br>56 | MYBPC3 | myosin binding protein C, cardiac   | -0.604006 | Inlier |

Identification of Survival Genes in Human Glioblastoma Cells Using siRNA Screening  
 Nikhil G Thaker, Fang Zhang, Peter R. McDonald, Tong Ying Shun, Michael D Lewen, Ian F. Pollack, and John S. Lazo

Molecular Pharmacology

|                              |               |        |                                                                                                                                                                           |           |        |
|------------------------------|---------------|--------|---------------------------------------------------------------------------------------------------------------------------------------------------------------------------|-----------|--------|
| siRNA Disorazole DMSO Run3   | NM_0002<br>56 | MYBPC3 | myosin<br>binding<br>protein C,<br>cardiac<br>myosin<br>binding<br>protein C,<br>cardiac<br>myosin<br>binding<br>protein C,<br>cardiac<br>myosin<br>binding<br>protein C, | -0.316793 | Inlier |
| siRNA-Vinblastine Run2-DMSO  | NM_0002<br>56 | MYBPC3 | myosin<br>binding<br>protein C,<br>cardiac<br>myosin<br>binding<br>protein C,<br>cardiac<br>myosin<br>binding<br>protein C,                                               | -0.263346 | Inlier |
| siRNA Disorazole DMSO Run1   | NM_0002<br>56 | MYBPC3 | myosin<br>binding<br>protein C,<br>cardiac<br>myosin<br>binding<br>protein C,<br>cardiac<br>myosin<br>binding<br>protein C,                                               | 0.263346  | Inlier |
| siRNA-Temozolomide Run1-DMSO | NM_0002<br>56 | MYBPC3 | myosin<br>binding<br>protein C,<br>cardiac<br>myosin<br>binding<br>protein C,<br>cardiac<br>myosin<br>binding<br>protein C,                                               | 0.744994  | Inlier |
| siRNA Disorazole DMSO Run2   | NM_0002<br>56 | MYBPC3 | myosin<br>binding<br>protein C,<br>cardiac<br>myosin<br>binding<br>protein C,<br>cardiac<br>myosin<br>binding<br>protein C,                                               | 2.127096  | Inlier |
| siRNA-Vinblastine Run1-DMSO  | NM_0002<br>56 | MYBPC3 | myosin<br>binding<br>protein C,<br>cardiac<br>myosin<br>binding<br>protein C,<br>cardiac<br>myosin<br>binding<br>protein C,                                               | 2.449089  | Inlier |
| siRNA-Vinblastine Run2-DMSO  | NM_0049<br>97 | MYBPH  | myosin<br>binding<br>protein H<br>myosin<br>binding<br>protein H                                                                                                          | -1.270529 | Inlier |
| siRNA Disorazole DMSO Run1   | NM_0049<br>97 | MYBPH  | myosin<br>binding<br>protein H<br>myosin<br>binding<br>protein H                                                                                                          | -0.902302 | Inlier |
| siRNA Disorazole DMSO Run3   | NM_0049<br>97 | MYBPH  | myosin<br>binding<br>protein H<br>myosin<br>binding<br>protein H                                                                                                          | -0.427262 | Inlier |
| siRNA-Temozolomide Run2-DMSO | NM_0049<br>97 | MYBPH  | myosin<br>binding<br>protein H<br>myosin<br>binding<br>protein H                                                                                                          | -0.306377 | Inlier |
| siRNA-Temozolomide Run1-DMSO | NM_0049<br>97 | MYBPH  | myosin<br>binding<br>protein H<br>myosin<br>binding<br>protein H                                                                                                          | 0.306376  | Inlier |
| siRNA-Temozolomide Run3-DMSO | NM_0049<br>97 | MYBPH  | myosin<br>binding<br>protein H<br>myosin<br>binding<br>protein H                                                                                                          | 0.446698  | Inlier |
| siRNA Disorazole DMSO Run2   | NM_0049<br>97 | MYBPH  | myosin<br>binding<br>protein H<br>myosin<br>binding<br>protein H                                                                                                          | 2.066308  | Inlier |
| siRNA-Vinblastine Run1-DMSO  | NM_0049<br>97 | MYBPH  | myosin<br>binding<br>protein H                                                                                                                                            | 2.855083  | Inlier |

Identification of Survival Genes in Human Glioblastoma Cells Using siRNA Screening

Nikhil G Thaker, Fang Zhang, Peter R. McDonald, Tong Ying Shun, Michael D Lewen, Ian F. Pollack, and John S. Lazo

Molecular Pharmacology

|                              |               |      |                                                                        |           |        |
|------------------------------|---------------|------|------------------------------------------------------------------------|-----------|--------|
| siRNA-Temozolomide Run3-DMSO | NM_0059<br>63 | MYH1 | myosin,<br>heavy<br>polypeptid<br>e 1,<br>skeletal<br>muscle,<br>adult | -2.598429 | Inlier |
| siRNA Disorazole DMSO Run3   | NM_0059<br>63 | MYH1 | myosin,<br>heavy<br>polypeptid<br>e 1,<br>skeletal<br>muscle,<br>adult | -1.044214 | Inlier |
| siRNA-Temozolomide Run1-DMSO | NM_0059<br>63 | MYH1 | myosin,<br>heavy<br>polypeptid<br>e 1,<br>skeletal<br>muscle,<br>adult | -0.267348 | Inlier |
| siRNA-Vinblastine Run2-DMSO  | NM_0059<br>63 | MYH1 | myosin,<br>heavy<br>polypeptid<br>e 1,<br>skeletal<br>muscle,<br>adult | -0.020146 | Inlier |
| siRNA Disorazole DMSO Run1   | NM_0059<br>63 | MYH1 | myosin,<br>heavy<br>polypeptid<br>e 1,<br>skeletal<br>muscle,<br>adult | 0.020147  | Inlier |
| siRNA-Temozolomide Run2-DMSO | NM_0059<br>63 | MYH1 | myosin,<br>heavy<br>polypeptid<br>e 1,<br>skeletal<br>muscle,<br>adult | 0.304785  | Inlier |
| siRNA Disorazole DMSO Run2   | NM_0059<br>63 | MYH1 | myosin,<br>heavy<br>polypeptid<br>e 1,<br>skeletal<br>muscle,<br>adult | 2.235296  | Inlier |

Identification of Survival Genes in Human Glioblastoma Cells Using siRNA Screening  
 Nikhil G Thaker, Fang Zhang, Peter R. McDonald, Tong Ying Shun, Michael D Lewen, Ian F. Pollack, and John S. Lazo

Molecular Pharmacology

|                              |           |       |                                                     |           |         |
|------------------------------|-----------|-------|-----------------------------------------------------|-----------|---------|
| siRNA-Vinblastine Run1-DMSO  | NM_005963 | MYH1  | myosin, heavy polypeptide 1, skeletal muscle, adult | 3.962316  | Outlier |
| siRNA-Temozolomide Run3-DMSO | NM_022844 | MYH11 | myosin, heavy polypeptide 11, smooth muscle         | -1.328158 | Inlier  |
| siRNA-Temozolomide Run2-DMSO | NM_022844 | MYH11 | myosin, heavy polypeptide 11, smooth muscle         | -0.712316 | Inlier  |
| siRNA Disorazole DMSO Run3   | NM_022844 | MYH11 | myosin, heavy polypeptide 11, smooth muscle         | -0.636684 | Inlier  |
| siRNA-Vinblastine Run2-DMSO  | NM_022844 | MYH11 | myosin, heavy polypeptide 11, smooth muscle         | -0.368921 | Inlier  |
| siRNA Disorazole DMSO Run1   | NM_022844 | MYH11 | myosin, heavy polypeptide 11, smooth muscle         | 0.368921  | Inlier  |
| siRNA-Temozolomide Run1-DMSO | NM_022844 | MYH11 | myosin, heavy polypeptide 11, smooth muscle         | 0.497334  | Inlier  |
| siRNA Disorazole DMSO Run2   | NM_022844 | MYH11 | myosin, heavy polypeptide 11, smooth muscle         | 1.473552  | Inlier  |

Identification of Survival Genes in Human Glioblastoma Cells Using siRNA Screening

Nikhil G Thaker, Fang Zhang, Peter R. McDonald, Tong Ying Shun, Michael D Lewen, Ian F. Pollack, and John S. Lazo

Molecular Pharmacology

|                              |           |       |                                                     |           |        |
|------------------------------|-----------|-------|-----------------------------------------------------|-----------|--------|
| siRNA-Vinblastine Run1-DMSO  | NM_022844 | MYH11 | myosin, heavy polypeptide 11, smooth muscle myosin, | 1.605705  | Inlier |
| siRNA-Temozolomide Run3-DMSO | NM_003802 | MYH13 | heavy polypeptide 13, skeletal muscle myosin,       | -2.343492 | Inlier |
| siRNA-Temozolomide Run2-DMSO | NM_003802 | MYH13 | heavy polypeptide 13, skeletal muscle myosin,       | -1.142534 | Inlier |
| siRNA Disorazole DMSO Run3   | NM_003802 | MYH13 | heavy polypeptide 13, skeletal muscle myosin,       | -0.206466 | Inlier |
| siRNA Disorazole DMSO Run1   | NM_003802 | MYH13 | heavy polypeptide 13, skeletal muscle myosin,       | -0.121782 | Inlier |
| siRNA-Temozolomide Run1-DMSO | NM_003802 | MYH13 | heavy polypeptide 13, skeletal muscle myosin,       | 0.121782  | Inlier |
| siRNA-Vinblastine Run2-DMSO  | NM_003802 | MYH13 | heavy polypeptide 13, skeletal muscle myosin,       | 0.178878  | Inlier |
| siRNA Disorazole DMSO Run2   | NM_003802 | MYH13 | skeletal muscle                                     | 1.780442  | Inlier |

Identification of Survival Genes in Human Glioblastoma Cells Using siRNA Screening

Nikhil G Thaker, Fang Zhang, Peter R. McDonald, Tong Ying Shun, Michael D Lewen, Ian F. Pollack, and John S. Lazo

Molecular Pharmacology

|                              |           |       |                                                     |           |        |
|------------------------------|-----------|-------|-----------------------------------------------------|-----------|--------|
| siRNA-Vinblastine Run1-DMSO  | NM_003802 | MYH13 | myosin, heavy polypeptide 13, skeletal muscle       | 1.923036  | Inlier |
| siRNA-Temozolomide Run3-DMSO | NM_017534 | MYH2  | myosin, heavy polypeptide 2, skeletal muscle, adult | -1.335157 | Inlier |
| siRNA-Temozolomide Run2-DMSO | NM_017534 | MYH2  | myosin, heavy polypeptide 2, skeletal muscle, adult | -0.683833 | Inlier |
| siRNA Disorazole DMSO Run3   | NM_017534 | MYH2  | myosin, heavy polypeptide 2, skeletal muscle, adult | -0.250287 | Inlier |
| siRNA-Vinblastine Run2-DMSO  | NM_017534 | MYH2  | myosin, heavy polypeptide 2, skeletal muscle, adult | -0.135999 | Inlier |
| siRNA-Temozolomide Run1-DMSO | NM_017534 | MYH2  | myosin, heavy polypeptide 2, skeletal muscle, adult | 0.135999  | Inlier |
| siRNA Disorazole DMSO Run1   | NM_017534 | MYH2  | myosin, heavy polypeptide 2, skeletal muscle, adult | 0.665167  | Inlier |



Identification of Survival Genes in Human Glioblastoma Cells Using siRNA Screening

Nikhil G Thaker, Fang Zhang, Peter R. McDonald, Tong Ying Shun, Michael D Lewen, Ian F. Pollack, and John S. Lazo

Molecular Pharmacology

|                              |               |      |                                                                            |           |        |
|------------------------------|---------------|------|----------------------------------------------------------------------------|-----------|--------|
| siRNA Disorazole DMSO Run2   | NM_0175<br>34 | MYH2 | myosin,<br>heavy<br>polypeptid<br>e 2,<br>skeletal<br>muscle,<br>adult     | 0.974726  | Inlier |
| siRNA-Vinblastine Run1-DMSO  | NM_0175<br>34 | MYH2 | myosin,<br>heavy<br>polypeptid<br>e 2,<br>skeletal<br>muscle,<br>adult     | 1.780278  | Inlier |
| siRNA-Temozolomide Run3-DMSO | NM_0024<br>70 | MYH3 | myosin,<br>heavy<br>polypeptid<br>e 3,<br>skeletal<br>muscle,<br>embryonic | -1.846804 | Inlier |
| siRNA-Temozolomide Run2-DMSO | NM_0024<br>70 | MYH3 | myosin,<br>heavy<br>polypeptid<br>e 3,<br>skeletal<br>muscle,<br>embryonic | -1.085288 | Inlier |
| siRNA Disorazole DMSO Run1   | NM_0024<br>70 | MYH3 | myosin,<br>heavy<br>polypeptid<br>e 3,<br>skeletal<br>muscle,<br>embryonic | -0.284603 | Inlier |
| siRNA-Vinblastine Run2-DMSO  | NM_0024<br>70 | MYH3 | myosin,<br>heavy<br>polypeptid<br>e 3,<br>skeletal<br>muscle,<br>embryonic | -0.040083 | Inlier |

Identification of Survival Genes in Human Glioblastoma Cells Using siRNA Screening  
 Nikhil G Thaker, Fang Zhang, Peter R. McDonald, Tong Ying Shun, Michael D Lewen, Ian F. Pollack, and John S. Lazo  
 Molecular Pharmacology

|                              |               |      |                                                                            |           |        |
|------------------------------|---------------|------|----------------------------------------------------------------------------|-----------|--------|
| siRNA Disorazole DMSO Run3   | NM_0024<br>70 | MYH3 | myosin,<br>heavy<br>polypeptid<br>e 3,<br>skeletal<br>muscle,<br>embryonic | 0.040083  | Inlier |
| siRNA-Temozolomide Run1-DMSO | NM_0024<br>70 | MYH3 | myosin,<br>heavy<br>polypeptid<br>e 3,<br>skeletal<br>muscle,<br>embryonic | 0.261639  | Inlier |
| siRNA-Vinblastine Run1-DMSO  | NM_0024<br>70 | MYH3 | myosin,<br>heavy<br>polypeptid<br>e 3,<br>skeletal<br>muscle,<br>embryonic | 1.064397  | Inlier |
| siRNA Disorazole DMSO Run2   | NM_0024<br>70 | MYH3 | myosin,<br>heavy<br>polypeptid<br>e 3,<br>skeletal<br>muscle,<br>embryonic | 1.20514   | Inlier |
| siRNA Disorazole DMSO Run3   | NM_0175<br>33 | MYH4 | myosin,<br>heavy<br>polypeptid<br>e 4,<br>skeletal<br>muscle               | -0.825915 | Inlier |
| siRNA-Temozolomide Run3-DMSO | NM_0175<br>33 | MYH4 | myosin,<br>heavy<br>polypeptid<br>e 4,<br>skeletal<br>muscle               | -0.796378 | Inlier |
| siRNA-Vinblastine Run2-DMSO  | NM_0175<br>33 | MYH4 | myosin,<br>heavy<br>polypeptid<br>e 4,<br>skeletal<br>muscle               | -0.552622 | Inlier |

Identification of Survival Genes in Human Glioblastoma Cells Using siRNA Screening

Nikhil G Thaker, Fang Zhang, Peter R. McDonald, Tong Ying Shun, Michael D Lewen, Ian F. Pollack, and John S. Lazo

Molecular Pharmacology

|                              |               |      |                                                                                                                      |           |        |
|------------------------------|---------------|------|----------------------------------------------------------------------------------------------------------------------|-----------|--------|
| siRNA-Temozolomide Run2-DMSO | NM_0175<br>33 | MYH4 | myosin,<br>heavy<br>polypeptid<br>e 4,<br>skeletal<br>muscle                                                         | -0.369657 | Inlier |
| siRNA Disorazole DMSO Run1   | NM_0175<br>33 | MYH4 | myosin,<br>heavy<br>polypeptid<br>e 4,<br>skeletal<br>muscle                                                         | 0.369657  | Inlier |
| siRNA-Temozolomide Run1-DMSO | NM_0175<br>33 | MYH4 | myosin,<br>heavy<br>polypeptid<br>e 4,<br>skeletal<br>muscle                                                         | 0.526639  | Inlier |
| siRNA Disorazole DMSO Run2   | NM_0175<br>33 | MYH4 | myosin,<br>heavy<br>polypeptid<br>e 4,<br>skeletal<br>muscle                                                         | 1.397464  | Inlier |
| siRNA-Vinblastine Run1-DMSO  | NM_0175<br>33 | MYH4 | myosin,<br>heavy<br>polypeptid<br>e 6,<br>cardiac<br>muscle,<br>alpha<br>(cardiomy<br>opathy,<br>hypertroph<br>ic 1) | 3.153979  | Inlier |
| siRNA-Temozolomide Run2-DMSO | NM_0024<br>71 | MYH6 | myosin,<br>heavy<br>polypeptid<br>e 6,<br>cardiac<br>muscle,<br>alpha<br>(cardiomy<br>opathy,<br>hypertroph<br>ic 1) | -1.169488 | Inlier |
| siRNA-Vinblastine Run2-DMSO  | NM_0024<br>71 | MYH6 | myosin,<br>heavy<br>polypeptid<br>e 6,<br>cardiac<br>muscle,<br>alpha<br>(cardiomy<br>opathy,<br>hypertroph<br>ic 1) | -0.8346   | Inlier |

Identification of Survival Genes in Human Glioblastoma Cells Using siRNA Screening

Nikhil G Thaker, Fang Zhang, Peter R. McDonald, Tong Ying Shun, Michael D Lewen, Ian F. Pollack, and John S. Lazo

Molecular Pharmacology

| siRNA                        | Gene      | Accession | Gene                                                                                | Score     | Category |
|------------------------------|-----------|-----------|-------------------------------------------------------------------------------------|-----------|----------|
| siRNA-Temozolomide Run1-DMSO | NM_002471 | MYH6      | myosin, heavy polypeptide 6, cardiac muscle, alpha (cardiomyopathy, hypertrophic 1) | -0.714011 | Inlier   |
| siRNA-Temozolomide Run3-DMSO | NM_002471 | MYH6      | myosin, heavy polypeptide 6, cardiac muscle, alpha (cardiomyopathy, hypertrophic 1) | -0.005533 | Inlier   |
| siRNA Disorazole DMSO Run3   | NM_002471 | MYH6      | myosin, heavy polypeptide 6, cardiac muscle, alpha (cardiomyopathy, hypertrophic 1) | 0.005534  | Inlier   |
| siRNA Disorazole DMSO Run2   | NM_002471 | MYH6      | myosin, heavy polypeptide 6, cardiac muscle, alpha (cardiomyopathy, hypertrophic 1) | 0.501931  | Inlier   |

Identification of Survival Genes in Human Glioblastoma Cells Using siRNA Screening

Nikhil G Thaker, Fang Zhang, Peter R. McDonald, Tong Ying Shun, Michael D Lewen, Ian F. Pollack, and John S. Lazo

Molecular Pharmacology

|                              |               |      |                                                                                     |           |        |
|------------------------------|---------------|------|-------------------------------------------------------------------------------------|-----------|--------|
| siRNA Disorazole DMSO Run1   | NM_0024<br>71 | MYH6 | myosin, heavy polypeptide 6, cardiac muscle, alpha (cardiomyopathy, hypertrophic 1) | 0.634989  | Inlier |
| siRNA-Vinblastine Run1-DMSO  | NM_0024<br>71 | MYH6 | myosin, heavy polypeptide 6, cardiac muscle, alpha (cardiomyopathy, hypertrophic 1) | 0.794607  | Inlier |
| siRNA-Temozolomide Run2-DMSO | NM_0002<br>57 | MYH7 | myosin, heavy polypeptide 7, cardiac muscle, beta                                   | -0.937766 | Inlier |
| siRNA-Temozolomide Run3-DMSO | NM_0002<br>57 | MYH7 | myosin, heavy polypeptide 7, cardiac muscle, beta                                   | -0.874437 | Inlier |
| siRNA Disorazole DMSO Run3   | NM_0002<br>57 | MYH7 | myosin, heavy polypeptide 7, cardiac muscle, beta                                   | -0.474563 | Inlier |
| siRNA-Vinblastine Run2-DMSO  | NM_0002<br>57 | MYH7 | myosin, heavy polypeptide 7, cardiac muscle, beta                                   | -0.292816 | Inlier |

Identification of Survival Genes in Human Glioblastoma Cells Using siRNA Screening

Nikhil G Thaker, Fang Zhang, Peter R. McDonald, Tong Ying Shun, Michael D Lewen, Ian F. Pollack, and John S. Lazo

Molecular Pharmacology

|                              |           |       |                                                    |           |        |
|------------------------------|-----------|-------|----------------------------------------------------|-----------|--------|
| siRNA-Temozolomide Run1-DMSO | NM_000257 | MYH7  | myosin, heavy polypeptide 7, cardiac muscle, beta  | 0.292816  | Inlier |
| siRNA Disorazole DMSO Run1   | NM_000257 | MYH7  | myosin, heavy polypeptide 7, cardiac muscle, beta  | 0.444411  | Inlier |
| siRNA Disorazole DMSO Run2   | NM_000257 | MYH7  | myosin, heavy polypeptide 7, cardiac muscle, beta  | 2.586555  | Inlier |
| siRNA-Vinblastine Run1-DMSO  | NM_000257 | MYH7  | myosin, heavy polypeptide 7, cardiac muscle, beta  | 2.600145  | Inlier |
| siRNA-Temozolomide Run3-DMSO | NM_033424 | MYH7B | myosin, heavy polypeptide 7B, cardiac muscle, beta | -1.566064 | Inlier |
| siRNA-Temozolomide Run2-DMSO | NM_033424 | MYH7B | myosin, heavy polypeptide 7B, cardiac muscle, beta | -1.07726  | Inlier |
| siRNA Disorazole DMSO Run3   | NM_033424 | MYH7B | myosin, heavy polypeptide 7B, cardiac muscle, beta | -0.27174  | Inlier |

Identification of Survival Genes in Human Glioblastoma Cells Using siRNA Screening

Nikhil G Thaker, Fang Zhang, Peter R. McDonald, Tong Ying Shun, Michael D Lewen, Ian F. Pollack, and John S.

Lazo

Molecular Pharmacology

|                              |               |       |                                                         |           |        |
|------------------------------|---------------|-------|---------------------------------------------------------|-----------|--------|
| siRNA-Vinblastine Run2-DMSO  | NM_0334<br>24 | MYH7B | myosin, heavy polypeptide 7B, cardiac muscle, beta      | -0.103739 | Inlier |
| siRNA Disorazole DMSO Run1   | NM_0334<br>24 | MYH7B | myosin, heavy polypeptide 7B, cardiac muscle, beta      | 0.103739  | Inlier |
| siRNA-Temozolomide Run1-DMSO | NM_0334<br>24 | MYH7B | myosin, heavy polypeptide 7B, cardiac muscle, beta      | 0.241974  | Inlier |
| siRNA-Vinblastine Run1-DMSO  | NM_0334<br>24 | MYH7B | myosin, heavy polypeptide 7B, cardiac muscle, beta      | 1.286122  | Inlier |
| siRNA Disorazole DMSO Run2   | NM_0334<br>24 | MYH7B | myosin, heavy polypeptide 8, skeletal muscle, perinatal | 1.338104  | Inlier |
| siRNA-Vinblastine Run2-DMSO  | NM_0024<br>72 | MYH8  | myosin, heavy polypeptide 8, skeletal muscle, perinatal | -0.855228 | Inlier |
| siRNA Disorazole DMSO Run3   | NM_0024<br>72 | MYH8  | myosin, heavy polypeptide 8, skeletal muscle, perinatal | -0.811046 | Inlier |

Identification of Survival Genes in Human Glioblastoma Cells Using siRNA Screening

Nikhil G Thaker, Fang Zhang, Peter R. McDonald, Tong Ying Shun, Michael D Lewen, Ian F. Pollack, and John S. Lazo

Molecular Pharmacology

|                              |           |      |                                                         |           |        |
|------------------------------|-----------|------|---------------------------------------------------------|-----------|--------|
| siRNA-Temozolomide Run1-DMSO | NM_002472 | MYH8 | myosin, heavy polypeptide 8, skeletal muscle, perinatal | -0.052061 | Inlier |
| siRNA-Temozolomide Run3-DMSO | NM_002472 | MYH8 | myosin, heavy polypeptide 8, skeletal muscle, perinatal | -0.015756 | Inlier |
| siRNA-Temozolomide Run2-DMSO | NM_002472 | MYH8 | myosin, heavy polypeptide 8, skeletal muscle, perinatal | 0.015756  | Inlier |
| siRNA Disorazole DMSO Run1   | NM_002472 | MYH8 | myosin, heavy polypeptide 8, skeletal muscle, perinatal | 0.640701  | Inlier |
| siRNA Disorazole DMSO Run2   | NM_002472 | MYH8 | myosin, heavy polypeptide 8, skeletal muscle, perinatal | 0.708299  | Inlier |
| siRNA-Vinblastine Run1-DMSO  | NM_002472 | MYH8 | myosin, heavy polypeptide 8, skeletal muscle, perinatal | 1.358938  | Inlier |
| siRNA-Temozolomide Run3-DMSO | NM_002473 | MYH9 | myosin, heavy polypeptide 9, non-muscle                 | -1.063058 | Inlier |
| siRNA Disorazole DMSO Run3   | NM_002473 | MYH9 | myosin, heavy polypeptide 9, non-muscle                 | -0.590268 | Inlier |



Identification of Survival Genes in Human Glioblastoma Cells Using siRNA Screening  
 Nikhil G Thaker, Fang Zhang, Peter R. McDonald, Tong Ying Shun, Michael D Lewen, Ian F. Pollack, and John S. Lazo

Molecular Pharmacology

|                              |           |      |                                                     |           |        |
|------------------------------|-----------|------|-----------------------------------------------------|-----------|--------|
| siRNA-Temozolomide Run2-DMSO | NM_002473 | MYH9 | myosin, heavy polypeptide 9, non-muscle             | -0.412684 | Inlier |
| siRNA-Vinblastine Run2-DMSO  | NM_002473 | MYH9 | myosin, heavy polypeptide 9, non-muscle             | -0.208749 | Inlier |
| siRNA-Temozolomide Run1-DMSO | NM_002473 | MYH9 | myosin, heavy polypeptide 9, non-muscle             | 0.208749  | Inlier |
| siRNA Disorazole DMSO Run1   | NM_002473 | MYH9 | myosin, heavy polypeptide 9, non-muscle             | 0.758732  | Inlier |
| siRNA Disorazole DMSO Run2   | NM_002473 | MYH9 | myosin, heavy polypeptide 9, non-muscle             | 2.728331  | Inlier |
| siRNA-Vinblastine Run1-DMSO  | NM_002473 | MYH9 | myosin, heavy polypeptide 9, non-muscle             | 2.963033  | Inlier |
| siRNA-Vinblastine Run2-DMSO  | NM_079422 | MYL1 | myosin, light polypeptide 1, alkali; skeletal, fast | -0.79123  | Inlier |
| siRNA-Temozolomide Run3-DMSO | NM_079422 | MYL1 | myosin, light polypeptide 1, alkali; skeletal, fast | -0.665676 | Inlier |
| siRNA-Temozolomide Run2-DMSO | NM_079422 | MYL1 | myosin, light polypeptide 1, alkali; skeletal, fast | -0.638573 | Inlier |

Identification of Survival Genes in Human Glioblastoma Cells Using siRNA Screening

Nikhil G Thaker, Fang Zhang, Peter R. McDonald, Tong Ying Shun, Michael D Lewen, Ian F. Pollack, and John S. Lazo

Molecular Pharmacology

|                                  |               |      |                                                                                      |           |         |
|----------------------------------|---------------|------|--------------------------------------------------------------------------------------|-----------|---------|
| siRNA Disorazole DMSO Run3       | NM_0794<br>22 | MYL1 | myosin,<br>light<br>polypeptid<br>e 1, alkali;<br>skeletal,<br>fast                  | -0.477053 | Inlier  |
| siRNA-Temozolomide Run1-<br>DMSO | NM_0794<br>22 | MYL1 | myosin,<br>light<br>polypeptid<br>e 1, alkali;<br>skeletal,<br>fast                  | 0.477054  | Inlier  |
| siRNA Disorazole DMSO Run1       | NM_0794<br>22 | MYL1 | myosin,<br>light<br>polypeptid<br>e 1, alkali;<br>skeletal,<br>fast                  | 0.683324  | Inlier  |
| siRNA Disorazole DMSO Run2       | NM_0794<br>22 | MYL1 | myosin,<br>light<br>polypeptid<br>e 1, alkali;<br>skeletal,<br>fast                  | 0.884827  | Inlier  |
| siRNA-Vinblastine Run1-<br>DMSO  | NM_0794<br>22 | MYL1 | myosin,<br>light<br>polypeptid<br>e 1, alkali;<br>skeletal,<br>fast                  | 2.759012  | Inlier  |
| siRNA-Temozolomide Run3-<br>DMSO | NM_0002<br>58 | MYL3 | myosin,<br>light<br>polypeptid<br>e 3, alkali;<br>ventricular<br>, skeletal,<br>slow | -3.715913 | Outlier |
| siRNA-Temozolomide Run2-<br>DMSO | NM_0002<br>58 | MYL3 | myosin,<br>light<br>polypeptid<br>e 3, alkali;<br>ventricular<br>, skeletal,<br>slow | -2.026985 | Inlier  |

Identification of Survival Genes in Human Glioblastoma Cells Using siRNA Screening  
 Nikhil G Thaker, Fang Zhang, Peter R. McDonald, Tong Ying Shun, Michael D Lewen, Ian F. Pollack, and John S. Lazo  
 Molecular Pharmacology

|                              |               |      |                                                                                      |           |        |
|------------------------------|---------------|------|--------------------------------------------------------------------------------------|-----------|--------|
| siRNA Disorazole DMSO Run3   | NM_0002<br>58 | MYL3 | myosin,<br>light<br>polypeptid<br>e 3, alkali;<br>ventricular<br>, skeletal,<br>slow | -0.421606 | Inlier |
| siRNA-Vinblastine Run2-DMSO  | NM_0002<br>58 | MYL3 | myosin,<br>light<br>polypeptid<br>e 3, alkali;<br>ventricular<br>, skeletal,<br>slow | -0.110474 | Inlier |
| siRNA Disorazole DMSO Run1   | NM_0002<br>58 | MYL3 | myosin,<br>light<br>polypeptid<br>e 3, alkali;<br>ventricular<br>, skeletal,<br>slow | 0.110474  | Inlier |
| siRNA-Temozolomide Run1-DMSO | NM_0002<br>58 | MYL3 | myosin,<br>light<br>polypeptid<br>e 3, alkali;<br>ventricular<br>, skeletal,<br>slow | 0.135505  | Inlier |
| siRNA-Vinblastine Run1-DMSO  | NM_0002<br>58 | MYL3 | myosin,<br>light<br>polypeptid<br>e 3, alkali;<br>ventricular<br>, skeletal,<br>slow | 0.927394  | Inlier |
| siRNA Disorazole DMSO Run2   | NM_0002<br>58 | MYL3 | myosin,<br>light<br>polypeptid<br>e 3, alkali;<br>ventricular<br>, skeletal,<br>slow | 0.966144  | Inlier |

Identification of Survival Genes in Human Glioblastoma Cells Using siRNA Screening

Nikhil G Thaker, Fang Zhang, Peter R. McDonald, Tong Ying Shun, Michael D Lewen, Ian F. Pollack, and John S. Lazo

Molecular Pharmacology

|                              |                  |      |                                                                        |                  |
|------------------------------|------------------|------|------------------------------------------------------------------------|------------------|
| siRNA-Temozolomide Run3-DMSO | NM_0010<br>02841 | MYL4 | myosin,<br>light<br>polypeptid<br>e 4, alkali;<br>atrial,<br>embryonic | -1.38484 Inlier  |
| siRNA Disorazole DMSO Run1   | NM_0010<br>02841 | MYL4 | myosin,<br>light<br>polypeptid<br>e 4, alkali;<br>atrial,<br>embryonic | -0.818265 Inlier |
| siRNA-Vinblastine Run2-DMSO  | NM_0010<br>02841 | MYL4 | myosin,<br>light<br>polypeptid<br>e 4, alkali;<br>atrial,<br>embryonic | -0.492233 Inlier |
| siRNA-Temozolomide Run2-DMSO | NM_0010<br>02841 | MYL4 | myosin,<br>light<br>polypeptid<br>e 4, alkali;<br>atrial,<br>embryonic | -0.067562 Inlier |
| siRNA Disorazole DMSO Run3   | NM_0010<br>02841 | MYL4 | myosin,<br>light<br>polypeptid<br>e 4, alkali;<br>atrial,<br>embryonic | 0.067562 Inlier  |
| siRNA-Temozolomide Run1-DMSO | NM_0010<br>02841 | MYL4 | myosin,<br>light<br>polypeptid<br>e 4, alkali;<br>atrial,<br>embryonic | 0.530735 Inlier  |

Identification of Survival Genes in Human Glioblastoma Cells Using siRNA Screening

Nikhil G Thaker, Fang Zhang, Peter R. McDonald, Tong Ying Shun, Michael D Lewen, Ian F. Pollack, and John S. Lazo

Molecular Pharmacology

|                              |                  |      |                                                                                          |           |        |
|------------------------------|------------------|------|------------------------------------------------------------------------------------------|-----------|--------|
| siRNA-Vinblastine Run1-DMSO  | NM_0010<br>02841 | MYL4 | myosin,<br>light<br>polypeptid<br>e 4, alkali;<br>atrial,<br>embryonic                   | 1.118459  | Inlier |
| siRNA Disorazole DMSO Run2   | NM_0010<br>02841 | MYL4 | myosin,<br>light<br>polypeptid<br>e 4, alkali;<br>atrial,<br>embryonic                   | 1.136209  | Inlier |
| siRNA-Vinblastine Run2-DMSO  | NM_0210<br>19    | MYL6 | myosin,<br>light<br>polypeptid<br>e 6, alkali,<br>smooth<br>muscle<br>and non-<br>muscle | -0.957877 | Inlier |
| siRNA-Temozolomide Run2-DMSO | NM_0210<br>19    | MYL6 | myosin,<br>light<br>polypeptid<br>e 6, alkali,<br>smooth<br>muscle<br>and non-<br>muscle | -0.898148 | Inlier |
| siRNA-Temozolomide Run1-DMSO | NM_0210<br>19    | MYL6 | myosin,<br>light<br>polypeptid<br>e 6, alkali,<br>smooth<br>muscle<br>and non-<br>muscle | -0.450852 | Inlier |
| siRNA Disorazole DMSO Run3   | NM_0210<br>19    | MYL6 | myosin,<br>light<br>polypeptid<br>e 6, alkali,<br>smooth<br>muscle<br>and non-<br>muscle | -0.04448  | Inlier |

Identification of Survival Genes in Human Glioblastoma Cells Using siRNA Screening

Nikhil G Thaker, Fang Zhang, Peter R. McDonald, Tong Ying Shun, Michael D Lewen, Ian F. Pollack, and John S. Lazo

Molecular Pharmacology

|                                  |               |       |                                                                                          |           |        |
|----------------------------------|---------------|-------|------------------------------------------------------------------------------------------|-----------|--------|
| siRNA Disorazole DMSO Run1       | NM_0210<br>19 | MYL6  | myosin,<br>light<br>polypeptid<br>e 6, alkali,<br>smooth<br>muscle<br>and non-<br>muscle | 0.04448   | Inlier |
| siRNA-Temozolomide Run3-<br>DMSO | NM_0210<br>19 | MYL6  | myosin,<br>light<br>polypeptid<br>e 6, alkali,<br>smooth<br>muscle<br>and non-<br>muscle | 0.302837  | Inlier |
| siRNA Disorazole DMSO Run2       | NM_0210<br>19 | MYL6  | myosin,<br>light<br>polypeptid<br>e 6, alkali,<br>smooth<br>muscle<br>and non-<br>muscle | 0.925998  | Inlier |
| siRNA-Vinblastine Run1-<br>DMSO  | NM_0210<br>19 | MYL6  | myosin,<br>light<br>polypeptid<br>e 6, alkali,<br>smooth<br>muscle<br>and non-<br>muscle | 1.209075  | Inlier |
| siRNA-Temozolomide Run3-<br>DMSO | NM_0132<br>62 | MYLIP | myosin<br>regulatory<br>light chain<br>interacting<br>protein                            | -1.775867 | Inlier |
| siRNA-Vinblastine Run2-<br>DMSO  | NM_0132<br>62 | MYLIP | myosin<br>regulatory<br>light chain<br>interacting<br>protein                            | -0.578118 | Inlier |
| siRNA Disorazole DMSO Run3       | NM_0132<br>62 | MYLIP | myosin<br>regulatory<br>light chain<br>interacting<br>protein                            | -0.560078 | Inlier |

Identification of Survival Genes in Human Glioblastoma Cells Using siRNA Screening  
 Nikhil G Thaker, Fang Zhang, Peter R. McDonald, Tong Ying Shun, Michael D Lewen, Ian F. Pollack, and John S. Lazo

Molecular Pharmacology

|                              |               |       |                                                               |           |        |
|------------------------------|---------------|-------|---------------------------------------------------------------|-----------|--------|
| siRNA-Temozolomide Run2-DMSO | NM_0132<br>62 | MYLIP | myosin<br>regulatory<br>light chain<br>interacting<br>protein | -0.484066 | Inlier |
| siRNA-Temozolomide Run1-DMSO | NM_0132<br>62 | MYLIP | myosin<br>regulatory<br>light chain<br>interacting<br>protein | 0.484066  | Inlier |
| siRNA Disorazole DMSO Run1   | NM_0132<br>62 | MYLIP | myosin<br>regulatory<br>light chain<br>interacting<br>protein | 0.770882  | Inlier |
| siRNA-Vinblastine Run1-DMSO  | NM_0132<br>62 | MYLIP | myosin<br>regulatory<br>light chain<br>interacting<br>protein | 3.169058  | Inlier |
| siRNA Disorazole DMSO Run2   | NM_0132<br>62 | MYLIP | myosin<br>regulatory<br>light chain<br>interacting<br>protein | 3.437751  | Inlier |
| siRNA Disorazole DMSO Run2   | NM_0530<br>31 | MYLK  | myosin,<br>light<br>polypeptid<br>e kinase                    | -1.235818 | Inlier |
| siRNA-Temozolomide Run3-DMSO | NM_0530<br>31 | MYLK  | myosin,<br>light<br>polypeptid<br>e kinase                    | -1.079759 | Inlier |
| siRNA-Temozolomide Run2-DMSO | NM_0530<br>31 | MYLK  | myosin,<br>light<br>polypeptid<br>e kinase                    | -0.623144 | Inlier |
| siRNA-Temozolomide Run1-DMSO | NM_0530<br>31 | MYLK  | myosin,<br>light<br>polypeptid<br>e kinase                    | -0.153699 | Inlier |
| siRNA Disorazole DMSO Run3   | NM_0530<br>31 | MYLK  | myosin,<br>light<br>polypeptid<br>e kinase                    | 0.1537    | Inlier |
| siRNA Disorazole DMSO Run1   | NM_0530<br>31 | MYLK  | myosin,<br>light<br>polypeptid<br>e kinase                    | 0.158072  | Inlier |

Identification of Survival Genes in Human Glioblastoma Cells Using siRNA Screening  
 Nikhil G Thaker, Fang Zhang, Peter R. McDonald, Tong Ying Shun, Michael D Lewen, Ian F. Pollack, and John S. Lazo

Molecular Pharmacology

|                              |               |       |                                                          |           |         |
|------------------------------|---------------|-------|----------------------------------------------------------|-----------|---------|
| siRNA-Vinblastine Run1-DMSO  | NM_0530<br>31 | MYLK  | myosin,<br>light<br>polypeptid<br>e kinase               | 0.725856  | Inlier  |
| siRNA-Vinblastine Run2-DMSO  | NM_0530<br>31 | MYLK  | myosin,<br>light<br>polypeptid<br>e kinase               | 1.015089  | Inlier  |
| siRNA Disorazole DMSO Run2   | NM_0331<br>18 | MYLK2 | myosin<br>light chain<br>kinase 2,<br>skeletal<br>muscle | -3.57623  | Outlier |
| siRNA-Temozolomide Run3-DMSO | NM_0331<br>18 | MYLK2 | myosin<br>light chain<br>kinase 2,<br>skeletal<br>muscle | -2.016628 | Inlier  |
| siRNA-Temozolomide Run2-DMSO | NM_0331<br>18 | MYLK2 | myosin<br>light chain<br>kinase 2,<br>skeletal<br>muscle | -0.566054 | Inlier  |
| siRNA-Vinblastine Run1-DMSO  | NM_0331<br>18 | MYLK2 | myosin<br>light chain<br>kinase 2,<br>skeletal<br>muscle | -0.174426 | Inlier  |
| siRNA Disorazole DMSO Run3   | NM_0331<br>18 | MYLK2 | myosin<br>light chain<br>kinase 2,<br>skeletal<br>muscle | 0.174425  | Inlier  |
| siRNA Disorazole DMSO Run1   | NM_0331<br>18 | MYLK2 | myosin<br>light chain<br>kinase 2,<br>skeletal<br>muscle | 0.644927  | Inlier  |
| siRNA-Temozolomide Run1-DMSO | NM_0331<br>18 | MYLK2 | myosin<br>light chain<br>kinase 2,<br>skeletal<br>muscle | 0.704073  | Inlier  |
| siRNA-Vinblastine Run2-DMSO  | NM_0331<br>18 | MYLK2 | myosin<br>light chain<br>kinase 2,<br>skeletal<br>muscle | 1.38553   | Inlier  |
| siRNA-Temozolomide Run3-DMSO | NM_0123<br>34 | MYO10 | myosin X                                                 | -1.082043 | Inlier  |
| siRNA-Temozolomide Run2-DMSO | NM_0123<br>34 | MYO10 | myosin X                                                 | -0.675878 | Inlier  |



Identification of Survival Genes in Human Glioblastoma Cells Using siRNA Screening  
 Nikhil G Thaker, Fang Zhang, Peter R. McDonald, Tong Ying Shun, Michael D Lewen, Ian F. Pollack, and John S. Lazo

|                              |               |        |           |           |        |
|------------------------------|---------------|--------|-----------|-----------|--------|
| Molecular Pharmacology       | NM_0123       |        |           |           |        |
| siRNA Disorazole DMSO Run3   | 34            | MYO10  | myosin X  | -0.089681 | Inlier |
| siRNA-Vinblastine Run2-DMSO  | NM_0123<br>34 | MYO10  | myosin X  | -0.004748 | Inlier |
| siRNA Disorazole DMSO Run1   | NM_0123<br>34 | MYO10  | myosin X  | 0.004748  | Inlier |
| siRNA-Temozolomide Run1-DMSO | NM_0123<br>34 | MYO10  | myosin X  | 0.673122  | Inlier |
| siRNA Disorazole DMSO Run2   | NM_0123<br>34 | MYO10  | myosin X  | 1.409449  | Inlier |
| siRNA-Vinblastine Run1-DMSO  | NM_0123<br>34 | MYO10  | myosin X  | 1.970655  | Inlier |
| siRNA Disorazole DMSO Run1   | NM_0162<br>39 | MYO15A | XVA       | -2.587078 | Inlier |
| siRNA-Temozolomide Run2-DMSO | NM_0162<br>39 | MYO15A | XVA       | -0.383626 | Inlier |
| siRNA Disorazole DMSO Run3   | NM_0162<br>39 | MYO15A | XVA       | -0.156036 | Inlier |
| siRNA-Vinblastine Run2-DMSO  | NM_0162<br>39 | MYO15A | XVA       | -0.128529 | Inlier |
| siRNA-Temozolomide Run1-DMSO | NM_0162<br>39 | MYO15A | XVA       | 0.128529  | Inlier |
| siRNA Disorazole DMSO Run2   | NM_0162<br>39 | MYO15A | XVA       | 0.965374  | Inlier |
| siRNA-Temozolomide Run3-DMSO | NM_0162<br>39 | MYO15A | XVA       | 1.102873  | Inlier |
| siRNA-Vinblastine Run1-DMSO  | NM_0162<br>39 | MYO15A | XVA       | 2.765023  | Inlier |
| siRNA-Temozolomide Run3-DMSO | NM_0326<br>08 | MYO18B | XVIIIIB   | -1.426164 | Inlier |
| siRNA-Temozolomide Run2-DMSO | NM_0326<br>08 | MYO18B | XVIIIIB   | -0.964028 | Inlier |
| siRNA Disorazole DMSO Run3   | NM_0326<br>08 | MYO18B | XVIIIIB   | -0.317671 | Inlier |
| siRNA-Temozolomide Run1-DMSO | NM_0326<br>08 | MYO18B | XVIIIIB   | -0.111185 | Inlier |
| siRNA-Vinblastine Run2-DMSO  | NM_0326<br>08 | MYO18B | XVIIIIB   | 0.111184  | Inlier |
| siRNA Disorazole DMSO Run1   | NM_0326<br>08 | MYO18B | XVIIIIB   | 0.384972  | Inlier |
| siRNA Disorazole DMSO Run2   | NM_0326<br>08 | MYO18B | XVIIIIB   | 2.03881   | Inlier |
| siRNA-Vinblastine Run1-DMSO  | NM_0326<br>08 | MYO18B | XVIIIIB   | 2.094701  | Inlier |
| siRNA-Temozolomide Run3-DMSO | NM_0053<br>79 | MYO1A  | myosin IA | -1.485031 | Inlier |
| siRNA-Vinblastine Run2-DMSO  | NM_0053<br>79 | MYO1A  | myosin IA | -0.139597 | Inlier |
| siRNA-Temozolomide Run2-DMSO | NM_0053<br>79 | MYO1A  | myosin IA | -0.122372 | Inlier |
| siRNA Disorazole DMSO Run3   | NM_0053<br>79 | MYO1A  | myosin IA | -0.060126 | Inlier |

Identification of Survival Genes in Human Glioblastoma Cells Using siRNA Screening  
 Nikhil G Thaker, Fang Zhang, Peter R. McDonald, Tong Ying Shun, Michael D Lewen, Ian F. Pollack, and John S. Lazo

|                              |               |       |           |           |        |
|------------------------------|---------------|-------|-----------|-----------|--------|
| Molecular Pharmacology       | NM_0053       |       |           |           |        |
| siRNA Disorazole DMSO Run1   | 79            | MYO1A | myosin IA | 0.060126  | Inlier |
| siRNA-Temozolomide Run1-DMSO | NM_0053<br>79 | MYO1A | myosin IA | 1.209403  | Inlier |
| siRNA-Vinblastine Run1-DMSO  | NM_0053<br>79 | MYO1A | myosin IA | 2.298696  | Inlier |
| siRNA Disorazole DMSO Run2   | NM_0053<br>79 | MYO1A | myosin IA | 2.343527  | Inlier |
| siRNA-Temozolomide Run3-DMSO | NM_0333<br>75 | MYO1C | myosin IC | -2.033128 | Inlier |
| siRNA-Vinblastine Run2-DMSO  | NM_0333<br>75 | MYO1C | myosin IC | -0.964248 | Inlier |
| siRNA Disorazole DMSO Run3   | NM_0333<br>75 | MYO1C | myosin IC | -0.384752 | Inlier |
| siRNA-Temozolomide Run2-DMSO | NM_0333<br>75 | MYO1C | myosin IC | -0.011716 | Inlier |
| siRNA Disorazole DMSO Run1   | NM_0333<br>75 | MYO1C | myosin IC | 0.011715  | Inlier |
| siRNA-Temozolomide Run1-DMSO | NM_0333<br>75 | MYO1C | myosin IC | 0.303798  | Inlier |
| siRNA Disorazole DMSO Run2   | NM_0333<br>75 | MYO1C | myosin IC | 1.432815  | Inlier |
| siRNA-Vinblastine Run1-DMSO  | NM_0333<br>75 | MYO1C | myosin IC | 1.474883  | Inlier |
| siRNA-Temozolomide Run3-DMSO | NM_0049<br>98 | MYO1E | myosin IE | -1.400998 | Inlier |
| siRNA-Temozolomide Run2-DMSO | NM_0049<br>98 | MYO1E | myosin IE | -0.646825 | Inlier |
| siRNA Disorazole DMSO Run3   | NM_0049<br>98 | MYO1E | myosin IE | -0.630149 | Inlier |
| siRNA-Vinblastine Run2-DMSO  | NM_0049<br>98 | MYO1E | myosin IE | -0.288407 | Inlier |
| siRNA Disorazole DMSO Run1   | NM_0049<br>98 | MYO1E | myosin IE | 0.288407  | Inlier |
| siRNA-Temozolomide Run1-DMSO | NM_0049<br>98 | MYO1E | myosin IE | 0.702175  | Inlier |
| siRNA Disorazole DMSO Run2   | NM_0049<br>98 | MYO1E | myosin IE | 2.309716  | Inlier |
| siRNA-Vinblastine Run1-DMSO  | NM_0049<br>98 | MYO1E | myosin IE | 2.34023   | Inlier |
| siRNA-Temozolomide Run3-DMSO | NM_0123<br>35 | MYO1F | myosin IF | -1.468644 | Inlier |
| siRNA-Temozolomide Run2-DMSO | NM_0123<br>35 | MYO1F | myosin IF | -0.795436 | Inlier |
| siRNA-Vinblastine Run2-DMSO  | NM_0123<br>35 | MYO1F | myosin IF | -0.344309 | Inlier |
| siRNA Disorazole DMSO Run3   | NM_0123<br>35 | MYO1F | myosin IF | -0.221885 | Inlier |
| siRNA Disorazole DMSO Run1   | NM_0123<br>35 | MYO1F | myosin IF | 0.221885  | Inlier |
| siRNA-Temozolomide Run1-DMSO | NM_0123<br>35 | MYO1F | myosin IF | 0.553564  | Inlier |

Identification of Survival Genes in Human Glioblastoma Cells Using siRNA Screening  
 Nikhil G Thaker, Fang Zhang, Peter R. McDonald, Tong Ying Shun, Michael D Lewen, Ian F. Pollack, and John S. Lazo

|                              |               |       |                                          |           |        |
|------------------------------|---------------|-------|------------------------------------------|-----------|--------|
| Molecular Pharmacology       | NM_0123       |       |                                          |           |        |
| siRNA Disorazole DMSO Run2   | 35            | MYO1F | myosin IF                                | 2.241087  | Inlier |
| siRNA-Vinblastine Run1-DMSO  | NM_0123<br>35 | MYO1F | myosin IF                                | 2.79598   | Inlier |
| siRNA-Vinblastine Run1-DMSO  | NM_0174<br>33 | MYO3A | myosin IIIA                              | -1.188718 | Inlier |
| siRNA-Temozolomide Run3-DMSO | NM_0174<br>33 | MYO3A | myosin IIIA                              | -0.936147 | Inlier |
| siRNA-Temozolomide Run1-DMSO | NM_0174<br>33 | MYO3A | myosin IIIA                              | -0.400307 | Inlier |
| siRNA Disorazole DMSO Run1   | NM_0174<br>33 | MYO3A | myosin IIIA                              | -0.012493 | Inlier |
| siRNA-Temozolomide Run2-DMSO | NM_0174<br>33 | MYO3A | myosin IIIA                              | 0.012494  | Inlier |
| siRNA Disorazole DMSO Run2   | NM_0174<br>33 | MYO3A | myosin IIIA                              | 0.412853  | Inlier |
| siRNA-Vinblastine Run2-DMSO  | NM_0174<br>33 | MYO3A | myosin IIIA                              | 0.999607  | Inlier |
| siRNA Disorazole DMSO Run3   | NM_0174<br>33 | MYO3A | myosin IIIA                              | 2.111774  | Inlier |
| siRNA-Temozolomide Run1-DMSO | NM_1389<br>95 | MYO3B | myosin IIIB                              | -0.997975 | Inlier |
| siRNA-Temozolomide Run3-DMSO | NM_1389<br>95 | MYO3B | myosin IIIB                              | -0.940088 | Inlier |
| siRNA-Temozolomide Run2-DMSO | NM_1389<br>95 | MYO3B | myosin IIIB                              | -0.346017 | Inlier |
| siRNA-Vinblastine Run1-DMSO  | NM_1389<br>95 | MYO3B | myosin IIIB                              | -0.072318 | Inlier |
| siRNA Disorazole DMSO Run1   | NM_1389<br>95 | MYO3B | myosin IIIB                              | 0.072318  | Inlier |
| siRNA Disorazole DMSO Run2   | NM_1389<br>95 | MYO3B | myosin IIIB                              | 0.408912  | Inlier |
| siRNA Disorazole DMSO Run3   | NM_1389<br>95 | MYO3B | myosin IIIB                              | 0.984666  | Inlier |
| siRNA-Vinblastine Run2-DMSO  | NM_1389<br>95 | MYO3B | myosin IIIB                              | 2.175338  | Inlier |
| siRNA-Temozolomide Run3-DMSO | NM_0002<br>59 | MYO5A | myosin VA (heavy polypeptide 12, myoxin) | -2.524632 | Inlier |
| siRNA-Vinblastine Run2-DMSO  | NM_0002<br>59 | MYO5A | myosin VA (heavy polypeptide 12, myoxin) | -0.742808 | Inlier |
| siRNA-Temozolomide Run2-DMSO | NM_0002<br>59 | MYO5A | myosin VA (heavy polypeptide 12, myoxin) | -0.606192 | Inlier |

Identification of Survival Genes in Human Glioblastoma Cells Using siRNA Screening  
 Nikhil G Thaker, Fang Zhang, Peter R. McDonald, Tong Ying Shun, Michael D Lewen, Ian F. Pollack, and John S. Lazo

Molecular Pharmacology

|                              |               |       |                                                |           |         |
|------------------------------|---------------|-------|------------------------------------------------|-----------|---------|
| siRNA Disorazole DMSO Run3   | NM_0002<br>59 | MYO5A | myosin VA<br>(heavy polypeptide 12,<br>myoxin) | -0.051786 | Inlier  |
| siRNA Disorazole DMSO Run1   | NM_0002<br>59 | MYO5A | myosin VA<br>(heavy polypeptide 12,<br>myoxin) | 0.051785  | Inlier  |
| siRNA-Temozolomide Run1-DMSO | NM_0002<br>59 | MYO5A | myosin VA<br>(heavy polypeptide 12,<br>myoxin) | 0.055058  | Inlier  |
| siRNA-Vinblastine Run1-DMSO  | NM_0002<br>59 | MYO5A | myosin VA<br>(heavy polypeptide 12,<br>myoxin) | 2.031694  | Inlier  |
| siRNA Disorazole DMSO Run2   | NM_0002<br>59 | MYO5A | myosin VA<br>(heavy polypeptide 12,<br>myoxin) | 2.892818  | Inlier  |
| siRNA-Temozolomide Run3-DMSO | NM_0187<br>28 | MYO5C | myosin VC                                      | -4.586735 | Outlier |
| siRNA-Temozolomide Run2-DMSO | NM_0187<br>28 | MYO5C | myosin VC                                      | -0.792988 | Inlier  |
| siRNA-Vinblastine Run2-DMSO  | NM_0187<br>28 | MYO5C | myosin VC                                      | -0.165179 | Inlier  |
| siRNA-Temozolomide Run1-DMSO | NM_0187<br>28 | MYO5C | myosin VC                                      | -0.072547 | Inlier  |
| siRNA Disorazole DMSO Run3   | NM_0187<br>28 | MYO5C | myosin VC                                      | 0.072546  | Inlier  |
| siRNA Disorazole DMSO Run1   | NM_0187<br>28 | MYO5C | myosin VC                                      | 0.556012  | Inlier  |
| siRNA-Vinblastine Run1-DMSO  | NM_0187<br>28 | MYO5C | myosin VC                                      | 1.982085  | Inlier  |
| siRNA Disorazole DMSO Run2   | NM_0187<br>28 | MYO5C | myosin VC                                      | 2.292981  | Inlier  |
| siRNA-Temozolomide Run3-DMSO | NM_0049<br>99 | MYO6  | myosin VI                                      | -3.026725 | Inlier  |
| siRNA Disorazole DMSO Run3   | NM_0049<br>99 | MYO6  | myosin VI                                      | -0.739959 | Inlier  |
| siRNA-Temozolomide Run2-DMSO | NM_0049<br>99 | MYO6  | myosin VI                                      | -0.609041 | Inlier  |
| siRNA Disorazole DMSO Run1   | NM_0049<br>99 | MYO6  | myosin VI                                      | -0.123125 | Inlier  |
| siRNA-Vinblastine Run2-DMSO  | NM_0049<br>99 | MYO6  | myosin VI                                      | 0.123125  | Inlier  |

Identification of Survival Genes in Human Glioblastoma Cells Using siRNA Screening

Nikhil G Thaker, Fang Zhang, Peter R. McDonald, Tong Ying Shun, Michael D Lewen, Ian F. Pollack, and John S.

Lazo

| siRNA Treatment         | Run   | Gene ID   | Gene  | Protein                                                       | Z-score   | Outlier |
|-------------------------|-------|-----------|-------|---------------------------------------------------------------|-----------|---------|
| siRNA-Temozolomide DMSO | Run1- | NM_004999 | MYO6  | myosin VI                                                     | 0.311     | Inlier  |
| siRNA Disorazole DMSO   | Run2  | NM_004999 | MYO6  | myosin VI                                                     | 1.424303  | Inlier  |
| siRNA-Vinblastine DMSO  | Run1- | NM_004999 | MYO6  | myosin VI                                                     | 1.857393  | Inlier  |
| siRNA-Temozolomide DMSO | Run3- | NM_000260 | MYO7A | myosin VIIA (Usher syndrome 1B (autosomal recessive, severe)) | -1.31869  | Inlier  |
| siRNA-Temozolomide DMSO | Run2- | NM_000260 | MYO7A | myosin VIIA (Usher syndrome 1B (autosomal recessive, severe)) | -1.168411 | Inlier  |
| siRNA-Vinblastine DMSO  | Run2- | NM_000260 | MYO7A | myosin VIIA (Usher syndrome 1B (autosomal recessive, severe)) | -0.539018 | Inlier  |
| siRNA Disorazole DMSO   | Run3  | NM_000260 | MYO7A | myosin VIIA (Usher syndrome 1B (autosomal recessive, severe)) | -0.212357 | Inlier  |
| siRNA-Temozolomide DMSO | Run1- | NM_000260 | MYO7A | myosin VIIA (Usher syndrome 1B (autosomal recessive, severe)) | 0.212357  | Inlier  |

Identification of Survival Genes in Human Glioblastoma Cells Using siRNA Screening  
 Nikhil G Thaker, Fang Zhang, Peter R. McDonald, Tong Ying Shun, Michael D Lewen, Ian F. Pollack, and John S. Lazo

Molecular Pharmacology

|                                  |               |       |                                                              |           |        |
|----------------------------------|---------------|-------|--------------------------------------------------------------|-----------|--------|
|                                  |               |       | myosin<br>VIIA<br>(Usher<br>syndrome<br>1B<br>(autosoma<br>l |           |        |
| siRNA Disorazole DMSO Run1       | NM_0002<br>60 | MYO7A | recessive,<br>severe))                                       | 0.528066  | Inlier |
|                                  |               |       | myosin<br>VIIA<br>(Usher<br>syndrome<br>1B<br>(autosoma<br>l |           |        |
| siRNA Disorazole DMSO Run2       | NM_0002<br>60 | MYO7A | recessive,<br>severe))                                       | 0.809982  | Inlier |
|                                  |               |       | myosin<br>VIIA<br>(Usher<br>syndrome<br>1B<br>(autosoma<br>l |           |        |
| siRNA-Vinblastine Run1-<br>DMSO  | NM_0002<br>60 | MYO7A | recessive,<br>severe))                                       | 0.860687  | Inlier |
| siRNA-Temozolomide Run3-<br>DMSO | NM_0069<br>01 | MYO9A | myosin<br>IXA                                                | -2.589708 | Inlier |
| siRNA-Temozolomide Run2-<br>DMSO | NM_0069<br>01 | MYO9A | myosin<br>IXA                                                | -0.708943 | Inlier |
| siRNA-Temozolomide Run1-<br>DMSO | NM_0069<br>01 | MYO9A | myosin<br>IXA                                                | -0.214566 | Inlier |
| siRNA-Vinblastine Run2-<br>DMSO  | NM_0069<br>01 | MYO9A | myosin<br>IXA                                                | -0.131871 | Inlier |
| siRNA Disorazole DMSO Run3       | NM_0069<br>01 | MYO9A | myosin<br>IXA                                                | 0.131872  | Inlier |
| siRNA Disorazole DMSO Run1       | NM_0069<br>01 | MYO9A | myosin<br>IXA                                                | 0.640057  | Inlier |
| siRNA-Vinblastine Run1-<br>DMSO  | NM_0069<br>01 | MYO9A | myosin<br>IXA                                                | 1.049611  | Inlier |
| siRNA Disorazole DMSO Run2       | NM_0069<br>01 | MYO9A | myosin<br>IXA                                                | 1.689965  | Inlier |
| siRNA-Temozolomide Run3-<br>DMSO | NM_0041<br>45 | MYO9B | myosin<br>IXB                                                | -2.378798 | Inlier |
| siRNA-Temozolomide Run2-<br>DMSO | NM_0041<br>45 | MYO9B | myosin<br>IXB                                                | -1.236712 | Inlier |
| siRNA-Vinblastine Run2-<br>DMSO  | NM_0041<br>45 | MYO9B | myosin<br>IXB                                                | -0.308912 | Inlier |
| siRNA-Temozolomide Run1-<br>DMSO | NM_0041<br>45 | MYO9B | myosin<br>IXB                                                | -0.296877 | Inlier |

Identification of Survival Genes in Human Glioblastoma Cells Using siRNA Screening  
 Nikhil G Thaker, Fang Zhang, Peter R. McDonald, Tong Ying Shun, Michael D Lewen, Ian F. Pollack, and John S. Lazo

|                              |         |       |             |           |        |
|------------------------------|---------|-------|-------------|-----------|--------|
| Molecular Pharmacology       | NM_0041 |       | myosin      |           |        |
| siRNA Disorazole DMSO Run1   | 45      | MYO9B | IXB         | 0.296876  | Inlier |
|                              | NM_0041 |       | myosin      |           |        |
| siRNA Disorazole DMSO Run3   | 45      | MYO9B | IXB         | 0.334081  | Inlier |
| siRNA-Vinblastine Run1-DMSO  | NM_0041 |       | myosin      |           |        |
|                              | 45      | MYO9B | IXB         | 1.014919  | Inlier |
|                              | NM_0041 |       | myosin      |           |        |
| siRNA Disorazole DMSO Run2   | 45      | MYO9B | IXB         | 1.386149  | Inlier |
|                              |         |       | MYST        |           |        |
|                              |         |       | histone     |           |        |
|                              | NM_0321 |       | acetyltrans |           |        |
| siRNA Disorazole DMSO Run1   | 88      | MYST1 | ferase 1    | -1.207788 | Inlier |
|                              |         |       | MYST        |           |        |
|                              |         |       | histone     |           |        |
|                              | NM_0321 |       | acetyltrans |           |        |
| siRNA Disorazole DMSO Run3   | 88      | MYST1 | ferase 1    | -0.490997 | Inlier |
|                              |         |       | MYST        |           |        |
|                              |         |       | histone     |           |        |
|                              | NM_0321 |       | acetyltrans |           |        |
| siRNA-Temozolomide Run1-DMSO | 88      | MYST1 | ferase 1    | -0.214759 | Inlier |
|                              |         |       | MYST        |           |        |
|                              |         |       | histone     |           |        |
|                              | NM_0321 |       | acetyltrans |           |        |
| siRNA-Temozolomide Run3-DMSO | 88      | MYST1 | ferase 1    | -0.057331 | Inlier |
|                              |         |       | MYST        |           |        |
|                              |         |       | histone     |           |        |
|                              | NM_0321 |       | acetyltrans |           |        |
| siRNA-Temozolomide Run2-DMSO | 88      | MYST1 | ferase 1    | 0.057331  | Inlier |
|                              |         |       | MYST        |           |        |
|                              |         |       | histone     |           |        |
|                              | NM_0321 |       | acetyltrans |           |        |
| siRNA Disorazole DMSO Run2   | 88      | MYST1 | ferase 1    | 0.858003  | Inlier |
|                              |         |       | MYST        |           |        |
|                              |         |       | histone     |           |        |
|                              | NM_0321 |       | acetyltrans |           |        |
| siRNA-Vinblastine Run2-DMSO  | 88      | MYST1 | ferase 1    | 1.020325  | Inlier |
|                              |         |       | MYST        |           |        |
|                              |         |       | histone     |           |        |
|                              | NM_0321 |       | acetyltrans |           |        |
| siRNA-Vinblastine Run1-DMSO  | 88      | MYST1 | ferase 1    | 1.894602  | Inlier |
|                              |         |       | MYST        |           |        |
|                              |         |       | histone     |           |        |
|                              | NM_0070 |       | acetyltrans |           |        |
| siRNA-Temozolomide Run2-DMSO | 67      | MYST2 | ferase 2    | -1.779239 | Inlier |
|                              |         |       | MYST        |           |        |
|                              |         |       | histone     |           |        |
|                              | NM_0070 |       | acetyltrans |           |        |
| siRNA Disorazole DMSO Run1   | 67      | MYST2 | ferase 2    | -1.205495 | Inlier |
|                              |         |       | MYST        |           |        |
|                              |         |       | histone     |           |        |
|                              | NM_0070 |       | acetyltrans |           |        |
| siRNA Disorazole DMSO Run3   | 67      | MYST2 | ferase 2    | -0.055179 | Inlier |

Identification of Survival Genes in Human Glioblastoma Cells Using siRNA Screening  
 Nikhil G Thaker, Fang Zhang, Peter R. McDonald, Tong Ying Shun, Michael D Lewen, Ian F. Pollack, and John S. Lazo

Molecular Pharmacology

|                              |               |       |                                                                     |           |                  |
|------------------------------|---------------|-------|---------------------------------------------------------------------|-----------|------------------|
| siRNA-Temozolomide Run3-DMSO | NM_0070<br>67 | MYST2 | MYST<br>histone<br>acetyltrans<br>ferase 2                          | -0.018721 | Inlier           |
| siRNA-Temozolomide Run1-DMSO | NM_0070<br>67 | MYST2 | MYST<br>histone<br>acetyltrans<br>ferase 2                          | 0.018721  | Inlier           |
| siRNA-Vinblastine Run2-DMSO  | NM_0070<br>67 | MYST2 | MYST<br>histone<br>acetyltrans<br>ferase 2                          | 0.143505  | Inlier           |
| siRNA Disorazole DMSO Run2   | NM_0070<br>67 | MYST2 | MYST<br>histone<br>acetyltrans<br>ferase 2                          | 1.559568  | Inlier           |
| siRNA-Vinblastine Run1-DMSO  | NM_0070<br>67 | MYST2 | MYST<br>histone<br>acetyltrans<br>ferase 2                          | 3.038121  | Inlier           |
| siRNA-Temozolomide Run2-DMSO | NM_0123<br>30 | MYST4 | MYST<br>histone<br>acetyltrans<br>ferase<br>(monocytic<br>leukemia) | 4         | -1.948831 Inlier |
| siRNA Disorazole DMSO Run1   | NM_0123<br>30 | MYST4 | MYST<br>histone<br>acetyltrans<br>ferase<br>(monocytic<br>leukemia) | 4         | -0.995304 Inlier |
| siRNA-Temozolomide Run1-DMSO | NM_0123<br>30 | MYST4 | MYST<br>histone<br>acetyltrans<br>ferase<br>(monocytic<br>leukemia) | 4         | -0.785215 Inlier |
| siRNA-Temozolomide Run3-DMSO | NM_0123<br>30 | MYST4 | MYST<br>histone<br>acetyltrans<br>ferase<br>(monocytic<br>leukemia) | 4         | -0.16933 Inlier  |



Identification of Survival Genes in Human Glioblastoma Cells Using siRNA Screening  
 Nikhil G Thaker, Fang Zhang, Peter R. McDonald, Tong Ying Shun, Michael D Lewen, Ian F. Pollack, and John S. Lazo  
 Molecular Pharmacology

|                                  |               |       |                                                                     |   |           |        |
|----------------------------------|---------------|-------|---------------------------------------------------------------------|---|-----------|--------|
| siRNA Disorazole DMSO Run3       | NM_0123<br>30 | MYST4 | MYST<br>histone<br>acetyltrans<br>ferase<br>(monocytic<br>leukemia) | 4 | 0.16933   | Inlier |
| siRNA-Vinblastine Run2-<br>DMSO  | NM_0123<br>30 | MYST4 | MYST<br>histone<br>acetyltrans<br>ferase<br>(monocytic<br>leukemia) | 4 | 0.470509  | Inlier |
| siRNA Disorazole DMSO Run2       | NM_0123<br>30 | MYST4 | MYST<br>histone<br>acetyltrans<br>ferase<br>(monocytic<br>leukemia) | 4 | 0.563785  | Inlier |
| siRNA-Vinblastine Run1-<br>DMSO  | NM_0123<br>30 | MYST4 | MYST<br>histone<br>acetyltrans<br>ferase<br>(monocytic<br>leukemia) | 4 | 0.990985  | Inlier |
| siRNA Disorazole DMSO Run1       | NM_0045<br>35 | MYT1  | myelin<br>transcripti<br>on factor 1                                |   | -2.696156 | Inlier |
| siRNA-Temozolomide Run1-<br>DMSO | NM_0045<br>35 | MYT1  | myelin<br>transcripti<br>on factor 1                                |   | -0.834477 | Inlier |
| siRNA-Temozolomide Run3-<br>DMSO | NM_0045<br>35 | MYT1  | myelin<br>transcripti<br>on factor 1                                |   | -0.514523 | Inlier |
| siRNA-Temozolomide Run2-<br>DMSO | NM_0045<br>35 | MYT1  | myelin<br>transcripti<br>on factor 1                                |   | -0.265101 | Inlier |
| siRNA Disorazole DMSO Run3       | NM_0045<br>35 | MYT1  | myelin<br>transcripti<br>on factor 1                                |   | 0.265102  | Inlier |

Identification of Survival Genes in Human Glioblastoma Cells Using siRNA Screening

Nikhil G Thaker, Fang Zhang, Peter R. McDonald, Tong Ying Shun, Michael D Lewen, Ian F. Pollack, and John S. Lazo

Molecular Pharmacology

|                              |               |         |                                                                     |           |        |
|------------------------------|---------------|---------|---------------------------------------------------------------------|-----------|--------|
| siRNA-Vinblastine Run2-DMSO  | NM_0045<br>35 | MYT1    | myelin<br>transcripti<br>on factor 1                                | 0.332793  | Inlier |
| siRNA Disorazole DMSO Run2   | NM_0045<br>35 | MYT1    | myelin<br>transcripti<br>on factor 1                                | 2.146892  | Inlier |
| siRNA-Vinblastine Run1-DMSO  | NM_0045<br>35 | MYT1    | myelin<br>transcripti<br>on factor 1                                | 2.717813  | Inlier |
| siRNA-Temozolomide Run3-DMSO | NM_0054<br>67 | NAALAD2 | N-<br>acetylated<br>alpha-<br>linked<br>acidic<br>dipeptidas<br>e 2 | -1.210098 | Inlier |
| siRNA-Temozolomide Run2-DMSO | NM_0054<br>67 | NAALAD2 | N-<br>acetylated<br>alpha-<br>linked<br>acidic<br>dipeptidas<br>e 2 | -0.965289 | Inlier |
| siRNA Disorazole DMSO Run1   | NM_0054<br>67 | NAALAD2 | N-<br>acetylated<br>alpha-<br>linked<br>acidic<br>dipeptidas<br>e 2 | -0.761243 | Inlier |
| siRNA-Temozolomide Run1-DMSO | NM_0054<br>67 | NAALAD2 | N-<br>acetylated<br>alpha-<br>linked<br>acidic<br>dipeptidas<br>e 2 | -0.01918  | Inlier |
| siRNA Disorazole DMSO Run2   | NM_0054<br>67 | NAALAD2 | N-<br>acetylated<br>alpha-<br>linked<br>acidic<br>dipeptidas<br>e 2 | 0.01918   | Inlier |

Identification of Survival Genes in Human Glioblastoma Cells Using siRNA Screening  
 Nikhil G Thaker, Fang Zhang, Peter R. McDonald, Tong Ying Shun, Michael D Lewen, Ian F. Pollack, and John S. Lazo

Molecular Pharmacology

| siRNA Treatment              | Gene ID   | Gene Name | Protein Name                                        | Log2 Fold Change | Inlier |
|------------------------------|-----------|-----------|-----------------------------------------------------|------------------|--------|
| siRNA-Vinblastine Run2-DMSO  | NM_005467 | NAALAD2   | N-acetylated alpha-linked acidic dipeptidase 2      | 0.139841         | Inlier |
| siRNA Disorazole DMSO Run3   | NM_005467 | NAALAD2   | N-acetylated alpha-linked acidic dipeptidase 2      | 0.651082         | Inlier |
| siRNA-Vinblastine Run1-DMSO  | NM_005467 | NAALAD2   | N-acetylated alpha-linked acidic dipeptidase 2      | 0.697918         | Inlier |
| siRNA-Temozolomide Run3-DMSO | NM_005468 | NAALADL1  | N-acetylated alpha-linked acidic dipeptidase-like 1 | -1.058942        | Inlier |
| siRNA Disorazole DMSO Run2   | NM_005468 | NAALADL1  | N-acetylated alpha-linked acidic dipeptidase-like 1 | -0.976551        | Inlier |
| siRNA-Temozolomide Run2-DMSO | NM_005468 | NAALADL1  | N-acetylated alpha-linked acidic dipeptidase-like 1 | -0.608349        | Inlier |
| siRNA Disorazole DMSO Run1   | NM_005468 | NAALADL1  | N-acetylated alpha-linked acidic dipeptidase-like 1 | -0.074089        | Inlier |

Identification of Survival Genes in Human Glioblastoma Cells Using siRNA Screening  
 Nikhil G Thaker, Fang Zhang, Peter R. McDonald, Tong Ying Shun, Michael D Lewen, Ian F. Pollack, and John S. Lazo

Molecular Pharmacology

|                              |               |              |                                                                  |           |        |
|------------------------------|---------------|--------------|------------------------------------------------------------------|-----------|--------|
| siRNA-Temozolomide Run1-DMSO | NM_0054<br>68 | NAALADL<br>1 | N-acetylated<br>alpha-linked<br>acidic<br>dipeptidas<br>e-like 1 | 0.074089  | Inlier |
| siRNA Disorazole DMSO Run3   | NM_0054<br>68 | NAALADL<br>1 | N-acetylated<br>alpha-linked<br>acidic<br>dipeptidas<br>e-like 1 | 0.306369  | Inlier |
| siRNA-Vinblastine Run2-DMSO  | NM_0054<br>68 | NAALADL<br>1 | N-acetylated<br>alpha-linked<br>acidic<br>dipeptidas<br>e-like 1 | 0.740651  | Inlier |
| siRNA-Vinblastine Run1-DMSO  | NM_0054<br>68 | NAALADL<br>1 | N-acetylated<br>alpha-linked<br>acidic<br>dipeptidas<br>e-like 1 | 0.979341  | Inlier |
| siRNA-Temozolomide Run3-DMSO | NM_0181<br>61 | NADSYN1      | NADSYN1                                                          | -0.790541 | Inlier |
| siRNA Disorazole DMSO Run1   | NM_0181<br>61 | NADSYN1      | NADSYN1                                                          | -0.707712 | Inlier |
| siRNA-Temozolomide Run1-DMSO | NM_0181<br>61 | NADSYN1      | NADSYN1                                                          | -0.627203 | Inlier |
| siRNA-Temozolomide Run2-DMSO | NM_0181<br>61 | NADSYN1      | NADSYN1                                                          | -0.530126 | Inlier |
| siRNA-Vinblastine Run2-DMSO  | NM_0181<br>61 | NADSYN1      | NADSYN1                                                          | 0.530125  | Inlier |
| siRNA Disorazole DMSO Run3   | NM_0181<br>61 | NADSYN1      | NADSYN1                                                          | 0.641288  | Inlier |
| siRNA-Vinblastine Run1-DMSO  | NM_0181<br>61 | NADSYN1      | NADSYN1                                                          | 0.71147   | Inlier |
| siRNA Disorazole DMSO Run2   | NM_0181<br>61 | NADSYN1      | NADSYN1                                                          | 0.793228  | Inlier |
| siRNA-Temozolomide Run3-DMSO | NM_0002<br>62 | NAGA         | N-acetylgala<br>ctosaminid<br>ase, alpha-                        | -1.724301 | Inlier |

Identification of Survival Genes in Human Glioblastoma Cells Using siRNA Screening  
 Nikhil G Thaker, Fang Zhang, Peter R. McDonald, Tong Ying Shun, Michael D Lewen, Ian F. Pollack, and John S. Lazo  
 Molecular Pharmacology

|                              |           |      |                                   |           |        |
|------------------------------|-----------|------|-----------------------------------|-----------|--------|
| siRNA-Temozolomide Run2-DMSO | NM_000262 | NAGA | N-acetylgalactosaminidase, alpha- | -1.277738 | Inlier |
| siRNA-Vinblastine Run2-DMSO  | NM_000262 | NAGA | N-acetylgalactosaminidase, alpha- | -0.323947 | Inlier |
| siRNA Disorazole DMSO Run3   | NM_000262 | NAGA | N-acetylgalactosaminidase, alpha- | -0.254993 | Inlier |
| siRNA Disorazole DMSO Run1   | NM_000262 | NAGA | N-acetylgalactosaminidase, alpha- | 0.254994  | Inlier |
| siRNA-Temozolomide Run1-DMSO | NM_000262 | NAGA | N-acetylgalactosaminidase, alpha- | 0.402925  | Inlier |
| siRNA Disorazole DMSO Run2   | NM_000262 | NAGA | N-acetylgalactosaminidase, alpha- | 0.946075  | Inlier |
| siRNA-Vinblastine Run1-DMSO  | NM_000262 | NAGA | N-acetylgalactosaminidase, alpha- | 1.735276  | Inlier |
| siRNA-Temozolomide Run3-DMSO | NM_017567 | NAGK | N-acetylglucosamine kinase        | -1.360693 | Inlier |
| siRNA Disorazole DMSO Run2   | NM_017567 | NAGK | N-acetylglucosamine kinase        | -0.731354 | Inlier |
| siRNA-Temozolomide Run2-DMSO | NM_017567 | NAGK | N-acetylglucosamine kinase        | -0.239027 | Inlier |
| siRNA-Temozolomide Run1-DMSO | NM_017567 | NAGK | N-acetylglucosamine kinase        | -0.014637 | Inlier |

Identification of Survival Genes in Human Glioblastoma Cells Using siRNA Screening  
 Nikhil G Thaker, Fang Zhang, Peter R. McDonald, Tong Ying Shun, Michael D Lewen, Ian F. Pollack, and John S. Lazo

Molecular Pharmacology

|                              |               |       |                                                           |           |         |
|------------------------------|---------------|-------|-----------------------------------------------------------|-----------|---------|
| siRNA-Vinblastine Run1-DMSO  | NM_0175<br>67 | NAGK  | N-acetylglucosamine kinase                                | 0.014637  | Inlier  |
| siRNA Disorazole DMSO Run1   | NM_0175<br>67 | NAGK  | N-acetylglucosamine kinase                                | 0.617646  | Inlier  |
| siRNA-Vinblastine Run2-DMSO  | NM_0175<br>67 | NAGK  | N-acetylglucosamine kinase                                | 1.278022  | Inlier  |
| siRNA Disorazole DMSO Run3   | NM_0175<br>67 | NAGK  | N-acetylglucosamine kinase                                | 6.747408  | Outlier |
| siRNA-Temozolomide Run3-DMSO | NM_0002<br>63 | NAGLU | N-acetylglucosaminidase, alpha- (Sanfilippo disease IIIB) | -1.162473 | Inlier  |
| siRNA-Temozolomide Run2-DMSO | NM_0002<br>63 | NAGLU | N-acetylglucosaminidase, alpha- (Sanfilippo disease IIIB) | -0.883525 | Inlier  |
| siRNA Disorazole DMSO Run1   | NM_0002<br>63 | NAGLU | N-acetylglucosaminidase, alpha- (Sanfilippo disease IIIB) | -0.817537 | Inlier  |
| siRNA-Temozolomide Run1-DMSO | NM_0002<br>63 | NAGLU | N-acetylglucosaminidase, alpha- (Sanfilippo disease IIIB) | -0.347497 | Inlier  |
| siRNA-Vinblastine Run1-DMSO  | NM_0002<br>63 | NAGLU | N-acetylglucosaminidase, alpha- (Sanfilippo disease IIIB) | 0.347497  | Inlier  |

Identification of Survival Genes in Human Glioblastoma Cells Using siRNA Screening  
 Nikhil G Thaker, Fang Zhang, Peter R. McDonald, Tong Ying Shun, Michael D Lewen, Ian F. Pollack, and John S. Lazo

Molecular Pharmacology

| siRNA Treatment              | Gene ID   | Gene Name | Enzyme Name                                               | Log2 Fold Change | Classification |
|------------------------------|-----------|-----------|-----------------------------------------------------------|------------------|----------------|
| siRNA Disorazole DMSO Run3   | NM_000263 | NAGLU     | N-acetylglucosaminidase, alpha- (Sanfilippo disease IIIB) | 0.371535         | Inlier         |
| siRNA-Vinblastine Run2-DMSO  | NM_000263 | NAGLU     | N-acetylglucosaminidase, alpha- (Sanfilippo disease IIIB) | 0.531463         | Inlier         |
| siRNA Disorazole DMSO Run2   | NM_000263 | NAGLU     | N-acetylglucosaminidase, alpha- (Sanfilippo disease IIIB) | 0.894131         | Inlier         |
| siRNA-Temozolomide Run3-DMSO | NM_153006 | NAGS      | N-acetylglutamate synthase                                | -4.060478        | Outlier        |
| siRNA-Temozolomide Run2-DMSO | NM_153006 | NAGS      | N-acetylglutamate synthase                                | -0.944963        | Inlier         |
| siRNA-Vinblastine Run2-DMSO  | NM_153006 | NAGS      | N-acetylglutamate synthase                                | -0.404037        | Inlier         |
| siRNA-Temozolomide Run1-DMSO | NM_153006 | NAGS      | N-acetylglutamate synthase                                | -0.024177        | Inlier         |
| siRNA Disorazole DMSO Run1   | NM_153006 | NAGS      | N-acetylglutamate synthase                                | 0.024177         | Inlier         |
| siRNA Disorazole DMSO Run3   | NM_153006 | NAGS      | N-acetylglutamate synthase                                | 0.082597         | Inlier         |
| siRNA-Vinblastine Run1-DMSO  | NM_153006 | NAGS      | N-acetylglutamate synthase                                | 1.697877         | Inlier         |

Identification of Survival Genes in Human Glioblastoma Cells Using siRNA Screening  
 Nikhil G Thaker, Fang Zhang, Peter R. McDonald, Tong Ying Shun, Michael D Lewen, Ian F. Pollack, and John S. Lazo

Molecular Pharmacology

|                              |               |        |                                                  |           |        |
|------------------------------|---------------|--------|--------------------------------------------------|-----------|--------|
| siRNA Disorazole DMSO Run2   | NM_1530<br>06 | NAGS   | N-acetylglutamate synthase                       | 2.117801  | Inlier |
| siRNA-Temozolomide Run1-DMSO | NM_1450<br>07 | NALP11 | NACHT, leucine rich repeat and PYD containing 11 | -0.899357 | Inlier |
| siRNA-Vinblastine Run2-DMSO  | NM_1450<br>07 | NALP11 | NACHT, leucine rich repeat and PYD containing 11 | -0.690502 | Inlier |
| siRNA-Temozolomide Run2-DMSO | NM_1450<br>07 | NALP11 | NACHT, leucine rich repeat and PYD containing 11 | -0.658498 | Inlier |
| siRNA-Temozolomide Run3-DMSO | NM_1450<br>07 | NALP11 | NACHT, leucine rich repeat and PYD containing 11 | -0.212472 | Inlier |
| siRNA Disorazole DMSO Run1   | NM_1450<br>07 | NALP11 | NACHT, leucine rich repeat and PYD containing 11 | 0.212472  | Inlier |
| siRNA Disorazole DMSO Run3   | NM_1450<br>07 | NALP11 | NACHT, leucine rich repeat and PYD containing 11 | 0.446003  | Inlier |



Identification of Survival Genes in Human Glioblastoma Cells Using siRNA Screening  
 Nikhil G Thaker, Fang Zhang, Peter R. McDonald, Tong Ying Shun, Michael D Lewen, Ian F. Pollack, and John S. Lazo  
 Molecular Pharmacology

|                              |           |        |                                                  |           |         |
|------------------------------|-----------|--------|--------------------------------------------------|-----------|---------|
| siRNA-Vinblastine Run1-DMSO  | NM_145007 | NALP11 | NACHT, leucine rich repeat and PYD containing 11 | 0.757739  | Inlier  |
| siRNA Disorazole DMSO Run2   | NM_145007 | NALP11 | NACHT, leucine rich repeat and PYD containing 11 | 1.043037  | Inlier  |
| siRNA-Temozolomide Run3-DMSO | NM_004851 | NAPSA  | napsin A aspartic peptidase                      | -1.349884 | Inlier  |
| siRNA-Temozolomide Run1-DMSO | NM_004851 | NAPSA  | napsin A aspartic peptidase                      | -0.905798 | Inlier  |
| siRNA-Temozolomide Run2-DMSO | NM_004851 | NAPSA  | napsin A aspartic peptidase                      | -0.345128 | Inlier  |
| siRNA Disorazole DMSO Run1   | NM_004851 | NAPSA  | napsin A aspartic peptidase                      | -0.2694   | Inlier  |
| siRNA-Vinblastine Run2-DMSO  | NM_004851 | NAPSA  | napsin A aspartic peptidase                      | 0.2694    | Inlier  |
| siRNA-Vinblastine Run1-DMSO  | NM_004851 | NAPSA  | napsin A aspartic peptidase                      | 0.443202  | Inlier  |
| siRNA Disorazole DMSO Run2   | NM_004851 | NAPSA  | napsin A aspartic peptidase                      | 1.384491  | Inlier  |
| siRNA Disorazole DMSO Run3   | NM_004851 | NAPSA  | napsin A aspartic peptidase                      | 5.236999  | Outlier |
| siRNA Disorazole DMSO Run1   | NM_004539 | NARS   | asparaginy l-tRNA synthetase                     | -1.861961 | Inlier  |
| siRNA-Temozolomide Run1-DMSO | NM_004539 | NARS   | asparaginy l-tRNA synthetase                     | -0.869006 | Inlier  |
| siRNA-Temozolomide Run2-DMSO | NM_004539 | NARS   | asparaginy l-tRNA synthetase                     | -0.479993 | Inlier  |

Identification of Survival Genes in Human Glioblastoma Cells Using siRNA Screening  
 Nikhil G Thaker, Fang Zhang, Peter R. McDonald, Tong Ying Shun, Michael D Lewen, Ian F. Pollack, and John S. Lazo

Molecular Pharmacology

|                              |               |      |                                                                                                                                                            |           |        |
|------------------------------|---------------|------|------------------------------------------------------------------------------------------------------------------------------------------------------------|-----------|--------|
| siRNA-Temozolomide Run3-DMSO | NM_0045<br>39 | NARS | asparaginy<br>l-tRNA<br>synthetase                                                                                                                         | -0.125759 | Inlier |
| siRNA Disorazole DMSO Run3   | NM_0045<br>39 | NARS | asparaginy<br>l-tRNA<br>synthetase                                                                                                                         | 0.12576   | Inlier |
| siRNA-Vinblastine Run2-DMSO  | NM_0045<br>39 | NARS | asparaginy<br>l-tRNA<br>synthetase                                                                                                                         | 0.239216  | Inlier |
| siRNA Disorazole DMSO Run2   | NM_0045<br>39 | NARS | asparaginy<br>l-tRNA<br>synthetase                                                                                                                         | 1.725064  | Inlier |
| siRNA-Vinblastine Run1-DMSO  | NM_0045<br>39 | NARS | asparaginy<br>l-tRNA<br>synthetase                                                                                                                         | 2.433367  | Inlier |
| siRNA-Temozolomide Run2-DMSO | NM_0006<br>62 | NAT1 | N-<br>acetyltrans<br>ferase 1<br>(arylamine<br>N-<br>acetyltrans<br>ferase)<br>N-<br>acetyltrans<br>ferase 1<br>(arylamine<br>N-<br>acetyltrans<br>ferase) | -0.739867 | Inlier |
| siRNA-Temozolomide Run3-DMSO | NM_0006<br>62 | NAT1 | N-<br>acetyltrans<br>ferase 1<br>(arylamine<br>N-<br>acetyltrans<br>ferase)<br>N-<br>acetyltrans<br>ferase 1<br>(arylamine<br>N-<br>acetyltrans<br>ferase) | -0.682234 | Inlier |
| siRNA Disorazole DMSO Run1   | NM_0006<br>62 | NAT1 | N-<br>acetyltrans<br>ferase 1<br>(arylamine<br>N-<br>acetyltrans<br>ferase)<br>N-<br>acetyltrans<br>ferase 1<br>(arylamine<br>N-<br>acetyltrans<br>ferase) | -0.666766 | Inlier |
| siRNA-Temozolomide Run1-DMSO | NM_0006<br>62 | NAT1 | N-<br>acetyltrans<br>ferase)                                                                                                                               | -0.297078 | Inlier |

Identification of Survival Genes in Human Glioblastoma Cells Using siRNA Screening  
 Nikhil G Thaker, Fang Zhang, Peter R. McDonald, Tong Ying Shun, Michael D Lewen, Ian F. Pollack, and John S. Lazo

Molecular Pharmacology

| siRNA Treatment              | Gene ID   | Gene Name | Value     | Category |
|------------------------------|-----------|-----------|-----------|----------|
| siRNA Disorazole DMSO Run3   | NM_000662 | NAT1      | 0.297078  | Inlier   |
| siRNA-Vinblastine Run2-DMSO  | NM_000662 | NAT1      | 0.303892  | Inlier   |
| siRNA-Vinblastine Run1-DMSO  | NM_000662 | NAT1      | 0.877584  | Inlier   |
| siRNA Disorazole DMSO Run2   | NM_000662 | NAT1      | 1.024903  | Inlier   |
| siRNA-Temozolomide Run2-DMSO | NM_000015 | NAT2      | -0.835877 | Inlier   |
| siRNA Disorazole DMSO Run3   | NM_000015 | NAT2      | -0.513123 | Inlier   |
| siRNA-Temozolomide Run3-DMSO | NM_000015 | NAT2      | -0.310222 | Inlier   |

N-acetyltransferase 1 (arylamine N-acetyltransferase)  
 N-acetyltransferase 1 (arylamine N-acetyltransferase)  
 N-acetyltransferase 1 (arylamine N-acetyltransferase)  
 N-acetyltransferase 1 (arylamine N-acetyltransferase)  
 N-acetyltransferase 2 (arylamine N-acetyltransferase)  
 N-acetyltransferase 2 (arylamine N-acetyltransferase)  
 N-acetyltransferase 2 (arylamine N-acetyltransferase)

Identification of Survival Genes in Human Glioblastoma Cells Using siRNA Screening

Nikhil G Thaker, Fang Zhang, Peter R. McDonald, Tong Ying Shun, Michael D Lewen, Ian F. Pollack, and John S. Lazo

Molecular Pharmacology

|                              |           |      |  |                                                     |                  |
|------------------------------|-----------|------|--|-----------------------------------------------------|------------------|
|                              |           |      |  | N-acetyltransferase 2 (arylamine N-                 |                  |
| siRNA Disorazole DMSO Run1   | NM_000015 | NAT2 |  | transferase)                                        | -0.064657 Inlier |
|                              |           |      |  | N-acetyltransferase 2 (arylamine N-                 |                  |
| siRNA-Temozolomide Run1-DMSO | NM_000015 | NAT2 |  | transferase)                                        | 0.064658 Inlier  |
|                              |           |      |  | N-acetyltransferase 2 (arylamine N-                 |                  |
| siRNA-Vinblastine Run2-DMSO  | NM_000015 | NAT2 |  | transferase)                                        | 1.189056 Inlier  |
|                              |           |      |  | N-acetyltransferase 2 (arylamine N-                 |                  |
| siRNA Disorazole DMSO Run2   | NM_000015 | NAT2 |  | transferase)                                        | 5.178018 Outlier |
|                              |           |      |  | N-acetyltransferase 2 (arylamine N-                 |                  |
| siRNA-Vinblastine Run1-DMSO  | NM_000015 | NAT2 |  | transferase)                                        | 6.651894 Outlier |
|                              |           |      |  | N-acetyltransferase 5 (ARD1 homolog, S. cerevisiae) |                  |
| siRNA-Temozolomide Run1-DMSO | NM_181528 | NAT5 |  |                                                     | -0.987395 Inlier |
|                              |           |      |  | N-acetyltransferase 5 (ARD1 homolog, S. cerevisiae) |                  |
| siRNA-Temozolomide Run3-DMSO | NM_181528 | NAT5 |  |                                                     | -0.62253 Inlier  |

Identification of Survival Genes in Human Glioblastoma Cells Using siRNA Screening  
 Nikhil G Thaker, Fang Zhang, Peter R. McDonald, Tong Ying Shun, Michael D Lewen, Ian F. Pollack, and John S. Lazo  
 Molecular Pharmacology

|                                  |               |      |                                                                         |           |        |
|----------------------------------|---------------|------|-------------------------------------------------------------------------|-----------|--------|
| siRNA Disorazole DMSO Run1       | NM_1815<br>28 | NAT5 | N-<br>acetyltrans<br>ferase 5<br>(ARD1<br>homolog,<br>S.<br>cerevisiae) | -0.486222 | Inlier |
| siRNA-Temozolomide Run2-<br>DMSO | NM_1815<br>28 | NAT5 | N-<br>acetyltrans<br>ferase 5<br>(ARD1<br>homolog,<br>S.<br>cerevisiae) | -0.317376 | Inlier |
| siRNA Disorazole DMSO Run3       | NM_1815<br>28 | NAT5 | N-<br>acetyltrans<br>ferase 5<br>(ARD1<br>homolog,<br>S.<br>cerevisiae) | 0.317376  | Inlier |
| siRNA-Vinblastine Run2-<br>DMSO  | NM_1815<br>28 | NAT5 | N-<br>acetyltrans<br>ferase 5<br>(ARD1<br>homolog,<br>S.<br>cerevisiae) | 0.72647   | Inlier |
| siRNA-Vinblastine Run1-<br>DMSO  | NM_1815<br>28 | NAT5 | N-<br>acetyltrans<br>ferase 5<br>(ARD1<br>homolog,<br>S.<br>cerevisiae) | 1.929751  | Inlier |
| siRNA Disorazole DMSO Run2       | NM_1815<br>28 | NAT5 | N-<br>acetyltrans<br>ferase 5<br>(ARD1<br>homolog,<br>S.<br>cerevisiae) | 1.985588  | Inlier |
| siRNA Disorazole DMSO Run1       | NM_0121<br>91 | NAT6 | N-<br>acetyltrans<br>ferase 6                                           | -1.260989 | Inlier |

Identification of Survival Genes in Human Glioblastoma Cells Using siRNA Screening  
 Nikhil G Thaker, Fang Zhang, Peter R. McDonald, Tong Ying Shun, Michael D Lewen, Ian F. Pollack, and John S. Lazo

| Molecular Pharmacology       | Gene ID | Cell Line | Gene Name | Log Fold Change                      | Outlier Status   |
|------------------------------|---------|-----------|-----------|--------------------------------------|------------------|
| siRNA-Vinblastine Run2-DMSO  | NM_0121 | 91        | NAT6      | N-acetyltransferase 6                | -0.926368 Inlier |
| siRNA Disorazole DMSO Run3   | NM_0121 | 91        | NAT6      | N-acetyltransferase 6                | -0.422632 Inlier |
| siRNA-Temozolomide Run1-DMSO | NM_0121 | 91        | NAT6      | N-acetyltransferase 6                | -0.053359 Inlier |
| siRNA-Temozolomide Run2-DMSO | NM_0121 | 91        | NAT6      | N-acetyltransferase 6                | 0.053359 Inlier  |
| siRNA-Temozolomide Run3-DMSO | NM_0121 | 91        | NAT6      | N-acetyltransferase 6                | 0.250605 Inlier  |
| siRNA Disorazole DMSO Run2   | NM_0121 | 91        | NAT6      | N-acetyltransferase 6                | 1.166671 Inlier  |
| siRNA-Vinblastine Run1-DMSO  | NM_0121 | 91        | NAT6      | N-acetyltransferase 6                | 2.372061 Inlier  |
| siRNA Disorazole DMSO Run1   | NM_0039 | 60        | NAT8      | N-acetyltransferase 8 (camello like) | -1.169428 Inlier |
| siRNA-Temozolomide Run3-DMSO | NM_0039 | 60        | NAT8      | N-acetyltransferase 8 (camello like) | -0.557357 Inlier |
| siRNA Disorazole DMSO Run3   | NM_0039 | 60        | NAT8      | N-acetyltransferase 8 (camello like) | -0.552678 Inlier |
| siRNA-Temozolomide Run1-DMSO | NM_0039 | 60        | NAT8      | N-acetyltransferase 8 (camello like) | -0.316364 Inlier |
| siRNA-Temozolomide Run2-DMSO | NM_0039 | 60        | NAT8      | N-acetyltransferase 8 (camello like) | 0.316364 Inlier  |
| siRNA-Vinblastine Run2-DMSO  | NM_0039 | 60        | NAT8      | N-acetyltransferase 8 (camello like) | 0.791643 Inlier  |

Identification of Survival Genes in Human Glioblastoma Cells Using siRNA Screening  
 Nikhil G Thaker, Fang Zhang, Peter R. McDonald, Tong Ying Shun, Michael D Lewen, Ian F. Pollack, and John S. Lazo

Molecular Pharmacology

|                              |               |        |                                      |           |         |
|------------------------------|---------------|--------|--------------------------------------|-----------|---------|
| siRNA-Vinblastine Run1-DMSO  | NM_0039<br>60 | NAT8   | N-acetyltransferase 8 (camello like) | 4.662046  | Outlier |
| siRNA Disorazole DMSO Run2   | NM_0039<br>60 | NAT8   | N-acetyltransferase 8 (camello like) | 5.512426  | Outlier |
| siRNA-Temozolomide Run3-DMSO | NM_0162<br>30 | NCB5OR | NADPH cytochrome B5 oxidoreductase   | -1.723218 | Inlier  |
| siRNA Disorazole DMSO Run3   | NM_0162<br>30 | NCB5OR | NADPH cytochrome B5 oxidoreductase   | -1.028092 | Inlier  |
| siRNA-Temozolomide Run2-DMSO | NM_0162<br>30 | NCB5OR | NADPH cytochrome B5 oxidoreductase   | -0.307952 | Inlier  |
| siRNA Disorazole DMSO Run1   | NM_0162<br>30 | NCB5OR | NADPH cytochrome B5 oxidoreductase   | -0.001219 | Inlier  |
| siRNA-Vinblastine Run2-DMSO  | NM_0162<br>30 | NCB5OR | NADPH cytochrome B5 oxidoreductase   | 0.001219  | Inlier  |
| siRNA-Temozolomide Run1-DMSO | NM_0162<br>30 | NCB5OR | NADPH cytochrome B5 oxidoreductase   | 0.320908  | Inlier  |
| siRNA-Vinblastine Run1-DMSO  | NM_0162<br>30 | NCB5OR | NADPH cytochrome B5 oxidoreductase   | 2.029982  | Inlier  |
| siRNA Disorazole DMSO Run2   | NM_0162<br>30 | NCB5OR | NADPH cytochrome B5 oxidoreductase   | 2.650317  | Inlier  |
| siRNA-Temozolomide Run3-DMSO | NM_0806<br>78 | NCE2   | NCE2                                 | -3.762502 | Outlier |

Identification of Survival Genes in Human Glioblastoma Cells Using siRNA Screening

Nikhil G Thaker, Fang Zhang, Peter R. McDonald, Tong Ying Shun, Michael D Lewen, Ian F. Pollack, and John S.

Lazo

|                                  |               |      |                                                                                                               |           |         |
|----------------------------------|---------------|------|---------------------------------------------------------------------------------------------------------------|-----------|---------|
| siRNA-Temozolomide Run2-<br>DMSO | NM_0806<br>78 | NCE2 | NCE2                                                                                                          | -3.54553  | Outlier |
| siRNA-Temozolomide Run1-<br>DMSO | NM_0806<br>78 | NCE2 | NCE2                                                                                                          | -0.62529  | Inlier  |
| siRNA Disorazole DMSO Run2       | NM_0806<br>78 | NCE2 | NCE2                                                                                                          | -0.099675 | Inlier  |
| siRNA Disorazole DMSO Run3       | NM_0806<br>78 | NCE2 | NCE2                                                                                                          | 0.099675  | Inlier  |
| siRNA-Vinblastine Run2-<br>DMSO  | NM_0806<br>78 | NCE2 | NCE2                                                                                                          | 0.53883   | Inlier  |
| siRNA Disorazole DMSO Run1       | NM_0806<br>78 | NCE2 | NCE2                                                                                                          | 0.72371   | Inlier  |
| siRNA-Vinblastine Run1-<br>DMSO  | NM_0806<br>78 | NCE2 | NCE2                                                                                                          | 2.679326  | Inlier  |
| siRNA Disorazole DMSO Run1       | NM_0004<br>33 | NCF2 | neutrophil<br>cytosolic<br>factor 2<br>(65kDa,<br>chronic<br>granuloma<br>tous<br>disease,<br>autosomal<br>2) | -1.018203 | Inlier  |
| siRNA Disorazole DMSO Run3       | NM_0004<br>33 | NCF2 | neutrophil<br>cytosolic<br>factor 2<br>(65kDa,<br>chronic<br>granuloma<br>tous<br>disease,<br>autosomal<br>2) | -0.68226  | Inlier  |
| siRNA-Temozolomide Run2-<br>DMSO | NM_0004<br>33 | NCF2 | neutrophil<br>cytosolic<br>factor 2<br>(65kDa,<br>chronic<br>granuloma<br>tous<br>disease,<br>autosomal<br>2) | -0.627295 | Inlier  |



Identification of Survival Genes in Human Glioblastoma Cells Using siRNA Screening

Nikhil G Thaker, Fang Zhang, Peter R. McDonald, Tong Ying Shun, Michael D Lewen, Ian F. Pollack, and John S. Lazo

Molecular Pharmacology

|                              |           |      |                                                                                   |           |        |
|------------------------------|-----------|------|-----------------------------------------------------------------------------------|-----------|--------|
| siRNA-Temozolomide Run3-DMSO | NM_000433 | NCF2 | neutrophil cytosolic factor 2 (65kDa, chronic granulomatous disease, autosomal 2) | -0.211285 | Inlier |
| siRNA-Vinblastine Run2-DMSO  | NM_000433 | NCF2 | neutrophil cytosolic factor 2 (65kDa, chronic granulomatous disease, autosomal 2) | 0.211285  | Inlier |
| siRNA-Temozolomide Run1-DMSO | NM_000433 | NCF2 | neutrophil cytosolic factor 2 (65kDa, chronic granulomatous disease, autosomal 2) | 0.66674   | Inlier |
| siRNA-Vinblastine Run1-DMSO  | NM_000433 | NCF2 | neutrophil cytosolic factor 2 (65kDa, chronic granulomatous disease, autosomal 2) | 1.056699  | Inlier |
| siRNA Disorazole DMSO Run2   | NM_000433 | NCF2 | neutrophil cytosolic factor 2 (65kDa, chronic granulomatous disease, autosomal 2) | 2.980587  | Inlier |

Identification of Survival Genes in Human Glioblastoma Cells Using siRNA Screening  
 Nikhil G Thaker, Fang Zhang, Peter R. McDonald, Tong Ying Shun, Michael D Lewen, Ian F. Pollack, and John S. Lazo

Molecular Pharmacology

| siRNA Treatment              | Gene ID       | Gene Name | Target                         | Value     | Outlier Status |
|------------------------------|---------------|-----------|--------------------------------|-----------|----------------|
| siRNA-Temozolomide Run3-DMSO | NM_0037<br>43 | NCOA1     | nuclear receptor coactivator 1 | -1.052807 | Inlier         |
| siRNA-Temozolomide Run1-DMSO | NM_0037<br>43 | NCOA1     | nuclear receptor coactivator 1 | -0.690601 | Inlier         |
| siRNA-Temozolomide Run2-DMSO | NM_0037<br>43 | NCOA1     | nuclear receptor coactivator 1 | -0.610821 | Inlier         |
| siRNA Disorazole DMSO Run2   | NM_0037<br>43 | NCOA1     | nuclear receptor coactivator 1 | -0.054243 | Inlier         |
| siRNA Disorazole DMSO Run3   | NM_0037<br>43 | NCOA1     | nuclear receptor coactivator 1 | 0.054244  | Inlier         |
| siRNA Disorazole DMSO Run1   | NM_0037<br>43 | NCOA1     | nuclear receptor coactivator 1 | 0.658399  | Inlier         |
| siRNA-Vinblastine Run1-DMSO  | NM_0037<br>43 | NCOA1     | nuclear receptor coactivator 1 | 1.877954  | Inlier         |
| siRNA-Vinblastine Run2-DMSO  | NM_0037<br>43 | NCOA1     | nuclear receptor coactivator 1 | 2.252064  | Inlier         |
| siRNA-Temozolomide Run3-DMSO | NM_0065<br>40 | NCOA2     | nuclear receptor coactivator 2 | -2.147402 | Inlier         |
| siRNA-Temozolomide Run1-DMSO | NM_0065<br>40 | NCOA2     | nuclear receptor coactivator 2 | -0.678436 | Inlier         |
| siRNA Disorazole DMSO Run1   | NM_0065<br>40 | NCOA2     | nuclear receptor coactivator 2 | -0.670564 | Inlier         |
| siRNA-Temozolomide Run2-DMSO | NM_0065<br>40 | NCOA2     | nuclear receptor coactivator 2 | -0.383103 | Inlier         |
| siRNA-Vinblastine Run1-DMSO  | NM_0065<br>40 | NCOA2     | nuclear receptor coactivator 2 | 0.383103  | Inlier         |

Identification of Survival Genes in Human Glioblastoma Cells Using siRNA Screening  
 Nikhil G Thaker, Fang Zhang, Peter R. McDonald, Tong Ying Shun, Michael D Lewen, Ian F. Pollack, and John S. Lazo

Molecular Pharmacology

|                                  |               |       |                                         |           |        |
|----------------------------------|---------------|-------|-----------------------------------------|-----------|--------|
| siRNA Disorazole DMSO Run2       | NM_0065<br>40 | NCOA2 | nuclear<br>receptor<br>coactivator<br>2 | 0.483716  | Inlier |
| siRNA-Vinblastine Run2-<br>DMSO  | NM_0065<br>40 | NCOA2 | nuclear<br>receptor<br>coactivator<br>2 | 0.856369  | Inlier |
| siRNA Disorazole DMSO Run3       | NM_0065<br>40 | NCOA2 | nuclear<br>receptor<br>coactivator<br>2 | 1.109845  | Inlier |
| siRNA-Temozolomide Run3-<br>DMSO | NM_0065<br>34 | NCOA3 | nuclear<br>receptor<br>coactivator<br>3 | -2.350618 | Inlier |
| siRNA-Temozolomide Run2-<br>DMSO | NM_0065<br>34 | NCOA3 | nuclear<br>receptor<br>coactivator<br>3 | -0.803735 | Inlier |
| siRNA-Temozolomide Run1-<br>DMSO | NM_0065<br>34 | NCOA3 | nuclear<br>receptor<br>coactivator<br>3 | -0.770018 | Inlier |
| siRNA Disorazole DMSO Run1       | NM_0065<br>34 | NCOA3 | nuclear<br>receptor<br>coactivator<br>3 | -0.047833 | Inlier |
| siRNA Disorazole DMSO Run3       | NM_0065<br>34 | NCOA3 | nuclear<br>receptor<br>coactivator<br>3 | 0.047833  | Inlier |
| siRNA Disorazole DMSO Run2       | NM_0065<br>34 | NCOA3 | nuclear<br>receptor<br>coactivator<br>3 | 0.325089  | Inlier |
| siRNA-Vinblastine Run1-<br>DMSO  | NM_0065<br>34 | NCOA3 | nuclear<br>receptor<br>coactivator<br>3 | 0.578982  | Inlier |
| siRNA-Vinblastine Run2-<br>DMSO  | NM_0065<br>34 | NCOA3 | nuclear<br>receptor<br>coactivator<br>3 | 1.016415  | Inlier |
| siRNA-Temozolomide Run3-<br>DMSO | NM_0140<br>71 | NCOA6 | nuclear<br>receptor<br>coactivator<br>6 | -1.547643 | Inlier |
| siRNA-Temozolomide Run1-<br>DMSO | NM_0140<br>71 | NCOA6 | nuclear<br>receptor<br>coactivator<br>6 | -0.850336 | Inlier |

Identification of Survival Genes in Human Glioblastoma Cells Using siRNA Screening  
 Nikhil G Thaker, Fang Zhang, Peter R. McDonald, Tong Ying Shun, Michael D Lewen, Ian F. Pollack, and John S. Lazo

Molecular Pharmacology

|                              |               |         |                                                                   |           |        |
|------------------------------|---------------|---------|-------------------------------------------------------------------|-----------|--------|
| siRNA-Temozolomide Run2-DMSO | NM_0140<br>71 | NCOA6   | nuclear<br>receptor<br>coactivator<br>6                           | -0.498663 | Inlier |
| siRNA Disorazole DMSO Run3   | NM_0140<br>71 | NCOA6   | nuclear<br>receptor<br>coactivator<br>6                           | -0.15709  | Inlier |
| siRNA Disorazole DMSO Run2   | NM_0140<br>71 | NCOA6   | nuclear<br>receptor<br>coactivator<br>6                           | 0.15709   | Inlier |
| siRNA Disorazole DMSO Run1   | NM_0140<br>71 | NCOA6   | nuclear<br>receptor<br>coactivator<br>6                           | 0.223211  | Inlier |
| siRNA-Vinblastine Run1-DMSO  | NM_0140<br>71 | NCOA6   | nuclear<br>receptor<br>coactivator<br>6                           | 1.497362  | Inlier |
| siRNA-Vinblastine Run2-DMSO  | NM_0140<br>71 | NCOA6   | nuclear<br>receptor<br>coactivator<br>6                           | 1.763908  | Inlier |
| siRNA-Vinblastine Run2-DMSO  | NM_0248<br>31 | NCOA6IP | interacting<br>protein<br>nuclear<br>receptor<br>coactivator<br>6 | -1.908995 | Inlier |
| siRNA-Temozolomide Run2-DMSO | NM_0248<br>31 | NCOA6IP | interacting<br>protein<br>nuclear<br>receptor<br>coactivator<br>6 | -0.885788 | Inlier |
| siRNA Disorazole DMSO Run1   | NM_0248<br>31 | NCOA6IP | interacting<br>protein<br>nuclear<br>receptor<br>coactivator<br>6 | -0.395757 | Inlier |
| siRNA Disorazole DMSO Run3   | NM_0248<br>31 | NCOA6IP | interacting<br>protein                                            | -0.277168 | Inlier |

Identification of Survival Genes in Human Glioblastoma Cells Using siRNA Screening

Nikhil G Thaker, Fang Zhang, Peter R. McDonald, Tong Ying Shun, Michael D Lewen, Ian F. Pollack, and John S.

Lazo

Molecular Pharmacology

| siRNA Treatment              | Gene ID   | Gene Name | Protein Name                                       | Score     | Category |
|------------------------------|-----------|-----------|----------------------------------------------------|-----------|----------|
| siRNA-Temozolomide Run3-DMSO | NM_024831 | NCOA6IP   | nuclear receptor coactivator 6 interacting protein | 0.277168  | Inlier   |
| siRNA-Temozolomide Run1-DMSO | NM_024831 | NCOA6IP   | nuclear receptor coactivator 6 interacting protein | 0.463212  | Inlier   |
| siRNA-Vinblastine Run1-DMSO  | NM_024831 | NCOA6IP   | nuclear receptor coactivator 6 interacting protein | 1.011235  | Inlier   |
| siRNA Disorazole DMSO Run2   | NM_024831 | NCOA6IP   | nuclear receptor coactivator 6 interacting protein | 1.068112  | Inlier   |
| siRNA-Temozolomide Run3-DMSO | NM_006311 | NCOR1     | nuclear receptor co-repressor 1                    | -4.14193  | Outlier  |
| siRNA Disorazole DMSO Run1   | NM_006311 | NCOR1     | nuclear receptor co-repressor 1                    | -1.901323 | Inlier   |
| siRNA-Temozolomide Run2-DMSO | NM_006311 | NCOR1     | nuclear receptor co-repressor 1                    | -0.780238 | Inlier   |
| siRNA-Vinblastine Run1-DMSO  | NM_006311 | NCOR1     | nuclear receptor co-repressor 1                    | -0.176098 | Inlier   |
| siRNA Disorazole DMSO Run2   | NM_006311 | NCOR1     | nuclear receptor co-repressor 1                    | 0.176098  | Inlier   |

Identification of Survival Genes in Human Glioblastoma Cells Using siRNA Screening  
 Nikhil G Thaker, Fang Zhang, Peter R. McDonald, Tong Ying Shun, Michael D Lewen, Ian F. Pollack, and John S. Lazo

Molecular Pharmacology

|                              |               |       |                                              |           |        |
|------------------------------|---------------|-------|----------------------------------------------|-----------|--------|
| siRNA-Vinblastine Run2-DMSO  | NM_0063<br>11 | NCOR1 | nuclear<br>receptor<br>co-<br>repressor<br>1 | 0.409784  | Inlier |
| siRNA-Temozolomide Run1-DMSO | NM_0063<br>11 | NCOR1 | nuclear<br>receptor<br>co-<br>repressor<br>1 | 0.568762  | Inlier |
| siRNA Disorazole DMSO Run3   | NM_0063<br>11 | NCOR1 | nuclear<br>receptor<br>co-<br>repressor<br>1 | 1.716342  | Inlier |
| siRNA-Temozolomide Run3-DMSO | NM_0063<br>12 | NCOR2 | nuclear<br>receptor<br>co-<br>repressor<br>2 | -2.56944  | Inlier |
| siRNA-Temozolomide Run1-DMSO | NM_0063<br>12 | NCOR2 | nuclear<br>receptor<br>co-<br>repressor<br>2 | -0.707868 | Inlier |
| siRNA Disorazole DMSO Run1   | NM_0063<br>12 | NCOR2 | nuclear<br>receptor<br>co-<br>repressor<br>2 | -0.228826 | Inlier |
| siRNA-Temozolomide Run2-DMSO | NM_0063<br>12 | NCOR2 | nuclear<br>receptor<br>co-<br>repressor<br>2 | -0.160343 | Inlier |
| siRNA-Vinblastine Run1-DMSO  | NM_0063<br>12 | NCOR2 | nuclear<br>receptor<br>co-<br>repressor<br>2 | 0.160344  | Inlier |
| siRNA-Vinblastine Run2-DMSO  | NM_0063<br>12 | NCOR2 | nuclear<br>receptor<br>co-<br>repressor<br>2 | 0.641132  | Inlier |
| siRNA Disorazole DMSO Run3   | NM_0063<br>12 | NCOR2 | nuclear<br>receptor<br>co-<br>repressor<br>2 | 0.718276  | Inlier |

Identification of Survival Genes in Human Glioblastoma Cells Using siRNA Screening  
 Nikhil G Thaker, Fang Zhang, Peter R. McDonald, Tong Ying Shun, Michael D Lewen, Ian F. Pollack, and John S. Lazo

Molecular Pharmacology

|                                  |               |       |                                                     |           |        |
|----------------------------------|---------------|-------|-----------------------------------------------------|-----------|--------|
| siRNA Disorazole DMSO Run2       | NM_0063<br>12 | NCOR2 | nuclear<br>receptor<br>co-<br>repressor<br>2        | 1.034283  | Inlier |
| siRNA Disorazole DMSO Run1       | NM_0048<br>29 | NCR1  | natural<br>cytotoxicity<br>triggering<br>receptor 1 | -0.724373 | Inlier |
| siRNA-Vinblastine Run2-<br>DMSO  | NM_0048<br>29 | NCR1  | natural<br>cytotoxicity<br>triggering<br>receptor 1 | -0.707552 | Inlier |
| siRNA-Temozolomide Run2-<br>DMSO | NM_0048<br>29 | NCR1  | natural<br>cytotoxicity<br>triggering<br>receptor 1 | -0.641448 | Inlier |
| siRNA Disorazole DMSO Run3       | NM_0048<br>29 | NCR1  | natural<br>cytotoxicity<br>triggering<br>receptor 1 | -0.184613 | Inlier |
| siRNA-Temozolomide Run3-<br>DMSO | NM_0048<br>29 | NCR1  | natural<br>cytotoxicity<br>triggering<br>receptor 1 | 0.184613  | Inlier |
| siRNA-Temozolomide Run1-<br>DMSO | NM_0048<br>29 | NCR1  | natural<br>cytotoxicity<br>triggering<br>receptor 1 | 0.318541  | Inlier |
| siRNA Disorazole DMSO Run2       | NM_0048<br>29 | NCR1  | natural<br>cytotoxicity<br>triggering<br>receptor 1 | 1.665477  | Inlier |
| siRNA-Vinblastine Run1-<br>DMSO  | NM_0048<br>29 | NCR1  | natural<br>cytotoxicity<br>triggering<br>receptor 1 | 1.712349  | Inlier |
| siRNA-Temozolomide Run2-<br>DMSO | NM_0048<br>28 | NCR2  | natural<br>cytotoxicity<br>triggering<br>receptor 2 | -1.088934 | Inlier |

Identification of Survival Genes in Human Glioblastoma Cells Using siRNA Screening  
 Nikhil G Thaker, Fang Zhang, Peter R. McDonald, Tong Ying Shun, Michael D Lewen, Ian F. Pollack, and John S. Lazo  
 Molecular Pharmacology

|                              |               |       |                                                        |           |        |
|------------------------------|---------------|-------|--------------------------------------------------------|-----------|--------|
| siRNA-Vinblastine Run2-DMSO  | NM_0048<br>28 | NCR2  | natural<br>cytotoxicity<br>triggering<br>receptor 2    | -0.771722 | Inlier |
| siRNA Disorazole DMSO Run3   | NM_0048<br>28 | NCR2  | natural<br>cytotoxicity<br>triggering<br>receptor 2    | -0.096997 | Inlier |
| siRNA Disorazole DMSO Run1   | NM_0048<br>28 | NCR2  | natural<br>cytotoxicity<br>triggering<br>receptor 2    | -0.062886 | Inlier |
| siRNA-Temozolomide Run3-DMSO | NM_0048<br>28 | NCR2  | natural<br>cytotoxicity<br>triggering<br>receptor 2    | 0.062886  | Inlier |
| siRNA-Temozolomide Run1-DMSO | NM_0048<br>28 | NCR2  | natural<br>cytotoxicity<br>triggering<br>receptor 2    | 0.577278  | Inlier |
| siRNA-Vinblastine Run1-DMSO  | NM_0048<br>28 | NCR2  | natural<br>cytotoxicity<br>triggering<br>receptor 2    | 1.252087  | Inlier |
| siRNA Disorazole DMSO Run2   | NM_0048<br>28 | NCR2  | natural<br>cytotoxicity<br>triggering<br>receptor 2    | 1.400929  | Inlier |
| siRNA-Temozolomide Run3-DMSO | NM_0144<br>34 | NDOR1 | NADPH<br>dependent<br>diflavin<br>oxidoredu<br>ctase 1 | -0.841581 | Inlier |
| siRNA-Vinblastine Run2-DMSO  | NM_0144<br>34 | NDOR1 | NADPH<br>dependent<br>diflavin<br>oxidoredu<br>ctase 1 | -0.507419 | Inlier |
| siRNA Disorazole DMSO Run3   | NM_0144<br>34 | NDOR1 | NADPH<br>dependent<br>diflavin<br>oxidoredu<br>ctase 1 | -0.406656 | Inlier |



Identification of Survival Genes in Human Glioblastoma Cells Using siRNA Screening

Nikhil G Thaker, Fang Zhang, Peter R. McDonald, Tong Ying Shun, Michael D Lewen, Ian F. Pollack, and John S. Lazo

Molecular Pharmacology

| siRNA                        | Gene    | Accession | Gene  | Value     | Category |
|------------------------------|---------|-----------|-------|-----------|----------|
| siRNA Disorazole DMSO Run1   | NM_0144 | 34        | NDOR1 | -0.25024  | Inlier   |
| siRNA-Temozolomide Run2-DMSO | NM_0144 | 34        | NDOR1 | 0.25024   | Inlier   |
| siRNA-Temozolomide Run1-DMSO | NM_0144 | 34        | NDOR1 | 2.19109   | Inlier   |
| siRNA-Vinblastine Run1-DMSO  | NM_0144 | 34        | NDOR1 | 4.49251   | Outlier  |
| siRNA Disorazole DMSO Run2   | NM_0144 | 34        | NDOR1 | 4.652663  | Outlier  |
| siRNA-Temozolomide Run3-DMSO | NM_0015 | 43        | NDST1 | -1.514935 | Inlier   |
| siRNA-Temozolomide Run2-DMSO | NM_0015 | 43        | NDST1 | -0.952567 | Inlier   |
| siRNA Disorazole DMSO Run1   | NM_0015 | 43        | NDST1 | -0.469394 | Inlier   |

Identification of Survival Genes in Human Glioblastoma Cells Using siRNA Screening

Nikhil G Thaker, Fang Zhang, Peter R. McDonald, Tong Ying Shun, Michael D Lewen, Ian F. Pollack, and John S. Lazo

Molecular Pharmacology

| siRNA                        | Gene      | Accession | Gene ID | Gene Name                                                 | Log2FC    | Category |
|------------------------------|-----------|-----------|---------|-----------------------------------------------------------|-----------|----------|
| siRNA-Vinblastine Run1-DMSO  | NM_001543 | NDST1     | 1       | N-deacetylase/N-sulfotransferase (heparan glucosaminyl) 1 | -0.123706 | Inlier   |
| siRNA-Temozolomide Run1-DMSO | NM_001543 | NDST1     | 1       | N-deacetylase/N-sulfotransferase (heparan glucosaminyl) 1 | 0.123706  | Inlier   |
| siRNA Disorazole DMSO Run2   | NM_001543 | NDST1     | 1       | N-deacetylase/N-sulfotransferase (heparan glucosaminyl) 1 | 0.641645  | Inlier   |
| siRNA-Vinblastine Run2-DMSO  | NM_001543 | NDST1     | 1       | N-deacetylase/N-sulfotransferase (heparan glucosaminyl) 1 | 0.707354  | Inlier   |
| siRNA Disorazole DMSO Run3   | NM_001543 | NDST1     | 1       | N-deacetylase/N-sulfotransferase (heparan glucosaminyl) 1 | 1.803644  | Inlier   |
| siRNA-Temozolomide Run3-DMSO | NM_003635 | NDST2     | 2       | N-deacetylase/N-sulfotransferase (heparan glucosaminyl) 2 | -1.115684 | Inlier   |

Identification of Survival Genes in Human Glioblastoma Cells Using siRNA Screening

Nikhil G Thaker, Fang Zhang, Peter R. McDonald, Tong Ying Shun, Michael D Lewen, Ian F. Pollack, and John S. Lazo

Molecular Pharmacology

| siRNA              | Condition | Run  | Gene  | Log2 Fold Change | Category |
|--------------------|-----------|------|-------|------------------|----------|
| siRNA Disorazole   | DMSO      | Run2 | NDST2 | -0.76775         | Inlier   |
| siRNA-Temozolomide | DMSO      | Run2 | NDST2 | -0.745959        | Inlier   |
| siRNA-Temozolomide | DMSO      | Run1 | NDST2 | -0.037617        | Inlier   |
| siRNA Disorazole   | DMSO      | Run1 | NDST2 | 0.037617         | Inlier   |
| siRNA-Vinblastine  | DMSO      | Run1 | NDST2 | 0.317982         | Inlier   |
| siRNA Disorazole   | DMSO      | Run3 | NDST2 | 0.603041         | Inlier   |

N-deacetylase/N-sulfotransferase (heparan glucosaminyl) 2

Identification of Survival Genes in Human Glioblastoma Cells Using siRNA Screening

Nikhil G Thaker, Fang Zhang, Peter R. McDonald, Tong Ying Shun, Michael D Lewen, Ian F. Pollack, and John S. Lazo

Molecular Pharmacology

| siRNA Treatment              | Gene ID   | Gene Name | Enzyme Name                                               | Log Fold Change | Outlier Status |
|------------------------------|-----------|-----------|-----------------------------------------------------------|-----------------|----------------|
| siRNA-Vinblastine Run2-DMSO  | NM_003635 | NDST2     | N-deacetylase/N-sulfotransferase (heparan glucosaminyl) 2 | 1.062953        | Inlier         |
| siRNA-Temozolomide Run3-DMSO | NM_004784 | NDST3     | N-deacetylase/N-sulfotransferase (heparan glucosaminyl) 3 | -1.680145       | Inlier         |
| siRNA-Temozolomide Run2-DMSO | NM_004784 | NDST3     | N-deacetylase/N-sulfotransferase (heparan glucosaminyl) 3 | -0.479547       | Inlier         |
| siRNA Disorazole DMSO Run1   | NM_004784 | NDST3     | N-deacetylase/N-sulfotransferase (heparan glucosaminyl) 3 | -0.141502       | Inlier         |
| siRNA Disorazole DMSO Run2   | NM_004784 | NDST3     | N-deacetylase/N-sulfotransferase (heparan glucosaminyl) 3 | -0.055857       | Inlier         |
| siRNA-Temozolomide Run1-DMSO | NM_004784 | NDST3     | N-deacetylase/N-sulfotransferase (heparan glucosaminyl) 3 | 0.055857        | Inlier         |

Identification of Survival Genes in Human Glioblastoma Cells Using siRNA Screening

Nikhil G Thaker, Fang Zhang, Peter R. McDonald, Tong Ying Shun, Michael D Lewen, Ian F. Pollack, and John S. Lazo

Molecular Pharmacology

| siRNA Treatment              | Gene ID   | Gene Name | Enzyme Name                                               | Value     | Category |
|------------------------------|-----------|-----------|-----------------------------------------------------------|-----------|----------|
| siRNA-Vinblastine Run1-DMSO  | NM_004784 | NDST3     | N-deacetylase/N-sulfotransferase (heparan glucosaminyl) 3 | 0.869453  | Inlier   |
| siRNA-Vinblastine Run2-DMSO  | NM_004784 | NDST3     | N-deacetylase/N-sulfotransferase (heparan glucosaminyl) 3 | 2.802671  | Inlier   |
| siRNA Disorazole DMSO Run3   | NM_004784 | NDST3     | N-deacetylase/N-sulfotransferase (heparan glucosaminyl) 3 | 7.050049  | Outlier  |
| siRNA Disorazole DMSO Run1   | NM_022569 | NDST4     | N-deacetylase/N-sulfotransferase (heparan glucosaminyl) 4 | -1.285712 | Inlier   |
| siRNA Disorazole DMSO Run2   | NM_022569 | NDST4     | N-deacetylase/N-sulfotransferase (heparan glucosaminyl) 4 | -0.726018 | Inlier   |
| siRNA-Temozolomide Run2-DMSO | NM_022569 | NDST4     | N-deacetylase/N-sulfotransferase (heparan glucosaminyl) 4 | -0.194617 | Inlier   |

Identification of Survival Genes in Human Glioblastoma Cells Using siRNA Screening

Nikhil G Thaker, Fang Zhang, Peter R. McDonald, Tong Ying Shun, Michael D Lewen, Ian F. Pollack, and John S. Lazo

Molecular Pharmacology

|                              |           |        |                                                               |           |         |
|------------------------------|-----------|--------|---------------------------------------------------------------|-----------|---------|
| siRNA-Vinblastine Run1-DMSO  | NM_022569 | NDST4  | N-deacetylase/N-sulfotransferase (heparan glucosaminyl) 4     | -0.189327 | Inlier  |
| siRNA-Temozolomide Run1-DMSO | NM_022569 | NDST4  | N-deacetylase/N-sulfotransferase (heparan glucosaminyl) 4     | 0.189326  | Inlier  |
| siRNA-Temozolomide Run3-DMSO | NM_022569 | NDST4  | N-deacetylase/N-sulfotransferase (heparan glucosaminyl) 4     | 0.622982  | Inlier  |
| siRNA-Vinblastine Run2-DMSO  | NM_022569 | NDST4  | N-deacetylase/N-sulfotransferase (heparan glucosaminyl) 4     | 1.58129   | Inlier  |
| siRNA Disorazole DMSO Run3   | NM_022569 | NDST4  | NADH dehydrogenase (ubiquinone) 1 alpha subcomplex, 1, 7.5kDa | 7.187591  | Outlier |
| siRNA-Temozolomide Run3-DMSO | NM_004541 | NDUFA1 | NADH dehydrogenase (ubiquinone) 1 alpha subcomplex, 1, 7.5kDa | -1.195869 | Inlier  |

Identification of Survival Genes in Human Glioblastoma Cells Using siRNA Screening

Nikhil G Thaker, Fang Zhang, Peter R. McDonald, Tong Ying Shun, Michael D Lewen, Ian F. Pollack, and John S. Lazo

Molecular Pharmacology

| siRNA Treatment              | Gene   | Accession | Protein                                                       | Weight | Log2FC    | Category |
|------------------------------|--------|-----------|---------------------------------------------------------------|--------|-----------|----------|
| siRNA Disorazole DMSO Run1   | NDUFA1 | NM_004541 | NADH dehydrogenase (ubiquinone) 1 alpha subcomplex, 1, 7.5kDa | 7.5kDa | -0.937346 | Inlier   |
| siRNA-Temozolomide Run2-DMSO | NDUFA1 | NM_004541 | NADH dehydrogenase (ubiquinone) 1 alpha subcomplex, 1, 7.5kDa | 7.5kDa | -0.795453 | Inlier   |
| siRNA Disorazole DMSO Run3   | NDUFA1 | NM_004541 | NADH dehydrogenase (ubiquinone) 1 alpha subcomplex, 1, 7.5kDa | 7.5kDa | -0.032963 | Inlier   |
| siRNA-Temozolomide Run1-DMSO | NDUFA1 | NM_004541 | NADH dehydrogenase (ubiquinone) 1 alpha subcomplex, 1, 7.5kDa | 7.5kDa | 0.032963  | Inlier   |
| siRNA-Vinblastine Run2-DMSO  | NDUFA1 | NM_004541 | NADH dehydrogenase (ubiquinone) 1 alpha subcomplex, 1, 7.5kDa | 7.5kDa | 0.484262  | Inlier   |
| siRNA-Vinblastine Run1-DMSO  | NDUFA1 | NM_004541 | NADH dehydrogenase (ubiquinone) 1 alpha subcomplex, 1, 7.5kDa | 7.5kDa | 0.553547  | Inlier   |

Identification of Survival Genes in Human Glioblastoma Cells Using siRNA Screening

Nikhil G Thaker, Fang Zhang, Peter R. McDonald, Tong Ying Shun, Michael D Lewen, Ian F. Pollack, and John S. Lazo

Molecular Pharmacology

| siRNA              | Condition | Run  | Gene    | Protein                                                       | Log2FC    | Inlier |
|--------------------|-----------|------|---------|---------------------------------------------------------------|-----------|--------|
| siRNA Disorazole   | DMSO      | Run2 | NDUFA1  | NADH dehydrogenase (ubiquinone) 1 alpha subcomplex, 1, 7.5kDa | 2.505427  | Inlier |
| siRNA-Temozolomide | DMSO      | Run2 | NDUFA10 | NADH dehydrogenase (ubiquinone) 1 alpha subcomplex, 10, 42kDa | -1.762346 | Inlier |
| siRNA-Temozolomide | DMSO      | Run3 | NDUFA10 | NADH dehydrogenase (ubiquinone) 1 alpha subcomplex, 10, 42kDa | -0.859649 | Inlier |
| siRNA Disorazole   | DMSO      | Run3 | NDUFA10 | NADH dehydrogenase (ubiquinone) 1 alpha subcomplex, 10, 42kDa | -0.740537 | Inlier |
| siRNA Disorazole   | DMSO      | Run1 | NDUFA10 | NADH dehydrogenase (ubiquinone) 1 alpha subcomplex, 10, 42kDa | -0.078868 | Inlier |
| siRNA Disorazole   | DMSO      | Run2 | NDUFA10 | NADH dehydrogenase (ubiquinone) 1 alpha subcomplex, 10, 42kDa | 0.078868  | Inlier |



Identification of Survival Genes in Human Glioblastoma Cells Using siRNA Screening

Nikhil G Thaker, Fang Zhang, Peter R. McDonald, Tong Ying Shun, Michael D Lewen, Ian F. Pollack, and John S. Lazo

Molecular Pharmacology

| siRNA Treatment              | Gene ID   | Gene Name | Protein Name                                                    | Protein Weight | Score     | Outlier Type |
|------------------------------|-----------|-----------|-----------------------------------------------------------------|----------------|-----------|--------------|
| siRNA-Vinblastine Run2-DMSO  | NM_004544 | NDUFA10   | NADH dehydrogenase (ubiquinone) 1 alpha subcomplex, 10, 42kDa   | 42kDa          | 0.411927  | Inlier       |
| siRNA-Temozolomide Run1-DMSO | NM_004544 | NDUFA10   | NADH dehydrogenase (ubiquinone) 1 alpha subcomplex, 10, 42kDa   | 42kDa          | 0.608463  | Inlier       |
| siRNA-Vinblastine Run1-DMSO  | NM_004544 | NDUFA10   | NADH dehydrogenase (ubiquinone) 1 alpha subcomplex, 10, 42kDa   | 42kDa          | 0.843474  | Inlier       |
| siRNA Disorazole DMSO Run1   | NM_175614 | NDUFA11   | NADH dehydrogenase (ubiquinone) 1 alpha subcomplex, 11, 14.7kDa | 14.7kDa        | -1.517395 | Inlier       |
| siRNA-Temozolomide Run3-DMSO | NM_175614 | NDUFA11   | NADH dehydrogenase (ubiquinone) 1 alpha subcomplex, 11, 14.7kDa | 14.7kDa        | -0.954056 | Inlier       |
| siRNA-Temozolomide Run2-DMSO | NM_175614 | NDUFA11   | NADH dehydrogenase (ubiquinone) 1 alpha subcomplex, 11, 14.7kDa | 14.7kDa        | -0.203683 | Inlier       |

Identification of Survival Genes in Human Glioblastoma Cells Using siRNA Screening

Nikhil G Thaker, Fang Zhang, Peter R. McDonald, Tong Ying Shun, Michael D Lewen, Ian F. Pollack, and John S. Lazo

Molecular Pharmacology

| siRNA                        | Gene    | Accession | Protein                                                 | Weight  | Log2FC    | Category |
|------------------------------|---------|-----------|---------------------------------------------------------|---------|-----------|----------|
| siRNA-Temozolomide Run1-DMSO | NM_1756 | 14        | NDUFA11                                                 | 14.7kDa | -0.018216 | Inlier   |
|                              |         |           | NADH dehydrogenase (ubiquinone) 1 alpha subcomplex, 11, |         |           |          |
| siRNA Disorazole DMSO Run3   | NM_1756 | 14        | NDUFA11                                                 | 14.7kDa | 0.018215  | Inlier   |
|                              |         |           | NADH dehydrogenase (ubiquinone) 1 alpha subcomplex, 11, |         |           |          |
| siRNA-Vinblastine Run2-DMSO  | NM_1756 | 14        | NDUFA11                                                 | 14.7kDa | 0.394944  | Inlier   |
|                              |         |           | NADH dehydrogenase (ubiquinone) 1 alpha subcomplex, 11, |         |           |          |
| siRNA-Vinblastine Run1-DMSO  | NM_1756 | 14        | NDUFA11                                                 | 14.7kDa | 1.150106  | Inlier   |
|                              |         |           | NADH dehydrogenase (ubiquinone) 1 alpha subcomplex, 11, |         |           |          |
| siRNA Disorazole DMSO Run2   | NM_1756 | 14        | NDUFA11                                                 | 14.7kDa | 3.520834  | Outlier  |
|                              |         |           | NADH dehydrogenase (ubiquinone) 1 alpha subcomplex, 11, |         |           |          |
| siRNA Disorazole DMSO Run1   | NM_0024 | 88        | NDUFA2                                                  | 8kDa    | -2.639919 | Inlier   |
|                              |         |           | NADH dehydrogenase (ubiquinone) 1 alpha subcomplex, 2,  |         |           |          |

Identification of Survival Genes in Human Glioblastoma Cells Using siRNA Screening  
 Nikhil G Thaker, Fang Zhang, Peter R. McDonald, Tong Ying Shun, Michael D Lewen, Ian F. Pollack, and John S. Lazo  
 Molecular Pharmacology

|                              |           |        |                                                             |           |        |
|------------------------------|-----------|--------|-------------------------------------------------------------|-----------|--------|
| siRNA-Temozolomide Run2-DMSO | NM_002488 | NDUFA2 | NADH dehydrogenase (ubiquinone) 1 alpha subcomplex, 2, 8kDa | -2.343358 | Inlier |
| siRNA Disorazole DMSO Run3   | NM_002488 | NDUFA2 | NADH dehydrogenase (ubiquinone) 1 alpha subcomplex, 2, 8kDa | -2.328814 | Inlier |
| siRNA Disorazole DMSO Run2   | NM_002488 | NDUFA2 | NADH dehydrogenase (ubiquinone) 1 alpha subcomplex, 2, 8kDa | -0.004817 | Inlier |
| siRNA-Temozolomide Run3-DMSO | NM_002488 | NDUFA2 | NADH dehydrogenase (ubiquinone) 1 alpha subcomplex, 2, 8kDa | 0.004818  | Inlier |
| siRNA-Vinblastine Run2-DMSO  | NM_002488 | NDUFA2 | NADH dehydrogenase (ubiquinone) 1 alpha subcomplex, 2, 8kDa | 0.358535  | Inlier |
| siRNA-Temozolomide Run1-DMSO | NM_002488 | NDUFA2 | NADH dehydrogenase (ubiquinone) 1 alpha subcomplex, 2, 8kDa | 0.537581  | Inlier |

Identification of Survival Genes in Human Glioblastoma Cells Using siRNA Screening  
 Nikhil G Thaker, Fang Zhang, Peter R. McDonald, Tong Ying Shun, Michael D Lewen, Ian F. Pollack, and John S. Lazo  
 Molecular Pharmacology

|                              |           |        |                                                             |           |        |
|------------------------------|-----------|--------|-------------------------------------------------------------|-----------|--------|
| siRNA-Vinblastine Run1-DMSO  | NM_002488 | NDUFA2 | NADH dehydrogenase (ubiquinone) 1 alpha subcomplex, 2, 8kDa | 0.811419  | Inlier |
| siRNA-Temozolomide Run3-DMSO | NM_004542 | NDUFA3 | NADH dehydrogenase (ubiquinone) 1 alpha subcomplex, 3, 9kDa | -2.290761 | Inlier |
| siRNA-Temozolomide Run2-DMSO | NM_004542 | NDUFA3 | NADH dehydrogenase (ubiquinone) 1 alpha subcomplex, 3, 9kDa | -1.789839 | Inlier |
| siRNA Disorazole DMSO Run3   | NM_004542 | NDUFA3 | NADH dehydrogenase (ubiquinone) 1 alpha subcomplex, 3, 9kDa | -0.319575 | Inlier |
| siRNA Disorazole DMSO Run1   | NM_004542 | NDUFA3 | NADH dehydrogenase (ubiquinone) 1 alpha subcomplex, 3, 9kDa | -0.165675 | Inlier |
| siRNA-Temozolomide Run1-DMSO | NM_004542 | NDUFA3 | NADH dehydrogenase (ubiquinone) 1 alpha subcomplex, 3, 9kDa | 0.165675  | Inlier |

Identification of Survival Genes in Human Glioblastoma Cells Using siRNA Screening  
 Nikhil G Thaker, Fang Zhang, Peter R. McDonald, Tong Ying Shun, Michael D Lewen, Ian F. Pollack, and John S. Lazo  
 Molecular Pharmacology

|                                  |               |        |                                                                                  |           |        |
|----------------------------------|---------------|--------|----------------------------------------------------------------------------------|-----------|--------|
| siRNA Disorazole DMSO Run2       | NM_0045<br>42 | NDUFA3 | NADH<br>dehydroge<br>nase<br>(ubiquinon<br>e) 1 alpha<br>subcomple<br>x, 3, 9kDa | 0.230459  | Inlier |
| siRNA-Vinblastine Run1-<br>DMSO  | NM_0045<br>42 | NDUFA3 | NADH<br>dehydroge<br>nase<br>(ubiquinon<br>e) 1 alpha<br>subcomple<br>x, 3, 9kDa | 1.029425  | Inlier |
| siRNA-Vinblastine Run2-<br>DMSO  | NM_0045<br>42 | NDUFA3 | NADH<br>dehydroge<br>nase<br>(ubiquinon<br>e) 1 alpha<br>subcomple<br>x, 3, 9kDa | 1.572481  | Inlier |
| siRNA-Temozolomide Run3-<br>DMSO | NM_0024<br>89 | NDUFA4 | NADH<br>dehydroge<br>nase<br>(ubiquinon<br>e) 1 alpha<br>subcomple<br>x, 4, 9kDa | -0.798322 | Inlier |
| siRNA-Temozolomide Run2-<br>DMSO | NM_0024<br>89 | NDUFA4 | NADH<br>dehydroge<br>nase<br>(ubiquinon<br>e) 1 alpha<br>subcomple<br>x, 4, 9kDa | -0.738429 | Inlier |
| siRNA Disorazole DMSO Run3       | NM_0024<br>89 | NDUFA4 | NADH<br>dehydroge<br>nase<br>(ubiquinon<br>e) 1 alpha<br>subcomple<br>x, 4, 9kDa | -0.610571 | Inlier |

Identification of Survival Genes in Human Glioblastoma Cells Using siRNA Screening  
 Nikhil G Thaker, Fang Zhang, Peter R. McDonald, Tong Ying Shun, Michael D Lewen, Ian F. Pollack, and John S. Lazo  
 Molecular Pharmacology

|                              |           |        |                                                              |           |        |
|------------------------------|-----------|--------|--------------------------------------------------------------|-----------|--------|
| siRNA-Temozolomide Run1-DMSO | NM_002489 | NDUFA4 | NADH dehydrogenase (ubiquinone) 1 alpha subcomplex, 4, 9kDa  | -0.063797 | Inlier |
| siRNA Disorazole DMSO Run1   | NM_002489 | NDUFA4 | NADH dehydrogenase (ubiquinone) 1 alpha subcomplex, 4, 9kDa  | 0.063797  | Inlier |
| siRNA Disorazole DMSO Run2   | NM_002489 | NDUFA4 | NADH dehydrogenase (ubiquinone) 1 alpha subcomplex, 4, 9kDa  | 0.170286  | Inlier |
| siRNA-Vinblastine Run2-DMSO  | NM_002489 | NDUFA4 | NADH dehydrogenase (ubiquinone) 1 alpha subcomplex, 4, 9kDa  | 0.960526  | Inlier |
| siRNA-Vinblastine Run1-DMSO  | NM_002489 | NDUFA4 | NADH dehydrogenase (ubiquinone) 1 alpha subcomplex, 4, 9kDa  | 1.134701  | Inlier |
| siRNA-Temozolomide Run2-DMSO | NM_005000 | NDUFA5 | NADH dehydrogenase (ubiquinone) 1 alpha subcomplex, 5, 13kDa | -2.055561 | Inlier |

Identification of Survival Genes in Human Glioblastoma Cells Using siRNA Screening

Nikhil G Thaker, Fang Zhang, Peter R. McDonald, Tong Ying Shun, Michael D Lewen, Ian F. Pollack, and John S. Lazo

Molecular Pharmacology

| siRNA Treatment              | Gene ID   | Gene Name | Protein MW | Log2 Fold Change | Category |
|------------------------------|-----------|-----------|------------|------------------|----------|
| siRNA-Temozolomide Run3-DMSO | NM_005000 | NDUFA5    | 13kDa      | -1.197863        | Inlier   |
| siRNA Disorazole DMSO Run2   | NM_005000 | NDUFA5    | 13kDa      | -0.522335        | Inlier   |
| siRNA Disorazole DMSO Run1   | NM_005000 | NDUFA5    | 13kDa      | -0.495194        | Inlier   |
| siRNA Disorazole DMSO Run3   | NM_005000 | NDUFA5    | 13kDa      | 0.495193         | Inlier   |
| siRNA-Vinblastine Run2-DMSO  | NM_005000 | NDUFA5    | 13kDa      | 0.502769         | Inlier   |
| siRNA-Temozolomide Run1-DMSO | NM_005000 | NDUFA5    | 13kDa      | 0.826665         | Inlier   |

NADH dehydrogenase (ubiquinone) 1 alpha subcomplex, 5, 13kDa

Identification of Survival Genes in Human Glioblastoma Cells Using siRNA Screening

Nikhil G Thaker, Fang Zhang, Peter R. McDonald, Tong Ying Shun, Michael D Lewen, Ian F. Pollack, and John S. Lazo

Molecular Pharmacology

| siRNA Treatment              | Gene ID   | Gene Name | Protein MW | Log2 FC   | Category |
|------------------------------|-----------|-----------|------------|-----------|----------|
| siRNA-Vinblastine Run1-DMSO  | NM_005000 | NDUFA5    | 13kDa      | 2.186518  | Inlier   |
| siRNA Disorazole DMSO Run3   | NM_002490 | NDUFA6    | 14kDa      | -1.697013 | Inlier   |
| siRNA-Temozolomide Run2-DMSO | NM_002490 | NDUFA6    | 14kDa      | -0.993361 | Inlier   |
| siRNA Disorazole DMSO Run1   | NM_002490 | NDUFA6    | 14kDa      | -0.04859  | Inlier   |
| siRNA-Temozolomide Run3-DMSO | NM_002490 | NDUFA6    | 14kDa      | -0.031114 | Inlier   |
| siRNA-Vinblastine Run2-DMSO  | NM_002490 | NDUFA6    | 14kDa      | 0.031114  | Inlier   |

NADH dehydrogenase (ubiquinone) 1 alpha subcomplex, 5, 13kDa  
 NADH dehydrogenase (ubiquinone) 1 alpha subcomplex, 6, 14kDa  
 NADH dehydrogenase (ubiquinone) 1 alpha subcomplex, 6, 14kDa  
 NADH dehydrogenase (ubiquinone) 1 alpha subcomplex, 6, 14kDa  
 NADH dehydrogenase (ubiquinone) 1 alpha subcomplex, 6, 14kDa



Identification of Survival Genes in Human Glioblastoma Cells Using siRNA Screening

Nikhil G Thaker, Fang Zhang, Peter R. McDonald, Tong Ying Shun, Michael D Lewen, Ian F. Pollack, and John S. Lazo

Molecular Pharmacology

| siRNA Treatment              | Gene ID   | Gene Name | Protein Name                                                   | Protein Weight | Score     | Category |
|------------------------------|-----------|-----------|----------------------------------------------------------------|----------------|-----------|----------|
| siRNA-Temozolomide Run1-DMSO | NM_002490 | NDUFA6    | NADH dehydrogenase (ubiquinone) 1 alpha subcomplex, 6, 14kDa   | 14kDa          | 0.547409  | Inlier   |
| siRNA-Vinblastine Run1-DMSO  | NM_002490 | NDUFA6    | NADH dehydrogenase (ubiquinone) 1 alpha subcomplex, 6, 14kDa   | 14kDa          | 0.801591  | Inlier   |
| siRNA Disorazole DMSO Run2   | NM_002490 | NDUFA6    | NADH dehydrogenase (ubiquinone) 1 alpha subcomplex, 6, 14kDa   | 14kDa          | 0.841     | Inlier   |
| siRNA Disorazole DMSO Run2   | NM_005001 | NDUFA7    | NADH dehydrogenase (ubiquinone) 1 alpha subcomplex, 7, 14.5kDa | 14.5kDa        | -2.210611 | Inlier   |
| siRNA Disorazole DMSO Run3   | NM_005001 | NDUFA7    | NADH dehydrogenase (ubiquinone) 1 alpha subcomplex, 7, 14.5kDa | 14.5kDa        | -0.810022 | Inlier   |
| siRNA-Temozolomide Run3-DMSO | NM_005001 | NDUFA7    | NADH dehydrogenase (ubiquinone) 1 alpha subcomplex, 7, 14.5kDa | 14.5kDa        | -0.418057 | Inlier   |

Identification of Survival Genes in Human Glioblastoma Cells Using siRNA Screening

Nikhil G Thaker, Fang Zhang, Peter R. McDonald, Tong Ying Shun, Michael D Lewen, Ian F. Pollack, and John S. Lazo

Molecular Pharmacology

| siRNA Treatment              | Gene ID   | Gene Name | Protein Name                                                   | MW      | Log2FC    | Category |
|------------------------------|-----------|-----------|----------------------------------------------------------------|---------|-----------|----------|
| siRNA-Temozolomide Run2-DMSO | NM_005001 | NDUFA7    | NADH dehydrogenase (ubiquinone) 1 alpha subcomplex, 7, 14.5kDa | 14.5kDa | -0.373965 | Inlier   |
| siRNA-Vinblastine Run1-DMSO  | NM_005001 | NDUFA7    | NADH dehydrogenase (ubiquinone) 1 alpha subcomplex, 7, 14.5kDa | 14.5kDa | 0.373965  | Inlier   |
| siRNA Disorazole DMSO Run1   | NM_005001 | NDUFA7    | NADH dehydrogenase (ubiquinone) 1 alpha subcomplex, 7, 14.5kDa | 14.5kDa | 0.538978  | Inlier   |
| siRNA-Temozolomide Run1-DMSO | NM_005001 | NDUFA7    | NADH dehydrogenase (ubiquinone) 1 alpha subcomplex, 7, 14.5kDa | 14.5kDa | 1.067808  | Inlier   |
| siRNA-Vinblastine Run2-DMSO  | NM_005001 | NDUFA7    | NADH dehydrogenase (ubiquinone) 1 alpha subcomplex, 7, 14.5kDa | 14.5kDa | 1.195331  | Inlier   |
| siRNA-Vinblastine Run1-DMSO  | NM_014222 | NDUFA8    | NADH dehydrogenase (ubiquinone) 1 alpha subcomplex, 8, 19kDa   | 19kDa   | -1.633368 | Inlier   |

Identification of Survival Genes in Human Glioblastoma Cells Using siRNA Screening

Nikhil G Thaker, Fang Zhang, Peter R. McDonald, Tong Ying Shun, Michael D Lewen, Ian F. Pollack, and John S. Lazo

Molecular Pharmacology

| siRNA Treatment              | Gene   | Accession | Protein                                                      | Weight | Score     | Category |
|------------------------------|--------|-----------|--------------------------------------------------------------|--------|-----------|----------|
| siRNA Disorazole DMSO Run1   | NDUFA8 | NM_014222 | NADH dehydrogenase (ubiquinone) 1 alpha subcomplex, 8, 19kDa | 19kDa  | -1.07453  | Inlier   |
| siRNA Disorazole DMSO Run2   | NDUFA8 | NM_014222 | NADH dehydrogenase (ubiquinone) 1 alpha subcomplex, 8, 19kDa | 19kDa  | -0.725653 | Inlier   |
| siRNA-Temozolomide Run3-DMSO | NDUFA8 | NM_014222 | NADH dehydrogenase (ubiquinone) 1 alpha subcomplex, 8, 19kDa | 19kDa  | -0.180169 | Inlier   |
| siRNA-Temozolomide Run2-DMSO | NDUFA8 | NM_014222 | NADH dehydrogenase (ubiquinone) 1 alpha subcomplex, 8, 19kDa | 19kDa  | 0.180169  | Inlier   |
| siRNA Disorazole DMSO Run3   | NDUFA8 | NM_014222 | NADH dehydrogenase (ubiquinone) 1 alpha subcomplex, 8, 19kDa | 19kDa  | 0.439794  | Inlier   |
| siRNA-Temozolomide Run1-DMSO | NDUFA8 | NM_014222 | NADH dehydrogenase (ubiquinone) 1 alpha subcomplex, 8, 19kDa | 19kDa  | 0.623347  | Inlier   |

Identification of Survival Genes in Human Glioblastoma Cells Using siRNA Screening

Nikhil G Thaker, Fang Zhang, Peter R. McDonald, Tong Ying Shun, Michael D Lewen, Ian F. Pollack, and John S. Lazo

Molecular Pharmacology

| siRNA Treatment              | Gene ID   | Gene Name | Protein Name                                                 | MW (kDa) | Log2FC    | Category |
|------------------------------|-----------|-----------|--------------------------------------------------------------|----------|-----------|----------|
| siRNA-Vinblastine Run2-DMSO  | NM_014222 | NDUFA8    | NADH dehydrogenase (ubiquinone) 1 alpha subcomplex, 8, 19kDa | 19       | 1.718227  | Inlier   |
| siRNA-Temozolomide Run2-DMSO | NM_005002 | NDUFA9    | NADH dehydrogenase (ubiquinone) 1 alpha subcomplex, 9, 39kDa | 39       | -0.952761 | Inlier   |
| siRNA-Temozolomide Run3-DMSO | NM_005002 | NDUFA9    | NADH dehydrogenase (ubiquinone) 1 alpha subcomplex, 9, 39kDa | 39       | -0.779986 | Inlier   |
| siRNA Disorazole DMSO Run1   | NM_005002 | NDUFA9    | NADH dehydrogenase (ubiquinone) 1 alpha subcomplex, 9, 39kDa | 39       | -0.569014 | Inlier   |
| siRNA Disorazole DMSO Run3   | NM_005002 | NDUFA9    | NADH dehydrogenase (ubiquinone) 1 alpha subcomplex, 9, 39kDa | 39       | -0.238975 | Inlier   |
| siRNA-Temozolomide Run1-DMSO | NM_005002 | NDUFA9    | NADH dehydrogenase (ubiquinone) 1 alpha subcomplex, 9, 39kDa | 39       | 0.238975  | Inlier   |

Identification of Survival Genes in Human Glioblastoma Cells Using siRNA Screening

Nikhil G Thaker, Fang Zhang, Peter R. McDonald, Tong Ying Shun, Michael D Lewen, Ian F. Pollack, and John S. Lazo

Molecular Pharmacology

|                              |           |         |                                                                   |           |        |
|------------------------------|-----------|---------|-------------------------------------------------------------------|-----------|--------|
| siRNA-Vinblastine Run2-DMSO  | NM_005002 | NDUFA9  | NADH dehydrogenase (ubiquinone) 1 alpha subcomplex, 9, 39kDa      | 0.305953  | Inlier |
| siRNA-Vinblastine Run1-DMSO  | NM_005002 | NDUFA9  | NADH dehydrogenase (ubiquinone) 1 alpha subcomplex, 9, 39kDa      | 0.986163  | Inlier |
| siRNA Disorazole DMSO Run2   | NM_005002 | NDUFA9  | NADH dehydrogenase (ubiquinone) 1 alpha subcomplex, 9, 39kDa      | 1.286488  | Inlier |
| siRNA Disorazole DMSO Run1   | NM_005003 | NDUFAB1 | NADH dehydrogenase (ubiquinone) 1, alpha/beta subcomplex, 1, 8kDa | -1.490076 | Inlier |
| siRNA-Temozolomide Run2-DMSO | NM_005003 | NDUFAB1 | NADH dehydrogenase (ubiquinone) 1, alpha/beta subcomplex, 1, 8kDa | -1.022626 | Inlier |

Identification of Survival Genes in Human Glioblastoma Cells Using siRNA Screening  
 Nikhil G Thaker, Fang Zhang, Peter R. McDonald, Tong Ying Shun, Michael D Lewen, Ian F. Pollack, and John S. Lazo  
 Molecular Pharmacology

|                              |           |         |                                                                   |           |        |
|------------------------------|-----------|---------|-------------------------------------------------------------------|-----------|--------|
| siRNA-Vinblastine Run2-DMSO  | NM_005003 | NDUFAB1 | NADH dehydrogenase (ubiquinone) 1, alpha/beta subcomplex, 1, 8kDa | -0.326374 | Inlier |
| siRNA-Temozolomide Run3-DMSO | NM_005003 | NDUFAB1 | NADH dehydrogenase (ubiquinone) 1, alpha/beta subcomplex, 1, 8kDa | -0.04076  | Inlier |
| siRNA-Temozolomide Run1-DMSO | NM_005003 | NDUFAB1 | NADH dehydrogenase (ubiquinone) 1, alpha/beta subcomplex, 1, 8kDa | 0.04076   | Inlier |
| siRNA-Vinblastine Run1-DMSO  | NM_005003 | NDUFAB1 | NADH dehydrogenase (ubiquinone) 1, alpha/beta subcomplex, 1, 8kDa | 0.213041  | Inlier |
| siRNA Disorazole DMSO Run3   | NM_005003 | NDUFAB1 | NADH dehydrogenase (ubiquinone) 1, alpha/beta subcomplex, 1, 8kDa | 1.09677   | Inlier |

Identification of Survival Genes in Human Glioblastoma Cells Using siRNA Screening  
 Nikhil G Thaker, Fang Zhang, Peter R. McDonald, Tong Ying Shun, Michael D Lewen, Ian F. Pollack, and John S. Lazo  
 Molecular Pharmacology

|                              |               |         |                                                                   |           |        |
|------------------------------|---------------|---------|-------------------------------------------------------------------|-----------|--------|
| siRNA Disorazole DMSO Run2   | NM_0050<br>03 | NDUFAB1 | NADH dehydrogenase (ubiquinone) 1, alpha/beta subcomplex, 1, 8kDa | 2.066328  | Inlier |
| siRNA-Temozolomide Run1-DMSO | NM_0045<br>45 | NDUFB1  | NADH dehydrogenase (ubiquinone) 1 beta subcomplex, 1, 7kDa        | -1.005503 | Inlier |
| siRNA-Temozolomide Run2-DMSO | NM_0045<br>45 | NDUFB1  | NADH dehydrogenase (ubiquinone) 1 beta subcomplex, 1, 7kDa        | -0.88952  | Inlier |
| siRNA-Temozolomide Run3-DMSO | NM_0045<br>45 | NDUFB1  | NADH dehydrogenase (ubiquinone) 1 beta subcomplex, 1, 7kDa        | -0.873585 | Inlier |
| siRNA Disorazole DMSO Run3   | NM_0045<br>45 | NDUFB1  | NADH dehydrogenase (ubiquinone) 1 beta subcomplex, 1, 7kDa        | -0.152817 | Inlier |
| siRNA-Vinblastine Run1-DMSO  | NM_0045<br>45 | NDUFB1  | NADH dehydrogenase (ubiquinone) 1 beta subcomplex, 1, 7kDa        | 0.152817  | Inlier |

Identification of Survival Genes in Human Glioblastoma Cells Using siRNA Screening  
 Nikhil G Thaker, Fang Zhang, Peter R. McDonald, Tong Ying Shun, Michael D Lewen, Ian F. Pollack, and John S. Lazo  
 Molecular Pharmacology

|                              |               |         |                                                              |           |        |
|------------------------------|---------------|---------|--------------------------------------------------------------|-----------|--------|
| siRNA Disorazole DMSO Run1   | NM_0045<br>45 | NDUFB1  | NADH dehydrogenase (ubiquinone) 1 beta subcomplex, 1, 7kDa   | 0.153952  | Inlier |
| siRNA Disorazole DMSO Run2   | NM_0045<br>45 | NDUFB1  | NADH dehydrogenase (ubiquinone) 1 beta subcomplex, 1, 7kDa   | 0.475414  | Inlier |
| siRNA-Vinblastine Run2-DMSO  | NM_0045<br>45 | NDUFB1  | NADH dehydrogenase (ubiquinone) 1 beta subcomplex, 1, 7kDa   | 1.170734  | Inlier |
| siRNA-Temozolomide Run1-DMSO | NM_0045<br>48 | NDUFB10 | NADH dehydrogenase (ubiquinone) 1 beta subcomplex, 10, 22kDa | -1.024737 | Inlier |
| siRNA-Temozolomide Run3-DMSO | NM_0045<br>48 | NDUFB10 | NADH dehydrogenase (ubiquinone) 1 beta subcomplex, 10, 22kDa | -0.832752 | Inlier |
| siRNA-Temozolomide Run2-DMSO | NM_0045<br>48 | NDUFB10 | NADH dehydrogenase (ubiquinone) 1 beta subcomplex, 10, 22kDa | -0.571766 | Inlier |



Identification of Survival Genes in Human Glioblastoma Cells Using siRNA Screening

Nikhil G Thaker, Fang Zhang, Peter R. McDonald, Tong Ying Shun, Michael D Lewen, Ian F. Pollack, and John S. Lazo

Molecular Pharmacology

| siRNA Treatment              | Gene    | Accession | Protein                                                      | Weight | Log2FC    | Category |
|------------------------------|---------|-----------|--------------------------------------------------------------|--------|-----------|----------|
| siRNA Disorazole DMSO Run1   | NDUFB10 | NM_004548 | NADH dehydrogenase (ubiquinone) 1 beta subcomplex, 10, 22kDa | 22kDa  | -0.166757 | Inlier   |
| siRNA Disorazole DMSO Run3   | NDUFB10 | NM_004548 | NADH dehydrogenase (ubiquinone) 1 beta subcomplex, 10, 22kDa | 22kDa  | 0.166757  | Inlier   |
| siRNA-Vinblastine Run1-DMSO  | NDUFB10 | NM_004548 | NADH dehydrogenase (ubiquinone) 1 beta subcomplex, 10, 22kDa | 22kDa  | 0.484653  | Inlier   |
| siRNA Disorazole DMSO Run2   | NDUFB10 | NM_004548 | NADH dehydrogenase (ubiquinone) 1 beta subcomplex, 10, 22kDa | 22kDa  | 0.777234  | Inlier   |
| siRNA-Vinblastine Run2-DMSO  | NDUFB10 | NM_004548 | NADH dehydrogenase (ubiquinone) 1 beta subcomplex, 10, 22kDa | 22kDa  | 1.287133  | Inlier   |
| siRNA-Temozolomide Run1-DMSO | NDUFB2  | NM_004546 | NADH dehydrogenase (ubiquinone) 1 beta subcomplex, 2, 8kDa   | 8kDa   | -0.829264 | Inlier   |

Identification of Survival Genes in Human Glioblastoma Cells Using siRNA Screening

Nikhil G Thaker, Fang Zhang, Peter R. McDonald, Tong Ying Shun, Michael D Lewen, Ian F. Pollack, and John S. Lazo

Molecular Pharmacology

|                              |           |        |                                                            |           |        |
|------------------------------|-----------|--------|------------------------------------------------------------|-----------|--------|
| siRNA-Temozolomide Run3-DMSO | NM_004546 | NDUFB2 | NADH dehydrogenase (ubiquinone) 1 beta subcomplex, 2, 8kDa | -0.66514  | Inlier |
| siRNA-Temozolomide Run2-DMSO | NM_004546 | NDUFB2 | NADH dehydrogenase (ubiquinone) 1 beta subcomplex, 2, 8kDa | -0.613913 | Inlier |
| siRNA Disorazole DMSO Run2   | NM_004546 | NDUFB2 | NADH dehydrogenase (ubiquinone) 1 beta subcomplex, 2, 8kDa | -0.448505 | Inlier |
| siRNA Disorazole DMSO Run1   | NM_004546 | NDUFB2 | NADH dehydrogenase (ubiquinone) 1 beta subcomplex, 2, 8kDa | 0.448505  | Inlier |
| siRNA Disorazole DMSO Run3   | NM_004546 | NDUFB2 | NADH dehydrogenase (ubiquinone) 1 beta subcomplex, 2, 8kDa | 0.68386   | Inlier |
| siRNA-Vinblastine Run1-DMSO  | NM_004546 | NDUFB2 | NADH dehydrogenase (ubiquinone) 1 beta subcomplex, 2, 8kDa | 1.263198  | Inlier |

Identification of Survival Genes in Human Glioblastoma Cells Using siRNA Screening  
 Nikhil G Thaker, Fang Zhang, Peter R. McDonald, Tong Ying Shun, Michael D Lewen, Ian F. Pollack, and John S. Lazo  
 Molecular Pharmacology

|                              |           |        |                                                             |           |        |
|------------------------------|-----------|--------|-------------------------------------------------------------|-----------|--------|
| siRNA-Vinblastine Run2-DMSO  | NM_004546 | NDUFB2 | NADH dehydrogenase (ubiquinone) 1 beta subcomplex, 2, 8kDa  | 2.093406  | Inlier |
| siRNA-Temozolomide Run1-DMSO | NM_002491 | NDUFB3 | NADH dehydrogenase (ubiquinone) 1 beta subcomplex, 3, 12kDa | -1.210397 | Inlier |
| siRNA-Temozolomide Run3-DMSO | NM_002491 | NDUFB3 | NADH dehydrogenase (ubiquinone) 1 beta subcomplex, 3, 12kDa | -0.928331 | Inlier |
| siRNA Disorazole DMSO Run3   | NM_002491 | NDUFB3 | NADH dehydrogenase (ubiquinone) 1 beta subcomplex, 3, 12kDa | -0.422274 | Inlier |
| siRNA-Temozolomide Run2-DMSO | NM_002491 | NDUFB3 | NADH dehydrogenase (ubiquinone) 1 beta subcomplex, 3, 12kDa | -0.393837 | Inlier |
| siRNA Disorazole DMSO Run2   | NM_002491 | NDUFB3 | NADH dehydrogenase (ubiquinone) 1 beta subcomplex, 3, 12kDa | 0.393837  | Inlier |

Identification of Survival Genes in Human Glioblastoma Cells Using siRNA Screening

Nikhil G Thaker, Fang Zhang, Peter R. McDonald, Tong Ying Shun, Michael D Lewen, Ian F. Pollack, and John S. Lazo

Molecular Pharmacology

| siRNA Treatment              | Gene ID   | Gene Name | Protein Name                                                | Protein MW | Log2 Fold Change | Outlier Status |
|------------------------------|-----------|-----------|-------------------------------------------------------------|------------|------------------|----------------|
| siRNA Disorazole DMSO Run1   | NM_002491 | NDUFB3    | NADH dehydrogenase (ubiquinone) 1 beta subcomplex, 3, 12kDa | 12kDa      | 0.445459         | Inlier         |
| siRNA-Vinblastine Run1-DMSO  | NM_002491 | NDUFB3    | NADH dehydrogenase (ubiquinone) 1 beta subcomplex, 3, 12kDa | 12kDa      | 0.903541         | Inlier         |
| siRNA-Vinblastine Run2-DMSO  | NM_002491 | NDUFB3    | NADH dehydrogenase (ubiquinone) 1 beta subcomplex, 3, 12kDa | 12kDa      | 2.178828         | Inlier         |
| siRNA-Temozolomide Run3-DMSO | NM_004547 | NDUFB4    | NADH dehydrogenase (ubiquinone) 1 beta subcomplex, 4, 15kDa | 15kDa      | -1.300914        | Inlier         |
| siRNA-Temozolomide Run1-DMSO | NM_004547 | NDUFB4    | NADH dehydrogenase (ubiquinone) 1 beta subcomplex, 4, 15kDa | 15kDa      | -0.8479          | Inlier         |
| siRNA Disorazole DMSO Run2   | NM_004547 | NDUFB4    | NADH dehydrogenase (ubiquinone) 1 beta subcomplex, 4, 15kDa | 15kDa      | -0.5011          | Inlier         |

Identification of Survival Genes in Human Glioblastoma Cells Using siRNA Screening

Nikhil G Thaker, Fang Zhang, Peter R. McDonald, Tong Ying Shun, Michael D Lewen, Ian F. Pollack, and John S. Lazo

Molecular Pharmacology

| siRNA Treatment              | Gene ID   | Gene Name | Protein Name                                                | Protein MW | Log2 Fold Change | Category |
|------------------------------|-----------|-----------|-------------------------------------------------------------|------------|------------------|----------|
| siRNA Disorazole DMSO Run1   | NM_004547 | NDUFB4    | NADH dehydrogenase (ubiquinone) 1 beta subcomplex, 4, 15kDa | 15kDa      | -0.042219        | Inlier   |
| siRNA-Temozolomide Run2-DMSO | NM_004547 | NDUFB4    | NADH dehydrogenase (ubiquinone) 1 beta subcomplex, 4, 15kDa | 15kDa      | 0.042219         | Inlier   |
| siRNA Disorazole DMSO Run3   | NM_004547 | NDUFB4    | NADH dehydrogenase (ubiquinone) 1 beta subcomplex, 4, 15kDa | 15kDa      | 0.2358           | Inlier   |
| siRNA-Vinblastine Run1-DMSO  | NM_004547 | NDUFB4    | NADH dehydrogenase (ubiquinone) 1 beta subcomplex, 4, 15kDa | 15kDa      | 0.92317          | Inlier   |
| siRNA-Vinblastine Run2-DMSO  | NM_004547 | NDUFB4    | NADH dehydrogenase (ubiquinone) 1 beta subcomplex, 4, 15kDa | 15kDa      | 1.129989         | Inlier   |
| siRNA-Temozolomide Run1-DMSO | NM_002492 | NDUFB5    | NADH dehydrogenase (ubiquinone) 1 beta subcomplex, 5, 16kDa | 16kDa      | -0.91976         | Inlier   |

Identification of Survival Genes in Human Glioblastoma Cells Using siRNA Screening  
 Nikhil G Thaker, Fang Zhang, Peter R. McDonald, Tong Ying Shun, Michael D Lewen, Ian F. Pollack, and John S. Lazo

Molecular Pharmacology

| siRNA Treatment              | Gene ID   | Gene Name | Protein Name                                                | MW (kDa) | Log2 Fold Change | Category |
|------------------------------|-----------|-----------|-------------------------------------------------------------|----------|------------------|----------|
| siRNA-Temozolomide Run3-DMSO | NM_002492 | NDUFB5    | NADH dehydrogenase (ubiquinone) 1 beta subcomplex, 5, 16kDa | 16       | -0.810338        | Inlier   |
| siRNA-Temozolomide Run2-DMSO | NM_002492 | NDUFB5    | NADH dehydrogenase (ubiquinone) 1 beta subcomplex, 5, 16kDa | 16       | -0.659306        | Inlier   |
| siRNA Disorazole DMSO Run2   | NM_002492 | NDUFB5    | NADH dehydrogenase (ubiquinone) 1 beta subcomplex, 5, 16kDa | 16       | -0.091398        | Inlier   |
| siRNA Disorazole DMSO Run3   | NM_002492 | NDUFB5    | NADH dehydrogenase (ubiquinone) 1 beta subcomplex, 5, 16kDa | 16       | 0.091398         | Inlier   |
| siRNA Disorazole DMSO Run1   | NM_002492 | NDUFB5    | NADH dehydrogenase (ubiquinone) 1 beta subcomplex, 5, 16kDa | 16       | 0.279701         | Inlier   |
| siRNA-Vinblastine Run1-DMSO  | NM_002492 | NDUFB5    | NADH dehydrogenase (ubiquinone) 1 beta subcomplex, 5, 16kDa | 16       | 0.689694         | Inlier   |

Identification of Survival Genes in Human Glioblastoma Cells Using siRNA Screening

Nikhil G Thaker, Fang Zhang, Peter R. McDonald, Tong Ying Shun, Michael D Lewen, Ian F. Pollack, and John S. Lazo

Molecular Pharmacology

| siRNA Treatment              | Gene ID   | Gene Name | Protein Name                                                | Protein MW | Log2 Fold Change | Outlier Status |
|------------------------------|-----------|-----------|-------------------------------------------------------------|------------|------------------|----------------|
| siRNA-Vinblastine Run2-DMSO  | NM_002492 | NDUFB5    | NADH dehydrogenase (ubiquinone) 1 beta subcomplex, 5, 16kDa | 16kDa      | 1.741967         | Inlier         |
| siRNA-Temozolomide Run1-DMSO | NM_182739 | NDUFB6    | NADH dehydrogenase (ubiquinone) 1 beta subcomplex, 6, 17kDa | 17kDa      | -0.852724        | Inlier         |
| siRNA Disorazole DMSO Run1   | NM_182739 | NDUFB6    | NADH dehydrogenase (ubiquinone) 1 beta subcomplex, 6, 17kDa | 17kDa      | -0.759218        | Inlier         |
| siRNA Disorazole DMSO Run2   | NM_182739 | NDUFB6    | NADH dehydrogenase (ubiquinone) 1 beta subcomplex, 6, 17kDa | 17kDa      | -0.480352        | Inlier         |
| siRNA-Temozolomide Run3-DMSO | NM_182739 | NDUFB6    | NADH dehydrogenase (ubiquinone) 1 beta subcomplex, 6, 17kDa | 17kDa      | -0.058606        | Inlier         |
| siRNA-Temozolomide Run2-DMSO | NM_182739 | NDUFB6    | NADH dehydrogenase (ubiquinone) 1 beta subcomplex, 6, 17kDa | 17kDa      | 0.058605         | Inlier         |

Identification of Survival Genes in Human Glioblastoma Cells Using siRNA Screening

Nikhil G Thaker, Fang Zhang, Peter R. McDonald, Tong Ying Shun, Michael D Lewen, Ian F. Pollack, and John S. Lazo

Molecular Pharmacology

| siRNA                        | Gene      | Protein | MW    | Score     | Category |
|------------------------------|-----------|---------|-------|-----------|----------|
| siRNA-Vinblastine Run1-DMSO  | NM_182739 | NDUFB6  | 17kDa | 0.589782  | Inlier   |
| siRNA Disorazole DMSO Run3   | NM_182739 | NDUFB6  | 17kDa | 0.773289  | Inlier   |
| siRNA-Vinblastine Run2-DMSO  | NM_182739 | NDUFB6  | 17kDa | 1.25138   | Inlier   |
| siRNA-Temozolomide Run1-DMSO | NM_004146 | NDUFB7  | 18kDa | -1.207088 | Inlier   |
| siRNA-Temozolomide Run3-DMSO | NM_004146 | NDUFB7  | 18kDa | -0.930858 | Inlier   |
| siRNA-Temozolomide Run2-DMSO | NM_004146 | NDUFB7  | 18kDa | -0.418142 | Inlier   |

NADH dehydrogenase (ubiquinone) 1 beta subcomplex, 6, 17kDa

NADH dehydrogenase (ubiquinone) 1 beta subcomplex, 6, 17kDa

NADH dehydrogenase (ubiquinone) 1 beta subcomplex, 6, 17kDa

NADH dehydrogenase (ubiquinone) 1 beta subcomplex, 7, 18kDa

NADH dehydrogenase (ubiquinone) 1 beta subcomplex, 7, 18kDa

NADH dehydrogenase (ubiquinone) 1 beta subcomplex, 7, 18kDa



Identification of Survival Genes in Human Glioblastoma Cells Using siRNA Screening

Nikhil G Thaker, Fang Zhang, Peter R. McDonald, Tong Ying Shun, Michael D Lewen, Ian F. Pollack, and John S. Lazo

Molecular Pharmacology

|                                 |               |        |                                                                                     |           |        |
|---------------------------------|---------------|--------|-------------------------------------------------------------------------------------|-----------|--------|
| siRNA Disorazole DMSO Run3      | NM_0041<br>46 | NDUFB7 | NADH<br>dehydroge<br>nase<br>(ubiquinon<br>e) 1 beta<br>subcomple<br>x, 7,<br>18kDa | -0.000149 | Inlier |
| siRNA Disorazole DMSO Run2      | NM_0041<br>46 | NDUFB7 | NADH<br>dehydroge<br>nase<br>(ubiquinon<br>e) 1 beta<br>subcomple<br>x, 7,<br>18kDa | 0.00015   | Inlier |
| siRNA Disorazole DMSO Run1      | NM_0041<br>46 | NDUFB7 | NADH<br>dehydroge<br>nase<br>(ubiquinon<br>e) 1 beta<br>subcomple<br>x, 7,<br>18kDa | 0.141937  | Inlier |
| siRNA-Vinblastine Run1-<br>DMSO | NM_0041<br>46 | NDUFB7 | NADH<br>dehydroge<br>nase<br>(ubiquinon<br>e) 1 beta<br>subcomple<br>x, 7,<br>18kDa | 1.154899  | Inlier |
| siRNA-Vinblastine Run2-<br>DMSO | NM_0041<br>46 | NDUFB7 | NADH<br>dehydroge<br>nase<br>(ubiquinon<br>e) 1 beta<br>subcomple<br>x, 7,<br>18kDa | 1.958969  | Inlier |
| siRNA Disorazole DMSO Run2      | NM_0050<br>04 | NDUFB8 | NADH<br>dehydroge<br>nase<br>(ubiquinon<br>e) 1 beta<br>subcomple<br>x, 8,<br>19kDa | -1.434133 | Inlier |

Identification of Survival Genes in Human Glioblastoma Cells Using siRNA Screening

Nikhil G Thaker, Fang Zhang, Peter R. McDonald, Tong Ying Shun, Michael D Lewen, Ian F. Pollack, and John S. Lazo

Molecular Pharmacology

| siRNA Treatment              | Gene   | Accession | Protein                                                     | Weight | Log2FC    | Category |
|------------------------------|--------|-----------|-------------------------------------------------------------|--------|-----------|----------|
| siRNA Disorazole DMSO Run3   | NDUFB8 | NM_005004 | NADH dehydrogenase (ubiquinone) 1 beta subcomplex, 8, 19kDa | 19kDa  | -0.596773 | Inlier   |
| siRNA-Temozolomide Run2-DMSO | NDUFB8 | NM_005004 | NADH dehydrogenase (ubiquinone) 1 beta subcomplex, 8, 19kDa | 19kDa  | -0.352474 | Inlier   |
| siRNA-Temozolomide Run3-DMSO | NDUFB8 | NM_005004 | NADH dehydrogenase (ubiquinone) 1 beta subcomplex, 8, 19kDa | 19kDa  | -0.096269 | Inlier   |
| siRNA Disorazole DMSO Run1   | NDUFB8 | NM_005004 | NADH dehydrogenase (ubiquinone) 1 beta subcomplex, 8, 19kDa | 19kDa  | 0.096269  | Inlier   |
| siRNA-Temozolomide Run1-DMSO | NDUFB8 | NM_005004 | NADH dehydrogenase (ubiquinone) 1 beta subcomplex, 8, 19kDa | 19kDa  | 0.752227  | Inlier   |
| siRNA-Vinblastine Run1-DMSO  | NDUFB8 | NM_005004 | NADH dehydrogenase (ubiquinone) 1 beta subcomplex, 8, 19kDa | 19kDa  | 2.015416  | Inlier   |

Identification of Survival Genes in Human Glioblastoma Cells Using siRNA Screening

Nikhil G Thaker, Fang Zhang, Peter R. McDonald, Tong Ying Shun, Michael D Lewen, Ian F. Pollack, and John S. Lazo

Molecular Pharmacology

| siRNA Treatment              | Gene ID   | Gene Name | Protein Name                                                | Protein Weight | Log Fold Change | Classification |
|------------------------------|-----------|-----------|-------------------------------------------------------------|----------------|-----------------|----------------|
| siRNA-Vinblastine Run2-DMSO  | NM_005004 | NDUFB8    | NADH dehydrogenase (ubiquinone) 1 beta subcomplex, 8, 19kDa | 19kDa          | 3.592563        | Outlier        |
| siRNA-Temozolomide Run1-DMSO | NM_005005 | NDUFB9    | NADH dehydrogenase (ubiquinone) 1 beta subcomplex, 9, 22kDa | 22kDa          | -1.758817       | Inlier         |
| siRNA-Temozolomide Run3-DMSO | NM_005005 | NDUFB9    | NADH dehydrogenase (ubiquinone) 1 beta subcomplex, 9, 22kDa | 22kDa          | -1.076069       | Inlier         |
| siRNA-Temozolomide Run2-DMSO | NM_005005 | NDUFB9    | NADH dehydrogenase (ubiquinone) 1 beta subcomplex, 9, 22kDa | 22kDa          | -0.512113       | Inlier         |
| siRNA Disorazole DMSO Run1   | NM_005005 | NDUFB9    | NADH dehydrogenase (ubiquinone) 1 beta subcomplex, 9, 22kDa | 22kDa          | -0.050192       | Inlier         |
| siRNA Disorazole DMSO Run2   | NM_005005 | NDUFB9    | NADH dehydrogenase (ubiquinone) 1 beta subcomplex, 9, 22kDa | 22kDa          | 0.050193        | Inlier         |

Identification of Survival Genes in Human Glioblastoma Cells Using siRNA Screening

Nikhil G Thaker, Fang Zhang, Peter R. McDonald, Tong Ying Shun, Michael D Lewen, Ian F. Pollack, and John S. Lazo

Molecular Pharmacology

| siRNA Treatment              | Gene ID   | Gene Name | Protein Name                                                | Score     | Category |
|------------------------------|-----------|-----------|-------------------------------------------------------------|-----------|----------|
| siRNA-Vinblastine Run1-DMSO  | NM_005005 | NDUFB9    | NADH dehydrogenase (ubiquinone) 1 beta subcomplex, 9, 22kDa | 0.214975  | Inlier   |
| siRNA Disorazole DMSO Run3   | NM_005005 | NDUFB9    | NADH dehydrogenase (ubiquinone) 1 beta subcomplex, 9, 22kDa | 0.836887  | Inlier   |
| siRNA-Vinblastine Run2-DMSO  | NM_005005 | NDUFB9    | NADH dehydrogenase (ubiquinone) 1, subcomplex x, 9, 22kDa   | 1.352732  | Inlier   |
| siRNA-Temozolomide Run2-DMSO | NM_002494 | NDUFC1    | unknown, 1, 6kDa                                            | -1.112139 | Inlier   |
| siRNA-Temozolomide Run3-DMSO | NM_002494 | NDUFC1    | unknown, 1, 6kDa                                            | -0.704429 | Inlier   |
| siRNA Disorazole DMSO Run3   | NM_002494 | NDUFC1    | unknown, 1, 6kDa                                            | -0.644571 | Inlier   |

Identification of Survival Genes in Human Glioblastoma Cells Using siRNA Screening

Nikhil G Thaker, Fang Zhang, Peter R. McDonald, Tong Ying Shun, Michael D Lewen, Ian F. Pollack, and John S. Lazo

Molecular Pharmacology

| siRNA Treatment              | Gene ID   | Gene Name | Protein Name                                                     | Log2 Fold Change | Outlier Status |
|------------------------------|-----------|-----------|------------------------------------------------------------------|------------------|----------------|
| siRNA Disorazole DMSO Run1   | NM_002494 | NDUFC1    | NADH dehydrogenase (ubiquinone) 1, subcomplex X unknown, 1, 6kDa | -0.034061        | Inlier         |
| siRNA-Temozolomide Run1-DMSO | NM_002494 | NDUFC1    | NADH dehydrogenase (ubiquinone) 1, subcomplex X unknown, 1, 6kDa | 0.034061         | Inlier         |
| siRNA Disorazole DMSO Run2   | NM_002494 | NDUFC1    | NADH dehydrogenase (ubiquinone) 1, subcomplex X unknown, 1, 6kDa | 0.45813          | Inlier         |
| siRNA-Vinblastine Run1-DMSO  | NM_002494 | NDUFC1    | NADH dehydrogenase (ubiquinone) 1, subcomplex X unknown, 1, 6kDa | 1.022666         | Inlier         |
| siRNA-Vinblastine Run2-DMSO  | NM_002494 | NDUFC1    | NADH dehydrogenase (ubiquinone) 1, subcomplex X unknown, 1, 6kDa | 1.35137          | Inlier         |

Identification of Survival Genes in Human Glioblastoma Cells Using siRNA Screening

Nikhil G Thaker, Fang Zhang, Peter R. McDonald, Tong Ying Shun, Michael D Lewen, Ian F. Pollack, and John S. Lazo

Molecular Pharmacology

|                              |               |        |                                                          |           |        |
|------------------------------|---------------|--------|----------------------------------------------------------|-----------|--------|
| siRNA-Temozolomide Run1-DMSO | NM_0045<br>49 | NDUFC2 | NADH dehydrogenase (ubiquinone) 1, subcomplex 2, 14.5kDa | -2.123912 | Inlier |
| siRNA-Temozolomide Run3-DMSO | NM_0045<br>49 | NDUFC2 | NADH dehydrogenase (ubiquinone) 1, subcomplex 2, 14.5kDa | -1.380969 | Inlier |
| siRNA Disorazole DMSO Run1   | NM_0045<br>49 | NDUFC2 | NADH dehydrogenase (ubiquinone) 1, subcomplex 2, 14.5kDa | -0.713533 | Inlier |
| siRNA-Temozolomide Run2-DMSO | NM_0045<br>49 | NDUFC2 | NADH dehydrogenase (ubiquinone) 1, subcomplex 2, 14.5kDa | -0.340338 | Inlier |
| siRNA-Vinblastine Run1-DMSO  | NM_0045<br>49 | NDUFC2 | NADH dehydrogenase (ubiquinone) 1, subcomplex 2, 14.5kDa | 0.340339  | Inlier |

Identification of Survival Genes in Human Glioblastoma Cells Using siRNA Screening

Nikhil G Thaker, Fang Zhang, Peter R. McDonald, Tong Ying Shun, Michael D Lewen, Ian F. Pollack, and John S. Lazo

Molecular Pharmacology

|                              |               |        |                                                                                   |           |        |
|------------------------------|---------------|--------|-----------------------------------------------------------------------------------|-----------|--------|
| siRNA Disorazole DMSO Run3   | NM_0045<br>49 | NDUFC2 | NADH dehydrogenase (ubiquinone) 1, subcomplex 2, 14.5kDa                          | 0.474341  | Inlier |
| siRNA-Vinblastine Run2-DMSO  | NM_0045<br>49 | NDUFC2 | NADH dehydrogenase (ubiquinone) 1, subcomplex 2, 14.5kDa                          | 0.635467  | Inlier |
| siRNA Disorazole DMSO Run2   | NM_0045<br>49 | NDUFC2 | NADH dehydrogenase (ubiquinone) 1, subcomplex 2, 14.5kDa                          | 1.043011  | Inlier |
| siRNA-Temozolomide Run3-DMSO | NM_0050<br>06 | NDUFS1 | NADH dehydrogenase (ubiquinone) Fe-S protein 1, 75kDa (NADH-coenzyme Q reductase) | -0.760517 | Inlier |

Identification of Survival Genes in Human Glioblastoma Cells Using siRNA Screening

Nikhil G Thaker, Fang Zhang, Peter R. McDonald, Tong Ying Shun, Michael D Lewen, Ian F. Pollack, and John S. Lazo

Molecular Pharmacology

|                              |           |        |                                                                                   |           |        |
|------------------------------|-----------|--------|-----------------------------------------------------------------------------------|-----------|--------|
| siRNA-Temozolomide Run2-DMSO | NM_005006 | NDUFS1 | NADH dehydrogenase (ubiquinone) Fe-S protein 1, 75kDa (NADH-coenzyme Q reductase) | -0.640547 | Inlier |
| siRNA-Temozolomide Run1-DMSO | NM_005006 | NDUFS1 | NADH dehydrogenase (ubiquinone) Fe-S protein 1, 75kDa (NADH-coenzyme Q reductase) | -0.431669 | Inlier |
| siRNA Disorazole DMSO Run3   | NM_005006 | NDUFS1 | NADH dehydrogenase (ubiquinone) Fe-S protein 1, 75kDa (NADH-coenzyme Q reductase) | -0.176739 | Inlier |
| siRNA Disorazole DMSO Run1   | NM_005006 | NDUFS1 | NADH dehydrogenase (ubiquinone) Fe-S protein 1, 75kDa (NADH-coenzyme Q reductase) | 0.176739  | Inlier |



Identification of Survival Genes in Human Glioblastoma Cells Using siRNA Screening

Nikhil G Thaker, Fang Zhang, Peter R. McDonald, Tong Ying Shun, Michael D Lewen, Ian F. Pollack, and John S. Lazo

Molecular Pharmacology

|                              |           |        |                                                                                   |           |        |
|------------------------------|-----------|--------|-----------------------------------------------------------------------------------|-----------|--------|
| siRNA Disorazole DMSO Run2   | NM_005006 | NDUFS1 | NADH dehydrogenase (ubiquinone) Fe-S protein 1, 75kDa (NADH-coenzyme Q reductase) | 0.708453  | Inlier |
| siRNA-Vinblastine Run1-DMSO  | NM_005006 | NDUFS1 | NADH dehydrogenase (ubiquinone) Fe-S protein 1, 75kDa (NADH-coenzyme Q reductase) | 1.063793  | Inlier |
| siRNA-Vinblastine Run2-DMSO  | NM_005006 | NDUFS1 | NADH dehydrogenase (ubiquinone) Fe-S protein 1, 75kDa (NADH-coenzyme Q reductase) | 1.59085   | Inlier |
| siRNA-Temozolomide Run1-DMSO | NM_004550 | NDUFS2 | NADH dehydrogenase (ubiquinone) Fe-S protein 2, 49kDa (NADH-coenzyme Q reductase) | -2.150937 | Inlier |

Identification of Survival Genes in Human Glioblastoma Cells Using siRNA Screening

Nikhil G Thaker, Fang Zhang, Peter R. McDonald, Tong Ying Shun, Michael D Lewen, Ian F. Pollack, and John S. Lazo

Molecular Pharmacology

|                              |               |        |                                                                                   |           |        |
|------------------------------|---------------|--------|-----------------------------------------------------------------------------------|-----------|--------|
| siRNA-Temozolomide Run3-DMSO | NM_0045<br>50 | NDUFS2 | NADH dehydrogenase (ubiquinone) Fe-S protein 2, 49kDa (NADH-coenzyme Q reductase) | -1.143883 | Inlier |
| siRNA-Temozolomide Run2-DMSO | NM_0045<br>50 | NDUFS2 | NADH dehydrogenase (ubiquinone) Fe-S protein 2, 49kDa (NADH-coenzyme Q reductase) | -0.96374  | Inlier |
| siRNA Disorazole DMSO Run1   | NM_0045<br>50 | NDUFS2 | NADH dehydrogenase (ubiquinone) Fe-S protein 2, 49kDa (NADH-coenzyme Q reductase) | -0.167501 | Inlier |
| siRNA Disorazole DMSO Run2   | NM_0045<br>50 | NDUFS2 | NADH dehydrogenase (ubiquinone) Fe-S protein 2, 49kDa (NADH-coenzyme Q reductase) | 0.167501  | Inlier |

Identification of Survival Genes in Human Glioblastoma Cells Using siRNA Screening

Nikhil G Thaker, Fang Zhang, Peter R. McDonald, Tong Ying Shun, Michael D Lewen, Ian F. Pollack, and John S. Lazo

Molecular Pharmacology

|                             |               |        |                                                                                   |           |        |
|-----------------------------|---------------|--------|-----------------------------------------------------------------------------------|-----------|--------|
| siRNA-Vinblastine Run1-DMSO | NM_0045<br>50 | NDUFS2 | NADH dehydrogenase (ubiquinone) Fe-S protein 2, 49kDa (NADH-coenzyme Q reductase) | 0.169002  | Inlier |
| siRNA Disorazole DMSO Run3  | NM_0045<br>50 | NDUFS2 | NADH dehydrogenase (ubiquinone) Fe-S protein 2, 49kDa (NADH-coenzyme Q reductase) | 0.38526   | Inlier |
| siRNA-Vinblastine Run2-DMSO | NM_0045<br>50 | NDUFS2 | NADH dehydrogenase (ubiquinone) Fe-S protein 2, 49kDa (NADH-coenzyme Q reductase) | 1.506786  | Inlier |
| siRNA Disorazole DMSO Run3  | NM_0045<br>51 | NDUFS3 | NADH dehydrogenase (ubiquinone) Fe-S protein 3, 30kDa (NADH-coenzyme Q reductase) | -1.406314 | Inlier |

Identification of Survival Genes in Human Glioblastoma Cells Using siRNA Screening

Nikhil G Thaker, Fang Zhang, Peter R. McDonald, Tong Ying Shun, Michael D Lewen, Ian F. Pollack, and John S. Lazo

Molecular Pharmacology

|                              |               |        |                                                                                   |           |        |
|------------------------------|---------------|--------|-----------------------------------------------------------------------------------|-----------|--------|
| siRNA Disorazole DMSO Run2   | NM_0045<br>51 | NDUFS3 | NADH dehydrogenase (ubiquinone) Fe-S protein 3, 30kDa (NADH-coenzyme Q reductase) | -0.690968 | Inlier |
| siRNA-Temozolomide Run3-DMSO | NM_0045<br>51 | NDUFS3 | NADH dehydrogenase (ubiquinone) Fe-S protein 3, 30kDa (NADH-coenzyme Q reductase) | -0.360282 | Inlier |
| siRNA-Temozolomide Run2-DMSO | NM_0045<br>51 | NDUFS3 | NADH dehydrogenase (ubiquinone) Fe-S protein 3, 30kDa (NADH-coenzyme Q reductase) | -0.237409 | Inlier |
| siRNA Disorazole DMSO Run1   | NM_0045<br>51 | NDUFS3 | NADH dehydrogenase (ubiquinone) Fe-S protein 3, 30kDa (NADH-coenzyme Q reductase) | 0.237409  | Inlier |

Identification of Survival Genes in Human Glioblastoma Cells Using siRNA Screening

Nikhil G Thaker, Fang Zhang, Peter R. McDonald, Tong Ying Shun, Michael D Lewen, Ian F. Pollack, and John S. Lazo

Molecular Pharmacology

|                              |           |        |                                                                                   |           |        |
|------------------------------|-----------|--------|-----------------------------------------------------------------------------------|-----------|--------|
| siRNA-Temozolomide Run1-DMSO | NM_004551 | NDUFS3 | NADH dehydrogenase (ubiquinone) Fe-S protein 3, 30kDa (NADH-coenzyme Q reductase) | 0.658032  | Inlier |
| siRNA-Vinblastine Run1-DMSO  | NM_004551 | NDUFS3 | NADH dehydrogenase (ubiquinone) Fe-S protein 3, 30kDa (NADH-coenzyme Q reductase) | 0.964813  | Inlier |
| siRNA-Vinblastine Run2-DMSO  | NM_004551 | NDUFS3 | NADH dehydrogenase (ubiquinone) Fe-S protein 3, 30kDa (NADH-coenzyme Q reductase) | 1.367448  | Inlier |
| siRNA-Temozolomide Run3-DMSO | NM_002495 | NDUFS4 | NADH dehydrogenase (ubiquinone) Fe-S protein 4, 18kDa (NADH-coenzyme Q reductase) | -1.071993 | Inlier |

Identification of Survival Genes in Human Glioblastoma Cells Using siRNA Screening  
 Nikhil G Thaker, Fang Zhang, Peter R. McDonald, Tong Ying Shun, Michael D Lewen, Ian F. Pollack, and John S. Lazo  
 Molecular Pharmacology

|                              |           |        |                                                                                   |           |        |
|------------------------------|-----------|--------|-----------------------------------------------------------------------------------|-----------|--------|
| siRNA-Temozolomide Run1-DMSO | NM_002495 | NDUFS4 | NADH dehydrogenase (ubiquinone) Fe-S protein 4, 18kDa (NADH-coenzyme Q reductase) | -1.059372 | Inlier |
| siRNA Disorazole DMSO Run1   | NM_002495 | NDUFS4 | NADH dehydrogenase (ubiquinone) Fe-S protein 4, 18kDa (NADH-coenzyme Q reductase) | -0.250739 | Inlier |
| siRNA-Temozolomide Run2-DMSO | NM_002495 | NDUFS4 | NADH dehydrogenase (ubiquinone) Fe-S protein 4, 18kDa (NADH-coenzyme Q reductase) | -0.022215 | Inlier |
| siRNA-Vinblastine Run1-DMSO  | NM_002495 | NDUFS4 | NADH dehydrogenase (ubiquinone) Fe-S protein 4, 18kDa (NADH-coenzyme Q reductase) | 0.022215  | Inlier |

Identification of Survival Genes in Human Glioblastoma Cells Using siRNA Screening  
 Nikhil G Thaker, Fang Zhang, Peter R. McDonald, Tong Ying Shun, Michael D Lewen, Ian F. Pollack, and John S. Lazo  
 Molecular Pharmacology

|                             |               |        |                                                                                   |           |        |
|-----------------------------|---------------|--------|-----------------------------------------------------------------------------------|-----------|--------|
| siRNA Disorazole DMSO Run2  | NM_0024<br>95 | NDUFS4 | NADH dehydrogenase (ubiquinone) Fe-S protein 4, 18kDa (NADH-coenzyme Q reductase) | 0.382335  | Inlier |
| siRNA-Vinblastine Run2-DMSO | NM_0024<br>95 | NDUFS4 | NADH dehydrogenase (ubiquinone) Fe-S protein 4, 18kDa (NADH-coenzyme Q reductase) | 0.966665  | Inlier |
| siRNA Disorazole DMSO Run3  | NM_0024<br>95 | NDUFS4 | NADH dehydrogenase (ubiquinone) Fe-S protein 4, 18kDa (NADH-coenzyme Q reductase) | 1.278871  | Inlier |
| siRNA Disorazole DMSO Run1  | NM_0045<br>52 | NDUFS5 | NADH dehydrogenase (ubiquinone) Fe-S protein 5, 15kDa (NADH-coenzyme Q reductase) | -1.164295 | Inlier |

Identification of Survival Genes in Human Glioblastoma Cells Using siRNA Screening  
 Nikhil G Thaker, Fang Zhang, Peter R. McDonald, Tong Ying Shun, Michael D Lewen, Ian F. Pollack, and John S. Lazo  
 Molecular Pharmacology

|                              |               |        |                                                                                   |           |        |
|------------------------------|---------------|--------|-----------------------------------------------------------------------------------|-----------|--------|
| siRNA Disorazole DMSO Run3   | NM_0045<br>52 | NDUFS5 | NADH dehydrogenase (ubiquinone) Fe-S protein 5, 15kDa (NADH-coenzyme Q reductase) | -0.966148 | Inlier |
| siRNA Disorazole DMSO Run2   | NM_0045<br>52 | NDUFS5 | NADH dehydrogenase (ubiquinone) Fe-S protein 5, 15kDa (NADH-coenzyme Q reductase) | -0.368982 | Inlier |
| siRNA-Temozolomide Run3-DMSO | NM_0045<br>52 | NDUFS5 | NADH dehydrogenase (ubiquinone) Fe-S protein 5, 15kDa (NADH-coenzyme Q reductase) | -0.141087 | Inlier |
| siRNA-Temozolomide Run2-DMSO | NM_0045<br>52 | NDUFS5 | NADH dehydrogenase (ubiquinone) Fe-S protein 5, 15kDa (NADH-coenzyme Q reductase) | 0.141087  | Inlier |



Identification of Survival Genes in Human Glioblastoma Cells Using siRNA Screening

Nikhil G Thaker, Fang Zhang, Peter R. McDonald, Tong Ying Shun, Michael D Lewen, Ian F. Pollack, and John S.

Lazo

Molecular Pharmacology

|                              |           |        |                                                                                   |           |        |
|------------------------------|-----------|--------|-----------------------------------------------------------------------------------|-----------|--------|
| siRNA-Temozolomide Run1-DMSO | NM_004552 | NDUFS5 | NADH dehydrogenase (ubiquinone) Fe-S protein 5, 15kDa (NADH-coenzyme Q reductase) | 0.382852  | Inlier |
| siRNA-Vinblastine Run1-DMSO  | NM_004552 | NDUFS5 | NADH dehydrogenase (ubiquinone) Fe-S protein 5, 15kDa (NADH-coenzyme Q reductase) | 1.708804  | Inlier |
| siRNA-Vinblastine Run2-DMSO  | NM_004552 | NDUFS5 | NADH dehydrogenase (ubiquinone) Fe-S protein 5, 15kDa (NADH-coenzyme Q reductase) | 3.210934  | Inlier |
| siRNA-Temozolomide Run1-DMSO | NM_004553 | NDUFS6 | NADH dehydrogenase (ubiquinone) Fe-S protein 6, 13kDa (NADH-coenzyme Q reductase) | -1.345832 | Inlier |

Identification of Survival Genes in Human Glioblastoma Cells Using siRNA Screening

Nikhil G Thaker, Fang Zhang, Peter R. McDonald, Tong Ying Shun, Michael D Lewen, Ian F. Pollack, and John S. Lazo

Molecular Pharmacology

|                              |           |        |                                                                                   |           |        |
|------------------------------|-----------|--------|-----------------------------------------------------------------------------------|-----------|--------|
| siRNA-Temozolomide Run3-DMSO | NM_004553 | NDUFS6 | NADH dehydrogenase (ubiquinone) Fe-S protein 6, 13kDa (NADH-coenzyme Q reductase) | -0.671316 | Inlier |
| siRNA Disorazole DMSO Run1   | NM_004553 | NDUFS6 | NADH dehydrogenase (ubiquinone) Fe-S protein 6, 13kDa (NADH-coenzyme Q reductase) | -0.20143  | Inlier |
| siRNA-Vinblastine Run1-DMSO  | NM_004553 | NDUFS6 | NADH dehydrogenase (ubiquinone) Fe-S protein 6, 13kDa (NADH-coenzyme Q reductase) | -0.094639 | Inlier |
| siRNA-Temozolomide Run2-DMSO | NM_004553 | NDUFS6 | NADH dehydrogenase (ubiquinone) Fe-S protein 6, 13kDa (NADH-coenzyme Q reductase) | 0.094639  | Inlier |

Identification of Survival Genes in Human Glioblastoma Cells Using siRNA Screening

Nikhil G Thaker, Fang Zhang, Peter R. McDonald, Tong Ying Shun, Michael D Lewen, Ian F. Pollack, and John S. Lazo

Molecular Pharmacology

|                             |               |        |                                                                                   |           |        |
|-----------------------------|---------------|--------|-----------------------------------------------------------------------------------|-----------|--------|
| siRNA-Vinblastine Run2-DMSO | NM_0045<br>53 | NDUFS6 | NADH dehydrogenase (ubiquinone) Fe-S protein 6, 13kDa (NADH-coenzyme Q reductase) | 0.677684  | Inlier |
| siRNA Disorazole DMSO Run3  | NM_0045<br>53 | NDUFS6 | NADH dehydrogenase (ubiquinone) Fe-S protein 6, 13kDa (NADH-coenzyme Q reductase) | 0.731518  | Inlier |
| siRNA Disorazole DMSO Run2  | NM_0045<br>53 | NDUFS6 | NADH dehydrogenase (ubiquinone) Fe-S protein 6, 13kDa (NADH-coenzyme Q reductase) | 1.155609  | Inlier |
| siRNA Disorazole DMSO Run2  | NM_0244<br>07 | NDUFS7 | NADH dehydrogenase (ubiquinone) Fe-S protein 7, 20kDa (NADH-coenzyme Q reductase) | -0.907806 | Inlier |

Identification of Survival Genes in Human Glioblastoma Cells Using siRNA Screening

Nikhil G Thaker, Fang Zhang, Peter R. McDonald, Tong Ying Shun, Michael D Lewen, Ian F. Pollack, and John S. Lazo

Molecular Pharmacology

|                              |           |        |                                                                                   |           |        |
|------------------------------|-----------|--------|-----------------------------------------------------------------------------------|-----------|--------|
| siRNA-Temozolomide Run2-DMSO | NM_024407 | NDUFS7 | NADH dehydrogenase (ubiquinone) Fe-S protein 7, 20kDa (NADH-coenzyme Q reductase) | -0.749582 | Inlier |
| siRNA-Temozolomide Run3-DMSO | NM_024407 | NDUFS7 | NADH dehydrogenase (ubiquinone) Fe-S protein 7, 20kDa (NADH-coenzyme Q reductase) | -0.549562 | Inlier |
| siRNA Disorazole DMSO Run3   | NM_024407 | NDUFS7 | NADH dehydrogenase (ubiquinone) Fe-S protein 7, 20kDa (NADH-coenzyme Q reductase) | -0.080964 | Inlier |
| siRNA Disorazole DMSO Run1   | NM_024407 | NDUFS7 | NADH dehydrogenase (ubiquinone) Fe-S protein 7, 20kDa (NADH-coenzyme Q reductase) | 0.080964  | Inlier |

Identification of Survival Genes in Human Glioblastoma Cells Using siRNA Screening

Nikhil G Thaker, Fang Zhang, Peter R. McDonald, Tong Ying Shun, Michael D Lewen, Ian F. Pollack, and John S. Lazo

Molecular Pharmacology

|                              |           |        |                                                                                   |           |        |
|------------------------------|-----------|--------|-----------------------------------------------------------------------------------|-----------|--------|
| siRNA-Temozolomide Run1-DMSO | NM_024407 | NDUFS7 | NADH dehydrogenase (ubiquinone) Fe-S protein 7, 20kDa (NADH-coenzyme Q reductase) | 0.599418  | Inlier |
| siRNA-Vinblastine Run1-DMSO  | NM_024407 | NDUFS7 | NADH dehydrogenase (ubiquinone) Fe-S protein 7, 20kDa (NADH-coenzyme Q reductase) | 1.28616   | Inlier |
| siRNA-Vinblastine Run2-DMSO  | NM_024407 | NDUFS7 | NADH dehydrogenase (ubiquinone) Fe-S protein 7, 20kDa (NADH-coenzyme Q reductase) | 1.978469  | Inlier |
| siRNA-Temozolomide Run1-DMSO | NM_002496 | NDUFS8 | NADH dehydrogenase (ubiquinone) Fe-S protein 8, 23kDa (NADH-coenzyme Q reductase) | -2.106277 | Inlier |

Identification of Survival Genes in Human Glioblastoma Cells Using siRNA Screening

Nikhil G Thaker, Fang Zhang, Peter R. McDonald, Tong Ying Shun, Michael D Lewen, Ian F. Pollack, and John S. Lazo

Molecular Pharmacology

|                              |           |        |                                                                                   |           |        |
|------------------------------|-----------|--------|-----------------------------------------------------------------------------------|-----------|--------|
| siRNA-Temozolomide Run3-DMSO | NM_002496 | NDUFS8 | NADH dehydrogenase (ubiquinone) Fe-S protein 8, 23kDa (NADH-coenzyme Q reductase) | -1.293656 | Inlier |
| siRNA Disorazole DMSO Run1   | NM_002496 | NDUFS8 | NADH dehydrogenase (ubiquinone) Fe-S protein 8, 23kDa (NADH-coenzyme Q reductase) | -0.367619 | Inlier |
| siRNA-Temozolomide Run2-DMSO | NM_002496 | NDUFS8 | NADH dehydrogenase (ubiquinone) Fe-S protein 8, 23kDa (NADH-coenzyme Q reductase) | -0.296604 | Inlier |
| siRNA Disorazole DMSO Run3   | NM_002496 | NDUFS8 | NADH dehydrogenase (ubiquinone) Fe-S protein 8, 23kDa (NADH-coenzyme Q reductase) | 0.296604  | Inlier |

Identification of Survival Genes in Human Glioblastoma Cells Using siRNA Screening  
 Nikhil G Thaker, Fang Zhang, Peter R. McDonald, Tong Ying Shun, Michael D Lewen, Ian F. Pollack, and John S. Lazo  
 Molecular Pharmacology

|                             |           |        |                                                                                   |           |        |
|-----------------------------|-----------|--------|-----------------------------------------------------------------------------------|-----------|--------|
| siRNA-Vinblastine Run1-DMSO | NM_002496 | NDUFS8 | NADH dehydrogenase (ubiquinone) Fe-S protein 8, 23kDa (NADH-coenzyme Q reductase) | 0.416281  | Inlier |
| siRNA Disorazole DMSO Run2  | NM_002496 | NDUFS8 | NADH dehydrogenase (ubiquinone) Fe-S protein 8, 23kDa (NADH-coenzyme Q reductase) | 0.932719  | Inlier |
| siRNA-Vinblastine Run2-DMSO | NM_002496 | NDUFS8 | NADH dehydrogenase (ubiquinone) Fe-S protein 8, 23kDa (NADH-coenzyme Q reductase) | 1.067039  | Inlier |
| siRNA Disorazole DMSO Run2  | NM_007103 | NDUFV1 | NADH dehydrogenase (ubiquinone) flavoprotein 1, 51kDa                             | -1.0178   | Inlier |
| siRNA Disorazole DMSO Run3  | NM_007103 | NDUFV1 | NADH dehydrogenase (ubiquinone) flavoprotein 1, 51kDa                             | -0.921506 | Inlier |

Identification of Survival Genes in Human Glioblastoma Cells Using siRNA Screening

Nikhil G Thaker, Fang Zhang, Peter R. McDonald, Tong Ying Shun, Michael D Lewen, Ian F. Pollack, and John S. Lazo

Molecular Pharmacology

|                              |           |        |                                                       |           |        |
|------------------------------|-----------|--------|-------------------------------------------------------|-----------|--------|
| siRNA-Temozolomide Run3-DMSO | NM_007103 | NDUFV1 | NADH dehydrogenase (ubiquinone) flavoprotein 1, 51kDa | -0.427494 | Inlier |
| siRNA-Temozolomide Run2-DMSO | NM_007103 | NDUFV1 | NADH dehydrogenase (ubiquinone) flavoprotein 1, 51kDa | -0.189896 | Inlier |
| siRNA Disorazole DMSO Run1   | NM_007103 | NDUFV1 | NADH dehydrogenase (ubiquinone) flavoprotein 1, 51kDa | 0.189896  | Inlier |
| siRNA-Temozolomide Run1-DMSO | NM_007103 | NDUFV1 | NADH dehydrogenase (ubiquinone) flavoprotein 1, 51kDa | 0.251615  | Inlier |
| siRNA-Vinblastine Run2-DMSO  | NM_007103 | NDUFV1 | NADH dehydrogenase (ubiquinone) flavoprotein 1, 51kDa | 1.21433   | Inlier |
| siRNA-Vinblastine Run1-DMSO  | NM_007103 | NDUFV1 | NADH dehydrogenase (ubiquinone) flavoprotein 1, 51kDa | 1.276126  | Inlier |



Identification of Survival Genes in Human Glioblastoma Cells Using siRNA Screening

Nikhil G Thaker, Fang Zhang, Peter R. McDonald, Tong Ying Shun, Michael D Lewen, Ian F. Pollack, and John S. Lazo

Molecular Pharmacology

|                              |           |        |                                                       |           |        |
|------------------------------|-----------|--------|-------------------------------------------------------|-----------|--------|
| siRNA-Temozolomide Run1-DMSO | NM_021074 | NDUFV2 | NADH dehydrogenase (ubiquinone) flavoprotein 2, 24kDa | -2.82275  | Inlier |
| siRNA-Temozolomide Run3-DMSO | NM_021074 | NDUFV2 | NADH dehydrogenase (ubiquinone) flavoprotein 2, 24kDa | -0.751458 | Inlier |
| siRNA Disorazole DMSO Run2   | NM_021074 | NDUFV2 | NADH dehydrogenase (ubiquinone) flavoprotein 2, 24kDa | -0.597542 | Inlier |
| siRNA Disorazole DMSO Run1   | NM_021074 | NDUFV2 | NADH dehydrogenase (ubiquinone) flavoprotein 2, 24kDa | -0.190397 | Inlier |
| siRNA-Vinblastine Run1-DMSO  | NM_021074 | NDUFV2 | NADH dehydrogenase (ubiquinone) flavoprotein 2, 24kDa | 0.190396  | Inlier |
| siRNA-Temozolomide Run2-DMSO | NM_021074 | NDUFV2 | NADH dehydrogenase (ubiquinone) flavoprotein 2, 24kDa | 0.589872  | Inlier |

Identification of Survival Genes in Human Glioblastoma Cells Using siRNA Screening

Nikhil G Thaker, Fang Zhang, Peter R. McDonald, Tong Ying Shun, Michael D Lewen, Ian F. Pollack, and John S. Lazo

Molecular Pharmacology

|                              |               |        |                                                       |           |         |
|------------------------------|---------------|--------|-------------------------------------------------------|-----------|---------|
| siRNA Disorazole DMSO Run3   | NM_0210<br>74 | NDUFV2 | NADH dehydrogenase (ubiquinone) flavoprotein 2, 24kDa | 0.99008   | Inlier  |
| siRNA-Vinblastine Run2-DMSO  | NM_0210<br>74 | NDUFV2 | NADH dehydrogenase (ubiquinone) flavoprotein 2, 24kDa | 2.615444  | Inlier  |
| siRNA Disorazole DMSO Run1   | NM_0210<br>75 | NDUFV3 | NADH dehydrogenase (ubiquinone) flavoprotein 3, 10kDa | -8.069188 | Outlier |
| siRNA-Temozolomide Run2-DMSO | NM_0210<br>75 | NDUFV3 | NADH dehydrogenase (ubiquinone) flavoprotein 3, 10kDa | -2.097184 | Inlier  |
| siRNA-Temozolomide Run3-DMSO | NM_0210<br>75 | NDUFV3 | NADH dehydrogenase (ubiquinone) flavoprotein 3, 10kDa | -0.971977 | Inlier  |
| siRNA Disorazole DMSO Run2   | NM_0210<br>75 | NDUFV3 | NADH dehydrogenase (ubiquinone) flavoprotein 3, 10kDa | -0.160223 | Inlier  |

Identification of Survival Genes in Human Glioblastoma Cells Using siRNA Screening

Nikhil G Thaker, Fang Zhang, Peter R. McDonald, Tong Ying Shun, Michael D Lewen, Ian F. Pollack, and John S. Lazo

Molecular Pharmacology

|                              |           |        |                                                                   |           |        |
|------------------------------|-----------|--------|-------------------------------------------------------------------|-----------|--------|
| siRNA-Vinblastine Run1-DMSO  | NM_021075 | NDUFV3 | NADH dehydrogenase (ubiquinone) flavoprotein 3, 10kDa             | 0.16022   | Inlier |
| siRNA Disorazole DMSO Run3   | NM_021075 | NDUFV3 | NADH dehydrogenase (ubiquinone) flavoprotein 3, 10kDa             | 0.362501  | Inlier |
| siRNA-Vinblastine Run2-DMSO  | NM_021075 | NDUFV3 | NADH dehydrogenase (ubiquinone) flavoprotein 3, 10kDa             | 0.377023  | Inlier |
| siRNA-Temozolomide Run1-DMSO | NM_021075 | NDUFV3 | NADH dehydrogenase (ubiquinone) flavoprotein 3, 10kDa             | 1.572305  | Inlier |
| siRNA-Temozolomide Run1-DMSO | NM_198400 | NEDD4  | neural precursor cell expressed, developmentally down-regulated 4 | -0.859949 | Inlier |
| siRNA-Temozolomide Run3-DMSO | NM_198400 | NEDD4  | neural precursor cell expressed, developmentally down-regulated 4 | -0.76854  | Inlier |

Identification of Survival Genes in Human Glioblastoma Cells Using siRNA Screening  
 Nikhil G Thaker, Fang Zhang, Peter R. McDonald, Tong Ying Shun, Michael D Lewen, Ian F. Pollack, and John S. Lazo  
 Molecular Pharmacology

|                              |           |       |                                                                       |           |        |
|------------------------------|-----------|-------|-----------------------------------------------------------------------|-----------|--------|
| siRNA-Temozolomide Run2-DMSO | NM_198400 | NEDD4 | neural precursor cell expressed<br>, developmentally down-regulated 4 | -0.649933 | Inlier |
| siRNA Disorazole DMSO Run3   | NM_198400 | NEDD4 | neural precursor cell expressed<br>, developmentally down-regulated 4 | -0.058609 | Inlier |
| siRNA-Vinblastine Run2-DMSO  | NM_198400 | NEDD4 | neural precursor cell expressed<br>, developmentally down-regulated 4 | 0.058608  | Inlier |
| siRNA Disorazole DMSO Run1   | NM_198400 | NEDD4 | neural precursor cell expressed<br>, developmentally down-regulated 4 | 0.643272  | Inlier |
| siRNA Disorazole DMSO Run2   | NM_198400 | NEDD4 | neural precursor cell expressed<br>, developmentally down-regulated 4 | 0.699067  | Inlier |

Identification of Survival Genes in Human Glioblastoma Cells Using siRNA Screening  
 Nikhil G Thaker, Fang Zhang, Peter R. McDonald, Tong Ying Shun, Michael D Lewen, Ian F. Pollack, and John S. Lazo

Molecular Pharmacology

neural  
 precursor  
 cell  
 expressed

,  
 developm  
 entally  
 down-  
 regulated

|                              |           |       |                                                                                                  |           |        |
|------------------------------|-----------|-------|--------------------------------------------------------------------------------------------------|-----------|--------|
| siRNA-Vinblastine Run1-DMSO  | NM_198400 | NEDD4 | 4                                                                                                | 0.853013  | Inlier |
| siRNA-Temozolomide Run2-DMSO | NM_006155 | NEDD5 | septin 2                                                                                         | -1.040192 | Inlier |
| siRNA-Temozolomide Run1-DMSO | NM_006155 | NEDD5 | septin 2                                                                                         | -0.904908 | Inlier |
| siRNA-Vinblastine Run2-DMSO  | NM_006155 | NEDD5 | septin 2                                                                                         | -0.553514 | Inlier |
| siRNA-Temozolomide Run3-DMSO | NM_006155 | NEDD5 | septin 2                                                                                         | -0.189873 | Inlier |
| siRNA Disorazole DMSO Run1   | NM_006155 | NEDD5 | septin 2                                                                                         | 0.189873  | Inlier |
| siRNA Disorazole DMSO Run3   | NM_006155 | NEDD5 | septin 2                                                                                         | 0.260613  | Inlier |
| siRNA-Vinblastine Run1-DMSO  | NM_006155 | NEDD5 | septin 2                                                                                         | 0.795486  | Inlier |
| siRNA Disorazole DMSO Run2   | NM_006155 | NEDD5 | septin 2<br>HECT, C2<br>and WW<br>domain<br>containing<br>E3<br>ubiquitin<br>protein<br>ligase 1 | 1.084499  | Inlier |
| siRNA-Temozolomide Run3-DMSO | NM_015052 | NEDL1 | HECT, C2<br>and WW<br>domain<br>containing<br>E3<br>ubiquitin<br>protein<br>ligase 1             | -3.212578 | Inlier |
| siRNA-Temozolomide Run2-DMSO | NM_015052 | NEDL1 | HECT, C2<br>and WW<br>domain<br>containing<br>E3<br>ubiquitin<br>protein<br>ligase 1             | -2.902365 | Inlier |
| siRNA-Vinblastine Run2-DMSO  | NM_015052 | NEDL1 | ubiquitin<br>protein<br>ligase 1                                                                 | -0.238887 | Inlier |

Identification of Survival Genes in Human Glioblastoma Cells Using siRNA Screening

Nikhil G Thaker, Fang Zhang, Peter R. McDonald, Tong Ying Shun, Michael D Lewen, Ian F. Pollack, and John S. Lazo

Molecular Pharmacology

| siRNA Treatment              | Gene ID   | Gene Name | Protein Description                                             | Log Fold Change | Category |
|------------------------------|-----------|-----------|-----------------------------------------------------------------|-----------------|----------|
| siRNA-Temozolomide Run1-DMSO | NM_015052 | NEDL1     | HECT, C2 and WW domain containing E3 ubiquitin protein ligase 1 | -0.009121       | Inlier   |
| siRNA Disorazole DMSO Run3   | NM_015052 | NEDL1     | HECT, C2 and WW domain containing E3 ubiquitin protein ligase 1 | 0.009121        | Inlier   |
| siRNA Disorazole DMSO Run1   | NM_015052 | NEDL1     | HECT, C2 and WW domain containing E3 ubiquitin protein ligase 1 | 0.177457        | Inlier   |
| siRNA Disorazole DMSO Run2   | NM_015052 | NEDL1     | HECT, C2 and WW domain containing E3 ubiquitin protein ligase 1 | 1.110113        | Inlier   |
| siRNA-Vinblastine Run1-DMSO  | NM_015052 | NEDL1     | HECT, C2 and WW domain containing E3 ubiquitin protein ligase 1 | 1.475536        | Inlier   |
| siRNA-Temozolomide Run3-DMSO | NM_024608 | NEIL1     | nei endonuclease VIII-like 1 (E. coli)                          | -1.352078       | Inlier   |
| siRNA-Vinblastine Run2-DMSO  | NM_024608 | NEIL1     | nei endonuclease VIII-like 1 (E. coli)                          | -0.705322       | Inlier   |

Identification of Survival Genes in Human Glioblastoma Cells Using siRNA Screening  
 Nikhil G Thaker, Fang Zhang, Peter R. McDonald, Tong Ying Shun, Michael D Lewen, Ian F. Pollack, and John S. Lazo

Molecular Pharmacology

|                                  |               |       |                                                                 |           |        |
|----------------------------------|---------------|-------|-----------------------------------------------------------------|-----------|--------|
| siRNA Disorazole DMSO Run3       | NM_0246<br>08 | NEIL1 | nei<br>endonucle<br>ase VIII-<br>like 1 (E.<br>coli)            | -0.499144 | Inlier |
| siRNA-Temozolomide Run2-<br>DMSO | NM_0246<br>08 | NEIL1 | nei<br>endonucle<br>ase VIII-<br>like 1 (E.<br>coli)            | -0.310013 | Inlier |
| siRNA Disorazole DMSO Run1       | NM_0246<br>08 | NEIL1 | nei<br>endonucle<br>ase VIII-<br>like 1 (E.<br>coli)            | 0.310014  | Inlier |
| siRNA-Temozolomide Run1-<br>DMSO | NM_0246<br>08 | NEIL1 | nei<br>endonucle<br>ase VIII-<br>like 1 (E.<br>coli)            | 0.643678  | Inlier |
| siRNA-Vinblastine Run1-<br>DMSO  | NM_0246<br>08 | NEIL1 | nei<br>endonucle<br>ase VIII-<br>like 1 (E.<br>coli)            | 1.445404  | Inlier |
| siRNA Disorazole DMSO Run2       | NM_0246<br>08 | NEIL1 | nei<br>endonucle<br>ase VIII-<br>like 1 (E.<br>coli)            | 1.684848  | Inlier |
| siRNA-Temozolomide Run2-<br>DMSO | NM_0122<br>24 | NEK1  | NIMA<br>(never in<br>mitosis<br>gene a)-<br>related<br>kinase 1 | -1.730124 | Inlier |
| siRNA-Vinblastine Run1-<br>DMSO  | NM_0122<br>24 | NEK1  | NIMA<br>(never in<br>mitosis<br>gene a)-<br>related<br>kinase 1 | -1.59589  | Inlier |
| siRNA Disorazole DMSO Run1       | NM_0122<br>24 | NEK1  | NIMA<br>(never in<br>mitosis<br>gene a)-<br>related<br>kinase 1 | -0.574203 | Inlier |

Identification of Survival Genes in Human Glioblastoma Cells Using siRNA Screening

Nikhil G Thaker, Fang Zhang, Peter R. McDonald, Tong Ying Shun, Michael D Lewen, Ian F. Pollack, and John S. Lazo

Molecular Pharmacology

| siRNA Treatment              | Gene ID   | Gene Name | Gene Description                                 | Value     | Category |
|------------------------------|-----------|-----------|--------------------------------------------------|-----------|----------|
| siRNA-Temozolomide Run1-DMSO | NM_012224 | NEK1      | NIMA (never in mitosis gene a)-related kinase 1  | -0.258191 | Inlier   |
| siRNA-Temozolomide Run3-DMSO | NM_012224 | NEK1      | NIMA (never in mitosis gene a)-related kinase 1  | 0.258194  | Inlier   |
| siRNA Disorazole DMSO Run2   | NM_012224 | NEK1      | NIMA (never in mitosis gene a)-related kinase 1  | 0.593484  | Inlier   |
| siRNA-Vinblastine Run2-DMSO  | NM_012224 | NEK1      | NIMA (never in mitosis gene a)-related kinase 1  | 0.755516  | Inlier   |
| siRNA Disorazole DMSO Run3   | NM_012224 | NEK1      | NIMA (never in mitosis gene a)-related kinase 1  | 9.348152  | Outlier  |
| siRNA Disorazole DMSO Run2   | NM_145910 | NEK11     | NIMA (never in mitosis gene a)-related kinase 11 | -1.236259 | Inlier   |
| siRNA-Temozolomide Run3-DMSO | NM_145910 | NEK11     | NIMA (never in mitosis gene a)-related kinase 11 | -0.411977 | Inlier   |
| siRNA-Temozolomide Run2-DMSO | NM_145910 | NEK11     | NIMA (never in mitosis gene a)-related kinase 11 | -0.229013 | Inlier   |



Identification of Survival Genes in Human Glioblastoma Cells Using siRNA Screening

Nikhil G Thaker, Fang Zhang, Peter R. McDonald, Tong Ying Shun, Michael D Lewen, Ian F. Pollack, and John S. Lazo

Molecular Pharmacology

|                              |               |       |                                                        |           |        |
|------------------------------|---------------|-------|--------------------------------------------------------|-----------|--------|
| siRNA-Temozolomide Run1-DMSO | NM_1459<br>10 | NEK11 | NIMA<br>(never in mitosis gene a)-related<br>kinase 11 | -0.034812 | Inlier |
| siRNA Disorazole DMSO Run3   | NM_1459<br>10 | NEK11 | NIMA<br>(never in mitosis gene a)-related<br>kinase 11 | 0.034813  | Inlier |
| siRNA Disorazole DMSO Run1   | NM_1459<br>10 | NEK11 | NIMA<br>(never in mitosis gene a)-related<br>kinase 11 | 0.937023  | Inlier |
| siRNA-Vinblastine Run2-DMSO  | NM_1459<br>10 | NEK11 | NIMA<br>(never in mitosis gene a)-related<br>kinase 11 | 1.162976  | Inlier |
| siRNA-Vinblastine Run1-DMSO  | NM_1459<br>10 | NEK11 | NIMA<br>(never in mitosis gene a)-related<br>kinase 11 | 1.197184  | Inlier |
| siRNA-Temozolomide Run3-DMSO | NM_0024<br>97 | NEK2  | NIMA<br>(never in mitosis gene a)-related<br>kinase 2  | -1.788523 | Inlier |
| siRNA Disorazole DMSO Run3   | NM_0024<br>97 | NEK2  | NIMA<br>(never in mitosis gene a)-related<br>kinase 2  | -0.847379 | Inlier |
| siRNA Disorazole DMSO Run2   | NM_0024<br>97 | NEK2  | NIMA<br>(never in mitosis gene a)-related<br>kinase 2  | -0.298956 | Inlier |

Identification of Survival Genes in Human Glioblastoma Cells Using siRNA Screening  
 Nikhil G Thaker, Fang Zhang, Peter R. McDonald, Tong Ying Shun, Michael D Lewen, Ian F. Pollack, and John S. Lazo

Molecular Pharmacology

|                              |               |      |                                                    |           |        |
|------------------------------|---------------|------|----------------------------------------------------|-----------|--------|
| siRNA-Temozolomide Run1-DMSO | NM_0024<br>97 | NEK2 | NIMA<br>(never in mitosis gene a)-related kinase 2 | -0.066637 | Inlier |
| siRNA-Temozolomide Run2-DMSO | NM_0024<br>97 | NEK2 | NIMA<br>(never in mitosis gene a)-related kinase 2 | 0.066637  | Inlier |
| siRNA Disorazole DMSO Run1   | NM_0024<br>97 | NEK2 | NIMA<br>(never in mitosis gene a)-related kinase 2 | 0.501621  | Inlier |
| siRNA-Vinblastine Run1-DMSO  | NM_0024<br>97 | NEK2 | NIMA<br>(never in mitosis gene a)-related kinase 2 | 1.428203  | Inlier |
| siRNA-Vinblastine Run2-DMSO  | NM_0024<br>97 | NEK2 | NIMA<br>(never in mitosis gene a)-related kinase 2 | 1.902705  | Inlier |
| siRNA-Temozolomide Run3-DMSO | NM_1527<br>20 | NEK3 | NIMA<br>(never in mitosis gene a)-related kinase 3 | -1.268723 | Inlier |
| siRNA-Temozolomide Run1-DMSO | NM_1527<br>20 | NEK3 | NIMA<br>(never in mitosis gene a)-related kinase 3 | -0.727482 | Inlier |
| siRNA Disorazole DMSO Run2   | NM_1527<br>20 | NEK3 | NIMA<br>(never in mitosis gene a)-related kinase 3 | -0.613987 | Inlier |

Identification of Survival Genes in Human Glioblastoma Cells Using siRNA Screening  
 Nikhil G Thaker, Fang Zhang, Peter R. McDonald, Tong Ying Shun, Michael D Lewen, Ian F. Pollack, and John S. Lazo

Molecular Pharmacology

|                              |               |      |                                                    |                  |
|------------------------------|---------------|------|----------------------------------------------------|------------------|
| siRNA-Temozolomide Run2-DMSO | NM_1527<br>20 | NEK3 | NIMA<br>(never in mitosis gene a)-related kinase 3 | -0.062085 Inlier |
| siRNA Disorazole DMSO Run3   | NM_1527<br>20 | NEK3 | NIMA<br>(never in mitosis gene a)-related kinase 3 | 0.062084 Inlier  |
| siRNA Disorazole DMSO Run1   | NM_1527<br>20 | NEK3 | NIMA<br>(never in mitosis gene a)-related kinase 3 | 0.673555 Inlier  |
| siRNA-Vinblastine Run2-DMSO  | NM_1527<br>20 | NEK3 | NIMA<br>(never in mitosis gene a)-related kinase 3 | 0.675444 Inlier  |
| siRNA-Vinblastine Run1-DMSO  | NM_1527<br>20 | NEK3 | NIMA<br>(never in mitosis gene a)-related kinase 3 | 0.845719 Inlier  |
| siRNA Disorazole DMSO Run2   | NM_0031<br>57 | NEK4 | NIMA<br>(never in mitosis gene a)-related kinase 4 | -0.811935 Inlier |
| siRNA-Temozolomide Run1-DMSO | NM_0031<br>57 | NEK4 | NIMA<br>(never in mitosis gene a)-related kinase 4 | -0.678789 Inlier |
| siRNA-Temozolomide Run3-DMSO | NM_0031<br>57 | NEK4 | NIMA<br>(never in mitosis gene a)-related kinase 4 | -0.670211 Inlier |

Identification of Survival Genes in Human Glioblastoma Cells Using siRNA Screening

Nikhil G Thaker, Fang Zhang, Peter R. McDonald, Tong Ying Shun, Michael D Lewen, Ian F. Pollack, and John S. Lazo

Molecular Pharmacology

|                              |               |      |                                                    |                  |
|------------------------------|---------------|------|----------------------------------------------------|------------------|
| siRNA-Temozolomide Run2-DMSO | NM_0031<br>57 | NEK4 | NIMA<br>(never in mitosis gene a)-related kinase 4 | -0.112906 Inlier |
| siRNA Disorazole DMSO Run3   | NM_0031<br>57 | NEK4 | NIMA<br>(never in mitosis gene a)-related kinase 4 | 0.112906 Inlier  |
| siRNA Disorazole DMSO Run1   | NM_0031<br>57 | NEK4 | NIMA<br>(never in mitosis gene a)-related kinase 4 | 0.528678 Inlier  |
| siRNA-Vinblastine Run1-DMSO  | NM_0031<br>57 | NEK4 | NIMA<br>(never in mitosis gene a)-related kinase 4 | 0.988301 Inlier  |
| siRNA-Vinblastine Run2-DMSO  | NM_0031<br>57 | NEK4 | NIMA<br>(never in mitosis gene a)-related kinase 4 | 1.047635 Inlier  |
| siRNA Disorazole DMSO Run2   | NM_0143<br>97 | NEK6 | NIMA<br>(never in mitosis gene a)-related kinase 6 | -0.872182 Inlier |
| siRNA-Temozolomide Run1-DMSO | NM_0143<br>97 | NEK6 | NIMA<br>(never in mitosis gene a)-related kinase 6 | -0.787238 Inlier |
| siRNA-Temozolomide Run3-DMSO | NM_0143<br>97 | NEK6 | NIMA<br>(never in mitosis gene a)-related kinase 6 | -0.746167 Inlier |

Identification of Survival Genes in Human Glioblastoma Cells Using siRNA Screening  
 Nikhil G Thaker, Fang Zhang, Peter R. McDonald, Tong Ying Shun, Michael D Lewen, Ian F. Pollack, and John S. Lazo

Molecular Pharmacology

| siRNA                         | Gene          | NEK  | Gene Description                                      | Value     | Inlier |
|-------------------------------|---------------|------|-------------------------------------------------------|-----------|--------|
| siRNA Disorazole DMSO Run3    | NM_0143<br>97 | NEK6 | NIMA<br>(never in mitosis gene a)-related<br>kinase 6 | -0.474476 | Inlier |
| siRNA-Temozolomide DMSO Run2- | NM_0143<br>97 | NEK6 | NIMA<br>(never in mitosis gene a)-related<br>kinase 6 | 0.474476  | Inlier |
| siRNA Disorazole DMSO Run1    | NM_0143<br>97 | NEK6 | NIMA<br>(never in mitosis gene a)-related<br>kinase 6 | 0.563493  | Inlier |
| siRNA-Vinblastine Run1-DMSO   | NM_0143<br>97 | NEK6 | NIMA<br>(never in mitosis gene a)-related<br>kinase 6 | 0.602833  | Inlier |
| siRNA-Vinblastine Run2-DMSO   | NM_0143<br>97 | NEK6 | NIMA<br>(never in mitosis gene a)-related<br>kinase 6 | 1.006273  | Inlier |
| siRNA Disorazole DMSO Run2    | NM_1334<br>94 | NEK7 | NIMA<br>(never in mitosis gene a)-related<br>kinase 7 | -3.051043 | Inlier |
| siRNA-Temozolomide DMSO Run3- | NM_1334<br>94 | NEK7 | NIMA<br>(never in mitosis gene a)-related<br>kinase 7 | -0.829538 | Inlier |
| siRNA-Temozolomide DMSO Run1- | NM_1334<br>94 | NEK7 | NIMA<br>(never in mitosis gene a)-related<br>kinase 7 | -0.519462 | Inlier |

Identification of Survival Genes in Human Glioblastoma Cells Using siRNA Screening  
 Nikhil G Thaker, Fang Zhang, Peter R. McDonald, Tong Ying Shun, Michael D Lewen, Ian F. Pollack, and John S. Lazo

Molecular Pharmacology

|                              |               |      |                                                    |                  |
|------------------------------|---------------|------|----------------------------------------------------|------------------|
| siRNA-Temozolomide Run2-DMSO | NM_1334<br>94 | NEK7 | NIMA<br>(never in mitosis gene a)-related kinase 7 | -0.327974 Inlier |
| siRNA Disorazole DMSO Run1   | NM_1334<br>94 | NEK7 | NIMA<br>(never in mitosis gene a)-related kinase 7 | 0.327974 Inlier  |
| siRNA Disorazole DMSO Run3   | NM_1334<br>94 | NEK7 | NIMA<br>(never in mitosis gene a)-related kinase 7 | 0.413012 Inlier  |
| siRNA-Vinblastine Run1-DMSO  | NM_1334<br>94 | NEK7 | NIMA<br>(never in mitosis gene a)-related kinase 7 | 0.895836 Inlier  |
| siRNA-Vinblastine Run2-DMSO  | NM_1334<br>94 | NEK7 | NIMA<br>(never in mitosis gene a)-related kinase 7 | 1.137688 Inlier  |
| siRNA Disorazole DMSO Run2   | NM_1781<br>70 | NEK8 | NIMA<br>(never in mitosis gene a)-related kinase 8 | -0.714091 Inlier |
| siRNA-Temozolomide Run3-DMSO | NM_1781<br>70 | NEK8 | NIMA<br>(never in mitosis gene a)-related kinase 8 | -0.634909 Inlier |
| siRNA-Temozolomide Run1-DMSO | NM_1781<br>70 | NEK8 | NIMA<br>(never in mitosis gene a)-related kinase 8 | -0.481052 Inlier |

Identification of Survival Genes in Human Glioblastoma Cells Using siRNA Screening

Nikhil G Thaker, Fang Zhang, Peter R. McDonald, Tong Ying Shun, Michael D Lewen, Ian F. Pollack, and John S. Lazo

Molecular Pharmacology

| siRNA Treatment              | Gene ID       | Gene Name | Gene Description                                | Log2 Fold Change | Outlier Status |
|------------------------------|---------------|-----------|-------------------------------------------------|------------------|----------------|
| siRNA Disorazole DMSO Run3   | NM_1781<br>70 | NEK8      | NIMA (never in mitosis gene a)-related kinase 8 | -0.046633        | Inlier         |
| siRNA-Temozolomide Run2-DMSO | NM_1781<br>70 | NEK8      | NIMA (never in mitosis gene a)-related kinase 8 | 0.046634         | Inlier         |
| siRNA Disorazole DMSO Run1   | NM_1781<br>70 | NEK8      | NIMA (never in mitosis gene a)-related kinase 8 | 0.98658          | Inlier         |
| siRNA-Vinblastine Run1-DMSO  | NM_1781<br>70 | NEK8      | NIMA (never in mitosis gene a)-related kinase 8 | 1.25478          | Inlier         |
| siRNA-Vinblastine Run2-DMSO  | NM_1781<br>70 | NEK8      | NIMA (never in mitosis gene a)-related kinase 8 | 1.286968         | Inlier         |
| siRNA-Temozolomide Run3-DMSO | NM_0331<br>16 | NEK9      | NIMA (never in mitosis gene a)-related kinase 9 | -1.142746        | Inlier         |
| siRNA-Temozolomide Run1-DMSO | NM_0331<br>16 | NEK9      | NIMA (never in mitosis gene a)-related kinase 9 | -0.461255        | Inlier         |
| siRNA-Temozolomide Run2-DMSO | NM_0331<br>16 | NEK9      | NIMA (never in mitosis gene a)-related kinase 9 | -0.440607        | Inlier         |

Identification of Survival Genes in Human Glioblastoma Cells Using siRNA Screening  
 Nikhil G Thaker, Fang Zhang, Peter R. McDonald, Tong Ying Shun, Michael D Lewen, Ian F. Pollack, and John S. Lazo

Molecular Pharmacology

|                                  |               |      |                                                                 |           |        |
|----------------------------------|---------------|------|-----------------------------------------------------------------|-----------|--------|
| siRNA Disorazole DMSO Run2       | NM_0331<br>16 | NEK9 | NIMA<br>(never in<br>mitosis<br>gene a)-<br>related<br>kinase 9 | -0.418758 | Inlier |
| siRNA Disorazole DMSO Run3       | NM_0331<br>16 | NEK9 | NIMA<br>(never in<br>mitosis<br>gene a)-<br>related<br>kinase 9 | 0.418758  | Inlier |
| siRNA Disorazole DMSO Run1       | NM_0331<br>16 | NEK9 | NIMA<br>(never in<br>mitosis<br>gene a)-<br>related<br>kinase 9 | 0.887745  | Inlier |
| siRNA-Vinblastine Run2-<br>DMSO  | NM_0331<br>16 | NEK9 | NIMA<br>(never in<br>mitosis<br>gene a)-<br>related<br>kinase 9 | 1.141129  | Inlier |
| siRNA-Vinblastine Run1-<br>DMSO  | NM_0331<br>16 | NEK9 | NIMA<br>(never in<br>mitosis<br>gene a)-<br>related<br>kinase 9 | 1.491487  | Inlier |
| siRNA Disorazole DMSO Run3       | NM_0024<br>99 | NEO1 | neogenin<br>homolog 1<br>(chicken)                              | -1.751928 | Inlier |
| siRNA-Temozolomide Run1-<br>DMSO | NM_0024<br>99 | NEO1 | neogenin<br>homolog 1<br>(chicken)                              | -0.684597 | Inlier |
| siRNA-Temozolomide Run3-<br>DMSO | NM_0024<br>99 | NEO1 | neogenin<br>homolog 1<br>(chicken)                              | -0.423051 | Inlier |
| siRNA-Temozolomide Run2-<br>DMSO | NM_0024<br>99 | NEO1 | neogenin<br>homolog 1<br>(chicken)                              | -0.294024 | Inlier |
| siRNA Disorazole DMSO Run1       | NM_0024<br>99 | NEO1 | neogenin<br>homolog 1<br>(chicken)                              | 0.294023  | Inlier |



Identification of Survival Genes in Human Glioblastoma Cells Using siRNA Screening  
 Nikhil G Thaker, Fang Zhang, Peter R. McDonald, Tong Ying Shun, Michael D Lewen, Ian F. Pollack, and John S. Lazo

Molecular Pharmacology

|                              |               |       |                                                       |           |        |
|------------------------------|---------------|-------|-------------------------------------------------------|-----------|--------|
| siRNA-Vinblastine Run2-DMSO  | NM_0024<br>99 | NEO1  | neogenin<br>homolog 1<br>(chicken)                    | 0.664402  | Inlier |
| siRNA Disorazole DMSO Run2   | NM_0024<br>99 | NEO1  | neogenin<br>homolog 1<br>(chicken)                    | 2.097542  | Inlier |
| siRNA-Vinblastine Run1-DMSO  | NM_0024<br>99 | NEO1  | neogenin<br>homolog 1<br>(chicken)                    | 2.842249  | Inlier |
| siRNA-Temozolomide Run3-DMSO | NM_1389<br>99 | NETO1 | neuropilin<br>(NRP) and<br>tolloid<br>(TLL)-like<br>1 | -1.252128 | Inlier |
| siRNA-Temozolomide Run2-DMSO | NM_1389<br>99 | NETO1 | neuropilin<br>(NRP) and<br>tolloid<br>(TLL)-like<br>1 | -0.847974 | Inlier |
| siRNA Disorazole DMSO Run2   | NM_1389<br>99 | NETO1 | neuropilin<br>(NRP) and<br>tolloid<br>(TLL)-like<br>1 | -0.501025 | Inlier |
| siRNA Disorazole DMSO Run3   | NM_1389<br>99 | NETO1 | neuropilin<br>(NRP) and<br>tolloid<br>(TLL)-like<br>1 | -0.391935 | Inlier |
| siRNA-Temozolomide Run1-DMSO | NM_1389<br>99 | NETO1 | neuropilin<br>(NRP) and<br>tolloid<br>(TLL)-like<br>1 | 0.391935  | Inlier |
| siRNA Disorazole DMSO Run1   | NM_1389<br>99 | NETO1 | neuropilin<br>(NRP) and<br>tolloid<br>(TLL)-like<br>1 | 0.497171  | Inlier |
| siRNA-Vinblastine Run2-DMSO  | NM_1389<br>99 | NETO1 | neuropilin<br>(NRP) and<br>tolloid<br>(TLL)-like<br>1 | 1.440638  | Inlier |
| siRNA-Vinblastine Run1-DMSO  | NM_1389<br>99 | NETO1 | neuropilin<br>(NRP) and<br>tolloid<br>(TLL)-like<br>1 | 1.596527  | Inlier |

Identification of Survival Genes in Human Glioblastoma Cells Using siRNA Screening  
 Nikhil G Thaker, Fang Zhang, Peter R. McDonald, Tong Ying Shun, Michael D Lewen, Ian F. Pollack, and John S. Lazo

Molecular Pharmacology

|                              |           |        |                                                                           |           |        |
|------------------------------|-----------|--------|---------------------------------------------------------------------------|-----------|--------|
| siRNA-Temozolomide Run3-DMSO | NM_018092 | NETO2  | neuropilin (NRP) and tolloid (TLL)-like 2                                 | -1.000024 | Inlier |
| siRNA-Temozolomide Run2-DMSO | NM_018092 | NETO2  | neuropilin (NRP) and tolloid (TLL)-like 2                                 | -0.667443 | Inlier |
| siRNA Disorazole DMSO Run2   | NM_018092 | NETO2  | neuropilin (NRP) and tolloid (TLL)-like 2                                 | -0.336952 | Inlier |
| siRNA Disorazole DMSO Run1   | NM_018092 | NETO2  | neuropilin (NRP) and tolloid (TLL)-like 2                                 | -0.060911 | Inlier |
| siRNA-Temozolomide Run1-DMSO | NM_018092 | NETO2  | neuropilin (NRP) and tolloid (TLL)-like 2                                 | 0.060911  | Inlier |
| siRNA Disorazole DMSO Run3   | NM_018092 | NETO2  | neuropilin (NRP) and tolloid (TLL)-like 2                                 | 0.681557  | Inlier |
| siRNA-Vinblastine Run2-DMSO  | NM_018092 | NETO2  | neuropilin (NRP) and tolloid (TLL)-like 2                                 | 1.323747  | Inlier |
| siRNA-Vinblastine Run1-DMSO  | NM_018092 | NETO2  | neuropilin (NRP) and tolloid (TLL)-like 2                                 | 1.575371  | Inlier |
| siRNA-Temozolomide Run3-DMSO | NM_173163 | NFATC3 | nuclear factor of activated T-cells, cytoplasmic, calcineurin-dependent 3 | -1.206917 | Inlier |

Identification of Survival Genes in Human Glioblastoma Cells Using siRNA Screening

Nikhil G Thaker, Fang Zhang, Peter R. McDonald, Tong Ying Shun, Michael D Lewen, Ian F. Pollack, and John S. Lazo

Molecular Pharmacology

|                              |           |        |                                                                           |           |        |
|------------------------------|-----------|--------|---------------------------------------------------------------------------|-----------|--------|
| siRNA-Temozolomide Run2-DMSO | NM_173163 | NFATC3 | nuclear factor of activated T-cells, cytoplasmic, calcineurin-dependent 3 | -0.729213 | Inlier |
| siRNA Disorazole DMSO Run1   | NM_173163 | NFATC3 | nuclear factor of activated T-cells, cytoplasmic, calcineurin-dependent 3 | -0.619787 | Inlier |
| siRNA-Vinblastine Run1-DMSO  | NM_173163 | NFATC3 | nuclear factor of activated T-cells, cytoplasmic, calcineurin-dependent 3 | -0.045847 | Inlier |
| siRNA-Vinblastine Run2-DMSO  | NM_173163 | NFATC3 | nuclear factor of activated T-cells, cytoplasmic, calcineurin-dependent 3 | 0.045848  | Inlier |
| siRNA-Temozolomide Run1-DMSO | NM_173163 | NFATC3 | nuclear factor of activated T-cells, cytoplasmic, calcineurin-dependent 3 | 0.337895  | Inlier |

Identification of Survival Genes in Human Glioblastoma Cells Using siRNA Screening  
 Nikhil G Thaker, Fang Zhang, Peter R. McDonald, Tong Ying Shun, Michael D Lewen, Ian F. Pollack, and John S. Lazo  
 Molecular Pharmacology

|                              |               |        |                                                                         |   |           |        |
|------------------------------|---------------|--------|-------------------------------------------------------------------------|---|-----------|--------|
| siRNA Disorazole DMSO Run2   | NM_1731<br>63 | NFATC3 | nuclear factor of activated T-cells, cytoplasmic, calcineurin-dependent | 3 | 0.788036  | Inlier |
| siRNA Disorazole DMSO Run3   | NM_1731<br>63 | NFATC3 | nuclear factor of activated T-cells, cytoplasmic, calcineurin-dependent | 3 | 2.035569  | Inlier |
| siRNA-Temozolomide Run3-DMSO | NM_2058<br>43 | NFIC   | nuclear factor I/C (CCAAT-binding transcription factor)                 |   | -1.133612 | Inlier |
| siRNA-Temozolomide Run1-DMSO | NM_2058<br>43 | NFIC   | nuclear factor I/C (CCAAT-binding transcription factor)                 |   | -0.850368 | Inlier |
| siRNA-Vinblastine Run1-DMSO  | NM_2058<br>43 | NFIC   | nuclear factor I/C (CCAAT-binding transcription factor)                 |   | -0.293051 | Inlier |
| siRNA-Temozolomide Run2-DMSO | NM_2058<br>43 | NFIC   | nuclear factor I/C (CCAAT-binding transcription factor)                 |   | -0.064983 | Inlier |
| siRNA Disorazole DMSO Run1   | NM_2058<br>43 | NFIC   | nuclear factor I/C (CCAAT-binding transcription factor)                 |   | 0.064981  | Inlier |

Identification of Survival Genes in Human Glioblastoma Cells Using siRNA Screening

Nikhil G Thaker, Fang Zhang, Peter R. McDonald, Tong Ying Shun, Michael D Lewen, Ian F. Pollack, and John S. Lazo

Molecular Pharmacology

| siRNA Treatment              | Gene ID       | Cell Line | Transcription Factor                                    | Log Fold Change | Outlier Status |
|------------------------------|---------------|-----------|---------------------------------------------------------|-----------------|----------------|
| siRNA-Vinblastine Run2-DMSO  | NM_2058<br>43 | NFIC      | nuclear factor I/C (CCAAT-binding transcription factor) | 0.571844        | Inlier         |
| siRNA Disorazole DMSO Run2   | NM_2058<br>43 | NFIC      | nuclear factor I/C (CCAAT-binding transcription factor) | 0.777156        | Inlier         |
| siRNA Disorazole DMSO Run3   | NM_2058<br>43 | NFIC      | nuclear factor I/X (CCAAT-binding transcription factor) | 1.316838        | Inlier         |
| siRNA-Temozolomide Run3-DMSO | NM_0025<br>01 | NFIX      | nuclear factor I/X (CCAAT-binding transcription factor) | -0.981644       | Inlier         |
| siRNA-Temozolomide Run2-DMSO | NM_0025<br>01 | NFIX      | nuclear factor I/X (CCAAT-binding transcription factor) | -0.77676        | Inlier         |
| siRNA Disorazole DMSO Run1   | NM_0025<br>01 | NFIX      | nuclear factor I/X (CCAAT-binding transcription factor) | -0.206141       | Inlier         |
| siRNA-Vinblastine Run1-DMSO  | NM_0025<br>01 | NFIX      | nuclear factor I/X (CCAAT-binding transcription factor) | -0.004811       | Inlier         |
| siRNA-Temozolomide Run1-DMSO | NM_0025<br>01 | NFIX      | nuclear factor I/X (CCAAT-binding transcription factor) | 0.004811        | Inlier         |

Identification of Survival Genes in Human Glioblastoma Cells Using siRNA Screening

Nikhil G Thaker, Fang Zhang, Peter R. McDonald, Tong Ying Shun, Michael D Lewen, Ian F. Pollack, and John S. Lazo

Molecular Pharmacology

|                              |           |        |                                                                                       |           |        |
|------------------------------|-----------|--------|---------------------------------------------------------------------------------------|-----------|--------|
| siRNA-Vinblastine Run2-DMSO  | NM_002501 | NFIX   | nuclear factor I/X (CCAAT-binding transcription factor)                               | 0.57224   | Inlier |
| siRNA Disorazole DMSO Run2   | NM_002501 | NFIX   | nuclear factor I/X (CCAAT-binding transcription factor)                               | 2.417068  | Inlier |
| siRNA Disorazole DMSO Run3   | NM_002501 | NFIX   | nuclear factor I/X (CCAAT-binding transcription factor)                               | 2.561265  | Inlier |
| siRNA-Temozolomide Run3-DMSO | NM_004556 | NFKBIE | nuclear factor of kappa light polypeptide gene enhancer in B-cells inhibitor, epsilon | -1.812819 | Inlier |
| siRNA Disorazole DMSO Run3   | NM_004556 | NFKBIE | nuclear factor of kappa light polypeptide gene enhancer in B-cells inhibitor, epsilon | -0.726503 | Inlier |
| siRNA-Temozolomide Run2-DMSO | NM_004556 | NFKBIE | nuclear factor of kappa light polypeptide gene enhancer in B-cells inhibitor, epsilon | -0.622496 | Inlier |

Identification of Survival Genes in Human Glioblastoma Cells Using siRNA Screening  
 Nikhil G Thaker, Fang Zhang, Peter R. McDonald, Tong Ying Shun, Michael D Lewen, Ian F. Pollack, and John S. Lazo  
 Molecular Pharmacology

|                              |           |        |                                                                                       |           |         |
|------------------------------|-----------|--------|---------------------------------------------------------------------------------------|-----------|---------|
| siRNA-Vinblastine Run2-DMSO  | NM_004556 | NFKBIE | nuclear factor of kappa light polypeptide gene enhancer in B-cells inhibitor, epsilon | -0.279068 | Inlier  |
| siRNA-Temozolomide Run1-DMSO | NM_004556 | NFKBIE | nuclear factor of kappa light polypeptide gene enhancer in B-cells inhibitor, epsilon | 0.279067  | Inlier  |
| siRNA Disorazole DMSO Run1   | NM_004556 | NFKBIE | nuclear factor of kappa light polypeptide gene enhancer in B-cells inhibitor, epsilon | 0.380248  | Inlier  |
| siRNA-Vinblastine Run1-DMSO  | NM_004556 | NFKBIE | nuclear factor of kappa light polypeptide gene enhancer in B-cells inhibitor, epsilon | 2.6815    | Inlier  |
| siRNA Disorazole DMSO Run2   | NM_004556 | NFKBIE | nuclear factor of kappa light polypeptide gene enhancer in B-cells inhibitor, epsilon | 4.695119  | Outlier |

Identification of Survival Genes in Human Glioblastoma Cells Using siRNA Screening

Nikhil G Thaker, Fang Zhang, Peter R. McDonald, Tong Ying Shun, Michael D Lewen, Ian F. Pollack, and John S. Lazo

Molecular Pharmacology

|                              |           |      |                                                            |           |        |
|------------------------------|-----------|------|------------------------------------------------------------|-----------|--------|
| siRNA-Vinblastine Run2-DMSO  | NM_002507 | NGFR | nerve growth factor receptor (TNFR superfamily, member 16) | -1.198458 | Inlier |
| siRNA-Temozolomide Run2-DMSO | NM_002507 | NGFR | nerve growth factor receptor (TNFR superfamily, member 16) | -0.629808 | Inlier |
| siRNA Disorazole DMSO Run1   | NM_002507 | NGFR | nerve growth factor receptor (TNFR superfamily, member 16) | -0.605905 | Inlier |
| siRNA Disorazole DMSO Run3   | NM_002507 | NGFR | nerve growth factor receptor (TNFR superfamily, member 16) | -0.156185 | Inlier |
| siRNA-Temozolomide Run3-DMSO | NM_002507 | NGFR | nerve growth factor receptor (TNFR superfamily, member 16) | 0.156185  | Inlier |



Identification of Survival Genes in Human Glioblastoma Cells Using siRNA Screening

Nikhil G Thaker, Fang Zhang, Peter R. McDonald, Tong Ying Shun, Michael D Lewen, Ian F. Pollack, and John S. Lazo

Molecular Pharmacology

|                              |           |      |                                                            |           |        |
|------------------------------|-----------|------|------------------------------------------------------------|-----------|--------|
| siRNA-Temozolomide Run1-DMSO | NM_002507 | NGFR | nerve growth factor receptor (TNFR superfamily, member 16) | 0.719192  | Inlier |
| siRNA Disorazole DMSO Run2   | NM_002507 | NGFR | nerve growth factor receptor (TNFR superfamily, member 16) | 1.407914  | Inlier |
| siRNA-Vinblastine Run1-DMSO  | NM_002507 | NGFR | nerve growth factor receptor (TNFR superfamily, member 16) | 1.716602  | Inlier |
| siRNA-Temozolomide Run1-DMSO | NM_016478 | NIPA | zinc finger, C3HC type 1                                   | -2.750547 | Inlier |
| siRNA-Temozolomide Run3-DMSO | NM_016478 | NIPA | zinc finger, C3HC type 1                                   | -0.319367 | Inlier |
| siRNA-Vinblastine Run1-DMSO  | NM_016478 | NIPA | zinc finger, C3HC type 1                                   | -0.315811 | Inlier |
| siRNA Disorazole DMSO Run1   | NM_016478 | NIPA | zinc finger, C3HC type 1                                   | -0.042603 | Inlier |
| siRNA-Temozolomide Run2-DMSO | NM_016478 | NIPA | zinc finger, C3HC type 1                                   | 0.042603  | Inlier |
| siRNA Disorazole DMSO Run2   | NM_016478 | NIPA | zinc finger, C3HC type 1                                   | 1.029632  | Inlier |

Identification of Survival Genes in Human Glioblastoma Cells Using siRNA Screening  
 Nikhil G Thaker, Fang Zhang, Peter R. McDonald, Tong Ying Shun, Michael D Lewen, Ian F. Pollack, and John S. Lazo

Molecular Pharmacology

|                              |                  |       |                                                                       |           |         |
|------------------------------|------------------|-------|-----------------------------------------------------------------------|-----------|---------|
| siRNA-Vinblastine Run2-DMSO  | NM_0164<br>78    | NIPA  | zinc finger,<br>C3HC type<br>1                                        | 1.73716   | Inlier  |
| siRNA Disorazole DMSO Run3   | NM_0164<br>78    | NIPA  | zinc finger,<br>C3HC type<br>1                                        | 4.557562  | Outlier |
| siRNA-Temozolomide Run3-DMSO | NM_0010<br>08892 | NIPA2 | non<br>imprinted<br>in Prader-<br>Willi/Angel<br>man<br>syndrome<br>2 | -0.678815 | Inlier  |
| siRNA-Temozolomide Run2-DMSO | NM_0010<br>08892 | NIPA2 | non<br>imprinted<br>in Prader-<br>Willi/Angel<br>man<br>syndrome<br>2 | -0.670185 | Inlier  |
| siRNA Disorazole DMSO Run3   | NM_0010<br>08892 | NIPA2 | non<br>imprinted<br>in Prader-<br>Willi/Angel<br>man<br>syndrome<br>2 | -0.646698 | Inlier  |
| siRNA-Vinblastine Run2-DMSO  | NM_0010<br>08892 | NIPA2 | non<br>imprinted<br>in Prader-<br>Willi/Angel<br>man<br>syndrome<br>2 | -0.578287 | Inlier  |
| siRNA Disorazole DMSO Run1   | NM_0010<br>08892 | NIPA2 | non<br>imprinted<br>in Prader-<br>Willi/Angel<br>man<br>syndrome<br>2 | 0.578286  | Inlier  |
| siRNA-Temozolomide Run1-DMSO | NM_0010<br>08892 | NIPA2 | non<br>imprinted<br>in Prader-<br>Willi/Angel<br>man<br>syndrome<br>2 | 0.735725  | Inlier  |

Identification of Survival Genes in Human Glioblastoma Cells Using siRNA Screening  
 Nikhil G Thaker, Fang Zhang, Peter R. McDonald, Tong Ying Shun, Michael D Lewen, Ian F. Pollack, and John S. Lazo

Molecular Pharmacology

|                                  |                  |         |                                                                  |           |         |
|----------------------------------|------------------|---------|------------------------------------------------------------------|-----------|---------|
|                                  |                  |         | non<br>imprinted<br>in Prader-<br>Willi/Angel<br>man<br>syndrome |           |         |
| siRNA Disorazole DMSO Run2       | NM_0010<br>08892 | NIPA2   | 2                                                                | 2.097312  | Inlier  |
|                                  |                  |         | non<br>imprinted<br>in Prader-<br>Willi/Angel<br>man<br>syndrome |           |         |
| siRNA-Vinblastine Run1-<br>DMSO  | NM_0010<br>08892 | NIPA2   | 2                                                                | 3.671539  | Outlier |
| siRNA Disorazole DMSO Run1       | NM_0056<br>00    | NIT1    | nitrilase 1                                                      | -0.731203 | Inlier  |
| siRNA-Vinblastine Run2-<br>DMSO  | NM_0056<br>00    | NIT1    | nitrilase 1                                                      | -0.617797 | Inlier  |
| siRNA-Temozolomide Run1-<br>DMSO | NM_0056<br>00    | NIT1    | nitrilase 1                                                      | -0.580258 | Inlier  |
| siRNA-Temozolomide Run2-<br>DMSO | NM_0056<br>00    | NIT1    | nitrilase 1                                                      | -0.425888 | Inlier  |
| siRNA Disorazole DMSO Run3       | NM_0056<br>00    | NIT1    | nitrilase 1                                                      | 0.425886  | Inlier  |
| siRNA-Temozolomide Run3-<br>DMSO | NM_0056<br>00    | NIT1    | nitrilase 1                                                      | 1.994096  | Inlier  |
| siRNA-Vinblastine Run1-<br>DMSO  | NM_0056<br>00    | NIT1    | nitrilase 1                                                      | 3.121664  | Inlier  |
| siRNA Disorazole DMSO Run2       | NM_0056<br>00    | NIT1    | nitrilase 1                                                      | 3.917991  | Outlier |
| siRNA-Temozolomide Run1-<br>DMSO | NM_0223<br>44    | NJMU-R1 | NJMU-R1                                                          | -2.289217 | Inlier  |
| siRNA-Temozolomide Run3-<br>DMSO | NM_0223<br>44    | NJMU-R1 | NJMU-R1                                                          | -0.78628  | Inlier  |
| siRNA-Temozolomide Run2-<br>DMSO | NM_0223<br>44    | NJMU-R1 | NJMU-R1                                                          | -0.433166 | Inlier  |
| siRNA-Vinblastine Run1-<br>DMSO  | NM_0223<br>44    | NJMU-R1 | NJMU-R1                                                          | -0.009405 | Inlier  |
| siRNA Disorazole DMSO Run1       | NM_0223<br>44    | NJMU-R1 | NJMU-R1                                                          | 0.009404  | Inlier  |
| siRNA Disorazole DMSO Run2       | NM_0223<br>44    | NJMU-R1 | NJMU-R1                                                          | 0.56272   | Inlier  |
| siRNA-Vinblastine Run2-<br>DMSO  | NM_0223<br>44    | NJMU-R1 | NJMU-R1                                                          | 1.793008  | Inlier  |
| siRNA Disorazole DMSO Run3       | NM_0223<br>44    | NJMU-R1 | NJMU-R1                                                          | 5.764196  | Outlier |
| siRNA-Vinblastine Run2-<br>DMSO  | NM_1390<br>18    | NKIR    | CD300<br>antigen<br>like family<br>member F                      | -1.480119 | Inlier  |

Identification of Survival Genes in Human Glioblastoma Cells Using siRNA Screening  
 Nikhil G Thaker, Fang Zhang, Peter R. McDonald, Tong Ying Shun, Michael D Lewen, Ian F. Pollack, and John S. Lazo

Molecular Pharmacology

|                                  |               |      |                                                                                               |           |         |
|----------------------------------|---------------|------|-----------------------------------------------------------------------------------------------|-----------|---------|
| siRNA Disorazole DMSO Run1       | NM_1390<br>18 | NKIR | CD300<br>antigen<br>like family<br>member F                                                   | -0.438593 | Inlier  |
| siRNA-Temozolomide Run2-<br>DMSO | NM_1390<br>18 | NKIR | CD300<br>antigen<br>like family<br>member F                                                   | -0.284661 | Inlier  |
| siRNA Disorazole DMSO Run3       | NM_1390<br>18 | NKIR | CD300<br>antigen<br>like family<br>member F                                                   | -0.121822 | Inlier  |
| siRNA-Temozolomide Run3-<br>DMSO | NM_1390<br>18 | NKIR | CD300<br>antigen<br>like family<br>member F                                                   | 0.121822  | Inlier  |
| siRNA-Temozolomide Run1-<br>DMSO | NM_1390<br>18 | NKIR | CD300<br>antigen<br>like family<br>member F                                                   | 0.910407  | Inlier  |
| siRNA Disorazole DMSO Run2       | NM_1390<br>18 | NKIR | CD300<br>antigen<br>like family<br>member F                                                   | 3.126218  | Inlier  |
| siRNA-Vinblastine Run1-<br>DMSO  | NM_1390<br>18 | NKIR | CD300<br>antigen<br>like family<br>member F<br>natural<br>killer-<br>tumor<br>recognitio<br>n | 3.945378  | Outlier |
| siRNA-Temozolomide Run1-<br>DMSO | NM_0053<br>85 | NKTR | sequence<br>natural<br>killer-<br>tumor<br>recognitio<br>n                                    | -1.830355 | Inlier  |
| siRNA Disorazole DMSO Run1       | NM_0053<br>85 | NKTR | sequence<br>natural<br>killer-<br>tumor<br>recognitio<br>n                                    | -1.006137 | Inlier  |
| siRNA-Temozolomide Run3-<br>DMSO | NM_0053<br>85 | NKTR | sequence<br>natural<br>killer-<br>tumor<br>recognitio<br>n                                    | -0.878927 | Inlier  |
| siRNA-Temozolomide Run2-<br>DMSO | NM_0053<br>85 | NKTR | sequence                                                                                      | -0.225781 | Inlier  |

Identification of Survival Genes in Human Glioblastoma Cells Using siRNA Screening  
 Nikhil G Thaker, Fang Zhang, Peter R. McDonald, Tong Ying Shun, Michael D Lewen, Ian F. Pollack, and John S. Lazo

Molecular Pharmacology

|                              |               |       |   |                                           |                  |
|------------------------------|---------------|-------|---|-------------------------------------------|------------------|
|                              |               |       |   | natural killer-tumor recognition          |                  |
| siRNA Disorazole DMSO Run2   | NM_0053<br>85 | NKTR  |   | sequence natural killer-tumor recognition | 0.225781 Inlier  |
| siRNA-Vinblastine Run1-DMSO  | NM_0053<br>85 | NKTR  |   | sequence natural killer-tumor recognition | 0.346775 Inlier  |
| siRNA-Vinblastine Run2-DMSO  | NM_0053<br>85 | NKTR  |   | sequence natural killer-tumor recognition | 0.470073 Inlier  |
| siRNA Disorazole DMSO Run3   | NM_0053<br>85 | NKTR  |   | sequence natural killer-tumor recognition | 0.995445 Inlier  |
| siRNA-Temozolomide Run3-DMSO | NM_0149<br>32 | NLGN1 | 1 | neuroigin                                 | -1.636418 Inlier |
| siRNA-Temozolomide Run2-DMSO | NM_0149<br>32 | NLGN1 | 1 | neuroigin                                 | -0.760001 Inlier |
| siRNA-Temozolomide Run1-DMSO | NM_0149<br>32 | NLGN1 | 1 | neuroigin                                 | -0.588998 Inlier |
| siRNA-Vinblastine Run2-DMSO  | NM_0149<br>32 | NLGN1 | 1 | neuroigin                                 | -0.137676 Inlier |
| siRNA Disorazole DMSO Run3   | NM_0149<br>32 | NLGN1 | 1 | neuroigin                                 | 0.137677 Inlier  |
| siRNA Disorazole DMSO Run1   | NM_0149<br>32 | NLGN1 | 1 | neuroigin                                 | 0.424212 Inlier  |
| siRNA-Vinblastine Run1-DMSO  | NM_0149<br>32 | NLGN1 | 1 | neuroigin                                 | 1.081487 Inlier  |
| siRNA Disorazole DMSO Run2   | NM_0149<br>32 | NLGN1 | 1 | neuroigin                                 | 1.419321 Inlier  |
| siRNA-Temozolomide Run3-DMSO | NM_0207<br>95 | NLGN2 | 2 | neuroigin                                 | -1.694039 Inlier |
| siRNA-Temozolomide Run2-DMSO | NM_0207<br>95 | NLGN2 | 2 | neuroigin                                 | -1.564828 Inlier |
| siRNA-Vinblastine Run2-DMSO  | NM_0207<br>95 | NLGN2 | 2 | neuroigin                                 | -1.376785 Inlier |
| siRNA-Vinblastine Run1-DMSO  | NM_0207<br>95 | NLGN2 | 2 | neuroigin                                 | -0.201946 Inlier |
| siRNA-Temozolomide Run1-DMSO | NM_0207<br>95 | NLGN2 | 2 | neuroigin                                 | 0.201946 Inlier  |
| siRNA Disorazole DMSO Run1   | NM_0207<br>95 | NLGN2 | 2 | neuroigin                                 | 0.243179 Inlier  |

Identification of Survival Genes in Human Glioblastoma Cells Using siRNA Screening  
 Nikhil G Thaker, Fang Zhang, Peter R. McDonald, Tong Ying Shun, Michael D Lewen, Ian F. Pollack, and John S. Lazo

|                              |         |        |             |                  |
|------------------------------|---------|--------|-------------|------------------|
| Molecular Pharmacology       | NM_0207 |        | neuroigin   |                  |
| siRNA Disorazole DMSO Run3   | 95      | NLGN2  | 2           | 0.270423 Inlier  |
|                              | NM_0207 |        | neuroigin   |                  |
| siRNA Disorazole DMSO Run2   | 95      | NLGN2  | 2           | 1.078577 Inlier  |
| siRNA-Temozolomide Run3-DMSO | NM_0189 |        | neuroigin   |                  |
|                              | 77      | NLGN3  | 3           | -1.039308 Inlier |
| siRNA-Temozolomide Run2-DMSO | NM_0189 |        | neuroigin   |                  |
|                              | 77      | NLGN3  | 3           | -0.569838 Inlier |
| siRNA-Vinblastine Run2-DMSO  | NM_0189 |        | neuroigin   |                  |
|                              | 77      | NLGN3  | 3           | -0.316706 Inlier |
| siRNA-Temozolomide Run1-DMSO | NM_0189 |        | neuroigin   |                  |
|                              | 77      | NLGN3  | 3           | -0.051658 Inlier |
|                              | NM_0189 |        | neuroigin   |                  |
| siRNA Disorazole DMSO Run3   | 77      | NLGN3  | 3           | 0.051659 Inlier  |
|                              | NM_0189 |        | neuroigin   |                  |
| siRNA Disorazole DMSO Run1   | 77      | NLGN3  | 3           | 0.779162 Inlier  |
|                              | NM_0189 |        | neuroigin   |                  |
| siRNA Disorazole DMSO Run2   | 77      | NLGN3  | 3           | 1.491137 Inlier  |
| siRNA-Vinblastine Run1-DMSO  | NM_0189 |        | neuroigin   |                  |
|                              | 77      | NLGN3  | 3           | 1.638761 Inlier  |
| siRNA-Temozolomide Run2-DMSO | NM_1813 |        | neuroigin   |                  |
|                              | 32      | NLGN4X | 4, X-linked | -0.865507 Inlier |
| siRNA-Temozolomide Run3-DMSO | NM_1813 |        | neuroigin   |                  |
|                              | 32      | NLGN4X | 4, X-linked | -0.712057 Inlier |
| siRNA-Temozolomide Run1-DMSO | NM_1813 |        | neuroigin   |                  |
|                              | 32      | NLGN4X | 4, X-linked | -0.636943 Inlier |
| siRNA-Vinblastine Run2-DMSO  | NM_1813 |        | neuroigin   |                  |
|                              | 32      | NLGN4X | 4, X-linked | -0.024296 Inlier |
|                              | NM_1813 |        | neuroigin   |                  |
| siRNA Disorazole DMSO Run3   | 32      | NLGN4X | 4, X-linked | 0.024296 Inlier  |
|                              | NM_1813 |        | neuroigin   |                  |
| siRNA Disorazole DMSO Run1   | 32      | NLGN4X | 4, X-linked | 0.570021 Inlier  |
|                              | NM_1813 |        | neuroigin   |                  |
| siRNA Disorazole DMSO Run2   | 32      | NLGN4X | 4, X-linked | 1.261022 Inlier  |
| siRNA-Vinblastine Run1-DMSO  | NM_1813 |        | neuroigin   |                  |
|                              | 32      | NLGN4X | 4, X-linked | 2.232616 Inlier  |
| siRNA-Temozolomide Run2-DMSO | NM_0148 |        | neuroigin   |                  |
|                              | 93      | NLGN4Y | 4, Y-linked | -1.519483 Inlier |
| siRNA-Temozolomide Run1-DMSO | NM_0148 |        | neuroigin   |                  |
|                              | 93      | NLGN4Y | 4, Y-linked | -1.270586 Inlier |

Identification of Survival Genes in Human Glioblastoma Cells Using siRNA Screening  
 Nikhil G Thaker, Fang Zhang, Peter R. McDonald, Tong Ying Shun, Michael D Lewen, Ian F. Pollack, and John S. Lazo

Molecular Pharmacology

|                                  |               |        |                                                   |           |        |
|----------------------------------|---------------|--------|---------------------------------------------------|-----------|--------|
| siRNA-Vinblastine Run2-<br>DMSO  | NM_0148<br>93 | NLGN4Y | neuroigin<br>4, Y-linked                          | -0.992334 | Inlier |
| siRNA Disorazole DMSO Run3       | NM_0148<br>93 | NLGN4Y | neuroigin<br>4, Y-linked                          | -0.065361 | Inlier |
| siRNA Disorazole DMSO Run1       | NM_0148<br>93 | NLGN4Y | neuroigin<br>4, Y-linked                          | 0.065361  | Inlier |
| siRNA-Temozolomide Run3-<br>DMSO | NM_0148<br>93 | NLGN4Y | neuroigin<br>4, Y-linked                          | 0.109426  | Inlier |
| siRNA Disorazole DMSO Run2       | NM_0148<br>93 | NLGN4Y | neuroigin<br>4, Y-linked                          | 0.658571  | Inlier |
| siRNA-Vinblastine Run1-<br>DMSO  | NM_0148<br>93 | NLGN4Y | neuroigin<br>4, Y-linked                          | 0.690429  | Inlier |
| siRNA-Temozolomide Run3-<br>DMSO | NM_0162<br>31 | NLK    | nemo like<br>kinase                               | -2.081437 | Inlier |
| siRNA-Temozolomide Run1-<br>DMSO | NM_0162<br>31 | NLK    | nemo like<br>kinase                               | -0.682207 | Inlier |
| siRNA Disorazole DMSO Run3       | NM_0162<br>31 | NLK    | nemo like<br>kinase                               | -0.321131 | Inlier |
| siRNA Disorazole DMSO Run1       | NM_0162<br>31 | NLK    | nemo like<br>kinase                               | -0.0541   | Inlier |
| siRNA-Temozolomide Run2-<br>DMSO | NM_0162<br>31 | NLK    | nemo like<br>kinase                               | 0.0541    | Inlier |
| siRNA-Vinblastine Run1-<br>DMSO  | NM_0162<br>31 | NLK    | nemo like<br>kinase                               | 0.666793  | Inlier |
| siRNA Disorazole DMSO Run2       | NM_0162<br>31 | NLK    | nemo like<br>kinase                               | 1.131015  | Inlier |
| siRNA-Vinblastine Run2-<br>DMSO  | NM_0162<br>31 | NLK    | nemo like<br>kinase                               | 2.939666  | Inlier |
| siRNA-Temozolomide Run3-<br>DMSO | NM_0207<br>26 | NLN    | neurolysin<br>(metallope<br>ptidase<br>M3 family) | -2.32366  | Inlier |
| siRNA-Temozolomide Run2-<br>DMSO | NM_0207<br>26 | NLN    | neurolysin<br>(metallope<br>ptidase<br>M3 family) | -0.481556 | Inlier |
| siRNA-Temozolomide Run1-<br>DMSO | NM_0207<br>26 | NLN    | neurolysin<br>(metallope<br>ptidase<br>M3 family) | -0.071655 | Inlier |

Identification of Survival Genes in Human Glioblastoma Cells Using siRNA Screening  
 Nikhil G Thaker, Fang Zhang, Peter R. McDonald, Tong Ying Shun, Michael D Lewen, Ian F. Pollack, and John S. Lazo  
 Molecular Pharmacology

|                                  |               |      |                                                   |           |        |
|----------------------------------|---------------|------|---------------------------------------------------|-----------|--------|
| siRNA Disorazole DMSO Run1       | NM_0207<br>26 | NLN  | neurolysin<br>(metallope<br>ptidase<br>M3 family) | -0.048217 | Inlier |
| siRNA Disorazole DMSO Run2       | NM_0207<br>26 | NLN  | neurolysin<br>(metallope<br>ptidase<br>M3 family) | 0.048217  | Inlier |
| siRNA Disorazole DMSO Run3       | NM_0207<br>26 | NLN  | neurolysin<br>(metallope<br>ptidase<br>M3 family) | 0.867444  | Inlier |
| siRNA-Vinblastine Run1-<br>DMSO  | NM_0207<br>26 | NLN  | neurolysin<br>(metallope<br>ptidase<br>M3 family) | 2.256802  | Inlier |
| siRNA-Vinblastine Run2-<br>DMSO  | NM_0207<br>26 | NLN  | neurolysin<br>(metallope<br>ptidase<br>M3 family) | 2.407309  | Inlier |
| siRNA-Temozolomide Run3-<br>DMSO | NM_0025<br>11 | NMBR | neuromedi<br>n B<br>receptor                      | -1.624168 | Inlier |
| siRNA Disorazole DMSO Run2       | NM_0025<br>11 | NMBR | neuromedi<br>n B<br>receptor                      | -0.736389 | Inlier |
| siRNA-Temozolomide Run1-<br>DMSO | NM_0025<br>11 | NMBR | neuromedi<br>n B<br>receptor                      | -0.062111 | Inlier |
| siRNA Disorazole DMSO Run3       | NM_0025<br>11 | NMBR | neuromedi<br>n B<br>receptor                      | -0.057803 | Inlier |
| siRNA-Temozolomide Run2-<br>DMSO | NM_0025<br>11 | NMBR | neuromedi<br>n B<br>receptor                      | 0.057803  | Inlier |
| siRNA Disorazole DMSO Run1       | NM_0025<br>11 | NMBR | neuromedi<br>n B<br>receptor                      | 0.612611  | Inlier |
| siRNA-Vinblastine Run2-<br>DMSO  | NM_0025<br>11 | NMBR | neuromedi<br>n B<br>receptor                      | 1.016338  | Inlier |
| siRNA-Vinblastine Run1-<br>DMSO  | NM_0025<br>11 | NMBR | neuromedi<br>n B<br>receptor                      | 1.164648  | Inlier |



Identification of Survival Genes in Human Glioblastoma Cells Using siRNA Screening

Nikhil G Thaker, Fang Zhang, Peter R. McDonald, Tong Ying Shun, Michael D Lewen, Ian F. Pollack, and John S. Lazo

Molecular Pharmacology

|                              |               |      |                                                      |           |        |
|------------------------------|---------------|------|------------------------------------------------------|-----------|--------|
| siRNA-Temozolomide Run3-DMSO | NM_1981<br>75 | NME1 | non-metastatic cells 1, protein (NM23A) expressed in | -0.715457 | Inlier |
| siRNA-Temozolomide Run1-DMSO | NM_1981<br>75 | NME1 | non-metastatic cells 1, protein (NM23A) expressed in | -0.633543 | Inlier |
| siRNA Disorazole DMSO Run2   | NM_1981<br>75 | NME1 | non-metastatic cells 1, protein (NM23A) expressed in | -0.468816 | Inlier |
| siRNA-Temozolomide Run2-DMSO | NM_1981<br>75 | NME1 | non-metastatic cells 1, protein (NM23A) expressed in | -0.422392 | Inlier |
| siRNA Disorazole DMSO Run3   | NM_1981<br>75 | NME1 | non-metastatic cells 1, protein (NM23A) expressed in | 0.422392  | Inlier |
| siRNA Disorazole DMSO Run1   | NM_1981<br>75 | NME1 | non-metastatic cells 1, protein (NM23A) expressed in | 0.802237  | Inlier |
| siRNA-Vinblastine Run1-DMSO  | NM_1981<br>75 | NME1 | non-metastatic cells 1, protein (NM23A) expressed in | 0.853308  | Inlier |

Identification of Survival Genes in Human Glioblastoma Cells Using siRNA Screening  
 Nikhil G Thaker, Fang Zhang, Peter R. McDonald, Tong Ying Shun, Michael D Lewen, Ian F. Pollack, and John S. Lazo

Molecular Pharmacology

|                              |               |      |                                                      |           |        |
|------------------------------|---------------|------|------------------------------------------------------|-----------|--------|
| siRNA-Vinblastine Run2-DMSO  | NM_1981<br>75 | NME1 | non-metastatic cells 1, protein (NM23A) expressed in | 1.130571  | Inlier |
| siRNA Disorazole DMSO Run2   | NM_0025<br>12 | NME2 | non-metastatic cells 2, protein (NM23B) expressed in | -0.971085 | Inlier |
| siRNA-Temozolomide Run3-DMSO | NM_0025<br>12 | NME2 | non-metastatic cells 2, protein (NM23B) expressed in | -0.722497 | Inlier |
| siRNA Disorazole DMSO Run3   | NM_0025<br>12 | NME2 | non-metastatic cells 2, protein (NM23B) expressed in | -0.626503 | Inlier |
| siRNA-Temozolomide Run1-DMSO | NM_0025<br>12 | NME2 | non-metastatic cells 2, protein (NM23B) expressed in | -0.246313 | Inlier |
| siRNA-Temozolomide Run2-DMSO | NM_0025<br>12 | NME2 | non-metastatic cells 2, protein (NM23B) expressed in | 0.246313  | Inlier |
| siRNA Disorazole DMSO Run1   | NM_0025<br>12 | NME2 | non-metastatic cells 2, protein (NM23B) expressed in | 0.591056  | Inlier |

Identification of Survival Genes in Human Glioblastoma Cells Using siRNA Screening

Nikhil G Thaker, Fang Zhang, Peter R. McDonald, Tong Ying Shun, Michael D Lewen, Ian F. Pollack, and John S. Lazo

Molecular Pharmacology

|                              |               |      |                                                      |           |        |
|------------------------------|---------------|------|------------------------------------------------------|-----------|--------|
| siRNA-Vinblastine Run1-DMSO  | NM_0025<br>12 | NME2 | non-metastatic cells 2, protein (NM23B) expressed in | 1.086582  | Inlier |
| siRNA-Vinblastine Run2-DMSO  | NM_0025<br>12 | NME2 | non-metastatic cells 2, protein (NM23B) expressed in | 1.647942  | Inlier |
| siRNA-Temozolomide Run1-DMSO | NM_0025<br>13 | NME3 | non-metastatic cells 3, protein expressed in         | -1.770638 | Inlier |
| siRNA-Temozolomide Run3-DMSO | NM_0025<br>13 | NME3 | non-metastatic cells 3, protein expressed in         | -0.945371 | Inlier |
| siRNA-Temozolomide Run2-DMSO | NM_0025<br>13 | NME3 | non-metastatic cells 3, protein expressed in         | -0.62866  | Inlier |
| siRNA Disorazole DMSO Run1   | NM_0025<br>13 | NME3 | non-metastatic cells 3, protein expressed in         | -0.003933 | Inlier |
| siRNA-Vinblastine Run1-DMSO  | NM_0025<br>13 | NME3 | non-metastatic cells 3, protein expressed in         | 0.003933  | Inlier |
| siRNA-Vinblastine Run2-DMSO  | NM_0025<br>13 | NME3 | non-metastatic cells 3, protein expressed in         | 0.485733  | Inlier |

Identification of Survival Genes in Human Glioblastoma Cells Using siRNA Screening  
 Nikhil G Thaker, Fang Zhang, Peter R. McDonald, Tong Ying Shun, Michael D Lewen, Ian F. Pollack, and John S. Lazo

Molecular Pharmacology

|                              |               |      |                                              |           |        |
|------------------------------|---------------|------|----------------------------------------------|-----------|--------|
| siRNA Disorazole DMSO Run2   | NM_0025<br>13 | NME3 | non-metastatic cells 3, protein expressed in | 0.72034   | Inlier |
| siRNA Disorazole DMSO Run3   | NM_0025<br>13 | NME3 | non-metastatic cells 3, protein expressed in | 2.271308  | Inlier |
| siRNA-Temozolomide Run1-DMSO | NM_0050<br>09 | NME4 | non-metastatic cells 4, protein expressed in | -1.193251 | Inlier |
| siRNA-Temozolomide Run3-DMSO | NM_0050<br>09 | NME4 | non-metastatic cells 4, protein expressed in | -0.870024 | Inlier |
| siRNA-Temozolomide Run2-DMSO | NM_0050<br>09 | NME4 | non-metastatic cells 4, protein expressed in | -0.478976 | Inlier |
| siRNA-Vinblastine Run1-DMSO  | NM_0050<br>09 | NME4 | non-metastatic cells 4, protein expressed in | -0.231145 | Inlier |
| siRNA-Vinblastine Run2-DMSO  | NM_0050<br>09 | NME4 | non-metastatic cells 4, protein expressed in | 0.231145  | Inlier |
| siRNA Disorazole DMSO Run1   | NM_0050<br>09 | NME4 | non-metastatic cells 4, protein expressed in | 0.31015   | Inlier |

Identification of Survival Genes in Human Glioblastoma Cells Using siRNA Screening

Nikhil G Thaker, Fang Zhang, Peter R. McDonald, Tong Ying Shun, Michael D Lewen, Ian F. Pollack, and John S. Lazo

Molecular Pharmacology

|                              |               |      |                                                                              |           |         |
|------------------------------|---------------|------|------------------------------------------------------------------------------|-----------|---------|
| siRNA Disorazole DMSO Run2   | NM_0050<br>09 | NME4 | non-metastatic cells 4, protein expressed in                                 | 1.153438  | Inlier  |
| siRNA Disorazole DMSO Run3   | NM_0050<br>09 | NME4 | non-metastatic cells 4, protein expressed in                                 | 3.556656  | Outlier |
| siRNA-Temozolomide Run3-DMSO | NM_0035<br>51 | NME5 | non-metastatic cells 5, protein expressed in (nucleoside diphosphate kinase) | -1.177154 | Inlier  |
| siRNA-Temozolomide Run2-DMSO | NM_0035<br>51 | NME5 | non-metastatic cells 5, protein expressed in (nucleoside diphosphate kinase) | -0.765185 | Inlier  |
| siRNA-Temozolomide Run1-DMSO | NM_0035<br>51 | NME5 | non-metastatic cells 5, protein expressed in (nucleoside diphosphate kinase) | -0.583815 | Inlier  |
| siRNA Disorazole DMSO Run1   | NM_0035<br>51 | NME5 | non-metastatic cells 5, protein expressed in (nucleoside diphosphate kinase) | -0.107361 | Inlier  |

Identification of Survival Genes in Human Glioblastoma Cells Using siRNA Screening

Nikhil G Thaker, Fang Zhang, Peter R. McDonald, Tong Ying Shun, Michael D Lewen, Ian F. Pollack, and John S. Lazo

Molecular Pharmacology

|                              |           |      |                                                                              |           |        |
|------------------------------|-----------|------|------------------------------------------------------------------------------|-----------|--------|
| siRNA-Vinblastine Run1-DMSO  | NM_003551 | NME5 | non-metastatic cells 5, protein expressed in (nucleoside diphosphate kinase) | 0.107361  | Inlier |
| siRNA-Vinblastine Run2-DMSO  | NM_003551 | NME5 | non-metastatic cells 5, protein expressed in (nucleoside diphosphate kinase) | 0.119571  | Inlier |
| siRNA Disorazole DMSO Run2   | NM_003551 | NME5 | non-metastatic cells 5, protein expressed in (nucleoside diphosphate kinase) | 0.952605  | Inlier |
| siRNA Disorazole DMSO Run3   | NM_003551 | NME5 | non-metastatic cells 6, protein expressed in (nucleoside diphosphate kinase) | 1.782944  | Inlier |
| siRNA-Temozolomide Run3-DMSO | NM_005793 | NME6 | non-metastatic cells 6, protein expressed in (nucleoside diphosphate kinase) | -0.884681 | Inlier |

Identification of Survival Genes in Human Glioblastoma Cells Using siRNA Screening

Nikhil G Thaker, Fang Zhang, Peter R. McDonald, Tong Ying Shun, Michael D Lewen, Ian F. Pollack, and John S. Lazo

Molecular Pharmacology

| siRNA Treatment              | Gene ID   | Gene Name | Expression | Classification |
|------------------------------|-----------|-----------|------------|----------------|
| siRNA Disorazole DMSO Run2   | NM_005793 | NME6      | -0.811288  | Inlier         |
| siRNA-Temozolomide Run1-DMSO | NM_005793 | NME6      | -0.73406   | Inlier         |
| siRNA-Temozolomide Run2-DMSO | NM_005793 | NME6      | -0.088545  | Inlier         |
| siRNA-Vinblastine Run1-DMSO  | NM_005793 | NME6      | 0.088545   | Inlier         |
| siRNA-Vinblastine Run2-DMSO  | NM_005793 | NME6      | 0.260113   | Inlier         |

non-metastatic cells 6, protein expressed in (nucleoside diphosphate kinase) non-metastatic cells 6, protein expressed in (nucleoside diphosphate kinase) non-metastatic cells 6, protein expressed in (nucleoside diphosphate kinase) non-metastatic cells 6, protein expressed in (nucleoside diphosphate kinase)

Identification of Survival Genes in Human Glioblastoma Cells Using siRNA Screening

Nikhil G Thaker, Fang Zhang, Peter R. McDonald, Tong Ying Shun, Michael D Lewen, Ian F. Pollack, and John S. Lazo

Molecular Pharmacology

|                              |               |      |                                                                              |           |        |
|------------------------------|---------------|------|------------------------------------------------------------------------------|-----------|--------|
| siRNA Disorazole DMSO Run1   | NM_0057<br>93 | NME6 | non-metastatic cells 6, protein expressed in (nucleoside diphosphate kinase) | 0.61494   | Inlier |
| siRNA Disorazole DMSO Run3   | NM_0057<br>93 | NME6 | non-metastatic cells 6, protein expressed in (nucleoside diphosphate kinase) | 0.868131  | Inlier |
| siRNA-Temozolomide Run3-DMSO | NM_0133<br>30 | NME7 | non-metastatic cells 7, protein expressed in (nucleoside diphosphate kinase) | -1.233535 | Inlier |
| siRNA-Temozolomide Run1-DMSO | NM_0133<br>30 | NME7 | non-metastatic cells 7, protein expressed in (nucleoside diphosphate kinase) | -0.581233 | Inlier |
| siRNA-Vinblastine Run1-DMSO  | NM_0133<br>30 | NME7 | non-metastatic cells 7, protein expressed in (nucleoside diphosphate kinase) | -0.354096 | Inlier |



Identification of Survival Genes in Human Glioblastoma Cells Using siRNA Screening

Nikhil G Thaker, Fang Zhang, Peter R. McDonald, Tong Ying Shun, Michael D Lewen, Ian F. Pollack, and John S. Lazo

Molecular Pharmacology

| siRNA              | Condition | Gene    | Cell Line | Log2 Fold Change | Outlier Status |
|--------------------|-----------|---------|-----------|------------------|----------------|
| siRNA Disorazole   | DMSO Run1 | NM_0133 | NME7      | -0.126258        | Inlier         |
| siRNA-Temozolomide | Run2-DMSO | NM_0133 | NME7      | 0.126258         | Inlier         |
| siRNA-Vinblastine  | Run2-DMSO | NM_0133 | NME7      | 0.767766         | Inlier         |
| siRNA Disorazole   | DMSO Run2 | NM_0133 | NME7      | 0.927406         | Inlier         |
| siRNA Disorazole   | DMSO Run3 | NM_0133 | NME7      | 1.052443         | Inlier         |

non-metastatic cells 7, protein expressed in (nucleoside diphosphate kinase) non-metastatic cells 7, protein expressed in (nucleoside diphosphate kinase) non-metastatic cells 7, protein expressed in (nucleoside diphosphate kinase) non-metastatic cells 7, protein expressed in (nucleoside diphosphate kinase)

Identification of Survival Genes in Human Glioblastoma Cells Using siRNA Screening

Nikhil G Thaker, Fang Zhang, Peter R. McDonald, Tong Ying Shun, Michael D Lewen, Ian F. Pollack, and John S. Lazo

Molecular Pharmacology

|                              |               |        |                                                     |           |         |
|------------------------------|---------------|--------|-----------------------------------------------------|-----------|---------|
| siRNA-Temozolomide Run3-DMSO | NM_0227<br>87 | NMNAT1 | nicotinamide<br>nucleotide<br>adenylyltransferase 1 | -0.737756 | Inlier  |
| siRNA-Vinblastine Run2-DMSO  | NM_0227<br>87 | NMNAT1 | nicotinamide<br>nucleotide<br>adenylyltransferase 1 | -0.611244 | Inlier  |
| siRNA Disorazole DMSO Run3   | NM_0227<br>87 | NMNAT1 | nicotinamide<br>nucleotide<br>adenylyltransferase 1 | -0.597895 | Inlier  |
| siRNA-Temozolomide Run2-DMSO | NM_0227<br>87 | NMNAT1 | nicotinamide<br>nucleotide<br>adenylyltransferase 1 | -0.033519 | Inlier  |
| siRNA-Temozolomide Run1-DMSO | NM_0227<br>87 | NMNAT1 | nicotinamide<br>nucleotide<br>adenylyltransferase 1 | 0.033518  | Inlier  |
| siRNA Disorazole DMSO Run1   | NM_0227<br>87 | NMNAT1 | nicotinamide<br>nucleotide<br>adenylyltransferase 1 | 1.660611  | Inlier  |
| siRNA Disorazole DMSO Run2   | NM_0227<br>87 | NMNAT1 | nicotinamide<br>nucleotide<br>adenylyltransferase 1 | 7.417036  | Outlier |
| siRNA-Vinblastine Run1-DMSO  | NM_0227<br>87 | NMNAT1 | nicotinamide<br>nucleotide<br>adenylyltransferase 1 | 7.614155  | Outlier |

Identification of Survival Genes in Human Glioblastoma Cells Using siRNA Screening  
 Nikhil G Thaker, Fang Zhang, Peter R. McDonald, Tong Ying Shun, Michael D Lewen, Ian F. Pollack, and John S. Lazo  
 Molecular Pharmacology

|                              |           |        |                                             |           |        |
|------------------------------|-----------|--------|---------------------------------------------|-----------|--------|
| siRNA-Temozolomide Run3-DMSO | NM_170706 | NMNAT2 | nicotinamide nucleotide adenyltransferase 2 | -0.920332 | Inlier |
| siRNA-Temozolomide Run2-DMSO | NM_170706 | NMNAT2 | nicotinamide nucleotide adenyltransferase 2 | -0.51292  | Inlier |
| siRNA Disorazole DMSO Run1   | NM_170706 | NMNAT2 | nicotinamide nucleotide adenyltransferase 2 | -0.209711 | Inlier |
| siRNA Disorazole DMSO Run3   | NM_170706 | NMNAT2 | nicotinamide nucleotide adenyltransferase 2 | -0.123428 | Inlier |
| siRNA-Temozolomide Run1-DMSO | NM_170706 | NMNAT2 | nicotinamide nucleotide adenyltransferase 2 | 0.123429  | Inlier |
| siRNA-Vinblastine Run2-DMSO  | NM_170706 | NMNAT2 | nicotinamide nucleotide adenyltransferase 2 | 0.83608   | Inlier |
| siRNA-Vinblastine Run1-DMSO  | NM_170706 | NMNAT2 | nicotinamide nucleotide adenyltransferase 2 | 3.014448  | Inlier |
| siRNA Disorazole DMSO Run2   | NM_170706 | NMNAT2 | nicotinamide nucleotide adenyltransferase 2 | 3.443113  | Inlier |

Identification of Survival Genes in Human Glioblastoma Cells Using siRNA Screening  
 Nikhil G Thaker, Fang Zhang, Peter R. McDonald, Tong Ying Shun, Michael D Lewen, Ian F. Pollack, and John S. Lazo  
 Molecular Pharmacology

|                              |               |        |                                                     |           |        |
|------------------------------|---------------|--------|-----------------------------------------------------|-----------|--------|
| siRNA Disorazole DMSO Run1   | NM_1781<br>77 | NMNAT3 | nicotinamide<br>nucleotide<br>adenylyltransferase 3 | -1.12542  | Inlier |
| siRNA-Vinblastine Run2-DMSO  | NM_1781<br>77 | NMNAT3 | nicotinamide<br>nucleotide<br>adenylyltransferase 3 | -0.809332 | Inlier |
| siRNA-Temozolomide Run3-DMSO | NM_1781<br>77 | NMNAT3 | nicotinamide<br>nucleotide<br>adenylyltransferase 3 | -0.539668 | Inlier |
| siRNA-Temozolomide Run2-DMSO | NM_1781<br>77 | NMNAT3 | nicotinamide<br>nucleotide<br>adenylyltransferase 3 | -0.321767 | Inlier |
| siRNA Disorazole DMSO Run3   | NM_1781<br>77 | NMNAT3 | nicotinamide<br>nucleotide<br>adenylyltransferase 3 | 0.321766  | Inlier |
| siRNA-Temozolomide Run1-DMSO | NM_1781<br>77 | NMNAT3 | nicotinamide<br>nucleotide<br>adenylyltransferase 3 | 0.39127   | Inlier |
| siRNA-Vinblastine Run1-DMSO  | NM_1781<br>77 | NMNAT3 | nicotinamide<br>nucleotide<br>adenylyltransferase 3 | 2.698806  | Inlier |
| siRNA Disorazole DMSO Run2   | NM_1781<br>77 | NMNAT3 | nicotinamide<br>nucleotide<br>adenylyltransferase 3 | 2.753697  | Inlier |
| siRNA Disorazole DMSO Run1   | NM_0210<br>79 | NMT1   | N-myristoyltransferase 1                            | -1.426764 | Inlier |

Identification of Survival Genes in Human Glioblastoma Cells Using siRNA Screening  
 Nikhil G Thaker, Fang Zhang, Peter R. McDonald, Tong Ying Shun, Michael D Lewen, Ian F. Pollack, and John S. Lazo

Molecular Pharmacology

|                                  |               |      |                                     |           |        |
|----------------------------------|---------------|------|-------------------------------------|-----------|--------|
| siRNA Disorazole DMSO Run3       | NM_0210<br>79 | NMT1 | N-<br>myristoyltr<br>ansferase<br>1 | -1.134686 | Inlier |
| siRNA-Vinblastine Run2-<br>DMSO  | NM_0210<br>79 | NMT1 | N-<br>myristoyltr<br>ansferase<br>1 | -0.196001 | Inlier |
| siRNA-Temozolomide Run2-<br>DMSO | NM_0210<br>79 | NMT1 | N-<br>myristoyltr<br>ansferase<br>1 | -0.011863 | Inlier |
| siRNA-Temozolomide Run3-<br>DMSO | NM_0210<br>79 | NMT1 | N-<br>myristoyltr<br>ansferase<br>1 | 0.011863  | Inlier |
| siRNA-Temozolomide Run1-<br>DMSO | NM_0210<br>79 | NMT1 | N-<br>myristoyltr<br>ansferase<br>1 | 0.469162  | Inlier |
| siRNA-Vinblastine Run1-<br>DMSO  | NM_0210<br>79 | NMT1 | N-<br>myristoyltr<br>ansferase<br>1 | 0.879838  | Inlier |
| siRNA Disorazole DMSO Run2       | NM_0210<br>79 | NMT1 | N-<br>myristoyltr<br>ansferase<br>1 | 1.457919  | Inlier |
| siRNA-Temozolomide Run2-<br>DMSO | NM_0048<br>08 | NMT2 | N-<br>myristoyltr<br>ansferase<br>2 | -1.550015 | Inlier |
| siRNA-Temozolomide Run3-<br>DMSO | NM_0048<br>08 | NMT2 | N-<br>myristoyltr<br>ansferase<br>2 | -0.767912 | Inlier |
| siRNA Disorazole DMSO Run3       | NM_0048<br>08 | NMT2 | N-<br>myristoyltr<br>ansferase<br>2 | -0.188497 | Inlier |
| siRNA-Vinblastine Run2-<br>DMSO  | NM_0048<br>08 | NMT2 | N-<br>myristoyltr<br>ansferase<br>2 | -0.145074 | Inlier |
| siRNA Disorazole DMSO Run1       | NM_0048<br>08 | NMT2 | N-<br>myristoyltr<br>ansferase<br>2 | 0.145074  | Inlier |
| siRNA-Temozolomide Run1-<br>DMSO | NM_0048<br>08 | NMT2 | N-<br>myristoyltr<br>ansferase<br>2 | 0.581088  | Inlier |

Identification of Survival Genes in Human Glioblastoma Cells Using siRNA Screening  
 Nikhil G Thaker, Fang Zhang, Peter R. McDonald, Tong Ying Shun, Michael D Lewen, Ian F. Pollack, and John S. Lazo

Molecular Pharmacology

| siRNA Treatment              | Gene ID   | Gene Name | Protein                  | Log2 Fold Change | Significance |
|------------------------------|-----------|-----------|--------------------------|------------------|--------------|
| siRNA-Vinblastine Run1-DMSO  | NM_004808 | NMT2      | N-myristoyltransferase 2 | 4.496526         | Outlier      |
| siRNA Disorazole DMSO Run2   | NM_004808 | NMT2      | N-myristoyltransferase 2 | 5.075325         | Outlier      |
| siRNA-Temozolomide Run3-DMSO | NM_006056 | NMUR1     | neuromedin U receptor 1  | -2.029582        | Inlier       |
| siRNA Disorazole DMSO Run2   | NM_006056 | NMUR1     | neuromedin U receptor 1  | -1.88412         | Inlier       |
| siRNA-Temozolomide Run2-DMSO | NM_006056 | NMUR1     | neuromedin U receptor 1  | -0.371172        | Inlier       |
| siRNA-Temozolomide Run1-DMSO | NM_006056 | NMUR1     | neuromedin U receptor 1  | -0.230178        | Inlier       |
| siRNA Disorazole DMSO Run1   | NM_006056 | NMUR1     | neuromedin U receptor 1  | 0.230178         | Inlier       |
| siRNA Disorazole DMSO Run3   | NM_006056 | NMUR1     | neuromedin U receptor 1  | 0.520139         | Inlier       |
| siRNA-Vinblastine Run1-DMSO  | NM_006056 | NMUR1     | neuromedin U receptor 1  | 0.828861         | Inlier       |
| siRNA-Vinblastine Run2-DMSO  | NM_006056 | NMUR1     | neuromedin U receptor 1  | 1.060914         | Inlier       |
| siRNA Disorazole DMSO Run3   | NM_020167 | NMUR2     | neuromedin U receptor 2  | -1.172571        | Inlier       |
| siRNA-Temozolomide Run3-DMSO | NM_020167 | NMUR2     | neuromedin U receptor 2  | -1.136104        | Inlier       |
| siRNA Disorazole DMSO Run2   | NM_020167 | NMUR2     | neuromedin U receptor 2  | -1.0694          | Inlier       |
| siRNA-Temozolomide Run1-DMSO | NM_020167 | NMUR2     | neuromedin U receptor 2  | -0.069879        | Inlier       |
| siRNA-Temozolomide Run2-DMSO | NM_020167 | NMUR2     | neuromedin U receptor 2  | 0.069879         | Inlier       |
| siRNA Disorazole DMSO Run1   | NM_020167 | NMUR2     | neuromedin U receptor 2  | 0.168682         | Inlier       |

Identification of Survival Genes in Human Glioblastoma Cells Using siRNA Screening  
 Nikhil G Thaker, Fang Zhang, Peter R. McDonald, Tong Ying Shun, Michael D Lewen, Ian F. Pollack, and John S. Lazo

| Molecular Pharmacology       | Gene ID   | Gene Name | Gene Description                 | Log2 Fold Change | Outlier Status |
|------------------------------|-----------|-----------|----------------------------------|------------------|----------------|
| siRNA-Vinblastine Run1-DMSO  | NM_020167 | NMUR2     | neuromedin U receptor 2          | 0.564878         | Inlier         |
| siRNA-Vinblastine Run2-DMSO  | NM_020167 | NMUR2     | neuromedin U receptor 2          | 0.784122         | Inlier         |
| siRNA Disorazole DMSO Run1   | NM_006169 | NNMT      | nicotinamide N-methyltransferase | -2.082172        | Inlier         |
| siRNA-Vinblastine Run2-DMSO  | NM_006169 | NNMT      | nicotinamide N-methyltransferase | -0.983632        | Inlier         |
| siRNA-Temozolomide Run2-DMSO | NM_006169 | NNMT      | nicotinamide N-methyltransferase | -0.590661        | Inlier         |
| siRNA-Temozolomide Run1-DMSO | NM_006169 | NNMT      | nicotinamide N-methyltransferase | -0.380841        | Inlier         |
| siRNA-Vinblastine Run1-DMSO  | NM_006169 | NNMT      | nicotinamide N-methyltransferase | 0.380841         | Inlier         |
| siRNA Disorazole DMSO Run3   | NM_006169 | NNMT      | nicotinamide N-methyltransferase | 0.433549         | Inlier         |
| siRNA-Temozolomide Run3-DMSO | NM_006169 | NNMT      | nicotinamide N-methyltransferase | 0.758339         | Inlier         |
| siRNA Disorazole DMSO Run2   | NM_006169 | NNMT      | nicotinamide N-methyltransferase | 0.768313         | Inlier         |
| siRNA Disorazole DMSO Run2   | NM_182977 | NNT       | nucleotide transhydrogenase      | -1.864809        | Inlier         |
| siRNA Disorazole DMSO Run3   | NM_182977 | NNT       | nucleotide transhydrogenase      | -1.608138        | Inlier         |

Identification of Survival Genes in Human Glioblastoma Cells Using siRNA Screening  
 Nikhil G Thaker, Fang Zhang, Peter R. McDonald, Tong Ying Shun, Michael D Lewen, Ian F. Pollack, and John S. Lazo

Molecular Pharmacology

|                                  |               |      |                                                        |           |        |
|----------------------------------|---------------|------|--------------------------------------------------------|-----------|--------|
| siRNA Disorazole DMSO Run1       | NM_1829<br>77 | NNT  | nicotinami<br>de<br>nucleotide<br>transhydro<br>genase | -0.82892  | Inlier |
| siRNA-Vinblastine Run1-<br>DMSO  | NM_1829<br>77 | NNT  | nicotinami<br>de<br>nucleotide<br>transhydro<br>genase | -0.381145 | Inlier |
| siRNA-Temozolomide Run2-<br>DMSO | NM_1829<br>77 | NNT  | nicotinami<br>de<br>nucleotide<br>transhydro<br>genase | 0.381144  | Inlier |
| siRNA-Temozolomide Run1-<br>DMSO | NM_1829<br>77 | NNT  | nicotinami<br>de<br>nucleotide<br>transhydro<br>genase | 0.583937  | Inlier |
| siRNA-Vinblastine Run2-<br>DMSO  | NM_1829<br>77 | NNT  | nicotinami<br>de<br>nucleotide<br>transhydro<br>genase | 0.642136  | Inlier |
| siRNA-Temozolomide Run3-<br>DMSO | NM_1829<br>77 | NNT  | nicotinami<br>de<br>nucleotide<br>transhydro<br>genase | 0.706864  | Inlier |
| siRNA-Temozolomide Run3-<br>DMSO | NM_1788<br>44 | NOD3 | NOD3                                                   | -0.838116 | Inlier |
| siRNA-Temozolomide Run2-<br>DMSO | NM_1788<br>44 | NOD3 | NOD3                                                   | -0.792142 | Inlier |
| siRNA-Temozolomide Run1-<br>DMSO | NM_1788<br>44 | NOD3 | NOD3                                                   | -0.426726 | Inlier |
| siRNA Disorazole DMSO Run3       | NM_1788<br>44 | NOD3 | NOD3                                                   | -0.134005 | Inlier |
| siRNA Disorazole DMSO Run2       | NM_1788<br>44 | NOD3 | NOD3                                                   | 0.134005  | Inlier |
| siRNA Disorazole DMSO Run1       | NM_1788<br>44 | NOD3 | NOD3                                                   | 0.556857  | Inlier |
| siRNA-Vinblastine Run1-<br>DMSO  | NM_1788<br>44 | NOD3 | NOD3                                                   | 1.69787   | Inlier |
| siRNA-Vinblastine Run2-<br>DMSO  | NM_1788<br>44 | NOD3 | NOD3                                                   | 1.829715  | Inlier |
| siRNA-Temozolomide Run2-<br>DMSO | NM_0006<br>20 | NOS1 | nitric oxide<br>synthase 1<br>(neuronal)               | -1.568948 | Inlier |



Identification of Survival Genes in Human Glioblastoma Cells Using siRNA Screening  
 Nikhil G Thaker, Fang Zhang, Peter R. McDonald, Tong Ying Shun, Michael D Lewen, Ian F. Pollack, and John S. Lazo  
 Molecular Pharmacology

|                              |               |       |                                                                   |           |        |
|------------------------------|---------------|-------|-------------------------------------------------------------------|-----------|--------|
| siRNA-Temozolomide Run1-DMSO | NM_0006<br>20 | NOS1  | nitric oxide<br>synthase 1<br>(neuronal)                          | -0.681044 | Inlier |
| siRNA Disorazole DMSO Run1   | NM_0006<br>20 | NOS1  | nitric oxide<br>synthase 1<br>(neuronal)                          | -0.218703 | Inlier |
| siRNA-Vinblastine Run2-DMSO  | NM_0006<br>20 | NOS1  | nitric oxide<br>synthase 1<br>(neuronal)                          | -0.184967 | Inlier |
| siRNA Disorazole DMSO Run3   | NM_0006<br>20 | NOS1  | nitric oxide<br>synthase 1<br>(neuronal)                          | 0.184966  | Inlier |
| siRNA-Temozolomide Run3-DMSO | NM_0006<br>20 | NOS1  | nitric oxide<br>synthase 1<br>(neuronal)                          | 0.667956  | Inlier |
| siRNA Disorazole DMSO Run2   | NM_0006<br>20 | NOS1  | nitric oxide<br>synthase 1<br>(neuronal)                          | 2.404024  | Inlier |
| siRNA-Vinblastine Run1-DMSO  | NM_0006<br>20 | NOS1  | nitric oxide<br>synthase 1<br>(neuronal)                          | 2.938183  | Inlier |
| siRNA Disorazole DMSO Run3   | NM_0006<br>25 | NOS2A | nitric oxide<br>synthase<br>2A<br>(inducible,<br>hepatocyte<br>s) | -0.796622 | Inlier |
| siRNA-Temozolomide Run3-DMSO | NM_0006<br>25 | NOS2A | nitric oxide<br>synthase<br>2A<br>(inducible,<br>hepatocyte<br>s) | -0.793763 | Inlier |

Identification of Survival Genes in Human Glioblastoma Cells Using siRNA Screening  
 Nikhil G Thaker, Fang Zhang, Peter R. McDonald, Tong Ying Shun, Michael D Lewen, Ian F. Pollack, and John S. Lazo  
 Molecular Pharmacology

|                                  |               |       |                                                                   |           |        |
|----------------------------------|---------------|-------|-------------------------------------------------------------------|-----------|--------|
| siRNA Disorazole DMSO Run1       | NM_0006<br>25 | NOS2A | nitric oxide<br>synthase<br>2A<br>(inducible,<br>hepatocyte<br>s) | -0.555237 | Inlier |
| siRNA-Vinblastine Run2-<br>DMSO  | NM_0006<br>25 | NOS2A | nitric oxide<br>synthase<br>2A<br>(inducible,<br>hepatocyte<br>s) | -0.016507 | Inlier |
| siRNA-Temozolomide Run1-<br>DMSO | NM_0006<br>25 | NOS2A | nitric oxide<br>synthase<br>2A<br>(inducible,<br>hepatocyte<br>s) | 0.016507  | Inlier |
| siRNA-Temozolomide Run2-<br>DMSO | NM_0006<br>25 | NOS2A | nitric oxide<br>synthase<br>2A<br>(inducible,<br>hepatocyte<br>s) | 0.159692  | Inlier |
| siRNA Disorazole DMSO Run2       | NM_0006<br>25 | NOS2A | nitric oxide<br>synthase<br>2A<br>(inducible,<br>hepatocyte<br>s) | 1.244667  | Inlier |
| siRNA-Vinblastine Run1-<br>DMSO  | NM_0006<br>25 | NOS2A | nitric oxide<br>synthase<br>2A<br>(inducible,<br>hepatocyte<br>s) | 1.764954  | Inlier |
| siRNA-Temozolomide Run3-<br>DMSO | NM_0006<br>03 | NOS3  | nitric oxide<br>synthase 3<br>(endotheli<br>al cell)              | -1.395805 | Inlier |

Identification of Survival Genes in Human Glioblastoma Cells Using siRNA Screening  
 Nikhil G Thaker, Fang Zhang, Peter R. McDonald, Tong Ying Shun, Michael D Lewen, Ian F. Pollack, and John S. Lazo  
 Molecular Pharmacology

|                                  |               |      |                                                      |           |        |
|----------------------------------|---------------|------|------------------------------------------------------|-----------|--------|
| siRNA Disorazole DMSO Run3       | NM_0006<br>03 | NOS3 | nitric oxide<br>synthase 3<br>(endotheli<br>al cell) | -0.626234 | Inlier |
| siRNA Disorazole DMSO Run1       | NM_0006<br>03 | NOS3 | nitric oxide<br>synthase 3<br>(endotheli<br>al cell) | -0.57057  | Inlier |
| siRNA-Vinblastine Run2-<br>DMSO  | NM_0006<br>03 | NOS3 | nitric oxide<br>synthase 3<br>(endotheli<br>al cell) | -0.388961 | Inlier |
| siRNA-Temozolomide Run2-<br>DMSO | NM_0006<br>03 | NOS3 | nitric oxide<br>synthase 3<br>(endotheli<br>al cell) | 0.388961  | Inlier |
| siRNA-Temozolomide Run1-<br>DMSO | NM_0006<br>03 | NOS3 | nitric oxide<br>synthase 3<br>(endotheli<br>al cell) | 0.722766  | Inlier |
| siRNA-Vinblastine Run1-<br>DMSO  | NM_0006<br>03 | NOS3 | nitric oxide<br>synthase 3<br>(endotheli<br>al cell) | 2.105604  | Inlier |
| siRNA Disorazole DMSO Run2       | NM_0006<br>03 | NOS3 | nitric oxide<br>synthase 3<br>(endotheli<br>al cell) | 2.702917  | Inlier |
| siRNA-Temozolomide Run1-<br>DMSO | NM_0139<br>54 | NOX1 | NADPH<br>oxidase 1                                   | -0.874987 | Inlier |
| siRNA Disorazole DMSO Run1       | NM_0139<br>54 | NOX1 | NADPH<br>oxidase 1                                   | -0.779114 | Inlier |
| siRNA-Temozolomide Run3-<br>DMSO | NM_0139<br>54 | NOX1 | NADPH<br>oxidase 1                                   | -0.388266 | Inlier |
| siRNA-Temozolomide Run2-<br>DMSO | NM_0139<br>54 | NOX1 | NADPH<br>oxidase 1                                   | -0.262214 | Inlier |
| siRNA Disorazole DMSO Run3       | NM_0139<br>54 | NOX1 | NADPH<br>oxidase 1                                   | 0.262214  | Inlier |

Identification of Survival Genes in Human Glioblastoma Cells Using siRNA Screening  
 Nikhil G Thaker, Fang Zhang, Peter R. McDonald, Tong Ying Shun, Michael D Lewen, Ian F. Pollack, and John S. Lazo

|                                  |               |      |                                                                 |           |        |
|----------------------------------|---------------|------|-----------------------------------------------------------------|-----------|--------|
| siRNA-Vinblastine Run1-<br>DMSO  | NM_0139<br>54 |      | NADPH<br>oxidase 1                                              | 0.569886  | Inlier |
| siRNA-Vinblastine Run2-<br>DMSO  | NM_0139<br>54 | NOX1 | NADPH<br>oxidase 1                                              | 1.502549  | Inlier |
| siRNA Disorazole DMSO Run2       | NM_0139<br>54 | NOX1 | NADPH<br>oxidase 1                                              | 2.717406  | Inlier |
| siRNA-Temozolomide Run3-<br>DMSO | NM_0157<br>18 | NOX3 | NADPH<br>oxidase 3                                              | -1.770352 | Inlier |
| siRNA-Temozolomide Run2-<br>DMSO | NM_0157<br>18 | NOX3 | NADPH<br>oxidase 3                                              | -0.792388 | Inlier |
| siRNA Disorazole DMSO Run1       | NM_0157<br>18 | NOX3 | NADPH<br>oxidase 3                                              | -0.057023 | Inlier |
| siRNA-Temozolomide Run1-<br>DMSO | NM_0157<br>18 | NOX3 | NADPH<br>oxidase 3                                              | -0.05623  | Inlier |
| siRNA-Vinblastine Run2-<br>DMSO  | NM_0157<br>18 | NOX3 | NADPH<br>oxidase 3                                              | 0.05623   | Inlier |
| siRNA Disorazole DMSO Run3       | NM_0157<br>18 | NOX3 | NADPH<br>oxidase 3                                              | 0.556612  | Inlier |
| siRNA-Vinblastine Run1-<br>DMSO  | NM_0157<br>18 | NOX3 | NADPH<br>oxidase 3                                              | 1.746958  | Inlier |
| siRNA Disorazole DMSO Run2       | NM_0157<br>18 | NOX3 | NADPH<br>oxidase 3                                              | 2.263584  | Inlier |
| siRNA-Temozolomide Run3-<br>DMSO | NM_0169<br>31 | NOX4 | NADPH<br>oxidase 4                                              | -0.873598 | Inlier |
| siRNA-Temozolomide Run2-<br>DMSO | NM_0169<br>31 | NOX4 | NADPH<br>oxidase 4                                              | -0.834163 | Inlier |
| siRNA Disorazole DMSO Run3       | NM_0169<br>31 | NOX4 | NADPH<br>oxidase 4                                              | -0.249601 | Inlier |
| siRNA-Temozolomide Run1-<br>DMSO | NM_0169<br>31 | NOX4 | NADPH<br>oxidase 4                                              | -0.196159 | Inlier |
| siRNA Disorazole DMSO Run1       | NM_0169<br>31 | NOX4 | NADPH<br>oxidase 4                                              | 0.196159  | Inlier |
| siRNA Disorazole DMSO Run2       | NM_0169<br>31 | NOX4 | NADPH<br>oxidase 4                                              | 0.514837  | Inlier |
| siRNA-Vinblastine Run1-<br>DMSO  | NM_0169<br>31 | NOX4 | NADPH<br>oxidase 4                                              | 0.930216  | Inlier |
| siRNA-Vinblastine Run2-<br>DMSO  | NM_0169<br>31 | NOX4 | NADPH<br>oxidase 4                                              | 1.089056  | Inlier |
| siRNA Disorazole DMSO Run1       | NM_0245<br>05 | NOX5 | NADPH<br>oxidase,<br>EF hand<br>calcium-<br>binding<br>domain 5 | -0.687787 | Inlier |
| siRNA-Temozolomide Run2-<br>DMSO | NM_0245<br>05 | NOX5 | NADPH<br>oxidase,<br>EF hand<br>calcium-<br>binding<br>domain 5 | -0.661213 | Inlier |

Identification of Survival Genes in Human Glioblastoma Cells Using siRNA Screening  
 Nikhil G Thaker, Fang Zhang, Peter R. McDonald, Tong Ying Shun, Michael D Lewen, Ian F. Pollack, and John S. Lazo

Molecular Pharmacology

|                              |           |      |                                                 |           |        |
|------------------------------|-----------|------|-------------------------------------------------|-----------|--------|
| siRNA-Temozolomide Run3-DMSO | NM_024505 | NOX5 | NADPH oxidase, EF hand calcium-binding domain 5 | -0.345157 | Inlier |
| siRNA-Temozolomide Run1-DMSO | NM_024505 | NOX5 | NADPH oxidase, EF hand calcium-binding domain 5 | -0.283812 | Inlier |
| siRNA Disorazole DMSO Run3   | NM_024505 | NOX5 | NADPH oxidase, EF hand calcium-binding domain 5 | 0.283812  | Inlier |
| siRNA-Vinblastine Run2-DMSO  | NM_024505 | NOX5 | NADPH oxidase, EF hand calcium-binding domain 5 | 1.150921  | Inlier |
| siRNA-Vinblastine Run1-DMSO  | NM_024505 | NOX5 | NADPH oxidase, EF hand calcium-binding domain 5 | 1.16898   | Inlier |
| siRNA Disorazole DMSO Run2   | NM_024505 | NOX5 | NADPH oxidase, EF hand calcium-binding domain 5 | 2.141065  | Inlier |
| siRNA Disorazole DMSO Run1   | NM_000270 | NP   | nucleoside phosphorylase                        | -2.084646 | Inlier |
| siRNA-Temozolomide Run1-DMSO | NM_000270 | NP   | nucleoside phosphorylase                        | -1.028903 | Inlier |
| siRNA-Temozolomide Run2-DMSO | NM_000270 | NP   | nucleoside phosphorylase                        | -0.451884 | Inlier |
| siRNA-Temozolomide Run3-DMSO | NM_000270 | NP   | nucleoside phosphorylase                        | -0.092392 | Inlier |

Identification of Survival Genes in Human Glioblastoma Cells Using siRNA Screening  
 Nikhil G Thaker, Fang Zhang, Peter R. McDonald, Tong Ying Shun, Michael D Lewen, Ian F. Pollack, and John S. Lazo  
 Molecular Pharmacology

|                              |               |       |                               |           |         |
|------------------------------|---------------|-------|-------------------------------|-----------|---------|
| siRNA Disorazole DMSO Run3   | NM_0002<br>70 | NP    | nucleoside phosphorylase      | 0.092392  | Inlier  |
| siRNA-Vinblastine Run1-DMSO  | NM_0002<br>70 | NP    | nucleoside phosphorylase      | 0.669134  | Inlier  |
| siRNA-Vinblastine Run2-DMSO  | NM_0002<br>70 | NP    | nucleoside phosphorylase      | 0.679866  | Inlier  |
| siRNA Disorazole DMSO Run2   | NM_0002<br>70 | NP    | nucleoside phosphorylase      | 0.700159  | Inlier  |
| siRNA-Vinblastine Run2-DMSO  | NM_0325<br>69 | N-PAC | N-PAC                         | -0.974359 | Inlier  |
| siRNA-Temozolomide Run2-DMSO | NM_0325<br>69 | N-PAC | N-PAC                         | -0.928304 | Inlier  |
| siRNA-Temozolomide Run1-DMSO | NM_0325<br>69 | N-PAC | N-PAC                         | -0.420696 | Inlier  |
| siRNA-Temozolomide Run3-DMSO | NM_0325<br>69 | N-PAC | N-PAC                         | -0.212062 | Inlier  |
| siRNA Disorazole DMSO Run1   | NM_0325<br>69 | N-PAC | N-PAC                         | 0.212062  | Inlier  |
| siRNA Disorazole DMSO Run3   | NM_0325<br>69 | N-PAC | N-PAC                         | 0.252722  | Inlier  |
| siRNA Disorazole DMSO Run2   | NM_0325<br>69 | N-PAC | N-PAC                         | 2.908686  | Inlier  |
| siRNA-Vinblastine Run1-DMSO  | NM_0325<br>69 | N-PAC | N-PAC                         | 3.719577  | Outlier |
| siRNA-Temozolomide Run1-DMSO | NM_0002<br>71 | NPC1  | Niemann-Pick disease, type C1 | -0.818191 | Inlier  |
| siRNA-Temozolomide Run3-DMSO | NM_0002<br>71 | NPC1  | Niemann-Pick disease, type C1 | -0.639803 | Inlier  |
| siRNA Disorazole DMSO Run3   | NM_0002<br>71 | NPC1  | Niemann-Pick disease, type C1 | -0.401038 | Inlier  |
| siRNA Disorazole DMSO Run1   | NM_0002<br>71 | NPC1  | Niemann-Pick disease, type C1 | -0.134778 | Inlier  |
| siRNA-Temozolomide Run2-DMSO | NM_0002<br>71 | NPC1  | Niemann-Pick disease, type C1 | 0.134779  | Inlier  |

Identification of Survival Genes in Human Glioblastoma Cells Using siRNA Screening  
 Nikhil G Thaker, Fang Zhang, Peter R. McDonald, Tong Ying Shun, Michael D Lewen, Ian F. Pollack, and John S. Lazo

Molecular Pharmacology

|                              |           |        |                                    |           |        |
|------------------------------|-----------|--------|------------------------------------|-----------|--------|
| siRNA-Vinblastine Run2-DMSO  | NM_000271 | NPC1   | Niemann-Pick disease, type C1      | 0.709197  | Inlier |
| siRNA-Vinblastine Run1-DMSO  | NM_000271 | NPC1   | Niemann-Pick disease, type C1      | 1.225806  | Inlier |
| siRNA Disorazole DMSO Run2   | NM_000271 | NPC1   | Niemann-Pick disease, type C1      | 2.117676  | Inlier |
| siRNA-Temozolomide Run2-DMSO | NM_024663 | NPEPL1 | aminopeptidase-like 1              | -0.917399 | Inlier |
| siRNA-Temozolomide Run1-DMSO | NM_024663 | NPEPL1 | aminopeptidase-like 1              | -0.742748 | Inlier |
| siRNA-Temozolomide Run3-DMSO | NM_024663 | NPEPL1 | aminopeptidase-like 1              | -0.346174 | Inlier |
| siRNA Disorazole DMSO Run1   | NM_024663 | NPEPL1 | aminopeptidase-like 1              | -0.094123 | Inlier |
| siRNA Disorazole DMSO Run2   | NM_024663 | NPEPL1 | aminopeptidase-like 1              | 0.094123  | Inlier |
| siRNA Disorazole DMSO Run3   | NM_024663 | NPEPL1 | aminopeptidase-like 1              | 0.606252  | Inlier |
| siRNA-Vinblastine Run2-DMSO  | NM_024663 | NPEPL1 | aminopeptidase-like 1              | 0.858848  | Inlier |
| siRNA-Vinblastine Run1-DMSO  | NM_024663 | NPEPL1 | aminopeptidase-like 1              | 0.953755  | Inlier |
| siRNA-Temozolomide Run2-DMSO | NM_006310 | NPEPPS | aminopeptidase puromycin sensitive | -3.298284 | Inlier |
| siRNA-Temozolomide Run3-DMSO | NM_006310 | NPEPPS | aminopeptidase puromycin sensitive | -3.194868 | Inlier |
| siRNA-Temozolomide Run1-DMSO | NM_006310 | NPEPPS | aminopeptidase puromycin sensitive | -0.708645 | Inlier |

Identification of Survival Genes in Human Glioblastoma Cells Using siRNA Screening  
 Nikhil G Thaker, Fang Zhang, Peter R. McDonald, Tong Ying Shun, Michael D Lewen, Ian F. Pollack, and John S. Lazo  
 Molecular Pharmacology

|                              |               |        |                                                             |           |        |
|------------------------------|---------------|--------|-------------------------------------------------------------|-----------|--------|
| siRNA Disorazole DMSO Run1   | NM_0063<br>10 | NPEPPS | aminopeptidase<br>puromycin sensitive                       | -0.408359 | Inlier |
| siRNA Disorazole DMSO Run3   | NM_0063<br>10 | NPEPPS | aminopeptidase<br>puromycin sensitive                       | 0.408359  | Inlier |
| siRNA-Vinblastine Run2-DMSO  | NM_0063<br>10 | NPEPPS | aminopeptidase<br>puromycin sensitive                       | 0.613842  | Inlier |
| siRNA Disorazole DMSO Run2   | NM_0063<br>10 | NPEPPS | aminopeptidase<br>puromycin sensitive                       | 0.640355  | Inlier |
| siRNA-Vinblastine Run1-DMSO  | NM_0063<br>10 | NPEPPS | aminopeptidase<br>puromycin sensitive                       | 0.877419  | Inlier |
| siRNA-Temozolomide Run3-DMSO | NM_0046<br>46 | NPHS1  | nephrosis 1,<br>congenital,<br>Finnish<br>type<br>(nephrin) | -2.598064 | Inlier |
| siRNA-Temozolomide Run2-DMSO | NM_0046<br>46 | NPHS1  | nephrosis 1,<br>congenital,<br>Finnish<br>type<br>(nephrin) | -0.84993  | Inlier |
| siRNA-Temozolomide Run1-DMSO | NM_0046<br>46 | NPHS1  | nephrosis 1,<br>congenital,<br>Finnish<br>type<br>(nephrin) | -0.49907  | Inlier |
| siRNA Disorazole DMSO Run1   | NM_0046<br>46 | NPHS1  | nephrosis 1,<br>congenital,<br>Finnish<br>type<br>(nephrin) | -0.413342 | Inlier |



Identification of Survival Genes in Human Glioblastoma Cells Using siRNA Screening  
 Nikhil G Thaker, Fang Zhang, Peter R. McDonald, Tong Ying Shun, Michael D Lewen, Ian F. Pollack, and John S. Lazo

Molecular Pharmacology

|                                  |               |       |                                                                                           |           |         |
|----------------------------------|---------------|-------|-------------------------------------------------------------------------------------------|-----------|---------|
| siRNA Disorazole DMSO Run2       | NM_0046<br>46 | NPHS1 | nephrosis<br>1,<br>congenital,<br>Finnish<br>type<br>(nephrin)                            | 0.413341  | Inlier  |
| siRNA Disorazole DMSO Run3       | NM_0046<br>46 | NPHS1 | nephrosis<br>1,<br>congenital,<br>Finnish<br>type<br>(nephrin)                            | 0.468099  | Inlier  |
| siRNA-Vinblastine Run2-<br>DMSO  | NM_0046<br>46 | NPHS1 | nephrosis<br>1,<br>congenital,<br>Finnish<br>type<br>(nephrin)                            | 1.263789  | Inlier  |
| siRNA-Vinblastine Run1-<br>DMSO  | NM_0046<br>46 | NPHS1 | nephrosis<br>1,<br>congenital,<br>Finnish<br>type<br>(nephrin)                            | 4.25308   | Outlier |
| siRNA-Vinblastine Run2-<br>DMSO  | NM_0307<br>69 | NPL   | N-<br>acetylneur<br>aminate<br>pyruvate<br>lyase<br>(dihydrodi<br>picolinate<br>synthase) | -0.696734 | Inlier  |
| siRNA Disorazole DMSO Run1       | NM_0307<br>69 | NPL   | N-<br>acetylneur<br>aminate<br>pyruvate<br>lyase<br>(dihydrodi<br>picolinate<br>synthase) | -0.652266 | Inlier  |
| siRNA-Temozolomide Run2-<br>DMSO | NM_0307<br>69 | NPL   | N-<br>acetylneur<br>aminate<br>pyruvate<br>lyase<br>(dihydrodi<br>picolinate<br>synthase) | -0.299047 | Inlier  |

Identification of Survival Genes in Human Glioblastoma Cells Using siRNA Screening  
 Nikhil G Thaker, Fang Zhang, Peter R. McDonald, Tong Ying Shun, Michael D Lewen, Ian F. Pollack, and John S. Lazo

Molecular Pharmacology

| siRNA Treatment              | Gene ID   | Cell Line | Gene Name                                                        | Log2 Fold Change | Classification |
|------------------------------|-----------|-----------|------------------------------------------------------------------|------------------|----------------|
| siRNA-Temozolomide Run1-DMSO | NM_030769 | NPL       | N-acetylneuraminyl pyruvate lyase (dihydrodipicolinate synthase) | -0.029294        | Inlier         |
| siRNA Disorazole DMSO Run3   | NM_030769 | NPL       | N-acetylneuraminyl pyruvate lyase (dihydrodipicolinate synthase) | 0.029294         | Inlier         |
| siRNA-Temozolomide Run3-DMSO | NM_030769 | NPL       | N-acetylneuraminyl pyruvate lyase (dihydrodipicolinate synthase) | 0.724374         | Inlier         |
| siRNA Disorazole DMSO Run2   | NM_030769 | NPL       | N-acetylneuraminyl pyruvate lyase (dihydrodipicolinate synthase) | 1.53114          | Inlier         |
| siRNA-Vinblastine Run1-DMSO  | NM_030769 | NPL       | N-acetylneuraminyl pyruvate lyase (dihydrodipicolinate synthase) | 4.739491         | Outlier        |
| siRNA-Temozolomide Run3-DMSO | NM_017921 | NPL4      | NPL4                                                             | -0.674918        | Inlier         |
| siRNA Disorazole DMSO Run3   | NM_017921 | NPL4      | NPL4                                                             | -0.674082        | Inlier         |
| siRNA-Vinblastine Run2-DMSO  | NM_017921 | NPL4      | NPL4                                                             | -0.561173        | Inlier         |
| siRNA-Temozolomide Run2-DMSO | NM_017921 | NPL4      | NPL4                                                             | -0.276838        | Inlier         |
| siRNA Disorazole DMSO Run1   | NM_017921 | NPL4      | NPL4                                                             | 0.276838         | Inlier         |
| siRNA-Temozolomide Run1-DMSO | NM_017921 | NPL4      | NPL4                                                             | 1.01739          | Inlier         |

Identification of Survival Genes in Human Glioblastoma Cells Using siRNA Screening

Nikhil G Thaker, Fang Zhang, Peter R. McDonald, Tong Ying Shun, Michael D Lewen, Ian F. Pollack, and John S. Lazo

| siRNA/Plasmid/Drug           | Gene | Accession | Gene | Gene                                                                               | Log2FC    | Category |
|------------------------------|------|-----------|------|------------------------------------------------------------------------------------|-----------|----------|
| siRNA-Vincristine Run1       | NPL4 | NM_0179   | NPL4 | NPL4                                                                               | 2.354316  | Inlier   |
| DMSO                         | NPL4 | 21        | NPL4 | NPL4                                                                               | 2.354316  | Inlier   |
| siRNA Disorazole DMSO Run2   | NPL4 | NM_0179   | NPL4 | NPL4                                                                               | 2.558421  | Inlier   |
| siRNA-Temozolomide Run3-DMSO | NPR1 | NM_000906 | NPR1 | natriuretic peptide receptor A/guanylate cyclase A (atriuretic peptide receptor A) | -0.746431 | Inlier   |
| siRNA-Temozolomide Run2-DMSO | NPR1 | NM_000906 | NPR1 | natriuretic peptide receptor A/guanylate cyclase A (atriuretic peptide receptor A) | -0.602569 | Inlier   |
| siRNA Disorazole DMSO Run1   | NPR1 | NM_000906 | NPR1 | natriuretic peptide receptor A/guanylate cyclase A (atriuretic peptide receptor A) | -0.338559 | Inlier   |
| siRNA-Temozolomide Run1-DMSO | NPR1 | NM_000906 | NPR1 | natriuretic peptide receptor A/guanylate cyclase A (atriuretic peptide receptor A) | -0.328372 | Inlier   |

Identification of Survival Genes in Human Glioblastoma Cells Using siRNA Screening

Nikhil G Thaker, Fang Zhang, Peter R. McDonald, Tong Ying Shun, Michael D Lewen, Ian F. Pollack, and John S. Lazo

Molecular Pharmacology

| siRNA             | Condition | Run   | Gene | Accession | Gene Name | Value    | Outlier |
|-------------------|-----------|-------|------|-----------|-----------|----------|---------|
| siRNA Disorazole  | DMSO      | Run2  | 06   | NM_0009   | NPR1      | 0.328372 | Inlier  |
| siRNA-Vinblastine | DMSO      | Run1- | 06   | NM_0009   | NPR1      | 0.78674  | Inlier  |
| siRNA-Vinblastine | DMSO      | Run2- | 06   | NM_0009   | NPR1      | 0.838457 | Inlier  |
| siRNA Disorazole  | DMSO      | Run3  | 06   | NM_0009   | NPR1      | 1.117678 | Inlier  |

natriuretic peptide receptor A/guanylate cyclase A (atriuretic peptide receptor A) natriuretic peptide receptor A/guanylate cyclase A (atriuretic peptide receptor A) natriuretic peptide receptor A/guanylate cyclase A (atriuretic peptide receptor A) natriuretic peptide receptor A/guanylate cyclase A (atriuretic peptide receptor A)

Identification of Survival Genes in Human Glioblastoma Cells Using siRNA Screening

Nikhil G Thaker, Fang Zhang, Peter R. McDonald, Tong Ying Shun, Michael D Lewen, Ian F. Pollack, and John S. Lazo

Molecular Pharmacology

| siRNA              | Condition | Run  | Gene    | Accession | Probe     | Log2FC    | Outlier                                                                                              | Gene Description                                                                                     |
|--------------------|-----------|------|---------|-----------|-----------|-----------|------------------------------------------------------------------------------------------------------|------------------------------------------------------------------------------------------------------|
| siRNA Disorazole   | DMSO      | Run2 | 95      | NM_0039   | NPR2      | -1.039232 | Inlier                                                                                               | natriuretic peptide receptor B/guanylate cyclase B (atrioventricular natriuretic peptide receptor B) |
| siRNA-Temozolomide | Run3-DMSO | 95   | NM_0039 | NPR2      | -0.804642 | Inlier    | natriuretic peptide receptor B/guanylate cyclase B (atrioventricular natriuretic peptide receptor B) |                                                                                                      |
| siRNA-Temozolomide | Run1-DMSO | 95   | NM_0039 | NPR2      | -0.283942 | Inlier    | natriuretic peptide receptor B/guanylate cyclase B (atrioventricular natriuretic peptide receptor B) |                                                                                                      |
| siRNA Disorazole   | DMSO      | Run3 | 95      | NM_0039   | NPR2      | -0.257137 | Inlier                                                                                               | natriuretic peptide receptor B                                                                       |

Identification of Survival Genes in Human Glioblastoma Cells Using siRNA Screening

Nikhil G Thaker, Fang Zhang, Peter R. McDonald, Tong Ying Shun, Michael D Lewen, Ian F. Pollack, and John S. Lazo

Molecular Pharmacology

| siRNA Treatment              | Gene ID   | Gene Name | Protein Name                                                                             | Value    | Outlier Status |
|------------------------------|-----------|-----------|------------------------------------------------------------------------------------------|----------|----------------|
| siRNA-Temozolomide Run2-DMSO | NM_003995 | NPR2      | natriuretic peptide receptor B/guanylate cyclase B (atrioventricular peptide receptor B) | 0.257137 | Inlier         |
| siRNA-Vinblastine Run2-DMSO  | NM_003995 | NPR2      | natriuretic peptide receptor B/guanylate cyclase B (atrioventricular peptide receptor B) | 0.646899 | Inlier         |
| siRNA-Vinblastine Run1-DMSO  | NM_003995 | NPR2      | natriuretic peptide receptor B/guanylate cyclase B (atrioventricular peptide receptor B) | 0.702101 | Inlier         |
| siRNA Disorazole DMSO Run1   | NM_003995 | NPR2      | natriuretic peptide receptor B                                                           | 0.777352 | Inlier         |

Identification of Survival Genes in Human Glioblastoma Cells Using siRNA Screening

Nikhil G Thaker, Fang Zhang, Peter R. McDonald, Tong Ying Shun, Michael D Lewen, Ian F. Pollack, and John S. Lazo

Molecular Pharmacology

| siRNA                        | Gene | Gene ID   | Gene Name                                                                          | Log2FC    | Inlier |
|------------------------------|------|-----------|------------------------------------------------------------------------------------|-----------|--------|
| siRNA-Temozolomide Run3-DMSO | NPR3 | NM_000908 | natriuretic peptide receptor C/guanylate cyclase C (atriuretic peptide receptor C) | -2.912904 | Inlier |
| siRNA-Temozolomide Run1-DMSO | NPR3 | NM_000908 | natriuretic peptide receptor C/guanylate cyclase C (atriuretic peptide receptor C) | -1.480194 | Inlier |
| siRNA-Temozolomide Run2-DMSO | NPR3 | NM_000908 | natriuretic peptide receptor C/guanylate cyclase C (atriuretic peptide receptor C) | -0.75874  | Inlier |
| siRNA Disorazole DMSO Run2   | NPR3 | NM_000908 | natriuretic peptide receptor C                                                     | -0.373698 | Inlier |

Identification of Survival Genes in Human Glioblastoma Cells Using siRNA Screening

Nikhil G Thaker, Fang Zhang, Peter R. McDonald, Tong Ying Shun, Michael D Lewen, Ian F. Pollack, and John S. Lazo

Molecular Pharmacology

|                              |           |       |                                                                                    |           |        |
|------------------------------|-----------|-------|------------------------------------------------------------------------------------|-----------|--------|
| siRNA Disorazole DMSO Run1   | NM_000908 | NPR3  | natriuretic peptide receptor C/guanylate cyclase C (atriuretic peptide receptor C) | 0.373698  | Inlier |
| siRNA-Vinblastine Run2-DMSO  | NM_000908 | NPR3  | natriuretic peptide receptor C/guanylate cyclase C (atriuretic peptide receptor C) | 0.395146  | Inlier |
| siRNA-Vinblastine Run1-DMSO  | NM_000908 | NPR3  | natriuretic peptide receptor C/guanylate cyclase C (atriuretic peptide receptor C) | 0.617722  | Inlier |
| siRNA Disorazole DMSO Run3   | NM_000908 | NPR3  | natriuretic peptide receptor C                                                     | 0.731278  | Inlier |
| siRNA-Vinblastine Run2-DMSO  | NM_058178 | NPTXR | neuronal pentraxin receptor                                                        | -0.699136 | Inlier |
| siRNA-Temozolomide Run2-DMSO | NM_058178 | NPTXR | neuronal pentraxin receptor                                                        | -0.649864 | Inlier |



Identification of Survival Genes in Human Glioblastoma Cells Using siRNA Screening  
 Nikhil G Thaker, Fang Zhang, Peter R. McDonald, Tong Ying Shun, Michael D Lewen, Ian F. Pollack, and John S. Lazo

Molecular Pharmacology

|                              |         |       |            |           |        |
|------------------------------|---------|-------|------------|-----------|--------|
|                              | NM_0581 |       | neuronal   |           |        |
| siRNA Disorazole DMSO Run3   | 78      | NPTXR | pentraxin  | -0.384682 | Inlier |
|                              |         |       | receptor   |           |        |
|                              | NM_0581 |       | neuronal   |           |        |
| siRNA Disorazole DMSO Run1   | 78      | NPTXR | pentraxin  | -0.033709 | Inlier |
|                              |         |       | receptor   |           |        |
|                              | NM_0581 |       | neuronal   |           |        |
| siRNA-Temozolomide Run3-DMSO | 78      | NPTXR | pentraxin  | 0.033709  | Inlier |
|                              |         |       | receptor   |           |        |
|                              | NM_0581 |       | neuronal   |           |        |
| siRNA-Temozolomide Run1-DMSO | 78      | NPTXR | pentraxin  | 1.188637  | Inlier |
|                              |         |       | receptor   |           |        |
|                              | NM_0581 |       | neuronal   |           |        |
| siRNA-Vinblastine Run1-DMSO  | 78      | NPTXR | pentraxin  | 1.527681  | Inlier |
|                              |         |       | receptor   |           |        |
|                              | NM_0581 |       | neuronal   |           |        |
| siRNA Disorazole DMSO Run2   | 78      | NPTXR | pentraxin  | 2.032607  | Inlier |
|                              |         |       | receptor   |           |        |
|                              | NM_0009 |       | neuropepti |           |        |
| siRNA-Temozolomide Run3-DMSO | 05      | NPY   | de Y       | -2.443898 | Inlier |
|                              |         |       |            |           |        |
|                              | NM_0009 |       | neuropepti |           |        |
| siRNA-Temozolomide Run1-DMSO | 05      | NPY   | de Y       | -0.447834 | Inlier |
|                              |         |       |            |           |        |
|                              | NM_0009 |       | neuropepti |           |        |
| siRNA-Temozolomide Run2-DMSO | 05      | NPY   | de Y       | -0.444041 | Inlier |
|                              |         |       |            |           |        |
|                              | NM_0009 |       | neuropepti |           |        |
| siRNA Disorazole DMSO Run2   | 05      | NPY   | de Y       | -0.260706 | Inlier |
|                              |         |       |            |           |        |
|                              | NM_0009 |       | neuropepti |           |        |
| siRNA Disorazole DMSO Run1   | 05      | NPY   | de Y       | 0.260705  | Inlier |
|                              |         |       |            |           |        |
|                              | NM_0009 |       | neuropepti |           |        |
| siRNA Disorazole DMSO Run3   | 05      | NPY   | de Y       | 0.901165  | Inlier |
|                              |         |       |            |           |        |
|                              | NM_0009 |       | neuropepti |           |        |
| siRNA-Vinblastine Run1-DMSO  | 05      | NPY   | de Y       | 1.018436  | Inlier |
|                              |         |       |            |           |        |
|                              | NM_0009 |       | neuropepti |           |        |
| siRNA-Vinblastine Run2-DMSO  | 05      | NPY   | de Y       | 1.081604  | Inlier |
|                              |         |       |            |           |        |
|                              | NM_0009 |       | neuropepti |           |        |
|                              |         |       | de Y       |           |        |
|                              | NM_0009 |       | receptor   |           |        |
| siRNA-Temozolomide Run3-DMSO | 09      | NPY1R | Y1         | -1.981126 | Inlier |
|                              |         |       |            |           |        |
|                              | NM_0009 |       | neuropepti |           |        |
|                              |         |       | de Y       |           |        |
|                              | NM_0009 |       | receptor   |           |        |
| siRNA-Temozolomide Run2-DMSO | 09      | NPY1R | Y1         | -1.03906  | Inlier |
|                              |         |       |            |           |        |
|                              | NM_0009 |       | neuropepti |           |        |
|                              |         |       | de Y       |           |        |
|                              | NM_0009 |       | receptor   |           |        |
| siRNA-Temozolomide Run1-DMSO | 09      | NPY1R | Y1         | -0.978311 | Inlier |
|                              |         |       |            |           |        |
|                              | NM_0009 |       | neuropepti |           |        |
|                              |         |       | de Y       |           |        |
|                              | NM_0009 |       | receptor   |           |        |
| siRNA Disorazole DMSO Run2   | 09      | NPY1R | Y1         | -0.044403 | Inlier |

Identification of Survival Genes in Human Glioblastoma Cells Using siRNA Screening  
 Nikhil G Thaker, Fang Zhang, Peter R. McDonald, Tong Ying Shun, Michael D Lewen, Ian F. Pollack, and John S. Lazo

Molecular Pharmacology

| siRNA Treatment              | Gene ID   | Gene Name | Protein                    | Value     | Outlier Status |
|------------------------------|-----------|-----------|----------------------------|-----------|----------------|
| siRNA Disorazole DMSO Run1   | NM_000909 | NPY1R     | neuropeptide Y receptor Y1 | 0.044403  | Inlier         |
| siRNA Disorazole DMSO Run3   | NM_000909 | NPY1R     | neuropeptide Y receptor Y1 | 0.230224  | Inlier         |
| siRNA-Vinblastine Run1-DMSO  | NM_000909 | NPY1R     | neuropeptide Y receptor Y1 | 0.633152  | Inlier         |
| siRNA-Vinblastine Run2-DMSO  | NM_000909 | NPY1R     | neuropeptide Y receptor Y1 | 0.715848  | Inlier         |
| siRNA-Temozolomide Run3-DMSO | NM_000910 | NPY2R     | neuropeptide Y receptor Y2 | -0.900126 | Inlier         |
| siRNA-Temozolomide Run2-DMSO | NM_000910 | NPY2R     | neuropeptide Y receptor Y2 | -0.448874 | Inlier         |
| siRNA Disorazole DMSO Run2   | NM_000910 | NPY2R     | neuropeptide Y receptor Y2 | -0.300788 | Inlier         |
| siRNA-Temozolomide Run1-DMSO | NM_000910 | NPY2R     | neuropeptide Y receptor Y2 | -0.142316 | Inlier         |
| siRNA Disorazole DMSO Run3   | NM_000910 | NPY2R     | neuropeptide Y receptor Y2 | 0.142316  | Inlier         |
| siRNA Disorazole DMSO Run1   | NM_000910 | NPY2R     | neuropeptide Y receptor Y2 | 0.952405  | Inlier         |
| siRNA-Vinblastine Run2-DMSO  | NM_000910 | NPY2R     | neuropeptide Y receptor Y2 | 1.4913    | Inlier         |
| siRNA-Vinblastine Run1-DMSO  | NM_000910 | NPY2R     | neuropeptide Y receptor Y2 | 1.499637  | Inlier         |
| siRNA-Temozolomide Run3-DMSO | NM_006174 | NPY5R     | neuropeptide Y receptor Y5 | -1.982362 | Inlier         |

Identification of Survival Genes in Human Glioblastoma Cells Using siRNA Screening  
 Nikhil G Thaker, Fang Zhang, Peter R. McDonald, Tong Ying Shun, Michael D Lewen, Ian F. Pollack, and John S. Lazo

Molecular Pharmacology

|                              |               |       |                                  |           |        |
|------------------------------|---------------|-------|----------------------------------|-----------|--------|
| siRNA-Temozolomide Run1-DMSO | NM_0061<br>74 | NPY5R | neuropeptide Y receptor Y5       | -0.244748 | Inlier |
| siRNA Disorazole DMSO Run2   | NM_0061<br>74 | NPY5R | neuropeptide Y receptor Y5       | -0.21466  | Inlier |
| siRNA-Temozolomide Run2-DMSO | NM_0061<br>74 | NPY5R | neuropeptide Y receptor Y5       | -0.087425 | Inlier |
| siRNA Disorazole DMSO Run3   | NM_0061<br>74 | NPY5R | neuropeptide Y receptor Y5       | 0.087425  | Inlier |
| siRNA Disorazole DMSO Run1   | NM_0061<br>74 | NPY5R | neuropeptide Y receptor Y5       | 1.104252  | Inlier |
| siRNA-Vinblastine Run2-DMSO  | NM_0061<br>74 | NPY5R | neuropeptide Y receptor Y5       | 1.250044  | Inlier |
| siRNA-Vinblastine Run1-DMSO  | NM_0061<br>74 | NPY5R | neuropeptide Y receptor Y5       | 1.390063  | Inlier |
| siRNA-Temozolomide Run3-DMSO | NM_0009<br>03 | NQO1  | NAD(P)H dehydrogenase, quinone 1 | -0.747908 | Inlier |
| siRNA-Temozolomide Run2-DMSO | NM_0009<br>03 | NQO1  | NAD(P)H dehydrogenase, quinone 1 | -0.601092 | Inlier |
| siRNA Disorazole DMSO Run3   | NM_0009<br>03 | NQO1  | NAD(P)H dehydrogenase, quinone 1 | -0.393415 | Inlier |
| siRNA-Temozolomide Run1-DMSO | NM_0009<br>03 | NQO1  | NAD(P)H dehydrogenase, quinone 1 | -0.199511 | Inlier |
| siRNA Disorazole DMSO Run1   | NM_0009<br>03 | NQO1  | NAD(P)H dehydrogenase, quinone 1 | 0.199511  | Inlier |
| siRNA-Vinblastine Run1-DMSO  | NM_0009<br>03 | NQO1  | NAD(P)H dehydrogenase, quinone 1 | 1.108617  | Inlier |

Identification of Survival Genes in Human Glioblastoma Cells Using siRNA Screening  
 Nikhil G Thaker, Fang Zhang, Peter R. McDonald, Tong Ying Shun, Michael D Lewen, Ian F. Pollack, and John S. Lazo

Molecular Pharmacology

|                              |           |        |                                                       |           |        |
|------------------------------|-----------|--------|-------------------------------------------------------|-----------|--------|
| siRNA-Vinblastine Run2-DMSO  | NM_000903 | NQO1   | NAD(P)H dehydrogenase, quinone 1                      | 1.172071  | Inlier |
| siRNA Disorazole DMSO Run2   | NM_000903 | NQO1   | NAD(P)H dehydrogenase, quinone 1                      | 1.205516  | Inlier |
| siRNA Disorazole DMSO Run1   | NM_000904 | NQO2   | NAD(P)H dehydrogenase, quinone 2                      | -0.971186 | Inlier |
| siRNA-Temozolomide Run2-DMSO | NM_000904 | NQO2   | NAD(P)H dehydrogenase, quinone 2                      | -0.733191 | Inlier |
| siRNA Disorazole DMSO Run2   | NM_000904 | NQO2   | NAD(P)H dehydrogenase, quinone 2                      | -0.615809 | Inlier |
| siRNA-Temozolomide Run1-DMSO | NM_000904 | NQO2   | NAD(P)H dehydrogenase, quinone 2                      | -0.305876 | Inlier |
| siRNA-Temozolomide Run3-DMSO | NM_000904 | NQO2   | NAD(P)H dehydrogenase, quinone 2                      | 0.305876  | Inlier |
| siRNA Disorazole DMSO Run3   | NM_000904 | NQO2   | NAD(P)H dehydrogenase, quinone 2                      | 0.320928  | Inlier |
| siRNA-Vinblastine Run1-DMSO  | NM_000904 | NQO2   | NAD(P)H dehydrogenase, quinone 2                      | 1.252267  | Inlier |
| siRNA-Vinblastine Run2-DMSO  | NM_000904 | NQO2   | NAD(P)H dehydrogenase, quinone 2                      | 1.682246  | Inlier |
| siRNA Disorazole DMSO Run3   | NM_016243 | NQO3A2 | NAD(P)H:quinone oxidoreductase type 3, polypeptide A2 | -0.698709 | Inlier |



Identification of Survival Genes in Human Glioblastoma Cells Using siRNA Screening  
 Nikhil G Thaker, Fang Zhang, Peter R. McDonald, Tong Ying Shun, Michael D Lewen, Ian F. Pollack, and John S. Lazo

Molecular Pharmacology

| siRNA Treatment              | Gene      | Accession | Family                                 | Member   | Score     | Category |
|------------------------------|-----------|-----------|----------------------------------------|----------|-----------|----------|
| siRNA Disorazole DMSO Run1   | NM_000475 | NR0B1     | nuclear receptor subfamily 0, group B, | member 1 | -1.993611 | Inlier   |
| siRNA-Temozolomide Run3-DMSO | NM_000475 | NR0B1     | nuclear receptor subfamily 0, group B, | member 1 | -0.757126 | Inlier   |
| siRNA-Temozolomide Run1-DMSO | NM_000475 | NR0B1     | nuclear receptor subfamily 0, group B, | member 1 | -0.082214 | Inlier   |
| siRNA Disorazole DMSO Run2   | NM_000475 | NR0B1     | nuclear receptor subfamily 0, group B, | member 1 | -0.070003 | Inlier   |
| siRNA-Temozolomide Run2-DMSO | NM_000475 | NR0B1     | nuclear receptor subfamily 0, group B, | member 1 | 0.070003  | Inlier   |
| siRNA-Vinblastine Run1-DMSO  | NM_000475 | NR0B1     | nuclear receptor subfamily 0, group B, | member 1 | 0.591874  | Inlier   |
| siRNA-Vinblastine Run2-DMSO  | NM_000475 | NR0B1     | nuclear receptor subfamily 0, group B, | member 1 | 1.546628  | Inlier   |
| siRNA Disorazole DMSO Run3   | NM_000475 | NR0B1     | nuclear receptor subfamily 0, group B, | member 1 | 8.578998  | Outlier  |

Identification of Survival Genes in Human Glioblastoma Cells Using siRNA Screening  
 Nikhil G Thaker, Fang Zhang, Peter R. McDonald, Tong Ying Shun, Michael D Lewen, Ian F. Pollack, and John S. Lazo

Molecular Pharmacology

| siRNA Treatment              | Gene ID   | Accession | Gene Name                                       | Log Fold Change | Outlier Status |
|------------------------------|-----------|-----------|-------------------------------------------------|-----------------|----------------|
| siRNA-Temozolomide Run3-DMSO | NM_021969 | NR0B2     | nuclear receptor subfamily 0, group B, member 2 | -1.317173       | Inlier         |
| siRNA-Temozolomide Run2-DMSO | NM_021969 | NR0B2     | nuclear receptor subfamily 0, group B, member 2 | -0.771956       | Inlier         |
| siRNA Disorazole DMSO Run2   | NM_021969 | NR0B2     | nuclear receptor subfamily 0, group B, member 2 | -0.240825       | Inlier         |
| siRNA Disorazole DMSO Run1   | NM_021969 | NR0B2     | nuclear receptor subfamily 0, group B, member 2 | -0.142273       | Inlier         |
| siRNA-Temozolomide Run1-DMSO | NM_021969 | NR0B2     | nuclear receptor subfamily 0, group B, member 2 | 0.142273        | Inlier         |
| siRNA Disorazole DMSO Run3   | NM_021969 | NR0B2     | nuclear receptor subfamily 0, group B, member 2 | 0.577044        | Inlier         |
| siRNA-Vinblastine Run1-DMSO  | NM_021969 | NR0B2     | nuclear receptor subfamily 0, group B, member 2 | 0.965734        | Inlier         |
| siRNA-Vinblastine Run2-DMSO  | NM_021969 | NR0B2     | nuclear receptor subfamily 0, group B, member 2 | 0.982887        | Inlier         |

Identification of Survival Genes in Human Glioblastoma Cells Using siRNA Screening  
 Nikhil G Thaker, Fang Zhang, Peter R. McDonald, Tong Ying Shun, Michael D Lewen, Ian F. Pollack, and John S. Lazo

Molecular Pharmacology

| siRNA Treatment              | Gene    | Accession | Gene ID | Gene Description                                | Log Fold Change | Classification |
|------------------------------|---------|-----------|---------|-------------------------------------------------|-----------------|----------------|
| siRNA Disorazole DMSO Run1   | NM_0217 | 24        | NR1D1   | nuclear receptor subfamily 1, group D, member 1 | -1.596804       | Inlier         |
| siRNA-Vinblastine Run1-DMSO  | NM_0217 | 24        | NR1D1   | nuclear receptor subfamily 1, group D, member 1 | -0.686715       | Inlier         |
| siRNA-Temozolomide Run1-DMSO | NM_0217 | 24        | NR1D1   | nuclear receptor subfamily 1, group D, member 1 | -0.636739       | Inlier         |
| siRNA-Temozolomide Run2-DMSO | NM_0217 | 24        | NR1D1   | nuclear receptor subfamily 1, group D, member 1 | -0.070418       | Inlier         |
| siRNA-Temozolomide Run3-DMSO | NM_0217 | 24        | NR1D1   | nuclear receptor subfamily 1, group D, member 1 | 0.070417        | Inlier         |
| siRNA-Vinblastine Run2-DMSO  | NM_0217 | 24        | NR1D1   | nuclear receptor subfamily 1, group D, member 1 | 0.662285        | Inlier         |
| siRNA Disorazole DMSO Run2   | NM_0217 | 24        | NR1D1   | nuclear receptor subfamily 1, group D, member 1 | 1.493891        | Inlier         |
| siRNA Disorazole DMSO Run3   | NM_0217 | 24        | NR1D1   | nuclear receptor subfamily 1, group D, member 1 | 10.00396        | Outlier        |



Identification of Survival Genes in Human Glioblastoma Cells Using siRNA Screening  
 Nikhil G Thaker, Fang Zhang, Peter R. McDonald, Tong Ying Shun, Michael D Lewen, Ian F. Pollack, and John S. Lazo

Molecular Pharmacology

| siRNA Treatment              | Gene    | Accession | Gene ID | Gene Description                                | Log2 Fold Change | Classification |
|------------------------------|---------|-----------|---------|-------------------------------------------------|------------------|----------------|
| siRNA Disorazole DMSO Run1   | NM_0051 | 26        | NR1D2   | nuclear receptor subfamily 1, group D, member 2 | -1.131685        | Inlier         |
| siRNA-Temozolomide Run3-DMSO | NM_0051 | 26        | NR1D2   | nuclear receptor subfamily 1, group D, member 2 | -1.045461        | Inlier         |
| siRNA Disorazole DMSO Run2   | NM_0051 | 26        | NR1D2   | nuclear receptor subfamily 1, group D, member 2 | -0.384953        | Inlier         |
| siRNA-Vinblastine Run1-DMSO  | NM_0051 | 26        | NR1D2   | nuclear receptor subfamily 1, group D, member 2 | -0.08297         | Inlier         |
| siRNA-Temozolomide Run2-DMSO | NM_0051 | 26        | NR1D2   | nuclear receptor subfamily 1, group D, member 2 | 0.08297          | Inlier         |
| siRNA-Temozolomide Run1-DMSO | NM_0051 | 26        | NR1D2   | nuclear receptor subfamily 1, group D, member 2 | 0.168756         | Inlier         |
| siRNA-Vinblastine Run2-DMSO  | NM_0051 | 26        | NR1D2   | nuclear receptor subfamily 1, group D, member 2 | 0.964047         | Inlier         |
| siRNA Disorazole DMSO Run3   | NM_0051 | 26        | NR1D2   | nuclear receptor subfamily 1, group D, member 2 | 12.39063         | Outlier        |

Identification of Survival Genes in Human Glioblastoma Cells Using siRNA Screening

Nikhil G Thaker, Fang Zhang, Peter R. McDonald, Tong Ying Shun, Michael D Lewen, Ian F. Pollack, and John S. Lazo

Molecular Pharmacology

| siRNA Treatment              | Gene    | Accession | Gene ID | Gene Description                                | Log Fold Change | Outlier Status |
|------------------------------|---------|-----------|---------|-------------------------------------------------|-----------------|----------------|
| siRNA Disorazole DMSO Run3   | NM_0071 | 21        | NR1H2   | nuclear receptor subfamily 1, group H, member 2 | -2.858093       | Inlier         |
| siRNA-Temozolomide Run3-DMSO | NM_0071 | 21        | NR1H2   | nuclear receptor subfamily 1, group H, member 2 | -1.12522        | Inlier         |
| siRNA Disorazole DMSO Run2   | NM_0071 | 21        | NR1H2   | nuclear receptor subfamily 1, group H, member 2 | -1.017219       | Inlier         |
| siRNA Disorazole DMSO Run1   | NM_0071 | 21        | NR1H2   | nuclear receptor subfamily 1, group H, member 2 | -0.306336       | Inlier         |
| siRNA-Temozolomide Run2-DMSO | NM_0071 | 21        | NR1H2   | nuclear receptor subfamily 1, group H, member 2 | 0.306335        | Inlier         |
| siRNA-Temozolomide Run1-DMSO | NM_0071 | 21        | NR1H2   | nuclear receptor subfamily 1, group H, member 2 | 0.399906        | Inlier         |
| siRNA-Vinblastine Run1-DMSO  | NM_0071 | 21        | NR1H2   | nuclear receptor subfamily 1, group H, member 2 | 0.662879        | Inlier         |
| siRNA-Vinblastine Run2-DMSO  | NM_0071 | 21        | NR1H2   | nuclear receptor subfamily 1, group H, member 2 | 0.686121        | Inlier         |

Identification of Survival Genes in Human Glioblastoma Cells Using siRNA Screening  
 Nikhil G Thaker, Fang Zhang, Peter R. McDonald, Tong Ying Shun, Michael D Lewen, Ian F. Pollack, and John S. Lazo

Molecular Pharmacology

| siRNA Treatment              | Gene ID   | Gene Name | Gene Description                                | Log Fold Change | Outlier Status |
|------------------------------|-----------|-----------|-------------------------------------------------|-----------------|----------------|
| siRNA-Temozolomide Run3-DMSO | NM_005693 | NR1H3     | nuclear receptor subfamily 1, group H, member 3 | -1.787696       | Inlier         |
| siRNA Disorazole DMSO Run2   | NM_005693 | NR1H3     | nuclear receptor subfamily 1, group H, member 3 | -0.674113       | Inlier         |
| siRNA-Temozolomide Run2-DMSO | NM_005693 | NR1H3     | nuclear receptor subfamily 1, group H, member 3 | -0.502263       | Inlier         |
| siRNA-Temozolomide Run1-DMSO | NM_005693 | NR1H3     | nuclear receptor subfamily 1, group H, member 3 | -0.159172       | Inlier         |
| siRNA Disorazole DMSO Run1   | NM_005693 | NR1H3     | nuclear receptor subfamily 1, group H, member 3 | 0.159173        | Inlier         |
| siRNA-Vinblastine Run1-DMSO  | NM_005693 | NR1H3     | nuclear receptor subfamily 1, group H, member 3 | 0.674887        | Inlier         |
| siRNA Disorazole DMSO Run3   | NM_005693 | NR1H3     | nuclear receptor subfamily 1, group H, member 3 | 1.044451        | Inlier         |
| siRNA-Vinblastine Run2-DMSO  | NM_005693 | NR1H3     | nuclear receptor subfamily 1, group H, member 3 | 1.14803         | Inlier         |

Identification of Survival Genes in Human Glioblastoma Cells Using siRNA Screening

Nikhil G Thaker, Fang Zhang, Peter R. McDonald, Tong Ying Shun, Michael D Lewen, Ian F. Pollack, and John S. Lazo

Molecular Pharmacology

| siRNA Treatment              | Gene ID   | Accession | Gene Name                                       | Log Fold Change | Outlier Status |
|------------------------------|-----------|-----------|-------------------------------------------------|-----------------|----------------|
| siRNA-Temozolomide Run3-DMSO | NM_005123 | NR1H4     | nuclear receptor subfamily 1, group H, member 4 | -1.553528       | Inlier         |
| siRNA-Temozolomide Run2-DMSO | NM_005123 | NR1H4     | nuclear receptor subfamily 1, group H, member 4 | -1.066595       | Inlier         |
| siRNA Disorazole DMSO Run2   | NM_005123 | NR1H4     | nuclear receptor subfamily 1, group H, member 4 | -0.607853       | Inlier         |
| siRNA-Temozolomide Run1-DMSO | NM_005123 | NR1H4     | nuclear receptor subfamily 1, group H, member 4 | -0.011659       | Inlier         |
| siRNA Disorazole DMSO Run1   | NM_005123 | NR1H4     | nuclear receptor subfamily 1, group H, member 4 | 0.011659        | Inlier         |
| siRNA Disorazole DMSO Run3   | NM_005123 | NR1H4     | nuclear receptor subfamily 1, group H, member 4 | 0.392013        | Inlier         |
| siRNA-Vinblastine Run1-DMSO  | NM_005123 | NR1H4     | nuclear receptor subfamily 1, group H, member 4 | 0.741147        | Inlier         |
| siRNA-Vinblastine Run2-DMSO  | NM_005123 | NR1H4     | nuclear receptor subfamily 1, group H, member 4 | 1.200028        | Inlier         |

Identification of Survival Genes in Human Glioblastoma Cells Using siRNA Screening  
 Nikhil G Thaker, Fang Zhang, Peter R. McDonald, Tong Ying Shun, Michael D Lewen, Ian F. Pollack, and John S. Lazo

Molecular Pharmacology

|                              |               |       |                                                             |           |         |
|------------------------------|---------------|-------|-------------------------------------------------------------|-----------|---------|
| siRNA-Temozolomide Run3-DMSO | NM_0330<br>13 | NR112 | nuclear<br>receptor<br>subfamily<br>1, group I,<br>member 2 | -3.518012 | Outlier |
| siRNA-Temozolomide Run2-DMSO | NM_0330<br>13 | NR112 | nuclear<br>receptor<br>subfamily<br>1, group I,<br>member 2 | -0.839342 | Inlier  |
| siRNA Disorazole DMSO Run1   | NM_0330<br>13 | NR112 | nuclear<br>receptor<br>subfamily<br>1, group I,<br>member 2 | -0.788276 | Inlier  |
| siRNA-Vinblastine Run2-DMSO  | NM_0330<br>13 | NR112 | nuclear<br>receptor<br>subfamily<br>1, group I,<br>member 2 | -0.01385  | Inlier  |
| siRNA-Temozolomide Run1-DMSO | NM_0330<br>13 | NR112 | nuclear<br>receptor<br>subfamily<br>1, group I,<br>member 2 | 0.013851  | Inlier  |
| siRNA-Vinblastine Run1-DMSO  | NM_0330<br>13 | NR112 | nuclear<br>receptor<br>subfamily<br>1, group I,<br>member 2 | 0.203189  | Inlier  |
| siRNA Disorazole DMSO Run2   | NM_0330<br>13 | NR112 | nuclear<br>receptor<br>subfamily<br>1, group I,<br>member 2 | 0.560724  | Inlier  |
| siRNA Disorazole DMSO Run3   | NM_0330<br>13 | NR112 | nuclear<br>receptor<br>subfamily<br>1, group I,<br>member 2 | 3.884427  | Outlier |
| siRNA-Temozolomide Run3-DMSO | NM_0051<br>22 | NR113 | nuclear<br>receptor<br>subfamily<br>1, group I,<br>member 3 | -1.534134 | Inlier  |
| siRNA-Temozolomide Run2-DMSO | NM_0051<br>22 | NR113 | nuclear<br>receptor<br>subfamily<br>1, group I,<br>member 3 | -0.913281 | Inlier  |

Identification of Survival Genes in Human Glioblastoma Cells Using siRNA Screening  
 Nikhil G Thaker, Fang Zhang, Peter R. McDonald, Tong Ying Shun, Michael D Lewen, Ian F. Pollack, and John S. Lazo

Molecular Pharmacology

|                              |               |       |                                                                |           |        |
|------------------------------|---------------|-------|----------------------------------------------------------------|-----------|--------|
| siRNA-Temozolomide Run1-DMSO | NM_0051<br>22 | NR1I3 | nuclear<br>receptor<br>subfamily<br>1, group I,<br>member 3    | -0.775848 | Inlier |
| siRNA Disorazole DMSO Run1   | NM_0051<br>22 | NR1I3 | nuclear<br>receptor<br>subfamily<br>1, group I,<br>member 3    | -0.169655 | Inlier |
| siRNA Disorazole DMSO Run2   | NM_0051<br>22 | NR1I3 | nuclear<br>receptor<br>subfamily<br>1, group I,<br>member 3    | 0.169655  | Inlier |
| siRNA-Vinblastine Run1-DMSO  | NM_0051<br>22 | NR1I3 | nuclear<br>receptor<br>subfamily<br>1, group I,<br>member 3    | 0.419279  | Inlier |
| siRNA Disorazole DMSO Run3   | NM_0051<br>22 | NR1I3 | nuclear<br>receptor<br>subfamily<br>1, group I,<br>member 3    | 0.573152  | Inlier |
| siRNA-Vinblastine Run2-DMSO  | NM_0051<br>22 | NR1I3 | nuclear<br>receptor<br>subfamily<br>1, group I,<br>member 3    | 0.913719  | Inlier |
| siRNA Disorazole DMSO Run2   | NM_0032<br>97 | NR2C1 | nuclear<br>receptor<br>subfamily<br>2, group<br>C,<br>member 1 | -2.648729 | Inlier |
| siRNA-Temozolomide Run3-DMSO | NM_0032<br>97 | NR2C1 | nuclear<br>receptor<br>subfamily<br>2, group<br>C,<br>member 1 | -1.125603 | Inlier |
| siRNA Disorazole DMSO Run1   | NM_0032<br>97 | NR2C1 | nuclear<br>receptor<br>subfamily<br>2, group<br>C,<br>member 1 | -0.398052 | Inlier |

Identification of Survival Genes in Human Glioblastoma Cells Using siRNA Screening  
 Nikhil G Thaker, Fang Zhang, Peter R. McDonald, Tong Ying Shun, Michael D Lewen, Ian F. Pollack, and John S. Lazo

Molecular Pharmacology

|                              |               |       |                                                                |           |        |
|------------------------------|---------------|-------|----------------------------------------------------------------|-----------|--------|
| siRNA-Temozolomide Run2-DMSO | NM_0032<br>97 | NR2C1 | nuclear<br>receptor<br>subfamily<br>2, group<br>C,<br>member 1 | -0.279691 | Inlier |
| siRNA Disorazole DMSO Run3   | NM_0032<br>97 | NR2C1 | nuclear<br>receptor<br>subfamily<br>2, group<br>C,<br>member 1 | 0.279691  | Inlier |
| siRNA-Temozolomide Run1-DMSO | NM_0032<br>97 | NR2C1 | nuclear<br>receptor<br>subfamily<br>2, group<br>C,<br>member 1 | 0.58386   | Inlier |
| siRNA-Vinblastine Run2-DMSO  | NM_0032<br>97 | NR2C1 | nuclear<br>receptor<br>subfamily<br>2, group<br>C,<br>member 1 | 0.76514   | Inlier |
| siRNA-Vinblastine Run1-DMSO  | NM_0032<br>97 | NR2C1 | nuclear<br>receptor<br>subfamily<br>2, group<br>C,<br>member 1 | 0.810732  | Inlier |
| siRNA-Temozolomide Run1-DMSO | NM_0032<br>98 | NR2C2 | nuclear<br>receptor<br>subfamily<br>2, group<br>C,<br>member 2 | -0.810365 | Inlier |
| siRNA-Temozolomide Run3-DMSO | NM_0032<br>98 | NR2C2 | nuclear<br>receptor<br>subfamily<br>2, group<br>C,<br>member 2 | -0.794186 | Inlier |
| siRNA Disorazole DMSO Run1   | NM_0032<br>98 | NR2C2 | nuclear<br>receptor<br>subfamily<br>2, group<br>C,<br>member 2 | -0.401527 | Inlier |

Identification of Survival Genes in Human Glioblastoma Cells Using siRNA Screening  
 Nikhil G Thaker, Fang Zhang, Peter R. McDonald, Tong Ying Shun, Michael D Lewen, Ian F. Pollack, and John S. Lazo

Molecular Pharmacology

| siRNA Treatment              | Gene ID   | Accession | Family                                          | Value     | Category |
|------------------------------|-----------|-----------|-------------------------------------------------|-----------|----------|
| siRNA-Temozolomide Run2-DMSO | NM_003298 | NR2C2     | nuclear receptor subfamily 2, group C, member 2 | -0.172274 | Inlier   |
| siRNA-Vinblastine Run1-DMSO  | NM_003298 | NR2C2     | nuclear receptor subfamily 2, group C, member 2 | 0.172274  | Inlier   |
| siRNA-Vinblastine Run2-DMSO  | NM_003298 | NR2C2     | nuclear receptor subfamily 2, group C, member 2 | 0.554814  | Inlier   |
| siRNA Disorazole DMSO Run3   | NM_003298 | NR2C2     | nuclear receptor subfamily 2, group C, member 2 | 1.156464  | Inlier   |
| siRNA Disorazole DMSO Run2   | NM_003298 | NR2C2     | nuclear receptor subfamily 2, group C, member 2 | 1.319214  | Inlier   |
| siRNA-Temozolomide Run3-DMSO | NM_003269 | NR2E1     | nuclear receptor subfamily 2, group E, member 1 | -3.494742 | Inlier   |
| siRNA Disorazole DMSO Run1   | NM_003269 | NR2E1     | nuclear receptor subfamily 2, group E, member 1 | -0.64574  | Inlier   |
| siRNA Disorazole DMSO Run2   | NM_003269 | NR2E1     | nuclear receptor subfamily 2, group E, member 1 | -0.506155 | Inlier   |



Identification of Survival Genes in Human Glioblastoma Cells Using siRNA Screening

Nikhil G Thaker, Fang Zhang, Peter R. McDonald, Tong Ying Shun, Michael D Lewen, Ian F. Pollack, and John S. Lazo

Molecular Pharmacology

| siRNA Treatment              | Gene ID   | Gene Name | Gene Description                                | Value     | Category |
|------------------------------|-----------|-----------|-------------------------------------------------|-----------|----------|
| siRNA-Temozolomide Run2-DMSO | NM_003269 | NR2E1     | nuclear receptor subfamily 2, group E, member 1 | -0.20727  | Inlier   |
| siRNA-Temozolomide Run1-DMSO | NM_003269 | NR2E1     | nuclear receptor subfamily 2, group E, member 1 | 0.20727   | Inlier   |
| siRNA-Vinblastine Run1-DMSO  | NM_003269 | NR2E1     | nuclear receptor subfamily 2, group E, member 1 | 0.70326   | Inlier   |
| siRNA Disorazole DMSO Run3   | NM_003269 | NR2E1     | nuclear receptor subfamily 2, group E, member 1 | 1.042141  | Inlier   |
| siRNA-Vinblastine Run2-DMSO  | NM_003269 | NR2E1     | nuclear receptor subfamily 2, group E, member 1 | 1.048438  | Inlier   |
| siRNA-Temozolomide Run3-DMSO | NM_016346 | NR2E3     | nuclear receptor subfamily 2, group E, member 3 | -1.17522  | Inlier   |
| siRNA Disorazole DMSO Run1   | NM_016346 | NR2E3     | nuclear receptor subfamily 2, group E, member 3 | -0.683695 | Inlier   |
| siRNA-Temozolomide Run1-DMSO | NM_016346 | NR2E3     | nuclear receptor subfamily 2, group E, member 3 | -0.665305 | Inlier   |

Identification of Survival Genes in Human Glioblastoma Cells Using siRNA Screening  
 Nikhil G Thaker, Fang Zhang, Peter R. McDonald, Tong Ying Shun, Michael D Lewen, Ian F. Pollack, and John S. Lazo

Molecular Pharmacology

|                              |               |       |                                                                |                   |
|------------------------------|---------------|-------|----------------------------------------------------------------|-------------------|
| siRNA-Vinblastine Run1-DMSO  | NM_0163<br>46 | NR2E3 | nuclear<br>receptor<br>subfamily<br>2, group<br>E,<br>member 3 | -0.359331 Inlier  |
| siRNA-Temozolomide Run2-DMSO | NM_0163<br>46 | NR2E3 | nuclear<br>receptor<br>subfamily<br>2, group<br>E,<br>member 3 | 0.359331 Inlier   |
| siRNA-Vinblastine Run2-DMSO  | NM_0163<br>46 | NR2E3 | nuclear<br>receptor<br>subfamily<br>2, group<br>E,<br>member 3 | 0.658655 Inlier   |
| siRNA Disorazole DMSO Run2   | NM_0163<br>46 | NR2E3 | nuclear<br>receptor<br>subfamily<br>2, group<br>E,<br>member 3 | 2.21698 Inlier    |
| siRNA Disorazole DMSO Run3   | NM_0163<br>46 | NR2E3 | nuclear<br>receptor<br>subfamily<br>2, group<br>E,<br>member 3 | 2.217442 Inlier   |
| siRNA-Temozolomide Run3-DMSO | NM_0056<br>54 | NR2F1 | nuclear<br>receptor<br>subfamily<br>2, group F,<br>member 1    | -4.626852 Outlier |
| siRNA-Temozolomide Run2-DMSO | NM_0056<br>54 | NR2F1 | nuclear<br>receptor<br>subfamily<br>2, group F,<br>member 1    | -1.744323 Inlier  |
| siRNA-Temozolomide Run1-DMSO | NM_0056<br>54 | NR2F1 | nuclear<br>receptor<br>subfamily<br>2, group F,<br>member 1    | -1.65571 Inlier   |

Identification of Survival Genes in Human Glioblastoma Cells Using siRNA Screening  
 Nikhil G Thaker, Fang Zhang, Peter R. McDonald, Tong Ying Shun, Michael D Lewen, Ian F. Pollack, and John S. Lazo  
 Molecular Pharmacology

|                                  |               |       |                                                             |                  |
|----------------------------------|---------------|-------|-------------------------------------------------------------|------------------|
| siRNA Disorazole DMSO Run1       | NM_0056<br>54 | NR2F1 | nuclear<br>receptor<br>subfamily<br>2, group F,<br>member 1 | -0.25256 Inlier  |
| siRNA-Vinblastine Run1-<br>DMSO  | NM_0056<br>54 | NR2F1 | nuclear<br>receptor<br>subfamily<br>2, group F,<br>member 1 | 0.25256 Inlier   |
| siRNA-Vinblastine Run2-<br>DMSO  | NM_0056<br>54 | NR2F1 | nuclear<br>receptor<br>subfamily<br>2, group F,<br>member 1 | 0.355091 Inlier  |
| siRNA Disorazole DMSO Run2       | NM_0056<br>54 | NR2F1 | nuclear<br>receptor<br>subfamily<br>2, group F,<br>member 1 | 0.535506 Inlier  |
| siRNA Disorazole DMSO Run3       | NM_0056<br>54 | NR2F1 | nuclear<br>receptor<br>subfamily<br>2, group F,<br>member 1 | 0.813494 Inlier  |
| siRNA-Temozolomide Run3-<br>DMSO | NM_0210<br>05 | NR2F2 | nuclear<br>receptor<br>subfamily<br>2, group F,<br>member 2 | -0.821628 Inlier |
| siRNA Disorazole DMSO Run1       | NM_0210<br>05 | NR2F2 | nuclear<br>receptor<br>subfamily<br>2, group F,<br>member 2 | -0.591334 Inlier |
| siRNA-Temozolomide Run2-<br>DMSO | NM_0210<br>05 | NR2F2 | nuclear<br>receptor<br>subfamily<br>2, group F,<br>member 2 | -0.076285 Inlier |

Identification of Survival Genes in Human Glioblastoma Cells Using siRNA Screening  
 Nikhil G Thaker, Fang Zhang, Peter R. McDonald, Tong Ying Shun, Michael D Lewen, Ian F. Pollack, and John S. Lazo  
 Molecular Pharmacology

|                              |           |       |                                                 |           |         |
|------------------------------|-----------|-------|-------------------------------------------------|-----------|---------|
| siRNA-Temozolomide Run1-DMSO | NM_021005 | NR2F2 | nuclear receptor subfamily 2, group F, member 2 | -0.008241 | Inlier  |
| siRNA-Vinblastine Run2-DMSO  | NM_021005 | NR2F2 | nuclear receptor subfamily 2, group F, member 2 | 0.008241  | Inlier  |
| siRNA-Vinblastine Run1-DMSO  | NM_021005 | NR2F2 | nuclear receptor subfamily 2, group F, member 2 | 0.757666  | Inlier  |
| siRNA Disorazole DMSO Run2   | NM_021005 | NR2F2 | nuclear receptor subfamily 2, group F, member 2 | 2.218818  | Inlier  |
| siRNA Disorazole DMSO Run3   | NM_021005 | NR2F2 | nuclear receptor subfamily 2, group F, member 2 | 4.054045  | Outlier |
| siRNA Disorazole DMSO Run2   | NM_005234 | NR2F6 | nuclear receptor subfamily 2, group F, member 6 | -0.935824 | Inlier  |
| siRNA Disorazole DMSO Run1   | NM_005234 | NR2F6 | nuclear receptor subfamily 2, group F, member 6 | -0.800052 | Inlier  |
| siRNA-Temozolomide Run3-DMSO | NM_005234 | NR2F6 | nuclear receptor subfamily 2, group F, member 6 | -0.496598 | Inlier  |

Identification of Survival Genes in Human Glioblastoma Cells Using siRNA Screening  
 Nikhil G Thaker, Fang Zhang, Peter R. McDonald, Tong Ying Shun, Michael D Lewen, Ian F. Pollack, and John S. Lazo  
 Molecular Pharmacology

|                              |               |       |                                                                           |                  |
|------------------------------|---------------|-------|---------------------------------------------------------------------------|------------------|
| siRNA-Temozolomide Run2-DMSO | NM_0052<br>34 | NR2F6 | nuclear receptor subfamily 2, group F, member 6                           | -0.280027 Inlier |
| siRNA-Temozolomide Run1-DMSO | NM_0052<br>34 | NR2F6 | nuclear receptor subfamily 2, group F, member 6                           | 0.280026 Inlier  |
| siRNA-Vinblastine Run2-DMSO  | NM_0052<br>34 | NR2F6 | nuclear receptor subfamily 2, group F, member 6                           | 0.662707 Inlier  |
| siRNA-Vinblastine Run1-DMSO  | NM_0052<br>34 | NR2F6 | nuclear receptor subfamily 2, group F, member 6                           | 0.686293 Inlier  |
| siRNA Disorazole DMSO Run3   | NM_0052<br>34 | NR2F6 | nuclear receptor subfamily 2, group F, member 6                           | 4.772815 Outlier |
| siRNA-Temozolomide Run3-DMSO | NM_0001<br>76 | NR3C1 | nuclear receptor subfamily 3, group C, member 1 (glucocorticoid receptor) | -1.634724 Inlier |
| siRNA Disorazole DMSO Run2   | NM_0001<br>76 | NR3C1 | nuclear receptor subfamily 3, group C, member 1 (glucocorticoid receptor) | -1.248278 Inlier |

Identification of Survival Genes in Human Glioblastoma Cells Using siRNA Screening

Nikhil G Thaker, Fang Zhang, Peter R. McDonald, Tong Ying Shun, Michael D Lewen, Ian F. Pollack, and John S. Lazo

Molecular Pharmacology

|                              |           |       |                                                                           |           |        |
|------------------------------|-----------|-------|---------------------------------------------------------------------------|-----------|--------|
| siRNA-Temozolomide Run2-DMSO | NM_000176 | NR3C1 | nuclear receptor subfamily 3, group C, member 1 (glucocorticoid receptor) | -0.501334 | Inlier |
| siRNA Disorazole DMSO Run1   | NM_000176 | NR3C1 | nuclear receptor subfamily 3, group C, member 1 (glucocorticoid receptor) | -0.008126 | Inlier |
| siRNA-Temozolomide Run1-DMSO | NM_000176 | NR3C1 | nuclear receptor subfamily 3, group C, member 1 (glucocorticoid receptor) | 0.008125  | Inlier |
| siRNA Disorazole DMSO Run3   | NM_000176 | NR3C1 | nuclear receptor subfamily 3, group C, member 1 (glucocorticoid receptor) | 0.503655  | Inlier |
| siRNA-Vinblastine Run2-DMSO  | NM_000176 | NR3C1 | nuclear receptor subfamily 3, group C, member 1 (glucocorticoid receptor) | 0.845345  | Inlier |

Identification of Survival Genes in Human Glioblastoma Cells Using siRNA Screening  
 Nikhil G Thaker, Fang Zhang, Peter R. McDonald, Tong Ying Shun, Michael D Lewen, Ian F. Pollack, and John S. Lazo

Molecular Pharmacology

| siRNA Treatment              | Gene ID   | Gene Symbol | Gene Description                                                          | Log Fold Change | Outlier Status |
|------------------------------|-----------|-------------|---------------------------------------------------------------------------|-----------------|----------------|
| siRNA-Vinblastine Run1-DMSO  | NM_000176 | NR3C1       | nuclear receptor subfamily 3, group C, member 1 (glucocorticoid receptor) | 1.088659        | Inlier         |
| siRNA-Temozolomide Run3-DMSO | NM_000901 | NR3C2       | nuclear receptor subfamily 3, group C, member 2                           | -1.453597       | Inlier         |
| siRNA Disorazole DMSO Run1   | NM_000901 | NR3C2       | nuclear receptor subfamily 3, group C, member 2                           | -0.917221       | Inlier         |
| siRNA-Vinblastine Run1-DMSO  | NM_000901 | NR3C2       | nuclear receptor subfamily 3, group C, member 2                           | -0.604203       | Inlier         |
| siRNA Disorazole DMSO Run2   | NM_000901 | NR3C2       | nuclear receptor subfamily 3, group C, member 2                           | -0.192018       | Inlier         |
| siRNA-Temozolomide Run2-DMSO | NM_000901 | NR3C2       | nuclear receptor subfamily 3, group C, member 2                           | 0.192019        | Inlier         |
| siRNA-Vinblastine Run2-DMSO  | NM_000901 | NR3C2       | nuclear receptor subfamily 3, group C, member 2                           | 0.311912        | Inlier         |
| siRNA-Temozolomide Run1-DMSO | NM_000901 | NR3C2       | nuclear receptor subfamily 3, group C, member 2                           | 0.744797        | Inlier         |

Identification of Survival Genes in Human Glioblastoma Cells Using siRNA Screening  
 Nikhil G Thaker, Fang Zhang, Peter R. McDonald, Tong Ying Shun, Michael D Lewen, Ian F. Pollack, and John S. Lazo

Molecular Pharmacology

| siRNA Treatment         | Run  | Gene  | Accession | Family                                          | Score     | Outlier |
|-------------------------|------|-------|-----------|-------------------------------------------------|-----------|---------|
| siRNA Disorazole DMSO   | Run3 | NR3C2 | NM_000901 | nuclear receptor subfamily 3, group C, member 2 | 2.859452  | Inlier  |
| siRNA-Temozolomide DMSO | Run3 | NR4A1 | NM_002135 | nuclear receptor subfamily 4, group A, member 1 | -1.406781 | Inlier  |
| siRNA Disorazole DMSO   | Run2 | NR4A1 | NM_002135 | nuclear receptor subfamily 4, group A, member 1 | -0.714014 | Inlier  |
| siRNA Disorazole DMSO   | Run1 | NR4A1 | NM_002135 | nuclear receptor subfamily 4, group A, member 1 | -0.634986 | Inlier  |
| siRNA-Temozolomide DMSO | Run2 | NR4A1 | NM_002135 | nuclear receptor subfamily 4, group A, member 1 | -0.168502 | Inlier  |
| siRNA-Temozolomide DMSO | Run1 | NR4A1 | NM_002135 | nuclear receptor subfamily 4, group A, member 1 | 0.168502  | Inlier  |
| siRNA-Vinblastine DMSO  | Run2 | NR4A1 | NM_002135 | nuclear receptor subfamily 4, group A, member 1 | 0.602801  | Inlier  |
| siRNA-Vinblastine DMSO  | Run1 | NR4A1 | NM_002135 | nuclear receptor subfamily 4, group A, member 1 | 1.261631  | Inlier  |



Identification of Survival Genes in Human Glioblastoma Cells Using siRNA Screening  
 Nikhil G Thaker, Fang Zhang, Peter R. McDonald, Tong Ying Shun, Michael D Lewen, Ian F. Pollack, and John S. Lazo

Molecular Pharmacology

|                                  |               |       |                                                                |           |        |
|----------------------------------|---------------|-------|----------------------------------------------------------------|-----------|--------|
| siRNA Disorazole DMSO Run3       | NM_0021<br>35 | NR4A1 | nuclear<br>receptor<br>subfamily<br>4, group<br>A,<br>member 1 | 2.073534  | Inlier |
| siRNA Disorazole DMSO Run1       | NM_1731<br>72 | NR4A2 | nuclear<br>receptor<br>subfamily<br>4, group<br>A,<br>member 2 | -1.443272 | Inlier |
| siRNA-Vinblastine Run2-<br>DMSO  | NM_1731<br>72 | NR4A2 | nuclear<br>receptor<br>subfamily<br>4, group<br>A,<br>member 2 | -1.14724  | Inlier |
| siRNA-Temozolomide Run3-<br>DMSO | NM_1731<br>72 | NR4A2 | nuclear<br>receptor<br>subfamily<br>4, group<br>A,<br>member 2 | -0.20176  | Inlier |
| siRNA-Vinblastine Run1-<br>DMSO  | NM_1731<br>72 | NR4A2 | nuclear<br>receptor<br>subfamily<br>4, group<br>A,<br>member 2 | -0.086776 | Inlier |
| siRNA-Temozolomide Run1-<br>DMSO | NM_1731<br>72 | NR4A2 | nuclear<br>receptor<br>subfamily<br>4, group<br>A,<br>member 2 | 0.086777  | Inlier |
| siRNA-Temozolomide Run2-<br>DMSO | NM_1731<br>72 | NR4A2 | nuclear<br>receptor<br>subfamily<br>4, group<br>A,<br>member 2 | 0.122496  | Inlier |
| siRNA Disorazole DMSO Run2       | NM_1731<br>72 | NR4A2 | nuclear<br>receptor<br>subfamily<br>4, group<br>A,<br>member 2 | 3.458993  | Inlier |

Identification of Survival Genes in Human Glioblastoma Cells Using siRNA Screening  
 Nikhil G Thaker, Fang Zhang, Peter R. McDonald, Tong Ying Shun, Michael D Lewen, Ian F. Pollack, and John S. Lazo

Molecular Pharmacology

| siRNA Treatment              | Gene ID   | Accession | Family                                          | Score     | Category |
|------------------------------|-----------|-----------|-------------------------------------------------|-----------|----------|
| siRNA Disorazole DMSO Run3   | NM_173172 | NR4A2     | nuclear receptor subfamily 4, group A, member 2 | 4.728052  | Outlier  |
| siRNA Disorazole DMSO Run1   | NM_173200 | NR4A3     | nuclear receptor subfamily 4, group A, member 3 | -2.476501 | Inlier   |
| siRNA-Temozolomide Run3-DMSO | NM_173200 | NR4A3     | nuclear receptor subfamily 4, group A, member 3 | -1.730971 | Inlier   |
| siRNA-Vinblastine Run1-DMSO  | NM_173200 | NR4A3     | nuclear receptor subfamily 4, group A, member 3 | -0.842519 | Inlier   |
| siRNA-Temozolomide Run1-DMSO | NM_173200 | NR4A3     | nuclear receptor subfamily 4, group A, member 3 | -0.343753 | Inlier   |
| siRNA-Temozolomide Run2-DMSO | NM_173200 | NR4A3     | nuclear receptor subfamily 4, group A, member 3 | 0.343758  | Inlier   |
| siRNA Disorazole DMSO Run2   | NM_173200 | NR4A3     | nuclear receptor subfamily 4, group A, member 3 | 0.379711  | Inlier   |
| siRNA-Vinblastine Run2-DMSO  | NM_173200 | NR4A3     | nuclear receptor subfamily 4, group A, member 3 | 0.506481  | Inlier   |

Identification of Survival Genes in Human Glioblastoma Cells Using siRNA Screening  
 Nikhil G Thaker, Fang Zhang, Peter R. McDonald, Tong Ying Shun, Michael D Lewen, Ian F. Pollack, and John S. Lazo

Molecular Pharmacology

| siRNA Treatment              | Gene    | Accession | Family | Member   | Value     | Category |
|------------------------------|---------|-----------|--------|----------|-----------|----------|
| siRNA Disorazole DMSO Run3   | NM_1732 | 00        | NR4A3  | member 3 | 17.25158  | Outlier  |
| siRNA Disorazole DMSO Run2   | NM_0049 | 59        | NR5A1  | member 1 | -1.591082 | Inlier   |
| siRNA-Temozolomide Run3-DMSO | NM_0049 | 59        | NR5A1  | member 1 | -1.033367 | Inlier   |
| siRNA Disorazole DMSO Run1   | NM_0049 | 59        | NR5A1  | member 1 | -0.703639 | Inlier   |
| siRNA-Temozolomide Run2-DMSO | NM_0049 | 59        | NR5A1  | member 1 | -0.021603 | Inlier   |
| siRNA-Vinblastine Run1-DMSO  | NM_0049 | 59        | NR5A1  | member 1 | 0.021603  | Inlier   |
| siRNA-Temozolomide Run1-DMSO | NM_0049 | 59        | NR5A1  | member 1 | 0.472557  | Inlier   |
| siRNA-Vinblastine Run2-DMSO  | NM_0049 | 59        | NR5A1  | member 1 | 0.645361  | Inlier   |

nuclear  
receptor  
subfamily  
4, group  
A,

nuclear  
receptor  
subfamily  
5, group  
A,

member 1

Identification of Survival Genes in Human Glioblastoma Cells Using siRNA Screening  
 Nikhil G Thaker, Fang Zhang, Peter R. McDonald, Tong Ying Shun, Michael D Lewen, Ian F. Pollack, and John S. Lazo

Molecular Pharmacology

|                                  |               |       |                                                                |           |        |
|----------------------------------|---------------|-------|----------------------------------------------------------------|-----------|--------|
| siRNA Disorazole DMSO Run3       | NM_0049<br>59 | NR5A1 | nuclear<br>receptor<br>subfamily<br>5, group<br>A,<br>member 1 | 1.175892  | Inlier |
| siRNA-Temozolomide Run3-<br>DMSO | NM_0038<br>22 | NR5A2 | nuclear<br>receptor<br>subfamily<br>5, group<br>A,<br>member 2 | -2.378392 | Inlier |
| siRNA Disorazole DMSO Run2       | NM_0038<br>22 | NR5A2 | nuclear<br>receptor<br>subfamily<br>5, group<br>A,<br>member 2 | -0.785714 | Inlier |
| siRNA-Temozolomide Run2-<br>DMSO | NM_0038<br>22 | NR5A2 | nuclear<br>receptor<br>subfamily<br>5, group<br>A,<br>member 2 | -0.563286 | Inlier |
| siRNA Disorazole DMSO Run1       | NM_0038<br>22 | NR5A2 | nuclear<br>receptor<br>subfamily<br>5, group<br>A,<br>member 2 | -0.054393 | Inlier |
| siRNA-Vinblastine Run1-<br>DMSO  | NM_0038<br>22 | NR5A2 | nuclear<br>receptor<br>subfamily<br>5, group<br>A,<br>member 2 | 0.054393  | Inlier |
| siRNA-Temozolomide Run1-<br>DMSO | NM_0038<br>22 | NR5A2 | nuclear<br>receptor<br>subfamily<br>5, group<br>A,<br>member 2 | 0.26135   | Inlier |
| siRNA-Vinblastine Run2-<br>DMSO  | NM_0038<br>22 | NR5A2 | nuclear<br>receptor<br>subfamily<br>5, group<br>A,<br>member 2 | 0.926793  | Inlier |

Identification of Survival Genes in Human Glioblastoma Cells Using siRNA Screening  
 Nikhil G Thaker, Fang Zhang, Peter R. McDonald, Tong Ying Shun, Michael D Lewen, Ian F. Pollack, and John S. Lazo

Molecular Pharmacology

| siRNA Treatment              | Gene ID       | Gene Name | Log Fold Change | Category |
|------------------------------|---------------|-----------|-----------------|----------|
| siRNA Disorazole DMSO Run3   | NM_0038<br>22 | NR5A2     | 1.959221        | Inlier   |
| siRNA-Temozolomide Run3-DMSO | NM_0014<br>89 | NR6A1     | -1.983422       | Inlier   |
| siRNA Disorazole DMSO Run2   | NM_0014<br>89 | NR6A1     | -1.622142       | Inlier   |
| siRNA-Temozolomide Run2-DMSO | NM_0014<br>89 | NR6A1     | -0.722293       | Inlier   |
| siRNA Disorazole DMSO Run1   | NM_0014<br>89 | NR6A1     | -0.155692       | Inlier   |
| siRNA-Vinblastine Run1-DMSO  | NM_0014<br>89 | NR6A1     | 0.155692        | Inlier   |
| siRNA-Temozolomide Run1-DMSO | NM_0014<br>89 | NR6A1     | 0.203933        | Inlier   |
| siRNA-Vinblastine Run2-DMSO  | NM_0014<br>89 | NR6A1     | 0.626707        | Inlier   |

nuclear  
receptor  
subfamily  
5, group  
A,

member 2

nuclear  
receptor  
subfamily  
6, group  
A,

member 1

Identification of Survival Genes in Human Glioblastoma Cells Using siRNA Screening

Nikhil G Thaker, Fang Zhang, Peter R. McDonald, Tong Ying Shun, Michael D Lewen, Ian F. Pollack, and John S. Lazo

Molecular Pharmacology

|                                  |               |       |                                                                   |           |        |
|----------------------------------|---------------|-------|-------------------------------------------------------------------|-----------|--------|
| siRNA Disorazole DMSO Run3       | NM_0014<br>89 | NR6A1 | nuclear<br>receptor<br>subfamily<br>6, group<br>A,<br>member 1    | 1.179753  | Inlier |
| siRNA-Temozolomide Run2-<br>DMSO | NM_0025<br>24 | NRAS  | neuroblast<br>oma RAS<br>viral (v-<br>ras)<br>oncogene<br>homolog | -2.93668  | Inlier |
| siRNA-Temozolomide Run3-<br>DMSO | NM_0025<br>24 | NRAS  | neuroblast<br>oma RAS<br>viral (v-<br>ras)<br>oncogene<br>homolog | -0.552127 | Inlier |
| siRNA Disorazole DMSO Run1       | NM_0025<br>24 | NRAS  | neuroblast<br>oma RAS<br>viral (v-<br>ras)<br>oncogene<br>homolog | -0.299881 | Inlier |
| siRNA-Temozolomide Run1-<br>DMSO | NM_0025<br>24 | NRAS  | neuroblast<br>oma RAS<br>viral (v-<br>ras)<br>oncogene<br>homolog | -0.111319 | Inlier |
| siRNA-Vinblastine Run2-<br>DMSO  | NM_0025<br>24 | NRAS  | neuroblast<br>oma RAS<br>viral (v-<br>ras)<br>oncogene<br>homolog | 0.111319  | Inlier |
| siRNA Disorazole DMSO Run3       | NM_0025<br>24 | NRAS  | neuroblast<br>oma RAS<br>viral (v-<br>ras)<br>oncogene<br>homolog | 0.796873  | Inlier |
| siRNA Disorazole DMSO Run2       | NM_0025<br>24 | NRAS  | oncogene<br>homolog                                               | 2.706306  | Inlier |

Identification of Survival Genes in Human Glioblastoma Cells Using siRNA Screening  
 Nikhil G Thaker, Fang Zhang, Peter R. McDonald, Tong Ying Shun, Michael D Lewen, Ian F. Pollack, and John S. Lazo

Molecular Pharmacology

|                              |           |      |                                                                                   |           |        |
|------------------------------|-----------|------|-----------------------------------------------------------------------------------|-----------|--------|
| siRNA-Vinblastine Run1-DMSO  | NM_002524 | NRAS | neuroblastoma RAS viral (v-ras) oncogene homolog nuclear receptor binding protein | 2.766797  | Inlier |
| siRNA-Temozolomide Run3-DMSO | NM_013392 | NRBP | nuclear receptor binding protein                                                  | -0.684094 | Inlier |
| siRNA Disorazole DMSO Run2   | NM_013392 | NRBP | nuclear receptor binding protein                                                  | -0.664906 | Inlier |
| siRNA Disorazole DMSO Run3   | NM_013392 | NRBP | nuclear receptor binding protein                                                  | -0.376625 | Inlier |
| siRNA-Temozolomide Run2-DMSO | NM_013392 | NRBP | nuclear receptor binding protein                                                  | -0.230508 | Inlier |
| siRNA-Temozolomide Run1-DMSO | NM_013392 | NRBP | nuclear receptor binding protein                                                  | 0.230508  | Inlier |
| siRNA Disorazole DMSO Run1   | NM_013392 | NRBP | nuclear receptor binding protein                                                  | 0.705341  | Inlier |
| siRNA-Vinblastine Run1-DMSO  | NM_013392 | NRBP | nuclear receptor binding protein                                                  | 1.199394  | Inlier |
| siRNA-Vinblastine Run2-DMSO  | NM_013392 | NRBP | nuclear receptor binding protein nardilysin (N-arginine dibasic convertase)       | 1.205223  | Inlier |
| siRNA-Temozolomide Run3-DMSO | NM_002525 | NRD1 | nardilysin (N-arginine dibasic convertase)                                        | -1.281439 | Inlier |
| siRNA-Temozolomide Run2-DMSO | NM_002525 | NRD1 | nardilysin (N-arginine dibasic convertase)                                        | -0.854949 | Inlier |

Identification of Survival Genes in Human Glioblastoma Cells Using siRNA Screening  
 Nikhil G Thaker, Fang Zhang, Peter R. McDonald, Tong Ying Shun, Michael D Lewen, Ian F. Pollack, and John S. Lazo

Molecular Pharmacology

|                              |               |      |                                                        |           |        |
|------------------------------|---------------|------|--------------------------------------------------------|-----------|--------|
| siRNA-Temozolomide Run1-DMSO | NM_0025<br>25 | NRD1 | nardilysin<br>(N-arginine<br>dibasic<br>convertase)    | -0.3704   | Inlier |
| siRNA Disorazole DMSO Run1   | NM_0025<br>25 | NRD1 | nardilysin<br>(N-arginine<br>dibasic<br>convertase)    | -0.359623 | Inlier |
| siRNA Disorazole DMSO Run2   | NM_0025<br>25 | NRD1 | nardilysin<br>(N-arginine<br>dibasic<br>convertase)    | 0.359624  | Inlier |
| siRNA Disorazole DMSO Run3   | NM_0025<br>25 | NRD1 | nardilysin<br>(N-arginine<br>dibasic<br>convertase)    | 0.494051  | Inlier |
| siRNA-Vinblastine Run2-DMSO  | NM_0025<br>25 | NRD1 | nardilysin<br>(N-arginine<br>dibasic<br>convertase)    | 1.015903  | Inlier |
| siRNA-Vinblastine Run1-DMSO  | NM_0025<br>25 | NRD1 | nardilysin<br>(N-arginine<br>dibasic<br>convertase)    | 1.255476  | Inlier |
| siRNA-Vinblastine Run1-DMSO  | NM_0061<br>76 | NRGN | neurogranin (protein<br>kinase C<br>substrate,<br>RC3) | -1.198805 | Inlier |
| siRNA-Temozolomide Run1-DMSO | NM_0061<br>76 | NRGN | neurogranin (protein<br>kinase C<br>substrate,<br>RC3) | -0.709607 | Inlier |
| siRNA-Temozolomide Run2-DMSO | NM_0061<br>76 | NRGN | neurogranin (protein<br>kinase C<br>substrate,<br>RC3) | -0.471154 | Inlier |



Identification of Survival Genes in Human Glioblastoma Cells Using siRNA Screening  
 Nikhil G Thaker, Fang Zhang, Peter R. McDonald, Tong Ying Shun, Michael D Lewen, Ian F. Pollack, and John S. Lazo

Molecular Pharmacology

|                              |               |       |                                               |           |        |
|------------------------------|---------------|-------|-----------------------------------------------|-----------|--------|
| siRNA Disorazole DMSO Run1   | NM_0061<br>76 | NRGN  | neurogranin (protein kinase C substrate, RC3) | -0.251865 | Inlier |
| siRNA-Temozolomide Run3-DMSO | NM_0061<br>76 | NRGN  | neurogranin (protein kinase C substrate, RC3) | 0.251866  | Inlier |
| siRNA-Vinblastine Run2-DMSO  | NM_0061<br>76 | NRGN  | neurogranin (protein kinase C substrate, RC3) | 0.639393  | Inlier |
| siRNA Disorazole DMSO Run3   | NM_0061<br>76 | NRGN  | neurogranin (protein kinase C substrate, RC3) | 2.585593  | Inlier |
| siRNA Disorazole DMSO Run2   | NM_0061<br>76 | NRGN  | neurogranin (protein kinase C substrate, RC3) | 3.279869  | Inlier |
| siRNA-Temozolomide Run3-DMSO | NM_0034<br>89 | NRIP1 | nuclear receptor interacting protein 1        | -1.219745 | Inlier |
| siRNA-Temozolomide Run1-DMSO | NM_0034<br>89 | NRIP1 | nuclear receptor interacting protein 1        | -1.096374 | Inlier |
| siRNA Disorazole DMSO Run2   | NM_0034<br>89 | NRIP1 | nuclear receptor interacting protein 1        | -0.570878 | Inlier |
| siRNA Disorazole DMSO Run1   | NM_0034<br>89 | NRIP1 | nuclear receptor interacting protein 1        | -0.125999 | Inlier |
| siRNA-Temozolomide Run2-DMSO | NM_0034<br>89 | NRIP1 | nuclear receptor interacting protein 1        | 0.125999  | Inlier |

Identification of Survival Genes in Human Glioblastoma Cells Using siRNA Screening  
 Nikhil G Thaker, Fang Zhang, Peter R. McDonald, Tong Ying Shun, Michael D Lewen, Ian F. Pollack, and John S. Lazo  
 Molecular Pharmacology

|                              |               |       |                                                 |                  |
|------------------------------|---------------|-------|-------------------------------------------------|------------------|
| siRNA-Vinblastine Run1-DMSO  | NM_0034<br>89 | NRIP1 | nuclear<br>receptor<br>interacting<br>protein 1 | 0.41866 Inlier   |
| siRNA Disorazole DMSO Run3   | NM_0034<br>89 | NRIP1 | nuclear<br>receptor<br>interacting<br>protein 1 | 0.778122 Inlier  |
| siRNA-Vinblastine Run2-DMSO  | NM_0034<br>89 | NRIP1 | nuclear<br>receptor<br>interacting<br>protein 1 | 1.494849 Inlier  |
| siRNA-Temozolomide Run3-DMSO | NM_0314<br>74 | NRIP2 | nuclear<br>receptor<br>interacting<br>protein 2 | -1.437688 Inlier |
| siRNA-Temozolomide Run1-DMSO | NM_0314<br>74 | NRIP2 | nuclear<br>receptor<br>interacting<br>protein 2 | -0.829911 Inlier |
| siRNA-Temozolomide Run2-DMSO | NM_0314<br>74 | NRIP2 | nuclear<br>receptor<br>interacting<br>protein 2 | -0.339618 Inlier |
| siRNA Disorazole DMSO Run1   | NM_0314<br>74 | NRIP2 | nuclear<br>receptor<br>interacting<br>protein 2 | -0.249851 Inlier |
| siRNA-Vinblastine Run1-DMSO  | NM_0314<br>74 | NRIP2 | nuclear<br>receptor<br>interacting<br>protein 2 | 0.249851 Inlier  |
| siRNA-Vinblastine Run2-DMSO  | NM_0314<br>74 | NRIP2 | nuclear<br>receptor<br>interacting<br>protein 2 | 0.519089 Inlier  |
| siRNA Disorazole DMSO Run2   | NM_0314<br>74 | NRIP2 | nuclear<br>receptor<br>interacting<br>protein 2 | 1.944639 Inlier  |

Identification of Survival Genes in Human Glioblastoma Cells Using siRNA Screening  
 Nikhil G Thaker, Fang Zhang, Peter R. McDonald, Tong Ying Shun, Michael D Lewen, Ian F. Pollack, and John S. Lazo  
 Molecular Pharmacology

|                                  |               |       |                                                 |           |        |
|----------------------------------|---------------|-------|-------------------------------------------------|-----------|--------|
| siRNA Disorazole DMSO Run3       | NM_0314<br>74 | NRIP2 | nuclear<br>receptor<br>interacting<br>protein 2 | 2.853148  | Inlier |
| siRNA-Temozolomide Run3-<br>DMSO | NM_1984<br>65 | NRK   | Nik related<br>kinase                           | -1.261482 | Inlier |
| siRNA-Temozolomide Run2-<br>DMSO | NM_1984<br>65 | NRK   | Nik related<br>kinase                           | -1.087375 | Inlier |
| siRNA-Temozolomide Run1-<br>DMSO | NM_1984<br>65 | NRK   | Nik related<br>kinase                           | -0.660847 | Inlier |
| siRNA Disorazole DMSO Run3       | NM_1984<br>65 | NRK   | Nik related<br>kinase                           | -0.045709 | Inlier |
| siRNA Disorazole DMSO Run1       | NM_1984<br>65 | NRK   | Nik related<br>kinase                           | 0.045709  | Inlier |
| siRNA Disorazole DMSO Run2       | NM_1984<br>65 | NRK   | Nik related<br>kinase                           | 0.482656  | Inlier |
| siRNA-Vinblastine Run2-<br>DMSO  | NM_1984<br>65 | NRK   | Nik related<br>kinase                           | 0.688153  | Inlier |
| siRNA-Vinblastine Run1-<br>DMSO  | NM_1984<br>65 | NRK   | Nik related<br>kinase                           | 1.76409   | Inlier |
| siRNA-Temozolomide Run3-<br>DMSO | NM_0038<br>73 | NRP1  | neuropilin<br>1                                 | -1.598619 | Inlier |
| siRNA-Temozolomide Run2-<br>DMSO | NM_0038<br>73 | NRP1  | neuropilin<br>1                                 | -0.493028 | Inlier |
| siRNA Disorazole DMSO Run1       | NM_0038<br>73 | NRP1  | neuropilin<br>1                                 | -0.165451 | Inlier |
| siRNA-Temozolomide Run1-<br>DMSO | NM_0038<br>73 | NRP1  | neuropilin<br>1                                 | -0.081836 | Inlier |
| siRNA Disorazole DMSO Run3       | NM_0038<br>73 | NRP1  | neuropilin<br>1                                 | 0.081836  | Inlier |
| siRNA-Vinblastine Run2-<br>DMSO  | NM_0038<br>73 | NRP1  | neuropilin<br>1                                 | 0.855972  | Inlier |
| siRNA Disorazole DMSO Run2       | NM_0038<br>73 | NRP1  | neuropilin<br>1                                 | 0.947438  | Inlier |
| siRNA-Vinblastine Run1-<br>DMSO  | NM_0038<br>73 | NRP1  | neuropilin<br>1                                 | 1.20295   | Inlier |
| siRNA-Temozolomide Run3-<br>DMSO | NM_2012<br>64 | NRP2  | neuropilin<br>2                                 | -1.64515  | Inlier |
| siRNA Disorazole DMSO Run1       | NM_2012<br>64 | NRP2  | neuropilin<br>2                                 | -0.694135 | Inlier |
| siRNA-Temozolomide Run2-<br>DMSO | NM_2012<br>64 | NRP2  | neuropilin<br>2                                 | -0.654865 | Inlier |

Identification of Survival Genes in Human Glioblastoma Cells Using siRNA Screening  
 Nikhil G Thaker, Fang Zhang, Peter R. McDonald, Tong Ying Shun, Michael D Lewen, Ian F. Pollack, and John S. Lazo

|                                  |               |         |                                                              |           |        |
|----------------------------------|---------------|---------|--------------------------------------------------------------|-----------|--------|
| siRNA-Temozolomide Run1-<br>DMSO | NM_2012<br>64 | NRP2    | neuropilin<br>2                                              | -0.287982 | Inlier |
| siRNA Disorazole DMSO Run3       | NM_2012<br>64 | NRP2    | neuropilin<br>2                                              | 0.287982  | Inlier |
| siRNA-Vinblastine Run2-<br>DMSO  | NM_2012<br>64 | NRP2    | neuropilin<br>2                                              | 0.537824  | Inlier |
| siRNA Disorazole DMSO Run2       | NM_2012<br>64 | NRP2    | neuropilin<br>2                                              | 1.380702  | Inlier |
| siRNA-Vinblastine Run1-<br>DMSO  | NM_2012<br>64 | NRP2    | neuropilin<br>2                                              | 1.675512  | Inlier |
| siRNA-Temozolomide Run1-<br>DMSO | NM_1818<br>06 | NRPS998 | NRPS998                                                      | -0.972508 | Inlier |
| siRNA-Temozolomide Run3-<br>DMSO | NM_1818<br>06 | NRPS998 | NRPS998                                                      | -0.791513 | Inlier |
| siRNA-Temozolomide Run2-<br>DMSO | NM_1818<br>06 | NRPS998 | NRPS998                                                      | -0.557487 | Inlier |
| siRNA Disorazole DMSO Run2       | NM_1818<br>06 | NRPS998 | NRPS998                                                      | -0.02283  | Inlier |
| siRNA Disorazole DMSO Run1       | NM_1818<br>06 | NRPS998 | NRPS998                                                      | 0.02283   | Inlier |
| siRNA-Vinblastine Run1-<br>DMSO  | NM_1818<br>06 | NRPS998 | NRPS998                                                      | 0.469329  | Inlier |
| siRNA Disorazole DMSO Run3       | NM_1818<br>06 | NRPS998 | NRPS998                                                      | 0.810783  | Inlier |
| siRNA-Vinblastine Run2-<br>DMSO  | NM_1818<br>06 | NRPS998 | NRPS998                                                      | 1.247366  | Inlier |
| siRNA Disorazole DMSO Run1       | NM_1723<br>49 | NSD1    | nuclear<br>receptor<br>binding<br>SET<br>domain<br>protein 1 | -0.868561 | Inlier |
| siRNA-Temozolomide Run3-<br>DMSO | NM_1723<br>49 | NSD1    | nuclear<br>receptor<br>binding<br>SET<br>domain<br>protein 1 | -0.480439 | Inlier |
| siRNA-Vinblastine Run1-<br>DMSO  | NM_1723<br>49 | NSD1    | nuclear<br>receptor<br>binding<br>SET<br>domain<br>protein 1 | -0.257579 | Inlier |
| siRNA-Vinblastine Run2-<br>DMSO  | NM_1723<br>49 | NSD1    | domain<br>protein 1                                          | -0.163482 | Inlier |

Identification of Survival Genes in Human Glioblastoma Cells Using siRNA Screening  
 Nikhil G Thaker, Fang Zhang, Peter R. McDonald, Tong Ying Shun, Michael D Lewen, Ian F. Pollack, and John S. Lazo

Molecular Pharmacology

|                              |               |       |                                                              |           |        |
|------------------------------|---------------|-------|--------------------------------------------------------------|-----------|--------|
| siRNA-Temozolomide Run2-DMSO | NM_1723<br>49 | NSD1  | nuclear<br>receptor<br>binding<br>SET<br>domain<br>protein 1 | 0.163483  | Inlier |
| siRNA-Temozolomide Run1-DMSO | NM_1723<br>49 | NSD1  | nuclear<br>receptor<br>binding<br>SET<br>domain<br>protein 1 | 1.297086  | Inlier |
| siRNA Disorazole DMSO Run2   | NM_1723<br>49 | NSD1  | nuclear<br>receptor<br>binding<br>SET<br>domain<br>protein 1 | 1.601748  | Inlier |
| siRNA Disorazole DMSO Run3   | NM_1723<br>49 | NSD1  | nuclear<br>receptor<br>binding<br>SET<br>domain<br>protein 1 | 1.826033  | Inlier |
| siRNA Disorazole DMSO Run2   | NM_0159<br>22 | NSDHL | NAD(P)<br>dependent<br>steroid<br>dehydroge<br>nase-like     | -1.236105 | Inlier |
| siRNA-Temozolomide Run2-DMSO | NM_0159<br>22 | NSDHL | NAD(P)<br>dependent<br>steroid<br>dehydroge<br>nase-like     | -0.680214 | Inlier |
| siRNA-Temozolomide Run3-DMSO | NM_0159<br>22 | NSDHL | NAD(P)<br>dependent<br>steroid<br>dehydroge<br>nase-like     | -0.668786 | Inlier |
| siRNA Disorazole DMSO Run1   | NM_0159<br>22 | NSDHL | NAD(P)<br>dependent<br>steroid<br>dehydroge<br>nase-like     | -0.009164 | Inlier |
| siRNA Disorazole DMSO Run3   | NM_0159<br>22 | NSDHL | NAD(P)<br>dependent<br>steroid<br>dehydroge<br>nase-like     | 0.009165  | Inlier |

Identification of Survival Genes in Human Glioblastoma Cells Using siRNA Screening  
 Nikhil G Thaker, Fang Zhang, Peter R. McDonald, Tong Ying Shun, Michael D Lewen, Ian F. Pollack, and John S. Lazo

Molecular Pharmacology

|                              |               |       |                                                          |           |        |
|------------------------------|---------------|-------|----------------------------------------------------------|-----------|--------|
| siRNA-Temozolomide Run1-DMSO | NM_0159<br>22 | NSDHL | NAD(P)<br>dependent<br>steroid<br>dehydroge<br>nase-like | 0.525216  | Inlier |
| siRNA-Vinblastine Run2-DMSO  | NM_0159<br>22 | NSDHL | NAD(P)<br>dependent<br>steroid<br>dehydroge<br>nase-like | 1.0311    | Inlier |
| siRNA-Vinblastine Run1-DMSO  | NM_0159<br>22 | NSDHL | NAD(P)<br>dependent<br>steroid<br>dehydroge<br>nase-like | 1.354464  | Inlier |
| siRNA-Temozolomide Run3-DMSO | NM_0061<br>78 | NSF   | N-<br>ethylmalei<br>mide-<br>sensitive<br>factor         | -0.992455 | Inlier |
| siRNA Disorazole DMSO Run1   | NM_0061<br>78 | NSF   | N-<br>ethylmalei<br>mide-<br>sensitive<br>factor         | -0.497266 | Inlier |
| siRNA-Temozolomide Run1-DMSO | NM_0061<br>78 | NSF   | N-<br>ethylmalei<br>mide-<br>sensitive<br>factor         | -0.293146 | Inlier |
| siRNA-Temozolomide Run2-DMSO | NM_0061<br>78 | NSF   | N-<br>ethylmalei<br>mide-<br>sensitive<br>factor         | -0.186966 | Inlier |
| siRNA-Vinblastine Run2-DMSO  | NM_0061<br>78 | NSF   | N-<br>ethylmalei<br>mide-<br>sensitive<br>factor         | 0.186965  | Inlier |
| siRNA-Vinblastine Run1-DMSO  | NM_0061<br>78 | NSF   | N-<br>ethylmalei<br>mide-<br>sensitive<br>factor         | 0.851734  | Inlier |
| siRNA Disorazole DMSO Run3   | NM_0061<br>78 | NSF   | N-<br>ethylmalei<br>mide-<br>sensitive<br>factor         | 0.95568   | Inlier |

Identification of Survival Genes in Human Glioblastoma Cells Using siRNA Screening  
 Nikhil G Thaker, Fang Zhang, Peter R. McDonald, Tong Ying Shun, Michael D Lewen, Ian F. Pollack, and John S. Lazo

Molecular Pharmacology

| siRNA Treatment              | Gene ID       | Gene Name | Gene Description                       | Log2 Fold Change | Outlier Status |
|------------------------------|---------------|-----------|----------------------------------------|------------------|----------------|
| siRNA Disorazole DMSO Run2   | NM_0061<br>78 | NSF       | N-ethylmaleimide-sensitive factor      | 1.987761         | Inlier         |
| siRNA-Temozolomide Run2-DMSO | NM_1825<br>43 | NSUN6     | NOL1/NO P2/Sun domain family, member 6 | -1.119952        | Inlier         |
| siRNA-Vinblastine Run2-DMSO  | NM_1825<br>43 | NSUN6     | NOL1/NO P2/Sun domain family, member 6 | -1.039899        | Inlier         |
| siRNA Disorazole DMSO Run1   | NM_1825<br>43 | NSUN6     | NOL1/NO P2/Sun domain family, member 6 | -0.309101        | Inlier         |
| siRNA-Temozolomide Run3-DMSO | NM_1825<br>43 | NSUN6     | NOL1/NO P2/Sun domain family, member 6 | -0.141831        | Inlier         |
| siRNA-Temozolomide Run1-DMSO | NM_1825<br>43 | NSUN6     | NOL1/NO P2/Sun domain family, member 6 | 0.141831         | Inlier         |
| siRNA Disorazole DMSO Run3   | NM_1825<br>43 | NSUN6     | NOL1/NO P2/Sun domain family, member 6 | 0.267019         | Inlier         |
| siRNA Disorazole DMSO Run2   | NM_1825<br>43 | NSUN6     | NOL1/NO P2/Sun domain family, member 6 | 2.994752         | Inlier         |
| siRNA-Vinblastine Run1-DMSO  | NM_1825<br>43 | NSUN6     | NOL1/NO P2/Sun domain family, member 6 | 4.856696         | Outlier        |
| siRNA-Vinblastine Run2-DMSO  | NM_0325<br>26 | NT5C1A    | 5-nucleotidase, cytosolic              | -0.991497        | Inlier         |

Identification of Survival Genes in Human Glioblastoma Cells Using siRNA Screening  
 Nikhil G Thaker, Fang Zhang, Peter R. McDonald, Tong Ying Shun, Michael D Lewen, Ian F. Pollack, and John S. Lazo

Molecular Pharmacology

|                              |               |        |                              |           |        |
|------------------------------|---------------|--------|------------------------------|-----------|--------|
| siRNA Disorazole DMSO Run3   | NM_0325<br>26 | NT5C1A | 5-nucleotidase, cytosolic IA | -0.728323 | Inlier |
| siRNA-Temozolomide Run3-DMSO | NM_0325<br>26 | NT5C1A | 5-nucleotidase, cytosolic IA | -0.428311 | Inlier |
| siRNA-Temozolomide Run2-DMSO | NM_0325<br>26 | NT5C1A | 5-nucleotidase, cytosolic IA | -0.01707  | Inlier |
| siRNA Disorazole DMSO Run1   | NM_0325<br>26 | NT5C1A | 5-nucleotidase, cytosolic IA | 0.01707   | Inlier |
| siRNA-Temozolomide Run1-DMSO | NM_0325<br>26 | NT5C1A | 5-nucleotidase, cytosolic IA | 0.620677  | Inlier |
| siRNA Disorazole DMSO Run2   | NM_0325<br>26 | NT5C1A | 5-nucleotidase, cytosolic IA | 0.924851  | Inlier |
| siRNA-Vinblastine Run1-DMSO  | NM_0325<br>26 | NT5C1A | 5-nucleotidase, cytosolic IA | 1.403797  | Inlier |
| siRNA Disorazole DMSO Run3   | NM_0332<br>53 | NT5C1B | 5-nucleotidase, cytosolic IB | -0.994146 | Inlier |
| siRNA Disorazole DMSO Run1   | NM_0332<br>53 | NT5C1B | 5-nucleotidase, cytosolic IB | -0.954174 | Inlier |
| siRNA-Temozolomide Run3-DMSO | NM_0332<br>53 | NT5C1B | 5-nucleotidase, cytosolic IB | -0.444552 | Inlier |



Identification of Survival Genes in Human Glioblastoma Cells Using siRNA Screening  
 Nikhil G Thaker, Fang Zhang, Peter R. McDonald, Tong Ying Shun, Michael D Lewen, Ian F. Pollack, and John S. Lazo

Molecular Pharmacology

|                              |               |        |                              |           |        |
|------------------------------|---------------|--------|------------------------------|-----------|--------|
| siRNA-Temozolomide Run2-DMSO | NM_0332<br>53 | NT5C1B | 5-nucleotidase, cytosolic IB | -0.063176 | Inlier |
| siRNA-Vinblastine Run2-DMSO  | NM_0332<br>53 | NT5C1B | 5-nucleotidase, cytosolic IB | 0.063175  | Inlier |
| siRNA-Temozolomide Run1-DMSO | NM_0332<br>53 | NT5C1B | 5-nucleotidase, cytosolic IB | 0.166976  | Inlier |
| siRNA-Vinblastine Run1-DMSO  | NM_0332<br>53 | NT5C1B | 5-nucleotidase, cytosolic IB | 0.904448  | Inlier |
| siRNA Disorazole DMSO Run2   | NM_0332<br>53 | NT5C1B | 5-nucleotidase, cytosolic IB | 3.052276  | Inlier |
| siRNA-Temozolomide Run3-DMSO | NM_0122<br>29 | NT5C2  | 5-nucleotidase, cytosolic II | -1.310172 | Inlier |
| siRNA-Temozolomide Run2-DMSO | NM_0122<br>29 | NT5C2  | 5-nucleotidase, cytosolic II | -1.179021 | Inlier |
| siRNA-Vinblastine Run2-DMSO  | NM_0122<br>29 | NT5C2  | 5-nucleotidase, cytosolic II | -0.256209 | Inlier |
| siRNA-Temozolomide Run1-DMSO | NM_0122<br>29 | NT5C2  | 5-nucleotidase, cytosolic II | -0.02729  | Inlier |
| siRNA Disorazole DMSO Run1   | NM_0122<br>29 | NT5C2  | 5-nucleotidase, cytosolic II | 0.02729   | Inlier |

Identification of Survival Genes in Human Glioblastoma Cells Using siRNA Screening  
 Nikhil G Thaker, Fang Zhang, Peter R. McDonald, Tong Ying Shun, Michael D Lewen, Ian F. Pollack, and John S. Lazo  
 Molecular Pharmacology

|                                  |               |       |                                         |           |         |
|----------------------------------|---------------|-------|-----------------------------------------|-----------|---------|
| siRNA Disorazole DMSO Run3       | NM_0122<br>29 | NT5C2 | 5-<br>nucleotida<br>se,<br>cytosolic II | 0.345357  | Inlier  |
| siRNA-Vinblastine Run1-<br>DMSO  | NM_0122<br>29 | NT5C2 | 5-<br>nucleotida<br>se,<br>cytosolic II | 1.003643  | Inlier  |
| siRNA Disorazole DMSO Run2       | NM_0122<br>29 | NT5C2 | 5-<br>nucleotida<br>se,<br>cytosolic II | 1.826141  | Inlier  |
| siRNA-Vinblastine Run1-<br>DMSO  | NM_0025<br>26 | NT5E  | 5-<br>nucleotida<br>se, ecto<br>(CD73)  | -1.212524 | Inlier  |
| siRNA-Vinblastine Run2-<br>DMSO  | NM_0025<br>26 | NT5E  | 5-<br>nucleotida<br>se, ecto<br>(CD73)  | -0.787219 | Inlier  |
| siRNA-Temozolomide Run2-<br>DMSO | NM_0025<br>26 | NT5E  | 5-<br>nucleotida<br>se, ecto<br>(CD73)  | -0.561781 | Inlier  |
| siRNA-Temozolomide Run3-<br>DMSO | NM_0025<br>26 | NT5E  | 5-<br>nucleotida<br>se, ecto<br>(CD73)  | -0.2291   | Inlier  |
| siRNA Disorazole DMSO Run2       | NM_0025<br>26 | NT5E  | 5-<br>nucleotida<br>se, ecto<br>(CD73)  | 0.2291    | Inlier  |
| siRNA Disorazole DMSO Run3       | NM_0025<br>26 | NT5E  | 5-<br>nucleotida<br>se, ecto<br>(CD73)  | 0.236964  | Inlier  |
| siRNA Disorazole DMSO Run1       | NM_0025<br>26 | NT5E  | 5-<br>nucleotida<br>se, ecto<br>(CD73)  | 5.069636  | Outlier |
| siRNA-Temozolomide Run1-<br>DMSO | NM_0025<br>26 | NT5E  | 5-<br>nucleotida<br>se, ecto<br>(CD73)  | 5.803801  | Outlier |
| siRNA-Vinblastine Run2-<br>DMSO  | NM_0067<br>02 | NTE   | NTE                                     | -0.934746 | Inlier  |
| siRNA Disorazole DMSO Run3       | NM_0067<br>02 | NTE   | NTE                                     | -0.673751 | Inlier  |

Identification of Survival Genes in Human Glioblastoma Cells Using siRNA Screening  
 Nikhil G Thaker, Fang Zhang, Peter R. McDonald, Tong Ying Shun, Michael D Lewen, Ian F. Pollack, and John S. Lazo

|                              |           |       |                                                |           |        |
|------------------------------|-----------|-------|------------------------------------------------|-----------|--------|
| siRNA-Temozolomide Run2-DMSO | NM_006702 | NTE   | NTE                                            | -0.56217  | Inlier |
| siRNA-Temozolomide Run1-DMSO | NM_006702 | NTE   | NTE                                            | -0.38632  | Inlier |
| siRNA-Temozolomide Run3-DMSO | NM_006702 | NTE   | NTE                                            | 0.38632   | Inlier |
| siRNA Disorazole DMSO Run2   | NM_006702 | NTE   | NTE                                            | 0.675249  | Inlier |
| siRNA-Vinblastine Run1-DMSO  | NM_006702 | NTE   | NTE                                            | 1.305554  | Inlier |
| siRNA Disorazole DMSO Run1   | NM_006702 | NTE   | NTE                                            | 1.486119  | Inlier |
| siRNA-Temozolomide Run3-DMSO | NM_002528 | NTHL1 | endonuclease III-like 1 (E. coli)              | -1.085079 | Inlier |
| siRNA-Temozolomide Run2-DMSO | NM_002528 | NTHL1 | endonuclease III-like 1 (E. coli)              | -0.911176 | Inlier |
| siRNA Disorazole DMSO Run3   | NM_002528 | NTHL1 | endonuclease III-like 1 (E. coli)              | -0.379842 | Inlier |
| siRNA-Temozolomide Run1-DMSO | NM_002528 | NTHL1 | endonuclease III-like 1 (E. coli)              | -0.013747 | Inlier |
| siRNA-Vinblastine Run2-DMSO  | NM_002528 | NTHL1 | endonuclease III-like 1 (E. coli)              | 0.013747  | Inlier |
| siRNA Disorazole DMSO Run1   | NM_002528 | NTHL1 | endonuclease III-like 1 (E. coli)              | 0.437824  | Inlier |
| siRNA Disorazole DMSO Run2   | NM_002528 | NTHL1 | endonuclease III-like 1 (E. coli)              | 1.125358  | Inlier |
| siRNA-Vinblastine Run1-DMSO  | NM_002528 | NTHL1 | endonuclease III-like 1 (E. coli)              | 1.660267  | Inlier |
| siRNA Disorazole DMSO Run2   | NM_002529 | NTRK1 | neurotrophic tyrosine kinase, receptor, type 1 | -0.694363 | Inlier |

Identification of Survival Genes in Human Glioblastoma Cells Using siRNA Screening  
 Nikhil G Thaker, Fang Zhang, Peter R. McDonald, Tong Ying Shun, Michael D Lewen, Ian F. Pollack, and John S. Lazo  
 Molecular Pharmacology

|                              |                  |       |                                                |           |        |
|------------------------------|------------------|-------|------------------------------------------------|-----------|--------|
| siRNA-Temozolomide Run3-DMSO | NM_0025<br>29    | NTRK1 | neurotrophic tyrosine kinase, receptor, type 1 | -0.654637 | Inlier |
| siRNA Disorazole DMSO Run3   | NM_0025<br>29    | NTRK1 | neurotrophic tyrosine kinase, receptor, type 1 | -0.172817 | Inlier |
| siRNA-Temozolomide Run1-DMSO | NM_0025<br>29    | NTRK1 | neurotrophic tyrosine kinase, receptor, type 1 | -0.074202 | Inlier |
| siRNA-Temozolomide Run2-DMSO | NM_0025<br>29    | NTRK1 | neurotrophic tyrosine kinase, receptor, type 1 | 0.074202  | Inlier |
| siRNA-Vinblastine Run1-DMSO  | NM_0025<br>29    | NTRK1 | neurotrophic tyrosine kinase, receptor, type 1 | 0.988971  | Inlier |
| siRNA Disorazole DMSO Run1   | NM_0025<br>29    | NTRK1 | neurotrophic tyrosine kinase, receptor, type 1 | 1.053818  | Inlier |
| siRNA-Vinblastine Run2-DMSO  | NM_0025<br>29    | NTRK1 | neurotrophic tyrosine kinase, receptor, type 1 | 1.869749  | Inlier |
| siRNA-Temozolomide Run3-DMSO | NM_0010<br>07097 | NTRK2 | neurotrophic tyrosine kinase, receptor, type 2 | -1.787237 | Inlier |

Identification of Survival Genes in Human Glioblastoma Cells Using siRNA Screening  
 Nikhil G Thaker, Fang Zhang, Peter R. McDonald, Tong Ying Shun, Michael D Lewen, Ian F. Pollack, and John S. Lazo  
 Molecular Pharmacology

|                                  |                  |       |                                                             |                  |
|----------------------------------|------------------|-------|-------------------------------------------------------------|------------------|
| siRNA Disorazole DMSO Run2       | NM_0010<br>07097 | NTRK2 | neurotroph<br>ic tyrosine<br>kinase,<br>receptor,<br>type 2 | -1.16285 Inlier  |
| siRNA-Temozolomide Run2-<br>DMSO | NM_0010<br>07097 | NTRK2 | neurotroph<br>ic tyrosine<br>kinase,<br>receptor,<br>type 2 | -0.979735 Inlier |
| siRNA-Temozolomide Run1-<br>DMSO | NM_0010<br>07097 | NTRK2 | neurotroph<br>ic tyrosine<br>kinase,<br>receptor,<br>type 2 | -0.150862 Inlier |
| siRNA-Vinblastine Run1-<br>DMSO  | NM_0010<br>07097 | NTRK2 | neurotroph<br>ic tyrosine<br>kinase,<br>receptor,<br>type 2 | 0.150862 Inlier  |
| siRNA Disorazole DMSO Run1       | NM_0010<br>07097 | NTRK2 | neurotroph<br>ic tyrosine<br>kinase,<br>receptor,<br>type 2 | 0.325488 Inlier  |
| siRNA Disorazole DMSO Run3       | NM_0010<br>07097 | NTRK2 | neurotroph<br>ic tyrosine<br>kinase,<br>receptor,<br>type 2 | 0.369265 Inlier  |
| siRNA-Vinblastine Run2-<br>DMSO  | NM_0010<br>07097 | NTRK2 | neurotroph<br>ic tyrosine<br>kinase,<br>receptor,<br>type 2 | 2.439032 Inlier  |
| siRNA-Temozolomide Run2-<br>DMSO | NM_0025<br>30    | NTRK3 | neurotroph<br>ic tyrosine<br>kinase,<br>receptor,<br>type 3 | -1.391511 Inlier |

Identification of Survival Genes in Human Glioblastoma Cells Using siRNA Screening  
 Nikhil G Thaker, Fang Zhang, Peter R. McDonald, Tong Ying Shun, Michael D Lewen, Ian F. Pollack, and John S. Lazo  
 Molecular Pharmacology

|                              |           |       |                                                |           |        |
|------------------------------|-----------|-------|------------------------------------------------|-----------|--------|
| siRNA-Temozolomide Run3-DMSO | NM_002530 | NTRK3 | neurotrophic tyrosine kinase, receptor, type 3 | -1.222959 | Inlier |
| siRNA-Temozolomide Run1-DMSO | NM_002530 | NTRK3 | neurotrophic tyrosine kinase, receptor, type 3 | -0.710422 | Inlier |
| siRNA Disorazole DMSO Run2   | NM_002530 | NTRK3 | neurotrophic tyrosine kinase, receptor, type 3 | -0.074911 | Inlier |
| siRNA Disorazole DMSO Run1   | NM_002530 | NTRK3 | neurotrophic tyrosine kinase, receptor, type 3 | 0.074912  | Inlier |
| siRNA-Vinblastine Run1-DMSO  | NM_002530 | NTRK3 | neurotrophic tyrosine kinase, receptor, type 3 | 0.547578  | Inlier |
| siRNA Disorazole DMSO Run3   | NM_002530 | NTRK3 | neurotrophic tyrosine kinase, receptor, type 3 | 0.638578  | Inlier |
| siRNA-Vinblastine Run2-DMSO  | NM_002530 | NTRK3 | neurotrophic tyrosine kinase, receptor, type 3 | 1.463087  | Inlier |
| siRNA-Temozolomide Run2-DMSO | NM_006183 | NTS   | neurotensin                                    | -0.863622 | Inlier |
| siRNA Disorazole DMSO Run3   | NM_006183 | NTS   | neurotensin                                    | -0.744114 | Inlier |
| siRNA-Vinblastine Run2-DMSO  | NM_006183 | NTS   | neurotensin                                    | -0.604886 | Inlier |
| siRNA-Temozolomide Run3-DMSO | NM_006183 | NTS   | neurotensin                                    | -0.372595 | Inlier |
| siRNA Disorazole DMSO Run1   | NM_006183 | NTS   | neurotensin                                    | 0.372595  | Inlier |

Identification of Survival Genes in Human Glioblastoma Cells Using siRNA Screening  
 Nikhil G Thaker, Fang Zhang, Peter R. McDonald, Tong Ying Shun, Michael D Lewen, Ian F. Pollack, and John S. Lazo

|                                  |               |       |                                           |           |        |
|----------------------------------|---------------|-------|-------------------------------------------|-----------|--------|
| siRNA-Temozolomide Run1-<br>DMSO | NM_0061<br>83 | NTS   | neurotensin                               | 0.593553  | Inlier |
| siRNA Disorazole DMSO Run2       | NM_0061<br>83 | NTS   | neurotensin                               | 1.190384  | Inlier |
| siRNA-Vinblastine Run1-<br>DMSO  | NM_0061<br>83 | NTS   | neurotensin                               | 2.625466  | Inlier |
| siRNA-Temozolomide Run3-<br>DMSO | NM_0025<br>31 | NTSR1 | neurotensin receptor<br>1 (high affinity) | -1.717104 | Inlier |
| siRNA Disorazole DMSO Run2       | NM_0025<br>31 | NTSR1 | neurotensin receptor<br>1 (high affinity) | -1.628066 | Inlier |
| siRNA Disorazole DMSO Run3       | NM_0025<br>31 | NTSR1 | neurotensin receptor<br>1 (high affinity) | -0.034798 | Inlier |
| siRNA-Temozolomide Run2-<br>DMSO | NM_0025<br>31 | NTSR1 | neurotensin receptor<br>1 (high affinity) | -0.025151 | Inlier |
| siRNA-Temozolomide Run1-<br>DMSO | NM_0025<br>31 | NTSR1 | neurotensin receptor<br>1 (high affinity) | 0.025152  | Inlier |
| siRNA Disorazole DMSO Run1       | NM_0025<br>31 | NTSR1 | neurotensin receptor<br>1 (high affinity) | 0.140924  | Inlier |
| siRNA-Vinblastine Run1-<br>DMSO  | NM_0025<br>31 | NTSR1 | neurotensin receptor<br>1 (high affinity) | 1.208076  | Inlier |
| siRNA-Vinblastine Run2-<br>DMSO  | NM_0025<br>31 | NTSR1 | neurotensin receptor<br>1 (high affinity) | 1.849761  | Inlier |
| siRNA-Temozolomide Run3-<br>DMSO | NM_0123<br>44 | NTSR2 | neurotensin receptor<br>2                 | -2.708658 | Inlier |
| siRNA Disorazole DMSO Run2       | NM_0123<br>44 | NTSR2 | neurotensin receptor<br>2                 | -0.696862 | Inlier |

Identification of Survival Genes in Human Glioblastoma Cells Using siRNA Screening

Nikhil G Thaker, Fang Zhang, Peter R. McDonald, Tong Ying Shun, Michael D Lewen, Ian F. Pollack, and John S.

Lazo

Molecular Pharmacology

|                              |               |       |                                                             |           |        |
|------------------------------|---------------|-------|-------------------------------------------------------------|-----------|--------|
| siRNA-Temozolomide Run1-DMSO | NM_0123<br>44 | NTSR2 | neurotensin receptor 2                                      | -0.466466 | Inlier |
| siRNA-Temozolomide Run2-DMSO | NM_0123<br>44 | NTSR2 | neurotensin receptor 2                                      | -0.441304 | Inlier |
| siRNA Disorazole DMSO Run3   | NM_0123<br>44 | NTSR2 | neurotensin receptor 2                                      | 0.441304  | Inlier |
| siRNA Disorazole DMSO Run1   | NM_0123<br>44 | NTSR2 | neurotensin receptor 2                                      | 0.652138  | Inlier |
| siRNA-Vinblastine Run1-DMSO  | NM_0123<br>44 | NTSR2 | neurotensin receptor 2                                      | 0.874618  | Inlier |
| siRNA-Vinblastine Run2-DMSO  | NM_0123<br>44 | NTSR2 | neurotensin receptor 2                                      | 0.893067  | Inlier |
| siRNA-Temozolomide Run3-DMSO | NM_1989<br>48 | NUDT1 | nudix (nucleoside diphosphate linked moiety X)-type motif 1 | -1.435398 | Inlier |
| siRNA-Temozolomide Run2-DMSO | NM_1989<br>48 | NUDT1 | nudix (nucleoside diphosphate linked moiety X)-type motif 1 | -0.7944   | Inlier |
| siRNA-Vinblastine Run2-DMSO  | NM_1989<br>48 | NUDT1 | nudix (nucleoside diphosphate linked moiety X)-type motif 1 | -0.285393 | Inlier |
| siRNA Disorazole DMSO Run1   | NM_1989<br>48 | NUDT1 | nudix (nucleoside diphosphate linked moiety X)-type motif 1 | -0.200872 | Inlier |



Identification of Survival Genes in Human Glioblastoma Cells Using siRNA Screening

Nikhil G Thaker, Fang Zhang, Peter R. McDonald, Tong Ying Shun, Michael D Lewen, Ian F. Pollack, and John S. Lazo

Molecular Pharmacology

|                                  |               |        |                                                                                      |           |        |
|----------------------------------|---------------|--------|--------------------------------------------------------------------------------------|-----------|--------|
| siRNA Disorazole DMSO Run3       | NM_1989<br>48 | NUDT1  | nudix<br>(nucleosid<br>e<br>diphospha<br>te linked<br>moiety X)-<br>type motif<br>1  | 0.200872  | Inlier |
| siRNA-Temozolomide Run1-<br>DMSO | NM_1989<br>48 | NUDT1  | nudix<br>(nucleosid<br>e<br>diphospha<br>te linked<br>moiety X)-<br>type motif<br>1  | 0.5546    | Inlier |
| siRNA-Vinblastine Run1-<br>DMSO  | NM_1989<br>48 | NUDT1  | nudix<br>(nucleosid<br>e<br>diphospha<br>te linked<br>moiety X)-<br>type motif<br>1  | 1.047215  | Inlier |
| siRNA Disorazole DMSO Run2       | NM_1989<br>48 | NUDT1  | nudix<br>(nucleosid<br>e<br>diphospha<br>te linked<br>moiety X)-<br>type motif<br>1  | 1.535682  | Inlier |
| siRNA-Vinblastine Run2-<br>DMSO  | NM_1775<br>33 | NUDT14 | nudix<br>(nucleosid<br>e<br>diphospha<br>te linked<br>moiety X)-<br>type motif<br>14 | -0.932098 | Inlier |
| siRNA Disorazole DMSO Run3       | NM_1775<br>33 | NUDT14 | nudix<br>(nucleosid<br>e<br>diphospha<br>te linked<br>moiety X)-<br>type motif<br>14 | -0.657431 | Inlier |

Identification of Survival Genes in Human Glioblastoma Cells Using siRNA Screening

Nikhil G Thaker, Fang Zhang, Peter R. McDonald, Tong Ying Shun, Michael D Lewen, Ian F. Pollack, and John S. Lazo

Molecular Pharmacology

| siRNA Treatment              | Gene ID   | Gene Name | Gene Description                                             | Log Fold Change | Outlier Status |
|------------------------------|-----------|-----------|--------------------------------------------------------------|-----------------|----------------|
| siRNA-Temozolomide Run2-DMSO | NM_177533 | NUDT14    | nudix (nucleoside diphosphate linked moiety X)-type motif 14 | -0.608421       | Inlier         |
| siRNA-Temozolomide Run3-DMSO | NM_177533 | NUDT14    | nudix (nucleoside diphosphate linked moiety X)-type motif 14 | -0.47395        | Inlier         |
| siRNA-Temozolomide Run1-DMSO | NM_177533 | NUDT14    | nudix (nucleoside diphosphate linked moiety X)-type motif 14 | 0.47395         | Inlier         |
| siRNA Disorazole DMSO Run1   | NM_177533 | NUDT14    | nudix (nucleoside diphosphate linked moiety X)-type motif 14 | 0.691569        | Inlier         |
| siRNA Disorazole DMSO Run2   | NM_177533 | NUDT14    | nudix (nucleoside diphosphate linked moiety X)-type motif 14 | 1.263357        | Inlier         |
| siRNA-Vinblastine Run1-DMSO  | NM_177533 | NUDT14    | nudix (nucleoside diphosphate linked moiety X)-type motif 14 | 1.969139        | Inlier         |

Identification of Survival Genes in Human Glioblastoma Cells Using siRNA Screening

Nikhil G Thaker, Fang Zhang, Peter R. McDonald, Tong Ying Shun, Michael D Lewen, Ian F. Pollack, and John S. Lazo

Molecular Pharmacology

|                              |               |       |                                                                                     |           |        |
|------------------------------|---------------|-------|-------------------------------------------------------------------------------------|-----------|--------|
| siRNA-Temozolomide Run1-DMSO | NM_1471<br>73 | NUDT2 | nudix<br>(nucleosid<br>e<br>diphospha<br>te linked<br>moiety X)-<br>type motif<br>2 | -0.741339 | Inlier |
| siRNA-Vinblastine Run2-DMSO  | NM_1471<br>73 | NUDT2 | nudix<br>(nucleosid<br>e<br>diphospha<br>te linked<br>moiety X)-<br>type motif<br>2 | -0.663141 | Inlier |
| siRNA-Temozolomide Run2-DMSO | NM_1471<br>73 | NUDT2 | nudix<br>(nucleosid<br>e<br>diphospha<br>te linked<br>moiety X)-<br>type motif<br>2 | -0.115017 | Inlier |
| siRNA-Temozolomide Run3-DMSO | NM_1471<br>73 | NUDT2 | nudix<br>(nucleosid<br>e<br>diphospha<br>te linked<br>moiety X)-<br>type motif<br>2 | -0.108002 | Inlier |
| siRNA Disorazole DMSO Run3   | NM_1471<br>73 | NUDT2 | nudix<br>(nucleosid<br>e<br>diphospha<br>te linked<br>moiety X)-<br>type motif<br>2 | 0.108002  | Inlier |
| siRNA Disorazole DMSO Run1   | NM_1471<br>73 | NUDT2 | nudix<br>(nucleosid<br>e<br>diphospha<br>te linked<br>moiety X)-<br>type motif<br>2 | 0.685859  | Inlier |

Identification of Survival Genes in Human Glioblastoma Cells Using siRNA Screening  
 Nikhil G Thaker, Fang Zhang, Peter R. McDonald, Tong Ying Shun, Michael D Lewen, Ian F. Pollack, and John S. Lazo

Molecular Pharmacology

|                                  |               |       |                                                                                     |           |        |
|----------------------------------|---------------|-------|-------------------------------------------------------------------------------------|-----------|--------|
| siRNA Disorazole DMSO Run2       | NM_1471<br>73 | NUDT2 | nudix<br>(nucleosid<br>e<br>diphospha<br>te linked<br>moiety X)-<br>type motif<br>2 | 0.843995  | Inlier |
| siRNA-Vinblastine Run1-<br>DMSO  | NM_1471<br>73 | NUDT2 | nudix<br>(nucleosid<br>e<br>diphospha<br>te linked<br>moiety X)-<br>type motif<br>2 | 1.53992   | Inlier |
| siRNA Disorazole DMSO Run3       | NM_0067<br>03 | NUDT3 | nudix<br>(nucleosid<br>e<br>diphospha<br>te linked<br>moiety X)-<br>type motif<br>3 | -0.745988 | Inlier |
| siRNA-Vinblastine Run2-<br>DMSO  | NM_0067<br>03 | NUDT3 | nudix<br>(nucleosid<br>e<br>diphospha<br>te linked<br>moiety X)-<br>type motif<br>3 | -0.603012 | Inlier |
| siRNA-Temozolomide Run3-<br>DMSO | NM_0067<br>03 | NUDT3 | nudix<br>(nucleosid<br>e<br>diphospha<br>te linked<br>moiety X)-<br>type motif<br>3 | -0.048355 | Inlier |
| siRNA Disorazole DMSO Run1       | NM_0067<br>03 | NUDT3 | nudix<br>(nucleosid<br>e<br>diphospha<br>te linked<br>moiety X)-<br>type motif<br>3 | -0.020969 | Inlier |

Identification of Survival Genes in Human Glioblastoma Cells Using siRNA Screening

Nikhil G Thaker, Fang Zhang, Peter R. McDonald, Tong Ying Shun, Michael D Lewen, Ian F. Pollack, and John S. Lazo

Molecular Pharmacology

|                              |           |       |                                                             |           |        |
|------------------------------|-----------|-------|-------------------------------------------------------------|-----------|--------|
| siRNA-Temozolomide Run2-DMSO | NM_006703 | NUDT3 | nudix (nucleoside diphosphate linked moiety X)-type motif 3 | 0.020969  | Inlier |
| siRNA-Vinblastine Run1-DMSO  | NM_006703 | NUDT3 | nudix (nucleoside diphosphate linked moiety X)-type motif 3 | 0.998625  | Inlier |
| siRNA Disorazole DMSO Run2   | NM_006703 | NUDT3 | nudix (nucleoside diphosphate linked moiety X)-type motif 3 | 1.303002  | Inlier |
| siRNA-Temozolomide Run1-DMSO | NM_006703 | NUDT3 | nudix (nucleoside diphosphate linked moiety X)-type motif 3 | 1.427803  | Inlier |
| siRNA-Vinblastine Run2-DMSO  | NM_199040 | NUDT4 | nudix (nucleoside diphosphate linked moiety X)-type motif 4 | -1.232127 | Inlier |
| siRNA-Temozolomide Run2-DMSO | NM_199040 | NUDT4 | nudix (nucleoside diphosphate linked moiety X)-type motif 4 | -1.0037   | Inlier |

Identification of Survival Genes in Human Glioblastoma Cells Using siRNA Screening

Nikhil G Thaker, Fang Zhang, Peter R. McDonald, Tong Ying Shun, Michael D Lewen, Ian F. Pollack, and John S. Lazo

Molecular Pharmacology

| siRNA              | Condition | Run  | Gene  | Value     | Outlier |
|--------------------|-----------|------|-------|-----------|---------|
| siRNA Disorazole   | DMSO      | Run3 | NUDT4 | -0.404836 | Inlier  |
| siRNA-Temozolomide | DMSO      | Run1 | NUDT4 | -0.364696 | Inlier  |
| siRNA Disorazole   | DMSO      | Run1 | NUDT4 | 0.364696  | Inlier  |
| siRNA-Temozolomide | DMSO      | Run3 | NUDT4 | 0.43203   | Inlier  |
| siRNA-Vinblastine  | DMSO      | Run1 | NUDT4 | 0.91697   | Inlier  |
| siRNA Disorazole   | DMSO      | Run2 | NUDT4 | 1.528757  | Inlier  |

nudix  
(nucleosid  
e  
diphospha  
te linked  
moiety X)-  
type motif  
4  
nudix  
(nucleosid  
e  
diphospha  
te linked  
moiety X)-  
type motif  
4  
nudix  
(nucleosid  
e  
diphospha  
te linked  
moiety X)-  
type motif  
4  
nudix  
(nucleosid  
e  
diphospha  
te linked  
moiety X)-  
type motif  
4  
nudix  
(nucleosid  
e  
diphospha  
te linked  
moiety X)-  
type motif  
4



Identification of Survival Genes in Human Glioblastoma Cells Using siRNA Screening

Nikhil G Thaker, Fang Zhang, Peter R. McDonald, Tong Ying Shun, Michael D Lewen, Ian F. Pollack, and John S. Lazo

Molecular Pharmacology

|                              |               |       |                                                                                     |           |        |
|------------------------------|---------------|-------|-------------------------------------------------------------------------------------|-----------|--------|
| siRNA-Temozolomide Run1-DMSO | NM_0141<br>42 | NUDT5 | nudix<br>(nucleosid<br>e<br>diphospha<br>te linked<br>moiety X)-<br>type motif<br>5 | 0.650642  | Inlier |
| siRNA Disorazole DMSO Run2   | NM_0141<br>42 | NUDT5 | nudix<br>(nucleosid<br>e<br>diphospha<br>te linked<br>moiety X)-<br>type motif<br>5 | 1.072793  | Inlier |
| siRNA-Temozolomide Run3-DMSO | NM_1980<br>41 | NUDT6 | nudix<br>(nucleosid<br>e<br>diphospha<br>te linked<br>moiety X)-<br>type motif<br>6 | -1.494536 | Inlier |
| siRNA-Vinblastine Run2-DMSO  | NM_1980<br>41 | NUDT6 | nudix<br>(nucleosid<br>e<br>diphospha<br>te linked<br>moiety X)-<br>type motif<br>6 | -1.201006 | Inlier |
| siRNA Disorazole DMSO Run3   | NM_1980<br>41 | NUDT6 | nudix<br>(nucleosid<br>e<br>diphospha<br>te linked<br>moiety X)-<br>type motif<br>6 | -0.145748 | Inlier |
| siRNA-Temozolomide Run1-DMSO | NM_1980<br>41 | NUDT6 | nudix<br>(nucleosid<br>e<br>diphospha<br>te linked<br>moiety X)-<br>type motif<br>6 | -0.128744 | Inlier |



Identification of Survival Genes in Human Glioblastoma Cells Using siRNA Screening

Nikhil G Thaker, Fang Zhang, Peter R. McDonald, Tong Ying Shun, Michael D Lewen, Ian F. Pollack, and John S. Lazo

Molecular Pharmacology

| siRNA Treatment              | Gene ID   | Gene Name | Value     | Category |
|------------------------------|-----------|-----------|-----------|----------|
| siRNA-Temozolomide Run2-DMSO | NM_198041 | NUDT6     | 0.128744  | Inlier   |
| siRNA Disorazole DMSO Run1   | NM_198041 | NUDT6     | 0.147994  | Inlier   |
| siRNA-Vinblastine Run1-DMSO  | NM_198041 | NUDT6     | 3.513813  | Outlier  |
| siRNA Disorazole DMSO Run2   | NM_198041 | NUDT6     | 4.865986  | Outlier  |
| siRNA Disorazole DMSO Run3   | NM_198038 | NUDT9     | -1.936431 | Inlier   |
| siRNA-Temozolomide Run2-DMSO | NM_198038 | NUDT9     | -0.85389  | Inlier   |

nudix  
(nucleosid  
e  
diphospha  
te linked  
moiety X)-  
type motif  
6

nudix  
(nucleosid  
e  
diphospha  
te linked  
moiety X)-  
type motif  
6

nudix  
(nucleosid  
e  
diphospha  
te linked  
moiety X)-  
type motif  
6

nudix  
(nucleosid  
e  
diphospha  
te linked  
moiety X)-  
type motif  
6

nudix  
(nucleosid  
e  
diphospha  
te linked  
moiety X)-  
type motif  
9

nudix  
(nucleosid  
e  
diphospha  
te linked  
moiety X)-  
type motif  
9

Identification of Survival Genes in Human Glioblastoma Cells Using siRNA Screening

Nikhil G Thaker, Fang Zhang, Peter R. McDonald, Tong Ying Shun, Michael D Lewen, Ian F. Pollack, and John S. Lazo

Molecular Pharmacology

|                              |           |        |                                                             |           |        |
|------------------------------|-----------|--------|-------------------------------------------------------------|-----------|--------|
| siRNA-Temozolomide Run3-DMSO | NM_198038 | NUDT9  | nudix (nucleoside diphosphate linked moiety X)-type motif 9 | -0.390624 | Inlier |
| siRNA-Vinblastine Run1-DMSO  | NM_198038 | NUDT9  | nudix (nucleoside diphosphate linked moiety X)-type motif 9 | -0.055511 | Inlier |
| siRNA Disorazole DMSO Run1   | NM_198038 | NUDT9  | nudix (nucleoside diphosphate linked moiety X)-type motif 9 | 0.055511  | Inlier |
| siRNA Disorazole DMSO Run2   | NM_198038 | NUDT9  | nudix (nucleoside diphosphate linked moiety X)-type motif 9 | 0.49511   | Inlier |
| siRNA-Temozolomide Run1-DMSO | NM_198038 | NUDT9  | nudix (nucleoside diphosphate linked moiety X)-type motif 9 | 1.428323  | Inlier |
| siRNA-Vinblastine Run2-DMSO  | NM_198038 | NUDT9  | nucleoporin 153kDa                                          | 2.055571  | Inlier |
| siRNA Disorazole DMSO Run2   | NM_005124 | NUP153 | nucleoporin 153kDa                                          | -0.990065 | Inlier |
| siRNA-Temozolomide Run3-DMSO | NM_005124 | NUP153 | nucleoporin 153kDa                                          | -0.464095 | Inlier |

Identification of Survival Genes in Human Glioblastoma Cells Using siRNA Screening  
 Nikhil G Thaker, Fang Zhang, Peter R. McDonald, Tong Ying Shun, Michael D Lewen, Ian F. Pollack, and John S. Lazo

|                                  |               |        |                                      |           |        |
|----------------------------------|---------------|--------|--------------------------------------|-----------|--------|
| siRNA-Temozolomide Run2-<br>DMSO | NM_0051<br>24 | NUP153 | nucleopori<br>n 153kDa               | -0.207428 | Inlier |
| siRNA Disorazole DMSO Run1       | NM_0051<br>24 | NUP153 | nucleopori<br>n 153kDa               | -0.078249 | Inlier |
| siRNA Disorazole DMSO Run3       | NM_0051<br>24 | NUP153 | nucleopori<br>n 153kDa               | 0.078249  | Inlier |
| siRNA-Vinblastine Run1-<br>DMSO  | NM_0051<br>24 | NUP153 | nucleopori<br>n 153kDa               | 0.884905  | Inlier |
| siRNA-Temozolomide Run1-<br>DMSO | NM_0051<br>24 | NUP153 | nucleopori<br>n 153kDa               | 0.896774  | Inlier |
| siRNA-Vinblastine Run2-<br>DMSO  | NM_0051<br>24 | NUP153 | nucleopori<br>n 153kDa               | 1.236075  | Inlier |
| siRNA-Temozolomide Run2-<br>DMSO | NM_2068<br>40 | NVL    | nuclear<br>VCP-like                  | -0.688406 | Inlier |
| siRNA-Temozolomide Run3-<br>DMSO | NM_2068<br>40 | NVL    | nuclear<br>VCP-like                  | -0.660594 | Inlier |
| siRNA Disorazole DMSO Run3       | NM_2068<br>40 | NVL    | nuclear<br>VCP-like                  | -0.477417 | Inlier |
| siRNA-Vinblastine Run2-<br>DMSO  | NM_2068<br>40 | NVL    | nuclear<br>VCP-like                  | -0.448955 | Inlier |
| siRNA-Temozolomide Run1-<br>DMSO | NM_2068<br>40 | NVL    | nuclear<br>VCP-like                  | 0.448955  | Inlier |
| siRNA Disorazole DMSO Run1       | NM_2068<br>40 | NVL    | nuclear<br>VCP-like                  | 0.850173  | Inlier |
| siRNA Disorazole DMSO Run2       | NM_2068<br>40 | NVL    | nuclear<br>VCP-like                  | 1.052075  | Inlier |
| siRNA-Vinblastine Run1-<br>DMSO  | NM_2068<br>40 | NVL    | nuclear<br>VCP-like                  | 1.753539  | Inlier |
| siRNA-Temozolomide Run1-<br>DMSO | NM_0220<br>52 | NXF3   | nuclear<br>RNA<br>export<br>factor 3 | -0.924498 | Inlier |
| siRNA-Temozolomide Run2-<br>DMSO | NM_0220<br>52 | NXF3   | nuclear<br>RNA<br>export<br>factor 3 | -0.424502 | Inlier |
| siRNA Disorazole DMSO Run1       | NM_0220<br>52 | NXF3   | nuclear<br>RNA<br>export<br>factor 3 | -0.355817 | Inlier |
| siRNA-Temozolomide Run3-<br>DMSO | NM_0220<br>52 | NXF3   | nuclear<br>RNA<br>export<br>factor 3 | -0.306989 | Inlier |
| siRNA Disorazole DMSO Run3       | NM_0220<br>52 | NXF3   | nuclear<br>RNA<br>export<br>factor 3 | 0.306989  | Inlier |
| siRNA-Vinblastine Run2-<br>DMSO  | NM_0220<br>52 | NXF3   | nuclear<br>RNA<br>export<br>factor 3 | 0.972481  | Inlier |

Identification of Survival Genes in Human Glioblastoma Cells Using siRNA Screening  
 Nikhil G Thaker, Fang Zhang, Peter R. McDonald, Tong Ying Shun, Michael D Lewen, Ian F. Pollack, and John S. Lazo

Molecular Pharmacology

| siRNA                        | Gene     | Gene ID       | Gene Name                                  | Log Fold Change | Outlier Status |
|------------------------------|----------|---------------|--------------------------------------------|-----------------|----------------|
| siRNA-Vinblastine Run1-DMSO  | NXF3     | NM_0220<br>52 | nuclear RNA export factor 3                | 1.011675        | Inlier         |
| siRNA Disorazole DMSO Run2   | NXF3     | NM_0220<br>52 | nuclear RNA export factor 3                | 1.167464        | Inlier         |
| siRNA-Temozolomide Run3-DMSO | NYD-SP25 | NM_0335<br>16 | NYD-SP25                                   | -1.396758       | Inlier         |
| siRNA-Temozolomide Run1-DMSO | NYD-SP25 | NM_0335<br>16 | NYD-SP25                                   | -0.974425       | Inlier         |
| siRNA-Temozolomide Run2-DMSO | NYD-SP25 | NM_0335<br>16 | NYD-SP25                                   | -0.527399       | Inlier         |
| siRNA Disorazole DMSO Run2   | NYD-SP25 | NM_0335<br>16 | NYD-SP25                                   | -0.170121       | Inlier         |
| siRNA Disorazole DMSO Run1   | NYD-SP25 | NM_0335<br>16 | NYD-SP25                                   | 0.170121        | Inlier         |
| siRNA Disorazole DMSO Run3   | NYD-SP25 | NM_0335<br>16 | NYD-SP25                                   | 0.586587        | Inlier         |
| siRNA-Vinblastine Run2-DMSO  | NYD-SP25 | NM_0335<br>16 | NYD-SP25                                   | 0.762413        | Inlier         |
| siRNA-Vinblastine Run1-DMSO  | NYD-SP25 | NM_0335<br>16 | NYD-SP25                                   | 0.817363        | Inlier         |
| siRNA Disorazole DMSO Run1   | OAS1     | NM_0168<br>16 | 2,5-oligoadeny late synthetase 1, 40/46kDa | -2.754405       | Inlier         |
| siRNA-Temozolomide Run2-DMSO | OAS1     | NM_0168<br>16 | 2,5-oligoadeny late synthetase 1, 40/46kDa | -0.889784       | Inlier         |
| siRNA-Vinblastine Run2-DMSO  | OAS1     | NM_0168<br>16 | 2,5-oligoadeny late synthetase 1, 40/46kDa | -0.165132       | Inlier         |
| siRNA-Temozolomide Run3-DMSO | OAS1     | NM_0168<br>16 | 2,5-oligoadeny late synthetase 1, 40/46kDa | -0.141178       | Inlier         |

Identification of Survival Genes in Human Glioblastoma Cells Using siRNA Screening  
 Nikhil G Thaker, Fang Zhang, Peter R. McDonald, Tong Ying Shun, Michael D Lewen, Ian F. Pollack, and John S. Lazo

Molecular Pharmacology

|                              |               |      |                                            |           |        |
|------------------------------|---------------|------|--------------------------------------------|-----------|--------|
| siRNA Disorazole DMSO Run3   | NM_0168<br>16 | OAS1 | 2,5-oligoadeny late synthetase 1, 40/46kDa | 0.141178  | Inlier |
| siRNA-Temozolomide Run1-DMSO | NM_0168<br>16 | OAS1 | 2,5-oligoadeny late synthetase 1, 40/46kDa | 0.459216  | Inlier |
| siRNA Disorazole DMSO Run2   | NM_0168<br>16 | OAS1 | 2,5-oligoadeny late synthetase 1, 40/46kDa | 0.981369  | Inlier |
| siRNA-Vinblastine Run1-DMSO  | NM_0168<br>16 | OAS1 | 2-5-oligoadeny late synthetase 1, 40/46kDa | 2.762263  | Inlier |
| siRNA-Temozolomide Run1-DMSO | NM_0025<br>35 | OAS2 | 2-5-oligoadeny late synthetase 2, 69/71kDa | -0.952704 | Inlier |
| siRNA Disorazole DMSO Run1   | NM_0025<br>35 | OAS2 | 2-5-oligoadeny late synthetase 2, 69/71kDa | -0.508203 | Inlier |
| siRNA-Vinblastine Run2-DMSO  | NM_0025<br>35 | OAS2 | 2-5-oligoadeny late synthetase 2, 69/71kDa | -0.276242 | Inlier |
| siRNA-Temozolomide Run2-DMSO | NM_0025<br>35 | OAS2 | 2-5-oligoadeny late synthetase 2, 69/71kDa | -0.034546 | Inlier |

Identification of Survival Genes in Human Glioblastoma Cells Using siRNA Screening  
 Nikhil G Thaker, Fang Zhang, Peter R. McDonald, Tong Ying Shun, Michael D Lewen, Ian F. Pollack, and John S. Lazo

Molecular Pharmacology

|                              |               |      |                                               |           |        |
|------------------------------|---------------|------|-----------------------------------------------|-----------|--------|
| siRNA Disorazole DMSO Run3   | NM_0025<br>35 | OAS2 | 2-5-oligoadeny late synthetase 2,<br>69/71kDa | 0.034545  | Inlier |
| siRNA-Temozolomide Run3-DMSO | NM_0025<br>35 | OAS2 | 2-5-oligoadeny late synthetase 2,<br>69/71kDa | 0.840797  | Inlier |
| siRNA Disorazole DMSO Run2   | NM_0025<br>35 | OAS2 | 2-5-oligoadeny late synthetase 2,<br>69/71kDa | 1.249765  | Inlier |
| siRNA-Vinblastine Run1-DMSO  | NM_0025<br>35 | OAS2 | 2-5-oligoadeny late synthetase 2,<br>69/71kDa | 1.911742  | Inlier |
| siRNA-Temozolomide Run1-DMSO | NM_0061<br>87 | OAS3 | 2-5-oligoadeny late synthetase 3, 100kDa      | -0.757841 | Inlier |
| siRNA Disorazole DMSO Run1   | NM_0061<br>87 | OAS3 | 2-5-oligoadeny late synthetase 3, 100kDa      | -0.745212 | Inlier |
| siRNA Disorazole DMSO Run3   | NM_0061<br>87 | OAS3 | 2-5-oligoadeny late synthetase 3, 100kDa      | -0.461125 | Inlier |
| siRNA-Temozolomide Run3-DMSO | NM_0061<br>87 | OAS3 | 2-5-oligoadeny late synthetase 3, 100kDa      | -0.049081 | Inlier |

Identification of Survival Genes in Human Glioblastoma Cells Using siRNA Screening  
 Nikhil G Thaker, Fang Zhang, Peter R. McDonald, Tong Ying Shun, Michael D Lewen, Ian F. Pollack, and John S. Lazo  
 Molecular Pharmacology

|                              |               |      |                                          |                  |
|------------------------------|---------------|------|------------------------------------------|------------------|
| siRNA-Temozolomide Run2-DMSO | NM_0061<br>87 | OAS3 | 2-5-oligoadeny late synthetase 3, 100kDa | 0.049081 Inlier  |
| siRNA-Vinblastine Run2-DMSO  | NM_0061<br>87 | OAS3 | 2-5-oligoadeny late synthetase 3, 100kDa | 0.603788 Inlier  |
| siRNA Disorazole DMSO Run2   | NM_0061<br>87 | OAS3 | 2-5-oligoadeny late synthetase 3, 100kDa | 0.824971 Inlier  |
| siRNA-Vinblastine Run1-DMSO  | NM_0061<br>87 | OAS3 | 2-5-oligoadeny late synthetase 3, 100kDa | 1.295426 Inlier  |
| siRNA Disorazole DMSO Run1   | NM_1982<br>13 | OASL | 2-5-oligoadeny late synthetase-like      | -1.702906 Inlier |
| siRNA-Temozolomide Run3-DMSO | NM_1982<br>13 | OASL | 2-5-oligoadeny late synthetase-like      | -0.910941 Inlier |
| siRNA-Temozolomide Run1-DMSO | NM_1982<br>13 | OASL | 2-5-oligoadeny late synthetase-like      | -0.438059 Inlier |
| siRNA-Vinblastine Run2-DMSO  | NM_1982<br>13 | OASL | 2-5-oligoadeny late synthetase-like      | -0.228265 Inlier |
| siRNA Disorazole DMSO Run3   | NM_1982<br>13 | OASL | 2-5-oligoadeny late synthetase-like      | 0.228265 Inlier  |

Identification of Survival Genes in Human Glioblastoma Cells Using siRNA Screening  
 Nikhil G Thaker, Fang Zhang, Peter R. McDonald, Tong Ying Shun, Michael D Lewen, Ian F. Pollack, and John S. Lazo

Molecular Pharmacology

|                              |               |      |                                             |           |        |
|------------------------------|---------------|------|---------------------------------------------|-----------|--------|
| siRNA-Temozolomide Run2-DMSO | NM_1982<br>13 | OASL | 2-5-oligoadeny late synthetase-like         | 0.393832  | Inlier |
| siRNA Disorazole DMSO Run2   | NM_1982<br>13 | OASL | 2-5-oligoadeny late synthetase-like         | 1.932574  | Inlier |
| siRNA-Vinblastine Run1-DMSO  | NM_1982<br>13 | OASL | 2-5-oligoadeny late synthetase-like         | 3.348157  | Inlier |
| siRNA-Temozolomide Run2-DMSO | NM_0002<br>74 | OAT  | ornithine aminotransferase (gyrate atrophy) | -0.918139 | Inlier |
| siRNA Disorazole DMSO Run1   | NM_0002<br>74 | OAT  | ornithine aminotransferase (gyrate atrophy) | -0.850743 | Inlier |
| siRNA Disorazole DMSO Run3   | NM_0002<br>74 | OAT  | ornithine aminotransferase (gyrate atrophy) | -0.668706 | Inlier |
| siRNA-Vinblastine Run2-DMSO  | NM_0002<br>74 | OAT  | ornithine aminotransferase (gyrate atrophy) | -0.31865  | Inlier |
| siRNA-Vinblastine Run1-DMSO  | NM_0002<br>74 | OAT  | ornithine aminotransferase (gyrate atrophy) | 0.31865   | Inlier |
| siRNA-Temozolomide Run1-DMSO | NM_0002<br>74 | OAT  | ornithine aminotransferase (gyrate atrophy) | 0.416987  | Inlier |
| siRNA-Temozolomide Run3-DMSO | NM_0002<br>74 | OAT  | ornithine aminotransferase (gyrate atrophy) | 0.680294  | Inlier |



Identification of Survival Genes in Human Glioblastoma Cells Using siRNA Screening  
 Nikhil G Thaker, Fang Zhang, Peter R. McDonald, Tong Ying Shun, Michael D Lewen, Ian F. Pollack, and John S. Lazo

Molecular Pharmacology

|                                  |               |       |                                                          |           |        |
|----------------------------------|---------------|-------|----------------------------------------------------------|-----------|--------|
| siRNA Disorazole DMSO Run2       | NM_0002<br>74 | OAT   | ornithine<br>aminotran<br>sferase<br>(gyrate<br>atrophy) | 0.715614  | Inlier |
| siRNA-Temozolomide Run3-<br>DMSO | XM_04702<br>5 | OATL1 | ornithine<br>aminotran<br>sferase-<br>like 1             | -0.705565 | Inlier |
| siRNA-Temozolomide Run2-<br>DMSO | XM_04702<br>5 | OATL1 | ornithine<br>aminotran<br>sferase-<br>like 1             | -0.643435 | Inlier |
| siRNA-Temozolomide Run1-<br>DMSO | XM_04702<br>5 | OATL1 | ornithine<br>aminotran<br>sferase-<br>like 1             | -0.262588 | Inlier |
| siRNA Disorazole DMSO Run3       | XM_04702<br>5 | OATL1 | ornithine<br>aminotran<br>sferase-<br>like 1             | -0.010269 | Inlier |
| siRNA Disorazole DMSO Run1       | XM_04702<br>5 | OATL1 | ornithine<br>aminotran<br>sferase-<br>like 1             | 0.010269  | Inlier |
| siRNA-Vinblastine Run2-<br>DMSO  | XM_04702<br>5 | OATL1 | ornithine<br>aminotran<br>sferase-<br>like 1             | 0.776414  | Inlier |
| siRNA-Vinblastine Run1-<br>DMSO  | XM_04702<br>5 | OATL1 | ornithine<br>aminotran<br>sferase-<br>like 1             | 2.137088  | Inlier |
| siRNA Disorazole DMSO Run2       | XM_04702<br>5 | OATL1 | ornithine<br>aminotran<br>sferase-<br>like 1             | 2.207609  | Inlier |
| siRNA-Temozolomide Run3-<br>DMSO | NM_0041<br>52 | OAZ1  | ornithine<br>decarboxyl<br>ase<br>antizyme 1             | -0.926389 | Inlier |
| siRNA-Temozolomide Run2-<br>DMSO | NM_0041<br>52 | OAZ1  | ornithine<br>decarboxyl<br>ase<br>antizyme 1             | -0.809776 | Inlier |
| siRNA-Vinblastine Run2-<br>DMSO  | NM_0041<br>52 | OAZ1  | ornithine<br>decarboxyl<br>ase<br>antizyme 1             | -0.167361 | Inlier |

Identification of Survival Genes in Human Glioblastoma Cells Using siRNA Screening  
 Nikhil G Thaker, Fang Zhang, Peter R. McDonald, Tong Ying Shun, Michael D Lewen, Ian F. Pollack, and John S. Lazo  
 Molecular Pharmacology

|                                  |               |      |                                              |           |         |
|----------------------------------|---------------|------|----------------------------------------------|-----------|---------|
| siRNA Disorazole DMSO Run3       | NM_0041<br>52 | OAZ1 | ornithine<br>decarboxyl<br>ase<br>antizyme 1 | -0.146062 | Inlier  |
| siRNA Disorazole DMSO Run1       | NM_0041<br>52 | OAZ1 | ornithine<br>decarboxyl<br>ase<br>antizyme 1 | 0.146062  | Inlier  |
| siRNA-Temozolomide Run1-<br>DMSO | NM_0041<br>52 | OAZ1 | ornithine<br>decarboxyl<br>ase<br>antizyme 1 | 0.539223  | Inlier  |
| siRNA-Vinblastine Run1-<br>DMSO  | NM_0041<br>52 | OAZ1 | ornithine<br>decarboxyl<br>ase<br>antizyme 1 | 5.447915  | Outlier |
| siRNA Disorazole DMSO Run2       | NM_0041<br>52 | OAZ1 | ornithine<br>decarboxyl<br>ase<br>antizyme 1 | 5.679163  | Outlier |
| siRNA-Temozolomide Run3-<br>DMSO | NM_0025<br>37 | OAZ2 | ornithine<br>decarboxyl<br>ase<br>antizyme 2 | -3.59279  | Outlier |
| siRNA-Temozolomide Run2-<br>DMSO | NM_0025<br>37 | OAZ2 | ornithine<br>decarboxyl<br>ase<br>antizyme 2 | -2.409549 | Inlier  |
| siRNA-Temozolomide Run1-<br>DMSO | NM_0025<br>37 | OAZ2 | ornithine<br>decarboxyl<br>ase<br>antizyme 2 | -0.943616 | Inlier  |
| siRNA Disorazole DMSO Run2       | NM_0025<br>37 | OAZ2 | ornithine<br>decarboxyl<br>ase<br>antizyme 2 | -0.259719 | Inlier  |
| siRNA Disorazole DMSO Run1       | NM_0025<br>37 | OAZ2 | ornithine<br>decarboxyl<br>ase<br>antizyme 2 | 0.259719  | Inlier  |

Identification of Survival Genes in Human Glioblastoma Cells Using siRNA Screening  
 Nikhil G Thaker, Fang Zhang, Peter R. McDonald, Tong Ying Shun, Michael D Lewen, Ian F. Pollack, and John S. Lazo  
 Molecular Pharmacology

|                              |               |      |                                              |           |        |
|------------------------------|---------------|------|----------------------------------------------|-----------|--------|
| siRNA-Vinblastine Run2-DMSO  | NM_0025<br>37 | OAZ2 | ornithine<br>decarboxyl<br>ase<br>antizyme 2 | 0.263602  | Inlier |
| siRNA Disorazole DMSO Run3   | NM_0025<br>37 | OAZ2 | ornithine<br>decarboxyl<br>ase<br>antizyme 2 | 0.405384  | Inlier |
| siRNA-Vinblastine Run1-DMSO  | NM_0025<br>37 | OAZ2 | ornithine<br>decarboxyl<br>ase<br>antizyme 2 | 1.851463  | Inlier |
| siRNA-Temozolomide Run3-DMSO | NM_0161<br>78 | OAZ3 | ornithine<br>decarboxyl<br>ase<br>antizyme 3 | -1.401522 | Inlier |
| siRNA-Temozolomide Run2-DMSO | NM_0161<br>78 | OAZ3 | ornithine<br>decarboxyl<br>ase<br>antizyme 3 | -0.968416 | Inlier |
| siRNA Disorazole DMSO Run3   | NM_0161<br>78 | OAZ3 | ornithine<br>decarboxyl<br>ase<br>antizyme 3 | -0.380584 | Inlier |
| siRNA-Temozolomide Run1-DMSO | NM_0161<br>78 | OAZ3 | ornithine<br>decarboxyl<br>ase<br>antizyme 3 | -0.192053 | Inlier |
| siRNA Disorazole DMSO Run1   | NM_0161<br>78 | OAZ3 | ornithine<br>decarboxyl<br>ase<br>antizyme 3 | 0.192053  | Inlier |
| siRNA-Vinblastine Run2-DMSO  | NM_0161<br>78 | OAZ3 | ornithine<br>decarboxyl<br>ase<br>antizyme 3 | 0.192957  | Inlier |
| siRNA Disorazole DMSO Run2   | NM_0161<br>78 | OAZ3 | ornithine<br>decarboxyl<br>ase<br>antizyme 3 | 1.047742  | Inlier |

Identification of Survival Genes in Human Glioblastoma Cells Using siRNA Screening  
 Nikhil G Thaker, Fang Zhang, Peter R. McDonald, Tong Ying Shun, Michael D Lewen, Ian F. Pollack, and John S. Lazo  
 Molecular Pharmacology

|                              |           |       |                                               |           |        |
|------------------------------|-----------|-------|-----------------------------------------------|-----------|--------|
| siRNA-Vinblastine Run1-DMSO  | NM_016178 | OAZ3  | ornithine decarboxylase<br>antizyme 3         | 1.930742  | Inlier |
| siRNA-Temozolomide Run3-DMSO | NM_148174 | OAZIN | ornithine decarboxylase<br>antizyme inhibitor | -2.316039 | Inlier |
| siRNA-Temozolomide Run2-DMSO | NM_148174 | OAZIN | ornithine decarboxylase<br>antizyme inhibitor | -1.034198 | Inlier |
| siRNA-Temozolomide Run1-DMSO | NM_148174 | OAZIN | ornithine decarboxylase<br>antizyme inhibitor | -0.243088 | Inlier |
| siRNA Disorazole DMSO Run3   | NM_148174 | OAZIN | ornithine decarboxylase<br>antizyme inhibitor | -0.044196 | Inlier |
| siRNA-Vinblastine Run2-DMSO  | NM_148174 | OAZIN | ornithine decarboxylase<br>antizyme inhibitor | 0.044196  | Inlier |
| siRNA Disorazole DMSO Run1   | NM_148174 | OAZIN | ornithine decarboxylase<br>antizyme inhibitor | 0.314802  | Inlier |
| siRNA Disorazole DMSO Run2   | NM_148174 | OAZIN | ornithine decarboxylase<br>antizyme inhibitor | 2.30895   | Inlier |
| siRNA-Vinblastine Run1-DMSO  | NM_148174 | OAZIN | odorant binding protein 2A                    | 3.133978  | Inlier |
| siRNA Disorazole DMSO Run1   | NM_014582 | OBP2A | odorant binding protein 2A                    | -1.238788 | Inlier |
| siRNA-Temozolomide Run2-DMSO | NM_014582 | OBP2A | odorant binding protein 2A                    | -0.828864 | Inlier |

Identification of Survival Genes in Human Glioblastoma Cells Using siRNA Screening  
 Nikhil G Thaker, Fang Zhang, Peter R. McDonald, Tong Ying Shun, Michael D Lewen, Ian F. Pollack, and John S. Lazo

| Molecular Pharmacology       |               |        |                                        |           |        |
|------------------------------|---------------|--------|----------------------------------------|-----------|--------|
| siRNA-Temozolomide Run1-DMSO | NM_0145<br>82 | OBP2A  | odorant binding protein 2A             | -0.520136 | Inlier |
| siRNA-Temozolomide Run3-DMSO | NM_0145<br>82 | OBP2A  | odorant binding protein 2A             | -0.203269 | Inlier |
| siRNA Disorazole DMSO Run3   | NM_0145<br>82 | OBP2A  | odorant binding protein 2A             | 0.20327   | Inlier |
| siRNA-Vinblastine Run2-DMSO  | NM_0145<br>82 | OBP2A  | odorant binding protein 2A             | 0.44723   | Inlier |
| siRNA-Vinblastine Run1-DMSO  | NM_0145<br>82 | OBP2A  | odorant binding protein 2A             | 1.079203  | Inlier |
| siRNA Disorazole DMSO Run2   | NM_0145<br>82 | OBP2A  | odorant binding protein 2A             | 1.393378  | Inlier |
| siRNA-Temozolomide Run2-DMSO | NM_0145<br>81 | OBP2B  | odorant binding protein 2B             | -0.924459 | Inlier |
| siRNA Disorazole DMSO Run1   | NM_0145<br>81 | OBP2B  | odorant binding protein 2B             | -0.903765 | Inlier |
| siRNA-Temozolomide Run1-DMSO | NM_0145<br>81 | OBP2B  | odorant binding protein 2B             | -0.445235 | Inlier |
| siRNA-Vinblastine Run2-DMSO  | NM_0145<br>81 | OBP2B  | odorant binding protein 2B             | -0.140993 | Inlier |
| siRNA Disorazole DMSO Run3   | NM_0145<br>81 | OBP2B  | odorant binding protein 2B             | 0.140993  | Inlier |
| siRNA-Temozolomide Run3-DMSO | NM_0145<br>81 | OBP2B  | odorant binding protein 2B             | 0.25718   | Inlier |
| siRNA-Vinblastine Run1-DMSO  | NM_0145<br>81 | OBP2B  | odorant binding protein 2B             | 1.573414  | Inlier |
| siRNA Disorazole DMSO Run2   | NM_0145<br>81 | OBP2B  | odorant binding protein 2B             | 2.05989   | Inlier |
| siRNA-Vinblastine Run2-DMSO  | NM_0175<br>26 | OBRGRP | leptin receptor overlapping transcript | -0.966817 | Inlier |
| siRNA Disorazole DMSO Run1   | NM_0175<br>26 | OBRGRP | leptin receptor overlapping transcript | -0.883964 | Inlier |

Identification of Survival Genes in Human Glioblastoma Cells Using siRNA Screening  
 Nikhil G Thaker, Fang Zhang, Peter R. McDonald, Tong Ying Shun, Michael D Lewen, Ian F. Pollack, and John S. Lazo

Molecular Pharmacology

|                              |               |        |                                        |                  |
|------------------------------|---------------|--------|----------------------------------------|------------------|
|                              |               |        | leptin receptor overlapping transcript |                  |
| siRNA Disorazole DMSO Run3   | NM_0175<br>26 | OBRGRP | leptin receptor overlapping transcript | -0.326143 Inlier |
| siRNA-Temozolomide Run2-DMSO | NM_0175<br>26 | OBRGRP | leptin receptor overlapping transcript | -0.193986 Inlier |
| siRNA-Temozolomide Run3-DMSO | NM_0175<br>26 | OBRGRP | leptin receptor overlapping transcript | 0.193986 Inlier  |
| siRNA-Temozolomide Run1-DMSO | NM_0175<br>26 | OBRGRP | leptin receptor overlapping transcript | 0.465036 Inlier  |
| siRNA Disorazole DMSO Run2   | NM_0175<br>26 | OBRGRP | leptin receptor overlapping transcript | 0.963985 Inlier  |
| siRNA-Vinblastine Run1-DMSO  | NM_0175<br>26 | OBRGRP | leptin receptor overlapping transcript | 0.967913 Inlier  |
| siRNA-Temozolomide Run3-DMSO | XM_07027<br>7 | OC90   | otoconin 90                            | -1.291696 Inlier |
| siRNA-Temozolomide Run2-DMSO | XM_07027<br>7 | OC90   | otoconin 90                            | -0.581498 Inlier |
| siRNA-Vinblastine Run2-DMSO  | XM_07027<br>7 | OC90   | otoconin 90                            | -0.145673 Inlier |
| siRNA Disorazole DMSO Run3   | XM_07027<br>7 | OC90   | otoconin 90                            | -0.125329 Inlier |
| siRNA-Temozolomide Run1-DMSO | XM_07027<br>7 | OC90   | otoconin 90                            | 0.125329 Inlier  |
| siRNA Disorazole DMSO Run1   | XM_07027<br>7 | OC90   | otoconin 90                            | 0.767502 Inlier  |
| siRNA Disorazole DMSO Run2   | XM_07027<br>7 | OC90   | otoconin 90                            | 1.203248 Inlier  |
| siRNA-Vinblastine Run1-DMSO  | XM_07027<br>7 | OC90   | otoconin 90                            | 1.414573 Inlier  |
| siRNA-Temozolomide Run3-DMSO | NM_0015<br>87 | OCRL   | oculocerebrorenal syndrome of Lowe     | -0.917633 Inlier |

Identification of Survival Genes in Human Glioblastoma Cells Using siRNA Screening  
 Nikhil G Thaker, Fang Zhang, Peter R. McDonald, Tong Ying Shun, Michael D Lewen, Ian F. Pollack, and John S. Lazo

Molecular Pharmacology

|                              |               |      |                                              |           |        |
|------------------------------|---------------|------|----------------------------------------------|-----------|--------|
| siRNA-Temozolomide Run2-DMSO | NM_0015<br>87 | OCRL | oculocere<br>brorenal<br>syndrome<br>of Lowe | -0.752234 | Inlier |
| siRNA Disorazole DMSO Run3   | NM_0015<br>87 | OCRL | oculocere<br>brorenal<br>syndrome<br>of Lowe | -0.438262 | Inlier |
| siRNA Disorazole DMSO Run2   | NM_0015<br>87 | OCRL | oculocere<br>brorenal<br>syndrome<br>of Lowe | -0.392538 | Inlier |
| siRNA-Temozolomide Run1-DMSO | NM_0015<br>87 | OCRL | oculocere<br>brorenal<br>syndrome<br>of Lowe | 0.392538  | Inlier |
| siRNA Disorazole DMSO Run1   | NM_0015<br>87 | OCRL | oculocere<br>brorenal<br>syndrome<br>of Lowe | 0.596766  | Inlier |
| siRNA-Vinblastine Run1-DMSO  | NM_0015<br>87 | OCRL | oculocere<br>brorenal<br>syndrome<br>of Lowe | 0.983254  | Inlier |
| siRNA-Vinblastine Run2-DMSO  | NM_0015<br>87 | OCRL | oculocere<br>brorenal<br>syndrome<br>of Lowe | 1.212484  | Inlier |
| siRNA-Temozolomide Run3-DMSO | NM_0025<br>39 | ODC1 | ornithine<br>decarboxyl<br>ase 1             | -1.419743 | Inlier |
| siRNA-Temozolomide Run2-DMSO | NM_0025<br>39 | ODC1 | ornithine<br>decarboxyl<br>ase 1             | -0.928169 | Inlier |
| siRNA-Temozolomide Run1-DMSO | NM_0025<br>39 | ODC1 | ornithine<br>decarboxyl<br>ase 1             | -0.420831 | Inlier |
| siRNA-Vinblastine Run2-DMSO  | NM_0025<br>39 | ODC1 | ornithine<br>decarboxyl<br>ase 1             | -0.171488 | Inlier |
| siRNA Disorazole DMSO Run3   | NM_0025<br>39 | ODC1 | ornithine<br>decarboxyl<br>ase 1             | 0.171488  | Inlier |
| siRNA Disorazole DMSO Run1   | NM_0025<br>39 | ODC1 | ornithine<br>decarboxyl<br>ase 1             | 0.26414   | Inlier |
| siRNA Disorazole DMSO Run2   | NM_0025<br>39 | ODC1 | ornithine<br>decarboxyl<br>ase 1             | 1.830644  | Inlier |
| siRNA-Vinblastine Run1-DMSO  | NM_0025<br>39 | ODC1 | ornithine<br>decarboxyl<br>ase 1             | 2.153772  | Inlier |

Identification of Survival Genes in Human Glioblastoma Cells Using siRNA Screening  
 Nikhil G Thaker, Fang Zhang, Peter R. McDonald, Tong Ying Shun, Michael D Lewen, Ian F. Pollack, and John S. Lazo

Molecular Pharmacology

|                              |               |       |                                          |           |        |
|------------------------------|---------------|-------|------------------------------------------|-----------|--------|
| siRNA-Temozolomide Run3-DMSO | NM_0529<br>98 | ODC-p | arginine<br>decarboxyl<br>ase            | -1.329927 | Inlier |
| siRNA-Temozolomide Run2-DMSO | NM_0529<br>98 | ODC-p | arginine<br>decarboxyl<br>ase            | -0.944673 | Inlier |
| siRNA-Temozolomide Run1-DMSO | NM_0529<br>98 | ODC-p | arginine<br>decarboxyl<br>ase            | -0.404327 | Inlier |
| siRNA Disorazole DMSO Run1   | NM_0529<br>98 | ODC-p | arginine<br>decarboxyl<br>ase            | -0.08691  | Inlier |
| siRNA-Vinblastine Run2-DMSO  | NM_0529<br>98 | ODC-p | arginine<br>decarboxyl<br>ase            | 0.08691   | Inlier |
| siRNA Disorazole DMSO Run3   | NM_0529<br>98 | ODC-p | arginine<br>decarboxyl<br>ase            | 0.100309  | Inlier |
| siRNA-Vinblastine Run1-DMSO  | NM_0529<br>98 | ODC-p | arginine<br>decarboxyl<br>ase            | 0.958764  | Inlier |
| siRNA Disorazole DMSO Run2   | NM_0529<br>98 | ODC-p | arginine<br>decarboxyl<br>ase            | 0.996943  | Inlier |
| siRNA-Temozolomide Run3-DMSO | NM_0036<br>11 | OFD1  | oral-facial-<br>digital<br>syndrome<br>1 | -0.747927 | Inlier |
| siRNA-Temozolomide Run2-DMSO | NM_0036<br>11 | OFD1  | oral-facial-<br>digital<br>syndrome<br>1 | -0.678436 | Inlier |
| siRNA-Vinblastine Run2-DMSO  | NM_0036<br>11 | OFD1  | oral-facial-<br>digital<br>syndrome<br>1 | -0.326525 | Inlier |
| siRNA-Temozolomide Run1-DMSO | NM_0036<br>11 | OFD1  | oral-facial-<br>digital<br>syndrome<br>1 | -0.091752 | Inlier |
| siRNA Disorazole DMSO Run1   | NM_0036<br>11 | OFD1  | oral-facial-<br>digital<br>syndrome<br>1 | 0.091752  | Inlier |
| siRNA Disorazole DMSO Run3   | NM_0036<br>11 | OFD1  | oral-facial-<br>digital<br>syndrome<br>1 | 0.670564  | Inlier |
| siRNA Disorazole DMSO Run2   | NM_0036<br>11 | OFD1  | oral-facial-<br>digital<br>syndrome<br>1 | 1.018263  | Inlier |



Identification of Survival Genes in Human Glioblastoma Cells Using siRNA Screening

Nikhil G Thaker, Fang Zhang, Peter R. McDonald, Tong Ying Shun, Michael D Lewen, Ian F. Pollack, and John S. Lazo

Molecular Pharmacology

|                              |               |      |                                                              |           |        |
|------------------------------|---------------|------|--------------------------------------------------------------|-----------|--------|
| siRNA-Vinblastine Run1-DMSO  | NM_0036<br>11 | OFD1 | oral-facial-digital syndrome<br>1                            | 1.125867  | Inlier |
| siRNA-Temozolomide Run1-DMSO | NM_0025<br>41 | OGDH | oxoglutarate (alpha-ketoglutarate) dehydrogenase (lipoamide) | -0.851213 | Inlier |
| siRNA-Temozolomide Run3-DMSO | NM_0025<br>41 | OGDH | oxoglutarate (alpha-ketoglutarate) dehydrogenase (lipoamide) | -0.70794  | Inlier |
| siRNA Disorazole DMSO Run2   | NM_0025<br>41 | OGDH | oxoglutarate (alpha-ketoglutarate) dehydrogenase (lipoamide) | -0.282189 | Inlier |
| siRNA-Temozolomide Run2-DMSO | NM_0025<br>41 | OGDH | oxoglutarate (alpha-ketoglutarate) dehydrogenase (lipoamide) | -0.232376 | Inlier |
| siRNA Disorazole DMSO Run1   | NM_0025<br>41 | OGDH | oxoglutarate (alpha-ketoglutarate) dehydrogenase (lipoamide) | 0.232376  | Inlier |
| siRNA Disorazole DMSO Run3   | NM_0025<br>41 | OGDH | oxoglutarate (alpha-ketoglutarate) dehydrogenase (lipoamide) | 0.64106   | Inlier |

Identification of Survival Genes in Human Glioblastoma Cells Using siRNA Screening  
 Nikhil G Thaker, Fang Zhang, Peter R. McDonald, Tong Ying Shun, Michael D Lewen, Ian F. Pollack, and John S. Lazo

Molecular Pharmacology

|                              |           |       |                                                              |           |        |
|------------------------------|-----------|-------|--------------------------------------------------------------|-----------|--------|
| siRNA-Vinblastine Run1-DMSO  | NM_002541 | OGDH  | oxoglutarate (alpha-ketoglutarate) dehydrogenase (lipoamide) | 1.237119  | Inlier |
| siRNA-Vinblastine Run2-DMSO  | NM_002541 | OGDH  | oxoglutarate (alpha-ketoglutarate) dehydrogenase (lipoamide) | 1.525482  | Inlier |
| siRNA Disorazole DMSO Run1   | NM_018245 | OGDHL | oxoglutarate dehydrogenase-like                              | -1.092352 | Inlier |
| siRNA-Vinblastine Run2-DMSO  | NM_018245 | OGDHL | oxoglutarate dehydrogenase-like                              | -0.561138 | Inlier |
| siRNA-Temozolomide Run1-DMSO | NM_018245 | OGDHL | oxoglutarate dehydrogenase-like                              | -0.328063 | Inlier |
| siRNA Disorazole DMSO Run3   | NM_018245 | OGDHL | oxoglutarate dehydrogenase-like                              | -0.215288 | Inlier |
| siRNA-Temozolomide Run3-DMSO | NM_018245 | OGDHL | oxoglutarate dehydrogenase-like                              | 0.215287  | Inlier |
| siRNA-Temozolomide Run2-DMSO | NM_018245 | OGDHL | oxoglutarate dehydrogenase-like                              | 0.787862  | Inlier |
| siRNA Disorazole DMSO Run2   | NM_018245 | OGDHL | oxoglutarate dehydrogenase-like                              | 1.727325  | Inlier |
| siRNA-Vinblastine Run1-DMSO  | NM_018245 | OGDHL | oxoglutarate dehydrogenase-like                              | 2.933494  | Inlier |
| siRNA-Temozolomide Run2-DMSO | NM_007346 | OGFR  | opioid growth factor receptor                                | -1.442492 | Inlier |

Identification of Survival Genes in Human Glioblastoma Cells Using siRNA Screening  
 Nikhil G Thaker, Fang Zhang, Peter R. McDonald, Tong Ying Shun, Michael D Lewen, Ian F. Pollack, and John S. Lazo

Molecular Pharmacology

|                              |               |      |                                        |                  |
|------------------------------|---------------|------|----------------------------------------|------------------|
| siRNA-Vinblastine Run2-DMSO  | NM_0073<br>46 | OGFR | opioid<br>growth<br>factor<br>receptor | -0.846235 Inlier |
| siRNA-Temozolomide Run3-DMSO | NM_0073<br>46 | OGFR | opioid<br>growth<br>factor<br>receptor | -0.37993 Inlier  |
| siRNA Disorazole DMSO Run3   | NM_0073<br>46 | OGFR | opioid<br>growth<br>factor<br>receptor | -0.008385 Inlier |
| siRNA Disorazole DMSO Run1   | NM_0073<br>46 | OGFR | opioid<br>growth<br>factor<br>receptor | 0.008385 Inlier  |
| siRNA-Temozolomide Run1-DMSO | NM_0073<br>46 | OGFR | opioid<br>growth<br>factor<br>receptor | 0.502765 Inlier  |
| siRNA-Vinblastine Run1-DMSO  | NM_0073<br>46 | OGFR | opioid<br>growth<br>factor<br>receptor | 1.696327 Inlier  |
| siRNA Disorazole DMSO Run2   | NM_0073<br>46 | OGFR | opioid<br>growth<br>factor<br>receptor | 1.702188 Inlier  |
| siRNA-Temozolomide Run1-DMSO | NM_0025<br>42 | OGG1 | 8-oxoguanine DNA glycosylase           | -1.487927 Inlier |
| siRNA-Temozolomide Run3-DMSO | NM_0025<br>42 | OGG1 | 8-oxoguanine DNA glycosylase           | -0.819532 Inlier |
| siRNA Disorazole DMSO Run3   | NM_0025<br>42 | OGG1 | 8-oxoguanine DNA glycosylase           | -0.505972 Inlier |
| siRNA Disorazole DMSO Run1   | NM_0025<br>42 | OGG1 | 8-oxoguanine DNA glycosylase           | -0.062623 Inlier |

Identification of Survival Genes in Human Glioblastoma Cells Using siRNA Screening

Nikhil G Thaker, Fang Zhang, Peter R. McDonald, Tong Ying Shun, Michael D Lewen, Ian F. Pollack, and John S. Lazo

Molecular Pharmacology

|                              |               |      |                                                                                                                          |           |        |
|------------------------------|---------------|------|--------------------------------------------------------------------------------------------------------------------------|-----------|--------|
| siRNA-Temozolomide Run2-DMSO | NM_0025<br>42 | OGG1 | 8-oxoguanine DNA glycosylase                                                                                             | 0.062622  | Inlier |
| siRNA Disorazole DMSO Run2   | NM_0025<br>42 | OGG1 | 8-oxoguanine DNA glycosylase                                                                                             | 0.529468  | Inlier |
| siRNA-Vinblastine Run2-DMSO  | NM_0025<br>42 | OGG1 | 8-oxoguanine DNA glycosylase                                                                                             | 1.073046  | Inlier |
| siRNA-Vinblastine Run1-DMSO  | NM_0025<br>42 | OGG1 | 8-oxoguanine DNA glycosylase                                                                                             | 1.461644  | Inlier |
| siRNA-Temozolomide Run2-DMSO | NM_1816<br>73 | OGT  | O-linked N-acetylglucosamine (GlcNAc) transferase (UDP-N-acetylglucosamine:polypeptide-N-acetylglucosaminyl transferase) | -2.53255  | Inlier |
| siRNA-Temozolomide Run3-DMSO | NM_1816<br>73 | OGT  | O-linked N-acetylglucosamine (GlcNAc) transferase (UDP-N-acetylglucosamine:polypeptide-N-acetylglucosaminyl transferase) | -0.782201 | Inlier |

Identification of Survival Genes in Human Glioblastoma Cells Using siRNA Screening

Nikhil G Thaker, Fang Zhang, Peter R. McDonald, Tong Ying Shun, Michael D Lewen, Ian F. Pollack, and John S.

Lazo

Molecular Pharmacology

|                              |           |     |                                                                                                                          |           |        |
|------------------------------|-----------|-----|--------------------------------------------------------------------------------------------------------------------------|-----------|--------|
| siRNA-Temozolomide Run1-DMSO | NM_181673 | OGT | O-linked N-acetylglucosamine (GlcNAc) transferase (UDP-N-acetylglucosamine:polypeptide-N-acetylglucosaminyl transferase) | -0.566799 | Inlier |
| siRNA Disorazole DMSO Run1   | NM_181673 | OGT | O-linked N-acetylglucosamine (GlcNAc) transferase (UDP-N-acetylglucosamine:polypeptide-N-acetylglucosaminyl transferase) | -0.092266 | Inlier |
| siRNA-Vinblastine Run2-DMSO  | NM_181673 | OGT | O-linked N-acetylglucosamine (GlcNAc) transferase (UDP-N-acetylglucosamine:polypeptide-N-acetylglucosaminyl transferase) | 0.092266  | Inlier |

Identification of Survival Genes in Human Glioblastoma Cells Using siRNA Screening

Nikhil G Thaker, Fang Zhang, Peter R. McDonald, Tong Ying Shun, Michael D Lewen, Ian F. Pollack, and John S. Lazo

Molecular Pharmacology

|                              |               |             |                                                                                                                          |           |        |
|------------------------------|---------------|-------------|--------------------------------------------------------------------------------------------------------------------------|-----------|--------|
| siRNA Disorazole DMSO Run3   | NM_1816<br>73 | OGT         | O-linked N-acetylglucosamine (GlcNAc) transferase (UDP-N-acetylglucosamine:polypeptide-N-acetylglucosaminyl transferase) | 0.485275  | Inlier |
| siRNA-Vinblastine Run1-DMSO  | NM_1816<br>73 | OGT         | O-linked N-acetylglucosamine (GlcNAc) transferase (UDP-N-acetylglucosamine:polypeptide-N-acetylglucosaminyl transferase) | 1.967433  | Inlier |
| siRNA Disorazole DMSO Run2   | NM_1816<br>73 | OGT         | O-linked N-acetylglucosamine (GlcNAc) transferase (UDP-N-acetylglucosamine:polypeptide-N-acetylglucosaminyl transferase) | 2.5331    | Inlier |
| siRNA-Temozolomide Run3-DMSO | NM_1780<br>14 | OK/SW-cl.56 | tubulin, beta polypeptide                                                                                                | -1.228769 | Inlier |

Identification of Survival Genes in Human Glioblastoma Cells Using siRNA Screening  
 Nikhil G Thaker, Fang Zhang, Peter R. McDonald, Tong Ying Shun, Michael D Lewen, Ian F. Pollack, and John S. Lazo

Molecular Pharmacology

|                              |               |                 |                                                                          |           |         |
|------------------------------|---------------|-----------------|--------------------------------------------------------------------------|-----------|---------|
| siRNA Disorazole DMSO Run3   | NM_1780<br>14 | OK/SW-<br>cl.56 | tubulin,<br>beta<br>polypeptid<br>e                                      | -0.120231 | Inlier  |
| siRNA-Temozolomide Run2-DMSO | NM_1780<br>14 | OK/SW-<br>cl.56 | tubulin,<br>beta<br>polypeptid<br>e                                      | -0.103542 | Inlier  |
| siRNA-Vinblastine Run2-DMSO  | NM_1780<br>14 | OK/SW-<br>cl.56 | tubulin,<br>beta<br>polypeptid<br>e                                      | -0.003321 | Inlier  |
| siRNA-Temozolomide Run1-DMSO | NM_1780<br>14 | OK/SW-<br>cl.56 | tubulin,<br>beta<br>polypeptid<br>e                                      | 0.003321  | Inlier  |
| siRNA Disorazole DMSO Run1   | NM_1780<br>14 | OK/SW-<br>cl.56 | tubulin,<br>beta<br>polypeptid<br>e                                      | 1.332746  | Inlier  |
| siRNA-Vinblastine Run1-DMSO  | NM_1780<br>14 | OK/SW-<br>cl.56 | tubulin,<br>beta<br>polypeptid<br>e                                      | 3.40507   | Inlier  |
| siRNA Disorazole DMSO Run2   | NM_1780<br>14 | OK/SW-<br>cl.56 | tubulin,<br>beta<br>polypeptid<br>e                                      | 4.042576  | Outlier |
| siRNA-Temozolomide Run2-DMSO | NM_0025<br>43 | OLR1            | oxidised<br>low<br>density<br>lipoprotein<br>(lectin-like)<br>receptor 1 | -1.40397  | Inlier  |
| siRNA-Vinblastine Run2-DMSO  | NM_0025<br>43 | OLR1            | oxidised<br>low<br>density<br>lipoprotein<br>(lectin-like)<br>receptor 1 | -0.879916 | Inlier  |
| siRNA Disorazole DMSO Run1   | NM_0025<br>43 | OLR1            | oxidised<br>low<br>density<br>lipoprotein<br>(lectin-like)<br>receptor 1 | -0.25644  | Inlier  |

Identification of Survival Genes in Human Glioblastoma Cells Using siRNA Screening  
 Nikhil G Thaker, Fang Zhang, Peter R. McDonald, Tong Ying Shun, Michael D Lewen, Ian F. Pollack, and John S. Lazo  
 Molecular Pharmacology

|                              |               |      |                                                                          |           |        |
|------------------------------|---------------|------|--------------------------------------------------------------------------|-----------|--------|
| siRNA-Temozolomide Run3-DMSO | NM_0025<br>43 | OLR1 | oxidised<br>low<br>density<br>lipoprotein<br>(lectin-like)<br>receptor 1 | -0.146429 | Inlier |
| siRNA Disorazole DMSO Run3   | NM_0025<br>43 | OLR1 | oxidised<br>low<br>density<br>lipoprotein<br>(lectin-like)<br>receptor 1 | 0.146429  | Inlier |
| siRNA-Temozolomide Run1-DMSO | NM_0025<br>43 | OLR1 | oxidised<br>low<br>density<br>lipoprotein<br>(lectin-like)<br>receptor 1 | 0.469084  | Inlier |
| siRNA Disorazole DMSO Run2   | NM_0025<br>43 | OLR1 | oxidised<br>low<br>density<br>lipoprotein<br>(lectin-like)<br>receptor 1 | 1.402452  | Inlier |
| siRNA-Vinblastine Run1-DMSO  | NM_0025<br>43 | OLR1 | oxidised<br>low<br>density<br>lipoprotein<br>(lectin-like)<br>receptor 1 | 1.747044  | Inlier |
| siRNA-Temozolomide Run3-DMSO | NM_0025<br>44 | OMG  | oligodendr<br>ocyte<br>myelin<br>glycoprotein                            | -1.03794  | Inlier |
| siRNA-Temozolomide Run2-DMSO | NM_0025<br>44 | OMG  | oligodendr<br>ocyte<br>myelin<br>glycoprotein                            | -0.869968 | Inlier |
| siRNA-Temozolomide Run1-DMSO | NM_0025<br>44 | OMG  | oligodendr<br>ocyte<br>myelin<br>glycoprotein                            | -0.451778 | Inlier |



Identification of Survival Genes in Human Glioblastoma Cells Using siRNA Screening  
 Nikhil G Thaker, Fang Zhang, Peter R. McDonald, Tong Ying Shun, Michael D Lewen, Ian F. Pollack, and John S. Lazo

Molecular Pharmacology

|                                  |               |       |                                                   |           |        |
|----------------------------------|---------------|-------|---------------------------------------------------|-----------|--------|
| siRNA Disorazole DMSO Run1       | NM_0025<br>44 | OMG   | oligodendr<br>ocyte<br>myelin<br>glycoprotei<br>n | -0.125928 | Inlier |
| siRNA Disorazole DMSO Run3       | NM_0025<br>44 | OMG   | oligodendr<br>ocyte<br>myelin<br>glycoprotei<br>n | 0.125928  | Inlier |
| siRNA Disorazole DMSO Run2       | NM_0025<br>44 | OMG   | oligodendr<br>ocyte<br>myelin<br>glycoprotei<br>n | 0.479032  | Inlier |
| siRNA-Vinblastine Run2-<br>DMSO  | NM_0025<br>44 | OMG   | oligodendr<br>ocyte<br>myelin<br>glycoprotei<br>n | 1.079843  | Inlier |
| siRNA-Vinblastine Run1-<br>DMSO  | NM_0025<br>44 | OMG   | oligodendr<br>ocyte<br>myelin<br>glycoprotei<br>n | 1.193308  | Inlier |
| siRNA-Temozolomide Run3-<br>DMSO | NM_0025<br>47 | OPHN1 | oligophreni<br>n 1                                | -1.897482 | Inlier |
| siRNA-Temozolomide Run2-<br>DMSO | NM_0025<br>47 | OPHN1 | oligophreni<br>n 1                                | -1.376181 | Inlier |
| siRNA-Vinblastine Run2-<br>DMSO  | NM_0025<br>47 | OPHN1 | oligophreni<br>n 1                                | -0.247789 | Inlier |
| siRNA-Temozolomide Run1-<br>DMSO | NM_0025<br>47 | OPHN1 | oligophreni<br>n 1                                | -0.118412 | Inlier |
| siRNA Disorazole DMSO Run3       | NM_0025<br>47 | OPHN1 | oligophreni<br>n 1                                | 0.118411  | Inlier |
| siRNA Disorazole DMSO Run1       | NM_0025<br>47 | OPHN1 | oligophreni<br>n 1                                | 0.640231  | Inlier |
| siRNA-Vinblastine Run1-<br>DMSO  | NM_0025<br>47 | OPHN1 | oligophreni<br>n 1                                | 0.708769  | Inlier |
| siRNA Disorazole DMSO Run2       | NM_0025<br>47 | OPHN1 | oligophreni<br>n 1                                | 1.330793  | Inlier |
| siRNA-Vinblastine Run2-<br>DMSO  | XM_29126<br>6 | OPLAH | 5-<br>oxoprolina<br>se (ATP-<br>hydrolysin<br>g)  | -2.244681 | Inlier |
| siRNA Disorazole DMSO Run1       | XM_29126<br>6 | OPLAH | 5-<br>oxoprolina<br>se (ATP-<br>hydrolysin<br>g)  | -1.080041 | Inlier |

Identification of Survival Genes in Human Glioblastoma Cells Using siRNA Screening  
 Nikhil G Thaker, Fang Zhang, Peter R. McDonald, Tong Ying Shun, Michael D Lewen, Ian F. Pollack, and John S. Lazo

Molecular Pharmacology

|                              |               |        |                                                                         |           |        |
|------------------------------|---------------|--------|-------------------------------------------------------------------------|-----------|--------|
| siRNA Disorazole DMSO Run3   | XM_29126<br>6 | OPLAH  | 5-oxoprolinase (ATP-hydrolysin g)                                       | -0.881186 | Inlier |
| siRNA-Temozolomide Run1-DMSO | XM_29126<br>6 | OPLAH  | 5-oxoprolinase (ATP-hydrolysin g)                                       | -0.034363 | Inlier |
| siRNA-Temozolomide Run3-DMSO | XM_29126<br>6 | OPLAH  | 5-oxoprolinase (ATP-hydrolysin g)                                       | 0.034363  | Inlier |
| siRNA-Temozolomide Run2-DMSO | XM_29126<br>6 | OPLAH  | 5-oxoprolinase (ATP-hydrolysin g)                                       | 0.351171  | Inlier |
| siRNA Disorazole DMSO Run2   | XM_29126<br>6 | OPLAH  | 5-oxoprolinase (ATP-hydrolysin g)                                       | 0.467814  | Inlier |
| siRNA-Vinblastine Run1-DMSO  | XM_29126<br>6 | OPLAH  | 5-oxoprolinase (ATP-hydrolysin g)                                       | 0.951227  | Inlier |
| siRNA-Temozolomide Run3-DMSO | NM_0017<br>08 | OPN1SW | opsin 1 (cone pigments), short-wave-sensitive (color blindness, tritan) | -1.351126 | Inlier |
| siRNA Disorazole DMSO Run2   | NM_0017<br>08 | OPN1SW | opsin 1 (cone pigments), short-wave-sensitive (color blindness, tritan) | -0.898473 | Inlier |

Identification of Survival Genes in Human Glioblastoma Cells Using siRNA Screening

Nikhil G Thaker, Fang Zhang, Peter R. McDonald, Tong Ying Shun, Michael D Lewen, Ian F. Pollack, and John S.

Lazo

Molecular Pharmacology

|                              |           |        |                                                                         |           |        |
|------------------------------|-----------|--------|-------------------------------------------------------------------------|-----------|--------|
| siRNA Disorazole DMSO Run3   | NM_001708 | OPN1SW | opsin 1 (cone pigments), short-wave-sensitive (color blindness, tritan) | -0.078202 | Inlier |
| siRNA-Temozolomide Run2-DMSO | NM_001708 | OPN1SW | opsin 1 (cone pigments), short-wave-sensitive (color blindness, tritan) | -0.045195 | Inlier |
| siRNA-Temozolomide Run1-DMSO | NM_001708 | OPN1SW | opsin 1 (cone pigments), short-wave-sensitive (color blindness, tritan) | 0.045194  | Inlier |
| siRNA Disorazole DMSO Run1   | NM_001708 | OPN1SW | opsin 1 (cone pigments), short-wave-sensitive (color blindness, tritan) | 0.450527  | Inlier |
| siRNA-Vinblastine Run2-DMSO  | NM_001708 | OPN1SW | opsin 1 (cone pigments), short-wave-sensitive (color blindness, tritan) | 1.199885  | Inlier |

Identification of Survival Genes in Human Glioblastoma Cells Using siRNA Screening  
 Nikhil G Thaker, Fang Zhang, Peter R. McDonald, Tong Ying Shun, Michael D Lewen, Ian F. Pollack, and John S. Lazo

Molecular Pharmacology

| siRNA Treatment              | Gene ID   | Gene Name | Gene Description                                                        | Log Fold Change | Outlier Status |
|------------------------------|-----------|-----------|-------------------------------------------------------------------------|-----------------|----------------|
| siRNA-Vinblastine Run1-DMSO  | NM_001708 | OPN1SW    | opsin 1 (cone pigments), short-wave-sensitive (color blindness, tritan) | 1.562238        | Inlier         |
| siRNA Disorazole DMSO Run2   | NM_014322 | OPN3      | opsin 3 (encephalopsin, panopsin)                                       | -2.034321       | Inlier         |
| siRNA-Temozolomide Run3-DMSO | NM_014322 | OPN3      | opsin 3 (encephalopsin, panopsin)                                       | -1.560688       | Inlier         |
| siRNA-Temozolomide Run2-DMSO | NM_014322 | OPN3      | opsin 3 (encephalopsin, panopsin)                                       | -1.331849       | Inlier         |
| siRNA Disorazole DMSO Run3   | NM_014322 | OPN3      | opsin 3 (encephalopsin, panopsin)                                       | -0.100207       | Inlier         |
| siRNA Disorazole DMSO Run1   | NM_014322 | OPN3      | opsin 3 (encephalopsin, panopsin)                                       | 0.100206        | Inlier         |
| siRNA-Temozolomide Run1-DMSO | NM_014322 | OPN3      | opsin 3 (encephalopsin, panopsin)                                       | 0.33415         | Inlier         |
| siRNA-Vinblastine Run1-DMSO  | NM_014322 | OPN3      | opsin 3 (encephalopsin, panopsin)                                       | 0.367396        | Inlier         |
| siRNA-Vinblastine Run2-DMSO  | NM_014322 | OPN3      | opsin 4 (melanopsin)                                                    | 0.981604        | Inlier         |
| siRNA-Temozolomide Run3-DMSO | NM_033282 | OPN4      | opsin 4 (melanopsin)                                                    | -1.081334       | Inlier         |
| siRNA Disorazole DMSO Run2   | NM_033282 | OPN4      | opsin 4 (melanopsin)                                                    | -0.866788       | Inlier         |
| siRNA-Temozolomide Run1-DMSO | NM_033282 | OPN4      | opsin 4 (melanopsin)                                                    | -0.482212       | Inlier         |

Identification of Survival Genes in Human Glioblastoma Cells Using siRNA Screening  
 Nikhil G Thaker, Fang Zhang, Peter R. McDonald, Tong Ying Shun, Michael D Lewen, Ian F. Pollack, and John S. Lazo

Molecular Pharmacology

|                              |               |       |                                |           |        |
|------------------------------|---------------|-------|--------------------------------|-----------|--------|
| siRNA-Temozolomide Run2-DMSO | NM_0332<br>82 | OPN4  | opsin 4<br>(melanopsin)        | -0.24727  | Inlier |
| siRNA Disorazole DMSO Run3   | NM_0332<br>82 | OPN4  | opsin 4<br>(melanopsin)        | 0.247269  | Inlier |
| siRNA Disorazole DMSO Run1   | NM_0332<br>82 | OPN4  | opsin 4<br>(melanopsin)        | 0.40842   | Inlier |
| siRNA-Vinblastine Run2-DMSO  | NM_0332<br>82 | OPN4  | opsin 4<br>(melanopsin)        | 0.996967  | Inlier |
| siRNA-Vinblastine Run1-DMSO  | NM_0332<br>82 | OPN4  | opsin 4<br>(melanopsin)        | 1.215708  | Inlier |
| siRNA-Temozolomide Run3-DMSO | NM_0009<br>11 | OPRD1 | opioid<br>receptor,<br>delta 1 | -1.202405 | Inlier |
| siRNA Disorazole DMSO Run2   | NM_0009<br>11 | OPRD1 | opioid<br>receptor,<br>delta 1 | -0.707251 | Inlier |
| siRNA-Temozolomide Run1-DMSO | NM_0009<br>11 | OPRD1 | opioid<br>receptor,<br>delta 1 | -0.069799 | Inlier |
| siRNA-Temozolomide Run2-DMSO | NM_0009<br>11 | OPRD1 | opioid<br>receptor,<br>delta 1 | -0.032461 | Inlier |
| siRNA Disorazole DMSO Run3   | NM_0009<br>11 | OPRD1 | opioid<br>receptor,<br>delta 1 | 0.032462  | Inlier |
| siRNA Disorazole DMSO Run1   | NM_0009<br>11 | OPRD1 | opioid<br>receptor,<br>delta 1 | 0.641749  | Inlier |
| siRNA-Vinblastine Run2-DMSO  | NM_0009<br>11 | OPRD1 | opioid<br>receptor,<br>delta 1 | 0.87741   | Inlier |
| siRNA-Vinblastine Run1-DMSO  | NM_0009<br>11 | OPRD1 | opioid<br>receptor,<br>delta 1 | 1.000087  | Inlier |
| siRNA Disorazole DMSO Run2   | NM_0009<br>12 | OPRK1 | opioid<br>receptor,<br>kappa 1 | -1.394021 | Inlier |
| siRNA-Temozolomide Run3-DMSO | NM_0009<br>12 | OPRK1 | opioid<br>receptor,<br>kappa 1 | -0.934249 | Inlier |
| siRNA Disorazole DMSO Run3   | NM_0009<br>12 | OPRK1 | opioid<br>receptor,<br>kappa 1 | -0.414751 | Inlier |
| siRNA-Temozolomide Run1-DMSO | NM_0009<br>12 | OPRK1 | opioid<br>receptor,<br>kappa 1 | -0.056919 | Inlier |

Identification of Survival Genes in Human Glioblastoma Cells Using siRNA Screening  
 Nikhil G Thaker, Fang Zhang, Peter R. McDonald, Tong Ying Shun, Michael D Lewen, Ian F. Pollack, and John S. Lazo

| Molecular Pharmacology       |                  |       |                          |           |        |
|------------------------------|------------------|-------|--------------------------|-----------|--------|
| siRNA-Temozolomide Run2-DMSO | NM_0009<br>12    | OPRK1 | opioid receptor, kappa 1 | 0.056919  | Inlier |
| siRNA Disorazole DMSO Run1   | NM_0009<br>12    | OPRK1 | opioid receptor, kappa 1 | 0.206689  | Inlier |
| siRNA-Vinblastine Run1-DMSO  | NM_0009<br>12    | OPRK1 | opioid receptor, kappa 1 | 1.018366  | Inlier |
| siRNA-Vinblastine Run2-DMSO  | NM_0009<br>12    | OPRK1 | opioid receptor, kappa 1 | 1.162752  | Inlier |
| siRNA-Temozolomide Run3-DMSO | NM_1826<br>47    | OPRL1 | opiate receptor-like 1   | -1.887391 | Inlier |
| siRNA-Temozolomide Run2-DMSO | NM_1826<br>47    | OPRL1 | opiate receptor-like 1   | -1.783639 | Inlier |
| siRNA Disorazole DMSO Run3   | NM_1826<br>47    | OPRL1 | opiate receptor-like 1   | -0.104974 | Inlier |
| siRNA-Temozolomide Run1-DMSO | NM_1826<br>47    | OPRL1 | opiate receptor-like 1   | -0.031153 | Inlier |
| siRNA Disorazole DMSO Run2   | NM_1826<br>47    | OPRL1 | opiate receptor-like 1   | 0.031153  | Inlier |
| siRNA Disorazole DMSO Run1   | NM_1826<br>47    | OPRL1 | opiate receptor-like 1   | 0.138661  | Inlier |
| siRNA-Vinblastine Run2-DMSO  | NM_1826<br>47    | OPRL1 | opiate receptor-like 1   | 1.21034   | Inlier |
| siRNA-Vinblastine Run1-DMSO  | NM_1826<br>47    | OPRL1 | opiate receptor-like 1   | 1.29125   | Inlier |
| siRNA Disorazole DMSO Run2   | NM_0010<br>08505 | OPRM1 | opioid receptor, mu 1    | -2.129628 | Inlier |
| siRNA Disorazole DMSO Run3   | NM_0010<br>08505 | OPRM1 | opioid receptor, mu 1    | -0.95397  | Inlier |
| siRNA-Temozolomide Run2-DMSO | NM_0010<br>08505 | OPRM1 | opioid receptor, mu 1    | -0.270154 | Inlier |
| siRNA-Temozolomide Run3-DMSO | NM_0010<br>08505 | OPRM1 | opioid receptor, mu 1    | -0.139784 | Inlier |
| siRNA-Temozolomide Run1-DMSO | NM_0010<br>08505 | OPRM1 | opioid receptor, mu 1    | 0.139784  | Inlier |

Identification of Survival Genes in Human Glioblastoma Cells Using siRNA Screening  
 Nikhil G Thaker, Fang Zhang, Peter R. McDonald, Tong Ying Shun, Michael D Lewen, Ian F. Pollack, and John S. Lazo

Molecular Pharmacology

|                                  |                  |        |                                                                     |           |        |
|----------------------------------|------------------|--------|---------------------------------------------------------------------|-----------|--------|
| siRNA Disorazole DMSO Run1       | NM_0010<br>08505 | OPRM1  | opioid<br>receptor,<br>mu 1                                         | 0.39503   | Inlier |
| siRNA-Vinblastine Run1-<br>DMSO  | NM_0010<br>08505 | OPRM1  | opioid<br>receptor,<br>mu 1                                         | 1.037794  | Inlier |
| siRNA-Vinblastine Run2-<br>DMSO  | NM_0010<br>08505 | OPRM1  | opioid<br>receptor,<br>mu 1                                         | 1.635237  | Inlier |
| siRNA-Vinblastine Run2-<br>DMSO  | NM_1471<br>60    | OPRS1  | opioid<br>receptor,<br>sigma 1                                      | -0.961233 | Inlier |
| siRNA Disorazole DMSO Run1       | NM_1471<br>60    | OPRS1  | opioid<br>receptor,<br>sigma 1                                      | -0.667393 | Inlier |
| siRNA Disorazole DMSO Run3       | NM_1471<br>60    | OPRS1  | opioid<br>receptor,<br>sigma 1                                      | -0.18955  | Inlier |
| siRNA-Temozolomide Run3-<br>DMSO | NM_1471<br>60    | OPRS1  | opioid<br>receptor,<br>sigma 1                                      | -0.105975 | Inlier |
| siRNA-Temozolomide Run2-<br>DMSO | NM_1471<br>60    | OPRS1  | opioid<br>receptor,<br>sigma 1                                      | 0.105975  | Inlier |
| siRNA-Temozolomide Run1-<br>DMSO | NM_1471<br>60    | OPRS1  | opioid<br>receptor,<br>sigma 1                                      | 0.681607  | Inlier |
| siRNA Disorazole DMSO Run2       | NM_1471<br>60    | OPRS1  | opioid<br>receptor,<br>sigma 1                                      | 1.822977  | Inlier |
| siRNA-Vinblastine Run1-<br>DMSO  | NM_1471<br>60    | OPRS1  | opioid<br>receptor,<br>sigma 1                                      | 1.844447  | Inlier |
| siRNA-Vinblastine Run2-<br>DMSO  | XM_29198<br>6    | OR10A3 | olfactory<br>receptor,<br>family 10,<br>subfamily<br>A,<br>member 3 | -1.134015 | Inlier |
| siRNA Disorazole DMSO Run1       | XM_29198<br>6    | OR10A3 | olfactory<br>receptor,<br>family 10,<br>subfamily<br>A,<br>member 3 | -0.97507  | Inlier |
| siRNA Disorazole DMSO Run3       | XM_29198<br>6    | OR10A3 | olfactory<br>receptor,<br>family 10,<br>subfamily<br>A,<br>member 3 | -0.578784 | Inlier |

Identification of Survival Genes in Human Glioblastoma Cells Using siRNA Screening  
 Nikhil G Thaker, Fang Zhang, Peter R. McDonald, Tong Ying Shun, Michael D Lewen, Ian F. Pollack, and John S. Lazo

Molecular Pharmacology

|                              |               |        |                                                      |           |        |
|------------------------------|---------------|--------|------------------------------------------------------|-----------|--------|
| siRNA-Temozolomide Run2-DMSO | XM_29198<br>6 | OR10A3 | olfactory receptor, family 10, subfamily A, member 3 | -0.09892  | Inlier |
| siRNA-Temozolomide Run3-DMSO | XM_29198<br>6 | OR10A3 | olfactory receptor, family 10, subfamily A, member 3 | 0.09892   | Inlier |
| siRNA-Temozolomide Run1-DMSO | XM_29198<br>6 | OR10A3 | olfactory receptor, family 10, subfamily A, member 3 | 0.647071  | Inlier |
| siRNA Disorazole DMSO Run2   | XM_29198<br>6 | OR10A3 | olfactory receptor, family 10, subfamily A, member 3 | 0.701929  | Inlier |
| siRNA-Vinblastine Run1-DMSO  | XM_29198<br>6 | OR10A3 | olfactory receptor, family 10, subfamily A, member 3 | 1.290666  | Inlier |
| siRNA-Vinblastine Run2-DMSO  | NM_2071<br>86 | OR10A4 | olfactory receptor, family 10, subfamily A, member 4 | -1.804978 | Inlier |
| siRNA Disorazole DMSO Run3   | NM_2071<br>86 | OR10A4 | olfactory receptor, family 10, subfamily A, member 4 | -0.441038 | Inlier |
| siRNA Disorazole DMSO Run1   | NM_2071<br>86 | OR10A4 | olfactory receptor, family 10, subfamily A, member 4 | -0.403487 | Inlier |



Identification of Survival Genes in Human Glioblastoma Cells Using siRNA Screening  
 Nikhil G Thaker, Fang Zhang, Peter R. McDonald, Tong Ying Shun, Michael D Lewen, Ian F. Pollack, and John S. Lazo

Molecular Pharmacology

|                              |               |        |                                                      |           |        |
|------------------------------|---------------|--------|------------------------------------------------------|-----------|--------|
| siRNA-Temozolomide Run1-DMSO | NM_2071<br>86 | OR10A4 | olfactory receptor, family 10, subfamily A, member 4 | -0.260127 | Inlier |
| siRNA-Temozolomide Run2-DMSO | NM_2071<br>86 | OR10A4 | olfactory receptor, family 10, subfamily A, member 4 | 0.260127  | Inlier |
| siRNA-Temozolomide Run3-DMSO | NM_2071<br>86 | OR10A4 | olfactory receptor, family 10, subfamily A, member 4 | 0.907962  | Inlier |
| siRNA Disorazole DMSO Run2   | NM_2071<br>86 | OR10A4 | olfactory receptor, family 10, subfamily A, member 4 | 1.402622  | Inlier |
| siRNA-Vinblastine Run1-DMSO  | NM_2071<br>86 | OR10A4 | olfactory receptor, family 10, subfamily A, member 4 | 1.930128  | Inlier |
| siRNA-Temozolomide Run2-DMSO | NM_1781<br>68 | OR10A5 | olfactory receptor, family 10, subfamily A, member 5 | -0.876746 | Inlier |
| siRNA-Vinblastine Run2-DMSO  | NM_1781<br>68 | OR10A5 | olfactory receptor, family 10, subfamily A, member 5 | -0.571393 | Inlier |
| siRNA Disorazole DMSO Run3   | NM_1781<br>68 | OR10A5 | olfactory receptor, family 10, subfamily A, member 5 | -0.460888 | Inlier |

Identification of Survival Genes in Human Glioblastoma Cells Using siRNA Screening  
 Nikhil G Thaker, Fang Zhang, Peter R. McDonald, Tong Ying Shun, Michael D Lewen, Ian F. Pollack, and John S. Lazo

Molecular Pharmacology

|                              |               |        |                                                      |           |        |
|------------------------------|---------------|--------|------------------------------------------------------|-----------|--------|
| siRNA-Temozolomide Run3-DMSO | NM_1781<br>68 | OR10A5 | olfactory receptor, family 10, subfamily A, member 5 | -0.294132 | Inlier |
| siRNA Disorazole DMSO Run1   | NM_1781<br>68 | OR10A5 | olfactory receptor, family 10, subfamily A, member 5 | 0.294132  | Inlier |
| siRNA-Temozolomide Run1-DMSO | NM_1781<br>68 | OR10A5 | olfactory receptor, family 10, subfamily A, member 5 | 0.777607  | Inlier |
| siRNA Disorazole DMSO Run2   | NM_1781<br>68 | OR10A5 | olfactory receptor, family 10, subfamily A, member 5 | 1.237464  | Inlier |
| siRNA-Vinblastine Run1-DMSO  | NM_1781<br>68 | OR10A5 | olfactory receptor, family 10, subfamily A, member 5 | 1.762962  | Inlier |
| siRNA-Temozolomide Run3-DMSO | NM_0139<br>40 | OR10H1 | olfactory receptor, family 10, subfamily H, member 1 | -2.561765 | Inlier |
| siRNA-Temozolomide Run2-DMSO | NM_0139<br>40 | OR10H1 | olfactory receptor, family 10, subfamily H, member 1 | -0.762276 | Inlier |
| siRNA Disorazole DMSO Run1   | NM_0139<br>40 | OR10H1 | olfactory receptor, family 10, subfamily H, member 1 | -0.586724 | Inlier |

Identification of Survival Genes in Human Glioblastoma Cells Using siRNA Screening  
 Nikhil G Thaker, Fang Zhang, Peter R. McDonald, Tong Ying Shun, Michael D Lewen, Ian F. Pollack, and John S. Lazo

Molecular Pharmacology

|                              |               |        |                                                      |           |         |
|------------------------------|---------------|--------|------------------------------------------------------|-----------|---------|
| siRNA Disorazole DMSO Run3   | NM_0139<br>40 | OR10H1 | olfactory receptor, family 10, subfamily H, member 1 | -0.145054 | Inlier  |
| siRNA-Temozolomide Run1-DMSO | NM_0139<br>40 | OR10H1 | olfactory receptor, family 10, subfamily H, member 1 | 0.145054  | Inlier  |
| siRNA Disorazole DMSO Run2   | NM_0139<br>40 | OR10H1 | olfactory receptor, family 10, subfamily H, member 1 | 0.184956  | Inlier  |
| siRNA-Vinblastine Run2-DMSO  | NM_0139<br>40 | OR10H1 | olfactory receptor, family 10, subfamily H, member 1 | 1.059325  | Inlier  |
| siRNA-Vinblastine Run1-DMSO  | NM_0139<br>40 | OR10H1 | olfactory receptor, family 10, subfamily H, member 1 | 1.341725  | Inlier  |
| siRNA Disorazole DMSO Run2   | NM_0139<br>39 | OR10H2 | olfactory receptor, family 10, subfamily H, member 2 | -5.960083 | Outlier |
| siRNA-Temozolomide Run2-DMSO | NM_0139<br>39 | OR10H2 | olfactory receptor, family 10, subfamily H, member 2 | -2.348298 | Inlier  |
| siRNA Disorazole DMSO Run3   | NM_0139<br>39 | OR10H2 | olfactory receptor, family 10, subfamily H, member 2 | -0.641504 | Inlier  |

Identification of Survival Genes in Human Glioblastoma Cells Using siRNA Screening

Nikhil G Thaker, Fang Zhang, Peter R. McDonald, Tong Ying Shun, Michael D Lewen, Ian F. Pollack, and John S. Lazo

Molecular Pharmacology

|                              |               |        |                                                      |           |        |
|------------------------------|---------------|--------|------------------------------------------------------|-----------|--------|
| siRNA-Temozolomide Run1-DMSO | NM_0139<br>39 | OR10H2 | olfactory receptor, family 10, subfamily H, member 2 | -0.082035 | Inlier |
| siRNA-Temozolomide Run3-DMSO | NM_0139<br>39 | OR10H2 | olfactory receptor, family 10, subfamily H, member 2 | 0.082037  | Inlier |
| siRNA-Vinblastine Run2-DMSO  | NM_0139<br>39 | OR10H2 | olfactory receptor, family 10, subfamily H, member 2 | 0.306636  | Inlier |
| siRNA Disorazole DMSO Run1   | NM_0139<br>39 | OR10H2 | olfactory receptor, family 10, subfamily H, member 2 | 0.707496  | Inlier |
| siRNA-Vinblastine Run1-DMSO  | NM_0139<br>39 | OR10H2 | olfactory receptor, family 10, subfamily H, member 2 | 1.275979  | Inlier |
| siRNA Disorazole DMSO Run1   | NM_0123<br>51 | OR10J1 | olfactory receptor, family 10, subfamily J, member 1 | -1.505451 | Inlier |
| siRNA-Temozolomide Run3-DMSO | NM_0123<br>51 | OR10J1 | olfactory receptor, family 10, subfamily J, member 1 | -0.865319 | Inlier |
| siRNA-Temozolomide Run1-DMSO | NM_0123<br>51 | OR10J1 | olfactory receptor, family 10, subfamily J, member 1 | -0.132255 | Inlier |

Identification of Survival Genes in Human Glioblastoma Cells Using siRNA Screening

Nikhil G Thaker, Fang Zhang, Peter R. McDonald, Tong Ying Shun, Michael D Lewen, Ian F. Pollack, and John S. Lazo

Molecular Pharmacology

|                              |               |        |                                                      |           |         |
|------------------------------|---------------|--------|------------------------------------------------------|-----------|---------|
| siRNA-Temozolomide Run2-DMSO | NM_0123<br>51 | OR10J1 | olfactory receptor, family 10, subfamily J, member 1 | -0.110618 | Inlier  |
| siRNA-Vinblastine Run2-DMSO  | NM_0123<br>51 | OR10J1 | olfactory receptor, family 10, subfamily J, member 1 | 0.110619  | Inlier  |
| siRNA Disorazole DMSO Run2   | NM_0123<br>51 | OR10J1 | olfactory receptor, family 10, subfamily J, member 1 | 0.483681  | Inlier  |
| siRNA-Vinblastine Run1-DMSO  | NM_0123<br>51 | OR10J1 | olfactory receptor, family 10, subfamily J, member 1 | 1.444469  | Inlier  |
| siRNA Disorazole DMSO Run3   | NM_0123<br>51 | OR10J1 | olfactory receptor, family 11, subfamily A, member 1 | 3.653742  | Outlier |
| siRNA-Temozolomide Run3-DMSO | NM_0139<br>37 | OR11A1 | olfactory receptor, family 11, subfamily A, member 1 | -2.547848 | Inlier  |
| siRNA-Temozolomide Run2-DMSO | NM_0139<br>37 | OR11A1 | olfactory receptor, family 11, subfamily A, member 1 | -2.273226 | Inlier  |
| siRNA Disorazole DMSO Run1   | NM_0139<br>37 | OR11A1 | olfactory receptor, family 11, subfamily A, member 1 | -0.274158 | Inlier  |

Identification of Survival Genes in Human Glioblastoma Cells Using siRNA Screening  
 Nikhil G Thaker, Fang Zhang, Peter R. McDonald, Tong Ying Shun, Michael D Lewen, Ian F. Pollack, and John S. Lazo

Molecular Pharmacology

|                              |               |        |                                                      |           |        |
|------------------------------|---------------|--------|------------------------------------------------------|-----------|--------|
| siRNA-Temozolomide Run1-DMSO | NM_0139<br>37 | OR11A1 | olfactory receptor, family 11, subfamily A, member 1 | -0.074071 | Inlier |
| siRNA Disorazole DMSO Run2   | NM_0139<br>37 | OR11A1 | olfactory receptor, family 11, subfamily A, member 1 | 0.074071  | Inlier |
| siRNA-Vinblastine Run2-DMSO  | NM_0139<br>37 | OR11A1 | olfactory receptor, family 11, subfamily A, member 1 | 0.654701  | Inlier |
| siRNA-Vinblastine Run1-DMSO  | NM_0139<br>37 | OR11A1 | olfactory receptor, family 11, subfamily A, member 1 | 0.694299  | Inlier |
| siRNA Disorazole DMSO Run3   | NM_0139<br>37 | OR11A1 | olfactory receptor, family 12, subfamily D, member 1 | 0.760592  | Inlier |
| siRNA Disorazole DMSO Run1   | NM_0139<br>36 | OR12D2 | olfactory receptor, family 12, subfamily D, member 2 | -0.880125 | Inlier |
| siRNA-Temozolomide Run2-DMSO | NM_0139<br>36 | OR12D2 | olfactory receptor, family 12, subfamily D, member 2 | -0.743442 | Inlier |
| siRNA-Temozolomide Run3-DMSO | NM_0139<br>36 | OR12D2 | olfactory receptor, family 12, subfamily D, member 2 | -0.605558 | Inlier |

Identification of Survival Genes in Human Glioblastoma Cells Using siRNA Screening  
 Nikhil G Thaker, Fang Zhang, Peter R. McDonald, Tong Ying Shun, Michael D Lewen, Ian F. Pollack, and John S. Lazo

Molecular Pharmacology

|                              |               |        |                                                      |           |        |
|------------------------------|---------------|--------|------------------------------------------------------|-----------|--------|
| siRNA-Temozolomide Run1-DMSO | NM_0139<br>36 | OR12D2 | olfactory receptor, family 12, subfamily D, member 2 | -0.205585 | Inlier |
| siRNA-Vinblastine Run1-DMSO  | NM_0139<br>36 | OR12D2 | olfactory receptor, family 12, subfamily D, member 2 | 0.205585  | Inlier |
| siRNA-Vinblastine Run2-DMSO  | NM_0139<br>36 | OR12D2 | olfactory receptor, family 12, subfamily D, member 2 | 0.239477  | Inlier |
| siRNA Disorazole DMSO Run2   | NM_0139<br>36 | OR12D2 | olfactory receptor, family 12, subfamily D, member 2 | 0.985534  | Inlier |
| siRNA Disorazole DMSO Run3   | NM_0139<br>36 | OR12D2 | olfactory receptor, family 12, subfamily D, member 2 | 1.007514  | Inlier |
| siRNA-Temozolomide Run3-DMSO | NM_0309<br>59 | OR12D3 | olfactory receptor, family 12, subfamily D, member 3 | -2.423407 | Inlier |
| siRNA-Temozolomide Run2-DMSO | NM_0309<br>59 | OR12D3 | olfactory receptor, family 12, subfamily D, member 3 | -2.111062 | Inlier |
| siRNA-Temozolomide Run1-DMSO | NM_0309<br>59 | OR12D3 | olfactory receptor, family 12, subfamily D, member 3 | -1.7588   | Inlier |

Identification of Survival Genes in Human Glioblastoma Cells Using siRNA Screening  
 Nikhil G Thaker, Fang Zhang, Peter R. McDonald, Tong Ying Shun, Michael D Lewen, Ian F. Pollack, and John S. Lazo

Molecular Pharmacology

|                              |               |        |                                                      |           |        |
|------------------------------|---------------|--------|------------------------------------------------------|-----------|--------|
| siRNA Disorazole DMSO Run2   | NM_0309<br>59 | OR12D3 | olfactory receptor, family 12, subfamily D, member 3 | -0.163287 | Inlier |
| siRNA Disorazole DMSO Run1   | NM_0309<br>59 | OR12D3 | olfactory receptor, family 12, subfamily D, member 3 | 0.163287  | Inlier |
| siRNA Disorazole DMSO Run3   | NM_0309<br>59 | OR12D3 | olfactory receptor, family 12, subfamily D, member 3 | 0.491713  | Inlier |
| siRNA-Vinblastine Run2-DMSO  | NM_0309<br>59 | OR12D3 | olfactory receptor, family 12, subfamily D, member 3 | 0.623384  | Inlier |
| siRNA-Vinblastine Run1-DMSO  | NM_0309<br>59 | OR12D3 | olfactory receptor, family 1, subfamily D, member 3  | 0.725616  | Inlier |
| siRNA-Temozolomide Run2-DMSO | NM_0145<br>65 | OR1A1  | olfactory receptor, family 1, subfamily A, member 1  | -0.873944 | Inlier |
| siRNA-Temozolomide Run3-DMSO | NM_0145<br>65 | OR1A1  | olfactory receptor, family 1, subfamily A, member 1  | -0.780447 | Inlier |
| siRNA-Temozolomide Run1-DMSO | NM_0145<br>65 | OR1A1  | olfactory receptor, family 1, subfamily A, member 1  | -0.121911 | Inlier |



Identification of Survival Genes in Human Glioblastoma Cells Using siRNA Screening  
 Nikhil G Thaker, Fang Zhang, Peter R. McDonald, Tong Ying Shun, Michael D Lewen, Ian F. Pollack, and John S. Lazo

Molecular Pharmacology

|                              |               |       |                                                     |                  |
|------------------------------|---------------|-------|-----------------------------------------------------|------------------|
| siRNA-Vinblastine Run2-DMSO  | NM_0145<br>65 | OR1A1 | olfactory receptor, family 1, subfamily A, member 1 | -0.005953 Inlier |
| siRNA Disorazole DMSO Run1   | NM_0145<br>65 | OR1A1 | olfactory receptor, family 1, subfamily A, member 1 | 0.005953 Inlier  |
| siRNA-Vinblastine Run1-DMSO  | NM_0145<br>65 | OR1A1 | olfactory receptor, family 1, subfamily A, member 1 | 0.568553 Inlier  |
| siRNA Disorazole DMSO Run3   | NM_0145<br>65 | OR1A1 | olfactory receptor, family 1, subfamily A, member 1 | 0.795525 Inlier  |
| siRNA Disorazole DMSO Run2   | NM_0145<br>65 | OR1A1 | olfactory receptor, family 1, subfamily A, member 1 | 1.196615 Inlier  |
| siRNA Disorazole DMSO Run1   | NM_0123<br>52 | OR1A2 | olfactory receptor, family 1, subfamily A, member 2 | -0.781952 Inlier |
| siRNA-Temozolomide Run2-DMSO | NM_0123<br>52 | OR1A2 | olfactory receptor, family 1, subfamily A, member 2 | -0.756909 Inlier |
| siRNA-Temozolomide Run3-DMSO | NM_0123<br>52 | OR1A2 | olfactory receptor, family 1, subfamily A, member 2 | -0.592091 Inlier |

Identification of Survival Genes in Human Glioblastoma Cells Using siRNA Screening

Nikhil G Thaker, Fang Zhang, Peter R. McDonald, Tong Ying Shun, Michael D Lewen, Ian F. Pollack, and John S. Lazo

Molecular Pharmacology

|                              |               |       |                                                     |           |        |
|------------------------------|---------------|-------|-----------------------------------------------------|-----------|--------|
| siRNA-Temozolomide Run1-DMSO | NM_0123<br>52 | OR1A2 | olfactory receptor, family 1, subfamily A, member 2 | -0.393427 | Inlier |
| siRNA-Vinblastine Run2-DMSO  | NM_0123<br>52 | OR1A2 | olfactory receptor, family 1, subfamily A, member 2 | 0.393427  | Inlier |
| siRNA-Vinblastine Run1-DMSO  | NM_0123<br>52 | OR1A2 | olfactory receptor, family 1, subfamily A, member 2 | 0.590848  | Inlier |
| siRNA Disorazole DMSO Run3   | NM_0123<br>52 | OR1A2 | olfactory receptor, family 1, subfamily A, member 2 | 1.369503  | Inlier |
| siRNA Disorazole DMSO Run2   | NM_0123<br>52 | OR1A2 | olfactory receptor, family 1, subfamily A, member 2 | 1.673153  | Inlier |
| siRNA Disorazole DMSO Run1   | XM_29143<br>7 | OR1C1 | olfactory receptor, family 1, subfamily C, member 1 | -1.514982 | Inlier |
| siRNA-Temozolomide Run3-DMSO | XM_29143<br>7 | OR1C1 | olfactory receptor, family 1, subfamily C, member 1 | -0.713654 | Inlier |
| siRNA-Vinblastine Run2-DMSO  | XM_29143<br>7 | OR1C1 | olfactory receptor, family 1, subfamily C, member 1 | -0.356961 | Inlier |

Identification of Survival Genes in Human Glioblastoma Cells Using siRNA Screening  
 Nikhil G Thaker, Fang Zhang, Peter R. McDonald, Tong Ying Shun, Michael D Lewen, Ian F. Pollack, and John S. Lazo

Molecular Pharmacology

|                              |               |       |                                                     |           |        |
|------------------------------|---------------|-------|-----------------------------------------------------|-----------|--------|
| siRNA Disorazole DMSO Run3   | XM_29143<br>7 | OR1C1 | olfactory receptor, family 1, subfamily C, member 1 | -0.08147  | Inlier |
| siRNA-Temozolomide Run2-DMSO | XM_29143<br>7 | OR1C1 | olfactory receptor, family 1, subfamily C, member 1 | 0.081471  | Inlier |
| siRNA Disorazole DMSO Run2   | XM_29143<br>7 | OR1C1 | olfactory receptor, family 1, subfamily C, member 1 | 0.635346  | Inlier |
| siRNA-Temozolomide Run1-DMSO | XM_29143<br>7 | OR1C1 | olfactory receptor, family 1, subfamily C, member 1 | 0.834146  | Inlier |
| siRNA-Vinblastine Run1-DMSO  | XM_29143<br>7 | OR1C1 | olfactory receptor, family 1, subfamily C, member 1 | 1.11912   | Inlier |
| siRNA-Temozolomide Run3-DMSO | NM_0025<br>48 | OR1D2 | olfactory receptor, family 1, subfamily D, member 2 | -2.047601 | Inlier |
| siRNA Disorazole DMSO Run2   | NM_0025<br>48 | OR1D2 | olfactory receptor, family 1, subfamily D, member 2 | -0.919887 | Inlier |
| siRNA-Temozolomide Run2-DMSO | NM_0025<br>48 | OR1D2 | olfactory receptor, family 1, subfamily D, member 2 | -0.55418  | Inlier |

Identification of Survival Genes in Human Glioblastoma Cells Using siRNA Screening  
 Nikhil G Thaker, Fang Zhang, Peter R. McDonald, Tong Ying Shun, Michael D Lewen, Ian F. Pollack, and John S. Lazo

Molecular Pharmacology

|                              |               |       |                                                     |           |        |
|------------------------------|---------------|-------|-----------------------------------------------------|-----------|--------|
| siRNA-Temozolomide Run1-DMSO | NM_0025<br>48 | OR1D2 | olfactory receptor, family 1, subfamily D, member 2 | -0.039065 | Inlier |
| siRNA Disorazole DMSO Run1   | NM_0025<br>48 | OR1D2 | olfactory receptor, family 1, subfamily D, member 2 | 0.039066  | Inlier |
| siRNA Disorazole DMSO Run3   | NM_0025<br>48 | OR1D2 | olfactory receptor, family 1, subfamily D, member 2 | 0.328963  | Inlier |
| siRNA-Vinblastine Run2-DMSO  | NM_0025<br>48 | OR1D2 | olfactory receptor, family 1, subfamily D, member 2 | 0.79482   | Inlier |
| siRNA-Vinblastine Run1-DMSO  | NM_0025<br>48 | OR1D2 | olfactory receptor, family 1, subfamily D, member 2 | 0.907315  | Inlier |
| siRNA-Vinblastine Run2-DMSO  | NM_0035<br>52 | OR1D4 | olfactory receptor, family 1, subfamily D, member 4 | -0.760937 | Inlier |
| siRNA Disorazole DMSO Run1   | NM_0035<br>52 | OR1D4 | olfactory receptor, family 1, subfamily D, member 4 | -0.588063 | Inlier |
| siRNA-Temozolomide Run3-DMSO | NM_0035<br>52 | OR1D4 | olfactory receptor, family 1, subfamily D, member 4 | -0.394561 | Inlier |

Identification of Survival Genes in Human Glioblastoma Cells Using siRNA Screening

Nikhil G Thaker, Fang Zhang, Peter R. McDonald, Tong Ying Shun, Michael D Lewen, Ian F. Pollack, and John S. Lazo

Molecular Pharmacology

|                              |               |       |                                                     |           |         |
|------------------------------|---------------|-------|-----------------------------------------------------|-----------|---------|
| siRNA-Temozolomide Run2-DMSO | NM_0035<br>52 | OR1D4 | olfactory receptor, family 1, subfamily D, member 4 | -0.209244 | Inlier  |
| siRNA Disorazole DMSO Run3   | NM_0035<br>52 | OR1D4 | olfactory receptor, family 1, subfamily D, member 4 | 0.209244  | Inlier  |
| siRNA-Temozolomide Run1-DMSO | NM_0035<br>52 | OR1D4 | olfactory receptor, family 1, subfamily D, member 4 | 1.155788  | Inlier  |
| siRNA Disorazole DMSO Run2   | NM_0035<br>52 | OR1D4 | olfactory receptor, family 1, subfamily D, member 4 | 5.801385  | Outlier |
| siRNA-Vinblastine Run1-DMSO  | NM_0035<br>52 | OR1D4 | olfactory receptor, family 1, subfamily D, member 4 | 6.409328  | Outlier |
| siRNA-Temozolomide Run3-DMSO | NM_0145<br>66 | OR1D5 | olfactory receptor, family 1, subfamily D, member 5 | -1.303799 | Inlier  |
| siRNA-Vinblastine Run2-DMSO  | NM_0145<br>66 | OR1D5 | olfactory receptor, family 1, subfamily D, member 5 | -0.841017 | Inlier  |
| siRNA Disorazole DMSO Run1   | NM_0145<br>66 | OR1D5 | olfactory receptor, family 1, subfamily D, member 5 | -0.507983 | Inlier  |

Identification of Survival Genes in Human Glioblastoma Cells Using siRNA Screening

Nikhil G Thaker, Fang Zhang, Peter R. McDonald, Tong Ying Shun, Michael D Lewen, Ian F. Pollack, and John S. Lazo

Molecular Pharmacology

|                              |               |       |                                                     |           |         |
|------------------------------|---------------|-------|-----------------------------------------------------|-----------|---------|
| siRNA-Temozolomide Run2-DMSO | NM_0145<br>66 | OR1D5 | olfactory receptor, family 1, subfamily D, member 5 | -0.300785 | Inlier  |
| siRNA-Temozolomide Run1-DMSO | NM_0145<br>66 | OR1D5 | olfactory receptor, family 1, subfamily D, member 5 | 0.300784  | Inlier  |
| siRNA Disorazole DMSO Run3   | NM_0145<br>66 | OR1D5 | olfactory receptor, family 1, subfamily D, member 5 | 0.319389  | Inlier  |
| siRNA Disorazole DMSO Run2   | NM_0145<br>66 | OR1D5 | olfactory receptor, family 1, subfamily D, member 5 | 2.126579  | Inlier  |
| siRNA-Vinblastine Run1-DMSO  | NM_0145<br>66 | OR1D5 | olfactory receptor, family 1, subfamily D, member 5 | 3.387979  | Inlier  |
| siRNA-Temozolomide Run3-DMSO | NM_0035<br>53 | OR1E1 | olfactory receptor, family 1, subfamily E, member 1 | -4.620492 | Outlier |
| siRNA-Temozolomide Run2-DMSO | NM_0035<br>53 | OR1E1 | olfactory receptor, family 1, subfamily E, member 1 | -1.116873 | Inlier  |
| siRNA Disorazole DMSO Run1   | NM_0035<br>53 | OR1E1 | olfactory receptor, family 1, subfamily E, member 1 | -0.987291 | Inlier  |

Identification of Survival Genes in Human Glioblastoma Cells Using siRNA Screening  
 Nikhil G Thaker, Fang Zhang, Peter R. McDonald, Tong Ying Shun, Michael D Lewen, Ian F. Pollack, and John S. Lazo

Molecular Pharmacology

|                              |               |       |                                                     |           |        |
|------------------------------|---------------|-------|-----------------------------------------------------|-----------|--------|
| siRNA Disorazole DMSO Run2   | NM_0035<br>53 | OR1E1 | olfactory receptor, family 1, subfamily E, member 1 | -0.054436 | Inlier |
| siRNA-Temozolomide Run1-DMSO | NM_0035<br>53 | OR1E1 | olfactory receptor, family 1, subfamily E, member 1 | 0.054435  | Inlier |
| siRNA-Vinblastine Run2-DMSO  | NM_0035<br>53 | OR1E1 | olfactory receptor, family 1, subfamily E, member 1 | 0.343458  | Inlier |
| siRNA Disorazole DMSO Run3   | NM_0035<br>53 | OR1E1 | olfactory receptor, family 1, subfamily E, member 1 | 0.378125  | Inlier |
| siRNA-Vinblastine Run1-DMSO  | NM_0035<br>53 | OR1E1 | olfactory receptor, family 1, subfamily E, member 1 | 0.970875  | Inlier |
| siRNA-Temozolomide Run3-DMSO | NM_0035<br>54 | OR1E2 | olfactory receptor, family 1, subfamily E, member 2 | -2.440959 | Inlier |
| siRNA-Temozolomide Run2-DMSO | NM_0035<br>54 | OR1E2 | olfactory receptor, family 1, subfamily E, member 2 | -0.929091 | Inlier |
| siRNA Disorazole DMSO Run2   | NM_0035<br>54 | OR1E2 | olfactory receptor, family 1, subfamily E, member 2 | -0.419909 | Inlier |

Identification of Survival Genes in Human Glioblastoma Cells Using siRNA Screening

Nikhil G Thaker, Fang Zhang, Peter R. McDonald, Tong Ying Shun, Michael D Lewen, Ian F. Pollack, and John S. Lazo

Molecular Pharmacology

|                              |               |       |                                                     |           |        |
|------------------------------|---------------|-------|-----------------------------------------------------|-----------|--------|
| siRNA-Temozolomide Run1-DMSO | NM_0035<br>54 | OR1E2 | olfactory receptor, family 1, subfamily E, member 2 | -0.118814 | Inlier |
| siRNA Disorazole DMSO Run1   | NM_0035<br>54 | OR1E2 | olfactory receptor, family 1, subfamily E, member 2 | 0.118814  | Inlier |
| siRNA Disorazole DMSO Run3   | NM_0035<br>54 | OR1E2 | olfactory receptor, family 1, subfamily E, member 2 | 0.154538  | Inlier |
| siRNA-Vinblastine Run1-DMSO  | NM_0035<br>54 | OR1E2 | olfactory receptor, family 1, subfamily E, member 2 | 1.324831  | Inlier |
| siRNA-Vinblastine Run2-DMSO  | NM_0035<br>54 | OR1E2 | olfactory receptor, family 1, subfamily E, member 2 | 1.47028   | Inlier |
| siRNA-Temozolomide Run3-DMSO | NM_0123<br>60 | OR1F1 | olfactory receptor, family 1, subfamily F, member 1 | -1.670998 | Inlier |
| siRNA Disorazole DMSO Run2   | NM_0123<br>60 | OR1F1 | olfactory receptor, family 1, subfamily F, member 1 | -1.226868 | Inlier |
| siRNA-Temozolomide Run2-DMSO | NM_0123<br>60 | OR1F1 | olfactory receptor, family 1, subfamily F, member 1 | -0.424762 | Inlier |



Identification of Survival Genes in Human Glioblastoma Cells Using siRNA Screening

Nikhil G Thaker, Fang Zhang, Peter R. McDonald, Tong Ying Shun, Michael D Lewen, Ian F. Pollack, and John S. Lazo

Molecular Pharmacology

|                              |               |       |                                                     |           |        |
|------------------------------|---------------|-------|-----------------------------------------------------|-----------|--------|
| siRNA-Temozolomide Run1-DMSO | NM_0123<br>60 | OR1F1 | olfactory receptor, family 1, subfamily F, member 1 | -0.22859  | Inlier |
| siRNA Disorazole DMSO Run3   | NM_0123<br>60 | OR1F1 | olfactory receptor, family 1, subfamily F, member 1 | 0.22859   | Inlier |
| siRNA Disorazole DMSO Run1   | NM_0123<br>60 | OR1F1 | olfactory receptor, family 1, subfamily F, member 1 | 0.233006  | Inlier |
| siRNA-Vinblastine Run1-DMSO  | NM_0123<br>60 | OR1F1 | olfactory receptor, family 1, subfamily F, member 1 | 0.924238  | Inlier |
| siRNA-Vinblastine Run2-DMSO  | NM_0123<br>60 | OR1F1 | olfactory receptor, family 1, subfamily F, member 1 | 1.132602  | Inlier |
| siRNA-Temozolomide Run3-DMSO | NM_0035<br>55 | OR1G1 | olfactory receptor, family 1, subfamily G, member 1 | -1.429628 | Inlier |
| siRNA-Temozolomide Run2-DMSO | NM_0035<br>55 | OR1G1 | olfactory receptor, family 1, subfamily G, member 1 | -0.910507 | Inlier |
| siRNA Disorazole DMSO Run1   | NM_0035<br>55 | OR1G1 | olfactory receptor, family 1, subfamily G, member 1 | -0.661814 | Inlier |

Identification of Survival Genes in Human Glioblastoma Cells Using siRNA Screening  
 Nikhil G Thaker, Fang Zhang, Peter R. McDonald, Tong Ying Shun, Michael D Lewen, Ian F. Pollack, and John S. Lazo

Molecular Pharmacology

|                              |               |       |                                                     |           |        |
|------------------------------|---------------|-------|-----------------------------------------------------|-----------|--------|
| siRNA-Temozolomide Run1-DMSO | NM_0035<br>55 | OR1G1 | olfactory receptor, family 1, subfamily G, member 1 | -0.445903 | Inlier |
| siRNA-Vinblastine Run1-DMSO  | NM_0035<br>55 | OR1G1 | olfactory receptor, family 1, subfamily G, member 1 | 0.445903  | Inlier |
| siRNA Disorazole DMSO Run2   | NM_0035<br>55 | OR1G1 | olfactory receptor, family 1, subfamily G, member 1 | 0.575577  | Inlier |
| siRNA-Vinblastine Run2-DMSO  | NM_0035<br>55 | OR1G1 | olfactory receptor, family 1, subfamily G, member 1 | 0.687186  | Inlier |
| siRNA Disorazole DMSO Run3   | NM_0035<br>55 | OR1G1 | olfactory receptor, family 2, subfamily B, member 2 | 1.62534   | Inlier |
| siRNA-Temozolomide Run3-DMSO | NM_0330<br>57 | OR2B2 | olfactory receptor, family 2, subfamily B, member 2 | -2.739811 | Inlier |
| siRNA-Temozolomide Run2-DMSO | NM_0330<br>57 | OR2B2 | olfactory receptor, family 2, subfamily B, member 2 | -1.255394 | Inlier |
| siRNA Disorazole DMSO Run2   | NM_0330<br>57 | OR2B2 | olfactory receptor, family 2, subfamily B, member 2 | -0.544273 | Inlier |

Identification of Survival Genes in Human Glioblastoma Cells Using siRNA Screening

Nikhil G Thaker, Fang Zhang, Peter R. McDonald, Tong Ying Shun, Michael D Lewen, Ian F. Pollack, and John S. Lazo

Molecular Pharmacology

|                              |               |       |                                                     |           |        |
|------------------------------|---------------|-------|-----------------------------------------------------|-----------|--------|
| siRNA-Temozolomide Run1-DMSO | NM_0330<br>57 | OR2B2 | olfactory receptor, family 2, subfamily B, member 2 | -0.30492  | Inlier |
| siRNA-Vinblastine Run2-DMSO  | NM_0330<br>57 | OR2B2 | olfactory receptor, family 2, subfamily B, member 2 | 0.30492   | Inlier |
| siRNA Disorazole DMSO Run1   | NM_0330<br>57 | OR2B2 | olfactory receptor, family 2, subfamily B, member 2 | 0.641681  | Inlier |
| siRNA Disorazole DMSO Run3   | NM_0330<br>57 | OR2B2 | olfactory receptor, family 2, subfamily B, member 2 | 0.707319  | Inlier |
| siRNA-Vinblastine Run1-DMSO  | NM_0330<br>57 | OR2B2 | olfactory receptor, family 2, subfamily B, member 2 | 1.049984  | Inlier |
| siRNA-Temozolomide Run3-DMSO | NM_0123<br>68 | OR2C1 | olfactory receptor, family 2, subfamily C, member 1 | -2.175218 | Inlier |
| siRNA-Temozolomide Run2-DMSO | NM_0123<br>68 | OR2C1 | olfactory receptor, family 2, subfamily C, member 1 | -1.064698 | Inlier |
| siRNA-Temozolomide Run1-DMSO | NM_0123<br>68 | OR2C1 | olfactory receptor, family 2, subfamily C, member 1 | -0.443223 | Inlier |

Identification of Survival Genes in Human Glioblastoma Cells Using siRNA Screening  
 Nikhil G Thaker, Fang Zhang, Peter R. McDonald, Tong Ying Shun, Michael D Lewen, Ian F. Pollack, and John S. Lazo

Molecular Pharmacology

|                              |               |       |                                                     |           |        |
|------------------------------|---------------|-------|-----------------------------------------------------|-----------|--------|
| siRNA Disorazole DMSO Run2   | NM_0123<br>68 | OR2C1 | olfactory receptor, family 2, subfamily C, member 1 | -0.280193 | Inlier |
| siRNA-Vinblastine Run2-DMSO  | NM_0123<br>68 | OR2C1 | olfactory receptor, family 2, subfamily C, member 1 | 0.280193  | Inlier |
| siRNA Disorazole DMSO Run1   | NM_0123<br>68 | OR2C1 | olfactory receptor, family 2, subfamily C, member 1 | 0.321694  | Inlier |
| siRNA-Vinblastine Run1-DMSO  | NM_0123<br>68 | OR2C1 | olfactory receptor, family 2, subfamily C, member 1 | 0.905777  | Inlier |
| siRNA Disorazole DMSO Run3   | NM_0123<br>68 | OR2C1 | olfactory receptor, family 2, subfamily C, member 1 | 0.982994  | Inlier |
| siRNA-Temozolomide Run3-DMSO | NM_0123<br>69 | OR2F1 | olfactory receptor, family 2, subfamily F, member 1 | -2.83624  | Inlier |
| siRNA-Temozolomide Run2-DMSO | NM_0123<br>69 | OR2F1 | olfactory receptor, family 2, subfamily F, member 1 | -1.805506 | Inlier |
| siRNA-Temozolomide Run1-DMSO | NM_0123<br>69 | OR2F1 | olfactory receptor, family 2, subfamily F, member 1 | -0.337681 | Inlier |

Identification of Survival Genes in Human Glioblastoma Cells Using siRNA Screening  
 Nikhil G Thaker, Fang Zhang, Peter R. McDonald, Tong Ying Shun, Michael D Lewen, Ian F. Pollack, and John S. Lazo

Molecular Pharmacology

|                                  |               |       |                                                                    |           |        |
|----------------------------------|---------------|-------|--------------------------------------------------------------------|-----------|--------|
| siRNA Disorazole DMSO Run2       | NM_0123<br>69 | OR2F1 | olfactory<br>receptor,<br>family 2,<br>subfamily<br>F,<br>member 1 | -0.250256 | Inlier |
| siRNA Disorazole DMSO Run3       | NM_0123<br>69 | OR2F1 | olfactory<br>receptor,<br>family 2,<br>subfamily<br>F,<br>member 1 | 0.250256  | Inlier |
| siRNA Disorazole DMSO Run1       | NM_0123<br>69 | OR2F1 | olfactory<br>receptor,<br>family 2,<br>subfamily<br>F,<br>member 1 | 0.408801  | Inlier |
| siRNA-Vinblastine Run1-<br>DMSO  | NM_0123<br>69 | OR2F1 | olfactory<br>receptor,<br>family 2,<br>subfamily<br>F,<br>member 1 | 0.940199  | Inlier |
| siRNA-Vinblastine Run2-<br>DMSO  | NM_0123<br>69 | OR2F1 | olfactory<br>receptor,<br>family 2,<br>subfamily<br>F,<br>member 1 | 1.522861  | Inlier |
| siRNA-Temozolomide Run3-<br>DMSO | NM_0308<br>83 | OR2H1 | olfactory<br>receptor,<br>family 2,<br>subfamily<br>H,<br>member 1 | -2.520407 | Inlier |
| siRNA-Temozolomide Run2-<br>DMSO | NM_0308<br>83 | OR2H1 | olfactory<br>receptor,<br>family 2,<br>subfamily<br>H,<br>member 1 | -1.613868 | Inlier |
| siRNA-Temozolomide Run1-<br>DMSO | NM_0308<br>83 | OR2H1 | olfactory<br>receptor,<br>family 2,<br>subfamily<br>H,<br>member 1 | -0.907431 | Inlier |

Identification of Survival Genes in Human Glioblastoma Cells Using siRNA Screening  
 Nikhil G Thaker, Fang Zhang, Peter R. McDonald, Tong Ying Shun, Michael D Lewen, Ian F. Pollack, and John S. Lazo

Molecular Pharmacology

|                              |               |       |                                                     |           |        |
|------------------------------|---------------|-------|-----------------------------------------------------|-----------|--------|
| siRNA Disorazole DMSO Run1   | NM_0308<br>83 | OR2H1 | olfactory receptor, family 2, subfamily H, member 1 | -0.193254 | Inlier |
| siRNA Disorazole DMSO Run2   | NM_0308<br>83 | OR2H1 | olfactory receptor, family 2, subfamily H, member 1 | 0.193254  | Inlier |
| siRNA Disorazole DMSO Run3   | NM_0308<br>83 | OR2H1 | olfactory receptor, family 2, subfamily H, member 1 | 0.391595  | Inlier |
| siRNA-Vinblastine Run1-DMSO  | NM_0308<br>83 | OR2H1 | olfactory receptor, family 2, subfamily H, member 1 | 0.506207  | Inlier |
| siRNA-Vinblastine Run2-DMSO  | NM_0308<br>83 | OR2H1 | olfactory receptor, family 2, subfamily H, member 1 | 0.842793  | Inlier |
| siRNA-Temozolomide Run3-DMSO | NM_0071<br>60 | OR2H2 | olfactory receptor, family 2, subfamily H, member 2 | -1.912977 | Inlier |
| siRNA-Temozolomide Run2-DMSO | NM_0071<br>60 | OR2H2 | olfactory receptor, family 2, subfamily H, member 2 | -0.96262  | Inlier |
| siRNA-Temozolomide Run1-DMSO | NM_0071<br>60 | OR2H2 | olfactory receptor, family 2, subfamily H, member 2 | -0.738348 | Inlier |

Identification of Survival Genes in Human Glioblastoma Cells Using siRNA Screening  
 Nikhil G Thaker, Fang Zhang, Peter R. McDonald, Tong Ying Shun, Michael D Lewen, Ian F. Pollack, and John S. Lazo

Molecular Pharmacology

|                              |               |       |                                                     |           |        |
|------------------------------|---------------|-------|-----------------------------------------------------|-----------|--------|
| siRNA Disorazole DMSO Run3   | NM_0071<br>60 | OR2H2 | olfactory receptor, family 2, subfamily H, member 2 | -0.051355 | Inlier |
| siRNA Disorazole DMSO Run2   | NM_0071<br>60 | OR2H2 | olfactory receptor, family 2, subfamily H, member 2 | 0.051355  | Inlier |
| siRNA Disorazole DMSO Run1   | NM_0071<br>60 | OR2H2 | olfactory receptor, family 2, subfamily H, member 2 | 0.179996  | Inlier |
| siRNA-Vinblastine Run1-DMSO  | NM_0071<br>60 | OR2H2 | olfactory receptor, family 2, subfamily H, member 2 | 0.610652  | Inlier |
| siRNA-Vinblastine Run2-DMSO  | NM_0071<br>60 | OR2H2 | olfactory receptor, family 2, subfamily H, member 2 | 0.812296  | Inlier |
| siRNA-Temozolomide Run3-DMSO | NM_0309<br>05 | OR2J2 | olfactory receptor, family 2, subfamily J, member 2 | -1.565025 | Inlier |
| siRNA Disorazole DMSO Run2   | NM_0309<br>05 | OR2J2 | olfactory receptor, family 2, subfamily J, member 2 | -1.336056 | Inlier |
| siRNA-Temozolomide Run2-DMSO | NM_0309<br>05 | OR2J2 | olfactory receptor, family 2, subfamily J, member 2 | -1.084009 | Inlier |

Identification of Survival Genes in Human Glioblastoma Cells Using siRNA Screening  
 Nikhil G Thaker, Fang Zhang, Peter R. McDonald, Tong Ying Shun, Michael D Lewen, Ian F. Pollack, and John S. Lazo

Molecular Pharmacology

|                              |           |       |                                                     |           |        |
|------------------------------|-----------|-------|-----------------------------------------------------|-----------|--------|
| siRNA-Temozolomide Run1-DMSO | NM_030905 | OR2J2 | olfactory receptor, family 2, subfamily J, member 2 | -0.521659 | Inlier |
| siRNA Disorazole DMSO Run3   | NM_030905 | OR2J2 | olfactory receptor, family 2, subfamily J, member 2 | 0.521659  | Inlier |
| siRNA-Vinblastine Run1-DMSO  | NM_030905 | OR2J2 | olfactory receptor, family 2, subfamily J, member 2 | 0.571963  | Inlier |
| siRNA-Vinblastine Run2-DMSO  | NM_030905 | OR2J2 | olfactory receptor, family 2, subfamily J, member 2 | 0.63984   | Inlier |
| siRNA Disorazole DMSO Run1   | NM_030905 | OR2J2 | olfactory receptor, family 2, subfamily J, member 2 | 0.70916   | Inlier |
| siRNA-Temozolomide Run2-DMSO | XM_371358 | OR2M4 | olfactory receptor, family 2, subfamily M, member 4 | -1.129641 | Inlier |
| siRNA-Vinblastine Run2-DMSO  | XM_371358 | OR2M4 | olfactory receptor, family 2, subfamily M, member 4 | -0.419357 | Inlier |
| siRNA Disorazole DMSO Run1   | XM_371358 | OR2M4 | olfactory receptor, family 2, subfamily M, member 4 | -0.288225 | Inlier |



Identification of Survival Genes in Human Glioblastoma Cells Using siRNA Screening  
 Nikhil G Thaker, Fang Zhang, Peter R. McDonald, Tong Ying Shun, Michael D Lewen, Ian F. Pollack, and John S. Lazo

Molecular Pharmacology

|                              |               |       |                                                     |           |        |
|------------------------------|---------------|-------|-----------------------------------------------------|-----------|--------|
| siRNA Disorazole DMSO Run3   | XM_37135<br>8 | OR2M4 | olfactory receptor, family 2, subfamily M, member 4 | -0.05268  | Inlier |
| siRNA-Temozolomide Run3-DMSO | XM_37135<br>8 | OR2M4 | olfactory receptor, family 2, subfamily M, member 4 | 0.052679  | Inlier |
| siRNA-Temozolomide Run1-DMSO | XM_37135<br>8 | OR2M4 | olfactory receptor, family 2, subfamily M, member 4 | 0.929643  | Inlier |
| siRNA-Vinblastine Run1-DMSO  | XM_37135<br>8 | OR2M4 | olfactory receptor, family 2, subfamily M, member 4 | 1.366908  | Inlier |
| siRNA Disorazole DMSO Run2   | XM_37135<br>8 | OR2M4 | olfactory receptor, family 2, subfamily M, member 4 | 1.508194  | Inlier |
| siRNA-Temozolomide Run3-DMSO | NM_0198<br>97 | OR2S2 | olfactory receptor, family 2, subfamily S, member 2 | -1.283525 | Inlier |
| siRNA Disorazole DMSO Run2   | NM_0198<br>97 | OR2S2 | olfactory receptor, family 2, subfamily S, member 2 | -1.077273 | Inlier |
| siRNA-Temozolomide Run2-DMSO | NM_0198<br>97 | OR2S2 | olfactory receptor, family 2, subfamily S, member 2 | -0.560213 | Inlier |

Identification of Survival Genes in Human Glioblastoma Cells Using siRNA Screening  
 Nikhil G Thaker, Fang Zhang, Peter R. McDonald, Tong Ying Shun, Michael D Lewen, Ian F. Pollack, and John S. Lazo

Molecular Pharmacology

|                              |               |       |                                                     |           |        |
|------------------------------|---------------|-------|-----------------------------------------------------|-----------|--------|
| siRNA-Temozolomide Run1-DMSO | NM_0198<br>97 | OR2S2 | olfactory receptor, family 2, subfamily S, member 2 | -0.22179  | Inlier |
| siRNA Disorazole DMSO Run3   | NM_0198<br>97 | OR2S2 | olfactory receptor, family 2, subfamily S, member 2 | 0.22179   | Inlier |
| siRNA Disorazole DMSO Run1   | NM_0198<br>97 | OR2S2 | olfactory receptor, family 2, subfamily S, member 2 | 0.248593  | Inlier |
| siRNA-Vinblastine Run1-DMSO  | NM_0198<br>97 | OR2S2 | olfactory receptor, family 2, subfamily S, member 2 | 0.788787  | Inlier |
| siRNA-Vinblastine Run2-DMSO  | NM_0198<br>97 | OR2S2 | olfactory receptor, family 2, subfamily S, member 2 | 0.817388  | Inlier |
| siRNA Disorazole DMSO Run3   | NM_0309<br>04 | OR2T1 | olfactory receptor, family 2, subfamily T, member 1 | -0.718488 | Inlier |
| siRNA-Temozolomide Run2-DMSO | NM_0309<br>04 | OR2T1 | olfactory receptor, family 2, subfamily T, member 1 | -0.630512 | Inlier |
| siRNA-Vinblastine Run2-DMSO  | NM_0309<br>04 | OR2T1 | olfactory receptor, family 2, subfamily T, member 1 | -0.536236 | Inlier |

Identification of Survival Genes in Human Glioblastoma Cells Using siRNA Screening  
 Nikhil G Thaker, Fang Zhang, Peter R. McDonald, Tong Ying Shun, Michael D Lewen, Ian F. Pollack, and John S. Lazo

Molecular Pharmacology

|                              |           |       |                                                     |           |         |
|------------------------------|-----------|-------|-----------------------------------------------------|-----------|---------|
| siRNA-Temozolomide Run3-DMSO | NM_030904 | OR2T1 | olfactory receptor, family 2, subfamily T, member 1 | -0.131351 | Inlier  |
| siRNA Disorazole DMSO Run1   | NM_030904 | OR2T1 | olfactory receptor, family 2, subfamily T, member 1 | 0.131352  | Inlier  |
| siRNA-Temozolomide Run1-DMSO | NM_030904 | OR2T1 | olfactory receptor, family 2, subfamily T, member 1 | 2.481729  | Inlier  |
| siRNA-Vinblastine Run1-DMSO  | NM_030904 | OR2T1 | olfactory receptor, family 2, subfamily T, member 1 | 4.765763  | Outlier |
| siRNA Disorazole DMSO Run2   | NM_030904 | OR2T1 | olfactory receptor, family 2, subfamily T, member 1 | 5.429103  | Outlier |
| siRNA-Temozolomide Run3-DMSO | NM_030903 | OR2W1 | olfactory receptor, family 2, subfamily W, member 1 | -1.229861 | Inlier  |
| siRNA Disorazole DMSO Run2   | NM_030903 | OR2W1 | olfactory receptor, family 2, subfamily W, member 1 | -0.81317  | Inlier  |
| siRNA-Temozolomide Run2-DMSO | NM_030903 | OR2W1 | olfactory receptor, family 2, subfamily W, member 1 | -0.568291 | Inlier  |

Identification of Survival Genes in Human Glioblastoma Cells Using siRNA Screening

Nikhil G Thaker, Fang Zhang, Peter R. McDonald, Tong Ying Shun, Michael D Lewen, Ian F. Pollack, and John S. Lazo

Molecular Pharmacology

|                              |           |       |                                                     |           |        |
|------------------------------|-----------|-------|-----------------------------------------------------|-----------|--------|
| siRNA-Temozolomide Run1-DMSO | NM_030903 | OR2W1 | olfactory receptor, family 2, subfamily W, member 1 | -0.217691 | Inlier |
| siRNA Disorazole DMSO Run1   | NM_030903 | OR2W1 | olfactory receptor, family 2, subfamily W, member 1 | 0.217691  | Inlier |
| siRNA Disorazole DMSO Run3   | NM_030903 | OR2W1 | olfactory receptor, family 2, subfamily W, member 1 | 0.285925  | Inlier |
| siRNA-Vinblastine Run2-DMSO  | NM_030903 | OR2W1 | olfactory receptor, family 2, subfamily W, member 1 | 0.780709  | Inlier |
| siRNA-Vinblastine Run1-DMSO  | NM_030903 | OR2W1 | olfactory receptor, family 3, subfamily A, member 1 | 0.786085  | Inlier |
| siRNA-Temozolomide Run3-DMSO | NM_002550 | OR3A1 | olfactory receptor, family 3, subfamily A, member 1 | -1.148796 | Inlier |
| siRNA Disorazole DMSO Run3   | NM_002550 | OR3A1 | olfactory receptor, family 3, subfamily A, member 1 | -0.686907 | Inlier |
| siRNA-Temozolomide Run2-DMSO | NM_002550 | OR3A1 | olfactory receptor, family 3, subfamily A, member 1 | -0.652979 | Inlier |

Identification of Survival Genes in Human Glioblastoma Cells Using siRNA Screening  
 Nikhil G Thaker, Fang Zhang, Peter R. McDonald, Tong Ying Shun, Michael D Lewen, Ian F. Pollack, and John S. Lazo

Molecular Pharmacology

|                              |               |       |                                                     |           |        |
|------------------------------|---------------|-------|-----------------------------------------------------|-----------|--------|
| siRNA Disorazole DMSO Run2   | NM_0025<br>50 | OR3A1 | olfactory receptor, family 3, subfamily A, member 1 | -0.179269 | Inlier |
| siRNA-Temozolomide Run1-DMSO | NM_0025<br>50 | OR3A1 | olfactory receptor, family 3, subfamily A, member 1 | 0.179269  | Inlier |
| siRNA Disorazole DMSO Run1   | NM_0025<br>50 | OR3A1 | olfactory receptor, family 3, subfamily A, member 1 | 0.662093  | Inlier |
| siRNA-Vinblastine Run2-DMSO  | NM_0025<br>50 | OR3A1 | olfactory receptor, family 3, subfamily A, member 1 | 1.059535  | Inlier |
| siRNA-Vinblastine Run1-DMSO  | NM_0025<br>50 | OR3A1 | olfactory receptor, family 3, subfamily A, member 1 | 1.17323   | Inlier |
| siRNA Disorazole DMSO Run2   | NM_0025<br>51 | OR3A2 | olfactory receptor, family 3, subfamily A, member 2 | -1.40979  | Inlier |
| siRNA-Temozolomide Run3-DMSO | NM_0025<br>51 | OR3A2 | olfactory receptor, family 3, subfamily A, member 2 | -1.378703 | Inlier |
| siRNA-Temozolomide Run2-DMSO | NM_0025<br>51 | OR3A2 | olfactory receptor, family 3, subfamily A, member 2 | -0.608957 | Inlier |

Identification of Survival Genes in Human Glioblastoma Cells Using siRNA Screening  
 Nikhil G Thaker, Fang Zhang, Peter R. McDonald, Tong Ying Shun, Michael D Lewen, Ian F. Pollack, and John S. Lazo

Molecular Pharmacology

|                              |               |       |                                                     |           |        |
|------------------------------|---------------|-------|-----------------------------------------------------|-----------|--------|
| siRNA-Temozolomide Run1-DMSO | NM_0025<br>51 | OR3A2 | olfactory receptor, family 3, subfamily A, member 2 | -0.22813  | Inlier |
| siRNA Disorazole DMSO Run1   | NM_0025<br>51 | OR3A2 | olfactory receptor, family 3, subfamily A, member 2 | 0.22813   | Inlier |
| siRNA Disorazole DMSO Run3   | NM_0025<br>51 | OR3A2 | olfactory receptor, family 3, subfamily A, member 2 | 0.431558  | Inlier |
| siRNA-Vinblastine Run1-DMSO  | NM_0025<br>51 | OR3A2 | olfactory receptor, family 3, subfamily A, member 2 | 0.740043  | Inlier |
| siRNA-Vinblastine Run2-DMSO  | NM_0025<br>51 | OR3A2 | olfactory receptor, family 3, subfamily A, member 2 | 0.949506  | Inlier |
| siRNA-Temozolomide Run2-DMSO | NM_0123<br>73 | OR3A3 | olfactory receptor, family 3, subfamily A, member 3 | -0.776261 | Inlier |
| siRNA Disorazole DMSO Run1   | NM_0123<br>73 | OR3A3 | olfactory receptor, family 3, subfamily A, member 3 | -0.572739 | Inlier |
| siRNA-Temozolomide Run3-DMSO | NM_0123<br>73 | OR3A3 | olfactory receptor, family 3, subfamily A, member 3 | -0.491268 | Inlier |

Identification of Survival Genes in Human Glioblastoma Cells Using siRNA Screening  
 Nikhil G Thaker, Fang Zhang, Peter R. McDonald, Tong Ying Shun, Michael D Lewen, Ian F. Pollack, and John S. Lazo

Molecular Pharmacology

|                              |               |       |                                                     |           |        |
|------------------------------|---------------|-------|-----------------------------------------------------|-----------|--------|
| siRNA-Temozolomide Run1-DMSO | NM_0123<br>73 | OR3A3 | olfactory receptor, family 3, subfamily A, member 3 | -0.262676 | Inlier |
| siRNA Disorazole DMSO Run2   | NM_0123<br>73 | OR3A3 | olfactory receptor, family 3, subfamily A, member 3 | 0.262676  | Inlier |
| siRNA-Vinblastine Run1-DMSO  | NM_0123<br>73 | OR3A3 | olfactory receptor, family 3, subfamily A, member 3 | 1.22397   | Inlier |
| siRNA-Vinblastine Run2-DMSO  | NM_0123<br>73 | OR3A3 | olfactory receptor, family 3, subfamily A, member 3 | 1.385025  | Inlier |
| siRNA Disorazole DMSO Run3   | NM_0123<br>73 | OR3A3 | olfactory receptor, family 4, subfamily D, member 1 | 2.341484  | Inlier |
| siRNA Disorazole DMSO Run3   | NM_0123<br>74 | OR4D1 | olfactory receptor, family 4, subfamily D, member 1 | -0.742768 | Inlier |
| siRNA-Vinblastine Run2-DMSO  | NM_0123<br>74 | OR4D1 | olfactory receptor, family 4, subfamily D, member 1 | -0.606232 | Inlier |
| siRNA Disorazole DMSO Run1   | NM_0123<br>74 | OR4D1 | olfactory receptor, family 4, subfamily D, member 1 | -0.260934 | Inlier |

Identification of Survival Genes in Human Glioblastoma Cells Using siRNA Screening

Nikhil G Thaker, Fang Zhang, Peter R. McDonald, Tong Ying Shun, Michael D Lewen, Ian F. Pollack, and John S.

Lazo

Molecular Pharmacology

|                              |           |        |                                                      |           |         |
|------------------------------|-----------|--------|------------------------------------------------------|-----------|---------|
| siRNA-Temozolomide Run3-DMSO | NM_012374 | OR4D1  | olfactory receptor, family 4, subfamily D, member 1  | -0.246754 | Inlier  |
| siRNA-Temozolomide Run2-DMSO | NM_012374 | OR4D1  | olfactory receptor, family 4, subfamily D, member 1  | 0.246754  | Inlier  |
| siRNA-Temozolomide Run1-DMSO | NM_012374 | OR4D1  | olfactory receptor, family 4, subfamily D, member 1  | 1.353232  | Inlier  |
| siRNA Disorazole DMSO Run2   | NM_012374 | OR4D1  | olfactory receptor, family 4, subfamily D, member 1  | 3.562129  | Outlier |
| siRNA-Vinblastine Run1-DMSO  | NM_012374 | OR4D1  | olfactory receptor, family 51, subfamily B, member 2 | 4.134523  | Outlier |
| siRNA-Temozolomide Run3-DMSO | NM_033180 | OR51B2 | olfactory receptor, family 51, subfamily B, member 2 | -2.865108 | Inlier  |
| siRNA-Temozolomide Run2-DMSO | NM_033180 | OR51B2 | olfactory receptor, family 51, subfamily B, member 2 | -1.822223 | Inlier  |
| siRNA-Temozolomide Run1-DMSO | NM_033180 | OR51B2 | olfactory receptor, family 51, subfamily B, member 2 | -0.738864 | Inlier  |



Identification of Survival Genes in Human Glioblastoma Cells Using siRNA Screening  
 Nikhil G Thaker, Fang Zhang, Peter R. McDonald, Tong Ying Shun, Michael D Lewen, Ian F. Pollack, and John S. Lazo

Molecular Pharmacology

|                              |               |        |                                                      |           |        |
|------------------------------|---------------|--------|------------------------------------------------------|-----------|--------|
| siRNA Disorazole DMSO Run1   | NM_0331<br>80 | OR51B2 | olfactory receptor, family 51, subfamily B, member 2 | -0.268327 | Inlier |
| siRNA Disorazole DMSO Run2   | NM_0331<br>80 | OR51B2 | olfactory receptor, family 51, subfamily B, member 2 | 0.268327  | Inlier |
| siRNA-Vinblastine Run1-DMSO  | NM_0331<br>80 | OR51B2 | olfactory receptor, family 51, subfamily B, member 2 | 0.553162  | Inlier |
| siRNA Disorazole DMSO Run3   | NM_0331<br>80 | OR51B2 | olfactory receptor, family 51, subfamily B, member 2 | 0.610136  | Inlier |
| siRNA-Vinblastine Run2-DMSO  | NM_0331<br>80 | OR51B2 | olfactory receptor, family 51, subfamily B, member 2 | 1.091658  | Inlier |
| siRNA-Temozolomide Run2-DMSO | NM_0331<br>79 | OR51B4 | olfactory receptor, family 51, subfamily B, member 4 | -1.27901  | Inlier |
| siRNA-Temozolomide Run3-DMSO | NM_0331<br>79 | OR51B4 | olfactory receptor, family 51, subfamily B, member 4 | -1.108193 | Inlier |
| siRNA-Temozolomide Run1-DMSO | NM_0331<br>79 | OR51B4 | olfactory receptor, family 51, subfamily B, member 4 | -0.833684 | Inlier |

Identification of Survival Genes in Human Glioblastoma Cells Using siRNA Screening

Nikhil G Thaker, Fang Zhang, Peter R. McDonald, Tong Ying Shun, Michael D Lewen, Ian F. Pollack, and John S. Lazo

Molecular Pharmacology

|                              |               |        |                                                      |           |        |
|------------------------------|---------------|--------|------------------------------------------------------|-----------|--------|
| siRNA-Vinblastine Run1-DMSO  | NM_0331<br>79 | OR51B4 | olfactory receptor, family 51, subfamily B, member 4 | -0.131486 | Inlier |
| siRNA-Vinblastine Run2-DMSO  | NM_0331<br>79 | OR51B4 | olfactory receptor, family 51, subfamily B, member 4 | 0.131486  | Inlier |
| siRNA Disorazole DMSO Run3   | NM_0331<br>79 | OR51B4 | olfactory receptor, family 51, subfamily B, member 4 | 0.210809  | Inlier |
| siRNA Disorazole DMSO Run1   | NM_0331<br>79 | OR51B4 | olfactory receptor, family 51, subfamily B, member 4 | 0.515316  | Inlier |
| siRNA Disorazole DMSO Run2   | NM_0331<br>79 | OR51B4 | olfactory receptor, family 51, subfamily B, member 4 | 2.03457   | Inlier |
| siRNA-Temozolomide Run3-DMSO | NM_0307<br>74 | OR51E2 | olfactory receptor, family 51, subfamily E, member 2 | -1.735083 | Inlier |
| siRNA-Temozolomide Run2-DMSO | NM_0307<br>74 | OR51E2 | olfactory receptor, family 51, subfamily E, member 2 | -0.631122 | Inlier |
| siRNA Disorazole DMSO Run2   | NM_0307<br>74 | OR51E2 | olfactory receptor, family 51, subfamily E, member 2 | -0.414147 | Inlier |

Identification of Survival Genes in Human Glioblastoma Cells Using siRNA Screening  
 Nikhil G Thaker, Fang Zhang, Peter R. McDonald, Tong Ying Shun, Michael D Lewen, Ian F. Pollack, and John S. Lazo

Molecular Pharmacology

|                              |               |        |                                                      |           |        |
|------------------------------|---------------|--------|------------------------------------------------------|-----------|--------|
| siRNA Disorazole DMSO Run3   | NM_0307<br>74 | OR51E2 | olfactory receptor, family 51, subfamily E, member 2 | -0.364797 | Inlier |
| siRNA-Temozolomide Run1-DMSO | NM_0307<br>74 | OR51E2 | olfactory receptor, family 51, subfamily E, member 2 | 0.364797  | Inlier |
| siRNA Disorazole DMSO Run1   | NM_0307<br>74 | OR51E2 | olfactory receptor, family 51, subfamily E, member 2 | 0.717878  | Inlier |
| siRNA-Vinblastine Run1-DMSO  | NM_0307<br>74 | OR51E2 | olfactory receptor, family 51, subfamily E, member 2 | 1.412923  | Inlier |
| siRNA-Vinblastine Run2-DMSO  | NM_0307<br>74 | OR51E2 | olfactory receptor, family 52, subfamily E, member 2 | 1.471719  | Inlier |
| siRNA-Temozolomide Run3-DMSO | NM_0123<br>75 | OR52A1 | olfactory receptor, family 52, subfamily A, member 1 | -1.591846 | Inlier |
| siRNA-Temozolomide Run2-DMSO | NM_0123<br>75 | OR52A1 | olfactory receptor, family 52, subfamily A, member 1 | -0.654676 | Inlier |
| siRNA Disorazole DMSO Run2   | NM_0123<br>75 | OR52A1 | olfactory receptor, family 52, subfamily A, member 1 | -0.582145 | Inlier |

Identification of Survival Genes in Human Glioblastoma Cells Using siRNA Screening  
 Nikhil G Thaker, Fang Zhang, Peter R. McDonald, Tong Ying Shun, Michael D Lewen, Ian F. Pollack, and John S. Lazo

Molecular Pharmacology

|                              |               |        |                                                      |           |        |
|------------------------------|---------------|--------|------------------------------------------------------|-----------|--------|
| siRNA Disorazole DMSO Run3   | NM_0123<br>75 | OR52A1 | olfactory receptor, family 52, subfamily A, member 1 | -0.336201 | Inlier |
| siRNA-Temozolomide Run1-DMSO | NM_0123<br>75 | OR52A1 | olfactory receptor, family 52, subfamily A, member 1 | 0.336201  | Inlier |
| siRNA Disorazole DMSO Run1   | NM_0123<br>75 | OR52A1 | olfactory receptor, family 52, subfamily A, member 1 | 0.694323  | Inlier |
| siRNA-Vinblastine Run1-DMSO  | NM_0123<br>75 | OR52A1 | olfactory receptor, family 52, subfamily A, member 1 | 1.988223  | Inlier |
| siRNA-Vinblastine Run2-DMSO  | NM_0123<br>75 | OR52A1 | olfactory receptor, family 5, subfamily F, member 1  | 2.926849  | Inlier |
| siRNA Disorazole DMSO Run1   | NM_0036<br>97 | OR5F1  | olfactory receptor, family 5, subfamily F, member 1  | -2.027417 | Inlier |
| siRNA-Vinblastine Run2-DMSO  | NM_0036<br>97 | OR5F1  | olfactory receptor, family 5, subfamily F, member 1  | -0.917189 | Inlier |
| siRNA-Temozolomide Run3-DMSO | NM_0036<br>97 | OR5F1  | olfactory receptor, family 5, subfamily F, member 1  | -0.244356 | Inlier |

Identification of Survival Genes in Human Glioblastoma Cells Using siRNA Screening  
 Nikhil G Thaker, Fang Zhang, Peter R. McDonald, Tong Ying Shun, Michael D Lewen, Ian F. Pollack, and John S. Lazo

Molecular Pharmacology

|                              |                  |        |                                                      |           |        |
|------------------------------|------------------|--------|------------------------------------------------------|-----------|--------|
| siRNA Disorazole DMSO Run3   | NM_0036<br>97    | OR5F1  | olfactory receptor, family 5, subfamily F, member 1  | -0.219156 | Inlier |
| siRNA-Temozolomide Run2-DMSO | NM_0036<br>97    | OR5F1  | olfactory receptor, family 5, subfamily F, member 1  | 0.219157  | Inlier |
| siRNA-Temozolomide Run1-DMSO | NM_0036<br>97    | OR5F1  | olfactory receptor, family 5, subfamily F, member 1  | 0.431811  | Inlier |
| siRNA Disorazole DMSO Run2   | NM_0036<br>97    | OR5F1  | olfactory receptor, family 5, subfamily F, member 1  | 1.427206  | Inlier |
| siRNA-Vinblastine Run1-DMSO  | NM_0036<br>97    | OR5F1  | olfactory receptor, family 5, subfamily F, member 1  | 2.746931  | Inlier |
| siRNA-Temozolomide Run3-DMSO | NM_0010<br>05514 | OR5H14 | olfactory receptor, family 5, subfamily H, member 14 | -0.957319 | Inlier |
| siRNA-Temozolomide Run2-DMSO | NM_0010<br>05514 | OR5H14 | olfactory receptor, family 5, subfamily H, member 14 | -0.602013 | Inlier |
| siRNA-Temozolomide Run1-DMSO | NM_0010<br>05514 | OR5H14 | olfactory receptor, family 5, subfamily H, member 14 | -0.332511 | Inlier |

Identification of Survival Genes in Human Glioblastoma Cells Using siRNA Screening

Nikhil G Thaker, Fang Zhang, Peter R. McDonald, Tong Ying Shun, Michael D Lewen, Ian F. Pollack, and John S. Lazo

Molecular Pharmacology

|                              |                  |        |  |                                                      |                  |
|------------------------------|------------------|--------|--|------------------------------------------------------|------------------|
|                              |                  |        |  | olfactory receptor, family 5, subfamily H, member 14 |                  |
| siRNA Disorazole DMSO Run1   | NM_0010<br>05514 | OR5H14 |  |                                                      | -0.254319 Inlier |
|                              |                  |        |  | olfactory receptor, family 5, subfamily H, member 14 |                  |
| siRNA Disorazole DMSO Run2   | NM_0010<br>05514 | OR5H14 |  |                                                      | 0.254319 Inlier  |
|                              |                  |        |  | olfactory receptor, family 5, subfamily H, member 14 |                  |
| siRNA-Vinblastine Run1-DMSO  | NM_0010<br>05514 | OR5H14 |  |                                                      | 0.746987 Inlier  |
|                              |                  |        |  | olfactory receptor, family 5, subfamily H, member 14 |                  |
| siRNA Disorazole DMSO Run3   | NM_0010<br>05514 | OR5H14 |  |                                                      | 0.748512 Inlier  |
|                              |                  |        |  | olfactory receptor, family 5, subfamily H, member 14 |                  |
| siRNA-Vinblastine Run2-DMSO  | NM_0010<br>05514 | OR5H14 |  |                                                      | 0.92911 Inlier   |
|                              |                  |        |  | olfactory receptor, family 5, subfamily I, member 1  |                  |
| siRNA-Temozolomide Run3-DMSO | NM_0066<br>37    | OR5I1  |  |                                                      | -1.548033 Inlier |
|                              |                  |        |  | olfactory receptor, family 5, subfamily I, member 1  |                  |
| siRNA Disorazole DMSO Run2   | NM_0066<br>37    | OR5I1  |  |                                                      | -1.163915 Inlier |

Identification of Survival Genes in Human Glioblastoma Cells Using siRNA Screening

Nikhil G Thaker, Fang Zhang, Peter R. McDonald, Tong Ying Shun, Michael D Lewen, Ian F. Pollack, and John S. Lazo

Molecular Pharmacology

|                                  |               |       |                                                                    |           |        |
|----------------------------------|---------------|-------|--------------------------------------------------------------------|-----------|--------|
| siRNA Disorazole DMSO Run3       | NM_0066<br>37 | OR5I1 | olfactory<br>receptor,<br>family 5,<br>subfamily<br>I, member<br>1 | -0.44022  | Inlier |
| siRNA Disorazole DMSO Run1       | NM_0066<br>37 | OR5I1 | olfactory<br>receptor,<br>family 5,<br>subfamily<br>I, member<br>1 | -0.000308 | Inlier |
| siRNA-Temozolomide Run1-<br>DMSO | NM_0066<br>37 | OR5I1 | olfactory<br>receptor,<br>family 5,<br>subfamily<br>I, member<br>1 | 0.000308  | Inlier |
| siRNA-Temozolomide Run2-<br>DMSO | NM_0066<br>37 | OR5I1 | olfactory<br>receptor,<br>family 5,<br>subfamily<br>I, member<br>1 | 0.073364  | Inlier |
| siRNA-Vinblastine Run2-<br>DMSO  | NM_0066<br>37 | OR5I1 | olfactory<br>receptor,<br>family 5,<br>subfamily<br>I, member<br>1 | 0.90878   | Inlier |
| siRNA-Vinblastine Run1-<br>DMSO  | NM_0066<br>37 | OR5I1 | olfactory<br>receptor,<br>family 5,<br>subfamily<br>I, member<br>1 | 0.90924   | Inlier |
| siRNA-Temozolomide Run3-<br>DMSO | NM_1534<br>44 | OR5P2 | olfactory<br>receptor,<br>family 5,<br>subfamily<br>P,<br>member 2 | -1.731323 | Inlier |
| siRNA Disorazole DMSO Run2       | NM_1534<br>44 | OR5P2 | olfactory<br>receptor,<br>family 5,<br>subfamily<br>P,<br>member 2 | -1.707482 | Inlier |

Identification of Survival Genes in Human Glioblastoma Cells Using siRNA Screening

Nikhil G Thaker, Fang Zhang, Peter R. McDonald, Tong Ying Shun, Michael D Lewen, Ian F. Pollack, and John S. Lazo

Molecular Pharmacology

|                              |               |       |                                                     |           |        |
|------------------------------|---------------|-------|-----------------------------------------------------|-----------|--------|
| siRNA-Temozolomide Run2-DMSO | NM_1534<br>44 | OR5P2 | olfactory receptor, family 5, subfamily P, member 2 | -0.343952 | Inlier |
| siRNA Disorazole DMSO Run3   | NM_1534<br>44 | OR5P2 | olfactory receptor, family 5, subfamily P, member 2 | -0.080573 | Inlier |
| siRNA-Temozolomide Run1-DMSO | NM_1534<br>44 | OR5P2 | olfactory receptor, family 5, subfamily P, member 2 | 0.080574  | Inlier |
| siRNA Disorazole DMSO Run1   | NM_1534<br>44 | OR5P2 | olfactory receptor, family 5, subfamily P, member 2 | 0.286367  | Inlier |
| siRNA-Vinblastine Run1-DMSO  | NM_1534<br>44 | OR5P2 | olfactory receptor, family 5, subfamily P, member 2 | 1.005048  | Inlier |
| siRNA-Vinblastine Run2-DMSO  | NM_1534<br>44 | OR5P2 | olfactory receptor, family 5, subfamily P, member 2 | 1.192194  | Inlier |
| siRNA-Temozolomide Run3-DMSO | NM_1534<br>45 | OR5P3 | olfactory receptor, family 5, subfamily P, member 3 | -1.265027 | Inlier |
| siRNA Disorazole DMSO Run3   | NM_1534<br>45 | OR5P3 | olfactory receptor, family 5, subfamily P, member 3 | -0.690445 | Inlier |



Identification of Survival Genes in Human Glioblastoma Cells Using siRNA Screening

Nikhil G Thaker, Fang Zhang, Peter R. McDonald, Tong Ying Shun, Michael D Lewen, Ian F. Pollack, and John S. Lazo

Molecular Pharmacology

|                              |               |       |                                                     |           |        |
|------------------------------|---------------|-------|-----------------------------------------------------|-----------|--------|
| siRNA Disorazole DMSO Run2   | NM_1534<br>45 | OR5P3 | olfactory receptor, family 5, subfamily P, member 3 | -0.553926 | Inlier |
| siRNA-Temozolomide Run2-DMSO | NM_1534<br>45 | OR5P3 | olfactory receptor, family 5, subfamily P, member 3 | -0.246035 | Inlier |
| siRNA-Temozolomide Run1-DMSO | NM_1534<br>45 | OR5P3 | olfactory receptor, family 5, subfamily P, member 3 | 0.246035  | Inlier |
| siRNA Disorazole DMSO Run1   | NM_1534<br>45 | OR5P3 | olfactory receptor, family 5, subfamily P, member 3 | 0.658555  | Inlier |
| siRNA-Vinblastine Run1-DMSO  | NM_1534<br>45 | OR5P3 | olfactory receptor, family 5, subfamily P, member 3 | 0.917633  | Inlier |
| siRNA-Vinblastine Run2-DMSO  | NM_1534<br>45 | OR5P3 | olfactory receptor, family 5, subfamily P, member 3 | 1.326126  | Inlier |
| siRNA-Temozolomide Run3-DMSO | NM_0308<br>76 | OR5V1 | olfactory receptor, family 5, subfamily V, member 1 | -1.682432 | Inlier |
| siRNA-Temozolomide Run2-DMSO | NM_0308<br>76 | OR5V1 | olfactory receptor, family 5, subfamily V, member 1 | -0.627631 | Inlier |

Identification of Survival Genes in Human Glioblastoma Cells Using siRNA Screening

Nikhil G Thaker, Fang Zhang, Peter R. McDonald, Tong Ying Shun, Michael D Lewen, Ian F. Pollack, and John S. Lazo

Molecular Pharmacology

|                              |               |       |                                                     |           |        |
|------------------------------|---------------|-------|-----------------------------------------------------|-----------|--------|
| siRNA Disorazole DMSO Run2   | NM_0308<br>76 | OR5V1 | olfactory receptor, family 5, subfamily V, member 1 | -0.560755 | Inlier |
| siRNA-Temozolomide Run1-DMSO | NM_0308<br>76 | OR5V1 | olfactory receptor, family 5, subfamily V, member 1 | -0.258812 | Inlier |
| siRNA Disorazole DMSO Run3   | NM_0308<br>76 | OR5V1 | olfactory receptor, family 5, subfamily V, member 1 | 0.258812  | Inlier |
| siRNA Disorazole DMSO Run1   | NM_0308<br>76 | OR5V1 | olfactory receptor, family 5, subfamily V, member 1 | 0.721369  | Inlier |
| siRNA-Vinblastine Run1-DMSO  | NM_0308<br>76 | OR5V1 | olfactory receptor, family 5, subfamily V, member 1 | 1.424626  | Inlier |
| siRNA-Vinblastine Run2-DMSO  | NM_0308<br>76 | OR5V1 | olfactory receptor, family 6, subfamily A, member 2 | 1.497754  | Inlier |
| siRNA-Temozolomide Run3-DMSO | NM_0036<br>96 | OR6A2 | olfactory receptor, family 6, subfamily A, member 2 | -1.069715 | Inlier |
| siRNA Disorazole DMSO Run3   | NM_0036<br>96 | OR6A2 | olfactory receptor, family 6, subfamily A, member 2 | -0.739311 | Inlier |

Identification of Survival Genes in Human Glioblastoma Cells Using siRNA Screening  
 Nikhil G Thaker, Fang Zhang, Peter R. McDonald, Tong Ying Shun, Michael D Lewen, Ian F. Pollack, and John S. Lazo

Molecular Pharmacology

|                              |               |        |                                                      |           |        |
|------------------------------|---------------|--------|------------------------------------------------------|-----------|--------|
| siRNA Disorazole DMSO Run2   | NM_0036<br>96 | OR6A2  | olfactory receptor, family 6, subfamily A, member 2  | -0.609689 | Inlier |
| siRNA-Temozolomide Run2-DMSO | NM_0036<br>96 | OR6A2  | olfactory receptor, family 6, subfamily A, member 2  | -0.222573 | Inlier |
| siRNA-Temozolomide Run1-DMSO | NM_0036<br>96 | OR6A2  | olfactory receptor, family 6, subfamily A, member 2  | 0.222573  | Inlier |
| siRNA-Vinblastine Run2-DMSO  | NM_0036<br>96 | OR6A2  | olfactory receptor, family 6, subfamily A, member 2  | 0.586412  | Inlier |
| siRNA Disorazole DMSO Run1   | NM_0036<br>96 | OR6A2  | olfactory receptor, family 6, subfamily A, member 2  | 0.792163  | Inlier |
| siRNA-Vinblastine Run1-DMSO  | NM_0036<br>96 | OR6A2  | olfactory receptor, family 7, subfamily A, member 2  | 0.93902   | Inlier |
| siRNA-Temozolomide Run3-DMSO | NM_0309<br>01 | OR7A17 | olfactory receptor, family 7, subfamily A, member 17 | -1.180134 | Inlier |
| siRNA Disorazole DMSO Run2   | NM_0309<br>01 | OR7A17 | olfactory receptor, family 7, subfamily A, member 17 | -0.820152 | Inlier |

Identification of Survival Genes in Human Glioblastoma Cells Using siRNA Screening

Nikhil G Thaker, Fang Zhang, Peter R. McDonald, Tong Ying Shun, Michael D Lewen, Ian F. Pollack, and John S. Lazo

Molecular Pharmacology

|                              |           |        |                                                      |           |        |
|------------------------------|-----------|--------|------------------------------------------------------|-----------|--------|
| siRNA-Temozolomide Run1-DMSO | NM_030901 | OR7A17 | olfactory receptor, family 7, subfamily A, member 17 | -0.528848 | Inlier |
| siRNA-Temozolomide Run2-DMSO | NM_030901 | OR7A17 | olfactory receptor, family 7, subfamily A, member 17 | -0.386039 | Inlier |
| siRNA Disorazole DMSO Run3   | NM_030901 | OR7A17 | olfactory receptor, family 7, subfamily A, member 17 | 0.38604   | Inlier |
| siRNA Disorazole DMSO Run1   | NM_030901 | OR7A17 | olfactory receptor, family 7, subfamily A, member 17 | 0.391085  | Inlier |
| siRNA-Vinblastine Run2-DMSO  | NM_030901 | OR7A17 | olfactory receptor, family 7, subfamily A, member 17 | 0.908974  | Inlier |
| siRNA-Vinblastine Run1-DMSO  | NM_030901 | OR7A17 | olfactory receptor, family 7, subfamily A, member 17 | 0.964938  | Inlier |
| siRNA Disorazole DMSO Run2   | NM_017506 | OR7A5  | olfactory receptor, family 7, subfamily A, member 5  | -1.098416 | Inlier |

Identification of Survival Genes in Human Glioblastoma Cells Using siRNA Screening  
 Nikhil G Thaker, Fang Zhang, Peter R. McDonald, Tong Ying Shun, Michael D Lewen, Ian F. Pollack, and John S. Lazo

Molecular Pharmacology

|                              |           |       |                                                     |           |         |
|------------------------------|-----------|-------|-----------------------------------------------------|-----------|---------|
| siRNA-Temozolomide Run3-DMSO | NM_017506 | OR7A5 | olfactory receptor, family 7, subfamily A, member 5 | -0.939391 | Inlier  |
| siRNA-Temozolomide Run2-DMSO | NM_017506 | OR7A5 | olfactory receptor, family 7, subfamily A, member 5 | -0.659952 | Inlier  |
| siRNA-Temozolomide Run1-DMSO | NM_017506 | OR7A5 | olfactory receptor, family 7, subfamily A, member 5 | -0.001532 | Inlier  |
| siRNA Disorazole DMSO Run1   | NM_017506 | OR7A5 | olfactory receptor, family 7, subfamily A, member 5 | 0.001533  | Inlier  |
| siRNA-Vinblastine Run2-DMSO  | NM_017506 | OR7A5 | olfactory receptor, family 7, subfamily A, member 5 | 0.460082  | Inlier  |
| siRNA-Vinblastine Run1-DMSO  | NM_017506 | OR7A5 | olfactory receptor, family 7, subfamily A, member 5 | 0.689048  | Inlier  |
| siRNA Disorazole DMSO Run3   | NM_017506 | OR7A5 | olfactory receptor, family 7, subfamily A, member 5 | 0.921775  | Inlier  |
| siRNA-Temozolomide Run3-DMSO | NM_012377 | OR7C2 | olfactory receptor, family 7, subfamily C, member 2 | -4.190269 | Outlier |

Identification of Survival Genes in Human Glioblastoma Cells Using siRNA Screening  
 Nikhil G Thaker, Fang Zhang, Peter R. McDonald, Tong Ying Shun, Michael D Lewen, Ian F. Pollack, and John S. Lazo

Molecular Pharmacology

|                              |               |       |                                                     |           |        |
|------------------------------|---------------|-------|-----------------------------------------------------|-----------|--------|
| siRNA Disorazole DMSO Run2   | NM_0123<br>77 | OR7C2 | olfactory receptor, family 7, subfamily C, member 2 | -3.450736 | Inlier |
| siRNA-Temozolomide Run1-DMSO | NM_0123<br>77 | OR7C2 | olfactory receptor, family 7, subfamily C, member 2 | -0.51596  | Inlier |
| siRNA Disorazole DMSO Run3   | NM_0123<br>77 | OR7C2 | olfactory receptor, family 7, subfamily C, member 2 | -0.156662 | Inlier |
| siRNA-Temozolomide Run2-DMSO | NM_0123<br>77 | OR7C2 | olfactory receptor, family 7, subfamily C, member 2 | 0.156662  | Inlier |
| siRNA Disorazole DMSO Run1   | NM_0123<br>77 | OR7C2 | olfactory receptor, family 7, subfamily C, member 2 | 0.583311  | Inlier |
| siRNA-Vinblastine Run2-DMSO  | NM_0123<br>77 | OR7C2 | olfactory receptor, family 7, subfamily C, member 2 | 0.765689  | Inlier |
| siRNA-Vinblastine Run1-DMSO  | NM_0123<br>77 | OR7C2 | olfactory receptor, family 8, subfamily C, member 2 | 1.970877  | Inlier |
| siRNA-Temozolomide Run3-DMSO | NM_0123<br>78 | OR8B8 | olfactory receptor, family 8, subfamily B, member 8 | -1.067752 | Inlier |

Identification of Survival Genes in Human Glioblastoma Cells Using siRNA Screening  
 Nikhil G Thaker, Fang Zhang, Peter R. McDonald, Tong Ying Shun, Michael D Lewen, Ian F. Pollack, and John S. Lazo

Molecular Pharmacology

|                              |               |       |                                                     |           |        |
|------------------------------|---------------|-------|-----------------------------------------------------|-----------|--------|
| siRNA Disorazole DMSO Run2   | NM_0123<br>78 | OR8B8 | olfactory receptor, family 8, subfamily B, member 8 | -0.774436 | Inlier |
| siRNA Disorazole DMSO Run1   | NM_0123<br>78 | OR8B8 | olfactory receptor, family 8, subfamily B, member 8 | -0.419676 | Inlier |
| siRNA-Temozolomide Run2-DMSO | NM_0123<br>78 | OR8B8 | olfactory receptor, family 8, subfamily B, member 8 | -0.054029 | Inlier |
| siRNA Disorazole DMSO Run3   | NM_0123<br>78 | OR8B8 | olfactory receptor, family 8, subfamily B, member 8 | 0.054028  | Inlier |
| siRNA-Temozolomide Run1-DMSO | NM_0123<br>78 | OR8B8 | olfactory receptor, family 8, subfamily B, member 8 | 0.574564  | Inlier |
| siRNA-Vinblastine Run2-DMSO  | NM_0123<br>78 | OR8B8 | olfactory receptor, family 8, subfamily B, member 8 | 2.00178   | Inlier |
| siRNA-Vinblastine Run1-DMSO  | NM_0123<br>78 | OR8B8 | olfactory receptor, family 8, subfamily B, member 8 | 2.168373  | Inlier |
| siRNA Disorazole DMSO Run1   | XM_37066<br>2 | OR8G2 | olfactory receptor, family 8, subfamily G, member 2 | -1.036955 | Inlier |

Identification of Survival Genes in Human Glioblastoma Cells Using siRNA Screening  
 Nikhil G Thaker, Fang Zhang, Peter R. McDonald, Tong Ying Shun, Michael D Lewen, Ian F. Pollack, and John S. Lazo

Molecular Pharmacology

|                              |               |       |                                                     |           |        |
|------------------------------|---------------|-------|-----------------------------------------------------|-----------|--------|
| siRNA-Vinblastine Run2-DMSO  | XM_37066<br>2 | OR8G2 | olfactory receptor, family 8, subfamily G, member 2 | -0.312045 | Inlier |
| siRNA-Temozolomide Run3-DMSO | XM_37066<br>2 | OR8G2 | olfactory receptor, family 8, subfamily G, member 2 | -0.11306  | Inlier |
| siRNA-Temozolomide Run2-DMSO | XM_37066<br>2 | OR8G2 | olfactory receptor, family 8, subfamily G, member 2 | -0.060274 | Inlier |
| siRNA Disorazole DMSO Run3   | XM_37066<br>2 | OR8G2 | olfactory receptor, family 8, subfamily G, member 2 | 0.060274  | Inlier |
| siRNA-Temozolomide Run1-DMSO | XM_37066<br>2 | OR8G2 | olfactory receptor, family 8, subfamily G, member 2 | 1.126379  | Inlier |
| siRNA Disorazole DMSO Run2   | XM_37066<br>2 | OR8G2 | olfactory receptor, family 8, subfamily G, member 2 | 1.74652   | Inlier |
| siRNA-Vinblastine Run1-DMSO  | XM_37066<br>2 | OR8G2 | olfactory receptor, family 8, subfamily G, member 2 | 2.615482  | Inlier |
| siRNA-Temozolomide Run2-DMSO | NM_0006<br>07 | ORM1  | orosomucoid 1                                       | -1.233856 | Inlier |
| siRNA Disorazole DMSO Run3   | NM_0006<br>07 | ORM1  | orosomucoid 1                                       | -0.623401 | Inlier |
| siRNA-Temozolomide Run3-DMSO | NM_0006<br>07 | ORM1  | orosomucoid 1                                       | -0.601342 | Inlier |
| siRNA Disorazole DMSO Run2   | NM_0006<br>07 | ORM1  | orosomucoid 1                                       | -0.2059   | Inlier |
| siRNA-Temozolomide Run1-DMSO | NM_0006<br>07 | ORM1  | orosomucoid 1                                       | 0.2059    | Inlier |



Identification of Survival Genes in Human Glioblastoma Cells Using siRNA Screening  
 Nikhil G Thaker, Fang Zhang, Peter R. McDonald, Tong Ying Shun, Michael D Lewen, Ian F. Pollack, and John S. Lazo

|                             |         |       |           |           |         |
|-----------------------------|---------|-------|-----------|-----------|---------|
| Molecular Pharmacology      | NM_0006 |       | orosomuc  |           |         |
| siRNA Disorazole DMSO Run1  | 07      | ORM1  | oid 1     | 0.725599  | Inlier  |
| siRNA-Vinblastine Run1-DMSO | NM_0006 |       | orosomuc  |           |         |
| siRNA-Vinblastine Run2-DMSO | 07      | ORM1  | oid 1     | 2.162691  | Inlier  |
| siRNA Disorazole DMSO Run3  | NM_0006 |       | orosomuc  |           |         |
| siRNA Disorazole DMSO Run3  | 56      | OSBP  | oid 1     | 2.404211  | Inlier  |
| siRNA Disorazole DMSO Run3  | NM_0025 |       | oxysterol |           |         |
| siRNA Disorazole DMSO Run3  | 56      | OSBP  | binding   | -1.337169 | Inlier  |
| siRNA Disorazole DMSO Run3  | NM_0025 |       | protein   |           |         |
| siRNA Disorazole DMSO Run3  | 56      | OSBP  | oxysterol | -1.076012 | Inlier  |
| siRNA Disorazole DMSO Run3  | NM_0025 |       | binding   |           |         |
| siRNA Disorazole DMSO Run3  | 56      | OSBP  | protein   | -0.272988 | Inlier  |
| siRNA Disorazole DMSO Run3  | NM_0025 |       | oxysterol |           |         |
| siRNA Disorazole DMSO Run3  | 56      | OSBP  | binding   | -0.085027 | Inlier  |
| siRNA Disorazole DMSO Run3  | NM_0025 |       | protein   |           |         |
| siRNA Disorazole DMSO Run3  | 56      | OSBP  | oxysterol | 0.085028  | Inlier  |
| siRNA Disorazole DMSO Run3  | NM_0025 |       | binding   |           |         |
| siRNA Disorazole DMSO Run3  | 56      | OSBP  | protein   | 0.187584  | Inlier  |
| siRNA Disorazole DMSO Run3  | NM_0025 |       | oxysterol |           |         |
| siRNA Disorazole DMSO Run3  | 56      | OSBP  | binding   | 5.294773  | Outlier |
| siRNA Disorazole DMSO Run3  | NM_0025 |       | protein   |           |         |
| siRNA Disorazole DMSO Run3  | 56      | OSBP  | oxysterol | 5.498348  | Outlier |
| siRNA Disorazole DMSO Run3  | NM_0025 |       | binding   |           |         |
| siRNA Disorazole DMSO Run3  | 56      | OSBP  | protein   | -1.025982 | Inlier  |
| siRNA Disorazole DMSO Run3  | NM_0010 |       | oxysterol |           |         |
| siRNA Disorazole DMSO Run3  | 03812   | OSBP2 | binding   | -0.804547 | Inlier  |
| siRNA Disorazole DMSO Run3  | NM_0010 |       | protein   |           |         |
| siRNA Disorazole DMSO Run3  | 03812   | OSBP2 | oxysterol | -0.544453 | Inlier  |
| siRNA Disorazole DMSO Run3  | NM_0010 |       | binding   |           |         |
| siRNA Disorazole DMSO Run3  | 03812   | OSBP2 | protein   | -0.084884 | Inlier  |
| siRNA Disorazole DMSO Run3  | NM_0010 |       | oxysterol |           |         |
| siRNA Disorazole DMSO Run3  | 03812   | OSBP2 | binding   | 0.084884  | Inlier  |
| siRNA Disorazole DMSO Run3  | NM_0010 |       | protein   |           |         |
| siRNA Disorazole DMSO Run3  | 03812   | OSBP2 | oxysterol | 0.286088  | Inlier  |
| siRNA Disorazole DMSO Run3  | NM_0010 |       | binding   |           |         |
| siRNA Disorazole DMSO Run3  | 03812   | OSBP2 | protein   | 1.66886   | Inlier  |

Identification of Survival Genes in Human Glioblastoma Cells Using siRNA Screening  
 Nikhil G Thaker, Fang Zhang, Peter R. McDonald, Tong Ying Shun, Michael D Lewen, Ian F. Pollack, and John S. Lazo

Molecular Pharmacology

| siRNA Treatment              | Gene ID          | Gene Name | Protein Name                      | Value     | Outlier Status |
|------------------------------|------------------|-----------|-----------------------------------|-----------|----------------|
| siRNA Disorazole DMSO Run2   | NM_0010<br>03812 | OSBP2     | oxysterol binding protein 2       | 1.727478  | Inlier         |
| siRNA Disorazole DMSO Run1   | NM_0177<br>84    | OSBPL10   | oxysterol binding protein-like 10 | -1.095246 | Inlier         |
| siRNA-Temozolomide Run1-DMSO | NM_0177<br>84    | OSBPL10   | oxysterol binding protein-like 10 | -0.490689 | Inlier         |
| siRNA-Temozolomide Run2-DMSO | NM_0177<br>84    | OSBPL10   | oxysterol binding protein-like 10 | -0.465164 | Inlier         |
| siRNA-Temozolomide Run3-DMSO | NM_0177<br>84    | OSBPL10   | oxysterol binding protein-like 10 | -0.22057  | Inlier         |
| siRNA-Vinblastine Run2-DMSO  | NM_0177<br>84    | OSBPL10   | oxysterol binding protein-like 10 | 0.220571  | Inlier         |
| siRNA Disorazole DMSO Run3   | NM_0177<br>84    | OSBPL10   | oxysterol binding protein-like 10 | 0.858311  | Inlier         |
| siRNA Disorazole DMSO Run2   | NM_0177<br>84    | OSBPL10   | oxysterol binding protein-like 10 | 2.421854  | Inlier         |
| siRNA-Vinblastine Run1-DMSO  | NM_0177<br>84    | OSBPL10   | oxysterol binding protein-like 10 | 3.403796  | Inlier         |
| siRNA-Temozolomide Run3-DMSO | NM_0227<br>76    | OSBPL11   | oxysterol binding protein-like 11 | -0.940094 | Inlier         |
| siRNA-Temozolomide Run2-DMSO | NM_0227<br>76    | OSBPL11   | oxysterol binding protein-like 11 | -0.807497 | Inlier         |
| siRNA-Vinblastine Run2-DMSO  | NM_0227<br>76    | OSBPL11   | oxysterol binding protein-like 11 | -0.192342 | Inlier         |
| siRNA-Temozolomide Run1-DMSO | NM_0227<br>76    | OSBPL11   | oxysterol binding protein-like 11 | -0.049156 | Inlier         |

Identification of Survival Genes in Human Glioblastoma Cells Using siRNA Screening  
 Nikhil G Thaker, Fang Zhang, Peter R. McDonald, Tong Ying Shun, Michael D Lewen, Ian F. Pollack, and John S. Lazo

Molecular Pharmacology

|                                  |               |         |                                             |           |        |
|----------------------------------|---------------|---------|---------------------------------------------|-----------|--------|
| siRNA Disorazole DMSO Run1       | NM_0227<br>76 | OSBPL11 | oxysterol<br>binding<br>protein-<br>like 11 | 0.049156  | Inlier |
| siRNA Disorazole DMSO Run3       | NM_0227<br>76 | OSBPL11 | oxysterol<br>binding<br>protein-<br>like 11 | 0.541503  | Inlier |
| siRNA Disorazole DMSO Run2       | NM_0227<br>76 | OSBPL11 | oxysterol<br>binding<br>protein-<br>like 11 | 1.192654  | Inlier |
| siRNA-Vinblastine Run1-<br>DMSO  | NM_0227<br>76 | OSBPL11 | oxysterol<br>binding<br>protein-<br>like 11 | 1.409012  | Inlier |
| siRNA-Temozolomide Run3-<br>DMSO | NM_0805<br>97 | OSBPL1A | oxysterol<br>binding<br>protein-<br>like 1A | -1.305298 | Inlier |
| siRNA-Temozolomide Run2-<br>DMSO | NM_0805<br>97 | OSBPL1A | oxysterol<br>binding<br>protein-<br>like 1A | -0.660607 | Inlier |
| siRNA-Temozolomide Run1-<br>DMSO | NM_0805<br>97 | OSBPL1A | oxysterol<br>binding<br>protein-<br>like 1A | -0.086408 | Inlier |
| siRNA Disorazole DMSO Run3       | NM_0805<br>97 | OSBPL1A | oxysterol<br>binding<br>protein-<br>like 1A | -0.040517 | Inlier |
| siRNA-Vinblastine Run2-<br>DMSO  | NM_0805<br>97 | OSBPL1A | oxysterol<br>binding<br>protein-<br>like 1A | 0.040517  | Inlier |
| siRNA Disorazole DMSO Run1       | NM_0805<br>97 | OSBPL1A | oxysterol<br>binding<br>protein-<br>like 1A | 0.688393  | Inlier |
| siRNA-Vinblastine Run1-<br>DMSO  | NM_0805<br>97 | OSBPL1A | oxysterol<br>binding<br>protein-<br>like 1A | 0.698598  | Inlier |
| siRNA Disorazole DMSO Run2       | NM_0805<br>97 | OSBPL1A | oxysterol<br>binding<br>protein-<br>like 1A | 0.899411  | Inlier |
| siRNA-Temozolomide Run3-<br>DMSO | NM_0148<br>35 | OSBPL2  | oxysterol<br>binding<br>protein-<br>like 2  | -2.06671  | Inlier |

Identification of Survival Genes in Human Glioblastoma Cells Using siRNA Screening  
 Nikhil G Thaker, Fang Zhang, Peter R. McDonald, Tong Ying Shun, Michael D Lewen, Ian F. Pollack, and John S. Lazo

Molecular Pharmacology

| siRNA Treatment              | Gene ID       | Gene Name | Protein Name                     | Value     | Outlier Status |
|------------------------------|---------------|-----------|----------------------------------|-----------|----------------|
| siRNA-Temozolomide Run2-DMSO | NM_0148<br>35 | OSBPL2    | oxysterol binding protein-like 2 | -1.773635 | Inlier         |
| siRNA-Vinblastine Run2-DMSO  | NM_0148<br>35 | OSBPL2    | oxysterol binding protein-like 2 | -0.805645 | Inlier         |
| siRNA-Temozolomide Run1-DMSO | NM_0148<br>35 | OSBPL2    | oxysterol binding protein-like 2 | -0.370997 | Inlier         |
| siRNA-Vinblastine Run1-DMSO  | NM_0148<br>35 | OSBPL2    | oxysterol binding protein-like 2 | 0.370997  | Inlier         |
| siRNA Disorazole DMSO Run3   | NM_0148<br>35 | OSBPL2    | oxysterol binding protein-like 2 | 0.514512  | Inlier         |
| siRNA Disorazole DMSO Run1   | NM_0148<br>35 | OSBPL2    | oxysterol binding protein-like 2 | 0.543355  | Inlier         |
| siRNA Disorazole DMSO Run2   | NM_0148<br>35 | OSBPL2    | oxysterol binding protein-like 2 | 0.85839   | Inlier         |
| siRNA-Temozolomide Run3-DMSO | NM_1456<br>38 | OSBPL5    | oxysterol binding protein-like 5 | -1.507883 | Inlier         |
| siRNA-Temozolomide Run2-DMSO | NM_1456<br>38 | OSBPL5    | oxysterol binding protein-like 5 | -1.123477 | Inlier         |
| siRNA-Vinblastine Run2-DMSO  | NM_1456<br>38 | OSBPL5    | oxysterol binding protein-like 5 | -0.09606  | Inlier         |
| siRNA Disorazole DMSO Run3   | NM_1456<br>38 | OSBPL5    | oxysterol binding protein-like 5 | -0.047653 | Inlier         |
| siRNA-Temozolomide Run1-DMSO | NM_1456<br>38 | OSBPL5    | oxysterol binding protein-like 5 | 0.047653  | Inlier         |
| siRNA Disorazole DMSO Run1   | NM_1456<br>38 | OSBPL5    | oxysterol binding protein-like 5 | 0.525576  | Inlier         |

Identification of Survival Genes in Human Glioblastoma Cells Using siRNA Screening  
 Nikhil G Thaker, Fang Zhang, Peter R. McDonald, Tong Ying Shun, Michael D Lewen, Ian F. Pollack, and John S. Lazo

Molecular Pharmacology

| siRNA Treatment              | Gene ID          | Gene Name | Protein Name                     | Value     | Category |
|------------------------------|------------------|-----------|----------------------------------|-----------|----------|
| siRNA Disorazole DMSO Run2   | NM_1456<br>38    | OSBPL5    | oxysterol binding protein-like 5 | 0.823424  | Inlier   |
| siRNA-Vinblastine Run1-DMSO  | NM_1456<br>38    | OSBPL5    | oxysterol binding protein-like 5 | 1.060316  | Inlier   |
| siRNA-Temozolomide Run3-DMSO | NM_1457<br>98    | OSBPL7    | oxysterol binding protein-like 7 | -2.236125 | Inlier   |
| siRNA-Vinblastine Run2-DMSO  | NM_1457<br>98    | OSBPL7    | oxysterol binding protein-like 7 | -0.732762 | Inlier   |
| siRNA-Temozolomide Run2-DMSO | NM_1457<br>98    | OSBPL7    | oxysterol binding protein-like 7 | -0.242316 | Inlier   |
| siRNA-Temozolomide Run1-DMSO | NM_1457<br>98    | OSBPL7    | oxysterol binding protein-like 7 | -0.230203 | Inlier   |
| siRNA Disorazole DMSO Run3   | NM_1457<br>98    | OSBPL7    | oxysterol binding protein-like 7 | 0.230202  | Inlier   |
| siRNA Disorazole DMSO Run1   | NM_1457<br>98    | OSBPL7    | oxysterol binding protein-like 7 | 0.616238  | Inlier   |
| siRNA Disorazole DMSO Run2   | NM_1457<br>98    | OSBPL7    | oxysterol binding protein-like 7 | 2.023696  | Inlier   |
| siRNA-Vinblastine Run1-DMSO  | NM_1457<br>98    | OSBPL7    | oxysterol binding protein-like 7 | 2.402436  | Inlier   |
| siRNA-Temozolomide Run3-DMSO | NM_0010<br>03712 | OSBPL8    | oxysterol binding protein-like 8 | -1.892269 | Inlier   |
| siRNA-Vinblastine Run2-DMSO  | NM_0010<br>03712 | OSBPL8    | oxysterol binding protein-like 8 | -0.991457 | Inlier   |
| siRNA-Temozolomide Run2-DMSO | NM_0010<br>03712 | OSBPL8    | oxysterol binding protein-like 8 | -0.053213 | Inlier   |

Identification of Survival Genes in Human Glioblastoma Cells Using siRNA Screening  
 Nikhil G Thaker, Fang Zhang, Peter R. McDonald, Tong Ying Shun, Michael D Lewen, Ian F. Pollack, and John S. Lazo

Molecular Pharmacology

|                                  |                  |        |                                            |           |         |
|----------------------------------|------------------|--------|--------------------------------------------|-----------|---------|
| siRNA Disorazole DMSO Run3       | NM_0010<br>03712 | OSBPL8 | oxysterol<br>binding<br>protein-<br>like 8 | -0.049705 | Inlier  |
| siRNA Disorazole DMSO Run1       | NM_0010<br>03712 | OSBPL8 | oxysterol<br>binding<br>protein-<br>like 8 | 0.049705  | Inlier  |
| siRNA-Temozolomide Run1-<br>DMSO | NM_0010<br>03712 | OSBPL8 | oxysterol<br>binding<br>protein-<br>like 8 | 0.357543  | Inlier  |
| siRNA-Vinblastine Run1-<br>DMSO  | NM_0010<br>03712 | OSBPL8 | oxysterol<br>binding<br>protein-<br>like 8 | 2.184015  | Inlier  |
| siRNA Disorazole DMSO Run2       | NM_0010<br>03712 | OSBPL8 | oxysterol<br>binding<br>protein-<br>like 8 | 4.317164  | Outlier |
| siRNA Disorazole DMSO Run1       | NM_1489<br>08    | OSBPL9 | oxysterol<br>binding<br>protein-<br>like 9 | -1.429488 | Inlier  |
| siRNA-Vinblastine Run2-<br>DMSO  | NM_1489<br>08    | OSBPL9 | oxysterol<br>binding<br>protein-<br>like 9 | -0.911592 | Inlier  |
| siRNA Disorazole DMSO Run3       | NM_1489<br>08    | OSBPL9 | oxysterol<br>binding<br>protein-<br>like 9 | -0.043834 | Inlier  |
| siRNA-Temozolomide Run2-<br>DMSO | NM_1489<br>08    | OSBPL9 | oxysterol<br>binding<br>protein-<br>like 9 | -0.001942 | Inlier  |
| siRNA-Temozolomide Run1-<br>DMSO | NM_1489<br>08    | OSBPL9 | oxysterol<br>binding<br>protein-<br>like 9 | 0.001943  | Inlier  |
| siRNA-Temozolomide Run3-<br>DMSO | NM_1489<br>08    | OSBPL9 | oxysterol<br>binding<br>protein-<br>like 9 | 0.437408  | Inlier  |
| siRNA-Vinblastine Run1-<br>DMSO  | NM_1489<br>08    | OSBPL9 | oxysterol<br>binding<br>protein-<br>like 9 | 1.03112   | Inlier  |
| siRNA Disorazole DMSO Run2       | NM_1489<br>08    | OSBPL9 | oxysterol<br>binding<br>protein-<br>like 9 | 1.248711  | Inlier  |

Identification of Survival Genes in Human Glioblastoma Cells Using siRNA Screening  
 Nikhil G Thaker, Fang Zhang, Peter R. McDonald, Tong Ying Shun, Michael D Lewen, Ian F. Pollack, and John S. Lazo

Molecular Pharmacology

|                              |           |         |                                           |           |        |
|------------------------------|-----------|---------|-------------------------------------------|-----------|--------|
| siRNA-Temozolomide Run3-DMSO | NM_017807 | OSGEP   | O-sialoglyco protein endopeptidase        | -2.1751   | Inlier |
| siRNA-Temozolomide Run2-DMSO | NM_017807 | OSGEP   | O-sialoglyco protein endopeptidase        | -2.049238 | Inlier |
| siRNA-Temozolomide Run1-DMSO | NM_017807 | OSGEP   | O-sialoglyco protein endopeptidase        | -0.578064 | Inlier |
| siRNA Disorazole DMSO Run1   | NM_017807 | OSGEP   | O-sialoglyco protein endopeptidase        | -0.205441 | Inlier |
| siRNA Disorazole DMSO Run2   | NM_017807 | OSGEP   | O-sialoglyco protein endopeptidase        | 0.205441  | Inlier |
| siRNA Disorazole DMSO Run3   | NM_017807 | OSGEP   | O-sialoglyco protein endopeptidase        | 0.331077  | Inlier |
| siRNA-Vinblastine Run2-DMSO  | NM_017807 | OSGEP   | O-sialoglyco protein endopeptidase        | 0.770936  | Inlier |
| siRNA-Vinblastine Run1-DMSO  | NM_017807 | OSGEP   | O-sialoglyco protein endopeptidase        | 0.881146  | Inlier |
| siRNA-Temozolomide Run3-DMSO | NM_022353 | OSGEPL1 | O-sialoglyco protein endopeptidase-like 1 | -0.98358  | Inlier |
| siRNA-Temozolomide Run2-DMSO | NM_022353 | OSGEPL1 | O-sialoglyco protein endopeptidase-like 1 | -0.411202 | Inlier |

Identification of Survival Genes in Human Glioblastoma Cells Using siRNA Screening  
 Nikhil G Thaker, Fang Zhang, Peter R. McDonald, Tong Ying Shun, Michael D Lewen, Ian F. Pollack, and John S. Lazo  
 Molecular Pharmacology

|                                  |               |         |                                                     |           |        |
|----------------------------------|---------------|---------|-----------------------------------------------------|-----------|--------|
| siRNA Disorazole DMSO Run2       | NM_0223<br>53 | OSGEPL1 | O-sialoglyco<br>protein<br>endopepti<br>dase-like 1 | -0.358492 | Inlier |
| siRNA Disorazole DMSO Run3       | NM_0223<br>53 | OSGEPL1 | O-sialoglyco<br>protein<br>endopepti<br>dase-like 1 | -0.318406 | Inlier |
| siRNA-Temozolomide Run1-<br>DMSO | NM_0223<br>53 | OSGEPL1 | O-sialoglyco<br>protein<br>endopepti<br>dase-like 1 | 0.318406  | Inlier |
| siRNA Disorazole DMSO Run1       | NM_0223<br>53 | OSGEPL1 | O-sialoglyco<br>protein<br>endopepti<br>dase-like 1 | 0.937798  | Inlier |
| siRNA-Vinblastine Run1-<br>DMSO  | NM_0223<br>53 | OSGEPL1 | O-sialoglyco<br>protein<br>endopepti<br>dase-like 1 | 0.965195  | Inlier |
| siRNA-Vinblastine Run2-<br>DMSO  | NM_0223<br>53 | OSGEPL1 | O-sialoglyco<br>protein<br>endopepti<br>dase-like 1 | 1.45113   | Inlier |
| siRNA Disorazole DMSO Run1       | NM_0039<br>99 | OSMR    | oncostatin<br>M receptor                            | -1.119429 | Inlier |
| siRNA-Vinblastine Run2-<br>DMSO  | NM_0039<br>99 | OSMR    | oncostatin<br>M receptor                            | -0.721214 | Inlier |
| siRNA-Temozolomide Run3-<br>DMSO | NM_0039<br>99 | OSMR    | oncostatin<br>M receptor                            | -0.504817 | Inlier |
| siRNA-Temozolomide Run1-<br>DMSO | NM_0039<br>99 | OSMR    | oncostatin<br>M receptor                            | -0.061933 | Inlier |
| siRNA-Temozolomide Run2-<br>DMSO | NM_0039<br>99 | OSMR    | oncostatin<br>M receptor                            | 0.061934  | Inlier |



Identification of Survival Genes in Human Glioblastoma Cells Using siRNA Screening  
 Nikhil G Thaker, Fang Zhang, Peter R. McDonald, Tong Ying Shun, Michael D Lewen, Ian F. Pollack, and John S. Lazo

Molecular Pharmacology

|                                  |               |      |                                         |           |        |
|----------------------------------|---------------|------|-----------------------------------------|-----------|--------|
| siRNA Disorazole DMSO Run3       | NM_0039<br>99 | OSMR | oncostatin<br>M receptor                | 0.627786  | Inlier |
| siRNA-Vinblastine Run1-<br>DMSO  | NM_0039<br>99 | OSMR | oncostatin<br>M receptor                | 1.356275  | Inlier |
| siRNA Disorazole DMSO Run2       | NM_0039<br>99 | OSMR | oncostatin<br>M receptor                | 2.799864  | Inlier |
| siRNA Disorazole DMSO Run2       | NM_0051<br>09 | OSR1 | oxidative-<br>stress<br>responsive<br>1 | -2.533787 | Inlier |
| siRNA-Temozolomide Run3-<br>DMSO | NM_0051<br>09 | OSR1 | oxidative-<br>stress<br>responsive<br>1 | -1.784667 | Inlier |
| siRNA-Temozolomide Run1-<br>DMSO | NM_0051<br>09 | OSR1 | oxidative-<br>stress<br>responsive<br>1 | -0.61525  | Inlier |
| siRNA Disorazole DMSO Run3       | NM_0051<br>09 | OSR1 | oxidative-<br>stress<br>responsive<br>1 | -0.173508 | Inlier |
| siRNA-Temozolomide Run2-<br>DMSO | NM_0051<br>09 | OSR1 | oxidative-<br>stress<br>responsive<br>1 | 0.173508  | Inlier |
| siRNA-Vinblastine Run1-<br>DMSO  | NM_0051<br>09 | OSR1 | oxidative-<br>stress<br>responsive<br>1 | 0.420905  | Inlier |
| siRNA-Vinblastine Run2-<br>DMSO  | NM_0051<br>09 | OSR1 | oxidative-<br>stress<br>responsive<br>1 | 0.73375   | Inlier |
| siRNA Disorazole DMSO Run1       | NM_0051<br>09 | OSR1 | oxidative-<br>stress<br>responsive<br>1 | 1.218157  | Inlier |
| siRNA-Temozolomide Run1-<br>DMSO | NM_0123<br>82 | OSRF | OSRF                                    | -0.724212 | Inlier |
| siRNA-Temozolomide Run3-<br>DMSO | NM_0123<br>82 | OSRF | OSRF                                    | -0.712115 | Inlier |
| siRNA-Temozolomide Run2-<br>DMSO | NM_0123<br>82 | OSRF | OSRF                                    | -0.533788 | Inlier |
| siRNA Disorazole DMSO Run2       | NM_0123<br>82 | OSRF | OSRF                                    | -0.31215  | Inlier |
| siRNA Disorazole DMSO Run1       | NM_0123<br>82 | OSRF | OSRF                                    | 0.31215   | Inlier |

Identification of Survival Genes in Human Glioblastoma Cells Using siRNA Screening  
 Nikhil G Thaker, Fang Zhang, Peter R. McDonald, Tong Ying Shun, Michael D Lewen, Ian F. Pollack, and John S. Lazo

|                              |               |       |                                          |           |        |
|------------------------------|---------------|-------|------------------------------------------|-----------|--------|
| Molecular Pharmacology       | NM_0123       |       |                                          |           |        |
| siRNA Disorazole DMSO Run3   | 82            | OSRF  | OSRF                                     | 0.636885  | Inlier |
| siRNA-Vinblastine Run1-DMSO  | NM_0123<br>82 | OSRF  | OSRF                                     | 0.9533    | Inlier |
| siRNA-Vinblastine Run2-DMSO  | NM_0123<br>82 | OSRF  | OSRF                                     | 1.219049  | Inlier |
| siRNA-Temozolomide Run2-DMSO | NM_0005<br>31 | OTC   | ornithine carbamoyl transferase          | -1.065618 | Inlier |
| siRNA Disorazole DMSO Run1   | NM_0005<br>31 | OTC   | ornithine carbamoyl transferase          | -0.283382 | Inlier |
| siRNA-Temozolomide Run3-DMSO | NM_0005<br>31 | OTC   | ornithine carbamoyl transferase          | -0.253409 | Inlier |
| siRNA-Vinblastine Run2-DMSO  | NM_0005<br>31 | OTC   | ornithine carbamoyl transferase          | -0.247118 | Inlier |
| siRNA Disorazole DMSO Run3   | NM_0005<br>31 | OTC   | ornithine carbamoyl transferase          | 0.247118  | Inlier |
| siRNA-Temozolomide Run1-DMSO | NM_0005<br>31 | OTC   | ornithine carbamoyl transferase          | 1.099027  | Inlier |
| siRNA Disorazole DMSO Run2   | NM_0005<br>31 | OTC   | ornithine carbamoyl transferase          | 2.001478  | Inlier |
| siRNA-Vinblastine Run1-DMSO  | NM_0005<br>31 | OTC   | OTU domain, ubiquitin                    | 2.357646  | Inlier |
| siRNA-Temozolomide Run2-DMSO | NM_0176<br>70 | OTUB1 | aldehyde binding 1                       | -0.839917 | Inlier |
| siRNA-Temozolomide Run3-DMSO | NM_0176<br>70 | OTUB1 | OTU domain, ubiquitin aldehyde binding 1 | -0.827286 | Inlier |

Identification of Survival Genes in Human Glioblastoma Cells Using siRNA Screening  
 Nikhil G Thaker, Fang Zhang, Peter R. McDonald, Tong Ying Shun, Michael D Lewen, Ian F. Pollack, and John S. Lazo

Molecular Pharmacology

| siRNA              | Condition | Run  | Gene  | OTU                                  | Value     | Category |
|--------------------|-----------|------|-------|--------------------------------------|-----------|----------|
| siRNA Disorazole   | DMSO      | Run2 | OTUB1 | domain, ubiquitin aldehyde binding 1 | -0.521714 | Inlier   |
| siRNA Disorazole   | DMSO      | Run1 | OTUB1 | domain, ubiquitin aldehyde binding 1 | -0.203742 | Inlier   |
| siRNA-Temozolomide | DMSO      | Run1 | OTUB1 | domain, ubiquitin aldehyde binding 1 | 0.203743  | Inlier   |
| siRNA Disorazole   | DMSO      | Run3 | OTUB1 | domain, ubiquitin aldehyde binding 1 | 0.274004  | Inlier   |
| siRNA-Vinblastine  | DMSO      | Run2 | OTUB1 | domain, ubiquitin aldehyde binding 1 | 0.82959   | Inlier   |
| siRNA-Vinblastine  | DMSO      | Run1 | OTUB1 | domain, ubiquitin aldehyde binding 1 | 0.889662  | Inlier   |
| siRNA Disorazole   | DMSO      | Run2 | OVCH1 | ovochoyama se 1                      | -0.740986 | Inlier   |
| siRNA-Temozolomide | DMSO      | Run2 | OVCH1 | ovochoyama se 1                      | -0.723058 | Inlier   |
| siRNA-Temozolomide | DMSO      | Run3 | OVCH1 | ovochoyama se 1                      | -0.625942 | Inlier   |
| siRNA Disorazole   | DMSO      | Run3 | OVCH1 | ovochoyama se 1                      | -0.048488 | Inlier   |
| siRNA Disorazole   | DMSO      | Run1 | OVCH1 | ovochoyama se 1                      | 0.048488  | Inlier   |
| siRNA-Temozolomide | DMSO      | Run1 | OVCH1 | ovochoyama se 1                      | 0.216468  | Inlier   |
| siRNA-Vinblastine  | DMSO      | Run1 | OVCH1 | ovochoyama se 1                      | 0.905757  | Inlier   |
| siRNA-Vinblastine  | DMSO      | Run2 | OVCH1 | ovochoyama se 1                      | 0.914977  | Inlier   |
| siRNA-Temozolomide | DMSO      | Run3 | OVTN  | ovochoyama se 2                      | -0.946687 | Inlier   |
| siRNA-Temozolomide | DMSO      | Run2 | OVTN  | ovochoyama se 2                      | -0.40835  | Inlier   |
| siRNA Disorazole   | DMSO      | Run1 | OVTN  | ovochoyama se 2                      | -0.129625 | Inlier   |

Identification of Survival Genes in Human Glioblastoma Cells Using siRNA Screening

Nikhil G Thaker, Fang Zhang, Peter R. McDonald, Tong Ying Shun, Michael D Lewen, Ian F. Pollack, and John S.

Lazo

|                                  |               |       |                                       |           |        |
|----------------------------------|---------------|-------|---------------------------------------|-----------|--------|
| siRNA-Temozolomide Run1-<br>DMSO | NM_1981<br>85 | OVTN  | ovochoyama<br>se 2                    | -0.036247 | Inlier |
| siRNA Disorazole DMSO Run3       | NM_1981<br>85 | OVTN  | ovochoyama<br>se 2                    | 0.036247  | Inlier |
| siRNA-Vinblastine Run2-<br>DMSO  | NM_1981<br>85 | OVTN  | ovochoyama<br>se 2                    | 0.94065   | Inlier |
| siRNA-Vinblastine Run1-<br>DMSO  | NM_1981<br>85 | OVTN  | ovochoyama<br>se 2                    | 1.17311   | Inlier |
| siRNA Disorazole DMSO Run2       | NM_1981<br>85 | OVTN  | ovochoyama<br>se 2                    | 1.193856  | Inlier |
| siRNA-Temozolomide Run2-<br>DMSO | NM_0004<br>36 | OXCT1 | 3-oxoacid<br>CoA<br>transferas<br>e 1 | -1.497485 | Inlier |
| siRNA-Temozolomide Run3-<br>DMSO | NM_0004<br>36 | OXCT1 | 3-oxoacid<br>CoA<br>transferas<br>e 1 | -0.818072 | Inlier |
| siRNA-Temozolomide Run1-<br>DMSO | NM_0004<br>36 | OXCT1 | 3-oxoacid<br>CoA<br>transferas<br>e 1 | -0.183651 | Inlier |
| siRNA Disorazole DMSO Run3       | NM_0004<br>36 | OXCT1 | 3-oxoacid<br>CoA<br>transferas<br>e 1 | -0.043265 | Inlier |
| siRNA Disorazole DMSO Run1       | NM_0004<br>36 | OXCT1 | 3-oxoacid<br>CoA<br>transferas<br>e 1 | 0.043265  | Inlier |
| siRNA-Vinblastine Run2-<br>DMSO  | NM_0004<br>36 | OXCT1 | 3-oxoacid<br>CoA<br>transferas<br>e 1 | 0.530928  | Inlier |
| siRNA-Vinblastine Run1-<br>DMSO  | NM_0004<br>36 | OXCT1 | 3-oxoacid<br>CoA<br>transferas<br>e 1 | 2.954972  | Inlier |
| siRNA Disorazole DMSO Run2       | NM_0004<br>36 | OXCT1 | 3-oxoacid<br>CoA<br>transferas<br>e 1 | 2.991862  | Inlier |
| siRNA Disorazole DMSO Run1       | NM_0221<br>20 | OXCT2 | 3-oxoacid<br>CoA<br>transferas<br>e 2 | -1.227229 | Inlier |
| siRNA-Temozolomide Run2-<br>DMSO | NM_0221<br>20 | OXCT2 | 3-oxoacid<br>CoA<br>transferas<br>e 2 | -0.957867 | Inlier |

Identification of Survival Genes in Human Glioblastoma Cells Using siRNA Screening  
 Nikhil G Thaker, Fang Zhang, Peter R. McDonald, Tong Ying Shun, Michael D Lewen, Ian F. Pollack, and John S. Lazo

Molecular Pharmacology

|                              |               |       |                                      |           |        |
|------------------------------|---------------|-------|--------------------------------------|-----------|--------|
| siRNA-Vinblastine Run2-DMSO  | NM_0221<br>20 | OXCT2 | 3-oxoacid<br>CoA<br>transferase 2    | -0.391133 | Inlier |
| siRNA-Temozolomide Run3-DMSO | NM_0221<br>20 | OXCT2 | 3-oxoacid<br>CoA<br>transferase 2    | -0.050975 | Inlier |
| siRNA-Temozolomide Run1-DMSO | NM_0221<br>20 | OXCT2 | 3-oxoacid<br>CoA<br>transferase 2    | 0.050975  | Inlier |
| siRNA Disorazole DMSO Run3   | NM_0221<br>20 | OXCT2 | 3-oxoacid<br>CoA<br>transferase 2    | 0.347442  | Inlier |
| siRNA Disorazole DMSO Run2   | NM_0221<br>20 | OXCT2 | 3-oxoacid<br>CoA<br>transferase 2    | 2.040749  | Inlier |
| siRNA-Vinblastine Run1-DMSO  | NM_0221<br>20 | OXCT2 | 3-oxoacid<br>CoA<br>transferase 2    | 3.499646  | Inlier |
| siRNA-Temozolomide Run3-DMSO | NM_1489<br>62 | OXER1 | oxoeicosanoid<br>(OXE)<br>receptor 1 | -1.51046  | Inlier |
| siRNA Disorazole DMSO Run2   | NM_1489<br>62 | OXER1 | oxoeicosanoid<br>(OXE)<br>receptor 1 | -0.685012 | Inlier |
| siRNA-Temozolomide Run1-DMSO | NM_1489<br>62 | OXER1 | oxoeicosanoid<br>(OXE)<br>receptor 1 | -0.108609 | Inlier |
| siRNA-Temozolomide Run2-DMSO | NM_1489<br>62 | OXER1 | oxoeicosanoid<br>(OXE)<br>receptor 1 | -0.0712   | Inlier |
| siRNA Disorazole DMSO Run3   | NM_1489<br>62 | OXER1 | oxoeicosanoid<br>(OXE)<br>receptor 1 | 0.0712    | Inlier |
| siRNA Disorazole DMSO Run1   | NM_1489<br>62 | OXER1 | oxoeicosanoid<br>(OXE)<br>receptor 1 | 0.663988  | Inlier |
| siRNA-Vinblastine Run1-DMSO  | NM_1489<br>62 | OXER1 | oxoeicosanoid<br>(OXE)<br>receptor 1 | 0.81751   | Inlier |

Identification of Survival Genes in Human Glioblastoma Cells Using siRNA Screening  
 Nikhil G Thaker, Fang Zhang, Peter R. McDonald, Tong Ying Shun, Michael D Lewen, Ian F. Pollack, and John S. Lazo

Molecular Pharmacology

|                              |           |       |                                               |           |        |
|------------------------------|-----------|-------|-----------------------------------------------|-----------|--------|
| siRNA-Vinblastine Run2-DMSO  | NM_148962 | OXER1 | oxoeicosanoid (OXE) receptor 1                | 1.101897  | Inlier |
| siRNA-Temozolomide Run3-DMSO | NM_080818 | OXGR1 | oxoglutarate (alpha-ketoglutarate) receptor 1 | -1.100857 | Inlier |
| siRNA Disorazole DMSO Run3   | NM_080818 | OXGR1 | oxoglutarate (alpha-ketoglutarate) receptor 1 | -0.486846 | Inlier |
| siRNA Disorazole DMSO Run2   | NM_080818 | OXGR1 | oxoglutarate (alpha-ketoglutarate) receptor 1 | -0.46969  | Inlier |
| siRNA-Temozolomide Run2-DMSO | NM_080818 | OXGR1 | oxoglutarate (alpha-ketoglutarate) receptor 1 | -0.339658 | Inlier |
| siRNA-Temozolomide Run1-DMSO | NM_080818 | OXGR1 | oxoglutarate (alpha-ketoglutarate) receptor 1 | 0.339658  | Inlier |
| siRNA Disorazole DMSO Run1   | NM_080818 | OXGR1 | oxoglutarate (alpha-ketoglutarate) receptor 1 | 0.862154  | Inlier |
| siRNA-Vinblastine Run1-DMSO  | NM_080818 | OXGR1 | oxoglutarate (alpha-ketoglutarate) receptor 1 | 1.687996  | Inlier |
| siRNA-Vinblastine Run2-DMSO  | NM_080818 | OXGR1 | oxoglutarate (alpha-ketoglutarate) receptor 1 | 1.690244  | Inlier |
| siRNA-Temozolomide Run3-DMSO | NM_000916 | OXTR  | oxytocin receptor                             | -1.58159  | Inlier |
| siRNA-Temozolomide Run2-DMSO | NM_000916 | OXTR  | oxytocin receptor                             | -0.68064  | Inlier |
| siRNA Disorazole DMSO Run2   | NM_000916 | OXTR  | oxytocin receptor                             | -0.463641 | Inlier |
| siRNA Disorazole DMSO Run3   | NM_000916 | OXTR  | oxytocin receptor                             | -0.088616 | Inlier |

Identification of Survival Genes in Human Glioblastoma Cells Using siRNA Screening

Nikhil G Thaker, Fang Zhang, Peter R. McDonald, Tong Ying Shun, Michael D Lewen, Ian F. Pollack, and John S. Lazo

|                              |           |           |                                                       |           |        |
|------------------------------|-----------|-----------|-------------------------------------------------------|-----------|--------|
| siRNA-Temozolomide Run1-DMSO | NM_000916 | OXTR      | oxytocin receptor                                     | 0.088616  | Inlier |
| siRNA-Disorazole DMSO Run1   | NM_000916 | OXTR      | oxytocin receptor                                     | 0.66836   | Inlier |
| siRNA-Vinblastine Run1-DMSO  | NM_000916 | OXTR      | oxytocin receptor                                     | 1.360446  | Inlier |
| siRNA-Vinblastine Run2-DMSO  | NM_000916 | OXTR      | oxytocin receptor                                     | 1.426693  | Inlier |
| siRNA-Temozolomide Run3-DMSO | NM_014308 | P101-PI3K | phosphoinositide-3-kinase, regulatory subunit 5, p101 | -1.410657 | Inlier |
| siRNA-Temozolomide Run1-DMSO | NM_014308 | P101-PI3K | phosphoinositide-3-kinase, regulatory subunit 5, p101 | -1.352688 | Inlier |
| siRNA-Disorazole DMSO Run1   | NM_014308 | P101-PI3K | phosphoinositide-3-kinase, regulatory subunit 5, p101 | -0.71031  | Inlier |
| siRNA-Temozolomide Run2-DMSO | NM_014308 | P101-PI3K | phosphoinositide-3-kinase, regulatory subunit 5, p101 | -0.431257 | Inlier |
| siRNA-Vinblastine Run1-DMSO  | NM_014308 | P101-PI3K | phosphoinositide-3-kinase, regulatory subunit 5, p101 | 0.431257  | Inlier |
| siRNA-Vinblastine Run2-DMSO  | NM_014308 | P101-PI3K | phosphoinositide-3-kinase, regulatory subunit 5, p101 | 0.599913  | Inlier |
| siRNA-Disorazole DMSO Run2   | NM_014308 | P101-PI3K | phosphoinositide-3-kinase, regulatory subunit 5, p101 | 0.63869   | Inlier |

Identification of Survival Genes in Human Glioblastoma Cells Using siRNA Screening  
 Nikhil G Thaker, Fang Zhang, Peter R. McDonald, Tong Ying Shun, Michael D Lewen, Ian F. Pollack, and John S. Lazo

Molecular Pharmacology

|                              |         |    |           |                                                      |                  |
|------------------------------|---------|----|-----------|------------------------------------------------------|------------------|
|                              |         |    |           | phosphoinositide-3-kinase, regulatory subunit 5,     |                  |
| siRNA Disorazole DMSO Run3   | NM_0143 | 08 | P101-PI3K | p101                                                 | 4.175575 Outlier |
| siRNA-Temozolomide Run3-DMSO | NM_0060 | 25 | P11       | P11                                                  | -1.051859 Inlier |
| siRNA-Temozolomide Run2-DMSO | NM_0060 | 25 | P11       | P11                                                  | -0.864839 Inlier |
| siRNA-Temozolomide Run1-DMSO | NM_0060 | 25 | P11       | P11                                                  | -0.320655 Inlier |
| siRNA Disorazole DMSO Run3   | NM_0060 | 25 | P11       | P11                                                  | -0.171931 Inlier |
| siRNA Disorazole DMSO Run2   | NM_0060 | 25 | P11       | P11                                                  | 0.171931 Inlier  |
| siRNA Disorazole DMSO Run1   | NM_0060 | 25 | P11       | P11                                                  | 0.484161 Inlier  |
| siRNA-Vinblastine Run1-DMSO  | NM_0060 | 25 | P11       | P11                                                  | 1.317753 Inlier  |
| siRNA-Vinblastine Run2-DMSO  | NM_0060 | 25 | P11       | P11                                                  | 1.586661 Inlier  |
| siRNA-Temozolomide Run3-DMSO | NM_0181 | 70 | P15RS     | P15RS                                                | -1.26603 Inlier  |
| siRNA-Temozolomide Run1-DMSO | NM_0181 | 70 | P15RS     | P15RS                                                | -0.848318 Inlier |
| siRNA-Temozolomide Run2-DMSO | NM_0181 | 70 | P15RS     | P15RS                                                | -0.349633 Inlier |
| siRNA-Vinblastine Run1-DMSO  | NM_0181 | 70 | P15RS     | P15RS                                                | -0.167479 Inlier |
| siRNA Disorazole DMSO Run1   | NM_0181 | 70 | P15RS     | P15RS                                                | 0.16748 Inlier   |
| siRNA-Vinblastine Run2-DMSO  | NM_0181 | 70 | P15RS     | P15RS                                                | 0.598601 Inlier  |
| siRNA Disorazole DMSO Run2   | NM_0181 | 70 | P15RS     | P15RS                                                | 0.750399 Inlier  |
| siRNA Disorazole DMSO Run3   | NM_0181 | 70 | P15RS     | P15RS                                                | 2.476075 Inlier  |
|                              |         |    |           | purinergic receptor P2X, ligand-gated ion channel, 1 |                  |
| siRNA Disorazole DMSO Run2   | NM_0025 | 58 | P2RX1     | channel, 1                                           | -0.922622 Inlier |
|                              |         |    |           | purinergic receptor P2X, ligand-gated ion channel, 1 |                  |
| siRNA-Temozolomide Run3-DMSO | NM_0025 | 58 | P2RX1     | channel, 1                                           | -0.776826 Inlier |



Identification of Survival Genes in Human Glioblastoma Cells Using siRNA Screening  
 Nikhil G Thaker, Fang Zhang, Peter R. McDonald, Tong Ying Shun, Michael D Lewen, Ian F. Pollack, and John S. Lazo  
 Molecular Pharmacology

|                                  |               |       |                                                                      |           |        |
|----------------------------------|---------------|-------|----------------------------------------------------------------------|-----------|--------|
| siRNA Disorazole DMSO Run3       | NM_0025<br>58 | P2RX1 | purinergic<br>receptor<br>P2X,<br>ligand-<br>gated ion<br>channel, 1 | -0.572174 | Inlier |
| siRNA-Temozolomide Run2-<br>DMSO | NM_0025<br>58 | P2RX1 | purinergic<br>receptor<br>P2X,<br>ligand-<br>gated ion<br>channel, 1 | -0.266603 | Inlier |
| siRNA-Temozolomide Run1-<br>DMSO | NM_0025<br>58 | P2RX1 | purinergic<br>receptor<br>P2X,<br>ligand-<br>gated ion<br>channel, 1 | 0.266603  | Inlier |
| siRNA Disorazole DMSO Run1       | NM_0025<br>58 | P2RX1 | purinergic<br>receptor<br>P2X,<br>ligand-<br>gated ion<br>channel, 1 | 0.27218   | Inlier |
| siRNA-Vinblastine Run1-<br>DMSO  | NM_0025<br>58 | P2RX1 | purinergic<br>receptor<br>P2X,<br>ligand-<br>gated ion<br>channel, 1 | 0.891988  | Inlier |
| siRNA-Vinblastine Run2-<br>DMSO  | NM_0025<br>58 | P2RX1 | purinergic<br>receptor<br>P2X,<br>ligand-<br>gated ion<br>channel, 1 | 0.905845  | Inlier |
| siRNA-Temozolomide Run2-<br>DMSO | NM_1706<br>82 | P2RX2 | purinergic<br>receptor<br>P2X,<br>ligand-<br>gated ion<br>channel, 2 | -1.865173 | Inlier |

Identification of Survival Genes in Human Glioblastoma Cells Using siRNA Screening  
 Nikhil G Thaker, Fang Zhang, Peter R. McDonald, Tong Ying Shun, Michael D Lewen, Ian F. Pollack, and John S. Lazo  
 Molecular Pharmacology

|                              |               |       |                                                                      |           |        |
|------------------------------|---------------|-------|----------------------------------------------------------------------|-----------|--------|
| siRNA-Temozolomide Run3-DMSO | NM_1706<br>82 | P2RX2 | purinergic<br>receptor<br>P2X,<br>ligand-<br>gated ion<br>channel, 2 | -0.831223 | Inlier |
| siRNA-Vinblastine Run2-DMSO  | NM_1706<br>82 | P2RX2 | purinergic<br>receptor<br>P2X,<br>ligand-<br>gated ion<br>channel, 2 | -0.326206 | Inlier |
| siRNA-Vinblastine Run1-DMSO  | NM_1706<br>82 | P2RX2 | purinergic<br>receptor<br>P2X,<br>ligand-<br>gated ion<br>channel, 2 | -0.283923 | Inlier |
| siRNA-Temozolomide Run1-DMSO | NM_1706<br>82 | P2RX2 | purinergic<br>receptor<br>P2X,<br>ligand-<br>gated ion<br>channel, 2 | 0.283923  | Inlier |
| siRNA Disorazole DMSO Run1   | NM_1706<br>82 | P2RX2 | purinergic<br>receptor<br>P2X,<br>ligand-<br>gated ion<br>channel, 2 | 0.649648  | Inlier |
| siRNA Disorazole DMSO Run3   | NM_1706<br>82 | P2RX2 | purinergic<br>receptor<br>P2X,<br>ligand-<br>gated ion<br>channel, 2 | 0.699352  | Inlier |
| siRNA Disorazole DMSO Run2   | NM_1706<br>82 | P2RX2 | purinergic<br>receptor<br>P2X,<br>ligand-<br>gated ion<br>channel, 2 | 0.906769  | Inlier |

Identification of Survival Genes in Human Glioblastoma Cells Using siRNA Screening  
 Nikhil G Thaker, Fang Zhang, Peter R. McDonald, Tong Ying Shun, Michael D Lewen, Ian F. Pollack, and John S. Lazo  
 Molecular Pharmacology

|                                  |               |       |                                                                      |           |        |
|----------------------------------|---------------|-------|----------------------------------------------------------------------|-----------|--------|
| siRNA Disorazole DMSO Run2       | NM_0025<br>59 | P2RX3 | purinergic<br>receptor<br>P2X,<br>ligand-<br>gated ion<br>channel, 3 | -1.173246 | Inlier |
| siRNA-Temozolomide Run3-<br>DMSO | NM_0025<br>59 | P2RX3 | purinergic<br>receptor<br>P2X,<br>ligand-<br>gated ion<br>channel, 3 | -0.747119 | Inlier |
| siRNA-Temozolomide Run2-<br>DMSO | NM_0025<br>59 | P2RX3 | purinergic<br>receptor<br>P2X,<br>ligand-<br>gated ion<br>channel, 3 | -0.601881 | Inlier |
| siRNA Disorazole DMSO Run3       | NM_0025<br>59 | P2RX3 | purinergic<br>receptor<br>P2X,<br>ligand-<br>gated ion<br>channel, 3 | -0.181155 | Inlier |
| siRNA-Temozolomide Run1-<br>DMSO | NM_0025<br>59 | P2RX3 | purinergic<br>receptor<br>P2X,<br>ligand-<br>gated ion<br>channel, 3 | 0.181155  | Inlier |
| siRNA Disorazole DMSO Run1       | NM_0025<br>59 | P2RX3 | purinergic<br>receptor<br>P2X,<br>ligand-<br>gated ion<br>channel, 3 | 0.184286  | Inlier |
| siRNA-Vinblastine Run2-<br>DMSO  | NM_0025<br>59 | P2RX3 | purinergic<br>receptor<br>P2X,<br>ligand-<br>gated ion<br>channel, 3 | 0.989691  | Inlier |

Identification of Survival Genes in Human Glioblastoma Cells Using siRNA Screening

Nikhil G Thaker, Fang Zhang, Peter R. McDonald, Tong Ying Shun, Michael D Lewen, Ian F. Pollack, and John S. Lazo

Molecular Pharmacology

|                              |           |       |                                                      |           |        |
|------------------------------|-----------|-------|------------------------------------------------------|-----------|--------|
| siRNA-Vinblastine Run1-DMSO  | NM_002559 | P2RX3 | purinergic receptor P2X, ligand-gated ion channel, 3 | 1.086739  | Inlier |
| siRNA-Temozolomide Run3-DMSO | NM_175568 | P2RX4 | purinergic receptor P2X, ligand-gated ion channel, 4 | -2.232329 | Inlier |
| siRNA-Temozolomide Run2-DMSO | NM_175568 | P2RX4 | purinergic receptor P2X, ligand-gated ion channel, 4 | -0.698472 | Inlier |
| siRNA Disorazole DMSO Run2   | NM_175568 | P2RX4 | purinergic receptor P2X, ligand-gated ion channel, 4 | -0.526499 | Inlier |
| siRNA Disorazole DMSO Run1   | NM_175568 | P2RX4 | purinergic receptor P2X, ligand-gated ion channel, 4 | -0.237764 | Inlier |
| siRNA Disorazole DMSO Run3   | NM_175568 | P2RX4 | purinergic receptor P2X, ligand-gated ion channel, 4 | 0.237764  | Inlier |
| siRNA-Temozolomide Run1-DMSO | NM_175568 | P2RX4 | purinergic receptor P2X, ligand-gated ion channel, 4 | 0.650528  | Inlier |

Identification of Survival Genes in Human Glioblastoma Cells Using siRNA Screening  
 Nikhil G Thaker, Fang Zhang, Peter R. McDonald, Tong Ying Shun, Michael D Lewen, Ian F. Pollack, and John S. Lazo  
 Molecular Pharmacology

|                              |               |       |                                                                      |           |        |
|------------------------------|---------------|-------|----------------------------------------------------------------------|-----------|--------|
| siRNA-Vinblastine Run1-DMSO  | NM_1755<br>68 | P2RX4 | purinergic<br>receptor<br>P2X,<br>ligand-<br>gated ion<br>channel, 4 | 1.153468  | Inlier |
| siRNA-Vinblastine Run2-DMSO  | NM_1755<br>68 | P2RX4 | purinergic<br>receptor<br>P2X,<br>ligand-<br>gated ion<br>channel, 4 | 1.64401   | Inlier |
| siRNA Disorazole DMSO Run2   | NM_1750<br>81 | P2RX5 | purinergic<br>receptor<br>P2X,<br>ligand-<br>gated ion<br>channel, 5 | -3.075084 | Inlier |
| siRNA-Temozolomide Run3-DMSO | NM_1750<br>81 | P2RX5 | purinergic<br>receptor<br>P2X,<br>ligand-<br>gated ion<br>channel, 5 | -2.381667 | Inlier |
| siRNA-Temozolomide Run2-DMSO | NM_1750<br>81 | P2RX5 | purinergic<br>receptor<br>P2X,<br>ligand-<br>gated ion<br>channel, 5 | -0.510781 | Inlier |
| siRNA Disorazole DMSO Run1   | NM_1750<br>81 | P2RX5 | purinergic<br>receptor<br>P2X,<br>ligand-<br>gated ion<br>channel, 5 | -0.162031 | Inlier |
| siRNA-Temozolomide Run1-DMSO | NM_1750<br>81 | P2RX5 | purinergic<br>receptor<br>P2X,<br>ligand-<br>gated ion<br>channel, 5 | 0.162031  | Inlier |

Identification of Survival Genes in Human Glioblastoma Cells Using siRNA Screening

Nikhil G Thaker, Fang Zhang, Peter R. McDonald, Tong Ying Shun, Michael D Lewen, Ian F. Pollack, and John S. Lazo

Molecular Pharmacology

|                              |               |       |                                                                      |           |        |
|------------------------------|---------------|-------|----------------------------------------------------------------------|-----------|--------|
| siRNA-Vinblastine Run2-DMSO  | NM_1750<br>81 | P2RX5 | purinergic<br>receptor<br>P2X,<br>ligand-<br>gated ion<br>channel, 5 | 0.221681  | Inlier |
| siRNA-Vinblastine Run1-DMSO  | NM_1750<br>81 | P2RX5 | purinergic<br>receptor<br>P2X,<br>ligand-<br>gated ion<br>channel, 5 | 0.838219  | Inlier |
| siRNA Disorazole DMSO Run3   | NM_1750<br>81 | P2RX5 | purinergic<br>receptor<br>P2X,<br>ligand-<br>gated ion<br>channel, 5 | 1.064882  | Inlier |
| siRNA-Temozolomide Run3-DMSO | NM_0025<br>62 | P2RX7 | purinergic<br>receptor<br>P2X,<br>ligand-<br>gated ion<br>channel, 7 | -1.791839 | Inlier |
| siRNA-Temozolomide Run2-DMSO | NM_0025<br>62 | P2RX7 | purinergic<br>receptor<br>P2X,<br>ligand-<br>gated ion<br>channel, 7 | -1.630848 | Inlier |
| siRNA Disorazole DMSO Run2   | NM_0025<br>62 | P2RX7 | purinergic<br>receptor<br>P2X,<br>ligand-<br>gated ion<br>channel, 7 | -0.407264 | Inlier |
| siRNA Disorazole DMSO Run3   | NM_0025<br>62 | P2RX7 | purinergic<br>receptor<br>P2X,<br>ligand-<br>gated ion<br>channel, 7 | -0.057781 | Inlier |

Identification of Survival Genes in Human Glioblastoma Cells Using siRNA Screening  
 Nikhil G Thaker, Fang Zhang, Peter R. McDonald, Tong Ying Shun, Michael D Lewen, Ian F. Pollack, and John S. Lazo  
 Molecular Pharmacology

|                                  |               |        |                                                                      |           |        |
|----------------------------------|---------------|--------|----------------------------------------------------------------------|-----------|--------|
| siRNA Disorazole DMSO Run1       | NM_0025<br>62 | P2RX7  | purinergic<br>receptor<br>P2X,<br>ligand-<br>gated ion<br>channel, 7 | 0.057781  | Inlier |
| siRNA-Temozolomide Run1-<br>DMSO | NM_0025<br>62 | P2RX7  | purinergic<br>receptor<br>P2X,<br>ligand-<br>gated ion<br>channel, 7 | 0.500954  | Inlier |
| siRNA-Vinblastine Run1-<br>DMSO  | NM_0025<br>62 | P2RX7  | purinergic<br>receptor<br>P2X,<br>ligand-<br>gated ion<br>channel, 7 | 0.848046  | Inlier |
| siRNA-Vinblastine Run2-<br>DMSO  | NM_0025<br>62 | P2RX7  | purinergic<br>receptor<br>P2X,<br>ligand-<br>gated ion<br>channel, 7 | 1.257496  | Inlier |
| siRNA-Temozolomide Run3-<br>DMSO | NM_0054<br>46 | P2RXL1 | purinergic<br>receptor<br>P2X-like 1,<br>orphan<br>receptor          | -1.419526 | Inlier |
| siRNA Disorazole DMSO Run2       | NM_0054<br>46 | P2RXL1 | purinergic<br>receptor<br>P2X-like 1,<br>orphan<br>receptor          | -1.341542 | Inlier |
| siRNA-Temozolomide Run2-<br>DMSO | NM_0054<br>46 | P2RXL1 | purinergic<br>receptor<br>P2X-like 1,<br>orphan<br>receptor          | -0.781472 | Inlier |
| siRNA Disorazole DMSO Run1       | NM_0054<br>46 | P2RXL1 | purinergic<br>receptor<br>P2X-like 1,<br>orphan<br>receptor          | -0.145713 | Inlier |

Identification of Survival Genes in Human Glioblastoma Cells Using siRNA Screening  
 Nikhil G Thaker, Fang Zhang, Peter R. McDonald, Tong Ying Shun, Michael D Lewen, Ian F. Pollack, and John S. Lazo

Molecular Pharmacology

|                                  |               |        |                                                             |           |        |
|----------------------------------|---------------|--------|-------------------------------------------------------------|-----------|--------|
| siRNA Disorazole DMSO Run3       | NM_0054<br>46 | P2RXL1 | purinergic<br>receptor<br>P2X-like 1,<br>orphan<br>receptor | 0.145713  | Inlier |
| siRNA-Temozolomide Run1-<br>DMSO | NM_0054<br>46 | P2RXL1 | purinergic<br>receptor<br>P2X-like 1,<br>orphan<br>receptor | 0.253677  | Inlier |
| siRNA-Vinblastine Run1-<br>DMSO  | NM_0054<br>46 | P2RXL1 | purinergic<br>receptor<br>P2X-like 1,<br>orphan<br>receptor | 0.588368  | Inlier |
| siRNA-Vinblastine Run2-<br>DMSO  | NM_0054<br>46 | P2RXL1 | purinergic<br>receptor<br>P2X-like 1,<br>orphan<br>receptor | 0.760632  | Inlier |
| siRNA-Temozolomide Run3-<br>DMSO | NM_0025<br>63 | P2RY1  | purinergic<br>receptor<br>P2Y, G-<br>protein<br>coupled, 1  | -0.893001 | Inlier |
| siRNA Disorazole DMSO Run2       | NM_0025<br>63 | P2RY1  | purinergic<br>receptor<br>P2Y, G-<br>protein<br>coupled, 1  | -0.70262  | Inlier |
| siRNA Disorazole DMSO Run3       | NM_0025<br>63 | P2RY1  | purinergic<br>receptor<br>P2Y, G-<br>protein<br>coupled, 1  | -0.550642 | Inlier |
| siRNA-Temozolomide Run2-<br>DMSO | NM_0025<br>63 | P2RY1  | purinergic<br>receptor<br>P2Y, G-<br>protein<br>coupled, 1  | -0.273837 | Inlier |
| siRNA Disorazole DMSO Run1       | NM_0025<br>63 | P2RY1  | purinergic<br>receptor<br>P2Y, G-<br>protein<br>coupled, 1  | 0.273836  | Inlier |



Identification of Survival Genes in Human Glioblastoma Cells Using siRNA Screening

Nikhil G Thaker, Fang Zhang, Peter R. McDonald, Tong Ying Shun, Michael D Lewen, Ian F. Pollack, and John S. Lazo

Molecular Pharmacology

|                              |           |        |                                                |           |        |
|------------------------------|-----------|--------|------------------------------------------------|-----------|--------|
| siRNA-Temozolomide Run1-DMSO | NM_002563 | P2RY1  | purinergic receptor P2Y, G-protein coupled, 1  | 0.64638   | Inlier |
| siRNA-Vinblastine Run1-DMSO  | NM_002563 | P2RY1  | purinergic receptor P2Y, G-protein coupled, 1  | 1.006579  | Inlier |
| siRNA-Vinblastine Run2-DMSO  | NM_002563 | P2RY1  | purinergic receptor P2Y, G-protein coupled, 1  | 1.672556  | Inlier |
| siRNA-Temozolomide Run3-DMSO | NM_014499 | P2RY10 | purinergic receptor P2Y, G-protein coupled, 10 | -1.162626 | Inlier |
| siRNA-Temozolomide Run2-DMSO | NM_014499 | P2RY10 | purinergic receptor P2Y, G-protein coupled, 10 | -0.706174 | Inlier |
| siRNA Disorazole DMSO Run2   | NM_014499 | P2RY10 | purinergic receptor P2Y, G-protein coupled, 10 | -0.642826 | Inlier |
| siRNA Disorazole DMSO Run3   | NM_014499 | P2RY10 | purinergic receptor P2Y, G-protein coupled, 10 | -0.256254 | Inlier |
| siRNA-Temozolomide Run1-DMSO | NM_014499 | P2RY10 | purinergic receptor P2Y, G-protein coupled, 10 | 0.256254  | Inlier |

Identification of Survival Genes in Human Glioblastoma Cells Using siRNA Screening

Nikhil G Thaker, Fang Zhang, Peter R. McDonald, Tong Ying Shun, Michael D Lewen, Ian F. Pollack, and John S. Lazo

Molecular Pharmacology

|                                  |               |        |                                                                |           |        |
|----------------------------------|---------------|--------|----------------------------------------------------------------|-----------|--------|
| siRNA Disorazole DMSO Run1       | NM_0144<br>99 | P2RY10 | purinergic<br>receptor<br>P2Y, G-<br>protein<br>coupled,<br>10 | 0.328338  | Inlier |
| siRNA-Vinblastine Run2-<br>DMSO  | NM_0144<br>99 | P2RY10 | purinergic<br>receptor<br>P2Y, G-<br>protein<br>coupled,<br>10 | 0.750835  | Inlier |
| siRNA-Vinblastine Run1-<br>DMSO  | NM_0144<br>99 | P2RY10 | purinergic<br>receptor<br>P2Y, G-<br>protein<br>coupled,<br>10 | 0.900477  | Inlier |
| siRNA-Temozolomide Run3-<br>DMSO | NM_0025<br>66 | P2RY11 | purinergic<br>receptor<br>P2Y, G-<br>protein<br>coupled,<br>11 | -1.540867 | Inlier |
| siRNA-Temozolomide Run2-<br>DMSO | NM_0025<br>66 | P2RY11 | purinergic<br>receptor<br>P2Y, G-<br>protein<br>coupled,<br>11 | -1.337291 | Inlier |
| siRNA-Temozolomide Run1-<br>DMSO | NM_0025<br>66 | P2RY11 | purinergic<br>receptor<br>P2Y, G-<br>protein<br>coupled,<br>11 | -0.273079 | Inlier |
| siRNA Disorazole DMSO Run1       | NM_0025<br>66 | P2RY11 | purinergic<br>receptor<br>P2Y, G-<br>protein<br>coupled,<br>11 | -0.091407 | Inlier |
| siRNA-Vinblastine Run2-<br>DMSO  | NM_0025<br>66 | P2RY11 | purinergic<br>receptor<br>P2Y, G-<br>protein<br>coupled,<br>11 | 0.091407  | Inlier |



Identification of Survival Genes in Human Glioblastoma Cells Using siRNA Screening

Nikhil G Thaker, Fang Zhang, Peter R. McDonald, Tong Ying Shun, Michael D Lewen, Ian F. Pollack, and John S. Lazo

Molecular Pharmacology

|                                  |               |        |                                                                |                   |
|----------------------------------|---------------|--------|----------------------------------------------------------------|-------------------|
| siRNA Disorazole DMSO Run3       | NM_1768<br>76 | P2RY12 | purinergic<br>receptor<br>P2Y, G-<br>protein<br>coupled,<br>12 | 0.415505 Inlier   |
| siRNA-Vinblastine Run2-<br>DMSO  | NM_1768<br>76 | P2RY12 | purinergic<br>receptor<br>P2Y, G-<br>protein<br>coupled,<br>12 | 0.58759 Inlier    |
| siRNA-Vinblastine Run1-<br>DMSO  | NM_1768<br>76 | P2RY12 | purinergic<br>receptor<br>P2Y, G-<br>protein<br>coupled,<br>12 | 0.76141 Inlier    |
| siRNA-Temozolomide Run3-<br>DMSO | NM_0239<br>14 | P2RY13 | purinergic<br>receptor<br>P2Y, G-<br>protein<br>coupled,<br>13 | -7.626282 Outlier |
| siRNA-Temozolomide Run2-<br>DMSO | NM_0239<br>14 | P2RY13 | purinergic<br>receptor<br>P2Y, G-<br>protein<br>coupled,<br>13 | -4.15514 Outlier  |
| siRNA Disorazole DMSO Run1       | NM_0239<br>14 | P2RY13 | purinergic<br>receptor<br>P2Y, G-<br>protein<br>coupled,<br>13 | -0.472953 Inlier  |
| siRNA-Temozolomide Run1-<br>DMSO | NM_0239<br>14 | P2RY13 | purinergic<br>receptor<br>P2Y, G-<br>protein<br>coupled,<br>13 | -0.275758 Inlier  |
| siRNA Disorazole DMSO Run2       | NM_0239<br>14 | P2RY13 | purinergic<br>receptor<br>P2Y, G-<br>protein<br>coupled,<br>13 | 0.27576 Inlier    |

Identification of Survival Genes in Human Glioblastoma Cells Using siRNA Screening  
 Nikhil G Thaker, Fang Zhang, Peter R. McDonald, Tong Ying Shun, Michael D Lewen, Ian F. Pollack, and John S. Lazo

Molecular Pharmacology

| siRNA Treatment              | Gene ID | Accession | Receptor Type | Value | Outlier Status   |
|------------------------------|---------|-----------|---------------|-------|------------------|
| siRNA-Vinblastine Run2-DMSO  | NM_0239 | 14        | P2RY13        | 13    | 0.392601 Inlier  |
| siRNA Disorazole DMSO Run3   | NM_0239 | 14        | P2RY13        | 13    | 0.876047 Inlier  |
| siRNA-Vinblastine Run1-DMSO  | NM_0239 | 14        | P2RY13        | 13    | 1.059566 Inlier  |
| siRNA Disorazole DMSO Run2   | NM_0148 | 79        | P2RY14        | 14    | -0.807053 Inlier |
| siRNA-Temozolomide Run1-DMSO | NM_0148 | 79        | P2RY14        | 14    | -0.712978 Inlier |
| siRNA-Temozolomide Run2-DMSO | NM_0148 | 79        | P2RY14        | 14    | -0.636022 Inlier |
| siRNA-Vinblastine Run2-DMSO  | NM_0148 | 79        | P2RY14        | 14    | -0.033627 Inlier |
| siRNA-Vinblastine Run1-DMSO  | NM_0148 | 79        | P2RY14        | 14    | 0.033627 Inlier  |

Identification of Survival Genes in Human Glioblastoma Cells Using siRNA Screening  
 Nikhil G Thaker, Fang Zhang, Peter R. McDonald, Tong Ying Shun, Michael D Lewen, Ian F. Pollack, and John S. Lazo

Molecular Pharmacology

|                                  |               |        |                                                                |           |        |
|----------------------------------|---------------|--------|----------------------------------------------------------------|-----------|--------|
| siRNA Disorazole DMSO Run1       | NM_0148<br>79 | P2RY14 | purinergic<br>receptor<br>P2Y, G-<br>protein<br>coupled,<br>14 | 0.103188  | Inlier |
| siRNA-Temozolomide Run3-<br>DMSO | NM_0148<br>79 | P2RY14 | purinergic<br>receptor<br>P2Y, G-<br>protein<br>coupled,<br>14 | 1.178654  | Inlier |
| siRNA Disorazole DMSO Run3       | NM_0148<br>79 | P2RY14 | purinergic<br>receptor<br>P2Y, G-<br>protein<br>coupled,<br>14 | 2.787613  | Inlier |
| siRNA Disorazole DMSO Run2       | NM_1760<br>72 | P2RY2  | purinergic<br>receptor<br>P2Y, G-<br>protein<br>coupled, 2     | -2.071529 | Inlier |
| siRNA-Temozolomide Run3-<br>DMSO | NM_1760<br>72 | P2RY2  | purinergic<br>receptor<br>P2Y, G-<br>protein<br>coupled, 2     | -1.36594  | Inlier |
| siRNA-Temozolomide Run2-<br>DMSO | NM_1760<br>72 | P2RY2  | purinergic<br>receptor<br>P2Y, G-<br>protein<br>coupled, 2     | -0.67294  | Inlier |
| siRNA Disorazole DMSO Run3       | NM_1760<br>72 | P2RY2  | purinergic<br>receptor<br>P2Y, G-<br>protein<br>coupled, 2     | -0.010553 | Inlier |
| siRNA-Temozolomide Run1-<br>DMSO | NM_1760<br>72 | P2RY2  | purinergic<br>receptor<br>P2Y, G-<br>protein<br>coupled, 2     | 0.010552  | Inlier |

Identification of Survival Genes in Human Glioblastoma Cells Using siRNA Screening

Nikhil G Thaker, Fang Zhang, Peter R. McDonald, Tong Ying Shun, Michael D Lewen, Ian F. Pollack, and John S.

Lazo

Molecular Pharmacology

|                              |               |       |                                                                    |           |        |
|------------------------------|---------------|-------|--------------------------------------------------------------------|-----------|--------|
| siRNA-Vinblastine Run2-DMSO  | NM_1760<br>72 | P2RY2 | purinergic<br>receptor<br>P2Y, G-<br>protein<br>coupled, 2         | 0.610591  | Inlier |
| siRNA Disorazole DMSO Run1   | NM_1760<br>72 | P2RY2 | purinergic<br>receptor<br>P2Y, G-<br>protein<br>coupled, 2         | 0.67606   | Inlier |
| siRNA-Vinblastine Run1-DMSO  | NM_1760<br>72 | P2RY2 | purinergic<br>receptor<br>P2Y, G-<br>protein<br>coupled, 2         | 0.778255  | Inlier |
| siRNA Disorazole DMSO Run2   | NM_0025<br>65 | P2RY4 | pyrimidiner<br>gic<br>receptor<br>P2Y, G-<br>protein<br>coupled, 4 | -0.993258 | Inlier |
| siRNA Disorazole DMSO Run1   | NM_0025<br>65 | P2RY4 | pyrimidiner<br>gic<br>receptor<br>P2Y, G-<br>protein<br>coupled, 4 | -0.660269 | Inlier |
| siRNA-Temozolomide Run2-DMSO | NM_0025<br>65 | P2RY4 | pyrimidiner<br>gic<br>receptor<br>P2Y, G-<br>protein<br>coupled, 4 | -0.30864  | Inlier |
| siRNA-Temozolomide Run1-DMSO | NM_0025<br>65 | P2RY4 | pyrimidiner<br>gic<br>receptor<br>P2Y, G-<br>protein<br>coupled, 4 | -0.061951 | Inlier |

Identification of Survival Genes in Human Glioblastoma Cells Using siRNA Screening

Nikhil G Thaker, Fang Zhang, Peter R. McDonald, Tong Ying Shun, Michael D Lewen, Ian F. Pollack, and John S. Lazo

Molecular Pharmacology

|                              |               |       |                                                                    |           |        |
|------------------------------|---------------|-------|--------------------------------------------------------------------|-----------|--------|
| siRNA-Temozolomide Run3-DMSO | NM_0025<br>65 | P2RY4 | pyrimidiner<br>gic<br>receptor<br>P2Y, G-<br>protein<br>coupled, 4 | 0.061951  | Inlier |
| siRNA-Vinblastine Run2-DMSO  | NM_0025<br>65 | P2RY4 | pyrimidiner<br>gic<br>receptor<br>P2Y, G-<br>protein<br>coupled, 4 | 0.688731  | Inlier |
| siRNA-Vinblastine Run1-DMSO  | NM_0025<br>65 | P2RY4 | pyrimidiner<br>gic<br>receptor<br>P2Y, G-<br>protein<br>coupled, 4 | 0.761112  | Inlier |
| siRNA Disorazole DMSO Run3   | NM_0025<br>65 | P2RY4 | pyrimidiner<br>gic<br>receptor<br>P2Y, G-<br>protein<br>coupled, 4 | 1.696687  | Inlier |
| siRNA-Temozolomide Run3-DMSO | NM_0057<br>67 | P2RY5 | purinergic<br>receptor<br>P2Y, G-<br>protein<br>coupled, 5         | -1.43442  | Inlier |
| siRNA Disorazole DMSO Run2   | NM_0057<br>67 | P2RY5 | purinergic<br>receptor<br>P2Y, G-<br>protein<br>coupled, 5         | -1.011441 | Inlier |
| siRNA Disorazole DMSO Run3   | NM_0057<br>67 | P2RY5 | purinergic<br>receptor<br>P2Y, G-<br>protein<br>coupled, 5         | -0.623517 | Inlier |
| siRNA-Temozolomide Run2-DMSO | NM_0057<br>67 | P2RY5 | purinergic<br>receptor<br>P2Y, G-<br>protein<br>coupled, 5         | -0.081494 | Inlier |



Identification of Survival Genes in Human Glioblastoma Cells Using siRNA Screening  
 Nikhil G Thaker, Fang Zhang, Peter R. McDonald, Tong Ying Shun, Michael D Lewen, Ian F. Pollack, and John S. Lazo  
 Molecular Pharmacology

|                              |               |       |                                                                    |                  |
|------------------------------|---------------|-------|--------------------------------------------------------------------|------------------|
| siRNA-Temozolomide Run1-DMSO | NM_0057<br>67 | P2RY5 | purinergic<br>receptor<br>P2Y, G-<br>protein<br>coupled, 5         | 0.081494 Inlier  |
| siRNA Disorazole DMSO Run1   | NM_0057<br>67 | P2RY5 | purinergic<br>receptor<br>P2Y, G-<br>protein<br>coupled, 5         | 0.163521 Inlier  |
| siRNA-Vinblastine Run2-DMSO  | NM_0057<br>67 | P2RY5 | purinergic<br>receptor<br>P2Y, G-<br>protein<br>coupled, 5         | 0.725483 Inlier  |
| siRNA-Vinblastine Run1-DMSO  | NM_0057<br>67 | P2RY5 | purinergic<br>receptor<br>P2Y, G-<br>protein<br>coupled, 5         | 0.98412 Inlier   |
| siRNA-Temozolomide Run3-DMSO | NM_0041<br>54 | P2RY6 | pyrimidiner<br>gic<br>receptor<br>P2Y, G-<br>protein<br>coupled, 6 | -1.116932 Inlier |
| siRNA Disorazole DMSO Run2   | NM_0041<br>54 | P2RY6 | pyrimidiner<br>gic<br>receptor<br>P2Y, G-<br>protein<br>coupled, 6 | -1.070796 Inlier |
| siRNA Disorazole DMSO Run3   | NM_0041<br>54 | P2RY6 | pyrimidiner<br>gic<br>receptor<br>P2Y, G-<br>protein<br>coupled, 6 | -0.786246 Inlier |
| siRNA-Temozolomide Run2-DMSO | NM_0041<br>54 | P2RY6 | pyrimidiner<br>gic<br>receptor<br>P2Y, G-<br>protein<br>coupled, 6 | -0.039333 Inlier |

Identification of Survival Genes in Human Glioblastoma Cells Using siRNA Screening  
 Nikhil G Thaker, Fang Zhang, Peter R. McDonald, Tong Ying Shun, Michael D Lewen, Ian F. Pollack, and John S. Lazo  
 Molecular Pharmacology

|                              |               |       |                                                                    |           |        |
|------------------------------|---------------|-------|--------------------------------------------------------------------|-----------|--------|
| siRNA-Temozolomide Run1-DMSO | NM_0041<br>54 | P2RY6 | pyrimidiner<br>gic<br>receptor<br>P2Y, G-<br>protein<br>coupled, 6 | 0.039333  | Inlier |
| siRNA Disorazole DMSO Run1   | NM_0041<br>54 | P2RY6 | pyrimidiner<br>gic<br>receptor<br>P2Y, G-<br>protein<br>coupled, 6 | 0.1227    | Inlier |
| siRNA-Vinblastine Run2-DMSO  | NM_0041<br>54 | P2RY6 | pyrimidiner<br>gic<br>receptor<br>P2Y, G-<br>protein<br>coupled, 6 | 0.593071  | Inlier |
| siRNA-Vinblastine Run1-DMSO  | NM_0041<br>54 | P2RY6 | pyrimidiner<br>gic<br>receptor<br>P2Y, G-<br>protein<br>coupled, 6 | 0.755929  | Inlier |
| siRNA Disorazole DMSO Run2   | NM_1781<br>29 | P2RY8 | purinergic<br>receptor<br>P2Y, G-<br>protein<br>coupled, 8         | -2.467234 | Inlier |
| siRNA-Temozolomide Run3-DMSO | NM_1781<br>29 | P2RY8 | purinergic<br>receptor<br>P2Y, G-<br>protein<br>coupled, 8         | -0.787613 | Inlier |
| siRNA-Temozolomide Run2-DMSO | NM_1781<br>29 | P2RY8 | purinergic<br>receptor<br>P2Y, G-<br>protein<br>coupled, 8         | -0.766641 | Inlier |
| siRNA-Temozolomide Run1-DMSO | NM_1781<br>29 | P2RY8 | purinergic<br>receptor<br>P2Y, G-<br>protein<br>coupled, 8         | -0.340065 | Inlier |

Identification of Survival Genes in Human Glioblastoma Cells Using siRNA Screening

Nikhil G Thaker, Fang Zhang, Peter R. McDonald, Tong Ying Shun, Michael D Lewen, Ian F. Pollack, and John S. Lazo

Molecular Pharmacology

|                              |                  |       |                                                                                                                                                                                       |                  |
|------------------------------|------------------|-------|---------------------------------------------------------------------------------------------------------------------------------------------------------------------------------------|------------------|
| siRNA-Vinblastine Run2-DMSO  | NM_1781<br>29    | P2RY8 | purinergic<br>receptor<br>P2Y, G-<br>protein<br>coupled, 8                                                                                                                            | 0.340065 Inlier  |
| siRNA Disorazole DMSO Run1   | NM_1781<br>29    | P2RY8 | purinergic<br>receptor<br>P2Y, G-<br>protein<br>coupled, 8                                                                                                                            | 0.35387 Inlier   |
| siRNA-Vinblastine Run1-DMSO  | NM_1781<br>29    | P2RY8 | purinergic<br>receptor<br>P2Y, G-<br>protein<br>coupled, 8                                                                                                                            | 0.582359 Inlier  |
| siRNA Disorazole DMSO Run3   | NM_1781<br>29    | P2RY8 | purinergic<br>receptor<br>P2Y, G-<br>protein<br>coupled, 8<br>procollage<br>n-proline,<br>2-<br>oxoglutarate 4-<br>dioxygenase (proline<br>4-<br>hydroxylase), alpha<br>polypeptide I | 0.892612 Inlier  |
| siRNA-Temozolomide Run3-DMSO | NM_0010<br>17962 | P4HA1 | procollage<br>n-proline,<br>2-<br>oxoglutarate 4-<br>dioxygenase (proline<br>4-<br>hydroxylase), alpha<br>polypeptide I                                                               | -1.007209 Inlier |
| siRNA-Temozolomide Run2-DMSO | NM_0010<br>17962 | P4HA1 | procollage<br>n-proline,<br>2-<br>oxoglutarate 4-<br>dioxygenase (proline<br>4-<br>hydroxylase), alpha<br>polypeptide I                                                               | -0.621753 Inlier |

Identification of Survival Genes in Human Glioblastoma Cells Using siRNA Screening

Nikhil G Thaker, Fang Zhang, Peter R. McDonald, Tong Ying Shun, Michael D Lewen, Ian F. Pollack, and John S. Lazo

Molecular Pharmacology

|                              |                  |       |                                                                                                |           |        |
|------------------------------|------------------|-------|------------------------------------------------------------------------------------------------|-----------|--------|
| siRNA Disorazole DMSO Run3   | NM_0010<br>17962 | P4HA1 | procollagen-proline, 2-oxoglutarate 4-dioxygenase (proline 4-hydroxylase), alpha polypeptide I | -0.101545 | Inlier |
| siRNA Disorazole DMSO Run1   | NM_0010<br>17962 | P4HA1 | procollagen-proline, 2-oxoglutarate 4-dioxygenase (proline 4-hydroxylase), alpha polypeptide I | -0.021728 | Inlier |
| siRNA-Vinblastine Run2-DMSO  | NM_0010<br>17962 | P4HA1 | procollagen-proline, 2-oxoglutarate 4-dioxygenase (proline 4-hydroxylase), alpha polypeptide I | 0.021728  | Inlier |
| siRNA-Temozolomide Run1-DMSO | NM_0010<br>17962 | P4HA1 | procollagen-proline, 2-oxoglutarate 4-dioxygenase (proline 4-hydroxylase), alpha polypeptide I | 0.727247  | Inlier |

Identification of Survival Genes in Human Glioblastoma Cells Using siRNA Screening

Nikhil G Thaker, Fang Zhang, Peter R. McDonald, Tong Ying Shun, Michael D Lewen, Ian F. Pollack, and John S. Lazo

Molecular Pharmacology

|                              |                  |       |                                                                                                 |           |        |
|------------------------------|------------------|-------|-------------------------------------------------------------------------------------------------|-----------|--------|
| siRNA-Vinblastine Run1-DMSO  | NM_0010<br>17962 | P4HA1 | procollagen-proline, 2-oxoglutarate 4-dioxygenase (proline 4-hydroxylase), alpha polypeptide I  | 2.447992  | Inlier |
| siRNA Disorazole DMSO Run2   | NM_0010<br>17962 | P4HA1 | procollagen-proline, 2-oxoglutarate 4-dioxygenase (proline 4-hydroxylase), alpha polypeptide I  | 2.488735  | Inlier |
| siRNA-Temozolomide Run3-DMSO | NM_0010<br>17974 | P4HA2 | procollagen-proline, 2-oxoglutarate 4-dioxygenase (proline 4-hydroxylase), alpha polypeptide II | -0.871911 | Inlier |
| siRNA-Temozolomide Run2-DMSO | NM_0010<br>17974 | P4HA2 | procollagen-proline, 2-oxoglutarate 4-dioxygenase (proline 4-hydroxylase), alpha polypeptide II | -0.574898 | Inlier |

Identification of Survival Genes in Human Glioblastoma Cells Using siRNA Screening

Nikhil G Thaker, Fang Zhang, Peter R. McDonald, Tong Ying Shun, Michael D Lewen, Ian F. Pollack, and John S. Lazo

Molecular Pharmacology

|                              |                  |       |                                                                                                 |           |        |
|------------------------------|------------------|-------|-------------------------------------------------------------------------------------------------|-----------|--------|
| siRNA Disorazole DMSO Run1   | NM_0010<br>17974 | P4HA2 | procollagen-proline, 2-oxoglutarate 4-dioxygenase (proline 4-hydroxylase), alpha polypeptide II | -0.124186 | Inlier |
| siRNA-Vinblastine Run2-DMSO  | NM_0010<br>17974 | P4HA2 | procollagen-proline, 2-oxoglutarate 4-dioxygenase (proline 4-hydroxylase), alpha polypeptide II | -0.032464 | Inlier |
| siRNA Disorazole DMSO Run3   | NM_0010<br>17974 | P4HA2 | procollagen-proline, 2-oxoglutarate 4-dioxygenase (proline 4-hydroxylase), alpha polypeptide II | 0.032464  | Inlier |
| siRNA-Temozolomide Run1-DMSO | NM_0010<br>17974 | P4HA2 | procollagen-proline, 2-oxoglutarate 4-dioxygenase (proline 4-hydroxylase), alpha polypeptide II | 0.774102  | Inlier |

Identification of Survival Genes in Human Glioblastoma Cells Using siRNA Screening

Nikhil G Thaker, Fang Zhang, Peter R. McDonald, Tong Ying Shun, Michael D Lewen, Ian F. Pollack, and John S. Lazo

Molecular Pharmacology

|                              |                  |       |                                                                                                  |           |        |
|------------------------------|------------------|-------|--------------------------------------------------------------------------------------------------|-----------|--------|
| siRNA-Vinblastine Run1-DMSO  | NM_0010<br>17974 | P4HA2 | procollagen-proline, 2-oxoglutarate 4-dioxygenase (proline 4-hydroxylase), alpha polypeptide II  | 1.168013  | Inlier |
| siRNA Disorazole DMSO Run2   | NM_0010<br>17974 | P4HA2 | procollagen-proline, 2-oxoglutarate 4-dioxygenase (proline 4-hydroxylase), alpha polypeptide II  | 1.425869  | Inlier |
| siRNA-Temozolomide Run3-DMSO | NM_1829<br>04    | P4HA3 | procollagen-proline, 2-oxoglutarate 4-dioxygenase (proline 4-hydroxylase), alpha polypeptide III | -1.048588 | Inlier |
| siRNA Disorazole DMSO Run3   | NM_1829<br>04    | P4HA3 | procollagen-proline, 2-oxoglutarate 4-dioxygenase (proline 4-hydroxylase), alpha polypeptide III | -0.693504 | Inlier |

Identification of Survival Genes in Human Glioblastoma Cells Using siRNA Screening

Nikhil G Thaker, Fang Zhang, Peter R. McDonald, Tong Ying Shun, Michael D Lewen, Ian F. Pollack, and John S. Lazo

Molecular Pharmacology

|                              |           |       |                                                                                                  |           |        |
|------------------------------|-----------|-------|--------------------------------------------------------------------------------------------------|-----------|--------|
| siRNA-Temozolomide Run2-DMSO | NM_182904 | P4HA3 | procollagen-proline, 2-oxoglutarate 4-dioxygenase (proline 4-hydroxylase), alpha polypeptide III | -0.144631 | Inlier |
| siRNA Disorazole DMSO Run1   | NM_182904 | P4HA3 | procollagen-proline, 2-oxoglutarate 4-dioxygenase (proline 4-hydroxylase), alpha polypeptide III | -0.039908 | Inlier |
| siRNA-Vinblastine Run2-DMSO  | NM_182904 | P4HA3 | procollagen-proline, 2-oxoglutarate 4-dioxygenase (proline 4-hydroxylase), alpha polypeptide III | 0.039908  | Inlier |
| siRNA-Temozolomide Run1-DMSO | NM_182904 | P4HA3 | procollagen-proline, 2-oxoglutarate 4-dioxygenase (proline 4-hydroxylase), alpha polypeptide III | 0.655496  | Inlier |



Identification of Survival Genes in Human Glioblastoma Cells Using siRNA Screening

Nikhil G Thaker, Fang Zhang, Peter R. McDonald, Tong Ying Shun, Michael D Lewen, Ian F. Pollack, and John S. Lazo

Molecular Pharmacology

|                             |           |       |                                                                                                                                                                 |           |         |
|-----------------------------|-----------|-------|-----------------------------------------------------------------------------------------------------------------------------------------------------------------|-----------|---------|
| siRNA-Vinblastine Run1-DMSO | NM_182904 | P4HA3 | procollagen-proline, 2-oxoglutarate 4-dioxygenase (proline 4-hydroxylase), alpha polypeptide III                                                                | 1.230953  | Inlier  |
| siRNA Disorazole DMSO Run2  | NM_182904 | P4HA3 | procollagen-proline, 2-oxoglutarate 4-dioxygenase (proline 4-hydroxylase), alpha polypeptide III                                                                | 2.025828  | Inlier  |
| siRNA Disorazole DMSO Run1  | NM_000918 | P4HB  | procollagen-proline, 2-oxoglutarate 4-dioxygenase (proline 4-hydroxylase), beta polypeptide (protein disulfide isomerase ; thyroid hormone binding protein p55) | -3.673865 | Outlier |

Identification of Survival Genes in Human Glioblastoma Cells Using siRNA Screening

Nikhil G Thaker, Fang Zhang, Peter R. McDonald, Tong Ying Shun, Michael D Lewen, Ian F. Pollack, and John S.

Lazo

Molecular Pharmacology

|                              |           |      |                                                                                                                                                                 |           |        |
|------------------------------|-----------|------|-----------------------------------------------------------------------------------------------------------------------------------------------------------------|-----------|--------|
|                              |           |      | procollagen-proline, 2-oxoglutarate 4-dioxygenase (proline 4-hydroxylase), beta polypeptide (protein disulfide isomerase ; thyroid hormone binding protein p55) | -0.926972 | Inlier |
| siRNA-Temozolomide Run2-DMSO | NM_000918 | P4HB | procollagen-proline, 2-oxoglutarate 4-dioxygenase (proline 4-hydroxylase), beta polypeptide (protein disulfide isomerase ; thyroid hormone binding protein p55) |           |        |
| siRNA-Temozolomide Run1-DMSO | NM_000918 | P4HB | procollagen-proline, 2-oxoglutarate 4-dioxygenase (proline 4-hydroxylase), beta polypeptide (protein disulfide isomerase ; thyroid hormone binding protein p55) | -0.314675 | Inlier |

Identification of Survival Genes in Human Glioblastoma Cells Using siRNA Screening

Nikhil G Thaker, Fang Zhang, Peter R. McDonald, Tong Ying Shun, Michael D Lewen, Ian F. Pollack, and John S. Lazo

Molecular Pharmacology

|                              |           |      |  |                                                                                                                                                                 |                  |
|------------------------------|-----------|------|--|-----------------------------------------------------------------------------------------------------------------------------------------------------------------|------------------|
|                              |           |      |  | procollagen-proline, 2-oxoglutarate 4-dioxygenase (proline 4-hydroxylase), beta polypeptide (protein disulfide isomerase ; thyroid hormone binding protein p55) |                  |
| siRNA-Temozolomide Run3-DMSO | NM_000918 | P4HB |  |                                                                                                                                                                 | -0.161199 Inlier |
|                              |           |      |  | procollagen-proline, 2-oxoglutarate 4-dioxygenase (proline 4-hydroxylase), beta polypeptide (protein disulfide isomerase ; thyroid hormone binding protein p55) |                  |
| siRNA Disorazole DMSO Run3   | NM_000918 | P4HB |  |                                                                                                                                                                 | 0.161202 Inlier  |

Identification of Survival Genes in Human Glioblastoma Cells Using siRNA Screening

Nikhil G Thaker, Fang Zhang, Peter R. McDonald, Tong Ying Shun, Michael D Lewen, Ian F. Pollack, and John S. Lazo

Molecular Pharmacology

|                             |           |      |                                                                                                                                                                 |                 |
|-----------------------------|-----------|------|-----------------------------------------------------------------------------------------------------------------------------------------------------------------|-----------------|
|                             |           |      | procollagen-proline, 2-oxoglutarate 4-dioxygenase (proline 4-hydroxylase), beta polypeptide (protein disulfide isomerase ; thyroid hormone binding protein p55) |                 |
| siRNA-Vinblastine Run1-DMSO | NM_000918 | P4HB | procollagen-proline, 2-oxoglutarate 4-dioxygenase (proline 4-hydroxylase), beta polypeptide (protein disulfide isomerase ; thyroid hormone binding protein p55) | 0.422028 Inlier |
| siRNA-Vinblastine Run2-DMSO | NM_000918 | P4HB | procollagen-proline, 2-oxoglutarate 4-dioxygenase (proline 4-hydroxylase), beta polypeptide (protein disulfide isomerase ; thyroid hormone binding protein p55) | 0.964833 Inlier |

Identification of Survival Genes in Human Glioblastoma Cells Using siRNA Screening  
 Nikhil G Thaker, Fang Zhang, Peter R. McDonald, Tong Ying Shun, Michael D Lewen, Ian F. Pollack, and John S. Lazo

Molecular Pharmacology

| siRNA                   | Run     | Gene    | Cell Line | Value     | Category |
|-------------------------|---------|---------|-----------|-----------|----------|
| siRNA Disorazole DMSO   | Run2 18 | NM_0009 | P4HB      | 4.611228  | Outlier  |
| siRNA-Temozolomide DMSO | Run3-91 | NM_0061 | PA2G4     | -1.732044 | Inlier   |
| siRNA-Temozolomide DMSO | Run2-91 | NM_0061 | PA2G4     | -0.91607  | Inlier   |
| siRNA-Temozolomide DMSO | Run1-91 | NM_0061 | PA2G4     | -0.777419 | Inlier   |
| siRNA Disorazole DMSO   | Run3 91 | NM_0061 | PA2G4     | -0.12047  | Inlier   |
| siRNA Disorazole DMSO   | Run1 91 | NM_0061 | PA2G4     | 0.120471  | Inlier   |
| siRNA-Vinblastine DMSO  | Run2-91 | NM_0061 | PA2G4     | 0.200917  | Inlier   |

procollage  
 n-proline,  
 2-oxoglutarate 4-dioxygenase (proline 4-hydroxylase), beta polypeptide (protein disulfide isomerase ; thyroid hormone binding protein p55)

proliferation-associated 2G4, 38kDa  
 proliferation-associated 2G4, 38kDa

Identification of Survival Genes in Human Glioblastoma Cells Using siRNA Screening  
 Nikhil G Thaker, Fang Zhang, Peter R. McDonald, Tong Ying Shun, Michael D Lewen, Ian F. Pollack, and John S. Lazo

Molecular Pharmacology

| siRNA                            | Gene          | Target | Protein                                           | Value     | Inlier |
|----------------------------------|---------------|--------|---------------------------------------------------|-----------|--------|
| siRNA Disorazole DMSO Run2       | NM_0061<br>91 | PA2G4  | proliferatio<br>n-<br>associated<br>2G4,<br>38kDa | 0.571581  | Inlier |
| siRNA-Vinblastine Run1-<br>DMSO  | NM_0061<br>91 | PA2G4  | proliferatio<br>n-<br>associated<br>2G4,<br>38kDa | 0.880987  | Inlier |
| siRNA Disorazole DMSO Run2       | NM_0164<br>59 | PACAP  | PACAP                                             | -1.137348 | Inlier |
| siRNA-Temozolomide Run3-<br>DMSO | NM_0164<br>59 | PACAP  | PACAP                                             | -0.888797 | Inlier |
| siRNA-Temozolomide Run1-<br>DMSO | NM_0164<br>59 | PACAP  | PACAP                                             | -0.460203 | Inlier |
| siRNA-Temozolomide Run2-<br>DMSO | NM_0164<br>59 | PACAP  | PACAP                                             | -0.021096 | Inlier |
| siRNA-Vinblastine Run2-<br>DMSO  | NM_0164<br>59 | PACAP  | PACAP                                             | 0.021096  | Inlier |
| siRNA Disorazole DMSO Run1       | NM_0164<br>59 | PACAP  | PACAP                                             | 0.336847  | Inlier |
| siRNA Disorazole DMSO Run3       | NM_0164<br>59 | PACAP  | PACAP                                             | 0.922075  | Inlier |
| siRNA-Vinblastine Run1-<br>DMSO  | NM_0164<br>59 | PACAP  | PACAP                                             | 1.080773  | Inlier |
| siRNA-Temozolomide Run3-<br>DMSO | NM_0204<br>23 | PACE-1 | SCY1-like<br>3 (S.<br>cerevisiae)                 | -1.711963 | Inlier |
| siRNA Disorazole DMSO Run3       | NM_0204<br>23 | PACE-1 | SCY1-like<br>3 (S.<br>cerevisiae)                 | -0.701698 | Inlier |
| siRNA Disorazole DMSO Run2       | NM_0204<br>23 | PACE-1 | SCY1-like<br>3 (S.<br>cerevisiae)                 | -0.278967 | Inlier |
| siRNA-Temozolomide Run1-<br>DMSO | NM_0204<br>23 | PACE-1 | SCY1-like<br>3 (S.<br>cerevisiae)                 | -0.045698 | Inlier |
| siRNA-Temozolomide Run2-<br>DMSO | NM_0204<br>23 | PACE-1 | SCY1-like<br>3 (S.<br>cerevisiae)                 | 0.045698  | Inlier |
| siRNA Disorazole DMSO Run1       | NM_0204<br>23 | PACE-1 | SCY1-like<br>3 (S.<br>cerevisiae)                 | 0.671279  | Inlier |

Identification of Survival Genes in Human Glioblastoma Cells Using siRNA Screening  
 Nikhil G Thaker, Fang Zhang, Peter R. McDonald, Tong Ying Shun, Michael D Lewen, Ian F. Pollack, and John S. Lazo

Molecular Pharmacology

|                              |               |         |                                                                        |           |        |
|------------------------------|---------------|---------|------------------------------------------------------------------------|-----------|--------|
| siRNA-Vinblastine Run2-DMSO  | NM_0204<br>23 | PACE-1  | SCY1-like<br>3 (S.<br>cerevisiae)                                      | 0.677721  | Inlier |
| siRNA-Vinblastine Run1-DMSO  | NM_0204<br>23 | PACE-1  | SCY1-like<br>3 (S.<br>cerevisiae)                                      | 0.950701  | Inlier |
| siRNA Disorazole DMSO Run2   | NM_0208<br>04 | PACSIN1 | protein<br>kinase C<br>and casein<br>kinase<br>substrate<br>in neurons | -1.699541 | Inlier |
| siRNA-Temozolomide Run3-DMSO | NM_0208<br>04 | PACSIN1 | protein<br>kinase C<br>and casein<br>kinase<br>substrate<br>in neurons | -1.337753 | Inlier |
| siRNA-Temozolomide Run2-DMSO | NM_0208<br>04 | PACSIN1 | protein<br>kinase C<br>and casein<br>kinase<br>substrate<br>in neurons | -0.303109 | Inlier |
| siRNA-Temozolomide Run1-DMSO | NM_0208<br>04 | PACSIN1 | protein<br>kinase C<br>and casein<br>kinase<br>substrate<br>in neurons | -0.176832 | Inlier |
| siRNA Disorazole DMSO Run1   | NM_0208<br>04 | PACSIN1 | protein<br>kinase C<br>and casein<br>kinase<br>substrate<br>in neurons | 0.176832  | Inlier |

Identification of Survival Genes in Human Glioblastoma Cells Using siRNA Screening

Nikhil G Thaker, Fang Zhang, Peter R. McDonald, Tong Ying Shun, Michael D Lewen, Ian F. Pollack, and John S. Lazo

Molecular Pharmacology

|                                  |               |         |   |                                                                        |                  |
|----------------------------------|---------------|---------|---|------------------------------------------------------------------------|------------------|
| siRNA Disorazole DMSO Run3       | NM_0208<br>04 | PACSIN1 | 1 | protein<br>kinase C<br>and casein<br>kinase<br>substrate<br>in neurons | 0.408528 Inlier  |
| siRNA-Vinblastine Run1-<br>DMSO  | NM_0208<br>04 | PACSIN1 | 1 | protein<br>kinase C<br>and casein<br>kinase<br>substrate<br>in neurons | 0.940472 Inlier  |
| siRNA-Vinblastine Run2-<br>DMSO  | NM_0208<br>04 | PACSIN1 | 1 | protein<br>kinase C<br>and casein<br>kinase<br>substrate<br>in neurons | 1.534572 Inlier  |
| siRNA-Temozolomide Run3-<br>DMSO | NM_0072<br>29 | PACSIN2 | 2 | protein<br>kinase C<br>and casein<br>kinase<br>substrate<br>in neurons | -1.911879 Inlier |
| siRNA-Temozolomide Run1-<br>DMSO | NM_0072<br>29 | PACSIN2 | 2 | protein<br>kinase C<br>and casein<br>kinase<br>substrate<br>in neurons | -1.173038 Inlier |
| siRNA-Temozolomide Run2-<br>DMSO | NM_0072<br>29 | PACSIN2 | 2 | protein<br>kinase C<br>and casein<br>kinase<br>substrate<br>in neurons | -0.333603 Inlier |



Identification of Survival Genes in Human Glioblastoma Cells Using siRNA Screening  
 Nikhil G Thaker, Fang Zhang, Peter R. McDonald, Tong Ying Shun, Michael D Lewen, Ian F. Pollack, and John S. Lazo  
 Molecular Pharmacology

|                              |               |         |   |                                                         |                  |
|------------------------------|---------------|---------|---|---------------------------------------------------------|------------------|
| siRNA-Vinblastine Run1-DMSO  | NM_0072<br>29 | PACSIN2 | 2 | protein kinase C and casein kinase substrate in neurons | -0.137586 Inlier |
| siRNA Disorazole DMSO Run2   | NM_0072<br>29 | PACSIN2 | 2 | protein kinase C and casein kinase substrate in neurons | 0.137586 Inlier  |
| siRNA Disorazole DMSO Run1   | NM_0072<br>29 | PACSIN2 | 2 | protein kinase C and casein kinase substrate in neurons | 0.360515 Inlier  |
| siRNA-Vinblastine Run2-DMSO  | NM_0072<br>29 | PACSIN2 | 2 | protein kinase C and casein kinase substrate in neurons | 0.988485 Inlier  |
| siRNA Disorazole DMSO Run3   | NM_0072<br>29 | PACSIN2 | 2 | protein kinase C and casein kinase substrate in neurons | 1.405789 Inlier  |
| siRNA-Temozolomide Run3-DMSO | NM_0162<br>23 | PACSIN3 | 3 | protein kinase C and casein kinase substrate in neurons | -1.304745 Inlier |

Identification of Survival Genes in Human Glioblastoma Cells Using siRNA Screening  
 Nikhil G Thaker, Fang Zhang, Peter R. McDonald, Tong Ying Shun, Michael D Lewen, Ian F. Pollack, and John S. Lazo  
 Molecular Pharmacology

|                              |           |         |                                                              |           |        |
|------------------------------|-----------|---------|--------------------------------------------------------------|-----------|--------|
| siRNA-Temozolomide Run1-DMSO | NM_016223 | PACSIN3 | protein kinase C and casein kinase substrate in neurons<br>3 | -1.173133 | Inlier |
| siRNA-Temozolomide Run2-DMSO | NM_016223 | PACSIN3 | protein kinase C and casein kinase substrate in neurons<br>3 | -0.42466  | Inlier |
| siRNA-Vinblastine Run1-DMSO  | NM_016223 | PACSIN3 | protein kinase C and casein kinase substrate in neurons<br>3 | -0.103259 | Inlier |
| siRNA Disorazole DMSO Run1   | NM_016223 | PACSIN3 | protein kinase C and casein kinase substrate in neurons<br>3 | 0.103258  | Inlier |
| siRNA-Vinblastine Run2-DMSO  | NM_016223 | PACSIN3 | protein kinase C and casein kinase substrate in neurons<br>3 | 0.301555  | Inlier |
| siRNA Disorazole DMSO Run2   | NM_016223 | PACSIN3 | protein kinase C and casein kinase substrate in neurons<br>3 | 0.92434   | Inlier |

Identification of Survival Genes in Human Glioblastoma Cells Using siRNA Screening  
 Nikhil G Thaker, Fang Zhang, Peter R. McDonald, Tong Ying Shun, Michael D Lewen, Ian F. Pollack, and John S. Lazo  
 Molecular Pharmacology

|                                  |               |        |                                                                        |   |           |        |
|----------------------------------|---------------|--------|------------------------------------------------------------------------|---|-----------|--------|
| siRNA Disorazole DMSO Run3       | NM_0162<br>23 | PACSN3 | protein<br>kinase C<br>and casein<br>kinase<br>substrate<br>in neurons | 3 | 1.50553   | Inlier |
| siRNA-Vinblastine Run2-<br>DMSO  | NM_0133<br>58 | PADI1  | peptidyl<br>arginine<br>deiminase,<br>type I                           |   | -2.089885 | Inlier |
| siRNA Disorazole DMSO Run3       | NM_0133<br>58 | PADI1  | peptidyl<br>arginine<br>deiminase,<br>type I                           |   | -1.423769 | Inlier |
| siRNA-Temozolomide Run2-<br>DMSO | NM_0133<br>58 | PADI1  | peptidyl<br>arginine<br>deiminase,<br>type I                           |   | -0.755545 | Inlier |
| siRNA Disorazole DMSO Run1       | NM_0133<br>58 | PADI1  | peptidyl<br>arginine<br>deiminase,<br>type I                           |   | -0.08238  | Inlier |
| siRNA-Temozolomide Run1-<br>DMSO | NM_0133<br>58 | PADI1  | peptidyl<br>arginine<br>deiminase,<br>type I                           |   | 0.08238   | Inlier |
| siRNA-Vinblastine Run1-<br>DMSO  | NM_0133<br>58 | PADI1  | peptidyl<br>arginine<br>deiminase,<br>type I                           |   | 0.591187  | Inlier |
| siRNA-Temozolomide Run3-<br>DMSO | NM_0133<br>58 | PADI1  | peptidyl<br>arginine<br>deiminase,<br>type I                           |   | 0.593455  | Inlier |
| siRNA Disorazole DMSO Run2       | NM_0133<br>58 | PADI1  | peptidyl<br>arginine<br>deiminase,<br>type I                           |   | 1.360216  | Inlier |
| siRNA-Temozolomide Run3-<br>DMSO | NM_0162<br>33 | PADI3  | peptidyl<br>arginine<br>deiminase,<br>type III                         |   | -1.14635  | Inlier |
| siRNA-Temozolomide Run2-<br>DMSO | NM_0162<br>33 | PADI3  | peptidyl<br>arginine<br>deiminase,<br>type III                         |   | -0.673961 | Inlier |
| siRNA-Vinblastine Run2-<br>DMSO  | NM_0162<br>33 | PADI3  | peptidyl<br>arginine<br>deiminase,<br>type III                         |   | -0.62329  | Inlier |

Identification of Survival Genes in Human Glioblastoma Cells Using siRNA Screening  
 Nikhil G Thaker, Fang Zhang, Peter R. McDonald, Tong Ying Shun, Michael D Lewen, Ian F. Pollack, and John S. Lazo

Molecular Pharmacology

|                                  |               |       |                                                |           |         |
|----------------------------------|---------------|-------|------------------------------------------------|-----------|---------|
| siRNA Disorazole DMSO Run3       | NM_0162<br>33 | PADI3 | peptidyl<br>arginine<br>deiminase,<br>type III | -0.0177   | Inlier  |
| siRNA-Temozolomide Run1-<br>DMSO | NM_0162<br>33 | PADI3 | peptidyl<br>arginine<br>deiminase,<br>type III | 0.017699  | Inlier  |
| siRNA Disorazole DMSO Run1       | NM_0162<br>33 | PADI3 | peptidyl<br>arginine<br>deiminase,<br>type III | 0.675039  | Inlier  |
| siRNA-Vinblastine Run1-<br>DMSO  | NM_0162<br>33 | PADI3 | peptidyl<br>arginine<br>deiminase,<br>type III | 1.164145  | Inlier  |
| siRNA Disorazole DMSO Run2       | NM_0162<br>33 | PADI3 | peptidyl<br>arginine<br>deiminase,<br>type III | 1.549256  | Inlier  |
| siRNA-Vinblastine Run2-<br>DMSO  | NM_0123<br>87 | PADI4 | peptidyl<br>arginine<br>deiminase,<br>type IV  | -0.738588 | Inlier  |
| siRNA-Temozolomide Run3-<br>DMSO | NM_0123<br>87 | PADI4 | peptidyl<br>arginine<br>deiminase,<br>type IV  | -0.610412 | Inlier  |
| siRNA-Temozolomide Run2-<br>DMSO | NM_0123<br>87 | PADI4 | peptidyl<br>arginine<br>deiminase,<br>type IV  | -0.259895 | Inlier  |
| siRNA Disorazole DMSO Run3       | NM_0123<br>87 | PADI4 | peptidyl<br>arginine<br>deiminase,<br>type IV  | -0.20519  | Inlier  |
| siRNA-Temozolomide Run1-<br>DMSO | NM_0123<br>87 | PADI4 | peptidyl<br>arginine<br>deiminase,<br>type IV  | 0.20519   | Inlier  |
| siRNA Disorazole DMSO Run1       | NM_0123<br>87 | PADI4 | peptidyl<br>arginine<br>deiminase,<br>type IV  | 1.321136  | Inlier  |
| siRNA Disorazole DMSO Run2       | NM_0123<br>87 | PADI4 | peptidyl<br>arginine<br>deiminase,<br>type IV  | 3.535179  | Outlier |
| siRNA-Vinblastine Run1-<br>DMSO  | NM_0123<br>87 | PADI4 | peptidyl<br>arginine<br>deiminase,<br>type IV  | 3.79375   | Outlier |

Identification of Survival Genes in Human Glioblastoma Cells Using siRNA Screening

Nikhil G Thaker, Fang Zhang, Peter R. McDonald, Tong Ying Shun, Michael D Lewen, Ian F. Pollack, and John S.

Lazo

Molecular Pharmacology

|                              |           |      |                                                                                                                                              |           |        |
|------------------------------|-----------|------|----------------------------------------------------------------------------------------------------------------------------------------------|-----------|--------|
| siRNA-Temozolomide Run3-DMSO | NM_002571 | PAEP | progesterone-associated endometrial protein (placental protein 14, pregnancy-associated endometrial alpha-2-globulin, alpha uterine protein) | -0.962293 | Inlier |
|------------------------------|-----------|------|----------------------------------------------------------------------------------------------------------------------------------------------|-----------|--------|

|                              |           |      |                                                                                                                                              |           |        |
|------------------------------|-----------|------|----------------------------------------------------------------------------------------------------------------------------------------------|-----------|--------|
| siRNA-Temozolomide Run2-DMSO | NM_002571 | PAEP | progesterone-associated endometrial protein (placental protein 14, pregnancy-associated endometrial alpha-2-globulin, alpha uterine protein) | -0.715769 | Inlier |
|------------------------------|-----------|------|----------------------------------------------------------------------------------------------------------------------------------------------|-----------|--------|

Identification of Survival Genes in Human Glioblastoma Cells Using siRNA Screening

Nikhil G Thaker, Fang Zhang, Peter R. McDonald, Tong Ying Shun, Michael D Lewen, Ian F. Pollack, and John S.

Lazo

Molecular Pharmacology

|                             |           |      |                                                                                                                                              |           |        |
|-----------------------------|-----------|------|----------------------------------------------------------------------------------------------------------------------------------------------|-----------|--------|
| siRNA-Vinblastine Run2-DMSO | NM_002571 | PAEP | progesterone-associated endometrial protein (placental protein 14, pregnancy-associated endometrial alpha-2-globulin, alpha uterine protein) | -0.633231 | Inlier |
|-----------------------------|-----------|------|----------------------------------------------------------------------------------------------------------------------------------------------|-----------|--------|

|                              |           |      |                                                                                                                                              |           |        |
|------------------------------|-----------|------|----------------------------------------------------------------------------------------------------------------------------------------------|-----------|--------|
| siRNA-Temozolomide Run1-DMSO | NM_002571 | PAEP | progesterone-associated endometrial protein (placental protein 14, pregnancy-associated endometrial alpha-2-globulin, alpha uterine protein) | -0.398991 | Inlier |
|------------------------------|-----------|------|----------------------------------------------------------------------------------------------------------------------------------------------|-----------|--------|

Identification of Survival Genes in Human Glioblastoma Cells Using siRNA Screening

Nikhil G Thaker, Fang Zhang, Peter R. McDonald, Tong Ying Shun, Michael D Lewen, Ian F. Pollack, and John S. Lazo

Molecular Pharmacology

|                            |    |         |      |                                                                                                                                             |          |        |
|----------------------------|----|---------|------|---------------------------------------------------------------------------------------------------------------------------------------------|----------|--------|
| siRNA Disorazole DMSO Run3 | 71 | NM_0025 | PAEP | progestagen-associated endometrial protein (placental protein 14, pregnancy-associated endometrial alpha-2-globulin, alpha uterine protein) | 0.398991 | Inlier |
|----------------------------|----|---------|------|---------------------------------------------------------------------------------------------------------------------------------------------|----------|--------|

|                            |    |         |      |                                                                                                                                             |          |        |
|----------------------------|----|---------|------|---------------------------------------------------------------------------------------------------------------------------------------------|----------|--------|
| siRNA Disorazole DMSO Run1 | 71 | NM_0025 | PAEP | progestagen-associated endometrial protein (placental protein 14, pregnancy-associated endometrial alpha-2-globulin, alpha uterine protein) | 0.603977 | Inlier |
|----------------------------|----|---------|------|---------------------------------------------------------------------------------------------------------------------------------------------|----------|--------|

Identification of Survival Genes in Human Glioblastoma Cells Using siRNA Screening

Nikhil G Thaker, Fang Zhang, Peter R. McDonald, Tong Ying Shun, Michael D Lewen, Ian F. Pollack, and John S.

Lazo

Molecular Pharmacology

|                              |               |              |                                                                                                                                                                                                             |           |        |
|------------------------------|---------------|--------------|-------------------------------------------------------------------------------------------------------------------------------------------------------------------------------------------------------------|-----------|--------|
| siRNA Disorazole DMSO Run2   | NM_0025<br>71 | PAEP         | progesterone-associated endometrial protein (placental protein 14, pregnancy-associated endometrial alpha-2-globulin, alpha uterine protein)                                                                | 1.896852  | Inlier |
| siRNA-Vinblastine Run1-DMSO  | NM_0025<br>71 | PAEP         | progesterone-associated endometrial protein (placental protein 14, pregnancy-associated endometrial alpha-2-globulin, alpha uterine protein), platelet-activating factor acetylhydrolase, isoform 1b, alpha | 2.764226  | Inlier |
| siRNA-Temozolomide Run3-DMSO | NM_0004<br>30 | PAFAH1B<br>1 | alpha subunit 45kDa                                                                                                                                                                                         | -0.825079 | Inlier |



Identification of Survival Genes in Human Glioblastoma Cells Using siRNA Screening

Nikhil G Thaker, Fang Zhang, Peter R. McDonald, Tong Ying Shun, Michael D Lewen, Ian F. Pollack, and John S. Lazo

Molecular Pharmacology

| siRNA Treatment              | Gene    | Accession | Transcript | Protein                                                                     | Log2FC    | Category |
|------------------------------|---------|-----------|------------|-----------------------------------------------------------------------------|-----------|----------|
| siRNA-Temozolomide Run2-DMSO | NM_0004 | PAFAH1B   | 1          | platelet-activating factor acetylhydrolase, isoform Ib, alpha subunit 45kDa | -0.523921 | Inlier   |
| siRNA-Vinblastine Run2-DMSO  | NM_0004 | PAFAH1B   | 1          | platelet-activating factor acetylhydrolase, isoform Ib, alpha subunit 45kDa | -0.519801 | Inlier   |
| siRNA Disorazole DMSO Run3   | NM_0004 | PAFAH1B   | 1          | platelet-activating factor acetylhydrolase, isoform Ib, alpha subunit 45kDa | -0.513637 | Inlier   |
| siRNA Disorazole DMSO Run1   | NM_0004 | PAFAH1B   | 1          | platelet-activating factor acetylhydrolase, isoform Ib, alpha subunit 45kDa | 0.513637  | Inlier   |
| siRNA-Temozolomide Run1-DMSO | NM_0004 | PAFAH1B   | 1          | platelet-activating factor acetylhydrolase, isoform Ib, alpha subunit 45kDa | 1.701087  | Inlier   |

Identification of Survival Genes in Human Glioblastoma Cells Using siRNA Screening

Nikhil G Thaker, Fang Zhang, Peter R. McDonald, Tong Ying Shun, Michael D Lewen, Ian F. Pollack, and John S. Lazo

Molecular Pharmacology

| siRNA Treatment              | Gene ID   | Gene Name | Protein Name                                                                | Value     | Category |
|------------------------------|-----------|-----------|-----------------------------------------------------------------------------|-----------|----------|
| siRNA-Vinblastine Run1-DMSO  | NM_000430 | PAFAH1B   | platelet-activating factor acetylhydrolase, isoform Ib, alpha subunit 45kDa | 3.614369  | Outlier  |
| siRNA Disorazole DMSO Run2   | NM_000430 | PAFAH1B   | platelet-activating factor acetylhydrolase, isoform Ib, alpha subunit 45kDa | 4.594857  | Outlier  |
| siRNA-Temozolomide Run3-DMSO | NM_002572 | PAFAH1B   | platelet-activating factor acetylhydrolase, isoform Ib, beta subunit 30kDa  | -1.296672 | Inlier   |
| siRNA-Temozolomide Run2-DMSO | NM_002572 | PAFAH1B   | platelet-activating factor acetylhydrolase, isoform Ib, beta subunit 30kDa  | -1.162972 | Inlier   |
| siRNA Disorazole DMSO Run3   | NM_002572 | PAFAH1B   | platelet-activating factor acetylhydrolase, isoform Ib, beta subunit 30kDa  | -0.252695 | Inlier   |

Identification of Survival Genes in Human Glioblastoma Cells Using siRNA Screening

Nikhil G Thaker, Fang Zhang, Peter R. McDonald, Tong Ying Shun, Michael D Lewen, Ian F. Pollack, and John S. Lazo

Molecular Pharmacology

| siRNA              | Run       | Gene    | Accession | Protein                                                                    | Value     | Outlier |
|--------------------|-----------|---------|-----------|----------------------------------------------------------------------------|-----------|---------|
| siRNA-Vinblastine  | Run2-DMSO | PFAFH1B | NM_002572 | platelet-activating factor acetylhydrolase, isoform Ib, beta subunit 30kDa | -0.210053 | Inlier  |
| siRNA-Temozolomide | Run1-DMSO | PFAFH1B | NM_002572 | platelet-activating factor acetylhydrolase, isoform Ib, beta subunit 30kDa | 0.210053  | Inlier  |
| siRNA-Vinblastine  | Run1-DMSO | PFAFH1B | NM_002572 | platelet-activating factor acetylhydrolase, isoform Ib, beta subunit 30kDa | 0.624391  | Inlier  |
| siRNA Disorazole   | DMSO Run1 | PFAFH1B | NM_002572 | platelet-activating factor acetylhydrolase, isoform Ib, beta subunit 30kDa | 0.724609  | Inlier  |
| siRNA Disorazole   | DMSO Run2 | PFAFH1B | NM_002572 | platelet-activating factor acetylhydrolase, isoform Ib, beta subunit 30kDa | 1.234715  | Inlier  |

Identification of Survival Genes in Human Glioblastoma Cells Using siRNA Screening

Nikhil G Thaker, Fang Zhang, Peter R. McDonald, Tong Ying Shun, Michael D Lewen, Ian F. Pollack, and John S. Lazo

Molecular Pharmacology

|                              |           |          |                                                                             |           |        |
|------------------------------|-----------|----------|-----------------------------------------------------------------------------|-----------|--------|
| siRNA-Temozolomide Run2-DMSO | NM_002573 | PAFAH1B3 | platelet-activating factor acetylhydrolase, isoform Ib, gamma subunit 29kDa | -0.776939 | Inlier |
| siRNA-Vinblastine Run2-DMSO  | NM_002573 | PAFAH1B3 | platelet-activating factor acetylhydrolase, isoform Ib, gamma subunit 29kDa | -0.572061 | Inlier |
| siRNA-Temozolomide Run3-DMSO | NM_002573 | PAFAH1B3 | platelet-activating factor acetylhydrolase, isoform Ib, gamma subunit 29kDa | -0.279755 | Inlier |
| siRNA Disorazole DMSO Run1   | NM_002573 | PAFAH1B3 | platelet-activating factor acetylhydrolase, isoform Ib, gamma subunit 29kDa | -0.098133 | Inlier |
| siRNA Disorazole DMSO Run3   | NM_002573 | PAFAH1B3 | platelet-activating factor acetylhydrolase, isoform Ib, gamma subunit 29kDa | 0.098133  | Inlier |

Identification of Survival Genes in Human Glioblastoma Cells Using siRNA Screening  
 Nikhil G Thaker, Fang Zhang, Peter R. McDonald, Tong Ying Shun, Michael D Lewen, Ian F. Pollack, and John S. Lazo  
 Molecular Pharmacology

|                              |           |          |                                                                             |           |        |
|------------------------------|-----------|----------|-----------------------------------------------------------------------------|-----------|--------|
| siRNA-Temozolomide Run1-DMSO | NM_002573 | PAFAH1B3 | platelet-activating factor acetylhydrolase, isoform Ib, gamma subunit 29kDa | 1.25555   | Inlier |
| siRNA-Vinblastine Run1-DMSO  | NM_002573 | PAFAH1B3 | platelet-activating factor acetylhydrolase, isoform Ib, gamma subunit 29kDa | 1.26783   | Inlier |
| siRNA Disorazole DMSO Run2   | NM_002573 | PAFAH1B3 | platelet-activating factor acetylhydrolase, isoform Ib, gamma subunit 29kDa | 1.378157  | Inlier |
| siRNA Disorazole DMSO Run3   | NM_000437 | PAFAH2   | platelet-activating factor acetylhydrolase 2, 40kDa                         | -0.808841 | Inlier |
| siRNA-Vinblastine Run2-DMSO  | NM_000437 | PAFAH2   | platelet-activating factor acetylhydrolase 2, 40kDa                         | -0.540159 | Inlier |
| siRNA-Temozolomide Run2-DMSO | NM_000437 | PAFAH2   | platelet-activating factor acetylhydrolase 2, 40kDa                         | -0.479686 | Inlier |

Identification of Survival Genes in Human Glioblastoma Cells Using siRNA Screening  
 Nikhil G Thaker, Fang Zhang, Peter R. McDonald, Tong Ying Shun, Michael D Lewen, Ian F. Pollack, and John S. Lazo

Molecular Pharmacology

|                              |           |        |                                                     |           |        |
|------------------------------|-----------|--------|-----------------------------------------------------|-----------|--------|
| siRNA-Temozolomide Run3-DMSO | NM_000437 | PAFAH2 | platelet-activating factor acetylhydrolase 2, 40kDa | -0.273203 | Inlier |
| siRNA-Temozolomide Run1-DMSO | NM_000437 | PAFAH2 | platelet-activating factor acetylhydrolase 2, 40kDa | 0.273203  | Inlier |
| siRNA Disorazole DMSO Run1   | NM_000437 | PAFAH2 | platelet-activating factor acetylhydrolase 2, 40kDa | 0.860535  | Inlier |
| siRNA-Vinblastine Run1-DMSO  | NM_000437 | PAFAH2 | platelet-activating factor acetylhydrolase 2, 40kDa | 1.112188  | Inlier |
| siRNA Disorazole DMSO Run2   | NM_000437 | PAFAH2 | platelet-activating factor acetylhydrolase 2, 40kDa | 1.540007  | Inlier |
| siRNA-Temozolomide Run3-DMSO | NM_000277 | PAH    | phenylalanine hydroxylase                           | -0.847206 | Inlier |
| siRNA-Temozolomide Run2-DMSO | NM_000277 | PAH    | phenylalanine hydroxylase                           | -0.69222  | Inlier |
| siRNA Disorazole DMSO Run1   | NM_000277 | PAH    | phenylalanine hydroxylase                           | -0.63211  | Inlier |
| siRNA Disorazole DMSO Run3   | NM_000277 | PAH    | phenylalanine hydroxylase                           | -0.026608 | Inlier |
| siRNA-Vinblastine Run2-DMSO  | NM_000277 | PAH    | phenylalanine hydroxylase                           | 0.026608  | Inlier |

Identification of Survival Genes in Human Glioblastoma Cells Using siRNA Screening

Nikhil G Thaker, Fang Zhang, Peter R. McDonald, Tong Ying Shun, Michael D Lewen, Ian F. Pollack, and John S. Lazo

Molecular Pharmacology

|                              |           |       |                                                                                                    |           |        |
|------------------------------|-----------|-------|----------------------------------------------------------------------------------------------------|-----------|--------|
| siRNA-Temozolomide Run1-DMSO | NM_000277 | PAH   | phenylalanine hydroxylase                                                                          | 0.65678   | Inlier |
| siRNA-Vinblastine Run1-DMSO  | NM_000277 | PAH   | phenylalanine hydroxylase                                                                          | 1.125796  | Inlier |
| siRNA Disorazole DMSO Run2   | NM_000277 | PAH   | phenylalanine hydroxylase                                                                          | 1.493739  | Inlier |
| siRNA-Temozolomide Run2-DMSO | NM_006452 | PAICS | phosphoribosylaminimidazole carboxylase, phosphoribosylaminimidazole succinocarboxamide synthetase | -1.751343 | Inlier |
| siRNA-Vinblastine Run2-DMSO  | NM_006452 | PAICS | phosphoribosylaminimidazole carboxylase, phosphoribosylaminimidazole succinocarboxamide synthetase | -0.729489 | Inlier |

Identification of Survival Genes in Human Glioblastoma Cells Using siRNA Screening

Nikhil G Thaker, Fang Zhang, Peter R. McDonald, Tong Ying Shun, Michael D Lewen, Ian F. Pollack, and John S. Lazo

Molecular Pharmacology

|                                  |               |       |                                                                                                                                          |                  |
|----------------------------------|---------------|-------|------------------------------------------------------------------------------------------------------------------------------------------|------------------|
| siRNA Disorazole DMSO Run3       | NM_0064<br>52 | PAICS | phosphori<br>bosylamin<br>oimidazole<br>carboxylas<br>e,<br>phosphori<br>bosylamin<br>oimidazole<br>succinocar<br>boxamide<br>synthetase | -0.619511 Inlier |
| siRNA-Temozolomide Run3-<br>DMSO | NM_0064<br>52 | PAICS | phosphori<br>bosylamin<br>oimidazole<br>carboxylas<br>e,<br>phosphori<br>bosylamin<br>oimidazole<br>succinocar<br>boxamide<br>synthetase | -0.04812 Inlier  |
| siRNA-Temozolomide Run1-<br>DMSO | NM_0064<br>52 | PAICS | phosphori<br>bosylamin<br>oimidazole<br>carboxylas<br>e,<br>phosphori<br>bosylamin<br>oimidazole<br>succinocar<br>boxamide<br>synthetase | 0.04812 Inlier   |



Identification of Survival Genes in Human Glioblastoma Cells Using siRNA Screening

Nikhil G Thaker, Fang Zhang, Peter R. McDonald, Tong Ying Shun, Michael D Lewen, Ian F. Pollack, and John S.

Lazo

Molecular Pharmacology

|                            |               |       |                                                                                                                                          |          |        |
|----------------------------|---------------|-------|------------------------------------------------------------------------------------------------------------------------------------------|----------|--------|
|                            |               |       | phosphori<br>bosylamin<br>oimidazole<br>carboxylas<br>e,<br>phosphori<br>bosylamin<br>oimidazole<br>succinocar<br>boxamide<br>synthetase | 0.056399 | Inlier |
| siRNA Disorazole DMSO Run1 | NM_0064<br>52 | PAICS |                                                                                                                                          |          |        |

|                            |               |       |                                                                                                                                          |          |        |
|----------------------------|---------------|-------|------------------------------------------------------------------------------------------------------------------------------------------|----------|--------|
|                            |               |       | phosphori<br>bosylamin<br>oimidazole<br>carboxylas<br>e,<br>phosphori<br>bosylamin<br>oimidazole<br>succinocar<br>boxamide<br>synthetase | 2.328365 | Inlier |
| siRNA Disorazole DMSO Run2 | NM_0064<br>52 | PAICS |                                                                                                                                          |          |        |

|                                 |               |       |                                                                                                                                          |          |        |
|---------------------------------|---------------|-------|------------------------------------------------------------------------------------------------------------------------------------------|----------|--------|
|                                 |               |       | phosphori<br>bosylamin<br>oimidazole<br>carboxylas<br>e,<br>phosphori<br>bosylamin<br>oimidazole<br>succinocar<br>boxamide<br>synthetase | 3.297329 | Inlier |
| siRNA-Vinblastine Run1-<br>DMSO | NM_0064<br>52 | PAICS | p21/Cdc42<br>/Rac1-<br>activated<br>kinase 1<br>(STE20<br>homolog,<br>yeast)                                                             |          |        |

|                                 |               |      |  |           |        |
|---------------------------------|---------------|------|--|-----------|--------|
| siRNA-Vinblastine Run1-<br>DMSO | NM_0025<br>76 | PAK1 |  | -0.856026 | Inlier |
|---------------------------------|---------------|------|--|-----------|--------|

Identification of Survival Genes in Human Glioblastoma Cells Using siRNA Screening

Nikhil G Thaker, Fang Zhang, Peter R. McDonald, Tong Ying Shun, Michael D Lewen, Ian F. Pollack, and John S. Lazo

Molecular Pharmacology

| siRNA Treatment              | Gene ID   | Gene Name | Protein                                                  | Log Fold Change | Outlier Type |
|------------------------------|-----------|-----------|----------------------------------------------------------|-----------------|--------------|
| siRNA-Temozolomide Run1-DMSO | NM_002576 | PAK1      | p21/Cdc42/Rac1-activated kinase 1 (STE20 homolog, yeast) | -0.492974       | Inlier       |
| siRNA-Temozolomide Run3-DMSO | NM_002576 | PAK1      | p21/Cdc42/Rac1-activated kinase 1 (STE20 homolog, yeast) | -0.421448       | Inlier       |
| siRNA-Temozolomide Run2-DMSO | NM_002576 | PAK1      | p21/Cdc42/Rac1-activated kinase 1 (STE20 homolog, yeast) | -0.046843       | Inlier       |
| siRNA Disorazole DMSO Run1   | NM_002576 | PAK1      | p21/Cdc42/Rac1-activated kinase 1 (STE20 homolog, yeast) | 0.046844        | Inlier       |
| siRNA-Vinblastine Run2-DMSO  | NM_002576 | PAK1      | p21/Cdc42/Rac1-activated kinase 1 (STE20 homolog, yeast) | 1.443119        | Inlier       |
| siRNA Disorazole DMSO Run3   | NM_002576 | PAK1      | p21/Cdc42/Rac1-activated kinase 1 (STE20 homolog, yeast) | 1.9473          | Inlier       |
| siRNA Disorazole DMSO Run2   | NM_002576 | PAK1      | p21/Cdc42/Rac1-activated kinase 1 (STE20 homolog, yeast) | 3.016347        | Inlier       |

Identification of Survival Genes in Human Glioblastoma Cells Using siRNA Screening  
 Nikhil G Thaker, Fang Zhang, Peter R. McDonald, Tong Ying Shun, Michael D Lewen, Ian F. Pollack, and John S. Lazo

Molecular Pharmacology

|                              |               |      |                                           |           |        |
|------------------------------|---------------|------|-------------------------------------------|-----------|--------|
| siRNA-Temozolomide Run3-DMSO | NM_0025<br>77 | PAK2 | p21<br>(CDKN1A)-<br>activated<br>kinase 2 | -1.328326 | Inlier |
| siRNA-Temozolomide Run2-DMSO | NM_0025<br>77 | PAK2 | p21<br>(CDKN1A)-<br>activated<br>kinase 2 | -0.754153 | Inlier |
| siRNA-Temozolomide Run1-DMSO | NM_0025<br>77 | PAK2 | p21<br>(CDKN1A)-<br>activated<br>kinase 2 | -0.594847 | Inlier |
| siRNA Disorazole DMSO Run3   | NM_0025<br>77 | PAK2 | p21<br>(CDKN1A)-<br>activated<br>kinase 2 | -0.027255 | Inlier |
| siRNA Disorazole DMSO Run1   | NM_0025<br>77 | PAK2 | p21<br>(CDKN1A)-<br>activated<br>kinase 2 | 0.027255  | Inlier |
| siRNA Disorazole DMSO Run2   | NM_0025<br>77 | PAK2 | p21<br>(CDKN1A)-<br>activated<br>kinase 2 | 0.423157  | Inlier |
| siRNA-Vinblastine Run2-DMSO  | NM_0025<br>77 | PAK2 | p21<br>(CDKN1A)-<br>activated<br>kinase 2 | 1.173636  | Inlier |
| siRNA-Vinblastine Run1-DMSO  | NM_0025<br>77 | PAK2 | p21<br>(CDKN1A)-<br>activated<br>kinase 2 | 1.617912  | Inlier |
| siRNA-Temozolomide Run3-DMSO | NM_0025<br>78 | PAK3 | p21<br>(CDKN1A)-<br>activated<br>kinase 3 | -1.455171 | Inlier |
| siRNA-Temozolomide Run2-DMSO | NM_0025<br>78 | PAK3 | p21<br>(CDKN1A)-<br>activated<br>kinase 3 | -0.329197 | Inlier |
| siRNA-Temozolomide Run1-DMSO | NM_0025<br>78 | PAK3 | p21<br>(CDKN1A)-<br>activated<br>kinase 3 | -0.21095  | Inlier |
| siRNA Disorazole DMSO Run2   | NM_0025<br>78 | PAK3 | p21<br>(CDKN1A)-<br>activated<br>kinase 3 | -0.128694 | Inlier |
| siRNA-Vinblastine Run1-DMSO  | NM_0025<br>78 | PAK3 | p21<br>(CDKN1A)-<br>activated<br>kinase 3 | 0.128694  | Inlier |

Identification of Survival Genes in Human Glioblastoma Cells Using siRNA Screening  
 Nikhil G Thaker, Fang Zhang, Peter R. McDonald, Tong Ying Shun, Michael D Lewen, Ian F. Pollack, and John S. Lazo

Molecular Pharmacology

|                              |                  |      |                                           |           |        |
|------------------------------|------------------|------|-------------------------------------------|-----------|--------|
| siRNA-Vinblastine Run2-DMSO  | NM_0025<br>78    | PAK3 | p21<br>(CDKN1A)-<br>activated<br>kinase 3 | 1.019803  | Inlier |
| siRNA Disorazole DMSO Run3   | NM_0025<br>78    | PAK3 | p21<br>(CDKN1A)-<br>activated<br>kinase 3 | 1.048957  | Inlier |
| siRNA Disorazole DMSO Run1   | NM_0025<br>78    | PAK3 | p21<br>(CDKN1A)-<br>activated<br>kinase 3 | 2.161759  | Inlier |
| siRNA-Temozolomide Run3-DMSO | NM_0010<br>14832 | PAK4 | p21(CDKN<br>1A)-<br>activated<br>kinase 4 | -0.688741 | Inlier |
| siRNA-Temozolomide Run1-DMSO | NM_0010<br>14832 | PAK4 | p21(CDKN<br>1A)-<br>activated<br>kinase 4 | -0.660259 | Inlier |
| siRNA-Vinblastine Run1-DMSO  | NM_0010<br>14832 | PAK4 | p21(CDKN<br>1A)-<br>activated<br>kinase 4 | -0.385475 | Inlier |
| siRNA-Temozolomide Run2-DMSO | NM_0010<br>14832 | PAK4 | p21(CDKN<br>1A)-<br>activated<br>kinase 4 | -0.155221 | Inlier |
| siRNA Disorazole DMSO Run1   | NM_0010<br>14832 | PAK4 | p21(CDKN<br>1A)-<br>activated<br>kinase 4 | 0.155222  | Inlier |
| siRNA-Vinblastine Run2-DMSO  | NM_0010<br>14832 | PAK4 | p21(CDKN<br>1A)-<br>activated<br>kinase 4 | 0.927561  | Inlier |
| siRNA Disorazole DMSO Run2   | NM_0010<br>14832 | PAK4 | p21(CDKN<br>1A)-<br>activated<br>kinase 4 | 1.014261  | Inlier |
| siRNA Disorazole DMSO Run3   | NM_0010<br>14832 | PAK4 | p21(CDKN<br>1A)-<br>activated<br>kinase 4 | 1.159322  | Inlier |
| siRNA-Temozolomide Run3-DMSO | NM_0201<br>68    | PAK6 | p21(CDKN<br>1A)-<br>activated<br>kinase 6 | -0.985948 | Inlier |
| siRNA-Temozolomide Run1-DMSO | NM_0201<br>68    | PAK6 | p21(CDKN<br>1A)-<br>activated<br>kinase 6 | -0.732668 | Inlier |

Identification of Survival Genes in Human Glioblastoma Cells Using siRNA Screening  
 Nikhil G Thaker, Fang Zhang, Peter R. McDonald, Tong Ying Shun, Michael D Lewen, Ian F. Pollack, and John S. Lazo

Molecular Pharmacology

| siRNA                        | Gene          | PK   | Gene                                  | Value     | Outlier |
|------------------------------|---------------|------|---------------------------------------|-----------|---------|
| siRNA-Temozolomide Run2-DMSO | NM_0201<br>68 | PAK6 | p21(CDKN1A)-<br>activated<br>kinase 6 | -0.616332 | Inlier  |
| siRNA Disorazole DMSO Run2   | NM_0201<br>68 | PAK6 | p21(CDKN1A)-<br>activated<br>kinase 6 | -0.301661 | Inlier  |
| siRNA Disorazole DMSO Run1   | NM_0201<br>68 | PAK6 | p21(CDKN1A)-<br>activated<br>kinase 6 | 0.301661  | Inlier  |
| siRNA Disorazole DMSO Run3   | NM_0201<br>68 | PAK6 | p21(CDKN1A)-<br>activated<br>kinase 6 | 0.509375  | Inlier  |
| siRNA-Vinblastine Run1-DMSO  | NM_0201<br>68 | PAK6 | p21(CDKN1A)-<br>activated<br>kinase 6 | 1.532319  | Inlier  |
| siRNA-Vinblastine Run2-DMSO  | NM_0201<br>68 | PAK6 | p21(CDKN1A)-<br>activated<br>kinase 6 | 2.664271  | Inlier  |
| siRNA-Temozolomide Run1-DMSO | NM_0203<br>41 | PAK7 | p21(CDKN1A)-<br>activated<br>kinase 7 | -0.924849 | Inlier  |
| siRNA-Temozolomide Run2-DMSO | NM_0203<br>41 | PAK7 | p21(CDKN1A)-<br>activated<br>kinase 7 | -0.699013 | Inlier  |
| siRNA-Vinblastine Run1-DMSO  | NM_0203<br>41 | PAK7 | p21(CDKN1A)-<br>activated<br>kinase 7 | -0.649987 | Inlier  |
| siRNA-Temozolomide Run3-DMSO | NM_0203<br>41 | PAK7 | p21(CDKN1A)-<br>activated<br>kinase 7 | -0.202304 | Inlier  |
| siRNA Disorazole DMSO Run1   | NM_0203<br>41 | PAK7 | p21(CDKN1A)-<br>activated<br>kinase 7 | 0.202304  | Inlier  |
| siRNA Disorazole DMSO Run2   | NM_0203<br>41 | PAK7 | p21(CDKN1A)-<br>activated<br>kinase 7 | 0.35219   | Inlier  |
| siRNA-Vinblastine Run2-DMSO  | NM_0203<br>41 | PAK7 | p21(CDKN1A)-<br>activated<br>kinase 7 | 1.757692  | Inlier  |

Identification of Survival Genes in Human Glioblastoma Cells Using siRNA Screening  
 Nikhil G Thaker, Fang Zhang, Peter R. McDonald, Tong Ying Shun, Michael D Lewen, Ian F. Pollack, and John S. Lazo

Molecular Pharmacology

|                                  |               |      |                                                              |           |        |
|----------------------------------|---------------|------|--------------------------------------------------------------|-----------|--------|
| siRNA Disorazole DMSO Run3       | NM_0203<br>41 | PAK7 | p21(CDKN<br>1A)-<br>activated<br>kinase 7                    | 2.625884  | Inlier |
| siRNA-Temozolomide Run3-<br>DMSO | NM_1388<br>22 | PAM  | peptidylgly<br>cine alpha-<br>amidating<br>monooxyg<br>enase | -1.086015 | Inlier |
| siRNA-Temozolomide Run2-<br>DMSO | NM_1388<br>22 | PAM  | peptidylgly<br>cine alpha-<br>amidating<br>monooxyg<br>enase | -0.815147 | Inlier |
| siRNA-Temozolomide Run1-<br>DMSO | NM_1388<br>22 | PAM  | peptidylgly<br>cine alpha-<br>amidating<br>monooxyg<br>enase | -0.267527 | Inlier |
| siRNA Disorazole DMSO Run1       | NM_1388<br>22 | PAM  | peptidylgly<br>cine alpha-<br>amidating<br>monooxyg<br>enase | -0.156822 | Inlier |
| siRNA-Vinblastine Run2-<br>DMSO  | NM_1388<br>22 | PAM  | peptidylgly<br>cine alpha-<br>amidating<br>monooxyg<br>enase | 0.156822  | Inlier |
| siRNA Disorazole DMSO Run3       | NM_1388<br>22 | PAM  | peptidylgly<br>cine alpha-<br>amidating<br>monooxyg<br>enase | 0.533853  | Inlier |
| siRNA Disorazole DMSO Run2       | NM_1388<br>22 | PAM  | peptidylgly<br>cine alpha-<br>amidating<br>monooxyg<br>enase | 1.001131  | Inlier |
| siRNA-Vinblastine Run1-<br>DMSO  | NM_1388<br>22 | PAM  | peptidylgly<br>cine alpha-<br>amidating<br>monooxyg<br>enase | 1.403719  | Inlier |

Identification of Survival Genes in Human Glioblastoma Cells Using siRNA Screening

Nikhil G Thaker, Fang Zhang, Peter R. McDonald, Tong Ying Shun, Michael D Lewen, Ian F. Pollack, and John S. Lazo

Molecular Pharmacology

|                              |               |       |                                                                        |           |        |
|------------------------------|---------------|-------|------------------------------------------------------------------------|-----------|--------|
| siRNA-Vinblastine Run2-DMSO  | NM_0054<br>47 | PAMCI | peptidylglycine alpha-amidating monooxygenase COOH-terminal interactor | -1.617375 | Inlier |
| siRNA-Temozolomide Run2-DMSO | NM_0054<br>47 | PAMCI | peptidylglycine alpha-amidating monooxygenase COOH-terminal interactor | -0.871825 | Inlier |
| siRNA Disorazole DMSO Run3   | NM_0054<br>47 | PAMCI | peptidylglycine alpha-amidating monooxygenase COOH-terminal interactor | -0.151276 | Inlier |
| siRNA-Temozolomide Run1-DMSO | NM_0054<br>47 | PAMCI | peptidylglycine alpha-amidating monooxygenase COOH-terminal interactor | -0.121686 | Inlier |
| siRNA Disorazole DMSO Run1   | NM_0054<br>47 | PAMCI | peptidylglycine alpha-amidating monooxygenase COOH-terminal interactor | 0.121687  | Inlier |

Identification of Survival Genes in Human Glioblastoma Cells Using siRNA Screening  
 Nikhil G Thaker, Fang Zhang, Peter R. McDonald, Tong Ying Shun, Michael D Lewen, Ian F. Pollack, and John S. Lazo  
 Molecular Pharmacology

|                              |               |       |                                                                        |           |        |
|------------------------------|---------------|-------|------------------------------------------------------------------------|-----------|--------|
| siRNA-Temozolomide Run3-DMSO | NM_0054<br>47 | PAMCI | peptidylglycine alpha-amidating monooxygenase COOH-terminal interactor | 0.477175  | Inlier |
| siRNA Disorazole DMSO Run2   | NM_0054<br>47 | PAMCI | peptidylglycine alpha-amidating monooxygenase COOH-terminal interactor | 1.34962   | Inlier |
| siRNA-Vinblastine Run1-DMSO  | NM_0054<br>47 | PAMCI | peptidylglycine alpha-amidating monooxygenase COOH-terminal interactor | 1.956177  | Inlier |
| siRNA Disorazole DMSO Run2   | NM_1489<br>78 | PANK1 | pantothenate kinase 1                                                  | -0.942078 | Inlier |
| siRNA-Temozolomide Run1-DMSO | NM_1489<br>78 | PANK1 | pantothenate kinase 1                                                  | -0.791894 | Inlier |
| siRNA-Temozolomide Run2-DMSO | NM_1489<br>78 | PANK1 | pantothenate kinase 1                                                  | -0.603915 | Inlier |
| siRNA-Vinblastine Run1-DMSO  | NM_1489<br>78 | PANK1 | pantothenate kinase 1                                                  | -0.216368 | Inlier |
| siRNA Disorazole DMSO Run1   | NM_1489<br>78 | PANK1 | pantothenate kinase 1                                                  | 0.216368  | Inlier |
| siRNA-Temozolomide Run3-DMSO | NM_1489<br>78 | PANK1 | pantothenate kinase 1                                                  | 0.241046  | Inlier |
| siRNA Disorazole DMSO Run3   | NM_1489<br>78 | PANK1 | pantothenate kinase 1                                                  | 0.745085  | Inlier |
| siRNA-Vinblastine Run2-DMSO  | NM_1489<br>78 | PANK1 | pantothenate kinase 1                                                  | 0.84343   | Inlier |



Identification of Survival Genes in Human Glioblastoma Cells Using siRNA Screening  
 Nikhil G Thaker, Fang Zhang, Peter R. McDonald, Tong Ying Shun, Michael D Lewen, Ian F. Pollack, and John S. Lazo  
 Molecular Pharmacology

|                              |               |       |                                                        |           |        |
|------------------------------|---------------|-------|--------------------------------------------------------|-----------|--------|
| siRNA-Temozolomide Run3-DMSO | NM_1536<br>40 | PANK2 | pantothenate kinase 2<br>(Hallervorden-Spatz syndrome) | -1.940558 | Inlier |
| siRNA Disorazole DMSO Run2   | NM_1536<br>40 | PANK2 | pantothenate kinase 2<br>(Hallervorden-Spatz syndrome) | -1.196862 | Inlier |
| siRNA-Temozolomide Run1-DMSO | NM_1536<br>40 | PANK2 | pantothenate kinase 2<br>(Hallervorden-Spatz syndrome) | -0.630491 | Inlier |
| siRNA-Temozolomide Run2-DMSO | NM_1536<br>40 | PANK2 | pantothenate kinase 2<br>(Hallervorden-Spatz syndrome) | -0.348005 | Inlier |
| siRNA Disorazole DMSO Run1   | NM_1536<br>40 | PANK2 | pantothenate kinase 2<br>(Hallervorden-Spatz syndrome) | 0.348006  | Inlier |
| siRNA Disorazole DMSO Run3   | NM_1536<br>40 | PANK2 | pantothenate kinase 2<br>(Hallervorden-Spatz syndrome) | 0.462955  | Inlier |
| siRNA-Vinblastine Run1-DMSO  | NM_1536<br>40 | PANK2 | pantothenate kinase 2<br>(Hallervorden-Spatz syndrome) | 0.718509  | Inlier |

Identification of Survival Genes in Human Glioblastoma Cells Using siRNA Screening  
 Nikhil G Thaker, Fang Zhang, Peter R. McDonald, Tong Ying Shun, Michael D Lewen, Ian F. Pollack, and John S. Lazo  
 Molecular Pharmacology

|                              |               |       |                                                        |           |        |
|------------------------------|---------------|-------|--------------------------------------------------------|-----------|--------|
| siRNA-Vinblastine Run2-DMSO  | NM_1536<br>40 | PANK2 | pantothenate kinase 2<br>(Hallervorden-Spatz syndrome) | 0.978269  | Inlier |
| siRNA Disorazole DMSO Run2   | NM_0245<br>94 | PANK3 | pantothenate kinase 3                                  | -0.91309  | Inlier |
| siRNA-Temozolomide Run3-DMSO | NM_0245<br>94 | PANK3 | pantothenate kinase 3                                  | -0.771866 | Inlier |
| siRNA Disorazole DMSO Run1   | NM_0245<br>94 | PANK3 | pantothenate kinase 3                                  | -0.078103 | Inlier |
| siRNA-Temozolomide Run1-DMSO | NM_0245<br>94 | PANK3 | pantothenate kinase 3                                  | -0.074861 | Inlier |
| siRNA-Temozolomide Run2-DMSO | NM_0245<br>94 | PANK3 | pantothenate kinase 3                                  | 0.07486   | Inlier |
| siRNA Disorazole DMSO Run3   | NM_0245<br>94 | PANK3 | pantothenate kinase 3                                  | 0.577134  | Inlier |
| siRNA-Vinblastine Run2-DMSO  | NM_0245<br>94 | PANK3 | pantothenate kinase 3                                  | 0.873782  | Inlier |
| siRNA-Vinblastine Run1-DMSO  | NM_0245<br>94 | PANK3 | pantothenate kinase 3                                  | 0.927154  | Inlier |
| siRNA Disorazole DMSO Run2   | NM_0182<br>16 | PANK4 | pantothenate kinase 4                                  | -2.885752 | Inlier |
| siRNA-Temozolomide Run1-DMSO | NM_0182<br>16 | PANK4 | pantothenate kinase 4                                  | -0.966695 | Inlier |
| siRNA-Temozolomide Run3-DMSO | NM_0182<br>16 | PANK4 | pantothenate kinase 4                                  | -0.792872 | Inlier |
| siRNA-Temozolomide Run2-DMSO | NM_0182<br>16 | PANK4 | pantothenate kinase 4                                  | -0.001404 | Inlier |
| siRNA Disorazole DMSO Run3   | NM_0182<br>16 | PANK4 | pantothenate kinase 4                                  | 0.001403  | Inlier |
| siRNA Disorazole DMSO Run1   | NM_0182<br>16 | PANK4 | pantothenate kinase 4                                  | 0.132727  | Inlier |
| siRNA-Vinblastine Run2-DMSO  | NM_0182<br>16 | PANK4 | pantothenate kinase 4                                  | 0.667002  | Inlier |

Identification of Survival Genes in Human Glioblastoma Cells Using siRNA Screening  
 Nikhil G Thaker, Fang Zhang, Peter R. McDonald, Tong Ying Shun, Michael D Lewen, Ian F. Pollack, and John S. Lazo

| Molecular Pharmacology       | siRNA         | Gene  | Protein                            | Log2FC    | Outlier |
|------------------------------|---------------|-------|------------------------------------|-----------|---------|
| siRNA-Vinblastine Run1-DMSO  | NM_0182<br>16 | PANK4 | pantothenate kinase 4              | 0.681998  | Inlier  |
| siRNA-Temozolomide Run2-DMSO | NM_1529<br>11 | PAOX  | polyamine oxidase (exo-N4-amino)   | -1.207632 | Inlier  |
| siRNA-Temozolomide Run3-DMSO | NM_1529<br>11 | PAOX  | polyamine oxidase (exo-N4-amino)   | -1.144019 | Inlier  |
| siRNA Disorazole DMSO Run1   | NM_1529<br>11 | PAOX  | polyamine oxidase (exo-N4-amino)   | -0.33087  | Inlier  |
| siRNA-Temozolomide Run1-DMSO | NM_1529<br>11 | PAOX  | polyamine oxidase (exo-N4-amino)   | -0.090362 | Inlier  |
| siRNA-Vinblastine Run2-DMSO  | NM_1529<br>11 | PAOX  | polyamine oxidase (exo-N4-amino)   | 0.090362  | Inlier  |
| siRNA Disorazole DMSO Run3   | NM_1529<br>11 | PAOX  | polyamine oxidase (exo-N4-amino)   | 0.217332  | Inlier  |
| siRNA-Vinblastine Run1-DMSO  | NM_1529<br>11 | PAOX  | polyamine oxidase (exo-N4-amino)   | 1.01813   | Inlier  |
| siRNA Disorazole DMSO Run2   | NM_1529<br>11 | PAOX  | polyamine oxidase (exo-N4-amino)   | 2.090485  | Inlier  |
| siRNA-Temozolomide Run3-DMSO | NM_0224<br>47 | PAPD5 | PAP associated domain containing 5 | -1.53197  | Inlier  |
| siRNA Disorazole DMSO Run3   | NM_0224<br>47 | PAPD5 | PAP associated domain containing 5 | -0.846027 | Inlier  |
| siRNA Disorazole DMSO Run1   | NM_0224<br>47 | PAPD5 | PAP associated domain containing 5 | -0.368305 | Inlier  |

Identification of Survival Genes in Human Glioblastoma Cells Using siRNA Screening  
 Nikhil G Thaker, Fang Zhang, Peter R. McDonald, Tong Ying Shun, Michael D Lewen, Ian F. Pollack, and John S. Lazo

Molecular Pharmacology

| siRNA                        | Gene    | Gene ID | Protein | Domain                             | Value     | Outlier |
|------------------------------|---------|---------|---------|------------------------------------|-----------|---------|
| siRNA-Temozolomide Run2-DMSO | NM_0224 | 47      | PAPD5   | PAP associated domain containing 5 | -0.266462 | Inlier  |
| siRNA-Temozolomide Run1-DMSO | NM_0224 | 47      | PAPD5   | PAP associated domain containing 5 | 0.266462  | Inlier  |
| siRNA-Vinblastine Run2-DMSO  | NM_0224 | 47      | PAPD5   | PAP associated domain containing 5 | 0.502973  | Inlier  |
| siRNA-Vinblastine Run1-DMSO  | NM_0224 | 47      | PAPD5   | PAP associated domain containing 5 | 1.400676  | Inlier  |
| siRNA Disorazole DMSO Run2   | NM_0224 | 47      | PAPD5   | PAP associated domain containing 5 | 2.020074  | Inlier  |
| siRNA Disorazole DMSO Run3   | NM_0326 | 32      | PAPOLA  | poly(A) polymerase alpha           | -1.415416 | Inlier  |
| siRNA-Vinblastine Run2-DMSO  | NM_0326 | 32      | PAPOLA  | poly(A) polymerase alpha           | -0.913125 | Inlier  |
| siRNA-Temozolomide Run3-DMSO | NM_0326 | 32      | PAPOLA  | poly(A) polymerase alpha           | -0.514553 | Inlier  |
| siRNA-Temozolomide Run2-DMSO | NM_0326 | 32      | PAPOLA  | poly(A) polymerase alpha           | -0.025359 | Inlier  |
| siRNA Disorazole DMSO Run1   | NM_0326 | 32      | PAPOLA  | poly(A) polymerase alpha           | 0.025359  | Inlier  |
| siRNA-Vinblastine Run1-DMSO  | NM_0326 | 32      | PAPOLA  | poly(A) polymerase alpha           | 0.091173  | Inlier  |
| siRNA Disorazole DMSO Run2   | NM_0326 | 32      | PAPOLA  | poly(A) polymerase alpha           | 0.834447  | Inlier  |
| siRNA-Temozolomide Run1-DMSO | NM_0326 | 32      | PAPOLA  | poly(A) polymerase alpha           | 0.881282  | Inlier  |

Identification of Survival Genes in Human Glioblastoma Cells Using siRNA Screening  
 Nikhil G Thaker, Fang Zhang, Peter R. McDonald, Tong Ying Shun, Michael D Lewen, Ian F. Pollack, and John S. Lazo

Molecular Pharmacology

|                              |               |        |                                                       |           |        |
|------------------------------|---------------|--------|-------------------------------------------------------|-----------|--------|
| siRNA-Temozolomide Run3-DMSO | NM_0201<br>44 | PAPOLB | poly(A)<br>polymerase<br>beta<br>(testis<br>specific) | -0.738232 | Inlier |
| siRNA-Temozolomide Run2-DMSO | NM_0201<br>44 | PAPOLB | poly(A)<br>polymerase<br>beta<br>(testis<br>specific) | -0.721296 | Inlier |
| siRNA-Vinblastine Run2-DMSO  | NM_0201<br>44 | PAPOLB | poly(A)<br>polymerase<br>beta<br>(testis<br>specific) | -0.627704 | Inlier |
| siRNA Disorazole DMSO Run3   | NM_0201<br>44 | PAPOLB | poly(A)<br>polymerase<br>beta<br>(testis<br>specific) | -0.216318 | Inlier |
| siRNA-Temozolomide Run1-DMSO | NM_0201<br>44 | PAPOLB | poly(A)<br>polymerase<br>beta<br>(testis<br>specific) | 0.216318  | Inlier |
| siRNA Disorazole DMSO Run1   | NM_0201<br>44 | PAPOLB | poly(A)<br>polymerase<br>beta<br>(testis<br>specific) | 0.378762  | Inlier |
| siRNA-Vinblastine Run1-DMSO  | NM_0201<br>44 | PAPOLB | poly(A)<br>polymerase<br>beta<br>(testis<br>specific) | 1.190327  | Inlier |
| siRNA Disorazole DMSO Run2   | NM_0201<br>44 | PAPOLB | poly(A)<br>polymerase<br>beta<br>(testis<br>specific) | 1.434658  | Inlier |
| siRNA-Temozolomide Run3-DMSO | NM_0228<br>94 | PAPOLG | poly(A)<br>polymerase<br>gamma                        | -0.962538 | Inlier |
| siRNA-Temozolomide Run2-DMSO | NM_0228<br>94 | PAPOLG | poly(A)<br>polymerase<br>gamma                        | -0.875552 | Inlier |
| siRNA-Vinblastine Run2-DMSO  | NM_0228<br>94 | PAPOLG | poly(A)<br>polymerase<br>gamma                        | -0.473448 | Inlier |

Identification of Survival Genes in Human Glioblastoma Cells Using siRNA Screening  
 Nikhil G Thaker, Fang Zhang, Peter R. McDonald, Tong Ying Shun, Michael D Lewen, Ian F. Pollack, and John S. Lazo  
 Molecular Pharmacology

|                                  |               |        |                                                                     |           |        |
|----------------------------------|---------------|--------|---------------------------------------------------------------------|-----------|--------|
| siRNA Disorazole DMSO Run3       | NM_0228<br>94 | PAPOLG | poly(A)<br>polymerase<br>gamma                                      | -0.295975 | Inlier |
| siRNA Disorazole DMSO Run1       | NM_0228<br>94 | PAPOLG | poly(A)<br>polymerase<br>gamma                                      | 0.295975  | Inlier |
| siRNA-Temozolomide Run1-<br>DMSO | NM_0228<br>94 | PAPOLG | poly(A)<br>polymerase<br>gamma                                      | 0.299415  | Inlier |
| siRNA-Vinblastine Run1-<br>DMSO  | NM_0228<br>94 | PAPOLG | poly(A)<br>polymerase<br>gamma                                      | 1.193316  | Inlier |
| siRNA Disorazole DMSO Run2       | NM_0228<br>94 | PAPOLG | poly(A)<br>polymerase<br>gamma                                      | 1.386271  | Inlier |
| siRNA-Temozolomide Run3-<br>DMSO | NM_0025<br>81 | PAPPA  | pregnancy-<br>associated<br>plasma<br>protein A,<br>pappalysin<br>1 | -1.769019 | Inlier |
| siRNA-Temozolomide Run2-<br>DMSO | NM_0025<br>81 | PAPPA  | pregnancy-<br>associated<br>plasma<br>protein A,<br>pappalysin<br>1 | -1.469618 | Inlier |
| siRNA Disorazole DMSO Run3       | NM_0025<br>81 | PAPPA  | pregnancy-<br>associated<br>plasma<br>protein A,<br>pappalysin<br>1 | -0.693857 | Inlier |
| siRNA-Temozolomide Run1-<br>DMSO | NM_0025<br>81 | PAPPA  | pregnancy-<br>associated<br>plasma<br>protein A,<br>pappalysin<br>1 | -0.141186 | Inlier |

Identification of Survival Genes in Human Glioblastoma Cells Using siRNA Screening  
 Nikhil G Thaker, Fang Zhang, Peter R. McDonald, Tong Ying Shun, Michael D Lewen, Ian F. Pollack, and John S. Lazo  
 Molecular Pharmacology

|                              |               |        |                                                     |   |           |        |
|------------------------------|---------------|--------|-----------------------------------------------------|---|-----------|--------|
| siRNA Disorazole DMSO Run1   | NM_0025<br>81 | PAPPA  | pregnancy-associated plasma protein A, pappalysin 1 | 1 | 0.141186  | Inlier |
| siRNA Disorazole DMSO Run2   | NM_0025<br>81 | PAPPA  | pregnancy-associated plasma protein A, pappalysin 1 | 1 | 0.146045  | Inlier |
| siRNA-Vinblastine Run2-DMSO  | NM_0025<br>81 | PAPPA  | pregnancy-associated plasma protein A, pappalysin 1 | 1 | 0.655143  | Inlier |
| siRNA-Vinblastine Run1-DMSO  | NM_0025<br>81 | PAPPA  | pregnancy-associated plasma protein A, pappalysin 1 | 1 | 0.776236  | Inlier |
| siRNA Disorazole DMSO Run2   | NM_0219<br>36 | PAPPA2 | pappalysin 2                                        | 2 | -1.007865 | Inlier |
| siRNA-Temozolomide Run2-DMSO | NM_0219<br>36 | PAPPA2 | pappalysin 2                                        | 2 | -0.688927 | Inlier |
| siRNA-Temozolomide Run3-DMSO | NM_0219<br>36 | PAPPA2 | pappalysin 2                                        | 2 | -0.660073 | Inlier |
| siRNA Disorazole DMSO Run3   | NM_0219<br>36 | PAPPA2 | pappalysin 2                                        | 2 | -0.018545 | Inlier |
| siRNA-Temozolomide Run1-DMSO | NM_0219<br>36 | PAPPA2 | pappalysin 2                                        | 2 | 0.018545  | Inlier |
| siRNA Disorazole DMSO Run1   | NM_0219<br>36 | PAPPA2 | pappalysin 2                                        | 2 | 0.33074   | Inlier |
| siRNA-Vinblastine Run2-DMSO  | NM_0219<br>36 | PAPPA2 | pappalysin 2                                        | 2 | 0.939589  | Inlier |
| siRNA-Vinblastine Run1-DMSO  | NM_0219<br>36 | PAPPA2 | pappalysin 2                                        | 2 | 1.018289  | Inlier |
| siRNA-Temozolomide Run1-DMSO | NM_0054<br>43 | PAPSS1 | 3-phosphoadenosine 5-phosphosulfate synthase 1      | 1 | -0.735816 | Inlier |

Identification of Survival Genes in Human Glioblastoma Cells Using siRNA Screening  
 Nikhil G Thaker, Fang Zhang, Peter R. McDonald, Tong Ying Shun, Michael D Lewen, Ian F. Pollack, and John S. Lazo  
 Molecular Pharmacology

|                              |               |        |                                                     |           |        |
|------------------------------|---------------|--------|-----------------------------------------------------|-----------|--------|
| siRNA-Temozolomide Run3-DMSO | NM_0054<br>43 | PAPSS1 | 3-phosphoadenosine 5-phospho-<br>ulphate synthase 1 | -0.718623 | Inlier |
| siRNA Disorazole DMSO Run2   | NM_0054<br>43 | PAPSS1 | 3-phosphoadenosine 5-phospho-<br>ulphate synthase 1 | -0.680933 | Inlier |
| siRNA-Vinblastine Run1-DMSO  | NM_0054<br>43 | PAPSS1 | 3-phosphoadenosine 5-phospho-<br>ulphate synthase 1 | -0.046726 | Inlier |
| siRNA Disorazole DMSO Run1   | NM_0054<br>43 | PAPSS1 | 3-phosphoadenosine 5-phospho-<br>ulphate synthase 1 | 0.046727  | Inlier |
| siRNA-Temozolomide Run2-DMSO | NM_0054<br>43 | PAPSS1 | 3-phosphoadenosine 5-phospho-<br>ulphate synthase 1 | 0.178838  | Inlier |
| siRNA-Vinblastine Run2-DMSO  | NM_0054<br>43 | PAPSS1 | 3-phosphoadenosine 5-phospho-<br>ulphate synthase 1 | 0.668067  | Inlier |



Identification of Survival Genes in Human Glioblastoma Cells Using siRNA Screening  
 Nikhil G Thaker, Fang Zhang, Peter R. McDonald, Tong Ying Shun, Michael D Lewen, Ian F. Pollack, and John S. Lazo  
 Molecular Pharmacology

|                              |                  |        |                                                |           |        |
|------------------------------|------------------|--------|------------------------------------------------|-----------|--------|
| siRNA Disorazole DMSO Run3   | NM_0054<br>43    | PAPSS1 | 3-phosphoadenosine 5-phospho-ulfate synthase 1 | 0.817966  | Inlier |
| siRNA Disorazole DMSO Run2   | NM_0010<br>15880 | PAPSS2 | 3-phosphoadenosine 5-phospho-ulfate synthase 2 | -0.764124 | Inlier |
| siRNA-Temozolomide Run3-DMSO | NM_0010<br>15880 | PAPSS2 | 3-phosphoadenosine 5-phospho-ulfate synthase 2 | -0.584876 | Inlier |
| siRNA Disorazole DMSO Run3   | NM_0010<br>15880 | PAPSS2 | 3-phosphoadenosine 5-phospho-ulfate synthase 2 | -0.105837 | Inlier |
| siRNA-Temozolomide Run1-DMSO | NM_0010<br>15880 | PAPSS2 | 3-phosphoadenosine 5-phospho-ulfate synthase 2 | -0.075989 | Inlier |
| siRNA-Temozolomide Run2-DMSO | NM_0010<br>15880 | PAPSS2 | 3-phosphoadenosine 5-phospho-ulfate synthase 2 | 0.07599   | Inlier |

Identification of Survival Genes in Human Glioblastoma Cells Using siRNA Screening  
 Nikhil G Thaker, Fang Zhang, Peter R. McDonald, Tong Ying Shun, Michael D Lewen, Ian F. Pollack, and John S. Lazo  
 Molecular Pharmacology

|                              |                  |        |                                                |           |        |
|------------------------------|------------------|--------|------------------------------------------------|-----------|--------|
| siRNA Disorazole DMSO Run1   | NM_0010<br>15880 | PAPSS2 | 3-phosphoadenosine 5-phosphosulfate synthase 2 | 0.822082  | Inlier |
| siRNA-Vinblastine Run1-DMSO  | NM_0010<br>15880 | PAPSS2 | 3-phosphoadenosine 5-phosphosulfate synthase 2 | 1.444665  | Inlier |
| siRNA-Vinblastine Run2-DMSO  | NM_0010<br>15880 | PAPSS2 | 3-phosphoadenosine 5-phosphosulfate synthase 2 | 1.454702  | Inlier |
| siRNA-Temozolomide Run2-DMSO | NM_0036<br>31    | PARG   | glycohydrolyase poly (ADP-ribose)              | -2.586895 | Inlier |
| siRNA-Temozolomide Run3-DMSO | NM_0036<br>31    | PARG   | glycohydrolyase poly (ADP-ribose)              | -2.35971  | Inlier |
| siRNA Disorazole DMSO Run1   | NM_0036<br>31    | PARG   | glycohydrolyase poly (ADP-ribose)              | -0.380795 | Inlier |
| siRNA Disorazole DMSO Run3   | NM_0036<br>31    | PARG   | glycohydrolyase poly (ADP-ribose)              | -0.087592 | Inlier |
| siRNA-Temozolomide Run1-DMSO | NM_0036<br>31    | PARG   | glycohydrolyase poly (ADP-ribose)              | 0.087592  | Inlier |
| siRNA-Vinblastine Run2-DMSO  | NM_0036<br>31    | PARG   | glycohydrolyase poly (ADP-ribose)              | 0.158191  | Inlier |
| siRNA Disorazole DMSO Run2   | NM_0036<br>31    | PARG   | glycohydrolyase                                | 0.968205  | Inlier |

Identification of Survival Genes in Human Glioblastoma Cells Using siRNA Screening  
 Nikhil G Thaker, Fang Zhang, Peter R. McDonald, Tong Ying Shun, Michael D Lewen, Ian F. Pollack, and John S. Lazo

Molecular Pharmacology

|                              |           |       |                                                                                          |           |        |
|------------------------------|-----------|-------|------------------------------------------------------------------------------------------|-----------|--------|
| siRNA-Vinblastine Run1-DMSO  | NM_003631 | PARG  | poly (ADP-ribose) glycohydrolase                                                         | 1.031235  | Inlier |
| siRNA-Temozolomide Run3-DMSO | NM_004815 | PARG1 | Rho GTPase activating protein 29                                                         | -1.807386 | Inlier |
| siRNA-Temozolomide Run2-DMSO | NM_004815 | PARG1 | Rho GTPase activating protein 29                                                         | -0.88312  | Inlier |
| siRNA-Temozolomide Run1-DMSO | NM_004815 | PARG1 | Rho GTPase activating protein 29                                                         | -0.783707 | Inlier |
| siRNA-Vinblastine Run2-DMSO  | NM_004815 | PARG1 | Rho GTPase activating protein 29                                                         | -0.022459 | Inlier |
| siRNA Disorazole DMSO Run3   | NM_004815 | PARG1 | Rho GTPase activating protein 29                                                         | 0.022459  | Inlier |
| siRNA Disorazole DMSO Run1   | NM_004815 | PARG1 | Rho GTPase activating protein 29                                                         | 0.636155  | Inlier |
| siRNA Disorazole DMSO Run2   | NM_004815 | PARG1 | Rho GTPase activating protein 29                                                         | 0.63776   | Inlier |
| siRNA-Vinblastine Run1-DMSO  | NM_004815 | PARG1 | Rho GTPase activating protein 29<br>Parkinson disease (autosomal recessive, juvenile) 2, | 0.71124   | Inlier |
| siRNA-Temozolomide Run3-DMSO | NM_013988 | PARK2 | parkin<br>Parkinson disease (autosomal recessive, juvenile) 2,                           | -0.83924  | Inlier |
| siRNA Disorazole DMSO Run2   | NM_013988 | PARK2 | parkin                                                                                   | -0.50976  | Inlier |

Identification of Survival Genes in Human Glioblastoma Cells Using siRNA Screening

Nikhil G Thaker, Fang Zhang, Peter R. McDonald, Tong Ying Shun, Michael D Lewen, Ian F. Pollack, and John S. Lazo

Molecular Pharmacology

|                              |               |       |                                                             |           |        |
|------------------------------|---------------|-------|-------------------------------------------------------------|-----------|--------|
| siRNA-Temozolomide Run2-DMSO | NM_0139<br>88 | PARK2 | Parkinson disease (autosomal recessive, juvenile) 2, parkin | -0.496756 | Inlier |
| siRNA Disorazole DMSO Run1   | NM_0139<br>88 | PARK2 | Parkinson disease (autosomal recessive, juvenile) 2, parkin | -0.019808 | Inlier |
| siRNA-Temozolomide Run1-DMSO | NM_0139<br>88 | PARK2 | Parkinson disease (autosomal recessive, juvenile) 2, parkin | 0.019808  | Inlier |
| siRNA-Vinblastine Run2-DMSO  | NM_0139<br>88 | PARK2 | Parkinson disease (autosomal recessive, juvenile) 2, parkin | 0.918496  | Inlier |
| siRNA-Vinblastine Run1-DMSO  | NM_0139<br>88 | PARK2 | Parkinson disease (autosomal recessive, juvenile) 2, parkin | 0.932883  | Inlier |
| siRNA Disorazole DMSO Run3   | NM_0139<br>88 | PARK2 | poly(A)-specific ribonuclease (deadenylation)               | 1.281975  | Inlier |
| siRNA-Temozolomide Run3-DMSO | NM_0025<br>82 | PARN  | nuclease)                                                   | -2.353622 | Inlier |

Identification of Survival Genes in Human Glioblastoma Cells Using siRNA Screening

Nikhil G Thaker, Fang Zhang, Peter R. McDonald, Tong Ying Shun, Michael D Lewen, Ian F. Pollack, and John S. Lazo

Molecular Pharmacology

| siRNA Treatment              | Gene ID   | Gene Name | Enzyme                                                 | Log Fold Change | Outlier Status |
|------------------------------|-----------|-----------|--------------------------------------------------------|-----------------|----------------|
| siRNA-Temozolomide Run2-DMSO | NM_002582 | PARN      | poly(A)-specific ribonuclease (deadenylation nuclease) | -1.823909       | Inlier         |
| siRNA-Temozolomide Run1-DMSO | NM_002582 | PARN      | poly(A)-specific ribonuclease (deadenylation nuclease) | -0.976224       | Inlier         |
| siRNA-Vinblastine Run2-DMSO  | NM_002582 | PARN      | poly(A)-specific ribonuclease (deadenylation nuclease) | -0.053313       | Inlier         |
| siRNA Disorazole DMSO Run1   | NM_002582 | PARN      | poly(A)-specific ribonuclease (deadenylation nuclease) | 0.053314        | Inlier         |
| siRNA Disorazole DMSO Run3   | NM_002582 | PARN      | poly(A)-specific ribonuclease (deadenylation nuclease) | 0.155157        | Inlier         |
| siRNA Disorazole DMSO Run2   | NM_002582 | PARN      | poly(A)-specific ribonuclease (deadenylation nuclease) | 0.467748        | Inlier         |
| siRNA-Vinblastine Run1-DMSO  | NM_002582 | PARN      | poly(A)-specific ribonuclease (deadenylation nuclease) | 0.881252        | Inlier         |

Identification of Survival Genes in Human Glioblastoma Cells Using siRNA Screening  
 Nikhil G Thaker, Fang Zhang, Peter R. McDonald, Tong Ying Shun, Michael D Lewen, Ian F. Pollack, and John S. Lazo

Molecular Pharmacology

|                              |               |       |                                               |           |        |
|------------------------------|---------------|-------|-----------------------------------------------|-----------|--------|
| siRNA-Temozolomide Run1-DMSO | NM_0016<br>18 | PARP1 | poly (ADP-ribose) polymerase family, member 1 | -0.715359 | Inlier |
| siRNA Disorazole DMSO Run1   | NM_0016<br>18 | PARP1 | poly (ADP-ribose) polymerase family, member 1 | -0.633641 | Inlier |
| siRNA Disorazole DMSO Run3   | NM_0016<br>18 | PARP1 | poly (ADP-ribose) polymerase family, member 1 | -0.385389 | Inlier |
| siRNA-Vinblastine Run2-DMSO  | NM_0016<br>18 | PARP1 | poly (ADP-ribose) polymerase family, member 1 | -0.208095 | Inlier |
| siRNA-Temozolomide Run2-DMSO | NM_0016<br>18 | PARP1 | poly (ADP-ribose) polymerase family, member 1 | 0.208093  | Inlier |
| siRNA-Temozolomide Run3-DMSO | NM_0016<br>18 | PARP1 | poly (ADP-ribose) polymerase family, member 1 | 1.514278  | Inlier |
| siRNA-Vinblastine Run1-DMSO  | NM_0016<br>18 | PARP1 | poly (ADP-ribose) polymerase family, member 1 | 1.716998  | Inlier |
| siRNA Disorazole DMSO Run2   | NM_0016<br>18 | PARP1 | poly (ADP-ribose) polymerase family, member 1 | 2.085032  | Inlier |
| siRNA-Temozolomide Run2-DMSO | NM_0054<br>84 | PARP2 | poly (ADP-ribose) polymerase family, member 2 | -1.289931 | Inlier |
| siRNA-Temozolomide Run3-DMSO | NM_0054<br>84 | PARP2 | poly (ADP-ribose) polymerase family, member 2 | -0.756748 | Inlier |

Identification of Survival Genes in Human Glioblastoma Cells Using siRNA Screening  
 Nikhil G Thaker, Fang Zhang, Peter R. McDonald, Tong Ying Shun, Michael D Lewen, Ian F. Pollack, and John S. Lazo

Molecular Pharmacology

|                              |               |       |                                               |           |         |
|------------------------------|---------------|-------|-----------------------------------------------|-----------|---------|
| siRNA-Vinblastine Run2-DMSO  | NM_0054<br>84 | PARP2 | poly (ADP-ribose) polymerase family, member 2 | -0.592252 | Inlier  |
| siRNA Disorazole DMSO Run3   | NM_0054<br>84 | PARP2 | poly (ADP-ribose) polymerase family, member 2 | -0.200749 | Inlier  |
| siRNA Disorazole DMSO Run1   | NM_0054<br>84 | PARP2 | poly (ADP-ribose) polymerase family, member 2 | 0.200749  | Inlier  |
| siRNA-Temozolomide Run1-DMSO | NM_0054<br>84 | PARP2 | poly (ADP-ribose) polymerase family, member 2 | 0.467192  | Inlier  |
| siRNA-Vinblastine Run1-DMSO  | NM_0054<br>84 | PARP2 | poly (ADP-ribose) polymerase family, member 2 | 2.879934  | Inlier  |
| siRNA Disorazole DMSO Run2   | NM_0054<br>84 | PARP2 | poly (ADP-ribose) polymerase family, member 2 | 3.516866  | Outlier |
| siRNA Disorazole DMSO Run1   | NM_0054<br>85 | PARP3 | poly (ADP-ribose) polymerase family, member 3 | -1.026003 | Inlier  |
| siRNA-Vinblastine Run2-DMSO  | NM_0054<br>85 | PARP3 | poly (ADP-ribose) polymerase family, member 3 | -0.455812 | Inlier  |
| siRNA-Vinblastine Run1-DMSO  | NM_0054<br>85 | PARP3 | poly (ADP-ribose) polymerase family, member 3 | -0.269468 | Inlier  |
| siRNA-Temozolomide Run1-DMSO | NM_0054<br>85 | PARP3 | poly (ADP-ribose) polymerase family, member 3 | -0.032866 | Inlier  |

Identification of Survival Genes in Human Glioblastoma Cells Using siRNA Screening  
 Nikhil G Thaker, Fang Zhang, Peter R. McDonald, Tong Ying Shun, Michael D Lewen, Ian F. Pollack, and John S. Lazo

Molecular Pharmacology

|                              |               |       |                                               |           |        |
|------------------------------|---------------|-------|-----------------------------------------------|-----------|--------|
| siRNA Disorazole DMSO Run3   | NM_0054<br>85 | PARP3 | poly (ADP-ribose) polymerase family, member 3 | 0.032866  | Inlier |
| siRNA-Temozolomide Run2-DMSO | NM_0054<br>85 | PARP3 | poly (ADP-ribose) polymerase family, member 3 | 0.893188  | Inlier |
| siRNA-Temozolomide Run3-DMSO | NM_0054<br>85 | PARP3 | poly (ADP-ribose) polymerase family, member 3 | 1.278794  | Inlier |
| siRNA Disorazole DMSO Run2   | NM_0054<br>85 | PARP3 | poly (ADP-ribose) polymerase family, member 3 | 2.508637  | Inlier |
| siRNA-Temozolomide Run3-DMSO | NM_0064<br>37 | PARP4 | poly (ADP-ribose) polymerase family, member 4 | -0.848344 | Inlier |
| siRNA Disorazole DMSO Run3   | NM_0064<br>37 | PARP4 | poly (ADP-ribose) polymerase family, member 4 | -0.834536 | Inlier |
| siRNA-Temozolomide Run2-DMSO | NM_0064<br>37 | PARP4 | poly (ADP-ribose) polymerase family, member 4 | -0.277474 | Inlier |
| siRNA Disorazole DMSO Run1   | NM_0064<br>37 | PARP4 | poly (ADP-ribose) polymerase family, member 4 | -0.144624 | Inlier |
| siRNA-Vinblastine Run2-DMSO  | NM_0064<br>37 | PARP4 | poly (ADP-ribose) polymerase family, member 4 | 0.144624  | Inlier |
| siRNA-Temozolomide Run1-DMSO | NM_0064<br>37 | PARP4 | poly (ADP-ribose) polymerase family, member 4 | 0.514463  | Inlier |



Identification of Survival Genes in Human Glioblastoma Cells Using siRNA Screening  
 Nikhil G Thaker, Fang Zhang, Peter R. McDonald, Tong Ying Shun, Michael D Lewen, Ian F. Pollack, and John S. Lazo

Molecular Pharmacology

|                              |               |       |                                               |           |        |
|------------------------------|---------------|-------|-----------------------------------------------|-----------|--------|
| siRNA-Vinblastine Run1-DMSO  | NM_0064<br>37 | PARP4 | poly (ADP-ribose) polymerase family, member 4 | 2.522447  | Inlier |
| siRNA Disorazole DMSO Run2   | NM_0064<br>37 | PARP4 | poly (ADP-ribose) polymerase family, member 4 | 2.618478  | Inlier |
| siRNA-Temozolomide Run1-DMSO | NM_0151<br>48 | PASK  | PAS domain containing serine/threonine kinase | -0.808067 | Inlier |
| siRNA-Temozolomide Run3-DMSO | NM_0151<br>48 | PASK  | PAS domain containing serine/threonine kinase | -0.744602 | Inlier |
| siRNA-Temozolomide Run2-DMSO | NM_0151<br>48 | PASK  | PAS domain containing serine/threonine kinase | -0.604398 | Inlier |
| siRNA-Vinblastine Run1-DMSO  | NM_0151<br>48 | PASK  | PAS domain containing serine/threonine kinase | -0.335219 | Inlier |
| siRNA Disorazole DMSO Run1   | NM_0151<br>48 | PASK  | PAS domain containing serine/threonine kinase | 0.33522   | Inlier |
| siRNA Disorazole DMSO Run2   | NM_0151<br>48 | PASK  | PAS domain containing serine/threonine kinase | 0.588443  | Inlier |
| siRNA Disorazole DMSO Run3   | NM_0151<br>48 | PASK  | PAS domain containing serine/threonine kinase | 1.356386  | Inlier |

Identification of Survival Genes in Human Glioblastoma Cells Using siRNA Screening  
 Nikhil G Thaker, Fang Zhang, Peter R. McDonald, Tong Ying Shun, Michael D Lewen, Ian F. Pollack, and John S. Lazo

Molecular Pharmacology

|                              |               |      | PAS domain containing serine/threonine kinase |                  |
|------------------------------|---------------|------|-----------------------------------------------|------------------|
| siRNA-Vinblastine Run2-DMSO  | NM_0151<br>48 | PASK | kinase                                        | 1.743675 Inlier  |
| siRNA-Temozolomide Run3-DMSO | NM_1382<br>94 | PATE | PATE                                          | -1.512797 Inlier |
| siRNA-Temozolomide Run1-DMSO | NM_1382<br>94 | PATE | PATE                                          | -0.549396 Inlier |
| siRNA-Vinblastine Run2-DMSO  | NM_1382<br>94 | PATE | PATE                                          | -0.452744 Inlier |
| siRNA Disorazole DMSO Run3   | NM_1382<br>94 | PATE | PATE                                          | -0.263973 Inlier |
| siRNA-Temozolomide Run2-DMSO | NM_1382<br>94 | PATE | PATE                                          | 0.263974 Inlier  |
| siRNA Disorazole DMSO Run1   | NM_1382<br>94 | PATE | PATE                                          | 0.799604 Inlier  |
| siRNA Disorazole DMSO Run2   | NM_1382<br>94 | PATE | PATE                                          | 1.081996 Inlier  |
| siRNA-Vinblastine Run1-DMSO  | NM_1382<br>94 | PATE | PATE                                          | 1.797199 Inlier  |
| siRNA-Temozolomide Run3-DMSO | NM_0221<br>72 | PC   | pyruvate carboxylase                          | -1.075567 Inlier |
| siRNA-Temozolomide Run2-DMSO | NM_0221<br>72 | PC   | pyruvate carboxylase                          | -0.667292 Inlier |
| siRNA Disorazole DMSO Run3   | NM_0221<br>72 | PC   | pyruvate carboxylase                          | -0.372489 Inlier |
| siRNA-Vinblastine Run2-DMSO  | NM_0221<br>72 | PC   | pyruvate carboxylase                          | -0.066018 Inlier |
| siRNA-Temozolomide Run1-DMSO | NM_0221<br>72 | PC   | pyruvate carboxylase                          | 0.066018 Inlier  |
| siRNA Disorazole DMSO Run1   | NM_0221<br>72 | PC   | pyruvate carboxylase                          | 0.681708 Inlier  |
| siRNA Disorazole DMSO Run2   | NM_0221<br>72 | PC   | pyruvate carboxylase                          | 0.712586 Inlier  |
| siRNA-Vinblastine Run1-DMSO  | NM_0221<br>72 | PC   | pyruvate carboxylase                          | 1.422089 Inlier  |
| siRNA-Temozolomide Run3-DMSO | NM_0067<br>13 | PC4  | PC4                                           | -0.685943 Inlier |
| siRNA-Temozolomide Run1-DMSO | NM_0067<br>13 | PC4  | PC4                                           | -0.663057 Inlier |
| siRNA Disorazole DMSO Run2   | NM_0067<br>13 | PC4  | PC4                                           | -0.247214 Inlier |

Identification of Survival Genes in Human Glioblastoma Cells Using siRNA Screening  
 Nikhil G Thaker, Fang Zhang, Peter R. McDonald, Tong Ying Shun, Michael D Lewen, Ian F. Pollack, and John S. Lazo

|                              |               |      |                                                                                                        |           |        |
|------------------------------|---------------|------|--------------------------------------------------------------------------------------------------------|-----------|--------|
| Molecular Pharmacology       | NM_0067       |      |                                                                                                        |           |        |
| siRNA Disorazole DMSO Run1   | 13            | PC4  | PC4                                                                                                    | -0.061451 | Inlier |
| siRNA-Temozolomide Run2-DMSO | NM_0067<br>13 | PC4  | PC4                                                                                                    | 0.061451  | Inlier |
| siRNA-Vinblastine Run1-DMSO  | NM_0067<br>13 | PC4  | PC4                                                                                                    | 0.898275  | Inlier |
| siRNA-Vinblastine Run2-DMSO  | NM_0067<br>13 | PC4  | PC4                                                                                                    | 1.008042  | Inlier |
| siRNA Disorazole DMSO Run3   | NM_0067<br>13 | PC4  | PC4                                                                                                    | 1.680252  | Inlier |
| siRNA Disorazole DMSO Run1   | NM_0038<br>84 | PCAF | p300/CBP-associated factor                                                                             | -0.911134 | Inlier |
| siRNA-Temozolomide Run3-DMSO | NM_0038<br>84 | PCAF | p300/CBP-associated factor                                                                             | -0.80131  | Inlier |
| siRNA-Temozolomide Run2-DMSO | NM_0038<br>84 | PCAF | p300/CBP-associated factor                                                                             | -0.374217 | Inlier |
| siRNA-Temozolomide Run1-DMSO | NM_0038<br>84 | PCAF | p300/CBP-associated factor                                                                             | -0.349047 | Inlier |
| siRNA Disorazole DMSO Run2   | NM_0038<br>84 | PCAF | p300/CBP-associated factor                                                                             | 0.349048  | Inlier |
| siRNA-Vinblastine Run2-DMSO  | NM_0038<br>84 | PCAF | p300/CBP-associated factor                                                                             | 0.54769   | Inlier |
| siRNA-Vinblastine Run1-DMSO  | NM_0038<br>84 | PCAF | p300/CBP-associated factor                                                                             | 1.075897  | Inlier |
| siRNA Disorazole DMSO Run3   | NM_0038<br>84 | PCAF | p300/CBP-associated factor                                                                             | 1.712243  | Inlier |
| siRNA-Temozolomide Run2-DMSO | NM_0002<br>81 | PCBD | 6-pyruvoyl-tetrahydropterin synthase/dimerization cofactor of hepatocyte nuclear factor 1 alpha (TCF1) | -1.068671 | Inlier |

Identification of Survival Genes in Human Glioblastoma Cells Using siRNA Screening

Nikhil G Thaker, Fang Zhang, Peter R. McDonald, Tong Ying Shun, Michael D Lewen, Ian F. Pollack, and John S. Lazo

Molecular Pharmacology

|                              |           |      |                                                                                                        |           |        |
|------------------------------|-----------|------|--------------------------------------------------------------------------------------------------------|-----------|--------|
| siRNA-Vinblastine Run2-DMSO  | NM_000281 | PCBD | 6-pyruvoyl-tetrahydropterin synthase/dimerization cofactor of hepatocyte nuclear factor 1 alpha (TCF1) | -0.644462 | Inlier |
| siRNA-Temozolomide Run1-DMSO | NM_000281 | PCBD | 6-pyruvoyl-tetrahydropterin synthase/dimerization cofactor of hepatocyte nuclear factor 1 alpha (TCF1) | -0.33683  | Inlier |
| siRNA Disorazole DMSO Run3   | NM_000281 | PCBD | 6-pyruvoyl-tetrahydropterin synthase/dimerization cofactor of hepatocyte nuclear factor 1 alpha (TCF1) | -0.09571  | Inlier |
| siRNA Disorazole DMSO Run1   | NM_000281 | PCBD | 6-pyruvoyl-tetrahydropterin synthase/dimerization cofactor of hepatocyte nuclear factor 1 alpha (TCF1) | 0.09571   | Inlier |

Identification of Survival Genes in Human Glioblastoma Cells Using siRNA Screening  
 Nikhil G Thaker, Fang Zhang, Peter R. McDonald, Tong Ying Shun, Michael D Lewen, Ian F. Pollack, and John S. Lazo  
 Molecular Pharmacology

|                              |           |      |                                                                                                        |           |         |
|------------------------------|-----------|------|--------------------------------------------------------------------------------------------------------|-----------|---------|
| siRNA-Temozolomide Run3-DMSO | NM_000281 | PCBD | 6-pyruvoyl-tetrahydropterin synthase/dimerization cofactor of hepatocyte nuclear factor 1 alpha (TCF1) | 0.704538  | Inlier  |
| siRNA Disorazole DMSO Run2   | NM_000281 | PCBD | 6-pyruvoyl-tetrahydropterin synthase/dimerization cofactor of hepatocyte nuclear factor 1 alpha (TCF1) | 3.069299  | Inlier  |
| siRNA-Vinblastine Run1-DMSO  | NM_000281 | PCBD | 6-pyruvoyl-tetrahydropterin synthase/dimerization cofactor of hepatocyte nuclear factor 1 alpha (TCF1) | 4.275069  | Outlier |
| siRNA-Temozolomide Run3-DMSO | NM_000282 | PCCA | propionyl Coenzyme A carboxylase, alpha polypeptide                                                    | -2.436513 | Inlier  |

Identification of Survival Genes in Human Glioblastoma Cells Using siRNA Screening  
 Nikhil G Thaker, Fang Zhang, Peter R. McDonald, Tong Ying Shun, Michael D Lewen, Ian F. Pollack, and John S. Lazo

Molecular Pharmacology

|                              |           |      |                                                     |           |         |
|------------------------------|-----------|------|-----------------------------------------------------|-----------|---------|
| siRNA-Temozolomide Run2-DMSO | NM_000282 | PCCA | propionyl Coenzyme A carboxylase, alpha polypeptide | -0.42421  | Inlier  |
| siRNA Disorazole DMSO Run3   | NM_000282 | PCCA | propionyl Coenzyme A carboxylase, alpha polypeptide | -0.145095 | Inlier  |
| siRNA-Vinblastine Run2-DMSO  | NM_000282 | PCCA | propionyl Coenzyme A carboxylase, alpha polypeptide | -0.019992 | Inlier  |
| siRNA-Temozolomide Run1-DMSO | NM_000282 | PCCA | propionyl Coenzyme A carboxylase, alpha polypeptide | 0.019992  | Inlier  |
| siRNA Disorazole DMSO Run1   | NM_000282 | PCCA | propionyl Coenzyme A carboxylase, alpha polypeptide | 0.92479   | Inlier  |
| siRNA Disorazole DMSO Run2   | NM_000282 | PCCA | propionyl Coenzyme A carboxylase, alpha polypeptide | 4.216091  | Outlier |
| siRNA-Vinblastine Run1-DMSO  | NM_000282 | PCCA | propionyl Coenzyme A carboxylase, alpha polypeptide | 5.221708  | Outlier |

Identification of Survival Genes in Human Glioblastoma Cells Using siRNA Screening  
 Nikhil G Thaker, Fang Zhang, Peter R. McDonald, Tong Ying Shun, Michael D Lewen, Ian F. Pollack, and John S. Lazo

Molecular Pharmacology

|                              |           |      |                                                    |           |        |
|------------------------------|-----------|------|----------------------------------------------------|-----------|--------|
| siRNA-Temozolomide Run1-DMSO | NM_000532 | PCCB | propionyl Coenzyme A carboxylase, beta polypeptide | -1.16422  | Inlier |
| siRNA-Temozolomide Run2-DMSO | NM_000532 | PCCB | propionyl Coenzyme A carboxylase, beta polypeptide | -0.73447  | Inlier |
| siRNA-Temozolomide Run3-DMSO | NM_000532 | PCCB | propionyl Coenzyme A carboxylase, beta polypeptide | -0.663124 | Inlier |
| siRNA Disorazole DMSO Run1   | NM_000532 | PCCB | propionyl Coenzyme A carboxylase, beta polypeptide | -0.573068 | Inlier |
| siRNA Disorazole DMSO Run2   | NM_000532 | PCCB | propionyl Coenzyme A carboxylase, beta polypeptide | 0.573068  | Inlier |
| siRNA-Vinblastine Run2-DMSO  | NM_000532 | PCCB | propionyl Coenzyme A carboxylase, beta polypeptide | 0.577929  | Inlier |
| siRNA Disorazole DMSO Run3   | NM_000532 | PCCB | propionyl Coenzyme A carboxylase, beta polypeptide | 0.685876  | Inlier |

Identification of Survival Genes in Human Glioblastoma Cells Using siRNA Screening  
 Nikhil G Thaker, Fang Zhang, Peter R. McDonald, Tong Ying Shun, Michael D Lewen, Ian F. Pollack, and John S. Lazo

Molecular Pharmacology

|                              |           |       |                                                    |           |        |
|------------------------------|-----------|-------|----------------------------------------------------|-----------|--------|
| siRNA-Vinblastine Run1-DMSO  | NM_000532 | PCCB  | propionyl Coenzyme A carboxylase, beta polypeptide | 1.592535  | Inlier |
| siRNA-Temozolomide Run1-DMSO | NM_032456 | PCDH7 | BH-protocadherin (brain-heart)                     | -0.996687 | Inlier |
| siRNA-Temozolomide Run2-DMSO | NM_032456 | PCDH7 | BH-protocadherin (brain-heart)                     | -0.741982 | Inlier |
| siRNA Disorazole DMSO Run2   | NM_032456 | PCDH7 | BH-protocadherin (brain-heart)                     | -0.607018 | Inlier |
| siRNA Disorazole DMSO Run1   | NM_032456 | PCDH7 | BH-protocadherin (brain-heart)                     | -0.32483  | Inlier |
| siRNA Disorazole DMSO Run3   | NM_032456 | PCDH7 | BH-protocadherin (brain-heart)                     | 0.324831  | Inlier |
| siRNA-Temozolomide Run3-DMSO | NM_032456 | PCDH7 | BH-protocadherin (brain-heart)                     | 0.384764  | Inlier |
| siRNA-Vinblastine Run2-DMSO  | NM_032456 | PCDH7 | BH-protocadherin (brain-heart)                     | 1.827124  | Inlier |
| siRNA-Vinblastine Run1-DMSO  | NM_032456 | PCDH7 | BH-protocadherin (brain-heart)                     | 3.020381  | Inlier |
| siRNA-Temozolomide Run3-DMSO | NM_002591 | PCK1  | phosphoenolpyruvate carboxykinase 1 (soluble)      | -1.411209 | Inlier |
| siRNA-Temozolomide Run2-DMSO | NM_002591 | PCK1  | phosphoenolpyruvate carboxykinase 1 (soluble)      | -0.679329 | Inlier |



Identification of Survival Genes in Human Glioblastoma Cells Using siRNA Screening  
 Nikhil G Thaker, Fang Zhang, Peter R. McDonald, Tong Ying Shun, Michael D Lewen, Ian F. Pollack, and John S. Lazo

Molecular Pharmacology

| siRNA Treatment              | Gene ID   | Gene Name            | Log2 Fold Change | Outlier Status |
|------------------------------|-----------|----------------------|------------------|----------------|
| siRNA Disorazole DMSO Run1   | NM_002591 | PCK1 (soluble)       | -0.669671        | Inlier         |
| siRNA-Temozolomide Run1-DMSO | NM_002591 | PCK1 (soluble)       | -0.342478        | Inlier         |
| siRNA-Vinblastine Run2-DMSO  | NM_002591 | PCK1 (soluble)       | 0.342478         | Inlier         |
| siRNA Disorazole DMSO Run3   | NM_002591 | PCK1 (soluble)       | 0.544642         | Inlier         |
| siRNA Disorazole DMSO Run2   | NM_002591 | PCK1 (soluble)       | 0.859344         | Inlier         |
| siRNA-Vinblastine Run1-DMSO  | NM_002591 | PCK1 (soluble)       | 1.607013         | Inlier         |
| siRNA-Temozolomide Run3-DMSO | NM_004563 | PCK2 (mitochondrial) | -2.792487        | Inlier         |
| siRNA-Temozolomide Run1-DMSO | NM_004563 | PCK2 (mitochondrial) | -0.419298        | Inlier         |

Identification of Survival Genes in Human Glioblastoma Cells Using siRNA Screening

Nikhil G Thaker, Fang Zhang, Peter R. McDonald, Tong Ying Shun, Michael D Lewen, Ian F. Pollack, and John S. Lazo

Molecular Pharmacology

| siRNA Treatment              | Gene ID   | Gene Name | Log Fold Change | Classification |
|------------------------------|-----------|-----------|-----------------|----------------|
| siRNA-Temozolomide Run2-DMSO | NM_004563 | PCK2      | -0.241216       | Inlier         |
| siRNA Disorazole DMSO Run1   | NM_004563 | PCK2      | -0.205239       | Inlier         |
| siRNA-Vinblastine Run2-DMSO  | NM_004563 | PCK2      | 0.205239        | Inlier         |
| siRNA Disorazole DMSO Run3   | NM_004563 | PCK2      | 0.929702        | Inlier         |
| siRNA-Vinblastine Run1-DMSO  | NM_004563 | PCK2      | 3.338938        | Inlier         |
| siRNA Disorazole DMSO Run2   | NM_004563 | PCK2      | 4.76444         | Outlier        |
| siRNA-Temozolomide Run3-DMSO | NM_006197 | PCM1      | -1.365073       | Inlier         |
| siRNA Disorazole DMSO Run2   | NM_006197 | PCM1      | -1.012445       | Inlier         |
| siRNA-Temozolomide Run1-DMSO | NM_006197 | PCM1      | -0.165318       | Inlier         |

Identification of Survival Genes in Human Glioblastoma Cells Using siRNA Screening  
 Nikhil G Thaker, Fang Zhang, Peter R. McDonald, Tong Ying Shun, Michael D Lewen, Ian F. Pollack, and John S. Lazo

Molecular Pharmacology

|                              |               |       |                                                          |           |        |
|------------------------------|---------------|-------|----------------------------------------------------------|-----------|--------|
| siRNA Disorazole DMSO Run3   | NM_0061<br>97 | PCM1  | pericentriolar material 1                                | -0.115375 | Inlier |
| siRNA-Temozolomide Run2-DMSO | NM_0061<br>97 | PCM1  | pericentriolar material 1                                | 0.115375  | Inlier |
| siRNA Disorazole DMSO Run1   | NM_0061<br>97 | PCM1  | pericentriolar material 1                                | 0.55031   | Inlier |
| siRNA-Vinblastine Run2-DMSO  | NM_0061<br>97 | PCM1  | pericentriolar material 1                                | 0.79869   | Inlier |
| siRNA-Vinblastine Run1-DMSO  | NM_0061<br>97 | PCM1  | pericentriolar material 1                                | 1.049527  | Inlier |
| siRNA-Temozolomide Run2-DMSO | NM_0053<br>89 | PCMT1 | protein-L-isoaspartate (D-aspartate) O-methyltransferase | -1.323914 | Inlier |
| siRNA Disorazole DMSO Run3   | NM_0053<br>89 | PCMT1 | protein-L-isoaspartate (D-aspartate) O-methyltransferase | -0.615921 | Inlier |
| siRNA Disorazole DMSO Run1   | NM_0053<br>89 | PCMT1 | protein-L-isoaspartate (D-aspartate) O-methyltransferase | -0.591474 | Inlier |
| siRNA-Temozolomide Run3-DMSO | NM_0053<br>89 | PCMT1 | protein-L-isoaspartate (D-aspartate) O-methyltransferase | -0.379408 | Inlier |
| siRNA-Temozolomide Run1-DMSO | NM_0053<br>89 | PCMT1 | protein-L-isoaspartate (D-aspartate) O-methyltransferase | 0.379409  | Inlier |

Identification of Survival Genes in Human Glioblastoma Cells Using siRNA Screening  
 Nikhil G Thaker, Fang Zhang, Peter R. McDonald, Tong Ying Shun, Michael D Lewen, Ian F. Pollack, and John S. Lazo

Molecular Pharmacology

|                              |           |         |                                                          |           |         |
|------------------------------|-----------|---------|----------------------------------------------------------|-----------|---------|
| siRNA-Vinblastine Run2-DMSO  | NM_005389 | PCMT1   | protein-L-isoaspartate (D-aspartate) O-methyltransferase | 0.733079  | Inlier  |
| siRNA Disorazole DMSO Run2   | NM_005389 | PCMT1   | protein-L-isoaspartate (D-aspartate) O-methyltransferase | 3.325766  | Inlier  |
| siRNA-Vinblastine Run1-DMSO  | NM_005389 | PCMT1   | protein-L-isoaspartate (D-aspartate) O-methyltransferase | 4.196558  | Outlier |
| siRNA-Temozolomide Run1-DMSO | NM_013363 | PCOLCE2 | procollagen C-endopeptidase enhancer 2                   | -0.823848 | Inlier  |
| siRNA Disorazole DMSO Run2   | NM_013363 | PCOLCE2 | procollagen C-endopeptidase enhancer 2                   | -0.525152 | Inlier  |
| siRNA-Temozolomide Run2-DMSO | NM_013363 | PCOLCE2 | procollagen C-endopeptidase enhancer 2                   | -0.239421 | Inlier  |
| siRNA-Temozolomide Run3-DMSO | NM_013363 | PCOLCE2 | procollagen C-endopeptidase enhancer 2                   | -0.002779 | Inlier  |
| siRNA Disorazole DMSO Run1   | NM_013363 | PCOLCE2 | procollagen C-endopeptidase enhancer 2                   | 0.002779  | Inlier  |

Identification of Survival Genes in Human Glioblastoma Cells Using siRNA Screening  
 Nikhil G Thaker, Fang Zhang, Peter R. McDonald, Tong Ying Shun, Michael D Lewen, Ian F. Pollack, and John S. Lazo

Molecular Pharmacology

| siRNA                        | Gene    | Gene ID   | Gene Name                              | Log2FC    | Category |
|------------------------------|---------|-----------|----------------------------------------|-----------|----------|
| siRNA Disorazole DMSO Run3   | PCOLCE2 | NM_013363 | procollagen C-endopeptidase enhancer   | 1.290904  | Inlier   |
| siRNA-Vinblastine Run1-DMSO  | PCOLCE2 | NM_013363 | procollagen C-endopeptidase enhancer   | 1.697018  | Inlier   |
| siRNA-Vinblastine Run2-DMSO  | PCOLCE2 | NM_013363 | procollagen C-endopeptidase enhancer   | 1.818326  | Inlier   |
| siRNA-Temozolomide Run3-DMSO | PCOLN3  | NM_002768 | procollagen (type III) N-endopeptidase | -2.389273 | Inlier   |
| siRNA Disorazole DMSO Run1   | PCOLN3  | NM_002768 | procollagen (type III) N-endopeptidase | -0.717195 | Inlier   |
| siRNA-Temozolomide Run2-DMSO | PCOLN3  | NM_002768 | procollagen (type III) N-endopeptidase | -0.631805 | Inlier   |
| siRNA-Temozolomide Run1-DMSO | PCOLN3  | NM_002768 | procollagen (type III) N-endopeptidase | -0.378606 | Inlier   |
| siRNA Disorazole DMSO Run2   | PCOLN3  | NM_002768 | procollagen (type III) N-endopeptidase | 0.378607  | Inlier   |
| siRNA Disorazole DMSO Run3   | PCOLN3  | NM_002768 | procollagen (type III) N-endopeptidase | 0.392211  | Inlier   |

Identification of Survival Genes in Human Glioblastoma Cells Using siRNA Screening

Nikhil G Thaker, Fang Zhang, Peter R. McDonald, Tong Ying Shun, Michael D Lewen, Ian F. Pollack, and John S. Lazo

Molecular Pharmacology

|                              |           |        |                                               |           |        |
|------------------------------|-----------|--------|-----------------------------------------------|-----------|--------|
| siRNA-Vinblastine Run2-DMSO  | NM_002768 | PCOLN3 | procollagen (type III) N-endopeptidase        | 1.107771  | Inlier |
| siRNA-Vinblastine Run1-DMSO  | NM_002768 | PCOLN3 | procollagen (type III) N-endopeptidase        | 1.342372  | Inlier |
| siRNA-Temozolomide Run3-DMSO | NM_000439 | PCSK1  | proprotein convertase subtilisin/kexin type 1 | -0.768649 | Inlier |
| siRNA Disorazole DMSO Run2   | NM_000439 | PCSK1  | proprotein convertase subtilisin/kexin type 1 | -0.76783  | Inlier |
| siRNA-Temozolomide Run2-DMSO | NM_000439 | PCSK1  | proprotein convertase subtilisin/kexin type 1 | -0.58117  | Inlier |
| siRNA Disorazole DMSO Run3   | NM_000439 | PCSK1  | proprotein convertase subtilisin/kexin type 1 | -0.264486 | Inlier |
| siRNA-Temozolomide Run1-DMSO | NM_000439 | PCSK1  | proprotein convertase subtilisin/kexin type 1 | 0.264486  | Inlier |
| siRNA Disorazole DMSO Run1   | NM_000439 | PCSK1  | proprotein convertase subtilisin/kexin type 1 | 0.546984  | Inlier |
| siRNA-Vinblastine Run1-DMSO  | NM_000439 | PCSK1  | proprotein convertase subtilisin/kexin type 1 | 0.772427  | Inlier |

Identification of Survival Genes in Human Glioblastoma Cells Using siRNA Screening  
 Nikhil G Thaker, Fang Zhang, Peter R. McDonald, Tong Ying Shun, Michael D Lewen, Ian F. Pollack, and John S. Lazo  
 Molecular Pharmacology

|                              |           |       |                                               |           |        |
|------------------------------|-----------|-------|-----------------------------------------------|-----------|--------|
| siRNA-Vinblastine Run2-DMSO  | NM_000439 | PCSK1 | proprotein convertase subtilisin/kexin type 1 | 1.054262  | Inlier |
| siRNA-Temozolomide Run2-DMSO | NM_002594 | PCSK2 | proprotein convertase subtilisin/kexin type 2 | -2.427075 | Inlier |
| siRNA-Temozolomide Run3-DMSO | NM_002594 | PCSK2 | proprotein convertase subtilisin/kexin type 2 | -2.357058 | Inlier |
| siRNA-Vinblastine Run2-DMSO  | NM_002594 | PCSK2 | proprotein convertase subtilisin/kexin type 2 | -0.225901 | Inlier |
| siRNA-Temozolomide Run1-DMSO | NM_002594 | PCSK2 | proprotein convertase subtilisin/kexin type 2 | -0.142802 | Inlier |
| siRNA Disorazole DMSO Run1   | NM_002594 | PCSK2 | proprotein convertase subtilisin/kexin type 2 | 0.142801  | Inlier |
| siRNA-Vinblastine Run1-DMSO  | NM_002594 | PCSK2 | proprotein convertase subtilisin/kexin type 2 | 0.576554  | Inlier |
| siRNA Disorazole DMSO Run3   | NM_002594 | PCSK2 | proprotein convertase subtilisin/kexin type 2 | 0.772446  | Inlier |

Identification of Survival Genes in Human Glioblastoma Cells Using siRNA Screening  
 Nikhil G Thaker, Fang Zhang, Peter R. McDonald, Tong Ying Shun, Michael D Lewen, Ian F. Pollack, and John S. Lazo  
 Molecular Pharmacology

|                                  |               |       |                                                             |           |        |
|----------------------------------|---------------|-------|-------------------------------------------------------------|-----------|--------|
| siRNA Disorazole DMSO Run2       | NM_0025<br>94 | PCSK2 | proprotein<br>convertas<br>e<br>subtilisin/k<br>exin type 2 | 1.542473  | Inlier |
| siRNA-Temozolomide Run3-<br>DMSO | NM_0175<br>73 | PCSK4 | proprotein<br>convertas<br>e<br>subtilisin/k<br>exin type 4 | -1.42387  | Inlier |
| siRNA-Temozolomide Run1-<br>DMSO | NM_0175<br>73 | PCSK4 | proprotein<br>convertas<br>e<br>subtilisin/k<br>exin type 4 | -0.564203 | Inlier |
| siRNA-Temozolomide Run2-<br>DMSO | NM_0175<br>73 | PCSK4 | proprotein<br>convertas<br>e<br>subtilisin/k<br>exin type 4 | -0.389954 | Inlier |
| siRNA Disorazole DMSO Run1       | NM_0175<br>73 | PCSK4 | proprotein<br>convertas<br>e<br>subtilisin/k<br>exin type 4 | -0.051657 | Inlier |
| siRNA Disorazole DMSO Run3       | NM_0175<br>73 | PCSK4 | proprotein<br>convertas<br>e<br>subtilisin/k<br>exin type 4 | 0.051657  | Inlier |
| siRNA Disorazole DMSO Run2       | NM_0175<br>73 | PCSK4 | proprotein<br>convertas<br>e<br>subtilisin/k<br>exin type 4 | 0.784797  | Inlier |
| siRNA-Vinblastine Run2-<br>DMSO  | NM_0175<br>73 | PCSK4 | proprotein<br>convertas<br>e<br>subtilisin/k<br>exin type 4 | 0.981     | Inlier |



Identification of Survival Genes in Human Glioblastoma Cells Using siRNA Screening  
 Nikhil G Thaker, Fang Zhang, Peter R. McDonald, Tong Ying Shun, Michael D Lewen, Ian F. Pollack, and John S. Lazo  
 Molecular Pharmacology

|                              |           |       |                                               |           |        |
|------------------------------|-----------|-------|-----------------------------------------------|-----------|--------|
| siRNA-Vinblastine Run1-DMSO  | NM_017573 | PCSK4 | proprotein convertase subtilisin/kexin type 4 | 2.12058   | Inlier |
| siRNA-Temozolomide Run3-DMSO | NM_006200 | PCSK5 | proprotein convertase subtilisin/kexin type 5 | -1.601482 | Inlier |
| siRNA-Temozolomide Run2-DMSO | NM_006200 | PCSK5 | proprotein convertase subtilisin/kexin type 5 | -0.804073 | Inlier |
| siRNA Disorazole DMSO Run2   | NM_006200 | PCSK5 | proprotein convertase subtilisin/kexin type 5 | -0.544927 | Inlier |
| siRNA Disorazole DMSO Run3   | NM_006200 | PCSK5 | proprotein convertase subtilisin/kexin type 5 | -0.325955 | Inlier |
| siRNA Disorazole DMSO Run1   | NM_006200 | PCSK5 | proprotein convertase subtilisin/kexin type 5 | 0.325955  | Inlier |
| siRNA-Temozolomide Run1-DMSO | NM_006200 | PCSK5 | proprotein convertase subtilisin/kexin type 5 | 0.491192  | Inlier |
| siRNA-Vinblastine Run1-DMSO  | NM_006200 | PCSK5 | proprotein convertase subtilisin/kexin type 5 | 1.481359  | Inlier |

Identification of Survival Genes in Human Glioblastoma Cells Using siRNA Screening  
 Nikhil G Thaker, Fang Zhang, Peter R. McDonald, Tong Ying Shun, Michael D Lewen, Ian F. Pollack, and John S. Lazo  
 Molecular Pharmacology

|                              |           |       |                                               |           |        |
|------------------------------|-----------|-------|-----------------------------------------------|-----------|--------|
| siRNA-Vinblastine Run2-DMSO  | NM_006200 | PCSK5 | proprotein convertase subtilisin/kexin type 5 | 1.975854  | Inlier |
| siRNA-Temozolomide Run3-DMSO | NM_138324 | PCSK6 | proprotein convertase subtilisin/kexin type 6 | -0.900497 | Inlier |
| siRNA-Temozolomide Run2-DMSO | NM_138324 | PCSK6 | proprotein convertase subtilisin/kexin type 6 | -0.748528 | Inlier |
| siRNA Disorazole DMSO Run2   | NM_138324 | PCSK6 | proprotein convertase subtilisin/kexin type 6 | -0.600472 | Inlier |
| siRNA Disorazole DMSO Run3   | NM_138324 | PCSK6 | proprotein convertase subtilisin/kexin type 6 | -0.101441 | Inlier |
| siRNA-Temozolomide Run1-DMSO | NM_138324 | PCSK6 | proprotein convertase subtilisin/kexin type 6 | 0.101441  | Inlier |
| siRNA Disorazole DMSO Run1   | NM_138324 | PCSK6 | proprotein convertase subtilisin/kexin type 6 | 0.573655  | Inlier |
| siRNA-Vinblastine Run2-DMSO  | NM_138324 | PCSK6 | proprotein convertase subtilisin/kexin type 6 | 1.716422  | Inlier |

Identification of Survival Genes in Human Glioblastoma Cells Using siRNA Screening  
 Nikhil G Thaker, Fang Zhang, Peter R. McDonald, Tong Ying Shun, Michael D Lewen, Ian F. Pollack, and John S. Lazo  
 Molecular Pharmacology

|                              |               |       |                                                              |           |        |
|------------------------------|---------------|-------|--------------------------------------------------------------|-----------|--------|
| siRNA-Vinblastine Run1-DMSO  | NM_1383<br>24 | PCSK6 | proprotein<br>convertase<br>e<br>subtilisin/k<br>exin type 6 | 2.211832  | Inlier |
| siRNA Disorazole DMSO Run2   | NM_0047<br>16 | PCSK7 | proprotein<br>convertase<br>e<br>subtilisin/k<br>exin type 7 | -2.851401 | Inlier |
| siRNA-Temozolomide Run3-DMSO | NM_0047<br>16 | PCSK7 | proprotein<br>convertase<br>e<br>subtilisin/k<br>exin type 7 | -2.208684 | Inlier |
| siRNA Disorazole DMSO Run1   | NM_0047<br>16 | PCSK7 | proprotein<br>convertase<br>e<br>subtilisin/k<br>exin type 7 | -0.825338 | Inlier |
| siRNA-Temozolomide Run2-DMSO | NM_0047<br>16 | PCSK7 | proprotein<br>convertase<br>e<br>subtilisin/k<br>exin type 7 | -0.199928 | Inlier |
| siRNA-Temozolomide Run1-DMSO | NM_0047<br>16 | PCSK7 | proprotein<br>convertase<br>e<br>subtilisin/k<br>exin type 7 | 0.199927  | Inlier |
| siRNA-Vinblastine Run2-DMSO  | NM_0047<br>16 | PCSK7 | proprotein<br>convertase<br>e<br>subtilisin/k<br>exin type 7 | 0.312809  | Inlier |
| siRNA Disorazole DMSO Run3   | NM_0047<br>16 | PCSK7 | proprotein<br>convertase<br>e<br>subtilisin/k<br>exin type 7 | 0.523661  | Inlier |

Identification of Survival Genes in Human Glioblastoma Cells Using siRNA Screening  
 Nikhil G Thaker, Fang Zhang, Peter R. McDonald, Tong Ying Shun, Michael D Lewen, Ian F. Pollack, and John S. Lazo  
 Molecular Pharmacology

|                              |               |       |                                                              |           |        |
|------------------------------|---------------|-------|--------------------------------------------------------------|-----------|--------|
| siRNA-Vinblastine Run1-DMSO  | NM_0047<br>16 | PCSK7 | proprotein<br>convertase<br>e<br>subtilisin/k<br>exin type 7 | 1.535129  | Inlier |
| siRNA-Temozolomide Run3-DMSO | NM_1749<br>36 | PCSK9 | proprotein<br>convertase<br>e<br>subtilisin/k<br>exin type 9 | -1.96856  | Inlier |
| siRNA-Temozolomide Run2-DMSO | NM_1749<br>36 | PCSK9 | proprotein<br>convertase<br>e<br>subtilisin/k<br>exin type 9 | -1.763337 | Inlier |
| siRNA-Temozolomide Run1-DMSO | NM_1749<br>36 | PCSK9 | proprotein<br>convertase<br>e<br>subtilisin/k<br>exin type 9 | -0.087949 | Inlier |
| siRNA Disorazole DMSO Run2   | NM_1749<br>36 | PCSK9 | proprotein<br>convertase<br>e<br>subtilisin/k<br>exin type 9 | -0.027632 | Inlier |
| siRNA Disorazole DMSO Run3   | NM_1749<br>36 | PCSK9 | proprotein<br>convertase<br>e<br>subtilisin/k<br>exin type 9 | 0.027632  | Inlier |
| siRNA Disorazole DMSO Run1   | NM_1749<br>36 | PCSK9 | proprotein<br>convertase<br>e<br>subtilisin/k<br>exin type 9 | 0.040474  | Inlier |
| siRNA-Vinblastine Run2-DMSO  | NM_1749<br>36 | PCSK9 | proprotein<br>convertase<br>e<br>subtilisin/k<br>exin type 9 | 1.261051  | Inlier |

Identification of Survival Genes in Human Glioblastoma Cells Using siRNA Screening  
 Nikhil G Thaker, Fang Zhang, Peter R. McDonald, Tong Ying Shun, Michael D Lewen, Ian F. Pollack, and John S. Lazo  
 Molecular Pharmacology

|                                  |               |       |                                        |                  |
|----------------------------------|---------------|-------|----------------------------------------|------------------|
|                                  |               |       | proprotein<br>convertase               |                  |
| siRNA-Vinblastine Run1-<br>DMSO  | NM_1749<br>36 | PCSK9 | subtilisin/k<br>exin type 9<br>PCTAIRE | 1.658948 Inlier  |
| siRNA-Temozolomide Run3-<br>DMSO | NM_0330<br>19 | PCK1  | protein<br>kinase 1<br>PCTAIRE         | -1.746601 Inlier |
| siRNA-Temozolomide Run2-<br>DMSO | NM_0330<br>19 | PCK1  | protein<br>kinase 1<br>PCTAIRE         | -1.440492 Inlier |
| siRNA-Temozolomide Run1-<br>DMSO | NM_0330<br>19 | PCK1  | protein<br>kinase 1<br>PCTAIRE         | -0.718468 Inlier |
| siRNA Disorazole DMSO Run2       | NM_0330<br>19 | PCK1  | protein<br>kinase 1<br>PCTAIRE         | -0.175737 Inlier |
| siRNA Disorazole DMSO Run1       | NM_0330<br>19 | PCK1  | protein<br>kinase 1<br>PCTAIRE         | 0.175737 Inlier  |
| siRNA-Vinblastine Run1-<br>DMSO  | NM_0330<br>19 | PCK1  | protein<br>kinase 1<br>PCTAIRE         | 0.574165 Inlier  |
| siRNA Disorazole DMSO Run3       | NM_0330<br>19 | PCK1  | protein<br>kinase 1<br>PCTAIRE         | 0.630532 Inlier  |
| siRNA-Vinblastine Run2-<br>DMSO  | NM_0330<br>19 | PCK1  | protein<br>kinase 1<br>PCTAIRE         | 1.906421 Inlier  |
| siRNA Disorazole DMSO Run2       | NM_0025<br>95 | PCK2  | protein<br>kinase 2<br>PCTAIRE         | -2.353775 Inlier |
| siRNA-Temozolomide Run3-<br>DMSO | NM_0025<br>95 | PCK2  | protein<br>kinase 2<br>PCTAIRE         | -0.622559 Inlier |
| siRNA Disorazole DMSO Run3       | NM_0025<br>95 | PCK2  | protein<br>kinase 2<br>PCTAIRE         | -0.172751 Inlier |
| siRNA-Temozolomide Run2-<br>DMSO | NM_0025<br>95 | PCK2  | protein<br>kinase 2<br>PCTAIRE         | -0.029535 Inlier |
| siRNA-Temozolomide Run1-<br>DMSO | NM_0025<br>95 | PCK2  | protein<br>kinase 2<br>PCTAIRE         | 0.029535 Inlier  |
| siRNA-Vinblastine Run1-<br>DMSO  | NM_0025<br>95 | PCK2  | protein<br>kinase 2<br>PCTAIRE         | 0.726441 Inlier  |
| siRNA Disorazole DMSO Run1       | NM_0025<br>95 | PCK2  | protein<br>kinase 2                    | 0.929267 Inlier  |

Identification of Survival Genes in Human Glioblastoma Cells Using siRNA Screening  
 Nikhil G Thaker, Fang Zhang, Peter R. McDonald, Tong Ying Shun, Michael D Lewen, Ian F. Pollack, and John S. Lazo

|                              |               |       |                                                |                  |
|------------------------------|---------------|-------|------------------------------------------------|------------------|
| Molecular Pharmacology       |               |       | PCTAIRE                                        |                  |
| siRNA-Vinblastine Run2-DMSO  | NM_0025<br>95 | PCTK2 | protein<br>kinase 2                            | 2.00445 Inlier   |
| siRNA-Temozolomide Run3-DMSO | NM_2125<br>03 | PCTK3 | PCTAIRE<br>protein<br>kinase 3                 | -0.972388 Inlier |
| siRNA-Temozolomide Run1-DMSO | NM_2125<br>03 | PCTK3 | PCTAIRE<br>protein<br>kinase 3                 | -0.376612 Inlier |
| siRNA-Temozolomide Run2-DMSO | NM_2125<br>03 | PCTK3 | PCTAIRE<br>protein<br>kinase 3                 | -0.212457 Inlier |
| siRNA Disorazole DMSO Run2   | NM_2125<br>03 | PCTK3 | PCTAIRE<br>protein<br>kinase 3                 | -0.109909 Inlier |
| siRNA Disorazole DMSO Run3   | NM_2125<br>03 | PCTK3 | PCTAIRE<br>protein<br>kinase 3                 | 0.109909 Inlier  |
| siRNA Disorazole DMSO Run1   | NM_2125<br>03 | PCTK3 | PCTAIRE<br>protein<br>kinase 3                 | 1.631642 Inlier  |
| siRNA-Vinblastine Run1-DMSO  | NM_2125<br>03 | PCTK3 | PCTAIRE<br>protein<br>kinase 3                 | 3.129656 Inlier  |
| siRNA-Vinblastine Run2-DMSO  | NM_2125<br>03 | PCTK3 | PCTAIRE<br>protein<br>kinase 3                 | 3.477854 Inlier  |
| siRNA-Temozolomide Run2-DMSO | NM_0212<br>13 | PCTP  | phosphati<br>dylcholine<br>transfer<br>protein | -0.96351 Inlier  |
| siRNA-Temozolomide Run1-DMSO | NM_0212<br>13 | PCTP  | phosphati<br>dylcholine<br>transfer<br>protein | -0.38549 Inlier  |
| siRNA-Vinblastine Run2-DMSO  | NM_0212<br>13 | PCTP  | phosphati<br>dylcholine<br>transfer<br>protein | -0.121888 Inlier |
| siRNA Disorazole DMSO Run1   | NM_0212<br>13 | PCTP  | phosphati<br>dylcholine<br>transfer<br>protein | -0.058793 Inlier |
| siRNA-Temozolomide Run3-DMSO | NM_0212<br>13 | PCTP  | phosphati<br>dylcholine<br>transfer<br>protein | 0.058793 Inlier  |
| siRNA Disorazole DMSO Run3   | NM_0212<br>13 | PCTP  | phosphati<br>dylcholine<br>transfer<br>protein | 1.552255 Inlier  |

Identification of Survival Genes in Human Glioblastoma Cells Using siRNA Screening  
 Nikhil G Thaker, Fang Zhang, Peter R. McDonald, Tong Ying Shun, Michael D Lewen, Ian F. Pollack, and John S. Lazo

Molecular Pharmacology

|                              |               |        |                                                        |           |         |
|------------------------------|---------------|--------|--------------------------------------------------------|-----------|---------|
| siRNA-Vinblastine Run1-DMSO  | NM_0212<br>13 | PCTP   | phosphatidylcholine transfer protein                   | 4.021771  | Outlier |
| siRNA Disorazole DMSO Run2   | NM_0212<br>13 | PCTP   | phosphatidylcholine transfer protein                   | 6.610857  | Outlier |
| siRNA-Temozolomide Run2-DMSO | NM_0050<br>17 | PCYT1A | phosphate cytidyltransferase 1, choline, alpha isoform | -0.680295 | Inlier  |
| siRNA Disorazole DMSO Run1   | NM_0050<br>17 | PCYT1A | phosphate cytidyltransferase 1, choline, alpha isoform | -0.668705 | Inlier  |
| siRNA Disorazole DMSO Run3   | NM_0050<br>17 | PCYT1A | phosphate cytidyltransferase 1, choline, alpha isoform | -0.306921 | Inlier  |
| siRNA-Temozolomide Run3-DMSO | NM_0050<br>17 | PCYT1A | phosphate cytidyltransferase 1, choline, alpha isoform | -0.290196 | Inlier  |
| siRNA-Vinblastine Run2-DMSO  | NM_0050<br>17 | PCYT1A | phosphate cytidyltransferase 1, choline, alpha isoform | 0.290196  | Inlier  |

Identification of Survival Genes in Human Glioblastoma Cells Using siRNA Screening  
 Nikhil G Thaker, Fang Zhang, Peter R. McDonald, Tong Ying Shun, Michael D Lewen, Ian F. Pollack, and John S. Lazo  
 Molecular Pharmacology

|                              |           |        |                                                          |           |        |
|------------------------------|-----------|--------|----------------------------------------------------------|-----------|--------|
| siRNA-Temozolomide Run1-DMSO | NM_005017 | PCYT1A | phosphate cytidylyltransferase 1, choline, alpha isoform | 0.787701  | Inlier |
| siRNA Disorazole DMSO Run2   | NM_005017 | PCYT1A | phosphate cytidylyltransferase 1, choline, alpha isoform | 1.700156  | Inlier |
| siRNA-Vinblastine Run1-DMSO  | NM_005017 | PCYT1A | phosphate cytidylyltransferase 1, choline, alpha isoform | 1.958705  | Inlier |
| siRNA-Temozolomide Run2-DMSO | NM_004845 | PCYT1B | phosphate cytidylyltransferase 1, choline, beta isoform  | -1.110484 | Inlier |
| siRNA-Temozolomide Run3-DMSO | NM_004845 | PCYT1B | phosphate cytidylyltransferase 1, choline, beta isoform  | -0.907857 | Inlier |
| siRNA Disorazole DMSO Run1   | NM_004845 | PCYT1B | phosphate cytidylyltransferase 1, choline, beta isoform  | -0.441143 | Inlier |



Identification of Survival Genes in Human Glioblastoma Cells Using siRNA Screening  
 Nikhil G Thaker, Fang Zhang, Peter R. McDonald, Tong Ying Shun, Michael D Lewen, Ian F. Pollack, and John S. Lazo  
 Molecular Pharmacology

|                              |               |        |                                                                       |                  |
|------------------------------|---------------|--------|-----------------------------------------------------------------------|------------------|
| siRNA-Temozolomide Run1-DMSO | NM_0048<br>45 | PCYT1B | phosphate<br>cytidyltra<br>nsferase<br>1, choline,<br>beta<br>isoform | -0.088595 Inlier |
| siRNA Disorazole DMSO Run3   | NM_0048<br>45 | PCYT1B | phosphate<br>cytidyltra<br>nsferase<br>1, choline,<br>beta<br>isoform | 0.088596 Inlier  |
| siRNA-Vinblastine Run2-DMSO  | NM_0048<br>45 | PCYT1B | phosphate<br>cytidyltra<br>nsferase<br>1, choline,<br>beta<br>isoform | 0.117941 Inlier  |
| siRNA Disorazole DMSO Run2   | NM_0048<br>45 | PCYT1B | phosphate<br>cytidyltra<br>nsferase<br>1, choline,<br>beta<br>isoform | 1.381258 Inlier  |
| siRNA-Vinblastine Run1-DMSO  | NM_0048<br>45 | PCYT1B | phosphate<br>cytidyltra<br>nsferase<br>1, choline,<br>beta<br>isoform | 1.723261 Inlier  |
| siRNA-Temozolomide Run2-DMSO | NM_0028<br>61 | PCYT2  | phosphate<br>cytidyltra<br>nsferase<br>2,<br>ethanolam<br>ine         | -2.603609 Inlier |

Identification of Survival Genes in Human Glioblastoma Cells Using siRNA Screening  
 Nikhil G Thaker, Fang Zhang, Peter R. McDonald, Tong Ying Shun, Michael D Lewen, Ian F. Pollack, and John S. Lazo  
 Molecular Pharmacology

|                              |           |       |                                                |           |        |
|------------------------------|-----------|-------|------------------------------------------------|-----------|--------|
| siRNA-Temozolomide Run3-DMSO | NM_002861 | PCYT2 | phosphate cytidylyltransferase 2, ethanolamine | -1.390099 | Inlier |
| siRNA-Temozolomide Run1-DMSO | NM_002861 | PCYT2 | phosphate cytidylyltransferase 2, ethanolamine | -0.73415  | Inlier |
| siRNA-Vinblastine Run2-DMSO  | NM_002861 | PCYT2 | phosphate cytidylyltransferase 2, ethanolamine | -0.117716 | Inlier |
| siRNA Disorazole DMSO Run3   | NM_002861 | PCYT2 | phosphate cytidylyltransferase 2, ethanolamine | 0.117716  | Inlier |
| siRNA Disorazole DMSO Run1   | NM_002861 | PCYT2 | phosphate cytidylyltransferase 2, ethanolamine | 0.123555  | Inlier |
| siRNA Disorazole DMSO Run2   | NM_002861 | PCYT2 | phosphate cytidylyltransferase 2, ethanolamine | 0.61485   | Inlier |
| siRNA-Vinblastine Run1-DMSO  | NM_002861 | PCYT2 | phosphate cytidylyltransferase 2, ethanolamine | 1.178296  | Inlier |

Identification of Survival Genes in Human Glioblastoma Cells Using siRNA Screening

Nikhil G Thaker, Fang Zhang, Peter R. McDonald, Tong Ying Shun, Michael D Lewen, Ian F. Pollack, and John S. Lazo

Molecular Pharmacology

|                              |               |        |                                                     |           |        |
|------------------------------|---------------|--------|-----------------------------------------------------|-----------|--------|
| siRNA-Temozolomide Run3-DMSO | NM_1458<br>12 | PDCD8  | programmed cell death 8 (apoptosis-inducing factor) | -1.182378 | Inlier |
| siRNA-Temozolomide Run1-DMSO | NM_1458<br>12 | PDCD8  | programmed cell death 8 (apoptosis-inducing factor) | -0.303765 | Inlier |
| siRNA-Temozolomide Run2-DMSO | NM_1458<br>12 | PDCD8  | programmed cell death 8 (apoptosis-inducing factor) | -0.190183 | Inlier |
| siRNA Disorazole DMSO Run1   | NM_1458<br>12 | PDCD8  | programmed cell death 8 (apoptosis-inducing factor) | -0.076478 | Inlier |
| siRNA Disorazole DMSO Run2   | NM_1458<br>12 | PDCD8  | programmed cell death 8 (apoptosis-inducing factor) | 0.076478  | Inlier |
| siRNA-Vinblastine Run2-DMSO  | NM_1458<br>12 | PDCD8  | programmed cell death 8 (apoptosis-inducing factor) | 1.045235  | Inlier |
| siRNA Disorazole DMSO Run3   | NM_1458<br>12 | PDCD8  | programmed cell death 8 (apoptosis-inducing factor) | 1.061125  | Inlier |
| siRNA-Vinblastine Run1-DMSO  | NM_1458<br>12 | PDCD8  | programmed cell death 8 (apoptosis-inducing factor) | 1.400162  | Inlier |
| siRNA-Temozolomide Run3-DMSO | NM_0066<br>61 | PDE10A | phosphodiesterase 10A                               | -1.457623 | Inlier |

Identification of Survival Genes in Human Glioblastoma Cells Using siRNA Screening  
 Nikhil G Thaker, Fang Zhang, Peter R. McDonald, Tong Ying Shun, Michael D Lewen, Ian F. Pollack, and John S. Lazo

| Molecular Pharmacology       |               |        |     | phosphodi                                   |                  |
|------------------------------|---------------|--------|-----|---------------------------------------------|------------------|
| siRNA-Temozolomide Run1-DMSO | NM_0066<br>61 | PDE10A | 10A | esterase                                    | -1.093898 Inlier |
| siRNA-Temozolomide Run2-DMSO | NM_0066<br>61 | PDE10A | 10A | esterase                                    | -0.518922 Inlier |
| siRNA Disorazole DMSO Run1   | NM_0066<br>61 | PDE10A | 10A | esterase                                    | -0.274915 Inlier |
| siRNA Disorazole DMSO Run2   | NM_0066<br>61 | PDE10A | 10A | esterase                                    | 0.274915 Inlier  |
| siRNA-Vinblastine Run1-DMSO  | NM_0066<br>61 | PDE10A | 10A | esterase                                    | 0.305355 Inlier  |
| siRNA-Vinblastine Run2-DMSO  | NM_0066<br>61 | PDE10A | 10A | esterase                                    | 0.830078 Inlier  |
| siRNA Disorazole DMSO Run3   | NM_0066<br>61 | PDE10A | 10A | esterase                                    | 1.082917 Inlier  |
| siRNA Disorazole DMSO Run1   | NM_0169<br>53 | PDE11A | 11A | esterase                                    | -1.232191 Inlier |
| siRNA-Vinblastine Run1-DMSO  | NM_0169<br>53 | PDE11A | 11A | esterase                                    | -0.804584 Inlier |
| siRNA-Temozolomide Run1-DMSO | NM_0169<br>53 | PDE11A | 11A | esterase                                    | -0.432542 Inlier |
| siRNA-Vinblastine Run2-DMSO  | NM_0169<br>53 | PDE11A | 11A | esterase                                    | -0.239315 Inlier |
| siRNA-Temozolomide Run2-DMSO | NM_0169<br>53 | PDE11A | 11A | esterase                                    | 0.239316 Inlier  |
| siRNA-Temozolomide Run3-DMSO | NM_0169<br>53 | PDE11A | 11A | esterase                                    | 0.544416 Inlier  |
| siRNA Disorazole DMSO Run2   | NM_0169<br>53 | PDE11A | 11A | esterase                                    | 1.72414 Inlier   |
| siRNA Disorazole DMSO Run3   | NM_0169<br>53 | PDE11A | 11A | esterase                                    | 5.069953 Outlier |
| siRNA-Temozolomide Run3-DMSO | NM_0050<br>19 | PDE1A  |     | esterase<br>1A,<br>calmodulin-<br>dependent | -2.126327 Inlier |

Identification of Survival Genes in Human Glioblastoma Cells Using siRNA Screening

Nikhil G Thaker, Fang Zhang, Peter R. McDonald, Tong Ying Shun, Michael D Lewen, Ian F. Pollack, and John S. Lazo

Molecular Pharmacology

|                              |           |       |                                            |           |        |
|------------------------------|-----------|-------|--------------------------------------------|-----------|--------|
| siRNA-Temozolomide Run1-DMSO | NM_005019 | PDE1A | phosphodiesterase 1A, calmodulin-dependent | -0.820087 | Inlier |
| siRNA-Temozolomide Run2-DMSO | NM_005019 | PDE1A | phosphodiesterase 1A, calmodulin-dependent | -0.642314 | Inlier |
| siRNA Disorazole DMSO Run1   | NM_005019 | PDE1A | phosphodiesterase 1A, calmodulin-dependent | -0.234459 | Inlier |
| siRNA Disorazole DMSO Run3   | NM_005019 | PDE1A | phosphodiesterase 1A, calmodulin-dependent | 0.234459  | Inlier |
| siRNA-Vinblastine Run1-DMSO  | NM_005019 | PDE1A | phosphodiesterase 1A, calmodulin-dependent | 0.348365  | Inlier |
| siRNA-Vinblastine Run2-DMSO  | NM_005019 | PDE1A | phosphodiesterase 1A, calmodulin-dependent | 0.706686  | Inlier |
| siRNA Disorazole DMSO Run2   | NM_005019 | PDE1A | phosphodiesterase 1A, calmodulin-dependent | 0.746993  | Inlier |

Identification of Survival Genes in Human Glioblastoma Cells Using siRNA Screening  
 Nikhil G Thaker, Fang Zhang, Peter R. McDonald, Tong Ying Shun, Michael D Lewen, Ian F. Pollack, and John S. Lazo  
 Molecular Pharmacology

|                              |           |       |                                            |           |        |
|------------------------------|-----------|-------|--------------------------------------------|-----------|--------|
| siRNA-Temozolomide Run1-DMSO | NM_000924 | PDE1B | phosphodiesterase 1B, calmodulin-dependent | -0.933276 | Inlier |
| siRNA-Temozolomide Run3-DMSO | NM_000924 | PDE1B | phosphodiesterase 1B, calmodulin-dependent | -0.789087 | Inlier |
| siRNA Disorazole DMSO Run1   | NM_000924 | PDE1B | phosphodiesterase 1B, calmodulin-dependent | -0.559913 | Inlier |
| siRNA-Temozolomide Run2-DMSO | NM_000924 | PDE1B | phosphodiesterase 1B, calmodulin-dependent | -0.063842 | Inlier |
| siRNA-Vinblastine Run1-DMSO  | NM_000924 | PDE1B | phosphodiesterase 1B, calmodulin-dependent | 0.063842  | Inlier |
| siRNA Disorazole DMSO Run2   | NM_000924 | PDE1B | phosphodiesterase 1B, calmodulin-dependent | 0.083643  | Inlier |
| siRNA-Vinblastine Run2-DMSO  | NM_000924 | PDE1B | phosphodiesterase 1B, calmodulin-dependent | 0.872362  | Inlier |

Identification of Survival Genes in Human Glioblastoma Cells Using siRNA Screening  
 Nikhil G Thaker, Fang Zhang, Peter R. McDonald, Tong Ying Shun, Michael D Lewen, Ian F. Pollack, and John S. Lazo  
 Molecular Pharmacology

|                              |    |         |       |                                                  |           |        |
|------------------------------|----|---------|-------|--------------------------------------------------|-----------|--------|
| siRNA Disorazole DMSO Run3   | 24 | NM_0009 | PDE1B | phosphodiesterase 1B, calmodulin-dependent       | 1.295015  | Inlier |
| siRNA-Temozolomide Run3-DMSO | 20 | NM_0050 | PDE1C | phosphodiesterase 1C, calmodulin-dependent 70kDa | -1.323654 | Inlier |
| siRNA-Temozolomide Run1-DMSO | 20 | NM_0050 | PDE1C | phosphodiesterase 1C, calmodulin-dependent 70kDa | -0.73189  | Inlier |
| siRNA Disorazole DMSO Run1   | 20 | NM_0050 | PDE1C | phosphodiesterase 1C, calmodulin-dependent 70kDa | -0.61711  | Inlier |
| siRNA-Temozolomide Run2-DMSO | 20 | NM_0050 | PDE1C | phosphodiesterase 1C, calmodulin-dependent 70kDa | -0.027989 | Inlier |
| siRNA-Vinblastine Run2-DMSO  | 20 | NM_0050 | PDE1C | phosphodiesterase 1C, calmodulin-dependent 70kDa | 0.027989  | Inlier |
| siRNA-Vinblastine Run1-DMSO  | 20 | NM_0050 | PDE1C | phosphodiesterase 1C, calmodulin-dependent 70kDa | 0.057772  | Inlier |

Identification of Survival Genes in Human Glioblastoma Cells Using siRNA Screening  
 Nikhil G Thaker, Fang Zhang, Peter R. McDonald, Tong Ying Shun, Michael D Lewen, Ian F. Pollack, and John S. Lazo  
 Molecular Pharmacology

|                              |               |       |                                                  |           |         |
|------------------------------|---------------|-------|--------------------------------------------------|-----------|---------|
| siRNA Disorazole DMSO Run3   | NM_0050<br>20 | PDE1C | phosphodiesterase 1C, calmodulin-dependent 70kDa | 4.983657  | Outlier |
| siRNA Disorazole DMSO Run2   | NM_0050<br>20 | PDE1C | phosphodiesterase 1C, calmodulin-dependent 70kDa | 6.596884  | Outlier |
| siRNA-Temozolomide Run3-DMSO | NM_0025<br>99 | PDE2A | phosphodiesterase 2A, cGMP-stimulated            | -2.44939  | Inlier  |
| siRNA-Temozolomide Run2-DMSO | NM_0025<br>99 | PDE2A | phosphodiesterase 2A, cGMP-stimulated            | -0.898408 | Inlier  |
| siRNA Disorazole DMSO Run1   | NM_0025<br>99 | PDE2A | phosphodiesterase 2A, cGMP-stimulated            | -0.165652 | Inlier  |
| siRNA Disorazole DMSO Run2   | NM_0025<br>99 | PDE2A | phosphodiesterase 2A, cGMP-stimulated            | -0.032749 | Inlier  |
| siRNA-Temozolomide Run1-DMSO | NM_0025<br>99 | PDE2A | phosphodiesterase 2A, cGMP-stimulated            | 0.032748  | Inlier  |
| siRNA-Vinblastine Run1-DMSO  | NM_0025<br>99 | PDE2A | phosphodiesterase 2A, cGMP-stimulated            | 0.450592  | Inlier  |



Identification of Survival Genes in Human Glioblastoma Cells Using siRNA Screening  
 Nikhil G Thaker, Fang Zhang, Peter R. McDonald, Tong Ying Shun, Michael D Lewen, Ian F. Pollack, and John S. Lazo  
 Molecular Pharmacology

|                              |           |       |                                       |           |        |
|------------------------------|-----------|-------|---------------------------------------|-----------|--------|
| siRNA-Vinblastine Run2-DMSO  | NM_002599 | PDE2A | phosphodiesterase 2A, cGMP-stimulated | 1.320642  | Inlier |
| siRNA Disorazole DMSO Run3   | NM_002599 | PDE2A | phosphodiesterase 2A, cGMP-stimulated | 2.742841  | Inlier |
| siRNA-Temozolomide Run3-DMSO | NM_000921 | PDE3A | phosphodiesterase 3A, cGMP-inhibited  | -3.056101 | Inlier |
| siRNA-Temozolomide Run1-DMSO | NM_000921 | PDE3A | phosphodiesterase 3A, cGMP-inhibited  | -0.933421 | Inlier |
| siRNA-Temozolomide Run2-DMSO | NM_000921 | PDE3A | phosphodiesterase 3A, cGMP-inhibited  | -0.571497 | Inlier |
| siRNA Disorazole DMSO Run1   | NM_000921 | PDE3A | phosphodiesterase 3A, cGMP-inhibited  | -0.334974 | Inlier |
| siRNA Disorazole DMSO Run2   | NM_000921 | PDE3A | phosphodiesterase 3A, cGMP-inhibited  | 0.334973  | Inlier |
| siRNA Disorazole DMSO Run3   | NM_000921 | PDE3A | phosphodiesterase 3A, cGMP-inhibited  | 0.667638  | Inlier |
| siRNA-Vinblastine Run2-DMSO  | NM_000921 | PDE3A | phosphodiesterase 3A, cGMP-inhibited  | 0.681362  | Inlier |
| siRNA-Vinblastine Run1-DMSO  | NM_000921 | PDE3A | phosphodiesterase 3A, cGMP-inhibited  | 0.719094  | Inlier |

Identification of Survival Genes in Human Glioblastoma Cells Using siRNA Screening  
 Nikhil G Thaker, Fang Zhang, Peter R. McDonald, Tong Ying Shun, Michael D Lewen, Ian F. Pollack, and John S. Lazo  
 Molecular Pharmacology

|                              |           |       |                                                                                       |           |         |
|------------------------------|-----------|-------|---------------------------------------------------------------------------------------|-----------|---------|
| siRNA-Temozolomide Run3-DMSO | NM_000922 | PDE3B | phosphodiesterase 3B, cGMP-inhibited                                                  | -2.019259 | Inlier  |
| siRNA Disorazole DMSO Run1   | NM_000922 | PDE3B | phosphodiesterase 3B, cGMP-inhibited                                                  | -0.439555 | Inlier  |
| siRNA-Temozolomide Run2-DMSO | NM_000922 | PDE3B | phosphodiesterase 3B, cGMP-inhibited                                                  | -0.341033 | Inlier  |
| siRNA-Vinblastine Run1-DMSO  | NM_000922 | PDE3B | phosphodiesterase 3B, cGMP-inhibited                                                  | -0.196538 | Inlier  |
| siRNA-Temozolomide Run1-DMSO | NM_000922 | PDE3B | phosphodiesterase 3B, cGMP-inhibited                                                  | 0.196539  | Inlier  |
| siRNA-Vinblastine Run2-DMSO  | NM_000922 | PDE3B | phosphodiesterase 3B, cGMP-inhibited                                                  | 0.909445  | Inlier  |
| siRNA Disorazole DMSO Run2   | NM_000922 | PDE3B | phosphodiesterase 3B, cGMP-inhibited                                                  | 2.722776  | Inlier  |
| siRNA Disorazole DMSO Run3   | NM_000922 | PDE3B | phosphodiesterase 3B, cGMP-inhibited                                                  | 3.907164  | Outlier |
| siRNA-Temozolomide Run1-DMSO | NM_006202 | PDE4A | phosphodiesterase 4A, cAMP-specific (phosphodiesterase E2 dunce homolog, Drosophila ) | -1.223609 | Inlier  |

Identification of Survival Genes in Human Glioblastoma Cells Using siRNA Screening

Nikhil G Thaker, Fang Zhang, Peter R. McDonald, Tong Ying Shun, Michael D Lewen, Ian F. Pollack, and John S. Lazo

Molecular Pharmacology

|                              |           |       |                                                                                        |           |        |
|------------------------------|-----------|-------|----------------------------------------------------------------------------------------|-----------|--------|
| siRNA-Temozolomide Run3-DMSO | NM_006202 | PDE4A | phosphodiesterase 4A, cAMP-specific (phosphodiesterase E2 duncce homolog, Drosophila ) | -0.859306 | Inlier |
|------------------------------|-----------|-------|----------------------------------------------------------------------------------------|-----------|--------|

|                              |           |       |                                                                                        |           |        |
|------------------------------|-----------|-------|----------------------------------------------------------------------------------------|-----------|--------|
| siRNA-Temozolomide Run2-DMSO | NM_006202 | PDE4A | phosphodiesterase 4A, cAMP-specific (phosphodiesterase E2 duncce homolog, Drosophila ) | -0.255118 | Inlier |
|------------------------------|-----------|-------|----------------------------------------------------------------------------------------|-----------|--------|

|                            |           |       |                                                                                        |          |        |
|----------------------------|-----------|-------|----------------------------------------------------------------------------------------|----------|--------|
| siRNA Disorazole DMSO Run3 | NM_006202 | PDE4A | phosphodiesterase 4A, cAMP-specific (phosphodiesterase E2 duncce homolog, Drosophila ) | -0.11003 | Inlier |
|----------------------------|-----------|-------|----------------------------------------------------------------------------------------|----------|--------|

|                            |           |       |                                                                                        |         |        |
|----------------------------|-----------|-------|----------------------------------------------------------------------------------------|---------|--------|
| siRNA Disorazole DMSO Run1 | NM_006202 | PDE4A | phosphodiesterase 4A, cAMP-specific (phosphodiesterase E2 duncce homolog, Drosophila ) | 0.11003 | Inlier |
|----------------------------|-----------|-------|----------------------------------------------------------------------------------------|---------|--------|

Identification of Survival Genes in Human Glioblastoma Cells Using siRNA Screening  
 Nikhil G Thaker, Fang Zhang, Peter R. McDonald, Tong Ying Shun, Michael D Lewen, Ian F. Pollack, and John S. Lazo  
 Molecular Pharmacology

|                             |           |       |                                                                                        |           |        |
|-----------------------------|-----------|-------|----------------------------------------------------------------------------------------|-----------|--------|
| siRNA Disorazole DMSO Run2  | NM_006202 | PDE4A | phosphodiesterase 4A, cAMP-specific (phosphodiesterase E2 duncce homolog, Drosophila ) | 0.663067  | Inlier |
| siRNA-Vinblastine Run1-DMSO | NM_006202 | PDE4A | phosphodiesterase 4A, cAMP-specific (phosphodiesterase E2 duncce homolog, Drosophila ) | 0.685933  | Inlier |
| siRNA-Vinblastine Run2-DMSO | NM_006202 | PDE4A | phosphodiesterase 4A, cAMP-specific (phosphodiesterase E2 duncce homolog, Drosophila ) | 0.716956  | Inlier |
| siRNA Disorazole DMSO Run1  | NM_002600 | PDE4B | phosphodiesterase 4B, cAMP-specific (phosphodiesterase E4 duncce homolog, Drosophila ) | -0.945359 | Inlier |

Identification of Survival Genes in Human Glioblastoma Cells Using siRNA Screening

Nikhil G Thaker, Fang Zhang, Peter R. McDonald, Tong Ying Shun, Michael D Lewen, Ian F. Pollack, and John S.

Lazo

Molecular Pharmacology

|                              |           |       |                                                                                       |           |        |
|------------------------------|-----------|-------|---------------------------------------------------------------------------------------|-----------|--------|
| siRNA-Temozolomide Run1-DMSO | NM_002600 | PDE4B | phosphodiesterase 4B, cAMP-specific (phosphodiesterase E4 dunce homolog, Drosophila ) | -0.842001 | Inlier |
| siRNA-Temozolomide Run3-DMSO | NM_002600 | PDE4B | phosphodiesterase 4B, cAMP-specific (phosphodiesterase E4 dunce homolog, Drosophila ) | -0.506999 | Inlier |
| siRNA-Vinblastine Run1-DMSO  | NM_002600 | PDE4B | phosphodiesterase 4B, cAMP-specific (phosphodiesterase E4 dunce homolog, Drosophila ) | -0.274483 | Inlier |
| siRNA-Temozolomide Run2-DMSO | NM_002600 | PDE4B | phosphodiesterase 4B, cAMP-specific (phosphodiesterase E4 dunce homolog, Drosophila ) | 0.274484  | Inlier |

Identification of Survival Genes in Human Glioblastoma Cells Using siRNA Screening  
 Nikhil G Thaker, Fang Zhang, Peter R. McDonald, Tong Ying Shun, Michael D Lewen, Ian F. Pollack, and John S. Lazo  
 Molecular Pharmacology

|                              |           |       |                                                                                      |           |        |
|------------------------------|-----------|-------|--------------------------------------------------------------------------------------|-----------|--------|
| siRNA Disorazole DMSO Run2   | NM_002600 | PDE4B | phosphodiesterase 4B, cAMP-specific (phosphodiesterase E4 dunce homolog, Drosophila) | 0.452137  | Inlier |
| siRNA-Vinblastine Run2-DMSO  | NM_002600 | PDE4B | phosphodiesterase 4B, cAMP-specific (phosphodiesterase E4 dunce homolog, Drosophila) | 0.875758  | Inlier |
| siRNA Disorazole DMSO Run3   | NM_002600 | PDE4B | phosphodiesterase 4B, cAMP-specific (phosphodiesterase E4 dunce homolog, Drosophila) | 2.833622  | Inlier |
| siRNA-Temozolomide Run2-DMSO | NM_000923 | PDE4C | phosphodiesterase 4C, cAMP-specific (phosphodiesterase E1 dunce homolog, Drosophila) | -1.545308 | Inlier |

Identification of Survival Genes in Human Glioblastoma Cells Using siRNA Screening

Nikhil G Thaker, Fang Zhang, Peter R. McDonald, Tong Ying Shun, Michael D Lewen, Ian F. Pollack, and John S.

Lazo

Molecular Pharmacology

|                              |               |       |                                                                                      |           |        |
|------------------------------|---------------|-------|--------------------------------------------------------------------------------------|-----------|--------|
| siRNA Disorazole DMSO Run1   | NM_0009<br>23 | PDE4C | phosphodiesterase 4C, cAMP-specific (phosphodiesterase E1 dunce homolog, Drosophila) | -1.110336 | Inlier |
| siRNA-Temozolomide Run3-DMSO | NM_0009<br>23 | PDE4C | phosphodiesterase 4C, cAMP-specific (phosphodiesterase E1 dunce homolog, Drosophila) | -0.238664 | Inlier |
| siRNA-Temozolomide Run1-DMSO | NM_0009<br>23 | PDE4C | phosphodiesterase 4C, cAMP-specific (phosphodiesterase E1 dunce homolog, Drosophila) | -0.040472 | Inlier |
| siRNA Disorazole DMSO Run2   | NM_0009<br>23 | PDE4C | phosphodiesterase 4C, cAMP-specific (phosphodiesterase E1 dunce homolog, Drosophila) | 0.040471  | Inlier |

Identification of Survival Genes in Human Glioblastoma Cells Using siRNA Screening

Nikhil G Thaker, Fang Zhang, Peter R. McDonald, Tong Ying Shun, Michael D Lewen, Ian F. Pollack, and John S.

Lazo

Molecular Pharmacology

|                             |           |       |                                                                                       |           |         |
|-----------------------------|-----------|-------|---------------------------------------------------------------------------------------|-----------|---------|
| siRNA-Vinblastine Run1-DMSO | NM_000923 | PDE4C | phosphodiesterase 4C, cAMP-specific (phosphodiesterase E1 dunce homolog, Drosophila ) | 0.044637  | Inlier  |
| siRNA-Vinblastine Run2-DMSO | NM_000923 | PDE4C | phosphodiesterase 4C, cAMP-specific (phosphodiesterase E1 dunce homolog, Drosophila ) | 1.218158  | Inlier  |
| siRNA Disorazole DMSO Run3  | NM_000923 | PDE4C | phosphodiesterase 4C, cAMP-specific (phosphodiesterase E1 dunce homolog, Drosophila ) | 4.832255  | Outlier |
| siRNA Disorazole DMSO Run2  | NM_006203 | PDE4D | phosphodiesterase 4D, cAMP-specific (phosphodiesterase E3 dunce homolog, Drosophila ) | -2.079615 | Inlier  |



Identification of Survival Genes in Human Glioblastoma Cells Using siRNA Screening

Nikhil G Thaker, Fang Zhang, Peter R. McDonald, Tong Ying Shun, Michael D Lewen, Ian F. Pollack, and John S.

Lazo

Molecular Pharmacology

|                              |           |       |                                                                                       |           |        |
|------------------------------|-----------|-------|---------------------------------------------------------------------------------------|-----------|--------|
| siRNA-Temozolomide Run3-DMSO | NM_006203 | PDE4D | phosphodiesterase 4D, cAMP-specific (phosphodiesterase E3 dunce homolog, Drosophila ) | -1.120924 | Inlier |
|------------------------------|-----------|-------|---------------------------------------------------------------------------------------|-----------|--------|

|                              |           |       |                                                                                       |           |        |
|------------------------------|-----------|-------|---------------------------------------------------------------------------------------|-----------|--------|
| siRNA-Temozolomide Run1-DMSO | NM_006203 | PDE4D | phosphodiesterase 4D, cAMP-specific (phosphodiesterase E3 dunce homolog, Drosophila ) | -0.700351 | Inlier |
|------------------------------|-----------|-------|---------------------------------------------------------------------------------------|-----------|--------|

|                            |           |       |                                                                                       |           |        |
|----------------------------|-----------|-------|---------------------------------------------------------------------------------------|-----------|--------|
| siRNA Disorazole DMSO Run1 | NM_006203 | PDE4D | phosphodiesterase 4D, cAMP-specific (phosphodiesterase E3 dunce homolog, Drosophila ) | -0.152042 | Inlier |
|----------------------------|-----------|-------|---------------------------------------------------------------------------------------|-----------|--------|

|                             |           |       |                                                                                       |          |        |
|-----------------------------|-----------|-------|---------------------------------------------------------------------------------------|----------|--------|
| siRNA-Vinblastine Run1-DMSO | NM_006203 | PDE4D | phosphodiesterase 4D, cAMP-specific (phosphodiesterase E3 dunce homolog, Drosophila ) | 0.152042 | Inlier |
|-----------------------------|-----------|-------|---------------------------------------------------------------------------------------|----------|--------|

Identification of Survival Genes in Human Glioblastoma Cells Using siRNA Screening  
 Nikhil G Thaker, Fang Zhang, Peter R. McDonald, Tong Ying Shun, Michael D Lewen, Ian F. Pollack, and John S. Lazo  
 Molecular Pharmacology

|                              |           |       |                                                                                       |           |        |
|------------------------------|-----------|-------|---------------------------------------------------------------------------------------|-----------|--------|
| siRNA-Temozolomide Run2-DMSO | NM_006203 | PDE4D | phosphodiesterase 4D, cAMP-specific (phosphodiesterase E3 dunce homolog, Drosophila ) | 0.164445  | Inlier |
| siRNA Disorazole DMSO Run3   | NM_006203 | PDE4D | phosphodiesterase 4D, cAMP-specific (phosphodiesterase E3 dunce homolog, Drosophila ) | 0.648649  | Inlier |
| siRNA-Vinblastine Run2-DMSO  | NM_006203 | PDE4D | phosphodiesterase 4D, cAMP-specific (phosphodiesterase E3 dunce homolog, Drosophila ) | 0.791922  | Inlier |
| siRNA-Temozolomide Run3-DMSO | NM_033431 | PDE5A | phosphodiesterase 5A, cGMP-specific                                                   | -1.632878 | Inlier |
| siRNA-Temozolomide Run1-DMSO | NM_033431 | PDE5A | phosphodiesterase 5A, cGMP-specific                                                   | -0.822856 | Inlier |
| siRNA Disorazole DMSO Run1   | NM_033431 | PDE5A | phosphodiesterase 5A, cGMP-specific                                                   | -0.526143 | Inlier |

Identification of Survival Genes in Human Glioblastoma Cells Using siRNA Screening

Nikhil G Thaker, Fang Zhang, Peter R. McDonald, Tong Ying Shun, Michael D Lewen, Ian F. Pollack, and John S. Lazo

Molecular Pharmacology

|                              |               |       |                                                 |           |        |
|------------------------------|---------------|-------|-------------------------------------------------|-----------|--------|
| siRNA-Vinblastine Run1-DMSO  | NM_0334<br>31 | PDE5A | phosphodiesterase 5A, cGMP-specific             | -0.025337 | Inlier |
| siRNA-Temozolomide Run2-DMSO | NM_0334<br>31 | PDE5A | phosphodiesterase 5A, cGMP-specific             | 0.025336  | Inlier |
| siRNA Disorazole DMSO Run2   | NM_0334<br>31 | PDE5A | phosphodiesterase 5A, cGMP-specific             | 0.470211  | Inlier |
| siRNA-Vinblastine Run2-DMSO  | NM_0334<br>31 | PDE5A | phosphodiesterase 5A, cGMP-specific             | 1.104625  | Inlier |
| siRNA Disorazole DMSO Run3   | NM_0334<br>31 | PDE5A | phosphodiesterase 5A, cGMP-specific             | 2.950248  | Inlier |
| siRNA-Temozolomide Run3-DMSO | NM_0004<br>40 | PDE6A | phosphodiesterase 6A, cGMP-specific, rod, alpha | -1.813048 | Inlier |
| siRNA-Temozolomide Run2-DMSO | NM_0004<br>40 | PDE6A | phosphodiesterase 6A, cGMP-specific, rod, alpha | -1.150044 | Inlier |
| siRNA Disorazole DMSO Run1   | NM_0004<br>40 | PDE6A | phosphodiesterase 6A, cGMP-specific, rod, alpha | -0.605629 | Inlier |
| siRNA-Temozolomide Run1-DMSO | NM_0004<br>40 | PDE6A | phosphodiesterase 6A, cGMP-specific, rod, alpha | -0.220364 | Inlier |

Identification of Survival Genes in Human Glioblastoma Cells Using siRNA Screening  
 Nikhil G Thaker, Fang Zhang, Peter R. McDonald, Tong Ying Shun, Michael D Lewen, Ian F. Pollack, and John S. Lazo  
 Molecular Pharmacology

|                              |           |       |                                                                                                              |           |        |
|------------------------------|-----------|-------|--------------------------------------------------------------------------------------------------------------|-----------|--------|
| siRNA-Vinblastine Run1-DMSO  | NM_000440 | PDE6A | phosphodiesterase 6A, cGMP-specific, rod, alpha                                                              | 0.220363  | Inlier |
| siRNA-Vinblastine Run2-DMSO  | NM_000440 | PDE6A | phosphodiesterase 6A, cGMP-specific, rod, alpha                                                              | 0.522859  | Inlier |
| siRNA Disorazole DMSO Run2   | NM_000440 | PDE6A | phosphodiesterase 6A, cGMP-specific, rod, alpha                                                              | 0.743371  | Inlier |
| siRNA Disorazole DMSO Run3   | NM_000440 | PDE6A | phosphodiesterase 6A, cGMP-specific, rod, alpha                                                              | 1.993618  | Inlier |
| siRNA-Temozolomide Run3-DMSO | NM_000283 | PDE6B | phosphodiesterase 6B, cGMP-specific, rod, beta (congenital stationary night blindness 3, autosomal dominant) | -3.493391 | Inlier |

Identification of Survival Genes in Human Glioblastoma Cells Using siRNA Screening

Nikhil G Thaker, Fang Zhang, Peter R. McDonald, Tong Ying Shun, Michael D Lewen, Ian F. Pollack, and John S. Lazo

Molecular Pharmacology

|                              |           |       |                                                                                                              |           |        |
|------------------------------|-----------|-------|--------------------------------------------------------------------------------------------------------------|-----------|--------|
| siRNA Disorazole DMSO Run1   | NM_000283 | PDE6B | phosphodiesterase 6B, cGMP-specific, rod, beta (congenital stationary night blindness 3, autosomal dominant) | -1.65678  | Inlier |
| siRNA-Temozolomide Run2-DMSO | NM_000283 | PDE6B | phosphodiesterase 6B, cGMP-specific, rod, beta (congenital stationary night blindness 3, autosomal dominant) | -0.845917 | Inlier |
| siRNA-Vinblastine Run1-DMSO  | NM_000283 | PDE6B | phosphodiesterase 6B, cGMP-specific, rod, beta (congenital stationary night blindness 3, autosomal dominant) | -0.03442  | Inlier |

Identification of Survival Genes in Human Glioblastoma Cells Using siRNA Screening

Nikhil G Thaker, Fang Zhang, Peter R. McDonald, Tong Ying Shun, Michael D Lewen, Ian F. Pollack, and John S.

Lazo

Molecular Pharmacology

|                              |               |       |                                                                                                              |          |        |
|------------------------------|---------------|-------|--------------------------------------------------------------------------------------------------------------|----------|--------|
| siRNA Disorazole DMSO Run2   | NM_0002<br>83 | PDE6B | phosphodiesterase 6B, cGMP-specific, rod, beta (congenital stationary night blindness 3, autosomal dominant) | 0.03442  | Inlier |
| siRNA Disorazole DMSO Run3   | NM_0002<br>83 | PDE6B | phosphodiesterase 6B, cGMP-specific, rod, beta (congenital stationary night blindness 3, autosomal dominant) | 0.350129 | Inlier |
| siRNA-Temozolomide Run1-DMSO | NM_0002<br>83 | PDE6B | phosphodiesterase 6B, cGMP-specific, rod, beta (congenital stationary night blindness 3, autosomal dominant) | 0.503083 | Inlier |

Identification of Survival Genes in Human Glioblastoma Cells Using siRNA Screening

Nikhil G Thaker, Fang Zhang, Peter R. McDonald, Tong Ying Shun, Michael D Lewen, Ian F. Pollack, and John S.

Lazo

Molecular Pharmacology

|                              |           |       |                                                                                                              |           |        |
|------------------------------|-----------|-------|--------------------------------------------------------------------------------------------------------------|-----------|--------|
| siRNA-Vinblastine Run2-DMSO  | NM_000283 | PDE6B | phosphodiesterase 6B, cGMP-specific, rod, beta (congenital stationary night blindness 3, autosomal dominant) | 2.514826  | Inlier |
| siRNA-Temozolomide Run3-DMSO | NM_006204 | PDE6C | phosphodiesterase 6C, cGMP-specific, cone, alpha prime                                                       | -1.476166 | Inlier |
| siRNA-Temozolomide Run1-DMSO | NM_006204 | PDE6C | phosphodiesterase 6C, cGMP-specific, cone, alpha prime                                                       | -0.919306 | Inlier |
| siRNA-Temozolomide Run2-DMSO | NM_006204 | PDE6C | phosphodiesterase 6C, cGMP-specific, cone, alpha prime                                                       | -0.879093 | Inlier |
| siRNA Disorazole DMSO Run1   | NM_006204 | PDE6C | phosphodiesterase 6C, cGMP-specific, cone, alpha prime                                                       | -0.189884 | Inlier |

Identification of Survival Genes in Human Glioblastoma Cells Using siRNA Screening  
 Nikhil G Thaker, Fang Zhang, Peter R. McDonald, Tong Ying Shun, Michael D Lewen, Ian F. Pollack, and John S. Lazo  
 Molecular Pharmacology

|                              |           |       |                                                        |           |        |
|------------------------------|-----------|-------|--------------------------------------------------------|-----------|--------|
| siRNA-Vinblastine Run2-DMSO  | NM_006204 | PDE6C | phosphodiesterase 6C, cGMP-specific, cone, alpha prime | 0.189885  | Inlier |
| siRNA-Vinblastine Run1-DMSO  | NM_006204 | PDE6C | phosphodiesterase 6C, cGMP-specific, cone, alpha prime | 0.429136  | Inlier |
| siRNA Disorazole DMSO Run2   | NM_006204 | PDE6C | phosphodiesterase 6C, cGMP-specific, cone, alpha prime | 0.469907  | Inlier |
| siRNA Disorazole DMSO Run3   | NM_006204 | PDE6C | phosphodiesterase 6C, cGMP-specific, cone, alpha prime | 2.453091  | Inlier |
| siRNA Disorazole DMSO Run2   | NM_002601 | PDE6D | phosphodiesterase 6D, cGMP-specific, rod, delta        | -1.361267 | Inlier |
| siRNA-Temozolomide Run3-DMSO | NM_002601 | PDE6D | phosphodiesterase 6D, cGMP-specific, rod, delta        | -1.029706 | Inlier |
| siRNA-Temozolomide Run1-DMSO | NM_002601 | PDE6D | phosphodiesterase 6D, cGMP-specific, rod, delta        | -0.732502 | Inlier |



Identification of Survival Genes in Human Glioblastoma Cells Using siRNA Screening  
 Nikhil G Thaker, Fang Zhang, Peter R. McDonald, Tong Ying Shun, Michael D Lewen, Ian F. Pollack, and John S. Lazo  
 Molecular Pharmacology

|                              |               |       |                                                 |           |        |
|------------------------------|---------------|-------|-------------------------------------------------|-----------|--------|
| siRNA Disorazole DMSO Run1   | NM_0026<br>01 | PDE6D | phosphodiesterase 6D, cGMP-specific, rod, delta | -0.04991  | Inlier |
| siRNA-Temozolomide Run2-DMSO | NM_0026<br>01 | PDE6D | phosphodiesterase 6D, cGMP-specific, rod, delta | 0.04991   | Inlier |
| siRNA-Vinblastine Run1-DMSO  | NM_0026<br>01 | PDE6D | phosphodiesterase 6D, cGMP-specific, rod, delta | 0.442015  | Inlier |
| siRNA Disorazole DMSO Run3   | NM_0026<br>01 | PDE6D | phosphodiesterase 6D, cGMP-specific, rod, delta | 0.664518  | Inlier |
| siRNA-Vinblastine Run2-DMSO  | NM_0026<br>01 | PDE6D | phosphodiesterase 6D, cGMP-specific, rod, delta | 0.684482  | Inlier |
| siRNA-Temozolomide Run3-DMSO | NM_0026<br>02 | PDE6G | phosphodiesterase 6G, cGMP-specific, rod, gamma | -1.728293 | Inlier |
| siRNA-Temozolomide Run1-DMSO | NM_0026<br>02 | PDE6G | phosphodiesterase 6G, cGMP-specific, rod, gamma | -0.682519 | Inlier |
| siRNA-Temozolomide Run2-DMSO | NM_0026<br>02 | PDE6G | phosphodiesterase 6G, cGMP-specific, rod, gamma | -0.669207 | Inlier |

Identification of Survival Genes in Human Glioblastoma Cells Using siRNA Screening  
 Nikhil G Thaker, Fang Zhang, Peter R. McDonald, Tong Ying Shun, Michael D Lewen, Ian F. Pollack, and John S. Lazo  
 Molecular Pharmacology

|                              |               |       |                                                  |           |        |
|------------------------------|---------------|-------|--------------------------------------------------|-----------|--------|
| siRNA Disorazole DMSO Run1   | NM_0026<br>02 | PDE6G | phosphodiesterase 6G, cGMP-specific, rod, gamma  | -0.196828 | Inlier |
| siRNA Disorazole DMSO Run3   | NM_0026<br>02 | PDE6G | phosphodiesterase 6G, cGMP-specific, rod, gamma  | 0.196828  | Inlier |
| siRNA-Vinblastine Run1-DMSO  | NM_0026<br>02 | PDE6G | phosphodiesterase 6G, cGMP-specific, rod, gamma  | 0.227244  | Inlier |
| siRNA Disorazole DMSO Run2   | NM_0026<br>02 | PDE6G | phosphodiesterase 6G, cGMP-specific, rod, gamma  | 0.679793  | Inlier |
| siRNA-Vinblastine Run2-DMSO  | NM_0026<br>02 | PDE6G | phosphodiesterase 6G, cGMP-specific, rod, gamma  | 0.901508  | Inlier |
| siRNA-Temozolomide Run3-DMSO | NM_0062<br>05 | PDE6H | phosphodiesterase 6H, cGMP-specific, cone, gamma | -1.155112 | Inlier |
| siRNA Disorazole DMSO Run2   | NM_0062<br>05 | PDE6H | phosphodiesterase 6H, cGMP-specific, cone, gamma | -0.892963 | Inlier |

Identification of Survival Genes in Human Glioblastoma Cells Using siRNA Screening  
 Nikhil G Thaker, Fang Zhang, Peter R. McDonald, Tong Ying Shun, Michael D Lewen, Ian F. Pollack, and John S. Lazo  
 Molecular Pharmacology

|                              |           |       |                                                  |           |         |
|------------------------------|-----------|-------|--------------------------------------------------|-----------|---------|
| siRNA Disorazole DMSO Run1   | NM_006205 | PDE6H | phosphodiesterase 6H, cGMP-specific, cone, gamma | -0.579793 | Inlier  |
| siRNA-Vinblastine Run1-DMSO  | NM_006205 | PDE6H | phosphodiesterase 6H, cGMP-specific, cone, gamma | -0.00162  | Inlier  |
| siRNA-Temozolomide Run2-DMSO | NM_006205 | PDE6H | phosphodiesterase 6H, cGMP-specific, cone, gamma | 0.001621  | Inlier  |
| siRNA-Vinblastine Run2-DMSO  | NM_006205 | PDE6H | phosphodiesterase 6H, cGMP-specific, cone, gamma | 0.380751  | Inlier  |
| siRNA-Temozolomide Run1-DMSO | NM_006205 | PDE6H | phosphodiesterase 6H, cGMP-specific, cone, gamma | 0.769207  | Inlier  |
| siRNA Disorazole DMSO Run3   | NM_006205 | PDE6H | phosphodiesterase 6H, cGMP-specific, cone, gamma | 2.204871  | Inlier  |
| siRNA-Temozolomide Run3-DMSO | NM_002603 | PDE7A | phosphodiesterase 7A                             | -4.619446 | Outlier |
| siRNA-Temozolomide Run1-DMSO | NM_002603 | PDE7A | phosphodiesterase 7A                             | -2.024539 | Inlier  |
| siRNA Disorazole DMSO Run1   | NM_002603 | PDE7A | phosphodiesterase 7A                             | -0.490125 | Inlier  |

Identification of Survival Genes in Human Glioblastoma Cells Using siRNA Screening  
 Nikhil G Thaker, Fang Zhang, Peter R. McDonald, Tong Ying Shun, Michael D Lewen, Ian F. Pollack, and John S. Lazo

| Molecular Pharmacology           |               |       |    | phosphodi |                  |
|----------------------------------|---------------|-------|----|-----------|------------------|
| siRNA-Temozolomide Run2-<br>DMSO | NM_0026<br>03 | PDE7A | 7A | esterase  | -0.255533 Inlier |
| siRNA-Vinblastine Run2-<br>DMSO  | NM_0026<br>03 | PDE7A | 7A | esterase  | 0.255533 Inlier  |
| siRNA-Vinblastine Run1-<br>DMSO  | NM_0026<br>03 | PDE7A | 7A | esterase  | 0.428062 Inlier  |
| siRNA Disorazole DMSO Run2       | NM_0026<br>03 | PDE7A | 7A | esterase  | 0.858875 Inlier  |
| siRNA Disorazole DMSO Run3       | NM_0026<br>03 | PDE7A | 7A | esterase  | 1.702643 Inlier  |
| siRNA-Temozolomide Run3-<br>DMSO | NM_0189<br>45 | PDE7B | 7B | esterase  | -1.170137 Inlier |
| siRNA Disorazole DMSO Run2       | NM_0189<br>45 | PDE7B | 7B | esterase  | -0.956448 Inlier |
| siRNA-Temozolomide Run1-<br>DMSO | NM_0189<br>45 | PDE7B | 7B | esterase  | -0.498715 Inlier |
| siRNA-Temozolomide Run2-<br>DMSO | NM_0189<br>45 | PDE7B | 7B | esterase  | -0.194965 Inlier |
| siRNA Disorazole DMSO Run1       | NM_0189<br>45 | PDE7B | 7B | esterase  | 0.194965 Inlier  |
| siRNA Disorazole DMSO Run3       | NM_0189<br>45 | PDE7B | 7B | esterase  | 0.512317 Inlier  |
| siRNA-Vinblastine Run1-<br>DMSO  | NM_0189<br>45 | PDE7B | 7B | esterase  | 0.836683 Inlier  |
| siRNA-Vinblastine Run2-<br>DMSO  | NM_0189<br>45 | PDE7B | 7B | esterase  | 1.313647 Inlier  |
| siRNA-Temozolomide Run1-<br>DMSO | NM_1734<br>54 | PDE8A | 8A | esterase  | -1.662399 Inlier |
| siRNA Disorazole DMSO Run2       | NM_1734<br>54 | PDE8A | 8A | esterase  | -1.032399 Inlier |
| siRNA-Temozolomide Run3-<br>DMSO | NM_1734<br>54 | PDE8A | 8A | esterase  | -0.667234 Inlier |
| siRNA-Temozolomide Run2-<br>DMSO | NM_1734<br>54 | PDE8A | 8A | esterase  | -0.005459 Inlier |

Identification of Survival Genes in Human Glioblastoma Cells Using siRNA Screening  
 Nikhil G Thaker, Fang Zhang, Peter R. McDonald, Tong Ying Shun, Michael D Lewen, Ian F. Pollack, and John S. Lazo

Molecular Pharmacology

|                              |                  |       |                         |           |        |
|------------------------------|------------------|-------|-------------------------|-----------|--------|
| siRNA Disorazole DMSO Run1   | NM_1734<br>54    | PDE8A | phosphodiesterase<br>8A | 0.005459  | Inlier |
| siRNA-Vinblastine Run1-DMSO  | NM_1734<br>54    | PDE8A | phosphodiesterase<br>8A | 0.554753  | Inlier |
| siRNA-Vinblastine Run2-DMSO  | NM_1734<br>54    | PDE8A | phosphodiesterase<br>8A | 0.681766  | Inlier |
| siRNA Disorazole DMSO Run3   | NM_1734<br>54    | PDE8A | phosphodiesterase<br>8A | 2.282391  | Inlier |
| siRNA-Temozolomide Run3-DMSO | NM_0037<br>19    | PDE8B | phosphodiesterase<br>8B | -0.886582 | Inlier |
| siRNA-Temozolomide Run2-DMSO | NM_0037<br>19    | PDE8B | phosphodiesterase<br>8B | -0.462418 | Inlier |
| siRNA-Temozolomide Run1-DMSO | NM_0037<br>19    | PDE8B | phosphodiesterase<br>8B | -0.23508  | Inlier |
| siRNA Disorazole DMSO Run3   | NM_0037<br>19    | PDE8B | phosphodiesterase<br>8B | -0.07805  | Inlier |
| siRNA Disorazole DMSO Run2   | NM_0037<br>19    | PDE8B | phosphodiesterase<br>8B | 0.07805   | Inlier |
| siRNA Disorazole DMSO Run1   | NM_0037<br>19    | PDE8B | phosphodiesterase<br>8B | 1.057812  | Inlier |
| siRNA-Vinblastine Run1-DMSO  | NM_0037<br>19    | PDE8B | phosphodiesterase<br>8B | 1.521488  | Inlier |
| siRNA-Vinblastine Run2-DMSO  | NM_0037<br>19    | PDE8B | phosphodiesterase<br>8B | 1.890447  | Inlier |
| siRNA-Temozolomide Run3-DMSO | NM_0010<br>01568 | PDE9A | phosphodiesterase<br>9A | -3.293073 | Inlier |
| siRNA Disorazole DMSO Run2   | NM_0010<br>01568 | PDE9A | phosphodiesterase<br>9A | -2.69531  | Inlier |
| siRNA Disorazole DMSO Run1   | NM_0010<br>01568 | PDE9A | phosphodiesterase<br>9A | -0.62502  | Inlier |
| siRNA-Temozolomide Run2-DMSO | NM_0010<br>01568 | PDE9A | phosphodiesterase<br>9A | -0.111265 | Inlier |
| siRNA-Temozolomide Run1-DMSO | NM_0010<br>01568 | PDE9A | phosphodiesterase<br>9A | 0.111266  | Inlier |

Identification of Survival Genes in Human Glioblastoma Cells Using siRNA Screening  
 Nikhil G Thaker, Fang Zhang, Peter R. McDonald, Tong Ying Shun, Michael D Lewen, Ian F. Pollack, and John S. Lazo

|                                                           |                  |       |                                           |           |        |
|-----------------------------------------------------------|------------------|-------|-------------------------------------------|-----------|--------|
| Molecular Pharmacology<br>siRNA-Vinblastine Run1-<br>DMSO | NM_0010<br>01568 | PDE9A | phosphodi<br>esterase<br>9A               | 0.421416  | Inlier |
| siRNA Disorazole DMSO Run3                                | NM_0010<br>01568 | PDE9A | phosphodi<br>esterase<br>9A               | 0.72398   | Inlier |
| siRNA-Vinblastine Run2-<br>DMSO                           | NM_0010<br>01568 | PDE9A | phosphodi<br>esterase<br>9A               | 1.463429  | Inlier |
| siRNA-Temozolomide Run3-<br>DMSO                          | NM_0223<br>41    | PDF   | PDF                                       | -0.712163 | Inlier |
| siRNA-Temozolomide Run2-<br>DMSO                          | NM_0223<br>41    | PDF   | PDF                                       | -0.636837 | Inlier |
| siRNA Disorazole DMSO Run3                                | NM_0223<br>41    | PDF   | PDF                                       | -0.400824 | Inlier |
| siRNA-Vinblastine Run2-<br>DMSO                           | NM_0223<br>41    | PDF   | PDF                                       | -0.047135 | Inlier |
| siRNA-Temozolomide Run1-<br>DMSO                          | NM_0223<br>41    | PDF   | PDF                                       | 0.047135  | Inlier |
| siRNA-Vinblastine Run1-<br>DMSO                           | NM_0223<br>41    | PDF   | PDF                                       | 1.464221  | Inlier |
| siRNA Disorazole DMSO Run1                                | NM_0223<br>41    | PDF   | PDF                                       | 1.640997  | Inlier |
| siRNA Disorazole DMSO Run2                                | NM_0223<br>41    | PDF   | PDF                                       | 2.074975  | Inlier |
| siRNA-Temozolomide Run3-<br>DMSO                          | NM_0331<br>35    | PDGFD | platelet<br>derived<br>growth<br>factor D | -3.03921  | Inlier |
| siRNA Disorazole DMSO Run1                                | NM_0331<br>35    | PDGFD | platelet<br>derived<br>growth<br>factor D | -0.749797 | Inlier |
| siRNA Disorazole DMSO Run2                                | NM_0331<br>35    | PDGFD | platelet<br>derived<br>growth<br>factor D | -0.599203 | Inlier |
| siRNA-Temozolomide Run2-<br>DMSO                          | NM_0331<br>35    | PDGFD | platelet<br>derived<br>growth<br>factor D | -0.015638 | Inlier |
| siRNA-Temozolomide Run1-<br>DMSO                          | NM_0331<br>35    | PDGFD | platelet<br>derived<br>growth<br>factor D | 0.015637  | Inlier |
| siRNA Disorazole DMSO Run3                                | NM_0331<br>35    | PDGFD | platelet<br>derived<br>growth<br>factor D | 0.173464  | Inlier |

Identification of Survival Genes in Human Glioblastoma Cells Using siRNA Screening

Nikhil G Thaker, Fang Zhang, Peter R. McDonald, Tong Ying Shun, Michael D Lewen, Ian F. Pollack, and John S. Lazo

Molecular Pharmacology

|                              |           |        |                                                            |           |        |
|------------------------------|-----------|--------|------------------------------------------------------------|-----------|--------|
| siRNA-Vinblastine Run2-DMSO  | NM_033135 | PDGFD  | platelet derived growth factor D                           | 1.640678  | Inlier |
| siRNA-Vinblastine Run1-DMSO  | NM_033135 | PDGFD  | platelet derived growth factor D                           | 2.300411  | Inlier |
| siRNA-Temozolomide Run3-DMSO | NM_006206 | PDGFRA | platelet-derived growth factor receptor, alpha polypeptide | -1.654629 | Inlier |
| siRNA-Temozolomide Run2-DMSO | NM_006206 | PDGFRA | platelet-derived growth factor receptor, alpha polypeptide | -1.114132 | Inlier |
| siRNA-Temozolomide Run1-DMSO | NM_006206 | PDGFRA | platelet-derived growth factor receptor, alpha polypeptide | -0.728354 | Inlier |
| siRNA-Vinblastine Run1-DMSO  | NM_006206 | PDGFRA | platelet-derived growth factor receptor, alpha polypeptide | -0.361666 | Inlier |
| siRNA Disorazole DMSO Run2   | NM_006206 | PDGFRA | platelet-derived growth factor receptor, alpha polypeptide | 0.361666  | Inlier |

Identification of Survival Genes in Human Glioblastoma Cells Using siRNA Screening

Nikhil G Thaker, Fang Zhang, Peter R. McDonald, Tong Ying Shun, Michael D Lewen, Ian F. Pollack, and John S. Lazo

Molecular Pharmacology

|                              |           |        |                                                            |           |        |
|------------------------------|-----------|--------|------------------------------------------------------------|-----------|--------|
| siRNA-Vinblastine Run2-DMSO  | NM_006206 | PDGFRA | platelet-derived growth factor receptor, alpha polypeptide | 0.436286  | Inlier |
| siRNA Disorazole DMSO Run1   | NM_006206 | PDGFRA | platelet-derived growth factor receptor, alpha polypeptide | 0.620646  | Inlier |
| siRNA Disorazole DMSO Run3   | NM_006206 | PDGFRA | platelet-derived growth factor receptor, alpha polypeptide | 1.082882  | Inlier |
| siRNA-Temozolomide Run1-DMSO | NM_002609 | PDGFRB | platelet-derived growth factor receptor, beta polypeptide  | -1.327991 | Inlier |
| siRNA-Temozolomide Run3-DMSO | NM_002609 | PDGFRB | platelet-derived growth factor receptor, beta polypeptide  | -0.613801 | Inlier |
| siRNA-Temozolomide Run2-DMSO | NM_002609 | PDGFRB | platelet-derived growth factor receptor, beta polypeptide  | -0.283314 | Inlier |



Identification of Survival Genes in Human Glioblastoma Cells Using siRNA Screening

Nikhil G Thaker, Fang Zhang, Peter R. McDonald, Tong Ying Shun, Michael D Lewen, Ian F. Pollack, and John S. Lazo

Molecular Pharmacology

|                              |           |        |                                                           |           |        |
|------------------------------|-----------|--------|-----------------------------------------------------------|-----------|--------|
| siRNA Disorazole DMSO Run2   | NM_002609 | PDGFRB | platelet-derived growth factor receptor, beta polypeptide | -0.249975 | Inlier |
| siRNA-Vinblastine Run1-DMSO  | NM_002609 | PDGFRB | platelet-derived growth factor receptor, beta polypeptide | 0.249977  | Inlier |
| siRNA-Vinblastine Run2-DMSO  | NM_002609 | PDGFRB | platelet-derived growth factor receptor, beta polypeptide | 0.735199  | Inlier |
| siRNA Disorazole DMSO Run1   | NM_002609 | PDGFRB | platelet-derived growth factor receptor, beta polypeptide | 1.169224  | Inlier |
| siRNA Disorazole DMSO Run3   | NM_002609 | PDGFRB | platelet-derived growth factor receptor, beta polypeptide | 1.919084  | Inlier |
| siRNA-Temozolomide Run2-DMSO | NM_006207 | PDGFRL | platelet-derived growth factor receptor-like              | -1.347871 | Inlier |
| siRNA-Temozolomide Run3-DMSO | NM_006207 | PDGFRL | platelet-derived growth factor receptor-like              | -0.811679 | Inlier |

Identification of Survival Genes in Human Glioblastoma Cells Using siRNA Screening  
 Nikhil G Thaker, Fang Zhang, Peter R. McDonald, Tong Ying Shun, Michael D Lewen, Ian F. Pollack, and John S. Lazo

Molecular Pharmacology

|                              |           |        |                                              |           |        |
|------------------------------|-----------|--------|----------------------------------------------|-----------|--------|
| siRNA Disorazole DMSO Run1   | NM_006207 | PDGFRL | platelet-derived growth factor receptor-like | -0.352553 | Inlier |
| siRNA-Vinblastine Run2-DMSO  | NM_006207 | PDGFRL | platelet-derived growth factor receptor-like | -0.203454 | Inlier |
| siRNA Disorazole DMSO Run3   | NM_006207 | PDGFRL | platelet-derived growth factor receptor-like | 0.203454  | Inlier |
| siRNA-Temozolomide Run1-DMSO | NM_006207 | PDGFRL | platelet-derived growth factor receptor-like | 0.537321  | Inlier |
| siRNA-Vinblastine Run1-DMSO  | NM_006207 | PDGFRL | platelet-derived growth factor receptor-like | 1.046476  | Inlier |
| siRNA Disorazole DMSO Run2   | NM_006207 | PDGFRL | platelet-derived growth factor receptor-like | 1.065297  | Inlier |
| siRNA-Temozolomide Run3-DMSO | NM_000284 | PDHA1  | pyruvate dehydrogenase (lipoamide) alpha 1   | -1.628321 | Inlier |
| siRNA Disorazole DMSO Run2   | NM_000284 | PDHA1  | pyruvate dehydrogenase (lipoamide) alpha 1   | -0.781166 | Inlier |
| siRNA-Temozolomide Run2-DMSO | NM_000284 | PDHA1  | pyruvate dehydrogenase (lipoamide) alpha 1   | -0.567834 | Inlier |

Identification of Survival Genes in Human Glioblastoma Cells Using siRNA Screening  
 Nikhil G Thaker, Fang Zhang, Peter R. McDonald, Tong Ying Shun, Michael D Lewen, Ian F. Pollack, and John S. Lazo

Molecular Pharmacology

|                              |               |       |                                            |           |        |
|------------------------------|---------------|-------|--------------------------------------------|-----------|--------|
| siRNA Disorazole DMSO Run3   | NM_0002<br>84 | PDHA1 | pyruvate dehydrogenase (lipoamide) alpha 1 | -0.0176   | Inlier |
| siRNA-Temozolomide Run1-DMSO | NM_0002<br>84 | PDHA1 | pyruvate dehydrogenase (lipoamide) alpha 1 | 0.017601  | Inlier |
| siRNA Disorazole DMSO Run1   | NM_0002<br>84 | PDHA1 | pyruvate dehydrogenase (lipoamide) alpha 1 | 0.298038  | Inlier |
| siRNA-Vinblastine Run1-DMSO  | NM_0002<br>84 | PDHA1 | pyruvate dehydrogenase (lipoamide) alpha 1 | 1.550213  | Inlier |
| siRNA-Vinblastine Run2-DMSO  | NM_0002<br>84 | PDHA1 | pyruvate dehydrogenase (lipoamide) alpha 1 | 2.288455  | Inlier |
| siRNA-Temozolomide Run1-DMSO | NM_0053<br>90 | PDHA2 | pyruvate dehydrogenase (lipoamide) alpha 2 | -0.996581 | Inlier |
| siRNA-Temozolomide Run3-DMSO | NM_0053<br>90 | PDHA2 | pyruvate dehydrogenase (lipoamide) alpha 2 | -0.983921 | Inlier |
| siRNA-Temozolomide Run2-DMSO | NM_0053<br>90 | PDHA2 | pyruvate dehydrogenase (lipoamide) alpha 2 | -0.684537 | Inlier |
| siRNA Disorazole DMSO Run2   | NM_0053<br>90 | PDHA2 | pyruvate dehydrogenase (lipoamide) alpha 2 | -0.00939  | Inlier |
| siRNA Disorazole DMSO Run1   | NM_0053<br>90 | PDHA2 | pyruvate dehydrogenase (lipoamide) alpha 2 | 0.00939   | Inlier |

Identification of Survival Genes in Human Glioblastoma Cells Using siRNA Screening  
 Nikhil G Thaker, Fang Zhang, Peter R. McDonald, Tong Ying Shun, Michael D Lewen, Ian F. Pollack, and John S. Lazo

Molecular Pharmacology

|                                  |               |       |                                                          |           |        |
|----------------------------------|---------------|-------|----------------------------------------------------------|-----------|--------|
| siRNA Disorazole DMSO Run3       | NM_0053<br>90 | PDHA2 | pyruvate<br>dehydroge<br>nase<br>(lipoamide<br>) alpha 2 | 0.061649  | Inlier |
| siRNA-Vinblastine Run1-<br>DMSO  | NM_0053<br>90 | PDHA2 | pyruvate<br>dehydroge<br>nase<br>(lipoamide<br>) alpha 2 | 0.664463  | Inlier |
| siRNA-Vinblastine Run2-<br>DMSO  | NM_0053<br>90 | PDHA2 | pyruvate<br>dehydroge<br>nase<br>(lipoamide<br>) alpha 2 | 0.701407  | Inlier |
| siRNA-Temozolomide Run2-<br>DMSO | NM_0009<br>25 | PDHB  | pyruvate<br>dehydroge<br>nase<br>(lipoamide<br>) beta    | -0.828157 | Inlier |
| siRNA Disorazole DMSO Run2       | NM_0009<br>25 | PDHB  | pyruvate<br>dehydroge<br>nase<br>(lipoamide<br>) beta    | -0.777151 | Inlier |
| siRNA-Temozolomide Run3-<br>DMSO | NM_0009<br>25 | PDHB  | pyruvate<br>dehydroge<br>nase<br>(lipoamide<br>) beta    | -0.571849 | Inlier |
| siRNA Disorazole DMSO Run1       | NM_0009<br>25 | PDHB  | pyruvate<br>dehydroge<br>nase<br>(lipoamide<br>) beta    | -0.067653 | Inlier |
| siRNA Disorazole DMSO Run3       | NM_0009<br>25 | PDHB  | pyruvate<br>dehydroge<br>nase<br>(lipoamide<br>) beta    | 0.067653  | Inlier |
| siRNA-Temozolomide Run1-<br>DMSO | NM_0009<br>25 | PDHB  | pyruvate<br>dehydroge<br>nase<br>(lipoamide<br>) beta    | 0.209276  | Inlier |
| siRNA-Vinblastine Run1-<br>DMSO  | NM_0009<br>25 | PDHB  | pyruvate<br>dehydroge<br>nase<br>(lipoamide<br>) beta    | 0.828831  | Inlier |

Identification of Survival Genes in Human Glioblastoma Cells Using siRNA Screening  
 Nikhil G Thaker, Fang Zhang, Peter R. McDonald, Tong Ying Shun, Michael D Lewen, Ian F. Pollack, and John S. Lazo

Molecular Pharmacology

|                              |           |      |                                             |           |        |
|------------------------------|-----------|------|---------------------------------------------|-----------|--------|
| siRNA-Vinblastine Run2-DMSO  | NM_000925 | PDHB | pyruvate dehydrogenase (lipoamide) beta     | 1.245932  | Inlier |
| siRNA-Temozolomide Run3-DMSO | NM_003477 | PDHX | pyruvate dehydrogenase complex, component X | -1.785913 | Inlier |
| siRNA-Temozolomide Run1-DMSO | NM_003477 | PDHX | pyruvate dehydrogenase complex, component X | -1.316303 | Inlier |
| siRNA-Temozolomide Run2-DMSO | NM_003477 | PDHX | pyruvate dehydrogenase complex, component X | -1.072923 | Inlier |
| siRNA Disorazole DMSO Run1   | NM_003477 | PDHX | pyruvate dehydrogenase complex, component X | -0.391667 | Inlier |
| siRNA-Vinblastine Run1-DMSO  | NM_003477 | PDHX | pyruvate dehydrogenase complex, component X | 0.391667  | Inlier |
| siRNA Disorazole DMSO Run2   | NM_003477 | PDHX | pyruvate dehydrogenase complex, component X | 0.472487  | Inlier |
| siRNA Disorazole DMSO Run3   | NM_003477 | PDHX | pyruvate dehydrogenase complex, component X | 0.488166  | Inlier |

Identification of Survival Genes in Human Glioblastoma Cells Using siRNA Screening  
 Nikhil G Thaker, Fang Zhang, Peter R. McDonald, Tong Ying Shun, Michael D Lewen, Ian F. Pollack, and John S. Lazo

Molecular Pharmacology

|                              |           |      |                                             |           |        |
|------------------------------|-----------|------|---------------------------------------------|-----------|--------|
| siRNA-Vinblastine Run2-DMSO  | NM_003477 | PDHX | pyruvate dehydrogenase complex, component X | 0.860834  | Inlier |
| siRNA-Temozolomide Run3-DMSO | NM_006849 | PDIP | protein disulfide isomerase, pancreatic     | -1.635497 | Inlier |
| siRNA Disorazole DMSO Run3   | NM_006849 | PDIP | protein disulfide isomerase, pancreatic     | -1.203883 | Inlier |
| siRNA-Vinblastine Run2-DMSO  | NM_006849 | PDIP | protein disulfide isomerase, pancreatic     | -0.071838 | Inlier |
| siRNA-Vinblastine Run1-DMSO  | NM_006849 | PDIP | protein disulfide isomerase, pancreatic     | -0.029022 | Inlier |
| siRNA-Temozolomide Run2-DMSO | NM_006849 | PDIP | protein disulfide isomerase, pancreatic     | 0.029021  | Inlier |
| siRNA-Temozolomide Run1-DMSO | NM_006849 | PDIP | protein disulfide isomerase, pancreatic     | 0.459675  | Inlier |
| siRNA Disorazole DMSO Run1   | NM_006849 | PDIP | protein disulfide isomerase, pancreatic     | 0.889325  | Inlier |

Identification of Survival Genes in Human Glioblastoma Cells Using siRNA Screening  
 Nikhil G Thaker, Fang Zhang, Peter R. McDonald, Tong Ying Shun, Michael D Lewen, Ian F. Pollack, and John S. Lazo  
 Molecular Pharmacology

|                              |               |      |                                                |           |        |
|------------------------------|---------------|------|------------------------------------------------|-----------|--------|
| siRNA Disorazole DMSO Run2   | NM_0068<br>49 | PDIP | protein disulfide isomerase<br>, pancreatic    | 2.241153  | Inlier |
| siRNA-Temozolomide Run3-DMSO | NM_0068<br>10 | PDIR | protein disulfide isomerase family A, member 5 | -0.86687  | Inlier |
| siRNA Disorazole DMSO Run3   | NM_0068<br>10 | PDIR | protein disulfide isomerase family A, member 5 | -0.661588 | Inlier |
| siRNA Disorazole DMSO Run1   | NM_0068<br>10 | PDIR | protein disulfide isomerase family A, member 5 | -0.247555 | Inlier |
| siRNA-Temozolomide Run2-DMSO | NM_0068<br>10 | PDIR | protein disulfide isomerase family A, member 5 | -0.025936 | Inlier |
| siRNA-Vinblastine Run2-DMSO  | NM_0068<br>10 | PDIR | protein disulfide isomerase family A, member 5 | 0.025936  | Inlier |
| siRNA-Temozolomide Run1-DMSO | NM_0068<br>10 | PDIR | protein disulfide isomerase family A, member 5 | 0.687412  | Inlier |
| siRNA Disorazole DMSO Run2   | NM_0068<br>10 | PDIR | protein disulfide isomerase family A, member 5 | 0.884603  | Inlier |

Identification of Survival Genes in Human Glioblastoma Cells Using siRNA Screening  
 Nikhil G Thaker, Fang Zhang, Peter R. McDonald, Tong Ying Shun, Michael D Lewen, Ian F. Pollack, and John S. Lazo  
 Molecular Pharmacology

|                              |               |      |                                                |           |        |
|------------------------------|---------------|------|------------------------------------------------|-----------|--------|
| siRNA-Vinblastine Run1-DMSO  | NM_0068<br>10 | PDIR | protein disulfide isomerase family A, member 5 | 1.087104  | Inlier |
| siRNA-Temozolomide Run3-DMSO | NM_0026<br>10 | PDK1 | pyruvate dehydrogenase kinase, isoenzyme 1     | -0.731613 | Inlier |
| siRNA Disorazole DMSO Run2   | NM_0026<br>10 | PDK1 | pyruvate dehydrogenase kinase, isoenzyme 1     | -0.617387 | Inlier |
| siRNA Disorazole DMSO Run3   | NM_0026<br>10 | PDK1 | pyruvate dehydrogenase kinase, isoenzyme 1     | -0.282677 | Inlier |
| siRNA-Temozolomide Run2-DMSO | NM_0026<br>10 | PDK1 | pyruvate dehydrogenase kinase, isoenzyme 1     | -0.022976 | Inlier |
| siRNA-Temozolomide Run1-DMSO | NM_0026<br>10 | PDK1 | pyruvate dehydrogenase kinase, isoenzyme 1     | 0.022976  | Inlier |
| siRNA Disorazole DMSO Run1   | NM_0026<br>10 | PDK1 | pyruvate dehydrogenase kinase, isoenzyme 1     | 0.905775  | Inlier |
| siRNA-Vinblastine Run2-DMSO  | NM_0026<br>10 | PDK1 | pyruvate dehydrogenase kinase, isoenzyme 1     | 1.370454  | Inlier |



Identification of Survival Genes in Human Glioblastoma Cells Using siRNA Screening  
 Nikhil G Thaker, Fang Zhang, Peter R. McDonald, Tong Ying Shun, Michael D Lewen, Ian F. Pollack, and John S. Lazo

Molecular Pharmacology

|                              |               |      |                                                            |           |        |
|------------------------------|---------------|------|------------------------------------------------------------|-----------|--------|
| siRNA-Vinblastine Run1-DMSO  | NM_0026<br>10 | PDK1 | pyruvate<br>dehydroge<br>nase<br>kinase,<br>isoenzyme<br>1 | 1.627489  | Inlier |
| siRNA-Temozolomide Run2-DMSO | NM_0026<br>11 | PDK2 | pyruvate<br>dehydroge<br>nase<br>kinase,<br>isoenzyme<br>2 | -1.094565 | Inlier |
| siRNA-Temozolomide Run3-DMSO | NM_0026<br>11 | PDK2 | pyruvate<br>dehydroge<br>nase<br>kinase,<br>isoenzyme<br>2 | -1.093267 | Inlier |
| siRNA-Temozolomide Run1-DMSO | NM_0026<br>11 | PDK2 | pyruvate<br>dehydroge<br>nase<br>kinase,<br>isoenzyme<br>2 | -0.616734 | Inlier |
| siRNA Disorazole DMSO Run1   | NM_0026<br>11 | PDK2 | pyruvate<br>dehydroge<br>nase<br>kinase,<br>isoenzyme<br>2 | -0.377967 | Inlier |
| siRNA-Vinblastine Run1-DMSO  | NM_0026<br>11 | PDK2 | pyruvate<br>dehydroge<br>nase<br>kinase,<br>isoenzyme<br>2 | 0.377966  | Inlier |
| siRNA Disorazole DMSO Run2   | NM_0026<br>11 | PDK2 | pyruvate<br>dehydroge<br>nase<br>kinase,<br>isoenzyme<br>2 | 0.657924  | Inlier |
| siRNA-Vinblastine Run2-DMSO  | NM_0026<br>11 | PDK2 | pyruvate<br>dehydroge<br>nase<br>kinase,<br>isoenzyme<br>2 | 0.691076  | Inlier |

Identification of Survival Genes in Human Glioblastoma Cells Using siRNA Screening  
 Nikhil G Thaker, Fang Zhang, Peter R. McDonald, Tong Ying Shun, Michael D Lewen, Ian F. Pollack, and John S. Lazo

Molecular Pharmacology

|                              |               |      |   |           |         |
|------------------------------|---------------|------|---|-----------|---------|
| siRNA Disorazole DMSO Run3   | NM_0026<br>11 | PDK2 | 2 | 1.43119   | Inlier  |
| siRNA Disorazole DMSO Run2   | NM_0053<br>91 | PDK3 | 3 | -3.95852  | Outlier |
| siRNA Disorazole DMSO Run3   | NM_0053<br>91 | PDK3 | 3 | -1.177684 | Inlier  |
| siRNA-Temozolomide Run3-DMSO | NM_0053<br>91 | PDK3 | 3 | -0.672965 | Inlier  |
| siRNA-Temozolomide Run1-DMSO | NM_0053<br>91 | PDK3 | 3 | -0.203791 | Inlier  |
| siRNA Disorazole DMSO Run1   | NM_0053<br>91 | PDK3 | 3 | 0.203792  | Inlier  |
| siRNA-Vinblastine Run2-DMSO  | NM_0053<br>91 | PDK3 | 3 | 0.376079  | Inlier  |
| siRNA-Temozolomide Run2-DMSO | NM_0053<br>91 | PDK3 | 3 | 0.676035  | Inlier  |

Identification of Survival Genes in Human Glioblastoma Cells Using siRNA Screening  
 Nikhil G Thaker, Fang Zhang, Peter R. McDonald, Tong Ying Shun, Michael D Lewen, Ian F. Pollack, and John S. Lazo

Molecular Pharmacology

|                              |               |      |   |           |        |
|------------------------------|---------------|------|---|-----------|--------|
| siRNA-Vinblastine Run1-DMSO  | NM_0053<br>91 | PDK3 | 3 | 0.797409  | Inlier |
| siRNA Disorazole DMSO Run2   | NM_0026<br>12 | PDK4 | 4 | -0.981729 | Inlier |
| siRNA Disorazole DMSO Run3   | NM_0026<br>12 | PDK4 | 4 | -0.886264 | Inlier |
| siRNA-Temozolomide Run3-DMSO | NM_0026<br>12 | PDK4 | 4 | -0.704273 | Inlier |
| siRNA-Temozolomide Run2-DMSO | NM_0026<br>12 | PDK4 | 4 | -0.002254 | Inlier |
| siRNA-Temozolomide Run1-DMSO | NM_0026<br>12 | PDK4 | 4 | 0.002254  | Inlier |
| siRNA Disorazole DMSO Run1   | NM_0026<br>12 | PDK4 | 4 | 0.253542  | Inlier |
| siRNA-Vinblastine Run1-DMSO  | NM_0026<br>12 | PDK4 | 4 | 0.644728  | Inlier |

pyruvate  
dehydroge  
nase

kinase,  
isoenzyme

Identification of Survival Genes in Human Glioblastoma Cells Using siRNA Screening  
 Nikhil G Thaker, Fang Zhang, Peter R. McDonald, Tong Ying Shun, Michael D Lewen, Ian F. Pollack, and John S. Lazo

Molecular Pharmacology

|                              |           |       |                                               |           |        |
|------------------------------|-----------|-------|-----------------------------------------------|-----------|--------|
|                              |           |       | pyruvate dehydrogenase kinase, isoenzyme      |           |        |
| siRNA-Vinblastine Run2-DMSO  | NM_002612 | PDK4  | 4                                             | 0.742607  | Inlier |
|                              | NM_0207   |       |                                               |           |        |
| siRNA Disorazole DMSO Run3   | 86        | PDP2  | PDP2                                          | -1.686981 | Inlier |
|                              | NM_0207   |       |                                               |           |        |
| siRNA Disorazole DMSO Run2   | 86        | PDP2  | PDP2                                          | -0.856179 | Inlier |
| siRNA-Temozolomide Run2-DMSO | NM_020786 | PDP2  | PDP2                                          | -0.797948 | Inlier |
| siRNA-Vinblastine Run2-DMSO  | NM_020786 | PDP2  | PDP2                                          | -0.002665 | Inlier |
| siRNA-Temozolomide Run1-DMSO | NM_020786 | PDP2  | PDP2                                          | 0.002664  | Inlier |
| siRNA-Temozolomide Run3-DMSO | NM_020786 | PDP2  | PDP2                                          | 0.02708   | Inlier |
| siRNA-Vinblastine Run1-DMSO  | NM_020786 | PDP2  | PDP2                                          | 0.551052  | Inlier |
|                              | NM_0207   |       |                                               |           |        |
| siRNA Disorazole DMSO Run1   | 86        | PDP2  | PDP2                                          | 0.829162  | Inlier |
|                              |           |       | 3-phosphoinositide dependent protein kinase-1 |           |        |
|                              | NM_0312   |       |                                               |           |        |
| siRNA Disorazole DMSO Run3   | 68        | PDPK1 | kinase-1                                      | -1.176566 | Inlier |
|                              |           |       | 3-phosphoinositide dependent protein kinase-1 |           |        |
|                              | NM_0312   |       |                                               |           |        |
| siRNA-Temozolomide Run3-DMSO | 68        | PDPK1 | kinase-1                                      | -0.588283 | Inlier |
|                              |           |       | 3-phosphoinositide dependent protein kinase-1 |           |        |
|                              | NM_0312   |       |                                               |           |        |
| siRNA-Temozolomide Run2-DMSO | 68        | PDPK1 | kinase-1                                      | -0.444702 | Inlier |
|                              |           |       | 3-phosphoinositide dependent protein kinase-1 |           |        |
|                              | NM_0312   |       |                                               |           |        |
| siRNA-Temozolomide Run1-DMSO | 68        | PDPK1 | kinase-1                                      | -0.07532  | Inlier |
|                              |           |       | 3-phosphoinositide dependent protein kinase-1 |           |        |
|                              | NM_0312   |       |                                               |           |        |
| siRNA Disorazole DMSO Run2   | 68        | PDPK1 | kinase-1                                      | 0.07532   | Inlier |

Identification of Survival Genes in Human Glioblastoma Cells Using siRNA Screening  
 Nikhil G Thaker, Fang Zhang, Peter R. McDonald, Tong Ying Shun, Michael D Lewen, Ian F. Pollack, and John S. Lazo

Molecular Pharmacology

|                              |               |       |                                               |           |        |
|------------------------------|---------------|-------|-----------------------------------------------|-----------|--------|
| siRNA Disorazole DMSO Run1   | NM_0312<br>68 | PDPK1 | 3-phosphoinositide dependent protein kinase-1 | 0.760717  | Inlier |
| siRNA-Vinblastine Run1-DMSO  | NM_0312<br>68 | PDPK1 | 3-phosphoinositide dependent protein kinase-1 | 1.353252  | Inlier |
| siRNA-Vinblastine Run2-DMSO  | NM_0312<br>68 | PDPK1 | 3-phosphoinositide dependent protein kinase-1 | 1.520487  | Inlier |
| siRNA-Temozolomide Run2-DMSO | NM_0179<br>90 | PDPR  | PDPR                                          | -2.497243 | Inlier |
| siRNA-Temozolomide Run3-DMSO | NM_0179<br>90 | PDPR  | PDPR                                          | -1.737009 | Inlier |
| siRNA-Vinblastine Run1-DMSO  | NM_0179<br>90 | PDPR  | PDPR                                          | -1.431312 | Inlier |
| siRNA Disorazole DMSO Run1   | NM_0179<br>90 | PDPR  | PDPR                                          | -0.156204 | Inlier |
| siRNA-Temozolomide Run1-DMSO | NM_0179<br>90 | PDPR  | PDPR                                          | 0.156203  | Inlier |
| siRNA-Vinblastine Run2-DMSO  | NM_0179<br>90 | PDPR  | PDPR                                          | 0.293999  | Inlier |
| siRNA Disorazole DMSO Run2   | NM_0179<br>90 | PDPR  | PDPR                                          | 0.605426  | Inlier |
| siRNA Disorazole DMSO Run3   | NM_0179<br>90 | PDPR  | PDPR                                          | 0.743574  | Inlier |
| siRNA-Temozolomide Run3-DMSO | NM_0036<br>81 | PDXK  | pyridoxal (pyridoxine , vitamin B6) kinase    | -1.574988 | Inlier |
| siRNA Disorazole DMSO Run3   | NM_0036<br>81 | PDXK  | pyridoxal (pyridoxine , vitamin B6) kinase    | -0.70612  | Inlier |
| siRNA Disorazole DMSO Run2   | NM_0036<br>81 | PDXK  | pyridoxal (pyridoxine , vitamin B6) kinase    | -0.53824  | Inlier |

Identification of Survival Genes in Human Glioblastoma Cells Using siRNA Screening

Nikhil G Thaker, Fang Zhang, Peter R. McDonald, Tong Ying Shun, Michael D Lewen, Ian F. Pollack, and John S. Lazo

Molecular Pharmacology

|                              |               |      |                                                     |           |        |
|------------------------------|---------------|------|-----------------------------------------------------|-----------|--------|
| siRNA-Temozolomide Run2-DMSO | NM_0036<br>81 | PDXK | pyridoxal<br>(pyridoxine<br>, vitamin<br>B6) kinase | -0.366205 | Inlier |
| siRNA-Temozolomide Run1-DMSO | NM_0036<br>81 | PDXK | pyridoxal<br>(pyridoxine<br>, vitamin<br>B6) kinase | 0.366205  | Inlier |
| siRNA Disorazole DMSO Run1   | NM_0036<br>81 | PDXK | pyridoxal<br>(pyridoxine<br>, vitamin<br>B6) kinase | 0.64288   | Inlier |
| siRNA-Vinblastine Run1-DMSO  | NM_0036<br>81 | PDXK | pyridoxal<br>(pyridoxine<br>, vitamin<br>B6) kinase | 1.269398  | Inlier |
| siRNA-Vinblastine Run2-DMSO  | NM_0036<br>81 | PDXK | pyridoxal<br>(pyridoxine<br>, vitamin<br>B6) kinase | 1.374851  | Inlier |
| siRNA-Temozolomide Run3-DMSO | NM_0061<br>17 | PECI | peroxisom<br>al D3,D2-<br>enoyl-CoA<br>isomerase    | -1.428759 | Inlier |
| siRNA-Temozolomide Run1-DMSO | NM_0061<br>17 | PECI | peroxisom<br>al D3,D2-<br>enoyl-CoA<br>isomerase    | -1.3761   | Inlier |
| siRNA-Vinblastine Run2-DMSO  | NM_0061<br>17 | PECI | peroxisom<br>al D3,D2-<br>enoyl-CoA<br>isomerase    | -0.44257  | Inlier |

Identification of Survival Genes in Human Glioblastoma Cells Using siRNA Screening  
 Nikhil G Thaker, Fang Zhang, Peter R. McDonald, Tong Ying Shun, Michael D Lewen, Ian F. Pollack, and John S. Lazo  
 Molecular Pharmacology

|                              |               |      |                                         |           |        |
|------------------------------|---------------|------|-----------------------------------------|-----------|--------|
| siRNA-Temozolomide Run2-DMSO | NM_0061<br>17 | PECI | peroxisomal D3,D2-enoyl-CoA isomerase   | -0.274377 | Inlier |
| siRNA Disorazole DMSO Run1   | NM_0061<br>17 | PECI | peroxisomal D3,D2-enoyl-CoA isomerase   | 0.274376  | Inlier |
| siRNA Disorazole DMSO Run3   | NM_0061<br>17 | PECI | peroxisomal D3,D2-enoyl-CoA isomerase   | 0.335903  | Inlier |
| siRNA Disorazole DMSO Run2   | NM_0061<br>17 | PECI | peroxisomal D3,D2-enoyl-CoA isomerase   | 0.90643   | Inlier |
| siRNA-Vinblastine Run1-DMSO  | NM_0061<br>17 | PECI | peroxisomal D3,D2-enoyl-CoA isomerase   | 1.658878  | Inlier |
| siRNA-Temozolomide Run3-DMSO | NM_0184<br>41 | PECR | peroxisomal trans-2-enoyl-CoA reductase | -0.994886 | Inlier |
| siRNA Disorazole DMSO Run1   | NM_0184<br>41 | PECR | peroxisomal trans-2-enoyl-CoA reductase | -0.354114 | Inlier |
| siRNA-Temozolomide Run2-DMSO | NM_0184<br>41 | PECR | peroxisomal trans-2-enoyl-CoA reductase | -0.348259 | Inlier |

Identification of Survival Genes in Human Glioblastoma Cells Using siRNA Screening  
 Nikhil G Thaker, Fang Zhang, Peter R. McDonald, Tong Ying Shun, Michael D Lewen, Ian F. Pollack, and John S. Lazo  
 Molecular Pharmacology

|                              |               |      |                                              |           |        |
|------------------------------|---------------|------|----------------------------------------------|-----------|--------|
| siRNA-Vinblastine Run2-DMSO  | NM_0184<br>41 | PECR | peroxisomal trans-2-enoyl-CoA reductase      | -0.014862 | Inlier |
| siRNA-Temozolomide Run1-DMSO | NM_0184<br>41 | PECR | peroxisomal trans-2-enoyl-CoA reductase      | 0.014862  | Inlier |
| siRNA Disorazole DMSO Run3   | NM_0184<br>41 | PECR | peroxisomal trans-2-enoyl-CoA reductase      | 1.014836  | Inlier |
| siRNA Disorazole DMSO Run2   | NM_0184<br>41 | PECR | peroxisomal trans-2-enoyl-CoA reductase      | 1.557008  | Inlier |
| siRNA-Vinblastine Run1-DMSO  | NM_0184<br>41 | PECR | peroxisomal trans-2-enoyl-CoA reductase      | 2.108606  | Inlier |
| siRNA-Temozolomide Run2-DMSO | NM_1481<br>73 | PEMT | phosphatidylethanolamine N-methyltransferase | -2.795147 | Inlier |
| siRNA-Temozolomide Run3-DMSO | NM_1481<br>73 | PEMT | phosphatidylethanolamine N-methyltransferase | -1.671217 | Inlier |
| siRNA Disorazole DMSO Run3   | NM_1481<br>73 | PEMT | phosphatidylethanolamine N-methyltransferase | -0.312241 | Inlier |
| siRNA-Vinblastine Run2-DMSO  | NM_1481<br>73 | PEMT | phosphatidylethanolamine N-methyltransferase | -0.115214 | Inlier |
| siRNA Disorazole DMSO Run1   | NM_1481<br>73 | PEMT | phosphatidylethanolamine N-methyltransferase | 0.115214  | Inlier |



Identification of Survival Genes in Human Glioblastoma Cells Using siRNA Screening  
 Nikhil G Thaker, Fang Zhang, Peter R. McDonald, Tong Ying Shun, Michael D Lewen, Ian F. Pollack, and John S. Lazo

Molecular Pharmacology

|                              |               |      |                                              |           |        |
|------------------------------|---------------|------|----------------------------------------------|-----------|--------|
| siRNA-Temozolomide Run1-DMSO | NM_1481<br>73 | PEMT | phosphatidylethanolamine N-methyltransferase | 0.369477  | Inlier |
| siRNA-Vinblastine Run1-DMSO  | NM_1481<br>73 | PEMT | phosphatidylethanolamine N-methyltransferase | 0.979523  | Inlier |
| siRNA Disorazole DMSO Run2   | NM_1481<br>73 | PEMT | phosphatidylethanolamine N-methyltransferase | 1.199484  | Inlier |
| siRNA-Temozolomide Run2-DMSO | NM_0002<br>85 | PEPD | peptidase D                                  | -1.686    | Inlier |
| siRNA-Temozolomide Run3-DMSO | NM_0002<br>85 | PEPD | peptidase D                                  | -1.577322 | Inlier |
| siRNA-Temozolomide Run1-DMSO | NM_0002<br>85 | PEPD | peptidase D                                  | -0.256395 | Inlier |
| siRNA Disorazole DMSO Run3   | NM_0002<br>85 | PEPD | peptidase D                                  | -0.129906 | Inlier |
| siRNA Disorazole DMSO Run2   | NM_0002<br>85 | PEPD | peptidase D                                  | 0.129906  | Inlier |
| siRNA Disorazole DMSO Run1   | NM_0002<br>85 | PEPD | peptidase D                                  | 0.20709   | Inlier |
| siRNA-Vinblastine Run2-DMSO  | NM_0002<br>85 | PEPD | peptidase D                                  | 1.092605  | Inlier |
| siRNA-Vinblastine Run1-DMSO  | NM_0002<br>85 | PEPD | peptidase D                                  | 1.303738  | Inlier |
| siRNA-Vinblastine Run2-DMSO  | NM_0004<br>66 | PEX1 | peroxisome biogenesis factor 1               | -1.164186 | Inlier |
| siRNA Disorazole DMSO Run1   | NM_0004<br>66 | PEX1 | peroxisome biogenesis factor 1               | -1.098722 | Inlier |
| siRNA Disorazole DMSO Run3   | NM_0004<br>66 | PEX1 | peroxisome biogenesis factor 1               | -0.834368 | Inlier |
| siRNA-Temozolomide Run3-DMSO | NM_0004<br>66 | PEX1 | peroxisome biogenesis factor 1               | -0.182609 | Inlier |
| siRNA-Temozolomide Run2-DMSO | NM_0004<br>66 | PEX1 | peroxisome biogenesis factor 1               | 0.182609  | Inlier |

Identification of Survival Genes in Human Glioblastoma Cells Using siRNA Screening  
 Nikhil G Thaker, Fang Zhang, Peter R. McDonald, Tong Ying Shun, Michael D Lewen, Ian F. Pollack, and John S. Lazo

Molecular Pharmacology

| siRNA Treatment              | Gene ID   | Gene Name | Gene Description                | Value     | Outlier Status |
|------------------------------|-----------|-----------|---------------------------------|-----------|----------------|
| siRNA-Vinblastine Run1-DMSO  | NM_000466 | PEX1      | peroxisome biogenesis factor 1  | 0.308286  | Inlier         |
| siRNA-Temozolomide Run1-DMSO | NM_000466 | PEX1      | peroxisome biogenesis factor 1  | 0.514631  | Inlier         |
| siRNA Disorazole DMSO Run2   | NM_000466 | PEX1      | peroxisomal biogenesis factor 1 | 1.00049   | Inlier         |
| siRNA Disorazole DMSO Run1   | NM_000319 | PEX5      | peroxisomal biogenesis factor 5 | -0.693653 | Inlier         |
| siRNA-Vinblastine Run2-DMSO  | NM_000319 | PEX5      | peroxisomal biogenesis factor 5 | -0.655347 | Inlier         |
| siRNA-Temozolomide Run3-DMSO | NM_000319 | PEX5      | peroxisomal biogenesis factor 5 | -0.364489 | Inlier         |
| siRNA Disorazole DMSO Run3   | NM_000319 | PEX5      | peroxisomal biogenesis factor 5 | -0.007775 | Inlier         |
| siRNA-Temozolomide Run2-DMSO | NM_000319 | PEX5      | peroxisomal biogenesis factor 5 | 0.007775  | Inlier         |
| siRNA-Temozolomide Run1-DMSO | NM_000319 | PEX5      | peroxisomal biogenesis factor 5 | 0.787556  | Inlier         |
| siRNA-Vinblastine Run1-DMSO  | NM_000319 | PEX5      | peroxisomal biogenesis factor 5 | 1.263937  | Inlier         |
| siRNA Disorazole DMSO Run2   | NM_000319 | PEX5      | peroxisomal biogenesis factor 5 | 1.437897  | Inlier         |
| siRNA-Vinblastine Run2-DMSO  | NM_000287 | PEX6      | peroxisomal biogenesis factor 6 | -1.980855 | Inlier         |
| siRNA-Temozolomide Run3-DMSO | NM_000287 | PEX6      | peroxisomal biogenesis factor 6 | -1.31352  | Inlier         |

Identification of Survival Genes in Human Glioblastoma Cells Using siRNA Screening  
 Nikhil G Thaker, Fang Zhang, Peter R. McDonald, Tong Ying Shun, Michael D Lewen, Ian F. Pollack, and John S. Lazo

Molecular Pharmacology

|                              |               |      |                                                                  |           |        |
|------------------------------|---------------|------|------------------------------------------------------------------|-----------|--------|
| siRNA Disorazole DMSO Run3   | NM_0002<br>87 | PEX6 | peroxisomal biogenesis factor 6                                  | -0.898062 | Inlier |
| siRNA Disorazole DMSO Run1   | NM_0002<br>87 | PEX6 | peroxisomal biogenesis factor 6                                  | -0.095735 | Inlier |
| siRNA-Vinblastine Run1-DMSO  | NM_0002<br>87 | PEX6 | peroxisomal biogenesis factor 6                                  | 0.095735  | Inlier |
| siRNA-Temozolomide Run2-DMSO | NM_0002<br>87 | PEX6 | peroxisomal biogenesis factor 6                                  | 0.14304   | Inlier |
| siRNA-Temozolomide Run1-DMSO | NM_0002<br>87 | PEX6 | peroxisomal biogenesis factor 6                                  | 0.450938  | Inlier |
| siRNA Disorazole DMSO Run2   | NM_0002<br>87 | PEX6 | peroxisomal biogenesis factor 6                                  | 1.639014  | Inlier |
| siRNA-Temozolomide Run2-DMSO | NM_0123<br>93 | PFAS | phosphoribosylformylglycinamide synthase (FGAR amidotransferase) | -1.094211 | Inlier |
| siRNA-Temozolomide Run3-DMSO | NM_0123<br>93 | PFAS | phosphoribosylformylglycinamide synthase (FGAR amidotransferase) | -0.645194 | Inlier |
| siRNA-Vinblastine Run2-DMSO  | NM_0123<br>93 | PFAS | phosphoribosylformylglycinamide synthase (FGAR amidotransferase) | -0.312244 | Inlier |

Identification of Survival Genes in Human Glioblastoma Cells Using siRNA Screening

Nikhil G Thaker, Fang Zhang, Peter R. McDonald, Tong Ying Shun, Michael D Lewen, Ian F. Pollack, and John S. Lazo

Molecular Pharmacology

|                              |               |        |                                                                  |           |        |
|------------------------------|---------------|--------|------------------------------------------------------------------|-----------|--------|
| siRNA Disorazole DMSO Run3   | NM_0123<br>93 | PFAS   | phosphoribosylformylglycinamide synthase (FGAR amidotransferase) | -0.210025 | Inlier |
| siRNA-Temozolomide Run1-DMSO | NM_0123<br>93 | PFAS   | phosphoribosylformylglycinamide synthase (FGAR amidotransferase) | 0.210025  | Inlier |
| siRNA Disorazole DMSO Run1   | NM_0123<br>93 | PFAS   | phosphoribosylformylglycinamide synthase (FGAR amidotransferase) | 0.703806  | Inlier |
| siRNA Disorazole DMSO Run2   | NM_0123<br>93 | PFAS   | phosphoribosylformylglycinamide synthase (FGAR amidotransferase) | 2.68084   | Inlier |
| siRNA-Vinblastine Run1-DMSO  | NM_0123<br>93 | PFAS   | 6-phosphofructo-2-kinase/fructose-2,6-biphosphatase 1            | 2.789414  | Inlier |
| siRNA-Temozolomide Run2-DMSO | NM_0026<br>25 | PFKFB1 | 6-phosphofructo-2-kinase/fructose-2,6-biphosphatase 1            | -0.873378 | Inlier |

Identification of Survival Genes in Human Glioblastoma Cells Using siRNA Screening

Nikhil G Thaker, Fang Zhang, Peter R. McDonald, Tong Ying Shun, Michael D Lewen, Ian F. Pollack, and John S. Lazo

Molecular Pharmacology

| siRNA Treatment         | Run  | Gene ID   | Gene Name | Log Fold Change | Outlier Status |
|-------------------------|------|-----------|-----------|-----------------|----------------|
| siRNA-Temozolomide DMSO | Run3 | NM_002625 | PFKFB1    | -0.757446       | Inlier         |
| siRNA Disorazole DMSO   | Run3 | NM_002625 | PFKFB1    | -0.23135        | Inlier         |
| siRNA-Temozolomide DMSO | Run1 | NM_002625 | PFKFB1    | -0.167205       | Inlier         |
| siRNA Disorazole DMSO   | Run2 | NM_002625 | PFKFB1    | 0.167205        | Inlier         |
| siRNA Disorazole DMSO   | Run1 | NM_002625 | PFKFB1    | 0.591554        | Inlier         |
| siRNA-Vinblastine DMSO  | Run1 | NM_002625 | PFKFB1    | 0.896212        | Inlier         |
| siRNA-Vinblastine DMSO  | Run2 | NM_002625 | PFKFB1    | 0.896314        | Inlier         |



Identification of Survival Genes in Human Glioblastoma Cells Using siRNA Screening  
 Nikhil G Thaker, Fang Zhang, Peter R. McDonald, Tong Ying Shun, Michael D Lewen, Ian F. Pollack, and John S. Lazo

Molecular Pharmacology

| siRNA                        | Gene         | Accession | Protein                                             | Value     | Category |
|------------------------------|--------------|-----------|-----------------------------------------------------|-----------|----------|
| siRNA-Vinblastine Run1-DMSO  | NM_001018053 | PFKFB2    | 6-phosphofructo-2-kinase/fructose-2,6-biphosphate 2 | 1.880949  | Inlier   |
| siRNA Disorazole DMSO Run2   | NM_004566    | PFKFB3    | 6-phosphofructo-2-kinase/fructose-2,6-biphosphate 3 | -0.675849 | Inlier   |
| siRNA-Temozolomide Run3-DMSO | NM_004566    | PFKFB3    | 6-phosphofructo-2-kinase/fructose-2,6-biphosphate 3 | -0.673151 | Inlier   |
| siRNA-Temozolomide Run1-DMSO | NM_004566    | PFKFB3    | 6-phosphofructo-2-kinase/fructose-2,6-biphosphate 3 | -0.546053 | Inlier   |
| siRNA Disorazole DMSO Run3   | NM_004566    | PFKFB3    | 6-phosphofructo-2-kinase/fructose-2,6-biphosphate 3 | -0.126284 | Inlier   |
| siRNA-Temozolomide Run2-DMSO | NM_004566    | PFKFB3    | 6-phosphofructo-2-kinase/fructose-2,6-biphosphate 3 | 0.126284  | Inlier   |
| siRNA Disorazole DMSO Run1   | NM_004566    | PFKFB3    | 6-phosphofructo-2-kinase/fructose-2,6-biphosphate 3 | 2.45598   | Inlier   |

Identification of Survival Genes in Human Glioblastoma Cells Using siRNA Screening

Nikhil G Thaker, Fang Zhang, Peter R. McDonald, Tong Ying Shun, Michael D Lewen, Ian F. Pollack, and John S. Lazo

Molecular Pharmacology

|                              |           |        |                                                       |           |        |
|------------------------------|-----------|--------|-------------------------------------------------------|-----------|--------|
| siRNA-Vinblastine Run2-DMSO  | NM_004566 | PFKFB3 | 6-phosphofructo-2-kinase/fructose-2,6-biphosphatase 3 | 3.0799    | Inlier |
| siRNA-Vinblastine Run1-DMSO  | NM_004566 | PFKFB3 | 6-phosphofructo-2-kinase/fructose-2,6-biphosphatase 3 | 3.397595  | Inlier |
| siRNA-Temozolomide Run3-DMSO | NM_004567 | PFKFB4 | 6-phosphofructo-2-kinase/fructose-2,6-biphosphatase 4 | -0.756462 | Inlier |
| siRNA Disorazole DMSO Run2   | NM_004567 | PFKFB4 | 6-phosphofructo-2-kinase/fructose-2,6-biphosphatase 4 | -0.756164 | Inlier |
| siRNA-Temozolomide Run2-DMSO | NM_004567 | PFKFB4 | 6-phosphofructo-2-kinase/fructose-2,6-biphosphatase 4 | -0.582196 | Inlier |
| siRNA Disorazole DMSO Run3   | NM_004567 | PFKFB4 | 6-phosphofructo-2-kinase/fructose-2,6-biphosphatase 4 | -0.108722 | Inlier |
| siRNA-Temozolomide Run1-DMSO | NM_004567 | PFKFB4 | 6-phosphofructo-2-kinase/fructose-2,6-biphosphatase 4 | 0.108722  | Inlier |



Identification of Survival Genes in Human Glioblastoma Cells Using siRNA Screening  
 Nikhil G Thaker, Fang Zhang, Peter R. McDonald, Tong Ying Shun, Michael D Lewen, Ian F. Pollack, and John S. Lazo

Molecular Pharmacology

|                              |                  |        |                                                       |           |        |
|------------------------------|------------------|--------|-------------------------------------------------------|-----------|--------|
| siRNA Disorazole DMSO Run1   | NM_0045<br>67    | PFKFB4 | 6-phosphofructo-2-kinase/fructose-2,6-biphosphatase 4 | 0.597446  | Inlier |
| siRNA-Vinblastine Run1-DMSO  | NM_0045<br>67    | PFKFB4 | 6-phosphofructo-2-kinase/fructose-2,6-biphosphatase 4 | 0.751554  | Inlier |
| siRNA-Vinblastine Run2-DMSO  | NM_0045<br>67    | PFKFB4 | 6-phosphofructo-2-kinase/fructose-2,6-biphosphatase 4 | 0.955467  | Inlier |
| siRNA Disorazole DMSO Run2   | NM_0010<br>02021 | PFKL   | phosphofructokinase , liver                           | -0.90794  | Inlier |
| siRNA-Temozolomide Run3-DMSO | NM_0010<br>02021 | PFKL   | phosphofructokinase , liver                           | -0.758798 | Inlier |
| siRNA-Temozolomide Run1-DMSO | NM_0010<br>02021 | PFKL   | phosphofructokinase , liver                           | -0.21399  | Inlier |
| siRNA Disorazole DMSO Run3   | NM_0010<br>02021 | PFKL   | phosphofructokinase , liver                           | -0.174186 | Inlier |
| siRNA-Temozolomide Run2-DMSO | NM_0010<br>02021 | PFKL   | phosphofructokinase , liver                           | 0.174186  | Inlier |
| siRNA Disorazole DMSO Run1   | NM_0010<br>02021 | PFKL   | phosphofructokinase , liver                           | 0.590202  | Inlier |
| siRNA-Vinblastine Run1-DMSO  | NM_0010<br>02021 | PFKL   | phosphofructokinase , liver                           | 1.601876  | Inlier |
| siRNA-Vinblastine Run2-DMSO  | NM_0010<br>02021 | PFKL   | phosphofructokinase , liver                           | 1.607604  | Inlier |
| siRNA-Temozolomide Run1-DMSO | NM_0002<br>89    | PFKM   | phosphofructokinase , muscle                          | -1.220259 | Inlier |
| siRNA-Temozolomide Run2-DMSO | NM_0002<br>89    | PFKM   | phosphofructokinase , muscle                          | -0.821357 | Inlier |

Identification of Survival Genes in Human Glioblastoma Cells Using siRNA Screening  
 Nikhil G Thaker, Fang Zhang, Peter R. McDonald, Tong Ying Shun, Michael D Lewen, Ian F. Pollack, and John S. Lazo

| Condition                                                  | Gene ID       | Method | Gene Name                                         | Log2FC    | Category |
|------------------------------------------------------------|---------------|--------|---------------------------------------------------|-----------|----------|
| Molecular Pharmacology<br>siRNA-Temozolomide Run3-<br>DMSO | NM_0002<br>89 | PFKM   | phospho-<br>receptor tyrosine<br>kinase, muscle   | -0.676682 | Inlier   |
| siRNA Disorazole DMSO Run1                                 | NM_0002<br>89 | PFKM   | phospho-<br>receptor tyrosine<br>kinase, muscle   | -0.240311 | Inlier   |
| siRNA-Vinblastine Run2-<br>DMSO                            | NM_0002<br>89 | PFKM   | phospho-<br>receptor tyrosine<br>kinase, muscle   | 0.240312  | Inlier   |
| siRNA Disorazole DMSO Run2                                 | NM_0002<br>89 | PFKM   | phospho-<br>receptor tyrosine<br>kinase, muscle   | 0.617237  | Inlier   |
| siRNA-Vinblastine Run1-<br>DMSO                            | NM_0002<br>89 | PFKM   | phospho-<br>receptor tyrosine<br>kinase, muscle   | 0.672318  | Inlier   |
| siRNA Disorazole DMSO Run3                                 | NM_0002<br>89 | PFKM   | phospho-<br>receptor tyrosine<br>kinase, muscle   | 2.586889  | Inlier   |
| siRNA Disorazole DMSO Run2                                 | NM_0026<br>27 | PFKP   | phospho-<br>receptor tyrosine<br>kinase, platelet | -2.135644 | Inlier   |
| siRNA-Temozolomide Run3-<br>DMSO                           | NM_0026<br>27 | PFKP   | phospho-<br>receptor tyrosine<br>kinase, platelet | -1.37033  | Inlier   |
| siRNA-Temozolomide Run1-<br>DMSO                           | NM_0026<br>27 | PFKP   | phospho-<br>receptor tyrosine<br>kinase, platelet | -0.331422 | Inlier   |
| siRNA Disorazole DMSO Run1                                 | NM_0026<br>27 | PFKP   | phospho-<br>receptor tyrosine<br>kinase, platelet | -0.069935 | Inlier   |
| siRNA Disorazole DMSO Run3                                 | NM_0026<br>27 | PFKP   | phospho-<br>receptor tyrosine<br>kinase, platelet | 0.069935  | Inlier   |
| siRNA-Temozolomide Run2-<br>DMSO                           | NM_0026<br>27 | PFKP   | phospho-<br>receptor tyrosine<br>kinase, platelet | 0.084869  | Inlier   |
| siRNA-Vinblastine Run2-<br>DMSO                            | NM_0026<br>27 | PFKP   | phospho-<br>receptor tyrosine<br>kinase, platelet | 1.017578  | Inlier   |
| siRNA-Vinblastine Run1-<br>DMSO                            | NM_0026<br>27 | PFKP   | phospho-<br>receptor tyrosine<br>kinase, platelet | 1.419081  | Inlier   |
| siRNA-Temozolomide Run2-<br>DMSO                           | NM_0123<br>95 | PFTK1  | PFTAIRE<br>protein<br>kinase 1                    | -1.303624 | Inlier   |
| siRNA-Temozolomide Run3-<br>DMSO                           | NM_0123<br>95 | PFTK1  | PFTAIRE<br>protein<br>kinase 1                    | -0.993708 | Inlier   |
| siRNA-Temozolomide Run1-<br>DMSO                           | NM_0123<br>95 | PFTK1  | PFTAIRE<br>protein<br>kinase 1                    | -0.872092 | Inlier   |

Identification of Survival Genes in Human Glioblastoma Cells Using siRNA Screening  
 Nikhil G Thaker, Fang Zhang, Peter R. McDonald, Tong Ying Shun, Michael D Lewen, Ian F. Pollack, and John S. Lazo

Molecular Pharmacology

| siRNA                        | Gene  | Gene ID    | Gene Name                            | Value     | Category |
|------------------------------|-------|------------|--------------------------------------|-----------|----------|
| siRNA Disorazole DMSO Run3   | PFTK1 | NM_0123 95 | PFTAIRE protein kinase 1             | -0.090414 | Inlier   |
| siRNA-Vinblastine Run1-DMSO  | PFTK1 | NM_0123 95 | PFTAIRE protein kinase 1             | 0.090414  | Inlier   |
| siRNA Disorazole DMSO Run2   | PFTK1 | NM_0123 95 | PFTAIRE protein kinase 1             | 0.360856  | Inlier   |
| siRNA Disorazole DMSO Run1   | PFTK1 | NM_0123 95 | PFTAIRE protein kinase 1             | 0.476908  | Inlier   |
| siRNA-Vinblastine Run2-DMSO  | PFTK1 | NM_0123 95 | PFTAIRE protein kinase 1             | 1.01894   | Inlier   |
| siRNA Disorazole DMSO Run1   | PGA5  | NM_0142 24 | pepsinogen 5, group I (pepsinogen A) | -1.265426 | Inlier   |
| siRNA-Vinblastine Run1-DMSO  | PGA5  | NM_0142 24 | pepsinogen 5, group I (pepsinogen A) | -0.77679  | Inlier   |
| siRNA-Temozolomide Run3-DMSO | PGA5  | NM_0142 24 | pepsinogen 5, group I (pepsinogen A) | -0.57221  | Inlier   |
| siRNA-Temozolomide Run2-DMSO | PGA5  | NM_0142 24 | pepsinogen 5, group I (pepsinogen A) | -0.210852 | Inlier   |
| siRNA-Vinblastine Run2-DMSO  | PGA5  | NM_0142 24 | pepsinogen 5, group I (pepsinogen A) | 0.210852  | Inlier   |
| siRNA-Temozolomide Run1-DMSO | PGA5  | NM_0142 24 | pepsinogen 5, group I (pepsinogen A) | 0.440568  | Inlier   |
| siRNA Disorazole DMSO Run2   | PGA5  | NM_0142 24 | pepsinogen 5, group I (pepsinogen A) | 0.816369  | Inlier   |

Identification of Survival Genes in Human Glioblastoma Cells Using siRNA Screening  
 Nikhil G Thaker, Fang Zhang, Peter R. McDonald, Tong Ying Shun, Michael D Lewen, Ian F. Pollack, and John S. Lazo

Molecular Pharmacology

| siRNA Treatment              | Gene ID | Cell Line | Gene Name                            | Log Fold Change | Classification |
|------------------------------|---------|-----------|--------------------------------------|-----------------|----------------|
| siRNA Disorazole DMSO Run3   | NM_0142 | PGA5      | pepsinogen 5, group I (pepsinogen A) | 4.590895        | Outlier        |
| siRNA-Vinblastine Run2-DMSO  | NM_0026 | PGAM1     | phosphoglycerate mutase 1 (brain)    | -1.682997       | Inlier         |
| siRNA-Temozolomide Run2-DMSO | NM_0026 | PGAM1     | phosphoglycerate mutase 1 (brain)    | -1.406108       | Inlier         |
| siRNA Disorazole DMSO Run1   | NM_0026 | PGAM1     | phosphoglycerate mutase 1 (brain)    | -0.662514       | Inlier         |
| siRNA-Temozolomide Run1-DMSO | NM_0026 | PGAM1     | phosphoglycerate mutase 1 (brain)    | -0.212047       | Inlier         |
| siRNA-Temozolomide Run3-DMSO | NM_0026 | PGAM1     | phosphoglycerate mutase 1 (brain)    | 0.212047        | Inlier         |
| siRNA-Vinblastine Run1-DMSO  | NM_0026 | PGAM1     | phosphoglycerate mutase 1 (brain)    | 0.417427        | Inlier         |
| siRNA Disorazole DMSO Run2   | NM_0026 | PGAM1     | phosphoglycerate mutase 1 (brain)    | 0.686486        | Inlier         |
| siRNA Disorazole DMSO Run3   | NM_0026 | PGAM1     | phosphoglycerate mutase 1 (brain)    | 3.2946          | Inlier         |
| siRNA-Temozolomide Run1-DMSO | NM_0002 | PGAM2     | phosphoglycerate mutase 2 (muscle)   | -1.047839       | Inlier         |
| siRNA-Temozolomide Run3-DMSO | NM_0002 | PGAM2     | phosphoglycerate mutase 2 (muscle)   | -0.87884        | Inlier         |
| siRNA-Temozolomide Run2-DMSO | NM_0002 | PGAM2     | phosphoglycerate mutase 2 (muscle)   | -0.332523       | Inlier         |

Identification of Survival Genes in Human Glioblastoma Cells Using siRNA Screening  
 Nikhil G Thaker, Fang Zhang, Peter R. McDonald, Tong Ying Shun, Michael D Lewen, Ian F. Pollack, and John S. Lazo

Molecular Pharmacology

| siRNA Treatment              | Gene ID | Cell Line | Gene Name | Log Fold Change | Outlier Status |
|------------------------------|---------|-----------|-----------|-----------------|----------------|
| siRNA Disorazole DMSO Run1   | NM_0002 | 90        | PGAM2     | -0.303483       | Inlier         |
| siRNA-Vinblastine Run2-DMSO  | NM_0002 | 90        | PGAM2     | 0.303483        | Inlier         |
| siRNA Disorazole DMSO Run3   | NM_0002 | 90        | PGAM2     | 0.47016         | Inlier         |
| siRNA Disorazole DMSO Run2   | NM_0002 | 90        | PGAM2     | 1.054668        | Inlier         |
| siRNA-Vinblastine Run1-DMSO  | NM_0002 | 90        | PGAM2     | 1.552755        | Inlier         |
| siRNA-Temozolomide Run3-DMSO | NM_0026 | 30        | PGC       | -3.379765       | Inlier         |
| siRNA Disorazole DMSO Run2   | NM_0026 | 30        | PGC       | -3.016931       | Inlier         |
| siRNA-Temozolomide Run1-DMSO | NM_0026 | 30        | PGC       | -0.397942       | Inlier         |
| siRNA Disorazole DMSO Run1   | NM_0026 | 30        | PGC       | -0.188247       | Inlier         |
| siRNA-Vinblastine Run1-DMSO  | NM_0026 | 30        | PGC       | 0.188246        | Inlier         |
| siRNA-Temozolomide Run2-DMSO | NM_0026 | 30        | PGC       | 0.244402        | Inlier         |
| siRNA Disorazole DMSO Run3   | NM_0026 | 30        | PGC       | 0.951058        | Inlier         |
| siRNA-Vinblastine Run2-DMSO  | NM_0026 | 30        | PGC       | 2.158398        | Inlier         |

Identification of Survival Genes in Human Glioblastoma Cells Using siRNA Screening

Nikhil G Thaker, Fang Zhang, Peter R. McDonald, Tong Ying Shun, Michael D Lewen, Ian F. Pollack, and John S.

Lazo

|                                  |               |      |                                           |           |        |
|----------------------------------|---------------|------|-------------------------------------------|-----------|--------|
| siRNA-Temozolomide Run3-<br>DMSO | NM_0161<br>34 | PGCP | PGCP                                      | -1.186659 | Inlier |
| siRNA Disorazole DMSO Run2       | NM_0161<br>34 | PGCP | PGCP                                      | -0.714955 | Inlier |
| siRNA-Temozolomide Run2-<br>DMSO | NM_0161<br>34 | PGCP | PGCP                                      | -0.634045 | Inlier |
| siRNA Disorazole DMSO Run1       | NM_0161<br>34 | PGCP | PGCP                                      | -0.211968 | Inlier |
| siRNA-Temozolomide Run1-<br>DMSO | NM_0161<br>34 | PGCP | PGCP                                      | 0.211969  | Inlier |
| siRNA Disorazole DMSO Run3       | NM_0161<br>34 | PGCP | PGCP                                      | 0.390146  | Inlier |
| siRNA-Vinblastine Run2-<br>DMSO  | NM_0161<br>34 | PGCP | PGCP                                      | 0.748367  | Inlier |
| siRNA-Vinblastine Run1-<br>DMSO  | NM_0161<br>34 | PGCP | PGCP                                      | 0.892034  | Inlier |
| siRNA Disorazole DMSO Run3       | NM_0026<br>31 | PGD  | phosphogl<br>uconate<br>dehydroge<br>nase | -0.829751 | Inlier |
| siRNA-Temozolomide Run2-<br>DMSO | NM_0026<br>31 | PGD  | phosphogl<br>uconate<br>dehydroge<br>nase | -0.713994 | Inlier |
| siRNA-Temozolomide Run3-<br>DMSO | NM_0026<br>31 | PGD  | phosphogl<br>uconate<br>dehydroge<br>nase | -0.635006 | Inlier |
| siRNA Disorazole DMSO Run1       | NM_0026<br>31 | PGD  | phosphogl<br>uconate<br>dehydroge<br>nase | -0.358309 | Inlier |
| siRNA-Temozolomide Run1-<br>DMSO | NM_0026<br>31 | PGD  | phosphogl<br>uconate<br>dehydroge<br>nase | 0.358309  | Inlier |
| siRNA-Vinblastine Run1-<br>DMSO  | NM_0026<br>31 | PGD  | phosphogl<br>uconate<br>dehydroge<br>nase | 0.498257  | Inlier |
| siRNA Disorazole DMSO Run2       | NM_0026<br>31 | PGD  | phosphogl<br>uconate<br>dehydroge<br>nase | 1.025331  | Inlier |
| siRNA-Vinblastine Run2-<br>DMSO  | NM_0026<br>31 | PGD  | phosphogl<br>uconate<br>dehydroge<br>nase | 1.269617  | Inlier |
| siRNA-Temozolomide Run2-<br>DMSO | NM_0144<br>85 | PGDS | PGDS                                      | -0.855714 | Inlier |
| siRNA-Temozolomide Run3-<br>DMSO | NM_0144<br>85 | PGDS | PGDS                                      | -0.734405 | Inlier |

Identification of Survival Genes in Human Glioblastoma Cells Using siRNA Screening  
 Nikhil G Thaker, Fang Zhang, Peter R. McDonald, Tong Ying Shun, Michael D Lewen, Ian F. Pollack, and John S. Lazo

|                                  |               |        |                                                                         |           |        |
|----------------------------------|---------------|--------|-------------------------------------------------------------------------|-----------|--------|
| siRNA-Temozolomide Run1-<br>DMSO | NM_0144<br>85 | PGDS   | PGDS                                                                    | -0.393114 | Inlier |
| siRNA Disorazole DMSO Run1       | NM_0144<br>85 | PGDS   | PGDS                                                                    | -0.076313 | Inlier |
| siRNA-Vinblastine Run2-<br>DMSO  | NM_0144<br>85 | PGDS   | PGDS                                                                    | 0.076313  | Inlier |
| siRNA Disorazole DMSO Run3       | NM_0144<br>85 | PGDS   | PGDS                                                                    | 0.614595  | Inlier |
| siRNA Disorazole DMSO Run2       | NM_0144<br>85 | PGDS   | PGDS                                                                    | 2.141515  | Inlier |
| siRNA-Vinblastine Run1-<br>DMSO  | NM_0144<br>85 | PGDS   | PGDS                                                                    | 3.015497  | Inlier |
| siRNA-Temozolomide Run3-<br>DMSO | NM_0050<br>23 | PGGT1B | protein<br>geranylger<br>anyltransfe<br>rase type<br>I, beta<br>subunit | -1.111172 | Inlier |
| siRNA-Vinblastine Run2-<br>DMSO  | NM_0050<br>23 | PGGT1B | protein<br>geranylger<br>anyltransfe<br>rase type<br>I, beta<br>subunit | -0.475365 | Inlier |
| siRNA Disorazole DMSO Run3       | NM_0050<br>23 | PGGT1B | protein<br>geranylger<br>anyltransfe<br>rase type<br>I, beta<br>subunit | -0.324505 | Inlier |
| siRNA-Temozolomide Run2-<br>DMSO | NM_0050<br>23 | PGGT1B | protein<br>geranylger<br>anyltransfe<br>rase type<br>I, beta<br>subunit | -0.290272 | Inlier |
| siRNA Disorazole DMSO Run1       | NM_0050<br>23 | PGGT1B | protein<br>geranylger<br>anyltransfe<br>rase type<br>I, beta<br>subunit | 0.290271  | Inlier |

Identification of Survival Genes in Human Glioblastoma Cells Using siRNA Screening  
 Nikhil G Thaker, Fang Zhang, Peter R. McDonald, Tong Ying Shun, Michael D Lewen, Ian F. Pollack, and John S. Lazo  
 Molecular Pharmacology

|                              |           |        |                                                        |           |        |
|------------------------------|-----------|--------|--------------------------------------------------------|-----------|--------|
| siRNA-Temozolomide Run1-DMSO | NM_005023 | PGGT1B | protein geranylgeranyltransferase type I, beta subunit | 0.873635  | Inlier |
| siRNA-Vinblastine Run1-DMSO  | NM_005023 | PGGT1B | protein geranylgeranyltransferase type I, beta subunit | 1.797449  | Inlier |
| siRNA Disorazole DMSO Run2   | NM_005023 | PGGT1B | protein geranylgeranyltransferase type I, beta subunit | 1.911884  | Inlier |
| siRNA Disorazole DMSO Run2   | NM_000291 | PGK1   | phosphoglycerate kinase 1                              | -0.984816 | Inlier |
| siRNA-Temozolomide Run3-DMSO | NM_000291 | PGK1   | phosphoglycerate kinase 1                              | -0.714707 | Inlier |
| siRNA-Temozolomide Run1-DMSO | NM_000291 | PGK1   | phosphoglycerate kinase 1                              | -0.172959 | Inlier |
| siRNA-Temozolomide Run2-DMSO | NM_000291 | PGK1   | phosphoglycerate kinase 1                              | -0.135926 | Inlier |
| siRNA Disorazole DMSO Run1   | NM_000291 | PGK1   | phosphoglycerate kinase 1                              | 0.135927  | Inlier |
| siRNA-Vinblastine Run2-DMSO  | NM_000291 | PGK1   | phosphoglycerate kinase 1                              | 0.634293  | Inlier |
| siRNA-Vinblastine Run1-DMSO  | NM_000291 | PGK1   | phosphoglycerate kinase 1                              | 0.756003  | Inlier |
| siRNA Disorazole DMSO Run3   | NM_000291 | PGK1   | phosphoglycerate kinase 1                              | 0.873287  | Inlier |
| siRNA-Temozolomide Run3-DMSO | NM_138733 | PGK2   | phosphoglycerate kinase 2                              | -1.247727 | Inlier |
| siRNA Disorazole DMSO Run2   | NM_138733 | PGK2   | phosphoglycerate kinase 2                              | -1.010058 | Inlier |



Identification of Survival Genes in Human Glioblastoma Cells Using siRNA Screening  
 Nikhil G Thaker, Fang Zhang, Peter R. McDonald, Tong Ying Shun, Michael D Lewen, Ian F. Pollack, and John S. Lazo

| Molecular Pharmacology           |               |      |  | phosphogl<br>ycerate<br>kinase 2 |        |
|----------------------------------|---------------|------|--|----------------------------------|--------|
| siRNA-Temozolomide Run2-<br>DMSO | NM_1387<br>33 | PGK2 |  | -0.467433                        | Inlier |
| siRNA-Temozolomide Run1-<br>DMSO | NM_1387<br>33 | PGK2 |  | -0.115039                        | Inlier |
| siRNA-Vinblastine Run2-<br>DMSO  | NM_1387<br>33 | PGK2 |  | 0.115039                         | Inlier |
| siRNA Disorazole DMSO Run1       | NM_1387<br>33 | PGK2 |  | 0.304814                         | Inlier |
| siRNA-Vinblastine Run1-<br>DMSO  | NM_1387<br>33 | PGK2 |  | 0.881567                         | Inlier |
| siRNA Disorazole DMSO Run3       | NM_1387<br>33 | PGK2 |  | 0.933148                         | Inlier |
| siRNA-Temozolomide Run3-<br>DMSO | NM_0120<br>88 | PGLS |  | -0.795374                        | Inlier |
| siRNA-Vinblastine Run2-<br>DMSO  | NM_0120<br>88 | PGLS |  | -0.685455                        | Inlier |
| siRNA-Temozolomide Run2-<br>DMSO | NM_0120<br>88 | PGLS |  | -0.663545                        | Inlier |
| siRNA Disorazole DMSO Run3       | NM_0120<br>88 | PGLS |  | -0.361175                        | Inlier |
| siRNA Disorazole DMSO Run1       | NM_0120<br>88 | PGLS |  | 0.361175                         | Inlier |
| siRNA-Temozolomide Run1-<br>DMSO | NM_0120<br>88 | PGLS |  | 0.44951                          | Inlier |
| siRNA-Vinblastine Run1-<br>DMSO  | NM_0120<br>88 | PGLS |  | 2.166594                         | Inlier |
| siRNA Disorazole DMSO Run2       | NM_0120<br>88 | PGLS |  | 2.647294                         | Inlier |

Identification of Survival Genes in Human Glioblastoma Cells Using siRNA Screening  
 Nikhil G Thaker, Fang Zhang, Peter R. McDonald, Tong Ying Shun, Michael D Lewen, Ian F. Pollack, and John S. Lazo  
 Molecular Pharmacology

|                              |           |         |                                     |           |        |
|------------------------------|-----------|---------|-------------------------------------|-----------|--------|
| siRNA-Vinblastine Run2-DMSO  | NM_005091 | PGLYRP1 | peptidoglycan recognition protein 1 | -0.857576 | Inlier |
| siRNA-Temozolomide Run2-DMSO | NM_005091 | PGLYRP1 | peptidoglycan recognition protein 1 | -0.633261 | Inlier |
| siRNA-Temozolomide Run1-DMSO | NM_005091 | PGLYRP1 | peptidoglycan recognition protein 1 | -0.289645 | Inlier |
| siRNA-Temozolomide Run3-DMSO | NM_005091 | PGLYRP1 | peptidoglycan recognition protein 1 | -0.141083 | Inlier |
| siRNA Disorazole DMSO Run3   | NM_005091 | PGLYRP1 | peptidoglycan recognition protein 1 | 0.141083  | Inlier |
| siRNA Disorazole DMSO Run1   | NM_005091 | PGLYRP1 | peptidoglycan recognition protein 1 | 0.715739  | Inlier |
| siRNA-Vinblastine Run1-DMSO  | NM_005091 | PGLYRP1 | peptidoglycan recognition protein 1 | 1.621225  | Inlier |
| siRNA Disorazole DMSO Run2   | NM_005091 | PGLYRP1 | peptidoglycan recognition protein 1 | 2.01847   | Inlier |
| siRNA-Temozolomide Run3-DMSO | NM_052890 | PGLYRP2 | peptidoglycan recognition protein 2 | -1.905039 | Inlier |
| siRNA-Temozolomide Run2-DMSO | NM_052890 | PGLYRP2 | peptidoglycan recognition protein 2 | -1.084297 | Inlier |

Identification of Survival Genes in Human Glioblastoma Cells Using siRNA Screening  
 Nikhil G Thaker, Fang Zhang, Peter R. McDonald, Tong Ying Shun, Michael D Lewen, Ian F. Pollack, and John S. Lazo  
 Molecular Pharmacology

|                                  |               |         |                                                |           |         |
|----------------------------------|---------------|---------|------------------------------------------------|-----------|---------|
| siRNA Disorazole DMSO Run3       | NM_0528<br>90 | PGLYRP2 | peptidogly<br>can<br>recognitio<br>n protein 2 | -0.264703 | Inlier  |
| siRNA Disorazole DMSO Run1       | NM_0528<br>90 | PGLYRP2 | peptidogly<br>can<br>recognitio<br>n protein 2 | -0.052417 | Inlier  |
| siRNA-Vinblastine Run2-<br>DMSO  | NM_0528<br>90 | PGLYRP2 | peptidogly<br>can<br>recognitio<br>n protein 2 | 0.052417  | Inlier  |
| siRNA-Temozolomide Run1-<br>DMSO | NM_0528<br>90 | PGLYRP2 | peptidogly<br>can<br>recognitio<br>n protein 2 | 0.059071  | Inlier  |
| siRNA Disorazole DMSO Run2       | NM_0528<br>90 | PGLYRP2 | peptidogly<br>can<br>recognitio<br>n protein 2 | 2.55179   | Inlier  |
| siRNA-Vinblastine Run1-<br>DMSO  | NM_0528<br>90 | PGLYRP2 | peptidogly<br>can<br>recognitio<br>n protein 2 | 3.784882  | Outlier |
| siRNA-Temozolomide Run3-<br>DMSO | NM_0528<br>91 | PGLYRP3 | peptidogly<br>can<br>recognitio<br>n protein 3 | -3.968098 | Outlier |
| siRNA Disorazole DMSO Run1       | NM_0528<br>91 | PGLYRP3 | peptidogly<br>can<br>recognitio<br>n protein 3 | -0.850226 | Inlier  |
| siRNA-Temozolomide Run1-<br>DMSO | NM_0528<br>91 | PGLYRP3 | peptidogly<br>can<br>recognitio<br>n protein 3 | -0.498774 | Inlier  |
| siRNA-Temozolomide Run2-<br>DMSO | NM_0528<br>91 | PGLYRP3 | peptidogly<br>can<br>recognitio<br>n protein 3 | -0.146878 | Inlier  |

Identification of Survival Genes in Human Glioblastoma Cells Using siRNA Screening  
 Nikhil G Thaker, Fang Zhang, Peter R. McDonald, Tong Ying Shun, Michael D Lewen, Ian F. Pollack, and John S. Lazo  
 Molecular Pharmacology

|                                  |               |         |                                                |           |        |
|----------------------------------|---------------|---------|------------------------------------------------|-----------|--------|
| siRNA Disorazole DMSO Run3       | NM_0528<br>91 | PGLYRP3 | peptidogly<br>can<br>recognitio<br>n protein 3 | 0.146878  | Inlier |
| siRNA-Vinblastine Run2-<br>DMSO  | NM_0528<br>91 | PGLYRP3 | peptidogly<br>can<br>recognitio<br>n protein 3 | 0.319201  | Inlier |
| siRNA-Vinblastine Run1-<br>DMSO  | NM_0528<br>91 | PGLYRP3 | peptidogly<br>can<br>recognitio<br>n protein 3 | 1.279534  | Inlier |
| siRNA Disorazole DMSO Run2       | NM_0528<br>91 | PGLYRP3 | peptidogly<br>can<br>recognitio<br>n protein 3 | 2.702257  | Inlier |
| siRNA-Temozolomide Run3-<br>DMSO | NM_0203<br>93 | PGLYRP4 | peptidogly<br>can<br>recognitio<br>n protein 4 | -1.644693 | Inlier |
| siRNA Disorazole DMSO Run3       | NM_0203<br>93 | PGLYRP4 | peptidogly<br>can<br>recognitio<br>n protein 4 | -0.572821 | Inlier |
| siRNA-Vinblastine Run2-<br>DMSO  | NM_0203<br>93 | PGLYRP4 | peptidogly<br>can<br>recognitio<br>n protein 4 | -0.536704 | Inlier |
| siRNA-Temozolomide Run2-<br>DMSO | NM_0203<br>93 | PGLYRP4 | peptidogly<br>can<br>recognitio<br>n protein 4 | -0.228688 | Inlier |
| siRNA Disorazole DMSO Run1       | NM_0203<br>93 | PGLYRP4 | peptidogly<br>can<br>recognitio<br>n protein 4 | 0.228688  | Inlier |
| siRNA-Temozolomide Run1-<br>DMSO | NM_0203<br>93 | PGLYRP4 | peptidogly<br>can<br>recognitio<br>n protein 4 | 0.776179  | Inlier |

Identification of Survival Genes in Human Glioblastoma Cells Using siRNA Screening  
 Nikhil G Thaker, Fang Zhang, Peter R. McDonald, Tong Ying Shun, Michael D Lewen, Ian F. Pollack, and John S. Lazo  
 Molecular Pharmacology

|                              |               |         |                                     |           |         |
|------------------------------|---------------|---------|-------------------------------------|-----------|---------|
| siRNA-Vinblastine Run1-DMSO  | NM_0203<br>93 | PGLYRP4 | peptidoglycan recognition protein 4 | 3.800952  | Outlier |
| siRNA Disorazole DMSO Run2   | NM_0203<br>93 | PGLYRP4 | peptidoglycan recognition protein 4 | 3.995481  | Outlier |
| siRNA-Temozolomide Run1-DMSO | NM_0026<br>33 | PGM1    | phosphoglucomutase 1                | -4.276432 | Outlier |
| siRNA-Temozolomide Run2-DMSO | NM_0026<br>33 | PGM1    | phosphoglucomutase 1                | -1.025603 | Inlier  |
| siRNA Disorazole DMSO Run1   | NM_0026<br>33 | PGM1    | phosphoglucomutase 1                | -0.635938 | Inlier  |
| siRNA Disorazole DMSO Run2   | NM_0026<br>33 | PGM1    | phosphoglucomutase 1                | -0.065807 | Inlier  |
| siRNA-Temozolomide Run3-DMSO | NM_0026<br>33 | PGM1    | phosphoglucomutase 1                | 0.065805  | Inlier  |
| siRNA Disorazole DMSO Run3   | NM_0026<br>33 | PGM1    | phosphoglucomutase 1                | 0.640931  | Inlier  |
| siRNA-Vinblastine Run1-DMSO  | NM_0026<br>33 | PGM1    | phosphoglucomutase 1                | 0.708069  | Inlier  |
| siRNA-Vinblastine Run2-DMSO  | NM_0026<br>33 | PGM1    | phosphoglucomutase 1                | 1.720514  | Inlier  |
| siRNA-Temozolomide Run3-DMSO | NM_0182<br>90 | PGM2    | phosphoglucomutase 2                | -1.857137 | Inlier  |
| siRNA-Temozolomide Run2-DMSO | NM_0182<br>90 | PGM2    | phosphoglucomutase 2                | -0.660087 | Inlier  |
| siRNA-Vinblastine Run2-DMSO  | NM_0182<br>90 | PGM2    | phosphoglucomutase 2                | -0.235828 | Inlier  |
| siRNA Disorazole DMSO Run1   | NM_0182<br>90 | PGM2    | phosphoglucomutase 2                | -0.136517 | Inlier  |
| siRNA-Temozolomide Run1-DMSO | NM_0182<br>90 | PGM2    | phosphoglucomutase 2                | 0.136517  | Inlier  |
| siRNA Disorazole DMSO Run3   | NM_0182<br>90 | PGM2    | phosphoglucomutase 2                | 0.688913  | Inlier  |

Identification of Survival Genes in Human Glioblastoma Cells Using siRNA Screening  
 Nikhil G Thaker, Fang Zhang, Peter R. McDonald, Tong Ying Shun, Michael D Lewen, Ian F. Pollack, and John S. Lazo

Molecular Pharmacology

| siRNA Treatment              | Gene ID       | Method | Gene Name                    | Value     | Outlier Status |
|------------------------------|---------------|--------|------------------------------|-----------|----------------|
| siRNA Disorazole DMSO Run2   | NM_0182<br>90 | PGM2   | phosphoglucosyltransferase 2 | 0.714998  | Inlier         |
| siRNA-Vinblastine Run1-DMSO  | NM_0182<br>90 | PGM2   | phosphoglucosyltransferase 2 | 0.778188  | Inlier         |
| siRNA-Temozolomide Run2-DMSO | NM_0155<br>99 | PGM3   | phosphoglucosyltransferase 3 | -1.908126 | Inlier         |
| siRNA-Temozolomide Run1-DMSO | NM_0155<br>99 | PGM3   | phosphoglucosyltransferase 3 | -1.619289 | Inlier         |
| siRNA-Temozolomide Run3-DMSO | NM_0155<br>99 | PGM3   | phosphoglucosyltransferase 3 | -1.206636 | Inlier         |
| siRNA Disorazole DMSO Run1   | NM_0155<br>99 | PGM3   | phosphoglucosyltransferase 3 | -0.291961 | Inlier         |
| siRNA Disorazole DMSO Run3   | NM_0155<br>99 | PGM3   | phosphoglucosyltransferase 3 | 0.291961  | Inlier         |
| siRNA-Vinblastine Run2-DMSO  | NM_0155<br>99 | PGM3   | phosphoglucosyltransferase 3 | 0.475842  | Inlier         |
| siRNA Disorazole DMSO Run2   | NM_0155<br>99 | PGM3   | phosphoglucosyltransferase 3 | 0.483372  | Inlier         |
| siRNA-Vinblastine Run1-DMSO  | NM_0155<br>99 | PGM3   | phosphoglucosyltransferase 3 | 0.865628  | Inlier         |
| siRNA-Temozolomide Run2-DMSO | NM_0219<br>65 | PGM5   | phosphoglucosyltransferase 5 | -2.328829 | Inlier         |
| siRNA-Temozolomide Run3-DMSO | NM_0219<br>65 | PGM5   | phosphoglucosyltransferase 5 | -1.885863 | Inlier         |
| siRNA-Vinblastine Run2-DMSO  | NM_0219<br>65 | PGM5   | phosphoglucosyltransferase 5 | -0.714563 | Inlier         |
| siRNA Disorazole DMSO Run1   | NM_0219<br>65 | PGM5   | phosphoglucosyltransferase 5 | -0.120723 | Inlier         |
| siRNA-Temozolomide Run1-DMSO | NM_0219<br>65 | PGM5   | phosphoglucosyltransferase 5 | 0.120724  | Inlier         |
| siRNA Disorazole DMSO Run2   | NM_0219<br>65 | PGM5   | phosphoglucosyltransferase 5 | 0.35924   | Inlier         |
| siRNA-Vinblastine Run1-DMSO  | NM_0219<br>65 | PGM5   | phosphoglucosyltransferase 5 | 0.634437  | Inlier         |

Identification of Survival Genes in Human Glioblastoma Cells Using siRNA Screening  
 Nikhil G Thaker, Fang Zhang, Peter R. McDonald, Tong Ying Shun, Michael D Lewen, Ian F. Pollack, and John S. Lazo

Molecular Pharmacology

|                                  |               |        |                                     |           |        |
|----------------------------------|---------------|--------|-------------------------------------|-----------|--------|
| siRNA Disorazole DMSO Run3       | NM_0219<br>65 | PGM5   | phosphogl<br>ucomutas<br>e 5        | 0.779568  | Inlier |
| siRNA-Temozolomide Run3-<br>DMSO | NM_0177<br>12 | PGPEP1 | pyrogluta<br>myl-<br>peptidase<br>I | -0.85259  | Inlier |
| siRNA-Temozolomide Run2-<br>DMSO | NM_0177<br>12 | PGPEP1 | pyrogluta<br>myl-<br>peptidase<br>I | -0.660319 | Inlier |
| siRNA-Temozolomide Run1-<br>DMSO | NM_0177<br>12 | PGPEP1 | pyrogluta<br>myl-<br>peptidase<br>I | -0.5335   | Inlier |
| siRNA Disorazole DMSO Run2       | NM_0177<br>12 | PGPEP1 | pyrogluta<br>myl-<br>peptidase<br>I | -0.236586 | Inlier |
| siRNA Disorazole DMSO Run3       | NM_0177<br>12 | PGPEP1 | pyrogluta<br>myl-<br>peptidase<br>I | 0.236586  | Inlier |
| siRNA Disorazole DMSO Run1       | NM_0177<br>12 | PGPEP1 | pyrogluta<br>myl-<br>peptidase<br>I | 0.688681  | Inlier |
| siRNA-Vinblastine Run1-<br>DMSO  | NM_0177<br>12 | PGPEP1 | pyrogluta<br>myl-<br>peptidase<br>I | 1.626799  | Inlier |
| siRNA-Vinblastine Run2-<br>DMSO  | NM_0177<br>12 | PGPEP1 | pyrogluta<br>myl-<br>peptidase<br>I | 2.834297  | Inlier |
| siRNA-Temozolomide Run1-<br>DMSO | NM_0009<br>26 | PGR    | progesterone<br>receptor            | -1.013392 | Inlier |
| siRNA-Temozolomide Run2-<br>DMSO | NM_0009<br>26 | PGR    | progesterone<br>receptor            | -0.810557 | Inlier |
| siRNA-Temozolomide Run3-<br>DMSO | NM_0009<br>26 | PGR    | progesterone<br>receptor            | -0.538443 | Inlier |
| siRNA Disorazole DMSO Run1       | NM_0009<br>26 | PGR    | progesterone<br>receptor            | -0.314425 | Inlier |
| siRNA-Vinblastine Run2-<br>DMSO  | NM_0009<br>26 | PGR    | progesterone<br>receptor            | 0.314425  | Inlier |

Identification of Survival Genes in Human Glioblastoma Cells Using siRNA Screening  
 Nikhil G Thaker, Fang Zhang, Peter R. McDonald, Tong Ying Shun, Michael D Lewen, Ian F. Pollack, and John S. Lazo

|                                                           |               |        |                                                     |           |        |
|-----------------------------------------------------------|---------------|--------|-----------------------------------------------------|-----------|--------|
| Molecular Pharmacology<br>siRNA-Vinblastine Run1-<br>DMSO | NM_0009<br>26 | PGR    | progesterone<br>receptor                            | 0.420753  | Inlier |
| siRNA Disorazole DMSO Run2                                | NM_0009<br>26 | PGR    | progesterone<br>receptor                            | 1.399889  | Inlier |
| siRNA Disorazole DMSO Run3                                | NM_0009<br>26 | PGR    | progesterone<br>receptor                            | 2.532402  | Inlier |
| siRNA Disorazole DMSO Run1                                | NM_0066<br>67 | PGRMC1 | progesterone<br>receptor<br>membrane<br>component 1 | -1.059828 | Inlier |
| siRNA-Vinblastine Run2-<br>DMSO                           | NM_0066<br>67 | PGRMC1 | progesterone<br>receptor<br>membrane<br>component 1 | -0.887798 | Inlier |
| siRNA-Temozolomide Run1-<br>DMSO                          | NM_0066<br>67 | PGRMC1 | progesterone<br>receptor<br>membrane<br>component 1 | -0.470482 | Inlier |
| siRNA Disorazole DMSO Run3                                | NM_0066<br>67 | PGRMC1 | progesterone<br>receptor<br>membrane<br>component 1 | -0.091188 | Inlier |
| siRNA-Temozolomide Run2-<br>DMSO                          | NM_0066<br>67 | PGRMC1 | progesterone<br>receptor<br>membrane<br>component 1 | 0.091187  | Inlier |
| siRNA Disorazole DMSO Run2                                | NM_0066<br>67 | PGRMC1 | progesterone<br>receptor<br>membrane<br>component 1 | 0.513442  | Inlier |



Identification of Survival Genes in Human Glioblastoma Cells Using siRNA Screening  
 Nikhil G Thaker, Fang Zhang, Peter R. McDonald, Tong Ying Shun, Michael D Lewen, Ian F. Pollack, and John S. Lazo  
 Molecular Pharmacology

|                              |           |        |                                            |           |         |
|------------------------------|-----------|--------|--------------------------------------------|-----------|---------|
| siRNA-Temozolomide Run3-DMSO | NM_006667 | PGRMC1 | progesterone receptor membrane component 1 | 0.835558  | Inlier  |
| siRNA-Vinblastine Run1-DMSO  | NM_006667 | PGRMC1 | progesterone receptor membrane component 1 | 0.880013  | Inlier  |
| siRNA Disorazole DMSO Run2   | NM_006320 | PGRMC2 | progesterone receptor membrane component 2 | -5.679877 | Outlier |
| siRNA-Temozolomide Run3-DMSO | NM_006320 | PGRMC2 | progesterone receptor membrane component 2 | -5.29428  | Outlier |
| siRNA-Temozolomide Run2-DMSO | NM_006320 | PGRMC2 | progesterone receptor membrane component 2 | -0.468654 | Inlier  |
| siRNA Disorazole DMSO Run1   | NM_006320 | PGRMC2 | progesterone receptor membrane component 2 | -0.396653 | Inlier  |
| siRNA-Vinblastine Run1-DMSO  | NM_006320 | PGRMC2 | progesterone receptor membrane component 2 | 0.396655  | Inlier  |

Identification of Survival Genes in Human Glioblastoma Cells Using siRNA Screening  
 Nikhil G Thaker, Fang Zhang, Peter R. McDonald, Tong Ying Shun, Michael D Lewen, Ian F. Pollack, and John S. Lazo  
 Molecular Pharmacology

|                              |               |        |                                                         |           |        |
|------------------------------|---------------|--------|---------------------------------------------------------|-----------|--------|
| siRNA-Temozolomide Run1-DMSO | NM_0063<br>20 | PGRMC2 | progesterone<br>receptor<br>membrane<br>componen<br>t 2 | 0.646397  | Inlier |
| siRNA-Vinblastine Run2-DMSO  | NM_0063<br>20 | PGRMC2 | progesterone<br>receptor<br>membrane<br>componen<br>t 2 | 0.702603  | Inlier |
| siRNA Disorazole DMSO Run3   | NM_0063<br>20 | PGRMC2 | progesterone<br>receptor<br>membrane<br>componen<br>t 2 | 1.742388  | Inlier |
| siRNA-Temozolomide Run2-DMSO | NM_0244<br>19 | PGS1   | PGS1                                                    | -2.410194 | Inlier |
| siRNA Disorazole DMSO Run1   | NM_0244<br>19 | PGS1   | PGS1                                                    | -0.499881 | Inlier |
| siRNA Disorazole DMSO Run3   | NM_0244<br>19 | PGS1   | PGS1                                                    | -0.419043 | Inlier |
| siRNA-Temozolomide Run1-DMSO | NM_0244<br>19 | PGS1   | PGS1                                                    | -0.107303 | Inlier |
| siRNA-Vinblastine Run2-DMSO  | NM_0244<br>19 | PGS1   | PGS1                                                    | 0.107303  | Inlier |
| siRNA Disorazole DMSO Run2   | NM_0244<br>19 | PGS1   | PGS1                                                    | 0.849119  | Inlier |
| siRNA-Temozolomide Run3-DMSO | NM_0244<br>19 | PGS1   | PGS1                                                    | 0.902624  | Inlier |
| siRNA-Vinblastine Run1-DMSO  | NM_0244<br>19 | PGS1   | PGS1                                                    | 2.390784  | Inlier |
| siRNA-Temozolomide Run3-DMSO | NM_1779<br>39 | PH-4   | PH-4                                                    | -1.219514 | Inlier |
| siRNA-Temozolomide Run2-DMSO | NM_1779<br>39 | PH-4   | PH-4                                                    | -1.012951 | Inlier |
| siRNA Disorazole DMSO Run1   | NM_1779<br>39 | PH-4   | PH-4                                                    | -0.336049 | Inlier |
| siRNA-Vinblastine Run2-DMSO  | NM_1779<br>39 | PH-4   | PH-4                                                    | -0.052747 | Inlier |
| siRNA Disorazole DMSO Run3   | NM_1779<br>39 | PH-4   | PH-4                                                    | 0.052747  | Inlier |
| siRNA-Temozolomide Run1-DMSO | NM_1779<br>39 | PH-4   | PH-4                                                    | 0.23662   | Inlier |
| siRNA-Vinblastine Run1-DMSO  | NM_1779<br>39 | PH-4   | PH-4                                                    | 1.221254  | Inlier |

Identification of Survival Genes in Human Glioblastoma Cells Using siRNA Screening

Nikhil G Thaker, Fang Zhang, Peter R. McDonald, Tong Ying Shun, Michael D Lewen, Ian F. Pollack, and John S. Lazo

|                              |         |       |           |           |        |
|------------------------------|---------|-------|-----------|-----------|--------|
| Molecular Pharmacology       | NM_1779 |       |           |           |        |
| siRNA Disorazole DMSO Run2   | 39      | PH-4  | PH-4      | 1.320829  | Inlier |
| siRNA-Temozolomide Run2-DMSO | NM_0325 |       |           |           |        |
|                              | 92      | PHACS | PHACS     | -1.517771 | Inlier |
|                              | NM_0325 |       |           |           |        |
| siRNA Disorazole DMSO Run1   | 92      | PHACS | PHACS     | -0.324289 | Inlier |
| siRNA-Vinblastine Run2-DMSO  | NM_0325 |       |           |           |        |
|                              | 92      | PHACS | PHACS     | -0.123835 | Inlier |
| siRNA-Temozolomide Run1-DMSO | NM_0325 |       |           |           |        |
|                              | 92      | PHACS | PHACS     | -0.076835 | Inlier |
|                              | NM_0325 |       |           |           |        |
| siRNA Disorazole DMSO Run3   | 92      | PHACS | PHACS     | 0.076835  | Inlier |
| siRNA-Temozolomide Run3-DMSO | NM_0325 |       |           |           |        |
|                              | 92      | PHACS | PHACS     | 1.024711  | Inlier |
|                              | NM_0325 |       |           |           |        |
| siRNA Disorazole DMSO Run2   | 92      | PHACS | PHACS     | 1.075472  | Inlier |
| siRNA-Vinblastine Run1-DMSO  | NM_0325 |       |           |           |        |
|                              | 92      | PHACS | PHACS     | 1.663171  | Inlier |
|                              |         |       | phytocera |           |        |
| siRNA-Vinblastine Run2-DMSO  | NM_0183 |       | midase,   |           |        |
|                              | 67      | PHCA  | alkaline  | -0.760812 | Inlier |
|                              |         |       | phytocera |           |        |
| siRNA-Temozolomide Run2-DMSO | NM_0183 |       | midase,   |           |        |
|                              | 67      | PHCA  | alkaline  | -0.749153 | Inlier |
|                              |         |       | phytocera |           |        |
| siRNA Disorazole DMSO Run3   | NM_0183 |       | midase,   |           |        |
|                              | 67      | PHCA  | alkaline  | -0.222153 | Inlier |
|                              |         |       | phytocera |           |        |
| siRNA Disorazole DMSO Run1   | NM_0183 |       | midase,   |           |        |
|                              | 67      | PHCA  | alkaline  | -0.077867 | Inlier |
|                              |         |       | phytocera |           |        |
| siRNA-Temozolomide Run3-DMSO | NM_0183 |       | midase,   |           |        |
|                              | 67      | PHCA  | alkaline  | 0.077868  | Inlier |
|                              |         |       | phytocera |           |        |
| siRNA-Temozolomide Run1-DMSO | NM_0183 |       | midase,   |           |        |
|                              | 67      | PHCA  | alkaline  | 0.599847  | Inlier |
|                              |         |       | phytocera |           |        |
| siRNA-Vinblastine Run1-DMSO  | NM_0183 |       | midase,   |           |        |
|                              | 67      | PHCA  | alkaline  | 0.876951  | Inlier |
|                              |         |       | phytocera |           |        |
|                              | NM_0183 |       | midase,   |           |        |
| siRNA Disorazole DMSO Run2   | 67      | PHCA  | alkaline  | 1.003524  | Inlier |

Identification of Survival Genes in Human Glioblastoma Cells Using siRNA Screening

Nikhil G Thaker, Fang Zhang, Peter R. McDonald, Tong Ying Shun, Michael D Lewen, Ian F. Pollack, and John S.

Lazo

Molecular Pharmacology

|                              |           |      |                                                                                                      |           |         |
|------------------------------|-----------|------|------------------------------------------------------------------------------------------------------|-----------|---------|
| siRNA-Temozolomide Run3-DMSO | NM_000444 | PHEX | phosphate regulating endopeptidase homolog, X-linked (hypophosphatemia, vitamin D resistant rickets) | -16.39537 | Outlier |
| siRNA-Temozolomide Run1-DMSO | NM_000444 | PHEX | phosphate regulating endopeptidase homolog, X-linked (hypophosphatemia, vitamin D resistant rickets) | -0.279879 | Inlier  |
| siRNA Disorazole DMSO Run3   | NM_000444 | PHEX | phosphate regulating endopeptidase homolog, X-linked (hypophosphatemia, vitamin D resistant rickets) | -0.139194 | Inlier  |
| siRNA Disorazole DMSO Run2   | NM_000444 | PHEX | phosphate regulating endopeptidase homolog, X-linked (hypophosphatemia, vitamin D resistant rickets) | -0.000247 | Inlier  |

Identification of Survival Genes in Human Glioblastoma Cells Using siRNA Screening

Nikhil G Thaker, Fang Zhang, Peter R. McDonald, Tong Ying Shun, Michael D Lewen, Ian F. Pollack, and John S. Lazo

Molecular Pharmacology

|                              |           |      |                                                                                                      |          |         |
|------------------------------|-----------|------|------------------------------------------------------------------------------------------------------|----------|---------|
| siRNA-Temozolomide Run2-DMSO | NM_000444 | PHEX | phosphate regulating endopeptidase homolog, X-linked (hypophosphatemia, vitamin D resistant rickets) | 0.000247 | Inlier  |
| siRNA Disorazole DMSO Run1   | NM_000444 | PHEX | phosphate regulating endopeptidase homolog, X-linked (hypophosphatemia, vitamin D resistant rickets) | 1.069121 | Inlier  |
| siRNA-Vinblastine Run2-DMSO  | NM_000444 | PHEX | phosphate regulating endopeptidase homolog, X-linked (hypophosphatemia, vitamin D resistant rickets) | 10.11998 | Outlier |
| siRNA-Vinblastine Run1-DMSO  | NM_000444 | PHEX | phosphate regulating endopeptidase homolog, X-linked (hypophosphatemia, vitamin D resistant rickets) | 14.09986 | Outlier |

Identification of Survival Genes in Human Glioblastoma Cells Using siRNA Screening  
 Nikhil G Thaker, Fang Zhang, Peter R. McDonald, Tong Ying Shun, Michael D Lewen, Ian F. Pollack, and John S. Lazo

Molecular Pharmacology

|                              |         |       |                      |           |         |
|------------------------------|---------|-------|----------------------|-----------|---------|
|                              | NM_0208 |       | PHD<br>finger        |           |         |
| siRNA Disorazole DMSO Run1   | 89      | PHF12 | protein 12           | -1.244129 | Inlier  |
|                              | NM_0208 |       | PHD<br>finger        |           |         |
| siRNA Disorazole DMSO Run3   | 89      | PHF12 | protein 12           | -0.83709  | Inlier  |
|                              | NM_0208 |       | PHD<br>finger        |           |         |
| siRNA-Temozolomide Run2-DMSO | 89      | PHF12 | protein 12           | -0.419165 | Inlier  |
|                              | NM_0208 |       | PHD<br>finger        |           |         |
| siRNA-Temozolomide Run1-DMSO | 89      | PHF12 | protein 12           | -0.082595 | Inlier  |
|                              | NM_0208 |       | PHD<br>finger        |           |         |
| siRNA-Vinblastine Run2-DMSO  | 89      | PHF12 | protein 12           | 0.082593  | Inlier  |
|                              | NM_0208 |       | PHD<br>finger        |           |         |
| siRNA-Temozolomide Run3-DMSO | 89      | PHF12 | protein 12           | 0.51191   | Inlier  |
|                              | NM_0208 |       | PHD<br>finger        |           |         |
| siRNA-Vinblastine Run1-DMSO  | 89      | PHF12 | protein 12           | 0.946672  | Inlier  |
|                              | NM_0208 |       | PHD<br>finger        |           |         |
| siRNA Disorazole DMSO Run2   | 89      | PHF12 | protein 12           | 3.791131  | Outlier |
|                              | NM_0066 |       | phosphogl<br>ycerate |           |         |
| siRNA-Temozolomide Run3-DMSO | 23      | PHGDH | dehydroge<br>nase    | -0.934598 | Inlier  |
|                              | NM_0066 |       | phosphogl<br>ycerate |           |         |
| siRNA-Temozolomide Run1-DMSO | 23      | PHGDH | dehydroge<br>nase    | -0.832843 | Inlier  |
|                              | NM_0066 |       | phosphogl<br>ycerate |           |         |
| siRNA Disorazole DMSO Run2   | 23      | PHGDH | dehydroge<br>nase    | -0.363587 | Inlier  |
|                              | NM_0066 |       | phosphogl<br>ycerate |           |         |
| siRNA-Temozolomide Run2-DMSO | 23      | PHGDH | dehydroge<br>nase    | -0.237943 | Inlier  |
|                              | NM_0066 |       | phosphogl<br>ycerate |           |         |
| siRNA Disorazole DMSO Run3   | 23      | PHGDH | dehydroge<br>nase    | 0.237943  | Inlier  |
|                              | NM_0066 |       | phosphogl<br>ycerate |           |         |
| siRNA Disorazole DMSO Run1   | 23      | PHGDH | dehydroge<br>nase    | 0.516157  | Inlier  |
|                              | NM_0066 |       | phosphogl<br>ycerate |           |         |
| siRNA-Vinblastine Run1-DMSO  | 23      | PHGDH | dehydroge<br>nase    | 1.201949  | Inlier  |

Identification of Survival Genes in Human Glioblastoma Cells Using siRNA Screening  
 Nikhil G Thaker, Fang Zhang, Peter R. McDonald, Tong Ying Shun, Michael D Lewen, Ian F. Pollack, and John S. Lazo

Molecular Pharmacology

|                              |           |         |                                        |           |        |
|------------------------------|-----------|---------|----------------------------------------|-----------|--------|
| siRNA-Vinblastine Run2-DMSO  | NM_006623 | PHGDH   | phosphoglycerate dehydrogenase         | 1.568277  | Inlier |
| siRNA-Temozolomide Run3-DMSO | NM_177967 | PHGDHL1 | phosphoglycerate dehydrogenase like 1  | -0.922525 | Inlier |
| siRNA-Temozolomide Run2-DMSO | NM_177967 | PHGDHL1 | phosphoglycerate dehydrogenase like 1  | -0.478362 | Inlier |
| siRNA-Temozolomide Run1-DMSO | NM_177967 | PHGDHL1 | phosphoglycerate dehydrogenase like 1  | -0.133884 | Inlier |
| siRNA Disorazole DMSO Run1   | NM_177967 | PHGDHL1 | phosphoglycerate dehydrogenase like 1  | -0.126156 | Inlier |
| siRNA Disorazole DMSO Run2   | NM_177967 | PHGDHL1 | phosphoglycerate dehydrogenase like 1  | 0.126156  | Inlier |
| siRNA-Vinblastine Run1-DMSO  | NM_177967 | PHGDHL1 | phosphoglycerate dehydrogenase like 1  | 0.870638  | Inlier |
| siRNA-Vinblastine Run2-DMSO  | NM_177967 | PHGDHL1 | phosphoglycerate dehydrogenase like 1  | 1.173137  | Inlier |
| siRNA Disorazole DMSO Run3   | NM_177967 | PHGDHL1 | phosphoglycerate dehydrogenase like 1  | 1.247283  | Inlier |
| siRNA Disorazole DMSO Run2   | NM_002637 | PHKA1   | phosphorylase kinase, alpha 1 (muscle) | -1.008533 | Inlier |

Identification of Survival Genes in Human Glioblastoma Cells Using siRNA Screening

Nikhil G Thaker, Fang Zhang, Peter R. McDonald, Tong Ying Shun, Michael D Lewen, Ian F. Pollack, and John S. Lazo

Molecular Pharmacology

|                              |               |       |                                                     |           |        |
|------------------------------|---------------|-------|-----------------------------------------------------|-----------|--------|
| siRNA-Temozolomide Run3-DMSO | NM_0026<br>37 | PHKA1 | phosphoryl<br>ase<br>kinase,<br>alpha 1<br>(muscle) | -0.852884 | Inlier |
| siRNA-Temozolomide Run2-DMSO | NM_0026<br>37 | PHKA1 | phosphoryl<br>ase<br>kinase,<br>alpha 1<br>(muscle) | -0.496116 | Inlier |
| siRNA-Temozolomide Run1-DMSO | NM_0026<br>37 | PHKA1 | phosphoryl<br>ase<br>kinase,<br>alpha 1<br>(muscle) | -0.173998 | Inlier |
| siRNA Disorazole DMSO Run1   | NM_0026<br>37 | PHKA1 | phosphoryl<br>ase<br>kinase,<br>alpha 1<br>(muscle) | 0.173998  | Inlier |
| siRNA Disorazole DMSO Run3   | NM_0026<br>37 | PHKA1 | phosphoryl<br>ase<br>kinase,<br>alpha 1<br>(muscle) | 0.2762    | Inlier |
| siRNA-Vinblastine Run2-DMSO  | NM_0026<br>37 | PHKA1 | phosphoryl<br>ase<br>kinase,<br>alpha 1<br>(muscle) | 0.877194  | Inlier |
| siRNA-Vinblastine Run1-DMSO  | NM_0026<br>37 | PHKA1 | phosphoryl<br>ase<br>kinase,<br>alpha 1<br>(muscle) | 0.948669  | Inlier |
| siRNA Disorazole DMSO Run2   | NM_0002<br>92 | PHKA2 | phosphoryl<br>ase<br>kinase,<br>alpha 2<br>(liver)  | -1.143039 | Inlier |
| siRNA-Temozolomide Run3-DMSO | NM_0002<br>92 | PHKA2 | phosphoryl<br>ase<br>kinase,<br>alpha 2<br>(liver)  | -0.697815 | Inlier |
| siRNA-Temozolomide Run2-DMSO | NM_0002<br>92 | PHKA2 | phosphoryl<br>ase<br>kinase,<br>alpha 2<br>(liver)  | -0.651185 | Inlier |



Identification of Survival Genes in Human Glioblastoma Cells Using siRNA Screening  
 Nikhil G Thaker, Fang Zhang, Peter R. McDonald, Tong Ying Shun, Michael D Lewen, Ian F. Pollack, and John S. Lazo

Molecular Pharmacology

| siRNA Treatment              | Gene ID   | Gene Name | Gene Description                      | Value     | Outlier Status |
|------------------------------|-----------|-----------|---------------------------------------|-----------|----------------|
| siRNA-Temozolomide Run1-DMSO | NM_000292 | PHKA2     | phosphorylase kinase, alpha 2 (liver) | -0.156464 | Inlier         |
| siRNA Disorazole DMSO Run1   | NM_000292 | PHKA2     | phosphorylase kinase, alpha 2 (liver) | 0.156464  | Inlier         |
| siRNA Disorazole DMSO Run3   | NM_000292 | PHKA2     | phosphorylase kinase, alpha 2 (liver) | 0.168761  | Inlier         |
| siRNA-Vinblastine Run2-DMSO  | NM_000292 | PHKA2     | phosphorylase kinase, alpha 2 (liver) | 0.855085  | Inlier         |
| siRNA-Vinblastine Run1-DMSO  | NM_000292 | PHKA2     | phosphorylase kinase, alpha 2 (liver) | 0.985555  | Inlier         |
| siRNA Disorazole DMSO Run2   | NM_000293 | PHKB      | phosphorylase kinase, beta            | -2.99999  | Inlier         |
| siRNA-Temozolomide Run3-DMSO | NM_000293 | PHKB      | phosphorylase kinase, beta            | -2.335852 | Inlier         |
| siRNA-Temozolomide Run1-DMSO | NM_000293 | PHKB      | phosphorylase kinase, beta            | -0.649171 | Inlier         |
| siRNA-Temozolomide Run2-DMSO | NM_000293 | PHKB      | phosphorylase kinase, beta            | -0.231277 | Inlier         |
| siRNA-Vinblastine Run1-DMSO  | NM_000293 | PHKB      | phosphorylase kinase, beta            | 0.231278  | Inlier         |
| siRNA Disorazole DMSO Run1   | NM_000293 | PHKB      | phosphorylase kinase, beta            | 0.374283  | Inlier         |

Identification of Survival Genes in Human Glioblastoma Cells Using siRNA Screening  
 Nikhil G Thaker, Fang Zhang, Peter R. McDonald, Tong Ying Shun, Michael D Lewen, Ian F. Pollack, and John S. Lazo

Molecular Pharmacology

| siRNA                        | Gene      | Accession | Gene                                   | Value     | Outlier |
|------------------------------|-----------|-----------|----------------------------------------|-----------|---------|
| siRNA-Vinblastine Run2-DMSO  | NM_000293 | PHKB      | phosphorylase kinase, beta             | 0.699829  | Inlier  |
| siRNA Disorazole DMSO Run3   | NM_000293 | PHKB      | phosphorylase kinase, beta             | 2.435858  | Inlier  |
| siRNA-Temozolomide Run3-DMSO | NM_006213 | PHKG1     | kinase, gamma 1 (muscle)               | -0.909225 | Inlier  |
| siRNA Disorazole DMSO Run3   | NM_006213 | PHKG1     | phosphorylase kinase, gamma 1 (muscle) | -0.770322 | Inlier  |
| siRNA Disorazole DMSO Run2   | NM_006213 | PHKG1     | phosphorylase kinase, gamma 1 (muscle) | -0.592658 | Inlier  |
| siRNA-Temozolomide Run2-DMSO | NM_006213 | PHKG1     | phosphorylase kinase, gamma 1 (muscle) | -0.154707 | Inlier  |
| siRNA-Temozolomide Run1-DMSO | NM_006213 | PHKG1     | phosphorylase kinase, gamma 1 (muscle) | 0.154707  | Inlier  |
| siRNA Disorazole DMSO Run1   | NM_006213 | PHKG1     | phosphorylase kinase, gamma 1 (muscle) | 0.425338  | Inlier  |
| siRNA-Vinblastine Run1-DMSO  | NM_006213 | PHKG1     | phosphorylase kinase, gamma 1 (muscle) | 0.756342  | Inlier  |
| siRNA-Vinblastine Run2-DMSO  | NM_006213 | PHKG1     | phosphorylase kinase, gamma 1 (muscle) | 0.845699  | Inlier  |

Identification of Survival Genes in Human Glioblastoma Cells Using siRNA Screening  
 Nikhil G Thaker, Fang Zhang, Peter R. McDonald, Tong Ying Shun, Michael D Lewen, Ian F. Pollack, and John S. Lazo

Molecular Pharmacology

|                              |           |          |                                        |           |        |
|------------------------------|-----------|----------|----------------------------------------|-----------|--------|
| siRNA-Temozolomide Run3-DMSO | NM_000294 | PHKG2    | phosphorylase kinase, gamma 2 (testis) | -1.304894 | Inlier |
| siRNA Disorazole DMSO Run2   | NM_000294 | PHKG2    | phosphorylase kinase, gamma 2 (testis) | -1.242203 | Inlier |
| siRNA-Temozolomide Run2-DMSO | NM_000294 | PHKG2    | phosphorylase kinase, gamma 2 (testis) | -0.697228 | Inlier |
| siRNA-Temozolomide Run1-DMSO | NM_000294 | PHKG2    | phosphorylase kinase, gamma 2 (testis) | -0.070487 | Inlier |
| siRNA Disorazole DMSO Run3   | NM_000294 | PHKG2    | phosphorylase kinase, gamma 2 (testis) | 0.070487  | Inlier |
| siRNA Disorazole DMSO Run1   | NM_000294 | PHKG2    | phosphorylase kinase, gamma 2 (testis) | 0.473579  | Inlier |
| siRNA-Vinblastine Run2-DMSO  | NM_000294 | PHKG2    | phosphorylase kinase, gamma 2 (testis) | 0.651771  | Inlier |
| siRNA-Vinblastine Run1-DMSO  | NM_000294 | PHKG2    | phosphorylase kinase, gamma 2 (testis) | 0.967222  | Inlier |
| siRNA-Temozolomide Run3-DMSO | NM_178500 | PHOSPHO1 | phosphatase, orphan 1                  | -1.140424 | Inlier |
| siRNA-Temozolomide Run2-DMSO | NM_178500 | PHOSPHO1 | phosphatase, orphan 1                  | -0.320696 | Inlier |
| siRNA Disorazole DMSO Run2   | NM_178500 | PHOSPHO1 | phosphatase, orphan 1                  | -0.140483 | Inlier |
| siRNA Disorazole DMSO Run3   | NM_178500 | PHOSPHO1 | phosphatase, orphan 1                  | -0.125744 | Inlier |

Identification of Survival Genes in Human Glioblastoma Cells Using siRNA Screening  
 Nikhil G Thaker, Fang Zhang, Peter R. McDonald, Tong Ying Shun, Michael D Lewen, Ian F. Pollack, and John S. Lazo

| Molecular Pharmacology       |           |          |                                            |           |        |
|------------------------------|-----------|----------|--------------------------------------------|-----------|--------|
| siRNA-Temozolomide Run1-DMSO | NM_178500 | PHOSPHO1 | phosphatase, orphan 1                      | 0.125744  | Inlier |
| siRNA Disorazole DMSO Run1   | NM_178500 | PHOSPHO1 | phosphatase, orphan 1                      | 1.028304  | Inlier |
| siRNA-Vinblastine Run1-DMSO  | NM_178500 | PHOSPHO1 | phosphatase, orphan 1                      | 1.239936  | Inlier |
| siRNA-Vinblastine Run2-DMSO  | NM_178500 | PHOSPHO1 | phosphatase, orphan 1                      | 1.293676  | Inlier |
| siRNA-Temozolomide Run2-DMSO | NM_014172 | PHPT1    | phosphohistidine phosphatase 1             | -1.466143 | Inlier |
| siRNA-Temozolomide Run3-DMSO | NM_014172 | PHPT1    | phosphohistidine phosphatase 1             | -0.900429 | Inlier |
| siRNA Disorazole DMSO Run3   | NM_014172 | PHPT1    | phosphohistidine phosphatase 1             | -0.358819 | Inlier |
| siRNA Disorazole DMSO Run2   | NM_014172 | PHPT1    | phosphohistidine phosphatase 1             | -0.237526 | Inlier |
| siRNA-Temozolomide Run1-DMSO | NM_014172 | PHPT1    | phosphohistidine phosphatase 1             | 0.237526  | Inlier |
| siRNA Disorazole DMSO Run1   | NM_014172 | PHPT1    | phosphohistidine phosphatase 1             | 0.448571  | Inlier |
| siRNA-Vinblastine Run1-DMSO  | NM_014172 | PHPT1    | phosphohistidine phosphatase 1             | 1.323323  | Inlier |
| siRNA-Vinblastine Run2-DMSO  | NM_014172 | PHPT1    | phosphohistidine phosphatase 1             | 2.026379  | Inlier |
| siRNA-Temozolomide Run3-DMSO | NM_006214 | PHYH     | phytanoyl-CoA hydroxylase (Refsum disease) | -0.892198 | Inlier |

Identification of Survival Genes in Human Glioblastoma Cells Using siRNA Screening

Nikhil G Thaker, Fang Zhang, Peter R. McDonald, Tong Ying Shun, Michael D Lewen, Ian F. Pollack, and John S. Lazo

Molecular Pharmacology

|                              |               |        |                                               |           |         |
|------------------------------|---------------|--------|-----------------------------------------------|-----------|---------|
| siRNA-Vinblastine Run2-DMSO  | NM_0062<br>14 | PHYH   | phytanoyl-CoA hydroxylase (Refsum disease)    | -0.456802 | Inlier  |
| siRNA Disorazole DMSO Run3   | NM_0062<br>14 | PHYH   | phytanoyl-CoA hydroxylase (Refsum disease)    | -0.348082 | Inlier  |
| siRNA-Temozolomide Run2-DMSO | NM_0062<br>14 | PHYH   | phytanoyl-CoA hydroxylase (Refsum disease)    | -0.135972 | Inlier  |
| siRNA Disorazole DMSO Run1   | NM_0062<br>14 | PHYH   | phytanoyl-CoA hydroxylase (Refsum disease)    | 0.135972  | Inlier  |
| siRNA-Temozolomide Run1-DMSO | NM_0062<br>14 | PHYH   | phytanoyl-CoA hydroxylase (Refsum disease)    | 1.288489  | Inlier  |
| siRNA-Vinblastine Run1-DMSO  | NM_0062<br>14 | PHYH   | phytanoyl-CoA hydroxylase (Refsum disease)    | 3.729411  | Outlier |
| siRNA Disorazole DMSO Run2   | NM_0062<br>14 | PHYH   | phytanoyl-CoA hydroxylase (Refsum disease)    | 4.757591  | Outlier |
| siRNA-Vinblastine Run2-DMSO  | NM_1749<br>33 | PHYHD1 | phytanoyl-CoA dioxygenase domain containing 1 | -4.113895 | Outlier |

Identification of Survival Genes in Human Glioblastoma Cells Using siRNA Screening

Nikhil G Thaker, Fang Zhang, Peter R. McDonald, Tong Ying Shun, Michael D Lewen, Ian F. Pollack, and John S. Lazo

Molecular Pharmacology

|                              |               |        |   |                                             |           |        |
|------------------------------|---------------|--------|---|---------------------------------------------|-----------|--------|
| siRNA Disorazole DMSO Run1   | NM_1749<br>33 | PHYHD1 | 1 | phytanoyl-CoA dioxygenase domain containing | -0.595362 | Inlier |
| siRNA Disorazole DMSO Run3   | NM_1749<br>33 | PHYHD1 | 1 | phytanoyl-CoA dioxygenase domain containing | -0.581599 | Inlier |
| siRNA-Temozolomide Run2-DMSO | NM_1749<br>33 | PHYHD1 | 1 | phytanoyl-CoA dioxygenase domain containing | -0.109842 | Inlier |
| siRNA-Temozolomide Run3-DMSO | NM_1749<br>33 | PHYHD1 | 1 | phytanoyl-CoA dioxygenase domain containing | 0.109841  | Inlier |
| siRNA-Temozolomide Run1-DMSO | NM_1749<br>33 | PHYHD1 | 1 | phytanoyl-CoA dioxygenase domain containing | 0.753638  | Inlier |
| siRNA Disorazole DMSO Run2   | NM_1749<br>33 | PHYHD1 | 1 | phytanoyl-CoA dioxygenase domain containing | 2.001202  | Inlier |
| siRNA-Vinblastine Run1-DMSO  | NM_1749<br>33 | PHYHD1 | 1 | phytanoyl-CoA dioxygenase domain containing | 3.180314  | Inlier |

Identification of Survival Genes in Human Glioblastoma Cells Using siRNA Screening

Nikhil G Thaker, Fang Zhang, Peter R. McDonald, Tong Ying Shun, Michael D Lewen, Ian F. Pollack, and John S. Lazo

Molecular Pharmacology

| siRNA Treatment              | Gene ID   | Gene Name | Log Fold Change | Classification |
|------------------------------|-----------|-----------|-----------------|----------------|
| siRNA-Temozolomide Run3-DMSO | NM_014759 | PHYHIP    | -1.157869       | Inlier         |
| siRNA Disorazole DMSO Run1   | NM_014759 | PHYHIP    | -0.994748       | Inlier         |
| siRNA-Temozolomide Run2-DMSO | NM_014759 | PHYHIP    | -0.354252       | Inlier         |
| siRNA-Vinblastine Run2-DMSO  | NM_014759 | PHYHIP    | -0.062041       | Inlier         |
| siRNA Disorazole DMSO Run3   | NM_014759 | PHYHIP    | 0.062041        | Inlier         |
| siRNA-Temozolomide Run1-DMSO | NM_014759 | PHYHIP    | 0.347732        | Inlier         |
| siRNA-Vinblastine Run1-DMSO  | NM_014759 | PHYHIP    | 3.41966         | Inlier         |
| siRNA Disorazole DMSO Run2   | NM_014759 | PHYHIP    | 3.56275         | Outlier        |

phytanoyl-CoA hydroxylase interacting protein

Identification of Survival Genes in Human Glioblastoma Cells Using siRNA Screening  
 Nikhil G Thaker, Fang Zhang, Peter R. McDonald, Tong Ying Shun, Michael D Lewen, Ian F. Pollack, and John S. Lazo

Molecular Pharmacology

|                              |               |        |                                            |           |        |
|------------------------------|---------------|--------|--------------------------------------------|-----------|--------|
| siRNA-Temozolomide Run3-DMSO | NM_0026<br>38 | PI3    | protease inhibitor 3, skin-derived (SKALP) | -1.121381 | Inlier |
| siRNA-Temozolomide Run2-DMSO | NM_0026<br>38 | PI3    | protease inhibitor 3, skin-derived (SKALP) | -0.96497  | Inlier |
| siRNA-Temozolomide Run1-DMSO | NM_0026<br>38 | PI3    | protease inhibitor 3, skin-derived (SKALP) | -0.293368 | Inlier |
| siRNA Disorazole DMSO Run1   | NM_0026<br>38 | PI3    | protease inhibitor 3, skin-derived (SKALP) | -0.039032 | Inlier |
| siRNA Disorazole DMSO Run3   | NM_0026<br>38 | PI3    | protease inhibitor 3, skin-derived (SKALP) | 0.039032  | Inlier |
| siRNA Disorazole DMSO Run2   | NM_0026<br>38 | PI3    | protease inhibitor 3, skin-derived (SKALP) | 0.38403   | Inlier |
| siRNA-Vinblastine Run2-DMSO  | NM_0026<br>38 | PI3    | protease inhibitor 3, skin-derived (SKALP) | 1.085309  | Inlier |
| siRNA-Vinblastine Run1-DMSO  | NM_0026<br>38 | PI3    | protease inhibitor 3, skin-derived (SKALP) | 2.052901  | Inlier |
| siRNA Disorazole DMSO Run2   | NM_0183<br>23 | PI4K2B | PI4K2B                                     | -1.506147 | Inlier |
| siRNA-Temozolomide Run3-DMSO | NM_0183<br>23 | PI4K2B | PI4K2B                                     | -1.077533 | Inlier |
| siRNA-Temozolomide Run1-DMSO | NM_0183<br>23 | PI4K2B | PI4K2B                                     | -0.448133 | Inlier |
| siRNA-Temozolomide Run2-DMSO | NM_0183<br>23 | PI4K2B | PI4K2B                                     | -0.160335 | Inlier |
| siRNA Disorazole DMSO Run1   | NM_0183<br>23 | PI4K2B | PI4K2B                                     | 0.160335  | Inlier |
| siRNA Disorazole DMSO Run3   | NM_0183<br>23 | PI4K2B | PI4K2B                                     | 0.263919  | Inlier |



Identification of Survival Genes in Human Glioblastoma Cells Using siRNA Screening

Nikhil G Thaker, Fang Zhang, Peter R. McDonald, Tong Ying Shun, Michael D Lewen, Ian F. Pollack, and John S.

Lazo

|                                  |               |        |                                                                                |           |         |
|----------------------------------|---------------|--------|--------------------------------------------------------------------------------|-----------|---------|
| siRNA-Vinblastine Run2-<br>DMSO  | NM_0183<br>23 | PI4K2B | PI4K2B                                                                         | 0.900867  | Inlier  |
| siRNA-Vinblastine Run1-<br>DMSO  | NM_0183<br>23 | PI4K2B | PI4K2B                                                                         | 1.24713   | Inlier  |
| siRNA Disorazole DMSO Run1       | NM_0184<br>25 | PI4KII | PI4KII                                                                         | -0.819954 | Inlier  |
| siRNA-Temozolomide Run3-<br>DMSO | NM_0184<br>25 | PI4KII | PI4KII                                                                         | -0.73685  | Inlier  |
| siRNA-Temozolomide Run1-<br>DMSO | NM_0184<br>25 | PI4KII | PI4KII                                                                         | -0.251038 | Inlier  |
| siRNA-Vinblastine Run1-<br>DMSO  | NM_0184<br>25 | PI4KII | PI4KII                                                                         | -0.241501 | Inlier  |
| siRNA Disorazole DMSO Run2       | NM_0184<br>25 | PI4KII | PI4KII                                                                         | 0.241501  | Inlier  |
| siRNA-Temozolomide Run2-<br>DMSO | NM_0184<br>25 | PI4KII | PI4KII                                                                         | 0.61215   | Inlier  |
| siRNA-Vinblastine Run2-<br>DMSO  | NM_0184<br>25 | PI4KII | PI4KII                                                                         | 1.389991  | Inlier  |
| siRNA Disorazole DMSO Run3       | NM_0184<br>25 | PI4KII | PI4KII                                                                         | 5.493733  | Outlier |
| siRNA-Temozolomide Run2-<br>DMSO | NM_0144<br>22 | PIB5PA | phosphati<br>dylinositol<br>(4,5)<br>bisphosph<br>ate 5-<br>phosphata<br>se, A | -0.808312 | Inlier  |
| siRNA-Temozolomide Run3-<br>DMSO | NM_0144<br>22 | PIB5PA | phosphati<br>dylinositol<br>(4,5)<br>bisphosph<br>ate 5-<br>phosphata<br>se, A | -0.540688 | Inlier  |
| siRNA Disorazole DMSO Run2       | NM_0144<br>22 | PIB5PA | phosphati<br>dylinositol<br>(4,5)<br>bisphosph<br>ate 5-<br>phosphata<br>se, A | -0.456167 | Inlier  |
| siRNA Disorazole DMSO Run3       | NM_0144<br>22 | PIB5PA | phosphata<br>se, A                                                             | -0.346349 | Inlier  |

Identification of Survival Genes in Human Glioblastoma Cells Using siRNA Screening

Nikhil G Thaker, Fang Zhang, Peter R. McDonald, Tong Ying Shun, Michael D Lewen, Ian F. Pollack, and John S. Lazo

Molecular Pharmacology

|                              |               |        |                                                                            |           |        |
|------------------------------|---------------|--------|----------------------------------------------------------------------------|-----------|--------|
| siRNA-Temozolomide Run1-DMSO | NM_0144<br>22 | PIB5PA | phosphatidylinositol (4,5) bisphosphate 5-phosphatase, A                   | 0.346349  | Inlier |
| siRNA Disorazole DMSO Run1   | NM_0144<br>22 | PIB5PA | phosphatidylinositol (4,5) bisphosphate 5-phosphatase, A                   | 0.817435  | Inlier |
| siRNA-Vinblastine Run2-DMSO  | NM_0144<br>22 | PIB5PA | phosphatidylinositol (4,5) bisphosphate 5-phosphatase, A                   | 1.327521  | Inlier |
| siRNA-Vinblastine Run1-DMSO  | NM_0144<br>22 | PIB5PA | phosphatidylinositol glycan, class A (paroxysmal nocturnal hemoglobinuria) | 1.540883  | Inlier |
| siRNA Disorazole DMSO Run1   | NM_0204<br>72 | PIGA   | phosphatidylinositol glycan, class A (paroxysmal nocturnal hemoglobinuria) | -2.814895 | Inlier |
| siRNA-Temozolomide Run2-DMSO | NM_0204<br>72 | PIGA   | phosphatidylinositol glycan, class A (paroxysmal nocturnal hemoglobinuria) | -1.042536 | Inlier |

Identification of Survival Genes in Human Glioblastoma Cells Using siRNA Screening

Nikhil G Thaker, Fang Zhang, Peter R. McDonald, Tong Ying Shun, Michael D Lewen, Ian F. Pollack, and John S. Lazo

Molecular Pharmacology

|                              |           |      |                                                                            |           |        |
|------------------------------|-----------|------|----------------------------------------------------------------------------|-----------|--------|
| siRNA-Temozolomide Run1-DMSO | NM_020472 | PIGA | phosphatidylinositol glycan, class A (paroxysmal nocturnal hemoglobinuria) | -0.306464 | Inlier |
| siRNA-Vinblastine Run2-DMSO  | NM_020472 | PIGA | phosphatidylinositol glycan, class A (paroxysmal nocturnal hemoglobinuria) | -0.085995 | Inlier |
| siRNA Disorazole DMSO Run2   | NM_020472 | PIGA | phosphatidylinositol glycan, class A (paroxysmal nocturnal hemoglobinuria) | 0.085995  | Inlier |
| siRNA-Temozolomide Run3-DMSO | NM_020472 | PIGA | phosphatidylinositol glycan, class A (paroxysmal nocturnal hemoglobinuria) | 0.214057  | Inlier |
| siRNA Disorazole DMSO Run3   | NM_020472 | PIGA | phosphatidylinositol glycan, class A (paroxysmal nocturnal hemoglobinuria) | 1.404775  | Inlier |

Identification of Survival Genes in Human Glioblastoma Cells Using siRNA Screening  
 Nikhil G Thaker, Fang Zhang, Peter R. McDonald, Tong Ying Shun, Michael D Lewen, Ian F. Pollack, and John S. Lazo

Molecular Pharmacology

|                              |           |      |                                                                            |           |        |
|------------------------------|-----------|------|----------------------------------------------------------------------------|-----------|--------|
| siRNA-Vinblastine Run1-DMSO  | NM_020472 | PIGA | phosphatidylinositol glycan, class A (paroxysmal nocturnal hemoglobinuria) | 2.25189   | Inlier |
| siRNA-Temozolomide Run2-DMSO | NM_153747 | PIGC | phosphatidylinositol glycan, class C                                       | -0.992117 | Inlier |
| siRNA-Vinblastine Run2-DMSO  | NM_153747 | PIGC | phosphatidylinositol glycan, class C                                       | -0.763555 | Inlier |
| siRNA Disorazole DMSO Run1   | NM_153747 | PIGC | phosphatidylinositol glycan, class C                                       | -0.585445 | Inlier |
| siRNA-Temozolomide Run1-DMSO | NM_153747 | PIGC | phosphatidylinositol glycan, class C                                       | -0.19013  | Inlier |
| siRNA Disorazole DMSO Run3   | NM_153747 | PIGC | phosphatidylinositol glycan, class C                                       | 0.190131  | Inlier |
| siRNA-Temozolomide Run3-DMSO | NM_153747 | PIGC | phosphatidylinositol glycan, class C                                       | 0.406286  | Inlier |
| siRNA Disorazole DMSO Run2   | NM_153747 | PIGC | phosphatidylinositol glycan, class C                                       | 0.764087  | Inlier |
| siRNA-Vinblastine Run1-DMSO  | NM_153747 | PIGC | phosphatidylinositol glycan, class C                                       | 1.828457  | Inlier |
| siRNA Disorazole DMSO Run1   | NM_004569 | PIGH | phosphatidylinositol glycan, class H                                       | -0.858272 | Inlier |
| siRNA-Temozolomide Run1-DMSO | NM_004569 | PIGH | phosphatidylinositol glycan, class H                                       | -0.825046 | Inlier |

Identification of Survival Genes in Human Glioblastoma Cells Using siRNA Screening  
 Nikhil G Thaker, Fang Zhang, Peter R. McDonald, Tong Ying Shun, Michael D Lewen, Ian F. Pollack, and John S. Lazo

Molecular Pharmacology

|                              |               |      |                                      |           |        |
|------------------------------|---------------|------|--------------------------------------|-----------|--------|
| siRNA-Temozolomide Run2-DMSO | NM_0045<br>69 | PIGH | phosphatidylinositol glycan, class H | -0.523954 | Inlier |
| siRNA Disorazole DMSO Run3   | NM_0045<br>69 | PIGH | phosphatidylinositol glycan, class H | -0.066834 | Inlier |
| siRNA Disorazole DMSO Run2   | NM_0045<br>69 | PIGH | phosphatidylinositol glycan, class H | 0.066833  | Inlier |
| siRNA-Temozolomide Run3-DMSO | NM_0045<br>69 | PIGH | phosphatidylinositol glycan, class H | 0.081965  | Inlier |
| siRNA-Vinblastine Run2-DMSO  | NM_0045<br>69 | PIGH | phosphatidylinositol glycan, class H | 1.284888  | Inlier |
| siRNA-Vinblastine Run1-DMSO  | NM_0045<br>69 | PIGH | phosphatidylinositol glycan, class H | 3.358615  | Inlier |
| siRNA-Temozolomide Run2-DMSO | NM_0054<br>82 | PIGK | phosphatidylinositol glycan, class K | -2.41013  | Inlier |
| siRNA-Temozolomide Run1-DMSO | NM_0054<br>82 | PIGK | phosphatidylinositol glycan, class K | -1.084854 | Inlier |
| siRNA-Temozolomide Run3-DMSO | NM_0054<br>82 | PIGK | phosphatidylinositol glycan, class K | -0.633137 | Inlier |
| siRNA Disorazole DMSO Run1   | NM_0054<br>82 | PIGK | phosphatidylinositol glycan, class K | -0.523837 | Inlier |
| siRNA Disorazole DMSO Run2   | NM_0054<br>82 | PIGK | phosphatidylinositol glycan, class K | 0.523837  | Inlier |
| siRNA Disorazole DMSO Run3   | NM_0054<br>82 | PIGK | phosphatidylinositol glycan, class K | 0.568846  | Inlier |
| siRNA-Vinblastine Run2-DMSO  | NM_0054<br>82 | PIGK | phosphatidylinositol glycan, class K | 0.715863  | Inlier |

Identification of Survival Genes in Human Glioblastoma Cells Using siRNA Screening  
 Nikhil G Thaker, Fang Zhang, Peter R. McDonald, Tong Ying Shun, Michael D Lewen, Ian F. Pollack, and John S. Lazo

Molecular Pharmacology

|                              |               |      |                                      |           |        |
|------------------------------|---------------|------|--------------------------------------|-----------|--------|
| siRNA-Vinblastine Run1-DMSO  | NM_0054<br>82 | PIGK | phosphatidylinositol glycan, class K | 1.368538  | Inlier |
| siRNA Disorazole DMSO Run1   | NM_0042<br>78 | PIGL | phosphatidylinositol glycan, class L | -0.918478 | Inlier |
| siRNA-Temozolomide Run2-DMSO | NM_0042<br>78 | PIGL | phosphatidylinositol glycan, class L | -0.714623 | Inlier |
| siRNA-Vinblastine Run2-DMSO  | NM_0042<br>78 | PIGL | phosphatidylinositol glycan, class L | -0.49026  | Inlier |
| siRNA-Temozolomide Run1-DMSO | NM_0042<br>78 | PIGL | phosphatidylinositol glycan, class L | -0.078788 | Inlier |
| siRNA Disorazole DMSO Run3   | NM_0042<br>78 | PIGL | phosphatidylinositol glycan, class L | 0.078788  | Inlier |
| siRNA-Temozolomide Run3-DMSO | NM_0042<br>78 | PIGL | phosphatidylinositol glycan, class L | 0.634377  | Inlier |
| siRNA Disorazole DMSO Run2   | NM_0042<br>78 | PIGL | phosphatidylinositol glycan, class L | 0.878967  | Inlier |
| siRNA-Vinblastine Run1-DMSO  | NM_0042<br>78 | PIGL | phosphatidylinositol glycan, class L | 1.367174  | Inlier |
| siRNA-Temozolomide Run3-DMSO | NM_0326<br>34 | PIGO | phosphatidylinositol glycan, class O | -1.19998  | Inlier |
| siRNA Disorazole DMSO Run3   | NM_0326<br>34 | PIGO | phosphatidylinositol glycan, class O | -0.657262 | Inlier |
| siRNA-Temozolomide Run2-DMSO | NM_0326<br>34 | PIGO | phosphatidylinositol glycan, class O | -0.591506 | Inlier |
| siRNA-Vinblastine Run2-DMSO  | NM_0326<br>34 | PIGO | phosphatidylinositol glycan, class O | -0.214476 | Inlier |

Identification of Survival Genes in Human Glioblastoma Cells Using siRNA Screening  
 Nikhil G Thaker, Fang Zhang, Peter R. McDonald, Tong Ying Shun, Michael D Lewen, Ian F. Pollack, and John S. Lazo

Molecular Pharmacology

|                              |               |      |                                      |           |         |
|------------------------------|---------------|------|--------------------------------------|-----------|---------|
| siRNA-Temozolomide Run1-DMSO | NM_0326<br>34 | PIGO | phosphatidylinositol glycan, class O | 0.214476  | Inlier  |
| siRNA Disorazole DMSO Run1   | NM_0326<br>34 | PIGO | phosphatidylinositol glycan, class O | 0.691738  | Inlier  |
| siRNA-Vinblastine Run1-DMSO  | NM_0326<br>34 | PIGO | phosphatidylinositol glycan, class O | 1.675209  | Inlier  |
| siRNA Disorazole DMSO Run2   | NM_0326<br>34 | PIGO | phosphatidylinositol glycan, class O | 1.681074  | Inlier  |
| siRNA-Vinblastine Run2-DMSO  | NM_1489<br>20 | PIGQ | phosphatidylinositol glycan, class Q | -0.734403 | Inlier  |
| siRNA Disorazole DMSO Run1   | NM_1489<br>20 | PIGQ | phosphatidylinositol glycan, class Q | -0.614597 | Inlier  |
| siRNA-Temozolomide Run2-DMSO | NM_1489<br>20 | PIGQ | phosphatidylinositol glycan, class Q | -0.257911 | Inlier  |
| siRNA Disorazole DMSO Run3   | NM_1489<br>20 | PIGQ | phosphatidylinositol glycan, class Q | -0.166672 | Inlier  |
| siRNA-Temozolomide Run1-DMSO | NM_1489<br>20 | PIGQ | phosphatidylinositol glycan, class Q | 0.166672  | Inlier  |
| siRNA-Temozolomide Run3-DMSO | NM_1489<br>20 | PIGQ | phosphatidylinositol glycan, class Q | 2.109318  | Inlier  |
| siRNA-Vinblastine Run1-DMSO  | NM_1489<br>20 | PIGQ | phosphatidylinositol glycan, class Q | 5.557457  | Outlier |
| siRNA Disorazole DMSO Run2   | NM_1489<br>20 | PIGQ | phosphatidylinositol glycan, class Q | 5.967189  | Outlier |
| siRNA Disorazole DMSO Run1   | NM_0026<br>44 | PIGR | polymeric immunoglobulin receptor    | -0.786967 | Inlier  |

Identification of Survival Genes in Human Glioblastoma Cells Using siRNA Screening

Nikhil G Thaker, Fang Zhang, Peter R. McDonald, Tong Ying Shun, Michael D Lewen, Ian F. Pollack, and John S. Lazo

Molecular Pharmacology

|                              |               |         |                                             |           |        |
|------------------------------|---------------|---------|---------------------------------------------|-----------|--------|
| siRNA-Vinblastine Run2-DMSO  | NM_0026<br>44 | PIGR    | polymeric immunoglobulin receptor           | -0.701635 | Inlier |
| siRNA Disorazole DMSO Run3   | NM_0026<br>44 | PIGR    | polymeric immunoglobulin receptor           | -0.647365 | Inlier |
| siRNA-Temozolomide Run3-DMSO | NM_0026<br>44 | PIGR    | polymeric immunoglobulin receptor           | -0.064078 | Inlier |
| siRNA-Temozolomide Run2-DMSO | NM_0026<br>44 | PIGR    | polymeric immunoglobulin receptor           | 0.064078  | Inlier |
| siRNA-Temozolomide Run1-DMSO | NM_0026<br>44 | PIGR    | polymeric immunoglobulin receptor           | 0.576602  | Inlier |
| siRNA Disorazole DMSO Run2   | NM_0026<br>44 | PIGR    | polymeric immunoglobulin receptor           | 2.944676  | Inlier |
| siRNA-Vinblastine Run1-DMSO  | NM_0026<br>44 | PIGR    | polymeric immunoglobulin receptor           | 3.338816  | Inlier |
| siRNA Disorazole DMSO Run2   | NM_1523<br>09 | PIK3AP1 | phosphoinositide-3-kinase adaptor protein 1 | -1.092227 | Inlier |
| siRNA-Temozolomide Run3-DMSO | NM_1523<br>09 | PIK3AP1 | phosphoinositide-3-kinase adaptor protein 1 | -0.64967  | Inlier |
| siRNA-Temozolomide Run1-DMSO | NM_1523<br>09 | PIK3AP1 | phosphoinositide-3-kinase adaptor protein 1 | -0.16838  | Inlier |
| siRNA Disorazole DMSO Run1   | NM_1523<br>09 | PIK3AP1 | phosphoinositide-3-kinase adaptor protein 1 | -0.159221 | Inlier |



Identification of Survival Genes in Human Glioblastoma Cells Using siRNA Screening

Nikhil G Thaker, Fang Zhang, Peter R. McDonald, Tong Ying Shun, Michael D Lewen, Ian F. Pollack, and John S. Lazo

Molecular Pharmacology

|                              |           |         |                                                       |           |        |
|------------------------------|-----------|---------|-------------------------------------------------------|-----------|--------|
| siRNA-Temozolomide Run2-DMSO | NM_152309 | PIK3AP1 | phosphoinositide-3-kinase adaptor protein 1           | 0.159221  | Inlier |
| siRNA-Vinblastine Run2-DMSO  | NM_152309 | PIK3AP1 | phosphoinositide-3-kinase adaptor protein 1           | 0.69933   | Inlier |
| siRNA-Vinblastine Run1-DMSO  | NM_152309 | PIK3AP1 | phosphoinositide-3-kinase adaptor protein 1           | 0.792618  | Inlier |
| siRNA Disorazole DMSO Run3   | NM_152309 | PIK3AP1 | phosphoinositide-3-kinase adaptor protein 1           | 0.925573  | Inlier |
| siRNA-Temozolomide Run3-DMSO | NM_002645 | PIK3C2A | phosphoinositide-3-kinase, class 2, alpha polypeptide | -1.451438 | Inlier |
| siRNA-Temozolomide Run1-DMSO | NM_002645 | PIK3C2A | phosphoinositide-3-kinase, class 2, alpha polypeptide | -1.383851 | Inlier |
| siRNA Disorazole DMSO Run2   | NM_002645 | PIK3C2A | phosphoinositide-3-kinase, class 2, alpha polypeptide | -1.115882 | Inlier |
| siRNA-Temozolomide Run2-DMSO | NM_002645 | PIK3C2A | phosphoinositide-3-kinase, class 2, alpha polypeptide | -0.338245 | Inlier |

Identification of Survival Genes in Human Glioblastoma Cells Using siRNA Screening

Nikhil G Thaker, Fang Zhang, Peter R. McDonald, Tong Ying Shun, Michael D Lewen, Ian F. Pollack, and John S. Lazo

Molecular Pharmacology

|                              |               |         |                                                       |           |        |
|------------------------------|---------------|---------|-------------------------------------------------------|-----------|--------|
| siRNA-Vinblastine Run1-DMSO  | NM_0026<br>45 | PIK3C2A | phosphoinositide-3-kinase, class 2, alpha polypeptide | 0.338245  | Inlier |
| siRNA Disorazole DMSO Run3   | NM_0026<br>45 | PIK3C2A | phosphoinositide-3-kinase, class 2, alpha polypeptide | 0.402786  | Inlier |
| siRNA Disorazole DMSO Run1   | NM_0026<br>45 | PIK3C2A | phosphoinositide-3-kinase, class 2, alpha polypeptide | 0.462982  | Inlier |
| siRNA-Vinblastine Run2-DMSO  | NM_0026<br>45 | PIK3C2A | phosphoinositide-3-kinase, class 2, alpha polypeptide | 0.886018  | Inlier |
| siRNA Disorazole DMSO Run2   | NM_0026<br>46 | PIK3C2B | phosphoinositide-3-kinase, class 2, beta polypeptide  | -2.259479 | Inlier |
| siRNA Disorazole DMSO Run1   | NM_0026<br>46 | PIK3C2B | phosphoinositide-3-kinase, class 2, beta polypeptide  | -0.740741 | Inlier |
| siRNA-Temozolomide Run1-DMSO | NM_0026<br>46 | PIK3C2B | phosphoinositide-3-kinase, class 2, beta polypeptide  | -0.608259 | Inlier |

Identification of Survival Genes in Human Glioblastoma Cells Using siRNA Screening  
 Nikhil G Thaker, Fang Zhang, Peter R. McDonald, Tong Ying Shun, Michael D Lewen, Ian F. Pollack, and John S. Lazo

Molecular Pharmacology

|                              |           |         |                                                       |           |         |
|------------------------------|-----------|---------|-------------------------------------------------------|-----------|---------|
| siRNA-Vinblastine Run1-DMSO  | NM_002646 | PIK3C2B | phosphoinositide-3-kinase, class 2, beta polypeptide  | -0.023071 | Inlier  |
| siRNA-Temozolomide Run3-DMSO | NM_002646 | PIK3C2B | phosphoinositide-3-kinase, class 2, beta polypeptide  | 0.023069  | Inlier  |
| siRNA-Temozolomide Run2-DMSO | NM_002646 | PIK3C2B | phosphoinositide-3-kinase, class 2, beta polypeptide  | 0.538866  | Inlier  |
| siRNA-Vinblastine Run2-DMSO  | NM_002646 | PIK3C2B | phosphoinositide-3-kinase, class 2, beta polypeptide  | 1.509503  | Inlier  |
| siRNA Disorazole DMSO Run3   | NM_002646 | PIK3C2B | phosphoinositide-3-kinase, class 2, gamma polypeptide | 6.042192  | Outlier |
| siRNA-Temozolomide Run1-DMSO | NM_004570 | PIK3C2G | phosphoinositide-3-kinase, class 2, gamma polypeptide | -1.106304 | Inlier  |
| siRNA-Vinblastine Run1-DMSO  | NM_004570 | PIK3C2G | phosphoinositide-3-kinase, class 2, gamma polypeptide | -0.378933 | Inlier  |

Identification of Survival Genes in Human Glioblastoma Cells Using siRNA Screening  
 Nikhil G Thaker, Fang Zhang, Peter R. McDonald, Tong Ying Shun, Michael D Lewen, Ian F. Pollack, and John S. Lazo

Molecular Pharmacology

|                              |               |         |                                                       |           |        |
|------------------------------|---------------|---------|-------------------------------------------------------|-----------|--------|
| siRNA-Temozolomide Run3-DMSO | NM_0045<br>70 | PIK3C2G | phosphoinositide-3-kinase, class 2, gamma polypeptide | -0.354195 | Inlier |
| siRNA Disorazole DMSO Run1   | NM_0045<br>70 | PIK3C2G | phosphoinositide-3-kinase, class 2, gamma polypeptide | -0.074899 | Inlier |
| siRNA-Temozolomide Run2-DMSO | NM_0045<br>70 | PIK3C2G | phosphoinositide-3-kinase, class 2, gamma polypeptide | 0.074899  | Inlier |
| siRNA-Vinblastine Run2-DMSO  | NM_0045<br>70 | PIK3C2G | phosphoinositide-3-kinase, class 2, gamma polypeptide | 0.970067  | Inlier |
| siRNA Disorazole DMSO Run2   | NM_0045<br>70 | PIK3C2G | phosphoinositide-3-kinase, class 2, gamma polypeptide | 1.279225  | Inlier |
| siRNA Disorazole DMSO Run3   | NM_0045<br>70 | PIK3C2G | phosphoinositide-3-kinase, class 2, gamma polypeptide | 3.352361  | Inlier |
| siRNA-Temozolomide Run3-DMSO | NM_0026<br>47 | PIK3C3  | phosphoinositide-3-kinase, class 3                    | -2.581451 | Inlier |
| siRNA-Temozolomide Run2-DMSO | NM_0026<br>47 | PIK3C3  | phosphoinositide-3-kinase, class 3                    | -1.518843 | Inlier |

Identification of Survival Genes in Human Glioblastoma Cells Using siRNA Screening  
 Nikhil G Thaker, Fang Zhang, Peter R. McDonald, Tong Ying Shun, Michael D Lewen, Ian F. Pollack, and John S. Lazo

Molecular Pharmacology

|                              |               |        |                                                         |           |        |
|------------------------------|---------------|--------|---------------------------------------------------------|-----------|--------|
| siRNA-Temozolomide Run1-DMSO | NM_0026<br>47 | PIK3C3 | phosphoinositide-3-kinase, class 3                      | -0.801781 | Inlier |
| siRNA Disorazole DMSO Run2   | NM_0026<br>47 | PIK3C3 | phosphoinositide-3-kinase, class 3                      | -0.282235 | Inlier |
| siRNA Disorazole DMSO Run1   | NM_0026<br>47 | PIK3C3 | phosphoinositide-3-kinase, class 3                      | 0.282236  | Inlier |
| siRNA Disorazole DMSO Run3   | NM_0026<br>47 | PIK3C3 | phosphoinositide-3-kinase, class 3                      | 0.587059  | Inlier |
| siRNA-Vinblastine Run2-DMSO  | NM_0026<br>47 | PIK3C3 | phosphoinositide-3-kinase, class 3                      | 0.628019  | Inlier |
| siRNA-Vinblastine Run1-DMSO  | NM_0026<br>47 | PIK3C3 | phosphoinositide-3-kinase, class 3                      | 0.720981  | Inlier |
| siRNA-Temozolomide Run3-DMSO | NM_0062<br>18 | PIK3CA | phosphoinositide-3-kinase, catalytic, alpha polypeptide | -0.86009  | Inlier |
| siRNA-Temozolomide Run1-DMSO | NM_0062<br>18 | PIK3CA | phosphoinositide-3-kinase, catalytic, alpha polypeptide | -0.715648 | Inlier |
| siRNA-Temozolomide Run2-DMSO | NM_0062<br>18 | PIK3CA | phosphoinositide-3-kinase, catalytic, alpha polypeptide | -0.633352 | Inlier |
| siRNA Disorazole DMSO Run1   | NM_0062<br>18 | PIK3CA | phosphoinositide-3-kinase, catalytic, alpha polypeptide | -0.27471  | Inlier |

Identification of Survival Genes in Human Glioblastoma Cells Using siRNA Screening

Nikhil G Thaker, Fang Zhang, Peter R. McDonald, Tong Ying Shun, Michael D Lewen, Ian F. Pollack, and John S. Lazo

Molecular Pharmacology

|                              |               |        |                                                         |           |        |
|------------------------------|---------------|--------|---------------------------------------------------------|-----------|--------|
| siRNA Disorazole DMSO Run2   | NM_0062<br>18 | PIK3CA | phosphoinositide-3-kinase, catalytic, alpha polypeptide | 0.27471   | Inlier |
| siRNA Disorazole DMSO Run3   | NM_0062<br>18 | PIK3CA | phosphoinositide-3-kinase, catalytic, alpha polypeptide | 0.557964  | Inlier |
| siRNA-Vinblastine Run2-DMSO  | NM_0062<br>18 | PIK3CA | phosphoinositide-3-kinase, catalytic, alpha polypeptide | 0.788421  | Inlier |
| siRNA-Vinblastine Run1-DMSO  | NM_0062<br>18 | PIK3CA | phosphoinositide-3-kinase, catalytic, alpha polypeptide | 0.909921  | Inlier |
| siRNA-Temozolomide Run3-DMSO | NM_0062<br>19 | PIK3CB | phosphoinositide-3-kinase, catalytic, beta polypeptide  | -2.0978   | Inlier |
| siRNA-Temozolomide Run2-DMSO | NM_0062<br>19 | PIK3CB | phosphoinositide-3-kinase, catalytic, beta polypeptide  | -0.933736 | Inlier |
| siRNA Disorazole DMSO Run1   | NM_0062<br>19 | PIK3CB | phosphoinositide-3-kinase, catalytic, beta polypeptide  | -0.415264 | Inlier |

Identification of Survival Genes in Human Glioblastoma Cells Using siRNA Screening

Nikhil G Thaker, Fang Zhang, Peter R. McDonald, Tong Ying Shun, Michael D Lewen, Ian F. Pollack, and John S. Lazo

Molecular Pharmacology

|                              |               |        |                                                         |           |        |
|------------------------------|---------------|--------|---------------------------------------------------------|-----------|--------|
| siRNA-Temozolomide Run1-DMSO | NM_0062<br>19 | PIK3CB | phosphoinositide-3-kinase, catalytic, beta polypeptide  | -0.288318 | Inlier |
| siRNA Disorazole DMSO Run2   | NM_0062<br>19 | PIK3CB | phosphoinositide-3-kinase, catalytic, beta polypeptide  | 0.288318  | Inlier |
| siRNA Disorazole DMSO Run3   | NM_0062<br>19 | PIK3CB | phosphoinositide-3-kinase, catalytic, beta polypeptide  | 0.408647  | Inlier |
| siRNA-Vinblastine Run2-DMSO  | NM_0062<br>19 | PIK3CB | phosphoinositide-3-kinase, catalytic, beta polypeptide  | 1.068328  | Inlier |
| siRNA-Vinblastine Run1-DMSO  | NM_0062<br>19 | PIK3CB | phosphoinositide-3-kinase, catalytic, beta polypeptide  | 1.254709  | Inlier |
| siRNA-Temozolomide Run3-DMSO | NM_0050<br>26 | PIK3CD | phosphoinositide-3-kinase, catalytic, delta polypeptide | -1.42375  | Inlier |
| siRNA-Temozolomide Run1-DMSO | NM_0050<br>26 | PIK3CD | phosphoinositide-3-kinase, catalytic, delta polypeptide | -0.685568 | Inlier |

Identification of Survival Genes in Human Glioblastoma Cells Using siRNA Screening  
 Nikhil G Thaker, Fang Zhang, Peter R. McDonald, Tong Ying Shun, Michael D Lewen, Ian F. Pollack, and John S. Lazo

Molecular Pharmacology

|                              |               |        |                                                         |           |        |
|------------------------------|---------------|--------|---------------------------------------------------------|-----------|--------|
| siRNA Disorazole DMSO Run2   | NM_0050<br>26 | PIK3CD | phosphoinositide-3-kinase, catalytic, delta polypeptide | -0.663432 | Inlier |
| siRNA-Temozolomide Run2-DMSO | NM_0050<br>26 | PIK3CD | phosphoinositide-3-kinase, catalytic, delta polypeptide | -0.260185 | Inlier |
| siRNA-Vinblastine Run1-DMSO  | NM_0050<br>26 | PIK3CD | phosphoinositide-3-kinase, catalytic, delta polypeptide | 0.260184  | Inlier |
| siRNA Disorazole DMSO Run1   | NM_0050<br>26 | PIK3CD | phosphoinositide-3-kinase, catalytic, delta polypeptide | 0.462055  | Inlier |
| siRNA-Vinblastine Run2-DMSO  | NM_0050<br>26 | PIK3CD | phosphoinositide-3-kinase, catalytic, delta polypeptide | 1.084593  | Inlier |
| siRNA Disorazole DMSO Run3   | NM_0050<br>26 | PIK3CD | phosphoinositide-3-kinase, catalytic, delta polypeptide | 2.510547  | Inlier |
| siRNA-Temozolomide Run3-DMSO | NM_0026<br>49 | PIK3CG | phosphoinositide-3-kinase, catalytic, gamma polypeptide | -0.705678 | Inlier |



Identification of Survival Genes in Human Glioblastoma Cells Using siRNA Screening  
 Nikhil G Thaker, Fang Zhang, Peter R. McDonald, Tong Ying Shun, Michael D Lewen, Ian F. Pollack, and John S. Lazo

Molecular Pharmacology

|                              |           |        |                                                         |           |        |
|------------------------------|-----------|--------|---------------------------------------------------------|-----------|--------|
| siRNA-Temozolomide Run2-DMSO | NM_002649 | PIK3CG | phosphoinositide-3-kinase, catalytic, gamma polypeptide | -0.643322 | Inlier |
| siRNA-Temozolomide Run1-DMSO | NM_002649 | PIK3CG | phosphoinositide-3-kinase, catalytic, gamma polypeptide | -0.405634 | Inlier |
| siRNA Disorazole DMSO Run1   | NM_002649 | PIK3CG | phosphoinositide-3-kinase, catalytic, gamma polypeptide | -0.013345 | Inlier |
| siRNA Disorazole DMSO Run3   | NM_002649 | PIK3CG | phosphoinositide-3-kinase, catalytic, gamma polypeptide | 0.013345  | Inlier |
| siRNA Disorazole DMSO Run2   | NM_002649 | PIK3CG | phosphoinositide-3-kinase, catalytic, gamma polypeptide | 0.990874  | Inlier |
| siRNA-Vinblastine Run2-DMSO  | NM_002649 | PIK3CG | phosphoinositide-3-kinase, catalytic, gamma polypeptide | 1.256901  | Inlier |
| siRNA-Vinblastine Run1-DMSO  | NM_002649 | PIK3CG | phosphoinositide-3-kinase, catalytic, gamma polypeptide | 1.458541  | Inlier |

Identification of Survival Genes in Human Glioblastoma Cells Using siRNA Screening

Nikhil G Thaker, Fang Zhang, Peter R. McDonald, Tong Ying Shun, Michael D Lewen, Ian F. Pollack, and John S. Lazo

Molecular Pharmacology

|                              |               |        |                                                             |           |        |
|------------------------------|---------------|--------|-------------------------------------------------------------|-----------|--------|
| siRNA-Temozolomide Run3-DMSO | NM_1815<br>24 | PIK3R1 | phosphoinositide-3-kinase, regulatory subunit 1 (p85 alpha) | -1.964072 | Inlier |
| siRNA Disorazole DMSO Run2   | NM_1815<br>24 | PIK3R1 | phosphoinositide-3-kinase, regulatory subunit 1 (p85 alpha) | -1.254555 | Inlier |
| siRNA Disorazole DMSO Run1   | NM_1815<br>24 | PIK3R1 | phosphoinositide-3-kinase, regulatory subunit 1 (p85 alpha) | -0.035764 | Inlier |
| siRNA-Vinblastine Run1-DMSO  | NM_1815<br>24 | PIK3R1 | phosphoinositide-3-kinase, regulatory subunit 1 (p85 alpha) | -0.019925 | Inlier |
| siRNA-Temozolomide Run2-DMSO | NM_1815<br>24 | PIK3R1 | phosphoinositide-3-kinase, regulatory subunit 1 (p85 alpha) | 0.019925  | Inlier |
| siRNA-Temozolomide Run1-DMSO | NM_1815<br>24 | PIK3R1 | phosphoinositide-3-kinase, regulatory subunit 1 (p85 alpha) | 0.190431  | Inlier |
| siRNA-Vinblastine Run2-DMSO  | NM_1815<br>24 | PIK3R1 | phosphoinositide-3-kinase, regulatory subunit 1 (p85 alpha) | 1.158569  | Inlier |

Identification of Survival Genes in Human Glioblastoma Cells Using siRNA Screening

Nikhil G Thaker, Fang Zhang, Peter R. McDonald, Tong Ying Shun, Michael D Lewen, Ian F. Pollack, and John S. Lazo

Molecular Pharmacology

|                              |               |        |                                                             |           |        |
|------------------------------|---------------|--------|-------------------------------------------------------------|-----------|--------|
| siRNA Disorazole DMSO Run3   | NM_1815<br>24 | PIK3R1 | phosphoinositide-3-kinase, regulatory subunit 1 (p85 alpha) | 1.761987  | Inlier |
| siRNA-Temozolomide Run3-DMSO | NM_0050<br>27 | PIK3R2 | phosphoinositide-3-kinase, regulatory subunit 2 (p85 beta)  | -1.41323  | Inlier |
| siRNA Disorazole DMSO Run2   | NM_0050<br>27 | PIK3R2 | phosphoinositide-3-kinase, regulatory subunit 2 (p85 beta)  | -1.081468 | Inlier |
| siRNA-Temozolomide Run2-DMSO | NM_0050<br>27 | PIK3R2 | phosphoinositide-3-kinase, regulatory subunit 2 (p85 beta)  | -0.425983 | Inlier |
| siRNA-Temozolomide Run1-DMSO | NM_0050<br>27 | PIK3R2 | phosphoinositide-3-kinase, regulatory subunit 2 (p85 beta)  | -0.418455 | Inlier |
| siRNA Disorazole DMSO Run1   | NM_0050<br>27 | PIK3R2 | phosphoinositide-3-kinase, regulatory subunit 2 (p85 beta)  | 0.418455  | Inlier |
| siRNA-Vinblastine Run1-DMSO  | NM_0050<br>27 | PIK3R2 | phosphoinositide-3-kinase, regulatory subunit 2 (p85 beta)  | 0.481013  | Inlier |
| siRNA-Vinblastine Run2-DMSO  | NM_0050<br>27 | PIK3R2 | phosphoinositide-3-kinase, regulatory subunit 2 (p85 beta)  | 0.867987  | Inlier |

Identification of Survival Genes in Human Glioblastoma Cells Using siRNA Screening  
 Nikhil G Thaker, Fang Zhang, Peter R. McDonald, Tong Ying Shun, Michael D Lewen, Ian F. Pollack, and John S. Lazo

Molecular Pharmacology

| siRNA Treatment              | Gene    | Gene ID | Gene Name                                                    | Value     | Outlier Status |
|------------------------------|---------|---------|--------------------------------------------------------------|-----------|----------------|
| siRNA Disorazole DMSO Run3   | NM_0050 | PIK3R2  | phosphoinositide-3-kinase, regulatory subunit 2 (p85 beta)   | 1.490601  | Inlier         |
| siRNA Disorazole DMSO Run2   | NM_0036 | PIK3R3  | phosphoinositide-3-kinase, regulatory subunit 3 (p55, gamma) | -1.352561 | Inlier         |
| siRNA-Temozolomide Run3-DMSO | NM_0036 | PIK3R3  | phosphoinositide-3-kinase, regulatory subunit 3 (p55, gamma) | -1.236277 | Inlier         |
| siRNA-Temozolomide Run1-DMSO | NM_0036 | PIK3R3  | phosphoinositide-3-kinase, regulatory subunit 3 (p55, gamma) | -0.474394 | Inlier         |
| siRNA-Temozolomide Run2-DMSO | NM_0036 | PIK3R3  | phosphoinositide-3-kinase, regulatory subunit 3 (p55, gamma) | -0.248681 | Inlier         |
| siRNA Disorazole DMSO Run1   | NM_0036 | PIK3R3  | phosphoinositide-3-kinase, regulatory subunit 3 (p55, gamma) | 0.248681  | Inlier         |
| siRNA-Vinblastine Run1-DMSO  | NM_0036 | PIK3R3  | phosphoinositide-3-kinase, regulatory subunit 3 (p55, gamma) | 0.297048  | Inlier         |

Identification of Survival Genes in Human Glioblastoma Cells Using siRNA Screening  
 Nikhil G Thaker, Fang Zhang, Peter R. McDonald, Tong Ying Shun, Michael D Lewen, Ian F. Pollack, and John S. Lazo

Molecular Pharmacology

|                              |               |        |                                                              |           |        |
|------------------------------|---------------|--------|--------------------------------------------------------------|-----------|--------|
| siRNA Disorazole DMSO Run3   | NM_0036<br>29 | PIK3R3 | phosphoinositide-3-kinase, regulatory subunit 3 (p55, gamma) | 0.874606  | Inlier |
| siRNA-Vinblastine Run2-DMSO  | NM_0036<br>29 | PIK3R3 | phosphoinositide-3-kinase, regulatory subunit 3 (p55, gamma) | 0.905736  | Inlier |
| siRNA-Temozolomide Run3-DMSO | NM_0146<br>02 | PIK3R4 | phosphoinositide-3-kinase, regulatory subunit 4, p150        | -1.507835 | Inlier |
| siRNA Disorazole DMSO Run2   | NM_0146<br>02 | PIK3R4 | phosphoinositide-3-kinase, regulatory subunit 4, p150        | -0.298881 | Inlier |
| siRNA Disorazole DMSO Run3   | NM_0146<br>02 | PIK3R4 | phosphoinositide-3-kinase, regulatory subunit 4, p150        | -0.133777 | Inlier |
| siRNA-Temozolomide Run1-DMSO | NM_0146<br>02 | PIK3R4 | phosphoinositide-3-kinase, regulatory subunit 4, p150        | -0.000192 | Inlier |
| siRNA-Temozolomide Run2-DMSO | NM_0146<br>02 | PIK3R4 | phosphoinositide-3-kinase, regulatory subunit 4, p150        | 0.000192  | Inlier |
| siRNA Disorazole DMSO Run1   | NM_0146<br>02 | PIK3R4 | phosphoinositide-3-kinase, regulatory subunit 4, p150        | 1.050119  | Inlier |

Identification of Survival Genes in Human Glioblastoma Cells Using siRNA Screening

Nikhil G Thaker, Fang Zhang, Peter R. McDonald, Tong Ying Shun, Michael D Lewen, Ian F. Pollack, and John S. Lazo

Molecular Pharmacology

|                              |           |        |                                                             |           |        |
|------------------------------|-----------|--------|-------------------------------------------------------------|-----------|--------|
| siRNA-Vinblastine Run1-DMSO  | NM_014602 | PIK3R4 | phosphoinositide-3-kinase, regulatory subunit 4, p150       | 1.176055  | Inlier |
| siRNA-Vinblastine Run2-DMSO  | NM_014602 | PIK3R4 | phosphoinositide-3-kinase, regulatory subunit 4, p150       | 1.214362  | Inlier |
| siRNA-Temozolomide Run2-DMSO | NM_058004 | PIK4CA | phosphatidylinositol 4-kinase, catalytic, alpha polypeptide | -1.513421 | Inlier |
| siRNA-Temozolomide Run3-DMSO | NM_058004 | PIK4CA | phosphatidylinositol 4-kinase, catalytic, alpha polypeptide | -0.90894  | Inlier |
| siRNA-Temozolomide Run1-DMSO | NM_058004 | PIK4CA | phosphatidylinositol 4-kinase, catalytic, alpha polypeptide | -0.44006  | Inlier |
| siRNA-Vinblastine Run1-DMSO  | NM_058004 | PIK4CA | phosphatidylinositol 4-kinase, catalytic, alpha polypeptide | -0.254629 | Inlier |
| siRNA Disorazole DMSO Run2   | NM_058004 | PIK4CA | phosphatidylinositol 4-kinase, catalytic, alpha polypeptide | 0.254628  | Inlier |

Identification of Survival Genes in Human Glioblastoma Cells Using siRNA Screening  
 Nikhil G Thaker, Fang Zhang, Peter R. McDonald, Tong Ying Shun, Michael D Lewen, Ian F. Pollack, and John S. Lazo

Molecular Pharmacology

|                              |               |        |                                                             |           |        |
|------------------------------|---------------|--------|-------------------------------------------------------------|-----------|--------|
| siRNA Disorazole DMSO Run1   | NM_0580<br>04 | PIK4CA | phosphatidylinositol 4-kinase, catalytic, alpha polypeptide | 0.290377  | Inlier |
| siRNA-Vinblastine Run2-DMSO  | NM_0580<br>04 | PIK4CA | phosphatidylinositol 4-kinase, catalytic, alpha polypeptide | 1.088126  | Inlier |
| siRNA Disorazole DMSO Run3   | NM_0580<br>04 | PIK4CA | phosphatidylinositol 4-kinase, catalytic, alpha polypeptide | 3.176092  | Inlier |
| siRNA-Temozolomide Run3-DMSO | NM_0026<br>51 | PIK4CB | phosphatidylinositol 4-kinase, catalytic, beta polypeptide  | -1.197442 | Inlier |
| siRNA Disorazole DMSO Run2   | NM_0026<br>51 | PIK4CB | phosphatidylinositol 4-kinase, catalytic, beta polypeptide  | -1.008361 | Inlier |
| siRNA-Temozolomide Run1-DMSO | NM_0026<br>51 | PIK4CB | phosphatidylinositol 4-kinase, catalytic, beta polypeptide  | -0.349314 | Inlier |
| siRNA-Temozolomide Run2-DMSO | NM_0026<br>51 | PIK4CB | phosphatidylinositol 4-kinase, catalytic, beta polypeptide  | -0.226399 | Inlier |

Identification of Survival Genes in Human Glioblastoma Cells Using siRNA Screening  
 Nikhil G Thaker, Fang Zhang, Peter R. McDonald, Tong Ying Shun, Michael D Lewen, Ian F. Pollack, and John S. Lazo

Molecular Pharmacology

|                              |               |        |                                                            |           |        |
|------------------------------|---------------|--------|------------------------------------------------------------|-----------|--------|
| siRNA Disorazole DMSO Run1   | NM_0026<br>51 | PIK4CB | phosphatidylinositol 4-kinase, catalytic, beta polypeptide | 0.226399  | Inlier |
| siRNA-Vinblastine Run2-DMSO  | NM_0026<br>51 | PIK4CB | phosphatidylinositol 4-kinase, catalytic, beta polypeptide | 0.594872  | Inlier |
| siRNA-Vinblastine Run1-DMSO  | NM_0026<br>51 | PIK4CB | phosphatidylinositol 4-kinase, catalytic, beta polypeptide | 0.754128  | Inlier |
| siRNA Disorazole DMSO Run3   | NM_0026<br>51 | PIK4CB | phosphatidylinositol 4-kinase, catalytic, beta polypeptide | 1.061017  | Inlier |
| siRNA Disorazole DMSO Run2   | NM_0026<br>48 | PIM1   | pim-1 oncogene                                             | -0.835775 | Inlier |
| siRNA Disorazole DMSO Run3   | NM_0026<br>48 | PIM1   | pim-1 oncogene                                             | -0.64393  | Inlier |
| siRNA-Temozolomide Run3-DMSO | NM_0026<br>48 | PIM1   | pim-1 oncogene                                             | -0.577268 | Inlier |
| siRNA-Temozolomide Run2-DMSO | NM_0026<br>48 | PIM1   | pim-1 oncogene                                             | -0.306434 | Inlier |
| siRNA-Temozolomide Run1-DMSO | NM_0026<br>48 | PIM1   | pim-1 oncogene                                             | 0.306434  | Inlier |
| siRNA Disorazole DMSO Run1   | NM_0026<br>48 | PIM1   | pim-1 oncogene                                             | 0.70507   | Inlier |
| siRNA-Vinblastine Run2-DMSO  | NM_0026<br>48 | PIM1   | pim-1 oncogene                                             | 1.134937  | Inlier |
| siRNA-Vinblastine Run1-DMSO  | NM_0026<br>48 | PIM1   | pim-1 oncogene                                             | 1.290268  | Inlier |
| siRNA-Temozolomide Run3-DMSO | NM_0068<br>75 | PIM2   | pim-2 oncogene                                             | -1.343486 | Inlier |
| siRNA Disorazole DMSO Run3   | NM_0068<br>75 | PIM2   | pim-2 oncogene                                             | -0.500007 | Inlier |
| siRNA-Temozolomide Run2-DMSO | NM_0068<br>75 | PIM2   | pim-2 oncogene                                             | -0.302002 | Inlier |
| siRNA Disorazole DMSO Run2   | NM_0068<br>75 | PIM2   | pim-2 oncogene                                             | -0.208578 | Inlier |



Identification of Survival Genes in Human Glioblastoma Cells Using siRNA Screening

Nikhil G Thaker, Fang Zhang, Peter R. McDonald, Tong Ying Shun, Michael D Lewen, Ian F. Pollack, and John S. Lazo

|                                  |               |      |                                                                                     |           |        |
|----------------------------------|---------------|------|-------------------------------------------------------------------------------------|-----------|--------|
| siRNA-Temozolomide Run1-<br>DMSO | NM_0068<br>75 | PIM2 | pim-2<br>oncogene                                                                   | 0.208578  | Inlier |
| siRNA Disorazole DMSO Run1       | NM_0068<br>75 | PIM2 | pim-2<br>oncogene                                                                   | 0.848993  | Inlier |
| siRNA-Vinblastine Run1-<br>DMSO  | NM_0068<br>75 | PIM2 | pim-2<br>oncogene                                                                   | 2.226556  | Inlier |
| siRNA-Vinblastine Run2-<br>DMSO  | NM_0068<br>75 | PIM2 | pim-2<br>oncogene                                                                   | 2.24169   | Inlier |
|                                  |               |      | protein<br>(peptidyl-<br>prolyl<br>cis/trans<br>isomerase<br>) NIMA-<br>interacting |           |        |
| siRNA Disorazole DMSO Run1       | NM_0062<br>21 | PIN1 | 1                                                                                   | -1.291753 | Inlier |
|                                  |               |      | protein<br>(peptidyl-<br>prolyl<br>cis/trans<br>isomerase<br>) NIMA-<br>interacting |           |        |
| siRNA-Temozolomide Run3-<br>DMSO | NM_0062<br>21 | PIN1 | 1                                                                                   | -1.009475 | Inlier |
|                                  |               |      | protein<br>(peptidyl-<br>prolyl<br>cis/trans<br>isomerase<br>) NIMA-<br>interacting |           |        |
| siRNA-Temozolomide Run2-<br>DMSO | NM_0062<br>21 | PIN1 | 1                                                                                   | -0.471246 | Inlier |
|                                  |               |      | protein<br>(peptidyl-<br>prolyl<br>cis/trans<br>isomerase<br>) NIMA-<br>interacting |           |        |
| siRNA Disorazole DMSO Run3       | NM_0062<br>21 | PIN1 | 1                                                                                   | -0.44652  | Inlier |
|                                  |               |      | protein<br>(peptidyl-<br>prolyl<br>cis/trans<br>isomerase<br>) NIMA-<br>interacting |           |        |
| siRNA-Vinblastine Run2-<br>DMSO  | NM_0062<br>21 | PIN1 | 1                                                                                   | 0.44652   | Inlier |

Identification of Survival Genes in Human Glioblastoma Cells Using siRNA Screening

Nikhil G Thaker, Fang Zhang, Peter R. McDonald, Tong Ying Shun, Michael D Lewen, Ian F. Pollack, and John S. Lazo

Molecular Pharmacology

|                              |               |       |                                                                                               |           |        |
|------------------------------|---------------|-------|-----------------------------------------------------------------------------------------------|-----------|--------|
| siRNA-Vinblastine Run1-DMSO  | NM_0062<br>21 | PIN1  | protein<br>(peptidyl-<br>prolyl<br>cis/trans<br>isomerase<br>) NIMA-<br>interacting<br>1      | 0.481797  | Inlier |
| siRNA-Temozolomide Run1-DMSO | NM_0062<br>21 | PIN1  | protein<br>(peptidyl-<br>prolyl<br>cis/trans<br>isomerase<br>) NIMA-<br>interacting<br>1      | 0.867203  | Inlier |
| siRNA Disorazole DMSO Run2   | NM_0062<br>21 | PIN1  | protein<br>(peptidyl-<br>prolyl<br>cis/trans<br>isomerase<br>) NIMA-<br>interacting<br>1      | 1.206132  | Inlier |
| siRNA Disorazole DMSO Run3   | NM_0062<br>22 | PIN1L | protein<br>(peptidyl-<br>prolyl<br>cis/trans<br>isomerase<br>) NIMA-<br>interacting<br>1-like | -0.7249   | Inlier |
| siRNA Disorazole DMSO Run1   | NM_0062<br>22 | PIN1L | protein<br>(peptidyl-<br>prolyl<br>cis/trans<br>isomerase<br>) NIMA-<br>interacting<br>1-like | -0.6241   | Inlier |
| siRNA-Temozolomide Run1-DMSO | NM_0062<br>22 | PIN1L | protein<br>(peptidyl-<br>prolyl<br>cis/trans<br>isomerase<br>) NIMA-<br>interacting<br>1-like | -0.359346 | Inlier |

Identification of Survival Genes in Human Glioblastoma Cells Using siRNA Screening

Nikhil G Thaker, Fang Zhang, Peter R. McDonald, Tong Ying Shun, Michael D Lewen, Ian F. Pollack, and John S. Lazo

Molecular Pharmacology

|                              |               |       |                                                                                               |           |         |
|------------------------------|---------------|-------|-----------------------------------------------------------------------------------------------|-----------|---------|
| siRNA-Temozolomide Run3-DMSO | NM_0062<br>22 | PIN1L | protein<br>(peptidyl-<br>prolyl<br>cis/trans<br>isomerase<br>) NIMA-<br>interacting<br>1-like | -0.015586 | Inlier  |
| siRNA-Vinblastine Run2-DMSO  | NM_0062<br>22 | PIN1L | protein<br>(peptidyl-<br>prolyl<br>cis/trans<br>isomerase<br>) NIMA-<br>interacting<br>1-like | 0.015588  | Inlier  |
| siRNA-Vinblastine Run1-DMSO  | NM_0062<br>22 | PIN1L | protein<br>(peptidyl-<br>prolyl<br>cis/trans<br>isomerase<br>) NIMA-<br>interacting<br>1-like | 1.043261  | Inlier  |
| siRNA-Temozolomide Run2-DMSO | NM_0062<br>22 | PIN1L | protein<br>(peptidyl-<br>prolyl<br>cis/trans<br>isomerase<br>) NIMA-<br>interacting<br>1-like | 1.964669  | Inlier  |
| siRNA Disorazole DMSO Run2   | NM_0062<br>22 | PIN1L | protein<br>(peptidyl-<br>prolyl<br>cis/trans<br>isomerase<br>) NIMA-<br>interacting<br>1-like | 3.516331  | Outlier |
| siRNA Disorazole DMSO Run3   | NM_0062<br>23 | PIN4  | , 4<br>(parvulin)                                                                             | -0.890448 | Inlier  |

Identification of Survival Genes in Human Glioblastoma Cells Using siRNA Screening

Nikhil G Thaker, Fang Zhang, Peter R. McDonald, Tong Ying Shun, Michael D Lewen, Ian F. Pollack, and John S. Lazo

Molecular Pharmacology

| siRNA              | Condition | Run  | Gene ID   | Gene Name                                                                               | Score     | Outlier Status |
|--------------------|-----------|------|-----------|-----------------------------------------------------------------------------------------|-----------|----------------|
| siRNA Disorazole   | DMSO      | Run1 | NM_006223 | PIN4<br>protein (peptidyl-prolyl cis/trans isomerase) ) NIMA-interacting , 4 (parvulin) | -0.514178 | Inlier         |
| siRNA-Vinblastine  | Run2-DMSO |      | NM_006223 | PIN4<br>protein (peptidyl-prolyl cis/trans isomerase) ) NIMA-interacting , 4 (parvulin) | -0.33236  | Inlier         |
| siRNA-Vinblastine  | Run1-DMSO |      | NM_006223 | PIN4<br>protein (peptidyl-prolyl cis/trans isomerase) ) NIMA-interacting , 4 (parvulin) | -0.313325 | Inlier         |
| siRNA-Temozolomide | Run1-DMSO |      | NM_006223 | PIN4<br>protein (peptidyl-prolyl cis/trans isomerase) ) NIMA-interacting , 4 (parvulin) | 0.313325  | Inlier         |
| siRNA Disorazole   | DMSO      | Run2 | NM_006223 | PIN4<br>protein (parvulin)                                                              | 0.834822  | Inlier         |



Identification of Survival Genes in Human Glioblastoma Cells Using siRNA Screening

Nikhil G Thaker, Fang Zhang, Peter R. McDonald, Tong Ying Shun, Michael D Lewen, Ian F. Pollack, and John S. Lazo

Molecular Pharmacology

|                              |           |        |                                                     |           |        |
|------------------------------|-----------|--------|-----------------------------------------------------|-----------|--------|
| siRNA-Temozolomide Run3-DMSO | NM_019061 | PIP3AP | phosphatidylinositol-3-phosphate associated protein | -1.940643 | Inlier |
| siRNA-Temozolomide Run2-DMSO | NM_019061 | PIP3AP | phosphatidylinositol-3-phosphate associated protein | -0.922799 | Inlier |
| siRNA-Vinblastine Run2-DMSO  | NM_019061 | PIP3AP | phosphatidylinositol-3-phosphate associated protein | -0.703321 | Inlier |
| siRNA Disorazole DMSO Run1   | NM_019061 | PIP3AP | phosphatidylinositol-3-phosphate associated protein | -0.399976 | Inlier |
| siRNA Disorazole DMSO Run2   | NM_019061 | PIP3AP | phosphatidylinositol-3-phosphate associated protein | 0.399975  | Inlier |
| siRNA-Vinblastine Run1-DMSO  | NM_019061 | PIP3AP | phosphatidylinositol-3-phosphate associated protein | 0.570079  | Inlier |
| siRNA-Temozolomide Run1-DMSO | NM_019061 | PIP3AP | phosphatidylinositol-3-phosphate associated protein | 0.645679  | Inlier |

Identification of Survival Genes in Human Glioblastoma Cells Using siRNA Screening  
 Nikhil G Thaker, Fang Zhang, Peter R. McDonald, Tong Ying Shun, Michael D Lewen, Ian F. Pollack, and John S. Lazo  
 Molecular Pharmacology

|                              |               |         |                                                          |           |        |
|------------------------------|---------------|---------|----------------------------------------------------------|-----------|--------|
| siRNA Disorazole DMSO Run3   | NM_0190<br>61 | PIP3AP  | phosphatidylinositol-3-phosphate associated protein      | 1.929016  | Inlier |
| siRNA-Vinblastine Run1-DMSO  | NM_0035<br>57 | PIP5K1A | phosphatidylinositol-4-phosphate 5-kinase, type I, alpha | -0.680947 | Inlier |
| siRNA-Temozolomide Run1-DMSO | NM_0035<br>57 | PIP5K1A | phosphatidylinositol-4-phosphate 5-kinase, type I, alpha | -0.668053 | Inlier |
| siRNA Disorazole DMSO Run1   | NM_0035<br>57 | PIP5K1A | phosphatidylinositol-4-phosphate 5-kinase, type I, alpha | -0.31224  | Inlier |
| siRNA-Temozolomide Run2-DMSO | NM_0035<br>57 | PIP5K1A | phosphatidylinositol-4-phosphate 5-kinase, type I, alpha | -0.001464 | Inlier |
| siRNA-Temozolomide Run3-DMSO | NM_0035<br>57 | PIP5K1A | phosphatidylinositol-4-phosphate 5-kinase, type I, alpha | 0.001463  | Inlier |

Identification of Survival Genes in Human Glioblastoma Cells Using siRNA Screening  
 Nikhil G Thaker, Fang Zhang, Peter R. McDonald, Tong Ying Shun, Michael D Lewen, Ian F. Pollack, and John S. Lazo  
 Molecular Pharmacology

|                              |               |         |                                                          |           |         |
|------------------------------|---------------|---------|----------------------------------------------------------|-----------|---------|
| siRNA Disorazole DMSO Run2   | NM_0035<br>57 | PIP5K1A | phosphatidylinositol-4-phosphate 5-kinase, type I, alpha | 1.306757  | Inlier  |
| siRNA-Vinblastine Run2-DMSO  | NM_0035<br>57 | PIP5K1A | phosphatidylinositol-4-phosphate 5-kinase, type I, alpha | 1.600042  | Inlier  |
| siRNA Disorazole DMSO Run3   | NM_0035<br>57 | PIP5K1A | phosphatidylinositol-4-phosphate 5-kinase, type I, alpha | 3.775115  | Outlier |
| siRNA-Temozolomide Run3-DMSO | NM_0035<br>58 | PIP5K1B | phosphatidylinositol-4-phosphate 5-kinase, type I, beta  | -2.659463 | Inlier  |
| siRNA Disorazole DMSO Run2   | NM_0035<br>58 | PIP5K1B | phosphatidylinositol-4-phosphate 5-kinase, type I, beta  | -0.813428 | Inlier  |
| siRNA-Temozolomide Run1-DMSO | NM_0035<br>58 | PIP5K1B | phosphatidylinositol-4-phosphate 5-kinase, type I, beta  | -0.535572 | Inlier  |



Identification of Survival Genes in Human Glioblastoma Cells Using siRNA Screening  
 Nikhil G Thaker, Fang Zhang, Peter R. McDonald, Tong Ying Shun, Michael D Lewen, Ian F. Pollack, and John S. Lazo  
 Molecular Pharmacology

|                              |               |         |                                                          |           |         |
|------------------------------|---------------|---------|----------------------------------------------------------|-----------|---------|
| siRNA-Temozolomide Run2-DMSO | NM_0035<br>58 | PIP5K1B | phosphatidylinositol-4-phosphate 5-kinase, type I, beta  | -0.046486 | Inlier  |
| siRNA Disorazole DMSO Run1   | NM_0035<br>58 | PIP5K1B | phosphatidylinositol-4-phosphate 5-kinase, type I, beta  | 0.046484  | Inlier  |
| siRNA-Vinblastine Run1-DMSO  | NM_0035<br>58 | PIP5K1B | phosphatidylinositol-4-phosphate 5-kinase, type I, beta  | 0.089273  | Inlier  |
| siRNA-Vinblastine Run2-DMSO  | NM_0035<br>58 | PIP5K1B | phosphatidylinositol-4-phosphate 5-kinase, type I, beta  | 1.378545  | Inlier  |
| siRNA Disorazole DMSO Run3   | NM_0035<br>58 | PIP5K1B | phosphatidylinositol-4-phosphate 5-kinase, type I, beta  | 4.402153  | Outlier |
| siRNA-Temozolomide Run3-DMSO | NM_0123<br>98 | PIP5K1C | phosphatidylinositol-4-phosphate 5-kinase, type I, gamma | -1.975585 | Inlier  |

Identification of Survival Genes in Human Glioblastoma Cells Using siRNA Screening  
 Nikhil G Thaker, Fang Zhang, Peter R. McDonald, Tong Ying Shun, Michael D Lewen, Ian F. Pollack, and John S. Lazo  
 Molecular Pharmacology

|                              |               |         |                                                          |           |        |
|------------------------------|---------------|---------|----------------------------------------------------------|-----------|--------|
| siRNA Disorazole DMSO Run2   | NM_0123<br>98 | PIP5K1C | phosphatidylinositol-4-phosphate 5-kinase, type I, gamma | -1.023835 | Inlier |
| siRNA-Temozolomide Run1-DMSO | NM_0123<br>98 | PIP5K1C | phosphatidylinositol-4-phosphate 5-kinase, type I, gamma | -0.436468 | Inlier |
| siRNA-Temozolomide Run2-DMSO | NM_0123<br>98 | PIP5K1C | phosphatidylinositol-4-phosphate 5-kinase, type I, gamma | -0.200136 | Inlier |
| siRNA-Vinblastine Run1-DMSO  | NM_0123<br>98 | PIP5K1C | phosphatidylinositol-4-phosphate 5-kinase, type I, gamma | 0.200135  | Inlier |
| siRNA Disorazole DMSO Run1   | NM_0123<br>98 | PIP5K1C | phosphatidylinositol-4-phosphate 5-kinase, type I, gamma | 0.640281  | Inlier |
| siRNA-Vinblastine Run2-DMSO  | NM_0123<br>98 | PIP5K1C | phosphatidylinositol-4-phosphate 5-kinase, type I, gamma | 0.708719  | Inlier |

Identification of Survival Genes in Human Glioblastoma Cells Using siRNA Screening  
 Nikhil G Thaker, Fang Zhang, Peter R. McDonald, Tong Ying Shun, Michael D Lewen, Ian F. Pollack, and John S. Lazo  
 Molecular Pharmacology

|                              |               |         |                                                           |           |        |
|------------------------------|---------------|---------|-----------------------------------------------------------|-----------|--------|
| siRNA Disorazole DMSO Run3   | NM_0123<br>98 | PIP5K1C | phosphatidylinositol-4-phosphate 5-kinase, type I, gamma  | 1.229578  | Inlier |
| siRNA-Temozolomide Run3-DMSO | NM_0050<br>28 | PIP5K2A | phosphatidylinositol-4-phosphate 5-kinase, type II, alpha | -1.405082 | Inlier |
| siRNA Disorazole DMSO Run2   | NM_0050<br>28 | PIP5K2A | phosphatidylinositol-4-phosphate 5-kinase, type II, alpha | -0.875302 | Inlier |
| siRNA Disorazole DMSO Run1   | NM_0050<br>28 | PIP5K2A | phosphatidylinositol-4-phosphate 5-kinase, type II, alpha | -0.575533 | Inlier |
| siRNA-Temozolomide Run2-DMSO | NM_0050<br>28 | PIP5K2A | phosphatidylinositol-4-phosphate 5-kinase, type II, alpha | -0.012011 | Inlier |
| siRNA-Temozolomide Run1-DMSO | NM_0050<br>28 | PIP5K2A | phosphatidylinositol-4-phosphate 5-kinase, type II, alpha | 0.012012  | Inlier |

Identification of Survival Genes in Human Glioblastoma Cells Using siRNA Screening  
 Nikhil G Thaker, Fang Zhang, Peter R. McDonald, Tong Ying Shun, Michael D Lewen, Ian F. Pollack, and John S. Lazo  
 Molecular Pharmacology

|                              |               |         |                                                           |           |        |
|------------------------------|---------------|---------|-----------------------------------------------------------|-----------|--------|
| siRNA-Vinblastine Run1-DMSO  | NM_0050<br>28 | PIP5K2A | phosphatidylinositol-4-phosphate 5-kinase, type II, alpha | 0.213129  | Inlier |
| siRNA Disorazole DMSO Run3   | NM_0050<br>28 | PIP5K2A | phosphatidylinositol-4-phosphate 5-kinase, type II, alpha | 0.773467  | Inlier |
| siRNA-Vinblastine Run2-DMSO  | NM_0050<br>28 | PIP5K2A | phosphatidylinositol-4-phosphate 5-kinase, type II, alpha | 0.787389  | Inlier |
| siRNA-Temozolomide Run1-DMSO | NM_1386<br>87 | PIP5K2B | phosphatidylinositol-4-phosphate 5-kinase, type II, beta  | -1.097067 | Inlier |
| siRNA Disorazole DMSO Run1   | NM_1386<br>87 | PIP5K2B | phosphatidylinositol-4-phosphate 5-kinase, type II, beta  | -1.047664 | Inlier |
| siRNA-Temozolomide Run2-DMSO | NM_1386<br>87 | PIP5K2B | phosphatidylinositol-4-phosphate 5-kinase, type II, beta  | -0.581114 | Inlier |

Identification of Survival Genes in Human Glioblastoma Cells Using siRNA Screening  
 Nikhil G Thaker, Fang Zhang, Peter R. McDonald, Tong Ying Shun, Michael D Lewen, Ian F. Pollack, and John S. Lazo  
 Molecular Pharmacology

|                              |               |         |                                                           |           |         |
|------------------------------|---------------|---------|-----------------------------------------------------------|-----------|---------|
| siRNA Disorazole DMSO Run2   | NM_1386<br>87 | PIP5K2B | phosphatidylinositol-4-phosphate 5-kinase, type II, beta  | -0.017882 | Inlier  |
| siRNA-Vinblastine Run2-DMSO  | NM_1386<br>87 | PIP5K2B | phosphatidylinositol-4-phosphate 5-kinase, type II, beta  | 0.017882  | Inlier  |
| siRNA-Temozolomide Run3-DMSO | NM_1386<br>87 | PIP5K2B | phosphatidylinositol-4-phosphate 5-kinase, type II, beta  | 0.054417  | Inlier  |
| siRNA-Vinblastine Run1-DMSO  | NM_1386<br>87 | PIP5K2B | phosphatidylinositol-4-phosphate 5-kinase, type II, beta  | 0.767886  | Inlier  |
| siRNA Disorazole DMSO Run3   | NM_1386<br>87 | PIP5K2B | phosphatidylinositol-4-phosphate 5-kinase, type II, beta  | 3.833329  | Outlier |
| siRNA-Temozolomide Run3-DMSO | NM_0247<br>79 | PIP5K2C | phosphatidylinositol-4-phosphate 5-kinase, type II, gamma | -1.649677 | Inlier  |

Identification of Survival Genes in Human Glioblastoma Cells Using siRNA Screening  
 Nikhil G Thaker, Fang Zhang, Peter R. McDonald, Tong Ying Shun, Michael D Lewen, Ian F. Pollack, and John S. Lazo  
 Molecular Pharmacology

|                              |               |         |                                                           |           |        |
|------------------------------|---------------|---------|-----------------------------------------------------------|-----------|--------|
| siRNA Disorazole DMSO Run2   | NM_0247<br>79 | PIP5K2C | phosphatidylinositol-4-phosphate 5-kinase, type II, gamma | -1.094574 | Inlier |
| siRNA-Temozolomide Run1-DMSO | NM_0247<br>79 | PIP5K2C | phosphatidylinositol-4-phosphate 5-kinase, type II, gamma | -0.51833  | Inlier |
| siRNA-Temozolomide Run2-DMSO | NM_0247<br>79 | PIP5K2C | phosphatidylinositol-4-phosphate 5-kinase, type II, gamma | -0.180387 | Inlier |
| siRNA Disorazole DMSO Run1   | NM_0247<br>79 | PIP5K2C | phosphatidylinositol-4-phosphate 5-kinase, type II, gamma | 0.180387  | Inlier |
| siRNA-Vinblastine Run1-DMSO  | NM_0247<br>79 | PIP5K2C | phosphatidylinositol-4-phosphate 5-kinase, type II, gamma | 0.636105  | Inlier |
| siRNA-Vinblastine Run2-DMSO  | NM_0247<br>79 | PIP5K2C | phosphatidylinositol-4-phosphate 5-kinase, type II, gamma | 0.712895  | Inlier |

Identification of Survival Genes in Human Glioblastoma Cells Using siRNA Screening  
 Nikhil G Thaker, Fang Zhang, Peter R. McDonald, Tong Ying Shun, Michael D Lewen, Ian F. Pollack, and John S. Lazo  
 Molecular Pharmacology

|                              |               |         |                                                           |           |        |
|------------------------------|---------------|---------|-----------------------------------------------------------|-----------|--------|
| siRNA Disorazole DMSO Run3   | NM_0247<br>79 | PIP5K2C | phosphatidylinositol-4-phosphate 5-kinase, type II, gamma | 1.293741  | Inlier |
| siRNA-Temozolomide Run3-DMSO | NM_1734<br>92 | PIP5KL1 | phosphatidylinositol-4-phosphate 5-kinase-like 1          | -2.392415 | Inlier |
| siRNA-Temozolomide Run1-DMSO | NM_1734<br>92 | PIP5KL1 | phosphatidylinositol-4-phosphate 5-kinase-like 1          | -0.8587   | Inlier |
| siRNA Disorazole DMSO Run2   | NM_1734<br>92 | PIP5KL1 | phosphatidylinositol-4-phosphate 5-kinase-like 1          | -0.751115 | Inlier |
| siRNA-Temozolomide Run2-DMSO | NM_1734<br>92 | PIP5KL1 | phosphatidylinositol-4-phosphate 5-kinase-like 1          | -0.189872 | Inlier |
| siRNA-Vinblastine Run1-DMSO  | NM_1734<br>92 | PIP5KL1 | phosphatidylinositol-4-phosphate 5-kinase-like 1          | 0.189872  | Inlier |
| siRNA-Vinblastine Run2-DMSO  | NM_1734<br>92 | PIP5KL1 | phosphatidylinositol-4-phosphate 5-kinase-like 1          | 0.334518  | Inlier |

Identification of Survival Genes in Human Glioblastoma Cells Using siRNA Screening  
 Nikhil G Thaker, Fang Zhang, Peter R. McDonald, Tong Ying Shun, Michael D Lewen, Ian F. Pollack, and John S. Lazo  
 Molecular Pharmacology

|                              |               |         |                                                  |           |        |
|------------------------------|---------------|---------|--------------------------------------------------|-----------|--------|
| siRNA Disorazole DMSO Run1   | NM_1734<br>92 | PIP5KL1 | phosphatidylinositol-4-phosphate 5-kinase-like 1 | 0.597885  | Inlier |
| siRNA Disorazole DMSO Run3   | NM_1734<br>92 | PIP5KL1 | phosphatidylinositol-4-phosphate 5-kinase-like 1 | 0.757043  | Inlier |
| siRNA-Temozolomide Run3-DMSO | NM_0143<br>38 | PISD    | phosphatidylserine decarboxylase                 | -1.731169 | Inlier |
| siRNA-Temozolomide Run2-DMSO | NM_0143<br>38 | PISD    | phosphatidylserine decarboxylase                 | -0.969199 | Inlier |
| siRNA Disorazole DMSO Run3   | NM_0143<br>38 | PISD    | phosphatidylserine decarboxylase                 | -0.379801 | Inlier |
| siRNA-Temozolomide Run1-DMSO | NM_0143<br>38 | PISD    | phosphatidylserine decarboxylase                 | -0.010924 | Inlier |
| siRNA-Vinblastine Run2-DMSO  | NM_0143<br>38 | PISD    | phosphatidylserine decarboxylase                 | 0.010924  | Inlier |
| siRNA Disorazole DMSO Run1   | NM_0143<br>38 | PISD    | phosphatidylserine decarboxylase                 | 0.218762  | Inlier |
| siRNA-Vinblastine Run1-DMSO  | NM_0143<br>38 | PISD    | phosphatidylserine decarboxylase                 | 2.223901  | Inlier |
| siRNA Disorazole DMSO Run2   | NM_0143<br>38 | PISD    | phosphatidylserine decarboxylase                 | 2.280231  | Inlier |
| siRNA-Temozolomide Run1-DMSO | NM_0062<br>24 | PITPNA  | phosphatidylinositol transfer protein, alpha     | -1.223711 | Inlier |



Identification of Survival Genes in Human Glioblastoma Cells Using siRNA Screening  
 Nikhil G Thaker, Fang Zhang, Peter R. McDonald, Tong Ying Shun, Michael D Lewen, Ian F. Pollack, and John S. Lazo

Molecular Pharmacology

|                              |               |        |                                              |           |        |
|------------------------------|---------------|--------|----------------------------------------------|-----------|--------|
| siRNA-Temozolomide Run3-DMSO | NM_0062<br>24 | PITPNA | phosphatidylinositol transfer protein, alpha | -0.623195 | Inlier |
| siRNA Disorazole DMSO Run1   | NM_0062<br>24 | PITPNA | phosphatidylinositol transfer protein, alpha | -0.490029 | Inlier |
| siRNA-Temozolomide Run2-DMSO | NM_0062<br>24 | PITPNA | phosphatidylinositol transfer protein, alpha | -0.267746 | Inlier |
| siRNA-Vinblastine Run2-DMSO  | NM_0062<br>24 | PITPNA | phosphatidylinositol transfer protein, alpha | 0.267746  | Inlier |
| siRNA-Vinblastine Run1-DMSO  | NM_0062<br>24 | PITPNA | phosphatidylinositol transfer protein, alpha | 0.725805  | Inlier |
| siRNA Disorazole DMSO Run3   | NM_0062<br>24 | PITPNA | phosphatidylinositol transfer protein, alpha | 1.990006  | Inlier |
| siRNA Disorazole DMSO Run2   | NM_0062<br>24 | PITPNA | phosphatidylinositol transfer protein, alpha | 2.563045  | Inlier |
| siRNA-Temozolomide Run3-DMSO | NM_0123<br>99 | PITPNB | phosphatidylinositol transfer protein, beta  | -1.059113 | Inlier |
| siRNA-Temozolomide Run2-DMSO | NM_0123<br>99 | PITPNB | phosphatidylinositol transfer protein, beta  | -0.467141 | Inlier |
| siRNA-Temozolomide Run1-DMSO | NM_0123<br>99 | PITPNB | phosphatidylinositol transfer protein, beta  | -0.225704 | Inlier |

Identification of Survival Genes in Human Glioblastoma Cells Using siRNA Screening

Nikhil G Thaker, Fang Zhang, Peter R. McDonald, Tong Ying Shun, Michael D Lewen, Ian F. Pollack, and John S. Lazo

Molecular Pharmacology

|                                  |               |         |                                                                             |           |                  |
|----------------------------------|---------------|---------|-----------------------------------------------------------------------------|-----------|------------------|
| siRNA Disorazole DMSO Run3       | NM_0123<br>99 | PITPNB  | phosphati<br>dylinositol<br>transfer<br>protein,<br>beta                    | -0.071252 | Inlier           |
| siRNA Disorazole DMSO Run2       | NM_0123<br>99 | PITPNB  | phosphati<br>dylinositol<br>transfer<br>protein,<br>beta                    | 0.071252  | Inlier           |
| siRNA Disorazole DMSO Run1       | NM_0123<br>99 | PITPNB  | phosphati<br>dylinositol<br>transfer<br>protein,<br>beta                    | 0.881859  | Inlier           |
| siRNA-Vinblastine Run1-<br>DMSO  | NM_0123<br>99 | PITPNB  | phosphati<br>dylinositol<br>transfer<br>protein,<br>beta                    | 1.655835  | Inlier           |
| siRNA-Vinblastine Run2-<br>DMSO  | NM_0123<br>99 | PITPNB  | phosphati<br>dylinositol<br>transfer<br>protein,<br>beta                    | 1.917858  | Inlier           |
| siRNA-Temozolomide Run3-<br>DMSO | NM_0049<br>10 | PITPNM1 | phosphati<br>dylinositol<br>transfer<br>protein,<br>membrane-<br>associated | 1         | -1.381674 Inlier |
| siRNA-Temozolomide Run1-<br>DMSO | NM_0049<br>10 | PITPNM1 | phosphati<br>dylinositol<br>transfer<br>protein,<br>membrane-<br>associated | 1         | -0.678759 Inlier |
| siRNA-Temozolomide Run2-<br>DMSO | NM_0049<br>10 | PITPNM1 | phosphati<br>dylinositol<br>transfer<br>protein,<br>membrane-<br>associated | 1         | -0.670241 Inlier |

Identification of Survival Genes in Human Glioblastoma Cells Using siRNA Screening

Nikhil G Thaker, Fang Zhang, Peter R. McDonald, Tong Ying Shun, Michael D Lewen, Ian F. Pollack, and John S. Lazo

Molecular Pharmacology

|                              |               |         |   |                                                            |           |        |
|------------------------------|---------------|---------|---|------------------------------------------------------------|-----------|--------|
| siRNA Disorazole DMSO Run2   | NM_0049<br>10 | PITPNM1 | 1 | phosphatidylinositol transfer protein, membrane-associated | -0.163809 | Inlier |
| siRNA Disorazole DMSO Run3   | NM_0049<br>10 | PITPNM1 | 1 | phosphatidylinositol transfer protein, membrane-associated | 0.163809  | Inlier |
| siRNA Disorazole DMSO Run1   | NM_0049<br>10 | PITPNM1 | 1 | phosphatidylinositol transfer protein, membrane-associated | 0.288062  | Inlier |
| siRNA-Vinblastine Run2-DMSO  | NM_0049<br>10 | PITPNM1 | 1 | phosphatidylinositol transfer protein, membrane-associated | 1.382555  | Inlier |
| siRNA-Vinblastine Run1-DMSO  | NM_0049<br>10 | PITPNM1 | 1 | phosphatidylinositol transfer protein, membrane-associated | 1.663936  | Inlier |
| siRNA-Temozolomide Run3-DMSO | NM_0149<br>68 | PITRM1  | 1 | pitrilysin metalloproteinase 1                             | -0.865823 | Inlier |
| siRNA-Temozolomide Run2-DMSO | NM_0149<br>68 | PITRM1  | 1 | pitrilysin metalloproteinase 1                             | -0.483177 | Inlier |
| siRNA Disorazole DMSO Run1   | NM_0149<br>68 | PITRM1  | 1 | pitrilysin metalloproteinase 1                             | -0.11288  | Inlier |

Identification of Survival Genes in Human Glioblastoma Cells Using siRNA Screening  
 Nikhil G Thaker, Fang Zhang, Peter R. McDonald, Tong Ying Shun, Michael D Lewen, Ian F. Pollack, and John S. Lazo  
 Molecular Pharmacology

|                                  |               |        |                                              |           |         |
|----------------------------------|---------------|--------|----------------------------------------------|-----------|---------|
| siRNA Disorazole DMSO Run2       | NM_0149<br>68 | PITRM1 | pitrilysin<br>metallopro<br>teinase 1        | -0.019588 | Inlier  |
| siRNA-Temozolomide Run1-<br>DMSO | NM_0149<br>68 | PITRM1 | pitrilysin<br>metallopro<br>teinase 1        | 0.019588  | Inlier  |
| siRNA-Vinblastine Run1-<br>DMSO  | NM_0149<br>68 | PITRM1 | pitrilysin<br>metallopro<br>teinase 1        | 0.920037  | Inlier  |
| siRNA Disorazole DMSO Run3       | NM_0149<br>68 | PITRM1 | pitrilysin<br>metallopro<br>teinase 1        | 1.036896  | Inlier  |
| siRNA-Vinblastine Run2-<br>DMSO  | NM_0149<br>68 | PITRM1 | pitrilysin<br>metallopro<br>teinase 1        | 1.270064  | Inlier  |
| siRNA-Temozolomide Run3-<br>DMSO | NM_0528<br>92 | PKD1L2 | polycystic<br>kidney<br>disease 1-<br>like 2 | -4.092137 | Outlier |
| siRNA Disorazole DMSO Run1       | NM_0528<br>92 | PKD1L2 | polycystic<br>kidney<br>disease 1-<br>like 2 | -1.990268 | Inlier  |
| siRNA-Temozolomide Run1-<br>DMSO | NM_0528<br>92 | PKD1L2 | polycystic<br>kidney<br>disease 1-<br>like 2 | -0.278998 | Inlier  |
| siRNA-Temozolomide Run2-<br>DMSO | NM_0528<br>92 | PKD1L2 | polycystic<br>kidney<br>disease 1-<br>like 2 | -0.216766 | Inlier  |
| siRNA-Vinblastine Run2-<br>DMSO  | NM_0528<br>92 | PKD1L2 | polycystic<br>kidney<br>disease 1-<br>like 2 | 0.216767  | Inlier  |
| siRNA Disorazole DMSO Run3       | NM_0528<br>92 | PKD1L2 | polycystic<br>kidney<br>disease 1-<br>like 2 | 0.622594  | Inlier  |
| siRNA-Vinblastine Run1-<br>DMSO  | NM_0528<br>92 | PKD1L2 | polycystic<br>kidney<br>disease 1-<br>like 2 | 0.726406  | Inlier  |
| siRNA Disorazole DMSO Run2       | NM_0528<br>92 | PKD1L2 | polycystic<br>kidney<br>disease 1-<br>like 2 | 3.147828  | Inlier  |

Identification of Survival Genes in Human Glioblastoma Cells Using siRNA Screening  
 Nikhil G Thaker, Fang Zhang, Peter R. McDonald, Tong Ying Shun, Michael D Lewen, Ian F. Pollack, and John S. Lazo

Molecular Pharmacology

| siRNA Treatment              | Gene ID   | PKD    | Disease                                          | Value     | Category |
|------------------------------|-----------|--------|--------------------------------------------------|-----------|----------|
| siRNA-Temozolomide Run3-DMSO | NM_181536 | PKD1L3 | polycystic kidney disease 1-like 3               | -0.74707  | Inlier   |
| siRNA-Temozolomide Run2-DMSO | NM_181536 | PKD1L3 | polycystic kidney disease 1-like 3               | -0.60193  | Inlier   |
| siRNA Disorazole DMSO Run2   | NM_181536 | PKD1L3 | polycystic kidney disease 1-like 3               | -0.115377 | Inlier   |
| siRNA Disorazole DMSO Run3   | NM_181536 | PKD1L3 | polycystic kidney disease 1-like 3               | -0.082293 | Inlier   |
| siRNA-Temozolomide Run1-DMSO | NM_181536 | PKD1L3 | polycystic kidney disease 1-like 3               | 0.082293  | Inlier   |
| siRNA Disorazole DMSO Run1   | NM_181536 | PKD1L3 | polycystic kidney disease 1-like 3               | 1.118594  | Inlier   |
| siRNA-Vinblastine Run2-DMSO  | NM_181536 | PKD1L3 | polycystic kidney disease 1-like 3               | 3.162598  | Inlier   |
| siRNA-Vinblastine Run1-DMSO  | NM_181536 | PKD1L3 | polycystic kidney disease 1-like 3               | 3.5267    | Outlier  |
| siRNA-Temozolomide Run3-DMSO | NM_000297 | PKD2   | polycystic kidney disease 2 (autosomal dominant) | -5.066564 | Outlier  |
| siRNA Disorazole DMSO Run3   | NM_000297 | PKD2   | polycystic kidney disease 2 (autosomal dominant) | -2.490861 | Inlier   |
| siRNA-Temozolomide Run2-DMSO | NM_000297 | PKD2   | polycystic kidney disease 2 (autosomal dominant) | -0.795681 | Inlier   |

Identification of Survival Genes in Human Glioblastoma Cells Using siRNA Screening  
 Nikhil G Thaker, Fang Zhang, Peter R. McDonald, Tong Ying Shun, Michael D Lewen, Ian F. Pollack, and John S. Lazo

Molecular Pharmacology

|                                  |               |        |                                                                  |           |        |
|----------------------------------|---------------|--------|------------------------------------------------------------------|-----------|--------|
| siRNA Disorazole DMSO Run1       | NM_0002<br>97 | PKD2   | polycystic<br>kidney<br>disease 2<br>(autosoma<br>l<br>dominant) | -0.040431 | Inlier |
| siRNA-Temozolomide Run1-<br>DMSO | NM_0002<br>97 | PKD2   | polycystic<br>kidney<br>disease 2<br>(autosoma<br>l<br>dominant) | 0.040431  | Inlier |
| siRNA-Vinblastine Run2-<br>DMSO  | NM_0002<br>97 | PKD2   | polycystic<br>kidney<br>disease 2<br>(autosoma<br>l<br>dominant) | 0.506803  | Inlier |
| siRNA Disorazole DMSO Run2       | NM_0002<br>97 | PKD2   | polycystic<br>kidney<br>disease 2<br>(autosoma<br>l<br>dominant) | 0.553319  | Inlier |
| siRNA-Vinblastine Run1-<br>DMSO  | NM_0002<br>97 | PKD2   | polycystic<br>kidney<br>disease 2-<br>like 1                     | 1.977405  | Inlier |
| siRNA-Temozolomide Run3-<br>DMSO | NM_0161<br>12 | PKD2L1 | polycystic<br>kidney<br>disease 2-<br>like 1                     | -2.303982 | Inlier |
| siRNA-Temozolomide Run1-<br>DMSO | NM_0161<br>12 | PKD2L1 | polycystic<br>kidney<br>disease 2-<br>like 1                     | -0.720364 | Inlier |
| siRNA-Temozolomide Run2-<br>DMSO | NM_0161<br>12 | PKD2L1 | polycystic<br>kidney<br>disease 2-<br>like 1                     | -0.628636 | Inlier |
| siRNA Disorazole DMSO Run1       | NM_0161<br>12 | PKD2L1 | polycystic<br>kidney<br>disease 2-<br>like 1                     | -0.065929 | Inlier |
| siRNA Disorazole DMSO Run3       | NM_0161<br>12 | PKD2L1 | polycystic<br>kidney<br>disease 2-<br>like 1                     | 0.065929  | Inlier |

Identification of Survival Genes in Human Glioblastoma Cells Using siRNA Screening  
 Nikhil G Thaker, Fang Zhang, Peter R. McDonald, Tong Ying Shun, Michael D Lewen, Ian F. Pollack, and John S. Lazo

Molecular Pharmacology

| siRNA Treatment              | Gene ID   | Gene Name | Disease                            | Value     | Outlier Status |
|------------------------------|-----------|-----------|------------------------------------|-----------|----------------|
| siRNA-Vinblastine Run2-DMSO  | NM_016112 | PKD2L1    | polycystic kidney disease 2-like 1 | 0.588753  | Inlier         |
| siRNA-Vinblastine Run1-DMSO  | NM_016112 | PKD2L1    | polycystic kidney disease 2-like 1 | 0.765017  | Inlier         |
| siRNA Disorazole DMSO Run2   | NM_016112 | PKD2L1    | polycystic kidney disease 2-like 1 | 1.403243  | Inlier         |
| siRNA Disorazole DMSO Run3   | NM_014386 | PKD2L2    | polycystic kidney disease 2-like 2 | -2.773445 | Inlier         |
| siRNA-Temozolomide Run3-DMSO | NM_014386 | PKD2L2    | polycystic kidney disease 2-like 2 | -0.993715 | Inlier         |
| siRNA Disorazole DMSO Run1   | NM_014386 | PKD2L2    | polycystic kidney disease 2-like 2 | -0.989555 | Inlier         |
| siRNA-Temozolomide Run2-DMSO | NM_014386 | PKD2L2    | polycystic kidney disease 2-like 2 | -0.154317 | Inlier         |
| siRNA-Vinblastine Run2-DMSO  | NM_014386 | PKD2L2    | polycystic kidney disease 2-like 2 | 0.154317  | Inlier         |
| siRNA-Temozolomide Run1-DMSO | NM_014386 | PKD2L2    | polycystic kidney disease 2-like 2 | 0.197664  | Inlier         |
| siRNA-Vinblastine Run1-DMSO  | NM_014386 | PKD2L2    | polycystic kidney disease 2-like 2 | 0.359445  | Inlier         |
| siRNA Disorazole DMSO Run2   | NM_014386 | PKD2L2    | polycystic kidney disease 2-like 2 | 1.280495  | Inlier         |

Identification of Survival Genes in Human Glioblastoma Cells Using siRNA Screening

Nikhil G Thaker, Fang Zhang, Peter R. McDonald, Tong Ying Shun, Michael D Lewen, Ian F. Pollack, and John S. Lazo

Molecular Pharmacology

|                              |           |        |                                                                                                        |           |        |
|------------------------------|-----------|--------|--------------------------------------------------------------------------------------------------------|-----------|--------|
| siRNA-Temozolomide Run3-DMSO | NM_006071 | PKDREJ | polycystic kidney disease (polycystin) and REJ (sperm receptor for egg jelly homolog, sea urchin)-like | -1.187506 | Inlier |
| siRNA Disorazole DMSO Run3   | NM_006071 | PKDREJ | polycystic kidney disease (polycystin) and REJ (sperm receptor for egg jelly homolog, sea urchin)-like | -0.782141 | Inlier |
| siRNA-Temozolomide Run2-DMSO | NM_006071 | PKDREJ | polycystic kidney disease (polycystin) and REJ (sperm receptor for egg jelly homolog, sea urchin)-like | -0.67973  | Inlier |



Identification of Survival Genes in Human Glioblastoma Cells Using siRNA Screening  
 Nikhil G Thaker, Fang Zhang, Peter R. McDonald, Tong Ying Shun, Michael D Lewen, Ian F. Pollack, and John S. Lazo  
 Molecular Pharmacology

|                              |               |        |                                                                                                         |           |        |
|------------------------------|---------------|--------|---------------------------------------------------------------------------------------------------------|-----------|--------|
| siRNA Disorazole DMSO Run1   | NM_0060<br>71 | PKDREJ | polycystic kidney disease (polycystin ) and REJ (sperm receptor for egg jelly homolog, sea urchin)-like | -0.279606 | Inlier |
| siRNA Disorazole DMSO Run2   | NM_0060<br>71 | PKDREJ | polycystic kidney disease (polycystin ) and REJ (sperm receptor for egg jelly homolog, sea urchin)-like | 0.279606  | Inlier |
| siRNA-Temozolomide Run1-DMSO | NM_0060<br>71 | PKDREJ | polycystic kidney disease (polycystin ) and REJ (sperm receptor for egg jelly homolog, sea urchin)-like | 0.518299  | Inlier |

Identification of Survival Genes in Human Glioblastoma Cells Using siRNA Screening

Nikhil G Thaker, Fang Zhang, Peter R. McDonald, Tong Ying Shun, Michael D Lewen, Ian F. Pollack, and John S.

Lazo

Molecular Pharmacology

|                              |           |        |                                                                                                         |           |        |
|------------------------------|-----------|--------|---------------------------------------------------------------------------------------------------------|-----------|--------|
| siRNA-Vinblastine Run2-DMSO  | NM_006071 | PKDREJ | polycystic kidney disease (polycystin ) and REJ (sperm receptor for egg jelly homolog, sea urchin)-like | 0.66927   | Inlier |
| siRNA-Vinblastine Run1-DMSO  | NM_006071 | PKDREJ | polycystic kidney disease (polycystin ) and REJ (sperm receptor for egg jelly homolog, sea urchin)-like | 0.88419   | Inlier |
| siRNA-Temozolomide Run3-DMSO | NM_181839 | PKIA   | protein kinase (cAMP-dependent , catalytic) inhibitor alpha                                             | -1.384601 | Inlier |
| siRNA-Temozolomide Run1-DMSO | NM_181839 | PKIA   | protein kinase (cAMP-dependent , catalytic) inhibitor alpha                                             | -0.591607 | Inlier |
| siRNA-Vinblastine Run1-DMSO  | NM_181839 | PKIA   | protein kinase (cAMP-dependent , catalytic) inhibitor alpha                                             | -0.270556 | Inlier |

Identification of Survival Genes in Human Glioblastoma Cells Using siRNA Screening  
 Nikhil G Thaker, Fang Zhang, Peter R. McDonald, Tong Ying Shun, Michael D Lewen, Ian F. Pollack, and John S. Lazo  
 Molecular Pharmacology

|                              |               |      |                                                             |          |         |
|------------------------------|---------------|------|-------------------------------------------------------------|----------|---------|
| siRNA-Temozolomide Run2-DMSO | NM_1818<br>39 | PKIA | protein kinase (cAMP-dependent , catalytic) inhibitor alpha | -0.09105 | Inlier  |
| siRNA Disorazole DMSO Run2   | NM_1818<br>39 | PKIA | protein kinase (cAMP-dependent , catalytic) inhibitor alpha | 0.091049 | Inlier  |
| siRNA Disorazole DMSO Run1   | NM_1818<br>39 | PKIA | protein kinase (cAMP-dependent , catalytic) inhibitor alpha | 0.757393 | Inlier  |
| siRNA-Vinblastine Run2-DMSO  | NM_1818<br>39 | PKIA | protein kinase (cAMP-dependent , catalytic) inhibitor alpha | 1.989261 | Inlier  |
| siRNA Disorazole DMSO Run3   | NM_1818<br>39 | PKIA | protein kinase (cAMP-dependent , catalytic) inhibitor alpha | 4.778259 | Outlier |
| siRNA-Temozolomide Run3-DMSO | NM_1817<br>94 | PKIB | protein kinase (cAMP-dependent , catalytic) inhibitor beta  | -1.53367 | Inlier  |

Identification of Survival Genes in Human Glioblastoma Cells Using siRNA Screening

Nikhil G Thaker, Fang Zhang, Peter R. McDonald, Tong Ying Shun, Michael D Lewen, Ian F. Pollack, and John S. Lazo

Molecular Pharmacology

|                                  |               |      |                                                                               |           |        |
|----------------------------------|---------------|------|-------------------------------------------------------------------------------|-----------|--------|
| siRNA Disorazole DMSO Run2       | NM_1817<br>94 | PKIB | protein<br>kinase<br>(cAMP-<br>dependent<br>, catalytic)<br>inhibitor<br>beta | -1.294341 | Inlier |
| siRNA-Temozolomide Run1-<br>DMSO | NM_1817<br>94 | PKIB | protein<br>kinase<br>(cAMP-<br>dependent<br>, catalytic)<br>inhibitor<br>beta | -0.657143 | Inlier |
| siRNA-Temozolomide Run2-<br>DMSO | NM_1817<br>94 | PKIB | protein<br>kinase<br>(cAMP-<br>dependent<br>, catalytic)<br>inhibitor<br>beta | -0.109775 | Inlier |
| siRNA Disorazole DMSO Run3       | NM_1817<br>94 | PKIB | protein<br>kinase<br>(cAMP-<br>dependent<br>, catalytic)<br>inhibitor<br>beta | 0.109775  | Inlier |
| siRNA Disorazole DMSO Run1       | NM_1817<br>94 | PKIB | protein<br>kinase<br>(cAMP-<br>dependent<br>, catalytic)<br>inhibitor<br>beta | 0.413662  | Inlier |
| siRNA-Vinblastine Run1-<br>DMSO  | NM_1817<br>94 | PKIB | protein<br>kinase<br>(cAMP-<br>dependent<br>, catalytic)<br>inhibitor<br>beta | 0.691857  | Inlier |

Identification of Survival Genes in Human Glioblastoma Cells Using siRNA Screening  
 Nikhil G Thaker, Fang Zhang, Peter R. McDonald, Tong Ying Shun, Michael D Lewen, Ian F. Pollack, and John S. Lazo  
 Molecular Pharmacology

|                              |           |      |                                                             |           |        |
|------------------------------|-----------|------|-------------------------------------------------------------|-----------|--------|
| siRNA-Vinblastine Run2-DMSO  | NM_181794 | PKIB | protein kinase (cAMP-dependent , catalytic) inhibitor beta  | 0.853103  | Inlier |
| siRNA-Temozolomide Run3-DMSO | NM_181805 | PKIG | protein kinase (cAMP-dependent , catalytic) inhibitor gamma | -0.679191 | Inlier |
| siRNA-Temozolomide Run1-DMSO | NM_181805 | PKIG | protein kinase (cAMP-dependent , catalytic) inhibitor gamma | -0.669809 | Inlier |
| siRNA Disorazole DMSO Run2   | NM_181805 | PKIG | protein kinase (cAMP-dependent , catalytic) inhibitor gamma | -0.575146 | Inlier |
| siRNA-Temozolomide Run2-DMSO | NM_181805 | PKIG | protein kinase (cAMP-dependent , catalytic) inhibitor gamma | -0.204347 | Inlier |
| siRNA Disorazole DMSO Run3   | NM_181805 | PKIG | protein kinase (cAMP-dependent , catalytic) inhibitor gamma | 0.204347  | Inlier |

Identification of Survival Genes in Human Glioblastoma Cells Using siRNA Screening  
 Nikhil G Thaker, Fang Zhang, Peter R. McDonald, Tong Ying Shun, Michael D Lewen, Ian F. Pollack, and John S. Lazo  
 Molecular Pharmacology

|                              |               |      |                                                            |           |        |
|------------------------------|---------------|------|------------------------------------------------------------|-----------|--------|
| siRNA Disorazole DMSO Run1   | NM_1818<br>05 | PKIG | protein kinase (cAMP-dependent, catalytic) inhibitor gamma | 0.952457  | Inlier |
| siRNA-Vinblastine Run2-DMSO  | NM_1818<br>05 | PKIG | protein kinase (cAMP-dependent, catalytic) inhibitor gamma | 1.389804  | Inlier |
| siRNA-Vinblastine Run1-DMSO  | NM_1818<br>05 | PKIG | protein kinase (cAMP-dependent, catalytic) inhibitor gamma | 2.11809   | Inlier |
| siRNA-Temozolomide Run3-DMSO | NM_1818<br>71 | PKLR | pyruvate kinase, liver and RBC                             | -3.114451 | Inlier |
| siRNA-Temozolomide Run2-DMSO | NM_1818<br>71 | PKLR | pyruvate kinase, liver and RBC                             | -0.53821  | Inlier |
| siRNA-Temozolomide Run1-DMSO | NM_1818<br>71 | PKLR | pyruvate kinase, liver and RBC                             | -0.403412 | Inlier |
| siRNA Disorazole DMSO Run2   | NM_1818<br>71 | PKLR | pyruvate kinase, liver and RBC                             | -0.377916 | Inlier |
| siRNA-Vinblastine Run1-DMSO  | NM_1818<br>71 | PKLR | pyruvate kinase, liver and RBC                             | 0.377916  | Inlier |
| siRNA-Vinblastine Run2-DMSO  | NM_1818<br>71 | PKLR | pyruvate kinase, liver and RBC                             | 0.81079   | Inlier |
| siRNA Disorazole DMSO Run1   | NM_1818<br>71 | PKLR | pyruvate kinase, liver and RBC                             | 1.094187  | Inlier |

Identification of Survival Genes in Human Glioblastoma Cells Using siRNA Screening  
 Nikhil G Thaker, Fang Zhang, Peter R. McDonald, Tong Ying Shun, Michael D Lewen, Ian F. Pollack, and John S. Lazo

Molecular Pharmacology

|                                  |               |        |                                                                          |           |         |
|----------------------------------|---------------|--------|--------------------------------------------------------------------------|-----------|---------|
| siRNA Disorazole DMSO Run3       | NM_1818<br>71 | PKLR   | pyruvate<br>kinase,<br>liver and<br>RBC                                  | 2.370074  | Inlier  |
| siRNA Disorazole DMSO Run1       | NM_1824<br>70 | PKM2   | pyruvate<br>kinase,<br>muscle                                            | -3.089754 | Inlier  |
| siRNA-Temozolomide Run3-<br>DMSO | NM_1824<br>70 | PKM2   | pyruvate<br>kinase,<br>muscle                                            | -0.355316 | Inlier  |
| siRNA-Temozolomide Run1-<br>DMSO | NM_1824<br>70 | PKM2   | pyruvate<br>kinase,<br>muscle                                            | -0.331885 | Inlier  |
| siRNA-Temozolomide Run2-<br>DMSO | NM_1824<br>70 | PKM2   | pyruvate<br>kinase,<br>muscle                                            | -0.22352  | Inlier  |
| siRNA Disorazole DMSO Run2       | NM_1824<br>70 | PKM2   | pyruvate<br>kinase,<br>muscle                                            | 0.22352   | Inlier  |
| siRNA-Vinblastine Run2-<br>DMSO  | NM_1824<br>70 | PKM2   | pyruvate<br>kinase,<br>muscle                                            | 0.993684  | Inlier  |
| siRNA-Vinblastine Run1-<br>DMSO  | NM_1824<br>70 | PKM2   | pyruvate<br>kinase,<br>muscle                                            | 1.95939   | Inlier  |
| siRNA Disorazole DMSO Run3       | NM_1824<br>70 | PKM2   | pyruvate<br>kinase,<br>muscle                                            | 4.320032  | Outlier |
| siRNA-Temozolomide Run3-<br>DMSO | NM_0042<br>03 | PKMYT1 | protein<br>kinase,<br>membrane<br>associated<br>tyrosine/th<br>reonine 1 | -0.747902 | Inlier  |
| siRNA-Temozolomide Run2-<br>DMSO | NM_0042<br>03 | PKMYT1 | protein<br>kinase,<br>membrane<br>associated<br>tyrosine/th<br>reonine 1 | -0.601098 | Inlier  |

Identification of Survival Genes in Human Glioblastoma Cells Using siRNA Screening  
 Nikhil G Thaker, Fang Zhang, Peter R. McDonald, Tong Ying Shun, Michael D Lewen, Ian F. Pollack, and John S. Lazo  
 Molecular Pharmacology

|                                  |               |        |                                                                          |           |        |
|----------------------------------|---------------|--------|--------------------------------------------------------------------------|-----------|--------|
| siRNA Disorazole DMSO Run2       | NM_0042<br>03 | PKMYT1 | protein<br>kinase,<br>membrane<br>associated<br>tyrosine/th<br>reonine 1 | -0.224872 | Inlier |
| siRNA Disorazole DMSO Run3       | NM_0042<br>03 | PKMYT1 | protein<br>kinase,<br>membrane<br>associated<br>tyrosine/th<br>reonine 1 | -0.122488 | Inlier |
| siRNA-Temozolomide Run1-<br>DMSO | NM_0042<br>03 | PKMYT1 | protein<br>kinase,<br>membrane<br>associated<br>tyrosine/th<br>reonine 1 | 0.122488  | Inlier |
| siRNA Disorazole DMSO Run1       | NM_0042<br>03 | PKMYT1 | protein<br>kinase,<br>membrane<br>associated<br>tyrosine/th<br>reonine 1 | 1.70326   | Inlier |
| siRNA-Vinblastine Run2-<br>DMSO  | NM_0042<br>03 | PKMYT1 | protein<br>kinase,<br>membrane<br>associated<br>tyrosine/th<br>reonine 1 | 1.867883  | Inlier |



Identification of Survival Genes in Human Glioblastoma Cells Using siRNA Screening  
 Nikhil G Thaker, Fang Zhang, Peter R. McDonald, Tong Ying Shun, Michael D Lewen, Ian F. Pollack, and John S. Lazo  
 Molecular Pharmacology

|                              |           |        |                                                          |           |        |
|------------------------------|-----------|--------|----------------------------------------------------------|-----------|--------|
| siRNA-Vinblastine Run1-DMSO  | NM_004203 | PKMYT1 | protein kinase, membrane associated tyrosine/threonine 1 | 2.087764  | Inlier |
| siRNA-Temozolomide Run3-DMSO | NM_213560 | PKN1   | protein kinase N1                                        | -1.08792  | Inlier |
| siRNA-Temozolomide Run1-DMSO | NM_213560 | PKN1   | protein kinase N1                                        | -0.693961 | Inlier |
| siRNA Disorazole DMSO Run3   | NM_213560 | PKN1   | protein kinase N1                                        | -0.557803 | Inlier |
| siRNA-Temozolomide Run2-DMSO | NM_213560 | PKN1   | protein kinase N1                                        | -0.49751  | Inlier |
| siRNA Disorazole DMSO Run2   | NM_213560 | PKN1   | protein kinase N1                                        | 0.49751   | Inlier |
| siRNA Disorazole DMSO Run1   | NM_213560 | PKN1   | protein kinase N1                                        | 0.655039  | Inlier |
| siRNA-Vinblastine Run1-DMSO  | NM_213560 | PKN1   | protein kinase N1                                        | 0.923597  | Inlier |
| siRNA-Vinblastine Run2-DMSO  | NM_213560 | PKN1   | protein kinase N1                                        | 1.281697  | Inlier |
| siRNA Disorazole DMSO Run3   | NM_006256 | PKN2   | protein kinase N2                                        | -1.03928  | Inlier |
| siRNA Disorazole DMSO Run2   | NM_006256 | PKN2   | protein kinase N2                                        | -0.775773 | Inlier |
| siRNA-Temozolomide Run3-DMSO | NM_006256 | PKN2   | protein kinase N2                                        | -0.029063 | Inlier |
| siRNA-Temozolomide Run2-DMSO | NM_006256 | PKN2   | protein kinase N2                                        | -0.005436 | Inlier |
| siRNA-Temozolomide Run1-DMSO | NM_006256 | PKN2   | protein kinase N2                                        | 0.005435  | Inlier |
| siRNA-Vinblastine Run1-DMSO  | NM_006256 | PKN2   | protein kinase N2                                        | 0.667637  | Inlier |
| siRNA Disorazole DMSO Run1   | NM_006256 | PKN2   | protein kinase N2                                        | 0.681363  | Inlier |
| siRNA-Vinblastine Run2-DMSO  | NM_006256 | PKN2   | protein kinase N2                                        | 1.523689  | Inlier |
| siRNA-Temozolomide Run3-DMSO | NM_013355 | PKN3   | protein kinase N3                                        | -2.492945 | Inlier |
| siRNA-Temozolomide Run2-DMSO | NM_013355 | PKN3   | protein kinase N3                                        | -1.183891 | Inlier |
| siRNA Disorazole DMSO Run3   | NM_013355 | PKN3   | protein kinase N3                                        | -0.116435 | Inlier |
| siRNA-Temozolomide Run1-DMSO | NM_013355 | PKN3   | protein kinase N3                                        | -0.026171 | Inlier |
| siRNA Disorazole DMSO Run2   | NM_013355 | PKN3   | protein kinase N3                                        | 0.026171  | Inlier |

Identification of Survival Genes in Human Glioblastoma Cells Using siRNA Screening  
 Nikhil G Thaker, Fang Zhang, Peter R. McDonald, Tong Ying Shun, Michael D Lewen, Ian F. Pollack, and John S. Lazo

|                              |         |         |                           |           |        |
|------------------------------|---------|---------|---------------------------|-----------|--------|
| Molecular Pharmacology       | NM_0133 |         | protein                   |           |        |
| siRNA Disorazole DMSO Run1   | 55      | PKN3    | kinase N3                 | 0.230752  | Inlier |
| siRNA-Vinblastine Run1-DMSO  | NM_0133 |         | protein                   |           |        |
| siRNA-Vinblastine Run2-DMSO  | 55      | PKN3    | kinase N3                 | 1.118248  | Inlier |
| siRNA-Vinblastine Run2-DMSO  | NM_0133 |         | protein                   |           |        |
| siRNA-Vinblastine Run2-DMSO  | 55      | PKN3    | kinase N3                 | 1.613207  | Inlier |
| siRNA-Temozolomide Run3-DMSO | NM_0159 |         | phospholipase A1          |           |        |
| siRNA-Temozolomide Run3-DMSO | 00      | PLA1A   | member A                  | -0.847245 | Inlier |
| siRNA-Temozolomide Run2-DMSO | NM_0159 |         | phospholipase A1          |           |        |
| siRNA-Temozolomide Run2-DMSO | 00      | PLA1A   | member A                  | -0.705588 | Inlier |
| siRNA Disorazole DMSO Run3   | NM_0159 |         | phospholipase A1          |           |        |
| siRNA Disorazole DMSO Run3   | 00      | PLA1A   | member A                  | -0.643412 | Inlier |
| siRNA-Vinblastine Run2-DMSO  | NM_0159 |         | phospholipase A1          |           |        |
| siRNA-Vinblastine Run2-DMSO  | 00      | PLA1A   | member A                  | -0.329446 | Inlier |
| siRNA Disorazole DMSO Run1   | NM_0159 |         | phospholipase A1          |           |        |
| siRNA Disorazole DMSO Run1   | 00      | PLA1A   | member A                  | 0.329446  | Inlier |
| siRNA-Temozolomide Run1-DMSO | NM_0159 |         | phospholipase A1          |           |        |
| siRNA-Temozolomide Run1-DMSO | 00      | PLA1A   | member A                  | 0.475286  | Inlier |
| siRNA Disorazole DMSO Run2   | NM_0159 |         | phospholipase A1          |           |        |
| siRNA Disorazole DMSO Run2   | 00      | PLA1A   | member A                  | 2.132476  | Inlier |
| siRNA-Vinblastine Run1-DMSO  | NM_0159 |         | phospholipase A1          |           |        |
| siRNA-Vinblastine Run1-DMSO  | 00      | PLA1A   | member A                  | 2.231793  | Inlier |
| siRNA-Temozolomide Run3-DMSO | NM_0035 |         | phospholipase A2, group X |           |        |
| siRNA-Temozolomide Run3-DMSO | 61      | PLA2G10 | phospholipase A2, group X | -1.098996 | Inlier |
| siRNA-Temozolomide Run2-DMSO | NM_0035 |         | phospholipase A2, group X |           |        |
| siRNA-Temozolomide Run2-DMSO | 61      | PLA2G10 | phospholipase A2, group X | -0.548127 | Inlier |
| siRNA-Vinblastine Run2-DMSO  | NM_0035 |         | phospholipase A2, group X |           |        |
| siRNA-Vinblastine Run2-DMSO  | 61      | PLA2G10 | phospholipase A2, group X | -0.101643 | Inlier |
| siRNA-Temozolomide Run1-DMSO | NM_0035 |         | phospholipase A2, group X |           |        |
| siRNA-Temozolomide Run1-DMSO | 61      | PLA2G10 | phospholipase A2, group X | -0.061988 | Inlier |

Identification of Survival Genes in Human Glioblastoma Cells Using siRNA Screening  
 Nikhil G Thaker, Fang Zhang, Peter R. McDonald, Tong Ying Shun, Michael D Lewen, Ian F. Pollack, and John S. Lazo

Molecular Pharmacology

|                              |         |         |                              |                  |
|------------------------------|---------|---------|------------------------------|------------------|
|                              | NM_0035 |         | phospholipase A2, group X    |                  |
| siRNA Disorazole DMSO Run3   | 61      | PLA2G10 |                              | 0.061988 Inlier  |
|                              | NM_0035 |         | phospholipase A2, group X    |                  |
| siRNA-Vinblastine Run1-DMSO  | 61      | PLA2G10 |                              | 0.800873 Inlier  |
|                              | NM_0035 |         | phospholipase A2, group X    |                  |
| siRNA Disorazole DMSO Run1   | 61      | PLA2G10 |                              | 0.864782 Inlier  |
|                              | NM_0035 |         | phospholipase A2, group X    |                  |
| siRNA Disorazole DMSO Run2   | 61      | PLA2G10 |                              | 1.196581 Inlier  |
|                              | NM_0308 |         | phospholipase A2, group XIIA |                  |
| siRNA-Temozolomide Run3-DMSO | 21      | A       |                              | -1.915553 Inlier |
|                              | NM_0308 |         | phospholipase A2, group XIIA |                  |
| siRNA-Temozolomide Run1-DMSO | 21      | A       |                              | -0.526744 Inlier |
|                              | NM_0308 |         | phospholipase A2, group XIIA |                  |
| siRNA Disorazole DMSO Run3   | 21      | A       |                              | -0.494922 Inlier |
|                              | NM_0308 |         | phospholipase A2, group XIIA |                  |
| siRNA-Temozolomide Run2-DMSO | 21      | A       |                              | -0.054965 Inlier |
|                              | NM_0308 |         | phospholipase A2, group XIIA |                  |
| siRNA-Vinblastine Run2-DMSO  | 21      | A       |                              | 0.054966 Inlier  |
|                              | NM_0308 |         | phospholipase A2, group XIIA |                  |
| siRNA-Vinblastine Run1-DMSO  | 21      | A       |                              | 0.822256 Inlier  |
|                              | NM_0308 |         | phospholipase A2, group XIIA |                  |
| siRNA Disorazole DMSO Run1   | 21      | A       |                              | 1.382827 Inlier  |
|                              | NM_0308 |         | phospholipase A2, group XIIA |                  |
| siRNA Disorazole DMSO Run2   | 21      | A       |                              | 2.067751 Inlier  |
|                              | NM_0325 |         | phospholipase A2, group XIIB |                  |
| siRNA-Temozolomide Run3-DMSO | 62      | B       |                              | -0.67903 Inlier  |
|                              | NM_0325 |         | phospholipase A2, group XIIB |                  |
| siRNA Disorazole DMSO Run3   | 62      | B       |                              | -0.672257 Inlier |
|                              | NM_0325 |         | phospholipase A2, group XIIB |                  |
| siRNA-Vinblastine Run2-DMSO  | 62      | B       |                              | -0.426332 Inlier |
|                              | NM_0325 |         | phospholipase A2, group XIIB |                  |
| siRNA-Temozolomide Run2-DMSO | 62      | B       |                              | -0.209013 Inlier |
|                              | NM_0325 |         | phospholipase A2, group XIIB |                  |
| siRNA Disorazole DMSO Run1   | 62      | B       |                              | 0.209013 Inlier  |

Identification of Survival Genes in Human Glioblastoma Cells Using siRNA Screening

Nikhil G Thaker, Fang Zhang, Peter R. McDonald, Tong Ying Shun, Michael D Lewen, Ian F. Pollack, and John S. Lazo

Molecular Pharmacology

|                              |               |              |                                                 |           |        |
|------------------------------|---------------|--------------|-------------------------------------------------|-----------|--------|
| siRNA-Temozolomide Run1-DMSO | NM_0325<br>62 | PLA2G12<br>B | phospholip<br>ase A2,<br>group XIIB             | 0.676743  | Inlier |
| siRNA-Vinblastine Run1-DMSO  | NM_0325<br>62 | PLA2G12<br>B | phospholip<br>ase A2,<br>group XIIB             | 1.357647  | Inlier |
| siRNA Disorazole DMSO Run2   | NM_0325<br>62 | PLA2G12<br>B | phospholip<br>ase A2,<br>group XIIB             | 1.596011  | Inlier |
| siRNA-Temozolomide Run2-DMSO | NM_0009<br>28 | PLA2G1B      | phospholip<br>ase A2,<br>group IB<br>(pancreas) | -1.189816 | Inlier |
| siRNA-Temozolomide Run3-DMSO | NM_0009<br>28 | PLA2G1B      | phospholip<br>ase A2,<br>group IB<br>(pancreas) | -1.001342 | Inlier |
| siRNA-Temozolomide Run1-DMSO | NM_0009<br>28 | PLA2G1B      | phospholip<br>ase A2,<br>group IB<br>(pancreas) | -0.406843 | Inlier |
| siRNA-Vinblastine Run2-DMSO  | NM_0009<br>28 | PLA2G1B      | phospholip<br>ase A2,<br>group IB<br>(pancreas) | -0.030728 | Inlier |
| siRNA Disorazole DMSO Run3   | NM_0009<br>28 | PLA2G1B      | phospholip<br>ase A2,<br>group IB<br>(pancreas) | 0.030727  | Inlier |
| siRNA-Vinblastine Run1-DMSO  | NM_0009<br>28 | PLA2G1B      | phospholip<br>ase A2,<br>group IB<br>(pancreas) | 0.669153  | Inlier |
| siRNA Disorazole DMSO Run1   | NM_0009<br>28 | PLA2G1B      | phospholip<br>ase A2,<br>group IB<br>(pancreas) | 0.679847  | Inlier |
| siRNA Disorazole DMSO Run2   | NM_0009<br>28 | PLA2G1B      | phospholip<br>ase A2,<br>group IB<br>(pancreas) | 0.985194  | Inlier |

Identification of Survival Genes in Human Glioblastoma Cells Using siRNA Screening  
 Nikhil G Thaker, Fang Zhang, Peter R. McDonald, Tong Ying Shun, Michael D Lewen, Ian F. Pollack, and John S. Lazo

Molecular Pharmacology

| siRNA Treatment              | Gene ID   | Gene Name | Gene Description                                        | Log2 Fold Change | Outlier Status |
|------------------------------|-----------|-----------|---------------------------------------------------------|------------------|----------------|
| siRNA-Temozolomide Run3-DMSO | NM_000300 | PLA2G2A   | phospholipase A2, group IIA (platelets, synovial fluid) | -1.167045        | Inlier         |
| siRNA Disorazole DMSO Run1   | NM_000300 | PLA2G2A   | phospholipase A2, group IIA (platelets, synovial fluid) | -1.104211        | Inlier         |
| siRNA-Temozolomide Run1-DMSO | NM_000300 | PLA2G2A   | phospholipase A2, group IIA (platelets, synovial fluid) | -0.611514        | Inlier         |
| siRNA-Vinblastine Run2-DMSO  | NM_000300 | PLA2G2A   | phospholipase A2, group IIA (platelets, synovial fluid) | -0.030471        | Inlier         |
| siRNA Disorazole DMSO Run3   | NM_000300 | PLA2G2A   | phospholipase A2, group IIA (platelets, synovial fluid) | 0.030472         | Inlier         |
| siRNA-Temozolomide Run2-DMSO | NM_000300 | PLA2G2A   | phospholipase A2, group IIA (platelets, synovial fluid) | 0.297186         | Inlier         |
| siRNA-Vinblastine Run1-DMSO  | NM_000300 | PLA2G2A   | phospholipase A2, group IIA (platelets, synovial fluid) | 0.737486         | Inlier         |
| siRNA Disorazole DMSO Run2   | NM_000300 | PLA2G2A   | phospholipase A2, group IIA (platelets, synovial fluid) | 1.622475         | Inlier         |
| siRNA-Temozolomide Run3-DMSO | NM_012400 | PLA2G2D   | phospholipase A2, group IID                             | -1.508293        | Inlier         |

Identification of Survival Genes in Human Glioblastoma Cells Using siRNA Screening  
 Nikhil G Thaker, Fang Zhang, Peter R. McDonald, Tong Ying Shun, Michael D Lewen, Ian F. Pollack, and John S. Lazo

| Condition                                                 | Gene ID       | Probe   | Gene Name                          | Value     | Category |
|-----------------------------------------------------------|---------------|---------|------------------------------------|-----------|----------|
| Molecular Pharmacology<br>siRNA-Vinblastine Run2-<br>DMSO | NM_0124<br>00 | PLA2G2D | phospholip<br>ase A2,<br>group IID | -0.362568 | Inlier   |
| siRNA Disorazole DMSO Run1                                | NM_0124<br>00 | PLA2G2D | phospholip<br>ase A2,<br>group IID | -0.323037 | Inlier   |
| siRNA-Temozolomide Run2-<br>DMSO                          | NM_0124<br>00 | PLA2G2D | phospholip<br>ase A2,<br>group IID | -0.137935 | Inlier   |
| siRNA-Temozolomide Run1-<br>DMSO                          | NM_0124<br>00 | PLA2G2D | phospholip<br>ase A2,<br>group IID | 0.137935  | Inlier   |
| siRNA-Vinblastine Run1-<br>DMSO                           | NM_0124<br>00 | PLA2G2D | phospholip<br>ase A2,<br>group IID | 0.986432  | Inlier   |
| siRNA Disorazole DMSO Run3                                | NM_0124<br>00 | PLA2G2D | phospholip<br>ase A2,<br>group IID | 0.99297   | Inlier   |
| siRNA Disorazole DMSO Run2                                | NM_0124<br>00 | PLA2G2D | phospholip<br>ase A2,<br>group IID | 1.560479  | Inlier   |
| siRNA-Temozolomide Run3-<br>DMSO                          | NM_0145<br>89 | PLA2G2E | phospholip<br>ase A2,<br>group IIE | -2.286969 | Inlier   |
| siRNA-Temozolomide Run2-<br>DMSO                          | NM_0145<br>89 | PLA2G2E | phospholip<br>ase A2,<br>group IIE | -0.712729 | Inlier   |
| siRNA Disorazole DMSO Run1                                | NM_0145<br>89 | PLA2G2E | phospholip<br>ase A2,<br>group IIE | -0.224699 | Inlier   |
| siRNA-Vinblastine Run2-<br>DMSO                           | NM_0145<br>89 | PLA2G2E | phospholip<br>ase A2,<br>group IIE | -0.140071 | Inlier   |
| siRNA-Temozolomide Run1-<br>DMSO                          | NM_0145<br>89 | PLA2G2E | phospholip<br>ase A2,<br>group IIE | 0.140065  | Inlier   |
| siRNA Disorazole DMSO Run3                                | NM_0145<br>89 | PLA2G2E | phospholip<br>ase A2,<br>group IIE | 0.636271  | Inlier   |
| siRNA-Vinblastine Run1-<br>DMSO                           | NM_0145<br>89 | PLA2G2E | phospholip<br>ase A2,<br>group IIE | 2.108126  | Inlier   |
| siRNA Disorazole DMSO Run2                                | NM_0145<br>89 | PLA2G2E | phospholip<br>ase A2,<br>group IIE | 10.20913  | Outlier  |
| siRNA-Temozolomide Run3-<br>DMSO                          | NM_0228<br>19 | PLA2G2F | phospholip<br>ase A2,<br>group IIF | -2.72725  | Inlier   |
| siRNA-Temozolomide Run2-<br>DMSO                          | NM_0228<br>19 | PLA2G2F | phospholip<br>ase A2,<br>group IIF | -0.919569 | Inlier   |

Identification of Survival Genes in Human Glioblastoma Cells Using siRNA Screening  
 Nikhil G Thaker, Fang Zhang, Peter R. McDonald, Tong Ying Shun, Michael D Lewen, Ian F. Pollack, and John S. Lazo

Molecular Pharmacology

|                              |               |         |                                                            |           |        |
|------------------------------|---------------|---------|------------------------------------------------------------|-----------|--------|
| siRNA Disorazole DMSO Run3   | NM_0228<br>19 | PLA2G2F | phospholipase A2, group IIF                                | -0.429431 | Inlier |
| siRNA-Vinblastine Run2-DMSO  | NM_0228<br>19 | PLA2G2F | phospholipase A2, group IIF                                | -0.371294 | Inlier |
| siRNA Disorazole DMSO Run1   | NM_0228<br>19 | PLA2G2F | phospholipase A2, group IIF                                | 0.371295  | Inlier |
| siRNA-Temozolomide Run1-DMSO | NM_0228<br>19 | PLA2G2F | phospholipase A2, group IIF                                | 0.378696  | Inlier |
| siRNA-Vinblastine Run1-DMSO  | NM_0228<br>19 | PLA2G2F | phospholipase A2, group IIF                                | 1.31323   | Inlier |
| siRNA Disorazole DMSO Run2   | NM_0228<br>19 | PLA2G2F | phospholipase A2, group IIF                                | 2.251722  | Inlier |
| siRNA-Temozolomide Run3-DMSO | NM_0157<br>15 | PLA2G3  | phospholipase A2, group III                                | -1.831136 | Inlier |
| siRNA-Temozolomide Run2-DMSO | NM_0157<br>15 | PLA2G3  | phospholipase A2, group III                                | -0.775063 | Inlier |
| siRNA Disorazole DMSO Run3   | NM_0157<br>15 | PLA2G3  | phospholipase A2, group III                                | -0.573937 | Inlier |
| siRNA-Vinblastine Run2-DMSO  | NM_0157<br>15 | PLA2G3  | phospholipase A2, group III                                | -0.026314 | Inlier |
| siRNA-Temozolomide Run1-DMSO | NM_0157<br>15 | PLA2G3  | phospholipase A2, group III                                | 0.026314  | Inlier |
| siRNA Disorazole DMSO Run1   | NM_0157<br>15 | PLA2G3  | phospholipase A2, group III                                | 0.047806  | Inlier |
| siRNA-Vinblastine Run1-DMSO  | NM_0157<br>15 | PLA2G3  | phospholipase A2, group III                                | 1.044857  | Inlier |
| siRNA Disorazole DMSO Run2   | NM_0157<br>15 | PLA2G3  | phospholipase A2, group III                                | 1.821141  | Inlier |
| siRNA-Temozolomide Run1-DMSO | NM_0244<br>20 | PLA2G4A | phospholipase A2, group IVA (cytosolic, calcium-dependent) | -1.364264 | Inlier |

Identification of Survival Genes in Human Glioblastoma Cells Using siRNA Screening

Nikhil G Thaker, Fang Zhang, Peter R. McDonald, Tong Ying Shun, Michael D Lewen, Ian F. Pollack, and John S. Lazo

Molecular Pharmacology

|                              |               |         |   |                                                            |           |        |
|------------------------------|---------------|---------|---|------------------------------------------------------------|-----------|--------|
| siRNA-Temozolomide Run2-DMSO | NM_0244<br>20 | PLA2G4A | ) | phospholipase A2, group IVA (cytosolic, calcium-dependent) | -0.716693 | Inlier |
| siRNA-Vinblastine Run2-DMSO  | NM_0244<br>20 | PLA2G4A | ) | phospholipase A2, group IVA (cytosolic, calcium-dependent) | -0.632307 | Inlier |
| siRNA-Temozolomide Run3-DMSO | NM_0244<br>20 | PLA2G4A | ) | phospholipase A2, group IVA (cytosolic, calcium-dependent) | -0.002659 | Inlier |
| siRNA Disorazole DMSO Run1   | NM_0244<br>20 | PLA2G4A | ) | phospholipase A2, group IVA (cytosolic, calcium-dependent) | 0.002658  | Inlier |
| siRNA Disorazole DMSO Run3   | NM_0244<br>20 | PLA2G4A | ) | phospholipase A2, group IVA (cytosolic, calcium-dependent) | 0.304971  | Inlier |
| siRNA-Vinblastine Run1-DMSO  | NM_0244<br>20 | PLA2G4A | ) | phospholipase A2, group IVA (cytosolic, calcium-dependent) | 2.160748  | Inlier |
| siRNA Disorazole DMSO Run2   | NM_0244<br>20 | PLA2G4A | ) | phospholipase A2, group IVA (cytosolic, calcium-dependent) | 3.007692  | Inlier |



Identification of Survival Genes in Human Glioblastoma Cells Using siRNA Screening  
 Nikhil G Thaker, Fang Zhang, Peter R. McDonald, Tong Ying Shun, Michael D Lewen, Ian F. Pollack, and John S. Lazo  
 Molecular Pharmacology

|                              |           |         |                                                              |           |        |
|------------------------------|-----------|---------|--------------------------------------------------------------|-----------|--------|
| siRNA-Temozolomide Run3-DMSO | NM_005090 | PLA2G4B | phospholipase A2, group IVB (cytosolic)                      | -0.951994 | Inlier |
| siRNA-Temozolomide Run2-DMSO | NM_005090 | PLA2G4B | phospholipase A2, group IVB (cytosolic)                      | -0.397006 | Inlier |
| siRNA-Vinblastine Run2-DMSO  | NM_005090 | PLA2G4B | phospholipase A2, group IVB (cytosolic)                      | -0.345935 | Inlier |
| siRNA Disorazole DMSO Run3   | NM_005090 | PLA2G4B | phospholipase A2, group IVB (cytosolic)                      | -0.252179 | Inlier |
| siRNA-Temozolomide Run1-DMSO | NM_005090 | PLA2G4B | phospholipase A2, group IVB (cytosolic)                      | 0.252179  | Inlier |
| siRNA Disorazole DMSO Run1   | NM_005090 | PLA2G4B | phospholipase A2, group IVB (cytosolic)                      | 0.983215  | Inlier |
| siRNA-Vinblastine Run1-DMSO  | NM_005090 | PLA2G4B | phospholipase A2, group IVB (cytosolic)                      | 1.643384  | Inlier |
| siRNA Disorazole DMSO Run2   | NM_005090 | PLA2G4B | phospholipase A2, group IVB (cytosolic)                      | 1.705805  | Inlier |
| siRNA-Temozolomide Run1-DMSO | NM_003706 | PLA2G4C | phospholipase A2, group IVC (cytosolic, calcium-independent) | -1.023935 | Inlier |

Identification of Survival Genes in Human Glioblastoma Cells Using siRNA Screening

Nikhil G Thaker, Fang Zhang, Peter R. McDonald, Tong Ying Shun, Michael D Lewen, Ian F. Pollack, and John S. Lazo

Molecular Pharmacology

| siRNA Treatment              | Gene ID   | Target  | Gene Description                                             | Value     | Outlier Status |
|------------------------------|-----------|---------|--------------------------------------------------------------|-----------|----------------|
| siRNA-Temozolomide Run2-DMSO | NM_003706 | PLA2G4C | phospholipase A2, group IVC (cytosolic, calcium-independent) | -0.831577 | Inlier         |
| siRNA-Vinblastine Run2-DMSO  | NM_003706 | PLA2G4C | phospholipase A2, group IVC (cytosolic, calcium-independent) | -0.436463 | Inlier         |
| siRNA-Temozolomide Run3-DMSO | NM_003706 | PLA2G4C | phospholipase A2, group IVC (cytosolic, calcium-independent) | -0.172121 | Inlier         |
| siRNA Disorazole DMSO Run3   | NM_003706 | PLA2G4C | phospholipase A2, group IVC (cytosolic, calcium-independent) | 0.17212   | Inlier         |
| siRNA-Vinblastine Run1-DMSO  | NM_003706 | PLA2G4C | phospholipase A2, group IVC (cytosolic, calcium-independent) | 0.517423  | Inlier         |
| siRNA Disorazole DMSO Run2   | NM_003706 | PLA2G4C | phospholipase A2, group IVC (cytosolic, calcium-independent) | 1.152553  | Inlier         |
| siRNA Disorazole DMSO Run1   | NM_003706 | PLA2G4C | phospholipase A2, group IVC (cytosolic, calcium-independent) | 1.979278  | Inlier         |

Identification of Survival Genes in Human Glioblastoma Cells Using siRNA Screening  
 Nikhil G Thaker, Fang Zhang, Peter R. McDonald, Tong Ying Shun, Michael D Lewen, Ian F. Pollack, and John S. Lazo  
 Molecular Pharmacology

|                              |               |         |                                         |           |         |
|------------------------------|---------------|---------|-----------------------------------------|-----------|---------|
| siRNA-Temozolomide Run3-DMSO | NM_1780<br>34 | PLA2G4D | phospholipase A2, group IVD (cytosolic) | -1.308179 | Inlier  |
| siRNA-Temozolomide Run2-DMSO | NM_1780<br>34 | PLA2G4D | phospholipase A2, group IVD (cytosolic) | -0.71743  | Inlier  |
| siRNA Disorazole DMSO Run3   | NM_1780<br>34 | PLA2G4D | phospholipase A2, group IVD (cytosolic) | -0.178418 | Inlier  |
| siRNA-Temozolomide Run1-DMSO | NM_1780<br>34 | PLA2G4D | phospholipase A2, group IVD (cytosolic) | -0.028992 | Inlier  |
| siRNA-Vinblastine Run2-DMSO  | NM_1780<br>34 | PLA2G4D | phospholipase A2, group IVD (cytosolic) | 0.028992  | Inlier  |
| siRNA Disorazole DMSO Run1   | NM_1780<br>34 | PLA2G4D | phospholipase A2, group IVD (cytosolic) | 0.637463  | Inlier  |
| siRNA Disorazole DMSO Run2   | NM_1780<br>34 | PLA2G4D | phospholipase A2, group IVD (cytosolic) | 0.711537  | Inlier  |
| siRNA-Vinblastine Run1-DMSO  | NM_1780<br>34 | PLA2G4D | phospholipase A2, group IVD (cytosolic) | 0.795752  | Inlier  |
| siRNA-Temozolomide Run3-DMSO | NM_0009<br>29 | PLA2G5  | phospholipase A2, group V               | -4.616567 | Outlier |
| siRNA Disorazole DMSO Run3   | NM_0009<br>29 | PLA2G5  | phospholipase A2, group V               | -0.890652 | Inlier  |
| siRNA-Temozolomide Run1-DMSO | NM_0009<br>29 | PLA2G5  | phospholipase A2, group V               | -0.458348 | Inlier  |
| siRNA-Temozolomide Run2-DMSO | NM_0009<br>29 | PLA2G5  | phospholipase A2, group V               | -0.036939 | Inlier  |

Identification of Survival Genes in Human Glioblastoma Cells Using siRNA Screening  
 Nikhil G Thaker, Fang Zhang, Peter R. McDonald, Tong Ying Shun, Michael D Lewen, Ian F. Pollack, and John S. Lazo

Molecular Pharmacology

|                              |               |        |                                                             |           |         |
|------------------------------|---------------|--------|-------------------------------------------------------------|-----------|---------|
| siRNA Disorazole DMSO Run1   | NM_0009<br>29 | PLA2G5 | phospholipase A2, group V                                   | 0.036939  | Inlier  |
| siRNA-Vinblastine Run2-DMSO  | NM_0009<br>29 | PLA2G5 | phospholipase A2, group V                                   | 0.102662  | Inlier  |
| siRNA-Vinblastine Run1-DMSO  | NM_0009<br>29 | PLA2G5 | phospholipase A2, group V                                   | 4.43181   | Outlier |
| siRNA Disorazole DMSO Run2   | NM_0009<br>29 | PLA2G5 | phospholipase A2, group V                                   | 5.804195  | Outlier |
| siRNA-Temozolomide Run2-DMSO | NM_0035<br>60 | PLA2G6 | phospholipase A2, group VI (cytosolic, calcium-independent) | -1.499751 | Inlier  |
| siRNA-Vinblastine Run2-DMSO  | NM_0035<br>60 | PLA2G6 | phospholipase A2, group VI (cytosolic, calcium-independent) | -1.0492   | Inlier  |
| siRNA-Temozolomide Run1-DMSO | NM_0035<br>60 | PLA2G6 | phospholipase A2, group VI (cytosolic, calcium-independent) | -0.528536 | Inlier  |
| siRNA Disorazole DMSO Run3   | NM_0035<br>60 | PLA2G6 | phospholipase A2, group VI (cytosolic, calcium-independent) | -0.040836 | Inlier  |
| siRNA Disorazole DMSO Run1   | NM_0035<br>60 | PLA2G6 | phospholipase A2, group VI (cytosolic, calcium-independent) | 0.040836  | Inlier  |

Identification of Survival Genes in Human Glioblastoma Cells Using siRNA Screening

Nikhil G Thaker, Fang Zhang, Peter R. McDonald, Tong Ying Shun, Michael D Lewen, Ian F. Pollack, and John S.

Lazo

Molecular Pharmacology

|                              |               |        |                                                                                  |           |         |
|------------------------------|---------------|--------|----------------------------------------------------------------------------------|-----------|---------|
| siRNA-Temozolomide Run3-DMSO | NM_0035<br>60 | PLA2G6 | phospholipase A2, group VI (cytosolic, calcium-independent)                      | 0.111199  | Inlier  |
| siRNA Disorazole DMSO Run2   | NM_0035<br>60 | PLA2G6 | phospholipase A2, group VI (cytosolic, calcium-independent)                      | 0.820464  | Inlier  |
| siRNA-Vinblastine Run1-DMSO  | NM_0035<br>60 | PLA2G6 | phospholipase A2, group VII (platelet-activating factor acetylhydrolase, plasma) | 1.24364   | Inlier  |
| siRNA-Temozolomide Run3-DMSO | NM_0050<br>84 | PLA2G7 | phospholipase A2, group VII (platelet-activating factor acetylhydrolase, plasma) | -3.680193 | Outlier |
| siRNA-Temozolomide Run2-DMSO | NM_0050<br>84 | PLA2G7 | phospholipase A2, group VII (platelet-activating factor acetylhydrolase, plasma) | -1.282374 | Inlier  |
| siRNA-Temozolomide Run1-DMSO | NM_0050<br>84 | PLA2G7 | phospholipase A2, group VII (platelet-activating factor acetylhydrolase, plasma) | -0.488858 | Inlier  |

Identification of Survival Genes in Human Glioblastoma Cells Using siRNA Screening

Nikhil G Thaker, Fang Zhang, Peter R. McDonald, Tong Ying Shun, Michael D Lewen, Ian F. Pollack, and John S. Lazo

Molecular Pharmacology

|                              |           |        |                                                                                  |           |        |
|------------------------------|-----------|--------|----------------------------------------------------------------------------------|-----------|--------|
| siRNA-Vinblastine Run2-DMSO  | NM_005084 | PLA2G7 | phospholipase A2, group VII (platelet-activating factor acetylhydrolase, plasma) | -0.29753  | Inlier |
| siRNA Disorazole DMSO Run1   | NM_005084 | PLA2G7 | phospholipase A2, group VII (platelet-activating factor acetylhydrolase, plasma) | 0.297529  | Inlier |
| siRNA Disorazole DMSO Run3   | NM_005084 | PLA2G7 | phospholipase A2, group VII (platelet-activating factor acetylhydrolase, plasma) | 0.343797  | Inlier |
| siRNA-Vinblastine Run1-DMSO  | NM_005084 | PLA2G7 | phospholipase A2, group VII (platelet-activating factor acetylhydrolase, plasma) | 0.860142  | Inlier |
| siRNA Disorazole DMSO Run2   | NM_005084 | PLA2G7 | phospholipase A2, group VII (platelet-activating factor acetylhydrolase, plasma) | 1.449186  | Inlier |
| siRNA-Temozolomide Run2-DMSO | NM_007366 | PLA2R1 | receptor 1, 180kDa                                                               | -1.014426 | Inlier |

Identification of Survival Genes in Human Glioblastoma Cells Using siRNA Screening  
 Nikhil G Thaker, Fang Zhang, Peter R. McDonald, Tong Ying Shun, Michael D Lewen, Ian F. Pollack, and John S. Lazo

Molecular Pharmacology

|                              |               |        |                                     |           |        |
|------------------------------|---------------|--------|-------------------------------------|-----------|--------|
| siRNA-Temozolomide Run3-DMSO | NM_0073<br>66 | PLA2R1 | phospholipase A2 receptor 1, 180kDa | -0.845291 | Inlier |
| siRNA-Vinblastine Run2-DMSO  | NM_0073<br>66 | PLA2R1 | phospholipase A2 receptor 1, 180kDa | -0.503709 | Inlier |
| siRNA-Temozolomide Run1-DMSO | NM_0073<br>66 | PLA2R1 | phospholipase A2 receptor 1, 180kDa | -0.2174   | Inlier |
| siRNA Disorazole DMSO Run3   | NM_0073<br>66 | PLA2R1 | phospholipase A2 receptor 1, 180kDa | 0.2174    | Inlier |
| siRNA Disorazole DMSO Run1   | NM_0073<br>66 | PLA2R1 | phospholipase A2 receptor 1, 180kDa | 0.247617  | Inlier |
| siRNA Disorazole DMSO Run2   | NM_0073<br>66 | PLA2R1 | phospholipase A2 receptor 1, 180kDa | 1.441715  | Inlier |
| siRNA-Vinblastine Run1-DMSO  | NM_0073<br>66 | PLA2R1 | phospholipase A2 receptor 1, 180kDa | 1.690025  | Inlier |
| siRNA-Temozolomide Run3-DMSO | NM_0042<br>53 | PLAA   | phospholipase A2-activating protein | -1.28172  | Inlier |
| siRNA-Temozolomide Run2-DMSO | NM_0042<br>53 | PLAA   | phospholipase A2-activating protein | -0.817256 | Inlier |
| siRNA-Temozolomide Run1-DMSO | NM_0042<br>53 | PLAA   | phospholipase A2-activating protein | -0.07718  | Inlier |
| siRNA Disorazole DMSO Run3   | NM_0042<br>53 | PLAA   | phospholipase A2-activating protein | -0.022022 | Inlier |
| siRNA-Vinblastine Run2-DMSO  | NM_0042<br>53 | PLAA   | phospholipase A2-activating protein | 0.022022  | Inlier |
| siRNA Disorazole DMSO Run1   | NM_0042<br>53 | PLAA   | phospholipase A2-activating protein | 0.590638  | Inlier |

Identification of Survival Genes in Human Glioblastoma Cells Using siRNA Screening  
 Nikhil G Thaker, Fang Zhang, Peter R. McDonald, Tong Ying Shun, Michael D Lewen, Ian F. Pollack, and John S. Lazo

Molecular Pharmacology

| siRNA Treatment              | Gene ID   | Cell Line | Gene Name                           | Value     | Outlier Status |
|------------------------------|-----------|-----------|-------------------------------------|-----------|----------------|
| siRNA-Vinblastine Run1-DMSO  | NM_004253 | PLAA      | phospholipase A2-activating protein | 0.758362  | Inlier         |
| siRNA Disorazole DMSO Run2   | NM_004253 | PLAA      | phospholipase A2-activating protein | 1.440549  | Inlier         |
| siRNA-Temozolomide Run3-DMSO | NM_033011 | PLAT      | plasminogen activator, tissue       | -1.29667  | Inlier         |
| siRNA-Temozolomide Run2-DMSO | NM_033011 | PLAT      | plasminogen activator, tissue       | -0.955052 | Inlier         |
| siRNA Disorazole DMSO Run2   | NM_033011 | PLAT      | plasminogen activator, tissue       | -0.282136 | Inlier         |
| siRNA Disorazole DMSO Run1   | NM_033011 | PLAT      | plasminogen activator, tissue       | -0.256437 | Inlier         |
| siRNA-Temozolomide Run1-DMSO | NM_033011 | PLAT      | plasminogen activator, tissue       | 0.256437  | Inlier         |
| siRNA Disorazole DMSO Run3   | NM_033011 | PLAT      | plasminogen activator, tissue       | 0.393948  | Inlier         |
| siRNA-Vinblastine Run1-DMSO  | NM_033011 | PLAT      | plasminogen activator, tissue       | 0.971833  | Inlier         |
| siRNA-Vinblastine Run2-DMSO  | NM_033011 | PLAT      | plasminogen activator, tissue       | 1.327929  | Inlier         |
| siRNA-Temozolomide Run3-DMSO | NM_002658 | PLAU      | plasminogen activator, urokinase    | -1.179087 | Inlier         |
| siRNA-Temozolomide Run2-DMSO | NM_002658 | PLAU      | plasminogen activator, urokinase    | -0.726545 | Inlier         |
| siRNA Disorazole DMSO Run1   | NM_002658 | PLAU      | plasminogen activator, urokinase    | -0.622455 | Inlier         |



Identification of Survival Genes in Human Glioblastoma Cells Using siRNA Screening  
 Nikhil G Thaker, Fang Zhang, Peter R. McDonald, Tong Ying Shun, Michael D Lewen, Ian F. Pollack, and John S. Lazo

Molecular Pharmacology

|                              |               |       |                                                               |           |        |
|------------------------------|---------------|-------|---------------------------------------------------------------|-----------|--------|
| siRNA Disorazole DMSO Run2   | NM_0026<br>58 | PLAU  | plasminog<br>en<br>activator,<br>urokinase<br>plasminog<br>en | -0.097763 | Inlier |
| siRNA-Temozolomide Run1-DMSO | NM_0026<br>58 | PLAU  | activator,<br>urokinase<br>plasminog<br>en                    | 0.097764  | Inlier |
| siRNA-Vinblastine Run2-DMSO  | NM_0026<br>58 | PLAU  | activator,<br>urokinase<br>plasminog<br>en                    | 0.592143  | Inlier |
| siRNA-Vinblastine Run1-DMSO  | NM_0026<br>58 | PLAU  | activator,<br>urokinase<br>plasminog<br>en                    | 1.072008  | Inlier |
| siRNA Disorazole DMSO Run3   | NM_0026<br>58 | PLAU  | activator,<br>urokinase<br>plasminog<br>en                    | 1.319358  | Inlier |
| siRNA-Temozolomide Run3-DMSO | NM_0026<br>59 | PLAUR | activator,<br>urokinase<br>receptor<br>plasminog<br>en        | -0.866124 | Inlier |
| siRNA-Vinblastine Run2-DMSO  | NM_0026<br>59 | PLAUR | activator,<br>urokinase<br>receptor<br>plasminog<br>en        | -0.785501 | Inlier |
| siRNA-Temozolomide Run2-DMSO | NM_0026<br>59 | PLAUR | activator,<br>urokinase<br>receptor<br>plasminog<br>en        | -0.590804 | Inlier |
| siRNA-Temozolomide Run1-DMSO | NM_0026<br>59 | PLAUR | activator,<br>urokinase<br>receptor<br>plasminog<br>en        | -0.141345 | Inlier |
| siRNA Disorazole DMSO Run3   | NM_0026<br>59 | PLAUR | activator,<br>urokinase<br>receptor<br>plasminog<br>en        | 0.141345  | Inlier |
| siRNA Disorazole DMSO Run1   | NM_0026<br>59 | PLAUR | activator,<br>urokinase<br>receptor                           | 0.160152  | Inlier |

Identification of Survival Genes in Human Glioblastoma Cells Using siRNA Screening  
 Nikhil G Thaker, Fang Zhang, Peter R. McDonald, Tong Ying Shun, Michael D Lewen, Ian F. Pollack, and John S. Lazo

Molecular Pharmacology

|                              |               |       |                                                     |           |        |
|------------------------------|---------------|-------|-----------------------------------------------------|-----------|--------|
| siRNA-Vinblastine Run1-DMSO  | NM_0026<br>59 | PLAUR | plasminogen activator, urokinase receptor           | 0.758195  | Inlier |
| siRNA Disorazole DMSO Run2   | NM_0026<br>59 | PLAUR | plasminogen activator, urokinase receptor           | 0.760648  | Inlier |
| siRNA Disorazole DMSO Run1   | NM_1530<br>21 | PLB   | phospholipase B1                                    | -2.313193 | Inlier |
| siRNA-Temozolomide Run1-DMSO | NM_1530<br>21 | PLB   | phospholipase B1                                    | -0.994751 | Inlier |
| siRNA-Temozolomide Run2-DMSO | NM_1530<br>21 | PLB   | phospholipase B1                                    | -0.500717 | Inlier |
| siRNA-Vinblastine Run2-DMSO  | NM_1530<br>21 | PLB   | phospholipase B1                                    | -0.401063 | Inlier |
| siRNA-Temozolomide Run3-DMSO | NM_1530<br>21 | PLB   | phospholipase B1                                    | 0.401062  | Inlier |
| siRNA Disorazole DMSO Run3   | NM_1530<br>21 | PLB   | phospholipase B1                                    | 0.455393  | Inlier |
| siRNA-Vinblastine Run1-DMSO  | NM_1530<br>21 | PLB   | phospholipase B1                                    | 0.848283  | Inlier |
| siRNA Disorazole DMSO Run2   | NM_1530<br>21 | PLB   | phospholipase B1                                    | 2.048588  | Inlier |
| siRNA-Temozolomide Run3-DMSO | NM_1827<br>34 | PLCB1 | phospholipase C, beta 1 (phosphoinositide-specific) | -1.593506 | Inlier |
| siRNA-Vinblastine Run2-DMSO  | NM_1827<br>34 | PLCB1 | phospholipase C, beta 1 (phosphoinositide-specific) | -0.734799 | Inlier |
| siRNA Disorazole DMSO Run3   | NM_1827<br>34 | PLCB1 | phospholipase C, beta 1 (phosphoinositide-specific) | -0.614201 | Inlier |
| siRNA-Temozolomide Run2-DMSO | NM_1827<br>34 | PLCB1 | phospholipase C, beta 1 (phosphoinositide-specific) | -0.375072 | Inlier |

Identification of Survival Genes in Human Glioblastoma Cells Using siRNA Screening  
 Nikhil G Thaker, Fang Zhang, Peter R. McDonald, Tong Ying Shun, Michael D Lewen, Ian F. Pollack, and John S. Lazo

Molecular Pharmacology

| siRNA                        | Gene    | Gene ID | Gene Symbol | Gene Description                                    | Value     | Outlier |
|------------------------------|---------|---------|-------------|-----------------------------------------------------|-----------|---------|
| siRNA-Temozolomide Run1-DMSO | NM_1827 | 34      | PLCB1       | phospholipase C, beta 1 (phosphoinositide-specific) | 0.375072  | Inlier  |
| siRNA Disorazole DMSO Run1   | NM_1827 | 34      | PLCB1       | phospholipase C, beta 1 (phosphoinositide-specific) | 0.500719  | Inlier  |
| siRNA-Vinblastine Run1-DMSO  | NM_1827 | 34      | PLCB1       | phospholipase C, beta 1 (phosphoinositide-specific) | 1.378188  | Inlier  |
| siRNA Disorazole DMSO Run2   | NM_1827 | 34      | PLCB1       | phospholipase C, beta 1 (phosphoinositide-specific) | 1.528473  | Inlier  |
| siRNA-Temozolomide Run1-DMSO | NM_0045 | 73      | PLCB2       | phospholipase C, beta 2                             | -0.816729 | Inlier  |
| siRNA-Temozolomide Run2-DMSO | NM_0045 | 73      | PLCB2       | phospholipase C, beta 2                             | -0.532271 | Inlier  |
| siRNA-Temozolomide Run3-DMSO | NM_0045 | 73      | PLCB2       | phospholipase C, beta 2                             | -0.474371 | Inlier  |
| siRNA Disorazole DMSO Run3   | NM_0045 | 73      | PLCB2       | phospholipase C, beta 2                             | -0.137296 | Inlier  |
| siRNA-Vinblastine Run2-DMSO  | NM_0045 | 73      | PLCB2       | phospholipase C, beta 2                             | 0.137296  | Inlier  |
| siRNA-Vinblastine Run1-DMSO  | NM_0045 | 73      | PLCB2       | phospholipase C, beta 2                             | 0.974352  | Inlier  |
| siRNA Disorazole DMSO Run2   | NM_0045 | 73      | PLCB2       | phospholipase C, beta 2                             | 1.049966  | Inlier  |
| siRNA Disorazole DMSO Run1   | NM_0045 | 73      | PLCB2       | phospholipase C, beta 2                             | 1.575069  | Inlier  |

Identification of Survival Genes in Human Glioblastoma Cells Using siRNA Screening  
 Nikhil G Thaker, Fang Zhang, Peter R. McDonald, Tong Ying Shun, Michael D Lewen, Ian F. Pollack, and John S. Lazo

Molecular Pharmacology

| siRNA Treatment              | Gene ID   | Gene Name | Gene Description                                        | Log Fold Change | Category |
|------------------------------|-----------|-----------|---------------------------------------------------------|-----------------|----------|
| siRNA-Temozolomide Run3-DMSO | NM_000932 | PLCB3     | phospholipase C, beta 3 (phosphatidylinositol-specific) | -2.544188       | Inlier   |
| siRNA-Temozolomide Run2-DMSO | NM_000932 | PLCB3     | phospholipase C, beta 3 (phosphatidylinositol-specific) | -0.651758       | Inlier   |
| siRNA-Vinblastine Run2-DMSO  | NM_000932 | PLCB3     | phospholipase C, beta 3 (phosphatidylinositol-specific) | -0.620822       | Inlier   |
| siRNA-Temozolomide Run1-DMSO | NM_000932 | PLCB3     | phospholipase C, beta 3 (phosphatidylinositol-specific) | -0.564103       | Inlier   |
| siRNA Disorazole DMSO Run1   | NM_000932 | PLCB3     | phospholipase C, beta 3 (phosphatidylinositol-specific) | 0.564103        | Inlier   |
| siRNA Disorazole DMSO Run3   | NM_000932 | PLCB3     | phospholipase C, beta 3 (phosphatidylinositol-specific) | 0.697242        | Inlier   |
| siRNA-Vinblastine Run1-DMSO  | NM_000932 | PLCB3     | phospholipase C, beta 3 (phosphatidylinositol-specific) | 4.470563        | Outlier  |
| siRNA Disorazole DMSO Run2   | NM_000932 | PLCB3     | phospholipase C, beta 3 (phosphatidylinositol-specific) | 7.537486        | Outlier  |
| siRNA-Temozolomide Run2-DMSO | NM_182797 | PLCB4     | phospholipase C, beta 4                                 | -1.110819       | Inlier   |

Identification of Survival Genes in Human Glioblastoma Cells Using siRNA Screening  
 Nikhil G Thaker, Fang Zhang, Peter R. McDonald, Tong Ying Shun, Michael D Lewen, Ian F. Pollack, and John S. Lazo

| Molecular Pharmacology       |               |       |  | phospholipase C, beta 4 |                  |
|------------------------------|---------------|-------|--|-------------------------|------------------|
| siRNA-Temozolomide Run3-DMSO | NM_1827<br>97 | PLCB4 |  |                         | -0.238181 Inlier |
| siRNA-Temozolomide Run1-DMSO | NM_1827<br>97 | PLCB4 |  |                         | -0.103074 Inlier |
| siRNA Disorazole DMSO Run1   | NM_1827<br>97 | PLCB4 |  |                         | -0.00634 Inlier  |
| siRNA-Vinblastine Run2-DMSO  | NM_1827<br>97 | PLCB4 |  |                         | 0.00634 Inlier   |
| siRNA Disorazole DMSO Run3   | NM_1827<br>97 | PLCB4 |  |                         | 1.998894 Inlier  |
| siRNA-Vinblastine Run1-DMSO  | NM_1827<br>97 | PLCB4 |  |                         | 2.029284 Inlier  |
| siRNA Disorazole DMSO Run2   | NM_1827<br>97 | PLCB4 |  |                         | 2.996962 Inlier  |
| siRNA-Temozolomide Run2-DMSO | NM_0062<br>25 | PLCD1 |  |                         | -1.646217 Inlier |
| siRNA-Temozolomide Run1-DMSO | NM_0062<br>25 | PLCD1 |  |                         | -1.622961 Inlier |
| siRNA Disorazole DMSO Run1   | NM_0062<br>25 | PLCD1 |  |                         | -1.337313 Inlier |
| siRNA-Vinblastine Run2-DMSO  | NM_0062<br>25 | PLCD1 |  |                         | -0.025459 Inlier |
| siRNA-Temozolomide Run3-DMSO | NM_0062<br>25 | PLCD1 |  |                         | 0.025459 Inlier  |
| siRNA Disorazole DMSO Run3   | NM_0062<br>25 | PLCD1 |  |                         | 0.155738 Inlier  |
| siRNA Disorazole DMSO Run2   | NM_0062<br>25 | PLCD1 |  |                         | 0.385144 Inlier  |
| siRNA-Vinblastine Run1-DMSO  | NM_0062<br>25 | PLCD1 |  |                         | 0.963856 Inlier  |
| siRNA-Temozolomide Run1-DMSO | NM_1333<br>73 | PLCD3 |  |                         | -1.761795 Inlier |
| siRNA-Vinblastine Run2-DMSO  | NM_1333<br>73 | PLCD3 |  |                         | -0.464534 Inlier |

Identification of Survival Genes in Human Glioblastoma Cells Using siRNA Screening  
 Nikhil G Thaker, Fang Zhang, Peter R. McDonald, Tong Ying Shun, Michael D Lewen, Ian F. Pollack, and John S. Lazo

Molecular Pharmacology

|                                  |               |       |                                   |           |        |
|----------------------------------|---------------|-------|-----------------------------------|-----------|--------|
| siRNA Disorazole DMSO Run1       | NM_1333<br>73 | PLCD3 | phospholip<br>ase C,<br>delta 3   | -0.334175 | Inlier |
| siRNA-Temozolomide Run2-<br>DMSO | NM_1333<br>73 | PLCD3 | phospholip<br>ase C,<br>delta 3   | -0.207627 | Inlier |
| siRNA-Temozolomide Run3-<br>DMSO | NM_1333<br>73 | PLCD3 | phospholip<br>ase C,<br>delta 3   | 0.207625  | Inlier |
| siRNA-Vinblastine Run1-<br>DMSO  | NM_1333<br>73 | PLCD3 | phospholip<br>ase C,<br>delta 3   | 0.884466  | Inlier |
| siRNA Disorazole DMSO Run2       | NM_1333<br>73 | PLCD3 | phospholip<br>ase C,<br>delta 3   | 1.71892   | Inlier |
| siRNA Disorazole DMSO Run3       | NM_1333<br>73 | PLCD3 | phospholip<br>ase C,<br>delta 3   | 2.387918  | Inlier |
| siRNA-Temozolomide Run2-<br>DMSO | NM_0327<br>26 | PLCD4 | phospholip<br>ase C,<br>delta 4   | -1.421294 | Inlier |
| siRNA-Temozolomide Run1-<br>DMSO | NM_0327<br>26 | PLCD4 | phospholip<br>ase C,<br>delta 4   | -1.250511 | Inlier |
| siRNA-Temozolomide Run3-<br>DMSO | NM_0327<br>26 | PLCD4 | phospholip<br>ase C,<br>delta 4   | -0.582711 | Inlier |
| siRNA-Vinblastine Run2-<br>DMSO  | NM_0327<br>26 | PLCD4 | phospholip<br>ase C,<br>delta 4   | -0.12789  | Inlier |
| siRNA Disorazole DMSO Run3       | NM_0327<br>26 | PLCD4 | phospholip<br>ase C,<br>delta 4   | 0.12789   | Inlier |
| siRNA Disorazole DMSO Run1       | NM_0327<br>26 | PLCD4 | phospholip<br>ase C,<br>delta 4   | 0.544248  | Inlier |
| siRNA Disorazole DMSO Run2       | NM_0327<br>26 | PLCD4 | phospholip<br>ase C,<br>delta 4   | 0.766289  | Inlier |
| siRNA-Vinblastine Run1-<br>DMSO  | NM_0327<br>26 | PLCD4 | phospholip<br>ase C,<br>delta 4   | 1.074007  | Inlier |
| siRNA-Temozolomide Run3-<br>DMSO | NM_0163<br>41 | PLCE1 | phospholip<br>ase C,<br>epsilon 1 | -2.193833 | Inlier |
| siRNA-Temozolomide Run2-<br>DMSO | NM_0163<br>41 | PLCE1 | phospholip<br>ase C,<br>epsilon 1 | -0.544198 | Inlier |
| siRNA-Temozolomide Run1-<br>DMSO | NM_0163<br>41 | PLCE1 | phospholip<br>ase C,<br>epsilon 1 | -0.538421 | Inlier |

Identification of Survival Genes in Human Glioblastoma Cells Using siRNA Screening  
 Nikhil G Thaker, Fang Zhang, Peter R. McDonald, Tong Ying Shun, Michael D Lewen, Ian F. Pollack, and John S. Lazo

Molecular Pharmacology

| siRNA Treatment              | Gene ID       | Gene Name | Gene Description                                         | Value     | Category |
|------------------------------|---------------|-----------|----------------------------------------------------------|-----------|----------|
| siRNA Disorazole DMSO Run3   | NM_0163<br>41 | PLCE1     | phospholipase C, epsilon 1                               | -0.104385 | Inlier   |
| siRNA-Vinblastine Run2-DMSO  | NM_0163<br>41 | PLCE1     | phospholipase C, epsilon 1                               | 0.104385  | Inlier   |
| siRNA Disorazole DMSO Run1   | NM_0163<br>41 | PLCE1     | phospholipase C, epsilon 1                               | 0.804802  | Inlier   |
| siRNA-Vinblastine Run1-DMSO  | NM_0163<br>41 | PLCE1     | phospholipase C, epsilon 1                               | 1.609354  | Inlier   |
| siRNA Disorazole DMSO Run2   | NM_0163<br>41 | PLCE1     | phospholipase C, epsilon 1                               | 1.698795  | Inlier   |
| siRNA-Temozolomide Run1-DMSO | NM_1828<br>11 | PLCG1     | phospholipase C, gamma 1                                 | -2.3327   | Inlier   |
| siRNA-Temozolomide Run2-DMSO | NM_1828<br>11 | PLCG1     | phospholipase C, gamma 1                                 | -2.291001 | Inlier   |
| siRNA Disorazole DMSO Run1   | NM_1828<br>11 | PLCG1     | phospholipase C, gamma 1                                 | -0.362464 | Inlier   |
| siRNA Disorazole DMSO Run3   | NM_1828<br>11 | PLCG1     | phospholipase C, gamma 1                                 | -0.12389  | Inlier   |
| siRNA-Temozolomide Run3-DMSO | NM_1828<br>11 | PLCG1     | phospholipase C, gamma 1                                 | 0.12389   | Inlier   |
| siRNA Disorazole DMSO Run2   | NM_1828<br>11 | PLCG1     | phospholipase C, gamma 1                                 | 0.610066  | Inlier   |
| siRNA-Vinblastine Run2-DMSO  | NM_1828<br>11 | PLCG1     | phospholipase C, gamma 1                                 | 0.738934  | Inlier   |
| siRNA-Vinblastine Run1-DMSO  | NM_1828<br>11 | PLCG1     | phospholipase C, gamma 1                                 | 1.072616  | Inlier   |
| siRNA-Temozolomide Run3-DMSO | NM_0026<br>61 | PLCG2     | phospholipase C, gamma 2 (phosphatidylinositol-specific) | -4.369986 | Outlier  |
| siRNA-Vinblastine Run2-DMSO  | NM_0026<br>61 | PLCG2     | phospholipase C, gamma 2 (phosphatidylinositol-specific) | -1.603444 | Inlier   |

Identification of Survival Genes in Human Glioblastoma Cells Using siRNA Screening  
 Nikhil G Thaker, Fang Zhang, Peter R. McDonald, Tong Ying Shun, Michael D Lewen, Ian F. Pollack, and John S. Lazo

Molecular Pharmacology

|                              |               |       |                                                          |           |        |
|------------------------------|---------------|-------|----------------------------------------------------------|-----------|--------|
| siRNA Disorazole DMSO Run1   | NM_0026<br>61 | PLCG2 | phospholipase C, gamma 2 (phosphatidylinositol-specific) | -0.727788 | Inlier |
| siRNA-Vinblastine Run1-DMSO  | NM_0026<br>61 | PLCG2 | phospholipase C, gamma 2 (phosphatidylinositol-specific) | -0.045653 | Inlier |
| siRNA-Temozolomide Run2-DMSO | NM_0026<br>61 | PLCG2 | phospholipase C, gamma 2 (phosphatidylinositol-specific) | 0.045653  | Inlier |
| siRNA Disorazole DMSO Run3   | NM_0026<br>61 | PLCG2 | phospholipase C, gamma 2 (phosphatidylinositol-specific) | 0.060951  | Inlier |
| siRNA-Temozolomide Run1-DMSO | NM_0026<br>61 | PLCG2 | phospholipase C, gamma 2 (phosphatidylinositol-specific) | 0.621212  | Inlier |
| siRNA Disorazole DMSO Run2   | NM_0026<br>61 | PLCG2 | phospholipase C-like 1                                   | 0.930893  | Inlier |
| siRNA-Temozolomide Run3-DMSO | NM_0062<br>26 | PLCL1 | phospholipase C-like 1                                   | -1.249149 | Inlier |
| siRNA-Temozolomide Run2-DMSO | NM_0062<br>26 | PLCL1 | phospholipase C-like 1                                   | -0.530177 | Inlier |
| siRNA-Vinblastine Run2-DMSO  | NM_0062<br>26 | PLCL1 | phospholipase C-like 1                                   | -0.482432 | Inlier |
| siRNA Disorazole DMSO Run3   | NM_0062<br>26 | PLCL1 | phospholipase C-like 1                                   | -0.437933 | Inlier |
| siRNA Disorazole DMSO Run1   | NM_0062<br>26 | PLCL1 | phospholipase C-like 1                                   | 0.437933  | Inlier |



Identification of Survival Genes in Human Glioblastoma Cells Using siRNA Screening  
 Nikhil G Thaker, Fang Zhang, Peter R. McDonald, Tong Ying Shun, Michael D Lewen, Ian F. Pollack, and John S. Lazo

| Molecular Pharmacology       |               |       | phospholipase C-like    |                  |
|------------------------------|---------------|-------|-------------------------|------------------|
| siRNA-Temozolomide Run1-DMSO | NM_0062<br>26 | PLCL1 | 1                       | 0.818823 Inlier  |
| siRNA-Vinblastine Run1-DMSO  | NM_0062<br>26 | PLCL1 | 1                       | 1.383465 Inlier  |
| siRNA Disorazole DMSO Run2   | NM_0062<br>26 | PLCL1 | 1                       | 1.955608 Inlier  |
| siRNA Disorazole DMSO Run3   | NM_0151<br>84 | PLCL2 | 2                       | -0.884608 Inlier |
| siRNA-Vinblastine Run2-DMSO  | NM_0151<br>84 | PLCL2 | 2                       | -0.625099 Inlier |
| siRNA-Temozolomide Run3-DMSO | NM_0151<br>84 | PLCL2 | 2                       | -0.381749 Inlier |
| siRNA Disorazole DMSO Run1   | NM_0151<br>84 | PLCL2 | 2                       | -0.354189 Inlier |
| siRNA-Vinblastine Run1-DMSO  | NM_0151<br>84 | PLCL2 | 2                       | 0.354188 Inlier  |
| siRNA Disorazole DMSO Run2   | NM_0151<br>84 | PLCL2 | 2                       | 0.723901 Inlier  |
| siRNA-Temozolomide Run1-DMSO | NM_0151<br>84 | PLCL2 | 2                       | 0.809337 Inlier  |
| siRNA-Temozolomide Run2-DMSO | NM_0151<br>84 | PLCL2 | 2                       | 1.099777 Inlier  |
| siRNA-Temozolomide Run3-DMSO | NM_0331<br>23 | PLCZ1 | phospholipase C, zeta 1 | -1.972241 Inlier |
| siRNA-Temozolomide Run2-DMSO | NM_0331<br>23 | PLCZ1 | phospholipase C, zeta 1 | -0.877538 Inlier |
| siRNA-Temozolomide Run1-DMSO | NM_0331<br>23 | PLCZ1 | phospholipase C, zeta 1 | -0.349451 Inlier |
| siRNA Disorazole DMSO Run3   | NM_0331<br>23 | PLCZ1 | phospholipase C, zeta 1 | -0.075157 Inlier |
| siRNA-Vinblastine Run2-DMSO  | NM_0331<br>23 | PLCZ1 | phospholipase C, zeta 1 | 0.075157 Inlier  |
| siRNA Disorazole DMSO Run1   | NM_0331<br>23 | PLCZ1 | phospholipase C, zeta 1 | 0.471462 Inlier  |

Identification of Survival Genes in Human Glioblastoma Cells Using siRNA Screening  
 Nikhil G Thaker, Fang Zhang, Peter R. McDonald, Tong Ying Shun, Michael D Lewen, Ian F. Pollack, and John S. Lazo

Molecular Pharmacology

|                              |               |       |                                                |           |         |
|------------------------------|---------------|-------|------------------------------------------------|-----------|---------|
| siRNA Disorazole DMSO Run2   | NM_0331<br>23 | PLCZ1 | phospholipase C, zeta 1                        | 2.214528  | Inlier  |
| siRNA-Vinblastine Run1-DMSO  | NM_0331<br>23 | PLCZ1 | phospholipase C, zeta 1                        | 3.62954   | Outlier |
| siRNA-Temozolomide Run3-DMSO | NM_0026<br>62 | PLD1  | phospholipase D1, phosphatidylcholine-specific | -1.900128 | Inlier  |
| siRNA-Vinblastine Run2-DMSO  | NM_0026<br>62 | PLD1  | phospholipase D1, phosphatidylcholine-specific | -0.33187  | Inlier  |
| siRNA Disorazole DMSO Run3   | NM_0026<br>62 | PLD1  | phospholipase D1, phosphatidylcholine-specific | -0.290321 | Inlier  |
| siRNA-Temozolomide Run2-DMSO | NM_0026<br>62 | PLD1  | phospholipase D1, phosphatidylcholine-specific | -0.262792 | Inlier  |
| siRNA-Temozolomide Run1-DMSO | NM_0026<br>62 | PLD1  | phospholipase D1, phosphatidylcholine-specific | 0.262792  | Inlier  |
| siRNA Disorazole DMSO Run1   | NM_0026<br>62 | PLD1  | phospholipase D1, phosphatidylcholine-specific | 1.01713   | Inlier  |
| siRNA Disorazole DMSO Run2   | NM_0026<br>62 | PLD1  | phospholipase D1, phosphatidylcholine-specific | 1.1608    | Inlier  |
| siRNA-Vinblastine Run1-DMSO  | NM_0026<br>62 | PLD1  | phospholipase D1, phosphatidylcholine-specific | 1.832223  | Inlier  |
| siRNA-Vinblastine Run2-DMSO  | NM_0026<br>63 | PLD2  | phospholipase D2                               | -1.602393 | Inlier  |
| siRNA Disorazole DMSO Run1   | NM_0026<br>63 | PLD2  | phospholipase D2                               | -1.243869 | Inlier  |
| siRNA Disorazole DMSO Run3   | NM_0026<br>63 | PLD2  | phospholipase D2                               | -0.407363 | Inlier  |

Identification of Survival Genes in Human Glioblastoma Cells Using siRNA Screening  
 Nikhil G Thaker, Fang Zhang, Peter R. McDonald, Tong Ying Shun, Michael D Lewen, Ian F. Pollack, and John S. Lazo

|                              |               |      |                          |           |         |
|------------------------------|---------------|------|--------------------------|-----------|---------|
| siRNA-Temozolomide Run1-DMSO | NM_0026<br>63 | PLD2 | phospholipase D2         | -0.272951 | Inlier  |
| siRNA-Temozolomide Run3-DMSO | NM_0026<br>63 | PLD2 | phospholipase D2         | 0.27295   | Inlier  |
| siRNA-Vinblastine Run1-DMSO  | NM_0026<br>63 | PLD2 | phospholipase D2         | 0.544936  | Inlier  |
| siRNA Disorazole DMSO Run2   | NM_0026<br>63 | PLD2 | phospholipase D2         | 0.804064  | Inlier  |
| siRNA-Temozolomide Run2-DMSO | NM_0026<br>63 | PLD2 | phospholipase D2         | 0.882034  | Inlier  |
| siRNA-Temozolomide Run3-DMSO | NM_0122<br>68 | PLD3 | phospholipase D3         | -4.096066 | Outlier |
| siRNA-Temozolomide Run2-DMSO | NM_0122<br>68 | PLD3 | phospholipase D3         | -0.496472 | Inlier  |
| siRNA-Temozolomide Run1-DMSO | NM_0122<br>68 | PLD3 | phospholipase D3         | -0.277425 | Inlier  |
| siRNA-Vinblastine Run2-DMSO  | NM_0122<br>68 | PLD3 | phospholipase D3         | -0.059165 | Inlier  |
| siRNA Disorazole DMSO Run3   | NM_0122<br>68 | PLD3 | phospholipase D3         | 0.059165  | Inlier  |
| siRNA Disorazole DMSO Run1   | NM_0122<br>68 | PLD3 | phospholipase D3         | 0.852528  | Inlier  |
| siRNA Disorazole DMSO Run2   | NM_0122<br>68 | PLD3 | phospholipase D3         | 1.842809  | Inlier  |
| siRNA-Vinblastine Run1-DMSO  | NM_0122<br>68 | PLD3 | phospholipase D3         | 1.989206  | Inlier  |
| siRNA Disorazole DMSO Run3   | NM_0123<br>88 | PLDN | pallidin homolog (mouse) | -1.154536 | Inlier  |
| siRNA-Vinblastine Run2-DMSO  | NM_0123<br>88 | PLDN | pallidin homolog (mouse) | -0.5153   | Inlier  |
| siRNA Disorazole DMSO Run1   | NM_0123<br>88 | PLDN | pallidin homolog (mouse) | -0.260119 | Inlier  |
| siRNA-Vinblastine Run1-DMSO  | NM_0123<br>88 | PLDN | pallidin homolog (mouse) | -0.150057 | Inlier  |
| siRNA Disorazole DMSO Run2   | NM_0123<br>88 | PLDN | pallidin homolog (mouse) | 0.150056  | Inlier  |
| siRNA-Temozolomide Run3-DMSO | NM_0123<br>88 | PLDN | pallidin homolog (mouse) | 0.8337    | Inlier  |
| siRNA-Temozolomide Run1-DMSO | NM_0123<br>88 | PLDN | pallidin homolog (mouse) | 0.962154  | Inlier  |
| siRNA-Temozolomide Run2-DMSO | NM_0123<br>88 | PLDN | pallidin homolog (mouse) | 1.099782  | Inlier  |
| siRNA-Temozolomide Run3-DMSO | NM_0003<br>01 | PLG  | plasminogen              | -2.038692 | Inlier  |

Identification of Survival Genes in Human Glioblastoma Cells Using siRNA Screening  
 Nikhil G Thaker, Fang Zhang, Peter R. McDonald, Tong Ying Shun, Michael D Lewen, Ian F. Pollack, and John S. Lazo

|                                  |               |      |                                    |           |        |
|----------------------------------|---------------|------|------------------------------------|-----------|--------|
| siRNA-Temozolomide Run2-<br>DMSO | NM_0003<br>01 | PLG  | plasminog<br>en                    | -1.841133 | Inlier |
| siRNA Disorazole DMSO Run2       | NM_0003<br>01 | PLG  | plasminog<br>en                    | -0.681186 | Inlier |
| siRNA Disorazole DMSO Run3       | NM_0003<br>01 | PLG  | plasminog<br>en                    | -0.054084 | Inlier |
| siRNA Disorazole DMSO Run1       | NM_0003<br>01 | PLG  | plasminog<br>en                    | 0.054084  | Inlier |
| siRNA-Temozolomide Run1-<br>DMSO | NM_0003<br>01 | PLG  | plasminog<br>en                    | 0.265243  | Inlier |
| siRNA-Vinblastine Run2-<br>DMSO  | NM_0003<br>01 | PLG  | plasminog<br>en                    | 0.667814  | Inlier |
| siRNA-Vinblastine Run1-<br>DMSO  | NM_0003<br>01 | PLG  | plasminog<br>en                    | 1.025196  | Inlier |
| siRNA-Temozolomide Run3-<br>DMSO | NM_0026<br>65 | PLGL | plasminog<br>en-like               | -1.195572 | Inlier |
| siRNA Disorazole DMSO Run2       | NM_0026<br>65 | PLGL | plasminog<br>en-like               | -1.075862 | Inlier |
| siRNA-Temozolomide Run2-<br>DMSO | NM_0026<br>65 | PLGL | plasminog<br>en-like               | -0.44221  | Inlier |
| siRNA Disorazole DMSO Run1       | NM_0026<br>65 | PLGL | plasminog<br>en-like               | -0.314213 | Inlier |
| siRNA-Temozolomide Run1-<br>DMSO | NM_0026<br>65 | PLGL | plasminog<br>en-like               | 0.314214  | Inlier |
| siRNA Disorazole DMSO Run3       | NM_0026<br>65 | PLGL | plasminog<br>en-like               | 0.497706  | Inlier |
| siRNA-Vinblastine Run2-<br>DMSO  | NM_0026<br>65 | PLGL | plasminog<br>en-like               | 0.851294  | Inlier |
| siRNA-Vinblastine Run1-<br>DMSO  | NM_0026<br>65 | PLGL | plasminog<br>en-like               | 1.042648  | Inlier |
| siRNA-Temozolomide Run2-<br>DMSO | NM_0026<br>66 | PLIN | perilipin                          | -1.289856 | Inlier |
| siRNA-Temozolomide Run3-<br>DMSO | NM_0026<br>66 | PLIN | perilipin                          | -1.161161 | Inlier |
| siRNA-Vinblastine Run2-<br>DMSO  | NM_0026<br>66 | PLIN | perilipin                          | -0.182587 | Inlier |
| siRNA Disorazole DMSO Run3       | NM_0026<br>66 | PLIN | perilipin                          | -0.031823 | Inlier |
| siRNA Disorazole DMSO Run1       | NM_0026<br>66 | PLIN | perilipin                          | 0.031823  | Inlier |
| siRNA-Temozolomide Run1-<br>DMSO | NM_0026<br>66 | PLIN | perilipin                          | 0.187839  | Inlier |
| siRNA-Vinblastine Run1-<br>DMSO  | NM_0026<br>66 | PLIN | perilipin                          | 1.950691  | Inlier |
| siRNA Disorazole DMSO Run2       | NM_0026<br>66 | PLIN | perilipin<br>polo-like<br>kinase 1 | 2.166682  | Inlier |
| siRNA-Temozolomide Run3-<br>DMSO | NM_0050<br>30 | PLK1 | (Drosophil<br>a)                   | -1.607064 | Inlier |

Identification of Survival Genes in Human Glioblastoma Cells Using siRNA Screening  
 Nikhil G Thaker, Fang Zhang, Peter R. McDonald, Tong Ying Shun, Michael D Lewen, Ian F. Pollack, and John S. Lazo

Molecular Pharmacology

|                              |               |      |                                 |           |         |
|------------------------------|---------------|------|---------------------------------|-----------|---------|
| siRNA-Temozolomide Run2-DMSO | NM_0050<br>30 | PLK1 | polo-like kinase 1 (Drosophila) | -1.011485 | Inlier  |
| siRNA-Temozolomide Run1-DMSO | NM_0050<br>30 | PLK1 | polo-like kinase 1 (Drosophila) | -0.337515 | Inlier  |
| siRNA Disorazole DMSO Run1   | NM_0050<br>30 | PLK1 | polo-like kinase 1 (Drosophila) | -0.085382 | Inlier  |
| siRNA Disorazole DMSO Run3   | NM_0050<br>30 | PLK1 | polo-like kinase 1 (Drosophila) | 0.085382  | Inlier  |
| siRNA Disorazole DMSO Run2   | NM_0050<br>30 | PLK1 | polo-like kinase 1 (Drosophila) | 0.100827  | Inlier  |
| siRNA-Vinblastine Run2-DMSO  | NM_0050<br>30 | PLK1 | polo-like kinase 1 (Drosophila) | 1.021187  | Inlier  |
| siRNA-Vinblastine Run1-DMSO  | NM_0050<br>30 | PLK1 | polo-like kinase 1 (Drosophila) | 1.165496  | Inlier  |
| siRNA-Temozolomide Run3-DMSO | NM_0066<br>22 | PLK2 | polo-like kinase 2 (Drosophila) | -4.192407 | Outlier |
| siRNA Disorazole DMSO Run2   | NM_0066<br>22 | PLK2 | polo-like kinase 2 (Drosophila) | -1.881754 | Inlier  |
| siRNA-Temozolomide Run1-DMSO | NM_0066<br>22 | PLK2 | polo-like kinase 2 (Drosophila) | -1.735918 | Inlier  |
| siRNA-Temozolomide Run2-DMSO | NM_0066<br>22 | PLK2 | polo-like kinase 2 (Drosophila) | -0.119073 | Inlier  |
| siRNA Disorazole DMSO Run3   | NM_0066<br>22 | PLK2 | polo-like kinase 2 (Drosophila) | 0.119073  | Inlier  |
| siRNA Disorazole DMSO Run1   | NM_0066<br>22 | PLK2 | polo-like kinase 2 (Drosophila) | 0.370675  | Inlier  |

Identification of Survival Genes in Human Glioblastoma Cells Using siRNA Screening  
 Nikhil G Thaker, Fang Zhang, Peter R. McDonald, Tong Ying Shun, Michael D Lewen, Ian F. Pollack, and John S. Lazo

Molecular Pharmacology

|                              |               |      |                                 |                  |
|------------------------------|---------------|------|---------------------------------|------------------|
| siRNA-Vinblastine Run2-DMSO  | NM_0066<br>22 | PLK2 | polo-like kinase 2 (Drosophila) | 0.410593 Inlier  |
| siRNA-Vinblastine Run1-DMSO  | NM_0066<br>22 | PLK2 | polo-like kinase 2 (Drosophila) | 0.938407 Inlier  |
| siRNA-Temozolomide Run3-DMSO | NM_0040<br>73 | PLK3 | polo-like kinase 3 (Drosophila) | -0.815802 Inlier |
| siRNA Disorazole DMSO Run2   | NM_0040<br>73 | PLK3 | polo-like kinase 3 (Drosophila) | -0.533198 Inlier |
| siRNA-Temozolomide Run2-DMSO | NM_0040<br>73 | PLK3 | polo-like kinase 3 (Drosophila) | -0.48547 Inlier  |
| siRNA-Temozolomide Run1-DMSO | NM_0040<br>73 | PLK3 | polo-like kinase 3 (Drosophila) | -0.132781 Inlier |
| siRNA Disorazole DMSO Run3   | NM_0040<br>73 | PLK3 | polo-like kinase 3 (Drosophila) | 0.132782 Inlier  |
| siRNA Disorazole DMSO Run1   | NM_0040<br>73 | PLK3 | polo-like kinase 3 (Drosophila) | 0.836376 Inlier  |
| siRNA-Vinblastine Run1-DMSO  | NM_0040<br>73 | PLK3 | polo-like kinase 3 (Drosophila) | 1.335672 Inlier  |
| siRNA-Vinblastine Run2-DMSO  | NM_0040<br>73 | PLK3 | polo-like kinase 3 (Drosophila) | 1.659321 Inlier  |
| siRNA-Temozolomide Run3-DMSO | NM_0142<br>64 | PLK4 | polo-like kinase 4 (Drosophila) | -4.33343 Outlier |
| siRNA-Temozolomide Run1-DMSO | NM_0142<br>64 | PLK4 | polo-like kinase 4 (Drosophila) | -2.266899 Inlier |
| siRNA Disorazole DMSO Run2   | NM_0142<br>64 | PLK4 | polo-like kinase 4 (Drosophila) | -0.158055 Inlier |

Identification of Survival Genes in Human Glioblastoma Cells Using siRNA Screening  
 Nikhil G Thaker, Fang Zhang, Peter R. McDonald, Tong Ying Shun, Michael D Lewen, Ian F. Pollack, and John S. Lazo

Molecular Pharmacology

|                              |               |      |                                                      |           |         |
|------------------------------|---------------|------|------------------------------------------------------|-----------|---------|
| siRNA-Temozolomide Run2-DMSO | NM_0142<br>64 | PLK4 | polo-like kinase 4 (Drosophila)                      | -0.012541 | Inlier  |
| siRNA Disorazole DMSO Run3   | NM_0142<br>64 | PLK4 | polo-like kinase 4 (Drosophila)                      | 0.01254   | Inlier  |
| siRNA Disorazole DMSO Run1   | NM_0142<br>64 | PLK4 | polo-like kinase 4 (Drosophila)                      | 0.45327   | Inlier  |
| siRNA-Vinblastine Run1-DMSO  | NM_0142<br>64 | PLK4 | polo-like kinase 4 (Drosophila)                      | 0.89573   | Inlier  |
| siRNA-Vinblastine Run2-DMSO  | NM_0142<br>64 | PLK4 | polo-like kinase 4 (Drosophila)                      | 0.945751  | Inlier  |
| siRNA Disorazole DMSO Run1   | NM_0003<br>02 | PLOD | procollagen lysine 1, 2-oxoglutarate 5-dioxygenase 1 | -4.323372 | Outlier |
| siRNA Disorazole DMSO Run3   | NM_0003<br>02 | PLOD | procollagen lysine 1, 2-oxoglutarate 5-dioxygenase 1 | -0.805544 | Inlier  |
| siRNA-Temozolomide Run3-DMSO | NM_0003<br>02 | PLOD | procollagen lysine 1, 2-oxoglutarate 5-dioxygenase 1 | -0.45842  | Inlier  |
| siRNA-Temozolomide Run1-DMSO | NM_0003<br>02 | PLOD | procollagen lysine 1, 2-oxoglutarate 5-dioxygenase 1 | -0.007699 | Inlier  |

Identification of Survival Genes in Human Glioblastoma Cells Using siRNA Screening  
 Nikhil G Thaker, Fang Zhang, Peter R. McDonald, Tong Ying Shun, Michael D Lewen, Ian F. Pollack, and John S. Lazo

Molecular Pharmacology

|                              |           |       |                                                    |           |         |
|------------------------------|-----------|-------|----------------------------------------------------|-----------|---------|
| siRNA-Temozolomide Run2-DMSO | NM_000302 | PLOD  | procollagen-lysine, 2-oxoglutarate 5-dioxygenase 1 | 0.007702  | Inlier  |
| siRNA-Vinblastine Run2-DMSO  | NM_000302 | PLOD  | procollagen-lysine, 2-oxoglutarate 5-dioxygenase 1 | 0.543456  | Inlier  |
| siRNA-Vinblastine Run1-DMSO  | NM_000302 | PLOD  | procollagen-lysine, 2-oxoglutarate 5-dioxygenase 1 | 1.41995   | Inlier  |
| siRNA Disorazole DMSO Run2   | NM_000302 | PLOD  | procollagen-lysine, 2-oxoglutarate 5-dioxygenase 1 | 8.056372  | Outlier |
| siRNA-Temozolomide Run2-DMSO | NM_182943 | PLOD2 | procollagen-lysine, 2-oxoglutarate 5-dioxygenase 2 | -0.723212 | Inlier  |
| siRNA-Temozolomide Run3-DMSO | NM_182943 | PLOD2 | procollagen-lysine, 2-oxoglutarate 5-dioxygenase 2 | -0.672022 | Inlier  |
| siRNA Disorazole DMSO Run1   | NM_182943 | PLOD2 | procollagen-lysine, 2-oxoglutarate 5-dioxygenase 2 | -0.449523 | Inlier  |



Identification of Survival Genes in Human Glioblastoma Cells Using siRNA Screening

Nikhil G Thaker, Fang Zhang, Peter R. McDonald, Tong Ying Shun, Michael D Lewen, Ian F. Pollack, and John S. Lazo

Molecular Pharmacology

|                              |               |       |                                                    |           |         |
|------------------------------|---------------|-------|----------------------------------------------------|-----------|---------|
| siRNA Disorazole DMSO Run3   | NM_1829<br>43 | PLOD2 | procollagen-lysine, 2-oxoglutarate 5-dioxygenase 2 | -0.147667 | Inlier  |
| siRNA-Vinblastine Run2-DMSO  | NM_1829<br>43 | PLOD2 | procollagen-lysine, 2-oxoglutarate 5-dioxygenase 2 | 0.147667  | Inlier  |
| siRNA-Temozolomide Run1-DMSO | NM_1829<br>43 | PLOD2 | procollagen-lysine, 2-oxoglutarate 5-dioxygenase 2 | 0.676978  | Inlier  |
| siRNA-Vinblastine Run1-DMSO  | NM_1829<br>43 | PLOD2 | procollagen-lysine, 2-oxoglutarate 5-dioxygenase 2 | 1.331019  | Inlier  |
| siRNA Disorazole DMSO Run2   | NM_1829<br>43 | PLOD2 | procollagen-lysine, 2-oxoglutarate 5-dioxygenase 2 | 1.49719   | Inlier  |
| siRNA-Vinblastine Run2-DMSO  | NM_0010<br>84 | PLOD3 | procollagen-lysine, 2-oxoglutarate 5-dioxygenase 3 | -3.606595 | Outlier |
| siRNA-Temozolomide Run1-DMSO | NM_0010<br>84 | PLOD3 | procollagen-lysine, 2-oxoglutarate 5-dioxygenase 3 | -0.929153 | Inlier  |

Identification of Survival Genes in Human Glioblastoma Cells Using siRNA Screening

Nikhil G Thaker, Fang Zhang, Peter R. McDonald, Tong Ying Shun, Michael D Lewen, Ian F. Pollack, and John S. Lazo

Molecular Pharmacology

|                              |           |        |                                                    |           |        |
|------------------------------|-----------|--------|----------------------------------------------------|-----------|--------|
| siRNA-Temozolomide Run2-DMSO | NM_001084 | PLOD3  | procollagen-lysine, 2-oxoglutarate 5-dioxygenase 3 | -0.419847 | Inlier |
| siRNA Disorazole DMSO Run3   | NM_001084 | PLOD3  | procollagen-lysine, 2-oxoglutarate 5-dioxygenase 3 | -0.111409 | Inlier |
| siRNA Disorazole DMSO Run1   | NM_001084 | PLOD3  | procollagen-lysine, 2-oxoglutarate 5-dioxygenase 3 | 0.111407  | Inlier |
| siRNA-Temozolomide Run3-DMSO | NM_001084 | PLOD3  | procollagen-lysine, 2-oxoglutarate 5-dioxygenase 3 | 0.323676  | Inlier |
| siRNA-Vinblastine Run1-DMSO  | NM_001084 | PLOD3  | procollagen-lysine, 2-oxoglutarate 5-dioxygenase 3 | 1.309991  | Inlier |
| siRNA Disorazole DMSO Run2   | NM_001084 | PLOD3  | procollagen-lysine, 2-oxoglutarate 5-dioxygenase 3 | 2.237443  | Inlier |
| siRNA Disorazole DMSO Run1   | NM_021105 | PLSCR1 | phospholipid scramblase 1                          | -1.51042  | Inlier |
| siRNA-Temozolomide Run2-DMSO | NM_021105 | PLSCR1 | phospholipid scramblase 1                          | -1.462733 | Inlier |

Identification of Survival Genes in Human Glioblastoma Cells Using siRNA Screening  
 Nikhil G Thaker, Fang Zhang, Peter R. McDonald, Tong Ying Shun, Michael D Lewen, Ian F. Pollack, and John S. Lazo

Molecular Pharmacology

|                              |           |        |                           |           |        |
|------------------------------|-----------|--------|---------------------------|-----------|--------|
| siRNA-Temozolomide Run1-DMSO | NM_021105 | PLSCR1 | phospholipid scramblase 1 | -0.711507 | Inlier |
| siRNA-Vinblastine Run2-DMSO  | NM_021105 | PLSCR1 | phospholipid scramblase 1 | -0.265677 | Inlier |
| siRNA-Temozolomide Run3-DMSO | NM_021105 | PLSCR1 | phospholipid scramblase 1 | 0.265677  | Inlier |
| siRNA Disorazole DMSO Run3   | NM_021105 | PLSCR1 | phospholipid scramblase 1 | 0.281981  | Inlier |
| siRNA-Vinblastine Run1-DMSO  | NM_021105 | PLSCR1 | phospholipid scramblase 1 | 0.637493  | Inlier |
| siRNA Disorazole DMSO Run2   | NM_021105 | PLSCR1 | phospholipid scramblase 1 | 1.008153  | Inlier |
| siRNA-Temozolomide Run3-DMSO | NM_020359 | PLSCR2 | phospholipid scramblase 2 | -1.194991 | Inlier |
| siRNA-Temozolomide Run2-DMSO | NM_020359 | PLSCR2 | phospholipid scramblase 2 | -0.840583 | Inlier |
| siRNA Disorazole DMSO Run3   | NM_020359 | PLSCR2 | phospholipid scramblase 2 | -0.508417 | Inlier |
| siRNA-Temozolomide Run1-DMSO | NM_020359 | PLSCR2 | phospholipid scramblase 2 | -0.025889 | Inlier |
| siRNA-Vinblastine Run2-DMSO  | NM_020359 | PLSCR2 | phospholipid scramblase 2 | 0.025889  | Inlier |
| siRNA Disorazole DMSO Run1   | NM_020359 | PLSCR2 | phospholipid scramblase 2 | 0.043589  | Inlier |
| siRNA-Vinblastine Run1-DMSO  | NM_020359 | PLSCR2 | phospholipid scramblase 2 | 1.90301   | Inlier |

Identification of Survival Genes in Human Glioblastoma Cells Using siRNA Screening  
 Nikhil G Thaker, Fang Zhang, Peter R. McDonald, Tong Ying Shun, Michael D Lewen, Ian F. Pollack, and John S. Lazo

Molecular Pharmacology

| siRNA                   | Gene    | Run | Condition | PLSCR  | Value     | Category |
|-------------------------|---------|-----|-----------|--------|-----------|----------|
| siRNA Disorazole DMSO   | NM_0203 | 59  | Run2      | PLSCR2 | 2.141444  | Inlier   |
| siRNA-Temozolomide DMSO | NM_0203 | 60  | Run3      | PLSCR3 | -0.902856 | Inlier   |
| siRNA-Vinblastine DMSO  | NM_0203 | 60  | Run2      | PLSCR3 | -0.779747 | Inlier   |
| siRNA Disorazole DMSO   | NM_0203 | 60  | Run3      | PLSCR3 | -0.519794 | Inlier   |
| siRNA-Temozolomide DMSO | NM_0203 | 60  | Run2      | PLSCR3 | -0.336561 | Inlier   |
| siRNA-Temozolomide DMSO | NM_0203 | 60  | Run1      | PLSCR3 | 0.336561  | Inlier   |
| siRNA Disorazole DMSO   | NM_0203 | 60  | Run1      | PLSCR3 | 0.569253  | Inlier   |
| siRNA Disorazole DMSO   | NM_0203 | 60  | Run2      | PLSCR3 | 4.747947  | Outlier  |
| siRNA-Vinblastine DMSO  | NM_0203 | 60  | Run1      | PLSCR3 | 4.898457  | Outlier  |
| siRNA-Temozolomide DMSO | NM_0203 | 53  | Run3      | PLSCR4 | -1.239995 | Inlier   |
| siRNA-Temozolomide DMSO | NM_0203 | 53  | Run2      | PLSCR4 | -1.222295 | Inlier   |
| siRNA-Vinblastine DMSO  | NM_0203 | 53  | Run2      | PLSCR4 | -0.406369 | Inlier   |
| siRNA Disorazole DMSO   | NM_0203 | 53  | Run3      | PLSCR4 | -0.031879 | Inlier   |

Identification of Survival Genes in Human Glioblastoma Cells Using siRNA Screening  
 Nikhil G Thaker, Fang Zhang, Peter R. McDonald, Tong Ying Shun, Michael D Lewen, Ian F. Pollack, and John S. Lazo

Molecular Pharmacology

|                              |               |        |                               |           |        |
|------------------------------|---------------|--------|-------------------------------|-----------|--------|
| siRNA-Temozolomide Run1-DMSO | NM_0203<br>53 | PLSCR4 | phospholipid<br>scramblase 4  | 0.031879  | Inlier |
| siRNA Disorazole DMSO Run1   | NM_0203<br>53 | PLSCR4 | phospholipid<br>scramblase 4  | 0.125793  | Inlier |
| siRNA-Vinblastine Run1-DMSO  | NM_0203<br>53 | PLSCR4 | phospholipid<br>scramblase 4  | 0.942631  | Inlier |
| siRNA Disorazole DMSO Run2   | NM_0203<br>53 | PLSCR4 | phospholipid<br>scramblase 4  | 2.331292  | Inlier |
| siRNA-Temozolomide Run2-DMSO | NM_0062<br>27 | PLTP   | phospholipid transfer protein | -0.775858 | Inlier |
| siRNA-Temozolomide Run1-DMSO | NM_0062<br>27 | PLTP   | phospholipid transfer protein | -0.662335 | Inlier |
| siRNA-Vinblastine Run2-DMSO  | NM_0062<br>27 | PLTP   | phospholipid transfer protein | -0.503696 | Inlier |
| siRNA Disorazole DMSO Run1   | NM_0062<br>27 | PLTP   | phospholipid transfer protein | -0.029476 | Inlier |
| siRNA-Temozolomide Run3-DMSO | NM_0062<br>27 | PLTP   | phospholipid transfer protein | 0.029476  | Inlier |
| siRNA Disorazole DMSO Run3   | NM_0062<br>27 | PLTP   | phospholipid transfer protein | 0.686665  | Inlier |
| siRNA-Vinblastine Run1-DMSO  | NM_0062<br>27 | PLTP   | phospholipid transfer protein | 1.97359   | Inlier |
| siRNA Disorazole DMSO Run2   | NM_0062<br>27 | PLTP   | phospholipid transfer protein | 3.384632  | Inlier |

Identification of Survival Genes in Human Glioblastoma Cells Using siRNA Screening

Nikhil G Thaker, Fang Zhang, Peter R. McDonald, Tong Ying Shun, Michael D Lewen, Ian F. Pollack, and John S. Lazo

Molecular Pharmacology

|                                  |               |       |                                                                       |           |        |
|----------------------------------|---------------|-------|-----------------------------------------------------------------------|-----------|--------|
| siRNA Disorazole DMSO Run3       | NM_1308<br>52 | PLUNC | palate,<br>lung and<br>nasal<br>epithelium<br>carcinoma<br>associated | -1.158981 | Inlier |
| siRNA-Temozolomide Run2-<br>DMSO | NM_1308<br>52 | PLUNC | palate,<br>lung and<br>nasal<br>epithelium<br>carcinoma<br>associated | -0.806542 | Inlier |
| siRNA-Vinblastine Run2-<br>DMSO  | NM_1308<br>52 | PLUNC | palate,<br>lung and<br>nasal<br>epithelium<br>carcinoma<br>associated | -0.542458 | Inlier |
| siRNA Disorazole DMSO Run2       | NM_1308<br>52 | PLUNC | palate,<br>lung and<br>nasal<br>epithelium<br>carcinoma<br>associated | -0.308174 | Inlier |
| siRNA Disorazole DMSO Run1       | NM_1308<br>52 | PLUNC | palate,<br>lung and<br>nasal<br>epithelium<br>carcinoma<br>associated | 0.308173  | Inlier |
| siRNA-Temozolomide Run3-<br>DMSO | NM_1308<br>52 | PLUNC | palate,<br>lung and<br>nasal<br>epithelium<br>carcinoma<br>associated | 0.339507  | Inlier |

Identification of Survival Genes in Human Glioblastoma Cells Using siRNA Screening  
 Nikhil G Thaker, Fang Zhang, Peter R. McDonald, Tong Ying Shun, Michael D Lewen, Ian F. Pollack, and John S. Lazo  
 Molecular Pharmacology

|                              |               |       |                                                                       |           |        |
|------------------------------|---------------|-------|-----------------------------------------------------------------------|-----------|--------|
| siRNA-Vinblastine Run1-DMSO  | NM_1308<br>52 | PLUNC | palate,<br>lung and<br>nasal<br>epithelium<br>carcinoma<br>associated | 1.445083  | Inlier |
| siRNA-Temozolomide Run1-DMSO | NM_1308<br>52 | PLUNC | palate,<br>lung and<br>nasal<br>epithelium<br>carcinoma<br>associated | 1.458766  | Inlier |
| siRNA-Temozolomide Run2-DMSO | NM_0161<br>47 | PME-1 | PME-1                                                                 | -1.346322 | Inlier |
| siRNA-Temozolomide Run3-DMSO | NM_0161<br>47 | PME-1 | PME-1                                                                 | -1.279243 | Inlier |
| siRNA-Vinblastine Run2-DMSO  | NM_0161<br>47 | PME-1 | PME-1                                                                 | -0.729765 | Inlier |
| siRNA Disorazole DMSO Run3   | NM_0161<br>47 | PME-1 | PME-1                                                                 | -0.276401 | Inlier |
| siRNA-Temozolomide Run1-DMSO | NM_0161<br>47 | PME-1 | PME-1                                                                 | 0.276401  | Inlier |
| siRNA Disorazole DMSO Run2   | NM_0161<br>47 | PME-1 | PME-1                                                                 | 0.473336  | Inlier |
| siRNA Disorazole DMSO Run1   | NM_0161<br>47 | PME-1 | PME-1                                                                 | 0.619235  | Inlier |
| siRNA-Vinblastine Run1-DMSO  | NM_0161<br>47 | PME-1 | PME-1                                                                 | 0.750417  | Inlier |
| siRNA-Temozolomide Run3-DMSO | NM_0332<br>50 | PML   | promyelocytic<br>leukemia                                             | -1.651151 | Inlier |
| siRNA-Temozolomide Run2-DMSO | NM_0332<br>50 | PML   | promyelocytic<br>leukemia                                             | -0.754451 | Inlier |
| siRNA Disorazole DMSO Run1   | NM_0332<br>50 | PML   | promyelocytic<br>leukemia                                             | -0.594549 | Inlier |
| siRNA-Vinblastine Run1-DMSO  | NM_0332<br>50 | PML   | promyelocytic<br>leukemia                                             | -0.053257 | Inlier |
| siRNA-Temozolomide Run1-DMSO | NM_0332<br>50 | PML   | promyelocytic<br>leukemia                                             | 0.053258  | Inlier |
| siRNA-Vinblastine Run2-DMSO  | NM_0332<br>50 | PML   | promyelocytic<br>leukemia                                             | 0.481726  | Inlier |

Identification of Survival Genes in Human Glioblastoma Cells Using siRNA Screening  
 Nikhil G Thaker, Fang Zhang, Peter R. McDonald, Tong Ying Shun, Michael D Lewen, Ian F. Pollack, and John S. Lazo

Molecular Pharmacology

|                              |               |      |                        |                  |
|------------------------------|---------------|------|------------------------|------------------|
|                              | NM_0332       |      | promyelocytic leukemia |                  |
| siRNA Disorazole DMSO Run2   | 50            | PML  | 0.869531               | Inlier           |
|                              | NM_0332       |      | promyelocytic leukemia |                  |
| siRNA Disorazole DMSO Run3   | 50            | PML  | 2.693125               | Inlier           |
| siRNA-Temozolomide Run1-DMSO | NM_0026<br>76 | PMM1 | phosphomannomutase 1   | -1.015976 Inlier |
| siRNA-Temozolomide Run2-DMSO | NM_0026<br>76 | PMM1 | phosphomannomutase 1   | -0.948004 Inlier |
| siRNA-Temozolomide Run3-DMSO | NM_0026<br>76 | PMM1 | phosphomannomutase 1   | -0.605115 Inlier |
| siRNA-Vinblastine Run2-DMSO  | NM_0026<br>76 | PMM1 | phosphomannomutase 1   | -0.08619 Inlier  |
| siRNA Disorazole DMSO Run1   | NM_0026<br>76 | PMM1 | phosphomannomutase 1   | 0.086191 Inlier  |
| siRNA Disorazole DMSO Run2   | NM_0026<br>76 | PMM1 | phosphomannomutase 1   | 0.616713 Inlier  |
| siRNA-Vinblastine Run1-DMSO  | NM_0026<br>76 | PMM1 | phosphomannomutase 1   | 0.732287 Inlier  |
| siRNA Disorazole DMSO Run3   | NM_0026<br>76 | PMM1 | phosphomannomutase 1   | 1.193975 Inlier  |
| siRNA-Temozolomide Run2-DMSO | NM_0003<br>03 | PMM2 | phosphomannomutase 2   | -1.074977 Inlier |
| siRNA-Temozolomide Run3-DMSO | NM_0003<br>03 | PMM2 | phosphomannomutase 2   | -1.069831 Inlier |
| siRNA-Temozolomide Run1-DMSO | NM_0003<br>03 | PMM2 | phosphomannomutase 2   | -0.216695 Inlier |
| siRNA-Vinblastine Run2-DMSO  | NM_0003<br>03 | PMM2 | phosphomannomutase 2   | -0.029115 Inlier |
| siRNA Disorazole DMSO Run1   | NM_0003<br>03 | PMM2 | phosphomannomutase 2   | 0.029115 Inlier  |
| siRNA Disorazole DMSO Run3   | NM_0003<br>03 | PMM2 | phosphomannomutase 2   | 0.515265 Inlier  |
| siRNA Disorazole DMSO Run2   | NM_0003<br>03 | PMM2 | phosphomannomutase 2   | 0.833735 Inlier  |



Identification of Survival Genes in Human Glioblastoma Cells Using siRNA Screening  
 Nikhil G Thaker, Fang Zhang, Peter R. McDonald, Tong Ying Shun, Michael D Lewen, Ian F. Pollack, and John S. Lazo

| siRNA Treatment                                           | Gene ID   | Gene Name | Gene Description                           | Log Fold Change | Outlier Status |
|-----------------------------------------------------------|-----------|-----------|--------------------------------------------|-----------------|----------------|
| Molecular Pharmacology<br>siRNA-Vinblastine Run1-<br>DMSO | NM_000303 | PMM2      | phosphomannomutase 2                       | 1.023421        | Inlier         |
| siRNA-Temozolomide Run3-<br>DMSO                          | NM_002677 | PMP2      | peripheral myelin protein 2                | -1.276487       | Inlier         |
| siRNA-Temozolomide Run2-<br>DMSO                          | NM_002677 | PMP2      | peripheral myelin protein 2                | -0.836115       | Inlier         |
| siRNA-Vinblastine Run2-<br>DMSO                           | NM_002677 | PMP2      | peripheral myelin protein 2                | -0.501462       | Inlier         |
| siRNA Disorazole DMSO Run1                                | NM_002677 | PMP2      | peripheral myelin protein 2                | -0.136463       | Inlier         |
| siRNA-Temozolomide Run1-<br>DMSO                          | NM_002677 | PMP2      | peripheral myelin protein 2                | 0.136463        | Inlier         |
| siRNA Disorazole DMSO Run3                                | NM_002677 | PMP2      | peripheral myelin protein 2                | 0.512885        | Inlier         |
| siRNA-Vinblastine Run1-<br>DMSO                           | NM_002677 | PMP2      | peripheral myelin protein 2                | 2.592765        | Inlier         |
| siRNA Disorazole DMSO Run2                                | NM_002677 | PMP2      | peripheral myelin protein 2                | 2.807922        | Inlier         |
| siRNA-Temozolomide Run3-<br>DMSO                          | NM_015160 | PMPCA     | peptidase (mitochondrial processing) alpha | -1.474175       | Inlier         |
| siRNA-Temozolomide Run2-<br>DMSO                          | NM_015160 | PMPCA     | peptidase (mitochondrial processing) alpha | -0.314727       | Inlier         |
| siRNA Disorazole DMSO Run1                                | NM_015160 | PMPCA     | peptidase (mitochondrial processing) alpha | -0.269907       | Inlier         |
| siRNA Disorazole DMSO Run2                                | NM_015160 | PMPCA     | peptidase (mitochondrial processing) alpha | -0.031899       | Inlier         |
| siRNA-Temozolomide Run1-<br>DMSO                          | NM_015160 | PMPCA     | peptidase (mitochondrial processing) alpha | 0.031899        | Inlier         |

Identification of Survival Genes in Human Glioblastoma Cells Using siRNA Screening  
 Nikhil G Thaker, Fang Zhang, Peter R. McDonald, Tong Ying Shun, Michael D Lewen, Ian F. Pollack, and John S. Lazo

Molecular Pharmacology

|                              |               |       |                                                      |           |        |
|------------------------------|---------------|-------|------------------------------------------------------|-----------|--------|
| siRNA-Vinblastine Run2-DMSO  | NM_0151<br>60 | PMPCA | peptidase<br>(mitochondrial<br>processing<br>) alpha | 1.034273  | Inlier |
| siRNA Disorazole DMSO Run3   | NM_0151<br>60 | PMPCA | peptidase<br>(mitochondrial<br>processing<br>) alpha | 1.208947  | Inlier |
| siRNA-Vinblastine Run1-DMSO  | NM_0151<br>60 | PMPCA | peptidase<br>(mitochondrial<br>processing<br>) alpha | 1.625561  | Inlier |
| siRNA-Temozolomide Run3-DMSO | NM_0042<br>79 | PMPCB | peptidase<br>(mitochondrial<br>processing<br>) beta  | -0.875505 | Inlier |
| siRNA-Temozolomide Run2-DMSO | NM_0042<br>79 | PMPCB | peptidase<br>(mitochondrial<br>processing<br>) beta  | -0.619744 | Inlier |
| siRNA-Temozolomide Run1-DMSO | NM_0042<br>79 | PMPCB | peptidase<br>(mitochondrial<br>processing<br>) beta  | -0.425638 | Inlier |
| siRNA Disorazole DMSO Run2   | NM_0042<br>79 | PMPCB | peptidase<br>(mitochondrial<br>processing<br>) beta  | -0.008155 | Inlier |
| siRNA Disorazole DMSO Run3   | NM_0042<br>79 | PMPCB | peptidase<br>(mitochondrial<br>processing<br>) beta  | 0.008156  | Inlier |
| siRNA Disorazole DMSO Run1   | NM_0042<br>79 | PMPCB | peptidase<br>(mitochondrial<br>processing<br>) beta  | 0.729255  | Inlier |
| siRNA-Vinblastine Run2-DMSO  | NM_0042<br>79 | PMPCB | peptidase<br>(mitochondrial<br>processing<br>) beta  | 1.851045  | Inlier |

Identification of Survival Genes in Human Glioblastoma Cells Using siRNA Screening  
 Nikhil G Thaker, Fang Zhang, Peter R. McDonald, Tong Ying Shun, Michael D Lewen, Ian F. Pollack, and John S. Lazo

Molecular Pharmacology

|                              |           |       |                                                          |           |        |
|------------------------------|-----------|-------|----------------------------------------------------------|-----------|--------|
| siRNA-Vinblastine Run1-DMSO  | NM_004279 | PMPCB | peptidase (mitochondrial processing) beta                | 1.86332   | Inlier |
| siRNA-Temozolomide Run3-DMSO | NM_000534 | PMS1  | PMS1 postmeiotic segregation increased 1 (S. cerevisiae) | -2.401563 | Inlier |
| siRNA-Vinblastine Run2-DMSO  | NM_000534 | PMS1  | PMS1 postmeiotic segregation increased 1 (S. cerevisiae) | -0.871507 | Inlier |
| siRNA-Temozolomide Run1-DMSO | NM_000534 | PMS1  | PMS1 postmeiotic segregation increased 1 (S. cerevisiae) | -0.477493 | Inlier |
| siRNA-Temozolomide Run2-DMSO | NM_000534 | PMS1  | PMS1 postmeiotic segregation increased 1 (S. cerevisiae) | -0.118626 | Inlier |
| siRNA Disorazole DMSO Run3   | NM_000534 | PMS1  | PMS1 postmeiotic segregation increased 1 (S. cerevisiae) | 0.118625  | Inlier |

Identification of Survival Genes in Human Glioblastoma Cells Using siRNA Screening  
 Nikhil G Thaker, Fang Zhang, Peter R. McDonald, Tong Ying Shun, Michael D Lewen, Ian F. Pollack, and John S. Lazo  
 Molecular Pharmacology

|                              |                  |      |                                                                         |           |        |
|------------------------------|------------------|------|-------------------------------------------------------------------------|-----------|--------|
| siRNA Disorazole DMSO Run1   | NM_0005<br>34    | PMS1 | PMS1<br>postmeiotic<br>segregation<br>increased<br>1 (S.<br>cerevisiae) | 0.355161  | Inlier |
| siRNA Disorazole DMSO Run2   | NM_0005<br>34    | PMS1 | PMS1<br>postmeiotic<br>segregation<br>increased<br>1 (S.<br>cerevisiae) | 3.112775  | Inlier |
| siRNA-Vinblastine Run1-DMSO  | NM_0005<br>34    | PMS1 | PMS1<br>postmeiotic<br>segregation<br>increased<br>1 (S.<br>cerevisiae) | 3.469587  | Inlier |
| siRNA-Temozolomide Run3-DMSO | NM_0010<br>18040 | PMS2 | PMS2<br>postmeiotic<br>segregation<br>increased<br>2 (S.<br>cerevisiae) | -1.754951 | Inlier |
| siRNA-Temozolomide Run1-DMSO | NM_0010<br>18040 | PMS2 | PMS2<br>postmeiotic<br>segregation<br>increased<br>2 (S.<br>cerevisiae) | -0.363568 | Inlier |

Identification of Survival Genes in Human Glioblastoma Cells Using siRNA Screening

Nikhil G Thaker, Fang Zhang, Peter R. McDonald, Tong Ying Shun, Michael D Lewen, Ian F. Pollack, and John S.

Lazo

Molecular Pharmacology

|                              |              |      |                                                                         |           |         |
|------------------------------|--------------|------|-------------------------------------------------------------------------|-----------|---------|
| siRNA-Temozolomide Run2-DMSO | NM_001018040 | PMS2 | PMS2<br>postmeiotic<br>segregation<br>increased<br>2 (S.<br>cerevisiae) | -0.295697 | Inlier  |
| siRNA-Vinblastine Run2-DMSO  | NM_001018040 | PMS2 | PMS2<br>postmeiotic<br>segregation<br>increased<br>2 (S.<br>cerevisiae) | -0.186486 | Inlier  |
| siRNA Disorazole DMSO Run1   | NM_001018040 | PMS2 | PMS2<br>postmeiotic<br>segregation<br>increased<br>2 (S.<br>cerevisiae) | 0.186487  | Inlier  |
| siRNA Disorazole DMSO Run3   | NM_001018040 | PMS2 | PMS2<br>postmeiotic<br>segregation<br>increased<br>2 (S.<br>cerevisiae) | 0.985432  | Inlier  |
| siRNA Disorazole DMSO Run2   | NM_001018040 | PMS2 | PMS2<br>postmeiotic<br>segregation<br>increased<br>2 (S.<br>cerevisiae) | 4.030733  | Outlier |

Identification of Survival Genes in Human Glioblastoma Cells Using siRNA Screening  
 Nikhil G Thaker, Fang Zhang, Peter R. McDonald, Tong Ying Shun, Michael D Lewen, Ian F. Pollack, and John S. Lazo  
 Molecular Pharmacology

| siRNA Treatment              | Gene ID      | Gene Name | Expression Change                                        | Significance     |
|------------------------------|--------------|-----------|----------------------------------------------------------|------------------|
| siRNA-Vinblastine Run1-DMSO  | NM_001018040 | PMS2      | PMS2 postmeiotic segregation increased 2 (S. cerevisiae) | 4.489582 Outlier |
| siRNA-Temozolomide Run3-DMSO | NM_005395    | PMS2L9    | PMS2L9 postmeiotic segregation increased 2-like 3        | -1.541183 Inlier |
| siRNA-Temozolomide Run2-DMSO | NM_005395    | PMS2L9    | PMS2L9 postmeiotic segregation increased 2-like 3        | -1.055163 Inlier |
| siRNA-Temozolomide Run1-DMSO | NM_005395    | PMS2L9    | PMS2L9 postmeiotic segregation increased 2-like 3        | -0.89852 Inlier  |
| siRNA Disorazole DMSO Run1   | NM_005395    | PMS2L9    | PMS2L9 postmeiotic segregation increased 2-like 3        | -0.073663 Inlier |
| siRNA-Vinblastine Run2-DMSO  | NM_005395    | PMS2L9    | PMS2L9 postmeiotic segregation increased 2-like 3        | 0.073663 Inlier  |
| siRNA Disorazole DMSO Run3   | NM_005395    | PMS2L9    | PMS2L9 postmeiotic segregation increased 2-like 3        | 0.337398 Inlier  |
| siRNA Disorazole DMSO Run2   | NM_005395    | PMS2L9    | PMS2L9 postmeiotic segregation increased 2-like 3        | 0.645864 Inlier  |

Identification of Survival Genes in Human Glioblastoma Cells Using siRNA Screening  
 Nikhil G Thaker, Fang Zhang, Peter R. McDonald, Tong Ying Shun, Michael D Lewen, Ian F. Pollack, and John S. Lazo

Molecular Pharmacology

|                              |               |        |                                                      |           |        |
|------------------------------|---------------|--------|------------------------------------------------------|-----------|--------|
|                              |               |        | postmeiotic segregation                              |           |        |
| siRNA-Vinblastine Run1-DMSO  | NM_0053<br>95 | PMS2L9 | increased 2-like 3 phosphom evalonate kinase         | 0.703136  | Inlier |
| siRNA-Temozolomide Run1-DMSO | NM_0065<br>56 | PMVK   | phosphom evalonate kinase                            | -1.351577 | Inlier |
| siRNA Disorazole DMSO Run2   | NM_0065<br>56 | PMVK   | phosphom evalonate kinase                            | -0.838711 | Inlier |
| siRNA-Temozolomide Run2-DMSO | NM_0065<br>56 | PMVK   | phosphom evalonate kinase                            | -0.806639 | Inlier |
| siRNA Disorazole DMSO Run1   | NM_0065<br>56 | PMVK   | phosphom evalonate kinase                            | -0.114682 | Inlier |
| siRNA-Temozolomide Run3-DMSO | NM_0065<br>56 | PMVK   | phosphom evalonate kinase                            | 0.114684  | Inlier |
| siRNA-Vinblastine Run1-DMSO  | NM_0065<br>56 | PMVK   | phosphom evalonate kinase                            | 0.376019  | Inlier |
| siRNA Disorazole DMSO Run3   | NM_0065<br>56 | PMVK   | phosphom evalonate kinase                            | 0.542361  | Inlier |
| siRNA-Vinblastine Run2-DMSO  | NM_0065<br>56 | PMVK   | phosphom evalonate kinase                            | 1.588396  | Inlier |
|                              |               |        | pregnancy upregulated non-ubiquitously expressed CaM |           |        |
| siRNA Disorazole DMSO Run2   | NM_1984<br>52 | PNCK   | kinase                                               | -2.069177 | Inlier |
|                              |               |        | pregnancy upregulated non-ubiquitously expressed CaM |           |        |
| siRNA-Temozolomide Run3-DMSO | NM_1984<br>52 | PNCK   | kinase                                               | -1.899513 | Inlier |

Identification of Survival Genes in Human Glioblastoma Cells Using siRNA Screening

Nikhil G Thaker, Fang Zhang, Peter R. McDonald, Tong Ying Shun, Michael D Lewen, Ian F. Pollack, and John S. Lazo

Molecular Pharmacology

|                              |           |      |                                                             |           |        |
|------------------------------|-----------|------|-------------------------------------------------------------|-----------|--------|
| siRNA-Temozolomide Run2-DMSO | NM_198452 | PNCK | pregnancy upregulated non-ubiquitously expressed CaM kinase | -0.377351 | Inlier |
| siRNA-Temozolomide Run1-DMSO | NM_198452 | PNCK | pregnancy upregulated non-ubiquitously expressed CaM kinase | -0.20094  | Inlier |
| siRNA Disorazole DMSO Run1   | NM_198452 | PNCK | pregnancy upregulated non-ubiquitously expressed CaM kinase | 0.20094   | Inlier |
| siRNA-Vinblastine Run1-DMSO  | NM_198452 | PNCK | pregnancy upregulated non-ubiquitously expressed CaM kinase | 0.628859  | Inlier |
| siRNA Disorazole DMSO Run3   | NM_198452 | PNCK | pregnancy upregulated non-ubiquitously expressed CaM kinase | 0.720141  | Inlier |



Identification of Survival Genes in Human Glioblastoma Cells Using siRNA Screening  
 Nikhil G Thaker, Fang Zhang, Peter R. McDonald, Tong Ying Shun, Michael D Lewen, Ian F. Pollack, and John S. Lazo  
 Molecular Pharmacology

|                              |           |       |                                                                                                 |           |        |
|------------------------------|-----------|-------|-------------------------------------------------------------------------------------------------|-----------|--------|
| siRNA-Vinblastine Run2-DMSO  | NM_198452 | PNCK  | pregnancy upregulated non-ubiquitously expressed CaM kinase polynucleotide kinase 3-phosphatase | 1.113586  | Inlier |
| siRNA-Temozolomide Run2-DMSO | NM_007254 | PNKP  | polynucleotide kinase 3-phosphatase                                                             | -0.780095 | Inlier |
| siRNA Disorazole DMSO Run2   | NM_007254 | PNKP  | polynucleotide kinase 3-phosphatase                                                             | -0.568905 | Inlier |
| siRNA-Temozolomide Run3-DMSO | NM_007254 | PNKP  | polynucleotide kinase 3-phosphatase                                                             | -0.337288 | Inlier |
| siRNA Disorazole DMSO Run3   | NM_007254 | PNKP  | polynucleotide kinase 3-phosphatase                                                             | -0.257603 | Inlier |
| siRNA-Temozolomide Run1-DMSO | NM_007254 | PNKP  | polynucleotide kinase 3-phosphatase                                                             | 0.257603  | Inlier |
| siRNA Disorazole DMSO Run1   | NM_007254 | PNKP  | polynucleotide kinase 3-phosphatase                                                             | 1.064878  | Inlier |
| siRNA-Vinblastine Run2-DMSO  | NM_007254 | PNKP  | polynucleotide kinase 3-phosphatase                                                             | 1.62514   | Inlier |
| siRNA-Vinblastine Run1-DMSO  | NM_007254 | PNKP  | polynucleotide kinase 3-phosphatase                                                             | 1.825792  | Inlier |
| siRNA-Temozolomide Run3-DMSO | NM_000936 | PNLIP | pancreatic lipase                                                                               | -0.97362  | Inlier |

Identification of Survival Genes in Human Glioblastoma Cells Using siRNA Screening  
 Nikhil G Thaker, Fang Zhang, Peter R. McDonald, Tong Ying Shun, Michael D Lewen, Ian F. Pollack, and John S. Lazo

|                              |         |          |                           |           |         |
|------------------------------|---------|----------|---------------------------|-----------|---------|
| Molecular Pharmacology       | NM_0009 |          | pancreatic                |           |         |
| siRNA Disorazole DMSO Run3   | 36      | PNLIP    | lipase                    | -0.477484 | Inlier  |
| siRNA-Vinblastine Run2-DMSO  | NM_0009 |          | pancreatic                |           |         |
| siRNA-Temozolomide Run2-DMSO | 36      | PNLIP    | lipase                    | -0.437213 | Inlier  |
| siRNA-Temozolomide Run1-DMSO | NM_0009 |          | pancreatic                |           |         |
| siRNA-Temozolomide Run1-DMSO | 36      | PNLIP    | lipase                    | -0.375547 | Inlier  |
| siRNA Disorazole DMSO Run1   | NM_0009 |          | pancreatic                |           |         |
| siRNA Disorazole DMSO Run1   | 36      | PNLIP    | lipase                    | 0.871516  | Inlier  |
| siRNA-Vinblastine Run1-DMSO  | NM_0009 |          | pancreatic                |           |         |
| siRNA-Vinblastine Run1-DMSO  | 36      | PNLIP    | lipase                    | 2.166004  | Inlier  |
| siRNA Disorazole DMSO Run2   | NM_0009 |          | pancreatic                |           |         |
| siRNA Disorazole DMSO Run2   | 36      | PNLIP    | lipase                    | 2.265968  | Inlier  |
| siRNA-Temozolomide Run3-DMSO | NM_0062 |          | pancreatic lipase-related |           |         |
| siRNA-Temozolomide Run3-DMSO | 29      | PNLIPRP1 | protein 1                 | -3.917493 | Outlier |
| siRNA-Temozolomide Run2-DMSO | NM_0062 |          | pancreatic lipase-related |           |         |
| siRNA-Temozolomide Run2-DMSO | 29      | PNLIPRP1 | protein 1                 | -0.590919 | Inlier  |
| siRNA-Temozolomide Run1-DMSO | NM_0062 |          | pancreatic lipase-related |           |         |
| siRNA-Temozolomide Run1-DMSO | 29      | PNLIPRP1 | protein 1                 | -0.058911 | Inlier  |
| siRNA Disorazole DMSO Run3   | NM_0062 |          | pancreatic lipase-related |           |         |
| siRNA Disorazole DMSO Run3   | 29      | PNLIPRP1 | protein 1                 | -0.048341 | Inlier  |
| siRNA-Vinblastine Run2-DMSO  | NM_0062 |          | pancreatic lipase-related |           |         |
| siRNA-Vinblastine Run2-DMSO  | 29      | PNLIPRP1 | protein 1                 | 0.048342  | Inlier  |
| siRNA Disorazole DMSO Run1   | NM_0062 |          | pancreatic lipase-related |           |         |
| siRNA Disorazole DMSO Run1   | 29      | PNLIPRP1 | protein 1                 | 0.75808   | Inlier  |
| siRNA Disorazole DMSO Run2   | NM_0062 |          | pancreatic lipase-related |           |         |
| siRNA Disorazole DMSO Run2   | 29      | PNLIPRP1 | protein 1                 | 1.566471  | Inlier  |
| siRNA-Vinblastine Run1-DMSO  | NM_0062 |          | pancreatic lipase-related |           |         |
| siRNA-Vinblastine Run1-DMSO  | 29      | PNLIPRP1 | protein 1                 | 2.124102  | Inlier  |
| siRNA-Temozolomide Run3-DMSO | NM_0053 |          | pancreatic lipase-related |           |         |
| siRNA-Temozolomide Run3-DMSO | 96      | PNLIPRP2 | protein 2                 | -1.990328 | Inlier  |

Identification of Survival Genes in Human Glioblastoma Cells Using siRNA Screening  
 Nikhil G Thaker, Fang Zhang, Peter R. McDonald, Tong Ying Shun, Michael D Lewen, Ian F. Pollack, and John S. Lazo

Molecular Pharmacology

|                              |               |          |                                        |           |        |
|------------------------------|---------------|----------|----------------------------------------|-----------|--------|
| siRNA Disorazole DMSO Run1   | NM_0053<br>96 | PNLIPRP2 | pancreatic lipase-related protein 2    | -1.051695 | Inlier |
| siRNA-Temozolomide Run2-DMSO | NM_0053<br>96 | PNLIPRP2 | pancreatic lipase-related protein 2    | -0.511349 | Inlier |
| siRNA-Vinblastine Run2-DMSO  | NM_0053<br>96 | PNLIPRP2 | pancreatic lipase-related protein 2    | -0.094197 | Inlier |
| siRNA Disorazole DMSO Run3   | NM_0053<br>96 | PNLIPRP2 | pancreatic lipase-related protein 2    | 0.094198  | Inlier |
| siRNA-Temozolomide Run1-DMSO | NM_0053<br>96 | PNLIPRP2 | pancreatic lipase-related protein 2    | 0.288206  | Inlier |
| siRNA Disorazole DMSO Run2   | NM_0053<br>96 | PNLIPRP2 | pancreatic lipase-related protein 2    | 0.837651  | Inlier |
| siRNA-Vinblastine Run1-DMSO  | NM_0053<br>96 | PNLIPRP2 | pancreatic lipase-related protein 2    | 1.173622  | Inlier |
| siRNA-Temozolomide Run2-DMSO | NM_0026<br>86 | PNMT     | phenylethanolamine N-methyltransferase | -3.123416 | Inlier |
| siRNA-Temozolomide Run3-DMSO | NM_0026<br>86 | PNMT     | phenylethanolamine N-methyltransferase | -1.068248 | Inlier |
| siRNA-Vinblastine Run2-DMSO  | NM_0026<br>86 | PNMT     | phenylethanolamine N-methyltransferase | -0.270994 | Inlier |
| siRNA Disorazole DMSO Run2   | NM_0026<br>86 | PNMT     | phenylethanolamine N-methyltransferase | -0.006352 | Inlier |

Identification of Survival Genes in Human Glioblastoma Cells Using siRNA Screening

Nikhil G Thaker, Fang Zhang, Peter R. McDonald, Tong Ying Shun, Michael D Lewen, Ian F. Pollack, and John S. Lazo

Molecular Pharmacology

|                              |               |        |                                                |           |        |
|------------------------------|---------------|--------|------------------------------------------------|-----------|--------|
| siRNA Disorazole DMSO Run1   | NM_0026<br>86 | PNMT   | phenylethanolamine N-methyltransferase         | 0.006352  | Inlier |
| siRNA Disorazole DMSO Run3   | NM_0026<br>86 | PNMT   | phenylethanolamine N-methyltransferase         | 0.432651  | Inlier |
| siRNA-Temozolomide Run1-DMSO | NM_0026<br>86 | PNMT   | phenylethanolamine N-methyltransferase         | 0.916349  | Inlier |
| siRNA-Vinblastine Run1-DMSO  | NM_0026<br>86 | PNMT   | phenylethanolamine N-methyltransferase         | 2.858104  | Inlier |
| siRNA Disorazole DMSO Run3   | NM_1736<br>76 | PNPLA1 | patatin-like phospholipase domain containing 1 | -1.10506  | Inlier |
| siRNA-Vinblastine Run2-DMSO  | NM_1736<br>76 | PNPLA1 | patatin-like phospholipase domain containing 1 | -0.970939 | Inlier |
| siRNA-Temozolomide Run3-DMSO | NM_1736<br>76 | PNPLA1 | patatin-like phospholipase domain containing 1 | -0.270525 | Inlier |
| siRNA-Temozolomide Run2-DMSO | NM_1736<br>76 | PNPLA1 | patatin-like phospholipase domain containing 1 | -0.06535  | Inlier |

Identification of Survival Genes in Human Glioblastoma Cells Using siRNA Screening  
 Nikhil G Thaker, Fang Zhang, Peter R. McDonald, Tong Ying Shun, Michael D Lewen, Ian F. Pollack, and John S. Lazo  
 Molecular Pharmacology

|                                  |               |        |                                                                |           |        |
|----------------------------------|---------------|--------|----------------------------------------------------------------|-----------|--------|
| siRNA Disorazole DMSO Run1       | NM_1736<br>76 | PNPLA1 | patatin-like<br>phospholip<br>ase<br>domain<br>containing<br>1 | 0.06535   | Inlier |
| siRNA-Temozolomide Run1-<br>DMSO | NM_1736<br>76 | PNPLA1 | patatin-like<br>phospholip<br>ase<br>domain<br>containing<br>1 | 0.378061  | Inlier |
| siRNA Disorazole DMSO Run2       | NM_1736<br>76 | PNPLA1 | patatin-like<br>phospholip<br>ase<br>domain<br>containing<br>1 | 1.836937  | Inlier |
| siRNA-Vinblastine Run1-<br>DMSO  | NM_1736<br>76 | PNPLA1 | patatin-like<br>phospholip<br>ase<br>domain<br>containing<br>1 | 2.299748  | Inlier |
| siRNA Disorazole DMSO Run1       | NM_0181<br>29 | PNPO   | pyridoxine<br>5-<br>phosphate<br>oxidase                       | -0.949532 | Inlier |
| siRNA-Temozolomide Run2-<br>DMSO | NM_0181<br>29 | PNPO   | pyridoxine<br>5-<br>phosphate<br>oxidase                       | -0.905519 | Inlier |
| siRNA-Temozolomide Run3-<br>DMSO | NM_0181<br>29 | PNPO   | pyridoxine<br>5-<br>phosphate<br>oxidase                       | -0.738491 | Inlier |
| siRNA-Temozolomide Run1-<br>DMSO | NM_0181<br>29 | PNPO   | pyridoxine<br>5-<br>phosphate<br>oxidase                       | -0.347191 | Inlier |
| siRNA Disorazole DMSO Run3       | NM_0181<br>29 | PNPO   | pyridoxine<br>5-<br>phosphate<br>oxidase                       | 0.347192  | Inlier |
| siRNA-Vinblastine Run2-<br>DMSO  | NM_0181<br>29 | PNPO   | pyridoxine<br>5-<br>phosphate<br>oxidase                       | 0.406005  | Inlier |

Identification of Survival Genes in Human Glioblastoma Cells Using siRNA Screening  
 Nikhil G Thaker, Fang Zhang, Peter R. McDonald, Tong Ying Shun, Michael D Lewen, Ian F. Pollack, and John S. Lazo

Molecular Pharmacology

| siRNA                        | Gene    | Accession | Gene  | Value                                        | Outlier          |
|------------------------------|---------|-----------|-------|----------------------------------------------|------------------|
| siRNA-Vinblastine Run1-DMSO  | NM_0181 | 29        | PNPO  | pyridoxine 5-phosphate oxidase               | 0.610509 Inlier  |
| siRNA Disorazole DMSO Run2   | NM_0181 | 29        | PNPO  | pyridoxine 5-phosphate oxidase               | 1.53238 Inlier   |
| siRNA-Temozolomide Run2-DMSO | NM_0331 | 09        | PNPT1 | polyribonucleotide nucleotidyl transferase 1 | -2.738008 Inlier |
| siRNA-Temozolomide Run3-DMSO | NM_0331 | 09        | PNPT1 | polyribonucleotide nucleotidyl transferase 1 | -0.801809 Inlier |
| siRNA Disorazole DMSO Run3   | NM_0331 | 09        | PNPT1 | polyribonucleotide nucleotidyl transferase 1 | -0.228189 Inlier |
| siRNA-Temozolomide Run1-DMSO | NM_0331 | 09        | PNPT1 | polyribonucleotide nucleotidyl transferase 1 | -0.127282 Inlier |
| siRNA-Vinblastine Run2-DMSO  | NM_0331 | 09        | PNPT1 | polyribonucleotide nucleotidyl transferase 1 | 0.127282 Inlier  |
| siRNA Disorazole DMSO Run1   | NM_0331 | 09        | PNPT1 | polyribonucleotide nucleotidyl transferase 1 | 0.547191 Inlier  |
| siRNA-Vinblastine Run1-DMSO  | NM_0331 | 09        | PNPT1 | polyribonucleotide nucleotidyl transferase 1 | 0.928769 Inlier  |
| siRNA Disorazole DMSO Run2   | NM_0331 | 09        | PNPT1 | polyribonucleotide nucleotidyl transferase 1 | 1.358791 Inlier  |

Identification of Survival Genes in Human Glioblastoma Cells Using siRNA Screening  
 Nikhil G Thaker, Fang Zhang, Peter R. McDonald, Tong Ying Shun, Michael D Lewen, Ian F. Pollack, and John S. Lazo  
 Molecular Pharmacology

|                              |               |        |                                            |           |        |
|------------------------------|---------------|--------|--------------------------------------------|-----------|--------|
| siRNA-Temozolomide Run3-DMSO | NM_0039<br>67 | PNR    | trace<br>amine<br>associated<br>receptor 5 | -3.081089 | Inlier |
| siRNA Disorazole DMSO Run2   | NM_0039<br>67 | PNR    | trace<br>amine<br>associated<br>receptor 5 | -2.50936  | Inlier |
| siRNA-Temozolomide Run1-DMSO | NM_0039<br>67 | PNR    | trace<br>amine<br>associated<br>receptor 5 | -0.283811 | Inlier |
| siRNA Disorazole DMSO Run1   | NM_0039<br>67 | PNR    | trace<br>amine<br>associated<br>receptor 5 | -0.096072 | Inlier |
| siRNA-Temozolomide Run2-DMSO | NM_0039<br>67 | PNR    | trace<br>amine<br>associated<br>receptor 5 | 0.096073  | Inlier |
| siRNA Disorazole DMSO Run3   | NM_0039<br>67 | PNR    | trace<br>amine<br>associated<br>receptor 5 | 0.324878  | Inlier |
| siRNA-Vinblastine Run1-DMSO  | NM_0039<br>67 | PNR    | trace<br>amine<br>associated<br>receptor 5 | 1.024122  | Inlier |
| siRNA-Vinblastine Run2-DMSO  | NM_0039<br>67 | PNR    | trace<br>amine<br>associated<br>receptor 5 | 1.639277  | Inlier |
| siRNA Disorazole DMSO Run3   | NM_1722<br>36 | POFUT1 | protein O-<br>fucosyltran<br>sferase 1     | -1.037923 | Inlier |
| siRNA-Temozolomide Run3-DMSO | NM_1722<br>36 | POFUT1 | protein O-<br>fucosyltran<br>sferase 1     | -0.452332 | Inlier |
| siRNA-Vinblastine Run2-DMSO  | NM_1722<br>36 | POFUT1 | protein O-<br>fucosyltran<br>sferase 1     | -0.451134 | Inlier |

Identification of Survival Genes in Human Glioblastoma Cells Using siRNA Screening  
 Nikhil G Thaker, Fang Zhang, Peter R. McDonald, Tong Ying Shun, Michael D Lewen, Ian F. Pollack, and John S. Lazo  
 Molecular Pharmacology

|                              |               |        |                                  |           |         |
|------------------------------|---------------|--------|----------------------------------|-----------|---------|
| siRNA Disorazole DMSO Run1   | NM_1722<br>36 | POFUT1 | protein O-fucosyltransferase 1   | -0.398767 | Inlier  |
| siRNA-Temozolomide Run2-DMSO | NM_1722<br>36 | POFUT1 | protein O-fucosyltransferase 1   | 0.398767  | Inlier  |
| siRNA-Temozolomide Run1-DMSO | NM_1722<br>36 | POFUT1 | protein O-fucosyltransferase 1   | 0.896668  | Inlier  |
| siRNA-Vinblastine Run1-DMSO  | NM_1722<br>36 | POFUT1 | protein O-fucosyltransferase 1   | 4.19902   | Outlier |
| siRNA Disorazole DMSO Run2   | NM_1722<br>36 | POFUT1 | protein O-fucosyltransferase 1   | 4.483842  | Outlier |
| siRNA-Temozolomide Run2-DMSO | NM_0169<br>37 | POLA   | polymerase (DNA directed), alpha | -1.082004 | Inlier  |
| siRNA Disorazole DMSO Run3   | NM_0169<br>37 | POLA   | polymerase (DNA directed), alpha | -0.266996 | Inlier  |
| siRNA-Temozolomide Run1-DMSO | NM_0169<br>37 | POLA   | polymerase (DNA directed), alpha | -0.145168 | Inlier  |
| siRNA Disorazole DMSO Run1   | NM_0169<br>37 | POLA   | polymerase (DNA directed), alpha | -0.139686 | Inlier  |
| siRNA-Vinblastine Run2-DMSO  | NM_0169<br>37 | POLA   | polymerase (DNA directed), alpha | 0.139686  | Inlier  |
| siRNA-Temozolomide Run3-DMSO | NM_0169<br>37 | POLA   | polymerase (DNA directed), alpha | 2.932343  | Inlier  |
| siRNA Disorazole DMSO Run2   | NM_0169<br>37 | POLA   | polymerase (DNA directed), alpha | 4.35557   | Outlier |
| siRNA-Vinblastine Run1-DMSO  | NM_0169<br>37 | POLA   | polymerase (DNA directed), alpha | 6.941393  | Outlier |



Identification of Survival Genes in Human Glioblastoma Cells Using siRNA Screening

Nikhil G Thaker, Fang Zhang, Peter R. McDonald, Tong Ying Shun, Michael D Lewen, Ian F. Pollack, and John S. Lazo

Molecular Pharmacology

|                              |           |       |                                                   |           |        |
|------------------------------|-----------|-------|---------------------------------------------------|-----------|--------|
| siRNA-Temozolomide Run3-DMSO | NM_002689 | POLA2 | polymerase (DNA directed), alpha 2 (70kD subunit) | -1.204289 | Inlier |
| siRNA-Vinblastine Run2-DMSO  | NM_002689 | POLA2 | polymerase (DNA directed), alpha 2 (70kD subunit) | -1.085034 | Inlier |
| siRNA Disorazole DMSO Run3   | NM_002689 | POLA2 | polymerase (DNA directed), alpha 2 (70kD subunit) | -0.788319 | Inlier |
| siRNA-Temozolomide Run1-DMSO | NM_002689 | POLA2 | polymerase (DNA directed), alpha 2 (70kD subunit) | -0.197622 | Inlier |
| siRNA-Temozolomide Run2-DMSO | NM_002689 | POLA2 | polymerase (DNA directed), alpha 2 (70kD subunit) | 0.197622  | Inlier |
| siRNA Disorazole DMSO Run1   | NM_002689 | POLA2 | polymerase (DNA directed), alpha 2 (70kD subunit) | 0.509812  | Inlier |
| siRNA-Vinblastine Run1-DMSO  | NM_002689 | POLA2 | polymerase (DNA directed), alpha 2 (70kD subunit) | 0.560681  | Inlier |
| siRNA Disorazole DMSO Run2   | NM_002689 | POLA2 | polymerase (DNA directed), alpha 2 (70kD subunit) | 0.903525  | Inlier |
| siRNA-Temozolomide Run2-DMSO | NM_002690 | POLB  | beta                                              | -1.726533 | Inlier |

Identification of Survival Genes in Human Glioblastoma Cells Using siRNA Screening  
 Nikhil G Thaker, Fang Zhang, Peter R. McDonald, Tong Ying Shun, Michael D Lewen, Ian F. Pollack, and John S. Lazo

Molecular Pharmacology

|                              |               |       |                                                              |           |         |
|------------------------------|---------------|-------|--------------------------------------------------------------|-----------|---------|
| siRNA Disorazole DMSO Run1   | NM_0026<br>90 | POLB  | polymerase (DNA directed), beta                              | -0.311445 | Inlier  |
| siRNA-Temozolomide Run1-DMSO | NM_0026<br>90 | POLB  | polymerase (DNA directed), beta                              | -0.172712 | Inlier  |
| siRNA-Temozolomide Run3-DMSO | NM_0026<br>90 | POLB  | polymerase (DNA directed), beta                              | -0.024983 | Inlier  |
| siRNA-Vinblastine Run2-DMSO  | NM_0026<br>90 | POLB  | polymerase (DNA directed), beta                              | 0.024983  | Inlier  |
| siRNA Disorazole DMSO Run2   | NM_0026<br>90 | POLB  | polymerase (DNA directed), beta                              | 1.037555  | Inlier  |
| siRNA Disorazole DMSO Run3   | NM_0026<br>90 | POLB  | polymerase (DNA directed), beta                              | 1.551487  | Inlier  |
| siRNA-Vinblastine Run1-DMSO  | NM_0026<br>90 | POLB  | polymerase (DNA directed), beta                              | 3.52092   | Outlier |
| siRNA-Temozolomide Run2-DMSO | NM_0026<br>91 | POLD1 | polymerase (DNA directed), delta 1, catalytic subunit 125kDa | -1.460125 | Inlier  |
| siRNA Disorazole DMSO Run1   | NM_0026<br>91 | POLD1 | polymerase (DNA directed), delta 1, catalytic subunit 125kDa | -0.6599   | Inlier  |
| siRNA-Temozolomide Run1-DMSO | NM_0026<br>91 | POLD1 | polymerase (DNA directed), delta 1, catalytic subunit 125kDa | -0.308583 | Inlier  |

Identification of Survival Genes in Human Glioblastoma Cells Using siRNA Screening  
 Nikhil G Thaker, Fang Zhang, Peter R. McDonald, Tong Ying Shun, Michael D Lewen, Ian F. Pollack, and John S. Lazo

Molecular Pharmacology

|                              |               |       |                                                               |           |        |
|------------------------------|---------------|-------|---------------------------------------------------------------|-----------|--------|
| siRNA-Temozolomide Run3-DMSO | NM_0026<br>91 | POLD1 | polymerase (DNA directed), delta 1, catalytic subunit 125kDa  | -0.257935 | Inlier |
| siRNA Disorazole DMSO Run3   | NM_0026<br>91 | POLD1 | polymerase (DNA directed), delta 1, catalytic subunit 125kDa  | 0.257935  | Inlier |
| siRNA-Vinblastine Run2-DMSO  | NM_0026<br>91 | POLD1 | polymerase (DNA directed), delta 1, catalytic subunit 125kDa  | 0.6891    | Inlier |
| siRNA Disorazole DMSO Run2   | NM_0026<br>91 | POLD1 | polymerase (DNA directed), delta 1, catalytic subunit 125kDa  | 1.469409  | Inlier |
| siRNA-Vinblastine Run1-DMSO  | NM_0026<br>91 | POLD1 | polymerase (DNA directed), delta 2, regulatory subunit 125kDa | 2.699878  | Inlier |
| siRNA-Temozolomide Run2-DMSO | NM_0062<br>30 | POLD2 | polymerase (DNA directed), delta 2, regulatory subunit 50kDa  | -1.336618 | Inlier |
| siRNA Disorazole DMSO Run1   | NM_0062<br>30 | POLD2 | polymerase (DNA directed), delta 2, regulatory subunit 50kDa  | -0.749552 | Inlier |

Identification of Survival Genes in Human Glioblastoma Cells Using siRNA Screening

Nikhil G Thaker, Fang Zhang, Peter R. McDonald, Tong Ying Shun, Michael D Lewen, Ian F. Pollack, and John S. Lazo

Molecular Pharmacology

|                              |               |       |                                                              |           |        |
|------------------------------|---------------|-------|--------------------------------------------------------------|-----------|--------|
| siRNA-Vinblastine Run2-DMSO  | NM_0062<br>30 | POLD2 | polymerase (DNA directed), delta 2, regulatory subunit 50kDa | -0.599448 | Inlier |
| siRNA Disorazole DMSO Run3   | NM_0062<br>30 | POLD2 | polymerase (DNA directed), delta 2, regulatory subunit 50kDa | -0.142037 | Inlier |
| siRNA-Temozolomide Run3-DMSO | NM_0062<br>30 | POLD2 | polymerase (DNA directed), delta 2, regulatory subunit 50kDa | 0.142038  | Inlier |
| siRNA-Temozolomide Run1-DMSO | NM_0062<br>30 | POLD2 | polymerase (DNA directed), delta 2, regulatory subunit 50kDa | 0.162344  | Inlier |
| siRNA Disorazole DMSO Run2   | NM_0062<br>30 | POLD2 | polymerase (DNA directed), delta 2, regulatory subunit 50kDa | 1.458344  | Inlier |
| siRNA-Vinblastine Run1-DMSO  | NM_0062<br>30 | POLD2 | polymerase (DNA-directed), delta 3, accessory subunit 50kDa  | 2.281403  | Inlier |
| siRNA-Temozolomide Run3-DMSO | NM_0065<br>91 | POLD3 | accessory subunit                                            | -0.975095 | Inlier |

Identification of Survival Genes in Human Glioblastoma Cells Using siRNA Screening  
 Nikhil G Thaker, Fang Zhang, Peter R. McDonald, Tong Ying Shun, Michael D Lewen, Ian F. Pollack, and John S. Lazo

Molecular Pharmacology

|                              |               |       |                                                       |           |        |
|------------------------------|---------------|-------|-------------------------------------------------------|-----------|--------|
| siRNA-Temozolomide Run2-DMSO | NM_0065<br>91 | POLD3 | polymerase (DNA-directed), delta 3, accessory subunit | -0.809053 | Inlier |
| siRNA Disorazole DMSO Run3   | NM_0065<br>91 | POLD3 | polymerase (DNA-directed), delta 3, accessory subunit | -0.539947 | Inlier |
| siRNA-Vinblastine Run2-DMSO  | NM_0065<br>91 | POLD3 | polymerase (DNA-directed), delta 3, accessory subunit | -0.023198 | Inlier |
| siRNA-Temozolomide Run1-DMSO | NM_0065<br>91 | POLD3 | polymerase (DNA-directed), delta 3, accessory subunit | 0.023198  | Inlier |
| siRNA Disorazole DMSO Run1   | NM_0065<br>91 | POLD3 | polymerase (DNA-directed), delta 3, accessory subunit | 0.189498  | Inlier |
| siRNA-Vinblastine Run1-DMSO  | NM_0065<br>91 | POLD3 | polymerase (DNA-directed), delta 3, accessory subunit | 1.523224  | Inlier |
| siRNA Disorazole DMSO Run2   | NM_0065<br>91 | POLD3 | polymerase (DNA-directed), delta 3, accessory subunit | 2.000385  | Inlier |
| siRNA Disorazole DMSO Run1   | NM_0211<br>73 | POLD4 | polymerase (DNA-directed), delta 4                    | -1.678078 | Inlier |
| siRNA Disorazole DMSO Run3   | NM_0211<br>73 | POLD4 | polymerase (DNA-directed), delta 4                    | -1.053041 | Inlier |

Identification of Survival Genes in Human Glioblastoma Cells Using siRNA Screening  
 Nikhil G Thaker, Fang Zhang, Peter R. McDonald, Tong Ying Shun, Michael D Lewen, Ian F. Pollack, and John S. Lazo

Molecular Pharmacology

| siRNA Treatment              | Gene ID   | Gene Name | Delta 4                            | Outlier Status    |
|------------------------------|-----------|-----------|------------------------------------|-------------------|
| siRNA-Temozolomide Run1-DMSO | NM_021173 | POLD4     | polymerase (DNA-directed), delta 4 | -0.29596 Inlier   |
| siRNA-Vinblastine Run2-DMSO  | NM_021173 | POLD4     | polymerase (DNA-directed), delta 4 | -0.127555 Inlier  |
| siRNA Disorazole DMSO Run2   | NM_021173 | POLD4     | polymerase (DNA-directed), delta 4 | 0.127557 Inlier   |
| siRNA-Temozolomide Run2-DMSO | NM_021173 | POLD4     | polymerase (DNA-directed), delta 4 | 0.221635 Inlier   |
| siRNA-Temozolomide Run3-DMSO | NM_021173 | POLD4     | polymerase (DNA-directed), delta 4 | 1.76124 Inlier    |
| siRNA-Vinblastine Run1-DMSO  | NM_021173 | POLD4     | polymerase (DNA-directed), delta 4 | 2.01407 Inlier    |
| siRNA-Temozolomide Run2-DMSO | NM_006231 | POLE      | polymerase (DNA directed), epsilon | -4.204149 Outlier |
| siRNA-Temozolomide Run1-DMSO | NM_006231 | POLE      | polymerase (DNA directed), epsilon | -0.724074 Inlier  |
| siRNA Disorazole DMSO Run1   | NM_006231 | POLE      | polymerase (DNA directed), epsilon | -0.624926 Inlier  |
| siRNA Disorazole DMSO Run3   | NM_006231 | POLE      | polymerase (DNA directed), epsilon | -0.06554 Inlier   |
| siRNA-Vinblastine Run2-DMSO  | NM_006231 | POLE      | polymerase (DNA directed), epsilon | 0.06554 Inlier    |
| siRNA-Temozolomide Run3-DMSO | NM_006231 | POLE      | polymerase (DNA directed), epsilon | 0.467405 Inlier   |
| siRNA Disorazole DMSO Run2   | NM_006231 | POLE      | polymerase (DNA directed), epsilon | 3.134213 Inlier   |

Identification of Survival Genes in Human Glioblastoma Cells Using siRNA Screening

Nikhil G Thaker, Fang Zhang, Peter R. McDonald, Tong Ying Shun, Michael D Lewen, Ian F. Pollack, and John S. Lazo

Molecular Pharmacology

|                              |           |       |                                                    |           |         |
|------------------------------|-----------|-------|----------------------------------------------------|-----------|---------|
| siRNA-Vinblastine Run1-DMSO  | NM_006231 | POLE  | polymerase (DNA directed), epsilon                 | 4.927405  | Outlier |
| siRNA-Temozolomide Run3-DMSO | NM_002692 | POLE2 | polymerase (DNA directed), epsilon 2 (p59 subunit) | -1.357104 | Inlier  |
| siRNA-Temozolomide Run2-DMSO | NM_002692 | POLE2 | polymerase (DNA directed), epsilon 2 (p59 subunit) | -0.970367 | Inlier  |
| siRNA-Vinblastine Run2-DMSO  | NM_002692 | POLE2 | polymerase (DNA directed), epsilon 2 (p59 subunit) | -0.244984 | Inlier  |
| siRNA Disorazole DMSO Run3   | NM_002692 | POLE2 | polymerase (DNA directed), epsilon 2 (p59 subunit) | -0.137061 | Inlier  |
| siRNA Disorazole DMSO Run1   | NM_002692 | POLE2 | polymerase (DNA directed), epsilon 2 (p59 subunit) | 0.137061  | Inlier  |
| siRNA-Temozolomide Run1-DMSO | NM_002692 | POLE2 | polymerase (DNA directed), epsilon 2 (p59 subunit) | 0.378633  | Inlier  |
| siRNA Disorazole DMSO Run2   | NM_002692 | POLE2 | polymerase (DNA directed), epsilon 2 (p59 subunit) | 1.770973  | Inlier  |
| siRNA-Vinblastine Run1-DMSO  | NM_002692 | POLE2 | polymerase (DNA directed), epsilon 2 (p59 subunit) | 1.833706  | Inlier  |

Identification of Survival Genes in Human Glioblastoma Cells Using siRNA Screening

Nikhil G Thaker, Fang Zhang, Peter R. McDonald, Tong Ying Shun, Michael D Lewen, Ian F. Pollack, and John S. Lazo

Molecular Pharmacology

| siRNA Treatment              | Gene    | Gene ID | Gene Symbol | Log Fold Change | Classification |
|------------------------------|---------|---------|-------------|-----------------|----------------|
| siRNA-Temozolomide Run2-DMSO | NM_0174 | 43      | POLE3       | -1.209301       | Inlier         |
| siRNA Disorazole DMSO Run1   | NM_0174 | 43      | POLE3       | -0.758487       | Inlier         |
| siRNA Disorazole DMSO Run3   | NM_0174 | 43      | POLE3       | -0.20387        | Inlier         |
| siRNA-Vinblastine Run2-DMSO  | NM_0174 | 43      | POLE3       | -0.141135       | Inlier         |
| siRNA-Temozolomide Run1-DMSO | NM_0174 | 43      | POLE3       | 0.141135        | Inlier         |
| siRNA-Temozolomide Run3-DMSO | NM_0174 | 43      | POLE3       | 0.590513        | Inlier         |
| siRNA Disorazole DMSO Run2   | NM_0174 | 43      | POLE3       | 4.436752        | Outlier        |
| siRNA-Vinblastine Run1-DMSO  | NM_0174 | 43      | POLE3       | 4.837168        | Outlier        |



Identification of Survival Genes in Human Glioblastoma Cells Using siRNA Screening

Nikhil G Thaker, Fang Zhang, Peter R. McDonald, Tong Ying Shun, Michael D Lewen, Ian F. Pollack, and John S.

Lazo

Molecular Pharmacology

|                              |               |       |                                                    |           |         |
|------------------------------|---------------|-------|----------------------------------------------------|-----------|---------|
| siRNA Disorazole DMSO Run1   | NM_0198<br>96 | POLE4 | polymerase (DNA-directed), epsilon 4 (p12 subunit) | -0.983344 | Inlier  |
| siRNA Disorazole DMSO Run3   | NM_0198<br>96 | POLE4 | polymerase (DNA-directed), epsilon 4 (p12 subunit) | -0.819747 | Inlier  |
| siRNA-Vinblastine Run2-DMSO  | NM_0198<br>96 | POLE4 | polymerase (DNA-directed), epsilon 4 (p12 subunit) | -0.346472 | Inlier  |
| siRNA-Temozolomide Run1-DMSO | NM_0198<br>96 | POLE4 | polymerase (DNA-directed), epsilon 4 (p12 subunit) | -0.063789 | Inlier  |
| siRNA-Temozolomide Run2-DMSO | NM_0198<br>96 | POLE4 | polymerase (DNA-directed), epsilon 4 (p12 subunit) | 0.063788  | Inlier  |
| siRNA-Temozolomide Run3-DMSO | NM_0198<br>96 | POLE4 | polymerase (DNA-directed), epsilon 4 (p12 subunit) | 0.529253  | Inlier  |
| siRNA Disorazole DMSO Run2   | NM_0198<br>96 | POLE4 | polymerase (DNA-directed), epsilon 4 (p12 subunit) | 1.486244  | Inlier  |
| siRNA-Vinblastine Run1-DMSO  | NM_0198<br>96 | POLE4 | polymerase (DNA-directed), epsilon 4 (p12 subunit) | 5.140892  | Outlier |
| siRNA-Temozolomide Run2-DMSO | NM_0026<br>93 | POLG  | gamma                                              | -1.614765 | Inlier  |

Identification of Survival Genes in Human Glioblastoma Cells Using siRNA Screening  
 Nikhil G Thaker, Fang Zhang, Peter R. McDonald, Tong Ying Shun, Michael D Lewen, Ian F. Pollack, and John S. Lazo

Molecular Pharmacology

|                              |               |       |                                                                |           |        |
|------------------------------|---------------|-------|----------------------------------------------------------------|-----------|--------|
| siRNA-Temozolomide Run1-DMSO | NM_0026<br>93 | POLG  | polymerase (DNA directed), gamma                               | -0.837799 | Inlier |
| siRNA Disorazole DMSO Run1   | NM_0026<br>93 | POLG  | polymerase (DNA directed), gamma                               | -0.511201 | Inlier |
| siRNA-Vinblastine Run2-DMSO  | NM_0026<br>93 | POLG  | polymerase (DNA directed), gamma                               | -0.074377 | Inlier |
| siRNA-Temozolomide Run3-DMSO | NM_0026<br>93 | POLG  | polymerase (DNA directed), gamma                               | 0.074377  | Inlier |
| siRNA Disorazole DMSO Run3   | NM_0026<br>93 | POLG  | polymerase (DNA directed), gamma                               | 0.122874  | Inlier |
| siRNA Disorazole DMSO Run2   | NM_0026<br>93 | POLG  | polymerase (DNA directed), gamma                               | 1.531145  | Inlier |
| siRNA-Vinblastine Run1-DMSO  | NM_0026<br>93 | POLG  | polymerase (DNA directed), gamma                               | 2.105443  | Inlier |
| siRNA Disorazole DMSO Run3   | NM_0072<br>15 | POLG2 | gamma 2, accessory subunit polymerase (DNA directed), gamma 2, | -0.803264 | Inlier |
| siRNA-Temozolomide Run2-DMSO | NM_0072<br>15 | POLG2 | accessory subunit polymerase (DNA directed), gamma 2,          | -0.706304 | Inlier |
| siRNA-Vinblastine Run2-DMSO  | NM_0072<br>15 | POLG2 | accessory subunit polymerase (DNA directed), gamma 2,          | -0.642696 | Inlier |
| siRNA Disorazole DMSO Run1   | NM_0072<br>15 | POLG2 | accessory subunit                                              | -0.13039  | Inlier |

Identification of Survival Genes in Human Glioblastoma Cells Using siRNA Screening  
 Nikhil G Thaker, Fang Zhang, Peter R. McDonald, Tong Ying Shun, Michael D Lewen, Ian F. Pollack, and John S. Lazo

Molecular Pharmacology

|                              |               |       |                                                       |           |        |
|------------------------------|---------------|-------|-------------------------------------------------------|-----------|--------|
| siRNA-Temozolomide Run3-DMSO | NM_0072<br>15 | POLG2 | polymerase (DNA directed), gamma 2, accessory subunit | 0.13039   | Inlier |
| siRNA-Temozolomide Run1-DMSO | NM_0072<br>15 | POLG2 | polymerase (DNA directed), gamma 2, accessory subunit | 0.436834  | Inlier |
| siRNA Disorazole DMSO Run2   | NM_0072<br>15 | POLG2 | polymerase (DNA directed), gamma 2, accessory subunit | 1.281965  | Inlier |
| siRNA-Vinblastine Run1-DMSO  | NM_0072<br>15 | POLG2 | polymerase (DNA directed), gamma 2, accessory subunit | 1.975766  | Inlier |
| siRNA-Temozolomide Run3-DMSO | NM_0065<br>02 | POLH  | polymerase (DNA directed), eta                        | -0.900532 | Inlier |
| siRNA-Temozolomide Run2-DMSO | NM_0065<br>02 | POLH  | polymerase (DNA directed), eta                        | -0.641805 | Inlier |
| siRNA-Vinblastine Run2-DMSO  | NM_0065<br>02 | POLH  | polymerase (DNA directed), eta                        | -0.360044 | Inlier |
| siRNA Disorazole DMSO Run3   | NM_0065<br>02 | POLH  | polymerase (DNA directed), eta                        | -0.359493 | Inlier |
| siRNA Disorazole DMSO Run1   | NM_0065<br>02 | POLH  | polymerase (DNA directed), eta                        | 0.359493  | Inlier |
| siRNA-Temozolomide Run1-DMSO | NM_0065<br>02 | POLH  | polymerase (DNA directed), eta                        | 0.707195  | Inlier |
| siRNA-Vinblastine Run1-DMSO  | NM_0065<br>02 | POLH  | polymerase (DNA directed), eta                        | 1.753529  | Inlier |

Identification of Survival Genes in Human Glioblastoma Cells Using siRNA Screening  
 Nikhil G Thaker, Fang Zhang, Peter R. McDonald, Tong Ying Shun, Michael D Lewen, Ian F. Pollack, and John S. Lazo

Molecular Pharmacology

|                              |               |      |                                 |           |        |
|------------------------------|---------------|------|---------------------------------|-----------|--------|
| siRNA Disorazole DMSO Run2   | NM_0065<br>02 | POLH | polymerase (DNA directed), eta  | 1.928432  | Inlier |
| siRNA-Temozolomide Run3-DMSO | NM_0071<br>95 | POLI | polymerase (DNA directed) iota  | -1.034926 | Inlier |
| siRNA-Temozolomide Run2-DMSO | NM_0071<br>95 | POLI | polymerase (DNA directed) iota  | -0.50952  | Inlier |
| siRNA Disorazole DMSO Run3   | NM_0071<br>95 | POLI | polymerase (DNA directed) iota  | -0.233469 | Inlier |
| siRNA-Vinblastine Run2-DMSO  | NM_0071<br>95 | POLI | polymerase (DNA directed) iota  | -0.028405 | Inlier |
| siRNA-Temozolomide Run1-DMSO | NM_0071<br>95 | POLI | polymerase (DNA directed) iota  | 0.028405  | Inlier |
| siRNA Disorazole DMSO Run1   | NM_0071<br>95 | POLI | polymerase (DNA directed) iota  | 0.83948   | Inlier |
| siRNA Disorazole DMSO Run2   | NM_0071<br>95 | POLI | polymerase (DNA directed) iota  | 0.898076  | Inlier |
| siRNA-Vinblastine Run1-DMSO  | NM_0071<br>95 | POLI | polymerase (DNA directed) iota  | 0.934345  | Inlier |
| siRNA Disorazole DMSO Run1   | NM_0162<br>18 | POLK | polymerase (DNA directed) kappa | -0.969151 | Inlier |
| siRNA-Vinblastine Run2-DMSO  | NM_0162<br>18 | POLK | polymerase (DNA directed) kappa | -0.769238 | Inlier |
| siRNA-Temozolomide Run2-DMSO | NM_0162<br>18 | POLK | polymerase (DNA directed) kappa | -0.363245 | Inlier |
| siRNA-Temozolomide Run1-DMSO | NM_0162<br>18 | POLK | polymerase (DNA directed) kappa | -0.110797 | Inlier |

Identification of Survival Genes in Human Glioblastoma Cells Using siRNA Screening  
 Nikhil G Thaker, Fang Zhang, Peter R. McDonald, Tong Ying Shun, Michael D Lewen, Ian F. Pollack, and John S. Lazo

Molecular Pharmacology

|                              |               |      |                                      |           |        |
|------------------------------|---------------|------|--------------------------------------|-----------|--------|
| siRNA-Temozolomide Run3-DMSO | NM_0162<br>18 | POLK | polymerase (DNA directed)<br>kappa   | 0.110796  | Inlier |
| siRNA Disorazole DMSO Run3   | NM_0162<br>18 | POLK | polymerase (DNA directed)<br>kappa   | 0.579762  | Inlier |
| siRNA Disorazole DMSO Run2   | NM_0162<br>18 | POLK | polymerase (DNA directed)<br>kappa   | 1.741961  | Inlier |
| siRNA-Vinblastine Run1-DMSO  | NM_0162<br>18 | POLK | polymerase (DNA directed)<br>kappa   | 3.000549  | Inlier |
| siRNA Disorazole DMSO Run1   | NM_0132<br>74 | POLL | polymerase (DNA directed),<br>lambda | -1.450161 | Inlier |
| siRNA-Temozolomide Run1-DMSO | NM_0132<br>74 | POLL | polymerase (DNA directed),<br>lambda | -0.753002 | Inlier |
| siRNA-Temozolomide Run3-DMSO | NM_0132<br>74 | POLL | polymerase (DNA directed),<br>lambda | -0.157366 | Inlier |
| siRNA Disorazole DMSO Run3   | NM_0132<br>74 | POLL | polymerase (DNA directed),<br>lambda | -0.040612 | Inlier |
| siRNA-Temozolomide Run2-DMSO | NM_0132<br>74 | POLL | polymerase (DNA directed),<br>lambda | 0.040613  | Inlier |
| siRNA Disorazole DMSO Run2   | NM_0132<br>74 | POLL | polymerase (DNA directed),<br>lambda | 0.595998  | Inlier |
| siRNA-Vinblastine Run2-DMSO  | NM_0132<br>74 | POLL | polymerase (DNA directed),<br>lambda | 0.9012    | Inlier |
| siRNA-Vinblastine Run1-DMSO  | NM_0132<br>74 | POLL | polymerase (DNA directed),<br>lambda | 1.160132  | Inlier |
| siRNA-Temozolomide Run1-DMSO | NM_0132<br>84 | POLM | polymerase (DNA directed),<br>mu     | -3.176308 | Inlier |

Identification of Survival Genes in Human Glioblastoma Cells Using siRNA Screening  
 Nikhil G Thaker, Fang Zhang, Peter R. McDonald, Tong Ying Shun, Michael D Lewen, Ian F. Pollack, and John S. Lazo

Molecular Pharmacology

|                              |               |      |                                  |           |        |
|------------------------------|---------------|------|----------------------------------|-----------|--------|
| siRNA-Temozolomide Run3-DMSO | NM_0132<br>84 | POLM | polymerase (DNA directed), mu    | -1.903349 | Inlier |
| siRNA Disorazole DMSO Run3   | NM_0132<br>84 | POLM | polymerase (DNA directed), mu    | -0.680642 | Inlier |
| siRNA Disorazole DMSO Run2   | NM_0132<br>84 | POLM | polymerase (DNA directed), mu    | -0.447641 | Inlier |
| siRNA-Vinblastine Run1-DMSO  | NM_0132<br>84 | POLM | polymerase (DNA directed), mu    | 0.447641  | Inlier |
| siRNA-Temozolomide Run2-DMSO | NM_0132<br>84 | POLM | polymerase (DNA directed), mu    | 0.526074  | Inlier |
| siRNA-Vinblastine Run2-DMSO  | NM_0132<br>84 | POLM | polymerase (DNA directed), mu    | 0.668358  | Inlier |
| siRNA Disorazole DMSO Run1   | NM_0132<br>84 | POLM | polymerase (DNA directed), mu    | 0.913222  | Inlier |
| siRNA Disorazole DMSO Run1   | NM_0065<br>96 | POLQ | polymerase (DNA directed), theta | -0.997073 | Inlier |
| siRNA-Temozolomide Run3-DMSO | NM_0065<br>96 | POLQ | polymerase (DNA directed), theta | -0.803393 | Inlier |
| siRNA-Temozolomide Run2-DMSO | NM_0065<br>96 | POLQ | polymerase (DNA directed), theta | -0.478813 | Inlier |
| siRNA-Temozolomide Run1-DMSO | NM_0065<br>96 | POLQ | polymerase (DNA directed), theta | -0.437202 | Inlier |
| siRNA-Vinblastine Run2-DMSO  | NM_0065<br>96 | POLQ | polymerase (DNA directed), theta | 0.437202  | Inlier |
| siRNA Disorazole DMSO Run3   | NM_0065<br>96 | POLQ | polymerase (DNA directed), theta | 0.545607  | Inlier |

Identification of Survival Genes in Human Glioblastoma Cells Using siRNA Screening  
 Nikhil G Thaker, Fang Zhang, Peter R. McDonald, Tong Ying Shun, Michael D Lewen, Ian F. Pollack, and John S. Lazo

Molecular Pharmacology

|                              |               |        |                                          |           |        |
|------------------------------|---------------|--------|------------------------------------------|-----------|--------|
| siRNA-Vinblastine Run1-DMSO  | NM_0065<br>96 | POLQ   | polymerase (DNA directed), theta         | 0.856651  | Inlier |
| siRNA Disorazole DMSO Run2   | NM_0065<br>96 | POLQ   | polymerase (DNA directed), theta         | 1.04788   | Inlier |
| siRNA Disorazole DMSO Run1   | NM_0154<br>25 | POLR1A | polymerase (RNA) I polypeptide A, 194kDa | -0.704451 | Inlier |
| siRNA-Temozolomide Run2-DMSO | NM_0154<br>25 | POLR1A | polymerase (RNA) I polypeptide A, 194kDa | -0.644549 | Inlier |
| siRNA-Temozolomide Run1-DMSO | NM_0154<br>25 | POLR1A | polymerase (RNA) I polypeptide A, 194kDa | -0.594939 | Inlier |
| siRNA-Vinblastine Run2-DMSO  | NM_0154<br>25 | POLR1A | polymerase (RNA) I polypeptide A, 194kDa | -0.164927 | Inlier |
| siRNA Disorazole DMSO Run3   | NM_0154<br>25 | POLR1A | polymerase (RNA) I polypeptide A, 194kDa | 0.164925  | Inlier |
| siRNA-Temozolomide Run3-DMSO | NM_0154<br>25 | POLR1A | polymerase (RNA) I polypeptide A, 194kDa | 0.926966  | Inlier |
| siRNA Disorazole DMSO Run2   | NM_0154<br>25 | POLR1A | polymerase (RNA) I polypeptide A, 194kDa | 2.801419  | Inlier |

Identification of Survival Genes in Human Glioblastoma Cells Using siRNA Screening  
 Nikhil G Thaker, Fang Zhang, Peter R. McDonald, Tong Ying Shun, Michael D Lewen, Ian F. Pollack, and John S. Lazo  
 Molecular Pharmacology

|                              |               |        |                                             |           |         |
|------------------------------|---------------|--------|---------------------------------------------|-----------|---------|
| siRNA-Vinblastine Run1-DMSO  | NM_0154<br>25 | POLR1A | polymerase (RNA) I polypeptide A,<br>194kDa | 3.91873   | Outlier |
| siRNA Disorazole DMSO Run1   | NM_0048<br>75 | POLR1C | polymerase (RNA) I polypeptide C,<br>30kDa  | -1.040222 | Inlier  |
| siRNA-Temozolomide Run2-DMSO | NM_0048<br>75 | POLR1C | polymerase (RNA) I polypeptide C,<br>30kDa  | -0.654498 | Inlier  |
| siRNA-Vinblastine Run2-DMSO  | NM_0048<br>75 | POLR1C | polymerase (RNA) I polypeptide C,<br>30kDa  | -0.634063 | Inlier  |
| siRNA Disorazole DMSO Run3   | NM_0048<br>75 | POLR1C | polymerase (RNA) I polypeptide C,<br>30kDa  | -0.285997 | Inlier  |
| siRNA-Temozolomide Run1-DMSO | NM_0048<br>75 | POLR1C | polymerase (RNA) I polypeptide C,<br>30kDa  | 0.285996  | Inlier  |
| siRNA-Temozolomide Run3-DMSO | NM_0048<br>75 | POLR1C | polymerase (RNA) I polypeptide C,<br>30kDa  | 0.694502  | Inlier  |
| siRNA Disorazole DMSO Run2   | NM_0048<br>75 | POLR1C | polymerase (RNA) I polypeptide C,<br>30kDa  | 3.228249  | Inlier  |



Identification of Survival Genes in Human Glioblastoma Cells Using siRNA Screening  
 Nikhil G Thaker, Fang Zhang, Peter R. McDonald, Tong Ying Shun, Michael D Lewen, Ian F. Pollack, and John S. Lazo  
 Molecular Pharmacology

|                              |           |        |                                         |           |         |
|------------------------------|-----------|--------|-----------------------------------------|-----------|---------|
| siRNA-Vinblastine Run1-DMSO  | NM_004875 | POLR1C | polymerase (RNA) I polypeptide C, 30kDa | 3.328967  | Inlier  |
| siRNA Disorazole DMSO Run1   | NM_015972 | POLR1D | polymerase (RNA) I polypeptide D, 16kDa | -1.01009  | Inlier  |
| siRNA-Temozolomide Run2-DMSO | NM_015972 | POLR1D | polymerase (RNA) I polypeptide D, 16kDa | -0.62568  | Inlier  |
| siRNA-Vinblastine Run2-DMSO  | NM_015972 | POLR1D | polymerase (RNA) I polypeptide D, 16kDa | -0.362484 | Inlier  |
| siRNA Disorazole DMSO Run3   | NM_015972 | POLR1D | polymerase (RNA) I polypeptide D, 16kDa | -0.119247 | Inlier  |
| siRNA-Temozolomide Run1-DMSO | NM_015972 | POLR1D | polymerase (RNA) I polypeptide D, 16kDa | 0.119246  | Inlier  |
| siRNA-Temozolomide Run3-DMSO | NM_015972 | POLR1D | polymerase (RNA) I polypeptide D, 16kDa | 0.72332   | Inlier  |
| siRNA-Vinblastine Run1-DMSO  | NM_015972 | POLR1D | polymerase (RNA) I polypeptide D, 16kDa | 6.722705  | Outlier |

Identification of Survival Genes in Human Glioblastoma Cells Using siRNA Screening

Nikhil G Thaker, Fang Zhang, Peter R. McDonald, Tong Ying Shun, Michael D Lewen, Ian F. Pollack, and John S. Lazo

Molecular Pharmacology

|                              |               |        |                                                          |           |         |
|------------------------------|---------------|--------|----------------------------------------------------------|-----------|---------|
| siRNA Disorazole DMSO Run2   | NM_0159<br>72 | POLR1D | polymerase (RNA) I polypeptide D, 16kDa                  | 6.769031  | Outlier |
| siRNA-Temozolomide Run2-DMSO | NM_0009<br>37 | POLR2A | polymerase (RNA) II (DNA directed) polypeptide A, 220kDa | -0.68581  | Inlier  |
| siRNA-Temozolomide Run1-DMSO | NM_0009<br>37 | POLR2A | polymerase (RNA) II (DNA directed) polypeptide A, 220kDa | -0.66319  | Inlier  |
| siRNA Disorazole DMSO Run3   | NM_0009<br>37 | POLR2A | polymerase (RNA) II (DNA directed) polypeptide A, 220kDa | -0.650083 | Inlier  |
| siRNA Disorazole DMSO Run1   | NM_0009<br>37 | POLR2A | polymerase (RNA) II (DNA directed) polypeptide A, 220kDa | -0.16181  | Inlier  |
| siRNA-Vinblastine Run2-DMSO  | NM_0009<br>37 | POLR2A | polymerase (RNA) II (DNA directed) polypeptide A, 220kDa | 0.16181   | Inlier  |
| siRNA-Temozolomide Run3-DMSO | NM_0009<br>37 | POLR2A | polymerase (RNA) II (DNA directed) polypeptide A, 220kDa | 1.351641  | Inlier  |

Identification of Survival Genes in Human Glioblastoma Cells Using siRNA Screening

Nikhil G Thaker, Fang Zhang, Peter R. McDonald, Tong Ying Shun, Michael D Lewen, Ian F. Pollack, and John S. Lazo

Molecular Pharmacology

|                              |               |        |                                                          |           |         |
|------------------------------|---------------|--------|----------------------------------------------------------|-----------|---------|
| siRNA Disorazole DMSO Run2   | NM_0009<br>37 | POLR2A | polymerase (RNA) II (DNA directed) polypeptide A, 220kDa | 4.085755  | Outlier |
| siRNA-Vinblastine Run1-DMSO  | NM_0009<br>37 | POLR2A | polymerase (RNA) II (DNA directed) polypeptide A, 220kDa | 4.944071  | Outlier |
| siRNA-Temozolomide Run2-DMSO | NM_0009<br>38 | POLR2B | polymerase (RNA) II (DNA directed) polypeptide B, 140kDa | -1.370346 | Inlier  |
| siRNA-Temozolomide Run1-DMSO | NM_0009<br>38 | POLR2B | polymerase (RNA) II (DNA directed) polypeptide B, 140kDa | -0.870274 | Inlier  |
| siRNA-Vinblastine Run2-DMSO  | NM_0009<br>38 | POLR2B | polymerase (RNA) II (DNA directed) polypeptide B, 140kDa | -0.068585 | Inlier  |
| siRNA Disorazole DMSO Run3   | NM_0009<br>38 | POLR2B | polymerase (RNA) II (DNA directed) polypeptide B, 140kDa | -0.031412 | Inlier  |
| siRNA Disorazole DMSO Run1   | NM_0009<br>38 | POLR2B | polymerase (RNA) II (DNA directed) polypeptide B, 140kDa | 0.031412  | Inlier  |

Identification of Survival Genes in Human Glioblastoma Cells Using siRNA Screening

Nikhil G Thaker, Fang Zhang, Peter R. McDonald, Tong Ying Shun, Michael D Lewen, Ian F. Pollack, and John S. Lazo

Molecular Pharmacology

|                              |           |        |                                                          |           |         |
|------------------------------|-----------|--------|----------------------------------------------------------|-----------|---------|
| siRNA-Temozolomide Run3-DMSO | NM_000938 | POLR2B | polymerase (RNA) II (DNA directed) polypeptide B, 140kDa | 0.478726  | Inlier  |
| siRNA Disorazole DMSO Run2   | NM_000938 | POLR2B | polymerase (RNA) II (DNA directed) polypeptide B, 140kDa | 3.206622  | Inlier  |
| siRNA-Vinblastine Run1-DMSO  | NM_000938 | POLR2B | polymerase (RNA) II (DNA directed) polypeptide B, 140kDa | 6.695687  | Outlier |
| siRNA-Temozolomide Run2-DMSO | NM_002694 | POLR2C | polymerase (RNA) II (DNA directed) polypeptide C, 33kDa  | -0.834057 | Inlier  |
| siRNA-Temozolomide Run1-DMSO | NM_002694 | POLR2C | polymerase (RNA) II (DNA directed) polypeptide C, 33kDa  | -0.514943 | Inlier  |
| siRNA Disorazole DMSO Run1   | NM_002694 | POLR2C | polymerase (RNA) II (DNA directed) polypeptide C, 33kDa  | -0.415592 | Inlier  |
| siRNA Disorazole DMSO Run3   | NM_002694 | POLR2C | polymerase (RNA) II (DNA directed) polypeptide C, 33kDa  | -0.012309 | Inlier  |

Identification of Survival Genes in Human Glioblastoma Cells Using siRNA Screening

Nikhil G Thaker, Fang Zhang, Peter R. McDonald, Tong Ying Shun, Michael D Lewen, Ian F. Pollack, and John S. Lazo

Molecular Pharmacology

|                              |           |        |                                                         |           |        |
|------------------------------|-----------|--------|---------------------------------------------------------|-----------|--------|
| siRNA-Vinblastine Run2-DMSO  | NM_002694 | POLR2C | polymerase (RNA) II (DNA directed) polypeptide C, 33kDa | 0.012309  | Inlier |
| siRNA-Temozolomide Run3-DMSO | NM_002694 | POLR2C | polymerase (RNA) II (DNA directed) polypeptide C, 33kDa | 0.879095  | Inlier |
| siRNA Disorazole DMSO Run2   | NM_002694 | POLR2C | polymerase (RNA) II (DNA directed) polypeptide C, 33kDa | 1.581359  | Inlier |
| siRNA-Vinblastine Run1-DMSO  | NM_002694 | POLR2C | polymerase (RNA) II (DNA directed) polypeptide C, 33kDa | 1.93957   | Inlier |
| siRNA-Vinblastine Run2-DMSO  | NM_004805 | POLR2D | polymerase (RNA) II (DNA directed) polypeptide D        | -0.715814 | Inlier |
| siRNA-Temozolomide Run2-DMSO | NM_004805 | POLR2D | polymerase (RNA) II (DNA directed) polypeptide D        | -0.633186 | Inlier |
| siRNA Disorazole DMSO Run1   | NM_004805 | POLR2D | polymerase (RNA) II (DNA directed) polypeptide D        | -0.231976 | Inlier |
| siRNA Disorazole DMSO Run3   | NM_004805 | POLR2D | polymerase (RNA) II (DNA directed) polypeptide D        | -0.112342 | Inlier |

Identification of Survival Genes in Human Glioblastoma Cells Using siRNA Screening

Nikhil G Thaker, Fang Zhang, Peter R. McDonald, Tong Ying Shun, Michael D Lewen, Ian F. Pollack, and John S. Lazo

Molecular Pharmacology

|                              |           |        |                                                         |           |         |
|------------------------------|-----------|--------|---------------------------------------------------------|-----------|---------|
| siRNA-Temozolomide Run1-DMSO | NM_004805 | POLR2D | polymerase (RNA) II (DNA directed) polypeptide D        | 0.112342  | Inlier  |
| siRNA-Temozolomide Run3-DMSO | NM_004805 | POLR2D | polymerase (RNA) II (DNA directed) polypeptide D        | 0.960466  | Inlier  |
| siRNA Disorazole DMSO Run2   | NM_004805 | POLR2D | polymerase (RNA) II (DNA directed) polypeptide D        | 6.902347  | Outlier |
| siRNA-Vinblastine Run1-DMSO  | NM_004805 | POLR2D | polymerase (RNA) II (DNA directed) polypeptide D        | 7.063977  | Outlier |
| siRNA-Temozolomide Run2-DMSO | NM_002695 | POLR2E | polymerase (RNA) II (DNA directed) polypeptide E, 25kDa | -0.797103 | Inlier  |
| siRNA-Temozolomide Run1-DMSO | NM_002695 | POLR2E | polymerase (RNA) II (DNA directed) polypeptide E, 25kDa | -0.742721 | Inlier  |
| siRNA-Vinblastine Run2-DMSO  | NM_002695 | POLR2E | polymerase (RNA) II (DNA directed) polypeptide E, 25kDa | -0.1598   | Inlier  |
| siRNA Disorazole DMSO Run3   | NM_002695 | POLR2E | polymerase (RNA) II (DNA directed) polypeptide E, 25kDa | -0.055193 | Inlier  |

Identification of Survival Genes in Human Glioblastoma Cells Using siRNA Screening

Nikhil G Thaker, Fang Zhang, Peter R. McDonald, Tong Ying Shun, Michael D Lewen, Ian F. Pollack, and John S. Lazo

Molecular Pharmacology

|                              |               |        |                                                         |           |        |
|------------------------------|---------------|--------|---------------------------------------------------------|-----------|--------|
| siRNA Disorazole DMSO Run1   | NM_0026<br>95 | POLR2E | polymerase (RNA) II (DNA directed) polypeptide E, 25kDa | 0.055193  | Inlier |
| siRNA-Temozolomide Run3-DMSO | NM_0026<br>95 | POLR2E | polymerase (RNA) II (DNA directed) polypeptide E, 25kDa | 0.606279  | Inlier |
| siRNA Disorazole DMSO Run2   | NM_0026<br>95 | POLR2E | polymerase (RNA) II (DNA directed) polypeptide E, 25kDa | 1.955152  | Inlier |
| siRNA-Vinblastine Run1-DMSO  | NM_0026<br>95 | POLR2E | polymerase (RNA) II (DNA directed) polypeptide E, 25kDa | 2.741952  | Inlier |
| siRNA-Temozolomide Run1-DMSO | NM_0219<br>74 | POLR2F | polymerase (RNA) II (DNA directed) polypeptide F        | -0.679367 | Inlier |
| siRNA-Temozolomide Run2-DMSO | NM_0219<br>74 | POLR2F | polymerase (RNA) II (DNA directed) polypeptide F        | -0.669633 | Inlier |
| siRNA Disorazole DMSO Run3   | NM_0219<br>74 | POLR2F | polymerase (RNA) II (DNA directed) polypeptide F        | -0.243341 | Inlier |
| siRNA-Temozolomide Run3-DMSO | NM_0219<br>74 | POLR2F | polymerase (RNA) II (DNA directed) polypeptide F        | -0.085207 | Inlier |

Identification of Survival Genes in Human Glioblastoma Cells Using siRNA Screening  
 Nikhil G Thaker, Fang Zhang, Peter R. McDonald, Tong Ying Shun, Michael D Lewen, Ian F. Pollack, and John S. Lazo

Molecular Pharmacology

|                              |               |        |                                                  |           |         |
|------------------------------|---------------|--------|--------------------------------------------------|-----------|---------|
| siRNA-Vinblastine Run2-DMSO  | NM_0219<br>74 | POLR2F | polymerase (RNA) II (DNA directed) polypeptide F | 0.085207  | Inlier  |
| siRNA Disorazole DMSO Run1   | NM_0219<br>74 | POLR2F | polymerase (RNA) II (DNA directed) polypeptide F | 2.168807  | Inlier  |
| siRNA-Vinblastine Run1-DMSO  | NM_0219<br>74 | POLR2F | polymerase (RNA) II (DNA directed) polypeptide F | 19.42047  | Outlier |
| siRNA Disorazole DMSO Run2   | NM_0219<br>74 | POLR2F | polymerase (RNA) II (DNA directed) polypeptide F | 19.65567  | Outlier |
| siRNA-Temozolomide Run1-DMSO | NM_0026<br>96 | POLR2G | polymerase (RNA) II (DNA directed) polypeptide G | -0.796863 | Inlier  |
| siRNA-Temozolomide Run2-DMSO | NM_0026<br>96 | POLR2G | polymerase (RNA) II (DNA directed) polypeptide G | -0.559771 | Inlier  |
| siRNA Disorazole DMSO Run3   | NM_0026<br>96 | POLR2G | polymerase (RNA) II (DNA directed) polypeptide G | -0.178973 | Inlier  |
| siRNA Disorazole DMSO Run1   | NM_0026<br>96 | POLR2G | polymerase (RNA) II (DNA directed) polypeptide G | -0.056062 | Inlier  |



Identification of Survival Genes in Human Glioblastoma Cells Using siRNA Screening  
 Nikhil G Thaker, Fang Zhang, Peter R. McDonald, Tong Ying Shun, Michael D Lewen, Ian F. Pollack, and John S. Lazo

Molecular Pharmacology

|                              |           |        |                                                  |           |         |
|------------------------------|-----------|--------|--------------------------------------------------|-----------|---------|
| siRNA-Vinblastine Run2-DMSO  | NM_002696 | POLR2G | polymerase (RNA) II (DNA directed) polypeptide G | 0.056062  | Inlier  |
| siRNA-Temozolomide Run3-DMSO | NM_002696 | POLR2G | polymerase (RNA) II (DNA directed) polypeptide G | 0.789229  | Inlier  |
| siRNA Disorazole DMSO Run2   | NM_002696 | POLR2G | polymerase (RNA) II (DNA directed) polypeptide G | 2.659478  | Inlier  |
| siRNA-Vinblastine Run1-DMSO  | NM_002696 | POLR2G | polymerase (RNA) II (DNA directed) polypeptide G | 4.279407  | Outlier |
| siRNA-Temozolomide Run2-DMSO | NM_006232 | POLR2H | polymerase (RNA) II (DNA directed) polypeptide H | -1.148533 | Inlier  |
| siRNA-Temozolomide Run1-DMSO | NM_006232 | POLR2H | polymerase (RNA) II (DNA directed) polypeptide H | -0.794233 | Inlier  |
| siRNA Disorazole DMSO Run1   | NM_006232 | POLR2H | polymerase (RNA) II (DNA directed) polypeptide H | -0.720779 | Inlier  |
| siRNA-Vinblastine Run2-DMSO  | NM_006232 | POLR2H | polymerase (RNA) II (DNA directed) polypeptide H | -0.145903 | Inlier  |

Identification of Survival Genes in Human Glioblastoma Cells Using siRNA Screening

Nikhil G Thaker, Fang Zhang, Peter R. McDonald, Tong Ying Shun, Michael D Lewen, Ian F. Pollack, and John S. Lazo

Molecular Pharmacology

|                              |           |        |                                                           |           |        |
|------------------------------|-----------|--------|-----------------------------------------------------------|-----------|--------|
| siRNA-Temozolomide Run3-DMSO | NM_006232 | POLR2H | polymerase (RNA) II (DNA directed) polypeptide H          | 0.145903  | Inlier |
| siRNA Disorazole DMSO Run3   | NM_006232 | POLR2H | polymerase (RNA) II (DNA directed) polypeptide H          | 0.367633  | Inlier |
| siRNA Disorazole DMSO Run2   | NM_006232 | POLR2H | polymerase (RNA) II (DNA directed) polypeptide H          | 0.628221  | Inlier |
| siRNA-Vinblastine Run1-DMSO  | NM_006232 | POLR2H | polymerase (RNA) II (DNA directed) polypeptide H          | 1.174999  | Inlier |
| siRNA-Vinblastine Run2-DMSO  | NM_006233 | POLR2I | polymerase (RNA) II (DNA directed) polypeptide I, 14.5kDa | -1.318099 | Inlier |
| siRNA-Temozolomide Run2-DMSO | NM_006233 | POLR2I | polymerase (RNA) II (DNA directed) polypeptide I, 14.5kDa | -0.698631 | Inlier |
| siRNA Disorazole DMSO Run1   | NM_006233 | POLR2I | polymerase (RNA) II (DNA directed) polypeptide I, 14.5kDa | -0.650369 | Inlier |
| siRNA-Temozolomide Run1-DMSO | NM_006233 | POLR2I | polymerase (RNA) II (DNA directed) polypeptide I, 14.5kDa | -0.296837 | Inlier |

Identification of Survival Genes in Human Glioblastoma Cells Using siRNA Screening

Nikhil G Thaker, Fang Zhang, Peter R. McDonald, Tong Ying Shun, Michael D Lewen, Ian F. Pollack, and John S. Lazo

Molecular Pharmacology

|                              |               |        |                                                              |           |        |
|------------------------------|---------------|--------|--------------------------------------------------------------|-----------|--------|
| siRNA Disorazole DMSO Run3   | NM_0062<br>33 | POLR2I | polymerase (RNA) II (DNA directed) polypeptide I,<br>14.5kDa | 0.296838  | Inlier |
| siRNA-Temozolomide Run3-DMSO | NM_0062<br>33 | POLR2I | polymerase (RNA) II (DNA directed) polypeptide I,<br>14.5kDa | 0.425685  | Inlier |
| siRNA Disorazole DMSO Run2   | NM_0062<br>33 | POLR2I | polymerase (RNA) II (DNA directed) polypeptide I,<br>14.5kDa | 2.828026  | Inlier |
| siRNA-Vinblastine Run1-DMSO  | NM_0062<br>33 | POLR2I | polymerase (RNA) II (DNA directed) polypeptide I,<br>14.5kDa | 2.998677  | Inlier |
| siRNA-Temozolomide Run2-DMSO | NM_0062<br>34 | POLR2J | polymerase (RNA) II (DNA directed) polypeptide J,<br>13.3kDa | -0.913249 | Inlier |
| siRNA Disorazole DMSO Run1   | NM_0062<br>34 | POLR2J | polymerase (RNA) II (DNA directed) polypeptide J,<br>13.3kDa | -0.712391 | Inlier |
| siRNA-Temozolomide Run1-DMSO | NM_0062<br>34 | POLR2J | polymerase (RNA) II (DNA directed) polypeptide J,<br>13.3kDa | -0.670861 | Inlier |

Identification of Survival Genes in Human Glioblastoma Cells Using siRNA Screening

Nikhil G Thaker, Fang Zhang, Peter R. McDonald, Tong Ying Shun, Michael D Lewen, Ian F. Pollack, and John S. Lazo

Molecular Pharmacology

|                              |               |        |                                                              |           |        |
|------------------------------|---------------|--------|--------------------------------------------------------------|-----------|--------|
| siRNA-Temozolomide Run3-DMSO | NM_0062<br>34 | POLR2J | polymerase (RNA) II (DNA directed) polypeptide J,<br>13.3kDa | -0.436597 | Inlier |
| siRNA-Vinblastine Run2-DMSO  | NM_0062<br>34 | POLR2J | polymerase (RNA) II (DNA directed) polypeptide J,<br>13.3kDa | 0.436597  | Inlier |
| siRNA Disorazole DMSO Run2   | NM_0062<br>34 | POLR2J | polymerase (RNA) II (DNA directed) polypeptide J,<br>13.3kDa | 0.648196  | Inlier |
| siRNA Disorazole DMSO Run3   | NM_0062<br>34 | POLR2J | polymerase (RNA) II (DNA directed) polypeptide J,<br>13.3kDa | 0.678139  | Inlier |
| siRNA-Vinblastine Run1-DMSO  | NM_0062<br>34 | POLR2J | polymerase (RNA) II (DNA directed) polypeptide J,<br>13.3kDa | 0.959686  | Inlier |
| siRNA Disorazole DMSO Run1   | NM_0050<br>34 | POLR2K | polymerase (RNA) II (DNA directed) polypeptide K,<br>7.0kDa  | -0.872436 | Inlier |
| siRNA-Temozolomide Run1-DMSO | NM_0050<br>34 | POLR2K | polymerase (RNA) II (DNA directed) polypeptide K,<br>7.0kDa  | -0.476564 | Inlier |

Identification of Survival Genes in Human Glioblastoma Cells Using siRNA Screening

Nikhil G Thaker, Fang Zhang, Peter R. McDonald, Tong Ying Shun, Michael D Lewen, Ian F. Pollack, and John S. Lazo

Molecular Pharmacology

|                              |           |        |                                                          |           |         |
|------------------------------|-----------|--------|----------------------------------------------------------|-----------|---------|
| siRNA-Vinblastine Run2-DMSO  | NM_005034 | POLR2K | polymerase (RNA) II (DNA directed) polypeptide K, 7.0kDa | -0.192165 | Inlier  |
| siRNA Disorazole DMSO Run3   | NM_005034 | POLR2K | polymerase (RNA) II (DNA directed) polypeptide K, 7.0kDa | -0.115239 | Inlier  |
| siRNA-Temozolomide Run2-DMSO | NM_005034 | POLR2K | polymerase (RNA) II (DNA directed) polypeptide K, 7.0kDa | 0.115239  | Inlier  |
| siRNA-Temozolomide Run3-DMSO | NM_005034 | POLR2K | polymerase (RNA) II (DNA directed) polypeptide K, 7.0kDa | 1.369744  | Inlier  |
| siRNA-Vinblastine Run1-DMSO  | NM_005034 | POLR2K | polymerase (RNA) II (DNA directed) polypeptide K, 7.0kDa | 6.034625  | Outlier |
| siRNA Disorazole DMSO Run2   | NM_005034 | POLR2K | polymerase (RNA) II (DNA directed) polypeptide K, 7.0kDa | 6.282773  | Outlier |
| siRNA-Temozolomide Run1-DMSO | NM_021128 | POLR2L | polymerase (RNA) II (DNA directed) polypeptide L, 7.6kDa | -0.811896 | Inlier  |

Identification of Survival Genes in Human Glioblastoma Cells Using siRNA Screening  
 Nikhil G Thaker, Fang Zhang, Peter R. McDonald, Tong Ying Shun, Michael D Lewen, Ian F. Pollack, and John S. Lazo

Molecular Pharmacology

| siRNA Treatment              | Gene   | Gene ID   | Gene Name                                         | Protein Weight | Log Fold Change | Category |
|------------------------------|--------|-----------|---------------------------------------------------|----------------|-----------------|----------|
| siRNA Disorazole DMSO Run1   | POLR2L | NM_021128 | polymerase (RNA) II (DNA directed) polypeptide L, | 7.6kDa         | -0.779938       | Inlier   |
| siRNA-Temozolomide Run2-DMSO | POLR2L | NM_021128 | polymerase (RNA) II (DNA directed) polypeptide L, | 7.6kDa         | -0.296957       | Inlier   |
| siRNA-Temozolomide Run3-DMSO | POLR2L | NM_021128 | polymerase (RNA) II (DNA directed) polypeptide L, | 7.6kDa         | -0.166016       | Inlier   |
| siRNA Disorazole DMSO Run3   | POLR2L | NM_021128 | polymerase (RNA) II (DNA directed) polypeptide L, | 7.6kDa         | 0.166017        | Inlier   |
| siRNA-Vinblastine Run2-DMSO  | POLR2L | NM_021128 | polymerase (RNA) II (DNA directed) polypeptide L, | 7.6kDa         | 0.569062        | Inlier   |
| siRNA Disorazole DMSO Run2   | POLR2L | NM_021128 | polymerase (RNA) II (DNA directed) polypeptide L, | 7.6kDa         | 1.449707        | Inlier   |
| siRNA-Vinblastine Run1-DMSO  | POLR2L | NM_021128 | polymerase (RNA) II (DNA directed) polypeptide L, | 7.6kDa         | 1.834424        | Inlier   |

Identification of Survival Genes in Human Glioblastoma Cells Using siRNA Screening

Nikhil G Thaker, Fang Zhang, Peter R. McDonald, Tong Ying Shun, Michael D Lewen, Ian F. Pollack, and John S. Lazo

Molecular Pharmacology

|                              |           |        |                                                          |           |        |
|------------------------------|-----------|--------|----------------------------------------------------------|-----------|--------|
| siRNA-Temozolomide Run3-DMSO | NM_006467 | POLR3G | polymerase (RNA) III (DNA directed) polypeptide G (32kD) | -1.21784  | Inlier |
| siRNA-Temozolomide Run2-DMSO | NM_006467 | POLR3G | polymerase (RNA) III (DNA directed) polypeptide G (32kD) | -0.688291 | Inlier |
| siRNA-Vinblastine Run2-DMSO  | NM_006467 | POLR3G | polymerase (RNA) III (DNA directed) polypeptide G (32kD) | -0.323822 | Inlier |
| siRNA Disorazole DMSO Run3   | NM_006467 | POLR3G | polymerase (RNA) III (DNA directed) polypeptide G (32kD) | -0.241311 | Inlier |
| siRNA-Temozolomide Run1-DMSO | NM_006467 | POLR3G | polymerase (RNA) III (DNA directed) polypeptide G (32kD) | 0.241311  | Inlier |
| siRNA Disorazole DMSO Run1   | NM_006467 | POLR3G | polymerase (RNA) III (DNA directed) polypeptide G (32kD) | 0.660709  | Inlier |
| siRNA-Vinblastine Run1-DMSO  | NM_006467 | POLR3G | polymerase (RNA) III (DNA directed) polypeptide G (32kD) | 1.56169   | Inlier |

Identification of Survival Genes in Human Glioblastoma Cells Using siRNA Screening

Nikhil G Thaker, Fang Zhang, Peter R. McDonald, Tong Ying Shun, Michael D Lewen, Ian F. Pollack, and John S. Lazo

Molecular Pharmacology

|                              |               |        |                                                             |           |         |
|------------------------------|---------------|--------|-------------------------------------------------------------|-----------|---------|
| siRNA Disorazole DMSO Run2   | NM_0064<br>67 | POLR3G | polymerase (RNA) III (DNA directed) polypeptide G (32kD)    | 2.146574  | Inlier  |
| siRNA Disorazole DMSO Run1   | NM_0163<br>10 | POLR3K | polymerase (RNA) III (DNA directed) polypeptide K, 12.3 kDa | -4.685278 | Outlier |
| siRNA-Temozolomide Run1-DMSO | NM_0163<br>10 | POLR3K | polymerase (RNA) III (DNA directed) polypeptide K, 12.3 kDa | -1.102023 | Inlier  |
| siRNA Disorazole DMSO Run3   | NM_0163<br>10 | POLR3K | polymerase (RNA) III (DNA directed) polypeptide K, 12.3 kDa | -0.653394 | Inlier  |
| siRNA-Temozolomide Run2-DMSO | NM_0163<br>10 | POLR3K | polymerase (RNA) III (DNA directed) polypeptide K, 12.3 kDa | -0.060525 | Inlier  |
| siRNA-Vinblastine Run2-DMSO  | NM_0163<br>10 | POLR3K | polymerase (RNA) III (DNA directed) polypeptide K, 12.3 kDa | 0.060523  | Inlier  |
| siRNA-Temozolomide Run3-DMSO | NM_0163<br>10 | POLR3K | polymerase (RNA) III (DNA directed) polypeptide K, 12.3 kDa | 0.095431  | Inlier  |



Identification of Survival Genes in Human Glioblastoma Cells Using siRNA Screening

Nikhil G Thaker, Fang Zhang, Peter R. McDonald, Tong Ying Shun, Michael D Lewen, Ian F. Pollack, and John S. Lazo

Molecular Pharmacology

| siRNA Treatment              | Gene ID       | Gene Name | Protein Name                                            | Weight (kDa) | Score   | Category |
|------------------------------|---------------|-----------|---------------------------------------------------------|--------------|---------|----------|
| siRNA Disorazole DMSO Run2   | NM_0163<br>10 | POLR3K    | polymerase (RNA) III (DNA directed) polypeptide K, 12.3 | 0.695606     | Inlier  |          |
| siRNA-Vinblastine Run1-DMSO  | NM_0163<br>10 | POLR3K    | polymerase (RNA) III (DNA directed) polypeptide K, 12.3 | 2.400395     | Inlier  |          |
| siRNA Disorazole DMSO Run1   | NM_0050<br>35 | POLRMT    | polymerase (RNA) mitochondrial (DNA directed)           | -4.108855    | Outlier |          |
| siRNA-Temozolomide Run3-DMSO | NM_0050<br>35 | POLRMT    | polymerase (RNA) mitochondrial (DNA directed)           | -0.638681    | Inlier  |          |
| siRNA-Temozolomide Run2-DMSO | NM_0050<br>35 | POLRMT    | polymerase (RNA) mitochondrial (DNA directed)           | -0.515497    | Inlier  |          |
| siRNA-Temozolomide Run1-DMSO | NM_0050<br>35 | POLRMT    | polymerase (RNA) mitochondrial (DNA directed)           | -0.434844    | Inlier  |          |
| siRNA Disorazole DMSO Run3   | NM_0050<br>35 | POLRMT    | polymerase (RNA) mitochondrial (DNA directed)           | 0.434844     | Inlier  |          |
| siRNA Disorazole DMSO Run2   | NM_0050<br>35 | POLRMT    | polymerase (RNA) mitochondrial (DNA directed)           | 0.710319     | Inlier  |          |
| siRNA-Vinblastine Run2-DMSO  | NM_0050<br>35 | POLRMT    | polymerase (RNA) mitochondrial (DNA directed)           | 1.090611     | Inlier  |          |

Identification of Survival Genes in Human Glioblastoma Cells Using siRNA Screening  
 Nikhil G Thaker, Fang Zhang, Peter R. McDonald, Tong Ying Shun, Michael D Lewen, Ian F. Pollack, and John S. Lazo

Molecular Pharmacology

| siRNA Treatment              | Gene ID   | Gene Name | Gene Description                             | Log2 Fold Change | Outlier Status |
|------------------------------|-----------|-----------|----------------------------------------------|------------------|----------------|
| siRNA-Vinblastine Run1-DMSO  | NM_005035 | POLRMT    | polymerase (RNA mitochondrial (DNA directed) | 1.493732         | Inlier         |
| siRNA-Temozolomide Run3-DMSO | NM_006999 | POLS      | polymerase (DNA directed) sigma              | -1.769006        | Inlier         |
| siRNA-Temozolomide Run2-DMSO | NM_006999 | POLS      | polymerase (DNA directed) sigma              | -1.087542        | Inlier         |
| siRNA-Vinblastine Run2-DMSO  | NM_006999 | POLS      | polymerase (DNA directed) sigma              | -0.987651        | Inlier         |
| siRNA Disorazole DMSO Run3   | NM_006999 | POLS      | polymerase (DNA directed) sigma              | -0.014002        | Inlier         |
| siRNA-Vinblastine Run1-DMSO  | NM_006999 | POLS      | polymerase (DNA directed) sigma              | 0.014002         | Inlier         |
| siRNA Disorazole DMSO Run1   | NM_006999 | POLS      | polymerase (DNA directed) sigma              | 0.208315         | Inlier         |
| siRNA-Temozolomide Run1-DMSO | NM_006999 | POLS      | polymerase (DNA directed) sigma              | 0.450472         | Inlier         |
| siRNA Disorazole DMSO Run2   | NM_006999 | POLS      | polymerase (DNA directed) sigma              | 0.898528         | Inlier         |
| siRNA Disorazole DMSO Run3   | NM_007171 | POMT1     | protein-O-mannosyltransferase 1              | -0.828048        | Inlier         |
| siRNA-Temozolomide Run2-DMSO | NM_007171 | POMT1     | protein-O-mannosyltransferase 1              | -0.520952        | Inlier         |
| siRNA-Vinblastine Run2-DMSO  | NM_007171 | POMT1     | protein-O-mannosyltransferase 1              | -0.157765        | Inlier         |

Identification of Survival Genes in Human Glioblastoma Cells Using siRNA Screening  
 Nikhil G Thaker, Fang Zhang, Peter R. McDonald, Tong Ying Shun, Michael D Lewen, Ian F. Pollack, and John S. Lazo

Molecular Pharmacology

| siRNA Treatment              | Gene ID       | Gene Name | Protein                         | Value     | Category |
|------------------------------|---------------|-----------|---------------------------------|-----------|----------|
| siRNA-Temozolomide Run3-DMSO | NM_0071<br>71 | POMT1     | protein-O-mannosyltransferase 1 | -0.049011 | Inlier   |
| siRNA Disorazole DMSO Run1   | NM_0071<br>71 | POMT1     | protein-O-mannosyltransferase 1 | 0.049012  | Inlier   |
| siRNA-Temozolomide Run1-DMSO | NM_0071<br>71 | POMT1     | protein-O-mannosyltransferase 1 | 0.856048  | Inlier   |
| siRNA Disorazole DMSO Run2   | NM_0071<br>71 | POMT1     | protein-O-mannosyltransferase 1 | 5.290807  | Outlier  |
| siRNA-Vinblastine Run1-DMSO  | NM_0071<br>71 | POMT1     | protein-O-mannosyltransferase 1 | 5.794102  | Outlier  |
| siRNA-Temozolomide Run3-DMSO | NM_0133<br>82 | POMT2     | protein-O-mannosyltransferase 2 | -0.934371 | Inlier   |
| siRNA Disorazole DMSO Run3   | NM_0133<br>82 | POMT2     | protein-O-mannosyltransferase 2 | -0.795805 | Inlier   |
| siRNA-Vinblastine Run2-DMSO  | NM_0133<br>82 | POMT2     | protein-O-mannosyltransferase 2 | -0.553195 | Inlier   |
| siRNA Disorazole DMSO Run1   | NM_0133<br>82 | POMT2     | protein-O-mannosyltransferase 2 | -0.220864 | Inlier   |
| siRNA-Temozolomide Run2-DMSO | NM_0133<br>82 | POMT2     | protein-O-mannosyltransferase 2 | 0.220863  | Inlier   |
| siRNA-Temozolomide Run1-DMSO | NM_0133<br>82 | POMT2     | protein-O-mannosyltransferase 2 | 0.352206  | Inlier   |
| siRNA-Vinblastine Run1-DMSO  | NM_0133<br>82 | POMT2     | protein-O-mannosyltransferase 2 | 2.639186  | Inlier   |
| siRNA Disorazole DMSO Run2   | NM_0133<br>82 | POMT2     | protein-O-mannosyltransferase 2 | 2.824051  | Inlier   |

Identification of Survival Genes in Human Glioblastoma Cells Using siRNA Screening  
 Nikhil G Thaker, Fang Zhang, Peter R. McDonald, Tong Ying Shun, Michael D Lewen, Ian F. Pollack, and John S. Lazo

|                              |               |      |                   |           |        |
|------------------------------|---------------|------|-------------------|-----------|--------|
| siRNA-Temozolomide Run1-DMSO | NM_0004<br>46 | PON1 | paraoxona<br>se 1 | -1.478849 | Inlier |
| siRNA-Temozolomide Run3-DMSO | NM_0004<br>46 | PON1 | paraoxona<br>se 1 | -0.710845 | Inlier |
| siRNA-Vinblastine Run2-DMSO  | NM_0004<br>46 | PON1 | paraoxona<br>se 1 | -0.638155 | Inlier |
| siRNA-Temozolomide Run2-DMSO | NM_0004<br>46 | PON1 | paraoxona<br>se 1 | -0.015346 | Inlier |
| siRNA Disorazole DMSO Run1   | NM_0004<br>46 | PON1 | paraoxona<br>se 1 | 0.015347  | Inlier |
| siRNA Disorazole DMSO Run3   | NM_0004<br>46 | PON1 | paraoxona<br>se 1 | 0.335691  | Inlier |
| siRNA-Vinblastine Run1-DMSO  | NM_0004<br>46 | PON1 | paraoxona<br>se 1 | 1.384315  | Inlier |
| siRNA Disorazole DMSO Run2   | NM_0004<br>46 | PON1 | paraoxona<br>se 1 | 1.506145  | Inlier |
| siRNA Disorazole DMSO Run3   | NM_0003<br>05 | PON2 | paraoxona<br>se 2 | -0.73645  | Inlier |
| siRNA-Temozolomide Run3-DMSO | NM_0003<br>05 | PON2 | paraoxona<br>se 2 | -0.61255  | Inlier |
| siRNA-Temozolomide Run2-DMSO | NM_0003<br>05 | PON2 | paraoxona<br>se 2 | -0.329024 | Inlier |
| siRNA-Vinblastine Run2-DMSO  | NM_0003<br>05 | PON2 | paraoxona<br>se 2 | -0.210993 | Inlier |
| siRNA Disorazole DMSO Run1   | NM_0003<br>05 | PON2 | paraoxona<br>se 2 | 0.210993  | Inlier |
| siRNA-Temozolomide Run1-DMSO | NM_0003<br>05 | PON2 | paraoxona<br>se 2 | 1.374505  | Inlier |
| siRNA-Vinblastine Run1-DMSO  | NM_0003<br>05 | PON2 | paraoxona<br>se 2 | 1.467072  | Inlier |
| siRNA Disorazole DMSO Run2   | NM_0003<br>05 | PON2 | paraoxona<br>se 2 | 1.528159  | Inlier |
| siRNA-Temozolomide Run3-DMSO | NM_0009<br>40 | PON3 | paraoxona<br>se 3 | -0.913894 | Inlier |
| siRNA-Temozolomide Run2-DMSO | NM_0009<br>40 | PON3 | paraoxona<br>se 3 | -0.588721 | Inlier |
| siRNA-Temozolomide Run1-DMSO | NM_0009<br>40 | PON3 | paraoxona<br>se 3 | -0.2835   | Inlier |
| siRNA Disorazole DMSO Run3   | NM_0009<br>40 | PON3 | paraoxona<br>se 3 | -0.052389 | Inlier |
| siRNA-Vinblastine Run2-DMSO  | NM_0009<br>40 | PON3 | paraoxona<br>se 3 | 0.052389  | Inlier |
| siRNA Disorazole DMSO Run1   | NM_0009<br>40 | PON3 | paraoxona<br>se 3 | 0.760279  | Inlier |
| siRNA-Vinblastine Run1-DMSO  | NM_0009<br>40 | PON3 | paraoxona<br>se 3 | 0.888094  | Inlier |
| siRNA Disorazole DMSO Run2   | NM_0009<br>40 | PON3 | paraoxona<br>se 3 | 1.236675  | Inlier |

Identification of Survival Genes in Human Glioblastoma Cells Using siRNA Screening  
 Nikhil G Thaker, Fang Zhang, Peter R. McDonald, Tong Ying Shun, Michael D Lewen, Ian F. Pollack, and John S. Lazo

Molecular Pharmacology

|                              |               |     |  |                                        |                  |
|------------------------------|---------------|-----|--|----------------------------------------|------------------|
|                              |               |     |  | P450<br>(cytochrome)<br>oxidoreductase |                  |
| siRNA Disorazole DMSO Run1   | NM_0009<br>41 | POR |  | P450<br>(cytochrome)<br>oxidoreductase | -0.694221 Inlier |
| siRNA-Temozolomide Run2-DMSO | NM_0009<br>41 | POR |  | P450<br>(cytochrome)<br>oxidoreductase | -0.654779 Inlier |
| siRNA Disorazole DMSO Run3   | NM_0009<br>41 | POR |  | P450<br>(cytochrome)<br>oxidoreductase | -0.457437 Inlier |
| siRNA-Temozolomide Run3-DMSO | NM_0009<br>41 | POR |  | P450<br>(cytochrome)<br>oxidoreductase | -0.01966 Inlier  |
| siRNA-Temozolomide Run1-DMSO | NM_0009<br>41 | POR |  | P450<br>(cytochrome)<br>oxidoreductase | 0.01966 Inlier   |
| siRNA-Vinblastine Run2-DMSO  | NM_0009<br>41 | POR |  | P450<br>(cytochrome)<br>oxidoreductase | 0.856879 Inlier  |
| siRNA-Vinblastine Run1-DMSO  | NM_0009<br>41 | POR |  | P450<br>(cytochrome)<br>oxidoreductase | 1.015102 Inlier  |
| siRNA Disorazole DMSO Run2   | NM_0009<br>41 | POR |  | oxidoreductase                         | 2.78386 Inlier   |
| siRNA-Temozolomide Run3-DMSO | NM_0211<br>29 | PP  |  | pyrophosphatase<br>(inorganic)         | -0.728671 Inlier |
| siRNA-Temozolomide Run2-DMSO | NM_0211<br>29 | PP  |  | pyrophosphatase<br>(inorganic)         | -0.623754 Inlier |
| siRNA Disorazole DMSO Run3   | NM_0211<br>29 | PP  |  | pyrophosphatase<br>(inorganic)         | -0.495573 Inlier |

Identification of Survival Genes in Human Glioblastoma Cells Using siRNA Screening  
 Nikhil G Thaker, Fang Zhang, Peter R. McDonald, Tong Ying Shun, Michael D Lewen, Ian F. Pollack, and John S. Lazo  
 Molecular Pharmacology

|                              |               |        |                                                             |           |        |
|------------------------------|---------------|--------|-------------------------------------------------------------|-----------|--------|
| siRNA Disorazole DMSO Run2   | NM_0211<br>29 | PP     | pyrophosphatase (inorganic)                                 | -0.357188 | Inlier |
| siRNA-Temozolomide Run1-DMSO | NM_0211<br>29 | PP     | pyrophosphatase (inorganic)                                 | 0.357188  | Inlier |
| siRNA Disorazole DMSO Run1   | NM_0211<br>29 | PP     | pyrophosphatase (inorganic)                                 | 0.725246  | Inlier |
| siRNA-Vinblastine Run1-DMSO  | NM_0211<br>29 | PP     | pyrophosphatase (inorganic)                                 | 1.835637  | Inlier |
| siRNA-Vinblastine Run2-DMSO  | NM_0211<br>29 | PP     | pyrophosphatase (inorganic)                                 | 1.953553  | Inlier |
| siRNA-Vinblastine Run2-DMSO  | NM_0307<br>92 | PP1665 | glycerophosphodiester phosphodiesterase domain containing 5 | -1.171266 | Inlier |
| siRNA Disorazole DMSO Run2   | NM_0307<br>92 | PP1665 | glycerophosphodiester phosphodiesterase domain containing 5 | -0.740596 | Inlier |
| siRNA Disorazole DMSO Run1   | NM_0307<br>92 | PP1665 | glycerophosphodiester phosphodiesterase domain containing 5 | -0.608404 | Inlier |
| siRNA-Temozolomide Run2-DMSO | NM_0307<br>92 | PP1665 | glycerophosphodiester phosphodiesterase domain containing 5 | -0.034112 | Inlier |

Identification of Survival Genes in Human Glioblastoma Cells Using siRNA Screening  
 Nikhil G Thaker, Fang Zhang, Peter R. McDonald, Tong Ying Shun, Michael D Lewen, Ian F. Pollack, and John S. Lazo

Molecular Pharmacology

|                              |           |        |                                            |                  |
|------------------------------|-----------|--------|--------------------------------------------|------------------|
|                              |           |        | glycerophosphodiesterase domain containing |                  |
| siRNA-Vinblastine Run1-DMSO  | NM_030792 | PP1665 | 5                                          | 0.034114 Inlier  |
|                              |           |        | glycerophosphodiesterase domain containing |                  |
| siRNA-Temozolomide Run3-DMSO | NM_030792 | PP1665 | 5                                          | 0.151228 Inlier  |
|                              |           |        | glycerophosphodiesterase domain containing |                  |
| siRNA-Temozolomide Run1-DMSO | NM_030792 | PP1665 | 5                                          | 0.90118 Inlier   |
|                              |           |        | glycerophosphodiesterase domain containing |                  |
| siRNA Disorazole DMSO Run3   | NM_030792 | PP1665 | 5                                          | 5.136657 Outlier |
| siRNA-Temozolomide Run2-DMSO | NM_201398 | PP591  | PP591                                      | -1.17942 Inlier  |
| siRNA-Temozolomide Run1-DMSO | NM_201398 | PP591  | PP591                                      | -0.837378 Inlier |
| siRNA Disorazole DMSO Run1   | NM_201398 | PP591  | PP591                                      | -0.570477 Inlier |
| siRNA Disorazole DMSO Run3   | NM_201398 | PP591  | PP591                                      | -0.098056 Inlier |
| siRNA-Temozolomide Run3-DMSO | NM_201398 | PP591  | PP591                                      | 0.098057 Inlier  |
| siRNA-Vinblastine Run2-DMSO  | NM_201398 | PP591  | PP591                                      | 0.366479 Inlier  |
| siRNA Disorazole DMSO Run2   | NM_201398 | PP591  | PP591                                      | 0.778523 Inlier  |
| siRNA-Vinblastine Run1-DMSO  | NM_201398 | PP591  | PP591                                      | 1.014243 Inlier  |
| siRNA Disorazole DMSO Run2   | NM_176869 | PPA2   | PPA2                                       | -1.694176 Inlier |
| siRNA-Temozolomide Run3-DMSO | NM_176869 | PPA2   | PPA2                                       | -0.775857 Inlier |

Identification of Survival Genes in Human Glioblastoma Cells Using siRNA Screening

Nikhil G Thaker, Fang Zhang, Peter R. McDonald, Tong Ying Shun, Michael D Lewen, Ian F. Pollack, and John S.

Lazo

|                                  |               |        |                                                  |           |        |
|----------------------------------|---------------|--------|--------------------------------------------------|-----------|--------|
| siRNA-Temozolomide Run2-<br>DMSO | NM_1768<br>69 | PPA2   | PPA2                                             | -0.669678 | Inlier |
|                                  | NM_1768       |        |                                                  |           |        |
| siRNA Disorazole DMSO Run3       | 69            | PPA2   | PPA2                                             | -0.018944 | Inlier |
| siRNA-Temozolomide Run1-<br>DMSO | NM_1768<br>69 | PPA2   | PPA2                                             | 0.018944  | Inlier |
| siRNA-Vinblastine Run2-<br>DMSO  | NM_1768<br>69 | PPA2   | PPA2                                             | 0.440668  | Inlier |
|                                  | NM_1768       |        |                                                  |           |        |
| siRNA Disorazole DMSO Run1       | 69            | PPA2   | PPA2                                             | 0.679322  | Inlier |
| siRNA-Vinblastine Run1-<br>DMSO  | NM_1768<br>69 | PPA2   | PPA2                                             | 1.262035  | Inlier |
|                                  |               |        |                                                  |           |        |
|                                  |               |        | phosphati<br>dic acid<br>phosphata<br>se type 2A |           |        |
| siRNA-Temozolomide Run2-<br>DMSO | NM_0037<br>11 | PPAP2A |                                                  | -2.630793 | Inlier |
|                                  |               |        |                                                  |           |        |
|                                  |               |        | phosphati<br>dic acid<br>phosphata<br>se type 2A |           |        |
| siRNA-Temozolomide Run3-<br>DMSO | NM_0037<br>11 | PPAP2A |                                                  | -2.183084 | Inlier |
|                                  |               |        |                                                  |           |        |
|                                  |               |        | phosphati<br>dic acid<br>phosphata<br>se type 2A |           |        |
| siRNA-Temozolomide Run1-<br>DMSO | NM_0037<br>11 | PPAP2A |                                                  | -0.51586  | Inlier |
|                                  |               |        |                                                  |           |        |
|                                  |               |        | phosphati<br>dic acid<br>phosphata<br>se type 2A |           |        |
| siRNA Disorazole DMSO Run3       | NM_0037<br>11 | PPAP2A |                                                  | -0.206783 | Inlier |
|                                  |               |        |                                                  |           |        |
|                                  |               |        | phosphati<br>dic acid<br>phosphata<br>se type 2A |           |        |
| siRNA-Vinblastine Run1-<br>DMSO  | NM_0037<br>11 | PPAP2A |                                                  | 0.206782  | Inlier |
|                                  |               |        |                                                  |           |        |
|                                  |               |        | phosphati<br>dic acid<br>phosphata<br>se type 2A |           |        |
| siRNA Disorazole DMSO Run2       | NM_0037<br>11 | PPAP2A |                                                  | 0.214753  | Inlier |
|                                  |               |        |                                                  |           |        |
|                                  |               |        | phosphati<br>dic acid<br>phosphata<br>se type 2A |           |        |
| siRNA Disorazole DMSO Run1       | NM_0037<br>11 | PPAP2A |                                                  | 0.83314   | Inlier |
|                                  |               |        |                                                  |           |        |
|                                  |               |        | phosphati<br>dic acid<br>phosphata<br>se type 2A |           |        |
| siRNA-Vinblastine Run2-<br>DMSO  | NM_0037<br>11 | PPAP2A |                                                  | 1.047704  | Inlier |



Identification of Survival Genes in Human Glioblastoma Cells Using siRNA Screening  
 Nikhil G Thaker, Fang Zhang, Peter R. McDonald, Tong Ying Shun, Michael D Lewen, Ian F. Pollack, and John S. Lazo  
 Molecular Pharmacology

|                              |               |        |                                      |           |        |
|------------------------------|---------------|--------|--------------------------------------|-----------|--------|
| siRNA-Temozolomide Run2-DMSO | NM_1774<br>14 | PPAP2B | phosphatic acid<br>phosphate type 2B | -0.706011 | Inlier |
| siRNA Disorazole DMSO Run2   | NM_1774<br>14 | PPAP2B | phosphatic acid<br>phosphate type 2B | -0.642989 | Inlier |
| siRNA-Temozolomide Run3-DMSO | NM_1774<br>14 | PPAP2B | phosphatic acid<br>phosphate type 2B | -0.608176 | Inlier |
| siRNA Disorazole DMSO Run3   | NM_1774<br>14 | PPAP2B | phosphatic acid<br>phosphate type 2B | -0.041263 | Inlier |
| siRNA-Temozolomide Run1-DMSO | NM_1774<br>14 | PPAP2B | phosphatic acid<br>phosphate type 2B | 0.041263  | Inlier |
| siRNA Disorazole DMSO Run1   | NM_1774<br>14 | PPAP2B | phosphatic acid<br>phosphate type 2B | 1.066833  | Inlier |
| siRNA-Vinblastine Run1-DMSO  | NM_1774<br>14 | PPAP2B | phosphatic acid<br>phosphate type 2B | 1.407809  | Inlier |
| siRNA-Vinblastine Run2-DMSO  | NM_1774<br>14 | PPAP2B | phosphatic acid<br>phosphate type 2B | 1.70852   | Inlier |
| siRNA-Temozolomide Run3-DMSO | NM_1775<br>26 | PPAP2C | phosphatic acid<br>phosphate type 2C | -1.512175 | Inlier |
| siRNA-Temozolomide Run2-DMSO | NM_1775<br>26 | PPAP2C | phosphatic acid<br>phosphate type 2C | -0.598988 | Inlier |

Identification of Survival Genes in Human Glioblastoma Cells Using siRNA Screening  
 Nikhil G Thaker, Fang Zhang, Peter R. McDonald, Tong Ying Shun, Michael D Lewen, Ian F. Pollack, and John S. Lazo  
 Molecular Pharmacology

|                              |                  |        |                                                    |           |        |
|------------------------------|------------------|--------|----------------------------------------------------|-----------|--------|
| siRNA Disorazole DMSO Run3   | NM_1775<br>26    | PPAP2C | phosphatic acid<br>phosphate type 2C               | -0.527244 | Inlier |
| siRNA Disorazole DMSO Run2   | NM_1775<br>26    | PPAP2C | phosphatic acid<br>phosphate type 2C               | -0.031866 | Inlier |
| siRNA-Temozolomide Run1-DMSO | NM_1775<br>26    | PPAP2C | phosphatic acid<br>phosphate type 2C               | 0.031865  | Inlier |
| siRNA Disorazole DMSO Run1   | NM_1775<br>26    | PPAP2C | phosphatic acid<br>phosphate type 2C               | 0.750012  | Inlier |
| siRNA-Vinblastine Run1-DMSO  | NM_1775<br>26    | PPAP2C | phosphatic acid<br>phosphate type 2C               | 0.837983  | Inlier |
| siRNA-Vinblastine Run2-DMSO  | NM_1775<br>26    | PPAP2C | phosphatic acid<br>phosphate type 2C               | 2.214356  | Inlier |
| siRNA-Temozolomide Run3-DMSO | NM_0010<br>01928 | PPARA  | peroxisome proliferative activated receptor, alpha | -1.769285 | Inlier |
| siRNA-Temozolomide Run2-DMSO | NM_0010<br>01928 | PPARA  | peroxisome proliferative activated receptor, alpha | -0.935289 | Inlier |
| siRNA Disorazole DMSO Run2   | NM_0010<br>01928 | PPARA  | peroxisome proliferative activated receptor, alpha | -0.413711 | Inlier |

Identification of Survival Genes in Human Glioblastoma Cells Using siRNA Screening  
 Nikhil G Thaker, Fang Zhang, Peter R. McDonald, Tong Ying Shun, Michael D Lewen, Ian F. Pollack, and John S. Lazo  
 Molecular Pharmacology

|                              |                  |        |                                                    |           |         |
|------------------------------|------------------|--------|----------------------------------------------------|-----------|---------|
| siRNA-Temozolomide Run1-DMSO | NM_0010<br>01928 | PPARA  | peroxisome proliferative activated receptor, alpha | -0.038765 | Inlier  |
| siRNA Disorazole DMSO Run1   | NM_0010<br>01928 | PPARA  | peroxisome proliferative activated receptor, alpha | 0.038765  | Inlier  |
| siRNA-Vinblastine Run1-DMSO  | NM_0010<br>01928 | PPARA  | peroxisome proliferative activated receptor, alpha | 0.400736  | Inlier  |
| siRNA-Vinblastine Run2-DMSO  | NM_0010<br>01928 | PPARA  | peroxisome proliferative activated receptor, alpha | 1.902681  | Inlier  |
| siRNA Disorazole DMSO Run3   | NM_0010<br>01928 | PPARA  | peroxisome proliferative activated receptor, alpha | 5.307108  | Outlier |
| siRNA-Temozolomide Run3-DMSO | NM_0047<br>74    | PPARBP | PPAR binding protein                               | -4.224745 | Outlier |
| siRNA Disorazole DMSO Run1   | NM_0047<br>74    | PPARBP | PPAR binding protein                               | -0.663025 | Inlier  |
| siRNA-Temozolomide Run2-DMSO | NM_0047<br>74    | PPARBP | PPAR binding protein                               | -0.310685 | Inlier  |
| siRNA-Vinblastine Run1-DMSO  | NM_0047<br>74    | PPARBP | PPAR binding protein                               | -0.301984 | Inlier  |
| siRNA-Temozolomide Run1-DMSO | NM_0047<br>74    | PPARBP | PPAR binding protein                               | 0.301984  | Inlier  |

Identification of Survival Genes in Human Glioblastoma Cells Using siRNA Screening  
 Nikhil G Thaker, Fang Zhang, Peter R. McDonald, Tong Ying Shun, Michael D Lewen, Ian F. Pollack, and John S. Lazo

|                                                           |               |        |                                                                     |           |         |
|-----------------------------------------------------------|---------------|--------|---------------------------------------------------------------------|-----------|---------|
| Molecular Pharmacology<br>siRNA-Vinblastine Run2-<br>DMSO | NM_0047<br>74 | PPARBP | PPAR<br>binding<br>protein                                          | 0.685975  | Inlier  |
| siRNA Disorazole DMSO Run2                                | NM_0047<br>74 | PPARBP | PPAR<br>binding<br>protein                                          | 5.466434  | Outlier |
| siRNA Disorazole DMSO Run3                                | NM_0047<br>74 | PPARBP | PPAR<br>binding<br>protein                                          | 15.43494  | Outlier |
| siRNA-Temozolomide Run3-<br>DMSO                          | NM_1774<br>35 | PPARD  | peroxisom<br>e<br>proliferativ<br>e activated<br>receptor,<br>delta | -1.229599 | Inlier  |
| siRNA Disorazole DMSO Run2                                | NM_1774<br>35 | PPARD  | peroxisom<br>e<br>proliferativ<br>e activated<br>receptor,<br>delta | -0.761167 | Inlier  |
| siRNA-Temozolomide Run2-<br>DMSO                          | NM_1774<br>35 | PPARD  | peroxisom<br>e<br>proliferativ<br>e activated<br>receptor,<br>delta | -0.319423 | Inlier  |
| siRNA Disorazole DMSO Run3                                | NM_1774<br>35 | PPARD  | peroxisom<br>e<br>proliferativ<br>e activated<br>receptor,<br>delta | -0.305616 | Inlier  |
| siRNA Disorazole DMSO Run1                                | NM_1774<br>35 | PPARD  | peroxisom<br>e<br>proliferativ<br>e activated<br>receptor,<br>delta | 0.305616  | Inlier  |
| siRNA-Temozolomide Run1-<br>DMSO                          | NM_1774<br>35 | PPARD  | peroxisom<br>e<br>proliferativ<br>e activated<br>receptor,<br>delta | 0.587833  | Inlier  |

Identification of Survival Genes in Human Glioblastoma Cells Using siRNA Screening  
 Nikhil G Thaker, Fang Zhang, Peter R. McDonald, Tong Ying Shun, Michael D Lewen, Ian F. Pollack, and John S. Lazo  
 Molecular Pharmacology

|                              |               |       |                                                                     |                  |
|------------------------------|---------------|-------|---------------------------------------------------------------------|------------------|
| siRNA-Vinblastine Run1-DMSO  | NM_1774<br>35 | PPARD | peroxisom<br>e<br>proliferativ<br>e activated<br>receptor,<br>delta | 1.076877 Inlier  |
| siRNA-Vinblastine Run2-DMSO  | NM_1774<br>35 | PPARD | peroxisom<br>e<br>proliferativ<br>e activated<br>receptor,<br>delta | 1.156832 Inlier  |
| siRNA Disorazole DMSO Run2   | NM_0158<br>69 | PPARG | peroxisom<br>e<br>proliferativ<br>e activated<br>receptor,<br>gamma | -1.001596 Inlier |
| siRNA-Temozolomide Run3-DMSO | NM_0158<br>69 | PPARG | peroxisom<br>e<br>proliferativ<br>e activated<br>receptor,<br>gamma | -0.689841 Inlier |
| siRNA-Temozolomide Run2-DMSO | NM_0158<br>69 | PPARG | peroxisom<br>e<br>proliferativ<br>e activated<br>receptor,<br>gamma | -0.659159 Inlier |
| siRNA Disorazole DMSO Run3   | NM_0158<br>69 | PPARG | peroxisom<br>e<br>proliferativ<br>e activated<br>receptor,<br>gamma | -0.160555 Inlier |
| siRNA-Temozolomide Run1-DMSO | NM_0158<br>69 | PPARG | peroxisom<br>e<br>proliferativ<br>e activated<br>receptor,<br>gamma | 0.160554 Inlier  |

Identification of Survival Genes in Human Glioblastoma Cells Using siRNA Screening  
 Nikhil G Thaker, Fang Zhang, Peter R. McDonald, Tong Ying Shun, Michael D Lewen, Ian F. Pollack, and John S. Lazo  
 Molecular Pharmacology

|                                  |               |              |                                                                                                |           |        |
|----------------------------------|---------------|--------------|------------------------------------------------------------------------------------------------|-----------|--------|
| siRNA Disorazole DMSO Run1       | NM_0158<br>69 | PPARG        | peroxisom<br>e<br>proliferativ<br>e activated<br>receptor,<br>gamma                            | 0.629792  | Inlier |
| siRNA-Vinblastine Run1-<br>DMSO  | NM_0158<br>69 | PPARG        | peroxisom<br>e<br>proliferativ<br>e activated<br>receptor,<br>gamma                            | 1.228114  | Inlier |
| siRNA-Vinblastine Run2-<br>DMSO  | NM_0158<br>69 | PPARG        | peroxisom<br>e<br>proliferativ<br>e activated<br>receptor,<br>gamma                            | 1.620044  | Inlier |
| siRNA-Temozolomide Run3-<br>DMSO | NM_1332<br>63 | PPARGC1<br>B | peroxisom<br>e<br>proliferativ<br>e activated<br>receptor,<br>gamma,<br>coactivator<br>1, beta | -2.640352 | Inlier |
| siRNA-Temozolomide Run2-<br>DMSO | NM_1332<br>63 | PPARGC1<br>B | peroxisom<br>e<br>proliferativ<br>e activated<br>receptor,<br>gamma,<br>coactivator<br>1, beta | -0.845107 | Inlier |
| siRNA Disorazole DMSO Run1       | NM_1332<br>63 | PPARGC1<br>B | peroxisom<br>e<br>proliferativ<br>e activated<br>receptor,<br>gamma,<br>coactivator<br>1, beta | -0.634901 | Inlier |

Identification of Survival Genes in Human Glioblastoma Cells Using siRNA Screening  
 Nikhil G Thaker, Fang Zhang, Peter R. McDonald, Tong Ying Shun, Michael D Lewen, Ian F. Pollack, and John S. Lazo  
 Molecular Pharmacology

|                              |           |          |                                                                         |           |        |
|------------------------------|-----------|----------|-------------------------------------------------------------------------|-----------|--------|
| siRNA-Temozolomide Run1-DMSO | NM_133263 | PPARGC1B | peroxisome proliferative activated receptor, gamma, coactivator 1, beta | -0.103705 | Inlier |
| siRNA-Vinblastine Run1-DMSO  | NM_133263 | PPARGC1B | peroxisome proliferative activated receptor, gamma, coactivator 1, beta | 0.103705  | Inlier |
| siRNA Disorazole DMSO Run3   | NM_133263 | PPARGC1B | peroxisome proliferative activated receptor, gamma, coactivator 1, beta | 0.445375  | Inlier |
| siRNA-Vinblastine Run2-DMSO  | NM_133263 | PPARGC1B | peroxisome proliferative activated receptor, gamma, coactivator 1, beta | 0.714099  | Inlier |
| siRNA Disorazole DMSO Run2   | NM_133263 | PPARGC1B | peroxisome proliferative activated receptor, gamma, coactivator 1, beta | 1.348434  | Inlier |
| siRNA-Temozolomide Run2-DMSO | NM_002703 | PPAT     | phosphoribosyl pyrophosphate amidotransferase                           | -0.96726  | Inlier |

Identification of Survival Genes in Human Glioblastoma Cells Using siRNA Screening

Nikhil G Thaker, Fang Zhang, Peter R. McDonald, Tong Ying Shun, Michael D Lewen, Ian F. Pollack, and John S. Lazo

Molecular Pharmacology

|                              |           |       |                                                       |           |        |
|------------------------------|-----------|-------|-------------------------------------------------------|-----------|--------|
| siRNA-Temozolomide Run3-DMSO | NM_002703 | PPAT  | phosphoribosyl pyrophosphate amidotransferase         | -0.784272 | Inlier |
| siRNA Disorazole DMSO Run3   | NM_002703 | PPAT  | phosphoribosyl pyrophosphate amidotransferase         | -0.564728 | Inlier |
| siRNA-Temozolomide Run1-DMSO | NM_002703 | PPAT  | phosphoribosyl pyrophosphate amidotransferase         | -0.228111 | Inlier |
| siRNA Disorazole DMSO Run1   | NM_002703 | PPAT  | phosphoribosyl pyrophosphate amidotransferase         | 0.228111  | Inlier |
| siRNA-Vinblastine Run2-DMSO  | NM_002703 | PPAT  | phosphoribosyl pyrophosphate amidotransferase         | 0.246177  | Inlier |
| siRNA-Vinblastine Run1-DMSO  | NM_002703 | PPAT  | phosphoribosyl pyrophosphate amidotransferase         | 1.625976  | Inlier |
| siRNA Disorazole DMSO Run2   | NM_002703 | PPAT  | protein phosphatase, EF hand calcium-binding domain 1 | 2.311794  | Inlier |
| siRNA Disorazole DMSO Run2   | NM_152225 | PPEF1 | protein phosphatase, EF hand calcium-binding domain 1 | -0.94425  | Inlier |



Identification of Survival Genes in Human Glioblastoma Cells Using siRNA Screening

Nikhil G Thaker, Fang Zhang, Peter R. McDonald, Tong Ying Shun, Michael D Lewen, Ian F. Pollack, and John S. Lazo

Molecular Pharmacology

| siRNA Treatment              | Gene      | Accession | Protein                                               | Score     | Outlier |
|------------------------------|-----------|-----------|-------------------------------------------------------|-----------|---------|
| siRNA-Temozolomide Run3-DMSO | NM_152225 | PPEF1     | protein phosphatase, EF hand calcium-binding domain 1 | -0.728687 | Inlier  |
| siRNA Disorazole DMSO Run3   | NM_152225 | PPEF1     | protein phosphatase, EF hand calcium-binding domain 1 | -0.360641 | Inlier  |
| siRNA-Temozolomide Run2-DMSO | NM_152225 | PPEF1     | protein phosphatase, EF hand calcium-binding domain 1 | -0.066024 | Inlier  |
| siRNA-Temozolomide Run1-DMSO | NM_152225 | PPEF1     | protein phosphatase, EF hand calcium-binding domain 1 | 0.066024  | Inlier  |
| siRNA-Vinblastine Run1-DMSO  | NM_152225 | PPEF1     | protein phosphatase, EF hand calcium-binding domain 1 | 0.620313  | Inlier  |
| siRNA Disorazole DMSO Run1   | NM_152225 | PPEF1     | protein phosphatase, EF hand calcium-binding domain 1 | 0.775053  | Inlier  |
| siRNA-Vinblastine Run2-DMSO  | NM_152225 | PPEF1     | protein phosphatase, EF hand calcium-binding domain 1 | 1.124408  | Inlier  |

Identification of Survival Genes in Human Glioblastoma Cells Using siRNA Screening

Nikhil G Thaker, Fang Zhang, Peter R. McDonald, Tong Ying Shun, Michael D Lewen, Ian F. Pollack, and John S. Lazo

Molecular Pharmacology

| siRNA Treatment              | Gene ID   | Protein | Score     | Outlier Type |
|------------------------------|-----------|---------|-----------|--------------|
| siRNA-Temozolomide Run2-DMSO | NM_152934 | PPEF2   | -1.120381 | Inlier       |
| siRNA Disorazole DMSO Run3   | NM_152934 | PPEF2   | -0.617912 | Inlier       |
| siRNA Disorazole DMSO Run2   | NM_152934 | PPEF2   | -0.222115 | Inlier       |
| siRNA-Temozolomide Run1-DMSO | NM_152934 | PPEF2   | -0.111366 | Inlier       |
| siRNA-Temozolomide Run3-DMSO | NM_152934 | PPEF2   | 0.111366  | Inlier       |
| siRNA Disorazole DMSO Run1   | NM_152934 | PPEF2   | 0.731088  | Inlier       |
| siRNA-Vinblastine Run1-DMSO  | NM_152934 | PPEF2   | 1.042262  | Inlier       |

protein phosphatase, EF hand calcium-binding domain 2

Identification of Survival Genes in Human Glioblastoma Cells Using siRNA Screening

Nikhil G Thaker, Fang Zhang, Peter R. McDonald, Tong Ying Shun, Michael D Lewen, Ian F. Pollack, and John S. Lazo

Molecular Pharmacology

|                              |               |        |                                                                                                           |           |        |
|------------------------------|---------------|--------|-----------------------------------------------------------------------------------------------------------|-----------|--------|
| siRNA-Vinblastine Run2-DMSO  | NM_1529<br>34 | PPEF2  | protein phosphatase, EF hand calcium-binding domain 2                                                     | 1.14196   | Inlier |
| siRNA-Temozolomide Run3-DMSO | NM_1774<br>23 | PPFIA1 | protein tyrosine phosphatase, receptor type, f polypeptide (PTPRF), interacting protein (liprin), alpha 1 | -2.047618 | Inlier |
| siRNA Disorazole DMSO Run2   | NM_1774<br>23 | PPFIA1 | protein tyrosine phosphatase, receptor type, f polypeptide (PTPRF), interacting protein (liprin), alpha 1 | -1.844308 | Inlier |
| siRNA-Temozolomide Run1-DMSO | NM_1774<br>23 | PPFIA1 | protein tyrosine phosphatase, receptor type, f polypeptide (PTPRF), interacting protein (liprin), alpha 1 | -1.258283 | Inlier |

Identification of Survival Genes in Human Glioblastoma Cells Using siRNA Screening

Nikhil G Thaker, Fang Zhang, Peter R. McDonald, Tong Ying Shun, Michael D Lewen, Ian F. Pollack, and John S. Lazo

Molecular Pharmacology

| siRNA Treatment    | Run       | Gene ID | Accession | Protein Name | Score     | Category |
|--------------------|-----------|---------|-----------|--------------|-----------|----------|
| siRNA-Temozolomide | Run2-DMSO | NM_1774 | 23        | PPFIA1       | -0.105772 | Inlier   |
| siRNA Disorazole   | DMSO Run3 | NM_1774 | 23        | PPFIA1       | 0.105772  | Inlier   |
| siRNA-Vinblastine  | Run2-DMSO | NM_1774 | 23        | PPFIA1       | 0.416231  | Inlier   |
| siRNA Disorazole   | DMSO Run1 | NM_1774 | 23        | PPFIA1       | 0.438284  | Inlier   |

protein tyrosine phosphatase, receptor type, f polypeptide (PTPRF), interacting protein (liprin), alpha 1

Identification of Survival Genes in Human Glioblastoma Cells Using siRNA Screening

Nikhil G Thaker, Fang Zhang, Peter R. McDonald, Tong Ying Shun, Michael D Lewen, Ian F. Pollack, and John S. Lazo

Molecular Pharmacology

|                              |               |        |                                                                                                           |           |        |
|------------------------------|---------------|--------|-----------------------------------------------------------------------------------------------------------|-----------|--------|
| siRNA-Vinblastine Run1-DMSO  | NM_1774<br>23 | PPFIA1 | protein tyrosine phosphatase, receptor type, f polypeptide (PTPRF), interacting protein (liprin), alpha 1 | 0.910716  | Inlier |
| siRNA-Temozolomide Run3-DMSO | NM_0036<br>25 | PPFIA2 | protein tyrosine phosphatase, receptor type, f polypeptide (PTPRF), interacting protein (liprin), alpha 2 | -1.362302 | Inlier |
| siRNA-Temozolomide Run1-DMSO | NM_0036<br>25 | PPFIA2 | protein tyrosine phosphatase, receptor type, f polypeptide (PTPRF), interacting protein (liprin), alpha 2 | -1.154355 | Inlier |
| siRNA-Vinblastine Run1-DMSO  | NM_0036<br>25 | PPFIA2 | protein tyrosine phosphatase, receptor type, f polypeptide (PTPRF), interacting protein (liprin), alpha 2 | -0.135582 | Inlier |

Identification of Survival Genes in Human Glioblastoma Cells Using siRNA Screening

Nikhil G Thaker, Fang Zhang, Peter R. McDonald, Tong Ying Shun, Michael D Lewen, Ian F. Pollack, and John S. Lazo

Molecular Pharmacology

|                              |               |        |                                                                                                           |           |        |
|------------------------------|---------------|--------|-----------------------------------------------------------------------------------------------------------|-----------|--------|
| siRNA-Vinblastine Run2-DMSO  | NM_0036<br>25 | PPFIA2 | protein tyrosine phosphatase, receptor type, f polypeptide (PTPRF), interacting protein (liprin), alpha 2 | -0.080871 | Inlier |
| siRNA-Temozolomide Run2-DMSO | NM_0036<br>25 | PPFIA2 | protein tyrosine phosphatase, receptor type, f polypeptide (PTPRF), interacting protein (liprin), alpha 2 | 0.080871  | Inlier |
| siRNA Disorazole DMSO Run1   | NM_0036<br>25 | PPFIA2 | protein tyrosine phosphatase, receptor type, f polypeptide (PTPRF), interacting protein (liprin), alpha 2 | 0.194645  | Inlier |
| siRNA Disorazole DMSO Run3   | NM_0036<br>25 | PPFIA2 | protein tyrosine phosphatase, receptor type, f polypeptide (PTPRF), interacting protein (liprin), alpha 2 | 1.455722  | Inlier |

Identification of Survival Genes in Human Glioblastoma Cells Using siRNA Screening

Nikhil G Thaker, Fang Zhang, Peter R. McDonald, Tong Ying Shun, Michael D Lewen, Ian F. Pollack, and John S. Lazo

Molecular Pharmacology

|                              |               |        |                                                                                                           |           |        |
|------------------------------|---------------|--------|-----------------------------------------------------------------------------------------------------------|-----------|--------|
| siRNA Disorazole DMSO Run2   | NM_0036<br>25 | PPFIA2 | protein tyrosine phosphatase, receptor type, f polypeptide (PTPRF), interacting protein (liprin), alpha 2 | 2.283251  | Inlier |
| siRNA-Temozolomide Run3-DMSO | NM_0036<br>60 | PPFIA3 | protein tyrosine phosphatase, receptor type, f polypeptide (PTPRF), interacting protein (liprin), alpha 3 | -2.258927 | Inlier |
| siRNA Disorazole DMSO Run3   | NM_0036<br>60 | PPFIA3 | protein tyrosine phosphatase, receptor type, f polypeptide (PTPRF), interacting protein (liprin), alpha 3 | -2.011781 | Inlier |
| siRNA Disorazole DMSO Run2   | NM_0036<br>60 | PPFIA3 | protein tyrosine phosphatase, receptor type, f polypeptide (PTPRF), interacting protein (liprin), alpha 3 | -1.772884 | Inlier |

Identification of Survival Genes in Human Glioblastoma Cells Using siRNA Screening

Nikhil G Thaker, Fang Zhang, Peter R. McDonald, Tong Ying Shun, Michael D Lewen, Ian F. Pollack, and John S. Lazo

Molecular Pharmacology

| siRNA Treatment              | Gene      | Accession | Protein Name                                                                                              | Log2 Fold Change | Annotation |
|------------------------------|-----------|-----------|-----------------------------------------------------------------------------------------------------------|------------------|------------|
| siRNA-Temozolomide Run1-DMSO | NM_003660 | PPFIA3    | protein tyrosine phosphatase, receptor type, f polypeptide (PTPRF), interacting protein (liprin), alpha 3 | -0.149071        | Inlier     |
| siRNA Disorazole DMSO Run1   | NM_003660 | PPFIA3    | protein tyrosine phosphatase, receptor type, f polypeptide (PTPRF), interacting protein (liprin), alpha 3 | 0.149071         | Inlier     |
| siRNA-Temozolomide Run2-DMSO | NM_003660 | PPFIA3    | protein tyrosine phosphatase, receptor type, f polypeptide (PTPRF), interacting protein (liprin), alpha 3 | 0.40731          | Inlier     |
| siRNA-Vinblastine Run1-DMSO  | NM_003660 | PPFIA3    | protein tyrosine phosphatase, receptor type, f polypeptide (PTPRF), interacting protein (liprin), alpha 3 | 0.666133         | Inlier     |



Identification of Survival Genes in Human Glioblastoma Cells Using siRNA Screening

Nikhil G Thaker, Fang Zhang, Peter R. McDonald, Tong Ying Shun, Michael D Lewen, Ian F. Pollack, and John S. Lazo

Molecular Pharmacology

| siRNA Treatment              | Gene ID   | Gene Name | Protein Description                                                                                       | Score     | Category |
|------------------------------|-----------|-----------|-----------------------------------------------------------------------------------------------------------|-----------|----------|
| siRNA-Vinblastine Run2-DMSO  | NM_003660 | PPFIA3    | protein tyrosine phosphatase, receptor type, f polypeptide (PTPRF), interacting protein (liprin), alpha 3 | 0.682867  | Inlier   |
| siRNA-Temozolomide Run3-DMSO | NM_015053 | PPFIA4    | protein tyrosine phosphatase, receptor type, f polypeptide (PTPRF), interacting protein (liprin), alpha 4 | -3.839399 | Outlier  |
| siRNA-Temozolomide Run2-DMSO | NM_015053 | PPFIA4    | protein tyrosine phosphatase, receptor type, f polypeptide (PTPRF), interacting protein (liprin), alpha 4 | -0.742819 | Inlier   |
| siRNA Disorazole DMSO Run2   | NM_015053 | PPFIA4    | protein tyrosine phosphatase, receptor type, f polypeptide (PTPRF), interacting protein (liprin), alpha 4 | -0.606181 | Inlier   |

Identification of Survival Genes in Human Glioblastoma Cells Using siRNA Screening

Nikhil G Thaker, Fang Zhang, Peter R. McDonald, Tong Ying Shun, Michael D Lewen, Ian F. Pollack, and John S. Lazo

Molecular Pharmacology

| siRNA Treatment              | Gene ID   | Gene Name | Protein Description                                                                                       | Score    | Category |
|------------------------------|-----------|-----------|-----------------------------------------------------------------------------------------------------------|----------|----------|
| siRNA-Temozolomide Run1-DMSO | NM_015053 | PPFIA4    | protein tyrosine phosphatase, receptor type, f polypeptide (PTPRF), interacting protein (liprin), alpha 4 | -0.5466  | Inlier   |
| siRNA Disorazole DMSO Run1   | NM_015053 | PPFIA4    | protein tyrosine phosphatase, receptor type, f polypeptide (PTPRF), interacting protein (liprin), alpha 4 | 0.546601 | Inlier   |
| siRNA Disorazole DMSO Run3   | NM_015053 | PPFIA4    | protein tyrosine phosphatase, receptor type, f polypeptide (PTPRF), interacting protein (liprin), alpha 4 | 0.581255 | Inlier   |
| siRNA-Vinblastine Run1-DMSO  | NM_015053 | PPFIA4    | protein tyrosine phosphatase, receptor type, f polypeptide (PTPRF), interacting protein (liprin), alpha 4 | 2.566003 | Inlier   |



Identification of Survival Genes in Human Glioblastoma Cells Using siRNA Screening  
 Nikhil G Thaker, Fang Zhang, Peter R. McDonald, Tong Ying Shun, Michael D Lewen, Ian F. Pollack, and John S. Lazo

Molecular Pharmacology

|                              |           |      |                                                               |           |        |
|------------------------------|-----------|------|---------------------------------------------------------------|-----------|--------|
| siRNA Disorazole DMSO Run1   | NM_000308 | PPGB | protective protein for beta-galactosidase (galactosialidosis) | 0.427347  | Inlier |
| siRNA-Vinblastine Run2-DMSO  | NM_000308 | PPGB | protective protein for beta-galactosidase (galactosialidosis) | 0.528389  | Inlier |
| siRNA-Vinblastine Run1-DMSO  | NM_000308 | PPGB | peptidylprolyl isomerase A (cyclophilin A)                    | 1.222705  | Inlier |
| siRNA-Temozolomide Run3-DMSO | NM_021130 | PPIA | peptidylprolyl isomerase A (cyclophilin A)                    | -0.952332 | Inlier |
| siRNA-Temozolomide Run2-DMSO | NM_021130 | PPIA | peptidylprolyl isomerase A (cyclophilin A)                    | -0.396668 | Inlier |
| siRNA Disorazole DMSO Run3   | NM_021130 | PPIA | peptidylprolyl isomerase A (cyclophilin A)                    | -0.250824 | Inlier |
| siRNA-Vinblastine Run2-DMSO  | NM_021130 | PPIA | peptidylprolyl isomerase A (cyclophilin A)                    | -0.212417 | Inlier |
| siRNA Disorazole DMSO Run1   | NM_021130 | PPIA | (cyclophilin A)                                               | 0.212417  | Inlier |

Identification of Survival Genes in Human Glioblastoma Cells Using siRNA Screening

Nikhil G Thaker, Fang Zhang, Peter R. McDonald, Tong Ying Shun, Michael D Lewen, Ian F. Pollack, and John S. Lazo

Molecular Pharmacology

|                              |           |      |                                            |           |        |
|------------------------------|-----------|------|--------------------------------------------|-----------|--------|
| siRNA-Temozolomide Run1-DMSO | NM_021130 | PPIA | peptidylprolyl isomerase A (cyclophilin A) | 1.38141   | Inlier |
| siRNA-Vinblastine Run1-DMSO  | NM_021130 | PPIA | peptidylprolyl isomerase A (cyclophilin A) | 2.058543  | Inlier |
| siRNA Disorazole DMSO Run2   | NM_021130 | PPIA | peptidylprolyl isomerase A (cyclophilin A) | 2.387331  | Inlier |
| siRNA-Vinblastine Run2-DMSO  | NM_000942 | PPIB | peptidylprolyl isomerase B (cyclophilin B) | -1.314925 | Inlier |
| siRNA-Temozolomide Run3-DMSO | NM_000942 | PPIB | peptidylprolyl isomerase B (cyclophilin B) | -0.918228 | Inlier |
| siRNA Disorazole DMSO Run1   | NM_000942 | PPIB | peptidylprolyl isomerase B (cyclophilin B) | -0.27973  | Inlier |
| siRNA Disorazole DMSO Run3   | NM_000942 | PPIB | peptidylprolyl isomerase B (cyclophilin B) | -0.179823 | Inlier |
| siRNA-Temozolomide Run2-DMSO | NM_000942 | PPIB | peptidylprolyl isomerase B (cyclophilin B) | 0.179824  | Inlier |

Identification of Survival Genes in Human Glioblastoma Cells Using siRNA Screening

Nikhil G Thaker, Fang Zhang, Peter R. McDonald, Tong Ying Shun, Michael D Lewen, Ian F. Pollack, and John S. Lazo

Molecular Pharmacology

| siRNA Treatment              | Gene ID   | Protein | Gene Name                                  | Log2 Fold Change | Outlier Status |
|------------------------------|-----------|---------|--------------------------------------------|------------------|----------------|
| siRNA-Vinblastine Run1-DMSO  | NM_000942 | PPIB    | peptidylprolyl isomerase B (cyclophilin B) | 0.430772         | Inlier         |
| siRNA-Temozolomide Run1-DMSO | NM_000942 | PPIB    | peptidylprolyl isomerase B (cyclophilin B) | 1.386128         | Inlier         |
| siRNA Disorazole DMSO Run2   | NM_000942 | PPIB    | peptidylprolyl isomerase B (cyclophilin B) | 1.395647         | Inlier         |
| siRNA Disorazole DMSO Run1   | NM_000943 | PPIC    | peptidylprolyl isomerase C (cyclophilin C) | -1.326889        | Inlier         |
| siRNA Disorazole DMSO Run3   | NM_000943 | PPIC    | peptidylprolyl isomerase C (cyclophilin C) | -0.823946        | Inlier         |
| siRNA-Temozolomide Run3-DMSO | NM_000943 | PPIC    | peptidylprolyl isomerase C (cyclophilin C) | -0.525054        | Inlier         |
| siRNA-Vinblastine Run2-DMSO  | NM_000943 | PPIC    | peptidylprolyl isomerase C (cyclophilin C) | -0.072671        | Inlier         |
| siRNA-Temozolomide Run1-DMSO | NM_000943 | PPIC    | peptidylprolyl isomerase C (cyclophilin C) | 0.07267          | Inlier         |

Identification of Survival Genes in Human Glioblastoma Cells Using siRNA Screening  
 Nikhil G Thaker, Fang Zhang, Peter R. McDonald, Tong Ying Shun, Michael D Lewen, Ian F. Pollack, and John S. Lazo

Molecular Pharmacology

|                              |               |      |                                            |           |        |
|------------------------------|---------------|------|--------------------------------------------|-----------|--------|
| siRNA-Temozolomide Run2-DMSO | NM_0009<br>43 | PPIC | peptidylprolyl isomerase C (cyclophilin C) | 0.27323   | Inlier |
| siRNA Disorazole DMSO Run2   | NM_0009<br>43 | PPIC | peptidylprolyl isomerase C (cyclophilin C) | 1.992042  | Inlier |
| siRNA-Vinblastine Run1-DMSO  | NM_0009<br>43 | PPIC | peptidylprolyl isomerase C (cyclophilin C) | 2.35449   | Inlier |
| siRNA-Vinblastine Run2-DMSO  | NM_0050<br>38 | PPID | peptidylprolyl isomerase D (cyclophilin D) | -2.714135 | Inlier |
| siRNA Disorazole DMSO Run3   | NM_0050<br>38 | PPID | peptidylprolyl isomerase D (cyclophilin D) | -2.147353 | Inlier |
| siRNA-Temozolomide Run3-DMSO | NM_0050<br>38 | PPID | peptidylprolyl isomerase D (cyclophilin D) | -1.148317 | Inlier |
| siRNA Disorazole DMSO Run1   | NM_0050<br>38 | PPID | peptidylprolyl isomerase D (cyclophilin D) | -0.09407  | Inlier |
| siRNA-Temozolomide Run2-DMSO | NM_0050<br>38 | PPID | peptidylprolyl isomerase D (cyclophilin D) | 0.09407   | Inlier |

Identification of Survival Genes in Human Glioblastoma Cells Using siRNA Screening

Nikhil G Thaker, Fang Zhang, Peter R. McDonald, Tong Ying Shun, Michael D Lewen, Ian F. Pollack, and John S. Lazo

Molecular Pharmacology

| siRNA Treatment              | Gene ID   | Protein | Gene Name                                  | Value     | Outlier Type |
|------------------------------|-----------|---------|--------------------------------------------|-----------|--------------|
| siRNA-Vinblastine Run1-DMSO  | NM_005038 | PPID    | peptidylprolyl isomerase D (cyclophilin D) | 0.104861  | Inlier       |
| siRNA-Temozolomide Run1-DMSO | NM_005038 | PPID    | peptidylprolyl isomerase D (cyclophilin D) | 0.212713  | Inlier       |
| siRNA Disorazole DMSO Run2   | NM_005038 | PPID    | peptidylprolyl isomerase D (cyclophilin D) | 1.136287  | Inlier       |
| siRNA Disorazole DMSO Run3   | NM_203456 | PPIE    | peptidylprolyl isomerase E (cyclophilin E) | -0.685757 | Inlier       |
| siRNA-Temozolomide Run3-DMSO | NM_203456 | PPIE    | peptidylprolyl isomerase E (cyclophilin E) | -0.663243 | Inlier       |
| siRNA Disorazole DMSO Run1   | NM_203456 | PPIE    | peptidylprolyl isomerase E (cyclophilin E) | -0.268957 | Inlier       |
| siRNA-Vinblastine Run2-DMSO  | NM_203456 | PPIE    | peptidylprolyl isomerase E (cyclophilin E) | -0.159543 | Inlier       |
| siRNA-Temozolomide Run2-DMSO | NM_203456 | PPIE    | peptidylprolyl isomerase E (cyclophilin E) | 0.159543  | Inlier       |



Identification of Survival Genes in Human Glioblastoma Cells Using siRNA Screening

Nikhil G Thaker, Fang Zhang, Peter R. McDonald, Tong Ying Shun, Michael D Lewen, Ian F. Pollack, and John S.

Lazo

Molecular Pharmacology

|                              |               |      |                                            |           |        |
|------------------------------|---------------|------|--------------------------------------------|-----------|--------|
| siRNA-Temozolomide Run1-DMSO | NM_2034<br>56 | PPIE | peptidylprolyl isomerase E (cyclophilin E) | 1.528952  | Inlier |
| siRNA-Vinblastine Run1-DMSO  | NM_2034<br>56 | PPIE | peptidylprolyl isomerase E (cyclophilin E) | 3.246386  | Inlier |
| siRNA Disorazole DMSO Run2   | NM_2034<br>56 | PPIE | peptidylprolyl isomerase E (cyclophilin E) | 3.498268  | Inlier |
| siRNA-Temozolomide Run2-DMSO | NM_0057<br>29 | PPIF | peptidylprolyl isomerase F (cyclophilin F) | -0.884175 | Inlier |
| siRNA-Temozolomide Run3-DMSO | NM_0057<br>29 | PPIF | peptidylprolyl isomerase F (cyclophilin F) | -0.792622 | Inlier |
| siRNA Disorazole DMSO Run3   | NM_0057<br>29 | PPIF | peptidylprolyl isomerase F (cyclophilin F) | -0.556378 | Inlier |
| siRNA-Vinblastine Run2-DMSO  | NM_0057<br>29 | PPIF | peptidylprolyl isomerase F (cyclophilin F) | -0.05801  | Inlier |
| siRNA Disorazole DMSO Run1   | NM_0057<br>29 | PPIF | peptidylprolyl isomerase F (cyclophilin F) | 0.058009  | Inlier |

Identification of Survival Genes in Human Glioblastoma Cells Using siRNA Screening  
 Nikhil G Thaker, Fang Zhang, Peter R. McDonald, Tong Ying Shun, Michael D Lewen, Ian F. Pollack, and John S. Lazo

Molecular Pharmacology

|                              |               |      |                                            |           |        |
|------------------------------|---------------|------|--------------------------------------------|-----------|--------|
| siRNA-Vinblastine Run1-DMSO  | NM_0057<br>29 | PPIF | peptidylprolyl isomerase F (cyclophilin F) | 0.492613  | Inlier |
| siRNA-Temozolomide Run1-DMSO | NM_0057<br>29 | PPIF | peptidylprolyl isomerase F (cyclophilin F) | 1.07441   | Inlier |
| siRNA Disorazole DMSO Run2   | NM_0057<br>29 | PPIF | peptidylprolyl isomerase F (cyclophilin F) | 2.750764  | Inlier |
| siRNA-Temozolomide Run3-DMSO | NM_0047<br>92 | PPIG | peptidylprolyl isomerase G (cyclophilin G) | -1.084188 | Inlier |
| siRNA Disorazole DMSO Run3   | NM_0047<br>92 | PPIG | peptidylprolyl isomerase G (cyclophilin G) | -1.016865 | Inlier |
| siRNA-Vinblastine Run2-DMSO  | NM_0047<br>92 | PPIG | peptidylprolyl isomerase G (cyclophilin G) | -0.315827 | Inlier |
| siRNA Disorazole DMSO Run1   | NM_0047<br>92 | PPIG | peptidylprolyl isomerase G (cyclophilin G) | -0.234025 | Inlier |
| siRNA-Temozolomide Run2-DMSO | NM_0047<br>92 | PPIG | peptidylprolyl isomerase G (cyclophilin G) | 0.234025  | Inlier |

Identification of Survival Genes in Human Glioblastoma Cells Using siRNA Screening

Nikhil G Thaker, Fang Zhang, Peter R. McDonald, Tong Ying Shun, Michael D Lewen, Ian F. Pollack, and John S. Lazo

Molecular Pharmacology

|                              |               |      |                                                |           |        |
|------------------------------|---------------|------|------------------------------------------------|-----------|--------|
| siRNA-Temozolomide Run1-DMSO | NM_0047<br>92 | PPIG | peptidyl-prolyl isomerase G<br>(cyclophilin G) | 0.448988  | Inlier |
| siRNA Disorazole DMSO Run2   | NM_0047<br>92 | PPIG | peptidyl-prolyl isomerase G<br>(cyclophilin G) | 0.900012  | Inlier |
| siRNA-Vinblastine Run1-DMSO  | NM_0047<br>92 | PPIG | peptidyl-prolyl isomerase G<br>(cyclophilin G) | 1.091038  | Inlier |
| siRNA-Temozolomide Run3-DMSO | NM_0063<br>47 | PPIH | peptidyl-prolyl isomerase H<br>(cyclophilin H) | -1.096865 | Inlier |
| siRNA-Temozolomide Run2-DMSO | NM_0063<br>47 | PPIH | peptidyl-prolyl isomerase H<br>(cyclophilin H) | -0.374523 | Inlier |
| siRNA Disorazole DMSO Run3   | NM_0063<br>47 | PPIH | peptidyl-prolyl isomerase H<br>(cyclophilin H) | -0.306865 | Inlier |
| siRNA Disorazole DMSO Run1   | NM_0063<br>47 | PPIH | peptidyl-prolyl isomerase H<br>(cyclophilin H) | -0.035409 | Inlier |
| siRNA-Vinblastine Run2-DMSO  | NM_0063<br>47 | PPIH | peptidyl-prolyl isomerase H<br>(cyclophilin H) | 0.035409  | Inlier |

Identification of Survival Genes in Human Glioblastoma Cells Using siRNA Screening  
 Nikhil G Thaker, Fang Zhang, Peter R. McDonald, Tong Ying Shun, Michael D Lewen, Ian F. Pollack, and John S. Lazo

Molecular Pharmacology

|                              |               |       |                                                         |           |         |
|------------------------------|---------------|-------|---------------------------------------------------------|-----------|---------|
| siRNA-Temozolomide Run1-DMSO | NM_0063<br>47 | PPIH  | peptidyl<br>prolyl<br>isomerase<br>H<br>(cyclophilin H) | 0.974477  | Inlier  |
| siRNA-Vinblastine Run1-DMSO  | NM_0063<br>47 | PPIH  | peptidyl<br>prolyl<br>isomerase<br>H<br>(cyclophilin H) | 1.859228  | Inlier  |
| siRNA Disorazole DMSO Run2   | NM_0063<br>47 | PPIH  | peptidyl<br>prolyl<br>isomerase<br>H<br>(cyclophilin H) | 3.049211  | Inlier  |
| siRNA-Temozolomide Run3-DMSO | NM_0160<br>59 | PPIL1 | peptidylprolyl<br>isomerase<br>(cyclophilin)-like 1     | -3.565186 | Outlier |
| siRNA Disorazole DMSO Run1   | NM_0160<br>59 | PPIL1 | peptidylprolyl<br>isomerase<br>(cyclophilin)-like 1     | -0.778128 | Inlier  |
| siRNA-Temozolomide Run2-DMSO | NM_0160<br>59 | PPIL1 | peptidylprolyl<br>isomerase<br>(cyclophilin)-like 1     | -0.104642 | Inlier  |
| siRNA Disorazole DMSO Run3   | NM_0160<br>59 | PPIL1 | peptidylprolyl<br>isomerase<br>(cyclophilin)-like 1     | -0.01182  | Inlier  |
| siRNA-Vinblastine Run2-DMSO  | NM_0160<br>59 | PPIL1 | peptidylprolyl<br>isomerase<br>(cyclophilin)-like 1     | 0.011821  | Inlier  |

Identification of Survival Genes in Human Glioblastoma Cells Using siRNA Screening  
 Nikhil G Thaker, Fang Zhang, Peter R. McDonald, Tong Ying Shun, Michael D Lewen, Ian F. Pollack, and John S. Lazo  
 Molecular Pharmacology

|                              |               |       |                                               |           |         |
|------------------------------|---------------|-------|-----------------------------------------------|-----------|---------|
| siRNA-Temozolomide Run1-DMSO | NM_0160<br>59 | PPIL1 | peptidylprolyl isomerase (cyclophilin)-like 1 | 0.570872  | Inlier  |
| siRNA-Vinblastine Run1-DMSO  | NM_0160<br>59 | PPIL1 | peptidylprolyl isomerase (cyclophilin)-like 1 | 2.080674  | Inlier  |
| siRNA Disorazole DMSO Run2   | NM_0160<br>59 | PPIL1 | peptidylprolyl isomerase (cyclophilin)-like 1 | 3.851735  | Outlier |
| siRNA Disorazole DMSO Run3   | NM_1481<br>76 | PPIL2 | peptidylprolyl isomerase (cyclophilin)-like 2 | -1.665363 | Inlier  |
| siRNA-Temozolomide Run3-DMSO | NM_1481<br>76 | PPIL2 | peptidylprolyl isomerase (cyclophilin)-like 2 | -1.024774 | Inlier  |
| siRNA-Temozolomide Run1-DMSO | NM_1481<br>76 | PPIL2 | peptidylprolyl isomerase (cyclophilin)-like 2 | -0.324226 | Inlier  |
| siRNA Disorazole DMSO Run1   | NM_1481<br>76 | PPIL2 | peptidylprolyl isomerase (cyclophilin)-like 2 | -0.052258 | Inlier  |
| siRNA-Vinblastine Run2-DMSO  | NM_1481<br>76 | PPIL2 | peptidylprolyl isomerase (cyclophilin)-like 2 | 0.052258  | Inlier  |

Identification of Survival Genes in Human Glioblastoma Cells Using siRNA Screening  
 Nikhil G Thaker, Fang Zhang, Peter R. McDonald, Tong Ying Shun, Michael D Lewen, Ian F. Pollack, and John S. Lazo  
 Molecular Pharmacology

|                              |               |       |                                               |           |        |
|------------------------------|---------------|-------|-----------------------------------------------|-----------|--------|
| siRNA-Temozolomide Run2-DMSO | NM_1481<br>76 | PPIL2 | peptidylprolyl isomerase (cyclophilin)-like 2 | 0.321196  | Inlier |
| siRNA Disorazole DMSO Run2   | NM_1481<br>76 | PPIL2 | peptidylprolyl isomerase (cyclophilin)-like 2 | 2.805284  | Inlier |
| siRNA-Vinblastine Run1-DMSO  | NM_1481<br>76 | PPIL2 | peptidylprolyl isomerase (cyclophilin)-like 2 | 2.846501  | Inlier |
| siRNA-Temozolomide Run3-DMSO | NM_1319<br>16 | PPIL3 | peptidylprolyl isomerase (cyclophilin)-like 3 | -0.718454 | Inlier |
| siRNA-Temozolomide Run2-DMSO | NM_1319<br>16 | PPIL3 | peptidylprolyl isomerase (cyclophilin)-like 3 | -0.630546 | Inlier |
| siRNA Disorazole DMSO Run1   | NM_1319<br>16 | PPIL3 | peptidylprolyl isomerase (cyclophilin)-like 3 | -0.214559 | Inlier |
| siRNA Disorazole DMSO Run3   | NM_1319<br>16 | PPIL3 | peptidylprolyl isomerase (cyclophilin)-like 3 | -0.197932 | Inlier |
| siRNA-Vinblastine Run2-DMSO  | NM_1319<br>16 | PPIL3 | peptidylprolyl isomerase (cyclophilin)-like 3 | 0.197931  | Inlier |

Identification of Survival Genes in Human Glioblastoma Cells Using siRNA Screening  
 Nikhil G Thaker, Fang Zhang, Peter R. McDonald, Tong Ying Shun, Michael D Lewen, Ian F. Pollack, and John S. Lazo  
 Molecular Pharmacology

|                              |               |       |                                               |           |        |
|------------------------------|---------------|-------|-----------------------------------------------|-----------|--------|
| siRNA-Temozolomide Run1-DMSO | NM_1319<br>16 | PPIL3 | peptidylprolyl isomerase (cyclophilin)-like 3 | 0.947629  | Inlier |
| siRNA-Vinblastine Run1-DMSO  | NM_1319<br>16 | PPIL3 | peptidylprolyl isomerase (cyclophilin)-like 3 | 1.436482  | Inlier |
| siRNA Disorazole DMSO Run2   | NM_1319<br>16 | PPIL3 | peptidylprolyl isomerase (cyclophilin)-like 3 | 1.53809   | Inlier |
| siRNA-Temozolomide Run3-DMSO | NM_1391<br>26 | PPIL4 | peptidylprolyl isomerase (cyclophilin)-like 4 | -1.042175 | Inlier |
| siRNA-Temozolomide Run2-DMSO | NM_1391<br>26 | PPIL4 | peptidylprolyl isomerase (cyclophilin)-like 4 | -0.596916 | Inlier |
| siRNA Disorazole DMSO Run1   | NM_1391<br>26 | PPIL4 | peptidylprolyl isomerase (cyclophilin)-like 4 | -0.14972  | Inlier |
| siRNA Disorazole DMSO Run3   | NM_1391<br>26 | PPIL4 | peptidylprolyl isomerase (cyclophilin)-like 4 | -0.032319 | Inlier |
| siRNA-Vinblastine Run2-DMSO  | NM_1391<br>26 | PPIL4 | peptidylprolyl isomerase (cyclophilin)-like 4 | 0.032319  | Inlier |

Identification of Survival Genes in Human Glioblastoma Cells Using siRNA Screening  
 Nikhil G Thaker, Fang Zhang, Peter R. McDonald, Tong Ying Shun, Michael D Lewen, Ian F. Pollack, and John S. Lazo  
 Molecular Pharmacology

|                              |               |       |                                               |           |        |
|------------------------------|---------------|-------|-----------------------------------------------|-----------|--------|
| siRNA-Temozolomide Run1-DMSO | NM_1391<br>26 | PPIL4 | peptidylprolyl isomerase (cyclophilin)-like 4 | 0.752084  | Inlier |
| siRNA-Vinblastine Run1-DMSO  | NM_1391<br>26 | PPIL4 | peptidylprolyl isomerase (cyclophilin)-like 4 | 0.940749  | Inlier |
| siRNA Disorazole DMSO Run2   | NM_1391<br>26 | PPIL4 | peptidylprolyl isomerase (cyclophilin)-like 4 | 1.218937  | Inlier |
| siRNA-Temozolomide Run3-DMSO | NM_2034<br>66 | PPIL5 | peptidylprolyl isomerase (cyclophilin)-like 5 | -2.393209 | Inlier |
| siRNA-Temozolomide Run2-DMSO | NM_2034<br>66 | PPIL5 | peptidylprolyl isomerase (cyclophilin)-like 5 | -0.964877 | Inlier |
| siRNA Disorazole DMSO Run1   | NM_2034<br>66 | PPIL5 | peptidylprolyl isomerase (cyclophilin)-like 5 | -0.384123 | Inlier |
| siRNA Disorazole DMSO Run3   | NM_2034<br>66 | PPIL5 | peptidylprolyl isomerase (cyclophilin)-like 5 | -0.242651 | Inlier |
| siRNA-Vinblastine Run2-DMSO  | NM_2034<br>66 | PPIL5 | peptidylprolyl isomerase (cyclophilin)-like 5 | 0.242652  | Inlier |



Identification of Survival Genes in Human Glioblastoma Cells Using siRNA Screening  
 Nikhil G Thaker, Fang Zhang, Peter R. McDonald, Tong Ying Shun, Michael D Lewen, Ian F. Pollack, and John S. Lazo  
 Molecular Pharmacology

|                              |               |       |                                               |           |        |
|------------------------------|---------------|-------|-----------------------------------------------|-----------|--------|
| siRNA-Temozolomide Run1-DMSO | NM_2034<br>66 | PPIL5 | peptidylprolyl isomerase (cyclophilin)-like 5 | 0.371788  | Inlier |
| siRNA-Vinblastine Run1-DMSO  | NM_2034<br>66 | PPIL5 | peptidylprolyl isomerase (cyclophilin)-like 5 | 3.198734  | Inlier |
| siRNA Disorazole DMSO Run2   | NM_2034<br>66 | PPIL5 | peptidylprolyl isomerase (cyclophilin)-like 5 | 3.285452  | Inlier |
| siRNA-Temozolomide Run3-DMSO | NM_1736<br>72 | PPIL6 | peptidylprolyl isomerase (cyclophilin)-like 6 | -1.62881  | Inlier |
| siRNA Disorazole DMSO Run3   | NM_1736<br>72 | PPIL6 | peptidylprolyl isomerase (cyclophilin)-like 6 | -1.164996 | Inlier |
| siRNA-Vinblastine Run2-DMSO  | NM_1736<br>72 | PPIL6 | peptidylprolyl isomerase (cyclophilin)-like 6 | -0.448813 | Inlier |
| siRNA-Temozolomide Run2-DMSO | NM_1736<br>72 | PPIL6 | peptidylprolyl isomerase (cyclophilin)-like 6 | -0.007303 | Inlier |
| siRNA Disorazole DMSO Run1   | NM_1736<br>72 | PPIL6 | peptidylprolyl isomerase (cyclophilin)-like 6 | 0.007302  | Inlier |

Identification of Survival Genes in Human Glioblastoma Cells Using siRNA Screening  
 Nikhil G Thaker, Fang Zhang, Peter R. McDonald, Tong Ying Shun, Michael D Lewen, Ian F. Pollack, and John S. Lazo  
 Molecular Pharmacology

|                              |               |       |                                                                          |           |        |
|------------------------------|---------------|-------|--------------------------------------------------------------------------|-----------|--------|
| siRNA-Temozolomide Run1-DMSO | NM_1736<br>72 | PPIL6 | peptidylprolyl isomerase (cyclophilin)-like 6                            | 0.29664   | Inlier |
| siRNA Disorazole DMSO Run2   | NM_1736<br>72 | PPIL6 | peptidylprolyl isomerase (cyclophilin)-like 6                            | 0.900187  | Inlier |
| siRNA-Vinblastine Run1-DMSO  | NM_1736<br>72 | PPIL6 | peptidylprolyl isomerase (cyclophilin)-like 6                            | 1.328876  | Inlier |
| siRNA-Temozolomide Run2-DMSO | NM_1779<br>52 | PPM1A | protein phosphatase 1A (formerly 2C), magnesium dependent, alpha isoform | -1.030499 | Inlier |
| siRNA-Temozolomide Run1-DMSO | NM_1779<br>52 | PPM1A | protein phosphatase 1A (formerly 2C), magnesium dependent, alpha isoform | -0.61033  | Inlier |
| siRNA Disorazole DMSO Run2   | NM_1779<br>52 | PPM1A | protein phosphatase 1A (formerly 2C), magnesium dependent, alpha isoform | -0.068773 | Inlier |

Identification of Survival Genes in Human Glioblastoma Cells Using siRNA Screening

Nikhil G Thaker, Fang Zhang, Peter R. McDonald, Tong Ying Shun, Michael D Lewen, Ian F. Pollack, and John S. Lazo

Molecular Pharmacology

| siRNA Treatment              | Gene ID   | Protein | Log2 Fold Change | Annotation |
|------------------------------|-----------|---------|------------------|------------|
| siRNA-Temozolomide Run3-DMSO | NM_177952 | PPM1A   | -0.01236         | Inlier     |
| siRNA Disorazole DMSO Run3   | NM_177952 | PPM1A   | 0.012359         | Inlier     |
| siRNA Disorazole DMSO Run1   | NM_177952 | PPM1A   | 0.73867          | Inlier     |
| siRNA-Vinblastine Run1-DMSO  | NM_177952 | PPM1A   | 1.393757         | Inlier     |
| siRNA-Vinblastine Run2-DMSO  | NM_177952 | PPM1A   | 2.105067         | Inlier     |

protein phosphatase 1A (formerly 2C), magnesium-dependent, alpha isoform

-0.01236 Inlier

0.012359 Inlier

0.73867 Inlier

1.393757 Inlier

2.105067 Inlier

Identification of Survival Genes in Human Glioblastoma Cells Using siRNA Screening

Nikhil G Thaker, Fang Zhang, Peter R. McDonald, Tong Ying Shun, Michael D Lewen, Ian F. Pollack, and John S. Lazo

Molecular Pharmacology

| siRNA Treatment              | Gene ID   | Protein | Log Fold Change | Outlier Status |
|------------------------------|-----------|---------|-----------------|----------------|
| siRNA-Temozolomide Run1-DMSO | NM_177969 | PPM1B   | -0.94737        | Inlier         |
| siRNA-Temozolomide Run2-DMSO | NM_177969 | PPM1B   | -0.597481       | Inlier         |
| siRNA Disorazole DMSO Run1   | NM_177969 | PPM1B   | -0.371095       | Inlier         |
| siRNA-Temozolomide Run3-DMSO | NM_177969 | PPM1B   | -0.187509       | Inlier         |
| siRNA-Vinblastine Run1-DMSO  | NM_177969 | PPM1B   | 0.18751         | Inlier         |

protein phosphatase 1B (formerly 2C), magnesium dependent, beta isoform

protein phosphatase 1B (formerly 2C), magnesium dependent, beta isoform

protein phosphatase 1B (formerly 2C), magnesium dependent, beta isoform

protein phosphatase 1B (formerly 2C), magnesium dependent, beta isoform

protein phosphatase 1B (formerly 2C), magnesium dependent, beta isoform

protein phosphatase 1B (formerly 2C), magnesium dependent, beta isoform

Identification of Survival Genes in Human Glioblastoma Cells Using siRNA Screening

Nikhil G Thaker, Fang Zhang, Peter R. McDonald, Tong Ying Shun, Michael D Lewen, Ian F. Pollack, and John S. Lazo

Molecular Pharmacology

|                              |               |       |                                                                         |           |        |
|------------------------------|---------------|-------|-------------------------------------------------------------------------|-----------|--------|
| siRNA-Vinblastine Run2-DMSO  | NM_1779<br>69 | PPM1B | protein phosphatase 1B (formerly 2C), magnesium dependent, beta isoform | 0.751519  | Inlier |
| siRNA Disorazole DMSO Run3   | NM_1779<br>69 | PPM1B | protein phosphatase 1B (formerly 2C), magnesium dependent, beta isoform | 1.771056  | Inlier |
| siRNA Disorazole DMSO Run2   | NM_1779<br>69 | PPM1B | protein phosphatase 1D magnesium dependent, beta isoform                | 2.494753  | Inlier |
| siRNA-Temozolomide Run2-DMSO | NM_0036<br>20 | PPM1D | protein phosphatase 1D magnesium dependent, delta isoform               | -2.725652 | Inlier |
| siRNA-Temozolomide Run3-DMSO | NM_0036<br>20 | PPM1D | protein phosphatase 1D magnesium dependent, delta isoform               | -2.683091 | Inlier |



Identification of Survival Genes in Human Glioblastoma Cells Using siRNA Screening

Nikhil G Thaker, Fang Zhang, Peter R. McDonald, Tong Ying Shun, Michael D Lewen, Ian F. Pollack, and John S. Lazo

Molecular Pharmacology

| siRNA Treatment              | Gene ID   | Method | Protein Description                             | Log Fold Change | Outlier Status |
|------------------------------|-----------|--------|-------------------------------------------------|-----------------|----------------|
| siRNA-Temozolomide Run2-DMSO | NM_014906 | PPM1E  | protein phosphatase 1E (PP2C domain containing) | -1.036006       | Inlier         |
| siRNA-Temozolomide Run3-DMSO | NM_014906 | PPM1E  | protein phosphatase 1E (PP2C domain containing) | -0.312994       | Inlier         |
| siRNA-Temozolomide Run1-DMSO | NM_014906 | PPM1E  | protein phosphatase 1E (PP2C domain containing) | -0.193231       | Inlier         |
| siRNA Disorazole DMSO Run3   | NM_014906 | PPM1E  | protein phosphatase 1E (PP2C domain containing) | -0.161755       | Inlier         |
| siRNA Disorazole DMSO Run2   | NM_014906 | PPM1E  | protein phosphatase 1E (PP2C domain containing) | 0.161755        | Inlier         |
| siRNA Disorazole DMSO Run1   | NM_014906 | PPM1E  | protein phosphatase 1E (PP2C domain containing) | 1.294438        | Inlier         |
| siRNA-Vinblastine Run1-DMSO  | NM_014906 | PPM1E  | protein phosphatase 1E (PP2C domain containing) | 1.388245        | Inlier         |

Identification of Survival Genes in Human Glioblastoma Cells Using siRNA Screening  
 Nikhil G Thaker, Fang Zhang, Peter R. McDonald, Tong Ying Shun, Michael D Lewen, Ian F. Pollack, and John S. Lazo

Molecular Pharmacology

| siRNA Treatment              | Gene ID   | Protein                                                  | Value     | Category |
|------------------------------|-----------|----------------------------------------------------------|-----------|----------|
| siRNA-Vinblastine Run2-DMSO  | NM_014906 | PPM1E<br>protein phosphatase 1E (PP2C domain containing) | 1.566257  | Inlier   |
| siRNA-Temozolomide Run2-DMSO | NM_014634 | PPM1F<br>protein phosphatase 1F (PP2C domain containing) | -1.13493  | Inlier   |
| siRNA-Temozolomide Run1-DMSO | NM_014634 | PPM1F<br>protein phosphatase 1F (PP2C domain containing) | -0.870306 | Inlier   |
| siRNA Disorazole DMSO Run3   | NM_014634 | PPM1F<br>protein phosphatase 1F (PP2C domain containing) | -0.270771 | Inlier   |
| siRNA-Vinblastine Run2-DMSO  | NM_014634 | PPM1F<br>protein phosphatase 1F (PP2C domain containing) | -0.005186 | Inlier   |
| siRNA-Temozolomide Run3-DMSO | NM_014634 | PPM1F<br>protein phosphatase 1F (PP2C domain containing) | 0.005186  | Inlier   |
| siRNA Disorazole DMSO Run1   | NM_014634 | PPM1F<br>protein phosphatase 1F (PP2C domain containing) | 0.580352  | Inlier   |



Identification of Survival Genes in Human Glioblastoma Cells Using siRNA Screening

Nikhil G Thaker, Fang Zhang, Peter R. McDonald, Tong Ying Shun, Michael D Lewen, Ian F. Pollack, and John S. Lazo

Molecular Pharmacology

| siRNA Treatment              | Gene ID   | PPM   | Protein Description                                                      | Log2 Fold Change | Inlier |
|------------------------------|-----------|-------|--------------------------------------------------------------------------|------------------|--------|
| siRNA-Vinblastine Run1-DMSO  | NM_014634 | PPM1F | protein phosphatase 1F (PP2C domain containing)                          | 0.768648         | Inlier |
| siRNA Disorazole DMSO Run2   | NM_014634 | PPM1F | protein phosphatase 1F (PP2C domain containing)                          | 3.025802         | Inlier |
| siRNA-Temozolomide Run2-DMSO | NM_177983 | PPM1G | protein phosphatase 1G (formerly 2C), magnesium-dependent, gamma isoform | -1.941911        | Inlier |
| siRNA Disorazole DMSO Run3   | NM_177983 | PPM1G | protein phosphatase 1G (formerly 2C), magnesium-dependent, gamma isoform | -0.838783        | Inlier |
| siRNA-Temozolomide Run1-DMSO | NM_177983 | PPM1G | protein phosphatase 1G (formerly 2C), magnesium-dependent, gamma isoform | -0.796013        | Inlier |

Identification of Survival Genes in Human Glioblastoma Cells Using siRNA Screening

Nikhil G Thaker, Fang Zhang, Peter R. McDonald, Tong Ying Shun, Michael D Lewen, Ian F. Pollack, and John S. Lazo

Molecular Pharmacology

| siRNA Treatment              | Gene ID   | PPM1G | Gene Name                                                                | Value     | Category |
|------------------------------|-----------|-------|--------------------------------------------------------------------------|-----------|----------|
| siRNA-Vinblastine Run2-DMSO  | NM_177983 | PPM1G | protein phosphatase 1G (formerly 2C), magnesium-dependent, gamma isoform | -0.032626 | Inlier   |
| siRNA Disorazole DMSO Run1   | NM_177983 | PPM1G | protein phosphatase 1G (formerly 2C), magnesium-dependent, gamma isoform | 0.032626  | Inlier   |
| siRNA-Vinblastine Run1-DMSO  | NM_177983 | PPM1G | protein phosphatase 1G (formerly 2C), magnesium-dependent, gamma isoform | 0.259495  | Inlier   |
| siRNA-Temozolomide Run3-DMSO | NM_177983 | PPM1G | protein phosphatase 1G (formerly 2C), magnesium-dependent, gamma isoform | 0.552987  | Inlier   |
| siRNA Disorazole DMSO Run2   | NM_177983 | PPM1G | protein phosphatase 1G (formerly 2C), magnesium-dependent, gamma isoform | 0.944657  | Inlier   |

Identification of Survival Genes in Human Glioblastoma Cells Using siRNA Screening  
 Nikhil G Thaker, Fang Zhang, Peter R. McDonald, Tong Ying Shun, Michael D Lewen, Ian F. Pollack, and John S. Lazo

Molecular Pharmacology

| siRNA Treatment              | Gene ID | Accession | Protein Name | Score     | Category |
|------------------------------|---------|-----------|--------------|-----------|----------|
| siRNA-Temozolomide Run2-DMSO | NM_1392 | 45        | PPM1L        | -1.056559 | Inlier   |
| siRNA Disorazole DMSO Run3   | NM_1392 | 45        | PPM1L        | -0.695253 | Inlier   |
| siRNA-Temozolomide Run1-DMSO | NM_1392 | 45        | PPM1L        | -0.371964 | Inlier   |
| siRNA-Temozolomide Run3-DMSO | NM_1392 | 45        | PPM1L        | -0.347749 | Inlier   |
| siRNA-Vinblastine Run2-DMSO  | NM_1392 | 45        | PPM1L        | 0.347749  | Inlier   |
| siRNA Disorazole DMSO Run1   | NM_1392 | 45        | PPM1L        | 0.653747  | Inlier   |
| siRNA-Vinblastine Run1-DMSO  | NM_1392 | 45        | PPM1L        | 1.051406  | Inlier   |
| siRNA Disorazole DMSO Run2   | NM_1392 | 45        | PPM1L        | 2.750603  | Inlier   |
| siRNA-Temozolomide Run1-DMSO | NM_0184 | 44        | PPM2C        | -1.217263 | Inlier   |

protein phosphatase 1

(formerly 2C)-like

protein phosphatase 2C,

magnesium-

dependent,

catalytic subunit

Identification of Survival Genes in Human Glioblastoma Cells Using siRNA Screening  
 Nikhil G Thaker, Fang Zhang, Peter R. McDonald, Tong Ying Shun, Michael D Lewen, Ian F. Pollack, and John S. Lazo  
 Molecular Pharmacology

|                              |           |       |                                                                |           |        |
|------------------------------|-----------|-------|----------------------------------------------------------------|-----------|--------|
| siRNA-Temozolomide Run2-DMSO | NM_018444 | PPM2C | protein phosphatase 2C, magnesium dependent, catalytic subunit | -1.087088 | Inlier |
| siRNA-Temozolomide Run3-DMSO | NM_018444 | PPM2C | protein phosphatase 2C, magnesium dependent, catalytic subunit | -0.318041 | Inlier |
| siRNA-Vinblastine Run2-DMSO  | NM_018444 | PPM2C | protein phosphatase 2C, magnesium dependent, catalytic subunit | -0.110712 | Inlier |
| siRNA-Vinblastine Run1-DMSO  | NM_018444 | PPM2C | protein phosphatase 2C, magnesium dependent, catalytic subunit | 0.110712  | Inlier |
| siRNA Disorazole DMSO Run1   | NM_018444 | PPM2C | protein phosphatase 2C, magnesium dependent, catalytic subunit | 0.294938  | Inlier |

Identification of Survival Genes in Human Glioblastoma Cells Using siRNA Screening  
 Nikhil G Thaker, Fang Zhang, Peter R. McDonald, Tong Ying Shun, Michael D Lewen, Ian F. Pollack, and John S. Lazo  
 Molecular Pharmacology

|                              |                  |        |                                                                |           |        |
|------------------------------|------------------|--------|----------------------------------------------------------------|-----------|--------|
| siRNA Disorazole DMSO Run3   | NM_0184<br>44    | PPM2C  | protein phosphatase 2C, magnesium-dependent, catalytic subunit | 1.030959  | Inlier |
| siRNA Disorazole DMSO Run2   | NM_0184<br>44    | PPM2C  | protein phosphatase 2C, magnesium-dependent, catalytic subunit | 2.280297  | Inlier |
| siRNA-Temozolomide Run3-DMSO | NM_0003<br>09    | PPOX   | protoporphyrinogen oxidase                                     | -1.633412 | Inlier |
| siRNA-Temozolomide Run2-DMSO | NM_0003<br>09    | PPOX   | protoporphyrinogen oxidase                                     | -0.741316 | Inlier |
| siRNA Disorazole DMSO Run3   | NM_0003<br>09    | PPOX   | protoporphyrinogen oxidase                                     | -0.607684 | Inlier |
| siRNA-Temozolomide Run1-DMSO | NM_0003<br>09    | PPOX   | protoporphyrinogen oxidase                                     | -0.122818 | Inlier |
| siRNA Disorazole DMSO Run1   | NM_0003<br>09    | PPOX   | protoporphyrinogen oxidase                                     | 0.122818  | Inlier |
| siRNA-Vinblastine Run2-DMSO  | NM_0003<br>09    | PPOX   | protoporphyrinogen oxidase                                     | 0.312033  | Inlier |
| siRNA-Vinblastine Run1-DMSO  | NM_0003<br>09    | PPOX   | protoporphyrinogen oxidase                                     | 1.583902  | Inlier |
| siRNA Disorazole DMSO Run2   | NM_0003<br>09    | PPOX   | protoporphyrinogen oxidase                                     | 1.906292  | Inlier |
| siRNA-Temozolomide Run2-DMSO | NM_0010<br>08709 | PPP1CA | protein phosphatase 1, catalytic subunit, alpha isoform        | -3.025793 | Inlier |

Identification of Survival Genes in Human Glioblastoma Cells Using siRNA Screening  
 Nikhil G Thaker, Fang Zhang, Peter R. McDonald, Tong Ying Shun, Michael D Lewen, Ian F. Pollack, and John S. Lazo

Molecular Pharmacology

| siRNA Treatment              | Gene ID      | Gene Name | Protein Name                                            | Log2 Fold Change | Inlier Status |
|------------------------------|--------------|-----------|---------------------------------------------------------|------------------|---------------|
| siRNA-Temozolomide Run1-DMSO | NM_001008709 | PPP1CA    | protein phosphatase 1, catalytic subunit, alpha isoform | -1.962045        | Inlier        |
| siRNA Disorazole DMSO Run1   | NM_001008709 | PPP1CA    | protein phosphatase 1, catalytic subunit, alpha isoform | -0.354726        | Inlier        |
| siRNA-Temozolomide Run3-DMSO | NM_001008709 | PPP1CA    | protein phosphatase 1, catalytic subunit, alpha isoform | -0.147116        | Inlier        |
| siRNA-Vinblastine Run2-DMSO  | NM_001008709 | PPP1CA    | protein phosphatase 1, catalytic subunit, alpha isoform | 0.147116         | Inlier        |
| siRNA Disorazole DMSO Run3   | NM_001008709 | PPP1CA    | protein phosphatase 1, catalytic subunit, alpha isoform | 0.306082         | Inlier        |
| siRNA-Vinblastine Run1-DMSO  | NM_001008709 | PPP1CA    | protein phosphatase 1, catalytic subunit, alpha isoform | 0.994274         | Inlier        |
| siRNA Disorazole DMSO Run2   | NM_001008709 | PPP1CA    | protein phosphatase 1, catalytic subunit, alpha isoform | 2.644487         | Inlier        |

Identification of Survival Genes in Human Glioblastoma Cells Using siRNA Screening

Nikhil G Thaker, Fang Zhang, Peter R. McDonald, Tong Ying Shun, Michael D Lewen, Ian F. Pollack, and John S. Lazo

Molecular Pharmacology

| siRNA Treatment              | Gene ID   | Target | Protein Name                                           | Log2 Fold Change | Outlier Status |
|------------------------------|-----------|--------|--------------------------------------------------------|------------------|----------------|
| siRNA-Temozolomide Run2-DMSO | NM_206876 | PPP1CB | protein phosphatase 1, catalytic subunit, beta isoform | -1.25519         | Inlier         |
| siRNA-Temozolomide Run3-DMSO | NM_206876 | PPP1CB | protein phosphatase 1, catalytic subunit, beta isoform | -1.187007        | Inlier         |
| siRNA-Temozolomide Run1-DMSO | NM_206876 | PPP1CB | protein phosphatase 1, catalytic subunit, beta isoform | -0.402264        | Inlier         |
| siRNA Disorazole DMSO Run1   | NM_206876 | PPP1CB | protein phosphatase 1, catalytic subunit, beta isoform | -0.135789        | Inlier         |
| siRNA-Vinblastine Run1-DMSO  | NM_206876 | PPP1CB | protein phosphatase 1, catalytic subunit, beta isoform | 0.135789         | Inlier         |
| siRNA Disorazole DMSO Run3   | NM_206876 | PPP1CB | protein phosphatase 1, catalytic subunit, beta isoform | 0.3985           | Inlier         |
| siRNA-Vinblastine Run2-DMSO  | NM_206876 | PPP1CB | protein phosphatase 1, catalytic subunit, beta isoform | 0.946736         | Inlier         |

Identification of Survival Genes in Human Glioblastoma Cells Using siRNA Screening  
 Nikhil G Thaker, Fang Zhang, Peter R. McDonald, Tong Ying Shun, Michael D Lewen, Ian F. Pollack, and John S. Lazo

Molecular Pharmacology

| siRNA Treatment              | Gene ID | Accession | Protein Name | Log2 Fold Change | Outlier Status |
|------------------------------|---------|-----------|--------------|------------------|----------------|
| siRNA Disorazole DMSO Run2   | NM_2068 | 76        | PPP1CB       | 1.85147          | Inlier         |
| siRNA-Temozolomide Run3-DMSO | NM_0027 | 10        | PPP1CC       | -0.682537        | Inlier         |
| siRNA-Temozolomide Run1-DMSO | NM_0027 | 10        | PPP1CC       | -0.666463        | Inlier         |
| siRNA Disorazole DMSO Run3   | NM_0027 | 10        | PPP1CC       | -0.539585        | Inlier         |
| siRNA-Temozolomide Run2-DMSO | NM_0027 | 10        | PPP1CC       | -0.409581        | Inlier         |
| siRNA Disorazole DMSO Run1   | NM_0027 | 10        | PPP1CC       | 0.409581         | Inlier         |
| siRNA-Vinblastine Run1-DMSO  | NM_0027 | 10        | PPP1CC       | 2.104924         | Inlier         |



Identification of Survival Genes in Human Glioblastoma Cells Using siRNA Screening  
 Nikhil G Thaker, Fang Zhang, Peter R. McDonald, Tong Ying Shun, Michael D Lewen, Ian F. Pollack, and John S. Lazo

Molecular Pharmacology

| siRNA Treatment              | Gene ID   | Accession | Protein Description                                     | Log2 Fold Change | Outlier Status |
|------------------------------|-----------|-----------|---------------------------------------------------------|------------------|----------------|
| siRNA-Vinblastine Run2-DMSO  | NM_002710 | PPP1CC    | protein phosphatase 1, catalytic subunit, gamma isoform | 3.173336         | Inlier         |
| siRNA Disorazole DMSO Run2   | NM_002710 | PPP1CC    | protein phosphatase 1, catalytic subunit, gamma isoform | 3.380708         | Inlier         |
| siRNA-Temozolomide Run2-DMSO | NM_002714 | PPP1R10   | protein phosphatase 1, regulatory subunit 10            | -2.057116        | Inlier         |
| siRNA-Temozolomide Run1-DMSO | NM_002714 | PPP1R10   | protein phosphatase 1, regulatory subunit 10            | -1.323438        | Inlier         |
| siRNA-Temozolomide Run3-DMSO | NM_002714 | PPP1R10   | protein phosphatase 1, regulatory subunit 10            | -0.932218        | Inlier         |
| siRNA Disorazole DMSO Run3   | NM_002714 | PPP1R10   | protein phosphatase 1, regulatory subunit 10            | -0.114649        | Inlier         |
| siRNA-Vinblastine Run2-DMSO  | NM_002714 | PPP1R10   | protein phosphatase 1, regulatory subunit 10            | 0.114649         | Inlier         |
| siRNA Disorazole DMSO Run1   | NM_002714 | PPP1R10   | protein phosphatase 1, regulatory subunit 10            | 0.182483         | Inlier         |

Identification of Survival Genes in Human Glioblastoma Cells Using siRNA Screening  
 Nikhil G Thaker, Fang Zhang, Peter R. McDonald, Tong Ying Shun, Michael D Lewen, Ian F. Pollack, and John S. Lazo  
 Molecular Pharmacology

|                              |               |         |                                                          |           |        |
|------------------------------|---------------|---------|----------------------------------------------------------|-----------|--------|
| siRNA-Vinblastine Run1-DMSO  | NM_0027<br>14 | PPP1R10 | protein phosphatase 1, regulatory subunit 10             | 0.416781  | Inlier |
| siRNA Disorazole DMSO Run2   | NM_0027<br>14 | PPP1R10 | protein phosphatase 1, regulatory subunit 10             | 1.163237  | Inlier |
| siRNA-Temozolomide Run3-DMSO | NM_0219<br>59 | PPP1R11 | protein phosphatase 1, regulatory (inhibitor) subunit 11 | -1.192161 | Inlier |
| siRNA-Temozolomide Run2-DMSO | NM_0219<br>59 | PPP1R11 | protein phosphatase 1, regulatory (inhibitor) subunit 11 | -1.150216 | Inlier |
| siRNA-Temozolomide Run1-DMSO | NM_0219<br>59 | PPP1R11 | protein phosphatase 1, regulatory (inhibitor) subunit 11 | -0.244464 | Inlier |
| siRNA Disorazole DMSO Run1   | NM_0219<br>59 | PPP1R11 | protein phosphatase 1, regulatory (inhibitor) subunit 11 | -0.165533 | Inlier |
| siRNA Disorazole DMSO Run3   | NM_0219<br>59 | PPP1R11 | protein phosphatase 1, regulatory (inhibitor) subunit 11 | 0.165533  | Inlier |

Identification of Survival Genes in Human Glioblastoma Cells Using siRNA Screening

Nikhil G Thaker, Fang Zhang, Peter R. McDonald, Tong Ying Shun, Michael D Lewen, Ian F. Pollack, and John S. Lazo

Molecular Pharmacology

|                              |               |              |                                                           |           |        |
|------------------------------|---------------|--------------|-----------------------------------------------------------|-----------|--------|
| siRNA-Vinblastine Run2-DMSO  | NM_0219<br>59 | PPP1R11      | protein phosphatase 1, regulatory (inhibitor) subunit 11  | 0.453723  | Inlier |
| siRNA-Vinblastine Run1-DMSO  | NM_0219<br>59 | PPP1R11      | protein phosphatase 1, regulatory (inhibitor) subunit 11  | 0.895277  | Inlier |
| siRNA Disorazole DMSO Run2   | NM_0219<br>59 | PPP1R11      | protein phosphatase 1, regulatory (inhibitor) subunit 11  | 1.7112    | Inlier |
| siRNA Disorazole DMSO Run3   | NM_0024<br>80 | PPP1R12<br>A | protein phosphatase 1, regulatory (inhibitor) subunit 12A | -0.960226 | Inlier |
| siRNA-Temozolomide Run2-DMSO | NM_0024<br>80 | PPP1R12<br>A | protein phosphatase 1, regulatory (inhibitor) subunit 12A | -0.74386  | Inlier |
| siRNA-Temozolomide Run1-DMSO | NM_0024<br>80 | PPP1R12<br>A | protein phosphatase 1, regulatory (inhibitor) subunit 12A | -0.552271 | Inlier |
| siRNA Disorazole DMSO Run1   | NM_0024<br>80 | PPP1R12<br>A | protein phosphatase 1, regulatory (inhibitor) subunit 12A | -0.049166 | Inlier |

Identification of Survival Genes in Human Glioblastoma Cells Using siRNA Screening  
 Nikhil G Thaker, Fang Zhang, Peter R. McDonald, Tong Ying Shun, Michael D Lewen, Ian F. Pollack, and John S. Lazo

Molecular Pharmacology

| siRNA Treatment              | Gene ID   | Accession | Protein Name                                              | Value     | Outlier Status |
|------------------------------|-----------|-----------|-----------------------------------------------------------|-----------|----------------|
| siRNA-Temozolomide Run3-DMSO | NM_002480 | PPP1R12A  | protein phosphatase 1, regulatory (inhibitor) subunit 12A | 0.049166  | Inlier         |
| siRNA Disorazole DMSO Run2   | NM_002480 | PPP1R12A  | protein phosphatase 1, regulatory (inhibitor) subunit 12A | 0.605139  | Inlier         |
| siRNA-Vinblastine Run1-DMSO  | NM_002480 | PPP1R12A  | protein phosphatase 1, regulatory (inhibitor) subunit 12A | 0.786521  | Inlier         |
| siRNA-Vinblastine Run2-DMSO  | NM_002480 | PPP1R12A  | protein phosphatase 1, regulatory (inhibitor) subunit 12A | 0.989124  | Inlier         |
| siRNA Disorazole DMSO Run3   | NM_032105 | PPP1R12B  | protein phosphatase 1, regulatory (inhibitor) subunit 12B | -0.697003 | Inlier         |
| siRNA-Temozolomide Run2-DMSO | NM_032105 | PPP1R12B  | protein phosphatase 1, regulatory (inhibitor) subunit 12B | -0.651997 | Inlier         |
| siRNA-Temozolomide Run3-DMSO | NM_032105 | PPP1R12B  | protein phosphatase 1, regulatory (inhibitor) subunit 12B | -0.514419 | Inlier         |

Identification of Survival Genes in Human Glioblastoma Cells Using siRNA Screening  
 Nikhil G Thaker, Fang Zhang, Peter R. McDonald, Tong Ying Shun, Michael D Lewen, Ian F. Pollack, and John S. Lazo

Molecular Pharmacology

| siRNA Treatment              | Gene ID   | Accession | Subunit                                                   | Log2 Fold Change | Outlier Status |
|------------------------------|-----------|-----------|-----------------------------------------------------------|------------------|----------------|
| siRNA Disorazole DMSO Run2   | NM_032105 | PPP1R12B  | protein phosphatase 1, regulatory (inhibitor) subunit 12B | -0.422865        | Inlier         |
| siRNA-Temozolomide Run1-DMSO | NM_032105 | PPP1R12B  | protein phosphatase 1, regulatory (inhibitor) subunit 12B | 0.422865         | Inlier         |
| siRNA Disorazole DMSO Run1   | NM_032105 | PPP1R12B  | protein phosphatase 1, regulatory (inhibitor) subunit 12B | 1.408565         | Inlier         |
| siRNA-Vinblastine Run2-DMSO  | NM_032105 | PPP1R12B  | protein phosphatase 1, regulatory (inhibitor) subunit 12B | 1.527656         | Inlier         |
| siRNA-Vinblastine Run1-DMSO  | NM_032105 | PPP1R12B  | protein phosphatase 1, regulatory (inhibitor) subunit 12B | 2.019616         | Inlier         |
| siRNA-Temozolomide Run2-DMSO | NM_017607 | PPP1R12C  | protein phosphatase 1, regulatory (inhibitor) subunit 12C | -2.176918        | Inlier         |
| siRNA-Temozolomide Run3-DMSO | NM_017607 | PPP1R12C  | protein phosphatase 1, regulatory (inhibitor) subunit 12C | -1.322195        | Inlier         |

Identification of Survival Genes in Human Glioblastoma Cells Using siRNA Screening

Nikhil G Thaker, Fang Zhang, Peter R. McDonald, Tong Ying Shun, Michael D Lewen, Ian F. Pollack, and John S. Lazo

Molecular Pharmacology

| siRNA Treatment              | Gene ID   | Accession | Protein                                                   | Value     | Outlier |
|------------------------------|-----------|-----------|-----------------------------------------------------------|-----------|---------|
| siRNA-Temozolomide Run1-DMSO | NM_017607 | PPP1R12C  | protein phosphatase 1, regulatory (inhibitor) subunit 12C | -0.859616 | Inlier  |
| siRNA Disorazole DMSO Run2   | NM_017607 | PPP1R12C  | protein phosphatase 1, regulatory (inhibitor) subunit 12C | -0.185726 | Inlier  |
| siRNA Disorazole DMSO Run3   | NM_017607 | PPP1R12C  | protein phosphatase 1, regulatory (inhibitor) subunit 12C | 0.185726  | Inlier  |
| siRNA Disorazole DMSO Run1   | NM_017607 | PPP1R12C  | protein phosphatase 1, regulatory (inhibitor) subunit 12C | 0.19329   | Inlier  |
| siRNA-Vinblastine Run2-DMSO  | NM_017607 | PPP1R12C  | protein phosphatase 1, regulatory (inhibitor) subunit 12C | 0.549225  | Inlier  |
| siRNA-Vinblastine Run1-DMSO  | NM_017607 | PPP1R12C  | protein phosphatase 1, regulatory (inhibitor) subunit 12C | 0.799775  | Inlier  |
| siRNA-Temozolomide Run3-DMSO | NM_015316 | PPP1R13B  | protein phosphatase 1, regulatory (inhibitor) subunit 13B | -1.616201 | Inlier  |

Identification of Survival Genes in Human Glioblastoma Cells Using siRNA Screening

Nikhil G Thaker, Fang Zhang, Peter R. McDonald, Tong Ying Shun, Michael D Lewen, Ian F. Pollack, and John S. Lazo

Molecular Pharmacology

| siRNA Treatment              | Gene ID   | Accession | Protein Name                                              | Log2 Fold Change | Outlier Status |
|------------------------------|-----------|-----------|-----------------------------------------------------------|------------------|----------------|
| siRNA-Temozolomide Run1-DMSO | NM_015316 | PPP1R13B  | protein phosphatase 1, regulatory (inhibitor) subunit 13B | -1.327111        | Inlier         |
| siRNA-Temozolomide Run2-DMSO | NM_015316 | PPP1R13B  | protein phosphatase 1, regulatory (inhibitor) subunit 13B | -0.895446        | Inlier         |
| siRNA Disorazole DMSO Run3   | NM_015316 | PPP1R13B  | protein phosphatase 1, regulatory (inhibitor) subunit 13B | -0.097033        | Inlier         |
| siRNA Disorazole DMSO Run2   | NM_015316 | PPP1R13B  | protein phosphatase 1, regulatory (inhibitor) subunit 13B | 0.097034         | Inlier         |
| siRNA Disorazole DMSO Run1   | NM_015316 | PPP1R13B  | protein phosphatase 1, regulatory (inhibitor) subunit 13B | 0.264689         | Inlier         |
| siRNA-Vinblastine Run2-DMSO  | NM_015316 | PPP1R13B  | protein phosphatase 1, regulatory (inhibitor) subunit 13B | 0.453554         | Inlier         |
| siRNA-Vinblastine Run1-DMSO  | NM_015316 | PPP1R13B  | protein phosphatase 1, regulatory (inhibitor) subunit 13B | 0.943057         | Inlier         |

Identification of Survival Genes in Human Glioblastoma Cells Using siRNA Screening

Nikhil G Thaker, Fang Zhang, Peter R. McDonald, Tong Ying Shun, Michael D Lewen, Ian F. Pollack, and John S. Lazo

Molecular Pharmacology

| siRNA Treatment              | Gene ID   | Accession | Protein Name                                              | Log2 Fold Change | Outlier Status |
|------------------------------|-----------|-----------|-----------------------------------------------------------|------------------|----------------|
| siRNA-Temozolomide Run3-DMSO | NM_033256 | PPP1R14A  | protein phosphatase 1, regulatory (inhibitor) subunit 14A | -0.701616        | Inlier         |
| siRNA-Temozolomide Run2-DMSO | NM_033256 | PPP1R14A  | protein phosphatase 1, regulatory (inhibitor) subunit 14A | -0.647384        | Inlier         |
| siRNA Disorazole DMSO Run2   | NM_033256 | PPP1R14A  | protein phosphatase 1, regulatory (inhibitor) subunit 14A | -0.632243        | Inlier         |
| siRNA Disorazole DMSO Run3   | NM_033256 | PPP1R14A  | protein phosphatase 1, regulatory (inhibitor) subunit 14A | -0.168136        | Inlier         |
| siRNA-Temozolomide Run1-DMSO | NM_033256 | PPP1R14A  | protein phosphatase 1, regulatory (inhibitor) subunit 14A | 0.168136         | Inlier         |
| siRNA Disorazole DMSO Run1   | NM_033256 | PPP1R14A  | protein phosphatase 1, regulatory (inhibitor) subunit 14A | 1.318454         | Inlier         |
| siRNA-Vinblastine Run1-DMSO  | NM_033256 | PPP1R14A  | protein phosphatase 1, regulatory (inhibitor) subunit 14A | 2.101342         | Inlier         |



Identification of Survival Genes in Human Glioblastoma Cells Using siRNA Screening

Nikhil G Thaker, Fang Zhang, Peter R. McDonald, Tong Ying Shun, Michael D Lewen, Ian F. Pollack, and John S. Lazo

Molecular Pharmacology

| siRNA Treatment              | NM ID     | PPP1R14 | Gene Name                                                 | Value     | Inlier |
|------------------------------|-----------|---------|-----------------------------------------------------------|-----------|--------|
| siRNA-Vinblastine Run2-DMSO  | NM_033256 | A       | protein phosphatase 1, regulatory (inhibitor) subunit 14A | 2.543772  | Inlier |
| siRNA-Temozolomide Run3-DMSO | NM_030949 | C       | protein phosphatase 1, regulatory (inhibitor) subunit 14C | -0.83193  | Inlier |
| siRNA-Temozolomide Run2-DMSO | NM_030949 | C       | protein phosphatase 1, regulatory (inhibitor) subunit 14C | -0.655592 | Inlier |
| siRNA Disorazole DMSO Run2   | NM_030949 | C       | protein phosphatase 1, regulatory (inhibitor) subunit 14C | -0.215107 | Inlier |
| siRNA-Temozolomide Run1-DMSO | NM_030949 | C       | protein phosphatase 1, regulatory (inhibitor) subunit 14C | -0.015656 | Inlier |
| siRNA Disorazole DMSO Run3   | NM_030949 | C       | protein phosphatase 1, regulatory (inhibitor) subunit 14C | 0.015656  | Inlier |
| siRNA Disorazole DMSO Run1   | NM_030949 | C       | protein phosphatase 1, regulatory (inhibitor) subunit 14C | 0.693408  | Inlier |

Identification of Survival Genes in Human Glioblastoma Cells Using siRNA Screening

Nikhil G Thaker, Fang Zhang, Peter R. McDonald, Tong Ying Shun, Michael D Lewen, Ian F. Pollack, and John S. Lazo

Molecular Pharmacology

| siRNA Treatment              | Gene ID   | Accession | Protein Name                                              | Score     | Outlier Type |
|------------------------------|-----------|-----------|-----------------------------------------------------------|-----------|--------------|
| siRNA-Vinblastine Run2-DMSO  | NM_030949 | PPP1R14C  | protein phosphatase 1, regulatory (inhibitor) subunit 14C | 1.354562  | Inlier       |
| siRNA-Vinblastine Run1-DMSO  | NM_030949 | PPP1R14C  | protein phosphatase 1, regulatory (inhibitor) subunit 14C | 1.400785  | Inlier       |
| siRNA-Temozolomide Run2-DMSO | NM_017726 | PPP1R14D  | protein phosphatase 1, regulatory (inhibitor) subunit 14D | -0.702669 | Inlier       |
| siRNA-Temozolomide Run3-DMSO | NM_017726 | PPP1R14D  | protein phosphatase 1, regulatory (inhibitor) subunit 14D | -0.646331 | Inlier       |
| siRNA Disorazole DMSO Run3   | NM_017726 | PPP1R14D  | protein phosphatase 1, regulatory (inhibitor) subunit 14D | -0.56423  | Inlier       |
| siRNA Disorazole DMSO Run2   | NM_017726 | PPP1R14D  | protein phosphatase 1, regulatory (inhibitor) subunit 14D | -0.18619  | Inlier       |
| siRNA-Temozolomide Run1-DMSO | NM_017726 | PPP1R14D  | protein phosphatase 1, regulatory (inhibitor) subunit 14D | 0.18619   | Inlier       |

Identification of Survival Genes in Human Glioblastoma Cells Using siRNA Screening

Nikhil G Thaker, Fang Zhang, Peter R. McDonald, Tong Ying Shun, Michael D Lewen, Ian F. Pollack, and John S. Lazo

Molecular Pharmacology

| siRNA Treatment              | Gene    | Accession | Subunit     | Value     | Category |
|------------------------------|---------|-----------|-------------|-----------|----------|
| siRNA Disorazole DMSO Run1   | NM_0177 | PPP1R14   | subunit 14D | 1.112073  | Inlier   |
| siRNA-Vinblastine Run1-DMSO  | NM_0177 | PPP1R14   | subunit 14D | 1.738117  | Inlier   |
| siRNA-Vinblastine Run2-DMSO  | NM_0177 | PPP1R14   | subunit 14D | 1.813345  | Inlier   |
| siRNA-Temozolomide Run3-DMSO | NM_0143 | PPP1R15   | subunit 15A | -0.750852 | Inlier   |
| siRNA-Temozolomide Run2-DMSO | NM_0143 | PPP1R15   | subunit 15A | -0.598148 | Inlier   |
| siRNA Disorazole DMSO Run2   | NM_0143 | PPP1R15   | subunit 15A | -0.250577 | Inlier   |
| siRNA Disorazole DMSO Run3   | NM_0143 | PPP1R15   | subunit 15A | -0.012018 | Inlier   |

Identification of Survival Genes in Human Glioblastoma Cells Using siRNA Screening

Nikhil G Thaker, Fang Zhang, Peter R. McDonald, Tong Ying Shun, Michael D Lewen, Ian F. Pollack, and John S. Lazo

Molecular Pharmacology

| siRNA                        | Gene    | Accession | Protein                                                   | Value     | Category |
|------------------------------|---------|-----------|-----------------------------------------------------------|-----------|----------|
| siRNA-Temozolomide Run1-DMSO | NM_0143 | PPP1R15A  | protein phosphatase 1, regulatory (inhibitor) subunit 15A | 0.012018  | Inlier   |
| siRNA Disorazole DMSO Run1   | NM_0143 | PPP1R15A  | protein phosphatase 1, regulatory (inhibitor) subunit 15A | 0.810105  | Inlier   |
| siRNA-Vinblastine Run1-DMSO  | NM_0143 | PPP1R15A  | protein phosphatase 1, regulatory (inhibitor) subunit 15A | 1.065614  | Inlier   |
| siRNA-Vinblastine Run2-DMSO  | NM_0143 | PPP1R15A  | protein phosphatase 1, regulatory (inhibitor) subunit 15A | 1.350678  | Inlier   |
| siRNA-Temozolomide Run3-DMSO | NM_0328 | PPP1R15B  | protein phosphatase 1, regulatory (inhibitor) subunit 15B | -0.826923 | Inlier   |
| siRNA-Temozolomide Run2-DMSO | NM_0328 | PPP1R15B  | protein phosphatase 1, regulatory (inhibitor) subunit 15B | -0.522077 | Inlier   |
| siRNA Disorazole DMSO Run3   | NM_0328 | PPP1R15B  | protein phosphatase 1, regulatory (inhibitor) subunit 15B | -0.303811 | Inlier   |

Identification of Survival Genes in Human Glioblastoma Cells Using siRNA Screening

Nikhil G Thaker, Fang Zhang, Peter R. McDonald, Tong Ying Shun, Michael D Lewen, Ian F. Pollack, and John S. Lazo

Molecular Pharmacology

| siRNA Treatment              | Gene ID | Accession | Protein Name                                              | Log Fold Change | Outlier Status |
|------------------------------|---------|-----------|-----------------------------------------------------------|-----------------|----------------|
| siRNA Disorazole DMSO Run2   | NM_0328 | PPP1R15   | protein phosphatase 1, regulatory (inhibitor) subunit 15B | -0.223139       | Inlier         |
| siRNA-Temozolomide Run1-DMSO | NM_0328 | PPP1R15   | protein phosphatase 1, regulatory (inhibitor) subunit 15B | 0.223139        | Inlier         |
| siRNA Disorazole DMSO Run1   | NM_0328 | PPP1R15   | protein phosphatase 1, regulatory (inhibitor) subunit 15B | 1.409935        | Inlier         |
| siRNA-Vinblastine Run2-DMSO  | NM_0328 | PPP1R15   | protein phosphatase 1, regulatory (inhibitor) subunit 15B | 1.861795        | Inlier         |
| siRNA-Vinblastine Run1-DMSO  | NM_0328 | PPP1R15   | protein phosphatase 1, regulatory (inhibitor) subunit 15B | 1.866961        | Inlier         |
| siRNA-Temozolomide Run3-DMSO | NM_0329 | PPP1R16   | protein phosphatase 1, regulatory (inhibitor) subunit 16A | -0.951925       | Inlier         |
| siRNA-Temozolomide Run2-DMSO | NM_0329 | PPP1R16   | protein phosphatase 1, regulatory (inhibitor) subunit 16A | -0.679342       | Inlier         |

Identification of Survival Genes in Human Glioblastoma Cells Using siRNA Screening

Nikhil G Thaker, Fang Zhang, Peter R. McDonald, Tong Ying Shun, Michael D Lewen, Ian F. Pollack, and John S. Lazo

Molecular Pharmacology

| siRNA Treatment              | Gene ID   | Accession | Protein Name                                              | Value     | Outlier Status |
|------------------------------|-----------|-----------|-----------------------------------------------------------|-----------|----------------|
| siRNA-Temozolomide Run1-DMSO | NM_032902 | PPP1R16A  | protein phosphatase 1, regulatory (inhibitor) subunit 16A | -0.369306 | Inlier         |
| siRNA Disorazole DMSO Run3   | NM_032902 | PPP1R16A  | protein phosphatase 1, regulatory (inhibitor) subunit 16A | -0.104942 | Inlier         |
| siRNA Disorazole DMSO Run1   | NM_032902 | PPP1R16A  | protein phosphatase 1, regulatory (inhibitor) subunit 16A | 0.104942  | Inlier         |
| siRNA-Vinblastine Run1-DMSO  | NM_032902 | PPP1R16A  | protein phosphatase 1, regulatory (inhibitor) subunit 16A | 0.669658  | Inlier         |
| siRNA-Vinblastine Run2-DMSO  | NM_032902 | PPP1R16A  | protein phosphatase 1, regulatory (inhibitor) subunit 16A | 0.728853  | Inlier         |
| siRNA Disorazole DMSO Run2   | NM_032902 | PPP1R16A  | protein phosphatase 1, regulatory (inhibitor) subunit 16A | 0.770784  | Inlier         |
| siRNA-Temozolomide Run2-DMSO | NM_015568 | PPP1R16B  | protein phosphatase 1, regulatory (inhibitor) subunit 16B | -0.813322 | Inlier         |

Identification of Survival Genes in Human Glioblastoma Cells Using siRNA Screening  
 Nikhil G Thaker, Fang Zhang, Peter R. McDonald, Tong Ying Shun, Michael D Lewen, Ian F. Pollack, and John S. Lazo

Molecular Pharmacology

| siRNA Treatment              | Gene ID   | Accession | Protein Name                                              | Log Fold Change | Outlier Status |
|------------------------------|-----------|-----------|-----------------------------------------------------------|-----------------|----------------|
| siRNA-Temozolomide Run3-DMSO | NM_015568 | PPP1R16B  | protein phosphatase 1, regulatory (inhibitor) subunit 16B | -0.713677       | Inlier         |
| siRNA-Temozolomide Run1-DMSO | NM_015568 | PPP1R16B  | protein phosphatase 1, regulatory (inhibitor) subunit 16B | -0.635323       | Inlier         |
| siRNA Disorazole DMSO Run3   | NM_015568 | PPP1R16B  | protein phosphatase 1, regulatory (inhibitor) subunit 16B | -0.311799       | Inlier         |
| siRNA Disorazole DMSO Run1   | NM_015568 | PPP1R16B  | protein phosphatase 1, regulatory (inhibitor) subunit 16B | 0.311799        | Inlier         |
| siRNA Disorazole DMSO Run2   | NM_015568 | PPP1R16B  | protein phosphatase 1, regulatory (inhibitor) subunit 16B | 0.486937        | Inlier         |
| siRNA-Vinblastine Run1-DMSO  | NM_015568 | PPP1R16B  | protein phosphatase 1, regulatory (inhibitor) subunit 16B | 1.665967        | Inlier         |
| siRNA-Vinblastine Run2-DMSO  | NM_015568 | PPP1R16B  | protein phosphatase 1, regulatory (inhibitor) subunit 16B | 2.015861        | Inlier         |

Identification of Survival Genes in Human Glioblastoma Cells Using siRNA Screening  
 Nikhil G Thaker, Fang Zhang, Peter R. McDonald, Tong Ying Shun, Michael D Lewen, Ian F. Pollack, and John S. Lazo  
 Molecular Pharmacology

|                              |               |         |                                                          |           |        |
|------------------------------|---------------|---------|----------------------------------------------------------|-----------|--------|
| siRNA Disorazole DMSO Run3   | NM_0067<br>41 | PPP1R1A | protein phosphatase 1, regulatory (inhibitor) subunit 1A | -1.036713 | Inlier |
| siRNA-Temozolomide Run2-DMSO | NM_0067<br>41 | PPP1R1A | protein phosphatase 1, regulatory (inhibitor) subunit 1A | -0.624256 | Inlier |
| siRNA-Temozolomide Run3-DMSO | NM_0067<br>41 | PPP1R1A | protein phosphatase 1, regulatory (inhibitor) subunit 1A | -0.501002 | Inlier |
| siRNA-Temozolomide Run1-DMSO | NM_0067<br>41 | PPP1R1A | protein phosphatase 1, regulatory (inhibitor) subunit 1A | -0.269921 | Inlier |
| siRNA Disorazole DMSO Run1   | NM_0067<br>41 | PPP1R1A | protein phosphatase 1, regulatory (inhibitor) subunit 1A | 0.269921  | Inlier |
| siRNA-Vinblastine Run2-DMSO  | NM_0067<br>41 | PPP1R1A | protein phosphatase 1, regulatory (inhibitor) subunit 1A | 0.724744  | Inlier |
| siRNA-Vinblastine Run1-DMSO  | NM_0067<br>41 | PPP1R1A | protein phosphatase 1, regulatory (inhibitor) subunit 1A | 0.965337  | Inlier |



Identification of Survival Genes in Human Glioblastoma Cells Using siRNA Screening

Nikhil G Thaker, Fang Zhang, Peter R. McDonald, Tong Ying Shun, Michael D Lewen, Ian F. Pollack, and John S. Lazo

Molecular Pharmacology

|                               |    |         |         |                                                                                                                 |           |        |
|-------------------------------|----|---------|---------|-----------------------------------------------------------------------------------------------------------------|-----------|--------|
| siRNA Disorazole DMSO Run2    | 41 | NM_0067 | PPP1R1A | protein phosphatase 1, regulatory (inhibitor) subunit 1A                                                        | 1.154819  | Inlier |
| siRNA-Temozolomide DMSO Run3- | 05 | NM_1815 | PPP1R1B | protein phosphatase 1, regulatory (inhibitor) subunit 1B (dopamine and cAMP regulated phosphoprotein, DARPP-32) | -0.793007 | Inlier |
| siRNA-Temozolomide DMSO Run2- | 05 | NM_1815 | PPP1R1B | protein phosphatase 1, regulatory (inhibitor) subunit 1B (dopamine and cAMP regulated phosphoprotein, DARPP-32) | -0.555993 | Inlier |
| siRNA Disorazole DMSO Run3    | 05 | NM_1815 | PPP1R1B | protein phosphatase 1, regulatory (inhibitor) subunit 1B (dopamine and cAMP regulated phosphoprotein, DARPP-32) | -0.376153 | Inlier |

Identification of Survival Genes in Human Glioblastoma Cells Using siRNA Screening  
 Nikhil G Thaker, Fang Zhang, Peter R. McDonald, Tong Ying Shun, Michael D Lewen, Ian F. Pollack, and John S. Lazo  
 Molecular Pharmacology

|                            |         |    |         |                                                                                                                 |                  |
|----------------------------|---------|----|---------|-----------------------------------------------------------------------------------------------------------------|------------------|
|                            |         |    |         | protein phosphatase 1, regulatory (inhibitor) subunit 1B (dopamine and cAMP regulated phosphoprotein, DARPP-32) |                  |
| siRNA Disorazole DMSO Run2 | NM_1815 | 05 | PPP1R1B | 32)                                                                                                             | -0.158608 Inlier |

|                              |         |    |         |                                                                                                                 |                 |
|------------------------------|---------|----|---------|-----------------------------------------------------------------------------------------------------------------|-----------------|
|                              |         |    |         | protein phosphatase 1, regulatory (inhibitor) subunit 1B (dopamine and cAMP regulated phosphoprotein, DARPP-32) |                 |
| siRNA-Temozolomide Run1-DMSO | NM_1815 | 05 | PPP1R1B | 32)                                                                                                             | 0.158608 Inlier |

|                            |         |    |         |                                                                                                                 |                 |
|----------------------------|---------|----|---------|-----------------------------------------------------------------------------------------------------------------|-----------------|
|                            |         |    |         | protein phosphatase 1, regulatory (inhibitor) subunit 1B (dopamine and cAMP regulated phosphoprotein, DARPP-32) |                 |
| siRNA Disorazole DMSO Run1 | NM_1815 | 05 | PPP1R1B | 32)                                                                                                             | 0.986924 Inlier |

Identification of Survival Genes in Human Glioblastoma Cells Using siRNA Screening

Nikhil G Thaker, Fang Zhang, Peter R. McDonald, Tong Ying Shun, Michael D Lewen, Ian F. Pollack, and John S.

Lazo

Molecular Pharmacology

|                              |           |         |                                                                                                                 |           |        |
|------------------------------|-----------|---------|-----------------------------------------------------------------------------------------------------------------|-----------|--------|
| siRNA-Vinblastine Run2-DMSO  | NM_181505 | PPP1R1B | protein phosphatase 1, regulatory (inhibitor) subunit 1B (dopamine and cAMP regulated phosphoprotein, DARPP-32) | 1.376035  | Inlier |
| siRNA-Vinblastine Run1-DMSO  | NM_181505 | PPP1R1B | protein phosphatase 1, regulatory (inhibitor) subunit 1B (dopamine and cAMP regulated phosphoprotein, DARPP-32) | 1.391854  | Inlier |
| siRNA-Temozolomide Run3-DMSO | NM_006241 | PPP1R2  | protein phosphatase 1, regulatory (inhibitor) subunit 2                                                         | -0.946115 | Inlier |
| siRNA-Temozolomide Run2-DMSO | NM_006241 | PPP1R2  | protein phosphatase 1, regulatory (inhibitor) subunit 2                                                         | -0.673777 | Inlier |
| siRNA-Temozolomide Run1-DMSO | NM_006241 | PPP1R2  | protein phosphatase 1, regulatory (inhibitor) subunit 2                                                         | -0.284905 | Inlier |

Identification of Survival Genes in Human Glioblastoma Cells Using siRNA Screening

Nikhil G Thaker, Fang Zhang, Peter R. McDonald, Tong Ying Shun, Michael D Lewen, Ian F. Pollack, and John S. Lazo

Molecular Pharmacology

|                              |               |         |                                                                                                                                 |           |        |
|------------------------------|---------------|---------|---------------------------------------------------------------------------------------------------------------------------------|-----------|--------|
| siRNA Disorazole DMSO Run3   | NM_0062<br>41 | PPP1R2  | protein phosphatase 1, regulatory (inhibitor) subunit 2                                                                         | -0.275677 | Inlier |
| siRNA Disorazole DMSO Run1   | NM_0062<br>41 | PPP1R2  | protein phosphatase 1, regulatory (inhibitor) subunit 2                                                                         | 0.275677  | Inlier |
| siRNA Disorazole DMSO Run2   | NM_0062<br>41 | PPP1R2  | protein phosphatase 1, regulatory (inhibitor) subunit 2                                                                         | 0.675223  | Inlier |
| siRNA-Vinblastine Run2-DMSO  | NM_0062<br>41 | PPP1R2  | protein phosphatase 1, regulatory (inhibitor) subunit 2                                                                         | 0.946572  | Inlier |
| siRNA-Vinblastine Run1-DMSO  | NM_0062<br>41 | PPP1R2  | protein phosphatase 1, regulatory (inhibitor) subunit 2                                                                         | 0.94994   | Inlier |
| siRNA-Temozolomide Run2-DMSO | NM_0027<br>11 | PPP1R3A | protein phosphatase 1, regulatory (inhibitor) subunit 3A (glycogen and sarcoplasmic reticulum binding subunit, skeletal muscle) | -0.838034 | Inlier |

Identification of Survival Genes in Human Glioblastoma Cells Using siRNA Screening

Nikhil G Thaker, Fang Zhang, Peter R. McDonald, Tong Ying Shun, Michael D Lewen, Ian F. Pollack, and John S. Lazo

Molecular Pharmacology

|                              |           |         |                                                                                                                                 |           |        |
|------------------------------|-----------|---------|---------------------------------------------------------------------------------------------------------------------------------|-----------|--------|
| siRNA-Temozolomide Run3-DMSO | NM_002711 | PPP1R3A | protein phosphatase 1, regulatory (inhibitor) subunit 3A (glycogen and sarcoplasmic reticulum binding subunit, skeletal muscle) | -0.584162 | Inlier |
| siRNA Disorazole DMSO Run3   | NM_002711 | PPP1R3A | protein phosphatase 1, regulatory (inhibitor) subunit 3A (glycogen and sarcoplasmic reticulum binding subunit, skeletal muscle) | -0.239735 | Inlier |
| siRNA-Temozolomide Run1-DMSO | NM_002711 | PPP1R3A | protein phosphatase 1, regulatory (inhibitor) subunit 3A (glycogen and sarcoplasmic reticulum binding subunit, skeletal muscle) | -0.033015 | Inlier |

Identification of Survival Genes in Human Glioblastoma Cells Using siRNA Screening

Nikhil G Thaker, Fang Zhang, Peter R. McDonald, Tong Ying Shun, Michael D Lewen, Ian F. Pollack, and John S. Lazo

Molecular Pharmacology

|                             |               |         |                                                                                                                                 |                 |
|-----------------------------|---------------|---------|---------------------------------------------------------------------------------------------------------------------------------|-----------------|
| siRNA-Vinblastine Run2-DMSO | NM_0027<br>11 | PPP1R3A | protein phosphatase 1, regulatory (inhibitor) subunit 3A (glycogen and sarcoplasmic reticulum binding subunit, skeletal muscle) | 0.033015 Inlier |
| siRNA Disorazole DMSO Run2  | NM_0027<br>11 | PPP1R3A | protein phosphatase 1, regulatory (inhibitor) subunit 3A (glycogen and sarcoplasmic reticulum binding subunit, skeletal muscle) | 0.764838 Inlier |
| siRNA Disorazole DMSO Run1  | NM_0027<br>11 | PPP1R3A | protein phosphatase 1, regulatory (inhibitor) subunit 3A (glycogen and sarcoplasmic reticulum binding subunit, skeletal muscle) | 1.049342 Inlier |

Identification of Survival Genes in Human Glioblastoma Cells Using siRNA Screening

Nikhil G Thaker, Fang Zhang, Peter R. McDonald, Tong Ying Shun, Michael D Lewen, Ian F. Pollack, and John S. Lazo

Molecular Pharmacology

|                              |           |         |                                                                                                                                 |           |        |
|------------------------------|-----------|---------|---------------------------------------------------------------------------------------------------------------------------------|-----------|--------|
| siRNA-Vinblastine Run1-DMSO  | NM_002711 | PPP1R3A | protein phosphatase 1, regulatory (inhibitor) subunit 3A (glycogen and sarcoplasmic reticulum binding subunit, skeletal muscle) | 2.002004  | Inlier |
| siRNA-Temozolomide Run2-DMSO | NM_024607 | PPP1R3B | protein phosphatase 1, regulatory (inhibitor) subunit 3B                                                                        | -2.062289 | Inlier |
| siRNA-Temozolomide Run1-DMSO | NM_024607 | PPP1R3B | protein phosphatase 1, regulatory (inhibitor) subunit 3B                                                                        | -1.969336 | Inlier |
| siRNA-Temozolomide Run3-DMSO | NM_024607 | PPP1R3B | protein phosphatase 1, regulatory (inhibitor) subunit 3B                                                                        | -0.620373 | Inlier |
| siRNA Disorazole DMSO Run3   | NM_024607 | PPP1R3B | protein phosphatase 1, regulatory (inhibitor) subunit 3B                                                                        | -0.106634 | Inlier |
| siRNA Disorazole DMSO Run2   | NM_024607 | PPP1R3B | protein phosphatase 1, regulatory (inhibitor) subunit 3B                                                                        | 0.106634  | Inlier |

Identification of Survival Genes in Human Glioblastoma Cells Using siRNA Screening  
 Nikhil G Thaker, Fang Zhang, Peter R. McDonald, Tong Ying Shun, Michael D Lewen, Ian F. Pollack, and John S. Lazo  
 Molecular Pharmacology

|                              |           |         |                                                          |           |        |
|------------------------------|-----------|---------|----------------------------------------------------------|-----------|--------|
| siRNA-Vinblastine Run2-DMSO  | NM_024607 | PPP1R3B | protein phosphatase 1, regulatory (inhibitor) subunit 3B | 0.382761  | Inlier |
| siRNA Disorazole DMSO Run1   | NM_024607 | PPP1R3B | protein phosphatase 1, regulatory (inhibitor) subunit 3B | 0.728627  | Inlier |
| siRNA-Vinblastine Run1-DMSO  | NM_024607 | PPP1R3B | protein phosphatase 1, regulatory (inhibitor) subunit 3B | 1.149022  | Inlier |
| siRNA-Temozolomide Run3-DMSO | NM_005398 | PPP1R3C | protein phosphatase 1, regulatory (inhibitor) subunit 3C | -0.681469 | Inlier |
| siRNA-Temozolomide Run2-DMSO | NM_005398 | PPP1R3C | protein phosphatase 1, regulatory (inhibitor) subunit 3C | -0.667531 | Inlier |
| siRNA-Temozolomide Run1-DMSO | NM_005398 | PPP1R3C | protein phosphatase 1, regulatory (inhibitor) subunit 3C | -0.26302  | Inlier |
| siRNA Disorazole DMSO Run2   | NM_005398 | PPP1R3C | protein phosphatase 1, regulatory (inhibitor) subunit 3C | -0.051378 | Inlier |



Identification of Survival Genes in Human Glioblastoma Cells Using siRNA Screening  
 Nikhil G Thaker, Fang Zhang, Peter R. McDonald, Tong Ying Shun, Michael D Lewen, Ian F. Pollack, and John S. Lazo  
 Molecular Pharmacology

|                              |               |         |                                                          |           |        |
|------------------------------|---------------|---------|----------------------------------------------------------|-----------|--------|
| siRNA Disorazole DMSO Run3   | NM_0053<br>98 | PPP1R3C | protein phosphatase 1, regulatory (inhibitor) subunit 3C | 0.051378  | Inlier |
| siRNA Disorazole DMSO Run1   | NM_0053<br>98 | PPP1R3C | protein phosphatase 1, regulatory (inhibitor) subunit 3C | 0.691127  | Inlier |
| siRNA-Vinblastine Run2-DMSO  | NM_0053<br>98 | PPP1R3C | protein phosphatase 1, regulatory (inhibitor) subunit 3C | 0.835757  | Inlier |
| siRNA-Vinblastine Run1-DMSO  | NM_0053<br>98 | PPP1R3C | protein phosphatase 1, regulatory (inhibitor) subunit 3C | 1.290668  | Inlier |
| siRNA-Temozolomide Run1-DMSO | NM_0062<br>42 | PPP1R3D | protein phosphatase 1, regulatory subunit 3D             | -1.034319 | Inlier |
| siRNA-Temozolomide Run2-DMSO | NM_0062<br>42 | PPP1R3D | protein phosphatase 1, regulatory subunit 3D             | -0.876419 | Inlier |
| siRNA-Temozolomide Run3-DMSO | NM_0062<br>42 | PPP1R3D | protein phosphatase 1, regulatory subunit 3D             | -0.472581 | Inlier |
| siRNA Disorazole DMSO Run3   | NM_0062<br>42 | PPP1R3D | protein phosphatase 1, regulatory subunit 3D             | -0.234779 | Inlier |

Identification of Survival Genes in Human Glioblastoma Cells Using siRNA Screening  
 Nikhil G Thaker, Fang Zhang, Peter R. McDonald, Tong Ying Shun, Michael D Lewen, Ian F. Pollack, and John S. Lazo  
 Molecular Pharmacology

|                              |               |         |                                              |           |        |
|------------------------------|---------------|---------|----------------------------------------------|-----------|--------|
| siRNA-Vinblastine Run2-DMSO  | NM_0062<br>42 | PPP1R3D | protein phosphatase 1, regulatory subunit 3D | 0.234779  | Inlier |
| siRNA Disorazole DMSO Run1   | NM_0062<br>42 | PPP1R3D | protein phosphatase 1, regulatory subunit 3D | 0.32187   | Inlier |
| siRNA-Vinblastine Run1-DMSO  | NM_0062<br>42 | PPP1R3D | protein phosphatase 1, regulatory subunit 3D | 1.131867  | Inlier |
| siRNA Disorazole DMSO Run2   | NM_0062<br>42 | PPP1R3D | protein phosphatase 1, regulatory subunit 3D | 2.78072   | Inlier |
| siRNA-Temozolomide Run2-DMSO | NM_0027<br>12 | PPP1R7  | protein phosphatase 1, regulatory subunit 7  | -1.000928 | Inlier |
| siRNA-Temozolomide Run3-DMSO | NM_0027<br>12 | PPP1R7  | protein phosphatase 1, regulatory subunit 7  | -0.680261 | Inlier |
| siRNA-Temozolomide Run1-DMSO | NM_0027<br>12 | PPP1R7  | protein phosphatase 1, regulatory subunit 7  | -0.668739 | Inlier |
| siRNA Disorazole DMSO Run1   | NM_0027<br>12 | PPP1R7  | protein phosphatase 1, regulatory subunit 7  | -0.176648 | Inlier |
| siRNA Disorazole DMSO Run3   | NM_0027<br>12 | PPP1R7  | protein phosphatase 1, regulatory subunit 7  | 0.176648  | Inlier |

Identification of Survival Genes in Human Glioblastoma Cells Using siRNA Screening

Nikhil G Thaker, Fang Zhang, Peter R. McDonald, Tong Ying Shun, Michael D Lewen, Ian F. Pollack, and John S. Lazo

Molecular Pharmacology

| siRNA Treatment              | Gene ID | Accession | Protein | Value     | Outlier |
|------------------------------|---------|-----------|---------|-----------|---------|
| siRNA Disorazole DMSO Run2   | NM_0027 | 12        | PPP1R7  | 0.475739  | Inlier  |
| siRNA-Vinblastine Run1-DMSO  | NM_0027 | 12        | PPP1R7  | 1.371221  | Inlier  |
| siRNA-Vinblastine Run2-DMSO  | NM_0027 | 12        | PPP1R7  | 1.46136   | Inlier  |
| siRNA-Temozolomide Run2-DMSO | NM_1385 | 58        | PPP1R8  | -1.173412 | Inlier  |
| siRNA-Temozolomide Run1-DMSO | NM_1385 | 58        | PPP1R8  | -0.587475 | Inlier  |
| siRNA Disorazole DMSO Run3   | NM_1385 | 58        | PPP1R8  | -0.303463 | Inlier  |
| siRNA-Temozolomide Run3-DMSO | NM_1385 | 58        | PPP1R8  | -0.095388 | Inlier  |
| siRNA Disorazole DMSO Run1   | NM_1385 | 58        | PPP1R8  | 0.095388  | Inlier  |
| siRNA Disorazole DMSO Run2   | NM_1385 | 58        | PPP1R8  | 0.761525  | Inlier  |

Identification of Survival Genes in Human Glioblastoma Cells Using siRNA Screening  
 Nikhil G Thaker, Fang Zhang, Peter R. McDonald, Tong Ying Shun, Michael D Lewen, Ian F. Pollack, and John S. Lazo

Molecular Pharmacology

|                              |           |         |                                                           |           |        |
|------------------------------|-----------|---------|-----------------------------------------------------------|-----------|--------|
| siRNA-Vinblastine Run2-DMSO  | NM_138558 | PPP1R8  | protein phosphatase 1, regulatory (inhibitor) subunit 8   | 1.415572  | Inlier |
| siRNA-Vinblastine Run1-DMSO  | NM_138558 | PPP1R8  | protein phosphatase 1, regulatory (inhibitor) subunit 8   | 1.527284  | Inlier |
| siRNA-Temozolomide Run2-DMSO | NM_032595 | PPP1R9B | protein phosphatase 1, regulatory subunit 9B, spinophilin | -0.731089 | Inlier |
| siRNA Disorazole DMSO Run3   | NM_032595 | PPP1R9B | protein phosphatase 1, regulatory subunit 9B, spinophilin | -0.61791  | Inlier |
| siRNA-Temozolomide Run3-DMSO | NM_032595 | PPP1R9B | protein phosphatase 1, regulatory subunit 9B, spinophilin | -0.396989 | Inlier |
| siRNA Disorazole DMSO Run2   | NM_032595 | PPP1R9B | protein phosphatase 1, regulatory subunit 9B, spinophilin | -0.080041 | Inlier |
| siRNA-Temozolomide Run1-DMSO | NM_032595 | PPP1R9B | protein phosphatase 1, regulatory subunit 9B, spinophilin | 0.080041  | Inlier |

Identification of Survival Genes in Human Glioblastoma Cells Using siRNA Screening  
 Nikhil G Thaker, Fang Zhang, Peter R. McDonald, Tong Ying Shun, Michael D Lewen, Ian F. Pollack, and John S. Lazo  
 Molecular Pharmacology

|                              |               |         |                                                                       |           |         |
|------------------------------|---------------|---------|-----------------------------------------------------------------------|-----------|---------|
| siRNA Disorazole DMSO Run1   | NM_0325<br>95 | PPP1R9B | protein phosphatase 1, regulatory subunit 9B, spinophilin             | 1.730663  | Inlier  |
| siRNA-Vinblastine Run2-DMSO  | NM_0325<br>95 | PPP1R9B | protein phosphatase 1, regulatory subunit 9B, spinophilin             | 3.210876  | Inlier  |
| siRNA-Vinblastine Run1-DMSO  | NM_0325<br>95 | PPP1R9B | protein phosphatase 1, regulatory subunit 9B, spinophilin             | 3.839868  | Outlier |
| siRNA-Temozolomide Run2-DMSO | NM_0027<br>15 | PPP2CA  | protein phosphatase 2 (formerly 2A), catalytic subunit, alpha isoform | -0.998441 | Inlier  |
| siRNA-Temozolomide Run3-DMSO | NM_0027<br>15 | PPP2CA  | protein phosphatase 2 (formerly 2A), catalytic subunit, alpha isoform | -0.960395 | Inlier  |
| siRNA Disorazole DMSO Run3   | NM_0027<br>15 | PPP2CA  | protein phosphatase 2 (formerly 2A), catalytic subunit, alpha isoform | -0.545007 | Inlier  |

Identification of Survival Genes in Human Glioblastoma Cells Using siRNA Screening

Nikhil G Thaker, Fang Zhang, Peter R. McDonald, Tong Ying Shun, Michael D Lewen, Ian F. Pollack, and John S.

Lazo

Molecular Pharmacology

| siRNA Treatment              | Gene ID   | Gene Name | Protein Description                                                   | Value     | Outlier Status |
|------------------------------|-----------|-----------|-----------------------------------------------------------------------|-----------|----------------|
| siRNA-Temozolomide Run1-DMSO | NM_002715 | PPP2CA    | protein phosphatase 2 (formerly 2A), catalytic subunit, alpha isoform | -0.322691 | Inlier         |
| siRNA-Vinblastine Run2-DMSO  | NM_002715 | PPP2CA    | protein phosphatase 2 (formerly 2A), catalytic subunit, alpha isoform | 0.322691  | Inlier         |
| siRNA-Vinblastine Run1-DMSO  | NM_002715 | PPP2CA    | protein phosphatase 2 (formerly 2A), catalytic subunit, alpha isoform | 0.616462  | Inlier         |
| siRNA Disorazole DMSO Run1   | NM_002715 | PPP2CA    | protein phosphatase 2 (formerly 2A), catalytic subunit, alpha isoform | 0.732538  | Inlier         |
| siRNA Disorazole DMSO Run2   | NM_002715 | PPP2CA    | protein phosphatase 2 (formerly 2A), catalytic subunit, alpha isoform | 2.294461  | Inlier         |

Identification of Survival Genes in Human Glioblastoma Cells Using siRNA Screening

Nikhil G Thaker, Fang Zhang, Peter R. McDonald, Tong Ying Shun, Michael D Lewen, Ian F. Pollack, and John S. Lazo

Molecular Pharmacology

| siRNA Treatment              | Gene ID      | Gene Name | Protein Description                                                  | Log Fold Change | Outlier Status |
|------------------------------|--------------|-----------|----------------------------------------------------------------------|-----------------|----------------|
| siRNA Disorazole DMSO Run2   | NM_001009552 | PPP2CB    | protein phosphatase 2 (formerly 2A), catalytic subunit, beta isoform | -1.765355       | Inlier         |
| siRNA Disorazole DMSO Run3   | NM_001009552 | PPP2CB    | protein phosphatase 2 (formerly 2A), catalytic subunit, beta isoform | -0.9214         | Inlier         |
| siRNA-Temozolomide Run3-DMSO | NM_001009552 | PPP2CB    | protein phosphatase 2 (formerly 2A), catalytic subunit, beta isoform | -0.318476       | Inlier         |
| siRNA-Temozolomide Run2-DMSO | NM_001009552 | PPP2CB    | protein phosphatase 2 (formerly 2A), catalytic subunit, beta isoform | -0.303444       | Inlier         |
| siRNA-Temozolomide Run1-DMSO | NM_001009552 | PPP2CB    | protein phosphatase 2 (formerly 2A), catalytic subunit, beta isoform | 0.303444        | Inlier         |

Identification of Survival Genes in Human Glioblastoma Cells Using siRNA Screening

Nikhil G Thaker, Fang Zhang, Peter R. McDonald, Tong Ying Shun, Michael D Lewen, Ian F. Pollack, and John S. Lazo

Molecular Pharmacology

| siRNA Treatment              | Gene ID      | Gene Name | Protein Description                                                              | Value     | Outlier Status |
|------------------------------|--------------|-----------|----------------------------------------------------------------------------------|-----------|----------------|
| siRNA-Vinblastine Run2-DMSO  | NM_001009552 | PPP2CB    | protein phosphatase 2 (formerly 2A), catalytic subunit, beta isoform             | 0.509386  | Inlier         |
| siRNA Disorazole DMSO Run1   | NM_001009552 | PPP2CB    | protein phosphatase 2 (formerly 2A), catalytic subunit, beta isoform             | 0.839614  | Inlier         |
| siRNA-Vinblastine Run1-DMSO  | NM_001009552 | PPP2CB    | protein phosphatase 2 (formerly 2A), catalytic subunit, beta isoform             | 1.187891  | Inlier         |
| siRNA-Temozolomide Run3-DMSO | NM_014225    | PPP2R1A   | protein phosphatase 2 (formerly 2A), regulatory subunit A (PR 65), alpha isoform | -0.837515 | Inlier         |
| siRNA-Temozolomide Run2-DMSO | NM_014225    | PPP2R1A   | protein phosphatase 2 (formerly 2A), regulatory subunit A (PR 65), alpha isoform | -0.800067 | Inlier         |



Identification of Survival Genes in Human Glioblastoma Cells Using siRNA Screening

Nikhil G Thaker, Fang Zhang, Peter R. McDonald, Tong Ying Shun, Michael D Lewen, Ian F. Pollack, and John S. Lazo

Molecular Pharmacology

| siRNA Treatment         | Run  | Gene    | Accession | Gene Description                                                                 | Log2 Fold Change | Outlier Status |
|-------------------------|------|---------|-----------|----------------------------------------------------------------------------------|------------------|----------------|
| siRNA Disorazole DMSO   | Run2 | PPP2R1A | NM_014225 | protein phosphatase 2 (formerly 2A), regulatory subunit A (PR 65), alpha isoform | -0.648125        | Inlier         |
| siRNA Disorazole DMSO   | Run3 | PPP2R1A | NM_014225 | protein phosphatase 2 (formerly 2A), regulatory subunit A (PR 65), alpha isoform | -0.127037        | Inlier         |
| siRNA-Temozolomide DMSO | Run1 | PPP2R1A | NM_014225 | protein phosphatase 2 (formerly 2A), regulatory subunit A (PR 65), alpha isoform | 0.127037         | Inlier         |
| siRNA Disorazole DMSO   | Run1 | PPP2R1A | NM_014225 | protein phosphatase 2 (formerly 2A), regulatory subunit A (PR 65), alpha isoform | 0.631822         | Inlier         |
| siRNA-Vinblastine DMSO  | Run2 | PPP2R1A | NM_014225 | protein phosphatase 2 (formerly 2A), regulatory subunit A (PR 65), alpha isoform | 0.700875         | Inlier         |

Identification of Survival Genes in Human Glioblastoma Cells Using siRNA Screening

Nikhil G Thaker, Fang Zhang, Peter R. McDonald, Tong Ying Shun, Michael D Lewen, Ian F. Pollack, and John S. Lazo

Molecular Pharmacology

| siRNA Treatment              | Gene ID   | Gene Name | Protein Name                                                                     | Log Fold Change | Inlier |
|------------------------------|-----------|-----------|----------------------------------------------------------------------------------|-----------------|--------|
| siRNA-Vinblastine Run1-DMSO  | NM_014225 | PPP2R1A   | protein phosphatase 2 (formerly 2A), regulatory subunit A (PR 65), alpha isoform | 1.368597        | Inlier |
| siRNA-Temozolomide Run2-DMSO | NM_181699 | PPP2R1B   | protein phosphatase 2 (formerly 2A), regulatory subunit A (PR 65), beta isoform  | -1.115664       | Inlier |
| siRNA-Temozolomide Run3-DMSO | NM_181699 | PPP2R1B   | protein phosphatase 2 (formerly 2A), regulatory subunit A (PR 65), beta isoform  | -0.719569       | Inlier |
| siRNA-Temozolomide Run1-DMSO | NM_181699 | PPP2R1B   | protein phosphatase 2 (formerly 2A), regulatory subunit A (PR 65), beta isoform  | -0.629431       | Inlier |
| siRNA Disorazole DMSO Run3   | NM_181699 | PPP2R1B   | protein phosphatase 2 (formerly 2A), regulatory subunit A (PR 65), beta isoform  | -0.048772       | Inlier |

Identification of Survival Genes in Human Glioblastoma Cells Using siRNA Screening

Nikhil G Thaker, Fang Zhang, Peter R. McDonald, Tong Ying Shun, Michael D Lewen, Ian F. Pollack, and John S. Lazo

Molecular Pharmacology

| siRNA Treatment              | Gene ID       | Gene Name | Protein Description                                                              | Value     | Category |
|------------------------------|---------------|-----------|----------------------------------------------------------------------------------|-----------|----------|
| siRNA Disorazole DMSO Run1   | NM_1816<br>99 | PPP2R1B   | protein phosphatase 2 (formerly 2A), regulatory subunit A (PR 65), beta isoform  | 0.048772  | Inlier   |
| siRNA Disorazole DMSO Run2   | NM_1816<br>99 | PPP2R1B   | protein phosphatase 2 (formerly 2A), regulatory subunit A (PR 65), beta isoform  | 0.48889   | Inlier   |
| siRNA-Vinblastine Run2-DMSO  | NM_1816<br>99 | PPP2R1B   | protein phosphatase 2 (formerly 2A), regulatory subunit A (PR 65), beta isoform  | 0.795083  | Inlier   |
| siRNA-Vinblastine Run1-DMSO  | NM_1816<br>99 | PPP2R1B   | protein phosphatase 2 (formerly 2A), regulatory subunit A (PR 65), beta isoform  | 1.393859  | Inlier   |
| siRNA-Temozolomide Run3-DMSO | NM_0027<br>17 | PPP2R2A   | protein phosphatase 2 (formerly 2A), regulatory subunit B (PR 52), alpha isoform | -0.720818 | Inlier   |

Identification of Survival Genes in Human Glioblastoma Cells Using siRNA Screening  
 Nikhil G Thaker, Fang Zhang, Peter R. McDonald, Tong Ying Shun, Michael D Lewen, Ian F. Pollack, and John S. Lazo  
 Molecular Pharmacology

| siRNA Treatment              | Gene ID   | Gene Name | Protein Name                                                                     | Log Fold Change | Outlier Status |
|------------------------------|-----------|-----------|----------------------------------------------------------------------------------|-----------------|----------------|
| siRNA-Temozolomide Run2-DMSO | NM_002717 | PPP2R2A   | protein phosphatase 2 (formerly 2A), regulatory subunit B (PR 52), alpha isoform | -0.707109       | Inlier         |
| siRNA Disorazole DMSO Run2   | NM_002717 | PPP2R2A   | protein phosphatase 2 (formerly 2A), regulatory subunit B (PR 52), alpha isoform | -0.641891       | Inlier         |
| siRNA-Temozolomide Run1-DMSO | NM_002717 | PPP2R2A   | protein phosphatase 2 (formerly 2A), regulatory subunit B (PR 52), alpha isoform | -0.002107       | Inlier         |
| siRNA Disorazole DMSO Run3   | NM_002717 | PPP2R2A   | protein phosphatase 2 (formerly 2A), regulatory subunit B (PR 52), alpha isoform | 0.002107        | Inlier         |
| siRNA Disorazole DMSO Run1   | NM_002717 | PPP2R2A   | protein phosphatase 2 (formerly 2A), regulatory subunit B (PR 52), alpha isoform | 0.303143        | Inlier         |

Identification of Survival Genes in Human Glioblastoma Cells Using siRNA Screening

Nikhil G Thaker, Fang Zhang, Peter R. McDonald, Tong Ying Shun, Michael D Lewen, Ian F. Pollack, and John S. Lazo

Molecular Pharmacology

| siRNA Treatment              | Gene ID   | Gene Name | Protein Description                                                              | Log2 Fold Change | Significance |
|------------------------------|-----------|-----------|----------------------------------------------------------------------------------|------------------|--------------|
| siRNA-Vinblastine Run2-DMSO  | NM_002717 | PPP2R2A   | protein phosphatase 2 (formerly 2A), regulatory subunit B (PR 52), alpha isoform | 1.116355         | Inlier       |
| siRNA-Vinblastine Run1-DMSO  | NM_002717 | PPP2R2A   | protein phosphatase 2 (formerly 2A), regulatory subunit B (PR 52), alpha isoform | 1.573582         | Inlier       |
| siRNA-Temozolomide Run2-DMSO | NM_181678 | PPP2R2B   | protein phosphatase 2 (formerly 2A), regulatory subunit B (PR 52), beta isoform  | -2.224032        | Inlier       |
| siRNA-Temozolomide Run3-DMSO | NM_181678 | PPP2R2B   | protein phosphatase 2 (formerly 2A), regulatory subunit B (PR 52), beta isoform  | -1.964365        | Inlier       |
| siRNA Disorazole DMSO Run2   | NM_181678 | PPP2R2B   | protein phosphatase 2 (formerly 2A), regulatory subunit B (PR 52), beta isoform  | -1.892408        | Inlier       |

Identification of Survival Genes in Human Glioblastoma Cells Using siRNA Screening

Nikhil G Thaker, Fang Zhang, Peter R. McDonald, Tong Ying Shun, Michael D Lewen, Ian F. Pollack, and John S. Lazo

Molecular Pharmacology

| siRNA Treatment              | Gene ID   | Gene Name | Protein Name                                                                    | Log Fold Change | Outlier Status |
|------------------------------|-----------|-----------|---------------------------------------------------------------------------------|-----------------|----------------|
| siRNA Disorazole DMSO Run3   | NM_181678 | PPP2R2B   | protein phosphatase 2 (formerly 2A), regulatory subunit B (PR 52), beta isoform | -0.036794       | Inlier         |
| siRNA-Vinblastine Run1-DMSO  | NM_181678 | PPP2R2B   | protein phosphatase 2 (formerly 2A), regulatory subunit B (PR 52), beta isoform | 0.036794        | Inlier         |
| siRNA Disorazole DMSO Run1   | NM_181678 | PPP2R2B   | protein phosphatase 2 (formerly 2A), regulatory subunit B (PR 52), beta isoform | 0.436283        | Inlier         |
| siRNA-Temozolomide Run1-DMSO | NM_181678 | PPP2R2B   | protein phosphatase 2 (formerly 2A), regulatory subunit B (PR 52), beta isoform | 0.436562        | Inlier         |
| siRNA-Vinblastine Run2-DMSO  | NM_181678 | PPP2R2B   | protein phosphatase 2 (formerly 2A), regulatory subunit B (PR 52), beta isoform | 0.912438        | Inlier         |

Identification of Survival Genes in Human Glioblastoma Cells Using siRNA Screening

Nikhil G Thaker, Fang Zhang, Peter R. McDonald, Tong Ying Shun, Michael D Lewen, Ian F. Pollack, and John S. Lazo

Molecular Pharmacology

| siRNA Treatment              | Gene ID   | Gene Name | Protein Name                                                                     | Log Fold Change | Outlier Status |
|------------------------------|-----------|-----------|----------------------------------------------------------------------------------|-----------------|----------------|
| siRNA-Temozolomide Run2-DMSO | NM_020416 | PPP2R2C   | protein phosphatase 2 (formerly 2A), regulatory subunit B (PR 52), gamma isoform | -1.077959       | Inlier         |
| siRNA Disorazole DMSO Run3   | NM_020416 | PPP2R2C   | protein phosphatase 2 (formerly 2A), regulatory subunit B (PR 52), gamma isoform | -0.868725       | Inlier         |
| siRNA Disorazole DMSO Run1   | NM_020416 | PPP2R2C   | protein phosphatase 2 (formerly 2A), regulatory subunit B (PR 52), gamma isoform | -0.480275       | Inlier         |
| siRNA-Temozolomide Run3-DMSO | NM_020416 | PPP2R2C   | protein phosphatase 2 (formerly 2A), regulatory subunit B (PR 52), gamma isoform | -0.045794       | Inlier         |
| siRNA Disorazole DMSO Run2   | NM_020416 | PPP2R2C   | protein phosphatase 2 (formerly 2A), regulatory subunit B (PR 52), gamma isoform | 0.045794        | Inlier         |

Identification of Survival Genes in Human Glioblastoma Cells Using siRNA Screening

Nikhil G Thaker, Fang Zhang, Peter R. McDonald, Tong Ying Shun, Michael D Lewen, Ian F. Pollack, and John S. Lazo

Molecular Pharmacology

| siRNA Treatment              | Gene ID   | Gene Name | Protein Name                                                                     | Value     | Outlier Status |
|------------------------------|-----------|-----------|----------------------------------------------------------------------------------|-----------|----------------|
| siRNA-Vinblastine Run1-DMSO  | NM_020416 | PPP2R2C   | protein phosphatase 2 (formerly 2A), regulatory subunit B (PR 52), gamma isoform | 0.335846  | Inlier         |
| siRNA-Vinblastine Run2-DMSO  | NM_020416 | PPP2R2C   | protein phosphatase 2 (formerly 2A), regulatory subunit B (PR 52), gamma isoform | 0.956318  | Inlier         |
| siRNA-Temozolomide Run1-DMSO | NM_020416 | PPP2R2C   | protein phosphatase 2, regulatory subunit B, gamma isoform                       | 1.036206  | Inlier         |
| siRNA-Temozolomide Run3-DMSO | NM_018461 | PPP2R2D   | protein phosphatase 2, regulatory subunit B, delta isoform                       | -1.977845 | Inlier         |
| siRNA-Temozolomide Run2-DMSO | NM_018461 | PPP2R2D   | protein phosphatase 2, regulatory subunit B, delta isoform                       | -1.193393 | Inlier         |
| siRNA-Temozolomide Run1-DMSO | NM_018461 | PPP2R2D   | protein phosphatase 2, regulatory subunit B, delta isoform                       | -0.749043 | Inlier         |



Identification of Survival Genes in Human Glioblastoma Cells Using siRNA Screening

Nikhil G Thaker, Fang Zhang, Peter R. McDonald, Tong Ying Shun, Michael D Lewen, Ian F. Pollack, and John S. Lazo

Molecular Pharmacology

|                              |               |         |                                                                          |           |        |
|------------------------------|---------------|---------|--------------------------------------------------------------------------|-----------|--------|
| siRNA Disorazole DMSO Run1   | NM_0184<br>61 | PPP2R2D | protein phosphatase 2, regulatory subunit B, delta isoform               | -0.027482 | Inlier |
| siRNA Disorazole DMSO Run3   | NM_0184<br>61 | PPP2R2D | protein phosphatase 2, regulatory subunit B, delta isoform               | 0.027482  | Inlier |
| siRNA-Vinblastine Run1-DMSO  | NM_0184<br>61 | PPP2R2D | protein phosphatase 2, regulatory subunit B, delta isoform               | 0.55236   | Inlier |
| siRNA-Vinblastine Run2-DMSO  | NM_0184<br>61 | PPP2R2D | protein phosphatase 2, regulatory subunit B, delta isoform               | 0.599957  | Inlier |
| siRNA Disorazole DMSO Run2   | NM_0184<br>61 | PPP2R2D | protein phosphatase 2 (formerly 2A), regulatory subunit B, delta isoform | 1.188637  | Inlier |
| siRNA-Temozolomide Run3-DMSO | NM_0027<br>18 | PPP2R3A | protein phosphatase 2 (formerly 2A), regulatory subunit B, alpha         | -1.406203 | Inlier |
| siRNA-Temozolomide Run2-DMSO | NM_0027<br>18 | PPP2R3A | protein phosphatase 2 (formerly 2A), regulatory subunit B, alpha         | -0.987805 | Inlier |

Identification of Survival Genes in Human Glioblastoma Cells Using siRNA Screening

Nikhil G Thaker, Fang Zhang, Peter R. McDonald, Tong Ying Shun, Michael D Lewen, Ian F. Pollack, and John S. Lazo

Molecular Pharmacology

| siRNA Treatment              | Gene    | Accession | Gene    | Protein                                                          | Log2FC    | Category |
|------------------------------|---------|-----------|---------|------------------------------------------------------------------|-----------|----------|
| siRNA Disorazole DMSO Run2   | NM_0027 | 18        | PPP2R3A | protein phosphatase 2 (formerly 2A), regulatory subunit B, alpha | -0.348714 | Inlier   |
| siRNA Disorazole DMSO Run1   | NM_0027 | 18        | PPP2R3A | protein phosphatase 2 (formerly 2A), regulatory subunit B, alpha | -0.302475 | Inlier   |
| siRNA-Temozolomide Run1-DMSO | NM_0027 | 18        | PPP2R3A | protein phosphatase 2 (formerly 2A), regulatory subunit B, alpha | 0.302475  | Inlier   |
| siRNA Disorazole DMSO Run3   | NM_0027 | 18        | PPP2R3A | protein phosphatase 2 (formerly 2A), regulatory subunit B, alpha | 0.361195  | Inlier   |
| siRNA-Vinblastine Run1-DMSO  | NM_0027 | 18        | PPP2R3A | protein phosphatase 2 (formerly 2A), regulatory subunit B, alpha | 0.989991  | Inlier   |
| siRNA-Vinblastine Run2-DMSO  | NM_0027 | 18        | PPP2R3A | protein phosphatase 2 (formerly 2A), regulatory subunit B, alpha | 1.512995  | Inlier   |

Identification of Survival Genes in Human Glioblastoma Cells Using siRNA Screening

Nikhil G Thaker, Fang Zhang, Peter R. McDonald, Tong Ying Shun, Michael D Lewen, Ian F. Pollack, and John S. Lazo

Molecular Pharmacology

| siRNA Treatment              | Gene ID   | Gene Name | Protein Name                                         | Log Fold Change | Outlier Status |
|------------------------------|-----------|-----------|------------------------------------------------------|-----------------|----------------|
| siRNA-Temozolomide Run3-DMSO | NM_178001 | PPP2R4    | protein phosphatase 2A, regulatory subunit B (PR 53) | -1.174903       | Inlier         |
| siRNA-Temozolomide Run2-DMSO | NM_178001 | PPP2R4    | protein phosphatase 2A, regulatory subunit B (PR 53) | -0.296312       | Inlier         |
| siRNA-Temozolomide Run1-DMSO | NM_178001 | PPP2R4    | protein phosphatase 2A, regulatory subunit B (PR 53) | -0.13041        | Inlier         |
| siRNA Disorazole DMSO Run3   | NM_178001 | PPP2R4    | protein phosphatase 2A, regulatory subunit B (PR 53) | -0.108521       | Inlier         |
| siRNA Disorazole DMSO Run1   | NM_178001 | PPP2R4    | protein phosphatase 2A, regulatory subunit B (PR 53) | 0.108521        | Inlier         |
| siRNA-Vinblastine Run2-DMSO  | NM_178001 | PPP2R4    | protein phosphatase 2A, regulatory subunit B (PR 53) | 1.052688        | Inlier         |
| siRNA-Vinblastine Run1-DMSO  | NM_178001 | PPP2R4    | protein phosphatase 2A, regulatory subunit B (PR 53) | 1.083143        | Inlier         |
| siRNA Disorazole DMSO Run2   | NM_178001 | PPP2R4    | protein phosphatase 2A, regulatory subunit B (PR 53) | 1.164166        | Inlier         |

Identification of Survival Genes in Human Glioblastoma Cells Using siRNA Screening

Nikhil G Thaker, Fang Zhang, Peter R. McDonald, Tong Ying Shun, Michael D Lewen, Ian F. Pollack, and John S. Lazo

Molecular Pharmacology

| siRNA Treatment              | Gene      | Accession | Gene Name                                                        | Value     | Category |
|------------------------------|-----------|-----------|------------------------------------------------------------------|-----------|----------|
| siRNA-Temozolomide Run2-DMSO | NM_006243 | PPP2R5A   | protein phosphatase 2, regulatory subunit B (B56), alpha isoform | -3.67711  | Outlier  |
| siRNA-Temozolomide Run3-DMSO | NM_006243 | PPP2R5A   | protein phosphatase 2, regulatory subunit B (B56), alpha isoform | -2.628875 | Inlier   |
| siRNA-Temozolomide Run1-DMSO | NM_006243 | PPP2R5A   | protein phosphatase 2, regulatory subunit B (B56), alpha isoform | -0.419686 | Inlier   |
| siRNA Disorazole DMSO Run3   | NM_006243 | PPP2R5A   | protein phosphatase 2, regulatory subunit B (B56), alpha isoform | -0.267864 | Inlier   |
| siRNA Disorazole DMSO Run2   | NM_006243 | PPP2R5A   | protein phosphatase 2, regulatory subunit B (B56), alpha isoform | 0.267864  | Inlier   |
| siRNA Disorazole DMSO Run1   | NM_006243 | PPP2R5A   | protein phosphatase 2, regulatory subunit B (B56), alpha isoform | 0.353054  | Inlier   |

Identification of Survival Genes in Human Glioblastoma Cells Using siRNA Screening

Nikhil G Thaker, Fang Zhang, Peter R. McDonald, Tong Ying Shun, Michael D Lewen, Ian F. Pollack, and John S. Lazo

Molecular Pharmacology

| siRNA Treatment              | Gene ID   | Gene Name | Protein Name                                                     | Value     | Category |
|------------------------------|-----------|-----------|------------------------------------------------------------------|-----------|----------|
| siRNA-Vinblastine Run2-DMSO  | NM_006243 | PPP2R5A   | protein phosphatase 2, regulatory subunit B (B56), alpha isoform | 0.929314  | Inlier   |
| siRNA-Vinblastine Run1-DMSO  | NM_006243 | PPP2R5A   | protein phosphatase 2, regulatory subunit B (B56), alpha isoform | 1.05697   | Inlier   |
| siRNA-Temozolomide Run2-DMSO | NM_006244 | PPP2R5B   | protein phosphatase 2, regulatory subunit B (B56), beta isoform  | -1.217478 | Inlier   |
| siRNA-Temozolomide Run3-DMSO | NM_006244 | PPP2R5B   | protein phosphatase 2, regulatory subunit B (B56), beta isoform  | -0.906674 | Inlier   |
| siRNA-Temozolomide Run1-DMSO | NM_006244 | PPP2R5B   | protein phosphatase 2, regulatory subunit B (B56), beta isoform  | -0.820347 | Inlier   |
| siRNA Disorazole DMSO Run1   | NM_006244 | PPP2R5B   | protein phosphatase 2, regulatory subunit B (B56), beta isoform  | -0.137035 | Inlier   |

Identification of Survival Genes in Human Glioblastoma Cells Using siRNA Screening

Nikhil G Thaker, Fang Zhang, Peter R. McDonald, Tong Ying Shun, Michael D Lewen, Ian F. Pollack, and John S. Lazo

Molecular Pharmacology

| siRNA Treatment              | Gene ID   | Gene Name | Protein Name                                                     | Value     | Outlier Status |
|------------------------------|-----------|-----------|------------------------------------------------------------------|-----------|----------------|
| siRNA-Vinblastine Run2-DMSO  | NM_006244 | PPP2R5B   | protein phosphatase 2, regulatory subunit B (B56), beta isoform  | 0.137035  | Inlier         |
| siRNA-Vinblastine Run1-DMSO  | NM_006244 | PPP2R5B   | protein phosphatase 2, regulatory subunit B (B56), beta isoform  | 0.438092  | Inlier         |
| siRNA Disorazole DMSO Run3   | NM_006244 | PPP2R5B   | protein phosphatase 2, regulatory subunit B (B56), beta isoform  | 0.528653  | Inlier         |
| siRNA Disorazole DMSO Run2   | NM_006244 | PPP2R5B   | protein phosphatase 2, regulatory subunit B (B56), beta isoform  | 1.623803  | Inlier         |
| siRNA-Temozolomide Run2-DMSO | NM_178588 | PPP2R5C   | protein phosphatase 2, regulatory subunit B (B56), gamma isoform | -2.54094  | Inlier         |
| siRNA-Temozolomide Run1-DMSO | NM_178588 | PPP2R5C   | protein phosphatase 2, regulatory subunit B (B56), gamma isoform | -1.718368 | Inlier         |

Identification of Survival Genes in Human Glioblastoma Cells Using siRNA Screening

Nikhil G Thaker, Fang Zhang, Peter R. McDonald, Tong Ying Shun, Michael D Lewen, Ian F. Pollack, and John S. Lazo

Molecular Pharmacology

| siRNA Treatment              | Gene ID   | Gene Name | Protein Name                                                     | Value     | Category |
|------------------------------|-----------|-----------|------------------------------------------------------------------|-----------|----------|
| siRNA Disorazole DMSO Run1   | NM_178588 | PPP2R5C   | protein phosphatase 2, regulatory subunit B (B56), gamma isoform | -0.935664 | Inlier   |
| siRNA-Vinblastine Run2-DMSO  | NM_178588 | PPP2R5C   | protein phosphatase 2, regulatory subunit B (B56), gamma isoform | -0.126686 | Inlier   |
| siRNA Disorazole DMSO Run2   | NM_178588 | PPP2R5C   | protein phosphatase 2, regulatory subunit B (B56), gamma isoform | 0.126686  | Inlier   |
| siRNA-Temozolomide Run3-DMSO | NM_178588 | PPP2R5C   | protein phosphatase 2, regulatory subunit B (B56), gamma isoform | 0.153107  | Inlier   |
| siRNA Disorazole DMSO Run3   | NM_178588 | PPP2R5C   | protein phosphatase 2, regulatory subunit B (B56), gamma isoform | 0.413336  | Inlier   |
| siRNA-Vinblastine Run1-DMSO  | NM_178588 | PPP2R5C   | protein phosphatase 2, regulatory subunit B (B56), gamma isoform | 2.632541  | Inlier   |

Identification of Survival Genes in Human Glioblastoma Cells Using siRNA Screening

Nikhil G Thaker, Fang Zhang, Peter R. McDonald, Tong Ying Shun, Michael D Lewen, Ian F. Pollack, and John S. Lazo

Molecular Pharmacology

| siRNA Treatment              | Gene ID   | Gene Name | Protein Name                                                     | Log Fold Change | Outlier Status |
|------------------------------|-----------|-----------|------------------------------------------------------------------|-----------------|----------------|
| siRNA-Temozolomide Run2-DMSO | NM_180977 | PPP2R5D   | protein phosphatase 2, regulatory subunit B (B56), delta isoform | -2.491319       | Inlier         |
| siRNA-Temozolomide Run1-DMSO | NM_180977 | PPP2R5D   | protein phosphatase 2, regulatory subunit B (B56), delta isoform | -1.320148       | Inlier         |
| siRNA Disorazole DMSO Run1   | NM_180977 | PPP2R5D   | protein phosphatase 2, regulatory subunit B (B56), delta isoform | -0.261005       | Inlier         |
| siRNA-Vinblastine Run1-DMSO  | NM_180977 | PPP2R5D   | protein phosphatase 2, regulatory subunit B (B56), delta isoform | -0.015165       | Inlier         |
| siRNA-Temozolomide Run3-DMSO | NM_180977 | PPP2R5D   | protein phosphatase 2, regulatory subunit B (B56), delta isoform | 0.015165        | Inlier         |
| siRNA-Vinblastine Run2-DMSO  | NM_180977 | PPP2R5D   | protein phosphatase 2, regulatory subunit B (B56), delta isoform | 0.357299        | Inlier         |



Identification of Survival Genes in Human Glioblastoma Cells Using siRNA Screening

Nikhil G Thaker, Fang Zhang, Peter R. McDonald, Tong Ying Shun, Michael D Lewen, Ian F. Pollack, and John S. Lazo

Molecular Pharmacology

| siRNA              | Condition | Run   | Gene | Accession | Protein                                                                    | Score     | Inlier |
|--------------------|-----------|-------|------|-----------|----------------------------------------------------------------------------|-----------|--------|
| siRNA Disorazole   | DMSO      | Run3  | 77   | NM_1809   | PPP2R5D isoform protein phosphatase 2, regulatory subunit B (B56), delta   | 0.991701  | Inlier |
| siRNA Disorazole   | DMSO      | Run2  | 77   | NM_1809   | PPP2R5D isoform protein phosphatase 2, regulatory subunit B (B56), delta   | 1.11537   | Inlier |
| siRNA-Temozolomide | DMSO      | Run2- | 46   | NM_0062   | PPP2R5E isoform protein phosphatase 2, regulatory subunit B (B56), epsilon | -1.000466 | Inlier |
| siRNA-Temozolomide | DMSO      | Run3- | 46   | NM_0062   | PPP2R5E isoform protein phosphatase 2, regulatory subunit B (B56), epsilon | -0.698581 | Inlier |
| siRNA Disorazole   | DMSO      | Run3  | 46   | NM_0062   | PPP2R5E isoform protein phosphatase 2, regulatory subunit B (B56), epsilon | -0.650419 | Inlier |
| siRNA Disorazole   | DMSO      | Run1  | 46   | NM_0062   | PPP2R5E isoform protein phosphatase 2, regulatory subunit B (B56), epsilon | -0.001739 | Inlier |

Identification of Survival Genes in Human Glioblastoma Cells Using siRNA Screening

Nikhil G Thaker, Fang Zhang, Peter R. McDonald, Tong Ying Shun, Michael D Lewen, Ian F. Pollack, and John S. Lazo

Molecular Pharmacology

| siRNA Treatment              | Gene ID   | Gene Name | Protein Name                                                          | Log2 Fold Change | Outlier Status |
|------------------------------|-----------|-----------|-----------------------------------------------------------------------|------------------|----------------|
| siRNA-Temozolomide Run1-DMSO | NM_006246 | PPP2R5E   | protein phosphatase 2, regulatory subunit B (B56), epsilon isoform    | 0.001739         | Inlier         |
| siRNA Disorazole DMSO Run2   | NM_006246 | PPP2R5E   | protein phosphatase 2, regulatory subunit B (B56), epsilon isoform    | 0.310357         | Inlier         |
| siRNA-Vinblastine Run1-DMSO  | NM_006246 | PPP2R5E   | protein phosphatase 2, regulatory subunit B (B56), epsilon isoform    | 0.749277         | Inlier         |
| siRNA-Vinblastine Run2-DMSO  | NM_006246 | PPP2R5E   | protein phosphatase 3 (formerly 2B), catalytic subunit, alpha isoform | 0.873764         | Inlier         |
| siRNA-Temozolomide Run2-DMSO | NM_000944 | PPP3CA    | calcineurin A alpha                                                   | -2.429997        | Inlier         |

Identification of Survival Genes in Human Glioblastoma Cells Using siRNA Screening

Nikhil G Thaker, Fang Zhang, Peter R. McDonald, Tong Ying Shun, Michael D Lewen, Ian F. Pollack, and John S. Lazo

Molecular Pharmacology

| siRNA Treatment              | Gene ID   | Gene Name | Protein Name                                                                                | Log Fold Change | Outlier Status |
|------------------------------|-----------|-----------|---------------------------------------------------------------------------------------------|-----------------|----------------|
| siRNA-Temozolomide Run3-DMSO | NM_000944 | PPP3CA    | protein phosphatase 3 (formerly 2B), catalytic subunit, alpha isoform (calcineurin A alpha) | -1.688655       | Inlier         |
| siRNA-Temozolomide Run1-DMSO | NM_000944 | PPP3CA    | protein phosphatase 3 (formerly 2B), catalytic subunit, alpha isoform (calcineurin A alpha) | -0.877245       | Inlier         |
| siRNA Disorazole DMSO Run3   | NM_000944 | PPP3CA    | protein phosphatase 3 (formerly 2B), catalytic subunit, alpha isoform (calcineurin A alpha) | -0.117263       | Inlier         |
| siRNA-Vinblastine Run2-DMSO  | NM_000944 | PPP3CA    | protein phosphatase 3 (formerly 2B), catalytic subunit, alpha isoform (calcineurin A alpha) | 0.117263        | Inlier         |

Identification of Survival Genes in Human Glioblastoma Cells Using siRNA Screening

Nikhil G Thaker, Fang Zhang, Peter R. McDonald, Tong Ying Shun, Michael D Lewen, Ian F. Pollack, and John S. Lazo

Molecular Pharmacology

| siRNA Treatment              | Gene ID   | Gene Symbol | Protein Description                                                                         | Value     | Outlier Status |
|------------------------------|-----------|-------------|---------------------------------------------------------------------------------------------|-----------|----------------|
| siRNA Disorazole DMSO Run1   | NM_000944 | PPP3CA      | protein phosphatase 3 (formerly 2B), catalytic subunit, alpha isoform (calcineurin A alpha) | 0.153684  | Inlier         |
| siRNA-Vinblastine Run1-DMSO  | NM_000944 | PPP3CA      | protein phosphatase 3 (formerly 2B), catalytic subunit, alpha isoform (calcineurin A alpha) | 0.471755  | Inlier         |
| siRNA Disorazole DMSO Run2   | NM_000944 | PPP3CA      | protein phosphatase 3 (formerly 2B), catalytic subunit, beta isoform (calcineurin A beta)   | 3.020069  | Inlier         |
| siRNA-Temozolomide Run2-DMSO | NM_021132 | PPP3CB      | protein phosphatase 3 (formerly 2B), catalytic subunit, beta isoform (calcineurin A beta)   | -1.998222 | Inlier         |

Identification of Survival Genes in Human Glioblastoma Cells Using siRNA Screening

Nikhil G Thaker, Fang Zhang, Peter R. McDonald, Tong Ying Shun, Michael D Lewen, Ian F. Pollack, and John S. Lazo

Molecular Pharmacology

| siRNA Treatment              | Gene ID   | Gene Name | Protein Description                                                                       | Log2 Fold Change | Outlier Status |
|------------------------------|-----------|-----------|-------------------------------------------------------------------------------------------|------------------|----------------|
| siRNA-Temozolomide Run3-DMSO | NM_021132 | PPP3CB    | protein phosphatase 3 (formerly 2B), catalytic subunit, beta isoform (calcineurin A beta) | -1.363523        | Inlier         |
| siRNA Disorazole DMSO Run1   | NM_021132 | PPP3CB    | protein phosphatase 3 (formerly 2B), catalytic subunit, beta isoform (calcineurin A beta) | -0.156418        | Inlier         |
| siRNA-Temozolomide Run1-DMSO | NM_021132 | PPP3CB    | protein phosphatase 3 (formerly 2B), catalytic subunit, beta isoform (calcineurin A beta) | -0.003023        | Inlier         |
| siRNA Disorazole DMSO Run2   | NM_021132 | PPP3CB    | protein phosphatase 3 (formerly 2B), catalytic subunit, beta isoform (calcineurin A beta) | 0.003023         | Inlier         |

Identification of Survival Genes in Human Glioblastoma Cells Using siRNA Screening

Nikhil G Thaker, Fang Zhang, Peter R. McDonald, Tong Ying Shun, Michael D Lewen, Ian F. Pollack, and John S. Lazo

Molecular Pharmacology

| siRNA Treatment              | Gene ID   | Gene Name | Protein Name                                                                                | Score     | Outlier Status |
|------------------------------|-----------|-----------|---------------------------------------------------------------------------------------------|-----------|----------------|
| siRNA Disorazole DMSO Run3   | NM_021132 | PPP3CB    | protein phosphatase 3 (formerly 2B), catalytic subunit, beta isoform (calcineurin A beta)   | 0.670061  | Inlier         |
| siRNA-Vinblastine Run1-DMSO  | NM_021132 | PPP3CB    | protein phosphatase 3 (formerly 2B), catalytic subunit, beta isoform (calcineurin A beta)   | 0.678939  | Inlier         |
| siRNA-Vinblastine Run2-DMSO  | NM_021132 | PPP3CB    | protein phosphatase 3 (formerly 2B), catalytic subunit, gamma isoform (calcineurin A gamma) | 0.761946  | Inlier         |
| siRNA-Temozolomide Run2-DMSO | NM_005605 | PPP3CC    | protein phosphatase 3 (formerly 2B), catalytic subunit, gamma isoform (calcineurin A gamma) | -1.005187 | Inlier         |

Identification of Survival Genes in Human Glioblastoma Cells Using siRNA Screening

Nikhil G Thaker, Fang Zhang, Peter R. McDonald, Tong Ying Shun, Michael D Lewen, Ian F. Pollack, and John S.

Lazo

Molecular Pharmacology

| siRNA Treatment              | Gene ID   | Protein                                                                                               | Log Fold Change | Outlier Status |
|------------------------------|-----------|-------------------------------------------------------------------------------------------------------|-----------------|----------------|
| siRNA-Temozolomide Run3-DMSO | NM_005605 | PPP3CC<br>protein phosphatase 3 (formerly 2B), catalytic subunit, gamma isoform (calcineurin A gamma) | -0.537914       | Inlier         |
| siRNA-Temozolomide Run1-DMSO | NM_005605 | PPP3CC<br>protein phosphatase 3 (formerly 2B), catalytic subunit, gamma isoform (calcineurin A gamma) | -0.481019       | Inlier         |
| siRNA Disorazole DMSO Run1   | NM_005605 | PPP3CC<br>protein phosphatase 3 (formerly 2B), catalytic subunit, gamma isoform (calcineurin A gamma) | -0.211215       | Inlier         |
| siRNA-Vinblastine Run2-DMSO  | NM_005605 | PPP3CC<br>protein phosphatase 3 (formerly 2B), catalytic subunit, gamma isoform (calcineurin A gamma) | 0.211215        | Inlier         |

Identification of Survival Genes in Human Glioblastoma Cells Using siRNA Screening

Nikhil G Thaker, Fang Zhang, Peter R. McDonald, Tong Ying Shun, Michael D Lewen, Ian F. Pollack, and John S. Lazo

Molecular Pharmacology

|                              |           |        |                                                                                                         |           |        |
|------------------------------|-----------|--------|---------------------------------------------------------------------------------------------------------|-----------|--------|
| siRNA-Vinblastine Run1-DMSO  | NM_005605 | PPP3CC | protein phosphatase 3 (formerly 2B), catalytic subunit, gamma isoform (calcineurin A gamma)             | 0.811086  | Inlier |
| siRNA Disorazole DMSO Run3   | NM_005605 | PPP3CC | protein phosphatase 3 (formerly 2B), catalytic subunit, gamma isoform (calcineurin A gamma)             | 1.332608  | Inlier |
| siRNA Disorazole DMSO Run2   | NM_005605 | PPP3CC | protein phosphatase 3 (formerly 2B), catalytic subunit, gamma isoform (calcineurin A gamma)             | 2.239696  | Inlier |
| siRNA-Temozolomide Run3-DMSO | NM_000945 | PPP3R1 | protein phosphatase 3 (formerly 2B), regulatory subunit B, 19kDa, alpha isoform (calcineurin B, type I) | -1.736762 | Inlier |



Identification of Survival Genes in Human Glioblastoma Cells Using siRNA Screening

Nikhil G Thaker, Fang Zhang, Peter R. McDonald, Tong Ying Shun, Michael D Lewen, Ian F. Pollack, and John S. Lazo

Molecular Pharmacology

|                              |           |        |                                                                                                         |           |        |
|------------------------------|-----------|--------|---------------------------------------------------------------------------------------------------------|-----------|--------|
| siRNA-Temozolomide Run2-DMSO | NM_000945 | PPP3R1 | protein phosphatase 3 (formerly 2B), regulatory subunit B, 19kDa, alpha isoform (calcineurin B, type I) | -0.738085 | Inlier |
| siRNA-Temozolomide Run1-DMSO | NM_000945 | PPP3R1 | protein phosphatase 3 (formerly 2B), regulatory subunit B, 19kDa, alpha isoform (calcineurin B, type I) | -0.610915 | Inlier |
| siRNA Disorazole DMSO Run1   | NM_000945 | PPP3R1 | protein phosphatase 3 (formerly 2B), regulatory subunit B, 19kDa, alpha isoform (calcineurin B, type I) | -0.374155 | Inlier |
| siRNA Disorazole DMSO Run3   | NM_000945 | PPP3R1 | protein phosphatase 3 (formerly 2B), regulatory subunit B, 19kDa, alpha isoform (calcineurin B, type I) | 0.374156  | Inlier |

Identification of Survival Genes in Human Glioblastoma Cells Using siRNA Screening

Nikhil G Thaker, Fang Zhang, Peter R. McDonald, Tong Ying Shun, Michael D Lewen, Ian F. Pollack, and John S. Lazo

Molecular Pharmacology

|                              |               |        |                                                                                                         |           |         |
|------------------------------|---------------|--------|---------------------------------------------------------------------------------------------------------|-----------|---------|
| siRNA Disorazole DMSO Run2   | NM_0009<br>45 | PPP3R1 | protein phosphatase 3 (formerly 2B), regulatory subunit B, 19kDa, alpha isoform (calcineurin B, type I) | 0.407887  | Inlier  |
| siRNA-Vinblastine Run2-DMSO  | NM_0009<br>45 | PPP3R1 | protein phosphatase 3 (formerly 2B), regulatory subunit B, 19kDa, alpha isoform (calcineurin B, type I) | 1.128697  | Inlier  |
| siRNA-Vinblastine Run1-DMSO  | NM_0009<br>45 | PPP3R1 | protein phosphatase 3 (formerly 2B), regulatory subunit B, 19kDa, alpha isoform (calcineurin B, type I) | 1.603775  | Inlier  |
| siRNA-Temozolomide Run2-DMSO | NM_1471<br>80 | PPP3R2 | protein phosphatase 3 (formerly 2B), regulatory subunit B, 19kDa, beta isoform (calcineurin B, type II) | -4.790887 | Outlier |

Identification of Survival Genes in Human Glioblastoma Cells Using siRNA Screening

Nikhil G Thaker, Fang Zhang, Peter R. McDonald, Tong Ying Shun, Michael D Lewen, Ian F. Pollack, and John S. Lazo

Molecular Pharmacology

|                              |           |        |                                                                                                         |           |        |
|------------------------------|-----------|--------|---------------------------------------------------------------------------------------------------------|-----------|--------|
| siRNA-Temozolomide Run1-DMSO | NM_147180 | PPP3R2 | protein phosphatase 3 (formerly 2B), regulatory subunit B, 19kDa, beta isoform (calcineurin B, type II) | -2.966812 | Inlier |
| siRNA Disorazole DMSO Run1   | NM_147180 | PPP3R2 | protein phosphatase 3 (formerly 2B), regulatory subunit B, 19kDa, beta isoform (calcineurin B, type II) | -0.854388 | Inlier |
| siRNA-Vinblastine Run1-DMSO  | NM_147180 | PPP3R2 | protein phosphatase 3 (formerly 2B), regulatory subunit B, 19kDa, beta isoform (calcineurin B, type II) | -0.106738 | Inlier |
| siRNA-Vinblastine Run2-DMSO  | NM_147180 | PPP3R2 | protein phosphatase 3 (formerly 2B), regulatory subunit B, 19kDa, beta isoform (calcineurin B, type II) | 0.10674   | Inlier |

Identification of Survival Genes in Human Glioblastoma Cells Using siRNA Screening

Nikhil G Thaker, Fang Zhang, Peter R. McDonald, Tong Ying Shun, Michael D Lewen, Ian F. Pollack, and John S. Lazo

Molecular Pharmacology

|                              |           |        |                                                                                                         |           |        |
|------------------------------|-----------|--------|---------------------------------------------------------------------------------------------------------|-----------|--------|
| siRNA-Temozolomide Run3-DMSO | NM_147180 | PPP3R2 | protein phosphatase 3 (formerly 2B), regulatory subunit B, 19kDa, beta isoform (calcineurin B, type II) | 0.305431  | Inlier |
| siRNA Disorazole DMSO Run2   | NM_147180 | PPP3R2 | protein phosphatase 3 (formerly 2B), regulatory subunit B, 19kDa, beta isoform (calcineurin B, type II) | 0.494612  | Inlier |
| siRNA Disorazole DMSO Run3   | NM_147180 | PPP3R2 | protein phosphatase 3 (formerly 2B), regulatory subunit B, 19kDa, beta isoform (calcineurin B, type II) | 1.976879  | Inlier |
| siRNA-Temozolomide Run3-DMSO | NM_002720 | PPP4C  | protein phosphatase 4 (formerly X), catalytic subunit                                                   | -1.424807 | Inlier |

Identification of Survival Genes in Human Glioblastoma Cells Using siRNA Screening  
 Nikhil G Thaker, Fang Zhang, Peter R. McDonald, Tong Ying Shun, Michael D Lewen, Ian F. Pollack, and John S. Lazo

Molecular Pharmacology

| siRNA Treatment              | Gene ID   | Gene Name | Protein Name                                          | Log Fold Change | Outlier Status |
|------------------------------|-----------|-----------|-------------------------------------------------------|-----------------|----------------|
| siRNA-Temozolomide Run2-DMSO | NM_002720 | PPP4C     | protein phosphatase 4 (formerly X), catalytic subunit | -1.102879       | Inlier         |
| siRNA-Temozolomide Run1-DMSO | NM_002720 | PPP4C     | protein phosphatase 4 (formerly X), catalytic subunit | -0.823485       | Inlier         |
| siRNA Disorazole DMSO Run1   | NM_002720 | PPP4C     | protein phosphatase 4 (formerly X), catalytic subunit | -0.151522       | Inlier         |
| siRNA-Vinblastine Run2-DMSO  | NM_002720 | PPP4C     | protein phosphatase 4 (formerly X), catalytic subunit | 0.151522        | Inlier         |
| siRNA-Vinblastine Run1-DMSO  | NM_002720 | PPP4C     | protein phosphatase 4 (formerly X), catalytic subunit | 0.25008         | Inlier         |
| siRNA Disorazole DMSO Run3   | NM_002720 | PPP4C     | protein phosphatase 4 (formerly X), catalytic subunit | 0.525515        | Inlier         |
| siRNA Disorazole DMSO Run2   | NM_002720 | PPP4C     | protein phosphatase 4 (formerly X), catalytic subunit | 0.978155        | Inlier         |

Identification of Survival Genes in Human Glioblastoma Cells Using siRNA Screening  
 Nikhil G Thaker, Fang Zhang, Peter R. McDonald, Tong Ying Shun, Michael D Lewen, Ian F. Pollack, and John S. Lazo

Molecular Pharmacology

| siRNA Treatment              | Gene ID | Accession | Protein | Score     | Category |
|------------------------------|---------|-----------|---------|-----------|----------|
| siRNA Disorazole DMSO Run3   | NM_0051 | 34        | PPP4R1  | -0.979358 | Inlier   |
| siRNA Disorazole DMSO Run1   | NM_0051 | 34        | PPP4R1  | -0.897599 | Inlier   |
| siRNA-Temozolomide Run2-DMSO | NM_0051 | 34        | PPP4R1  | -0.567617 | Inlier   |
| siRNA-Temozolomide Run1-DMSO | NM_0051 | 34        | PPP4R1  | -0.187384 | Inlier   |
| siRNA-Temozolomide Run3-DMSO | NM_0051 | 34        | PPP4R1  | 0.187384  | Inlier   |
| siRNA Disorazole DMSO Run2   | NM_0051 | 34        | PPP4R1  | 0.454749  | Inlier   |
| siRNA-Vinblastine Run2-DMSO  | NM_0051 | 34        | PPP4R1  | 0.781383  | Inlier   |
| siRNA-Vinblastine Run1-DMSO  | NM_0051 | 34        | PPP4R1  | 0.918744  | Inlier   |
| siRNA-Temozolomide Run2-DMSO | NM_1749 | 07        | PPP4R2  | -1.558227 | Inlier   |
| siRNA-Temozolomide Run1-DMSO | NM_1749 | 07        | PPP4R2  | -1.07822  | Inlier   |

Identification of Survival Genes in Human Glioblastoma Cells Using siRNA Screening  
 Nikhil G Thaker, Fang Zhang, Peter R. McDonald, Tong Ying Shun, Michael D Lewen, Ian F. Pollack, and John S. Lazo

Molecular Pharmacology

| siRNA Treatment              | Gene ID   | Protein | Log2 Fold Change | Outlier Type |
|------------------------------|-----------|---------|------------------|--------------|
| siRNA Disorazole DMSO Run1   | NM_174907 | PPP4R2  | -0.273742        | Inlier       |
| siRNA-Temozolomide Run3-DMSO | NM_174907 | PPP4R2  | -0.083459        | Inlier       |
| siRNA Disorazole DMSO Run3   | NM_174907 | PPP4R2  | 0.08346          | Inlier       |
| siRNA-Vinblastine Run2-DMSO  | NM_174907 | PPP4R2  | 0.651772         | Inlier       |
| siRNA-Vinblastine Run1-DMSO  | NM_174907 | PPP4R2  | 0.697228         | Inlier       |
| siRNA Disorazole DMSO Run2   | NM_174907 | PPP4R2  | 2.556934         | Inlier       |
| siRNA-Temozolomide Run3-DMSO | NM_006247 | PPP5C   | -1.507693        | Inlier       |
| siRNA-Temozolomide Run2-DMSO | NM_006247 | PPP5C   | -1.336092        | Inlier       |
| siRNA-Temozolomide Run1-DMSO | NM_006247 | PPP5C   | -0.573444        | Inlier       |
| siRNA Disorazole DMSO Run1   | NM_006247 | PPP5C   | -0.568331        | Inlier       |





Identification of Survival Genes in Human Glioblastoma Cells Using siRNA Screening

Nikhil G Thaker, Fang Zhang, Peter R. McDonald, Tong Ying Shun, Michael D Lewen, Ian F. Pollack, and John S. Lazo

Molecular Pharmacology

| siRNA Treatment              | Gene ID | Accession | Protein Name | Score     | Outlier Status |
|------------------------------|---------|-----------|--------------|-----------|----------------|
| siRNA Disorazole DMSO Run3   | NM_0027 | 21        | PPP6C        | 0.707798  | Inlier         |
| siRNA Disorazole DMSO Run2   | NM_0027 | 21        | PPP6C        | 0.872831  | Inlier         |
| siRNA-Temozolomide Run3-DMSO | NM_0003 | 10        | PPT1         | -2.65156  | Inlier         |
| siRNA-Vinblastine Run2-DMSO  | NM_0003 | 10        | PPT1         | -2.113817 | Inlier         |
| siRNA-Temozolomide Run2-DMSO | NM_0003 | 10        | PPT1         | -0.618848 | Inlier         |
| siRNA Disorazole DMSO Run3   | NM_0003 | 10        | PPT1         | -0.012374 | Inlier         |

protein phosphatase 6, catalytic subunit  
 protein phosphatase 6, catalytic subunit  
 palmitoyl-protein thioesterase 1 (ceroid-lipofuscinosis, neuronal 1, infantile)  
 palmitoyl-protein thioesterase 1 (ceroid-lipofuscinosis, neuronal 1, infantile)  
 palmitoyl-protein thioesterase 1 (ceroid-lipofuscinosis, neuronal 1, infantile)

Identification of Survival Genes in Human Glioblastoma Cells Using siRNA Screening

Nikhil G Thaker, Fang Zhang, Peter R. McDonald, Tong Ying Shun, Michael D Lewen, Ian F. Pollack, and John S. Lazo

Molecular Pharmacology

|                              |               |      |                                                                                 |           |        |
|------------------------------|---------------|------|---------------------------------------------------------------------------------|-----------|--------|
| siRNA Disorazole DMSO Run2   | NM_0003<br>10 | PPT1 | palmitoyl-protein thioesterase 1 (ceroid-lipofuscinosis, neuronal 1, infantile) | 0.012374  | Inlier |
| siRNA-Temozolomide Run1-DMSO | NM_0003<br>10 | PPT1 | palmitoyl-protein thioesterase 1 (ceroid-lipofuscinosis, neuronal 1, infantile) | 0.23664   | Inlier |
| siRNA Disorazole DMSO Run1   | NM_0003<br>10 | PPT1 | palmitoyl-protein thioesterase 1 (ceroid-lipofuscinosis, neuronal 1, infantile) | 0.730152  | Inlier |
| siRNA-Vinblastine Run1-DMSO  | NM_0003<br>10 | PPT1 | palmitoyl-protein thioesterase 1 (ceroid-lipofuscinosis, neuronal 1, infantile) | 2.055012  | Inlier |
| siRNA-Temozolomide Run2-DMSO | NM_1387<br>17 | PPT2 | palmitoyl-protein thioesterase 2                                                | -2.263897 | Inlier |
| siRNA-Temozolomide Run3-DMSO | NM_1387<br>17 | PPT2 | palmitoyl-protein thioesterase 2                                                | -2.186256 | Inlier |
| siRNA-Vinblastine Run2-DMSO  | NM_1387<br>17 | PPT2 | palmitoyl-protein thioesterase 2                                                | -0.300154 | Inlier |

Identification of Survival Genes in Human Glioblastoma Cells Using siRNA Screening  
 Nikhil G Thaker, Fang Zhang, Peter R. McDonald, Tong Ying Shun, Michael D Lewen, Ian F. Pollack, and John S. Lazo

Molecular Pharmacology

|                                  |               |       |                                             |           |        |
|----------------------------------|---------------|-------|---------------------------------------------|-----------|--------|
| siRNA Disorazole DMSO Run1       | NM_1387<br>17 | PPT2  | palmitoyl-<br>protein<br>thioestera<br>se 2 | -0.127906 | Inlier |
| siRNA-Temozolomide Run1-<br>DMSO | NM_1387<br>17 | PPT2  | palmitoyl-<br>protein<br>thioestera<br>se 2 | 0.127906  | Inlier |
| siRNA Disorazole DMSO Run3       | NM_1387<br>17 | PPT2  | palmitoyl-<br>protein<br>thioestera<br>se 2 | 0.174478  | Inlier |
| siRNA Disorazole DMSO Run2       | NM_1387<br>17 | PPT2  | palmitoyl-<br>protein<br>thioestera<br>se 2 | 1.048846  | Inlier |
| siRNA-Vinblastine Run1-<br>DMSO  | NM_1387<br>17 | PPT2  | palmitoyl-<br>protein<br>thioestera<br>se 2 | 1.073528  | Inlier |
| siRNA Disorazole DMSO Run2       | NM_0059<br>72 | PPYR1 | pancreatic<br>polypeptid<br>e receptor<br>1 | -1.671161 | Inlier |
| siRNA-Temozolomide Run2-<br>DMSO | NM_0059<br>72 | PPYR1 | pancreatic<br>polypeptid<br>e receptor<br>1 | -0.89729  | Inlier |
| siRNA-Temozolomide Run3-<br>DMSO | NM_0059<br>72 | PPYR1 | pancreatic<br>polypeptid<br>e receptor<br>1 | -0.686578 | Inlier |
| siRNA-Temozolomide Run1-<br>DMSO | NM_0059<br>72 | PPYR1 | pancreatic<br>polypeptid<br>e receptor<br>1 | -0.057414 | Inlier |
| siRNA Disorazole DMSO Run3       | NM_0059<br>72 | PPYR1 | pancreatic<br>polypeptid<br>e receptor<br>1 | 0.057414  | Inlier |
| siRNA Disorazole DMSO Run1       | NM_0059<br>72 | PPYR1 | pancreatic<br>polypeptid<br>e receptor<br>1 | 0.269884  | Inlier |

Identification of Survival Genes in Human Glioblastoma Cells Using siRNA Screening  
 Nikhil G Thaker, Fang Zhang, Peter R. McDonald, Tong Ying Shun, Michael D Lewen, Ian F. Pollack, and John S. Lazo  
 Molecular Pharmacology

|                              |           |       |                                                                  |           |        |
|------------------------------|-----------|-------|------------------------------------------------------------------|-----------|--------|
| siRNA-Vinblastine Run1-DMSO  | NM_005972 | PPYR1 | pancreatic polypeptide receptor 1                                | 0.672177  | Inlier |
| siRNA-Vinblastine Run2-DMSO  | NM_005972 | PPYR1 | pancreatic polypeptide receptor 1                                | 0.676823  | Inlier |
| siRNA-Temozolomide Run3-DMSO | NM_199326 | PR48  | protein phosphatase 2 (formerly 2A), regulatory subunit B', beta | -2.350044 | Inlier |
| siRNA-Temozolomide Run2-DMSO | NM_199326 | PR48  | protein phosphatase 2 (formerly 2A), regulatory subunit B', beta | -2.105463 | Inlier |
| siRNA Disorazole DMSO Run3   | NM_199326 | PR48  | protein phosphatase 2 (formerly 2A), regulatory subunit B', beta | -0.395597 | Inlier |
| siRNA-Temozolomide Run1-DMSO | NM_199326 | PR48  | protein phosphatase 2 (formerly 2A), regulatory subunit B', beta | -0.093133 | Inlier |
| siRNA Disorazole DMSO Run1   | NM_199326 | PR48  | protein phosphatase 2 (formerly 2A), regulatory subunit B', beta | 0.093134  | Inlier |

Identification of Survival Genes in Human Glioblastoma Cells Using siRNA Screening

Nikhil G Thaker, Fang Zhang, Peter R. McDonald, Tong Ying Shun, Michael D Lewen, Ian F. Pollack, and John S. Lazo

Molecular Pharmacology

|                              |               |      |                                                                  |           |        |
|------------------------------|---------------|------|------------------------------------------------------------------|-----------|--------|
| siRNA Disorazole DMSO Run2   | NM_1993<br>26 | PR48 | protein phosphatase 2 (formerly 2A), regulatory subunit B', beta | 0.17096   | Inlier |
| siRNA-Vinblastine Run2-DMSO  | NM_1993<br>26 | PR48 | protein phosphatase 2 (formerly 2A), regulatory subunit B', beta | 0.953403  | Inlier |
| siRNA-Vinblastine Run1-DMSO  | NM_1993<br>26 | PR48 | protein phosphatase 2 (formerly 2A), regulatory subunit B', beta | 1.45532   | Inlier |
| siRNA-Temozolomide Run2-DMSO | NM_0050<br>40 | PRCP | prolylcarboxypeptidase (angiotensinase C)                        | -1.064483 | Inlier |
| siRNA-Temozolomide Run3-DMSO | NM_0050<br>40 | PRCP | prolylcarboxypeptidase (angiotensinase C)                        | -0.554482 | Inlier |
| siRNA Disorazole DMSO Run3   | NM_0050<br>40 | PRCP | prolylcarboxypeptidase (angiotensinase C)                        | -0.469231 | Inlier |
| siRNA Disorazole DMSO Run2   | NM_0050<br>40 | PRCP | prolylcarboxypeptidase (angiotensinase C)                        | -0.290152 | Inlier |
| siRNA-Temozolomide Run1-DMSO | NM_0050<br>40 | PRCP | prolylcarboxypeptidase (angiotensinase C)                        | 0.290152  | Inlier |

Identification of Survival Genes in Human Glioblastoma Cells Using siRNA Screening  
 Nikhil G Thaker, Fang Zhang, Peter R. McDonald, Tong Ying Shun, Michael D Lewen, Ian F. Pollack, and John S. Lazo

Molecular Pharmacology

|                                  |               |       |                                |                  |
|----------------------------------|---------------|-------|--------------------------------|------------------|
|                                  |               |       | prolylcarbo<br>xypeptidas<br>e |                  |
| siRNA Disorazole DMSO Run1       | NM_0050<br>40 | PRCP  | (angiotens<br>inase C)         | 0.794518 Inlier  |
|                                  |               |       | prolylcarbo<br>xypeptidas<br>e |                  |
| siRNA-Vinblastine Run1-<br>DMSO  | NM_0050<br>40 | PRCP  | (angiotens<br>inase C)         | 1.493941 Inlier  |
|                                  |               |       | prolylcarbo<br>xypeptidas<br>e |                  |
| siRNA-Vinblastine Run2-<br>DMSO  | NM_0050<br>40 | PRCP  | (angiotens<br>inase C)         | 2.201363 Inlier  |
| siRNA-Temozolomide Run3-<br>DMSO | NM_1816<br>97 | PRDX1 | peroxiredo<br>xin 1            | -1.901529 Inlier |
| siRNA-Temozolomide Run2-<br>DMSO | NM_1816<br>97 | PRDX1 | peroxiredo<br>xin 1            | -0.718448 Inlier |
| siRNA-Vinblastine Run2-<br>DMSO  | NM_1816<br>97 | PRDX1 | peroxiredo<br>xin 1            | -0.453431 Inlier |
|                                  | NM_1816       |       | peroxiredo                     |                  |
| siRNA Disorazole DMSO Run3       | 97            | PRDX1 | xin 1                          | -0.099014 Inlier |
|                                  | NM_1816       |       | peroxiredo                     |                  |
| siRNA Disorazole DMSO Run1       | 97            | PRDX1 | xin 1                          | 0.099015 Inlier  |
| siRNA-Temozolomide Run1-<br>DMSO | NM_1816<br>97 | PRDX1 | peroxiredo<br>xin 1            | 0.630552 Inlier  |
|                                  | NM_1816       |       | peroxiredo                     |                  |
| siRNA Disorazole DMSO Run2       | 97            | PRDX1 | xin 1                          | 0.869618 Inlier  |
| siRNA-Vinblastine Run1-<br>DMSO  | NM_1816<br>97 | PRDX1 | peroxiredo<br>xin 1            | 1.42558 Inlier   |
| siRNA-Temozolomide Run1-<br>DMSO | NM_1817<br>37 | PRDX2 | peroxiredo<br>xin 2            | -0.726617 Inlier |
| siRNA-Temozolomide Run2-<br>DMSO | NM_1817<br>37 | PRDX2 | peroxiredo<br>xin 2            | -0.622383 Inlier |
|                                  | NM_1817       |       | peroxiredo                     |                  |
| siRNA Disorazole DMSO Run1       | 37            | PRDX2 | xin 2                          | -0.611772 Inlier |
|                                  | NM_1817       |       | peroxiredo                     |                  |
| siRNA Disorazole DMSO Run3       | 37            | PRDX2 | xin 2                          | -0.25545 Inlier  |
| siRNA-Temozolomide Run3-<br>DMSO | NM_1817<br>37 | PRDX2 | peroxiredo<br>xin 2            | 0.255448 Inlier  |
| siRNA-Vinblastine Run1-<br>DMSO  | NM_1817<br>37 | PRDX2 | peroxiredo<br>xin 2            | 1.214215 Inlier  |
| siRNA-Vinblastine Run2-<br>DMSO  | NM_1817<br>37 | PRDX2 | peroxiredo<br>xin 2            | 1.607975 Inlier  |
|                                  | NM_1817       |       | peroxiredo                     |                  |
| siRNA Disorazole DMSO Run2       | 37            | PRDX2 | xin 2                          | 4.390152 Outlier |
| siRNA-Temozolomide Run2-<br>DMSO | NM_0140<br>98 | PRDX3 | peroxiredo<br>xin 3            | -0.779985 Inlier |
| siRNA-Temozolomide Run3-<br>DMSO | NM_0140<br>98 | PRDX3 | peroxiredo<br>xin 3            | -0.569015 Inlier |

Identification of Survival Genes in Human Glioblastoma Cells Using siRNA Screening  
 Nikhil G Thaker, Fang Zhang, Peter R. McDonald, Tong Ying Shun, Michael D Lewen, Ian F. Pollack, and John S. Lazo

|                            |         |       |            |                  |
|----------------------------|---------|-------|------------|------------------|
| Molecular Pharmacology     | NM_0140 |       | peroxiredo |                  |
| siRNA Disorazole DMSO Run3 | 98      | PRDX3 | xin 3      | -0.274858 Inlier |
| siRNA-Vinblastine Run2-    | NM_0140 |       | peroxiredo |                  |
| DMSO                       | 98      | PRDX3 | xin 3      | -0.074707 Inlier |
|                            | NM_0140 |       | peroxiredo |                  |
| siRNA Disorazole DMSO Run1 | 98      | PRDX3 | xin 3      | 0.074707 Inlier  |
| siRNA-Temozolomide Run1-   | NM_0140 |       | peroxiredo |                  |
| DMSO                       | 98      | PRDX3 | xin 3      | 1.211922 Inlier  |
| siRNA-Vinblastine Run1-    | NM_0140 |       | peroxiredo |                  |
| DMSO                       | 98      | PRDX3 | xin 3      | 2.296768 Inlier  |
|                            | NM_0140 |       | peroxiredo |                  |
| siRNA Disorazole DMSO Run2 | 98      | PRDX3 | xin 3      | 2.367168 Inlier  |
| siRNA-Temozolomide Run3-   | NM_0064 |       | peroxiredo |                  |
| DMSO                       | 06      | PRDX4 | xin 4      | -0.947685 Inlier |
|                            | NM_0064 |       | peroxiredo |                  |
| siRNA Disorazole DMSO Run3 | 06      | PRDX4 | xin 4      | -0.87297 Inlier  |
| siRNA-Vinblastine Run2-    | NM_0064 |       | peroxiredo |                  |
| DMSO                       | 06      | PRDX4 | xin 4      | -0.47603 Inlier  |
| siRNA-Temozolomide Run2-   | NM_0064 |       | peroxiredo |                  |
| DMSO                       | 06      | PRDX4 | xin 4      | -0.021491 Inlier |
|                            | NM_0064 |       | peroxiredo |                  |
| siRNA Disorazole DMSO Run1 | 06      | PRDX4 | xin 4      | 0.021491 Inlier  |
| siRNA-Temozolomide Run1-   | NM_0064 |       | peroxiredo |                  |
| DMSO                       | 06      | PRDX4 | xin 4      | 0.434935 Inlier  |
|                            | NM_0064 |       | peroxiredo |                  |
| siRNA Disorazole DMSO Run2 | 06      | PRDX4 | xin 4      | 1.665524 Inlier  |
| siRNA-Vinblastine Run1-    | NM_0064 |       | peroxiredo |                  |
| DMSO                       | 06      | PRDX4 | xin 4      | 2.731335 Inlier  |
| siRNA-Temozolomide Run3-   | NM_1816 |       | peroxiredo |                  |
| DMSO                       | 52      | PRDX5 | xin 5      | -2.277596 Inlier |
| siRNA-Temozolomide Run2-   | NM_1816 |       | peroxiredo |                  |
| DMSO                       | 52      | PRDX5 | xin 5      | -2.104162 Inlier |
| siRNA-Vinblastine Run2-    | NM_1816 |       | peroxiredo |                  |
| DMSO                       | 52      | PRDX5 | xin 5      | -0.300625 Inlier |
|                            | NM_1816 |       | peroxiredo |                  |
| siRNA Disorazole DMSO Run3 | 52      | PRDX5 | xin 5      | -0.066221 Inlier |
|                            | NM_1816 |       | peroxiredo |                  |
| siRNA Disorazole DMSO Run1 | 52      | PRDX5 | xin 5      | 0.06622 Inlier   |
| siRNA-Temozolomide Run1-   | NM_1816 |       | peroxiredo |                  |
| DMSO                       | 52      | PRDX5 | xin 5      | 0.240929 Inlier  |
|                            | NM_1816 |       | peroxiredo |                  |
| siRNA Disorazole DMSO Run2 | 52      | PRDX5 | xin 5      | 1.048375 Inlier  |
| siRNA-Vinblastine Run1-    | NM_1816 |       | peroxiredo |                  |
| DMSO                       | 52      | PRDX5 | xin 5      | 1.083632 Inlier  |
| siRNA-Temozolomide Run3-   | NM_0049 |       | peroxiredo |                  |
| DMSO                       | 05      | PRDX6 | xin 6      | -1.094263 Inlier |
| siRNA-Temozolomide Run2-   | NM_0049 |       | peroxiredo |                  |
| DMSO                       | 05      | PRDX6 | xin 6      | -0.68075 Inlier  |
|                            | NM_0049 |       | peroxiredo |                  |
| siRNA Disorazole DMSO Run3 | 05      | PRDX6 | xin 6      | -0.66825 Inlier  |
|                            | NM_0049 |       | peroxiredo |                  |
| siRNA Disorazole DMSO Run1 | 05      | PRDX6 | xin 6      | -0.029198 Inlier |

Identification of Survival Genes in Human Glioblastoma Cells Using siRNA Screening

Nikhil G Thaker, Fang Zhang, Peter R. McDonald, Tong Ying Shun, Michael D Lewen, Ian F. Pollack, and John S.

Lazo

|                                  |               |       |                                      |           |        |
|----------------------------------|---------------|-------|--------------------------------------|-----------|--------|
| siRNA-Vinblastine Run2-<br>DMSO  | NM_0049<br>05 | PRDX6 | peroxiredo<br>xin 6                  | 0.029198  | Inlier |
| siRNA-Temozolomide Run1-<br>DMSO | NM_0049<br>05 | PRDX6 | peroxiredo<br>xin 6                  | 0.385174  | Inlier |
| siRNA-Vinblastine Run1-<br>DMSO  | NM_0049<br>05 | PRDX6 | peroxiredo<br>xin 6                  | 1.394884  | Inlier |
| siRNA Disorazole DMSO Run2       | NM_0049<br>05 | PRDX6 | peroxiredo<br>xin 6                  | 1.473774  | Inlier |
| siRNA-Temozolomide Run3-<br>DMSO | NM_0027<br>26 | PREP  | prolyl<br>endopepti<br>dase          | -1.647537 | Inlier |
| siRNA Disorazole DMSO Run1       | NM_0027<br>26 | PREP  | prolyl<br>endopepti<br>dase          | -1.253502 | Inlier |
| siRNA-Temozolomide Run2-<br>DMSO | NM_0027<br>26 | PREP  | prolyl<br>endopepti<br>dase          | -0.944093 | Inlier |
| siRNA-Temozolomide Run1-<br>DMSO | NM_0027<br>26 | PREP  | prolyl<br>endopepti<br>dase          | -0.005145 | Inlier |
| siRNA Disorazole DMSO Run3       | NM_0027<br>26 | PREP  | prolyl<br>endopepti<br>dase          | 0.005145  | Inlier |
| siRNA-Vinblastine Run1-<br>DMSO  | NM_0027<br>26 | PREP  | prolyl<br>endopepti<br>dase          | 0.470093  | Inlier |
| siRNA Disorazole DMSO Run2       | NM_0027<br>26 | PREP  | prolyl<br>endopepti<br>dase          | 0.602089  | Inlier |
| siRNA-Vinblastine Run2-<br>DMSO  | NM_0027<br>26 | PREP  | prolyl<br>endopepti<br>dase          | 0.746911  | Inlier |
| siRNA Disorazole DMSO Run1       | NM_0009<br>46 | PRIM1 | primase,<br>polypeptid<br>e 1, 49kDa | -2.899981 | Inlier |
| siRNA-Temozolomide Run1-<br>DMSO | NM_0009<br>46 | PRIM1 | primase,<br>polypeptid<br>e 1, 49kDa | -0.484351 | Inlier |
| siRNA-Temozolomide Run3-<br>DMSO | NM_0009<br>46 | PRIM1 | primase,<br>polypeptid<br>e 1, 49kDa | -0.451524 | Inlier |
| siRNA-Temozolomide Run2-<br>DMSO | NM_0009<br>46 | PRIM1 | primase,<br>polypeptid<br>e 1, 49kDa | -0.288032 | Inlier |
| siRNA-Vinblastine Run2-<br>DMSO  | NM_0009<br>46 | PRIM1 | primase,<br>polypeptid<br>e 1, 49kDa | 0.288033  | Inlier |



Identification of Survival Genes in Human Glioblastoma Cells Using siRNA Screening  
 Nikhil G Thaker, Fang Zhang, Peter R. McDonald, Tong Ying Shun, Michael D Lewen, Ian F. Pollack, and John S. Lazo  
 Molecular Pharmacology

|                              |               |        |                                                                             |           |         |
|------------------------------|---------------|--------|-----------------------------------------------------------------------------|-----------|---------|
| siRNA Disorazole DMSO Run3   | NM_0009<br>46 | PRIM1  | primase,<br>polypeptid<br>e 1, 49kDa                                        | 0.864649  | Inlier  |
| siRNA-Vinblastine Run1-DMSO  | NM_0009<br>46 | PRIM1  | primase,<br>polypeptid<br>e 1, 49kDa                                        | 3.36888   | Inlier  |
| siRNA Disorazole DMSO Run2   | NM_0009<br>46 | PRIM1  | primase,<br>polypeptid<br>e 1, 49kDa                                        | 3.897933  | Outlier |
| siRNA-Temozolomide Run2-DMSO | NM_0009<br>47 | PRIM2A | primase,<br>polypeptid<br>e 2A,<br>58kDa                                    | -1.575427 | Inlier  |
| siRNA-Temozolomide Run3-DMSO | NM_0009<br>47 | PRIM2A | primase,<br>polypeptid<br>e 2A,<br>58kDa                                    | -1.107469 | Inlier  |
| siRNA Disorazole DMSO Run1   | NM_0009<br>47 | PRIM2A | primase,<br>polypeptid<br>e 2A,<br>58kDa                                    | -0.354231 | Inlier  |
| siRNA-Temozolomide Run1-DMSO | NM_0009<br>47 | PRIM2A | primase,<br>polypeptid<br>e 2A,<br>58kDa                                    | -0.20161  | Inlier  |
| siRNA Disorazole DMSO Run3   | NM_0009<br>47 | PRIM2A | primase,<br>polypeptid<br>e 2A,<br>58kDa                                    | 0.20161   | Inlier  |
| siRNA-Vinblastine Run2-DMSO  | NM_0009<br>47 | PRIM2A | primase,<br>polypeptid<br>e 2A,<br>58kDa                                    | 0.292176  | Inlier  |
| siRNA Disorazole DMSO Run2   | NM_0009<br>47 | PRIM2A | primase,<br>polypeptid<br>e 2A,<br>58kDa                                    | 0.994769  | Inlier  |
| siRNA-Vinblastine Run1-DMSO  | NM_0009<br>47 | PRIM2A | primase,<br>polypeptid<br>e 2A,<br>58kDa                                    | 2.501426  | Inlier  |
| siRNA Disorazole DMSO Run2   | NM_0062<br>51 | PRKAA1 | protein<br>kinase,<br>AMP-<br>activated,<br>alpha 1<br>catalytic<br>subunit | -0.695808 | Inlier  |

Identification of Survival Genes in Human Glioblastoma Cells Using siRNA Screening

Nikhil G Thaker, Fang Zhang, Peter R. McDonald, Tong Ying Shun, Michael D Lewen, Ian F. Pollack, and John S. Lazo

Molecular Pharmacology

| siRNA Treatment              | Gene ID   | Gene Symbol | Protein Description                                      | Log Fold Change | Outlier Status |
|------------------------------|-----------|-------------|----------------------------------------------------------|-----------------|----------------|
| siRNA-Temozolomide Run3-DMSO | NM_006251 | PRKAA1      | protein kinase, AMP-activated, alpha 1 catalytic subunit | -0.657696       | Inlier         |
| siRNA Disorazole DMSO Run3   | NM_006251 | PRKAA1      | protein kinase, AMP-activated, alpha 1 catalytic subunit | -0.545964       | Inlier         |
| siRNA-Temozolomide Run2-DMSO | NM_006251 | PRKAA1      | protein kinase, AMP-activated, alpha 1 catalytic subunit | -0.177294       | Inlier         |
| siRNA-Temozolomide Run1-DMSO | NM_006251 | PRKAA1      | protein kinase, AMP-activated, alpha 1 catalytic subunit | 0.177294        | Inlier         |
| siRNA Disorazole DMSO Run1   | NM_006251 | PRKAA1      | protein kinase, AMP-activated, alpha 1 catalytic subunit | 0.691304        | Inlier         |
| siRNA-Vinblastine Run1-DMSO  | NM_006251 | PRKAA1      | protein kinase, AMP-activated, alpha 1 catalytic subunit | 1.17314         | Inlier         |
| siRNA-Vinblastine Run2-DMSO  | NM_006251 | PRKAA1      | protein kinase, AMP-activated, alpha 1 catalytic subunit | 1.255048        | Inlier         |

Identification of Survival Genes in Human Glioblastoma Cells Using siRNA Screening

Nikhil G Thaker, Fang Zhang, Peter R. McDonald, Tong Ying Shun, Michael D Lewen, Ian F. Pollack, and John S. Lazo

Molecular Pharmacology

|                                  |               |        |                                                                             |           |        |
|----------------------------------|---------------|--------|-----------------------------------------------------------------------------|-----------|--------|
| siRNA Disorazole DMSO Run2       | NM_0062<br>52 | PRKAA2 | protein<br>kinase,<br>AMP-<br>activated,<br>alpha 2<br>catalytic<br>subunit | -0.877679 | Inlier |
| siRNA-Temozolomide Run3-<br>DMSO | NM_0062<br>52 | PRKAA2 | protein<br>kinase,<br>AMP-<br>activated,<br>alpha 2<br>catalytic<br>subunit | -0.471321 | Inlier |
| siRNA Disorazole DMSO Run3       | NM_0062<br>52 | PRKAA2 | protein<br>kinase,<br>AMP-<br>activated,<br>alpha 2<br>catalytic<br>subunit | -0.305624 | Inlier |
| siRNA-Temozolomide Run2-<br>DMSO | NM_0062<br>52 | PRKAA2 | protein<br>kinase,<br>AMP-<br>activated,<br>alpha 2<br>catalytic<br>subunit | -0.014109 | Inlier |
| siRNA-Temozolomide Run1-<br>DMSO | NM_0062<br>52 | PRKAA2 | protein<br>kinase,<br>AMP-<br>activated,<br>alpha 2<br>catalytic<br>subunit | 0.014109  | Inlier |
| siRNA Disorazole DMSO Run1       | NM_0062<br>52 | PRKAA2 | protein<br>kinase,<br>AMP-<br>activated,<br>alpha 2<br>catalytic<br>subunit | 1.316896  | Inlier |
| siRNA-Vinblastine Run1-<br>DMSO  | NM_0062<br>52 | PRKAA2 | protein<br>kinase,<br>AMP-<br>activated,<br>alpha 2<br>catalytic<br>subunit | 2.196514  | Inlier |

Identification of Survival Genes in Human Glioblastoma Cells Using siRNA Screening

Nikhil G Thaker, Fang Zhang, Peter R. McDonald, Tong Ying Shun, Michael D Lewen, Ian F. Pollack, and John S. Lazo

Molecular Pharmacology

|                              |               |        |                                                             |                  |
|------------------------------|---------------|--------|-------------------------------------------------------------|------------------|
| siRNA-Vinblastine Run2-DMSO  | NM_0062<br>52 | PRKAA2 | protein kinase, AMP-activated, alpha 2 catalytic subunit    | 2.457103 Inlier  |
| siRNA-Temozolomide Run1-DMSO | NM_0062<br>53 | PRKAB1 | protein kinase, AMP-activated, beta 1 non-catalytic subunit | -1.789216 Inlier |
| siRNA-Temozolomide Run3-DMSO | NM_0062<br>53 | PRKAB1 | protein kinase, AMP-activated, beta 1 non-catalytic subunit | -0.83584 Inlier  |
| siRNA-Temozolomide Run2-DMSO | NM_0062<br>53 | PRKAB1 | protein kinase, AMP-activated, beta 1 non-catalytic subunit | -0.28224 Inlier  |
| siRNA-Vinblastine Run1-DMSO  | NM_0062<br>53 | PRKAB1 | protein kinase, AMP-activated, beta 1 non-catalytic subunit | -0.281726 Inlier |
| siRNA Disorazole DMSO Run1   | NM_0062<br>53 | PRKAB1 | protein kinase, AMP-activated, beta 1 non-catalytic subunit | 0.281728 Inlier  |

Identification of Survival Genes in Human Glioblastoma Cells Using siRNA Screening

Nikhil G Thaker, Fang Zhang, Peter R. McDonald, Tong Ying Shun, Michael D Lewen, Ian F. Pollack, and John S. Lazo

Molecular Pharmacology

|                              |               |        |                                                             |                  |
|------------------------------|---------------|--------|-------------------------------------------------------------|------------------|
| siRNA-Vinblastine Run2-DMSO  | NM_0062<br>53 | PRKAB1 | protein kinase, AMP-activated, beta 1 non-catalytic subunit | 0.51316 Inlier   |
| siRNA Disorazole DMSO Run2   | NM_0062<br>53 | PRKAB1 | protein kinase, AMP-activated, beta 1 non-catalytic subunit | 1.645153 Inlier  |
| siRNA Disorazole DMSO Run3   | NM_0062<br>53 | PRKAB1 | protein kinase, AMP-activated, beta 1 non-catalytic subunit | 4.476523 Outlier |
| siRNA-Temozolomide Run3-DMSO | NM_0053<br>99 | PRKAB2 | protein kinase, AMP-activated, beta 2 non-catalytic subunit | -1.297325 Inlier |
| siRNA-Temozolomide Run1-DMSO | NM_0053<br>99 | PRKAB2 | protein kinase, AMP-activated, beta 2 non-catalytic subunit | -0.687637 Inlier |
| siRNA-Temozolomide Run2-DMSO | NM_0053<br>99 | PRKAB2 | protein kinase, AMP-activated, beta 2 non-catalytic subunit | -0.52482 Inlier  |

Identification of Survival Genes in Human Glioblastoma Cells Using siRNA Screening

Nikhil G Thaker, Fang Zhang, Peter R. McDonald, Tong Ying Shun, Michael D Lewen, Ian F. Pollack, and John S. Lazo

Molecular Pharmacology

|                             |               |        |                                                             |           |        |
|-----------------------------|---------------|--------|-------------------------------------------------------------|-----------|--------|
| siRNA Disorazole DMSO Run2  | NM_0053<br>99 | PRKAB2 | protein kinase, AMP-activated, beta 2 non-catalytic subunit | -0.320508 | Inlier |
| siRNA Disorazole DMSO Run3  | NM_0053<br>99 | PRKAB2 | protein kinase, AMP-activated, beta 2 non-catalytic subunit | 0.320508  | Inlier |
| siRNA Disorazole DMSO Run1  | NM_0053<br>99 | PRKAB2 | protein kinase, AMP-activated, beta 2 non-catalytic subunit | 0.661363  | Inlier |
| siRNA-Vinblastine Run2-DMSO | NM_0053<br>99 | PRKAB2 | protein kinase, AMP-activated, beta 2 non-catalytic subunit | 0.904703  | Inlier |
| siRNA-Vinblastine Run1-DMSO | NM_0053<br>99 | PRKAB2 | protein kinase, AMP-activated, beta 2 non-catalytic subunit | 0.918979  | Inlier |
| siRNA Disorazole DMSO Run2  | NM_0027<br>30 | PRKACA | protein kinase, cAMP-dependent, catalytic, alpha            | -0.954541 | Inlier |

Identification of Survival Genes in Human Glioblastoma Cells Using siRNA Screening  
 Nikhil G Thaker, Fang Zhang, Peter R. McDonald, Tong Ying Shun, Michael D Lewen, Ian F. Pollack, and John S. Lazo  
 Molecular Pharmacology

|                              |               |        |                                                  |           |        |
|------------------------------|---------------|--------|--------------------------------------------------|-----------|--------|
| siRNA-Temozolomide Run3-DMSO | NM_0027<br>30 | PRKACA | protein kinase, cAMP-dependent, catalytic, alpha | -0.83403  | Inlier |
| siRNA Disorazole DMSO Run3   | NM_0027<br>30 | PRKACA | protein kinase, cAMP-dependent, catalytic, alpha | -0.65014  | Inlier |
| siRNA-Temozolomide Run2-DMSO | NM_0027<br>30 | PRKACA | protein kinase, cAMP-dependent, catalytic, alpha | -0.038322 | Inlier |
| siRNA-Temozolomide Run1-DMSO | NM_0027<br>30 | PRKACA | protein kinase, cAMP-dependent, catalytic, alpha | 0.038322  | Inlier |
| siRNA-Vinblastine Run1-DMSO  | NM_0027<br>30 | PRKACA | protein kinase, cAMP-dependent, catalytic, alpha | 0.386211  | Inlier |
| siRNA Disorazole DMSO Run1   | NM_0027<br>30 | PRKACA | protein kinase, cAMP-dependent, catalytic, alpha | 0.69886   | Inlier |
| siRNA-Vinblastine Run2-DMSO  | NM_0027<br>30 | PRKACA | protein kinase, cAMP-dependent, catalytic, alpha | 0.769006  | Inlier |

Identification of Survival Genes in Human Glioblastoma Cells Using siRNA Screening  
 Nikhil G Thaker, Fang Zhang, Peter R. McDonald, Tong Ying Shun, Michael D Lewen, Ian F. Pollack, and John S. Lazo  
 Molecular Pharmacology

|                              |               |        |                                                 |           |        |
|------------------------------|---------------|--------|-------------------------------------------------|-----------|--------|
| siRNA-Temozolomide Run3-DMSO | NM_2075<br>78 | PRKACB | protein kinase, cAMP-dependent, catalytic, beta | -0.815892 | Inlier |
| siRNA Disorazole DMSO Run3   | NM_2075<br>78 | PRKACB | protein kinase, cAMP-dependent, catalytic, beta | -0.646214 | Inlier |
| siRNA Disorazole DMSO Run2   | NM_2075<br>78 | PRKACB | protein kinase, cAMP-dependent, catalytic, beta | -0.195679 | Inlier |
| siRNA-Temozolomide Run1-DMSO | NM_2075<br>78 | PRKACB | protein kinase, cAMP-dependent, catalytic, beta | -0.113448 | Inlier |
| siRNA-Temozolomide Run2-DMSO | NM_2075<br>78 | PRKACB | protein kinase, cAMP-dependent, catalytic, beta | 0.113448  | Inlier |
| siRNA Disorazole DMSO Run1   | NM_2075<br>78 | PRKACB | protein kinase, cAMP-dependent, catalytic, beta | 0.702786  | Inlier |
| siRNA-Vinblastine Run1-DMSO  | NM_2075<br>78 | PRKACB | protein kinase, cAMP-dependent, catalytic, beta | 2.07751   | Inlier |



Identification of Survival Genes in Human Glioblastoma Cells Using siRNA Screening  
 Nikhil G Thaker, Fang Zhang, Peter R. McDonald, Tong Ying Shun, Michael D Lewen, Ian F. Pollack, and John S. Lazo  
 Molecular Pharmacology

|                              |           |        |                                                  |           |        |
|------------------------------|-----------|--------|--------------------------------------------------|-----------|--------|
| siRNA-Vinblastine Run2-DMSO  | NM_207578 | PRKACB | protein kinase, cAMP-dependent, catalytic, beta  | 2.397375  | Inlier |
| siRNA Disorazole DMSO Run2   | NM_002732 | PRKACG | protein kinase, cAMP-dependent, catalytic, gamma | -1.936875 | Inlier |
| siRNA-Temozolomide Run3-DMSO | NM_002732 | PRKACG | protein kinase, cAMP-dependent, catalytic, gamma | -1.208734 | Inlier |
| siRNA Disorazole DMSO Run3   | NM_002732 | PRKACG | protein kinase, cAMP-dependent, catalytic, gamma | -1.105415 | Inlier |
| siRNA-Temozolomide Run2-DMSO | NM_002732 | PRKACG | protein kinase, cAMP-dependent, catalytic, gamma | -0.085177 | Inlier |
| siRNA-Temozolomide Run1-DMSO | NM_002732 | PRKACG | protein kinase, cAMP-dependent, catalytic, gamma | 0.085176  | Inlier |
| siRNA Disorazole DMSO Run1   | NM_002732 | PRKACG | protein kinase, cAMP-dependent, catalytic, gamma | 0.506565  | Inlier |

Identification of Survival Genes in Human Glioblastoma Cells Using siRNA Screening

Nikhil G Thaker, Fang Zhang, Peter R. McDonald, Tong Ying Shun, Michael D Lewen, Ian F. Pollack, and John S. Lazo

Molecular Pharmacology

|                              |           |        |                                                              |           |        |
|------------------------------|-----------|--------|--------------------------------------------------------------|-----------|--------|
| siRNA-Vinblastine Run2-DMSO  | NM_002732 | PRKACG | protein kinase, cAMP-dependent, catalytic, gamma             | 0.613636  | Inlier |
| siRNA-Vinblastine Run1-DMSO  | NM_002732 | PRKACG | protein kinase, cAMP-dependent, catalytic, gamma             | 0.735364  | Inlier |
| siRNA-Temozolomide Run1-DMSO | NM_212461 | PRKAG1 | protein kinase, AMP-activated, gamma 1 non-catalytic subunit | -0.843644 | Inlier |
| siRNA-Temozolomide Run3-DMSO | NM_212461 | PRKAG1 | protein kinase, AMP-activated, gamma 1 non-catalytic subunit | -0.814345 | Inlier |
| siRNA Disorazole DMSO Run2   | NM_212461 | PRKAG1 | protein kinase, AMP-activated, gamma 1 non-catalytic subunit | -0.672644 | Inlier |
| siRNA-Temozolomide Run2-DMSO | NM_212461 | PRKAG1 | protein kinase, AMP-activated, gamma 1 non-catalytic subunit | -0.105533 | Inlier |

Identification of Survival Genes in Human Glioblastoma Cells Using siRNA Screening

Nikhil G Thaker, Fang Zhang, Peter R. McDonald, Tong Ying Shun, Michael D Lewen, Ian F. Pollack, and John S. Lazo

Molecular Pharmacology

|                              |               |        |                                                              |           |        |
|------------------------------|---------------|--------|--------------------------------------------------------------|-----------|--------|
| siRNA Disorazole DMSO Run1   | NM_2124<br>61 | PRKAG1 | protein kinase, AMP-activated, gamma 1 non-catalytic subunit | 0.105533  | Inlier |
| siRNA Disorazole DMSO Run3   | NM_2124<br>61 | PRKAG1 | protein kinase, AMP-activated, gamma 1 non-catalytic subunit | 0.377042  | Inlier |
| siRNA-Vinblastine Run1-DMSO  | NM_2124<br>61 | PRKAG1 | protein kinase, AMP-activated, gamma 1 non-catalytic subunit | 0.676356  | Inlier |
| siRNA-Vinblastine Run2-DMSO  | NM_2124<br>61 | PRKAG1 | protein kinase, AMP-activated, gamma 2 non-catalytic subunit | 0.901316  | Inlier |
| siRNA Disorazole DMSO Run2   | NM_0162<br>03 | PRKAG2 | protein kinase, AMP-activated, gamma 2 non-catalytic subunit | -0.926105 | Inlier |
| siRNA-Temozolomide Run3-DMSO | NM_0162<br>03 | PRKAG2 | protein kinase, AMP-activated, gamma 2 non-catalytic subunit | -0.422895 | Inlier |

Identification of Survival Genes in Human Glioblastoma Cells Using siRNA Screening

Nikhil G Thaker, Fang Zhang, Peter R. McDonald, Tong Ying Shun, Michael D Lewen, Ian F. Pollack, and John S. Lazo

Molecular Pharmacology

| siRNA Treatment              | Gene ID   | Gene Name | Protein Description                                          | Value     | Outlier Status |
|------------------------------|-----------|-----------|--------------------------------------------------------------|-----------|----------------|
| siRNA-Temozolomide Run2-DMSO | NM_016203 | PRKAG2    | protein kinase, AMP-activated, gamma 2 non-catalytic subunit | -0.223472 | Inlier         |
| siRNA Disorazole DMSO Run3   | NM_016203 | PRKAG2    | protein kinase, AMP-activated, gamma 2 non-catalytic subunit | -0.086737 | Inlier         |
| siRNA-Temozolomide Run1-DMSO | NM_016203 | PRKAG2    | protein kinase, AMP-activated, gamma 2 non-catalytic subunit | 0.086737  | Inlier         |
| siRNA Disorazole DMSO Run1   | NM_016203 | PRKAG2    | protein kinase, AMP-activated, gamma 2 non-catalytic subunit | 1.982704  | Inlier         |
| siRNA-Vinblastine Run1-DMSO  | NM_016203 | PRKAG2    | protein kinase, AMP-activated, gamma 2 non-catalytic subunit | 2.138184  | Inlier         |
| siRNA-Vinblastine Run2-DMSO  | NM_016203 | PRKAG2    | protein kinase, AMP-activated, gamma 2 non-catalytic subunit | 2.57124   | Inlier         |

Identification of Survival Genes in Human Glioblastoma Cells Using siRNA Screening

Nikhil G Thaker, Fang Zhang, Peter R. McDonald, Tong Ying Shun, Michael D Lewen, Ian F. Pollack, and John S. Lazo

Molecular Pharmacology

| siRNA Treatment              | Gene ID       | Gene Name | Protein Description                                          | Log Fold Change | Outlier Status |
|------------------------------|---------------|-----------|--------------------------------------------------------------|-----------------|----------------|
| siRNA Disorazole DMSO Run2   | NM_0174<br>31 | PRKAG3    | protein kinase, AMP-activated, gamma 3 non-catalytic subunit | -0.824025       | Inlier         |
| siRNA-Temozolomide Run3-DMSO | NM_0174<br>31 | PRKAG3    | protein kinase, AMP-activated, gamma 3 non-catalytic subunit | -0.795814       | Inlier         |
| siRNA Disorazole DMSO Run3   | NM_0174<br>31 | PRKAG3    | protein kinase, AMP-activated, gamma 3 non-catalytic subunit | -0.431996       | Inlier         |
| siRNA-Temozolomide Run1-DMSO | NM_0174<br>31 | PRKAG3    | protein kinase, AMP-activated, gamma 3 non-catalytic subunit | -0.109844       | Inlier         |
| siRNA-Temozolomide Run2-DMSO | NM_0174<br>31 | PRKAG3    | protein kinase, AMP-activated, gamma 3 non-catalytic subunit | 0.109844        | Inlier         |
| siRNA Disorazole DMSO Run1   | NM_0174<br>31 | PRKAG3    | protein kinase, AMP-activated, gamma 3 non-catalytic subunit | 0.594083        | Inlier         |

Identification of Survival Genes in Human Glioblastoma Cells Using siRNA Screening

Nikhil G Thaker, Fang Zhang, Peter R. McDonald, Tong Ying Shun, Michael D Lewen, Ian F. Pollack, and John S. Lazo

Molecular Pharmacology

|                              |           |         |                                                                                            |           |         |
|------------------------------|-----------|---------|--------------------------------------------------------------------------------------------|-----------|---------|
| siRNA-Vinblastine Run1-DMSO  | NM_017431 | PRKAG3  | protein kinase, AMP-activated, gamma 3 non-catalytic subunit                               | 0.754917  | Inlier  |
| siRNA-Vinblastine Run2-DMSO  | NM_017431 | PRKAG3  | protein kinase, AMP-activated, gamma 3 non-catalytic subunit                               | 0.869548  | Inlier  |
| siRNA Disorazole DMSO Run2   | NM_212472 | PRKAR1A | protein kinase, cAMP-dependent, regulatory, type I, alpha (tissue specific extinguisher 1) | -3.669053 | Outlier |
| siRNA Disorazole DMSO Run3   | NM_212472 | PRKAR1A | protein kinase, cAMP-dependent, regulatory, type I, alpha (tissue specific extinguisher 1) | -0.375625 | Inlier  |
| siRNA-Temozolomide Run3-DMSO | NM_212472 | PRKAR1A | protein kinase, cAMP-dependent, regulatory, type I, alpha (tissue specific extinguisher 1) | -0.162044 | Inlier  |

Identification of Survival Genes in Human Glioblastoma Cells Using siRNA Screening

Nikhil G Thaker, Fang Zhang, Peter R. McDonald, Tong Ying Shun, Michael D Lewen, Ian F. Pollack, and John S. Lazo

Molecular Pharmacology

|                              |           |         |                                                                                            |           |        |
|------------------------------|-----------|---------|--------------------------------------------------------------------------------------------|-----------|--------|
| siRNA-Temozolomide Run2-DMSO | NM_212472 | PRKAR1A | protein kinase, cAMP-dependent, regulatory, type I, alpha (tissue specific extinguisher 1) | -0.109731 | Inlier |
| siRNA-Temozolomide Run1-DMSO | NM_212472 | PRKAR1A | protein kinase, cAMP-dependent, regulatory, type I, alpha (tissue specific extinguisher 1) | 0.109731  | Inlier |
| siRNA Disorazole DMSO Run1   | NM_212472 | PRKAR1A | protein kinase, cAMP-dependent, regulatory, type I, alpha (tissue specific extinguisher 1) | 0.973375  | Inlier |
| siRNA-Vinblastine Run2-DMSO  | NM_212472 | PRKAR1A | protein kinase, cAMP-dependent, regulatory, type I, alpha (tissue specific extinguisher 1) | 2.663969  | Inlier |

Identification of Survival Genes in Human Glioblastoma Cells Using siRNA Screening

Nikhil G Thaker, Fang Zhang, Peter R. McDonald, Tong Ying Shun, Michael D Lewen, Ian F. Pollack, and John S. Lazo

Molecular Pharmacology

|                              |           |         |                                                                                                |           |        |
|------------------------------|-----------|---------|------------------------------------------------------------------------------------------------|-----------|--------|
| siRNA-Vinblastine Run1-DMSO  | NM_212472 | PRKAR1A | protein kinase, cAMP-dependent<br>, regulatory, type I, alpha (tissue specific extinguisher 1) | 2.883117  | Inlier |
| siRNA-Temozolomide Run1-DMSO | NM_002735 | PRKAR1B | protein kinase, cAMP-dependent<br>, regulatory, type I, beta                                   | -1.434703 | Inlier |
| siRNA-Temozolomide Run3-DMSO | NM_002735 | PRKAR1B | protein kinase, cAMP-dependent<br>, regulatory, type I, beta                                   | -0.942138 | Inlier |
| siRNA Disorazole DMSO Run2   | NM_002735 | PRKAR1B | protein kinase, cAMP-dependent<br>, regulatory, type I, beta                                   | -0.396072 | Inlier |
| siRNA-Temozolomide Run2-DMSO | NM_002735 | PRKAR1B | protein kinase, cAMP-dependent<br>, regulatory, type I, beta                                   | -0.058123 | Inlier |
| siRNA Disorazole DMSO Run3   | NM_002735 | PRKAR1B | protein kinase, cAMP-dependent<br>, regulatory, type I, beta                                   | 0.058123  | Inlier |



Identification of Survival Genes in Human Glioblastoma Cells Using siRNA Screening

Nikhil G Thaker, Fang Zhang, Peter R. McDonald, Tong Ying Shun, Michael D Lewen, Ian F. Pollack, and John S. Lazo

Molecular Pharmacology

|                              |               |         |                                                            |           |        |
|------------------------------|---------------|---------|------------------------------------------------------------|-----------|--------|
| siRNA Disorazole DMSO Run1   | NM_0027<br>35 | PRKAR1B | protein kinase, cAMP-dependent, regulatory, type I, beta   | 0.406862  | Inlier |
| siRNA-Vinblastine Run2-DMSO  | NM_0027<br>35 | PRKAR1B | protein kinase, cAMP-dependent, regulatory, type I, beta   | 0.993343  | Inlier |
| siRNA-Vinblastine Run1-DMSO  | NM_0027<br>35 | PRKAR1B | protein kinase, cAMP-dependent, regulatory, type I, beta   | 1.006152  | Inlier |
| siRNA Disorazole DMSO Run3   | NM_0041<br>57 | PRKAR2A | protein kinase, cAMP-dependent, regulatory, type II, alpha | -0.699121 | Inlier |
| siRNA-Temozolomide Run3-DMSO | NM_0041<br>57 | PRKAR2A | protein kinase, cAMP-dependent, regulatory, type II, alpha | -0.684884 | Inlier |
| siRNA Disorazole DMSO Run2   | NM_0041<br>57 | PRKAR2A | regulatory, type II, alpha                                 | -0.664116 | Inlier |

Identification of Survival Genes in Human Glioblastoma Cells Using siRNA Screening

Nikhil G Thaker, Fang Zhang, Peter R. McDonald, Tong Ying Shun, Michael D Lewen, Ian F. Pollack, and John S. Lazo

Molecular Pharmacology

|                              |           |         |                                                             |           |        |
|------------------------------|-----------|---------|-------------------------------------------------------------|-----------|--------|
|                              |           |         | protein kinase, cAMP-dependent                              |           |        |
| siRNA-Temozolomide Run1-DMSO | NM_004157 | PRKAR2A | , regulatory, type II, alpha protein kinase, cAMP-dependent | -0.136238 | Inlier |
| siRNA-Temozolomide Run2-DMSO | NM_004157 | PRKAR2A | , regulatory, type II, alpha protein kinase, cAMP-dependent | 0.136238  | Inlier |
| siRNA Disorazole DMSO Run1   | NM_004157 | PRKAR2A | , regulatory, type II, alpha protein kinase, cAMP-dependent | 0.481384  | Inlier |
| siRNA-Vinblastine Run2-DMSO  | NM_004157 | PRKAR2A | , regulatory, type II, alpha protein kinase, cAMP-dependent | 0.745641  | Inlier |
| siRNA-Vinblastine Run1-DMSO  | NM_004157 | PRKAR2A | , regulatory, type II, alpha protein kinase, cAMP-dependent | 0.832049  | Inlier |
| siRNA-Temozolomide Run3-DMSO | NM_002736 | PRKAR2B | , regulatory, type II, beta                                 | -0.753951 | Inlier |

Identification of Survival Genes in Human Glioblastoma Cells Using siRNA Screening

Nikhil G Thaker, Fang Zhang, Peter R. McDonald, Tong Ying Shun, Michael D Lewen, Ian F. Pollack, and John S. Lazo

Molecular Pharmacology

|                              |               |         |      |                                |                  |
|------------------------------|---------------|---------|------|--------------------------------|------------------|
|                              |               |         |      | protein kinase, cAMP-dependent |                  |
| siRNA Disorazole DMSO Run2   | NM_0027<br>36 | PRKAR2B | beta | regulatory, type II, beta      | -0.595049 Inlier |
|                              |               |         |      | protein kinase, cAMP-dependent |                  |
| siRNA-Temozolomide Run2-DMSO | NM_0027<br>36 | PRKAR2B | beta | regulatory, type II, beta      | -0.332812 Inlier |
|                              |               |         |      | protein kinase, cAMP-dependent |                  |
| siRNA-Temozolomide Run1-DMSO | NM_0027<br>36 | PRKAR2B | beta | regulatory, type II, beta      | -0.221426 Inlier |
|                              |               |         |      | protein kinase, cAMP-dependent |                  |
| siRNA Disorazole DMSO Run3   | NM_0027<br>36 | PRKAR2B | beta | regulatory, type II, beta      | 0.221426 Inlier  |
|                              |               |         |      | protein kinase, cAMP-dependent |                  |
| siRNA Disorazole DMSO Run1   | NM_0027<br>36 | PRKAR2B | beta | regulatory, type II, beta      | 1.083392 Inlier  |
|                              |               |         |      | protein kinase, cAMP-dependent |                  |
| siRNA-Vinblastine Run2-DMSO  | NM_0027<br>36 | PRKAR2B | beta | regulatory, type II, beta      | 1.344851 Inlier  |

Identification of Survival Genes in Human Glioblastoma Cells Using siRNA Screening  
 Nikhil G Thaker, Fang Zhang, Peter R. McDonald, Tong Ying Shun, Michael D Lewen, Ian F. Pollack, and John S. Lazo

Molecular Pharmacology

| siRNA Treatment              | Gene ID   | Gene Symbol | Gene Description                                          | Log2 Fold Change | Outlier Status |
|------------------------------|-----------|-------------|-----------------------------------------------------------|------------------|----------------|
| siRNA-Vinblastine Run1-DMSO  | NM_002736 | PRKAR2B     | protein kinase, cAMP-dependent, regulatory, type II, beta | 1.775337         | Inlier         |
| siRNA-Temozolomide Run1-DMSO | NM_002737 | PRKCA       | protein kinase C, alpha                                   | -1.653933        | Inlier         |
| siRNA Disorazole DMSO Run1   | NM_002737 | PRKCA       | protein kinase C, alpha                                   | -0.855481        | Inlier         |
| siRNA-Temozolomide Run2-DMSO | NM_002737 | PRKCA       | protein kinase C, alpha                                   | -0.61205         | Inlier         |
| siRNA Disorazole DMSO Run3   | NM_002737 | PRKCA       | protein kinase C, alpha                                   | -0.418073        | Inlier         |
| siRNA-Vinblastine Run1-DMSO  | NM_002737 | PRKCA       | protein kinase C, alpha                                   | 0.418071         | Inlier         |
| siRNA-Temozolomide Run3-DMSO | NM_002737 | PRKCA       | protein kinase C, alpha                                   | 0.630095         | Inlier         |
| siRNA-Vinblastine Run2-DMSO  | NM_002737 | PRKCA       | protein kinase C, alpha                                   | 0.718905         | Inlier         |
| siRNA Disorazole DMSO Run2   | NM_002737 | PRKCA       | protein kinase C, alpha                                   | 0.755844         | Inlier         |
| siRNA Disorazole DMSO Run1   | NM_012407 | PRKCABP     | protein binding protein kinase C, alpha                   | -1.731424        | Inlier         |
| siRNA-Temozolomide Run2-DMSO | NM_012407 | PRKCABP     | protein binding protein kinase C, alpha                   | -1.10466         | Inlier         |
| siRNA-Temozolomide Run1-DMSO | NM_012407 | PRKCABP     | protein binding protein kinase C, alpha                   | -0.951216        | Inlier         |
| siRNA-Temozolomide Run3-DMSO | NM_012407 | PRKCABP     | protein binding protein kinase C, alpha                   | -0.001256        | Inlier         |

Identification of Survival Genes in Human Glioblastoma Cells Using siRNA Screening  
 Nikhil G Thaker, Fang Zhang, Peter R. McDonald, Tong Ying Shun, Michael D Lewen, Ian F. Pollack, and John S. Lazo

Molecular Pharmacology

|                              |               |         |                                         |           |        |
|------------------------------|---------------|---------|-----------------------------------------|-----------|--------|
| siRNA Disorazole DMSO Run2   | NM_0124<br>07 | PRKCABP | protein kinase C, alpha binding protein | 0.001256  | Inlier |
| siRNA-Vinblastine Run1-DMSO  | NM_0124<br>07 | PRKCABP | protein kinase C, alpha binding protein | 0.531234  | Inlier |
| siRNA-Vinblastine Run2-DMSO  | NM_0124<br>07 | PRKCABP | protein kinase C, alpha binding protein | 0.601528  | Inlier |
| siRNA Disorazole DMSO Run3   | NM_0124<br>07 | PRKCABP | protein kinase C, alpha binding protein | 0.747472  | Inlier |
| siRNA-Temozolomide Run3-DMSO | NM_0027<br>38 | PRKCB1  | protein kinase C, beta 1                | -1.87028  | Inlier |
| siRNA-Temozolomide Run1-DMSO | NM_0027<br>38 | PRKCB1  | protein kinase C, beta 1                | -0.839174 | Inlier |
| siRNA-Temozolomide Run2-DMSO | NM_0027<br>38 | PRKCB1  | protein kinase C, beta 1                | -0.611338 | Inlier |
| siRNA Disorazole DMSO Run2   | NM_0027<br>38 | PRKCB1  | protein kinase C, beta 1                | -0.094483 | Inlier |
| siRNA Disorazole DMSO Run3   | NM_0027<br>38 | PRKCB1  | protein kinase C, beta 1                | 0.094484  | Inlier |
| siRNA Disorazole DMSO Run1   | NM_0027<br>38 | PRKCB1  | protein kinase C, beta 1                | 0.314531  | Inlier |
| siRNA-Vinblastine Run1-DMSO  | NM_0027<br>38 | PRKCB1  | protein kinase C, beta 1                | 0.737662  | Inlier |
| siRNA-Vinblastine Run2-DMSO  | NM_0027<br>38 | PRKCB1  | protein kinase C, beta 1                | 1.462584  | Inlier |
| siRNA-Temozolomide Run3-DMSO | NM_1830<br>48 | PRKCBP1 | protein kinase C binding protein 1      | -0.869132 | Inlier |
| siRNA Disorazole DMSO Run2   | NM_1830<br>48 | PRKCBP1 | protein kinase C binding protein 1      | -0.479868 | Inlier |

Identification of Survival Genes in Human Glioblastoma Cells Using siRNA Screening  
 Nikhil G Thaker, Fang Zhang, Peter R. McDonald, Tong Ying Shun, Michael D Lewen, Ian F. Pollack, and John S. Lazo

Molecular Pharmacology

| siRNA Treatment              | Gene ID       | Gene Name | Protein Name                       | Value     | Category |
|------------------------------|---------------|-----------|------------------------------------|-----------|----------|
| siRNA-Temozolomide Run2-DMSO | NM_1830<br>48 | PRKCBP1   | protein kinase C binding protein 1 | -0.414273 | Inlier   |
| siRNA-Temozolomide Run1-DMSO | NM_1830<br>48 | PRKCBP1   | protein kinase C binding protein 1 | -0.049505 | Inlier   |
| siRNA Disorazole DMSO Run3   | NM_1830<br>48 | PRKCBP1   | protein kinase C binding protein 1 | 0.049505  | Inlier   |
| siRNA Disorazole DMSO Run1   | NM_1830<br>48 | PRKCBP1   | protein kinase C binding protein 1 | 1.742344  | Inlier   |
| siRNA-Vinblastine Run2-DMSO  | NM_1830<br>48 | PRKCBP1   | protein kinase C binding protein 1 | 2.430257  | Inlier   |
| siRNA-Vinblastine Run1-DMSO  | NM_1830<br>48 | PRKCBP1   | protein kinase C binding protein 1 | 2.89941   | Inlier   |
| siRNA-Temozolomide Run1-DMSO | NM_0062<br>54 | PRKCD     | protein kinase C, delta            | -0.687982 | Inlier   |
| siRNA-Temozolomide Run2-DMSO | NM_0062<br>54 | PRKCD     | protein kinase C, delta            | -0.661018 | Inlier   |
| siRNA-Temozolomide Run3-DMSO | NM_0062<br>54 | PRKCD     | protein kinase C, delta            | -0.454565 | Inlier   |
| siRNA Disorazole DMSO Run1   | NM_0062<br>54 | PRKCD     | protein kinase C, delta            | -0.143359 | Inlier   |
| siRNA Disorazole DMSO Run3   | NM_0062<br>54 | PRKCD     | protein kinase C, delta            | 0.143359  | Inlier   |
| siRNA-Vinblastine Run2-DMSO  | NM_0062<br>54 | PRKCD     | protein kinase C, delta            | 3.502737  | Outlier  |
| siRNA Disorazole DMSO Run2   | NM_0062<br>54 | PRKCD     | protein kinase C, delta            | 3.818912  | Outlier  |
| siRNA-Vinblastine Run1-DMSO  | NM_0062<br>54 | PRKCD     | protein kinase C, delta            | 4.571127  | Outlier  |

Identification of Survival Genes in Human Glioblastoma Cells Using siRNA Screening  
 Nikhil G Thaker, Fang Zhang, Peter R. McDonald, Tong Ying Shun, Michael D Lewen, Ian F. Pollack, and John S. Lazo

Molecular Pharmacology

|                              |               |         |                                         |           |        |
|------------------------------|---------------|---------|-----------------------------------------|-----------|--------|
| siRNA-Temozolomide Run3-DMSO | NM_1450<br>40 | PRKCDBP | protein kinase C, delta binding protein | -0.915226 | Inlier |
| siRNA-Temozolomide Run1-DMSO | NM_1450<br>40 | PRKCDBP | protein kinase C, delta binding protein | -0.721192 | Inlier |
| siRNA-Temozolomide Run2-DMSO | NM_1450<br>40 | PRKCDBP | protein kinase C, delta binding protein | -0.627808 | Inlier |
| siRNA Disorazole DMSO Run2   | NM_1450<br>40 | PRKCDBP | protein kinase C, delta binding protein | -0.06468  | Inlier |
| siRNA Disorazole DMSO Run3   | NM_1450<br>40 | PRKCDBP | protein kinase C, delta binding protein | 0.06468   | Inlier |
| siRNA Disorazole DMSO Run1   | NM_1450<br>40 | PRKCDBP | protein kinase C, delta binding protein | 0.256559  | Inlier |
| siRNA-Vinblastine Run2-DMSO  | NM_1450<br>40 | PRKCDBP | protein kinase C, delta binding protein | 1.556692  | Inlier |
| siRNA-Vinblastine Run1-DMSO  | NM_1450<br>40 | PRKCDBP | protein kinase C, delta binding protein | 2.039982  | Inlier |
| siRNA Disorazole DMSO Run3   | NM_0054<br>00 | PRKCE   | protein kinase C, epsilon               | -1.009635 | Inlier |
| siRNA Disorazole DMSO Run2   | NM_0054<br>00 | PRKCE   | protein kinase C, epsilon               | -0.85927  | Inlier |
| siRNA-Temozolomide Run3-DMSO | NM_0054<br>00 | PRKCE   | protein kinase C, epsilon               | -0.712718 | Inlier |
| siRNA-Temozolomide Run2-DMSO | NM_0054<br>00 | PRKCE   | protein kinase C, epsilon               | -0.140944 | Inlier |

Identification of Survival Genes in Human Glioblastoma Cells Using siRNA Screening  
 Nikhil G Thaker, Fang Zhang, Peter R. McDonald, Tong Ying Shun, Michael D Lewen, Ian F. Pollack, and John S. Lazo

Molecular Pharmacology

|                              |               |       |                           |           |        |
|------------------------------|---------------|-------|---------------------------|-----------|--------|
| siRNA-Temozolomide Run1-DMSO | NM_0054<br>00 | PRKCE | protein kinase C, epsilon | 0.140944  | Inlier |
| siRNA Disorazole DMSO Run1   | NM_0054<br>00 | PRKCE | protein kinase C, epsilon | 0.327408  | Inlier |
| siRNA-Vinblastine Run1-DMSO  | NM_0054<br>00 | PRKCE | protein kinase C, epsilon | 0.636282  | Inlier |
| siRNA-Vinblastine Run2-DMSO  | NM_0054<br>00 | PRKCE | protein kinase C, epsilon | 1.006357  | Inlier |
| siRNA Disorazole DMSO Run1   | NM_0027<br>39 | PRKCG | protein kinase C, gamma   | -1.191052 | Inlier |
| siRNA-Temozolomide Run1-DMSO | NM_0027<br>39 | PRKCG | protein kinase C, gamma   | -1.110961 | Inlier |
| siRNA-Temozolomide Run2-DMSO | NM_0027<br>39 | PRKCG | protein kinase C, gamma   | -0.548696 | Inlier |
| siRNA Disorazole DMSO Run2   | NM_0027<br>39 | PRKCG | protein kinase C, gamma   | -0.096092 | Inlier |
| siRNA-Temozolomide Run3-DMSO | NM_0027<br>39 | PRKCG | protein kinase C, gamma   | 0.096091  | Inlier |
| siRNA Disorazole DMSO Run3   | NM_0027<br>39 | PRKCG | protein kinase C, gamma   | 0.203358  | Inlier |
| siRNA-Vinblastine Run2-DMSO  | NM_0027<br>39 | PRKCG | protein kinase C, gamma   | 0.800304  | Inlier |
| siRNA-Vinblastine Run1-DMSO  | NM_0027<br>39 | PRKCG | protein kinase C, gamma   | 1.194933  | Inlier |
| siRNA-Temozolomide Run3-DMSO | NM_0062<br>55 | PRKCH | protein kinase C, eta     | -1.082923 | Inlier |
| siRNA-Temozolomide Run2-DMSO | NM_0062<br>55 | PRKCH | protein kinase C, eta     | -0.809966 | Inlier |
| siRNA-Temozolomide Run1-DMSO | NM_0062<br>55 | PRKCH | protein kinase C, eta     | -0.412567 | Inlier |
| siRNA Disorazole DMSO Run1   | NM_0062<br>55 | PRKCH | protein kinase C, eta     | -0.309134 | Inlier |
| siRNA Disorazole DMSO Run3   | NM_0062<br>55 | PRKCH | protein kinase C, eta     | 0.309134  | Inlier |



Identification of Survival Genes in Human Glioblastoma Cells Using siRNA Screening  
 Nikhil G Thaker, Fang Zhang, Peter R. McDonald, Tong Ying Shun, Michael D Lewen, Ian F. Pollack, and John S. Lazo

Molecular Pharmacology

|                                  |               |       |                              |           |         |
|----------------------------------|---------------|-------|------------------------------|-----------|---------|
| siRNA Disorazole DMSO Run2       | NM_0062<br>55 | PRKCH | protein<br>kinase C,<br>eta  | 0.539034  | Inlier  |
| siRNA-Vinblastine Run2-<br>DMSO  | NM_0062<br>55 | PRKCH | protein<br>kinase C,<br>eta  | 0.917465  | Inlier  |
| siRNA-Vinblastine Run1-<br>DMSO  | NM_0062<br>55 | PRKCH | protein<br>kinase C,<br>eta  | 1.038746  | Inlier  |
| siRNA-Temozolomide Run3-<br>DMSO | NM_0027<br>40 | PRKCI | protein<br>kinase C,<br>iota | -1.057369 | Inlier  |
| siRNA Disorazole DMSO Run2       | NM_0027<br>40 | PRKCI | protein<br>kinase C,<br>iota | -0.6128   | Inlier  |
| siRNA Disorazole DMSO Run1       | NM_0027<br>40 | PRKCI | protein<br>kinase C,<br>iota | -0.403302 | Inlier  |
| siRNA-Temozolomide Run2-<br>DMSO | NM_0027<br>40 | PRKCI | protein<br>kinase C,<br>iota | -0.191926 | Inlier  |
| siRNA Disorazole DMSO Run3       | NM_0027<br>40 | PRKCI | protein<br>kinase C,<br>iota | 0.191926  | Inlier  |
| siRNA-Temozolomide Run1-<br>DMSO | NM_0027<br>40 | PRKCI | protein<br>kinase C,<br>iota | 0.7362    | Inlier  |
| siRNA-Vinblastine Run1-<br>DMSO  | NM_0027<br>40 | PRKCI | protein<br>kinase C,<br>iota | 1.365612  | Inlier  |
| siRNA-Vinblastine Run2-<br>DMSO  | NM_0027<br>40 | PRKCI | protein<br>kinase C,<br>iota | 1.708481  | Inlier  |
| siRNA Disorazole DMSO Run2       | NM_0027<br>42 | PRKCM | protein<br>kinase D1         | -5.999363 | Outlier |
| siRNA-Temozolomide Run1-<br>DMSO | NM_0027<br>42 | PRKCM | protein<br>kinase D1         | -0.77349  | Inlier  |
| siRNA Disorazole DMSO Run3       | NM_0027<br>42 | PRKCM | protein<br>kinase D1         | -0.57551  | Inlier  |
| siRNA Disorazole DMSO Run1       | NM_0027<br>42 | PRKCM | protein<br>kinase D1         | -0.112522 | Inlier  |
| siRNA-Temozolomide Run3-<br>DMSO | NM_0027<br>42 | PRKCM | protein<br>kinase D1         | 0.112522  | Inlier  |
| siRNA-Temozolomide Run2-<br>DMSO | NM_0027<br>42 | PRKCM | protein<br>kinase D1         | 0.14897   | Inlier  |
| siRNA-Vinblastine Run1-<br>DMSO  | NM_0027<br>42 | PRKCM | protein<br>kinase D1         | 1.451483  | Inlier  |
| siRNA-Vinblastine Run2-<br>DMSO  | NM_0027<br>42 | PRKCM | protein<br>kinase D1         | 5.290834  | Outlier |
| siRNA Disorazole DMSO Run2       | NM_0058<br>13 | PRKCN | protein<br>kinase D3         | -6.357272 | Outlier |

Identification of Survival Genes in Human Glioblastoma Cells Using siRNA Screening  
 Nikhil G Thaker, Fang Zhang, Peter R. McDonald, Tong Ying Shun, Michael D Lewen, Ian F. Pollack, and John S. Lazo

|                              |                  |        |                                           |           |         |
|------------------------------|------------------|--------|-------------------------------------------|-----------|---------|
| Molecular Pharmacology       | NM_0058          |        | protein                                   |           |         |
| siRNA Disorazole DMSO Run3   | 13               | PRKCN  | kinase D3                                 | -5.315773 | Outlier |
| siRNA-Temozolomide Run1-DMSO | NM_0058<br>13    | PRKCN  | protein<br>kinase D3                      | -0.360949 | Inlier  |
| siRNA-Temozolomide Run3-DMSO | NM_0058<br>13    | PRKCN  | protein<br>kinase D3                      | -0.064366 | Inlier  |
| siRNA-Vinblastine Run1-DMSO  | NM_0058<br>13    | PRKCN  | protein<br>kinase D3                      | 0.064367  | Inlier  |
| siRNA-Temozolomide Run2-DMSO | NM_0058<br>13    | PRKCN  | protein<br>kinase D3                      | 0.145483  | Inlier  |
| siRNA Disorazole DMSO Run1   | NM_0058<br>13    | PRKCN  | protein<br>kinase D3                      | 0.988051  | Inlier  |
| siRNA-Vinblastine Run2-DMSO  | NM_0058<br>13    | PRKCN  | protein<br>kinase D3                      | 1.723751  | Inlier  |
| siRNA-Temozolomide Run3-DMSO | NM_0062<br>57    | PRKCQ  | protein<br>kinase C,<br>theta             | -1.020832 | Inlier  |
| siRNA Disorazole DMSO Run3   | NM_0062<br>57    | PRKCQ  | protein<br>kinase C,<br>theta             | -0.814267 | Inlier  |
| siRNA Disorazole DMSO Run2   | NM_0062<br>57    | PRKCQ  | protein<br>kinase C,<br>theta             | -0.241553 | Inlier  |
| siRNA Disorazole DMSO Run1   | NM_0062<br>57    | PRKCQ  | protein<br>kinase C,<br>theta             | -0.14307  | Inlier  |
| siRNA-Temozolomide Run2-DMSO | NM_0062<br>57    | PRKCQ  | protein<br>kinase C,<br>theta             | 0.143071  | Inlier  |
| siRNA-Temozolomide Run1-DMSO | NM_0062<br>57    | PRKCQ  | protein<br>kinase C,<br>theta             | 0.534733  | Inlier  |
| siRNA-Vinblastine Run1-DMSO  | NM_0062<br>57    | PRKCQ  | protein<br>kinase C,<br>theta             | 1.155865  | Inlier  |
| siRNA-Vinblastine Run2-DMSO  | NM_0062<br>57    | PRKCQ  | protein<br>kinase C,<br>theta             | 1.244434  | Inlier  |
| siRNA-Temozolomide Run2-DMSO | NM_0010<br>01329 | PRKCSH | protein<br>kinase C<br>substrate<br>80K-H | -1.264471 | Inlier  |
| siRNA Disorazole DMSO Run1   | NM_0010<br>01329 | PRKCSH | protein<br>kinase C<br>substrate<br>80K-H | -0.889583 | Inlier  |
| siRNA-Temozolomide Run1-DMSO | NM_0010<br>01329 | PRKCSH | protein<br>kinase C<br>substrate<br>80K-H | -0.822642 | Inlier  |

Identification of Survival Genes in Human Glioblastoma Cells Using siRNA Screening  
 Nikhil G Thaker, Fang Zhang, Peter R. McDonald, Tong Ying Shun, Michael D Lewen, Ian F. Pollack, and John S. Lazo

Molecular Pharmacology

|                              |                  |        |                                  |           |         |
|------------------------------|------------------|--------|----------------------------------|-----------|---------|
| siRNA-Temozolomide Run3-DMSO | NM_0010<br>01329 | PRKCSH | protein kinase C substrate 80K-H | -0.012871 | Inlier  |
| siRNA Disorazole DMSO Run2   | NM_0010<br>01329 | PRKCSH | protein kinase C substrate 80K-H | 0.012871  | Inlier  |
| siRNA-Vinblastine Run2-DMSO  | NM_0010<br>01329 | PRKCSH | protein kinase C substrate 80K-H | 0.073997  | Inlier  |
| siRNA-Vinblastine Run1-DMSO  | NM_0010<br>01329 | PRKCSH | protein kinase C substrate 80K-H | 0.526358  | Inlier  |
| siRNA Disorazole DMSO Run3   | NM_0010<br>01329 | PRKCSH | protein kinase C substrate 80K-H | 1.476455  | Inlier  |
| siRNA Disorazole DMSO Run2   | NM_0027<br>44    | PRKCZ  | protein kinase C, zeta           | -0.698397 | Inlier  |
| siRNA Disorazole DMSO Run3   | NM_0027<br>44    | PRKCZ  | protein kinase C, zeta           | -0.650603 | Inlier  |
| siRNA-Temozolomide Run3-DMSO | NM_0027<br>44    | PRKCZ  | protein kinase C, zeta           | -0.612068 | Inlier  |
| siRNA-Temozolomide Run1-DMSO | NM_0027<br>44    | PRKCZ  | protein kinase C, zeta           | -0.361773 | Inlier  |
| siRNA-Temozolomide Run2-DMSO | NM_0027<br>44    | PRKCZ  | protein kinase C, zeta           | 0.361773  | Inlier  |
| siRNA Disorazole DMSO Run1   | NM_0027<br>44    | PRKCZ  | protein kinase C, zeta           | 1.703213  | Inlier  |
| siRNA-Vinblastine Run1-DMSO  | NM_0027<br>44    | PRKCZ  | protein kinase C, zeta           | 2.940625  | Inlier  |
| siRNA-Vinblastine Run2-DMSO  | NM_0027<br>44    | PRKCZ  | protein kinase C, zeta           | 3.607118  | Outlier |
| siRNA Disorazole DMSO Run2   | NM_0164<br>57    | PRKD2  | protein kinase D2                | -0.9632   | Inlier  |
| siRNA-Temozolomide Run1-DMSO | NM_0164<br>57    | PRKD2  | protein kinase D2                | -0.745198 | Inlier  |
| siRNA-Temozolomide Run3-DMSO | NM_0164<br>57    | PRKD2  | protein kinase D2                | -0.297082 | Inlier  |
| siRNA-Temozolomide Run2-DMSO | NM_0164<br>57    | PRKD2  | protein kinase D2                | -0.037654 | Inlier  |

Identification of Survival Genes in Human Glioblastoma Cells Using siRNA Screening  
 Nikhil G Thaker, Fang Zhang, Peter R. McDonald, Tong Ying Shun, Michael D Lewen, Ian F. Pollack, and John S. Lazo

|                              |         |       |            |           |        |
|------------------------------|---------|-------|------------|-----------|--------|
| Molecular Pharmacology       | NM_0164 |       | protein    |           |        |
| siRNA Disorazole DMSO Run1   | 57      | PRKD2 | kinase D2  | 0.037654  | Inlier |
| siRNA-Vinblastine Run1-DMSO  | NM_0164 |       | protein    |           |        |
|                              | 57      | PRKD2 | kinase D2  | 0.65567   | Inlier |
|                              | NM_0164 |       | protein    |           |        |
| siRNA Disorazole DMSO Run3   | 57      | PRKD2 | kinase D2  | 0.69333   | Inlier |
| siRNA-Vinblastine Run2-DMSO  | NM_0164 |       | protein    |           |        |
|                              | 57      | PRKD2 | kinase D2  | 1.043393  | Inlier |
|                              |         |       | protein    |           |        |
|                              |         |       | kinase,    |           |        |
|                              |         |       | DNA-       |           |        |
|                              |         |       | activated, |           |        |
|                              |         |       | catalytic  |           |        |
|                              |         |       | polypeptid |           |        |
| siRNA Disorazole DMSO Run2   | NM_0069 | PRKDC | e          | -1.034214 | Inlier |
|                              | 04      |       | protein    |           |        |
|                              |         |       | kinase,    |           |        |
|                              |         |       | DNA-       |           |        |
|                              |         |       | activated, |           |        |
|                              |         |       | catalytic  |           |        |
|                              |         |       | polypeptid |           |        |
| siRNA-Temozolomide Run3-DMSO | NM_0069 | PRKDC | e          | -0.773903 | Inlier |
|                              | 04      |       | protein    |           |        |
|                              |         |       | kinase,    |           |        |
|                              |         |       | DNA-       |           |        |
|                              |         |       | activated, |           |        |
|                              |         |       | catalytic  |           |        |
|                              |         |       | polypeptid |           |        |
| siRNA Disorazole DMSO Run3   | NM_0069 | PRKDC | e          | -0.575097 | Inlier |
|                              | 04      |       | protein    |           |        |
|                              |         |       | kinase,    |           |        |
|                              |         |       | DNA-       |           |        |
|                              |         |       | activated, |           |        |
|                              |         |       | catalytic  |           |        |
|                              |         |       | polypeptid |           |        |
| siRNA-Temozolomide Run1-DMSO | NM_0069 | PRKDC | e          | -0.03317  | Inlier |
|                              | 04      |       | protein    |           |        |
|                              |         |       | kinase,    |           |        |
|                              |         |       | DNA-       |           |        |
|                              |         |       | activated, |           |        |
|                              |         |       | catalytic  |           |        |
|                              |         |       | polypeptid |           |        |
| siRNA-Temozolomide Run2-DMSO | NM_0069 | PRKDC | e          | 0.03317   | Inlier |
|                              | 04      |       | protein    |           |        |
|                              |         |       | kinase,    |           |        |
|                              |         |       | DNA-       |           |        |
|                              |         |       | activated, |           |        |
|                              |         |       | catalytic  |           |        |
|                              |         |       | polypeptid |           |        |
| siRNA Disorazole DMSO Run1   | NM_0069 | PRKDC | e          | 0.354812  | Inlier |
|                              | 04      |       |            |           |        |

Identification of Survival Genes in Human Glioblastoma Cells Using siRNA Screening  
 Nikhil G Thaker, Fang Zhang, Peter R. McDonald, Tong Ying Shun, Michael D Lewen, Ian F. Pollack, and John S. Lazo

Molecular Pharmacology

|                              |           |       |                                                      |           |        |
|------------------------------|-----------|-------|------------------------------------------------------|-----------|--------|
| siRNA-Vinblastine Run1-DMSO  | NM_006904 | PRKDC | protein kinase, DNA-activated, catalytic polypeptide | 0.88791   | Inlier |
| siRNA-Vinblastine Run2-DMSO  | NM_006904 | PRKDC | protein kinase, DNA-activated, catalytic polypeptide | 0.914835  | Inlier |
| siRNA-Temozolomide Run3-DMSO | NM_006258 | PRKG1 | protein kinase, cGMP-dependent, type I               | -1.14591  | Inlier |
| siRNA Disorazole DMSO Run2   | NM_006258 | PRKG1 | protein kinase, cGMP-dependent, type I               | -0.743678 | Inlier |
| siRNA-Temozolomide Run2-DMSO | NM_006258 | PRKG1 | protein kinase, cGMP-dependent, type I               | -0.605322 | Inlier |
| siRNA Disorazole DMSO Run3   | NM_006258 | PRKG1 | protein kinase, cGMP-dependent, type I               | -0.207992 | Inlier |
| siRNA-Temozolomide Run1-DMSO | NM_006258 | PRKG1 | protein kinase, cGMP-dependent, type I               | 0.207992  | Inlier |
| siRNA-Vinblastine Run1-DMSO  | NM_006258 | PRKG1 | protein kinase, cGMP-dependent, type I               | 0.495291  | Inlier |
| siRNA Disorazole DMSO Run1   | NM_006258 | PRKG1 | protein kinase, cGMP-dependent, type I               | 0.781653  | Inlier |

Identification of Survival Genes in Human Glioblastoma Cells Using siRNA Screening  
 Nikhil G Thaker, Fang Zhang, Peter R. McDonald, Tong Ying Shun, Michael D Lewen, Ian F. Pollack, and John S. Lazo

Molecular Pharmacology

|                              |               |       |                                                           |                   |
|------------------------------|---------------|-------|-----------------------------------------------------------|-------------------|
| siRNA-Vinblastine Run2-DMSO  | NM_0062<br>58 | PRKG1 | protein kinase, cGMP-dependent, type I                    | 1.030786 Inlier   |
| siRNA-Temozolomide Run3-DMSO | NM_0062<br>59 | PRKG2 | protein kinase, cGMP-dependent, type II                   | -4.82595 Outlier  |
| siRNA-Temozolomide Run2-DMSO | NM_0062<br>59 | PRKG2 | protein kinase, cGMP-dependent, type II                   | -4.441073 Outlier |
| siRNA-Temozolomide Run1-DMSO | NM_0062<br>59 | PRKG2 | protein kinase, cGMP-dependent, type II                   | -0.215578 Inlier  |
| siRNA Disorazole DMSO Run2   | NM_0062<br>59 | PRKG2 | protein kinase, cGMP-dependent, type II                   | -0.210249 Inlier  |
| siRNA Disorazole DMSO Run1   | NM_0062<br>59 | PRKG2 | protein kinase, cGMP-dependent, type II                   | 0.210249 Inlier   |
| siRNA Disorazole DMSO Run3   | NM_0062<br>59 | PRKG2 | protein kinase, cGMP-dependent, type II                   | 0.340796 Inlier   |
| siRNA-Vinblastine Run1-DMSO  | NM_0062<br>59 | PRKG2 | protein kinase, cGMP-dependent, type II                   | 1.008204 Inlier   |
| siRNA-Vinblastine Run2-DMSO  | NM_0062<br>59 | PRKG2 | protein kinase, cGMP-dependent, type II                   | 1.778159 Inlier   |
| siRNA Disorazole DMSO Run2   | NM_0027<br>59 | PRKR  | eukaryotic translation initiation factor 2-alpha kinase 2 | -1.273884 Inlier  |

Identification of Survival Genes in Human Glioblastoma Cells Using siRNA Screening  
 Nikhil G Thaker, Fang Zhang, Peter R. McDonald, Tong Ying Shun, Michael D Lewen, Ian F. Pollack, and John S. Lazo  
 Molecular Pharmacology

|                              |               |      |                                                           |           |        |
|------------------------------|---------------|------|-----------------------------------------------------------|-----------|--------|
| siRNA-Temozolomide Run3-DMSO | NM_0027<br>59 | PRKR | eukaryotic translation initiation factor 2-alpha kinase 2 | -1.16973  | Inlier |
| siRNA Disorazole DMSO Run3   | NM_0027<br>59 | PRKR | eukaryotic translation initiation factor 2-alpha kinase 2 | -0.862475 | Inlier |
| siRNA-Temozolomide Run2-DMSO | NM_0027<br>59 | PRKR | eukaryotic translation initiation factor 2-alpha kinase 2 | -0.175891 | Inlier |
| siRNA-Temozolomide Run1-DMSO | NM_0027<br>59 | PRKR | eukaryotic translation initiation factor 2-alpha kinase 2 | 0.175891  | Inlier |
| siRNA Disorazole DMSO Run1   | NM_0027<br>59 | PRKR | eukaryotic translation initiation factor 2-alpha kinase 2 | 0.462125  | Inlier |
| siRNA-Vinblastine Run1-DMSO  | NM_0027<br>59 | PRKR | eukaryotic translation initiation factor 2-alpha kinase 2 | 0.62384   | Inlier |
| siRNA-Vinblastine Run2-DMSO  | NM_0027<br>59 | PRKR | eukaryotic translation initiation factor 2-alpha kinase 2 | 0.72516   | Inlier |

Identification of Survival Genes in Human Glioblastoma Cells Using siRNA Screening

Nikhil G Thaker, Fang Zhang, Peter R. McDonald, Tong Ying Shun, Michael D Lewen, Ian F. Pollack, and John S. Lazo

Molecular Pharmacology

|                                  |               |       |                                                                                                       |           |        |
|----------------------------------|---------------|-------|-------------------------------------------------------------------------------------------------------|-----------|--------|
| siRNA Disorazole DMSO Run2       | NM_0036<br>90 | PRKRA | protein<br>kinase,<br>interferon-<br>inducible<br>double<br>stranded<br>RNA<br>dependent<br>activator | -1.655817 | Inlier |
| siRNA Disorazole DMSO Run1       | NM_0036<br>90 | PRKRA | protein<br>kinase,<br>interferon-<br>inducible<br>double<br>stranded<br>RNA<br>dependent<br>activator | -0.796599 | Inlier |
| siRNA-Temozolomide Run1-<br>DMSO | NM_0036<br>90 | PRKRA | protein<br>kinase,<br>interferon-<br>inducible<br>double<br>stranded<br>RNA<br>dependent<br>activator | -0.27889  | Inlier |
| siRNA-Temozolomide Run3-<br>DMSO | NM_0036<br>90 | PRKRA | protein<br>kinase,<br>interferon-<br>inducible<br>double<br>stranded<br>RNA<br>dependent<br>activator | -0.070395 | Inlier |
| siRNA-Temozolomide Run2-<br>DMSO | NM_0036<br>90 | PRKRA | protein<br>kinase,<br>interferon-<br>inducible<br>double<br>stranded<br>RNA<br>dependent<br>activator | 0.070396  | Inlier |



Identification of Survival Genes in Human Glioblastoma Cells Using siRNA Screening

Nikhil G Thaker, Fang Zhang, Peter R. McDonald, Tong Ying Shun, Michael D Lewen, Ian F. Pollack, and John S. Lazo

Molecular Pharmacology

|                              |           |        |                                                                                                            |           |        |
|------------------------------|-----------|--------|------------------------------------------------------------------------------------------------------------|-----------|--------|
| siRNA-Vinblastine Run2-DMSO  | NM_003690 | PRKRA  | protein kinase, interferon-inducible double stranded RNA dependent activator                               | 0.552401  | Inlier |
| siRNA-Vinblastine Run1-DMSO  | NM_003690 | PRKRA  | protein kinase, interferon-inducible double stranded RNA dependent activator                               | 1.398941  | Inlier |
| siRNA Disorazole DMSO Run3   | NM_003690 | PRKRA  | protein-kinase, interferon-inducible double stranded RNA dependent inhibitor, repressor of (P58 repressor) | 1.407469  | Inlier |
| siRNA-Temozolomide Run3-DMSO | NM_004705 | PRKRIR | protein-kinase, interferon-inducible double stranded RNA dependent inhibitor, repressor of (P58 repressor) | -0.771898 | Inlier |
| siRNA-Temozolomide Run2-DMSO | NM_004705 | PRKRIR | protein-kinase, interferon-inducible double stranded RNA dependent inhibitor, repressor of (P58 repressor) | -0.767228 | Inlier |

Identification of Survival Genes in Human Glioblastoma Cells Using siRNA Screening

Nikhil G Thaker, Fang Zhang, Peter R. McDonald, Tong Ying Shun, Michael D Lewen, Ian F. Pollack, and John S. Lazo

Molecular Pharmacology

|                              |           |        |                                                                                                            |           |        |
|------------------------------|-----------|--------|------------------------------------------------------------------------------------------------------------|-----------|--------|
| siRNA-Temozolomide Run1-DMSO | NM_004705 | PRKRIR | protein-kinase, interferon-inducible double stranded RNA dependent inhibitor, repressor of (P58 repressor) | -0.581772 | Inlier |
| siRNA Disorazole DMSO Run2   | NM_004705 | PRKRIR | protein-kinase, interferon-inducible double stranded RNA dependent inhibitor, repressor of (P58 repressor) | -0.362265 | Inlier |
| siRNA Disorazole DMSO Run3   | NM_004705 | PRKRIR | protein-kinase, interferon-inducible double stranded RNA dependent inhibitor, repressor of (P58 repressor) | 0.362265  | Inlier |
| siRNA Disorazole DMSO Run1   | NM_004705 | PRKRIR | protein-kinase, interferon-inducible double stranded RNA dependent inhibitor, repressor of (P58 repressor) | 0.373625  | Inlier |

Identification of Survival Genes in Human Glioblastoma Cells Using siRNA Screening

Nikhil G Thaker, Fang Zhang, Peter R. McDonald, Tong Ying Shun, Michael D Lewen, Ian F. Pollack, and John S. Lazo

Molecular Pharmacology

| siRNA Treatment              | Gene ID   | Accession | Protein Name                                                                                               | Score     | Outlier Status |
|------------------------------|-----------|-----------|------------------------------------------------------------------------------------------------------------|-----------|----------------|
| siRNA-Vinblastine Run2-DMSO  | NM_004705 | PRKRIR    | protein-kinase, interferon-inducible double stranded RNA dependent inhibitor, repressor of (P58 repressor) | 1.713674  | Inlier         |
| siRNA-Vinblastine Run1-DMSO  | NM_004705 | PRKRIR    | protein-kinase, interferon-inducible double stranded RNA dependent inhibitor, repressor of (P58 repressor) | 2.095751  | Inlier         |
| siRNA-Temozolomide Run3-DMSO | NM_018979 | PRKWNK1   | WNK lysine deficient protein kinase 1                                                                      | -1.451678 | Inlier         |
| siRNA Disorazole DMSO Run2   | NM_018979 | PRKWNK1   | WNK lysine deficient protein kinase 1                                                                      | -0.935843 | Inlier         |
| siRNA Disorazole DMSO Run3   | NM_018979 | PRKWNK1   | WNK lysine deficient protein kinase 1                                                                      | -0.753414 | Inlier         |
| siRNA-Temozolomide Run1-DMSO | NM_018979 | PRKWNK1   | WNK lysine deficient protein kinase 1                                                                      | -0.215224 | Inlier         |
| siRNA Disorazole DMSO Run1   | NM_018979 | PRKWNK1   | WNK lysine deficient protein kinase 1                                                                      | 0.215224  | Inlier         |

Identification of Survival Genes in Human Glioblastoma Cells Using siRNA Screening  
 Nikhil G Thaker, Fang Zhang, Peter R. McDonald, Tong Ying Shun, Michael D Lewen, Ian F. Pollack, and John S. Lazo

Molecular Pharmacology

| siRNA Treatment              | Gene ID   | Accession | Gene Name                             | Value     | Outlier Status |
|------------------------------|-----------|-----------|---------------------------------------|-----------|----------------|
| siRNA-Temozolomide Run2-DMSO | NM_018979 | 1         | WNK lysine deficient protein kinase 1 | 0.304652  | Inlier         |
| siRNA-Vinblastine Run1-DMSO  | NM_018979 | 1         | WNK lysine deficient protein kinase 1 | 0.595586  | Inlier         |
| siRNA-Vinblastine Run2-DMSO  | NM_018979 | 1         | WNK lysine deficient protein kinase 1 | 0.983005  | Inlier         |
| siRNA-Temozolomide Run3-DMSO | NM_006648 | 2         | WNK lysine deficient protein kinase 2 | -0.70789  | Inlier         |
| siRNA Disorazole DMSO Run2   | NM_006648 | 2         | WNK lysine deficient protein kinase 2 | -0.64111  | Inlier         |
| siRNA-Temozolomide Run1-DMSO | NM_006648 | 2         | WNK lysine deficient protein kinase 2 | -0.551332 | Inlier         |
| siRNA-Temozolomide Run2-DMSO | NM_006648 | 2         | WNK lysine deficient protein kinase 2 | -0.387612 | Inlier         |
| siRNA Disorazole DMSO Run3   | NM_006648 | 2         | WNK lysine deficient protein kinase 2 | 0.387612  | Inlier         |
| siRNA Disorazole DMSO Run1   | NM_006648 | 2         | WNK lysine deficient protein kinase 2 | 0.82711   | Inlier         |
| siRNA-Vinblastine Run2-DMSO  | NM_006648 | 2         | WNK lysine deficient protein kinase 2 | 2.194257  | Inlier         |

Identification of Survival Genes in Human Glioblastoma Cells Using siRNA Screening  
 Nikhil G Thaker, Fang Zhang, Peter R. McDonald, Tong Ying Shun, Michael D Lewen, Ian F. Pollack, and John S. Lazo

Molecular Pharmacology

|                              |           |         |                                     |           |        |
|------------------------------|-----------|---------|-------------------------------------|-----------|--------|
| siRNA-Vinblastine Run1-DMSO  | NM_006648 | PRKWNK2 | WNLysine deficient protein kinase 2 | 2.88849   | Inlier |
| siRNA Disorazole DMSO Run2   | NM_020922 | PRKWNK3 | WNLysine deficient protein kinase 3 | -3.077145 | Inlier |
| siRNA Disorazole DMSO Run3   | NM_020922 | PRKWNK3 | WNLysine deficient protein kinase 3 | -2.14735  | Inlier |
| siRNA-Temozolomide Run2-DMSO | NM_020922 | PRKWNK3 | WNLysine deficient protein kinase 3 | -0.966992 | Inlier |
| siRNA-Temozolomide Run3-DMSO | NM_020922 | PRKWNK3 | WNLysine deficient protein kinase 3 | -0.232938 | Inlier |
| siRNA-Temozolomide Run1-DMSO | NM_020922 | PRKWNK3 | WNLysine deficient protein kinase 3 | 0.232938  | Inlier |
| siRNA-Vinblastine Run2-DMSO  | NM_020922 | PRKWNK3 | WNLysine deficient protein kinase 3 | 0.301146  | Inlier |
| siRNA-Vinblastine Run1-DMSO  | NM_020922 | PRKWNK3 | WNLysine deficient protein kinase 3 | 0.382008  | Inlier |
| siRNA Disorazole DMSO Run1   | NM_020922 | PRKWNK3 | WNLysine deficient protein kinase 3 | 1.419187  | Inlier |
| siRNA-Temozolomide Run3-DMSO | NM_032387 | PRKWNK4 | WNLysine deficient protein kinase 4 | -0.756042 | Inlier |

Identification of Survival Genes in Human Glioblastoma Cells Using siRNA Screening  
 Nikhil G Thaker, Fang Zhang, Peter R. McDonald, Tong Ying Shun, Michael D Lewen, Ian F. Pollack, and John S. Lazo

Molecular Pharmacology

| siRNA Treatment              | Gene ID   | Accession | Gene Name                             | Log Fold Change | Outlier Status |
|------------------------------|-----------|-----------|---------------------------------------|-----------------|----------------|
| siRNA-Temozolomide Run2-DMSO | NM_032387 | PRKWNK4   | WNK lysine deficient protein kinase 4 | -0.740597       | Inlier         |
| siRNA-Temozolomide Run1-DMSO | NM_032387 | PRKWNK4   | WNK lysine deficient protein kinase 4 | -0.584724       | Inlier         |
| siRNA Disorazole DMSO Run2   | NM_032387 | PRKWNK4   | WNK lysine deficient protein kinase 4 | -0.030567       | Inlier         |
| siRNA Disorazole DMSO Run3   | NM_032387 | PRKWNK4   | WNK lysine deficient protein kinase 4 | 0.030567        | Inlier         |
| siRNA Disorazole DMSO Run1   | NM_032387 | PRKWNK4   | WNK lysine deficient protein kinase 4 | 0.608403        | Inlier         |
| siRNA-Vinblastine Run1-DMSO  | NM_032387 | PRKWNK4   | WNK lysine deficient protein kinase 4 | 0.846431        | Inlier         |
| siRNA-Vinblastine Run2-DMSO  | NM_032387 | PRKWNK4   | WNK lysine deficient protein kinase 4 | 0.847886        | Inlier         |
| siRNA-Temozolomide Run3-DMSO | NM_005044 | PRKX      | protein kinase, X-linked              | -1.493441       | Inlier         |
| siRNA Disorazole DMSO Run2   | NM_005044 | PRKX      | protein kinase, X-linked              | -1.387186       | Inlier         |
| siRNA Disorazole DMSO Run3   | NM_005044 | PRKX      | protein kinase, X-linked              | -0.49309        | Inlier         |
| siRNA-Temozolomide Run2-DMSO | NM_005044 | PRKX      | protein kinase, X-linked              | -0.274766       | Inlier         |
| siRNA-Temozolomide Run1-DMSO | NM_005044 | PRKX      | protein kinase, X-linked              | 0.274766        | Inlier         |

Identification of Survival Genes in Human Glioblastoma Cells Using siRNA Screening  
 Nikhil G Thaker, Fang Zhang, Peter R. McDonald, Tong Ying Shun, Michael D Lewen, Ian F. Pollack, and John S. Lazo

| Molecular Pharmacology       |               |       |       | protein                  |                  |
|------------------------------|---------------|-------|-------|--------------------------|------------------|
| siRNA-Vinblastine Run1-DMSO  | NM_0050<br>44 | PRKX  |       | kinase, X-linked         | 0.313188 Inlier  |
| siRNA Disorazole DMSO Run1   | NM_0050<br>44 | PRKX  |       | protein kinase, X-linked | 0.85591 Inlier   |
| siRNA-Vinblastine Run2-DMSO  | NM_0050<br>44 | PRKX  |       | protein kinase, X-linked | 0.887218 Inlier  |
| siRNA Disorazole DMSO Run2   | NM_0027<br>60 | PRKY  |       | protein kinase, Y-linked | -1.220362 Inlier |
| siRNA-Temozolomide Run3-DMSO | NM_0027<br>60 | PRKY  |       | protein kinase, Y-linked | -1.188138 Inlier |
| siRNA-Temozolomide Run1-DMSO | NM_0027<br>60 | PRKY  |       | protein kinase, Y-linked | -0.341842 Inlier |
| siRNA Disorazole DMSO Run1   | NM_0027<br>60 | PRKY  |       | protein kinase, Y-linked | -0.300786 Inlier |
| siRNA Disorazole DMSO Run3   | NM_0027<br>60 | PRKY  |       | protein kinase, Y-linked | 0.300786 Inlier  |
| siRNA-Temozolomide Run2-DMSO | NM_0027<br>60 | PRKY  |       | protein kinase, Y-linked | 0.494336 Inlier  |
| siRNA-Vinblastine Run1-DMSO  | NM_0027<br>60 | PRKY  |       | protein kinase, Y-linked | 0.854664 Inlier  |
| siRNA-Vinblastine Run2-DMSO  | NM_0027<br>60 | PRKY  |       | protein kinase, Y-linked | 1.290634 Inlier  |
| siRNA-Vinblastine Run2-DMSO  | NM_0009<br>49 | PRLR  |       | prolactin receptor       | -1.323501 Inlier |
| siRNA-Temozolomide Run2-DMSO | NM_0009<br>49 | PRLR  |       | prolactin receptor       | -0.737448 Inlier |
| siRNA-Temozolomide Run3-DMSO | NM_0009<br>49 | PRLR  |       | prolactin receptor       | -0.515843 Inlier |
| siRNA Disorazole DMSO Run1   | NM_0009<br>49 | PRLR  |       | prolactin receptor       | -0.061829 Inlier |
| siRNA Disorazole DMSO Run3   | NM_0009<br>49 | PRLR  |       | prolactin receptor       | 0.061829 Inlier  |
| siRNA-Temozolomide Run1-DMSO | NM_0009<br>49 | PRLR  |       | prolactin receptor       | 0.64958 Inlier   |
| siRNA Disorazole DMSO Run2   | NM_0009<br>49 | PRLR  |       | prolactin receptor       | 0.69942 Inlier   |
| siRNA-Vinblastine Run1-DMSO  | NM_0009<br>49 | PRLR  |       | prolactin receptor       | 1.067044 Inlier  |
| siRNA Disorazole DMSO Run1   | NM_0190<br>23 | PRMT7 | PRMT7 |                          | -2.580068 Inlier |

Identification of Survival Genes in Human Glioblastoma Cells Using siRNA Screening

Nikhil G Thaker, Fang Zhang, Peter R. McDonald, Tong Ying Shun, Michael D Lewen, Ian F. Pollack, and John S. Lazo

|                              |               |       |                                                             |           |        |
|------------------------------|---------------|-------|-------------------------------------------------------------|-----------|--------|
| siRNA-Temozolomide Run1-DMSO | NM_0190<br>23 | PRMT7 | PRMT7                                                       | -1.008555 | Inlier |
| siRNA-Temozolomide Run3-DMSO | NM_0190<br>23 | PRMT7 | PRMT7                                                       | -0.616715 | Inlier |
| siRNA-Temozolomide Run2-DMSO | NM_0190<br>23 | PRMT7 | PRMT7                                                       | -0.399242 | Inlier |
| siRNA-Vinblastine Run2-DMSO  | NM_0190<br>23 | PRMT7 | PRMT7                                                       | 0.399242  | Inlier |
| siRNA Disorazole DMSO Run3   | NM_0190<br>23 | PRMT7 | PRMT7                                                       | 0.559931  | Inlier |
| siRNA Disorazole DMSO Run2   | NM_0190<br>23 | PRMT7 | PRMT7                                                       | 0.732285  | Inlier |
| siRNA-Vinblastine Run1-DMSO  | NM_0190<br>23 | PRMT7 | PRMT7                                                       | 1.18286   | Inlier |
| siRNA-Temozolomide Run3-DMSO | NM_0003<br>12 | PROC  | protein C (inactivator of coagulation factors Va and VIIIa) | -1.971525 | Inlier |
| siRNA-Temozolomide Run2-DMSO | NM_0003<br>12 | PROC  | protein C (inactivator of coagulation factors Va and VIIIa) | -1.197523 | Inlier |
| siRNA Disorazole DMSO Run1   | NM_0003<br>12 | PROC  | protein C (inactivator of coagulation factors Va and VIIIa) | -0.487217 | Inlier |
| siRNA-Temozolomide Run1-DMSO | NM_0003<br>12 | PROC  | protein C (inactivator of coagulation factors Va and VIIIa) | -0.207107 | Inlier |
| siRNA Disorazole DMSO Run2   | NM_0003<br>12 | PROC  | protein C (inactivator of coagulation factors Va and VIIIa) | 0.207107  | Inlier |



Identification of Survival Genes in Human Glioblastoma Cells Using siRNA Screening  
 Nikhil G Thaker, Fang Zhang, Peter R. McDonald, Tong Ying Shun, Michael D Lewen, Ian F. Pollack, and John S. Lazo

Molecular Pharmacology

|                              |           |       |                                                             |           |        |
|------------------------------|-----------|-------|-------------------------------------------------------------|-----------|--------|
| siRNA-Vinblastine Run2-DMSO  | NM_000312 | PROC  | protein C (inactivator of coagulation factors Va and VIIIa) | 0.27882   | Inlier |
| siRNA-Vinblastine Run1-DMSO  | NM_000312 | PROC  | protein C (inactivator of coagulation factors Va and VIIIa) | 0.861783  | Inlier |
| siRNA Disorazole DMSO Run3   | NM_000312 | PROC  | protein C (inactivator of coagulation factors Va and VIIIa) | 1.078139  | Inlier |
| siRNA-Vinblastine Run2-DMSO  | NM_006404 | PROCR | protein C receptor, endothelial (EPCR)                      | -2.900502 | Inlier |
| siRNA-Temozolomide Run3-DMSO | NM_006404 | PROCR | protein C receptor, endothelial (EPCR)                      | -2.23859  | Inlier |
| siRNA Disorazole DMSO Run3   | NM_006404 | PROCR | protein C receptor, endothelial (EPCR)                      | -0.680338 | Inlier |
| siRNA-Temozolomide Run2-DMSO | NM_006404 | PROCR | protein C receptor, endothelial (EPCR)                      | -0.099056 | Inlier |
| siRNA Disorazole DMSO Run1   | NM_006404 | PROCR | protein C receptor, endothelial (EPCR)                      | 0.099055  | Inlier |
| siRNA Disorazole DMSO Run2   | NM_006404 | PROCR | protein C receptor, endothelial (EPCR)                      | 0.582155  | Inlier |
| siRNA-Temozolomide Run1-DMSO | NM_006404 | PROCR | protein C receptor, endothelial (EPCR)                      | 0.668662  | Inlier |

Identification of Survival Genes in Human Glioblastoma Cells Using siRNA Screening  
 Nikhil G Thaker, Fang Zhang, Peter R. McDonald, Tong Ying Shun, Michael D Lewen, Ian F. Pollack, and John S. Lazo

Molecular Pharmacology

| siRNA Treatment              | Gene ID   | Gene Name | Protein                                | Value     | Outlier Status |
|------------------------------|-----------|-----------|----------------------------------------|-----------|----------------|
| siRNA-Vinblastine Run1-DMSO  | NM_006404 | PROCR     | protein C receptor, endothelial (EPCR) | 1.313118  | Inlier         |
| siRNA-Temozolomide Run3-DMSO | NM_016335 | PRODH     | proline dehydrogenase (oxidase) 1      | -1.757249 | Inlier         |
| siRNA-Temozolomide Run2-DMSO | NM_016335 | PRODH     | proline dehydrogenase (oxidase) 1      | -1.450044 | Inlier         |
| siRNA Disorazole DMSO Run2   | NM_016335 | PRODH     | proline dehydrogenase (oxidase) 1      | -0.826132 | Inlier         |
| siRNA-Temozolomide Run1-DMSO | NM_016335 | PRODH     | proline dehydrogenase (oxidase) 1      | -0.006192 | Inlier         |
| siRNA Disorazole DMSO Run1   | NM_016335 | PRODH     | proline dehydrogenase (oxidase) 1      | 0.006191  | Inlier         |
| siRNA-Vinblastine Run1-DMSO  | NM_016335 | PRODH     | proline dehydrogenase (oxidase) 1      | 0.264052  | Inlier         |
| siRNA Disorazole DMSO Run3   | NM_016335 | PRODH     | proline dehydrogenase (oxidase) 1      | 0.522868  | Inlier         |
| siRNA-Vinblastine Run2-DMSO  | NM_016335 | PRODH     | proline dehydrogenase (oxidase) 1      | 1.081634  | Inlier         |
| siRNA-Temozolomide Run1-DMSO | NM_021232 | PRODH2    | proline dehydrogenase (oxidase) 2      | -1.859453 | Inlier         |

Identification of Survival Genes in Human Glioblastoma Cells Using siRNA Screening  
 Nikhil G Thaker, Fang Zhang, Peter R. McDonald, Tong Ying Shun, Michael D Lewen, Ian F. Pollack, and John S. Lazo

Molecular Pharmacology

| siRNA Treatment              | Gene ID   | Gene Name | Accession                         | Value     | Outlier Status |
|------------------------------|-----------|-----------|-----------------------------------|-----------|----------------|
| siRNA-Temozolomide Run3-DMSO | NM_021232 | PRODH2    | proline dehydrogenase (oxidase) 2 | -1.806878 | Inlier         |
| siRNA Disorazole DMSO Run1   | NM_021232 | PRODH2    | proline dehydrogenase (oxidase) 2 | -0.646327 | Inlier         |
| siRNA-Temozolomide Run2-DMSO | NM_021232 | PRODH2    | proline dehydrogenase (oxidase) 2 | -0.310641 | Inlier         |
| siRNA Disorazole DMSO Run3   | NM_021232 | PRODH2    | proline dehydrogenase (oxidase) 2 | 0.310641  | Inlier         |
| siRNA-Vinblastine Run1-DMSO  | NM_021232 | PRODH2    | proline dehydrogenase (oxidase) 2 | 0.410626  | Inlier         |
| siRNA Disorazole DMSO Run2   | NM_021232 | PRODH2    | proline dehydrogenase (oxidase) 2 | 0.702673  | Inlier         |
| siRNA-Vinblastine Run2-DMSO  | NM_021232 | PRODH2    | proline dehydrogenase (oxidase) 2 | 1.11108   | Inlier         |
| siRNA-Temozolomide Run3-DMSO | NM_021935 | PROK2     | prokineticin 2                    | -1.024578 | Inlier         |
| siRNA Disorazole DMSO Run2   | NM_021935 | PROK2     | prokineticin 2                    | -0.324422 | Inlier         |
| siRNA-Temozolomide Run2-DMSO | NM_021935 | PROK2     | prokineticin 2                    | -0.245096 | Inlier         |
| siRNA Disorazole DMSO Run3   | NM_021935 | PROK2     | prokineticin 2                    | -0.054276 | Inlier         |
| siRNA-Temozolomide Run1-DMSO | NM_021935 | PROK2     | prokineticin 2                    | 0.054276  | Inlier         |
| siRNA Disorazole DMSO Run1   | NM_021935 | PROK2     | prokineticin 2                    | 1.460995  | Inlier         |
| siRNA-Vinblastine Run2-DMSO  | NM_021935 | PROK2     | prokineticin 2                    | 2.132631  | Inlier         |
| siRNA-Vinblastine Run1-DMSO  | NM_021935 | PROK2     | prokineticin 2                    | 2.339017  | Inlier         |

Identification of Survival Genes in Human Glioblastoma Cells Using siRNA Screening

Nikhil G Thaker, Fang Zhang, Peter R. McDonald, Tong Ying Shun, Michael D Lewen, Ian F. Pollack, and John S.

Lazo

|                                  |               |       |                                                                        |           |        |
|----------------------------------|---------------|-------|------------------------------------------------------------------------|-----------|--------|
| siRNA-Temozolomide Run3-<br>DMSO | NM_1447<br>07 | PROM2 | prominin 2                                                             | -1.285512 | Inlier |
| siRNA Disorazole DMSO Run3       | NM_1447<br>07 | PROM2 | prominin 2                                                             | -0.723267 | Inlier |
| siRNA-Temozolomide Run2-<br>DMSO | NM_1447<br>07 | PROM2 | prominin 2                                                             | -0.320011 | Inlier |
| siRNA-Temozolomide Run1-<br>DMSO | NM_1447<br>07 | PROM2 | prominin 2                                                             | -0.166089 | Inlier |
| siRNA Disorazole DMSO Run2       | NM_1447<br>07 | PROM2 | prominin 2                                                             | 0.166089  | Inlier |
| siRNA Disorazole DMSO Run1       | NM_1447<br>07 | PROM2 | prominin 2                                                             | 0.625733  | Inlier |
| siRNA-Vinblastine Run1-<br>DMSO  | NM_1447<br>07 | PROM2 | prominin 2                                                             | 1.56593   | Inlier |
| siRNA-Vinblastine Run2-<br>DMSO  | NM_1447<br>07 | PROM2 | prominin 2                                                             | 1.786234  | Inlier |
| siRNA-Temozolomide Run3-<br>DMSO | NM_0003<br>13 | PROS1 | protein S<br>(alpha)                                                   | -0.943461 | Inlier |
| siRNA Disorazole DMSO Run1       | NM_0003<br>13 | PROS1 | protein S<br>(alpha)                                                   | -0.842641 | Inlier |
| siRNA-Temozolomide Run1-<br>DMSO | NM_0003<br>13 | PROS1 | protein S<br>(alpha)                                                   | -0.506359 | Inlier |
| siRNA Disorazole DMSO Run3       | NM_0003<br>13 | PROS1 | protein S<br>(alpha)                                                   | -0.171456 | Inlier |
| siRNA-Temozolomide Run2-<br>DMSO | NM_0003<br>13 | PROS1 | protein S<br>(alpha)                                                   | 0.171456  | Inlier |
| siRNA-Vinblastine Run2-<br>DMSO  | NM_0003<br>13 | PROS1 | protein S<br>(alpha)                                                   | 0.42774   | Inlier |
| siRNA-Vinblastine Run1-<br>DMSO  | NM_0003<br>13 | PROS1 | protein S<br>(alpha)                                                   | 1.176654  | Inlier |
| siRNA Disorazole DMSO Run2       | NM_0003<br>13 | PROS1 | protein S<br>(alpha)                                                   | 1.830172  | Inlier |
| siRNA Disorazole DMSO Run1       | NM_0071<br>98 | PROSC | proline<br>synthetase<br>co-<br>transcribe<br>d homolog<br>(bacterial) | -0.878811 | Inlier |
| siRNA-Temozolomide Run2-<br>DMSO | NM_0071<br>98 | PROSC | proline<br>synthetase<br>co-<br>transcribe<br>d homolog<br>(bacterial) | -0.838781 | Inlier |

Identification of Survival Genes in Human Glioblastoma Cells Using siRNA Screening

Nikhil G Thaker, Fang Zhang, Peter R. McDonald, Tong Ying Shun, Michael D Lewen, Ian F. Pollack, and John S. Lazo

Molecular Pharmacology

|                              |               |       |                                                                        |           |        |
|------------------------------|---------------|-------|------------------------------------------------------------------------|-----------|--------|
| siRNA-Temozolomide Run1-DMSO | NM_0071<br>98 | PROSC | proline<br>synthetase<br>co-<br>transcribe<br>d homolog<br>(bacterial) | -0.122688 | Inlier |
| siRNA Disorazole DMSO Run3   | NM_0071<br>98 | PROSC | proline<br>synthetase<br>co-<br>transcribe<br>d homolog<br>(bacterial) | -0.029217 | Inlier |
| siRNA-Vinblastine Run2-DMSO  | NM_0071<br>98 | PROSC | proline<br>synthetase<br>co-<br>transcribe<br>d homolog<br>(bacterial) | 0.029217  | Inlier |
| siRNA-Temozolomide Run3-DMSO | NM_0071<br>98 | PROSC | proline<br>synthetase<br>co-<br>transcribe<br>d homolog<br>(bacterial) | 0.510219  | Inlier |
| siRNA-Vinblastine Run1-DMSO  | NM_0071<br>98 | PROSC | proline<br>synthetase<br>co-<br>transcribe<br>d homolog<br>(bacterial) | 1.313995  | Inlier |
| siRNA Disorazole DMSO Run2   | NM_0071<br>98 | PROSC | proline<br>synthetase<br>co-<br>transcribe<br>d homolog<br>(bacterial) | 1.394238  | Inlier |
| siRNA-Temozolomide Run3-DMSO | NM_0038<br>91 | PROZ  | protein Z,<br>vitamin K-<br>dependent<br>plasma<br>glycoprotei<br>n    | -1.690433 | Inlier |

Identification of Survival Genes in Human Glioblastoma Cells Using siRNA Screening

Nikhil G Thaker, Fang Zhang, Peter R. McDonald, Tong Ying Shun, Michael D Lewen, Ian F. Pollack, and John S. Lazo

Molecular Pharmacology

|                              |           |        |                                                     |           |        |
|------------------------------|-----------|--------|-----------------------------------------------------|-----------|--------|
| siRNA-Temozolomide Run2-DMSO | NM_003891 | PROZ   | protein Z, vitamin K-dependent plasma glycoprotein  | -1.382093 | Inlier |
| siRNA-Temozolomide Run1-DMSO | NM_003891 | PROZ   | protein Z, vitamin K-dependent plasma glycoprotein  | -0.428378 | Inlier |
| siRNA Disorazole DMSO Run2   | NM_003891 | PROZ   | protein Z, vitamin K-dependent plasma glycoprotein  | -0.308555 | Inlier |
| siRNA Disorazole DMSO Run1   | NM_003891 | PROZ   | protein Z, vitamin K-dependent plasma glycoprotein  | 0.308555  | Inlier |
| siRNA Disorazole DMSO Run3   | NM_003891 | PROZ   | protein Z, vitamin K-dependent plasma glycoprotein  | 0.593576  | Inlier |
| siRNA-Vinblastine Run1-DMSO  | NM_003891 | PROZ   | protein Z, vitamin K-dependent plasma glycoprotein  | 0.755424  | Inlier |
| siRNA-Vinblastine Run2-DMSO  | NM_003891 | PROZ   | protein Z, vitamin K-dependent plasma glycoprotein  | 1.19795   | Inlier |
| siRNA-Temozolomide Run3-DMSO | NM_176800 | PRPF4B | PRP4 pre-mRNA processing factor 4 homolog B (yeast) | -1.628877 | Inlier |

Identification of Survival Genes in Human Glioblastoma Cells Using siRNA Screening  
 Nikhil G Thaker, Fang Zhang, Peter R. McDonald, Tong Ying Shun, Michael D Lewen, Ian F. Pollack, and John S. Lazo

Molecular Pharmacology

|                              |               |        |                                                     |           |         |
|------------------------------|---------------|--------|-----------------------------------------------------|-----------|---------|
| siRNA Disorazole DMSO Run2   | NM_1768<br>00 | PRPF4B | PRP4 pre-mRNA processing factor 4 homolog B (yeast) | -0.693217 | Inlier  |
| siRNA-Temozolomide Run2-DMSO | NM_1768<br>00 | PRPF4B | PRP4 pre-mRNA processing factor 4 homolog B (yeast) | -0.655783 | Inlier  |
| siRNA-Temozolomide Run1-DMSO | NM_1768<br>00 | PRPF4B | PRP4 pre-mRNA processing factor 4 homolog B (yeast) | -0.244164 | Inlier  |
| siRNA Disorazole DMSO Run3   | NM_1768<br>00 | PRPF4B | PRP4 pre-mRNA processing factor 4 homolog B (yeast) | 0.244164  | Inlier  |
| siRNA Disorazole DMSO Run1   | NM_1768<br>00 | PRPF4B | PRP4 pre-mRNA processing factor 4 homolog B (yeast) | 0.520388  | Inlier  |
| siRNA-Vinblastine Run1-DMSO  | NM_1768<br>00 | PRPF4B | PRP4 pre-mRNA processing factor 4 homolog B (yeast) | 0.798536  | Inlier  |
| siRNA-Vinblastine Run2-DMSO  | NM_1768<br>00 | PRPF4B | PRP4 pre-mRNA processing factor 4 homolog B (yeast) | 1.798828  | Inlier  |
| siRNA Disorazole DMSO Run2   | NM_0027<br>64 | PRPS1  | 1 phosphoribosyl pyrophosphate synthetase           | -3.724833 | Outlier |

Identification of Survival Genes in Human Glioblastoma Cells Using siRNA Screening  
 Nikhil G Thaker, Fang Zhang, Peter R. McDonald, Tong Ying Shun, Michael D Lewen, Ian F. Pollack, and John S. Lazo

Molecular Pharmacology

|                              |               |         |                                                  |           |        |
|------------------------------|---------------|---------|--------------------------------------------------|-----------|--------|
| siRNA-Temozolomide Run3-DMSO | NM_0027<br>64 | PRPS1   | phosphoribosyl pyrophosphate synthetase 1        | -0.837965 | Inlier |
| siRNA-Temozolomide Run1-DMSO | NM_0027<br>64 | PRPS1   | phosphoribosyl pyrophosphate synthetase 1        | -0.060601 | Inlier |
| siRNA Disorazole DMSO Run1   | NM_0027<br>64 | PRPS1   | phosphoribosyl pyrophosphate synthetase 1        | -0.000315 | Inlier |
| siRNA-Temozolomide Run2-DMSO | NM_0027<br>64 | PRPS1   | phosphoribosyl pyrophosphate synthetase 1        | 0.000316  | Inlier |
| siRNA-Vinblastine Run2-DMSO  | NM_0027<br>64 | PRPS1   | phosphoribosyl pyrophosphate synthetase 1        | 0.511035  | Inlier |
| siRNA-Vinblastine Run1-DMSO  | NM_0027<br>64 | PRPS1   | phosphoribosyl pyrophosphate synthetase 1        | 0.849567  | Inlier |
| siRNA Disorazole DMSO Run3   | NM_0027<br>64 | PRPS1   | phosphoribosyl pyrophosphate synthetase 1        | 2.817815  | Inlier |
| siRNA Disorazole DMSO Run1   | NM_1758<br>86 | PRPS1L1 | phosphoribosyl pyrophosphate synthetase 1-like 1 | -1.157682 | Inlier |



Identification of Survival Genes in Human Glioblastoma Cells Using siRNA Screening  
 Nikhil G Thaker, Fang Zhang, Peter R. McDonald, Tong Ying Shun, Michael D Lewen, Ian F. Pollack, and John S. Lazo

Molecular Pharmacology

| siRNA Treatment              | Gene ID   | Gene Name | Protein Name                                     | Log Fold Change | Outlier Status |
|------------------------------|-----------|-----------|--------------------------------------------------|-----------------|----------------|
| siRNA-Temozolomide Run1-DMSO | NM_175886 | PRPS1L1   | phosphoribosyl pyrophosphate synthetase 1-like 1 | -0.491442       | Inlier         |
| siRNA Disorazole DMSO Run3   | NM_175886 | PRPS1L1   | phosphoribosyl pyrophosphate synthetase 1-like 1 | -0.486909       | Inlier         |
| siRNA-Temozolomide Run2-DMSO | NM_175886 | PRPS1L1   | phosphoribosyl pyrophosphate synthetase 1-like 1 | -0.24017        | Inlier         |
| siRNA-Vinblastine Run2-DMSO  | NM_175886 | PRPS1L1   | phosphoribosyl pyrophosphate synthetase 1-like 1 | 0.24017         | Inlier         |
| siRNA-Temozolomide Run3-DMSO | NM_175886 | PRPS1L1   | phosphoribosyl pyrophosphate synthetase 1-like 1 | 0.857558        | Inlier         |
| siRNA Disorazole DMSO Run2   | NM_175886 | PRPS1L1   | phosphoribosyl pyrophosphate synthetase 1-like 1 | 1.150845        | Inlier         |
| siRNA-Vinblastine Run1-DMSO  | NM_175886 | PRPS1L1   | phosphoribosyl pyrophosphate synthetase 1-like 1 | 2.03863         | Inlier         |
| siRNA Disorazole DMSO Run2   | NM_002765 | PRPS2     | phosphoribosyl pyrophosphate synthetase 2        | -1.340156       | Inlier         |

Identification of Survival Genes in Human Glioblastoma Cells Using siRNA Screening  
 Nikhil G Thaker, Fang Zhang, Peter R. McDonald, Tong Ying Shun, Michael D Lewen, Ian F. Pollack, and John S. Lazo

Molecular Pharmacology

|                              |               |         |                                                              |           |        |
|------------------------------|---------------|---------|--------------------------------------------------------------|-----------|--------|
| siRNA-Temozolomide Run3-DMSO | NM_0027<br>65 | PRPS2   | phosphoribosyl pyrophosphate synthetase 2                    | -0.842223 | Inlier |
| siRNA-Temozolomide Run2-DMSO | NM_0027<br>65 | PRPS2   | phosphoribosyl pyrophosphate synthetase 2                    | -0.506777 | Inlier |
| siRNA Disorazole DMSO Run3   | NM_0027<br>65 | PRPS2   | phosphoribosyl pyrophosphate synthetase 2                    | -0.312904 | Inlier |
| siRNA Disorazole DMSO Run1   | NM_0027<br>65 | PRPS2   | phosphoribosyl pyrophosphate synthetase 2                    | 0.312904  | Inlier |
| siRNA-Temozolomide Run1-DMSO | NM_0027<br>65 | PRPS2   | phosphoribosyl pyrophosphate synthetase 2                    | 0.327847  | Inlier |
| siRNA-Vinblastine Run2-DMSO  | NM_0027<br>65 | PRPS2   | phosphoribosyl pyrophosphate synthetase 2                    | 0.924535  | Inlier |
| siRNA-Vinblastine Run1-DMSO  | NM_0027<br>65 | PRPS2   | phosphoribosyl pyrophosphate synthetase 2                    | 1.104197  | Inlier |
| siRNA-Temozolomide Run2-DMSO | NM_0027<br>66 | PRPSAP1 | phosphoribosyl pyrophosphate synthetase-associated protein 1 | -2.337714 | Inlier |

Identification of Survival Genes in Human Glioblastoma Cells Using siRNA Screening  
 Nikhil G Thaker, Fang Zhang, Peter R. McDonald, Tong Ying Shun, Michael D Lewen, Ian F. Pollack, and John S. Lazo  
 Molecular Pharmacology

|                              |               |         |                                                              |           |        |
|------------------------------|---------------|---------|--------------------------------------------------------------|-----------|--------|
| siRNA Disorazole DMSO Run1   | NM_0027<br>66 | PRPSAP1 | phosphoribosyl pyrophosphate synthetase-associated protein 1 | -0.742718 | Inlier |
| siRNA-Temozolomide Run1-DMSO | NM_0027<br>66 | PRPSAP1 | phosphoribosyl pyrophosphate synthetase-associated protein 1 | -0.606282 | Inlier |
| siRNA-Vinblastine Run2-DMSO  | NM_0027<br>66 | PRPSAP1 | phosphoribosyl pyrophosphate synthetase-associated protein 1 | -0.112534 | Inlier |
| siRNA-Temozolomide Run3-DMSO | NM_0027<br>66 | PRPSAP1 | phosphoribosyl pyrophosphate synthetase-associated protein 1 | 0.112534  | Inlier |
| siRNA Disorazole DMSO Run3   | NM_0027<br>66 | PRPSAP1 | phosphoribosyl pyrophosphate synthetase-associated protein 1 | 0.332628  | Inlier |

Identification of Survival Genes in Human Glioblastoma Cells Using siRNA Screening  
 Nikhil G Thaker, Fang Zhang, Peter R. McDonald, Tong Ying Shun, Michael D Lewen, Ian F. Pollack, and John S. Lazo  
 Molecular Pharmacology

|                                  |               |         |                                                                                   |           |         |
|----------------------------------|---------------|---------|-----------------------------------------------------------------------------------|-----------|---------|
| siRNA Disorazole DMSO Run2       | NM_0027<br>66 | PRPSAP1 | phosphori<br>bosyl<br>pyrophosp<br>hate<br>synthetase-<br>associated<br>protein 1 | 3.776752  | Outlier |
| siRNA-Vinblastine Run1-<br>DMSO  | NM_0027<br>66 | PRPSAP1 | phosphori<br>bosyl<br>pyrophosp<br>hate<br>synthetase-<br>associated<br>protein 1 | 4.898748  | Outlier |
| siRNA Disorazole DMSO Run1       | NM_0027<br>67 | PRPSAP2 | phosphori<br>bosyl<br>pyrophosp<br>hate<br>synthetase-<br>associated<br>protein 2 | -1.323669 | Inlier  |
| siRNA-Temozolomide Run1-<br>DMSO | NM_0027<br>67 | PRPSAP2 | phosphori<br>bosyl<br>pyrophosp<br>hate<br>synthetase-<br>associated<br>protein 2 | -0.664923 | Inlier  |
| siRNA-Temozolomide Run2-<br>DMSO | NM_0027<br>67 | PRPSAP2 | phosphori<br>bosyl<br>pyrophosp<br>hate<br>synthetase-<br>associated<br>protein 2 | -0.526905 | Inlier  |

Identification of Survival Genes in Human Glioblastoma Cells Using siRNA Screening  
 Nikhil G Thaker, Fang Zhang, Peter R. McDonald, Tong Ying Shun, Michael D Lewen, Ian F. Pollack, and John S. Lazo  
 Molecular Pharmacology

|                              |           |         |                                                              |           |        |
|------------------------------|-----------|---------|--------------------------------------------------------------|-----------|--------|
| siRNA-Temozolomide Run3-DMSO | NM_002767 | PRPSAP2 | phosphoribosyl pyrophosphate synthetase-associated protein 2 | -0.246074 | Inlier |
| siRNA-Vinblastine Run2-DMSO  | NM_002767 | PRPSAP2 | phosphoribosyl pyrophosphate synthetase-associated protein 2 | 0.246075  | Inlier |
| siRNA Disorazole DMSO Run3   | NM_002767 | PRPSAP2 | phosphoribosyl pyrophosphate synthetase-associated protein 2 | 0.684077  | Inlier |
| siRNA Disorazole DMSO Run2   | NM_002767 | PRPSAP2 | phosphoribosyl pyrophosphate synthetase-associated protein 2 | 0.854658  | Inlier |
| siRNA-Vinblastine Run1-DMSO  | NM_002767 | PRPSAP2 | phosphoribosyl pyrophosphate synthetase-associated protein 2 | 1.570758  | Inlier |
| siRNA Disorazole DMSO Run2   | NM_002769 | PRSS1   | protease, serine, 1 (trypsin 1)                              | -0.837391 | Inlier |
| siRNA-Temozolomide Run3-DMSO | NM_002769 | PRSS1   | protease, serine, 1 (trypsin 1)                              | -0.789629 | Inlier |

Identification of Survival Genes in Human Glioblastoma Cells Using siRNA Screening  
 Nikhil G Thaker, Fang Zhang, Peter R. McDonald, Tong Ying Shun, Michael D Lewen, Ian F. Pollack, and John S. Lazo

Molecular Pharmacology

|                              |               |        |                                          |           |        |
|------------------------------|---------------|--------|------------------------------------------|-----------|--------|
| siRNA Disorazole DMSO Run3   | NM_0027<br>69 | PRSS1  | protease,<br>serine, 1<br>(trypsin 1)    | -0.559371 | Inlier |
| siRNA Disorazole DMSO Run1   | NM_0027<br>69 | PRSS1  | protease,<br>serine, 1<br>(trypsin 1)    | -0.03966  | Inlier |
| siRNA-Temozolomide Run2-DMSO | NM_0027<br>69 | PRSS1  | protease,<br>serine, 1<br>(trypsin 1)    | 0.03966   | Inlier |
| siRNA-Temozolomide Run1-DMSO | NM_0027<br>69 | PRSS1  | protease,<br>serine, 1<br>(trypsin 1)    | 0.288045  | Inlier |
| siRNA-Vinblastine Run1-DMSO  | NM_0027<br>69 | PRSS1  | protease,<br>serine, 1<br>(trypsin 1)    | 1.184514  | Inlier |
| siRNA-Vinblastine Run2-DMSO  | NM_0027<br>69 | PRSS1  | protease,<br>serine, 1<br>(trypsin 1)    | 1.672144  | Inlier |
| siRNA-Temozolomide Run3-DMSO | NM_0027<br>75 | PRSS11 | protease,<br>serine, 11<br>(IGF binding) | -0.694637 | Inlier |
| siRNA-Temozolomide Run2-DMSO | NM_0027<br>75 | PRSS11 | protease,<br>serine, 11<br>(IGF binding) | -0.673722 | Inlier |
| siRNA Disorazole DMSO Run2   | NM_0027<br>75 | PRSS11 | protease,<br>serine, 11<br>(IGF binding) | -0.420557 | Inlier |
| siRNA Disorazole DMSO Run3   | NM_0027<br>75 | PRSS11 | protease,<br>serine, 11<br>(IGF binding) | -0.250141 | Inlier |
| siRNA-Temozolomide Run1-DMSO | NM_0027<br>75 | PRSS11 | protease,<br>serine, 11<br>(IGF binding) | 0.250141  | Inlier |
| siRNA Disorazole DMSO Run1   | NM_0027<br>75 | PRSS11 | protease,<br>serine, 11<br>(IGF binding) | 0.675278  | Inlier |
| siRNA-Vinblastine Run1-DMSO  | NM_0027<br>75 | PRSS11 | protease,<br>serine, 11<br>(IGF binding) | 1.44398   | Inlier |
| siRNA-Vinblastine Run2-DMSO  | NM_0027<br>75 | PRSS11 | protease,<br>serine, 11<br>(IGF binding) | 1.551593  | Inlier |

Identification of Survival Genes in Human Glioblastoma Cells Using siRNA Screening  
 Nikhil G Thaker, Fang Zhang, Peter R. McDonald, Tong Ying Shun, Michael D Lewen, Ian F. Pollack, and John S. Lazo

Molecular Pharmacology

|                              |               |        |                                                            |           |         |
|------------------------------|---------------|--------|------------------------------------------------------------|-----------|---------|
| siRNA-Temozolomide Run3-DMSO | NM_0036<br>19 | PRSS12 | protease,<br>serine, 12<br>(neurotryp<br>sin,<br>motopsin) | -0.944668 | Inlier  |
| siRNA-Temozolomide Run2-DMSO | NM_0036<br>19 | PRSS12 | protease,<br>serine, 12<br>(neurotryp<br>sin,<br>motopsin) | -0.521956 | Inlier  |
| siRNA Disorazole DMSO Run3   | NM_0036<br>19 | PRSS12 | protease,<br>serine, 12<br>(neurotryp<br>sin,<br>motopsin) | -0.480481 | Inlier  |
| siRNA Disorazole DMSO Run2   | NM_0036<br>19 | PRSS12 | protease,<br>serine, 12<br>(neurotryp<br>sin,<br>motopsin) | -0.15445  | Inlier  |
| siRNA-Temozolomide Run1-DMSO | NM_0036<br>19 | PRSS12 | protease,<br>serine, 12<br>(neurotryp<br>sin,<br>motopsin) | 0.15445   | Inlier  |
| siRNA Disorazole DMSO Run1   | NM_0036<br>19 | PRSS12 | protease,<br>serine, 12<br>(neurotryp<br>sin,<br>motopsin) | 0.827044  | Inlier  |
| siRNA-Vinblastine Run2-DMSO  | NM_0036<br>19 | PRSS12 | protease,<br>serine, 12<br>(neurotryp<br>sin,<br>motopsin) | 1.730775  | Inlier  |
| siRNA-Vinblastine Run1-DMSO  | NM_0036<br>19 | PRSS12 | protease,<br>serine, 15                                    | 1.9318    | Inlier  |
| siRNA-Temozolomide Run3-DMSO | NM_0047<br>93 | PRSS15 | protease,<br>serine, 15                                    | -3.938976 | Outlier |
| siRNA-Temozolomide Run2-DMSO | NM_0047<br>93 | PRSS15 | protease,<br>serine, 15                                    | -1.894949 | Inlier  |
| siRNA Disorazole DMSO Run2   | NM_0047<br>93 | PRSS15 | protease,<br>serine, 15                                    | -1.537361 | Inlier  |
| siRNA-Temozolomide Run1-DMSO | NM_0047<br>93 | PRSS15 | protease,<br>serine, 15                                    | -0.151232 | Inlier  |
| siRNA Disorazole DMSO Run1   | NM_0047<br>93 | PRSS15 | protease,<br>serine, 15                                    | 0.151233  | Inlier  |
| siRNA Disorazole DMSO Run3   | NM_0047<br>93 | PRSS15 | protease,<br>serine, 15                                    | 0.154851  | Inlier  |

Identification of Survival Genes in Human Glioblastoma Cells Using siRNA Screening  
 Nikhil G Thaker, Fang Zhang, Peter R. McDonald, Tong Ying Shun, Michael D Lewen, Ian F. Pollack, and John S. Lazo

|                                  |               |        |                                       |           |        |
|----------------------------------|---------------|--------|---------------------------------------|-----------|--------|
| siRNA-Vinblastine Run2-<br>DMSO  | NM_0047<br>93 | PRSS15 | protease,<br>serine, 15               | 0.424039  | Inlier |
| siRNA-Vinblastine Run1-<br>DMSO  | NM_0047<br>93 | PRSS15 | protease,<br>serine, 15               | 0.924961  | Inlier |
| siRNA-Temozolomide Run3-<br>DMSO | NM_0058<br>65 | PRSS16 | protease,<br>serine, 16<br>(thymus)   | -1.235082 | Inlier |
| siRNA-Temozolomide Run2-<br>DMSO | NM_0058<br>65 | PRSS16 | protease,<br>serine, 16<br>(thymus)   | -0.937879 | Inlier |
| siRNA Disorazole DMSO Run2       | NM_0058<br>65 | PRSS16 | protease,<br>serine, 16<br>(thymus)   | -0.29693  | Inlier |
| siRNA Disorazole DMSO Run1       | NM_0058<br>65 | PRSS16 | protease,<br>serine, 16<br>(thymus)   | -0.028299 | Inlier |
| siRNA Disorazole DMSO Run3       | NM_0058<br>65 | PRSS16 | protease,<br>serine, 16<br>(thymus)   | 0.028299  | Inlier |
| siRNA-Temozolomide Run1-<br>DMSO | NM_0058<br>65 | PRSS16 | protease,<br>serine, 16<br>(thymus)   | 0.411121  | Inlier |
| siRNA-Vinblastine Run2-<br>DMSO  | NM_0058<br>65 | PRSS16 | protease,<br>serine, 16<br>(thymus)   | 1.109517  | Inlier |
| siRNA-Vinblastine Run1-<br>DMSO  | NM_0058<br>65 | PRSS16 | protease,<br>serine, 16<br>(thymus)   | 1.396058  | Inlier |
| siRNA Disorazole DMSO Run2       | NM_0027<br>70 | PRSS2  | protease,<br>serine, 2<br>(trypsin 2) | -2.110859 | Inlier |
| siRNA-Temozolomide Run2-<br>DMSO | NM_0027<br>70 | PRSS2  | protease,<br>serine, 2<br>(trypsin 2) | -0.840542 | Inlier |
| siRNA-Temozolomide Run3-<br>DMSO | NM_0027<br>70 | PRSS2  | protease,<br>serine, 2<br>(trypsin 2) | -0.76762  | Inlier |
| siRNA Disorazole DMSO Run3       | NM_0027<br>70 | PRSS2  | protease,<br>serine, 2<br>(trypsin 2) | -0.289285 | Inlier |
| siRNA Disorazole DMSO Run1       | NM_0027<br>70 | PRSS2  | protease,<br>serine, 2<br>(trypsin 2) | 0.289284  | Inlier |
| siRNA-Temozolomide Run1-<br>DMSO | NM_0027<br>70 | PRSS2  | protease,<br>serine, 2<br>(trypsin 2) | 0.529676  | Inlier |
| siRNA-Vinblastine Run2-<br>DMSO  | NM_0027<br>70 | PRSS2  | protease,<br>serine, 2<br>(trypsin 2) | 0.581379  | Inlier |
| siRNA-Vinblastine Run1-<br>DMSO  | NM_0027<br>70 | PRSS2  | protease,<br>serine, 2<br>(trypsin 2) | 1.82201   | Inlier |



Identification of Survival Genes in Human Glioblastoma Cells Using siRNA Screening  
 Nikhil G Thaker, Fang Zhang, Peter R. McDonald, Tong Ying Shun, Michael D Lewen, Ian F. Pollack, and John S. Lazo

| Molecular Pharmacology       |               |        | protease,                             |                  |
|------------------------------|---------------|--------|---------------------------------------|------------------|
| siRNA-Temozolomide Run3-DMSO | NM_1449<br>56 | PRSS21 | serine, 21<br>(testisin)              | -1.202928 Inlier |
| siRNA-Temozolomide Run2-DMSO | NM_1449<br>56 | PRSS21 | protease,<br>serine, 21<br>(testisin) | -0.676449 Inlier |
| siRNA Disorazole DMSO Run2   | NM_1449<br>56 | PRSS21 | protease,<br>serine, 21<br>(testisin) | -0.672551 Inlier |
| siRNA Disorazole DMSO Run3   | NM_1449<br>56 | PRSS21 | protease,<br>serine, 21<br>(testisin) | -0.224043 Inlier |
| siRNA Disorazole DMSO Run1   | NM_1449<br>56 | PRSS21 | protease,<br>serine, 21<br>(testisin) | 0.224042 Inlier  |
| siRNA-Temozolomide Run1-DMSO | NM_1449<br>56 | PRSS21 | protease,<br>serine, 21<br>(testisin) | 0.501351 Inlier  |
| siRNA-Vinblastine Run2-DMSO  | NM_1449<br>56 | PRSS21 | protease,<br>serine, 21<br>(testisin) | 2.120571 Inlier  |
| siRNA-Vinblastine Run1-DMSO  | NM_1449<br>56 | PRSS21 | protease,<br>serine, 21<br>(testisin) | 2.603019 Inlier  |
| siRNA-Temozolomide Run3-DMSO | NM_0221<br>19 | PRSS22 | protease,<br>serine, 22               | -1.324286 Inlier |
| siRNA Disorazole DMSO Run2   | NM_0221<br>19 | PRSS22 | protease,<br>serine, 22               | -1.112071 Inlier |
| siRNA-Temozolomide Run2-DMSO | NM_0221<br>19 | PRSS22 | protease,<br>serine, 22               | -0.422915 Inlier |
| siRNA Disorazole DMSO Run1   | NM_0221<br>19 | PRSS22 | protease,<br>serine, 22               | -0.15232 Inlier  |
| siRNA-Temozolomide Run1-DMSO | NM_0221<br>19 | PRSS22 | protease,<br>serine, 22               | 0.15232 Inlier   |
| siRNA Disorazole DMSO Run3   | NM_0221<br>19 | PRSS22 | protease,<br>serine, 22               | 0.3837 Inlier    |
| siRNA-Vinblastine Run2-DMSO  | NM_0221<br>19 | PRSS22 | protease,<br>serine, 22               | 0.926085 Inlier  |
| siRNA-Vinblastine Run1-DMSO  | NM_0221<br>19 | PRSS22 | protease,<br>serine, 22               | 1.129993 Inlier  |
| siRNA-Temozolomide Run3-DMSO | NM_0071<br>73 | PRSS23 | protease,<br>serine, 23               | -1.220333 Inlier |
| siRNA Disorazole DMSO Run2   | NM_0071<br>73 | PRSS23 | protease,<br>serine, 23               | -0.449479 Inlier |
| siRNA Disorazole DMSO Run1   | NM_0071<br>73 | PRSS23 | protease,<br>serine, 23               | -0.41567 Inlier  |
| siRNA-Temozolomide Run2-DMSO | NM_0071<br>73 | PRSS23 | protease,<br>serine, 23               | -0.308294 Inlier |
| siRNA-Temozolomide Run1-DMSO | NM_0071<br>73 | PRSS23 | protease,<br>serine, 23               | 0.308293 Inlier  |
| siRNA Disorazole DMSO Run3   | NM_0071<br>73 | PRSS23 | protease,<br>serine, 23               | 0.899521 Inlier  |

Identification of Survival Genes in Human Glioblastoma Cells Using siRNA Screening  
 Nikhil G Thaker, Fang Zhang, Peter R. McDonald, Tong Ying Shun, Michael D Lewen, Ian F. Pollack, and John S. Lazo

|                                  |               |        |                                             |           |        |
|----------------------------------|---------------|--------|---------------------------------------------|-----------|--------|
| siRNA-Vinblastine Run1-<br>DMSO  | NM_0071<br>73 | PRSS23 | protease,<br>serine, 23                     | 2.353814  | Inlier |
| siRNA-Vinblastine Run2-<br>DMSO  | NM_0071<br>73 | PRSS23 | protease,<br>serine, 23                     | 3.004298  | Inlier |
| siRNA-Temozolomide Run3-<br>DMSO | NM_0132<br>47 | PRSS25 | protease,<br>serine, 25                     | -0.700802 | Inlier |
| siRNA Disorazole DMSO Run3       | NM_0132<br>47 | PRSS25 | protease,<br>serine, 25                     | -0.697847 | Inlier |
| siRNA Disorazole DMSO Run2       | NM_0132<br>47 | PRSS25 | protease,<br>serine, 25                     | -0.651153 | Inlier |
| siRNA-Temozolomide Run2-<br>DMSO | NM_0132<br>47 | PRSS25 | protease,<br>serine, 25                     | -0.52144  | Inlier |
| siRNA Disorazole DMSO Run1       | NM_0132<br>47 | PRSS25 | protease,<br>serine, 25                     | 0.52144   | Inlier |
| siRNA-Temozolomide Run1-<br>DMSO | NM_0132<br>47 | PRSS25 | protease,<br>serine, 25                     | 0.628507  | Inlier |
| siRNA-Vinblastine Run2-<br>DMSO  | NM_0132<br>47 | PRSS25 | protease,<br>serine, 25                     | 0.802371  | Inlier |
| siRNA-Vinblastine Run1-<br>DMSO  | NM_0132<br>47 | PRSS25 | protease,<br>serine, 25                     | 1.032723  | Inlier |
| siRNA-Temozolomide Run3-<br>DMSO | NM_0027<br>71 | PRSS3  | protease,<br>serine, 3<br>(mesotryp<br>sin) | -1.279128 | Inlier |
| siRNA Disorazole DMSO Run2       | NM_0027<br>71 | PRSS3  | protease,<br>serine, 3<br>(mesotryp<br>sin) | -0.830835 | Inlier |
| siRNA Disorazole DMSO Run3       | NM_0027<br>71 | PRSS3  | protease,<br>serine, 3<br>(mesotryp<br>sin) | -0.310789 | Inlier |
| siRNA Disorazole DMSO Run1       | NM_0027<br>71 | PRSS3  | protease,<br>serine, 3<br>(mesotryp<br>sin) | -0.132638 | Inlier |
| siRNA-Temozolomide Run2-<br>DMSO | NM_0027<br>71 | PRSS3  | protease,<br>serine, 3<br>(mesotryp<br>sin) | 0.132638  | Inlier |
| siRNA-Vinblastine Run2-<br>DMSO  | NM_0027<br>71 | PRSS3  | protease,<br>serine, 3<br>(mesotryp<br>sin) | 0.642572  | Inlier |
| siRNA-Temozolomide Run1-<br>DMSO | NM_0027<br>71 | PRSS3  | protease,<br>serine, 3<br>(mesotryp<br>sin) | 0.706428  | Inlier |
| siRNA-Vinblastine Run1-<br>DMSO  | NM_0027<br>71 | PRSS3  | protease,<br>serine, 3<br>(mesotryp<br>sin) | 1.175848  | Inlier |

Identification of Survival Genes in Human Glioblastoma Cells Using siRNA Screening  
 Nikhil G Thaker, Fang Zhang, Peter R. McDonald, Tong Ying Shun, Michael D Lewen, Ian F. Pollack, and John S. Lazo

|                            |         |        |            |           |        |
|----------------------------|---------|--------|------------|-----------|--------|
| Molecular Pharmacology     | NM_1528 |        | protease,  |           |        |
| siRNA Disorazole DMSO Run2 | 91      | PRSS33 | serine, 33 | -0.680482 | Inlier |
| siRNA-Temozolomide Run3-   | NM_1528 |        | protease,  |           |        |
| DMSO                       | 91      | PRSS33 | serine, 33 | -0.668518 | Inlier |
| siRNA-Temozolomide Run2-   | NM_1528 |        | protease,  |           |        |
| DMSO                       | 91      | PRSS33 | serine, 33 | -0.456768 | Inlier |
|                            | NM_1528 |        | protease,  |           |        |
| siRNA Disorazole DMSO Run3 | 91      | PRSS33 | serine, 33 | -0.416852 | Inlier |
| siRNA-Temozolomide Run1-   | NM_1528 |        | protease,  |           |        |
| DMSO                       | 91      | PRSS33 | serine, 33 | 0.416852  | Inlier |
|                            | NM_1528 |        | protease,  |           |        |
| siRNA Disorazole DMSO Run1 | 91      | PRSS33 | serine, 33 | 0.759581  | Inlier |
| siRNA-Vinblastine Run2-    | NM_1528 |        | protease,  |           |        |
| DMSO                       | 91      | PRSS33 | serine, 33 | 1.049665  | Inlier |
| siRNA-Vinblastine Run1-    | NM_1528 |        | protease,  |           |        |
| DMSO                       | 91      | PRSS33 | serine, 33 | 1.38753   | Inlier |
|                            | NM_1533 |        | protease,  |           |        |
| siRNA Disorazole DMSO Run2 | 62      | PRSS35 | serine, 35 | -1.646899 | Inlier |
| siRNA-Temozolomide Run3-   | NM_1533 |        | protease,  |           |        |
| DMSO                       | 62      | PRSS35 | serine, 35 | -0.759529 | Inlier |
| siRNA-Temozolomide Run2-   | NM_1533 |        | protease,  |           |        |
| DMSO                       | 62      | PRSS35 | serine, 35 | -0.548781 | Inlier |
|                            | NM_1533 |        | protease,  |           |        |
| siRNA Disorazole DMSO Run1 | 62      | PRSS35 | serine, 35 | -0.121462 | Inlier |
|                            | NM_1533 |        | protease,  |           |        |
| siRNA Disorazole DMSO Run3 | 62      | PRSS35 | serine, 35 | 0.121462  | Inlier |
| siRNA-Temozolomide Run1-   | NM_1533 |        | protease,  |           |        |
| DMSO                       | 62      | PRSS35 | serine, 35 | 0.589471  | Inlier |
| siRNA-Vinblastine Run2-    | NM_1533 |        | protease,  |           |        |
| DMSO                       | 62      | PRSS35 | serine, 35 | 0.905855  | Inlier |
| siRNA-Vinblastine Run1-    | NM_1533 |        | protease,  |           |        |
| DMSO                       | 62      | PRSS35 | serine, 35 | 1.426282  | Inlier |
|                            |         |        | protease,  |           |        |
|                            |         |        | serine, 7  |           |        |
| siRNA-Temozolomide Run2-   | NM_0027 |        | (enterokin |           |        |
| DMSO                       | 72      | PRSS7  | ase)       | -1.574557 | Inlier |
|                            |         |        | protease,  |           |        |
|                            |         |        | serine, 7  |           |        |
|                            | NM_0027 |        | (enterokin |           |        |
| siRNA Disorazole DMSO Run3 | 72      | PRSS7  | ase)       | -0.650663 | Inlier |
|                            |         |        | protease,  |           |        |
|                            |         |        | serine, 7  |           |        |
|                            | NM_0027 |        | (enterokin |           |        |
| siRNA Disorazole DMSO Run2 | 72      | PRSS7  | ase)       | -0.38919  | Inlier |
|                            |         |        | protease,  |           |        |
|                            |         |        | serine, 7  |           |        |
|                            | NM_0027 |        | (enterokin |           |        |
| siRNA-Temozolomide Run3-   | 72      | PRSS7  | ase)       | -0.11248  | Inlier |
| DMSO                       |         |        | protease,  |           |        |
|                            |         |        | serine, 7  |           |        |
|                            | NM_0027 |        | (enterokin |           |        |
| siRNA Disorazole DMSO Run1 | 72      | PRSS7  | ase)       | 0.112479  | Inlier |

Identification of Survival Genes in Human Glioblastoma Cells Using siRNA Screening  
 Nikhil G Thaker, Fang Zhang, Peter R. McDonald, Tong Ying Shun, Michael D Lewen, Ian F. Pollack, and John S. Lazo

Molecular Pharmacology

|                              |               |         |                                               |           |         |
|------------------------------|---------------|---------|-----------------------------------------------|-----------|---------|
| siRNA-Temozolomide Run1-DMSO | NM_0027<br>72 | PRSS7   | protease, serine, 7 (enterokinase)            | 0.698337  | Inlier  |
| siRNA-Vinblastine Run1-DMSO  | NM_0027<br>72 | PRSS7   | protease, serine, 7 (enterokinase)            | 2.699762  | Inlier  |
| siRNA-Vinblastine Run2-DMSO  | NM_0027<br>72 | PRSS7   | protease, serine, 7 (enterokinase)            | 3.501604  | Outlier |
| siRNA-Temozolomide Run3-DMSO | NM_0027<br>73 | PRSS8   | protease, serine, 8 (prostasin)               | -1.238472 | Inlier  |
| siRNA-Temozolomide Run2-DMSO | NM_0027<br>73 | PRSS8   | protease, serine, 8 (prostasin)               | -1.004677 | Inlier  |
| siRNA Disorazole DMSO Run3   | NM_0027<br>73 | PRSS8   | protease, serine, 8 (prostasin)               | -0.670198 | Inlier  |
| siRNA Disorazole DMSO Run1   | NM_0027<br>73 | PRSS8   | protease, serine, 8 (prostasin)               | -0.169699 | Inlier  |
| siRNA Disorazole DMSO Run2   | NM_0027<br>73 | PRSS8   | protease, serine, 8 (prostasin)               | 0.169699  | Inlier  |
| siRNA-Temozolomide Run1-DMSO | NM_0027<br>73 | PRSS8   | protease, serine, 8 (prostasin)               | 0.277141  | Inlier  |
| siRNA-Vinblastine Run1-DMSO  | NM_0027<br>73 | PRSS8   | protease, serine, 8 (prostasin)               | 0.678802  | Inlier  |
| siRNA-Vinblastine Run2-DMSO  | NM_0027<br>73 | PRSS8   | protease, serine, 8 (prostasin)               | 0.987786  | Inlier  |
| siRNA-Temozolomide Run3-DMSO | NM_0202<br>00 | PRTFDC1 | 1<br>phosphoryl transferase domain containing | -3.494412 | Inlier  |

Identification of Survival Genes in Human Glioblastoma Cells Using siRNA Screening  
 Nikhil G Thaker, Fang Zhang, Peter R. McDonald, Tong Ying Shun, Michael D Lewen, Ian F. Pollack, and John S. Lazo

Molecular Pharmacology

| siRNA                        | Gene      | Condition | Phosphorylation                   | Log2 Fold Change | Outlier |
|------------------------------|-----------|-----------|-----------------------------------|------------------|---------|
| siRNA-Vinblastine Run2-DMSO  | NM_020200 | PRTFDC1   | phosphorylation domain containing | -1.028722        | Inlier  |
| siRNA-Temozolomide Run2-DMSO | NM_020200 | PRTFDC1   | phosphorylation domain containing | -0.320278        | Inlier  |
| siRNA-Temozolomide Run1-DMSO | NM_020200 | PRTFDC1   | phosphorylation domain containing | -0.090704        | Inlier  |
| siRNA Disorazole DMSO Run1   | NM_020200 | PRTFDC1   | phosphorylation domain containing | 0.090704         | Inlier  |
| siRNA Disorazole DMSO Run3   | NM_020200 | PRTFDC1   | phosphorylation domain containing | 0.2141           | Inlier  |
| siRNA-Vinblastine Run1-DMSO  | NM_020200 | PRTFDC1   | phosphorylation domain containing | 1.789326         | Inlier  |
| siRNA Disorazole DMSO Run2   | NM_020200 | PRTFDC1   | phosphorylation domain containing | 2.531578         | Inlier  |

Identification of Survival Genes in Human Glioblastoma Cells Using siRNA Screening

Nikhil G Thaker, Fang Zhang, Peter R. McDonald, Tong Ying Shun, Michael D Lewen, Ian F. Pollack, and John S. Lazo

Molecular Pharmacology

|                              |           |       |                                                                                   |           |        |
|------------------------------|-----------|-------|-----------------------------------------------------------------------------------|-----------|--------|
| siRNA-Temozolomide Run3-DMSO | NM_002777 | PRTN3 | proteinase 3 (serine proteinase , neutrophil, Wegener granulomatosis autoantigen) | -1.38788  | Inlier |
| siRNA-Temozolomide Run2-DMSO | NM_002777 | PRTN3 | proteinase 3 (serine proteinase , neutrophil, Wegener granulomatosis autoantigen) | -0.932731 | Inlier |
| siRNA Disorazole DMSO Run2   | NM_002777 | PRTN3 | proteinase 3 (serine proteinase , neutrophil, Wegener granulomatosis autoantigen) | -0.271781 | Inlier |
| siRNA Disorazole DMSO Run1   | NM_002777 | PRTN3 | proteinase 3 (serine proteinase , neutrophil, Wegener granulomatosis autoantigen) | -0.137929 | Inlier |

Identification of Survival Genes in Human Glioblastoma Cells Using siRNA Screening  
 Nikhil G Thaker, Fang Zhang, Peter R. McDonald, Tong Ying Shun, Michael D Lewen, Ian F. Pollack, and John S. Lazo  
 Molecular Pharmacology

|                                  |               |       |                                                                                                                |           |        |
|----------------------------------|---------------|-------|----------------------------------------------------------------------------------------------------------------|-----------|--------|
| siRNA Disorazole DMSO Run3       | NM_0027<br>77 | PRTN3 | proteinase<br>3 (serine<br>proteinase<br>,<br>neutrophil,<br>Wegener<br>granuloma<br>tosis<br>autoantige<br>n) | 0.137929  | Inlier |
| siRNA-Temozolomide Run1-<br>DMSO | NM_0027<br>77 | PRTN3 | proteinase<br>3 (serine<br>proteinase<br>,<br>neutrophil,<br>Wegener<br>granuloma<br>tosis<br>autoantige<br>n) | 0.416269  | Inlier |
| siRNA-Vinblastine Run1-<br>DMSO  | NM_0027<br>77 | PRTN3 | proteinase<br>3 (serine<br>proteinase<br>,<br>neutrophil,<br>Wegener<br>granuloma<br>tosis<br>autoantige<br>n) | 1.232351  | Inlier |
| siRNA-Vinblastine Run2-<br>DMSO  | NM_0027<br>77 | PRTN3 | proteinase<br>3 (serine<br>proteinase<br>,<br>neutrophil,<br>Wegener<br>granuloma<br>tosis<br>autoantige<br>n) | 1.469216  | Inlier |
| siRNA Disorazole DMSO Run3       | NM_0581<br>79 | PSAT1 | phospho<br>serine<br>aminotran<br>sferase 1                                                                    | -1.302506 | Inlier |

Identification of Survival Genes in Human Glioblastoma Cells Using siRNA Screening  
 Nikhil G Thaker, Fang Zhang, Peter R. McDonald, Tong Ying Shun, Michael D Lewen, Ian F. Pollack, and John S. Lazo

Molecular Pharmacology

|                              |               |       |                                    |           |        |
|------------------------------|---------------|-------|------------------------------------|-----------|--------|
| siRNA-Temozolomide Run2-DMSO | NM_0581<br>79 | PSAT1 | phosphoserine aminotransferase 1   | -0.866387 | Inlier |
| siRNA-Temozolomide Run3-DMSO | NM_0581<br>79 | PSAT1 | phosphoserine aminotransferase 1   | -0.737801 | Inlier |
| siRNA-Vinblastine Run2-DMSO  | NM_0581<br>79 | PSAT1 | phosphoserine aminotransferase 1   | -0.074694 | Inlier |
| siRNA Disorazole DMSO Run1   | NM_0581<br>79 | PSAT1 | phosphoserine aminotransferase 1   | 0.074694  | Inlier |
| siRNA-Vinblastine Run1-DMSO  | NM_0581<br>79 | PSAT1 | phosphoserine aminotransferase 1   | 0.352476  | Inlier |
| siRNA-Temozolomide Run1-DMSO | NM_0581<br>79 | PSAT1 | phosphoserine aminotransferase 1   | 0.611199  | Inlier |
| siRNA Disorazole DMSO Run2   | NM_0581<br>79 | PSAT1 | phosphoserine aminotransferase 1   | 1.182159  | Inlier |
| siRNA-Temozolomide Run3-DMSO | NM_0000<br>21 | PSEN1 | presenilin 1 (Alzheimer disease 3) | -1.565166 | Inlier |
| siRNA-Temozolomide Run2-DMSO | NM_0000<br>21 | PSEN1 | presenilin 1 (Alzheimer disease 3) | -1.171477 | Inlier |
| siRNA Disorazole DMSO Run2   | NM_0000<br>21 | PSEN1 | presenilin 1 (Alzheimer disease 3) | -0.833402 | Inlier |
| siRNA Disorazole DMSO Run1   | NM_0000<br>21 | PSEN1 | presenilin 1 (Alzheimer disease 3) | -0.18598  | Inlier |



Identification of Survival Genes in Human Glioblastoma Cells Using siRNA Screening  
 Nikhil G Thaker, Fang Zhang, Peter R. McDonald, Tong Ying Shun, Michael D Lewen, Ian F. Pollack, and John S. Lazo  
 Molecular Pharmacology

|                              |           |       |                                       |           |        |
|------------------------------|-----------|-------|---------------------------------------|-----------|--------|
| siRNA-Temozolomide Run1-DMSO | NM_000021 | PSEN1 | presenilin 1<br>(Alzheimer disease 3) | 0.185979  | Inlier |
| siRNA Disorazole DMSO Run3   | NM_000021 | PSEN1 | presenilin 1<br>(Alzheimer disease 3) | 0.634844  | Inlier |
| siRNA-Vinblastine Run2-DMSO  | NM_000021 | PSEN1 | presenilin 1<br>(Alzheimer disease 3) | 0.654147  | Inlier |
| siRNA-Vinblastine Run1-DMSO  | NM_000021 | PSEN1 | presenilin 1<br>(Alzheimer disease 3) | 0.694853  | Inlier |
| siRNA-Temozolomide Run3-DMSO | NM_012486 | PSEN2 | presenilin 2<br>(Alzheimer disease 4) | -2.147428 | Inlier |
| siRNA-Temozolomide Run2-DMSO | NM_012486 | PSEN2 | presenilin 2<br>(Alzheimer disease 4) | -0.878477 | Inlier |
| siRNA Disorazole DMSO Run1   | NM_012486 | PSEN2 | presenilin 2<br>(Alzheimer disease 4) | -0.470523 | Inlier |
| siRNA Disorazole DMSO Run2   | NM_012486 | PSEN2 | presenilin 2<br>(Alzheimer disease 4) | -0.230636 | Inlier |
| siRNA-Temozolomide Run1-DMSO | NM_012486 | PSEN2 | presenilin 2<br>(Alzheimer disease 4) | 0.230636  | Inlier |
| siRNA Disorazole DMSO Run3   | NM_012486 | PSEN2 | presenilin 2<br>(Alzheimer disease 4) | 0.384528  | Inlier |

Identification of Survival Genes in Human Glioblastoma Cells Using siRNA Screening  
 Nikhil G Thaker, Fang Zhang, Peter R. McDonald, Tong Ying Shun, Michael D Lewen, Ian F. Pollack, and John S. Lazo  
 Molecular Pharmacology

|                              |               |       |                                             |           |         |
|------------------------------|---------------|-------|---------------------------------------------|-----------|---------|
| siRNA-Vinblastine Run2-DMSO  | NM_0124<br>86 | PSEN2 | presenilin<br>2<br>(Alzheimer<br>disease 4) | 0.957386  | Inlier  |
| siRNA-Vinblastine Run1-DMSO  | NM_0124<br>86 | PSEN2 | presenilin<br>2<br>(Alzheimer<br>disease 4) | 1.184909  | Inlier  |
| siRNA-Vinblastine Run1-DMSO  | NM_0067<br>42 | PSKH1 | protein<br>serine<br>kinase H1              | -1.753879 | Inlier  |
| siRNA-Temozolomide Run2-DMSO | NM_0067<br>42 | PSKH1 | protein<br>serine<br>kinase H1              | -0.957018 | Inlier  |
| siRNA-Temozolomide Run3-DMSO | NM_0067<br>42 | PSKH1 | protein<br>serine<br>kinase H1              | -0.590369 | Inlier  |
| siRNA Disorazole DMSO Run3   | NM_0067<br>42 | PSKH1 | protein<br>serine<br>kinase H1              | -0.312349 | Inlier  |
| siRNA-Temozolomide Run1-DMSO | NM_0067<br>42 | PSKH1 | protein<br>serine<br>kinase H1              | 0.312349  | Inlier  |
| siRNA Disorazole DMSO Run2   | NM_0067<br>42 | PSKH1 | protein<br>serine<br>kinase H1              | 0.495432  | Inlier  |
| siRNA Disorazole DMSO Run1   | NM_0067<br>42 | PSKH1 | protein<br>serine<br>kinase H1              | 0.758631  | Inlier  |
| siRNA-Vinblastine Run2-DMSO  | NM_0067<br>42 | PSKH1 | protein<br>serine<br>kinase H1              | 5.190081  | Outlier |
| siRNA Disorazole DMSO Run3   | NM_0331<br>26 | PSKH2 | protein<br>serine<br>kinase H2              | -2.027067 | Inlier  |
| siRNA Disorazole DMSO Run2   | NM_0331<br>26 | PSKH2 | protein<br>serine<br>kinase H2              | -1.291475 | Inlier  |
| siRNA-Temozolomide Run3-DMSO | NM_0331<br>26 | PSKH2 | protein<br>serine<br>kinase H2              | -0.788009 | Inlier  |
| siRNA-Temozolomide Run2-DMSO | NM_0331<br>26 | PSKH2 | protein<br>serine<br>kinase H2              | -0.049502 | Inlier  |
| siRNA-Temozolomide Run1-DMSO | NM_0331<br>26 | PSKH2 | protein<br>serine<br>kinase H2              | 0.049501  | Inlier  |
| siRNA Disorazole DMSO Run1   | NM_0331<br>26 | PSKH2 | protein<br>serine<br>kinase H2              | 0.436933  | Inlier  |

Identification of Survival Genes in Human Glioblastoma Cells Using siRNA Screening

Nikhil G Thaker, Fang Zhang, Peter R. McDonald, Tong Ying Shun, Michael D Lewen, Ian F. Pollack, and John S. Lazo

Molecular Pharmacology

|                              |               |       |                                                        |           |        |
|------------------------------|---------------|-------|--------------------------------------------------------|-----------|--------|
| siRNA-Vinblastine Run1-DMSO  | NM_0331<br>26 | PSKH2 | protein serine kinase H2                               | 0.560991  | Inlier |
| siRNA-Vinblastine Run2-DMSO  | NM_0331<br>26 | PSKH2 | protein serine kinase H2                               | 2.355527  | Inlier |
| siRNA-Temozolomide Run3-DMSO | NM_1489<br>76 | PSMA1 | proteasome (prosome, macropain) subunit, alpha type, 1 | -0.831082 | Inlier |
| siRNA-Temozolomide Run2-DMSO | NM_1489<br>76 | PSMA1 | proteasome (prosome, macropain) subunit, alpha type, 1 | -0.712224 | Inlier |
| siRNA-Temozolomide Run1-DMSO | NM_1489<br>76 | PSMA1 | proteasome (prosome, macropain) subunit, alpha type, 1 | -0.636776 | Inlier |
| siRNA Disorazole DMSO Run2   | NM_1489<br>76 | PSMA1 | proteasome (prosome, macropain) subunit, alpha type, 1 | -0.057143 | Inlier |
| siRNA Disorazole DMSO Run1   | NM_1489<br>76 | PSMA1 | proteasome (prosome, macropain) subunit, alpha type, 1 | 0.057143  | Inlier |

Identification of Survival Genes in Human Glioblastoma Cells Using siRNA Screening

Nikhil G Thaker, Fang Zhang, Peter R. McDonald, Tong Ying Shun, Michael D Lewen, Ian F. Pollack, and John S. Lazo

Molecular Pharmacology

|                                  |               |       |                                                                            |           |        |
|----------------------------------|---------------|-------|----------------------------------------------------------------------------|-----------|--------|
| siRNA Disorazole DMSO Run3       | NM_1489<br>76 | PSMA1 | proteasom<br>e<br>(prosome,<br>macropain<br>) subunit,<br>alpha type,<br>1 | 0.114515  | Inlier |
| siRNA-Vinblastine Run2-<br>DMSO  | NM_1489<br>76 | PSMA1 | proteasom<br>e<br>(prosome,<br>macropain<br>) subunit,<br>alpha type,<br>1 | 1.679818  | Inlier |
| siRNA-Vinblastine Run1-<br>DMSO  | NM_1489<br>76 | PSMA1 | proteasom<br>e<br>(prosome,<br>macropain<br>) subunit,<br>alpha type,<br>1 | 1.911018  | Inlier |
| siRNA-Temozolomide Run3-<br>DMSO | NM_0027<br>87 | PSMA2 | proteasom<br>e<br>(prosome,<br>macropain<br>) subunit,<br>alpha type,<br>2 | -1.398765 | Inlier |
| siRNA-Temozolomide Run1-<br>DMSO | NM_0027<br>87 | PSMA2 | proteasom<br>e<br>(prosome,<br>macropain<br>) subunit,<br>alpha type,<br>2 | -1.086455 | Inlier |
| siRNA Disorazole DMSO Run3       | NM_0027<br>87 | PSMA2 | proteasom<br>e<br>(prosome,<br>macropain<br>) subunit,<br>alpha type,<br>2 | -0.063708 | Inlier |

Identification of Survival Genes in Human Glioblastoma Cells Using siRNA Screening

Nikhil G Thaker, Fang Zhang, Peter R. McDonald, Tong Ying Shun, Michael D Lewen, Ian F. Pollack, and John S. Lazo

Molecular Pharmacology

|                              |           |       |                                                        |           |        |
|------------------------------|-----------|-------|--------------------------------------------------------|-----------|--------|
| siRNA-Temozolomide Run2-DMSO | NM_002787 | PSMA2 | proteasome (prosome, macropain) subunit, alpha type, 2 | -0.003927 | Inlier |
| siRNA Disorazole DMSO Run1   | NM_002787 | PSMA2 | proteasome (prosome, macropain) subunit, alpha type, 2 | 0.003927  | Inlier |
| siRNA Disorazole DMSO Run2   | NM_002787 | PSMA2 | proteasome (prosome, macropain) subunit, alpha type, 2 | 0.262545  | Inlier |
| siRNA-Vinblastine Run1-DMSO  | NM_002787 | PSMA2 | proteasome (prosome, macropain) subunit, alpha type, 2 | 2.932016  | Inlier |
| siRNA-Vinblastine Run2-DMSO  | NM_002787 | PSMA2 | proteasome (prosome, macropain) subunit, alpha type, 2 | 3.221474  | Inlier |
| siRNA-Temozolomide Run3-DMSO | NM_152132 | PSMA3 | proteasome (prosome, macropain) subunit, alpha type, 3 | -0.756744 | Inlier |

Identification of Survival Genes in Human Glioblastoma Cells Using siRNA Screening

Nikhil G Thaker, Fang Zhang, Peter R. McDonald, Tong Ying Shun, Michael D Lewen, Ian F. Pollack, and John S. Lazo

Molecular Pharmacology

|                              |               |       |                                                                        |           |        |
|------------------------------|---------------|-------|------------------------------------------------------------------------|-----------|--------|
| siRNA-Temozolomide Run2-DMSO | NM_1521<br>32 | PSMA3 | proteasome<br>(prosome,<br>macropain<br>) subunit,<br>alpha type,<br>3 | -0.734694 | Inlier |
| siRNA-Temozolomide Run1-DMSO | NM_1521<br>32 | PSMA3 | proteasome<br>(prosome,<br>macropain<br>) subunit,<br>alpha type,<br>3 | -0.614306 | Inlier |
| siRNA Disorazole DMSO Run3   | NM_1521<br>32 | PSMA3 | proteasome<br>(prosome,<br>macropain<br>) subunit,<br>alpha type,<br>3 | -0.088738 | Inlier |
| siRNA Disorazole DMSO Run2   | NM_1521<br>32 | PSMA3 | proteasome<br>(prosome,<br>macropain<br>) subunit,<br>alpha type,<br>3 | 0.088738  | Inlier |
| siRNA Disorazole DMSO Run1   | NM_1521<br>32 | PSMA3 | proteasome<br>(prosome,<br>macropain<br>) subunit,<br>alpha type,<br>3 | 0.515202  | Inlier |
| siRNA-Vinblastine Run1-DMSO  | NM_1521<br>32 | PSMA3 | proteasome<br>(prosome,<br>macropain<br>) subunit,<br>alpha type,<br>3 | 2.103282  | Inlier |

Identification of Survival Genes in Human Glioblastoma Cells Using siRNA Screening

Nikhil G Thaker, Fang Zhang, Peter R. McDonald, Tong Ying Shun, Michael D Lewen, Ian F. Pollack, and John S. Lazo

Molecular Pharmacology

|                              |           |       |                                                        |           |        |
|------------------------------|-----------|-------|--------------------------------------------------------|-----------|--------|
| siRNA-Vinblastine Run2-DMSO  | NM_152132 | PSMA3 | proteasome (prosome, macropain) subunit, alpha type, 3 | 2.592805  | Inlier |
| siRNA-Temozolomide Run3-DMSO | NM_002789 | PSMA4 | proteasome (prosome, macropain) subunit, alpha type, 4 | -0.751241 | Inlier |
| siRNA-Temozolomide Run2-DMSO | NM_002789 | PSMA4 | proteasome (prosome, macropain) subunit, alpha type, 4 | -0.681446 | Inlier |
| siRNA-Temozolomide Run1-DMSO | NM_002789 | PSMA4 | proteasome (prosome, macropain) subunit, alpha type, 4 | -0.667554 | Inlier |
| siRNA Disorazole DMSO Run1   | NM_002789 | PSMA4 | proteasome (prosome, macropain) subunit, alpha type, 4 | -0.12346  | Inlier |
| siRNA Disorazole DMSO Run2   | NM_002789 | PSMA4 | proteasome (prosome, macropain) subunit, alpha type, 4 | 0.12346   | Inlier |

Identification of Survival Genes in Human Glioblastoma Cells Using siRNA Screening

Nikhil G Thaker, Fang Zhang, Peter R. McDonald, Tong Ying Shun, Michael D Lewen, Ian F. Pollack, and John S. Lazo

Molecular Pharmacology

|                                  |               |       |                                                                            |           |        |
|----------------------------------|---------------|-------|----------------------------------------------------------------------------|-----------|--------|
| siRNA Disorazole DMSO Run3       | NM_0027<br>89 | PSMA4 | proteasom<br>e<br>(prosome,<br>macropain<br>) subunit,<br>alpha type,<br>4 | 0.303334  | Inlier |
| siRNA-Vinblastine Run1-<br>DMSO  | NM_0027<br>89 | PSMA4 | proteasom<br>e<br>(prosome,<br>macropain<br>) subunit,<br>alpha type,<br>4 | 0.932259  | Inlier |
| siRNA-Vinblastine Run2-<br>DMSO  | NM_0027<br>89 | PSMA4 | proteasom<br>e<br>(prosome,<br>macropain<br>) subunit,<br>alpha type,<br>4 | 1.20138   | Inlier |
| siRNA-Temozolomide Run3-<br>DMSO | NM_0027<br>90 | PSMA5 | proteasom<br>e<br>(prosome,<br>macropain<br>) subunit,<br>alpha type,<br>5 | -1.294342 | Inlier |
| siRNA-Temozolomide Run2-<br>DMSO | NM_0027<br>90 | PSMA5 | proteasom<br>e<br>(prosome,<br>macropain<br>) subunit,<br>alpha type,<br>5 | -0.797864 | Inlier |
| siRNA-Temozolomide Run1-<br>DMSO | NM_0027<br>90 | PSMA5 | proteasom<br>e<br>(prosome,<br>macropain<br>) subunit,<br>alpha type,<br>5 | -0.551136 | Inlier |



Identification of Survival Genes in Human Glioblastoma Cells Using siRNA Screening

Nikhil G Thaker, Fang Zhang, Peter R. McDonald, Tong Ying Shun, Michael D Lewen, Ian F. Pollack, and John S. Lazo

Molecular Pharmacology

|                                  |               |       |                                                                            |           |        |
|----------------------------------|---------------|-------|----------------------------------------------------------------------------|-----------|--------|
| siRNA Disorazole DMSO Run2       | NM_0027<br>90 | PSMA5 | proteasom<br>e<br>(prosome,<br>macropain<br>) subunit,<br>alpha type,<br>5 | -0.067932 | Inlier |
| siRNA Disorazole DMSO Run1       | NM_0027<br>90 | PSMA5 | proteasom<br>e<br>(prosome,<br>macropain<br>) subunit,<br>alpha type,<br>5 | 0.067932  | Inlier |
| siRNA Disorazole DMSO Run3       | NM_0027<br>90 | PSMA5 | proteasom<br>e<br>(prosome,<br>macropain<br>) subunit,<br>alpha type,<br>5 | 0.532177  | Inlier |
| siRNA-Vinblastine Run1-<br>DMSO  | NM_0027<br>90 | PSMA5 | proteasom<br>e<br>(prosome,<br>macropain<br>) subunit,<br>alpha type,<br>5 | 2.989799  | Inlier |
| siRNA-Vinblastine Run2-<br>DMSO  | NM_0027<br>90 | PSMA5 | proteasom<br>e<br>(prosome,<br>macropain<br>) subunit,<br>alpha type,<br>5 | 3.367941  | Inlier |
| siRNA-Temozolomide Run3-<br>DMSO | NM_0027<br>91 | PSMA6 | proteasom<br>e<br>(prosome,<br>macropain<br>) subunit,<br>alpha type,<br>6 | -0.727867 | Inlier |

Identification of Survival Genes in Human Glioblastoma Cells Using siRNA Screening

Nikhil G Thaker, Fang Zhang, Peter R. McDonald, Tong Ying Shun, Michael D Lewen, Ian F. Pollack, and John S. Lazo

Molecular Pharmacology

|                              |           |       |                                                        |           |        |
|------------------------------|-----------|-------|--------------------------------------------------------|-----------|--------|
| siRNA-Temozolomide Run1-DMSO | NM_002791 | PSMA6 | proteasome (prosome, macropain) subunit, alpha type, 6 | -0.685678 | Inlier |
| siRNA-Temozolomide Run2-DMSO | NM_002791 | PSMA6 | proteasome (prosome, macropain) subunit, alpha type, 6 | -0.663322 | Inlier |
| siRNA Disorazole DMSO Run1   | NM_002791 | PSMA6 | proteasome (prosome, macropain) subunit, alpha type, 6 | -0.07085  | Inlier |
| siRNA Disorazole DMSO Run3   | NM_002791 | PSMA6 | proteasome (prosome, macropain) subunit, alpha type, 6 | 0.07085   | Inlier |
| siRNA Disorazole DMSO Run2   | NM_002791 | PSMA6 | proteasome (prosome, macropain) subunit, alpha type, 6 | 0.108637  | Inlier |
| siRNA-Vinblastine Run1-DMSO  | NM_002791 | PSMA6 | proteasome (prosome, macropain) subunit, alpha type, 6 | 1.381532  | Inlier |

Identification of Survival Genes in Human Glioblastoma Cells Using siRNA Screening

Nikhil G Thaker, Fang Zhang, Peter R. McDonald, Tong Ying Shun, Michael D Lewen, Ian F. Pollack, and John S. Lazo

Molecular Pharmacology

|                              |           |       |                                                        |           |        |
|------------------------------|-----------|-------|--------------------------------------------------------|-----------|--------|
| siRNA-Vinblastine Run2-DMSO  | NM_002791 | PSMA6 | proteasome (prosome, macropain) subunit, alpha type, 6 | 1.946093  | Inlier |
| siRNA-Temozolomide Run3-DMSO | NM_152255 | PSMA7 | proteasome (prosome, macropain) subunit, alpha type, 7 | -1.020212 | Inlier |
| siRNA-Temozolomide Run2-DMSO | NM_152255 | PSMA7 | proteasome (prosome, macropain) subunit, alpha type, 7 | -0.813476 | Inlier |
| siRNA Disorazole DMSO Run2   | NM_152255 | PSMA7 | proteasome (prosome, macropain) subunit, alpha type, 7 | -0.535524 | Inlier |
| siRNA-Temozolomide Run1-DMSO | NM_152255 | PSMA7 | proteasome (prosome, macropain) subunit, alpha type, 7 | -0.052333 | Inlier |
| siRNA Disorazole DMSO Run3   | NM_152255 | PSMA7 | proteasome (prosome, macropain) subunit, alpha type, 7 | 0.052333  | Inlier |

Identification of Survival Genes in Human Glioblastoma Cells Using siRNA Screening  
 Nikhil G Thaker, Fang Zhang, Peter R. McDonald, Tong Ying Shun, Michael D Lewen, Ian F. Pollack, and John S. Lazo  
 Molecular Pharmacology

|                                  |               |                   |                                                                            |           |        |
|----------------------------------|---------------|-------------------|----------------------------------------------------------------------------|-----------|--------|
| siRNA Disorazole DMSO Run1       | NM_1522<br>55 | PSMA7             | proteasom<br>e<br>(prosome,<br>macropain<br>) subunit,<br>alpha type,<br>7 | 0.13552   | Inlier |
| siRNA-Vinblastine Run1-<br>DMSO  | NM_1522<br>55 | PSMA7             | proteasom<br>e<br>(prosome,<br>macropain<br>) subunit,<br>alpha type,<br>7 | 1.12611   | Inlier |
| siRNA-Vinblastine Run2-<br>DMSO  | NM_1522<br>55 | PSMA7             | proteasom<br>e<br>(prosome,<br>macropain<br>) subunit,<br>alpha type,<br>7 | 1.221267  | Inlier |
| siRNA Disorazole DMSO Run2       | NM_1536<br>96 | PSMAL/G<br>CP III | PSMAL/G<br>CP III                                                          | -1.013736 | Inlier |
| siRNA-Temozolomide Run3-<br>DMSO | NM_1536<br>96 | PSMAL/G<br>CP III | PSMAL/G<br>CP III                                                          | -0.632812 | Inlier |
| siRNA Disorazole DMSO Run3       | NM_1536<br>96 | PSMAL/G<br>CP III | PSMAL/G<br>CP III                                                          | -0.203915 | Inlier |
| siRNA Disorazole DMSO Run1       | NM_1536<br>96 | PSMAL/G<br>CP III | PSMAL/G<br>CP III                                                          | -0.001344 | Inlier |
| siRNA-Temozolomide Run2-<br>DMSO | NM_1536<br>96 | PSMAL/G<br>CP III | PSMAL/G<br>CP III                                                          | 0.001344  | Inlier |
| siRNA-Temozolomide Run1-<br>DMSO | NM_1536<br>96 | PSMAL/G<br>CP III | PSMAL/G<br>CP III                                                          | 0.716188  | Inlier |
| siRNA-Vinblastine Run2-<br>DMSO  | NM_1536<br>96 | PSMAL/G<br>CP III | PSMAL/G<br>CP III                                                          | 0.985768  | Inlier |
| siRNA-Vinblastine Run1-<br>DMSO  | NM_1536<br>96 | PSMAL/G<br>CP III | PSMAL/G<br>CP III                                                          | 1.168358  | Inlier |
| siRNA-Temozolomide Run3-<br>DMSO | NM_0027<br>93 | PSMB1             | proteasom<br>e<br>(prosome,<br>macropain<br>) subunit,<br>beta type,<br>1  | -0.98937  | Inlier |

Identification of Survival Genes in Human Glioblastoma Cells Using siRNA Screening

Nikhil G Thaker, Fang Zhang, Peter R. McDonald, Tong Ying Shun, Michael D Lewen, Ian F. Pollack, and John S. Lazo

Molecular Pharmacology

|                              |           |       |                                                       |           |        |
|------------------------------|-----------|-------|-------------------------------------------------------|-----------|--------|
| siRNA-Temozolomide Run2-DMSO | NM_002793 | PSMB1 | proteasome (prosome, macropain) subunit, beta type, 1 | -0.926566 | Inlier |
| siRNA-Temozolomide Run1-DMSO | NM_002793 | PSMB1 | proteasome (prosome, macropain) subunit, beta type, 1 | -0.422434 | Inlier |
| siRNA Disorazole DMSO Run2   | NM_002793 | PSMB1 | proteasome (prosome, macropain) subunit, beta type, 1 | -0.12813  | Inlier |
| siRNA Disorazole DMSO Run1   | NM_002793 | PSMB1 | proteasome (prosome, macropain) subunit, beta type, 1 | 0.12813   | Inlier |
| siRNA Disorazole DMSO Run3   | NM_002793 | PSMB1 | proteasome (prosome, macropain) subunit, beta type, 1 | 0.355544  | Inlier |
| siRNA-Vinblastine Run1-DMSO  | NM_002793 | PSMB1 | proteasome (prosome, macropain) subunit, beta type, 1 | 1.042065  | Inlier |

Identification of Survival Genes in Human Glioblastoma Cells Using siRNA Screening  
 Nikhil G Thaker, Fang Zhang, Peter R. McDonald, Tong Ying Shun, Michael D Lewen, Ian F. Pollack, and John S. Lazo  
 Molecular Pharmacology

|                              |           |        |    |                                                     |                  |
|------------------------------|-----------|--------|----|-----------------------------------------------------|------------------|
| siRNA-Vinblastine Run2-DMSO  | NM_002793 | PSMB1  | 1  | proteasome (prosome, macropain) subunit, beta type, | 1.061587 Inlier  |
| siRNA-Temozolomide Run3-DMSO | NM_002801 | PSMB10 | 10 | proteasome (prosome, macropain) subunit, beta type, | -1.647043 Inlier |
| siRNA Disorazole DMSO Run2   | NM_002801 | PSMB10 | 10 | proteasome (prosome, macropain) subunit, beta type, | -0.455047 Inlier |
| siRNA Disorazole DMSO Run3   | NM_002801 | PSMB10 | 10 | proteasome (prosome, macropain) subunit, beta type, | -0.271317 Inlier |
| siRNA-Temozolomide Run2-DMSO | NM_002801 | PSMB10 | 10 | proteasome (prosome, macropain) subunit, beta type, | -0.073532 Inlier |
| siRNA-Temozolomide Run1-DMSO | NM_002801 | PSMB10 | 10 | proteasome (prosome, macropain) subunit, beta type, | 0.073532 Inlier  |

Identification of Survival Genes in Human Glioblastoma Cells Using siRNA Screening

Nikhil G Thaker, Fang Zhang, Peter R. McDonald, Tong Ying Shun, Michael D Lewen, Ian F. Pollack, and John S. Lazo

Molecular Pharmacology

|                              |           |        |                                                        |           |        |
|------------------------------|-----------|--------|--------------------------------------------------------|-----------|--------|
| siRNA Disorazole DMSO Run1   | NM_002801 | PSMB10 | proteasome (prosome, macropain) subunit, beta type, 10 | 0.893953  | Inlier |
| siRNA-Vinblastine Run2-DMSO  | NM_002801 | PSMB10 | proteasome (prosome, macropain) subunit, beta type, 10 | 1.506797  | Inlier |
| siRNA-Vinblastine Run1-DMSO  | NM_002801 | PSMB10 | proteasome (prosome, macropain) subunit, beta type, 10 | 1.693153  | Inlier |
| siRNA-Temozolomide Run3-DMSO | NM_002794 | PSMB2  | proteasome (prosome, macropain) subunit, beta type, 2  | -0.807584 | Inlier |
| siRNA-Temozolomide Run2-DMSO | NM_002794 | PSMB2  | proteasome (prosome, macropain) subunit, beta type, 2  | -0.71402  | Inlier |
| siRNA-Temozolomide Run1-DMSO | NM_002794 | PSMB2  | proteasome (prosome, macropain) subunit, beta type, 2  | -0.63498  | Inlier |

Identification of Survival Genes in Human Glioblastoma Cells Using siRNA Screening

Nikhil G Thaker, Fang Zhang, Peter R. McDonald, Tong Ying Shun, Michael D Lewen, Ian F. Pollack, and John S. Lazo

Molecular Pharmacology

|                                  |               |       |                                                                           |           |        |
|----------------------------------|---------------|-------|---------------------------------------------------------------------------|-----------|--------|
| siRNA Disorazole DMSO Run1       | NM_0027<br>94 | PSMB2 | proteasom<br>e<br>(prosome,<br>macropain<br>) subunit,<br>beta type,<br>2 | -0.179464 | Inlier |
| siRNA Disorazole DMSO Run2       | NM_0027<br>94 | PSMB2 | proteasom<br>e<br>(prosome,<br>macropain<br>) subunit,<br>beta type,<br>2 | 0.179464  | Inlier |
| siRNA Disorazole DMSO Run3       | NM_0027<br>94 | PSMB2 | proteasom<br>e<br>(prosome,<br>macropain<br>) subunit,<br>beta type,<br>2 | 0.506001  | Inlier |
| siRNA-Vinblastine Run1-<br>DMSO  | NM_0027<br>94 | PSMB2 | proteasom<br>e<br>(prosome,<br>macropain<br>) subunit,<br>beta type,<br>2 | 1.810422  | Inlier |
| siRNA-Vinblastine Run2-<br>DMSO  | NM_0027<br>94 | PSMB2 | proteasom<br>e<br>(prosome,<br>macropain<br>) subunit,<br>beta type,<br>2 | 2.711805  | Inlier |
| siRNA-Temozolomide Run3-<br>DMSO | NM_0027<br>95 | PSMB3 | proteasom<br>e<br>(prosome,<br>macropain<br>) subunit,<br>beta type,<br>3 | -1.151646 | Inlier |



Identification of Survival Genes in Human Glioblastoma Cells Using siRNA Screening  
 Nikhil G Thaker, Fang Zhang, Peter R. McDonald, Tong Ying Shun, Michael D Lewen, Ian F. Pollack, and John S. Lazo  
 Molecular Pharmacology

|                              |               |       |                                                                           |           |        |
|------------------------------|---------------|-------|---------------------------------------------------------------------------|-----------|--------|
| siRNA-Temozolomide Run2-DMSO | NM_0027<br>95 | PSMB3 | proteasom<br>e<br>(prosome,<br>macropain<br>) subunit,<br>beta type,<br>3 | -0.809497 | Inlier |
| siRNA-Temozolomide Run1-DMSO | NM_0027<br>95 | PSMB3 | proteasom<br>e<br>(prosome,<br>macropain<br>) subunit,<br>beta type,<br>3 | -0.518092 | Inlier |
| siRNA Disorazole DMSO Run3   | NM_0027<br>95 | PSMB3 | proteasom<br>e<br>(prosome,<br>macropain<br>) subunit,<br>beta type,<br>3 | -0.040147 | Inlier |
| siRNA Disorazole DMSO Run2   | NM_0027<br>95 | PSMB3 | proteasom<br>e<br>(prosome,<br>macropain<br>) subunit,<br>beta type,<br>3 | 0.040147  | Inlier |
| siRNA Disorazole DMSO Run1   | NM_0027<br>95 | PSMB3 | proteasom<br>e<br>(prosome,<br>macropain<br>) subunit,<br>beta type,<br>3 | 0.539503  | Inlier |
| siRNA-Vinblastine Run1-DMSO  | NM_0027<br>95 | PSMB3 | proteasom<br>e<br>(prosome,<br>macropain<br>) subunit,<br>beta type,<br>3 | 1.750829  | Inlier |

Identification of Survival Genes in Human Glioblastoma Cells Using siRNA Screening

Nikhil G Thaker, Fang Zhang, Peter R. McDonald, Tong Ying Shun, Michael D Lewen, Ian F. Pollack, and John S. Lazo

Molecular Pharmacology

|                              |           |       |                                                       |           |        |
|------------------------------|-----------|-------|-------------------------------------------------------|-----------|--------|
| siRNA-Vinblastine Run2-DMSO  | NM_002795 | PSMB3 | proteasome (prosome, macropain) subunit, beta type, 3 | 1.872429  | Inlier |
| siRNA-Temozolomide Run3-DMSO | NM_002796 | PSMB4 | proteasome (prosome, macropain) subunit, beta type, 4 | -0.833578 | Inlier |
| siRNA-Temozolomide Run2-DMSO | NM_002796 | PSMB4 | proteasome (prosome, macropain) subunit, beta type, 4 | -0.73425  | Inlier |
| siRNA-Temozolomide Run1-DMSO | NM_002796 | PSMB4 | proteasome (prosome, macropain) subunit, beta type, 4 | -0.61475  | Inlier |
| siRNA Disorazole DMSO Run1   | NM_002796 | PSMB4 | proteasome (prosome, macropain) subunit, beta type, 4 | -0.107157 | Inlier |
| siRNA Disorazole DMSO Run2   | NM_002796 | PSMB4 | proteasome (prosome, macropain) subunit, beta type, 4 | 0.107157  | Inlier |

Identification of Survival Genes in Human Glioblastoma Cells Using siRNA Screening

Nikhil G Thaker, Fang Zhang, Peter R. McDonald, Tong Ying Shun, Michael D Lewen, Ian F. Pollack, and John S. Lazo

Molecular Pharmacology

|                                  |               |       |                                                                           |           |         |
|----------------------------------|---------------|-------|---------------------------------------------------------------------------|-----------|---------|
| siRNA Disorazole DMSO Run3       | NM_0027<br>96 | PSMB4 | proteasom<br>e<br>(prosome,<br>macropain<br>) subunit,<br>beta type,<br>4 | 0.320785  | Inlier  |
| siRNA-Vinblastine Run2-<br>DMSO  | NM_0027<br>96 | PSMB4 | proteasom<br>e<br>(prosome,<br>macropain<br>) subunit,<br>beta type,<br>4 | 2.542411  | Inlier  |
| siRNA-Vinblastine Run1-<br>DMSO  | NM_0027<br>96 | PSMB4 | proteasom<br>e<br>(prosome,<br>macropain<br>) subunit,<br>beta type,<br>4 | 3.050937  | Inlier  |
| siRNA-Temozolomide Run3-<br>DMSO | NM_0027<br>97 | PSMB5 | proteasom<br>e<br>(prosome,<br>macropain<br>) subunit,<br>beta type,<br>5 | -5.081172 | Outlier |
| siRNA-Temozolomide Run1-<br>DMSO | NM_0027<br>97 | PSMB5 | proteasom<br>e<br>(prosome,<br>macropain<br>) subunit,<br>beta type,<br>5 | -0.470271 | Inlier  |
| siRNA Disorazole DMSO Run1       | NM_0027<br>97 | PSMB5 | proteasom<br>e<br>(prosome,<br>macropain<br>) subunit,<br>beta type,<br>5 | -0.443546 | Inlier  |

Identification of Survival Genes in Human Glioblastoma Cells Using siRNA Screening  
 Nikhil G Thaker, Fang Zhang, Peter R. McDonald, Tong Ying Shun, Michael D Lewen, Ian F. Pollack, and John S. Lazo  
 Molecular Pharmacology

|                                  |               |       |                                                                           |           |        |
|----------------------------------|---------------|-------|---------------------------------------------------------------------------|-----------|--------|
| siRNA Disorazole DMSO Run2       | NM_0027<br>97 | PSMB5 | proteasom<br>e<br>(prosome,<br>macropain<br>) subunit,<br>beta type,<br>5 | -0.070882 | Inlier |
| siRNA-Temozolomide Run2-<br>DMSO | NM_0027<br>97 | PSMB5 | proteasom<br>e<br>(prosome,<br>macropain<br>) subunit,<br>beta type,<br>5 | 0.070883  | Inlier |
| siRNA-Vinblastine Run2-<br>DMSO  | NM_0027<br>97 | PSMB5 | proteasom<br>e<br>(prosome,<br>macropain<br>) subunit,<br>beta type,<br>5 | 0.878729  | Inlier |
| siRNA-Vinblastine Run1-<br>DMSO  | NM_0027<br>97 | PSMB5 | proteasom<br>e<br>(prosome,<br>macropain<br>) subunit,<br>beta type,<br>5 | 1.779658  | Inlier |
| siRNA Disorazole DMSO Run3       | NM_0027<br>97 | PSMB5 | proteasom<br>e<br>(prosome,<br>macropain<br>) subunit,<br>beta type,<br>5 | 2.034888  | Inlier |
| siRNA Disorazole DMSO Run2       | NM_0027<br>98 | PSMB6 | proteasom<br>e<br>(prosome,<br>macropain<br>) subunit,<br>beta type,<br>6 | -0.870278 | Inlier |

Identification of Survival Genes in Human Glioblastoma Cells Using siRNA Screening  
 Nikhil G Thaker, Fang Zhang, Peter R. McDonald, Tong Ying Shun, Michael D Lewen, Ian F. Pollack, and John S. Lazo  
 Molecular Pharmacology

|                              |           |       |                                                       |           |        |
|------------------------------|-----------|-------|-------------------------------------------------------|-----------|--------|
| siRNA-Temozolomide Run3-DMSO | NM_002798 | PSMB6 | proteasome (prosome, macropain) subunit, beta type, 6 | -0.711468 | Inlier |
| siRNA Disorazole DMSO Run3   | NM_002798 | PSMB6 | proteasome (prosome, macropain) subunit, beta type, 6 | -0.553119 | Inlier |
| siRNA-Temozolomide Run2-DMSO | NM_002798 | PSMB6 | proteasome (prosome, macropain) subunit, beta type, 6 | -0.417668 | Inlier |
| siRNA Disorazole DMSO Run1   | NM_002798 | PSMB6 | proteasome (prosome, macropain) subunit, beta type, 6 | 0.417668  | Inlier |
| siRNA-Temozolomide Run1-DMSO | NM_002798 | PSMB6 | proteasome (prosome, macropain) subunit, beta type, 6 | 0.637532  | Inlier |
| siRNA-Vinblastine Run2-DMSO  | NM_002798 | PSMB6 | proteasome (prosome, macropain) subunit, beta type, 6 | 1.378799  | Inlier |

Identification of Survival Genes in Human Glioblastoma Cells Using siRNA Screening  
 Nikhil G Thaker, Fang Zhang, Peter R. McDonald, Tong Ying Shun, Michael D Lewen, Ian F. Pollack, and John S. Lazo  
 Molecular Pharmacology

|                              |           |       |                                                       |           |        |
|------------------------------|-----------|-------|-------------------------------------------------------|-----------|--------|
| siRNA-Vinblastine Run1-DMSO  | NM_002798 | PSMB6 | proteasome (prosome, macropain) subunit, beta type, 6 | 1.474127  | Inlier |
| siRNA-Temozolomide Run3-DMSO | NM_002799 | PSMB7 | proteasome (prosome, macropain) subunit, beta type, 7 | -1.06461  | Inlier |
| siRNA-Temozolomide Run2-DMSO | NM_002799 | PSMB7 | proteasome (prosome, macropain) subunit, beta type, 7 | -0.72763  | Inlier |
| siRNA-Temozolomide Run1-DMSO | NM_002799 | PSMB7 | proteasome (prosome, macropain) subunit, beta type, 7 | -0.418828 | Inlier |
| siRNA Disorazole DMSO Run2   | NM_002799 | PSMB7 | proteasome (prosome, macropain) subunit, beta type, 7 | -0.218575 | Inlier |
| siRNA Disorazole DMSO Run1   | NM_002799 | PSMB7 | proteasome (prosome, macropain) subunit, beta type, 7 | 0.218575  | Inlier |

Identification of Survival Genes in Human Glioblastoma Cells Using siRNA Screening

Nikhil G Thaker, Fang Zhang, Peter R. McDonald, Tong Ying Shun, Michael D Lewen, Ian F. Pollack, and John S. Lazo

Molecular Pharmacology

|                                  |               |       |                                                                                                                           |           |        |
|----------------------------------|---------------|-------|---------------------------------------------------------------------------------------------------------------------------|-----------|--------|
| siRNA Disorazole DMSO Run3       | NM_0027<br>99 | PSMB7 | proteasom<br>e<br>(prosome,<br>macropain<br>) subunit,<br>beta type,<br>7                                                 | 0.62137   | Inlier |
| siRNA-Vinblastine Run2-<br>DMSO  | NM_0027<br>99 | PSMB7 | proteasom<br>e<br>(prosome,<br>macropain<br>) subunit,<br>beta type,<br>7                                                 | 1.020177  | Inlier |
| siRNA-Vinblastine Run1-<br>DMSO  | NM_0027<br>99 | PSMB7 | proteasom<br>e<br>(prosome,<br>macropain<br>) subunit,<br>beta type,<br>7                                                 | 1.258258  | Inlier |
| siRNA Disorazole DMSO Run2       | NM_0041<br>59 | PSMB8 | proteasom<br>e<br>(prosome,<br>macropain<br>) subunit,<br>beta type,<br>8 (large<br>multifuncti<br>onal<br>protease<br>7) | -0.843895 | Inlier |
| siRNA-Temozolomide Run3-<br>DMSO | NM_0041<br>59 | PSMB8 | proteasom<br>e<br>(prosome,<br>macropain<br>) subunit,<br>beta type,<br>8 (large<br>multifuncti<br>onal<br>protease<br>7) | -0.821127 | Inlier |

Identification of Survival Genes in Human Glioblastoma Cells Using siRNA Screening  
 Nikhil G Thaker, Fang Zhang, Peter R. McDonald, Tong Ying Shun, Michael D Lewen, Ian F. Pollack, and John S. Lazo  
 Molecular Pharmacology

|                              |           |       |                                                                                          |           |        |
|------------------------------|-----------|-------|------------------------------------------------------------------------------------------|-----------|--------|
| siRNA-Temozolomide Run2-DMSO | NM_004159 | PSMB8 | proteasome (prosome, macropain) subunit, beta type, 8 (large multifunctional protease 7) | -0.325051 | Inlier |
| siRNA Disorazole DMSO Run3   | NM_004159 | PSMB8 | proteasome (prosome, macropain) subunit, beta type, 8 (large multifunctional protease 7) | -0.298861 | Inlier |
| siRNA-Temozolomide Run1-DMSO | NM_004159 | PSMB8 | proteasome (prosome, macropain) subunit, beta type, 8 (large multifunctional protease 7) | 0.298861  | Inlier |
| siRNA Disorazole DMSO Run1   | NM_004159 | PSMB8 | proteasome (prosome, macropain) subunit, beta type, 8 (large multifunctional protease 7) | 0.527873  | Inlier |



Identification of Survival Genes in Human Glioblastoma Cells Using siRNA Screening

Nikhil G Thaker, Fang Zhang, Peter R. McDonald, Tong Ying Shun, Michael D Lewen, Ian F. Pollack, and John S.

Lazo

Molecular Pharmacology

|                              |           |       |                                                                                          |           |        |
|------------------------------|-----------|-------|------------------------------------------------------------------------------------------|-----------|--------|
| siRNA-Vinblastine Run1-DMSO  | NM_004159 | PSMB8 | proteasome (prosome, macropain) subunit, beta type, 8 (large multifunctional protease 7) | 0.985196  | Inlier |
| siRNA-Vinblastine Run2-DMSO  | NM_004159 | PSMB8 | proteasome (prosome, macropain) subunit, beta type, 8 (large multifunctional protease 7) | 1.148595  | Inlier |
| siRNA-Temozolomide Run3-DMSO | NM_002800 | PSMB9 | proteasome (prosome, macropain) subunit, beta type, 9 (large multifunctional protease 2) | -1.986653 | Inlier |
| siRNA-Temozolomide Run2-DMSO | NM_002800 | PSMB9 | proteasome (prosome, macropain) subunit, beta type, 9 (large multifunctional protease 2) | -1.437385 | Inlier |

Identification of Survival Genes in Human Glioblastoma Cells Using siRNA Screening  
 Nikhil G Thaker, Fang Zhang, Peter R. McDonald, Tong Ying Shun, Michael D Lewen, Ian F. Pollack, and John S. Lazo  
 Molecular Pharmacology

|                               |           |       |                                                                                          |           |        |
|-------------------------------|-----------|-------|------------------------------------------------------------------------------------------|-----------|--------|
| siRNA Disorazole DMSO Run2    | NM_002800 | PSMB9 | proteasome (prosome, macropain) subunit, beta type, 9 (large multifunctional protease 2) | -0.413997 | Inlier |
| siRNA Disorazole DMSO Run3    | NM_002800 | PSMB9 | proteasome (prosome, macropain) subunit, beta type, 9 (large multifunctional protease 2) | -0.33384  | Inlier |
| siRNA-Temozolomide DMSO Run1- | NM_002800 | PSMB9 | proteasome (prosome, macropain) subunit, beta type, 9 (large multifunctional protease 2) | 0.33384   | Inlier |
| siRNA-Vinblastine DMSO Run2-  | NM_002800 | PSMB9 | proteasome (prosome, macropain) subunit, beta type, 9 (large multifunctional protease 2) | 0.623975  | Inlier |

Identification of Survival Genes in Human Glioblastoma Cells Using siRNA Screening

Nikhil G Thaker, Fang Zhang, Peter R. McDonald, Tong Ying Shun, Michael D Lewen, Ian F. Pollack, and John S. Lazo

Molecular Pharmacology

|                              |           |       |                                                                                          |           |        |
|------------------------------|-----------|-------|------------------------------------------------------------------------------------------|-----------|--------|
| siRNA-Vinblastine Run1-DMSO  | NM_002800 | PSMB9 | proteasome (prosome, macropain) subunit, beta type, 9 (large multifunctional protease 2) | 0.725025  | Inlier |
| siRNA Disorazole DMSO Run1   | NM_002800 | PSMB9 | proteasome (prosome, macropain) subunit, beta type, 9 (large multifunctional protease 2) | 0.914091  | Inlier |
| siRNA-Temozolomide Run3-DMSO | NM_002802 | PSMC1 | proteasome (prosome, macropain) 26S subunit, ATPase, 1                                   | -1.051282 | Inlier |
| siRNA-Temozolomide Run2-DMSO | NM_002802 | PSMC1 | proteasome (prosome, macropain) 26S subunit, ATPase, 1                                   | -0.802031 | Inlier |
| siRNA-Vinblastine Run2-DMSO  | NM_002802 | PSMC1 | proteasome (prosome, macropain) 26S subunit, ATPase, 1                                   | -0.546969 | Inlier |

Identification of Survival Genes in Human Glioblastoma Cells Using siRNA Screening

Nikhil G Thaker, Fang Zhang, Peter R. McDonald, Tong Ying Shun, Michael D Lewen, Ian F. Pollack, and John S. Lazo

Molecular Pharmacology

|                                  |               |       |                                                                            |           |        |
|----------------------------------|---------------|-------|----------------------------------------------------------------------------|-----------|--------|
| siRNA Disorazole DMSO Run3       | NM_0028<br>02 | PSMC1 | proteasom<br>e<br>(prosome,<br>macropain<br>) 26S<br>subunit,<br>ATPase, 1 | -0.251525 | Inlier |
| siRNA Disorazole DMSO Run1       | NM_0028<br>02 | PSMC1 | proteasom<br>e<br>(prosome,<br>macropain<br>) 26S<br>subunit,<br>ATPase, 1 | 0.251526  | Inlier |
| siRNA-Temozolomide Run1-<br>DMSO | NM_0028<br>02 | PSMC1 | proteasom<br>e<br>(prosome,<br>macropain<br>) 26S<br>subunit,<br>ATPase, 1 | 0.377014  | Inlier |
| siRNA Disorazole DMSO Run2       | NM_0028<br>02 | PSMC1 | proteasom<br>e<br>(prosome,<br>macropain<br>) 26S<br>subunit,<br>ATPase, 1 | 0.872527  | Inlier |
| siRNA-Vinblastine Run1-<br>DMSO  | NM_0028<br>02 | PSMC1 | proteasom<br>e<br>(prosome,<br>macropain<br>) 26S<br>subunit,<br>ATPase, 1 | 1.164856  | Inlier |
| siRNA Disorazole DMSO Run3       | NM_0028<br>03 | PSMC2 | proteasom<br>e<br>(prosome,<br>macropain<br>) 26S<br>subunit,<br>ATPase, 2 | -1.049115 | Inlier |

Identification of Survival Genes in Human Glioblastoma Cells Using siRNA Screening

Nikhil G Thaker, Fang Zhang, Peter R. McDonald, Tong Ying Shun, Michael D Lewen, Ian F. Pollack, and John S. Lazo

Molecular Pharmacology

|                              |           |       |                                                        |           |        |
|------------------------------|-----------|-------|--------------------------------------------------------|-----------|--------|
| siRNA-Vinblastine Run2-DMSO  | NM_002803 | PSMC2 | proteasome (prosome, macropain) 26S subunit, ATPase, 2 | -0.937001 | Inlier |
| siRNA-Temozolomide Run1-DMSO | NM_002803 | PSMC2 | proteasome (prosome, macropain) 26S subunit, ATPase, 2 | -0.411999 | Inlier |
| siRNA-Temozolomide Run3-DMSO | NM_002803 | PSMC2 | proteasome (prosome, macropain) 26S subunit, ATPase, 2 | -0.187897 | Inlier |
| siRNA Disorazole DMSO Run1   | NM_002803 | PSMC2 | proteasome (prosome, macropain) 26S subunit, ATPase, 2 | 0.187897  | Inlier |
| siRNA-Temozolomide Run2-DMSO | NM_002803 | PSMC2 | proteasome (prosome, macropain) 26S subunit, ATPase, 2 | 0.302545  | Inlier |
| siRNA Disorazole DMSO Run2   | NM_002803 | PSMC2 | proteasome (prosome, macropain) 26S subunit, ATPase, 2 | 2.328124  | Inlier |

Identification of Survival Genes in Human Glioblastoma Cells Using siRNA Screening

Nikhil G Thaker, Fang Zhang, Peter R. McDonald, Tong Ying Shun, Michael D Lewen, Ian F. Pollack, and John S. Lazo

Molecular Pharmacology

|                              |           |       |                                                        |           |        |
|------------------------------|-----------|-------|--------------------------------------------------------|-----------|--------|
| siRNA-Vinblastine Run1-DMSO  | NM_002803 | PSMC2 | proteasome (prosome, macropain) 26S subunit, ATPase, 2 | 2.405607  | Inlier |
| siRNA-Vinblastine Run2-DMSO  | NM_002804 | PSMC3 | proteasome (prosome, macropain) 26S subunit, ATPase, 3 | -0.800716 | Inlier |
| siRNA-Temozolomide Run1-DMSO | NM_002804 | PSMC3 | proteasome (prosome, macropain) 26S subunit, ATPase, 3 | -0.548284 | Inlier |
| siRNA Disorazole DMSO Run1   | NM_002804 | PSMC3 | proteasome (prosome, macropain) 26S subunit, ATPase, 3 | -0.485685 | Inlier |
| siRNA-Temozolomide Run2-DMSO | NM_002804 | PSMC3 | proteasome (prosome, macropain) 26S subunit, ATPase, 3 | -0.433999 | Inlier |
| siRNA Disorazole DMSO Run3   | NM_002804 | PSMC3 | proteasome (prosome, macropain) 26S subunit, ATPase, 3 | 0.433999  | Inlier |

Identification of Survival Genes in Human Glioblastoma Cells Using siRNA Screening

Nikhil G Thaker, Fang Zhang, Peter R. McDonald, Tong Ying Shun, Michael D Lewen, Ian F. Pollack, and John S. Lazo

Molecular Pharmacology

|                              |           |       |                                                        |           |         |
|------------------------------|-----------|-------|--------------------------------------------------------|-----------|---------|
| siRNA-Temozolomide Run3-DMSO | NM_002804 | PSMC3 | proteasome (prosome, macropain) 26S subunit, ATPase, 3 | 1.600664  | Inlier  |
| siRNA-Vinblastine Run1-DMSO  | NM_002804 | PSMC3 | proteasome (prosome, macropain) 26S subunit, ATPase, 3 | 31.45086  | Outlier |
| siRNA Disorazole DMSO Run2   | NM_002804 | PSMC3 | proteasome (prosome, macropain) 26S subunit, ATPase, 3 | 43.92327  | Outlier |
| siRNA-Temozolomide Run1-DMSO | NM_153001 | PSMC4 | proteasome (prosome, macropain) 26S subunit, ATPase, 4 | -0.92974  | Inlier  |
| siRNA-Temozolomide Run3-DMSO | NM_153001 | PSMC4 | proteasome (prosome, macropain) 26S subunit, ATPase, 4 | -0.914706 | Inlier  |
| siRNA-Temozolomide Run2-DMSO | NM_153001 | PSMC4 | proteasome (prosome, macropain) 26S subunit, ATPase, 4 | -0.434293 | Inlier  |

Identification of Survival Genes in Human Glioblastoma Cells Using siRNA Screening

Nikhil G Thaker, Fang Zhang, Peter R. McDonald, Tong Ying Shun, Michael D Lewen, Ian F. Pollack, and John S. Lazo

Molecular Pharmacology

|                              |           |       |                                                        |           |         |
|------------------------------|-----------|-------|--------------------------------------------------------|-----------|---------|
| siRNA-Vinblastine Run2-DMSO  | NM_153001 | PSMC4 | proteasome (prosome, macropain) 26S subunit, ATPase, 4 | -0.351622 | Inlier  |
| siRNA Disorazole DMSO Run1   | NM_153001 | PSMC4 | proteasome (prosome, macropain) 26S subunit, ATPase, 4 | 0.351622  | Inlier  |
| siRNA Disorazole DMSO Run3   | NM_153001 | PSMC4 | proteasome (prosome, macropain) 26S subunit, ATPase, 4 | 0.421617  | Inlier  |
| siRNA-Vinblastine Run1-DMSO  | NM_153001 | PSMC4 | proteasome (prosome, macropain) 26S subunit, ATPase, 4 | 3.634471  | Outlier |
| siRNA Disorazole DMSO Run2   | NM_153001 | PSMC4 | proteasome (prosome, macropain) 26S subunit, ATPase, 4 | 3.75931   | Outlier |
| siRNA-Temozolomide Run1-DMSO | NM_002805 | PSMC5 | proteasome (prosome, macropain) 26S subunit, ATPase, 5 | -1.076595 | Inlier  |



Identification of Survival Genes in Human Glioblastoma Cells Using siRNA Screening

Nikhil G Thaker, Fang Zhang, Peter R. McDonald, Tong Ying Shun, Michael D Lewen, Ian F. Pollack, and John S. Lazo

Molecular Pharmacology

|                               |           |       |                                                        |           |         |
|-------------------------------|-----------|-------|--------------------------------------------------------|-----------|---------|
| siRNA Disorazole DMSO Run3    | NM_002805 | PSMC5 | proteasome (prosome, macropain) 26S subunit, ATPase, 5 | -0.272405 | Inlier  |
| siRNA-Temozolomide DMSO Run2- | NM_002805 | PSMC5 | proteasome (prosome, macropain) 26S subunit, ATPase, 5 | -0.174263 | Inlier  |
| siRNA-Vinblastine DMSO Run2-  | NM_002805 | PSMC5 | proteasome (prosome, macropain) 26S subunit, ATPase, 5 | -0.092345 | Inlier  |
| siRNA-Temozolomide DMSO Run3- | NM_002805 | PSMC5 | proteasome (prosome, macropain) 26S subunit, ATPase, 5 | 0.092346  | Inlier  |
| siRNA Disorazole DMSO Run1    | NM_002805 | PSMC5 | proteasome (prosome, macropain) 26S subunit, ATPase, 5 | 2.477895  | Inlier  |
| siRNA Disorazole DMSO Run2    | NM_002805 | PSMC5 | proteasome (prosome, macropain) 26S subunit, ATPase, 5 | 39.53764  | Outlier |

Identification of Survival Genes in Human Glioblastoma Cells Using siRNA Screening  
 Nikhil G Thaker, Fang Zhang, Peter R. McDonald, Tong Ying Shun, Michael D Lewen, Ian F. Pollack, and John S. Lazo  
 Molecular Pharmacology

|                              |           |       |                                                        |           |         |
|------------------------------|-----------|-------|--------------------------------------------------------|-----------|---------|
| siRNA-Vinblastine Run1-DMSO  | NM_002805 | PSMC5 | proteasome (prosome, macropain) 26S subunit, ATPase, 5 | 44.52777  | Outlier |
| siRNA-Vinblastine Run2-DMSO  | NM_002806 | PSMC6 | proteasome (prosome, macropain) 26S subunit, ATPase, 6 | -0.986706 | Inlier  |
| siRNA-Temozolomide Run3-DMSO | NM_002806 | PSMC6 | proteasome (prosome, macropain) 26S subunit, ATPase, 6 | -0.53383  | Inlier  |
| siRNA-Temozolomide Run1-DMSO | NM_002806 | PSMC6 | proteasome (prosome, macropain) 26S subunit, ATPase, 6 | -0.44789  | Inlier  |
| siRNA-Temozolomide Run2-DMSO | NM_002806 | PSMC6 | proteasome (prosome, macropain) 26S subunit, ATPase, 6 | -0.002179 | Inlier  |
| siRNA Disorazole DMSO Run3   | NM_002806 | PSMC6 | proteasome (prosome, macropain) 26S subunit, ATPase, 6 | 0.00218   | Inlier  |

Identification of Survival Genes in Human Glioblastoma Cells Using siRNA Screening  
 Nikhil G Thaker, Fang Zhang, Peter R. McDonald, Tong Ying Shun, Michael D Lewen, Ian F. Pollack, and John S. Lazo  
 Molecular Pharmacology

|                              |           |        |                                                             |           |         |
|------------------------------|-----------|--------|-------------------------------------------------------------|-----------|---------|
| siRNA Disorazole DMSO Run1   | NM_002806 | PSMC6  | proteasome (prosome, macropain) 26S subunit, ATPase, 6      | 0.81517   | Inlier  |
| siRNA-Vinblastine Run1-DMSO  | NM_002806 | PSMC6  | proteasome (prosome, macropain) 26S subunit, ATPase, 6      | 22.99059  | Outlier |
| siRNA Disorazole DMSO Run2   | NM_002806 | PSMC6  | proteasome (prosome, macropain) 26S subunit, ATPase, 6      | 26.46636  | Outlier |
| siRNA-Vinblastine Run2-DMSO  | NM_005805 | PSMD14 | proteasome (prosome, macropain) 26S subunit, non-ATPase, 14 | -0.854942 | Inlier  |
| siRNA-Temozolomide Run1-DMSO | NM_005805 | PSMD14 | proteasome (prosome, macropain) 26S subunit, non-ATPase, 14 | -0.843388 | Inlier  |
| siRNA Disorazole DMSO Run3   | NM_005805 | PSMD14 | proteasome (prosome, macropain) 26S subunit, non-ATPase, 14 | -0.3763   | Inlier  |

Identification of Survival Genes in Human Glioblastoma Cells Using siRNA Screening

Nikhil G Thaker, Fang Zhang, Peter R. McDonald, Tong Ying Shun, Michael D Lewen, Ian F. Pollack, and John S. Lazo

Molecular Pharmacology

| siRNA Treatment              | Gene ID   | Gene Name | Protein Name                                                | Log2 Fold Change | Classification |
|------------------------------|-----------|-----------|-------------------------------------------------------------|------------------|----------------|
| siRNA-Temozolomide Run2-DMSO | NM_005805 | PSMD14    | proteasome (prosome, macropain) 26S subunit, non-ATPase, 14 | -0.047969        | Inlier         |
| siRNA-Temozolomide Run3-DMSO | NM_005805 | PSMD14    | proteasome (prosome, macropain) 26S subunit, non-ATPase, 14 | 0.047969         | Inlier         |
| siRNA Disorazole DMSO Run1   | NM_005805 | PSMD14    | proteasome (prosome, macropain) 26S subunit, non-ATPase, 14 | 0.505612         | Inlier         |
| siRNA-Vinblastine Run1-DMSO  | NM_005805 | PSMD14    | proteasome (prosome, macropain) 26S subunit, non-ATPase, 14 | 19.60837         | Outlier        |
| siRNA Disorazole DMSO Run2   | NM_005805 | PSMD14    | proteasome (prosome, macropain) 26S subunit, non-ATPase, 14 | 21.17624         | Outlier        |

Identification of Survival Genes in Human Glioblastoma Cells Using siRNA Screening

Nikhil G Thaker, Fang Zhang, Peter R. McDonald, Tong Ying Shun, Michael D Lewen, Ian F. Pollack, and John S. Lazo

Molecular Pharmacology

| siRNA Treatment              | Gene ID   | Gene Name | Protein Name                                                               | Log Fold Change | Outlier Type |
|------------------------------|-----------|-----------|----------------------------------------------------------------------------|-----------------|--------------|
| siRNA-Temozolomide Run2-DMSO | NM_002811 | PSMD7     | proteasome (prosome, macropain) 26S subunit, non-ATPase, 7 (Mov34 homolog) | -0.86176        | Inlier       |
| siRNA-Temozolomide Run3-DMSO | NM_002811 | PSMD7     | proteasome (prosome, macropain) 26S subunit, non-ATPase, 7 (Mov34 homolog) | -0.48724        | Inlier       |
| siRNA-Temozolomide Run1-DMSO | NM_002811 | PSMD7     | proteasome (prosome, macropain) 26S subunit, non-ATPase, 7 (Mov34 homolog) | -0.395313       | Inlier       |
| siRNA Disorazole DMSO Run3   | NM_002811 | PSMD7     | proteasome (prosome, macropain) 26S subunit, non-ATPase, 7 (Mov34 homolog) | -0.055548       | Inlier       |
| siRNA-Vinblastine Run2-DMSO  | NM_002811 | PSMD7     | proteasome (prosome, macropain) 26S subunit, non-ATPase, 7 (Mov34 homolog) | 0.055548        | Inlier       |

Identification of Survival Genes in Human Glioblastoma Cells Using siRNA Screening

Nikhil G Thaker, Fang Zhang, Peter R. McDonald, Tong Ying Shun, Michael D Lewen, Ian F. Pollack, and John S. Lazo

Molecular Pharmacology

|                                  |               |       |                                                                                                          |           |         |
|----------------------------------|---------------|-------|----------------------------------------------------------------------------------------------------------|-----------|---------|
| siRNA Disorazole DMSO Run1       | NM_0028<br>11 | PSMD7 | proteasom<br>e<br>(prosome,<br>macropain<br>) 26S<br>subunit,<br>non-<br>ATPase, 7<br>(Mov34<br>homolog) | 1.717583  | Inlier  |
| siRNA Disorazole DMSO Run2       | NM_0028<br>11 | PSMD7 | proteasom<br>e<br>(prosome,<br>macropain<br>) 26S<br>subunit,<br>non-<br>ATPase, 7<br>(Mov34<br>homolog) | 8.174967  | Outlier |
| siRNA-Vinblastine Run1-<br>DMSO  | NM_0028<br>11 | PSMD7 | proteasom<br>e<br>(prosome,<br>macropain<br>) 26S<br>subunit,<br>non-<br>ATPase, 7<br>(Mov34<br>homolog) | 8.813714  | Outlier |
| siRNA-Temozolomide Run3-<br>DMSO | NM_0028<br>13 | PSMD9 | proteasom<br>e<br>(prosome,<br>macropain<br>) 26S<br>subunit,<br>non-<br>ATPase, 9                       | -4.049537 | Outlier |
| siRNA-Temozolomide Run2-<br>DMSO | NM_0028<br>13 | PSMD9 | proteasom<br>e<br>(prosome,<br>macropain<br>) 26S<br>subunit,<br>non-<br>ATPase, 9                       | -1.692074 | Inlier  |

Identification of Survival Genes in Human Glioblastoma Cells Using siRNA Screening

Nikhil G Thaker, Fang Zhang, Peter R. McDonald, Tong Ying Shun, Michael D Lewen, Ian F. Pollack, and John S. Lazo

Molecular Pharmacology

|                                  |               |       |                                                                                    |           |        |
|----------------------------------|---------------|-------|------------------------------------------------------------------------------------|-----------|--------|
| siRNA Disorazole DMSO Run2       | NM_0028<br>13 | PSMD9 | proteasom<br>e<br>(prosome,<br>macropain<br>) 26S<br>subunit,<br>non-<br>ATPase, 9 | -0.595201 | Inlier |
| siRNA-Temozolomide Run1-<br>DMSO | NM_0028<br>13 | PSMD9 | proteasom<br>e<br>(prosome,<br>macropain<br>) 26S<br>subunit,<br>non-<br>ATPase, 9 | -0.112161 | Inlier |
| siRNA Disorazole DMSO Run1       | NM_0028<br>13 | PSMD9 | proteasom<br>e<br>(prosome,<br>macropain<br>) 26S<br>subunit,<br>non-<br>ATPase, 9 | 0.112161  | Inlier |
| siRNA-Vinblastine Run2-<br>DMSO  | NM_0028<br>13 | PSMD9 | proteasom<br>e<br>(prosome,<br>macropain<br>) 26S<br>subunit,<br>non-<br>ATPase, 9 | 0.576881  | Inlier |
| siRNA Disorazole DMSO Run3       | NM_0028<br>13 | PSMD9 | proteasom<br>e<br>(prosome,<br>macropain<br>) 26S<br>subunit,<br>non-<br>ATPase, 9 | 0.753799  | Inlier |

Identification of Survival Genes in Human Glioblastoma Cells Using siRNA Screening  
 Nikhil G Thaker, Fang Zhang, Peter R. McDonald, Tong Ying Shun, Michael D Lewen, Ian F. Pollack, and John S. Lazo  
 Molecular Pharmacology

|                              |           |         |                                                                                      |           |         |
|------------------------------|-----------|---------|--------------------------------------------------------------------------------------|-----------|---------|
| siRNA-Vinblastine Run1-DMSO  | NM_002813 | PSMD9   | proteasome (prosome, macropain) 26S subunit, non-ATPase, 9 phosphoserine phosphatase | 1.532437  | Inlier  |
| siRNA-Temozolomide Run3-DMSO | NM_004577 | PSPH    | phosphoserine phosphatase                                                            | -1.41022  | Inlier  |
| siRNA-Temozolomide Run2-DMSO | NM_004577 | PSPH    | phosphoserine phosphatase                                                            | -0.796173 | Inlier  |
| siRNA Disorazole DMSO Run3   | NM_004577 | PSPH    | phosphoserine phosphatase                                                            | -0.552827 | Inlier  |
| siRNA Disorazole DMSO Run2   | NM_004577 | PSPH    | phosphoserine phosphatase                                                            | -0.474177 | Inlier  |
| siRNA-Temozolomide Run1-DMSO | NM_004577 | PSPH    | phosphoserine phosphatase                                                            | 0.474177  | Inlier  |
| siRNA Disorazole DMSO Run1   | NM_004577 | PSPH    | phosphoserine phosphatase                                                            | 0.495043  | Inlier  |
| siRNA-Vinblastine Run1-DMSO  | NM_004577 | PSPH    | phosphoserine phosphatase                                                            | 1.348151  | Inlier  |
| siRNA-Vinblastine Run2-DMSO  | NM_004577 | PSPH    | phosphoserine phosphatase                                                            | 1.493408  | Inlier  |
| siRNA-Temozolomide Run3-DMSO | NM_003978 | PSTPIP1 | proline-serine-threonine phosphatase interacting protein 1                           | -3.553591 | Outlier |



Identification of Survival Genes in Human Glioblastoma Cells Using siRNA Screening

Nikhil G Thaker, Fang Zhang, Peter R. McDonald, Tong Ying Shun, Michael D Lewen, Ian F. Pollack, and John S. Lazo

Molecular Pharmacology

|                              |           |         |                                                            |           |        |
|------------------------------|-----------|---------|------------------------------------------------------------|-----------|--------|
| siRNA-Temozolomide Run2-DMSO | NM_003978 | PSTPIP1 | proline-serine-threonine phosphatase interacting protein 1 | -2.753439 | Inlier |
| siRNA-Temozolomide Run1-DMSO | NM_003978 | PSTPIP1 | proline-serine-threonine phosphatase interacting protein 1 | -0.935508 | Inlier |
| siRNA Disorazole DMSO Run1   | NM_003978 | PSTPIP1 | proline-serine-threonine phosphatase interacting protein 1 | -0.085941 | Inlier |
| siRNA-Vinblastine Run2-DMSO  | NM_003978 | PSTPIP1 | proline-serine-threonine phosphatase interacting protein 1 | 0.085941  | Inlier |
| siRNA-Vinblastine Run1-DMSO  | NM_003978 | PSTPIP1 | proline-serine-threonine phosphatase interacting protein 1 | 0.265304  | Inlier |
| siRNA Disorazole DMSO Run3   | NM_003978 | PSTPIP1 | proline-serine-threonine phosphatase interacting protein 1 | 0.413492  | Inlier |

Identification of Survival Genes in Human Glioblastoma Cells Using siRNA Screening

Nikhil G Thaker, Fang Zhang, Peter R. McDonald, Tong Ying Shun, Michael D Lewen, Ian F. Pollack, and John S. Lazo

Molecular Pharmacology

|                              |               |         |                                                            |           |        |
|------------------------------|---------------|---------|------------------------------------------------------------|-----------|--------|
| siRNA Disorazole DMSO Run2   | NM_0039<br>78 | PSTPIP1 | proline-serine-threonine phosphatase interacting protein 1 | 2.486708  | Inlier |
| siRNA-Temozolomide Run3-DMSO | NM_0244<br>30 | PSTPIP2 | proline-serine-threonine phosphatase interacting protein 2 | -1.594513 | Inlier |
| siRNA-Temozolomide Run2-DMSO | NM_0244<br>30 | PSTPIP2 | proline-serine-threonine phosphatase interacting protein 2 | -1.451591 | Inlier |
| siRNA Disorazole DMSO Run1   | NM_0244<br>30 | PSTPIP2 | proline-serine-threonine phosphatase interacting protein 2 | -0.348583 | Inlier |
| siRNA-Temozolomide Run1-DMSO | NM_0244<br>30 | PSTPIP2 | proline-serine-threonine phosphatase interacting protein 2 | -0.266516 | Inlier |
| siRNA Disorazole DMSO Run3   | NM_0244<br>30 | PSTPIP2 | proline-serine-threonine phosphatase interacting protein 2 | 0.266516  | Inlier |

Identification of Survival Genes in Human Glioblastoma Cells Using siRNA Screening  
 Nikhil G Thaker, Fang Zhang, Peter R. McDonald, Tong Ying Shun, Michael D Lewen, Ian F. Pollack, and John S. Lazo  
 Molecular Pharmacology

|                              |               |         |                                                            |           |        |
|------------------------------|---------------|---------|------------------------------------------------------------|-----------|--------|
| siRNA-Vinblastine Run2-DMSO  | NM_0244<br>30 | PSTPIP2 | proline-serine-threonine phosphatase interacting protein 2 | 0.330214  | Inlier |
| siRNA-Vinblastine Run1-DMSO  | NM_0244<br>30 | PSTPIP2 | proline-serine-threonine phosphatase interacting protein 2 | 1.000417  | Inlier |
| siRNA Disorazole DMSO Run2   | NM_0244<br>30 | PSTPIP2 | proline-serine-threonine phosphatase interacting protein 2 | 1.108945  | Inlier |
| siRNA Disorazole DMSO Run3   | NM_0009<br>52 | PTAFR   | platelet-activating factor receptor                        | -0.879638 | Inlier |
| siRNA-Temozolomide Run3-DMSO | NM_0009<br>52 | PTAFR   | platelet-activating factor receptor                        | -0.655724 | Inlier |
| siRNA Disorazole DMSO Run2   | NM_0009<br>52 | PTAFR   | platelet-activating factor receptor                        | -0.391819 | Inlier |
| siRNA Disorazole DMSO Run1   | NM_0009<br>52 | PTAFR   | platelet-activating factor receptor                        | -0.150292 | Inlier |
| siRNA-Temozolomide Run2-DMSO | NM_0009<br>52 | PTAFR   | platelet-activating factor receptor                        | 0.150293  | Inlier |
| siRNA-Temozolomide Run1-DMSO | NM_0009<br>52 | PTAFR   | platelet-activating factor receptor                        | 0.693276  | Inlier |
| siRNA-Vinblastine Run2-DMSO  | NM_0009<br>52 | PTAFR   | platelet-activating factor receptor                        | 1.236796  | Inlier |

Identification of Survival Genes in Human Glioblastoma Cells Using siRNA Screening  
 Nikhil G Thaker, Fang Zhang, Peter R. McDonald, Tong Ying Shun, Michael D Lewen, Ian F. Pollack, and John S. Lazo

Molecular Pharmacology

|                              |           |       |                                                   |           |        |
|------------------------------|-----------|-------|---------------------------------------------------|-----------|--------|
| siRNA-Vinblastine Run1-DMSO  | NM_000952 | PTAFR | platelet-activating factor receptor               | 1.370624  | Inlier |
| siRNA-Temozolomide Run3-DMSO | NM_003738 | PTCH2 | patched homolog 2 (Drosophila)                    | -2.711061 | Inlier |
| siRNA-Temozolomide Run2-DMSO | NM_003738 | PTCH2 | patched homolog 2 (Drosophila)                    | -0.666547 | Inlier |
| siRNA Disorazole DMSO Run3   | NM_003738 | PTCH2 | patched homolog 2 (Drosophila)                    | -0.091841 | Inlier |
| siRNA Disorazole DMSO Run1   | NM_003738 | PTCH2 | patched homolog 2 (Drosophila)                    | -0.076257 | Inlier |
| siRNA-Vinblastine Run2-DMSO  | NM_003738 | PTCH2 | patched homolog 2 (Drosophila)                    | 0.076257  | Inlier |
| siRNA-Temozolomide Run1-DMSO | NM_003738 | PTCH2 | patched homolog 2 (Drosophila)                    | 0.682453  | Inlier |
| siRNA Disorazole DMSO Run2   | NM_003738 | PTCH2 | patched homolog 2 (Drosophila)                    | 2.040804  | Inlier |
| siRNA-Vinblastine Run1-DMSO  | NM_003738 | PTCH2 | patched homolog 2 (Drosophila)                    | 2.317863  | Inlier |
| siRNA-Vinblastine Run2-DMSO  | NM_015167 | PTDSR | phosphatidylinositol 3-OH kinase class I receptor | -1.005629 | Inlier |
| siRNA-Temozolomide Run2-DMSO | NM_015167 | PTDSR | phosphatidylinositol 3-OH kinase class I receptor | -0.856989 | Inlier |

Identification of Survival Genes in Human Glioblastoma Cells Using siRNA Screening  
 Nikhil G Thaker, Fang Zhang, Peter R. McDonald, Tong Ying Shun, Michael D Lewen, Ian F. Pollack, and John S. Lazo

Molecular Pharmacology

|                              |               |        |                              |           |         |
|------------------------------|---------------|--------|------------------------------|-----------|---------|
| siRNA-Temozolomide Run3-DMSO | NM_0151<br>67 | PTDSR  | phosphatidyserine receptor   | -0.492011 | Inlier  |
| siRNA Disorazole DMSO Run3   | NM_0151<br>67 | PTDSR  | phosphatidyserine receptor   | -0.059695 | Inlier  |
| siRNA-Temozolomide Run1-DMSO | NM_0151<br>67 | PTDSR  | phosphatidyserine receptor   | 0.059695  | Inlier  |
| siRNA Disorazole DMSO Run1   | NM_0151<br>67 | PTDSR  | phosphatidyserine receptor   | 0.415816  | Inlier  |
| siRNA-Vinblastine Run1-DMSO  | NM_0151<br>67 | PTDSR  | phosphatidyserine receptor   | 0.962299  | Inlier  |
| siRNA Disorazole DMSO Run2   | NM_0151<br>67 | PTDSR  | phosphatidyserine receptor   | 1.192266  | Inlier  |
| siRNA Disorazole DMSO Run1   | NM_0147<br>54 | PTDSS1 | phosphatidyserine synthase 1 | -3.685596 | Outlier |
| siRNA-Temozolomide Run3-DMSO | NM_0147<br>54 | PTDSS1 | phosphatidyserine synthase 1 | -0.6038   | Inlier  |
| siRNA-Temozolomide Run2-DMSO | NM_0147<br>54 | PTDSS1 | phosphatidyserine synthase 1 | -0.584634 | Inlier  |
| siRNA-Temozolomide Run1-DMSO | NM_0147<br>54 | PTDSS1 | phosphatidyserine synthase 1 | -0.462432 | Inlier  |
| siRNA Disorazole DMSO Run3   | NM_0147<br>54 | PTDSS1 | phosphatidyserine synthase 1 | 0.462432  | Inlier  |
| siRNA-Vinblastine Run2-DMSO  | NM_0147<br>54 | PTDSS1 | phosphatidyserine synthase 1 | 0.7452    | Inlier  |
| siRNA Disorazole DMSO Run2   | NM_0147<br>54 | PTDSS1 | phosphatidyserine synthase 1 | 1.173058  | Inlier  |
| siRNA-Vinblastine Run1-DMSO  | NM_0147<br>54 | PTDSS1 | phosphatidyserine synthase 1 | 2.589468  | Inlier  |

Identification of Survival Genes in Human Glioblastoma Cells Using siRNA Screening  
 Nikhil G Thaker, Fang Zhang, Peter R. McDonald, Tong Ying Shun, Michael D Lewen, Ian F. Pollack, and John S. Lazo  
 Molecular Pharmacology

|                              |               |        |                                   |           |        |
|------------------------------|---------------|--------|-----------------------------------|-----------|--------|
| siRNA Disorazole DMSO Run1   | NM_0307<br>83 | PTDSS2 | phosphatidyserine synthase 2      | -1.866316 | Inlier |
| siRNA Disorazole DMSO Run3   | NM_0307<br>83 | PTDSS2 | phosphatidyserine synthase 2      | -0.924539 | Inlier |
| siRNA-Temozolomide Run2-DMSO | NM_0307<br>83 | PTDSS2 | phosphatidyserine synthase 2      | -0.655886 | Inlier |
| siRNA-Temozolomide Run3-DMSO | NM_0307<br>83 | PTDSS2 | phosphatidyserine synthase 2      | -0.018214 | Inlier |
| siRNA-Temozolomide Run1-DMSO | NM_0307<br>83 | PTDSS2 | phosphatidyserine synthase 2      | 0.018215  | Inlier |
| siRNA-Vinblastine Run2-DMSO  | NM_0307<br>83 | PTDSS2 | phosphatidyserine synthase 2      | 0.571809  | Inlier |
| siRNA Disorazole DMSO Run2   | NM_0307<br>83 | PTDSS2 | phosphatidyserine synthase 2      | 0.693114  | Inlier |
| siRNA-Vinblastine Run1-DMSO  | NM_0307<br>83 | PTDSS2 | phosphatidyserine synthase 2      | 1.758905  | Inlier |
| siRNA-Vinblastine Run2-DMSO  | NM_1833<br>86 | PTE1   | peroxisomal acyl-CoA thioesterase | -0.715215 | Inlier |
| siRNA Disorazole DMSO Run3   | NM_1833<br>86 | PTE1   | peroxisomal acyl-CoA thioesterase | -0.633785 | Inlier |
| siRNA-Temozolomide Run2-DMSO | NM_1833<br>86 | PTE1   | peroxisomal acyl-CoA thioesterase | -0.538841 | Inlier |
| siRNA-Temozolomide Run1-DMSO | NM_1833<br>86 | PTE1   | peroxisomal acyl-CoA thioesterase | -0.060724 | Inlier |

Identification of Survival Genes in Human Glioblastoma Cells Using siRNA Screening  
 Nikhil G Thaker, Fang Zhang, Peter R. McDonald, Tong Ying Shun, Michael D Lewen, Ian F. Pollack, and John S. Lazo

Molecular Pharmacology

|                              |               |       |                                                                         |           |        |
|------------------------------|---------------|-------|-------------------------------------------------------------------------|-----------|--------|
| siRNA-Temozolomide Run3-DMSO | NM_1833<br>86 | PTE1  | peroxisomal acyl-CoA thioesterase                                       | 0.060724  | Inlier |
| siRNA Disorazole DMSO Run1   | NM_1833<br>86 | PTE1  | peroxisomal acyl-CoA thioesterase                                       | 0.762619  | Inlier |
| siRNA-Vinblastine Run1-DMSO  | NM_1833<br>86 | PTE1  | peroxisomal acyl-CoA thioesterase                                       | 3.386709  | Inlier |
| siRNA Disorazole DMSO Run2   | NM_1833<br>86 | PTE1  | peroxisomal acyl-CoA thioesterase                                       | 3.488523  | Inlier |
| siRNA Disorazole DMSO Run3   | NM_1523<br>31 | PTE2B | PTE2B                                                                   | -0.690779 | Inlier |
| siRNA-Vinblastine Run2-DMSO  | NM_1523<br>31 | PTE2B | PTE2B                                                                   | -0.658221 | Inlier |
| siRNA-Temozolomide Run2-DMSO | NM_1523<br>31 | PTE2B | PTE2B                                                                   | -0.506689 | Inlier |
| siRNA-Temozolomide Run3-DMSO | NM_1523<br>31 | PTE2B | PTE2B                                                                   | -0.302938 | Inlier |
| siRNA Disorazole DMSO Run1   | NM_1523<br>31 | PTE2B | PTE2B                                                                   | 0.302938  | Inlier |
| siRNA-Temozolomide Run1-DMSO | NM_1523<br>31 | PTE2B | PTE2B                                                                   | 0.789441  | Inlier |
| siRNA-Vinblastine Run1-DMSO  | NM_1523<br>31 | PTE2B | PTE2B                                                                   | 1.046908  | Inlier |
| siRNA Disorazole DMSO Run2   | NM_1523<br>31 | PTE2B | PTE2B                                                                   | 1.112025  | Inlier |
| siRNA-Temozolomide Run2-DMSO | NM_0003<br>14 | PTEN  | phosphatase and tensin homolog (mutated in multiple advanced cancers 1) | -0.956543 | Inlier |

Identification of Survival Genes in Human Glioblastoma Cells Using siRNA Screening  
 Nikhil G Thaker, Fang Zhang, Peter R. McDonald, Tong Ying Shun, Michael D Lewen, Ian F. Pollack, and John S. Lazo  
 Molecular Pharmacology

|                              |           |      |                                                                         |           |        |
|------------------------------|-----------|------|-------------------------------------------------------------------------|-----------|--------|
| siRNA-Temozolomide Run3-DMSO | NM_000314 | PTEN | phosphatase and tensin homolog (mutated in multiple advanced cancers 1) | -0.953108 | Inlier |
| siRNA Disorazole DMSO Run2   | NM_000314 | PTEN | phosphatase and tensin homolog (mutated in multiple advanced cancers 1) | -0.110864 | Inlier |
| siRNA Disorazole DMSO Run3   | NM_000314 | PTEN | phosphatase and tensin homolog (mutated in multiple advanced cancers 1) | -0.082151 | Inlier |
| siRNA-Temozolomide Run1-DMSO | NM_000314 | PTEN | phosphatase and tensin homolog (mutated in multiple advanced cancers 1) | 0.082151  | Inlier |
| siRNA Disorazole DMSO Run1   | NM_000314 | PTEN | phosphatase and tensin homolog (mutated in multiple advanced cancers 1) | 0.482101  | Inlier |



Identification of Survival Genes in Human Glioblastoma Cells Using siRNA Screening  
 Nikhil G Thaker, Fang Zhang, Peter R. McDonald, Tong Ying Shun, Michael D Lewen, Ian F. Pollack, and John S. Lazo  
 Molecular Pharmacology

|                              |           |       |                                                                         |           |        |
|------------------------------|-----------|-------|-------------------------------------------------------------------------|-----------|--------|
| siRNA-Vinblastine Run2-DMSO  | NM_000314 | PTEN  | phosphatase and tensin homolog (mutated in multiple advanced cancers 1) | 0.866899  | Inlier |
| siRNA-Vinblastine Run1-DMSO  | NM_000314 | PTEN  | phosphatase and tensin homolog (mutated in multiple advanced cancers 1) | 0.871946  | Inlier |
| siRNA Disorazole DMSO Run3   | NM_030664 | PTER  | phosphotriesterase related                                              | -1.010552 | Inlier |
| siRNA-Temozolomide Run3-DMSO | NM_030664 | PTER  | phosphotriesterase related                                              | -0.338448 | Inlier |
| siRNA-Temozolomide Run2-DMSO | NM_030664 | PTER  | phosphotriesterase related                                              | -0.236586 | Inlier |
| siRNA-Vinblastine Run2-DMSO  | NM_030664 | PTER  | phosphotriesterase related                                              | -0.107361 | Inlier |
| siRNA Disorazole DMSO Run1   | NM_030664 | PTER  | phosphotriesterase related                                              | 0.107361  | Inlier |
| siRNA-Temozolomide Run1-DMSO | NM_030664 | PTER  | phosphotriesterase related                                              | 1.35867   | Inlier |
| siRNA Disorazole DMSO Run2   | NM_030664 | PTER  | phosphotriesterase related                                              | 1.77605   | Inlier |
| siRNA-Vinblastine Run1-DMSO  | NM_030664 | PTER  | phosphotriesterase related                                              | 2.407954  | Inlier |
| siRNA-Temozolomide Run3-DMSO | NM_000953 | PTGDR | prostaglandin D2 receptor (DP)                                          | -1.342104 | Inlier |
| siRNA Disorazole DMSO Run2   | NM_000953 | PTGDR | prostaglandin D2 receptor (DP)                                          | -0.899698 | Inlier |

Identification of Survival Genes in Human Glioblastoma Cells Using siRNA Screening  
 Nikhil G Thaker, Fang Zhang, Peter R. McDonald, Tong Ying Shun, Michael D Lewen, Ian F. Pollack, and John S. Lazo

Molecular Pharmacology

|                              |               |       |                                                      |           |        |
|------------------------------|---------------|-------|------------------------------------------------------|-----------|--------|
| siRNA-Temozolomide Run2-DMSO | NM_0009<br>53 | PTGDR | prostaglan<br>din D2<br>receptor<br>(DP)             | -0.676358 | Inlier |
| siRNA-Temozolomide Run1-DMSO | NM_0009<br>53 | PTGDR | prostaglan<br>din D2<br>receptor<br>(DP)             | -0.03815  | Inlier |
| siRNA Disorazole DMSO Run3   | NM_0009<br>53 | PTGDR | prostaglan<br>din D2<br>receptor<br>(DP)             | 0.03815   | Inlier |
| siRNA Disorazole DMSO Run1   | NM_0009<br>53 | PTGDR | prostaglan<br>din D2<br>receptor<br>(DP)             | 0.183914  | Inlier |
| siRNA-Vinblastine Run2-DMSO  | NM_0009<br>53 | PTGDR | prostaglan<br>din D2<br>receptor<br>(DP)             | 0.672642  | Inlier |
| siRNA-Vinblastine Run1-DMSO  | NM_0009<br>53 | PTGDR | prostaglan<br>din D2<br>receptor<br>(DP)             | 0.693315  | Inlier |
| siRNA-Temozolomide Run2-DMSO | NM_0009<br>54 | PTGDS | prostaglan<br>din D2<br>synthase<br>21kDa<br>(brain) | -0.752519 | Inlier |
| siRNA-Temozolomide Run1-DMSO | NM_0009<br>54 | PTGDS | prostaglan<br>din D2<br>synthase<br>21kDa<br>(brain) | -0.725061 | Inlier |
| siRNA Disorazole DMSO Run1   | NM_0009<br>54 | PTGDS | prostaglan<br>din D2<br>synthase<br>21kDa<br>(brain) | -0.299388 | Inlier |
| siRNA Disorazole DMSO Run3   | NM_0009<br>54 | PTGDS | prostaglan<br>din D2<br>synthase<br>21kDa<br>(brain) | -0.060835 | Inlier |
| siRNA-Vinblastine Run2-DMSO  | NM_0009<br>54 | PTGDS | prostaglan<br>din D2<br>synthase<br>21kDa<br>(brain) | 0.060835  | Inlier |

Identification of Survival Genes in Human Glioblastoma Cells Using siRNA Screening  
 Nikhil G Thaker, Fang Zhang, Peter R. McDonald, Tong Ying Shun, Michael D Lewen, Ian F. Pollack, and John S. Lazo

Molecular Pharmacology

|                              |               |        |                                                 |           |        |
|------------------------------|---------------|--------|-------------------------------------------------|-----------|--------|
| siRNA-Temozolomide Run3-DMSO | NM_0009<br>54 | PTGDS  | prostaglandin D2 synthase 21kDa (brain)         | 0.623939  | Inlier |
| siRNA Disorazole DMSO Run2   | NM_0009<br>54 | PTGDS  | prostaglandin D2 synthase 21kDa (brain)         | 1.387609  | Inlier |
| siRNA-Vinblastine Run1-DMSO  | NM_0009<br>54 | PTGDS  | prostaglandin D2 synthase 21kDa (brain)         | 1.868354  | Inlier |
| siRNA Disorazole DMSO Run2   | NM_0009<br>55 | PTGER1 | prostaglandin E receptor 1 (subtype EP1), 42kDa | -3.314222 | Inlier |
| siRNA-Temozolomide Run3-DMSO | NM_0009<br>55 | PTGER1 | prostaglandin E receptor 1 (subtype EP1), 42kDa | -1.255525 | Inlier |
| siRNA-Temozolomide Run2-DMSO | NM_0009<br>55 | PTGER1 | prostaglandin E receptor 1 (subtype EP1), 42kDa | -0.512989 | Inlier |
| siRNA Disorazole DMSO Run3   | NM_0009<br>55 | PTGER1 | prostaglandin E receptor 1 (subtype EP1), 42kDa | -0.004104 | Inlier |
| siRNA Disorazole DMSO Run1   | NM_0009<br>55 | PTGER1 | prostaglandin E receptor 1 (subtype EP1), 42kDa | 0.004104  | Inlier |
| siRNA-Temozolomide Run1-DMSO | NM_0009<br>55 | PTGER1 | prostaglandin E receptor 1 (subtype EP1), 42kDa | 0.292115  | Inlier |

Identification of Survival Genes in Human Glioblastoma Cells Using siRNA Screening  
 Nikhil G Thaker, Fang Zhang, Peter R. McDonald, Tong Ying Shun, Michael D Lewen, Ian F. Pollack, and John S. Lazo

Molecular Pharmacology

| siRNA                        | Gene   | Accession | Protein                                         | Weight | Score     | Category |
|------------------------------|--------|-----------|-------------------------------------------------|--------|-----------|----------|
| siRNA-Vinblastine Run1-DMSO  | PTGER1 | NM_000955 | prostaglandin E receptor 1 (subtype EP1), 42kDa | 42kDa  | 0.836011  | Inlier   |
| siRNA-Vinblastine Run2-DMSO  | PTGER1 | NM_000955 | prostaglandin E receptor 1 (subtype EP1), 42kDa | 42kDa  | 1.009842  | Inlier   |
| siRNA-Temozolomide Run3-DMSO | PTGER2 | NM_000956 | prostaglandin E receptor 2 (subtype EP2), 53kDa | 53kDa  | -1.383945 | Inlier   |
| siRNA Disorazole DMSO Run2   | PTGER2 | NM_000956 | prostaglandin E receptor 2 (subtype EP2), 53kDa | 53kDa  | -0.754518 | Inlier   |
| siRNA-Temozolomide Run2-DMSO | PTGER2 | NM_000956 | prostaglandin E receptor 2 (subtype EP2), 53kDa | 53kDa  | -0.594482 | Inlier   |
| siRNA Disorazole DMSO Run3   | PTGER2 | NM_000956 | prostaglandin E receptor 2 (subtype EP2), 53kDa | 53kDa  | -0.066351 | Inlier   |
| siRNA Disorazole DMSO Run1   | PTGER2 | NM_000956 | prostaglandin E receptor 2 (subtype EP2), 53kDa | 53kDa  | 0.066351  | Inlier   |
| siRNA-Temozolomide Run1-DMSO | PTGER2 | NM_000956 | prostaglandin E receptor 2 (subtype EP2), 53kDa | 53kDa  | 0.200412  | Inlier   |

Identification of Survival Genes in Human Glioblastoma Cells Using siRNA Screening

Nikhil G Thaker, Fang Zhang, Peter R. McDonald, Tong Ying Shun, Michael D Lewen, Ian F. Pollack, and John S. Lazo

Molecular Pharmacology

| siRNA Treatment              | Gene ID   | Gene Name | Protein Name                                    | Log2 Fold Change | Category |
|------------------------------|-----------|-----------|-------------------------------------------------|------------------|----------|
| siRNA-Vinblastine Run2-DMSO  | NM_000956 | PTGER2    | prostaglandin E receptor 2 (subtype EP2), 53kDa | 1.303738         | Inlier   |
| siRNA-Vinblastine Run1-DMSO  | NM_000956 | PTGER2    | prostaglandin E receptor 2 (subtype EP2), 53kDa | 1.367379         | Inlier   |
| siRNA-Temozolomide Run3-DMSO | NM_198720 | PTGER3    | prostaglandin E receptor 3 (subtype EP3)        | -0.937575        | Inlier   |
| siRNA Disorazole DMSO Run2   | NM_198720 | PTGER3    | prostaglandin E receptor 3 (subtype EP3)        | -0.741368        | Inlier   |
| siRNA-Temozolomide Run2-DMSO | NM_198720 | PTGER3    | prostaglandin E receptor 3 (subtype EP3)        | -0.336117        | Inlier   |
| siRNA-Temozolomide Run1-DMSO | NM_198720 | PTGER3    | prostaglandin E receptor 3 (subtype EP3)        | -0.00761         | Inlier   |
| siRNA Disorazole DMSO Run3   | NM_198720 | PTGER3    | prostaglandin E receptor 3 (subtype EP3)        | 0.00761          | Inlier   |
| siRNA Disorazole DMSO Run1   | NM_198720 | PTGER3    | prostaglandin E receptor 3 (subtype EP3)        | 0.607632         | Inlier   |
| siRNA-Vinblastine Run1-DMSO  | NM_198720 | PTGER3    | prostaglandin E receptor 3 (subtype EP3)        | 0.86033          | Inlier   |
| siRNA-Vinblastine Run2-DMSO  | NM_198720 | PTGER3    | prostaglandin E receptor 3 (subtype EP3)        | 1.008708         | Inlier   |

Identification of Survival Genes in Human Glioblastoma Cells Using siRNA Screening  
 Nikhil G Thaker, Fang Zhang, Peter R. McDonald, Tong Ying Shun, Michael D Lewen, Ian F. Pollack, and John S. Lazo

Molecular Pharmacology

|                              |               |        |                                          |           |        |
|------------------------------|---------------|--------|------------------------------------------|-----------|--------|
| siRNA-Temozolomide Run3-DMSO | NM_0009<br>58 | PTGER4 | prostaglandin E receptor 4 (subtype EP4) | -2.220378 | Inlier |
| siRNA Disorazole DMSO Run2   | NM_0009<br>58 | PTGER4 | prostaglandin E receptor 4 (subtype EP4) | -0.773796 | Inlier |
| siRNA-Temozolomide Run2-DMSO | NM_0009<br>58 | PTGER4 | prostaglandin E receptor 4 (subtype EP4) | -0.575204 | Inlier |
| siRNA Disorazole DMSO Run1   | NM_0009<br>58 | PTGER4 | prostaglandin E receptor 4 (subtype EP4) | -0.004093 | Inlier |
| siRNA-Temozolomide Run1-DMSO | NM_0009<br>58 | PTGER4 | prostaglandin E receptor 4 (subtype EP4) | 0.004093  | Inlier |
| siRNA Disorazole DMSO Run3   | NM_0009<br>58 | PTGER4 | prostaglandin E receptor 4 (subtype EP4) | 0.373466  | Inlier |
| siRNA-Vinblastine Run1-DMSO  | NM_0009<br>58 | PTGER4 | prostaglandin E receptor 4 (subtype EP4) | 0.921947  | Inlier |
| siRNA-Vinblastine Run2-DMSO  | NM_0009<br>58 | PTGER4 | prostaglandin E receptor 4 (subtype EP4) | 1.104209  | Inlier |
| siRNA-Temozolomide Run2-DMSO | NM_1987<br>97 | PTGES  | prostaglandin E synthase                 | -1.914966 | Inlier |
| siRNA-Temozolomide Run1-DMSO | NM_1987<br>97 | PTGES  | prostaglandin E synthase                 | -0.307459 | Inlier |
| siRNA Disorazole DMSO Run3   | NM_1987<br>97 | PTGES  | prostaglandin E synthase                 | -0.112551 | Inlier |
| siRNA Disorazole DMSO Run1   | NM_1987<br>97 | PTGES  | prostaglandin E synthase                 | -0.040322 | Inlier |

Identification of Survival Genes in Human Glioblastoma Cells Using siRNA Screening  
 Nikhil G Thaker, Fang Zhang, Peter R. McDonald, Tong Ying Shun, Michael D Lewen, Ian F. Pollack, and John S. Lazo

| Molecular Pharmacology       |               |       |                                               |           |        |
|------------------------------|---------------|-------|-----------------------------------------------|-----------|--------|
| siRNA-Temozolomide Run3-DMSO | NM_1987<br>97 | PTGES | prostaglandin E synthase                      | 0.040322  | Inlier |
| siRNA-Vinblastine Run2-DMSO  | NM_1987<br>97 | PTGES | prostaglandin E synthase                      | 1.041541  | Inlier |
| siRNA Disorazole DMSO Run2   | NM_1987<br>97 | PTGES | prostaglandin E synthase                      | 1.347691  | Inlier |
| siRNA-Vinblastine Run1-DMSO  | NM_1987<br>97 | PTGES | prostaglandin E synthase                      | 2.221412  | Inlier |
| siRNA Disorazole DMSO Run2   | NM_0009<br>59 | PTGFR | prostaglandin F receptor (FP)                 | -1.640142 | Inlier |
| siRNA-Temozolomide Run3-DMSO | NM_0009<br>59 | PTGFR | prostaglandin F receptor (FP)                 | -1.338853 | Inlier |
| siRNA-Temozolomide Run2-DMSO | NM_0009<br>59 | PTGFR | prostaglandin F receptor (FP)                 | -0.602135 | Inlier |
| siRNA Disorazole DMSO Run3   | NM_0009<br>59 | PTGFR | prostaglandin F receptor (FP)                 | -0.120783 | Inlier |
| siRNA-Temozolomide Run1-DMSO | NM_0009<br>59 | PTGFR | prostaglandin F receptor (FP)                 | 0.120783  | Inlier |
| siRNA Disorazole DMSO Run1   | NM_0009<br>59 | PTGFR | prostaglandin F receptor (FP)                 | 0.133694  | Inlier |
| siRNA-Vinblastine Run1-DMSO  | NM_0009<br>59 | PTGFR | prostaglandin F receptor (FP)                 | 0.746865  | Inlier |
| siRNA-Vinblastine Run2-DMSO  | NM_0009<br>59 | PTGFR | prostaglandin F receptor (FP)                 | 0.88879   | Inlier |
| siRNA Disorazole DMSO Run2   | NM_0009<br>60 | PTGIR | prostaglandin I2 (prostacyclin) receptor (IP) | -2.44082  | Inlier |

Identification of Survival Genes in Human Glioblastoma Cells Using siRNA Screening

Nikhil G Thaker, Fang Zhang, Peter R. McDonald, Tong Ying Shun, Michael D Lewen, Ian F. Pollack, and John S. Lazo

Molecular Pharmacology

|                              |           |       |                                               |           |        |
|------------------------------|-----------|-------|-----------------------------------------------|-----------|--------|
| siRNA-Temozolomide Run3-DMSO | NM_000960 | PTGIR | prostaglandin I2 (prostacyclin) receptor (IP) | -1.039591 | Inlier |
| siRNA-Temozolomide Run2-DMSO | NM_000960 | PTGIR | prostaglandin I2 (prostacyclin) receptor (IP) | -0.722687 | Inlier |
| siRNA Disorazole DMSO Run1   | NM_000960 | PTGIR | prostaglandin I2 (prostacyclin) receptor (IP) | -0.02176  | Inlier |
| siRNA-Temozolomide Run1-DMSO | NM_000960 | PTGIR | prostaglandin I2 (prostacyclin) receptor (IP) | 0.02176   | Inlier |
| siRNA-Vinblastine Run1-DMSO  | NM_000960 | PTGIR | prostaglandin I2 (prostacyclin) receptor (IP) | 0.494382  | Inlier |
| siRNA-Vinblastine Run2-DMSO  | NM_000960 | PTGIR | prostaglandin I2 (prostacyclin) receptor (IP) | 0.626312  | Inlier |
| siRNA Disorazole DMSO Run3   | NM_000960 | PTGIR | prostaglandin I2 (prostacyclin) receptor (IP) | 2.917336  | Inlier |
| siRNA-Temozolomide Run3-DMSO | NM_000961 | PTGIS | prostaglandin I2 (prostacyclin) synthase      | -1.196733 | Inlier |
| siRNA-Temozolomide Run2-DMSO | NM_000961 | PTGIS | prostaglandin I2 (prostacyclin) synthase      | -0.989881 | Inlier |



Identification of Survival Genes in Human Glioblastoma Cells Using siRNA Screening  
 Nikhil G Thaker, Fang Zhang, Peter R. McDonald, Tong Ying Shun, Michael D Lewen, Ian F. Pollack, and John S. Lazo

Molecular Pharmacology

|                              |           |       |                                                                                       |           |        |
|------------------------------|-----------|-------|---------------------------------------------------------------------------------------|-----------|--------|
| siRNA-Temozolomide Run1-DMSO | NM_000961 | PTGIS | prostaglandin I2 (prostacyclin) synthase                                              | -0.179879 | Inlier |
| siRNA-Vinblastine Run2-DMSO  | NM_000961 | PTGIS | prostaglandin I2 (prostacyclin) synthase                                              | -0.126451 | Inlier |
| siRNA Disorazole DMSO Run3   | NM_000961 | PTGIS | prostaglandin I2 (prostacyclin) synthase                                              | 0.12645   | Inlier |
| siRNA Disorazole DMSO Run1   | NM_000961 | PTGIS | prostaglandin I2 (prostacyclin) synthase                                              | 0.599542  | Inlier |
| siRNA-Vinblastine Run1-DMSO  | NM_000961 | PTGIS | prostaglandin I2 (prostacyclin) synthase                                              | 0.749458  | Inlier |
| siRNA Disorazole DMSO Run2   | NM_000961 | PTGIS | prostaglandin I2 (prostacyclin) synthase                                              | 0.858395  | Inlier |
| siRNA-Temozolomide Run1-DMSO | NM_000962 | PTGS1 | prostaglandin-endoperoxide synthase 1 (prostaglandin G/H synthase and cyclooxygenase) | -0.700752 | Inlier |

Identification of Survival Genes in Human Glioblastoma Cells Using siRNA Screening  
 Nikhil G Thaker, Fang Zhang, Peter R. McDonald, Tong Ying Shun, Michael D Lewen, Ian F. Pollack, and John S. Lazo  
 Molecular Pharmacology

|                                  |               |       |                                                                                                                          |           |        |
|----------------------------------|---------------|-------|--------------------------------------------------------------------------------------------------------------------------|-----------|--------|
| siRNA Disorazole DMSO Run1       | NM_0009<br>62 | PTGS1 | prostaglan<br>din-<br>endoperox<br>ide<br>synthase 1<br>(prostagla<br>ndin G/H<br>synthase<br>and<br>cyclooxyg<br>enase) | -0.648248 | Inlier |
| siRNA Disorazole DMSO Run3       | NM_0009<br>62 | PTGS1 | prostaglan<br>din-<br>endoperox<br>ide<br>synthase 1<br>(prostagla<br>ndin G/H<br>synthase<br>and<br>cyclooxyg<br>enase) | -0.527857 | Inlier |
| siRNA-Temozolomide Run2-<br>DMSO | NM_0009<br>62 | PTGS1 | prostaglan<br>din-<br>endoperox<br>ide<br>synthase 1<br>(prostagla<br>ndin G/H<br>synthase<br>and<br>cyclooxyg<br>enase) | -0.10595  | Inlier |
| siRNA-Temozolomide Run3-<br>DMSO | NM_0009<br>62 | PTGS1 | prostaglan<br>din-<br>endoperox<br>ide<br>synthase 1<br>(prostagla<br>ndin G/H<br>synthase<br>and<br>cyclooxyg<br>enase) | 0.10595   | Inlier |

Identification of Survival Genes in Human Glioblastoma Cells Using siRNA Screening

Nikhil G Thaker, Fang Zhang, Peter R. McDonald, Tong Ying Shun, Michael D Lewen, Ian F. Pollack, and John S.

Lazo

Molecular Pharmacology

|                              |           |       |                                                                                       |           |        |
|------------------------------|-----------|-------|---------------------------------------------------------------------------------------|-----------|--------|
| siRNA-Vinblastine Run2-DMSO  | NM_000962 | PTGS1 | prostaglandin-endoperoxide synthase 1 (prostaglandin G/H synthase and cyclooxygenase) | 0.703947  | Inlier |
| siRNA-Vinblastine Run1-DMSO  | NM_000962 | PTGS1 | prostaglandin-endoperoxide synthase 1 (prostaglandin G/H synthase and cyclooxygenase) | 0.915945  | Inlier |
| siRNA Disorazole DMSO Run2   | NM_000962 | PTGS1 | prostaglandin-endoperoxide synthase 1 (prostaglandin G/H synthase and cyclooxygenase) | 3.33564   | Inlier |
| siRNA-Temozolomide Run3-DMSO | NM_000963 | PTGS2 | prostaglandin-endoperoxide synthase 2 (prostaglandin G/H synthase and cyclooxygenase) | -2.486564 | Inlier |

Identification of Survival Genes in Human Glioblastoma Cells Using siRNA Screening

Nikhil G Thaker, Fang Zhang, Peter R. McDonald, Tong Ying Shun, Michael D Lewen, Ian F. Pollack, and John S. Lazo

Molecular Pharmacology

|                                  |               |       |                                                                                                                          |           |        |
|----------------------------------|---------------|-------|--------------------------------------------------------------------------------------------------------------------------|-----------|--------|
| siRNA Disorazole DMSO Run1       | NM_0009<br>63 | PTGS2 | prostaglan<br>din-<br>endoperox<br>ide<br>synthase 2<br>(prostagla<br>ndin G/H<br>synthase<br>and<br>cyclooxyg<br>enase) | -0.864764 | Inlier |
| siRNA Disorazole DMSO Run3       | NM_0009<br>63 | PTGS2 | prostaglan<br>din-<br>endoperox<br>ide<br>synthase 2<br>(prostagla<br>ndin G/H<br>synthase<br>and<br>cyclooxyg<br>enase) | -0.434281 | Inlier |
| siRNA-Temozolomide Run2-<br>DMSO | NM_0009<br>63 | PTGS2 | prostaglan<br>din-<br>endoperox<br>ide<br>synthase 2<br>(prostagla<br>ndin G/H<br>synthase<br>and<br>cyclooxyg<br>enase) | -0.145461 | Inlier |
| siRNA-Vinblastine Run2-<br>DMSO  | NM_0009<br>63 | PTGS2 | prostaglan<br>din-<br>endoperox<br>ide<br>synthase 2<br>(prostagla<br>ndin G/H<br>synthase<br>and<br>cyclooxyg<br>enase) | 0.145462  | Inlier |

Identification of Survival Genes in Human Glioblastoma Cells Using siRNA Screening  
 Nikhil G Thaker, Fang Zhang, Peter R. McDonald, Tong Ying Shun, Michael D Lewen, Ian F. Pollack, and John S. Lazo  
 Molecular Pharmacology

|                              |           |       |                                                                                       |           |         |
|------------------------------|-----------|-------|---------------------------------------------------------------------------------------|-----------|---------|
| siRNA-Temozolomide Run1-DMSO | NM_000963 | PTGS2 | prostaglandin-endoperoxide synthase 2 (prostaglandin G/H synthase and cyclooxygenase) | 0.484236  | Inlier  |
| siRNA-Vinblastine Run1-DMSO  | NM_000963 | PTGS2 | prostaglandin-endoperoxide synthase 2 (prostaglandin G/H synthase and cyclooxygenase) | 2.606359  | Inlier  |
| siRNA Disorazole DMSO Run2   | NM_000963 | PTGS2 | prostaglandin-endoperoxide synthase 2 (prostaglandin G/H synthase and cyclooxygenase) | 5.293544  | Outlier |
| siRNA Disorazole DMSO Run2   | NM_000316 | PTHR1 | parathyroid hormone receptor 1                                                        | -0.754748 | Inlier  |
| siRNA-Temozolomide Run3-DMSO | NM_000316 | PTHR1 | parathyroid hormone receptor 1                                                        | -0.615212 | Inlier  |
| siRNA-Temozolomide Run1-DMSO | NM_000316 | PTHR1 | parathyroid hormone receptor 1                                                        | -0.155834 | Inlier  |
| siRNA-Temozolomide Run2-DMSO | NM_000316 | PTHR1 | parathyroid hormone receptor 1                                                        | -0.086221 | Inlier  |

Identification of Survival Genes in Human Glioblastoma Cells Using siRNA Screening  
 Nikhil G Thaker, Fang Zhang, Peter R. McDonald, Tong Ying Shun, Michael D Lewen, Ian F. Pollack, and John S. Lazo  
 Molecular Pharmacology

|                              |               |       |                                |           |        |
|------------------------------|---------------|-------|--------------------------------|-----------|--------|
| siRNA Disorazole DMSO Run3   | NM_0003<br>16 | PTHR1 | parathyroid hormone receptor 1 | 0.086221  | Inlier |
| siRNA Disorazole DMSO Run1   | NM_0003<br>16 | PTHR1 | parathyroid hormone receptor 1 | 0.733788  | Inlier |
| siRNA-Vinblastine Run1-DMSO  | NM_0003<br>16 | PTHR1 | parathyroid hormone receptor 1 | 1.244905  | Inlier |
| siRNA-Vinblastine Run2-DMSO  | NM_0003<br>16 | PTHR1 | parathyroid hormone receptor 1 | 1.65374   | Inlier |
| siRNA-Temozolomide Run3-DMSO | NM_0050<br>48 | PTHR2 | parathyroid hormone receptor 2 | -1.902617 | Inlier |
| siRNA Disorazole DMSO Run2   | NM_0050<br>48 | PTHR2 | parathyroid hormone receptor 2 | -1.125344 | Inlier |
| siRNA Disorazole DMSO Run3   | NM_0050<br>48 | PTHR2 | parathyroid hormone receptor 2 | -0.487951 | Inlier |
| siRNA-Temozolomide Run2-DMSO | NM_0050<br>48 | PTHR2 | parathyroid hormone receptor 2 | -0.243252 | Inlier |
| siRNA-Temozolomide Run1-DMSO | NM_0050<br>48 | PTHR2 | parathyroid hormone receptor 2 | 0.243252  | Inlier |
| siRNA Disorazole DMSO Run1   | NM_0050<br>48 | PTHR2 | parathyroid hormone receptor 2 | 0.559981  | Inlier |
| siRNA-Vinblastine Run1-DMSO  | NM_0050<br>48 | PTHR2 | parathyroid hormone receptor 2 | 0.789019  | Inlier |
| siRNA-Vinblastine Run2-DMSO  | NM_0050<br>48 | PTHR2 | parathyroid hormone receptor 2 | 0.898603  | Inlier |
| siRNA-Temozolomide Run3-DMSO | NM_1538<br>31 | PTK2  | PTK2 protein tyrosine kinase 2 | -1.840151 | Inlier |

Identification of Survival Genes in Human Glioblastoma Cells Using siRNA Screening  
 Nikhil G Thaker, Fang Zhang, Peter R. McDonald, Tong Ying Shun, Michael D Lewen, Ian F. Pollack, and John S. Lazo

Molecular Pharmacology

|                              |               |       |                                         |           |        |
|------------------------------|---------------|-------|-----------------------------------------|-----------|--------|
| siRNA-Temozolomide Run2-DMSO | NM_1538<br>31 | PTK2  | PTK2<br>protein tyrosine kinase 2       | -1.023246 | Inlier |
| siRNA-Temozolomide Run1-DMSO | NM_1538<br>31 | PTK2  | PTK2<br>protein tyrosine kinase 2       | -0.325754 | Inlier |
| siRNA Disorazole DMSO Run1   | NM_1538<br>31 | PTK2  | PTK2<br>protein tyrosine kinase 2       | -0.128895 | Inlier |
| siRNA Disorazole DMSO Run2   | NM_1538<br>31 | PTK2  | PTK2<br>protein tyrosine kinase 2       | 0.128895  | Inlier |
| siRNA Disorazole DMSO Run3   | NM_1538<br>31 | PTK2  | PTK2<br>protein tyrosine kinase 2       | 0.182373  | Inlier |
| siRNA-Vinblastine Run2-DMSO  | NM_1538<br>31 | PTK2  | PTK2<br>protein tyrosine kinase 2       | 1.718426  | Inlier |
| siRNA-Vinblastine Run1-DMSO  | NM_1538<br>31 | PTK2  | PTK2B<br>protein tyrosine kinase 2      | 1.882984  | Inlier |
| siRNA Disorazole DMSO Run2   | NM_1731<br>74 | PTK2B | PTK2B<br>protein tyrosine kinase 2 beta | -1.544047 | Inlier |
| siRNA-Temozolomide Run3-DMSO | NM_1731<br>74 | PTK2B | PTK2B<br>protein tyrosine kinase 2 beta | -0.785489 | Inlier |
| siRNA Disorazole DMSO Run3   | NM_1731<br>74 | PTK2B | PTK2B<br>protein tyrosine kinase 2 beta | -0.672636 | Inlier |
| siRNA-Temozolomide Run2-DMSO | NM_1731<br>74 | PTK2B | PTK2B<br>protein tyrosine kinase 2 beta | -0.182367 | Inlier |

Identification of Survival Genes in Human Glioblastoma Cells Using siRNA Screening

Nikhil G Thaker, Fang Zhang, Peter R. McDonald, Tong Ying Shun, Michael D Lewen, Ian F. Pollack, and John S. Lazo

Molecular Pharmacology

| siRNA Treatment              | Gene ID   | Gene Name | Protein Name                         | Value     | Outlier Status |
|------------------------------|-----------|-----------|--------------------------------------|-----------|----------------|
| siRNA-Temozolomide Run1-DMSO | NM_173174 | PTK2B     | PTK2B protein tyrosine kinase 2 beta | 0.182367  | Inlier         |
| siRNA-Vinblastine Run1-DMSO  | NM_173174 | PTK2B     | PTK2B protein tyrosine kinase 2 beta | 0.226477  | Inlier         |
| siRNA Disorazole DMSO Run1   | NM_173174 | PTK2B     | PTK2B protein tyrosine kinase 2 beta | 0.676364  | Inlier         |
| siRNA-Vinblastine Run2-DMSO  | NM_173174 | PTK2B     | PTK6 protein tyrosine kinase 2 beta  | 1.0268    | Inlier         |
| siRNA-Temozolomide Run3-DMSO | NM_005975 | PTK6      | PTK6 protein tyrosine kinase 6       | -1.003808 | Inlier         |
| siRNA-Temozolomide Run2-DMSO | NM_005975 | PTK6      | PTK6 protein tyrosine kinase 6       | -0.85274  | Inlier         |
| siRNA-Temozolomide Run1-DMSO | NM_005975 | PTK6      | PTK6 protein tyrosine kinase 6       | -0.82008  | Inlier         |
| siRNA Disorazole DMSO Run2   | NM_005975 | PTK6      | PTK6 protein tyrosine kinase 6       | -0.100709 | Inlier         |
| siRNA Disorazole DMSO Run3   | NM_005975 | PTK6      | PTK6 protein tyrosine kinase 6       | 0.100709  | Inlier         |
| siRNA-Vinblastine Run1-DMSO  | NM_005975 | PTK6      | PTK6 protein tyrosine kinase 6       | 0.434467  | Inlier         |
| siRNA Disorazole DMSO Run1   | NM_005975 | PTK6      | PTK6 protein tyrosine kinase 6       | 0.564187  | Inlier         |
| siRNA-Vinblastine Run2-DMSO  | NM_005975 | PTK6      | PTK6 protein tyrosine kinase 6       | 0.784813  | Inlier         |



Identification of Survival Genes in Human Glioblastoma Cells Using siRNA Screening  
 Nikhil G Thaker, Fang Zhang, Peter R. McDonald, Tong Ying Shun, Michael D Lewen, Ian F. Pollack, and John S. Lazo

Molecular Pharmacology

| siRNA Treatment              | Gene ID       | Gene Name | Protein Name                      | Value     | Outlier Status |
|------------------------------|---------------|-----------|-----------------------------------|-----------|----------------|
| siRNA-Temozolomide Run2-DMSO | NM_1528<br>83 | PTK7      | PTK7<br>protein tyrosine kinase 7 | -0.993918 | Inlier         |
| siRNA-Temozolomide Run3-DMSO | NM_1528<br>83 | PTK7      | PTK7<br>protein tyrosine kinase 7 | -0.67667  | Inlier         |
| siRNA Disorazole DMSO Run3   | NM_1528<br>83 | PTK7      | PTK7<br>protein tyrosine kinase 7 | -0.145077 | Inlier         |
| siRNA-Temozolomide Run1-DMSO | NM_1528<br>83 | PTK7      | PTK7<br>protein tyrosine kinase 7 | -0.127888 | Inlier         |
| siRNA Disorazole DMSO Run1   | NM_1528<br>83 | PTK7      | PTK7<br>protein tyrosine kinase 7 | 0.127888  | Inlier         |
| siRNA Disorazole DMSO Run2   | NM_1528<br>83 | PTK7      | PTK7<br>protein tyrosine kinase 7 | 0.67233   | Inlier         |
| siRNA-Vinblastine Run2-DMSO  | NM_1528<br>83 | PTK7      | PTK7<br>protein tyrosine kinase 7 | 1.592352  | Inlier         |
| siRNA-Vinblastine Run1-DMSO  | NM_1528<br>83 | PTK7      | PTK7<br>protein tyrosine kinase 7 | 2.077959  | Inlier         |
| siRNA Disorazole DMSO Run2   | NM_1989<br>74 | PTK9      | PTK9<br>protein tyrosine kinase 9 | -1.36716  | Inlier         |
| siRNA Disorazole DMSO Run3   | NM_1989<br>74 | PTK9      | PTK9<br>protein tyrosine kinase 9 | -1.051249 | Inlier         |
| siRNA-Temozolomide Run3-DMSO | NM_1989<br>74 | PTK9      | PTK9<br>protein tyrosine kinase 9 | -0.626309 | Inlier         |
| siRNA-Temozolomide Run1-DMSO | NM_1989<br>74 | PTK9      | PTK9<br>protein tyrosine kinase 9 | -0.119221 | Inlier         |
| siRNA-Temozolomide Run2-DMSO | NM_1989<br>74 | PTK9      | PTK9<br>protein tyrosine kinase 9 | 0.119221  | Inlier         |

Identification of Survival Genes in Human Glioblastoma Cells Using siRNA Screening

Nikhil G Thaker, Fang Zhang, Peter R. McDonald, Tong Ying Shun, Michael D Lewen, Ian F. Pollack, and John S. Lazo

Molecular Pharmacology

| siRNA                        | Gene  | Accession | Protein                                                   | Value     | Category |
|------------------------------|-------|-----------|-----------------------------------------------------------|-----------|----------|
| siRNA Disorazole DMSO Run1   | PTK9  | NM_198974 | PTK9 protein tyrosine kinase 9                            | 0.37904   | Inlier   |
| siRNA-Vinblastine Run2-DMSO  | PTK9  | NM_198974 | PTK9 protein tyrosine kinase 9                            | 0.722691  | Inlier   |
| siRNA-Vinblastine Run1-DMSO  | PTK9  | NM_198974 | PTK9 protein tyrosine kinase 9                            | 0.900955  | Inlier   |
| siRNA Disorazole DMSO Run2   | PTK9L | NM_007284 | PTK9L protein tyrosine kinase 9-like (A6-related protein) | -0.698521 | Inlier   |
| siRNA Disorazole DMSO Run3   | PTK9L | NM_007284 | PTK9L protein tyrosine kinase 9-like (A6-related protein) | -0.668754 | Inlier   |
| siRNA-Temozolomide Run3-DMSO | PTK9L | NM_007284 | PTK9L protein tyrosine kinase 9-like (A6-related protein) | -0.176862 | Inlier   |
| siRNA-Temozolomide Run2-DMSO | PTK9L | NM_007284 | PTK9L protein tyrosine kinase 9-like (A6-related protein) | -0.07389  | Inlier   |
| siRNA Disorazole DMSO Run1   | PTK9L | NM_007284 | PTK9L protein tyrosine kinase 9-like (A6-related protein) | 0.073889  | Inlier   |

Identification of Survival Genes in Human Glioblastoma Cells Using siRNA Screening  
 Nikhil G Thaker, Fang Zhang, Peter R. McDonald, Tong Ying Shun, Michael D Lewen, Ian F. Pollack, and John S. Lazo

Molecular Pharmacology

| siRNA Treatment              | Gene ID   | Gene Name | Gene Description                                          | Log Fold Change | Outlier Status |
|------------------------------|-----------|-----------|-----------------------------------------------------------|-----------------|----------------|
| siRNA-Vinblastine Run1-DMSO  | NM_007284 | PTK9L     | PTK9L protein tyrosine kinase 9-like (A6-related protein) | 0.680246        | Inlier         |
| siRNA-Vinblastine Run2-DMSO  | NM_007284 | PTK9L     | PTK9L protein tyrosine kinase 9-like (A6-related protein) | 0.689239        | Inlier         |
| siRNA-Temozolomide Run1-DMSO | NM_007284 | PTK9L     | PTK9L protein tyrosine kinase 9-like (A6-related protein) | 0.790133        | Inlier         |
| siRNA-Temozolomide Run3-DMSO | NM_017432 | PTOV1     | prostate tumor overexpressed gene 1                       | -2.550501       | Inlier         |
| siRNA-Temozolomide Run2-DMSO | NM_017432 | PTOV1     | prostate tumor overexpressed gene 1                       | -1.741269       | Inlier         |
| siRNA-Temozolomide Run1-DMSO | NM_017432 | PTOV1     | prostate tumor overexpressed gene 1                       | -0.822667       | Inlier         |
| siRNA-Vinblastine Run2-DMSO  | NM_017432 | PTOV1     | prostate tumor overexpressed gene 1                       | -0.204171       | Inlier         |
| siRNA Disorazole DMSO Run2   | NM_017432 | PTOV1     | prostate tumor overexpressed gene 1                       | 0.20417         | Inlier         |
| siRNA Disorazole DMSO Run3   | NM_017432 | PTOV1     | prostate tumor overexpressed gene 1                       | 0.296683        | Inlier         |

Identification of Survival Genes in Human Glioblastoma Cells Using siRNA Screening

Nikhil G Thaker, Fang Zhang, Peter R. McDonald, Tong Ying Shun, Michael D Lewen, Ian F. Pollack, and John S. Lazo

Molecular Pharmacology

|                              |               |        |                                                                 |           |        |
|------------------------------|---------------|--------|-----------------------------------------------------------------|-----------|--------|
| siRNA-Vinblastine Run1-DMSO  | NM_0174<br>32 | PTOV1  | prostate<br>tumor<br>overexpre<br>ssed gene<br>1                | 0.543815  | Inlier |
| siRNA Disorazole DMSO Run1   | NM_0174<br>32 | PTOV1  | prostate<br>tumor<br>overexpre<br>ssed gene<br>1                | 0.805185  | Inlier |
| siRNA Disorazole DMSO Run2   | NM_0034<br>63 | PTP4A1 | protein<br>tyrosine<br>phosphata<br>se type<br>IVA,<br>member 1 | -1.173455 | Inlier |
| siRNA Disorazole DMSO Run3   | NM_0034<br>63 | PTP4A1 | protein<br>tyrosine<br>phosphata<br>se type<br>IVA,<br>member 1 | -1.091828 | Inlier |
| siRNA-Temozolomide Run3-DMSO | NM_0034<br>63 | PTP4A1 | protein<br>tyrosine<br>phosphata<br>se type<br>IVA,<br>member 1 | -0.843899 | Inlier |
| siRNA-Temozolomide Run1-DMSO | NM_0034<br>63 | PTP4A1 | protein<br>tyrosine<br>phosphata<br>se type<br>IVA,<br>member 1 | -0.074077 | Inlier |
| siRNA-Temozolomide Run2-DMSO | NM_0034<br>63 | PTP4A1 | protein<br>tyrosine<br>phosphata<br>se type<br>IVA,<br>member 1 | 0.074077  | Inlier |
| siRNA Disorazole DMSO Run1   | NM_0034<br>63 | PTP4A1 | protein<br>tyrosine<br>phosphata<br>se type<br>IVA,<br>member 1 | 0.488624  | Inlier |
| siRNA-Vinblastine Run1-DMSO  | NM_0034<br>63 | PTP4A1 | protein<br>tyrosine<br>phosphata<br>se type<br>IVA,<br>member 1 | 0.505101  | Inlier |

Identification of Survival Genes in Human Glioblastoma Cells Using siRNA Screening

Nikhil G Thaker, Fang Zhang, Peter R. McDonald, Tong Ying Shun, Michael D Lewen, Ian F. Pollack, and John S. Lazo

Molecular Pharmacology

| siRNA Treatment              | Gene ID   | Gene Name | Protein Description                             | Log2 Fold Change | Outlier Status |
|------------------------------|-----------|-----------|-------------------------------------------------|------------------|----------------|
| siRNA-Vinblastine Run2-DMSO  | NM_003463 | PTP4A1    | protein tyrosine phosphatase type IVA, member 1 | 0.963989         | Inlier         |
| siRNA-Temozolomide Run3-DMSO | NM_080391 | PTP4A2    | protein tyrosine phosphatase type IVA, member 2 | -2.775909        | Inlier         |
| siRNA-Temozolomide Run2-DMSO | NM_080391 | PTP4A2    | protein tyrosine phosphatase type IVA, member 2 | -0.943762        | Inlier         |
| siRNA-Temozolomide Run1-DMSO | NM_080391 | PTP4A2    | protein tyrosine phosphatase type IVA, member 2 | -0.826068        | Inlier         |
| siRNA Disorazole DMSO Run1   | NM_080391 | PTP4A2    | protein tyrosine phosphatase type IVA, member 2 | -0.144283        | Inlier         |
| siRNA Disorazole DMSO Run2   | NM_080391 | PTP4A2    | protein tyrosine phosphatase type IVA, member 2 | 0.144284         | Inlier         |
| siRNA-Vinblastine Run2-DMSO  | NM_080391 | PTP4A2    | protein tyrosine phosphatase type IVA, member 2 | 0.386699         | Inlier         |
| siRNA Disorazole DMSO Run3   | NM_080391 | PTP4A2    | protein tyrosine phosphatase type IVA, member 2 | 0.522932         | Inlier         |

Identification of Survival Genes in Human Glioblastoma Cells Using siRNA Screening

Nikhil G Thaker, Fang Zhang, Peter R. McDonald, Tong Ying Shun, Michael D Lewen, Ian F. Pollack, and John S. Lazo

Molecular Pharmacology

| siRNA Treatment              | Gene ID   | Gene Name | Protein Name                                    | Log2 Fold Change | Outlier Status |
|------------------------------|-----------|-----------|-------------------------------------------------|------------------|----------------|
| siRNA-Vinblastine Run1-DMSO  | NM_080391 | PTP4A2    | protein tyrosine phosphatase type IVA, member 2 | 1.187879         | Inlier         |
| siRNA-Temozolomide Run3-DMSO | NM_032611 | PTP4A3    | protein tyrosine phosphatase type IVA, member 3 | -3.363936        | Inlier         |
| siRNA-Temozolomide Run1-DMSO | NM_032611 | PTP4A3    | protein tyrosine phosphatase type IVA, member 3 | -0.975689        | Inlier         |
| siRNA-Temozolomide Run2-DMSO | NM_032611 | PTP4A3    | protein tyrosine phosphatase type IVA, member 3 | -0.373311        | Inlier         |
| siRNA Disorazole DMSO Run3   | NM_032611 | PTP4A3    | protein tyrosine phosphatase type IVA, member 3 | -0.299804        | Inlier         |
| siRNA Disorazole DMSO Run2   | NM_032611 | PTP4A3    | protein tyrosine phosphatase type IVA, member 3 | 0.299804         | Inlier         |
| siRNA Disorazole DMSO Run1   | NM_032611 | PTP4A3    | protein tyrosine phosphatase type IVA, member 3 | 0.331638         | Inlier         |
| siRNA-Vinblastine Run2-DMSO  | NM_032611 | PTP4A3    | protein tyrosine phosphatase type IVA, member 3 | 0.992041         | Inlier         |

Identification of Survival Genes in Human Glioblastoma Cells Using siRNA Screening  
 Nikhil G Thaker, Fang Zhang, Peter R. McDonald, Tong Ying Shun, Michael D Lewen, Ian F. Pollack, and John S. Lazo

Molecular Pharmacology

|                              |               |        |                                                  |           |        |
|------------------------------|---------------|--------|--------------------------------------------------|-----------|--------|
| siRNA-Vinblastine Run1-DMSO  | NM_0326<br>11 | PTP4A3 | protein tyrosine phosphatase type IVA, member 3  | 1.984928  | Inlier |
| siRNA-Temozolomide Run3-DMSO | NM_1779<br>95 | PTPDC1 | protein tyrosine phosphatase domain containing 1 | -1.606726 | Inlier |
| siRNA Disorazole DMSO Run2   | NM_1779<br>95 | PTPDC1 | protein tyrosine phosphatase domain containing 1 | -0.716999 | Inlier |
| siRNA-Temozolomide Run2-DMSO | NM_1779<br>95 | PTPDC1 | protein tyrosine phosphatase domain containing 1 | -0.632001 | Inlier |
| siRNA Disorazole DMSO Run3   | NM_1779<br>95 | PTPDC1 | protein tyrosine phosphatase domain containing 1 | -0.449119 | Inlier |
| siRNA-Temozolomide Run1-DMSO | NM_1779<br>95 | PTPDC1 | protein tyrosine phosphatase domain containing 1 | 0.44912   | Inlier |
| siRNA Disorazole DMSO Run1   | NM_1779<br>95 | PTPDC1 | protein tyrosine phosphatase domain containing 1 | 0.477146  | Inlier |

Identification of Survival Genes in Human Glioblastoma Cells Using siRNA Screening

Nikhil G Thaker, Fang Zhang, Peter R. McDonald, Tong Ying Shun, Michael D Lewen, Ian F. Pollack, and John S. Lazo

Molecular Pharmacology

|                              |               |        |                                                                                     |           |        |
|------------------------------|---------------|--------|-------------------------------------------------------------------------------------|-----------|--------|
| siRNA-Vinblastine Run1-DMSO  | NM_1779<br>95 | PTPDC1 | protein tyrosine phosphatase domain containing 1                                    | 1.162885  | Inlier |
| siRNA-Vinblastine Run2-DMSO  | NM_1779<br>95 | PTPDC1 | protein tyrosine phosphatase domain containing 1                                    | 1.381503  | Inlier |
| siRNA-Temozolomide Run3-DMSO | NM_0142<br>41 | PTPLA  | protein tyrosine phosphatase-like (proline instead of catalytic arginine), member a | -0.863    | Inlier |
| siRNA-Temozolomide Run2-DMSO | NM_0142<br>41 | PTPLA  | protein tyrosine phosphatase-like (proline instead of catalytic arginine), member a | -0.486    | Inlier |
| siRNA Disorazole DMSO Run3   | NM_0142<br>41 | PTPLA  | protein tyrosine phosphatase-like (proline instead of catalytic arginine), member a | -0.382946 | Inlier |
| siRNA Disorazole DMSO Run2   | NM_0142<br>41 | PTPLA  | protein tyrosine phosphatase-like (proline instead of catalytic arginine), member a | -0.335754 | Inlier |



Identification of Survival Genes in Human Glioblastoma Cells Using siRNA Screening

Nikhil G Thaker, Fang Zhang, Peter R. McDonald, Tong Ying Shun, Michael D Lewen, Ian F. Pollack, and John S. Lazo

Molecular Pharmacology

|                              |               |       |                                                                                     |           |        |
|------------------------------|---------------|-------|-------------------------------------------------------------------------------------|-----------|--------|
| siRNA-Temozolomide Run1-DMSO | NM_0142<br>41 | PTPLA | protein tyrosine phosphatase-like (proline instead of catalytic arginine), member a | 0.335754  | Inlier |
| siRNA Disorazole DMSO Run1   | NM_0142<br>41 | PTPLA | protein tyrosine phosphatase-like (proline instead of catalytic arginine), member a | 1.053608  | Inlier |
| siRNA-Vinblastine Run2-DMSO  | NM_0142<br>41 | PTPLA | protein tyrosine phosphatase-like (proline instead of catalytic arginine), member a | 1.400447  | Inlier |
| siRNA-Vinblastine Run1-DMSO  | NM_0142<br>41 | PTPLA | protein tyrosine phosphatase-like (proline instead of catalytic arginine), member a | 1.890612  | Inlier |
| siRNA-Temozolomide Run3-DMSO | NM_1984<br>02 | PTPLB | protein tyrosine phosphatase-like (proline instead of catalytic arginine), member b | -1.488153 | Inlier |

Identification of Survival Genes in Human Glioblastoma Cells Using siRNA Screening

Nikhil G Thaker, Fang Zhang, Peter R. McDonald, Tong Ying Shun, Michael D Lewen, Ian F. Pollack, and John S. Lazo

Molecular Pharmacology

|                              |               |       |                                                                                     |           |        |
|------------------------------|---------------|-------|-------------------------------------------------------------------------------------|-----------|--------|
| siRNA Disorazole DMSO Run2   | NM_1984<br>02 | PTPLB | protein tyrosine phosphatase-like (proline instead of catalytic arginine), member b | -1.394968 | Inlier |
| siRNA Disorazole DMSO Run3   | NM_1984<br>02 | PTPLB | protein tyrosine phosphatase-like (proline instead of catalytic arginine), member b | -1.094185 | Inlier |
| siRNA-Temozolomide Run1-DMSO | NM_1984<br>02 | PTPLB | protein tyrosine phosphatase-like (proline instead of catalytic arginine), member b | -0.230757 | Inlier |
| siRNA-Temozolomide Run2-DMSO | NM_1984<br>02 | PTPLB | protein tyrosine phosphatase-like (proline instead of catalytic arginine), member b | 0.230757  | Inlier |
| siRNA Disorazole DMSO Run1   | NM_1984<br>02 | PTPLB | protein tyrosine phosphatase-like (proline instead of catalytic arginine), member b | 0.384841  | Inlier |

Identification of Survival Genes in Human Glioblastoma Cells Using siRNA Screening

Nikhil G Thaker, Fang Zhang, Peter R. McDonald, Tong Ying Shun, Michael D Lewen, Ian F. Pollack, and John S. Lazo

Molecular Pharmacology

| siRNA Treatment              | Gene ID   | Gene Name | Protein Description                                                                 | Score     | Outlier Status |
|------------------------------|-----------|-----------|-------------------------------------------------------------------------------------|-----------|----------------|
| siRNA-Vinblastine Run2-DMSO  | NM_198402 | PTPLB     | protein tyrosine phosphatase-like (proline instead of catalytic arginine), member b | 0.663333  | Inlier         |
| siRNA-Vinblastine Run1-DMSO  | NM_198402 | PTPLB     | protein tyrosine phosphatase-like (proline instead of catalytic arginine), member b | 0.685667  | Inlier         |
| siRNA-Temozolomide Run3-DMSO | NM_002827 | PTPN1     | protein tyrosine phosphatase, non-receptor type 1                                   | -1.997373 | Inlier         |
| siRNA-Temozolomide Run2-DMSO | NM_002827 | PTPN1     | protein tyrosine phosphatase, non-receptor type 1                                   | -1.091463 | Inlier         |
| siRNA-Temozolomide Run1-DMSO | NM_002827 | PTPN1     | protein tyrosine phosphatase, non-receptor type 1                                   | -0.674763 | Inlier         |
| siRNA Disorazole DMSO Run3   | NM_002827 | PTPN1     | protein tyrosine phosphatase, non-receptor type 1                                   | -0.264574 | Inlier         |
| siRNA Disorazole DMSO Run1   | NM_002827 | PTPN1     | protein tyrosine phosphatase, non-receptor type 1                                   | 0.264574  | Inlier         |

Identification of Survival Genes in Human Glioblastoma Cells Using siRNA Screening  
 Nikhil G Thaker, Fang Zhang, Peter R. McDonald, Tong Ying Shun, Michael D Lewen, Ian F. Pollack, and John S. Lazo

Molecular Pharmacology

| siRNA Treatment              | Gene ID   | Gene Name | Protein Name                                                           | Score     | Outlier Type |
|------------------------------|-----------|-----------|------------------------------------------------------------------------|-----------|--------------|
| siRNA Disorazole DMSO Run2   | NM_002827 | PTPN1     | protein tyrosine phosphatase, non-receptor type 1                      | 0.523565  | Inlier       |
| siRNA-Vinblastine Run2-DMSO  | NM_002827 | PTPN1     | protein tyrosine phosphatase, non-receptor type 1                      | 0.674237  | Inlier       |
| siRNA-Vinblastine Run1-DMSO  | NM_002827 | PTPN1     | protein tyrosine phosphatase, non-receptor type 1                      | 0.73581   | Inlier       |
| siRNA-Temozolomide Run3-DMSO | NM_002834 | PTPN11    | protein tyrosine phosphatase, non-receptor type 11 (Noonan syndrome 1) | -1.275725 | Inlier       |
| siRNA-Temozolomide Run1-DMSO | NM_002834 | PTPN11    | protein tyrosine phosphatase, non-receptor type 11 (Noonan syndrome 1) | -0.965321 | Inlier       |
| siRNA Disorazole DMSO Run2   | NM_002834 | PTPN11    | protein tyrosine phosphatase, non-receptor type 11 (Noonan syndrome 1) | -0.392311 | Inlier       |

Identification of Survival Genes in Human Glioblastoma Cells Using siRNA Screening

Nikhil G Thaker, Fang Zhang, Peter R. McDonald, Tong Ying Shun, Michael D Lewen, Ian F. Pollack, and John S. Lazo

Molecular Pharmacology

|                              |               |        |                                                                        |           |        |
|------------------------------|---------------|--------|------------------------------------------------------------------------|-----------|--------|
| siRNA Disorazole DMSO Run3   | NM_0028<br>34 | PTPN11 | protein tyrosine phosphatase, non-receptor type 11 (Noonan syndrome 1) | -0.272696 | Inlier |
| siRNA-Temozolomide Run2-DMSO | NM_0028<br>34 | PTPN11 | protein tyrosine phosphatase, non-receptor type 11 (Noonan syndrome 1) | 0.272695  | Inlier |
| siRNA-Vinblastine Run2-DMSO  | NM_0028<br>34 | PTPN11 | protein tyrosine phosphatase, non-receptor type 11 (Noonan syndrome 1) | 0.619031  | Inlier |
| siRNA Disorazole DMSO Run1   | NM_0028<br>34 | PTPN11 | protein tyrosine phosphatase, non-receptor type 11 (Noonan syndrome 1) | 0.729969  | Inlier |
| siRNA-Vinblastine Run1-DMSO  | NM_0028<br>34 | PTPN11 | protein tyrosine phosphatase, non-receptor type 11 (Noonan syndrome 1) | 1.812218  | Inlier |
| siRNA-Temozolomide Run3-DMSO | NM_0028<br>35 | PTPN12 | protein tyrosine phosphatase, non-receptor type 12                     | -0.856486 | Inlier |

Identification of Survival Genes in Human Glioblastoma Cells Using siRNA Screening

Nikhil G Thaker, Fang Zhang, Peter R. McDonald, Tong Ying Shun, Michael D Lewen, Ian F. Pollack, and John S. Lazo

Molecular Pharmacology

| siRNA Treatment              | Gene ID   | Gene Name | Protein Description                                | Log Fold Change | Outlier Status |
|------------------------------|-----------|-----------|----------------------------------------------------|-----------------|----------------|
| siRNA-Temozolomide Run1-DMSO | NM_002835 | PTPN12    | protein tyrosine phosphatase, non-receptor type 12 | -0.842115       | Inlier         |
| siRNA-Temozolomide Run2-DMSO | NM_002835 | PTPN12    | protein tyrosine phosphatase, non-receptor type 12 | -0.504441       | Inlier         |
| siRNA Disorazole DMSO Run2   | NM_002835 | PTPN12    | protein tyrosine phosphatase, non-receptor type 12 | -0.399829       | Inlier         |
| siRNA Disorazole DMSO Run1   | NM_002835 | PTPN12    | protein tyrosine phosphatase, non-receptor type 12 | 0.399829        | Inlier         |
| siRNA Disorazole DMSO Run3   | NM_002835 | PTPN12    | protein tyrosine phosphatase, non-receptor type 12 | 0.506885        | Inlier         |
| siRNA-Vinblastine Run1-DMSO  | NM_002835 | PTPN12    | protein tyrosine phosphatase, non-receptor type 12 | 0.904134        | Inlier         |
| siRNA-Vinblastine Run2-DMSO  | NM_002835 | PTPN12    | protein tyrosine phosphatase, non-receptor type 12 | 1.19437         | Inlier         |

Identification of Survival Genes in Human Glioblastoma Cells Using siRNA Screening

Nikhil G Thaker, Fang Zhang, Peter R. McDonald, Tong Ying Shun, Michael D Lewen, Ian F. Pollack, and John S. Lazo

Molecular Pharmacology

|                              |               |        |                                                                                              |           |        |
|------------------------------|---------------|--------|----------------------------------------------------------------------------------------------|-----------|--------|
| siRNA Disorazole DMSO Run1   | NM_0806<br>83 | PTPN13 | protein tyrosine phosphatase, non-receptor type 13 (APO-1/CD95 (Fas)-associated phosphatase) | -0.929923 | Inlier |
| siRNA-Temozolomide Run2-DMSO | NM_0806<br>83 | PTPN13 | protein tyrosine phosphatase, non-receptor type 13 (APO-1/CD95 (Fas)-associated phosphatase) | -0.862837 | Inlier |
| siRNA-Vinblastine Run1-DMSO  | NM_0806<br>83 | PTPN13 | protein tyrosine phosphatase, non-receptor type 13 (APO-1/CD95 (Fas)-associated phosphatase) | -0.560467 | Inlier |
| siRNA-Temozolomide Run3-DMSO | NM_0806<br>83 | PTPN13 | protein tyrosine phosphatase, non-receptor type 13 (APO-1/CD95 (Fas)-associated phosphatase) | -0.247549 | Inlier |

Identification of Survival Genes in Human Glioblastoma Cells Using siRNA Screening

Nikhil G Thaker, Fang Zhang, Peter R. McDonald, Tong Ying Shun, Michael D Lewen, Ian F. Pollack, and John S. Lazo

Molecular Pharmacology

|                              |           |        |                                                                                              |          |        |
|------------------------------|-----------|--------|----------------------------------------------------------------------------------------------|----------|--------|
| siRNA-Temozolomide Run1-DMSO | NM_080683 | PTPN13 | protein tyrosine phosphatase, non-receptor type 13 (APO-1/CD95 (Fas)-associated phosphatase) | 0.247549 | Inlier |
| siRNA-Vinblastine Run2-DMSO  | NM_080683 | PTPN13 | protein tyrosine phosphatase, non-receptor type 13 (APO-1/CD95 (Fas)-associated phosphatase) | 0.396682 | Inlier |
| siRNA Disorazole DMSO Run2   | NM_080683 | PTPN13 | protein tyrosine phosphatase, non-receptor type 13 (APO-1/CD95 (Fas)-associated phosphatase) | 0.788533 | Inlier |
| siRNA Disorazole DMSO Run3   | NM_080683 | PTPN13 | protein tyrosine phosphatase, non-receptor type 13 (APO-1/CD95 (Fas)-associated phosphatase) | 1.401588 | Inlier |



Identification of Survival Genes in Human Glioblastoma Cells Using siRNA Screening

Nikhil G Thaker, Fang Zhang, Peter R. McDonald, Tong Ying Shun, Michael D Lewen, Ian F. Pollack, and John S. Lazo

Molecular Pharmacology

| siRNA Treatment              | Gene ID   | Gene Name | Protein Description                                | Log Fold Change | Outlier Status |
|------------------------------|-----------|-----------|----------------------------------------------------|-----------------|----------------|
| siRNA Disorazole DMSO Run2   | NM_005401 | PTPN14    | protein tyrosine phosphatase, non-receptor type 14 | -1.155363       | Inlier         |
| siRNA-Temozolomide Run1-DMSO | NM_005401 | PTPN14    | protein tyrosine phosphatase, non-receptor type 14 | -0.841845       | Inlier         |
| siRNA-Temozolomide Run2-DMSO | NM_005401 | PTPN14    | protein tyrosine phosphatase, non-receptor type 14 | -0.572404       | Inlier         |
| siRNA Disorazole DMSO Run1   | NM_005401 | PTPN14    | protein tyrosine phosphatase, non-receptor type 14 | -0.06733        | Inlier         |
| siRNA-Temozolomide Run3-DMSO | NM_005401 | PTPN14    | protein tyrosine phosphatase, non-receptor type 14 | 0.06733         | Inlier         |
| siRNA Disorazole DMSO Run3   | NM_005401 | PTPN14    | protein tyrosine phosphatase, non-receptor type 14 | 0.398737        | Inlier         |
| siRNA-Vinblastine Run1-DMSO  | NM_005401 | PTPN14    | protein tyrosine phosphatase, non-receptor type 14 | 0.776596        | Inlier         |
| siRNA-Vinblastine Run2-DMSO  | NM_005401 | PTPN14    | protein tyrosine phosphatase, non-receptor type 14 | 1.048998        | Inlier         |

Identification of Survival Genes in Human Glioblastoma Cells Using siRNA Screening

Nikhil G Thaker, Fang Zhang, Peter R. McDonald, Tong Ying Shun, Michael D Lewen, Ian F. Pollack, and John S. Lazo

Molecular Pharmacology

| siRNA Treatment              | Gene ID   | Gene Name | Protein Description                                                | Log Fold Change | Outlier Status |
|------------------------------|-----------|-----------|--------------------------------------------------------------------|-----------------|----------------|
| siRNA-Temozolomide Run2-DMSO | NM_014369 | PTPN18    | protein tyrosine phosphatase, non-receptor type 18 (brain-derived) | -0.683267       | Inlier         |
| siRNA-Temozolomide Run3-DMSO | NM_014369 | PTPN18    | protein tyrosine phosphatase, non-receptor type 18 (brain-derived) | -0.665733       | Inlier         |
| siRNA Disorazole DMSO Run2   | NM_014369 | PTPN18    | protein tyrosine phosphatase, non-receptor type 18 (brain-derived) | -0.420862       | Inlier         |
| siRNA Disorazole DMSO Run3   | NM_014369 | PTPN18    | protein tyrosine phosphatase, non-receptor type 18 (brain-derived) | -0.22486        | Inlier         |
| siRNA Disorazole DMSO Run1   | NM_014369 | PTPN18    | protein tyrosine phosphatase, non-receptor type 18 (brain-derived) | 0.22486         | Inlier         |
| siRNA-Vinblastine Run1-DMSO  | NM_014369 | PTPN18    | protein tyrosine phosphatase, non-receptor type 18 (brain-derived) | 0.833264        | Inlier         |

Identification of Survival Genes in Human Glioblastoma Cells Using siRNA Screening

Nikhil G Thaker, Fang Zhang, Peter R. McDonald, Tong Ying Shun, Michael D Lewen, Ian F. Pollack, and John S. Lazo

Molecular Pharmacology

| siRNA Treatment              | Gene      | Gene ID | Gene Name                                                          | Protein Name | Log2 Fold Change | Category |
|------------------------------|-----------|---------|--------------------------------------------------------------------|--------------|------------------|----------|
| siRNA-Temozolomide Run1-DMSO | NM_014369 | PTPN18  | protein tyrosine phosphatase, non-receptor type 18 (brain-derived) | 0.976762     | Inlier           |          |
| siRNA-Vinblastine Run2-DMSO  | NM_014369 | PTPN18  | protein tyrosine phosphatase, non-receptor type 18 (brain-derived) | 1.213776     | Inlier           |          |
| siRNA-Temozolomide Run2-DMSO | NM_080423 | PTPN2   | protein tyrosine phosphatase, non-receptor type 2                  | -1.569319    | Inlier           |          |
| siRNA-Temozolomide Run3-DMSO | NM_080423 | PTPN2   | protein tyrosine phosphatase, non-receptor type 2                  | -1.279047    | Inlier           |          |
| siRNA Disorazole DMSO Run2   | NM_080423 | PTPN2   | protein tyrosine phosphatase, non-receptor type 2                  | -0.60441     | Inlier           |          |
| siRNA Disorazole DMSO Run1   | NM_080423 | PTPN2   | protein tyrosine phosphatase, non-receptor type 2                  | -0.543066    | Inlier           |          |
| siRNA-Vinblastine Run2-DMSO  | NM_080423 | PTPN2   | protein tyrosine phosphatase, non-receptor type 2                  | 0.543066     | Inlier           |          |
| siRNA-Vinblastine Run1-DMSO  | NM_080423 | PTPN2   | protein tyrosine phosphatase, non-receptor type 2                  | 0.589415     | Inlier           |          |

Identification of Survival Genes in Human Glioblastoma Cells Using siRNA Screening

Nikhil G Thaker, Fang Zhang, Peter R. McDonald, Tong Ying Shun, Michael D Lewen, Ian F. Pollack, and John S. Lazo

Molecular Pharmacology

| siRNA Treatment              | Gene ID   | Gene Name | Protein Name                                       | Value     | Category |
|------------------------------|-----------|-----------|----------------------------------------------------|-----------|----------|
| siRNA-Temozolomide Run1-DMSO | NM_080423 | PTPN2     | protein tyrosine phosphatase, non-receptor type 2  | 0.74459   | Inlier   |
| siRNA Disorazole DMSO Run3   | NM_080423 | PTPN2     | protein tyrosine phosphatase, non-receptor type 2  | 9.44589   | Outlier  |
| siRNA-Temozolomide Run2-DMSO | NM_007039 | PTPN21    | protein tyrosine phosphatase, non-receptor type 21 | -1.022012 | Inlier   |
| siRNA-Temozolomide Run3-DMSO | NM_007039 | PTPN21    | protein tyrosine phosphatase, non-receptor type 21 | -0.652313 | Inlier   |
| siRNA-Temozolomide Run1-DMSO | NM_007039 | PTPN21    | protein tyrosine phosphatase, non-receptor type 21 | -0.54178  | Inlier   |
| siRNA Disorazole DMSO Run2   | NM_007039 | PTPN21    | protein tyrosine phosphatase, non-receptor type 21 | -0.208411 | Inlier   |
| siRNA-Vinblastine Run2-DMSO  | NM_007039 | PTPN21    | protein tyrosine phosphatase, non-receptor type 21 | 0.208411  | Inlier   |
| siRNA Disorazole DMSO Run1   | NM_007039 | PTPN21    | protein tyrosine phosphatase, non-receptor type 21 | 0.696687  | Inlier   |

Identification of Survival Genes in Human Glioblastoma Cells Using siRNA Screening  
 Nikhil G Thaker, Fang Zhang, Peter R. McDonald, Tong Ying Shun, Michael D Lewen, Ian F. Pollack, and John S. Lazo

Molecular Pharmacology

| siRNA Treatment              | Gene ID   | Gene Name | Protein Name                                                  | Value     | Outlier Status |
|------------------------------|-----------|-----------|---------------------------------------------------------------|-----------|----------------|
| siRNA-Vinblastine Run1-DMSO  | NM_007039 | PTPN21    | protein tyrosine phosphatase, non-receptor type 21            | 1.604625  | Inlier         |
| siRNA Disorazole DMSO Run3   | NM_007039 | PTPN21    | protein tyrosine phosphatase, non-receptor type 21            | 3.117972  | Inlier         |
| siRNA-Temozolomide Run3-DMSO | NM_015967 | PTPN22    | protein tyrosine phosphatase, non-receptor type 22 (lymphoid) | -1.372788 | Inlier         |
| siRNA-Temozolomide Run2-DMSO | NM_015967 | PTPN22    | protein tyrosine phosphatase, non-receptor type 22 (lymphoid) | -1.003525 | Inlier         |
| siRNA Disorazole DMSO Run2   | NM_015967 | PTPN22    | protein tyrosine phosphatase, non-receptor type 22 (lymphoid) | -0.345474 | Inlier         |
| siRNA-Temozolomide Run1-DMSO | NM_015967 | PTPN22    | protein tyrosine phosphatase, non-receptor type 22 (lymphoid) | -0.128753 | Inlier         |
| siRNA-Vinblastine Run1-DMSO  | NM_015967 | PTPN22    | protein tyrosine phosphatase, non-receptor type 22 (lymphoid) | 0.128753  | Inlier         |

Identification of Survival Genes in Human Glioblastoma Cells Using siRNA Screening  
 Nikhil G Thaker, Fang Zhang, Peter R. McDonald, Tong Ying Shun, Michael D Lewen, Ian F. Pollack, and John S. Lazo  
 Molecular Pharmacology

|                              |               |        |                                                               |           |        |
|------------------------------|---------------|--------|---------------------------------------------------------------|-----------|--------|
| siRNA Disorazole DMSO Run1   | NM_0159<br>67 | PTPN22 | protein tyrosine phosphatase, non-receptor type 22 (lymphoid) | 0.192781  | Inlier |
| siRNA Disorazole DMSO Run3   | NM_0159<br>67 | PTPN22 | protein tyrosine phosphatase, non-receptor type 22 (lymphoid) | 1.09155   | Inlier |
| siRNA-Vinblastine Run2-DMSO  | NM_0159<br>67 | PTPN22 | protein tyrosine phosphatase, non-receptor type 22 (lymphoid) | 1.263929  | Inlier |
| siRNA-Temozolomide Run3-DMSO | NM_0154<br>66 | PTPN23 | protein tyrosine phosphatase, non-receptor type 23            | -1.840978 | Inlier |
| siRNA-Temozolomide Run2-DMSO | NM_0154<br>66 | PTPN23 | protein tyrosine phosphatase, non-receptor type 23            | -1.257022 | Inlier |
| siRNA-Temozolomide Run1-DMSO | NM_0154<br>66 | PTPN23 | protein tyrosine phosphatase, non-receptor type 23            | -0.832986 | Inlier |
| siRNA Disorazole DMSO Run1   | NM_0154<br>66 | PTPN23 | protein tyrosine phosphatase, non-receptor type 23            | -0.218414 | Inlier |

Identification of Survival Genes in Human Glioblastoma Cells Using siRNA Screening

Nikhil G Thaker, Fang Zhang, Peter R. McDonald, Tong Ying Shun, Michael D Lewen, Ian F. Pollack, and John S. Lazo

Molecular Pharmacology

| siRNA Treatment              | Gene ID   | Gene Name | Protein Name                                       | Value     | Outlier Status |
|------------------------------|-----------|-----------|----------------------------------------------------|-----------|----------------|
| siRNA-Vinblastine Run2-DMSO  | NM_015466 | PTPN23    | protein tyrosine phosphatase, non-receptor type 23 | 0.218414  | Inlier         |
| siRNA Disorazole DMSO Run3   | NM_015466 | PTPN23    | protein tyrosine phosphatase, non-receptor type 23 | 0.314212  | Inlier         |
| siRNA-Vinblastine Run1-DMSO  | NM_015466 | PTPN23    | protein tyrosine phosphatase, non-receptor type 23 | 0.516014  | Inlier         |
| siRNA Disorazole DMSO Run2   | NM_015466 | PTPN23    | protein tyrosine phosphatase, non-receptor type 23 | 0.839128  | Inlier         |
| siRNA-Temozolomide Run3-DMSO | NM_002829 | PTPN3     | protein tyrosine phosphatase, non-receptor type 3  | -1.12594  | Inlier         |
| siRNA-Temozolomide Run2-DMSO | NM_002829 | PTPN3     | protein tyrosine phosphatase, non-receptor type 3  | -0.821228 | Inlier         |
| siRNA Disorazole DMSO Run1   | NM_002829 | PTPN3     | protein tyrosine phosphatase, non-receptor type 3  | -0.521964 | Inlier         |
| siRNA-Temozolomide Run1-DMSO | NM_002829 | PTPN3     | protein tyrosine phosphatase, non-receptor type 3  | -0.3159   | Inlier         |

Identification of Survival Genes in Human Glioblastoma Cells Using siRNA Screening

Nikhil G Thaker, Fang Zhang, Peter R. McDonald, Tong Ying Shun, Michael D Lewen, Ian F. Pollack, and John S. Lazo

Molecular Pharmacology

| siRNA Treatment              | Gene  | Gene ID   | Gene Symbol | Gene Description                                                  | Value     | Category |
|------------------------------|-------|-----------|-------------|-------------------------------------------------------------------|-----------|----------|
| siRNA Disorazole DMSO Run3   | PTPN3 | NM_002829 | PTPN3       | protein tyrosine phosphatase, non-receptor type 3                 | 0.3159    | Inlier   |
| siRNA-Vinblastine Run1-DMSO  | PTPN3 | NM_002829 | PTPN3       | protein tyrosine phosphatase, non-receptor type 3                 | 0.527772  | Inlier   |
| siRNA-Vinblastine Run2-DMSO  | PTPN3 | NM_002829 | PTPN3       | protein tyrosine phosphatase, non-receptor type 3                 | 0.996598  | Inlier   |
| siRNA Disorazole DMSO Run2   | PTPN3 | NM_002829 | PTPN3       | protein tyrosine phosphatase, non-receptor type 3                 | 1.163179  | Inlier   |
| siRNA-Temozolomide Run3-DMSO | PTPN4 | NM_002830 | PTPN4       | protein tyrosine phosphatase, non-receptor type 4 (megakaryocyte) | -1.938633 | Inlier   |
| siRNA-Temozolomide Run1-DMSO | PTPN4 | NM_002830 | PTPN4       | protein tyrosine phosphatase, non-receptor type 4 (megakaryocyte) | -1.014201 | Inlier   |
| siRNA-Temozolomide Run2-DMSO | PTPN4 | NM_002830 | PTPN4       | protein tyrosine phosphatase, non-receptor type 4 (megakaryocyte) | -0.802852 | Inlier   |



Identification of Survival Genes in Human Glioblastoma Cells Using siRNA Screening

Nikhil G Thaker, Fang Zhang, Peter R. McDonald, Tong Ying Shun, Michael D Lewen, Ian F. Pollack, and John S. Lazo

Molecular Pharmacology

| siRNA              | Drug | Run  | Gene  | Accession | Protein                                                               | Score     | Inlier |
|--------------------|------|------|-------|-----------|-----------------------------------------------------------------------|-----------|--------|
| siRNA Disorazole   | DMSO | Run3 | PTPN4 | NM_002830 | protein tyrosine phosphatase, non-receptor type 4 (megakaryocyte)     | -0.028947 | Inlier |
| siRNA-Vinblastine  | DMSO | Run1 | PTPN4 | NM_002830 | protein tyrosine phosphatase, non-receptor type 4 (megakaryocyte)     | 0.028947  | Inlier |
| siRNA Disorazole   | DMSO | Run1 | PTPN4 | NM_002830 | protein tyrosine phosphatase, non-receptor type 4 (megakaryocyte)     | 0.182226  | Inlier |
| siRNA-Vinblastine  | DMSO | Run2 | PTPN4 | NM_002830 | protein tyrosine phosphatase, non-receptor type 4 (megakaryocyte)     | 0.655378  | Inlier |
| siRNA Disorazole   | DMSO | Run2 | PTPN4 | NM_002830 | protein tyrosine phosphatase, non-receptor type 4 (megakaryocyte)     | 0.693622  | Inlier |
| siRNA-Temozolomide | DMSO | Run3 | PTPN5 | NM_032781 | protein tyrosine phosphatase, non-receptor type 5 (striatum-enriched) | -3.289373 | Inlier |

Identification of Survival Genes in Human Glioblastoma Cells Using siRNA Screening

Nikhil G Thaker, Fang Zhang, Peter R. McDonald, Tong Ying Shun, Michael D Lewen, Ian F. Pollack, and John S. Lazo

Molecular Pharmacology

| siRNA Treatment         | Run  | Gene ID   | Gene Name | Log Fold Change | Outlier Status |
|-------------------------|------|-----------|-----------|-----------------|----------------|
| siRNA-Temozolomide DMSO | Run2 | NM_032781 | PTPN5     | -2.208302       | Inlier         |
| siRNA Disorazole DMSO   | Run2 | NM_032781 | PTPN5     | -0.516561       | Inlier         |
| siRNA Disorazole DMSO   | Run3 | NM_032781 | PTPN5     | -0.199907       | Inlier         |
| siRNA-Temozolomide DMSO | Run1 | NM_032781 | PTPN5     | 0.199908        | Inlier         |
| siRNA Disorazole DMSO   | Run1 | NM_032781 | PTPN5     | 0.343418        | Inlier         |
| siRNA-Vinblastine DMSO  | Run1 | NM_032781 | PTPN5     | 0.832439        | Inlier         |

protein tyrosine phosphatase, non-receptor type 5 (striatum-enriched)

Identification of Survival Genes in Human Glioblastoma Cells Using siRNA Screening

Nikhil G Thaker, Fang Zhang, Peter R. McDonald, Tong Ying Shun, Michael D Lewen, Ian F. Pollack, and John S. Lazo

Molecular Pharmacology

| siRNA Treatment              | Gene ID   | Gene Name | Protein Description                                                   | Log2 Fold Change | Outlier Status |
|------------------------------|-----------|-----------|-----------------------------------------------------------------------|------------------|----------------|
| siRNA-Vinblastine Run2-DMSO  | NM_032781 | PTPN5     | protein tyrosine phosphatase, non-receptor type 5 (striatum-enriched) | 1.445855         | Inlier         |
| siRNA-Temozolomide Run3-DMSO | NM_080548 | PTPN6     | protein tyrosine phosphatase, non-receptor type 6                     | -1.391483        | Inlier         |
| siRNA-Temozolomide Run2-DMSO | NM_080548 | PTPN6     | protein tyrosine phosphatase, non-receptor type 6                     | -0.485653        | Inlier         |
| siRNA-Temozolomide Run1-DMSO | NM_080548 | PTPN6     | protein tyrosine phosphatase, non-receptor type 6                     | -0.241182        | Inlier         |
| siRNA Disorazole DMSO Run2   | NM_080548 | PTPN6     | protein tyrosine phosphatase, non-receptor type 6                     | -0.155134        | Inlier         |
| siRNA Disorazole DMSO Run1   | NM_080548 | PTPN6     | protein tyrosine phosphatase, non-receptor type 6                     | 0.155134         | Inlier         |
| siRNA Disorazole DMSO Run3   | NM_080548 | PTPN6     | protein tyrosine phosphatase, non-receptor type 6                     | 0.863347         | Inlier         |
| siRNA-Vinblastine Run1-DMSO  | NM_080548 | PTPN6     | protein tyrosine phosphatase, non-receptor type 6                     | 0.914033         | Inlier         |

Identification of Survival Genes in Human Glioblastoma Cells Using siRNA Screening

Nikhil G Thaker, Fang Zhang, Peter R. McDonald, Tong Ying Shun, Michael D Lewen, Ian F. Pollack, and John S. Lazo

Molecular Pharmacology

| siRNA Treatment              | Gene ID   | Gene Name | Protein Name                                      | Log Fold Change | Classification |
|------------------------------|-----------|-----------|---------------------------------------------------|-----------------|----------------|
| siRNA-Vinblastine Run2-DMSO  | NM_080548 | PTPN6     | protein tyrosine phosphatase, non-receptor type 6 | 1.030799        | Inlier         |
| siRNA-Temozolomide Run3-DMSO | NM_080589 | PTPN7     | protein tyrosine phosphatase, non-receptor type 7 | -6.398386       | Outlier        |
| siRNA-Temozolomide Run2-DMSO | NM_080589 | PTPN7     | protein tyrosine phosphatase, non-receptor type 7 | -0.90351        | Inlier         |
| siRNA Disorazole DMSO Run3   | NM_080589 | PTPN7     | protein tyrosine phosphatase, non-receptor type 7 | -0.44549        | Inlier         |
| siRNA Disorazole DMSO Run2   | NM_080589 | PTPN7     | protein tyrosine phosphatase, non-receptor type 7 | -0.111168       | Inlier         |
| siRNA-Temozolomide Run1-DMSO | NM_080589 | PTPN7     | protein tyrosine phosphatase, non-receptor type 7 | 0.111168        | Inlier         |
| siRNA Disorazole DMSO Run1   | NM_080589 | PTPN7     | protein tyrosine phosphatase, non-receptor type 7 | 0.255558        | Inlier         |
| siRNA-Vinblastine Run1-DMSO  | NM_080589 | PTPN7     | protein tyrosine phosphatase, non-receptor type 7 | 2.63484         | Inlier         |

Identification of Survival Genes in Human Glioblastoma Cells Using siRNA Screening

Nikhil G Thaker, Fang Zhang, Peter R. McDonald, Tong Ying Shun, Michael D Lewen, Ian F. Pollack, and John S. Lazo

Molecular Pharmacology

| siRNA Treatment              | Gene ID   | Gene Name | Protein Name                                      | Value     | Category |
|------------------------------|-----------|-----------|---------------------------------------------------|-----------|----------|
| siRNA-Vinblastine Run2-DMSO  | NM_080589 | PTPN7     | protein tyrosine phosphatase, non-receptor type 7 | 3.135373  | Inlier   |
| siRNA-Temozolomide Run1-DMSO | NM_002833 | PTPN9     | protein tyrosine phosphatase, non-receptor type 9 | -1.53598  | Inlier   |
| siRNA-Temozolomide Run3-DMSO | NM_002833 | PTPN9     | protein tyrosine phosphatase, non-receptor type 9 | -0.877127 | Inlier   |
| siRNA-Temozolomide Run2-DMSO | NM_002833 | PTPN9     | protein tyrosine phosphatase, non-receptor type 9 | -0.669153 | Inlier   |
| siRNA Disorazole DMSO Run2   | NM_002833 | PTPN9     | protein tyrosine phosphatase, non-receptor type 9 | -0.077792 | Inlier   |
| siRNA-Vinblastine Run1-DMSO  | NM_002833 | PTPN9     | protein tyrosine phosphatase, non-receptor type 9 | 0.077793  | Inlier   |
| siRNA Disorazole DMSO Run1   | NM_002833 | PTPN9     | protein tyrosine phosphatase, non-receptor type 9 | 0.557748  | Inlier   |
| siRNA-Vinblastine Run2-DMSO  | NM_002833 | PTPN9     | protein tyrosine phosphatase, non-receptor type 9 | 0.679847  | Inlier   |

Identification of Survival Genes in Human Glioblastoma Cells Using siRNA Screening

Nikhil G Thaker, Fang Zhang, Peter R. McDonald, Tong Ying Shun, Michael D Lewen, Ian F. Pollack, and John S. Lazo

Molecular Pharmacology

| siRNA Treatment              | Gene ID   | Gene Name | Protein Description                                         | Log2 Fold Change | Outlier Status |
|------------------------------|-----------|-----------|-------------------------------------------------------------|------------------|----------------|
| siRNA Disorazole DMSO Run3   | NM_002833 | PTPN9     | protein tyrosine phosphatase, non-receptor type 9           | 1.002191         | Inlier         |
| siRNA-Temozolomide Run3-DMSO | NM_080792 | PTPNS1    | protein tyrosine phosphatase, non-receptor type substrate 1 | -1.006269        | Inlier         |
| siRNA-Temozolomide Run1-DMSO | NM_080792 | PTPNS1    | protein tyrosine phosphatase, non-receptor type substrate 1 | -0.829042        | Inlier         |
| siRNA Disorazole DMSO Run1   | NM_080792 | PTPNS1    | protein tyrosine phosphatase, non-receptor type substrate 1 | -0.519958        | Inlier         |
| siRNA-Vinblastine Run2-DMSO  | NM_080792 | PTPNS1    | protein tyrosine phosphatase, non-receptor type substrate 1 | -0.276872        | Inlier         |
| siRNA-Temozolomide Run2-DMSO | NM_080792 | PTPNS1    | protein tyrosine phosphatase, non-receptor type substrate 1 | 0.276872         | Inlier         |

Identification of Survival Genes in Human Glioblastoma Cells Using siRNA Screening

Nikhil G Thaker, Fang Zhang, Peter R. McDonald, Tong Ying Shun, Michael D Lewen, Ian F. Pollack, and John S. Lazo

Molecular Pharmacology

| siRNA Treatment              | Gene ID   | Gene Name | Protein Description                                                | Value     | Outlier Status |
|------------------------------|-----------|-----------|--------------------------------------------------------------------|-----------|----------------|
| siRNA-Vinblastine Run1-DMSO  | NM_080792 | PTPNS1    | protein tyrosine phosphatase, non-receptor type substrate 1        | 0.406649  | Inlier         |
| siRNA Disorazole DMSO Run2   | NM_080792 | PTPNS1    | protein tyrosine phosphatase, non-receptor type substrate 1        | 1.075213  | Inlier         |
| siRNA Disorazole DMSO Run3   | NM_080792 | PTPNS1    | protein tyrosine phosphatase, non-receptor type substrate 1        | 1.61911   | Inlier         |
| siRNA-Temozolomide Run3-DMSO | NM_178460 | PTPNS1L2  | protein tyrosine phosphatase, non-receptor type substrate 1-like 2 | -1.575388 | Inlier         |
| siRNA-Temozolomide Run2-DMSO | NM_178460 | PTPNS1L2  | protein tyrosine phosphatase, non-receptor type substrate 1-like 2 | -0.851124 | Inlier         |
| siRNA Disorazole DMSO Run2   | NM_178460 | PTPNS1L2  | protein tyrosine phosphatase, non-receptor type substrate 1-like 2 | -0.713938 | Inlier         |

Identification of Survival Genes in Human Glioblastoma Cells Using siRNA Screening

Nikhil G Thaker, Fang Zhang, Peter R. McDonald, Tong Ying Shun, Michael D Lewen, Ian F. Pollack, and John S. Lazo

Molecular Pharmacology

| siRNA Treatment              | Gene    | Accession | Gene    | Protein Description                                                | Log2 Fold Change | Outlier Status |
|------------------------------|---------|-----------|---------|--------------------------------------------------------------------|------------------|----------------|
| siRNA-Temozolomide Run1-DMSO | NM_1784 | 60        | PTPNS1L | protein tyrosine phosphatase, non-receptor type substrate 1-like 2 | -0.068682        | Inlier         |
| siRNA Disorazole DMSO Run1   | NM_1784 | 60        | PTPNS1L | protein tyrosine phosphatase, non-receptor type substrate 1-like 2 | 0.068682         | Inlier         |
| siRNA Disorazole DMSO Run3   | NM_1784 | 60        | PTPNS1L | protein tyrosine phosphatase, non-receptor type substrate 1-like 2 | 0.163735         | Inlier         |
| siRNA-Vinblastine Run1-DMSO  | NM_1784 | 60        | PTPNS1L | protein tyrosine phosphatase, non-receptor type substrate 1-like 2 | 0.635062         | Inlier         |
| siRNA-Vinblastine Run2-DMSO  | NM_1784 | 60        | PTPNS1L | protein tyrosine phosphatase, non-receptor type substrate 1-like 2 | 1.926523         | Inlier         |
| siRNA-Temozolomide Run1-DMSO | NM_0028 | 36        | PTPRA   | protein tyrosine phosphatase, receptor type, A                     | -1.345683        | Inlier         |
| siRNA-Temozolomide Run3-DMSO | NM_0028 | 36        | PTPRA   | protein tyrosine phosphatase, receptor type, A                     | -1.236098        | Inlier         |



Identification of Survival Genes in Human Glioblastoma Cells Using siRNA Screening

Nikhil G Thaker, Fang Zhang, Peter R. McDonald, Tong Ying Shun, Michael D Lewen, Ian F. Pollack, and John S. Lazo

Molecular Pharmacology

| siRNA Treatment              | Gene ID   | Gene Symbol | Gene Description                               | Log Fold Change | Outlier Status |
|------------------------------|-----------|-------------|------------------------------------------------|-----------------|----------------|
| siRNA-Vinblastine Run1-DMSO  | NM_002836 | PTPRA       | protein tyrosine phosphatase, receptor type, A | -0.112902       | Inlier         |
| siRNA-Vinblastine Run2-DMSO  | NM_002836 | PTPRA       | protein tyrosine phosphatase, receptor type, A | -0.022864       | Inlier         |
| siRNA-Temozolomide Run2-DMSO | NM_002836 | PTPRA       | protein tyrosine phosphatase, receptor type, A | 0.022865        | Inlier         |
| siRNA Disorazole DMSO Run1   | NM_002836 | PTPRA       | protein tyrosine phosphatase, receptor type, A | 0.106284        | Inlier         |
| siRNA Disorazole DMSO Run2   | NM_002836 | PTPRA       | protein tyrosine phosphatase, receptor type, A | 2.49446         | Inlier         |
| siRNA Disorazole DMSO Run3   | NM_002836 | PTPRA       | protein tyrosine phosphatase, receptor type, A | 3.124938        | Inlier         |
| siRNA-Temozolomide Run3-DMSO | NM_002837 | PTPRB       | protein tyrosine phosphatase, receptor type, B | -0.769735       | Inlier         |
| siRNA-Temozolomide Run2-DMSO | NM_002837 | PTPRB       | protein tyrosine phosphatase, receptor type, B | -0.688209       | Inlier         |

Identification of Survival Genes in Human Glioblastoma Cells Using siRNA Screening

Nikhil G Thaker, Fang Zhang, Peter R. McDonald, Tong Ying Shun, Michael D Lewen, Ian F. Pollack, and John S. Lazo

Molecular Pharmacology

| siRNA Treatment              | Gene ID   | Gene Name | Protein Description                            | Log Fold Change | Outlier Status |
|------------------------------|-----------|-----------|------------------------------------------------|-----------------|----------------|
| siRNA-Temozolomide Run1-DMSO | NM_002837 | PTPRB     | protein tyrosine phosphatase, receptor type, B | -0.660791       | Inlier         |
| siRNA Disorazole DMSO Run2   | NM_002837 | PTPRB     | protein tyrosine phosphatase, receptor type, B | -0.092689       | Inlier         |
| siRNA Disorazole DMSO Run1   | NM_002837 | PTPRB     | protein tyrosine phosphatase, receptor type, B | 0.092689        | Inlier         |
| siRNA Disorazole DMSO Run3   | NM_002837 | PTPRB     | protein tyrosine phosphatase, receptor type, B | 0.146484        | Inlier         |
| siRNA-Vinblastine Run1-DMSO  | NM_002837 | PTPRB     | protein tyrosine phosphatase, receptor type, B | 1.119533        | Inlier         |
| siRNA-Vinblastine Run2-DMSO  | NM_002837 | PTPRB     | protein tyrosine phosphatase, receptor type, B | 1.389994        | Inlier         |
| siRNA-Temozolomide Run3-DMSO | NM_002838 | PTPRC     | protein tyrosine phosphatase, receptor type, C | -2.480124       | Inlier         |
| siRNA-Temozolomide Run2-DMSO | NM_002838 | PTPRC     | protein tyrosine phosphatase, receptor type, C | -1.798519       | Inlier         |

Identification of Survival Genes in Human Glioblastoma Cells Using siRNA Screening  
 Nikhil G Thaker, Fang Zhang, Peter R. McDonald, Tong Ying Shun, Michael D Lewen, Ian F. Pollack, and John S. Lazo

Molecular Pharmacology

| siRNA Treatment              | Gene ID   | Gene Name | Protein Description                                       | Log Fold Change | Outlier Status |
|------------------------------|-----------|-----------|-----------------------------------------------------------|-----------------|----------------|
| siRNA Disorazole DMSO Run2   | NM_002838 | PTPRC     | protein tyrosine phosphatase, receptor type, C            | -0.505204       | Inlier         |
| siRNA-Temozolomide DMSO Run1 | NM_002838 | PTPRC     | protein tyrosine phosphatase, receptor type, C            | -0.332561       | Inlier         |
| siRNA Disorazole DMSO Run3   | NM_002838 | PTPRC     | protein tyrosine phosphatase, receptor type, C            | 0.332561        | Inlier         |
| siRNA Disorazole DMSO Run1   | NM_002838 | PTPRC     | protein tyrosine phosphatase, receptor type, C            | 0.612354        | Inlier         |
| siRNA-Vinblastine DMSO Run1  | NM_002838 | PTPRC     | protein tyrosine phosphatase, receptor type, C            | 0.736646        | Inlier         |
| siRNA-Vinblastine DMSO Run2  | NM_002838 | PTPRC     | protein tyrosine phosphatase, receptor type, C            | 1.378668        | Inlier         |
| siRNA-Temozolomide DMSO Run3 | NM_005608 | PTPRCAP   | protein tyrosine phosphatase, receptor type, C-associated | -1.384315       | Inlier         |
| siRNA-Temozolomide DMSO Run2 | NM_005608 | PTPRCAP   | protein tyrosine phosphatase, receptor type, C-associated | -1.154127       | Inlier         |

Identification of Survival Genes in Human Glioblastoma Cells Using siRNA Screening

Nikhil G Thaker, Fang Zhang, Peter R. McDonald, Tong Ying Shun, Michael D Lewen, Ian F. Pollack, and John S. Lazo

Molecular Pharmacology

| siRNA Treatment              | Gene ID   | Gene Name | Protein Description                                       | Value     | Category |
|------------------------------|-----------|-----------|-----------------------------------------------------------|-----------|----------|
| siRNA-Temozolomide Run1-DMSO | NM_005608 | PTPRCAP   | protein tyrosine phosphatase, receptor type, C-associated | -0.058971 | Inlier   |
| siRNA Disorazole DMSO Run3   | NM_005608 | PTPRCAP   | protein tyrosine phosphatase, receptor type, C-associated | -0.008594 | Inlier   |
| siRNA Disorazole DMSO Run1   | NM_005608 | PTPRCAP   | protein tyrosine phosphatase, receptor type, C-associated | 0.008594  | Inlier   |
| siRNA-Vinblastine Run1-DMSO  | NM_005608 | PTPRCAP   | protein tyrosine phosphatase, receptor type, C-associated | 0.460409  | Inlier   |
| siRNA-Vinblastine Run2-DMSO  | NM_005608 | PTPRCAP   | protein tyrosine phosphatase, receptor type, C-associated | 0.888591  | Inlier   |
| siRNA Disorazole DMSO Run2   | NM_005608 | PTPRCAP   | protein tyrosine phosphatase, receptor type, C-associated | 1.141061  | Inlier   |

Identification of Survival Genes in Human Glioblastoma Cells Using siRNA Screening  
 Nikhil G Thaker, Fang Zhang, Peter R. McDonald, Tong Ying Shun, Michael D Lewen, Ian F. Pollack, and John S. Lazo

Molecular Pharmacology

| siRNA Treatment              | Gene ID   | Gene Name | Protein Description                            | Log Fold Change | Classification |
|------------------------------|-----------|-----------|------------------------------------------------|-----------------|----------------|
| siRNA-Temozolomide Run3-DMSO | NM_130392 | PTPRD     | protein tyrosine phosphatase, receptor type, D | -7.995395       | Outlier        |
| siRNA-Temozolomide Run1-DMSO | NM_130392 | PTPRD     | protein tyrosine phosphatase, receptor type, D | -4.578256       | Outlier        |
| siRNA Disorazole DMSO Run2   | NM_130392 | PTPRD     | protein tyrosine phosphatase, receptor type, D | -0.406145       | Inlier         |
| siRNA Disorazole DMSO Run1   | NM_130392 | PTPRD     | protein tyrosine phosphatase, receptor type, D | -0.013402       | Inlier         |
| siRNA-Temozolomide Run2-DMSO | NM_130392 | PTPRD     | protein tyrosine phosphatase, receptor type, D | 0.013402        | Inlier         |
| siRNA-Vinblastine Run1-DMSO  | NM_130392 | PTPRD     | protein tyrosine phosphatase, receptor type, D | 0.365579        | Inlier         |
| siRNA-Vinblastine Run2-DMSO  | NM_130392 | PTPRD     | protein tyrosine phosphatase, receptor type, D | 0.942855        | Inlier         |
| siRNA Disorazole DMSO Run3   | NM_130392 | PTPRD     | protein tyrosine phosphatase, receptor type, D | 1.039227        | Inlier         |

Identification of Survival Genes in Human Glioblastoma Cells Using siRNA Screening  
 Nikhil G Thaker, Fang Zhang, Peter R. McDonald, Tong Ying Shun, Michael D Lewen, Ian F. Pollack, and John S. Lazo

Molecular Pharmacology

| siRNA Treatment              | Gene ID   | PTPRE | Gene Name                                      | Log Fold Change | Inlier |
|------------------------------|-----------|-------|------------------------------------------------|-----------------|--------|
| siRNA-Temozolomide Run3-DMSO | NM_006504 | PTPRE | protein tyrosine phosphatase, receptor type, E | -2.433534       | Inlier |
| siRNA Disorazole DMSO Run2   | NM_006504 | PTPRE | protein tyrosine phosphatase, receptor type, E | -1.332988       | Inlier |
| siRNA-Temozolomide Run1-DMSO | NM_006504 | PTPRE | protein tyrosine phosphatase, receptor type, E | -0.804423       | Inlier |
| siRNA-Temozolomide Run2-DMSO | NM_006504 | PTPRE | protein tyrosine phosphatase, receptor type, E | -0.09022        | Inlier |
| siRNA Disorazole DMSO Run1   | NM_006504 | PTPRE | protein tyrosine phosphatase, receptor type, E | 0.09022         | Inlier |
| siRNA-Vinblastine Run1-DMSO  | NM_006504 | PTPRE | protein tyrosine phosphatase, receptor type, E | 0.433672        | Inlier |
| siRNA-Vinblastine Run2-DMSO  | NM_006504 | PTPRE | protein tyrosine phosphatase, receptor type, E | 0.56851         | Inlier |
| siRNA Disorazole DMSO Run3   | NM_006504 | PTPRE | protein tyrosine phosphatase, receptor type, E | 0.78049         | Inlier |

Identification of Survival Genes in Human Glioblastoma Cells Using siRNA Screening

Nikhil G Thaker, Fang Zhang, Peter R. McDonald, Tong Ying Shun, Michael D Lewen, Ian F. Pollack, and John S. Lazo

Molecular Pharmacology

| siRNA Treatment              | Gene ID   | Gene Name | Protein Description                            | Log Fold Change | Outlier Status |
|------------------------------|-----------|-----------|------------------------------------------------|-----------------|----------------|
| siRNA-Temozolomide Run3-DMSO | NM_130440 | PTPRF     | protein tyrosine phosphatase, receptor type, F | -1.751933       | Inlier         |
| siRNA-Temozolomide Run1-DMSO | NM_130440 | PTPRF     | protein tyrosine phosphatase, receptor type, F | -1.587593       | Inlier         |
| siRNA Disorazole DMSO Run1   | NM_130440 | PTPRF     | protein tyrosine phosphatase, receptor type, F | -0.553713       | Inlier         |
| siRNA-Temozolomide Run2-DMSO | NM_130440 | PTPRF     | protein tyrosine phosphatase, receptor type, F | -0.11578        | Inlier         |
| siRNA-Vinblastine Run2-DMSO  | NM_130440 | PTPRF     | protein tyrosine phosphatase, receptor type, F | 0.11578         | Inlier         |
| siRNA Disorazole DMSO Run2   | NM_130440 | PTPRF     | protein tyrosine phosphatase, receptor type, F | 0.590999        | Inlier         |
| siRNA-Vinblastine Run1-DMSO  | NM_130440 | PTPRF     | protein tyrosine phosphatase, receptor type, F | 0.758001        | Inlier         |
| siRNA Disorazole DMSO Run3   | NM_130440 | PTPRF     | protein tyrosine phosphatase, receptor type, F | 2.397719        | Inlier         |

Identification of Survival Genes in Human Glioblastoma Cells Using siRNA Screening

Nikhil G Thaker, Fang Zhang, Peter R. McDonald, Tong Ying Shun, Michael D Lewen, Ian F. Pollack, and John S. Lazo

Molecular Pharmacology

| siRNA Treatment              | Gene ID   | Gene Name | Protein Description                            | Log Fold Change | Outlier Status |
|------------------------------|-----------|-----------|------------------------------------------------|-----------------|----------------|
| siRNA-Temozolomide Run3-DMSO | NM_002841 | PTPRG     | protein tyrosine phosphatase, receptor type, G | -1.111971       | Inlier         |
| siRNA-Temozolomide Run2-DMSO | NM_002841 | PTPRG     | protein tyrosine phosphatase, receptor type, G | -0.550286       | Inlier         |
| siRNA Disorazole DMSO Run3   | NM_002841 | PTPRG     | protein tyrosine phosphatase, receptor type, G | -0.253216       | Inlier         |
| siRNA Disorazole DMSO Run2   | NM_002841 | PTPRG     | protein tyrosine phosphatase, receptor type, G | -0.107361       | Inlier         |
| siRNA-Temozolomide Run1-DMSO | NM_002841 | PTPRG     | protein tyrosine phosphatase, receptor type, G | 0.107361        | Inlier         |
| siRNA Disorazole DMSO Run1   | NM_002841 | PTPRG     | protein tyrosine phosphatase, receptor type, G | 0.798714        | Inlier         |
| siRNA-Vinblastine Run1-DMSO  | NM_002841 | PTPRG     | protein tyrosine phosphatase, receptor type, G | 1.985264        | Inlier         |
| siRNA-Vinblastine Run2-DMSO  | NM_002841 | PTPRG     | protein tyrosine phosphatase, receptor type, G | 3.566681        | Outlier        |



Identification of Survival Genes in Human Glioblastoma Cells Using siRNA Screening  
 Nikhil G Thaker, Fang Zhang, Peter R. McDonald, Tong Ying Shun, Michael D Lewen, Ian F. Pollack, and John S. Lazo

Molecular Pharmacology

| siRNA Treatment              | Gene ID   | Gene Name | Protein Description                            | Log Fold Change | Outlier Status |
|------------------------------|-----------|-----------|------------------------------------------------|-----------------|----------------|
| siRNA-Temozolomide Run3-DMSO | NM_002842 | PTPRH     | protein tyrosine phosphatase, receptor type, H | -1.755325       | Inlier         |
| siRNA Disorazole DMSO Run2   | NM_002842 | PTPRH     | protein tyrosine phosphatase, receptor type, H | -0.786891       | Inlier         |
| siRNA-Temozolomide Run2-DMSO | NM_002842 | PTPRH     | protein tyrosine phosphatase, receptor type, H | -0.562109       | Inlier         |
| siRNA-Temozolomide Run1-DMSO | NM_002842 | PTPRH     | protein tyrosine phosphatase, receptor type, H | -0.012553       | Inlier         |
| siRNA Disorazole DMSO Run1   | NM_002842 | PTPRH     | protein tyrosine phosphatase, receptor type, H | 0.012553        | Inlier         |
| siRNA Disorazole DMSO Run3   | NM_002842 | PTPRH     | protein tyrosine phosphatase, receptor type, H | 0.41578         | Inlier         |
| siRNA-Vinblastine Run1-DMSO  | NM_002842 | PTPRH     | protein tyrosine phosphatase, receptor type, H | 0.94694         | Inlier         |
| siRNA-Vinblastine Run2-DMSO  | NM_002842 | PTPRH     | protein tyrosine phosphatase, receptor type, H | 1.786166        | Inlier         |

Identification of Survival Genes in Human Glioblastoma Cells Using siRNA Screening  
 Nikhil G Thaker, Fang Zhang, Peter R. McDonald, Tong Ying Shun, Michael D Lewen, Ian F. Pollack, and John S. Lazo

Molecular Pharmacology

| siRNA Treatment              | Gene ID   | Gene Name | Protein Description                            | Log Fold Change | Outlier Status |
|------------------------------|-----------|-----------|------------------------------------------------|-----------------|----------------|
| siRNA-Temozolomide Run3-DMSO | NM_002843 | PTPRJ     | protein tyrosine phosphatase, receptor type, J | -0.830018       | Inlier         |
| siRNA-Temozolomide Run2-DMSO | NM_002843 | PTPRJ     | protein tyrosine phosphatase, receptor type, J | -0.524317       | Inlier         |
| siRNA-Temozolomide Run1-DMSO | NM_002843 | PTPRJ     | protein tyrosine phosphatase, receptor type, J | -0.133026       | Inlier         |
| siRNA Disorazole DMSO Run2   | NM_002843 | PTPRJ     | protein tyrosine phosphatase, receptor type, J | -0.059987       | Inlier         |
| siRNA Disorazole DMSO Run3   | NM_002843 | PTPRJ     | protein tyrosine phosphatase, receptor type, J | 0.059987        | Inlier         |
| siRNA Disorazole DMSO Run1   | NM_002843 | PTPRJ     | protein tyrosine phosphatase, receptor type, J | 0.824683        | Inlier         |
| siRNA-Vinblastine Run1-DMSO  | NM_002843 | PTPRJ     | protein tyrosine phosphatase, receptor type, J | 1.896293        | Inlier         |
| siRNA-Vinblastine Run2-DMSO  | NM_002843 | PTPRJ     | protein tyrosine phosphatase, receptor type, J | 1.967874        | Inlier         |

Identification of Survival Genes in Human Glioblastoma Cells Using siRNA Screening  
 Nikhil G Thaker, Fang Zhang, Peter R. McDonald, Tong Ying Shun, Michael D Lewen, Ian F. Pollack, and John S. Lazo

Molecular Pharmacology

| siRNA Treatment              | Gene ID   | Gene Name | Protein Description                            | Log Fold Change | Outlier Status |
|------------------------------|-----------|-----------|------------------------------------------------|-----------------|----------------|
| siRNA-Temozolomide Run3-DMSO | NM_002844 | PTPRK     | protein tyrosine phosphatase, receptor type, K | -1.280012       | Inlier         |
| siRNA Disorazole DMSO Run2   | NM_002844 | PTPRK     | protein tyrosine phosphatase, receptor type, K | -0.744564       | Inlier         |
| siRNA Disorazole DMSO Run3   | NM_002844 | PTPRK     | protein tyrosine phosphatase, receptor type, K | -0.446546       | Inlier         |
| siRNA-Temozolomide Run2-DMSO | NM_002844 | PTPRK     | protein tyrosine phosphatase, receptor type, K | -0.363997       | Inlier         |
| siRNA-Temozolomide Run1-DMSO | NM_002844 | PTPRK     | protein tyrosine phosphatase, receptor type, K | 0.363996        | Inlier         |
| siRNA Disorazole DMSO Run1   | NM_002844 | PTPRK     | protein tyrosine phosphatase, receptor type, K | 0.604436        | Inlier         |
| siRNA-Vinblastine Run1-DMSO  | NM_002844 | PTPRK     | protein tyrosine phosphatase, receptor type, K | 2.042992        | Inlier         |
| siRNA-Vinblastine Run2-DMSO  | NM_002844 | PTPRK     | protein tyrosine phosphatase, receptor type, K | 2.171826        | Inlier         |

Identification of Survival Genes in Human Glioblastoma Cells Using siRNA Screening  
 Nikhil G Thaker, Fang Zhang, Peter R. McDonald, Tong Ying Shun, Michael D Lewen, Ian F. Pollack, and John S. Lazo

Molecular Pharmacology

| siRNA Treatment              | Gene ID   | Gene Name | Protein Description                            | Log Fold Change | Outlier Status |
|------------------------------|-----------|-----------|------------------------------------------------|-----------------|----------------|
| siRNA-Temozolomide Run3-DMSO | NM_002845 | PTPRM     | protein tyrosine phosphatase, receptor type, M | -1.97596        | Inlier         |
| siRNA Disorazole DMSO Run2   | NM_002845 | PTPRM     | protein tyrosine phosphatase, receptor type, M | -0.473944       | Inlier         |
| siRNA-Temozolomide Run2-DMSO | NM_002845 | PTPRM     | protein tyrosine phosphatase, receptor type, M | -0.460783       | Inlier         |
| siRNA-Temozolomide Run1-DMSO | NM_002845 | PTPRM     | protein tyrosine phosphatase, receptor type, M | -0.240285       | Inlier         |
| siRNA Disorazole DMSO Run3   | NM_002845 | PTPRM     | protein tyrosine phosphatase, receptor type, M | 0.240285        | Inlier         |
| siRNA-Vinblastine Run2-DMSO  | NM_002845 | PTPRM     | protein tyrosine phosphatase, receptor type, M | 0.875056        | Inlier         |
| siRNA Disorazole DMSO Run1   | NM_002845 | PTPRM     | protein tyrosine phosphatase, receptor type, M | 0.903741        | Inlier         |
| siRNA-Vinblastine Run1-DMSO  | NM_002845 | PTPRM     | protein tyrosine phosphatase, receptor type, M | 1.458737        | Inlier         |

Identification of Survival Genes in Human Glioblastoma Cells Using siRNA Screening  
 Nikhil G Thaker, Fang Zhang, Peter R. McDonald, Tong Ying Shun, Michael D Lewen, Ian F. Pollack, and John S. Lazo

Molecular Pharmacology

| siRNA Treatment              | Gene ID   | Gene Name | Log Fold Change | Outlier Status | Gene Description                               |
|------------------------------|-----------|-----------|-----------------|----------------|------------------------------------------------|
| siRNA Disorazole DMSO Run2   | NM_002846 | PTPRN     | -1.921226       | Inlier         | protein tyrosine phosphatase, receptor type, N |
| siRNA Disorazole DMSO Run3   | NM_002846 | PTPRN     | -1.641776       | Inlier         | protein tyrosine phosphatase, receptor type, N |
| siRNA-Temozolomide Run3-DMSO | NM_002846 | PTPRN     | -1.598402       | Inlier         | protein tyrosine phosphatase, receptor type, N |
| siRNA-Temozolomide Run1-DMSO | NM_002846 | PTPRN     | -0.019844       | Inlier         | protein tyrosine phosphatase, receptor type, N |
| siRNA-Temozolomide Run2-DMSO | NM_002846 | PTPRN     | 0.019844        | Inlier         | protein tyrosine phosphatase, receptor type, N |
| siRNA Disorazole DMSO Run1   | NM_002846 | PTPRN     | 0.09868         | Inlier         | protein tyrosine phosphatase, receptor type, N |
| siRNA-Vinblastine Run1-DMSO  | NM_002846 | PTPRN     | 0.633873        | Inlier         | protein tyrosine phosphatase, receptor type, N |
| siRNA-Vinblastine Run2-DMSO  | NM_002846 | PTPRN     | 0.715127        | Inlier         | protein tyrosine phosphatase, receptor type, N |

Identification of Survival Genes in Human Glioblastoma Cells Using siRNA Screening

Nikhil G Thaker, Fang Zhang, Peter R. McDonald, Tong Ying Shun, Michael D Lewen, Ian F. Pollack, and John S. Lazo

Molecular Pharmacology

|                              |           |        |                                                              |           |        |
|------------------------------|-----------|--------|--------------------------------------------------------------|-----------|--------|
| siRNA-Temozolomide Run3-DMSO | NM_130843 | PTPRN2 | protein tyrosine phosphatase, receptor type, N polypeptide 2 | -1.119363 | Inlier |
| siRNA-Temozolomide Run1-DMSO | NM_130843 | PTPRN2 | protein tyrosine phosphatase, receptor type, N polypeptide 2 | -0.799505 | Inlier |
| siRNA-Temozolomide Run2-DMSO | NM_130843 | PTPRN2 | protein tyrosine phosphatase, receptor type, N polypeptide 2 | -0.506852 | Inlier |
| siRNA Disorazole DMSO Run1   | NM_130843 | PTPRN2 | protein tyrosine phosphatase, receptor type, N polypeptide 2 | -0.036202 | Inlier |
| siRNA Disorazole DMSO Run3   | NM_130843 | PTPRN2 | protein tyrosine phosphatase, receptor type, N polypeptide 2 | 0.036202  | Inlier |
| siRNA-Vinblastine Run1-DMSO  | NM_130843 | PTPRN2 | protein tyrosine phosphatase, receptor type, N polypeptide 2 | 0.549495  | Inlier |

Identification of Survival Genes in Human Glioblastoma Cells Using siRNA Screening

Nikhil G Thaker, Fang Zhang, Peter R. McDonald, Tong Ying Shun, Michael D Lewen, Ian F. Pollack, and John S. Lazo

Molecular Pharmacology

| siRNA Treatment              | Gene ID   | Gene Name | Protein Description                                          | Log2 Fold Change | Outlier Status |
|------------------------------|-----------|-----------|--------------------------------------------------------------|------------------|----------------|
| siRNA-Vinblastine Run2-DMSO  | NM_130843 | PTPRN2    | protein tyrosine phosphatase, receptor type, N polypeptide 2 | 0.915272         | Inlier         |
| siRNA Disorazole DMSO Run2   | NM_130843 | PTPRN2    | protein tyrosine phosphatase, receptor type, N polypeptide 2 | 1.283545         | Inlier         |
| siRNA-Temozolomide Run1-DMSO | NM_030668 | PTPRO     | protein tyrosine phosphatase, receptor type, O               | -1.046574        | Inlier         |
| siRNA-Temozolomide Run3-DMSO | NM_030668 | PTPRO     | protein tyrosine phosphatase, receptor type, O               | -1.030494        | Inlier         |
| siRNA-Temozolomide Run2-DMSO | NM_030668 | PTPRO     | protein tyrosine phosphatase, receptor type, O               | -0.226846        | Inlier         |
| siRNA Disorazole DMSO Run1   | NM_030668 | PTPRO     | protein tyrosine phosphatase, receptor type, O               | -0.066382        | Inlier         |
| siRNA Disorazole DMSO Run2   | NM_030668 | PTPRO     | protein tyrosine phosphatase, receptor type, O               | 0.066381         | Inlier         |
| siRNA-Vinblastine Run2-DMSO  | NM_030668 | PTPRO     | protein tyrosine phosphatase, receptor type, O               | 0.436262         | Inlier         |

Identification of Survival Genes in Human Glioblastoma Cells Using siRNA Screening  
 Nikhil G Thaker, Fang Zhang, Peter R. McDonald, Tong Ying Shun, Michael D Lewen, Ian F. Pollack, and John S. Lazo

Molecular Pharmacology

| siRNA Treatment              | Gene ID   | Gene Name | Protein Name                                   | Score     | Category |
|------------------------------|-----------|-----------|------------------------------------------------|-----------|----------|
| siRNA-Vinblastine Run1-DMSO  | NM_030668 | PTPRO     | protein tyrosine phosphatase, receptor type, O | 0.912738  | Inlier   |
| siRNA Disorazole DMSO Run3   | NM_030668 | PTPRO     | protein tyrosine phosphatase, receptor type, O | 1.754203  | Inlier   |
| siRNA-Temozolomide Run3-DMSO | NM_130846 | PTPRR     | protein tyrosine phosphatase, receptor type, R | -1.816391 | Inlier   |
| siRNA-Temozolomide Run2-DMSO | NM_130846 | PTPRR     | protein tyrosine phosphatase, receptor type, R | -0.876201 | Inlier   |
| siRNA-Temozolomide Run1-DMSO | NM_130846 | PTPRR     | protein tyrosine phosphatase, receptor type, R | -0.477213 | Inlier   |
| siRNA Disorazole DMSO Run3   | NM_130846 | PTPRR     | protein tyrosine phosphatase, receptor type, R | -0.278456 | Inlier   |
| siRNA Disorazole DMSO Run1   | NM_130846 | PTPRR     | protein tyrosine phosphatase, receptor type, R | 0.278456  | Inlier   |
| siRNA Disorazole DMSO Run2   | NM_130846 | PTPRR     | protein tyrosine phosphatase, receptor type, R | 0.656976  | Inlier   |



Identification of Survival Genes in Human Glioblastoma Cells Using siRNA Screening  
 Nikhil G Thaker, Fang Zhang, Peter R. McDonald, Tong Ying Shun, Michael D Lewen, Ian F. Pollack, and John S. Lazo

Molecular Pharmacology

| siRNA Treatment              | Gene ID   | Gene Name | Protein Description                            | Score     | Outlier Status |
|------------------------------|-----------|-----------|------------------------------------------------|-----------|----------------|
| siRNA-Vinblastine Run2-DMSO  | NM_130846 | PTPRR     | protein tyrosine phosphatase, receptor type, R | 0.692024  | Inlier         |
| siRNA-Vinblastine Run1-DMSO  | NM_130846 | PTPRR     | protein tyrosine phosphatase, receptor type, R | 1.488392  | Inlier         |
| siRNA-Temozolomide Run3-DMSO | NM_002850 | PTPRS     | protein tyrosine phosphatase, receptor type, S | -1.664233 | Inlier         |
| siRNA Disorazole DMSO Run3   | NM_002850 | PTPRS     | protein tyrosine phosphatase, receptor type, S | -0.92209  | Inlier         |
| siRNA-Temozolomide Run1-DMSO | NM_002850 | PTPRS     | protein tyrosine phosphatase, receptor type, S | -0.635084 | Inlier         |
| siRNA-Temozolomide Run2-DMSO | NM_002850 | PTPRS     | protein tyrosine phosphatase, receptor type, S | -0.106979 | Inlier         |
| siRNA Disorazole DMSO Run2   | NM_002850 | PTPRS     | protein tyrosine phosphatase, receptor type, S | 0.10698   | Inlier         |
| siRNA-Vinblastine Run1-DMSO  | NM_002850 | PTPRS     | protein tyrosine phosphatase, receptor type, S | 0.355648  | Inlier         |

Identification of Survival Genes in Human Glioblastoma Cells Using siRNA Screening  
 Nikhil G Thaker, Fang Zhang, Peter R. McDonald, Tong Ying Shun, Michael D Lewen, Ian F. Pollack, and John S. Lazo

Molecular Pharmacology

| siRNA Treatment              | Gene ID       | Gene Name | Protein Description                            | Log2 Fold Change | Outlier Status |
|------------------------------|---------------|-----------|------------------------------------------------|------------------|----------------|
| siRNA Disorazole DMSO Run1   | NM_0028<br>50 | PTPRS     | protein tyrosine phosphatase, receptor type, S | 0.713916         | Inlier         |
| siRNA-Vinblastine Run2-DMSO  | NM_0028<br>50 | PTPRS     | protein tyrosine phosphatase, receptor type, S | 1.292514         | Inlier         |
| siRNA-Temozolomide Run3-DMSO | NM_1331<br>70 | PTPRT     | protein tyrosine phosphatase, receptor type, T | -3.457784        | Inlier         |
| siRNA-Temozolomide Run2-DMSO | NM_1331<br>70 | PTPRT     | protein tyrosine phosphatase, receptor type, T | -1.780029        | Inlier         |
| siRNA Disorazole DMSO Run2   | NM_1331<br>70 | PTPRT     | protein tyrosine phosphatase, receptor type, T | -0.872927        | Inlier         |
| siRNA-Temozolomide Run1-DMSO | NM_1331<br>70 | PTPRT     | protein tyrosine phosphatase, receptor type, T | -0.045829        | Inlier         |
| siRNA Disorazole DMSO Run3   | NM_1331<br>70 | PTPRT     | protein tyrosine phosphatase, receptor type, T | 0.045829         | Inlier         |
| siRNA Disorazole DMSO Run1   | NM_1331<br>70 | PTPRT     | protein tyrosine phosphatase, receptor type, T | 0.382605         | Inlier         |

Identification of Survival Genes in Human Glioblastoma Cells Using siRNA Screening

Nikhil G Thaker, Fang Zhang, Peter R. McDonald, Tong Ying Shun, Michael D Lewen, Ian F. Pollack, and John S. Lazo

Molecular Pharmacology

| siRNA Treatment              | Gene ID   | Gene Symbol | Gene Description                               | Value     | Category |
|------------------------------|-----------|-------------|------------------------------------------------|-----------|----------|
| siRNA-Vinblastine Run1-DMSO  | NM_133170 | PTPRT       | protein tyrosine phosphatase, receptor type, T | 0.476073  | Inlier   |
| siRNA-Vinblastine Run2-DMSO  | NM_133170 | PTPRT       | protein tyrosine phosphatase, receptor type, T | 1.130202  | Inlier   |
| siRNA-Temozolomide Run1-DMSO | NM_005704 | PTPRU       | protein tyrosine phosphatase, receptor type, U | -1.121344 | Inlier   |
| siRNA-Temozolomide Run3-DMSO | NM_005704 | PTPRU       | protein tyrosine phosphatase, receptor type, U | -0.605653 | Inlier   |
| siRNA-Temozolomide Run2-DMSO | NM_005704 | PTPRU       | protein tyrosine phosphatase, receptor type, U | -0.363463 | Inlier   |
| siRNA Disorazole DMSO Run1   | NM_005704 | PTPRU       | protein tyrosine phosphatase, receptor type, U | -0.258442 | Inlier   |
| siRNA Disorazole DMSO Run2   | NM_005704 | PTPRU       | protein tyrosine phosphatase, receptor type, U | 0.258441  | Inlier   |
| siRNA-Vinblastine Run1-DMSO  | NM_005704 | PTPRU       | protein tyrosine phosphatase, receptor type, U | 0.743347  | Inlier   |

Identification of Survival Genes in Human Glioblastoma Cells Using siRNA Screening

Nikhil G Thaker, Fang Zhang, Peter R. McDonald, Tong Ying Shun, Michael D Lewen, Ian F. Pollack, and John S. Lazo

Molecular Pharmacology

| siRNA Treatment              | Gene ID   | Gene Name | Protein Description                                          | Score     | Outlier Status |
|------------------------------|-----------|-----------|--------------------------------------------------------------|-----------|----------------|
| siRNA Disorazole DMSO Run3   | NM_005704 | PTPRU     | protein tyrosine phosphatase, receptor type, U               | 0.917279  | Inlier         |
| siRNA-Vinblastine Run2-DMSO  | NM_005704 | PTPRU     | protein tyrosine phosphatase, receptor type, U               | 1.34569   | Inlier         |
| siRNA-Temozolomide Run3-DMSO | NM_002851 | PTPRZ1    | protein tyrosine phosphatase, receptor-type, Z polypeptide 1 | -1.452808 | Inlier         |
| siRNA-Temozolomide Run2-DMSO | NM_002851 | PTPRZ1    | protein tyrosine phosphatase, receptor-type, Z polypeptide 1 | -0.675567 | Inlier         |
| siRNA Disorazole DMSO Run3   | NM_002851 | PTPRZ1    | protein tyrosine phosphatase, receptor-type, Z polypeptide 1 | -0.433489 | Inlier         |
| siRNA-Temozolomide Run1-DMSO | NM_002851 | PTPRZ1    | protein tyrosine phosphatase, receptor-type, Z polypeptide 1 | -0.045433 | Inlier         |
| siRNA Disorazole DMSO Run2   | NM_002851 | PTPRZ1    | protein tyrosine phosphatase, receptor-type, Z polypeptide 1 | 0.045433  | Inlier         |

Identification of Survival Genes in Human Glioblastoma Cells Using siRNA Screening

Nikhil G Thaker, Fang Zhang, Peter R. McDonald, Tong Ying Shun, Michael D Lewen, Ian F. Pollack, and John S. Lazo

Molecular Pharmacology

|                              |               |        |                                                              |           |        |
|------------------------------|---------------|--------|--------------------------------------------------------------|-----------|--------|
| siRNA Disorazole DMSO Run1   | NM_0028<br>51 | PTPRZ1 | protein tyrosine phosphatase, receptor-type, Z polypeptide 1 | 0.673433  | Inlier |
| siRNA-Vinblastine Run1-DMSO  | NM_0028<br>51 | PTPRZ1 | protein tyrosine phosphatase, receptor-type, Z polypeptide 1 | 0.769607  | Inlier |
| siRNA-Vinblastine Run2-DMSO  | NM_0028<br>51 | PTPRZ1 | protein tyrosine phosphatase, receptor-type, Z polypeptide 1 | 1.276154  | Inlier |
| siRNA-Temozolomide Run1-DMSO | NM_0003<br>17 | PTS    | 6-pyruvoyltetrahydropterin synthase                          | -0.864403 | Inlier |
| siRNA-Temozolomide Run2-DMSO | NM_0003<br>17 | PTS    | 6-pyruvoyltetrahydropterin synthase                          | -0.777012 | Inlier |
| siRNA Disorazole DMSO Run1   | NM_0003<br>17 | PTS    | 6-pyruvoyltetrahydropterin synthase                          | -0.608977 | Inlier |
| siRNA Disorazole DMSO Run2   | NM_0003<br>17 | PTS    | 6-pyruvoyltetrahydropterin synthase                          | -0.013354 | Inlier |
| siRNA-Temozolomide Run3-DMSO | NM_0003<br>17 | PTS    | 6-pyruvoyltetrahydropterin synthase                          | 0.013355  | Inlier |

Identification of Survival Genes in Human Glioblastoma Cells Using siRNA Screening  
 Nikhil G Thaker, Fang Zhang, Peter R. McDonald, Tong Ying Shun, Michael D Lewen, Ian F. Pollack, and John S. Lazo

Molecular Pharmacology

|                              |              |      |                                     |           |        |
|------------------------------|--------------|------|-------------------------------------|-----------|--------|
| siRNA-Vinblastine Run2-DMSO  | NM_000317    | PTS  | 6-pyruvoyltetrahydropterin synthase | 0.366784  | Inlier |
| siRNA-Vinblastine Run1-DMSO  | NM_000317    | PTS  | 6-pyruvoyltetrahydropterin synthase | 0.740023  | Inlier |
| siRNA Disorazole DMSO Run3   | NM_000317    | PTS  | 6-pyruvoyltetrahydropterin synthase | 0.825584  | Inlier |
| siRNA Disorazole DMSO Run3   | NM_001002019 | PUS1 | pseudouridylate synthase 1          | -1.207375 | Inlier |
| siRNA-Vinblastine Run2-DMSO  | NM_001002019 | PUS1 | pseudouridylate synthase 1          | -1.171608 | Inlier |
| siRNA-Temozolomide Run2-DMSO | NM_001002019 | PUS1 | pseudouridylate synthase 1          | -0.539081 | Inlier |
| siRNA-Temozolomide Run3-DMSO | NM_001002019 | PUS1 | pseudouridylate synthase 1          | -0.071686 | Inlier |
| siRNA Disorazole DMSO Run1   | NM_001002019 | PUS1 | pseudouridylate synthase 1          | 0.071686  | Inlier |
| siRNA-Temozolomide Run1-DMSO | NM_001002019 | PUS1 | pseudouridylate synthase 1          | 0.22439   | Inlier |
| siRNA-Vinblastine Run1-DMSO  | NM_001002019 | PUS1 | pseudouridylate synthase 1          | 0.809919  | Inlier |
| siRNA Disorazole DMSO Run2   | NM_001002019 | PUS1 | pseudouridylate synthase 1          | 1.209404  | Inlier |
| siRNA Disorazole DMSO Run1   | NM_031307    | PUS3 | pseudouridylate synthase 3          | -1.503155 | Inlier |

Identification of Survival Genes in Human Glioblastoma Cells Using siRNA Screening  
 Nikhil G Thaker, Fang Zhang, Peter R. McDonald, Tong Ying Shun, Michael D Lewen, Ian F. Pollack, and John S. Lazo

Molecular Pharmacology

|                              |           |       |                                                                      |           |        |
|------------------------------|-----------|-------|----------------------------------------------------------------------|-----------|--------|
| siRNA-Temozolomide Run3-DMSO | NM_031307 | PUS3  | pseudouridylate synthase 3                                           | -0.871603 | Inlier |
| siRNA-Temozolomide Run1-DMSO | NM_031307 | PUS3  | pseudouridylate synthase 3                                           | -0.800285 | Inlier |
| siRNA Disorazole DMSO Run3   | NM_031307 | PUS3  | pseudouridylate synthase 3                                           | -0.509122 | Inlier |
| siRNA-Temozolomide Run2-DMSO | NM_031307 | PUS3  | pseudouridylate synthase 3                                           | 0.509121  | Inlier |
| siRNA-Vinblastine Run2-DMSO  | NM_031307 | PUS3  | pseudouridylate synthase 3                                           | 0.533852  | Inlier |
| siRNA-Vinblastine Run1-DMSO  | NM_031307 | PUS3  | pseudouridylate synthase 3                                           | 0.548715  | Inlier |
| siRNA Disorazole DMSO Run2   | NM_031307 | PUS3  | pseudouridylate synthase 3                                           | 2.352516  | Inlier |
| siRNA-Vinblastine Run2-DMSO  | NM_006505 | PVR   | poliovirus receptor                                                  | -1.243965 | Inlier |
| siRNA-Temozolomide Run2-DMSO | NM_006505 | PVR   | poliovirus receptor                                                  | -0.931221 | Inlier |
| siRNA Disorazole DMSO Run3   | NM_006505 | PVR   | poliovirus receptor                                                  | -0.534769 | Inlier |
| siRNA Disorazole DMSO Run1   | NM_006505 | PVR   | poliovirus receptor                                                  | -0.381071 | Inlier |
| siRNA-Temozolomide Run3-DMSO | NM_006505 | PVR   | poliovirus receptor                                                  | 0.381071  | Inlier |
| siRNA-Temozolomide Run1-DMSO | NM_006505 | PVR   | poliovirus receptor                                                  | 0.473692  | Inlier |
| siRNA Disorazole DMSO Run2   | NM_006505 | PVR   | poliovirus receptor                                                  | 0.814231  | Inlier |
| siRNA-Vinblastine Run1-DMSO  | NM_006505 | PVR   | poliovirus receptor                                                  | 1.341034  | Inlier |
| siRNA-Vinblastine Run2-DMSO  | NM_203285 | PVRL1 | poliovirus receptor-related 1 (herpesvirus entry mediator C; nectin) | -1.251056 | Inlier |

Identification of Survival Genes in Human Glioblastoma Cells Using siRNA Screening  
 Nikhil G Thaker, Fang Zhang, Peter R. McDonald, Tong Ying Shun, Michael D Lewen, Ian F. Pollack, and John S. Lazo

Molecular Pharmacology

| siRNA                        | Gene      | Accession | Gene Name                                                            | Value     | Category |
|------------------------------|-----------|-----------|----------------------------------------------------------------------|-----------|----------|
| siRNA-Temozolomide Run2-DMSO | NM_203285 | PVRL1     | poliovirus receptor-related 1 (herpesvirus entry mediator C; nectin) | -0.827064 | Inlier   |
| siRNA-Temozolomide Run3-DMSO | NM_203285 | PVRL1     | poliovirus receptor-related 1 (herpesvirus entry mediator C; nectin) | -0.155083 | Inlier   |
| siRNA Disorazole DMSO Run3   | NM_203285 | PVRL1     | poliovirus receptor-related 1 (herpesvirus entry mediator C; nectin) | -0.094015 | Inlier   |
| siRNA Disorazole DMSO Run1   | NM_203285 | PVRL1     | poliovirus receptor-related 1 (herpesvirus entry mediator C; nectin) | 0.094015  | Inlier   |
| siRNA-Temozolomide Run1-DMSO | NM_203285 | PVRL1     | poliovirus receptor-related 1 (herpesvirus entry mediator C; nectin) | 0.521936  | Inlier   |
| siRNA Disorazole DMSO Run2   | NM_203285 | PVRL1     | poliovirus receptor-related 1 (herpesvirus entry mediator C; nectin) | 1.653336  | Inlier   |
| siRNA-Vinblastine Run1-DMSO  | NM_203285 | PVRL1     | poliovirus receptor-related 1 (herpesvirus entry mediator C; nectin) | 2.431007  | Inlier   |



Identification of Survival Genes in Human Glioblastoma Cells Using siRNA Screening  
 Nikhil G Thaker, Fang Zhang, Peter R. McDonald, Tong Ying Shun, Michael D Lewen, Ian F. Pollack, and John S. Lazo

Molecular Pharmacology

| siRNA Treatment              | Gene ID   | Cell Line | Gene Name                                                    | Log Fold Change | Outlier Status |
|------------------------------|-----------|-----------|--------------------------------------------------------------|-----------------|----------------|
| siRNA-Vinblastine Run2-DMSO  | NM_002856 | PVRL2     | poliovirus receptor-related 2 (herpesvirus entry mediator B) | -1.281795       | Inlier         |
| siRNA-Temozolomide Run2-DMSO | NM_002856 | PVRL2     | poliovirus receptor-related 2 (herpesvirus entry mediator B) | -0.613757       | Inlier         |
| siRNA Disorazole DMSO Run3   | NM_002856 | PVRL2     | poliovirus receptor-related 2 (herpesvirus entry mediator B) | -0.328467       | Inlier         |
| siRNA Disorazole DMSO Run1   | NM_002856 | PVRL2     | poliovirus receptor-related 2 (herpesvirus entry mediator B) | -0.310121       | Inlier         |
| siRNA-Temozolomide Run1-DMSO | NM_002856 | PVRL2     | poliovirus receptor-related 2 (herpesvirus entry mediator B) | 0.31012         | Inlier         |
| siRNA-Temozolomide Run3-DMSO | NM_002856 | PVRL2     | poliovirus receptor-related 2 (herpesvirus entry mediator B) | 0.735243        | Inlier         |
| siRNA-Vinblastine Run1-DMSO  | NM_002856 | PVRL2     | poliovirus receptor-related 2 (herpesvirus entry mediator B) | 1.651191        | Inlier         |

Identification of Survival Genes in Human Glioblastoma Cells Using siRNA Screening  
 Nikhil G Thaker, Fang Zhang, Peter R. McDonald, Tong Ying Shun, Michael D Lewen, Ian F. Pollack, and John S. Lazo

Molecular Pharmacology

|                              |         |    |       |                                                              |                  |
|------------------------------|---------|----|-------|--------------------------------------------------------------|------------------|
|                              |         |    |       | poliovirus receptor-related 2 (herpesvirus entry mediator B) |                  |
| siRNA Disorazole DMSO Run2   | NM_0028 | 56 | PVRL2 |                                                              | 1.719458 Inlier  |
| siRNA-Vinblastine Run2-DMSO  | NM_0154 | 80 | PVRL3 | poliovirus receptor-related 3                                | -2.659555 Inlier |
| siRNA-Temozolomide Run3-DMSO | NM_0154 | 80 | PVRL3 | poliovirus receptor-related 3                                | -0.425621 Inlier |
| siRNA Disorazole DMSO Run3   | NM_0154 | 80 | PVRL3 | poliovirus receptor-related 3                                | -0.399032 Inlier |
| siRNA Disorazole DMSO Run1   | NM_0154 | 80 | PVRL3 | poliovirus receptor-related 3                                | -0.001653 Inlier |
| siRNA-Temozolomide Run2-DMSO | NM_0154 | 80 | PVRL3 | poliovirus receptor-related 3                                | 0.001653 Inlier  |
| siRNA-Temozolomide Run1-DMSO | NM_0154 | 80 | PVRL3 | poliovirus receptor-related 3                                | 0.923379 Inlier  |
| siRNA Disorazole DMSO Run2   | NM_0154 | 80 | PVRL3 | poliovirus receptor-related 3                                | 1.067804 Inlier  |
| siRNA-Vinblastine Run1-DMSO  | NM_0154 | 80 | PVRL3 | poliovirus receptor-related 3                                | 1.123263 Inlier  |
| siRNA-Temozolomide Run2-DMSO | NM_0309 | 16 | PVRL4 | poliovirus receptor-related 4                                | -2.208577 Inlier |
| siRNA-Vinblastine Run2-DMSO  | NM_0309 | 16 | PVRL4 | poliovirus receptor-related 4                                | -1.613301 Inlier |
| siRNA Disorazole DMSO Run3   | NM_0309 | 16 | PVRL4 | poliovirus receptor-related 4                                | -0.514474 Inlier |
| siRNA-Temozolomide Run3-DMSO | NM_0309 | 16 | PVRL4 | poliovirus receptor-related 4                                | -0.059403 Inlier |
| siRNA Disorazole DMSO Run1   | NM_0309 | 16 | PVRL4 | poliovirus receptor-related 4                                | 0.059403 Inlier  |
| siRNA-Temozolomide Run1-DMSO | NM_0309 | 16 | PVRL4 | poliovirus receptor-related 4                                | 0.654204 Inlier  |
| siRNA Disorazole DMSO Run2   | NM_0309 | 16 | PVRL4 | poliovirus receptor-related 4                                | 0.694796 Inlier  |

Identification of Survival Genes in Human Glioblastoma Cells Using siRNA Screening  
 Nikhil G Thaker, Fang Zhang, Peter R. McDonald, Tong Ying Shun, Michael D Lewen, Ian F. Pollack, and John S. Lazo

| Molecular Pharmacology       | siRNA         | Gene  | Protein                                                                       | Score     | Category |
|------------------------------|---------------|-------|-------------------------------------------------------------------------------|-----------|----------|
| siRNA-Vinblastine Run1-DMSO  | NM_0309<br>16 | PVRL4 | poliovirus receptor-related 4<br>PX domain containing serine/threonine kinase | 0.881414  | Inlier   |
| siRNA-Temozolomide Run3-DMSO | NM_0177<br>71 | PXK   | PX domain containing serine/threonine kinase                                  | -0.767778 | Inlier   |
| siRNA-Temozolomide Run1-DMSO | NM_0177<br>71 | PXK   | PX domain containing serine/threonine kinase                                  | -0.709599 | Inlier   |
| siRNA-Temozolomide Run2-DMSO | NM_0177<br>71 | PXK   | PX domain containing serine/threonine kinase                                  | -0.6394   | Inlier   |
| siRNA Disorazole DMSO Run3   | NM_0177<br>71 | PXK   | PX domain containing serine/threonine kinase                                  | -0.178929 | Inlier   |
| siRNA Disorazole DMSO Run2   | NM_0177<br>71 | PXK   | PX domain containing serine/threonine kinase                                  | 0.178929  | Inlier   |
| siRNA Disorazole DMSO Run1   | NM_0177<br>71 | PXK   | PX domain containing serine/threonine kinase                                  | 0.583653  | Inlier   |
| siRNA-Vinblastine Run1-DMSO  | NM_0177<br>71 | PXK   | PX domain containing serine/threonine kinase                                  | 0.796986  | Inlier   |
| siRNA-Vinblastine Run2-DMSO  | NM_0177<br>71 | PXK   | PX domain containing serine/threonine kinase                                  | 0.891876  | Inlier   |

Identification of Survival Genes in Human Glioblastoma Cells Using siRNA Screening  
 Nikhil G Thaker, Fang Zhang, Peter R. McDonald, Tong Ying Shun, Michael D Lewen, Ian F. Pollack, and John S. Lazo

|                                  |               |        |                                         |           |        |
|----------------------------------|---------------|--------|-----------------------------------------|-----------|--------|
| siRNA-Temozolomide Run3-<br>DMSO | NM_0028<br>59 | PXN    | paxillin                                | -1.562528 | Inlier |
| siRNA-Temozolomide Run2-<br>DMSO | NM_0028<br>59 | PXN    | paxillin                                | -1.377925 | Inlier |
| siRNA Disorazole DMSO Run3       | NM_0028<br>59 | PXN    | paxillin                                | -0.126984 | Inlier |
| siRNA Disorazole DMSO Run1       | NM_0028<br>59 | PXN    | paxillin                                | -0.037255 | Inlier |
| siRNA-Vinblastine Run2-<br>DMSO  | NM_0028<br>59 | PXN    | paxillin                                | 0.037254  | Inlier |
| siRNA-Temozolomide Run1-<br>DMSO | NM_0028<br>59 | PXN    | paxillin                                | 0.04058   | Inlier |
| siRNA Disorazole DMSO Run2       | NM_0028<br>59 | PXN    | paxillin                                | 1.222016  | Inlier |
| siRNA-Vinblastine Run1-<br>DMSO  | NM_0028<br>59 | PXN    | paxillin                                | 1.227129  | Inlier |
| siRNA-Temozolomide Run3-<br>DMSO | NM_1529<br>01 | PYC1   | pyrin<br>domain<br>containing<br>1      | -0.927901 | Inlier |
| siRNA-Temozolomide Run2-<br>DMSO | NM_1529<br>01 | PYC1   | pyrin<br>domain<br>containing<br>1      | -0.421627 | Inlier |
| siRNA-Temozolomide Run1-<br>DMSO | NM_1529<br>01 | PYC1   | pyrin<br>domain<br>containing<br>1      | -0.292806 | Inlier |
| siRNA Disorazole DMSO Run2       | NM_1529<br>01 | PYC1   | pyrin<br>domain<br>containing<br>1      | -0.160972 | Inlier |
| siRNA Disorazole DMSO Run1       | NM_1529<br>01 | PYC1   | pyrin<br>domain<br>containing<br>1      | 0.160972  | Inlier |
| siRNA Disorazole DMSO Run3       | NM_1529<br>01 | PYC1   | pyrin<br>domain<br>containing<br>1      | 0.927372  | Inlier |
| siRNA-Vinblastine Run1-<br>DMSO  | NM_1529<br>01 | PYC1   | pyrin<br>domain<br>containing<br>1      | 2.492826  | Inlier |
| siRNA-Vinblastine Run2-<br>DMSO  | NM_1529<br>01 | PYC1   | pyrin<br>domain<br>containing<br>1      | 3.298701  | Inlier |
| siRNA Disorazole DMSO Run1       | NM_1451<br>83 | PYCARD | PYD and<br>CARD<br>domain<br>containing | -0.776376 | Inlier |

Identification of Survival Genes in Human Glioblastoma Cells Using siRNA Screening  
 Nikhil G Thaker, Fang Zhang, Peter R. McDonald, Tong Ying Shun, Michael D Lewen, Ian F. Pollack, and John S. Lazo

Molecular Pharmacology

|                              |               |        |                                     |           |        |
|------------------------------|---------------|--------|-------------------------------------|-----------|--------|
| siRNA-Temozolomide Run2-DMSO | NM_1451<br>83 | PYCARD | PYD and CARD domain containing      | -0.71523  | Inlier |
| siRNA-Temozolomide Run3-DMSO | NM_1451<br>83 | PYCARD | PYD and CARD domain containing      | -0.570679 | Inlier |
| siRNA-Temozolomide Run1-DMSO | NM_1451<br>83 | PYCARD | PYD and CARD domain containing      | -0.211685 | Inlier |
| siRNA Disorazole DMSO Run2   | NM_1451<br>83 | PYCARD | PYD and CARD domain containing      | 0.211685  | Inlier |
| siRNA-Vinblastine Run1-DMSO  | NM_1451<br>83 | PYCARD | PYD and CARD domain containing      | 0.63377   | Inlier |
| siRNA-Vinblastine Run2-DMSO  | NM_1451<br>83 | PYCARD | PYD and CARD domain containing      | 0.765326  | Inlier |
| siRNA Disorazole DMSO Run3   | NM_1451<br>83 | PYCARD | PYD and CARD domain containing      | 1.919849  | Inlier |
| siRNA Disorazole DMSO Run1   | NM_1538<br>24 | PYCR1  | pyrroline-5-carboxylate reductase 1 | -0.700166 | Inlier |
| siRNA Disorazole DMSO Run3   | NM_1538<br>24 | PYCR1  | pyrroline-5-carboxylate reductase 1 | -0.648834 | Inlier |
| siRNA-Temozolomide Run3-DMSO | NM_1538<br>24 | PYCR1  | pyrroline-5-carboxylate reductase 1 | -0.187597 | Inlier |
| siRNA-Vinblastine Run2-DMSO  | NM_1538<br>24 | PYCR1  | pyrroline-5-carboxylate reductase 1 | -0.067888 | Inlier |

Identification of Survival Genes in Human Glioblastoma Cells Using siRNA Screening  
 Nikhil G Thaker, Fang Zhang, Peter R. McDonald, Tong Ying Shun, Michael D Lewen, Ian F. Pollack, and John S. Lazo  
 Molecular Pharmacology

|                              |               |       |                                                    |           |        |
|------------------------------|---------------|-------|----------------------------------------------------|-----------|--------|
| siRNA-Temozolomide Run2-DMSO | NM_1538<br>24 | PYCR1 | pyrroline-5-carboxylate reductase 1                | 0.067888  | Inlier |
| siRNA-Temozolomide Run1-DMSO | NM_1538<br>24 | PYCR1 | pyrroline-5-carboxylate reductase 1                | 0.773964  | Inlier |
| siRNA-Vinblastine Run1-DMSO  | NM_1538<br>24 | PYCR1 | pyrroline-5-carboxylate reductase 1                | 1.815025  | Inlier |
| siRNA Disorazole DMSO Run2   | NM_1538<br>24 | PYCR1 | pyrroline-5-carboxylate reductase 1                | 1.975742  | Inlier |
| siRNA-Temozolomide Run3-DMSO | NM_0133<br>28 | PYCR2 | pyrroline-5-carboxylate reductase family, member 2 | -2.064717 | Inlier |
| siRNA-Temozolomide Run2-DMSO | NM_0133<br>28 | PYCR2 | pyrroline-5-carboxylate reductase family, member 2 | -0.8503   | Inlier |
| siRNA Disorazole DMSO Run1   | NM_0133<br>28 | PYCR2 | pyrroline-5-carboxylate reductase family, member 2 | -0.691029 | Inlier |
| siRNA Disorazole DMSO Run3   | NM_0133<br>28 | PYCR2 | pyrroline-5-carboxylate reductase family, member 2 | -0.175362 | Inlier |

Identification of Survival Genes in Human Glioblastoma Cells Using siRNA Screening  
 Nikhil G Thaker, Fang Zhang, Peter R. McDonald, Tong Ying Shun, Michael D Lewen, Ian F. Pollack, and John S. Lazo  
 Molecular Pharmacology

|                              |           |       |                                                    |           |        |
|------------------------------|-----------|-------|----------------------------------------------------|-----------|--------|
| siRNA-Vinblastine Run2-DMSO  | NM_013328 | PYCR2 | pyrroline-5-carboxylate reductase family, member 2 | 0.175362  | Inlier |
| siRNA-Temozolomide Run1-DMSO | NM_013328 | PYCR2 | pyrroline-5-carboxylate reductase family, member 2 | 0.321146  | Inlier |
| siRNA-Vinblastine Run1-DMSO  | NM_013328 | PYCR2 | pyrroline-5-carboxylate reductase family, member 2 | 0.657971  | Inlier |
| siRNA Disorazole DMSO Run2   | NM_013328 | PYCR2 | pyrroline-5-carboxylate reductase family, member 2 | 1.95487   | Inlier |
| siRNA Disorazole DMSO Run1   | NM_002862 | PYGB  | phosphorylase, glycogen; brain                     | -2.919765 | Inlier |
| siRNA-Temozolomide Run1-DMSO | NM_002862 | PYGB  | phosphorylase, glycogen; brain                     | -0.901493 | Inlier |
| siRNA-Temozolomide Run2-DMSO | NM_002862 | PYGB  | phosphorylase, glycogen; brain                     | -0.624176 | Inlier |
| siRNA Disorazole DMSO Run2   | NM_002862 | PYGB  | phosphorylase, glycogen; brain                     | -0.423261 | Inlier |
| siRNA Disorazole DMSO Run3   | NM_002862 | PYGB  | phosphorylase, glycogen; brain                     | 0.423262  | Inlier |
| siRNA-Temozolomide Run3-DMSO | NM_002862 | PYGB  | phosphorylase, glycogen; brain                     | 0.619816  | Inlier |

Identification of Survival Genes in Human Glioblastoma Cells Using siRNA Screening

Nikhil G Thaker, Fang Zhang, Peter R. McDonald, Tong Ying Shun, Michael D Lewen, Ian F. Pollack, and John S. Lazo

Molecular Pharmacology

|                              |               |      |                                                                                                          |           |        |
|------------------------------|---------------|------|----------------------------------------------------------------------------------------------------------|-----------|--------|
| siRNA-Vinblastine Run2-DMSO  | NM_0028<br>62 | PYGB | phosphoryl<br>ase,<br>glycogen;<br>brain                                                                 | 0.724824  | Inlier |
| siRNA-Vinblastine Run1-DMSO  | NM_0028<br>62 | PYGB | phosphoryl<br>ase,<br>glycogen;<br>brain                                                                 | 2.624424  | Inlier |
| siRNA-Temozolomide Run2-DMSO | NM_0028<br>63 | PYGL | phosphoryl<br>ase,<br>glycogen;<br>liver (Hers<br>disease,<br>glycogen<br>storage<br>disease<br>type VI) | -2.537417 | Inlier |
| siRNA-Temozolomide Run1-DMSO | NM_0028<br>63 | PYGL | phosphoryl<br>ase,<br>glycogen;<br>liver (Hers<br>disease,<br>glycogen<br>storage<br>disease<br>type VI) | -1.384014 | Inlier |
| siRNA-Temozolomide Run3-DMSO | NM_0028<br>63 | PYGL | phosphoryl<br>ase,<br>glycogen;<br>liver (Hers<br>disease,<br>glycogen<br>storage<br>disease<br>type VI) | -0.71661  | Inlier |
| siRNA Disorazole DMSO Run3   | NM_0028<br>63 | PYGL | phosphoryl<br>ase,<br>glycogen;<br>liver (Hers<br>disease,<br>glycogen<br>storage<br>disease<br>type VI) | -0.169949 | Inlier |



Identification of Survival Genes in Human Glioblastoma Cells Using siRNA Screening

Nikhil G Thaker, Fang Zhang, Peter R. McDonald, Tong Ying Shun, Michael D Lewen, Ian F. Pollack, and John S. Lazo

Molecular Pharmacology

|                                 |               |      |                                                                                                                 |           |        |
|---------------------------------|---------------|------|-----------------------------------------------------------------------------------------------------------------|-----------|--------|
| siRNA Disorazole DMSO Run1      | NM_0028<br>63 | PYGL | phosphoryl<br>ase,<br>glycogen;<br>liver (Hers<br>disease,<br>glycogen<br>storage<br>disease<br>type VI)        | 0.169949  | Inlier |
| siRNA-Vinblastine Run2-<br>DMSO | NM_0028<br>63 | PYGL | phosphoryl<br>ase,<br>glycogen;<br>liver (Hers<br>disease,<br>glycogen<br>storage<br>disease<br>type VI)        | 0.577384  | Inlier |
| siRNA Disorazole DMSO Run2      | NM_0028<br>63 | PYGL | phosphoryl<br>ase,<br>glycogen;<br>liver (Hers<br>disease,<br>glycogen<br>storage<br>disease<br>type VI)        | 0.63239   | Inlier |
| siRNA-Vinblastine Run1-<br>DMSO | NM_0028<br>63 | PYGL | phosphoryl<br>ase,<br>glycogen;<br>liver (Hers<br>disease,<br>glycogen<br>storage<br>disease<br>type VI)        | 1.335137  | Inlier |
| siRNA Disorazole DMSO Run1      | NM_0056<br>09 | PYGM | phosphoryl<br>ase,<br>glycogen;<br>muscle<br>(McArdle<br>syndrome,<br>glycogen<br>storage<br>disease<br>type V) | -1.592238 | Inlier |

Identification of Survival Genes in Human Glioblastoma Cells Using siRNA Screening

Nikhil G Thaker, Fang Zhang, Peter R. McDonald, Tong Ying Shun, Michael D Lewen, Ian F. Pollack, and John S. Lazo

Molecular Pharmacology

|                              |           |      |                                                                                     |           |        |
|------------------------------|-----------|------|-------------------------------------------------------------------------------------|-----------|--------|
| siRNA-Temozolomide Run1-DMSO | NM_005609 | PYGM | phosphorylase, glycogen; muscle (McArdle syndrome, glycogen storage disease type V) | -1.446703 | Inlier |
| siRNA Disorazole DMSO Run3   | NM_005609 | PYGM | phosphorylase, glycogen; muscle (McArdle syndrome, glycogen storage disease type V) | -0.468328 | Inlier |
| siRNA-Temozolomide Run2-DMSO | NM_005609 | PYGM | phosphorylase, glycogen; muscle (McArdle syndrome, glycogen storage disease type V) | -0.030022 | Inlier |
| siRNA-Temozolomide Run3-DMSO | NM_005609 | PYGM | phosphorylase, glycogen; muscle (McArdle syndrome, glycogen storage disease type V) | 0.030021  | Inlier |

Identification of Survival Genes in Human Glioblastoma Cells Using siRNA Screening  
 Nikhil G Thaker, Fang Zhang, Peter R. McDonald, Tong Ying Shun, Michael D Lewen, Ian F. Pollack, and John S. Lazo  
 Molecular Pharmacology

|                                  |               |      |                                                                                                                 |           |        |
|----------------------------------|---------------|------|-----------------------------------------------------------------------------------------------------------------|-----------|--------|
| siRNA Disorazole DMSO Run2       | NM_0056<br>09 | PYGM | phosphoryl<br>ase,<br>glycogen;<br>muscle<br>(McArdle<br>syndrome,<br>glycogen<br>storage<br>disease<br>type V) | 0.267075  | Inlier |
| siRNA-Vinblastine Run2-<br>DMSO  | NM_0056<br>09 | PYGM | phosphoryl<br>ase,<br>glycogen;<br>muscle<br>(McArdle<br>syndrome,<br>glycogen<br>storage<br>disease<br>type V) | 0.880672  | Inlier |
| siRNA-Vinblastine Run1-<br>DMSO  | NM_0056<br>09 | PYGM | phosphoryl<br>ase,<br>glycogen;<br>muscle<br>(McArdle<br>syndrome,<br>glycogen<br>storage<br>disease<br>type V) | 2.572459  | Inlier |
| siRNA-Temozolomide Run3-<br>DMSO | NM_0028<br>64 | PZP  | pregnancy-<br>zone<br>protein                                                                                   | -2.278497 | Inlier |
| siRNA Disorazole DMSO Run1       | NM_0028<br>64 | PZP  | pregnancy-<br>zone<br>protein                                                                                   | -0.752767 | Inlier |
| siRNA-Temozolomide Run1-<br>DMSO | NM_0028<br>64 | PZP  | pregnancy-<br>zone<br>protein                                                                                   | -0.375085 | Inlier |
| siRNA Disorazole DMSO Run2       | NM_0028<br>64 | PZP  | pregnancy-<br>zone<br>protein                                                                                   | -0.096101 | Inlier |
| siRNA-Temozolomide Run2-<br>DMSO | NM_0028<br>64 | PZP  | pregnancy-<br>zone<br>protein                                                                                   | 0.096102  | Inlier |
| siRNA Disorazole DMSO Run3       | NM_0028<br>64 | PZP  | pregnancy-<br>zone<br>protein                                                                                   | 0.596233  | Inlier |

Identification of Survival Genes in Human Glioblastoma Cells Using siRNA Screening  
 Nikhil G Thaker, Fang Zhang, Peter R. McDonald, Tong Ying Shun, Michael D Lewen, Ian F. Pollack, and John S. Lazo

|                                                           |               |      |                                              |           |         |
|-----------------------------------------------------------|---------------|------|----------------------------------------------|-----------|---------|
| Molecular Pharmacology<br>siRNA-Vinblastine Run2-<br>DMSO | NM_0028<br>64 | PZP  | pregnancy-<br>zone<br>protein                | 1.282318  | Inlier  |
| siRNA-Vinblastine Run1-<br>DMSO                           | NM_0028<br>64 | PZP  | pregnancy-<br>zone<br>protein                | 2.032768  | Inlier  |
| siRNA-Temozolomide Run2-<br>DMSO                          | NM_0050<br>51 | QARS | glutaminy-<br>l-tRNA<br>synthetase           | -1.626812 | Inlier  |
| siRNA-Vinblastine Run2-<br>DMSO                           | NM_0050<br>51 | QARS | glutaminy-<br>l-tRNA<br>synthetase           | -0.751854 | Inlier  |
| siRNA Disorazole DMSO Run1                                | NM_0050<br>51 | QARS | glutaminy-<br>l-tRNA<br>synthetase           | -0.597146 | Inlier  |
| siRNA-Temozolomide Run1-<br>DMSO                          | NM_0050<br>51 | QARS | glutaminy-<br>l-tRNA<br>synthetase           | -0.156954 | Inlier  |
| siRNA Disorazole DMSO Run3                                | NM_0050<br>51 | QARS | glutaminy-<br>l-tRNA<br>synthetase           | 0.156953  | Inlier  |
| siRNA-Temozolomide Run3-<br>DMSO                          | NM_0050<br>51 | QARS | glutaminy-<br>l-tRNA<br>synthetase           | 0.367664  | Inlier  |
| siRNA Disorazole DMSO Run2                                | NM_0050<br>51 | QARS | glutaminy-<br>l-tRNA<br>synthetase           | 3.156269  | Inlier  |
| siRNA-Vinblastine Run1-<br>DMSO                           | NM_0050<br>51 | QARS | glutaminy-<br>l-tRNA<br>synthetase           | 4.266563  | Outlier |
| siRNA-Vinblastine Run2-<br>DMSO                           | NM_0003<br>20 | QDPR | quinoid<br>dihydropte<br>ridine<br>reductase | -1.230471 | Inlier  |
| siRNA-Temozolomide Run3-<br>DMSO                          | NM_0003<br>20 | QDPR | quinoid<br>dihydropte<br>ridine<br>reductase | -1.077638 | Inlier  |
| siRNA-Temozolomide Run2-<br>DMSO                          | NM_0003<br>20 | QDPR | quinoid<br>dihydropte<br>ridine<br>reductase | -0.271362 | Inlier  |

Identification of Survival Genes in Human Glioblastoma Cells Using siRNA Screening  
 Nikhil G Thaker, Fang Zhang, Peter R. McDonald, Tong Ying Shun, Michael D Lewen, Ian F. Pollack, and John S. Lazo

Molecular Pharmacology

|                              |               |      |                                                          |           |         |
|------------------------------|---------------|------|----------------------------------------------------------|-----------|---------|
| siRNA-Temozolomide Run1-DMSO | NM_0003<br>20 | QDPR | quinoid dihydropteridine reductase                       | -0.043034 | Inlier  |
| siRNA Disorazole DMSO Run3   | NM_0003<br>20 | QDPR | quinoid dihydropteridine reductase                       | 0.043034  | Inlier  |
| siRNA Disorazole DMSO Run1   | NM_0003<br>20 | QDPR | quinoid dihydropteridine reductase                       | 0.195216  | Inlier  |
| siRNA Disorazole DMSO Run2   | NM_0003<br>20 | QDPR | quinoid dihydropteridine reductase                       | 3.159328  | Inlier  |
| siRNA-Vinblastine Run1-DMSO  | NM_0003<br>20 | QDPR | quinoid dihydropteridine reductase                       | 3.818901  | Outlier |
| siRNA-Vinblastine Run2-DMSO  | NM_0124<br>13 | QPCT | glutaminyl-peptide cyclotransferase (glutaminyl cyclase) | -1.093673 | Inlier  |
| siRNA Disorazole DMSO Run1   | NM_0124<br>13 | QPCT | glutaminyl-peptide cyclotransferase (glutaminyl cyclase) | -0.613577 | Inlier  |
| siRNA Disorazole DMSO Run3   | NM_0124<br>13 | QPCT | glutaminyl-peptide cyclotransferase (glutaminyl cyclase) | -0.543509 | Inlier  |
| siRNA-Temozolomide Run2-DMSO | NM_0124<br>13 | QPCT | glutaminyl-peptide cyclotransferase (glutaminyl cyclase) | -0.439585 | Inlier  |

Identification of Survival Genes in Human Glioblastoma Cells Using siRNA Screening

Nikhil G Thaker, Fang Zhang, Peter R. McDonald, Tong Ying Shun, Michael D Lewen, Ian F. Pollack, and John S. Lazo

Molecular Pharmacology

|                              |               |      |                                                                                                 |           |        |
|------------------------------|---------------|------|-------------------------------------------------------------------------------------------------|-----------|--------|
| siRNA-Temozolomide Run1-DMSO | NM_0124<br>13 | QPCT | glutaminyl-peptide cyclotransferase (glutaminyl cyclase)                                        | 0.439585  | Inlier |
| siRNA-Temozolomide Run3-DMSO | NM_0124<br>13 | QPCT | glutaminyl-peptide cyclotransferase (glutaminyl cyclase)                                        | 0.735423  | Inlier |
| siRNA Disorazole DMSO Run2   | NM_0124<br>13 | QPCT | glutaminyl-peptide cyclotransferase (glutaminyl cyclase)                                        | 2.14424   | Inlier |
| siRNA-Vinblastine Run1-DMSO  | NM_0124<br>13 | QPCT | glutaminyl-peptide cyclotransferase (glutaminyl cyclase)                                        | 2.422976  | Inlier |
| siRNA Disorazole DMSO Run3   | NM_0142<br>98 | QPRT | quinolinate phosphoribosyltransferase (nicotinate-nucleotide pyrophosphorylase (carboxylating)) | -0.732428 | Inlier |
| siRNA-Temozolomide Run2-DMSO | NM_0142<br>98 | QPRT | quinolinate phosphoribosyltransferase (nicotinate-nucleotide pyrophosphorylase (carboxylating)) | -0.714081 | Inlier |

Identification of Survival Genes in Human Glioblastoma Cells Using siRNA Screening

Nikhil G Thaker, Fang Zhang, Peter R. McDonald, Tong Ying Shun, Michael D Lewen, Ian F. Pollack, and John S. Lazo

Molecular Pharmacology

|                              |           |      |                                                                                                 |           |        |
|------------------------------|-----------|------|-------------------------------------------------------------------------------------------------|-----------|--------|
| siRNA-Temozolomide Run3-DMSO | NM_014298 | QPRT | quinolinate phosphoribosyltransferase (nicotinate-nucleotide pyrophosphorylase (carboxylating)) | -0.634919 | Inlier |
| siRNA-Vinblastine Run2-DMSO  | NM_014298 | QPRT | quinolinate phosphoribosyltransferase (nicotinate-nucleotide pyrophosphorylase (carboxylating)) | -0.122569 | Inlier |
| siRNA Disorazole DMSO Run1   | NM_014298 | QPRT | quinolinate phosphoribosyltransferase (nicotinate-nucleotide pyrophosphorylase (carboxylating)) | 0.122569  | Inlier |
| siRNA-Temozolomide Run1-DMSO | NM_014298 | QPRT | quinolinate phosphoribosyltransferase (nicotinate-nucleotide pyrophosphorylase (carboxylating)) | 0.314247  | Inlier |

Identification of Survival Genes in Human Glioblastoma Cells Using siRNA Screening

Nikhil G Thaker, Fang Zhang, Peter R. McDonald, Tong Ying Shun, Michael D Lewen, Ian F. Pollack, and John S.

Lazo

Molecular Pharmacology

|                              |               |       |                                                                                                 |           |        |
|------------------------------|---------------|-------|-------------------------------------------------------------------------------------------------|-----------|--------|
| siRNA-Vinblastine Run1-DMSO  | NM_0142<br>98 | QPRT  | quinolinate phosphoribosyltransferase (nicotinate-nucleotide pyrophosphorylase (carboxylating)) | 1.280625  | Inlier |
| siRNA Disorazole DMSO Run2   | NM_0142<br>98 | QPRT  | quinolinate phosphoribosyltransferase (nicotinate-nucleotide pyrophosphorylase (carboxylating)) | 1.348494  | Inlier |
| siRNA-Temozolomide Run2-DMSO | NM_0182<br>92 | QRSL1 | glutaminyl-tRNA synthase (glutamine-hydrolyzing)-like 1                                         | -2.878961 | Inlier |
| siRNA-Temozolomide Run3-DMSO | NM_0182<br>92 | QRSL1 | glutaminyl-tRNA synthase (glutamine-hydrolyzing)-like 1                                         | -1.16134  | Inlier |
| siRNA-Temozolomide Run1-DMSO | NM_0182<br>92 | QRSL1 | glutaminyl-tRNA synthase (glutamine-hydrolyzing)-like 1                                         | -0.604474 | Inlier |
| siRNA Disorazole DMSO Run3   | NM_0182<br>92 | QRSL1 | glutaminyl-tRNA synthase (glutamine-hydrolyzing)-like 1                                         | -0.249942 | Inlier |



Identification of Survival Genes in Human Glioblastoma Cells Using siRNA Screening  
 Nikhil G Thaker, Fang Zhang, Peter R. McDonald, Tong Ying Shun, Michael D Lewen, Ian F. Pollack, and John S. Lazo  
 Molecular Pharmacology

|                              |               |       |                                                                              |           |        |
|------------------------------|---------------|-------|------------------------------------------------------------------------------|-----------|--------|
| siRNA Disorazole DMSO Run2   | NM_0182<br>92 | QRSL1 | glutaminyl-tRNA synthase (glutamine-hydrolyzing)-like 1                      | 0.249941  | Inlier |
| siRNA Disorazole DMSO Run1   | NM_0182<br>92 | QRSL1 | glutaminyl-tRNA synthase (glutamine-hydrolyzing)-like 1                      | 0.516253  | Inlier |
| siRNA-Vinblastine Run2-DMSO  | NM_0182<br>92 | QRSL1 | glutaminyl-tRNA synthase (glutamine-hydrolyzing)-like 1                      | 0.744526  | Inlier |
| siRNA-Vinblastine Run1-DMSO  | NM_0182<br>92 | QRSL1 | glutaminyl-tRNA synthase (glutamine-hydrolyzing)-like 1<br>RAB10, member RAS | 1.612239  | Inlier |
| siRNA-Temozolomide Run2-DMSO | NM_0161<br>31 | RAB10 | oncogene family RAB10, member RAS                                            | -1.259349 | Inlier |
| siRNA-Vinblastine Run2-DMSO  | NM_0161<br>31 | RAB10 | oncogene family RAB10, member RAS                                            | -0.680539 | Inlier |
| siRNA Disorazole DMSO Run1   | NM_0161<br>31 | RAB10 | oncogene family RAB10, member RAS                                            | -0.668461 | Inlier |
| siRNA-Temozolomide Run1-DMSO | NM_0161<br>31 | RAB10 | oncogene family                                                              | -0.185306 | Inlier |

Identification of Survival Genes in Human Glioblastoma Cells Using siRNA Screening  
 Nikhil G Thaker, Fang Zhang, Peter R. McDonald, Tong Ying Shun, Michael D Lewen, Ian F. Pollack, and John S. Lazo

Molecular Pharmacology

|                                  |               |        |                                                |           |        |
|----------------------------------|---------------|--------|------------------------------------------------|-----------|--------|
| siRNA Disorazole DMSO Run3       | NM_0161<br>31 | RAB10  | RAB10,<br>member<br>RAS<br>oncogene<br>family  | 0.185307  | Inlier |
| siRNA-Temozolomide Run3-<br>DMSO | NM_0161<br>31 | RAB10  | RAB10,<br>member<br>RAS<br>oncogene<br>family  | 0.345561  | Inlier |
| siRNA Disorazole DMSO Run2       | NM_0161<br>31 | RAB10  | RAB10,<br>member<br>RAS<br>oncogene<br>family  | 1.525517  | Inlier |
| siRNA-Vinblastine Run1-<br>DMSO  | NM_0161<br>31 | RAB10  | RAB10,<br>member<br>RAS<br>oncogene<br>family  | 1.762344  | Inlier |
| siRNA Disorazole DMSO Run1       | NM_0046<br>63 | RAB11A | RAB11A,<br>member<br>RAS<br>oncogene<br>family | -0.904984 | Inlier |
| siRNA Disorazole DMSO Run3       | NM_0046<br>63 | RAB11A | RAB11A,<br>member<br>RAS<br>oncogene<br>family | -0.651112 | Inlier |
| siRNA-Temozolomide Run1-<br>DMSO | NM_0046<br>63 | RAB11A | RAB11A,<br>member<br>RAS<br>oncogene<br>family | -0.459226 | Inlier |
| siRNA-Temozolomide Run2-<br>DMSO | NM_0046<br>63 | RAB11A | RAB11A,<br>member<br>RAS<br>oncogene<br>family | -0.010251 | Inlier |
| siRNA-Temozolomide Run3-<br>DMSO | NM_0046<br>63 | RAB11A | RAB11A,<br>member<br>RAS<br>oncogene<br>family | 0.010251  | Inlier |
| siRNA-Vinblastine Run2-<br>DMSO  | NM_0046<br>63 | RAB11A | RAB11A,<br>member<br>RAS<br>oncogene<br>family | 0.697888  | Inlier |

Identification of Survival Genes in Human Glioblastoma Cells Using siRNA Screening  
 Nikhil G Thaker, Fang Zhang, Peter R. McDonald, Tong Ying Shun, Michael D Lewen, Ian F. Pollack, and John S. Lazo

Molecular Pharmacology

|                              |               |        |                                                |                  |
|------------------------------|---------------|--------|------------------------------------------------|------------------|
| siRNA-Vinblastine Run1-DMSO  | NM_0046<br>63 | RAB11A | RAB11A,<br>member<br>RAS<br>oncogene<br>family | 0.867283 Inlier  |
| siRNA Disorazole DMSO Run2   | NM_0046<br>63 | RAB11A | RAB11A,<br>member<br>RAS<br>oncogene<br>family | 0.989951 Inlier  |
| siRNA Disorazole DMSO Run3   | NM_0042<br>18 | RAB11B | RAB11B,<br>member<br>RAS<br>oncogene<br>family | -0.713919 Inlier |
| siRNA Disorazole DMSO Run1   | NM_0042<br>18 | RAB11B | RAB11B,<br>member<br>RAS<br>oncogene<br>family | -0.635081 Inlier |
| siRNA-Vinblastine Run2-DMSO  | NM_0042<br>18 | RAB11B | RAB11B,<br>member<br>RAS<br>oncogene<br>family | -0.541627 Inlier |
| siRNA-Temozolomide Run2-DMSO | NM_0042<br>18 | RAB11B | RAB11B,<br>member<br>RAS<br>oncogene<br>family | -0.242788 Inlier |
| siRNA-Temozolomide Run1-DMSO | NM_0042<br>18 | RAB11B | RAB11B,<br>member<br>RAS<br>oncogene<br>family | 0.242788 Inlier  |
| siRNA-Temozolomide Run3-DMSO | NM_0042<br>18 | RAB11B | RAB11B,<br>member<br>RAS<br>oncogene<br>family | 0.873749 Inlier  |
| siRNA Disorazole DMSO Run2   | NM_0042<br>18 | RAB11B | RAB11B,<br>member<br>RAS<br>oncogene<br>family | 1.80134 Inlier   |
| siRNA-Vinblastine Run1-DMSO  | NM_0042<br>18 | RAB11B | RAS<br>oncogene<br>family                      | 2.341501 Inlier  |

Identification of Survival Genes in Human Glioblastoma Cells Using siRNA Screening  
 Nikhil G Thaker, Fang Zhang, Peter R. McDonald, Tong Ying Shun, Michael D Lewen, Ian F. Pollack, and John S. Lazo

Molecular Pharmacology

|                              |               |       |                                               |           |        |
|------------------------------|---------------|-------|-----------------------------------------------|-----------|--------|
| siRNA-Vinblastine Run2-DMSO  | NM_0028<br>70 | RAB13 | RAB13,<br>member<br>RAS<br>oncogene<br>family | -2.642865 | Inlier |
| siRNA Disorazole DMSO Run3   | NM_0028<br>70 | RAB13 | RAB13,<br>member<br>RAS<br>oncogene<br>family | -0.668564 | Inlier |
| siRNA Disorazole DMSO Run1   | NM_0028<br>70 | RAB13 | RAB13,<br>member<br>RAS<br>oncogene<br>family | -0.286508 | Inlier |
| siRNA-Temozolomide Run2-DMSO | NM_0028<br>70 | RAB13 | RAB13,<br>member<br>RAS<br>oncogene<br>family | -0.267107 | Inlier |
| siRNA-Temozolomide Run3-DMSO | NM_0028<br>70 | RAB13 | RAB13,<br>member<br>RAS<br>oncogene<br>family | 0.267107  | Inlier |
| siRNA-Temozolomide Run1-DMSO | NM_0028<br>70 | RAB13 | RAB13,<br>member<br>RAS<br>oncogene<br>family | 0.680436  | Inlier |
| siRNA Disorazole DMSO Run2   | NM_0028<br>70 | RAB13 | RAB13,<br>member<br>RAS<br>oncogene<br>family | 2.466021  | Inlier |
| siRNA-Vinblastine Run1-DMSO  | NM_0028<br>70 | RAB13 | RAB13,<br>member<br>RAS<br>oncogene<br>family | 2.934059  | Inlier |
| siRNA-Temozolomide Run2-DMSO | NM_0163<br>22 | RAB14 | RAB14,<br>member<br>RAS<br>oncogene<br>family | -0.889257 | Inlier |
| siRNA Disorazole DMSO Run3   | NM_0163<br>22 | RAB14 | RAB14,<br>member<br>RAS<br>oncogene<br>family | -0.868468 | Inlier |

Identification of Survival Genes in Human Glioblastoma Cells Using siRNA Screening  
 Nikhil G Thaker, Fang Zhang, Peter R. McDonald, Tong Ying Shun, Michael D Lewen, Ian F. Pollack, and John S. Lazo

Molecular Pharmacology

|                              |               |       |                                               |           |        |
|------------------------------|---------------|-------|-----------------------------------------------|-----------|--------|
| siRNA-Temozolomide Run3-DMSO | NM_0163<br>22 | RAB14 | RAB14,<br>member<br>RAS<br>oncogene<br>family | -0.530473 | Inlier |
| siRNA Disorazole DMSO Run1   | NM_0163<br>22 | RAB14 | RAB14,<br>member<br>RAS<br>oncogene<br>family | -0.059192 | Inlier |
| siRNA-Vinblastine Run2-DMSO  | NM_0163<br>22 | RAB14 | RAB14,<br>member<br>RAS<br>oncogene<br>family | 0.059192  | Inlier |
| siRNA-Temozolomide Run1-DMSO | NM_0163<br>22 | RAB14 | RAB14,<br>member<br>RAS<br>oncogene<br>family | 0.131021  | Inlier |
| siRNA-Vinblastine Run1-DMSO  | NM_0163<br>22 | RAB14 | RAB14,<br>member<br>RAS<br>oncogene<br>family | 0.818527  | Inlier |
| siRNA Disorazole DMSO Run2   | NM_0163<br>22 | RAB14 | RAS<br>oncogene<br>family                     | 1.999632  | Inlier |
| siRNA Disorazole DMSO Run1   | NM_0224<br>49 | RAB17 | RAB17,<br>member<br>RAS<br>oncogene<br>family | -1.321015 | Inlier |
| siRNA-Temozolomide Run2-DMSO | NM_0224<br>49 | RAB17 | RAB17,<br>member<br>RAS<br>oncogene<br>family | -0.668595 | Inlier |
| siRNA-Vinblastine Run2-DMSO  | NM_0224<br>49 | RAB17 | RAB17,<br>member<br>RAS<br>oncogene<br>family | -0.313996 | Inlier |
| siRNA Disorazole DMSO Run3   | NM_0224<br>49 | RAB17 | RAS<br>oncogene<br>family                     | -0.259668 | Inlier |

Identification of Survival Genes in Human Glioblastoma Cells Using siRNA Screening  
 Nikhil G Thaker, Fang Zhang, Peter R. McDonald, Tong Ying Shun, Michael D Lewen, Ian F. Pollack, and John S. Lazo

Molecular Pharmacology

|                              |               |       |                                               |           |        |
|------------------------------|---------------|-------|-----------------------------------------------|-----------|--------|
| siRNA-Temozolomide Run3-DMSO | NM_0224<br>49 | RAB17 | RAB17,<br>member<br>RAS<br>oncogene<br>family | 0.259668  | Inlier |
| siRNA Disorazole DMSO Run2   | NM_0224<br>49 | RAB17 | RAB17,<br>member<br>RAS<br>oncogene<br>family | 0.680405  | Inlier |
| siRNA-Vinblastine Run1-DMSO  | NM_0224<br>49 | RAB17 | RAB17,<br>member<br>RAS<br>oncogene<br>family | 1.35482   | Inlier |
| siRNA-Temozolomide Run1-DMSO | NM_0224<br>49 | RAB17 | RAB17,<br>member<br>RAS<br>oncogene<br>family | 1.365267  | Inlier |
| siRNA Disorazole DMSO Run1   | NM_0212<br>52 | RAB18 | RAB18,<br>member<br>RAS<br>oncogene<br>family | -2.401788 | Inlier |
| siRNA Disorazole DMSO Run3   | NM_0212<br>52 | RAB18 | RAB18,<br>member<br>RAS<br>oncogene<br>family | -0.789002 | Inlier |
| siRNA-Temozolomide Run1-DMSO | NM_0212<br>52 | RAB18 | RAB18,<br>member<br>RAS<br>oncogene<br>family | -0.559998 | Inlier |
| siRNA-Temozolomide Run2-DMSO | NM_0212<br>52 | RAB18 | RAB18,<br>member<br>RAS<br>oncogene<br>family | -0.257175 | Inlier |
| siRNA-Temozolomide Run3-DMSO | NM_0212<br>52 | RAB18 | RAB18,<br>member<br>RAS<br>oncogene<br>family | 0.257176  | Inlier |
| siRNA-Vinblastine Run2-DMSO  | NM_0212<br>52 | RAB18 | RAB18,<br>member<br>RAS<br>oncogene<br>family | 0.510058  | Inlier |

Identification of Survival Genes in Human Glioblastoma Cells Using siRNA Screening  
 Nikhil G Thaker, Fang Zhang, Peter R. McDonald, Tong Ying Shun, Michael D Lewen, Ian F. Pollack, and John S. Lazo

Molecular Pharmacology

|                                  |               |       |                                               |           |         |
|----------------------------------|---------------|-------|-----------------------------------------------|-----------|---------|
| siRNA Disorazole DMSO Run2       | NM_0212<br>52 | RAB18 | RAB18,<br>member<br>RAS<br>oncogene<br>family | 0.892678  | Inlier  |
| siRNA-Vinblastine Run1-<br>DMSO  | NM_0212<br>52 | RAB18 | RAB18,<br>member<br>RAS<br>oncogene<br>family | 1.262106  | Inlier  |
| siRNA-Temozolomide Run2-<br>DMSO | NM_0041<br>61 | RAB1A | RAB1A,<br>member<br>RAS<br>oncogene<br>family | -0.797417 | Inlier  |
| siRNA-Temozolomide Run1-<br>DMSO | NM_0041<br>61 | RAB1A | RAB1A,<br>member<br>RAS<br>oncogene<br>family | -0.551583 | Inlier  |
| siRNA-Vinblastine Run2-<br>DMSO  | NM_0041<br>61 | RAB1A | RAB1A,<br>member<br>RAS<br>oncogene<br>family | -0.359815 | Inlier  |
| siRNA Disorazole DMSO Run3       | NM_0041<br>61 | RAB1A | RAB1A,<br>member<br>RAS<br>oncogene<br>family | -0.34804  | Inlier  |
| siRNA Disorazole DMSO Run1       | NM_0041<br>61 | RAB1A | RAB1A,<br>member<br>RAS<br>oncogene<br>family | 0.34804   | Inlier  |
| siRNA-Temozolomide Run3-<br>DMSO | NM_0041<br>61 | RAB1A | RAB1A,<br>member<br>RAS<br>oncogene<br>family | 0.95537   | Inlier  |
| siRNA Disorazole DMSO Run2       | NM_0041<br>61 | RAB1A | RAB1A,<br>member<br>RAS<br>oncogene<br>family | 5.38604   | Outlier |
| siRNA-Vinblastine Run1-<br>DMSO  | NM_0041<br>61 | RAB1A | RAB1A,<br>member<br>RAS<br>oncogene<br>family | 6.097798  | Outlier |

Identification of Survival Genes in Human Glioblastoma Cells Using siRNA Screening  
 Nikhil G Thaker, Fang Zhang, Peter R. McDonald, Tong Ying Shun, Michael D Lewen, Ian F. Pollack, and John S. Lazo

Molecular Pharmacology

|                                  |               |       |                                               |           |        |
|----------------------------------|---------------|-------|-----------------------------------------------|-----------|--------|
| siRNA Disorazole DMSO Run3       | NM_0309<br>81 | RAB1B | RAB1B,<br>member<br>RAS<br>oncogene<br>family | -1.300275 | Inlier |
| siRNA-Temozolomide Run1-<br>DMSO | NM_0309<br>81 | RAB1B | RAB1B,<br>member<br>RAS<br>oncogene<br>family | -0.252635 | Inlier |
| siRNA Disorazole DMSO Run1       | NM_0309<br>81 | RAB1B | RAB1B,<br>member<br>RAS<br>oncogene<br>family | -0.156446 | Inlier |
| siRNA-Temozolomide Run2-<br>DMSO | NM_0309<br>81 | RAB1B | RAB1B,<br>member<br>RAS<br>oncogene<br>family | -0.03429  | Inlier |
| siRNA-Vinblastine Run2-<br>DMSO  | NM_0309<br>81 | RAB1B | RAB1B,<br>member<br>RAS<br>oncogene<br>family | 0.034289  | Inlier |
| siRNA-Temozolomide Run3-<br>DMSO | NM_0309<br>81 | RAB1B | RAB1B,<br>member<br>RAS<br>oncogene<br>family | 1.096365  | Inlier |
| siRNA Disorazole DMSO Run2       | NM_0309<br>81 | RAB1B | RAB1B,<br>member<br>RAS<br>oncogene<br>family | 1.749341  | Inlier |
| siRNA-Vinblastine Run1-<br>DMSO  | NM_0309<br>81 | RAB1B | RAB2,<br>member<br>RAS<br>oncogene<br>family  | 2.224425  | Inlier |
| siRNA Disorazole DMSO Run3       | NM_0028<br>65 | RAB2  | RAB2,<br>member<br>RAS<br>oncogene<br>family  | -0.978241 | Inlier |
| siRNA-Temozolomide Run1-<br>DMSO | NM_0028<br>65 | RAB2  | RAB2,<br>member<br>RAS<br>oncogene<br>family  | -0.919934 | Inlier |



Identification of Survival Genes in Human Glioblastoma Cells Using siRNA Screening  
 Nikhil G Thaker, Fang Zhang, Peter R. McDonald, Tong Ying Shun, Michael D Lewen, Ian F. Pollack, and John S. Lazo

Molecular Pharmacology

|                              |               |       |                                                                          |                  |
|------------------------------|---------------|-------|--------------------------------------------------------------------------|------------------|
| siRNA-Temozolomide Run3-DMSO | NM_0028<br>65 | RAB2  | RAB2,<br>member<br>RAS<br>oncogene<br>family<br>RAB2,<br>member<br>RAS   | -0.70391 Inlier  |
| siRNA-Vinblastine Run2-DMSO  | NM_0028<br>65 | RAB2  | RAB2,<br>member<br>RAS<br>oncogene<br>family<br>RAB2,<br>member<br>RAS   | -0.048659 Inlier |
| siRNA-Temozolomide Run2-DMSO | NM_0028<br>65 | RAB2  | RAB2,<br>member<br>RAS<br>oncogene<br>family<br>RAB2,<br>member<br>RAS   | 0.048659 Inlier  |
| siRNA Disorazole DMSO Run1   | NM_0028<br>65 | RAB2  | RAB2,<br>member<br>RAS<br>oncogene<br>family<br>RAB2,<br>member<br>RAS   | 0.183766 Inlier  |
| siRNA Disorazole DMSO Run2   | NM_0028<br>65 | RAB2  | RAB2,<br>member<br>RAS<br>oncogene<br>family<br>RAB2,<br>member<br>RAS   | 0.64509 Inlier   |
| siRNA-Vinblastine Run1-DMSO  | NM_0028<br>65 | RAB2  | RAB20,<br>member<br>RAS<br>oncogene<br>family<br>RAB20,<br>member<br>RAS | 1.064694 Inlier  |
| siRNA-Vinblastine Run2-DMSO  | NM_0178<br>17 | RAB20 | RAB20,<br>member<br>RAS<br>oncogene<br>family<br>RAB20,<br>member<br>RAS | -0.816271 Inlier |
| siRNA Disorazole DMSO Run1   | NM_0178<br>17 | RAB20 | RAB20,<br>member<br>RAS<br>oncogene<br>family<br>RAB20,<br>member<br>RAS | -0.795492 Inlier |
| siRNA-Temozolomide Run2-DMSO | NM_0178<br>17 | RAB20 | RAB20,<br>member<br>RAS<br>oncogene<br>family<br>RAB20,<br>member<br>RAS | -0.277061 Inlier |
| siRNA Disorazole DMSO Run3   | NM_0178<br>17 | RAB20 | RAB20,<br>member<br>RAS<br>oncogene<br>family<br>RAB20,<br>member<br>RAS | -0.046727 Inlier |

Identification of Survival Genes in Human Glioblastoma Cells Using siRNA Screening  
 Nikhil G Thaker, Fang Zhang, Peter R. McDonald, Tong Ying Shun, Michael D Lewen, Ian F. Pollack, and John S. Lazo

Molecular Pharmacology

|                              |               |       |                                               |           |        |
|------------------------------|---------------|-------|-----------------------------------------------|-----------|--------|
| siRNA-Temozolomide Run1-DMSO | NM_0178<br>17 | RAB20 | RAB20,<br>member<br>RAS<br>oncogene<br>family | 0.046727  | Inlier |
| siRNA-Temozolomide Run3-DMSO | NM_0178<br>17 | RAB20 | RAB20,<br>member<br>RAS<br>oncogene<br>family | 0.553508  | Inlier |
| siRNA Disorazole DMSO Run2   | NM_0178<br>17 | RAB20 | RAB20,<br>member<br>RAS<br>oncogene<br>family | 1.882991  | Inlier |
| siRNA-Vinblastine Run1-DMSO  | NM_0178<br>17 | RAB20 | RAB20,<br>member<br>RAS<br>oncogene<br>family | 2.093036  | Inlier |
| siRNA-Vinblastine Run2-DMSO  | NM_0149<br>99 | RAB21 | RAB21,<br>member<br>RAS<br>oncogene<br>family | -1.448498 | Inlier |
| siRNA Disorazole DMSO Run1   | NM_0149<br>99 | RAB21 | RAB21,<br>member<br>RAS<br>oncogene<br>family | -1.093719 | Inlier |
| siRNA Disorazole DMSO Run3   | NM_0149<br>99 | RAB21 | RAB21,<br>member<br>RAS<br>oncogene<br>family | -0.146708 | Inlier |
| siRNA-Temozolomide Run2-DMSO | NM_0149<br>99 | RAB21 | RAB21,<br>member<br>RAS<br>oncogene<br>family | -0.09357  | Inlier |
| siRNA-Temozolomide Run3-DMSO | NM_0149<br>99 | RAB21 | RAB21,<br>member<br>RAS<br>oncogene<br>family | 0.09357   | Inlier |
| siRNA-Temozolomide Run1-DMSO | NM_0149<br>99 | RAB21 | RAB21,<br>member<br>RAS<br>oncogene<br>family | 0.335021  | Inlier |

Identification of Survival Genes in Human Glioblastoma Cells Using siRNA Screening  
 Nikhil G Thaker, Fang Zhang, Peter R. McDonald, Tong Ying Shun, Michael D Lewen, Ian F. Pollack, and John S. Lazo

Molecular Pharmacology

|                                  |               |       |                                               |           |        |
|----------------------------------|---------------|-------|-----------------------------------------------|-----------|--------|
| siRNA Disorazole DMSO Run2       | NM_0149<br>99 | RAB21 | RAB21,<br>member<br>RAS<br>oncogene<br>family | 1.013979  | Inlier |
| siRNA-Vinblastine Run1-<br>DMSO  | NM_0149<br>99 | RAB21 | RAB21,<br>member<br>RAS<br>oncogene<br>family | 1.186599  | Inlier |
| siRNA-Temozolomide Run2-<br>DMSO | NM_1832<br>27 | RAB23 | RAB23,<br>member<br>RAS<br>oncogene<br>family | -1.394146 | Inlier |
| siRNA Disorazole DMSO Run1       | NM_1832<br>27 | RAB23 | RAB23,<br>member<br>RAS<br>oncogene<br>family | -0.800574 | Inlier |
| siRNA-Temozolomide Run3-<br>DMSO | NM_1832<br>27 | RAB23 | RAB23,<br>member<br>RAS<br>oncogene<br>family | -0.548426 | Inlier |
| siRNA Disorazole DMSO Run3       | NM_1832<br>27 | RAB23 | RAB23,<br>member<br>RAS<br>oncogene<br>family | -0.088985 | Inlier |
| siRNA-Temozolomide Run1-<br>DMSO | NM_1832<br>27 | RAB23 | RAB23,<br>member<br>RAS<br>oncogene<br>family | 0.088985  | Inlier |
| siRNA-Vinblastine Run2-<br>DMSO  | NM_1832<br>27 | RAB23 | RAB23,<br>member<br>RAS<br>oncogene<br>family | 0.122612  | Inlier |
| siRNA Disorazole DMSO Run2       | NM_1832<br>27 | RAB23 | RAB23,<br>member<br>RAS<br>oncogene<br>family | 1.560193  | Inlier |
| siRNA-Vinblastine Run1-<br>DMSO  | NM_1832<br>27 | RAB23 | RAB23,<br>member<br>RAS<br>oncogene<br>family | 2.029804  | Inlier |

Identification of Survival Genes in Human Glioblastoma Cells Using siRNA Screening  
 Nikhil G Thaker, Fang Zhang, Peter R. McDonald, Tong Ying Shun, Michael D Lewen, Ian F. Pollack, and John S. Lazo

Molecular Pharmacology

|                              |               |       |                                               |           |        |
|------------------------------|---------------|-------|-----------------------------------------------|-----------|--------|
| siRNA-Temozolomide Run2-DMSO | NM_1307<br>81 | RAB24 | RAB24,<br>member<br>RAS<br>oncogene<br>family | -0.738684 | Inlier |
| siRNA-Temozolomide Run1-DMSO | NM_1307<br>81 | RAB24 | RAB24,<br>member<br>RAS<br>oncogene<br>family | -0.731161 | Inlier |
| siRNA Disorazole DMSO Run1   | NM_1307<br>81 | RAB24 | RAB24,<br>member<br>RAS<br>oncogene<br>family | -0.460786 | Inlier |
| siRNA-Vinblastine Run2-DMSO  | NM_1307<br>81 | RAB24 | RAB24,<br>member<br>RAS<br>oncogene<br>family | -0.06213  | Inlier |
| siRNA Disorazole DMSO Run3   | NM_1307<br>81 | RAB24 | RAB24,<br>member<br>RAS<br>oncogene<br>family | 0.06213   | Inlier |
| siRNA-Temozolomide Run3-DMSO | NM_1307<br>81 | RAB24 | RAB24,<br>member<br>RAS<br>oncogene<br>family | 0.617839  | Inlier |
| siRNA Disorazole DMSO Run2   | NM_1307<br>81 | RAB24 | RAB24,<br>member<br>RAS<br>oncogene<br>family | 0.980975  | Inlier |
| siRNA-Vinblastine Run1-DMSO  | NM_1307<br>81 | RAB24 | RAB25,<br>member<br>RAS<br>oncogene<br>family | 2.251122  | Inlier |
| siRNA Disorazole DMSO Run1   | NM_0203<br>87 | RAB25 | RAB25,<br>member<br>RAS<br>oncogene<br>family | -1.803347 | Inlier |
| siRNA-Temozolomide Run3-DMSO | NM_0203<br>87 | RAB25 | RAB25,<br>member<br>RAS<br>oncogene<br>family | -0.598377 | Inlier |

Identification of Survival Genes in Human Glioblastoma Cells Using siRNA Screening  
 Nikhil G Thaker, Fang Zhang, Peter R. McDonald, Tong Ying Shun, Michael D Lewen, Ian F. Pollack, and John S. Lazo

Molecular Pharmacology

|                              |               |        |                                                |           |        |
|------------------------------|---------------|--------|------------------------------------------------|-----------|--------|
| siRNA-Temozolomide Run2-DMSO | NM_0203<br>87 | RAB25  | RAB25,<br>member<br>RAS<br>oncogene<br>family  | -0.370224 | Inlier |
| siRNA-Vinblastine Run2-DMSO  | NM_0203<br>87 | RAB25  | RAB25,<br>member<br>RAS<br>oncogene<br>family  | -0.192275 | Inlier |
| siRNA-Temozolomide Run1-DMSO | NM_0203<br>87 | RAB25  | RAB25,<br>member<br>RAS<br>oncogene<br>family  | 0.192275  | Inlier |
| siRNA Disorazole DMSO Run3   | NM_0203<br>87 | RAB25  | RAB25,<br>member<br>RAS<br>oncogene<br>family  | 0.750623  | Inlier |
| siRNA Disorazole DMSO Run2   | NM_0203<br>87 | RAB25  | RAB25,<br>member<br>RAS<br>oncogene<br>family  | 1.863995  | Inlier |
| siRNA-Vinblastine Run1-DMSO  | NM_0203<br>87 | RAB25  | RAB27A,<br>member<br>RAS<br>oncogene<br>family | 1.998696  | Inlier |
| siRNA Disorazole DMSO Run3   | NM_1832<br>36 | RAB27A | RAB27A,<br>member<br>RAS<br>oncogene<br>family | -0.825091 | Inlier |
| siRNA Disorazole DMSO Run1   | NM_1832<br>36 | RAB27A | RAB27A,<br>member<br>RAS<br>oncogene<br>family | -0.750398 | Inlier |
| siRNA-Vinblastine Run2-DMSO  | NM_1832<br>36 | RAB27A | RAB27A,<br>member<br>RAS<br>oncogene<br>family | -0.654085 | Inlier |
| siRNA-Temozolomide Run2-DMSO | NM_1832<br>36 | RAB27A | RAS<br>oncogene<br>family                      | -0.168408 | Inlier |

Identification of Survival Genes in Human Glioblastoma Cells Using siRNA Screening  
 Nikhil G Thaker, Fang Zhang, Peter R. McDonald, Tong Ying Shun, Michael D Lewen, Ian F. Pollack, and John S. Lazo

Molecular Pharmacology

|                              |               |        |                                                |           |        |
|------------------------------|---------------|--------|------------------------------------------------|-----------|--------|
| siRNA-Temozolomide Run1-DMSO | NM_1832<br>36 | RAB27A | RAB27A,<br>member<br>RAS<br>oncogene<br>family | 0.168408  | Inlier |
| siRNA-Temozolomide Run3-DMSO | NM_1832<br>36 | RAB27A | RAB27A,<br>member<br>RAS<br>oncogene<br>family | 0.309952  | Inlier |
| siRNA Disorazole DMSO Run2   | NM_1832<br>36 | RAB27A | RAB27A,<br>member<br>RAS<br>oncogene<br>family | 0.694915  | Inlier |
| siRNA-Vinblastine Run1-DMSO  | NM_1832<br>36 | RAB27A | RAB27A,<br>member<br>RAS<br>oncogene<br>family | 1.012282  | Inlier |
| siRNA Disorazole DMSO Run1   | NM_0041<br>63 | RAB27B | RAB27B,<br>member<br>RAS<br>oncogene<br>family | -0.93863  | Inlier |
| siRNA-Temozolomide Run2-DMSO | NM_0041<br>63 | RAB27B | RAB27B,<br>member<br>RAS<br>oncogene<br>family | -0.849105 | Inlier |
| siRNA-Temozolomide Run1-DMSO | NM_0041<br>63 | RAB27B | RAB27B,<br>member<br>RAS<br>oncogene<br>family | -0.492969 | Inlier |
| siRNA-Vinblastine Run2-DMSO  | NM_0041<br>63 | RAB27B | RAB27B,<br>member<br>RAS<br>oncogene<br>family | -0.321716 | Inlier |
| siRNA-Temozolomide Run3-DMSO | NM_0041<br>63 | RAB27B | RAB27B,<br>member<br>RAS<br>oncogene<br>family | 0.321716  | Inlier |
| siRNA Disorazole DMSO Run3   | NM_0041<br>63 | RAB27B | RAB27B,<br>member<br>RAS<br>oncogene<br>family | 0.499895  | Inlier |

Identification of Survival Genes in Human Glioblastoma Cells Using siRNA Screening  
 Nikhil G Thaker, Fang Zhang, Peter R. McDonald, Tong Ying Shun, Michael D Lewen, Ian F. Pollack, and John S. Lazo

Molecular Pharmacology

|                                  |               |        |                                                |           |         |
|----------------------------------|---------------|--------|------------------------------------------------|-----------|---------|
| siRNA Disorazole DMSO Run2       | NM_0041<br>63 | RAB27B | RAB27B,<br>member<br>RAS<br>oncogene<br>family | 1.147365  | Inlier  |
| siRNA-Vinblastine Run1-<br>DMSO  | NM_0041<br>63 | RAB27B | RAB27B,<br>member<br>RAS<br>oncogene<br>family | 1.380795  | Inlier  |
| siRNA Disorazole DMSO Run1       | NM_0042<br>49 | RAB28  | RAB28,<br>member<br>RAS<br>oncogene<br>family  | -5.145989 | Outlier |
| siRNA-Temozolomide Run1-<br>DMSO | NM_0042<br>49 | RAB28  | RAB28,<br>member<br>RAS<br>oncogene<br>family  | -1.048954 | Inlier  |
| siRNA-Vinblastine Run2-<br>DMSO  | NM_0042<br>49 | RAB28  | RAB28,<br>member<br>RAS<br>oncogene<br>family  | -0.545281 | Inlier  |
| siRNA-Temozolomide Run2-<br>DMSO | NM_0042<br>49 | RAB28  | RAB28,<br>member<br>RAS<br>oncogene<br>family  | -1.26E-05 | Inlier  |
| siRNA-Temozolomide Run3-<br>DMSO | NM_0042<br>49 | RAB28  | RAB28,<br>member<br>RAS<br>oncogene<br>family  | 1.08E-05  | Inlier  |
| siRNA Disorazole DMSO Run2       | NM_0042<br>49 | RAB28  | RAB28,<br>member<br>RAS<br>oncogene<br>family  | 0.502978  | Inlier  |
| siRNA-Vinblastine Run1-<br>DMSO  | NM_0042<br>49 | RAB28  | RAB28,<br>member<br>RAS<br>oncogene<br>family  | 0.803719  | Inlier  |
| siRNA Disorazole DMSO Run3       | NM_0042<br>49 | RAB28  | RAS<br>oncogene<br>family                      | 1.636053  | Inlier  |

Identification of Survival Genes in Human Glioblastoma Cells Using siRNA Screening  
 Nikhil G Thaker, Fang Zhang, Peter R. McDonald, Tong Ying Shun, Michael D Lewen, Ian F. Pollack, and John S. Lazo

Molecular Pharmacology

|                              |               |       |                                               |           |        |
|------------------------------|---------------|-------|-----------------------------------------------|-----------|--------|
| siRNA-Temozolomide Run2-DMSO | NM_0328<br>46 | RAB2B | RAB2B,<br>member<br>RAS<br>oncogene<br>family | -2.06814  | Inlier |
| siRNA Disorazole DMSO Run1   | NM_0328<br>46 | RAB2B | RAB2B,<br>member<br>RAS<br>oncogene<br>family | -1.120705 | Inlier |
| siRNA-Temozolomide Run1-DMSO | NM_0328<br>46 | RAB2B | RAB2B,<br>member<br>RAS<br>oncogene<br>family | -0.614407 | Inlier |
| siRNA-Temozolomide Run3-DMSO | NM_0328<br>46 | RAB2B | RAB2B,<br>member<br>RAS<br>oncogene<br>family | -0.309664 | Inlier |
| siRNA-Vinblastine Run2-DMSO  | NM_0328<br>46 | RAB2B | RAB2B,<br>member<br>RAS<br>oncogene<br>family | 0.309663  | Inlier |
| siRNA Disorazole DMSO Run3   | NM_0328<br>46 | RAB2B | RAB2B,<br>member<br>RAS<br>oncogene<br>family | 0.538815  | Inlier |
| siRNA Disorazole DMSO Run2   | NM_0328<br>46 | RAB2B | RAB2B,<br>member<br>RAS<br>oncogene<br>family | 0.734593  | Inlier |
| siRNA-Vinblastine Run1-DMSO  | NM_0328<br>46 | RAB2B | RAB30,<br>member<br>RAS<br>oncogene<br>family | 1.682728  | Inlier |
| siRNA-Temozolomide Run2-DMSO | NM_0144<br>88 | RAB30 | RAB30,<br>member<br>RAS<br>oncogene<br>family | -1.031427 | Inlier |
| siRNA Disorazole DMSO Run3   | NM_0144<br>88 | RAB30 | RAB30,<br>member<br>RAS<br>oncogene<br>family | -0.367203 | Inlier |



Identification of Survival Genes in Human Glioblastoma Cells Using siRNA Screening  
 Nikhil G Thaker, Fang Zhang, Peter R. McDonald, Tong Ying Shun, Michael D Lewen, Ian F. Pollack, and John S. Lazo

Molecular Pharmacology

|                              |               |       |                                               |           |        |
|------------------------------|---------------|-------|-----------------------------------------------|-----------|--------|
| siRNA-Temozolomide Run1-DMSO | NM_0144<br>88 | RAB30 | RAB30,<br>member<br>RAS<br>oncogene<br>family | -0.30788  | Inlier |
| siRNA Disorazole DMSO Run1   | NM_0144<br>88 | RAB30 | RAB30,<br>member<br>RAS<br>oncogene<br>family | -0.245796 | Inlier |
| siRNA-Vinblastine Run2-DMSO  | NM_0144<br>88 | RAB30 | RAB30,<br>member<br>RAS<br>oncogene<br>family | 0.245796  | Inlier |
| siRNA Disorazole DMSO Run2   | NM_0144<br>88 | RAB30 | RAB30,<br>member<br>RAS<br>oncogene<br>family | 0.981797  | Inlier |
| siRNA-Vinblastine Run1-DMSO  | NM_0144<br>88 | RAB30 | RAB30,<br>member<br>RAS<br>oncogene<br>family | 2.219115  | Inlier |
| siRNA-Temozolomide Run3-DMSO | NM_0144<br>88 | RAB30 | RAB30,<br>member<br>RAS<br>oncogene<br>family | 2.430869  | Inlier |
| siRNA-Temozolomide Run2-DMSO | NM_0068<br>68 | RAB31 | RAB31,<br>member<br>RAS<br>oncogene<br>family | -2.525472 | Inlier |
| siRNA-Temozolomide Run3-DMSO | NM_0068<br>68 | RAB31 | RAB31,<br>member<br>RAS<br>oncogene<br>family | -0.879875 | Inlier |
| siRNA Disorazole DMSO Run1   | NM_0068<br>68 | RAB31 | RAB31,<br>member<br>RAS<br>oncogene<br>family | -0.146157 | Inlier |
| siRNA Disorazole DMSO Run3   | NM_0068<br>68 | RAB31 | RAB31,<br>member<br>RAS<br>oncogene<br>family | -0.06785  | Inlier |

Identification of Survival Genes in Human Glioblastoma Cells Using siRNA Screening  
 Nikhil G Thaker, Fang Zhang, Peter R. McDonald, Tong Ying Shun, Michael D Lewen, Ian F. Pollack, and John S. Lazo

Molecular Pharmacology

|                              |           |       |                                   |           |         |
|------------------------------|-----------|-------|-----------------------------------|-----------|---------|
| siRNA-Vinblastine Run2-DMSO  | NM_006868 | RAB31 | RAB31, member RAS oncogene family | 0.06785   | Inlier  |
| siRNA-Temozolomide Run1-DMSO | NM_006868 | RAB31 | RAB31, member RAS oncogene family | 0.545367  | Inlier  |
| siRNA Disorazole DMSO Run2   | NM_006868 | RAB31 | RAB31, member RAS oncogene family | 0.803633  | Inlier  |
| siRNA-Vinblastine Run1-DMSO  | NM_006868 | RAB31 | RAB32, member RAS oncogene family | 3.589875  | Outlier |
| siRNA-Temozolomide Run1-DMSO | NM_006834 | RAB32 | RAB32, member RAS oncogene family | -1.988926 | Inlier  |
| siRNA-Temozolomide Run2-DMSO | NM_006834 | RAB32 | RAB32, member RAS oncogene family | -0.628597 | Inlier  |
| siRNA-Temozolomide Run3-DMSO | NM_006834 | RAB32 | RAB32, member RAS oncogene family | -0.34618  | Inlier  |
| siRNA-Vinblastine Run2-DMSO  | NM_006834 | RAB32 | RAB32, member RAS oncogene family | -0.27828  | Inlier  |
| siRNA-Vinblastine Run1-DMSO  | NM_006834 | RAB32 | RAB32, member RAS oncogene family | 0.27828   | Inlier  |
| siRNA Disorazole DMSO Run1   | NM_006834 | RAB32 | RAS oncogene family               | 0.720402  | Inlier  |

Identification of Survival Genes in Human Glioblastoma Cells Using siRNA Screening  
 Nikhil G Thaker, Fang Zhang, Peter R. McDonald, Tong Ying Shun, Michael D Lewen, Ian F. Pollack, and John S. Lazo

Molecular Pharmacology

|                                  |               |        |                                                |           |        |
|----------------------------------|---------------|--------|------------------------------------------------|-----------|--------|
| siRNA Disorazole DMSO Run3       | NM_0068<br>34 | RAB32  | RAB32,<br>member<br>RAS<br>oncogene<br>family  | 1.446363  | Inlier |
| siRNA Disorazole DMSO Run2       | NM_0068<br>34 | RAB32  | RAB32,<br>member<br>RAS<br>oncogene<br>family  | 1.631359  | Inlier |
| siRNA-Temozolomide Run2-<br>DMSO | NM_0047<br>94 | RAB33A | RAB33A,<br>member<br>RAS<br>oncogene<br>family | -2.796224 | Inlier |
| siRNA Disorazole DMSO Run1       | NM_0047<br>94 | RAB33A | RAB33A,<br>member<br>RAS<br>oncogene<br>family | -0.677218 | Inlier |
| siRNA-Temozolomide Run3-<br>DMSO | NM_0047<br>94 | RAB33A | RAB33A,<br>member<br>RAS<br>oncogene<br>family | -0.545185 | Inlier |
| siRNA-Temozolomide Run1-<br>DMSO | NM_0047<br>94 | RAB33A | RAB33A,<br>member<br>RAS<br>oncogene<br>family | -0.320947 | Inlier |
| siRNA Disorazole DMSO Run3       | NM_0047<br>94 | RAB33A | RAB33A,<br>member<br>RAS<br>oncogene<br>family | 0.320945  | Inlier |
| siRNA-Vinblastine Run2-<br>DMSO  | NM_0047<br>94 | RAB33A | RAB33A,<br>member<br>RAS<br>oncogene<br>family | 0.671782  | Inlier |
| siRNA Disorazole DMSO Run2       | NM_0047<br>94 | RAB33A | RAB33A,<br>member<br>RAS<br>oncogene<br>family | 1.699797  | Inlier |
| siRNA-Vinblastine Run1-<br>DMSO  | NM_0047<br>94 | RAB33A | RAB33A,<br>member<br>RAS<br>oncogene<br>family | 2.659624  | Inlier |

Identification of Survival Genes in Human Glioblastoma Cells Using siRNA Screening  
 Nikhil G Thaker, Fang Zhang, Peter R. McDonald, Tong Ying Shun, Michael D Lewen, Ian F. Pollack, and John S. Lazo

Molecular Pharmacology

|                              |               |        |                                                |           |         |
|------------------------------|---------------|--------|------------------------------------------------|-----------|---------|
| siRNA-Temozolomide Run2-DMSO | NM_0312<br>96 | RAB33B | RAB33B,<br>member<br>RAS<br>oncogene<br>family | -1.332033 | Inlier  |
| siRNA-Vinblastine Run2-DMSO  | NM_0312<br>96 | RAB33B | RAB33B,<br>member<br>RAS<br>oncogene<br>family | -0.678658 | Inlier  |
| siRNA Disorazole DMSO Run1   | NM_0312<br>96 | RAB33B | RAB33B,<br>member<br>RAS<br>oncogene<br>family | -0.63558  | Inlier  |
| siRNA-Temozolomide Run1-DMSO | NM_0312<br>96 | RAB33B | RAB33B,<br>member<br>RAS<br>oncogene<br>family | -0.002015 | Inlier  |
| siRNA Disorazole DMSO Run3   | NM_0312<br>96 | RAB33B | RAB33B,<br>member<br>RAS<br>oncogene<br>family | 0.002015  | Inlier  |
| siRNA-Temozolomide Run3-DMSO | NM_0312<br>96 | RAB33B | RAB33B,<br>member<br>RAS<br>oncogene<br>family | 0.670342  | Inlier  |
| siRNA Disorazole DMSO Run2   | NM_0312<br>96 | RAB33B | RAB33B,<br>member<br>RAS<br>oncogene<br>family | 1.370517  | Inlier  |
| siRNA-Vinblastine Run1-DMSO  | NM_0312<br>96 | RAB33B | RAB34,<br>member<br>RAS<br>oncogene<br>family  | 2.097946  | Inlier  |
| siRNA-Vinblastine Run2-DMSO  | NM_0319<br>34 | RAB34  | RAB34,<br>member<br>RAS<br>oncogene<br>family  | -4.497844 | Outlier |
| siRNA Disorazole DMSO Run3   | NM_0319<br>34 | RAB34  | RAB34,<br>member<br>RAS<br>oncogene<br>family  | -2.121773 | Inlier  |

Identification of Survival Genes in Human Glioblastoma Cells Using siRNA Screening  
 Nikhil G Thaker, Fang Zhang, Peter R. McDonald, Tong Ying Shun, Michael D Lewen, Ian F. Pollack, and John S. Lazo

Molecular Pharmacology

|                                  |               |       |                                               |           |        |
|----------------------------------|---------------|-------|-----------------------------------------------|-----------|--------|
| siRNA Disorazole DMSO Run1       | NM_0319<br>34 | RAB34 | RAB34,<br>member<br>RAS<br>oncogene<br>family | -0.678704 | Inlier |
| siRNA-Temozolomide Run3-<br>DMSO | NM_0319<br>34 | RAB34 | RAB34,<br>member<br>RAS<br>oncogene<br>family | -0.016714 | Inlier |
| siRNA Disorazole DMSO Run2       | NM_0319<br>34 | RAB34 | RAB34,<br>member<br>RAS<br>oncogene<br>family | 0.016713  | Inlier |
| siRNA-Temozolomide Run2-<br>DMSO | NM_0319<br>34 | RAB34 | RAB34,<br>member<br>RAS<br>oncogene<br>family | 0.625407  | Inlier |
| siRNA-Vinblastine Run1-<br>DMSO  | NM_0319<br>34 | RAB34 | RAB34,<br>member<br>RAS<br>oncogene<br>family | 0.670296  | Inlier |
| siRNA-Temozolomide Run1-<br>DMSO | NM_0319<br>34 | RAB34 | RAB35,<br>member<br>RAS<br>oncogene<br>family | 1.223386  | Inlier |
| siRNA Disorazole DMSO Run3       | NM_0068<br>61 | RAB35 | RAB35,<br>member<br>RAS<br>oncogene<br>family | -0.78998  | Inlier |
| siRNA-Vinblastine Run2-<br>DMSO  | NM_0068<br>61 | RAB35 | RAB35,<br>member<br>RAS<br>oncogene<br>family | -0.55902  | Inlier |
| siRNA-Temozolomide Run1-<br>DMSO | NM_0068<br>61 | RAB35 | RAB35,<br>member<br>RAS<br>oncogene<br>family | -0.446941 | Inlier |
| siRNA-Temozolomide Run2-<br>DMSO | NM_0068<br>61 | RAB35 | RAS<br>oncogene<br>family                     | -0.411126 | Inlier |

Identification of Survival Genes in Human Glioblastoma Cells Using siRNA Screening  
 Nikhil G Thaker, Fang Zhang, Peter R. McDonald, Tong Ying Shun, Michael D Lewen, Ian F. Pollack, and John S. Lazo

Molecular Pharmacology

|                                  |               |       |                                               |           |         |
|----------------------------------|---------------|-------|-----------------------------------------------|-----------|---------|
| siRNA Disorazole DMSO Run1       | NM_0068<br>61 | RAB35 | RAB35,<br>member<br>RAS<br>oncogene<br>family | 0.411126  | Inlier  |
| siRNA-Temozolomide Run3-<br>DMSO | NM_0068<br>61 | RAB35 | RAB35,<br>member<br>RAS<br>oncogene<br>family | 1.680436  | Inlier  |
| siRNA Disorazole DMSO Run2       | NM_0068<br>61 | RAB35 | RAB35,<br>member<br>RAS<br>oncogene<br>family | 5.483197  | Outlier |
| siRNA-Vinblastine Run1-<br>DMSO  | NM_0068<br>61 | RAB35 | RAB35,<br>member<br>RAS<br>oncogene<br>family | 8.903632  | Outlier |
| siRNA Disorazole DMSO Run3       | NM_0049<br>14 | RAB36 | RAB36,<br>member<br>RAS<br>oncogene<br>family | -1.687944 | Inlier  |
| siRNA-Vinblastine Run2-<br>DMSO  | NM_0049<br>14 | RAB36 | RAB36,<br>member<br>RAS<br>oncogene<br>family | -1.155182 | Inlier  |
| siRNA Disorazole DMSO Run1       | NM_0049<br>14 | RAB36 | RAB36,<br>member<br>RAS<br>oncogene<br>family | -0.117548 | Inlier  |
| siRNA-Temozolomide Run2-<br>DMSO | NM_0049<br>14 | RAB36 | RAB36,<br>member<br>RAS<br>oncogene<br>family | -0.11599  | Inlier  |
| siRNA-Vinblastine Run1-<br>DMSO  | NM_0049<br>14 | RAB36 | RAB36,<br>member<br>RAS<br>oncogene<br>family | 0.11599   | Inlier  |
| siRNA-Temozolomide Run3-<br>DMSO | NM_0049<br>14 | RAB36 | RAB36,<br>member<br>RAS<br>oncogene<br>family | 0.56812   | Inlier  |

Identification of Survival Genes in Human Glioblastoma Cells Using siRNA Screening  
 Nikhil G Thaker, Fang Zhang, Peter R. McDonald, Tong Ying Shun, Michael D Lewen, Ian F. Pollack, and John S. Lazo

Molecular Pharmacology

|                              |               |       |                                               |           |        |
|------------------------------|---------------|-------|-----------------------------------------------|-----------|--------|
| siRNA-Temozolomide Run1-DMSO | NM_0049<br>14 | RAB36 | RAB36,<br>member<br>RAS<br>oncogene<br>family | 0.78088   | Inlier |
| siRNA Disorazole DMSO Run2   | NM_0049<br>14 | RAB36 | RAB36,<br>member<br>RAS<br>oncogene<br>family | 0.803642  | Inlier |
| siRNA-Vinblastine Run2-DMSO  | NM_1757<br>38 | RAB37 | RAB37,<br>member<br>RAS<br>oncogene<br>family | -2.299711 | Inlier |
| siRNA Disorazole DMSO Run3   | NM_1757<br>38 | RAB37 | RAB37,<br>member<br>RAS<br>oncogene<br>family | -1.519003 | Inlier |
| siRNA Disorazole DMSO Run1   | NM_1757<br>38 | RAB37 | RAB37,<br>member<br>RAS<br>oncogene<br>family | -0.532677 | Inlier |
| siRNA Disorazole DMSO Run2   | NM_1757<br>38 | RAB37 | RAB37,<br>member<br>RAS<br>oncogene<br>family | -0.186514 | Inlier |
| siRNA-Temozolomide Run2-DMSO | NM_1757<br>38 | RAB37 | RAB37,<br>member<br>RAS<br>oncogene<br>family | 0.186514  | Inlier |
| siRNA-Vinblastine Run1-DMSO  | NM_1757<br>38 | RAB37 | RAB37,<br>member<br>RAS<br>oncogene<br>family | 0.53218   | Inlier |
| siRNA-Temozolomide Run3-DMSO | NM_1757<br>38 | RAB37 | RAB37,<br>member<br>RAS<br>oncogene<br>family | 0.816323  | Inlier |
| siRNA-Temozolomide Run1-DMSO | NM_1757<br>38 | RAB37 | RAS<br>oncogene<br>family                     | 1.036993  | Inlier |

Identification of Survival Genes in Human Glioblastoma Cells Using siRNA Screening  
 Nikhil G Thaker, Fang Zhang, Peter R. McDonald, Tong Ying Shun, Michael D Lewen, Ian F. Pollack, and John S. Lazo

Molecular Pharmacology

|                                  |               |        |                                                |           |        |
|----------------------------------|---------------|--------|------------------------------------------------|-----------|--------|
| siRNA Disorazole DMSO Run3       | NM_0223<br>37 | RAB38  | RAB38,<br>member<br>RAS<br>oncogene<br>family  | -2.785897 | Inlier |
| siRNA-Vinblastine Run2-<br>DMSO  | NM_0223<br>37 | RAB38  | RAB38,<br>member<br>RAS<br>oncogene<br>family  | -1.765629 | Inlier |
| siRNA Disorazole DMSO Run1       | NM_0223<br>37 | RAB38  | RAB38,<br>member<br>RAS<br>oncogene<br>family  | -0.634761 | Inlier |
| siRNA-Temozolomide Run3-<br>DMSO | NM_0223<br>37 | RAB38  | RAB38,<br>member<br>RAS<br>oncogene<br>family  | -0.258585 | Inlier |
| siRNA-Temozolomide Run2-<br>DMSO | NM_0223<br>37 | RAB38  | RAB38,<br>member<br>RAS<br>oncogene<br>family  | 0.258585  | Inlier |
| siRNA-Vinblastine Run1-<br>DMSO  | NM_0223<br>37 | RAB38  | RAB38,<br>member<br>RAS<br>oncogene<br>family  | 0.559815  | Inlier |
| siRNA Disorazole DMSO Run2       | NM_0223<br>37 | RAB38  | RAB38,<br>member<br>RAS<br>oncogene<br>family  | 0.714239  | Inlier |
| siRNA-Temozolomide Run1-<br>DMSO | NM_0223<br>37 | RAB38  | RAB39B,<br>member<br>RAS<br>oncogene<br>family | 1.724927  | Inlier |
| siRNA-Vinblastine Run2-<br>DMSO  | NM_1719<br>98 | RAB39B | RAB39B,<br>member<br>RAS<br>oncogene<br>family | -2.689179 | Inlier |
| siRNA Disorazole DMSO Run3       | NM_1719<br>98 | RAB39B | RAB39B,<br>member<br>RAS<br>oncogene<br>family | -1.743203 | Inlier |



Identification of Survival Genes in Human Glioblastoma Cells Using siRNA Screening  
 Nikhil G Thaker, Fang Zhang, Peter R. McDonald, Tong Ying Shun, Michael D Lewen, Ian F. Pollack, and John S. Lazo

Molecular Pharmacology

|                                  |               |        |                                                |           |        |
|----------------------------------|---------------|--------|------------------------------------------------|-----------|--------|
| siRNA Disorazole DMSO Run1       | NM_1719<br>98 | RAB39B | RAB39B,<br>member<br>RAS<br>oncogene<br>family | -0.488607 | Inlier |
| siRNA Disorazole DMSO Run2       | NM_1719<br>98 | RAB39B | RAB39B,<br>member<br>RAS<br>oncogene<br>family | -0.062028 | Inlier |
| siRNA-Temozolomide Run2-<br>DMSO | NM_1719<br>98 | RAB39B | RAB39B,<br>member<br>RAS<br>oncogene<br>family | 0.062027  | Inlier |
| siRNA-Temozolomide Run3-<br>DMSO | NM_1719<br>98 | RAB39B | RAB39B,<br>member<br>RAS<br>oncogene<br>family | 0.534037  | Inlier |
| siRNA-Temozolomide Run1-<br>DMSO | NM_1719<br>98 | RAB39B | RAB39B,<br>member<br>RAS<br>oncogene<br>family | 0.814963  | Inlier |
| siRNA-Vinblastine Run1-<br>DMSO  | NM_1719<br>98 | RAB39B | RAB3A,<br>member<br>RAS<br>oncogene<br>family  | 1.10579   | Inlier |
| siRNA Disorazole DMSO Run1       | NM_0028<br>66 | RAB3A  | RAB3A,<br>member<br>RAS<br>oncogene<br>family  | -1.928376 | Inlier |
| siRNA-Temozolomide Run2-<br>DMSO | NM_0028<br>66 | RAB3A  | RAB3A,<br>member<br>RAS<br>oncogene<br>family  | -0.836789 | Inlier |
| siRNA-Temozolomide Run3-<br>DMSO | NM_0028<br>66 | RAB3A  | RAB3A,<br>member<br>RAS<br>oncogene<br>family  | -0.512211 | Inlier |
| siRNA-Vinblastine Run2-<br>DMSO  | NM_0028<br>66 | RAB3A  | RAS<br>oncogene<br>family                      | -0.017965 | Inlier |

Identification of Survival Genes in Human Glioblastoma Cells Using siRNA Screening  
 Nikhil G Thaker, Fang Zhang, Peter R. McDonald, Tong Ying Shun, Michael D Lewen, Ian F. Pollack, and John S. Lazo

Molecular Pharmacology

|                                  |               |       |                                               |           |        |
|----------------------------------|---------------|-------|-----------------------------------------------|-----------|--------|
| siRNA Disorazole DMSO Run3       | NM_0028<br>66 | RAB3A | RAB3A,<br>member<br>RAS<br>oncogene<br>family | 0.017965  | Inlier |
| siRNA-Temozolomide Run1-<br>DMSO | NM_0028<br>66 | RAB3A | RAB3A,<br>member<br>RAS<br>oncogene<br>family | 0.35522   | Inlier |
| siRNA-Vinblastine Run1-<br>DMSO  | NM_0028<br>66 | RAB3A | RAB3A,<br>member<br>RAS<br>oncogene<br>family | 2.413133  | Inlier |
| siRNA Disorazole DMSO Run2       | NM_0028<br>66 | RAB3A | RAB3A,<br>member<br>RAS<br>oncogene<br>family | 3.121415  | Inlier |
| siRNA-Temozolomide Run3-<br>DMSO | NM_0028<br>67 | RAB3B | RAB3B,<br>member<br>RAS<br>oncogene<br>family | -2.555373 | Inlier |
| siRNA-Temozolomide Run2-<br>DMSO | NM_0028<br>67 | RAB3B | RAB3B,<br>member<br>RAS<br>oncogene<br>family | -0.798652 | Inlier |
| siRNA Disorazole DMSO Run1       | NM_0028<br>67 | RAB3B | RAB3B,<br>member<br>RAS<br>oncogene<br>family | -0.550348 | Inlier |
| siRNA-Temozolomide Run1-<br>DMSO | NM_0028<br>67 | RAB3B | RAB3B,<br>member<br>RAS<br>oncogene<br>family | -0.414952 | Inlier |
| siRNA-Vinblastine Run2-<br>DMSO  | NM_0028<br>67 | RAB3B | RAB3B,<br>member<br>RAS<br>oncogene<br>family | 0.414952  | Inlier |
| siRNA Disorazole DMSO Run3       | NM_0028<br>67 | RAB3B | RAB3B,<br>member<br>RAS<br>oncogene<br>family | 0.531015  | Inlier |

Identification of Survival Genes in Human Glioblastoma Cells Using siRNA Screening  
 Nikhil G Thaker, Fang Zhang, Peter R. McDonald, Tong Ying Shun, Michael D Lewen, Ian F. Pollack, and John S. Lazo

Molecular Pharmacology

|                              |               |       |                                               |           |         |
|------------------------------|---------------|-------|-----------------------------------------------|-----------|---------|
| siRNA-Vinblastine Run1-DMSO  | NM_0028<br>67 | RAB3B | RAB3B,<br>member<br>RAS<br>oncogene<br>family | 0.915331  | Inlier  |
| siRNA Disorazole DMSO Run2   | NM_0028<br>67 | RAB3B | RAB3B,<br>member<br>RAS<br>oncogene<br>family | 2.538882  | Inlier  |
| siRNA-Temozolomide Run3-DMSO | NM_1384<br>53 | RAB3C | RAB3C,<br>member<br>RAS<br>oncogene<br>family | -4.061152 | Outlier |
| siRNA-Temozolomide Run2-DMSO | NM_1384<br>53 | RAB3C | RAB3C,<br>member<br>RAS<br>oncogene<br>family | -0.557464 | Inlier  |
| siRNA Disorazole DMSO Run3   | NM_1384<br>53 | RAB3C | RAB3C,<br>member<br>RAS<br>oncogene<br>family | -0.50682  | Inlier  |
| siRNA-Temozolomide Run1-DMSO | NM_1384<br>53 | RAB3C | RAB3C,<br>member<br>RAS<br>oncogene<br>family | -0.225097 | Inlier  |
| siRNA Disorazole DMSO Run1   | NM_1384<br>53 | RAB3C | RAB3C,<br>member<br>RAS<br>oncogene<br>family | 0.225096  | Inlier  |
| siRNA-Vinblastine Run2-DMSO  | NM_1384<br>53 | RAB3C | RAB3C,<br>member<br>RAS<br>oncogene<br>family | 0.791536  | Inlier  |
| siRNA-Vinblastine Run1-DMSO  | NM_1384<br>53 | RAB3C | RAB3C,<br>member<br>RAS<br>oncogene<br>family | 3.039914  | Inlier  |
| siRNA Disorazole DMSO Run2   | NM_1384<br>53 | RAB3C | RAS<br>oncogene<br>family                     | 5.429546  | Outlier |

Identification of Survival Genes in Human Glioblastoma Cells Using siRNA Screening  
 Nikhil G Thaker, Fang Zhang, Peter R. McDonald, Tong Ying Shun, Michael D Lewen, Ian F. Pollack, and John S. Lazo

Molecular Pharmacology

|                              |               |        |                                                |           |         |
|------------------------------|---------------|--------|------------------------------------------------|-----------|---------|
| siRNA-Temozolomide Run3-DMSO | NM_0042<br>83 | RAB3D  | RAB3D,<br>member<br>RAS<br>oncogene<br>family  | -4.644991 | Outlier |
| siRNA-Temozolomide Run2-DMSO | NM_0042<br>83 | RAB3D  | RAB3D,<br>member<br>RAS<br>oncogene<br>family  | -0.449279 | Inlier  |
| siRNA Disorazole DMSO Run3   | NM_0042<br>83 | RAB3D  | RAB3D,<br>member<br>RAS<br>oncogene<br>family  | -0.327048 | Inlier  |
| siRNA Disorazole DMSO Run1   | NM_0042<br>83 | RAB3D  | RAB3D,<br>member<br>RAS<br>oncogene<br>family  | -0.089542 | Inlier  |
| siRNA-Vinblastine Run2-DMSO  | NM_0042<br>83 | RAB3D  | RAB3D,<br>member<br>RAS<br>oncogene<br>family  | 0.089541  | Inlier  |
| siRNA-Temozolomide Run1-DMSO | NM_0042<br>83 | RAB3D  | RAB3D,<br>member<br>RAS<br>oncogene<br>family  | 0.899721  | Inlier  |
| siRNA-Vinblastine Run1-DMSO  | NM_0042<br>83 | RAB3D  | RAB3D,<br>member<br>RAS<br>oncogene<br>family  | 2.523257  | Inlier  |
| siRNA Disorazole DMSO Run2   | NM_0042<br>83 | RAB3D  | RAB3D,<br>member<br>RAS<br>oncogene<br>family  | 6.584134  | Outlier |
| siRNA-Vinblastine Run2-DMSO  | NM_0808<br>79 | RAB40A | RAB40A,<br>member<br>RAS<br>oncogene<br>family | -1.057823 | Inlier  |
| siRNA Disorazole DMSO Run3   | NM_0808<br>79 | RAB40A | RAB40A,<br>member<br>RAS<br>oncogene<br>family | -0.801073 | Inlier  |

Identification of Survival Genes in Human Glioblastoma Cells Using siRNA Screening  
 Nikhil G Thaker, Fang Zhang, Peter R. McDonald, Tong Ying Shun, Michael D Lewen, Ian F. Pollack, and John S. Lazo

Molecular Pharmacology

|                                  |               |        |                                                |           |        |
|----------------------------------|---------------|--------|------------------------------------------------|-----------|--------|
| siRNA Disorazole DMSO Run1       | NM_0808<br>79 | RAB40A | RAB40A,<br>member<br>RAS<br>oncogene<br>family | -0.726112 | Inlier |
| siRNA-Temozolomide Run2-<br>DMSO | NM_0808<br>79 | RAB40A | RAB40A,<br>member<br>RAS<br>oncogene<br>family | -0.410849 | Inlier |
| siRNA-Temozolomide Run3-<br>DMSO | NM_0808<br>79 | RAB40A | RAB40A,<br>member<br>RAS<br>oncogene<br>family | 0.410849  | Inlier |
| siRNA Disorazole DMSO Run2       | NM_0808<br>79 | RAB40A | RAB40A,<br>member<br>RAS<br>oncogene<br>family | 0.429542  | Inlier |
| siRNA-Temozolomide Run1-<br>DMSO | NM_0808<br>79 | RAB40A | RAB40A,<br>member<br>RAS<br>oncogene<br>family | 0.622888  | Inlier |
| siRNA-Vinblastine Run1-<br>DMSO  | NM_0808<br>79 | RAB40A | RAB40B,<br>member<br>RAS<br>oncogene<br>family | 0.985301  | Inlier |
| siRNA-Vinblastine Run2-<br>DMSO  | NM_0068<br>22 | RAB40B | RAB40B,<br>member<br>RAS<br>oncogene<br>family | -0.752618 | Inlier |
| siRNA Disorazole DMSO Run1       | NM_0068<br>22 | RAB40B | RAB40B,<br>member<br>RAS<br>oncogene<br>family | -0.713129 | Inlier |
| siRNA Disorazole DMSO Run3       | NM_0068<br>22 | RAB40B | RAB40B,<br>member<br>RAS<br>oncogene<br>family | -0.635871 | Inlier |
| siRNA-Temozolomide Run2-<br>DMSO | NM_0068<br>22 | RAB40B | RAS<br>oncogene<br>family                      | -0.452637 | Inlier |

Identification of Survival Genes in Human Glioblastoma Cells Using siRNA Screening  
 Nikhil G Thaker, Fang Zhang, Peter R. McDonald, Tong Ying Shun, Michael D Lewen, Ian F. Pollack, and John S. Lazo

Molecular Pharmacology

|                              |               |        |                                                |           |        |
|------------------------------|---------------|--------|------------------------------------------------|-----------|--------|
| siRNA-Temozolomide Run3-DMSO | NM_0068<br>22 | RAB40B | RAB40B,<br>member<br>RAS<br>oncogene<br>family | 0.452637  | Inlier |
| siRNA-Temozolomide Run1-DMSO | NM_0068<br>22 | RAB40B | RAB40B,<br>member<br>RAS<br>oncogene<br>family | 0.485339  | Inlier |
| siRNA-Vinblastine Run1-DMSO  | NM_0068<br>22 | RAB40B | RAB40B,<br>member<br>RAS<br>oncogene<br>family | 2.392658  | Inlier |
| siRNA Disorazole DMSO Run2   | NM_0068<br>22 | RAB40B | RAB40C,<br>member<br>RAS<br>oncogene<br>family | 2.830347  | Inlier |
| siRNA Disorazole DMSO Run1   | NM_0211<br>68 | RAB40C | RAB40C,<br>member<br>RAS<br>oncogene<br>family | -0.700808 | Inlier |
| siRNA-Vinblastine Run2-DMSO  | NM_0211<br>68 | RAB40C | RAB40C,<br>member<br>RAS<br>oncogene<br>family | -0.648192 | Inlier |
| siRNA Disorazole DMSO Run3   | NM_0211<br>68 | RAB40C | RAB40C,<br>member<br>RAS<br>oncogene<br>family | -0.552871 | Inlier |
| siRNA-Temozolomide Run2-DMSO | NM_0211<br>68 | RAB40C | RAB40C,<br>member<br>RAS<br>oncogene<br>family | -0.161679 | Inlier |
| siRNA-Temozolomide Run1-DMSO | NM_0211<br>68 | RAB40C | RAB40C,<br>member<br>RAS<br>oncogene<br>family | 0.161679  | Inlier |
| siRNA-Temozolomide Run3-DMSO | NM_0211<br>68 | RAB40C | RAB40C,<br>member<br>RAS<br>oncogene<br>family | 1.314867  | Inlier |

Identification of Survival Genes in Human Glioblastoma Cells Using siRNA Screening  
 Nikhil G Thaker, Fang Zhang, Peter R. McDonald, Tong Ying Shun, Michael D Lewen, Ian F. Pollack, and John S. Lazo

Molecular Pharmacology

|                                  |               |        |                                                |           |         |
|----------------------------------|---------------|--------|------------------------------------------------|-----------|---------|
| siRNA Disorazole DMSO Run2       | NM_0211<br>68 | RAB40C | RAB40C,<br>member<br>RAS<br>oncogene<br>family | 3.039823  | Inlier  |
| siRNA-Vinblastine Run1-<br>DMSO  | NM_0211<br>68 | RAB40C | RAB40C,<br>member<br>RAS<br>oncogene<br>family | 4.206178  | Outlier |
| siRNA-Temozolomide Run3-<br>DMSO | NM_0045<br>78 | RAB4A  | RAB4A,<br>member<br>RAS<br>oncogene<br>family  | -0.693061 | Inlier  |
| siRNA-Temozolomide Run2-<br>DMSO | NM_0045<br>78 | RAB4A  | RAB4A,<br>member<br>RAS<br>oncogene<br>family  | -0.655939 | Inlier  |
| siRNA-Vinblastine Run2-<br>DMSO  | NM_0045<br>78 | RAB4A  | RAB4A,<br>member<br>RAS<br>oncogene<br>family  | -0.087332 | Inlier  |
| siRNA Disorazole DMSO Run1       | NM_0045<br>78 | RAB4A  | RAB4A,<br>member<br>RAS<br>oncogene<br>family  | -0.084861 | Inlier  |
| siRNA Disorazole DMSO Run3       | NM_0045<br>78 | RAB4A  | RAB4A,<br>member<br>RAS<br>oncogene<br>family  | 0.084861  | Inlier  |
| siRNA-Temozolomide Run1-<br>DMSO | NM_0045<br>78 | RAB4A  | RAB4A,<br>member<br>RAS<br>oncogene<br>family  | 1.011122  | Inlier  |
| siRNA-Vinblastine Run1-<br>DMSO  | NM_0045<br>78 | RAB4A  | RAB4A,<br>member<br>RAS<br>oncogene<br>family  | 2.058699  | Inlier  |
| siRNA Disorazole DMSO Run2       | NM_0045<br>78 | RAB4A  | RAB4A,<br>member<br>RAS<br>oncogene<br>family  | 2.48989   | Inlier  |

Identification of Survival Genes in Human Glioblastoma Cells Using siRNA Screening

Nikhil G Thaker, Fang Zhang, Peter R. McDonald, Tong Ying Shun, Michael D Lewen, Ian F. Pollack, and John S. Lazo

Molecular Pharmacology

|                              |               |       |                                               |           |        |
|------------------------------|---------------|-------|-----------------------------------------------|-----------|--------|
| siRNA-Temozolomide Run3-DMSO | NM_0161<br>54 | RAB4B | RAB4B,<br>member<br>RAS<br>oncogene<br>family | -1.151487 | Inlier |
| siRNA-Temozolomide Run2-DMSO | NM_0161<br>54 | RAB4B | RAB4B,<br>member<br>RAS<br>oncogene<br>family | -0.801982 | Inlier |
| siRNA Disorazole DMSO Run1   | NM_0161<br>54 | RAB4B | RAB4B,<br>member<br>RAS<br>oncogene<br>family | -0.547018 | Inlier |
| siRNA-Vinblastine Run2-DMSO  | NM_0161<br>54 | RAB4B | RAB4B,<br>member<br>RAS<br>oncogene<br>family | -0.428681 | Inlier |
| siRNA-Temozolomide Run1-DMSO | NM_0161<br>54 | RAB4B | RAB4B,<br>member<br>RAS<br>oncogene<br>family | 0.428681  | Inlier |
| siRNA Disorazole DMSO Run3   | NM_0161<br>54 | RAB4B | RAB4B,<br>member<br>RAS<br>oncogene<br>family | 0.495939  | Inlier |
| siRNA-Vinblastine Run1-DMSO  | NM_0161<br>54 | RAB4B | RAB4B,<br>member<br>RAS<br>oncogene<br>family | 2.397931  | Inlier |
| siRNA Disorazole DMSO Run2   | NM_0161<br>54 | RAB4B | RAB4B,<br>member<br>RAS<br>oncogene<br>family | 2.606282  | Inlier |
| siRNA-Vinblastine Run2-DMSO  | NM_0041<br>62 | RAB5A | RAB5A,<br>member<br>RAS<br>oncogene<br>family | -1.557296 | Inlier |
| siRNA Disorazole DMSO Run3   | NM_0041<br>62 | RAB5A | RAB5A,<br>member<br>RAS<br>oncogene<br>family | -1.322862 | Inlier |



Identification of Survival Genes in Human Glioblastoma Cells Using siRNA Screening  
 Nikhil G Thaker, Fang Zhang, Peter R. McDonald, Tong Ying Shun, Michael D Lewen, Ian F. Pollack, and John S. Lazo

Molecular Pharmacology

|                                  |               |       |                                               |           |        |
|----------------------------------|---------------|-------|-----------------------------------------------|-----------|--------|
| siRNA Disorazole DMSO Run1       | NM_0041<br>62 | RAB5A | RAB5A,<br>member<br>RAS<br>oncogene<br>family | -1.286668 | Inlier |
| siRNA-Temozolomide Run3-<br>DMSO | NM_0041<br>62 | RAB5A | RAB5A,<br>member<br>RAS<br>oncogene<br>family | -0.081834 | Inlier |
| siRNA-Temozolomide Run1-<br>DMSO | NM_0041<br>62 | RAB5A | RAB5A,<br>member<br>RAS<br>oncogene<br>family | 0.081835  | Inlier |
| siRNA-Temozolomide Run2-<br>DMSO | NM_0041<br>62 | RAB5A | RAB5A,<br>member<br>RAS<br>oncogene<br>family | 0.198717  | Inlier |
| siRNA Disorazole DMSO Run2       | NM_0041<br>62 | RAB5A | RAB5A,<br>member<br>RAS<br>oncogene<br>family | 0.288662  | Inlier |
| siRNA-Vinblastine Run1-<br>DMSO  | NM_0041<br>62 | RAB5A | RAB5B,<br>member<br>RAS<br>oncogene<br>family | 1.060338  | Inlier |
| siRNA Disorazole DMSO Run3       | NM_0028<br>68 | RAB5B | RAB5B,<br>member<br>RAS<br>oncogene<br>family | -1.07152  | Inlier |
| siRNA-Vinblastine Run2-<br>DMSO  | NM_0028<br>68 | RAB5B | RAB5B,<br>member<br>RAS<br>oncogene<br>family | -0.987549 | Inlier |
| siRNA Disorazole DMSO Run2       | NM_0028<br>68 | RAB5B | RAB5B,<br>member<br>RAS<br>oncogene<br>family | -0.651    | Inlier |
| siRNA-Temozolomide Run2-<br>DMSO | NM_0028<br>68 | RAB5B | RAB5B,<br>member<br>RAS<br>oncogene<br>family | -0.509991 | Inlier |

Identification of Survival Genes in Human Glioblastoma Cells Using siRNA Screening  
 Nikhil G Thaker, Fang Zhang, Peter R. McDonald, Tong Ying Shun, Michael D Lewen, Ian F. Pollack, and John S. Lazo

Molecular Pharmacology

|                                  |               |       |                                               |           |        |
|----------------------------------|---------------|-------|-----------------------------------------------|-----------|--------|
| siRNA Disorazole DMSO Run1       | NM_0028<br>68 | RAB5B | RAB5B,<br>member<br>RAS<br>oncogene<br>family | 0.509991  | Inlier |
| siRNA-Temozolomide Run3-<br>DMSO | NM_0028<br>68 | RAB5B | RAB5B,<br>member<br>RAS<br>oncogene<br>family | 0.54854   | Inlier |
| siRNA-Vinblastine Run1-<br>DMSO  | NM_0028<br>68 | RAB5B | RAB5B,<br>member<br>RAS<br>oncogene<br>family | 0.698     | Inlier |
| siRNA-Temozolomide Run1-<br>DMSO | NM_0028<br>68 | RAB5B | RAB5C,<br>member<br>RAS<br>oncogene<br>family | 0.801572  | Inlier |
| siRNA-Vinblastine Run2-<br>DMSO  | NM_0045<br>83 | RAB5C | RAB5C,<br>member<br>RAS<br>oncogene<br>family | -0.78484  | Inlier |
| siRNA Disorazole DMSO Run1       | NM_0045<br>83 | RAB5C | RAB5C,<br>member<br>RAS<br>oncogene<br>family | -0.56416  | Inlier |
| siRNA Disorazole DMSO Run3       | NM_0045<br>83 | RAB5C | RAB5C,<br>member<br>RAS<br>oncogene<br>family | -0.37199  | Inlier |
| siRNA-Temozolomide Run2-<br>DMSO | NM_0045<br>83 | RAB5C | RAB5C,<br>member<br>RAS<br>oncogene<br>family | -0.147673 | Inlier |
| siRNA-Temozolomide Run1-<br>DMSO | NM_0045<br>83 | RAB5C | RAB5C,<br>member<br>RAS<br>oncogene<br>family | 0.147673  | Inlier |
| siRNA-Temozolomide Run3-<br>DMSO | NM_0045<br>83 | RAB5C | RAS<br>oncogene<br>family                     | 0.966312  | Inlier |

Identification of Survival Genes in Human Glioblastoma Cells Using siRNA Screening  
 Nikhil G Thaker, Fang Zhang, Peter R. McDonald, Tong Ying Shun, Michael D Lewen, Ian F. Pollack, and John S. Lazo

Molecular Pharmacology

|                                  |               |       |                                               |           |         |
|----------------------------------|---------------|-------|-----------------------------------------------|-----------|---------|
| siRNA Disorazole DMSO Run2       | NM_0045<br>83 | RAB5C | RAB5C,<br>member<br>RAS<br>oncogene<br>family | 1.88172   | Inlier  |
| siRNA-Vinblastine Run1-<br>DMSO  | NM_0045<br>83 | RAB5C | RAB5C,<br>member<br>RAS<br>oncogene<br>family | 2.010625  | Inlier  |
| siRNA-Temozolomide Run2-<br>DMSO | NM_1988<br>96 | RAB6A | RAB6A,<br>member<br>RAS<br>oncogene<br>family | -1.429366 | Inlier  |
| siRNA Disorazole DMSO Run1       | NM_1988<br>96 | RAB6A | RAB6A,<br>member<br>RAS<br>oncogene<br>family | -0.80029  | Inlier  |
| siRNA Disorazole DMSO Run3       | NM_1988<br>96 | RAB6A | RAB6A,<br>member<br>RAS<br>oncogene<br>family | -0.54871  | Inlier  |
| siRNA-Vinblastine Run2-<br>DMSO  | NM_1988<br>96 | RAB6A | RAB6A,<br>member<br>RAS<br>oncogene<br>family | -0.395647 | Inlier  |
| siRNA-Temozolomide Run1-<br>DMSO | NM_1988<br>96 | RAB6A | RAB6A,<br>member<br>RAS<br>oncogene<br>family | 0.395647  | Inlier  |
| siRNA-Temozolomide Run3-<br>DMSO | NM_1988<br>96 | RAB6A | RAB6A,<br>member<br>RAS<br>oncogene<br>family | 0.424759  | Inlier  |
| siRNA-Vinblastine Run1-<br>DMSO  | NM_1988<br>96 | RAB6A | RAB6A,<br>member<br>RAS<br>oncogene<br>family | 4.893447  | Outlier |
| siRNA Disorazole DMSO Run2       | NM_1988<br>96 | RAB6A | RAB6A,<br>member<br>RAS<br>oncogene<br>family | 5.517424  | Outlier |

Identification of Survival Genes in Human Glioblastoma Cells Using siRNA Screening  
 Nikhil G Thaker, Fang Zhang, Peter R. McDonald, Tong Ying Shun, Michael D Lewen, Ian F. Pollack, and John S. Lazo

Molecular Pharmacology

|                              |               |       |                                               |           |        |
|------------------------------|---------------|-------|-----------------------------------------------|-----------|--------|
| siRNA-Vinblastine Run2-DMSO  | NM_0165<br>77 | RAB6B | RAB6B,<br>member<br>RAS<br>oncogene<br>family | -2.744427 | Inlier |
| siRNA Disorazole DMSO Run3   | NM_0165<br>77 | RAB6B | RAB6B,<br>member<br>RAS<br>oncogene<br>family | -2.24711  | Inlier |
| siRNA-Vinblastine Run1-DMSO  | NM_0165<br>77 | RAB6B | RAB6B,<br>member<br>RAS<br>oncogene<br>family | -1.80964  | Inlier |
| siRNA Disorazole DMSO Run2   | NM_0165<br>77 | RAB6B | RAB6B,<br>member<br>RAS<br>oncogene<br>family | -0.188102 | Inlier |
| siRNA-Temozolomide Run3-DMSO | NM_0165<br>77 | RAB6B | RAB6B,<br>member<br>RAS<br>oncogene<br>family | 0.188102  | Inlier |
| siRNA Disorazole DMSO Run1   | NM_0165<br>77 | RAB6B | RAB6B,<br>member<br>RAS<br>oncogene<br>family | 0.450458  | Inlier |
| siRNA-Temozolomide Run2-DMSO | NM_0165<br>77 | RAB6B | RAB6B,<br>member<br>RAS<br>oncogene<br>family | 0.550407  | Inlier |
| siRNA-Temozolomide Run1-DMSO | NM_0165<br>77 | RAB6B | RAB6C,<br>member<br>RAS<br>oncogene<br>family | 0.798593  | Inlier |
| siRNA Disorazole DMSO Run3   | NM_0321<br>44 | RAB6C | RAB6C,<br>member<br>RAS<br>oncogene<br>family | -2.182785 | Inlier |
| siRNA-Vinblastine Run2-DMSO  | NM_0321<br>44 | RAB6C | RAB6C,<br>member<br>RAS<br>oncogene<br>family | -0.883507 | Inlier |

Identification of Survival Genes in Human Glioblastoma Cells Using siRNA Screening  
 Nikhil G Thaker, Fang Zhang, Peter R. McDonald, Tong Ying Shun, Michael D Lewen, Ian F. Pollack, and John S. Lazo

Molecular Pharmacology

|                              |               |        |                                                        |           |        |
|------------------------------|---------------|--------|--------------------------------------------------------|-----------|--------|
| siRNA-Temozolomide Run2-DMSO | NM_0321<br>44 | RAB6C  | RAB6C,<br>member<br>RAS<br>oncogene<br>family          | -0.491308 | Inlier |
| siRNA Disorazole DMSO Run2   | NM_0321<br>44 | RAB6C  | RAB6C,<br>member<br>RAS<br>oncogene<br>family          | -0.368665 | Inlier |
| siRNA-Temozolomide Run3-DMSO | NM_0321<br>44 | RAB6C  | RAB6C,<br>member<br>RAS<br>oncogene<br>family          | 0.368665  | Inlier |
| siRNA-Vinblastine Run1-DMSO  | NM_0321<br>44 | RAB6C  | RAB6C,<br>member<br>RAS<br>oncogene<br>family          | 0.622747  | Inlier |
| siRNA Disorazole DMSO Run1   | NM_0321<br>44 | RAB6C  | RAB6C,<br>member<br>RAS<br>oncogene<br>family          | 0.726253  | Inlier |
| siRNA-Temozolomide Run1-DMSO | NM_0321<br>44 | RAB6C  | RAB6C,<br>member<br>RAS<br>oncogene<br>family          | 2.498928  | Inlier |
| siRNA-Vinblastine Run2-DMSO  | NM_0039<br>29 | RAB7L1 | RAB7,<br>member<br>RAS<br>oncogene<br>family-like<br>1 | -0.911847 | Inlier |
| siRNA-Temozolomide Run3-DMSO | NM_0039<br>29 | RAB7L1 | RAB7,<br>member<br>RAS<br>oncogene<br>family-like<br>1 | -0.722909 | Inlier |
| siRNA-Temozolomide Run2-DMSO | NM_0039<br>29 | RAB7L1 | RAB7,<br>member<br>RAS<br>oncogene<br>family-like<br>1 | -0.662589 | Inlier |

Identification of Survival Genes in Human Glioblastoma Cells Using siRNA Screening  
 Nikhil G Thaker, Fang Zhang, Peter R. McDonald, Tong Ying Shun, Michael D Lewen, Ian F. Pollack, and John S. Lazo

Molecular Pharmacology

|                                  |               |        |                                                                          |           |        |
|----------------------------------|---------------|--------|--------------------------------------------------------------------------|-----------|--------|
| siRNA Disorazole DMSO Run3       | NM_0039<br>29 | RAB7L1 | RAB7,<br>member<br>RAS<br>oncogene<br>family-like<br>1                   | -0.337968 | Inlier |
| siRNA-Temozolomide Run1-<br>DMSO | NM_0039<br>29 | RAB7L1 | RAB7,<br>member<br>RAS<br>oncogene<br>family-like<br>1                   | 0.337968  | Inlier |
| siRNA Disorazole DMSO Run1       | NM_0039<br>29 | RAB7L1 | RAB7,<br>member<br>RAS<br>oncogene<br>family-like<br>1                   | 0.592185  | Inlier |
| siRNA-Vinblastine Run1-<br>DMSO  | NM_0039<br>29 | RAB7L1 | RAB7,<br>member<br>RAS<br>oncogene<br>family-like<br>1                   | 0.686411  | Inlier |
| siRNA Disorazole DMSO Run2       | NM_0039<br>29 | RAB7L1 | RAB7,<br>member<br>RAS<br>oncogene<br>family-like<br>1                   | 0.922113  | Inlier |
| siRNA Disorazole DMSO Run1       | NM_0053<br>70 | RAB8A  | RAB8A,<br>member<br>RAS<br>oncogene<br>family<br>RAB8A,<br>member<br>RAS | -2.124795 | Inlier |
| siRNA-Temozolomide Run1-<br>DMSO | NM_0053<br>70 | RAB8A  | RAB8A,<br>member<br>RAS<br>oncogene<br>family<br>RAB8A,<br>member<br>RAS | -0.931897 | Inlier |
| siRNA-Temozolomide Run2-<br>DMSO | NM_0053<br>70 | RAB8A  | RAB8A,<br>member<br>RAS<br>oncogene<br>family<br>RAB8A,<br>member<br>RAS | -0.928298 | Inlier |
| siRNA Disorazole DMSO Run3       | NM_0053<br>70 | RAB8A  | RAB8A,<br>member<br>RAS<br>oncogene<br>family                            | -0.091822 | Inlier |

Identification of Survival Genes in Human Glioblastoma Cells Using siRNA Screening  
 Nikhil G Thaker, Fang Zhang, Peter R. McDonald, Tong Ying Shun, Michael D Lewen, Ian F. Pollack, and John S. Lazo

Molecular Pharmacology

|                              |               |       |                                               |           |        |
|------------------------------|---------------|-------|-----------------------------------------------|-----------|--------|
| siRNA-Vinblastine Run1-DMSO  | NM_0053<br>70 | RAB8A | RAB8A,<br>member<br>RAS<br>oncogene<br>family | 0.091822  | Inlier |
| siRNA-Vinblastine Run2-DMSO  | NM_0053<br>70 | RAB8A | RAB8A,<br>member<br>RAS<br>oncogene<br>family | 0.125841  | Inlier |
| siRNA-Temozolomide Run3-DMSO | NM_0053<br>70 | RAB8A | RAB8A,<br>member<br>RAS<br>oncogene<br>family | 0.50314   | Inlier |
| siRNA Disorazole DMSO Run2   | NM_0053<br>70 | RAB8A | RAB8A,<br>member<br>RAS<br>oncogene<br>family | 0.84586   | Inlier |
| siRNA-Temozolomide Run1-DMSO | NM_0165<br>30 | RAB8B | RAB8B,<br>member<br>RAS<br>oncogene<br>family | -1.962857 | Inlier |
| siRNA-Temozolomide Run3-DMSO | NM_0165<br>30 | RAB8B | RAB8B,<br>member<br>RAS<br>oncogene<br>family | -1.27682  | Inlier |
| siRNA Disorazole DMSO Run3   | NM_0165<br>30 | RAB8B | RAB8B,<br>member<br>RAS<br>oncogene<br>family | -0.977462 | Inlier |
| siRNA-Temozolomide Run2-DMSO | NM_0165<br>30 | RAB8B | RAB8B,<br>member<br>RAS<br>oncogene<br>family | -0.16249  | Inlier |
| siRNA-Vinblastine Run2-DMSO  | NM_0165<br>30 | RAB8B | RAB8B,<br>member<br>RAS<br>oncogene<br>family | 0.16249   | Inlier |
| siRNA Disorazole DMSO Run1   | NM_0165<br>30 | RAB8B | RAB8B,<br>member<br>RAS<br>oncogene<br>family | 0.324698  | Inlier |

Identification of Survival Genes in Human Glioblastoma Cells Using siRNA Screening  
 Nikhil G Thaker, Fang Zhang, Peter R. McDonald, Tong Ying Shun, Michael D Lewen, Ian F. Pollack, and John S. Lazo

Molecular Pharmacology

|                                  |               |       |                                               |           |        |
|----------------------------------|---------------|-------|-----------------------------------------------|-----------|--------|
| siRNA Disorazole DMSO Run2       | NM_0165<br>30 | RAB8B | RAB8B,<br>member<br>RAS<br>oncogene<br>family | 0.371538  | Inlier |
| siRNA-Vinblastine Run1-<br>DMSO  | NM_0165<br>30 | RAB8B | RAB8B,<br>member<br>RAS<br>oncogene<br>family | 1.162633  | Inlier |
| siRNA-Vinblastine Run2-<br>DMSO  | NM_0042<br>51 | RAB9A | RAB9A,<br>member<br>RAS<br>oncogene<br>family | -1.319624 | Inlier |
| siRNA-Temozolomide Run2-<br>DMSO | NM_0042<br>51 | RAB9A | RAB9A,<br>member<br>RAS<br>oncogene<br>family | -0.772585 | Inlier |
| siRNA Disorazole DMSO Run3       | NM_0042<br>51 | RAB9A | RAB9A,<br>member<br>RAS<br>oncogene<br>family | -0.576415 | Inlier |
| siRNA Disorazole DMSO Run1       | NM_0042<br>51 | RAB9A | RAB9A,<br>member<br>RAS<br>oncogene<br>family | -0.15869  | Inlier |
| siRNA-Temozolomide Run1-<br>DMSO | NM_0042<br>51 | RAB9A | RAB9A,<br>member<br>RAS<br>oncogene<br>family | 0.15869   | Inlier |
| siRNA-Temozolomide Run3-<br>DMSO | NM_0042<br>51 | RAB9A | RAB9A,<br>member<br>RAS<br>oncogene<br>family | 0.368185  | Inlier |
| siRNA Disorazole DMSO Run2       | NM_0042<br>51 | RAB9A | RAB9A,<br>member<br>RAS<br>oncogene<br>family | 1.532477  | Inlier |
| siRNA-Vinblastine Run1-<br>DMSO  | NM_0042<br>51 | RAB9A | RAB9A,<br>member<br>RAS<br>oncogene<br>family | 2.437346  | Inlier |



Identification of Survival Genes in Human Glioblastoma Cells Using siRNA Screening  
 Nikhil G Thaker, Fang Zhang, Peter R. McDonald, Tong Ying Shun, Michael D Lewen, Ian F. Pollack, and John S. Lazo

Molecular Pharmacology

|                                  |               |         |                                                               |           |        |
|----------------------------------|---------------|---------|---------------------------------------------------------------|-----------|--------|
| siRNA Disorazole DMSO Run3       | NM_0163<br>70 | RAB9B   | RAB9B,<br>member<br>RAS<br>oncogene<br>family                 | -2.710899 | Inlier |
| siRNA-Vinblastine Run2-<br>DMSO  | NM_0163<br>70 | RAB9B   | RAB9B,<br>member<br>RAS<br>oncogene<br>family                 | -2.440484 | Inlier |
| siRNA Disorazole DMSO Run1       | NM_0163<br>70 | RAB9B   | RAB9B,<br>member<br>RAS<br>oncogene<br>family                 | -1.486631 | Inlier |
| siRNA-Temozolomide Run1-<br>DMSO | NM_0163<br>70 | RAB9B   | RAB9B,<br>member<br>RAS<br>oncogene<br>family                 | -0.029899 | Inlier |
| siRNA-Vinblastine Run1-<br>DMSO  | NM_0163<br>70 | RAB9B   | RAB9B,<br>member<br>RAS<br>oncogene<br>family                 | 0.029899  | Inlier |
| siRNA-Temozolomide Run3-<br>DMSO | NM_0163<br>70 | RAB9B   | RAB9B,<br>member<br>RAS<br>oncogene<br>family                 | 0.04305   | Inlier |
| siRNA-Temozolomide Run2-<br>DMSO | NM_0163<br>70 | RAB9B   | RAB9B,<br>member<br>RAS<br>oncogene<br>family                 | 0.274529  | Inlier |
| siRNA Disorazole DMSO Run2       | NM_0163<br>70 | RAB9B   | RAB<br>guanine<br>nucleotide<br>exchange<br>factor            | 1.074471  | Inlier |
| siRNA-Temozolomide Run3-<br>DMSO | NM_0145<br>04 | RABGEF1 | (GEF) 1<br>RAB<br>guanine<br>nucleotide<br>exchange<br>factor | -1.843293 | Inlier |
| siRNA-Temozolomide Run2-<br>DMSO | NM_0145<br>04 | RABGEF1 | (GEF) 1                                                       | -0.221736 | Inlier |

Identification of Survival Genes in Human Glioblastoma Cells Using siRNA Screening  
 Nikhil G Thaker, Fang Zhang, Peter R. McDonald, Tong Ying Shun, Michael D Lewen, Ian F. Pollack, and John S. Lazo

Molecular Pharmacology

| siRNA Treatment              | Gene ID   | Gene Name | Protein Name                                   | Log Fold Change | Outlier Status |
|------------------------------|-----------|-----------|------------------------------------------------|-----------------|----------------|
| siRNA-Temozolomide Run1-DMSO | NM_014504 | RABGEF1   | RAB guanine nucleotide exchange factor (GEF) 1 | -0.047133       | Inlier         |
| siRNA-Vinblastine Run2-DMSO  | NM_014504 | RABGEF1   | RAB guanine nucleotide exchange factor (GEF) 1 | -0.015858       | Inlier         |
| siRNA Disorazole DMSO Run3   | NM_014504 | RABGEF1   | RAB guanine nucleotide exchange factor (GEF) 1 | 0.015859        | Inlier         |
| siRNA Disorazole DMSO Run1   | NM_014504 | RABGEF1   | RAB guanine nucleotide exchange factor (GEF) 1 | 1.127264        | Inlier         |
| siRNA Disorazole DMSO Run2   | NM_014504 | RABGEF1   | RAB guanine nucleotide exchange factor (GEF) 1 | 2.443736        | Inlier         |
| siRNA-Vinblastine Run1-DMSO  | NM_014504 | RABGEF1   | Rab geranylgeranyltransferase, alpha subunit   | 3.48343         | Inlier         |
| siRNA Disorazole DMSO Run3   | NM_182836 | RABGGT A  | Rab geranylgeranyltransferase, alpha subunit   | -0.988777       | Inlier         |
| siRNA-Vinblastine Run2-DMSO  | NM_182836 | RABGGT A  | Rab geranylgeranyltransferase, alpha subunit   | -0.763387       | Inlier         |

Identification of Survival Genes in Human Glioblastoma Cells Using siRNA Screening  
 Nikhil G Thaker, Fang Zhang, Peter R. McDonald, Tong Ying Shun, Michael D Lewen, Ian F. Pollack, and John S. Lazo

Molecular Pharmacology

| siRNA Treatment              | Gene ID   | Accession | Protein Name                                 | Log Fold Change | Category |
|------------------------------|-----------|-----------|----------------------------------------------|-----------------|----------|
| siRNA-Temozolomide Run2-DMSO | NM_182836 | RABGGT A  | Rab geranylgeranyltransferase, alpha subunit | -0.585613       | Inlier   |
| siRNA-Temozolomide Run3-DMSO | NM_182836 | RABGGT A  | Rab geranylgeranyltransferase, alpha subunit | -0.052888       | Inlier   |
| siRNA Disorazole DMSO Run1   | NM_182836 | RABGGT A  | Rab geranylgeranyltransferase, alpha subunit | 0.052888        | Inlier   |
| siRNA-Temozolomide Run1-DMSO | NM_182836 | RABGGT A  | Rab geranylgeranyltransferase, alpha subunit | 0.161007        | Inlier   |
| siRNA-Vinblastine Run1-DMSO  | NM_182836 | RABGGT A  | Rab geranylgeranyltransferase, alpha subunit | 3.931888        | Outlier  |
| siRNA Disorazole DMSO Run2   | NM_182836 | RABGGT A  | Rab geranylgeranyltransferase, alpha subunit | 4.541155        | Outlier  |
| siRNA Disorazole DMSO Run1   | NM_004582 | RABGGT B  | Rab geranylgeranyltransferase, beta subunit  | -1.850669       | Inlier   |
| siRNA-Temozolomide Run1-DMSO | NM_004582 | RABGGT B  | Rab geranylgeranyltransferase, beta subunit  | -1.157287       | Inlier   |

Identification of Survival Genes in Human Glioblastoma Cells Using siRNA Screening  
 Nikhil G Thaker, Fang Zhang, Peter R. McDonald, Tong Ying Shun, Michael D Lewen, Ian F. Pollack, and John S. Lazo  
 Molecular Pharmacology

|                              |           |         |                                             |           |        |
|------------------------------|-----------|---------|---------------------------------------------|-----------|--------|
| siRNA-Temozolomide Run3-DMSO | NM_004582 | RABGGTB | Rab geranylgeranyltransferase, beta subunit | -0.863674 | Inlier |
| siRNA Disorazole DMSO Run3   | NM_004582 | RABGGTB | Rab geranylgeranyltransferase, beta subunit | -0.07521  | Inlier |
| siRNA-Vinblastine Run2-DMSO  | NM_004582 | RABGGTB | Rab geranylgeranyltransferase, beta subunit | 0.075211  | Inlier |
| siRNA-Temozolomide Run2-DMSO | NM_004582 | RABGGTB | Rab geranylgeranyltransferase, beta subunit | 0.131074  | Inlier |
| siRNA-Vinblastine Run1-DMSO  | NM_004582 | RABGGTB | Rab geranylgeranyltransferase, beta subunit | 0.485326  | Inlier |
| siRNA Disorazole DMSO Run2   | NM_004582 | RABGGTB | Rab geranylgeranyltransferase, beta subunit | 2.99042   | Inlier |
| siRNA-Vinblastine Run2-DMSO  | NM_007081 | RABL2B  | RAB, member of RAS oncogene family-like 2B  | -1.952272 | Inlier |
| siRNA Disorazole DMSO Run3   | NM_007081 | RABL2B  | RAB, member of RAS oncogene family-like 2B  | -1.917479 | Inlier |

Identification of Survival Genes in Human Glioblastoma Cells Using siRNA Screening  
 Nikhil G Thaker, Fang Zhang, Peter R. McDonald, Tong Ying Shun, Michael D Lewen, Ian F. Pollack, and John S. Lazo

Molecular Pharmacology

|                                  |               |        |                                                           |           |        |
|----------------------------------|---------------|--------|-----------------------------------------------------------|-----------|--------|
| siRNA Disorazole DMSO Run1       | NM_0070<br>81 | RABL2B | RAB,<br>member of<br>RAS<br>oncogene<br>family-like<br>2B | -0.656747 | Inlier |
| siRNA-Temozolomide Run2-<br>DMSO | NM_0070<br>81 | RABL2B | RAB,<br>member of<br>RAS<br>oncogene<br>family-like<br>2B | -0.112371 | Inlier |
| siRNA-Temozolomide Run3-<br>DMSO | NM_0070<br>81 | RABL2B | RAB,<br>member of<br>RAS<br>oncogene<br>family-like<br>2B | 0.112372  | Inlier |
| siRNA-Vinblastine Run1-<br>DMSO  | NM_0070<br>81 | RABL2B | RAB,<br>member of<br>RAS<br>oncogene<br>family-like<br>2B | 0.638349  | Inlier |
| siRNA-Temozolomide Run1-<br>DMSO | NM_0070<br>81 | RABL2B | RAB,<br>member of<br>RAS<br>oncogene<br>family-like<br>2B | 0.692253  | Inlier |
| siRNA Disorazole DMSO Run2       | NM_0070<br>81 | RABL2B | RAB,<br>member of<br>RAS<br>oncogene<br>family-like<br>2B | 1.26731   | Inlier |
| siRNA-Vinblastine Run2-<br>DMSO  | NM_0068<br>60 | RABL4  | RAB,<br>member of<br>RAS<br>oncogene<br>family-like<br>4  | -0.943539 | Inlier |
| siRNA Disorazole DMSO Run3       | NM_0068<br>60 | RABL4  | RAB,<br>member of<br>RAS<br>oncogene<br>family-like<br>4  | -0.837817 | Inlier |

Identification of Survival Genes in Human Glioblastoma Cells Using siRNA Screening  
 Nikhil G Thaker, Fang Zhang, Peter R. McDonald, Tong Ying Shun, Michael D Lewen, Ian F. Pollack, and John S. Lazo

Molecular Pharmacology

|                              |               |       |                                                                                                                       |           |        |
|------------------------------|---------------|-------|-----------------------------------------------------------------------------------------------------------------------|-----------|--------|
| siRNA-Temozolomide Run2-DMSO | NM_0068<br>60 | RABL4 | RAB,<br>member of<br>RAS<br>oncogene<br>family-like<br>4                                                              | -0.420057 | Inlier |
| siRNA Disorazole DMSO Run1   | NM_0068<br>60 | RABL4 | RAB,<br>member of<br>RAS<br>oncogene<br>family-like<br>4                                                              | -0.035693 | Inlier |
| siRNA-Temozolomide Run1-DMSO | NM_0068<br>60 | RABL4 | RAB,<br>member of<br>RAS<br>oncogene<br>family-like<br>4                                                              | 0.035693  | Inlier |
| siRNA-Temozolomide Run3-DMSO | NM_0068<br>60 | RABL4 | RAB,<br>member of<br>RAS<br>oncogene<br>family-like<br>4                                                              | 0.511183  | Inlier |
| siRNA-Vinblastine Run1-DMSO  | NM_0068<br>60 | RABL4 | RAB,<br>member of<br>RAS<br>oncogene<br>family-like<br>4                                                              | 1.064321  | Inlier |
| siRNA Disorazole DMSO Run2   | NM_0068<br>60 | RABL4 | RAB,<br>member of<br>RAS<br>oncogene<br>family-like<br>4                                                              | 1.499728  | Inlier |
| siRNA-Temozolomide Run2-DMSO | NM_1988<br>29 | RAC1  | ras-related<br>C3<br>botulinum<br>toxin<br>substrate<br>1 (rho<br>family,<br>small GTP<br>binding<br>protein<br>Rac1) | -0.735609 | Inlier |

Identification of Survival Genes in Human Glioblastoma Cells Using siRNA Screening

Nikhil G Thaker, Fang Zhang, Peter R. McDonald, Tong Ying Shun, Michael D Lewen, Ian F. Pollack, and John S. Lazo

Molecular Pharmacology

|                                  |               |      |                                                                                                                       |           |        |
|----------------------------------|---------------|------|-----------------------------------------------------------------------------------------------------------------------|-----------|--------|
| siRNA Disorazole DMSO Run3       | NM_1988<br>29 | RAC1 | ras-related<br>C3<br>botulinum<br>toxin<br>substrate<br>1 (rho<br>family,<br>small GTP<br>binding<br>protein<br>Rac1) | -0.613391 | Inlier |
| siRNA Disorazole DMSO Run1       | NM_1988<br>29 | RAC1 | ras-related<br>C3<br>botulinum<br>toxin<br>substrate<br>1 (rho<br>family,<br>small GTP<br>binding<br>protein<br>Rac1) | -0.232257 | Inlier |
| siRNA-Vinblastine Run2-<br>DMSO  | NM_1988<br>29 | RAC1 | ras-related<br>C3<br>botulinum<br>toxin<br>substrate<br>1 (rho<br>family,<br>small GTP<br>binding<br>protein<br>Rac1) | -0.149221 | Inlier |
| siRNA-Temozolomide Run1-<br>DMSO | NM_1988<br>29 | RAC1 | ras-related<br>C3<br>botulinum<br>toxin<br>substrate<br>1 (rho<br>family,<br>small GTP<br>binding<br>protein<br>Rac1) | 0.149221  | Inlier |

Identification of Survival Genes in Human Glioblastoma Cells Using siRNA Screening  
 Nikhil G Thaker, Fang Zhang, Peter R. McDonald, Tong Ying Shun, Michael D Lewen, Ian F. Pollack, and John S. Lazo  
 Molecular Pharmacology

|                              |               |      |                                                                                                                       |           |         |
|------------------------------|---------------|------|-----------------------------------------------------------------------------------------------------------------------|-----------|---------|
| siRNA-Temozolomide Run3-DMSO | NM_1988<br>29 | RAC1 | ras-related<br>C3<br>botulinum<br>toxin<br>substrate<br>1 (rho<br>family,<br>small GTP<br>binding<br>protein<br>Rac1) | 1.730226  | Inlier  |
| siRNA Disorazole DMSO Run2   | NM_1988<br>29 | RAC1 | ras-related<br>C3<br>botulinum<br>toxin<br>substrate<br>1 (rho<br>family,<br>small GTP<br>binding<br>protein<br>Rac1) | 3.179879  | Inlier  |
| siRNA-Vinblastine Run1-DMSO  | NM_1988<br>29 | RAC1 | ras-related<br>C3<br>botulinum<br>toxin<br>substrate<br>1 (rho<br>family,<br>small GTP<br>binding<br>protein<br>Rac1) | 3.258521  | Inlier  |
| siRNA-Vinblastine Run2-DMSO  | NM_0028<br>72 | RAC2 | ras-related<br>C3<br>botulinum<br>toxin<br>substrate<br>2 (rho<br>family,<br>small GTP<br>binding<br>protein<br>Rac2) | -3.701667 | Outlier |



Identification of Survival Genes in Human Glioblastoma Cells Using siRNA Screening

Nikhil G Thaker, Fang Zhang, Peter R. McDonald, Tong Ying Shun, Michael D Lewen, Ian F. Pollack, and John S. Lazo

Molecular Pharmacology

|                                  |               |      |                                                                                                                       |           |        |
|----------------------------------|---------------|------|-----------------------------------------------------------------------------------------------------------------------|-----------|--------|
| siRNA Disorazole DMSO Run3       | NM_0028<br>72 | RAC2 | ras-related<br>C3<br>botulinum<br>toxin<br>substrate<br>2 (rho<br>family,<br>small GTP<br>binding<br>protein<br>Rac2) | -1.679094 | Inlier |
| siRNA-Temozolomide Run2-<br>DMSO | NM_0028<br>72 | RAC2 | ras-related<br>C3<br>botulinum<br>toxin<br>substrate<br>2 (rho<br>family,<br>small GTP<br>binding<br>protein<br>Rac2) | -0.746466 | Inlier |
| siRNA-Temozolomide Run1-<br>DMSO | NM_0028<br>72 | RAC2 | ras-related<br>C3<br>botulinum<br>toxin<br>substrate<br>2 (rho<br>family,<br>small GTP<br>binding<br>protein<br>Rac2) | -0.35471  | Inlier |
| siRNA-Temozolomide Run3-<br>DMSO | NM_0028<br>72 | RAC2 | ras-related<br>C3<br>botulinum<br>toxin<br>substrate<br>2 (rho<br>family,<br>small GTP<br>binding<br>protein<br>Rac2) | 0.35471   | Inlier |

Identification of Survival Genes in Human Glioblastoma Cells Using siRNA Screening  
 Nikhil G Thaker, Fang Zhang, Peter R. McDonald, Tong Ying Shun, Michael D Lewen, Ian F. Pollack, and John S. Lazo  
 Molecular Pharmacology

|                                 |               |      |                                                                                                                       |           |        |
|---------------------------------|---------------|------|-----------------------------------------------------------------------------------------------------------------------|-----------|--------|
| siRNA Disorazole DMSO Run1      | NM_0028<br>72 | RAC2 | ras-related<br>C3<br>botulinum<br>toxin<br>substrate<br>2 (rho<br>family,<br>small GTP<br>binding<br>protein<br>Rac2) | 0.519406  | Inlier |
| siRNA-Vinblastine Run1-<br>DMSO | NM_0028<br>72 | RAC2 | ras-related<br>C3<br>botulinum<br>toxin<br>substrate<br>2 (rho<br>family,<br>small GTP<br>binding<br>protein<br>Rac2) | 0.602534  | Inlier |
| siRNA Disorazole DMSO Run2      | NM_0028<br>72 | RAC2 | ras-related<br>C3<br>botulinum<br>toxin<br>substrate<br>2 (rho<br>family,<br>small GTP<br>binding<br>protein<br>Rac2) | 1.532207  | Inlier |
| siRNA-Vinblastine Run2-<br>DMSO | NM_0050<br>52 | RAC3 | ras-related<br>C3<br>botulinum<br>toxin<br>substrate<br>3 (rho<br>family,<br>small GTP<br>binding<br>protein<br>Rac3) | -1.264973 | Inlier |

Identification of Survival Genes in Human Glioblastoma Cells Using siRNA Screening  
 Nikhil G Thaker, Fang Zhang, Peter R. McDonald, Tong Ying Shun, Michael D Lewen, Ian F. Pollack, and John S. Lazo  
 Molecular Pharmacology

|                                  |               |      |                                                                                                                       |           |        |
|----------------------------------|---------------|------|-----------------------------------------------------------------------------------------------------------------------|-----------|--------|
| siRNA Disorazole DMSO Run3       | NM_0050<br>52 | RAC3 | ras-related<br>C3<br>botulinum<br>toxin<br>substrate<br>3 (rho<br>family,<br>small GTP<br>binding<br>protein<br>Rac3) | -0.637049 | Inlier |
| siRNA-Temozolomide Run2-<br>DMSO | NM_0050<br>52 | RAC3 | ras-related<br>C3<br>botulinum<br>toxin<br>substrate<br>3 (rho<br>family,<br>small GTP<br>binding<br>protein<br>Rac3) | -0.531341 | Inlier |
| siRNA Disorazole DMSO Run1       | NM_0050<br>52 | RAC3 | ras-related<br>C3<br>botulinum<br>toxin<br>substrate<br>3 (rho<br>family,<br>small GTP<br>binding<br>protein<br>Rac3) | -0.183969 | Inlier |
| siRNA-Temozolomide Run1-<br>DMSO | NM_0050<br>52 | RAC3 | ras-related<br>C3<br>botulinum<br>toxin<br>substrate<br>3 (rho<br>family,<br>small GTP<br>binding<br>protein<br>Rac3) | 0.183968  | Inlier |

Identification of Survival Genes in Human Glioblastoma Cells Using siRNA Screening  
 Nikhil G Thaker, Fang Zhang, Peter R. McDonald, Tong Ying Shun, Michael D Lewen, Ian F. Pollack, and John S. Lazo  
 Molecular Pharmacology

|                              |           |         |                                                                                         |           |        |
|------------------------------|-----------|---------|-----------------------------------------------------------------------------------------|-----------|--------|
| siRNA-Temozolomide Run3-DMSO | NM_005052 | RAC3    | ras-related C3 botulinum toxin substrate 3 (rho family, small GTP binding protein Rac3) | 0.711951  | Inlier |
| siRNA-Vinblastine Run1-DMSO  | NM_005052 | RAC3    | ras-related C3 botulinum toxin substrate 3 (rho family, small GTP binding protein Rac3) | 0.836935  | Inlier |
| siRNA Disorazole DMSO Run2   | NM_005052 | RAC3    | ras-related C3 botulinum toxin substrate 3 (rho family, small GTP binding protein Rac3) | 2.724592  | Inlier |
| siRNA-Temozolomide Run2-DMSO | NM_013277 | RACGAP1 | Rac GTPase activating protein 1                                                         | -1.155697 | Inlier |
| siRNA-Temozolomide Run1-DMSO | NM_013277 | RACGAP1 | Rac GTPase activating protein 1                                                         | -0.727857 | Inlier |
| siRNA-Temozolomide Run3-DMSO | NM_013277 | RACGAP1 | Rac GTPase activating protein 1                                                         | -0.657471 | Inlier |
| siRNA-Vinblastine Run2-DMSO  | NM_013277 | RACGAP1 | Rac GTPase activating protein 1                                                         | -0.221168 | Inlier |

Identification of Survival Genes in Human Glioblastoma Cells Using siRNA Screening  
 Nikhil G Thaker, Fang Zhang, Peter R. McDonald, Tong Ying Shun, Michael D Lewen, Ian F. Pollack, and John S. Lazo

Molecular Pharmacology

|                              |               |         |                                 |           |        |
|------------------------------|---------------|---------|---------------------------------|-----------|--------|
| siRNA-Vinblastine Run1-DMSO  | NM_0132<br>77 | RACGAP1 | Rac GTPase activating protein 1 | 0.221168  | Inlier |
| siRNA Disorazole DMSO Run3   | NM_0132<br>77 | RACGAP1 | Rac GTPase activating protein 1 | 0.501947  | Inlier |
| siRNA Disorazole DMSO Run1   | NM_0132<br>77 | RACGAP1 | Rac GTPase activating protein 1 | 0.691529  | Inlier |
| siRNA Disorazole DMSO Run2   | NM_0132<br>77 | RACGAP1 | Rac GTPase activating protein 1 | 1.174311  | Inlier |
| siRNA-Temozolomide Run3-DMSO | NM_1334<br>82 | RAD50   | RAD50 homolog (S. cerevisiae)   | -1.597862 | Inlier |
| siRNA Disorazole DMSO Run1   | NM_1334<br>82 | RAD50   | RAD50 homolog (S. cerevisiae)   | -0.509072 | Inlier |
| siRNA-Temozolomide Run2-DMSO | NM_1334<br>82 | RAD50   | RAD50 homolog (S. cerevisiae)   | -0.432832 | Inlier |
| siRNA Disorazole DMSO Run2   | NM_1334<br>82 | RAD50   | RAD50 homolog (S. cerevisiae)   | -0.378118 | Inlier |
| siRNA Disorazole DMSO Run3   | NM_1334<br>82 | RAD50   | RAD50 homolog (S. cerevisiae)   | 0.378118  | Inlier |
| siRNA-Temozolomide Run1-DMSO | NM_1334<br>82 | RAD50   | RAD50 homolog (S. cerevisiae)   | 0.839928  | Inlier |
| siRNA-Vinblastine Run2-DMSO  | NM_1334<br>82 | RAD50   | RAD50 homolog (S. cerevisiae)   | 1.513937  | Inlier |

Identification of Survival Genes in Human Glioblastoma Cells Using siRNA Screening

Nikhil G Thaker, Fang Zhang, Peter R. McDonald, Tong Ying Shun, Michael D Lewen, Ian F. Pollack, and John S. Lazo

Molecular Pharmacology

|                              |           |      |                                                  |           |        |
|------------------------------|-----------|------|--------------------------------------------------|-----------|--------|
| siRNA-Vinblastine Run1-DMSO  | NM_133482 | RAF1 | RAD50 homolog (S. cerevisiae)                    | 1.696078  | Inlier |
| siRNA-Temozolomide Run3-DMSO | NM_002880 | RAF1 | v-raf-1 murine leukemia viral oncogene homolog 1 | -0.740005 | Inlier |
| siRNA Disorazole DMSO Run2   | NM_002880 | RAF1 | v-raf-1 murine leukemia viral oncogene homolog 1 | -0.608994 | Inlier |
| siRNA Disorazole DMSO Run3   | NM_002880 | RAF1 | v-raf-1 murine leukemia viral oncogene homolog 1 | -0.189966 | Inlier |
| siRNA-Temozolomide Run1-DMSO | NM_002880 | RAF1 | v-raf-1 murine leukemia viral oncogene homolog 1 | -0.108596 | Inlier |
| siRNA-Temozolomide Run2-DMSO | NM_002880 | RAF1 | v-raf-1 murine leukemia viral oncogene homolog 1 | 0.108596  | Inlier |
| siRNA Disorazole DMSO Run1   | NM_002880 | RAF1 | v-raf-1 murine leukemia viral oncogene homolog 1 | 2.275172  | Inlier |

Identification of Survival Genes in Human Glioblastoma Cells Using siRNA Screening  
 Nikhil G Thaker, Fang Zhang, Peter R. McDonald, Tong Ying Shun, Michael D Lewen, Ian F. Pollack, and John S. Lazo  
 Molecular Pharmacology

|                              |               |      |                                                                 |           |         |
|------------------------------|---------------|------|-----------------------------------------------------------------|-----------|---------|
| siRNA-Vinblastine Run1-DMSO  | NM_0028<br>80 | RAF1 | v-raf-1<br>murine<br>leukemia<br>viral<br>oncogene<br>homolog 1 | 2.529948  | Inlier  |
| siRNA-Vinblastine Run2-DMSO  | NM_0028<br>80 | RAF1 | v-raf-1<br>murine<br>leukemia<br>viral<br>oncogene<br>homolog 1 | 4.334682  | Outlier |
| siRNA Disorazole DMSO Run3   | NM_0004<br>48 | RAG1 | recombina<br>tion<br>activating<br>gene 1                       | -1.321125 | Inlier  |
| siRNA-Vinblastine Run2-DMSO  | NM_0004<br>48 | RAG1 | recombina<br>tion<br>activating<br>gene 1                       | -1.025266 | Inlier  |
| siRNA Disorazole DMSO Run1   | NM_0004<br>48 | RAG1 | recombina<br>tion<br>activating<br>gene 1                       | -0.890193 | Inlier  |
| siRNA-Temozolomide Run2-DMSO | NM_0004<br>48 | RAG1 | recombina<br>tion<br>activating<br>gene 1                       | -0.045315 | Inlier  |
| siRNA-Temozolomide Run3-DMSO | NM_0004<br>48 | RAG1 | recombina<br>tion<br>activating<br>gene 1                       | 0.045314  | Inlier  |
| siRNA-Temozolomide Run1-DMSO | NM_0004<br>48 | RAG1 | recombina<br>tion<br>activating<br>gene 1                       | 0.135458  | Inlier  |
| siRNA-Vinblastine Run1-DMSO  | NM_0004<br>48 | RAG1 | recombina<br>tion<br>activating<br>gene 1                       | 0.48626   | Inlier  |
| siRNA Disorazole DMSO Run2   | NM_0004<br>48 | RAG1 | recombina<br>tion<br>activating<br>gene 1                       | 0.86274   | Inlier  |
| siRNA-Temozolomide Run3-DMSO | NM_0005<br>36 | RAG2 | activating<br>gene 2                                            | -0.789834 | Inlier  |

Identification of Survival Genes in Human Glioblastoma Cells Using siRNA Screening  
 Nikhil G Thaker, Fang Zhang, Peter R. McDonald, Tong Ying Shun, Michael D Lewen, Ian F. Pollack, and John S. Lazo

Molecular Pharmacology

|                                  |               |      |                                           |           |        |
|----------------------------------|---------------|------|-------------------------------------------|-----------|--------|
| siRNA Disorazole DMSO Run3       | NM_0005<br>36 | RAG2 | recombina<br>tion<br>activating<br>gene 2 | -0.701122 | Inlier |
| siRNA-Vinblastine Run2-<br>DMSO  | NM_0005<br>36 | RAG2 | recombina<br>tion<br>activating<br>gene 2 | -0.447969 | Inlier |
| siRNA-Temozolomide Run2-<br>DMSO | NM_0005<br>36 | RAG2 | recombina<br>tion<br>activating<br>gene 2 | -0.327071 | Inlier |
| siRNA-Temozolomide Run1-<br>DMSO | NM_0005<br>36 | RAG2 | recombina<br>tion<br>activating<br>gene 2 | 0.327071  | Inlier |
| siRNA Disorazole DMSO Run1       | NM_0005<br>36 | RAG2 | recombina<br>tion<br>activating<br>gene 2 | 0.647878  | Inlier |
| siRNA-Vinblastine Run1-<br>DMSO  | NM_0005<br>36 | RAG2 | recombina<br>tion<br>activating<br>gene 2 | 0.7759    | Inlier |
| siRNA Disorazole DMSO Run2       | NM_0005<br>36 | RAG2 | recombina<br>tion<br>activating<br>gene 2 | 0.984186  | Inlier |
| siRNA-Temozolomide Run3-<br>DMSO | NM_0142<br>26 | RAGE | renal<br>tumor<br>antigen                 | -1.300538 | Inlier |
| siRNA Disorazole DMSO Run3       | NM_0142<br>26 | RAGE | renal<br>tumor<br>antigen                 | -0.856996 | Inlier |
| siRNA Disorazole DMSO Run2       | NM_0142<br>26 | RAGE | renal<br>tumor<br>antigen                 | -0.492004 | Inlier |
| siRNA-Temozolomide Run2-<br>DMSO | NM_0142<br>26 | RAGE | renal<br>tumor<br>antigen                 | -0.246932 | Inlier |
| siRNA-Temozolomide Run1-<br>DMSO | NM_0142<br>26 | RAGE | renal<br>tumor<br>antigen                 | 0.246932  | Inlier |
| siRNA Disorazole DMSO Run1       | NM_0142<br>26 | RAGE | renal<br>tumor<br>antigen                 | 0.428393  | Inlier |
| siRNA-Vinblastine Run1-<br>DMSO  | NM_0142<br>26 | RAGE | renal<br>tumor<br>antigen                 | 1.729165  | Inlier |
| siRNA-Vinblastine Run2-<br>DMSO  | NM_0142<br>26 | RAGE | renal<br>tumor<br>antigen                 | 2.102228  | Inlier |



Identification of Survival Genes in Human Glioblastoma Cells Using siRNA Screening

Nikhil G Thaker, Fang Zhang, Peter R. McDonald, Tong Ying Shun, Michael D Lewen, Ian F. Pollack, and John S. Lazo

Molecular Pharmacology

|                              |               |      |                                                         |           |        |
|------------------------------|---------------|------|---------------------------------------------------------|-----------|--------|
| siRNA-Temozolomide Run3-DMSO | NM_0039<br>79 | RAI3 | G protein-coupled receptor, family C, group 5, member A | -0.84899  | Inlier |
| siRNA-Temozolomide Run2-DMSO | NM_0039<br>79 | RAI3 | G protein-coupled receptor, family C, group 5, member A | -0.50001  | Inlier |
| siRNA Disorazole DMSO Run2   | NM_0039<br>79 | RAI3 | G protein-coupled receptor, family C, group 5, member A | -0.400234 | Inlier |
| siRNA Disorazole DMSO Run3   | NM_0039<br>79 | RAI3 | G protein-coupled receptor, family C, group 5, member A | -0.100401 | Inlier |
| siRNA-Temozolomide Run1-DMSO | NM_0039<br>79 | RAI3 | G protein-coupled receptor, family C, group 5, member A | 0.100401  | Inlier |
| siRNA Disorazole DMSO Run1   | NM_0039<br>79 | RAI3 | G protein-coupled receptor, family C, group 5, member A | 1.551934  | Inlier |
| siRNA-Vinblastine Run1-DMSO  | NM_0039<br>79 | RAI3 | G protein-coupled receptor, family C, group 5, member A | 2.267155  | Inlier |

Identification of Survival Genes in Human Glioblastoma Cells Using siRNA Screening  
 Nikhil G Thaker, Fang Zhang, Peter R. McDonald, Tong Ying Shun, Michael D Lewen, Ian F. Pollack, and John S. Lazo  
 Molecular Pharmacology

|                              |           |      |                                                              |           |        |
|------------------------------|-----------|------|--------------------------------------------------------------|-----------|--------|
| siRNA-Vinblastine Run2-DMSO  | NM_003979 | RAI3 | G protein-coupled receptor, family C, group 5, member A      | 2.347311  | Inlier |
| siRNA Disorazole DMSO Run1   | NM_005402 | RALA | v-ral simian leukemia viral oncogene homolog A (ras related) | -1.699237 | Inlier |
| siRNA Disorazole DMSO Run3   | NM_005402 | RALA | v-ral simian leukemia viral oncogene homolog A (ras related) | -1.376117 | Inlier |
| siRNA-Vinblastine Run2-DMSO  | NM_005402 | RALA | v-ral simian leukemia viral oncogene homolog A (ras related) | -0.781743 | Inlier |
| siRNA-Temozolomide Run2-DMSO | NM_005402 | RALA | v-ral simian leukemia viral oncogene homolog A (ras related) | -0.239314 | Inlier |
| siRNA-Vinblastine Run1-DMSO  | NM_005402 | RALA | v-ral simian leukemia viral oncogene homolog A (ras related) | 0.239317  | Inlier |

Identification of Survival Genes in Human Glioblastoma Cells Using siRNA Screening

Nikhil G Thaker, Fang Zhang, Peter R. McDonald, Tong Ying Shun, Michael D Lewen, Ian F. Pollack, and John S. Lazo

Molecular Pharmacology

|                              |           |      |                                                                                                                 |          |         |
|------------------------------|-----------|------|-----------------------------------------------------------------------------------------------------------------|----------|---------|
| siRNA-Temozolomide Run3-DMSO | NM_005402 | RALA | v-ral<br>simian<br>leukemia<br>viral<br>oncogene<br>homolog A<br>(ras<br>related)                               | 0.477594 | Inlier  |
| siRNA-Temozolomide Run1-DMSO | NM_005402 | RALA | v-ral<br>simian<br>leukemia<br>viral<br>oncogene<br>homolog A<br>(ras<br>related)                               | 0.567257 | Inlier  |
| siRNA Disorazole DMSO Run2   | NM_005402 | RALA | v-ral<br>simian<br>leukemia<br>viral<br>oncogene<br>homolog A<br>(ras<br>related)                               | 5.113845 | Outlier |
| siRNA Disorazole DMSO Run1   | NM_002881 | RALB | v-ral<br>simian<br>leukemia<br>viral<br>oncogene<br>homolog B<br>(ras<br>related;<br>GTP<br>binding<br>protein) | -0.73301 | Inlier  |
| siRNA-Temozolomide Run2-DMSO | NM_002881 | RALB | v-ral<br>simian<br>leukemia<br>viral<br>oncogene<br>homolog B<br>(ras<br>related;<br>GTP<br>binding<br>protein) | -0.61599 | Inlier  |

Identification of Survival Genes in Human Glioblastoma Cells Using siRNA Screening

Nikhil G Thaker, Fang Zhang, Peter R. McDonald, Tong Ying Shun, Michael D Lewen, Ian F. Pollack, and John S. Lazo

Molecular Pharmacology

|                                  |               |      |                                                                                                                 |           |        |
|----------------------------------|---------------|------|-----------------------------------------------------------------------------------------------------------------|-----------|--------|
| siRNA Disorazole DMSO Run3       | NM_0028<br>81 | RALB | v-ral<br>simian<br>leukemia<br>viral<br>oncogene<br>homolog B<br>(ras<br>related;<br>GTP<br>binding<br>protein) | -0.536487 | Inlier |
| siRNA-Vinblastine Run2-<br>DMSO  | NM_0028<br>81 | RALB | v-ral<br>simian<br>leukemia<br>viral<br>oncogene<br>homolog B<br>(ras<br>related;<br>GTP<br>binding<br>protein) | -0.406092 | Inlier |
| siRNA-Temozolomide Run1-<br>DMSO | NM_0028<br>81 | RALB | v-ral<br>simian<br>leukemia<br>viral<br>oncogene<br>homolog B<br>(ras<br>related;<br>GTP<br>binding<br>protein) | 0.406092  | Inlier |
| siRNA-Temozolomide Run3-<br>DMSO | NM_0028<br>81 | RALB | v-ral<br>simian<br>leukemia<br>viral<br>oncogene<br>homolog B<br>(ras<br>related;<br>GTP<br>binding<br>protein) | 0.759923  | Inlier |

Identification of Survival Genes in Human Glioblastoma Cells Using siRNA Screening  
 Nikhil G Thaker, Fang Zhang, Peter R. McDonald, Tong Ying Shun, Michael D Lewen, Ian F. Pollack, and John S. Lazo

Molecular Pharmacology

| siRNA Treatment              | Gene ID       | Gene Name | Gene Description                                                                                                | Score     | Outlier |
|------------------------------|---------------|-----------|-----------------------------------------------------------------------------------------------------------------|-----------|---------|
| siRNA Disorazole DMSO Run2   | NM_0028<br>81 | RALB      | v-ral<br>simian<br>leukemia<br>viral<br>oncogene<br>homolog B<br>(ras<br>related;<br>GTP<br>binding<br>protein) | 2.393975  | Inlier  |
| siRNA-Vinblastine Run1-DMSO  | NM_0028<br>81 | RALB      | v-ral<br>simian<br>leukemia<br>viral<br>oncogene<br>homolog B<br>(ras<br>related;<br>GTP<br>binding<br>protein) | 2.690596  | Inlier  |
| siRNA-Temozolomide Run3-DMSO | NM_0067<br>88 | RALBP1    | ralA<br>binding<br>protein 1                                                                                    | -1.637589 | Inlier  |
| siRNA-Temozolomide Run1-DMSO | NM_0067<br>88 | RALBP1    | ralA<br>binding<br>protein 1                                                                                    | -1.505867 | Inlier  |
| siRNA-Temozolomide Run2-DMSO | NM_0067<br>88 | RALBP1    | ralA<br>binding<br>protein 1                                                                                    | -0.859248 | Inlier  |
| siRNA Disorazole DMSO Run1   | NM_0067<br>88 | RALBP1    | ralA<br>binding<br>protein 1                                                                                    | -0.010535 | Inlier  |
| siRNA-Vinblastine Run2-DMSO  | NM_0067<br>88 | RALBP1    | ralA<br>binding<br>protein 1                                                                                    | 0.010536  | Inlier  |
| siRNA Disorazole DMSO Run3   | NM_0067<br>88 | RALBP1    | ralA<br>binding<br>protein 1                                                                                    | 0.467455  | Inlier  |
| siRNA-Vinblastine Run1-DMSO  | NM_0067<br>88 | RALBP1    | ralA<br>binding<br>protein 1                                                                                    | 0.489753  | Inlier  |
| siRNA Disorazole DMSO Run2   | NM_0067<br>88 | RALBP1    | ral<br>binding<br>protein 1                                                                                     | 0.910296  | Inlier  |
| siRNA-Temozolomide Run3-DMSO | NM_0062<br>66 | RALGDS    | ral<br>guanine<br>nucleotide<br>dissociatio<br>n<br>stimulator                                                  | -1.111528 | Inlier  |

Identification of Survival Genes in Human Glioblastoma Cells Using siRNA Screening  
 Nikhil G Thaker, Fang Zhang, Peter R. McDonald, Tong Ying Shun, Michael D Lewen, Ian F. Pollack, and John S. Lazo

Molecular Pharmacology

|                              |           |         |                                                               |           |        |
|------------------------------|-----------|---------|---------------------------------------------------------------|-----------|--------|
| siRNA-Temozolomide Run2-DMSO | NM_006266 | RALGDS  | ral<br>guanine<br>nucleotide<br>dissociation<br>stimulator    | -0.760842 | Inlier |
| siRNA-Vinblastine Run2-DMSO  | NM_006266 | RALGDS  | ral<br>guanine<br>nucleotide<br>dissociation<br>stimulator    | -0.543584 | Inlier |
| siRNA-Temozolomide Run1-DMSO | NM_006266 | RALGDS  | ral<br>guanine<br>nucleotide<br>dissociation<br>stimulator    | -0.165912 | Inlier |
| siRNA Disorazole DMSO Run3   | NM_006266 | RALGDS  | ral<br>guanine<br>nucleotide<br>dissociation<br>stimulator    | 0.165912  | Inlier |
| siRNA Disorazole DMSO Run1   | NM_006266 | RALGDS  | ral<br>guanine<br>nucleotide<br>dissociation<br>stimulator    | 0.588158  | Inlier |
| siRNA Disorazole DMSO Run2   | NM_006266 | RALGDS  | ral<br>guanine<br>nucleotide<br>dissociation<br>stimulator    | 0.808849  | Inlier |
| siRNA-Vinblastine Run1-DMSO  | NM_006266 | RALGDS  | ral<br>guanine<br>nucleotide<br>dissociation<br>stimulator    | 0.852036  | Inlier |
| siRNA-Temozolomide Run3-DMSO | NM_152663 | RALGPS2 | Ral GEF<br>with PH<br>domain<br>and SH3<br>binding<br>motif 2 | -2.685457 | Inlier |

Identification of Survival Genes in Human Glioblastoma Cells Using siRNA Screening  
 Nikhil G Thaker, Fang Zhang, Peter R. McDonald, Tong Ying Shun, Michael D Lewen, Ian F. Pollack, and John S. Lazo

Molecular Pharmacology

|                              |           |         |                                                    |           |        |
|------------------------------|-----------|---------|----------------------------------------------------|-----------|--------|
| siRNA-Vinblastine Run2-DMSO  | NM_152663 | RALGPS2 | Ral GEF with PH domain and SH3 binding motif 2     | -0.69448  | Inlier |
| siRNA-Temozolomide Run1-DMSO | NM_152663 | RALGPS2 | Ral GEF with PH domain and SH3 binding motif 2     | -0.539183 | Inlier |
| siRNA Disorazole DMSO Run3   | NM_152663 | RALGPS2 | Ral GEF with PH domain and SH3 binding motif 2     | -0.535449 | Inlier |
| siRNA-Temozolomide Run2-DMSO | NM_152663 | RALGPS2 | Ral GEF with PH domain and SH3 binding motif 2     | 0.535449  | Inlier |
| siRNA Disorazole DMSO Run1   | NM_152663 | RALGPS2 | Ral GEF with PH domain and SH3 binding motif 2     | 0.654519  | Inlier |
| siRNA Disorazole DMSO Run2   | NM_152663 | RALGPS2 | Ral GEF with PH domain and SH3 binding motif 2     | 2.19915   | Inlier |
| siRNA-Vinblastine Run1-DMSO  | NM_152663 | RALGPS2 | Ral GEF with PH domain and SH3 binding motif 2     | 2.775055  | Inlier |
| siRNA-Temozolomide Run2-DMSO | NM_005855 | RAMP1   | receptor (calcitonin) activity modifying protein 1 | -2.009495 | Inlier |
| siRNA-Temozolomide Run3-DMSO | NM_005855 | RAMP1   | receptor (calcitonin) activity modifying protein 1 | -0.895494 | Inlier |

Identification of Survival Genes in Human Glioblastoma Cells Using siRNA Screening  
 Nikhil G Thaker, Fang Zhang, Peter R. McDonald, Tong Ying Shun, Michael D Lewen, Ian F. Pollack, and John S. Lazo

Molecular Pharmacology

| siRNA Treatment              | Gene ID   | Gene Name | Activity                                           | Value     | Outlier Status |
|------------------------------|-----------|-----------|----------------------------------------------------|-----------|----------------|
| siRNA-Temozolomide Run1-DMSO | NM_005855 | RAMP1     | receptor (calcitonin) activity modifying protein 1 | -0.427232 | Inlier         |
| siRNA-Vinblastine Run2-DMSO  | NM_005855 | RAMP1     | receptor (calcitonin) activity modifying protein 1 | -0.050293 | Inlier         |
| siRNA-Vinblastine Run1-DMSO  | NM_005855 | RAMP1     | receptor (calcitonin) activity modifying protein 1 | 0.050293  | Inlier         |
| siRNA Disorazole DMSO Run1   | NM_005855 | RAMP1     | receptor (calcitonin) activity modifying protein 1 | 0.453506  | Inlier         |
| siRNA Disorazole DMSO Run3   | NM_005855 | RAMP1     | receptor (calcitonin) activity modifying protein 1 | 1.105294  | Inlier         |
| siRNA Disorazole DMSO Run2   | NM_005855 | RAMP1     | receptor (calcitonin) activity modifying protein 1 | 4.013348  | Outlier        |
| siRNA-Vinblastine Run2-DMSO  | NM_005854 | RAMP2     | receptor (calcitonin) activity modifying protein 2 | -3.08714  | Inlier         |
| siRNA-Temozolomide Run2-DMSO | NM_005854 | RAMP2     | receptor (calcitonin) activity modifying protein 2 | -1.306634 | Inlier         |
| siRNA Disorazole DMSO Run3   | NM_005854 | RAMP2     | receptor (calcitonin) activity modifying protein 2 | -0.570096 | Inlier         |
| siRNA Disorazole DMSO Run1   | NM_005854 | RAMP2     | receptor (calcitonin) activity modifying protein 2 | -0.166131 | Inlier         |



Identification of Survival Genes in Human Glioblastoma Cells Using siRNA Screening  
 Nikhil G Thaker, Fang Zhang, Peter R. McDonald, Tong Ying Shun, Michael D Lewen, Ian F. Pollack, and John S. Lazo

Molecular Pharmacology

|                              |               |       |                                                                |           |        |
|------------------------------|---------------|-------|----------------------------------------------------------------|-----------|--------|
| siRNA-Temozolomide Run3-DMSO | NM_0058<br>54 | RAMP2 | receptor<br>(calcitonin)<br>activity<br>modifying<br>protein 2 | 0.166131  | Inlier |
| siRNA-Vinblastine Run1-DMSO  | NM_0058<br>54 | RAMP2 | receptor<br>(calcitonin)<br>activity<br>modifying<br>protein 2 | 0.391567  | Inlier |
| siRNA-Temozolomide Run1-DMSO | NM_0058<br>54 | RAMP2 | receptor<br>(calcitonin)<br>activity<br>modifying<br>protein 2 | 0.778904  | Inlier |
| siRNA Disorazole DMSO Run2   | NM_0058<br>54 | RAMP2 | receptor<br>(calcitonin)<br>activity<br>modifying<br>protein 2 | 2.083574  | Inlier |
| siRNA-Vinblastine Run2-DMSO  | NM_0058<br>56 | RAMP3 | receptor<br>(calcitonin)<br>activity<br>modifying<br>protein 3 | -0.787047 | Inlier |
| siRNA-Temozolomide Run2-DMSO | NM_0058<br>56 | RAMP3 | receptor<br>(calcitonin)<br>activity<br>modifying<br>protein 3 | -0.730434 | Inlier |
| siRNA Disorazole DMSO Run1   | NM_0058<br>56 | RAMP3 | receptor<br>(calcitonin)<br>activity<br>modifying<br>protein 3 | -0.618566 | Inlier |
| siRNA Disorazole DMSO Run3   | NM_0058<br>56 | RAMP3 | receptor<br>(calcitonin)<br>activity<br>modifying<br>protein 3 | -0.099045 | Inlier |
| siRNA-Temozolomide Run1-DMSO | NM_0058<br>56 | RAMP3 | receptor<br>(calcitonin)<br>activity<br>modifying<br>protein 3 | 0.099044  | Inlier |
| siRNA-Temozolomide Run3-DMSO | NM_0058<br>56 | RAMP3 | receptor<br>(calcitonin)<br>activity<br>modifying<br>protein 3 | 0.397208  | Inlier |

Identification of Survival Genes in Human Glioblastoma Cells Using siRNA Screening

Nikhil G Thaker, Fang Zhang, Peter R. McDonald, Tong Ying Shun, Michael D Lewen, Ian F. Pollack, and John S. Lazo

Molecular Pharmacology

| siRNA Treatment              | Gene ID       | Gene Name | Function                                           | Score     | Category |
|------------------------------|---------------|-----------|----------------------------------------------------|-----------|----------|
| siRNA-Vinblastine Run1-DMSO  | NM_0058<br>56 | RAMP3     | receptor (calcitonin) activity modifying protein 3 | 0.874087  | Inlier   |
| siRNA Disorazole DMSO Run2   | NM_0058<br>56 | RAMP3     | receptor (calcitonin) activity modifying protein 3 | 0.956678  | Inlier   |
| siRNA Disorazole DMSO Run1   | NM_0063<br>25 | RAN       | RAN, member RAS oncogene family                    | -0.825114 | Inlier   |
| siRNA-Temozolomide Run2-DMSO | NM_0063<br>25 | RAN       | RAN, member RAS oncogene family                    | -0.523886 | Inlier   |
| siRNA-Temozolomide Run1-DMSO | NM_0063<br>25 | RAN       | RAN, member RAS oncogene family                    | -0.381469 | Inlier   |
| siRNA Disorazole DMSO Run3   | NM_0063<br>25 | RAN       | RAN, member RAS oncogene family                    | -0.256529 | Inlier   |
| siRNA-Vinblastine Run2-DMSO  | NM_0063<br>25 | RAN       | RAN, member RAS oncogene family                    | 0.256529  | Inlier   |
| siRNA-Temozolomide Run3-DMSO | NM_0063<br>25 | RAN       | RAN, member RAS oncogene family                    | 2.153487  | Inlier   |
| siRNA Disorazole DMSO Run2   | NM_0063<br>25 | RAN       | RAN, member RAS oncogene family                    | 15.57456  | Outlier  |
| siRNA-Vinblastine Run1-DMSO  | NM_0063<br>25 | RAN       | RAN, member RAS oncogene family                    | 15.93259  | Outlier  |

Identification of Survival Genes in Human Glioblastoma Cells Using siRNA Screening

Nikhil G Thaker, Fang Zhang, Peter R. McDonald, Tong Ying Shun, Michael D Lewen, Ian F. Pollack, and John S.

Lazo

| Molecular Pharmacology       | Gene ID       | Target | Gene Name                                   | Value     | Category |
|------------------------------|---------------|--------|---------------------------------------------|-----------|----------|
| siRNA-Temozolomide Run3-DMSO | NM_0062<br>67 | RANBP2 | RAN binding protein 2                       | -0.823092 | Inlier   |
| siRNA-Temozolomide Run2-DMSO | NM_0062<br>67 | RANBP2 | RAN binding protein 2                       | -0.525908 | Inlier   |
| siRNA-Vinblastine Run2-DMSO  | NM_0062<br>67 | RANBP2 | RAN binding protein 2                       | -0.413077 | Inlier   |
| siRNA Disorazole DMSO Run3   | NM_0062<br>67 | RANBP2 | RAN binding protein 2                       | -0.199705 | Inlier   |
| siRNA-Temozolomide Run1-DMSO | NM_0062<br>67 | RANBP2 | RAN binding protein 2                       | 0.199705  | Inlier   |
| siRNA Disorazole DMSO Run1   | NM_0062<br>67 | RANBP2 | RAN binding protein 2                       | 0.908278  | Inlier   |
| siRNA-Vinblastine Run1-DMSO  | NM_0062<br>67 | RANBP2 | RAN binding protein 2                       | 1.452219  | Inlier   |
| siRNA Disorazole DMSO Run2   | NM_0062<br>67 | RANBP2 | RAN binding protein 2                       | 1.832439  | Inlier   |
| siRNA-Temozolomide Run2-DMSO | NM_0028<br>84 | RAP1A  | RAS oncogene family<br>RAP1A, member of RAS | -1.483564 | Inlier   |
| siRNA-Vinblastine Run2-DMSO  | NM_0028<br>84 | RAP1A  | RAS oncogene family<br>RAP1A, member of RAS | -0.92947  | Inlier   |
| siRNA Disorazole DMSO Run3   | NM_0028<br>84 | RAP1A  | RAS oncogene family<br>RAP1A, member of RAS | -0.38096  | Inlier   |
| siRNA Disorazole DMSO Run1   | NM_0028<br>84 | RAP1A  | RAS oncogene family<br>RAP1A, member of RAS | -0.347924 | Inlier   |
| siRNA-Temozolomide Run3-DMSO | NM_0028<br>84 | RAP1A  | RAS oncogene family                         | 0.347924  | Inlier   |

Identification of Survival Genes in Human Glioblastoma Cells Using siRNA Screening  
 Nikhil G Thaker, Fang Zhang, Peter R. McDonald, Tong Ying Shun, Michael D Lewen, Ian F. Pollack, and John S. Lazo

Molecular Pharmacology

|                              |               |       |                                                  |           |        |
|------------------------------|---------------|-------|--------------------------------------------------|-----------|--------|
| siRNA-Temozolomide Run1-DMSO | NM_0028<br>84 | RAP1A | RAP1A,<br>member of<br>RAS<br>oncogene<br>family | 0.661679  | Inlier |
| siRNA Disorazole DMSO Run2   | NM_0028<br>84 | RAP1A | RAP1A,<br>member of<br>RAS<br>oncogene<br>family | 0.687321  | Inlier |
| siRNA-Vinblastine Run1-DMSO  | NM_0028<br>84 | RAP1A | RAP1A,<br>member of<br>RAS<br>oncogene<br>family | 1.586182  | Inlier |
| siRNA Disorazole DMSO Run3   | NM_0156<br>46 | RAP1B | RAP1B,<br>member of<br>RAS<br>oncogene<br>family | -1.316112 | Inlier |
| siRNA-Vinblastine Run2-DMSO  | NM_0156<br>46 | RAP1B | RAP1B,<br>member of<br>RAS<br>oncogene<br>family | -0.758844 | Inlier |
| siRNA Disorazole DMSO Run1   | NM_0156<br>46 | RAP1B | RAP1B,<br>member of<br>RAS<br>oncogene<br>family | -0.15065  | Inlier |
| siRNA-Vinblastine Run1-DMSO  | NM_0156<br>46 | RAP1B | RAP1B,<br>member of<br>RAS<br>oncogene<br>family | -0.094571 | Inlier |
| siRNA-Temozolomide Run3-DMSO | NM_0156<br>46 | RAP1B | RAP1B,<br>member of<br>RAS<br>oncogene<br>family | 0.094572  | Inlier |
| siRNA Disorazole DMSO Run2   | NM_0156<br>46 | RAP1B | RAP1B,<br>member of<br>RAS<br>oncogene<br>family | 0.590156  | Inlier |
| siRNA-Temozolomide Run1-DMSO | NM_0156<br>46 | RAP1B | RAP1B,<br>member of<br>RAS<br>oncogene<br>family | 1.144578  | Inlier |

Identification of Survival Genes in Human Glioblastoma Cells Using siRNA Screening  
 Nikhil G Thaker, Fang Zhang, Peter R. McDonald, Tong Ying Shun, Michael D Lewen, Ian F. Pollack, and John S. Lazo

Molecular Pharmacology

|                              |               |       |                                                  |                  |
|------------------------------|---------------|-------|--------------------------------------------------|------------------|
| siRNA-Temozolomide Run2-DMSO | NM_0156<br>46 | RAP1B | RAP1B,<br>member of<br>RAS<br>oncogene<br>family | 1.345397 Inlier  |
| siRNA Disorazole DMSO Run1   | NM_0210<br>33 | RAP2A | RAP2A,<br>member of<br>RAS<br>oncogene<br>family | -0.751767 Inlier |
| siRNA Disorazole DMSO Run3   | NM_0210<br>33 | RAP2A | RAP2A,<br>member of<br>RAS<br>oncogene<br>family | -0.701517 Inlier |
| siRNA-Temozolomide Run2-DMSO | NM_0210<br>33 | RAP2A | RAP2A,<br>member of<br>RAS<br>oncogene<br>family | -0.647483 Inlier |
| siRNA-Vinblastine Run2-DMSO  | NM_0210<br>33 | RAP2A | RAP2A,<br>member of<br>RAS<br>oncogene<br>family | -0.278145 Inlier |
| siRNA-Temozolomide Run3-DMSO | NM_0210<br>33 | RAP2A | RAP2A,<br>member of<br>RAS<br>oncogene<br>family | 0.278145 Inlier  |
| siRNA-Temozolomide Run1-DMSO | NM_0210<br>33 | RAP2A | RAP2A,<br>member of<br>RAS<br>oncogene<br>family | 0.339485 Inlier  |
| siRNA Disorazole DMSO Run2   | NM_0210<br>33 | RAP2A | RAP2A,<br>member of<br>RAS<br>oncogene<br>family | 1.76393 Inlier   |
| siRNA-Vinblastine Run1-DMSO  | NM_0210<br>33 | RAP2A | RAP2B,<br>member of<br>RAS<br>oncogene<br>family | 1.939597 Inlier  |
| siRNA-Vinblastine Run2-DMSO  | NM_0028<br>86 | RAP2B | RAP2B,<br>member of<br>RAS<br>oncogene<br>family | -2.906246 Inlier |

Identification of Survival Genes in Human Glioblastoma Cells Using siRNA Screening  
 Nikhil G Thaker, Fang Zhang, Peter R. McDonald, Tong Ying Shun, Michael D Lewen, Ian F. Pollack, and John S. Lazo

Molecular Pharmacology

|                              |               |       |                                                  |           |        |
|------------------------------|---------------|-------|--------------------------------------------------|-----------|--------|
| siRNA-Vinblastine Run1-DMSO  | NM_0028<br>86 | RAP2B | RAP2B,<br>member of<br>RAS<br>oncogene<br>family | -1.192438 | Inlier |
| siRNA Disorazole DMSO Run3   | NM_0028<br>86 | RAP2B | RAP2B,<br>member of<br>RAS<br>oncogene<br>family | -0.783722 | Inlier |
| siRNA Disorazole DMSO Run2   | NM_0028<br>86 | RAP2B | RAP2B,<br>member of<br>RAS<br>oncogene<br>family | -0.568452 | Inlier |
| siRNA Disorazole DMSO Run1   | NM_0028<br>86 | RAP2B | RAP2B,<br>member of<br>RAS<br>oncogene<br>family | 0.568452  | Inlier |
| siRNA-Temozolomide Run2-DMSO | NM_0028<br>86 | RAP2B | RAP2B,<br>member of<br>RAS<br>oncogene<br>family | 0.577339  | Inlier |
| siRNA-Temozolomide Run3-DMSO | NM_0028<br>86 | RAP2B | RAP2B,<br>member of<br>RAS<br>oncogene<br>family | 0.640287  | Inlier |
| siRNA-Temozolomide Run1-DMSO | NM_0028<br>86 | RAP2B | RAP2C,<br>member of<br>RAS<br>oncogene<br>family | 0.708713  | Inlier |
| siRNA Disorazole DMSO Run3   | NM_0211<br>83 | RAP2C | RAP2C,<br>member of<br>RAS<br>oncogene<br>family | -0.74246  | Inlier |
| siRNA-Vinblastine Run2-DMSO  | NM_0211<br>83 | RAP2C | RAP2C,<br>member of<br>RAS<br>oncogene<br>family | -0.717454 | Inlier |
| siRNA Disorazole DMSO Run1   | NM_0211<br>83 | RAP2C | RAP2C,<br>member of<br>RAS<br>oncogene<br>family | -0.631545 | Inlier |

Identification of Survival Genes in Human Glioblastoma Cells Using siRNA Screening  
 Nikhil G Thaker, Fang Zhang, Peter R. McDonald, Tong Ying Shun, Michael D Lewen, Ian F. Pollack, and John S. Lazo

Molecular Pharmacology

|                              |               |         |                                                               |                  |
|------------------------------|---------------|---------|---------------------------------------------------------------|------------------|
| siRNA-Temozolomide Run2-DMSO | NM_0211<br>83 | RAP2C   | RAP2C,<br>member of<br>RAS<br>oncogene<br>family              | -0.03305 Inlier  |
| siRNA-Vinblastine Run1-DMSO  | NM_0211<br>83 | RAP2C   | RAP2C,<br>member of<br>RAS<br>oncogene<br>family              | 0.03305 Inlier   |
| siRNA-Temozolomide Run3-DMSO | NM_0211<br>83 | RAP2C   | RAP2C,<br>member of<br>RAS<br>oncogene<br>family              | 0.169483 Inlier  |
| siRNA-Temozolomide Run1-DMSO | NM_0211<br>83 | RAP2C   | RAP2C,<br>member of<br>RAS<br>oncogene<br>family              | 1.007605 Inlier  |
| siRNA Disorazole DMSO Run2   | NM_0211<br>83 | RAP2C   | RAP2C,<br>member of<br>RAS<br>oncogene<br>family              | 2.687854 Inlier  |
| siRNA-Temozolomide Run3-DMSO | NM_0053<br>12 | RAPGEF1 | Rap<br>guanine<br>nucleotide<br>exchange<br>factor<br>(GEF) 1 | -0.92601 Inlier  |
| siRNA-Vinblastine Run2-DMSO  | NM_0053<br>12 | RAPGEF1 | Rap<br>guanine<br>nucleotide<br>exchange<br>factor<br>(GEF) 1 | -0.75431 Inlier  |
| siRNA-Temozolomide Run2-DMSO | NM_0053<br>12 | RAPGEF1 | Rap<br>guanine<br>nucleotide<br>exchange<br>factor<br>(GEF) 1 | -0.59469 Inlier  |
| siRNA Disorazole DMSO Run3   | NM_0053<br>12 | RAPGEF1 | Rap<br>guanine<br>nucleotide<br>exchange<br>factor<br>(GEF) 1 | -0.098707 Inlier |

Identification of Survival Genes in Human Glioblastoma Cells Using siRNA Screening  
 Nikhil G Thaker, Fang Zhang, Peter R. McDonald, Tong Ying Shun, Michael D Lewen, Ian F. Pollack, and John S. Lazo

Molecular Pharmacology

| siRNA Treatment              | Gene ID   | Gene Name | Protein Name                                   | Log2 Fold Change | Outlier Status |
|------------------------------|-----------|-----------|------------------------------------------------|------------------|----------------|
| siRNA-Temozolomide Run1-DMSO | NM_005312 | RAPGEF1   | Rap guanine nucleotide exchange factor (GEF) 1 | 0.098707         | Inlier         |
| siRNA Disorazole DMSO Run1   | NM_005312 | RAPGEF1   | Rap guanine nucleotide exchange factor (GEF) 1 | 0.18447          | Inlier         |
| siRNA-Vinblastine Run1-DMSO  | NM_005312 | RAPGEF1   | Rap guanine nucleotide exchange factor (GEF) 1 | 1.577155         | Inlier         |
| siRNA Disorazole DMSO Run2   | NM_005312 | RAPGEF1   | Rap guanine nucleotide exchange factor (GEF) 1 | 1.798628         | Inlier         |
| siRNA-Temozolomide Run3-DMSO | NM_006105 | RAPGEF3   | Rap guanine nucleotide exchange factor (GEF) 3 | -1.830785        | Inlier         |
| siRNA-Temozolomide Run1-DMSO | NM_006105 | RAPGEF3   | Rap guanine nucleotide exchange factor (GEF) 3 | -0.516823        | Inlier         |
| siRNA-Vinblastine Run2-DMSO  | NM_006105 | RAPGEF3   | Rap guanine nucleotide exchange factor (GEF) 3 | -0.317408        | Inlier         |
| siRNA Disorazole DMSO Run3   | NM_006105 | RAPGEF3   | Rap guanine nucleotide exchange factor (GEF) 3 | -0.122441        | Inlier         |



Identification of Survival Genes in Human Glioblastoma Cells Using siRNA Screening  
 Nikhil G Thaker, Fang Zhang, Peter R. McDonald, Tong Ying Shun, Michael D Lewen, Ian F. Pollack, and John S. Lazo

Molecular Pharmacology

| siRNA                        | Gene    | Gene ID   | Protein                                        | Value     | Outlier |
|------------------------------|---------|-----------|------------------------------------------------|-----------|---------|
| siRNA-Temozolomide Run2-DMSO | RAPGEF3 | NM_006105 | Rap guanine nucleotide exchange factor (GEF) 3 | 0.12244   | Inlier  |
| siRNA Disorazole DMSO Run1   | RAPGEF3 | NM_006105 | Rap guanine nucleotide exchange factor (GEF) 3 | 0.832177  | Inlier  |
| siRNA Disorazole DMSO Run2   | RAPGEF3 | NM_006105 | Rap guanine nucleotide exchange factor (GEF) 3 | 1.568165  | Inlier  |
| siRNA-Vinblastine Run1-DMSO  | RAPGEF3 | NM_006105 | Rap guanine nucleotide exchange factor (GEF) 3 | 1.865074  | Inlier  |
| siRNA-Temozolomide Run3-DMSO | RAPGEF4 | NM_007023 | Rap guanine nucleotide exchange factor (GEF) 4 | -1.584086 | Inlier  |
| siRNA-Temozolomide Run2-DMSO | RAPGEF4 | NM_007023 | Rap guanine nucleotide exchange factor (GEF) 4 | -1.11351  | Inlier  |
| siRNA-Temozolomide Run1-DMSO | RAPGEF4 | NM_007023 | Rap guanine nucleotide exchange factor (GEF) 4 | -0.564042 | Inlier  |
| siRNA Disorazole DMSO Run3   | RAPGEF4 | NM_007023 | Rap guanine nucleotide exchange factor (GEF) 4 | -0.014699 | Inlier  |

Identification of Survival Genes in Human Glioblastoma Cells Using siRNA Screening  
 Nikhil G Thaker, Fang Zhang, Peter R. McDonald, Tong Ying Shun, Michael D Lewen, Ian F. Pollack, and John S. Lazo

Molecular Pharmacology

| siRNA Treatment              | Gene    | Accession     | Protein                                        | Score     | Category |
|------------------------------|---------|---------------|------------------------------------------------|-----------|----------|
| siRNA Disorazole DMSO Run1   | RAPGEF4 | NM_0070<br>23 | Rap guanine nucleotide exchange factor (GEF) 4 | 0.0147    | Inlier   |
| siRNA-Vinblastine Run2-DMSO  | RAPGEF4 | NM_0070<br>23 | Rap guanine nucleotide exchange factor (GEF) 4 | 0.119761  | Inlier   |
| siRNA Disorazole DMSO Run2   | RAPGEF4 | NM_0070<br>23 | Rap guanine nucleotide exchange factor (GEF) 4 | 0.784958  | Inlier   |
| siRNA-Vinblastine Run1-DMSO  | RAPGEF4 | NM_0070<br>23 | Rap guanine nucleotide exchange factor (GEF) 4 | 0.936981  | Inlier   |
| siRNA-Temozolomide Run2-DMSO | RAPGEF5 | NM_0122<br>94 | Rap guanine nucleotide exchange factor (GEF) 5 | -0.863518 | Inlier   |
| siRNA-Temozolomide Run3-DMSO | RAPGEF5 | NM_0122<br>94 | Rap guanine nucleotide exchange factor (GEF) 5 | -0.485482 | Inlier   |
| siRNA-Temozolomide Run1-DMSO | RAPGEF5 | NM_0122<br>94 | Rap guanine nucleotide exchange factor (GEF) 5 | -0.228982 | Inlier   |
| siRNA Disorazole DMSO Run3   | RAPGEF5 | NM_0122<br>94 | Rap guanine nucleotide exchange factor (GEF) 5 | -0.098607 | Inlier   |

Identification of Survival Genes in Human Glioblastoma Cells Using siRNA Screening

Nikhil G Thaker, Fang Zhang, Peter R. McDonald, Tong Ying Shun, Michael D Lewen, Ian F. Pollack, and John S. Lazo

Molecular Pharmacology

| siRNA                        | Gene    | Accession | Gene Name       | Value     | Category |
|------------------------------|---------|-----------|-----------------|-----------|----------|
| siRNA-Vinblastine Run2-DMSO  | NM_0122 | 94        | RAPGEF5 (GEF) 5 | 0.098606  | Inlier   |
| siRNA Disorazole DMSO Run1   | NM_0122 | 94        | RAPGEF5 (GEF) 5 | 2.278284  | Inlier   |
| siRNA Disorazole DMSO Run2   | NM_0122 | 94        | RAPGEF5 (GEF) 5 | 2.372134  | Inlier   |
| siRNA-Vinblastine Run1-DMSO  | NM_0122 | 94        | RAPGEF5 (GEF) 5 | 3.725981  | Outlier  |
| siRNA-Temozolomide Run3-DMSO | NM_0163 | 40        | RAPGEF6 (GEF) 6 | -0.911701 | Inlier   |
| siRNA Disorazole DMSO Run3   | NM_0163 | 40        | RAPGEF6 (GEF) 6 | -0.437868 | Inlier   |
| siRNA-Temozolomide Run2-DMSO | NM_0163 | 40        | RAPGEF6 (GEF) 6 | -0.416177 | Inlier   |
| siRNA-Temozolomide Run1-DMSO | NM_0163 | 40        | RAPGEF6 (GEF) 6 | -0.093581 | Inlier   |

Identification of Survival Genes in Human Glioblastoma Cells Using siRNA Screening  
 Nikhil G Thaker, Fang Zhang, Peter R. McDonald, Tong Ying Shun, Michael D Lewen, Ian F. Pollack, and John S. Lazo

Molecular Pharmacology

| siRNA Treatment              | Gene ID   | Gene Name | Protein Name                                        | Value     | Outlier Type |
|------------------------------|-----------|-----------|-----------------------------------------------------|-----------|--------------|
| siRNA-Vinblastine Run2-DMSO  | NM_016340 | RAPGEF6   | Rap guanine nucleotide exchange factor (GEF) 6      | 0.093581  | Inlier       |
| siRNA Disorazole DMSO Run2   | NM_016340 | RAPGEF6   | Rap guanine nucleotide exchange factor (GEF) 6      | 0.911132  | Inlier       |
| siRNA Disorazole DMSO Run1   | NM_016340 | RAPGEF6   | Rap guanine nucleotide exchange factor (GEF) 6      | 1.159667  | Inlier       |
| siRNA-Vinblastine Run1-DMSO  | NM_016340 | RAPGEF6   | Rap guanine nucleotide exchange factor (GEF) 6      | 1.802132  | Inlier       |
| siRNA-Temozolomide Run3-DMSO | NM_016339 | RAPGEFL1  | Rap guanine nucleotide exchange factor (GEF)-like 1 | -0.836908 | Inlier       |
| siRNA-Vinblastine Run2-DMSO  | NM_016339 | RAPGEFL1  | Rap guanine nucleotide exchange factor (GEF)-like 1 | -0.61893  | Inlier       |
| siRNA Disorazole DMSO Run3   | NM_016339 | RAPGEFL1  | Rap guanine nucleotide exchange factor (GEF)-like 1 | -0.445722 | Inlier       |
| siRNA-Temozolomide Run1-DMSO | NM_016339 | RAPGEFL1  | Rap guanine nucleotide exchange factor (GEF)-like 1 | -0.246486 | Inlier       |

Identification of Survival Genes in Human Glioblastoma Cells Using siRNA Screening  
 Nikhil G Thaker, Fang Zhang, Peter R. McDonald, Tong Ying Shun, Michael D Lewen, Ian F. Pollack, and John S. Lazo

Molecular Pharmacology

| siRNA Treatment              | Gene ID      | Gene Name | Accession | Value | Outlier Status                                    |
|------------------------------|--------------|-----------|-----------|-------|---------------------------------------------------|
| siRNA Disorazole DMSO Run1   | NM_016339    | RAPGEFL   | 1         | 1     | 0.246486 Inlier                                   |
|                              |              |           |           |       | Rap guanine nucleotide exchange factor (GEF)-like |
| siRNA-Temozolomide Run2-DMSO | NM_016339    | RAPGEFL   | 1         | 1     | 0.73007 Inlier                                    |
|                              |              |           |           |       | Rap guanine nucleotide exchange factor (GEF)-like |
| siRNA-Vinblastine Run1-DMSO  | NM_016339    | RAPGEFL   | 1         | 1     | 1.345823 Inlier                                   |
|                              |              |           |           |       | Rap guanine nucleotide exchange factor (GEF)-like |
| siRNA Disorazole DMSO Run2   | NM_016339    | RAPGEFL   | 1         | 1     | 1.526305 Inlier                                   |
|                              |              |           |           |       | Rap guanine nucleotide exchange factor (GEF)-like |
| siRNA Disorazole DMSO Run1   | NM_001024809 | RARA      |           |       | -0.767552 Inlier                                  |
|                              |              |           |           |       | retinoic acid receptor, alpha                     |
| siRNA-Vinblastine Run1-DMSO  | NM_001024809 | RARA      |           |       | -0.581448 Inlier                                  |
|                              |              |           |           |       | retinoic acid receptor, alpha                     |
| siRNA-Temozolomide Run2-DMSO | NM_001024809 | RARA      |           |       | -0.295132 Inlier                                  |
|                              |              |           |           |       | retinoic acid receptor, alpha                     |
| siRNA-Temozolomide Run1-DMSO | NM_001024809 | RARA      |           |       | -0.187331 Inlier                                  |
|                              |              |           |           |       | retinoic acid receptor, alpha                     |
| siRNA-Temozolomide Run3-DMSO | NM_001024809 | RARA      |           |       | 0.187331 Inlier                                   |
|                              |              |           |           |       | retinoic acid receptor, alpha                     |
| siRNA Disorazole DMSO Run2   | NM_001024809 | RARA      |           |       | 0.820572 Inlier                                   |
|                              |              |           |           |       | retinoic acid receptor, alpha                     |

Identification of Survival Genes in Human Glioblastoma Cells Using siRNA Screening  
 Nikhil G Thaker, Fang Zhang, Peter R. McDonald, Tong Ying Shun, Michael D Lewen, Ian F. Pollack, and John S. Lazo

Molecular Pharmacology

|                              |                  |      |                               |           |         |
|------------------------------|------------------|------|-------------------------------|-----------|---------|
| siRNA-Vinblastine Run2-DMSO  | NM_0010<br>24809 | RARA | retinoic acid receptor, alpha | 1.245602  | Inlier  |
| siRNA Disorazole DMSO Run3   | NM_0010<br>24809 | RARA | retinoic acid receptor, alpha | 7.585509  | Outlier |
| siRNA-Temozolomide Run3-DMSO | NM_0161<br>52    | RARB | retinoic acid receptor, beta  | -1.488097 | Inlier  |
| siRNA Disorazole DMSO Run1   | NM_0161<br>52    | RARB | retinoic acid receptor, beta  | -0.498713 | Inlier  |
| siRNA-Temozolomide Run1-DMSO | NM_0161<br>52    | RARB | retinoic acid receptor, beta  | -0.408036 | Inlier  |
| siRNA Disorazole DMSO Run2   | NM_0161<br>52    | RARB | retinoic acid receptor, beta  | -0.029216 | Inlier  |
| siRNA-Temozolomide Run2-DMSO | NM_0161<br>52    | RARB | retinoic acid receptor, beta  | 0.029215  | Inlier  |
| siRNA Disorazole DMSO Run3   | NM_0161<br>52    | RARB | retinoic acid receptor, beta  | 0.850287  | Inlier  |
| siRNA-Vinblastine Run1-DMSO  | NM_0161<br>52    | RARB | retinoic acid receptor, beta  | 0.995161  | Inlier  |
| siRNA-Vinblastine Run2-DMSO  | NM_0161<br>52    | RARB | retinoic acid receptor, beta  | 1.544719  | Inlier  |
| siRNA-Temozolomide Run3-DMSO | NM_0009<br>66    | RARG | retinoic acid receptor, gamma | -1.273313 | Inlier  |
| siRNA Disorazole DMSO Run2   | NM_0009<br>66    | RARG | retinoic acid receptor, gamma | -0.7446   | Inlier  |
| siRNA-Temozolomide Run1-DMSO | NM_0009<br>66    | RARG | retinoic acid receptor, gamma | -0.120261 | Inlier  |

Identification of Survival Genes in Human Glioblastoma Cells Using siRNA Screening  
 Nikhil G Thaker, Fang Zhang, Peter R. McDonald, Tong Ying Shun, Michael D Lewen, Ian F. Pollack, and John S. Lazo

Molecular Pharmacology

|                              |               |         |                                                       |           |        |
|------------------------------|---------------|---------|-------------------------------------------------------|-----------|--------|
| siRNA Disorazole DMSO Run1   | NM_0009<br>66 | RARG    | retinoic acid receptor, gamma                         | -0.107359 | Inlier |
| siRNA-Temozolomide Run2-DMSO | NM_0009<br>66 | RARG    | retinoic acid receptor, gamma                         | 0.107359  | Inlier |
| siRNA-Vinblastine Run1-DMSO  | NM_0009<br>66 | RARG    | retinoic acid receptor, gamma                         | 0.6044    | Inlier |
| siRNA Disorazole DMSO Run3   | NM_0009<br>66 | RARG    | retinoic acid receptor, gamma                         | 1.312019  | Inlier |
| siRNA-Vinblastine Run2-DMSO  | NM_0009<br>66 | RARG    | retinoic acid receptor, gamma                         | 1.523287  | Inlier |
| siRNA-Vinblastine Run2-DMSO  | NM_2069<br>63 | RARRES1 | retinoic acid receptor responder (tazarotene induced) | -0.8616   | Inlier |
| siRNA-Temozolomide Run3-DMSO | NM_2069<br>63 | RARRES1 | retinoic acid receptor responder (tazarotene induced) | -0.608058 | Inlier |
| siRNA-Temozolomide Run2-DMSO | NM_2069<br>63 | RARRES1 | retinoic acid receptor responder (tazarotene induced) | -0.543662 | Inlier |
| siRNA Disorazole DMSO Run3   | NM_2069<br>63 | RARRES1 | retinoic acid receptor responder (tazarotene induced) | -0.176214 | Inlier |

Identification of Survival Genes in Human Glioblastoma Cells Using siRNA Screening  
 Nikhil G Thaker, Fang Zhang, Peter R. McDonald, Tong Ying Shun, Michael D Lewen, Ian F. Pollack, and John S. Lazo  
 Molecular Pharmacology

|                              |               |         |   |                                                       |                  |
|------------------------------|---------------|---------|---|-------------------------------------------------------|------------------|
| siRNA Disorazole DMSO Run1   | NM_2069<br>63 | RARRES1 | 1 | retinoic acid receptor responder (tazarotene induced) | 0.176214 Inlier  |
| siRNA-Temozolomide Run1-DMSO | NM_2069<br>63 | RARRES1 | 1 | retinoic acid receptor responder (tazarotene induced) | 0.740942 Inlier  |
| siRNA-Vinblastine Run1-DMSO  | NM_2069<br>63 | RARRES1 | 1 | retinoic acid receptor responder (tazarotene induced) | 0.906281 Inlier  |
| siRNA Disorazole DMSO Run2   | NM_2069<br>63 | RARRES1 | 1 | retinoic acid receptor responder (tazarotene induced) | 1.219485 Inlier  |
| siRNA-Temozolomide Run3-DMSO | NM_0028<br>89 | RARRES2 | 2 | retinoic acid receptor responder (tazarotene induced) | -1.528716 Inlier |
| siRNA Disorazole DMSO Run1   | NM_0028<br>89 | RARRES2 | 2 | retinoic acid receptor responder (tazarotene induced) | -0.709409 Inlier |



Identification of Survival Genes in Human Glioblastoma Cells Using siRNA Screening  
 Nikhil G Thaker, Fang Zhang, Peter R. McDonald, Tong Ying Shun, Michael D Lewen, Ian F. Pollack, and John S. Lazo  
 Molecular Pharmacology

| siRNA                        | Gene      | Gene ID | Gene Name                                             | Value     | Category |
|------------------------------|-----------|---------|-------------------------------------------------------|-----------|----------|
| siRNA-Vinblastine Run1-DMSO  | NM_002889 | RARRES2 | retinoic acid receptor responder (tazarotene induced) | -0.639591 | Inlier   |
| siRNA-Temozolomide Run2-DMSO | NM_002889 | RARRES2 | retinoic acid receptor responder (tazarotene induced) | -0.219646 | Inlier   |
| siRNA-Temozolomide Run1-DMSO | NM_002889 | RARRES2 | retinoic acid receptor responder (tazarotene induced) | 0.219646  | Inlier   |
| siRNA-Vinblastine Run2-DMSO  | NM_002889 | RARRES2 | retinoic acid receptor responder (tazarotene induced) | 0.560648  | Inlier   |
| siRNA Disorazole DMSO Run2   | NM_002889 | RARRES2 | retinoic acid receptor responder (tazarotene induced) | 1.549527  | Inlier   |
| siRNA Disorazole DMSO Run3   | NM_002889 | RARRES2 | retinoic acid receptor responder (tazarotene induced) | 4.362136  | Outlier  |

Identification of Survival Genes in Human Glioblastoma Cells Using siRNA Screening  
 Nikhil G Thaker, Fang Zhang, Peter R. McDonald, Tong Ying Shun, Michael D Lewen, Ian F. Pollack, and John S. Lazo  
 Molecular Pharmacology

|                              |               |         |   |                                                       |           |        |
|------------------------------|---------------|---------|---|-------------------------------------------------------|-----------|--------|
| siRNA Disorazole DMSO Run2   | NM_0045<br>85 | RARRES3 | 3 | retinoic acid receptor responder (tazarotene induced) | -1.348773 | Inlier |
| siRNA-Temozolomide Run3-DMSO | NM_0045<br>85 | RARRES3 | 3 | retinoic acid receptor responder (tazarotene induced) | -1.339529 | Inlier |
| siRNA Disorazole DMSO Run3   | NM_0045<br>85 | RARRES3 | 3 | retinoic acid receptor responder (tazarotene induced) | -0.360177 | Inlier |
| siRNA-Temozolomide Run1-DMSO | NM_0045<br>85 | RARRES3 | 3 | retinoic acid receptor responder (tazarotene induced) | -0.221138 | Inlier |
| siRNA-Temozolomide Run2-DMSO | NM_0045<br>85 | RARRES3 | 3 | retinoic acid receptor responder (tazarotene induced) | 0.221137  | Inlier |
| siRNA Disorazole DMSO Run1   | NM_0045<br>85 | RARRES3 | 3 | retinoic acid receptor responder (tazarotene induced) | 0.231142  | Inlier |

Identification of Survival Genes in Human Glioblastoma Cells Using siRNA Screening  
 Nikhil G Thaker, Fang Zhang, Peter R. McDonald, Tong Ying Shun, Michael D Lewen, Ian F. Pollack, and John S. Lazo  
 Molecular Pharmacology

|                              |           |         |   |                                                       |           |        |
|------------------------------|-----------|---------|---|-------------------------------------------------------|-----------|--------|
| siRNA-Vinblastine Run1-DMSO  | NM_004585 | RARRES3 | 3 | retinoic acid receptor responder (tazarotene induced) | 0.988823  | Inlier |
| siRNA-Vinblastine Run2-DMSO  | NM_004585 | RARRES3 | 3 | retinoic acid receptor responder (tazarotene induced) | 1.818936  | Inlier |
| siRNA-Temozolomide Run2-DMSO | NM_002887 | RARS    |   | arginyl-tRNA synthetase                               | -0.95312  | Inlier |
| siRNA Disorazole DMSO Run3   | NM_002887 | RARS    |   | arginyl-tRNA synthetase                               | -0.811209 | Inlier |
| siRNA Disorazole DMSO Run1   | NM_002887 | RARS    |   | arginyl-tRNA synthetase                               | -0.537791 | Inlier |
| siRNA-Vinblastine Run2-DMSO  | NM_002887 | RARS    |   | arginyl-tRNA synthetase                               | -0.318433 | Inlier |
| siRNA-Temozolomide Run1-DMSO | NM_002887 | RARS    |   | arginyl-tRNA synthetase                               | 0.318433  | Inlier |
| siRNA-Temozolomide Run3-DMSO | NM_002887 | RARS    |   | arginyl-tRNA synthetase                               | 0.404702  | Inlier |
| siRNA Disorazole DMSO Run2   | NM_002887 | RARS    |   | arginyl-tRNA synthetase                               | 1.574112  | Inlier |
| siRNA-Vinblastine Run1-DMSO  | NM_002887 | RARS    |   | arginyl-tRNA synthetase                               | 1.985502  | Inlier |
| siRNA-Temozolomide Run2-DMSO | NM_020320 | RARSL   |   | arginyl-tRNA synthetase-like                          | -0.830825 | Inlier |

Identification of Survival Genes in Human Glioblastoma Cells Using siRNA Screening  
 Nikhil G Thaker, Fang Zhang, Peter R. McDonald, Tong Ying Shun, Michael D Lewen, Ian F. Pollack, and John S. Lazo

Molecular Pharmacology

|                                  |               |       |                                                                        |           |        |
|----------------------------------|---------------|-------|------------------------------------------------------------------------|-----------|--------|
| siRNA Disorazole DMSO Run3       | NM_0203<br>20 | RARSL | arginyl-<br>tRNA<br>synthetase-<br>like                                | -0.575087 | Inlier |
| siRNA-Temozolomide Run1-<br>DMSO | NM_0203<br>20 | RARSL | arginyl-<br>tRNA<br>synthetase-<br>like                                | -0.280212 | Inlier |
| siRNA Disorazole DMSO Run1       | NM_0203<br>20 | RARSL | arginyl-<br>tRNA<br>synthetase-<br>like                                | -0.108731 | Inlier |
| siRNA-Temozolomide Run3-<br>DMSO | NM_0203<br>20 | RARSL | arginyl-<br>tRNA<br>synthetase-<br>like                                | 0.10873   | Inlier |
| siRNA-Vinblastine Run2-<br>DMSO  | NM_0203<br>20 | RARSL | arginyl-<br>tRNA<br>synthetase-<br>like                                | 0.773913  | Inlier |
| siRNA Disorazole DMSO Run2       | NM_0203<br>20 | RARSL | arginyl-<br>tRNA<br>synthetase-<br>like                                | 1.155295  | Inlier |
| siRNA-Vinblastine Run1-<br>DMSO  | NM_0203<br>20 | RARSL | arginyl-<br>tRNA<br>synthetase-<br>like                                | 1.722257  | Inlier |
| siRNA Disorazole DMSO Run1       | NM_0226<br>50 | RASA1 | RAS p21<br>protein<br>activator<br>(GTPase<br>activating<br>protein) 1 | -1.200879 | Inlier |
| siRNA-Vinblastine Run2-<br>DMSO  | NM_0226<br>50 | RASA1 | RAS p21<br>protein<br>activator<br>(GTPase<br>activating<br>protein) 1 | -1.074821 | Inlier |
| siRNA Disorazole DMSO Run3       | NM_0226<br>50 | RASA1 | RAS p21<br>protein<br>activator<br>(GTPase<br>activating<br>protein) 1 | -0.977207 | Inlier |
| siRNA-Vinblastine Run1-<br>DMSO  | NM_0226<br>50 | RASA1 | RAS p21<br>protein<br>activator<br>(GTPase<br>activating<br>protein) 1 | -0.065546 | Inlier |

Identification of Survival Genes in Human Glioblastoma Cells Using siRNA Screening  
 Nikhil G Thaker, Fang Zhang, Peter R. McDonald, Tong Ying Shun, Michael D Lewen, Ian F. Pollack, and John S. Lazo

Molecular Pharmacology

|                              |               |       |                                                                        |           |        |
|------------------------------|---------------|-------|------------------------------------------------------------------------|-----------|--------|
| siRNA-Temozolomide Run3-DMSO | NM_0226<br>50 | RASA1 | RAS p21<br>protein<br>activator<br>(GTPase<br>activating<br>protein) 1 | 0.065545  | Inlier |
| siRNA-Temozolomide Run2-DMSO | NM_0226<br>50 | RASA1 | RAS p21<br>protein<br>activator<br>(GTPase<br>activating<br>protein) 1 | 0.073145  | Inlier |
| siRNA Disorazole DMSO Run2   | NM_0226<br>50 | RASA1 | RAS p21<br>protein<br>activator<br>(GTPase<br>activating<br>protein) 1 | 0.645974  | Inlier |
| siRNA-Temozolomide Run1-DMSO | NM_0226<br>50 | RASA1 | RAS p21<br>protein<br>activator<br>(GTPase<br>activating<br>protein) 1 | 0.703026  | Inlier |
| siRNA Disorazole DMSO Run3   | NM_0065<br>06 | RASA2 | RAS p21<br>protein<br>activator 2                                      | -0.823997 | Inlier |
| siRNA-Vinblastine Run2-DMSO  | NM_0065<br>06 | RASA2 | RAS p21<br>protein<br>activator 2                                      | -0.525003 | Inlier |
| siRNA-Temozolomide Run2-DMSO | NM_0065<br>06 | RASA2 | RAS p21<br>protein<br>activator 2                                      | -0.176678 | Inlier |
| siRNA-Temozolomide Run1-DMSO | NM_0065<br>06 | RASA2 | RAS p21<br>protein<br>activator 2                                      | -0.059529 | Inlier |
| siRNA Disorazole DMSO Run1   | NM_0065<br>06 | RASA2 | RAS p21<br>protein<br>activator 2                                      | 0.059529  | Inlier |
| siRNA-Temozolomide Run3-DMSO | NM_0065<br>06 | RASA2 | RAS p21<br>protein<br>activator 2                                      | 0.827348  | Inlier |
| siRNA Disorazole DMSO Run2   | NM_0065<br>06 | RASA2 | RAS p21<br>protein<br>activator 2                                      | 1.09871   | Inlier |
| siRNA-Vinblastine Run1-DMSO  | NM_0065<br>06 | RASA2 | RAS p21<br>protein<br>activator 2                                      | 1.389304  | Inlier |
| siRNA Disorazole DMSO Run3   | NM_0073<br>68 | RASA3 | protein<br>activator 3                                                 | -3.355846 | Inlier |

Identification of Survival Genes in Human Glioblastoma Cells Using siRNA Screening  
 Nikhil G Thaker, Fang Zhang, Peter R. McDonald, Tong Ying Shun, Michael D Lewen, Ian F. Pollack, and John S. Lazo

|                              |               |        |                                                         |           |        |
|------------------------------|---------------|--------|---------------------------------------------------------|-----------|--------|
| Molecular Pharmacology       |               |        |                                                         | RAS p21   |        |
| siRNA-Temozolomide Run3-DMSO | NM_0073<br>68 | RASA3  | protein<br>activator 3                                  | -2.701088 | Inlier |
| siRNA-Vinblastine Run1-DMSO  | NM_0073<br>68 | RASA3  | protein<br>activator 3                                  | -0.726686 | Inlier |
| siRNA-Vinblastine Run2-DMSO  | NM_0073<br>68 | RASA3  | protein<br>activator 3                                  | -0.22733  | Inlier |
| siRNA-Temozolomide Run1-DMSO | NM_0073<br>68 | RASA3  | protein<br>activator 3                                  | 0.22733   | Inlier |
| siRNA-Temozolomide Run2-DMSO | NM_0073<br>68 | RASA3  | protein<br>activator 3                                  | 0.384867  | Inlier |
| siRNA Disorazole DMSO Run1   | NM_0073<br>68 | RASA3  | protein<br>activator 3                                  | 0.622314  | Inlier |
| siRNA Disorazole DMSO Run2   | NM_0073<br>68 | RASA3  | protein<br>activator 3                                  | 0.888236  | Inlier |
| siRNA-Temozolomide Run2-DMSO | NM_0069<br>89 | RASA4  | protein<br>activator 4                                  | -1.570253 | Inlier |
| siRNA-Vinblastine Run2-DMSO  | NM_0069<br>89 | RASA4  | protein<br>activator 4                                  | -0.905158 | Inlier |
| siRNA Disorazole DMSO Run3   | NM_0069<br>89 | RASA4  | protein<br>activator 4                                  | -0.424184 | Inlier |
| siRNA-Temozolomide Run1-DMSO | NM_0069<br>89 | RASA4  | protein<br>activator 4                                  | -0.344573 | Inlier |
| siRNA-Vinblastine Run1-DMSO  | NM_0069<br>89 | RASA4  | protein<br>activator 4                                  | 0.344573  | Inlier |
| siRNA Disorazole DMSO Run2   | NM_0069<br>89 | RASA4  | protein<br>activator 4                                  | 0.603107  | Inlier |
| siRNA Disorazole DMSO Run1   | NM_0069<br>89 | RASA4  | protein<br>activator 4                                  | 0.745893  | Inlier |
| siRNA-Temozolomide Run3-DMSO | NM_0069<br>89 | RASA4  | protein<br>activator 4                                  | 1.748984  | Inlier |
| siRNA-Temozolomide Run3-DMSO | NM_0046<br>58 | RASAL1 | RAS<br>protein<br>activator<br>like 1<br>(GAP1<br>like) | -1.505011 | Inlier |

Identification of Survival Genes in Human Glioblastoma Cells Using siRNA Screening  
 Nikhil G Thaker, Fang Zhang, Peter R. McDonald, Tong Ying Shun, Michael D Lewen, Ian F. Pollack, and John S. Lazo

Molecular Pharmacology

| siRNA Treatment              | Gene ID   | Gene Name | Gene Description                         | Value     | Category |
|------------------------------|-----------|-----------|------------------------------------------|-----------|----------|
| siRNA-Vinblastine Run2-DMSO  | NM_004658 | RASAL1    | RAS protein activator like 1 (GAP1 like) | -0.820284 | Inlier   |
| siRNA Disorazole DMSO Run3   | NM_004658 | RASAL1    | RAS protein activator like 1 (GAP1 like) | -0.427584 | Inlier   |
| siRNA-Temozolomide Run2-DMSO | NM_004658 | RASAL1    | RAS protein activator like 1 (GAP1 like) | -0.426372 | Inlier   |
| siRNA-Vinblastine Run1-DMSO  | NM_004658 | RASAL1    | RAS protein activator like 1 (GAP1 like) | 0.426372  | Inlier   |
| siRNA Disorazole DMSO Run1   | NM_004658 | RASAL1    | RAS protein activator like 1 (GAP1 like) | 0.626737  | Inlier   |
| siRNA-Temozolomide Run1-DMSO | NM_004658 | RASAL1    | RAS protein activator like 1 (GAP1 like) | 0.722263  | Inlier   |
| siRNA Disorazole DMSO Run2   | NM_004658 | RASAL1    | RAS protein activator like 1 (GAP1 like) | 1.004618  | Inlier   |
| siRNA Disorazole DMSO Run3   | NM_170692 | RASAL2    | RAS protein activator like 2             | -0.704403 | Inlier   |
| siRNA-Vinblastine Run2-DMSO  | NM_170692 | RASAL2    | RAS protein activator like 2             | -0.644598 | Inlier   |

Identification of Survival Genes in Human Glioblastoma Cells Using siRNA Screening  
 Nikhil G Thaker, Fang Zhang, Peter R. McDonald, Tong Ying Shun, Michael D Lewen, Ian F. Pollack, and John S. Lazo

Molecular Pharmacology

| siRNA                        | Gene    | Gene ID | Gene Name | Log Fold Change | Outlier Status |
|------------------------------|---------|---------|-----------|-----------------|----------------|
| siRNA-Temozolomide Run1-DMSO | NM_1706 | 92      | RASAL2    | -0.617081       | Inlier         |
| siRNA-Temozolomide Run2-DMSO | NM_1706 | 92      | RASAL2    | -0.126573       | Inlier         |
| siRNA Disorazole DMSO Run1   | NM_1706 | 92      | RASAL2    | 0.126573        | Inlier         |
| siRNA-Temozolomide Run3-DMSO | NM_1706 | 92      | RASAL2    | 2.949592        | Inlier         |
| siRNA-Vinblastine Run1-DMSO  | NM_1706 | 92      | RASAL2    | 5.047563        | Outlier        |
| siRNA Disorazole DMSO Run2   | NM_1706 | 92      | RASAL2    | 7.766654        | Outlier        |
| siRNA-Vinblastine Run2-DMSO  | NM_0160 | 84      | RASD1     | -0.808477       | Inlier         |
| siRNA Disorazole DMSO Run1   | NM_0160 | 84      | RASD1     | -0.724001       | Inlier         |
| siRNA Disorazole DMSO Run3   | NM_0160 | 84      | RASD1     | -0.607732       | Inlier         |
| siRNA-Temozolomide Run2-DMSO | NM_0160 | 84      | RASD1     | -0.519685       | Inlier         |
| siRNA-Temozolomide Run3-DMSO | NM_0160 | 84      | RASD1     | 0.519685        | Inlier         |
| siRNA-Temozolomide Run1-DMSO | NM_0160 | 84      | RASD1     | 0.646554        | Inlier         |
| siRNA-Vinblastine Run1-DMSO  | NM_0160 | 84      | RASD1     | 0.702446        | Inlier         |



Identification of Survival Genes in Human Glioblastoma Cells Using siRNA Screening  
 Nikhil G Thaker, Fang Zhang, Peter R. McDonald, Tong Ying Shun, Michael D Lewen, Ian F. Pollack, and John S. Lazo

Molecular Pharmacology

|                                  |               |         |                                                                                |           |        |
|----------------------------------|---------------|---------|--------------------------------------------------------------------------------|-----------|--------|
| siRNA Disorazole DMSO Run2       | NM_0160<br>84 | RASD1   | RAS,<br>dexameth<br>asone-<br>induced 1                                        | 1.166464  | Inlier |
| siRNA Disorazole DMSO Run1       | NM_0143<br>10 | RASD2   | RASD<br>family,<br>member 2                                                    | -1.379638 | Inlier |
| siRNA-Vinblastine Run2-<br>DMSO  | NM_0143<br>10 | RASD2   | RASD<br>family,<br>member 2                                                    | -1.274854 | Inlier |
| siRNA Disorazole DMSO Run3       | NM_0143<br>10 | RASD2   | RASD<br>family,<br>member 2                                                    | -1.046464 | Inlier |
| siRNA-Temozolomide Run2-<br>DMSO | NM_0143<br>10 | RASD2   | RASD<br>family,<br>member 2                                                    | -0.496251 | Inlier |
| siRNA-Temozolomide Run1-<br>DMSO | NM_0143<br>10 | RASD2   | RASD<br>family,<br>member 2                                                    | 0.496252  | Inlier |
| siRNA Disorazole DMSO Run2       | NM_0143<br>10 | RASD2   | RASD<br>family,<br>member 2                                                    | 0.530531  | Inlier |
| siRNA-Temozolomide Run3-<br>DMSO | NM_0143<br>10 | RASD2   | RASD<br>family,<br>member 2                                                    | 0.663518  | Inlier |
| siRNA-Vinblastine Run1-<br>DMSO  | NM_0143<br>10 | RASD2   | RAS<br>protein-<br>specific<br>guanine<br>nucleotide-<br>releasing             | 0.685482  | Inlier |
| siRNA-Vinblastine Run1-<br>DMSO  | NM_0028<br>91 | RASGRF1 | Ras<br>protein-<br>specific<br>guanine<br>nucleotide-<br>releasing<br>factor 1 | -3.178262 | Inlier |
| siRNA-Vinblastine Run2-<br>DMSO  | NM_0028<br>91 | RASGRF1 | Ras<br>protein-<br>specific<br>guanine<br>nucleotide-<br>releasing<br>factor 1 | -0.893847 | Inlier |
| siRNA Disorazole DMSO Run2       | NM_0028<br>91 | RASGRF1 | Ras<br>protein-<br>specific<br>guanine<br>nucleotide-<br>releasing<br>factor 1 | -0.555186 | Inlier |

Identification of Survival Genes in Human Glioblastoma Cells Using siRNA Screening

Nikhil G Thaker, Fang Zhang, Peter R. McDonald, Tong Ying Shun, Michael D Lewen, Ian F. Pollack, and John S. Lazo

Molecular Pharmacology

| siRNA              | Condition | Run  | Gene    | Protein                                                    | Value     | Outlier |
|--------------------|-----------|------|---------|------------------------------------------------------------|-----------|---------|
| siRNA Disorazole   | DMSO      | Run3 | RASGRF1 | Ras protein-specific guanine nucleotide-releasing factor 1 | -0.018184 | Inlier  |
| siRNA Disorazole   | DMSO      | Run1 | RASGRF1 | Ras protein-specific guanine nucleotide-releasing factor 1 | 0.018187  | Inlier  |
| siRNA-Temozolomide | Run3-DMSO |      | RASGRF1 | Ras protein-specific guanine nucleotide-releasing factor 1 | 0.046852  | Inlier  |
| siRNA-Temozolomide | Run2-DMSO |      | RASGRF1 | Ras protein-specific guanine nucleotide-releasing factor 1 | 0.793814  | Inlier  |
| siRNA-Temozolomide | Run1-DMSO |      | RASGRF1 | Ras protein-specific guanine nucleotide-releasing factor 1 | 2.653683  | Inlier  |
| siRNA Disorazole   | DMSO      | Run3 | RASGRF2 | Ras protein-specific guanine nucleotide-releasing factor 2 | -1.119864 | Inlier  |
| siRNA-Vinblastine  | Run2-DMSO |      | RASGRF2 | Ras protein-specific guanine nucleotide-releasing factor 2 | -0.60482  | Inlier  |

Identification of Survival Genes in Human Glioblastoma Cells Using siRNA Screening

Nikhil G Thaker, Fang Zhang, Peter R. McDonald, Tong Ying Shun, Michael D Lewen, Ian F. Pollack, and John S. Lazo

Molecular Pharmacology

| siRNA Treatment              | Gene ID   | Gene Name | Protein Name                                               | Log Fold Change | Outlier Status |
|------------------------------|-----------|-----------|------------------------------------------------------------|-----------------|----------------|
| siRNA-Temozolomide Run2-DMSO | NM_006909 | RASGRF2   | Ras protein-specific guanine nucleotide-releasing factor 2 | -0.221144       | Inlier         |
| siRNA Disorazole DMSO Run1   | NM_006909 | RASGRF2   | Ras protein-specific guanine nucleotide-releasing factor 2 | -0.020103       | Inlier         |
| siRNA-Temozolomide Run3-DMSO | NM_006909 | RASGRF2   | Ras protein-specific guanine nucleotide-releasing factor 2 | 0.020103        | Inlier         |
| siRNA Disorazole DMSO Run2   | NM_006909 | RASGRF2   | Ras protein-specific guanine nucleotide-releasing factor 2 | 0.74418         | Inlier         |
| siRNA-Temozolomide Run1-DMSO | NM_006909 | RASGRF2   | Ras protein-specific guanine nucleotide-releasing factor 2 | 0.892148        | Inlier         |
| siRNA-Vinblastine Run1-DMSO  | NM_006909 | RASGRF2   | RAS guanyl releasing protein 1 (calcium and DAG-regulated) | 0.957896        | Inlier         |
| siRNA-Temozolomide Run2-DMSO | NM_005739 | RASGRP1   | RAS guanyl releasing protein 1 (calcium and DAG-regulated) | -1.228778       | Inlier         |

Identification of Survival Genes in Human Glioblastoma Cells Using siRNA Screening

Nikhil G Thaker, Fang Zhang, Peter R. McDonald, Tong Ying Shun, Michael D Lewen, Ian F. Pollack, and John S. Lazo

Molecular Pharmacology

| siRNA Treatment                  | Gene ID       | Gene Name | Pathway                                                                       | Log Fold Change | Outlier Status |
|----------------------------------|---------------|-----------|-------------------------------------------------------------------------------|-----------------|----------------|
| siRNA Disorazole DMSO Run3       | NM_0057<br>39 | RASGRP1   | RAS<br>guanyl<br>releasing<br>protein 1<br>(calcium<br>and DAG-<br>regulated) | -0.996723       | Inlier         |
| siRNA-Vinblastine Run2-<br>DMSO  | NM_0057<br>39 | RASGRP1   | RAS<br>guanyl<br>releasing<br>protein 1<br>(calcium<br>and DAG-<br>regulated) | -0.309477       | Inlier         |
| siRNA Disorazole DMSO Run1       | NM_0057<br>39 | RASGRP1   | RAS<br>guanyl<br>releasing<br>protein 1<br>(calcium<br>and DAG-<br>regulated) | -0.278444       | Inlier         |
| siRNA-Temozolomide Run1-<br>DMSO | NM_0057<br>39 | RASGRP1   | RAS<br>guanyl<br>releasing<br>protein 1<br>(calcium<br>and DAG-<br>regulated) | 0.278444        | Inlier         |
| siRNA-Temozolomide Run3-<br>DMSO | NM_0057<br>39 | RASGRP1   | RAS<br>guanyl<br>releasing<br>protein 1<br>(calcium<br>and DAG-<br>regulated) | 0.352277        | Inlier         |
| siRNA-Vinblastine Run1-<br>DMSO  | NM_0057<br>39 | RASGRP1   | RAS<br>guanyl<br>releasing<br>protein 1<br>(calcium<br>and DAG-<br>regulated) | 1.480537        | Inlier         |
| siRNA Disorazole DMSO Run2       | NM_0057<br>39 | RASGRP1   | RAS<br>guanyl<br>releasing<br>protein 1<br>(calcium<br>and DAG-<br>regulated) | 2.720825        | Inlier         |

Identification of Survival Genes in Human Glioblastoma Cells Using siRNA Screening

Nikhil G Thaker, Fang Zhang, Peter R. McDonald, Tong Ying Shun, Michael D Lewen, Ian F. Pollack, and John S. Lazo

Molecular Pharmacology

| siRNA                        | siRNA   | siRNA | siRNA   | siRNA                                                      | siRNA     | siRNA  | siRNA | siRNA | siRNA |
|------------------------------|---------|-------|---------|------------------------------------------------------------|-----------|--------|-------|-------|-------|
| siRNA-Temozolomide Run2-DMSO | NM_1538 | 19    | RASGRP2 | RAS guanyl releasing protein 2 (calcium and DAG-regulated) | -1.09326  | Inlier |       |       |       |
| siRNA Disorazole DMSO Run3   | NM_1538 | 19    | RASGRP2 | RAS guanyl releasing protein 2 (calcium and DAG-regulated) | -0.885602 | Inlier |       |       |       |
| siRNA-Vinblastine Run2-DMSO  | NM_1538 | 19    | RASGRP2 | RAS guanyl releasing protein 2 (calcium and DAG-regulated) | -0.218636 | Inlier |       |       |       |
| siRNA Disorazole DMSO Run1   | NM_1538 | 19    | RASGRP2 | RAS guanyl releasing protein 2 (calcium and DAG-regulated) | -0.166494 | Inlier |       |       |       |
| siRNA-Temozolomide Run3-DMSO | NM_1538 | 19    | RASGRP2 | RAS guanyl releasing protein 2 (calcium and DAG-regulated) | 0.166494  | Inlier |       |       |       |
| siRNA-Temozolomide Run1-DMSO | NM_1538 | 19    | RASGRP2 | RAS guanyl releasing protein 2 (calcium and DAG-regulated) | 0.463398  | Inlier |       |       |       |
| siRNA Disorazole DMSO Run2   | NM_1538 | 19    | RASGRP2 | RAS guanyl releasing protein 2 (calcium and DAG-regulated) | 1.969232  | Inlier |       |       |       |

Identification of Survival Genes in Human Glioblastoma Cells Using siRNA Screening  
 Nikhil G Thaker, Fang Zhang, Peter R. McDonald, Tong Ying Shun, Michael D Lewen, Ian F. Pollack, and John S. Lazo

Molecular Pharmacology

|                                  |               |         | RAS<br>guanyl<br>releasing<br>protein 2<br>(calcium<br>and DAG-<br>regulated) |                  |
|----------------------------------|---------------|---------|-------------------------------------------------------------------------------|------------------|
| siRNA-Vinblastine Run1-<br>DMSO  | NM_1538<br>19 | RASGRP2 |                                                                               | 2.154625 Inlier  |
| siRNA-Temozolomide Run2-<br>DMSO | NM_0333<br>15 | RASL10B | RAS-like,<br>family 10,<br>member B                                           | -1.515085 Inlier |
| siRNA Disorazole DMSO Run3       | NM_0333<br>15 | RASL10B | RAS-like,<br>family 10,<br>member B                                           | -0.991377 Inlier |
| siRNA-Vinblastine Run2-<br>DMSO  | NM_0333<br>15 | RASL10B | RAS-like,<br>family 10,<br>member B                                           | -0.357623 Inlier |
| siRNA Disorazole DMSO Run1       | NM_0333<br>15 | RASL10B | RAS-like,<br>family 10,<br>member B                                           | -0.113467 Inlier |
| siRNA-Temozolomide Run3-<br>DMSO | NM_0333<br>15 | RASL10B | RAS-like,<br>family 10,<br>member B                                           | 0.113467 Inlier  |
| siRNA-Vinblastine Run1-<br>DMSO  | NM_0333<br>15 | RASL10B | RAS-like,<br>family 10,<br>member B                                           | 0.323651 Inlier  |
| siRNA-Temozolomide Run1-<br>DMSO | NM_0333<br>15 | RASL10B | RAS-like,<br>family 10,<br>member B                                           | 1.409168 Inlier  |
| siRNA Disorazole DMSO Run2       | NM_0333<br>15 | RASL10B | RAS-like,<br>family 10,<br>member B                                           | 3.06747 Inlier   |
| siRNA-Temozolomide Run3-<br>DMSO | NM_0165<br>63 | RASL12  | RAS-like,<br>family 12                                                        | -2.282175 Inlier |
| siRNA-Temozolomide Run2-<br>DMSO | NM_0165<br>63 | RASL12  | RAS-like,<br>family 12                                                        | -0.773606 Inlier |
| siRNA-Vinblastine Run2-<br>DMSO  | NM_0165<br>63 | RASL12  | RAS-like,<br>family 12                                                        | -0.541044 Inlier |
| siRNA Disorazole DMSO Run1       | NM_0165<br>63 | RASL12  | RAS-like,<br>family 12                                                        | -0.083731 Inlier |
| siRNA Disorazole DMSO Run3       | NM_0165<br>63 | RASL12  | RAS-like,<br>family 12                                                        | 0.083731 Inlier  |
| siRNA-Temozolomide Run1-<br>DMSO | NM_0165<br>63 | RASL12  | RAS-like,<br>family 12                                                        | 0.575394 Inlier  |

Identification of Survival Genes in Human Glioblastoma Cells Using siRNA Screening

Nikhil G Thaker, Fang Zhang, Peter R. McDonald, Tong Ying Shun, Michael D Lewen, Ian F. Pollack, and John S.

Lazo

|                                  |               |        |                                       |           |        |
|----------------------------------|---------------|--------|---------------------------------------|-----------|--------|
| siRNA-Vinblastine Run1-<br>DMSO  | NM_0165<br>63 | RASL12 | RAS-like,<br>family 12                | 1.551303  | Inlier |
| siRNA Disorazole DMSO Run2       | NM_0165<br>63 | RASL12 | RAS-like,<br>family 12                | 2.414322  | Inlier |
| siRNA-Temozolomide Run3-<br>DMSO | NM_0165<br>44 | RBJ    | RBJ                                   | -1.36183  | Inlier |
| siRNA-Temozolomide Run2-<br>DMSO | NM_0165<br>44 | RBJ    | RBJ                                   | -0.765582 | Inlier |
| siRNA Disorazole DMSO Run3       | NM_0165<br>44 | RBJ    | RBJ                                   | -0.205761 | Inlier |
| siRNA-Vinblastine Run2-<br>DMSO  | NM_0165<br>44 | RBJ    | RBJ                                   | -0.079939 | Inlier |
| siRNA Disorazole DMSO Run1       | NM_0165<br>44 | RBJ    | RBJ                                   | 0.079939  | Inlier |
| siRNA-Temozolomide Run1-<br>DMSO | NM_0165<br>44 | RBJ    | RBJ                                   | 0.583418  | Inlier |
| siRNA-Vinblastine Run1-<br>DMSO  | NM_0165<br>44 | RBJ    | RBJ                                   | 1.353869  | Inlier |
| siRNA Disorazole DMSO Run2       | NM_0165<br>44 | RBJ    | RBJ                                   | 1.86179   | Inlier |
| siRNA-Temozolomide Run3-<br>DMSO | NM_0221<br>28 | RBKS   | ribokinase                            | -0.819421 | Inlier |
| siRNA-Temozolomide Run1-<br>DMSO | NM_0221<br>28 | RBKS   | ribokinase                            | -0.529579 | Inlier |
| siRNA Disorazole DMSO Run2       | NM_0221<br>28 | RBKS   | ribokinase                            | -0.479135 | Inlier |
| siRNA-Temozolomide Run2-<br>DMSO | NM_0221<br>28 | RBKS   | ribokinase                            | -0.011299 | Inlier |
| siRNA Disorazole DMSO Run1       | NM_0221<br>28 | RBKS   | ribokinase                            | 0.011299  | Inlier |
| siRNA-Vinblastine Run2-<br>DMSO  | NM_0221<br>28 | RBKS   | ribokinase                            | 0.91028   | Inlier |
| siRNA-Vinblastine Run1-<br>DMSO  | NM_0221<br>28 | RBKS   | ribokinase                            | 1.498897  | Inlier |
| siRNA Disorazole DMSO Run3       | NM_0221<br>28 | RBKS   | ribokinase                            | 2.761406  | Inlier |
| siRNA-Temozolomide Run3-<br>DMSO | NM_0056<br>76 | RBM10  | RNA<br>binding<br>motif<br>protein 10 | -2.105609 | Inlier |
| siRNA Disorazole DMSO Run1       | NM_0056<br>76 | RBM10  | RNA<br>binding<br>motif<br>protein 10 | -0.695114 | Inlier |
| siRNA-Temozolomide Run2-<br>DMSO | NM_0056<br>76 | RBM10  | RNA<br>binding<br>motif<br>protein 10 | -0.592121 | Inlier |
| siRNA-Vinblastine Run2-<br>DMSO  | NM_0056<br>76 | RBM10  | RNA<br>binding<br>motif<br>protein 10 | -0.09495  | Inlier |

Identification of Survival Genes in Human Glioblastoma Cells Using siRNA Screening  
 Nikhil G Thaker, Fang Zhang, Peter R. McDonald, Tong Ying Shun, Michael D Lewen, Ian F. Pollack, and John S. Lazo

Molecular Pharmacology

| siRNA Treatment              | Gene ID       | Protein | RNA binding motif | Score     | Category |
|------------------------------|---------------|---------|-------------------|-----------|----------|
| siRNA Disorazole DMSO Run3   | NM_0056<br>76 | RBM10   | protein 10        | 0.09495   | Inlier   |
| siRNA Disorazole DMSO Run2   | NM_0056<br>76 | RBM10   | protein 10        | 0.653886  | Inlier   |
| siRNA-Temozolomide Run1-DMSO | NM_0056<br>76 | RBM10   | protein 10        | 1.117724  | Inlier   |
| siRNA-Vinblastine Run1-DMSO  | NM_0056<br>76 | RBM10   | protein 10        | 2.027009  | Inlier   |
| siRNA-Temozolomide Run3-DMSO | NM_1528<br>38 | RBM12   | protein 12        | -5.094625 | Outlier  |
| siRNA-Temozolomide Run2-DMSO | NM_1528<br>38 | RBM12   | protein 12        | -4.040829 | Outlier  |
| siRNA-Temozolomide Run1-DMSO | NM_1528<br>38 | RBM12   | protein 12        | -0.430364 | Inlier   |
| siRNA Disorazole DMSO Run2   | NM_1528<br>38 | RBM12   | protein 12        | -0.294414 | Inlier   |
| siRNA Disorazole DMSO Run1   | NM_1528<br>38 | RBM12   | protein 12        | 0.294415  | Inlier   |
| siRNA-Vinblastine Run2-DMSO  | NM_1528<br>38 | RBM12   | protein 12        | 0.502963  | Inlier   |
| siRNA Disorazole DMSO Run3   | NM_1528<br>38 | RBM12   | protein 12        | 0.846037  | Inlier   |
| siRNA-Vinblastine Run1-DMSO  | NM_1528<br>38 | RBM12   | protein 12        | 2.866829  | Inlier   |
| siRNA-Temozolomide Run3-DMSO | NM_0063<br>28 | RBM14   | protein 14        | -1.339346 | Inlier   |



Identification of Survival Genes in Human Glioblastoma Cells Using siRNA Screening  
 Nikhil G Thaker, Fang Zhang, Peter R. McDonald, Tong Ying Shun, Michael D Lewen, Ian F. Pollack, and John S. Lazo

Molecular Pharmacology

| siRNA                        | Gene    | Run | Protein | Score     | Outlier |
|------------------------------|---------|-----|---------|-----------|---------|
| siRNA Disorazole DMSO Run2   | NM_0063 | 28  | RBM14   | -1.062957 | Inlier  |
| siRNA Disorazole DMSO Run1   | NM_0063 | 28  | RBM14   | -0.489332 | Inlier  |
| siRNA-Temozolomide Run2-DMSO | NM_0063 | 28  | RBM14   | -0.000108 | Inlier  |
| siRNA-Temozolomide Run1-DMSO | NM_0063 | 28  | RBM14   | 0.000108  | Inlier  |
| siRNA-Vinblastine Run1-DMSO  | NM_0063 | 28  | RBM14   | 0.673832  | Inlier  |
| siRNA Disorazole DMSO Run3   | NM_0063 | 28  | RBM14   | 0.675168  | Inlier  |
| siRNA-Vinblastine Run2-DMSO  | NM_0063 | 28  | RBM14   | 0.979043  | Inlier  |
| siRNA-Temozolomide Run3-DMSO | NM_0057 | 78  | RBM5    | -1.368549 | Inlier  |
| siRNA-Temozolomide Run2-DMSO | NM_0057 | 78  | RBM5    | -0.779614 | Inlier  |
| siRNA-Temozolomide Run1-DMSO | NM_0057 | 78  | RBM5    | -0.569386 | Inlier  |
| siRNA Disorazole DMSO Run3   | NM_0057 | 78  | RBM5    | -0.008059 | Inlier  |
| siRNA Disorazole DMSO Run1   | NM_0057 | 78  | RBM5    | 0.008059  | Inlier  |
| siRNA-Vinblastine Run2-DMSO  | NM_0057 | 78  | RBM5    | 0.180389  | Inlier  |

Identification of Survival Genes in Human Glioblastoma Cells Using siRNA Screening  
 Nikhil G Thaker, Fang Zhang, Peter R. McDonald, Tong Ying Shun, Michael D Lewen, Ian F. Pollack, and John S. Lazo

Molecular Pharmacology

| siRNA Treatment              | Gene ID   | Protein | RNA binding motif                   | Score     | Outlier Status |
|------------------------------|-----------|---------|-------------------------------------|-----------|----------------|
| siRNA-Vinblastine Run1-DMSO  | NM_005778 | RBM5    | protein 5                           | 0.784344  | Inlier         |
| siRNA Disorazole DMSO Run2   | NM_005778 | RBM5    | protein 5                           | 1.271887  | Inlier         |
| siRNA-Temozolomide Run3-DMSO | NM_002899 | RBP1    | protein 1, cellular retinol binding | -1.021642 | Inlier         |
| siRNA Disorazole DMSO Run1   | NM_002899 | RBP1    | protein 1, cellular retinol binding | -0.327358 | Inlier         |
| siRNA-Temozolomide Run1-DMSO | NM_002899 | RBP1    | protein 1, cellular retinol binding | -0.213026 | Inlier         |
| siRNA-Temozolomide Run2-DMSO | NM_002899 | RBP1    | protein 1, cellular retinol binding | -0.206039 | Inlier         |
| siRNA-Vinblastine Run2-DMSO  | NM_002899 | RBP1    | protein 1, cellular retinol binding | 0.206038  | Inlier         |
| siRNA Disorazole DMSO Run3   | NM_002899 | RBP1    | protein 1, cellular retinol binding | 1.144586  | Inlier         |
| siRNA-Vinblastine Run1-DMSO  | NM_002899 | RBP1    | protein 1, cellular retinol binding | 1.424144  | Inlier         |
| siRNA Disorazole DMSO Run2   | NM_002899 | RBP1    | protein 1, cellular retinol binding | 2.549177  | Inlier         |
| siRNA-Vinblastine Run2-DMSO  | NM_004164 | RBP2    | protein 2, cellular retinol binding | -1.149768 | Inlier         |
| siRNA-Temozolomide Run2-DMSO | NM_004164 | RBP2    | protein 2, cellular retinol binding | -0.783013 | Inlier         |
| siRNA-Temozolomide Run1-DMSO | NM_004164 | RBP2    | protein 2, cellular                 | -0.565987 | Inlier         |

Identification of Survival Genes in Human Glioblastoma Cells Using siRNA Screening  
 Nikhil G Thaker, Fang Zhang, Peter R. McDonald, Tong Ying Shun, Michael D Lewen, Ian F. Pollack, and John S. Lazo

Molecular Pharmacology

|                                  |               |      |                                              |           |        |
|----------------------------------|---------------|------|----------------------------------------------|-----------|--------|
| siRNA Disorazole DMSO Run3       | NM_0041<br>64 | RBP2 | retinol<br>binding<br>protein 2,<br>cellular | -0.008071 | Inlier |
| siRNA Disorazole DMSO Run1       | NM_0041<br>64 | RBP2 | retinol<br>binding<br>protein 2,<br>cellular | 0.008072  | Inlier |
| siRNA-Temozolomide Run3-<br>DMSO | NM_0041<br>64 | RBP2 | retinol<br>binding<br>protein 2,<br>cellular | 0.139521  | Inlier |
| siRNA-Vinblastine Run1-<br>DMSO  | NM_0041<br>64 | RBP2 | retinol<br>binding<br>protein 2,<br>cellular | 1.408675  | Inlier |
| siRNA Disorazole DMSO Run2       | NM_0041<br>64 | RBP2 | retinol<br>binding<br>protein 2,<br>cellular | 1.882682  | Inlier |
| siRNA-Temozolomide Run2-<br>DMSO | NM_0067<br>44 | RBP4 | protein 4,<br>plasma<br>retinol<br>binding   | -0.988286 | Inlier |
| siRNA-Temozolomide Run1-<br>DMSO | NM_0067<br>44 | RBP4 | protein 4,<br>plasma<br>retinol<br>binding   | -0.707551 | Inlier |
| siRNA-Temozolomide Run3-<br>DMSO | NM_0067<br>44 | RBP4 | protein 4,<br>plasma<br>retinol<br>binding   | -0.339374 | Inlier |
| siRNA-Vinblastine Run2-<br>DMSO  | NM_0067<br>44 | RBP4 | protein 4,<br>plasma<br>retinol<br>binding   | -0.117139 | Inlier |
| siRNA Disorazole DMSO Run3       | NM_0067<br>44 | RBP4 | protein 4,<br>plasma<br>retinol<br>binding   | 0.117139  | Inlier |
| siRNA-Vinblastine Run1-<br>DMSO  | NM_0067<br>44 | RBP4 | protein 4,<br>plasma<br>retinol<br>binding   | 0.641449  | Inlier |
| siRNA Disorazole DMSO Run1       | NM_0067<br>44 | RBP4 | protein 4,<br>plasma<br>retinol<br>binding   | 0.769358  | Inlier |
| siRNA Disorazole DMSO Run2       | NM_0067<br>44 | RBP4 | protein 4,<br>plasma                         | 1.395014  | Inlier |

Identification of Survival Genes in Human Glioblastoma Cells Using siRNA Screening  
 Nikhil G Thaker, Fang Zhang, Peter R. McDonald, Tong Ying Shun, Michael D Lewen, Ian F. Pollack, and John S. Lazo

Molecular Pharmacology

|                              |               |      |                                     |                  |
|------------------------------|---------------|------|-------------------------------------|------------------|
| siRNA-Temozolomide Run3-DMSO | NM_0314<br>91 | RBP5 | retinol binding protein 5, cellular | -1.071898 Inlier |
| siRNA-Vinblastine Run2-DMSO  | NM_0314<br>91 | RBP5 | retinol binding protein 5, cellular | -0.747012 Inlier |
| siRNA-Temozolomide Run2-DMSO | NM_0314<br>91 | RBP5 | retinol binding protein 5, cellular | -0.43289 Inlier  |
| siRNA Disorazole DMSO Run3   | NM_0314<br>91 | RBP5 | retinol binding protein 5, cellular | -0.359141 Inlier |
| siRNA-Temozolomide Run1-DMSO | NM_0314<br>91 | RBP5 | retinol binding protein 5, cellular | 0.359141 Inlier  |
| siRNA Disorazole DMSO Run1   | NM_0314<br>91 | RBP5 | retinol binding protein 5, cellular | 0.601988 Inlier  |
| siRNA-Vinblastine Run1-DMSO  | NM_0314<br>91 | RBP5 | retinol binding protein 5, cellular | 1.600474 Inlier  |
| siRNA Disorazole DMSO Run2   | NM_0314<br>91 | RBP5 | retinol binding protein 5, cellular | 2.139113 Inlier  |
| siRNA-Temozolomide Run1-DMSO | NM_0529<br>60 | RBP7 | retinol binding protein 7, cellular | -0.879604 Inlier |
| siRNA Disorazole DMSO Run1   | NM_0529<br>60 | RBP7 | retinol binding protein 7, cellular | -0.784061 Inlier |
| siRNA-Temozolomide Run2-DMSO | NM_0529<br>60 | RBP7 | retinol binding protein 7, cellular | -0.563743 Inlier |
| siRNA-Vinblastine Run2-DMSO  | NM_0529<br>60 | RBP7 | retinol binding protein 7, cellular | -0.431689 Inlier |
| siRNA-Temozolomide Run3-DMSO | NM_0529<br>60 | RBP7 | retinol binding protein 7, cellular | 0.431689 Inlier  |

Identification of Survival Genes in Human Glioblastoma Cells Using siRNA Screening  
 Nikhil G Thaker, Fang Zhang, Peter R. McDonald, Tong Ying Shun, Michael D Lewen, Ian F. Pollack, and John S. Lazo

Molecular Pharmacology

|                                  |               |      |                                                                         |           |        |
|----------------------------------|---------------|------|-------------------------------------------------------------------------|-----------|--------|
| siRNA Disorazole DMSO Run3       | NM_0529<br>60 | RBP7 | retinol<br>binding<br>protein 7,<br>cellular                            | 0.564939  | Inlier |
| siRNA Disorazole DMSO Run2       | NM_0529<br>60 | RBP7 | retinol<br>binding<br>protein 7,<br>cellular                            | 1.187273  | Inlier |
| siRNA-Vinblastine Run1-<br>DMSO  | NM_0529<br>60 | RBP7 | retinol<br>binding<br>protein 7,<br>cellular                            | 1.23514   | Inlier |
| siRNA-Temozolomide Run3-<br>DMSO | NM_0051<br>33 | RCE1 | RCE1<br>homolog,<br>prenyl<br>protein<br>protease<br>(S.<br>cerevisiae) | -0.952039 | Inlier |
| siRNA-Temozolomide Run2-<br>DMSO | NM_0051<br>33 | RCE1 | RCE1<br>homolog,<br>prenyl<br>protein<br>protease<br>(S.<br>cerevisiae) | -0.816102 | Inlier |
| siRNA-Temozolomide Run1-<br>DMSO | NM_0051<br>33 | RCE1 | RCE1<br>homolog,<br>prenyl<br>protein<br>protease<br>(S.<br>cerevisiae) | -0.532898 | Inlier |
| siRNA Disorazole DMSO Run3       | NM_0051<br>33 | RCE1 | RCE1<br>homolog,<br>prenyl<br>protein<br>protease<br>(S.<br>cerevisiae) | -0.222355 | Inlier |
| siRNA Disorazole DMSO Run1       | NM_0051<br>33 | RCE1 | RCE1<br>homolog,<br>prenyl<br>protein<br>protease<br>(S.<br>cerevisiae) | 0.222355  | Inlier |

Identification of Survival Genes in Human Glioblastoma Cells Using siRNA Screening

Nikhil G Thaker, Fang Zhang, Peter R. McDonald, Tong Ying Shun, Michael D Lewen, Ian F. Pollack, and John S. Lazo

Molecular Pharmacology

|                                  |               |       |                                                                         |           |        |
|----------------------------------|---------------|-------|-------------------------------------------------------------------------|-----------|--------|
| siRNA Disorazole DMSO Run2       | NM_0051<br>33 | RCE1  | RCE1<br>homolog,<br>prenyl<br>protein<br>protease<br>(S.<br>cerevisiae) | 0.375737  | Inlier |
| siRNA-Vinblastine Run2-<br>DMSO  | NM_0051<br>33 | RCE1  | RCE1<br>homolog,<br>prenyl<br>protein<br>protease<br>(S.<br>cerevisiae) | 1.811652  | Inlier |
| siRNA-Vinblastine Run1-<br>DMSO  | NM_0051<br>33 | RCE1  | RCE1<br>homolog,<br>prenyl<br>protein<br>protease<br>(S.<br>cerevisiae) | 2.232699  | Inlier |
| siRNA-Temozolomide Run1-<br>DMSO | NM_0154<br>36 | RCHY1 | ring finger<br>and CHY<br>zinc finger<br>domain<br>containing<br>1      | -0.770259 | Inlier |
| siRNA-Temozolomide Run3-<br>DMSO | NM_0154<br>36 | RCHY1 | ring finger<br>and CHY<br>zinc finger<br>domain<br>containing<br>1      | -0.579157 | Inlier |
| siRNA Disorazole DMSO Run1       | NM_0154<br>36 | RCHY1 | ring finger<br>and CHY<br>zinc finger<br>domain<br>containing<br>1      | -0.442243 | Inlier |
| siRNA-Temozolomide Run2-<br>DMSO | NM_0154<br>36 | RCHY1 | ring finger<br>and CHY<br>zinc finger<br>domain<br>containing<br>1      | -0.400032 | Inlier |

Identification of Survival Genes in Human Glioblastoma Cells Using siRNA Screening  
 Nikhil G Thaker, Fang Zhang, Peter R. McDonald, Tong Ying Shun, Michael D Lewen, Ian F. Pollack, and John S. Lazo

Molecular Pharmacology

|                              |               |       |      |                                                   |                   |
|------------------------------|---------------|-------|------|---------------------------------------------------|-------------------|
| siRNA-Vinblastine Run1-DMSO  | NM_0154<br>36 | RCHY1 | 1    | ring finger and CHY zinc finger domain containing | 0.400032 Inlier   |
| siRNA Disorazole DMSO Run2   | NM_0154<br>36 | RCHY1 | 1    | ring finger and CHY zinc finger domain containing | 0.769843 Inlier   |
| siRNA-Vinblastine Run2-DMSO  | NM_0154<br>36 | RCHY1 | 1    | ring finger and CHY zinc finger domain containing | 0.953643 Inlier   |
| siRNA Disorazole DMSO Run3   | NM_0154<br>36 | RCHY1 | 1    | ring finger and CHY zinc finger domain containing | 1.166971 Inlier   |
| siRNA-Vinblastine Run2-DMSO  | NM_0144<br>78 | RCP9  | RCP9 |                                                   | -7.927977 Outlier |
| siRNA Disorazole DMSO Run3   | NM_0144<br>78 | RCP9  | RCP9 |                                                   | -2.143745 Inlier  |
| siRNA Disorazole DMSO Run1   | NM_0144<br>78 | RCP9  | RCP9 |                                                   | -0.628265 Inlier  |
| siRNA-Temozolomide Run2-DMSO | NM_0144<br>78 | RCP9  | RCP9 |                                                   | -0.287269 Inlier  |
| siRNA Disorazole DMSO Run2   | NM_0144<br>78 | RCP9  | RCP9 |                                                   | 0.287269 Inlier   |
| siRNA-Temozolomide Run3-DMSO | NM_0144<br>78 | RCP9  | RCP9 |                                                   | 0.443081 Inlier   |
| siRNA-Temozolomide Run1-DMSO | NM_0144<br>78 | RCP9  | RCP9 |                                                   | 0.720735 Inlier   |
| siRNA-Vinblastine Run1-DMSO  | NM_0144<br>78 | RCP9  | RCP9 |                                                   | 1.945719 Inlier   |
| siRNA Disorazole DMSO Run2   | NM_1720<br>37 | RDH10 |      | retinol dehydroge nase 10 (all-trans)             | -0.695492 Inlier  |
| siRNA Disorazole DMSO Run3   | NM_1720<br>37 | RDH10 |      | retinol dehydroge nase 10 (all-trans)             | -0.653508 Inlier  |
| siRNA-Temozolomide Run3-DMSO | NM_1720<br>37 | RDH10 |      | retinol dehydroge nase 10 (all-trans)             | -0.411246 Inlier  |

Identification of Survival Genes in Human Glioblastoma Cells Using siRNA Screening  
 Nikhil G Thaker, Fang Zhang, Peter R. McDonald, Tong Ying Shun, Michael D Lewen, Ian F. Pollack, and John S. Lazo

Molecular Pharmacology

| siRNA                        | Gene          | Enzyme | Value                                                       | Outlier |
|------------------------------|---------------|--------|-------------------------------------------------------------|---------|
| siRNA-Temozolomide Run2-DMSO | NM_1720<br>37 | RDH10  | retinol dehydrogenase 10 (all-trans)<br>-0.263061           | Inlier  |
| siRNA Disorazole DMSO Run1   | NM_1720<br>37 | RDH10  | retinol dehydrogenase 10 (all-trans)<br>0.263061            | Inlier  |
| siRNA-Temozolomide Run1-DMSO | NM_1720<br>37 | RDH10  | retinol dehydrogenase 10 (all-trans)<br>0.790342            | Inlier  |
| siRNA-Vinblastine Run1-DMSO  | NM_1720<br>37 | RDH10  | retinol dehydrogenase 10 (all-trans)<br>1.083469            | Inlier  |
| siRNA-Vinblastine Run2-DMSO  | NM_1720<br>37 | RDH10  | retinol dehydrogenase 10 (all-trans)<br>1.578414            | Inlier  |
| siRNA-Temozolomide Run3-DMSO | NM_0160<br>26 | RDH11  | retinol dehydrogenase 11 (all-trans and 9-cis)<br>-1.641387 | Inlier  |
| siRNA-Temozolomide Run1-DMSO | NM_0160<br>26 | RDH11  | retinol dehydrogenase 11 (all-trans and 9-cis)<br>-1.418561 | Inlier  |
| siRNA Disorazole DMSO Run2   | NM_0160<br>26 | RDH11  | retinol dehydrogenase 11 (all-trans and 9-cis)<br>-0.996483 | Inlier  |
| siRNA Disorazole DMSO Run3   | NM_0160<br>26 | RDH11  | retinol dehydrogenase 11 (all-trans and 9-cis)<br>-0.097631 | Inlier  |
| siRNA-Temozolomide Run2-DMSO | NM_0160<br>26 | RDH11  | retinol dehydrogenase 11 (all-trans and 9-cis)<br>0.097631  | Inlier  |
| siRNA Disorazole DMSO Run1   | NM_0160<br>26 | RDH11  | retinol dehydrogenase 11 (all-trans and 9-cis)<br>0.329052  | Inlier  |



Identification of Survival Genes in Human Glioblastoma Cells Using siRNA Screening  
 Nikhil G Thaker, Fang Zhang, Peter R. McDonald, Tong Ying Shun, Michael D Lewen, Ian F. Pollack, and John S. Lazo

Molecular Pharmacology

| siRNA                        | Gene      | Enzyme | Value     | Outlier |
|------------------------------|-----------|--------|-----------|---------|
| siRNA-Vinblastine Run2-DMSO  | NM_016026 | RDH11  | 0.352517  | Inlier  |
| siRNA-Vinblastine Run1-DMSO  | NM_016026 | RDH11  | 1.088217  | Inlier  |
| siRNA-Temozolomide Run2-DMSO | NM_152443 | RDH12  | -1.060542 | Inlier  |
| siRNA Disorazole DMSO Run1   | NM_152443 | RDH12  | -0.656332 | Inlier  |
| siRNA Disorazole DMSO Run3   | NM_152443 | RDH12  | -0.264823 | Inlier  |
| siRNA-Temozolomide Run1-DMSO | NM_152443 | RDH12  | -0.006198 | Inlier  |
| siRNA-Temozolomide Run3-DMSO | NM_152443 | RDH12  | 0.006198  | Inlier  |
| siRNA-Vinblastine Run1-DMSO  | NM_152443 | RDH12  | 0.692668  | Inlier  |
| siRNA-Vinblastine Run2-DMSO  | NM_152443 | RDH12  | 0.732725  | Inlier  |
| siRNA Disorazole DMSO Run2   | NM_152443 | RDH12  | 1.404894  | Inlier  |

Identification of Survival Genes in Human Glioblastoma Cells Using siRNA Screening  
 Nikhil G Thaker, Fang Zhang, Peter R. McDonald, Tong Ying Shun, Michael D Lewen, Ian F. Pollack, and John S. Lazo

Molecular Pharmacology

|                              |               |       |                                                |           |        |
|------------------------------|---------------|-------|------------------------------------------------|-----------|--------|
| siRNA-Temozolomide Run3-DMSO | NM_1384<br>12 | RDH13 | retinol dehydrogenase 13 (all-trans and 9-cis) | -1.765228 | Inlier |
| siRNA-Temozolomide Run1-DMSO | NM_1384<br>12 | RDH13 | retinol dehydrogenase 13 (all-trans and 9-cis) | -1.644922 | Inlier |
| siRNA Disorazole DMSO Run1   | NM_1384<br>12 | RDH13 | retinol dehydrogenase 13 (all-trans and 9-cis) | -0.658909 | Inlier |
| siRNA-Temozolomide Run2-DMSO | NM_1384<br>12 | RDH13 | retinol dehydrogenase 13 (all-trans and 9-cis) | -0.061238 | Inlier |
| siRNA-Vinblastine Run1-DMSO  | NM_1384<br>12 | RDH13 | retinol dehydrogenase 13 (all-trans and 9-cis) | 0.061238  | Inlier |
| siRNA-Vinblastine Run2-DMSO  | NM_1384<br>12 | RDH13 | retinol dehydrogenase 13 (all-trans and 9-cis) | 0.22478   | Inlier |
| siRNA Disorazole DMSO Run2   | NM_1384<br>12 | RDH13 | retinol dehydrogenase 13 (all-trans and 9-cis) | 0.690091  | Inlier |
| siRNA Disorazole DMSO Run3   | NM_1384<br>12 | RDH13 | retinol dehydrogenase 13 (all-trans and 9-cis) | 1.026648  | Inlier |
| siRNA Disorazole DMSO Run1   | NM_0209<br>05 | RDH14 | retinol dehydrogenase 14 (all-trans and 9-cis) | -0.788564 | Inlier |
| siRNA-Temozolomide Run2-DMSO | NM_0209<br>05 | RDH14 | retinol dehydrogenase 14 (all-trans and 9-cis) | -0.692935 | Inlier |

Identification of Survival Genes in Human Glioblastoma Cells Using siRNA Screening  
 Nikhil G Thaker, Fang Zhang, Peter R. McDonald, Tong Ying Shun, Michael D Lewen, Ian F. Pollack, and John S. Lazo

Molecular Pharmacology

| siRNA                        | Gene      | Accession | Enzyme                                         | Value     | Outlier |
|------------------------------|-----------|-----------|------------------------------------------------|-----------|---------|
| siRNA-Temozolomide Run3-DMSO | NM_020905 | RDH14     | retinol dehydrogenase 14 (all-trans and 9-cis) | -0.656065 | Inlier  |
| siRNA Disorazole DMSO Run3   | NM_020905 | RDH14     | retinol dehydrogenase 14 (all-trans and 9-cis) | -0.473608 | Inlier  |
| siRNA Disorazole DMSO Run2   | NM_020905 | RDH14     | retinol dehydrogenase 14 (all-trans and 9-cis) | 0.473608  | Inlier  |
| siRNA-Temozolomide Run1-DMSO | NM_020905 | RDH14     | retinol dehydrogenase 14 (all-trans and 9-cis) | 0.622798  | Inlier  |
| siRNA-Vinblastine Run1-DMSO  | NM_020905 | RDH14     | retinol dehydrogenase 14 (all-trans and 9-cis) | 1.270918  | Inlier  |
| siRNA-Vinblastine Run2-DMSO  | NM_020905 | RDH14     | retinol dehydrogenase 14 (all-trans and 9-cis) | 1.382393  | Inlier  |
| siRNA-Temozolomide Run1-DMSO | NM_002905 | RDH5      | retinol dehydrogenase 5 (11-cis and 9-cis)     | -0.954482 | Inlier  |
| siRNA-Temozolomide Run3-DMSO | NM_002905 | RDH5      | retinol dehydrogenase 5 (11-cis and 9-cis)     | -0.767915 | Inlier  |
| siRNA Disorazole DMSO Run2   | NM_002905 | RDH5      | retinol dehydrogenase 5 (11-cis and 9-cis)     | -0.256833 | Inlier  |
| siRNA-Temozolomide Run2-DMSO | NM_002905 | RDH5      | retinol dehydrogenase 5 (11-cis and 9-cis)     | -0.112072 | Inlier  |

Identification of Survival Genes in Human Glioblastoma Cells Using siRNA Screening  
 Nikhil G Thaker, Fang Zhang, Peter R. McDonald, Tong Ying Shun, Michael D Lewen, Ian F. Pollack, and John S. Lazo

Molecular Pharmacology

| siRNA Treatment              | Gene ID   | Gene Name | Value     | Outlier Status |
|------------------------------|-----------|-----------|-----------|----------------|
| siRNA Disorazole DMSO Run1   | NM_002905 | RDH5      | 0.112072  | Inlier         |
| siRNA Disorazole DMSO Run3   | NM_002905 | RDH5      | 0.581085  | Inlier         |
| siRNA-Vinblastine Run1-DMSO  | NM_002905 | RDH5      | 1.274507  | Inlier         |
| siRNA-Vinblastine Run2-DMSO  | NM_002905 | RDH5      | 1.67362   | Inlier         |
| siRNA Disorazole DMSO Run1   | NM_015725 | RDH8      | -2.67709  | Inlier         |
| siRNA-Temozolomide Run2-DMSO | NM_015725 | RDH8      | -1.82699  | Inlier         |
| siRNA-Temozolomide Run3-DMSO | NM_015725 | RDH8      | -0.289055 | Inlier         |
| siRNA-Vinblastine Run2-DMSO  | NM_015725 | RDH8      | -0.269024 | Inlier         |
| siRNA Disorazole DMSO Run2   | NM_015725 | RDH8      | 0.269022  | Inlier         |
| siRNA Disorazole DMSO Run3   | NM_015725 | RDH8      | 0.466115  | Inlier         |
| siRNA-Vinblastine Run1-DMSO  | NM_015725 | RDH8      | 0.882885  | Inlier         |
| siRNA-Temozolomide Run1-DMSO | NM_015725 | RDH8      | 0.968142  | Inlier         |

Identification of Survival Genes in Human Glioblastoma Cells Using siRNA Screening

Nikhil G Thaker, Fang Zhang, Peter R. McDonald, Tong Ying Shun, Michael D Lewen, Ian F. Pollack, and John S. Lazo

|                              |               |        |                                          |           |        |
|------------------------------|---------------|--------|------------------------------------------|-----------|--------|
| siRNA-Temozolomide Run3-DMSO | NM_1389<br>69 | RDH-E2 | RDH-E2                                   | -1.730583 | Inlier |
| siRNA-Temozolomide Run1-DMSO | NM_1389<br>69 | RDH-E2 | RDH-E2                                   | -0.79835  | Inlier |
| siRNA-Temozolomide Run2-DMSO | NM_1389<br>69 | RDH-E2 | RDH-E2                                   | -0.55065  | Inlier |
| siRNA Disorazole DMSO Run2   | NM_1389<br>69 | RDH-E2 | RDH-E2                                   | -0.394703 | Inlier |
| siRNA Disorazole DMSO Run3   | NM_1389<br>69 | RDH-E2 | RDH-E2                                   | 0.394703  | Inlier |
| siRNA Disorazole DMSO Run1   | NM_1389<br>69 | RDH-E2 | RDH-E2                                   | 0.484478  | Inlier |
| siRNA-Vinblastine Run1-DMSO  | NM_1389<br>69 | RDH-E2 | RDH-E2                                   | 1.391386  | Inlier |
| siRNA-Vinblastine Run2-DMSO  | NM_1389<br>69 | RDH-E2 | RDH-E2                                   | 2.016158  | Inlier |
| siRNA-Temozolomide Run3-DMSO | NM_0003<br>22 | RDS    | retinal degeneration, slow               | -1.005316 | Inlier |
| siRNA Disorazole DMSO Run2   | NM_0003<br>22 | RDS    | retinal degeneration, slow               | -0.682938 | Inlier |
| siRNA-Temozolomide Run2-DMSO | NM_0003<br>22 | RDS    | retinal degeneration, slow               | -0.655913 | Inlier |
| siRNA Disorazole DMSO Run3   | NM_0003<br>22 | RDS    | retinal degeneration, slow               | -0.425728 | Inlier |
| siRNA-Temozolomide Run1-DMSO | NM_0003<br>22 | RDS    | retinal degeneration, slow               | 0.425728  | Inlier |
| siRNA Disorazole DMSO Run1   | NM_0003<br>22 | RDS    | retinal degeneration, slow               | 0.666061  | Inlier |
| siRNA-Vinblastine Run2-DMSO  | NM_0003<br>22 | RDS    | retinal degeneration, slow               | 1.613482  | Inlier |
| siRNA-Vinblastine Run1-DMSO  | NM_0003<br>22 | RDS    | retinal degeneration, slow               | 1.770318  | Inlier |
| siRNA-Temozolomide Run2-DMSO | NM_0029<br>07 | RECQL  | RecQ protein-like (DNA helicase Q1-like) | -0.815325 | Inlier |
| siRNA-Temozolomide Run3-DMSO | NM_0029<br>07 | RECQL  | RecQ protein-like (DNA helicase Q1-like) | -0.722515 | Inlier |

Identification of Survival Genes in Human Glioblastoma Cells Using siRNA Screening  
 Nikhil G Thaker, Fang Zhang, Peter R. McDonald, Tong Ying Shun, Michael D Lewen, Ian F. Pollack, and John S. Lazo

Molecular Pharmacology

|                                  |               |        |                                                               |           |        |
|----------------------------------|---------------|--------|---------------------------------------------------------------|-----------|--------|
| siRNA Disorazole DMSO Run3       | NM_0029<br>07 | RECQL  | RecQ<br>protein-<br>like (DNA<br>helicase<br>Q1-like)<br>RecQ | -0.626485 | Inlier |
| siRNA-Vinblastine Run2-<br>DMSO  | NM_0029<br>07 | RECQL  | RecQ<br>protein-<br>like (DNA<br>helicase<br>Q1-like)<br>RecQ | -0.048681 | Inlier |
| siRNA-Temozolomide Run1-<br>DMSO | NM_0029<br>07 | RECQL  | RecQ<br>protein-<br>like (DNA<br>helicase<br>Q1-like)<br>RecQ | 0.048681  | Inlier |
| siRNA Disorazole DMSO Run1       | NM_0029<br>07 | RECQL  | RecQ<br>protein-<br>like (DNA<br>helicase<br>Q1-like)<br>RecQ | 0.312189  | Inlier |
| siRNA Disorazole DMSO Run2       | NM_0029<br>07 | RECQL  | RecQ<br>protein-<br>like (DNA<br>helicase<br>Q1-like)<br>RecQ | 1.809995  | Inlier |
| siRNA-Vinblastine Run1-<br>DMSO  | NM_0029<br>07 | RECQL  | RecQ<br>protein-<br>like (DNA<br>helicase<br>Q1-like)<br>RecQ | 2.148083  | Inlier |
| siRNA-Vinblastine Run2-<br>DMSO  | NM_0042<br>60 | RECQL4 | RecQ<br>protein-<br>like 4<br>RecQ                            | -1.34439  | Inlier |
| siRNA Disorazole DMSO Run1       | NM_0042<br>60 | RECQL4 | RecQ<br>protein-<br>like 4<br>RecQ                            | -0.797068 | Inlier |
| siRNA Disorazole DMSO Run3       | NM_0042<br>60 | RECQL4 | RecQ<br>protein-<br>like 4<br>RecQ                            | -0.202484 | Inlier |
| siRNA-Temozolomide Run2-<br>DMSO | NM_0042<br>60 | RECQL4 | RecQ<br>protein-<br>like 4<br>RecQ                            | -0.02428  | Inlier |
| siRNA-Temozolomide Run3-<br>DMSO | NM_0042<br>60 | RECQL4 | RecQ<br>protein-<br>like 4<br>RecQ                            | 0.024278  | Inlier |
| siRNA-Vinblastine Run1-<br>DMSO  | NM_0042<br>60 | RECQL4 | RecQ<br>protein-<br>like 4<br>RecQ                            | 0.551932  | Inlier |
| siRNA-Temozolomide Run1-<br>DMSO | NM_0042<br>60 | RECQL4 | RecQ<br>protein-<br>like 4                                    | 0.894127  | Inlier |

Identification of Survival Genes in Human Glioblastoma Cells Using siRNA Screening  
 Nikhil G Thaker, Fang Zhang, Peter R. McDonald, Tong Ying Shun, Michael D Lewen, Ian F. Pollack, and John S. Lazo

Molecular Pharmacology

|                                  |                  |        |                                                 |           |        |
|----------------------------------|------------------|--------|-------------------------------------------------|-----------|--------|
| siRNA Disorazole DMSO Run2       | NM_0042<br>60    | RECQL4 | RecQ<br>protein-<br>like 4                      | 2.148811  | Inlier |
| siRNA-Temozolomide Run3-<br>DMSO | NM_0010<br>03715 | RECQL5 | RecQ<br>protein-<br>like 5                      | -1.28006  | Inlier |
| siRNA-Temozolomide Run2-<br>DMSO | NM_0010<br>03715 | RECQL5 | RecQ<br>protein-<br>like 5                      | -0.852493 | Inlier |
| siRNA Disorazole DMSO Run3       | NM_0010<br>03715 | RECQL5 | RecQ<br>protein-<br>like 5                      | -0.820067 | Inlier |
| siRNA-Vinblastine Run2-<br>DMSO  | NM_0010<br>03715 | RECQL5 | RecQ<br>protein-<br>like 5                      | -0.010534 | Inlier |
| siRNA-Temozolomide Run1-<br>DMSO | NM_0010<br>03715 | RECQL5 | RecQ<br>protein-<br>like 5                      | 0.010534  | Inlier |
| siRNA-Vinblastine Run1-<br>DMSO  | NM_0010<br>03715 | RECQL5 | RecQ<br>protein-<br>like 5                      | 0.369547  | Inlier |
| siRNA Disorazole DMSO Run1       | NM_0010<br>03715 | RECQL5 | RecQ<br>protein-<br>like 5                      | 0.528933  | Inlier |
| siRNA Disorazole DMSO Run2       | NM_0010<br>03715 | RECQL5 | RecQ<br>protein-<br>like 5                      | 1.087592  | Inlier |
| siRNA-Temozolomide Run3-<br>DMSO | NM_1730<br>54    | RELN   | reelin                                          | -0.944244 | Inlier |
| siRNA Disorazole DMSO Run1       | NM_1730<br>54    | RELN   | reelin                                          | -0.404756 | Inlier |
| siRNA-Temozolomide Run2-<br>DMSO | NM_1730<br>54    | RELN   | reelin                                          | -0.340454 | Inlier |
| siRNA-Temozolomide Run1-<br>DMSO | NM_1730<br>54    | RELN   | reelin                                          | -0.10263  | Inlier |
| siRNA Disorazole DMSO Run2       | NM_1730<br>54    | RELN   | reelin                                          | 0.102629  | Inlier |
| siRNA Disorazole DMSO Run3       | NM_1730<br>54    | RELN   | reelin                                          | 1.070762  | Inlier |
| siRNA-Vinblastine Run2-<br>DMSO  | NM_1730<br>54    | RELN   | reelin                                          | 1.140663  | Inlier |
| siRNA-Vinblastine Run1-<br>DMSO  | NM_1730<br>54    | RELN   | reelin                                          | 1.92828   | Inlier |
| siRNA-Temozolomide Run3-<br>DMSO | NM_0140<br>12    | REM1   | RAS (RAD<br>and GEM)-<br>like GTP-<br>binding 1 | -1.599217 | Inlier |

Identification of Survival Genes in Human Glioblastoma Cells Using siRNA Screening  
 Nikhil G Thaker, Fang Zhang, Peter R. McDonald, Tong Ying Shun, Michael D Lewen, Ian F. Pollack, and John S. Lazo

Molecular Pharmacology

|                              |               |      |                                      |           |        |
|------------------------------|---------------|------|--------------------------------------|-----------|--------|
| siRNA-Temozolomide Run2-DMSO | NM_0140<br>12 | REM1 | RAS (RAD and GEM)-like GTP-binding 1 | -1.415013 | Inlier |
| siRNA-Temozolomide Run1-DMSO | NM_0140<br>12 | REM1 | RAS (RAD and GEM)-like GTP-binding 1 | -0.723258 | Inlier |
| siRNA-Vinblastine Run2-DMSO  | NM_0140<br>12 | REM1 | RAS (RAD and GEM)-like GTP-binding 1 | -0.205999 | Inlier |
| siRNA Disorazole DMSO Run3   | NM_0140<br>12 | REM1 | RAS (RAD and GEM)-like GTP-binding 1 | 0.205999  | Inlier |
| siRNA Disorazole DMSO Run1   | NM_0140<br>12 | REM1 | RAS (RAD and GEM)-like GTP-binding 1 | 0.434973  | Inlier |
| siRNA-Vinblastine Run1-DMSO  | NM_0140<br>12 | REM1 | RAS (RAD and GEM)-like GTP-binding 1 | 0.625742  | Inlier |
| siRNA Disorazole DMSO Run2   | NM_0140<br>12 | REM1 | RAS (RAD and GEM)-like GTP-binding 1 | 0.913379  | Inlier |
| siRNA-Temozolomide Run3-DMSO | NM_0005<br>37 | REN  | renin                                | -2.419059 | Inlier |
| siRNA Disorazole DMSO Run1   | NM_0005<br>37 | REN  | renin                                | -0.79392  | Inlier |
| siRNA-Temozolomide Run2-DMSO | NM_0005<br>37 | REN  | renin                                | -0.381608 | Inlier |
| siRNA Disorazole DMSO Run2   | NM_0005<br>37 | REN  | renin                                | -0.317997 | Inlier |
| siRNA-Vinblastine Run1-DMSO  | NM_0005<br>37 | REN  | renin                                | 0.317998  | Inlier |
| siRNA Disorazole DMSO Run3   | NM_0005<br>37 | REN  | renin                                | 0.652704  | Inlier |
| siRNA-Temozolomide Run1-DMSO | NM_0005<br>37 | REN  | renin                                | 0.696296  | Inlier |
| siRNA-Vinblastine Run2-DMSO  | NM_0005<br>37 | REN  | renin                                | 1.277125  | Inlier |



Identification of Survival Genes in Human Glioblastoma Cells Using siRNA Screening

Nikhil G Thaker, Fang Zhang, Peter R. McDonald, Tong Ying Shun, Michael D Lewen, Ian F. Pollack, and John S.

Lazo

Molecular Pharmacology

|                              |               |       |                                                             |           |        |
|------------------------------|---------------|-------|-------------------------------------------------------------|-----------|--------|
| siRNA-Temozolomide Run2-DMSO | NM_0029<br>10 | RENBP | renin<br>binding<br>protein                                 | -1.301754 | Inlier |
| siRNA-Temozolomide Run1-DMSO | NM_0029<br>10 | RENBP | renin<br>binding<br>protein                                 | -1.213432 | Inlier |
| siRNA-Temozolomide Run3-DMSO | NM_0029<br>10 | RENBP | renin<br>binding<br>protein                                 | -0.861024 | Inlier |
| siRNA Disorazole DMSO Run1   | NM_0029<br>10 | RENBP | renin<br>binding<br>protein                                 | -0.058944 | Inlier |
| siRNA-Vinblastine Run2-DMSO  | NM_0029<br>10 | RENBP | renin<br>binding<br>protein                                 | 0.058943  | Inlier |
| siRNA Disorazole DMSO Run3   | NM_0029<br>10 | RENBP | renin<br>binding<br>protein                                 | 0.122244  | Inlier |
| siRNA-Vinblastine Run1-DMSO  | NM_0029<br>10 | RENBP | renin<br>binding<br>protein                                 | 0.60096   | Inlier |
| siRNA Disorazole DMSO Run2   | NM_0029<br>10 | RENBP | renin<br>binding<br>protein                                 | 0.74804   | Inlier |
| siRNA-Temozolomide Run3-DMSO | NM_0329<br>18 | RERG  | RAS-like,<br>estrogen-<br>regulated,<br>growth<br>inhibitor | -1.047668 | Inlier |
| siRNA-Temozolomide Run2-DMSO | NM_0329<br>18 | RERG  | RAS-like,<br>estrogen-<br>regulated,<br>growth<br>inhibitor | -0.301333 | Inlier |
| siRNA Disorazole DMSO Run3   | NM_0329<br>18 | RERG  | RAS-like,<br>estrogen-<br>regulated,<br>growth<br>inhibitor | -0.085125 | Inlier |
| siRNA-Vinblastine Run2-DMSO  | NM_0329<br>18 | RERG  | RAS-like,<br>estrogen-<br>regulated,<br>growth<br>inhibitor | -0.012589 | Inlier |
| siRNA-Temozolomide Run1-DMSO | NM_0329<br>18 | RERG  | RAS-like,<br>estrogen-<br>regulated,<br>growth<br>inhibitor | 0.012589  | Inlier |

Identification of Survival Genes in Human Glioblastoma Cells Using siRNA Screening

Nikhil G Thaker, Fang Zhang, Peter R. McDonald, Tong Ying Shun, Michael D Lewen, Ian F. Pollack, and John S. Lazo

Molecular Pharmacology

|                                  |               |      |                                                                                                                                                 |           |         |
|----------------------------------|---------------|------|-------------------------------------------------------------------------------------------------------------------------------------------------|-----------|---------|
| siRNA Disorazole DMSO Run1       | NM_0329<br>18 | REGG | RAS-like,<br>estrogen-<br>regulated,<br>growth<br>inhibitor                                                                                     | 2.92909   | Inlier  |
| siRNA-Vinblastine Run1-<br>DMSO  | NM_0329<br>18 | REGG | RAS-like,<br>estrogen-<br>regulated,<br>growth<br>inhibitor                                                                                     | 3.984957  | Outlier |
| siRNA Disorazole DMSO Run2       | NM_0329<br>18 | REGG | RAS-like,<br>estrogen-<br>regulated,<br>growth<br>inhibitor                                                                                     | 4.389009  | Outlier |
| siRNA Disorazole DMSO Run2       | NM_0209<br>75 | RET  | ret proto-<br>oncogene<br>(multiple<br>endocrine<br>neoplasia<br>and<br>medullary<br>thyroid<br>carcinoma<br>1,<br>Hirschspru<br>ng<br>disease) | -1.947114 | Inlier  |
| siRNA-Temozolomide Run3-<br>DMSO | NM_0209<br>75 | RET  | ret proto-<br>oncogene<br>(multiple<br>endocrine<br>neoplasia<br>and<br>medullary<br>thyroid<br>carcinoma<br>1,<br>Hirschspru<br>ng<br>disease) | -1.113198 | Inlier  |

Identification of Survival Genes in Human Glioblastoma Cells Using siRNA Screening

Nikhil G Thaker, Fang Zhang, Peter R. McDonald, Tong Ying Shun, Michael D Lewen, Ian F. Pollack, and John S. Lazo

Molecular Pharmacology

|                              |           |     |                                                                                                           |           |        |
|------------------------------|-----------|-----|-----------------------------------------------------------------------------------------------------------|-----------|--------|
| siRNA-Temozolomide Run1-DMSO | NM_020975 | RET | ret proto-oncogene (multiple endocrine neoplasia and medullary thyroid carcinoma 1, Hirschsprung disease) | -0.617318 | Inlier |
| siRNA-Temozolomide Run2-DMSO | NM_020975 | RET | ret proto-oncogene (multiple endocrine neoplasia and medullary thyroid carcinoma 1, Hirschsprung disease) | -0.024466 | Inlier |
| siRNA Disorazole DMSO Run3   | NM_020975 | RET | ret proto-oncogene (multiple endocrine neoplasia and medullary thyroid carcinoma 1, Hirschsprung disease) | 0.024466  | Inlier |
| siRNA Disorazole DMSO Run1   | NM_020975 | RET | ret proto-oncogene (multiple endocrine neoplasia and medullary thyroid carcinoma 1, Hirschsprung disease) | 0.666292  | Inlier |

Identification of Survival Genes in Human Glioblastoma Cells Using siRNA Screening  
 Nikhil G Thaker, Fang Zhang, Peter R. McDonald, Tong Ying Shun, Michael D Lewen, Ian F. Pollack, and John S. Lazo

Molecular Pharmacology

|                              |           |       |                                                                                                           |           |        |
|------------------------------|-----------|-------|-----------------------------------------------------------------------------------------------------------|-----------|--------|
| siRNA-Vinblastine Run1-DMSO  | NM_020975 | RET   | ret proto-oncogene (multiple endocrine neoplasia and medullary thyroid carcinoma 1, Hirschsprung disease) | 0.682708  | Inlier |
| siRNA-Vinblastine Run2-DMSO  | NM_020975 | RET   | ret proto-oncogene (multiple endocrine neoplasia and medullary thyroid carcinoma 1, Hirschsprung disease) | 2.123924  | Inlier |
| siRNA Disorazole DMSO Run1   | NM_016316 | REV1L | REV1-like (yeast)                                                                                         | -0.918405 | Inlier |
| siRNA-Temozolomide Run1-DMSO | NM_016316 | REV1L | REV1-like (yeast)                                                                                         | -0.56603  | Inlier |
| siRNA-Temozolomide Run2-DMSO | NM_016316 | REV1L | REV1-like (yeast)                                                                                         | -0.485025 | Inlier |
| siRNA Disorazole DMSO Run2   | NM_016316 | REV1L | REV1-like (yeast)                                                                                         | -0.307492 | Inlier |
| siRNA-Vinblastine Run2-DMSO  | NM_016316 | REV1L | REV1-like (yeast)                                                                                         | 0.307494  | Inlier |
| siRNA Disorazole DMSO Run3   | NM_016316 | REV1L | REV1-like (yeast)                                                                                         | 0.78297   | Inlier |
| siRNA-Temozolomide Run3-DMSO | NM_016316 | REV1L | REV1-like (yeast)                                                                                         | 1.18611   | Inlier |
| siRNA-Vinblastine Run1-DMSO  | NM_016316 | REV1L | REV1-like (yeast)                                                                                         | 3.283214  | Inlier |
| siRNA Disorazole DMSO Run3   | NM_002912 | REV3L | REV3-like, catalytic subunit of DNA polymerase zeta (yeast)                                               | -1.617535 | Inlier |

Identification of Survival Genes in Human Glioblastoma Cells Using siRNA Screening  
 Nikhil G Thaker, Fang Zhang, Peter R. McDonald, Tong Ying Shun, Michael D Lewen, Ian F. Pollack, and John S. Lazo  
 Molecular Pharmacology

|                              |           |       |                                                             |           |        |
|------------------------------|-----------|-------|-------------------------------------------------------------|-----------|--------|
| siRNA-Vinblastine Run2-DMSO  | NM_002912 | REV3L | REV3-like, catalytic subunit of DNA polymerase zeta (yeast) | -0.437677 | Inlier |
| siRNA-Vinblastine Run1-DMSO  | NM_002912 | REV3L | REV3-like, catalytic subunit of DNA polymerase zeta (yeast) | -0.205266 | Inlier |
| siRNA-Temozolomide Run3-DMSO | NM_002912 | REV3L | REV3-like, catalytic subunit of DNA polymerase zeta (yeast) | -0.096288 | Inlier |
| siRNA Disorazole DMSO Run2   | NM_002912 | REV3L | REV3-like, catalytic subunit of DNA polymerase zeta (yeast) | 0.096287  | Inlier |
| siRNA Disorazole DMSO Run1   | NM_002912 | REV3L | REV3-like, catalytic subunit of DNA polymerase zeta (yeast) | 0.911323  | Inlier |
| siRNA-Temozolomide Run2-DMSO | NM_002912 | REV3L | REV3-like, catalytic subunit of DNA polymerase zeta (yeast) | 1.079858  | Inlier |

Identification of Survival Genes in Human Glioblastoma Cells Using siRNA Screening  
 Nikhil G Thaker, Fang Zhang, Peter R. McDonald, Tong Ying Shun, Michael D Lewen, Ian F. Pollack, and John S. Lazo  
 Molecular Pharmacology

|                              |               |       |                                                                                                                                           |           |        |
|------------------------------|---------------|-------|-------------------------------------------------------------------------------------------------------------------------------------------|-----------|--------|
| siRNA-Temozolomide Run1-DMSO | NM_0029<br>12 | REV3L | REV3-like,<br>catalytic<br>subunit of<br>DNA<br>polymerase<br>zeta<br>(yeast)<br>replication<br>factor C<br>(activator<br>1) 1,<br>145kDa | 1.100214  | Inlier |
| siRNA-Temozolomide Run3-DMSO | NM_0029<br>13 | RFC1  | replication<br>factor C<br>(activator<br>1) 1,<br>145kDa                                                                                  | -1.299372 | Inlier |
| siRNA-Temozolomide Run2-DMSO | NM_0029<br>13 | RFC1  | replication<br>factor C<br>(activator<br>1) 1,<br>145kDa                                                                                  | -0.72371  | Inlier |
| siRNA-Vinblastine Run2-DMSO  | NM_0029<br>13 | RFC1  | replication<br>factor C<br>(activator<br>1) 1,<br>145kDa                                                                                  | -0.202055 | Inlier |
| siRNA Disorazole DMSO Run3   | NM_0029<br>13 | RFC1  | replication<br>factor C<br>(activator<br>1) 1,<br>145kDa                                                                                  | -0.122005 | Inlier |
| siRNA-Temozolomide Run1-DMSO | NM_0029<br>13 | RFC1  | replication<br>factor C<br>(activator<br>1) 1,<br>145kDa                                                                                  | 0.122005  | Inlier |
| siRNA Disorazole DMSO Run1   | NM_0029<br>13 | RFC1  | replication<br>factor C<br>(activator<br>1) 1,<br>145kDa                                                                                  | 0.62529   | Inlier |
| siRNA-Vinblastine Run1-DMSO  | NM_0029<br>13 | RFC1  | replication<br>factor C<br>(activator<br>1) 1,<br>145kDa                                                                                  | 1.021083  | Inlier |
| siRNA Disorazole DMSO Run2   | NM_0029<br>13 | RFC1  | replication<br>factor C<br>(activator<br>1) 1,<br>145kDa                                                                                  | 1.357008  | Inlier |

Identification of Survival Genes in Human Glioblastoma Cells Using siRNA Screening  
 Nikhil G Thaker, Fang Zhang, Peter R. McDonald, Tong Ying Shun, Michael D Lewen, Ian F. Pollack, and John S. Lazo

Molecular Pharmacology

| siRNA                        | Gene    | Run | Condition | Protein                                       | Value     | Outlier |
|------------------------------|---------|-----|-----------|-----------------------------------------------|-----------|---------|
| siRNA Disorazole DMSO Run1   | NM_1815 | 73  | RFC4      | replication factor C (activator 1) 4, 37kDa   | -2.470629 | Inlier  |
| siRNA Disorazole DMSO Run3   | NM_1815 | 73  | RFC4      | replication factor C (activator 1) 4, 37kDa   | -1.751707 | Inlier  |
| siRNA-Vinblastine Run2-DMSO  | NM_1815 | 73  | RFC4      | replication factor C (activator 1) 4, 37kDa   | -0.467991 | Inlier  |
| siRNA-Vinblastine Run1-DMSO  | NM_1815 | 73  | RFC4      | replication factor C (activator 1) 4, 37kDa   | -0.142821 | Inlier  |
| siRNA-Temozolomide Run2-DMSO | NM_1815 | 73  | RFC4      | replication factor C (activator 1) 4, 37kDa   | 0.142824  | Inlier  |
| siRNA-Temozolomide Run3-DMSO | NM_1815 | 73  | RFC4      | replication factor C (activator 1) 4, 37kDa   | 0.381012  | Inlier  |
| siRNA-Temozolomide Run1-DMSO | NM_1815 | 73  | RFC4      | replication factor C (activator 1) 4, 37kDa   | 0.881009  | Inlier  |
| siRNA Disorazole DMSO Run2   | NM_1815 | 73  | RFC4      | replication factor C (activator 1) 4, 37kDa   | 2.512872  | Inlier  |
| siRNA Disorazole DMSO Run3   | NM_1815 | 78  | RFC5      | replication factor C (activator 1) 5, 36.5kDa | -0.789609 | Inlier  |
| siRNA-Vinblastine Run2-DMSO  | NM_1815 | 78  | RFC5      | replication factor C (activator 1) 5, 36.5kDa | -0.559391 | Inlier  |

Identification of Survival Genes in Human Glioblastoma Cells Using siRNA Screening  
 Nikhil G Thaker, Fang Zhang, Peter R. McDonald, Tong Ying Shun, Michael D Lewen, Ian F. Pollack, and John S. Lazo

Molecular Pharmacology

|                              |               |       |                                               |           |        |
|------------------------------|---------------|-------|-----------------------------------------------|-----------|--------|
| siRNA-Temozolomide Run3-DMSO | NM_1815<br>78 | RFC5  | replication factor C (activator 1) 5, 36.5kDa | -0.256893 | Inlier |
| siRNA Disorazole DMSO Run1   | NM_1815<br>78 | RFC5  | replication factor C (activator 1) 5, 36.5kDa | -0.142743 | Inlier |
| siRNA-Temozolomide Run2-DMSO | NM_1815<br>78 | RFC5  | replication factor C (activator 1) 5, 36.5kDa | 0.142744  | Inlier |
| siRNA-Temozolomide Run1-DMSO | NM_1815<br>78 | RFC5  | replication factor C (activator 1) 5, 36.5kDa | 1.529796  | Inlier |
| siRNA Disorazole DMSO Run2   | NM_1815<br>78 | RFC5  | replication factor C (activator 1) 5, 36.5kDa | 1.547519  | Inlier |
| siRNA-Vinblastine Run1-DMSO  | NM_1815<br>78 | RFC5  | replication factor C (activator 1) 5, 36.5kDa | 2.723739  | Inlier |
| siRNA Disorazole DMSO Run2   | NM_0183<br>39 | RFK   | riboflavin kinase                             | -2.912994 | Inlier |
| siRNA-Temozolomide Run3-DMSO | NM_0183<br>39 | RFK   | riboflavin kinase                             | -1.880321 | Inlier |
| siRNA-Temozolomide Run2-DMSO | NM_0183<br>39 | RFK   | riboflavin kinase                             | -0.712663 | Inlier |
| siRNA Disorazole DMSO Run1   | NM_0183<br>39 | RFK   | riboflavin kinase                             | -0.111998 | Inlier |
| siRNA-Temozolomide Run1-DMSO | NM_0183<br>39 | RFK   | riboflavin kinase                             | 0.111998  | Inlier |
| siRNA Disorazole DMSO Run3   | NM_0183<br>39 | RFK   | riboflavin kinase                             | 0.163325  | Inlier |
| siRNA-Vinblastine Run2-DMSO  | NM_0183<br>39 | RFK   | riboflavin kinase                             | 0.636337  | Inlier |
| siRNA-Vinblastine Run1-DMSO  | NM_0183<br>39 | RFK   | riboflavin kinase                             | 1.163344  | Inlier |
| siRNA-Temozolomide Run3-DMSO | NM_0210<br>26 | RFPL1 | ret finger protein-like 1                     | -1.561691 | Inlier |
| siRNA Disorazole DMSO Run1   | NM_0210<br>26 | RFPL1 | ret finger protein-like 1                     | -0.873151 | Inlier |



Identification of Survival Genes in Human Glioblastoma Cells Using siRNA Screening  
 Nikhil G Thaker, Fang Zhang, Peter R. McDonald, Tong Ying Shun, Michael D Lewen, Ian F. Pollack, and John S. Lazo

| Molecular Pharmacology       |               |       |                | ret finger |        |
|------------------------------|---------------|-------|----------------|------------|--------|
| siRNA-Temozolomide Run1-DMSO | NM_0210<br>26 | RFPL1 | protein-like 1 | -0.454507  | Inlier |
| siRNA-Temozolomide Run2-DMSO | NM_0210<br>26 | RFPL1 | protein-like 1 | -0.322891  | Inlier |
| siRNA-Vinblastine Run2-DMSO  | NM_0210<br>26 | RFPL1 | protein-like 1 | 0.322892   | Inlier |
| siRNA Disorazole DMSO Run3   | NM_0210<br>26 | RFPL1 | protein-like 1 | 0.475849   | Inlier |
| siRNA Disorazole DMSO Run2   | NM_0210<br>26 | RFPL1 | protein-like 1 | 0.887292   | Inlier |
| siRNA-Vinblastine Run1-DMSO  | NM_0210<br>26 | RFPL1 | protein-like 1 | 1.335965   | Inlier |
| siRNA Disorazole DMSO Run1   | NM_0066<br>05 | RFPL2 | protein-like 2 | -1.250968  | Inlier |
| siRNA-Temozolomide Run3-DMSO | NM_0066<br>05 | RFPL2 | protein-like 2 | -0.618821  | Inlier |
| siRNA-Temozolomide Run1-DMSO | NM_0066<br>05 | RFPL2 | protein-like 2 | -0.17807   | Inlier |
| siRNA-Temozolomide Run2-DMSO | NM_0066<br>05 | RFPL2 | protein-like 2 | -0.011376  | Inlier |
| siRNA Disorazole DMSO Run3   | NM_0066<br>05 | RFPL2 | protein-like 2 | 0.011375   | Inlier |
| siRNA Disorazole DMSO Run2   | NM_0066<br>05 | RFPL2 | protein-like 2 | 0.730179   | Inlier |
| siRNA-Vinblastine Run2-DMSO  | NM_0066<br>05 | RFPL2 | protein-like 2 | 0.872095   | Inlier |
| siRNA-Vinblastine Run1-DMSO  | NM_0066<br>05 | RFPL2 | protein-like 2 | 1.650542   | Inlier |
| siRNA-Temozolomide Run1-DMSO | NM_0066<br>04 | RFPL3 | protein-like 3 | -2.499949  | Inlier |
| siRNA Disorazole DMSO Run3   | NM_0066<br>04 | RFPL3 | protein-like 3 | -0.475363  | Inlier |
| siRNA Disorazole DMSO Run1   | NM_0066<br>04 | RFPL3 | protein-like 3 | -0.273371  | Inlier |

Identification of Survival Genes in Human Glioblastoma Cells Using siRNA Screening  
 Nikhil G Thaker, Fang Zhang, Peter R. McDonald, Tong Ying Shun, Michael D Lewen, Ian F. Pollack, and John S. Lazo

| Molecular Pharmacology       |           |       |                                                                                |           |         |
|------------------------------|-----------|-------|--------------------------------------------------------------------------------|-----------|---------|
| siRNA-Temozolomide Run3-DMSO | NM_006604 | RFPL3 | ret finger protein-like 3                                                      | -0.181063 | Inlier  |
| siRNA-Temozolomide Run2-DMSO | NM_006604 | RFPL3 | ret finger protein-like 3                                                      | 0.181063  | Inlier  |
| siRNA-Vinblastine Run2-DMSO  | NM_006604 | RFPL3 | ret finger protein-like 3                                                      | 0.873637  | Inlier  |
| siRNA-Vinblastine Run1-DMSO  | NM_006604 | RFPL3 | ret finger protein-like 3                                                      | 2.81271   | Inlier  |
| siRNA Disorazole DMSO Run2   | NM_006604 | RFPL3 | ret finger protein-like 3                                                      | 5.086946  | Outlier |
| siRNA-Temozolomide Run1-DMSO | NM_015149 | RGL1  | ret finger protein-like 3<br>guanine nucleotide dissociation stimulator-like 1 | -0.943836 | Inlier  |
| siRNA-Temozolomide Run2-DMSO | NM_015149 | RGL1  | ret finger protein-like 3<br>guanine nucleotide dissociation stimulator-like 1 | -0.780122 | Inlier  |
| siRNA-Vinblastine Run2-DMSO  | NM_015149 | RGL1  | ret finger protein-like 3<br>guanine nucleotide dissociation stimulator-like 1 | -0.38397  | Inlier  |
| siRNA-Temozolomide Run3-DMSO | NM_015149 | RGL1  | ret finger protein-like 3<br>guanine nucleotide dissociation stimulator-like 1 | -0.021372 | Inlier  |
| siRNA Disorazole DMSO Run3   | NM_015149 | RGL1  | ret finger protein-like 3<br>guanine nucleotide dissociation stimulator-like 1 | 0.021372  | Inlier  |

Identification of Survival Genes in Human Glioblastoma Cells Using siRNA Screening

Nikhil G Thaker, Fang Zhang, Peter R. McDonald, Tong Ying Shun, Michael D Lewen, Ian F. Pollack, and John S. Lazo

Molecular Pharmacology

|                              |               |      |                   |           |         |
|------------------------------|---------------|------|-------------------|-----------|---------|
| siRNA Disorazole DMSO Run1   | NM_0151<br>49 | RGL1 | stimulator-like 1 | 0.665222  | Inlier  |
| siRNA-Vinblastine Run1-DMSO  | NM_0151<br>49 | RGL1 | stimulator-like 1 | 0.683778  | Inlier  |
| siRNA Disorazole DMSO Run2   | NM_0151<br>49 | RGL1 | stimulator-like 1 | 1.334645  | Inlier  |
| siRNA-Temozolomide Run3-DMSO | NM_0047<br>61 | RGL2 | stimulator-like 2 | -4.359878 | Outlier |
| siRNA Disorazole DMSO Run3   | NM_0047<br>61 | RGL2 | stimulator-like 2 | -0.643975 | Inlier  |
| siRNA-Vinblastine Run2-DMSO  | NM_0047<br>61 | RGL2 | stimulator-like 2 | -0.552273 | Inlier  |
| siRNA-Temozolomide Run2-DMSO | NM_0047<br>61 | RGL2 | stimulator-like 2 | -0.473446 | Inlier  |

Identification of Survival Genes in Human Glioblastoma Cells Using siRNA Screening  
 Nikhil G Thaker, Fang Zhang, Peter R. McDonald, Tong Ying Shun, Michael D Lewen, Ian F. Pollack, and John S. Lazo

Molecular Pharmacology

|                                  |                  |      |                                                  |                  |
|----------------------------------|------------------|------|--------------------------------------------------|------------------|
|                                  |                  |      | ral<br>guanine<br>nucleotide<br>dissociatio<br>n |                  |
| siRNA-Temozolomide Run1-<br>DMSO | NM_0047<br>61    | RGL2 | stimulator-<br>like 2                            | 0.473446 Inlier  |
|                                  |                  |      | ral<br>guanine<br>nucleotide<br>dissociatio<br>n |                  |
| siRNA Disorazole DMSO Run1       | NM_0047<br>61    | RGL2 | stimulator-<br>like 2                            | 0.705025 Inlier  |
|                                  |                  |      | ral<br>guanine<br>nucleotide<br>dissociatio<br>n |                  |
| siRNA Disorazole DMSO Run2       | NM_0047<br>61    | RGL2 | stimulator-<br>like 2                            | 3.046105 Inlier  |
|                                  |                  |      | ral<br>guanine<br>nucleotide<br>dissociatio<br>n |                  |
| siRNA-Vinblastine Run1-<br>DMSO  | NM_0047<br>61    | RGL2 | stimulator-<br>like 2                            | 3.620983 Outlier |
|                                  |                  |      | retinal G<br>protein<br>coupled<br>receptor      |                  |
| siRNA-Temozolomide Run3-<br>DMSO | NM_0010<br>12720 | RGR  | retinal G<br>protein<br>coupled<br>receptor      | -0.979031 Inlier |
|                                  |                  |      | retinal G<br>protein<br>coupled<br>receptor      |                  |
| siRNA Disorazole DMSO Run2       | NM_0010<br>12720 | RGR  | retinal G<br>protein<br>coupled<br>receptor      | -0.739828 Inlier |
|                                  |                  |      | retinal G<br>protein<br>coupled<br>receptor      |                  |
| siRNA Disorazole DMSO Run3       | NM_0010<br>12720 | RGR  | retinal G<br>protein<br>coupled<br>receptor      | -0.636047 Inlier |
|                                  |                  |      | retinal G<br>protein<br>coupled<br>receptor      |                  |
| siRNA-Temozolomide Run1-<br>DMSO | NM_0010<br>12720 | RGR  | retinal G<br>protein<br>coupled<br>receptor      | -0.040746 Inlier |
|                                  |                  |      | retinal G<br>protein<br>coupled<br>receptor      |                  |
| siRNA Disorazole DMSO Run1       | NM_0010<br>12720 | RGR  | receptor                                         | 0.040746 Inlier  |
| siRNA-Temozolomide Run3-<br>DMSO | NM_1536<br>15    | Rgr  | Rgr                                              | -2.624703 Inlier |

Identification of Survival Genes in Human Glioblastoma Cells Using siRNA Screening  
 Nikhil G Thaker, Fang Zhang, Peter R. McDonald, Tong Ying Shun, Michael D Lewen, Ian F. Pollack, and John S. Lazo

Molecular Pharmacology

|                              |                  |      |                                     |           |        |
|------------------------------|------------------|------|-------------------------------------|-----------|--------|
| siRNA-Temozolomide Run2-DMSO | NM_0010<br>12720 | RGR  | retinal G protein coupled receptor  | 0.212139  | Inlier |
| siRNA-Temozolomide Run2-DMSO | NM_1536<br>15    | Rgr  | Rgr                                 | -0.732969 | Inlier |
| siRNA-Temozolomide Run1-DMSO | NM_1536<br>15    | Rgr  | Rgr                                 | -0.529388 | Inlier |
| siRNA Disorazole DMSO Run1   | NM_1536<br>15    | Rgr  | Rgr                                 | -0.394046 | Inlier |
| siRNA-Vinblastine Run2-DMSO  | NM_0010<br>12720 | RGR  | retinal G protein coupled receptor  | 0.712953  | Inlier |
| siRNA-Vinblastine Run1-DMSO  | NM_0010<br>12720 | RGR  | retinal G protein coupled receptor  | 0.897124  | Inlier |
| siRNA Disorazole DMSO Run3   | NM_1536<br>15    | Rgr  | Rgr                                 | 0.394046  | Inlier |
| siRNA-Vinblastine Run2-DMSO  | NM_1536<br>15    | Rgr  | Rgr                                 | 0.616031  | Inlier |
| siRNA-Vinblastine Run1-DMSO  | NM_1536<br>15    | Rgr  | Rgr                                 | 1.220896  | Inlier |
| siRNA Disorazole DMSO Run2   | NM_1536<br>15    | Rgr  | Rgr                                 | 1.249237  | Inlier |
| siRNA-Temozolomide Run1-DMSO | NM_0029<br>22    | RGS1 | regulator of G-protein signalling 1 | -1.660561 | Inlier |
| siRNA-Temozolomide Run2-DMSO | NM_0029<br>22    | RGS1 | regulator of G-protein signalling 1 | -1.223172 | Inlier |
| siRNA Disorazole DMSO Run3   | NM_0029<br>22    | RGS1 | regulator of G-protein signalling 1 | -0.174606 | Inlier |
| siRNA-Temozolomide Run3-DMSO | NM_0029<br>22    | RGS1 | regulator of G-protein signalling 1 | -0.125551 | Inlier |
| siRNA-Vinblastine Run2-DMSO  | NM_0029<br>22    | RGS1 | regulator of G-protein signalling 1 | 0.125552  | Inlier |

Identification of Survival Genes in Human Glioblastoma Cells Using siRNA Screening  
 Nikhil G Thaker, Fang Zhang, Peter R. McDonald, Tong Ying Shun, Michael D Lewen, Ian F. Pollack, and John S. Lazo

Molecular Pharmacology

| siRNA Treatment              | Gene ID   | Gene Name | Pathway                              | Value     | Outlier Status |
|------------------------------|-----------|-----------|--------------------------------------|-----------|----------------|
| siRNA-Vinblastine Run1-DMSO  | NM_002922 | RGS1      | regulator of G-protein signalling 1  | 0.628007  | Inlier         |
| siRNA Disorazole DMSO Run1   | NM_002922 | RGS1      | regulator of G-protein signalling 1  | 0.720993  | Inlier         |
| siRNA Disorazole DMSO Run2   | NM_002922 | RGS1      | regulator of G-protein signalling 1  | 0.829691  | Inlier         |
| siRNA-Temozolomide Run3-DMSO | NM_002925 | RGS10     | regulator of G-protein signalling 10 | -2.332013 | Inlier         |
| siRNA-Temozolomide Run2-DMSO | NM_002925 | RGS10     | regulator of G-protein signalling 10 | -2.039334 | Inlier         |
| siRNA-Temozolomide Run1-DMSO | NM_002925 | RGS10     | regulator of G-protein signalling 10 | -1.52599  | Inlier         |
| siRNA Disorazole DMSO Run3   | NM_002925 | RGS10     | regulator of G-protein signalling 10 | -0.025917 | Inlier         |
| siRNA Disorazole DMSO Run1   | NM_002925 | RGS10     | regulator of G-protein signalling 10 | 0.025918  | Inlier         |
| siRNA Disorazole DMSO Run2   | NM_002925 | RGS10     | regulator of G-protein signalling 10 | 0.13621   | Inlier         |
| siRNA-Vinblastine Run2-DMSO  | NM_002925 | RGS10     | regulator of G-protein signalling 10 | 0.240254  | Inlier         |

Identification of Survival Genes in Human Glioblastoma Cells Using siRNA Screening  
 Nikhil G Thaker, Fang Zhang, Peter R. McDonald, Tong Ying Shun, Michael D Lewen, Ian F. Pollack, and John S. Lazo

Molecular Pharmacology

|                              |               |       |                                         |           |        |
|------------------------------|---------------|-------|-----------------------------------------|-----------|--------|
| siRNA-Vinblastine Run1-DMSO  | NM_0029<br>25 | RGS10 | regulator of G-protein signalling<br>10 | 1.108746  | Inlier |
| siRNA-Temozolomide Run3-DMSO | NM_1833<br>37 | RGS11 | regulator of G-protein signalling<br>11 | -2.308825 | Inlier |
| siRNA Disorazole DMSO Run2   | NM_1833<br>37 | RGS11 | regulator of G-protein signalling<br>11 | -2.206883 | Inlier |
| siRNA-Temozolomide Run2-DMSO | NM_1833<br>37 | RGS11 | regulator of G-protein signalling<br>11 | -0.354127 | Inlier |
| siRNA-Temozolomide Run1-DMSO | NM_1833<br>37 | RGS11 | regulator of G-protein signalling<br>11 | -0.131261 | Inlier |
| siRNA Disorazole DMSO Run3   | NM_1833<br>37 | RGS11 | regulator of G-protein signalling<br>11 | 0.131262  | Inlier |
| siRNA Disorazole DMSO Run1   | NM_1833<br>37 | RGS11 | regulator of G-protein signalling<br>11 | 0.265511  | Inlier |
| siRNA-Vinblastine Run1-DMSO  | NM_1833<br>37 | RGS11 | regulator of G-protein signalling<br>11 | 0.994873  | Inlier |
| siRNA-Vinblastine Run2-DMSO  | NM_1833<br>37 | RGS11 | regulator of G-protein signalling<br>11 | 1.141626  | Inlier |
| siRNA-Temozolomide Run2-DMSO | NM_1447<br>66 | RGS13 | regulator of G-protein signalling<br>13 | -1.28752  | Inlier |

Identification of Survival Genes in Human Glioblastoma Cells Using siRNA Screening  
 Nikhil G Thaker, Fang Zhang, Peter R. McDonald, Tong Ying Shun, Michael D Lewen, Ian F. Pollack, and John S. Lazo

Molecular Pharmacology

|                              |               |       |                                      |           |        |
|------------------------------|---------------|-------|--------------------------------------|-----------|--------|
| siRNA-Temozolomide Run1-DMSO | NM_1447<br>66 | RGS13 | regulator of G-protein signalling 13 | -0.89916  | Inlier |
| siRNA-Vinblastine Run2-DMSO  | NM_1447<br>66 | RGS13 | regulator of G-protein signalling 13 | -0.660586 | Inlier |
| siRNA-Temozolomide Run3-DMSO | NM_1447<br>66 | RGS13 | regulator of G-protein signalling 13 | -0.144367 | Inlier |
| siRNA Disorazole DMSO Run3   | NM_1447<br>66 | RGS13 | regulator of G-protein signalling 13 | 0.144367  | Inlier |
| siRNA Disorazole DMSO Run1   | NM_1447<br>66 | RGS13 | regulator of G-protein signalling 13 | 0.492495  | Inlier |
| siRNA Disorazole DMSO Run2   | NM_1447<br>66 | RGS13 | regulator of G-protein signalling 13 | 0.688414  | Inlier |
| siRNA-Vinblastine Run1-DMSO  | NM_1447<br>66 | RGS13 | regulator of G-protein signalling 13 | 1.043045  | Inlier |
| siRNA-Temozolomide Run3-DMSO | NM_0064<br>80 | RGS14 | regulator of G-protein signalling 14 | -0.998876 | Inlier |
| siRNA Disorazole DMSO Run3   | NM_0064<br>80 | RGS14 | regulator of G-protein signalling 14 | -0.726593 | Inlier |
| siRNA Disorazole DMSO Run2   | NM_0064<br>80 | RGS14 | regulator of G-protein signalling 14 | -0.709544 | Inlier |



Identification of Survival Genes in Human Glioblastoma Cells Using siRNA Screening  
 Nikhil G Thaker, Fang Zhang, Peter R. McDonald, Tong Ying Shun, Michael D Lewen, Ian F. Pollack, and John S. Lazo

Molecular Pharmacology

|                              |               |       |                                                   |           |         |
|------------------------------|---------------|-------|---------------------------------------------------|-----------|---------|
| siRNA-Temozolomide Run2-DMSO | NM_0064<br>80 | RGS14 | regulator<br>of G-<br>protein<br>signalling<br>14 | -0.075182 | Inlier  |
| siRNA-Temozolomide Run1-DMSO | NM_0064<br>80 | RGS14 | regulator<br>of G-<br>protein<br>signalling<br>14 | 0.075182  | Inlier  |
| siRNA Disorazole DMSO Run1   | NM_0064<br>80 | RGS14 | regulator<br>of G-<br>protein<br>signalling<br>14 | 0.388178  | Inlier  |
| siRNA-Vinblastine Run2-DMSO  | NM_0064<br>80 | RGS14 | regulator<br>of G-<br>protein<br>signalling<br>14 | 0.639456  | Inlier  |
| siRNA-Vinblastine Run1-DMSO  | NM_0064<br>80 | RGS14 | regulator<br>of G-<br>protein<br>signalling<br>14 | 0.761787  | Inlier  |
| siRNA Disorazole DMSO Run2   | NM_0029<br>28 | RGS16 | regulator<br>of G-<br>protein<br>signalling<br>16 | -4.520005 | Outlier |
| siRNA Disorazole DMSO Run3   | NM_0029<br>28 | RGS16 | regulator<br>of G-<br>protein<br>signalling<br>16 | -0.583433 | Inlier  |
| siRNA Disorazole DMSO Run1   | NM_0029<br>28 | RGS16 | regulator<br>of G-<br>protein<br>signalling<br>16 | -0.449432 | Inlier  |
| siRNA-Temozolomide Run3-DMSO | NM_0029<br>28 | RGS16 | regulator<br>of G-<br>protein<br>signalling<br>16 | -0.290588 | Inlier  |
| siRNA-Temozolomide Run2-DMSO | NM_0029<br>28 | RGS16 | regulator<br>of G-<br>protein<br>signalling<br>16 | 0.290589  | Inlier  |

Identification of Survival Genes in Human Glioblastoma Cells Using siRNA Screening  
 Nikhil G Thaker, Fang Zhang, Peter R. McDonald, Tong Ying Shun, Michael D Lewen, Ian F. Pollack, and John S. Lazo

Molecular Pharmacology

|                              |               |       |                                         |           |        |
|------------------------------|---------------|-------|-----------------------------------------|-----------|--------|
| siRNA-Temozolomide Run1-DMSO | NM_0029<br>28 | RGS16 | regulator of G-protein signalling<br>16 | 0.765567  | Inlier |
| siRNA-Vinblastine Run2-DMSO  | NM_0029<br>28 | RGS16 | regulator of G-protein signalling<br>16 | 1.183597  | Inlier |
| siRNA-Vinblastine Run1-DMSO  | NM_0029<br>28 | RGS16 | regulator of G-protein signalling<br>16 | 1.625927  | Inlier |
| siRNA-Temozolomide Run2-DMSO | NM_0124<br>19 | RGS17 | regulator of G-protein signalling<br>17 | -0.882745 | Inlier |
| siRNA-Temozolomide Run3-DMSO | NM_0124<br>19 | RGS17 | regulator of G-protein signalling<br>17 | -0.876221 | Inlier |
| siRNA-Temozolomide Run1-DMSO | NM_0124<br>19 | RGS17 | regulator of G-protein signalling<br>17 | -0.042298 | Inlier |
| siRNA Disorazole DMSO Run3   | NM_0124<br>19 | RGS17 | regulator of G-protein signalling<br>17 | -0.001229 | Inlier |
| siRNA-Vinblastine Run2-DMSO  | NM_0124<br>19 | RGS17 | regulator of G-protein signalling<br>17 | 0.001229  | Inlier |
| siRNA Disorazole DMSO Run1   | NM_0124<br>19 | RGS17 | regulator of G-protein signalling<br>17 | 0.554173  | Inlier |
| siRNA Disorazole DMSO Run2   | NM_0124<br>19 | RGS17 | regulator of G-protein signalling<br>17 | 0.794827  | Inlier |

Identification of Survival Genes in Human Glioblastoma Cells Using siRNA Screening  
 Nikhil G Thaker, Fang Zhang, Peter R. McDonald, Tong Ying Shun, Michael D Lewen, Ian F. Pollack, and John S. Lazo

Molecular Pharmacology

|                              |               |       |                                         |                  |
|------------------------------|---------------|-------|-----------------------------------------|------------------|
| siRNA-Vinblastine Run1-DMSO  | NM_0124<br>19 | RGS17 | regulator of G-protein signalling<br>17 | 1.033412 Inlier  |
| siRNA-Temozolomide Run3-DMSO | NM_1307<br>82 | RGS18 | regulator of G-protein signalling<br>18 | -0.857107 Inlier |
| siRNA-Temozolomide Run2-DMSO | NM_1307<br>82 | RGS18 | regulator of G-protein signalling<br>18 | -0.637509 Inlier |
| siRNA-Temozolomide Run1-DMSO | NM_1307<br>82 | RGS18 | regulator of G-protein signalling<br>18 | -0.546374 Inlier |
| siRNA Disorazole DMSO Run3   | NM_1307<br>82 | RGS18 | regulator of G-protein signalling<br>18 | -0.181962 Inlier |
| siRNA-Vinblastine Run2-DMSO  | NM_1307<br>82 | RGS18 | regulator of G-protein signalling<br>18 | 0.181962 Inlier  |
| siRNA Disorazole DMSO Run1   | NM_1307<br>82 | RGS18 | regulator of G-protein signalling<br>18 | 0.711491 Inlier  |
| siRNA-Vinblastine Run1-DMSO  | NM_1307<br>82 | RGS18 | regulator of G-protein signalling<br>18 | 0.860871 Inlier  |
| siRNA Disorazole DMSO Run2   | NM_1307<br>82 | RGS18 | regulator of G-protein signalling<br>18 | 1.146917 Inlier  |
| siRNA-Temozolomide Run3-DMSO | NM_0058<br>73 | RGS19 | regulator of G-protein signalling<br>19 | -3.497353 Inlier |

Identification of Survival Genes in Human Glioblastoma Cells Using siRNA Screening  
 Nikhil G Thaker, Fang Zhang, Peter R. McDonald, Tong Ying Shun, Michael D Lewen, Ian F. Pollack, and John S. Lazo

Molecular Pharmacology

|                              |               |       |                                            |           |         |
|------------------------------|---------------|-------|--------------------------------------------|-----------|---------|
| siRNA-Temozolomide Run2-DMSO | NM_0058<br>73 | RGS19 | regulator of G-protein signalling 19       | -0.454472 | Inlier  |
| siRNA-Vinblastine Run2-DMSO  | NM_0058<br>73 | RGS19 | regulator of G-protein signalling 19       | -0.435997 | Inlier  |
| siRNA-Temozolomide Run1-DMSO | NM_0058<br>73 | RGS19 | regulator of G-protein signalling 19       | -0.351214 | Inlier  |
| siRNA Disorazole DMSO Run3   | NM_0058<br>73 | RGS19 | regulator of G-protein signalling 19       | 0.351214  | Inlier  |
| siRNA Disorazole DMSO Run1   | NM_0058<br>73 | RGS19 | regulator of G-protein signalling 19       | 0.894528  | Inlier  |
| siRNA Disorazole DMSO Run2   | NM_0058<br>73 | RGS19 | regulator of G-protein signalling 19       | 2.875148  | Inlier  |
| siRNA-Vinblastine Run1-DMSO  | NM_0058<br>73 | RGS19 | regulator of G-protein signalling 19       | 4.082661  | Outlier |
| siRNA Disorazole DMSO Run2   | NM_0029<br>23 | RGS2  | regulator of G-protein signalling 2, 24kDa | -5.111007 | Outlier |
| siRNA Disorazole DMSO Run1   | NM_0029<br>23 | RGS2  | regulator of G-protein signalling 2, 24kDa | -2.210405 | Inlier  |
| siRNA-Vinblastine Run2-DMSO  | NM_0029<br>23 | RGS2  | regulator of G-protein signalling 2, 24kDa | -0.20304  | Inlier  |

Identification of Survival Genes in Human Glioblastoma Cells Using siRNA Screening  
 Nikhil G Thaker, Fang Zhang, Peter R. McDonald, Tong Ying Shun, Michael D Lewen, Ian F. Pollack, and John S. Lazo

Molecular Pharmacology

| siRNA Treatment              | Gene ID   | Gene Name | Protein Name                               | Value     | Category |
|------------------------------|-----------|-----------|--------------------------------------------|-----------|----------|
| siRNA-Temozolomide Run1-DMSO | NM_002923 | RGS2      | regulator of G-protein signalling 2, 24kDa | -0.032675 | Inlier   |
| siRNA-Temozolomide Run3-DMSO | NM_002923 | RGS2      | regulator of G-protein signalling 2, 24kDa | 0.032675  | Inlier   |
| siRNA-Temozolomide Run2-DMSO | NM_002923 | RGS2      | regulator of G-protein signalling 2, 24kDa | 0.418117  | Inlier   |
| siRNA-Vinblastine Run1-DMSO  | NM_002923 | RGS2      | regulator of G-protein signalling 2, 24kDa | 0.930883  | Inlier   |
| siRNA Disorazole DMSO Run3   | NM_002923 | RGS2      | regulator of G-protein signalling 2, 24kDa | 4.462789  | Outlier  |
| siRNA Disorazole DMSO Run2   | NM_170587 | RGS20     | regulator of G-protein signalling 20       | -3.727467 | Outlier  |
| siRNA-Temozolomide Run3-DMSO | NM_170587 | RGS20     | regulator of G-protein signalling 20       | -1.833213 | Inlier   |
| siRNA Disorazole DMSO Run3   | NM_170587 | RGS20     | regulator of G-protein signalling 20       | -1.74188  | Inlier   |
| siRNA-Temozolomide Run1-DMSO | NM_170587 | RGS20     | regulator of G-protein signalling 20       | -0.04322  | Inlier   |
| siRNA-Temozolomide Run2-DMSO | NM_170587 | RGS20     | regulator of G-protein signalling 20       | 0.04322   | Inlier   |

Identification of Survival Genes in Human Glioblastoma Cells Using siRNA Screening  
 Nikhil G Thaker, Fang Zhang, Peter R. McDonald, Tong Ying Shun, Michael D Lewen, Ian F. Pollack, and John S. Lazo

Molecular Pharmacology

| siRNA Treatment              | Gene ID       | Gene Name | Regulator                            | Value     | Inlier |
|------------------------------|---------------|-----------|--------------------------------------|-----------|--------|
| siRNA Disorazole DMSO Run1   | NM_1705<br>87 | RGS20     | regulator of G-protein signalling 20 | 0.113877  | Inlier |
| siRNA-Vinblastine Run1-DMSO  | NM_1705<br>87 | RGS20     | regulator of G-protein signalling 20 | 0.62476   | Inlier |
| siRNA-Vinblastine Run2-DMSO  | NM_1705<br>87 | RGS20     | regulator of G-protein signalling 20 | 0.72424   | Inlier |
| siRNA-Temozolomide Run3-DMSO | NM_1444<br>89 | RGS3      | regulator of G-protein signalling 3  | -1.224689 | Inlier |
| siRNA Disorazole DMSO Run2   | NM_1444<br>89 | RGS3      | regulator of G-protein signalling 3  | -1.050639 | Inlier |
| siRNA-Temozolomide Run2-DMSO | NM_1444<br>89 | RGS3      | regulator of G-protein signalling 3  | -0.654643 | Inlier |
| siRNA Disorazole DMSO Run3   | NM_1444<br>89 | RGS3      | regulator of G-protein signalling 3  | -0.082739 | Inlier |
| siRNA-Temozolomide Run1-DMSO | NM_1444<br>89 | RGS3      | regulator of G-protein signalling 3  | 0.082739  | Inlier |
| siRNA Disorazole DMSO Run1   | NM_1444<br>89 | RGS3      | regulator of G-protein signalling 3  | 0.497682  | Inlier |
| siRNA-Vinblastine Run1-DMSO  | NM_1444<br>89 | RGS3      | regulator of G-protein signalling 3  | 0.694357  | Inlier |

Identification of Survival Genes in Human Glioblastoma Cells Using siRNA Screening  
 Nikhil G Thaker, Fang Zhang, Peter R. McDonald, Tong Ying Shun, Michael D Lewen, Ian F. Pollack, and John S. Lazo

Molecular Pharmacology

|                              |               |      |                                                  |           |        |
|------------------------------|---------------|------|--------------------------------------------------|-----------|--------|
| siRNA-Vinblastine Run2-DMSO  | NM_1444<br>89 | RGS3 | regulator<br>of G-<br>protein<br>signalling<br>3 | 0.835734  | Inlier |
| siRNA Disorazole DMSO Run2   | NM_0056<br>13 | RGS4 | regulator<br>of G-<br>protein<br>signalling<br>4 | -0.927991 | Inlier |
| siRNA-Temozolomide Run3-DMSO | NM_0056<br>13 | RGS4 | regulator<br>of G-<br>protein<br>signalling<br>4 | -0.688497 | Inlier |
| siRNA-Temozolomide Run2-DMSO | NM_0056<br>13 | RGS4 | regulator<br>of G-<br>protein<br>signalling<br>4 | -0.660503 | Inlier |
| siRNA Disorazole DMSO Run3   | NM_0056<br>13 | RGS4 | regulator<br>of G-<br>protein<br>signalling<br>4 | -0.320095 | Inlier |
| siRNA-Temozolomide Run1-DMSO | NM_0056<br>13 | RGS4 | regulator<br>of G-<br>protein<br>signalling<br>4 | 0.320094  | Inlier |
| siRNA Disorazole DMSO Run1   | NM_0056<br>13 | RGS4 | regulator<br>of G-<br>protein<br>signalling<br>4 | 0.590614  | Inlier |
| siRNA-Vinblastine Run1-DMSO  | NM_0056<br>13 | RGS4 | regulator<br>of G-<br>protein<br>signalling<br>4 | 1.180712  | Inlier |
| siRNA-Vinblastine Run2-DMSO  | NM_0056<br>13 | RGS4 | regulator<br>of G-<br>protein<br>signalling<br>4 | 1.238775  | Inlier |
| siRNA-Temozolomide Run3-DMSO | NM_0036<br>17 | RGS5 | regulator<br>of G-<br>protein<br>signalling<br>5 | -0.991011 | Inlier |

Identification of Survival Genes in Human Glioblastoma Cells Using siRNA Screening  
 Nikhil G Thaker, Fang Zhang, Peter R. McDonald, Tong Ying Shun, Michael D Lewen, Ian F. Pollack, and John S. Lazo

Molecular Pharmacology

|                                  |               |      |                                                  |           |        |
|----------------------------------|---------------|------|--------------------------------------------------|-----------|--------|
| siRNA Disorazole DMSO Run2       | NM_0036<br>17 | RGS5 | regulator<br>of G-<br>protein<br>signalling<br>5 | -0.917939 | Inlier |
| siRNA Disorazole DMSO Run3       | NM_0036<br>17 | RGS5 | regulator<br>of G-<br>protein<br>signalling<br>5 | -0.431061 | Inlier |
| siRNA-Temozolomide Run2-<br>DMSO | NM_0036<br>17 | RGS5 | regulator<br>of G-<br>protein<br>signalling<br>5 | -0.013527 | Inlier |
| siRNA-Temozolomide Run1-<br>DMSO | NM_0036<br>17 | RGS5 | regulator<br>of G-<br>protein<br>signalling<br>5 | 0.013527  | Inlier |
| siRNA Disorazole DMSO Run1       | NM_0036<br>17 | RGS5 | regulator<br>of G-<br>protein<br>signalling<br>5 | 0.400395  | Inlier |
| siRNA-Vinblastine Run1-<br>DMSO  | NM_0036<br>17 | RGS5 | regulator<br>of G-<br>protein<br>signalling<br>5 | 1.044653  | Inlier |
| siRNA-Vinblastine Run2-<br>DMSO  | NM_0036<br>17 | RGS5 | regulator<br>of G-<br>protein<br>signalling<br>5 | 1.130807  | Inlier |
| siRNA-Temozolomide Run2-<br>DMSO | NM_0042<br>96 | RGS6 | regulator<br>of G-<br>protein<br>signalling<br>6 | -1.087388 | Inlier |
| siRNA-Temozolomide Run3-<br>DMSO | NM_0042<br>96 | RGS6 | regulator<br>of G-<br>protein<br>signalling<br>6 | -0.953169 | Inlier |
| siRNA Disorazole DMSO Run2       | NM_0042<br>96 | RGS6 | regulator<br>of G-<br>protein<br>signalling<br>6 | -0.625911 | Inlier |



Identification of Survival Genes in Human Glioblastoma Cells Using siRNA Screening  
 Nikhil G Thaker, Fang Zhang, Peter R. McDonald, Tong Ying Shun, Michael D Lewen, Ian F. Pollack, and John S. Lazo

Molecular Pharmacology

|                              |               |      |                                                  |           |        |
|------------------------------|---------------|------|--------------------------------------------------|-----------|--------|
| siRNA-Temozolomide Run1-DMSO | NM_0042<br>96 | RGS6 | regulator<br>of G-<br>protein<br>signalling<br>6 | -0.041447 | Inlier |
| siRNA Disorazole DMSO Run3   | NM_0042<br>96 | RGS6 | regulator<br>of G-<br>protein<br>signalling<br>6 | 0.041448  | Inlier |
| siRNA-Vinblastine Run2-DMSO  | NM_0042<br>96 | RGS6 | regulator<br>of G-<br>protein<br>signalling<br>6 | 0.634134  | Inlier |
| siRNA Disorazole DMSO Run1   | NM_0042<br>96 | RGS6 | regulator<br>of G-<br>protein<br>signalling<br>6 | 0.714866  | Inlier |
| siRNA-Vinblastine Run1-DMSO  | NM_0042<br>96 | RGS6 | regulator<br>of G-<br>protein<br>signalling<br>6 | 0.723318  | Inlier |
| siRNA-Temozolomide Run3-DMSO | NM_0029<br>24 | RGS7 | regulator<br>of G-<br>protein<br>signalling<br>7 | -1.94072  | Inlier |
| siRNA Disorazole DMSO Run2   | NM_0029<br>24 | RGS7 | regulator<br>of G-<br>protein<br>signalling<br>7 | -1.17064  | Inlier |
| siRNA-Temozolomide Run2-DMSO | NM_0029<br>24 | RGS7 | regulator<br>of G-<br>protein<br>signalling<br>7 | -0.836942 | Inlier |
| siRNA Disorazole DMSO Run3   | NM_0029<br>24 | RGS7 | regulator<br>of G-<br>protein<br>signalling<br>7 | -0.088004 | Inlier |
| siRNA-Temozolomide Run1-DMSO | NM_0029<br>24 | RGS7 | regulator<br>of G-<br>protein<br>signalling<br>7 | 0.088004  | Inlier |

Identification of Survival Genes in Human Glioblastoma Cells Using siRNA Screening  
 Nikhil G Thaker, Fang Zhang, Peter R. McDonald, Tong Ying Shun, Michael D Lewen, Ian F. Pollack, and John S. Lazo

Molecular Pharmacology

| siRNA Treatment              | Gene ID       | Gene Name | Pathway                             | Score     | Outlier Status |
|------------------------------|---------------|-----------|-------------------------------------|-----------|----------------|
| siRNA Disorazole DMSO Run1   | NM_0029<br>24 | RGS7      | regulator of G-protein signalling 7 | 0.435356  | Inlier         |
| siRNA-Vinblastine Run1-DMSO  | NM_0029<br>24 | RGS7      | regulator of G-protein signalling 7 | 0.512058  | Inlier         |
| siRNA-Vinblastine Run2-DMSO  | NM_0029<br>24 | RGS7      | regulator of G-protein signalling 7 | 1.156824  | Inlier         |
| siRNA-Temozolomide Run1-DMSO | NM_0333<br>45 | RGS8      | regulator of G-protein signalling 8 | -2.364419 | Inlier         |
| siRNA-Temozolomide Run2-DMSO | NM_0333<br>45 | RGS8      | regulator of G-protein signalling 8 | -2.304282 | Inlier         |
| siRNA-Vinblastine Run2-DMSO  | NM_0333<br>45 | RGS8      | regulator of G-protein signalling 8 | -0.189506 | Inlier         |
| siRNA Disorazole DMSO Run3   | NM_0333<br>45 | RGS8      | regulator of G-protein signalling 8 | -0.029196 | Inlier         |
| siRNA-Temozolomide Run3-DMSO | NM_0333<br>45 | RGS8      | regulator of G-protein signalling 8 | 0.029196  | Inlier         |
| siRNA Disorazole DMSO Run2   | NM_0333<br>45 | RGS8      | regulator of G-protein signalling 8 | 0.495775  | Inlier         |
| siRNA Disorazole DMSO Run1   | NM_0333<br>45 | RGS8      | regulator of G-protein signalling 8 | 0.853225  | Inlier         |

Identification of Survival Genes in Human Glioblastoma Cells Using siRNA Screening  
 Nikhil G Thaker, Fang Zhang, Peter R. McDonald, Tong Ying Shun, Michael D Lewen, Ian F. Pollack, and John S. Lazo

Molecular Pharmacology

|                              |               |        |                                       |           |        |
|------------------------------|---------------|--------|---------------------------------------|-----------|--------|
| siRNA-Vinblastine Run1-DMSO  | NM_0333<br>45 | RGS8   | regulator of G-protein signalling 8   | 1.079886  | Inlier |
| siRNA Disorazole DMSO Run2   | NM_0038<br>35 | RGS9   | regulator of G-protein signalling 9   | -0.994383 | Inlier |
| siRNA-Temozolomide Run2-DMSO | NM_0038<br>35 | RGS9   | regulator of G-protein signalling 9   | -0.354617 | Inlier |
| siRNA Disorazole DMSO Run1   | NM_0038<br>35 | RGS9   | regulator of G-protein signalling 9   | -0.276158 | Inlier |
| siRNA-Temozolomide Run3-DMSO | NM_0038<br>35 | RGS9   | regulator of G-protein signalling 9   | -0.119572 | Inlier |
| siRNA Disorazole DMSO Run3   | NM_0038<br>35 | RGS9   | regulator of G-protein signalling 9   | 0.119571  | Inlier |
| siRNA-Temozolomide Run1-DMSO | NM_0038<br>35 | RGS9   | regulator of G-protein signalling 9   | 1.205581  | Inlier |
| siRNA-Vinblastine Run1-DMSO  | NM_0038<br>35 | RGS9   | regulator of G-protein signalling 9   | 2.25213   | Inlier |
| siRNA-Vinblastine Run2-DMSO  | NM_0038<br>35 | RGS9   | regulator of G-protein signalling 9   | 2.261912  | Inlier |
| siRNA-Temozolomide Run3-DMSO | NM_0039<br>61 | RHBDL1 | rhomboid, veinlet-like 1 (Drosophila) | -1.369306 | Inlier |

Identification of Survival Genes in Human Glioblastoma Cells Using siRNA Screening  
 Nikhil G Thaker, Fang Zhang, Peter R. McDonald, Tong Ying Shun, Michael D Lewen, Ian F. Pollack, and John S. Lazo

Molecular Pharmacology

|                                  |               |        |                                |                  |
|----------------------------------|---------------|--------|--------------------------------|------------------|
|                                  |               |        | rhomboid,<br>veinlet-like<br>1 |                  |
| siRNA-Temozolomide Run2-<br>DMSO | NM_0039<br>61 | RHBDL1 | (Drosophil<br>a)               | -0.973027 Inlier |
|                                  |               |        | rhomboid,<br>veinlet-like<br>1 |                  |
| siRNA-Temozolomide Run1-<br>DMSO | NM_0039<br>61 | RHBDL1 | (Drosophil<br>a)               | -0.415272 Inlier |
|                                  |               |        | rhomboid,<br>veinlet-like<br>1 |                  |
| siRNA Disorazole DMSO Run3       | NM_0039<br>61 | RHBDL1 | (Drosophil<br>a)               | -0.075189 Inlier |
|                                  |               |        | rhomboid,<br>veinlet-like<br>1 |                  |
| siRNA Disorazole DMSO Run1       | NM_0039<br>61 | RHBDL1 | (Drosophil<br>a)               | 0.075189 Inlier  |
|                                  |               |        | rhomboid,<br>veinlet-like<br>1 |                  |
| siRNA-Vinblastine Run2-<br>DMSO  | NM_0039<br>61 | RHBDL1 | (Drosophil<br>a)               | 0.531866 Inlier  |
|                                  |               |        | rhomboid,<br>veinlet-like<br>1 |                  |
| siRNA Disorazole DMSO Run2       | NM_0039<br>61 | RHBDL1 | (Drosophil<br>a)               | 0.817134 Inlier  |
|                                  |               |        | rhomboid,<br>veinlet-like<br>1 |                  |
| siRNA-Vinblastine Run1-<br>DMSO  | NM_0039<br>61 | RHBDL1 | (Drosophil<br>a)               | 1.375507 Inlier  |
|                                  |               |        | rhomboid,<br>veinlet-like<br>2 |                  |
| siRNA-Temozolomide Run2-<br>DMSO | NM_0178<br>21 | RHBDL2 | (Drosophil<br>a)               | -0.909672 Inlier |
|                                  |               |        | rhomboid,<br>veinlet-like<br>2 |                  |
| siRNA-Temozolomide Run1-<br>DMSO | NM_0178<br>21 | RHBDL2 | (Drosophil<br>a)               | -0.597672 Inlier |
|                                  |               |        | rhomboid,<br>veinlet-like<br>2 |                  |
| siRNA Disorazole DMSO Run1       | NM_0178<br>21 | RHBDL2 | (Drosophil<br>a)               | -0.139844 Inlier |

Identification of Survival Genes in Human Glioblastoma Cells Using siRNA Screening  
 Nikhil G Thaker, Fang Zhang, Peter R. McDonald, Tong Ying Shun, Michael D Lewen, Ian F. Pollack, and John S. Lazo

Molecular Pharmacology

|                                  |               |        |                                                    |           |        |
|----------------------------------|---------------|--------|----------------------------------------------------|-----------|--------|
| siRNA Disorazole DMSO Run3       | NM_0178<br>21 | RHBDL2 | rhomboid,<br>veinlet-like<br>2<br>(Drosophil<br>a) | -0.126361 | Inlier |
| siRNA-Vinblastine Run2-<br>DMSO  | NM_0178<br>21 | RHBDL2 | rhomboid,<br>veinlet-like<br>2<br>(Drosophil<br>a) | 0.12636   | Inlier |
| siRNA Disorazole DMSO Run2       | NM_0178<br>21 | RHBDL2 | rhomboid,<br>veinlet-like<br>2<br>(Drosophil<br>a) | 0.751328  | Inlier |
| siRNA-Temozolomide Run3-<br>DMSO | NM_0178<br>21 | RHBDL2 | rhomboid,<br>veinlet-like<br>2<br>(Drosophil<br>a) | 1.006702  | Inlier |
| siRNA-Vinblastine Run1-<br>DMSO  | NM_0178<br>21 | RHBDL2 | rhomboid,<br>veinlet-like<br>4<br>(Drosophil<br>a) | 1.659449  | Inlier |
| siRNA-Temozolomide Run3-<br>DMSO | NM_1383<br>28 | RHBDL4 | rhomboid,<br>veinlet-like<br>4<br>(Drosophil<br>a) | -0.829172 | Inlier |
| siRNA-Temozolomide Run1-<br>DMSO | NM_1383<br>28 | RHBDL4 | rhomboid,<br>veinlet-like<br>4<br>(Drosophil<br>a) | -0.558425 | Inlier |
| siRNA Disorazole DMSO Run1       | NM_1383<br>28 | RHBDL4 | rhomboid,<br>veinlet-like<br>4<br>(Drosophil<br>a) | -0.336235 | Inlier |
| siRNA Disorazole DMSO Run2       | NM_1383<br>28 | RHBDL4 | rhomboid,<br>veinlet-like<br>4<br>(Drosophil<br>a) | -0.127476 | Inlier |
| siRNA-Temozolomide Run2-<br>DMSO | NM_1383<br>28 | RHBDL4 | rhomboid,<br>veinlet-like<br>4<br>(Drosophil<br>a) | 0.127476  | Inlier |

Identification of Survival Genes in Human Glioblastoma Cells Using siRNA Screening  
 Nikhil G Thaker, Fang Zhang, Peter R. McDonald, Tong Ying Shun, Michael D Lewen, Ian F. Pollack, and John S. Lazo

Molecular Pharmacology

|                                  |               |        |                                           |                                |        |
|----------------------------------|---------------|--------|-------------------------------------------|--------------------------------|--------|
|                                  |               |        |                                           | rhomboid,<br>veinlet-like<br>4 |        |
| siRNA Disorazole DMSO Run3       | NM_1383<br>28 | RHBDL4 | (Drosophil<br>a)                          | 0.790575                       | Inlier |
|                                  |               |        | rhomboid,<br>veinlet-like<br>4            |                                |        |
| siRNA-Vinblastine Run2-<br>DMSO  | NM_1383<br>28 | RHBDL4 | (Drosophil<br>a)                          | 2.079407                       | Inlier |
|                                  |               |        | rhomboid,<br>veinlet-like<br>4            |                                |        |
| siRNA-Vinblastine Run1-<br>DMSO  | NM_1383<br>28 | RHBDL4 | (Drosophil<br>a)                          | 2.464733                       | Inlier |
|                                  |               |        | Ras                                       |                                |        |
| siRNA-Temozolomide Run3-<br>DMSO | NM_0056<br>14 | RHEB   | homolog<br>enriched<br>in brain           | -2.265781                      | Inlier |
|                                  |               |        | Ras                                       |                                |        |
| siRNA-Vinblastine Run2-<br>DMSO  | NM_0056<br>14 | RHEB   | homolog<br>enriched<br>in brain           | -1.048636                      | Inlier |
|                                  |               |        | Ras                                       |                                |        |
| siRNA Disorazole DMSO Run3       | NM_0056<br>14 | RHEB   | homolog<br>enriched<br>in brain           | -0.762477                      | Inlier |
|                                  |               |        | Ras                                       |                                |        |
| siRNA Disorazole DMSO Run1       | NM_0056<br>14 | RHEB   | homolog<br>enriched<br>in brain           | -0.238143                      | Inlier |
|                                  |               |        | Ras                                       |                                |        |
| siRNA-Vinblastine Run1-<br>DMSO  | NM_0056<br>14 | RHEB   | homolog<br>enriched<br>in brain           | 0.238144                       | Inlier |
|                                  |               |        | Ras                                       |                                |        |
| siRNA-Temozolomide Run1-<br>DMSO | NM_0056<br>14 | RHEB   | homolog<br>enriched<br>in brain           | 0.482675                       | Inlier |
|                                  |               |        | Ras                                       |                                |        |
| siRNA-Temozolomide Run2-<br>DMSO | NM_0056<br>14 | RHEB   | homolog<br>enriched<br>in brain           | 0.586523                       | Inlier |
|                                  |               |        | Ras                                       |                                |        |
| siRNA Disorazole DMSO Run2       | NM_0056<br>14 | RHEB   | homolog<br>enriched<br>in brain           | 1.224804                       | Inlier |
|                                  |               |        | Ras                                       |                                |        |
| siRNA-Temozolomide Run3-<br>DMSO | NM_1445<br>93 | RHEBL1 | homolog<br>enriched<br>in brain<br>like 1 | -2.42257                       | Inlier |

Identification of Survival Genes in Human Glioblastoma Cells Using siRNA Screening  
 Nikhil G Thaker, Fang Zhang, Peter R. McDonald, Tong Ying Shun, Michael D Lewen, Ian F. Pollack, and John S. Lazo

Molecular Pharmacology

|                              |               |        |                                                                               |           |        |
|------------------------------|---------------|--------|-------------------------------------------------------------------------------|-----------|--------|
| siRNA-Temozolomide Run2-DMSO | NM_1445<br>93 | RHEBL1 | Ras homolog enriched in brain like 1                                          | -0.996432 | Inlier |
| siRNA-Temozolomide Run1-DMSO | NM_1445<br>93 | RHEBL1 | Ras homolog enriched in brain like 1                                          | -0.489831 | Inlier |
| siRNA-Vinblastine Run1-DMSO  | NM_1445<br>93 | RHEBL1 | Ras homolog enriched in brain like 1                                          | -0.389539 | Inlier |
| siRNA-Vinblastine Run2-DMSO  | NM_1445<br>93 | RHEBL1 | Ras homolog enriched in brain like 1                                          | 0.389539  | Inlier |
| siRNA Disorazole DMSO Run3   | NM_1445<br>93 | RHEBL1 | Ras homolog enriched in brain like 1                                          | 0.487924  | Inlier |
| siRNA Disorazole DMSO Run1   | NM_1445<br>93 | RHEBL1 | Ras homolog enriched in brain like 1                                          | 0.859169  | Inlier |
| siRNA Disorazole DMSO Run2   | NM_1445<br>93 | RHEBL1 | Ras homolog enriched in brain like 1                                          | 1.314837  | Inlier |
| siRNA-Temozolomide Run3-DMSO | NM_0005<br>39 | RHO    | rhodopsin (opsin 2, rod pigment) (retinitis pigmentosa 4, autosomal dominant) | -0.951773 | Inlier |

Identification of Survival Genes in Human Glioblastoma Cells Using siRNA Screening

Nikhil G Thaker, Fang Zhang, Peter R. McDonald, Tong Ying Shun, Michael D Lewen, Ian F. Pollack, and John S. Lazo

Molecular Pharmacology

|                                  |               |     |                                                                                                        |           |        |
|----------------------------------|---------------|-----|--------------------------------------------------------------------------------------------------------|-----------|--------|
| siRNA Disorazole DMSO Run2       | NM_0005<br>39 | RHO | rhodopsin<br>(opsin 2,<br>rod<br>pigment)<br>(retinitis<br>pigmentos<br>a 4,<br>autosomal<br>dominant) | -0.813105 | Inlier |
| siRNA Disorazole DMSO Run3       | NM_0005<br>39 | RHO | rhodopsin<br>(opsin 2,<br>rod<br>pigment)<br>(retinitis<br>pigmentos<br>a 4,<br>autosomal<br>dominant) | -0.535895 | Inlier |
| siRNA-Temozolomide Run2-<br>DMSO | NM_0005<br>39 | RHO | rhodopsin<br>(opsin 2,<br>rod<br>pigment)<br>(retinitis<br>pigmentos<br>a 4,<br>autosomal<br>dominant) | -0.028774 | Inlier |
| siRNA-Temozolomide Run1-<br>DMSO | NM_0005<br>39 | RHO | rhodopsin<br>(opsin 2,<br>rod<br>pigment)<br>(retinitis<br>pigmentos<br>a 4,<br>autosomal<br>dominant) | 0.028774  | Inlier |
| siRNA Disorazole DMSO Run1       | NM_0005<br>39 | RHO | rhodopsin<br>(opsin 2,<br>rod<br>pigment)<br>(retinitis<br>pigmentos<br>a 4,<br>autosomal<br>dominant) | 0.472938  | Inlier |



Identification of Survival Genes in Human Glioblastoma Cells Using siRNA Screening

Nikhil G Thaker, Fang Zhang, Peter R. McDonald, Tong Ying Shun, Michael D Lewen, Ian F. Pollack, and John S.

Lazo

Molecular Pharmacology

|                              |           |      |                                                                               |           |        |
|------------------------------|-----------|------|-------------------------------------------------------------------------------|-----------|--------|
| siRNA-Vinblastine Run1-DMSO  | NM_000539 | RHO  | rhodopsin (opsin 2, rod pigment) (retinitis pigmentosa 4, autosomal dominant) | 0.875175  | Inlier |
| siRNA-Vinblastine Run2-DMSO  | NM_000539 | RHO  | rhodopsin (opsin 2, rod pigment) (retinitis pigmentosa 4, autosomal dominant) | 0.97112   | Inlier |
| siRNA-Vinblastine Run2-DMSO  | NM_001664 | RHOA | ras homolog gene family, member A                                             | -2.049571 | Inlier |
| siRNA-Temozolomide Run3-DMSO | NM_001664 | RHOA | ras homolog gene family, member A                                             | -1.423091 | Inlier |
| siRNA Disorazole DMSO Run3   | NM_001664 | RHOA | ras homolog gene family, member A                                             | -0.760899 | Inlier |
| siRNA-Vinblastine Run1-DMSO  | NM_001664 | RHOA | ras homolog gene family, member A                                             | -0.300245 | Inlier |
| siRNA Disorazole DMSO Run1   | NM_001664 | RHOA | ras homolog gene family, member A                                             | 0.300245  | Inlier |

Identification of Survival Genes in Human Glioblastoma Cells Using siRNA Screening  
 Nikhil G Thaker, Fang Zhang, Peter R. McDonald, Tong Ying Shun, Michael D Lewen, Ian F. Pollack, and John S. Lazo  
 Molecular Pharmacology

|                              |           |      |                                   |           |        |
|------------------------------|-----------|------|-----------------------------------|-----------|--------|
| siRNA-Temozolomide Run2-DMSO | NM_001664 | RHOA | ras homolog gene family, member A | 0.305951  | Inlier |
| siRNA-Temozolomide Run1-DMSO | NM_001664 | RHOA | ras homolog gene family, member A | 0.588101  | Inlier |
| siRNA Disorazole DMSO Run2   | NM_001664 | RHOA | ras homolog gene family, member A | 1.199015  | Inlier |
| siRNA Disorazole DMSO Run3   | NM_004040 | RHOB | ras homolog gene family, member B | -0.845387 | Inlier |
| siRNA-Temozolomide Run3-DMSO | NM_004040 | RHOB | ras homolog gene family, member B | -0.762634 | Inlier |
| siRNA-Temozolomide Run1-DMSO | NM_004040 | RHOB | ras homolog gene family, member B | -0.392554 | Inlier |
| siRNA-Vinblastine Run2-DMSO  | NM_004040 | RHOB | ras homolog gene family, member B | -0.260189 | Inlier |
| siRNA-Temozolomide Run2-DMSO | NM_004040 | RHOB | ras homolog gene family, member B | 0.260189  | Inlier |

Identification of Survival Genes in Human Glioblastoma Cells Using siRNA Screening  
 Nikhil G Thaker, Fang Zhang, Peter R. McDonald, Tong Ying Shun, Michael D Lewen, Ian F. Pollack, and John S. Lazo  
 Molecular Pharmacology

|                                  |               |         |                                                     |           |        |
|----------------------------------|---------------|---------|-----------------------------------------------------|-----------|--------|
| siRNA Disorazole DMSO Run1       | NM_0040<br>40 | RHOB    | ras<br>homolog<br>gene<br>family,<br>member B       | 0.586366  | Inlier |
| siRNA-Vinblastine Run1-<br>DMSO  | NM_0040<br>40 | RHOB    | ras<br>homolog<br>gene<br>family,<br>member B       | 1.410396  | Inlier |
| siRNA Disorazole DMSO Run2       | NM_0040<br>40 | RHOB    | ras<br>homolog<br>gene<br>family,<br>member B       | 1.640531  | Inlier |
| siRNA-Temozolomide Run1-<br>DMSO | NM_1982<br>25 | RHOBTB1 | Rho-<br>related<br>BTB<br>domain<br>containing<br>1 | -0.75404  | Inlier |
| siRNA-Temozolomide Run3-<br>DMSO | NM_1982<br>25 | RHOBTB1 | Rho-<br>related<br>BTB<br>domain<br>containing<br>1 | -0.708853 | Inlier |
| siRNA-Temozolomide Run2-<br>DMSO | NM_1982<br>25 | RHOBTB1 | Rho-<br>related<br>BTB<br>domain<br>containing<br>1 | -0.673484 | Inlier |
| siRNA-Vinblastine Run2-<br>DMSO  | NM_1982<br>25 | RHOBTB1 | Rho-<br>related<br>BTB<br>domain<br>containing<br>1 | -0.04539  | Inlier |
| siRNA Disorazole DMSO Run3       | NM_1982<br>25 | RHOBTB1 | Rho-<br>related<br>BTB<br>domain<br>containing<br>1 | 0.045391  | Inlier |





Identification of Survival Genes in Human Glioblastoma Cells Using siRNA Screening

Nikhil G Thaker, Fang Zhang, Peter R. McDonald, Tong Ying Shun, Michael D Lewen, Ian F. Pollack, and John S. Lazo

Molecular Pharmacology

| siRNA Treatment              | Gene ID   | Gene Name | Gene Description                    | Score     | Category |
|------------------------------|-----------|-----------|-------------------------------------|-----------|----------|
| siRNA-Vinblastine Run2-DMSO  | NM_014899 | RHOBTB3   | Rho-related BTB domain containing 3 | 1.167626  | Inlier   |
| siRNA Disorazole DMSO Run2   | NM_014899 | RHOBTB3   | Rho-related BTB domain containing 3 | 3.099153  | Inlier   |
| siRNA Disorazole DMSO Run3   | NM_014899 | RHOBTB3   | Rho-related BTB domain containing 3 | 4.663579  | Outlier  |
| siRNA-Temozolomide Run3-DMSO | NM_175744 | RHOC      | ras homolog gene family, member C   | -2.744881 | Inlier   |
| siRNA Disorazole DMSO Run3   | NM_175744 | RHOC      | ras homolog gene family, member C   | -1.26478  | Inlier   |
| siRNA-Vinblastine Run2-DMSO  | NM_175744 | RHOC      | ras homolog gene family, member C   | -0.897049 | Inlier   |
| siRNA Disorazole DMSO Run1   | NM_175744 | RHOC      | ras homolog gene family, member C   | -0.163219 | Inlier   |
| siRNA-Temozolomide Run2-DMSO | NM_175744 | RHOC      | ras homolog gene family, member C   | 0.163219  | Inlier   |

Identification of Survival Genes in Human Glioblastoma Cells Using siRNA Screening  
 Nikhil G Thaker, Fang Zhang, Peter R. McDonald, Tong Ying Shun, Michael D Lewen, Ian F. Pollack, and John S. Lazo  
 Molecular Pharmacology

|                              |               |      |                                               |           |        |
|------------------------------|---------------|------|-----------------------------------------------|-----------|--------|
| siRNA-Temozolomide Run1-DMSO | NM_1757<br>44 | RHOC | ras<br>homolog<br>gene<br>family,<br>member C | 0.301924  | Inlier |
| siRNA-Vinblastine Run1-DMSO  | NM_1757<br>44 | RHOC | ras<br>homolog<br>gene<br>family,<br>member C | 0.451951  | Inlier |
| siRNA Disorazole DMSO Run2   | NM_1757<br>44 | RHOC | ras<br>homolog<br>gene<br>family,<br>member C | 1.187361  | Inlier |
| siRNA-Temozolomide Run3-DMSO | NM_0145<br>78 | RHOD | ras<br>homolog<br>gene<br>family,<br>member D | -0.827806 | Inlier |
| siRNA-Temozolomide Run2-DMSO | NM_0145<br>78 | RHOD | ras<br>homolog<br>gene<br>family,<br>member D | -0.521194 | Inlier |
| siRNA-Vinblastine Run2-DMSO  | NM_0145<br>78 | RHOD | ras<br>homolog<br>gene<br>family,<br>member D | -0.456308 | Inlier |
| siRNA Disorazole DMSO Run3   | NM_0145<br>78 | RHOD | ras<br>homolog<br>gene<br>family,<br>member D | -0.350684 | Inlier |
| siRNA-Temozolomide Run1-DMSO | NM_0145<br>78 | RHOD | ras<br>homolog<br>gene<br>family,<br>member D | 0.350685  | Inlier |

Identification of Survival Genes in Human Glioblastoma Cells Using siRNA Screening  
 Nikhil G Thaker, Fang Zhang, Peter R. McDonald, Tong Ying Shun, Michael D Lewen, Ian F. Pollack, and John S. Lazo  
 Molecular Pharmacology

|                                  |               |      |                                                                    |           |         |
|----------------------------------|---------------|------|--------------------------------------------------------------------|-----------|---------|
| siRNA Disorazole DMSO Run1       | NM_0145<br>78 | RHOD | ras<br>homolog<br>gene<br>family,<br>member D                      | 1.688764  | Inlier  |
| siRNA Disorazole DMSO Run2       | NM_0145<br>78 | RHOD | ras<br>homolog<br>gene<br>family,<br>member D                      | 2.712593  | Inlier  |
| siRNA-Vinblastine Run1-<br>DMSO  | NM_0145<br>78 | RHOD | ras<br>homolog<br>gene<br>family,<br>member D                      | 3.555839  | Outlier |
| siRNA-Temozolomide Run3-<br>DMSO | NM_0190<br>34 | RHOF | ras<br>homolog<br>gene<br>family,<br>member F<br>(in<br>filopodia) | -0.806369 | Inlier  |
| siRNA-Temozolomide Run2-<br>DMSO | NM_0190<br>34 | RHOF | ras<br>homolog<br>gene<br>family,<br>member F<br>(in<br>filopodia) | -0.693133 | Inlier  |
| siRNA-Temozolomide Run1-<br>DMSO | NM_0190<br>34 | RHOF | ras<br>homolog<br>gene<br>family,<br>member F<br>(in<br>filopodia) | -0.380077 | Inlier  |
| siRNA Disorazole DMSO Run3       | NM_0190<br>34 | RHOF | ras<br>homolog<br>gene<br>family,<br>member F<br>(in<br>filopodia) | -0.04599  | Inlier  |



Identification of Survival Genes in Human Glioblastoma Cells Using siRNA Screening

Nikhil G Thaker, Fang Zhang, Peter R. McDonald, Tong Ying Shun, Michael D Lewen, Ian F. Pollack, and John S. Lazo

Molecular Pharmacology

| siRNA Treatment              | Gene ID   | Gene Name | Gene Description                                 | Value     | Category |
|------------------------------|-----------|-----------|--------------------------------------------------|-----------|----------|
| siRNA-Vinblastine Run2-DMSO  | NM_019034 | RHOF      | ras homolog gene family, member F (in filopodia) | 0.04599   | Inlier   |
| siRNA Disorazole DMSO Run1   | NM_019034 | RHOF      | ras homolog gene family, member F (in filopodia) | 0.655867  | Inlier   |
| siRNA-Vinblastine Run1-DMSO  | NM_019034 | RHOF      | ras homolog gene family, member F (in filopodia) | 0.699437  | Inlier   |
| siRNA Disorazole DMSO Run2   | NM_019034 | RHOF      | ras homolog gene family, member F (in filopodia) | 1.331203  | Inlier   |
| siRNA-Temozolomide Run3-DMSO | NM_001665 | RHOG      | ras homolog gene family, member G (rho G)        | -1.96222  | Inlier   |
| siRNA-Temozolomide Run2-DMSO | NM_001665 | RHOG      | ras homolog gene family, member G (rho G)        | -1.352109 | Inlier   |
| siRNA-Vinblastine Run2-DMSO  | NM_001665 | RHOG      | ras homolog gene family, member G (rho G)        | -0.403657 | Inlier   |
| siRNA-Temozolomide Run1-DMSO | NM_001665 | RHOG      | ras homolog gene family, member G (rho G)        | -0.124147 | Inlier   |

Identification of Survival Genes in Human Glioblastoma Cells Using siRNA Screening  
 Nikhil G Thaker, Fang Zhang, Peter R. McDonald, Tong Ying Shun, Michael D Lewen, Ian F. Pollack, and John S. Lazo

Molecular Pharmacology

|                                  |               |      |                                                          |           |         |
|----------------------------------|---------------|------|----------------------------------------------------------|-----------|---------|
| siRNA Disorazole DMSO Run3       | NM_0016<br>65 | RHOG | ras<br>homolog<br>gene<br>family,<br>member G<br>(rho G) | 0.124147  | Inlier  |
| siRNA Disorazole DMSO Run1       | NM_0016<br>65 | RHOG | ras<br>homolog<br>gene<br>family,<br>member G<br>(rho G) | 0.449153  | Inlier  |
| siRNA Disorazole DMSO Run2       | NM_0016<br>65 | RHOG | ras<br>homolog<br>gene<br>family,<br>member G<br>(rho G) | 0.899847  | Inlier  |
| siRNA-Vinblastine Run1-<br>DMSO  | NM_0016<br>65 | RHOG | ras<br>homolog<br>gene<br>family,<br>member G<br>(rho G) | 1.325314  | Inlier  |
| siRNA-Temozolomide Run3-<br>DMSO | NM_0043<br>10 | RHOH | ras<br>homolog<br>gene<br>family,<br>member H            | -4.035036 | Outlier |
| siRNA-Vinblastine Run2-<br>DMSO  | NM_0043<br>10 | RHOH | ras<br>homolog<br>gene<br>family,<br>member H            | -2.182203 | Inlier  |
| siRNA-Vinblastine Run1-<br>DMSO  | NM_0043<br>10 | RHOH | ras<br>homolog<br>gene<br>family,<br>member H            | -0.504676 | Inlier  |
| siRNA-Temozolomide Run2-<br>DMSO | NM_0043<br>10 | RHOH | ras<br>homolog<br>gene<br>family,<br>member H            | -0.297274 | Inlier  |

Identification of Survival Genes in Human Glioblastoma Cells Using siRNA Screening  
 Nikhil G Thaker, Fang Zhang, Peter R. McDonald, Tong Ying Shun, Michael D Lewen, Ian F. Pollack, and John S. Lazo  
 Molecular Pharmacology

|                                  |               |      |                                               |           |        |
|----------------------------------|---------------|------|-----------------------------------------------|-----------|--------|
| siRNA Disorazole DMSO Run3       | NM_0043<br>10 | RHOH | ras<br>homolog<br>gene<br>family,<br>member H | 0.297274  | Inlier |
| siRNA-Temozolomide Run1-<br>DMSO | NM_0043<br>10 | RHOH | ras<br>homolog<br>gene<br>family,<br>member H | 0.625044  | Inlier |
| siRNA Disorazole DMSO Run2       | NM_0043<br>10 | RHOH | ras<br>homolog<br>gene<br>family,<br>member H | 0.723956  | Inlier |
| siRNA Disorazole DMSO Run1       | NM_0043<br>10 | RHOH | ras<br>homolog<br>gene<br>family,<br>member H | 1.22138   | Inlier |
| siRNA-Temozolomide Run3-<br>DMSO | NM_0206<br>63 | RHOJ | ras<br>homolog<br>gene<br>family,<br>member J | -1.031676 | Inlier |
| siRNA-Temozolomide Run2-<br>DMSO | NM_0206<br>63 | RHOJ | ras<br>homolog<br>gene<br>family,<br>member J | -0.555397 | Inlier |
| siRNA Disorazole DMSO Run3       | NM_0206<br>63 | RHOJ | ras<br>homolog<br>gene<br>family,<br>member J | -0.449885 | Inlier |
| siRNA-Temozolomide Run1-<br>DMSO | NM_0206<br>63 | RHOJ | ras<br>homolog<br>gene<br>family,<br>member J | -0.127925 | Inlier |
| siRNA-Vinblastine Run2-<br>DMSO  | NM_0206<br>63 | RHOJ | ras<br>homolog<br>gene<br>family,<br>member J | 0.127925  | Inlier |

Identification of Survival Genes in Human Glioblastoma Cells Using siRNA Screening  
 Nikhil G Thaker, Fang Zhang, Peter R. McDonald, Tong Ying Shun, Michael D Lewen, Ian F. Pollack, and John S. Lazo

Molecular Pharmacology

|                                  |               |      |                                               |           |        |
|----------------------------------|---------------|------|-----------------------------------------------|-----------|--------|
| siRNA Disorazole DMSO Run1       | NM_0206<br>63 | RHOJ | ras<br>homolog<br>gene<br>family,<br>member J | 0.793603  | Inlier |
| siRNA-Vinblastine Run1-<br>DMSO  | NM_0206<br>63 | RHOJ | ras<br>homolog<br>gene<br>family,<br>member J | 0.919901  | Inlier |
| siRNA Disorazole DMSO Run2       | NM_0206<br>63 | RHOJ | ras<br>homolog<br>gene<br>family,<br>member J | 1.381236  | Inlier |
| siRNA-Temozolomide Run3-<br>DMSO | NM_0122<br>49 | RHOQ | ras<br>homolog<br>gene<br>family,<br>member Q | -1.316133 | Inlier |
| siRNA-Temozolomide Run2-<br>DMSO | NM_0122<br>49 | RHOQ | ras<br>homolog<br>gene<br>family,<br>member Q | -0.501654 | Inlier |
| siRNA-Vinblastine Run2-<br>DMSO  | NM_0122<br>49 | RHOQ | ras<br>homolog<br>gene<br>family,<br>member Q | -0.4393   | Inlier |
| siRNA-Temozolomide Run1-<br>DMSO | NM_0122<br>49 | RHOQ | ras<br>homolog<br>gene<br>family,<br>member Q | -0.249161 | Inlier |
| siRNA Disorazole DMSO Run3       | NM_0122<br>49 | RHOQ | ras<br>homolog<br>gene<br>family,<br>member Q | 0.249162  | Inlier |
| siRNA Disorazole DMSO Run1       | NM_0122<br>49 | RHOQ | ras<br>homolog<br>gene<br>family,<br>member Q | 0.847346  | Inlier |

Identification of Survival Genes in Human Glioblastoma Cells Using siRNA Screening  
 Nikhil G Thaker, Fang Zhang, Peter R. McDonald, Tong Ying Shun, Michael D Lewen, Ian F. Pollack, and John S. Lazo  
 Molecular Pharmacology

|                              |               |       |                                                   |                  |
|------------------------------|---------------|-------|---------------------------------------------------|------------------|
| siRNA-Vinblastine Run1-DMSO  | NM_0122<br>49 | RHOQ  | ras<br>homolog<br>gene<br>family,<br>member Q     | 0.955995 Inlier  |
| siRNA Disorazole DMSO Run2   | NM_0122<br>49 | RHOQ  | ras<br>homolog<br>gene<br>family,<br>member Q     | 1.324024 Inlier  |
| siRNA-Temozolomide Run3-DMSO | NM_0183<br>07 | RHOT1 | ras<br>homolog<br>gene<br>family,<br>member<br>T1 | -0.849435 Inlier |
| siRNA-Vinblastine Run2-DMSO  | NM_0183<br>07 | RHOT1 | ras<br>homolog<br>gene<br>family,<br>member<br>T1 | -0.499565 Inlier |
| siRNA-Temozolomide Run1-DMSO | NM_0183<br>07 | RHOT1 | ras<br>homolog<br>gene<br>family,<br>member<br>T1 | -0.420336 Inlier |
| siRNA-Temozolomide Run2-DMSO | NM_0183<br>07 | RHOT1 | ras<br>homolog<br>gene<br>family,<br>member<br>T1 | -0.347339 Inlier |
| siRNA Disorazole DMSO Run3   | NM_0183<br>07 | RHOT1 | ras<br>homolog<br>gene<br>family,<br>member<br>T1 | 0.347339 Inlier  |
| siRNA Disorazole DMSO Run1   | NM_0183<br>07 | RHOT1 | ras<br>homolog<br>gene<br>family,<br>member<br>T1 | 1.918213 Inlier  |

Identification of Survival Genes in Human Glioblastoma Cells Using siRNA Screening  
 Nikhil G Thaker, Fang Zhang, Peter R. McDonald, Tong Ying Shun, Michael D Lewen, Ian F. Pollack, and John S. Lazo

Molecular Pharmacology

|                              |           |       |                                    |           |         |
|------------------------------|-----------|-------|------------------------------------|-----------|---------|
| siRNA-Vinblastine Run1-DMSO  | NM_018307 | RHOT1 | ras homolog gene family, member T1 | 5.683858  | Outlier |
| siRNA Disorazole DMSO Run2   | NM_018307 | RHOT1 | ras homolog gene family, member T1 | 6.783616  | Outlier |
| siRNA-Temozolomide Run3-DMSO | NM_138769 | RHOT2 | ras homolog gene family, member T2 | -3.556327 | Outlier |
| siRNA-Temozolomide Run2-DMSO | NM_138769 | RHOT2 | ras homolog gene family, member T2 | -2.137785 | Inlier  |
| siRNA-Vinblastine Run2-DMSO  | NM_138769 | RHOT2 | ras homolog gene family, member T2 | -0.350596 | Inlier  |
| siRNA Disorazole DMSO Run1   | NM_138769 | RHOT2 | ras homolog gene family, member T2 | -0.046311 | Inlier  |
| siRNA Disorazole DMSO Run3   | NM_138769 | RHOT2 | ras homolog gene family, member T2 | 0.046311  | Inlier  |
| siRNA-Temozolomide Run1-DMSO | NM_138769 | RHOT2 | ras homolog gene family, member T2 | 0.547008  | Inlier  |

Identification of Survival Genes in Human Glioblastoma Cells Using siRNA Screening  
 Nikhil G Thaker, Fang Zhang, Peter R. McDonald, Tong Ying Shun, Michael D Lewen, Ian F. Pollack, and John S. Lazo

Molecular Pharmacology

|                              |               |       |                                                   |           |        |
|------------------------------|---------------|-------|---------------------------------------------------|-----------|--------|
| siRNA-Vinblastine Run1-DMSO  | NM_1387<br>69 | RHOT2 | ras<br>homolog<br>gene<br>family,<br>member<br>T2 | 0.801992  | Inlier |
| siRNA Disorazole DMSO Run2   | NM_1387<br>69 | RHOT2 | ras<br>homolog<br>gene<br>family,<br>member<br>T2 | 1.701435  | Inlier |
| siRNA-Temozolomide Run3-DMSO | NM_0212<br>05 | RHOU  | ras<br>homolog<br>gene<br>family,<br>member U     | -1.913647 | Inlier |
| siRNA-Temozolomide Run2-DMSO | NM_0212<br>05 | RHOU  | ras<br>homolog<br>gene<br>family,<br>member U     | -0.911473 | Inlier |
| siRNA-Temozolomide Run1-DMSO | NM_0212<br>05 | RHOU  | ras<br>homolog<br>gene<br>family,<br>member U     | -0.639865 | Inlier |
| siRNA-Vinblastine Run2-DMSO  | NM_0212<br>05 | RHOU  | ras<br>homolog<br>gene<br>family,<br>member U     | -0.05113  | Inlier |
| siRNA Disorazole DMSO Run1   | NM_0212<br>05 | RHOU  | ras<br>homolog<br>gene<br>family,<br>member U     | 0.05113   | Inlier |
| siRNA Disorazole DMSO Run3   | NM_0212<br>05 | RHOU  | ras<br>homolog<br>gene<br>family,<br>member U     | 0.344479  | Inlier |

Identification of Survival Genes in Human Glioblastoma Cells Using siRNA Screening  
 Nikhil G Thaker, Fang Zhang, Peter R. McDonald, Tong Ying Shun, Michael D Lewen, Ian F. Pollack, and John S. Lazo  
 Molecular Pharmacology

|                              |           |      |                                   |           |        |
|------------------------------|-----------|------|-----------------------------------|-----------|--------|
| siRNA-Vinblastine Run1-DMSO  | NM_021205 | RHOV | ras homolog gene family, member U | 0.709135  | Inlier |
| siRNA Disorazole DMSO Run2   | NM_021205 | RHOV | ras homolog gene family, member U | 0.864381  | Inlier |
| siRNA-Vinblastine Run1-DMSO  | NM_133639 | RHOV | ras homolog gene family, member V | -2.218503 | Inlier |
| siRNA-Temozolomide Run3-DMSO | NM_133639 | RHOV | ras homolog gene family, member V | -0.819388 | Inlier |
| siRNA Disorazole DMSO Run3   | NM_133639 | RHOV | ras homolog gene family, member V | -0.610891 | Inlier |
| siRNA Disorazole DMSO Run2   | NM_133639 | RHOV | ras homolog gene family, member V | -0.018539 | Inlier |
| siRNA-Vinblastine Run2-DMSO  | NM_133639 | RHOV | ras homolog gene family, member V | 0.018539  | Inlier |
| siRNA-Temozolomide Run1-DMSO | NM_133639 | RHOV | ras homolog gene family, member V | 0.604075  | Inlier |



Identification of Survival Genes in Human Glioblastoma Cells Using siRNA Screening  
 Nikhil G Thaker, Fang Zhang, Peter R. McDonald, Tong Ying Shun, Michael D Lewen, Ian F. Pollack, and John S. Lazo  
 Molecular Pharmacology

|                              |               |      |                                               |           |        |
|------------------------------|---------------|------|-----------------------------------------------|-----------|--------|
| siRNA-Temozolomide Run2-DMSO | NM_1336<br>39 | RHOV | ras<br>homolog<br>gene<br>family,<br>member V | 0.738109  | Inlier |
| siRNA Disorazole DMSO Run1   | NM_1336<br>39 | RHOV | ras<br>homolog<br>gene<br>family,<br>member V | 1.053982  | Inlier |
| siRNA-Temozolomide Run3-DMSO | NM_0147<br>15 | RICS | RICS                                          | -1.656938 | Inlier |
| siRNA-Temozolomide Run2-DMSO | NM_0147<br>15 | RICS | RICS                                          | -0.838999 | Inlier |
| siRNA-Vinblastine Run2-DMSO  | NM_0147<br>15 | RICS | RICS                                          | -0.510001 | Inlier |
| siRNA Disorazole DMSO Run3   | NM_0147<br>15 | RICS | RICS                                          | -0.084416 | Inlier |
| siRNA-Temozolomide Run1-DMSO | NM_0147<br>15 | RICS | RICS                                          | 0.084416  | Inlier |
| siRNA Disorazole DMSO Run1   | NM_0147<br>15 | RICS | RICS                                          | 0.467029  | Inlier |
| siRNA Disorazole DMSO Run2   | NM_0147<br>15 | RICS | RICS                                          | 3.11772   | Inlier |
| siRNA-Vinblastine Run1-DMSO  | NM_0147<br>15 | RICS | RICS                                          | 3.382913  | Inlier |
| siRNA Disorazole DMSO Run2   | NM_0314<br>30 | RILP | Rab<br>interacting<br>lysosomal<br>protein    | -0.95414  | Inlier |
| siRNA-Temozolomide Run3-DMSO | NM_0314<br>30 | RILP | Rab<br>interacting<br>lysosomal<br>protein    | -0.460887 | Inlier |
| siRNA-Temozolomide Run2-DMSO | NM_0314<br>30 | RILP | Rab<br>interacting<br>lysosomal<br>protein    | -0.435772 | Inlier |
| siRNA Disorazole DMSO Run1   | NM_0314<br>30 | RILP | Rab<br>interacting<br>lysosomal<br>protein    | -0.078309 | Inlier |

Identification of Survival Genes in Human Glioblastoma Cells Using siRNA Screening  
 Nikhil G Thaker, Fang Zhang, Peter R. McDonald, Tong Ying Shun, Michael D Lewen, Ian F. Pollack, and John S. Lazo  
 Molecular Pharmacology

|                              |               |       |                                   |                  |
|------------------------------|---------------|-------|-----------------------------------|------------------|
| siRNA-Temozolomide Run1-DMSO | NM_0314<br>30 | RILP  | Rab interacting lysosomal protein | 0.078309 Inlier  |
| siRNA Disorazole DMSO Run3   | NM_0314<br>30 | RILP  | Rab interacting lysosomal protein | 0.888113 Inlier  |
| siRNA-Vinblastine Run1-DMSO  | NM_0314<br>30 | RILP  | Rab interacting lysosomal protein | 1.587528 Inlier  |
| siRNA-Vinblastine Run2-DMSO  | NM_0314<br>30 | RILP  | Rab interacting lysosomal protein | 2.357102 Inlier  |
| siRNA Disorazole DMSO Run2   | NM_0314<br>80 | RIOK1 | RIO kinase 1 (yeast)              | -2.033257 Inlier |
| siRNA Disorazole DMSO Run3   | NM_0314<br>80 | RIOK1 | RIO kinase 1 (yeast)              | -0.451146 Inlier |
| siRNA-Temozolomide Run3-DMSO | NM_0314<br>80 | RIOK1 | RIO kinase 1 (yeast)              | -0.149031 Inlier |
| siRNA Disorazole DMSO Run1   | NM_0314<br>80 | RIOK1 | RIO kinase 1 (yeast)              | -0.020784 Inlier |
| siRNA-Temozolomide Run2-DMSO | NM_0314<br>80 | RIOK1 | RIO kinase 1 (yeast)              | 0.020784 Inlier  |
| siRNA-Temozolomide Run1-DMSO | NM_0314<br>80 | RIOK1 | RIO kinase 1 (yeast)              | 0.897854 Inlier  |
| siRNA-Vinblastine Run2-DMSO  | NM_0314<br>80 | RIOK1 | RIO kinase 1 (yeast)              | 1.701812 Inlier  |
| siRNA-Vinblastine Run1-DMSO  | NM_0314<br>80 | RIOK1 | RIO kinase 1 (yeast)              | 1.815286 Inlier  |
| siRNA-Temozolomide Run3-DMSO | NM_0183<br>43 | RIOK2 | RIO kinase 2 (yeast)              | -0.836326 Inlier |
| siRNA Disorazole DMSO Run2   | NM_0183<br>43 | RIOK2 | RIO kinase 2 (yeast)              | -0.512674 Inlier |

Identification of Survival Genes in Human Glioblastoma Cells Using siRNA Screening  
 Nikhil G Thaker, Fang Zhang, Peter R. McDonald, Tong Ying Shun, Michael D Lewen, Ian F. Pollack, and John S. Lazo

| Molecular Pharmacology       |               |       |                                                                          | RIO       |        |
|------------------------------|---------------|-------|--------------------------------------------------------------------------|-----------|--------|
| siRNA-Temozolomide Run1-DMSO | NM_0183<br>43 | RIOK2 | kinase 2<br>(yeast)                                                      | -0.23718  | Inlier |
| siRNA Disorazole DMSO Run3   | NM_0183<br>43 | RIOK2 | kinase 2<br>(yeast)                                                      | -0.137624 | Inlier |
| siRNA-Temozolomide Run2-DMSO | NM_0183<br>43 | RIOK2 | kinase 2<br>(yeast)                                                      | 0.137624  | Inlier |
| siRNA Disorazole DMSO Run1   | NM_0183<br>43 | RIOK2 | kinase 2<br>(yeast)                                                      | 1.04408   | Inlier |
| siRNA-Vinblastine Run2-DMSO  | NM_0183<br>43 | RIOK2 | kinase 2<br>(yeast)                                                      | 1.395078  | Inlier |
| siRNA-Vinblastine Run1-DMSO  | NM_0183<br>43 | RIOK2 | kinase 2<br>(yeast)                                                      | 1.669464  | Inlier |
| siRNA Disorazole DMSO Run2   | NM_1459<br>06 | RIOK3 | kinase 3<br>(yeast)                                                      | -0.965554 | Inlier |
| siRNA-Temozolomide Run3-DMSO | NM_1459<br>06 | RIOK3 | kinase 3<br>(yeast)                                                      | -0.919091 | Inlier |
| siRNA-Temozolomide Run2-DMSO | NM_1459<br>06 | RIOK3 | kinase 3<br>(yeast)                                                      | -0.407272 | Inlier |
| siRNA Disorazole DMSO Run3   | NM_1459<br>06 | RIOK3 | kinase 3<br>(yeast)                                                      | -0.285469 | Inlier |
| siRNA-Temozolomide Run1-DMSO | NM_1459<br>06 | RIOK3 | kinase 3<br>(yeast)                                                      | 0.285469  | Inlier |
| siRNA Disorazole DMSO Run1   | NM_1459<br>06 | RIOK3 | kinase 3<br>(yeast)                                                      | 0.429909  | Inlier |
| siRNA-Vinblastine Run2-DMSO  | NM_1459<br>06 | RIOK3 | kinase 3<br>(yeast)                                                      | 1.89782   | Inlier |
| siRNA-Vinblastine Run1-DMSO  | NM_1459<br>06 | RIOK3 | kinase 3<br>(yeast)                                                      | 2.178558  | Inlier |
| siRNA-Temozolomide Run3-DMSO | NM_0038<br>04 | RIPK1 | receptor<br>(TNFRSF)-<br>interacting<br>serine-<br>threonine<br>kinase 1 | -1.180985 | Inlier |

Identification of Survival Genes in Human Glioblastoma Cells Using siRNA Screening  
 Nikhil G Thaker, Fang Zhang, Peter R. McDonald, Tong Ying Shun, Michael D Lewen, Ian F. Pollack, and John S. Lazo

Molecular Pharmacology

|                              |           |       |                                                         |           |        |
|------------------------------|-----------|-------|---------------------------------------------------------|-----------|--------|
| siRNA-Temozolomide Run2-DMSO | NM_003804 | RIPK1 | receptor (TNFRSF)-interacting serine-threonine kinase 1 | -0.704674 | Inlier |
| siRNA-Temozolomide Run1-DMSO | NM_003804 | RIPK1 | receptor (TNFRSF)-interacting serine-threonine kinase 1 | -0.522146 | Inlier |
| siRNA Disorazole DMSO Run3   | NM_003804 | RIPK1 | receptor (TNFRSF)-interacting serine-threonine kinase 1 | -0.06119  | Inlier |
| siRNA Disorazole DMSO Run1   | NM_003804 | RIPK1 | receptor (TNFRSF)-interacting serine-threonine kinase 1 | 0.06119   | Inlier |
| siRNA Disorazole DMSO Run2   | NM_003804 | RIPK1 | receptor (TNFRSF)-interacting serine-threonine kinase 1 | 0.644326  | Inlier |
| siRNA-Vinblastine Run2-DMSO  | NM_003804 | RIPK1 | receptor (TNFRSF)-interacting serine-threonine kinase 1 | 0.8284    | Inlier |
| siRNA-Vinblastine Run1-DMSO  | NM_003804 | RIPK1 | receptor-interacting serine-threonine kinase 1          | 1.376711  | Inlier |
| siRNA Disorazole DMSO Run2   | NM_003821 | RIPK2 | receptor-interacting serine-threonine kinase 2          | -0.707053 | Inlier |
| siRNA-Temozolomide Run1-DMSO | NM_003821 | RIPK2 | receptor-interacting serine-threonine kinase 2          | -0.641947 | Inlier |

Identification of Survival Genes in Human Glioblastoma Cells Using siRNA Screening  
 Nikhil G Thaker, Fang Zhang, Peter R. McDonald, Tong Ying Shun, Michael D Lewen, Ian F. Pollack, and John S. Lazo

Molecular Pharmacology

|                              |               |       |                                                |           |         |
|------------------------------|---------------|-------|------------------------------------------------|-----------|---------|
| siRNA-Temozolomide Run3-DMSO | NM_0038<br>21 | RIPK2 | receptor-interacting serine-threonine kinase 2 | -0.31     | Inlier  |
| siRNA Disorazole DMSO Run3   | NM_0038<br>21 | RIPK2 | receptor-interacting serine-threonine kinase 2 | -0.131849 | Inlier  |
| siRNA-Temozolomide Run2-DMSO | NM_0038<br>21 | RIPK2 | receptor-interacting serine-threonine kinase 2 | 0.131849  | Inlier  |
| siRNA Disorazole DMSO Run1   | NM_0038<br>21 | RIPK2 | receptor-interacting serine-threonine kinase 2 | 1.503197  | Inlier  |
| siRNA-Vinblastine Run1-DMSO  | NM_0038<br>21 | RIPK2 | receptor-interacting serine-threonine kinase 2 | 2.102601  | Inlier  |
| siRNA-Vinblastine Run2-DMSO  | NM_0038<br>21 | RIPK2 | receptor-interacting serine-threonine kinase 2 | 3.610718  | Outlier |
| siRNA Disorazole DMSO Run2   | NM_0068<br>71 | RIPK3 | receptor-interacting serine-threonine kinase 3 | -1.480671 | Inlier  |
| siRNA-Temozolomide Run2-DMSO | NM_0068<br>71 | RIPK3 | receptor-interacting serine-threonine kinase 3 | -0.887594 | Inlier  |
| siRNA-Temozolomide Run3-DMSO | NM_0068<br>71 | RIPK3 | receptor-interacting serine-threonine kinase 3 | -0.461406 | Inlier  |
| siRNA-Temozolomide Run1-DMSO | NM_0068<br>71 | RIPK3 | receptor-interacting serine-threonine kinase 3 | -0.333603 | Inlier  |

Identification of Survival Genes in Human Glioblastoma Cells Using siRNA Screening  
 Nikhil G Thaker, Fang Zhang, Peter R. McDonald, Tong Ying Shun, Michael D Lewen, Ian F. Pollack, and John S. Lazo

Molecular Pharmacology

| siRNA Treatment              | Gene ID       | Gene Name | Protein Name                                   | Value     | Category |
|------------------------------|---------------|-----------|------------------------------------------------|-----------|----------|
| siRNA Disorazole DMSO Run3   | NM_0068<br>71 | RIPK3     | receptor-interacting serine-threonine kinase 3 | 0.333603  | Inlier   |
| siRNA-Vinblastine Run1-DMSO  | NM_0068<br>71 | RIPK3     | receptor-interacting serine-threonine kinase 3 | 0.351722  | Inlier   |
| siRNA Disorazole DMSO Run1   | NM_0068<br>71 | RIPK3     | receptor-interacting serine-threonine kinase 3 | 1.599152  | Inlier   |
| siRNA-Vinblastine Run2-DMSO  | NM_0068<br>71 | RIPK3     | receptor-interacting serine-threonine kinase 3 | 2.881414  | Inlier   |
| siRNA-Temozolomide Run3-DMSO | NM_0206<br>39 | RIPK4     | receptor-interacting serine-threonine kinase 4 | -1.313723 | Inlier   |
| siRNA-Temozolomide Run2-DMSO | NM_0206<br>39 | RIPK4     | receptor-interacting serine-threonine kinase 4 | -0.706352 | Inlier   |
| siRNA Disorazole DMSO Run2   | NM_0206<br>39 | RIPK4     | receptor-interacting serine-threonine kinase 4 | -0.642648 | Inlier   |
| siRNA-Temozolomide Run1-DMSO | NM_0206<br>39 | RIPK4     | receptor-interacting serine-threonine kinase 4 | -0.369924 | Inlier   |
| siRNA Disorazole DMSO Run3   | NM_0206<br>39 | RIPK4     | receptor-interacting serine-threonine kinase 4 | 0.369924  | Inlier   |
| siRNA Disorazole DMSO Run1   | NM_0206<br>39 | RIPK4     | receptor-interacting serine-threonine kinase 4 | 0.52179   | Inlier   |

Identification of Survival Genes in Human Glioblastoma Cells Using siRNA Screening  
 Nikhil G Thaker, Fang Zhang, Peter R. McDonald, Tong Ying Shun, Michael D Lewen, Ian F. Pollack, and John S. Lazo

Molecular Pharmacology

| siRNA Treatment              | Gene ID   | Gene Name | Protein Name                                   | Score     | Category |
|------------------------------|-----------|-----------|------------------------------------------------|-----------|----------|
| siRNA-Vinblastine Run1-DMSO  | NM_020639 | RIPK4     | receptor-interacting serine-threonine kinase 4 | 1.015986  | Inlier   |
| siRNA-Vinblastine Run2-DMSO  | NM_020639 | RIPK4     | receptor-interacting serine-threonine kinase 4 | 1.243089  | Inlier   |
| siRNA-Temozolomide Run3-DMSO | NM_006912 | RIT1      | Ras-like without CAAX 1                        | -3.083571 | Inlier   |
| siRNA-Temozolomide Run2-DMSO | NM_006912 | RIT1      | Ras-like without CAAX 1                        | -0.791841 | Inlier   |
| siRNA-Temozolomide Run1-DMSO | NM_006912 | RIT1      | Ras-like without CAAX 1                        | -0.516944 | Inlier   |
| siRNA-Vinblastine Run2-DMSO  | NM_006912 | RIT1      | Ras-like without CAAX 1                        | -0.021675 | Inlier   |
| siRNA Disorazole DMSO Run3   | NM_006912 | RIT1      | Ras-like without CAAX 1                        | 0.021675  | Inlier   |
| siRNA Disorazole DMSO Run2   | NM_006912 | RIT1      | Ras-like without CAAX 1                        | 0.557159  | Inlier   |
| siRNA-Vinblastine Run1-DMSO  | NM_006912 | RIT1      | Ras-like without CAAX 1                        | 1.364988  | Inlier   |
| siRNA Disorazole DMSO Run1   | NM_006912 | RIT1      | Ras-like without CAAX 1                        | 1.374639  | Inlier   |
| siRNA-Temozolomide Run3-DMSO | NM_002930 | RIT2      | Ras-like without CAAX 2                        | -4.487014 | Outlier  |
| siRNA-Vinblastine Run2-DMSO  | NM_002930 | RIT2      | Ras-like without CAAX 2                        | -2.487731 | Inlier   |
| siRNA-Temozolomide Run2-DMSO | NM_002930 | RIT2      | Ras-like without CAAX 2                        | -0.494498 | Inlier   |
| siRNA-Vinblastine Run1-DMSO  | NM_002930 | RIT2      | Ras-like without CAAX 2                        | -0.181704 | Inlier   |
| siRNA Disorazole DMSO Run3   | NM_002930 | RIT2      | Ras-like without CAAX 2                        | 0.181704  | Inlier   |
| siRNA-Temozolomide Run1-DMSO | NM_002930 | RIT2      | Ras-like without CAAX 2                        | 0.218545  | Inlier   |

Identification of Survival Genes in Human Glioblastoma Cells Using siRNA Screening  
 Nikhil G Thaker, Fang Zhang, Peter R. McDonald, Tong Ying Shun, Michael D Lewen, Ian F. Pollack, and John S. Lazo

Molecular Pharmacology

|                                  |               |        |                                                            |           |        |
|----------------------------------|---------------|--------|------------------------------------------------------------|-----------|--------|
| siRNA Disorazole DMSO Run2       | NM_0029<br>30 | RIT2   | Ras-like<br>without<br>CAAX 2                              | 0.854502  | Inlier |
| siRNA Disorazole DMSO Run1       | NM_0029<br>30 | RIT2   | Ras-like<br>without<br>CAAX 2                              | 1.295524  | Inlier |
| siRNA-Temozolomide Run3-<br>DMSO | NM_0029<br>33 | RNASE1 | ribonuclea<br>se, RNase<br>A family, 1<br>(pancreati<br>c) | -1.776771 | Inlier |
| siRNA-Temozolomide Run2-<br>DMSO | NM_0029<br>33 | RNASE1 | ribonuclea<br>se, RNase<br>A family, 1<br>(pancreati<br>c) | -0.96744  | Inlier |
| siRNA-Temozolomide Run1-<br>DMSO | NM_0029<br>33 | RNASE1 | ribonuclea<br>se, RNase<br>A family, 1<br>(pancreati<br>c) | -0.691709 | Inlier |
| siRNA Disorazole DMSO Run3       | NM_0029<br>33 | RNASE1 | ribonuclea<br>se, RNase<br>A family, 1<br>(pancreati<br>c) | -0.033739 | Inlier |
| siRNA-Vinblastine Run2-<br>DMSO  | NM_0029<br>33 | RNASE1 | ribonuclea<br>se, RNase<br>A family, 1<br>(pancreati<br>c) | 0.033739  | Inlier |
| siRNA Disorazole DMSO Run1       | NM_0029<br>33 | RNASE1 | ribonuclea<br>se, RNase<br>A family, 1<br>(pancreati<br>c) | 0.501891  | Inlier |
| siRNA Disorazole DMSO Run2       | NM_0029<br>33 | RNASE1 | ribonuclea<br>se, RNase<br>A family, 1<br>(pancreati<br>c) | 0.657291  | Inlier |



Identification of Survival Genes in Human Glioblastoma Cells Using siRNA Screening  
 Nikhil G Thaker, Fang Zhang, Peter R. McDonald, Tong Ying Shun, Michael D Lewen, Ian F. Pollack, and John S. Lazo  
 Molecular Pharmacology

|                              |               |        |                                                                        |           |        |
|------------------------------|---------------|--------|------------------------------------------------------------------------|-----------|--------|
| siRNA-Vinblastine Run1-DMSO  | NM_0029<br>33 | RNASE1 | ribonuclease, RNase A family, 1 (pancreatic)                           | 0.998475  | Inlier |
| siRNA Disorazole DMSO Run3   | NM_0029<br>34 | RNASE2 | ribonuclease, RNase A family, 2 (liver, eosinophil-derived neurotoxin) | -1.153358 | Inlier |
| siRNA Disorazole DMSO Run1   | NM_0029<br>34 | RNASE2 | ribonuclease, RNase A family, 2 (liver, eosinophil-derived neurotoxin) | -0.720393 | Inlier |
| siRNA-Temozolomide Run3-DMSO | NM_0029<br>34 | RNASE2 | ribonuclease, RNase A family, 2 (liver, eosinophil-derived neurotoxin) | -0.504724 | Inlier |
| siRNA-Vinblastine Run2-DMSO  | NM_0029<br>34 | RNASE2 | ribonuclease, RNase A family, 2 (liver, eosinophil-derived neurotoxin) | -0.357768 | Inlier |
| siRNA-Temozolomide Run1-DMSO | NM_0029<br>34 | RNASE2 | ribonuclease, RNase A family, 2 (liver, eosinophil-derived neurotoxin) | 0.357769  | Inlier |

Identification of Survival Genes in Human Glioblastoma Cells Using siRNA Screening

Nikhil G Thaker, Fang Zhang, Peter R. McDonald, Tong Ying Shun, Michael D Lewen, Ian F. Pollack, and John S. Lazo

Molecular Pharmacology

|                              |           |        |                                                                         |           |        |
|------------------------------|-----------|--------|-------------------------------------------------------------------------|-----------|--------|
| siRNA-Vinblastine Run1-DMSO  | NM_002934 | RNASE2 | ribonuclease, RNase A family, 2 (liver, eosinophil-derived neurotoxin ) | 0.628607  | Inlier |
| siRNA-Temozolomide Run2-DMSO | NM_002934 | RNASE2 | ribonuclease, RNase A family, 2 (liver, eosinophil-derived neurotoxin ) | 0.845299  | Inlier |
| siRNA Disorazole DMSO Run2   | NM_002934 | RNASE2 | ribonuclease, RNase A family, 2 (liver, eosinophil-derived neurotoxin ) | 1.462479  | Inlier |
| siRNA-Temozolomide Run3-DMSO | NM_002935 | RNASE3 | ribonuclease, RNase A family, 3 (eosinophil cationic protein)           | -1.754081 | Inlier |
| siRNA-Temozolomide Run2-DMSO | NM_002935 | RNASE3 | ribonuclease, RNase A family, 3 (eosinophil cationic protein)           | -0.363696 | Inlier |
| siRNA Disorazole DMSO Run3   | NM_002935 | RNASE3 | ribonuclease, RNase A family, 3 (eosinophil cationic protein)           | -0.180859 | Inlier |

Identification of Survival Genes in Human Glioblastoma Cells Using siRNA Screening  
 Nikhil G Thaker, Fang Zhang, Peter R. McDonald, Tong Ying Shun, Michael D Lewen, Ian F. Pollack, and John S. Lazo  
 Molecular Pharmacology

|                              |           |        |                                                               |           |        |
|------------------------------|-----------|--------|---------------------------------------------------------------|-----------|--------|
| siRNA-Temozolomide Run1-DMSO | NM_002935 | RNASE3 | ribonuclease, RNase A family, 3 (eosinophil cationic protein) | -0.058895 | Inlier |
| siRNA-Vinblastine Run2-DMSO  | NM_002935 | RNASE3 | ribonuclease, RNase A family, 3 (eosinophil cationic protein) | 0.058895  | Inlier |
| siRNA Disorazole DMSO Run1   | NM_002935 | RNASE3 | ribonuclease, RNase A family, 3 (eosinophil cationic protein) | 0.985304  | Inlier |
| siRNA-Vinblastine Run1-DMSO  | NM_002935 | RNASE3 | ribonuclease, RNase A family, 3 (eosinophil cationic protein) | 2.396677  | Inlier |
| siRNA Disorazole DMSO Run2   | NM_002935 | RNASE3 | ribonuclease, RNase A family, 3 (eosinophil cationic protein) | 2.643677  | Inlier |
| siRNA-Temozolomide Run3-DMSO | NM_194430 | RNASE4 | ribonuclease, RNase A family, 4                               | -1.494019 | Inlier |
| siRNA-Temozolomide Run2-DMSO | NM_194430 | RNASE4 | ribonuclease, RNase A family, 4                               | -0.648418 | Inlier |
| siRNA Disorazole DMSO Run3   | NM_194430 | RNASE4 | ribonuclease, RNase A family, 4                               | -0.224474 | Inlier |
| siRNA-Vinblastine Run2-DMSO  | NM_194430 | RNASE4 | ribonuclease, RNase A family, 4                               | -0.192429 | Inlier |

Identification of Survival Genes in Human Glioblastoma Cells Using siRNA Screening  
 Nikhil G Thaker, Fang Zhang, Peter R. McDonald, Tong Ying Shun, Michael D Lewen, Ian F. Pollack, and John S. Lazo

Molecular Pharmacology

|                              |               |         |                                  |           |        |
|------------------------------|---------------|---------|----------------------------------|-----------|--------|
| siRNA-Temozolomide Run1-DMSO | NM_1944<br>30 | RNASE4  | ribonuclease, RNase A family, 4  | 0.192429  | Inlier |
| siRNA Disorazole DMSO Run1   | NM_1944<br>30 | RNASE4  | ribonuclease, RNase A family, 4  | 0.700582  | Inlier |
| siRNA-Vinblastine Run1-DMSO  | NM_1944<br>30 | RNASE4  | ribonuclease, RNase A family, 4  | 1.968628  | Inlier |
| siRNA Disorazole DMSO Run2   | NM_1944<br>30 | RNASE4  | ribonuclease, RNase A family, 4  | 2.006376  | Inlier |
| siRNA-Temozolomide Run3-DMSO | NM_0056<br>15 | RNASE6  | ribonuclease, RNase A family, k6 | -0.99752  | Inlier |
| siRNA-Temozolomide Run1-DMSO | NM_0056<br>15 | RNASE6  | ribonuclease, RNase A family, k6 | -0.720042 | Inlier |
| siRNA-Vinblastine Run2-DMSO  | NM_0056<br>15 | RNASE6  | ribonuclease, RNase A family, k6 | -0.628958 | Inlier |
| siRNA Disorazole DMSO Run3   | NM_0056<br>15 | RNASE6  | ribonuclease, RNase A family, k6 | -0.010575 | Inlier |
| siRNA-Temozolomide Run2-DMSO | NM_0056<br>15 | RNASE6  | ribonuclease, RNase A family, k6 | 0.010575  | Inlier |
| siRNA Disorazole DMSO Run1   | NM_0056<br>15 | RNASE6  | ribonuclease, RNase A family, k6 | 0.257304  | Inlier |
| siRNA Disorazole DMSO Run2   | NM_0056<br>15 | RNASE6  | ribonuclease, RNase A family, k6 | 1.261844  | Inlier |
| siRNA-Vinblastine Run1-DMSO  | NM_0056<br>15 | RNASE6  | ribonuclease, RNase A family, k6 | 1.858943  | Inlier |
| siRNA-Temozolomide Run3-DMSO | NM_0029<br>36 | RNASEH1 | ribonuclease H1                  | -2.502041 | Inlier |
| siRNA-Vinblastine Run2-DMSO  | NM_0029<br>36 | RNASEH1 | ribonuclease H1                  | -0.994835 | Inlier |

Identification of Survival Genes in Human Glioblastoma Cells Using siRNA Screening  
 Nikhil G Thaker, Fang Zhang, Peter R. McDonald, Tong Ying Shun, Michael D Lewen, Ian F. Pollack, and John S. Lazo

|                              |         |         |             |           |        |
|------------------------------|---------|---------|-------------|-----------|--------|
| Molecular Pharmacology       | NM_0029 |         | ribonuclea  |           |        |
| siRNA Disorazole DMSO Run1   | 36      | RNASEH1 | se H1       | -0.522204 | Inlier |
|                              | NM_0029 |         | ribonuclea  |           |        |
| siRNA Disorazole DMSO Run3   | 36      | RNASEH1 | se H1       | -0.271443 | Inlier |
| siRNA-Temozolomide Run1-DMSO | NM_0029 |         | ribonuclea  |           |        |
|                              | 36      | RNASEH1 | se H1       | 0.271442  | Inlier |
| siRNA-Temozolomide Run2-DMSO | NM_0029 |         | ribonuclea  |           |        |
|                              | 36      | RNASEH1 | se H1       | 0.320715  | Inlier |
| siRNA-Vinblastine Run1-DMSO  | NM_0029 |         | ribonuclea  |           |        |
|                              | 36      | RNASEH1 | se H1       | 0.826796  | Inlier |
|                              | NM_0029 |         | ribonuclea  |           |        |
| siRNA Disorazole DMSO Run2   | 36      | RNASEH1 | se H1       | 1.508066  | Inlier |
|                              |         |         | ribonuclea  |           |        |
|                              |         |         | se L (2,5-  |           |        |
|                              |         |         | oligoisoad  |           |        |
|                              |         |         | enylate     |           |        |
|                              |         |         | synthetase- |           |        |
|                              |         |         | dependent   |           |        |
| siRNA-Temozolomide Run2-DMSO | NM_0211 |         | )           | -0.731203 | Inlier |
|                              | 33      | RNASEL  | )           |           |        |
|                              |         |         | ribonuclea  |           |        |
|                              |         |         | se L (2,5-  |           |        |
|                              |         |         | oligoisoad  |           |        |
|                              |         |         | enylate     |           |        |
|                              |         |         | synthetase- |           |        |
|                              |         |         | dependent   |           |        |
| siRNA-Temozolomide Run3-DMSO | NM_0211 |         | )           | -0.692898 | Inlier |
|                              | 33      | RNASEL  | )           |           |        |
|                              |         |         | ribonuclea  |           |        |
|                              |         |         | se L (2,5-  |           |        |
|                              |         |         | oligoisoad  |           |        |
|                              |         |         | enylate     |           |        |
|                              |         |         | synthetase- |           |        |
|                              |         |         | dependent   |           |        |
| siRNA-Temozolomide Run1-DMSO | NM_0211 |         | )           | -0.486889 | Inlier |
|                              | 33      | RNASEL  | )           |           |        |
|                              |         |         | ribonuclea  |           |        |
|                              |         |         | se L (2,5-  |           |        |
|                              |         |         | oligoisoad  |           |        |
|                              |         |         | enylate     |           |        |
|                              |         |         | synthetase- |           |        |
|                              |         |         | dependent   |           |        |
| siRNA Disorazole DMSO Run2   | NM_0211 |         | )           | -0.306985 | Inlier |
|                              | 33      | RNASEL  | )           |           |        |
|                              |         |         | ribonuclea  |           |        |
|                              |         |         | se L (2,5-  |           |        |
|                              |         |         | oligoisoad  |           |        |
|                              |         |         | enylate     |           |        |
|                              |         |         | synthetase- |           |        |
|                              |         |         | dependent   |           |        |
| siRNA Disorazole DMSO Run3   | NM_0211 |         | )           | 0.306985  | Inlier |
|                              | 33      | RNASEL  | )           |           |        |

Identification of Survival Genes in Human Glioblastoma Cells Using siRNA Screening  
 Nikhil G Thaker, Fang Zhang, Peter R. McDonald, Tong Ying Shun, Michael D Lewen, Ian F. Pollack, and John S. Lazo  
 Molecular Pharmacology

|                                  |               |         |                                                                                    |           |        |
|----------------------------------|---------------|---------|------------------------------------------------------------------------------------|-----------|--------|
| siRNA Disorazole DMSO Run1       | NM_0211<br>33 | RNASEL  | ribonuclea<br>se L (2,5-<br>oligoisoad<br>enylate<br>synthetase-<br>dependent<br>) | 0.656102  | Inlier |
| siRNA-Vinblastine Run2-<br>DMSO  | NM_0211<br>33 | RNASEL  | ribonuclea<br>se L (2,5-<br>oligoisoad<br>enylate<br>synthetase-<br>dependent<br>) | 1.866093  | Inlier |
| siRNA-Vinblastine Run1-<br>DMSO  | NM_0211<br>33 | RNASEL  | ribonuclea<br>se L (2,5-<br>oligoisoad<br>enylate<br>synthetase-<br>dependent<br>) | 1.952145  | Inlier |
| siRNA-Temozolomide Run2-<br>DMSO | NM_0037<br>30 | RNASET2 | ribonuclea<br>se T2                                                                | -1.177148 | Inlier |
| siRNA-Vinblastine Run2-<br>DMSO  | NM_0037<br>30 | RNASET2 | ribonuclea<br>se T2                                                                | -0.831385 | Inlier |
| siRNA-Temozolomide Run1-<br>DMSO | NM_0037<br>30 | RNASET2 | ribonuclea<br>se T2                                                                | -0.715135 | Inlier |
| siRNA Disorazole DMSO Run3       | NM_0037<br>30 | RNASET2 | ribonuclea<br>se T2                                                                | -0.138946 | Inlier |
| siRNA-Temozolomide Run3-<br>DMSO | NM_0037<br>30 | RNASET2 | ribonuclea<br>se T2                                                                | 0.138946  | Inlier |
| siRNA Disorazole DMSO Run1       | NM_0037<br>30 | RNASET2 | ribonuclea<br>se T2                                                                | 0.292884  | Inlier |
| siRNA Disorazole DMSO Run2       | NM_0037<br>30 | RNASET2 | ribonuclea<br>se T2                                                                | 0.633865  | Inlier |
| siRNA-Vinblastine Run1-<br>DMSO  | NM_0037<br>30 | RNASET2 | ribonuclea<br>se T2                                                                | 2.03048   | Inlier |
| siRNA-Temozolomide Run3-<br>DMSO | NM_0144<br>70 | RND1    | Rho family<br>GTPase 1                                                             | -2.982028 | Inlier |
| siRNA-Temozolomide Run2-<br>DMSO | NM_0144<br>70 | RND1    | Rho family<br>GTPase 1                                                             | -0.346583 | Inlier |
| siRNA-Temozolomide Run1-<br>DMSO | NM_0144<br>70 | RND1    | Rho family<br>GTPase 1                                                             | -0.175471 | Inlier |
| siRNA-Vinblastine Run2-<br>DMSO  | NM_0144<br>70 | RND1    | Rho family<br>GTPase 1                                                             | -0.069031 | Inlier |

Identification of Survival Genes in Human Glioblastoma Cells Using siRNA Screening  
 Nikhil G Thaker, Fang Zhang, Peter R. McDonald, Tong Ying Shun, Michael D Lewen, Ian F. Pollack, and John S. Lazo

Molecular Pharmacology

|                                  |               |        |                               |           |        |
|----------------------------------|---------------|--------|-------------------------------|-----------|--------|
| siRNA Disorazole DMSO Run3       | NM_0144<br>70 | RND1   | Rho family<br>GTPase 1        | 0.069031  | Inlier |
| siRNA Disorazole DMSO Run1       | NM_0144<br>70 | RND1   | Rho family<br>GTPase 1        | 1.002417  | Inlier |
| siRNA Disorazole DMSO Run2       | NM_0144<br>70 | RND1   | Rho family<br>GTPase 1        | 1.614907  | Inlier |
| siRNA-Vinblastine Run1-<br>DMSO  | NM_0144<br>70 | RND1   | Rho family<br>GTPase 1        | 1.845338  | Inlier |
| siRNA-Temozolomide Run3-<br>DMSO | NM_0245<br>39 | RNF128 | ring finger<br>protein<br>128 | -0.924918 | Inlier |
| siRNA-Vinblastine Run2-<br>DMSO  | NM_0245<br>39 | RNF128 | ring finger<br>protein<br>128 | -0.625805 | Inlier |
| siRNA-Temozolomide Run2-<br>DMSO | NM_0245<br>39 | RNF128 | ring finger<br>protein<br>128 | -0.25923  | Inlier |
| siRNA Disorazole DMSO Run3       | NM_0245<br>39 | RNF128 | ring finger<br>protein<br>128 | -0.047564 | Inlier |
| siRNA Disorazole DMSO Run1       | NM_0245<br>39 | RNF128 | ring finger<br>protein<br>128 | 0.047564  | Inlier |
| siRNA-Temozolomide Run1-<br>DMSO | NM_0245<br>39 | RNF128 | ring finger<br>protein<br>128 | 0.723195  | Inlier |
| siRNA Disorazole DMSO Run2       | NM_0245<br>39 | RNF128 | ring finger<br>protein<br>128 | 2.148918  | Inlier |
| siRNA-Vinblastine Run1-<br>DMSO  | NM_0245<br>39 | RNF128 | ring finger<br>protein<br>128 | 2.39978   | Inlier |
| siRNA-Temozolomide Run2-<br>DMSO | NM_1391<br>75 | RNF133 | ring finger<br>protein<br>133 | -1.51601  | Inlier |
| siRNA-Temozolomide Run3-<br>DMSO | NM_1391<br>75 | RNF133 | ring finger<br>protein<br>133 | -1.319596 | Inlier |
| siRNA-Vinblastine Run2-<br>DMSO  | NM_1391<br>75 | RNF133 | ring finger<br>protein<br>133 | -1.280849 | Inlier |
| siRNA Disorazole DMSO Run1       | NM_1391<br>75 | RNF133 | ring finger<br>protein<br>133 | -0.245395 | Inlier |
| siRNA Disorazole DMSO Run3       | NM_1391<br>75 | RNF133 | ring finger<br>protein<br>133 | 0.245394  | Inlier |

Identification of Survival Genes in Human Glioblastoma Cells Using siRNA Screening  
 Nikhil G Thaker, Fang Zhang, Peter R. McDonald, Tong Ying Shun, Michael D Lewen, Ian F. Pollack, and John S. Lazo

| Molecular Pharmacology       |               |        |     | ring finger protein |        |
|------------------------------|---------------|--------|-----|---------------------|--------|
| siRNA-Temozolomide Run1-DMSO | NM_1391<br>75 | RNF133 | 133 | 0.389823            | Inlier |
| siRNA Disorazole DMSO Run2   | NM_1391<br>75 | RNF133 | 133 | 0.655095            | Inlier |
| siRNA-Vinblastine Run1-DMSO  | NM_1391<br>75 | RNF133 | 133 | 0.693905            | Inlier |
| siRNA-Temozolomide Run3-DMSO | NM_1979<br>39 | RNF135 | 135 | -0.995256           | Inlier |
| siRNA-Temozolomide Run2-DMSO | NM_1979<br>39 | RNF135 | 135 | -0.849343           | Inlier |
| siRNA-Vinblastine Run2-DMSO  | NM_1979<br>39 | RNF135 | 135 | -0.331243           | Inlier |
| siRNA-Temozolomide Run1-DMSO | NM_1979<br>39 | RNF135 | 135 | -0.059521           | Inlier |
| siRNA Disorazole DMSO Run3   | NM_1979<br>39 | RNF135 | 135 | 0.059521            | Inlier |
| siRNA Disorazole DMSO Run1   | NM_1979<br>39 | RNF135 | 135 | 0.499657            | Inlier |
| siRNA Disorazole DMSO Run2   | NM_1979<br>39 | RNF135 | 135 | 1.364414            | Inlier |
| siRNA-Vinblastine Run1-DMSO  | NM_1979<br>39 | RNF135 | 135 | 1.631296            | Inlier |
| siRNA-Temozolomide Run3-DMSO | XM_37170<br>9 | RNF150 | 150 | -0.933787           | Inlier |
| siRNA Disorazole DMSO Run3   | XM_37170<br>9 | RNF150 | 150 | -0.415213           | Inlier |
| siRNA Disorazole DMSO Run1   | XM_37170<br>9 | RNF150 | 150 | -0.393709           | Inlier |
| siRNA-Temozolomide Run1-DMSO | XM_37170<br>9 | RNF150 | 150 | -0.100532           | Inlier |
| siRNA-Temozolomide Run2-DMSO | XM_37170<br>9 | RNF150 | 150 | 0.100533            | Inlier |
| siRNA Disorazole DMSO Run2   | XM_37170<br>9 | RNF150 | 150 | 2.100081            | Inlier |



Identification of Survival Genes in Human Glioblastoma Cells Using siRNA Screening  
 Nikhil G Thaker, Fang Zhang, Peter R. McDonald, Tong Ying Shun, Michael D Lewen, Ian F. Pollack, and John S. Lazo

|                            |          |        |             |           |         |
|----------------------------|----------|--------|-------------|-----------|---------|
| Molecular Pharmacology     |          |        | ring finger |           |         |
| siRNA-Vinblastine Run2-    | XM_37170 |        | protein     |           |         |
| DMSO                       | 9        | RNF150 | 150         | 2.793104  | Inlier  |
|                            |          |        | ring finger |           |         |
| siRNA-Vinblastine Run1-    | XM_37170 |        | protein     |           |         |
| DMSO                       | 9        | RNF150 | 150         | 3.537692  | Outlier |
| siRNA-Temozolomide Run1-   | NM_0179  |        | ring finger |           |         |
| DMSO                       | 99       | RNF31  | protein 31  | -0.694019 | Inlier  |
| siRNA-Vinblastine Run2-    | NM_0179  |        | ring finger |           |         |
| DMSO                       | 99       | RNF31  | protein 31  | -0.654981 | Inlier  |
|                            | NM_0179  |        | ring finger |           |         |
| siRNA Disorazole DMSO Run1 | 99       | RNF31  | protein 31  | -0.109825 | Inlier  |
| siRNA-Temozolomide Run3-   | NM_0179  |        | ring finger |           |         |
| DMSO                       | 99       | RNF31  | protein 31  | -0.099352 | Inlier  |
|                            | NM_0179  |        | ring finger |           |         |
| siRNA Disorazole DMSO Run3 | 99       | RNF31  | protein 31  | 0.099352  | Inlier  |
| siRNA-Temozolomide Run2-   | NM_0179  |        | ring finger |           |         |
| DMSO                       | 99       | RNF31  | protein 31  | 0.760739  | Inlier  |
|                            | NM_0179  |        | ring finger |           |         |
| siRNA Disorazole DMSO Run2 | 99       | RNF31  | protein 31  | 1.311432  | Inlier  |
| siRNA-Vinblastine Run1-    | NM_0179  |        | ring finger |           |         |
| DMSO                       | 99       | RNF31  | protein 31  | 1.626273  | Inlier  |
| siRNA-Temozolomide Run3-   | NM_1707  |        | ring finger |           |         |
| DMSO                       | 69       | RNF39  | protein 39  | -3.035035 | Inlier  |
| siRNA-Vinblastine Run2-    | NM_1707  |        | ring finger |           |         |
| DMSO                       | 69       | RNF39  | protein 39  | -0.67658  | Inlier  |
| siRNA-Temozolomide Run2-   | NM_1707  |        | ring finger |           |         |
| DMSO                       | 69       | RNF39  | protein 39  | -0.67242  | Inlier  |
|                            | NM_1707  |        | ring finger |           |         |
| siRNA Disorazole DMSO Run3 | 69       | RNF39  | protein 39  | -0.405232 | Inlier  |
| siRNA-Temozolomide Run1-   | NM_1707  |        | ring finger |           |         |
| DMSO                       | 69       | RNF39  | protein 39  | 0.405231  | Inlier  |
|                            | NM_1707  |        | ring finger |           |         |
| siRNA Disorazole DMSO Run1 | 69       | RNF39  | protein 39  | 0.473517  | Inlier  |
| siRNA-Vinblastine Run1-    | NM_1707  |        | ring finger |           |         |
| DMSO                       | 69       | RNF39  | protein 39  | 5.639994  | Outlier |
|                            | NM_1707  |        | ring finger |           |         |
| siRNA Disorazole DMSO Run2 | 69       | RNF39  | protein 39  | 6.406094  | Outlier |
|                            |          |        | RNA         |           |         |
|                            |          |        | guanylyltra |           |         |
|                            |          |        | nsferase    |           |         |
|                            |          |        | and 5-      |           |         |
| siRNA-Temozolomide Run2-   | NM_0038  |        | phosphata   |           |         |
| DMSO                       | 00       | RNGTT  | se          | -1.125438 | Inlier  |
|                            |          |        | RNA         |           |         |
|                            |          |        | guanylyltra |           |         |
|                            |          |        | nsferase    |           |         |
|                            |          |        | and 5-      |           |         |
| siRNA-Temozolomide Run3-   | NM_0038  |        | phosphata   |           |         |
| DMSO                       | 00       | RNGTT  | se          | -1.040392 | Inlier  |

Identification of Survival Genes in Human Glioblastoma Cells Using siRNA Screening  
 Nikhil G Thaker, Fang Zhang, Peter R. McDonald, Tong Ying Shun, Michael D Lewen, Ian F. Pollack, and John S. Lazo

Molecular Pharmacology

| siRNA              | Drug | Run  | Gene ID | Method | Log2FC    | Category | Gene Name                                 |
|--------------------|------|------|---------|--------|-----------|----------|-------------------------------------------|
| siRNA Disorazole   | DMSO | Run3 | NM_0038 | RNGTT  | -0.743901 | Inlier   | RNA guanylyltransferase and 5-phosphatase |
| siRNA Disorazole   | DMSO | Run2 | NM_0038 | RNGTT  | -0.244754 | Inlier   | RNA guanylyltransferase and 5-phosphatase |
| siRNA-Temozolomide | DMSO | Run1 | NM_0038 | RNGTT  | 0.244754  | Inlier   | RNA guanylyltransferase and 5-phosphatase |
| siRNA Disorazole   | DMSO | Run1 | NM_0038 | RNGTT  | 0.432899  | Inlier   | RNA guanylyltransferase and 5-phosphatase |
| siRNA-Vinblastine  | DMSO | Run1 | NM_0038 | RNGTT  | 0.605099  | Inlier   | RNA guanylyltransferase and 5-phosphatase |
| siRNA-Vinblastine  | DMSO | Run2 | NM_0038 | RNGTT  | 1.144469  | Inlier   | RNA guanylyltransferase and 5-phosphatase |
| siRNA-Vinblastine  | DMSO | Run2 | NM_0037 | RNMT   | -1.634823 | Inlier   | RNA (guanine-7-methyltransferase)         |
| siRNA Disorazole   | DMSO | Run3 | NM_0037 | RNMT   | -1.437515 | Inlier   | RNA (guanine-7-methyltransferase)         |
| siRNA Disorazole   | DMSO | Run1 | NM_0037 | RNMT   | -0.862571 | Inlier   | RNA (guanine-7-methyltransferase)         |

Identification of Survival Genes in Human Glioblastoma Cells Using siRNA Screening  
 Nikhil G Thaker, Fang Zhang, Peter R. McDonald, Tong Ying Shun, Michael D Lewen, Ian F. Pollack, and John S. Lazo

Molecular Pharmacology

| siRNA Treatment              | Gene ID   | Gene Name | RNA                                       | Value     | Inlier |
|------------------------------|-----------|-----------|-------------------------------------------|-----------|--------|
| siRNA-Vinblastine Run1-DMSO  | NM_003799 | RNMT      | RNA (guanine-7- ) methyltransferase       | -0.202419 | Inlier |
| siRNA-Temozolomide Run2-DMSO | NM_003799 | RNMT      | RNA (guanine-7- ) methyltransferase       | 0.202419  | Inlier |
| siRNA-Temozolomide Run3-DMSO | NM_003799 | RNMT      | RNA (guanine-7- ) methyltransferase       | 0.436128  | Inlier |
| siRNA-Temozolomide Run1-DMSO | NM_003799 | RNMT      | RNA (guanine-7- ) methyltransferase       | 0.486429  | Inlier |
| siRNA Disorazole DMSO Run2   | NM_003799 | RNMT      | RNA (guanine-7- ) methyltransferase       | 1.49371   | Inlier |
| siRNA-Temozolomide Run3-DMSO | NM_020216 | RNPEP     | arginyl aminopeptidase (aminopeptidase B) | -0.8298   | Inlier |
| siRNA-Temozolomide Run2-DMSO | NM_020216 | RNPEP     | arginyl aminopeptidase (aminopeptidase B) | -0.626063 | Inlier |
| siRNA Disorazole DMSO Run2   | NM_020216 | RNPEP     | arginyl aminopeptidase (aminopeptidase B) | -0.374804 | Inlier |
| siRNA Disorazole DMSO Run3   | NM_020216 | RNPEP     | arginyl aminopeptidase (aminopeptidase B) | -0.143717 | Inlier |
| siRNA-Temozolomide Run1-DMSO | NM_020216 | RNPEP     | arginyl aminopeptidase (aminopeptidase B) | 0.143717  | Inlier |

Identification of Survival Genes in Human Glioblastoma Cells Using siRNA Screening  
 Nikhil G Thaker, Fang Zhang, Peter R. McDonald, Tong Ying Shun, Michael D Lewen, Ian F. Pollack, and John S. Lazo

Molecular Pharmacology

|                                  |               |         |                                                                    |           |        |
|----------------------------------|---------------|---------|--------------------------------------------------------------------|-----------|--------|
| siRNA Disorazole DMSO Run1       | NM_0202<br>16 | RNPEP   | arginyl<br>aminopept<br>idase<br>(aminopep<br>tidase B)            | 0.722937  | Inlier |
| siRNA-Vinblastine Run2-<br>DMSO  | NM_0202<br>16 | RNPEP   | arginyl<br>aminopept<br>idase<br>(aminopep<br>tidase B)            | 2.120175  | Inlier |
| siRNA-Vinblastine Run1-<br>DMSO  | NM_0202<br>16 | RNPEP   | arginyl<br>aminopept<br>idase<br>(aminopep<br>tidase B)            | 2.152533  | Inlier |
| siRNA-Temozolomide Run3-<br>DMSO | NM_0182<br>26 | RNPEPL1 | arginyl<br>aminopept<br>idase<br>(aminopep<br>tidase B)-<br>like 1 | -0.900825 | Inlier |
| siRNA-Temozolomide Run2-<br>DMSO | NM_0182<br>26 | RNPEPL1 | arginyl<br>aminopept<br>idase<br>(aminopep<br>tidase B)-<br>like 1 | -0.756377 | Inlier |
| siRNA Disorazole DMSO Run3       | NM_0182<br>26 | RNPEPL1 | arginyl<br>aminopept<br>idase<br>(aminopep<br>tidase B)-<br>like 1 | -0.228714 | Inlier |
| siRNA Disorazole DMSO Run2       | NM_0182<br>26 | RNPEPL1 | arginyl<br>aminopept<br>idase<br>(aminopep<br>tidase B)-<br>like 1 | -0.078167 | Inlier |
| siRNA-Temozolomide Run1-<br>DMSO | NM_0182<br>26 | RNPEPL1 | arginyl<br>aminopept<br>idase<br>(aminopep<br>tidase B)-<br>like 1 | 0.078167  | Inlier |
| siRNA Disorazole DMSO Run1       | NM_0182<br>26 | RNPEPL1 | arginyl<br>aminopept<br>idase<br>(aminopep<br>tidase B)-<br>like 1 | 0.592623  | Inlier |

Identification of Survival Genes in Human Glioblastoma Cells Using siRNA Screening  
 Nikhil G Thaker, Fang Zhang, Peter R. McDonald, Tong Ying Shun, Michael D Lewen, Ian F. Pollack, and John S. Lazo

Molecular Pharmacology

|                              |           |         |                                                            |           |        |
|------------------------------|-----------|---------|------------------------------------------------------------|-----------|--------|
| siRNA-Vinblastine Run2-DMSO  | NM_018226 | RNPEPL1 | arginyl aminopeptidase (aminopeptidase B)-like 1           | 1.244119  | Inlier |
| siRNA-Vinblastine Run1-DMSO  | NM_018226 | RNPEPL1 | arginyl aminopeptidase (aminopeptidase B)-like 1           | 1.401991  | Inlier |
| siRNA-Temozolomide Run3-DMSO | NM_005701 | RNUT1   | RNA, U transporter 1                                       | -0.772982 | Inlier |
| siRNA-Temozolomide Run2-DMSO | NM_005701 | RNUT1   | RNA, U transporter 1                                       | -0.576018 | Inlier |
| siRNA-Temozolomide Run1-DMSO | NM_005701 | RNUT1   | RNA, U transporter 1                                       | -0.266693 | Inlier |
| siRNA Disorazole DMSO Run3   | NM_005701 | RNUT1   | RNA, U transporter 1                                       | -0.142214 | Inlier |
| siRNA Disorazole DMSO Run1   | NM_005701 | RNUT1   | RNA, U transporter 1                                       | 0.142214  | Inlier |
| siRNA Disorazole DMSO Run2   | NM_005701 | RNUT1   | RNA, U transporter 1                                       | 0.92769   | Inlier |
| siRNA-Vinblastine Run2-DMSO  | NM_005701 | RNUT1   | RNA, U transporter 1                                       | 0.97842   | Inlier |
| siRNA-Vinblastine Run1-DMSO  | NM_005701 | RNUT1   | RNA, U transporter 1                                       | 1.141494  | Inlier |
| siRNA-Vinblastine Run2-DMSO  | NM_133631 | ROBO1   | roundabout, axon guidance receptor, homolog 1 (Drosophila) | -1.113919 | Inlier |
| siRNA-Temozolomide Run2-DMSO | NM_133631 | ROBO1   | roundabout, axon guidance receptor, homolog 1 (Drosophila) | -0.912258 | Inlier |

Identification of Survival Genes in Human Glioblastoma Cells Using siRNA Screening

Nikhil G Thaker, Fang Zhang, Peter R. McDonald, Tong Ying Shun, Michael D Lewen, Ian F. Pollack, and John S. Lazo

Molecular Pharmacology

|                              |               |       |                                                            |           |        |
|------------------------------|---------------|-------|------------------------------------------------------------|-----------|--------|
| siRNA-Temozolomide Run3-DMSO | NM_1336<br>31 | ROBO1 | roundabout, axon guidance receptor, homolog 1 (Drosophila) | -0.901453 | Inlier |
| siRNA Disorazole DMSO Run3   | NM_1336<br>31 | ROBO1 | roundabout, axon guidance receptor, homolog 1 (Drosophila) | -0.311338 | Inlier |
| siRNA-Vinblastine Run1-DMSO  | NM_1336<br>31 | ROBO1 | roundabout, axon guidance receptor, homolog 1 (Drosophila) | 0.311337  | Inlier |
| siRNA Disorazole DMSO Run1   | NM_1336<br>31 | ROBO1 | roundabout, axon guidance receptor, homolog 1 (Drosophila) | 0.42128   | Inlier |
| siRNA-Temozolomide Run1-DMSO | NM_1336<br>31 | ROBO1 | roundabout, axon guidance receptor, homolog 1 (Drosophila) | 0.531336  | Inlier |
| siRNA Disorazole DMSO Run2   | NM_1336<br>31 | ROBO1 | roundabout, axon guidance receptor, homolog 1 (Drosophila) | 0.817664  | Inlier |

Identification of Survival Genes in Human Glioblastoma Cells Using siRNA Screening

Nikhil G Thaker, Fang Zhang, Peter R. McDonald, Tong Ying Shun, Michael D Lewen, Ian F. Pollack, and John S. Lazo

Molecular Pharmacology

|                              |           |       |                                                         |           |        |
|------------------------------|-----------|-------|---------------------------------------------------------|-----------|--------|
| siRNA-Temozolomide Run3-DMSO | NM_005406 | ROCK1 | Rho-associated, coiled-coil containing protein kinase 1 | -0.831706 | Inlier |
| siRNA-Temozolomide Run2-DMSO | NM_005406 | ROCK1 | Rho-associated, coiled-coil containing protein kinase 1 | -0.526077 | Inlier |
| siRNA Disorazole DMSO Run2   | NM_005406 | ROCK1 | Rho-associated, coiled-coil containing protein kinase 1 | -0.492945 | Inlier |
| siRNA Disorazole DMSO Run3   | NM_005406 | ROCK1 | Rho-associated, coiled-coil containing protein kinase 1 | -0.363046 | Inlier |
| siRNA-Temozolomide Run1-DMSO | NM_005406 | ROCK1 | Rho-associated, coiled-coil containing protein kinase 1 | 0.363046  | Inlier |
| siRNA Disorazole DMSO Run1   | NM_005406 | ROCK1 | Rho-associated, coiled-coil containing protein kinase 1 | 0.822923  | Inlier |
| siRNA-Vinblastine Run1-DMSO  | NM_005406 | ROCK1 | Rho-associated, coiled-coil containing protein kinase 1 | 1.021605  | Inlier |

Identification of Survival Genes in Human Glioblastoma Cells Using siRNA Screening  
 Nikhil G Thaker, Fang Zhang, Peter R. McDonald, Tong Ying Shun, Michael D Lewen, Ian F. Pollack, and John S. Lazo

Molecular Pharmacology

|                              |           |       |                                                         |           |        |
|------------------------------|-----------|-------|---------------------------------------------------------|-----------|--------|
| siRNA-Vinblastine Run2-DMSO  | NM_005406 | ROCK1 | Rho-associated, coiled-coil containing protein kinase 1 | 1.370286  | Inlier |
| siRNA-Temozolomide Run3-DMSO | NM_004850 | ROCK2 | Rho-associated, coiled-coil containing protein kinase 2 | -1.421927 | Inlier |
| siRNA Disorazole DMSO Run2   | NM_004850 | ROCK2 | Rho-associated, coiled-coil containing protein kinase 2 | -1.382274 | Inlier |
| siRNA-Temozolomide Run1-DMSO | NM_004850 | ROCK2 | Rho-associated, coiled-coil containing protein kinase 2 | -0.343029 | Inlier |
| siRNA-Temozolomide Run2-DMSO | NM_004850 | ROCK2 | Rho-associated, coiled-coil containing protein kinase 2 | -0.200752 | Inlier |
| siRNA Disorazole DMSO Run1   | NM_004850 | ROCK2 | Rho-associated, coiled-coil containing protein kinase 2 | 0.200752  | Inlier |
| siRNA-Vinblastine Run1-DMSO  | NM_004850 | ROCK2 | Rho-associated, coiled-coil containing protein kinase 2 | 0.623501  | Inlier |



Identification of Survival Genes in Human Glioblastoma Cells Using siRNA Screening  
 Nikhil G Thaker, Fang Zhang, Peter R. McDonald, Tong Ying Shun, Michael D Lewen, Ian F. Pollack, and John S. Lazo

Molecular Pharmacology

| siRNA                   | Drug | Run   | Gene          | Protein | Value     | Outlier |
|-------------------------|------|-------|---------------|---------|-----------|---------|
| siRNA Disorazole DMSO   |      | Run3  | NM_0048<br>50 | ROCK2   | 0.725499  | Inlier  |
| siRNA-Vinblastine DMSO  |      | Run2- | NM_0048<br>50 | ROCK2   | 0.984766  | Inlier  |
| siRNA-Temozolomide DMSO |      | Run2- | NM_0037<br>25 | RODH    | -2.144499 | Inlier  |
| siRNA-Temozolomide DMSO |      | Run3- | NM_0037<br>25 | RODH    | -0.686953 | Inlier  |
| siRNA-Temozolomide DMSO |      | Run1- | NM_0037<br>25 | RODH    | -0.662047 | Inlier  |
| siRNA-Vinblastine DMSO  |      | Run2- | NM_0037<br>25 | RODH    | -0.04263  | Inlier  |
| siRNA Disorazole DMSO   |      | Run1  | NM_0037<br>25 | RODH    | 0.04263   | Inlier  |
| siRNA Disorazole DMSO   |      | Run3  | NM_0037<br>25 | RODH    | 0.460287  | Inlier  |
| siRNA Disorazole DMSO   |      | Run2  | NM_0037<br>25 | RODH    | 1.557457  | Inlier  |

Rho-associated  
 , coiled-coil  
 containing  
 protein  
 kinase 2

Rho-associated  
 , coiled-coil  
 containing  
 protein  
 kinase 2

hydroxysteroid (17-beta)  
 dehydrogenase 6

Identification of Survival Genes in Human Glioblastoma Cells Using siRNA Screening

Nikhil G Thaker, Fang Zhang, Peter R. McDonald, Tong Ying Shun, Michael D Lewen, Ian F. Pollack, and John S. Lazo

Molecular Pharmacology

| siRNA Treatment              | Gene ID   | Gene Name | Enzyme Name                                     | Value     | Outlier Status |
|------------------------------|-----------|-----------|-------------------------------------------------|-----------|----------------|
| siRNA-Vinblastine Run1-DMSO  | NM_003725 | RODH      | hydroxysteroid (17-beta) dehydrogenase 6        | 2.121582  | Inlier         |
| siRNA-Temozolomide Run3-DMSO | NM_003708 | RODH-4    | retinol dehydrogenase 16 (all-trans and 13-cis) | -0.911604 | Inlier         |
| siRNA-Temozolomide Run2-DMSO | NM_003708 | RODH-4    | retinol dehydrogenase 16 (all-trans and 13-cis) | -0.903078 | Inlier         |
| siRNA Disorazole DMSO Run3   | NM_003708 | RODH-4    | retinol dehydrogenase 16 (all-trans and 13-cis) | -0.324343 | Inlier         |
| siRNA Disorazole DMSO Run2   | NM_003708 | RODH-4    | retinol dehydrogenase 16 (all-trans and 13-cis) | -0.318673 | Inlier         |
| siRNA Disorazole DMSO Run1   | NM_003708 | RODH-4    | retinol dehydrogenase 16 (all-trans and 13-cis) | 0.318673  | Inlier         |
| siRNA-Temozolomide Run1-DMSO | NM_003708 | RODH-4    | retinol dehydrogenase 16 (all-trans and 13-cis) | 0.445922  | Inlier         |
| siRNA-Vinblastine Run1-DMSO  | NM_003708 | RODH-4    | retinol dehydrogenase 16 (all-trans and 13-cis) | 1.734045  | Inlier         |

Identification of Survival Genes in Human Glioblastoma Cells Using siRNA Screening  
 Nikhil G Thaker, Fang Zhang, Peter R. McDonald, Tong Ying Shun, Michael D Lewen, Ian F. Pollack, and John S. Lazo

Molecular Pharmacology

|                              |           |        |                                                 |           |        |
|------------------------------|-----------|--------|-------------------------------------------------|-----------|--------|
| siRNA-Vinblastine Run2-DMSO  | NM_003708 | RODH-4 | retinol dehydrogenase 16 (all-trans and 13-cis) | 1.889776  | Inlier |
| siRNA Disorazole DMSO Run2   | NM_000327 | ROM1   | retinal outer segment membrane protein 1        | -1.273419 | Inlier |
| siRNA-Temozolomide Run3-DMSO | NM_000327 | ROM1   | retinal outer segment membrane protein 1        | -1.082496 | Inlier |
| siRNA Disorazole DMSO Run3   | NM_000327 | ROM1   | retinal outer segment membrane protein 1        | -0.843478 | Inlier |
| siRNA-Temozolomide Run1-DMSO | NM_000327 | ROM1   | retinal outer segment membrane protein 1        | -0.016021 | Inlier |
| siRNA-Temozolomide Run2-DMSO | NM_000327 | ROM1   | retinal outer segment membrane protein 1        | 0.016021  | Inlier |
| siRNA Disorazole DMSO Run1   | NM_000327 | ROM1   | retinal outer segment membrane protein 1        | 0.061759  | Inlier |
| siRNA-Vinblastine Run2-DMSO  | NM_000327 | ROM1   | retinal outer segment membrane protein 1        | 0.635052  | Inlier |

Identification of Survival Genes in Human Glioblastoma Cells Using siRNA Screening  
 Nikhil G Thaker, Fang Zhang, Peter R. McDonald, Tong Ying Shun, Michael D Lewen, Ian F. Pollack, and John S. Lazo  
 Molecular Pharmacology

|                              |           |      |                                                 |           |        |
|------------------------------|-----------|------|-------------------------------------------------|-----------|--------|
| siRNA-Vinblastine Run1-DMSO  | NM_000327 | ROM1 | retinal outer segment membrane protein 1        | 0.713948  | Inlier |
| siRNA-Temozolomide Run3-DMSO | NM_005012 | ROR1 | receptor tyrosine kinase-like orphan receptor 1 | -0.958364 | Inlier |
| siRNA-Temozolomide Run1-DMSO | NM_005012 | ROR1 | receptor tyrosine kinase-like orphan receptor 1 | -0.863435 | Inlier |
| siRNA Disorazole DMSO Run2   | NM_005012 | ROR1 | receptor tyrosine kinase-like orphan receptor 1 | -0.72359  | Inlier |
| siRNA-Temozolomide Run2-DMSO | NM_005012 | ROR1 | receptor tyrosine kinase-like orphan receptor 1 | -0.234215 | Inlier |
| siRNA-Vinblastine Run1-DMSO  | NM_005012 | ROR1 | receptor tyrosine kinase-like orphan receptor 1 | 0.234215  | Inlier |
| siRNA Disorazole DMSO Run3   | NM_005012 | ROR1 | receptor tyrosine kinase-like orphan receptor 1 | 0.555274  | Inlier |
| siRNA Disorazole DMSO Run1   | NM_005012 | ROR1 | receptor tyrosine kinase-like orphan receptor 1 | 0.62541   | Inlier |

Identification of Survival Genes in Human Glioblastoma Cells Using siRNA Screening  
 Nikhil G Thaker, Fang Zhang, Peter R. McDonald, Tong Ying Shun, Michael D Lewen, Ian F. Pollack, and John S. Lazo  
 Molecular Pharmacology

|                              |               |      |                                                             |           |        |
|------------------------------|---------------|------|-------------------------------------------------------------|-----------|--------|
| siRNA-Vinblastine Run2-DMSO  | NM_0050<br>12 | ROR1 | receptor<br>tyrosine<br>kinase-like<br>orphan<br>receptor 1 | 1.880522  | Inlier |
| siRNA Disorazole DMSO Run2   | NM_0045<br>60 | ROR2 | receptor<br>tyrosine<br>kinase-like<br>orphan<br>receptor 2 | -2.283054 | Inlier |
| siRNA-Vinblastine Run1-DMSO  | NM_0045<br>60 | ROR2 | receptor<br>tyrosine<br>kinase-like<br>orphan<br>receptor 2 | -1.26803  | Inlier |
| siRNA Disorazole DMSO Run3   | NM_0045<br>60 | ROR2 | receptor<br>tyrosine<br>kinase-like<br>orphan<br>receptor 2 | -0.270592 | Inlier |
| siRNA-Temozolomide Run2-DMSO | NM_0045<br>60 | ROR2 | receptor<br>tyrosine<br>kinase-like<br>orphan<br>receptor 2 | -0.173448 | Inlier |
| siRNA-Temozolomide Run1-DMSO | NM_0045<br>60 | ROR2 | receptor<br>tyrosine<br>kinase-like<br>orphan<br>receptor 2 | 0.173448  | Inlier |
| siRNA Disorazole DMSO Run1   | NM_0045<br>60 | ROR2 | receptor<br>tyrosine<br>kinase-like<br>orphan<br>receptor 2 | 0.619375  | Inlier |
| siRNA-Temozolomide Run3-DMSO | NM_0045<br>60 | ROR2 | receptor<br>tyrosine<br>kinase-like<br>orphan<br>receptor 2 | 0.729625  | Inlier |

Identification of Survival Genes in Human Glioblastoma Cells Using siRNA Screening  
 Nikhil G Thaker, Fang Zhang, Peter R. McDonald, Tong Ying Shun, Michael D Lewen, Ian F. Pollack, and John S. Lazo  
 Molecular Pharmacology

|                              |           |      |                                                 |           |        |
|------------------------------|-----------|------|-------------------------------------------------|-----------|--------|
| siRNA-Vinblastine Run2-DMSO  | NM_004560 | ROR2 | receptor tyrosine kinase-like orphan receptor 2 | 2.787935  | Inlier |
| siRNA-Temozolomide Run3-DMSO | NM_002943 | RORA | RAR-related orphan receptor A                   | -2.066012 | Inlier |
| siRNA Disorazole DMSO Run3   | NM_002943 | RORA | RAR-related orphan receptor A                   | -1.116743 | Inlier |
| siRNA-Temozolomide Run2-DMSO | NM_002943 | RORA | RAR-related orphan receptor A                   | -0.374731 | Inlier |
| siRNA-Temozolomide Run1-DMSO | NM_002943 | RORA | RAR-related orphan receptor A                   | -0.053999 | Inlier |
| siRNA Disorazole DMSO Run1   | NM_002943 | RORA | RAR-related orphan receptor A                   | 0.053999  | Inlier |
| siRNA Disorazole DMSO Run2   | NM_002943 | RORA | RAR-related orphan receptor A                   | 0.31114   | Inlier |
| siRNA-Vinblastine Run1-DMSO  | NM_002943 | RORA | RAR-related orphan receptor A                   | 0.974269  | Inlier |
| siRNA-Vinblastine Run2-DMSO  | NM_002943 | RORA | RAR-related orphan receptor A                   | 2.003803  | Inlier |
| siRNA Disorazole DMSO Run2   | NM_006914 | RORB | RAR-related orphan receptor B                   | -1.394342 | Inlier |

Identification of Survival Genes in Human Glioblastoma Cells Using siRNA Screening  
 Nikhil G Thaker, Fang Zhang, Peter R. McDonald, Tong Ying Shun, Michael D Lewen, Ian F. Pollack, and John S. Lazo  
 Molecular Pharmacology

|                              |               |      |                               |           |        |
|------------------------------|---------------|------|-------------------------------|-----------|--------|
| siRNA-Temozolomide Run2-DMSO | NM_0069<br>14 | RORB | RAR-related orphan receptor B | -0.512949 | Inlier |
| siRNA-Temozolomide Run3-DMSO | NM_0069<br>14 | RORB | RAR-related orphan receptor B | -0.395266 | Inlier |
| siRNA Disorazole DMSO Run1   | NM_0069<br>14 | RORB | RAR-related orphan receptor B | -0.017243 | Inlier |
| siRNA Disorazole DMSO Run3   | NM_0069<br>14 | RORB | RAR-related orphan receptor B | 0.017243  | Inlier |
| siRNA-Temozolomide Run1-DMSO | NM_0069<br>14 | RORB | RAR-related orphan receptor B | 0.836051  | Inlier |
| siRNA-Vinblastine Run2-DMSO  | NM_0069<br>14 | RORB | RAR-related orphan receptor B | 1.417484  | Inlier |
| siRNA-Vinblastine Run1-DMSO  | NM_0069<br>14 | RORB | RAR-related orphan receptor B | 1.605906  | Inlier |
| siRNA-Temozolomide Run3-DMSO | NM_0050<br>60 | RORC | RAR-related orphan receptor C | -2.408868 | Inlier |
| siRNA Disorazole DMSO Run2   | NM_0050<br>60 | RORC | RAR-related orphan receptor C | -1.883319 | Inlier |
| siRNA-Temozolomide Run1-DMSO | NM_0050<br>60 | RORC | RAR-related orphan receptor C | -0.423271 | Inlier |

Identification of Survival Genes in Human Glioblastoma Cells Using siRNA Screening  
 Nikhil G Thaker, Fang Zhang, Peter R. McDonald, Tong Ying Shun, Michael D Lewen, Ian F. Pollack, and John S. Lazo  
 Molecular Pharmacology

|                              |               |      |                                                                             |           |        |
|------------------------------|---------------|------|-----------------------------------------------------------------------------|-----------|--------|
| siRNA Disorazole DMSO Run1   | NM_0050<br>60 | RORC | RAR-related orphan receptor C                                               | -0.057231 | Inlier |
| siRNA-Temozolomide Run2-DMSO | NM_0050<br>60 | RORC | RAR-related orphan receptor C                                               | 0.057232  | Inlier |
| siRNA-Vinblastine Run1-DMSO  | NM_0050<br>60 | RORC | RAR-related orphan receptor C                                               | 0.559422  | Inlier |
| siRNA-Vinblastine Run2-DMSO  | NM_0050<br>60 | RORC | RAR-related orphan receptor C                                               | 0.789578  | Inlier |
| siRNA Disorazole DMSO Run3   | NM_0050<br>60 | RORC | RAR-related orphan receptor C<br>v-ros UR2 sarcoma virus oncogene homolog 1 | 1.226935  | Inlier |
| siRNA Disorazole DMSO Run2   | NM_0029<br>44 | ROS1 | (avian)<br>v-ros UR2 sarcoma virus oncogene homolog 1                       | -1.197074 | Inlier |
| siRNA-Temozolomide Run3-DMSO | NM_0029<br>44 | ROS1 | (avian)<br>v-ros UR2 sarcoma virus oncogene homolog 1                       | -1.069826 | Inlier |
| siRNA-Temozolomide Run2-DMSO | NM_0029<br>44 | ROS1 | (avian)<br>v-ros UR2 sarcoma virus oncogene homolog 1                       | -0.895003 | Inlier |
| siRNA Disorazole DMSO Run3   | NM_0029<br>44 | ROS1 | (avian)                                                                     | -0.123207 | Inlier |



Identification of Survival Genes in Human Glioblastoma Cells Using siRNA Screening  
 Nikhil G Thaker, Fang Zhang, Peter R. McDonald, Tong Ying Shun, Michael D Lewen, Ian F. Pollack, and John S. Lazo

Molecular Pharmacology

|                              |               |        |                                                           |           |        |
|------------------------------|---------------|--------|-----------------------------------------------------------|-----------|--------|
| siRNA-Temozolomide Run1-DMSO | NM_0029<br>44 | ROS1   | v-ros UR2 sarcoma virus oncogene homolog 1 (avian)        | 0.123207  | Inlier |
| siRNA Disorazole DMSO Run1   | NM_0029<br>44 | ROS1   | v-ros UR2 sarcoma virus oncogene homolog 1 (avian)        | 0.378507  | Inlier |
| siRNA-Vinblastine Run2-DMSO  | NM_0029<br>44 | ROS1   | v-ros UR2 sarcoma virus oncogene homolog 1 (avian)        | 0.453997  | Inlier |
| siRNA-Vinblastine Run1-DMSO  | NM_0029<br>44 | ROS1   | v-ros UR2 sarcoma virus oncogene homolog 1 (avian)        | 1.107462  | Inlier |
| siRNA-Temozolomide Run1-DMSO | NM_0070<br>55 | RPC155 | polymerase (RNA) III (DNA directed) polypeptide A, 155kDa | -1.181411 | Inlier |
| siRNA Disorazole DMSO Run3   | NM_0070<br>55 | RPC155 | polymerase (RNA) III (DNA directed) polypeptide A, 155kDa | -0.992742 | Inlier |
| siRNA-Vinblastine Run2-DMSO  | NM_0070<br>55 | RPC155 | polymerase (RNA) III (DNA directed) polypeptide A, 155kDa | -0.382538 | Inlier |
| siRNA Disorazole DMSO Run1   | NM_0070<br>55 | RPC155 | polymerase (RNA) III (DNA directed) polypeptide A, 155kDa | -0.078131 | Inlier |

Identification of Survival Genes in Human Glioblastoma Cells Using siRNA Screening

Nikhil G Thaker, Fang Zhang, Peter R. McDonald, Tong Ying Shun, Michael D Lewen, Ian F. Pollack, and John S. Lazo

Molecular Pharmacology

|                              |               |        |                                                           |           |        |
|------------------------------|---------------|--------|-----------------------------------------------------------|-----------|--------|
| siRNA-Temozolomide Run2-DMSO | NM_0070<br>55 | RPC155 | polymerase (RNA) III (DNA directed) polypeptide A, 155kDa | 0.078132  | Inlier |
| siRNA-Temozolomide Run3-DMSO | NM_0070<br>55 | RPC155 | polymerase (RNA) III (DNA directed) polypeptide A, 155kDa | 0.114633  | Inlier |
| siRNA Disorazole DMSO Run2   | NM_0070<br>55 | RPC155 | polymerase (RNA) III (DNA directed) polypeptide A, 155kDa | 0.966462  | Inlier |
| siRNA-Vinblastine Run1-DMSO  | NM_0070<br>55 | RPC155 | polymerase (RNA) III (DNA directed) polypeptide A, 155kDa | 2.141153  | Inlier |
| siRNA-Temozolomide Run2-DMSO | NM_1992<br>29 | RPE    | ribulose-5-phosphate-3-epimerase                          | -1.681    | Inlier |
| siRNA-Temozolomide Run3-DMSO | NM_1992<br>29 | RPE    | ribulose-5-phosphate-3-epimerase                          | -1.06798  | Inlier |
| siRNA-Temozolomide Run1-DMSO | NM_1992<br>29 | RPE    | ribulose-5-phosphate-3-epimerase                          | -0.28102  | Inlier |
| siRNA-Vinblastine Run2-DMSO  | NM_1992<br>29 | RPE    | ribulose-5-phosphate-3-epimerase                          | -0.180241 | Inlier |

Identification of Survival Genes in Human Glioblastoma Cells Using siRNA Screening  
 Nikhil G Thaker, Fang Zhang, Peter R. McDonald, Tong Ying Shun, Michael D Lewen, Ian F. Pollack, and John S. Lazo  
 Molecular Pharmacology

|                              |               |       |                                                   |           |         |
|------------------------------|---------------|-------|---------------------------------------------------|-----------|---------|
| siRNA Disorazole DMSO Run1   | NM_1992<br>29 | RPE   | ribulose-5-phosphate-3-epimerase                  | 0.180241  | Inlier  |
| siRNA Disorazole DMSO Run3   | NM_1992<br>29 | RPE   | ribulose-5-phosphate-3-epimerase                  | 0.183059  | Inlier  |
| siRNA-Vinblastine Run1-DMSO  | NM_1992<br>29 | RPE   | ribulose-5-phosphate-3-epimerase                  | 3.641164  | Outlier |
| siRNA Disorazole DMSO Run2   | NM_1992<br>29 | RPE   | ribulose-5-phosphate-3-epimerase                  | 4.750006  | Outlier |
| siRNA-Temozolomide Run2-DMSO | NM_0003<br>29 | RPE65 | retinal pigment epithelium-specific protein 65kDa | -1.061611 | Inlier  |
| siRNA-Vinblastine Run2-DMSO  | NM_0003<br>29 | RPE65 | retinal pigment epithelium-specific protein 65kDa | -0.827139 | Inlier  |
| siRNA Disorazole DMSO Run1   | NM_0003<br>29 | RPE65 | retinal pigment epithelium-specific protein 65kDa | -0.521861 | Inlier  |
| siRNA-Temozolomide Run3-DMSO | NM_0003<br>29 | RPE65 | retinal pigment epithelium-specific protein 65kDa | -0.086997 | Inlier  |
| siRNA-Temozolomide Run1-DMSO | NM_0003<br>29 | RPE65 | retinal pigment epithelium-specific protein 65kDa | 0.086996  | Inlier  |

Identification of Survival Genes in Human Glioblastoma Cells Using siRNA Screening

Nikhil G Thaker, Fang Zhang, Peter R. McDonald, Tong Ying Shun, Michael D Lewen, Ian F. Pollack, and John S. Lazo

Molecular Pharmacology

|                             |               |       |                                                                |           |        |
|-----------------------------|---------------|-------|----------------------------------------------------------------|-----------|--------|
| siRNA Disorazole DMSO Run3  | NM_0003<br>29 | RPE65 | retinal pigment epithelium-specific protein 65kDa              | 0.142154  | Inlier |
| siRNA Disorazole DMSO Run2  | NM_0003<br>29 | RPE65 | retinal pigment epithelium-specific protein 65kDa              | 1.693931  | Inlier |
| siRNA-Vinblastine Run1-DMSO | NM_0003<br>29 | RPE65 | retinal pigment epithelium-specific protein 65kDa              | 1.909022  | Inlier |
| siRNA Disorazole DMSO Run3  | NM_1445<br>63 | RPIA  | ribose 5-phosphate isomerase A (ribose 5-phosphate epimerase ) | -1.098073 | Inlier |
| siRNA Disorazole DMSO Run1  | NM_1445<br>63 | RPIA  | ribose 5-phosphate isomerase A (ribose 5-phosphate epimerase ) | -0.856604 | Inlier |
| siRNA-Vinblastine Run2-DMSO | NM_1445<br>63 | RPIA  | ribose 5-phosphate isomerase A (ribose 5-phosphate epimerase ) | -0.492396 | Inlier |

Identification of Survival Genes in Human Glioblastoma Cells Using siRNA Screening  
 Nikhil G Thaker, Fang Zhang, Peter R. McDonald, Tong Ying Shun, Michael D Lewen, Ian F. Pollack, and John S. Lazo  
 Molecular Pharmacology

|                              |           |      |                                                                |                 |
|------------------------------|-----------|------|----------------------------------------------------------------|-----------------|
| siRNA-Temozolomide Run1-DMSO | NM_144563 | RPIA | ribose 5-phosphate isomerase A (ribose 5-phosphate epimerase ) | -0.17008 Inlier |
| siRNA-Temozolomide Run2-DMSO | NM_144563 | RPIA | ribose 5-phosphate isomerase A (ribose 5-phosphate epimerase ) | 0.17008 Inlier  |
| siRNA-Temozolomide Run3-DMSO | NM_144563 | RPIA | ribose 5-phosphate isomerase A (ribose 5-phosphate epimerase ) | 0.430553 Inlier |
| siRNA Disorazole DMSO Run2   | NM_144563 | RPIA | ribose 5-phosphate isomerase A (ribose 5-phosphate epimerase ) | 0.872555 Inlier |
| siRNA-Vinblastine Run1-DMSO  | NM_144563 | RPIA | ribose 5-phosphate isomerase A (ribose 5-phosphate epimerase ) | 1.120246 Inlier |

Identification of Survival Genes in Human Glioblastoma Cells Using siRNA Screening  
 Nikhil G Thaker, Fang Zhang, Peter R. McDonald, Tong Ying Shun, Michael D Lewen, Ian F. Pollack, and John S. Lazo

|                              |               |       |     |                   |        |
|------------------------------|---------------|-------|-----|-------------------|--------|
| Molecular Pharmacology       |               |       |     | ribosomal protein |        |
| siRNA-Temozolomide Run3-DMSO | NM_0009<br>72 | RPL7A | L7a | -1.011756         | Inlier |
| siRNA-Temozolomide Run1-DMSO | NM_0009<br>72 | RPL7A | L7a | -0.809392         | Inlier |
| siRNA-Temozolomide Run2-DMSO | NM_0009<br>72 | RPL7A | L7a | -0.539608         | Inlier |
| siRNA Disorazole DMSO Run2   | NM_0009<br>72 | RPL7A | L7a | -0.162239         | Inlier |
| siRNA Disorazole DMSO Run3   | NM_0009<br>72 | RPL7A | L7a | 0.162239          | Inlier |
| siRNA Disorazole DMSO Run1   | NM_0009<br>72 | RPL7A | L7a | 0.438563          | Inlier |
| siRNA-Vinblastine Run1-DMSO  | NM_0009<br>72 | RPL7A | L7a | 1.415151          | Inlier |
| siRNA-Vinblastine Run2-DMSO  | NM_0009<br>72 | RPL7A | L7a | 2.533665          | Inlier |
| siRNA-Temozolomide Run2-DMSO | NM_0029<br>50 | RPN1  | I   | -0.955341         | Inlier |
| siRNA Disorazole DMSO Run1   | NM_0029<br>50 | RPN1  | I   | -0.701698         | Inlier |
| siRNA-Temozolomide Run1-DMSO | NM_0029<br>50 | RPN1  | I   | -0.647302         | Inlier |
| siRNA-Vinblastine Run2-DMSO  | NM_0029<br>50 | RPN1  | I   | -0.158645         | Inlier |
| siRNA Disorazole DMSO Run3   | NM_0029<br>50 | RPN1  | I   | 0.158645          | Inlier |
| siRNA-Temozolomide Run3-DMSO | NM_0029<br>50 | RPN1  | I   | 0.375792          | Inlier |
| siRNA Disorazole DMSO Run2   | NM_0029<br>50 | RPN1  | I   | 1.676353          | Inlier |
| siRNA-Vinblastine Run1-DMSO  | NM_0029<br>50 | RPN1  | I   | 2.516875          | Inlier |
| siRNA Disorazole DMSO Run2   | NM_0029<br>51 | RPN2  | II  | -0.752419         | Inlier |
| siRNA Disorazole DMSO Run3   | NM_0029<br>51 | RPN2  | II  | -0.699615         | Inlier |
| siRNA-Temozolomide Run2-DMSO | NM_0029<br>51 | RPN2  | II  | -0.649384         | Inlier |
| siRNA Disorazole DMSO Run1   | NM_0029<br>51 | RPN2  | II  | -0.12628          | Inlier |
| siRNA-Vinblastine Run2-DMSO  | NM_0029<br>51 | RPN2  | II  | 0.126279          | Inlier |
| siRNA-Temozolomide Run3-DMSO | NM_0029<br>51 | RPN2  | II  | 0.146216          | Inlier |

Identification of Survival Genes in Human Glioblastoma Cells Using siRNA Screening  
 Nikhil G Thaker, Fang Zhang, Peter R. McDonald, Tong Ying Shun, Michael D Lewen, Ian F. Pollack, and John S. Lazo

|                                  |               |         |                                                                   |           |        |
|----------------------------------|---------------|---------|-------------------------------------------------------------------|-----------|--------|
| siRNA-Temozolomide Run1-<br>DMSO | NM_0029<br>51 | RPN2    | ribophorin<br>II                                                  | 1.161994  | Inlier |
| siRNA-Vinblastine Run1-<br>DMSO  | NM_0029<br>51 | RPN2    | ribophorin<br>II                                                  | 2.056999  | Inlier |
| siRNA-Temozolomide Run2-<br>DMSO | NM_0029<br>53 | RPS6KA1 | ribosomal<br>protein S6<br>kinase,<br>90kDa,<br>polypeptid<br>e 1 | -1.122417 | Inlier |
| siRNA Disorazole DMSO Run2       | NM_0029<br>53 | RPS6KA1 | ribosomal<br>protein S6<br>kinase,<br>90kDa,<br>polypeptid<br>e 1 | -0.765844 | Inlier |
| siRNA-Temozolomide Run3-<br>DMSO | NM_0029<br>53 | RPS6KA1 | ribosomal<br>protein S6<br>kinase,<br>90kDa,<br>polypeptid<br>e 1 | -0.675458 | Inlier |
| siRNA-Temozolomide Run1-<br>DMSO | NM_0029<br>53 | RPS6KA1 | ribosomal<br>protein S6<br>kinase,<br>90kDa,<br>polypeptid<br>e 1 | -0.108131 | Inlier |
| siRNA Disorazole DMSO Run1       | NM_0029<br>53 | RPS6KA1 | ribosomal<br>protein S6<br>kinase,<br>90kDa,<br>polypeptid<br>e 1 | 0.108131  | Inlier |
| siRNA-Vinblastine Run1-<br>DMSO  | NM_0029<br>53 | RPS6KA1 | ribosomal<br>protein S6<br>kinase,<br>90kDa,<br>polypeptid<br>e 1 | 0.469905  | Inlier |
| siRNA Disorazole DMSO Run3       | NM_0029<br>53 | RPS6KA1 | ribosomal<br>protein S6<br>kinase,<br>90kDa,<br>polypeptid<br>e 1 | 0.673542  | Inlier |
| siRNA-Vinblastine Run2-<br>DMSO  | NM_0029<br>53 | RPS6KA1 | ribosomal<br>protein S6<br>kinase,<br>90kDa,<br>polypeptid<br>e 1 | 0.928092  | Inlier |

Identification of Survival Genes in Human Glioblastoma Cells Using siRNA Screening

Nikhil G Thaker, Fang Zhang, Peter R. McDonald, Tong Ying Shun, Michael D Lewen, Ian F. Pollack, and John S. Lazo

Molecular Pharmacology

|                              |               |         |                                                   |           |        |
|------------------------------|---------------|---------|---------------------------------------------------|-----------|--------|
| siRNA-Temozolomide Run3-DMSO | NM_0211<br>35 | RPS6KA2 | ribosomal protein S6 kinase, 90kDa, polypeptide 2 | -0.984965 | Inlier |
| siRNA-Temozolomide Run2-DMSO | NM_0211<br>35 | RPS6KA2 | ribosomal protein S6 kinase, 90kDa, polypeptide 2 | -0.500673 | Inlier |
| siRNA Disorazole DMSO Run3   | NM_0211<br>35 | RPS6KA2 | ribosomal protein S6 kinase, 90kDa, polypeptide 2 | -0.108296 | Inlier |
| siRNA Disorazole DMSO Run2   | NM_0211<br>35 | RPS6KA2 | ribosomal protein S6 kinase, 90kDa, polypeptide 2 | -0.06752  | Inlier |
| siRNA-Temozolomide Run1-DMSO | NM_0211<br>35 | RPS6KA2 | ribosomal protein S6 kinase, 90kDa, polypeptide 2 | 0.06752   | Inlier |
| siRNA Disorazole DMSO Run1   | NM_0211<br>35 | RPS6KA2 | ribosomal protein S6 kinase, 90kDa, polypeptide 2 | 0.848327  | Inlier |
| siRNA-Vinblastine Run1-DMSO  | NM_0211<br>35 | RPS6KA2 | ribosomal protein S6 kinase, 90kDa, polypeptide 2 | 1.110987  | Inlier |
| siRNA-Vinblastine Run2-DMSO  | NM_0211<br>35 | RPS6KA2 | ribosomal protein S6 kinase, 90kDa, polypeptide 2 | 1.623067  | Inlier |



Identification of Survival Genes in Human Glioblastoma Cells Using siRNA Screening  
 Nikhil G Thaker, Fang Zhang, Peter R. McDonald, Tong Ying Shun, Michael D Lewen, Ian F. Pollack, and John S. Lazo

Molecular Pharmacology

| siRNA Treatment              | Gene ID   | Gene Name | Protein Description                               | Log Fold Change | Outlier Status |
|------------------------------|-----------|-----------|---------------------------------------------------|-----------------|----------------|
| siRNA Disorazole DMSO Run2   | NM_004586 | RPS6KA3   | ribosomal protein S6 kinase, 90kDa, polypeptide 3 | -1.344701       | Inlier         |
| siRNA-Temozolomide Run3-DMSO | NM_004586 | RPS6KA3   | ribosomal protein S6 kinase, 90kDa, polypeptide 3 | -0.907708       | Inlier         |
| siRNA-Temozolomide Run2-DMSO | NM_004586 | RPS6KA3   | ribosomal protein S6 kinase, 90kDa, polypeptide 3 | -0.644306       | Inlier         |
| siRNA Disorazole DMSO Run3   | NM_004586 | RPS6KA3   | ribosomal protein S6 kinase, 90kDa, polypeptide 3 | -0.326261       | Inlier         |
| siRNA-Temozolomide Run1-DMSO | NM_004586 | RPS6KA3   | ribosomal protein S6 kinase, 90kDa, polypeptide 3 | 0.326261        | Inlier         |
| siRNA Disorazole DMSO Run1   | NM_004586 | RPS6KA3   | ribosomal protein S6 kinase, 90kDa, polypeptide 3 | 0.626833        | Inlier         |
| siRNA-Vinblastine Run1-DMSO  | NM_004586 | RPS6KA3   | ribosomal protein S6 kinase, 90kDa, polypeptide 3 | 0.704694        | Inlier         |
| siRNA-Vinblastine Run2-DMSO  | NM_004586 | RPS6KA3   | ribosomal protein S6 kinase, 90kDa, polypeptide 3 | 0.86678         | Inlier         |

Identification of Survival Genes in Human Glioblastoma Cells Using siRNA Screening

Nikhil G Thaker, Fang Zhang, Peter R. McDonald, Tong Ying Shun, Michael D Lewen, Ian F. Pollack, and John S.

Lazo

Molecular Pharmacology

|                                  |               |         |                                                                   |           |        |
|----------------------------------|---------------|---------|-------------------------------------------------------------------|-----------|--------|
| siRNA Disorazole DMSO Run2       | NM_0039<br>42 | RPS6KA4 | ribosomal<br>protein S6<br>kinase,<br>90kDa,<br>polypeptid<br>e 4 | -1.60689  | Inlier |
| siRNA Disorazole DMSO Run3       | NM_0039<br>42 | RPS6KA4 | ribosomal<br>protein S6<br>kinase,<br>90kDa,<br>polypeptid<br>e 4 | -0.815098 | Inlier |
| siRNA-Temozolomide Run3-<br>DMSO | NM_0039<br>42 | RPS6KA4 | ribosomal<br>protein S6<br>kinase,<br>90kDa,<br>polypeptid<br>e 4 | -0.615744 | Inlier |
| siRNA Disorazole DMSO Run1       | NM_0039<br>42 | RPS6KA4 | ribosomal<br>protein S6<br>kinase,<br>90kDa,<br>polypeptid<br>e 4 | -0.124516 | Inlier |
| siRNA-Temozolomide Run2-<br>DMSO | NM_0039<br>42 | RPS6KA4 | ribosomal<br>protein S6<br>kinase,<br>90kDa,<br>polypeptid<br>e 4 | 0.124515  | Inlier |
| siRNA-Temozolomide Run1-<br>DMSO | NM_0039<br>42 | RPS6KA4 | ribosomal<br>protein S6<br>kinase,<br>90kDa,<br>polypeptid<br>e 4 | 0.552326  | Inlier |
| siRNA-Vinblastine Run1-<br>DMSO  | NM_0039<br>42 | RPS6KA4 | ribosomal<br>protein S6<br>kinase,<br>90kDa,<br>polypeptid<br>e 4 | 0.733256  | Inlier |
| siRNA-Vinblastine Run2-<br>DMSO  | NM_0039<br>42 | RPS6KA4 | ribosomal<br>protein S6<br>kinase,<br>90kDa,<br>polypeptid<br>e 4 | 1.047017  | Inlier |

Identification of Survival Genes in Human Glioblastoma Cells Using siRNA Screening

Nikhil G Thaker, Fang Zhang, Peter R. McDonald, Tong Ying Shun, Michael D Lewen, Ian F. Pollack, and John S. Lazo

Molecular Pharmacology

|                              |               |         |                                                   |           |        |
|------------------------------|---------------|---------|---------------------------------------------------|-----------|--------|
| siRNA-Temozolomide Run3-DMSO | NM_1823<br>98 | RPS6KA5 | ribosomal protein S6 kinase, 90kDa, polypeptide 5 | -1.252841 | Inlier |
| siRNA-Temozolomide Run2-DMSO | NM_1823<br>98 | RPS6KA5 | ribosomal protein S6 kinase, 90kDa, polypeptide 5 | -0.415849 | Inlier |
| siRNA Disorazole DMSO Run3   | NM_1823<br>98 | RPS6KA5 | ribosomal protein S6 kinase, 90kDa, polypeptide 5 | -0.347925 | Inlier |
| siRNA Disorazole DMSO Run2   | NM_1823<br>98 | RPS6KA5 | ribosomal protein S6 kinase, 90kDa, polypeptide 5 | -0.133958 | Inlier |
| siRNA-Temozolomide Run1-DMSO | NM_1823<br>98 | RPS6KA5 | ribosomal protein S6 kinase, 90kDa, polypeptide 5 | 0.133957  | Inlier |
| siRNA-Vinblastine Run1-DMSO  | NM_1823<br>98 | RPS6KA5 | ribosomal protein S6 kinase, 90kDa, polypeptide 5 | 0.933151  | Inlier |
| siRNA-Vinblastine Run2-DMSO  | NM_1823<br>98 | RPS6KA5 | ribosomal protein S6 kinase, 90kDa, polypeptide 5 | 1.06772   | Inlier |
| siRNA Disorazole DMSO Run1   | NM_1823<br>98 | RPS6KA5 | ribosomal protein S6 kinase, 90kDa, polypeptide 5 | 1.14398   | Inlier |

Identification of Survival Genes in Human Glioblastoma Cells Using siRNA Screening  
 Nikhil G Thaker, Fang Zhang, Peter R. McDonald, Tong Ying Shun, Michael D Lewen, Ian F. Pollack, and John S. Lazo

Molecular Pharmacology

| siRNA Treatment              | Gene ID   | Gene Name | Protein Description                               | Log2 Fold Change | Outlier Status |
|------------------------------|-----------|-----------|---------------------------------------------------|------------------|----------------|
| siRNA-Temozolomide Run3-DMSO | NM_014496 | RPS6KA6   | ribosomal protein S6 kinase, 90kDa, polypeptide 6 | -1.137592        | Inlier         |
| siRNA Disorazole DMSO Run2   | NM_014496 | RPS6KA6   | ribosomal protein S6 kinase, 90kDa, polypeptide 6 | -0.82914         | Inlier         |
| siRNA-Temozolomide Run1-DMSO | NM_014496 | RPS6KA6   | ribosomal protein S6 kinase, 90kDa, polypeptide 6 | -0.380877        | Inlier         |
| siRNA-Temozolomide Run2-DMSO | NM_014496 | RPS6KA6   | ribosomal protein S6 kinase, 90kDa, polypeptide 6 | -0.018734        | Inlier         |
| siRNA Disorazole DMSO Run3   | NM_014496 | RPS6KA6   | ribosomal protein S6 kinase, 90kDa, polypeptide 6 | 0.018734         | Inlier         |
| siRNA Disorazole DMSO Run1   | NM_014496 | RPS6KA6   | ribosomal protein S6 kinase, 90kDa, polypeptide 6 | 0.51986          | Inlier         |
| siRNA-Vinblastine Run1-DMSO  | NM_014496 | RPS6KA6   | ribosomal protein S6 kinase, 90kDa, polypeptide 6 | 1.077401         | Inlier         |
| siRNA-Vinblastine Run2-DMSO  | NM_014496 | RPS6KA6   | ribosomal protein S6 kinase, 90kDa, polypeptide 6 | 1.279009         | Inlier         |

Identification of Survival Genes in Human Glioblastoma Cells Using siRNA Screening  
 Nikhil G Thaker, Fang Zhang, Peter R. McDonald, Tong Ying Shun, Michael D Lewen, Ian F. Pollack, and John S. Lazo

Molecular Pharmacology

|                              |           |         |                                                   |           |        |
|------------------------------|-----------|---------|---------------------------------------------------|-----------|--------|
| siRNA-Temozolomide Run3-DMSO | NM_003161 | RPS6KB1 | ribosomal protein S6 kinase, 70kDa, polypeptide 1 | -1.66915  | Inlier |
| siRNA-Temozolomide Run1-DMSO | NM_003161 | RPS6KB1 | ribosomal protein S6 kinase, 70kDa, polypeptide 1 | -1.242839 | Inlier |
| siRNA-Temozolomide Run2-DMSO | NM_003161 | RPS6KB1 | ribosomal protein S6 kinase, 70kDa, polypeptide 1 | -0.959668 | Inlier |
| siRNA Disorazole DMSO Run1   | NM_003161 | RPS6KB1 | ribosomal protein S6 kinase, 70kDa, polypeptide 1 | -0.176761 | Inlier |
| siRNA Disorazole DMSO Run3   | NM_003161 | RPS6KB1 | ribosomal protein S6 kinase, 70kDa, polypeptide 1 | 0.176761  | Inlier |
| siRNA-Vinblastine Run2-DMSO  | NM_003161 | RPS6KB1 | ribosomal protein S6 kinase, 70kDa, polypeptide 1 | 0.507745  | Inlier |
| siRNA-Vinblastine Run1-DMSO  | NM_003161 | RPS6KB1 | ribosomal protein S6 kinase, 70kDa, polypeptide 1 | 0.640177  | Inlier |
| siRNA Disorazole DMSO Run2   | NM_003161 | RPS6KB1 | ribosomal protein S6 kinase, 70kDa, polypeptide 1 | 0.708823  | Inlier |

Identification of Survival Genes in Human Glioblastoma Cells Using siRNA Screening

Nikhil G Thaker, Fang Zhang, Peter R. McDonald, Tong Ying Shun, Michael D Lewen, Ian F. Pollack, and John S. Lazo

Molecular Pharmacology

| siRNA Treatment              | Gene ID   | Gene Name | Protein Description                               | Log Fold Change | Outlier Status |
|------------------------------|-----------|-----------|---------------------------------------------------|-----------------|----------------|
| siRNA-Temozolomide Run3-DMSO | NM_003952 | RPS6KB2   | ribosomal protein S6 kinase, 70kDa, polypeptide 2 | -0.725543       | Inlier         |
| siRNA Disorazole DMSO Run2   | NM_003952 | RPS6KB2   | ribosomal protein S6 kinase, 70kDa, polypeptide 2 | -0.623457       | Inlier         |
| siRNA Disorazole DMSO Run3   | NM_003952 | RPS6KB2   | ribosomal protein S6 kinase, 70kDa, polypeptide 2 | -0.567717       | Inlier         |
| siRNA-Temozolomide Run2-DMSO | NM_003952 | RPS6KB2   | ribosomal protein S6 kinase, 70kDa, polypeptide 2 | -0.05083        | Inlier         |
| siRNA-Temozolomide Run1-DMSO | NM_003952 | RPS6KB2   | ribosomal protein S6 kinase, 70kDa, polypeptide 2 | 0.05083         | Inlier         |
| siRNA Disorazole DMSO Run1   | NM_003952 | RPS6KB2   | ribosomal protein S6 kinase, 70kDa, polypeptide 2 | 1.421631        | Inlier         |
| siRNA-Vinblastine Run1-DMSO  | NM_003952 | RPS6KB2   | ribosomal protein S6 kinase, 70kDa, polypeptide 2 | 1.753751        | Inlier         |
| siRNA-Vinblastine Run2-DMSO  | NM_003952 | RPS6KB2   | ribosomal protein S6 kinase, 70kDa, polypeptide 2 | 1.842233        | Inlier         |

Identification of Survival Genes in Human Glioblastoma Cells Using siRNA Screening

Nikhil G Thaker, Fang Zhang, Peter R. McDonald, Tong Ying Shun, Michael D Lewen, Ian F. Pollack, and John S.

Lazo

Molecular Pharmacology

|                              |               |         |                                                   |           |        |
|------------------------------|---------------|---------|---------------------------------------------------|-----------|--------|
| siRNA Disorazole DMSO Run3   | NM_0124<br>24 | RPS6KC1 | ribosomal protein S6 kinase, 52kDa, polypeptide 1 | -1.866646 | Inlier |
| siRNA Disorazole DMSO Run2   | NM_0124<br>24 | RPS6KC1 | ribosomal protein S6 kinase, 52kDa, polypeptide 1 | -1.524827 | Inlier |
| siRNA-Temozolomide Run3-DMSO | NM_0124<br>24 | RPS6KC1 | ribosomal protein S6 kinase, 52kDa, polypeptide 1 | -0.900297 | Inlier |
| siRNA-Temozolomide Run2-DMSO | NM_0124<br>24 | RPS6KC1 | ribosomal protein S6 kinase, 52kDa, polypeptide 1 | -0.129408 | Inlier |
| siRNA-Temozolomide Run1-DMSO | NM_0124<br>24 | RPS6KC1 | ribosomal protein S6 kinase, 52kDa, polypeptide 1 | 0.129408  | Inlier |
| siRNA Disorazole DMSO Run1   | NM_0124<br>24 | RPS6KC1 | ribosomal protein S6 kinase, 52kDa, polypeptide 1 | 0.318361  | Inlier |
| siRNA-Vinblastine Run1-DMSO  | NM_0124<br>24 | RPS6KC1 | ribosomal protein S6 kinase, 52kDa, polypeptide 1 | 0.668041  | Inlier |
| siRNA-Vinblastine Run2-DMSO  | NM_0124<br>24 | RPS6KC1 | ribosomal protein S6 kinase, 52kDa, polypeptide 1 | 0.680959  | Inlier |
| siRNA-Temozolomide Run3-DMSO | NM_0314<br>64 | RPS6KL1 | ribosomal protein S6 kinase-like 1                | -0.832776 | Inlier |

Identification of Survival Genes in Human Glioblastoma Cells Using siRNA Screening  
 Nikhil G Thaker, Fang Zhang, Peter R. McDonald, Tong Ying Shun, Michael D Lewen, Ian F. Pollack, and John S. Lazo

Molecular Pharmacology

|                              |               |         |   |                                      |           |        |
|------------------------------|---------------|---------|---|--------------------------------------|-----------|--------|
| siRNA Disorazole DMSO Run2   | NM_0314<br>64 | RPS6KL1 | 1 | ribosomal protein S6 kinase-like     | -0.516224 | Inlier |
| siRNA Disorazole DMSO Run3   | NM_0314<br>64 | RPS6KL1 | 1 | ribosomal protein S6 kinase-like     | -0.325449 | Inlier |
| siRNA-Temozolomide Run2-DMSO | NM_0314<br>64 | RPS6KL1 | 1 | ribosomal protein S6 kinase-like     | -0.005975 | Inlier |
| siRNA-Temozolomide Run1-DMSO | NM_0314<br>64 | RPS6KL1 | 1 | ribosomal protein S6 kinase-like     | 0.005975  | Inlier |
| siRNA Disorazole DMSO Run1   | NM_0314<br>64 | RPS6KL1 | 1 | ribosomal protein S6 kinase-like     | 1.298326  | Inlier |
| siRNA-Vinblastine Run1-DMSO  | NM_0314<br>64 | RPS6KL1 | 1 | ribosomal protein S6 kinase-like     | 1.880566  | Inlier |
| siRNA-Vinblastine Run2-DMSO  | NM_0314<br>64 | RPS6KL1 | 1 | ribosomal protein S6 kinase-like     | 1.919255  | Inlier |
| siRNA-Temozolomide Run3-DMSO | NM_0041<br>65 | RRAD    |   | Ras-related associated with diabetes | -2.294024 | Inlier |
| siRNA-Temozolomide Run2-DMSO | NM_0041<br>65 | RRAD    |   | Ras-related associated with diabetes | -0.607255 | Inlier |
| siRNA-Temozolomide Run1-DMSO | NM_0041<br>65 | RRAD    |   | Ras-related associated with diabetes | -0.413254 | Inlier |
| siRNA Disorazole DMSO Run3   | NM_0041<br>65 | RRAD    |   | Ras-related associated with diabetes | -0.095074 | Inlier |



Identification of Survival Genes in Human Glioblastoma Cells Using siRNA Screening  
 Nikhil G Thaker, Fang Zhang, Peter R. McDonald, Tong Ying Shun, Michael D Lewen, Ian F. Pollack, and John S. Lazo

Molecular Pharmacology

|                              |               |       |                                      |           |        |
|------------------------------|---------------|-------|--------------------------------------|-----------|--------|
| siRNA-Vinblastine Run2-DMSO  | NM_0041<br>65 | RRAD  | Ras-related associated with diabetes | 0.095074  | Inlier |
| siRNA Disorazole DMSO Run2   | NM_0041<br>65 | RRAD  | Ras-related associated with diabetes | 0.741745  | Inlier |
| siRNA Disorazole DMSO Run1   | NM_0041<br>65 | RRAD  | Ras-related associated with diabetes | 0.997939  | Inlier |
| siRNA-Vinblastine Run1-DMSO  | NM_0041<br>65 | RRAD  | Ras-related associated with diabetes | 1.659824  | Inlier |
| siRNA-Vinblastine Run2-DMSO  | NM_0065<br>70 | RRAGA | Ras-related GTP binding A            | -1.712132 | Inlier |
| siRNA-Temozolomide Run3-DMSO | NM_0065<br>70 | RRAGA | Ras-related GTP binding A            | -1.692671 | Inlier |
| siRNA Disorazole DMSO Run3   | NM_0065<br>70 | RRAGA | Ras-related GTP binding A            | -0.381037 | Inlier |
| siRNA-Temozolomide Run2-DMSO | NM_0065<br>70 | RRAGA | Ras-related GTP binding A            | -0.295638 | Inlier |
| siRNA Disorazole DMSO Run1   | NM_0065<br>70 | RRAGA | Ras-related GTP binding A            | 0.295638  | Inlier |
| siRNA-Temozolomide Run1-DMSO | NM_0065<br>70 | RRAGA | Ras-related GTP binding A            | 0.372041  | Inlier |
| siRNA-Vinblastine Run1-DMSO  | NM_0065<br>70 | RRAGA | Ras-related GTP binding A            | 0.967963  | Inlier |
| siRNA Disorazole DMSO Run2   | NM_0065<br>70 | RRAGA | Ras-related GTP binding A            | 1.625448  | Inlier |

Identification of Survival Genes in Human Glioblastoma Cells Using siRNA Screening  
 Nikhil G Thaker, Fang Zhang, Peter R. McDonald, Tong Ying Shun, Michael D Lewen, Ian F. Pollack, and John S. Lazo

Molecular Pharmacology

|                              |               |       |                                                        |           |        |
|------------------------------|---------------|-------|--------------------------------------------------------|-----------|--------|
| siRNA-Temozolomide Run3-DMSO | NM_0166<br>56 | RRAGB | Ras-related<br>GTP<br>binding B                        | -1.24603  | Inlier |
| siRNA-Temozolomide Run1-DMSO | NM_0166<br>56 | RRAGB | Ras-related<br>GTP<br>binding B                        | -0.769301 | Inlier |
| siRNA Disorazole DMSO Run3   | NM_0166<br>56 | RRAGB | Ras-related<br>GTP<br>binding B                        | -0.386908 | Inlier |
| siRNA-Temozolomide Run2-DMSO | NM_0166<br>56 | RRAGB | Ras-related<br>GTP<br>binding B                        | -0.249094 | Inlier |
| siRNA-Vinblastine Run2-DMSO  | NM_0166<br>56 | RRAGB | Ras-related<br>GTP<br>binding B                        | 0.249093  | Inlier |
| siRNA Disorazole DMSO Run2   | NM_0166<br>56 | RRAGB | Ras-related<br>GTP<br>binding B                        | 0.579699  | Inlier |
| siRNA-Vinblastine Run1-DMSO  | NM_0166<br>56 | RRAGB | Ras-related<br>GTP<br>binding B                        | 0.968641  | Inlier |
| siRNA Disorazole DMSO Run1   | NM_0166<br>56 | RRAGB | Ras-related<br>GTP<br>binding B                        | 1.026078  | Inlier |
| siRNA-Temozolomide Run3-DMSO | NM_0062<br>70 | RRAS  | related<br>RAS viral<br>(r-ras)<br>oncogene<br>homolog | -2.052036 | Inlier |
| siRNA Disorazole DMSO Run3   | NM_0062<br>70 | RRAS  | related<br>RAS viral<br>(r-ras)<br>oncogene<br>homolog | -1.139481 | Inlier |
| siRNA-Vinblastine Run2-DMSO  | NM_0062<br>70 | RRAS  | related<br>RAS viral<br>(r-ras)<br>oncogene<br>homolog | -0.851668 | Inlier |
| siRNA-Temozolomide Run2-DMSO | NM_0062<br>70 | RRAS  | related<br>RAS viral<br>(r-ras)<br>oncogene<br>homolog | -0.337648 | Inlier |

Identification of Survival Genes in Human Glioblastoma Cells Using siRNA Screening  
 Nikhil G Thaker, Fang Zhang, Peter R. McDonald, Tong Ying Shun, Michael D Lewen, Ian F. Pollack, and John S. Lazo

Molecular Pharmacology

|                                  |               |       |                                                          |           |        |
|----------------------------------|---------------|-------|----------------------------------------------------------|-----------|--------|
| siRNA Disorazole DMSO Run1       | NM_0062<br>70 | RRAS  | related<br>RAS viral<br>(r-ras)<br>oncogene<br>homolog   | 0.337648  | Inlier |
| siRNA-Vinblastine Run1-<br>DMSO  | NM_0062<br>70 | RRAS  | related<br>RAS viral<br>(r-ras)<br>oncogene<br>homolog   | 0.467314  | Inlier |
| siRNA-Temozolomide Run1-<br>DMSO | NM_0062<br>70 | RRAS  | related<br>RAS viral<br>(r-ras)<br>oncogene<br>homolog   | 0.497332  | Inlier |
| siRNA Disorazole DMSO Run2       | NM_0062<br>70 | RRAS  | related<br>RAS viral<br>(r-ras)<br>oncogene<br>homolog   | 1.265643  | Inlier |
| siRNA-Temozolomide Run3-<br>DMSO | NM_0122<br>50 | RRAS2 | related<br>RAS viral<br>(r-ras)<br>oncogene<br>homolog 2 | -1.238133 | Inlier |
| siRNA-Temozolomide Run1-<br>DMSO | NM_0122<br>50 | RRAS2 | related<br>RAS viral<br>(r-ras)<br>oncogene<br>homolog 2 | -0.926682 | Inlier |
| siRNA-Temozolomide Run2-<br>DMSO | NM_0122<br>50 | RRAS2 | related<br>RAS viral<br>(r-ras)<br>oncogene<br>homolog 2 | -0.859354 | Inlier |
| siRNA-Vinblastine Run2-<br>DMSO  | NM_0122<br>50 | RRAS2 | related<br>RAS viral<br>(r-ras)<br>oncogene<br>homolog 2 | -0.05111  | Inlier |
| siRNA Disorazole DMSO Run3       | NM_0122<br>50 | RRAS2 | related<br>RAS viral<br>(r-ras)<br>oncogene<br>homolog 2 | 0.05111   | Inlier |

Identification of Survival Genes in Human Glioblastoma Cells Using siRNA Screening  
 Nikhil G Thaker, Fang Zhang, Peter R. McDonald, Tong Ying Shun, Michael D Lewen, Ian F. Pollack, and John S. Lazo  
 Molecular Pharmacology

|                                  |               |       |                                                                      |           |        |
|----------------------------------|---------------|-------|----------------------------------------------------------------------|-----------|--------|
| siRNA Disorazole DMSO Run1       | NM_0122<br>50 | RRAS2 | related<br>RAS viral<br>(r-ras)<br>oncogene<br>homolog 2             | 0.327502  | Inlier |
| siRNA Disorazole DMSO Run2       | NM_0122<br>50 | RRAS2 | related<br>RAS viral<br>(r-ras)<br>oncogene<br>homolog 2             | 0.57187   | Inlier |
| siRNA-Vinblastine Run1-<br>DMSO  | NM_0122<br>50 | RRAS2 | related<br>RAS viral<br>(r-ras)<br>oncogene<br>homolog 2             | 0.77713   | Inlier |
| siRNA Disorazole DMSO Run1       | NM_0065<br>83 | RRH   | retinal<br>pigment<br>epithelium-<br>derived<br>rhodopsin<br>homolog | -1.838073 | Inlier |
| siRNA-Temozolomide Run3-<br>DMSO | NM_0065<br>83 | RRH   | retinal<br>pigment<br>epithelium-<br>derived<br>rhodopsin<br>homolog | -0.936145 | Inlier |
| siRNA Disorazole DMSO Run2       | NM_0065<br>83 | RRH   | retinal<br>pigment<br>epithelium-<br>derived<br>rhodopsin<br>homolog | -0.409427 | Inlier |
| siRNA-Temozolomide Run2-<br>DMSO | NM_0065<br>83 | RRH   | retinal<br>pigment<br>epithelium-<br>derived<br>rhodopsin<br>homolog | -0.013963 | Inlier |
| siRNA-Temozolomide Run1-<br>DMSO | NM_0065<br>83 | RRH   | retinal<br>pigment<br>epithelium-<br>derived<br>rhodopsin<br>homolog | 0.013963  | Inlier |

Identification of Survival Genes in Human Glioblastoma Cells Using siRNA Screening

Nikhil G Thaker, Fang Zhang, Peter R. McDonald, Tong Ying Shun, Michael D Lewen, Ian F. Pollack, and John S. Lazo

Molecular Pharmacology

|                              |               |      |                                                                                  |           |        |
|------------------------------|---------------|------|----------------------------------------------------------------------------------|-----------|--------|
| siRNA-Vinblastine Run1-DMSO  | NM_0065<br>83 | RRH  | retinal pigment epithelium-derived rhodopsin homolog                             | 0.508406  | Inlier |
| siRNA-Vinblastine Run2-DMSO  | NM_0065<br>83 | RRH  | retinal pigment epithelium-derived rhodopsin homolog                             | 0.840594  | Inlier |
| siRNA Disorazole DMSO Run3   | NM_0065<br>83 | RRH  | retinal pigment epithelium-derived rhodopsin homolog ribonucleotide reductase M1 | 1.864571  | Inlier |
| siRNA-Temozolomide Run3-DMSO | NM_0010<br>33 | RRM1 | polypeptide ribonucleotide reductase M1                                          | -1.466194 | Inlier |
| siRNA-Temozolomide Run2-DMSO | NM_0010<br>33 | RRM1 | polypeptide ribonucleotide reductase M1                                          | -0.947803 | Inlier |
| siRNA-Temozolomide Run1-DMSO | NM_0010<br>33 | RRM1 | polypeptide ribonucleotide reductase M1                                          | -0.401196 | Inlier |
| siRNA-Vinblastine Run2-DMSO  | NM_0010<br>33 | RRM1 | polypeptide ribonucleotide reductase M1                                          | -0.08521  | Inlier |
| siRNA Disorazole DMSO Run3   | NM_0010<br>33 | RRM1 | polypeptide                                                                      | 0.08521   | Inlier |

Identification of Survival Genes in Human Glioblastoma Cells Using siRNA Screening  
 Nikhil G Thaker, Fang Zhang, Peter R. McDonald, Tong Ying Shun, Michael D Lewen, Ian F. Pollack, and John S. Lazo

Molecular Pharmacology

|                                  |               |      |                                                          |           |         |
|----------------------------------|---------------|------|----------------------------------------------------------|-----------|---------|
| siRNA Disorazole DMSO Run1       | NM_0010<br>33 | RRM1 | ribonucleo<br>tide<br>reductase<br>M1<br>polypeptid<br>e | 0.297212  | Inlier  |
| siRNA-Vinblastine Run1-<br>DMSO  | NM_0010<br>33 | RRM1 | ribonucleo<br>tide<br>reductase<br>M1<br>polypeptid<br>e | 6.1939    | Outlier |
| siRNA Disorazole DMSO Run2       | NM_0010<br>33 | RRM1 | ribonucleo<br>tide<br>reductase<br>M1<br>polypeptid<br>e | 6.744544  | Outlier |
| siRNA Disorazole DMSO Run3       | NM_0010<br>34 | RRM2 | ribonucleo<br>tide<br>reductase<br>M2<br>polypeptid<br>e | -0.690309 | Inlier  |
| siRNA Disorazole DMSO Run1       | NM_0010<br>34 | RRM2 | ribonucleo<br>tide<br>reductase<br>M2<br>polypeptid<br>e | -0.658691 | Inlier  |
| siRNA-Temozolomide Run3-<br>DMSO | NM_0010<br>34 | RRM2 | ribonucleo<br>tide<br>reductase<br>M2<br>polypeptid<br>e | -0.172187 | Inlier  |
| siRNA-Vinblastine Run2-<br>DMSO  | NM_0010<br>34 | RRM2 | ribonucleo<br>tide<br>reductase<br>M2<br>polypeptid<br>e | -0.044609 | Inlier  |
| siRNA-Temozolomide Run2-<br>DMSO | NM_0010<br>34 | RRM2 | ribonucleo<br>tide<br>reductase<br>M2<br>polypeptid<br>e | 0.044609  | Inlier  |

Identification of Survival Genes in Human Glioblastoma Cells Using siRNA Screening

Nikhil G Thaker, Fang Zhang, Peter R. McDonald, Tong Ying Shun, Michael D Lewen, Ian F. Pollack, and John S. Lazo

Molecular Pharmacology

|                              |           |       |                                                |           |        |
|------------------------------|-----------|-------|------------------------------------------------|-----------|--------|
| siRNA-Temozolomide Run1-DMSO | NM_001034 | RRM2  | ribonucleotide reductase M2 polypeptide        | 0.848712  | Inlier |
| siRNA-Vinblastine Run1-DMSO  | NM_001034 | RRM2  | ribonucleotide reductase M2 polypeptide        | 1.669733  | Inlier |
| siRNA Disorazole DMSO Run2   | NM_001034 | RRM2  | ribonucleotide reductase M2 polypeptide        | 2.13855   | Inlier |
| siRNA-Temozolomide Run3-DMSO | NM_015713 | RRM2B | ribonucleotide reductase M2 B (TP53 inducible) | -1.302047 | Inlier |
| siRNA-Temozolomide Run2-DMSO | NM_015713 | RRM2B | ribonucleotide reductase M2 B (TP53 inducible) | -0.681275 | Inlier |
| siRNA Disorazole DMSO Run1   | NM_015713 | RRM2B | ribonucleotide reductase M2 B (TP53 inducible) | -0.667724 | Inlier |
| siRNA Disorazole DMSO Run3   | NM_015713 | RRM2B | ribonucleotide reductase M2 B (TP53 inducible) | -0.238167 | Inlier |
| siRNA-Vinblastine Run2-DMSO  | NM_015713 | RRM2B | ribonucleotide reductase M2 B (TP53 inducible) | 0.238167  | Inlier |

Identification of Survival Genes in Human Glioblastoma Cells Using siRNA Screening

Nikhil G Thaker, Fang Zhang, Peter R. McDonald, Tong Ying Shun, Michael D Lewen, Ian F. Pollack, and John S. Lazo

Molecular Pharmacology

|                                  |               |        |                                                                      |                  |
|----------------------------------|---------------|--------|----------------------------------------------------------------------|------------------|
|                                  |               |        | ribonucleo<br>tide<br>reductase<br>M2 B                              |                  |
| siRNA-Temozolomide Run1-<br>DMSO | NM_0157<br>13 | RRM2B  | (TP53<br>inducible)                                                  | 0.65906 Inlier   |
|                                  |               |        | ribonucleo<br>tide<br>reductase<br>M2 B                              |                  |
| siRNA-Vinblastine Run1-<br>DMSO  | NM_0157<br>13 | RRM2B  | (TP53<br>inducible)                                                  | 3.265942 Inlier  |
|                                  |               |        | ribonucleo<br>tide<br>reductase<br>M2 B                              |                  |
| siRNA Disorazole DMSO Run2       | NM_0157<br>13 | RRM2B  | (TP53<br>inducible)                                                  | 3.68769 Outlier  |
| siRNA-Temozolomide Run3-<br>DMSO | NM_0064<br>77 | RRP22  | RRP22                                                                | -0.89503 Inlier  |
|                                  | NM_0064       |        |                                                                      |                  |
| siRNA Disorazole DMSO Run3       | 77            | RRP22  | RRP22                                                                | -0.45397 Inlier  |
| siRNA-Temozolomide Run1-<br>DMSO | NM_0064<br>77 | RRP22  | RRP22                                                                | -0.184757 Inlier |
| siRNA-Vinblastine Run2-<br>DMSO  | NM_0064<br>77 | RRP22  | RRP22                                                                | -0.09638 Inlier  |
| siRNA-Temozolomide Run2-<br>DMSO | NM_0064<br>77 | RRP22  | RRP22                                                                | 0.09638 Inlier   |
|                                  | NM_0064       |        |                                                                      |                  |
| siRNA Disorazole DMSO Run1       | 77            | RRP22  | RRP22                                                                | 1.181951 Inlier  |
| siRNA-Vinblastine Run1-<br>DMSO  | NM_0064<br>77 | RRP22  | RRP22                                                                | 1.704896 Inlier  |
|                                  | NM_0064       |        |                                                                      |                  |
| siRNA Disorazole DMSO Run2       | 77            | RRP22  | RRP22                                                                | 2.570041 Inlier  |
|                                  |               |        | regulatory<br>solute<br>carrier<br>protein,<br>family 1,<br>member 1 |                  |
| siRNA-Temozolomide Run3-<br>DMSO | NM_0065<br>11 | RSC1A1 | member 1                                                             | -1.606226 Inlier |
|                                  |               |        | regulatory<br>solute<br>carrier<br>protein,<br>family 1,<br>member 1 |                  |
| siRNA-Temozolomide Run2-<br>DMSO | NM_0065<br>11 | RSC1A1 | member 1                                                             | -0.636854 Inlier |
|                                  |               |        | regulatory<br>solute<br>carrier<br>protein,<br>family 1,<br>member 1 |                  |
| siRNA Disorazole DMSO Run2       | NM_0065<br>11 | RSC1A1 | member 1                                                             | -0.574823 Inlier |



Identification of Survival Genes in Human Glioblastoma Cells Using siRNA Screening  
 Nikhil G Thaker, Fang Zhang, Peter R. McDonald, Tong Ying Shun, Michael D Lewen, Ian F. Pollack, and John S. Lazo

Molecular Pharmacology

| siRNA Treatment              | Gene ID       | Gene Name | Protein Name                                          | Log2 Fold Change | Outlier Status |
|------------------------------|---------------|-----------|-------------------------------------------------------|------------------|----------------|
| siRNA Disorazole DMSO Run1   | NM_0065<br>11 | RSC1A1    | regulatory solute carrier protein, family 1, member 1 | -0.301091        | Inlier         |
| siRNA Disorazole DMSO Run3   | NM_0065<br>11 | RSC1A1    | regulatory solute carrier protein, family 1, member 1 | 0.301091         | Inlier         |
| siRNA-Temozolomide Run1-DMSO | NM_0065<br>11 | RSC1A1    | regulatory solute carrier protein, family 1, member 1 | 0.712146         | Inlier         |
| siRNA-Vinblastine Run1-DMSO  | NM_0065<br>11 | RSC1A1    | regulatory solute carrier protein, family 1, member 1 | 0.723677         | Inlier         |
| siRNA-Vinblastine Run2-DMSO  | NM_0065<br>11 | RSC1A1    | regulatory solute carrier protein, family 1, member 1 | 1.002731         | Inlier         |
| siRNA-Temozolomide Run3-DMSO | NM_0037<br>29 | RTCD1     | RNA terminal phosphate cyclase domain 1               | -0.995745        | Inlier         |
| siRNA-Temozolomide Run2-DMSO | NM_0037<br>29 | RTCD1     | RNA terminal phosphate cyclase domain 1               | -0.808689        | Inlier         |
| siRNA Disorazole DMSO Run3   | NM_0037<br>29 | RTCD1     | RNA terminal phosphate cyclase domain 1               | -0.42886         | Inlier         |
| siRNA-Vinblastine Run2-DMSO  | NM_0037<br>29 | RTCD1     | RNA terminal phosphate cyclase domain 1               | -0.159475        | Inlier         |

Identification of Survival Genes in Human Glioblastoma Cells Using siRNA Screening  
 Nikhil G Thaker, Fang Zhang, Peter R. McDonald, Tong Ying Shun, Michael D Lewen, Ian F. Pollack, and John S. Lazo

Molecular Pharmacology

| siRNA Treatment              | Gene ID   | Gene Name | Protein Name                            | Value     | Outlier Status |
|------------------------------|-----------|-----------|-----------------------------------------|-----------|----------------|
| siRNA-Temozolomide Run1-DMSO | NM_003729 | RTCD1     | RNA terminal phosphate cyclase domain 1 | 0.159475  | Inlier         |
| siRNA Disorazole DMSO Run1   | NM_003729 | RTCD1     | RNA terminal phosphate cyclase domain 1 | 0.540311  | Inlier         |
| siRNA Disorazole DMSO Run2   | NM_003729 | RTCD1     | RNA terminal phosphate cyclase domain 1 | 1.342106  | Inlier         |
| siRNA-Vinblastine Run1-DMSO  | NM_003729 | RTCD1     | RNA terminal phosphate cyclase domain 1 | 1.620661  | Inlier         |
| siRNA-Temozolomide Run1-DMSO | NM_032730 | RTN4IP1   | reticulon 4 interacting protein 1       | -0.923372 | Inlier         |
| siRNA-Temozolomide Run2-DMSO | NM_032730 | RTN4IP1   | reticulon 4 interacting protein 1       | -0.853422 | Inlier         |
| siRNA-Temozolomide Run3-DMSO | NM_032730 | RTN4IP1   | reticulon 4 interacting protein 1       | -0.495578 | Inlier         |
| siRNA Disorazole DMSO Run1   | NM_032730 | RTN4IP1   | reticulon 4 interacting protein 1       | -0.040991 | Inlier         |
| siRNA-Vinblastine Run2-DMSO  | NM_032730 | RTN4IP1   | reticulon 4 interacting protein 1       | 0.040991  | Inlier         |
| siRNA Disorazole DMSO Run3   | NM_032730 | RTN4IP1   | reticulon 4 interacting protein 1       | 0.309698  | Inlier         |

Identification of Survival Genes in Human Glioblastoma Cells Using siRNA Screening  
 Nikhil G Thaker, Fang Zhang, Peter R. McDonald, Tong Ying Shun, Michael D Lewen, Ian F. Pollack, and John S. Lazo  
 Molecular Pharmacology

|                              |               |         |                                         |           |        |
|------------------------------|---------------|---------|-----------------------------------------|-----------|--------|
| siRNA-Vinblastine Run1-DMSO  | NM_0327<br>30 | RTN4IP1 | reticulon 4<br>interacting<br>protein 1 | 1.842926  | Inlier |
| siRNA Disorazole DMSO Run2   | NM_0327<br>30 | RTN4IP1 | reticulon 4<br>interacting<br>protein 1 | 2.299274  | Inlier |
| siRNA-Vinblastine Run2-DMSO  | NM_0230<br>04 | RTN4R   | reticulon 4<br>receptor                 | -1.541361 | Inlier |
| siRNA-Temozolomide Run2-DMSO | NM_0230<br>04 | RTN4R   | reticulon 4<br>receptor                 | -0.534895 | Inlier |
| siRNA Disorazole DMSO Run3   | NM_0230<br>04 | RTN4R   | reticulon 4<br>receptor                 | -0.455533 | Inlier |
| siRNA Disorazole DMSO Run1   | NM_0230<br>04 | RTN4R   | reticulon 4<br>receptor                 | -0.223498 | Inlier |
| siRNA-Temozolomide Run3-DMSO | NM_0230<br>04 | RTN4R   | reticulon 4<br>receptor                 | 0.223498  | Inlier |
| siRNA-Temozolomide Run1-DMSO | NM_0230<br>04 | RTN4R   | reticulon 4<br>receptor                 | 0.814105  | Inlier |
| siRNA-Vinblastine Run1-DMSO  | NM_0230<br>04 | RTN4R   | reticulon 4<br>receptor                 | 0.961707  | Inlier |
| siRNA Disorazole DMSO Run2   | NM_0230<br>04 | RTN4R   | reticulon 4<br>receptor                 | 0.971763  | Inlier |
| siRNA-Temozolomide Run3-DMSO | NM_1785<br>68 | RTN4RL1 | reticulon 4<br>receptor-<br>like 1      | -0.869155 | Inlier |
| siRNA-Temozolomide Run2-DMSO | NM_1785<br>68 | RTN4RL1 | reticulon 4<br>receptor-<br>like 1      | -0.714117 | Inlier |
| siRNA-Vinblastine Run2-DMSO  | NM_1785<br>68 | RTN4RL1 | reticulon 4<br>receptor-<br>like 1      | -0.456186 | Inlier |
| siRNA Disorazole DMSO Run3   | NM_1785<br>68 | RTN4RL1 | reticulon 4<br>receptor-<br>like 1      | -0.064866 | Inlier |
| siRNA-Temozolomide Run1-DMSO | NM_1785<br>68 | RTN4RL1 | reticulon 4<br>receptor-<br>like 1      | 0.064866  | Inlier |
| siRNA Disorazole DMSO Run1   | NM_1785<br>68 | RTN4RL1 | reticulon 4<br>receptor-<br>like 1      | 0.634883  | Inlier |
| siRNA Disorazole DMSO Run2   | NM_1785<br>68 | RTN4RL1 | reticulon 4<br>receptor-<br>like 1      | 1.968232  | Inlier |
| siRNA-Vinblastine Run1-DMSO  | NM_1785<br>68 | RTN4RL1 | reticulon 4<br>receptor-<br>like 1      | 2.112536  | Inlier |

Identification of Survival Genes in Human Glioblastoma Cells Using siRNA Screening  
 Nikhil G Thaker, Fang Zhang, Peter R. McDonald, Tong Ying Shun, Michael D Lewen, Ian F. Pollack, and John S. Lazo

|                                                           |               |         |                                    |           |         |
|-----------------------------------------------------------|---------------|---------|------------------------------------|-----------|---------|
| Molecular Pharmacology<br>siRNA-Vinblastine Run2-<br>DMSO | NM_1785<br>70 | RTN4RL2 | reticulon 4<br>receptor-<br>like 2 | -2.289759 | Inlier  |
| siRNA Disorazole DMSO Run3                                | NM_1785<br>70 | RTN4RL2 | reticulon 4<br>receptor-<br>like 2 | -0.635347 | Inlier  |
| siRNA-Temozolomide Run2-<br>DMSO                          | NM_1785<br>70 | RTN4RL2 | reticulon 4<br>receptor-<br>like 2 | -0.389293 | Inlier  |
| siRNA Disorazole DMSO Run1                                | NM_1785<br>70 | RTN4RL2 | reticulon 4<br>receptor-<br>like 2 | -0.204502 | Inlier  |
| siRNA-Temozolomide Run3-<br>DMSO                          | NM_1785<br>70 | RTN4RL2 | reticulon 4<br>receptor-<br>like 2 | 0.204502  | Inlier  |
| siRNA-Temozolomide Run1-<br>DMSO                          | NM_1785<br>70 | RTN4RL2 | reticulon 4<br>receptor-<br>like 2 | 0.713653  | Inlier  |
| siRNA Disorazole DMSO Run2                                | NM_1785<br>70 | RTN4RL2 | reticulon 4<br>receptor-<br>like 2 | 0.802962  | Inlier  |
| siRNA-Vinblastine Run1-<br>DMSO                           | NM_1785<br>70 | RTN4RL2 | reticulon 4<br>receptor-<br>like 2 | 0.869416  | Inlier  |
| siRNA-Temozolomide Run3-<br>DMSO                          | NM_0037<br>07 | RUVBL1  | RuvB-like<br>1 (E. coli)           | -1.175159 | Inlier  |
| siRNA-Temozolomide Run2-<br>DMSO                          | NM_0037<br>07 | RUVBL1  | RuvB-like<br>1 (E. coli)           | -0.708424 | Inlier  |
| siRNA-Vinblastine Run2-<br>DMSO                           | NM_0037<br>07 | RUVBL1  | RuvB-like<br>1 (E. coli)           | -0.379166 | Inlier  |
| siRNA Disorazole DMSO Run3                                | NM_0037<br>07 | RUVBL1  | RuvB-like<br>1 (E. coli)           | -0.143814 | Inlier  |
| siRNA Disorazole DMSO Run1                                | NM_0037<br>07 | RUVBL1  | RuvB-like<br>1 (E. coli)           | 0.143814  | Inlier  |
| siRNA-Temozolomide Run1-<br>DMSO                          | NM_0037<br>07 | RUVBL1  | RuvB-like<br>1 (E. coli)           | 0.640576  | Inlier  |
| siRNA-Vinblastine Run1-<br>DMSO                           | NM_0037<br>07 | RUVBL1  | RuvB-like<br>1 (E. coli)           | 2.612702  | Inlier  |
| siRNA Disorazole DMSO Run2                                | NM_0037<br>07 | RUVBL1  | RuvB-like<br>1 (E. coli)           | 3.70381   | Outlier |
| siRNA-Temozolomide Run3-<br>DMSO                          | NM_0029<br>57 | RXRA    | retinoid X<br>receptor,<br>alpha   | -1.680881 | Inlier  |
| siRNA Disorazole DMSO Run1                                | NM_0029<br>57 | RXRA    | retinoid X<br>receptor,<br>alpha   | -0.862727 | Inlier  |
| siRNA Disorazole DMSO Run2                                | NM_0029<br>57 | RXRA    | retinoid X<br>receptor,<br>alpha   | -0.486273 | Inlier  |
| siRNA-Temozolomide Run2-<br>DMSO                          | NM_0029<br>57 | RXRA    | retinoid X<br>receptor,<br>alpha   | -0.128218 | Inlier  |

Identification of Survival Genes in Human Glioblastoma Cells Using siRNA Screening  
 Nikhil G Thaker, Fang Zhang, Peter R. McDonald, Tong Ying Shun, Michael D Lewen, Ian F. Pollack, and John S. Lazo

| Molecular Pharmacology       |                  |      |       | retinoid X receptor, |        |
|------------------------------|------------------|------|-------|----------------------|--------|
| siRNA-Temozolomide Run1-DMSO | NM_0029<br>57    | RXRA | alpha | 0.128219             | Inlier |
| siRNA-Vinblastine Run1-DMSO  | NM_0029<br>57    | RXRA | alpha | 0.204303             | Inlier |
| siRNA-Vinblastine Run2-DMSO  | NM_0029<br>57    | RXRA | alpha | 1.108501             | Inlier |
| siRNA Disorazole DMSO Run3   | NM_0029<br>57    | RXRA | alpha | 2.656911             | Inlier |
| siRNA Disorazole DMSO Run2   | NM_0219<br>76    | RXRB | beta  | -1.045464            | Inlier |
| siRNA-Temozolomide Run2-DMSO | NM_0219<br>76    | RXRB | beta  | -0.7018              | Inlier |
| siRNA-Temozolomide Run3-DMSO | NM_0219<br>76    | RXRB | beta  | -0.564798            | Inlier |
| siRNA-Temozolomide Run1-DMSO | NM_0219<br>76    | RXRB | beta  | -0.066647            | Inlier |
| siRNA-Vinblastine Run1-DMSO  | NM_0219<br>76    | RXRB | beta  | 0.066647             | Inlier |
| siRNA-Vinblastine Run2-DMSO  | NM_0219<br>76    | RXRB | beta  | 0.667542             | Inlier |
| siRNA Disorazole DMSO Run1   | NM_0219<br>76    | RXRB | beta  | 0.681458             | Inlier |
| siRNA Disorazole DMSO Run3   | NM_0219<br>76    | RXRB | beta  | 1.598062             | Inlier |
| siRNA-Temozolomide Run3-DMSO | NM_0010<br>09598 | RXRG | gamma | -1.343099            | Inlier |
| siRNA-Temozolomide Run2-DMSO | NM_0010<br>09598 | RXRG | gamma | -1.022999            | Inlier |
| siRNA Disorazole DMSO Run2   | NM_0010<br>09598 | RXRG | gamma | -0.705093            | Inlier |
| siRNA-Temozolomide Run1-DMSO | NM_0010<br>09598 | RXRG | gamma | -0.500493            | Inlier |
| siRNA-Vinblastine Run1-DMSO  | NM_0010<br>09598 | RXRG | gamma | 0.500493             | Inlier |

Identification of Survival Genes in Human Glioblastoma Cells Using siRNA Screening  
 Nikhil G Thaker, Fang Zhang, Peter R. McDonald, Tong Ying Shun, Michael D Lewen, Ian F. Pollack, and John S. Lazo

Molecular Pharmacology

| siRNA Treatment              | Gene ID      | Gene Name | Protein Name                      | Score     | Category |
|------------------------------|--------------|-----------|-----------------------------------|-----------|----------|
| siRNA Disorazole DMSO Run1   | NM_001009598 | RXRG      | retinoid X receptor, gamma        | 0.516173  | Inlier   |
| siRNA-Vinblastine Run2-DMSO  | NM_001009598 | RXRG      | retinoid X receptor, gamma        | 0.643907  | Inlier   |
| siRNA Disorazole DMSO Run3   | NM_001009598 | RXRG      | retinoid X receptor, gamma        | 0.712077  | Inlier   |
| siRNA Disorazole DMSO Run2   | NM_002958    | RYK       | tyrosine kinase RYK receptor-like | -0.714971 | Inlier   |
| siRNA-Temozolomide Run3-DMSO | NM_002958    | RYK       | tyrosine kinase RYK receptor-like | -0.634029 | Inlier   |
| siRNA-Temozolomide Run2-DMSO | NM_002958    | RYK       | tyrosine kinase RYK receptor-like | -0.460221 | Inlier   |
| siRNA-Temozolomide Run1-DMSO | NM_002958    | RYK       | tyrosine kinase RYK receptor-like | -0.410978 | Inlier   |
| siRNA Disorazole DMSO Run3   | NM_002958    | RYK       | tyrosine kinase RYK receptor-like | 0.410978  | Inlier   |
| siRNA-Vinblastine Run1-DMSO  | NM_002958    | RYK       | tyrosine kinase RYK receptor-like | 5.475999  | Outlier  |
| siRNA-Vinblastine Run2-DMSO  | NM_002958    | RYK       | tyrosine kinase RYK receptor-like | 5.647406  | Outlier  |
| siRNA Disorazole DMSO Run1   | NM_002958    | RYK       | tyrosine kinase RYK receptor-like | 6.123346  | Outlier  |
| siRNA Disorazole DMSO Run2   | NM_000540    | RYR1      | ryanodine receptor 1 (skeletal)   | -1.496869 | Inlier   |

Identification of Survival Genes in Human Glioblastoma Cells Using siRNA Screening  
 Nikhil G Thaker, Fang Zhang, Peter R. McDonald, Tong Ying Shun, Michael D Lewen, Ian F. Pollack, and John S. Lazo

| Molecular Pharmacology       |               |      |                                 |           |        |
|------------------------------|---------------|------|---------------------------------|-----------|--------|
| siRNA-Temozolomide Run2-DMSO | NM_0005<br>40 | RYR1 | ryanodine receptor 1 (skeletal) | -0.79946  | Inlier |
| siRNA-Temozolomide Run3-DMSO | NM_0005<br>40 | RYR1 | ryanodine receptor 1 (skeletal) | -0.667929 | Inlier |
| siRNA Disorazole DMSO Run3   | NM_0005<br>40 | RYR1 | ryanodine receptor 1 (skeletal) | -0.290968 | Inlier |
| siRNA-Vinblastine Run1-DMSO  | NM_0005<br>40 | RYR1 | ryanodine receptor 1 (skeletal) | 0.290968  | Inlier |
| siRNA Disorazole DMSO Run1   | NM_0005<br>40 | RYR1 | ryanodine receptor 1 (skeletal) | 0.631418  | Inlier |
| siRNA-Vinblastine Run2-DMSO  | NM_0005<br>40 | RYR1 | ryanodine receptor 1 (skeletal) | 0.681071  | Inlier |
| siRNA-Temozolomide Run1-DMSO | NM_0005<br>40 | RYR1 | ryanodine receptor 1 (skeletal) | 0.890559  | Inlier |
| siRNA-Temozolomide Run2-DMSO | NM_0010<br>35 | RYR2 | ryanodine receptor 2 (cardiac)  | -2.584963 | Inlier |
| siRNA-Temozolomide Run1-DMSO | NM_0010<br>35 | RYR2 | ryanodine receptor 2 (cardiac)  | -0.912772 | Inlier |
| siRNA Disorazole DMSO Run3   | NM_0010<br>35 | RYR2 | ryanodine receptor 2 (cardiac)  | -0.600296 | Inlier |
| siRNA-Vinblastine Run1-DMSO  | NM_0010<br>35 | RYR2 | ryanodine receptor 2 (cardiac)  | -0.091144 | Inlier |
| siRNA-Temozolomide Run3-DMSO | NM_0010<br>35 | RYR2 | ryanodine receptor 2 (cardiac)  | 0.091144  | Inlier |
| siRNA Disorazole DMSO Run2   | NM_0010<br>35 | RYR2 | ryanodine receptor 2 (cardiac)  | 0.233745  | Inlier |
| siRNA Disorazole DMSO Run1   | NM_0010<br>35 | RYR2 | ryanodine receptor 2 (cardiac)  | 0.748704  | Inlier |
| siRNA-Vinblastine Run2-DMSO  | NM_0010<br>35 | RYR2 | ryanodine receptor 2 (cardiac)  | 1.321888  | Inlier |
| siRNA-Temozolomide Run2-DMSO | NM_0010<br>36 | RYR3 | ryanodine receptor 3            | -0.973667 | Inlier |
| siRNA-Temozolomide Run3-DMSO | NM_0010<br>36 | RYR3 | ryanodine receptor 3            | -0.400357 | Inlier |
| siRNA-Temozolomide Run1-DMSO | NM_0010<br>36 | RYR3 | ryanodine receptor 3            | -0.263362 | Inlier |

Identification of Survival Genes in Human Glioblastoma Cells Using siRNA Screening  
 Nikhil G Thaker, Fang Zhang, Peter R. McDonald, Tong Ying Shun, Michael D Lewen, Ian F. Pollack, and John S. Lazo

|                                  |               |        |                                     |           |        |
|----------------------------------|---------------|--------|-------------------------------------|-----------|--------|
| siRNA-Vinblastine Run2-<br>DMSO  | NM_0010<br>36 | RYR3   | ryanodine<br>receptor 3             | -0.033391 | Inlier |
| siRNA Disorazole DMSO Run1       | NM_0010<br>36 | RYR3   | ryanodine<br>receptor 3             | 0.033391  | Inlier |
| siRNA-Vinblastine Run1-<br>DMSO  | NM_0010<br>36 | RYR3   | ryanodine<br>receptor 3             | 0.948643  | Inlier |
| siRNA Disorazole DMSO Run3       | NM_0010<br>36 | RYR3   | ryanodine<br>receptor 3             | 1.068443  | Inlier |
| siRNA Disorazole DMSO Run2       | NM_0010<br>36 | RYR3   | ryanodine<br>receptor 3             | 1.948294  | Inlier |
| siRNA Disorazole DMSO Run3       | NM_0184<br>17 | SAC    | SAC                                 | -0.766404 | Inlier |
| siRNA-Temozolomide Run3-<br>DMSO | NM_0184<br>17 | SAC    | SAC                                 | -0.670383 | Inlier |
| siRNA-Temozolomide Run2-<br>DMSO | NM_0184<br>17 | SAC    | SAC                                 | -0.296798 | Inlier |
| siRNA-Vinblastine Run2-<br>DMSO  | NM_0184<br>17 | SAC    | SAC                                 | -0.281374 | Inlier |
| siRNA Disorazole DMSO Run1       | NM_0184<br>17 | SAC    | SAC                                 | 0.281374  | Inlier |
| siRNA-Temozolomide Run1-<br>DMSO | NM_0184<br>17 | SAC    | SAC                                 | 0.678617  | Inlier |
| siRNA Disorazole DMSO Run2       | NM_0184<br>17 | SAC    | SAC                                 | 1.574396  | Inlier |
| siRNA-Vinblastine Run1-<br>DMSO  | NM_0184<br>17 | SAC    | SAC                                 | 1.761901  | Inlier |
| siRNA-Temozolomide Run3-<br>DMSO | NM_0165<br>68 | SALPR  | relaxin 3<br>receptor 1             | -1.306138 | Inlier |
| siRNA Disorazole DMSO Run3       | NM_0165<br>68 | SALPR  | relaxin 3<br>receptor 1             | -0.971744 | Inlier |
| siRNA Disorazole DMSO Run2       | NM_0165<br>68 | SALPR  | relaxin 3<br>receptor 1             | -0.841827 | Inlier |
| siRNA Disorazole DMSO Run1       | NM_0165<br>68 | SALPR  | relaxin 3<br>receptor 1             | -0.00405  | Inlier |
| siRNA-Temozolomide Run1-<br>DMSO | NM_0165<br>68 | SALPR  | relaxin 3<br>receptor 1             | 0.00405   | Inlier |
| siRNA-Temozolomide Run2-<br>DMSO | NM_0165<br>68 | SALPR  | relaxin 3<br>receptor 1             | 0.08762   | Inlier |
| siRNA-Vinblastine Run2-<br>DMSO  | NM_0165<br>68 | SALPR  | relaxin 3<br>receptor 1             | 0.643395  | Inlier |
| siRNA-Vinblastine Run1-<br>DMSO  | NM_0165<br>68 | SALPR  | relaxin 3<br>receptor 1             | 0.705605  | Inlier |
| siRNA-Temozolomide Run3-<br>DMSO | NM_0154<br>74 | SAMHD1 | SAM<br>domain<br>and HD<br>domain 1 | -0.878603 | Inlier |
| siRNA-Temozolomide Run2-<br>DMSO | NM_0154<br>74 | SAMHD1 | SAM<br>domain<br>and HD<br>domain 1 | -0.699413 | Inlier |



Identification of Survival Genes in Human Glioblastoma Cells Using siRNA Screening  
 Nikhil G Thaker, Fang Zhang, Peter R. McDonald, Tong Ying Shun, Michael D Lewen, Ian F. Pollack, and John S. Lazo

Molecular Pharmacology

|                              |               |        |                            |           |        |
|------------------------------|---------------|--------|----------------------------|-----------|--------|
| siRNA-Temozolomide Run1-DMSO | NM_0154<br>74 | SAMHD1 | SAM domain and HD domain 1 | -0.268478 | Inlier |
| siRNA-Vinblastine Run2-DMSO  | NM_0154<br>74 | SAMHD1 | SAM domain and HD domain 1 | -0.057481 | Inlier |
| siRNA Disorazole DMSO Run3   | NM_0154<br>74 | SAMHD1 | SAM domain and HD domain 1 | 0.057481  | Inlier |
| siRNA Disorazole DMSO Run1   | NM_0154<br>74 | SAMHD1 | SAM domain and HD domain 1 | 0.649587  | Inlier |
| siRNA Disorazole DMSO Run2   | NM_0154<br>74 | SAMHD1 | SAM domain and HD domain 1 | 1.235221  | Inlier |
| siRNA-Vinblastine Run1-DMSO  | NM_0154<br>74 | SAMHD1 | SAM domain and HD domain 1 | 1.498822  | Inlier |
| siRNA-Temozolomide Run3-DMSO | NM_0071<br>01 | SARDH  | sarcosine dehydrogenase    | -1.87554  | Inlier |
| siRNA-Temozolomide Run1-DMSO | NM_0071<br>01 | SARDH  | sarcosine dehydrogenase    | -1.544084 | Inlier |
| siRNA Disorazole DMSO Run1   | NM_0071<br>01 | SARDH  | sarcosine dehydrogenase    | -0.895196 | Inlier |
| siRNA Disorazole DMSO Run3   | NM_0071<br>01 | SARDH  | sarcosine dehydrogenase    | -0.034883 | Inlier |
| siRNA-Temozolomide Run2-DMSO | NM_0071<br>01 | SARDH  | sarcosine dehydrogenase    | 0.034883  | Inlier |
| siRNA-Vinblastine Run1-DMSO  | NM_0071<br>01 | SARDH  | sarcosine dehydrogenase    | 0.293104  | Inlier |
| siRNA Disorazole DMSO Run2   | NM_0071<br>01 | SARDH  | sarcosine dehydrogenase    | 0.453804  | Inlier |
| siRNA-Vinblastine Run2-DMSO  | NM_0071<br>01 | SARDH  | sarcosine dehydrogenase    | 0.920899  | Inlier |
| siRNA-Temozolomide Run2-DMSO | NM_0065<br>13 | SARS   | seryl-tRNA synthetase      | -2.169876 | Inlier |

Identification of Survival Genes in Human Glioblastoma Cells Using siRNA Screening  
 Nikhil G Thaker, Fang Zhang, Peter R. McDonald, Tong Ying Shun, Michael D Lewen, Ian F. Pollack, and John S. Lazo  
 Molecular Pharmacology

|                                  |               |       |                               |           |         |
|----------------------------------|---------------|-------|-------------------------------|-----------|---------|
| siRNA Disorazole DMSO Run1       | NM_0065<br>13 | SARS  | seryl-tRNA<br>synthetase      | -0.940856 | Inlier  |
| siRNA-Vinblastine Run2-<br>DMSO  | NM_0065<br>13 | SARS  | seryl-tRNA<br>synthetase      | -0.408144 | Inlier  |
| siRNA-Temozolomide Run1-<br>DMSO | NM_0065<br>13 | SARS  | seryl-tRNA<br>synthetase      | -0.097796 | Inlier  |
| siRNA-Temozolomide Run3-<br>DMSO | NM_0065<br>13 | SARS  | seryl-tRNA<br>synthetase      | 0.097796  | Inlier  |
| siRNA Disorazole DMSO Run3       | NM_0065<br>13 | SARS  | seryl-tRNA<br>synthetase      | 0.40801   | Inlier  |
| siRNA Disorazole DMSO Run2       | NM_0065<br>13 | SARS  | seryl-tRNA<br>synthetase      | 3.564731  | Outlier |
| siRNA-Vinblastine Run1-<br>DMSO  | NM_0065<br>13 | SARS  | seryl-tRNA<br>synthetase      | 4.253556  | Outlier |
| siRNA Disorazole DMSO Run1       | NM_0178<br>27 | SARS2 | seryl-tRNA<br>synthetase<br>2 | -1.932366 | Inlier  |
| siRNA-Vinblastine Run2-<br>DMSO  | NM_0178<br>27 | SARS2 | seryl-tRNA<br>synthetase<br>2 | -1.70902  | Inlier  |
| siRNA Disorazole DMSO Run3       | NM_0178<br>27 | SARS2 | seryl-tRNA<br>synthetase<br>2 | -0.873991 | Inlier  |
| siRNA-Temozolomide Run1-<br>DMSO | NM_0178<br>27 | SARS2 | seryl-tRNA<br>synthetase<br>2 | -0.113398 | Inlier  |
| siRNA Disorazole DMSO Run2       | NM_0178<br>27 | SARS2 | seryl-tRNA<br>synthetase<br>2 | 0.113397  | Inlier  |
| siRNA-Vinblastine Run1-<br>DMSO  | NM_0178<br>27 | SARS2 | seryl-tRNA<br>synthetase<br>2 | 0.19741   | Inlier  |

Identification of Survival Genes in Human Glioblastoma Cells Using siRNA Screening  
 Nikhil G Thaker, Fang Zhang, Peter R. McDonald, Tong Ying Shun, Michael D Lewen, Ian F. Pollack, and John S. Lazo

Molecular Pharmacology

|                              |               |       |                                            |           |        |
|------------------------------|---------------|-------|--------------------------------------------|-----------|--------|
| siRNA-Temozolomide Run2-DMSO | NM_0178<br>27 | SARS2 | seryl-tRNA synthetase<br>2                 | 0.475008  | Inlier |
| siRNA-Temozolomide Run3-DMSO | NM_0178<br>27 | SARS2 | seryl-tRNA synthetase<br>2                 | 1.016154  | Inlier |
| siRNA Disorazole DMSO Run3   | NM_0029<br>70 | SAT   | spermidin e/spermin e N1-acetyltransferase | -0.894625 | Inlier |
| siRNA-Temozolomide Run2-DMSO | NM_0029<br>70 | SAT   | spermidin e/spermin e N1-acetyltransferase | -0.584179 | Inlier |
| siRNA-Temozolomide Run3-DMSO | NM_0029<br>70 | SAT   | spermidin e/spermin e N1-acetyltransferase | -0.553954 | Inlier |
| siRNA Disorazole DMSO Run1   | NM_0029<br>70 | SAT   | spermidin e/spermin e N1-acetyltransferase | -0.060361 | Inlier |
| siRNA-Vinblastine Run2-DMSO  | NM_0029<br>70 | SAT   | spermidin e/spermin e N1-acetyltransferase | 0.06036   | Inlier |
| siRNA-Temozolomide Run1-DMSO | NM_0029<br>70 | SAT   | spermidin e/spermin e N1-acetyltransferase | 0.764821  | Inlier |
| siRNA-Vinblastine Run1-DMSO  | NM_0029<br>70 | SAT   | spermidin e/spermin e N1-acetyltransferase | 2.136807  | Inlier |
| siRNA Disorazole DMSO Run2   | NM_0029<br>70 | SAT   | spermidin e/spermin e N1-acetyltransferase | 2.345229  | Inlier |

Identification of Survival Genes in Human Glioblastoma Cells Using siRNA Screening

Nikhil G Thaker, Fang Zhang, Peter R. McDonald, Tong Ying Shun, Michael D Lewen, Ian F. Pollack, and John S. Lazo

Molecular Pharmacology

|                              |               |      |                                                            |           |        |
|------------------------------|---------------|------|------------------------------------------------------------|-----------|--------|
| siRNA-Temozolomide Run3-DMSO | NM_1334<br>91 | SAT2 | spermidin<br>e/spermin<br>e N1-<br>acetyltrans<br>ferase 2 | -2.615388 | Inlier |
| siRNA-Temozolomide Run2-DMSO | NM_1334<br>91 | SAT2 | spermidin<br>e/spermin<br>e N1-<br>acetyltrans<br>ferase 2 | -2.25101  | Inlier |
| siRNA Disorazole DMSO Run3   | NM_1334<br>91 | SAT2 | spermidin<br>e/spermin<br>e N1-<br>acetyltrans<br>ferase 2 | -0.395238 | Inlier |
| siRNA-Vinblastine Run2-DMSO  | NM_1334<br>91 | SAT2 | spermidin<br>e/spermin<br>e N1-<br>acetyltrans<br>ferase 2 | -0.020311 | Inlier |
| siRNA-Vinblastine Run1-DMSO  | NM_1334<br>91 | SAT2 | spermidin<br>e/spermin<br>e N1-<br>acetyltrans<br>ferase 2 | 0.020312  | Inlier |
| siRNA-Temozolomide Run1-DMSO | NM_1334<br>91 | SAT2 | spermidin<br>e/spermin<br>e N1-<br>acetyltrans<br>ferase 2 | 0.06385   | Inlier |
| siRNA Disorazole DMSO Run1   | NM_1334<br>91 | SAT2 | spermidin<br>e/spermin<br>e N1-<br>acetyltrans<br>ferase 2 | 0.953762  | Inlier |
| siRNA Disorazole DMSO Run2   | NM_1334<br>91 | SAT2 | SET                                                        | 1.665406  | Inlier |
| siRNA-Temozolomide Run3-DMSO | NM_0029<br>72 | SBF1 | binding<br>factor 1                                        | -0.989073 | Inlier |
| siRNA-Temozolomide Run2-DMSO | NM_0029<br>72 | SBF1 | SET<br>binding<br>factor 1                                 | -0.927724 | Inlier |
| siRNA Disorazole DMSO Run1   | NM_0029<br>72 | SBF1 | SET<br>binding<br>factor 1                                 | -0.240577 | Inlier |
| siRNA-Temozolomide Run1-DMSO | NM_0029<br>72 | SBF1 | SET<br>binding<br>factor 1                                 | -0.071017 | Inlier |

Identification of Survival Genes in Human Glioblastoma Cells Using siRNA Screening  
 Nikhil G Thaker, Fang Zhang, Peter R. McDonald, Tong Ying Shun, Michael D Lewen, Ian F. Pollack, and John S. Lazo

Molecular Pharmacology

| siRNA Treatment              | Gene ID       | Gene Name | Gene Description              | Value     | Outlier Status |
|------------------------------|---------------|-----------|-------------------------------|-----------|----------------|
| siRNA Disorazole DMSO Run2   | NM_0029<br>72 | SBF1      | SET binding factor 1          | 0.071018  | Inlier         |
| siRNA Disorazole DMSO Run3   | NM_0029<br>72 | SBF1      | SET binding factor 1          | 0.421276  | Inlier         |
| siRNA-Vinblastine Run1-DMSO  | NM_0029<br>72 | SBF1      | SET binding factor 1          | 1.462026  | Inlier         |
| siRNA-Vinblastine Run2-DMSO  | NM_0029<br>72 | SBF1      | SET binding factor 1          | 1.515992  | Inlier         |
| siRNA-Temozolomide Run3-DMSO | NM_0067<br>45 | SC4MOL    | sterol-C4-methyl oxidase-like | -0.919596 | Inlier         |
| siRNA-Temozolomide Run2-DMSO | NM_0067<br>45 | SC4MOL    | sterol-C4-methyl oxidase-like | -0.892722 | Inlier         |
| siRNA Disorazole DMSO Run3   | NM_0067<br>45 | SC4MOL    | sterol-C4-methyl oxidase-like | -0.479619 | Inlier         |
| siRNA Disorazole DMSO Run1   | NM_0067<br>45 | SC4MOL    | sterol-C4-methyl oxidase-like | -0.016106 | Inlier         |
| siRNA-Temozolomide Run1-DMSO | NM_0067<br>45 | SC4MOL    | sterol-C4-methyl oxidase-like | 0.016107  | Inlier         |
| siRNA-Vinblastine Run2-DMSO  | NM_0067<br>45 | SC4MOL    | sterol-C4-methyl oxidase-like | 0.244549  | Inlier         |
| siRNA-Vinblastine Run1-DMSO  | NM_0067<br>45 | SC4MOL    | sterol-C4-methyl oxidase-like | 0.869381  | Inlier         |
| siRNA Disorazole DMSO Run2   | NM_0067<br>45 | SC4MOL    | sterol-C4-methyl oxidase-like | 0.930316  | Inlier         |

Identification of Survival Genes in Human Glioblastoma Cells Using siRNA Screening

Nikhil G Thaker, Fang Zhang, Peter R. McDonald, Tong Ying Shun, Michael D Lewen, Ian F. Pollack, and John S. Lazo

Molecular Pharmacology

|                              |           |       |                                                                     |           |        |
|------------------------------|-----------|-------|---------------------------------------------------------------------|-----------|--------|
| siRNA-Temozolomide Run3-DMSO | NM_006918 | SC5DL | sterol-C5-desaturase (ERG3 delta-5-desaturase homolog, fungal)-like | -0.938707 | Inlier |
| siRNA Disorazole DMSO Run3   | NM_006918 | SC5DL | sterol-C5-desaturase (ERG3 delta-5-desaturase homolog, fungal)-like | -0.718576 | Inlier |
| siRNA-Vinblastine Run2-DMSO  | NM_006918 | SC5DL | sterol-C5-desaturase (ERG3 delta-5-desaturase homolog, fungal)-like | -0.326505 | Inlier |
| siRNA Disorazole DMSO Run1   | NM_006918 | SC5DL | sterol-C5-desaturase (ERG3 delta-5-desaturase homolog, fungal)-like | -0.304467 | Inlier |
| siRNA-Temozolomide Run1-DMSO | NM_006918 | SC5DL | sterol-C5-desaturase (ERG3 delta-5-desaturase homolog, fungal)-like | 0.304467  | Inlier |

Identification of Survival Genes in Human Glioblastoma Cells Using siRNA Screening  
 Nikhil G Thaker, Fang Zhang, Peter R. McDonald, Tong Ying Shun, Michael D Lewen, Ian F. Pollack, and John S. Lazo

Molecular Pharmacology

|                              |           |        |                                                                     |           |        |
|------------------------------|-----------|--------|---------------------------------------------------------------------|-----------|--------|
| siRNA-Temozolomide Run2-DMSO | NM_006918 | SC5DL  | sterol-C5-desaturase (ERG3 delta-5-desaturase homolog, fungal)-like | 0.630424  | Inlier |
| siRNA-Vinblastine Run1-DMSO  | NM_006918 | SC5DL  | sterol-C5-desaturase (ERG3 delta-5-desaturase homolog, fungal)-like | 1.211551  | Inlier |
| siRNA Disorazole DMSO Run2   | NM_006918 | SC5DL  | sterol-C5-desaturase (ERG3 delta-5-desaturase homolog, fungal)-like | 1.824041  | Inlier |
| siRNA-Temozolomide Run1-DMSO | NM_138967 | SCAMP5 | secretory carrier membrane protein 5                                | -1.323413 | Inlier |
| siRNA-Temozolomide Run2-DMSO | NM_138967 | SCAMP5 | secretory carrier membrane protein 5                                | -0.84487  | Inlier |
| siRNA Disorazole DMSO Run2   | NM_138967 | SCAMP5 | secretory carrier membrane protein 5                                | -0.225034 | Inlier |
| siRNA-Temozolomide Run3-DMSO | NM_138967 | SCAMP5 | secretory carrier membrane protein 5                                | -0.030219 | Inlier |
| siRNA Disorazole DMSO Run1   | NM_138967 | SCAMP5 | secretory carrier membrane protein 5                                | 0.030218  | Inlier |

Identification of Survival Genes in Human Glioblastoma Cells Using siRNA Screening  
 Nikhil G Thaker, Fang Zhang, Peter R. McDonald, Tong Ying Shun, Michael D Lewen, Ian F. Pollack, and John S. Lazo  
 Molecular Pharmacology

|                              |               |        |                                        |           |        |
|------------------------------|---------------|--------|----------------------------------------|-----------|--------|
| siRNA-Vinblastine Run2-DMSO  | NM_1389<br>67 | SCAMP5 | secretory carrier membrane protein 5   | 0.50413   | Inlier |
| siRNA-Vinblastine Run1-DMSO  | NM_1389<br>67 | SCAMP5 | secretory carrier membrane protein 5   | 1.226928  | Inlier |
| siRNA Disorazole DMSO Run3   | NM_1389<br>67 | SCAMP5 | secretory carrier membrane protein 5   | 1.389128  | Inlier |
| siRNA-Temozolomide Run2-DMSO | NM_0037<br>26 | SCAP1  | src family associated phosphoprotein 1 | -0.721793 | Inlier |
| siRNA Disorazole DMSO Run2   | NM_0037<br>26 | SCAP1  | src family associated phosphoprotein 1 | -0.627207 | Inlier |
| siRNA-Temozolomide Run3-DMSO | NM_0037<br>26 | SCAP1  | src family associated phosphoprotein 1 | -0.62493  | Inlier |
| siRNA-Temozolomide Run1-DMSO | NM_0037<br>26 | SCAP1  | src family associated phosphoprotein 1 | -0.388086 | Inlier |
| siRNA Disorazole DMSO Run3   | NM_0037<br>26 | SCAP1  | src family associated phosphoprotein 1 | 0.388086  | Inlier |
| siRNA Disorazole DMSO Run1   | NM_0037<br>26 | SCAP1  | src family associated phosphoprotein 1 | 0.871336  | Inlier |
| siRNA-Vinblastine Run1-DMSO  | NM_0037<br>26 | SCAP1  | src family associated phosphoprotein 1 | 2.622818  | Inlier |



Identification of Survival Genes in Human Glioblastoma Cells Using siRNA Screening  
 Nikhil G Thaker, Fang Zhang, Peter R. McDonald, Tong Ying Shun, Michael D Lewen, Ian F. Pollack, and John S. Lazo  
 Molecular Pharmacology

|                              |           |        |                                                           |           |        |
|------------------------------|-----------|--------|-----------------------------------------------------------|-----------|--------|
| siRNA-Vinblastine Run2-DMSO  | NM_003726 | SCAP1  | src family associated phosphoprotein 1 scavenger receptor | 3.015269  | Inlier |
| siRNA-Vinblastine Run2-DMSO  | NM_005505 | SCARB1 | class B, member 1 scavenger receptor                      | -2.990769 | Inlier |
| siRNA-Temozolomide Run3-DMSO | NM_005505 | SCARB1 | class B, member 1 scavenger receptor                      | -1.682365 | Inlier |
| siRNA Disorazole DMSO Run3   | NM_005505 | SCARB1 | class B, member 1 scavenger receptor                      | -0.813501 | Inlier |
| siRNA-Temozolomide Run2-DMSO | NM_005505 | SCARB1 | class B, member 1 scavenger receptor                      | -0.099624 | Inlier |
| siRNA Disorazole DMSO Run1   | NM_005505 | SCARB1 | class B, member 1 scavenger receptor                      | 0.099624  | Inlier |
| siRNA-Vinblastine Run1-DMSO  | NM_005505 | SCARB1 | class B, member 1 scavenger receptor                      | 0.106432  | Inlier |
| siRNA-Temozolomide Run1-DMSO | NM_005505 | SCARB1 | class B, member 1 scavenger receptor                      | 0.535499  | Inlier |
| siRNA Disorazole DMSO Run2   | NM_005505 | SCARB1 | class B, member 1 scavenger receptor                      | 0.916745  | Inlier |
| siRNA-Vinblastine Run2-DMSO  | NM_005506 | SCARB2 | class B, member 2 scavenger receptor                      | -1.253623 | Inlier |
| siRNA-Temozolomide Run2-DMSO | NM_005506 | SCARB2 | class B, member 2 scavenger receptor                      | -0.991468 | Inlier |
| siRNA Disorazole DMSO Run3   | NM_005506 | SCARB2 | class B, member 2                                         | -0.556035 | Inlier |

Identification of Survival Genes in Human Glioblastoma Cells Using siRNA Screening  
 Nikhil G Thaker, Fang Zhang, Peter R. McDonald, Tong Ying Shun, Michael D Lewen, Ian F. Pollack, and John S. Lazo

Molecular Pharmacology

| siRNA Treatment              | Gene   | Gene ID   | Gene Description                     | Value     | Outlier Status |
|------------------------------|--------|-----------|--------------------------------------|-----------|----------------|
| siRNA Disorazole DMSO Run1   | SCARB2 | NM_005506 | scavenger receptor class B, member 2 | -0.277847 | Inlier         |
| siRNA-Temozolomide Run1-DMSO | SCARB2 | NM_005506 | scavenger receptor class B, member 2 | 0.277847  | Inlier         |
| siRNA-Temozolomide Run3-DMSO | SCARB2 | NM_005506 | scavenger receptor class B, member 2 | 0.414756  | Inlier         |
| siRNA Disorazole DMSO Run2   | SCARB2 | NM_005506 | scavenger receptor class B, member 2 | 0.792965  | Inlier         |
| siRNA-Vinblastine Run1-DMSO  | SCARB2 | NM_005506 | scavenger receptor class B, member 2 | 1.075689  | Inlier         |
| siRNA-Vinblastine Run2-DMSO  | SCARF1 | NM_145349 | scavenger receptor class F, member 1 | -1.039461 | Inlier         |
| siRNA Disorazole DMSO Run3   | SCARF1 | NM_145349 | scavenger receptor class F, member 1 | -0.558533 | Inlier         |
| siRNA-Temozolomide Run3-DMSO | SCARF1 | NM_145349 | scavenger receptor class F, member 1 | -0.507943 | Inlier         |
| siRNA-Temozolomide Run2-DMSO | SCARF1 | NM_145349 | scavenger receptor class F, member 1 | -0.306682 | Inlier         |
| siRNA Disorazole DMSO Run1   | SCARF1 | NM_145349 | scavenger receptor class F, member 1 | 0.306683  | Inlier         |
| siRNA-Temozolomide Run1-DMSO | SCARF1 | NM_145349 | scavenger receptor class F, member 1 | 0.790467  | Inlier         |
| siRNA Disorazole DMSO Run2   | SCARF1 | NM_145349 | scavenger receptor class F, member 1 | 1.503486  | Inlier         |
| siRNA-Vinblastine Run1-DMSO  | SCARF1 | NM_145349 | scavenger receptor class F, member 1 | 2.266873  | Inlier         |

Identification of Survival Genes in Human Glioblastoma Cells Using siRNA Screening  
 Nikhil G Thaker, Fang Zhang, Peter R. McDonald, Tong Ying Shun, Michael D Lewen, Ian F. Pollack, and John S. Lazo

Molecular Pharmacology

|                              |           |      |                                              |           |        |
|------------------------------|-----------|------|----------------------------------------------|-----------|--------|
| siRNA-Temozolomide Run1-DMSO | NM_005063 | SCD  | stearoyl-CoA desaturase (delta-9-desaturase) | -1.610851 | Inlier |
| siRNA-Temozolomide Run3-DMSO | NM_005063 | SCD  | stearoyl-CoA desaturase (delta-9-desaturase) | -1.362982 | Inlier |
| siRNA Disorazole DMSO Run3   | NM_005063 | SCD  | stearoyl-CoA desaturase (delta-9-desaturase) | -0.885294 | Inlier |
| siRNA-Vinblastine Run2-DMSO  | NM_005063 | SCD  | stearoyl-CoA desaturase (delta-9-desaturase) | -0.067888 | Inlier |
| siRNA Disorazole DMSO Run1   | NM_005063 | SCD  | stearoyl-CoA desaturase (delta-9-desaturase) | 0.067888  | Inlier |
| siRNA-Vinblastine Run1-DMSO  | NM_005063 | SCD  | stearoyl-CoA desaturase (delta-9-desaturase) | 0.461137  | Inlier |
| siRNA Disorazole DMSO Run2   | NM_005063 | SCD  | stearoyl-CoA desaturase (delta-9-desaturase) | 0.614516  | Inlier |
| siRNA-Temozolomide Run2-DMSO | NM_005063 | SCD  | stearoyl-CoA desaturase (delta-9-desaturase) | 0.734484  | Inlier |
| siRNA-Temozolomide Run3-DMSO | NM_024906 | SCD4 | stearoyl-CoA desaturase 4                    | -2.208067 | Inlier |

Identification of Survival Genes in Human Glioblastoma Cells Using siRNA Screening  
 Nikhil G Thaker, Fang Zhang, Peter R. McDonald, Tong Ying Shun, Michael D Lewen, Ian F. Pollack, and John S. Lazo

Molecular Pharmacology

|                              |               |        |                                           |           |        |
|------------------------------|---------------|--------|-------------------------------------------|-----------|--------|
| siRNA Disorazole DMSO Run3   | NM_0249<br>06 | SCD4   | stearoyl-CoA desaturase 4                 | -0.819449 | Inlier |
| siRNA-Temozolomide Run2-DMSO | NM_0249<br>06 | SCD4   | stearoyl-CoA desaturase 4                 | -0.744202 | Inlier |
| siRNA-Vinblastine Run2-DMSO  | NM_0249<br>06 | SCD4   | stearoyl-CoA desaturase 4                 | -0.298451 | Inlier |
| siRNA Disorazole DMSO Run1   | NM_0249<br>06 | SCD4   | stearoyl-CoA desaturase 4                 | 0.298451  | Inlier |
| siRNA Disorazole DMSO Run2   | NM_0249<br>06 | SCD4   | stearoyl-CoA desaturase 4                 | 0.392637  | Inlier |
| siRNA-Temozolomide Run1-DMSO | NM_0249<br>06 | SCD4   | stearoyl-CoA desaturase 4                 | 0.604798  | Inlier |
| siRNA-Vinblastine Run1-DMSO  | NM_0249<br>06 | SCD4   | stearoyl-CoA desaturase 4                 | 0.883576  | Inlier |
| siRNA-Temozolomide Run3-DMSO | NM_1987<br>08 | SCDR10 | SCDR10                                    | -1.067443 | Inlier |
| siRNA-Temozolomide Run2-DMSO | NM_1987<br>08 | SCDR10 | SCDR10                                    | -0.904389 | Inlier |
| siRNA-Vinblastine Run2-DMSO  | NM_1987<br>08 | SCDR10 | SCDR10                                    | -0.612202 | Inlier |
| siRNA Disorazole DMSO Run3   | NM_1987<br>08 | SCDR10 | SCDR10                                    | -0.277476 | Inlier |
| siRNA Disorazole DMSO Run1   | NM_1987<br>08 | SCDR10 | SCDR10                                    | 0.277476  | Inlier |
| siRNA-Temozolomide Run1-DMSO | NM_1987<br>08 | SCDR10 | SCDR10                                    | 0.437635  | Inlier |
| siRNA Disorazole DMSO Run2   | NM_1987<br>08 | SCDR10 | SCDR10                                    | 0.736798  | Inlier |
| siRNA-Vinblastine Run1-DMSO  | NM_1987<br>08 | SCDR10 | SCDR10                                    | 1.642977  | Inlier |
| siRNA-Temozolomide Run2-DMSO | NM_1781<br>35 | SCDR9  | hydroxysteroid (17-beta) dehydrogenase 13 | -1.621834 | Inlier |

Identification of Survival Genes in Human Glioblastoma Cells Using siRNA Screening  
 Nikhil G Thaker, Fang Zhang, Peter R. McDonald, Tong Ying Shun, Michael D Lewen, Ian F. Pollack, and John S. Lazo

Molecular Pharmacology

|                              |               |         |                                           |           |         |
|------------------------------|---------------|---------|-------------------------------------------|-----------|---------|
| siRNA-Temozolomide Run3-DMSO | NM_1781<br>35 | SCDR9   | hydroxysteroid (17-beta) dehydrogenase 13 | -1.459558 | Inlier  |
| siRNA-Vinblastine Run2-DMSO  | NM_1781<br>35 | SCDR9   | hydroxysteroid (17-beta) dehydrogenase 13 | -1.083829 | Inlier  |
| siRNA-Temozolomide Run1-DMSO | NM_1781<br>35 | SCDR9   | hydroxysteroid (17-beta) dehydrogenase 13 | -0.033377 | Inlier  |
| siRNA Disorazole DMSO Run1   | NM_1781<br>35 | SCDR9   | hydroxysteroid (17-beta) dehydrogenase 13 | 0.033377  | Inlier  |
| siRNA Disorazole DMSO Run3   | NM_1781<br>35 | SCDR9   | hydroxysteroid (17-beta) dehydrogenase 13 | 0.1359    | Inlier  |
| siRNA Disorazole DMSO Run2   | NM_1781<br>35 | SCDR9   | hydroxysteroid (17-beta) dehydrogenase 13 | 0.265171  | Inlier  |
| siRNA-Vinblastine Run1-DMSO  | NM_1781<br>35 | SCDR9   | secretoglobin, family 2A, member 1        | 1.332384  | Inlier  |
| siRNA Disorazole DMSO Run2   | NM_0024<br>07 | SCGB2A1 | secretoglobin, family 2A, member 1        | -4.547523 | Outlier |
| siRNA-Temozolomide Run3-DMSO | NM_0024<br>07 | SCGB2A1 | secretoglobin, family 2A, member 1        | -2.893612 | Inlier  |
| siRNA-Temozolomide Run1-DMSO | NM_0024<br>07 | SCGB2A1 | secretoglobin, family 2A, member 1        | -0.691007 | Inlier  |
| siRNA-Temozolomide Run2-DMSO | NM_0024<br>07 | SCGB2A1 | secretoglobin, family 2A, member 1        | -0.060932 | Inlier  |

Identification of Survival Genes in Human Glioblastoma Cells Using siRNA Screening  
 Nikhil G Thaker, Fang Zhang, Peter R. McDonald, Tong Ying Shun, Michael D Lewen, Ian F. Pollack, and John S. Lazo

Molecular Pharmacology

| siRNA Treatment              | Gene    | Accession | Gene Description                             | Value     | Category |
|------------------------------|---------|-----------|----------------------------------------------|-----------|----------|
| siRNA Disorazole DMSO Run3   | SCGB2A1 | NM_002407 | secretoglobin, family 2A, member 1           | 0.060931  | Inlier   |
| siRNA Disorazole DMSO Run1   | SCGB2A1 | NM_002407 | secretoglobin, family 2A, member 1           | 0.167829  | Inlier   |
| siRNA-Vinblastine Run1-DMSO  | SCGB2A1 | NM_002407 | secretoglobin, family 2A, member 1           | 0.657993  | Inlier   |
| siRNA-Vinblastine Run2-DMSO  | SCGB2A1 | NM_002407 | secretoglobin, family 2A, member 1           | 3.477616  | Inlier   |
| siRNA-Temozolomide Run3-DMSO | SCN10A  | NM_006514 | sodium channel, voltage-gated, type X, alpha | -1.258925 | Inlier   |
| siRNA Disorazole DMSO Run2   | SCN10A  | NM_006514 | sodium channel, voltage-gated, type X, alpha | -0.681587 | Inlier   |
| siRNA-Temozolomide Run2-DMSO | SCN10A  | NM_006514 | sodium channel, voltage-gated, type X, alpha | -0.667413 | Inlier   |
| siRNA-Temozolomide Run1-DMSO | SCN10A  | NM_006514 | sodium channel, voltage-gated, type X, alpha | -0.058614 | Inlier   |
| siRNA Disorazole DMSO Run3   | SCN10A  | NM_006514 | sodium channel, voltage-gated, type X, alpha | 0.058614  | Inlier   |
| siRNA Disorazole DMSO Run1   | SCN10A  | NM_006514 | sodium channel, voltage-gated, type X, alpha | 0.394374  | Inlier   |

Identification of Survival Genes in Human Glioblastoma Cells Using siRNA Screening

Nikhil G Thaker, Fang Zhang, Peter R. McDonald, Tong Ying Shun, Michael D Lewen, Ian F. Pollack, and John S. Lazo

Molecular Pharmacology

|                              |               |        |                                               |                  |
|------------------------------|---------------|--------|-----------------------------------------------|------------------|
| siRNA-Vinblastine Run2-DMSO  | NM_0065<br>14 | SCN10A | sodium channel, voltage-gated, type X, alpha  | 0.885608 Inlier  |
| siRNA-Vinblastine Run1-DMSO  | NM_0065<br>14 | SCN10A | sodium channel, voltage-gated, type X, alpha  | 1.149501 Inlier  |
| siRNA-Temozolomide Run3-DMSO | NM_0141<br>39 | SCN11A | sodium channel, voltage-gated, type XI, alpha | -2.010082 Inlier |
| siRNA Disorazole DMSO Run2   | NM_0141<br>39 | SCN11A | sodium channel, voltage-gated, type XI, alpha | -0.772198 Inlier |
| siRNA-Temozolomide Run2-DMSO | NM_0141<br>39 | SCN11A | sodium channel, voltage-gated, type XI, alpha | -0.576802 Inlier |
| siRNA Disorazole DMSO Run1   | NM_0141<br>39 | SCN11A | sodium channel, voltage-gated, type XI, alpha | -0.002835 Inlier |
| siRNA-Temozolomide Run1-DMSO | NM_0141<br>39 | SCN11A | sodium channel, voltage-gated, type XI, alpha | 0.002835 Inlier  |
| siRNA Disorazole DMSO Run3   | NM_0141<br>39 | SCN11A | sodium channel, voltage-gated, type XI, alpha | 0.216121 Inlier  |

Identification of Survival Genes in Human Glioblastoma Cells Using siRNA Screening

Nikhil G Thaker, Fang Zhang, Peter R. McDonald, Tong Ying Shun, Michael D Lewen, Ian F. Pollack, and John S. Lazo

Molecular Pharmacology

|                              |           |        |                                               |                  |
|------------------------------|-----------|--------|-----------------------------------------------|------------------|
| siRNA-Vinblastine Run1-DMSO  | NM_014139 | SCN11A | sodium channel, voltage-gated, type XI, alpha | 1.025385 Inlier  |
| siRNA-Vinblastine Run2-DMSO  | NM_014139 | SCN11A | sodium channel, voltage-gated, type XI, alpha | 1.113878 Inlier  |
| siRNA-Temozolomide Run3-DMSO | NM_006920 | SCN1A  | sodium channel, voltage-gated, type I, alpha  | -2.251919 Inlier |
| siRNA-Temozolomide Run2-DMSO | NM_006920 | SCN1A  | sodium channel, voltage-gated, type I, alpha  | -1.841717 Inlier |
| siRNA Disorazole DMSO Run1   | NM_006920 | SCN1A  | sodium channel, voltage-gated, type I, alpha  | -1.803102 Inlier |
| siRNA-Temozolomide Run1-DMSO | NM_006920 | SCN1A  | sodium channel, voltage-gated, type I, alpha  | -0.04558 Inlier  |
| siRNA-Vinblastine Run2-DMSO  | NM_006920 | SCN1A  | sodium channel, voltage-gated, type I, alpha  | 0.04558 Inlier   |
| siRNA Disorazole DMSO Run2   | NM_006920 | SCN1A  | sodium channel, voltage-gated, type I, alpha  | 0.318135 Inlier  |



Identification of Survival Genes in Human Glioblastoma Cells Using siRNA Screening  
 Nikhil G Thaker, Fang Zhang, Peter R. McDonald, Tong Ying Shun, Michael D Lewen, Ian F. Pollack, and John S. Lazo

Molecular Pharmacology

|                              |               |       |                                              |                   |
|------------------------------|---------------|-------|----------------------------------------------|-------------------|
| siRNA-Vinblastine Run1-DMSO  | NM_0069<br>20 | SCN1A | sodium channel, voltage-gated, type I, alpha | 0.342847 Inlier   |
| siRNA Disorazole DMSO Run3   | NM_0069<br>20 | SCN1A | sodium channel, voltage-gated, type I, alpha | 1.006153 Inlier   |
| siRNA-Temozolomide Run3-DMSO | NM_1990<br>37 | SCN1B | sodium channel, voltage-gated, type I, beta  | -3.952842 Outlier |
| siRNA Disorazole DMSO Run1   | NM_1990<br>37 | SCN1B | sodium channel, voltage-gated, type I, beta  | -0.525027 Inlier  |
| siRNA-Temozolomide Run2-DMSO | NM_1990<br>37 | SCN1B | sodium channel, voltage-gated, type I, beta  | -0.429786 Inlier  |
| siRNA Disorazole DMSO Run2   | NM_1990<br>37 | SCN1B | sodium channel, voltage-gated, type I, beta  | -0.22226 Inlier   |
| siRNA-Vinblastine Run2-DMSO  | NM_1990<br>37 | SCN1B | sodium channel, voltage-gated, type I, beta  | 0.222259 Inlier   |
| siRNA-Temozolomide Run1-DMSO | NM_1990<br>37 | SCN1B | sodium channel, voltage-gated, type I, beta  | 0.823973 Inlier   |

Identification of Survival Genes in Human Glioblastoma Cells Using siRNA Screening  
 Nikhil G Thaker, Fang Zhang, Peter R. McDonald, Tong Ying Shun, Michael D Lewen, Ian F. Pollack, and John S. Lazo

Molecular Pharmacology

| siRNA Treatment              | Gene   | Gene ID   | Gene Name | Gene Description                                | Value     | Category |
|------------------------------|--------|-----------|-----------|-------------------------------------------------|-----------|----------|
| siRNA Disorazole DMSO Run3   | SCN1B  | NM_199037 | SCN1B     | sodium channel, voltage-gated, type I, beta     | 1.369036  | Inlier   |
| siRNA-Vinblastine Run1-DMSO  | SCN1B  | NM_199037 | SCN1B     | sodium channel, voltage-gated, type I, beta     | 1.606072  | Inlier   |
| siRNA-Temozolomide Run3-DMSO | SCN2A2 | NM_021007 | SCN2A2    | sodium channel, voltage-gated, type II, alpha 2 | -1.655654 | Inlier   |
| siRNA-Temozolomide Run2-DMSO | SCN2A2 | NM_021007 | SCN2A2    | sodium channel, voltage-gated, type II, alpha 2 | -0.977127 | Inlier   |
| siRNA-Temozolomide Run1-DMSO | SCN2A2 | NM_021007 | SCN2A2    | sodium channel, voltage-gated, type II, alpha 2 | -0.264446 | Inlier   |
| siRNA Disorazole DMSO Run2   | SCN2A2 | NM_021007 | SCN2A2    | sodium channel, voltage-gated, type II, alpha 2 | -0.083844 | Inlier   |
| siRNA Disorazole DMSO Run3   | SCN2A2 | NM_021007 | SCN2A2    | sodium channel, voltage-gated, type II, alpha 2 | 0.083844  | Inlier   |
| siRNA Disorazole DMSO Run1   | SCN2A2 | NM_021007 | SCN2A2    | sodium channel, voltage-gated, type II, alpha 2 | 0.371873  | Inlier   |

Identification of Survival Genes in Human Glioblastoma Cells Using siRNA Screening  
 Nikhil G Thaker, Fang Zhang, Peter R. McDonald, Tong Ying Shun, Michael D Lewen, Ian F. Pollack, and John S. Lazo

Molecular Pharmacology

|                              |           |        |                                                 |                  |
|------------------------------|-----------|--------|-------------------------------------------------|------------------|
| siRNA-Vinblastine Run1-DMSO  | NM_021007 | SCN2A2 | sodium channel, voltage-gated, type II, alpha 2 | 2.576942 Inlier  |
| siRNA-Vinblastine Run2-DMSO  | NM_021007 | SCN2A2 | sodium channel, voltage-gated, type II, alpha 2 | 2.787238 Inlier  |
| siRNA-Temozolomide Run3-DMSO | NM_004588 | SCN2B  | sodium channel, voltage-gated, type II, beta    | -1.923315 Inlier |
| siRNA-Temozolomide Run2-DMSO | NM_004588 | SCN2B  | sodium channel, voltage-gated, type II, beta    | -0.923679 Inlier |
| siRNA Disorazole DMSO Run2   | NM_004588 | SCN2B  | sodium channel, voltage-gated, type II, beta    | -0.749881 Inlier |
| siRNA Disorazole DMSO Run1   | NM_004588 | SCN2B  | sodium channel, voltage-gated, type II, beta    | -0.090275 Inlier |
| siRNA Disorazole DMSO Run3   | NM_004588 | SCN2B  | sodium channel, voltage-gated, type II, beta    | 0.090275 Inlier  |
| siRNA-Temozolomide Run1-DMSO | NM_004588 | SCN2B  | sodium channel, voltage-gated, type II, beta    | 0.471924 Inlier  |

Identification of Survival Genes in Human Glioblastoma Cells Using siRNA Screening

Nikhil G Thaker, Fang Zhang, Peter R. McDonald, Tong Ying Shun, Michael D Lewen, Ian F. Pollack, and John S. Lazo

Molecular Pharmacology

|                              |           |       |                                                |           |        |
|------------------------------|-----------|-------|------------------------------------------------|-----------|--------|
| siRNA-Vinblastine Run1-DMSO  | NM_004588 | SCN2B | sodium channel, voltage-gated, type II, beta   | 0.599119  | Inlier |
| siRNA-Vinblastine Run2-DMSO  | NM_004588 | SCN2B | sodium channel, voltage-gated, type II, beta   | 0.886675  | Inlier |
| siRNA-Temozolomide Run3-DMSO | NM_006922 | SCN3A | sodium channel, voltage-gated, type III, alpha | -1.291234 | Inlier |
| siRNA-Temozolomide Run2-DMSO | NM_006922 | SCN3A | sodium channel, voltage-gated, type III, alpha | -0.707833 | Inlier |
| siRNA Disorazole DMSO Run3   | NM_006922 | SCN3A | sodium channel, voltage-gated, type III, alpha | -0.625975 | Inlier |
| siRNA Disorazole DMSO Run2   | NM_006922 | SCN3A | sodium channel, voltage-gated, type III, alpha | -0.533916 | Inlier |
| siRNA Disorazole DMSO Run1   | NM_006922 | SCN3A | sodium channel, voltage-gated, type III, alpha | 0.533916  | Inlier |
| siRNA-Temozolomide Run1-DMSO | NM_006922 | SCN3A | sodium channel, voltage-gated, type III, alpha | 0.641167  | Inlier |

Identification of Survival Genes in Human Glioblastoma Cells Using siRNA Screening

Nikhil G Thaker, Fang Zhang, Peter R. McDonald, Tong Ying Shun, Michael D Lewen, Ian F. Pollack, and John S. Lazo

Molecular Pharmacology

|                              |           |       |                                                |           |        |
|------------------------------|-----------|-------|------------------------------------------------|-----------|--------|
| siRNA-Vinblastine Run2-DMSO  | NM_006922 | SCN3A | sodium channel, voltage-gated, type III, alpha | 1.684261  | Inlier |
| siRNA-Vinblastine Run1-DMSO  | NM_006922 | SCN3A | sodium channel, voltage-gated, type III, alpha | 1.702818  | Inlier |
| siRNA-Temozolomide Run3-DMSO | NM_018400 | SCN3B | sodium channel, voltage-gated, type III, beta  | -1.237226 | Inlier |
| siRNA Disorazole DMSO Run2   | NM_018400 | SCN3B | sodium channel, voltage-gated, type III, beta  | -1.070091 | Inlier |
| siRNA Disorazole DMSO Run3   | NM_018400 | SCN3B | sodium channel, voltage-gated, type III, beta  | -0.636035 | Inlier |
| siRNA Disorazole DMSO Run1   | NM_018400 | SCN3B | sodium channel, voltage-gated, type III, beta  | -0.097225 | Inlier |
| siRNA-Temozolomide Run2-DMSO | NM_018400 | SCN3B | sodium channel, voltage-gated, type III, beta  | 0.097225  | Inlier |
| siRNA-Vinblastine Run2-DMSO  | NM_018400 | SCN3B | sodium channel, voltage-gated, type III, beta  | 0.373251  | Inlier |

Identification of Survival Genes in Human Glioblastoma Cells Using siRNA Screening  
 Nikhil G Thaker, Fang Zhang, Peter R. McDonald, Tong Ying Shun, Michael D Lewen, Ian F. Pollack, and John S. Lazo

Molecular Pharmacology

|                              |           |       |                                               |           |        |
|------------------------------|-----------|-------|-----------------------------------------------|-----------|--------|
| siRNA-Temozolomide Run1-DMSO | NM_018400 | SCN3B | sodium channel, voltage-gated, type III, beta | 0.712965  | Inlier |
| siRNA-Vinblastine Run1-DMSO  | NM_018400 | SCN3B | sodium channel, voltage-gated, type III, beta | 0.829889  | Inlier |
| siRNA-Temozolomide Run3-DMSO | NM_000334 | SCN4A | sodium channel, voltage-gated, type IV, alpha | -0.757714 | Inlier |
| siRNA Disorazole DMSO Run3   | NM_000334 | SCN4A | sodium channel, voltage-gated, type IV, alpha | -0.685219 | Inlier |
| siRNA Disorazole DMSO Run2   | NM_000334 | SCN4A | sodium channel, voltage-gated, type IV, alpha | -0.646232 | Inlier |
| siRNA Disorazole DMSO Run1   | NM_000334 | SCN4A | sodium channel, voltage-gated, type IV, alpha | -0.032695 | Inlier |
| siRNA-Temozolomide Run2-DMSO | NM_000334 | SCN4A | sodium channel, voltage-gated, type IV, alpha | 0.032695  | Inlier |
| siRNA-Temozolomide Run1-DMSO | NM_000334 | SCN4A | sodium channel, voltage-gated, type IV, alpha | 0.663781  | Inlier |

Identification of Survival Genes in Human Glioblastoma Cells Using siRNA Screening

Nikhil G Thaker, Fang Zhang, Peter R. McDonald, Tong Ying Shun, Michael D Lewen, Ian F. Pollack, and John S. Lazo

Molecular Pharmacology

|                              |           |       |                                                                   |           |        |
|------------------------------|-----------|-------|-------------------------------------------------------------------|-----------|--------|
| siRNA-Vinblastine Run1-DMSO  | NM_000334 | SCN4A | sodium channel, voltage-gated, type IV, alpha                     | 0.757047  | Inlier |
| siRNA-Vinblastine Run2-DMSO  | NM_000334 | SCN4A | sodium channel, voltage-gated, type IV, alpha                     | 0.831063  | Inlier |
| siRNA Disorazole DMSO Run1   | NM_198056 | SCN5A | sodium channel, voltage-gated, type V, alpha (long QT syndrome 3) | -2.027437 | Inlier |
| siRNA-Temozolomide Run3-DMSO | NM_198056 | SCN5A | sodium channel, voltage-gated, type V, alpha (long QT syndrome 3) | -1.956001 | Inlier |
| siRNA-Temozolomide Run1-DMSO | NM_198056 | SCN5A | sodium channel, voltage-gated, type V, alpha (long QT syndrome 3) | -0.335293 | Inlier |
| siRNA-Temozolomide Run2-DMSO | NM_198056 | SCN5A | sodium channel, voltage-gated, type V, alpha (long QT syndrome 3) | -0.043763 | Inlier |

Identification of Survival Genes in Human Glioblastoma Cells Using siRNA Screening

Nikhil G Thaker, Fang Zhang, Peter R. McDonald, Tong Ying Shun, Michael D Lewen, Ian F. Pollack, and John S.

Lazo

Molecular Pharmacology

|                              |               |       |                                                                   |          |        |
|------------------------------|---------------|-------|-------------------------------------------------------------------|----------|--------|
| siRNA-Vinblastine Run2-DMSO  | NM_1980<br>56 | SCN5A | sodium channel, voltage-gated, type V, alpha (long QT syndrome 3) | 0.043761 | Inlier |
| siRNA-Vinblastine Run1-DMSO  | NM_1980<br>56 | SCN5A | sodium channel, voltage-gated, type V, alpha (long QT syndrome 3) | 0.649827 | Inlier |
| siRNA Disorazole DMSO Run3   | NM_1980<br>56 | SCN5A | sodium channel, voltage-gated, type V, alpha (long QT syndrome 3) | 0.699173 | Inlier |
| siRNA Disorazole DMSO Run2   | NM_1980<br>56 | SCN5A | sodium channel, voltage-gated, type V, alpha (long QT syndrome 3) | 1.106741 | Inlier |
| siRNA-Temozolomide Run3-DMSO | NM_0029<br>76 | SCN7A | sodium channel, voltage-gated, type VII, alpha                    | -2.20739 | Inlier |
| siRNA Disorazole DMSO Run3   | NM_0029<br>76 | SCN7A | sodium channel, voltage-gated, type VII, alpha                    | -0.85426 | Inlier |



Identification of Survival Genes in Human Glioblastoma Cells Using siRNA Screening

Nikhil G Thaker, Fang Zhang, Peter R. McDonald, Tong Ying Shun, Michael D Lewen, Ian F. Pollack, and John S. Lazo

Molecular Pharmacology

|                              |               |       |                                                 |           |        |
|------------------------------|---------------|-------|-------------------------------------------------|-----------|--------|
| siRNA-Temozolomide Run2-DMSO | NM_0029<br>76 | SCN7A | sodium channel, voltage-gated, type VII, alpha  | -0.145885 | Inlier |
| siRNA Disorazole DMSO Run1   | NM_0029<br>76 | SCN7A | sodium channel, voltage-gated, type VII, alpha  | -0.100344 | Inlier |
| siRNA Disorazole DMSO Run2   | NM_0029<br>76 | SCN7A | sodium channel, voltage-gated, type VII, alpha  | 0.100344  | Inlier |
| siRNA-Temozolomide Run1-DMSO | NM_0029<br>76 | SCN7A | sodium channel, voltage-gated, type VII, alpha  | 0.49474   | Inlier |
| siRNA-Vinblastine Run1-DMSO  | NM_0029<br>76 | SCN7A | sodium channel, voltage-gated, type VII, alpha  | 1.020951  | Inlier |
| siRNA-Vinblastine Run2-DMSO  | NM_0029<br>76 | SCN7A | sodium channel, voltage gated, type VII, alpha  | 1.440387  | Inlier |
| siRNA Disorazole DMSO Run1   | NM_0141<br>91 | SCN8A | sodium channel, voltage gated, type VIII, alpha | -1.225307 | Inlier |
| siRNA-Temozolomide Run3-DMSO | NM_0141<br>91 | SCN8A | sodium channel, voltage gated, type VIII, alpha | -0.842745 | Inlier |

Identification of Survival Genes in Human Glioblastoma Cells Using siRNA Screening  
 Nikhil G Thaker, Fang Zhang, Peter R. McDonald, Tong Ying Shun, Michael D Lewen, Ian F. Pollack, and John S. Lazo

Molecular Pharmacology

|                              |               |       |                                                 |                  |
|------------------------------|---------------|-------|-------------------------------------------------|------------------|
| siRNA-Temozolomide Run2-DMSO | NM_0141<br>91 | SCN8A | sodium channel, voltage gated, type VIII, alpha | -0.558318 Inlier |
| siRNA Disorazole DMSO Run3   | NM_0141<br>91 | SCN8A | sodium channel, voltage gated, type VIII, alpha | -0.028783 Inlier |
| siRNA-Vinblastine Run2-DMSO  | NM_0141<br>91 | SCN8A | sodium channel, voltage gated, type VIII, alpha | 0.028783 Inlier  |
| siRNA-Temozolomide Run1-DMSO | NM_0141<br>91 | SCN8A | sodium channel, voltage gated, type VIII, alpha | 0.479336 Inlier  |
| siRNA-Vinblastine Run1-DMSO  | NM_0141<br>91 | SCN8A | sodium channel, voltage gated, type VIII, alpha | 0.790682 Inlier  |
| siRNA Disorazole DMSO Run2   | NM_0141<br>91 | SCN8A | sodium channel, voltage-gated, type VIII, alpha | 2.407218 Inlier  |
| siRNA-Temozolomide Run3-DMSO | NM_0029<br>77 | SCN9A | sodium channel, voltage-gated, type IX, alpha   | -1.297498 Inlier |
| siRNA-Temozolomide Run2-DMSO | NM_0029<br>77 | SCN9A | sodium channel, voltage-gated, type IX, alpha   | -0.26968 Inlier  |

Identification of Survival Genes in Human Glioblastoma Cells Using siRNA Screening  
 Nikhil G Thaker, Fang Zhang, Peter R. McDonald, Tong Ying Shun, Michael D Lewen, Ian F. Pollack, and John S. Lazo

Molecular Pharmacology

|                              |               |        |                                               |           |         |
|------------------------------|---------------|--------|-----------------------------------------------|-----------|---------|
| siRNA Disorazole DMSO Run3   | NM_0029<br>77 | SCN9A  | sodium channel, voltage-gated, type IX, alpha | -0.25657  | Inlier  |
| siRNA Disorazole DMSO Run2   | NM_0029<br>77 | SCN9A  | sodium channel, voltage-gated, type IX, alpha | -0.122315 | Inlier  |
| siRNA-Temozolomide Run1-DMSO | NM_0029<br>77 | SCN9A  | sodium channel, voltage-gated, type IX, alpha | 0.122315  | Inlier  |
| siRNA Disorazole DMSO Run1   | NM_0029<br>77 | SCN9A  | sodium channel, voltage-gated, type IX, alpha | 1.07932   | Inlier  |
| siRNA-Vinblastine Run1-DMSO  | NM_0029<br>77 | SCN9A  | sodium channel, voltage-gated, type IX, alpha | 2.617711  | Inlier  |
| siRNA-Vinblastine Run2-DMSO  | NM_0029<br>77 | SCN9A  | sodium channel, voltage-gated, type IX, alpha | 3.513652  | Outlier |
| siRNA Disorazole DMSO Run1   | NM_0010<br>38 | SCNN1A | nonvoltage-gated 1 alpha                      | -1.55252  | Inlier  |
| siRNA-Temozolomide Run2-DMSO | NM_0010<br>38 | SCNN1A | nonvoltage-gated 1 alpha                      | -0.70972  | Inlier  |
| siRNA-Temozolomide Run3-DMSO | NM_0010<br>38 | SCNN1A | nonvoltage-gated 1 alpha                      | -0.639279 | Inlier  |

Identification of Survival Genes in Human Glioblastoma Cells Using siRNA Screening  
 Nikhil G Thaker, Fang Zhang, Peter R. McDonald, Tong Ying Shun, Michael D Lewen, Ian F. Pollack, and John S. Lazo

Molecular Pharmacology

|                              |           |        |                                                            |           |         |
|------------------------------|-----------|--------|------------------------------------------------------------|-----------|---------|
| siRNA-Vinblastine Run2-DMSO  | NM_001038 | SCNN1A | sodium channel, nonvoltage-gated 1 alpha                   | -0.14451  | Inlier  |
| siRNA-Vinblastine Run1-DMSO  | NM_001038 | SCNN1A | sodium channel, nonvoltage-gated 1 alpha                   | 0.14451   | Inlier  |
| siRNA-Temozolomide Run1-DMSO | NM_001038 | SCNN1A | sodium channel, nonvoltage-gated 1 alpha                   | 0.611791  | Inlier  |
| siRNA Disorazole DMSO Run3   | NM_001038 | SCNN1A | sodium channel, nonvoltage-gated 1 alpha                   | 2.132017  | Inlier  |
| siRNA Disorazole DMSO Run2   | NM_001038 | SCNN1A | sodium channel, nonvoltage-gated 1 alpha                   | 3.868095  | Outlier |
| siRNA-Temozolomide Run3-DMSO | NM_000336 | SCNN1B | sodium channel, nonvoltage-gated 1, beta (Liddle syndrome) | -3.678634 | Outlier |
| siRNA Disorazole DMSO Run1   | NM_000336 | SCNN1B | sodium channel, nonvoltage-gated 1, beta (Liddle syndrome) | -0.88291  | Inlier  |
| siRNA-Temozolomide Run2-DMSO | NM_000336 | SCNN1B | sodium channel, nonvoltage-gated 1, beta (Liddle syndrome) | -0.284095 | Inlier  |

Identification of Survival Genes in Human Glioblastoma Cells Using siRNA Screening  
 Nikhil G Thaker, Fang Zhang, Peter R. McDonald, Tong Ying Shun, Michael D Lewen, Ian F. Pollack, and John S. Lazo  
 Molecular Pharmacology

|                              |               |        |                                                            |           |        |
|------------------------------|---------------|--------|------------------------------------------------------------|-----------|--------|
| siRNA Disorazole DMSO Run3   | NM_0003<br>36 | SCNN1B | sodium channel, nonvoltage-gated 1, beta (Liddle syndrome) | -0.03498  | Inlier |
| siRNA-Temozolomide Run1-DMSO | NM_0003<br>36 | SCNN1B | sodium channel, nonvoltage-gated 1, beta (Liddle syndrome) | 0.03498   | Inlier |
| siRNA-Vinblastine Run2-DMSO  | NM_0003<br>36 | SCNN1B | sodium channel, nonvoltage-gated 1, beta (Liddle syndrome) | 0.46609   | Inlier |
| siRNA-Vinblastine Run1-DMSO  | NM_0003<br>36 | SCNN1B | sodium channel, nonvoltage-gated 1, beta (Liddle syndrome) | 0.906927  | Inlier |
| siRNA Disorazole DMSO Run2   | NM_0003<br>36 | SCNN1B | sodium channel, nonvoltage-gated 1, beta (Liddle syndrome) | 2.347865  | Inlier |
| siRNA-Temozolomide Run3-DMSO | NM_0029<br>78 | SCNN1D | sodium channel, nonvoltage-gated 1, delta                  | -1.118499 | Inlier |
| siRNA Disorazole DMSO Run1   | NM_0029<br>78 | SCNN1D | sodium channel, nonvoltage-gated 1, delta                  | -0.708948 | Inlier |

Identification of Survival Genes in Human Glioblastoma Cells Using siRNA Screening  
 Nikhil G Thaker, Fang Zhang, Peter R. McDonald, Tong Ying Shun, Michael D Lewen, Ian F. Pollack, and John S. Lazo

Molecular Pharmacology

|                              |               |        |                                           |           |        |
|------------------------------|---------------|--------|-------------------------------------------|-----------|--------|
| siRNA-Temozolomide Run2-DMSO | NM_0029<br>78 | SCNN1D | sodium channel, nonvoltage-gated 1, delta | -0.361659 | Inlier |
| siRNA Disorazole DMSO Run3   | NM_0029<br>78 | SCNN1D | sodium channel, nonvoltage-gated 1, delta | -0.150954 | Inlier |
| siRNA-Vinblastine Run2-DMSO  | NM_0029<br>78 | SCNN1D | sodium channel, nonvoltage-gated 1, delta | 0.150954  | Inlier |
| siRNA-Vinblastine Run1-DMSO  | NM_0029<br>78 | SCNN1D | sodium channel, nonvoltage-gated 1, delta | 0.640052  | Inlier |
| siRNA-Temozolomide Run1-DMSO | NM_0029<br>78 | SCNN1D | sodium channel, nonvoltage-gated 1, delta | 0.73216   | Inlier |
| siRNA Disorazole DMSO Run2   | NM_0029<br>78 | SCNN1D | sodium channel, nonvoltage-gated 1, delta | 0.884395  | Inlier |
| siRNA Disorazole DMSO Run1   | NM_0010<br>39 | SCNN1G | sodium channel, nonvoltage-gated 1, gamma | -2.31689  | Inlier |
| siRNA-Temozolomide Run3-DMSO | NM_0010<br>39 | SCNN1G | sodium channel, nonvoltage-gated 1, gamma | -0.912627 | Inlier |
| siRNA-Temozolomide Run1-DMSO | NM_0010<br>39 | SCNN1G | sodium channel, nonvoltage-gated 1, gamma | -0.832245 | Inlier |
| siRNA-Vinblastine Run2-DMSO  | NM_0010<br>39 | SCNN1G | sodium channel, nonvoltage-gated 1, gamma | -0.200327 | Inlier |

Identification of Survival Genes in Human Glioblastoma Cells Using siRNA Screening  
 Nikhil G Thaker, Fang Zhang, Peter R. McDonald, Tong Ying Shun, Michael D Lewen, Ian F. Pollack, and John S. Lazo

Molecular Pharmacology

|                              |               |        |                                                                                                                                                                         |           |         |
|------------------------------|---------------|--------|-------------------------------------------------------------------------------------------------------------------------------------------------------------------------|-----------|---------|
| siRNA-Temozolomide Run2-DMSO | NM_0010<br>39 | SCNN1G | sodium channel, nonvoltage-gated 1, gamma | 0.200326  | Inlier  |
| siRNA Disorazole DMSO Run3   | NM_0010<br>39 | SCNN1G | sodium channel, nonvoltage-gated 1, gamma sodium channel, nonvoltage-gated 1, gamma sodium channel, nonvoltage-gated 1, gamma                                           | 0.444008  | Inlier  |
| siRNA-Vinblastine Run1-DMSO  | NM_0010<br>39 | SCNN1G | sodium channel, nonvoltage-gated 1, gamma sodium channel, nonvoltage-gated 1, gamma sodium channel, nonvoltage-gated 1, gamma                                           | 0.516755  | Inlier  |
| siRNA Disorazole DMSO Run2   | NM_0010<br>39 | SCNN1G | sodium channel, nonvoltage-gated 1, gamma sterol carrier protein 2                                                                                                      | 5.972632  | Outlier |
| siRNA-Temozolomide Run2-DMSO | NM_0029<br>79 | SCP2   | sterol carrier protein 2                                                                                                                                                | -2.097793 | Inlier  |
| siRNA Disorazole DMSO Run1   | NM_0029<br>79 | SCP2   | sterol carrier protein 2                                                                                                                                                | -0.760287 | Inlier  |
| siRNA Disorazole DMSO Run3   | NM_0029<br>79 | SCP2   | sterol carrier protein 2                                                                                                                                                | -0.493788 | Inlier  |
| siRNA-Temozolomide Run3-DMSO | NM_0029<br>79 | SCP2   | sterol carrier protein 2                                                                                                                                                | -0.399749 | Inlier  |
| siRNA-Vinblastine Run2-DMSO  | NM_0029<br>79 | SCP2   | sterol carrier protein 2                                                                                                                                                | 0.399749  | Inlier  |
| siRNA-Temozolomide Run1-DMSO | NM_0029<br>79 | SCP2   | sterol carrier protein 2                                                                                                                                                | 0.588713  | Inlier  |
| siRNA Disorazole DMSO Run2   | NM_0029<br>79 | SCP2   | sterol carrier protein 2                                                                                                                                                | 1.27292   | Inlier  |
| siRNA-Vinblastine Run1-DMSO  | NM_0029<br>79 | SCP2   | sterol carrier protein 2                                                                                                                                                | 3.554773  | Outlier |
| siRNA-Temozolomide Run3-DMSO | NM_0216<br>26 | SCPEP1 | serine carboxypeptidase 1                                                                                                                                               | -0.98784  | Inlier  |
| siRNA-Temozolomide Run2-DMSO | NM_0216<br>26 | SCPEP1 | serine carboxypeptidase 1                                                                                                                                               | -0.781315 | Inlier  |

Identification of Survival Genes in Human Glioblastoma Cells Using siRNA Screening  
 Nikhil G Thaker, Fang Zhang, Peter R. McDonald, Tong Ying Shun, Michael D Lewen, Ian F. Pollack, and John S. Lazo  
 Molecular Pharmacology

|                                  |               |        |                                   |           |        |
|----------------------------------|---------------|--------|-----------------------------------|-----------|--------|
| siRNA Disorazole DMSO Run2       | NM_0216<br>26 | SCPEP1 | serine<br>carboxype<br>ptidase 1  | -0.567685 | Inlier |
| siRNA Disorazole DMSO Run3       | NM_0216<br>26 | SCPEP1 | serine<br>carboxype<br>ptidase 1  | -0.326697 | Inlier |
| siRNA-Temozolomide Run1-<br>DMSO | NM_0216<br>26 | SCPEP1 | serine<br>carboxype<br>ptidase 1  | 0.326697  | Inlier |
| siRNA Disorazole DMSO Run1       | NM_0216<br>26 | SCPEP1 | serine<br>carboxype<br>ptidase 1  | 0.444104  | Inlier |
| siRNA-Vinblastine Run1-<br>DMSO  | NM_0216<br>26 | SCPEP1 | serine<br>carboxype<br>ptidase 1  | 1.242781  | Inlier |
| siRNA-Vinblastine Run2-<br>DMSO  | NM_0216<br>26 | SCPEP1 | serine<br>carboxype<br>ptidase 1  | 1.585012  | Inlier |
| siRNA Disorazole DMSO Run2       | NM_0029<br>80 | SCTR   | secretin<br>receptor              | -1.265954 | Inlier |
| siRNA-Temozolomide Run3-<br>DMSO | NM_0029<br>80 | SCTR   | secretin<br>receptor              | -0.373729 | Inlier |
| siRNA-Temozolomide Run2-<br>DMSO | NM_0029<br>80 | SCTR   | secretin<br>receptor              | -0.261668 | Inlier |
| siRNA Disorazole DMSO Run3       | NM_0029<br>80 | SCTR   | secretin<br>receptor              | -0.170334 | Inlier |
| siRNA-Temozolomide Run1-<br>DMSO | NM_0029<br>80 | SCTR   | secretin<br>receptor              | 0.170335  | Inlier |
| siRNA Disorazole DMSO Run1       | NM_0029<br>80 | SCTR   | secretin<br>receptor              | 0.975271  | Inlier |
| siRNA-Vinblastine Run1-<br>DMSO  | NM_0029<br>80 | SCTR   | secretin<br>receptor              | 0.999679  | Inlier |
| siRNA-Vinblastine Run2-<br>DMSO  | NM_0029<br>80 | SCTR   | secretin<br>receptor              | 1.437549  | Inlier |
| siRNA Disorazole DMSO Run2       | NM_0206<br>80 | SCYL1  | SCY1-like<br>1 (S.<br>cerevisiae) | -0.725771 | Inlier |
| siRNA-Temozolomide Run1-<br>DMSO | NM_0206<br>80 | SCYL1  | SCY1-like<br>1 (S.<br>cerevisiae) | -0.623229 | Inlier |
| siRNA-Temozolomide Run3-<br>DMSO | NM_0206<br>80 | SCYL1  | SCY1-like<br>1 (S.<br>cerevisiae) | -0.2712   | Inlier |



Identification of Survival Genes in Human Glioblastoma Cells Using siRNA Screening  
 Nikhil G Thaker, Fang Zhang, Peter R. McDonald, Tong Ying Shun, Michael D Lewen, Ian F. Pollack, and John S. Lazo

Molecular Pharmacology

|                              |                  |       |                                              |           |        |
|------------------------------|------------------|-------|----------------------------------------------|-----------|--------|
| siRNA-Temozolomide Run2-DMSO | NM_0206<br>80    | SCYL1 | SCY1-like<br>1 (S.<br>cerevisiae)            | -0.055464 | Inlier |
| siRNA Disorazole DMSO Run3   | NM_0206<br>80    | SCYL1 | SCY1-like<br>1 (S.<br>cerevisiae)            | 0.055464  | Inlier |
| siRNA Disorazole DMSO Run1   | NM_0206<br>80    | SCYL1 | SCY1-like<br>1 (S.<br>cerevisiae)            | 0.839897  | Inlier |
| siRNA-Vinblastine Run1-DMSO  | NM_0206<br>80    | SCYL1 | SCY1-like<br>1 (S.<br>cerevisiae)            | 1.206012  | Inlier |
| siRNA-Vinblastine Run2-DMSO  | NM_0206<br>80    | SCYL1 | SCY1-like<br>1 (S.<br>cerevisiae)            | 1.4735    | Inlier |
| siRNA-Temozolomide Run3-DMSO | NM_0010<br>07070 | SDCBP | syndecan<br>binding<br>protein<br>(syntenin) | -1.175118 | Inlier |
| siRNA-Temozolomide Run2-DMSO | NM_0010<br>07070 | SDCBP | syndecan<br>binding<br>protein<br>(syntenin) | -0.618664 | Inlier |
| siRNA Disorazole DMSO Run2   | NM_0010<br>07070 | SDCBP | syndecan<br>binding<br>protein<br>(syntenin) | -0.37222  | Inlier |
| siRNA Disorazole DMSO Run3   | NM_0010<br>07070 | SDCBP | syndecan<br>binding<br>protein<br>(syntenin) | -0.274359 | Inlier |
| siRNA-Vinblastine Run2-DMSO  | NM_0010<br>07070 | SDCBP | syndecan<br>binding<br>protein<br>(syntenin) | 0.274359  | Inlier |
| siRNA-Temozolomide Run1-DMSO | NM_0010<br>07070 | SDCBP | syndecan<br>binding<br>protein<br>(syntenin) | 0.730335  | Inlier |
| siRNA Disorazole DMSO Run1   | NM_0010<br>07070 | SDCBP | syndecan<br>binding<br>protein<br>(syntenin) | 2.02358   | Inlier |
| siRNA-Vinblastine Run1-DMSO  | NM_0010<br>07070 | SDCBP | syndecan<br>binding<br>protein<br>(syntenin) | 2.069586  | Inlier |

Identification of Survival Genes in Human Glioblastoma Cells Using siRNA Screening  
 Nikhil G Thaker, Fang Zhang, Peter R. McDonald, Tong Ying Shun, Michael D Lewen, Ian F. Pollack, and John S. Lazo  
 Molecular Pharmacology

|                              |           |          |                                                            |           |        |
|------------------------------|-----------|----------|------------------------------------------------------------|-----------|--------|
| siRNA-Temozolomide Run3-DMSO | NM_005869 | SDCCAG10 | serological<br>ly defined<br>colon<br>cancer<br>antigen 10 | -1.298576 | Inlier |
| siRNA-Temozolomide Run2-DMSO | NM_005869 | SDCCAG10 | serological<br>ly defined<br>colon<br>cancer<br>antigen 10 | -1.193025 | Inlier |
| siRNA-Temozolomide Run1-DMSO | NM_005869 | SDCCAG10 | serological<br>ly defined<br>colon<br>cancer<br>antigen 10 | -0.410648 | Inlier |
| siRNA Disorazole DMSO Run1   | NM_005869 | SDCCAG10 | serological<br>ly defined<br>colon<br>cancer<br>antigen 10 | -0.017713 | Inlier |
| siRNA-Vinblastine Run2-DMSO  | NM_005869 | SDCCAG10 | serological<br>ly defined<br>colon<br>cancer<br>antigen 10 | 0.017713  | Inlier |
| siRNA Disorazole DMSO Run3   | NM_005869 | SDCCAG10 | serological<br>ly defined<br>colon<br>cancer<br>antigen 10 | 0.056506  | Inlier |
| siRNA Disorazole DMSO Run2   | NM_005869 | SDCCAG10 | serological<br>ly defined<br>colon<br>cancer<br>antigen 10 | 0.938352  | Inlier |
| siRNA-Vinblastine Run1-DMSO  | NM_005869 | SDCCAG10 | serological<br>ly defined<br>colon<br>cancer<br>antigen 10 | 1.230627  | Inlier |

Identification of Survival Genes in Human Glioblastoma Cells Using siRNA Screening

Nikhil G Thaker, Fang Zhang, Peter R. McDonald, Tong Ying Shun, Michael D Lewen, Ian F. Pollack, and John S. Lazo

Molecular Pharmacology

|                              |               |       |                                                               |           |        |
|------------------------------|---------------|-------|---------------------------------------------------------------|-----------|--------|
| siRNA-Vinblastine Run2-DMSO  | NM_0124<br>28 | SDFR1 | stromal cell derived factor receptor 1                        | -2.154009 | Inlier |
| siRNA Disorazole DMSO Run3   | NM_0124<br>28 | SDFR1 | stromal cell derived factor receptor 1                        | -0.747048 | Inlier |
| siRNA-Temozolomide Run2-DMSO | NM_0124<br>28 | SDFR1 | stromal cell derived factor receptor 1                        | -0.720129 | Inlier |
| siRNA Disorazole DMSO Run1   | NM_0124<br>28 | SDFR1 | stromal cell derived factor receptor 1                        | -0.150998 | Inlier |
| siRNA-Temozolomide Run3-DMSO | NM_0124<br>28 | SDFR1 | stromal cell derived factor receptor 1                        | 0.150998  | Inlier |
| siRNA-Temozolomide Run1-DMSO | NM_0124<br>28 | SDFR1 | stromal cell derived factor receptor 1                        | 0.274163  | Inlier |
| siRNA Disorazole DMSO Run2   | NM_0124<br>28 | SDFR1 | stromal cell derived factor receptor 1                        | 0.628871  | Inlier |
| siRNA-Vinblastine Run1-DMSO  | NM_0124<br>28 | SDFR1 | stromal cell derived factor receptor 1                        | 0.839971  | Inlier |
| siRNA-Temozolomide Run3-DMSO | NM_0041<br>68 | SDHA  | succinate dehydrogenase complex, subunit A, flavoprotein (Fp) | -2.086895 | Inlier |

Identification of Survival Genes in Human Glioblastoma Cells Using siRNA Screening

Nikhil G Thaker, Fang Zhang, Peter R. McDonald, Tong Ying Shun, Michael D Lewen, Ian F. Pollack, and John S. Lazo

Molecular Pharmacology

|                              |           |      |                                                               |           |        |
|------------------------------|-----------|------|---------------------------------------------------------------|-----------|--------|
| siRNA-Temozolomide Run2-DMSO | NM_004168 | SDHA | succinate dehydrogenase complex, subunit A, flavoprotein (Fp) | -1.365565 | Inlier |
| siRNA-Vinblastine Run2-DMSO  | NM_004168 | SDHA | succinate dehydrogenase complex, subunit A, flavoprotein (Fp) | -1.141713 | Inlier |
| siRNA-Temozolomide Run1-DMSO | NM_004168 | SDHA | succinate dehydrogenase complex, subunit A, flavoprotein (Fp) | -0.0989   | Inlier |
| siRNA Disorazole DMSO Run3   | NM_004168 | SDHA | succinate dehydrogenase complex, subunit A, flavoprotein (Fp) | 0.0989    | Inlier |
| siRNA Disorazole DMSO Run2   | NM_004168 | SDHA | succinate dehydrogenase complex, subunit A, flavoprotein (Fp) | 0.346602  | Inlier |
| siRNA Disorazole DMSO Run1   | NM_004168 | SDHA | succinate dehydrogenase complex, subunit A, flavoprotein (Fp) | 0.427313  | Inlier |
| siRNA-Vinblastine Run1-DMSO  | NM_004168 | SDHA | succinate dehydrogenase complex, subunit A, flavoprotein (Fp) | 0.921687  | Inlier |

Identification of Survival Genes in Human Glioblastoma Cells Using siRNA Screening  
 Nikhil G Thaker, Fang Zhang, Peter R. McDonald, Tong Ying Shun, Michael D Lewen, Ian F. Pollack, and John S. Lazo

Molecular Pharmacology

|                              |           |      |                                                              |           |        |
|------------------------------|-----------|------|--------------------------------------------------------------|-----------|--------|
| siRNA-Vinblastine Run2-DMSO  | NM_003000 | SDHB | succinate dehydrogenase complex, subunit B, iron sulfur (lp) | -1.268425 | Inlier |
| siRNA-Temozolomide Run2-DMSO | NM_003000 | SDHB | succinate dehydrogenase complex, subunit B, iron sulfur (lp) | -1.043356 | Inlier |
| siRNA-Temozolomide Run3-DMSO | NM_003000 | SDHB | succinate dehydrogenase complex, subunit B, iron sulfur (lp) | -0.786968 | Inlier |
| siRNA Disorazole DMSO Run3   | NM_003000 | SDHB | succinate dehydrogenase complex, subunit B, iron sulfur (lp) | -0.100909 | Inlier |
| siRNA Disorazole DMSO Run1   | NM_003000 | SDHB | succinate dehydrogenase complex, subunit B, iron sulfur (lp) | 0.100909  | Inlier |
| siRNA-Temozolomide Run1-DMSO | NM_003000 | SDHB | succinate dehydrogenase complex, subunit B, iron sulfur (lp) | 0.111139  | Inlier |
| siRNA Disorazole DMSO Run2   | NM_003000 | SDHB | succinate dehydrogenase complex, subunit B, iron sulfur (lp) | 0.562032  | Inlier |

Identification of Survival Genes in Human Glioblastoma Cells Using siRNA Screening

Nikhil G Thaker, Fang Zhang, Peter R. McDonald, Tong Ying Shun, Michael D Lewen, Ian F. Pollack, and John S. Lazo

Molecular Pharmacology

|                              |           |      |                                                                              |           |        |
|------------------------------|-----------|------|------------------------------------------------------------------------------|-----------|--------|
| siRNA-Vinblastine Run1-DMSO  | NM_003000 | SDHB | succinate dehydrogenase complex, subunit B, iron sulfur (lp)                 | 1.255728  | Inlier |
| siRNA-Vinblastine Run2-DMSO  | NM_003001 | SDHC | succinate dehydrogenase complex, subunit C, integral membrane protein, 15kDa | -1.975744 | Inlier |
| siRNA-Temozolomide Run2-DMSO | NM_003001 | SDHC | succinate dehydrogenase complex, subunit C, integral membrane protein, 15kDa | -1.81607  | Inlier |
| siRNA Disorazole DMSO Run3   | NM_003001 | SDHC | succinate dehydrogenase complex, subunit C, integral membrane protein, 15kDa | -0.569848 | Inlier |
| siRNA Disorazole DMSO Run1   | NM_003001 | SDHC | succinate dehydrogenase complex, subunit C, integral membrane protein, 15kDa | -0.052147 | Inlier |
| siRNA Disorazole DMSO Run2   | NM_003001 | SDHC | succinate dehydrogenase complex, subunit C, integral membrane protein, 15kDa | 0.052147  | Inlier |

Identification of Survival Genes in Human Glioblastoma Cells Using siRNA Screening

Nikhil G Thaker, Fang Zhang, Peter R. McDonald, Tong Ying Shun, Michael D Lewen, Ian F. Pollack, and John S. Lazo

Molecular Pharmacology

|                              |           |      |                                                                              |           |        |
|------------------------------|-----------|------|------------------------------------------------------------------------------|-----------|--------|
| siRNA-Temozolomide Run3-DMSO | NM_003001 | SDHC | succinate dehydrogenase complex, subunit C, integral membrane protein, 15kDa | 0.076675  | Inlier |
| siRNA-Temozolomide Run1-DMSO | NM_003001 | SDHC | succinate dehydrogenase complex, subunit C, integral membrane protein, 15kDa | 0.779152  | Inlier |
| siRNA-Vinblastine Run1-DMSO  | NM_003001 | SDHC | succinate dehydrogenase complex, subunit D, integral membrane protein, 15kDa | 1.708734  | Inlier |
| siRNA-Vinblastine Run2-DMSO  | NM_003002 | SDHD | succinate dehydrogenase complex, subunit D, integral membrane protein        | -2.954798 | Inlier |
| siRNA-Temozolomide Run2-DMSO | NM_003002 | SDHD | succinate dehydrogenase complex, subunit D, integral membrane protein        | -2.760789 | Inlier |
| siRNA Disorazole DMSO Run3   | NM_003002 | SDHD | succinate dehydrogenase complex, subunit D, integral membrane protein        | -0.307578 | Inlier |

Identification of Survival Genes in Human Glioblastoma Cells Using siRNA Screening  
 Nikhil G Thaker, Fang Zhang, Peter R. McDonald, Tong Ying Shun, Michael D Lewen, Ian F. Pollack, and John S. Lazo

Molecular Pharmacology

|                              |           |       |                                                                       |           |        |
|------------------------------|-----------|-------|-----------------------------------------------------------------------|-----------|--------|
| siRNA-Temozolomide Run3-DMSO | NM_003002 | SDHD  | succinate dehydrogenase complex, subunit D, integral membrane protein | -0.071003 | Inlier |
| siRNA Disorazole DMSO Run1   | NM_003002 | SDHD  | succinate dehydrogenase complex, subunit D, integral membrane protein | 0.071003  | Inlier |
| siRNA-Temozolomide Run1-DMSO | NM_003002 | SDHD  | succinate dehydrogenase complex, subunit D, integral membrane protein | 0.392678  | Inlier |
| siRNA Disorazole DMSO Run2   | NM_003002 | SDHD  | succinate dehydrogenase complex, subunit D, integral membrane protein | 0.956322  | Inlier |
| siRNA-Vinblastine Run1-DMSO  | NM_003002 | SDHD  | succinate dehydrogenase complex, subunit D, integral membrane protein | 2.911189  | Inlier |
| siRNA-Temozolomide Run2-DMSO | NM_148897 | SDR-O | SDR-O                                                                 | -2.802442 | Inlier |
| siRNA-Vinblastine Run2-DMSO  | NM_148897 | SDR-O | SDR-O                                                                 | -2.56651  | Inlier |
| siRNA Disorazole DMSO Run1   | NM_148897 | SDR-O | SDR-O                                                                 | -0.655699 | Inlier |
| siRNA-Temozolomide Run3-DMSO | NM_148897 | SDR-O | SDR-O                                                                 | -0.491875 | Inlier |
| siRNA-Vinblastine Run1-DMSO  | NM_148897 | SDR-O | SDR-O                                                                 | 0.491875  | Inlier |
| siRNA Disorazole DMSO Run3   | NM_148897 | SDR-O | SDR-O                                                                 | 0.515873  | Inlier |



Identification of Survival Genes in Human Glioblastoma Cells Using siRNA Screening  
 Nikhil G Thaker, Fang Zhang, Peter R. McDonald, Tong Ying Shun, Michael D Lewen, Ian F. Pollack, and John S. Lazo

|                              |               |       |                                |           |        |
|------------------------------|---------------|-------|--------------------------------|-----------|--------|
| Molecular Pharmacology       | NM_1488       |       |                                |           |        |
| siRNA Disorazole DMSO Run2   | 97            | SDR-O | SDR-O                          | 0.693301  | Inlier |
| siRNA-Temozolomide Run1-DMSO | NM_1488<br>97 | SDR-O | SDR-O                          | 0.773018  | Inlier |
| siRNA-Temozolomide Run3-DMSO | NM_0068<br>43 | SDS   | serine<br>dehydrata<br>se      | -1.125532 | Inlier |
| siRNA-Temozolomide Run1-DMSO | NM_0068<br>43 | SDS   | serine<br>dehydrata<br>se      | -0.730802 | Inlier |
| siRNA-Temozolomide Run2-DMSO | NM_0068<br>43 | SDS   | serine<br>dehydrata<br>se      | -0.618198 | Inlier |
| siRNA-Vinblastine Run2-DMSO  | NM_0068<br>43 | SDS   | serine<br>dehydrata<br>se      | -0.144193 | Inlier |
| siRNA Disorazole DMSO Run1   | NM_0068<br>43 | SDS   | serine<br>dehydrata<br>se      | 0.144193  | Inlier |
| siRNA Disorazole DMSO Run3   | NM_0068<br>43 | SDS   | serine<br>dehydrata<br>se      | 0.346202  | Inlier |
| siRNA Disorazole DMSO Run2   | NM_0068<br>43 | SDS   | serine<br>dehydrata<br>se      | 1.14342   | Inlier |
| siRNA-Vinblastine Run1-DMSO  | NM_0068<br>43 | SDS   | serine<br>dehydrata<br>se      | 1.384683  | Inlier |
| siRNA-Temozolomide Run3-DMSO | NM_1384<br>32 | SDSL  | serine<br>dehydrata<br>se-like | -1.575058 | Inlier |
| siRNA-Temozolomide Run2-DMSO | NM_1384<br>32 | SDSL  | serine<br>dehydrata<br>se-like | -1.080456 | Inlier |
| siRNA Disorazole DMSO Run1   | NM_1384<br>32 | SDSL  | serine<br>dehydrata<br>se-like | -0.108415 | Inlier |
| siRNA-Temozolomide Run1-DMSO | NM_1384<br>32 | SDSL  | serine<br>dehydrata<br>se-like | -0.07831  | Inlier |
| siRNA-Vinblastine Run2-DMSO  | NM_1384<br>32 | SDSL  | serine<br>dehydrata<br>se-like | 0.07831   | Inlier |
| siRNA Disorazole DMSO Run3   | NM_1384<br>32 | SDSL  | serine<br>dehydrata<br>se-like | 0.268544  | Inlier |
| siRNA-Vinblastine Run1-DMSO  | NM_1384<br>32 | SDSL  | serine<br>dehydrata<br>se-like | 1.182014  | Inlier |
| siRNA Disorazole DMSO Run2   | NM_1384<br>32 | SDSL  | serine<br>dehydrata<br>se-like | 1.26561   | Inlier |

Identification of Survival Genes in Human Glioblastoma Cells Using siRNA Screening  
 Nikhil G Thaker, Fang Zhang, Peter R. McDonald, Tong Ying Shun, Michael D Lewen, Ian F. Pollack, and John S. Lazo  
 Molecular Pharmacology

|                              |               |        |                                          |           |        |
|------------------------------|---------------|--------|------------------------------------------|-----------|--------|
| siRNA-Temozolomide Run3-DMSO | NM_0063<br>64 | SEC23A | Sec23<br>homolog A<br>(S.<br>cerevisiae) | -2.170104 | Inlier |
| siRNA-Temozolomide Run2-DMSO | NM_0063<br>64 | SEC23A | Sec23<br>homolog A<br>(S.<br>cerevisiae) | -0.577942 | Inlier |
| siRNA-Vinblastine Run2-DMSO  | NM_0063<br>64 | SEC23A | Sec23<br>homolog A<br>(S.<br>cerevisiae) | -0.123198 | Inlier |
| siRNA Disorazole DMSO Run3   | NM_0063<br>64 | SEC23A | Sec23<br>homolog A<br>(S.<br>cerevisiae) | -0.020134 | Inlier |
| siRNA-Temozolomide Run1-DMSO | NM_0063<br>64 | SEC23A | Sec23<br>homolog A<br>(S.<br>cerevisiae) | 0.020134  | Inlier |
| siRNA Disorazole DMSO Run1   | NM_0063<br>64 | SEC23A | Sec23<br>homolog A<br>(S.<br>cerevisiae) | 0.771058  | Inlier |
| siRNA Disorazole DMSO Run2   | NM_0063<br>64 | SEC23A | Sec23<br>homolog A<br>(S.<br>cerevisiae) | 2.326362  | Inlier |
| siRNA-Vinblastine Run1-DMSO  | NM_0063<br>64 | SEC23A | Sec23<br>homolog A<br>(S.<br>cerevisiae) | 2.767837  | Inlier |
| siRNA-Temozolomide Run3-DMSO | NM_0329<br>85 | SEC23B | Sec23<br>homolog B<br>(S.<br>cerevisiae) | -0.679198 | Inlier |
| siRNA Disorazole DMSO Run3   | NM_0329<br>85 | SEC23B | Sec23<br>homolog B<br>(S.<br>cerevisiae) | -0.669802 | Inlier |

Identification of Survival Genes in Human Glioblastoma Cells Using siRNA Screening  
 Nikhil G Thaker, Fang Zhang, Peter R. McDonald, Tong Ying Shun, Michael D Lewen, Ian F. Pollack, and John S. Lazo  
 Molecular Pharmacology

|                              |               |        |                                                                       |           |         |
|------------------------------|---------------|--------|-----------------------------------------------------------------------|-----------|---------|
| siRNA-Temozolomide Run1-DMSO | NM_0329<br>85 | SEC23B | Sec23<br>homolog B<br>(S.<br>cerevisiae)                              | -0.499432 | Inlier  |
| siRNA-Vinblastine Run2-DMSO  | NM_0329<br>85 | SEC23B | Sec23<br>homolog B<br>(S.<br>cerevisiae)                              | -0.443895 | Inlier  |
| siRNA-Temozolomide Run2-DMSO | NM_0329<br>85 | SEC23B | Sec23<br>homolog B<br>(S.<br>cerevisiae)                              | 0.443895  | Inlier  |
| siRNA Disorazole DMSO Run1   | NM_0329<br>85 | SEC23B | Sec23<br>homolog B<br>(S.<br>cerevisiae)                              | 1.095446  | Inlier  |
| siRNA-Vinblastine Run1-DMSO  | NM_0329<br>85 | SEC23B | Sec23<br>homolog B<br>(S.<br>cerevisiae)                              | 3.720585  | Outlier |
| siRNA Disorazole DMSO Run2   | NM_0329<br>85 | SEC23B | Sec23<br>homolog B<br>(S.<br>cerevisiae)                              | 4.091234  | Outlier |
| siRNA-Temozolomide Run3-DMSO | NM_0063<br>23 | SEC24B | SEC24<br>related<br>gene<br>family,<br>member B<br>(S.<br>cerevisiae) | -1.004738 | Inlier  |
| siRNA-Temozolomide Run2-DMSO | NM_0063<br>23 | SEC24B | SEC24<br>related<br>gene<br>family,<br>member B<br>(S.<br>cerevisiae) | -0.857704 | Inlier  |

Identification of Survival Genes in Human Glioblastoma Cells Using siRNA Screening  
 Nikhil G Thaker, Fang Zhang, Peter R. McDonald, Tong Ying Shun, Michael D Lewen, Ian F. Pollack, and John S. Lazo  
 Molecular Pharmacology

|                                  |               |        |                                                                       |           |        |
|----------------------------------|---------------|--------|-----------------------------------------------------------------------|-----------|--------|
| siRNA Disorazole DMSO Run2       | NM_0063<br>23 | SEC24B | SEC24<br>related<br>gene<br>family,<br>member B<br>(S.<br>cerevisiae) | -0.468635 | Inlier |
| siRNA-Temozolomide Run1-<br>DMSO | NM_0063<br>23 | SEC24B | SEC24<br>related<br>gene<br>family,<br>member B<br>(S.<br>cerevisiae) | -0.456262 | Inlier |
| siRNA Disorazole DMSO Run3       | NM_0063<br>23 | SEC24B | SEC24<br>related<br>gene<br>family,<br>member B<br>(S.<br>cerevisiae) | 0.456262  | Inlier |
| siRNA Disorazole DMSO Run1       | NM_0063<br>23 | SEC24B | SEC24<br>related<br>gene<br>family,<br>member B<br>(S.<br>cerevisiae) | 0.491296  | Inlier |
| siRNA-Vinblastine Run1-<br>DMSO  | NM_0063<br>23 | SEC24B | SEC24<br>related<br>gene<br>family,<br>member B<br>(S.<br>cerevisiae) | 1.501398  | Inlier |
| siRNA-Vinblastine Run2-<br>DMSO  | NM_0063<br>23 | SEC24B | SEC24<br>related<br>gene<br>family,<br>member B<br>(S.<br>cerevisiae) | 1.505627  | Inlier |

Identification of Survival Genes in Human Glioblastoma Cells Using siRNA Screening

Nikhil G Thaker, Fang Zhang, Peter R. McDonald, Tong Ying Shun, Michael D Lewen, Ian F. Pollack, and John S. Lazo

Molecular Pharmacology

|                              |               |        |                                                                       |           |        |
|------------------------------|---------------|--------|-----------------------------------------------------------------------|-----------|--------|
| siRNA-Temozolomide Run3-DMSO | NM_1985<br>97 | SEC24C | SEC24<br>related<br>gene<br>family,<br>member C<br>(S.<br>cerevisiae) | -1.635773 | Inlier |
| siRNA-Temozolomide Run1-DMSO | NM_1985<br>97 | SEC24C | SEC24<br>related<br>gene<br>family,<br>member C<br>(S.<br>cerevisiae) | -0.747493 | Inlier |
| siRNA Disorazole DMSO Run3   | NM_1985<br>97 | SEC24C | SEC24<br>related<br>gene<br>family,<br>member C<br>(S.<br>cerevisiae) | -0.601507 | Inlier |
| siRNA-Temozolomide Run2-DMSO | NM_1985<br>97 | SEC24C | SEC24<br>related<br>gene<br>family,<br>member C<br>(S.<br>cerevisiae) | -0.232738 | Inlier |
| siRNA Disorazole DMSO Run1   | NM_1985<br>97 | SEC24C | SEC24<br>related<br>gene<br>family,<br>member C<br>(S.<br>cerevisiae) | 0.232738  | Inlier |
| siRNA Disorazole DMSO Run2   | NM_1985<br>97 | SEC24C | SEC24<br>related<br>gene<br>family,<br>member C<br>(S.<br>cerevisiae) | 0.460799  | Inlier |

Identification of Survival Genes in Human Glioblastoma Cells Using siRNA Screening  
 Nikhil G Thaker, Fang Zhang, Peter R. McDonald, Tong Ying Shun, Michael D Lewen, Ian F. Pollack, and John S. Lazo  
 Molecular Pharmacology

|                              |               |        |                                                                       |           |        |
|------------------------------|---------------|--------|-----------------------------------------------------------------------|-----------|--------|
| siRNA-Vinblastine Run2-DMSO  | NM_1985<br>97 | SEC24C | SEC24<br>related<br>gene<br>family,<br>member C<br>(S.<br>cerevisiae) | 1.019407  | Inlier |
| siRNA-Vinblastine Run1-DMSO  | NM_1985<br>97 | SEC24C | SEC24<br>related<br>gene<br>family,<br>member C<br>(S.<br>cerevisiae) | 1.165755  | Inlier |
| siRNA-Temozolomide Run3-DMSO | NM_0148<br>22 | SEC24D | SEC24<br>related<br>gene<br>family,<br>member D<br>(S.<br>cerevisiae) | -1.514853 | Inlier |
| siRNA-Temozolomide Run1-DMSO | NM_0148<br>22 | SEC24D | SEC24<br>related<br>gene<br>family,<br>member D<br>(S.<br>cerevisiae) | -0.981075 | Inlier |
| siRNA Disorazole DMSO Run2   | NM_0148<br>22 | SEC24D | SEC24<br>related<br>gene<br>family,<br>member D<br>(S.<br>cerevisiae) | -0.343898 | Inlier |
| siRNA-Temozolomide Run2-DMSO | NM_0148<br>22 | SEC24D | SEC24<br>related<br>gene<br>family,<br>member D<br>(S.<br>cerevisiae) | -0.151912 | Inlier |

Identification of Survival Genes in Human Glioblastoma Cells Using siRNA Screening  
 Nikhil G Thaker, Fang Zhang, Peter R. McDonald, Tong Ying Shun, Michael D Lewen, Ian F. Pollack, and John S. Lazo  
 Molecular Pharmacology

|                                  |               |        |                                                                       |           |        |
|----------------------------------|---------------|--------|-----------------------------------------------------------------------|-----------|--------|
| siRNA Disorazole DMSO Run1       | NM_0148<br>22 | SEC24D | SEC24<br>related<br>gene<br>family,<br>member D<br>(S.<br>cerevisiae) | 0.151912  | Inlier |
| siRNA Disorazole DMSO Run3       | NM_0148<br>22 | SEC24D | SEC24<br>related<br>gene<br>family,<br>member D<br>(S.<br>cerevisiae) | 0.569224  | Inlier |
| siRNA-Vinblastine Run1-<br>DMSO  | NM_0148<br>22 | SEC24D | SEC24<br>related<br>gene<br>family,<br>member D<br>(S.<br>cerevisiae) | 0.779776  | Inlier |
| siRNA-Vinblastine Run2-<br>DMSO  | NM_0148<br>22 | SEC24D | SEC24<br>related<br>gene<br>family,<br>member D<br>(S.<br>cerevisiae) | 0.9103    | Inlier |
| siRNA-Temozolomide Run3-<br>DMSO | NM_0314<br>54 | SELO   | SELO                                                                  | -1.117569 | Inlier |
| siRNA Disorazole DMSO Run1       | NM_0314<br>54 | SELO   | SELO                                                                  | -0.771678 | Inlier |
| siRNA-Temozolomide Run2-<br>DMSO | NM_0314<br>54 | SELO   | SELO                                                                  | -0.577322 | Inlier |
| siRNA-Temozolomide Run1-<br>DMSO | NM_0314<br>54 | SELO   | SELO                                                                  | -0.023636 | Inlier |
| siRNA Disorazole DMSO Run3       | NM_0314<br>54 | SELO   | SELO                                                                  | 0.023635  | Inlier |
| siRNA-Vinblastine Run2-<br>DMSO  | NM_0314<br>54 | SELO   | SELO                                                                  | 0.038182  | Inlier |
| siRNA-Vinblastine Run1-<br>DMSO  | NM_0314<br>54 | SELO   | SELO                                                                  | 1.120841  | Inlier |
| siRNA Disorazole DMSO Run2       | NM_0314<br>54 | SELO   | SELO                                                                  | 1.750958  | Inlier |

Identification of Survival Genes in Human Glioblastoma Cells Using siRNA Screening  
 Nikhil G Thaker, Fang Zhang, Peter R. McDonald, Tong Ying Shun, Michael D Lewen, Ian F. Pollack, and John S. Lazo  
 Molecular Pharmacology

|                                  |               |       |                                                   |           |        |
|----------------------------------|---------------|-------|---------------------------------------------------|-----------|--------|
| siRNA Disorazole DMSO Run2       | NM_0145<br>54 | SENP1 | SUMO1/s<br>entrin<br>specific<br>protease 1       | -1.86995  | Inlier |
| siRNA-Temozolomide Run3-<br>DMSO | NM_0145<br>54 | SENP1 | SUMO1/s<br>entrin<br>specific<br>protease 1       | -1.779144 | Inlier |
| siRNA-Temozolomide Run2-<br>DMSO | NM_0145<br>54 | SENP1 | SUMO1/s<br>entrin<br>specific<br>protease 1       | -1.495    | Inlier |
| siRNA Disorazole DMSO Run1       | NM_0145<br>54 | SENP1 | SUMO1/s<br>entrin<br>specific<br>protease 1       | -0.050991 | Inlier |
| siRNA-Temozolomide Run1-<br>DMSO | NM_0145<br>54 | SENP1 | SUMO1/s<br>entrin<br>specific<br>protease 1       | 0.050991  | Inlier |
| siRNA Disorazole DMSO Run3       | NM_0145<br>54 | SENP1 | SUMO1/s<br>entrin<br>specific<br>protease 1       | 0.138447  | Inlier |
| siRNA-Vinblastine Run2-<br>DMSO  | NM_0145<br>54 | SENP1 | SUMO1/s<br>entrin<br>specific<br>protease 1       | 0.306608  | Inlier |
| siRNA-Vinblastine Run1-<br>DMSO  | NM_0145<br>54 | SENP1 | SUMO1/s<br>entrin<br>specific<br>protease 1       | 1.042392  | Inlier |
| siRNA-Temozolomide Run3-<br>DMSO | NM_0216<br>27 | SENP2 | SUMO1/s<br>entrin/SM<br>T3 specific<br>protease 2 | -2.651279 | Inlier |
| siRNA Disorazole DMSO Run2       | NM_0216<br>27 | SENP2 | SUMO1/s<br>entrin/SM<br>T3 specific<br>protease 2 | -0.832614 | Inlier |



Identification of Survival Genes in Human Glioblastoma Cells Using siRNA Screening  
 Nikhil G Thaker, Fang Zhang, Peter R. McDonald, Tong Ying Shun, Michael D Lewen, Ian F. Pollack, and John S. Lazo  
 Molecular Pharmacology

|                                  |               |       |                                                   |           |         |
|----------------------------------|---------------|-------|---------------------------------------------------|-----------|---------|
| siRNA Disorazole DMSO Run3       | NM_0216<br>27 | SENP2 | SUMO1/s<br>entrin/SM<br>T3 specific<br>protease 2 | -0.516386 | Inlier  |
| siRNA-Temozolomide Run2-<br>DMSO | NM_0216<br>27 | SENP2 | SUMO1/s<br>entrin/SM<br>T3 specific<br>protease 2 | -0.073757 | Inlier  |
| siRNA Disorazole DMSO Run1       | NM_0216<br>27 | SENP2 | SUMO1/s<br>entrin/SM<br>T3 specific<br>protease 2 | 0.073757  | Inlier  |
| siRNA-Temozolomide Run1-<br>DMSO | NM_0216<br>27 | SENP2 | SUMO1/s<br>entrin/SM<br>T3 specific<br>protease 2 | 0.343896  | Inlier  |
| siRNA-Vinblastine Run2-<br>DMSO  | NM_0216<br>27 | SENP2 | SUMO1/s<br>entrin/SM<br>T3 specific<br>protease 2 | 5.136608  | Outlier |
| siRNA-Vinblastine Run1-<br>DMSO  | NM_0216<br>27 | SENP2 | SUMO1/s<br>entrin/SM<br>T3 specific<br>protease 2 | 5.419233  | Outlier |
| siRNA-Temozolomide Run2-<br>DMSO | NM_0156<br>70 | SENP3 | SUMO1/s<br>entrin/SM<br>T3 specific<br>protease 3 | -1.8785   | Inlier  |
| siRNA-Temozolomide Run3-<br>DMSO | NM_0156<br>70 | SENP3 | SUMO1/s<br>entrin/SM<br>T3 specific<br>protease 3 | -1.876349 | Inlier  |

Identification of Survival Genes in Human Glioblastoma Cells Using siRNA Screening  
 Nikhil G Thaker, Fang Zhang, Peter R. McDonald, Tong Ying Shun, Michael D Lewen, Ian F. Pollack, and John S. Lazo  
 Molecular Pharmacology

|                                  |               |       |                                                   |           |        |
|----------------------------------|---------------|-------|---------------------------------------------------|-----------|--------|
| siRNA Disorazole DMSO Run1       | NM_0156<br>70 | SENP3 | SUMO1/s<br>entrin/SM<br>T3 specific<br>protease 3 | -0.543231 | Inlier |
| siRNA Disorazole DMSO Run3       | NM_0156<br>70 | SENP3 | SUMO1/s<br>entrin/SM<br>T3 specific<br>protease 3 | -0.3138   | Inlier |
| siRNA-Temozolomide Run1-<br>DMSO | NM_0156<br>70 | SENP3 | SUMO1/s<br>entrin/SM<br>T3 specific<br>protease 3 | 0.3138    | Inlier |
| siRNA-Vinblastine Run2-<br>DMSO  | NM_0156<br>70 | SENP3 | SUMO1/s<br>entrin/SM<br>T3 specific<br>protease 3 | 0.642396  | Inlier |
| siRNA Disorazole DMSO Run2       | NM_0156<br>70 | SENP3 | SUMO1/s<br>entrin/SM<br>T3 specific<br>protease 3 | 0.706604  | Inlier |
| siRNA-Vinblastine Run1-<br>DMSO  | NM_0156<br>70 | SENP3 | SUMO1/s<br>entrin/SM<br>T3 specific<br>protease 3 | 0.731514  | Inlier |
| siRNA-Temozolomide Run2-<br>DMSO | NM_1526<br>99 | SENP5 | SUMO1/s<br>entrin<br>specific<br>protease 5       | -0.95075  | Inlier |
| siRNA-Temozolomide Run3-<br>DMSO | NM_1526<br>99 | SENP5 | SUMO1/s<br>entrin<br>specific<br>protease 5       | -0.704128 | Inlier |
| siRNA Disorazole DMSO Run2       | NM_1526<br>99 | SENP5 | SUMO1/s<br>entrin<br>specific<br>protease 5       | -0.659688 | Inlier |

Identification of Survival Genes in Human Glioblastoma Cells Using siRNA Screening  
 Nikhil G Thaker, Fang Zhang, Peter R. McDonald, Tong Ying Shun, Michael D Lewen, Ian F. Pollack, and John S. Lazo  
 Molecular Pharmacology

|                                  |               |       |                                             |           |        |
|----------------------------------|---------------|-------|---------------------------------------------|-----------|--------|
| siRNA Disorazole DMSO Run1       | NM_1526<br>99 | SENP5 | SUMO1/s<br>entrin<br>specific<br>protease 5 | -0.086903 | Inlier |
| siRNA Disorazole DMSO Run3       | NM_1526<br>99 | SENP5 | SUMO1/s<br>entrin<br>specific<br>protease 5 | 0.086902  | Inlier |
| siRNA-Temozolomide Run1-<br>DMSO | NM_1526<br>99 | SENP5 | SUMO1/s<br>entrin<br>specific<br>protease 5 | 0.126703  | Inlier |
| siRNA-Vinblastine Run1-<br>DMSO  | NM_1526<br>99 | SENP5 | SUMO1/s<br>entrin<br>specific<br>protease 5 | 0.689312  | Inlier |
| siRNA-Vinblastine Run2-<br>DMSO  | NM_1526<br>99 | SENP5 | SUMO1/s<br>entrin<br>specific<br>protease 5 | 0.873922  | Inlier |
| siRNA-Temozolomide Run2-<br>DMSO | NM_0155<br>71 | SENP6 | SUMO1/s<br>entrin<br>specific<br>protease 6 | -2.065602 | Inlier |
| siRNA Disorazole DMSO Run1       | NM_0155<br>71 | SENP6 | SUMO1/s<br>entrin<br>specific<br>protease 6 | -1.24014  | Inlier |
| siRNA-Vinblastine Run1-<br>DMSO  | NM_0155<br>71 | SENP6 | SUMO1/s<br>entrin<br>specific<br>protease 6 | -0.422319 | Inlier |
| siRNA-Temozolomide Run3-<br>DMSO | NM_0155<br>71 | SENP6 | SUMO1/s<br>entrin<br>specific<br>protease 6 | -0.213078 | Inlier |
| siRNA-Temozolomide Run1-<br>DMSO | NM_0155<br>71 | SENP6 | SUMO1/s<br>entrin<br>specific<br>protease 6 | 0.213078  | Inlier |

Identification of Survival Genes in Human Glioblastoma Cells Using siRNA Screening  
 Nikhil G Thaker, Fang Zhang, Peter R. McDonald, Tong Ying Shun, Michael D Lewen, Ian F. Pollack, and John S. Lazo  
 Molecular Pharmacology

|                              |               |       |                                             |           |        |
|------------------------------|---------------|-------|---------------------------------------------|-----------|--------|
| siRNA-Vinblastine Run2-DMSO  | NM_0155<br>71 | SENP6 | SUMO1/s<br>entrin<br>specific<br>protease 6 | 0.529722  | Inlier |
| siRNA Disorazole DMSO Run3   | NM_0155<br>71 | SENP6 | SUMO1/s<br>entrin<br>specific<br>protease 6 | 0.819278  | Inlier |
| siRNA Disorazole DMSO Run2   | NM_0155<br>71 | SENP6 | SUMO1/s<br>entrin<br>specific<br>protease 6 | 0.898212  | Inlier |
| siRNA Disorazole DMSO Run2   | NM_0206<br>54 | SENP7 | SUMO1/s<br>entrin<br>specific<br>protease 7 | -1.985275 | Inlier |
| siRNA-Temozolomide Run2-DMSO | NM_0206<br>54 | SENP7 | SUMO1/s<br>entrin<br>specific<br>protease 7 | -1.766673 | Inlier |
| siRNA Disorazole DMSO Run1   | NM_0206<br>54 | SENP7 | SUMO1/s<br>entrin<br>specific<br>protease 7 | -0.341636 | Inlier |
| siRNA-Temozolomide Run3-DMSO | NM_0206<br>54 | SENP7 | SUMO1/s<br>entrin<br>specific<br>protease 7 | -0.201986 | Inlier |
| siRNA-Temozolomide Run1-DMSO | NM_0206<br>54 | SENP7 | SUMO1/s<br>entrin<br>specific<br>protease 7 | 0.201986  | Inlier |
| siRNA Disorazole DMSO Run3   | NM_0206<br>54 | SENP7 | SUMO1/s<br>entrin<br>specific<br>protease 7 | 0.507951  | Inlier |
| siRNA-Vinblastine Run1-DMSO  | NM_0206<br>54 | SENP7 | SUMO1/s<br>entrin<br>specific<br>protease 7 | 0.841049  | Inlier |

Identification of Survival Genes in Human Glioblastoma Cells Using siRNA Screening  
 Nikhil G Thaker, Fang Zhang, Peter R. McDonald, Tong Ying Shun, Michael D Lewen, Ian F. Pollack, and John S. Lazo  
 Molecular Pharmacology

|                              |           |       |                                                                                                                                                                                                                               |           |        |
|------------------------------|-----------|-------|-------------------------------------------------------------------------------------------------------------------------------------------------------------------------------------------------------------------------------|-----------|--------|
| siRNA-Vinblastine Run2-DMSO  | NM_020654 | SENP7 | SUMO1/sentrin specific protease 7 SUMO/sentrin specific protease family member 8 | 1.182883  | Inlier |
| siRNA Disorazole DMSO Run2   | NM_145204 | SENP8 | SUMO/sentrin specific protease family member 8 SUMO/sentrin specific protease family member 8 SUMO/sentrin specific protease family member 8                                                                                  | -3.399492 | Inlier |
| siRNA-Temozolomide Run3-DMSO | NM_145204 | SENP8 | SUMO/sentrin specific protease family member 8 SUMO/sentrin specific protease family member 8 SUMO/sentrin specific protease family member 8                                                                                  | -1.119003 | Inlier |
| siRNA Disorazole DMSO Run1   | NM_145204 | SENP8 | SUMO/sentrin specific protease family member 8 SUMO/sentrin specific protease family member 8 SUMO/sentrin specific protease family member 8                                                                                  | -0.694706 | Inlier |
| siRNA-Temozolomide Run2-DMSO | NM_145204 | SENP8 | SUMO/sentrin specific protease family member 8 SUMO/sentrin specific protease family member 8 SUMO/sentrin specific protease family member 8                                                                                  | -0.32985  | Inlier |
| siRNA-Vinblastine Run1-DMSO  | NM_145204 | SENP8 | SUMO/sentrin specific protease family member 8 SUMO/sentrin specific protease family member 8 SUMO/sentrin specific protease family member 8                                                                                  | 0.329849  | Inlier |
| siRNA Disorazole DMSO Run3   | NM_145204 | SENP8 | SUMO/sentrin specific protease family member 8 SUMO/sentrin specific protease family member 8 SUMO/sentrin specific protease family member 8                                                                                  | 0.59918   | Inlier |
| siRNA-Temozolomide Run1-DMSO | NM_145204 | SENP8 | SUMO/sentrin specific protease family member 8 SUMO/sentrin specific protease family member 8 SUMO/sentrin specific protease family member 8                                                                                  | 0.654294  | Inlier |

Identification of Survival Genes in Human Glioblastoma Cells Using siRNA Screening  
 Nikhil G Thaker, Fang Zhang, Peter R. McDonald, Tong Ying Shun, Michael D Lewen, Ian F. Pollack, and John S. Lazo

Molecular Pharmacology

| siRNA Treatment              | Gene ID   | Gene Name | Protein Name                                   | Score     | Category |
|------------------------------|-----------|-----------|------------------------------------------------|-----------|----------|
| siRNA-Vinblastine Run2-DMSO  | NM_145204 | SENP8     | SUMO/sentrin specific protease family member 8 | 1.859601  | Inlier   |
| siRNA Disorazole DMSO Run2   | NM_012247 | SEPHS1    | selenophosphate synthetase 1                   | -0.801387 | Inlier   |
| siRNA-Temozolomide Run3-DMSO | NM_012247 | SEPHS1    | selenophosphate synthetase 1                   | -0.765634 | Inlier   |
| siRNA-Temozolomide Run2-DMSO | NM_012247 | SEPHS1    | selenophosphate synthetase 1                   | -0.703081 | Inlier   |
| siRNA-Temozolomide Run1-DMSO | NM_012247 | SEPHS1    | selenophosphate synthetase 1                   | -0.175036 | Inlier   |
| siRNA Disorazole DMSO Run1   | NM_012247 | SEPHS1    | selenophosphate synthetase 1                   | 0.175036  | Inlier   |
| siRNA Disorazole DMSO Run3   | NM_012247 | SEPHS1    | selenophosphate synthetase 1                   | 0.213965  | Inlier   |
| siRNA-Vinblastine Run1-DMSO  | NM_012247 | SEPHS1    | selenophosphate synthetase 1                   | 0.645918  | Inlier   |
| siRNA-Vinblastine Run2-DMSO  | NM_012247 | SEPHS1    | selenophosphate synthetase 1                   | 0.741611  | Inlier   |
| siRNA-Temozolomide Run3-DMSO | NM_012248 | SEPHS2    | selenophosphate synthetase 2                   | -1.245002 | Inlier   |
| siRNA-Temozolomide Run2-DMSO | NM_012248 | SEPHS2    | selenophosphate synthetase 2                   | -1.122604 | Inlier   |
| siRNA Disorazole DMSO Run2   | NM_012248 | SEPHS2    | selenophosphate synthetase 2                   | -0.910598 | Inlier   |

Identification of Survival Genes in Human Glioblastoma Cells Using siRNA Screening  
 Nikhil G Thaker, Fang Zhang, Peter R. McDonald, Tong Ying Shun, Michael D Lewen, Ian F. Pollack, and John S. Lazo

Molecular Pharmacology

|                              |               |          |                                                                                                    |           |        |
|------------------------------|---------------|----------|----------------------------------------------------------------------------------------------------|-----------|--------|
| siRNA Disorazole DMSO Run1   | NM_0122<br>48 | SEPHS2   | selenophosphate synthetase 2                                                                       | -0.130645 | Inlier |
| siRNA-Temozolomide Run1-DMSO | NM_0122<br>48 | SEPHS2   | selenophosphate synthetase 2                                                                       | 0.130645  | Inlier |
| siRNA-Vinblastine Run2-DMSO  | NM_0122<br>48 | SEPHS2   | selenophosphate synthetase 2                                                                       | 0.478162  | Inlier |
| siRNA-Vinblastine Run1-DMSO  | NM_0122<br>48 | SEPHS2   | selenophosphate synthetase 2                                                                       | 0.525397  | Inlier |
| siRNA Disorazole DMSO Run3   | NM_0122<br>48 | SEPHS2   | selenophosphate synthetase 2                                                                       | 0.823603  | Inlier |
| siRNA-Temozolomide Run1-DMSO | NM_0002<br>95 | SERPINA1 | serine (or cysteine) proteinase inhibitor, clade A (alpha-1 antiproteinase, antitrypsin), member 1 | -1.133928 | Inlier |
| siRNA-Temozolomide Run3-DMSO | NM_0002<br>95 | SERPINA1 | serine (or cysteine) proteinase inhibitor, clade A (alpha-1 antiproteinase, antitrypsin), member 1 | -0.848701 | Inlier |

Identification of Survival Genes in Human Glioblastoma Cells Using siRNA Screening

Nikhil G Thaker, Fang Zhang, Peter R. McDonald, Tong Ying Shun, Michael D Lewen, Ian F. Pollack, and John S. Lazo

Molecular Pharmacology

|                              |           |          |                                                                                                    |           |        |
|------------------------------|-----------|----------|----------------------------------------------------------------------------------------------------|-----------|--------|
| siRNA-Temozolomide Run2-DMSO | NM_000295 | SERPINA1 | serine (or cysteine) proteinase inhibitor, clade A (alpha-1 antiproteinase, antitrypsin), member 1 | -0.273207 | Inlier |
| siRNA Disorazole DMSO Run3   | NM_000295 | SERPINA1 | serine (or cysteine) proteinase inhibitor, clade A (alpha-1 antiproteinase, antitrypsin), member 1 | -0.216075 | Inlier |
| siRNA-Vinblastine Run2-DMSO  | NM_000295 | SERPINA1 | serine (or cysteine) proteinase inhibitor, clade A (alpha-1 antiproteinase, antitrypsin), member 1 | 0.216075  | Inlier |
| siRNA Disorazole DMSO Run1   | NM_000295 | SERPINA1 | serine (or cysteine) proteinase inhibitor, clade A (alpha-1 antiproteinase, antitrypsin), member 1 | 0.500299  | Inlier |



Identification of Survival Genes in Human Glioblastoma Cells Using siRNA Screening

Nikhil G Thaker, Fang Zhang, Peter R. McDonald, Tong Ying Shun, Michael D Lewen, Ian F. Pollack, and John S. Lazo

Molecular Pharmacology

|                              |           |           |                                                                                                     |           |        |
|------------------------------|-----------|-----------|-----------------------------------------------------------------------------------------------------|-----------|--------|
| siRNA-Vinblastine Run1-DMSO  | NM_000295 | SERPINA1  | serine (or cysteine) proteinase inhibitor, clade A (alpha-1 antiproteinase, antitrypsin), member 1  | 0.889733  | Inlier |
| siRNA Disorazole DMSO Run2   | NM_000295 | SERPINA1  | serine (or cysteine) proteinase inhibitor, clade A (alpha-1 antiproteinase, antitrypsin), member 1  | 0.948237  | Inlier |
| siRNA-Temozolomide Run3-DMSO | NM_016186 | SERPINA10 | serine (or cysteine) proteinase inhibitor, clade A (alpha-1 antiproteinase, antitrypsin), member 10 | -2.455756 | Inlier |
| siRNA Disorazole DMSO Run1   | NM_016186 | SERPINA10 | serine (or cysteine) proteinase inhibitor, clade A (alpha-1 antiproteinase, antitrypsin), member 10 | -0.797259 | Inlier |

Identification of Survival Genes in Human Glioblastoma Cells Using siRNA Screening

Nikhil G Thaker, Fang Zhang, Peter R. McDonald, Tong Ying Shun, Michael D Lewen, Ian F. Pollack, and John S.

Lazo

Molecular Pharmacology

|                              |           |           |                                                                                                     |           |        |
|------------------------------|-----------|-----------|-----------------------------------------------------------------------------------------------------|-----------|--------|
| siRNA-Temozolomide Run2-DMSO | NM_016186 | SERPINA10 | serine (or cysteine) proteinase inhibitor, clade A (alpha-1 antiproteinase, antitrypsin), member 10 | -0.276639 | Inlier |
| siRNA-Vinblastine Run2-DMSO  | NM_016186 | SERPINA10 | serine (or cysteine) proteinase inhibitor, clade A (alpha-1 antiproteinase, antitrypsin), member 10 | -0.041734 | Inlier |
| siRNA-Temozolomide Run1-DMSO | NM_016186 | SERPINA10 | serine (or cysteine) proteinase inhibitor, clade A (alpha-1 antiproteinase, antitrypsin), member 10 | 0.041734  | Inlier |
| siRNA Disorazole DMSO Run3   | NM_016186 | SERPINA10 | serine (or cysteine) proteinase inhibitor, clade A (alpha-1 antiproteinase, antitrypsin), member 10 | 0.551741  | Inlier |

Identification of Survival Genes in Human Glioblastoma Cells Using siRNA Screening

Nikhil G Thaker, Fang Zhang, Peter R. McDonald, Tong Ying Shun, Michael D Lewen, Ian F. Pollack, and John S. Lazo

Molecular Pharmacology

|                                  |               |               |                                                                                                                                     |           |        |
|----------------------------------|---------------|---------------|-------------------------------------------------------------------------------------------------------------------------------------|-----------|--------|
| siRNA Disorazole DMSO Run2       | NM_0161<br>86 | SERPINA<br>10 | serine (or<br>cysteine)<br>proteinase<br>inhibitor,<br>clade A<br>(alpha-1<br>antiprotein<br>ase,<br>antitrypsin)<br>, member<br>10 | 1.24802   | Inlier |
| siRNA-Vinblastine Run1-<br>DMSO  | NM_0161<br>86 | SERPINA<br>10 | serine (or<br>cysteine)<br>proteinase<br>inhibitor,<br>clade A<br>(alpha-1<br>antiprotein<br>ase,<br>antitrypsin)<br>, member<br>10 | 1.578832  | Inlier |
| siRNA-Temozolomide Run3-<br>DMSO | NM_1738<br>50 | SERPINA<br>12 | serine (or<br>cysteine)<br>proteinase<br>inhibitor,<br>clade A<br>(alpha-1<br>antiprotein<br>ase,<br>antitrypsin)<br>, member<br>12 | -0.94811  | Inlier |
| siRNA Disorazole DMSO Run3       | NM_1738<br>50 | SERPINA<br>12 | serine (or<br>cysteine)<br>proteinase<br>inhibitor,<br>clade A<br>(alpha-1<br>antiprotein<br>ase,<br>antitrypsin)<br>, member<br>12 | -0.469899 | Inlier |

Identification of Survival Genes in Human Glioblastoma Cells Using siRNA Screening

Nikhil G Thaker, Fang Zhang, Peter R. McDonald, Tong Ying Shun, Michael D Lewen, Ian F. Pollack, and John S.

Lazo

Molecular Pharmacology

|                              |               |               |                                                                                                                                     |                  |
|------------------------------|---------------|---------------|-------------------------------------------------------------------------------------------------------------------------------------|------------------|
| siRNA-Temozolomide Run2-DMSO | NM_1738<br>50 | SERPINA<br>12 | serine (or<br>cysteine)<br>proteinase<br>inhibitor,<br>clade A<br>(alpha-1<br>antiprotein<br>ase,<br>antitrypsin)<br>, member<br>12 | -0.414645 Inlier |
| siRNA-Vinblastine Run2-DMSO  | NM_1738<br>50 | SERPINA<br>12 | serine (or<br>cysteine)<br>proteinase<br>inhibitor,<br>clade A<br>(alpha-1<br>antiprotein<br>ase,<br>antitrypsin)<br>, member<br>12 | -0.001056 Inlier |
| siRNA-Temozolomide Run1-DMSO | NM_1738<br>50 | SERPINA<br>12 | serine (or<br>cysteine)<br>proteinase<br>inhibitor,<br>clade A<br>(alpha-1<br>antiprotein<br>ase,<br>antitrypsin)<br>, member<br>12 | 0.001056 Inlier  |
| siRNA Disorazole DMSO Run1   | NM_1738<br>50 | SERPINA<br>12 | serine (or<br>cysteine)<br>proteinase<br>inhibitor,<br>clade A<br>(alpha-1<br>antiprotein<br>ase,<br>antitrypsin)<br>, member<br>12 | 0.879101 Inlier  |

Identification of Survival Genes in Human Glioblastoma Cells Using siRNA Screening

Nikhil G Thaker, Fang Zhang, Peter R. McDonald, Tong Ying Shun, Michael D Lewen, Ian F. Pollack, and John S. Lazo

Molecular Pharmacology

|                              |               |               |                                                                                                                                     |                  |
|------------------------------|---------------|---------------|-------------------------------------------------------------------------------------------------------------------------------------|------------------|
| siRNA-Vinblastine Run1-DMSO  | NM_1738<br>50 | SERPINA<br>12 | serine (or<br>cysteine)<br>proteinase<br>inhibitor,<br>clade A<br>(alpha-1<br>antiprotein<br>ase,<br>antitrypsin)<br>, member<br>12 | 1.707245 Inlier  |
| siRNA Disorazole DMSO Run2   | NM_1738<br>50 | SERPINA<br>12 | serine (or<br>cysteine)<br>proteinase<br>inhibitor,<br>clade A<br>(alpha-1<br>antiprotein<br>ase,<br>antitrypsin)<br>, member<br>12 | 1.781889 Inlier  |
| siRNA-Temozolomide Run3-DMSO | NM_0010<br>85 | SERPINA<br>3  | serine (or<br>cysteine)<br>proteinase<br>inhibitor,<br>clade A<br>(alpha-1<br>antiprotein<br>ase,<br>antitrypsin)<br>, member<br>3  | -1.146993 Inlier |
| siRNA Disorazole DMSO Run3   | NM_0010<br>85 | SERPINA<br>3  | serine (or<br>cysteine)<br>proteinase<br>inhibitor,<br>clade A<br>(alpha-1<br>antiprotein<br>ase,<br>antitrypsin)<br>, member<br>3  | -0.708272 Inlier |

Identification of Survival Genes in Human Glioblastoma Cells Using siRNA Screening

Nikhil G Thaker, Fang Zhang, Peter R. McDonald, Tong Ying Shun, Michael D Lewen, Ian F. Pollack, and John S. Lazo

Molecular Pharmacology

|                              |           |          |                                                                                                    |           |        |
|------------------------------|-----------|----------|----------------------------------------------------------------------------------------------------|-----------|--------|
| siRNA-Temozolomide Run2-DMSO | NM_001085 | SERPINA3 | serine (or cysteine) proteinase inhibitor, clade A (alpha-1 antiproteinase, antitrypsin), member 3 | -0.706755 | Inlier |
| siRNA Disorazole DMSO Run1   | NM_001085 | SERPINA3 | serine (or cysteine) proteinase inhibitor, clade A (alpha-1 antiproteinase, antitrypsin), member 3 | -0.152098 | Inlier |
| siRNA-Temozolomide Run1-DMSO | NM_001085 | SERPINA3 | serine (or cysteine) proteinase inhibitor, clade A (alpha-1 antiproteinase, antitrypsin), member 3 | 0.152098  | Inlier |
| siRNA-Vinblastine Run1-DMSO  | NM_001085 | SERPINA3 | serine (or cysteine) proteinase inhibitor, clade A (alpha-1 antiproteinase, antitrypsin), member 3 | 0.530423  | Inlier |

Identification of Survival Genes in Human Glioblastoma Cells Using siRNA Screening

Nikhil G Thaker, Fang Zhang, Peter R. McDonald, Tong Ying Shun, Michael D Lewen, Ian F. Pollack, and John S. Lazo

Molecular Pharmacology

|                                  |               |              |                                                                                                                                    |           |        |
|----------------------------------|---------------|--------------|------------------------------------------------------------------------------------------------------------------------------------|-----------|--------|
| siRNA Disorazole DMSO Run2       | NM_0010<br>85 | SERPINA<br>3 | serine (or<br>cysteine)<br>proteinase<br>inhibitor,<br>clade A<br>(alpha-1<br>antiprotein<br>ase,<br>antitrypsin)<br>, member<br>3 | 0.642245  | Inlier |
| siRNA-Vinblastine Run2-<br>DMSO  | NM_0010<br>85 | SERPINA<br>3 | serine (or<br>cysteine)<br>proteinase<br>inhibitor,<br>clade A<br>(alpha-1<br>antiprotein<br>ase,<br>antitrypsin)<br>, member<br>3 | 0.783939  | Inlier |
| siRNA-Temozolomide Run1-<br>DMSO | NM_0062<br>15 | SERPINA<br>4 | serine (or<br>cysteine)<br>proteinase<br>inhibitor,<br>clade A<br>(alpha-1<br>antiprotein<br>ase,<br>antitrypsin)<br>, member<br>4 | -1.023489 | Inlier |
| siRNA-Temozolomide Run2-<br>DMSO | NM_0062<br>15 | SERPINA<br>4 | serine (or<br>cysteine)<br>proteinase<br>inhibitor,<br>clade A<br>(alpha-1<br>antiprotein<br>ase,<br>antitrypsin)<br>, member<br>4 | -0.687903 | Inlier |

Identification of Survival Genes in Human Glioblastoma Cells Using siRNA Screening

Nikhil G Thaker, Fang Zhang, Peter R. McDonald, Tong Ying Shun, Michael D Lewen, Ian F. Pollack, and John S.

Lazo

Molecular Pharmacology

|                              |    |         |         |   |   |                                                                                                    |           |        |
|------------------------------|----|---------|---------|---|---|----------------------------------------------------------------------------------------------------|-----------|--------|
| siRNA Disorazole DMSO Run1   | 15 | NM_0062 | SERPINA | 4 | 4 | serine (or cysteine) proteinase inhibitor, clade A (alpha-1 antiproteinase, antitrypsin), member 4 | -0.661097 | Inlier |
| siRNA-Temozolomide Run3-DMSO | 15 | NM_0062 | SERPINA | 4 | 4 | serine (or cysteine) proteinase inhibitor, clade A (alpha-1 antiproteinase, antitrypsin), member 4 | -0.472177 | Inlier |
| siRNA-Vinblastine Run2-DMSO  | 15 | NM_0062 | SERPINA | 4 | 4 | serine (or cysteine) proteinase inhibitor, clade A (alpha-1 antiproteinase, antitrypsin), member 4 | 0.472176  | Inlier |
| siRNA Disorazole DMSO Run3   | 15 | NM_0062 | SERPINA | 4 | 4 | serine (or cysteine) proteinase inhibitor, clade A (alpha-1 antiproteinase, antitrypsin), member 4 | 0.558571  | Inlier |



Identification of Survival Genes in Human Glioblastoma Cells Using siRNA Screening

Nikhil G Thaker, Fang Zhang, Peter R. McDonald, Tong Ying Shun, Michael D Lewen, Ian F. Pollack, and John S.

Lazo

Molecular Pharmacology

|                                  |               |              |                                                                                                                                    |                  |
|----------------------------------|---------------|--------------|------------------------------------------------------------------------------------------------------------------------------------|------------------|
| siRNA Disorazole DMSO Run2       | NM_0062<br>15 | SERPINA<br>4 | serine (or<br>cysteine)<br>proteinase<br>inhibitor,<br>clade A<br>(alpha-1<br>antiprotein<br>ase,<br>antitrypsin)<br>, member<br>4 | 0.8536 Inlier    |
| siRNA-Vinblastine Run1-<br>DMSO  | NM_0062<br>15 | SERPINA<br>4 | serine (or<br>cysteine)<br>proteinase<br>inhibitor,<br>clade A<br>(alpha-1<br>antiprotein<br>ase,<br>antitrypsin)<br>, member<br>4 | 1.499406 Inlier  |
| siRNA-Temozolomide Run3-<br>DMSO | NM_0006<br>24 | SERPINA<br>5 | serine (or<br>cysteine)<br>proteinase<br>inhibitor,<br>clade A<br>(alpha-1<br>antiprotein<br>ase,<br>antitrypsin)<br>, member<br>5 | -2.691953 Inlier |
| siRNA-Temozolomide Run2-<br>DMSO | NM_0006<br>24 | SERPINA<br>5 | serine (or<br>cysteine)<br>proteinase<br>inhibitor,<br>clade A<br>(alpha-1<br>antiprotein<br>ase,<br>antitrypsin)<br>, member<br>5 | -0.826448 Inlier |

Identification of Survival Genes in Human Glioblastoma Cells Using siRNA Screening

Nikhil G Thaker, Fang Zhang, Peter R. McDonald, Tong Ying Shun, Michael D Lewen, Ian F. Pollack, and John S.

Lazo

Molecular Pharmacology

|                              |           |          |                                                                                                    |           |        |
|------------------------------|-----------|----------|----------------------------------------------------------------------------------------------------|-----------|--------|
| siRNA-Vinblastine Run2-DMSO  | NM_000624 | SERPINA5 | serine (or cysteine) proteinase inhibitor, clade A (alpha-1 antiproteinase, antitrypsin), member 5 | -0.150102 | Inlier |
| siRNA Disorazole DMSO Run3   | NM_000624 | SERPINA5 | serine (or cysteine) proteinase inhibitor, clade A (alpha-1 antiproteinase, antitrypsin), member 5 | -0.036173 | Inlier |
| siRNA Disorazole DMSO Run1   | NM_000624 | SERPINA5 | serine (or cysteine) proteinase inhibitor, clade A (alpha-1 antiproteinase, antitrypsin), member 5 | 0.036173  | Inlier |
| siRNA-Temozolomide Run1-DMSO | NM_000624 | SERPINA5 | serine (or cysteine) proteinase inhibitor, clade A (alpha-1 antiproteinase, antitrypsin), member 5 | 0.522552  | Inlier |

Identification of Survival Genes in Human Glioblastoma Cells Using siRNA Screening  
 Nikhil G Thaker, Fang Zhang, Peter R. McDonald, Tong Ying Shun, Michael D Lewen, Ian F. Pollack, and John S. Lazo  
 Molecular Pharmacology

|                                  |               |              |                                                                                                                                    |                  |
|----------------------------------|---------------|--------------|------------------------------------------------------------------------------------------------------------------------------------|------------------|
| siRNA Disorazole DMSO Run2       | NM_0006<br>24 | SERPINA<br>5 | serine (or<br>cysteine)<br>proteinase<br>inhibitor,<br>clade A<br>(alpha-1<br>antiprotein<br>ase,<br>antitrypsin)<br>, member<br>5 | 0.835858 Inlier  |
| siRNA-Vinblastine Run1-<br>DMSO  | NM_0006<br>24 | SERPINA<br>5 | serine (or<br>cysteine)<br>proteinase<br>inhibitor,<br>clade A<br>(alpha-1<br>antiprotein<br>ase,<br>antitrypsin)<br>, member<br>5 | 3.44164 Inlier   |
| siRNA-Temozolomide Run2-<br>DMSO | NM_0017<br>56 | SERPINA<br>6 | serine (or<br>cysteine)<br>proteinase<br>inhibitor,<br>clade A<br>(alpha-1<br>antiprotein<br>ase,<br>antitrypsin)<br>, member<br>6 | -1.762175 Inlier |
| siRNA-Temozolomide Run3-<br>DMSO | NM_0017<br>56 | SERPINA<br>6 | serine (or<br>cysteine)<br>proteinase<br>inhibitor,<br>clade A<br>(alpha-1<br>antiprotein<br>ase,<br>antitrypsin)<br>, member<br>6 | -0.998106 Inlier |

Identification of Survival Genes in Human Glioblastoma Cells Using siRNA Screening

Nikhil G Thaker, Fang Zhang, Peter R. McDonald, Tong Ying Shun, Michael D Lewen, Ian F. Pollack, and John S.

Lazo

Molecular Pharmacology

|                              |           |          |                                                                                                    |           |        |
|------------------------------|-----------|----------|----------------------------------------------------------------------------------------------------|-----------|--------|
| siRNA-Temozolomide Run1-DMSO | NM_001756 | SERPINA6 | serine (or cysteine) proteinase inhibitor, clade A (alpha-1 antiproteinase, antitrypsin), member 6 | -0.350894 | Inlier |
| siRNA Disorazole DMSO Run3   | NM_001756 | SERPINA6 | serine (or cysteine) proteinase inhibitor, clade A (alpha-1 antiproteinase, antitrypsin), member 6 | -0.268963 | Inlier |
| siRNA Disorazole DMSO Run2   | NM_001756 | SERPINA6 | serine (or cysteine) proteinase inhibitor, clade A (alpha-1 antiproteinase, antitrypsin), member 6 | 0.268962  | Inlier |
| siRNA Disorazole DMSO Run1   | NM_001756 | SERPINA6 | serine (or cysteine) proteinase inhibitor, clade A (alpha-1 antiproteinase, antitrypsin), member 6 | 0.323189  | Inlier |

Identification of Survival Genes in Human Glioblastoma Cells Using siRNA Screening

Nikhil G Thaker, Fang Zhang, Peter R. McDonald, Tong Ying Shun, Michael D Lewen, Ian F. Pollack, and John S.

Lazo

Molecular Pharmacology

|                              |           |          |                                                                                                    |           |        |
|------------------------------|-----------|----------|----------------------------------------------------------------------------------------------------|-----------|--------|
| siRNA-Vinblastine Run2-DMSO  | NM_001756 | SERPINA6 | serine (or cysteine) proteinase inhibitor, clade A (alpha-1 antiproteinase, antitrypsin), member 6 | 1.245773  | Inlier |
| siRNA-Vinblastine Run1-DMSO  | NM_001756 | SERPINA6 | serine (or cysteine) proteinase inhibitor, clade A (alpha-1 antiproteinase, antitrypsin), member 6 | 1.791817  | Inlier |
| siRNA-Temozolomide Run3-DMSO | NM_000354 | SERPINA7 | serine (or cysteine) proteinase inhibitor, clade A (alpha-1 antiproteinase, antitrypsin), member 7 | -1.875797 | Inlier |
| siRNA-Temozolomide Run2-DMSO | NM_000354 | SERPINA7 | serine (or cysteine) proteinase inhibitor, clade A (alpha-1 antiproteinase, antitrypsin), member 7 | -0.919142 | Inlier |

Identification of Survival Genes in Human Glioblastoma Cells Using siRNA Screening

Nikhil G Thaker, Fang Zhang, Peter R. McDonald, Tong Ying Shun, Michael D Lewen, Ian F. Pollack, and John S. Lazo

Molecular Pharmacology

|                              |           |          |                                                                                                    |           |        |
|------------------------------|-----------|----------|----------------------------------------------------------------------------------------------------|-----------|--------|
| siRNA-Temozolomide Run1-DMSO | NM_000354 | SERPINA7 | serine (or cysteine) proteinase inhibitor, clade A (alpha-1 antiproteinase, antitrypsin), member 7 | -0.494668 | Inlier |
| siRNA Disorazole DMSO Run1   | NM_000354 | SERPINA7 | serine (or cysteine) proteinase inhibitor, clade A (alpha-1 antiproteinase, antitrypsin), member 7 | -0.13672  | Inlier |
| siRNA Disorazole DMSO Run3   | NM_000354 | SERPINA7 | serine (or cysteine) proteinase inhibitor, clade A (alpha-1 antiproteinase, antitrypsin), member 7 | 0.13672   | Inlier |
| siRNA Disorazole DMSO Run2   | NM_000354 | SERPINA7 | serine (or cysteine) proteinase inhibitor, clade A (alpha-1 antiproteinase, antitrypsin), member 7 | 0.294296  | Inlier |

Identification of Survival Genes in Human Glioblastoma Cells Using siRNA Screening

Nikhil G Thaker, Fang Zhang, Peter R. McDonald, Tong Ying Shun, Michael D Lewen, Ian F. Pollack, and John S. Lazo

Molecular Pharmacology

|                              |           |          |                                                                                                    |           |        |
|------------------------------|-----------|----------|----------------------------------------------------------------------------------------------------|-----------|--------|
| siRNA-Vinblastine Run1-DMSO  | NM_000354 | SERPINA7 | serine (or cysteine) proteinase inhibitor, clade A (alpha-1 antiproteinase, antitrypsin), member 7 | 0.854332  | Inlier |
| siRNA-Vinblastine Run2-DMSO  | NM_000354 | SERPINA7 | serine (or cysteine) proteinase inhibitor, clade A (alpha-1 antiproteinase, antitrypsin), member 7 | 0.868663  | Inlier |
| siRNA-Temozolomide Run3-DMSO | NM_030666 | SERPINB1 | serine (or cysteine) proteinase inhibitor, clade B (ovalbumin), member 1                           | -2.594847 | Inlier |
| siRNA-Temozolomide Run2-DMSO | NM_030666 | SERPINB1 | serine (or cysteine) proteinase inhibitor, clade B (ovalbumin), member 1                           | -0.894268 | Inlier |
| siRNA-Temozolomide Run1-DMSO | NM_030666 | SERPINB1 | serine (or cysteine) proteinase inhibitor, clade B (ovalbumin), member 1                           | -0.140404 | Inlier |

Identification of Survival Genes in Human Glioblastoma Cells Using siRNA Screening

Nikhil G Thaker, Fang Zhang, Peter R. McDonald, Tong Ying Shun, Michael D Lewen, Ian F. Pollack, and John S. Lazo

Molecular Pharmacology

|                                 |               |              |                                                                                                |           |        |
|---------------------------------|---------------|--------------|------------------------------------------------------------------------------------------------|-----------|--------|
| siRNA Disorazole DMSO Run3      | NM_0306<br>66 | SERPINB<br>1 | serine (or<br>cysteine)<br>proteinase<br>inhibitor,<br>clade B<br>(ovalbumi<br>n),<br>member 1 | -0.051359 | Inlier |
| siRNA-Vinblastine Run2-<br>DMSO | NM_0306<br>66 | SERPINB<br>1 | serine (or<br>cysteine)<br>proteinase<br>inhibitor,<br>clade B<br>(ovalbumi<br>n),<br>member 1 | 0.051359  | Inlier |
| siRNA Disorazole DMSO Run1      | NM_0306<br>66 | SERPINB<br>1 | serine (or<br>cysteine)<br>proteinase<br>inhibitor,<br>clade B<br>(ovalbumi<br>n),<br>member 1 | 0.454732  | Inlier |
| siRNA Disorazole DMSO Run2      | NM_0306<br>66 | SERPINB<br>1 | serine (or<br>cysteine)<br>proteinase<br>inhibitor,<br>clade B<br>(ovalbumi<br>n),<br>member 1 | 1.849141  | Inlier |
| siRNA-Vinblastine Run1-<br>DMSO | NM_0306<br>66 | SERPINB<br>1 | serine (or<br>cysteine)<br>proteinase<br>inhibitor,<br>clade B<br>(ovalbumi<br>n),<br>member 1 | 2.747675  | Inlier |



Identification of Survival Genes in Human Glioblastoma Cells Using siRNA Screening  
 Nikhil G Thaker, Fang Zhang, Peter R. McDonald, Tong Ying Shun, Michael D Lewen, Ian F. Pollack, and John S. Lazo  
 Molecular Pharmacology

|                              |           |           |                                                                           |           |        |
|------------------------------|-----------|-----------|---------------------------------------------------------------------------|-----------|--------|
| siRNA-Temozolomide Run3-DMSO | NM_005024 | SERPINB10 | serine (or cysteine) proteinase inhibitor, clade B (ovalbumin), member 10 | -1.998661 | Inlier |
| siRNA-Temozolomide Run2-DMSO | NM_005024 | SERPINB10 | serine (or cysteine) proteinase inhibitor, clade B (ovalbumin), member 10 | -1.482327 | Inlier |
| siRNA-Temozolomide Run1-DMSO | NM_005024 | SERPINB10 | serine (or cysteine) proteinase inhibitor, clade B (ovalbumin), member 10 | -0.835804 | Inlier |
| siRNA Disorazole DMSO Run3   | NM_005024 | SERPINB10 | serine (or cysteine) proteinase inhibitor, clade B (ovalbumin), member 10 | -0.151613 | Inlier |
| siRNA Disorazole DMSO Run1   | NM_005024 | SERPINB10 | serine (or cysteine) proteinase inhibitor, clade B (ovalbumin), member 10 | 0.151613  | Inlier |

Identification of Survival Genes in Human Glioblastoma Cells Using siRNA Screening

Nikhil G Thaker, Fang Zhang, Peter R. McDonald, Tong Ying Shun, Michael D Lewen, Ian F. Pollack, and John S. Lazo

Molecular Pharmacology

|                                  |               |               |                                                                                                    |           |        |
|----------------------------------|---------------|---------------|----------------------------------------------------------------------------------------------------|-----------|--------|
| siRNA Disorazole DMSO Run2       | NM_0050<br>24 | SERPINB<br>10 | serine (or<br>cysteine)<br>proteinase<br>inhibitor,<br>clade B<br>(ovalbumi<br>n),<br>member<br>10 | 0.33686   | Inlier |
| siRNA-Vinblastine Run2-<br>DMSO  | NM_0050<br>24 | SERPINB<br>10 | serine (or<br>cysteine)<br>proteinase<br>inhibitor,<br>clade B<br>(ovalbumi<br>n),<br>member<br>10 | 0.513196  | Inlier |
| siRNA-Vinblastine Run1-<br>DMSO  | NM_0050<br>24 | SERPINB<br>10 | serine (or<br>cysteine)<br>proteinase<br>inhibitor,<br>clade B<br>(ovalbumi<br>n),<br>member<br>10 | 1.642975  | Inlier |
| siRNA-Temozolomide Run2-<br>DMSO | NM_0804<br>75 | SERPINB<br>11 | serine (or<br>cysteine)<br>proteinase<br>inhibitor,<br>clade B<br>(ovalbumi<br>n),<br>member<br>11 | -0.755693 | Inlier |
| siRNA-Temozolomide Run3-<br>DMSO | NM_0804<br>75 | SERPINB<br>11 | serine (or<br>cysteine)<br>proteinase<br>inhibitor,<br>clade B<br>(ovalbumi<br>n),<br>member<br>11 | -0.593307 | Inlier |

Identification of Survival Genes in Human Glioblastoma Cells Using siRNA Screening

Nikhil G Thaker, Fang Zhang, Peter R. McDonald, Tong Ying Shun, Michael D Lewen, Ian F. Pollack, and John S. Lazo

Molecular Pharmacology

|                              |           |           |                                                                           |           |        |
|------------------------------|-----------|-----------|---------------------------------------------------------------------------|-----------|--------|
| siRNA-Temozolomide Run1-DMSO | NM_080475 | SERPINB11 | serine (or cysteine) proteinase inhibitor, clade B (ovalbumin), member 11 | -0.534569 | Inlier |
| siRNA Disorazole DMSO Run3   | NM_080475 | SERPINB11 | serine (or cysteine) proteinase inhibitor, clade B (ovalbumin), member 11 | -0.412863 | Inlier |
| siRNA Disorazole DMSO Run1   | NM_080475 | SERPINB11 | serine (or cysteine) proteinase inhibitor, clade B (ovalbumin), member 11 | 0.412862  | Inlier |
| siRNA Disorazole DMSO Run2   | NM_080475 | SERPINB11 | serine (or cysteine) proteinase inhibitor, clade B (ovalbumin), member 11 | 2.875349  | Inlier |
| siRNA-Vinblastine Run2-DMSO  | NM_080475 | SERPINB11 | serine (or cysteine) proteinase inhibitor, clade B (ovalbumin), member 11 | 3.173256  | Inlier |

Identification of Survival Genes in Human Glioblastoma Cells Using siRNA Screening

Nikhil G Thaker, Fang Zhang, Peter R. McDonald, Tong Ying Shun, Michael D Lewen, Ian F. Pollack, and John S. Lazo

Molecular Pharmacology

|                              |           |           |                                                                           |           |         |
|------------------------------|-----------|-----------|---------------------------------------------------------------------------|-----------|---------|
| siRNA-Vinblastine Run1-DMSO  | NM_080475 | SERPINB11 | serine (or cysteine) proteinase inhibitor, clade B (ovalbumin), member 11 | 4.251783  | Outlier |
| siRNA-Temozolomide Run3-DMSO | NM_080474 | SERPINB12 | serine (or cysteine) proteinase inhibitor, clade B (ovalbumin), member 12 | -1.368111 | Inlier  |
| siRNA-Temozolomide Run2-DMSO | NM_080474 | SERPINB12 | serine (or cysteine) proteinase inhibitor, clade B (ovalbumin), member 12 | -0.795463 | Inlier  |
| siRNA-Temozolomide Run1-DMSO | NM_080474 | SERPINB12 | serine (or cysteine) proteinase inhibitor, clade B (ovalbumin), member 12 | -0.553537 | Inlier  |
| siRNA Disorazole DMSO Run3   | NM_080474 | SERPINB12 | serine (or cysteine) proteinase inhibitor, clade B (ovalbumin), member 12 | -0.235831 | Inlier  |

Identification of Survival Genes in Human Glioblastoma Cells Using siRNA Screening

Nikhil G Thaker, Fang Zhang, Peter R. McDonald, Tong Ying Shun, Michael D Lewen, Ian F. Pollack, and John S. Lazo

Molecular Pharmacology

|                                  |               |               |                                                                                                    |           |        |
|----------------------------------|---------------|---------------|----------------------------------------------------------------------------------------------------|-----------|--------|
| siRNA Disorazole DMSO Run1       | NM_0804<br>74 | SERPINB<br>12 | serine (or<br>cysteine)<br>proteinase<br>inhibitor,<br>clade B<br>(ovalbumi<br>n),<br>member<br>12 | 0.235831  | Inlier |
| siRNA-Vinblastine Run2-<br>DMSO  | NM_0804<br>74 | SERPINB<br>12 | serine (or<br>cysteine)<br>proteinase<br>inhibitor,<br>clade B<br>(ovalbumi<br>n),<br>member<br>12 | 0.37935   | Inlier |
| siRNA Disorazole DMSO Run2       | NM_0804<br>74 | SERPINB<br>12 | serine (or<br>cysteine)<br>proteinase<br>inhibitor,<br>clade B<br>(ovalbumi<br>n),<br>member<br>12 | 0.894516  | Inlier |
| siRNA-Vinblastine Run1-<br>DMSO  | NM_0804<br>74 | SERPINB<br>12 | serine (or<br>cysteine)<br>proteinase<br>inhibitor,<br>clade B<br>(ovalbumi<br>n),<br>member<br>12 | 1.622814  | Inlier |
| siRNA-Temozolomide Run3-<br>DMSO | NM_0123<br>97 | SERPINB<br>13 | serine (or<br>cysteine)<br>proteinase<br>inhibitor,<br>clade B<br>(ovalbumi<br>n),<br>member<br>13 | -2.843129 | Inlier |

Identification of Survival Genes in Human Glioblastoma Cells Using siRNA Screening

Nikhil G Thaker, Fang Zhang, Peter R. McDonald, Tong Ying Shun, Michael D Lewen, Ian F. Pollack, and John S.

Lazo

Molecular Pharmacology

|                                  |               |               |                                                                                                    |           |        |
|----------------------------------|---------------|---------------|----------------------------------------------------------------------------------------------------|-----------|--------|
| siRNA Disorazole DMSO Run3       | NM_0123<br>97 | SERPINB<br>13 | serine (or<br>cysteine)<br>proteinase<br>inhibitor,<br>clade B<br>(ovalbumi<br>n),<br>member<br>13 | -1.003463 | Inlier |
| siRNA Disorazole DMSO Run1       | NM_0123<br>97 | SERPINB<br>13 | serine (or<br>cysteine)<br>proteinase<br>inhibitor,<br>clade B<br>(ovalbumi<br>n),<br>member<br>13 | -0.742434 | Inlier |
| siRNA-Temozolomide Run2-<br>DMSO | NM_0123<br>97 | SERPINB<br>13 | serine (or<br>cysteine)<br>proteinase<br>inhibitor,<br>clade B<br>(ovalbumi<br>n),<br>member<br>13 | -0.214011 | Inlier |
| siRNA Disorazole DMSO Run2       | NM_0123<br>97 | SERPINB<br>13 | serine (or<br>cysteine)<br>proteinase<br>inhibitor,<br>clade B<br>(ovalbumi<br>n),<br>member<br>13 | 0.214011  | Inlier |
| siRNA-Temozolomide Run1-<br>DMSO | NM_0123<br>97 | SERPINB<br>13 | serine (or<br>cysteine)<br>proteinase<br>inhibitor,<br>clade B<br>(ovalbumi<br>n),<br>member<br>13 | 0.356874  | Inlier |

Identification of Survival Genes in Human Glioblastoma Cells Using siRNA Screening  
 Nikhil G Thaker, Fang Zhang, Peter R. McDonald, Tong Ying Shun, Michael D Lewen, Ian F. Pollack, and John S. Lazo  
 Molecular Pharmacology

|                              |           |           |                                                                           |           |        |
|------------------------------|-----------|-----------|---------------------------------------------------------------------------|-----------|--------|
| siRNA-Vinblastine Run2-DMSO  | NM_012397 | SERPINB13 | serine (or cysteine) proteinase inhibitor, clade B (ovalbumin), member 13 | 0.606566  | Inlier |
| siRNA-Vinblastine Run1-DMSO  | NM_012397 | SERPINB13 | serine (or cysteine) proteinase inhibitor, clade B (ovalbumin), member 13 | 1.775215  | Inlier |
| siRNA-Temozolomide Run3-DMSO | NM_002575 | SERPINB2  | serine (or cysteine) proteinase inhibitor, clade B (ovalbumin), member 2  | -1.294713 | Inlier |
| siRNA-Temozolomide Run2-DMSO | NM_002575 | SERPINB2  | serine (or cysteine) proteinase inhibitor, clade B (ovalbumin), member 2  | -0.934547 | Inlier |
| siRNA-Temozolomide Run1-DMSO | NM_002575 | SERPINB2  | serine (or cysteine) proteinase inhibitor, clade B (ovalbumin), member 2  | -0.564057 | Inlier |

Identification of Survival Genes in Human Glioblastoma Cells Using siRNA Screening  
 Nikhil G Thaker, Fang Zhang, Peter R. McDonald, Tong Ying Shun, Michael D Lewen, Ian F. Pollack, and John S. Lazo  
 Molecular Pharmacology

|                                 |               |              |                                                                                                |           |        |
|---------------------------------|---------------|--------------|------------------------------------------------------------------------------------------------|-----------|--------|
| siRNA Disorazole DMSO Run3      | NM_0025<br>75 | SERPINB<br>2 | serine (or<br>cysteine)<br>proteinase<br>inhibitor,<br>clade B<br>(ovalbumi<br>n),<br>member 2 | -0.290176 | Inlier |
| siRNA Disorazole DMSO Run1      | NM_0025<br>75 | SERPINB<br>2 | serine (or<br>cysteine)<br>proteinase<br>inhibitor,<br>clade B<br>(ovalbumi<br>n),<br>member 2 | 0.290176  | Inlier |
| siRNA Disorazole DMSO Run2      | NM_0025<br>75 | SERPINB<br>2 | serine (or<br>cysteine)<br>proteinase<br>inhibitor,<br>clade B<br>(ovalbumi<br>n),<br>member 2 | 0.661908  | Inlier |
| siRNA-Vinblastine Run2-<br>DMSO | NM_0025<br>75 | SERPINB<br>2 | serine (or<br>cysteine)<br>proteinase<br>inhibitor,<br>clade B<br>(ovalbumi<br>n),<br>member 2 | 0.687092  | Inlier |
| siRNA-Vinblastine Run1-<br>DMSO | NM_0025<br>75 | SERPINB<br>2 | serine (or<br>cysteine)<br>proteinase<br>inhibitor,<br>clade B<br>(ovalbumi<br>n),<br>member 2 | 0.838305  | Inlier |



Identification of Survival Genes in Human Glioblastoma Cells Using siRNA Screening  
 Nikhil G Thaker, Fang Zhang, Peter R. McDonald, Tong Ying Shun, Michael D Lewen, Ian F. Pollack, and John S. Lazo  
 Molecular Pharmacology

|                              |           |          |                                                                          |           |        |
|------------------------------|-----------|----------|--------------------------------------------------------------------------|-----------|--------|
| siRNA-Temozolomide Run3-DMSO | NM_006919 | SERPINB3 | serine (or cysteine) proteinase inhibitor, clade B (ovalbumin), member 3 | -2.514228 | Inlier |
| siRNA Disorazole DMSO Run3   | NM_006919 | SERPINB3 | serine (or cysteine) proteinase inhibitor, clade B (ovalbumin), member 3 | -1.00339  | Inlier |
| siRNA-Temozolomide Run2-DMSO | NM_006919 | SERPINB3 | serine (or cysteine) proteinase inhibitor, clade B (ovalbumin), member 3 | -0.588154 | Inlier |
| siRNA Disorazole DMSO Run1   | NM_006919 | SERPINB3 | serine (or cysteine) proteinase inhibitor, clade B (ovalbumin), member 3 | -0.016546 | Inlier |
| siRNA-Temozolomide Run1-DMSO | NM_006919 | SERPINB3 | serine (or cysteine) proteinase inhibitor, clade B (ovalbumin), member 3 | 0.016546  | Inlier |

Identification of Survival Genes in Human Glioblastoma Cells Using siRNA Screening

Nikhil G Thaker, Fang Zhang, Peter R. McDonald, Tong Ying Shun, Michael D Lewen, Ian F. Pollack, and John S. Lazo

Molecular Pharmacology

|                              |           |          |                                                                          |           |        |
|------------------------------|-----------|----------|--------------------------------------------------------------------------|-----------|--------|
| siRNA-Vinblastine Run1-DMSO  | NM_006919 | SERPINB3 | serine (or cysteine) proteinase inhibitor, clade B (ovalbumin), member 3 | 0.190609  | Inlier |
| siRNA Disorazole DMSO Run2   | NM_006919 | SERPINB3 | serine (or cysteine) proteinase inhibitor, clade B (ovalbumin), member 3 | 0.760846  | Inlier |
| siRNA-Vinblastine Run2-DMSO  | NM_006919 | SERPINB3 | serine (or cysteine) proteinase inhibitor, clade B (ovalbumin), member 3 | 1.048027  | Inlier |
| siRNA-Temozolomide Run3-DMSO | NM_002974 | SERPINB4 | serine (or cysteine) proteinase inhibitor, clade B (ovalbumin), member 4 | -1.009227 | Inlier |
| siRNA-Temozolomide Run2-DMSO | NM_002974 | SERPINB4 | serine (or cysteine) proteinase inhibitor, clade B (ovalbumin), member 4 | -0.568881 | Inlier |

Identification of Survival Genes in Human Glioblastoma Cells Using siRNA Screening  
 Nikhil G Thaker, Fang Zhang, Peter R. McDonald, Tong Ying Shun, Michael D Lewen, Ian F. Pollack, and John S. Lazo  
 Molecular Pharmacology

|                              |           |          |                                                                          |           |        |
|------------------------------|-----------|----------|--------------------------------------------------------------------------|-----------|--------|
| siRNA-Temozolomide Run1-DMSO | NM_002974 | SERPINB4 | serine (or cysteine) proteinase inhibitor, clade B (ovalbumin), member 4 | -0.408069 | Inlier |
| siRNA Disorazole DMSO Run1   | NM_002974 | SERPINB4 | serine (or cysteine) proteinase inhibitor, clade B (ovalbumin), member 4 | -0.181534 | Inlier |
| siRNA Disorazole DMSO Run3   | NM_002974 | SERPINB4 | serine (or cysteine) proteinase inhibitor, clade B (ovalbumin), member 4 | 0.181534  | Inlier |
| siRNA Disorazole DMSO Run2   | NM_002974 | SERPINB4 | serine (or cysteine) proteinase inhibitor, clade B (ovalbumin), member 4 | 0.780119  | Inlier |
| siRNA-Vinblastine Run2-DMSO  | NM_002974 | SERPINB4 | serine (or cysteine) proteinase inhibitor, clade B (ovalbumin), member 4 | 1.133875  | Inlier |

Identification of Survival Genes in Human Glioblastoma Cells Using siRNA Screening  
 Nikhil G Thaker, Fang Zhang, Peter R. McDonald, Tong Ying Shun, Michael D Lewen, Ian F. Pollack, and John S. Lazo  
 Molecular Pharmacology

|                              |           |          |                                                                          |           |        |
|------------------------------|-----------|----------|--------------------------------------------------------------------------|-----------|--------|
| siRNA-Vinblastine Run1-DMSO  | NM_002974 | SERPINB4 | serine (or cysteine) proteinase inhibitor, clade B (ovalbumin), member 4 | 1.26106   | Inlier |
| siRNA-Temozolomide Run3-DMSO | NM_002639 | SERPINB5 | serine (or cysteine) proteinase inhibitor, clade B (ovalbumin), member 5 | -1.387658 | Inlier |
| siRNA-Temozolomide Run2-DMSO | NM_002639 | SERPINB5 | serine (or cysteine) proteinase inhibitor, clade B (ovalbumin), member 5 | -1.052608 | Inlier |
| siRNA Disorazole DMSO Run3   | NM_002639 | SERPINB5 | serine (or cysteine) proteinase inhibitor, clade B (ovalbumin), member 5 | -0.433893 | Inlier |
| siRNA-Temozolomide Run1-DMSO | NM_002639 | SERPINB5 | serine (or cysteine) proteinase inhibitor, clade B (ovalbumin), member 5 | -0.216921 | Inlier |

Identification of Survival Genes in Human Glioblastoma Cells Using siRNA Screening  
 Nikhil G Thaker, Fang Zhang, Peter R. McDonald, Tong Ying Shun, Michael D Lewen, Ian F. Pollack, and John S. Lazo  
 Molecular Pharmacology

|                                  |               |              |                                                                                                |           |        |
|----------------------------------|---------------|--------------|------------------------------------------------------------------------------------------------|-----------|--------|
| siRNA Disorazole DMSO Run1       | NM_0026<br>39 | SERPINB<br>5 | serine (or<br>cysteine)<br>proteinase<br>inhibitor,<br>clade B<br>(ovalbumi<br>n),<br>member 5 | 0.216921  | Inlier |
| siRNA-Vinblastine Run2-<br>DMSO  | NM_0026<br>39 | SERPINB<br>5 | serine (or<br>cysteine)<br>proteinase<br>inhibitor,<br>clade B<br>(ovalbumi<br>n),<br>member 5 | 0.344679  | Inlier |
| siRNA Disorazole DMSO Run2       | NM_0026<br>39 | SERPINB<br>5 | serine (or<br>cysteine)<br>proteinase<br>inhibitor,<br>clade B<br>(ovalbumi<br>n),<br>member 5 | 0.915107  | Inlier |
| siRNA-Vinblastine Run1-<br>DMSO  | NM_0026<br>39 | SERPINB<br>5 | serine (or<br>cysteine)<br>proteinase<br>inhibitor,<br>clade B<br>(ovalbumi<br>n),<br>member 5 | 1.038323  | Inlier |
| siRNA-Temozolomide Run3-<br>DMSO | NM_0045<br>68 | SERPINB<br>6 | serine (or<br>cysteine)<br>proteinase<br>inhibitor,<br>clade B<br>(ovalbumi<br>n),<br>member 6 | -1.065274 | Inlier |

Identification of Survival Genes in Human Glioblastoma Cells Using siRNA Screening

Nikhil G Thaker, Fang Zhang, Peter R. McDonald, Tong Ying Shun, Michael D Lewen, Ian F. Pollack, and John S. Lazo

Molecular Pharmacology

|                              |           |          |                                                                          |           |        |
|------------------------------|-----------|----------|--------------------------------------------------------------------------|-----------|--------|
| siRNA-Temozolomide Run1-DMSO | NM_004568 | SERPINB6 | serine (or cysteine) proteinase inhibitor, clade B (ovalbumin), member 6 | -0.754362 | Inlier |
| siRNA-Temozolomide Run2-DMSO | NM_004568 | SERPINB6 | serine (or cysteine) proteinase inhibitor, clade B (ovalbumin), member 6 | -0.594638 | Inlier |
| siRNA Disorazole DMSO Run3   | NM_004568 | SERPINB6 | serine (or cysteine) proteinase inhibitor, clade B (ovalbumin), member 6 | -0.02629  | Inlier |
| siRNA Disorazole DMSO Run1   | NM_004568 | SERPINB6 | serine (or cysteine) proteinase inhibitor, clade B (ovalbumin), member 6 | 0.02629   | Inlier |
| siRNA Disorazole DMSO Run2   | NM_004568 | SERPINB6 | serine (or cysteine) proteinase inhibitor, clade B (ovalbumin), member 6 | 0.594573  | Inlier |

Identification of Survival Genes in Human Glioblastoma Cells Using siRNA Screening  
 Nikhil G Thaker, Fang Zhang, Peter R. McDonald, Tong Ying Shun, Michael D Lewen, Ian F. Pollack, and John S. Lazo  
 Molecular Pharmacology

|                              |           |          |                                                                          |           |        |
|------------------------------|-----------|----------|--------------------------------------------------------------------------|-----------|--------|
| siRNA-Vinblastine Run2-DMSO  | NM_004568 | SERPINB6 | serine (or cysteine) proteinase inhibitor, clade B (ovalbumin), member 6 | 0.837061  | Inlier |
| siRNA-Vinblastine Run1-DMSO  | NM_004568 | SERPINB6 | serine (or cysteine) proteinase inhibitor, clade B (ovalbumin), member 6 | 1.896235  | Inlier |
| siRNA-Temozolomide Run3-DMSO | NM_003784 | SERPINB7 | serine (or cysteine) proteinase inhibitor, clade B (ovalbumin), member 7 | -1.315456 | Inlier |
| siRNA Disorazole DMSO Run2   | NM_003784 | SERPINB7 | serine (or cysteine) proteinase inhibitor, clade B (ovalbumin), member 7 | -0.777522 | Inlier |
| siRNA Disorazole DMSO Run3   | NM_003784 | SERPINB7 | serine (or cysteine) proteinase inhibitor, clade B (ovalbumin), member 7 | -0.138146 | Inlier |

Identification of Survival Genes in Human Glioblastoma Cells Using siRNA Screening  
 Nikhil G Thaker, Fang Zhang, Peter R. McDonald, Tong Ying Shun, Michael D Lewen, Ian F. Pollack, and John S. Lazo  
 Molecular Pharmacology

|                              |           |          |                                                                          |           |        |
|------------------------------|-----------|----------|--------------------------------------------------------------------------|-----------|--------|
| siRNA-Vinblastine Run2-DMSO  | NM_003784 | SERPINB7 | serine (or cysteine) proteinase inhibitor, clade B (ovalbumin), member 7 | -0.013758 | Inlier |
| siRNA Disorazole DMSO Run1   | NM_003784 | SERPINB7 | serine (or cysteine) proteinase inhibitor, clade B (ovalbumin), member 7 | 0.013758  | Inlier |
| siRNA-Temozolomide Run2-DMSO | NM_003784 | SERPINB7 | serine (or cysteine) proteinase inhibitor, clade B (ovalbumin), member 7 | 0.571478  | Inlier |
| siRNA-Temozolomide Run1-DMSO | NM_003784 | SERPINB7 | serine (or cysteine) proteinase inhibitor, clade B (ovalbumin), member 7 | 2.031415  | Inlier |
| siRNA-Vinblastine Run1-DMSO  | NM_003784 | SERPINB7 | serine (or cysteine) proteinase inhibitor, clade B (ovalbumin), member 7 | 2.755555  | Inlier |



Identification of Survival Genes in Human Glioblastoma Cells Using siRNA Screening  
 Nikhil G Thaker, Fang Zhang, Peter R. McDonald, Tong Ying Shun, Michael D Lewen, Ian F. Pollack, and John S. Lazo  
 Molecular Pharmacology

|                              |           |          |                                                                          |           |        |
|------------------------------|-----------|----------|--------------------------------------------------------------------------|-----------|--------|
| siRNA-Temozolomide Run3-DMSO | NM_198833 | SERPINB8 | serine (or cysteine) proteinase inhibitor, clade B (ovalbumin), member 8 | -1.879993 | Inlier |
| siRNA-Temozolomide Run2-DMSO | NM_198833 | SERPINB8 | serine (or cysteine) proteinase inhibitor, clade B (ovalbumin), member 8 | -1.325125 | Inlier |
| siRNA-Temozolomide Run1-DMSO | NM_198833 | SERPINB8 | serine (or cysteine) proteinase inhibitor, clade B (ovalbumin), member 8 | -0.369362 | Inlier |
| siRNA Disorazole DMSO Run3   | NM_198833 | SERPINB8 | serine (or cysteine) proteinase inhibitor, clade B (ovalbumin), member 8 | -0.20907  | Inlier |
| siRNA Disorazole DMSO Run1   | NM_198833 | SERPINB8 | serine (or cysteine) proteinase inhibitor, clade B (ovalbumin), member 8 | 0.20907   | Inlier |

Identification of Survival Genes in Human Glioblastoma Cells Using siRNA Screening

Nikhil G Thaker, Fang Zhang, Peter R. McDonald, Tong Ying Shun, Michael D Lewen, Ian F. Pollack, and John S. Lazo

Molecular Pharmacology

|                              |           |          |                                                                          |           |        |
|------------------------------|-----------|----------|--------------------------------------------------------------------------|-----------|--------|
| siRNA-Vinblastine Run2-DMSO  | NM_198833 | SERPINB8 | serine (or cysteine) proteinase inhibitor, clade B (ovalbumin), member 8 | 0.424775  | Inlier |
| siRNA Disorazole DMSO Run2   | NM_198833 | SERPINB8 | serine (or cysteine) proteinase inhibitor, clade B (ovalbumin), member 8 | 0.924225  | Inlier |
| siRNA-Vinblastine Run1-DMSO  | NM_198833 | SERPINB8 | serine (or cysteine) proteinase inhibitor, clade B (ovalbumin), member 8 | 1.419347  | Inlier |
| siRNA-Temozolomide Run3-DMSO | NM_004155 | SERPINB9 | serine (or cysteine) proteinase inhibitor, clade B (ovalbumin), member 9 | -2.552157 | Inlier |
| siRNA-Vinblastine Run2-DMSO  | NM_004155 | SERPINB9 | serine (or cysteine) proteinase inhibitor, clade B (ovalbumin), member 9 | -1.227867 | Inlier |

Identification of Survival Genes in Human Glioblastoma Cells Using siRNA Screening

Nikhil G Thaker, Fang Zhang, Peter R. McDonald, Tong Ying Shun, Michael D Lewen, Ian F. Pollack, and John S. Lazo

Molecular Pharmacology

|                                  |               |              |                                                                                                |           |        |
|----------------------------------|---------------|--------------|------------------------------------------------------------------------------------------------|-----------|--------|
| siRNA Disorazole DMSO Run3       | NM_0041<br>55 | SERPINB<br>9 | serine (or<br>cysteine)<br>proteinase<br>inhibitor,<br>clade B<br>(ovalbumi<br>n),<br>member 9 | -0.621789 | Inlier |
| siRNA Disorazole DMSO Run2       | NM_0041<br>55 | SERPINB<br>9 | serine (or<br>cysteine)<br>proteinase<br>inhibitor,<br>clade B<br>(ovalbumi<br>n),<br>member 9 | -0.056292 | Inlier |
| siRNA Disorazole DMSO Run1       | NM_0041<br>55 | SERPINB<br>9 | serine (or<br>cysteine)<br>proteinase<br>inhibitor,<br>clade B<br>(ovalbumi<br>n),<br>member 9 | 0.056292  | Inlier |
| siRNA-Temozolomide Run1-<br>DMSO | NM_0041<br>55 | SERPINB<br>9 | serine (or<br>cysteine)<br>proteinase<br>inhibitor,<br>clade B<br>(ovalbumi<br>n),<br>member 9 | 0.527482  | Inlier |
| siRNA-Temozolomide Run2-<br>DMSO | NM_0041<br>55 | SERPINB<br>9 | serine (or<br>cysteine)<br>proteinase<br>inhibitor,<br>clade B<br>(ovalbumi<br>n),<br>member 9 | 0.727211  | Inlier |

Identification of Survival Genes in Human Glioblastoma Cells Using siRNA Screening  
 Nikhil G Thaker, Fang Zhang, Peter R. McDonald, Tong Ying Shun, Michael D Lewen, Ian F. Pollack, and John S. Lazo  
 Molecular Pharmacology

|                              |           |          |                                                                             |           |        |
|------------------------------|-----------|----------|-----------------------------------------------------------------------------|-----------|--------|
| siRNA-Vinblastine Run1-DMSO  | NM_004155 | SERPINB9 | serine (or cysteine) proteinase inhibitor, clade B (ovalbumin), member 9    | 1.335917  | Inlier |
| siRNA-Temozolomide Run3-DMSO | NM_000488 | SERPINC1 | serine (or cysteine) proteinase inhibitor, clade C (antithrombin), member 1 | -1.082634 | Inlier |
| siRNA-Temozolomide Run1-DMSO | NM_000488 | SERPINC1 | serine (or cysteine) proteinase inhibitor, clade C (antithrombin), member 1 | -0.751656 | Inlier |
| siRNA-Temozolomide Run2-DMSO | NM_000488 | SERPINC1 | serine (or cysteine) proteinase inhibitor, clade C (antithrombin), member 1 | -0.660348 | Inlier |
| siRNA Disorazole DMSO Run3   | NM_000488 | SERPINC1 | serine (or cysteine) proteinase inhibitor, clade C (antithrombin), member 1 | -0.071232 | Inlier |

Identification of Survival Genes in Human Glioblastoma Cells Using siRNA Screening  
 Nikhil G Thaker, Fang Zhang, Peter R. McDonald, Tong Ying Shun, Michael D Lewen, Ian F. Pollack, and John S. Lazo  
 Molecular Pharmacology

|                                  |               |              |                                                                                                      |           |        |
|----------------------------------|---------------|--------------|------------------------------------------------------------------------------------------------------|-----------|--------|
| siRNA Disorazole DMSO Run1       | NM_0004<br>88 | SERPINC<br>1 | serine (or<br>cysteine)<br>proteinase<br>inhibitor,<br>clade C<br>(antithrom<br>bin),<br>member 1    | 0.071232  | Inlier |
| siRNA-Vinblastine Run2-<br>DMSO  | NM_0004<br>88 | SERPINC<br>1 | serine (or<br>cysteine)<br>proteinase<br>inhibitor,<br>clade C<br>(antithrom<br>bin),<br>member 1    | 0.261352  | Inlier |
| siRNA Disorazole DMSO Run2       | NM_0004<br>88 | SERPINC<br>1 | serine (or<br>cysteine)<br>proteinase<br>inhibitor,<br>clade C<br>(antithrom<br>bin),<br>member 1    | 0.688653  | Inlier |
| siRNA-Vinblastine Run1-<br>DMSO  | NM_0004<br>88 | SERPINC<br>1 | serine (or<br>cysteine)<br>proteinase<br>inhibitor,<br>clade C<br>(antithrom<br>bin),<br>member 1    | 1.129919  | Inlier |
| siRNA-Temozolomide Run3-<br>DMSO | NM_0001<br>85 | SERPIND<br>1 | serine (or<br>cysteine)<br>proteinase<br>inhibitor,<br>clade D<br>(heparin<br>cofactor),<br>member 1 | -2.523871 | Inlier |

Identification of Survival Genes in Human Glioblastoma Cells Using siRNA Screening

Nikhil G Thaker, Fang Zhang, Peter R. McDonald, Tong Ying Shun, Michael D Lewen, Ian F. Pollack, and John S. Lazo

Molecular Pharmacology

|                              |           |          |                                                                                 |           |        |
|------------------------------|-----------|----------|---------------------------------------------------------------------------------|-----------|--------|
| siRNA-Temozolomide Run2-DMSO | NM_000185 | SERPIND1 | serine (or cysteine) proteinase inhibitor, clade D (heparin cofactor), member 1 | -0.992931 | Inlier |
| siRNA Disorazole DMSO Run3   | NM_000185 | SERPIND1 | serine (or cysteine) proteinase inhibitor, clade D (heparin cofactor), member 1 | -0.620789 | Inlier |
| siRNA-Vinblastine Run2-DMSO  | NM_000185 | SERPIND1 | serine (or cysteine) proteinase inhibitor, clade D (heparin cofactor), member 1 | -0.302996 | Inlier |
| siRNA Disorazole DMSO Run1   | NM_000185 | SERPIND1 | serine (or cysteine) proteinase inhibitor, clade D (heparin cofactor), member 1 | 0.302995  | Inlier |
| siRNA-Temozolomide Run1-DMSO | NM_000185 | SERPIND1 | serine (or cysteine) proteinase inhibitor, clade D (heparin cofactor), member 1 | 0.594748  | Inlier |

Identification of Survival Genes in Human Glioblastoma Cells Using siRNA Screening

Nikhil G Thaker, Fang Zhang, Peter R. McDonald, Tong Ying Shun, Michael D Lewen, Ian F. Pollack, and John S.

Lazo

Molecular Pharmacology

|                                  |               |              |                                                                                                                                                |           |        |
|----------------------------------|---------------|--------------|------------------------------------------------------------------------------------------------------------------------------------------------|-----------|--------|
| siRNA Disorazole DMSO Run2       | NM_0001<br>85 | SERPIND<br>1 | serine (or<br>cysteine)<br>proteinase<br>inhibitor,<br>clade D<br>(heparin<br>cofactor),<br>member 1                                           | 0.728211  | Inlier |
| siRNA-Vinblastine Run1-<br>DMSO  | NM_0001<br>85 | SERPIND<br>1 | serine (or<br>cysteine)<br>proteinase<br>inhibitor,<br>clade D<br>(heparin<br>cofactor),<br>member 1                                           | 1.825844  | Inlier |
| siRNA-Temozolomide Run3-<br>DMSO | NM_0006<br>02 | SERPINE<br>1 | serine (or<br>cysteine)<br>proteinase<br>inhibitor,<br>clade E<br>(nexin,<br>plasminog<br>en<br>activator<br>inhibitor<br>type 1),<br>member 1 | -1.77996  | Inlier |
| siRNA-Temozolomide Run1-<br>DMSO | NM_0006<br>02 | SERPINE<br>1 | serine (or<br>cysteine)<br>proteinase<br>inhibitor,<br>clade E<br>(nexin,<br>plasminog<br>en<br>activator<br>inhibitor<br>type 1),<br>member 1 | -1.098986 | Inlier |

Identification of Survival Genes in Human Glioblastoma Cells Using siRNA Screening

Nikhil G Thaker, Fang Zhang, Peter R. McDonald, Tong Ying Shun, Michael D Lewen, Ian F. Pollack, and John S.

Lazo

Molecular Pharmacology

|                                  |               |              |                                                                                                                                                |                  |
|----------------------------------|---------------|--------------|------------------------------------------------------------------------------------------------------------------------------------------------|------------------|
|                                  |               |              | serine (or<br>cysteine)<br>proteinase<br>inhibitor,<br>clade E<br>(nexin,<br>plasminog<br>en<br>activator<br>inhibitor<br>type 1),<br>member 1 |                  |
| siRNA-Temozolomide Run2-<br>DMSO | NM_0006<br>02 | SERPINE<br>1 |                                                                                                                                                | -0.371313 Inlier |

|                            |               |              |                                                                                                                                                |                  |
|----------------------------|---------------|--------------|------------------------------------------------------------------------------------------------------------------------------------------------|------------------|
|                            |               |              | serine (or<br>cysteine)<br>proteinase<br>inhibitor,<br>clade E<br>(nexin,<br>plasminog<br>en<br>activator<br>inhibitor<br>type 1),<br>member 1 |                  |
| siRNA Disorazole DMSO Run3 | NM_0006<br>02 | SERPINE<br>1 |                                                                                                                                                | -0.358317 Inlier |

|                            |               |              |                                                                                                                                                |                 |
|----------------------------|---------------|--------------|------------------------------------------------------------------------------------------------------------------------------------------------|-----------------|
|                            |               |              | serine (or<br>cysteine)<br>proteinase<br>inhibitor,<br>clade E<br>(nexin,<br>plasminog<br>en<br>activator<br>inhibitor<br>type 1),<br>member 1 |                 |
| siRNA Disorazole DMSO Run2 | NM_0006<br>02 | SERPINE<br>1 |                                                                                                                                                | 0.358318 Inlier |

|                            |               |              |                                                                                                                                                |                 |
|----------------------------|---------------|--------------|------------------------------------------------------------------------------------------------------------------------------------------------|-----------------|
|                            |               |              | serine (or<br>cysteine)<br>proteinase<br>inhibitor,<br>clade E<br>(nexin,<br>plasminog<br>en<br>activator<br>inhibitor<br>type 1),<br>member 1 |                 |
| siRNA Disorazole DMSO Run1 | NM_0006<br>02 | SERPINE<br>1 |                                                                                                                                                | 0.561838 Inlier |



Identification of Survival Genes in Human Glioblastoma Cells Using siRNA Screening

Nikhil G Thaker, Fang Zhang, Peter R. McDonald, Tong Ying Shun, Michael D Lewen, Ian F. Pollack, and John S. Lazo

Molecular Pharmacology

|                              |           |          |                                                                                                              |           |         |
|------------------------------|-----------|----------|--------------------------------------------------------------------------------------------------------------|-----------|---------|
| siRNA-Vinblastine Run2-DMSO  | NM_000602 | SERPINE1 | serine (or cysteine) proteinase inhibitor, clade E (nexin, plasminogen activator inhibitor type 1), member 1 | 0.787162  | Inlier  |
| siRNA-Vinblastine Run1-DMSO  | NM_000602 | SERPINE1 | serine (or cysteine) proteinase inhibitor, clade E (nexin, plasminogen activator inhibitor type 1), member 1 | 1.216571  | Inlier  |
| siRNA-Temozolomide Run3-DMSO | NM_006216 | SERPINE2 | serine (or cysteine) proteinase inhibitor, clade E (nexin, plasminogen activator inhibitor type 1), member 2 | -3.94363  | Outlier |
| siRNA-Vinblastine Run2-DMSO  | NM_006216 | SERPINE2 | serine (or cysteine) proteinase inhibitor, clade E (nexin, plasminogen activator inhibitor type 1), member 2 | -1.551338 | Inlier  |

Identification of Survival Genes in Human Glioblastoma Cells Using siRNA Screening  
 Nikhil G Thaker, Fang Zhang, Peter R. McDonald, Tong Ying Shun, Michael D Lewen, Ian F. Pollack, and John S. Lazo  
 Molecular Pharmacology

|                              |           |          |                                                                                                              |           |        |
|------------------------------|-----------|----------|--------------------------------------------------------------------------------------------------------------|-----------|--------|
| siRNA-Temozolomide Run2-DMSO | NM_006216 | SERPINE2 | serine (or cysteine) proteinase inhibitor, clade E (nexin, plasminogen activator inhibitor type 1), member 2 | -1.241287 | Inlier |
| siRNA Disorazole DMSO Run3   | NM_006216 | SERPINE2 | serine (or cysteine) proteinase inhibitor, clade E (nexin, plasminogen activator inhibitor type 1), member 2 | -0.371869 | Inlier |
| siRNA Disorazole DMSO Run2   | NM_006216 | SERPINE2 | serine (or cysteine) proteinase inhibitor, clade E (nexin, plasminogen activator inhibitor type 1), member 2 | 0.371869  | Inlier |
| siRNA-Temozolomide Run1-DMSO | NM_006216 | SERPINE2 | serine (or cysteine) proteinase inhibitor, clade E (nexin, plasminogen activator inhibitor type 1), member 2 | 0.477358  | Inlier |

Identification of Survival Genes in Human Glioblastoma Cells Using siRNA Screening

Nikhil G Thaker, Fang Zhang, Peter R. McDonald, Tong Ying Shun, Michael D Lewen, Ian F. Pollack, and John S. Lazo

Molecular Pharmacology

|                                  |               |              |                                                                                                                                                         |          |        |
|----------------------------------|---------------|--------------|---------------------------------------------------------------------------------------------------------------------------------------------------------|----------|--------|
| siRNA Disorazole DMSO Run1       | NM_0062<br>16 | SERPINE<br>2 | serine (or<br>cysteine)<br>proteinase<br>inhibitor,<br>clade E<br>(nexin,<br>plasminog<br>en<br>activator<br>inhibitor<br>type 1),<br>member 2          | 0.491697 | Inlier |
| siRNA-Vinblastine Run1-<br>DMSO  | NM_0062<br>16 | SERPINE<br>2 | serine (or<br>cysteine)<br>proteinase<br>inhibitor,<br>clade E<br>(nexin,<br>plasminog<br>en<br>activator<br>inhibitor<br>type 1),<br>member 2          | 0.857303 | Inlier |
| siRNA-Temozolomide Run3-<br>DMSO | NM_0026<br>15 | SERPINF<br>1 | serine (or<br>cysteine)<br>proteinase<br>inhibitor,<br>clade F<br>(alpha-2<br>antiplasmi<br>n, pigment<br>epithelium<br>derived<br>factor),<br>member 1 | -1.20776 | Inlier |

Identification of Survival Genes in Human Glioblastoma Cells Using siRNA Screening

Nikhil G Thaker, Fang Zhang, Peter R. McDonald, Tong Ying Shun, Michael D Lewen, Ian F. Pollack, and John S.

Lazo

Molecular Pharmacology

|                              |           |          |                                                                                                                       |           |        |
|------------------------------|-----------|----------|-----------------------------------------------------------------------------------------------------------------------|-----------|--------|
| siRNA-Temozolomide Run2-DMSO | NM_002615 | SERPINF1 | serine (or cysteine) proteinase inhibitor, clade F (alpha-2 antiplasmin, pigment epithelium derived factor), member 1 | -0.8354   | Inlier |
| siRNA-Temozolomide Run1-DMSO | NM_002615 | SERPINF1 | serine (or cysteine) proteinase inhibitor, clade F (alpha-2 antiplasmin, pigment epithelium derived factor), member 1 | -0.581475 | Inlier |
| siRNA Disorazole DMSO Run3   | NM_002615 | SERPINF1 | serine (or cysteine) proteinase inhibitor, clade F (alpha-2 antiplasmin, pigment epithelium derived factor), member 1 | -0.150376 | Inlier |

Identification of Survival Genes in Human Glioblastoma Cells Using siRNA Screening  
 Nikhil G Thaker, Fang Zhang, Peter R. McDonald, Tong Ying Shun, Michael D Lewen, Ian F. Pollack, and John S. Lazo  
 Molecular Pharmacology

|                                 |               |              |                                                                                                                                                         |          |        |
|---------------------------------|---------------|--------------|---------------------------------------------------------------------------------------------------------------------------------------------------------|----------|--------|
| siRNA Disorazole DMSO Run1      | NM_0026<br>15 | SERPINF<br>1 | serine (or<br>cysteine)<br>proteinase<br>inhibitor,<br>clade F<br>(alpha-2<br>antiplasmi<br>n, pigment<br>epithelium<br>derived<br>factor),<br>member 1 | 0.150376 | Inlier |
| siRNA-Vinblastine Run2-<br>DMSO | NM_0026<br>15 | SERPINF<br>1 | serine (or<br>cysteine)<br>proteinase<br>inhibitor,<br>clade F<br>(alpha-2<br>antiplasmi<br>n, pigment<br>epithelium<br>derived<br>factor),<br>member 1 | 0.535428 | Inlier |
| siRNA Disorazole DMSO Run2      | NM_0026<br>15 | SERPINF<br>1 | serine (or<br>cysteine)<br>proteinase<br>inhibitor,<br>clade F<br>(alpha-2<br>antiplasmi<br>n, pigment<br>epithelium<br>derived<br>factor),<br>member 1 | 0.767525 | Inlier |

Identification of Survival Genes in Human Glioblastoma Cells Using siRNA Screening

Nikhil G Thaker, Fang Zhang, Peter R. McDonald, Tong Ying Shun, Michael D Lewen, Ian F. Pollack, and John S. Lazo

Molecular Pharmacology

|                              |           |          |                                                                                                                       |           |        |
|------------------------------|-----------|----------|-----------------------------------------------------------------------------------------------------------------------|-----------|--------|
| siRNA-Vinblastine Run1-DMSO  | NM_002615 | SERPINF1 | serine (or cysteine) proteinase inhibitor, clade F (alpha-2 antiplasmin, pigment epithelium derived factor), member 1 | 1.095301  | Inlier |
| siRNA-Temozolomide Run3-DMSO | NM_000934 | SERPINF2 | serine (or cysteine) proteinase inhibitor, clade F (alpha-2 antiplasmin, pigment epithelium derived factor), member 2 | -2.07808  | Inlier |
| siRNA-Temozolomide Run2-DMSO | NM_000934 | SERPINF2 | serine (or cysteine) proteinase inhibitor, clade F (alpha-2 antiplasmin, pigment epithelium derived factor), member 2 | -1.622312 | Inlier |

Identification of Survival Genes in Human Glioblastoma Cells Using siRNA Screening

Nikhil G Thaker, Fang Zhang, Peter R. McDonald, Tong Ying Shun, Michael D Lewen, Ian F. Pollack, and John S. Lazo

Molecular Pharmacology

|                                  |               |              |                                                                                                                                                         |                 |
|----------------------------------|---------------|--------------|---------------------------------------------------------------------------------------------------------------------------------------------------------|-----------------|
|                                  |               |              | serine (or<br>cysteine)<br>proteinase<br>inhibitor,<br>clade F<br>(alpha-2<br>antiplasmi<br>n, pigment<br>epithelium<br>derived<br>factor),<br>member 2 |                 |
| siRNA-Temozolomide Run1-<br>DMSO | NM_0009<br>34 | SERPINF<br>2 |                                                                                                                                                         | -0.30382 Inlier |

|                                 |               |              |                                                                                                                                                         |                  |
|---------------------------------|---------------|--------------|---------------------------------------------------------------------------------------------------------------------------------------------------------|------------------|
|                                 |               |              | serine (or<br>cysteine)<br>proteinase<br>inhibitor,<br>clade F<br>(alpha-2<br>antiplasmi<br>n, pigment<br>epithelium<br>derived<br>factor),<br>member 2 |                  |
| siRNA-Vinblastine Run2-<br>DMSO | NM_0009<br>34 | SERPINF<br>2 |                                                                                                                                                         | -0.035548 Inlier |

|                            |               |              |                                                                                                                                                         |                 |
|----------------------------|---------------|--------------|---------------------------------------------------------------------------------------------------------------------------------------------------------|-----------------|
|                            |               |              | serine (or<br>cysteine)<br>proteinase<br>inhibitor,<br>clade F<br>(alpha-2<br>antiplasmi<br>n, pigment<br>epithelium<br>derived<br>factor),<br>member 2 |                 |
| siRNA Disorazole DMSO Run1 | NM_0009<br>34 | SERPINF<br>2 |                                                                                                                                                         | 0.035548 Inlier |

Identification of Survival Genes in Human Glioblastoma Cells Using siRNA Screening

Nikhil G Thaker, Fang Zhang, Peter R. McDonald, Tong Ying Shun, Michael D Lewen, Ian F. Pollack, and John S. Lazo

Molecular Pharmacology

|                                 |               |              |                                                                                                                                                         |          |        |
|---------------------------------|---------------|--------------|---------------------------------------------------------------------------------------------------------------------------------------------------------|----------|--------|
| siRNA Disorazole DMSO Run3      | NM_0009<br>34 | SERPINF<br>2 | serine (or<br>cysteine)<br>proteinase<br>inhibitor,<br>clade F<br>(alpha-2<br>antiplasmi<br>n, pigment<br>epithelium<br>derived<br>factor),<br>member 2 | 0.270458 | Inlier |
| siRNA Disorazole DMSO Run2      | NM_0009<br>34 | SERPINF<br>2 | serine (or<br>cysteine)<br>proteinase<br>inhibitor,<br>clade F<br>(alpha-2<br>antiplasmi<br>n, pigment<br>epithelium<br>derived<br>factor),<br>member 2 | 1.04518  | Inlier |
| siRNA-Vinblastine Run1-<br>DMSO | NM_0009<br>34 | SERPINF<br>2 | serine (or<br>cysteine)<br>proteinase<br>inhibitor,<br>clade F<br>(alpha-2<br>antiplasmi<br>n, pigment<br>epithelium<br>derived<br>factor),<br>member 2 | 1.252882 | Inlier |



# Identification of Survival Genes in Human Glioblastoma Cells Using siRNA Screening

Nikhil G Thaker, Fang Zhang, Peter R. McDonald, Tong Ying Shun, Michael D Lewen, Ian F. Pollack, and John S.

Lazo

Molecular Pharmacology

|                              |           |          |                                                                                                       |           |        |
|------------------------------|-----------|----------|-------------------------------------------------------------------------------------------------------|-----------|--------|
| siRNA-Temozolomide Run3-DMSO | NM_000062 | SERPING1 | serine (or cysteine) proteinase inhibitor, clade G (C1 inhibitor), member 1, (angioedema, hereditary) | -1.230512 | Inlier |
|------------------------------|-----------|----------|-------------------------------------------------------------------------------------------------------|-----------|--------|

|                              |           |          |                                                                                                       |           |        |
|------------------------------|-----------|----------|-------------------------------------------------------------------------------------------------------|-----------|--------|
| siRNA-Temozolomide Run2-DMSO | NM_000062 | SERPING1 | serine (or cysteine) proteinase inhibitor, clade G (C1 inhibitor), member 1, (angioedema, hereditary) | -0.859339 | Inlier |
|------------------------------|-----------|----------|-------------------------------------------------------------------------------------------------------|-----------|--------|

|                              |           |          |                                                                                                       |           |        |
|------------------------------|-----------|----------|-------------------------------------------------------------------------------------------------------|-----------|--------|
| siRNA-Temozolomide Run1-DMSO | NM_000062 | SERPING1 | serine (or cysteine) proteinase inhibitor, clade G (C1 inhibitor), member 1, (angioedema, hereditary) | -0.466408 | Inlier |
|------------------------------|-----------|----------|-------------------------------------------------------------------------------------------------------|-----------|--------|

Identification of Survival Genes in Human Glioblastoma Cells Using siRNA Screening

Nikhil G Thaker, Fang Zhang, Peter R. McDonald, Tong Ying Shun, Michael D Lewen, Ian F. Pollack, and John S. Lazo

Molecular Pharmacology

|                            |               |              |  |                                                                                                                                      |                  |
|----------------------------|---------------|--------------|--|--------------------------------------------------------------------------------------------------------------------------------------|------------------|
|                            |               |              |  | serine (or<br>cysteine)<br>proteinase<br>inhibitor,<br>clade G<br>(C1<br>inhibitor),<br>member 1,<br>(angioede<br>ma,<br>hereditary) |                  |
| siRNA Disorazole DMSO Run1 | NM_0000<br>62 | SERPING<br>1 |  |                                                                                                                                      | -0.043175 Inlier |

|                            |               |              |  |                                                                                                                                      |                 |
|----------------------------|---------------|--------------|--|--------------------------------------------------------------------------------------------------------------------------------------|-----------------|
|                            |               |              |  | serine (or<br>cysteine)<br>proteinase<br>inhibitor,<br>clade G<br>(C1<br>inhibitor),<br>member 1,<br>(angioede<br>ma,<br>hereditary) |                 |
| siRNA Disorazole DMSO Run3 | NM_0000<br>62 | SERPING<br>1 |  |                                                                                                                                      | 0.043175 Inlier |

|                                 |               |              |  |                                                                                                                                      |                 |
|---------------------------------|---------------|--------------|--|--------------------------------------------------------------------------------------------------------------------------------------|-----------------|
|                                 |               |              |  | serine (or<br>cysteine)<br>proteinase<br>inhibitor,<br>clade G<br>(C1<br>inhibitor),<br>member 1,<br>(angioede<br>ma,<br>hereditary) |                 |
| siRNA-Vinblastine Run2-<br>DMSO | NM_0000<br>62 | SERPING<br>1 |  |                                                                                                                                      | 0.537339 Inlier |

Identification of Survival Genes in Human Glioblastoma Cells Using siRNA Screening

Nikhil G Thaker, Fang Zhang, Peter R. McDonald, Tong Ying Shun, Michael D Lewen, Ian F. Pollack, and John S.

Lazo

Molecular Pharmacology

|                             |           |          |                                                                                                       |          |        |
|-----------------------------|-----------|----------|-------------------------------------------------------------------------------------------------------|----------|--------|
| siRNA-Vinblastine Run1-DMSO | NM_000062 | SERPING1 | serine (or cysteine) proteinase inhibitor, clade G (C1 inhibitor), member 1, (angioedema, hereditary) | 0.811661 | Inlier |
|-----------------------------|-----------|----------|-------------------------------------------------------------------------------------------------------|----------|--------|

|                            |           |          |                                                                                                       |          |        |
|----------------------------|-----------|----------|-------------------------------------------------------------------------------------------------------|----------|--------|
| siRNA Disorazole DMSO Run2 | NM_000062 | SERPING1 | serine (or cysteine) proteinase inhibitor, clade G (C1 inhibitor), member 1, (angioedema, hereditary) | 0.816504 | Inlier |
|----------------------------|-----------|----------|-------------------------------------------------------------------------------------------------------|----------|--------|

|                              |           |          |                                                                                                                    |           |        |
|------------------------------|-----------|----------|--------------------------------------------------------------------------------------------------------------------|-----------|--------|
| siRNA-Temozolomide Run3-DMSO | NM_001235 | SERPINH1 | serine (or cysteine) proteinase inhibitor, clade H (heat shock protein 47), member 1, (collagen binding protein 1) | -2.200273 | Inlier |
|------------------------------|-----------|----------|--------------------------------------------------------------------------------------------------------------------|-----------|--------|

Identification of Survival Genes in Human Glioblastoma Cells Using siRNA Screening

Nikhil G Thaker, Fang Zhang, Peter R. McDonald, Tong Ying Shun, Michael D Lewen, Ian F. Pollack, and John S.

Lazo

Molecular Pharmacology

|                                  |               |              |  |                                                                                                                                                        |                  |
|----------------------------------|---------------|--------------|--|--------------------------------------------------------------------------------------------------------------------------------------------------------|------------------|
|                                  |               |              |  | serine (or<br>cysteine)<br>proteinase<br>inhibitor,<br>clade H<br>(heat<br>shock<br>protein<br>47),<br>member 1,<br>(collagen<br>binding<br>protein 1) |                  |
| siRNA-Temozolomide Run2-<br>DMSO | NM_0012<br>35 | SERPINH<br>1 |  |                                                                                                                                                        | -1.249368 Inlier |

|                                  |               |              |  |                                                                                                                                                        |                  |
|----------------------------------|---------------|--------------|--|--------------------------------------------------------------------------------------------------------------------------------------------------------|------------------|
|                                  |               |              |  | serine (or<br>cysteine)<br>proteinase<br>inhibitor,<br>clade H<br>(heat<br>shock<br>protein<br>47),<br>member 1,<br>(collagen<br>binding<br>protein 1) |                  |
| siRNA-Temozolomide Run1-<br>DMSO | NM_0012<br>35 | SERPINH<br>1 |  |                                                                                                                                                        | -0.545828 Inlier |

|                                 |               |              |  |                                                                                                                                                        |                  |
|---------------------------------|---------------|--------------|--|--------------------------------------------------------------------------------------------------------------------------------------------------------|------------------|
|                                 |               |              |  | serine (or<br>cysteine)<br>proteinase<br>inhibitor,<br>clade H<br>(heat<br>shock<br>protein<br>47),<br>member 1,<br>(collagen<br>binding<br>protein 1) |                  |
| siRNA-Vinblastine Run2-<br>DMSO | NM_0012<br>35 | SERPINH<br>1 |  |                                                                                                                                                        | -0.365981 Inlier |

Identification of Survival Genes in Human Glioblastoma Cells Using siRNA Screening

Nikhil G Thaker, Fang Zhang, Peter R. McDonald, Tong Ying Shun, Michael D Lewen, Ian F. Pollack, and John S. Lazo

Molecular Pharmacology

|                                 |               |              |  |                                                                                                                                                        |                 |
|---------------------------------|---------------|--------------|--|--------------------------------------------------------------------------------------------------------------------------------------------------------|-----------------|
|                                 |               |              |  | serine (or<br>cysteine)<br>proteinase<br>inhibitor,<br>clade H<br>(heat<br>shock<br>protein<br>47),<br>member 1,<br>(collagen<br>binding<br>protein 1) |                 |
| siRNA-Vinblastine Run1-<br>DMSO | NM_0012<br>35 | SERPINH<br>1 |  |                                                                                                                                                        | 0.365982 Inlier |

|                            |               |              |  |                                                                                                                                                        |                 |
|----------------------------|---------------|--------------|--|--------------------------------------------------------------------------------------------------------------------------------------------------------|-----------------|
|                            |               |              |  | serine (or<br>cysteine)<br>proteinase<br>inhibitor,<br>clade H<br>(heat<br>shock<br>protein<br>47),<br>member 1,<br>(collagen<br>binding<br>protein 1) |                 |
| siRNA Disorazole DMSO Run3 | NM_0012<br>35 | SERPINH<br>1 |  |                                                                                                                                                        | 0.557792 Inlier |

|                            |               |              |  |                                                                                                                                                        |                 |
|----------------------------|---------------|--------------|--|--------------------------------------------------------------------------------------------------------------------------------------------------------|-----------------|
|                            |               |              |  | serine (or<br>cysteine)<br>proteinase<br>inhibitor,<br>clade H<br>(heat<br>shock<br>protein<br>47),<br>member 1,<br>(collagen<br>binding<br>protein 1) |                 |
| siRNA Disorazole DMSO Run2 | NM_0012<br>35 | SERPINH<br>1 |  |                                                                                                                                                        | 0.791208 Inlier |

Identification of Survival Genes in Human Glioblastoma Cells Using siRNA Screening

Nikhil G Thaker, Fang Zhang, Peter R. McDonald, Tong Ying Shun, Michael D Lewen, Ian F. Pollack, and John S. Lazo

Molecular Pharmacology

|                                  |               |              |                                                                                                                                                        |           |        |
|----------------------------------|---------------|--------------|--------------------------------------------------------------------------------------------------------------------------------------------------------|-----------|--------|
| siRNA Disorazole DMSO Run1       | NM_0012<br>35 | SERPINH<br>1 | serine (or<br>cysteine)<br>proteinase<br>inhibitor,<br>clade H<br>(heat<br>shock<br>protein<br>47),<br>member 1,<br>(collagen<br>binding<br>protein 1) | 0.835877  | Inlier |
| siRNA-Temozolomide Run3-<br>DMSO | NM_0050<br>25 | SERPINI1     | serine (or<br>cysteine)<br>proteinase<br>inhibitor,<br>clade I<br>(neuroserp<br>in),<br>member 1                                                       | -1.475714 | Inlier |
| siRNA-Temozolomide Run2-<br>DMSO | NM_0050<br>25 | SERPINI1     | serine (or<br>cysteine)<br>proteinase<br>inhibitor,<br>clade I<br>(neuroserp<br>in),<br>member 1                                                       | -0.898028 | Inlier |
| siRNA-Temozolomide Run1-<br>DMSO | NM_0050<br>25 | SERPINI1     | serine (or<br>cysteine)<br>proteinase<br>inhibitor,<br>clade I<br>(neuroserp<br>in),<br>member 1                                                       | -0.646528 | Inlier |
| siRNA Disorazole DMSO Run3       | NM_0050<br>25 | SERPINI1     | serine (or<br>cysteine)<br>proteinase<br>inhibitor,<br>clade I<br>(neuroserp<br>in),<br>member 1                                                       | -0.249843 | Inlier |

Identification of Survival Genes in Human Glioblastoma Cells Using siRNA Screening  
 Nikhil G Thaker, Fang Zhang, Peter R. McDonald, Tong Ying Shun, Michael D Lewen, Ian F. Pollack, and John S. Lazo  
 Molecular Pharmacology

|                              |               |          |                                                                            |           |        |
|------------------------------|---------------|----------|----------------------------------------------------------------------------|-----------|--------|
| siRNA Disorazole DMSO Run1   | NM_0050<br>25 | SERPINI1 | serine (or cysteine) proteinase inhibitor, clade I (neuroserpin), member 1 | 0.249843  | Inlier |
| siRNA-Vinblastine Run2-DMSO  | NM_0050<br>25 | SERPINI1 | serine (or cysteine) proteinase inhibitor, clade I (neuroserpin), member 1 | 0.507846  | Inlier |
| siRNA Disorazole DMSO Run2   | NM_0050<br>25 | SERPINI1 | serine (or cysteine) proteinase inhibitor, clade I (neuroserpin), member 1 | 0.702472  | Inlier |
| siRNA-Vinblastine Run1-DMSO  | NM_0050<br>25 | SERPINI1 | serine (or cysteine) proteinase inhibitor, clade I (neuroserpin), member 1 | 1.206156  | Inlier |
| siRNA-Temozolomide Run2-DMSO | NM_0062<br>17 | SERPINI2 | serine (or cysteine) proteinase inhibitor, clade I (pancpin), member 2     | -3.238626 | Inlier |
| siRNA-Temozolomide Run3-DMSO | NM_0062<br>17 | SERPINI2 | serine (or cysteine) proteinase inhibitor, clade I (pancpin), member 2     | -3.030694 | Inlier |

Identification of Survival Genes in Human Glioblastoma Cells Using siRNA Screening  
 Nikhil G Thaker, Fang Zhang, Peter R. McDonald, Tong Ying Shun, Michael D Lewen, Ian F. Pollack, and John S. Lazo  
 Molecular Pharmacology

|                              |               |          |                                                                        |           |        |
|------------------------------|---------------|----------|------------------------------------------------------------------------|-----------|--------|
| siRNA-Temozolomide Run1-DMSO | NM_0062<br>17 | SERPINI2 | serine (or cysteine) proteinase inhibitor, clade I (pancpin), member 2 | -2.052168 | Inlier |
| siRNA Disorazole DMSO Run3   | NM_0062<br>17 | SERPINI2 | serine (or cysteine) proteinase inhibitor, clade I (pancpin), member 2 | -0.377301 | Inlier |
| siRNA-Vinblastine Run1-DMSO  | NM_0062<br>17 | SERPINI2 | serine (or cysteine) proteinase inhibitor, clade I (pancpin), member 2 | 0.377301  | Inlier |
| siRNA Disorazole DMSO Run2   | NM_0062<br>17 | SERPINI2 | serine (or cysteine) proteinase inhibitor, clade I (pancpin), member 2 | 0.528136  | Inlier |
| siRNA Disorazole DMSO Run1   | NM_0062<br>17 | SERPINI2 | serine (or cysteine) proteinase inhibitor, clade I (pancpin), member 2 | 0.560395  | Inlier |
| siRNA-Vinblastine Run2-DMSO  | NM_0062<br>17 | SERPINI2 | serine (or cysteine) proteinase inhibitor, clade I (pancpin), member 2 | 0.788605  | Inlier |



Identification of Survival Genes in Human Glioblastoma Cells Using siRNA Screening  
 Nikhil G Thaker, Fang Zhang, Peter R. McDonald, Tong Ying Shun, Michael D Lewen, Ian F. Pollack, and John S. Lazo

Molecular Pharmacology

|                              |               |        |                                                       |                  |
|------------------------------|---------------|--------|-------------------------------------------------------|------------------|
| siRNA-Temozolomide Run3-DMSO | NM_2015<br>75 | SEZ6L2 | seizure<br>related 6<br>homolog<br>(mouse)-<br>like 2 | -0.793963 Inlier |
| siRNA-Vinblastine Run2-DMSO  | NM_2015<br>75 | SEZ6L2 | seizure<br>related 6<br>homolog<br>(mouse)-<br>like 2 | -0.555037 Inlier |
| siRNA Disorazole DMSO Run1   | NM_2015<br>75 | SEZ6L2 | seizure<br>related 6<br>homolog<br>(mouse)-<br>like 2 | -0.319313 Inlier |
| siRNA-Temozolomide Run2-DMSO | NM_2015<br>75 | SEZ6L2 | seizure<br>related 6<br>homolog<br>(mouse)-<br>like 2 | -0.085521 Inlier |
| siRNA-Temozolomide Run1-DMSO | NM_2015<br>75 | SEZ6L2 | seizure<br>related 6<br>homolog<br>(mouse)-<br>like 2 | 0.085521 Inlier  |
| siRNA Disorazole DMSO Run3   | NM_2015<br>75 | SEZ6L2 | seizure<br>related 6<br>homolog<br>(mouse)-<br>like 2 | 0.926156 Inlier  |
| siRNA Disorazole DMSO Run2   | NM_2015<br>75 | SEZ6L2 | seizure<br>related 6<br>homolog<br>(mouse)-<br>like 2 | 3.169316 Inlier  |
| siRNA-Vinblastine Run1-DMSO  | NM_2015<br>75 | SEZ6L2 | seizure<br>related 6<br>homolog<br>(mouse)-<br>like 2 | 3.798881 Outlier |
| siRNA Disorazole DMSO Run1   | NM_0227<br>54 | SFXN1  | sideroflexi<br>n 1                                    | -0.725064 Inlier |
| siRNA-Temozolomide Run1-DMSO | NM_0227<br>54 | SFXN1  | sideroflexi<br>n 1                                    | -0.623936 Inlier |
| siRNA-Temozolomide Run3-DMSO | NM_0227<br>54 | SFXN1  | sideroflexi<br>n 1                                    | -0.318498 Inlier |
| siRNA-Temozolomide Run2-DMSO | NM_0227<br>54 | SFXN1  | sideroflexi<br>n 1                                    | -0.288558 Inlier |
| siRNA-Vinblastine Run2-DMSO  | NM_0227<br>54 | SFXN1  | sideroflexi<br>n 1                                    | 0.288558 Inlier  |
| siRNA Disorazole DMSO Run3   | NM_0227<br>54 | SFXN1  | sideroflexi<br>n 1                                    | 1.062831 Inlier  |

Identification of Survival Genes in Human Glioblastoma Cells Using siRNA Screening  
 Nikhil G Thaker, Fang Zhang, Peter R. McDonald, Tong Ying Shun, Michael D Lewen, Ian F. Pollack, and John S. Lazo

|                                  |               |       |                                                 |           |        |
|----------------------------------|---------------|-------|-------------------------------------------------|-----------|--------|
| siRNA-Vinblastine Run1-<br>DMSO  | NM_0227<br>54 | SFXN1 | sideroflexi<br>n 1                              | 1.457192  | Inlier |
| siRNA Disorazole DMSO Run2       | NM_0227<br>54 | SFXN1 | sideroflexi<br>n 1                              | 2.468638  | Inlier |
| siRNA-Vinblastine Run2-<br>DMSO  | NM_1445<br>79 | SFXN5 | sideroflexi<br>n 5                              | -0.945889 | Inlier |
| siRNA-Temozolomide Run1-<br>DMSO | NM_1445<br>79 | SFXN5 | sideroflexi<br>n 5                              | -0.522803 | Inlier |
| siRNA-Temozolomide Run2-<br>DMSO | NM_1445<br>79 | SFXN5 | sideroflexi<br>n 5                              | -0.258984 | Inlier |
| siRNA Disorazole DMSO Run1       | NM_1445<br>79 | SFXN5 | sideroflexi<br>n 5                              | -0.201723 | Inlier |
| siRNA Disorazole DMSO Run3       | NM_1445<br>79 | SFXN5 | sideroflexi<br>n 5                              | 0.201724  | Inlier |
| siRNA-Temozolomide Run3-<br>DMSO | NM_1445<br>79 | SFXN5 | sideroflexi<br>n 5                              | 0.826197  | Inlier |
| siRNA-Vinblastine Run1-<br>DMSO  | NM_1445<br>79 | SFXN5 | sideroflexi<br>n 5                              | 1.488407  | Inlier |
| siRNA Disorazole DMSO Run2       | NM_1445<br>79 | SFXN5 | sideroflexi<br>n 5                              | 1.542915  | Inlier |
| siRNA Disorazole DMSO Run1       | NM_0056<br>27 | SGK   | serum/glu<br>cocorticoid<br>regulated<br>kinase | -1.36409  | Inlier |
| siRNA-Temozolomide Run3-<br>DMSO | NM_0056<br>27 | SGK   | serum/glu<br>cocorticoid<br>regulated<br>kinase | -0.90777  | Inlier |
| siRNA-Temozolomide Run2-<br>DMSO | NM_0056<br>27 | SGK   | serum/glu<br>cocorticoid<br>regulated<br>kinase | -0.45805  | Inlier |
| siRNA Disorazole DMSO Run2       | NM_0056<br>27 | SGK   | serum/glu<br>cocorticoid<br>regulated<br>kinase | -0.058117 | Inlier |
| siRNA-Temozolomide Run1-<br>DMSO | NM_0056<br>27 | SGK   | serum/glu<br>cocorticoid<br>regulated<br>kinase | 0.058116  | Inlier |
| siRNA-Vinblastine Run1-<br>DMSO  | NM_0056<br>27 | SGK   | serum/glu<br>cocorticoid<br>regulated<br>kinase | 0.254692  | Inlier |

Identification of Survival Genes in Human Glioblastoma Cells Using siRNA Screening  
 Nikhil G Thaker, Fang Zhang, Peter R. McDonald, Tong Ying Shun, Michael D Lewen, Ian F. Pollack, and John S. Lazo  
 Molecular Pharmacology

|                              |               |      |                                                   |                  |
|------------------------------|---------------|------|---------------------------------------------------|------------------|
| siRNA-Vinblastine Run2-DMSO  | NM_0056<br>27 | SGK  | serum/glu<br>cocorticoid<br>regulated<br>kinase   | 0.89095 Inlier   |
| siRNA Disorazole DMSO Run3   | NM_0056<br>27 | SGK  | serum/glu<br>cocorticoid<br>regulated<br>kinase   | 1.517437 Inlier  |
| siRNA Disorazole DMSO Run2   | NM_0162<br>76 | SGK2 | serum/glu<br>cocorticoid<br>regulated<br>kinase 2 | -0.693183 Inlier |
| siRNA-Temozolomide Run3-DMSO | NM_0162<br>76 | SGK2 | serum/glu<br>cocorticoid<br>regulated<br>kinase 2 | -0.655817 Inlier |
| siRNA-Temozolomide Run2-DMSO | NM_0162<br>76 | SGK2 | serum/glu<br>cocorticoid<br>regulated<br>kinase 2 | -0.491565 Inlier |
| siRNA Disorazole DMSO Run3   | NM_0162<br>76 | SGK2 | serum/glu<br>cocorticoid<br>regulated<br>kinase 2 | -0.48496 Inlier  |
| siRNA-Temozolomide Run1-DMSO | NM_0162<br>76 | SGK2 | serum/glu<br>cocorticoid<br>regulated<br>kinase 2 | 0.48496 Inlier   |
| siRNA Disorazole DMSO Run1   | NM_0162<br>76 | SGK2 | serum/glu<br>cocorticoid<br>regulated<br>kinase 2 | 0.815294 Inlier  |
| siRNA-Vinblastine Run1-DMSO  | NM_0162<br>76 | SGK2 | serum/glu<br>cocorticoid<br>regulated<br>kinase 2 | 1.051718 Inlier  |
| siRNA-Vinblastine Run2-DMSO  | NM_0162<br>76 | SGK2 | serum/glu<br>cocorticoid<br>regulated<br>kinase 2 | 1.180745 Inlier  |

Identification of Survival Genes in Human Glioblastoma Cells Using siRNA Screening  
 Nikhil G Thaker, Fang Zhang, Peter R. McDonald, Tong Ying Shun, Michael D Lewen, Ian F. Pollack, and John S. Lazo  
 Molecular Pharmacology

|                              |               |       |                                                                            |           |        |
|------------------------------|---------------|-------|----------------------------------------------------------------------------|-----------|--------|
| siRNA-Temozolomide Run3-DMSO | NM_1707<br>09 | SGKL  | serum/glu<br>cocorticoid<br>regulated<br>kinase-like                       | -0.762654 | Inlier |
| siRNA Disorazole DMSO Run2   | NM_1707<br>09 | SGKL  | serum/glu<br>cocorticoid<br>regulated<br>kinase-like                       | -0.586346 | Inlier |
| siRNA Disorazole DMSO Run3   | NM_1707<br>09 | SGKL  | serum/glu<br>cocorticoid<br>regulated<br>kinase-like                       | -0.436388 | Inlier |
| siRNA-Temozolomide Run2-DMSO | NM_1707<br>09 | SGKL  | serum/glu<br>cocorticoid<br>regulated<br>kinase-like                       | -0.289374 | Inlier |
| siRNA-Temozolomide Run1-DMSO | NM_1707<br>09 | SGKL  | serum/glu<br>cocorticoid<br>regulated<br>kinase-like                       | 0.289374  | Inlier |
| siRNA Disorazole DMSO Run1   | NM_1707<br>09 | SGKL  | serum/glu<br>cocorticoid<br>regulated<br>kinase-like                       | 1.448282  | Inlier |
| siRNA-Vinblastine Run1-DMSO  | NM_1707<br>09 | SGKL  | serum/glu<br>cocorticoid<br>regulated<br>kinase-like                       | 2.082687  | Inlier |
| siRNA-Vinblastine Run2-DMSO  | NM_1707<br>09 | SGKL  | serum/glu<br>cocorticoid<br>regulated<br>kinase-like<br>sphingosin<br>e-1- | 2.170902  | Inlier |
| siRNA-Temozolomide Run3-DMSO | NM_0039<br>01 | SGPL1 | phosphate<br>lyase 1                                                       | -1.158981 | Inlier |

Identification of Survival Genes in Human Glioblastoma Cells Using siRNA Screening  
 Nikhil G Thaker, Fang Zhang, Peter R. McDonald, Tong Ying Shun, Michael D Lewen, Ian F. Pollack, and John S. Lazo

Molecular Pharmacology

|                              |           |       |                                        |           |        |
|------------------------------|-----------|-------|----------------------------------------|-----------|--------|
| siRNA-Temozolomide Run2-DMSO | NM_003901 | SGPL1 | sphingosin e-1-phosphate lyase 1       | -0.727906 | Inlier |
| siRNA-Temozolomide Run1-DMSO | NM_003901 | SGPL1 | sphingosin e-1-phosphate lyase 1       | -0.17733  | Inlier |
| siRNA-Vinblastine Run2-DMSO  | NM_003901 | SGPL1 | sphingosin e-1-phosphate lyase 1       | -0.033337 | Inlier |
| siRNA Disorazole DMSO Run3   | NM_003901 | SGPL1 | sphingosin e-1-phosphate lyase 1       | 0.033337  | Inlier |
| siRNA Disorazole DMSO Run1   | NM_003901 | SGPL1 | sphingosin e-1-phosphate lyase 1       | 0.621094  | Inlier |
| siRNA Disorazole DMSO Run2   | NM_003901 | SGPL1 | sphingosin e-1-phosphate lyase 1       | 1.33401   | Inlier |
| siRNA-Vinblastine Run1-DMSO  | NM_003901 | SGPL1 | sphingosin e-1-phosphate lyase 1       | 2.230155  | Inlier |
| siRNA Disorazole DMSO Run2   | NM_030791 | SGPP1 | sphingosin e-1-phosphate phosphatase 1 | -0.895191 | Inlier |
| siRNA Disorazole DMSO Run3   | NM_030791 | SGPP1 | sphingosin e-1-phosphate phosphatase 1 | -0.792801 | Inlier |
| siRNA-Temozolomide Run2-DMSO | NM_030791 | SGPP1 | sphingosin e-1-phosphate phosphatase 1 | -0.556199 | Inlier |
| siRNA Disorazole DMSO Run1   | NM_030791 | SGPP1 | sphingosin e-1-phosphate phosphatase 1 | -0.276486 | Inlier |

Identification of Survival Genes in Human Glioblastoma Cells Using siRNA Screening  
 Nikhil G Thaker, Fang Zhang, Peter R. McDonald, Tong Ying Shun, Michael D Lewen, Ian F. Pollack, and John S. Lazo  
 Molecular Pharmacology

|                              |           |       |                                                 |           |        |
|------------------------------|-----------|-------|-------------------------------------------------|-----------|--------|
| siRNA-Temozolomide Run1-DMSO | NM_030791 | SGPP1 | sphingosin e-1-phosphate phosphatase 1          | 0.276485  | Inlier |
| siRNA-Temozolomide Run3-DMSO | NM_030791 | SGPP1 | sphingosin e-1-phosphate phosphatase 1          | 0.483379  | Inlier |
| siRNA-Vinblastine Run2-DMSO  | NM_030791 | SGPP1 | sphingosin e-1-phosphate phosphatase 1          | 1.570878  | Inlier |
| siRNA-Vinblastine Run1-DMSO  | NM_030791 | SGPP1 | sphingosin e-1-phosphate phosphatase 1          | 1.723776  | Inlier |
| siRNA-Temozolomide Run3-DMSO | NM_000199 | SGSH  | N-sulfoglucosamine sulfohydrolase (sulfamidase) | -1.551319 | Inlier |
| siRNA Disorazole DMSO Run3   | NM_000199 | SGSH  | N-sulfoglucosamine sulfohydrolase (sulfamidase) | -1.511257 | Inlier |
| siRNA-Vinblastine Run2-DMSO  | NM_000199 | SGSH  | N-sulfoglucosamine sulfohydrolase (sulfamidase) | -0.638807 | Inlier |
| siRNA-Vinblastine Run1-DMSO  | NM_000199 | SGSH  | N-sulfoglucosamine sulfohydrolase (sulfamidase) | -0.061622 | Inlier |

Identification of Survival Genes in Human Glioblastoma Cells Using siRNA Screening

Nikhil G Thaker, Fang Zhang, Peter R. McDonald, Tong Ying Shun, Michael D Lewen, Ian F. Pollack, and John S. Lazo

Molecular Pharmacology

|                              |           |        |                                                 |           |        |
|------------------------------|-----------|--------|-------------------------------------------------|-----------|--------|
| siRNA-Temozolomide Run1-DMSO | NM_000199 | SGSH   | N-sulfoglucosamine sulfohydrolase (sulfamidase) | 0.061622  | Inlier |
| siRNA-Temozolomide Run2-DMSO | NM_000199 | SGSH   | N-sulfoglucosamine sulfohydrolase (sulfamidase) | 0.206974  | Inlier |
| siRNA Disorazole DMSO Run1   | NM_000199 | SGSH   | N-sulfoglucosamine sulfohydrolase (sulfamidase) | 0.710193  | Inlier |
| siRNA Disorazole DMSO Run2   | NM_000199 | SGSH   | N-sulfoglucosamine sulfohydrolase (sulfamidase) | 1.272399  | Inlier |
| siRNA-Temozolomide Run3-DMSO | NM_018957 | SH3BP1 | SH3-domain binding protein 1                    | -0.800712 | Inlier |
| siRNA-Temozolomide Run2-DMSO | NM_018957 | SH3BP1 | SH3-domain binding protein 1                    | -0.647641 | Inlier |
| siRNA Disorazole DMSO Run1   | NM_018957 | SH3BP1 | SH3-domain binding protein 1                    | -0.512962 | Inlier |
| siRNA-Temozolomide Run1-DMSO | NM_018957 | SH3BP1 | SH3-domain binding protein 1                    | -0.010702 | Inlier |
| siRNA Disorazole DMSO Run3   | NM_018957 | SH3BP1 | SH3-domain binding protein 1                    | 0.010702  | Inlier |
| siRNA-Vinblastine Run2-DMSO  | NM_018957 | SH3BP1 | SH3-domain binding protein 1                    | 0.701359  | Inlier |

Identification of Survival Genes in Human Glioblastoma Cells Using siRNA Screening

Nikhil G Thaker, Fang Zhang, Peter R. McDonald, Tong Ying Shun, Michael D Lewen, Ian F. Pollack, and John S. Lazo

Molecular Pharmacology

| siRNA Treatment              | Gene ID          | Gene Name | Protein Name                        | Score     | Outlier Status |
|------------------------------|------------------|-----------|-------------------------------------|-----------|----------------|
| siRNA-Vinblastine Run1-DMSO  | NM_0189<br>57    | SH3BP1    | SH3-domain binding protein 1        | 1.560055  | Inlier         |
| siRNA Disorazole DMSO Run2   | NM_0189<br>57    | SH3BP1    | SH3-domain binding protein 1        | 2.256369  | Inlier         |
| siRNA Disorazole DMSO Run2   | NM_0010<br>24666 | SH3KBP1   | SH3-domain kinase binding protein 1 | -0.808516 | Inlier         |
| siRNA-Temozolomide Run1-DMSO | NM_0010<br>24666 | SH3KBP1   | SH3-domain kinase binding protein 1 | -0.675917 | Inlier         |
| siRNA-Temozolomide Run2-DMSO | NM_0010<br>24666 | SH3KBP1   | SH3-domain kinase binding protein 1 | -0.673083 | Inlier         |
| siRNA-Temozolomide Run3-DMSO | NM_0010<br>24666 | SH3KBP1   | SH3-domain kinase binding protein 1 | -0.577856 | Inlier         |
| siRNA Disorazole DMSO Run1   | NM_0010<br>24666 | SH3KBP1   | SH3-domain kinase binding protein 1 | 0.577856  | Inlier         |
| siRNA Disorazole DMSO Run3   | NM_0010<br>24666 | SH3KBP1   | SH3-domain kinase binding protein 1 | 0.583233  | Inlier         |
| siRNA-Vinblastine Run2-DMSO  | NM_0010<br>24666 | SH3KBP1   | SH3-domain kinase binding protein 1 | 0.733628  | Inlier         |
| siRNA-Vinblastine Run1-DMSO  | NM_0010<br>24666 | SH3KBP1   | SH3-domain kinase binding protein 1 | 1.249379  | Inlier         |



Identification of Survival Genes in Human Glioblastoma Cells Using siRNA Screening  
 Nikhil G Thaker, Fang Zhang, Peter R. McDonald, Tong Ying Shun, Michael D Lewen, Ian F. Pollack, and John S. Lazo

Molecular Pharmacology

| siRNA Treatment              | Gene ID   | Method | Gene Name                                            | Log Fold Change | Outlier Status |
|------------------------------|-----------|--------|------------------------------------------------------|-----------------|----------------|
| siRNA-Temozolomide Run3-DMSO | NM_015001 | SHARP  | spen homolog, transcriptional regulator (Drosophila) | -2.546081       | Inlier         |
| siRNA-Temozolomide Run2-DMSO | NM_015001 | SHARP  | spen homolog, transcriptional regulator (Drosophila) | -0.686856       | Inlier         |
| siRNA-Temozolomide Run1-DMSO | NM_015001 | SHARP  | spen homolog, transcriptional regulator (Drosophila) | -0.616337       | Inlier         |
| siRNA Disorazole DMSO Run3   | NM_015001 | SHARP  | spen homolog, transcriptional regulator (Drosophila) | -0.004552       | Inlier         |
| siRNA Disorazole DMSO Run1   | NM_015001 | SHARP  | spen homolog, transcriptional regulator (Drosophila) | 0.004552        | Inlier         |
| siRNA-Vinblastine Run1-DMSO  | NM_015001 | SHARP  | spen homolog, transcriptional regulator (Drosophila) | 0.662144        | Inlier         |
| siRNA Disorazole DMSO Run2   | NM_015001 | SHARP  | spen homolog, transcriptional regulator (Drosophila) | 0.79341         | Inlier         |

Identification of Survival Genes in Human Glioblastoma Cells Using siRNA Screening  
 Nikhil G Thaker, Fang Zhang, Peter R. McDonald, Tong Ying Shun, Michael D Lewen, Ian F. Pollack, and John S. Lazo

Molecular Pharmacology

|                              |           |       |                                                      |           |         |
|------------------------------|-----------|-------|------------------------------------------------------|-----------|---------|
| siRNA-Vinblastine Run2-DMSO  | NM_015001 | SHARP | spen homolog, transcriptional regulator (Drosophila) | 1.628095  | Inlier  |
| siRNA-Temozolomide Run2-DMSO | NM_000193 | SHH   | sonic hedgehog homolog (Drosophila)                  | -3.936011 | Outlier |
| siRNA-Temozolomide Run3-DMSO | NM_000193 | SHH   | sonic hedgehog homolog (Drosophila)                  | -0.62662  | Inlier  |
| siRNA-Temozolomide Run1-DMSO | NM_000193 | SHH   | sonic hedgehog homolog (Drosophila)                  | -0.568873 | Inlier  |
| siRNA Disorazole DMSO Run1   | NM_000193 | SHH   | sonic hedgehog homolog (Drosophila)                  | -0.245513 | Inlier  |
| siRNA Disorazole DMSO Run3   | NM_000193 | SHH   | sonic hedgehog homolog (Drosophila)                  | 0.245513  | Inlier  |
| siRNA-Vinblastine Run2-DMSO  | NM_000193 | SHH   | sonic hedgehog homolog (Drosophila)                  | 0.72238   | Inlier  |
| siRNA Disorazole DMSO Run2   | NM_000193 | SHH   | sonic hedgehog homolog (Drosophila)                  | 1.159689  | Inlier  |
| siRNA-Vinblastine Run1-DMSO  | NM_000193 | SHH   | sonic hedgehog homolog (Drosophila)                  | 1.980663  | Inlier  |
| siRNA Disorazole DMSO Run3   | NM_148918 | SHMT1 | serine hydroxymethyltransferase 1 (soluble)          | -0.746906 | Inlier  |

Identification of Survival Genes in Human Glioblastoma Cells Using siRNA Screening  
 Nikhil G Thaker, Fang Zhang, Peter R. McDonald, Tong Ying Shun, Michael D Lewen, Ian F. Pollack, and John S. Lazo

Molecular Pharmacology

| siRNA Treatment              | Gene ID       | Gene Name | Protein Name                                         | Log Fold Change | Outlier Status |
|------------------------------|---------------|-----------|------------------------------------------------------|-----------------|----------------|
| siRNA-Vinblastine Run2-DMSO  | NM_1489<br>18 | SHMT1     | serine hydroxyme thyltransfe rase 1 (soluble)        | -0.602094       | Inlier         |
| siRNA Disorazole DMSO Run1   | NM_1489<br>18 | SHMT1     | serine hydroxyme thyltransfe rase 1 (soluble)        | -0.535651       | Inlier         |
| siRNA-Temozolomide Run2-DMSO | NM_1489<br>18 | SHMT1     | serine hydroxyme thyltransfe rase 1 (soluble)        | -0.452143       | Inlier         |
| siRNA-Temozolomide Run3-DMSO | NM_1489<br>18 | SHMT1     | serine hydroxyme thyltransfe rase 1 (soluble)        | 0.452143        | Inlier         |
| siRNA-Temozolomide Run1-DMSO | NM_1489<br>18 | SHMT1     | serine hydroxyme thyltransfe rase 1 (soluble)        | 1.749574        | Inlier         |
| siRNA-Vinblastine Run1-DMSO  | NM_1489<br>18 | SHMT1     | serine hydroxyme thyltransfe rase 1 (soluble)        | 3.077428        | Inlier         |
| siRNA Disorazole DMSO Run2   | NM_1489<br>18 | SHMT1     | serine hydroxyme thyltransfe rase 1 (soluble)        | 4.129159        | Outlier        |
| siRNA-Temozolomide Run2-DMSO | NM_0054<br>12 | SHMT2     | serine hydroxyme thyltransfe rase 2 (mitochon drial) | -1.273779       | Inlier         |
| siRNA-Temozolomide Run3-DMSO | NM_0054<br>12 | SHMT2     | serine hydroxyme thyltransfe rase 2 (mitochon drial) | -0.957472       | Inlier         |

Identification of Survival Genes in Human Glioblastoma Cells Using siRNA Screening  
 Nikhil G Thaker, Fang Zhang, Peter R. McDonald, Tong Ying Shun, Michael D Lewen, Ian F. Pollack, and John S. Lazo

Molecular Pharmacology

| siRNA Treatment              | Gene ID   | Gene Name | Gene Description                                  | Log Fold Change | Outlier Status |
|------------------------------|-----------|-----------|---------------------------------------------------|-----------------|----------------|
| siRNA-Vinblastine Run2-DMSO  | NM_005412 | SHMT2     | serine hydroxymethyltransferase 2 (mitochondrial) | -0.366517       | Inlier         |
| siRNA-Temozolomide Run1-DMSO | NM_005412 | SHMT2     | serine hydroxymethyltransferase 2 (mitochondrial) | -0.031074       | Inlier         |
| siRNA Disorazole DMSO Run3   | NM_005412 | SHMT2     | serine hydroxymethyltransferase 2 (mitochondrial) | 0.031074        | Inlier         |
| siRNA Disorazole DMSO Run1   | NM_005412 | SHMT2     | serine hydroxymethyltransferase 2 (mitochondrial) | 0.391528        | Inlier         |
| siRNA-Vinblastine Run1-DMSO  | NM_005412 | SHMT2     | serine hydroxymethyltransferase 2 (mitochondrial) | 1.85981         | Inlier         |
| siRNA Disorazole DMSO Run2   | NM_005412 | SHMT2     | serine hydroxymethyltransferase 2 (mitochondrial) | 2.208873        | Inlier         |
| siRNA-Temozolomide Run3-DMSO | NM_018836 | SHREW1    | SHREW1                                            | -2.470305       | Inlier         |
| siRNA-Temozolomide Run2-DMSO | NM_018836 | SHREW1    | SHREW1                                            | -0.615434       | Inlier         |
| siRNA-Temozolomide Run1-DMSO | NM_018836 | SHREW1    | SHREW1                                            | -0.497814       | Inlier         |
| siRNA Disorazole DMSO Run3   | NM_018836 | SHREW1    | SHREW1                                            | -0.04291        | Inlier         |
| siRNA Disorazole DMSO Run1   | NM_018836 | SHREW1    | SHREW1                                            | 0.04291         | Inlier         |
| siRNA-Vinblastine Run1-DMSO  | NM_018836 | SHREW1    | SHREW1                                            | 0.733566        | Inlier         |
| siRNA-Vinblastine Run2-DMSO  | NM_018836 | SHREW1    | SHREW1                                            | 0.997932        | Inlier         |
| siRNA Disorazole DMSO Run2   | NM_018836 | SHREW1    | SHREW1                                            | 2.617675        | Inlier         |

Identification of Survival Genes in Human Glioblastoma Cells Using siRNA Screening  
 Nikhil G Thaker, Fang Zhang, Peter R. McDonald, Tong Ying Shun, Michael D Lewen, Ian F. Pollack, and John S. Lazo

Molecular Pharmacology

|                              |               |       |                                                      |           |        |
|------------------------------|---------------|-------|------------------------------------------------------|-----------|--------|
| siRNA-Temozolomide Run3-DMSO | NM_0010<br>41 | SI    | sucrase-isomaltase (alpha-glucosidase)               | -0.706317 | Inlier |
| siRNA-Temozolomide Run2-DMSO | NM_0010<br>41 | SI    | sucrase-isomaltase (alpha-glucosidase)               | -0.702253 | Inlier |
| siRNA-Vinblastine Run2-DMSO  | NM_0010<br>41 | SI    | sucrase-isomaltase (alpha-glucosidase)               | -0.389796 | Inlier |
| siRNA-Temozolomide Run1-DMSO | NM_0010<br>41 | SI    | sucrase-isomaltase (alpha-glucosidase)               | -0.137796 | Inlier |
| siRNA Disorazole DMSO Run3   | NM_0010<br>41 | SI    | sucrase-isomaltase (alpha-glucosidase)               | 0.137796  | Inlier |
| siRNA Disorazole DMSO Run1   | NM_0010<br>41 | SI    | sucrase-isomaltase (alpha-glucosidase)               | 0.664788  | Inlier |
| siRNA-Vinblastine Run1-DMSO  | NM_0010<br>41 | SI    | sucrase-isomaltase (alpha-glucosidase)               | 0.684212  | Inlier |
| siRNA Disorazole DMSO Run2   | NM_0010<br>41 | SI    | sucrase-isomaltase (alpha-glucosidase)               | 0.696226  | Inlier |
| siRNA-Temozolomide Run3-DMSO | NM_1732<br>17 | SIAT1 | ST6 beta-galactosamide alpha-2,6-sialyltransferase 1 | -2.072578 | Inlier |
| siRNA Disorazole DMSO Run1   | NM_1732<br>17 | SIAT1 | ST6 beta-galactosamide alpha-2,6-sialyltransferase 1 | -1.121375 | Inlier |

Identification of Survival Genes in Human Glioblastoma Cells Using siRNA Screening  
 Nikhil G Thaker, Fang Zhang, Peter R. McDonald, Tong Ying Shun, Michael D Lewen, Ian F. Pollack, and John S. Lazo

Molecular Pharmacology

|                              |               |        |                                                          |           |        |
|------------------------------|---------------|--------|----------------------------------------------------------|-----------|--------|
| siRNA-Vinblastine Run2-DMSO  | NM_1732<br>17 | SIAT1  | ST6 beta-galactosaminidase alpha-2,6-sialyltransferase 1 | -0.466573 | Inlier |
| siRNA Disorazole DMSO Run3   | NM_1732<br>17 | SIAT1  | ST6 beta-galactosaminidase alpha-2,6-sialyltransferase 1 | -0.206701 | Inlier |
| siRNA-Temozolomide Run2-DMSO | NM_1732<br>17 | SIAT1  | ST6 beta-galactosaminidase alpha-2,6-sialyltransferase 1 | 0.206701  | Inlier |
| siRNA-Temozolomide Run1-DMSO | NM_1732<br>17 | SIAT1  | ST6 beta-galactosaminidase alpha-2,6-sialyltransferase 1 | 0.265319  | Inlier |
| siRNA Disorazole DMSO Run2   | NM_1732<br>17 | SIAT1  | ST6 beta-galactosaminidase alpha-2,6-sialyltransferase 1 | 0.882427  | Inlier |
| siRNA-Vinblastine Run1-DMSO  | NM_1732<br>17 | SIAT1  | ST3 beta-galactosidase alpha-2,3-sialyltransferase 6     | 0.902207  | Inlier |
| siRNA Disorazole DMSO Run3   | NM_0061<br>00 | SIAT10 | ST3 beta-galactosidase alpha-2,3-sialyltransferase 6     | -0.675285 | Inlier |
| siRNA-Vinblastine Run2-DMSO  | NM_0061<br>00 | SIAT10 | ST3 beta-galactosidase alpha-2,3-sialyltransferase 6     | -0.673715 | Inlier |

Identification of Survival Genes in Human Glioblastoma Cells Using siRNA Screening  
 Nikhil G Thaker, Fang Zhang, Peter R. McDonald, Tong Ying Shun, Michael D Lewen, Ian F. Pollack, and John S. Lazo

Molecular Pharmacology

|                              |           |        |                                                      |           |         |
|------------------------------|-----------|--------|------------------------------------------------------|-----------|---------|
| siRNA-Temozolomide Run3-DMSO | NM_006100 | SIAT10 | ST3 beta-galactosidase alpha-2,3-sialyltransferase 6 | -0.436461 | Inlier  |
| siRNA Disorazole DMSO Run1   | NM_006100 | SIAT10 | ST3 beta-galactosidase alpha-2,3-sialyltransferase 6 | -0.421013 | Inlier  |
| siRNA-Temozolomide Run2-DMSO | NM_006100 | SIAT10 | ST3 beta-galactosidase alpha-2,3-sialyltransferase 6 | 0.421013  | Inlier  |
| siRNA-Temozolomide Run1-DMSO | NM_006100 | SIAT10 | ST3 beta-galactosidase alpha-2,3-sialyltransferase 6 | 1.015821  | Inlier  |
| siRNA-Vinblastine Run1-DMSO  | NM_006100 | SIAT10 | ST3 beta-galactosidase alpha-2,3-sialyltransferase 6 | 4.482258  | Outlier |
| siRNA Disorazole DMSO Run2   | NM_006100 | SIAT10 | ST3 beta-galactosidase alpha-2,3-sialyltransferase 6 | 5.306235  | Outlier |
| siRNA Disorazole DMSO Run3   | NM_003033 | SIAT4A | ST3 beta-galactosidase alpha-2,3-sialyltransferase 1 | -0.803307 | Inlier  |
| siRNA-Temozolomide Run3-DMSO | NM_003033 | SIAT4A | ST3 beta-galactosidase alpha-2,3-sialyltransferase 1 | -0.545693 | Inlier  |

Identification of Survival Genes in Human Glioblastoma Cells Using siRNA Screening  
 Nikhil G Thaker, Fang Zhang, Peter R. McDonald, Tong Ying Shun, Michael D Lewen, Ian F. Pollack, and John S. Lazo

Molecular Pharmacology

|                              |               |        |                          |           |         |
|------------------------------|---------------|--------|--------------------------|-----------|---------|
| siRNA-Vinblastine Run2-DMSO  | NM_0030<br>33 | SIAT4A | ST3 beta-galactosidase 1 | -0.445033 | Inlier  |
| siRNA Disorazole DMSO Run1   | NM_0030<br>33 | SIAT4A | ST3 beta-galactosidase 1 | -0.415076 | Inlier  |
| siRNA-Temozolomide Run2-DMSO | NM_0030<br>33 | SIAT4A | ST3 beta-galactosidase 1 | 0.415076  | Inlier  |
| siRNA-Temozolomide Run1-DMSO | NM_0030<br>33 | SIAT4A | ST3 beta-galactosidase 1 | 1.907356  | Inlier  |
| siRNA-Vinblastine Run1-DMSO  | NM_0030<br>33 | SIAT4A | ST3 beta-galactosidase 1 | 3.456815  | Inlier  |
| siRNA Disorazole DMSO Run2   | NM_0030<br>33 | SIAT4A | ST3 beta-galactosidase 1 | 3.785585  | Outlier |
| siRNA-Vinblastine Run2-DMSO  | NM_0069<br>27 | SIAT4B | ST3 beta-galactosidase 2 | -0.838815 | Inlier  |
| siRNA Disorazole DMSO Run3   | NM_0069<br>27 | SIAT4B | ST3 beta-galactosidase 2 | -0.510185 | Inlier  |



Identification of Survival Genes in Human Glioblastoma Cells Using siRNA Screening

Nikhil G Thaker, Fang Zhang, Peter R. McDonald, Tong Ying Shun, Michael D Lewen, Ian F. Pollack, and John S. Lazo

Molecular Pharmacology

|                              |               |        |                          |           |         |
|------------------------------|---------------|--------|--------------------------|-----------|---------|
| siRNA Disorazole DMSO Run1   | NM_0069<br>27 | SIAT4B | ST3 beta-galactosidase 2 | -0.411675 | Inlier  |
| siRNA-Temozolomide Run2-DMSO | NM_0069<br>27 | SIAT4B | ST3 beta-galactosidase 2 | -0.283624 | Inlier  |
| siRNA-Temozolomide Run3-DMSO | NM_0069<br>27 | SIAT4B | ST3 beta-galactosidase 2 | 0.283624  | Inlier  |
| siRNA-Temozolomide Run1-DMSO | NM_0069<br>27 | SIAT4B | ST3 beta-galactosidase 2 | 2.473558  | Inlier  |
| siRNA-Vinblastine Run1-DMSO  | NM_0069<br>27 | SIAT4B | ST3 beta-galactosidase 2 | 11.09674  | Outlier |
| siRNA Disorazole DMSO Run2   | NM_0069<br>27 | SIAT4B | ST3 beta-galactosidase 2 | 15.11351  | Outlier |
| siRNA-Temozolomide Run3-DMSO | NM_0062<br>78 | SIAT4C | ST3 beta-galactosidase 4 | -1.212086 | Inlier  |
| siRNA Disorazole DMSO Run1   | NM_0062<br>78 | SIAT4C | ST3 beta-galactosidase 4 | -0.762188 | Inlier  |

Identification of Survival Genes in Human Glioblastoma Cells Using siRNA Screening  
 Nikhil G Thaker, Fang Zhang, Peter R. McDonald, Tong Ying Shun, Michael D Lewen, Ian F. Pollack, and John S. Lazo

Molecular Pharmacology

|                              |           |        |                                                      |           |        |
|------------------------------|-----------|--------|------------------------------------------------------|-----------|--------|
| siRNA-Temozolomide Run2-DMSO | NM_006278 | SIAT4C | ST3 beta-galactosidase alpha-2,3-sialyltransferase 4 | -0.586812 | Inlier |
| siRNA Disorazole DMSO Run3   | NM_006278 | SIAT4C | ST3 beta-galactosidase alpha-2,3-sialyltransferase 4 | -0.181294 | Inlier |
| siRNA-Temozolomide Run1-DMSO | NM_006278 | SIAT4C | ST3 beta-galactosidase alpha-2,3-sialyltransferase 4 | 0.181294  | Inlier |
| siRNA-Vinblastine Run2-DMSO  | NM_006278 | SIAT4C | ST3 beta-galactosidase alpha-2,3-sialyltransferase 4 | 0.289204  | Inlier |
| siRNA-Vinblastine Run1-DMSO  | NM_006278 | SIAT4C | ST3 beta-galactosidase alpha-2,3-sialyltransferase 4 | 1.145066  | Inlier |
| siRNA Disorazole DMSO Run2   | NM_006278 | SIAT4C | ST3 beta-galactosidase alpha-2,3-sialyltransferase 4 | 1.734565  | Inlier |
| siRNA-Vinblastine Run1-DMSO  | NM_174971 | SIAT6  | ST3 beta-galactosidase alpha-2,3-sialyltransferase 3 | -0.828982 | Inlier |
| siRNA-Temozolomide Run3-DMSO | NM_174971 | SIAT6  | ST3 beta-galactosidase alpha-2,3-sialyltransferase 3 | -0.770543 | Inlier |

Identification of Survival Genes in Human Glioblastoma Cells Using siRNA Screening

Nikhil G Thaker, Fang Zhang, Peter R. McDonald, Tong Ying Shun, Michael D Lewen, Ian F. Pollack, and John S. Lazo

Molecular Pharmacology

|                              |               |        |                                                                                                              |           |        |
|------------------------------|---------------|--------|--------------------------------------------------------------------------------------------------------------|-----------|--------|
| siRNA-Vinblastine Run2-DMSO  | NM_1749<br>71 | SIAT6  | ST3 beta-galactosidase alpha-2,3-sialyltransferase 3                                                         | -0.687262 | Inlier |
| siRNA Disorazole DMSO Run3   | NM_1749<br>71 | SIAT6  | ST3 beta-galactosidase alpha-2,3-sialyltransferase 3                                                         | -0.352514 | Inlier |
| siRNA-Temozolomide Run2-DMSO | NM_1749<br>71 | SIAT6  | ST3 beta-galactosidase alpha-2,3-sialyltransferase 3                                                         | 0.352514  | Inlier |
| siRNA-Temozolomide Run1-DMSO | NM_1749<br>71 | SIAT6  | ST3 beta-galactosidase alpha-2,3-sialyltransferase 3                                                         | 0.52834   | Inlier |
| siRNA Disorazole DMSO Run1   | NM_1749<br>71 | SIAT6  | ST3 beta-galactosidase alpha-2,3-sialyltransferase 3                                                         | 0.661738  | Inlier |
| siRNA Disorazole DMSO Run2   | NM_1749<br>71 | SIAT6  | ST3 beta-galactosidase alpha-2,3-sialyltransferase 3                                                         | 1.88603   | Inlier |
| siRNA-Vinblastine Run2-DMSO  | NM_0184<br>14 | SIAT7A | ST6 (alpha-N-acetylneuraminyl-2,3-beta-galactosyl-1,3)-N-acetylglucosaminidase alpha-2,6-sialyltransferase 1 | -0.997193 | Inlier |

Identification of Survival Genes in Human Glioblastoma Cells Using siRNA Screening

Nikhil G Thaker, Fang Zhang, Peter R. McDonald, Tong Ying Shun, Michael D Lewen, Ian F. Pollack, and John S. Lazo

Molecular Pharmacology

|                              |           |        |                                                                                                                 |                  |
|------------------------------|-----------|--------|-----------------------------------------------------------------------------------------------------------------|------------------|
|                              |           |        | ST6<br>(alpha-N-acetylneuraminyl-2,3-beta-galactosyl-1,3)-N-acetylgalactosaminide alpha-2,6-sialyltransferase 1 |                  |
| siRNA-Temozolomide Run3-DMSO | NM_018414 | SIAT7A |                                                                                                                 | -0.792011 Inlier |

|                            |           |        |                                                                                                                 |                  |
|----------------------------|-----------|--------|-----------------------------------------------------------------------------------------------------------------|------------------|
|                            |           |        | ST6<br>(alpha-N-acetylneuraminyl-2,3-beta-galactosyl-1,3)-N-acetylgalactosaminide alpha-2,6-sialyltransferase 1 |                  |
| siRNA Disorazole DMSO Run3 | NM_018414 | SIAT7A |                                                                                                                 | -0.556989 Inlier |

|                              |           |        |                                                                                                                 |                 |
|------------------------------|-----------|--------|-----------------------------------------------------------------------------------------------------------------|-----------------|
|                              |           |        | ST6<br>(alpha-N-acetylneuraminyl-2,3-beta-galactosyl-1,3)-N-acetylgalactosaminide alpha-2,6-sialyltransferase 1 |                 |
| siRNA-Temozolomide Run2-DMSO | NM_018414 | SIAT7A |                                                                                                                 | -0.06542 Inlier |

Identification of Survival Genes in Human Glioblastoma Cells Using siRNA Screening

Nikhil G Thaker, Fang Zhang, Peter R. McDonald, Tong Ying Shun, Michael D Lewen, Ian F. Pollack, and John S. Lazo

Molecular Pharmacology

|                              |               |        |                                                                                                                 |                 |
|------------------------------|---------------|--------|-----------------------------------------------------------------------------------------------------------------|-----------------|
| siRNA Disorazole DMSO Run1   | NM_0184<br>14 | SIAT7A | ST6<br>(alpha-N-acetylneuraminyl-2,3-beta-galactosyl-1,3)-N-acetylgalactosaminide alpha-2,6-sialyltransferase 1 | 0.06542 Inlier  |
| siRNA-Temozolomide Run1-DMSO | NM_0184<br>14 | SIAT7A | ST6<br>(alpha-N-acetylneuraminyl-2,3-beta-galactosyl-1,3)-N-acetylgalactosaminide alpha-2,6-sialyltransferase 1 | 0.421951 Inlier |
| siRNA-Vinblastine Run1-DMSO  | NM_0184<br>14 | SIAT7A | ST6<br>(alpha-N-acetylneuraminyl-2,3-beta-galactosyl-1,3)-N-acetylgalactosaminide alpha-2,6-sialyltransferase 1 | 2.836179 Inlier |

Identification of Survival Genes in Human Glioblastoma Cells Using siRNA Screening

Nikhil G Thaker, Fang Zhang, Peter R. McDonald, Tong Ying Shun, Michael D Lewen, Ian F. Pollack, and John S. Lazo

Molecular Pharmacology

|                              |               |        |                                                                                                                 |           |         |
|------------------------------|---------------|--------|-----------------------------------------------------------------------------------------------------------------|-----------|---------|
| siRNA Disorazole DMSO Run2   | NM_0184<br>14 | SIAT7A | ST6<br>(alpha-N-acetylneuraminyl-2,3-beta-galactosyl-1,3)-N-acetylglucosaminidase alpha-2,6-sialyltransferase 1 | 3.681389  | Outlier |
| siRNA-Temozolomide Run3-DMSO | NM_0064<br>56 | SIAT7B | ST6<br>(alpha-N-acetylneuraminyl-2,3-beta-galactosyl-1,3)-N-acetylglucosaminidase alpha-2,6-sialyltransferase 2 | -1.204156 | Inlier  |
| siRNA Disorazole DMSO Run3   | NM_0064<br>56 | SIAT7B | ST6<br>(alpha-N-acetylneuraminyl-2,3-beta-galactosyl-1,3)-N-acetylglucosaminidase alpha-2,6-sialyltransferase 2 | -0.913832 | Inlier  |

Identification of Survival Genes in Human Glioblastoma Cells Using siRNA Screening

Nikhil G Thaker, Fang Zhang, Peter R. McDonald, Tong Ying Shun, Michael D Lewen, Ian F. Pollack, and John S. Lazo

Molecular Pharmacology

|                              |           |        |                                                                                                                 |           |        |
|------------------------------|-----------|--------|-----------------------------------------------------------------------------------------------------------------|-----------|--------|
| siRNA-Vinblastine Run2-DMSO  | NM_006456 | SIAT7B | ST6<br>(alpha-N-acetylneuraminyl-2,3-beta-galactosyl-1,3)-N-acetylgalactosaminide alpha-2,6-sialyltransferase 2 | -0.651397 | Inlier |
| siRNA Disorazole DMSO Run1   | NM_006456 | SIAT7B | ST6<br>(alpha-N-acetylneuraminyl-2,3-beta-galactosyl-1,3)-N-acetylgalactosaminide alpha-2,6-sialyltransferase 2 | -0.005869 | Inlier |
| siRNA-Temozolomide Run2-DMSO | NM_006456 | SIAT7B | ST6<br>(alpha-N-acetylneuraminyl-2,3-beta-galactosyl-1,3)-N-acetylgalactosaminide alpha-2,6-sialyltransferase 2 | 0.005869  | Inlier |

Identification of Survival Genes in Human Glioblastoma Cells Using siRNA Screening

Nikhil G Thaker, Fang Zhang, Peter R. McDonald, Tong Ying Shun, Michael D Lewen, Ian F. Pollack, and John S. Lazo

Molecular Pharmacology

|                              |           |        |                                                                                                                 |          |        |
|------------------------------|-----------|--------|-----------------------------------------------------------------------------------------------------------------|----------|--------|
| siRNA-Temozolomide Run1-DMSO | NM_006456 | SIAT7B | ST6<br>(alpha-N-acetylneuraminyl-2,3-beta-galactosyl-1,3)-N-acetylglucosaminidase alpha-2,6-sialyltransferase 2 | 0.365407 | Inlier |
| siRNA Disorazole DMSO Run2   | NM_006456 | SIAT7B | ST6<br>(alpha-N-acetylneuraminyl-2,3-beta-galactosyl-1,3)-N-acetylglucosaminidase alpha-2,6-sialyltransferase 2 | 0.697603 | Inlier |
| siRNA-Vinblastine Run1-DMSO  | NM_006456 | SIAT7B | ST6<br>(alpha-N-acetylneuraminyl-2,3-beta-galactosyl-1,3)-N-acetylglucosaminidase alpha-2,6-sialyltransferase 2 | 0.814657 | Inlier |



Identification of Survival Genes in Human Glioblastoma Cells Using siRNA Screening

Nikhil G Thaker, Fang Zhang, Peter R. McDonald, Tong Ying Shun, Michael D Lewen, Ian F. Pollack, and John S. Lazo

Molecular Pharmacology

|                              |               |        |                                                                                                                 |           |        |
|------------------------------|---------------|--------|-----------------------------------------------------------------------------------------------------------------|-----------|--------|
| siRNA-Temozolomide Run3-DMSO | NM_1529<br>96 | SIAT7C | ST6<br>(alpha-N-acetylneuraminyl-2,3-beta-galactosyl-1,3)-N-acetylgalactosaminide alpha-2,6-sialyltransferase 3 | -1.520645 | Inlier |
| siRNA Disorazole DMSO Run1   | NM_1529<br>96 | SIAT7C | ST6<br>(alpha-N-acetylneuraminyl-2,3-beta-galactosyl-1,3)-N-acetylgalactosaminide alpha-2,6-sialyltransferase 3 | -0.749238 | Inlier |
| siRNA-Vinblastine Run2-DMSO  | NM_1529<br>96 | SIAT7C | ST6<br>(alpha-N-acetylneuraminyl-2,3-beta-galactosyl-1,3)-N-acetylgalactosaminide alpha-2,6-sialyltransferase 3 | -0.371528 | Inlier |

Identification of Survival Genes in Human Glioblastoma Cells Using siRNA Screening

Nikhil G Thaker, Fang Zhang, Peter R. McDonald, Tong Ying Shun, Michael D Lewen, Ian F. Pollack, and John S. Lazo

Molecular Pharmacology

|                              |           |        |                                                                                                                 |                  |
|------------------------------|-----------|--------|-----------------------------------------------------------------------------------------------------------------|------------------|
|                              |           |        | ST6<br>(alpha-N-acetylneuraminyl-2,3-beta-galactosyl-1,3)-N-acetylgalactosaminide alpha-2,6-sialyltransferase 3 |                  |
| siRNA-Temozolomide Run2-DMSO | NM_152996 | SIAT7C |                                                                                                                 | -0.188971 Inlier |

|                            |           |        |                                                                                                                 |                 |
|----------------------------|-----------|--------|-----------------------------------------------------------------------------------------------------------------|-----------------|
|                            |           |        | ST6<br>(alpha-N-acetylneuraminyl-2,3-beta-galactosyl-1,3)-N-acetylgalactosaminide alpha-2,6-sialyltransferase 3 |                 |
| siRNA Disorazole DMSO Run3 | NM_152996 | SIAT7C |                                                                                                                 | 0.188971 Inlier |

|                              |           |        |                                                                                                                 |                 |
|------------------------------|-----------|--------|-----------------------------------------------------------------------------------------------------------------|-----------------|
|                              |           |        | ST6<br>(alpha-N-acetylneuraminyl-2,3-beta-galactosyl-1,3)-N-acetylgalactosaminide alpha-2,6-sialyltransferase 3 |                 |
| siRNA-Temozolomide Run1-DMSO | NM_152996 | SIAT7C |                                                                                                                 | 0.599762 Inlier |

Identification of Survival Genes in Human Glioblastoma Cells Using siRNA Screening

Nikhil G Thaker, Fang Zhang, Peter R. McDonald, Tong Ying Shun, Michael D Lewen, Ian F. Pollack, and John S. Lazo

Molecular Pharmacology

|                              |           |        |                                                                                                                 |           |        |
|------------------------------|-----------|--------|-----------------------------------------------------------------------------------------------------------------|-----------|--------|
| siRNA-Vinblastine Run1-DMSO  | NM_152996 | SIAT7C | ST6<br>(alpha-N-acetylneuraminyl-2,3-beta-galactosyl-1,3)-N-acetylglucosaminidase alpha-2,6-sialyltransferase 3 | 1.034131  | Inlier |
| siRNA Disorazole DMSO Run2   | NM_152996 | SIAT7C | ST6<br>(alpha-N-acetylneuraminyl-2,3-beta-galactosyl-1,3)-N-acetylglucosaminidase alpha-2,6-sialyltransferase 3 | 1.653046  | Inlier |
| siRNA-Temozolomide Run3-DMSO | NM_014403 | SIAT7D | ST6<br>(alpha-N-acetylneuraminyl-2,3-beta-galactosyl-1,3)-N-acetylglucosaminidase alpha-2,6-sialyltransferase 4 | -1.396105 | Inlier |

Identification of Survival Genes in Human Glioblastoma Cells Using siRNA Screening

Nikhil G Thaker, Fang Zhang, Peter R. McDonald, Tong Ying Shun, Michael D Lewen, Ian F. Pollack, and John S. Lazo

Molecular Pharmacology

|                              |           |        |                                                                                                                 |           |        |
|------------------------------|-----------|--------|-----------------------------------------------------------------------------------------------------------------|-----------|--------|
| siRNA-Temozolomide Run1-DMSO | NM_014403 | SIAT7D | ST6<br>(alpha-N-acetylneuraminyl-2,3-beta-galactosyl-1,3)-N-acetylglucosaminidase alpha-2,6-sialyltransferase 4 | -0.86312  | Inlier |
| siRNA-Temozolomide Run2-DMSO | NM_014403 | SIAT7D | ST6<br>(alpha-N-acetylneuraminyl-2,3-beta-galactosyl-1,3)-N-acetylglucosaminidase alpha-2,6-sialyltransferase 4 | -0.48588  | Inlier |
| siRNA Disorazole DMSO Run3   | NM_014403 | SIAT7D | ST6<br>(alpha-N-acetylneuraminyl-2,3-beta-galactosyl-1,3)-N-acetylglucosaminidase alpha-2,6-sialyltransferase 4 | -0.157795 | Inlier |

Identification of Survival Genes in Human Glioblastoma Cells Using siRNA Screening

Nikhil G Thaker, Fang Zhang, Peter R. McDonald, Tong Ying Shun, Michael D Lewen, Ian F. Pollack, and John S.

Lazo

Molecular Pharmacology

|                             |           |        |                                                                                                                 |          |        |
|-----------------------------|-----------|--------|-----------------------------------------------------------------------------------------------------------------|----------|--------|
| siRNA-Vinblastine Run2-DMSO | NM_014403 | SIAT7D | ST6<br>(alpha-N-acetylneuraminyl-2,3-beta-galactosyl-1,3)-N-acetylgalactosaminide alpha-2,6-sialyltransferase 4 | 0.157795 | Inlier |
| siRNA Disorazole DMSO Run1  | NM_014403 | SIAT7D | ST6<br>(alpha-N-acetylneuraminyl-2,3-beta-galactosyl-1,3)-N-acetylgalactosaminide alpha-2,6-sialyltransferase 4 | 0.388145 | Inlier |
| siRNA-Vinblastine Run1-DMSO | NM_014403 | SIAT7D | ST6<br>(alpha-N-acetylneuraminyl-2,3-beta-galactosyl-1,3)-N-acetylgalactosaminide alpha-2,6-sialyltransferase 4 | 1.016631 | Inlier |

Identification of Survival Genes in Human Glioblastoma Cells Using siRNA Screening

Nikhil G Thaker, Fang Zhang, Peter R. McDonald, Tong Ying Shun, Michael D Lewen, Ian F. Pollack, and John S. Lazo

Molecular Pharmacology

|                              |               |        |                                                                                                                 |           |        |
|------------------------------|---------------|--------|-----------------------------------------------------------------------------------------------------------------|-----------|--------|
| siRNA Disorazole DMSO Run2   | NM_0144<br>03 | SIAT7D | ST6<br>(alpha-N-acetylneuraminyl-2,3-beta-galactosyl-1,3)-N-acetylgalactosaminide alpha-2,6-sialyltransferase 4 | 1.135895  | Inlier |
| siRNA-Temozolomide Run2-DMSO | NM_0309<br>65 | SIAT7E | ST6<br>(alpha-N-acetylneuraminyl-2,3-beta-galactosyl-1,3)-N-acetylgalactosaminide alpha-2,6-sialyltransferase 5 | -0.845965 | Inlier |
| siRNA Disorazole DMSO Run3   | NM_0309<br>65 | SIAT7E | ST6<br>(alpha-N-acetylneuraminyl-2,3-beta-galactosyl-1,3)-N-acetylgalactosaminide alpha-2,6-sialyltransferase 5 | -0.503035 | Inlier |

Identification of Survival Genes in Human Glioblastoma Cells Using siRNA Screening

Nikhil G Thaker, Fang Zhang, Peter R. McDonald, Tong Ying Shun, Michael D Lewen, Ian F. Pollack, and John S. Lazo

Molecular Pharmacology

|                              |               |        |                                                                                                                 |           |        |
|------------------------------|---------------|--------|-----------------------------------------------------------------------------------------------------------------|-----------|--------|
| siRNA Disorazole DMSO Run1   | NM_0309<br>65 | SIAT7E | ST6<br>(alpha-N-acetylneuraminyl-2,3-beta-galactosyl-1,3)-N-acetylgalactosaminide alpha-2,6-sialyltransferase 5 | -0.442573 | Inlier |
| siRNA-Vinblastine Run2-DMSO  | NM_0309<br>65 | SIAT7E | ST6<br>(alpha-N-acetylneuraminyl-2,3-beta-galactosyl-1,3)-N-acetylgalactosaminide alpha-2,6-sialyltransferase 5 | -0.246484 | Inlier |
| siRNA-Temozolomide Run3-DMSO | NM_0309<br>65 | SIAT7E | ST6<br>(alpha-N-acetylneuraminyl-2,3-beta-galactosyl-1,3)-N-acetylgalactosaminide alpha-2,6-sialyltransferase 5 | 0.246484  | Inlier |

Identification of Survival Genes in Human Glioblastoma Cells Using siRNA Screening

Nikhil G Thaker, Fang Zhang, Peter R. McDonald, Tong Ying Shun, Michael D Lewen, Ian F. Pollack, and John S. Lazo

Molecular Pharmacology

|                              |           |        |                                                                                                                 |          |         |
|------------------------------|-----------|--------|-----------------------------------------------------------------------------------------------------------------|----------|---------|
| siRNA-Temozolomide Run1-DMSO | NM_030965 | SIAT7E | ST6<br>(alpha-N-acetylneuraminyl-2,3-beta-galactosyl-1,3)-N-acetylgalactosaminide alpha-2,6-sialyltransferase 5 | 2.213945 | Inlier  |
| siRNA Disorazole DMSO Run2   | NM_030965 | SIAT7E | ST6<br>(alpha-N-acetylneuraminyl-2,3-beta-galactosyl-1,3)-N-acetylgalactosaminide alpha-2,6-sialyltransferase 5 | 17.3137  | Outlier |
| siRNA-Vinblastine Run1-DMSO  | NM_030965 | SIAT7E | ST6<br>(alpha-N-acetylneuraminyl-2,3-beta-galactosyl-1,3)-N-acetylgalactosaminide alpha-2,6-sialyltransferase 5 | 24.40895 | Outlier |



Identification of Survival Genes in Human Glioblastoma Cells Using siRNA Screening

Nikhil G Thaker, Fang Zhang, Peter R. McDonald, Tong Ying Shun, Michael D Lewen, Ian F. Pollack, and John S. Lazo

Molecular Pharmacology

|                              |           |        |                                                                                                               |                  |
|------------------------------|-----------|--------|---------------------------------------------------------------------------------------------------------------|------------------|
|                              |           |        | ST6<br>(alpha-N-acetylneuraminyl-2,3-beta-galactosyl-1,3)-N-acetylglucosaminide alpha-2,6-sialyltransferase 6 |                  |
| siRNA-Temozolomide Run2-DMSO | NM_013443 | SIAT7F |                                                                                                               | -1.012583 Inlier |

|                              |           |        |                                                                                                               |                  |
|------------------------------|-----------|--------|---------------------------------------------------------------------------------------------------------------|------------------|
|                              |           |        | ST6<br>(alpha-N-acetylneuraminyl-2,3-beta-galactosyl-1,3)-N-acetylglucosaminide alpha-2,6-sialyltransferase 6 |                  |
| siRNA-Temozolomide Run3-DMSO | NM_013443 | SIAT7F |                                                                                                               | -0.943399 Inlier |

|                            |           |        |                                                                                                               |                 |
|----------------------------|-----------|--------|---------------------------------------------------------------------------------------------------------------|-----------------|
|                            |           |        | ST6<br>(alpha-N-acetylneuraminyl-2,3-beta-galactosyl-1,3)-N-acetylglucosaminide alpha-2,6-sialyltransferase 6 |                 |
| siRNA Disorazole DMSO Run3 | NM_013443 | SIAT7F |                                                                                                               | -0.15151 Inlier |

Identification of Survival Genes in Human Glioblastoma Cells Using siRNA Screening

Nikhil G Thaker, Fang Zhang, Peter R. McDonald, Tong Ying Shun, Michael D Lewen, Ian F. Pollack, and John S. Lazo

Molecular Pharmacology

|                              |               |        |                                                                                                                 |           |        |
|------------------------------|---------------|--------|-----------------------------------------------------------------------------------------------------------------|-----------|--------|
| siRNA Disorazole DMSO Run1   | NM_0134<br>43 | SIAT7F | ST6<br>(alpha-N-acetylneuraminyl-2,3-beta-galactosyl-1,3)-N-acetylgalactosaminide alpha-2,6-sialyltransferase 6 | -0.120259 | Inlier |
| siRNA-Vinblastine Run2-DMSO  | NM_0134<br>43 | SIAT7F | ST6<br>(alpha-N-acetylneuraminyl-2,3-beta-galactosyl-1,3)-N-acetylgalactosaminide alpha-2,6-sialyltransferase 6 | 0.120259  | Inlier |
| siRNA-Temozolomide Run1-DMSO | NM_0134<br>43 | SIAT7F | ST6<br>(alpha-N-acetylneuraminyl-2,3-beta-galactosyl-1,3)-N-acetylgalactosaminide alpha-2,6-sialyltransferase 6 | 0.405601  | Inlier |

Identification of Survival Genes in Human Glioblastoma Cells Using siRNA Screening

Nikhil G Thaker, Fang Zhang, Peter R. McDonald, Tong Ying Shun, Michael D Lewen, Ian F. Pollack, and John S. Lazo

Molecular Pharmacology

|                              |               |        |                                                                                                                 |           |        |
|------------------------------|---------------|--------|-----------------------------------------------------------------------------------------------------------------|-----------|--------|
| siRNA-Vinblastine Run1-DMSO  | NM_0134<br>43 | SIAT7F | ST6<br>(alpha-N-acetylneuraminyl-2,3-beta-galactosyl-1,3)-N-acetylglucosaminidase alpha-2,6-sialyltransferase 6 | 2.678281  | Inlier |
| siRNA Disorazole DMSO Run2   | NM_0134<br>43 | SIAT7F | ST6<br>(alpha-N-acetylneuraminyl-2,3-beta-galactosyl-1,3)-N-acetylglucosaminidase alpha-2,6-sialyltransferase 6 | 2.75247   | Inlier |
| siRNA-Temozolomide Run3-DMSO | NM_0030<br>34 | SIAT8A | ST8 alpha-N-acetylneuraminidase alpha-2,8-sialyltransferase 1                                                   | -1.174881 | Inlier |
| siRNA Disorazole DMSO Run1   | NM_0030<br>34 | SIAT8A | ST8 alpha-N-acetylneuraminidase alpha-2,8-sialyltransferase 1                                                   | -0.960797 | Inlier |
| siRNA-Vinblastine Run2-DMSO  | NM_0030<br>34 | SIAT8A | ST8 alpha-N-acetylneuraminidase alpha-2,8-sialyltransferase 1                                                   | -0.352473 | Inlier |

Identification of Survival Genes in Human Glioblastoma Cells Using siRNA Screening

Nikhil G Thaker, Fang Zhang, Peter R. McDonald, Tong Ying Shun, Michael D Lewen, Ian F. Pollack, and John S. Lazo

Molecular Pharmacology

|                              |               |        |                                   |           |        |
|------------------------------|---------------|--------|-----------------------------------|-----------|--------|
| siRNA Disorazole DMSO Run3   | NM_0030<br>34 | SIAT8A | ST8 alpha-N-acetylneuraminidase 1 | -0.071799 | Inlier |
| siRNA-Temozolomide Run2-DMSO | NM_0030<br>34 | SIAT8A | ST8 alpha-N-acetylneuraminidase 1 | 0.071799  | Inlier |
| siRNA-Temozolomide Run1-DMSO | NM_0030<br>34 | SIAT8A | ST8 alpha-N-acetylneuraminidase 1 | 0.388203  | Inlier |
| siRNA Disorazole DMSO Run2   | NM_0030<br>34 | SIAT8A | ST8 alpha-N-acetylneuraminidase 1 | 1.315553  | Inlier |
| siRNA-Vinblastine Run1-DMSO  | NM_0030<br>34 | SIAT8A | ST8 alpha-N-acetylneuraminidase 1 | 1.990734  | Inlier |
| siRNA Disorazole DMSO Run3   | NM_0060<br>11 | SIAT8B | ST8 alpha-N-acetylneuraminidase 2 | -1.199076 | Inlier |
| siRNA-Temozolomide Run3-DMSO | NM_0060<br>11 | SIAT8B | ST8 alpha-N-acetylneuraminidase 2 | -1.003027 | Inlier |

Identification of Survival Genes in Human Glioblastoma Cells Using siRNA Screening

Nikhil G Thaker, Fang Zhang, Peter R. McDonald, Tong Ying Shun, Michael D Lewen, Ian F. Pollack, and John S. Lazo

Molecular Pharmacology

|                              |               |        |                                                             |           |         |
|------------------------------|---------------|--------|-------------------------------------------------------------|-----------|---------|
| siRNA-Temozolomide Run2-DMSO | NM_0060<br>11 | SIAT8B | ST8 alpha-N-acetylneuraminide alpha-2,8-sialyltransferase 2 | -0.345973 | Inlier  |
| siRNA-Vinblastine Run2-DMSO  | NM_0060<br>11 | SIAT8B | ST8 alpha-N-acetylneuraminide alpha-2,8-sialyltransferase 2 | -0.109995 | Inlier  |
| siRNA Disorazole DMSO Run1   | NM_0060<br>11 | SIAT8B | ST8 alpha-N-acetylneuraminide alpha-2,8-sialyltransferase 2 | 0.109995  | Inlier  |
| siRNA-Temozolomide Run1-DMSO | NM_0060<br>11 | SIAT8B | ST8 alpha-N-acetylneuraminide alpha-2,8-sialyltransferase 2 | 0.179724  | Inlier  |
| siRNA-Vinblastine Run1-DMSO  | NM_0060<br>11 | SIAT8B | ST8 alpha-N-acetylneuraminide alpha-2,8-sialyltransferase 2 | 2.988908  | Inlier  |
| siRNA Disorazole DMSO Run2   | NM_0060<br>11 | SIAT8B | ST8 alpha-N-acetylneuraminide alpha-2,8-sialyltransferase 2 | 4.444649  | Outlier |
| siRNA Disorazole DMSO Run3   | NM_0158<br>79 | SIAT8C | ST8 alpha-N-acetylneuraminide alpha-2,8-sialyltransferase 3 | -1.485937 | Inlier  |

Identification of Survival Genes in Human Glioblastoma Cells Using siRNA Screening

Nikhil G Thaker, Fang Zhang, Peter R. McDonald, Tong Ying Shun, Michael D Lewen, Ian F. Pollack, and John S. Lazo

Molecular Pharmacology

|                              |               |        |                                                               |           |        |
|------------------------------|---------------|--------|---------------------------------------------------------------|-----------|--------|
| siRNA Disorazole DMSO Run2   | NM_0158<br>79 | SIAT8C | ST8 alpha-N-acetylneuraminidase alpha-2,8-sialyltransferase 3 | -0.923323 | Inlier |
| siRNA Disorazole DMSO Run1   | NM_0158<br>79 | SIAT8C | ST8 alpha-N-acetylneuraminidase alpha-2,8-sialyltransferase 3 | -0.463338 | Inlier |
| siRNA-Vinblastine Run2-DMSO  | NM_0158<br>79 | SIAT8C | ST8 alpha-N-acetylneuraminidase alpha-2,8-sialyltransferase 3 | -0.275178 | Inlier |
| siRNA-Temozolomide Run2-DMSO | NM_0158<br>79 | SIAT8C | ST8 alpha-N-acetylneuraminidase alpha-2,8-sialyltransferase 3 | 0.275178  | Inlier |
| siRNA-Temozolomide Run3-DMSO | NM_0158<br>79 | SIAT8C | ST8 alpha-N-acetylneuraminidase alpha-2,8-sialyltransferase 3 | 0.515902  | Inlier |
| siRNA-Vinblastine Run1-DMSO  | NM_0158<br>79 | SIAT8C | ST8 alpha-N-acetylneuraminidase alpha-2,8-sialyltransferase 3 | 0.833098  | Inlier |
| siRNA-Temozolomide Run1-DMSO | NM_0158<br>79 | SIAT8C | ST8 alpha-N-acetylneuraminidase alpha-2,8-sialyltransferase 3 | 1.292683  | Inlier |

Identification of Survival Genes in Human Glioblastoma Cells Using siRNA Screening  
 Nikhil G Thaker, Fang Zhang, Peter R. McDonald, Tong Ying Shun, Michael D Lewen, Ian F. Pollack, and John S. Lazo

Molecular Pharmacology

| siRNA Treatment              | Gene ID   | Cell Line | Gene Name                         | Log Fold Change | Outlier Status |
|------------------------------|-----------|-----------|-----------------------------------|-----------------|----------------|
| siRNA-Temozolomide Run3-DMSO | NM_005668 | SIAT8D    | ST8 alpha-N-acetylneuraminidase 4 | -2.685521       | Inlier         |
| siRNA-Temozolomide Run2-DMSO | NM_005668 | SIAT8D    | ST8 alpha-N-acetylneuraminidase 4 | -1.14457        | Inlier         |
| siRNA Disorazole DMSO Run3   | NM_005668 | SIAT8D    | ST8 alpha-N-acetylneuraminidase 4 | -0.37734        | Inlier         |
| siRNA-Vinblastine Run2-DMSO  | NM_005668 | SIAT8D    | ST8 alpha-N-acetylneuraminidase 4 | -0.21018        | Inlier         |
| siRNA Disorazole DMSO Run1   | NM_005668 | SIAT8D    | ST8 alpha-N-acetylneuraminidase 4 | 0.21018         | Inlier         |
| siRNA-Temozolomide Run1-DMSO | NM_005668 | SIAT8D    | ST8 alpha-N-acetylneuraminidase 4 | 0.223443        | Inlier         |
| siRNA-Vinblastine Run1-DMSO  | NM_005668 | SIAT8D    | ST8 alpha-N-acetylneuraminidase 4 | 0.97166         | Inlier         |

Identification of Survival Genes in Human Glioblastoma Cells Using siRNA Screening

Nikhil G Thaker, Fang Zhang, Peter R. McDonald, Tong Ying Shun, Michael D Lewen, Ian F. Pollack, and John S. Lazo

Molecular Pharmacology

|                              |               |        |                                   |           |        |
|------------------------------|---------------|--------|-----------------------------------|-----------|--------|
| siRNA Disorazole DMSO Run2   | NM_0056<br>68 | SIAT8D | ST8 alpha-N-acetylneuraminidase 4 | 0.986976  | Inlier |
| siRNA-Temozolomide Run3-DMSO | NM_0133<br>05 | SIAT8E | ST8 alpha-N-acetylneuraminidase 5 | -1.804278 | Inlier |
| siRNA-Vinblastine Run2-DMSO  | NM_0133<br>05 | SIAT8E | ST8 alpha-N-acetylneuraminidase 5 | -0.78729  | Inlier |
| siRNA Disorazole DMSO Run1   | NM_0133<br>05 | SIAT8E | ST8 alpha-N-acetylneuraminidase 5 | -0.561711 | Inlier |
| siRNA Disorazole DMSO Run3   | NM_0133<br>05 | SIAT8E | ST8 alpha-N-acetylneuraminidase 5 | -0.116161 | Inlier |
| siRNA-Temozolomide Run2-DMSO | NM_0133<br>05 | SIAT8E | ST8 alpha-N-acetylneuraminidase 5 | 0.116161  | Inlier |
| siRNA-Temozolomide Run1-DMSO | NM_0133<br>05 | SIAT8E | ST8 alpha-N-acetylneuraminidase 5 | 0.517208  | Inlier |



Identification of Survival Genes in Human Glioblastoma Cells Using siRNA Screening

Nikhil G Thaker, Fang Zhang, Peter R. McDonald, Tong Ying Shun, Michael D Lewen, Ian F. Pollack, and John S. Lazo

Molecular Pharmacology

|                              |               |        |                                                               |           |        |
|------------------------------|---------------|--------|---------------------------------------------------------------|-----------|--------|
| siRNA Disorazole DMSO Run2   | NM_0133<br>05 | SIAT8E | ST8 alpha-N-acetylneuraminidase alpha-2,8-sialyltransferase 5 | 1.264805  | Inlier |
| siRNA-Vinblastine Run1-DMSO  | NM_0133<br>05 | SIAT8E | ST8 alpha-N-acetylneuraminidase alpha-2,8-sialyltransferase 5 | 1.286397  | Inlier |
| siRNA Disorazole DMSO Run3   | NM_0038<br>96 | SIAT9  | ST3 beta-galactosidase alpha-2,3-sialyltransferase 5          | -1.257858 | Inlier |
| siRNA-Temozolomide Run3-DMSO | NM_0038<br>96 | SIAT9  | ST3 beta-galactosidase alpha-2,3-sialyltransferase 5          | -1.231274 | Inlier |
| siRNA-Temozolomide Run2-DMSO | NM_0038<br>96 | SIAT9  | ST3 beta-galactosidase alpha-2,3-sialyltransferase 5          | -0.698513 | Inlier |
| siRNA-Vinblastine Run2-DMSO  | NM_0038<br>96 | SIAT9  | ST3 beta-galactosidase alpha-2,3-sialyltransferase 5          | -0.087757 | Inlier |
| siRNA Disorazole DMSO Run1   | NM_0038<br>96 | SIAT9  | ST3 beta-galactosidase alpha-2,3-sialyltransferase 5          | 0.087757  | Inlier |
| siRNA-Vinblastine Run1-DMSO  | NM_0038<br>96 | SIAT9  | ST3 beta-galactosidase alpha-2,3-sialyltransferase 5          | 0.372617  | Inlier |

Identification of Survival Genes in Human Glioblastoma Cells Using siRNA Screening

Nikhil G Thaker, Fang Zhang, Peter R. McDonald, Tong Ying Shun, Michael D Lewen, Ian F. Pollack, and John S.

Lazo

Molecular Pharmacology

|                              |               |       |                                                      |           |        |
|------------------------------|---------------|-------|------------------------------------------------------|-----------|--------|
| siRNA-Temozolomide Run1-DMSO | NM_0038<br>96 | SIAT9 | ST3 beta-galactosidase alpha-2,3-sialyltransferase 5 | 0.650487  | Inlier |
| siRNA Disorazole DMSO Run2   | NM_0038<br>96 | SIAT9 | ST3 beta-galactosidase alpha-2,3-sialyltransferase 5 | 1.300724  | Inlier |
| siRNA-Temozolomide Run3-DMSO | NM_0151<br>91 | SIK2  | SNF1-like kinase 2                                   | -0.811887 | Inlier |
| siRNA-Temozolomide Run1-DMSO | NM_0151<br>91 | SIK2  | SNF1-like kinase 2                                   | -0.537113 | Inlier |
| siRNA Disorazole DMSO Run2   | NM_0151<br>91 | SIK2  | SNF1-like kinase 2                                   | -0.414326 | Inlier |
| siRNA-Temozolomide Run2-DMSO | NM_0151<br>91 | SIK2  | SNF1-like kinase 2                                   | -0.411166 | Inlier |
| siRNA Disorazole DMSO Run1   | NM_0151<br>91 | SIK2  | SNF1-like kinase 2                                   | 0.411166  | Inlier |
| siRNA-Vinblastine Run2-DMSO  | NM_0151<br>91 | SIK2  | SNF1-like kinase 2                                   | 1.190565  | Inlier |
| siRNA-Vinblastine Run1-DMSO  | NM_0151<br>91 | SIK2  | SNF1-like kinase 2                                   | 1.382097  | Inlier |
| siRNA Disorazole DMSO Run3   | NM_0151<br>91 | SIK2  | SNF1-like kinase 2                                   | 1.585618  | Inlier |
| siRNA-Temozolomide Run3-DMSO | NM_1532<br>53 | SIPA1 | signal-induced proliferation-associated gene 1       | -2.463212 | Inlier |
| siRNA-Vinblastine Run2-DMSO  | NM_1532<br>53 | SIPA1 | signal-induced proliferation-associated gene 1       | -0.512861 | Inlier |
| siRNA-Temozolomide Run1-DMSO | NM_1532<br>53 | SIPA1 | signal-induced proliferation-associated gene 1       | -0.335794 | Inlier |
| siRNA Disorazole DMSO Run3   | NM_1532<br>53 | SIPA1 | signal-induced proliferation-associated gene 1       | -0.330491 | Inlier |

Identification of Survival Genes in Human Glioblastoma Cells Using siRNA Screening  
 Nikhil G Thaker, Fang Zhang, Peter R. McDonald, Tong Ying Shun, Michael D Lewen, Ian F. Pollack, and John S. Lazo

Molecular Pharmacology

|                              |               |        | signal-induced proliferation-associated gene 1 |        |
|------------------------------|---------------|--------|------------------------------------------------|--------|
| siRNA-Temozolomide Run2-DMSO | NM_1532<br>53 | SIPA1  | 0.330492                                       | Inlier |
| siRNA Disorazole DMSO Run1   | NM_1532<br>53 | SIPA1  | 0.836139                                       | Inlier |
| siRNA-Vinblastine Run1-DMSO  | NM_1532<br>53 | SIPA1  | 1.709743                                       | Inlier |
| siRNA Disorazole DMSO Run2   | NM_1532<br>53 | SIPA1  | 1.796206                                       | Inlier |
| siRNA-Temozolomide Run3-DMSO | NM_0165<br>81 | SITPEC | -1.631117                                      | Inlier |
| siRNA-Temozolomide Run2-DMSO | NM_0165<br>81 | SITPEC | -1.43444                                       | Inlier |
| siRNA-Temozolomide Run1-DMSO | NM_0165<br>81 | SITPEC | -0.523028                                      | Inlier |
| siRNA Disorazole DMSO Run3   | NM_0165<br>81 | SITPEC | -0.065299                                      | Inlier |
| siRNA Disorazole DMSO Run1   | NM_0165<br>81 | SITPEC | 0.065299                                       | Inlier |
| siRNA Disorazole DMSO Run2   | NM_0165<br>81 | SITPEC | 0.158964                                       | Inlier |
| siRNA-Vinblastine Run2-DMSO  | NM_0165<br>81 | SITPEC | 0.825972                                       | Inlier |
| siRNA-Vinblastine Run1-DMSO  | NM_0165<br>81 | SITPEC | 1.170934                                       | Inlier |
| siRNA-Temozolomide Run3-DMSO | NM_0064<br>27 | SIVA   | -1.833459                                      | Inlier |
| siRNA-Temozolomide Run2-DMSO | NM_0064<br>27 | SIVA   | -1.274748                                      | Inlier |
| siRNA Disorazole DMSO Run1   | NM_0064<br>27 | SIVA   | -1.219787                                      | Inlier |
| siRNA-Temozolomide Run1-DMSO | NM_0064<br>27 | SIVA   | -0.094248                                      | Inlier |
| siRNA-Vinblastine Run1-DMSO  | NM_0064<br>27 | SIVA   | 0.094248                                       | Inlier |
| siRNA-Vinblastine Run2-DMSO  | NM_0064<br>27 | SIVA   | 0.472415                                       | Inlier |

Identification of Survival Genes in Human Glioblastoma Cells Using siRNA Screening  
 Nikhil G Thaker, Fang Zhang, Peter R. McDonald, Tong Ying Shun, Michael D Lewen, Ian F. Pollack, and John S. Lazo

|                              |         |      |         |           |        |
|------------------------------|---------|------|---------|-----------|--------|
| Molecular Pharmacology       | NM_0064 |      |         |           |        |
| siRNA Disorazole DMSO Run3   | 27      | SIVA | SIVA    | 0.645012  | Inlier |
|                              | NM_0064 |      |         |           |        |
| siRNA Disorazole DMSO Run2   | 27      | SIVA | SIVA    | 0.703988  | Inlier |
|                              |         |      | SKB1    |           |        |
|                              |         |      | homolog |           |        |
|                              | NM_0061 |      | (S.     |           |        |
| siRNA Disorazole DMSO Run1   | 09      | SKB1 | pombe)  | -1.513588 | Inlier |
|                              |         |      | SKB1    |           |        |
|                              |         |      | homolog |           |        |
|                              | NM_0061 |      | (S.     |           |        |
| siRNA Disorazole DMSO Run3   | 09      | SKB1 | pombe)  | -0.813431 | Inlier |
|                              |         |      | SKB1    |           |        |
|                              |         |      | homolog |           |        |
|                              | NM_0061 |      | (S.     |           |        |
| siRNA-Temozolomide Run1-DMSO | 09      | SKB1 | pombe)  | -0.455815 | Inlier |
|                              |         |      | SKB1    |           |        |
|                              |         |      | homolog |           |        |
|                              | NM_0061 |      | (S.     |           |        |
| siRNA-Vinblastine Run2-DMSO  | 09      | SKB1 | pombe)  | -0.315176 | Inlier |
|                              |         |      | SKB1    |           |        |
|                              |         |      | homolog |           |        |
|                              | NM_0061 |      | (S.     |           |        |
| siRNA-Temozolomide Run2-DMSO | 09      | SKB1 | pombe)  | 0.315177  | Inlier |
|                              |         |      | SKB1    |           |        |
|                              |         |      | homolog |           |        |
|                              | NM_0061 |      | (S.     |           |        |
| siRNA-Temozolomide Run3-DMSO | 09      | SKB1 | pombe)  | 0.535569  | Inlier |
|                              |         |      | SKB1    |           |        |
|                              |         |      | homolog |           |        |
|                              | NM_0061 |      | (S.     |           |        |
| siRNA Disorazole DMSO Run2   | 09      | SKB1 | pombe)  | 1.477852  | Inlier |
|                              |         |      | SKB1    |           |        |
|                              |         |      | homolog |           |        |
|                              | NM_0061 |      | (S.     |           |        |
| siRNA-Vinblastine Run1-DMSO  | 09      | SKB1 | pombe)  | 2.928584  | Inlier |
|                              |         |      |         |           |        |
|                              | NM_1307 |      |         |           |        |
| siRNA Disorazole DMSO Run2   | 66      | SKIP | SKIP    | -0.779756 | Inlier |
| siRNA-Temozolomide Run2-DMSO | NM_1307 |      |         |           |        |
|                              | 66      | SKIP | SKIP    | -0.703719 | Inlier |
| siRNA-Temozolomide Run3-DMSO | NM_1307 |      |         |           |        |
|                              | 66      | SKIP | SKIP    | -0.574463 | Inlier |
|                              | NM_1307 |      |         |           |        |
| siRNA Disorazole DMSO Run3   | 66      | SKIP | SKIP    | -0.495163 | Inlier |
| siRNA-Temozolomide Run1-DMSO | NM_1307 |      |         |           |        |
|                              | 66      | SKIP | SKIP    | 0.495163  | Inlier |
|                              | NM_1307 |      |         |           |        |
| siRNA Disorazole DMSO Run1   | 66      | SKIP | SKIP    | 0.645281  | Inlier |
| siRNA-Vinblastine Run2-DMSO  | NM_1307 |      |         |           |        |
|                              | 66      | SKIP | SKIP    | 0.976296  | Inlier |
| siRNA-Vinblastine Run1-DMSO  | NM_1307 |      |         |           |        |
|                              | 66      | SKIP | SKIP    | 1.070103  | Inlier |

Identification of Survival Genes in Human Glioblastoma Cells Using siRNA Screening  
 Nikhil G Thaker, Fang Zhang, Peter R. McDonald, Tong Ying Shun, Michael D Lewen, Ian F. Pollack, and John S. Lazo  
 Molecular Pharmacology

|                                  |               |        |                                                                      |           |        |
|----------------------------------|---------------|--------|----------------------------------------------------------------------|-----------|--------|
| siRNA Disorazole DMSO Run2       | NM_0069<br>29 | SKIV2L | superkiller<br>viralicidic<br>activity 2-<br>like (S.<br>cerevisiae) | -1.194051 | Inlier |
| siRNA Disorazole DMSO Run1       | NM_0069<br>29 | SKIV2L | superkiller<br>viralicidic<br>activity 2-<br>like (S.<br>cerevisiae) | -0.487342 | Inlier |
| siRNA-Temozolomide Run2-<br>DMSO | NM_0069<br>29 | SKIV2L | superkiller<br>viralicidic<br>activity 2-<br>like (S.<br>cerevisiae) | -0.27652  | Inlier |
| siRNA-Temozolomide Run3-<br>DMSO | NM_0069<br>29 | SKIV2L | superkiller<br>viralicidic<br>activity 2-<br>like (S.<br>cerevisiae) | -0.076336 | Inlier |
| siRNA-Temozolomide Run1-<br>DMSO | NM_0069<br>29 | SKIV2L | superkiller<br>viralicidic<br>activity 2-<br>like (S.<br>cerevisiae) | 0.076336  | Inlier |
| siRNA-Vinblastine Run1-<br>DMSO  | NM_0069<br>29 | SKIV2L | superkiller<br>viralicidic<br>activity 2-<br>like (S.<br>cerevisiae) | 0.861658  | Inlier |
| siRNA-Vinblastine Run2-<br>DMSO  | NM_0069<br>29 | SKIV2L | superkiller<br>viralicidic<br>activity 2-<br>like (S.<br>cerevisiae) | 1.036721  | Inlier |
| siRNA Disorazole DMSO Run3       | NM_0069<br>29 | SKIV2L | superkiller<br>viralicidic<br>activity 2-<br>like (S.<br>cerevisiae) | 2.678982  | Inlier |

Identification of Survival Genes in Human Glioblastoma Cells Using siRNA Screening

Nikhil G Thaker, Fang Zhang, Peter R. McDonald, Tong Ying Shun, Michael D Lewen, Ian F. Pollack, and John S. Lazo

Molecular Pharmacology

|                                  |               |         |                                                                                                   |           |        |
|----------------------------------|---------------|---------|---------------------------------------------------------------------------------------------------|-----------|--------|
| siRNA Disorazole DMSO Run1       | NM_0326<br>37 | SKP2    | S-phase<br>kinase-<br>associated<br>protein 2<br>(p45)                                            | -1.971934 | Inlier |
| siRNA Disorazole DMSO Run2       | NM_0326<br>37 | SKP2    | S-phase<br>kinase-<br>associated<br>protein 2<br>(p45)                                            | -1.35931  | Inlier |
| siRNA-Temozolomide Run3-<br>DMSO | NM_0326<br>37 | SKP2    | S-phase<br>kinase-<br>associated<br>protein 2<br>(p45)                                            | -0.471495 | Inlier |
| siRNA-Vinblastine Run1-<br>DMSO  | NM_0326<br>37 | SKP2    | S-phase<br>kinase-<br>associated<br>protein 2<br>(p45)                                            | -0.22522  | Inlier |
| siRNA-Temozolomide Run2-<br>DMSO | NM_0326<br>37 | SKP2    | S-phase<br>kinase-<br>associated<br>protein 2<br>(p45)                                            | 0.225219  | Inlier |
| siRNA-Temozolomide Run1-<br>DMSO | NM_0326<br>37 | SKP2    | S-phase<br>kinase-<br>associated<br>protein 2<br>(p45)                                            | 0.609722  | Inlier |
| siRNA-Vinblastine Run2-<br>DMSO  | NM_0326<br>37 | SKP2    | S-phase<br>kinase-<br>associated<br>protein 2<br>(p45)                                            | 0.739278  | Inlier |
| siRNA Disorazole DMSO Run3       | NM_0326<br>37 | SKP2    | S-phase<br>kinase-<br>associated<br>protein 2<br>(p45)                                            | 1.880447  | Inlier |
| siRNA-Temozolomide Run3-<br>DMSO | NM_0030<br>49 | SLC10A1 | solute<br>carrier<br>family 10<br>(sodium/bil<br>e acid<br>cotranspor<br>ter family),<br>member 1 | -1.259685 | Inlier |

Identification of Survival Genes in Human Glioblastoma Cells Using siRNA Screening  
 Nikhil G Thaker, Fang Zhang, Peter R. McDonald, Tong Ying Shun, Michael D Lewen, Ian F. Pollack, and John S. Lazo  
 Molecular Pharmacology

|                              |           |         |                                                                            |           |        |
|------------------------------|-----------|---------|----------------------------------------------------------------------------|-----------|--------|
| siRNA-Temozolomide Run2-DMSO | NM_003049 | SLC10A1 | solute carrier family 10 (sodium/bile acid cotransporter family), member 1 | -1.133934 | Inlier |
| siRNA-Temozolomide Run1-DMSO | NM_003049 | SLC10A1 | solute carrier family 10 (sodium/bile acid cotransporter family), member 1 | -0.739915 | Inlier |
| siRNA Disorazole DMSO Run3   | NM_003049 | SLC10A1 | solute carrier family 10 (sodium/bile acid cotransporter family), member 1 | -0.083593 | Inlier |
| siRNA Disorazole DMSO Run1   | NM_003049 | SLC10A1 | solute carrier family 10 (sodium/bile acid cotransporter family), member 1 | 0.083592  | Inlier |
| siRNA Disorazole DMSO Run2   | NM_003049 | SLC10A1 | solute carrier family 10 (sodium/bile acid cotransporter family), member 1 | 0.250381  | Inlier |

Identification of Survival Genes in Human Glioblastoma Cells Using siRNA Screening

Nikhil G Thaker, Fang Zhang, Peter R. McDonald, Tong Ying Shun, Michael D Lewen, Ian F. Pollack, and John S. Lazo

Molecular Pharmacology

|                              |           |         |                                                                            |           |        |
|------------------------------|-----------|---------|----------------------------------------------------------------------------|-----------|--------|
| siRNA-Vinblastine Run1-DMSO  | NM_003049 | SLC10A1 | solute carrier family 10 (sodium/bile acid cotransporter family), member 1 | 0.609085  | Inlier |
| siRNA-Vinblastine Run2-DMSO  | NM_003049 | SLC10A1 | solute carrier family 10 (sodium/bile acid cotransporter family), member 1 | 0.928227  | Inlier |
| siRNA-Temozolomide Run3-DMSO | NM_000452 | SLC10A2 | solute carrier family 10 (sodium/bile acid cotransporter family), member 2 | -2.280151 | Inlier |
| siRNA-Temozolomide Run1-DMSO | NM_000452 | SLC10A2 | solute carrier family 10 (sodium/bile acid cotransporter family), member 2 | -0.320991 | Inlier |
| siRNA-Temozolomide Run2-DMSO | NM_000452 | SLC10A2 | solute carrier family 10 (sodium/bile acid cotransporter family), member 2 | -0.247818 | Inlier |



Identification of Survival Genes in Human Glioblastoma Cells Using siRNA Screening  
 Nikhil G Thaker, Fang Zhang, Peter R. McDonald, Tong Ying Shun, Michael D Lewen, Ian F. Pollack, and John S. Lazo  
 Molecular Pharmacology

|                             |               |         |                                                                            |           |        |
|-----------------------------|---------------|---------|----------------------------------------------------------------------------|-----------|--------|
| siRNA Disorazole DMSO Run3  | NM_0004<br>52 | SLC10A2 | solute carrier family 10 (sodium/bile acid cotransporter family), member 2 | -0.068454 | Inlier |
| siRNA Disorazole DMSO Run2  | NM_0004<br>52 | SLC10A2 | solute carrier family 10 (sodium/bile acid cotransporter family), member 2 | 0.068454  | Inlier |
| siRNA-Vinblastine Run2-DMSO | NM_0004<br>52 | SLC10A2 | solute carrier family 10 (sodium/bile acid cotransporter family), member 2 | 1.028009  | Inlier |
| siRNA Disorazole DMSO Run1  | NM_0004<br>52 | SLC10A2 | solute carrier family 10 (sodium/bile acid cotransporter family), member 2 | 1.293221  | Inlier |
| siRNA-Vinblastine Run1-DMSO | NM_0004<br>52 | SLC10A2 | solute carrier family 10 (sodium/bile acid cotransporter family), member 2 | 2.211735  | Inlier |

Identification of Survival Genes in Human Glioblastoma Cells Using siRNA Screening

Nikhil G Thaker, Fang Zhang, Peter R. McDonald, Tong Ying Shun, Michael D Lewen, Ian F. Pollack, and John S. Lazo

Molecular Pharmacology

|                                  |               |         |                                                                                                   |                  |
|----------------------------------|---------------|---------|---------------------------------------------------------------------------------------------------|------------------|
| siRNA-Temozolomide Run3-<br>DMSO | NM_0198<br>48 | SLC10A3 | solute<br>carrier<br>family 10<br>(sodium/bil<br>e acid<br>cotranspor<br>ter family),<br>member 3 | -1.439376 Inlier |
|----------------------------------|---------------|---------|---------------------------------------------------------------------------------------------------|------------------|

|                                  |               |         |                                                                                                   |                  |
|----------------------------------|---------------|---------|---------------------------------------------------------------------------------------------------|------------------|
| siRNA-Temozolomide Run2-<br>DMSO | NM_0198<br>48 | SLC10A3 | solute<br>carrier<br>family 10<br>(sodium/bil<br>e acid<br>cotranspor<br>ter family),<br>member 3 | -0.937899 Inlier |
|----------------------------------|---------------|---------|---------------------------------------------------------------------------------------------------|------------------|

|                                  |               |         |                                                                                                   |                  |
|----------------------------------|---------------|---------|---------------------------------------------------------------------------------------------------|------------------|
| siRNA-Temozolomide Run1-<br>DMSO | NM_0198<br>48 | SLC10A3 | solute<br>carrier<br>family 10<br>(sodium/bil<br>e acid<br>cotranspor<br>ter family),<br>member 3 | -0.766625 Inlier |
|----------------------------------|---------------|---------|---------------------------------------------------------------------------------------------------|------------------|

|                            |               |         |                                                                                                   |                  |
|----------------------------|---------------|---------|---------------------------------------------------------------------------------------------------|------------------|
| siRNA Disorazole DMSO Run3 | NM_0198<br>48 | SLC10A3 | solute<br>carrier<br>family 10<br>(sodium/bil<br>e acid<br>cotranspor<br>ter family),<br>member 3 | -0.018471 Inlier |
|----------------------------|---------------|---------|---------------------------------------------------------------------------------------------------|------------------|

|                            |               |         |                                                                                                   |                 |
|----------------------------|---------------|---------|---------------------------------------------------------------------------------------------------|-----------------|
| siRNA Disorazole DMSO Run1 | NM_0198<br>48 | SLC10A3 | solute<br>carrier<br>family 10<br>(sodium/bil<br>e acid<br>cotranspor<br>ter family),<br>member 3 | 0.018471 Inlier |
|----------------------------|---------------|---------|---------------------------------------------------------------------------------------------------|-----------------|

Identification of Survival Genes in Human Glioblastoma Cells Using siRNA Screening  
 Nikhil G Thaker, Fang Zhang, Peter R. McDonald, Tong Ying Shun, Michael D Lewen, Ian F. Pollack, and John S. Lazo  
 Molecular Pharmacology

|                              |               |         |                                                                            |           |        |
|------------------------------|---------------|---------|----------------------------------------------------------------------------|-----------|--------|
| siRNA-Vinblastine Run2-DMSO  | NM_0198<br>48 | SLC10A3 | solute carrier family 10 (sodium/bile acid cotransporter family), member 3 | 0.489116  | Inlier |
| siRNA-Vinblastine Run1-DMSO  | NM_0198<br>48 | SLC10A3 | solute carrier family 10 (sodium/bile acid cotransporter family), member 3 | 0.582375  | Inlier |
| siRNA Disorazole DMSO Run2   | NM_0198<br>48 | SLC10A3 | solute carrier family 10 (sodium/bile acid cotransporter family), member 3 | 0.92794   | Inlier |
| siRNA-Temozolomide Run1-DMSO | NM_1526<br>79 | SLC10A4 | solute carrier family 10 (sodium/bile acid cotransporter family), member 4 | -2.96188  | Inlier |
| siRNA-Temozolomide Run3-DMSO | NM_1526<br>79 | SLC10A4 | solute carrier family 10 (sodium/bile acid cotransporter family), member 4 | -1.595217 | Inlier |

Identification of Survival Genes in Human Glioblastoma Cells Using siRNA Screening

Nikhil G Thaker, Fang Zhang, Peter R. McDonald, Tong Ying Shun, Michael D Lewen, Ian F. Pollack, and John S. Lazo

Molecular Pharmacology

|                              |           |         |                                                                            |           |        |
|------------------------------|-----------|---------|----------------------------------------------------------------------------|-----------|--------|
| siRNA-Temozolomide Run2-DMSO | NM_152679 | SLC10A4 | solute carrier family 10 (sodium/bile acid cotransporter family), member 4 | -1.184958 | Inlier |
| siRNA Disorazole DMSO Run2   | NM_152679 | SLC10A4 | solute carrier family 10 (sodium/bile acid cotransporter family), member 4 | -0.025491 | Inlier |
| siRNA-Vinblastine Run2-DMSO  | NM_152679 | SLC10A4 | solute carrier family 10 (sodium/bile acid cotransporter family), member 4 | 0.025491  | Inlier |
| siRNA Disorazole DMSO Run1   | NM_152679 | SLC10A4 | solute carrier family 10 (sodium/bile acid cotransporter family), member 4 | 0.119816  | Inlier |
| siRNA-Vinblastine Run1-DMSO  | NM_152679 | SLC10A4 | solute carrier family 10 (sodium/bile acid cotransporter family), member 4 | 0.205216  | Inlier |

Identification of Survival Genes in Human Glioblastoma Cells Using siRNA Screening

Nikhil G Thaker, Fang Zhang, Peter R. McDonald, Tong Ying Shun, Michael D Lewen, Ian F. Pollack, and John S. Lazo

Molecular Pharmacology

|                              |               |         |                                                                                     |           |        |
|------------------------------|---------------|---------|-------------------------------------------------------------------------------------|-----------|--------|
| siRNA Disorazole DMSO Run3   | NM_1526<br>79 | SLC10A4 | solute carrier family 10 (sodium/bile acid cotransporter family), member 4          | 1.143784  | Inlier |
| siRNA-Temozolomide Run2-DMSO | NM_0005<br>78 | SLC11A1 | solute carrier family 11 (proton-coupled divalent metal ion transporters), member 1 | -1.198288 | Inlier |
| siRNA-Temozolomide Run1-DMSO | NM_0005<br>78 | SLC11A1 | solute carrier family 11 (proton-coupled divalent metal ion transporters), member 1 | -0.847819 | Inlier |
| siRNA-Temozolomide Run3-DMSO | NM_0005<br>78 | SLC11A1 | solute carrier family 11 (proton-coupled divalent metal ion transporters), member 1 | -0.611926 | Inlier |
| siRNA Disorazole DMSO Run2   | NM_0005<br>78 | SLC11A1 | solute carrier family 11 (proton-coupled divalent metal ion transporters), member 1 | -0.016661 | Inlier |

Identification of Survival Genes in Human Glioblastoma Cells Using siRNA Screening

Nikhil G Thaker, Fang Zhang, Peter R. McDonald, Tong Ying Shun, Michael D Lewen, Ian F. Pollack, and John S. Lazo

Molecular Pharmacology

|                             |               |         |                                                                                      |           |        |
|-----------------------------|---------------|---------|--------------------------------------------------------------------------------------|-----------|--------|
| siRNA Disorazole DMSO Run1  | NM_0005<br>78 | SLC11A1 | solute carrier family 11 (proton-coupled divalent metal ion transporter s), member 1 | 0.016661  | Inlier |
| siRNA Disorazole DMSO Run3  | NM_0005<br>78 | SLC11A1 | solute carrier family 11 (proton-coupled divalent metal ion transporter s), member 1 | 0.410606  | Inlier |
| siRNA-Vinblastine Run1-DMSO | NM_0005<br>78 | SLC11A1 | solute carrier family 11 (proton-coupled divalent metal ion transporter s), member 1 | 0.737074  | Inlier |
| siRNA-Vinblastine Run2-DMSO | NM_0005<br>78 | SLC11A1 | solute carrier family 11 (proton-coupled divalent metal ion transporter s), member 1 | 0.943168  | Inlier |
| siRNA Disorazole DMSO Run2  | NM_0006<br>17 | SLC11A2 | solute carrier family 11 (proton-coupled divalent metal ion transporter s), member 2 | -0.958573 | Inlier |

Identification of Survival Genes in Human Glioblastoma Cells Using siRNA Screening

Nikhil G Thaker, Fang Zhang, Peter R. McDonald, Tong Ying Shun, Michael D Lewen, Ian F. Pollack, and John S. Lazo

Molecular Pharmacology

| siRNA Treatment              | Gene      | Accession | Gene Name                                                                           | Log2 Fold Change | Category |
|------------------------------|-----------|-----------|-------------------------------------------------------------------------------------|------------------|----------|
| siRNA-Temozolomide Run3-DMSO | NM_000617 | SLC11A2   | solute carrier family 11 (proton-coupled divalent metal ion transporters), member 2 | -0.702832        | Inlier   |
| siRNA-Temozolomide Run1-DMSO | NM_000617 | SLC11A2   | solute carrier family 11 (proton-coupled divalent metal ion transporters), member 2 | -0.557364        | Inlier   |
| siRNA-Temozolomide Run2-DMSO | NM_000617 | SLC11A2   | solute carrier family 11 (proton-coupled divalent metal ion transporters), member 2 | -0.464062        | Inlier   |
| siRNA Disorazole DMSO Run3   | NM_000617 | SLC11A2   | solute carrier family 11 (proton-coupled divalent metal ion transporters), member 2 | 0.464061         | Inlier   |
| siRNA Disorazole DMSO Run1   | NM_000617 | SLC11A2   | solute carrier family 11 (proton-coupled divalent metal ion transporters), member 2 | 0.646168         | Inlier   |

Identification of Survival Genes in Human Glioblastoma Cells Using siRNA Screening

Nikhil G Thaker, Fang Zhang, Peter R. McDonald, Tong Ying Shun, Michael D Lewen, Ian F. Pollack, and John S. Lazo

Molecular Pharmacology

|                              |           |         |                                                                                      |           |        |
|------------------------------|-----------|---------|--------------------------------------------------------------------------------------|-----------|--------|
| siRNA-Vinblastine Run2-DMSO  | NM_000617 | SLC11A2 | solute carrier family 11 (proton-coupled divalent metal ion transporter s), member 2 | 0.928518  | Inlier |
| siRNA-Vinblastine Run1-DMSO  | NM_000617 | SLC11A2 | solute carrier family 11 (proton-coupled divalent metal ion transporter s), member 2 | 1.694654  | Inlier |
| siRNA-Temozolomide Run3-DMSO | NM_000338 | SLC12A1 | solute carrier family 12 (sodium/potassium/c chloride transporter s), member 1       | -0.957575 | Inlier |
| siRNA Disorazole DMSO Run2   | NM_000338 | SLC12A1 | solute carrier family 12 (sodium/potassium/c chloride transporter s), member 1       | -0.391425 | Inlier |
| siRNA-Temozolomide Run2-DMSO | NM_000338 | SLC12A1 | solute carrier family 12 (sodium/potassium/c chloride transporter s), member 1       | -0.310114 | Inlier |



Identification of Survival Genes in Human Glioblastoma Cells Using siRNA Screening

Nikhil G Thaker, Fang Zhang, Peter R. McDonald, Tong Ying Shun, Michael D Lewen, Ian F. Pollack, and John S.

Lazo

Molecular Pharmacology

| siRNA                        | Gene    | Gene ID   | Gene Name                                                                  | Log2FC    | Category |
|------------------------------|---------|-----------|----------------------------------------------------------------------------|-----------|----------|
| siRNA-Temozolomide Run1-DMSO | SLC12A1 | NM_000338 | solute carrier family 12 (sodium/potassium/chloride transporter), member 1 | -0.039005 | Inlier   |
| siRNA Disorazole DMSO Run3   | SLC12A1 | NM_000338 | solute carrier family 12 (sodium/potassium/chloride transporter), member 1 | 0.039005  | Inlier   |
| siRNA Disorazole DMSO Run1   | SLC12A1 | NM_000338 | solute carrier family 12 (sodium/potassium/chloride transporter), member 1 | 1.34325   | Inlier   |
| siRNA-Vinblastine Run2-DMSO  | SLC12A1 | NM_000338 | solute carrier family 12 (sodium/potassium/chloride transporter), member 1 | 2.36364   | Inlier   |
| siRNA-Vinblastine Run1-DMSO  | SLC12A1 | NM_000338 | solute carrier family 12 (sodium/potassium/chloride transporter), member 1 | 2.813563  | Inlier   |

Identification of Survival Genes in Human Glioblastoma Cells Using siRNA Screening

Nikhil G Thaker, Fang Zhang, Peter R. McDonald, Tong Ying Shun, Michael D Lewen, Ian F. Pollack, and John S.

Lazo

Molecular Pharmacology

| siRNA Treatment              | Gene ID   | Gene Name | Protein Description                                                         | Log2 Fold Change | Outlier Status |
|------------------------------|-----------|-----------|-----------------------------------------------------------------------------|------------------|----------------|
| siRNA-Temozolomide Run1-DMSO | NM_001046 | SLC12A2   | solute carrier family 12 (sodium/potassium/chloride transporters), member 2 | -1.023027        | Inlier         |
| siRNA-Temozolomide Run2-DMSO | NM_001046 | SLC12A2   | solute carrier family 12 (sodium/potassium/chloride transporters), member 2 | -0.684231        | Inlier         |
| siRNA-Temozolomide Run3-DMSO | NM_001046 | SLC12A2   | solute carrier family 12 (sodium/potassium/chloride transporters), member 2 | -0.467944        | Inlier         |
| siRNA-Vinblastine Run2-DMSO  | NM_001046 | SLC12A2   | solute carrier family 12 (sodium/potassium/chloride transporters), member 2 | -0.129716        | Inlier         |
| siRNA Disorazole DMSO Run1   | NM_001046 | SLC12A2   | solute carrier family 12 (sodium/potassium/chloride transporters), member 2 | 0.129716         | Inlier         |

Identification of Survival Genes in Human Glioblastoma Cells Using siRNA Screening

Nikhil G Thaker, Fang Zhang, Peter R. McDonald, Tong Ying Shun, Michael D Lewen, Ian F. Pollack, and John S.

Lazo

Molecular Pharmacology

| siRNA Treatment              | Gene ID   | Gene Name | Gene Description                                                            | Score     | Category |
|------------------------------|-----------|-----------|-----------------------------------------------------------------------------|-----------|----------|
| siRNA-Vinblastine Run1-DMSO  | NM_001046 | SLC12A2   | solute carrier family 12 (sodium/potassium/chloride transporters), member 2 | 0.664769  | Inlier   |
| siRNA Disorazole DMSO Run3   | NM_001046 | SLC12A2   | solute carrier family 12 (sodium/potassium/chloride transporters), member 2 | 1.368024  | Inlier   |
| siRNA Disorazole DMSO Run2   | NM_001046 | SLC12A2   | solute carrier family 12 (sodium/calcium/chloride transporters), member 2   | 2.460157  | Inlier   |
| siRNA-Temozolomide Run2-DMSO | NM_000339 | SLC12A3   | solute carrier family 12 (sodium/calcium/chloride transporters), member 3   | -0.827098 | Inlier   |
| siRNA-Temozolomide Run3-DMSO | NM_000339 | SLC12A3   | solute carrier family 12 (sodium/calcium/chloride transporters), member 3   | -0.821829 | Inlier   |
| siRNA-Temozolomide Run1-DMSO | NM_000339 | SLC12A3   | solute carrier family 12 (sodium/calcium/chloride transporters), member 3   | -0.661599 | Inlier   |

Identification of Survival Genes in Human Glioblastoma Cells Using siRNA Screening

Nikhil G Thaker, Fang Zhang, Peter R. McDonald, Tong Ying Shun, Michael D Lewen, Ian F. Pollack, and John S. Lazo

Molecular Pharmacology

| siRNA Treatment              | Gene    | Accession | Gene Description                                                     | Log2 Fold Change | Category |
|------------------------------|---------|-----------|----------------------------------------------------------------------|------------------|----------|
| siRNA Disorazole DMSO Run1   | SLC12A3 | NM_000339 | solute carrier family 12 (sodium/chloride transporters), member 3    | -0.108829        | Inlier   |
| siRNA Disorazole DMSO Run2   | SLC12A3 | NM_000339 | solute carrier family 12 (sodium/chloride transporters), member 3    | 0.108829         | Inlier   |
| siRNA Disorazole DMSO Run3   | SLC12A3 | NM_000339 | solute carrier family 12 (sodium/chloride transporters), member 3    | 0.218674         | Inlier   |
| siRNA-Vinblastine Run2-DMSO  | SLC12A3 | NM_000339 | solute carrier family 12 (sodium/chloride transporters), member 3    | 0.687401         | Inlier   |
| siRNA-Vinblastine Run1-DMSO  | SLC12A3 | NM_000339 | solute carrier family 12 (sodium/chloride transporters), member 3    | 0.776259         | Inlier   |
| siRNA-Temozolomide Run3-DMSO | SLC12A4 | NM_005072 | solute carrier family 12 (potassium/chloride transporters), member 4 | -1.247949        | Inlier   |

Identification of Survival Genes in Human Glioblastoma Cells Using siRNA Screening

Nikhil G Thaker, Fang Zhang, Peter R. McDonald, Tong Ying Shun, Michael D Lewen, Ian F. Pollack, and John S. Lazo

Molecular Pharmacology

|                              |           |         |                                                                      |           |        |
|------------------------------|-----------|---------|----------------------------------------------------------------------|-----------|--------|
| siRNA-Temozolomide Run2-DMSO | NM_005072 | SLC12A4 | solute carrier family 12 (potassium/chloride transporters), member 4 | -0.937608 | Inlier |
| siRNA-Temozolomide Run1-DMSO | NM_005072 | SLC12A4 | solute carrier family 12 (potassium/chloride transporters), member 4 | -0.461746 | Inlier |
| siRNA Disorazole DMSO Run3   | NM_005072 | SLC12A4 | solute carrier family 12 (potassium/chloride transporters), member 4 | -0.013732 | Inlier |
| siRNA Disorazole DMSO Run1   | NM_005072 | SLC12A4 | solute carrier family 12 (potassium/chloride transporters), member 4 | 0.013731  | Inlier |
| siRNA-Vinblastine Run2-DMSO  | NM_005072 | SLC12A4 | solute carrier family 12 (potassium/chloride transporters), member 4 | 0.56679   | Inlier |

Identification of Survival Genes in Human Glioblastoma Cells Using siRNA Screening

Nikhil G Thaker, Fang Zhang, Peter R. McDonald, Tong Ying Shun, Michael D Lewen, Ian F. Pollack, and John S.

Lazo

Molecular Pharmacology

|                              |               |         |                                                                      |           |        |
|------------------------------|---------------|---------|----------------------------------------------------------------------|-----------|--------|
| siRNA Disorazole DMSO Run2   | NM_0050<br>72 | SLC12A4 | solute carrier family 12 (potassium/chloride transporters), member 4 | 0.78221   | Inlier |
| siRNA-Vinblastine Run1-DMSO  | NM_0050<br>72 | SLC12A4 | solute carrier family 12 (potassium/chloride transporters), member 4 | 0.868809  | Inlier |
| siRNA-Temozolomide Run3-DMSO | NM_0207<br>08 | SLC12A5 | solute carrier family 12, (potassium-chloride transporter) member 5  | -1.109911 | Inlier |
| siRNA-Temozolomide Run2-DMSO | NM_0207<br>08 | SLC12A5 | solute carrier family 12, (potassium-chloride transporter) member 5  | -0.743095 | Inlier |
| siRNA Disorazole DMSO Run2   | NM_0207<br>08 | SLC12A5 | solute carrier family 12, (potassium-chloride transporter) member 5  | -0.46737  | Inlier |

Identification of Survival Genes in Human Glioblastoma Cells Using siRNA Screening  
 Nikhil G Thaker, Fang Zhang, Peter R. McDonald, Tong Ying Shun, Michael D Lewen, Ian F. Pollack, and John S. Lazo  
 Molecular Pharmacology

|                              |               |         |   |           |                                                                     |
|------------------------------|---------------|---------|---|-----------|---------------------------------------------------------------------|
| siRNA Disorazole DMSO Run3   | NM_0207<br>08 | SLC12A5 | 5 | -0.323988 | Inlier                                                              |
|                              |               |         |   |           | solute carrier family 12, (potassium-chloride transporter) member 5 |
| siRNA Disorazole DMSO Run1   | NM_0207<br>08 | SLC12A5 | 5 | 0.323988  | Inlier                                                              |
|                              |               |         |   |           | solute carrier family 12, (potassium-chloride transporter) member 5 |
| siRNA-Temozolomide Run1-DMSO | NM_0207<br>08 | SLC12A5 | 5 | 0.605905  | Inlier                                                              |
|                              |               |         |   |           | solute carrier family 12, (potassium-chloride transporter) member 5 |
| siRNA-Vinblastine Run2-DMSO  | NM_0207<br>08 | SLC12A5 | 5 | 5.159626  | Outlier                                                             |
|                              |               |         |   |           | solute carrier family 12, (potassium-chloride transporter) member 5 |
| siRNA-Vinblastine Run1-DMSO  | NM_0207<br>08 | SLC12A5 | 5 | 5.250355  | Outlier                                                             |
|                              |               |         |   |           | solute carrier family 12, (potassium-chloride transporter) member 5 |

Identification of Survival Genes in Human Glioblastoma Cells Using siRNA Screening  
 Nikhil G Thaker, Fang Zhang, Peter R. McDonald, Tong Ying Shun, Michael D Lewen, Ian F. Pollack, and John S. Lazo  
 Molecular Pharmacology

|                              |           |         |                                                                      |           |        |
|------------------------------|-----------|---------|----------------------------------------------------------------------|-----------|--------|
| siRNA-Temozolomide Run3-DMSO | NM_005135 | SLC12A6 | solute carrier family 12 (potassium/chloride transporters), member 6 | -1.292012 | Inlier |
| siRNA-Temozolomide Run1-DMSO | NM_005135 | SLC12A6 | solute carrier family 12 (potassium/chloride transporters), member 6 | -1.014867 | Inlier |
| siRNA-Temozolomide Run2-DMSO | NM_005135 | SLC12A6 | solute carrier family 12 (potassium/chloride transporters), member 6 | -0.759119 | Inlier |
| siRNA Disorazole DMSO Run1   | NM_005135 | SLC12A6 | solute carrier family 12 (potassium/chloride transporters), member 6 | -0.144512 | Inlier |
| siRNA Disorazole DMSO Run2   | NM_005135 | SLC12A6 | solute carrier family 12 (potassium/chloride transporters), member 6 | 0.144512  | Inlier |



Identification of Survival Genes in Human Glioblastoma Cells Using siRNA Screening  
 Nikhil G Thaker, Fang Zhang, Peter R. McDonald, Tong Ying Shun, Michael D Lewen, Ian F. Pollack, and John S. Lazo  
 Molecular Pharmacology

|                              |               |         |                                                                      |           |        |
|------------------------------|---------------|---------|----------------------------------------------------------------------|-----------|--------|
| siRNA Disorazole DMSO Run3   | NM_0051<br>35 | SLC12A6 | solute carrier family 12 (potassium/chloride transporters), member 6 | 0.160221  | Inlier |
| siRNA-Vinblastine Run2-DMSO  | NM_0051<br>35 | SLC12A6 | solute carrier family 12 (potassium/chloride transporters), member 6 | 0.589881  | Inlier |
| siRNA-Vinblastine Run1-DMSO  | NM_0051<br>35 | SLC12A6 | solute carrier family 12 (potassium/chloride transporters), member 6 | 0.972685  | Inlier |
| siRNA Disorazole DMSO Run2   | NM_0065<br>98 | SLC12A7 | solute carrier family 12 (potassium/chloride transporters), member 7 | -0.793279 | Inlier |
| siRNA-Temozolomide Run3-DMSO | NM_0065<br>98 | SLC12A7 | solute carrier family 12 (potassium/chloride transporters), member 7 | -0.660587 | Inlier |

Identification of Survival Genes in Human Glioblastoma Cells Using siRNA Screening

Nikhil G Thaker, Fang Zhang, Peter R. McDonald, Tong Ying Shun, Michael D Lewen, Ian F. Pollack, and John S. Lazo

Molecular Pharmacology

|                              |           |         |                                                                      |           |        |
|------------------------------|-----------|---------|----------------------------------------------------------------------|-----------|--------|
| siRNA-Temozolomide Run2-DMSO | NM_006598 | SLC12A7 | solute carrier family 12 (potassium/chloride transporters), member 7 | -0.388604 | Inlier |
| siRNA-Temozolomide Run1-DMSO | NM_006598 | SLC12A7 | solute carrier family 12 (potassium/chloride transporters), member 7 | -0.338884 | Inlier |
| siRNA Disorazole DMSO Run3   | NM_006598 | SLC12A7 | solute carrier family 12 (potassium/chloride transporters), member 7 | 0.338884  | Inlier |
| siRNA Disorazole DMSO Run1   | NM_006598 | SLC12A7 | solute carrier family 12 (potassium/chloride transporters), member 7 | 0.688413  | Inlier |
| siRNA-Vinblastine Run1-DMSO  | NM_006598 | SLC12A7 | solute carrier family 12 (potassium/chloride transporters), member 7 | 1.112344  | Inlier |

Identification of Survival Genes in Human Glioblastoma Cells Using siRNA Screening

Nikhil G Thaker, Fang Zhang, Peter R. McDonald, Tong Ying Shun, Michael D Lewen, Ian F. Pollack, and John S. Lazo

Molecular Pharmacology

|                              |           |         |                                                                      |           |        |
|------------------------------|-----------|---------|----------------------------------------------------------------------|-----------|--------|
| siRNA-Vinblastine Run2-DMSO  | NM_006598 | SLC12A7 | solute carrier family 12 (potassium/chloride transporters), member 7 | 1.260312  | Inlier |
| siRNA-Temozolomide Run3-DMSO | NM_024628 | SLC12A8 | solute carrier family 12 (potassium/chloride transporters), member 8 | -1.600537 | Inlier |
| siRNA-Temozolomide Run1-DMSO | NM_024628 | SLC12A8 | solute carrier family 12 (potassium/chloride transporters), member 8 | -0.774585 | Inlier |
| siRNA Disorazole DMSO Run1   | NM_024628 | SLC12A8 | solute carrier family 12 (potassium/chloride transporters), member 8 | -0.212138 | Inlier |
| siRNA-Temozolomide Run2-DMSO | NM_024628 | SLC12A8 | solute carrier family 12 (potassium/chloride transporters), member 8 | -0.017634 | Inlier |

Identification of Survival Genes in Human Glioblastoma Cells Using siRNA Screening  
 Nikhil G Thaker, Fang Zhang, Peter R. McDonald, Tong Ying Shun, Michael D Lewen, Ian F. Pollack, and John S. Lazo  
 Molecular Pharmacology

|                              |               |         |                                                                      |           |        |
|------------------------------|---------------|---------|----------------------------------------------------------------------|-----------|--------|
| siRNA Disorazole DMSO Run3   | NM_0246<br>28 | SLC12A8 | solute carrier family 12 (potassium/chloride transporters), member 8 | 0.017634  | Inlier |
| siRNA-Vinblastine Run2-DMSO  | NM_0246<br>28 | SLC12A8 | solute carrier family 12 (potassium/chloride transporters), member 8 | 0.579182  | Inlier |
| siRNA-Vinblastine Run1-DMSO  | NM_0246<br>28 | SLC12A8 | solute carrier family 12 (potassium/chloride transporters), member 8 | 0.769818  | Inlier |
| siRNA Disorazole DMSO Run2   | NM_0246<br>28 | SLC12A8 | solute carrier family 12 (potassium/chloride transporters), member 8 | 1.043159  | Inlier |
| siRNA-Temozolomide Run3-DMSO | NM_0202<br>46 | SLC12A9 | solute carrier family 12 (potassium/chloride transporters), member 9 | -0.722378 | Inlier |

Identification of Survival Genes in Human Glioblastoma Cells Using siRNA Screening  
 Nikhil G Thaker, Fang Zhang, Peter R. McDonald, Tong Ying Shun, Michael D Lewen, Ian F. Pollack, and John S. Lazo  
 Molecular Pharmacology

|                              |           |         |                                                                      |           |        |
|------------------------------|-----------|---------|----------------------------------------------------------------------|-----------|--------|
| siRNA-Temozolomide Run2-DMSO | NM_020246 | SLC12A9 | solute carrier family 12 (potassium/chloride transporters), member 9 | -0.658553 | Inlier |
| siRNA-Temozolomide Run1-DMSO | NM_020246 | SLC12A9 | solute carrier family 12 (potassium/chloride transporters), member 9 | -0.065038 | Inlier |
| siRNA Disorazole DMSO Run3   | NM_020246 | SLC12A9 | solute carrier family 12 (potassium/chloride transporters), member 9 | -0.014638 | Inlier |
| siRNA Disorazole DMSO Run2   | NM_020246 | SLC12A9 | solute carrier family 12 (potassium/chloride transporters), member 9 | 0.014638  | Inlier |
| siRNA Disorazole DMSO Run1   | NM_020246 | SLC12A9 | solute carrier family 12 (potassium/chloride transporters), member 9 | 0.690447  | Inlier |

Identification of Survival Genes in Human Glioblastoma Cells Using siRNA Screening  
 Nikhil G Thaker, Fang Zhang, Peter R. McDonald, Tong Ying Shun, Michael D Lewen, Ian F. Pollack, and John S. Lazo  
 Molecular Pharmacology

|                              |           |         |                                                                      |           |         |
|------------------------------|-----------|---------|----------------------------------------------------------------------|-----------|---------|
| siRNA-Vinblastine Run2-DMSO  | NM_020246 | SLC12A9 | solute carrier family 12 (potassium/chloride transporters), member 9 | 1.008788  | Inlier  |
| siRNA-Vinblastine Run1-DMSO  | NM_020246 | SLC12A9 | solute carrier family 12 (potassium/chloride transporters), member 9 | 1.256206  | Inlier  |
| siRNA-Temozolomide Run3-DMSO | NM_022444 | SLC13A1 | solute carrier family 13 (sodium/sulfate symporters), member 1       | -4.096587 | Outlier |
| siRNA-Temozolomide Run1-DMSO | NM_022444 | SLC13A1 | solute carrier family 13 (sodium/sulfate symporters), member 1       | -3.625511 | Outlier |
| siRNA-Temozolomide Run2-DMSO | NM_022444 | SLC13A1 | solute carrier family 13 (sodium/sulfate symporters), member 1       | -0.701098 | Inlier  |
| siRNA Disorazole DMSO Run1   | NM_022444 | SLC13A1 | solute carrier family 13 (sodium/sulfate symporters), member 1       | -0.161989 | Inlier  |

Identification of Survival Genes in Human Glioblastoma Cells Using siRNA Screening

Nikhil G Thaker, Fang Zhang, Peter R. McDonald, Tong Ying Shun, Michael D Lewen, Ian F. Pollack, and John S. Lazo

Molecular Pharmacology

|                             |               |         |                                                                                  |           |        |
|-----------------------------|---------------|---------|----------------------------------------------------------------------------------|-----------|--------|
| siRNA Disorazole DMSO Run2  | NM_0224<br>44 | SLC13A1 | solute carrier family 13 (sodium/sulfate symporter s), member 1                  | 0.161988  | Inlier |
| siRNA-Vinblastine Run2-DMSO | NM_0224<br>44 | SLC13A1 | solute carrier family 13 (sodium/sulfate symporter s), member 1                  | 0.201004  | Inlier |
| siRNA Disorazole DMSO Run3  | NM_0224<br>44 | SLC13A1 | solute carrier family 13 (sodium/sulfate symporter s), member 1                  | 0.647902  | Inlier |
| siRNA-Vinblastine Run1-DMSO | NM_0224<br>44 | SLC13A1 | solute carrier family 13 (sodium/sulfate symporter s), member 1                  | 2.058063  | Inlier |
| siRNA Disorazole DMSO Run2  | NM_0039<br>84 | SLC13A2 | solute carrier family 13 (sodium-dependent dicarboxylate transporter ), member 2 | -0.784189 | Inlier |

Identification of Survival Genes in Human Glioblastoma Cells Using siRNA Screening

Nikhil G Thaker, Fang Zhang, Peter R. McDonald, Tong Ying Shun, Michael D Lewen, Ian F. Pollack, and John S. Lazo

Molecular Pharmacology

|                              |           |         |                                                                                 |           |        |
|------------------------------|-----------|---------|---------------------------------------------------------------------------------|-----------|--------|
| siRNA-Temozolomide Run1-DMSO | NM_003984 | SLC13A2 | solute carrier family 13 (sodium-dependent dicarboxylate transporter), member 2 | -0.677299 | Inlier |
| siRNA-Temozolomide Run2-DMSO | NM_003984 | SLC13A2 | solute carrier family 13 (sodium-dependent dicarboxylate transporter), member 2 | -0.515921 | Inlier |
| siRNA-Temozolomide Run3-DMSO | NM_003984 | SLC13A2 | solute carrier family 13 (sodium-dependent dicarboxylate transporter), member 2 | -0.307004 | Inlier |
| siRNA-Vinblastine Run2-DMSO  | NM_003984 | SLC13A2 | solute carrier family 13 (sodium-dependent dicarboxylate transporter), member 2 | 0.307004  | Inlier |



Identification of Survival Genes in Human Glioblastoma Cells Using siRNA Screening  
 Nikhil G Thaker, Fang Zhang, Peter R. McDonald, Tong Ying Shun, Michael D Lewen, Ian F. Pollack, and John S. Lazo  
 Molecular Pharmacology

|                              |                  |         |                                                                                 |           |        |
|------------------------------|------------------|---------|---------------------------------------------------------------------------------|-----------|--------|
| siRNA Disorazole DMSO Run1   | NM_0039<br>84    | SLC13A2 | solute carrier family 13 (sodium-dependent dicarboxylate transporter), member 2 | 0.671701  | Inlier |
| siRNA Disorazole DMSO Run3   | NM_0039<br>84    | SLC13A2 | solute carrier family 13 (sodium-dependent dicarboxylate transporter), member 2 | 0.899647  | Inlier |
| siRNA-Vinblastine Run1-DMSO  | NM_0039<br>84    | SLC13A2 | solute carrier family 13 (sodium-dependent dicarboxylate transporter), member 2 | 1.392354  | Inlier |
| siRNA-Temozolomide Run3-DMSO | NM_0010<br>11554 | SLC13A3 | solute carrier family 13 (sodium-dependent dicarboxylate transporter), member 3 | -0.693804 | Inlier |

Identification of Survival Genes in Human Glioblastoma Cells Using siRNA Screening

Nikhil G Thaker, Fang Zhang, Peter R. McDonald, Tong Ying Shun, Michael D Lewen, Ian F. Pollack, and John S.

Lazo

Molecular Pharmacology

|                              |              |         |                                                                                 |           |        |
|------------------------------|--------------|---------|---------------------------------------------------------------------------------|-----------|--------|
| siRNA-Temozolomide Run1-DMSO | NM_001011554 | SLC13A3 | solute carrier family 13 (sodium-dependent dicarboxylate transporter), member 3 | -0.655196 | Inlier |
|------------------------------|--------------|---------|---------------------------------------------------------------------------------|-----------|--------|

|                              |              |         |                                                                                 |           |        |
|------------------------------|--------------|---------|---------------------------------------------------------------------------------|-----------|--------|
| siRNA-Temozolomide Run2-DMSO | NM_001011554 | SLC13A3 | solute carrier family 13 (sodium-dependent dicarboxylate transporter), member 3 | -0.608659 | Inlier |
|------------------------------|--------------|---------|---------------------------------------------------------------------------------|-----------|--------|

|                            |              |         |                                                                                 |           |        |
|----------------------------|--------------|---------|---------------------------------------------------------------------------------|-----------|--------|
| siRNA Disorazole DMSO Run3 | NM_001011554 | SLC13A3 | solute carrier family 13 (sodium-dependent dicarboxylate transporter), member 3 | -0.029452 | Inlier |
|----------------------------|--------------|---------|---------------------------------------------------------------------------------|-----------|--------|

|                            |              |         |                                                                                 |          |        |
|----------------------------|--------------|---------|---------------------------------------------------------------------------------|----------|--------|
| siRNA Disorazole DMSO Run1 | NM_001011554 | SLC13A3 | solute carrier family 13 (sodium-dependent dicarboxylate transporter), member 3 | 0.029452 | Inlier |
|----------------------------|--------------|---------|---------------------------------------------------------------------------------|----------|--------|

Identification of Survival Genes in Human Glioblastoma Cells Using siRNA Screening  
 Nikhil G Thaker, Fang Zhang, Peter R. McDonald, Tong Ying Shun, Michael D Lewen, Ian F. Pollack, and John S. Lazo  
 Molecular Pharmacology

|                              |              |         |                                                                                 |           |        |
|------------------------------|--------------|---------|---------------------------------------------------------------------------------|-----------|--------|
| siRNA-Vinblastine Run2-DMSO  | NM_001011554 | SLC13A3 | solute carrier family 13 (sodium-dependent dicarboxylate transporter), member 3 | 1.261289  | Inlier |
| siRNA-Vinblastine Run1-DMSO  | NM_001011554 | SLC13A3 | solute carrier family 13 (sodium-dependent dicarboxylate transporter), member 3 | 1.316707  | Inlier |
| siRNA Disorazole DMSO Run2   | NM_001011554 | SLC13A3 | solute carrier family 13 (sodium-dependent dicarboxylate transporter), member 3 | 1.379222  | Inlier |
| siRNA-Temozolomide Run3-DMSO | NM_012450    | SLC13A4 | solute carrier family 13 (sodium/sulfate symporter), member 4                   | -0.82981  | Inlier |
| siRNA-Temozolomide Run2-DMSO | NM_012450    | SLC13A4 | solute carrier family 13 (sodium/sulfate symporter), member 4                   | -0.764143 | Inlier |

Identification of Survival Genes in Human Glioblastoma Cells Using siRNA Screening

Nikhil G Thaker, Fang Zhang, Peter R. McDonald, Tong Ying Shun, Michael D Lewen, Ian F. Pollack, and John S. Lazo

Molecular Pharmacology

| siRNA Treatment              | Gene    | Gene ID | Gene Name | Gene Description                                              | Correlation | Outlier |
|------------------------------|---------|---------|-----------|---------------------------------------------------------------|-------------|---------|
| siRNA-Temozolomide Run1-DMSO | NM_0124 | 50      | SLC13A4   | solute carrier family 13 (sodium/ulfate symporters), member 4 | -0.38078    | Inlier  |
| siRNA Disorazole DMSO Run3   | NM_0124 | 50      | SLC13A4   | solute carrier family 13 (sodium/ulfate symporters), member 4 | -0.027367   | Inlier  |
| siRNA Disorazole DMSO Run2   | NM_0124 | 50      | SLC13A4   | solute carrier family 13 (sodium/ulfate symporters), member 4 | 0.027367    | Inlier  |
| siRNA-Vinblastine Run2-DMSO  | NM_0124 | 50      | SLC13A4   | solute carrier family 13 (sodium/ulfate symporters), member 4 | 0.598915    | Inlier  |
| siRNA-Vinblastine Run1-DMSO  | NM_0124 | 50      | SLC13A4   | solute carrier family 13 (sodium/ulfate symporters), member 4 | 0.750085    | Inlier  |
| siRNA Disorazole DMSO Run1   | NM_0124 | 50      | SLC13A4   | solute carrier family 13 (sodium/ulfate symporters), member 4 | 0.958463    | Inlier  |

Identification of Survival Genes in Human Glioblastoma Cells Using siRNA Screening

Nikhil G Thaker, Fang Zhang, Peter R. McDonald, Tong Ying Shun, Michael D Lewen, Ian F. Pollack, and John S.

Lazo

Molecular Pharmacology

| siRNA              | Drug | Run  | Concentration | Gene    | Log2FC    | Category |
|--------------------|------|------|---------------|---------|-----------|----------|
| siRNA Disorazole   | DMSO | Run3 | 50            | SLC13A5 | -0.831713 | Inlier   |
| siRNA-Temozolomide | DMSO | Run3 | 50            | SLC13A5 | -0.679494 | Inlier   |
| siRNA Disorazole   | DMSO | Run2 | 50            | SLC13A5 | -0.669506 | Inlier   |
| siRNA-Temozolomide | DMSO | Run1 | 50            | SLC13A5 | -0.13995  | Inlier   |
| siRNA Disorazole   | DMSO | Run1 | 50            | SLC13A5 | 0.13995   | Inlier   |

solute carrier family 13 (sodium-dependent citrate transporter), member 5

solute carrier family 13 (sodium-dependent citrate transporter), member 5

solute carrier family 13 (sodium-dependent citrate transporter), member 5

solute carrier family 13 (sodium-dependent citrate transporter), member 5

solute carrier family 13 (sodium-dependent citrate transporter), member 5

Identification of Survival Genes in Human Glioblastoma Cells Using siRNA Screening

Nikhil G Thaker, Fang Zhang, Peter R. McDonald, Tong Ying Shun, Michael D Lewen, Ian F. Pollack, and John S. Lazo

Molecular Pharmacology

|                              |               |         |                                                                           |           |        |
|------------------------------|---------------|---------|---------------------------------------------------------------------------|-----------|--------|
| siRNA-Temozolomide Run2-DMSO | NM_1775<br>50 | SLC13A5 | solute carrier family 13 (sodium-dependent citrate transporter), member 5 | 0.156642  | Inlier |
| siRNA-Vinblastine Run2-DMSO  | NM_1775<br>50 | SLC13A5 | solute carrier family 13 (sodium-dependent citrate transporter), member 5 | 0.77937   | Inlier |
| siRNA-Vinblastine Run1-DMSO  | NM_1775<br>50 | SLC13A5 | solute carrier family 13 (sodium-dependent citrate transporter), member 5 | 1.211836  | Inlier |
| siRNA-Temozolomide Run1-DMSO | NM_0158<br>65 | SLC14A1 | solute carrier family 14 (urea transporter), member 1 (Kidd blood group)  | -3.373928 | Inlier |
| siRNA-Temozolomide Run3-DMSO | NM_0158<br>65 | SLC14A1 | solute carrier family 14 (urea transporter), member 1 (Kidd blood group)  | -2.740023 | Inlier |

Identification of Survival Genes in Human Glioblastoma Cells Using siRNA Screening

Nikhil G Thaker, Fang Zhang, Peter R. McDonald, Tong Ying Shun, Michael D Lewen, Ian F. Pollack, and John S. Lazo

Molecular Pharmacology

|                              |           |         |                                                                          |           |        |
|------------------------------|-----------|---------|--------------------------------------------------------------------------|-----------|--------|
| siRNA-Temozolomide Run2-DMSO | NM_015865 | SLC14A1 | solute carrier family 14 (urea transporter), member 1 (Kidd blood group) | -1.808308 | Inlier |
| siRNA Disorazole DMSO Run1   | NM_015865 | SLC14A1 | solute carrier family 14 (urea transporter), member 1 (Kidd blood group) | -0.050349 | Inlier |
| siRNA-Vinblastine Run2-DMSO  | NM_015865 | SLC14A1 | solute carrier family 14 (urea transporter), member 1 (Kidd blood group) | 0.050349  | Inlier |
| siRNA Disorazole DMSO Run3   | NM_015865 | SLC14A1 | solute carrier family 14 (urea transporter), member 1 (Kidd blood group) | 0.170804  | Inlier |
| siRNA-Vinblastine Run1-DMSO  | NM_015865 | SLC14A1 | solute carrier family 14 (urea transporter), member 1 (Kidd blood group) | 0.534657  | Inlier |

Identification of Survival Genes in Human Glioblastoma Cells Using siRNA Screening  
 Nikhil G Thaker, Fang Zhang, Peter R. McDonald, Tong Ying Shun, Michael D Lewen, Ian F. Pollack, and John S. Lazo  
 Molecular Pharmacology

|                              |               |         |                                                                          |           |        |
|------------------------------|---------------|---------|--------------------------------------------------------------------------|-----------|--------|
| siRNA Disorazole DMSO Run2   | NM_0158<br>65 | SLC14A1 | solute carrier family 14 (urea transporter), member 1 (Kidd blood group) | 0.814343  | Inlier |
| siRNA-Temozolomide Run3-DMSO | NM_0071<br>63 | SLC14A2 | solute carrier family 14 (urea transporter), member 2                    | -1.248524 | Inlier |
| siRNA-Temozolomide Run1-DMSO | NM_0071<br>63 | SLC14A2 | solute carrier family 14 (urea transporter), member 2                    | -0.700407 | Inlier |
| siRNA Disorazole DMSO Run2   | NM_0071<br>63 | SLC14A2 | solute carrier family 14 (urea transporter), member 2                    | -0.066229 | Inlier |
| siRNA Disorazole DMSO Run3   | NM_0071<br>63 | SLC14A2 | solute carrier family 14 (urea transporter), member 2                    | -0.025979 | Inlier |
| siRNA-Temozolomide Run2-DMSO | NM_0071<br>63 | SLC14A2 | solute carrier family 14 (urea transporter), member 2                    | 0.025979  | Inlier |
| siRNA Disorazole DMSO Run1   | NM_0071<br>63 | SLC14A2 | solute carrier family 14 (urea transporter), member 2                    | 0.648593  | Inlier |



Identification of Survival Genes in Human Glioblastoma Cells Using siRNA Screening

Nikhil G Thaker, Fang Zhang, Peter R. McDonald, Tong Ying Shun, Michael D Lewen, Ian F. Pollack, and John S. Lazo

Molecular Pharmacology

|                              |           |         |                                                               |           |        |
|------------------------------|-----------|---------|---------------------------------------------------------------|-----------|--------|
| siRNA-Vinblastine Run2-DMSO  | NM_007163 | SLC14A2 | 2                                                             | 0.824927  | Inlier |
|                              |           |         | solute carrier family 14 (urea transporter), member 2         |           |        |
| siRNA-Vinblastine Run1-DMSO  | NM_007163 | SLC14A2 | 2                                                             | 1.262903  | Inlier |
|                              |           |         | solute carrier family 14 (urea transporter), member 2         |           |        |
| siRNA-Temozolomide Run1-DMSO | NM_005073 | SLC15A1 | 1                                                             | -2.068066 | Inlier |
|                              |           |         | solute carrier family 15 (oligopeptide transporter), member 1 |           |        |
| siRNA-Temozolomide Run3-DMSO | NM_005073 | SLC15A1 | 1                                                             | -1.662153 | Inlier |
|                              |           |         | solute carrier family 15 (oligopeptide transporter), member 1 |           |        |
| siRNA-Temozolomide Run2-DMSO | NM_005073 | SLC15A1 | 1                                                             | -0.772061 | Inlier |
|                              |           |         | solute carrier family 15 (oligopeptide transporter), member 1 |           |        |
| siRNA Disorazole DMSO Run1   | NM_005073 | SLC15A1 | 1                                                             | -0.061675 | Inlier |
|                              |           |         | solute carrier family 15 (oligopeptide transporter), member 1 |           |        |

Identification of Survival Genes in Human Glioblastoma Cells Using siRNA Screening

Nikhil G Thaker, Fang Zhang, Peter R. McDonald, Tong Ying Shun, Michael D Lewen, Ian F. Pollack, and John S. Lazo

Molecular Pharmacology

|                              |               |         |                                                                          |           |        |
|------------------------------|---------------|---------|--------------------------------------------------------------------------|-----------|--------|
| siRNA-Vinblastine Run2-DMSO  | NM_0050<br>73 | SLC15A1 | solute carrier family 15 (oligopeptide transporter), member 1            | 0.061674  | Inlier |
| siRNA Disorazole DMSO Run2   | NM_0050<br>73 | SLC15A1 | solute carrier family 15 (oligopeptide transporter), member 1            | 0.231382  | Inlier |
| siRNA-Vinblastine Run1-DMSO  | NM_0050<br>73 | SLC15A1 | solute carrier family 15 (oligopeptide transporter), member 1            | 0.576939  | Inlier |
| siRNA Disorazole DMSO Run3   | NM_0050<br>73 | SLC15A1 | solute carrier family 15 (H <sup>+</sup> /peptide transporter), member 1 | 1.011759  | Inlier |
| siRNA-Temozolomide Run3-DMSO | NM_0210<br>82 | SLC15A2 | solute carrier family 15 (H <sup>+</sup> /peptide transporter), member 2 | -0.716602 | Inlier |
| siRNA-Temozolomide Run2-DMSO | NM_0210<br>82 | SLC15A2 | solute carrier family 15 (H <sup>+</sup> /peptide transporter), member 2 | -0.632398 | Inlier |

Identification of Survival Genes in Human Glioblastoma Cells Using siRNA Screening

Nikhil G Thaker, Fang Zhang, Peter R. McDonald, Tong Ying Shun, Michael D Lewen, Ian F. Pollack, and John S. Lazo

Molecular Pharmacology

| siRNA                        | Gene    | Gene ID   | Gene Name                                                   | Log2FC    | Outlier |
|------------------------------|---------|-----------|-------------------------------------------------------------|-----------|---------|
| siRNA-Temozolomide Run1-DMSO | SLC15A2 | NM_021082 | solute carrier family 15 (H+/peptide transporter), member 2 | -0.564198 | Inlier  |
| siRNA Disorazole DMSO Run2   | SLC15A2 | NM_021082 | solute carrier family 15 (H+/peptide transporter), member 2 | -0.111089 | Inlier  |
| siRNA Disorazole DMSO Run3   | SLC15A2 | NM_021082 | solute carrier family 15 (H+/peptide transporter), member 2 | 0.111089  | Inlier  |
| siRNA Disorazole DMSO Run1   | SLC15A2 | NM_021082 | solute carrier family 15 (H+/peptide transporter), member 2 | 0.995793  | Inlier  |
| siRNA-Vinblastine Run2-DMSO  | SLC15A2 | NM_021082 | solute carrier family 15 (H+/peptide transporter), member 2 | 1.654493  | Inlier  |
| siRNA-Vinblastine Run1-DMSO  | SLC15A2 | NM_021082 | solute carrier family 15 (H+/peptide transporter), member 2 | 2.23456   | Inlier  |

Identification of Survival Genes in Human Glioblastoma Cells Using siRNA Screening  
 Nikhil G Thaker, Fang Zhang, Peter R. McDonald, Tong Ying Shun, Michael D Lewen, Ian F. Pollack, and John S. Lazo  
 Molecular Pharmacology

|                              |           |         |                                                                       |           |        |
|------------------------------|-----------|---------|-----------------------------------------------------------------------|-----------|--------|
| siRNA-Temozolomide Run3-DMSO | NM_003051 | SLC16A1 | solute carrier family 16 (monocarboxylic acid transporters), member 1 | -0.870447 | Inlier |
| siRNA-Temozolomide Run2-DMSO | NM_003051 | SLC16A1 | solute carrier family 16 (monocarboxylic acid transporters), member 1 | -0.625788 | Inlier |
| siRNA-Temozolomide Run1-DMSO | NM_003051 | SLC16A1 | solute carrier family 16 (monocarboxylic acid transporters), member 1 | -0.320726 | Inlier |
| siRNA Disorazole DMSO Run3   | NM_003051 | SLC16A1 | solute carrier family 16 (monocarboxylic acid transporters), member 1 | -0.168224 | Inlier |
| siRNA Disorazole DMSO Run2   | NM_003051 | SLC16A1 | solute carrier family 16 (monocarboxylic acid transporters), member 1 | 0.168224  | Inlier |

Identification of Survival Genes in Human Glioblastoma Cells Using siRNA Screening  
 Nikhil G Thaker, Fang Zhang, Peter R. McDonald, Tong Ying Shun, Michael D Lewen, Ian F. Pollack, and John S. Lazo  
 Molecular Pharmacology

|                              |               |          |                                                                        |           |        |
|------------------------------|---------------|----------|------------------------------------------------------------------------|-----------|--------|
| siRNA Disorazole DMSO Run1   | NM_0030<br>51 | SLC16A1  | solute carrier family 16 (monocarboxylic acid transporters), member 1  | 0.723212  | Inlier |
| siRNA-Vinblastine Run1-DMSO  | NM_0030<br>51 | SLC16A1  | solute carrier family 16 (monocarboxylic acid transporters), member 1  | 2.074714  | Inlier |
| siRNA-Vinblastine Run2-DMSO  | NM_0030<br>51 | SLC16A1  | solute carrier family 16 (monocarboxylic acid transporters), member 1  | 2.434165  | Inlier |
| siRNA-Temozolomide Run3-DMSO | NM_0185<br>93 | SLC16A10 | solute carrier family 16 (monocarboxylic acid transporters), member 10 | -0.938234 | Inlier |
| siRNA Disorazole DMSO Run3   | NM_0185<br>93 | SLC16A10 | solute carrier family 16 (monocarboxylic acid transporters), member 10 | -0.564259 | Inlier |

Identification of Survival Genes in Human Glioblastoma Cells Using siRNA Screening  
 Nikhil G Thaker, Fang Zhang, Peter R. McDonald, Tong Ying Shun, Michael D Lewen, Ian F. Pollack, and John S. Lazo  
 Molecular Pharmacology

|                              |           |          |    |                                                                        |           |        |
|------------------------------|-----------|----------|----|------------------------------------------------------------------------|-----------|--------|
| siRNA-Temozolomide Run2-DMSO | NM_018593 | SLC16A10 | 10 | solute carrier family 16 (monocarboxylic acid transporters), member 10 | -0.404403 | Inlier |
| siRNA-Temozolomide Run1-DMSO | NM_018593 | SLC16A10 | 10 | solute carrier family 16 (monocarboxylic acid transporters), member 10 | -0.017878 | Inlier |
| siRNA Disorazole DMSO Run2   | NM_018593 | SLC16A10 | 10 | solute carrier family 16 (monocarboxylic acid transporters), member 10 | 0.017878  | Inlier |
| siRNA Disorazole DMSO Run1   | NM_018593 | SLC16A10 | 10 | solute carrier family 16 (monocarboxylic acid transporters), member 10 | 0.784741  | Inlier |
| siRNA-Vinblastine Run2-DMSO  | NM_018593 | SLC16A10 | 10 | solute carrier family 16 (monocarboxylic acid transporters), member 10 | 1.349271  | Inlier |

Identification of Survival Genes in Human Glioblastoma Cells Using siRNA Screening

Nikhil G Thaker, Fang Zhang, Peter R. McDonald, Tong Ying Shun, Michael D Lewen, Ian F. Pollack, and John S. Lazo

Molecular Pharmacology

| siRNA                        | Gene      | Gene ID  | Gene Name | Gene Description                                                       | Score     | Outlier |
|------------------------------|-----------|----------|-----------|------------------------------------------------------------------------|-----------|---------|
| siRNA-Vinblastine Run1-DMSO  | NM_018593 | SLC16A10 | 10        | solute carrier family 16 (monocarboxylic acid transporters), member 10 | 1.932068  | Inlier  |
| siRNA-Temozolomide Run1-DMSO | NM_153357 | SLC16A11 | 11        | solute carrier family 16 (monocarboxylic acid transporters), member 11 | -1.295004 | Inlier  |
| siRNA-Temozolomide Run3-DMSO | NM_153357 | SLC16A11 | 11        | solute carrier family 16 (monocarboxylic acid transporters), member 11 | -0.802717 | Inlier  |
| siRNA-Temozolomide Run2-DMSO | NM_153357 | SLC16A11 | 11        | solute carrier family 16 (monocarboxylic acid transporters), member 11 | -0.546283 | Inlier  |
| siRNA Disorazole DMSO Run1   | NM_153357 | SLC16A11 | 11        | solute carrier family 16 (monocarboxylic acid transporters), member 11 | -0.303706 | Inlier  |

Identification of Survival Genes in Human Glioblastoma Cells Using siRNA Screening  
 Nikhil G Thaker, Fang Zhang, Peter R. McDonald, Tong Ying Shun, Michael D Lewen, Ian F. Pollack, and John S. Lazo  
 Molecular Pharmacology

|                              |               |          |          |           |        |                                                                       |
|------------------------------|---------------|----------|----------|-----------|--------|-----------------------------------------------------------------------|
| siRNA Disorazole DMSO Run3   | NM_1533<br>57 | SLC16A11 | 11       | 0.303706  | Inlier | solute carrier family 16 (monocarboxylic acid transporters), member   |
| siRNA-Vinblastine Run1-DMSO  | NM_1533<br>57 | SLC16A11 | 11       | 0.540467  | Inlier | solute carrier family 16 (monocarboxylic acid transporters), member   |
| siRNA-Vinblastine Run2-DMSO  | NM_1533<br>57 | SLC16A11 | 11       | 0.957736  | Inlier | solute carrier family 16 (monocarboxylic acid transporters), member   |
| siRNA Disorazole DMSO Run2   | NM_1533<br>57 | SLC16A11 | 11       | 0.985707  | Inlier | solute carrier family 16 (monocarboxylic acid transporters), member   |
| siRNA-Temozolomide Run3-DMSO | NM_0065<br>17 | SLC16A2  | member 2 | -1.740259 | Inlier | solute carrier family 16 (monocarboxylic acid transporters), member 2 |



Identification of Survival Genes in Human Glioblastoma Cells Using siRNA Screening  
 Nikhil G Thaker, Fang Zhang, Peter R. McDonald, Tong Ying Shun, Michael D Lewen, Ian F. Pollack, and John S. Lazo  
 Molecular Pharmacology

|                              |               |         |                                                                       |           |        |
|------------------------------|---------------|---------|-----------------------------------------------------------------------|-----------|--------|
| siRNA-Temozolomide Run2-DMSO | NM_0065<br>17 | SLC16A2 | solute carrier family 16 (monocarboxylic acid transporters), member 2 | -1.31877  | Inlier |
| siRNA-Temozolomide Run1-DMSO | NM_0065<br>17 | SLC16A2 | solute carrier family 16 (monocarboxylic acid transporters), member 2 | -0.602819 | Inlier |
| siRNA Disorazole DMSO Run3   | NM_0065<br>17 | SLC16A2 | solute carrier family 16 (monocarboxylic acid transporters), member 2 | -0.07519  | Inlier |
| siRNA Disorazole DMSO Run2   | NM_0065<br>17 | SLC16A2 | solute carrier family 16 (monocarboxylic acid transporters), member 2 | 0.075189  | Inlier |
| siRNA Disorazole DMSO Run1   | NM_0065<br>17 | SLC16A2 | solute carrier family 16 (monocarboxylic acid transporters), member 2 | 0.078356  | Inlier |

Identification of Survival Genes in Human Glioblastoma Cells Using siRNA Screening  
 Nikhil G Thaker, Fang Zhang, Peter R. McDonald, Tong Ying Shun, Michael D Lewen, Ian F. Pollack, and John S. Lazo  
 Molecular Pharmacology

|                              |           |         |                                                                       |           |        |
|------------------------------|-----------|---------|-----------------------------------------------------------------------|-----------|--------|
| siRNA-Vinblastine Run1-DMSO  | NM_006517 | SLC16A2 | solute carrier family 16 (monocarboxylic acid transporters), member 2 | 0.746181  | Inlier |
| siRNA-Vinblastine Run2-DMSO  | NM_006517 | SLC16A2 | solute carrier family 16 (monocarboxylic acid transporters), member 2 | 1.102228  | Inlier |
| siRNA-Temozolomide Run3-DMSO | NM_004207 | SLC16A3 | solute carrier family 16 (monocarboxylic acid transporters), member 3 | -0.797989 | Inlier |
| siRNA-Temozolomide Run2-DMSO | NM_004207 | SLC16A3 | solute carrier family 16 (monocarboxylic acid transporters), member 3 | -0.551011 | Inlier |
| siRNA Disorazole DMSO Run2   | NM_004207 | SLC16A3 | solute carrier family 16 (monocarboxylic acid transporters), member 3 | -0.320217 | Inlier |

Identification of Survival Genes in Human Glioblastoma Cells Using siRNA Screening

Nikhil G Thaker, Fang Zhang, Peter R. McDonald, Tong Ying Shun, Michael D Lewen, Ian F. Pollack, and John S. Lazo

Molecular Pharmacology

|                              |           |         |                                                                       |           |        |
|------------------------------|-----------|---------|-----------------------------------------------------------------------|-----------|--------|
| siRNA-Temozolomide Run1-DMSO | NM_004207 | SLC16A3 | solute carrier family 16 (monocarboxylic acid transporters), member 3 | -0.282385 | Inlier |
| siRNA Disorazole DMSO Run1   | NM_004207 | SLC16A3 | solute carrier family 16 (monocarboxylic acid transporters), member 3 | 0.282385  | Inlier |
| siRNA Disorazole DMSO Run3   | NM_004207 | SLC16A3 | solute carrier family 16 (monocarboxylic acid transporters), member 3 | 0.847016  | Inlier |
| siRNA-Vinblastine Run1-DMSO  | NM_004207 | SLC16A3 | solute carrier family 16 (monocarboxylic acid transporters), member 3 | 0.9067    | Inlier |
| siRNA-Vinblastine Run2-DMSO  | NM_004207 | SLC16A3 | solute carrier family 16 (monocarboxylic acid transporters), member 3 | 1.415257  | Inlier |

Identification of Survival Genes in Human Glioblastoma Cells Using siRNA Screening  
 Nikhil G Thaker, Fang Zhang, Peter R. McDonald, Tong Ying Shun, Michael D Lewen, Ian F. Pollack, and John S. Lazo  
 Molecular Pharmacology

|                              |           |         |                                                                       |           |         |
|------------------------------|-----------|---------|-----------------------------------------------------------------------|-----------|---------|
| siRNA-Temozolomide Run3-DMSO | NM_004696 | SLC16A4 | solute carrier family 16 (monocarboxylic acid transporters), member 4 | -3.742473 | Outlier |
| siRNA-Temozolomide Run2-DMSO | NM_004696 | SLC16A4 | solute carrier family 16 (monocarboxylic acid transporters), member 4 | -2.275149 | Inlier  |
| siRNA Disorazole DMSO Run1   | NM_004696 | SLC16A4 | solute carrier family 16 (monocarboxylic acid transporters), member 4 | -1.187575 | Inlier  |
| siRNA-Vinblastine Run1-DMSO  | NM_004696 | SLC16A4 | solute carrier family 16 (monocarboxylic acid transporters), member 4 | -0.100064 | Inlier  |
| siRNA Disorazole DMSO Run2   | NM_004696 | SLC16A4 | solute carrier family 16 (monocarboxylic acid transporters), member 4 | 0.100064  | Inlier  |

Identification of Survival Genes in Human Glioblastoma Cells Using siRNA Screening

Nikhil G Thaker, Fang Zhang, Peter R. McDonald, Tong Ying Shun, Michael D Lewen, Ian F. Pollack, and John S. Lazo

Molecular Pharmacology

|                              |               |         |                                                                       |           |        |
|------------------------------|---------------|---------|-----------------------------------------------------------------------|-----------|--------|
| siRNA-Temozolomide Run1-DMSO | NM_0046<br>96 | SLC16A4 | solute carrier family 16 (monocarboxylic acid transporters), member 4 | 0.197001  | Inlier |
| siRNA Disorazole DMSO Run3   | NM_0046<br>96 | SLC16A4 | solute carrier family 16 (monocarboxylic acid transporters), member 4 | 0.402914  | Inlier |
| siRNA-Vinblastine Run2-DMSO  | NM_0046<br>96 | SLC16A4 | solute carrier family 16 (monocarboxylic acid transporters), member 4 | 0.946086  | Inlier |
| siRNA-Temozolomide Run3-DMSO | NM_0046<br>95 | SLC16A5 | solute carrier family 16 (monocarboxylic acid transporters), member 5 | -0.901546 | Inlier |
| siRNA Disorazole DMSO Run2   | NM_0046<br>95 | SLC16A5 | solute carrier family 16 (monocarboxylic acid transporters), member 5 | -0.447454 | Inlier |

Identification of Survival Genes in Human Glioblastoma Cells Using siRNA Screening  
 Nikhil G Thaker, Fang Zhang, Peter R. McDonald, Tong Ying Shun, Michael D Lewen, Ian F. Pollack, and John S. Lazo  
 Molecular Pharmacology

|                              |           |         |                                                                       |           |        |
|------------------------------|-----------|---------|-----------------------------------------------------------------------|-----------|--------|
| siRNA-Temozolomide Run1-DMSO | NM_004695 | SLC16A5 | solute carrier family 16 (monocarboxylic acid transporters), member 5 | -0.057736 | Inlier |
| siRNA-Temozolomide Run2-DMSO | NM_004695 | SLC16A5 | solute carrier family 16 (monocarboxylic acid transporters), member 5 | -0.038194 | Inlier |
| siRNA Disorazole DMSO Run1   | NM_004695 | SLC16A5 | solute carrier family 16 (monocarboxylic acid transporters), member 5 | 0.038195  | Inlier |
| siRNA Disorazole DMSO Run3   | NM_004695 | SLC16A5 | solute carrier family 16 (monocarboxylic acid transporters), member 5 | 1.080918  | Inlier |
| siRNA-Vinblastine Run1-DMSO  | NM_004695 | SLC16A5 | solute carrier family 16 (monocarboxylic acid transporters), member 5 | 1.144924  | Inlier |

Identification of Survival Genes in Human Glioblastoma Cells Using siRNA Screening

Nikhil G Thaker, Fang Zhang, Peter R. McDonald, Tong Ying Shun, Michael D Lewen, Ian F. Pollack, and John S. Lazo

Molecular Pharmacology

|                              |           |         |                                                                       |           |        |
|------------------------------|-----------|---------|-----------------------------------------------------------------------|-----------|--------|
| siRNA-Vinblastine Run2-DMSO  | NM_004695 | SLC16A5 | solute carrier family 16 (monocarboxylic acid transporters), member 5 | 1.5601    | Inlier |
| siRNA-Temozolomide Run3-DMSO | NM_004694 | SLC16A6 | solute carrier family 16 (monocarboxylic acid transporters), member 6 | -1.672028 | Inlier |
| siRNA-Temozolomide Run2-DMSO | NM_004694 | SLC16A6 | solute carrier family 16 (monocarboxylic acid transporters), member 6 | -0.863826 | Inlier |
| siRNA Disorazole DMSO Run2   | NM_004694 | SLC16A6 | solute carrier family 16 (monocarboxylic acid transporters), member 6 | -0.485174 | Inlier |
| siRNA Disorazole DMSO Run3   | NM_004694 | SLC16A6 | solute carrier family 16 (monocarboxylic acid transporters), member 6 | -0.019051 | Inlier |

Identification of Survival Genes in Human Glioblastoma Cells Using siRNA Screening  
 Nikhil G Thaker, Fang Zhang, Peter R. McDonald, Tong Ying Shun, Michael D Lewen, Ian F. Pollack, and John S. Lazo  
 Molecular Pharmacology

|                              |               |         |                                                                       |          |        |
|------------------------------|---------------|---------|-----------------------------------------------------------------------|----------|--------|
| siRNA Disorazole DMSO Run1   | NM_0046<br>94 | SLC16A6 | solute carrier family 16 (monocarboxylic acid transporters), member 6 | 0.019051 | Inlier |
| siRNA-Temozolomide Run1-DMSO | NM_0046<br>94 | SLC16A6 | solute carrier family 16 (monocarboxylic acid transporters), member 6 | 0.140639 | Inlier |
| siRNA-Vinblastine Run2-DMSO  | NM_0046<br>94 | SLC16A6 | solute carrier family 16 (monocarboxylic acid transporters), member 6 | 1.073849 | Inlier |
| siRNA-Vinblastine Run1-DMSO  | NM_0046<br>94 | SLC16A6 | solute carrier family 16 (monocarboxylic acid transporters), member 6 | 1.096973 | Inlier |
| siRNA-Temozolomide Run3-DMSO | NM_0047<br>31 | SLC16A7 | solute carrier family 16 (monocarboxylic acid transporters), member 7 | -1.08984 | Inlier |



Identification of Survival Genes in Human Glioblastoma Cells Using siRNA Screening

Nikhil G Thaker, Fang Zhang, Peter R. McDonald, Tong Ying Shun, Michael D Lewen, Ian F. Pollack, and John S. Lazo

Molecular Pharmacology

|                              |               |         |                                                                       |           |        |
|------------------------------|---------------|---------|-----------------------------------------------------------------------|-----------|--------|
| siRNA-Temozolomide Run1-DMSO | NM_0047<br>31 | SLC16A7 | solute carrier family 16 (monocarboxylic acid transporters), member 7 | -0.948572 | Inlier |
| siRNA Disorazole DMSO Run1   | NM_0047<br>31 | SLC16A7 | solute carrier family 16 (monocarboxylic acid transporters), member 7 | -0.607469 | Inlier |
| siRNA-Temozolomide Run2-DMSO | NM_0047<br>31 | SLC16A7 | solute carrier family 16 (monocarboxylic acid transporters), member 7 | -0.093363 | Inlier |
| siRNA-Vinblastine Run2-DMSO  | NM_0047<br>31 | SLC16A7 | solute carrier family 16 (monocarboxylic acid transporters), member 7 | 0.093362  | Inlier |
| siRNA-Vinblastine Run1-DMSO  | NM_0047<br>31 | SLC16A7 | solute carrier family 16 (monocarboxylic acid transporters), member 7 | 0.583885  | Inlier |

Identification of Survival Genes in Human Glioblastoma Cells Using siRNA Screening  
 Nikhil G Thaker, Fang Zhang, Peter R. McDonald, Tong Ying Shun, Michael D Lewen, Ian F. Pollack, and John S. Lazo  
 Molecular Pharmacology

|                              |               |         |                                                                       |           |        |
|------------------------------|---------------|---------|-----------------------------------------------------------------------|-----------|--------|
| siRNA Disorazole DMSO Run3   | NM_0047<br>31 | SLC16A7 | solute carrier family 16 (monocarboxylic acid transporters), member 7 | 0.741531  | Inlier |
| siRNA Disorazole DMSO Run2   | NM_0047<br>31 | SLC16A7 | solute carrier family 16 (monocarboxylic acid transporters), member 7 | 0.78268   | Inlier |
| siRNA-Temozolomide Run3-DMSO | NM_0133<br>56 | SLC16A8 | solute carrier 16 (monocarboxylic acid transporters), member 8        | -2.488963 | Inlier |
| siRNA-Temozolomide Run1-DMSO | NM_0133<br>56 | SLC16A8 | solute carrier 16 (monocarboxylic acid transporters), member 8        | -0.638473 | Inlier |
| siRNA-Temozolomide Run2-DMSO | NM_0133<br>56 | SLC16A8 | solute carrier 16 (monocarboxylic acid transporters), member 8        | -0.536842 | Inlier |
| siRNA Disorazole DMSO Run2   | NM_0133<br>56 | SLC16A8 | solute carrier 16 (monocarboxylic acid transporters), member 8        | -0.194013 | Inlier |

Identification of Survival Genes in Human Glioblastoma Cells Using siRNA Screening

Nikhil G Thaker, Fang Zhang, Peter R. McDonald, Tong Ying Shun, Michael D Lewen, Ian F. Pollack, and John S. Lazo

Molecular Pharmacology

|                              |               |         |                                                                |           |        |
|------------------------------|---------------|---------|----------------------------------------------------------------|-----------|--------|
| siRNA Disorazole DMSO Run1   | NM_0133<br>56 | SLC16A8 | solute carrier 16 (monocarboxylic acid transporters), member 8 | 0.194014  | Inlier |
| siRNA-Vinblastine Run1-DMSO  | NM_0133<br>56 | SLC16A8 | solute carrier 16 (monocarboxylic acid transporters), member 8 | 0.710527  | Inlier |
| siRNA-Vinblastine Run2-DMSO  | NM_0133<br>56 | SLC16A8 | solute carrier 16 (monocarboxylic acid transporters), member 8 | 1.160182  | Inlier |
| siRNA Disorazole DMSO Run3   | NM_0133<br>56 | SLC16A8 | solute carrier 16 (monocarboxylic acid transporters), member 8 | 1.554371  | Inlier |
| siRNA-Temozolomide Run3-DMSO | NM_0050<br>74 | SLC17A1 | solute carrier family 17 (sodium phosphate), member 1          | -1.481305 | Inlier |
| siRNA Disorazole DMSO Run3   | NM_0050<br>74 | SLC17A1 | solute carrier family 17 (sodium phosphate), member 1          | -0.772083 | Inlier |

Identification of Survival Genes in Human Glioblastoma Cells Using siRNA Screening

Nikhil G Thaker, Fang Zhang, Peter R. McDonald, Tong Ying Shun, Michael D Lewen, Ian F. Pollack, and John S.

Lazo

Molecular Pharmacology

|                              |           |         |   |           |        |                                                       |
|------------------------------|-----------|---------|---|-----------|--------|-------------------------------------------------------|
| siRNA-Temozolomide Run2-DMSO | NM_005074 | SLC17A1 | 1 | -0.548656 | Inlier | solute carrier family 17 (sodium phosphate), member 1 |
| siRNA-Temozolomide Run1-DMSO | NM_005074 | SLC17A1 | 1 | -0.046457 | Inlier | solute carrier family 17 (sodium phosphate), member 1 |
| siRNA Disorazole DMSO Run1   | NM_005074 | SLC17A1 | 1 | 0.046457  | Inlier | solute carrier family 17 (sodium phosphate), member 1 |
| siRNA-Vinblastine Run2-DMSO  | NM_005074 | SLC17A1 | 1 | 0.576917  | Inlier | solute carrier family 17 (sodium phosphate), member 1 |
| siRNA Disorazole DMSO Run2   | NM_005074 | SLC17A1 | 1 | 1.070655  | Inlier | solute carrier family 17 (sodium phosphate), member 1 |
| siRNA-Vinblastine Run1-DMSO  | NM_005074 | SLC17A1 | 1 | 1.165498  | Inlier | solute carrier family 17 (sodium phosphate), member 1 |
| siRNA-Temozolomide Run3-DMSO | NM_005835 | SLC17A2 | 2 | -1.307169 | Inlier | solute carrier family 17 (sodium phosphate), member 2 |

Identification of Survival Genes in Human Glioblastoma Cells Using siRNA Screening

Nikhil G Thaker, Fang Zhang, Peter R. McDonald, Tong Ying Shun, Michael D Lewen, Ian F. Pollack, and John S. Lazo

Molecular Pharmacology

| siRNA Treatment              | Gene    | Gene ID | Gene Name | Gene Description                                      | Log Fold Change | Outlier Status |
|------------------------------|---------|---------|-----------|-------------------------------------------------------|-----------------|----------------|
| siRNA-Temozolomide Run2-DMSO | NM_0058 | 35      | SLC17A2   | solute carrier family 17 (sodium phosphate), member 2 | -0.632376       | Inlier         |
| siRNA Disorazole DMSO Run3   | NM_0058 | 35      | SLC17A2   | solute carrier family 17 (sodium phosphate), member 2 | -0.621899       | Inlier         |
| siRNA Disorazole DMSO Run2   | NM_0058 | 35      | SLC17A2   | solute carrier family 17 (sodium phosphate), member 2 | -0.172948       | Inlier         |
| siRNA-Temozolomide Run1-DMSO | NM_0058 | 35      | SLC17A2   | solute carrier family 17 (sodium phosphate), member 2 | 0.172947        | Inlier         |
| siRNA-Vinblastine Run1-DMSO  | NM_0058 | 35      | SLC17A2   | solute carrier family 17 (sodium phosphate), member 2 | 0.716624        | Inlier         |
| siRNA Disorazole DMSO Run1   | NM_0058 | 35      | SLC17A2   | solute carrier family 17 (sodium phosphate), member 2 | 0.766457        | Inlier         |
| siRNA-Vinblastine Run2-DMSO  | NM_0058 | 35      | SLC17A2   | solute carrier family 17 (sodium phosphate), member 2 | 1.316988        | Inlier         |

Identification of Survival Genes in Human Glioblastoma Cells Using siRNA Screening  
 Nikhil G Thaker, Fang Zhang, Peter R. McDonald, Tong Ying Shun, Michael D Lewen, Ian F. Pollack, and John S. Lazo

Molecular Pharmacology

| siRNA                        | Gene      | Gene ID | Gene Name                                             | Log Fold Change | Category |
|------------------------------|-----------|---------|-------------------------------------------------------|-----------------|----------|
| siRNA-Temozolomide Run3-DMSO | NM_006632 | SLC17A3 | solute carrier family 17 (sodium phosphate), member 3 | -0.814192       | Inlier   |
| siRNA Disorazole DMSO Run2   | NM_006632 | SLC17A3 | solute carrier family 17 (sodium phosphate), member 3 | -0.534808       | Inlier   |
| siRNA-Temozolomide Run1-DMSO | NM_006632 | SLC17A3 | solute carrier family 17 (sodium phosphate), member 3 | -0.430658       | Inlier   |
| siRNA-Temozolomide Run2-DMSO | NM_006632 | SLC17A3 | solute carrier family 17 (sodium phosphate), member 3 | -0.31261        | Inlier   |
| siRNA Disorazole DMSO Run1   | NM_006632 | SLC17A3 | solute carrier family 17 (sodium phosphate), member 3 | 0.31261         | Inlier   |
| siRNA-Vinblastine Run1-DMSO  | NM_006632 | SLC17A3 | solute carrier family 17 (sodium phosphate), member 3 | 0.872571        | Inlier   |
| siRNA Disorazole DMSO Run3   | NM_006632 | SLC17A3 | solute carrier family 17 (sodium phosphate), member 3 | 1.126758        | Inlier   |

Identification of Survival Genes in Human Glioblastoma Cells Using siRNA Screening  
 Nikhil G Thaker, Fang Zhang, Peter R. McDonald, Tong Ying Shun, Michael D Lewen, Ian F. Pollack, and John S. Lazo

Molecular Pharmacology

| siRNA Treatment              | Gene ID   | Gene Name | Family                                              | Member | Value     | Outlier |
|------------------------------|-----------|-----------|-----------------------------------------------------|--------|-----------|---------|
| siRNA-Vinblastine Run2-DMSO  | NM_006632 | SLC17A3   | solute carrier family 17 (sodium phosphate), member | 3      | 1.270758  | Inlier  |
| siRNA-Temozolomide Run3-DMSO | NM_005495 | SLC17A4   | solute carrier family 17 (sodium phosphate), member | 4      | -1.446185 | Inlier  |
| siRNA-Temozolomide Run2-DMSO | NM_005495 | SLC17A4   | solute carrier family 17 (sodium phosphate), member | 4      | -1.222108 | Inlier  |
| siRNA Disorazole DMSO Run3   | NM_005495 | SLC17A4   | solute carrier family 17 (sodium phosphate), member | 4      | -0.835013 | Inlier  |
| siRNA-Temozolomide Run1-DMSO | NM_005495 | SLC17A4   | solute carrier family 17 (sodium phosphate), member | 4      | -0.308697 | Inlier  |
| siRNA Disorazole DMSO Run1   | NM_005495 | SLC17A4   | solute carrier family 17 (sodium phosphate), member | 4      | 0.308697  | Inlier  |
| siRNA Disorazole DMSO Run2   | NM_005495 | SLC17A4   | solute carrier family 17 (sodium phosphate), member | 4      | 0.332794  | Inlier  |

Identification of Survival Genes in Human Glioblastoma Cells Using siRNA Screening

Nikhil G Thaker, Fang Zhang, Peter R. McDonald, Tong Ying Shun, Michael D Lewen, Ian F. Pollack, and John S. Lazo

Molecular Pharmacology

| siRNA Treatment              | Gene ID   | Gene Name | Family                                                       | Score     | Category |
|------------------------------|-----------|-----------|--------------------------------------------------------------|-----------|----------|
| siRNA-Vinblastine Run2-DMSO  | NM_005495 | SLC17A4   | solute carrier family 17 (sodium phosphate), member 4        | 0.530873  | Inlier   |
| siRNA-Vinblastine Run1-DMSO  | NM_005495 | SLC17A4   | solute carrier family 17 (sodium phosphate), member 4        | 0.818127  | Inlier   |
| siRNA-Temozolomide Run3-DMSO | NM_012434 | SLC17A5   | solute carrier family 17 (anion/sugar transporter), member 5 | -3.930262 | Outlier  |
| siRNA-Temozolomide Run1-DMSO | NM_012434 | SLC17A5   | solute carrier family 17 (anion/sugar transporter), member 5 | -1.313176 | Inlier   |
| siRNA-Temozolomide Run2-DMSO | NM_012434 | SLC17A5   | solute carrier family 17 (anion/sugar transporter), member 5 | -0.261804 | Inlier   |
| siRNA Disorazole DMSO Run2   | NM_012434 | SLC17A5   | solute carrier family 17 (anion/sugar transporter), member 5 | -0.026005 | Inlier   |



Identification of Survival Genes in Human Glioblastoma Cells Using siRNA Screening

Nikhil G Thaker, Fang Zhang, Peter R. McDonald, Tong Ying Shun, Michael D Lewen, Ian F. Pollack, and John S. Lazo

Molecular Pharmacology

|                              |               |         |                                                                                         |           |        |
|------------------------------|---------------|---------|-----------------------------------------------------------------------------------------|-----------|--------|
| siRNA Disorazole DMSO Run1   | NM_0124<br>34 | SLC17A5 | solute carrier family 17 (anion/sugar transporter), member 5                            | 0.026004  | Inlier |
| siRNA-Vinblastine Run2-DMSO  | NM_0124<br>34 | SLC17A5 | solute carrier family 17 (anion/sugar transporter), member 5                            | 0.478577  | Inlier |
| siRNA Disorazole DMSO Run3   | NM_0124<br>34 | SLC17A5 | solute carrier family 17 (anion/sugar transporter), member 5                            | 0.870423  | Inlier |
| siRNA-Vinblastine Run1-DMSO  | NM_0124<br>34 | SLC17A5 | solute carrier family 17 (anion/sugar transporter), member 5                            | 1.146323  | Inlier |
| siRNA-Temozolomide Run3-DMSO | NM_0203<br>46 | SLC17A6 | solute carrier family 17 (sodium-dependent inorganic phosphate cotransporter), member 6 | -3.179699 | Inlier |

Identification of Survival Genes in Human Glioblastoma Cells Using siRNA Screening  
 Nikhil G Thaker, Fang Zhang, Peter R. McDonald, Tong Ying Shun, Michael D Lewen, Ian F. Pollack, and John S. Lazo  
 Molecular Pharmacology

|                              |               |         |                                                                                         |           |        |
|------------------------------|---------------|---------|-----------------------------------------------------------------------------------------|-----------|--------|
| siRNA-Temozolomide Run1-DMSO | NM_0203<br>46 | SLC17A6 | solute carrier family 17 (sodium-dependent inorganic phosphate cotransporter), member 6 | -0.777737 | Inlier |
|------------------------------|---------------|---------|-----------------------------------------------------------------------------------------|-----------|--------|

|                              |               |         |                                                                                         |           |        |
|------------------------------|---------------|---------|-----------------------------------------------------------------------------------------|-----------|--------|
| siRNA-Temozolomide Run2-DMSO | NM_0203<br>46 | SLC17A6 | solute carrier family 17 (sodium-dependent inorganic phosphate cotransporter), member 6 | -0.571263 | Inlier |
|------------------------------|---------------|---------|-----------------------------------------------------------------------------------------|-----------|--------|

|                            |               |         |                                                                                         |           |        |
|----------------------------|---------------|---------|-----------------------------------------------------------------------------------------|-----------|--------|
| siRNA Disorazole DMSO Run3 | NM_0203<br>46 | SLC17A6 | solute carrier family 17 (sodium-dependent inorganic phosphate cotransporter), member 6 | -0.225127 | Inlier |
|----------------------------|---------------|---------|-----------------------------------------------------------------------------------------|-----------|--------|

|                            |               |         |                                                                                         |          |        |
|----------------------------|---------------|---------|-----------------------------------------------------------------------------------------|----------|--------|
| siRNA Disorazole DMSO Run2 | NM_0203<br>46 | SLC17A6 | solute carrier family 17 (sodium-dependent inorganic phosphate cotransporter), member 6 | 0.225127 | Inlier |
|----------------------------|---------------|---------|-----------------------------------------------------------------------------------------|----------|--------|

Identification of Survival Genes in Human Glioblastoma Cells Using siRNA Screening  
 Nikhil G Thaker, Fang Zhang, Peter R. McDonald, Tong Ying Shun, Michael D Lewen, Ian F. Pollack, and John S. Lazo  
 Molecular Pharmacology

|                              |               |         |                                                                                         |           |        |
|------------------------------|---------------|---------|-----------------------------------------------------------------------------------------|-----------|--------|
| siRNA Disorazole DMSO Run1   | NM_0203<br>46 | SLC17A6 | solute carrier family 17 (sodium-dependent inorganic phosphate cotransporter), member 6 | 0.266661  | Inlier |
| siRNA-Vinblastine Run2-DMSO  | NM_0203<br>46 | SLC17A6 | solute carrier family 17 (sodium-dependent inorganic phosphate cotransporter), member 6 | 0.796925  | Inlier |
| siRNA-Vinblastine Run1-DMSO  | NM_0203<br>46 | SLC17A6 | solute carrier family 17 (sodium-dependent inorganic phosphate cotransporter), member 6 | 1.807353  | Inlier |
| siRNA-Temozolomide Run3-DMSO | NM_0203<br>09 | SLC17A7 | solute carrier family 17 (sodium-dependent inorganic phosphate cotransporter), member 7 | -2.934281 | Inlier |

Identification of Survival Genes in Human Glioblastoma Cells Using siRNA Screening  
 Nikhil G Thaker, Fang Zhang, Peter R. McDonald, Tong Ying Shun, Michael D Lewen, Ian F. Pollack, and John S. Lazo  
 Molecular Pharmacology

|                              |               |         |                                                                                         |           |        |
|------------------------------|---------------|---------|-----------------------------------------------------------------------------------------|-----------|--------|
| siRNA Disorazole DMSO Run2   | NM_0203<br>09 | SLC17A7 | solute carrier family 17 (sodium-dependent inorganic phosphate cotransporter), member 7 | -1.890394 | Inlier |
| siRNA Disorazole DMSO Run3   | NM_0203<br>09 | SLC17A7 | solute carrier family 17 (sodium-dependent inorganic phosphate cotransporter), member 7 | -0.384751 | Inlier |
| siRNA-Temozolomide Run2-DMSO | NM_0203<br>09 | SLC17A7 | solute carrier family 17 (sodium-dependent inorganic phosphate cotransporter), member 7 | -0.070398 | Inlier |
| siRNA Disorazole DMSO Run1   | NM_0203<br>09 | SLC17A7 | solute carrier family 17 (sodium-dependent inorganic phosphate cotransporter), member 7 | 0.070397  | Inlier |

Identification of Survival Genes in Human Glioblastoma Cells Using siRNA Screening  
 Nikhil G Thaker, Fang Zhang, Peter R. McDonald, Tong Ying Shun, Michael D Lewen, Ian F. Pollack, and John S. Lazo  
 Molecular Pharmacology

|                              |           |         |                                                                                         |           |        |
|------------------------------|-----------|---------|-----------------------------------------------------------------------------------------|-----------|--------|
| siRNA-Temozolomide Run1-DMSO | NM_020309 | SLC17A7 | solute carrier family 17 (sodium-dependent inorganic phosphate cotransporter), member 7 | 0.158087  | Inlier |
| siRNA-Vinblastine Run1-DMSO  | NM_020309 | SLC17A7 | solute carrier family 17 (sodium-dependent inorganic phosphate cotransporter), member 7 | 0.964249  | Inlier |
| siRNA-Vinblastine Run2-DMSO  | NM_020309 | SLC17A7 | solute carrier family 17 (sodium-dependent inorganic phosphate cotransporter), member 7 | 1.963495  | Inlier |
| siRNA-Temozolomide Run3-DMSO | NM_139319 | SLC17A8 | solute carrier family 17 (sodium-dependent inorganic phosphate cotransporter), member 8 | -1.301885 | Inlier |

Identification of Survival Genes in Human Glioblastoma Cells Using siRNA Screening  
 Nikhil G Thaker, Fang Zhang, Peter R. McDonald, Tong Ying Shun, Michael D Lewen, Ian F. Pollack, and John S. Lazo  
 Molecular Pharmacology

|                              |           |         |                                                                                         |           |        |
|------------------------------|-----------|---------|-----------------------------------------------------------------------------------------|-----------|--------|
| siRNA-Temozolomide Run1-DMSO | NM_139319 | SLC17A8 | solute carrier family 17 (sodium-dependent inorganic phosphate cotransporter), member 8 | -0.769837 | Inlier |
| siRNA Disorazole DMSO Run1   | NM_139319 | SLC17A8 | solute carrier family 17 (sodium-dependent inorganic phosphate cotransporter), member 8 | -0.202    | Inlier |
| siRNA Disorazole DMSO Run3   | NM_139319 | SLC17A8 | solute carrier family 17 (sodium-dependent inorganic phosphate cotransporter), member 8 | -0.181688 | Inlier |
| siRNA-Temozolomide Run2-DMSO | NM_139319 | SLC17A8 | solute carrier family 17 (sodium-dependent inorganic phosphate cotransporter), member 8 | 0.181689  | Inlier |

Identification of Survival Genes in Human Glioblastoma Cells Using siRNA Screening  
 Nikhil G Thaker, Fang Zhang, Peter R. McDonald, Tong Ying Shun, Michael D Lewen, Ian F. Pollack, and John S. Lazo  
 Molecular Pharmacology

|                              |               |         |                                                                                         |           |        |
|------------------------------|---------------|---------|-----------------------------------------------------------------------------------------|-----------|--------|
| siRNA-Vinblastine Run2-DMSO  | NM_1393<br>19 | SLC17A8 | solute carrier family 17 (sodium-dependent inorganic phosphate cotransporter), member 8 | 0.579163  | Inlier |
| siRNA Disorazole DMSO Run2   | NM_1393<br>19 | SLC17A8 | solute carrier family 17 (sodium-dependent inorganic phosphate cotransporter), member 8 | 1.242437  | Inlier |
| siRNA-Vinblastine Run1-DMSO  | NM_1393<br>19 | SLC17A8 | solute carrier family 17 (sodium-dependent inorganic phosphate cotransporter), member 8 | 1.331753  | Inlier |
| siRNA-Temozolomide Run3-DMSO | NM_0030<br>53 | SLC18A1 | solute carrier family 18 (vesicular monoamine), member 1                                | -1.291174 | Inlier |
| siRNA-Temozolomide Run2-DMSO | NM_0030<br>53 | SLC18A1 | solute carrier family 18 (vesicular monoamine), member 1                                | -0.722404 | Inlier |

Identification of Survival Genes in Human Glioblastoma Cells Using siRNA Screening

Nikhil G Thaker, Fang Zhang, Peter R. McDonald, Tong Ying Shun, Michael D Lewen, Ian F. Pollack, and John S. Lazo

Molecular Pharmacology

| siRNA Treatment              | Gene ID   | Gene Name | Protein Name                                             | Log Fold Change | Outlier Status |
|------------------------------|-----------|-----------|----------------------------------------------------------|-----------------|----------------|
| siRNA-Temozolomide Run1-DMSO | NM_003053 | SLC18A1   | solute carrier family 18 (vesicular monoamine), member 1 | -0.21078        | Inlier         |
| siRNA Disorazole DMSO Run3   | NM_003053 | SLC18A1   | solute carrier family 18 (vesicular monoamine), member 1 | -0.047356       | Inlier         |
| siRNA Disorazole DMSO Run1   | NM_003053 | SLC18A1   | solute carrier family 18 (vesicular monoamine), member 1 | 0.047356        | Inlier         |
| siRNA Disorazole DMSO Run2   | NM_003053 | SLC18A1   | solute carrier family 18 (vesicular monoamine), member 1 | 0.626596        | Inlier         |
| siRNA-Vinblastine Run2-DMSO  | NM_003053 | SLC18A1   | solute carrier family 18 (vesicular monoamine), member 1 | 0.808704        | Inlier         |
| siRNA-Vinblastine Run1-DMSO  | NM_003053 | SLC18A1   | solute carrier family 18 (vesicular monoamine), member 1 | 1.239945        | Inlier         |
| siRNA-Temozolomide Run3-DMSO | NM_003054 | SLC18A2   | solute carrier family 18 (vesicular monoamine), member 2 | -1.701972       | Inlier         |



Identification of Survival Genes in Human Glioblastoma Cells Using siRNA Screening

Nikhil G Thaker, Fang Zhang, Peter R. McDonald, Tong Ying Shun, Michael D Lewen, Ian F. Pollack, and John S. Lazo

Molecular Pharmacology

| siRNA Treatment              | Gene      | Gene ID | Gene Name                                                | Log Fold Change | Outlier Status |
|------------------------------|-----------|---------|----------------------------------------------------------|-----------------|----------------|
| siRNA-Temozolomide Run1-DMSO | NM_003054 | SLC18A2 | solute carrier family 18 (vesicular monoamine), member 2 | -1.552888       | Inlier         |
| siRNA-Temozolomide Run2-DMSO | NM_003054 | SLC18A2 | solute carrier family 18 (vesicular monoamine), member 2 | -0.53668        | Inlier         |
| siRNA Disorazole DMSO Run1   | NM_003054 | SLC18A2 | solute carrier family 18 (vesicular monoamine), member 2 | -0.210505       | Inlier         |
| siRNA-Vinblastine Run2-DMSO  | NM_003054 | SLC18A2 | solute carrier family 18 (vesicular monoamine), member 2 | 0.210505        | Inlier         |
| siRNA Disorazole DMSO Run3   | NM_003054 | SLC18A2 | solute carrier family 18 (vesicular monoamine), member 2 | 0.351238        | Inlier         |
| siRNA-Vinblastine Run1-DMSO  | NM_003054 | SLC18A2 | solute carrier family 18 (vesicular monoamine), member 2 | 0.81232         | Inlier         |
| siRNA Disorazole DMSO Run2   | NM_003054 | SLC18A2 | solute carrier family 18 (vesicular monoamine), member 2 | 2.128617        | Inlier         |

Identification of Survival Genes in Human Glioblastoma Cells Using siRNA Screening

Nikhil G Thaker, Fang Zhang, Peter R. McDonald, Tong Ying Shun, Michael D Lewen, Ian F. Pollack, and John S. Lazo

Molecular Pharmacology

| siRNA Treatment              | Gene      | Gene ID | Gene Name                                                    | Log Fold Change | Category |
|------------------------------|-----------|---------|--------------------------------------------------------------|-----------------|----------|
| siRNA-Temozolomide Run3-DMSO | NM_003055 | SLC18A3 | solute carrier family 18 (vesicular acetylcholine), member 3 | -1.552591       | Inlier   |
| siRNA-Temozolomide Run2-DMSO | NM_003055 | SLC18A3 | solute carrier family 18 (vesicular acetylcholine), member 3 | -0.715521       | Inlier   |
| siRNA Disorazole DMSO Run3   | NM_003055 | SLC18A3 | solute carrier family 18 (vesicular acetylcholine), member 3 | -0.633479       | Inlier   |
| siRNA-Temozolomide Run1-DMSO | NM_003055 | SLC18A3 | solute carrier family 18 (vesicular acetylcholine), member 3 | -0.079162       | Inlier   |
| siRNA Disorazole DMSO Run1   | NM_003055 | SLC18A3 | solute carrier family 18 (vesicular acetylcholine), member 3 | 0.079161        | Inlier   |
| siRNA Disorazole DMSO Run2   | NM_003055 | SLC18A3 | solute carrier family 18 (vesicular acetylcholine), member 3 | 0.627479        | Inlier   |
| siRNA-Vinblastine Run1-DMSO  | NM_003055 | SLC18A3 | solute carrier family 18 (vesicular acetylcholine), member 3 | 1.369219        | Inlier   |

Identification of Survival Genes in Human Glioblastoma Cells Using siRNA Screening  
 Nikhil G Thaker, Fang Zhang, Peter R. McDonald, Tong Ying Shun, Michael D Lewen, Ian F. Pollack, and John S. Lazo

Molecular Pharmacology

|                              |           |         |                                                              |           |        |
|------------------------------|-----------|---------|--------------------------------------------------------------|-----------|--------|
| siRNA-Vinblastine Run2-DMSO  | NM_003055 | SLC18A3 | solute carrier family 18 (vesicular acetylcholine), member 3 | 1.941871  | Inlier |
| siRNA-Temozolomide Run3-DMSO | NM_194255 | SLC19A1 | solute carrier family 19 (folate transporter), member 1      | -1.517096 | Inlier |
| siRNA-Temozolomide Run1-DMSO | NM_194255 | SLC19A1 | solute carrier family 19 (folate transporter), member 1      | -0.340147 | Inlier |
| siRNA-Temozolomide Run2-DMSO | NM_194255 | SLC19A1 | solute carrier family 19 (folate transporter), member 1      | -0.2373   | Inlier |
| siRNA Disorazole DMSO Run1   | NM_194255 | SLC19A1 | solute carrier family 19 (folate transporter), member 1      | -0.219304 | Inlier |
| siRNA-Vinblastine Run2-DMSO  | NM_194255 | SLC19A1 | solute carrier family 19 (folate transporter), member 1      | 0.219303  | Inlier |
| siRNA Disorazole DMSO Run3   | NM_194255 | SLC19A1 | solute carrier family 19 (folate transporter), member 1      | 1.008853  | Inlier |

Identification of Survival Genes in Human Glioblastoma Cells Using siRNA Screening

Nikhil G Thaker, Fang Zhang, Peter R. McDonald, Tong Ying Shun, Michael D Lewen, Ian F. Pollack, and John S. Lazo

Molecular Pharmacology

|                              |               |         |   |           |        |
|------------------------------|---------------|---------|---|-----------|--------|
| siRNA-Vinblastine Run1-DMSO  | NM_1942<br>55 | SLC19A1 | 1 | 1.28294   | Inlier |
|                              |               |         | 1 |           |        |
| siRNA Disorazole DMSO Run2   | NM_1942<br>55 | SLC19A1 | 1 | 1.446908  | Inlier |
|                              |               |         | 1 |           |        |
| siRNA-Temozolomide Run3-DMSO | NM_0069<br>96 | SLC19A2 | 2 | -1.405973 | Inlier |
|                              |               |         | 2 |           |        |
| siRNA Disorazole DMSO Run2   | NM_0069<br>96 | SLC19A2 | 2 | -0.674422 | Inlier |
|                              |               |         | 2 |           |        |
| siRNA-Temozolomide Run2-DMSO | NM_0069<br>96 | SLC19A2 | 2 | -0.575019 | Inlier |
|                              |               |         | 2 |           |        |
| siRNA Disorazole DMSO Run3   | NM_0069<br>96 | SLC19A2 | 2 | -0.181288 | Inlier |
|                              |               |         | 2 |           |        |
| siRNA-Temozolomide Run1-DMSO | NM_0069<br>96 | SLC19A2 | 2 | 0.181288  | Inlier |
|                              |               |         | 2 |           |        |

Identification of Survival Genes in Human Glioblastoma Cells Using siRNA Screening  
 Nikhil G Thaker, Fang Zhang, Peter R. McDonald, Tong Ying Shun, Michael D Lewen, Ian F. Pollack, and John S. Lazo

Molecular Pharmacology

|                              |               |         |                                                           |           |        |
|------------------------------|---------------|---------|-----------------------------------------------------------|-----------|--------|
| siRNA Disorazole DMSO Run1   | NM_0069<br>96 | SLC19A2 | solute carrier family 19 (thiamine transporter), member 2 | 0.674578  | Inlier |
| siRNA-Vinblastine Run1-DMSO  | NM_0069<br>96 | SLC19A2 | solute carrier family 19 (thiamine transporter), member 2 | 0.773966  | Inlier |
| siRNA-Vinblastine Run2-DMSO  | NM_0069<br>96 | SLC19A2 | solute carrier family 19 (thiamine transporter), member 2 | 0.907295  | Inlier |
| siRNA-Temozolomide Run3-DMSO | NM_0252<br>43 | SLC19A3 | solute carrier family 19, member 3                        | -3.355162 | Inlier |
| siRNA-Temozolomide Run2-DMSO | NM_0252<br>43 | SLC19A3 | solute carrier family 19, member 3                        | -1.639624 | Inlier |
| siRNA-Temozolomide Run1-DMSO | NM_0252<br>43 | SLC19A3 | solute carrier family 19, member 3                        | -0.684673 | Inlier |
| siRNA Disorazole DMSO Run2   | NM_0252<br>43 | SLC19A3 | solute carrier family 19, member 3                        | -0.322724 | Inlier |
| siRNA Disorazole DMSO Run1   | NM_0252<br>43 | SLC19A3 | solute carrier family 19, member 3                        | 0.322723  | Inlier |
| siRNA-Vinblastine Run1-DMSO  | NM_0252<br>43 | SLC19A3 | solute carrier family 19, member 3                        | 0.428308  | Inlier |
| siRNA-Vinblastine Run2-DMSO  | NM_0252<br>43 | SLC19A3 | solute carrier family 19, member 3                        | 0.664327  | Inlier |

Identification of Survival Genes in Human Glioblastoma Cells Using siRNA Screening

Nikhil G Thaker, Fang Zhang, Peter R. McDonald, Tong Ying Shun, Michael D Lewen, Ian F. Pollack, and John S. Lazo

Molecular Pharmacology

| siRNA              | Condition | Run  | Gene    | Gene Description                                                                                        | Score     | Inlier |
|--------------------|-----------|------|---------|---------------------------------------------------------------------------------------------------------|-----------|--------|
| siRNA Disorazole   | DMSO      | Run3 | SLC19A3 | solute carrier family 19, member 3                                                                      | 0.759835  | Inlier |
| siRNA-Temozolomide | Run3-DMSO | Run3 | SLC1A1  | solute carrier family 1 (neuronal/epithelial high affinity glutamate transporter, system Xag), member 1 | -1.26137  | Inlier |
| siRNA Disorazole   | DMSO      | Run2 | SLC1A1  | solute carrier family 1 (neuronal/epithelial high affinity glutamate transporter, system Xag), member 1 | -1.065588 | Inlier |
| siRNA-Temozolomide | Run2-DMSO | Run2 | SLC1A1  | solute carrier family 1 (neuronal/epithelial high affinity glutamate transporter, system Xag), member 1 | -0.106942 | Inlier |
| siRNA-Temozolomide | Run1-DMSO | Run1 | SLC1A1  | solute carrier family 1 (neuronal/epithelial high affinity glutamate transporter, system Xag), member 1 | -0.078154 | Inlier |

Identification of Survival Genes in Human Glioblastoma Cells Using siRNA Screening

Nikhil G Thaker, Fang Zhang, Peter R. McDonald, Tong Ying Shun, Michael D Lewen, Ian F. Pollack, and John S.

Lazo

Molecular Pharmacology

| siRNA             | Condition | Run  | Gene | Accession | Gene Name                                                                                      | Score    | Category |
|-------------------|-----------|------|------|-----------|------------------------------------------------------------------------------------------------|----------|----------|
| siRNA Disorazole  | DMSO      | Run3 | 70   | NM_0041   | SLC1A1                                                                                         | 0.078154 | Inlier   |
|                   |           |      |      |           | member 1                                                                                       |          |          |
|                   |           |      |      |           | solute carrier family 1 (neuronal/epithelial high affinity glutamate transporter, system Xag), |          |          |
| siRNA Disorazole  | DMSO      | Run1 | 70   | NM_0041   | SLC1A1                                                                                         | 0.456411 | Inlier   |
|                   |           |      |      |           | member 1                                                                                       |          |          |
|                   |           |      |      |           | solute carrier family 1 (neuronal/epithelial high affinity glutamate transporter, system Xag), |          |          |
| siRNA-Vinblastine | Run2-DMSO |      | 70   | NM_0041   | SLC1A1                                                                                         | 0.892589 | Inlier   |
|                   |           |      |      |           | member 1                                                                                       |          |          |
|                   |           |      |      |           | solute carrier family 1 (neuronal/epithelial high affinity glutamate transporter, system Xag), |          |          |
| siRNA-Vinblastine | Run1-DMSO |      | 70   | NM_0041   | SLC1A1                                                                                         | 1.368119 | Inlier   |
|                   |           |      |      |           | member 1                                                                                       |          |          |
|                   |           |      |      |           | solute carrier family 1 (neuronal/epithelial high affinity glutamate transporter, system Xag), |          |          |

Identification of Survival Genes in Human Glioblastoma Cells Using siRNA Screening

Nikhil G Thaker, Fang Zhang, Peter R. McDonald, Tong Ying Shun, Michael D Lewen, Ian F. Pollack, and John S.

Lazo

Molecular Pharmacology

| siRNA Treatment              | Gene ID   | Gene Name | Log Fold Change | Outlier Status |
|------------------------------|-----------|-----------|-----------------|----------------|
| siRNA-Temozolomide Run3-DMSO | NM_004171 | SLC1A2    | -2.553665       | Inlier         |
| siRNA-Temozolomide Run1-DMSO | NM_004171 | SLC1A2    | -0.643524       | Inlier         |
| siRNA-Temozolomide Run2-DMSO | NM_004171 | SLC1A2    | -0.562586       | Inlier         |
| siRNA Disorazole DMSO Run1   | NM_004171 | SLC1A2    | -0.354295       | Inlier         |
| siRNA-Vinblastine Run1-DMSO  | NM_004171 | SLC1A2    | 0.354295        | Inlier         |

solute carrier family 1 (glial high affinity glutamate transporter), member 2

solute carrier family 1 (glial high affinity glutamate transporter), member 2

solute carrier family 1 (glial high affinity glutamate transporter), member 2

solute carrier family 1 (glial high affinity glutamate transporter), member 2

solute carrier family 1 (glial high affinity glutamate transporter), member 2



Identification of Survival Genes in Human Glioblastoma Cells Using siRNA Screening

Nikhil G Thaker, Fang Zhang, Peter R. McDonald, Tong Ying Shun, Michael D Lewen, Ian F. Pollack, and John S.

Lazo

Molecular Pharmacology

| siRNA Treatment              | Gene   | Gene ID   | Gene Name | Gene Description                                                              | Log2 Fold Change | Classification |
|------------------------------|--------|-----------|-----------|-------------------------------------------------------------------------------|------------------|----------------|
| siRNA-Vinblastine Run2-DMSO  | SLC1A2 | NM_004171 | SLC1A2    | solute carrier family 1 (glial high affinity glutamate transporter), member 2 | 0.705476         | Inlier         |
| siRNA Disorazole DMSO Run3   | SLC1A2 | NM_004171 | SLC1A2    | solute carrier family 1 (glial high affinity glutamate transporter), member 2 | 0.753457         | Inlier         |
| siRNA Disorazole DMSO Run2   | SLC1A2 | NM_004171 | SLC1A2    | solute carrier family 1 (glial high affinity glutamate transporter), member 2 | 0.979202         | Inlier         |
| siRNA-Temozolomide Run3-DMSO | SLC1A3 | NM_004172 | SLC1A3    | solute carrier family 1 (glial high affinity glutamate transporter), member 3 | -4.388338        | Outlier        |
| siRNA-Temozolomide Run1-DMSO | SLC1A3 | NM_004172 | SLC1A3    | solute carrier family 1 (glial high affinity glutamate transporter), member 3 | -0.71763         | Inlier         |

Identification of Survival Genes in Human Glioblastoma Cells Using siRNA Screening

Nikhil G Thaker, Fang Zhang, Peter R. McDonald, Tong Ying Shun, Michael D Lewen, Ian F. Pollack, and John S. Lazo

Molecular Pharmacology

| siRNA Treatment              | Gene   | Gene ID   | Gene Name                                                                     | Log2 Fold Change | Outlier Status |
|------------------------------|--------|-----------|-------------------------------------------------------------------------------|------------------|----------------|
| siRNA Disorazole DMSO Run2   | SLC1A3 | NM_004172 | solute carrier family 1 (glial high affinity glutamate transporter), member 3 | -0.229884        | Inlier         |
| siRNA-Temozolomide Run2-DMSO | SLC1A3 | NM_004172 | solute carrier family 1 (glial high affinity glutamate transporter), member 3 | -0.131331        | Inlier         |
| siRNA Disorazole DMSO Run1   | SLC1A3 | NM_004172 | solute carrier family 1 (glial high affinity glutamate transporter), member 3 | 0.13133          | Inlier         |
| siRNA Disorazole DMSO Run3   | SLC1A3 | NM_004172 | solute carrier family 1 (glial high affinity glutamate transporter), member 3 | 0.63137          | Inlier         |
| siRNA-Vinblastine Run1-DMSO  | SLC1A3 | NM_004172 | solute carrier family 1 (glial high affinity glutamate transporter), member 3 | 1.025386         | Inlier         |

Identification of Survival Genes in Human Glioblastoma Cells Using siRNA Screening

Nikhil G Thaker, Fang Zhang, Peter R. McDonald, Tong Ying Shun, Michael D Lewen, Ian F. Pollack, and John S. Lazo

Molecular Pharmacology

| siRNA Treatment              | Gene ID   | Gene Name | Protein Name                                                                  | Log2 Fold Change | Significance |
|------------------------------|-----------|-----------|-------------------------------------------------------------------------------|------------------|--------------|
| siRNA-Vinblastine Run2-DMSO  | NM_004172 | SLC1A3    | solute carrier family 1 (glial high affinity glutamate transporter), member 3 | 2.154539         | Inlier       |
| siRNA-Temozolomide Run3-DMSO | NM_003038 | SLC1A4    | solute carrier family 1 (glutamate /neutral amino acid transporter), member 4 | -1.44722         | Inlier       |
| siRNA-Temozolomide Run1-DMSO | NM_003038 | SLC1A4    | solute carrier family 1 (glutamate /neutral amino acid transporter), member 4 | -0.869057        | Inlier       |
| siRNA Disorazole DMSO Run1   | NM_003038 | SLC1A4    | solute carrier family 1 (glutamate /neutral amino acid transporter), member 4 | -0.679812        | Inlier       |
| siRNA-Vinblastine Run1-DMSO  | NM_003038 | SLC1A4    | solute carrier family 1 (glutamate /neutral amino acid transporter), member 4 | -0.104063        | Inlier       |

Identification of Survival Genes in Human Glioblastoma Cells Using siRNA Screening

Nikhil G Thaker, Fang Zhang, Peter R. McDonald, Tong Ying Shun, Michael D Lewen, Ian F. Pollack, and John S. Lazo

Molecular Pharmacology

|                              |           |        |                                                                              |   |           |        |
|------------------------------|-----------|--------|------------------------------------------------------------------------------|---|-----------|--------|
| siRNA-Temozolomide Run2-DMSO | NM_003038 | SLC1A4 | solute carrier family 1 (glutamate/neutral amino acid transporter), member 4 | 4 | 0.104063  | Inlier |
| siRNA-Vinblastine Run2-DMSO  | NM_003038 | SLC1A4 | solute carrier family 1 (glutamate/neutral amino acid transporter), member 4 | 4 | 0.159591  | Inlier |
| siRNA Disorazole DMSO Run2   | NM_003038 | SLC1A4 | solute carrier family 1 (glutamate/neutral amino acid transporter), member 4 | 4 | 0.669187  | Inlier |
| siRNA Disorazole DMSO Run3   | NM_003038 | SLC1A4 | solute carrier family 1 (glutamate/neutral amino acid transporter), member 4 | 4 | 0.778111  | Inlier |
| siRNA-Temozolomide Run3-DMSO | NM_005628 | SLC1A5 | solute carrier family 1 (neutral amino acid transporter), member 5           | 5 | -1.654567 | Inlier |

Identification of Survival Genes in Human Glioblastoma Cells Using siRNA Screening  
 Nikhil G Thaker, Fang Zhang, Peter R. McDonald, Tong Ying Shun, Michael D Lewen, Ian F. Pollack, and John S. Lazo  
 Molecular Pharmacology

|                              |               |        |                                                                    |           |        |
|------------------------------|---------------|--------|--------------------------------------------------------------------|-----------|--------|
| siRNA Disorazole DMSO Run2   | NM_0056<br>28 | SLC1A5 | solute carrier family 1 (neutral amino acid transporter), member 5 | -0.833967 | Inlier |
| siRNA-Temozolomide Run1-DMSO | NM_0056<br>28 | SLC1A5 | solute carrier family 1 (neutral amino acid transporter), member 5 | -0.51828  | Inlier |
| siRNA Disorazole DMSO Run1   | NM_0056<br>28 | SLC1A5 | solute carrier family 1 (neutral amino acid transporter), member 5 | -0.104958 | Inlier |
| siRNA-Temozolomide Run2-DMSO | NM_0056<br>28 | SLC1A5 | solute carrier family 1 (neutral amino acid transporter), member 5 | 0.104958  | Inlier |
| siRNA Disorazole DMSO Run3   | NM_0056<br>28 | SLC1A5 | solute carrier family 1 (neutral amino acid transporter), member 5 | 0.363758  | Inlier |

Identification of Survival Genes in Human Glioblastoma Cells Using siRNA Screening

Nikhil G Thaker, Fang Zhang, Peter R. McDonald, Tong Ying Shun, Michael D Lewen, Ian F. Pollack, and John S.

Lazo

Molecular Pharmacology

|                              |           |        |                                                                                    |           |        |
|------------------------------|-----------|--------|------------------------------------------------------------------------------------|-----------|--------|
| siRNA-Vinblastine Run2-DMSO  | NM_005628 | SLC1A5 | solute carrier family 1 (neutral amino acid transporter), member 5                 | 0.83072   | Inlier |
| siRNA-Vinblastine Run1-DMSO  | NM_005628 | SLC1A5 | solute carrier family 1 (neutral amino acid transporter), member 5                 | 1.121192  | Inlier |
| siRNA-Temozolomide Run3-DMSO | NM_005071 | SLC1A6 | solute carrier family 1 (high affinity aspartate/ glutamate transporter), member 6 | -2.445645 | Inlier |
| siRNA-Temozolomide Run1-DMSO | NM_005071 | SLC1A6 | solute carrier family 1 (high affinity aspartate/ glutamate transporter), member 6 | -0.70805  | Inlier |
| siRNA Disorazole DMSO Run2   | NM_005071 | SLC1A6 | solute carrier family 1 (high affinity aspartate/ glutamate transporter), member 6 | -0.465309 | Inlier |

Identification of Survival Genes in Human Glioblastoma Cells Using siRNA Screening

Nikhil G Thaker, Fang Zhang, Peter R. McDonald, Tong Ying Shun, Michael D Lewen, Ian F. Pollack, and John S. Lazo

Molecular Pharmacology

| siRNA Treatment              | Gene ID   | Gene Name | Log2 Fold Change | Annotation                                                                                   |
|------------------------------|-----------|-----------|------------------|----------------------------------------------------------------------------------------------|
| siRNA-Temozolomide Run2-DMSO | NM_005071 | SLC1A6    | -0.052163        | Inlier<br>solute carrier family 1 (high affinity aspartate/ glutamate transporter), member 6 |
| siRNA Disorazole DMSO Run3   | NM_005071 | SLC1A6    | 0.052164         | Inlier<br>solute carrier family 1 (high affinity aspartate/ glutamate transporter), member 6 |
| siRNA Disorazole DMSO Run1   | NM_005071 | SLC1A6    | 0.64095          | Inlier<br>solute carrier family 1 (high affinity aspartate/ glutamate transporter), member 6 |
| siRNA-Vinblastine Run1-DMSO  | NM_005071 | SLC1A6    | 1.032674         | Inlier<br>solute carrier family 1 (high affinity aspartate/ glutamate transporter), member 6 |
| siRNA-Vinblastine Run2-DMSO  | NM_005071 | SLC1A6    | 1.602695         | Inlier<br>solute carrier family 1 (high affinity aspartate/ glutamate transporter), member 6 |

Identification of Survival Genes in Human Glioblastoma Cells Using siRNA Screening

Nikhil G Thaker, Fang Zhang, Peter R. McDonald, Tong Ying Shun, Michael D Lewen, Ian F. Pollack, and John S. Lazo

Molecular Pharmacology

|                              |           |        |                                                           |           |        |
|------------------------------|-----------|--------|-----------------------------------------------------------|-----------|--------|
| siRNA-Temozolomide Run3-DMSO | NM_006671 | SLC1A7 | solute carrier family 1 (glutamate transporter), member 7 | -1.595512 | Inlier |
| siRNA Disorazole DMSO Run3   | NM_006671 | SLC1A7 | solute carrier family 1 (glutamate transporter), member 7 | -0.64506  | Inlier |
| siRNA-Temozolomide Run1-DMSO | NM_006671 | SLC1A7 | solute carrier family 1 (glutamate transporter), member 7 | -0.227405 | Inlier |
| siRNA-Temozolomide Run2-DMSO | NM_006671 | SLC1A7 | solute carrier family 1 (glutamate transporter), member 7 | -0.048954 | Inlier |
| siRNA Disorazole DMSO Run1   | NM_006671 | SLC1A7 | solute carrier family 1 (glutamate transporter), member 7 | 0.048954  | Inlier |
| siRNA-Vinblastine Run2-DMSO  | NM_006671 | SLC1A7 | solute carrier family 1 (glutamate transporter), member 7 | 0.70394   | Inlier |



Identification of Survival Genes in Human Glioblastoma Cells Using siRNA Screening

Nikhil G Thaker, Fang Zhang, Peter R. McDonald, Tong Ying Shun, Michael D Lewen, Ian F. Pollack, and John S. Lazo

Molecular Pharmacology

|                              |               |         |                                                            |           |        |
|------------------------------|---------------|---------|------------------------------------------------------------|-----------|--------|
| siRNA-Vinblastine Run1-DMSO  | NM_0066<br>71 | SLC1A7  | solute carrier family 1 (glutamate transporter), member 7  | 1.028119  | Inlier |
| siRNA Disorazole DMSO Run2   | NM_0066<br>71 | SLC1A7  | solute carrier family 1 (glutamate transporter), member 7  | 1.187284  | Inlier |
| siRNA-Temozolomide Run3-DMSO | NM_0054<br>15 | SLC20A1 | solute carrier family 20 (phosphate transporter), member 1 | -0.758403 | Inlier |
| siRNA-Temozolomide Run2-DMSO | NM_0054<br>15 | SLC20A1 | solute carrier family 20 (phosphate transporter), member 1 | -0.590597 | Inlier |
| siRNA Disorazole DMSO Run2   | NM_0054<br>15 | SLC20A1 | solute carrier family 20 (phosphate transporter), member 1 | -0.457783 | Inlier |
| siRNA Disorazole DMSO Run3   | NM_0054<br>15 | SLC20A1 | solute carrier family 20 (phosphate transporter), member 1 | -0.300698 | Inlier |

Identification of Survival Genes in Human Glioblastoma Cells Using siRNA Screening

Nikhil G Thaker, Fang Zhang, Peter R. McDonald, Tong Ying Shun, Michael D Lewen, Ian F. Pollack, and John S. Lazo

Molecular Pharmacology

| siRNA Treatment              | Gene    | Gene ID   | Accession | Value     | Outlier |
|------------------------------|---------|-----------|-----------|-----------|---------|
| siRNA-Temozolomide Run1-DMSO | SLC20A1 | NM_005415 | 1         | 0.300698  | Inlier  |
| siRNA Disorazole DMSO Run1   | SLC20A1 | NM_005415 | 1         | 0.808064  | Inlier  |
| siRNA-Vinblastine Run1-DMSO  | SLC20A1 | NM_005415 | 1         | 1.323437  | Inlier  |
| siRNA-Vinblastine Run2-DMSO  | SLC20A1 | NM_005415 | 1         | 1.65396   | Inlier  |
| siRNA-Temozolomide Run3-DMSO | SLC20A2 | NM_006749 | 2         | -1.610586 | Inlier  |
| siRNA Disorazole DMSO Run2   | SLC20A2 | NM_006749 | 2         | -1.167249 | Inlier  |

solute carrier family 20 (phosphate transporter), member 1  
solute carrier family 20 (phosphate transporter), member 2  
solute carrier family 20 (phosphate transporter), member 2



Identification of Survival Genes in Human Glioblastoma Cells Using siRNA Screening

Nikhil G Thaker, Fang Zhang, Peter R. McDonald, Tong Ying Shun, Michael D Lewen, Ian F. Pollack, and John S. Lazo

Molecular Pharmacology

| siRNA                        | Gene      | Gene ID | Gene Name | Gene Description                                                | Log2FC    | Category |
|------------------------------|-----------|---------|-----------|-----------------------------------------------------------------|-----------|----------|
| siRNA-Temozolomide Run3-DMSO | NM_003057 | SLC22A1 | 1         | solute carrier family 22 (organic cation transporter), member 1 | -3.182018 | Inlier   |
| siRNA Disorazole DMSO Run1   | NM_003057 | SLC22A1 | 1         | solute carrier family 22 (organic cation transporter), member 1 | -0.352965 | Inlier   |
| siRNA Disorazole DMSO Run2   | NM_003057 | SLC22A1 | 1         | solute carrier family 22 (organic cation transporter), member 1 | -0.290614 | Inlier   |
| siRNA Disorazole DMSO Run3   | NM_003057 | SLC22A1 | 1         | solute carrier family 22 (organic cation transporter), member 1 | -0.066268 | Inlier   |
| siRNA-Temozolomide Run1-DMSO | NM_003057 | SLC22A1 | 1         | solute carrier family 22 (organic cation transporter), member 1 | 0.066268  | Inlier   |
| siRNA-Temozolomide Run2-DMSO | NM_003057 | SLC22A1 | 1         | solute carrier family 22 (organic cation transporter), member 1 | 0.996035  | Inlier   |

Identification of Survival Genes in Human Glioblastoma Cells Using siRNA Screening

Nikhil G Thaker, Fang Zhang, Peter R. McDonald, Tong Ying Shun, Michael D Lewen, Ian F. Pollack, and John S. Lazo

Molecular Pharmacology

| siRNA Treatment              | Gene ID   | Gene Name | Gene Description                                                       | Score     | Category |
|------------------------------|-----------|-----------|------------------------------------------------------------------------|-----------|----------|
| siRNA-Vinblastine Run1-DMSO  | NM_003057 | SLC22A1   | solute carrier family 22 (organic cation transporter), member 1        | 2.070695  | Inlier   |
| siRNA-Vinblastine Run2-DMSO  | NM_003057 | SLC22A1   | solute carrier family 22 (organic cation transporter), member 1        | 4.057964  | Outlier  |
| siRNA-Temozolomide Run3-DMSO | NM_018484 | SLC22A11  | solute carrier family 22 (organic anion/cation transporter), member 11 | -2.966729 | Inlier   |
| siRNA-Temozolomide Run1-DMSO | NM_018484 | SLC22A11  | solute carrier family 22 (organic anion/cation transporter), member 11 | -0.611574 | Inlier   |
| siRNA Disorazole DMSO Run2   | NM_018484 | SLC22A11  | solute carrier family 22 (organic anion/cation transporter), member 11 | -0.232941 | Inlier   |

Identification of Survival Genes in Human Glioblastoma Cells Using siRNA Screening  
 Nikhil G Thaker, Fang Zhang, Peter R. McDonald, Tong Ying Shun, Michael D Lewen, Ian F. Pollack, and John S. Lazo  
 Molecular Pharmacology

|                              |               |          |    |           |                                                                     |
|------------------------------|---------------|----------|----|-----------|---------------------------------------------------------------------|
| siRNA Disorazole DMSO Run3   | NM_0184<br>84 | SLC22A11 | 11 | -0.031074 | Inlier                                                              |
|                              |               |          |    |           | solute carrier family 22 (organic anion/cation transporter), member |
| siRNA Disorazole DMSO Run1   | NM_0184<br>84 | SLC22A11 | 11 | 0.031073  | Inlier                                                              |
|                              |               |          |    |           | solute carrier family 22 (organic anion/cation transporter), member |
| siRNA-Temozolomide Run2-DMSO | NM_0184<br>84 | SLC22A11 | 11 | 0.737426  | Inlier                                                              |
|                              |               |          |    |           | solute carrier family 22 (organic anion/cation transporter), member |
| siRNA-Vinblastine Run1-DMSO  | NM_0184<br>84 | SLC22A11 | 11 | 2.213764  | Inlier                                                              |
|                              |               |          |    |           | solute carrier family 22 (organic anion/cation transporter), member |
| siRNA-Vinblastine Run2-DMSO  | NM_0184<br>84 | SLC22A11 | 11 | 2.786948  | Inlier                                                              |
|                              |               |          |    |           | solute carrier family 22 (organic anion/cation transporter), member |

Identification of Survival Genes in Human Glioblastoma Cells Using siRNA Screening

Nikhil G Thaker, Fang Zhang, Peter R. McDonald, Tong Ying Shun, Michael D Lewen, Ian F. Pollack, and John S. Lazo

Molecular Pharmacology

|                              |           |          |    |                                                                        |           |        |
|------------------------------|-----------|----------|----|------------------------------------------------------------------------|-----------|--------|
| siRNA-Temozolomide Run3-DMSO | NM_153378 | SLC22A12 | 12 | solute carrier family 22 (organic anion/cation transporter), member 12 | -3.29161  | Inlier |
| siRNA-Temozolomide Run1-DMSO | NM_153378 | SLC22A12 | 12 | solute carrier family 22 (organic anion/cation transporter), member 12 | -1.265519 | Inlier |
| siRNA-Temozolomide Run2-DMSO | NM_153378 | SLC22A12 | 12 | solute carrier family 22 (organic anion/cation transporter), member 12 | -0.652773 | Inlier |
| siRNA Disorazole DMSO Run1   | NM_153378 | SLC22A12 | 12 | solute carrier family 22 (organic anion/cation transporter), member 12 | -0.009046 | Inlier |
| siRNA Disorazole DMSO Run2   | NM_153378 | SLC22A12 | 12 | solute carrier family 22 (organic anion/cation transporter), member 12 | 0.009046  | Inlier |

Identification of Survival Genes in Human Glioblastoma Cells Using siRNA Screening  
 Nikhil G Thaker, Fang Zhang, Peter R. McDonald, Tong Ying Shun, Michael D Lewen, Ian F. Pollack, and John S. Lazo  
 Molecular Pharmacology

|                              |               |          |    |           |        |                                                                     |
|------------------------------|---------------|----------|----|-----------|--------|---------------------------------------------------------------------|
| siRNA Disorazole DMSO Run3   | NM_1533<br>78 | SLC22A12 | 12 | 0.55719   | Inlier | solute carrier family 22 (organic anion/cation transporter), member |
| siRNA-Vinblastine Run2-DMSO  | NM_1533<br>78 | SLC22A12 | 12 | 0.696227  | Inlier | solute carrier family 22 (organic anion/cation transporter), member |
| siRNA-Vinblastine Run1-DMSO  | NM_1533<br>78 | SLC22A12 | 12 | 1.088327  | Inlier | solute carrier family 22 (organic anion/cation transporter), member |
| siRNA-Temozolomide Run3-DMSO | NM_0042<br>56 | SLC22A13 | 13 | -2.376445 | Inlier | solute carrier family 22 (organic cation transporter), member       |
| siRNA Disorazole DMSO Run2   | NM_0042<br>56 | SLC22A13 | 13 | -0.691691 | Inlier | solute carrier family 22 (organic cation transporter), member       |



Identification of Survival Genes in Human Glioblastoma Cells Using siRNA Screening  
 Nikhil G Thaker, Fang Zhang, Peter R. McDonald, Tong Ying Shun, Michael D Lewen, Ian F. Pollack, and John S. Lazo  
 Molecular Pharmacology

| siRNA Treatment              | Gene ID   | Gene Name | Gene Description                                                 | Log Fold Change | Outlier Status |
|------------------------------|-----------|-----------|------------------------------------------------------------------|-----------------|----------------|
| siRNA-Temozolomide Run1-DMSO | NM_004256 | SLC22A13  | solute carrier family 22 (organic cation transporter), member 13 | -0.657309       | Inlier         |
| siRNA-Temozolomide Run2-DMSO | NM_004256 | SLC22A13  | solute carrier family 22 (organic cation transporter), member 13 | -0.401488       | Inlier         |
| siRNA Disorazole DMSO Run1   | NM_004256 | SLC22A13  | solute carrier family 22 (organic cation transporter), member 13 | 0.401487        | Inlier         |
| siRNA Disorazole DMSO Run3   | NM_004256 | SLC22A13  | solute carrier family 22 (organic cation transporter), member 13 | 0.616337        | Inlier         |
| siRNA-Vinblastine Run1-DMSO  | NM_004256 | SLC22A13  | solute carrier family 22 (organic cation transporter), member 13 | 0.989504        | Inlier         |

Identification of Survival Genes in Human Glioblastoma Cells Using siRNA Screening  
 Nikhil G Thaker, Fang Zhang, Peter R. McDonald, Tong Ying Shun, Michael D Lewen, Ian F. Pollack, and John S. Lazo  
 Molecular Pharmacology

|                              |           |          |                                                                  |           |        |
|------------------------------|-----------|----------|------------------------------------------------------------------|-----------|--------|
| siRNA-Vinblastine Run2-DMSO  | NM_004256 | SLC22A13 | solute carrier family 22 (organic cation transporter), member 13 | 1.50344   | Inlier |
| siRNA-Temozolomide Run3-DMSO | NM_004803 | SLC22A14 | solute carrier family 22 (organic cation transporter), member 14 | -1.644295 | Inlier |
| siRNA-Temozolomide Run2-DMSO | NM_004803 | SLC22A14 | solute carrier family 22 (organic cation transporter), member 14 | -0.825133 | Inlier |
| siRNA-Temozolomide Run1-DMSO | NM_004803 | SLC22A14 | solute carrier family 22 (organic cation transporter), member 14 | -0.322908 | Inlier |
| siRNA Disorazole DMSO Run1   | NM_004803 | SLC22A14 | solute carrier family 22 (organic cation transporter), member 14 | -0.310204 | Inlier |

Identification of Survival Genes in Human Glioblastoma Cells Using siRNA Screening  
 Nikhil G Thaker, Fang Zhang, Peter R. McDonald, Tong Ying Shun, Michael D Lewen, Ian F. Pollack, and John S. Lazo  
 Molecular Pharmacology

|                                  |               |          |    |           |         |                                                                                   |
|----------------------------------|---------------|----------|----|-----------|---------|-----------------------------------------------------------------------------------|
| siRNA Disorazole DMSO Run3       | NM_0048<br>03 | SLC22A14 | 14 | 0.310204  | Inlier  | solute<br>carrier<br>family 22<br>(organic<br>cation<br>transporter<br>) , member |
| siRNA Disorazole DMSO Run2       | NM_0048<br>03 | SLC22A14 | 14 | 0.546003  | Inlier  | solute<br>carrier<br>family 22<br>(organic<br>cation<br>transporter<br>) , member |
| siRNA-Vinblastine Run1-<br>DMSO  | NM_0048<br>03 | SLC22A14 | 14 | 0.802997  | Inlier  | solute<br>carrier<br>family 22<br>(organic<br>cation<br>transporter<br>) , member |
| siRNA-Vinblastine Run2-<br>DMSO  | NM_0048<br>03 | SLC22A14 | 14 | 1.360016  | Inlier  | solute<br>carrier<br>family 22<br>(organic<br>cation<br>transporter<br>) , member |
| siRNA-Temozolomide Run3-<br>DMSO | NM_0184<br>20 | SLC22A15 | 15 | -5.304485 | Outlier | solute<br>carrier<br>family 22<br>(organic<br>cation<br>transporter<br>) , member |

Identification of Survival Genes in Human Glioblastoma Cells Using siRNA Screening  
 Nikhil G Thaker, Fang Zhang, Peter R. McDonald, Tong Ying Shun, Michael D Lewen, Ian F. Pollack, and John S. Lazo  
 Molecular Pharmacology

| siRNA Treatment              | Gene    | Accession | Gene     | Accession | Value     | Category                                                      |
|------------------------------|---------|-----------|----------|-----------|-----------|---------------------------------------------------------------|
| siRNA-Temozolomide Run1-DMSO | NM_0184 | 20        | SLC22A15 | 15        | -0.554752 | Inlier                                                        |
|                              |         |           |          |           |           | solute carrier family 22 (organic cation transporter), member |
| siRNA Disorazole DMSO Run1   | NM_0184 | 20        | SLC22A15 | 15        | -0.473889 | Inlier                                                        |
|                              |         |           |          |           |           | solute carrier family 22 (organic cation transporter), member |
| siRNA Disorazole DMSO Run2   | NM_0184 | 20        | SLC22A15 | 15        | -0.403689 | Inlier                                                        |
|                              |         |           |          |           |           | solute carrier family 22 (organic cation transporter), member |
| siRNA-Temozolomide Run2-DMSO | NM_0184 | 20        | SLC22A15 | 15        | 0.403688  | Inlier                                                        |
|                              |         |           |          |           |           | solute carrier family 22 (organic cation transporter), member |
| siRNA Disorazole DMSO Run3   | NM_0184 | 20        | SLC22A15 | 15        | 0.794248  | Inlier                                                        |
|                              |         |           |          |           |           | solute carrier family 22 (organic cation transporter), member |

Identification of Survival Genes in Human Glioblastoma Cells Using siRNA Screening  
 Nikhil G Thaker, Fang Zhang, Peter R. McDonald, Tong Ying Shun, Michael D Lewen, Ian F. Pollack, and John S. Lazo  
 Molecular Pharmacology

| siRNA Treatment              | Gene ID   | Gene Name | Accession | Score     | Category                                                      |
|------------------------------|-----------|-----------|-----------|-----------|---------------------------------------------------------------|
| siRNA-Vinblastine Run1-DMSO  | NM_018420 | SLC22A15  | 15        | 2.395957  | Inlier                                                        |
|                              |           |           |           |           | solute carrier family 22 (organic cation transporter), member |
| siRNA-Vinblastine Run2-DMSO  | NM_018420 | SLC22A15  | 15        | 3.227816  | Inlier                                                        |
|                              |           |           |           |           | solute carrier family 22 (organic cation transporter), member |
| siRNA-Temozolomide Run3-DMSO | NM_033125 | SLC22A16  | 16        | -2.108515 | Inlier                                                        |
|                              |           |           |           |           | solute carrier family 22 (organic cation transporter), member |
| siRNA Disorazole DMSO Run2   | NM_033125 | SLC22A16  | 16        | -1.062299 | Inlier                                                        |
|                              |           |           |           |           | solute carrier family 22 (organic cation transporter), member |
| siRNA-Temozolomide Run1-DMSO | NM_033125 | SLC22A16  | 16        | -0.60483  | Inlier                                                        |
|                              |           |           |           |           | solute carrier family 22 (organic cation transporter), member |

Identification of Survival Genes in Human Glioblastoma Cells Using siRNA Screening  
 Nikhil G Thaker, Fang Zhang, Peter R. McDonald, Tong Ying Shun, Michael D Lewen, Ian F. Pollack, and John S. Lazo  
 Molecular Pharmacology

| siRNA Treatment              | Gene ID   | Gene Name | Protein ID | Protein Name                                                     | Value     | Category |
|------------------------------|-----------|-----------|------------|------------------------------------------------------------------|-----------|----------|
| siRNA-Temozolomide Run2-DMSO | NM_033125 | SLC22A16  | 16         | solute carrier family 22 (organic cation transporter), member 16 | -0.190987 | Inlier   |
| siRNA Disorazole DMSO Run1   | NM_033125 | SLC22A16  | 16         | solute carrier family 22 (organic cation transporter), member 16 | 0.190986  | Inlier   |
| siRNA Disorazole DMSO Run3   | NM_033125 | SLC22A16  | 16         | solute carrier family 22 (organic cation transporter), member 16 | 0.195154  | Inlier   |
| siRNA-Vinblastine Run1-DMSO  | NM_033125 | SLC22A16  | 16         | solute carrier family 22 (organic cation transporter), member 16 | 0.74417   | Inlier   |
| siRNA-Vinblastine Run2-DMSO  | NM_033125 | SLC22A16  | 16         | solute carrier family 22 (organic cation transporter), member 16 | 1.478761  | Inlier   |

Identification of Survival Genes in Human Glioblastoma Cells Using siRNA Screening  
 Nikhil G Thaker, Fang Zhang, Peter R. McDonald, Tong Ying Shun, Michael D Lewen, Ian F. Pollack, and John S. Lazo  
 Molecular Pharmacology

| siRNA Treatment              | Gene ID   | Gene Name | Protein Name                                                     | Log Fold Change | Outlier Status |
|------------------------------|-----------|-----------|------------------------------------------------------------------|-----------------|----------------|
| siRNA-Temozolomide Run3-DMSO | NM_020372 | SLC22A17  | solute carrier family 22 (organic cation transporter), member 17 | -1.764873       | Inlier         |
| siRNA-Temozolomide Run2-DMSO | NM_020372 | SLC22A17  | solute carrier family 22 (organic cation transporter), member 17 | -0.722655       | Inlier         |
| siRNA Disorazole DMSO Run3   | NM_020372 | SLC22A17  | solute carrier family 22 (organic cation transporter), member 17 | -0.626346       | Inlier         |
| siRNA Disorazole DMSO Run1   | NM_020372 | SLC22A17  | solute carrier family 22 (organic cation transporter), member 17 | -0.007179       | Inlier         |
| siRNA-Temozolomide Run1-DMSO | NM_020372 | SLC22A17  | solute carrier family 22 (organic cation transporter), member 17 | 0.007179        | Inlier         |

Identification of Survival Genes in Human Glioblastoma Cells Using siRNA Screening  
 Nikhil G Thaker, Fang Zhang, Peter R. McDonald, Tong Ying Shun, Michael D Lewen, Ian F. Pollack, and John S. Lazo  
 Molecular Pharmacology

| siRNA                        | Gene    | Gene ID | Gene Description                                              | Value     | Outlier |
|------------------------------|---------|---------|---------------------------------------------------------------|-----------|---------|
| siRNA Disorazole DMSO Run2   | NM_0203 | 72      | SLC22A17 17                                                   | 0.441914  | Inlier  |
|                              |         |         | solute carrier family 22 (organic cation transporter), member |           |         |
| siRNA-Vinblastine Run2-DMSO  | NM_0203 | 72      | SLC22A17 17                                                   | 1.100846  | Inlier  |
|                              |         |         | solute carrier family 22 (organic cation transporter), member |           |         |
| siRNA-Vinblastine Run1-DMSO  | NM_0203 | 72      | SLC22A17 17                                                   | 1.125635  | Inlier  |
|                              |         |         | solute carrier family 22 (organic cation transporter), member |           |         |
| siRNA-Temozolomide Run3-DMSO | NM_1832 | 33      | SLC22A18 18                                                   | -2.757129 | Inlier  |
|                              |         |         | solute carrier family 22 (organic cation transporter), member |           |         |
| siRNA Disorazole DMSO Run3   | NM_1832 | 33      | SLC22A18 18                                                   | -0.606918 | Inlier  |
|                              |         |         | solute carrier family 22 (organic cation transporter), member |           |         |



Identification of Survival Genes in Human Glioblastoma Cells Using siRNA Screening  
 Nikhil G Thaker, Fang Zhang, Peter R. McDonald, Tong Ying Shun, Michael D Lewen, Ian F. Pollack, and John S. Lazo  
 Molecular Pharmacology

| siRNA Treatment              | Gene ID   | Gene Name | Gene Description                                                 | Value     | Category |
|------------------------------|-----------|-----------|------------------------------------------------------------------|-----------|----------|
| siRNA-Temozolomide Run1-DMSO | NM_183233 | SLC22A18  | solute carrier family 22 (organic cation transporter), member 18 | -0.434286 | Inlier   |
| siRNA Disorazole DMSO Run2   | NM_183233 | SLC22A18  | solute carrier family 22 (organic cation transporter), member 18 | -0.144821 | Inlier   |
| siRNA Disorazole DMSO Run1   | NM_183233 | SLC22A18  | solute carrier family 22 (organic cation transporter), member 18 | 0.144821  | Inlier   |
| siRNA-Temozolomide Run2-DMSO | NM_183233 | SLC22A18  | solute carrier family 22 (organic cation transporter), member 18 | 0.742082  | Inlier   |
| siRNA-Vinblastine Run1-DMSO  | NM_183233 | SLC22A18  | solute carrier family 22 (organic cation transporter), member 18 | 1.166346  | Inlier   |

Identification of Survival Genes in Human Glioblastoma Cells Using siRNA Screening  
 Nikhil G Thaker, Fang Zhang, Peter R. McDonald, Tong Ying Shun, Michael D Lewen, Ian F. Pollack, and John S. Lazo  
 Molecular Pharmacology

|                              |           |          |                                                                                |           |        |
|------------------------------|-----------|----------|--------------------------------------------------------------------------------|-----------|--------|
| siRNA-Vinblastine Run2-DMSO  | NM_183233 | SLC22A18 | solute carrier family 22 (organic cation transporter), member 18               | 1.348274  | Inlier |
| siRNA-Temozolomide Run3-DMSO | NM_007105 | SLC22A1L | solute carrier family 22 (organic cation transporter), member 1-like antisense | -0.959912 | Inlier |
| siRNA Disorazole DMSO Run3   | NM_007105 | SLC22A1L | solute carrier family 22 (organic cation transporter), member 1-like antisense | -0.696341 | Inlier |
| siRNA Disorazole DMSO Run2   | NM_007105 | SLC22A1L | solute carrier family 22 (organic cation transporter), member 1-like antisense | -0.652659 | Inlier |
| siRNA-Temozolomide Run2-DMSO | NM_007105 | SLC22A1L | solute carrier family 22 (organic cation transporter), member 1-like antisense | -0.286618 | Inlier |

Identification of Survival Genes in Human Glioblastoma Cells Using siRNA Screening

Nikhil G Thaker, Fang Zhang, Peter R. McDonald, Tong Ying Shun, Michael D Lewen, Ian F. Pollack, and John S. Lazo

Molecular Pharmacology

|                              |           |          |   |                                                                                |           |        |
|------------------------------|-----------|----------|---|--------------------------------------------------------------------------------|-----------|--------|
| siRNA-Temozolomide Run1-DMSO | NM_007105 | SLC22A1L | S | solute carrier family 22 (organic cation transporter), member 1-like antisense | 0.286617  | Inlier |
| siRNA Disorazole DMSO Run1   | NM_007105 | SLC22A1L | S | solute carrier family 22 (organic cation transporter), member 1-like antisense | 0.456451  | Inlier |
| siRNA-Vinblastine Run2-DMSO  | NM_007105 | SLC22A1L | S | solute carrier family 22 (organic cation transporter), member 1-like antisense | 2.158733  | Inlier |
| siRNA-Vinblastine Run1-DMSO  | NM_007105 | SLC22A1L | S | solute carrier family 22 (organic cation transporter), member 1-like antisense | 2.402573  | Inlier |
| siRNA Disorazole DMSO Run2   | NM_153191 | SLC22A2  | 2 | solute carrier family 22 (organic cation transporter), member 2                | -1.516717 | Inlier |

Identification of Survival Genes in Human Glioblastoma Cells Using siRNA Screening

Nikhil G Thaker, Fang Zhang, Peter R. McDonald, Tong Ying Shun, Michael D Lewen, Ian F. Pollack, and John S. Lazo

Molecular Pharmacology

| siRNA                        | siRNA         | siRNA   | siRNA | siRNA     | siRNA  | siRNA                                                                    | siRNA    | siRNA | siRNA |
|------------------------------|---------------|---------|-------|-----------|--------|--------------------------------------------------------------------------|----------|-------|-------|
| siRNA-Temozolomide Run3-DMSO | NM_1531<br>91 | SLC22A2 | 2     | -1.449687 | Inlier | solute<br>carrier<br>family 22<br>(organic<br>cation<br>transporter<br>) | , member |       |       |
| siRNA Disorazole DMSO Run3   | NM_1531<br>91 | SLC22A2 | 2     | -0.351309 | Inlier | solute<br>carrier<br>family 22<br>(organic<br>cation<br>transporter<br>) | , member |       |       |
| siRNA-Temozolomide Run1-DMSO | NM_1531<br>91 | SLC22A2 | 2     | -0.21879  | Inlier | solute<br>carrier<br>family 22<br>(organic<br>cation<br>transporter<br>) | , member |       |       |
| siRNA-Temozolomide Run2-DMSO | NM_1531<br>91 | SLC22A2 | 2     | 0.21879   | Inlier | solute<br>carrier<br>family 22<br>(organic<br>cation<br>transporter<br>) | , member |       |       |
| siRNA Disorazole DMSO Run1   | NM_1531<br>91 | SLC22A2 | 2     | 0.403469  | Inlier | solute<br>carrier<br>family 22<br>(organic<br>cation<br>transporter<br>) | , member |       |       |
| siRNA-Vinblastine Run2-DMSO  | NM_1531<br>91 | SLC22A2 | 2     | 0.945531  | Inlier | solute<br>carrier<br>family 22<br>(organic<br>cation<br>transporter<br>) | , member |       |       |

Identification of Survival Genes in Human Glioblastoma Cells Using siRNA Screening

Nikhil G Thaker, Fang Zhang, Peter R. McDonald, Tong Ying Shun, Michael D Lewen, Ian F. Pollack, and John S.

Lazo

Molecular Pharmacology

| siRNA                        | Gene      | Gene ID | Gene Name                                                                | Value     | Category |
|------------------------------|-----------|---------|--------------------------------------------------------------------------|-----------|----------|
| siRNA-Vinblastine Run1-DMSO  | NM_153191 | SLC22A2 | solute carrier family 22 (organic cation transporter), member 2          | 1.663507  | Inlier   |
| siRNA-Temozolomide Run3-DMSO | NM_021977 | SLC22A3 | solute carrier family 22 (extraneuronal monoamine transporter), member 3 | -1.198573 | Inlier   |
| siRNA Disorazole DMSO Run2   | NM_021977 | SLC22A3 | solute carrier family 22 (extraneuronal monoamine transporter), member 3 | -0.868067 | Inlier   |
| siRNA Disorazole DMSO Run3   | NM_021977 | SLC22A3 | solute carrier family 22 (extraneuronal monoamine transporter), member 3 | -0.467811 | Inlier   |
| siRNA-Temozolomide Run2-DMSO | NM_021977 | SLC22A3 | solute carrier family 22 (extraneuronal monoamine transporter), member 3 | -0.18756  | Inlier   |

Identification of Survival Genes in Human Glioblastoma Cells Using siRNA Screening

Nikhil G Thaker, Fang Zhang, Peter R. McDonald, Tong Ying Shun, Michael D Lewen, Ian F. Pollack, and John S. Lazo

Molecular Pharmacology

| siRNA Treatment              | Gene ID   | Gene Name | Log2 Fold Change | Annotation                                                                         |
|------------------------------|-----------|-----------|------------------|------------------------------------------------------------------------------------|
| siRNA-Temozolomide Run1-DMSO | NM_021977 | SLC22A3   | 0.187561         | Inlier<br>solute carrier family 22 (extraneuronal monoamine transporter), member 3 |
| siRNA Disorazole DMSO Run1   | NM_021977 | SLC22A3   | 0.480933         | Inlier<br>solute carrier family 22 (extraneuronal monoamine transporter), member 3 |
| siRNA-Vinblastine Run1-DMSO  | NM_021977 | SLC22A3   | 1.241242         | Inlier<br>solute carrier family 22 (extraneuronal monoamine transporter), member 3 |
| siRNA-Vinblastine Run2-DMSO  | NM_021977 | SLC22A3   | 1.479007         | Inlier<br>solute carrier family 22 (organic cation transporter), member 3          |
| siRNA-Temozolomide Run3-DMSO | NM_003059 | SLC22A4   | -1.368122        | Inlier<br>solute carrier family 22 (organic cation transporter), member 4          |

Identification of Survival Genes in Human Glioblastoma Cells Using siRNA Screening

Nikhil G Thaker, Fang Zhang, Peter R. McDonald, Tong Ying Shun, Michael D Lewen, Ian F. Pollack, and John S. Lazo

Molecular Pharmacology

| siRNA              | Condition | Gene          | Value   | Outlier | Gene Description |        |                                                                 |
|--------------------|-----------|---------------|---------|---------|------------------|--------|-----------------------------------------------------------------|
| siRNA Disorazole   | DMSO Run2 | NM_0030<br>59 | SLC22A4 | 4       | -0.716259        | Inlier | solute carrier family 22 (organic cation transporter), member 4 |
| siRNA-Temozolomide | Run2-DMSO | NM_0030<br>59 | SLC22A4 | 4       | -0.333976        | Inlier | solute carrier family 22 (organic cation transporter), member 4 |
| siRNA Disorazole   | DMSO Run3 | NM_0030<br>59 | SLC22A4 | 4       | -0.089275        | Inlier | solute carrier family 22 (organic cation transporter), member 4 |
| siRNA-Temozolomide | Run1-DMSO | NM_0030<br>59 | SLC22A4 | 4       | 0.089275         | Inlier | solute carrier family 22 (organic cation transporter), member 4 |
| siRNA Disorazole   | DMSO Run1 | NM_0030<br>59 | SLC22A4 | 4       | 0.632741         | Inlier | solute carrier family 22 (organic cation transporter), member 4 |
| siRNA-Vinblastine  | Run2-DMSO | NM_0030<br>59 | SLC22A4 | 4       | 1.131706         | Inlier | solute carrier family 22 (organic cation transporter), member 4 |

Identification of Survival Genes in Human Glioblastoma Cells Using siRNA Screening

Nikhil G Thaker, Fang Zhang, Peter R. McDonald, Tong Ying Shun, Michael D Lewen, Ian F. Pollack, and John S. Lazo

Molecular Pharmacology

| siRNA                        | Gene      | Accession | Gene | Member    | Value  | Category                                                        |
|------------------------------|-----------|-----------|------|-----------|--------|-----------------------------------------------------------------|
| siRNA-Vinblastine Run1-DMSO  | NM_003059 | SLC22A4   | 4    | 1.25974   | Inlier | solute carrier family 22 (organic cation transporter), member 4 |
| siRNA-Temozolomide Run3-DMSO | NM_003060 | SLC22A5   | 5    | -0.957612 | Inlier | solute carrier family 22 (organic cation transporter), member 5 |
| siRNA-Temozolomide Run1-DMSO | NM_003060 | SLC22A5   | 5    | -0.797714 | Inlier | solute carrier family 22 (organic cation transporter), member 5 |
| siRNA-Temozolomide Run2-DMSO | NM_003060 | SLC22A5   | 5    | -0.551286 | Inlier | solute carrier family 22 (organic cation transporter), member 5 |
| siRNA Disorazole DMSO Run2   | NM_003060 | SLC22A5   | 5    | -0.078027 | Inlier | solute carrier family 22 (organic cation transporter), member 5 |
| siRNA Disorazole DMSO Run3   | NM_003060 | SLC22A5   | 5    | 0.078028  | Inlier | solute carrier family 22 (organic cation transporter), member 5 |



Identification of Survival Genes in Human Glioblastoma Cells Using siRNA Screening

Nikhil G Thaker, Fang Zhang, Peter R. McDonald, Tong Ying Shun, Michael D Lewen, Ian F. Pollack, and John S. Lazo

Molecular Pharmacology

| siRNA Treatment              | Gene ID       | Gene Name | Gene Description                                                | Value     | Outlier Status |
|------------------------------|---------------|-----------|-----------------------------------------------------------------|-----------|----------------|
| siRNA Disorazole DMSO Run1   | NM_0030<br>60 | SLC22A5   | solute carrier family 22 (organic cation transporter), member 5 | 0.142323  | Inlier         |
| siRNA-Vinblastine Run1-DMSO  | NM_0030<br>60 | SLC22A5   | solute carrier family 22 (organic cation transporter), member 5 | 0.812799  | Inlier         |
| siRNA-Vinblastine Run2-DMSO  | NM_0030<br>60 | SLC22A5   | solute carrier family 22 (organic anion transporter), member 5  | 1.139392  | Inlier         |
| siRNA-Temozolomide Run3-DMSO | NM_1532<br>77 | SLC22A6   | solute carrier family 22 (organic anion transporter), member 6  | -0.959372 | Inlier         |
| siRNA-Temozolomide Run2-DMSO | NM_1532<br>77 | SLC22A6   | solute carrier family 22 (organic anion transporter), member 6  | -0.634528 | Inlier         |
| siRNA Disorazole DMSO Run3   | NM_1532<br>77 | SLC22A6   | solute carrier family 22 (organic anion transporter), member 6  | -0.620153 | Inlier         |

Identification of Survival Genes in Human Glioblastoma Cells Using siRNA Screening

Nikhil G Thaker, Fang Zhang, Peter R. McDonald, Tong Ying Shun, Michael D Lewen, Ian F. Pollack, and John S. Lazo

Molecular Pharmacology

| siRNA Treatment              | Gene    | Gene ID   | Gene Description                                               | Value     | Outlier Status |
|------------------------------|---------|-----------|----------------------------------------------------------------|-----------|----------------|
| siRNA Disorazole DMSO Run2   | SLC22A6 | NM_153277 | solute carrier family 22 (organic anion transporter), member 6 | -0.37556  | Inlier         |
| siRNA Disorazole DMSO Run1   | SLC22A6 | NM_153277 | solute carrier family 22 (organic anion transporter), member 6 | 0.37556   | Inlier         |
| siRNA-Temozolomide Run1-DMSO | SLC22A6 | NM_153277 | solute carrier family 22 (organic anion transporter), member 6 | 0.714472  | Inlier         |
| siRNA-Vinblastine Run1-DMSO  | SLC22A6 | NM_153277 | solute carrier family 22 (organic anion transporter), member 6 | 1.006896  | Inlier         |
| siRNA-Vinblastine Run2-DMSO  | SLC22A6 | NM_153277 | solute carrier family 22 (organic anion transporter), member 6 | 1.56155   | Inlier         |
| siRNA-Temozolomide Run1-DMSO | SLC22A7 | NM_153320 | solute carrier family 22 (organic anion transporter), member 7 | -0.841451 | Inlier         |



Identification of Survival Genes in Human Glioblastoma Cells Using siRNA Screening

Nikhil G Thaker, Fang Zhang, Peter R. McDonald, Tong Ying Shun, Michael D Lewen, Ian F. Pollack, and John S. Lazo

Molecular Pharmacology

| siRNA                        | Gene      | Gene ID | Gene Name | Gene Description                                               | Value     | Category |
|------------------------------|-----------|---------|-----------|----------------------------------------------------------------|-----------|----------|
| siRNA-Vinblastine Run2-DMSO  | NM_153320 | SLC22A7 | 7         | solute carrier family 22 (organic anion transporter), member 7 | 1.04114   | Inlier   |
| siRNA Disorazole DMSO Run2   | NM_004254 | SLC22A8 | 8         | solute carrier family 22 (organic anion transporter), member 8 | -0.879535 | Inlier   |
| siRNA-Temozolomide Run1-DMSO | NM_004254 | SLC22A8 | 8         | solute carrier family 22 (organic anion transporter), member 8 | -0.469465 | Inlier   |
| siRNA-Temozolomide Run3-DMSO | NM_004254 | SLC22A8 | 8         | solute carrier family 22 (organic anion transporter), member 8 | -0.455805 | Inlier   |
| siRNA Disorazole DMSO Run1   | NM_004254 | SLC22A8 | 8         | solute carrier family 22 (organic anion transporter), member 8 | -0.317982 | Inlier   |
| siRNA-Temozolomide Run2-DMSO | NM_004254 | SLC22A8 | 8         | solute carrier family 22 (organic anion transporter), member 8 | 0.317981  | Inlier   |

Identification of Survival Genes in Human Glioblastoma Cells Using siRNA Screening

Nikhil G Thaker, Fang Zhang, Peter R. McDonald, Tong Ying Shun, Michael D Lewen, Ian F. Pollack, and John S. Lazo

Molecular Pharmacology

| siRNA Treatment              | Gene ID   | Gene Name | Gene Description                                                      | Log2 Fold Change | Significance |
|------------------------------|-----------|-----------|-----------------------------------------------------------------------|------------------|--------------|
| siRNA-Vinblastine Run1-DMSO  | NM_004254 | SLC22A8   | solute carrier family 22 (organic anion transporter), member 8        | 1.151783         | Inlier       |
| siRNA Disorazole DMSO Run3   | NM_004254 | SLC22A8   | solute carrier family 22 (organic anion transporter), member 8        | 1.485545         | Inlier       |
| siRNA-Vinblastine Run2-DMSO  | NM_004254 | SLC22A8   | solute carrier family 22 (organic anion/cation transporter), member 8 | 1.863851         | Inlier       |
| siRNA-Temozolomide Run3-DMSO | NM_080866 | SLC22A9   | solute carrier family 22 (organic anion/cation transporter), member 9 | -1.576198        | Inlier       |
| siRNA Disorazole DMSO Run2   | NM_080866 | SLC22A9   | solute carrier family 22 (organic anion/cation transporter), member 9 | -0.963452        | Inlier       |
| siRNA-Temozolomide Run2-DMSO | NM_080866 | SLC22A9   | solute carrier family 22 (organic anion/cation transporter), member 9 | -0.594177        | Inlier       |

Identification of Survival Genes in Human Glioblastoma Cells Using siRNA Screening

Nikhil G Thaker, Fang Zhang, Peter R. McDonald, Tong Ying Shun, Michael D Lewen, Ian F. Pollack, and John S. Lazo

Molecular Pharmacology

| siRNA Treatment              | Gene      | Gene ID | Gene Name                                                             | Value     | Outlier Status |
|------------------------------|-----------|---------|-----------------------------------------------------------------------|-----------|----------------|
| siRNA-Temozolomide Run1-DMSO | NM_080866 | SLC22A9 | solute carrier family 22 (organic anion/cation transporter), member 9 | -0.194393 | Inlier         |
| siRNA Disorazole DMSO Run1   | NM_080866 | SLC22A9 | solute carrier family 22 (organic anion/cation transporter), member 9 | 0.194392  | Inlier         |
| siRNA-Vinblastine Run1-DMSO  | NM_080866 | SLC22A9 | solute carrier family 22 (organic anion/cation transporter), member 9 | 0.565555  | Inlier         |
| siRNA Disorazole DMSO Run3   | NM_080866 | SLC22A9 | solute carrier family 22 (organic anion/cation transporter), member 9 | 0.754822  | Inlier         |
| siRNA-Vinblastine Run2-DMSO  | NM_080866 | SLC22A9 | solute carrier family 22 (organic anion/cation transporter), member 9 | 1.133983  | Inlier         |

Identification of Survival Genes in Human Glioblastoma Cells Using siRNA Screening

Nikhil G Thaker, Fang Zhang, Peter R. McDonald, Tong Ying Shun, Michael D Lewen, Ian F. Pollack, and John S. Lazo

Molecular Pharmacology

| siRNA Treatment              | Gene ID   | Gene Name | Log Fold Change | Category |
|------------------------------|-----------|-----------|-----------------|----------|
| siRNA Disorazole DMSO Run1   | NM_152685 | SLC23A1   | -1.684811       | Inlier   |
| siRNA-Temozolomide Run1-DMSO | NM_152685 | SLC23A1   | -1.446907       | Inlier   |
| siRNA-Temozolomide Run2-DMSO | NM_152685 | SLC23A1   | -0.546775       | Inlier   |
| siRNA-Vinblastine Run1-DMSO  | NM_152685 | SLC23A1   | -0.081116       | Inlier   |
| siRNA Disorazole DMSO Run2   | NM_152685 | SLC23A1   | 0.081116        | Inlier   |
| siRNA-Temozolomide Run3-DMSO | NM_152685 | SLC23A1   | 0.199472        | Inlier   |

solute carrier family 23 (nucleobase transporter

s), member 1

solute carrier family 23 (nucleobase transporter

s), member 1

solute carrier family 23 (nucleobase transporter

s), member 1

solute carrier family 23 (nucleobase transporter

s), member 1

solute carrier family 23 (nucleobase transporter

s), member 1

solute carrier family 23 (nucleobase transporter

s), member 1

Identification of Survival Genes in Human Glioblastoma Cells Using siRNA Screening

Nikhil G Thaker, Fang Zhang, Peter R. McDonald, Tong Ying Shun, Michael D Lewen, Ian F. Pollack, and John S. Lazo

Molecular Pharmacology

| siRNA                        | siRNA     | siRNA   | siRNA                                                        | siRNA     | siRNA  | siRNA | siRNA | siRNA | siRNA |
|------------------------------|-----------|---------|--------------------------------------------------------------|-----------|--------|-------|-------|-------|-------|
| siRNA-Vinblastine Run2-DMSO  | NM_152685 | SLC23A1 | solute carrier family 23 (nucleobase transporters), member 1 | 0.802225  | Inlier |       |       |       |       |
| siRNA Disorazole DMSO Run3   | NM_152685 | SLC23A1 | solute carrier family 23 (nucleobase transporters), member 1 | 3.18106   | Inlier |       |       |       |       |
| siRNA-Temozolomide Run3-DMSO | NM_203327 | SLC23A2 | solute carrier family 23 (nucleobase transporters), member 2 | -0.771952 | Inlier |       |       |       |       |
| siRNA Disorazole DMSO Run2   | NM_203327 | SLC23A2 | solute carrier family 23 (nucleobase transporters), member 2 | -0.714878 | Inlier |       |       |       |       |
| siRNA-Temozolomide Run2-DMSO | NM_203327 | SLC23A2 | solute carrier family 23 (nucleobase transporters), member 2 | -0.634122 | Inlier |       |       |       |       |
| siRNA Disorazole DMSO Run3   | NM_203327 | SLC23A2 | solute carrier family 23 (nucleobase transporters), member 2 | -0.416722 | Inlier |       |       |       |       |



Identification of Survival Genes in Human Glioblastoma Cells Using siRNA Screening

Nikhil G Thaker, Fang Zhang, Peter R. McDonald, Tong Ying Shun, Michael D Lewen, Ian F. Pollack, and John S. Lazo

Molecular Pharmacology

| siRNA                        | Gene    | Accession     | Member   | Value     | Category |
|------------------------------|---------|---------------|----------|-----------|----------|
| siRNA Disorazole DMSO Run1   | SLC23A2 | NM_2033<br>27 | member 2 | 0.416722  | Inlier   |
| siRNA-Temozolomide Run1-DMSO | SLC23A2 | NM_2033<br>27 | member 2 | 0.588159  | Inlier   |
| siRNA-Vinblastine Run1-DMSO  | SLC23A2 | NM_2033<br>27 | member 2 | 1.409573  | Inlier   |
| siRNA-Vinblastine Run2-DMSO  | SLC23A2 | NM_2033<br>27 | member 2 | 1.905844  | Inlier   |
| siRNA Disorazole DMSO Run1   | SLC23A3 | NM_1447<br>12 | member 3 | -2.035882 | Inlier   |
| siRNA-Temozolomide Run1-DMSO | SLC23A3 | NM_1447<br>12 | member 3 | -0.931099 | Inlier   |

solute carrier family 23 (nucleobase transporters), member 2  
solute carrier family 23 (nucleobase transporters), member 3

Identification of Survival Genes in Human Glioblastoma Cells Using siRNA Screening

Nikhil G Thaker, Fang Zhang, Peter R. McDonald, Tong Ying Shun, Michael D Lewen, Ian F. Pollack, and John S. Lazo

Molecular Pharmacology

| siRNA Treatment              | Gene      | Gene ID | Gene Name                                                    | Log Fold Change | Significance |
|------------------------------|-----------|---------|--------------------------------------------------------------|-----------------|--------------|
| siRNA-Temozolomide Run3-DMSO | NM_144712 | SLC23A3 | solute carrier family 23 (nucleobase transporters), member 3 | -0.722761       | Inlier       |
| siRNA-Temozolomide Run2-DMSO | NM_144712 | SLC23A3 | solute carrier family 23 (nucleobase transporters), member 3 | -0.10668        | Inlier       |
| siRNA Disorazole DMSO Run2   | NM_144712 | SLC23A3 | solute carrier family 23 (nucleobase transporters), member 3 | 0.10668         | Inlier       |
| siRNA-Vinblastine Run1-DMSO  | NM_144712 | SLC23A3 | solute carrier family 23 (nucleobase transporters), member 3 | 0.137047        | Inlier       |
| siRNA Disorazole DMSO Run3   | NM_144712 | SLC23A3 | solute carrier family 23 (nucleobase transporters), member 3 | 0.626239        | Inlier       |
| siRNA-Vinblastine Run2-DMSO  | NM_144712 | SLC23A3 | solute carrier family 23 (nucleobase transporters), member 3 | 1.124428        | Inlier       |

Identification of Survival Genes in Human Glioblastoma Cells Using siRNA Screening

Nikhil G Thaker, Fang Zhang, Peter R. McDonald, Tong Ying Shun, Michael D Lewen, Ian F. Pollack, and John S.

Lazo

Molecular Pharmacology

| siRNA Treatment              | Gene ID   | Gene Name | Log Fold Change | Outlier Status |
|------------------------------|-----------|-----------|-----------------|----------------|
| siRNA-Temozolomide Run3-DMSO | NM_004727 | SLC24A1   | -0.843128       | Inlier         |
| siRNA-Temozolomide Run1-DMSO | NM_004727 | SLC24A1   | -0.611812       | Inlier         |
| siRNA-Temozolomide Run2-DMSO | NM_004727 | SLC24A1   | -0.485699       | Inlier         |
| siRNA-Vinblastine Run2-DMSO  | NM_004727 | SLC24A1   | -0.111353       | Inlier         |
| siRNA Disorazole DMSO Run1   | NM_004727 | SLC24A1   | 0.111353        | Inlier         |

solute carrier family 24 (sodium/potassium/calcium exchanger), member 1

Identification of Survival Genes in Human Glioblastoma Cells Using siRNA Screening  
 Nikhil G Thaker, Fang Zhang, Peter R. McDonald, Tong Ying Shun, Michael D Lewen, Ian F. Pollack, and John S. Lazo  
 Molecular Pharmacology

| siRNA                   | Run  | Gene    | Accession | Gene ID | Score     | Category |
|-------------------------|------|---------|-----------|---------|-----------|----------|
| siRNA Disorazole DMSO   | Run3 | SLC24A1 | NM_004727 | 1       | 0.737188  | Inlier   |
| siRNA-Vinblastine DMSO  | Run1 | SLC24A1 | NM_004727 | 1       | 0.741076  | Inlier   |
| siRNA Disorazole DMSO   | Run2 | SLC24A1 | NM_004727 | 1       | 1.097891  | Inlier   |
| siRNA-Temozolomide DMSO | Run2 | SLC24A2 | NM_020344 | 2       | -0.973036 | Inlier   |
| siRNA-Temozolomide DMSO | Run3 | SLC24A2 | NM_020344 | 2       | -0.754609 | Inlier   |

solute carrier family 24 (sodium/potassium/calcium exchanger), member 1

solute carrier family 24 (sodium/potassium/calcium exchanger), member 1

solute carrier family 24 (sodium/potassium/calcium exchanger), member 1

solute carrier family 24 (sodium/potassium/calcium exchanger), member 2

solute carrier family 24 (sodium/potassium/calcium exchanger), member 2

Identification of Survival Genes in Human Glioblastoma Cells Using siRNA Screening

Nikhil G Thaker, Fang Zhang, Peter R. McDonald, Tong Ying Shun, Michael D Lewen, Ian F. Pollack, and John S. Lazo

Molecular Pharmacology

| siRNA              | siRNA     | siRNA | siRNA | siRNA   | siRNA   | siRNA | siRNA     | siRNA  | siRNA                                                                   |
|--------------------|-----------|-------|-------|---------|---------|-------|-----------|--------|-------------------------------------------------------------------------|
| siRNA Disorazole   | DMSO      | Run1  | 44    | NM_0203 | SLC24A2 | 2     | -0.594391 | Inlier | solute carrier family 24 (sodium/potassium/calcium exchanger), member 2 |
| siRNA-Temozolomide | Run1-DMSO |       | 44    | NM_0203 | SLC24A2 | 2     | -0.24429  | Inlier | solute carrier family 24 (sodium/potassium/calcium exchanger), member 2 |
| siRNA Disorazole   | DMSO      | Run3  | 44    | NM_0203 | SLC24A2 | 2     | 0.24429   | Inlier | solute carrier family 24 (sodium/potassium/calcium exchanger), member 2 |
| siRNA-Vinblastine  | Run2-DMSO |       | 44    | NM_0203 | SLC24A2 | 2     | 0.43689   | Inlier | solute carrier family 24 (sodium/potassium/calcium exchanger), member 2 |
| siRNA Disorazole   | DMSO      | Run2  | 44    | NM_0203 | SLC24A2 | 2     | 0.837759  | Inlier | solute carrier family 24 (sodium/potassium/calcium exchanger), member 2 |

Identification of Survival Genes in Human Glioblastoma Cells Using siRNA Screening

Nikhil G Thaker, Fang Zhang, Peter R. McDonald, Tong Ying Shun, Michael D Lewen, Ian F. Pollack, and John S. Lazo

Molecular Pharmacology

| siRNA Treatment              | Gene ID   | Gene Name | Gene Description                                                        | Log Fold Change | Outlier Status |
|------------------------------|-----------|-----------|-------------------------------------------------------------------------|-----------------|----------------|
| siRNA-Vinblastine Run1-DMSO  | NM_020344 | SLC24A2   | solute carrier family 24 (sodium/potassium/calcium exchanger), member 2 | 0.873461        | Inlier         |
| siRNA-Temozolomide Run2-DMSO | NM_020689 | SLC24A3   | solute carrier family 24 (sodium/potassium/calcium exchanger), member 3 | -1.644726       | Inlier         |
| siRNA-Temozolomide Run1-DMSO | NM_020689 | SLC24A3   | solute carrier family 24 (sodium/potassium/calcium exchanger), member 3 | -1.257796       | Inlier         |
| siRNA Disorazole DMSO Run1   | NM_020689 | SLC24A3   | solute carrier family 24 (sodium/potassium/calcium exchanger), member 3 | -0.436776       | Inlier         |
| siRNA-Vinblastine Run2-DMSO  | NM_020689 | SLC24A3   | solute carrier family 24 (sodium/potassium/calcium exchanger), member 3 | -0.217133       | Inlier         |

Identification of Survival Genes in Human Glioblastoma Cells Using siRNA Screening

Nikhil G Thaker, Fang Zhang, Peter R. McDonald, Tong Ying Shun, Michael D Lewen, Ian F. Pollack, and John S. Lazo

Molecular Pharmacology

| siRNA Treatment              | Gene ID   | Gene Name | Accession | Value     | Category |
|------------------------------|-----------|-----------|-----------|-----------|----------|
| siRNA-Temozolomide Run3-DMSO | NM_020689 | SLC24A3   | 3         | 0.217134  | Inlier   |
| siRNA-Vinblastine Run1-DMSO  | NM_020689 | SLC24A3   | 3         | 0.549496  | Inlier   |
| siRNA Disorazole DMSO Run3   | NM_020689 | SLC24A3   | 3         | 0.799504  | Inlier   |
| siRNA Disorazole DMSO Run2   | NM_020689 | SLC24A3   | 3         | 1.237201  | Inlier   |
| siRNA-Temozolomide Run3-DMSO | NM_153647 | SLC24A4   | 4         | -1.328212 | Inlier   |

solute carrier family 24 (sodium/potassium/calcium exchanger), member 3

solute carrier family 24 (sodium/potassium/calcium exchanger), member 4

Identification of Survival Genes in Human Glioblastoma Cells Using siRNA Screening

Nikhil G Thaker, Fang Zhang, Peter R. McDonald, Tong Ying Shun, Michael D Lewen, Ian F. Pollack, and John S.

Lazo

Molecular Pharmacology

| siRNA Treatment              | Gene ID   | Gene Name | Log2 Fold Change | Category |
|------------------------------|-----------|-----------|------------------|----------|
| siRNA-Temozolomide Run2-DMSO | NM_153647 | SLC24A4   | -0.872442        | Inlier   |
| siRNA-Temozolomide Run1-DMSO | NM_153647 | SLC24A4   | -0.317238        | Inlier   |
| siRNA Disorazole DMSO Run1   | NM_153647 | SLC24A4   | -0.008447        | Inlier   |
| siRNA-Vinblastine Run2-DMSO  | NM_153647 | SLC24A4   | 0.008447         | Inlier   |
| siRNA Disorazole DMSO Run3   | NM_153647 | SLC24A4   | 0.476558         | Inlier   |

solute carrier family 24 (sodium/potassium/calcium exchanger), member 4



Identification of Survival Genes in Human Glioblastoma Cells Using siRNA Screening

Nikhil G Thaker, Fang Zhang, Peter R. McDonald, Tong Ying Shun, Michael D Lewen, Ian F. Pollack, and John S. Lazo

Molecular Pharmacology

|                              |               |         |   |           |        |
|------------------------------|---------------|---------|---|-----------|--------|
| siRNA Disorazole DMSO Run2   | NM_1536<br>47 | SLC24A4 | 4 | 1.131937  | Inlier |
|                              |               |         |   |           |        |
| siRNA-Vinblastine Run1-DMSO  | NM_1536<br>47 | SLC24A4 | 4 | 1.50342   | Inlier |
|                              |               |         |   |           |        |
| siRNA-Temozolomide Run3-DMSO | NM_0059<br>84 | SLC25A1 | 1 | -1.483791 | Inlier |
|                              |               |         |   |           |        |
| siRNA-Temozolomide Run2-DMSO | NM_0059<br>84 | SLC25A1 | 1 | -0.677092 | Inlier |
|                              |               |         |   |           |        |
| siRNA Disorazole DMSO Run3   | NM_0059<br>84 | SLC25A1 | 1 | -0.429354 | Inlier |

solute carrier family 24 (sodium/potassium/calcium exchanger), member 4

solute carrier family 24 (sodium/potassium/calcium exchanger), member 4

solute carrier family 25 (mitochondrial carrier; citrate transporter), member 1

solute carrier family 25 (mitochondrial carrier; citrate transporter), member 1

solute carrier family 25 (mitochondrial carrier; citrate transporter), member 1

Identification of Survival Genes in Human Glioblastoma Cells Using siRNA Screening

Nikhil G Thaker, Fang Zhang, Peter R. McDonald, Tong Ying Shun, Michael D Lewen, Ian F. Pollack, and John S. Lazo

Molecular Pharmacology

| siRNA Treatment              | Gene    | Gene ID | Accession | Log Fold Change | Category |
|------------------------------|---------|---------|-----------|-----------------|----------|
| siRNA Disorazole DMSO Run2   | SLC25A1 | NM_0059 | 84        | -0.077176       | Inlier   |
| siRNA-Temozolomide Run1-DMSO | SLC25A1 | NM_0059 | 84        | 0.077176        | Inlier   |
| siRNA Disorazole DMSO Run1   | SLC25A1 | NM_0059 | 84        | 0.671908        | Inlier   |
| siRNA-Vinblastine Run2-DMSO  | SLC25A1 | NM_0059 | 84        | 1.164768        | Inlier   |
| siRNA-Vinblastine Run1-DMSO  | SLC25A1 | NM_0059 | 84        | 1.615933        | Inlier   |

solute carrier family 25 (mitochondrial carrier; citrate transporter), member 1

solute carrier family 25 (mitochondrial carrier; citrate transporter), member 1

solute carrier family 25 (mitochondrial carrier; citrate transporter), member 1

solute carrier family 25 (mitochondrial carrier; citrate transporter), member 1

solute carrier family 25 (mitochondrial carrier; citrate transporter), member 1

Identification of Survival Genes in Human Glioblastoma Cells Using siRNA Screening

Nikhil G Thaker, Fang Zhang, Peter R. McDonald, Tong Ying Shun, Michael D Lewen, Ian F. Pollack, and John S.

Lazo

Molecular Pharmacology

| siRNA Treatment              | Gene      | Accession | Gene Name                                                                              | Log Fold Change | Category |
|------------------------------|-----------|-----------|----------------------------------------------------------------------------------------|-----------------|----------|
| siRNA-Temozolomide Run3-DMSO | NM_012140 | SLC25A10  | solute carrier family 25 (mitochondrial carrier; dicarboxylate transporter), member 10 | -3.487264       | Inlier   |
| siRNA-Temozolomide Run2-DMSO | NM_012140 | SLC25A10  | solute carrier family 25 (mitochondrial carrier; dicarboxylate transporter), member 10 | -2.100827       | Inlier   |
| siRNA Disorazole DMSO Run3   | NM_012140 | SLC25A10  | solute carrier family 25 (mitochondrial carrier; dicarboxylate transporter), member 10 | -0.440748       | Inlier   |
| siRNA-Temozolomide Run1-DMSO | NM_012140 | SLC25A10  | solute carrier family 25 (mitochondrial carrier; dicarboxylate transporter), member 10 | -0.105322       | Inlier   |

Identification of Survival Genes in Human Glioblastoma Cells Using siRNA Screening  
 Nikhil G Thaker, Fang Zhang, Peter R. McDonald, Tong Ying Shun, Michael D Lewen, Ian F. Pollack, and John S. Lazo  
 Molecular Pharmacology

| siRNA             | Condition | Run  | Gene     | Accession     | Gene Description                                                                       | Score    | Inlier |
|-------------------|-----------|------|----------|---------------|----------------------------------------------------------------------------------------|----------|--------|
| siRNA Disorazole  | DMSO      | Run1 | SLC25A10 | NM_0121<br>40 | solute carrier family 25 (mitochondrial carrier; dicarboxylate transporter), member 10 | 0.105322 | Inlier |
| siRNA Disorazole  | DMSO      | Run2 | SLC25A10 | NM_0121<br>40 | solute carrier family 25 (mitochondrial carrier; dicarboxylate transporter), member 10 | 0.163384 | Inlier |
| siRNA-Vinblastine | Run2-DMSO |      | SLC25A10 | NM_0121<br>40 | solute carrier family 25 (mitochondrial carrier; dicarboxylate transporter), member 10 | 0.908252 | Inlier |
| siRNA-Vinblastine | Run1-DMSO |      | SLC25A10 | NM_0121<br>40 | solute carrier family 25 (mitochondrial carrier; dicarboxylate transporter), member 10 | 1.115559 | Inlier |

Identification of Survival Genes in Human Glioblastoma Cells Using siRNA Screening  
 Nikhil G Thaker, Fang Zhang, Peter R. McDonald, Tong Ying Shun, Michael D Lewen, Ian F. Pollack, and John S. Lazo  
 Molecular Pharmacology

|                              |           |          |    |                                                                                |           |        |
|------------------------------|-----------|----------|----|--------------------------------------------------------------------------------|-----------|--------|
| siRNA-Vinblastine Run2-DMSO  | NM_003562 | SLC25A11 | 11 | solute carrier family 25 (mitochondrial carrier; oxoglutarate carrier), member | -1.036643 | Inlier |
| siRNA-Temozolomide Run3-DMSO | NM_003562 | SLC25A11 | 11 | solute carrier family 25 (mitochondrial carrier; oxoglutarate carrier), member | -0.951637 | Inlier |
| siRNA Disorazole DMSO Run3   | NM_003562 | SLC25A11 | 11 | solute carrier family 25 (mitochondrial carrier; oxoglutarate carrier), member | -0.397363 | Inlier |
| siRNA Disorazole DMSO Run1   | NM_003562 | SLC25A11 | 11 | solute carrier family 25 (mitochondrial carrier; oxoglutarate carrier), member | -0.0651   | Inlier |

Identification of Survival Genes in Human Glioblastoma Cells Using siRNA Screening

Nikhil G Thaker, Fang Zhang, Peter R. McDonald, Tong Ying Shun, Michael D Lewen, Ian F. Pollack, and John S. Lazo

Molecular Pharmacology

|                              |           |          |    |          |        |                                                                                |
|------------------------------|-----------|----------|----|----------|--------|--------------------------------------------------------------------------------|
| siRNA-Temozolomide Run1-DMSO | NM_003562 | SLC25A11 | 11 | 0.0651   | Inlier | solute carrier family 25 (mitochondrial carrier; oxoglutarate carrier), member |
| siRNA-Temozolomide Run2-DMSO | NM_003562 | SLC25A11 | 11 | 0.097649 | Inlier | solute carrier family 25 (mitochondrial carrier; oxoglutarate carrier), member |
| siRNA Disorazole DMSO Run2   | NM_003562 | SLC25A11 | 11 | 3.358994 | Inlier | solute carrier family 25 (mitochondrial carrier; oxoglutarate carrier), member |
| siRNA-Vinblastine Run1-DMSO  | NM_003562 | SLC25A11 | 11 | 3.430198 | Inlier | solute carrier family 25 (mitochondrial carrier; oxoglutarate carrier), member |

Identification of Survival Genes in Human Glioblastoma Cells Using siRNA Screening

Nikhil G Thaker, Fang Zhang, Peter R. McDonald, Tong Ying Shun, Michael D Lewen, Ian F. Pollack, and John S. Lazo

Molecular Pharmacology

| siRNA Treatment              | Gene     | Gene ID   | Gene Description                                                    | Value     | Outlier Status |
|------------------------------|----------|-----------|---------------------------------------------------------------------|-----------|----------------|
| siRNA-Temozolomide Run3-DMSO | SLC25A12 | NM_003705 | solute carrier family 25 (mitochondrial carrier, Aralar), member 12 | -0.780001 | Inlier         |
| siRNA Disorazole DMSO Run3   | SLC25A12 | NM_003705 | solute carrier family 25 (mitochondrial carrier, Aralar), member 12 | -0.768096 | Inlier         |
| siRNA-Temozolomide Run2-DMSO | SLC25A12 | NM_003705 | solute carrier family 25 (mitochondrial carrier, Aralar), member 12 | -0.580904 | Inlier         |
| siRNA-Vinblastine Run2-DMSO  | SLC25A12 | NM_003705 | solute carrier family 25 (mitochondrial carrier, Aralar), member 12 | -0.207668 | Inlier         |
| siRNA Disorazole DMSO Run1   | SLC25A12 | NM_003705 | solute carrier family 25 (mitochondrial carrier, Aralar), member 12 | 0.207667  | Inlier         |

Identification of Survival Genes in Human Glioblastoma Cells Using siRNA Screening  
 Nikhil G Thaker, Fang Zhang, Peter R. McDonald, Tong Ying Shun, Michael D Lewen, Ian F. Pollack, and John S. Lazo

Molecular Pharmacology

| siRNA Treatment              | Gene ID   | Gene Name | Gene Description                                                    | Value     | Category |
|------------------------------|-----------|-----------|---------------------------------------------------------------------|-----------|----------|
| siRNA-Temozolomide Run1-DMSO | NM_003705 | SLC25A12  | 12 solute carrier family 25 (mitochondrial carrier, Aralar), member | 0.465386  | Inlier   |
| siRNA Disorazole DMSO Run2   | NM_003705 | SLC25A12  | 12 solute carrier family 25 (mitochondrial carrier, Aralar), member | 4.00363   | Outlier  |
| siRNA-Vinblastine Run1-DMSO  | NM_003705 | SLC25A12  | 12 solute carrier family 25 (mitochondrial carrier, Aralar), member | 4.043085  | Outlier  |
| siRNA-Temozolomide Run3-DMSO | NM_014251 | SLC25A13  | 13 (citrin) solute carrier family 25, member                        | -2.622797 | Inlier   |
| siRNA-Temozolomide Run1-DMSO | NM_014251 | SLC25A13  | 13 (citrin) solute carrier family 25, member                        | -0.880924 | Inlier   |
| siRNA-Temozolomide Run2-DMSO | NM_014251 | SLC25A13  | 13 (citrin) solute carrier family 25, member                        | -0.468076 | Inlier   |
| siRNA-Vinblastine Run2-DMSO  | NM_014251 | SLC25A13  | 13 (citrin) solute carrier family 25, member                        | -0.263375 | Inlier   |
| siRNA Disorazole DMSO Run1   | NM_014251 | SLC25A13  | 13 (citrin) solute carrier family 25, member                        | 0.263375  | Inlier   |



Identification of Survival Genes in Human Glioblastoma Cells Using siRNA Screening  
 Nikhil G Thaker, Fang Zhang, Peter R. McDonald, Tong Ying Shun, Michael D Lewen, Ian F. Pollack, and John S. Lazo

Molecular Pharmacology

| siRNA Treatment              | Gene    | Accession | Gene Name                                                          | Value     | Category |
|------------------------------|---------|-----------|--------------------------------------------------------------------|-----------|----------|
| siRNA Disorazole DMSO Run3   | NM_0142 | 51        | SLC25A13                                                           | 0.281186  | Inlier   |
|                              |         |           | 13 (citrin) solute carrier family 25, member                       |           |          |
| siRNA-Vinblastine Run1-DMSO  | NM_0142 | 51        | SLC25A13                                                           | 1.937899  | Inlier   |
|                              |         |           | 13 (citrin) solute carrier family 25, member                       |           |          |
| siRNA Disorazole DMSO Run2   | NM_0142 | 51        | SLC25A13                                                           | 3.297429  | Inlier   |
|                              |         |           | 13 (citrin) solute carrier family 25, member                       |           |          |
| siRNA-Temozolomide Run3-DMSO | NM_0228 | 10        | SLC25A14                                                           | -2.680051 | Inlier   |
|                              |         |           | 14 solute carrier family 25 (mitochondrial carrier, brain), member |           |          |
| siRNA Disorazole DMSO Run1   | NM_0228 | 10        | SLC25A14                                                           | -0.817364 | Inlier   |
|                              |         |           | 14 solute carrier family 25 (mitochondrial carrier, brain), member |           |          |
| siRNA-Temozolomide Run1-DMSO | NM_0228 | 10        | SLC25A14                                                           | -0.209856 | Inlier   |
|                              |         |           | 14 solute carrier family 25 (mitochondrial carrier, brain), member |           |          |
| siRNA-Temozolomide Run2-DMSO | NM_0228 | 10        | SLC25A14                                                           | -0.042149 | Inlier   |
|                              |         |           | 14 solute carrier family 25 (mitochondrial carrier, brain), member |           |          |

Identification of Survival Genes in Human Glioblastoma Cells Using siRNA Screening

Nikhil G Thaker, Fang Zhang, Peter R. McDonald, Tong Ying Shun, Michael D Lewen, Ian F. Pollack, and John S. Lazo

Molecular Pharmacology

| siRNA Treatment              | Gene ID   | Gene Name | Accession | Value     | Category |
|------------------------------|-----------|-----------|-----------|-----------|----------|
| siRNA-Vinblastine Run2-DMSO  | NM_022810 | SLC25A14  | 14        | 0.042149  | Inlier   |
| siRNA Disorazole DMSO Run3   | NM_022810 | SLC25A14  | 14        | 0.531636  | Inlier   |
| siRNA-Vinblastine Run1-DMSO  | NM_022810 | SLC25A14  | 14        | 5.896066  | Outlier  |
| siRNA Disorazole DMSO Run2   | NM_022810 | SLC25A14  | 14        | 6.168996  | Outlier  |
| siRNA-Temozolomide Run3-DMSO | NM_014252 | SLC25A15  | 15        | -3.227846 | Inlier   |

solute carrier family 25 (mitochondrial carrier, brain), member

solute carrier family 25 (mitochondrial carrier; ornithine transporter) member

Identification of Survival Genes in Human Glioblastoma Cells Using siRNA Screening

Nikhil G Thaker, Fang Zhang, Peter R. McDonald, Tong Ying Shun, Michael D Lewen, Ian F. Pollack, and John S. Lazo

Molecular Pharmacology

| siRNA Treatment              | Gene ID   | Gene Name | Accession | Value     | Category |
|------------------------------|-----------|-----------|-----------|-----------|----------|
| siRNA-Temozolomide Run2-DMSO | NM_014252 | SLC25A15  | 15        | -1.40438  | Inlier   |
| siRNA Disorazole DMSO Run1   | NM_014252 | SLC25A15  | 15        | -0.95159  | Inlier   |
| siRNA Disorazole DMSO Run2   | NM_014252 | SLC25A15  | 15        | -0.010917 | Inlier   |
| siRNA-Temozolomide Run1-DMSO | NM_014252 | SLC25A15  | 15        | 0.010917  | Inlier   |
| siRNA-Vinblastine Run2-DMSO  | NM_014252 | SLC25A15  | 15        | 0.148598  | Inlier   |

solute carrier family 25 (mitochondrial carrier; ornithine transporter) member

solute carrier family 25 (mitochondrial carrier; ornithine transporter) member

solute carrier family 25 (mitochondrial carrier; ornithine transporter) member

solute carrier family 25 (mitochondrial carrier; ornithine transporter) member

solute carrier family 25 (mitochondrial carrier; ornithine transporter) member

Identification of Survival Genes in Human Glioblastoma Cells Using siRNA Screening

Nikhil G Thaker, Fang Zhang, Peter R. McDonald, Tong Ying Shun, Michael D Lewen, Ian F. Pollack, and John S. Lazo

Molecular Pharmacology

| siRNA Treatment              | Gene ID   | Gene Name | Gene Description                                                                           | Score     | Category |
|------------------------------|-----------|-----------|--------------------------------------------------------------------------------------------|-----------|----------|
| siRNA-Vinblastine Run1-DMSO  | NM_014252 | SLC25A15  | 15<br>solute carrier family 25 (mitochondrial carrier; ornithine transporter) member       | 0.39741   | Inlier   |
| siRNA Disorazole DMSO Run3   | NM_014252 | SLC25A15  | 15<br>solute carrier family 25 (mitochondrial carrier; ornithine transporter) member       | 2.589896  | Inlier   |
| siRNA-Temozolomide Run3-DMSO | NM_152707 | SLC25A16  | 16<br>solute carrier family 25 (mitochondrial carrier; Graves disease autoantigen), member | -1.459896 | Inlier   |
| siRNA-Temozolomide Run1-DMSO | NM_152707 | SLC25A16  | 16<br>solute carrier family 25 (mitochondrial carrier; Graves disease autoantigen), member | -1.071146 | Inlier   |

Identification of Survival Genes in Human Glioblastoma Cells Using siRNA Screening

Nikhil G Thaker, Fang Zhang, Peter R. McDonald, Tong Ying Shun, Michael D Lewen, Ian F. Pollack, and John S.

Lazo

Molecular Pharmacology

| siRNA                        | siRNA     | siRNA    | siRNA | siRNA     | siRNA  | siRNA                                                                                | siRNA | siRNA | siRNA |
|------------------------------|-----------|----------|-------|-----------|--------|--------------------------------------------------------------------------------------|-------|-------|-------|
| siRNA-Temozolomide Run2-DMSO | NM_152707 | SLC25A16 | 16    | -0.211456 | Inlier | solute carrier family 25 (mitochondrial carrier; Graves disease autoantigen), member |       |       |       |
| siRNA Disorazole DMSO Run3   | NM_152707 | SLC25A16 | 16    | -0.039228 | Inlier | solute carrier family 25 (mitochondrial carrier; Graves disease autoantigen), member |       |       |       |
| siRNA Disorazole DMSO Run1   | NM_152707 | SLC25A16 | 16    | 0.039229  | Inlier | solute carrier family 25 (mitochondrial carrier; Graves disease autoantigen), member |       |       |       |
| siRNA-Vinblastine Run2-DMSO  | NM_152707 | SLC25A16 | 16    | 0.277854  | Inlier | solute carrier family 25 (mitochondrial carrier; Graves disease autoantigen), member |       |       |       |

Identification of Survival Genes in Human Glioblastoma Cells Using siRNA Screening

Nikhil G Thaker, Fang Zhang, Peter R. McDonald, Tong Ying Shun, Michael D Lewen, Ian F. Pollack, and John S. Lazo

Molecular Pharmacology

| siRNA              | Drug | Run  | Gene     | Accession | Log2FC    | Inlier | Annotations                                                                                   |
|--------------------|------|------|----------|-----------|-----------|--------|-----------------------------------------------------------------------------------------------|
| siRNA Disorazole   | DMSO | Run2 | SLC25A16 | NM_152707 | 1.636434  | Inlier | solute carrier family 25 (mitochondrial carrier; Graves disease autoantigen), member          |
| siRNA-Vinblastine  | DMSO | Run1 | SLC25A16 | NM_152707 | 1.709097  | Inlier | solute carrier family 25 (mitochondrial carrier; Graves disease autoantigen), member          |
| siRNA-Temozolomide | DMSO | Run3 | SLC25A17 | NM_006358 | -2.850956 | Inlier | solute carrier family 25 (mitochondrial carrier; peroxisomal membrane protein, 34kDa), member |
| siRNA Disorazole   | DMSO | Run2 | SLC25A17 | NM_006358 | -0.837871 | Inlier | solute carrier family 25 (mitochondrial carrier; peroxisomal membrane protein, 34kDa), member |

Identification of Survival Genes in Human Glioblastoma Cells Using siRNA Screening

Nikhil G Thaker, Fang Zhang, Peter R. McDonald, Tong Ying Shun, Michael D Lewen, Ian F. Pollack, and John S. Lazo

Molecular Pharmacology

|                              |           |          |                                                                                               |           |        |
|------------------------------|-----------|----------|-----------------------------------------------------------------------------------------------|-----------|--------|
| siRNA-Temozolomide Run1-DMSO | NM_006358 | SLC25A17 | 17                                                                                            | -0.613849 | Inlier |
|                              |           |          | solute carrier family 25 (mitochondrial carrier; peroxisomal membrane protein, 34kDa), member |           |        |
| siRNA-Temozolomide Run2-DMSO | NM_006358 | SLC25A17 | 17                                                                                            | -0.520693 | Inlier |
|                              |           |          | solute carrier family 25 (mitochondrial carrier; peroxisomal membrane protein, 34kDa), member |           |        |
| siRNA Disorazole DMSO Run3   | NM_006358 | SLC25A17 | 17                                                                                            | 0.520692  | Inlier |
|                              |           |          | solute carrier family 25 (mitochondrial carrier; peroxisomal membrane protein, 34kDa), member |           |        |
| siRNA Disorazole DMSO Run1   | NM_006358 | SLC25A17 | 17                                                                                            | 0.641368  | Inlier |
|                              |           |          | solute carrier family 25 (mitochondrial carrier; peroxisomal membrane protein, 34kDa), member |           |        |

Identification of Survival Genes in Human Glioblastoma Cells Using siRNA Screening

Nikhil G Thaker, Fang Zhang, Peter R. McDonald, Tong Ying Shun, Michael D Lewen, Ian F. Pollack, and John S. Lazo

Molecular Pharmacology

|                              |           |          |    |           |        |
|------------------------------|-----------|----------|----|-----------|--------|
| siRNA-Vinblastine Run1-DMSO  | NM_006358 | SLC25A17 | 17 | 0.707632  | Inlier |
| siRNA-Vinblastine Run2-DMSO  | NM_006358 | SLC25A17 | 17 | 1.714138  | Inlier |
| siRNA-Temozolomide Run3-DMSO | NM_031481 | SLC25A18 | 18 | -1.421371 | Inlier |
| siRNA-Temozolomide Run2-DMSO | NM_031481 | SLC25A18 | 18 | -0.880031 | Inlier |
| siRNA-Temozolomide Run1-DMSO | NM_031481 | SLC25A18 | 18 | -0.407672 | Inlier |

solute carrier family 25 (mitochondrial carrier; peroxisomal membrane protein, 34kDa), member

solute carrier family 25 (mitochondrial carrier; peroxisomal membrane protein, 34kDa), member

solute carrier family 25 (mitochondrial carrier), member

solute carrier family 25 (mitochondrial carrier), member

solute carrier family 25 (mitochondrial carrier), member



Identification of Survival Genes in Human Glioblastoma Cells Using siRNA Screening

Nikhil G Thaker, Fang Zhang, Peter R. McDonald, Tong Ying Shun, Michael D Lewen, Ian F. Pollack, and John S. Lazo

Molecular Pharmacology

|                              |               |          |    |                                                                          |                  |
|------------------------------|---------------|----------|----|--------------------------------------------------------------------------|------------------|
|                              |               |          |    | solute carrier family 25 (mitochondrial carrier), member                 |                  |
| siRNA Disorazole DMSO Run1   | NM_0314<br>81 | SLC25A18 | 18 |                                                                          | -0.358202 Inlier |
|                              |               |          |    | solute carrier family 25 (mitochondrial carrier), member                 |                  |
| siRNA Disorazole DMSO Run3   | NM_0314<br>81 | SLC25A18 | 18 |                                                                          | 0.358202 Inlier  |
|                              |               |          |    | solute carrier family 25 (mitochondrial carrier), member                 |                  |
| siRNA-Vinblastine Run2-DMSO  | NM_0314<br>81 | SLC25A18 | 18 |                                                                          | 0.468969 Inlier  |
|                              |               |          |    | solute carrier family 25 (mitochondrial carrier), member                 |                  |
| siRNA Disorazole DMSO Run2   | NM_0314<br>81 | SLC25A18 | 18 |                                                                          | 1.173679 Inlier  |
|                              |               |          |    | solute carrier family 25 (mitochondrial carrier), member                 |                  |
| siRNA-Vinblastine Run1-DMSO  | NM_0314<br>81 | SLC25A18 | 18 |                                                                          | 1.422212 Inlier  |
|                              |               |          |    | solute carrier family 25 (mitochondrial deoxynucleotide carrier), member |                  |
| siRNA-Temozolomide Run3-DMSO | NM_0217<br>34 | SLC25A19 | 19 |                                                                          | -1.193771 Inlier |

Identification of Survival Genes in Human Glioblastoma Cells Using siRNA Screening

Nikhil G Thaker, Fang Zhang, Peter R. McDonald, Tong Ying Shun, Michael D Lewen, Ian F. Pollack, and John S. Lazo

Molecular Pharmacology

| siRNA Treatment              | Gene    | Accession | SLC      | Count | Log2FC    | Category                                                                 |
|------------------------------|---------|-----------|----------|-------|-----------|--------------------------------------------------------------------------|
| siRNA Disorazole DMSO Run3   | NM_0217 | 34        | SLC25A19 | 19    | -0.752144 | Inlier                                                                   |
|                              |         |           |          |       |           | solute carrier family 25 (mitochondrial deoxynucleotide carrier), member |
| siRNA-Vinblastine Run2-DMSO  | NM_0217 | 34        | SLC25A19 | 19    | -0.423434 | Inlier                                                                   |
|                              |         |           |          |       |           | solute carrier family 25 (mitochondrial deoxynucleotide carrier), member |
| siRNA-Temozolomide Run1-DMSO | NM_0217 | 34        | SLC25A19 | 19    | -0.111476 | Inlier                                                                   |
|                              |         |           |          |       |           | solute carrier family 25 (mitochondrial deoxynucleotide carrier), member |
| siRNA-Temozolomide Run2-DMSO | NM_0217 | 34        | SLC25A19 | 19    | 0.111476  | Inlier                                                                   |
|                              |         |           |          |       |           | solute carrier family 25 (mitochondrial deoxynucleotide carrier), member |
| siRNA Disorazole DMSO Run1   | NM_0217 | 34        | SLC25A19 | 19    | 0.596855  | Inlier                                                                   |
|                              |         |           |          |       |           | solute carrier family 25 (mitochondrial deoxynucleotide carrier), member |

Identification of Survival Genes in Human Glioblastoma Cells Using siRNA Screening

Nikhil G Thaker, Fang Zhang, Peter R. McDonald, Tong Ying Shun, Michael D Lewen, Ian F. Pollack, and John S. Lazo

Molecular Pharmacology

| siRNA Treatment              | Gene     | Accession | Gene Description                                                                 | Value     | Category |
|------------------------------|----------|-----------|----------------------------------------------------------------------------------|-----------|----------|
| siRNA Disorazole DMSO Run2   | SLC25A19 | NM_021734 | solute carrier family 25 (mitochondrial deoxynucleotide carrier), member 19      | 6.599798  | Outlier  |
| siRNA-Vinblastine Run1-DMSO  | SLC25A19 | NM_021734 | solute carrier family 25 (mitochondrial deoxynucleotide carrier), member 19      | 8.690872  | Outlier  |
| siRNA-Temozolomide Run3-DMSO | SLC25A2  | NM_031947 | solute carrier family 25 (mitochondrial carrier; ornithine transporter) member 2 | -1.583863 | Inlier   |
| siRNA-Temozolomide Run2-DMSO | SLC25A2  | NM_031947 | solute carrier family 25 (mitochondrial carrier; ornithine transporter) member 2 | -1.136863 | Inlier   |
| siRNA Disorazole DMSO Run3   | SLC25A2  | NM_031947 | solute carrier family 25 (mitochondrial carrier; ornithine transporter) member 2 | -0.312485 | Inlier   |

Identification of Survival Genes in Human Glioblastoma Cells Using siRNA Screening

Nikhil G Thaker, Fang Zhang, Peter R. McDonald, Tong Ying Shun, Michael D Lewen, Ian F. Pollack, and John S. Lazo

Molecular Pharmacology

| siRNA Treatment              | Gene ID   | Gene Name | Log2 Fold Change | Outlier Status |
|------------------------------|-----------|-----------|------------------|----------------|
| siRNA-Temozolomide Run1-DMSO | NM_031947 | SLC25A2   | -0.097888        | Inlier         |
| siRNA-Vinblastine Run2-DMSO  | NM_031947 | SLC25A2   | 0.097888         | Inlier         |
| siRNA Disorazole DMSO Run1   | NM_031947 | SLC25A2   | 0.306913         | Inlier         |
| siRNA-Vinblastine Run1-DMSO  | NM_031947 | SLC25A2   | 1.036515         | Inlier         |
| siRNA Disorazole DMSO Run2   | NM_031947 | SLC25A2   | 2.259831         | Inlier         |

solute carrier family 25 (mitochondrial carrier; ornithine transporter) member 2

solute carrier family 25 (mitochondrial carrier; ornithine transporter) member 2

solute carrier family 25 (mitochondrial carrier; ornithine transporter) member 2

solute carrier family 25 (mitochondrial carrier; ornithine transporter) member 2

solute carrier family 25 (mitochondrial carrier; ornithine transporter) member 2

Identification of Survival Genes in Human Glioblastoma Cells Using siRNA Screening

Nikhil G Thaker, Fang Zhang, Peter R. McDonald, Tong Ying Shun, Michael D Lewen, Ian F. Pollack, and John S. Lazo

Molecular Pharmacology

| siRNA                        | Gene      | Gene ID  | Gene Name                                                                 | Log Fold Change | Inlier |
|------------------------------|-----------|----------|---------------------------------------------------------------------------|-----------------|--------|
| siRNA-Temozolomide Run3-DMSO | NM_000387 | SLC25A20 | 20 solute carrier family 25 (carnitine/acylcarnitine translocase), member | -1.12006        | Inlier |
| siRNA-Temozolomide Run2-DMSO | NM_000387 | SLC25A20 | 20 solute carrier family 25 (carnitine/acylcarnitine translocase), member | -0.810664       | Inlier |
| siRNA-Temozolomide Run1-DMSO | NM_000387 | SLC25A20 | 20 solute carrier family 25 (carnitine/acylcarnitine translocase), member | -0.465196       | Inlier |
| siRNA Disorazole DMSO Run1   | NM_000387 | SLC25A20 | 20 solute carrier family 25 (carnitine/acylcarnitine translocase), member | -0.350688       | Inlier |
| siRNA Disorazole DMSO Run3   | NM_000387 | SLC25A20 | 20 solute carrier family 25 (carnitine/acylcarnitine translocase), member | 0.350688        | Inlier |

Identification of Survival Genes in Human Glioblastoma Cells Using siRNA Screening

Nikhil G Thaker, Fang Zhang, Peter R. McDonald, Tong Ying Shun, Michael D Lewen, Ian F. Pollack, and John S. Lazo

Molecular Pharmacology

| siRNA Treatment              | Gene ID   | Gene Name | Gene Description                                                          | Log2 Fold Change | Significance |
|------------------------------|-----------|-----------|---------------------------------------------------------------------------|------------------|--------------|
| siRNA-Vinblastine Run2-DMSO  | NM_000387 | SLC25A20  | solute carrier family 25 (carnitine/acylcarnitine translocase), member 20 | 0.538336         | Inlier       |
| siRNA Disorazole DMSO Run2   | NM_000387 | SLC25A20  | solute carrier family 25 (carnitine/acylcarnitine translocase), member 20 | 1.51138          | Inlier       |
| siRNA-Vinblastine Run1-DMSO  | NM_000387 | SLC25A20  | solute carrier family 25 (carnitine/acylcarnitine translocase), member 20 | 1.675259         | Inlier       |
| siRNA-Temozolomide Run3-DMSO | NM_024698 | SLC25A22  | solute carrier family 25 (mitochondrial carrier: glutamate), member 22    | -1.57002         | Inlier       |
| siRNA-Temozolomide Run1-DMSO | NM_024698 | SLC25A22  | solute carrier family 25 (mitochondrial carrier: glutamate), member 22    | -0.630786        | Inlier       |

Identification of Survival Genes in Human Glioblastoma Cells Using siRNA Screening  
 Nikhil G Thaker, Fang Zhang, Peter R. McDonald, Tong Ying Shun, Michael D Lewen, Ian F. Pollack, and John S. Lazo  
 Molecular Pharmacology

| siRNA Treatment              | Gene ID   | Gene Name | Log Fold Change | Outlier Status |
|------------------------------|-----------|-----------|-----------------|----------------|
| siRNA-Temozolomide Run2-DMSO | NM_024698 | SLC25A22  | -0.334794       | Inlier         |
| siRNA Disorazole DMSO Run1   | NM_024698 | SLC25A22  | -0.184835       | Inlier         |
| siRNA Disorazole DMSO Run3   | NM_024698 | SLC25A22  | 0.184834        | Inlier         |
| siRNA-Vinblastine Run2-DMSO  | NM_024698 | SLC25A22  | 0.718213        | Inlier         |
| siRNA Disorazole DMSO Run2   | NM_024698 | SLC25A22  | 2.201838        | Inlier         |

solute carrier family 25 (mitochondrial carrier: glutamate), member 22

Identification of Survival Genes in Human Glioblastoma Cells Using siRNA Screening  
 Nikhil G Thaker, Fang Zhang, Peter R. McDonald, Tong Ying Shun, Michael D Lewen, Ian F. Pollack, and John S. Lazo

Molecular Pharmacology

| siRNA Treatment              | Gene ID   | Gene Name | Gene Description                                                       | Value     | Category |
|------------------------------|-----------|-----------|------------------------------------------------------------------------|-----------|----------|
| siRNA-Vinblastine Run1-DMSO  | NM_024698 | SLC25A22  | solute carrier family 25 (mitochondrial carrier: glutamate), member 22 | 2.220515  | Inlier   |
| siRNA-Temozolomide Run3-DMSO | NM_004277 | SLC25A27  | solute carrier family 25, member 27                                    | -1.161431 | Inlier   |
| siRNA-Temozolomide Run1-DMSO | NM_004277 | SLC25A27  | solute carrier family 25, member 27                                    | -0.804149 | Inlier   |
| siRNA-Temozolomide Run2-DMSO | NM_004277 | SLC25A27  | solute carrier family 25, member 27                                    | -0.544851 | Inlier   |
| siRNA Disorazole DMSO Run1   | NM_004277 | SLC25A27  | solute carrier family 25, member 27                                    | -0.022546 | Inlier   |
| siRNA-Vinblastine Run2-DMSO  | NM_004277 | SLC25A27  | solute carrier family 25, member 27                                    | 0.022546  | Inlier   |
| siRNA Disorazole DMSO Run3   | NM_004277 | SLC25A27  | solute carrier family 25, member 27                                    | 0.160036  | Inlier   |
| siRNA Disorazole DMSO Run2   | NM_004277 | SLC25A27  | solute carrier family 25, member 27                                    | 1.495052  | Inlier   |
| siRNA-Vinblastine Run1-DMSO  | NM_004277 | SLC25A27  | solute carrier family 25, member 27                                    | 1.626974  | Inlier   |



Identification of Survival Genes in Human Glioblastoma Cells Using siRNA Screening  
 Nikhil G Thaker, Fang Zhang, Peter R. McDonald, Tong Ying Shun, Michael D Lewen, Ian F. Pollack, and John S. Lazo

Molecular Pharmacology

| siRNA Treatment              | Gene ID       | Gene Name | Gene Description                                                              | Log Fold Change | Classification |
|------------------------------|---------------|-----------|-------------------------------------------------------------------------------|-----------------|----------------|
| siRNA Disorazole DMSO Run1   | NM_1523<br>33 | SLC25A29  | solute carrier family 25, member 29                                           | -2.751946       | Inlier         |
| siRNA-Temozolomide Run1-DMSO | NM_1523<br>33 | SLC25A29  | solute carrier family 25, member 29                                           | -0.968938       | Inlier         |
| siRNA-Vinblastine Run2-DMSO  | NM_1523<br>33 | SLC25A29  | solute carrier family 25, member 29                                           | -0.380062       | Inlier         |
| siRNA-Temozolomide Run2-DMSO | NM_1523<br>33 | SLC25A29  | solute carrier family 25, member 29                                           | -0.25355        | Inlier         |
| siRNA-Temozolomide Run3-DMSO | NM_1523<br>33 | SLC25A29  | solute carrier family 25, member 29                                           | 0.25355         | Inlier         |
| siRNA Disorazole DMSO Run3   | NM_1523<br>33 | SLC25A29  | solute carrier family 25, member 29                                           | 0.317917        | Inlier         |
| siRNA-Vinblastine Run1-DMSO  | NM_1523<br>33 | SLC25A29  | solute carrier family 25, member 29                                           | 2.189542        | Inlier         |
| siRNA Disorazole DMSO Run2   | NM_1523<br>33 | SLC25A29  | solute carrier family 25 (mitochondrial carrier; phosphate carrier), member 3 | 6.070897        | Outlier        |
| siRNA-Temozolomide Run3-DMSO | NM_0026<br>35 | SLC25A3   | solute carrier family 25, member 3                                            | -2.660438       | Inlier         |

Identification of Survival Genes in Human Glioblastoma Cells Using siRNA Screening

Nikhil G Thaker, Fang Zhang, Peter R. McDonald, Tong Ying Shun, Michael D Lewen, Ian F. Pollack, and John S.

Lazo

Molecular Pharmacology

| siRNA Treatment              | Gene    | Gene ID   | Gene Name                                                                     | Log2 Fold Change | Outlier Status |
|------------------------------|---------|-----------|-------------------------------------------------------------------------------|------------------|----------------|
| siRNA-Temozolomide Run2-DMSO | SLC25A3 | NM_002635 | solute carrier family 25 (mitochondrial carrier; phosphate carrier), member 3 | -0.852907        | Inlier         |
| siRNA Disorazole DMSO Run1   | SLC25A3 | NM_002635 | solute carrier family 25 (mitochondrial carrier; phosphate carrier), member 3 | -0.496093        | Inlier         |
| siRNA-Temozolomide Run1-DMSO | SLC25A3 | NM_002635 | solute carrier family 25 (mitochondrial carrier; phosphate carrier), member 3 | -0.113833        | Inlier         |
| siRNA Disorazole DMSO Run3   | SLC25A3 | NM_002635 | solute carrier family 25 (mitochondrial carrier; phosphate carrier), member 3 | 0.113833         | Inlier         |
| siRNA-Vinblastine Run2-DMSO  | SLC25A3 | NM_002635 | solute carrier family 25 (mitochondrial carrier; phosphate carrier), member 3 | 0.160341         | Inlier         |

Identification of Survival Genes in Human Glioblastoma Cells Using siRNA Screening

Nikhil G Thaker, Fang Zhang, Peter R. McDonald, Tong Ying Shun, Michael D Lewen, Ian F. Pollack, and John S. Lazo

Molecular Pharmacology

| siRNA              | Condition | Run  | Gene    | Value     | Category |
|--------------------|-----------|------|---------|-----------|----------|
| siRNA Disorazole   | DMSO      | Run2 | SLC25A3 | 6.058992  | Outlier  |
| siRNA-Vinblastine  | DMSO      | Run1 | SLC25A3 | 6.554461  | Outlier  |
| siRNA-Temozolomide | DMSO      | Run3 | SLC25A4 | -1.445249 | Inlier   |
| siRNA-Temozolomide | DMSO      | Run2 | SLC25A4 | -0.681075 | Inlier   |
| siRNA Disorazole   | DMSO      | Run1 | SLC25A4 | -0.113456 | Inlier   |

solute carrier family 25 (mitochondrial carrier; phosphate carrier), member 3

solute carrier family 25 (mitochondrial carrier; phosphate carrier), member 3

solute carrier family 25 (mitochondrial carrier; adenine nucleotide translocator), member 4

solute carrier family 25 (mitochondrial carrier; adenine nucleotide translocator), member 4

solute carrier family 25 (mitochondrial carrier; adenine nucleotide translocator), member 4

Identification of Survival Genes in Human Glioblastoma Cells Using siRNA Screening

Nikhil G Thaker, Fang Zhang, Peter R. McDonald, Tong Ying Shun, Michael D Lewen, Ian F. Pollack, and John S.

Lazo

Molecular Pharmacology

| siRNA                        | Gene      | Gene ID | Gene Name | Gene Description                                                                            | Value     | Category |
|------------------------------|-----------|---------|-----------|---------------------------------------------------------------------------------------------|-----------|----------|
| siRNA-Vinblastine Run2-DMSO  | NM_001151 | SLC25A4 | SLC25A4   | solute carrier family 25 (mitochondrial carrier; adenine nucleotide translocator), member 4 | -0.028858 | Inlier   |
| siRNA-Temozolomide Run1-DMSO | NM_001151 | SLC25A4 | SLC25A4   | solute carrier family 25 (mitochondrial carrier; adenine nucleotide translocator), member 4 | 0.028858  | Inlier   |
| siRNA Disorazole DMSO Run3   | NM_001151 | SLC25A4 | SLC25A4   | solute carrier family 25 (mitochondrial carrier; adenine nucleotide translocator), member 4 | 0.667925  | Inlier   |
| siRNA Disorazole DMSO Run2   | NM_001151 | SLC25A4 | SLC25A4   | solute carrier family 25 (mitochondrial carrier; adenine nucleotide translocator), member 4 | 1.013369  | Inlier   |

Identification of Survival Genes in Human Glioblastoma Cells Using siRNA Screening

Nikhil G Thaker, Fang Zhang, Peter R. McDonald, Tong Ying Shun, Michael D Lewen, Ian F. Pollack, and John S.

Lazo

Molecular Pharmacology

|                              |           |         |                                                                                             |           |        |
|------------------------------|-----------|---------|---------------------------------------------------------------------------------------------|-----------|--------|
| siRNA-Vinblastine Run1-DMSO  | NM_001151 | SLC25A4 | solute carrier family 25 (mitochondrial carrier; adenine nucleotide translocator), member 4 | 1.671347  | Inlier |
| siRNA-Temozolomide Run1-DMSO | NM_001152 | SLC25A5 | solute carrier family 25 (mitochondrial carrier; adenine nucleotide translocator), member 5 | -1.110795 | Inlier |
| siRNA-Temozolomide Run3-DMSO | NM_001152 | SLC25A5 | solute carrier family 25 (mitochondrial carrier; adenine nucleotide translocator), member 5 | -1.071693 | Inlier |
| siRNA-Temozolomide Run2-DMSO | NM_001152 | SLC25A5 | solute carrier family 25 (mitochondrial carrier; adenine nucleotide translocator), member 5 | -0.776617 | Inlier |

Identification of Survival Genes in Human Glioblastoma Cells Using siRNA Screening

Nikhil G Thaker, Fang Zhang, Peter R. McDonald, Tong Ying Shun, Michael D Lewen, Ian F. Pollack, and John S. Lazo

Molecular Pharmacology

| siRNA Treatment             | Gene ID   | Gene Name | Gene Description                                                                            | Log Fold Change | Outlier Status |
|-----------------------------|-----------|-----------|---------------------------------------------------------------------------------------------|-----------------|----------------|
| siRNA-Vinblastine Run2-DMSO | NM_001152 | SLC25A5   | solute carrier family 25 (mitochondrial carrier; adenine nucleotide translocator), member 5 | -0.036823       | Inlier         |
| siRNA Disorazole DMSO Run1  | NM_001152 | SLC25A5   | solute carrier family 25 (mitochondrial carrier; adenine nucleotide translocator), member 5 | 0.036823        | Inlier         |
| siRNA Disorazole DMSO Run3  | NM_001152 | SLC25A5   | solute carrier family 25 (mitochondrial carrier; adenine nucleotide translocator), member 5 | 0.190633        | Inlier         |
| siRNA-Vinblastine Run1-DMSO | NM_001152 | SLC25A5   | solute carrier family 25 (mitochondrial carrier; adenine nucleotide translocator), member 5 | 0.635861        | Inlier         |

Identification of Survival Genes in Human Glioblastoma Cells Using siRNA Screening

Nikhil G Thaker, Fang Zhang, Peter R. McDonald, Tong Ying Shun, Michael D Lewen, Ian F. Pollack, and John S.

Lazo

Molecular Pharmacology

| siRNA                        | Gene    | Gene ID   | Gene Description                                                                            | Score     | Category |
|------------------------------|---------|-----------|---------------------------------------------------------------------------------------------|-----------|----------|
| siRNA Disorazole DMSO Run2   | SLC25A5 | NM_001152 | solute carrier family 25 (mitochondrial carrier; adenine nucleotide translocator), member 5 | 0.713139  | Inlier   |
| siRNA-Temozolomide Run3-DMSO | SLC25A6 | NM_001636 | solute carrier family 25 (mitochondrial carrier; adenine nucleotide translocator), member 6 | -1.716235 | Inlier   |
| siRNA-Temozolomide Run2-DMSO | SLC25A6 | NM_001636 | solute carrier family 25 (mitochondrial carrier; adenine nucleotide translocator), member 6 | -0.967069 | Inlier   |
| siRNA-Temozolomide Run1-DMSO | SLC25A6 | NM_001636 | solute carrier family 25 (mitochondrial carrier; adenine nucleotide translocator), member 6 | -0.381931 | Inlier   |

Identification of Survival Genes in Human Glioblastoma Cells Using siRNA Screening

Nikhil G Thaker, Fang Zhang, Peter R. McDonald, Tong Ying Shun, Michael D Lewen, Ian F. Pollack, and John S.

Lazo

Molecular Pharmacology

| siRNA                       | Gene    | Gene ID   | Gene Description                                                                            | Log2 Fold Change | Category |
|-----------------------------|---------|-----------|---------------------------------------------------------------------------------------------|------------------|----------|
| siRNA-Vinblastine Run2-DMSO | SLC25A6 | NM_001636 | solute carrier family 25 (mitochondrial carrier; adenine nucleotide translocator), member 6 | -0.07461         | Inlier   |
| siRNA Disorazole DMSO Run1  | SLC25A6 | NM_001636 | solute carrier family 25 (mitochondrial carrier; adenine nucleotide translocator), member 6 | 0.07461          | Inlier   |
| siRNA Disorazole DMSO Run3  | SLC25A6 | NM_001636 | solute carrier family 25 (mitochondrial carrier; adenine nucleotide translocator), member 6 | 0.281394         | Inlier   |
| siRNA-Vinblastine Run1-DMSO | SLC25A6 | NM_001636 | solute carrier family 25 (mitochondrial carrier; adenine nucleotide translocator), member 6 | 1.925933         | Inlier   |



Identification of Survival Genes in Human Glioblastoma Cells Using siRNA Screening

Nikhil G Thaker, Fang Zhang, Peter R. McDonald, Tong Ying Shun, Michael D Lewen, Ian F. Pollack, and John S. Lazo

Molecular Pharmacology

| siRNA              | Condition | Run  | Gene    | Score     | Inlier | Function                                                                                    |
|--------------------|-----------|------|---------|-----------|--------|---------------------------------------------------------------------------------------------|
| siRNA Disorazole   | DMSO      | Run2 | SLC25A6 | 2.540947  | Inlier | solute carrier family 25 (mitochondrial carrier; adenine nucleotide translocator), member 6 |
| siRNA-Temozolomide | DMSO      | Run3 | SLC26A1 | -2.67908  | Inlier | solute carrier family 26 (sulfate transporter), member 1                                    |
| siRNA-Temozolomide | DMSO      | Run2 | SLC26A1 | -1.074788 | Inlier | solute carrier family 26 (sulfate transporter), member 1                                    |
| siRNA Disorazole   | DMSO      | Run1 | SLC26A1 | -0.224621 | Inlier | solute carrier family 26 (sulfate transporter), member 1                                    |
| siRNA-Temozolomide | DMSO      | Run1 | SLC26A1 | -0.037823 | Inlier | solute carrier family 26 (sulfate transporter), member 1                                    |
| siRNA Disorazole   | DMSO      | Run3 | SLC26A1 | 0.037824  | Inlier | solute carrier family 26 (sulfate transporter), member 1                                    |

Identification of Survival Genes in Human Glioblastoma Cells Using siRNA Screening  
 Nikhil G Thaker, Fang Zhang, Peter R. McDonald, Tong Ying Shun, Michael D Lewen, Ian F. Pollack, and John S. Lazo

Molecular Pharmacology

| siRNA Treatment              | Gene    | Accession | Gene     | Gene | Value     | Category                                               |
|------------------------------|---------|-----------|----------|------|-----------|--------------------------------------------------------|
| siRNA Disorazole DMSO Run2   | NM_1344 | 25        | SLC26A1  | 1    | 0.274212  | Inlier                                                 |
|                              |         |           |          |      |           | solute carrier family 26 (sulfate transporter), member |
| siRNA-Vinblastine Run1-DMSO  | NM_1344 | 25        | SLC26A1  | 1    | 1.643949  | Inlier                                                 |
|                              |         |           |          |      |           | solute carrier family 26 (sulfate transporter), member |
| siRNA-Vinblastine Run2-DMSO  | NM_1344 | 25        | SLC26A1  | 1    | 2.008691  | Inlier                                                 |
|                              |         |           |          |      |           | solute carrier family 26 (sulfate transporter), member |
| siRNA-Temozolomide Run1-DMSO | NM_1334 | 89        | SLC26A10 | 10   | -0.703337 | Inlier                                                 |
|                              |         |           |          |      |           | solute carrier family 26, member                       |
| siRNA-Temozolomide Run2-DMSO | NM_1334 | 89        | SLC26A10 | 10   | -0.69835  | Inlier                                                 |
|                              |         |           |          |      |           | solute carrier family 26, member                       |
| siRNA-Temozolomide Run3-DMSO | NM_1334 | 89        | SLC26A10 | 10   | -0.65065  | Inlier                                                 |
|                              |         |           |          |      |           | solute carrier family 26, member                       |
| siRNA Disorazole DMSO Run3   | NM_1334 | 89        | SLC26A10 | 10   | -0.086222 | Inlier                                                 |
|                              |         |           |          |      |           | solute carrier family 26, member                       |
| siRNA-Vinblastine Run2-DMSO  | NM_1334 | 89        | SLC26A10 | 10   | 0.086222  | Inlier                                                 |
|                              |         |           |          |      |           | solute carrier family 26, member                       |
| siRNA Disorazole DMSO Run1   | NM_1334 | 89        | SLC26A10 | 10   | 0.206416  | Inlier                                                 |
|                              |         |           |          |      |           | solute carrier family 26, member                       |

Identification of Survival Genes in Human Glioblastoma Cells Using siRNA Screening  
 Nikhil G Thaker, Fang Zhang, Peter R. McDonald, Tong Ying Shun, Michael D Lewen, Ian F. Pollack, and John S. Lazo

Molecular Pharmacology

| siRNA Treatment              | Gene    | Accession | SLC      | Family | Member | Value     | Inlier |
|------------------------------|---------|-----------|----------|--------|--------|-----------|--------|
| siRNA Disorazole DMSO Run2   | NM_1334 | 89        | SLC26A10 | 10     | 10     | 1.028256  | Inlier |
| siRNA-Vinblastine Run1-DMSO  | NM_1334 | 89        | SLC26A10 | 10     | 10     | 1.184121  | Inlier |
| siRNA-Temozolomide Run3-DMSO | NM_0001 | 12        | SLC26A2  | 2      | 2      | -1.154441 | Inlier |
| siRNA-Temozolomide Run2-DMSO | NM_0001 | 12        | SLC26A2  | 2      | 2      | -0.88394  | Inlier |
| siRNA Disorazole DMSO Run3   | NM_0001 | 12        | SLC26A2  | 2      | 2      | -0.46506  | Inlier |
| siRNA Disorazole DMSO Run2   | NM_0001 | 12        | SLC26A2  | 2      | 2      | -0.213455 | Inlier |
| siRNA-Temozolomide Run1-DMSO | NM_0001 | 12        | SLC26A2  | 2      | 2      | 0.213455  | Inlier |
| siRNA Disorazole DMSO Run1   | NM_0001 | 12        | SLC26A2  | 2      | 2      | 0.406423  | Inlier |

Identification of Survival Genes in Human Glioblastoma Cells Using siRNA Screening  
 Nikhil G Thaker, Fang Zhang, Peter R. McDonald, Tong Ying Shun, Michael D Lewen, Ian F. Pollack, and John S. Lazo

Molecular Pharmacology

|                              |           |         |                                                          |           |        |
|------------------------------|-----------|---------|----------------------------------------------------------|-----------|--------|
| siRNA-Vinblastine Run1-DMSO  | NM_000112 | SLC26A2 | solute carrier family 26 (sulfate transporter), member 2 | 1.732571  | Inlier |
| siRNA-Vinblastine Run2-DMSO  | NM_000112 | SLC26A2 | solute carrier family 26 (sulfate transporter), member 2 | 2.055115  | Inlier |
| siRNA-Temozolomide Run3-DMSO | NM_000111 | SLC26A3 | solute carrier family 26, member 3                       | -1.04705  | Inlier |
| siRNA-Temozolomide Run2-DMSO | NM_000111 | SLC26A3 | solute carrier family 26, member 3                       | -0.579542 | Inlier |
| siRNA Disorazole DMSO Run3   | NM_000111 | SLC26A3 | solute carrier family 26, member 3                       | -0.470316 | Inlier |
| siRNA-Temozolomide Run1-DMSO | NM_000111 | SLC26A3 | solute carrier family 26, member 3                       | -0.086241 | Inlier |
| siRNA Disorazole DMSO Run2   | NM_000111 | SLC26A3 | solute carrier family 26, member 3                       | 0.086241  | Inlier |
| siRNA Disorazole DMSO Run1   | NM_000111 | SLC26A3 | solute carrier family 26, member 3                       | 0.769458  | Inlier |
| siRNA-Vinblastine Run1-DMSO  | NM_000111 | SLC26A3 | solute carrier family 26, member 3                       | 1.142289  | Inlier |
| siRNA-Vinblastine Run2-DMSO  | NM_000111 | SLC26A3 | solute carrier family 26, member 3                       | 1.382942  | Inlier |
| siRNA-Temozolomide Run3-DMSO | NM_000441 | SLC26A4 | solute carrier family 26, member 4                       | -2.724066 | Inlier |

Identification of Survival Genes in Human Glioblastoma Cells Using siRNA Screening  
 Nikhil G Thaker, Fang Zhang, Peter R. McDonald, Tong Ying Shun, Michael D Lewen, Ian F. Pollack, and John S. Lazo

Molecular Pharmacology

| siRNA Treatment              | Gene ID   | Gene Name | Gene Description                   | Value     | Category |
|------------------------------|-----------|-----------|------------------------------------|-----------|----------|
| siRNA-Temozolomide Run1-DMSO | NM_000441 | SLC26A4   | solute carrier family 26, member 4 | -0.576434 | Inlier   |
| siRNA Disorazole DMSO Run3   | NM_000441 | SLC26A4   | solute carrier family 26, member 4 | -0.257854 | Inlier   |
| siRNA-Temozolomide Run2-DMSO | NM_000441 | SLC26A4   | solute carrier family 26, member 4 | -0.005298 | Inlier   |
| siRNA Disorazole DMSO Run1   | NM_000441 | SLC26A4   | solute carrier family 26, member 4 | 0.005298  | Inlier   |
| siRNA Disorazole DMSO Run2   | NM_000441 | SLC26A4   | solute carrier family 26, member 4 | 0.772566  | Inlier   |
| siRNA-Vinblastine Run2-DMSO  | NM_000441 | SLC26A4   | solute carrier family 26, member 4 | 1.259408  | Inlier   |
| siRNA-Vinblastine Run1-DMSO  | NM_000441 | SLC26A4   | solute carrier family 26, member 4 | 1.67423   | Inlier   |
| siRNA-Temozolomide Run3-DMSO | NM_134263 | SLC26A6   | solute carrier family 26, member 6 | -0.805703 | Inlier   |
| siRNA Disorazole DMSO Run3   | NM_134263 | SLC26A6   | solute carrier family 26, member 6 | -0.686863 | Inlier   |
| siRNA Disorazole DMSO Run2   | NM_134263 | SLC26A6   | solute carrier family 26, member 6 | -0.662137 | Inlier   |
| siRNA-Temozolomide Run2-DMSO | NM_134263 | SLC26A6   | solute carrier family 26, member 6 | -0.323509 | Inlier   |
| siRNA Disorazole DMSO Run1   | NM_134263 | SLC26A6   | solute carrier family 26, member 6 | 0.323509  | Inlier   |
| siRNA-Temozolomide Run1-DMSO | NM_134263 | SLC26A6   | solute carrier family 26, member 6 | 0.355539  | Inlier   |

Identification of Survival Genes in Human Glioblastoma Cells Using siRNA Screening  
 Nikhil G Thaker, Fang Zhang, Peter R. McDonald, Tong Ying Shun, Michael D Lewen, Ian F. Pollack, and John S. Lazo

Molecular Pharmacology

| siRNA Treatment              | Gene ID   | Gene Name | Gene Description                   | Value     | Category |
|------------------------------|-----------|-----------|------------------------------------|-----------|----------|
| siRNA-Vinblastine Run2-DMSO  | NM_134263 | SLC26A6   | solute carrier family 26, member 6 | 1.065174  | Inlier   |
| siRNA-Vinblastine Run1-DMSO  | NM_134263 | SLC26A6   | solute carrier family 26, member 6 | 1.256118  | Inlier   |
| siRNA-Temozolomide Run3-DMSO | NM_134266 | SLC26A7   | solute carrier family 26, member 7 | -1.934342 | Inlier   |
| siRNA-Temozolomide Run2-DMSO | NM_134266 | SLC26A7   | solute carrier family 26, member 7 | -0.515731 | Inlier   |
| siRNA Disorazole DMSO Run1   | NM_134266 | SLC26A7   | solute carrier family 26, member 7 | -0.070604 | Inlier   |
| siRNA Disorazole DMSO Run3   | NM_134266 | SLC26A7   | solute carrier family 26, member 7 | -0.068247 | Inlier   |
| siRNA-Temozolomide Run1-DMSO | NM_134266 | SLC26A7   | solute carrier family 26, member 7 | 0.068247  | Inlier   |
| siRNA Disorazole DMSO Run2   | NM_134266 | SLC26A7   | solute carrier family 26, member 7 | 0.833269  | Inlier   |
| siRNA-Vinblastine Run1-DMSO  | NM_134266 | SLC26A7   | solute carrier family 26, member 7 | 0.942521  | Inlier   |
| siRNA-Vinblastine Run2-DMSO  | NM_134266 | SLC26A7   | solute carrier family 26, member 7 | 1.48106   | Inlier   |
| siRNA-Temozolomide Run1-DMSO | NM_138718 | SLC26A8   | solute carrier family 26, member 8 | -1.969809 | Inlier   |
| siRNA Disorazole DMSO Run2   | NM_138718 | SLC26A8   | solute carrier family 26, member 8 | -0.740658 | Inlier   |
| siRNA-Temozolomide Run3-DMSO | NM_138718 | SLC26A8   | solute carrier family 26, member 8 | -0.635199 | Inlier   |

Identification of Survival Genes in Human Glioblastoma Cells Using siRNA Screening  
 Nikhil G Thaker, Fang Zhang, Peter R. McDonald, Tong Ying Shun, Michael D Lewen, Ian F. Pollack, and John S. Lazo

Molecular Pharmacology

| siRNA Treatment              | Gene ID       | Gene Name | Family                    | Member   | Value     | Category |
|------------------------------|---------------|-----------|---------------------------|----------|-----------|----------|
| siRNA Disorazole DMSO Run1   | NM_1387<br>18 | SLC26A8   | solute carrier family 26, | member 8 | -0.388943 | Inlier   |
| siRNA-Vinblastine Run2-DMSO  | NM_1387<br>18 | SLC26A8   | solute carrier family 26, | member 8 | 0.388944  | Inlier   |
| siRNA Disorazole DMSO Run3   | NM_1387<br>18 | SLC26A8   | solute carrier family 26, | member 8 | 0.665957  | Inlier   |
| siRNA-Vinblastine Run1-DMSO  | NM_1387<br>18 | SLC26A8   | solute carrier family 26, | member 8 | 0.683043  | Inlier   |
| siRNA-Temozolomide Run2-DMSO | NM_1387<br>18 | SLC26A8   | solute carrier family 26, | member 8 | 1.216832  | Inlier   |
| siRNA-Temozolomide Run3-DMSO | NM_1343<br>25 | SLC26A9   | solute carrier family 26, | member 9 | -5.638954 | Outlier  |
| siRNA-Temozolomide Run1-DMSO | NM_1343<br>25 | SLC26A9   | solute carrier family 26, | member 9 | -1.465347 | Inlier   |
| siRNA-Temozolomide Run2-DMSO | NM_1343<br>25 | SLC26A9   | solute carrier family 26, | member 9 | -0.105918 | Inlier   |
| siRNA Disorazole DMSO Run3   | NM_1343<br>25 | SLC26A9   | solute carrier family 26, | member 9 | -0.060795 | Inlier   |
| siRNA Disorazole DMSO Run2   | NM_1343<br>25 | SLC26A9   | solute carrier family 26, | member 9 | 0.060795  | Inlier   |
| siRNA Disorazole DMSO Run1   | NM_1343<br>25 | SLC26A9   | solute carrier family 26, | member 9 | 0.428039  | Inlier   |
| siRNA-Vinblastine Run1-DMSO  | NM_1343<br>25 | SLC26A9   | solute carrier family 26, | member 9 | 0.920961  | Inlier   |
| siRNA-Vinblastine Run2-DMSO  | NM_1343<br>25 | SLC26A9   | solute carrier family 26, | member 9 | 2.942875  | Inlier   |





Identification of Survival Genes in Human Glioblastoma Cells Using siRNA Screening

Nikhil G Thaker, Fang Zhang, Peter R. McDonald, Tong Ying Shun, Michael D Lewen, Ian F. Pollack, and John S. Lazo

Molecular Pharmacology

| siRNA Treatment              | Gene ID   | Gene Name | Gene Description                                            | Log2 Fold Change | Significance |
|------------------------------|-----------|-----------|-------------------------------------------------------------|------------------|--------------|
| siRNA-Vinblastine Run2-DMSO  | NM_003645 | SLC27A2   | solute carrier family 27 (fatty acid transporter), member 2 | 1.116732         | Inlier       |
| siRNA-Temozolomide Run1-DMSO | NM_024330 | SLC27A3   | solute carrier family 27 (fatty acid transporter), member 3 | -0.813232        | Inlier       |
| siRNA Disorazole DMSO Run2   | NM_024330 | SLC27A3   | solute carrier family 27 (fatty acid transporter), member 3 | -0.739433        | Inlier       |
| siRNA Disorazole DMSO Run3   | NM_024330 | SLC27A3   | solute carrier family 27 (fatty acid transporter), member 3 | -0.148042        | Inlier       |
| siRNA-Temozolomide Run3-DMSO | NM_024330 | SLC27A3   | solute carrier family 27 (fatty acid transporter), member 3 | -0.041531        | Inlier       |
| siRNA Disorazole DMSO Run1   | NM_024330 | SLC27A3   | solute carrier family 27 (fatty acid transporter), member 3 | 0.041531         | Inlier       |
| siRNA-Temozolomide Run2-DMSO | NM_024330 | SLC27A3   | solute carrier family 27 (fatty acid transporter), member 3 | 0.609567         | Inlier       |

Identification of Survival Genes in Human Glioblastoma Cells Using siRNA Screening  
 Nikhil G Thaker, Fang Zhang, Peter R. McDonald, Tong Ying Shun, Michael D Lewen, Ian F. Pollack, and John S. Lazo

Molecular Pharmacology

|                              |               |         |   |           |        |
|------------------------------|---------------|---------|---|-----------|--------|
| siRNA-Vinblastine Run2-DMSO  | NM_0243<br>30 | SLC27A3 | 3 | 1.841334  | Inlier |
| siRNA-Vinblastine Run1-DMSO  | NM_0243<br>30 | SLC27A3 | 3 | 2.364691  | Inlier |
| siRNA-Temozolomide Run3-DMSO | NM_0050<br>94 | SLC27A4 | 4 | -1.041101 | Inlier |
| siRNA Disorazole DMSO Run2   | NM_0050<br>94 | SLC27A4 | 4 | -0.95203  | Inlier |
| siRNA-Temozolomide Run2-DMSO | NM_0050<br>94 | SLC27A4 | 4 | -0.39697  | Inlier |
| siRNA Disorazole DMSO Run1   | NM_0050<br>94 | SLC27A4 | 4 | -0.126535 | Inlier |
| siRNA-Temozolomide Run1-DMSO | NM_0050<br>94 | SLC27A4 | 4 | 0.126535  | Inlier |

Identification of Survival Genes in Human Glioblastoma Cells Using siRNA Screening  
 Nikhil G Thaker, Fang Zhang, Peter R. McDonald, Tong Ying Shun, Michael D Lewen, Ian F. Pollack, and John S. Lazo

Molecular Pharmacology

|                              |               |         |                                                           |           |         |
|------------------------------|---------------|---------|-----------------------------------------------------------|-----------|---------|
| siRNA Disorazole DMSO Run3   | NM_0050<br>94 | SLC27A4 | 4                                                         | 0.261492  | Inlier  |
|                              |               |         | solute carrier family 27 (fatty acid transporter), member |           |         |
| siRNA-Vinblastine Run1-DMSO  | NM_0050<br>94 | SLC27A4 | 4                                                         | 1.061984  | Inlier  |
|                              |               |         | solute carrier family 27 (fatty acid transporter), member |           |         |
| siRNA-Vinblastine Run2-DMSO  | NM_0050<br>94 | SLC27A4 | 4                                                         | 1.316873  | Inlier  |
|                              |               |         | solute carrier family 27 (fatty acid transporter), member |           |         |
| siRNA-Temozolomide Run3-DMSO | NM_0122<br>54 | SLC27A5 | 5                                                         | -3.933567 | Outlier |
|                              |               |         | solute carrier family 27 (fatty acid transporter), member |           |         |
| siRNA-Temozolomide Run1-DMSO | NM_0122<br>54 | SLC27A5 | 5                                                         | -1.595088 | Inlier  |
|                              |               |         | solute carrier family 27 (fatty acid transporter), member |           |         |
| siRNA-Temozolomide Run2-DMSO | NM_0122<br>54 | SLC27A5 | 5                                                         | -0.99396  | Inlier  |
|                              |               |         | solute carrier family 27 (fatty acid transporter), member |           |         |
| siRNA-Vinblastine Run1-DMSO  | NM_0122<br>54 | SLC27A5 | 5                                                         | -0.224498 | Inlier  |
|                              |               |         | solute carrier family 27 (fatty acid transporter), member |           |         |

Identification of Survival Genes in Human Glioblastoma Cells Using siRNA Screening  
 Nikhil G Thaker, Fang Zhang, Peter R. McDonald, Tong Ying Shun, Michael D Lewen, Ian F. Pollack, and John S. Lazo

Molecular Pharmacology

|                              |               |         |   |           |        |                                                             |
|------------------------------|---------------|---------|---|-----------|--------|-------------------------------------------------------------|
| siRNA Disorazole DMSO Run1   | NM_0122<br>54 | SLC27A5 | 5 | 0.224498  | Inlier | solute carrier family 27 (fatty acid transporter), member 5 |
| siRNA-Vinblastine Run2-DMSO  | NM_0122<br>54 | SLC27A5 | 5 | 0.280981  | Inlier | solute carrier family 27 (fatty acid transporter), member 5 |
| siRNA Disorazole DMSO Run3   | NM_0122<br>54 | SLC27A5 | 5 | 0.35504   | Inlier | solute carrier family 27 (fatty acid transporter), member 5 |
| siRNA Disorazole DMSO Run2   | NM_0122<br>54 | SLC27A5 | 5 | 2.366442  | Inlier | solute carrier family 27 (fatty acid transporter), member 5 |
| siRNA Disorazole DMSO Run2   | NM_0140<br>31 | SLC27A6 | 6 | -1.295878 | Inlier | solute carrier family 27 (fatty acid transporter), member 6 |
| siRNA-Temozolomide Run1-DMSO | NM_0140<br>31 | SLC27A6 | 6 | -0.7006   | Inlier | solute carrier family 27 (fatty acid transporter), member 6 |
| siRNA Disorazole DMSO Run3   | NM_0140<br>31 | SLC27A6 | 6 | -0.6484   | Inlier | solute carrier family 27 (fatty acid transporter), member 6 |

Identification of Survival Genes in Human Glioblastoma Cells Using siRNA Screening

Nikhil G Thaker, Fang Zhang, Peter R. McDonald, Tong Ying Shun, Michael D Lewen, Ian F. Pollack, and John S. Lazo

Molecular Pharmacology

|                              |               |         |   |                                                                            |           |        |
|------------------------------|---------------|---------|---|----------------------------------------------------------------------------|-----------|--------|
| siRNA-Temozolomide Run3-DMSO | NM_0140<br>31 | SLC27A6 | 6 | solute carrier family 27 (fatty acid transporter), member 6                | -0.190213 | Inlier |
| siRNA Disorazole DMSO Run1   | NM_0140<br>31 | SLC27A6 | 6 | solute carrier family 27 (fatty acid transporter), member 6                | 0.190213  | Inlier |
| siRNA-Vinblastine Run1-DMSO  | NM_0140<br>31 | SLC27A6 | 6 | solute carrier family 27 (fatty acid transporter), member 6                | 0.258177  | Inlier |
| siRNA-Vinblastine Run2-DMSO  | NM_0140<br>31 | SLC27A6 | 6 | solute carrier family 27 (fatty acid transporter), member 6                | 0.755303  | Inlier |
| siRNA-Temozolomide Run2-DMSO | NM_0140<br>31 | SLC27A6 | 6 | solute carrier family 27 (fatty acid transporter), member 6                | 0.817356  | Inlier |
| siRNA-Temozolomide Run1-DMSO | NM_2016<br>51 | SLC28A1 | 1 | solute carrier family 28 (sodium-coupled nucleoside transporter), member 1 | -2.469308 | Inlier |

Identification of Survival Genes in Human Glioblastoma Cells Using siRNA Screening  
 Nikhil G Thaker, Fang Zhang, Peter R. McDonald, Tong Ying Shun, Michael D Lewen, Ian F. Pollack, and John S. Lazo  
 Molecular Pharmacology

|                              |               |         |   |                                                                            |                  |
|------------------------------|---------------|---------|---|----------------------------------------------------------------------------|------------------|
| siRNA-Temozolomide Run3-DMSO | NM_2016<br>51 | SLC28A1 | 1 | solute carrier family 28 (sodium-coupled nucleoside transporter), member 1 | -1.340578 Inlier |
| siRNA Disorazole DMSO Run2   | NM_2016<br>51 | SLC28A1 | 1 | solute carrier family 28 (sodium-coupled nucleoside transporter), member 1 | -1.095734 Inlier |
| siRNA-Vinblastine Run2-DMSO  | NM_2016<br>51 | SLC28A1 | 1 | solute carrier family 28 (sodium-coupled nucleoside transporter), member 1 | -0.102949 Inlier |
| siRNA Disorazole DMSO Run1   | NM_2016<br>51 | SLC28A1 | 1 | solute carrier family 28 (sodium-coupled nucleoside transporter), member 1 | 0.102949 Inlier  |
| siRNA-Temozolomide Run2-DMSO | NM_2016<br>51 | SLC28A1 | 1 | solute carrier family 28 (sodium-coupled nucleoside transporter), member 1 | 0.40801 Inlier   |

Identification of Survival Genes in Human Glioblastoma Cells Using siRNA Screening  
 Nikhil G Thaker, Fang Zhang, Peter R. McDonald, Tong Ying Shun, Michael D Lewen, Ian F. Pollack, and John S. Lazo  
 Molecular Pharmacology

|                              |               |         |   |           |        |                                                                          |
|------------------------------|---------------|---------|---|-----------|--------|--------------------------------------------------------------------------|
| siRNA Disorazole DMSO Run3   | NM_2016<br>51 | SLC28A1 | 1 | 0.620952  | Inlier | solute carrier family 28 (sodium-coupled nucleoside transporter), member |
| siRNA-Vinblastine Run1-DMSO  | NM_2016<br>51 | SLC28A1 | 1 | 0.728048  | Inlier | solute carrier family 28 (sodium-coupled nucleoside transporter), member |
| siRNA Disorazole DMSO Run2   | NM_0042<br>12 | SLC28A2 | 2 | -1.4543   | Inlier | solute carrier family 28 (sodium-coupled nucleoside transporter), member |
| siRNA-Temozolomide Run3-DMSO | NM_0042<br>12 | SLC28A2 | 2 | -1.397714 | Inlier | solute carrier family 28 (sodium-coupled nucleoside transporter), member |
| siRNA Disorazole DMSO Run3   | NM_0042<br>12 | SLC28A2 | 2 | -0.605032 | Inlier | solute carrier family 28 (sodium-coupled nucleoside transporter), member |

Identification of Survival Genes in Human Glioblastoma Cells Using siRNA Screening  
 Nikhil G Thaker, Fang Zhang, Peter R. McDonald, Tong Ying Shun, Michael D Lewen, Ian F. Pollack, and John S. Lazo  
 Molecular Pharmacology

| siRNA Treatment              | Gene      | Gene ID | Gene Name | Gene Description                                                           | Log Fold Change | Outlier Status |
|------------------------------|-----------|---------|-----------|----------------------------------------------------------------------------|-----------------|----------------|
| siRNA-Temozolomide Run1-DMSO | NM_004212 | SLC28A2 | 2         | solute carrier family 28 (sodium-coupled nucleoside transporter), member 2 | -0.344818       | Inlier         |
| siRNA-Temozolomide Run2-DMSO | NM_004212 | SLC28A2 | 2         | solute carrier family 28 (sodium-coupled nucleoside transporter), member 2 | 0.344818        | Inlier         |
| siRNA Disorazole DMSO Run1   | NM_004212 | SLC28A2 | 2         | solute carrier family 28 (sodium-coupled nucleoside transporter), member 2 | 0.401186        | Inlier         |
| siRNA-Vinblastine Run1-DMSO  | NM_004212 | SLC28A2 | 2         | solute carrier family 28 (sodium-coupled nucleoside transporter), member 2 | 0.743968        | Inlier         |
| siRNA-Vinblastine Run2-DMSO  | NM_004212 | SLC28A2 | 2         | solute carrier family 28 (sodium-coupled nucleoside transporter), member 2 | 0.823316        | Inlier         |



Identification of Survival Genes in Human Glioblastoma Cells Using siRNA Screening

Nikhil G Thaker, Fang Zhang, Peter R. McDonald, Tong Ying Shun, Michael D Lewen, Ian F. Pollack, and John S. Lazo

Molecular Pharmacology

|                                  |               |         |                                                                                                       |           |        |
|----------------------------------|---------------|---------|-------------------------------------------------------------------------------------------------------|-----------|--------|
| siRNA Disorazole DMSO Run2       | NM_0221<br>27 | SLC28A3 | solute<br>carrier<br>family 28<br>(sodium-<br>coupled<br>nucleoside<br>transporter<br>) , member<br>3 | -1.263446 | Inlier |
| siRNA Disorazole DMSO Run3       | NM_0221<br>27 | SLC28A3 | solute<br>carrier<br>family 28<br>(sodium-<br>coupled<br>nucleoside<br>transporter<br>) , member<br>3 | -0.680781 | Inlier |
| siRNA-Temozolomide Run1-<br>DMSO | NM_0221<br>27 | SLC28A3 | solute<br>carrier<br>family 28<br>(sodium-<br>coupled<br>nucleoside<br>transporter<br>) , member<br>3 | -0.668219 | Inlier |
| siRNA-Temozolomide Run3-<br>DMSO | NM_0221<br>27 | SLC28A3 | solute<br>carrier<br>family 28<br>(sodium-<br>coupled<br>nucleoside<br>transporter<br>) , member<br>3 | -0.092181 | Inlier |
| siRNA Disorazole DMSO Run1       | NM_0221<br>27 | SLC28A3 | solute<br>carrier<br>family 28<br>(sodium-<br>coupled<br>nucleoside<br>transporter<br>) , member<br>3 | 0.092181  | Inlier |

Identification of Survival Genes in Human Glioblastoma Cells Using siRNA Screening

Nikhil G Thaker, Fang Zhang, Peter R. McDonald, Tong Ying Shun, Michael D Lewen, Ian F. Pollack, and John S. Lazo

Molecular Pharmacology

|                              |               |         |                                                                            |           |        |
|------------------------------|---------------|---------|----------------------------------------------------------------------------|-----------|--------|
| siRNA-Temozolomide Run2-DMSO | NM_0221<br>27 | SLC28A3 | solute carrier family 28 (sodium-coupled nucleoside transporter), member 3 | 0.367132  | Inlier |
| siRNA-Vinblastine Run1-DMSO  | NM_0221<br>27 | SLC28A3 | solute carrier family 28 (sodium-coupled nucleoside transporter), member 3 | 1.36093   | Inlier |
| siRNA-Vinblastine Run2-DMSO  | NM_0221<br>27 | SLC28A3 | solute carrier family 28 (sodium-coupled nucleoside transporter), member 3 | 1.496542  | Inlier |
| siRNA Disorazole DMSO Run2   | NM_0049<br>55 | SLC29A1 | solute carrier family 29 (nucleoside transporters), member 1               | -1.324751 | Inlier |
| siRNA-Temozolomide Run3-DMSO | NM_0049<br>55 | SLC29A1 | solute carrier family 29 (nucleoside transporters), member 1               | -1.279381 | Inlier |

Identification of Survival Genes in Human Glioblastoma Cells Using siRNA Screening

Nikhil G Thaker, Fang Zhang, Peter R. McDonald, Tong Ying Shun, Michael D Lewen, Ian F. Pollack, and John S. Lazo

Molecular Pharmacology

| siRNA Treatment              | Gene    | Gene ID   | Gene Description                                             | Log Fold Change | Outlier Status |
|------------------------------|---------|-----------|--------------------------------------------------------------|-----------------|----------------|
| siRNA Disorazole DMSO Run3   | SLC29A1 | NM_004955 | solute carrier family 29 (nucleoside transporters), member 1 | -0.61805        | Inlier         |
| siRNA Disorazole DMSO Run1   | SLC29A1 | NM_004955 | solute carrier family 29 (nucleoside transporters), member 1 | -0.055734       | Inlier         |
| siRNA-Temozolomide Run1-DMSO | SLC29A1 | NM_004955 | solute carrier family 29 (nucleoside transporters), member 1 | 0.055734        | Inlier         |
| siRNA-Vinblastine Run1-DMSO  | SLC29A1 | NM_004955 | solute carrier family 29 (nucleoside transporters), member 1 | 0.560385        | Inlier         |
| siRNA-Vinblastine Run2-DMSO  | SLC29A1 | NM_004955 | solute carrier family 29 (nucleoside transporters), member 1 | 0.73095         | Inlier         |
| siRNA-Temozolomide Run2-DMSO | SLC29A1 | NM_004955 | solute carrier family 29 (nucleoside transporters), member 1 | 0.797074        | Inlier         |

Identification of Survival Genes in Human Glioblastoma Cells Using siRNA Screening

Nikhil G Thaker, Fang Zhang, Peter R. McDonald, Tong Ying Shun, Michael D Lewen, Ian F. Pollack, and John S. Lazo

Molecular Pharmacology

| siRNA Treatment              | Gene    | Gene ID   | Gene Description                                             | Log Fold Change | Outlier Status |
|------------------------------|---------|-----------|--------------------------------------------------------------|-----------------|----------------|
| siRNA-Temozolomide Run3-DMSO | SLC29A2 | NM_001532 | solute carrier family 29 (nucleoside transporters), member 2 | -1.284268       | Inlier         |
| siRNA-Temozolomide Run2-DMSO | SLC29A2 | NM_001532 | solute carrier family 29 (nucleoside transporters), member 2 | -0.865418       | Inlier         |
| siRNA Disorazole DMSO Run2   | SLC29A2 | NM_001532 | solute carrier family 29 (nucleoside transporters), member 2 | -0.384345       | Inlier         |
| siRNA Disorazole DMSO Run3   | SLC29A2 | NM_001532 | solute carrier family 29 (nucleoside transporters), member 2 | -0.190593       | Inlier         |
| siRNA-Temozolomide Run1-DMSO | SLC29A2 | NM_001532 | solute carrier family 29 (nucleoside transporters), member 2 | 0.190593        | Inlier         |
| siRNA Disorazole DMSO Run1   | SLC29A2 | NM_001532 | solute carrier family 29 (nucleoside transporters), member 2 | 0.483582        | Inlier         |

Identification of Survival Genes in Human Glioblastoma Cells Using siRNA Screening

Nikhil G Thaker, Fang Zhang, Peter R. McDonald, Tong Ying Shun, Michael D Lewen, Ian F. Pollack, and John S. Lazo

Molecular Pharmacology

| siRNA Treatment              | Gene ID   | Gene Name | Gene Description                                             | Score     | Category |
|------------------------------|-----------|-----------|--------------------------------------------------------------|-----------|----------|
| siRNA-Vinblastine Run1-DMSO  | NM_001532 | SLC29A2   | solute carrier family 29 (nucleoside transporters), member 2 | 1.01538   | Inlier   |
| siRNA-Vinblastine Run2-DMSO  | NM_001532 | SLC29A2   | solute carrier family 29 (nucleoside transporters), member 2 | 1.098604  | Inlier   |
| siRNA-Temozolomide Run1-DMSO | NM_018344 | SLC29A3   | solute carrier family 29 (nucleoside transporters), member 3 | -1.292236 | Inlier   |
| siRNA Disorazole DMSO Run2   | NM_018344 | SLC29A3   | solute carrier family 29 (nucleoside transporters), member 3 | -1.261244 | Inlier   |
| siRNA Disorazole DMSO Run3   | NM_018344 | SLC29A3   | solute carrier family 29 (nucleoside transporters), member 3 | -0.155608 | Inlier   |
| siRNA-Temozolomide Run3-DMSO | NM_018344 | SLC29A3   | solute carrier family 29 (nucleoside transporters), member 3 | -0.091955 | Inlier   |

Identification of Survival Genes in Human Glioblastoma Cells Using siRNA Screening

Nikhil G Thaker, Fang Zhang, Peter R. McDonald, Tong Ying Shun, Michael D Lewen, Ian F. Pollack, and John S. Lazo

Molecular Pharmacology

| siRNA Treatment              | Gene ID   | Gene Name | Protein Description                                          | Log2 Fold Change | Classification |
|------------------------------|-----------|-----------|--------------------------------------------------------------|------------------|----------------|
| siRNA-Vinblastine Run1-DMSO  | NM_018344 | SLC29A3   | solute carrier family 29 (nucleoside transporters), member 3 | 0.091955         | Inlier         |
| siRNA-Vinblastine Run2-DMSO  | NM_018344 | SLC29A3   | solute carrier family 29 (nucleoside transporters), member 3 | 0.646752         | Inlier         |
| siRNA Disorazole DMSO Run1   | NM_018344 | SLC29A3   | solute carrier family 29 (nucleoside transporters), member 3 | 0.702248         | Inlier         |
| siRNA-Temozolomide Run2-DMSO | NM_018344 | SLC29A3   | solute carrier family 29 (nucleoside transporters), member 3 | 0.913733         | Inlier         |
| siRNA-Temozolomide Run3-DMSO | NM_153247 | SLC29A4   | solute carrier family 29 (nucleoside transporters), member 4 | -3.821175        | Outlier        |
| siRNA-Temozolomide Run1-DMSO | NM_153247 | SLC29A4   | solute carrier family 29 (nucleoside transporters), member 4 | -2.659942        | Inlier         |

Identification of Survival Genes in Human Glioblastoma Cells Using siRNA Screening

Nikhil G Thaker, Fang Zhang, Peter R. McDonald, Tong Ying Shun, Michael D Lewen, Ian F. Pollack, and John S. Lazo

Molecular Pharmacology

| siRNA Treatment              | Gene    | Accession | Gene Name | Log Fold Change | Outlier Status |
|------------------------------|---------|-----------|-----------|-----------------|----------------|
| siRNA Disorazole DMSO Run1   | NM_1532 | 47        | SLC29A4   | -1.036917       | Inlier         |
| siRNA Disorazole DMSO Run2   | NM_1532 | 47        | SLC29A4   | -0.029891       | Inlier         |
| siRNA-Temozolomide Run2-DMSO | NM_1532 | 47        | SLC29A4   | 0.029891        | Inlier         |
| siRNA Disorazole DMSO Run3   | NM_1532 | 47        | SLC29A4   | 0.059185        | Inlier         |
| siRNA-Vinblastine Run2-DMSO  | NM_1532 | 47        | SLC29A4   | 0.540885        | Inlier         |
| siRNA-Vinblastine Run1-DMSO  | NM_1532 | 47        | SLC29A4   | 0.808115        | Inlier         |

solute carrier family 29 (nucleoside transporters), member 4

Identification of Survival Genes in Human Glioblastoma Cells Using siRNA Screening

Nikhil G Thaker, Fang Zhang, Peter R. McDonald, Tong Ying Shun, Michael D Lewen, Ian F. Pollack, and John S. Lazo

Molecular Pharmacology

| siRNA              | Condition | Run  | Gene   | Log2FC    | Inlier | Gene Description                                                    |
|--------------------|-----------|------|--------|-----------|--------|---------------------------------------------------------------------|
| siRNA Disorazole   | DMSO      | Run2 | SLC2A1 | -3.148654 | Inlier | solute carrier family 2 (facilitated glucose transporter), member 1 |
| siRNA Disorazole   | DMSO      | Run3 | SLC2A1 | -1.002728 | Inlier | solute carrier family 2 (facilitated glucose transporter), member 1 |
| siRNA-Temozolomide | DMSO      | Run3 | SLC2A1 | -0.588337 | Inlier | solute carrier family 2 (facilitated glucose transporter), member 1 |
| siRNA Disorazole   | DMSO      | Run1 | SLC2A1 | -0.268969 | Inlier | solute carrier family 2 (facilitated glucose transporter), member 1 |
| siRNA-Vinblastine  | DMSO      | Run2 | SLC2A1 | 0.26897   | Inlier | solute carrier family 2 (facilitated glucose transporter), member 1 |
| siRNA-Temozolomide | DMSO      | Run2 | SLC2A1 | 0.476277  | Inlier | solute carrier family 2 (facilitated glucose transporter), member 1 |



Identification of Survival Genes in Human Glioblastoma Cells Using siRNA Screening  
 Nikhil G Thaker, Fang Zhang, Peter R. McDonald, Tong Ying Shun, Michael D Lewen, Ian F. Pollack, and John S. Lazo

Molecular Pharmacology

| siRNA Treatment              | Gene ID   | Gene Name | Accession | Value     | Outlier Status |
|------------------------------|-----------|-----------|-----------|-----------|----------------|
| siRNA-Temozolomide Run1-DMSO | NM_006516 | SLC2A1    | 1         | 0.760663  | Inlier         |
| siRNA-Vinblastine Run1-DMSO  | NM_006516 | SLC2A1    | 1         | 0.821311  | Inlier         |
| siRNA Disorazole DMSO Run2   | NM_030777 | SLC2A10   | 10        | -1.710655 | Inlier         |
| siRNA Disorazole DMSO Run3   | NM_030777 | SLC2A10   | 10        | -0.786432 | Inlier         |
| siRNA-Temozolomide Run3-DMSO | NM_030777 | SLC2A10   | 10        | -0.626073 | Inlier         |
| siRNA-Temozolomide Run2-DMSO | NM_030777 | SLC2A10   | 10        | -0.308458 | Inlier         |

solute carrier family 2 (facilitated glucose transporter), member 1

solute carrier family 2 (facilitated glucose transporter), member 1

solute carrier family 2 (facilitated glucose transporter), member 10

solute carrier family 2 (facilitated glucose transporter), member 10

solute carrier family 2 (facilitated glucose transporter), member 10

solute carrier family 2 (facilitated glucose transporter), member 10

Identification of Survival Genes in Human Glioblastoma Cells Using siRNA Screening  
 Nikhil G Thaker, Fang Zhang, Peter R. McDonald, Tong Ying Shun, Michael D Lewen, Ian F. Pollack, and John S. Lazo  
 Molecular Pharmacology

|                              |               |         |    |          |        |                                                                      |
|------------------------------|---------------|---------|----|----------|--------|----------------------------------------------------------------------|
| siRNA Disorazole DMSO Run1   | NM_0307<br>77 | SLC2A10 | 10 | 0.308458 | Inlier | solute carrier family 2 (facilitated glucose transporter), member 10 |
| siRNA-Vinblastine Run1-DMSO  | NM_0307<br>77 | SLC2A10 | 10 | 0.610288 | Inlier | solute carrier family 2 (facilitated glucose transporter), member 10 |
| siRNA-Vinblastine Run2-DMSO  | NM_0307<br>77 | SLC2A10 | 10 | 0.722927 | Inlier | solute carrier family 2 (facilitated glucose transporter), member 10 |
| siRNA-Temozolomide Run1-DMSO | NM_0307<br>77 | SLC2A10 | 10 | 1.784217 | Inlier | solute carrier family 2 (facilitated glucose transporter), member 10 |
| siRNA-Temozolomide Run3-DMSO | NM_1451<br>76 | SLC2A12 | 12 | -1.46763 | Inlier | solute carrier family 2 (facilitated glucose transporter), member 12 |

Identification of Survival Genes in Human Glioblastoma Cells Using siRNA Screening

Nikhil G Thaker, Fang Zhang, Peter R. McDonald, Tong Ying Shun, Michael D Lewen, Ian F. Pollack, and John S. Lazo

Molecular Pharmacology

| siRNA Treatment              | Gene      | Accession | SLC | Family                                                               | Value     | Outlier |
|------------------------------|-----------|-----------|-----|----------------------------------------------------------------------|-----------|---------|
| siRNA-Temozolomide Run2-DMSO | NM_145176 | SLC2A12   | 12  | solute carrier family 2 (facilitated glucose transporter), member 12 | -0.807501 | Inlier  |
| siRNA Disorazole DMSO Run3   | NM_145176 | SLC2A12   | 12  | solute carrier family 2 (facilitated glucose transporter), member 12 | -0.678052 | Inlier  |
| siRNA Disorazole DMSO Run2   | NM_145176 | SLC2A12   | 12  | solute carrier family 2 (facilitated glucose transporter), member 12 | -0.229126 | Inlier  |
| siRNA Disorazole DMSO Run1   | NM_145176 | SLC2A12   | 12  | solute carrier family 2 (facilitated glucose transporter), member 12 | 0.229126  | Inlier  |
| siRNA-Temozolomide Run1-DMSO | NM_145176 | SLC2A12   | 12  | solute carrier family 2 (facilitated glucose transporter), member 12 | 0.281009  | Inlier  |

Identification of Survival Genes in Human Glioblastoma Cells Using siRNA Screening  
 Nikhil G Thaker, Fang Zhang, Peter R. McDonald, Tong Ying Shun, Michael D Lewen, Ian F. Pollack, and John S. Lazo  
 Molecular Pharmacology

|                              |           |         |                                                                      |           |        |
|------------------------------|-----------|---------|----------------------------------------------------------------------|-----------|--------|
| siRNA-Vinblastine Run1-DMSO  | NM_145176 | SLC2A12 | solute carrier family 2 (facilitated glucose transporter), member 12 | 0.670948  | Inlier |
| siRNA-Vinblastine Run2-DMSO  | NM_145176 | SLC2A12 | solute carrier family 2 (facilitated glucose transporter), member 12 | 0.844679  | Inlier |
| siRNA-Temozolomide Run3-DMSO | NM_000340 | SLC2A2  | solute carrier family 2 (facilitated glucose transporter), member 2  | -1.68564  | Inlier |
| siRNA Disorazole DMSO Run2   | NM_000340 | SLC2A2  | solute carrier family 2 (facilitated glucose transporter), member 2  | -1.036428 | Inlier |
| siRNA-Temozolomide Run2-DMSO | NM_000340 | SLC2A2  | solute carrier family 2 (facilitated glucose transporter), member 2  | -0.58997  | Inlier |
| siRNA Disorazole DMSO Run3   | NM_000340 | SLC2A2  | solute carrier family 2 (facilitated glucose transporter), member 2  | -0.130419 | Inlier |

Identification of Survival Genes in Human Glioblastoma Cells Using siRNA Screening

Nikhil G Thaker, Fang Zhang, Peter R. McDonald, Tong Ying Shun, Michael D Lewen, Ian F. Pollack, and John S. Lazo

Molecular Pharmacology

| siRNA                        | Gene   | Accession | Gene   | Value     | Category |
|------------------------------|--------|-----------|--------|-----------|----------|
| siRNA Disorazole DMSO Run1   | SLC2A2 | NM_000340 | SLC2A2 | 0.130419  | Inlier   |
| siRNA-Temozolomide Run1-DMSO | SLC2A2 | NM_000340 | SLC2A2 | 0.612095  | Inlier   |
| siRNA-Vinblastine Run1-DMSO  | SLC2A2 | NM_000340 | SLC2A2 | 0.736905  | Inlier   |
| siRNA-Vinblastine Run2-DMSO  | SLC2A2 | NM_000340 | SLC2A2 | 1.594096  | Inlier   |
| siRNA-Temozolomide Run3-DMSO | SLC2A3 | NM_006931 | SLC2A3 | -2.91109  | Inlier   |
| siRNA Disorazole DMSO Run3   | SLC2A3 | NM_006931 | SLC2A3 | -0.684771 | Inlier   |

solute carrier family 2 (facilitated glucose transporter), member 2  
solute carrier family 2 (facilitated glucose transporter), member 2  
solute carrier family 2 (facilitated glucose transporter), member 2  
solute carrier family 2 (facilitated glucose transporter), member 2  
solute carrier family 2 (facilitated glucose transporter), member 3  
solute carrier family 2 (facilitated glucose transporter), member 3

Identification of Survival Genes in Human Glioblastoma Cells Using siRNA Screening

Nikhil G Thaker, Fang Zhang, Peter R. McDonald, Tong Ying Shun, Michael D Lewen, Ian F. Pollack, and John S. Lazo

Molecular Pharmacology

| siRNA Treatment              | Gene ID   | Gene Name | Log2 Fold Change | Annotation                                                          |
|------------------------------|-----------|-----------|------------------|---------------------------------------------------------------------|
| siRNA-Temozolomide Run2-DMSO | NM_006931 | SLC2A3    | -0.664228        | solute carrier family 2 (facilitated glucose transporter), member 3 |
| siRNA Disorazole DMSO Run2   | NM_006931 | SLC2A3    | -0.532169        | solute carrier family 2 (facilitated glucose transporter), member 3 |
| siRNA-Vinblastine Run2-DMSO  | NM_006931 | SLC2A3    | 0.532171         | solute carrier family 2 (facilitated glucose transporter), member 3 |
| siRNA Disorazole DMSO Run1   | NM_006931 | SLC2A3    | 0.64921          | solute carrier family 2 (facilitated glucose transporter), member 3 |
| siRNA-Vinblastine Run1-DMSO  | NM_006931 | SLC2A3    | 1.5101           | solute carrier family 2 (facilitated glucose transporter), member 3 |
| siRNA-Temozolomide Run1-DMSO | NM_006931 | SLC2A3    | 3.224352         | solute carrier family 2 (facilitated glucose transporter), member 3 |



Identification of Survival Genes in Human Glioblastoma Cells Using siRNA Screening  
 Nikhil G Thaker, Fang Zhang, Peter R. McDonald, Tong Ying Shun, Michael D Lewen, Ian F. Pollack, and John S. Lazo

Molecular Pharmacology

|                              |           |        |                                                                              |           |        |
|------------------------------|-----------|--------|------------------------------------------------------------------------------|-----------|--------|
| siRNA-Temozolomide Run1-DMSO | NM_001042 | SLC2A4 | solute carrier family 2 (facilitated glucose transporter), member 4          | 0.74279   | Inlier |
| siRNA-Vinblastine Run2-DMSO  | NM_001042 | SLC2A4 | solute carrier family 2 (facilitated glucose transporter), member 4          | 0.91661   | Inlier |
| siRNA-Temozolomide Run3-DMSO | NM_003039 | SLC2A5 | solute carrier family 2 (facilitated glucose/fructose transporter), member 5 | -2.726508 | Inlier |
| siRNA Disorazole DMSO Run2   | NM_003039 | SLC2A5 | solute carrier family 2 (facilitated glucose/fructose transporter), member 5 | -0.461217 | Inlier |
| siRNA-Temozolomide Run2-DMSO | NM_003039 | SLC2A5 | solute carrier family 2 (facilitated glucose/fructose transporter), member 5 | -0.321593 | Inlier |
| siRNA Disorazole DMSO Run3   | NM_003039 | SLC2A5 | solute carrier family 2 (facilitated glucose/fructose transporter), member 5 | -0.036975 | Inlier |



Identification of Survival Genes in Human Glioblastoma Cells Using siRNA Screening

Nikhil G Thaker, Fang Zhang, Peter R. McDonald, Tong Ying Shun, Michael D Lewen, Ian F. Pollack, and John S. Lazo

Molecular Pharmacology

| siRNA Treatment              | Gene   | Accession | Gene Name                                                                    | Value     | Category |
|------------------------------|--------|-----------|------------------------------------------------------------------------------|-----------|----------|
| siRNA Disorazole DMSO Run1   | SLC2A5 | NM_003039 | solute carrier family 2 (facilitated glucose/fructose transporter), member 5 | 0.036976  | Inlier   |
| siRNA-Temozolomide Run1-DMSO | SLC2A5 | NM_003039 | solute carrier family 2 (facilitated glucose/fructose transporter), member 5 | 0.887783  | Inlier   |
| siRNA-Vinblastine Run1-DMSO  | SLC2A5 | NM_003039 | solute carrier family 2 (facilitated glucose/fructose transporter), member 5 | 0.891397  | Inlier   |
| siRNA-Vinblastine Run2-DMSO  | SLC2A5 | NM_003039 | solute carrier family 2 (facilitated glucose transporter), member 5          | 0.976629  | Inlier   |
| siRNA-Temozolomide Run3-DMSO | SLC2A6 | NM_017585 | solute carrier family 2 (facilitated glucose transporter), member 6          | -1.230545 | Inlier   |
| siRNA-Temozolomide Run2-DMSO | SLC2A6 | NM_017585 | solute carrier family 2 (facilitated glucose transporter), member 6          | -0.73787  | Inlier   |

Identification of Survival Genes in Human Glioblastoma Cells Using siRNA Screening

Nikhil G Thaker, Fang Zhang, Peter R. McDonald, Tong Ying Shun, Michael D Lewen, Ian F. Pollack, and John S. Lazo

Molecular Pharmacology

| siRNA Treatment              | Gene   | Gene ID   | Gene Symbol | Gene Description                                                    | Log Fold Change | Outlier Status |
|------------------------------|--------|-----------|-------------|---------------------------------------------------------------------|-----------------|----------------|
| siRNA Disorazole DMSO Run2   | SLC2A6 | NM_017585 | SLC2A6      | solute carrier family 2 (facilitated glucose transporter), member 6 | -0.361467       | Inlier         |
| siRNA Disorazole DMSO Run3   | SLC2A6 | NM_017585 | SLC2A6      | solute carrier family 2 (facilitated glucose transporter), member 6 | -0.184866       | Inlier         |
| siRNA Disorazole DMSO Run1   | SLC2A6 | NM_017585 | SLC2A6      | solute carrier family 2 (facilitated glucose transporter), member 6 | 0.184866        | Inlier         |
| siRNA-Temozolomide Run1-DMSO | SLC2A6 | NM_017585 | SLC2A6      | solute carrier family 2 (facilitated glucose transporter), member 6 | 0.61113         | Inlier         |
| siRNA-Vinblastine Run1-DMSO  | SLC2A6 | NM_017585 | SLC2A6      | solute carrier family 2 (facilitated glucose transporter), member 6 | 0.813169        | Inlier         |
| siRNA-Vinblastine Run2-DMSO  | SLC2A6 | NM_017585 | SLC2A6      | solute carrier family 2 (facilitated glucose transporter), member 6 | 1.185698        | Inlier         |

Identification of Survival Genes in Human Glioblastoma Cells Using siRNA Screening

Nikhil G Thaker, Fang Zhang, Peter R. McDonald, Tong Ying Shun, Michael D Lewen, Ian F. Pollack, and John S. Lazo

Molecular Pharmacology

| siRNA Treatment              | Gene ID   | Gene Name | Gene Description                                                    | Correlation | Outlier Status |
|------------------------------|-----------|-----------|---------------------------------------------------------------------|-------------|----------------|
| siRNA-Temozolomide Run3-DMSO | NM_014580 | SLC2A8    | solute carrier family 2, (facilitated glucose transporter) member 8 | -0.900939   | Inlier         |
| siRNA Disorazole DMSO Run2   | NM_014580 | SLC2A8    | solute carrier family 2, (facilitated glucose transporter) member 8 | -0.74341    | Inlier         |
| siRNA Disorazole DMSO Run1   | NM_014580 | SLC2A8    | solute carrier family 2, (facilitated glucose transporter) member 8 | -0.566285   | Inlier         |
| siRNA Disorazole DMSO Run3   | NM_014580 | SLC2A8    | solute carrier family 2, (facilitated glucose transporter) member 8 | -0.303386   | Inlier         |
| siRNA-Temozolomide Run2-DMSO | NM_014580 | SLC2A8    | solute carrier family 2, (facilitated glucose transporter) member 8 | 0.303386    | Inlier         |
| siRNA-Vinblastine Run1-DMSO  | NM_014580 | SLC2A8    | solute carrier family 2, (facilitated glucose transporter) member 8 | 0.60559     | Inlier         |

Identification of Survival Genes in Human Glioblastoma Cells Using siRNA Screening

Nikhil G Thaker, Fang Zhang, Peter R. McDonald, Tong Ying Shun, Michael D Lewen, Ian F. Pollack, and John S. Lazo

Molecular Pharmacology

| siRNA Treatment              | Gene ID     | Gene Name | Gene Description                                                    | Score     | Outlier Status |
|------------------------------|-------------|-----------|---------------------------------------------------------------------|-----------|----------------|
| siRNA-Temozolomide Run1-DMSO | NM_014580   | SLC2A8    | solute carrier family 2, (facilitated glucose transporter) member 8 | 0.809875  | Inlier         |
| siRNA-Vinblastine Run2-DMSO  | NM_014580   | SLC2A8    | solute carrier family 2, (facilitated glucose transporter) member 8 | 1.127345  | Inlier         |
| siRNA-Temozolomide Run3-DMSO | NM_00101290 | SLC2A9    | solute carrier family 2 (facilitated glucose transporter), member 9 | -0.843526 | Inlier         |
| siRNA Disorazole DMSO Run3   | NM_00101290 | SLC2A9    | solute carrier family 2 (facilitated glucose transporter), member 9 | -0.713503 | Inlier         |
| siRNA Disorazole DMSO Run2   | NM_00101290 | SLC2A9    | solute carrier family 2 (facilitated glucose transporter), member 9 | -0.635497 | Inlier         |
| siRNA-Temozolomide Run2-DMSO | NM_00101290 | SLC2A9    | solute carrier family 2 (facilitated glucose transporter), member 9 | -0.267924 | Inlier         |

Identification of Survival Genes in Human Glioblastoma Cells Using siRNA Screening

Nikhil G Thaker, Fang Zhang, Peter R. McDonald, Tong Ying Shun, Michael D Lewen, Ian F. Pollack, and John S. Lazo

Molecular Pharmacology

| siRNA Treatment              | Gene    | Accession | Gene Name                                                           | Value     | Outlier Status |
|------------------------------|---------|-----------|---------------------------------------------------------------------|-----------|----------------|
| siRNA Disorazole DMSO Run1   | SLC2A9  | NM_01290  | solute carrier family 2 (facilitated glucose transporter), member 9 | 0.267924  | Inlier         |
| siRNA-Temozolomide Run1-DMSO | SLC2A9  | NM_01290  | solute carrier family 2 (facilitated glucose transporter), member 9 | 0.608491  | Inlier         |
| siRNA-Vinblastine Run1-DMSO  | SLC2A9  | NM_01290  | solute carrier family 2 (facilitated glucose transporter), member 9 | 0.952779  | Inlier         |
| siRNA-Vinblastine Run2-DMSO  | SLC2A9  | NM_01290  | solute carrier family 2 (facilitated glucose transporter), member 9 | 1.659164  | Inlier         |
| siRNA-Temozolomide Run3-DMSO | SLC30A1 | NM_021194 | solute carrier family 30 (zinc transporter), member 1               | -1.766949 | Inlier         |
| siRNA-Temozolomide Run1-DMSO | SLC30A1 | NM_021194 | solute carrier family 30 (zinc transporter), member 1               | -1.644593 | Inlier         |

Identification of Survival Genes in Human Glioblastoma Cells Using siRNA Screening  
 Nikhil G Thaker, Fang Zhang, Peter R. McDonald, Tong Ying Shun, Michael D Lewen, Ian F. Pollack, and John S. Lazo

Molecular Pharmacology

|                              |               |         |   |           |        |                                                       |
|------------------------------|---------------|---------|---|-----------|--------|-------------------------------------------------------|
| siRNA Disorazole DMSO Run2   | NM_0211<br>94 | SLC30A1 | 1 | -0.573877 | Inlier | solute carrier family 30 (zinc transporter), member 1 |
| siRNA Disorazole DMSO Run3   | NM_0211<br>94 | SLC30A1 | 1 | -0.185989 | Inlier | solute carrier family 30 (zinc transporter), member 1 |
| siRNA Disorazole DMSO Run1   | NM_0211<br>94 | SLC30A1 | 1 | 0.185991  | Inlier | solute carrier family 30 (zinc transporter), member 1 |
| siRNA-Temozolomide Run2-DMSO | NM_0211<br>94 | SLC30A1 | 1 | 0.631036  | Inlier | solute carrier family 30 (zinc transporter), member 1 |
| siRNA-Vinblastine Run2-DMSO  | NM_0211<br>94 | SLC30A1 | 1 | 0.717963  | Inlier | solute carrier family 30 (zinc transporter), member 1 |
| siRNA-Vinblastine Run1-DMSO  | NM_0211<br>94 | SLC30A1 | 1 | 1.831236  | Inlier | solute carrier family 30 (zinc transporter), member 1 |
| siRNA-Temozolomide Run3-DMSO | NM_0325<br>13 | SLC30A2 | 2 | -1.970056 | Inlier | solute carrier family 30 (zinc transporter), member 2 |

Identification of Survival Genes in Human Glioblastoma Cells Using siRNA Screening  
 Nikhil G Thaker, Fang Zhang, Peter R. McDonald, Tong Ying Shun, Michael D Lewen, Ian F. Pollack, and John S. Lazo

Molecular Pharmacology

|                              |               |         |   |           |        |                                                       |
|------------------------------|---------------|---------|---|-----------|--------|-------------------------------------------------------|
| siRNA Disorazole DMSO Run2   | NM_0325<br>13 | SLC30A2 | 2 | -0.574129 | Inlier | solute carrier family 30 (zinc transporter), member 2 |
| siRNA-Temozolomide Run2-DMSO | NM_0325<br>13 | SLC30A2 | 2 | -0.556089 | Inlier | solute carrier family 30 (zinc transporter), member 2 |
| siRNA-Temozolomide Run1-DMSO | NM_0325<br>13 | SLC30A2 | 2 | -0.545387 | Inlier | solute carrier family 30 (zinc transporter), member 2 |
| siRNA Disorazole DMSO Run1   | NM_0325<br>13 | SLC30A2 | 2 | 0.545387  | Inlier | solute carrier family 30 (zinc transporter), member 2 |
| siRNA-Vinblastine Run1-DMSO  | NM_0325<br>13 | SLC30A2 | 2 | 0.774871  | Inlier | solute carrier family 30 (zinc transporter), member 2 |
| siRNA Disorazole DMSO Run3   | NM_0325<br>13 | SLC30A2 | 2 | 0.819034  | Inlier | solute carrier family 30 (zinc transporter), member 2 |
| siRNA-Vinblastine Run2-DMSO  | NM_0325<br>13 | SLC30A2 | 2 | 1.715328  | Inlier | solute carrier family 30 (zinc transporter), member 2 |





Identification of Survival Genes in Human Glioblastoma Cells Using siRNA Screening

Nikhil G Thaker, Fang Zhang, Peter R. McDonald, Tong Ying Shun, Michael D Lewen, Ian F. Pollack, and John S. Lazo

Molecular Pharmacology

| siRNA                        | Gene      | Accession | Protein                                               | Value     | Category |
|------------------------------|-----------|-----------|-------------------------------------------------------|-----------|----------|
| siRNA-Vinblastine Run2-DMSO  | NM_003459 | SLC30A3   | solute carrier family 30 (zinc transporter), member 3 | 1.023617  | Inlier   |
| siRNA-Temozolomide Run3-DMSO | NM_013309 | SLC30A4   | solute carrier family 30 (zinc transporter), member 4 | -2.694062 | Inlier   |
| siRNA Disorazole DMSO Run2   | NM_013309 | SLC30A4   | solute carrier family 30 (zinc transporter), member 4 | -0.692796 | Inlier   |
| siRNA Disorazole DMSO Run3   | NM_013309 | SLC30A4   | solute carrier family 30 (zinc transporter), member 4 | -0.624135 | Inlier   |
| siRNA-Temozolomide Run1-DMSO | NM_013309 | SLC30A4   | solute carrier family 30 (zinc transporter), member 4 | -0.004785 | Inlier   |
| siRNA-Temozolomide Run2-DMSO | NM_013309 | SLC30A4   | solute carrier family 30 (zinc transporter), member 4 | 0.004785  | Inlier   |
| siRNA Disorazole DMSO Run1   | NM_013309 | SLC30A4   | solute carrier family 30 (zinc transporter), member 4 | 0.656204  | Inlier   |

Identification of Survival Genes in Human Glioblastoma Cells Using siRNA Screening

Nikhil G Thaker, Fang Zhang, Peter R. McDonald, Tong Ying Shun, Michael D Lewen, Ian F. Pollack, and John S. Lazo

Molecular Pharmacology

|                              |           |         |   |           |        |
|------------------------------|-----------|---------|---|-----------|--------|
| siRNA-Vinblastine Run2-DMSO  | NM_013309 | SLC30A4 | 4 | 1.921801  | Inlier |
|                              |           |         | 4 |           |        |
| siRNA-Vinblastine Run1-DMSO  | NM_013309 | SLC30A4 | 4 | 2.18586   | Inlier |
|                              |           |         | 4 |           |        |
| siRNA-Temozolomide Run1-DMSO | NM_024055 | SLC30A5 | 5 | -1.772001 | Inlier |
|                              |           |         | 5 |           |        |
| siRNA-Temozolomide Run3-DMSO | NM_024055 | SLC30A5 | 5 | -1.497225 | Inlier |
|                              |           |         | 5 |           |        |
| siRNA Disorazole DMSO Run2   | NM_024055 | SLC30A5 | 5 | -0.811267 | Inlier |
|                              |           |         | 5 |           |        |
| siRNA Disorazole DMSO Run1   | NM_024055 | SLC30A5 | 5 | -0.305842 | Inlier |
|                              |           |         | 5 |           |        |
| siRNA Disorazole DMSO Run3   | NM_024055 | SLC30A5 | 5 | 0.305843  | Inlier |
|                              |           |         | 5 |           |        |

Identification of Survival Genes in Human Glioblastoma Cells Using siRNA Screening  
 Nikhil G Thaker, Fang Zhang, Peter R. McDonald, Tong Ying Shun, Michael D Lewen, Ian F. Pollack, and John S. Lazo

Molecular Pharmacology

| siRNA Treatment              | Gene ID   | Gene Name | Log2 Fold Change | Annotation                                                      |
|------------------------------|-----------|-----------|------------------|-----------------------------------------------------------------|
| siRNA-Temozolomide Run2-DMSO | NM_024055 | SLC30A5   | 0.390656         | Inlier<br>solute carrier family 30 (zinc transporter), member 5 |
| siRNA-Vinblastine Run2-DMSO  | NM_024055 | SLC30A5   | 0.537733         | Inlier<br>solute carrier family 30 (zinc transporter), member 5 |
| siRNA-Vinblastine Run1-DMSO  | NM_024055 | SLC30A5   | 1.071819         | Inlier<br>solute carrier family 30 (zinc transporter), member 5 |
| siRNA Disorazole DMSO Run2   | NM_133496 | SLC30A7   | -1.044434        | Inlier<br>solute carrier family 30 (zinc transporter), member 7 |
| siRNA-Temozolomide Run3-DMSO | NM_133496 | SLC30A7   | -0.735642        | Inlier<br>solute carrier family 30 (zinc transporter), member 7 |
| siRNA Disorazole DMSO Run3   | NM_133496 | SLC30A7   | -0.531332        | Inlier<br>solute carrier family 30 (zinc transporter), member 7 |
| siRNA-Temozolomide Run2-DMSO | NM_133496 | SLC30A7   | -0.175703        | Inlier<br>solute carrier family 30 (zinc transporter), member 7 |

Identification of Survival Genes in Human Glioblastoma Cells Using siRNA Screening  
 Nikhil G Thaker, Fang Zhang, Peter R. McDonald, Tong Ying Shun, Michael D Lewen, Ian F. Pollack, and John S. Lazo

Molecular Pharmacology

|                              |               |         |   |           |        |
|------------------------------|---------------|---------|---|-----------|--------|
| siRNA-Temozolomide Run1-DMSO | NM_1334<br>96 | SLC30A7 | 7 | 0.175703  | Inlier |
|                              |               |         | 7 |           |        |
| siRNA Disorazole DMSO Run1   | NM_1334<br>96 | SLC30A7 | 7 | 0.613358  | Inlier |
|                              |               |         | 7 |           |        |
| siRNA-Vinblastine Run1-DMSO  | NM_1334<br>96 | SLC30A7 | 7 | 0.852987  | Inlier |
|                              |               |         | 7 |           |        |
| siRNA-Vinblastine Run2-DMSO  | NM_1334<br>96 | SLC30A7 | 7 | 1.158144  | Inlier |
|                              |               |         | 7 |           |        |
| siRNA-Temozolomide Run3-DMSO | NM_1738<br>51 | SLC30A8 | 8 | -1.745148 | Inlier |
|                              |               |         | 8 |           |        |
| siRNA-Temozolomide Run1-DMSO | NM_1738<br>51 | SLC30A8 | 8 | -0.329568 | Inlier |
|                              |               |         | 8 |           |        |
| siRNA Disorazole DMSO Run2   | NM_1738<br>51 | SLC30A8 | 8 | -0.267776 | Inlier |
|                              |               |         | 8 |           |        |

Identification of Survival Genes in Human Glioblastoma Cells Using siRNA Screening  
 Nikhil G Thaker, Fang Zhang, Peter R. McDonald, Tong Ying Shun, Michael D Lewen, Ian F. Pollack, and John S. Lazo

Molecular Pharmacology

|                              |               |         |                                                         |           |        |
|------------------------------|---------------|---------|---------------------------------------------------------|-----------|--------|
| siRNA-Temozolomide Run2-DMSO | NM_1738<br>51 | SLC30A8 | solute carrier family 30 (zinc transporter), member 8   | -0.004936 | Inlier |
| siRNA Disorazole DMSO Run3   | NM_1738<br>51 | SLC30A8 | solute carrier family 30 (zinc transporter), member 8   | 0.004936  | Inlier |
| siRNA-Vinblastine Run2-DMSO  | NM_1738<br>51 | SLC30A8 | solute carrier family 30 (zinc transporter), member 8   | 1.019432  | Inlier |
| siRNA Disorazole DMSO Run1   | NM_1738<br>51 | SLC30A8 | solute carrier family 30 (zinc transporter), member 8   | 1.043307  | Inlier |
| siRNA-Vinblastine Run1-DMSO  | NM_1738<br>51 | SLC30A8 | solute carrier family 31 (copper transporter), member 1 | 1.482889  | Inlier |
| siRNA-Temozolomide Run1-DMSO | NM_0018<br>59 | SLC31A1 | solute carrier family 31 (copper transporter), member 1 | -1.343901 | Inlier |
| siRNA-Temozolomide Run3-DMSO | NM_0018<br>59 | SLC31A1 | solute carrier family 31 (copper transporter), member 1 | -0.88962  | Inlier |

Identification of Survival Genes in Human Glioblastoma Cells Using siRNA Screening  
 Nikhil G Thaker, Fang Zhang, Peter R. McDonald, Tong Ying Shun, Michael D Lewen, Ian F. Pollack, and John S. Lazo

Molecular Pharmacology

| siRNA Treatment              | Gene    | Accession | Gene Name | Member   | Log Fold Change | Outlier Type |
|------------------------------|---------|-----------|-----------|----------|-----------------|--------------|
| siRNA Disorazole DMSO Run3   | SLC31A1 | NM_001859 | SLC31A1   | member 1 | -0.566994       | Inlier       |
| siRNA Disorazole DMSO Run1   | SLC31A1 | NM_001859 | SLC31A1   | member 1 | -0.08925        | Inlier       |
| siRNA-Vinblastine Run2-DMSO  | SLC31A1 | NM_001859 | SLC31A1   | member 1 | 0.08925         | Inlier       |
| siRNA-Temozolomide Run2-DMSO | SLC31A1 | NM_001859 | SLC31A1   | member 1 | 0.508931        | Inlier       |
| siRNA Disorazole DMSO Run2   | SLC31A1 | NM_001859 | SLC31A1   | member 1 | 0.782006        | Inlier       |
| siRNA-Vinblastine Run1-DMSO  | SLC31A1 | NM_001859 | SLC31A1   | member 1 | 1.165912        | Inlier       |
| siRNA-Temozolomide Run3-DMSO | SLC31A2 | NM_001860 | SLC31A2   | member 2 | -2.057201       | Inlier       |

solute carrier family 31 (copper transporters),

Identification of Survival Genes in Human Glioblastoma Cells Using siRNA Screening  
 Nikhil G Thaker, Fang Zhang, Peter R. McDonald, Tong Ying Shun, Michael D Lewen, Ian F. Pollack, and John S. Lazo

Molecular Pharmacology

| siRNA              | siRNA | siRNA | siRNA | siRNA   | siRNA   | siRNA    | siRNA     | siRNA  | siRNA                                                    |
|--------------------|-------|-------|-------|---------|---------|----------|-----------|--------|----------------------------------------------------------|
| siRNA Disorazole   | DMSO  | Run3  | 60    | NM_0018 | SLC31A2 | member 2 | -0.889374 | Inlier | solute carrier family 31 (copper transporters), member 2 |
| siRNA-Temozolomide | DMSO  | Run2- | 60    | NM_0018 | SLC31A2 | member 2 | -0.592446 | Inlier | solute carrier family 31 (copper transporters), member 2 |
| siRNA Disorazole   | DMSO  | Run2  | 60    | NM_0018 | SLC31A2 | member 2 | -0.04841  | Inlier | solute carrier family 31 (copper transporters), member 2 |
| siRNA-Temozolomide | DMSO  | Run1- | 60    | NM_0018 | SLC31A2 | member 2 | 0.04841   | Inlier | solute carrier family 31 (copper transporters), member 2 |
| siRNA Disorazole   | DMSO  | Run1  | 60    | NM_0018 | SLC31A2 | member 2 | 0.27499   | Inlier | solute carrier family 31 (copper transporters), member 2 |
| siRNA-Vinblastine  | DMSO  | Run2- | 60    | NM_0018 | SLC31A2 | member 2 | 0.756554  | Inlier | solute carrier family 31 (copper transporters), member 2 |
| siRNA-Vinblastine  | DMSO  | Run1- | 60    | NM_0018 | SLC31A2 | member 2 | 0.879267  | Inlier | solute carrier family 31 (copper transporters), member 2 |

Identification of Survival Genes in Human Glioblastoma Cells Using siRNA Screening

Nikhil G Thaker, Fang Zhang, Peter R. McDonald, Tong Ying Shun, Michael D Lewen, Ian F. Pollack, and John S. Lazo

Molecular Pharmacology

| siRNA                        | Gene      | Accession | Gene                                                        | Value     | Category |
|------------------------------|-----------|-----------|-------------------------------------------------------------|-----------|----------|
| siRNA-Temozolomide Run3-DMSO | NM_004733 | SLC33A1   | solute carrier family 33 (acetyl-CoA transporter), member 1 | -2.288213 | Inlier   |
| siRNA Disorazole DMSO Run2   | NM_004733 | SLC33A1   | solute carrier family 33 (acetyl-CoA transporter), member 1 | -0.898923 | Inlier   |
| siRNA Disorazole DMSO Run3   | NM_004733 | SLC33A1   | solute carrier family 33 (acetyl-CoA transporter), member 1 | -0.856926 | Inlier   |
| siRNA-Temozolomide Run2-DMSO | NM_004733 | SLC33A1   | solute carrier family 33 (acetyl-CoA transporter), member 1 | -0.046176 | Inlier   |
| siRNA-Temozolomide Run1-DMSO | NM_004733 | SLC33A1   | solute carrier family 33 (acetyl-CoA transporter), member 1 | 0.046176  | Inlier   |
| siRNA Disorazole DMSO Run1   | NM_004733 | SLC33A1   | solute carrier family 33 (acetyl-CoA transporter), member 1 | 0.08012   | Inlier   |



Identification of Survival Genes in Human Glioblastoma Cells Using siRNA Screening

Nikhil G Thaker, Fang Zhang, Peter R. McDonald, Tong Ying Shun, Michael D Lewen, Ian F. Pollack, and John S. Lazo

Molecular Pharmacology

|                              |           |         |                                                             |           |        |
|------------------------------|-----------|---------|-------------------------------------------------------------|-----------|--------|
| siRNA-Vinblastine Run1-DMSO  | NM_004733 | SLC33A1 | solute carrier family 33 (acetyl-CoA transporter), member 1 | 0.492074  | Inlier |
| siRNA-Vinblastine Run2-DMSO  | NM_004733 | SLC33A1 | solute carrier family 33 (acetyl-CoA transporter), member 1 | 0.871583  | Inlier |
| siRNA-Temozolomide Run3-DMSO | NM_003052 | SLC34A1 | solute carrier family 34 (sodium phosphate), member 1       | -0.817158 | Inlier |
| siRNA-Temozolomide Run2-DMSO | NM_003052 | SLC34A1 | solute carrier family 34 (sodium phosphate), member 1       | -0.678465 | Inlier |
| siRNA-Temozolomide Run1-DMSO | NM_003052 | SLC34A1 | solute carrier family 34 (sodium phosphate), member 1       | -0.670535 | Inlier |
| siRNA-Vinblastine Run2-DMSO  | NM_003052 | SLC34A1 | solute carrier family 34 (sodium phosphate), member 1       | -0.100794 | Inlier |
| siRNA Disorazole DMSO Run1   | NM_003052 | SLC34A1 | solute carrier family 34 (sodium phosphate), member 1       | 0.100794  | Inlier |

Identification of Survival Genes in Human Glioblastoma Cells Using siRNA Screening  
 Nikhil G Thaker, Fang Zhang, Peter R. McDonald, Tong Ying Shun, Michael D Lewen, Ian F. Pollack, and John S. Lazo

Molecular Pharmacology

| siRNA Treatment              | Gene    | Accession | Gene ID | Family | Value     | Outlier |
|------------------------------|---------|-----------|---------|--------|-----------|---------|
| siRNA Disorazole DMSO Run3   | NM_0030 | 52        | SLC34A1 | 1      | 0.10777   | Inlier  |
| siRNA-Vinblastine Run1-DMSO  | NM_0030 | 52        | SLC34A1 | 1      | 0.722533  | Inlier  |
| siRNA Disorazole DMSO Run2   | NM_0030 | 52        | SLC34A1 | 1      | 0.806076  | Inlier  |
| siRNA-Temozolomide Run2-DMSO | NM_0064 | 24        | SLC34A2 | 2      | -3.282748 | Inlier  |
| siRNA-Temozolomide Run3-DMSO | NM_0064 | 24        | SLC34A2 | 2      | -1.649202 | Inlier  |
| siRNA-Vinblastine Run2-DMSO  | NM_0064 | 24        | SLC34A2 | 2      | -1.087514 | Inlier  |
| siRNA Disorazole DMSO Run1   | NM_0064 | 24        | SLC34A2 | 2      | -0.180606 | Inlier  |

Identification of Survival Genes in Human Glioblastoma Cells Using siRNA Screening

Nikhil G Thaker, Fang Zhang, Peter R. McDonald, Tong Ying Shun, Michael D Lewen, Ian F. Pollack, and John S. Lazo

Molecular Pharmacology

|                              |               |         |                                                                   |           |        |
|------------------------------|---------------|---------|-------------------------------------------------------------------|-----------|--------|
| siRNA-Temozolomide Run1-DMSO | NM_0064<br>24 | SLC34A2 | solute carrier family 34 (sodium phosphate), member 2             | 0.180606  | Inlier |
| siRNA Disorazole DMSO Run2   | NM_0064<br>24 | SLC34A2 | solute carrier family 34 (sodium phosphate), member 2             | 0.25333   | Inlier |
| siRNA Disorazole DMSO Run3   | NM_0064<br>24 | SLC34A2 | solute carrier family 34 (sodium phosphate), member 2             | 0.558594  | Inlier |
| siRNA-Vinblastine Run1-DMSO  | NM_0064<br>24 | SLC34A2 | solute carrier family 34 (sodium phosphate), member 2             | 0.790406  | Inlier |
| siRNA-Temozolomide Run1-DMSO | NM_0064<br>16 | SLC35A1 | solute carrier family 35 (CMP-sialic acid transporter), member A1 | -1.330094 | Inlier |
| siRNA Disorazole DMSO Run2   | NM_0064<br>16 | SLC35A1 | solute carrier family 35 (CMP-sialic acid transporter), member A1 | -0.94294  | Inlier |

Identification of Survival Genes in Human Glioblastoma Cells Using siRNA Screening

Nikhil G Thaker, Fang Zhang, Peter R. McDonald, Tong Ying Shun, Michael D Lewen, Ian F. Pollack, and John S. Lazo

Molecular Pharmacology

|                              |               |         |                                                                   |           |        |
|------------------------------|---------------|---------|-------------------------------------------------------------------|-----------|--------|
| siRNA-Temozolomide Run3-DMSO | NM_0064<br>16 | SLC35A1 | solute carrier family 35 (CMP-sialic acid transporter), member A1 | -0.31987  | Inlier |
| siRNA Disorazole DMSO Run3   | NM_0064<br>16 | SLC35A1 | solute carrier family 35 (CMP-sialic acid transporter), member A1 | -0.302815 | Inlier |
| siRNA-Vinblastine Run2-DMSO  | NM_0064<br>16 | SLC35A1 | solute carrier family 35 (CMP-sialic acid transporter), member A1 | 0.302815  | Inlier |
| siRNA Disorazole DMSO Run1   | NM_0064<br>16 | SLC35A1 | solute carrier family 35 (CMP-sialic acid transporter), member A1 | 0.40606   | Inlier |
| siRNA-Temozolomide Run2-DMSO | NM_0064<br>16 | SLC35A1 | solute carrier family 35 (CMP-sialic acid transporter), member A1 | 0.978399  | Inlier |

Identification of Survival Genes in Human Glioblastoma Cells Using siRNA Screening  
 Nikhil G Thaker, Fang Zhang, Peter R. McDonald, Tong Ying Shun, Michael D Lewen, Ian F. Pollack, and John S. Lazo  
 Molecular Pharmacology

|                              |           |         |                                                                   |           |        |
|------------------------------|-----------|---------|-------------------------------------------------------------------|-----------|--------|
| siRNA-Vinblastine Run1-DMSO  | NM_006416 | SLC35A1 | solute carrier family 35 (CMP-sialic acid transporter), member A1 | 0.983001  | Inlier |
| siRNA-Temozolomide Run3-DMSO | NM_005660 | SLC35A2 | solute carrier family 35 (UDP-galactose transporter), member A2   | -1.537803 | Inlier |
| siRNA Disorazole DMSO Run2   | NM_005660 | SLC35A2 | solute carrier family 35 (UDP-galactose transporter), member A2   | -0.834686 | Inlier |
| siRNA-Temozolomide Run1-DMSO | NM_005660 | SLC35A2 | solute carrier family 35 (UDP-galactose transporter), member A2   | -0.817385 | Inlier |
| siRNA-Temozolomide Run2-DMSO | NM_005660 | SLC35A2 | solute carrier family 35 (UDP-galactose transporter), member A2   | -0.032854 | Inlier |

Identification of Survival Genes in Human Glioblastoma Cells Using siRNA Screening

Nikhil G Thaker, Fang Zhang, Peter R. McDonald, Tong Ying Shun, Michael D Lewen, Ian F. Pollack, and John S. Lazo

Molecular Pharmacology

|                              |               |         |                                                                                        |           |        |
|------------------------------|---------------|---------|----------------------------------------------------------------------------------------|-----------|--------|
| siRNA Disorazole DMSO Run3   | NM_0056<br>60 | SLC35A2 | solute carrier family 35 (UDP-galactose transporter), member A2                        | 0.032854  | Inlier |
| siRNA Disorazole DMSO Run1   | NM_0056<br>60 | SLC35A2 | solute carrier family 35 (UDP-galactose transporter), member A2                        | 0.140474  | Inlier |
| siRNA-Vinblastine Run1-DMSO  | NM_0056<br>60 | SLC35A2 | solute carrier family 35 (UDP-galactose transporter), member A2                        | 0.606471  | Inlier |
| siRNA-Vinblastine Run2-DMSO  | NM_0056<br>60 | SLC35A2 | solute carrier family 35 (UDP-galactose transporter), member A2                        | 0.742529  | Inlier |
| siRNA-Temozolomide Run3-DMSO | NM_0122<br>43 | SLC35A3 | solute carrier family 35 (UDP-N-acetylglucosamine (UDP-GlcNAc) transporter), member A3 | -1.144159 | Inlier |

Identification of Survival Genes in Human Glioblastoma Cells Using siRNA Screening

Nikhil G Thaker, Fang Zhang, Peter R. McDonald, Tong Ying Shun, Michael D Lewen, Ian F. Pollack, and John S. Lazo

Molecular Pharmacology

|                              |               |         |                                                                                        |           |        |
|------------------------------|---------------|---------|----------------------------------------------------------------------------------------|-----------|--------|
| siRNA Disorazole DMSO Run2   | NM_0122<br>43 | SLC35A3 | solute carrier family 35 (UDP-N-acetylglucosamine (UDP-GlcNAc) transporter), member A3 | -0.854866 | Inlier |
| siRNA Disorazole DMSO Run3   | NM_0122<br>43 | SLC35A3 | solute carrier family 35 (UDP-N-acetylglucosamine (UDP-GlcNAc) transporter), member A3 | -0.749252 | Inlier |
| siRNA-Temozolomide Run1-DMSO | NM_0122<br>43 | SLC35A3 | solute carrier family 35 (UDP-N-acetylglucosamine (UDP-GlcNAc) transporter), member A3 | -0.105629 | Inlier |
| siRNA-Temozolomide Run2-DMSO | NM_0122<br>43 | SLC35A3 | solute carrier family 35 (UDP-N-acetylglucosamine (UDP-GlcNAc) transporter), member A3 | 0.105629  | Inlier |

Identification of Survival Genes in Human Glioblastoma Cells Using siRNA Screening  
 Nikhil G Thaker, Fang Zhang, Peter R. McDonald, Tong Ying Shun, Michael D Lewen, Ian F. Pollack, and John S. Lazo  
 Molecular Pharmacology

|                              |               |         |                                                                                        |           |        |
|------------------------------|---------------|---------|----------------------------------------------------------------------------------------|-----------|--------|
| siRNA Disorazole DMSO Run1   | NM_0122<br>43 | SLC35A3 | solute carrier family 35 (UDP-N-acetylglucosamine (UDP-GlcNAc) transporter), member A3 | 0.316796  | Inlier |
| siRNA-Vinblastine Run2-DMSO  | NM_0122<br>43 | SLC35A3 | solute carrier family 35 (UDP-N-acetylglucosamine (UDP-GlcNAc) transporter), member A3 | 0.599748  | Inlier |
| siRNA-Vinblastine Run1-DMSO  | NM_0122<br>43 | SLC35A3 | solute carrier family 35 (UDP-N-acetylglucosamine (UDP-GlcNAc) transporter), member A3 | 0.969506  | Inlier |
| siRNA-Temozolomide Run3-DMSO | NM_1730<br>73 | SLC35C2 | solute carrier family 35, member C2                                                    | -1.016289 | Inlier |
| siRNA-Temozolomide Run2-DMSO | NM_1730<br>73 | SLC35C2 | solute carrier family 35, member C2                                                    | -0.739068 | Inlier |
| siRNA-Temozolomide Run1-DMSO | NM_1730<br>73 | SLC35C2 | solute carrier family 35, member C2                                                    | -0.201917 | Inlier |



Identification of Survival Genes in Human Glioblastoma Cells Using siRNA Screening

Nikhil G Thaker, Fang Zhang, Peter R. McDonald, Tong Ying Shun, Michael D Lewen, Ian F. Pollack, and John S. Lazo

Molecular Pharmacology

|                              |               |         |                                                                       |           |        |
|------------------------------|---------------|---------|-----------------------------------------------------------------------|-----------|--------|
| siRNA-Vinblastine Run2-DMSO  | NM_1730<br>73 | SLC35C2 | solute carrier family 35, member C2                                   | -0.196789 | Inlier |
| siRNA Disorazole DMSO Run3   | NM_1730<br>73 | SLC35C2 | solute carrier family 35, member C2                                   | 0.196789  | Inlier |
| siRNA Disorazole DMSO Run1   | NM_1730<br>73 | SLC35C2 | solute carrier family 35, member C2                                   | 0.609932  | Inlier |
| siRNA-Vinblastine Run1-DMSO  | NM_1730<br>73 | SLC35C2 | solute carrier family 35, member C2                                   | 1.626573  | Inlier |
| siRNA Disorazole DMSO Run2   | NM_1730<br>73 | SLC35C2 | solute carrier family 35, member C2                                   | 2.377415  | Inlier |
| siRNA-Temozolomide Run1-DMSO | NM_0189<br>64 | SLC37A1 | solute carrier family 37 (glycerol-3-phosphate transporter), member 1 | -0.95327  | Inlier |
| siRNA-Temozolomide Run3-DMSO | NM_0189<br>64 | SLC37A1 | solute carrier family 37 (glycerol-3-phosphate transporter), member 1 | -0.879071 | Inlier |

Identification of Survival Genes in Human Glioblastoma Cells Using siRNA Screening  
 Nikhil G Thaker, Fang Zhang, Peter R. McDonald, Tong Ying Shun, Michael D Lewen, Ian F. Pollack, and John S. Lazo  
 Molecular Pharmacology

|                              |               |         |   |                                                                     |           |        |
|------------------------------|---------------|---------|---|---------------------------------------------------------------------|-----------|--------|
| siRNA-Temozolomide Run2-DMSO | NM_0189<br>64 | SLC37A1 | 1 | solute carrier family 37 (glycerol-3-phosphate transporter), member | -0.469929 | Inlier |
| siRNA Disorazole DMSO Run3   | NM_0189<br>64 | SLC37A1 | 1 | solute carrier family 37 (glycerol-3-phosphate transporter), member | -0.204153 | Inlier |
| siRNA Disorazole DMSO Run1   | NM_0189<br>64 | SLC37A1 | 1 | solute carrier family 37 (glycerol-3-phosphate transporter), member | 0.204153  | Inlier |
| siRNA Disorazole DMSO Run2   | NM_0189<br>64 | SLC37A1 | 1 | solute carrier family 37 (glycerol-3-phosphate transporter), member | 0.247428  | Inlier |
| siRNA-Vinblastine Run1-DMSO  | NM_0189<br>64 | SLC37A1 | 1 | solute carrier family 37 (glycerol-3-phosphate transporter), member | 0.948928  | Inlier |

Identification of Survival Genes in Human Glioblastoma Cells Using siRNA Screening  
 Nikhil G Thaker, Fang Zhang, Peter R. McDonald, Tong Ying Shun, Michael D Lewen, Ian F. Pollack, and John S. Lazo  
 Molecular Pharmacology

|                              |           |         |   |           |                                                                     |
|------------------------------|-----------|---------|---|-----------|---------------------------------------------------------------------|
| siRNA-Vinblastine Run2-DMSO  | NM_018964 | SLC37A1 | 1 | 1.27819   | Inlier                                                              |
|                              |           |         |   |           | solute carrier family 37 (glycerol-3-phosphate transporter), member |
| siRNA-Temozolomide Run3-DMSO | NM_198277 | SLC37A2 | 2 | -1.410706 | Inlier                                                              |
|                              |           |         |   |           | solute carrier family 37 (glycerol-3-phosphate transporter), member |
| siRNA Disorazole DMSO Run3   | NM_198277 | SLC37A2 | 2 | -0.766835 | Inlier                                                              |
|                              |           |         |   |           | solute carrier family 37 (glycerol-3-phosphate transporter), member |
| siRNA-Temozolomide Run2-DMSO | NM_198277 | SLC37A2 | 2 | -0.621917 | Inlier                                                              |
|                              |           |         |   |           | solute carrier family 37 (glycerol-3-phosphate transporter), member |
| siRNA Disorazole DMSO Run1   | NM_198277 | SLC37A2 | 2 | -0.016094 | Inlier                                                              |
|                              |           |         |   |           | solute carrier family 37 (glycerol-3-phosphate transporter), member |

Identification of Survival Genes in Human Glioblastoma Cells Using siRNA Screening  
 Nikhil G Thaker, Fang Zhang, Peter R. McDonald, Tong Ying Shun, Michael D Lewen, Ian F. Pollack, and John S. Lazo  
 Molecular Pharmacology

|                              |               |         |   |           |        |                                                                       |
|------------------------------|---------------|---------|---|-----------|--------|-----------------------------------------------------------------------|
| siRNA Disorazole DMSO Run2   | NM_1982<br>77 | SLC37A2 | 2 | 0.016094  | Inlier | solute carrier family 37 (glycerol-3-phosphate transporter), member 2 |
| siRNA-Temozolomide Run1-DMSO | NM_1982<br>77 | SLC37A2 | 2 | 0.48188   | Inlier | solute carrier family 37 (glycerol-3-phosphate transporter), member 2 |
| siRNA-Vinblastine Run1-DMSO  | NM_1982<br>77 | SLC37A2 | 2 | 0.727083  | Inlier | solute carrier family 37 (glycerol-3-phosphate transporter), member 2 |
| siRNA-Vinblastine Run2-DMSO  | NM_1982<br>77 | SLC37A2 | 2 | 1.740827  | Inlier | solute carrier family 37 (glycerol-3-phosphate transporter), member 2 |
| siRNA-Temozolomide Run3-DMSO | NM_2071<br>13 | SLC37A3 | 3 | -1.618384 | Inlier | solute carrier family 37 (glycerol-3-phosphate transporter), member 3 |

Identification of Survival Genes in Human Glioblastoma Cells Using siRNA Screening  
 Nikhil G Thaker, Fang Zhang, Peter R. McDonald, Tong Ying Shun, Michael D Lewen, Ian F. Pollack, and John S. Lazo  
 Molecular Pharmacology

|                              |               |         |   |                                                                       |           |        |
|------------------------------|---------------|---------|---|-----------------------------------------------------------------------|-----------|--------|
| siRNA-Temozolomide Run1-DMSO | NM_2071<br>13 | SLC37A3 | 3 | solute carrier family 37 (glycerol-3-phosphate transporter), member 3 | -1.583366 | Inlier |
| siRNA Disorazole DMSO Run2   | NM_2071<br>13 | SLC37A3 | 3 | solute carrier family 37 (glycerol-3-phosphate transporter), member 3 | -0.340873 | Inlier |
| siRNA Disorazole DMSO Run1   | NM_2071<br>13 | SLC37A3 | 3 | solute carrier family 37 (glycerol-3-phosphate transporter), member 3 | -0.191184 | Inlier |
| siRNA-Temozolomide Run2-DMSO | NM_2071<br>13 | SLC37A3 | 3 | solute carrier family 37 (glycerol-3-phosphate transporter), member 3 | 0.191184  | Inlier |
| siRNA-Vinblastine Run1-DMSO  | NM_2071<br>13 | SLC37A3 | 3 | solute carrier family 37 (glycerol-3-phosphate transporter), member 3 | 0.560132  | Inlier |

Identification of Survival Genes in Human Glioblastoma Cells Using siRNA Screening  
 Nikhil G Thaker, Fang Zhang, Peter R. McDonald, Tong Ying Shun, Michael D Lewen, Ian F. Pollack, and John S. Lazo  
 Molecular Pharmacology

|                              |               |         |   |                                                                       |           |        |
|------------------------------|---------------|---------|---|-----------------------------------------------------------------------|-----------|--------|
| siRNA Disorazole DMSO Run3   | NM_2071<br>13 | SLC37A3 | 3 | solute carrier family 37 (glycerol-3-phosphate transporter), member 3 | 0.788868  | Inlier |
| siRNA-Vinblastine Run2-DMSO  | NM_2071<br>13 | SLC37A3 | 3 | solute carrier family 37 (glycerol-3-phosphate transporter), member 3 | 0.926628  | Inlier |
| siRNA-Temozolomide Run3-DMSO | NM_0014<br>67 | SLC37A4 | 4 | solute carrier family 37 (glycerol-6-phosphate transporter), member 4 | -0.998977 | Inlier |
| siRNA Disorazole DMSO Run3   | NM_0014<br>67 | SLC37A4 | 4 | solute carrier family 37 (glycerol-6-phosphate transporter), member 4 | -0.758693 | Inlier |
| siRNA-Temozolomide Run2-DMSO | NM_0014<br>67 | SLC37A4 | 4 | solute carrier family 37 (glycerol-6-phosphate transporter), member 4 | -0.566044 | Inlier |

Identification of Survival Genes in Human Glioblastoma Cells Using siRNA Screening  
 Nikhil G Thaker, Fang Zhang, Peter R. McDonald, Tong Ying Shun, Michael D Lewen, Ian F. Pollack, and John S. Lazo  
 Molecular Pharmacology

|                              |               |         |   |                                                                       |                  |
|------------------------------|---------------|---------|---|-----------------------------------------------------------------------|------------------|
| siRNA Disorazole DMSO Run2   | NM_0014<br>67 | SLC37A4 | 4 | solute carrier family 37 (glycerol-6-phosphate transporter), member 4 | -0.500393 Inlier |
| siRNA-Temozolomide Run1-DMSO | NM_0014<br>67 | SLC37A4 | 4 | solute carrier family 37 (glycerol-6-phosphate transporter), member 4 | 0.500393 Inlier  |
| siRNA Disorazole DMSO Run1   | NM_0014<br>67 | SLC37A4 | 4 | solute carrier family 37 (glycerol-6-phosphate transporter), member 4 | 0.590307 Inlier  |
| siRNA-Vinblastine Run2-DMSO  | NM_0014<br>67 | SLC37A4 | 4 | solute carrier family 37 (glycerol-6-phosphate transporter), member 4 | 0.861317 Inlier  |
| siRNA-Vinblastine Run1-DMSO  | NM_0014<br>67 | SLC37A4 | 4 | solute carrier family 37 (glycerol-6-phosphate transporter), member 4 | 1.015764 Inlier  |

Identification of Survival Genes in Human Glioblastoma Cells Using siRNA Screening  
 Nikhil G Thaker, Fang Zhang, Peter R. McDonald, Tong Ying Shun, Michael D Lewen, Ian F. Pollack, and John S. Lazo

Molecular Pharmacology

| siRNA Treatment              | Gene ID   | Gene Name | Family                    | Member   | Value     | Outlier |
|------------------------------|-----------|-----------|---------------------------|----------|-----------|---------|
| siRNA-Temozolomide Run3-DMSO | NM_018976 | SLC38A2   | solute carrier family 38, | member 2 | -1.122617 | Inlier  |
| siRNA Disorazole DMSO Run2   | NM_018976 | SLC38A2   | solute carrier family 38, | member 2 | -1.050042 | Inlier  |
| siRNA-Temozolomide Run2-DMSO | NM_018976 | SLC38A2   | solute carrier family 38, | member 2 | -0.576283 | Inlier  |
| siRNA-Temozolomide Run1-DMSO | NM_018976 | SLC38A2   | solute carrier family 38, | member 2 | -0.015482 | Inlier  |
| siRNA Disorazole DMSO Run3   | NM_018976 | SLC38A2   | solute carrier family 38, | member 2 | 0.015482  | Inlier  |
| siRNA Disorazole DMSO Run1   | NM_018976 | SLC38A2   | solute carrier family 38, | member 2 | 0.222933  | Inlier  |
| siRNA-Vinblastine Run1-DMSO  | NM_018976 | SLC38A2   | solute carrier family 38, | member 2 | 0.772717  | Inlier  |
| siRNA-Vinblastine Run2-DMSO  | NM_018976 | SLC38A2   | solute carrier family 38, | member 2 | 0.967584  | Inlier  |
| siRNA-Temozolomide Run3-DMSO | NM_006841 | SLC38A3   | solute carrier family 38, | member 3 | -1.123793 | Inlier  |
| siRNA-Temozolomide Run2-DMSO | NM_006841 | SLC38A3   | solute carrier family 38, | member 3 | -0.701467 | Inlier  |
| siRNA Disorazole DMSO Run3   | NM_006841 | SLC38A3   | solute carrier family 38, | member 3 | -0.399381 | Inlier  |
| siRNA Disorazole DMSO Run2   | NM_006841 | SLC38A3   | solute carrier family 38, | member 3 | -0.242436 | Inlier  |
| siRNA Disorazole DMSO Run1   | NM_006841 | SLC38A3   | solute carrier family 38, | member 3 | 0.242436  | Inlier  |



Identification of Survival Genes in Human Glioblastoma Cells Using siRNA Screening  
 Nikhil G Thaker, Fang Zhang, Peter R. McDonald, Tong Ying Shun, Michael D Lewen, Ian F. Pollack, and John S. Lazo

Molecular Pharmacology

| siRNA                        | Gene      | Gene ID | Gene Name                              | Gene Description                                      | Score     | Category |
|------------------------------|-----------|---------|----------------------------------------|-------------------------------------------------------|-----------|----------|
| siRNA-Temozolomide Run1-DMSO | NM_006841 | SLC38A3 | family 38, member 3                    | solute carrier family 38, member 3                    | 0.647533  | Inlier   |
| siRNA-Vinblastine Run1-DMSO  | NM_006841 | SLC38A3 | family 38, member 3                    | solute carrier family 38, member 3                    | 0.959086  | Inlier   |
| siRNA-Vinblastine Run2-DMSO  | NM_006841 | SLC38A3 | family 38, member 3                    | solute carrier family 38, member 3                    | 1.056975  | Inlier   |
| siRNA Disorazole DMSO Run2   | NM_014437 | SLC39A1 | family 39 (zinc transporter), member 1 | solute carrier family 39 (zinc transporter), member 1 | -8.312512 | Outlier  |
| siRNA-Temozolomide Run3-DMSO | NM_014437 | SLC39A1 | family 39 (zinc transporter), member 1 | solute carrier family 39 (zinc transporter), member 1 | -7.578315 | Outlier  |
| siRNA-Temozolomide Run2-DMSO | NM_014437 | SLC39A1 | family 39 (zinc transporter), member 1 | solute carrier family 39 (zinc transporter), member 1 | -0.576876 | Inlier   |
| siRNA-Vinblastine Run1-DMSO  | NM_014437 | SLC39A1 | family 39 (zinc transporter), member 1 | solute carrier family 39 (zinc transporter), member 1 | -0.173095 | Inlier   |
| siRNA Disorazole DMSO Run1   | NM_014437 | SLC39A1 | family 39 (zinc transporter), member 1 | solute carrier family 39 (zinc transporter), member 1 | 0.173095  | Inlier   |

Identification of Survival Genes in Human Glioblastoma Cells Using siRNA Screening  
 Nikhil G Thaker, Fang Zhang, Peter R. McDonald, Tong Ying Shun, Michael D Lewen, Ian F. Pollack, and John S. Lazo

Molecular Pharmacology

|                              |               |         |                                                       |           |         |
|------------------------------|---------------|---------|-------------------------------------------------------|-----------|---------|
| siRNA-Temozolomide Run1-DMSO | NM_0144<br>37 | SLC39A1 | 1                                                     | 0.388859  | Inlier  |
|                              |               |         | solute carrier family 39 (zinc transporter), member 1 |           |         |
| siRNA Disorazole DMSO Run3   | NM_0144<br>37 | SLC39A1 | 1                                                     | 0.772124  | Inlier  |
|                              |               |         | solute carrier family 39 (zinc transporter), member 1 |           |         |
| siRNA-Vinblastine Run2-DMSO  | NM_0144<br>37 | SLC39A1 | 1                                                     | 6.067576  | Outlier |
|                              |               |         | solute carrier family 39 (zinc transporter), member 1 |           |         |
| siRNA-Temozolomide Run3-DMSO | NM_0145<br>79 | SLC39A2 | 2                                                     | -2.55433  | Inlier  |
|                              |               |         | solute carrier family 39 (zinc transporter), member 2 |           |         |
| siRNA-Temozolomide Run2-DMSO | NM_0145<br>79 | SLC39A2 | 2                                                     | -1.626121 | Inlier  |
|                              |               |         | solute carrier family 39 (zinc transporter), member 2 |           |         |
| siRNA-Temozolomide Run1-DMSO | NM_0145<br>79 | SLC39A2 | 2                                                     | -1.040047 | Inlier  |
|                              |               |         | solute carrier family 39 (zinc transporter), member 2 |           |         |
| siRNA Disorazole DMSO Run1   | NM_0145<br>79 | SLC39A2 | 2                                                     | -0.17802  | Inlier  |
|                              |               |         | solute carrier family 39 (zinc transporter), member 2 |           |         |

Identification of Survival Genes in Human Glioblastoma Cells Using siRNA Screening  
 Nikhil G Thaker, Fang Zhang, Peter R. McDonald, Tong Ying Shun, Michael D Lewen, Ian F. Pollack, and John S. Lazo

Molecular Pharmacology

|                              |               |         |   |           |        |                                                       |
|------------------------------|---------------|---------|---|-----------|--------|-------------------------------------------------------|
| siRNA Disorazole DMSO Run2   | NM_0145<br>79 | SLC39A2 | 2 | 0.17802   | Inlier | solute carrier family 39 (zinc transporter), member 2 |
| siRNA Disorazole DMSO Run3   | NM_0145<br>79 | SLC39A2 | 2 | 0.216506  | Inlier | solute carrier family 39 (zinc transporter), member 2 |
| siRNA-Vinblastine Run2-DMSO  | NM_0145<br>79 | SLC39A2 | 2 | 0.308953  | Inlier | solute carrier family 39 (zinc transporter), member 2 |
| siRNA-Vinblastine Run1-DMSO  | NM_0145<br>79 | SLC39A2 | 2 | 1.24126   | Inlier | solute carrier family 39 (zinc transporter), member 2 |
| siRNA-Temozolomide Run3-DMSO | NM_1445<br>64 | SLC39A3 | 3 | -2.311963 | Inlier | solute carrier family 39 (zinc transporter), member 3 |
| siRNA-Temozolomide Run2-DMSO | NM_1445<br>64 | SLC39A3 | 3 | -1.066435 | Inlier | solute carrier family 39 (zinc transporter), member 3 |
| siRNA-Temozolomide Run1-DMSO | NM_1445<br>64 | SLC39A3 | 3 | -0.919581 | Inlier | solute carrier family 39 (zinc transporter), member 3 |

Identification of Survival Genes in Human Glioblastoma Cells Using siRNA Screening

Nikhil G Thaker, Fang Zhang, Peter R. McDonald, Tong Ying Shun, Michael D Lewen, Ian F. Pollack, and John S. Lazo

Molecular Pharmacology

| siRNA Treatment              | Gene ID       | Gene Name | Accession | Value     | Category |
|------------------------------|---------------|-----------|-----------|-----------|----------|
| siRNA Disorazole DMSO Run1   | NM_1445<br>64 | SLC39A3   | 3         | -0.042325 | Inlier   |
| siRNA Disorazole DMSO Run3   | NM_1445<br>64 | SLC39A3   | 3         | 0.042325  | Inlier   |
| siRNA-Vinblastine Run1-DMSO  | NM_1445<br>64 | SLC39A3   | 3         | 0.404275  | Inlier   |
| siRNA-Vinblastine Run2-DMSO  | NM_1445<br>64 | SLC39A3   | 3         | 0.429419  | Inlier   |
| siRNA Disorazole DMSO Run2   | NM_1445<br>64 | SLC39A3   | 3         | 1.255193  | Inlier   |
| siRNA-Temozolomide Run3-DMSO | NM_1308<br>49 | SLC39A4   | 4         | -5.296488 | Outlier  |
| siRNA Disorazole DMSO Run3   | NM_1308<br>49 | SLC39A4   | 4         | -0.68366  | Inlier   |

solute  
carrier  
family 39  
(zinc  
transporter

), member

3

solute  
carrier  
family 39  
(zinc  
transporter

), member

3

solute  
carrier  
family 39  
(zinc  
transporter

), member

3

solute  
carrier  
family 39  
(zinc  
transporter

), member

3

solute  
carrier  
family 39  
(zinc  
transporter

), member

3

solute  
carrier  
family 39  
(zinc  
transporter

), member

3

solute  
carrier  
family 39  
(zinc  
transporter

), member

3

solute  
carrier  
family 39  
(zinc  
transporter

), member

3

solute  
carrier  
family 39  
(zinc  
transporter

), member

3

solute  
carrier  
family 39  
(zinc  
transporter

), member

3

solute  
carrier  
family 39  
(zinc  
transporter

), member

4

solute  
carrier  
family 39  
(zinc  
transporter

), member

4

solute  
carrier  
family 39  
(zinc  
transporter

), member

4

Identification of Survival Genes in Human Glioblastoma Cells Using siRNA Screening

Nikhil G Thaker, Fang Zhang, Peter R. McDonald, Tong Ying Shun, Michael D Lewen, Ian F. Pollack, and John S. Lazo

Molecular Pharmacology

|                              |               |         |   |                                                                      |           |        |
|------------------------------|---------------|---------|---|----------------------------------------------------------------------|-----------|--------|
| siRNA-Temozolomide Run1-DMSO | NM_1308<br>49 | SLC39A4 | 4 | solite<br>carrier<br>family 39<br>(zinc<br>transporter<br>) , member | -0.66534  | Inlier |
| siRNA Disorazole DMSO Run1   | NM_1308<br>49 | SLC39A4 | 4 | solite<br>carrier<br>family 39<br>(zinc<br>transporter<br>) , member | -0.467475 | Inlier |
| siRNA Disorazole DMSO Run2   | NM_1308<br>49 | SLC39A4 | 4 | solite<br>carrier<br>family 39<br>(zinc<br>transporter<br>) , member | 0.467475  | Inlier |
| siRNA-Temozolomide Run2-DMSO | NM_1308<br>49 | SLC39A4 | 4 | solite<br>carrier<br>family 39<br>(zinc<br>transporter<br>) , member | 0.60407   | Inlier |
| siRNA-Vinblastine Run2-DMSO  | NM_1308<br>49 | SLC39A4 | 4 | solite<br>carrier<br>family 39<br>(zinc<br>transporter<br>) , member | 1.049744  | Inlier |
| siRNA-Vinblastine Run1-DMSO  | NM_1308<br>49 | SLC39A4 | 4 | solite<br>carrier<br>family 39<br>(zinc<br>transporter<br>) , member | 1.118962  | Inlier |
| siRNA-Temozolomide Run3-DMSO | NM_0221<br>54 | SLC39A8 | 8 | solite<br>carrier<br>family 39<br>(zinc<br>transporter<br>) , member | -3.45407  | Inlier |



Identification of Survival Genes in Human Glioblastoma Cells Using siRNA Screening

Nikhil G Thaker, Fang Zhang, Peter R. McDonald, Tong Ying Shun, Michael D Lewen, Ian F. Pollack, and John S. Lazo

Molecular Pharmacology

|                              |           |        |                                                                                                                                                          |          |        |
|------------------------------|-----------|--------|----------------------------------------------------------------------------------------------------------------------------------------------------------|----------|--------|
| siRNA-Temozolomide Run3-DMSO | NM_000341 | SLC3A1 | solute carrier family 3 (cystine, dibasic and neutral amino acid transporters, activator of cystine, dibasic and neutral amino acid transport), member 1 | -2.37158 | Inlier |
|------------------------------|-----------|--------|----------------------------------------------------------------------------------------------------------------------------------------------------------|----------|--------|

|                            |           |        |                                                                                                                                                          |           |        |
|----------------------------|-----------|--------|----------------------------------------------------------------------------------------------------------------------------------------------------------|-----------|--------|
| siRNA Disorazole DMSO Run2 | NM_000341 | SLC3A1 | solute carrier family 3 (cystine, dibasic and neutral amino acid transporters, activator of cystine, dibasic and neutral amino acid transport), member 1 | -0.830963 | Inlier |
|----------------------------|-----------|--------|----------------------------------------------------------------------------------------------------------------------------------------------------------|-----------|--------|

Identification of Survival Genes in Human Glioblastoma Cells Using siRNA Screening

Nikhil G Thaker, Fang Zhang, Peter R. McDonald, Tong Ying Shun, Michael D Lewen, Ian F. Pollack, and John S. Lazo

Molecular Pharmacology

|                            |    |         |        |                                                                                                                                                          |           |        |
|----------------------------|----|---------|--------|----------------------------------------------------------------------------------------------------------------------------------------------------------|-----------|--------|
| siRNA Disorazole DMSO Run3 | 41 | NM_0003 | SLC3A1 | solute carrier family 3 (cystine, dibasic and neutral amino acid transporters, activator of cystine, dibasic and neutral amino acid transport), member 1 | -0.306103 | Inlier |
|----------------------------|----|---------|--------|----------------------------------------------------------------------------------------------------------------------------------------------------------|-----------|--------|

|                              |    |         |        |                                                                                                                                                          |           |        |
|------------------------------|----|---------|--------|----------------------------------------------------------------------------------------------------------------------------------------------------------|-----------|--------|
| siRNA-Temozolomide Run1-DMSO | 41 | NM_0003 | SLC3A1 | solute carrier family 3 (cystine, dibasic and neutral amino acid transporters, activator of cystine, dibasic and neutral amino acid transport), member 1 | -0.113005 | Inlier |
|------------------------------|----|---------|--------|----------------------------------------------------------------------------------------------------------------------------------------------------------|-----------|--------|



Identification of Survival Genes in Human Glioblastoma Cells Using siRNA Screening  
 Nikhil G Thaker, Fang Zhang, Peter R. McDonald, Tong Ying Shun, Michael D Lewen, Ian F. Pollack, and John S. Lazo  
 Molecular Pharmacology

|                              |           |        |                                                                                                                                                          |          |        |
|------------------------------|-----------|--------|----------------------------------------------------------------------------------------------------------------------------------------------------------|----------|--------|
| siRNA-Temozolomide Run2-DMSO | NM_000341 | SLC3A1 | solute carrier family 3 (cystine, dibasic and neutral amino acid transporters, activator of cystine, dibasic and neutral amino acid transport), member 1 | 0.113005 | Inlier |
|------------------------------|-----------|--------|----------------------------------------------------------------------------------------------------------------------------------------------------------|----------|--------|

|                            |           |        |                                                                                                                                                          |          |        |
|----------------------------|-----------|--------|----------------------------------------------------------------------------------------------------------------------------------------------------------|----------|--------|
| siRNA Disorazole DMSO Run1 | NM_000341 | SLC3A1 | solute carrier family 3 (cystine, dibasic and neutral amino acid transporters, activator of cystine, dibasic and neutral amino acid transport), member 1 | 0.580408 | Inlier |
|----------------------------|-----------|--------|----------------------------------------------------------------------------------------------------------------------------------------------------------|----------|--------|

Identification of Survival Genes in Human Glioblastoma Cells Using siRNA Screening

Nikhil G Thaker, Fang Zhang, Peter R. McDonald, Tong Ying Shun, Michael D Lewen, Ian F. Pollack, and John S. Lazo

Molecular Pharmacology

|                             |           |        |                                                                                                                                                          |                 |
|-----------------------------|-----------|--------|----------------------------------------------------------------------------------------------------------------------------------------------------------|-----------------|
| siRNA-Vinblastine Run2-DMSO | NM_000341 | SLC3A1 | solute carrier family 3 (cystine, dibasic and neutral amino acid transporters, activator of cystine, dibasic and neutral amino acid transport), member 1 | 0.768592 Inlier |
|-----------------------------|-----------|--------|----------------------------------------------------------------------------------------------------------------------------------------------------------|-----------------|

|                             |           |        |                                                                                                                                                          |                 |
|-----------------------------|-----------|--------|----------------------------------------------------------------------------------------------------------------------------------------------------------|-----------------|
| siRNA-Vinblastine Run1-DMSO | NM_000341 | SLC3A1 | solute carrier family 3 (cystine, dibasic and neutral amino acid transporters, activator of cystine, dibasic and neutral amino acid transport), member 1 | 0.920841 Inlier |
|-----------------------------|-----------|--------|----------------------------------------------------------------------------------------------------------------------------------------------------------|-----------------|

Identification of Survival Genes in Human Glioblastoma Cells Using siRNA Screening

Nikhil G Thaker, Fang Zhang, Peter R. McDonald, Tong Ying Shun, Michael D Lewen, Ian F. Pollack, and John S. Lazo

Molecular Pharmacology

|                              |                  |        |                                                                                            |           |        |
|------------------------------|------------------|--------|--------------------------------------------------------------------------------------------|-----------|--------|
| siRNA-Temozolomide Run3-DMSO | NM_0010<br>12664 | SLC3A2 | solute carrier family 3 (activators of dibasic and neutral amino acid transport), member 2 | -0.733034 | Inlier |
| siRNA Disorazole DMSO Run3   | NM_0010<br>12664 | SLC3A2 | solute carrier family 3 (activators of dibasic and neutral amino acid transport), member 2 | -0.615966 | Inlier |
| siRNA-Vinblastine Run2-DMSO  | NM_0010<br>12664 | SLC3A2 | solute carrier family 3 (activators of dibasic and neutral amino acid transport), member 2 | -0.613727 | Inlier |
| siRNA-Temozolomide Run2-DMSO | NM_0010<br>12664 | SLC3A2 | solute carrier family 3 (activators of dibasic and neutral amino acid transport), member 2 | -0.40523  | Inlier |

Identification of Survival Genes in Human Glioblastoma Cells Using siRNA Screening

Nikhil G Thaker, Fang Zhang, Peter R. McDonald, Tong Ying Shun, Michael D Lewen, Ian F. Pollack, and John S. Lazo

Molecular Pharmacology

|                              |                  |         |                                                                                            |           |         |
|------------------------------|------------------|---------|--------------------------------------------------------------------------------------------|-----------|---------|
| siRNA Disorazole DMSO Run1   | NM_0010<br>12664 | SLC3A2  | solute carrier family 3 (activators of dibasic and neutral amino acid transport), member 2 | 0.40523   | Inlier  |
| siRNA-Temozolomide Run1-DMSO | NM_0010<br>12664 | SLC3A2  | solute carrier family 3 (activators of dibasic and neutral amino acid transport), member 2 | 1.248353  | Inlier  |
| siRNA Disorazole DMSO Run2   | NM_0010<br>12664 | SLC3A2  | solute carrier family 3 (activators of dibasic and neutral amino acid transport), member 2 | 2.264718  | Inlier  |
| siRNA-Vinblastine Run1-DMSO  | NM_0010<br>12664 | SLC3A2  | solute carrier family 3 (activators of dibasic and neutral amino acid transport), member 2 | 3.034986  | Inlier  |
| siRNA-Temozolomide Run3-DMSO | NM_0145<br>85    | SLC40A1 | solute carrier family 40 (iron-regulated transporter), member 1                            | -6.007053 | Outlier |

Identification of Survival Genes in Human Glioblastoma Cells Using siRNA Screening

Nikhil G Thaker, Fang Zhang, Peter R. McDonald, Tong Ying Shun, Michael D Lewen, Ian F. Pollack, and John S. Lazo

Molecular Pharmacology

| siRNA Treatment              | Gene      | Accession | Gene Name                                                       | Value     | Category |
|------------------------------|-----------|-----------|-----------------------------------------------------------------|-----------|----------|
| siRNA-Temozolomide Run1-DMSO | NM_014585 | SLC40A1   | solute carrier family 40 (iron-regulated transporter), member 1 | -1.338281 | Inlier   |
| siRNA-Temozolomide Run2-DMSO | NM_014585 | SLC40A1   | solute carrier family 40 (iron-regulated transporter), member 1 | -0.706813 | Inlier   |
| siRNA Disorazole DMSO Run3   | NM_014585 | SLC40A1   | solute carrier family 40 (iron-regulated transporter), member 1 | -0.183121 | Inlier   |
| siRNA Disorazole DMSO Run1   | NM_014585 | SLC40A1   | solute carrier family 40 (iron-regulated transporter), member 1 | 0.183121  | Inlier   |
| siRNA-Vinblastine Run2-DMSO  | NM_014585 | SLC40A1   | solute carrier family 40 (iron-regulated transporter), member 1 | 0.561577  | Inlier   |
| siRNA-Vinblastine Run1-DMSO  | NM_014585 | SLC40A1   | solute carrier family 40 (iron-regulated transporter), member 1 | 0.642187  | Inlier   |

Identification of Survival Genes in Human Glioblastoma Cells Using siRNA Screening

Nikhil G Thaker, Fang Zhang, Peter R. McDonald, Tong Ying Shun, Michael D Lewen, Ian F. Pollack, and John S. Lazo

Molecular Pharmacology

| siRNA              | Drug | Run  | Gene    | Log2FC    | Inlier |
|--------------------|------|------|---------|-----------|--------|
| siRNA Disorazole   | DMSO | Run2 | SLC40A1 | 3.006222  | Inlier |
| siRNA-Temozolomide | DMSO | Run3 | SLC4A1  | -2.692504 | Inlier |
| siRNA-Temozolomide | DMSO | Run1 | SLC4A1  | -0.869008 | Inlier |

solute carrier family 40 (iron-regulated transporter), member 1

solute carrier family 4, anion exchanger, member 1 (erythrocyte membrane protein band 3, Diego blood group)

solute carrier family 4, anion exchanger, member 1 (erythrocyte membrane protein band 3, Diego blood group)

Identification of Survival Genes in Human Glioblastoma Cells Using siRNA Screening

Nikhil G Thaker, Fang Zhang, Peter R. McDonald, Tong Ying Shun, Michael D Lewen, Ian F. Pollack, and John S.

Lazo

Molecular Pharmacology

|                              |               |        |                                                                                                             |           |        |
|------------------------------|---------------|--------|-------------------------------------------------------------------------------------------------------------|-----------|--------|
| siRNA Disorazole DMSO Run1   | NM_0003<br>42 | SLC4A1 | solute carrier family 4, anion exchanger, member 1 (erythrocyte membrane protein band 3, Diego blood group) | -0.69159  | Inlier |
| siRNA-Temozolomide Run2-DMSO | NM_0003<br>42 | SLC4A1 | solute carrier family 4, anion exchanger, member 1 (erythrocyte membrane protein band 3, Diego blood group) | -0.275804 | Inlier |
| siRNA Disorazole DMSO Run3   | NM_0003<br>42 | SLC4A1 | solute carrier family 4, anion exchanger, member 1 (erythrocyte membrane protein band 3, Diego blood group) | 0.275804  | Inlier |

Identification of Survival Genes in Human Glioblastoma Cells Using siRNA Screening

Nikhil G Thaker, Fang Zhang, Peter R. McDonald, Tong Ying Shun, Michael D Lewen, Ian F. Pollack, and John S.

Lazo

Molecular Pharmacology

| siRNA                       | Gene      | Gene Symbol | Score    | Category |
|-----------------------------|-----------|-------------|----------|----------|
| siRNA-Vinblastine Run1-DMSO | NM_000342 | SLC4A1      | 0.434677 | Inlier   |
| siRNA Disorazole DMSO Run2  | NM_000342 | SLC4A1      | 0.65741  | Inlier   |
| siRNA-Vinblastine Run2-DMSO | NM_000342 | SLC4A1      | 1.032939 | Inlier   |

solute carrier family 4, anion exchanger, member 1 (erythrocyte membrane protein band 3, Diego blood group) solute carrier family 4, anion exchanger, member 1 (erythrocyte membrane protein band 3, Diego blood group) solute carrier family 4, anion exchanger, member 1 (erythrocyte membrane protein band 3, Diego blood group)



Identification of Survival Genes in Human Glioblastoma Cells Using siRNA Screening

Nikhil G Thaker, Fang Zhang, Peter R. McDonald, Tong Ying Shun, Michael D Lewen, Ian F. Pollack, and John S. Lazo

Molecular Pharmacology

| siRNA Treatment              | Gene    | Gene ID   | Gene Name                                                               | Log2 Fold Change | Outlier Status |
|------------------------------|---------|-----------|-------------------------------------------------------------------------|------------------|----------------|
| siRNA-Temozolomide Run1-DMSO | SLC4A10 | NM_022058 | solute carrier family 4, sodium bicarbonate transporter-like, member 10 | -2.433625        | Inlier         |
| siRNA-Temozolomide Run3-DMSO | SLC4A10 | NM_022058 | solute carrier family 4, sodium bicarbonate transporter-like, member 10 | -1.973451        | Inlier         |
| siRNA-Vinblastine Run1-DMSO  | SLC4A10 | NM_022058 | solute carrier family 4, sodium bicarbonate transporter-like, member 10 | -0.670081        | Inlier         |
| siRNA Disorazole DMSO Run1   | SLC4A10 | NM_022058 | solute carrier family 4, sodium bicarbonate transporter-like, member 10 | -0.10876         | Inlier         |
| siRNA-Vinblastine Run2-DMSO  | SLC4A10 | NM_022058 | solute carrier family 4, sodium bicarbonate transporter-like, member 10 | 0.108761         | Inlier         |

Identification of Survival Genes in Human Glioblastoma Cells Using siRNA Screening

Nikhil G Thaker, Fang Zhang, Peter R. McDonald, Tong Ying Shun, Michael D Lewen, Ian F. Pollack, and John S. Lazo

Molecular Pharmacology

| siRNA                        | Gene    | Gene ID   | Gene Description                                                        | Value     | Category |
|------------------------------|---------|-----------|-------------------------------------------------------------------------|-----------|----------|
| siRNA-Temozolomide Run2-DMSO | SLC4A10 | NM_022058 | solute carrier family 4, sodium bicarbonate transporter-like, member 10 | 0.115923  | Inlier   |
| siRNA Disorazole DMSO Run3   | SLC4A10 | NM_022058 | solute carrier family 4, sodium bicarbonate transporter-like, member 10 | 0.678919  | Inlier   |
| siRNA Disorazole DMSO Run2   | SLC4A10 | NM_022058 | solute carrier family 4, sodium bicarbonate transporter-like, member 10 | 1.473905  | Inlier   |
| siRNA-Temozolomide Run3-DMSO | SLC4A11 | NM_032034 | solute carrier family 4, sodium bicarbonate transporter-like, member 11 | -4.408958 | Outlier  |
| siRNA-Temozolomide Run1-DMSO | SLC4A11 | NM_032034 | solute carrier family 4, sodium bicarbonate transporter-like, member 11 | -1.417649 | Inlier   |

Identification of Survival Genes in Human Glioblastoma Cells Using siRNA Screening

Nikhil G Thaker, Fang Zhang, Peter R. McDonald, Tong Ying Shun, Michael D Lewen, Ian F. Pollack, and John S. Lazo

Molecular Pharmacology

| siRNA                  | Run  | Gene    | Accession | Gene ID | Value     | Outlier |
|------------------------|------|---------|-----------|---------|-----------|---------|
| siRNA Disorazole DMSO  | Run1 | SLC4A11 | NM_032034 | 11      | -0.509592 | Inlier  |
| siRNA-Vinblastine DMSO | Run1 | SLC4A11 | NM_032034 | 11      | -0.048875 | Inlier  |
| siRNA-Vinblastine DMSO | Run2 | SLC4A11 | NM_032034 | 11      | 0.048875  | Inlier  |
| siRNA Disorazole DMSO  | Run2 | SLC4A11 | NM_032034 | 11      | 0.615552  | Inlier  |
| siRNA Disorazole DMSO  | Run3 | SLC4A11 | NM_032034 | 11      | 0.733448  | Inlier  |

solute carrier family 4, sodium bicarbonate transporter-like, member

Identification of Survival Genes in Human Glioblastoma Cells Using siRNA Screening

Nikhil G Thaker, Fang Zhang, Peter R. McDonald, Tong Ying Shun, Michael D Lewen, Ian F. Pollack, and John S. Lazo

Molecular Pharmacology

|                              |           |           |                                                                         |           |        |
|------------------------------|-----------|-----------|-------------------------------------------------------------------------|-----------|--------|
| siRNA-Temozolomide Run2-DMSO | NM_032034 | SLC4A11   | solute carrier family 4, sodium bicarbonate transporter-like, member 11 | 1.466069  | Inlier |
| siRNA-Vinblastine Run2-DMSO  | NM_018158 | SLC4A1A P | solute carrier family 4 (anion exchanger), member 1, adaptor protein    | -0.837167 | Inlier |
| siRNA-Temozolomide Run2-DMSO | NM_018158 | SLC4A1A P | solute carrier family 4 (anion exchanger), member 1, adaptor protein    | -0.686221 | Inlier |
| siRNA-Temozolomide Run1-DMSO | NM_018158 | SLC4A1A P | solute carrier family 4 (anion exchanger), member 1, adaptor protein    | -0.317752 | Inlier |
| siRNA Disorazole DMSO Run1   | NM_018158 | SLC4A1A P | solute carrier family 4 (anion exchanger), member 1, adaptor protein    | -0.134939 | Inlier |

Identification of Survival Genes in Human Glioblastoma Cells Using siRNA Screening

Nikhil G Thaker, Fang Zhang, Peter R. McDonald, Tong Ying Shun, Michael D Lewen, Ian F. Pollack, and John S. Lazo

Molecular Pharmacology

|                              |               |              |                                                                                                 |           |        |
|------------------------------|---------------|--------------|-------------------------------------------------------------------------------------------------|-----------|--------|
| siRNA Disorazole DMSO Run3   | NM_0181<br>58 | SLC4A1A<br>P | solute carrier family 4 (anion exchanger), member 1, adaptor protein                            | 0.134939  | Inlier |
| siRNA Disorazole DMSO Run2   | NM_0181<br>58 | SLC4A1A<br>P | solute carrier family 4 (anion exchanger), member 1, adaptor protein                            | 0.662779  | Inlier |
| siRNA-Temozolomide Run3-DMSO | NM_0181<br>58 | SLC4A1A<br>P | solute carrier family 4 (anion exchanger), member 1, adaptor protein                            | 0.702005  | Inlier |
| siRNA-Vinblastine Run1-DMSO  | NM_0181<br>58 | SLC4A1A<br>P | solute carrier family 4 (anion exchanger), member 1, adaptor protein                            | 1.206576  | Inlier |
| siRNA-Temozolomide Run3-DMSO | NM_0030<br>40 | SLC4A2       | solute carrier family 4, anion exchanger, member 2 (erythrocyte membrane protein band 3-like 1) | -1.969388 | Inlier |

Identification of Survival Genes in Human Glioblastoma Cells Using siRNA Screening

Nikhil G Thaker, Fang Zhang, Peter R. McDonald, Tong Ying Shun, Michael D Lewen, Ian F. Pollack, and John S. Lazo

Molecular Pharmacology

|                               |    |         |        |                                                                                                 |           |        |
|-------------------------------|----|---------|--------|-------------------------------------------------------------------------------------------------|-----------|--------|
| siRNA Disorazole DMSO Run3    | 40 | NM_0030 | SLC4A2 | solute carrier family 4, anion exchanger, member 2 (erythrocyte membrane protein band 3-like 1) | -1.655442 | Inlier |
| siRNA Disorazole DMSO Run2    | 40 | NM_0030 | SLC4A2 | solute carrier family 4, anion exchanger, member 2 (erythrocyte membrane protein band 3-like 1) | -1.501608 | Inlier |
| siRNA-Temozolomide DMSO Run2- | 40 | NM_0030 | SLC4A2 | solute carrier family 4, anion exchanger, member 2 (erythrocyte membrane protein band 3-like 1) | -0.210412 | Inlier |
| siRNA-Temozolomide DMSO Run1- | 40 | NM_0030 | SLC4A2 | solute carrier family 4, anion exchanger, member 2 (erythrocyte membrane protein band 3-like 1) | 0.210412  | Inlier |

Identification of Survival Genes in Human Glioblastoma Cells Using siRNA Screening

Nikhil G Thaker, Fang Zhang, Peter R. McDonald, Tong Ying Shun, Michael D Lewen, Ian F. Pollack, and John S. Lazo

Molecular Pharmacology

|                              |               |        |                                                                                                 |           |        |
|------------------------------|---------------|--------|-------------------------------------------------------------------------------------------------|-----------|--------|
| siRNA Disorazole DMSO Run1   | NM_0030<br>40 | SLC4A2 | solute carrier family 4, anion exchanger, member 2 (erythrocyte membrane protein band 3-like 1) | 0.338181  | Inlier |
| siRNA-Vinblastine Run2-DMSO  | NM_0030<br>40 | SLC4A2 | solute carrier family 4, anion exchanger, member 2 (erythrocyte membrane protein band 3-like 1) | 0.614036  | Inlier |
| siRNA-Vinblastine Run1-DMSO  | NM_0030<br>40 | SLC4A2 | solute carrier family 4, anion exchanger, member 2 (erythrocyte membrane protein band 3-like 1) | 0.734964  | Inlier |
| siRNA-Temozolomide Run3-DMSO | NM_2015<br>74 | SLC4A3 | solute carrier family 4, anion exchanger, member 3                                              | -1.251463 | Inlier |

Identification of Survival Genes in Human Glioblastoma Cells Using siRNA Screening  
 Nikhil G Thaker, Fang Zhang, Peter R. McDonald, Tong Ying Shun, Michael D Lewen, Ian F. Pollack, and John S. Lazo

Molecular Pharmacology

|                              |               |        |   |           |        |                                                  |
|------------------------------|---------------|--------|---|-----------|--------|--------------------------------------------------|
| siRNA Disorazole DMSO Run3   | NM_2015<br>74 | SLC4A3 | 3 | -1.076188 | Inlier | solute carrier family 4, anion exchanger, member |
| siRNA-Temozolomide Run1-DMSO | NM_2015<br>74 | SLC4A3 | 3 | -0.62378  | Inlier | solute carrier family 4, anion exchanger, member |
| siRNA Disorazole DMSO Run2   | NM_2015<br>74 | SLC4A3 | 3 | -0.021672 | Inlier | solute carrier family 4, anion exchanger, member |
| siRNA-Temozolomide Run2-DMSO | NM_2015<br>74 | SLC4A3 | 3 | 0.021672  | Inlier | solute carrier family 4, anion exchanger, member |
| siRNA-Vinblastine Run2-DMSO  | NM_2015<br>74 | SLC4A3 | 3 | 0.616773  | Inlier | solute carrier family 4, anion exchanger, member |
| siRNA Disorazole DMSO Run1   | NM_2015<br>74 | SLC4A3 | 3 | 0.72522   | Inlier | solute carrier family 4, anion exchanger, member |
| siRNA-Vinblastine Run1-DMSO  | NM_2015<br>74 | SLC4A3 | 3 | 1.456608  | Inlier | solute carrier family 4, anion exchanger, member |



Identification of Survival Genes in Human Glioblastoma Cells Using siRNA Screening

Nikhil G Thaker, Fang Zhang, Peter R. McDonald, Tong Ying Shun, Michael D Lewen, Ian F. Pollack, and John S.

Lazo

Molecular Pharmacology

| siRNA Treatment              | Gene ID   | Gene Name | Gene Description                                                    | Log Fold Change | Outlier Status |
|------------------------------|-----------|-----------|---------------------------------------------------------------------|-----------------|----------------|
| siRNA-Temozolomide Run1-DMSO | NM_003759 | SLC4A4    | solute carrier family 4, sodium bicarbonate cotransporter, member 4 | -1.901426       | Inlier         |
| siRNA-Temozolomide Run3-DMSO | NM_003759 | SLC4A4    | solute carrier family 4, sodium bicarbonate cotransporter, member 4 | -1.87721        | Inlier         |
| siRNA-Vinblastine Run2-DMSO  | NM_003759 | SLC4A4    | solute carrier family 4, sodium bicarbonate cotransporter, member 4 | -0.810975       | Inlier         |
| siRNA-Temozolomide Run2-DMSO | NM_003759 | SLC4A4    | solute carrier family 4, sodium bicarbonate cotransporter, member 4 | -0.334598       | Inlier         |
| siRNA Disorazole DMSO Run3   | NM_003759 | SLC4A4    | solute carrier family 4, sodium bicarbonate cotransporter, member 4 | 0.334598        | Inlier         |

Identification of Survival Genes in Human Glioblastoma Cells Using siRNA Screening

Nikhil G Thaker, Fang Zhang, Peter R. McDonald, Tong Ying Shun, Michael D Lewen, Ian F. Pollack, and John S.

Lazo

Molecular Pharmacology

|                              |               |        |                                                                     |           |         |
|------------------------------|---------------|--------|---------------------------------------------------------------------|-----------|---------|
| siRNA Disorazole DMSO Run1   | NM_0037<br>59 | SLC4A4 | solute carrier family 4, sodium bicarbonate cotransporter, member 4 | 0.400365  | Inlier  |
| siRNA-Vinblastine Run1-DMSO  | NM_0037<br>59 | SLC4A4 | solute carrier family 4, sodium bicarbonate cotransporter, member 4 | 0.538025  | Inlier  |
| siRNA Disorazole DMSO Run2   | NM_0037<br>59 | SLC4A4 | solute carrier family 4, sodium bicarbonate cotransporter, member 4 | 4.378788  | Outlier |
| siRNA-Temozolomide Run3-DMSO | NM_1334<br>79 | SLC4A5 | solute carrier family 4, sodium bicarbonate cotransporter, member 5 | -2.57197  | Inlier  |
| siRNA-Temozolomide Run1-DMSO | NM_1334<br>79 | SLC4A5 | solute carrier family 4, sodium bicarbonate cotransporter, member 5 | -0.655075 | Inlier  |

Identification of Survival Genes in Human Glioblastoma Cells Using siRNA Screening

Nikhil G Thaker, Fang Zhang, Peter R. McDonald, Tong Ying Shun, Michael D Lewen, Ian F. Pollack, and John S. Lazo

Molecular Pharmacology

| siRNA Treatment              | Gene   | Gene ID   | Gene Name                                                           | Log Fold Change | Outlier Status |
|------------------------------|--------|-----------|---------------------------------------------------------------------|-----------------|----------------|
| siRNA Disorazole DMSO Run1   | SLC4A5 | NM_133479 | solute carrier family 4, sodium bicarbonate cotransporter, member 5 | -0.074838       | Inlier         |
| siRNA Disorazole DMSO Run2   | SLC4A5 | NM_133479 | solute carrier family 4, sodium bicarbonate cotransporter, member 5 | -0.037815       | Inlier         |
| siRNA-Temozolomide Run2-DMSO | SLC4A5 | NM_133479 | solute carrier family 4, sodium bicarbonate cotransporter, member 5 | 0.037814        | Inlier         |
| siRNA-Vinblastine Run2-DMSO  | SLC4A5 | NM_133479 | solute carrier family 4, sodium bicarbonate cotransporter, member 5 | 0.693925        | Inlier         |
| siRNA Disorazole DMSO Run3   | SLC4A5 | NM_133479 | solute carrier family 4, sodium bicarbonate cotransporter, member 5 | 1.4156          | Inlier         |

Identification of Survival Genes in Human Glioblastoma Cells Using siRNA Screening

Nikhil G Thaker, Fang Zhang, Peter R. McDonald, Tong Ying Shun, Michael D Lewen, Ian F. Pollack, and John S.

Lazo

Molecular Pharmacology

|                              |           |        |                                                                     |           |        |
|------------------------------|-----------|--------|---------------------------------------------------------------------|-----------|--------|
| siRNA-Vinblastine Run1-DMSO  | NM_133479 | SLC4A5 | solute carrier family 4, sodium bicarbonate cotransporter, member 5 | 2.087689  | Inlier |
| siRNA-Temozolomide Run3-DMSO | NM_003615 | SLC4A7 | solute carrier family 4, sodium bicarbonate cotransporter, member 7 | -1.41896  | Inlier |
| siRNA-Temozolomide Run2-DMSO | NM_003615 | SLC4A7 | solute carrier family 4, sodium bicarbonate cotransporter, member 7 | -0.738519 | Inlier |
| siRNA Disorazole DMSO Run3   | NM_003615 | SLC4A7 | solute carrier family 4, sodium bicarbonate cotransporter, member 7 | -0.592931 | Inlier |
| siRNA Disorazole DMSO Run2   | NM_003615 | SLC4A7 | solute carrier family 4, sodium bicarbonate cotransporter, member 7 | -0.449668 | Inlier |

Identification of Survival Genes in Human Glioblastoma Cells Using siRNA Screening

Nikhil G Thaker, Fang Zhang, Peter R. McDonald, Tong Ying Shun, Michael D Lewen, Ian F. Pollack, and John S. Lazo

Molecular Pharmacology

|                              |               |        |                                                                     |           |        |
|------------------------------|---------------|--------|---------------------------------------------------------------------|-----------|--------|
| siRNA-Temozolomide Run1-DMSO | NM_0036<br>15 | SLC4A7 | solute carrier family 4, sodium bicarbonate cotransporter, member 7 | 0.449668  | Inlier |
| siRNA Disorazole DMSO Run1   | NM_0036<br>15 | SLC4A7 | solute carrier family 4, sodium bicarbonate cotransporter, member 7 | 0.610481  | Inlier |
| siRNA-Vinblastine Run2-DMSO  | NM_0036<br>15 | SLC4A7 | solute carrier family 4, sodium bicarbonate cotransporter, member 7 | 1.424847  | Inlier |
| siRNA-Vinblastine Run1-DMSO  | NM_0036<br>15 | SLC4A7 | solute carrier family 4, sodium bicarbonate cotransporter, member 7 | 2.017029  | Inlier |
| siRNA-Temozolomide Run3-DMSO | NM_0048<br>58 | SLC4A8 | solute carrier family 4, sodium bicarbonate cotransporter, member 8 | -2.895841 | Inlier |

Identification of Survival Genes in Human Glioblastoma Cells Using siRNA Screening

Nikhil G Thaker, Fang Zhang, Peter R. McDonald, Tong Ying Shun, Michael D Lewen, Ian F. Pollack, and John S. Lazo

Molecular Pharmacology

| siRNA Treatment              | Gene   | Gene ID   | Gene Name                                                           | Log Fold Change | Outlier Status |
|------------------------------|--------|-----------|---------------------------------------------------------------------|-----------------|----------------|
| siRNA Disorazole DMSO Run3   | SLC4A8 | NM_004858 | solute carrier family 4, sodium bicarbonate cotransporter, member 8 | -1.06652        | Inlier         |
| siRNA-Temozolomide Run1-DMSO | SLC4A8 | NM_004858 | solute carrier family 4, sodium bicarbonate cotransporter, member 8 | -0.387772       | Inlier         |
| siRNA-Temozolomide Run2-DMSO | SLC4A8 | NM_004858 | solute carrier family 4, sodium bicarbonate cotransporter, member 8 | -0.370487       | Inlier         |
| siRNA Disorazole DMSO Run2   | SLC4A8 | NM_004858 | solute carrier family 4, sodium bicarbonate cotransporter, member 8 | 0.370487        | Inlier         |
| siRNA-Vinblastine Run1-DMSO  | SLC4A8 | NM_004858 | solute carrier family 4, sodium bicarbonate cotransporter, member 8 | 0.571143        | Inlier         |

Identification of Survival Genes in Human Glioblastoma Cells Using siRNA Screening

Nikhil G Thaker, Fang Zhang, Peter R. McDonald, Tong Ying Shun, Michael D Lewen, Ian F. Pollack, and John S.

Lazo

Molecular Pharmacology

|                              |               |        |                                                                     |           |        |
|------------------------------|---------------|--------|---------------------------------------------------------------------|-----------|--------|
| siRNA Disorazole DMSO Run1   | NM_0048<br>58 | SLC4A8 | solute carrier family 4, sodium bicarbonate cotransporter, member 8 | 0.777857  | Inlier |
| siRNA-Vinblastine Run2-DMSO  | NM_0048<br>58 | SLC4A8 | solute carrier family 4, sodium bicarbonate cotransporter, member 8 | 0.89609   | Inlier |
| siRNA-Temozolomide Run3-DMSO | NM_0314<br>67 | SLC4A9 | solute carrier family 4, sodium bicarbonate cotransporter, member 9 | -2.531014 | Inlier |
| siRNA-Temozolomide Run1-DMSO | NM_0314<br>67 | SLC4A9 | solute carrier family 4, sodium bicarbonate cotransporter, member 9 | -1.487652 | Inlier |
| siRNA-Temozolomide Run2-DMSO | NM_0314<br>67 | SLC4A9 | solute carrier family 4, sodium bicarbonate cotransporter, member 9 | -0.341112 | Inlier |

Identification of Survival Genes in Human Glioblastoma Cells Using siRNA Screening

Nikhil G Thaker, Fang Zhang, Peter R. McDonald, Tong Ying Shun, Michael D Lewen, Ian F. Pollack, and John S. Lazo

Molecular Pharmacology

| siRNA Treatment             | Gene   | Gene ID   | Gene Name                                                           | Log Fold Change | Outlier Status |
|-----------------------------|--------|-----------|---------------------------------------------------------------------|-----------------|----------------|
| siRNA-Vinblastine Run2-DMSO | SLC4A9 | NM_031467 | solute carrier family 4, sodium bicarbonate cotransporter, member 9 | -0.090199       | Inlier         |
| siRNA Disorazole DMSO Run2  | SLC4A9 | NM_031467 | solute carrier family 4, sodium bicarbonate cotransporter, member 9 | 0.0902          | Inlier         |
| siRNA Disorazole DMSO Run1  | SLC4A9 | NM_031467 | solute carrier family 4, sodium bicarbonate cotransporter, member 9 | 0.183568        | Inlier         |
| siRNA-Vinblastine Run1-DMSO | SLC4A9 | NM_031467 | solute carrier family 4, sodium bicarbonate cotransporter, member 9 | 1.007888        | Inlier         |
| siRNA Disorazole DMSO Run3  | SLC4A9 | NM_031467 | solute carrier family 4, sodium bicarbonate cotransporter, member 9 | 1.46844         | Inlier         |



Identification of Survival Genes in Human Glioblastoma Cells Using siRNA Screening

Nikhil G Thaker, Fang Zhang, Peter R. McDonald, Tong Ying Shun, Michael D Lewen, Ian F. Pollack, and John S. Lazo

Molecular Pharmacology

| siRNA Treatment              | Gene   | Accession | Gene   | Log Fold Change | Outlier Status |
|------------------------------|--------|-----------|--------|-----------------|----------------|
| siRNA Disorazole DMSO Run3   | SLC5A1 | NM_000343 | SLC5A1 | -2.662199       | Inlier         |
| siRNA-Temozolomide Run3-DMSO | SLC5A1 | NM_000343 | SLC5A1 | -1.74289        | Inlier         |
| siRNA-Temozolomide Run2-DMSO | SLC5A1 | NM_000343 | SLC5A1 | -1.173349       | Inlier         |
| siRNA-Vinblastine Run2-DMSO  | SLC5A1 | NM_000343 | SLC5A1 | -0.12805        | Inlier         |
| siRNA Disorazole DMSO Run2   | SLC5A1 | NM_000343 | SLC5A1 | 0.128049        | Inlier         |
| siRNA Disorazole DMSO Run1   | SLC5A1 | NM_000343 | SLC5A1 | 0.186126        | Inlier         |

solute carrier family 5 (sodium/glucose cotransporter), member 1

Identification of Survival Genes in Human Glioblastoma Cells Using siRNA Screening

Nikhil G Thaker, Fang Zhang, Peter R. McDonald, Tong Ying Shun, Michael D Lewen, Ian F. Pollack, and John S. Lazo

Molecular Pharmacology

| siRNA Treatment              | Gene      | Gene ID | Gene Name                                                         | Log Fold Change | Outlier Status |
|------------------------------|-----------|---------|-------------------------------------------------------------------|-----------------|----------------|
| siRNA-Vinblastine Run1-DMSO  | NM_000343 | SLC5A1  | solute carrier family 5 (sodium/glucose cotransporter), member 1  | 0.191206        | Inlier         |
| siRNA-Temozolomide Run1-DMSO | NM_000343 | SLC5A1  | solute carrier family 5 (sodium/glucose cotransporter), member 1  | 1.157794        | Inlier         |
| siRNA-Temozolomide Run3-DMSO | NM_152351 | SLC5A10 | solute carrier family 5 (sodium/glucose cotransporter), member 10 | -1.323375       | Inlier         |
| siRNA Disorazole DMSO Run2   | NM_152351 | SLC5A10 | solute carrier family 5 (sodium/glucose cotransporter), member 10 | -0.706641       | Inlier         |
| siRNA Disorazole DMSO Run3   | NM_152351 | SLC5A10 | solute carrier family 5 (sodium/glucose cotransporter), member 10 | -0.365712       | Inlier         |
| siRNA-Temozolomide Run2-DMSO | NM_152351 | SLC5A10 | solute carrier family 5 (sodium/glucose cotransporter), member 10 | -0.268138       | Inlier         |

Identification of Survival Genes in Human Glioblastoma Cells Using siRNA Screening

Nikhil G Thaker, Fang Zhang, Peter R. McDonald, Tong Ying Shun, Michael D Lewen, Ian F. Pollack, and John S. Lazo

Molecular Pharmacology

| siRNA                        | Gene    | Accession | Gene    | Gene | Value     | Outlier |
|------------------------------|---------|-----------|---------|------|-----------|---------|
| siRNA Disorazole DMSO Run1   | NM_1523 | 51        | SLC5A10 | 10   | 0.268138  | Inlier  |
|                              |         |           |         | 10   |           |         |
| siRNA-Vinblastine Run1-DMSO  | NM_1523 | 51        | SLC5A10 | 10   | 0.642359  | Inlier  |
|                              |         |           |         | 10   |           |         |
| siRNA-Vinblastine Run2-DMSO  | NM_1523 | 51        | SLC5A10 | 10   | 0.995855  | Inlier  |
|                              |         |           |         | 10   |           |         |
| siRNA-Temozolomide Run1-DMSO | NM_1523 | 51        | SLC5A10 | 10   | 0.998925  | Inlier  |
|                              |         |           |         | 10   |           |         |
| siRNA-Temozolomide Run3-DMSO | NM_0529 | 44        | SLC5A11 | 11   | -2.879642 | Inlier  |

solute carrier family 5 (sodium/glucose cotransporter), member

Identification of Survival Genes in Human Glioblastoma Cells Using siRNA Screening

Nikhil G Thaker, Fang Zhang, Peter R. McDonald, Tong Ying Shun, Michael D Lewen, Ian F. Pollack, and John S. Lazo

Molecular Pharmacology

| siRNA Treatment              | Gene ID   | Gene Name | Accession | Log Fold Change | Outlier Status |
|------------------------------|-----------|-----------|-----------|-----------------|----------------|
| siRNA-Temozolomide Run2-DMSO | NM_052944 | SLC5A11   | 11        | -2.369161       | Inlier         |
| siRNA Disorazole DMSO Run3   | NM_052944 | SLC5A11   | 11        | -1.697249       | Inlier         |
| siRNA-Vinblastine Run1-DMSO  | NM_052944 | SLC5A11   | 11        | -0.131054       | Inlier         |
| siRNA Disorazole DMSO Run2   | NM_052944 | SLC5A11   | 11        | 0.131054        | Inlier         |
| siRNA Disorazole DMSO Run1   | NM_052944 | SLC5A11   | 11        | 0.206239        | Inlier         |

solute carrier family 5 (sodium/glucose cotransporter), member 11

Identification of Survival Genes in Human Glioblastoma Cells Using siRNA Screening

Nikhil G Thaker, Fang Zhang, Peter R. McDonald, Tong Ying Shun, Michael D Lewen, Ian F. Pollack, and John S.

Lazo

Molecular Pharmacology

| siRNA Treatment              | Gene ID   | Gene Name | Accession | Score     | Category |
|------------------------------|-----------|-----------|-----------|-----------|----------|
| siRNA-Temozolomide Run1-DMSO | NM_052944 | SLC5A11   | 11        | 0.597626  | Inlier   |
| siRNA-Vinblastine Run2-DMSO  | NM_052944 | SLC5A11   | 11        | 0.751374  | Inlier   |
| siRNA-Temozolomide Run3-DMSO | NM_178498 | SLC5A12   | 12        | -1.890782 | Inlier   |
| siRNA-Temozolomide Run2-DMSO | NM_178498 | SLC5A12   | 12        | -0.965305 | Inlier   |
| siRNA-Temozolomide Run1-DMSO | NM_178498 | SLC5A12   | 12        | -0.383695 | Inlier   |

solute carrier family 5 (sodium/glucose cotransporter), member

Identification of Survival Genes in Human Glioblastoma Cells Using siRNA Screening

Nikhil G Thaker, Fang Zhang, Peter R. McDonald, Tong Ying Shun, Michael D Lewen, Ian F. Pollack, and John S. Lazo

Molecular Pharmacology

| siRNA Treatment             | Gene    | Accession | Gene ID | Score     | Category |
|-----------------------------|---------|-----------|---------|-----------|----------|
| siRNA Disorazole DMSO Run3  | SLC5A12 | NM_1784   | 12      | -0.176178 | Inlier   |
| siRNA Disorazole DMSO Run2  | SLC5A12 | NM_1784   | 12      | 0.176177  | Inlier   |
| siRNA Disorazole DMSO Run1  | SLC5A12 | NM_1784   | 12      | 0.313367  | Inlier   |
| siRNA-Vinblastine Run1-DMSO | SLC5A12 | NM_1784   | 12      | 0.983254  | Inlier   |
| siRNA-Vinblastine Run2-DMSO | SLC5A12 | NM_1784   | 12      | 1.085795  | Inlier   |

solute carrier family 5 (sodium/glucose cotransporter), member

Identification of Survival Genes in Human Glioblastoma Cells Using siRNA Screening

Nikhil G Thaker, Fang Zhang, Peter R. McDonald, Tong Ying Shun, Michael D Lewen, Ian F. Pollack, and John S. Lazo

Molecular Pharmacology

| siRNA              | Run       | Gene   | Log2 Fold Change | Category |
|--------------------|-----------|--------|------------------|----------|
| siRNA-Temozolomide | Run2-DMSO | SLC5A2 | -1.169712        | Inlier   |
| siRNA Disorazole   | Run1-DMSO | SLC5A2 | -0.577403        | Inlier   |
| siRNA-Temozolomide | Run3-DMSO | SLC5A2 | -0.219766        | Inlier   |
| siRNA-Temozolomide | Run1-DMSO | SLC5A2 | -0.07489         | Inlier   |
| siRNA Disorazole   | Run3-DMSO | SLC5A2 | 0.074891         | Inlier   |
| siRNA-Vinblastine  | Run2-DMSO | SLC5A2 | 0.771597         | Inlier   |

solute carrier family 5 (sodium/glucose cotransporter),

member 2

Identification of Survival Genes in Human Glioblastoma Cells Using siRNA Screening

Nikhil G Thaker, Fang Zhang, Peter R. McDonald, Tong Ying Shun, Michael D Lewen, Ian F. Pollack, and John S. Lazo

Molecular Pharmacology

| siRNA Treatment              | Gene   | Gene ID   | Gene Name                                                        | Score     | Outlier Status |
|------------------------------|--------|-----------|------------------------------------------------------------------|-----------|----------------|
| siRNA-Vinblastine Run1-DMSO  | SLC5A2 | NM_003041 | solute carrier family 5 (sodium/glucose cotransporter), member 2 | 0.788185  | Inlier         |
| siRNA Disorazole DMSO Run2   | SLC5A2 | NM_003041 | solute carrier family 5 (sodium/glucose cotransporter), member 2 | 1.684334  | Inlier         |
| siRNA-Temozolomide Run3-DMSO | SLC5A3 | NM_006933 | solute carrier family 5 (inositol transporters), member 3        | -1.548741 | Inlier         |
| siRNA-Temozolomide Run2-DMSO | SLC5A3 | NM_006933 | solute carrier family 5 (inositol transporters), member 3        | -1.315155 | Inlier         |
| siRNA Disorazole DMSO Run3   | SLC5A3 | NM_006933 | solute carrier family 5 (inositol transporters), member 3        | -0.468659 | Inlier         |
| siRNA Disorazole DMSO Run2   | SLC5A3 | NM_006933 | solute carrier family 5 (inositol transporters), member 3        | -0.10492  | Inlier         |
| siRNA-Temozolomide Run1-DMSO | SLC5A3 | NM_006933 | solute carrier family 5 (inositol transporters), member 3        | 0.10492   | Inlier         |



Identification of Survival Genes in Human Glioblastoma Cells Using siRNA Screening

Nikhil G Thaker, Fang Zhang, Peter R. McDonald, Tong Ying Shun, Michael D Lewen, Ian F. Pollack, and John S. Lazo

Molecular Pharmacology

| siRNA Treatment              | Gene ID   | Gene Name | Log2 Fold Change | Classification |
|------------------------------|-----------|-----------|------------------|----------------|
| siRNA Disorazole DMSO Run1   | NM_006933 | SLC5A3    | 0.453591         | Inlier         |
| siRNA-Vinblastine Run1-DMSO  | NM_006933 | SLC5A3    | 0.880341         | Inlier         |
| siRNA-Vinblastine Run2-DMSO  | NM_006933 | SLC5A3    | 1.564372         | Inlier         |
| siRNA-Temozolomide Run2-DMSO | NM_014227 | SLC5A4    | -4.298621        | Outlier        |
| siRNA Disorazole DMSO Run1   | NM_014227 | SLC5A4    | -2.323066        | Inlier         |
| siRNA-Temozolomide Run1-DMSO | NM_014227 | SLC5A4    | -0.299605        | Inlier         |

solute carrier family 5 (inositol transporter s),

member 3

solute carrier family 5 (inositol transporter s),

member 3

solute carrier family 5 (low affinity glucose cotransporter),

member 4

solute carrier family 5 (low affinity glucose cotransporter),

member 4

Identification of Survival Genes in Human Glioblastoma Cells Using siRNA Screening

Nikhil G Thaker, Fang Zhang, Peter R. McDonald, Tong Ying Shun, Michael D Lewen, Ian F. Pollack, and John S. Lazo

Molecular Pharmacology

| siRNA Treatment              | Gene   | Gene ID   | Gene Name                                                              | Score     | Outlier |
|------------------------------|--------|-----------|------------------------------------------------------------------------|-----------|---------|
| siRNA Disorazole DMSO Run3   | SLC5A4 | NM_014227 | solute carrier family 5 (low affinity glucose cotransporter), member 4 | -0.000309 | Inlier  |
| siRNA Disorazole DMSO Run2   | SLC5A4 | NM_014227 | solute carrier family 5 (low affinity glucose cotransporter), member 4 | 0.000308  | Inlier  |
| siRNA-Vinblastine Run1-DMSO  | SLC5A4 | NM_014227 | solute carrier family 5 (low affinity glucose cotransporter), member 4 | 0.62582   | Inlier  |
| siRNA-Vinblastine Run2-DMSO  | SLC5A4 | NM_014227 | solute carrier family 5 (low affinity glucose cotransporter), member 4 | 0.72318   | Inlier  |
| siRNA-Temozolomide Run3-DMSO | SLC5A4 | NM_014227 | solute carrier family 5 (low affinity glucose cotransporter), member 4 | 0.892414  | Inlier  |



Identification of Survival Genes in Human Glioblastoma Cells Using siRNA Screening

Nikhil G Thaker, Fang Zhang, Peter R. McDonald, Tong Ying Shun, Michael D Lewen, Ian F. Pollack, and John S. Lazo

Molecular Pharmacology

|                              |           |        |                                                                          |           |        |
|------------------------------|-----------|--------|--------------------------------------------------------------------------|-----------|--------|
| siRNA-Vinblastine Run1-DMSO  | NM_000453 | SLC5A5 | solute carrier family 5 (sodium iodide symporter), member 5              | 0.799347  | Inlier |
| siRNA-Vinblastine Run2-DMSO  | NM_000453 | SLC5A5 | solute carrier family 5 (sodium iodide symporter), member 5              | 1.026654  | Inlier |
| siRNA-Temozolomide Run1-DMSO | NM_021095 | SLC5A6 | solute carrier family 5 (sodium-dependent vitamin transporter), member 6 | -0.716722 | Inlier |
| siRNA Disorazole DMSO Run2   | NM_021095 | SLC5A6 | solute carrier family 5 (sodium-dependent vitamin transporter), member 6 | -0.632278 | Inlier |
| siRNA-Temozolomide Run3-DMSO | NM_021095 | SLC5A6 | solute carrier family 5 (sodium-dependent vitamin transporter), member 6 | -0.104159 | Inlier |
| siRNA Disorazole DMSO Run1   | NM_021095 | SLC5A6 | solute carrier family 5 (sodium-dependent vitamin transporter), member 6 | -0.070382 | Inlier |

Identification of Survival Genes in Human Glioblastoma Cells Using siRNA Screening

Nikhil G Thaker, Fang Zhang, Peter R. McDonald, Tong Ying Shun, Michael D Lewen, Ian F. Pollack, and John S. Lazo

Molecular Pharmacology

| siRNA Treatment              | Gene   | Gene ID   | Gene Name                                                                | Value     | Category |
|------------------------------|--------|-----------|--------------------------------------------------------------------------|-----------|----------|
| siRNA Disorazole DMSO Run3   | SLC5A6 | NM_021095 | solute carrier family 5 (sodium-dependent vitamin transporter), member 6 | 0.070382  | Inlier   |
| siRNA-Vinblastine Run2-DMSO  | SLC5A6 | NM_021095 | solute carrier family 5 (sodium-dependent vitamin transporter), member 6 | 0.936354  | Inlier   |
| siRNA-Vinblastine Run1-DMSO  | SLC5A6 | NM_021095 | solute carrier family 5 (sodium-dependent vitamin transporter), member 6 | 1.072187  | Inlier   |
| siRNA-Temozolomide Run2-DMSO | SLC5A6 | NM_021095 | solute carrier family 5 (choline transporter), member 6                  | 2.443983  | Inlier   |
| siRNA-Temozolomide Run3-DMSO | SLC5A7 | NM_021815 | solute carrier family 5 (choline transporter), member 7                  | -4.578078 | Outlier  |
| siRNA-Temozolomide Run1-DMSO | SLC5A7 | NM_021815 | solute carrier family 5 (choline transporter), member 7                  | -1.914791 | Inlier   |

Identification of Survival Genes in Human Glioblastoma Cells Using siRNA Screening  
 Nikhil G Thaker, Fang Zhang, Peter R. McDonald, Tong Ying Shun, Michael D Lewen, Ian F. Pollack, and John S. Lazo

Molecular Pharmacology

|                              |               |        |   |           |        |                                                         |
|------------------------------|---------------|--------|---|-----------|--------|---------------------------------------------------------|
| siRNA Disorazole DMSO Run3   | NM_0218<br>15 | SLC5A7 | 7 | -0.50251  | Inlier | solute carrier family 5 (choline transporter), member 7 |
| siRNA Disorazole DMSO Run2   | NM_0218<br>15 | SLC5A7 | 7 | -0.200225 | Inlier | solute carrier family 5 (choline transporter), member 7 |
| siRNA-Vinblastine Run1-DMSO  | NM_0218<br>15 | SLC5A7 | 7 | 0.200225  | Inlier | solute carrier family 5 (choline transporter), member 7 |
| siRNA Disorazole DMSO Run1   | NM_0218<br>15 | SLC5A7 | 7 | 0.24415   | Inlier | solute carrier family 5 (choline transporter), member 7 |
| siRNA-Vinblastine Run2-DMSO  | NM_0218<br>15 | SLC5A7 | 7 | 0.846489  | Inlier | solute carrier family 5 (choline transporter), member 7 |
| siRNA-Temozolomide Run2-DMSO | NM_0218<br>15 | SLC5A7 | 7 | 1.36314   | Inlier | solute carrier family 5 (iodide transporter), member 7  |
| siRNA-Temozolomide Run1-DMSO | NM_1459<br>13 | SLC5A8 | 8 | -1.081232 | Inlier | solute carrier family 5 (iodide transporter), member 8  |



Identification of Survival Genes in Human Glioblastoma Cells Using siRNA Screening

Nikhil G Thaker, Fang Zhang, Peter R. McDonald, Tong Ying Shun, Michael D Lewen, Ian F. Pollack, and John S. Lazo

Molecular Pharmacology

| siRNA Treatment              | Gene ID   | Gene Name | Protein Name                                                           | Log2 Fold Change | Category |
|------------------------------|-----------|-----------|------------------------------------------------------------------------|------------------|----------|
| siRNA-Temozolomide Run3-DMSO | NM_003042 | SLC6A1    | solute carrier family 6 (neurotransmitter transporter, GABA), member 1 | -1.268882        | Inlier   |
| siRNA-Temozolomide Run1-DMSO | NM_003042 | SLC6A1    | solute carrier family 6 (neurotransmitter transporter, GABA), member 1 | -0.980922        | Inlier   |
| siRNA Disorazole DMSO Run3   | NM_003042 | SLC6A1    | solute carrier family 6 (neurotransmitter transporter, GABA), member 1 | -0.145412        | Inlier   |
| siRNA-Temozolomide Run2-DMSO | NM_003042 | SLC6A1    | solute carrier family 6 (neurotransmitter transporter, GABA), member 1 | -0.011288        | Inlier   |
| siRNA-Vinblastine Run1-DMSO  | NM_003042 | SLC6A1    | solute carrier family 6 (neurotransmitter transporter, GABA), member 1 | 0.011287         | Inlier   |
| siRNA-Vinblastine Run2-DMSO  | NM_003042 | SLC6A1    | solute carrier family 6 (neurotransmitter transporter, GABA), member 1 | 0.533109         | Inlier   |



Identification of Survival Genes in Human Glioblastoma Cells Using siRNA Screening  
 Nikhil G Thaker, Fang Zhang, Peter R. McDonald, Tong Ying Shun, Michael D Lewen, Ian F. Pollack, and John S. Lazo

Molecular Pharmacology

|                              |               |         |                                                                         |           |         |
|------------------------------|---------------|---------|-------------------------------------------------------------------------|-----------|---------|
| siRNA Disorazole DMSO Run2   | NM_0030<br>42 | SLC6A1  | solute carrier family 6 (neurotransmitter transporter, GABA), member 1  | 0.815891  | Inlier  |
| siRNA Disorazole DMSO Run1   | NM_0030<br>42 | SLC6A1  | solute carrier family 6 (neurotransmitter transporter, GABA), member 1  | 0.827925  | Inlier  |
| siRNA-Temozolomide Run3-DMSO | NM_0142<br>29 | SLC6A11 | solute carrier family 6 (neurotransmitter transporter, GABA), member 11 | -4.678971 | Outlier |
| siRNA-Temozolomide Run1-DMSO | NM_0142<br>29 | SLC6A11 | solute carrier family 6 (neurotransmitter transporter, GABA), member 11 | -1.85598  | Inlier  |
| siRNA-Temozolomide Run2-DMSO | NM_0142<br>29 | SLC6A11 | solute carrier family 6 (neurotransmitter transporter, GABA), member 11 | -0.71692  | Inlier  |
| siRNA Disorazole DMSO Run2   | NM_0142<br>29 | SLC6A11 | solute carrier family 6 (neurotransmitter transporter, GABA), member 11 | -0.170361 | Inlier  |

Identification of Survival Genes in Human Glioblastoma Cells Using siRNA Screening

Nikhil G Thaker, Fang Zhang, Peter R. McDonald, Tong Ying Shun, Michael D Lewen, Ian F. Pollack, and John S. Lazo

Molecular Pharmacology

|                              |               |         |                                                                              |           |        |
|------------------------------|---------------|---------|------------------------------------------------------------------------------|-----------|--------|
| siRNA Disorazole DMSO Run3   | NM_0142<br>29 | SLC6A11 | 11                                                                           | 0.17036   | Inlier |
|                              |               |         | solute carrier family 6 (neurotransmitter transporter, GABA), member         |           |        |
| siRNA Disorazole DMSO Run1   | NM_0142<br>29 | SLC6A11 | 11                                                                           | 0.482928  | Inlier |
|                              |               |         | solute carrier family 6 (neurotransmitter transporter, GABA), member         |           |        |
| siRNA-Vinblastine Run1-DMSO  | NM_0142<br>29 | SLC6A11 | 11                                                                           | 0.63208   | Inlier |
|                              |               |         | solute carrier family 6 (neurotransmitter transporter, GABA), member         |           |        |
| siRNA-Vinblastine Run2-DMSO  | NM_0142<br>29 | SLC6A11 | 11                                                                           | 1.330103  | Inlier |
|                              |               |         | solute carrier family 6 (neurotransmitter transporter, betaine/GABA), member |           |        |
| siRNA-Temozolomide Run3-DMSO | NM_0030<br>44 | SLC6A12 | 12                                                                           | -2.213192 | Inlier |

Identification of Survival Genes in Human Glioblastoma Cells Using siRNA Screening

Nikhil G Thaker, Fang Zhang, Peter R. McDonald, Tong Ying Shun, Michael D Lewen, Ian F. Pollack, and John S. Lazo

Molecular Pharmacology

|                              |           |         |    |                                                                              |        |
|------------------------------|-----------|---------|----|------------------------------------------------------------------------------|--------|
|                              |           |         |    | solute carrier family 6 (neurotransmitter transporter, betaine/GABA), member |        |
| siRNA-Temozolomide Run1-DMSO | NM_003044 | SLC6A12 | 12 | -0.773884                                                                    | Inlier |
|                              |           |         |    | solute carrier family 6 (neurotransmitter transporter, betaine/GABA), member |        |
| siRNA-Temozolomide Run2-DMSO | NM_003044 | SLC6A12 | 12 | -0.388337                                                                    | Inlier |
|                              |           |         |    | solute carrier family 6 (neurotransmitter transporter, betaine/GABA), member |        |
| siRNA Disorazole DMSO Run3   | NM_003044 | SLC6A12 | 12 | -0.26825                                                                     | Inlier |
|                              |           |         |    | solute carrier family 6 (neurotransmitter transporter, betaine/GABA), member |        |
| siRNA Disorazole DMSO Run1   | NM_003044 | SLC6A12 | 12 | 0.268249                                                                     | Inlier |

Identification of Survival Genes in Human Glioblastoma Cells Using siRNA Screening

Nikhil G Thaker, Fang Zhang, Peter R. McDonald, Tong Ying Shun, Michael D Lewen, Ian F. Pollack, and John S. Lazo

Molecular Pharmacology

| siRNA Treatment              | Gene    | Accession | Gene ID | Gene Description                                                                | Log2 Fold Change | Classification |
|------------------------------|---------|-----------|---------|---------------------------------------------------------------------------------|------------------|----------------|
| siRNA Disorazole DMSO Run2   | SLC6A12 | NM_003044 | 12      | solute carrier family 6 (neurotransmitter transporter, betaine/GABA), member 12 | 0.575116         | Inlier         |
| siRNA-Vinblastine Run2-DMSO  | SLC6A12 | NM_003044 | 12      | solute carrier family 6 (neurotransmitter transporter, betaine/GABA), member 12 | 0.777242         | Inlier         |
| siRNA-Vinblastine Run1-DMSO  | SLC6A12 | NM_003044 | 12      | solute carrier family 6 (neurotransmitter transporter, betaine/GABA), member 12 | 1.151603         | Inlier         |
| siRNA-Temozolomide Run3-DMSO | SLC6A13 | NM_016615 | 13      | solute carrier family 6 (neurotransmitter transporter, GABA), member 13         | -3.729909        | Outlier        |
| siRNA-Temozolomide Run1-DMSO | SLC6A13 | NM_016615 | 13      | solute carrier family 6 (neurotransmitter transporter, GABA), member 13         | -0.940989        | Inlier         |

Identification of Survival Genes in Human Glioblastoma Cells Using siRNA Screening

Nikhil G Thaker, Fang Zhang, Peter R. McDonald, Tong Ying Shun, Michael D Lewen, Ian F. Pollack, and John S. Lazo

Molecular Pharmacology

| siRNA Treatment              | Gene    | Accession | Gene ID | Value     | Category |
|------------------------------|---------|-----------|---------|-----------|----------|
| siRNA Disorazole DMSO Run2   | SLC6A13 | NM_0166   | 13      | -0.629481 | Inlier   |
| siRNA-Temozolomide Run2-DMSO | SLC6A13 | NM_0166   | 13      | -0.232042 | Inlier   |
| siRNA Disorazole DMSO Run3   | SLC6A13 | NM_0166   | 13      | 0.232041  | Inlier   |
| siRNA Disorazole DMSO Run1   | SLC6A13 | NM_0166   | 13      | 0.274467  | Inlier   |
| siRNA-Vinblastine Run2-DMSO  | SLC6A13 | NM_0166   | 13      | 0.719519  | Inlier   |

solute carrier family 6 (neurotransmitter transporter, GABA), member 13

solute carrier family 6 (neurotransmitter transporter, GABA), member 13

solute carrier family 6 (neurotransmitter transporter, GABA), member 13

solute carrier family 6 (neurotransmitter transporter, GABA), member 13

solute carrier family 6 (neurotransmitter transporter, GABA), member 13

Identification of Survival Genes in Human Glioblastoma Cells Using siRNA Screening

Nikhil G Thaker, Fang Zhang, Peter R. McDonald, Tong Ying Shun, Michael D Lewen, Ian F. Pollack, and John S. Lazo

Molecular Pharmacology

|                              |               |         |    |           |        |                                                                      |
|------------------------------|---------------|---------|----|-----------|--------|----------------------------------------------------------------------|
| siRNA-Vinblastine Run1-DMSO  | NM_0166<br>15 | SLC6A13 | 13 | 0.897921  | Inlier | solute carrier family 6 (neurotransmitter transporter, GABA), member |
| siRNA Disorazole DMSO Run2   | NM_0072<br>31 | SLC6A14 | 14 | -1.515267 | Inlier | solute carrier family 6 (neurotransmitter transporter), member       |
| siRNA-Temozolomide Run3-DMSO | NM_0072<br>31 | SLC6A14 | 14 | -1.122317 | Inlier | solute carrier family 6 (neurotransmitter transporter), member       |
| siRNA Disorazole DMSO Run3   | NM_0072<br>31 | SLC6A14 | 14 | -0.12556  | Inlier | solute carrier family 6 (neurotransmitter transporter), member       |
| siRNA-Temozolomide Run1-DMSO | NM_0072<br>31 | SLC6A14 | 14 | -0.021084 | Inlier | solute carrier family 6 (neurotransmitter transporter), member       |

Identification of Survival Genes in Human Glioblastoma Cells Using siRNA Screening  
 Nikhil G Thaker, Fang Zhang, Peter R. McDonald, Tong Ying Shun, Michael D Lewen, Ian F. Pollack, and John S. Lazo  
 Molecular Pharmacology

|                              |               |         |                                                                   |           |        |
|------------------------------|---------------|---------|-------------------------------------------------------------------|-----------|--------|
| siRNA-Temozolomide Run2-DMSO | NM_0072<br>31 | SLC6A14 | solute carrier family 6 (neurotransmitter transporter), member 14 | 0.021084  | Inlier |
| siRNA Disorazole DMSO Run1   | NM_0072<br>31 | SLC6A14 | solute carrier family 6 (neurotransmitter transporter), member 14 | 0.322644  | Inlier |
| siRNA-Vinblastine Run1-DMSO  | NM_0072<br>31 | SLC6A14 | solute carrier family 6 (neurotransmitter transporter), member 14 | 1.026356  | Inlier |
| siRNA-Vinblastine Run2-DMSO  | NM_0072<br>31 | SLC6A14 | solute carrier family 6 (neurotransmitter transporter), member 14 | 1.226446  | Inlier |
| siRNA-Temozolomide Run3-DMSO | NM_1827<br>67 | SLC6A15 | solute carrier family 6 (neurotransmitter transporter), member 15 | -1.081958 | Inlier |

Identification of Survival Genes in Human Glioblastoma Cells Using siRNA Screening  
 Nikhil G Thaker, Fang Zhang, Peter R. McDonald, Tong Ying Shun, Michael D Lewen, Ian F. Pollack, and John S. Lazo  
 Molecular Pharmacology

|                              |               |         |    |           |        |                                                                   |
|------------------------------|---------------|---------|----|-----------|--------|-------------------------------------------------------------------|
| siRNA Disorazole DMSO Run3   | NM_1827<br>67 | SLC6A15 | 15 | -0.774906 | Inlier | solute carrier family 6 (neurotransmitter transporter), member 15 |
| siRNA Disorazole DMSO Run2   | NM_1827<br>67 | SLC6A15 | 15 | -0.574094 | Inlier | solute carrier family 6 (neurotransmitter transporter), member 15 |
| siRNA-Temozolomide Run2-DMSO | NM_1827<br>67 | SLC6A15 | 15 | -0.369758 | Inlier | solute carrier family 6 (neurotransmitter transporter), member 15 |
| siRNA-Temozolomide Run1-DMSO | NM_1827<br>67 | SLC6A15 | 15 | 0.369758  | Inlier | solute carrier family 6 (neurotransmitter transporter), member 15 |
| siRNA Disorazole DMSO Run1   | NM_1827<br>67 | SLC6A15 | 15 | 0.48494   | Inlier | solute carrier family 6 (neurotransmitter transporter), member 15 |



Identification of Survival Genes in Human Glioblastoma Cells Using siRNA Screening

Nikhil G Thaker, Fang Zhang, Peter R. McDonald, Tong Ying Shun, Michael D Lewen, Ian F. Pollack, and John S. Lazo

Molecular Pharmacology

|                              |           |         |                                                                   |           |        |
|------------------------------|-----------|---------|-------------------------------------------------------------------|-----------|--------|
| siRNA-Vinblastine Run1-DMSO  | NM_182767 | SLC6A15 | solute carrier family 6 (neurotransmitter transporter), member 15 | 1.147153  | Inlier |
| siRNA-Vinblastine Run2-DMSO  | NM_182767 | SLC6A15 | solute carrier family 6 (neurotransmitter transporter), member 15 | 1.378196  | Inlier |
| siRNA-Temozolomide Run3-DMSO | NM_014037 | SLC6A16 | solute carrier family 6 (neurotransmitter transporter), member 16 | -3.193136 | Inlier |
| siRNA-Temozolomide Run2-DMSO | NM_014037 | SLC6A16 | solute carrier family 6 (neurotransmitter transporter), member 16 | -1.672229 | Inlier |
| siRNA-Temozolomide Run1-DMSO | NM_014037 | SLC6A16 | solute carrier family 6 (neurotransmitter transporter), member 16 | -0.75846  | Inlier |

Identification of Survival Genes in Human Glioblastoma Cells Using siRNA Screening  
 Nikhil G Thaker, Fang Zhang, Peter R. McDonald, Tong Ying Shun, Michael D Lewen, Ian F. Pollack, and John S. Lazo  
 Molecular Pharmacology

|                             |               |         |                                                                   |           |        |
|-----------------------------|---------------|---------|-------------------------------------------------------------------|-----------|--------|
| siRNA Disorazole DMSO Run2  | NM_0140<br>37 | SLC6A16 | solute carrier family 6 (neurotransmitter transporter), member 16 | -0.191794 | Inlier |
| siRNA Disorazole DMSO Run1  | NM_0140<br>37 | SLC6A16 | solute carrier family 6 (neurotransmitter transporter), member 16 | 0.191793  | Inlier |
| siRNA Disorazole DMSO Run3  | NM_0140<br>37 | SLC6A16 | solute carrier family 6 (neurotransmitter transporter), member 16 | 0.297314  | Inlier |
| siRNA-Vinblastine Run2-DMSO | NM_0140<br>37 | SLC6A16 | solute carrier family 6 (neurotransmitter transporter), member 16 | 0.59054   | Inlier |
| siRNA-Vinblastine Run1-DMSO | NM_0140<br>37 | SLC6A16 | solute carrier family 6 (neurotransmitter transporter), member 16 | 1.013376  | Inlier |

Identification of Survival Genes in Human Glioblastoma Cells Using siRNA Screening

Nikhil G Thaker, Fang Zhang, Peter R. McDonald, Tong Ying Shun, Michael D Lewen, Ian F. Pollack, and John S. Lazo

Molecular Pharmacology

|                              |               |         |                                                                   |           |        |
|------------------------------|---------------|---------|-------------------------------------------------------------------|-----------|--------|
| siRNA-Temozolomide Run3-DMSO | NM_1826<br>32 | SLC6A18 | solute carrier family 6 (neurotransmitter transporter), member 18 | -0.986815 | Inlier |
| siRNA Disorazole DMSO Run3   | NM_1826<br>32 | SLC6A18 | solute carrier family 6 (neurotransmitter transporter), member 18 | -0.719374 | Inlier |
| siRNA Disorazole DMSO Run2   | NM_1826<br>32 | SLC6A18 | solute carrier family 6 (neurotransmitter transporter), member 18 | -0.629626 | Inlier |
| siRNA-Temozolomide Run1-DMSO | NM_1826<br>32 | SLC6A18 | solute carrier family 6 (neurotransmitter transporter), member 18 | -0.365002 | Inlier |
| siRNA Disorazole DMSO Run1   | NM_1826<br>32 | SLC6A18 | solute carrier family 6 (neurotransmitter transporter), member 18 | 0.365002  | Inlier |

Identification of Survival Genes in Human Glioblastoma Cells Using siRNA Screening

Nikhil G Thaker, Fang Zhang, Peter R. McDonald, Tong Ying Shun, Michael D Lewen, Ian F. Pollack, and John S.

Lazo

Molecular Pharmacology

|                              |           |         |                                                                                 |           |        |
|------------------------------|-----------|---------|---------------------------------------------------------------------------------|-----------|--------|
| siRNA-Vinblastine Run2-DMSO  | NM_182632 | SLC6A18 | solute carrier family 6 (neurotransmitter transporter), member 18               | 0.572312  | Inlier |
| siRNA-Temozolomide Run2-DMSO | NM_182632 | SLC6A18 | solute carrier family 6 (neurotransmitter transporter), member 18               | 1.122078  | Inlier |
| siRNA-Vinblastine Run1-DMSO  | NM_182632 | SLC6A18 | solute carrier family 6 (neurotransmitter transporter), member 18               | 1.228721  | Inlier |
| siRNA-Temozolomide Run3-DMSO | NM_001043 | SLC6A2  | solute carrier family 6 (neurotransmitter transporter), noradrenalin), member 2 | -2.94894  | Inlier |
| siRNA-Temozolomide Run1-DMSO | NM_001043 | SLC6A2  | solute carrier family 6 (neurotransmitter transporter), noradrenalin), member 2 | -1.370389 | Inlier |

Identification of Survival Genes in Human Glioblastoma Cells Using siRNA Screening

Nikhil G Thaker, Fang Zhang, Peter R. McDonald, Tong Ying Shun, Michael D Lewen, Ian F. Pollack, and John S. Lazo

Molecular Pharmacology

|                              |           |        |  |                                                                                 |           |        |
|------------------------------|-----------|--------|--|---------------------------------------------------------------------------------|-----------|--------|
|                              |           |        |  | solute carrier family 6 (neurotransmitter transporter, noradrenaline), member 2 |           |        |
| siRNA-Temozolomide Run2-DMSO | NM_001043 | SLC6A2 |  |                                                                                 | -1.174023 | Inlier |
|                              |           |        |  | solute carrier family 6 (neurotransmitter transporter, noradrenaline), member 2 |           |        |
| siRNA Disorazole DMSO Run3   | NM_001043 | SLC6A2 |  |                                                                                 | -0.128916 | Inlier |
|                              |           |        |  | solute carrier family 6 (neurotransmitter transporter, noradrenaline), member 2 |           |        |
| siRNA-Vinblastine Run2-DMSO  | NM_001043 | SLC6A2 |  |                                                                                 | 0.128916  | Inlier |
|                              |           |        |  | solute carrier family 6 (neurotransmitter transporter, noradrenaline), member 2 |           |        |
| siRNA-Vinblastine Run1-DMSO  | NM_001043 | SLC6A2 |  |                                                                                 | 0.258996  | Inlier |
|                              |           |        |  | solute carrier family 6 (neurotransmitter transporter, noradrenaline), member 2 |           |        |
| siRNA Disorazole DMSO Run1   | NM_001043 | SLC6A2 |  |                                                                                 | 0.657193  | Inlier |

Identification of Survival Genes in Human Glioblastoma Cells Using siRNA Screening

Nikhil G Thaker, Fang Zhang, Peter R. McDonald, Tong Ying Shun, Michael D Lewen, Ian F. Pollack, and John S. Lazo

Molecular Pharmacology

|                              |               |         |                                                                   |           |        |
|------------------------------|---------------|---------|-------------------------------------------------------------------|-----------|--------|
| siRNA Disorazole DMSO Run2   | NM_0010<br>43 | SLC6A2  | solute carrier family 6 (neurotransmitter transporter), member 2  | 0.691807  | Inlier |
| siRNA-Temozolomide Run3-DMSO | NM_0202<br>08 | SLC6A20 | solute carrier family 6 (neurotransmitter transporter), member 20 | -1.112342 | Inlier |
| siRNA Disorazole DMSO Run2   | NM_0202<br>08 | SLC6A20 | solute carrier family 6 (neurotransmitter transporter), member 20 | -0.800877 | Inlier |
| siRNA-Temozolomide Run2-DMSO | NM_0202<br>08 | SLC6A20 | solute carrier family 6 (neurotransmitter transporter), member 20 | -0.548123 | Inlier |
| siRNA Disorazole DMSO Run3   | NM_0202<br>08 | SLC6A20 | solute carrier family 6 (neurotransmitter transporter), member 20 | -0.489395 | Inlier |

Identification of Survival Genes in Human Glioblastoma Cells Using siRNA Screening

Nikhil G Thaker, Fang Zhang, Peter R. McDonald, Tong Ying Shun, Michael D Lewen, Ian F. Pollack, and John S. Lazo

Molecular Pharmacology

|                              |           |         |                                                                            |           |         |
|------------------------------|-----------|---------|----------------------------------------------------------------------------|-----------|---------|
| siRNA-Temozolomide Run1-DMSO | NM_020208 | SLC6A20 | solute carrier family 6 (neurotransmitter transporter), member 20          | 0.489395  | Inlier  |
| siRNA Disorazole DMSO Run1   | NM_020208 | SLC6A20 | solute carrier family 6 (neurotransmitter transporter), member 20          | 0.503065  | Inlier  |
| siRNA-Vinblastine Run2-DMSO  | NM_020208 | SLC6A20 | solute carrier family 6 (neurotransmitter transporter), member 20          | 1.647518  | Inlier  |
| siRNA-Vinblastine Run1-DMSO  | NM_020208 | SLC6A20 | solute carrier family 6 (neurotransmitter transporter), member 20          | 1.758633  | Inlier  |
| siRNA-Temozolomide Run3-DMSO | NM_001044 | SLC6A3  | solute carrier family 6 (neurotransmitter transporter, dopamine), member 3 | -4.062954 | Outlier |

Identification of Survival Genes in Human Glioblastoma Cells Using siRNA Screening

Nikhil G Thaker, Fang Zhang, Peter R. McDonald, Tong Ying Shun, Michael D Lewen, Ian F. Pollack, and John S. Lazo

Molecular Pharmacology

|                              |           |        |   |           |        |
|------------------------------|-----------|--------|---|-----------|--------|
| siRNA-Temozolomide Run1-DMSO | NM_001044 | SLC6A3 | 3 | -1.372014 | Inlier |
| siRNA-Temozolomide Run2-DMSO | NM_001044 | SLC6A3 | 3 | -0.934502 | Inlier |
| siRNA-Vinblastine Run1-DMSO  | NM_001044 | SLC6A3 | 3 | -0.028295 | Inlier |
| siRNA-Vinblastine Run2-DMSO  | NM_001044 | SLC6A3 | 3 | 0.028295  | Inlier |
| siRNA Disorazole DMSO Run2   | NM_001044 | SLC6A3 | 3 | 0.286143  | Inlier |

solute carrier family 6 (neurotransmitter transporter

, dopamine), member 3

solute carrier family 6 (neurotransmitter transporter

, dopamine), member 3

solute carrier family 6 (neurotransmitter transporter

, dopamine), member 3

solute carrier family 6 (neurotransmitter transporter

, dopamine), member 3

solute carrier family 6 (neurotransmitter transporter

, dopamine), member 3



Identification of Survival Genes in Human Glioblastoma Cells Using siRNA Screening

Nikhil G Thaker, Fang Zhang, Peter R. McDonald, Tong Ying Shun, Michael D Lewen, Ian F. Pollack, and John S. Lazo

Molecular Pharmacology

|                              |               |        |                                                                             |           |        |
|------------------------------|---------------|--------|-----------------------------------------------------------------------------|-----------|--------|
| siRNA Disorazole DMSO Run3   | NM_0010<br>44 | SLC6A3 | solute carrier family 6 (neurotransmitter transporter, dopamine), member 3  | 0.414498  | Inlier |
| siRNA Disorazole DMSO Run1   | NM_0010<br>44 | SLC6A3 | solute carrier family 6 (neurotransmitter transporter, dopamine), member 3  | 1.120601  | Inlier |
| siRNA-Temozolomide Run3-DMSO | NM_0010<br>45 | SLC6A4 | solute carrier family 6 (neurotransmitter transporter, serotonin), member 4 | -2.347646 | Inlier |
| siRNA Disorazole DMSO Run3   | NM_0010<br>45 | SLC6A4 | solute carrier family 6 (neurotransmitter transporter, serotonin), member 4 | -1.821016 | Inlier |
| siRNA-Temozolomide Run1-DMSO | NM_0010<br>45 | SLC6A4 | solute carrier family 6 (neurotransmitter transporter, serotonin), member 4 | -0.338146 | Inlier |

Identification of Survival Genes in Human Glioblastoma Cells Using siRNA Screening

Nikhil G Thaker, Fang Zhang, Peter R. McDonald, Tong Ying Shun, Michael D Lewen, Ian F. Pollack, and John S. Lazo

Molecular Pharmacology

|                              |               |        |                                                                             |           |        |
|------------------------------|---------------|--------|-----------------------------------------------------------------------------|-----------|--------|
| siRNA Disorazole DMSO Run1   | NM_0010<br>45 | SLC6A4 | solute carrier family 6 (neurotransmitter transporter, serotonin), member 4 | -0.045547 | Inlier |
| siRNA-Temozolomide Run2-DMSO | NM_0010<br>45 | SLC6A4 | solute carrier family 6 (neurotransmitter transporter, serotonin), member 4 | 0.045547  | Inlier |
| siRNA Disorazole DMSO Run2   | NM_0010<br>45 | SLC6A4 | solute carrier family 6 (neurotransmitter transporter, serotonin), member 4 | 0.594325  | Inlier |
| siRNA-Vinblastine Run2-DMSO  | NM_0010<br>45 | SLC6A4 | solute carrier family 6 (neurotransmitter transporter, serotonin), member 4 | 0.754675  | Inlier |
| siRNA-Vinblastine Run1-DMSO  | NM_0010<br>45 | SLC6A4 | solute carrier family 6 (neurotransmitter transporter, serotonin), member 4 | 0.841354  | Inlier |

Identification of Survival Genes in Human Glioblastoma Cells Using siRNA Screening

Nikhil G Thaker, Fang Zhang, Peter R. McDonald, Tong Ying Shun, Michael D Lewen, Ian F. Pollack, and John S. Lazo

Molecular Pharmacology

|                              |               |        |                                                                           |           |        |
|------------------------------|---------------|--------|---------------------------------------------------------------------------|-----------|--------|
| siRNA-Temozolomide Run1-DMSO | NM_0042<br>11 | SLC6A5 | solute carrier family 6 (neurotransmitter transporter, glycine), member 5 | -1.244563 | Inlier |
| siRNA Disorazole DMSO Run2   | NM_0042<br>11 | SLC6A5 | solute carrier family 6 (neurotransmitter transporter, glycine), member 5 | -0.851556 | Inlier |
| siRNA-Temozolomide Run3-DMSO | NM_0042<br>11 | SLC6A5 | solute carrier family 6 (neurotransmitter transporter, glycine), member 5 | -0.585799 | Inlier |
| siRNA-Vinblastine Run2-DMSO  | NM_0042<br>11 | SLC6A5 | solute carrier family 6 (neurotransmitter transporter, glycine), member 5 | -0.307228 | Inlier |
| siRNA Disorazole DMSO Run1   | NM_0042<br>11 | SLC6A5 | solute carrier family 6 (neurotransmitter transporter, glycine), member 5 | 0.307229  | Inlier |

Identification of Survival Genes in Human Glioblastoma Cells Using siRNA Screening  
 Nikhil G Thaker, Fang Zhang, Peter R. McDonald, Tong Ying Shun, Michael D Lewen, Ian F. Pollack, and John S. Lazo  
 Molecular Pharmacology

|                              |               |        |                                                                           |           |        |
|------------------------------|---------------|--------|---------------------------------------------------------------------------|-----------|--------|
| siRNA Disorazole DMSO Run3   | NM_0042<br>11 | SLC6A5 | solute carrier family 6 (neurotransmitter transporter, glycine), member 5 | 0.664161  | Inlier |
| siRNA-Vinblastine Run1-DMSO  | NM_0042<br>11 | SLC6A5 | solute carrier family 6 (neurotransmitter transporter, glycine), member 5 | 0.684839  | Inlier |
| siRNA-Temozolomide Run2-DMSO | NM_0042<br>11 | SLC6A5 | solute carrier family 6 (neurotransmitter transporter, glycine), member 5 | 1.510463  | Inlier |
| siRNA-Temozolomide Run1-DMSO | NM_0030<br>43 | SLC6A6 | solute carrier family 6 (neurotransmitter transporter, taurine), member 6 | -1.474643 | Inlier |
| siRNA Disorazole DMSO Run2   | NM_0030<br>43 | SLC6A6 | solute carrier family 6 (neurotransmitter transporter, taurine), member 6 | -1.326128 | Inlier |
| siRNA-Temozolomide Run3-DMSO | NM_0030<br>43 | SLC6A6 | solute carrier family 6 (neurotransmitter transporter, taurine), member 6 | -1.084917 | Inlier |

Identification of Survival Genes in Human Glioblastoma Cells Using siRNA Screening

Nikhil G Thaker, Fang Zhang, Peter R. McDonald, Tong Ying Shun, Michael D Lewen, Ian F. Pollack, and John S. Lazo

Molecular Pharmacology

| siRNA Treatment              | Gene ID   | Gene Name | Protein Name                                                                | Log Fold Change | Annotation |
|------------------------------|-----------|-----------|-----------------------------------------------------------------------------|-----------------|------------|
| siRNA-Vinblastine Run2-DMSO  | NM_003043 | SLC6A6    | solute carrier family 6 (neurotransmitter transporter, taurine), member 6   | -0.028976       | Inlier     |
| siRNA Disorazole DMSO Run3   | NM_003043 | SLC6A6    | solute carrier family 6 (neurotransmitter transporter, taurine), member 6   | 0.028976        | Inlier     |
| siRNA Disorazole DMSO Run1   | NM_003043 | SLC6A6    | solute carrier family 6 (neurotransmitter transporter, taurine), member 6   | 0.051092        | Inlier     |
| siRNA-Temozolomide Run2-DMSO | NM_003043 | SLC6A6    | solute carrier family 6 (neurotransmitter transporter, taurine), member 6   | 0.264083        | Inlier     |
| siRNA-Vinblastine Run1-DMSO  | NM_003043 | SLC6A6    | solute carrier family 6 (neurotransmitter transporter, taurine), member 6   | 1.326054        | Inlier     |
| siRNA-Temozolomide Run3-DMSO | NM_014228 | SLC6A7    | solute carrier family 6 (neurotransmitter transporter, L-proline), member 7 | -0.80674        | Inlier     |

Identification of Survival Genes in Human Glioblastoma Cells Using siRNA Screening

Nikhil G Thaker, Fang Zhang, Peter R. McDonald, Tong Ying Shun, Michael D Lewen, Ian F. Pollack, and John S.

Lazo

Molecular Pharmacology

| siRNA                        | siRNA   | siRNA | siRNA  | siRNA                                                                       | siRNA     | siRNA  | siRNA | siRNA | siRNA |
|------------------------------|---------|-------|--------|-----------------------------------------------------------------------------|-----------|--------|-------|-------|-------|
| siRNA-Temozolomide Run2-DMSO | NM_0142 | 28    | SLC6A7 | solute carrier family 6 (neurotransmitter transporter, L-proline), member 7 | -0.731581 | Inlier |       |       |       |
| siRNA Disorazole DMSO Run2   | NM_0142 | 28    | SLC6A7 | solute carrier family 6 (neurotransmitter transporter, L-proline), member 7 | -0.617419 | Inlier |       |       |       |
| siRNA-Temozolomide Run1-DMSO | NM_0142 | 28    | SLC6A7 | solute carrier family 6 (neurotransmitter transporter, L-proline), member 7 | -0.24574  | Inlier |       |       |       |
| siRNA Disorazole DMSO Run3   | NM_0142 | 28    | SLC6A7 | solute carrier family 6 (neurotransmitter transporter, L-proline), member 7 | 0.24574   | Inlier |       |       |       |
| siRNA Disorazole DMSO Run1   | NM_0142 | 28    | SLC6A7 | solute carrier family 6 (neurotransmitter transporter, L-proline), member 7 | 0.391233  | Inlier |       |       |       |

Identification of Survival Genes in Human Glioblastoma Cells Using siRNA Screening

Nikhil G Thaker, Fang Zhang, Peter R. McDonald, Tong Ying Shun, Michael D Lewen, Ian F. Pollack, and John S. Lazo

Molecular Pharmacology

|                              |           |        |                                                                             |           |        |
|------------------------------|-----------|--------|-----------------------------------------------------------------------------|-----------|--------|
| siRNA-Vinblastine Run2-DMSO  | NM_014228 | SLC6A7 | solute carrier family 6 (neurotransmitter transporter, L-proline), member 7 | 0.872988  | Inlier |
| siRNA-Vinblastine Run1-DMSO  | NM_014228 | SLC6A7 | solute carrier family 6 (neurotransmitter transporter, L-proline), member 7 | 1.343691  | Inlier |
| siRNA-Temozolomide Run3-DMSO | NM_005629 | SLC6A8 | solute carrier family 6 (neurotransmitter transporter, creatine), member 8  | -1.372712 | Inlier |
| siRNA-Temozolomide Run2-DMSO | NM_005629 | SLC6A8 | solute carrier family 6 (neurotransmitter transporter, creatine), member 8  | -0.792133 | Inlier |
| siRNA Disorazole DMSO Run3   | NM_005629 | SLC6A8 | solute carrier family 6 (neurotransmitter transporter, creatine), member 8  | -0.134237 | Inlier |

Identification of Survival Genes in Human Glioblastoma Cells Using siRNA Screening  
 Nikhil G Thaker, Fang Zhang, Peter R. McDonald, Tong Ying Shun, Michael D Lewen, Ian F. Pollack, and John S. Lazo  
 Molecular Pharmacology

|                              |               |        |                                                                            |           |        |
|------------------------------|---------------|--------|----------------------------------------------------------------------------|-----------|--------|
| siRNA Disorazole DMSO Run2   | NM_0056<br>29 | SLC6A8 | solute carrier family 6 (neurotransmitter transporter, creatine), member 8 | -0.104867 | Inlier |
| siRNA-Temozolomide Run1-DMSO | NM_0056<br>29 | SLC6A8 | solute carrier family 6 (neurotransmitter transporter, creatine), member 8 | 0.104867  | Inlier |
| siRNA Disorazole DMSO Run1   | NM_0056<br>29 | SLC6A8 | solute carrier family 6 (neurotransmitter transporter, creatine), member 8 | 0.556867  | Inlier |
| siRNA-Vinblastine Run2-DMSO  | NM_0056<br>29 | SLC6A8 | solute carrier family 6 (neurotransmitter transporter, creatine), member 8 | 1.303075  | Inlier |
| siRNA-Vinblastine Run1-DMSO  | NM_0056<br>29 | SLC6A8 | solute carrier family 6 (neurotransmitter transporter, creatine), member 8 | 1.567962  | Inlier |



Identification of Survival Genes in Human Glioblastoma Cells Using siRNA Screening

Nikhil G Thaker, Fang Zhang, Peter R. McDonald, Tong Ying Shun, Michael D Lewen, Ian F. Pollack, and John S. Lazo

Molecular Pharmacology

|                              |               |        |                                                                           |           |        |
|------------------------------|---------------|--------|---------------------------------------------------------------------------|-----------|--------|
| siRNA-Temozolomide Run3-DMSO | NM_0069<br>34 | SLC6A9 | solute carrier family 6 (neurotransmitter transporter, glycine), member 9 | -1.152521 | Inlier |
| siRNA Disorazole DMSO Run2   | NM_0069<br>34 | SLC6A9 | solute carrier family 6 (neurotransmitter transporter, glycine), member 9 | -0.580168 | Inlier |
| siRNA Disorazole DMSO Run3   | NM_0069<br>34 | SLC6A9 | solute carrier family 6 (neurotransmitter transporter, glycine), member 9 | -0.3772   | Inlier |
| siRNA-Temozolomide Run2-DMSO | NM_0069<br>34 | SLC6A9 | solute carrier family 6 (neurotransmitter transporter, glycine), member 9 | -0.355986 | Inlier |
| siRNA-Temozolomide Run1-DMSO | NM_0069<br>34 | SLC6A9 | solute carrier family 6 (neurotransmitter transporter, glycine), member 9 | 0.355986  | Inlier |

Identification of Survival Genes in Human Glioblastoma Cells Using siRNA Screening

Nikhil G Thaker, Fang Zhang, Peter R. McDonald, Tong Ying Shun, Michael D Lewen, Ian F. Pollack, and John S. Lazo

Molecular Pharmacology

|                              |               |        |                                                                                |           |        |
|------------------------------|---------------|--------|--------------------------------------------------------------------------------|-----------|--------|
| siRNA Disorazole DMSO Run1   | NM_0069<br>34 | SLC6A9 | solute carrier family 6 (neurotransmitter transporter, glycine), member 9      | 0.768832  | Inlier |
| siRNA-Vinblastine Run2-DMSO  | NM_0069<br>34 | SLC6A9 | solute carrier family 6 (neurotransmitter transporter, glycine), member 9      | 1.540107  | Inlier |
| siRNA-Vinblastine Run1-DMSO  | NM_0069<br>34 | SLC6A9 | solute carrier family 6 (neurotransmitter transporter, glycine), member 9      | 1.838884  | Inlier |
| siRNA-Temozolomide Run3-DMSO | NM_0030<br>45 | SLC7A1 | solute carrier family 7 (cationic amino acid transporter, y+ system), member 1 | -1.589061 | Inlier |
| siRNA Disorazole DMSO Run2   | NM_0030<br>45 | SLC7A1 | solute carrier family 7 (cationic amino acid transporter, y+ system), member 1 | -0.950793 | Inlier |

Identification of Survival Genes in Human Glioblastoma Cells Using siRNA Screening

Nikhil G Thaker, Fang Zhang, Peter R. McDonald, Tong Ying Shun, Michael D Lewen, Ian F. Pollack, and John S. Lazo

Molecular Pharmacology

|                              |               |        |                                                                                |           |        |
|------------------------------|---------------|--------|--------------------------------------------------------------------------------|-----------|--------|
| siRNA-Temozolomide Run2-DMSO | NM_0030<br>45 | SLC7A1 | solute carrier family 7 (cationic amino acid transporter, y+ system), member 1 | -0.799265 | Inlier |
| siRNA Disorazole DMSO Run3   | NM_0030<br>45 | SLC7A1 | solute carrier family 7 (cationic amino acid transporter, y+ system), member 1 | -0.094024 | Inlier |
| siRNA-Temozolomide Run1-DMSO | NM_0030<br>45 | SLC7A1 | solute carrier family 7 (cationic amino acid transporter, y+ system), member 1 | 0.094025  | Inlier |
| siRNA Disorazole DMSO Run1   | NM_0030<br>45 | SLC7A1 | solute carrier family 7 (cationic amino acid transporter, y+ system), member 1 | 0.303514  | Inlier |
| siRNA-Vinblastine Run2-DMSO  | NM_0030<br>45 | SLC7A1 | solute carrier family 7 (cationic amino acid transporter, y+ system), member 1 | 0.56364   | Inlier |

Identification of Survival Genes in Human Glioblastoma Cells Using siRNA Screening  
 Nikhil G Thaker, Fang Zhang, Peter R. McDonald, Tong Ying Shun, Michael D Lewen, Ian F. Pollack, and John S. Lazo  
 Molecular Pharmacology

|                              |           |         |                                                                                |           |        |
|------------------------------|-----------|---------|--------------------------------------------------------------------------------|-----------|--------|
| siRNA-Vinblastine Run1-DMSO  | NM_003045 | SLC7A1  | solute carrier family 7 (cationic amino acid transporter, y+ system), member 1 | 0.78536   | Inlier |
| siRNA-Temozolomide Run3-DMSO | NM_019849 | SLC7A10 | solute carrier family 7, (neutral amino acid transporter, y+ system) member 10 | -1.358224 | Inlier |
| siRNA-Temozolomide Run2-DMSO | NM_019849 | SLC7A10 | solute carrier family 7, (neutral amino acid transporter, y+ system) member 10 | -0.998727 | Inlier |
| siRNA-Vinblastine Run2-DMSO  | NM_019849 | SLC7A10 | solute carrier family 7, (neutral amino acid transporter, y+ system) member 10 | -0.469032 | Inlier |

Identification of Survival Genes in Human Glioblastoma Cells Using siRNA Screening

Nikhil G Thaker, Fang Zhang, Peter R. McDonald, Tong Ying Shun, Michael D Lewen, Ian F. Pollack, and John S. Lazo

Molecular Pharmacology

|                              |               |         |    |                                                                              |           |        |
|------------------------------|---------------|---------|----|------------------------------------------------------------------------------|-----------|--------|
| siRNA Disorazole DMSO Run3   | NM_0198<br>49 | SLC7A10 | 10 | solute carrier family 7, (neutral amino acid transporter , y+ system) member | -0.185061 | Inlier |
| siRNA Disorazole DMSO Run1   | NM_0198<br>49 | SLC7A10 | 10 | solute carrier family 7, (neutral amino acid transporter , y+ system) member | 0.185061  | Inlier |
| siRNA-Vinblastine Run1-DMSO  | NM_0198<br>49 | SLC7A10 | 10 | solute carrier family 7, (neutral amino acid transporter , y+ system) member | 0.472437  | Inlier |
| siRNA-Temozolomide Run1-DMSO | NM_0198<br>49 | SLC7A10 | 10 | solute carrier family 7, (neutral amino acid transporter , y+ system) member | 0.876563  | Inlier |

Identification of Survival Genes in Human Glioblastoma Cells Using siRNA Screening  
 Nikhil G Thaker, Fang Zhang, Peter R. McDonald, Tong Ying Shun, Michael D Lewen, Ian F. Pollack, and John S. Lazo  
 Molecular Pharmacology

|                              |               |         |    |           |        |                                                                              |
|------------------------------|---------------|---------|----|-----------|--------|------------------------------------------------------------------------------|
| siRNA Disorazole DMSO Run2   | NM_0198<br>49 | SLC7A10 | 10 | 1.056821  | Inlier | solute carrier family 7, (neutral amino acid transporter, y+ system) member  |
| siRNA-Temozolomide Run3-DMSO | NM_0143<br>31 | SLC7A11 | 11 | -1.90776  | Inlier | solute carrier family 7, (cationic amino acid transporter, y+ system) member |
| siRNA-Temozolomide Run2-DMSO | NM_0143<br>31 | SLC7A11 | 11 | -1.40668  | Inlier | solute carrier family 7, (cationic amino acid transporter, y+ system) member |
| siRNA Disorazole DMSO Run1   | NM_0143<br>31 | SLC7A11 | 11 | -0.508697 | Inlier | solute carrier family 7, (cationic amino acid transporter, y+ system) member |

Identification of Survival Genes in Human Glioblastoma Cells Using siRNA Screening  
 Nikhil G Thaker, Fang Zhang, Peter R. McDonald, Tong Ying Shun, Michael D Lewen, Ian F. Pollack, and John S. Lazo  
 Molecular Pharmacology

| siRNA Treatment         | Run  | Gene    | SLC7A11 | Member  | Value | Inlier    |        |
|-------------------------|------|---------|---------|---------|-------|-----------|--------|
| siRNA Disorazole DMSO   | Run3 | NM_0143 | 31      | SLC7A11 | 11    | -0.087124 | Inlier |
| siRNA-Temozolomide DMSO | Run1 | NM_0143 | 31      | SLC7A11 | 11    | 0.087125  | Inlier |
| siRNA-Vinblastine DMSO  | Run2 | NM_0143 | 31      | SLC7A11 | 11    | 0.571026  | Inlier |
| siRNA-Vinblastine DMSO  | Run1 | NM_0143 | 31      | SLC7A11 | 11    | 0.777974  | Inlier |

solute carrier family 7, (cationic amino acid transporter , y+ system) member

solute carrier family 7, (cationic amino acid transporter , y+ system) member

solute carrier family 7, (cationic amino acid transporter , y+ system) member

solute carrier family 7, (cationic amino acid transporter , y+ system) member

Identification of Survival Genes in Human Glioblastoma Cells Using siRNA Screening  
 Nikhil G Thaker, Fang Zhang, Peter R. McDonald, Tong Ying Shun, Michael D Lewen, Ian F. Pollack, and John S. Lazo  
 Molecular Pharmacology

|                              |               |         |    |           |        |                                                                              |
|------------------------------|---------------|---------|----|-----------|--------|------------------------------------------------------------------------------|
| siRNA Disorazole DMSO Run2   | NM_0143<br>31 | SLC7A11 | 11 | 1.571645  | Inlier | solute carrier family 7, (cationic amino acid transporter, y+ system) member |
| siRNA-Temozolomide Run3-DMSO | NM_1388<br>17 | SLC7A13 | 13 | -0.724597 | Inlier | solute carrier family 7, (cationic amino acid transporter, y+ system) member |
| siRNA Disorazole DMSO Run2   | NM_1388<br>17 | SLC7A13 | 13 | -0.717896 | Inlier | solute carrier family 7, (cationic amino acid transporter, y+ system) member |
| siRNA-Temozolomide Run2-DMSO | NM_1388<br>17 | SLC7A13 | 13 | -0.374378 | Inlier | solute carrier family 7, (cationic amino acid transporter, y+ system) member |



Identification of Survival Genes in Human Glioblastoma Cells Using siRNA Screening  
 Nikhil G Thaker, Fang Zhang, Peter R. McDonald, Tong Ying Shun, Michael D Lewen, Ian F. Pollack, and John S. Lazo  
 Molecular Pharmacology

|                              |               |         |    |                                                                                                  |
|------------------------------|---------------|---------|----|--------------------------------------------------------------------------------------------------|
| siRNA Disorazole DMSO Run3   | NM_1388<br>17 | SLC7A13 | 13 | solute carrier family 7, (cationic amino acid transporter, y+ system) member<br>-0.244978 Inlier |
| siRNA Disorazole DMSO Run1   | NM_1388<br>17 | SLC7A13 | 13 | solute carrier family 7, (cationic amino acid transporter, y+ system) member<br>0.244978 Inlier  |
| siRNA-Vinblastine Run1-DMSO  | NM_1388<br>17 | SLC7A13 | 13 | solute carrier family 7, (cationic amino acid transporter, y+ system) member<br>0.631104 Inlier  |
| siRNA-Temozolomide Run1-DMSO | NM_1388<br>17 | SLC7A13 | 13 | solute carrier family 7, (cationic amino acid transporter, y+ system) member<br>0.764338 Inlier  |

Identification of Survival Genes in Human Glioblastoma Cells Using siRNA Screening

Nikhil G Thaker, Fang Zhang, Peter R. McDonald, Tong Ying Shun, Michael D Lewen, Ian F. Pollack, and John S. Lazo

Molecular Pharmacology

|                              |               |         |                                                                                 |           |        |
|------------------------------|---------------|---------|---------------------------------------------------------------------------------|-----------|--------|
| siRNA-Vinblastine Run2-DMSO  | NM_1388<br>17 | SLC7A13 | solute carrier family 7, (cationic amino acid transporter, y+ system) member 13 | 0.801216  | Inlier |
| siRNA-Temozolomide Run3-DMSO | NM_0030<br>46 | SLC7A2  | solute carrier family 7 (cationic amino acid transporter, y+ system), member 2  | -1.000308 | Inlier |
| siRNA-Temozolomide Run2-DMSO | NM_0030<br>46 | SLC7A2  | solute carrier family 7 (cationic amino acid transporter, y+ system), member 2  | -0.854713 | Inlier |
| siRNA Disorazole DMSO Run3   | NM_0030<br>46 | SLC7A2  | solute carrier family 7 (cationic amino acid transporter, y+ system), member 2  | -0.136203 | Inlier |
| siRNA-Temozolomide Run1-DMSO | NM_0030<br>46 | SLC7A2  | solute carrier family 7 (cationic amino acid transporter, y+ system), member 2  | -0.115379 | Inlier |

Identification of Survival Genes in Human Glioblastoma Cells Using siRNA Screening

Nikhil G Thaker, Fang Zhang, Peter R. McDonald, Tong Ying Shun, Michael D Lewen, Ian F. Pollack, and John S. Lazo

Molecular Pharmacology

|                              |               |        |                                                                                |           |         |
|------------------------------|---------------|--------|--------------------------------------------------------------------------------|-----------|---------|
| siRNA Disorazole DMSO Run1   | NM_0030<br>46 | SLC7A2 | solute carrier family 7 (cationic amino acid transporter, y+ system), member 2 | 0.115379  | Inlier  |
| siRNA Disorazole DMSO Run2   | NM_0030<br>46 | SLC7A2 | solute carrier family 7 (cationic amino acid transporter, y+ system), member 2 | 0.494287  | Inlier  |
| siRNA-Vinblastine Run1-DMSO  | NM_0030<br>46 | SLC7A2 | solute carrier family 7 (cationic amino acid transporter, y+ system), member 2 | 2.973313  | Inlier  |
| siRNA-Vinblastine Run2-DMSO  | NM_0030<br>46 | SLC7A2 | solute carrier family 7 (cationic amino acid transporter, y+ system), member 2 | 4.585891  | Outlier |
| siRNA-Temozolomide Run3-DMSO | NM_0328<br>03 | SLC7A3 | solute carrier family 7 (cationic amino acid transporter, y+ system), member 3 | -0.935834 | Inlier  |

Identification of Survival Genes in Human Glioblastoma Cells Using siRNA Screening

Nikhil G Thaker, Fang Zhang, Peter R. McDonald, Tong Ying Shun, Michael D Lewen, Ian F. Pollack, and John S. Lazo

Molecular Pharmacology

|                              |           |        |                                                                                |           |        |
|------------------------------|-----------|--------|--------------------------------------------------------------------------------|-----------|--------|
| siRNA-Temozolomide Run2-DMSO | NM_032803 | SLC7A3 | solute carrier family 7 (cationic amino acid transporter, y+ system), member 3 | -0.745508 | Inlier |
| siRNA Disorazole DMSO Run2   | NM_032803 | SLC7A3 | solute carrier family 7 (cationic amino acid transporter, y+ system), member 3 | -0.44757  | Inlier |
| siRNA Disorazole DMSO Run3   | NM_032803 | SLC7A3 | solute carrier family 7 (cationic amino acid transporter, y+ system), member 3 | -0.021088 | Inlier |
| siRNA-Temozolomide Run1-DMSO | NM_032803 | SLC7A3 | solute carrier family 7 (cationic amino acid transporter, y+ system), member 3 | 0.021088  | Inlier |
| siRNA Disorazole DMSO Run1   | NM_032803 | SLC7A3 | solute carrier family 7 (cationic amino acid transporter, y+ system), member 3 | 0.603491  | Inlier |

Identification of Survival Genes in Human Glioblastoma Cells Using siRNA Screening

Nikhil G Thaker, Fang Zhang, Peter R. McDonald, Tong Ying Shun, Michael D Lewen, Ian F. Pollack, and John S. Lazo

Molecular Pharmacology

|                              |           |        |                                                                                |           |        |
|------------------------------|-----------|--------|--------------------------------------------------------------------------------|-----------|--------|
| siRNA-Vinblastine Run2-DMSO  | NM_032803 | SLC7A3 | solute carrier family 7 (cationic amino acid transporter, y+ system), member 3 | 1.080737  | Inlier |
| siRNA-Vinblastine Run1-DMSO  | NM_032803 | SLC7A3 | solute carrier family 7 (cationic amino acid transporter, y+ system), member 3 | 1.523638  | Inlier |
| siRNA-Temozolomide Run3-DMSO | NM_004173 | SLC7A4 | solute carrier family 7 (cationic amino acid transporter, y+ system), member 4 | -3.212062 | Inlier |
| siRNA-Temozolomide Run2-DMSO | NM_004173 | SLC7A4 | solute carrier family 7 (cationic amino acid transporter, y+ system), member 4 | -2.565248 | Inlier |
| siRNA Disorazole DMSO Run1   | NM_004173 | SLC7A4 | solute carrier family 7 (cationic amino acid transporter, y+ system), member 4 | -1.948916 | Inlier |

Identification of Survival Genes in Human Glioblastoma Cells Using siRNA Screening

Nikhil G Thaker, Fang Zhang, Peter R. McDonald, Tong Ying Shun, Michael D Lewen, Ian F. Pollack, and John S. Lazo

Molecular Pharmacology

|                                  |               |        |                                                                                                         |           |        |
|----------------------------------|---------------|--------|---------------------------------------------------------------------------------------------------------|-----------|--------|
| siRNA Disorazole DMSO Run3       | NM_0041<br>73 | SLC7A4 | solute<br>carrier<br>family 7<br>(cationic<br>amino acid<br>transporter<br>, y+<br>system),<br>member 4 | -0.395251 | Inlier |
| siRNA Disorazole DMSO Run2       | NM_0041<br>73 | SLC7A4 | solute<br>carrier<br>family 7<br>(cationic<br>amino acid<br>transporter<br>, y+<br>system),<br>member 4 | 0.395251  | Inlier |
| siRNA-Vinblastine Run2-<br>DMSO  | NM_0041<br>73 | SLC7A4 | solute<br>carrier<br>family 7<br>(cationic<br>amino acid<br>transporter<br>, y+<br>system),<br>member 4 | 0.448808  | Inlier |
| siRNA-Temozolomide Run1-<br>DMSO | NM_0041<br>73 | SLC7A4 | solute<br>carrier<br>family 7<br>(cationic<br>amino acid<br>transporter<br>, y+<br>system),<br>member 4 | 0.633732  | Inlier |
| siRNA-Vinblastine Run1-<br>DMSO  | NM_0041<br>73 | SLC7A4 | solute<br>carrier<br>family 7<br>(cationic<br>amino acid<br>transporter<br>, y+<br>system),<br>member 4 | 0.715268  | Inlier |

Identification of Survival Genes in Human Glioblastoma Cells Using siRNA Screening

Nikhil G Thaker, Fang Zhang, Peter R. McDonald, Tong Ying Shun, Michael D Lewen, Ian F. Pollack, and John S. Lazo

Molecular Pharmacology

|                              |               |        |                                                                                |           |        |
|------------------------------|---------------|--------|--------------------------------------------------------------------------------|-----------|--------|
| siRNA-Temozolomide Run3-DMSO | NM_0034<br>86 | SLC7A5 | solute carrier family 7 (cationic amino acid transporter, y+ system), member 5 | -1.224558 | Inlier |
| siRNA Disorazole DMSO Run2   | NM_0034<br>86 | SLC7A5 | solute carrier family 7 (cationic amino acid transporter, y+ system), member 5 | -0.764514 | Inlier |
| siRNA-Temozolomide Run2-DMSO | NM_0034<br>86 | SLC7A5 | solute carrier family 7 (cationic amino acid transporter, y+ system), member 5 | -0.654667 | Inlier |
| siRNA-Vinblastine Run1-DMSO  | NM_0034<br>86 | SLC7A5 | solute carrier family 7 (cationic amino acid transporter, y+ system), member 5 | -0.054041 | Inlier |
| siRNA Disorazole DMSO Run1   | NM_0034<br>86 | SLC7A5 | solute carrier family 7 (cationic amino acid transporter, y+ system), member 5 | 0.054041  | Inlier |

Identification of Survival Genes in Human Glioblastoma Cells Using siRNA Screening

Nikhil G Thaker, Fang Zhang, Peter R. McDonald, Tong Ying Shun, Michael D Lewen, Ian F. Pollack, and John S. Lazo

Molecular Pharmacology

|                              |               |        |                                                                                |           |        |
|------------------------------|---------------|--------|--------------------------------------------------------------------------------|-----------|--------|
| siRNA Disorazole DMSO Run3   | NM_0034<br>86 | SLC7A5 | solute carrier family 7 (cationic amino acid transporter, y+ system), member 5 | 0.241014  | Inlier |
| siRNA-Temozolomide Run1-DMSO | NM_0034<br>86 | SLC7A5 | solute carrier family 7 (cationic amino acid transporter, y+ system), member 5 | 0.694333  | Inlier |
| siRNA-Vinblastine Run2-DMSO  | NM_0034<br>86 | SLC7A5 | solute carrier family 7 (cationic amino acid transporter, y+ system), member 5 | 0.714228  | Inlier |
| siRNA Disorazole DMSO Run1   | NM_0039<br>82 | SLC7A7 | solute carrier family 7 (cationic amino acid transporter, y+ system), member 7 | -1.98868  | Inlier |
| siRNA-Temozolomide Run2-DMSO | NM_0039<br>82 | SLC7A7 | solute carrier family 7 (cationic amino acid transporter, y+ system), member 7 | -1.063665 | Inlier |



Identification of Survival Genes in Human Glioblastoma Cells Using siRNA Screening

Nikhil G Thaker, Fang Zhang, Peter R. McDonald, Tong Ying Shun, Michael D Lewen, Ian F. Pollack, and John S. Lazo

Molecular Pharmacology

|                              |           |        |                                                                                |           |        |
|------------------------------|-----------|--------|--------------------------------------------------------------------------------|-----------|--------|
| siRNA-Temozolomide Run3-DMSO | NM_003982 | SLC7A7 | solute carrier family 7 (cationic amino acid transporter, y+ system), member 7 | -0.550243 | Inlier |
| siRNA-Vinblastine Run2-DMSO  | NM_003982 | SLC7A7 | solute carrier family 7 (cationic amino acid transporter, y+ system), member 7 | -0.466335 | Inlier |
| siRNA-Vinblastine Run1-DMSO  | NM_003982 | SLC7A7 | solute carrier family 7 (cationic amino acid transporter, y+ system), member 7 | 0.466335  | Inlier |
| siRNA Disorazole DMSO Run3   | NM_003982 | SLC7A7 | solute carrier family 7 (cationic amino acid transporter, y+ system), member 7 | 0.471746  | Inlier |
| siRNA Disorazole DMSO Run2   | NM_003982 | SLC7A7 | solute carrier family 7 (cationic amino acid transporter, y+ system), member 7 | 0.798757  | Inlier |

Identification of Survival Genes in Human Glioblastoma Cells Using siRNA Screening

Nikhil G Thaker, Fang Zhang, Peter R. McDonald, Tong Ying Shun, Michael D Lewen, Ian F. Pollack, and John S. Lazo

Molecular Pharmacology

|                              |           |        |                                                                                |           |        |
|------------------------------|-----------|--------|--------------------------------------------------------------------------------|-----------|--------|
| siRNA-Temozolomide Run1-DMSO | NM_003982 | SLC7A7 | solute carrier family 7 (cationic amino acid transporter, y+ system), member 7 | 1.308203  | Inlier |
| siRNA-Temozolomide Run3-DMSO | NM_012244 | SLC7A8 | solute carrier family 7 (cationic amino acid transporter, y+ system), member 8 | -1.210298 | Inlier |
| siRNA Disorazole DMSO Run2   | NM_012244 | SLC7A8 | solute carrier family 7 (cationic amino acid transporter, y+ system), member 8 | -1.104934 | Inlier |
| siRNA Disorazole DMSO Run3   | NM_012244 | SLC7A8 | solute carrier family 7 (cationic amino acid transporter, y+ system), member 8 | -0.687273 | Inlier |
| siRNA-Temozolomide Run2-DMSO | NM_012244 | SLC7A8 | solute carrier family 7 (cationic amino acid transporter, y+ system), member 8 | -0.196228 | Inlier |

Identification of Survival Genes in Human Glioblastoma Cells Using siRNA Screening

Nikhil G Thaker, Fang Zhang, Peter R. McDonald, Tong Ying Shun, Michael D Lewen, Ian F. Pollack, and John S. Lazo

Molecular Pharmacology

|                              |               |        |                                                                                |           |         |
|------------------------------|---------------|--------|--------------------------------------------------------------------------------|-----------|---------|
| siRNA Disorazole DMSO Run1   | NM_0122<br>44 | SLC7A8 | solute carrier family 7 (cationic amino acid transporter, y+ system), member 8 | 0.196229  | Inlier  |
| siRNA-Vinblastine Run1-DMSO  | NM_0122<br>44 | SLC7A8 | solute carrier family 7 (cationic amino acid transporter, y+ system), member 8 | 0.647412  | Inlier  |
| siRNA-Vinblastine Run2-DMSO  | NM_0122<br>44 | SLC7A8 | solute carrier family 7 (cationic amino acid transporter, y+ system), member 8 | 0.661727  | Inlier  |
| siRNA-Temozolomide Run1-DMSO | NM_0122<br>44 | SLC7A8 | solute carrier family 7 (cationic amino acid transporter, y+ system), member 8 | 0.935662  | Inlier  |
| siRNA-Temozolomide Run3-DMSO | NM_0142<br>70 | SLC7A9 | solute carrier family 7 (cationic amino acid transporter, y+ system), member 9 | -3.924592 | Outlier |

Identification of Survival Genes in Human Glioblastoma Cells Using siRNA Screening

Nikhil G Thaker, Fang Zhang, Peter R. McDonald, Tong Ying Shun, Michael D Lewen, Ian F. Pollack, and John S. Lazo

Molecular Pharmacology

|                              |           |        |                                                                                |           |        |
|------------------------------|-----------|--------|--------------------------------------------------------------------------------|-----------|--------|
| siRNA-Temozolomide Run2-DMSO | NM_014270 | SLC7A9 | solute carrier family 7 (cationic amino acid transporter, y+ system), member 9 | -0.79405  | Inlier |
| siRNA Disorazole DMSO Run1   | NM_014270 | SLC7A9 | solute carrier family 7 (cationic amino acid transporter, y+ system), member 9 | -0.55495  | Inlier |
| siRNA Disorazole DMSO Run2   | NM_014270 | SLC7A9 | solute carrier family 7 (cationic amino acid transporter, y+ system), member 9 | -0.464399 | Inlier |
| siRNA-Vinblastine Run2-DMSO  | NM_014270 | SLC7A9 | solute carrier family 7 (cationic amino acid transporter, y+ system), member 9 | 0.464399  | Inlier |
| siRNA Disorazole DMSO Run3   | NM_014270 | SLC7A9 | solute carrier family 7 (cationic amino acid transporter, y+ system), member 9 | 0.466867  | Inlier |

Identification of Survival Genes in Human Glioblastoma Cells Using siRNA Screening

Nikhil G Thaker, Fang Zhang, Peter R. McDonald, Tong Ying Shun, Michael D Lewen, Ian F. Pollack, and John S. Lazo

Molecular Pharmacology

|                              |           |        |                                                                                |           |        |
|------------------------------|-----------|--------|--------------------------------------------------------------------------------|-----------|--------|
| siRNA-Temozolomide Run1-DMSO | NM_014270 | SLC7A9 | solute carrier family 7 (cationic amino acid transporter, y+ system), member 9 | 0.833782  | Inlier |
| siRNA-Vinblastine Run1-DMSO  | NM_014270 | SLC7A9 | solute carrier family 7 (cationic amino acid transporter, y+ system), member 9 | 1.369567  | Inlier |
| siRNA-Temozolomide Run2-DMSO | NM_021097 | SLC8A1 | solute carrier family 8 (sodium/calcium exchanger), member 1                   | -1.849406 | Inlier |
| siRNA-Temozolomide Run3-DMSO | NM_021097 | SLC8A1 | solute carrier family 8 (sodium/calcium exchanger), member 1                   | -1.830393 | Inlier |
| siRNA-Temozolomide Run1-DMSO | NM_021097 | SLC8A1 | solute carrier family 8 (sodium/calcium exchanger), member 1                   | -0.506729 | Inlier |
| siRNA Disorazole DMSO Run1   | NM_021097 | SLC8A1 | solute carrier family 8 (sodium/calcium exchanger), member 1                   | -0.00661  | Inlier |

Identification of Survival Genes in Human Glioblastoma Cells Using siRNA Screening

Nikhil G Thaker, Fang Zhang, Peter R. McDonald, Tong Ying Shun, Michael D Lewen, Ian F. Pollack, and John S. Lazo

Molecular Pharmacology

| siRNA Treatment              | Gene   | Gene ID   | Gene Family                                                  | Value     | Category |
|------------------------------|--------|-----------|--------------------------------------------------------------|-----------|----------|
| siRNA Disorazole DMSO Run2   | SLC8A1 | NM_021097 | solute carrier family 8 (sodium/calcium exchanger), member 1 | 0.00661   | Inlier   |
| siRNA Disorazole DMSO Run3   | SLC8A1 | NM_021097 | solute carrier family 8 (sodium/calcium exchanger), member 1 | 0.593185  | Inlier   |
| siRNA-Vinblastine Run1-DMSO  | SLC8A1 | NM_021097 | solute carrier family 8 (sodium/calcium exchanger), member 1 | 0.755815  | Inlier   |
| siRNA-Vinblastine Run2-DMSO  | SLC8A1 | NM_021097 | solute carrier family 8 (sodium-calcium exchanger), member 1 | 1.848614  | Inlier   |
| siRNA-Temozolomide Run3-DMSO | SLC8A3 | NM_182936 | solute carrier family 8 (sodium-calcium exchanger), member 3 | -10.00168 | Outlier  |
| siRNA-Temozolomide Run2-DMSO | SLC8A3 | NM_182936 | solute carrier family 8 (sodium-calcium exchanger), member 3 | -8.076701 | Outlier  |

Identification of Survival Genes in Human Glioblastoma Cells Using siRNA Screening

Nikhil G Thaker, Fang Zhang, Peter R. McDonald, Tong Ying Shun, Michael D Lewen, Ian F. Pollack, and John S. Lazo

Molecular Pharmacology

| siRNA                        | Gene    | Gene ID | Gene Name | Log Fold Change | Classification |
|------------------------------|---------|---------|-----------|-----------------|----------------|
| siRNA-Temozolomide Run1-DMSO | NM_1829 | 36      | SLC8A3    | -0.855789       | Inlier         |
| siRNA Disorazole DMSO Run1   | NM_1829 | 36      | SLC8A3    | -0.063458       | Inlier         |
| siRNA Disorazole DMSO Run2   | NM_1829 | 36      | SLC8A3    | 0.063458        | Inlier         |
| siRNA-Vinblastine Run1-DMSO  | NM_1829 | 36      | SLC8A3    | 0.110689        | Inlier         |
| siRNA Disorazole DMSO Run3   | NM_1829 | 36      | SLC8A3    | 0.493211        | Inlier         |
| siRNA-Vinblastine Run2-DMSO  | NM_1829 | 36      | SLC8A3    | 7.097856        | Outlier        |

solute carrier family 8 (sodium-calcium exchanger), member 3

Identification of Survival Genes in Human Glioblastoma Cells Using siRNA Screening

Nikhil G Thaker, Fang Zhang, Peter R. McDonald, Tong Ying Shun, Michael D Lewen, Ian F. Pollack, and John S.

Lazo

Molecular Pharmacology

|                              |               |        |                                                                                                          |           |        |
|------------------------------|---------------|--------|----------------------------------------------------------------------------------------------------------|-----------|--------|
| siRNA-Temozolomide Run2-DMSO | NM_0030<br>47 | SLC9A1 | solute carrier family 9 (sodium/hydrogen exchanger), isoform 1 (antiporter, Na+/H+, amiloride sensitive) | -1.062191 | Inlier |
| siRNA-Temozolomide Run3-DMSO | NM_0030<br>47 | SLC9A1 | solute carrier family 9 (sodium/hydrogen exchanger), isoform 1 (antiporter, Na+/H+, amiloride sensitive) | -0.98161  | Inlier |
| siRNA-Vinblastine Run2-DMSO  | NM_0030<br>47 | SLC9A1 | solute carrier family 9 (sodium/hydrogen exchanger), isoform 1 (antiporter, Na+/H+, amiloride sensitive) | -0.36739  | Inlier |
| siRNA Disorazole DMSO Run1   | NM_0030<br>47 | SLC9A1 | solute carrier family 9 (sodium/hydrogen exchanger), isoform 1 (antiporter, Na+/H+, amiloride sensitive) | -0.048789 | Inlier |



Identification of Survival Genes in Human Glioblastoma Cells Using siRNA Screening

Nikhil G Thaker, Fang Zhang, Peter R. McDonald, Tong Ying Shun, Michael D Lewen, Ian F. Pollack, and John S. Lazo

Molecular Pharmacology

| siRNA              | Drug      | Run  | Gene   | Accession | Gene Description                                                                                         | Score    | Inlier |
|--------------------|-----------|------|--------|-----------|----------------------------------------------------------------------------------------------------------|----------|--------|
| siRNA Disorazole   | DMSO      | Run3 | SLC9A1 | NM_003047 | solute carrier family 9 (sodium/hydrogen exchanger), isoform 1 (antiporter, Na+/H+, amiloride sensitive) | 0.048789 | Inlier |
| siRNA-Temozolomide | Run1-DMSO |      | SLC9A1 | NM_003047 | solute carrier family 9 (sodium/hydrogen exchanger), isoform 1 (antiporter, Na+/H+, amiloride sensitive) | 0.166454 | Inlier |
| siRNA Disorazole   | DMSO      | Run2 | SLC9A1 | NM_003047 | solute carrier family 9 (sodium/hydrogen exchanger), isoform 1 (antiporter, Na+/H+, amiloride sensitive) | 2.298702 | Inlier |
| siRNA-Vinblastine  | Run1-DMSO |      | SLC9A1 | NM_003047 | solute carrier family 9 (sodium/hydrogen exchanger), isoform 1 (antiporter, Na+/H+, amiloride sensitive) | 2.673587 | Inlier |

Identification of Survival Genes in Human Glioblastoma Cells Using siRNA Screening

Nikhil G Thaker, Fang Zhang, Peter R. McDonald, Tong Ying Shun, Michael D Lewen, Ian F. Pollack, and John S. Lazo

Molecular Pharmacology

| siRNA Treatment              | Gene      | Accession | Gene Name                                                      | Log Fold Change | Category |
|------------------------------|-----------|-----------|----------------------------------------------------------------|-----------------|----------|
| siRNA-Temozolomide Run3-DMSO | NM_003048 | SLC9A2    | solute carrier family 9 (sodium/hydrogen exchanger), isoform 2 | -2.634353       | Inlier   |
| siRNA-Temozolomide Run1-DMSO | NM_003048 | SLC9A2    | solute carrier family 9 (sodium/hydrogen exchanger), isoform 2 | -0.818521       | Inlier   |
| siRNA-Vinblastine Run2-DMSO  | NM_003048 | SLC9A2    | solute carrier family 9 (sodium/hydrogen exchanger), isoform 2 | -0.346807       | Inlier   |
| siRNA-Temozolomide Run2-DMSO | NM_003048 | SLC9A2    | solute carrier family 9 (sodium/hydrogen exchanger), isoform 2 | -0.174987       | Inlier   |
| siRNA Disorazole DMSO Run1   | NM_003048 | SLC9A2    | solute carrier family 9 (sodium/hydrogen exchanger), isoform 2 | 0.174987        | Inlier   |
| siRNA Disorazole DMSO Run3   | NM_003048 | SLC9A2    | solute carrier family 9 (sodium/hydrogen exchanger), isoform 2 | 0.530479        | Inlier   |

Identification of Survival Genes in Human Glioblastoma Cells Using siRNA Screening

Nikhil G Thaker, Fang Zhang, Peter R. McDonald, Tong Ying Shun, Michael D Lewen, Ian F. Pollack, and John S. Lazo

Molecular Pharmacology

| siRNA Treatment              | Gene | Accession | Gene   | Gene | Value     | Category |
|------------------------------|------|-----------|--------|------|-----------|----------|
| siRNA Disorazole DMSO Run2   | 48   | NM_0030   | SLC9A2 | 2    | 2.546841  | Inlier   |
| siRNA-Vinblastine Run1-DMSO  | 48   | NM_0030   | SLC9A2 | 2    | 3.371387  | Inlier   |
| siRNA-Temozolomide Run2-DMSO | 74   | NM_0041   | SLC9A3 | 3    | -0.699316 | Inlier   |
| siRNA-Temozolomide Run3-DMSO | 74   | NM_0041   | SLC9A3 | 3    | -0.649684 | Inlier   |
| siRNA Disorazole DMSO Run1   | 74   | NM_0041   | SLC9A3 | 3    | -0.34868  | Inlier   |
| siRNA-Vinblastine Run2-DMSO  | 74   | NM_0041   | SLC9A3 | 3    | -0.110074 | Inlier   |

solute carrier family 9 (sodium/hydrogen exchanger

), isoform 2

solute carrier family 9 (sodium/hydrogen exchanger

), isoform 3

solute carrier family 9 (sodium/hydrogen exchanger

), isoform 3

Identification of Survival Genes in Human Glioblastoma Cells Using siRNA Screening

Nikhil G Thaker, Fang Zhang, Peter R. McDonald, Tong Ying Shun, Michael D Lewen, Ian F. Pollack, and John S. Lazo

Molecular Pharmacology

| siRNA Treatment              | Gene    | Accession | Gene     | Gene                                                                       | Value     | Category |
|------------------------------|---------|-----------|----------|----------------------------------------------------------------------------|-----------|----------|
| siRNA Disorazole DMSO Run3   | NM_0041 | 74        | SLC9A3   | solute carrier family 9 (sodium/hydrogen exchanger), isoform 3             | 0.110074  | Inlier   |
| siRNA-Temozolomide Run1-DMSO | NM_0041 | 74        | SLC9A3   | solute carrier family 9 (sodium/hydrogen exchanger), isoform 3             | 0.938663  | Inlier   |
| siRNA-Vinblastine Run1-DMSO  | NM_0041 | 74        | SLC9A3   | solute carrier family 9 (sodium/hydrogen exchanger), isoform 3             | 4.576424  | Outlier  |
| siRNA Disorazole DMSO Run2   | NM_0041 | 74        | SLC9A3   | solute carrier family 9 (sodium/hydrogen exchanger), isoform 3             | 5.319808  | Outlier  |
| siRNA-Temozolomide Run2-DMSO | NM_0042 | 52        | SLC9A3R1 | solute carrier family 9 (sodium/hydrogen exchanger), isoform 3 regulator 1 | -1.379829 | Inlier   |
| siRNA-Vinblastine Run2-DMSO  | NM_0042 | 52        | SLC9A3R1 | solute carrier family 9 (sodium/hydrogen exchanger), isoform 3 regulator 1 | -0.741422 | Inlier   |

Identification of Survival Genes in Human Glioblastoma Cells Using siRNA Screening  
 Nikhil G Thaker, Fang Zhang, Peter R. McDonald, Tong Ying Shun, Michael D Lewen, Ian F. Pollack, and John S. Lazo  
 Molecular Pharmacology

|                              |           |          |   |   |                                                                          |           |        |
|------------------------------|-----------|----------|---|---|--------------------------------------------------------------------------|-----------|--------|
| siRNA-Temozolomide Run3-DMSO | NM_004252 | SLC9A3R1 | 1 | 1 | solute carrier family 9 (sodium/hydrogen exchanger), isoform 3 regulator | -0.607578 | Inlier |
| siRNA-Temozolomide Run1-DMSO | NM_004252 | SLC9A3R1 | 1 | 1 | solute carrier family 9 (sodium/hydrogen exchanger), isoform 3 regulator | -0.036766 | Inlier |
| siRNA Disorazole DMSO Run1   | NM_004252 | SLC9A3R1 | 1 | 1 | solute carrier family 9 (sodium/hydrogen exchanger), isoform 3 regulator | 0.036766  | Inlier |
| siRNA Disorazole DMSO Run3   | NM_004252 | SLC9A3R1 | 1 | 1 | solute carrier family 9 (sodium/hydrogen exchanger), isoform 3 regulator | 0.491197  | Inlier |
| siRNA-Vinblastine Run1-DMSO  | NM_004252 | SLC9A3R1 | 1 | 1 | solute carrier family 9 (sodium/hydrogen exchanger), isoform 3 regulator | 1.871915  | Inlier |

Identification of Survival Genes in Human Glioblastoma Cells Using siRNA Screening

Nikhil G Thaker, Fang Zhang, Peter R. McDonald, Tong Ying Shun, Michael D Lewen, Ian F. Pollack, and John S. Lazo

Molecular Pharmacology

|                              |         |         |                                                                |   |           |        |
|------------------------------|---------|---------|----------------------------------------------------------------|---|-----------|--------|
| siRNA Disorazole DMSO Run2   | NM_0042 | SLC9A3R | 3 regulator                                                    | 1 | 2.835907  | Inlier |
|                              | 52      | 1       | 1                                                              |   |           |        |
|                              |         |         | solute carrier family 9 (sodium/hydrogen exchanger), isoform 3 |   |           |        |
| siRNA-Temozolomide DMSO Run3 | NM_0047 | SLC9A3R | 3 regulator                                                    | 2 | -0.921676 | Inlier |
|                              | 85      | 2       | 2                                                              |   |           |        |
|                              |         |         | solute carrier family 9 (sodium/hydrogen exchanger), isoform 3 |   |           |        |
| siRNA Disorazole DMSO Run3   | NM_0047 | SLC9A3R | 3 regulator                                                    | 2 | -0.444584 | Inlier |
|                              | 85      | 2       | 2                                                              |   |           |        |
|                              |         |         | solute carrier family 9 (sodium/hydrogen exchanger), isoform 3 |   |           |        |
| siRNA-Temozolomide DMSO Run2 | NM_0047 | SLC9A3R | 3 regulator                                                    | 2 | -0.435529 | Inlier |
|                              | 85      | 2       | 2                                                              |   |           |        |
|                              |         |         | solute carrier family 9 (sodium/hydrogen exchanger), isoform 3 |   |           |        |
| siRNA-Vinblastine DMSO Run2  | NM_0047 | SLC9A3R | 3 regulator                                                    | 2 | -0.384624 | Inlier |
|                              | 85      | 2       | 2                                                              |   |           |        |
|                              |         |         | solute carrier family 9 (sodium/hydrogen exchanger), isoform 3 |   |           |        |

Identification of Survival Genes in Human Glioblastoma Cells Using siRNA Screening  
 Nikhil G Thaker, Fang Zhang, Peter R. McDonald, Tong Ying Shun, Michael D Lewen, Ian F. Pollack, and John S. Lazo  
 Molecular Pharmacology

|                                  |               |              |                                                                                                       |          |         |
|----------------------------------|---------------|--------------|-------------------------------------------------------------------------------------------------------|----------|---------|
| siRNA Disorazole DMSO Run1       | NM_0047<br>85 | SLC9A3R<br>2 | solute<br>carrier<br>family 9<br>(sodium/h<br>ydrogen<br>exchanger<br>) , isoform<br>3 regulator<br>2 | 0.384623 | Inlier  |
| siRNA-Temozolomide Run1-<br>DMSO | NM_0047<br>85 | SLC9A3R<br>2 | solute<br>carrier<br>family 9<br>(sodium/h<br>ydrogen<br>exchanger<br>) , isoform<br>3 regulator<br>2 | 0.904416 | Inlier  |
| siRNA-Vinblastine Run1-<br>DMSO  | NM_0047<br>85 | SLC9A3R<br>2 | solute<br>carrier<br>family 9<br>(sodium/h<br>ydrogen<br>exchanger<br>) , isoform<br>3 regulator<br>2 | 3.683438 | Outlier |
| siRNA Disorazole DMSO Run2       | NM_0047<br>85 | SLC9A3R<br>2 | solute<br>carrier<br>family 9<br>(sodium/h<br>ydrogen<br>exchanger<br>) , isoform<br>3 regulator<br>2 | 4.618569 | Outlier |
| siRNA-Temozolomide Run3-<br>DMSO | NM_0045<br>94 | SLC9A5       | solute<br>carrier<br>family 9<br>(sodium/h<br>ydrogen<br>exchanger<br>) , isoform<br>5                | -1.52911 | Inlier  |





Identification of Survival Genes in Human Glioblastoma Cells Using siRNA Screening

Nikhil G Thaker, Fang Zhang, Peter R. McDonald, Tong Ying Shun, Michael D Lewen, Ian F. Pollack, and John S. Lazo

Molecular Pharmacology

| siRNA Treatment              | Gene   | Accession | Gene Name                                                      | Value     | Category |
|------------------------------|--------|-----------|----------------------------------------------------------------|-----------|----------|
| siRNA Disorazole DMSO Run2   | SLC9A5 | NM_004594 | solute carrier family 9 (sodium/hydrogen exchanger), isoform 5 | 2.764683  | Inlier   |
| siRNA-Vinblastine Run2-DMSO  | SLC9A6 | NM_006359 | solute carrier family 9 (sodium/hydrogen exchanger), isoform 6 | -0.947845 | Inlier   |
| siRNA Disorazole DMSO Run3   | SLC9A6 | NM_006359 | solute carrier family 9 (sodium/hydrogen exchanger), isoform 6 | -0.682719 | Inlier   |
| siRNA-Temozolomide Run3-DMSO | SLC9A6 | NM_006359 | solute carrier family 9 (sodium/hydrogen exchanger), isoform 6 | -0.666281 | Inlier   |
| siRNA-Temozolomide Run2-DMSO | SLC9A6 | NM_006359 | solute carrier family 9 (sodium/hydrogen exchanger), isoform 6 | -0.095336 | Inlier   |
| siRNA-Temozolomide Run1-DMSO | SLC9A6 | NM_006359 | solute carrier family 9 (sodium/hydrogen exchanger), isoform 6 | 0.095336  | Inlier   |

Identification of Survival Genes in Human Glioblastoma Cells Using siRNA Screening

Nikhil G Thaker, Fang Zhang, Peter R. McDonald, Tong Ying Shun, Michael D Lewen, Ian F. Pollack, and John S. Lazo

Molecular Pharmacology

| siRNA Treatment              | Gene    | Accession | Gene   | Gene                                                           | Value     | Category |
|------------------------------|---------|-----------|--------|----------------------------------------------------------------|-----------|----------|
| siRNA Disorazole DMSO Run1   | NM_0063 | 59        | SLC9A6 | solute carrier family 9 (sodium/hydrogen exchanger), isoform 6 | 0.180465  | Inlier   |
| siRNA Disorazole DMSO Run2   | NM_0063 | 59        | SLC9A6 | solute carrier family 9 (sodium/hydrogen exchanger), isoform 6 | 2.599277  | Inlier   |
| siRNA-Vinblastine Run1-DMSO  | NM_0063 | 59        | SLC9A6 | solute carrier family 9 (sodium/hydrogen exchanger), isoform 6 | 3.135328  | Inlier   |
| siRNA Disorazole DMSO Run1   | NM_0325 | 91        | SLC9A7 | solute carrier family 9 (sodium/hydrogen exchanger), isoform 7 | -1.264074 | Inlier   |
| siRNA-Temozolomide Run2-DMSO | NM_0325 | 91        | SLC9A7 | solute carrier family 9 (sodium/hydrogen exchanger), isoform 7 | -1.09094  | Inlier   |
| siRNA-Temozolomide Run1-DMSO | NM_0325 | 91        | SLC9A7 | solute carrier family 9 (sodium/hydrogen exchanger), isoform 7 | -0.898661 | Inlier   |

Identification of Survival Genes in Human Glioblastoma Cells Using siRNA Screening

Nikhil G Thaker, Fang Zhang, Peter R. McDonald, Tong Ying Shun, Michael D Lewen, Ian F. Pollack, and John S. Lazo

Molecular Pharmacology

| siRNA Treatment              | Gene      | Gene ID | Gene Name | Gene Description                                               | Log Fold Change | Outlier Status |
|------------------------------|-----------|---------|-----------|----------------------------------------------------------------|-----------------|----------------|
| siRNA-Vinblastine Run2-DMSO  | NM_032591 | SLC9A7  | 7         | solute carrier family 9 (sodium/hydrogen exchanger), isoform 7 | -0.122143       | Inlier         |
| siRNA-Vinblastine Run1-DMSO  | NM_032591 | SLC9A7  | 7         | solute carrier family 9 (sodium/hydrogen exchanger), isoform 7 | 0.122143        | Inlier         |
| siRNA Disorazole DMSO Run3   | NM_032591 | SLC9A7  | 7         | solute carrier family 9 (sodium/hydrogen exchanger), isoform 7 | 0.447186        | Inlier         |
| siRNA-Temozolomide Run3-DMSO | NM_032591 | SLC9A7  | 7         | solute carrier family 9 (sodium/hydrogen exchanger), isoform 7 | 0.513078        | Inlier         |
| siRNA Disorazole DMSO Run2   | NM_032591 | SLC9A7  | 7         | solute carrier family 9 (sodium/hydrogen exchanger), isoform 7 | 0.835922        | Inlier         |
| siRNA Disorazole DMSO Run3   | NM_173653 | SLC9A9  | 9         | solute carrier family 9 (sodium/hydrogen exchanger), isoform 9 | -0.921517       | Inlier         |

Identification of Survival Genes in Human Glioblastoma Cells Using siRNA Screening

Nikhil G Thaker, Fang Zhang, Peter R. McDonald, Tong Ying Shun, Michael D Lewen, Ian F. Pollack, and John S. Lazo

Molecular Pharmacology

| siRNA Treatment              | Gene      | Gene ID | Gene Name | Gene Description                                               | Log Fold Change | Classification |
|------------------------------|-----------|---------|-----------|----------------------------------------------------------------|-----------------|----------------|
| siRNA-Temozolomide Run2-DMSO | NM_173653 | SLC9A9  | SLC9A9    | solute carrier family 9 (sodium/hydrogen exchanger), isoform 9 | -0.622587       | Inlier         |
| siRNA-Temozolomide Run3-DMSO | NM_173653 | SLC9A9  | SLC9A9    | solute carrier family 9 (sodium/hydrogen exchanger), isoform 9 | -0.233596       | Inlier         |
| siRNA Disorazole DMSO Run1   | NM_173653 | SLC9A9  | SLC9A9    | solute carrier family 9 (sodium/hydrogen exchanger), isoform 9 | -0.004095       | Inlier         |
| siRNA-Vinblastine Run2-DMSO  | NM_173653 | SLC9A9  | SLC9A9    | solute carrier family 9 (sodium/hydrogen exchanger), isoform 9 | 0.004095        | Inlier         |
| siRNA-Temozolomide Run1-DMSO | NM_173653 | SLC9A9  | SLC9A9    | solute carrier family 9 (sodium/hydrogen exchanger), isoform 9 | 0.726413        | Inlier         |
| siRNA Disorazole DMSO Run2   | NM_173653 | SLC9A9  | SLC9A9    | solute carrier family 9 (sodium/hydrogen exchanger), isoform 9 | 4.071743        | Outlier        |

Identification of Survival Genes in Human Glioblastoma Cells Using siRNA Screening

Nikhil G Thaker, Fang Zhang, Peter R. McDonald, Tong Ying Shun, Michael D Lewen, Ian F. Pollack, and John S. Lazo

Molecular Pharmacology

|                              |           |         |                                                                |           |         |
|------------------------------|-----------|---------|----------------------------------------------------------------|-----------|---------|
| siRNA-Vinblastine Run1-DMSO  | NM_173653 | SLC9A9  | solute carrier family 9 (sodium/hydrogen exchanger), isoform 9 | 4.403535  | Outlier |
| siRNA-Temozolomide Run1-DMSO | NM_134431 | SLCO1A2 | solute carrier organic anion transporter family, member 1A2    | -0.770066 | Inlier  |
| siRNA-Temozolomide Run2-DMSO | NM_134431 | SLCO1A2 | solute carrier organic anion transporter family, member 1A2    | -0.681578 | Inlier  |
| siRNA-Temozolomide Run3-DMSO | NM_134431 | SLCO1A2 | solute carrier organic anion transporter family, member 1A2    | -0.667422 | Inlier  |
| siRNA Disorazole DMSO Run1   | NM_134431 | SLCO1A2 | solute carrier organic anion transporter family, member 1A2    | -0.006824 | Inlier  |
| siRNA Disorazole DMSO Run3   | NM_134431 | SLCO1A2 | solute carrier organic anion transporter family, member 1A2    | 0.006824  | Inlier  |

Identification of Survival Genes in Human Glioblastoma Cells Using siRNA Screening

Nikhil G Thaker, Fang Zhang, Peter R. McDonald, Tong Ying Shun, Michael D Lewen, Ian F. Pollack, and John S. Lazo

Molecular Pharmacology

| siRNA              | Condition | Run  | Gene    | Accession | Value     | Outlier | Gene Description                                            |
|--------------------|-----------|------|---------|-----------|-----------|---------|-------------------------------------------------------------|
| siRNA Disorazole   | DMSO      | Run2 | SLCO1A2 | NM_134431 | 0.147155  | Inlier  | solute carrier organic anion transporter family, member 1A2 |
| siRNA-Vinblastine  | DMSO      | Run1 | SLCO1A2 | NM_134431 | 0.788081  | Inlier  | solute carrier organic anion transporter family, member 1A2 |
| siRNA-Vinblastine  | DMSO      | Run2 | SLCO1A2 | NM_134431 | 1.177184  | Inlier  | solute carrier organic anion transporter family, member 1A2 |
| siRNA-Temozolomide | DMSO      | Run3 | SLCO1B1 | NM_006446 | -1.747803 | Inlier  | solute carrier organic anion transporter family, member 1B1 |
| siRNA-Temozolomide | DMSO      | Run2 | SLCO1B1 | NM_006446 | -0.724467 | Inlier  | solute carrier organic anion transporter family, member 1B1 |
| siRNA Disorazole   | DMSO      | Run2 | SLCO1B1 | NM_006446 | -0.624533 | Inlier  | solute carrier organic anion transporter family, member 1B1 |

Identification of Survival Genes in Human Glioblastoma Cells Using siRNA Screening

Nikhil G Thaker, Fang Zhang, Peter R. McDonald, Tong Ying Shun, Michael D Lewen, Ian F. Pollack, and John S. Lazo

Molecular Pharmacology

| siRNA Treatment              | Gene    | Gene ID   | Gene Name | Gene Description                                            | Value     | Category |
|------------------------------|---------|-----------|-----------|-------------------------------------------------------------|-----------|----------|
| siRNA Disorazole DMSO Run3   | SLCO1B1 | NM_006446 | SLCO1B1   | solute carrier organic anion transporter family, member 1B1 | -0.181099 | Inlier   |
| siRNA Disorazole DMSO Run1   | SLCO1B1 | NM_006446 | SLCO1B1   | solute carrier organic anion transporter family, member 1B1 | 0.181099  | Inlier   |
| siRNA-Temozolomide Run1-DMSO | SLCO1B1 | NM_006446 | SLCO1B1   | solute carrier organic anion transporter family, member 1B1 | 0.575999  | Inlier   |
| siRNA-Vinblastine Run1-DMSO  | SLCO1B1 | NM_006446 | SLCO1B1   | solute carrier organic anion transporter family, member 1B1 | 1.084634  | Inlier   |
| siRNA-Vinblastine Run2-DMSO  | SLCO1B1 | NM_006446 | SLCO1B1   | solute carrier organic anion transporter family, member 1B1 | 1.372808  | Inlier   |
| siRNA-Temozolomide Run3-DMSO | SLCO1B3 | NM_019844 | SLCO1B3   | solute carrier organic anion transporter family, member 1B3 | -1.087491 | Inlier   |





Identification of Survival Genes in Human Glioblastoma Cells Using siRNA Screening

Nikhil G Thaker, Fang Zhang, Peter R. McDonald, Tong Ying Shun, Michael D Lewen, Ian F. Pollack, and John S. Lazo

Molecular Pharmacology

|                              |               |         |                                                         |           |        |
|------------------------------|---------------|---------|---------------------------------------------------------|-----------|--------|
| siRNA-Vinblastine Run1-DMSO  | NM_0198<br>44 | SLCO1B3 | 1B3                                                     | 0.896719  | Inlier |
|                              |               |         | solute carrier organic anion transporter family, member |           |        |
| siRNA-Temozolomide Run3-DMSO | NM_0174<br>35 | SLCO1C1 | 1C1                                                     | -3.348248 | Inlier |
|                              |               |         | solute carrier organic anion transporter family, member |           |        |
| siRNA Disorazole DMSO Run2   | NM_0174<br>35 | SLCO1C1 | 1C1                                                     | -1.917767 | Inlier |
|                              |               |         | solute carrier organic anion transporter family, member |           |        |
| siRNA-Temozolomide Run1-DMSO | NM_0174<br>35 | SLCO1C1 | 1C1                                                     | -0.946849 | Inlier |
|                              |               |         | solute carrier organic anion transporter family, member |           |        |
| siRNA-Temozolomide Run2-DMSO | NM_0174<br>35 | SLCO1C1 | 1C1                                                     | -0.090061 | Inlier |
|                              |               |         | solute carrier organic anion transporter family, member |           |        |
| siRNA-Vinblastine Run2-DMSO  | NM_0174<br>35 | SLCO1C1 | 1C1                                                     | 0.090061  | Inlier |
|                              |               |         | solute carrier organic anion transporter family, member |           |        |

Identification of Survival Genes in Human Glioblastoma Cells Using siRNA Screening  
 Nikhil G Thaker, Fang Zhang, Peter R. McDonald, Tong Ying Shun, Michael D Lewen, Ian F. Pollack, and John S. Lazo  
 Molecular Pharmacology

| siRNA Treatment              | Gene    | Gene ID   | Gene Description                                            | Value     | Category |
|------------------------------|---------|-----------|-------------------------------------------------------------|-----------|----------|
| siRNA-Vinblastine Run1-DMSO  | SLCO1C1 | NM_017435 | solute carrier organic anion transporter family, member 1C1 | 0.255692  | Inlier   |
| siRNA Disorazole DMSO Run1   | SLCO1C1 | NM_017435 | solute carrier organic anion transporter family, member 1C1 | 0.402151  | Inlier   |
| siRNA Disorazole DMSO Run3   | SLCO1C1 | NM_017435 | solute carrier organic anion transporter family, member 1C1 | 2.165095  | Inlier   |
| siRNA-Temozolomide Run3-DMSO | SLCO2A1 | NM_005630 | solute carrier organic anion transporter family, member 2A1 | -3.80097  | Outlier  |
| siRNA Disorazole DMSO Run2   | SLCO2A1 | NM_005630 | solute carrier organic anion transporter family, member 2A1 | -1.355817 | Inlier   |
| siRNA-Temozolomide Run1-DMSO | SLCO2A1 | NM_005630 | solute carrier organic anion transporter family, member 2A1 | -0.500979 | Inlier   |

Identification of Survival Genes in Human Glioblastoma Cells Using siRNA Screening

Nikhil G Thaker, Fang Zhang, Peter R. McDonald, Tong Ying Shun, Michael D Lewen, Ian F. Pollack, and John S. Lazo

Molecular Pharmacology

|                              |               |         |                                                             |           |        |
|------------------------------|---------------|---------|-------------------------------------------------------------|-----------|--------|
| siRNA-Temozolomide Run2-DMSO | NM_0056<br>30 | SLCO2A1 | solute carrier organic anion transporter family, member 2A1 | -0.151769 | Inlier |
| siRNA Disorazole DMSO Run1   | NM_0056<br>30 | SLCO2A1 | solute carrier organic anion transporter family, member 2A1 | 0.151769  | Inlier |
| siRNA-Vinblastine Run1-DMSO  | NM_0056<br>30 | SLCO2A1 | solute carrier organic anion transporter family, member 2A1 | 0.510363  | Inlier |
| siRNA Disorazole DMSO Run3   | NM_0056<br>30 | SLCO2A1 | solute carrier organic anion transporter family, member 2A1 | 0.838637  | Inlier |
| siRNA-Vinblastine Run2-DMSO  | NM_0056<br>30 | SLCO2A1 | solute carrier organic anion transporter family, member 2A1 | 1.168065  | Inlier |
| siRNA-Temozolomide Run3-DMSO | NM_0072<br>56 | SLCO2B1 | solute carrier organic anion transporter family, member 2B1 | -1.247175 | Inlier |

Identification of Survival Genes in Human Glioblastoma Cells Using siRNA Screening

Nikhil G Thaker, Fang Zhang, Peter R. McDonald, Tong Ying Shun, Michael D Lewen, Ian F. Pollack, and John S. Lazo

Molecular Pharmacology

| siRNA Treatment              | Gene ID   | Gene Name | Category                                                    | Value     | Outlier Status |
|------------------------------|-----------|-----------|-------------------------------------------------------------|-----------|----------------|
| siRNA-Temozolomide Run2-DMSO | NM_007256 | SLCO2B1   | solute carrier organic anion transporter family, member 2B1 | -0.934456 | Inlier         |
| siRNA Disorazole DMSO Run1   | NM_007256 | SLCO2B1   | solute carrier organic anion transporter family, member 2B1 | -0.223896 | Inlier         |
| siRNA Disorazole DMSO Run2   | NM_007256 | SLCO2B1   | solute carrier organic anion transporter family, member 2B1 | -0.067218 | Inlier         |
| siRNA-Temozolomide Run1-DMSO | NM_007256 | SLCO2B1   | solute carrier organic anion transporter family, member 2B1 | 0.067218  | Inlier         |
| siRNA-Vinblastine Run1-DMSO  | NM_007256 | SLCO2B1   | solute carrier organic anion transporter family, member 2B1 | 0.631088  | Inlier         |
| siRNA Disorazole DMSO Run3   | NM_007256 | SLCO2B1   | solute carrier organic anion transporter family, member 2B1 | 0.717912  | Inlier         |

Identification of Survival Genes in Human Glioblastoma Cells Using siRNA Screening

Nikhil G Thaker, Fang Zhang, Peter R. McDonald, Tong Ying Shun, Michael D Lewen, Ian F. Pollack, and John S. Lazo

Molecular Pharmacology

|                              |               |         |                                                             |           |        |
|------------------------------|---------------|---------|-------------------------------------------------------------|-----------|--------|
| siRNA-Vinblastine Run2-DMSO  | NM_0072<br>56 | SLCO2B1 | solute carrier organic anion transporter family, member 2B1 | 0.877988  | Inlier |
| siRNA-Temozolomide Run3-DMSO | NM_0132<br>72 | SLCO3A1 | solute carrier organic anion transporter family, member 3A1 | -1.870266 | Inlier |
| siRNA-Temozolomide Run2-DMSO | NM_0132<br>72 | SLCO3A1 | solute carrier organic anion transporter family, member 3A1 | -1.062771 | Inlier |
| siRNA Disorazole DMSO Run2   | NM_0132<br>72 | SLCO3A1 | solute carrier organic anion transporter family, member 3A1 | -0.789485 | Inlier |
| siRNA-Temozolomide Run1-DMSO | NM_0132<br>72 | SLCO3A1 | solute carrier organic anion transporter family, member 3A1 | -0.061839 | Inlier |
| siRNA Disorazole DMSO Run1   | NM_0132<br>72 | SLCO3A1 | solute carrier organic anion transporter family, member 3A1 | 0.061839  | Inlier |

Identification of Survival Genes in Human Glioblastoma Cells Using siRNA Screening  
 Nikhil G Thaker, Fang Zhang, Peter R. McDonald, Tong Ying Shun, Michael D Lewen, Ian F. Pollack, and John S. Lazo  
 Molecular Pharmacology

|                              |               |         |                                                             |           |        |
|------------------------------|---------------|---------|-------------------------------------------------------------|-----------|--------|
| siRNA Disorazole DMSO Run3   | NM_0132<br>72 | SLCO3A1 | solute carrier organic anion transporter family, member 3A1 | 0.328145  | Inlier |
| siRNA-Vinblastine Run1-DMSO  | NM_0132<br>72 | SLCO3A1 | solute carrier organic anion transporter family, member 3A1 | 0.559515  | Inlier |
| siRNA-Vinblastine Run2-DMSO  | NM_0132<br>72 | SLCO3A1 | solute carrier organic anion transporter family, member 3A1 | 0.982135  | Inlier |
| siRNA-Temozolomide Run3-DMSO | NM_0163<br>54 | SLCO4A1 | solute carrier organic anion transporter family, member 4A1 | -2.040305 | Inlier |
| siRNA-Temozolomide Run2-DMSO | NM_0163<br>54 | SLCO4A1 | solute carrier organic anion transporter family, member 4A1 | -1.030793 | Inlier |
| siRNA Disorazole DMSO Run3   | NM_0163<br>54 | SLCO4A1 | solute carrier organic anion transporter family, member 4A1 | -0.225939 | Inlier |

Identification of Survival Genes in Human Glioblastoma Cells Using siRNA Screening  
 Nikhil G Thaker, Fang Zhang, Peter R. McDonald, Tong Ying Shun, Michael D Lewen, Ian F. Pollack, and John S. Lazo

Molecular Pharmacology

| siRNA Treatment              | Gene ID       | Gene Name | Gene Description                                            | Log Fold Change | Outlier Status |
|------------------------------|---------------|-----------|-------------------------------------------------------------|-----------------|----------------|
| siRNA Disorazole DMSO Run2   | NM_0163<br>54 | SLCO4A1   | solute carrier organic anion transporter family, member 4A1 | -0.085512       | Inlier         |
| siRNA Disorazole DMSO Run1   | NM_0163<br>54 | SLCO4A1   | solute carrier organic anion transporter family, member 4A1 | 0.085512        | Inlier         |
| siRNA-Temozolomide Run1-DMSO | NM_0163<br>54 | SLCO4A1   | solute carrier organic anion transporter family, member 4A1 | 0.318207        | Inlier         |
| siRNA-Vinblastine Run2-DMSO  | NM_0163<br>54 | SLCO4A1   | solute carrier organic anion transporter family, member 4A1 | 2.622217        | Inlier         |
| siRNA-Vinblastine Run1-DMSO  | NM_0163<br>54 | SLCO4A1   | solute carrier organic anion transporter family, member 4A1 | 2.665001        | Inlier         |
| siRNA-Temozolomide Run1-DMSO | NM_1809<br>91 | SLCO4C1   | solute carrier organic anion transporter family, member 4C1 | -1.836276       | Inlier         |

Identification of Survival Genes in Human Glioblastoma Cells Using siRNA Screening

Nikhil G Thaker, Fang Zhang, Peter R. McDonald, Tong Ying Shun, Michael D Lewen, Ian F. Pollack, and John S. Lazo

Molecular Pharmacology

|                              |               |         |                                                             |           |        |
|------------------------------|---------------|---------|-------------------------------------------------------------|-----------|--------|
| siRNA-Vinblastine Run1-DMSO  | NM_1809<br>91 | SLCO4C1 | solute carrier organic anion transporter family, member 4C1 | -0.703178 | Inlier |
| siRNA-Vinblastine Run2-DMSO  | NM_1809<br>91 | SLCO4C1 | solute carrier organic anion transporter family, member 4C1 | -0.308239 | Inlier |
| siRNA-Temozolomide Run3-DMSO | NM_1809<br>91 | SLCO4C1 | solute carrier organic anion transporter family, member 4C1 | -0.013356 | Inlier |
| siRNA Disorazole DMSO Run1   | NM_1809<br>91 | SLCO4C1 | solute carrier organic anion transporter family, member 4C1 | 0.013355  | Inlier |
| siRNA-Temozolomide Run2-DMSO | NM_1809<br>91 | SLCO4C1 | solute carrier organic anion transporter family, member 4C1 | 0.645822  | Inlier |
| siRNA Disorazole DMSO Run3   | NM_1809<br>91 | SLCO4C1 | solute carrier organic anion transporter family, member 4C1 | 2.430136  | Inlier |



Identification of Survival Genes in Human Glioblastoma Cells Using siRNA Screening

Nikhil G Thaker, Fang Zhang, Peter R. McDonald, Tong Ying Shun, Michael D Lewen, Ian F. Pollack, and John S. Lazo

Molecular Pharmacology

|                              |               |         |                                                         |                                                         |        |
|------------------------------|---------------|---------|---------------------------------------------------------|---------------------------------------------------------|--------|
|                              |               |         |                                                         | solute carrier organic anion transporter family, member |        |
| siRNA Disorazole DMSO Run2   | NM_1809<br>91 | SLCO4C1 | 4C1                                                     | 2.987985                                                | Inlier |
|                              |               |         | solute carrier organic anion transporter family, member |                                                         |        |
| siRNA-Temozolomide Run3-DMSO | NM_0309<br>58 | SLCO5A1 | 5A1                                                     | -1.621919                                               | Inlier |
|                              |               |         | solute carrier organic anion transporter family, member |                                                         |        |
| siRNA-Temozolomide Run2-DMSO | NM_0309<br>58 | SLCO5A1 | 5A1                                                     | -1.428414                                               | Inlier |
|                              |               |         | solute carrier organic anion transporter family, member |                                                         |        |
| siRNA-Temozolomide Run1-DMSO | NM_0309<br>58 | SLCO5A1 | 5A1                                                     | -0.306105                                               | Inlier |
|                              |               |         | solute carrier organic anion transporter family, member |                                                         |        |
| siRNA Disorazole DMSO Run1   | NM_0309<br>58 | SLCO5A1 | 5A1                                                     | -0.097628                                               | Inlier |
|                              |               |         | solute carrier organic anion transporter family, member |                                                         |        |
| siRNA-Vinblastine Run1-DMSO  | NM_0309<br>58 | SLCO5A1 | 5A1                                                     | 0.097628                                                | Inlier |

Identification of Survival Genes in Human Glioblastoma Cells Using siRNA Screening

Nikhil G Thaker, Fang Zhang, Peter R. McDonald, Tong Ying Shun, Michael D Lewen, Ian F. Pollack, and John S. Lazo

Molecular Pharmacology

| siRNA Treatment              | Gene    | Accession | Gene                                                        | Value     | Category |
|------------------------------|---------|-----------|-------------------------------------------------------------|-----------|----------|
| siRNA-Vinblastine Run2-DMSO  | NM_0309 | 58        | SLCO5A1                                                     | 0.276668  | Inlier   |
|                              |         |           | solute carrier organic anion transporter family, member 5A1 |           |          |
| siRNA Disorazole DMSO Run2   | NM_0309 | 58        | SLCO5A1                                                     | 1.042895  | Inlier   |
|                              |         |           | solute carrier organic anion transporter family, member 5A1 |           |          |
| siRNA Disorazole DMSO Run3   | NM_0309 | 58        | SLCO5A1                                                     | 1.069625  | Inlier   |
|                              |         |           | solute carrier organic anion transporter family, member 5A1 |           |          |
| siRNA-Temozolomide Run3-DMSO | NM_1734 | 88        | SLCO6A1                                                     | -4.059179 | Outlier  |
|                              |         |           | solute carrier organic anion transporter family, member 6A1 |           |          |
| siRNA-Temozolomide Run2-DMSO | NM_1734 | 88        | SLCO6A1                                                     | -2.152225 | Inlier   |
|                              |         |           | solute carrier organic anion transporter family, member 6A1 |           |          |
| siRNA Disorazole DMSO Run3   | NM_1734 | 88        | SLCO6A1                                                     | -0.591035 | Inlier   |
|                              |         |           | solute carrier organic anion transporter family, member 6A1 |           |          |

Identification of Survival Genes in Human Glioblastoma Cells Using siRNA Screening  
 Nikhil G Thaker, Fang Zhang, Peter R. McDonald, Tong Ying Shun, Michael D Lewen, Ian F. Pollack, and John S. Lazo

Molecular Pharmacology

|                              |               |         |                                                             |           |        |
|------------------------------|---------------|---------|-------------------------------------------------------------|-----------|--------|
| siRNA-Temozolomide Run1-DMSO | NM_1734<br>88 | SLCO6A1 | solute carrier organic anion transporter family, member 6A1 | -0.082455 | Inlier |
| siRNA Disorazole DMSO Run2   | NM_1734<br>88 | SLCO6A1 | solute carrier organic anion transporter family, member 6A1 | 0.082455  | Inlier |
| siRNA Disorazole DMSO Run1   | NM_1734<br>88 | SLCO6A1 | solute carrier organic anion transporter family, member 6A1 | 0.183535  | Inlier |
| siRNA-Vinblastine Run1-DMSO  | NM_1734<br>88 | SLCO6A1 | solute carrier organic anion transporter family, member 6A1 | 0.757965  | Inlier |
| siRNA-Vinblastine Run2-DMSO  | NM_1734<br>88 | SLCO6A1 | solute carrier organic anion transporter family, member 6A1 | 1.093393  | Inlier |
| siRNA-Vinblastine Run1-DMSO  | NM_0147<br>20 | SLK     | STE20-like kinase (yeast)                                   | -0.754948 | Inlier |
| siRNA-Temozolomide Run3-DMSO | NM_0147<br>20 | SLK     | STE20-like kinase (yeast)                                   | -0.594052 | Inlier |
| siRNA-Temozolomide Run2-DMSO | NM_0147<br>20 | SLK     | STE20-like kinase (yeast)                                   | -0.499777 | Inlier |

Identification of Survival Genes in Human Glioblastoma Cells Using siRNA Screening  
 Nikhil G Thaker, Fang Zhang, Peter R. McDonald, Tong Ying Shun, Michael D Lewen, Ian F. Pollack, and John S. Lazo

Molecular Pharmacology

|                              |               |      |                                                                |           |         |
|------------------------------|---------------|------|----------------------------------------------------------------|-----------|---------|
| siRNA-Temozolomide Run1-DMSO | NM_0147<br>20 | SLK  | STE20-like kinase (yeast)                                      | -0.319934 | Inlier  |
| siRNA Disorazole DMSO Run1   | NM_0147<br>20 | SLK  | STE20-like kinase (yeast)                                      | 0.319935  | Inlier  |
| siRNA-Vinblastine Run2-DMSO  | NM_0147<br>20 | SLK  | STE20-like kinase (yeast)                                      | 1.358902  | Inlier  |
| siRNA Disorazole DMSO Run3   | NM_0147<br>20 | SLK  | STE20-like kinase (yeast)                                      | 1.607665  | Inlier  |
| siRNA Disorazole DMSO Run2   | NM_0147<br>20 | SLK  | STE20-like kinase (yeast)                                      | 3.582731  | Outlier |
| siRNA-Temozolomide Run3-DMSO | NM_0030<br>64 | SLPI | secretory leukocyte protease inhibitor (antileuko proteinase ) | -1.263479 | Inlier  |
| siRNA-Temozolomide Run2-DMSO | NM_0030<br>64 | SLPI | secretory leukocyte protease inhibitor (antileuko proteinase ) | -1.067874 | Inlier  |
| siRNA-Temozolomide Run1-DMSO | NM_0030<br>64 | SLPI | secretory leukocyte protease inhibitor (antileuko proteinase ) | -0.685291 | Inlier  |
| siRNA Disorazole DMSO Run3   | NM_0030<br>64 | SLPI | secretory leukocyte protease inhibitor (antileuko proteinase ) | -0.062836 | Inlier  |

Identification of Survival Genes in Human Glioblastoma Cells Using siRNA Screening

Nikhil G Thaker, Fang Zhang, Peter R. McDonald, Tong Ying Shun, Michael D Lewen, Ian F. Pollack, and John S. Lazo

Molecular Pharmacology

|                                 |               |         |                                                                                                                                     |           |        |
|---------------------------------|---------------|---------|-------------------------------------------------------------------------------------------------------------------------------------|-----------|--------|
| siRNA Disorazole DMSO Run1      | NM_0030<br>64 | SLPI    | secretory<br>leukocyte<br>protease<br>inhibitor<br>(antileuko<br>proteinase<br>)                                                    | 0.062836  | Inlier |
| siRNA Disorazole DMSO Run2      | NM_0030<br>64 | SLPI    | secretory<br>leukocyte<br>protease<br>inhibitor<br>(antileuko<br>proteinase<br>)                                                    | 0.467721  | Inlier |
| siRNA-Vinblastine Run2-<br>DMSO | NM_0030<br>64 | SLPI    | secretory<br>leukocyte<br>protease<br>inhibitor<br>(antileuko<br>proteinase<br>)                                                    | 0.663709  | Inlier |
| siRNA-Vinblastine Run1-<br>DMSO | NM_0030<br>64 | SLPI    | secretory<br>leukocyte<br>protease<br>inhibitor<br>(antileuko<br>proteinase<br>)                                                    | 0.733132  | Inlier |
| siRNA Disorazole DMSO Run3      | NM_0030<br>71 | SMARCA3 | 3<br>SWI/SNF<br>related,<br>matrix<br>associated<br>, actin<br>dependent<br>regulator<br>of<br>chromatin,<br>subfamily<br>a, member | -1.039009 | Inlier |

Identification of Survival Genes in Human Glioblastoma Cells Using siRNA Screening  
 Nikhil G Thaker, Fang Zhang, Peter R. McDonald, Tong Ying Shun, Michael D Lewen, Ian F. Pollack, and John S. Lazo  
 Molecular Pharmacology

|                              |           |         |                                                                                                   |           |        |
|------------------------------|-----------|---------|---------------------------------------------------------------------------------------------------|-----------|--------|
| siRNA-Temozolomide Run3-DMSO | NM_003071 | SMARCA3 | SWI/SNF related, matrix associated, actin dependent regulator of chromatin, subfamily a, member 3 | -0.844056 | Inlier |
| siRNA-Vinblastine Run2-DMSO  | NM_003071 | SMARCA3 | SWI/SNF related, matrix associated, actin dependent regulator of chromatin, subfamily a, member 3 | -0.332709 | Inlier |
| siRNA-Temozolomide Run1-DMSO | NM_003071 | SMARCA3 | SWI/SNF related, matrix associated, actin dependent regulator of chromatin, subfamily a, member 3 | -0.113775 | Inlier |
| siRNA-Temozolomide Run2-DMSO | NM_003071 | SMARCA3 | SWI/SNF related, matrix associated, actin dependent regulator of chromatin, subfamily a, member 3 | 0.113776  | Inlier |

Identification of Survival Genes in Human Glioblastoma Cells Using siRNA Screening  
 Nikhil G Thaker, Fang Zhang, Peter R. McDonald, Tong Ying Shun, Michael D Lewen, Ian F. Pollack, and John S. Lazo  
 Molecular Pharmacology

|                              |               |         |   |           |         |                                                                                                 |
|------------------------------|---------------|---------|---|-----------|---------|-------------------------------------------------------------------------------------------------|
| siRNA Disorazole DMSO Run1   | NM_0030<br>71 | SMARCA3 | 3 | 0.504944  | Inlier  | SWI/SNF related, matrix associated, actin dependent regulator of chromatin, subfamily a, member |
| siRNA-Vinblastine Run1-DMSO  | NM_0030<br>71 | SMARCA3 | 3 | 2.804792  | Inlier  | SWI/SNF related, matrix associated, actin dependent regulator of chromatin, subfamily a, member |
| siRNA Disorazole DMSO Run2   | NM_0030<br>71 | SMARCA3 | 3 | 3.512874  | Outlier | SWI/SNF related, matrix associated, actin dependent regulator of chromatin, subfamily a, member |
| siRNA-Temozolomide Run2-DMSO | NM_0036<br>01 | SMARCA5 | 5 | -1.844813 | Inlier  | SWI/SNF related, matrix associated, actin dependent regulator of chromatin, subfamily a, member |

Identification of Survival Genes in Human Glioblastoma Cells Using siRNA Screening  
 Nikhil G Thaker, Fang Zhang, Peter R. McDonald, Tong Ying Shun, Michael D Lewen, Ian F. Pollack, and John S. Lazo  
 Molecular Pharmacology

|                              |           |         |                                                                                                   |   |           |        |
|------------------------------|-----------|---------|---------------------------------------------------------------------------------------------------|---|-----------|--------|
| siRNA-Vinblastine Run2-DMSO  | NM_003601 | SMARCA5 | SWI/SNF related, matrix associated, actin dependent regulator of chromatin, subfamily a, member 5 | 5 | -0.702261 | Inlier |
| siRNA-Temozolomide Run1-DMSO | NM_003601 | SMARCA5 | SWI/SNF related, matrix associated, actin dependent regulator of chromatin, subfamily a, member 5 | 5 | -0.386859 | Inlier |
| siRNA Disorazole DMSO Run3   | NM_003601 | SMARCA5 | SWI/SNF related, matrix associated, actin dependent regulator of chromatin, subfamily a, member 5 | 5 | -0.152374 | Inlier |
| siRNA-Temozolomide Run3-DMSO | NM_003601 | SMARCA5 | SWI/SNF related, matrix associated, actin dependent regulator of chromatin, subfamily a, member 5 | 5 | 0.152374  | Inlier |



Identification of Survival Genes in Human Glioblastoma Cells Using siRNA Screening  
 Nikhil G Thaker, Fang Zhang, Peter R. McDonald, Tong Ying Shun, Michael D Lewen, Ian F. Pollack, and John S. Lazo  
 Molecular Pharmacology

|                              |                  |         |   |                                                                                                 |                 |
|------------------------------|------------------|---------|---|-------------------------------------------------------------------------------------------------|-----------------|
| siRNA Disorazole DMSO Run2   | NM_0036<br>01    | SMARCA5 | 5 | SWI/SNF related, matrix associated, actin dependent regulator of chromatin, subfamily a, member | 0.646739 Inlier |
| siRNA Disorazole DMSO Run1   | NM_0036<br>01    | SMARCA5 | 5 | SWI/SNF related, matrix associated, actin dependent regulator of chromatin, subfamily a, member | 1.073711 Inlier |
| siRNA-Vinblastine Run1-DMSO  | NM_0036<br>01    | SMARCA5 | 5 | SWI/SNF related, matrix associated, actin dependent regulator of chromatin, subfamily a, member | 2.21468 Inlier  |
| siRNA-Temozolomide Run3-DMSO | NM_0010<br>03802 | SMARCD3 | 3 | SWI/SNF related, matrix associated, actin dependent regulator of chromatin, subfamily d, member | -2.31908 Inlier |

Identification of Survival Genes in Human Glioblastoma Cells Using siRNA Screening  
 Nikhil G Thaker, Fang Zhang, Peter R. McDonald, Tong Ying Shun, Michael D Lewen, Ian F. Pollack, and John S. Lazo  
 Molecular Pharmacology

|                                  |                  |             |                                                                                                                                |                  |
|----------------------------------|------------------|-------------|--------------------------------------------------------------------------------------------------------------------------------|------------------|
|                                  |                  |             | SWI/SNF<br>related,<br>matrix<br>associated<br>, actin<br>dependent<br>regulator<br>of<br>chromatin,<br>subfamily<br>d, member |                  |
| siRNA-Temozolomide Run1-<br>DMSO | NM_0010<br>03802 | SMARCD<br>3 | 3                                                                                                                              | -0.965176 Inlier |

|                                  |                  |             |                                                                                                                                |                  |
|----------------------------------|------------------|-------------|--------------------------------------------------------------------------------------------------------------------------------|------------------|
|                                  |                  |             | SWI/SNF<br>related,<br>matrix<br>associated<br>, actin<br>dependent<br>regulator<br>of<br>chromatin,<br>subfamily<br>d, member |                  |
| siRNA-Temozolomide Run2-<br>DMSO | NM_0010<br>03802 | SMARCD<br>3 | 3                                                                                                                              | -0.709525 Inlier |

|                            |                  |             |                                                                                                                                |                  |
|----------------------------|------------------|-------------|--------------------------------------------------------------------------------------------------------------------------------|------------------|
|                            |                  |             | SWI/SNF<br>related,<br>matrix<br>associated<br>, actin<br>dependent<br>regulator<br>of<br>chromatin,<br>subfamily<br>d, member |                  |
| siRNA Disorazole DMSO Run1 | NM_0010<br>03802 | SMARCD<br>3 | 3                                                                                                                              | -0.188745 Inlier |

|                            |                  |             |                                                                                                                                |                 |
|----------------------------|------------------|-------------|--------------------------------------------------------------------------------------------------------------------------------|-----------------|
|                            |                  |             | SWI/SNF<br>related,<br>matrix<br>associated<br>, actin<br>dependent<br>regulator<br>of<br>chromatin,<br>subfamily<br>d, member |                 |
| siRNA Disorazole DMSO Run2 | NM_0010<br>03802 | SMARCD<br>3 | 3                                                                                                                              | 0.188745 Inlier |

Identification of Survival Genes in Human Glioblastoma Cells Using siRNA Screening  
 Nikhil G Thaker, Fang Zhang, Peter R. McDonald, Tong Ying Shun, Michael D Lewen, Ian F. Pollack, and John S. Lazo  
 Molecular Pharmacology

|                              |              |         |         |                                                                                                   |           |        |
|------------------------------|--------------|---------|---------|---------------------------------------------------------------------------------------------------|-----------|--------|
| siRNA-Vinblastine Run1-DMSO  | NM_001003802 | SMARCD3 | SMARCD3 | SWI/SNF related, matrix associated, actin dependent regulator of chromatin, subfamily d, member 3 | 0.381153  | Inlier |
| siRNA-Vinblastine Run2-DMSO  | NM_001003802 | SMARCD3 | SMARCD3 | SWI/SNF related, matrix associated, actin dependent regulator of chromatin, subfamily d, member 3 | 0.639475  | Inlier |
| siRNA Disorazole DMSO Run3   | NM_001003802 | SMARCD3 | SMARCD3 | SWI/SNF related, matrix associated, actin dependent regulator of chromatin, subfamily d, member 3 | 0.793251  | Inlier |
| siRNA Disorazole DMSO Run2   | NM_014006    | SMG1    | SMG1    |                                                                                                   | -1.642169 | Inlier |
| siRNA-Temozolomide Run3-DMSO | NM_014006    | SMG1    | SMG1    |                                                                                                   | -1.085119 | Inlier |
| siRNA-Temozolomide Run1-DMSO | NM_014006    | SMG1    | SMG1    |                                                                                                   | -0.73548  | Inlier |
| siRNA Disorazole DMSO Run3   | NM_014006    | SMG1    | SMG1    |                                                                                                   | -0.344444 | Inlier |
| siRNA Disorazole DMSO Run1   | NM_014006    | SMG1    | SMG1    |                                                                                                   | 0.344444  | Inlier |
| siRNA-Temozolomide Run2-DMSO | NM_014006    | SMG1    | SMG1    |                                                                                                   | 0.457939  | Inlier |

Identification of Survival Genes in Human Glioblastoma Cells Using siRNA Screening

Nikhil G Thaker, Fang Zhang, Peter R. McDonald, Tong Ying Shun, Michael D Lewen, Ian F. Pollack, and John S. Lazo

|                                  |               |      |                                 |           |        |
|----------------------------------|---------------|------|---------------------------------|-----------|--------|
| siRNA-Vinblastine Run2-<br>DMSO  | NM_0140<br>06 | SMG1 | SMG1                            | 0.61352   | Inlier |
| siRNA-Vinblastine Run1-<br>DMSO  | NM_0140<br>06 | SMG1 | SMG1                            | 0.865936  | Inlier |
| siRNA Disorazole DMSO Run3       | NM_0056<br>31 | SMO  | smoothened homolog (Drosophila) | -1.561058 | Inlier |
| siRNA-Temozolomide Run3-<br>DMSO | NM_0056<br>31 | SMO  | smoothened homolog (Drosophila) | -0.93822  | Inlier |
| siRNA Disorazole DMSO Run1       | NM_0056<br>31 | SMO  | smoothened homolog (Drosophila) | -0.41078  | Inlier |
| siRNA Disorazole DMSO Run2       | NM_0056<br>31 | SMO  | smoothened homolog (Drosophila) | -0.225323 | Inlier |
| siRNA-Temozolomide Run1-<br>DMSO | NM_0056<br>31 | SMO  | smoothened homolog (Drosophila) | 0.225324  | Inlier |
| siRNA-Temozolomide Run2-<br>DMSO | NM_0056<br>31 | SMO  | smoothened homolog (Drosophila) | 0.289855  | Inlier |
| siRNA-Vinblastine Run2-<br>DMSO  | NM_0056<br>31 | SMO  | smoothened homolog (Drosophila) | 0.947638  | Inlier |
| siRNA-Vinblastine Run1-<br>DMSO  | NM_0056<br>31 | SMO  | smoothened homolog (Drosophila) | 0.95172   | Inlier |
| siRNA Disorazole DMSO Run1       | NM_1758<br>42 | SMOX | spermine oxidase                | -0.719526 | Inlier |
| siRNA-Temozolomide Run3-<br>DMSO | NM_1758<br>42 | SMOX | spermine oxidase                | -0.688144 | Inlier |
| siRNA-Temozolomide Run2-<br>DMSO | NM_1758<br>42 | SMOX | spermine oxidase                | -0.660856 | Inlier |
| siRNA-Vinblastine Run2-<br>DMSO  | NM_1758<br>42 | SMOX | spermine oxidase                | -0.380458 | Inlier |

Identification of Survival Genes in Human Glioblastoma Cells Using siRNA Screening

Nikhil G Thaker, Fang Zhang, Peter R. McDonald, Tong Ying Shun, Michael D Lewen, Ian F. Pollack, and John S. Lazo

|                                  |                  |       |                                                                                                      |           |        |
|----------------------------------|------------------|-------|------------------------------------------------------------------------------------------------------|-----------|--------|
| siRNA-Temozolomide Run1-<br>DMSO | NM_1758<br>42    | SMOX  | spermine<br>oxidase                                                                                  | 0.380457  | Inlier |
| siRNA Disorazole DMSO Run3       | NM_1758<br>42    | SMOX  | spermine<br>oxidase                                                                                  | 0.444659  | Inlier |
| siRNA-Vinblastine Run1-<br>DMSO  | NM_1758<br>42    | SMOX  | spermine<br>oxidase                                                                                  | 2.35713   | Inlier |
| siRNA Disorazole DMSO Run2       | NM_1758<br>42    | SMOX  | spermine<br>oxidase                                                                                  | 2.800126  | Inlier |
| siRNA Disorazole DMSO Run1       | NM_0251<br>63    | SMP3  | SMP3                                                                                                 | -1.963058 | Inlier |
| siRNA Disorazole DMSO Run3       | NM_0251<br>63    | SMP3  | SMP3                                                                                                 | -0.578617 | Inlier |
| siRNA-Temozolomide Run3-<br>DMSO | NM_0251<br>63    | SMP3  | SMP3                                                                                                 | -0.57815  | Inlier |
| siRNA-Vinblastine Run2-<br>DMSO  | NM_0251<br>63    | SMP3  | SMP3                                                                                                 | -0.154475 | Inlier |
| siRNA-Vinblastine Run1-<br>DMSO  | NM_0251<br>63    | SMP3  | SMP3                                                                                                 | 0.154473  | Inlier |
| siRNA-Temozolomide Run2-<br>DMSO | NM_0251<br>63    | SMP3  | SMP3                                                                                                 | 0.770383  | Inlier |
| siRNA-Temozolomide Run1-<br>DMSO | NM_0251<br>63    | SMP3  | SMP3                                                                                                 | 1.14655   | Inlier |
| siRNA Disorazole DMSO Run2       | NM_0251<br>63    | SMP3  | SMP3                                                                                                 | 1.724055  | Inlier |
| siRNA Disorazole DMSO Run2       | NM_0010<br>07593 | SMPD1 | sphingomy<br>elin<br>phosphodi<br>esterase<br>1, acid<br>lysosomal<br>(acid<br>sphingomy<br>elinase) | -2.362922 | Inlier |
| siRNA-Temozolomide Run3-<br>DMSO | NM_0010<br>07593 | SMPD1 | sphingomy<br>elin<br>phosphodi<br>esterase<br>1, acid<br>lysosomal<br>(acid<br>sphingomy<br>elinase) | -2.235868 | Inlier |
| siRNA-Temozolomide Run1-<br>DMSO | NM_0010<br>07593 | SMPD1 | sphingomy<br>elinase)                                                                                | -0.688783 | Inlier |

Identification of Survival Genes in Human Glioblastoma Cells Using siRNA Screening

Nikhil G Thaker, Fang Zhang, Peter R. McDonald, Tong Ying Shun, Michael D Lewen, Ian F. Pollack, and John S.

Lazo

Molecular Pharmacology

|                              |                  |       |                                                                           |           |        |
|------------------------------|------------------|-------|---------------------------------------------------------------------------|-----------|--------|
| siRNA Disorazole DMSO Run1   | NM_0010<br>07593 | SMPD1 | sphingomyelin phosphodiesterase 1, acid lysosomal (acid sphingomyelinase) | -0.175591 | Inlier |
| siRNA Disorazole DMSO Run3   | NM_0010<br>07593 | SMPD1 | sphingomyelin phosphodiesterase 1, acid lysosomal (acid sphingomyelinase) | 0.175591  | Inlier |
| siRNA-Temozolomide Run2-DMSO | NM_0010<br>07593 | SMPD1 | sphingomyelin phosphodiesterase 1, acid lysosomal (acid sphingomyelinase) | 0.336746  | Inlier |
| siRNA-Vinblastine Run1-DMSO  | NM_0010<br>07593 | SMPD1 | sphingomyelin phosphodiesterase 1, acid lysosomal (acid sphingomyelinase) | 0.660217  | Inlier |
| siRNA-Vinblastine Run2-DMSO  | NM_0010<br>07593 | SMPD1 | sphingomyelin phosphodiesterase 1, acid lysosomal (acid sphingomyelinase) | 0.986742  | Inlier |

Identification of Survival Genes in Human Glioblastoma Cells Using siRNA Screening

Nikhil G Thaker, Fang Zhang, Peter R. McDonald, Tong Ying Shun, Michael D Lewen, Ian F. Pollack, and John S.

Lazo

Molecular Pharmacology

|                              |               |       |                                                                                                                                                                  |           |        |
|------------------------------|---------------|-------|------------------------------------------------------------------------------------------------------------------------------------------------------------------|-----------|--------|
| siRNA Disorazole DMSO Run2   | NM_0030<br>80 | SMPD2 | sphingomyelin phosphodiesterase 2, neutral membrane (neutral sphingomyelinase)<br>sphingomyelin phosphodiesterase 2, neutral membrane (neutral sphingomyelinase) | -2.702873 | Inlier |
| siRNA-Temozolomide Run3-DMSO | NM_0030<br>80 | SMPD2 | sphingomyelin phosphodiesterase 2, neutral membrane (neutral sphingomyelinase)<br>sphingomyelin phosphodiesterase 2, neutral membrane (neutral sphingomyelinase) | -2.519609 | Inlier |
| siRNA-Temozolomide Run2-DMSO | NM_0030<br>80 | SMPD2 | sphingomyelin phosphodiesterase 2, neutral membrane (neutral sphingomyelinase)<br>sphingomyelin phosphodiesterase 2, neutral membrane (neutral sphingomyelinase) | -0.801295 | Inlier |
| siRNA Disorazole DMSO Run1   | NM_0030<br>80 | SMPD2 | sphingomyelin phosphodiesterase 2, neutral membrane (neutral sphingomyelinase)<br>sphingomyelin phosphodiesterase 2, neutral membrane (neutral sphingomyelinase) | -0.382033 | Inlier |
| siRNA-Temozolomide Run1-DMSO | NM_0030<br>80 | SMPD2 | sphingomyelin phosphodiesterase 2, neutral membrane (neutral sphingomyelinase)<br>sphingomyelin phosphodiesterase 2, neutral membrane (neutral sphingomyelinase) | 0.382033  | Inlier |

Identification of Survival Genes in Human Glioblastoma Cells Using siRNA Screening

Nikhil G Thaker, Fang Zhang, Peter R. McDonald, Tong Ying Shun, Michael D Lewen, Ian F. Pollack, and John S. Lazo

Molecular Pharmacology

|                              |           |       |           |        |                                                                                   |
|------------------------------|-----------|-------|-----------|--------|-----------------------------------------------------------------------------------|
| siRNA-Vinblastine Run1-DMSO  | NM_003080 | SMPD2 | 0.556009  | Inlier | sphingomyelin phosphodiesterase 2, neutral membrane (neutral sphingomyelinase)    |
| siRNA-Vinblastine Run2-DMSO  | NM_003080 | SMPD2 | 0.616721  | Inlier | sphingomyelin phosphodiesterase 2, neutral membrane (neutral sphingomyelinase)    |
| siRNA Disorazole DMSO Run3   | NM_003080 | SMPD2 | 0.732279  | Inlier | sphingomyelin phosphodiesterase 3, neutral membrane (neutral sphingomyelinase II) |
| siRNA Disorazole DMSO Run2   | NM_018667 | SMPD3 | -1.172016 | Inlier | sphingomyelin phosphodiesterase 3, neutral membrane (neutral sphingomyelinase II) |
| siRNA-Temozolomide Run3-DMSO | NM_018667 | SMPD3 | -0.728172 | Inlier | sphingomyelin phosphodiesterase 3, neutral membrane (neutral sphingomyelinase II) |



Identification of Survival Genes in Human Glioblastoma Cells Using siRNA Screening

Nikhil G Thaker, Fang Zhang, Peter R. McDonald, Tong Ying Shun, Michael D Lewen, Ian F. Pollack, and John S. Lazo

Molecular Pharmacology

|                              |           |       |                                                                                   |           |        |
|------------------------------|-----------|-------|-----------------------------------------------------------------------------------|-----------|--------|
| siRNA-Temozolomide Run2-DMSO | NM_018667 | SMPD3 | sphingomyelin phosphodiesterase 3, neutral membrane (neutral sphingomyelinase II) | -0.620828 | Inlier |
| siRNA Disorazole DMSO Run1   | NM_018667 | SMPD3 | sphingomyelin phosphodiesterase 3, neutral membrane (neutral sphingomyelinase II) | -0.317416 | Inlier |
| siRNA-Temozolomide Run1-DMSO | NM_018667 | SMPD3 | sphingomyelin phosphodiesterase 3, neutral membrane (neutral sphingomyelinase II) | 0.317415  | Inlier |
| siRNA-Vinblastine Run2-DMSO  | NM_018667 | SMPD3 | sphingomyelin phosphodiesterase 3, neutral membrane (neutral sphingomyelinase II) | 0.615267  | Inlier |
| siRNA-Vinblastine Run1-DMSO  | NM_018667 | SMPD3 | sphingomyelin phosphodiesterase 3, neutral membrane (neutral sphingomyelinase II) | 0.867706  | Inlier |

Identification of Survival Genes in Human Glioblastoma Cells Using siRNA Screening  
 Nikhil G Thaker, Fang Zhang, Peter R. McDonald, Tong Ying Shun, Michael D Lewen, Ian F. Pollack, and John S. Lazo  
 Molecular Pharmacology

|                              |               |         |                                                                                   |           |         |
|------------------------------|---------------|---------|-----------------------------------------------------------------------------------|-----------|---------|
| siRNA Disorazole DMSO Run3   | NM_0186<br>67 | SMPD3   | sphingomyelin phosphodiesterase 3, neutral membrane (neutral sphingomyelinase II) | 4.109253  | Outlier |
| siRNA Disorazole DMSO Run2   | NM_0067<br>14 | SMPDL3A | sphingomyelin phosphodiesterase, acid-like 3A                                     | -1.838272 | Inlier  |
| siRNA-Temozolomide Run3-DMSO | NM_0067<br>14 | SMPDL3A | sphingomyelin phosphodiesterase, acid-like 3A                                     | -1.131805 | Inlier  |
| siRNA-Temozolomide Run2-DMSO | NM_0067<br>14 | SMPDL3A | sphingomyelin phosphodiesterase, acid-like 3A                                     | -0.217195 | Inlier  |
| siRNA Disorazole DMSO Run3   | NM_0067<br>14 | SMPDL3A | sphingomyelin phosphodiesterase, acid-like 3A                                     | -0.098142 | Inlier  |
| siRNA Disorazole DMSO Run1   | NM_0067<br>14 | SMPDL3A | sphingomyelin phosphodiesterase, acid-like 3A                                     | 0.098142  | Inlier  |
| siRNA-Temozolomide Run1-DMSO | NM_0067<br>14 | SMPDL3A | sphingomyelin phosphodiesterase, acid-like 3A                                     | 0.154206  | Inlier  |
| siRNA-Vinblastine Run2-DMSO  | NM_0067<br>14 | SMPDL3A | sphingomyelin phosphodiesterase, acid-like 3A                                     | 1.198392  | Inlier  |

Identification of Survival Genes in Human Glioblastoma Cells Using siRNA Screening  
 Nikhil G Thaker, Fang Zhang, Peter R. McDonald, Tong Ying Shun, Michael D Lewen, Ian F. Pollack, and John S. Lazo

Molecular Pharmacology

|                              |               |         |    |           |        |
|------------------------------|---------------|---------|----|-----------|--------|
| siRNA-Vinblastine Run1-DMSO  | NM_0067<br>14 | SMPDL3A | 3A | 1.526341  | Inlier |
| siRNA-Temozolomide Run3-DMSO | NM_0144<br>74 | SMPDL3B | 3B | -2.419797 | Inlier |
| siRNA-Temozolomide Run2-DMSO | NM_0144<br>74 | SMPDL3B | 3B | -1.290748 | Inlier |
| siRNA Disorazole DMSO Run2   | NM_0144<br>74 | SMPDL3B | 3B | -0.689483 | Inlier |
| siRNA-Temozolomide Run1-DMSO | NM_0144<br>74 | SMPDL3B | 3B | -0.188539 | Inlier |
| siRNA Disorazole DMSO Run1   | NM_0144<br>74 | SMPDL3B | 3B | 0.18854   | Inlier |
| siRNA-Vinblastine Run1-DMSO  | NM_0144<br>74 | SMPDL3B | 3B | 0.216005  | Inlier |
| siRNA-Vinblastine Run2-DMSO  | NM_0144<br>74 | SMPDL3B | 3B | 0.659517  | Inlier |

sphingomy  
elin

phosphodi  
esterase,  
acid-like

Identification of Survival Genes in Human Glioblastoma Cells Using siRNA Screening  
 Nikhil G Thaker, Fang Zhang, Peter R. McDonald, Tong Ying Shun, Michael D Lewen, Ian F. Pollack, and John S. Lazo

Molecular Pharmacology

|                              |               |         |                                             |                  |
|------------------------------|---------------|---------|---------------------------------------------|------------------|
|                              |               |         | sphingomyelin phosphodiesterase, acid-like  |                  |
| siRNA Disorazole DMSO Run3   | NM_0144<br>74 | SMPDL3B | 3B                                          | 0.923725 Inlier  |
| siRNA-Temozolomide Run2-DMSO | NM_0045<br>95 | SMS     | spermine synthase                           | -0.897918 Inlier |
| siRNA Disorazole DMSO Run3   | NM_0045<br>95 | SMS     | spermine synthase                           | -0.451082 Inlier |
| siRNA-Vinblastine Run2-DMSO  | NM_0045<br>95 | SMS     | spermine synthase                           | -0.308988 Inlier |
| siRNA Disorazole DMSO Run1   | NM_0045<br>95 | SMS     | spermine synthase                           | -0.111447 Inlier |
| siRNA-Temozolomide Run1-DMSO | NM_0045<br>95 | SMS     | spermine synthase                           | 0.111447 Inlier  |
| siRNA-Temozolomide Run3-DMSO | NM_0045<br>95 | SMS     | spermine synthase                           | 1.562671 Inlier  |
| siRNA Disorazole DMSO Run2   | NM_0045<br>95 | SMS     | spermine synthase                           | 3.502179 Outlier |
| siRNA-Vinblastine Run1-DMSO  | NM_0045<br>95 | SMS     | spermine synthase                           | 3.787844 Outlier |
|                              |               |         | SMAD specific E3 ubiquitin protein ligase 1 |                  |
| siRNA-Temozolomide Run3-DMSO | NM_0204<br>29 | SMURF1  | ligase 1                                    | -0.898957 Inlier |
|                              |               |         | SMAD specific E3 ubiquitin protein ligase 1 |                  |
| siRNA-Temozolomide Run2-DMSO | NM_0204<br>29 | SMURF1  | ligase 1                                    | -0.830828 Inlier |
|                              |               |         | SMAD specific E3 ubiquitin protein ligase 1 |                  |
| siRNA Disorazole DMSO Run3   | NM_0204<br>29 | SMURF1  | ligase 1                                    | -0.543401 Inlier |
|                              |               |         | SMAD specific E3 ubiquitin protein ligase 1 |                  |
| siRNA-Vinblastine Run2-DMSO  | NM_0204<br>29 | SMURF1  | ligase 1                                    | -0.008228 Inlier |
|                              |               |         | SMAD specific E3 ubiquitin protein ligase 1 |                  |
| siRNA-Temozolomide Run1-DMSO | NM_0204<br>29 | SMURF1  | ligase 1                                    | 0.008228 Inlier  |

Identification of Survival Genes in Human Glioblastoma Cells Using siRNA Screening  
 Nikhil G Thaker, Fang Zhang, Peter R. McDonald, Tong Ying Shun, Michael D Lewen, Ian F. Pollack, and John S. Lazo  
 Molecular Pharmacology

|                                  |               |        |                                                         |           |        |
|----------------------------------|---------------|--------|---------------------------------------------------------|-----------|--------|
| siRNA Disorazole DMSO Run1       | NM_0204<br>29 | SMURF1 | SMAD<br>specific E3<br>ubiquitin<br>protein<br>ligase 1 | 0.317126  | Inlier |
| siRNA Disorazole DMSO Run2       | NM_0204<br>29 | SMURF1 | SMAD<br>specific E3<br>ubiquitin<br>protein<br>ligase 1 | 0.805599  | Inlier |
| siRNA-Vinblastine Run1-<br>DMSO  | NM_0204<br>29 | SMURF1 | SMAD<br>specific E3<br>ubiquitin<br>protein<br>ligase 1 | 0.892653  | Inlier |
| siRNA-Temozolomide Run3-<br>DMSO | NM_0227<br>39 | SMURF2 | SMAD<br>specific E3<br>ubiquitin<br>protein<br>ligase 2 | -1.307592 | Inlier |
| siRNA-Temozolomide Run2-<br>DMSO | NM_0227<br>39 | SMURF2 | SMAD<br>specific E3<br>ubiquitin<br>protein<br>ligase 2 | -0.935524 | Inlier |
| siRNA Disorazole DMSO Run3       | NM_0227<br>39 | SMURF2 | SMAD<br>specific E3<br>ubiquitin<br>protein<br>ligase 2 | -0.261125 | Inlier |
| siRNA-Temozolomide Run1-<br>DMSO | NM_0227<br>39 | SMURF2 | SMAD<br>specific E3<br>ubiquitin<br>protein<br>ligase 2 | -0.187843 | Inlier |
| siRNA-Vinblastine Run2-<br>DMSO  | NM_0227<br>39 | SMURF2 | SMAD<br>specific E3<br>ubiquitin<br>protein<br>ligase 2 | 0.187843  | Inlier |

Identification of Survival Genes in Human Glioblastoma Cells Using siRNA Screening  
 Nikhil G Thaker, Fang Zhang, Peter R. McDonald, Tong Ying Shun, Michael D Lewen, Ian F. Pollack, and John S. Lazo  
 Molecular Pharmacology

|                                  |               |        |                                                         |                  |
|----------------------------------|---------------|--------|---------------------------------------------------------|------------------|
| siRNA Disorazole DMSO Run1       | NM_0227<br>39 | SMURF2 | SMAD<br>specific E3<br>ubiquitin<br>protein<br>ligase 2 | 0.413476 Inlier  |
| siRNA-Vinblastine Run1-<br>DMSO  | NM_0227<br>39 | SMURF2 | SMAD<br>specific E3<br>ubiquitin<br>protein<br>ligase 2 | 1.039648 Inlier  |
| siRNA Disorazole DMSO Run2       | NM_0227<br>39 | SMURF2 | SMAD<br>specific E3<br>ubiquitin<br>protein<br>ligase 2 | 1.176627 Inlier  |
| siRNA-Vinblastine Run2-<br>DMSO  | NM_0124<br>37 | SNAPAP | SNAP-<br>associated<br>protein                          | -0.956497 Inlier |
| siRNA-Temozolomide Run2-<br>DMSO | NM_0124<br>37 | SNAPAP | SNAP-<br>associated<br>protein                          | -0.72014 Inlier  |
| siRNA Disorazole DMSO Run1       | NM_0124<br>37 | SNAPAP | SNAP-<br>associated<br>protein                          | -0.62886 Inlier  |
| siRNA-Temozolomide Run1-<br>DMSO | NM_0124<br>37 | SNAPAP | SNAP-<br>associated<br>protein                          | -0.527662 Inlier |
| siRNA-Temozolomide Run3-<br>DMSO | NM_0124<br>37 | SNAPAP | SNAP-<br>associated<br>protein                          | 0.527662 Inlier  |
| siRNA-Vinblastine Run1-<br>DMSO  | NM_0124<br>37 | SNAPAP | SNAP-<br>associated<br>protein                          | 0.562027 Inlier  |
| siRNA Disorazole DMSO Run3       | NM_0124<br>37 | SNAPAP | SNAP-<br>associated<br>protein                          | 0.881655 Inlier  |
| siRNA Disorazole DMSO Run2       | NM_0124<br>37 | SNAPAP | SNAP-<br>associated<br>protein                          | 2.80209 Inlier   |
| siRNA Disorazole DMSO Run2       | NM_0309<br>52 | SNARK  | NUAK<br>family,<br>SNF1-like<br>kinase, 2               | -1.766591 Inlier |
| siRNA-Temozolomide Run3-<br>DMSO | NM_0309<br>52 | SNARK  | NUAK<br>family,<br>SNF1-like<br>kinase, 2               | -0.968932 Inlier |

Identification of Survival Genes in Human Glioblastoma Cells Using siRNA Screening  
 Nikhil G Thaker, Fang Zhang, Peter R. McDonald, Tong Ying Shun, Michael D Lewen, Ian F. Pollack, and John S. Lazo

Molecular Pharmacology

|                                  |               |        |                                           |           |         |
|----------------------------------|---------------|--------|-------------------------------------------|-----------|---------|
| siRNA Disorazole DMSO Run3       | NM_0309<br>52 | SNARK  | NUAK<br>family,<br>SNF1-like<br>kinase, 2 | -0.361868 | Inlier  |
| siRNA-Temozolomide Run1-<br>DMSO | NM_0309<br>52 | SNARK  | NUAK<br>family,<br>SNF1-like<br>kinase, 2 | -0.239564 | Inlier  |
| siRNA-Temozolomide Run2-<br>DMSO | NM_0309<br>52 | SNARK  | NUAK<br>family,<br>SNF1-like<br>kinase, 2 | 0.239564  | Inlier  |
| siRNA-Vinblastine Run1-<br>DMSO  | NM_0309<br>52 | SNARK  | NUAK<br>family,<br>SNF1-like<br>kinase, 2 | 0.628317  | Inlier  |
| siRNA Disorazole DMSO Run1       | NM_0309<br>52 | SNARK  | NUAK<br>family,<br>SNF1-like<br>kinase, 2 | 0.720683  | Inlier  |
| siRNA-Vinblastine Run2-<br>DMSO  | NM_0309<br>52 | SNARK  | NUAK<br>family,<br>SNF1-like<br>kinase, 2 | 1.713193  | Inlier  |
| siRNA-Temozolomide Run3-<br>DMSO | NM_1733<br>54 | SNF1LK | SNF1-like<br>kinase                       | -1.218881 | Inlier  |
| siRNA Disorazole DMSO Run3       | NM_1733<br>54 | SNF1LK | SNF1-like<br>kinase                       | -0.823441 | Inlier  |
| siRNA Disorazole DMSO Run2       | NM_1733<br>54 | SNF1LK | SNF1-like<br>kinase                       | -0.525559 | Inlier  |
| siRNA-Temozolomide Run1-<br>DMSO | NM_1733<br>54 | SNF1LK | SNF1-like<br>kinase                       | -0.333374 | Inlier  |
| siRNA-Vinblastine Run1-<br>DMSO  | NM_1733<br>54 | SNF1LK | SNF1-like<br>kinase                       | 0.333374  | Inlier  |
| siRNA-Temozolomide Run2-<br>DMSO | NM_1733<br>54 | SNF1LK | SNF1-like<br>kinase                       | 0.385833  | Inlier  |
| siRNA Disorazole DMSO Run1       | NM_1733<br>54 | SNF1LK | SNF1-like<br>kinase                       | 0.943484  | Inlier  |
| siRNA-Vinblastine Run2-<br>DMSO  | NM_1733<br>54 | SNF1LK | SNF1-like<br>kinase                       | 3.019922  | Inlier  |
| siRNA-Temozolomide Run3-<br>DMSO | NM_0177<br>19 | SNRK   | SNF<br>related<br>kinase                  | -4.272637 | Outlier |
| siRNA-Temozolomide Run1-<br>DMSO | NM_0177<br>19 | SNRK   | SNF<br>related<br>kinase                  | -2.411447 | Inlier  |
| siRNA Disorazole DMSO Run3       | NM_0177<br>19 | SNRK   | SNF<br>related<br>kinase                  | -0.165944 | Inlier  |
| siRNA Disorazole DMSO Run2       | NM_0177<br>19 | SNRK   | SNF<br>related<br>kinase                  | -0.000667 | Inlier  |

Identification of Survival Genes in Human Glioblastoma Cells Using siRNA Screening  
 Nikhil G Thaker, Fang Zhang, Peter R. McDonald, Tong Ying Shun, Michael D Lewen, Ian F. Pollack, and John S. Lazo

|                              |               |       |                     |                  |
|------------------------------|---------------|-------|---------------------|------------------|
| Molecular Pharmacology       |               |       | SNF                 |                  |
| siRNA-Temozolomide Run2-DMSO | NM_0177<br>19 | SNRK  | related<br>kinase   | 0.000667 Inlier  |
| siRNA-Vinblastine Run1-DMSO  | NM_0177<br>19 | SNRK  | related<br>kinase   | 0.487613 Inlier  |
| siRNA-Vinblastine Run2-DMSO  | NM_0177<br>19 | SNRK  | related<br>kinase   | 0.861387 Inlier  |
| siRNA Disorazole DMSO Run1   | NM_0177<br>19 | SNRK  | related<br>kinase   | 1.521704 Inlier  |
| siRNA Disorazole DMSO Run2   | NM_0151<br>32 | SNX13 | sorting<br>nexin 13 | -1.079105 Inlier |
| siRNA-Temozolomide Run3-DMSO | NM_0151<br>32 | SNX13 | sorting<br>nexin 13 | -0.73902 Inlier  |
| siRNA-Temozolomide Run1-DMSO | NM_0151<br>32 | SNX13 | sorting<br>nexin 13 | -0.268755 Inlier |
| siRNA-Temozolomide Run2-DMSO | NM_0151<br>32 | SNX13 | sorting<br>nexin 13 | -0.042786 Inlier |
| siRNA-Vinblastine Run1-DMSO  | NM_0151<br>32 | SNX13 | sorting<br>nexin 13 | 0.042787 Inlier  |
| siRNA Disorazole DMSO Run1   | NM_0151<br>32 | SNX13 | sorting<br>nexin 13 | 0.60998 Inlier   |
| siRNA-Vinblastine Run2-DMSO  | NM_0151<br>32 | SNX13 | sorting<br>nexin 13 | 0.84675 Inlier   |
| siRNA Disorazole DMSO Run3   | NM_0151<br>32 | SNX13 | sorting<br>nexin 13 | 1.480805 Inlier  |
| siRNA-Vinblastine Run2-DMSO  | NM_0529<br>48 | SNX26 | sorting<br>nexin 26 | -0.872405 Inlier |
| siRNA-Temozolomide Run1-DMSO | NM_0529<br>48 | SNX26 | sorting<br>nexin 26 | -0.657825 Inlier |
| siRNA-Temozolomide Run3-DMSO | NM_0529<br>48 | SNX26 | sorting<br>nexin 26 | -0.554837 Inlier |
| siRNA-Temozolomide Run2-DMSO | NM_0529<br>48 | SNX26 | sorting<br>nexin 26 | -0.092762 Inlier |
| siRNA Disorazole DMSO Run3   | NM_0529<br>48 | SNX26 | sorting<br>nexin 26 | 0.092762 Inlier  |
| siRNA-Vinblastine Run1-DMSO  | NM_0529<br>48 | SNX26 | sorting<br>nexin 26 | 0.691175 Inlier  |
| siRNA Disorazole DMSO Run1   | NM_0529<br>48 | SNX26 | sorting<br>nexin 26 | 1.25333 Inlier   |
| siRNA Disorazole DMSO Run2   | NM_0529<br>48 | SNX26 | sorting<br>nexin 26 | 1.268135 Inlier  |



Identification of Survival Genes in Human Glioblastoma Cells Using siRNA Screening

Nikhil G Thaker, Fang Zhang, Peter R. McDonald, Tong Ying Shun, Michael D Lewen, Ian F. Pollack, and John S. Lazo

Molecular Pharmacology

|                              |           |      |                                                                            |           |        |
|------------------------------|-----------|------|----------------------------------------------------------------------------|-----------|--------|
| siRNA-Temozolomide Run3-DMSO | NM_197965 | SOAT | solute carrier family 10 (sodium/bile acid cotransporter family), member 6 | -2.1597   | Inlier |
| siRNA Disorazole DMSO Run2   | NM_197965 | SOAT | solute carrier family 10 (sodium/bile acid cotransporter family), member 6 | -1.779606 | Inlier |
| siRNA-Temozolomide Run2-DMSO | NM_197965 | SOAT | solute carrier family 10 (sodium/bile acid cotransporter family), member 6 | -0.920369 | Inlier |
| siRNA-Temozolomide Run1-DMSO | NM_197965 | SOAT | solute carrier family 10 (sodium/bile acid cotransporter family), member 6 | -0.178904 | Inlier |
| siRNA Disorazole DMSO Run1   | NM_197965 | SOAT | solute carrier family 10 (sodium/bile acid cotransporter family), member 6 | 0.178904  | Inlier |

Identification of Survival Genes in Human Glioblastoma Cells Using siRNA Screening  
 Nikhil G Thaker, Fang Zhang, Peter R. McDonald, Tong Ying Shun, Michael D Lewen, Ian F. Pollack, and John S. Lazo  
 Molecular Pharmacology

|                              |           |       |                                                                            |           |        |
|------------------------------|-----------|-------|----------------------------------------------------------------------------|-----------|--------|
| siRNA-Vinblastine Run1-DMSO  | NM_197965 | SOAT  | solute carrier family 10 (sodium/bile acid cotransporter family), member 6 | 0.444372  | Inlier |
| siRNA Disorazole DMSO Run3   | NM_197965 | SOAT  | solute carrier family 10 (sodium/bile acid cotransporter family), member 6 | 0.633107  | Inlier |
| siRNA-Vinblastine Run2-DMSO  | NM_197965 | SOAT  | solute carrier family 10 (sodium/bile acid cotransporter family), member 6 | 0.715893  | Inlier |
| siRNA-Temozolomide Run3-DMSO | NM_003101 | SOAT1 | sterol O-acyltransferase (acyl-Coenzyme A: cholesterol acyltransferase) 1  | -2.480594 | Inlier |
| siRNA Disorazole DMSO Run3   | NM_003101 | SOAT1 | sterol O-acyltransferase (acyl-Coenzyme A: cholesterol acyltransferase) 1  | -1.009947 | Inlier |

Identification of Survival Genes in Human Glioblastoma Cells Using siRNA Screening

Nikhil G Thaker, Fang Zhang, Peter R. McDonald, Tong Ying Shun, Michael D Lewen, Ian F. Pollack, and John S. Lazo

Molecular Pharmacology

|                              |           |       |                                                                           |           |        |
|------------------------------|-----------|-------|---------------------------------------------------------------------------|-----------|--------|
| siRNA-Temozolomide Run2-DMSO | NM_003101 | SOAT1 | sterol O-acyltransferase (acyl-Coenzyme A: cholesterol acyltransferase) 1 | -0.320922 | Inlier |
| siRNA-Vinblastine Run2-DMSO  | NM_003101 | SOAT1 | sterol O-acyltransferase (acyl-Coenzyme A: cholesterol acyltransferase) 1 | -0.280511 | Inlier |
| siRNA-Temozolomide Run1-DMSO | NM_003101 | SOAT1 | sterol O-acyltransferase (acyl-Coenzyme A: cholesterol acyltransferase) 1 | 0.280511  | Inlier |
| siRNA Disorazole DMSO Run1   | NM_003101 | SOAT1 | sterol O-acyltransferase (acyl-Coenzyme A: cholesterol acyltransferase) 1 | 0.487267  | Inlier |
| siRNA-Vinblastine Run1-DMSO  | NM_003101 | SOAT1 | sterol O-acyltransferase (acyl-Coenzyme A: cholesterol acyltransferase) 1 | 0.861732  | Inlier |

Identification of Survival Genes in Human Glioblastoma Cells Using siRNA Screening  
 Nikhil G Thaker, Fang Zhang, Peter R. McDonald, Tong Ying Shun, Michael D Lewen, Ian F. Pollack, and John S. Lazo  
 Molecular Pharmacology

|                              |               |       |                                                                           |           |        |
|------------------------------|---------------|-------|---------------------------------------------------------------------------|-----------|--------|
| siRNA Disorazole DMSO Run2   | NM_0031<br>01 | SOAT1 | sterol O-acyltransferase (acyl-Coenzyme A: cholesterol acyltransferase) 1 | 1.37536   | Inlier |
| siRNA Disorazole DMSO Run1   | NM_0035<br>78 | SOAT2 | sterol O-acyltransferase 2                                                | -1.259569 | Inlier |
| siRNA-Temozolomide Run3-DMSO | NM_0035<br>78 | SOAT2 | sterol O-acyltransferase 2                                                | -0.566255 | Inlier |
| siRNA-Vinblastine Run2-DMSO  | NM_0035<br>78 | SOAT2 | sterol O-acyltransferase 2                                                | -0.489383 | Inlier |
| siRNA Disorazole DMSO Run3   | NM_0035<br>78 | SOAT2 | sterol O-acyltransferase 2                                                | -0.408358 | Inlier |
| siRNA-Vinblastine Run1-DMSO  | NM_0035<br>78 | SOAT2 | sterol O-acyltransferase 2                                                | 0.408358  | Inlier |
| siRNA-Temozolomide Run1-DMSO | NM_0035<br>78 | SOAT2 | sterol O-acyltransferase 2                                                | 0.782745  | Inlier |
| siRNA Disorazole DMSO Run2   | NM_0035<br>78 | SOAT2 | sterol O-acyltransferase 2                                                | 0.83655   | Inlier |
| siRNA-Temozolomide Run2-DMSO | NM_0035<br>78 | SOAT2 | sterol O-acyltransferase 2                                                | 1.130116  | Inlier |
| siRNA-Temozolomide Run3-DMSO | NM_0004<br>54 | SOD1  | superoxide dismutase 1, soluble (amyotrophic lateral sclerosis 1 (adult)) | -0.948893 | Inlier |
| siRNA-Temozolomide Run1-DMSO | NM_0004<br>54 | SOD1  | superoxide dismutase 1, soluble (amyotrophic lateral sclerosis 1 (adult)) | -0.400107 | Inlier |

Identification of Survival Genes in Human Glioblastoma Cells Using siRNA Screening

Nikhil G Thaker, Fang Zhang, Peter R. McDonald, Tong Ying Shun, Michael D Lewen, Ian F. Pollack, and John S. Lazo

Molecular Pharmacology

|                              |           |      |                                                                           |           |         |
|------------------------------|-----------|------|---------------------------------------------------------------------------|-----------|---------|
| siRNA-Temozolomide Run2-DMSO | NM_000454 | SOD1 | superoxide dismutase 1, soluble (amyotrophic lateral sclerosis 1 (adult)) | -0.356013 | Inlier  |
| siRNA Disorazole DMSO Run3   | NM_000454 | SOD1 | superoxide dismutase 1, soluble (amyotrophic lateral sclerosis 1 (adult)) | -0.085214 | Inlier  |
| siRNA-Vinblastine Run2-DMSO  | NM_000454 | SOD1 | superoxide dismutase 1, soluble (amyotrophic lateral sclerosis 1 (adult)) | 0.085214  | Inlier  |
| siRNA Disorazole DMSO Run1   | NM_000454 | SOD1 | superoxide dismutase 1, soluble (amyotrophic lateral sclerosis 1 (adult)) | 3.928799  | Outlier |
| siRNA-Vinblastine Run1-DMSO  | NM_000454 | SOD1 | superoxide dismutase 1, soluble (amyotrophic lateral sclerosis 1 (adult)) | 6.401504  | Outlier |

Identification of Survival Genes in Human Glioblastoma Cells Using siRNA Screening  
 Nikhil G Thaker, Fang Zhang, Peter R. McDonald, Tong Ying Shun, Michael D Lewen, Ian F. Pollack, and John S. Lazo  
 Molecular Pharmacology

|                                  |                  |      |                                                                                          |           |         |
|----------------------------------|------------------|------|------------------------------------------------------------------------------------------|-----------|---------|
| siRNA Disorazole DMSO Run2       | NM_0004<br>54    | SOD1 | superoxide<br>dismutase<br>1, soluble<br>(amyotrophic lateral<br>sclerosis 1<br>(adult)) | 6.923231  | Outlier |
| siRNA Disorazole DMSO Run3       | NM_0010<br>24466 | SOD2 | superoxide<br>dismutase<br>2,<br>mitochondrial                                           | -1.236176 | Inlier  |
| siRNA-Temozolomide Run3-<br>DMSO | NM_0010<br>24466 | SOD2 | superoxide<br>dismutase<br>2,<br>mitochondrial                                           | -0.863483 | Inlier  |
| siRNA-Temozolomide Run2-<br>DMSO | NM_0010<br>24466 | SOD2 | superoxide<br>dismutase<br>2,<br>mitochondrial                                           | -0.446934 | Inlier  |
| siRNA-Vinblastine Run2-<br>DMSO  | NM_0010<br>24466 | SOD2 | superoxide<br>dismutase<br>2,<br>mitochondrial                                           | -0.163565 | Inlier  |
| siRNA-Temozolomide Run1-<br>DMSO | NM_0010<br>24466 | SOD2 | superoxide<br>dismutase<br>2,<br>mitochondrial                                           | 0.163565  | Inlier  |
| siRNA Disorazole DMSO Run1       | NM_0010<br>24466 | SOD2 | superoxide<br>dismutase<br>2,<br>mitochondrial                                           | 0.485517  | Inlier  |
| siRNA Disorazole DMSO Run2       | NM_0010<br>24466 | SOD2 | superoxide<br>dismutase<br>2,<br>mitochondrial                                           | 0.935601  | Inlier  |

Identification of Survival Genes in Human Glioblastoma Cells Using siRNA Screening  
 Nikhil G Thaker, Fang Zhang, Peter R. McDonald, Tong Ying Shun, Michael D Lewen, Ian F. Pollack, and John S. Lazo

Molecular Pharmacology

| siRNA Treatment              | Gene ID      | Gene Name | Gene Description                      | Log2 Fold Change | Outlier Status |
|------------------------------|--------------|-----------|---------------------------------------|------------------|----------------|
| siRNA-Vinblastine Run1-DMSO  | NM_001024466 | SOD2      | superoxide dismutase 2, mitochondrial | 1.768297         | Inlier         |
| siRNA-Temozolomide Run3-DMSO | NM_003102    | SOD3      | superoxide dismutase 3, extracellular | -2.005036        | Inlier         |
| siRNA-Temozolomide Run2-DMSO | NM_003102    | SOD3      | superoxide dismutase 3, extracellular | -1.916764        | Inlier         |
| siRNA-Vinblastine Run2-DMSO  | NM_003102    | SOD3      | superoxide dismutase 3, extracellular | -0.552328        | Inlier         |
| siRNA Disorazole DMSO Run1   | NM_003102    | SOD3      | superoxide dismutase 3, extracellular | -0.188928        | Inlier         |
| siRNA Disorazole DMSO Run3   | NM_003102    | SOD3      | superoxide dismutase 3, extracellular | 0.188929         | Inlier         |
| siRNA-Temozolomide Run1-DMSO | NM_003102    | SOD3      | superoxide dismutase 3, extracellular | 0.28128          | Inlier         |
| siRNA Disorazole DMSO Run2   | NM_003102    | SOD3      | superoxide dismutase 3, extracellular | 0.796672         | Inlier         |

Identification of Survival Genes in Human Glioblastoma Cells Using siRNA Screening  
 Nikhil G Thaker, Fang Zhang, Peter R. McDonald, Tong Ying Shun, Michael D Lewen, Ian F. Pollack, and John S. Lazo

Molecular Pharmacology

|                              |           |      |                                        |           |        |
|------------------------------|-----------|------|----------------------------------------|-----------|--------|
| siRNA-Vinblastine Run1-DMSO  | NM_003102 | SOD3 | superoxide dismutase 3, extracellular  | 2.651654  | Inlier |
| siRNA Disorazole DMSO Run2   | NM_005632 | SOLH | small optic lobes homolog (Drosophila) | -3.050415 | Inlier |
| siRNA-Temozolomide Run3-DMSO | NM_005632 | SOLH | small optic lobes homolog (Drosophila) | -1.09891  | Inlier |
| siRNA Disorazole DMSO Run1   | NM_005632 | SOLH | small optic lobes homolog (Drosophila) | -0.794616 | Inlier |
| siRNA-Temozolomide Run2-DMSO | NM_005632 | SOLH | small optic lobes homolog (Drosophila) | -0.234408 | Inlier |
| siRNA Disorazole DMSO Run3   | NM_005632 | SOLH | small optic lobes homolog (Drosophila) | 0.234408  | Inlier |
| siRNA-Vinblastine Run1-DMSO  | NM_005632 | SOLH | small optic lobes homolog (Drosophila) | 0.523078  | Inlier |
| siRNA-Temozolomide Run1-DMSO | NM_005632 | SOLH | small optic lobes homolog (Drosophila) | 0.554384  | Inlier |



Identification of Survival Genes in Human Glioblastoma Cells Using siRNA Screening  
 Nikhil G Thaker, Fang Zhang, Peter R. McDonald, Tong Ying Shun, Michael D Lewen, Ian F. Pollack, and John S. Lazo  
 Molecular Pharmacology

|                              |              |        |                                                     |           |        |
|------------------------------|--------------|--------|-----------------------------------------------------|-----------|--------|
| siRNA-Vinblastine Run2-DMSO  | NM_005632    | SOLH   | small optic lobes homolog (Drosophila)              | 0.990477  | Inlier |
| siRNA-Temozolomide Run2-DMSO | NM_001013031 | SORCS1 | sortilin-related VPS10 domain containing receptor 1 | -0.691574 | Inlier |
| siRNA Disorazole DMSO Run1   | NM_001013031 | SORCS1 | sortilin-related VPS10 domain containing receptor 1 | -0.657425 | Inlier |
| siRNA-Vinblastine Run2-DMSO  | NM_001013031 | SORCS1 | sortilin-related VPS10 domain containing receptor 1 | -0.657073 | Inlier |
| siRNA Disorazole DMSO Run3   | NM_001013031 | SORCS1 | sortilin-related VPS10 domain containing receptor 1 | -0.200805 | Inlier |
| siRNA-Temozolomide Run3-DMSO | NM_001013031 | SORCS1 | sortilin-related VPS10 domain containing receptor 1 | 0.200805  | Inlier |
| siRNA-Temozolomide Run1-DMSO | NM_001013031 | SORCS1 | sortilin-related VPS10 domain containing receptor 1 | 1.503109  | Inlier |
| siRNA Disorazole DMSO Run2   | NM_001013031 | SORCS1 | sortilin-related VPS10 domain containing receptor 1 | 2.007905  | Inlier |

Identification of Survival Genes in Human Glioblastoma Cells Using siRNA Screening  
 Nikhil G Thaker, Fang Zhang, Peter R. McDonald, Tong Ying Shun, Michael D Lewen, Ian F. Pollack, and John S. Lazo

Molecular Pharmacology

|                              |                  |        |                                                     |           |        |
|------------------------------|------------------|--------|-----------------------------------------------------|-----------|--------|
| siRNA-Vinblastine Run1-DMSO  | NM_0010<br>13031 | SORCS1 | sortilin-related VPS10 domain containing receptor 1 | 2.758552  | Inlier |
| siRNA-Temozolomide Run3-DMSO | NM_0207<br>77    | SORCS2 | sortilin-related VPS10 domain containing receptor 2 | -1.224341 | Inlier |
| siRNA-Temozolomide Run2-DMSO | NM_0207<br>77    | SORCS2 | sortilin-related VPS10 domain containing receptor 2 | -0.72265  | Inlier |
| siRNA-Vinblastine Run2-DMSO  | NM_0207<br>77    | SORCS2 | sortilin-related VPS10 domain containing receptor 2 | -0.62635  | Inlier |
| siRNA Disorazole DMSO Run3   | NM_0207<br>77    | SORCS2 | sortilin-related VPS10 domain containing receptor 2 | -0.036741 | Inlier |
| siRNA Disorazole DMSO Run1   | NM_0207<br>77    | SORCS2 | sortilin-related VPS10 domain containing receptor 2 | 0.036741  | Inlier |
| siRNA-Temozolomide Run1-DMSO | NM_0207<br>77    | SORCS2 | sortilin-related VPS10 domain containing receptor 2 | 0.043743  | Inlier |
| siRNA Disorazole DMSO Run2   | NM_0207<br>77    | SORCS2 | sortilin-related VPS10 domain containing receptor 2 | 2.161808  | Inlier |

Identification of Survival Genes in Human Glioblastoma Cells Using siRNA Screening

Nikhil G Thaker, Fang Zhang, Peter R. McDonald, Tong Ying Shun, Michael D Lewen, Ian F. Pollack, and John S. Lazo

Molecular Pharmacology

|                              |           |        |                                                     |           |         |
|------------------------------|-----------|--------|-----------------------------------------------------|-----------|---------|
| siRNA-Vinblastine Run1-DMSO  | NM_020777 | SORCS2 | sortilin-related VPS10 domain containing receptor 2 | 2.281886  | Inlier  |
| siRNA-Vinblastine Run2-DMSO  | NM_014978 | SORCS3 | sortilin-related VPS10 domain containing receptor 3 | -0.703537 | Inlier  |
| siRNA-Temozolomide Run2-DMSO | NM_014978 | SORCS3 | sortilin-related VPS10 domain containing receptor 3 | -0.645463 | Inlier  |
| siRNA-Temozolomide Run3-DMSO | NM_014978 | SORCS3 | sortilin-related VPS10 domain containing receptor 3 | -0.348128 | Inlier  |
| siRNA Disorazole DMSO Run1   | NM_014978 | SORCS3 | sortilin-related VPS10 domain containing receptor 3 | -0.188882 | Inlier  |
| siRNA Disorazole DMSO Run3   | NM_014978 | SORCS3 | sortilin-related VPS10 domain containing receptor 3 | 0.188882  | Inlier  |
| siRNA-Temozolomide Run1-DMSO | NM_014978 | SORCS3 | sortilin-related VPS10 domain containing receptor 3 | 1.080054  | Inlier  |
| siRNA Disorazole DMSO Run2   | NM_014978 | SORCS3 | sortilin-related VPS10 domain containing receptor 3 | 4.215741  | Outlier |

Identification of Survival Genes in Human Glioblastoma Cells Using siRNA Screening  
 Nikhil G Thaker, Fang Zhang, Peter R. McDonald, Tong Ying Shun, Michael D Lewen, Ian F. Pollack, and John S. Lazo

Molecular Pharmacology

|                              |           |        |                                                              |           |         |
|------------------------------|-----------|--------|--------------------------------------------------------------|-----------|---------|
| siRNA-Vinblastine Run1-DMSO  | NM_014978 | SORCS3 | sortilin-related VPS10 domain containing receptor 3          | 5.672147  | Outlier |
| siRNA-Vinblastine Run2-DMSO  | NM_003104 | SORD   | sorbitol dehydrogenase                                       | -3.107358 | Inlier  |
| siRNA-Temozolomide Run2-DMSO | NM_003104 | SORD   | sorbitol dehydrogenase                                       | -2.18601  | Inlier  |
| siRNA-Temozolomide Run3-DMSO | NM_003104 | SORD   | sorbitol dehydrogenase                                       | -1.073105 | Inlier  |
| siRNA Disorazole DMSO Run1   | NM_003104 | SORD   | sorbitol dehydrogenase                                       | -0.116388 | Inlier  |
| siRNA-Temozolomide Run1-DMSO | NM_003104 | SORD   | sorbitol dehydrogenase                                       | 0.116388  | Inlier  |
| siRNA Disorazole DMSO Run2   | NM_003104 | SORD   | sorbitol dehydrogenase                                       | 0.21162   | Inlier  |
| siRNA Disorazole DMSO Run3   | NM_003104 | SORD   | sorbitol dehydrogenase                                       | 0.324207  | Inlier  |
| siRNA-Vinblastine Run1-DMSO  | NM_003104 | SORD   | sorbitol dehydrogenase                                       | 1.024793  | Inlier  |
| siRNA-Vinblastine Run2-DMSO  | NM_003105 | SORL1  | sortilin-related receptor, L(DLR class) A repeats-containing | -1.050027 | Inlier  |
| siRNA-Temozolomide Run3-DMSO | NM_003105 | SORL1  | sortilin-related receptor, L(DLR class) A repeats-containing | -1.010947 | Inlier  |
| siRNA-Temozolomide Run2-DMSO | NM_003105 | SORL1  | sortilin-related receptor, L(DLR class) A repeats-containing | -0.579178 | Inlier  |

Identification of Survival Genes in Human Glioblastoma Cells Using siRNA Screening  
 Nikhil G Thaker, Fang Zhang, Peter R. McDonald, Tong Ying Shun, Michael D Lewen, Ian F. Pollack, and John S. Lazo

Molecular Pharmacology

|                              |               |       |                                                              |           |         |
|------------------------------|---------------|-------|--------------------------------------------------------------|-----------|---------|
| siRNA Disorazole DMSO Run3   | NM_0031<br>05 | SORL1 | sortilin-related receptor, L(DLR class) A repeats-containing | -0.195745 | Inlier  |
| siRNA Disorazole DMSO Run1   | NM_0031<br>05 | SORL1 | sortilin-related receptor, L(DLR class) A repeats-containing | 0.195745  | Inlier  |
| siRNA-Vinblastine Run1-DMSO  | NM_0031<br>05 | SORL1 | sortilin-related receptor, L(DLR class) A repeats-containing | 0.564327  | Inlier  |
| siRNA-Temozolomide Run1-DMSO | NM_0031<br>05 | SORL1 | sortilin-related receptor, L(DLR class) A repeats-containing | 0.769822  | Inlier  |
| siRNA Disorazole DMSO Run2   | NM_0031<br>05 | SORL1 | sortilin-related receptor, L(DLR class) A repeats-containing | 1.744686  | Inlier  |
| siRNA Disorazole DMSO Run1   | NM_0029<br>59 | SORT1 | sortilin 1                                                   | -2.708069 | Inlier  |
| siRNA-Temozolomide Run3-DMSO | NM_0029<br>59 | SORT1 | sortilin 1                                                   | -0.812712 | Inlier  |
| siRNA-Temozolomide Run1-DMSO | NM_0029<br>59 | SORT1 | sortilin 1                                                   | -0.284435 | Inlier  |
| siRNA-Vinblastine Run2-DMSO  | NM_0029<br>59 | SORT1 | sortilin 1                                                   | -0.211557 | Inlier  |
| siRNA-Temozolomide Run2-DMSO | NM_0029<br>59 | SORT1 | sortilin 1                                                   | 0.211558  | Inlier  |
| siRNA Disorazole DMSO Run2   | NM_0029<br>59 | SORT1 | sortilin 1                                                   | 0.536288  | Inlier  |
| siRNA-Vinblastine Run1-DMSO  | NM_0029<br>59 | SORT1 | sortilin 1                                                   | 1.296583  | Inlier  |
| siRNA Disorazole DMSO Run3   | NM_0029<br>59 | SORT1 | sortilin 1                                                   | 3.682186  | Outlier |

Identification of Survival Genes in Human Glioblastoma Cells Using siRNA Screening  
 Nikhil G Thaker, Fang Zhang, Peter R. McDonald, Tong Ying Shun, Michael D Lewen, Ian F. Pollack, and John S. Lazo  
 Molecular Pharmacology

|                              |           |       |                                         |           |        |
|------------------------------|-----------|-------|-----------------------------------------|-----------|--------|
| siRNA-Temozolomide Run3-DMSO | NM_005633 | SOS1  | son of sevenless homolog 1 (Drosophila) | -1.216927 | Inlier |
| siRNA-Temozolomide Run2-DMSO | NM_005633 | SOS1  | son of sevenless homolog 1 (Drosophila) | -0.960479 | Inlier |
| siRNA-Temozolomide Run1-DMSO | NM_005633 | SOS1  | son of sevenless homolog 1 (Drosophila) | -0.442809 | Inlier |
| siRNA Disorazole DMSO Run3   | NM_005633 | SOS1  | son of sevenless homolog 1 (Drosophila) | -0.039346 | Inlier |
| siRNA-Vinblastine Run2-DMSO  | NM_005633 | SOS1  | son of sevenless homolog 1 (Drosophila) | 0.039346  | Inlier |
| siRNA-Vinblastine Run1-DMSO  | NM_005633 | SOS1  | son of sevenless homolog 1 (Drosophila) | 0.613929  | Inlier |
| siRNA Disorazole DMSO Run1   | NM_005633 | SOS1  | son of sevenless homolog 1 (Drosophila) | 0.735071  | Inlier |
| siRNA Disorazole DMSO Run2   | NM_005633 | SOS1  | son of sevenless homolog 1 (Drosophila) | 0.779398  | Inlier |
| siRNA-Temozolomide Run3-DMSO | NM_004510 | SP110 | SP110 nuclear body protein              | -1.126702 | Inlier |

Identification of Survival Genes in Human Glioblastoma Cells Using siRNA Screening  
 Nikhil G Thaker, Fang Zhang, Peter R. McDonald, Tong Ying Shun, Michael D Lewen, Ian F. Pollack, and John S. Lazo

Molecular Pharmacology

|                              |               |       |                                                                                                                                      |           |        |
|------------------------------|---------------|-------|--------------------------------------------------------------------------------------------------------------------------------------|-----------|--------|
| siRNA-Temozolomide Run2-DMSO | NM_0045<br>10 | SP110 | SP110<br>nuclear<br>body<br>protein                                                                                                  | -0.934588 | Inlier |
| siRNA Disorazole DMSO Run2   | NM_0045<br>10 | SP110 | SP110<br>nuclear<br>body<br>protein                                                                                                  | -0.414412 | Inlier |
| siRNA Disorazole DMSO Run3   | NM_0045<br>10 | SP110 | SP110<br>nuclear<br>body<br>protein                                                                                                  | -0.206301 | Inlier |
| siRNA-Temozolomide Run1-DMSO | NM_0045<br>10 | SP110 | SP110<br>nuclear<br>body<br>protein                                                                                                  | 0.206301  | Inlier |
| siRNA Disorazole DMSO Run1   | NM_0045<br>10 | SP110 | SP110<br>nuclear<br>body<br>protein                                                                                                  | 0.409747  | Inlier |
| siRNA-Vinblastine Run1-DMSO  | NM_0045<br>10 | SP110 | SP110<br>nuclear<br>body<br>protein                                                                                                  | 1.025043  | Inlier |
| siRNA-Vinblastine Run2-DMSO  | NM_0045<br>10 | SP110 | SP110<br>nuclear<br>body<br>protein<br>sperm<br>adhesion<br>molecule 1<br>(PH-20<br>hyaluronid<br>ase, zona<br>pellucida<br>binding) | 1.372334  | Inlier |
| siRNA Disorazole DMSO Run3   | NM_1531<br>89 | SPAM1 | SPAM1<br>sperm<br>adhesion<br>molecule 1<br>(PH-20<br>hyaluronid<br>ase, zona<br>pellucida<br>binding)                               | -0.809852 | Inlier |
| siRNA-Temozolomide Run2-DMSO | NM_1531<br>89 | SPAM1 | SPAM1<br>sperm<br>adhesion<br>molecule 1<br>(PH-20<br>hyaluronid<br>ase, zona<br>pellucida<br>binding)                               | -0.568164 | Inlier |
| siRNA-Vinblastine Run2-DMSO  | NM_1531<br>89 | SPAM1 | SPAM1<br>sperm<br>adhesion<br>molecule 1<br>(PH-20<br>hyaluronid<br>ase, zona<br>pellucida<br>binding)                               | -0.535613 | Inlier |

Identification of Survival Genes in Human Glioblastoma Cells Using siRNA Screening

Nikhil G Thaker, Fang Zhang, Peter R. McDonald, Tong Ying Shun, Michael D Lewen, Ian F. Pollack, and John S. Lazo

Molecular Pharmacology

|                              |               |       |                                                                         |           |        |
|------------------------------|---------------|-------|-------------------------------------------------------------------------|-----------|--------|
| siRNA-Temozolomide Run3-DMSO | NM_1531<br>89 | SPAM1 | sperm adhesion molecule 1 (PH-20 hyaluronidase, zona pellucida binding) | -0.409554 | Inlier |
| siRNA-Temozolomide Run1-DMSO | NM_1531<br>89 | SPAM1 | sperm adhesion molecule 1 (PH-20 hyaluronidase, zona pellucida binding) | 0.409554  | Inlier |
| siRNA Disorazole DMSO Run1   | NM_1531<br>89 | SPAM1 | sperm adhesion molecule 1 (PH-20 hyaluronidase, zona pellucida binding) | 0.780836  | Inlier |
| siRNA-Vinblastine Run1-DMSO  | NM_1531<br>89 | SPAM1 | sperm adhesion molecule 1 (PH-20 hyaluronidase, zona pellucida binding) | 1.335911  | Inlier |
| siRNA Disorazole DMSO Run2   | NM_1531<br>89 | SPAM1 | sperm adhesion molecule 1 (PH-20 hyaluronidase, zona pellucida binding) | 1.707354  | Inlier |
| siRNA-Temozolomide Run2-DMSO | NM_0307<br>64 | SPAP1 | SH2 domain containing phosphatase anchor protein 1                      | -2.460132 | Inlier |



Identification of Survival Genes in Human Glioblastoma Cells Using siRNA Screening  
 Nikhil G Thaker, Fang Zhang, Peter R. McDonald, Tong Ying Shun, Michael D Lewen, Ian F. Pollack, and John S. Lazo  
 Molecular Pharmacology

|                                  |               |       |                                                                    |           |         |
|----------------------------------|---------------|-------|--------------------------------------------------------------------|-----------|---------|
| siRNA Disorazole DMSO Run3       | NM_0307<br>64 | SPAP1 | SH2<br>domain<br>containing<br>phosphata<br>se anchor<br>protein 1 | -1.016735 | Inlier  |
| siRNA-Temozolomide Run1-<br>DMSO | NM_0307<br>64 | SPAP1 | SH2<br>domain<br>containing<br>phosphata<br>se anchor<br>protein 1 | -0.043986 | Inlier  |
| siRNA Disorazole DMSO Run1       | NM_0307<br>64 | SPAP1 | SH2<br>domain<br>containing<br>phosphata<br>se anchor<br>protein 1 | -0.008678 | Inlier  |
| siRNA-Vinblastine Run2-<br>DMSO  | NM_0307<br>64 | SPAP1 | SH2<br>domain<br>containing<br>phosphata<br>se anchor<br>protein 1 | 0.008677  | Inlier  |
| siRNA-Temozolomide Run3-<br>DMSO | NM_0307<br>64 | SPAP1 | SH2<br>domain<br>containing<br>phosphata<br>se anchor<br>protein 1 | 0.332265  | Inlier  |
| siRNA-Vinblastine Run1-<br>DMSO  | NM_0307<br>64 | SPAP1 | SH2<br>domain<br>containing<br>phosphata<br>se anchor<br>protein 1 | 1.031715  | Inlier  |
| siRNA Disorazole DMSO Run2       | NM_0307<br>64 | SPAP1 | SH2<br>domain<br>containing<br>phosphata<br>se anchor<br>protein 1 | 4.209998  | Outlier |

Identification of Survival Genes in Human Glioblastoma Cells Using siRNA Screening  
 Nikhil G Thaker, Fang Zhang, Peter R. McDonald, Tong Ying Shun, Michael D Lewen, Ian F. Pollack, and John S. Lazo

Molecular Pharmacology

|                              |           |          |                                     |           |        |
|------------------------------|-----------|----------|-------------------------------------|-----------|--------|
| siRNA-Temozolomide Run3-DMSO | NM_145207 | SPATA5   | spermatogenesis associated 5        | -0.782314 | Inlier |
| siRNA-Vinblastine Run2-DMSO  | NM_145207 | SPATA5   | spermatogenesis associated 5        | -0.696003 | Inlier |
| siRNA Disorazole DMSO Run3   | NM_145207 | SPATA5   | spermatogenesis associated 5        | -0.652997 | Inlier |
| siRNA-Temozolomide Run2-DMSO | NM_145207 | SPATA5   | spermatogenesis associated 5        | -0.172744 | Inlier |
| siRNA Disorazole DMSO Run1   | NM_145207 | SPATA5   | spermatogenesis associated 5        | 0.172744  | Inlier |
| siRNA-Temozolomide Run1-DMSO | NM_145207 | SPATA5   | spermatogenesis associated 5        | 0.28696   | Inlier |
| siRNA-Vinblastine Run1-DMSO  | NM_145207 | SPATA5   | spermatogenesis associated 5        | 2.021378  | Inlier |
| siRNA Disorazole DMSO Run2   | NM_145207 | SPATA5   | spermatogenesis associated 5        | 2.203163  | Inlier |
| siRNA-Temozolomide Run3-DMSO | NM_024063 | SPATA5L1 | spermatogenesis associated 5-like 1 | -0.928215 | Inlier |
| siRNA Disorazole DMSO Run3   | NM_024063 | SPATA5L1 | spermatogenesis associated 5-like 1 | -0.420785 | Inlier |
| siRNA-Temozolomide Run2-DMSO | NM_024063 | SPATA5L1 | spermatogenesis associated 5-like 1 | -0.413886 | Inlier |
| siRNA-Vinblastine Run2-DMSO  | NM_024063 | SPATA5L1 | spermatogenesis associated 5-like 1 | -0.128145 | Inlier |
| siRNA-Temozolomide Run1-DMSO | NM_024063 | SPATA5L1 | spermatogenesis associated 5-like 1 | 0.128145  | Inlier |

Identification of Survival Genes in Human Glioblastoma Cells Using siRNA Screening  
 Nikhil G Thaker, Fang Zhang, Peter R. McDonald, Tong Ying Shun, Michael D Lewen, Ian F. Pollack, and John S. Lazo

Molecular Pharmacology

|                              |           |          |                                     |           |         |
|------------------------------|-----------|----------|-------------------------------------|-----------|---------|
| siRNA Disorazole DMSO Run1   | NM_024063 | SPATA5L1 | spermatogenesis associated 5-like 1 | 1.459142  | Inlier  |
| siRNA-Vinblastine Run1-DMSO  | NM_024063 | SPATA5L1 | spermatogenesis associated 5-like 1 | 1.62174   | Inlier  |
| siRNA Disorazole DMSO Run2   | NM_024063 | SPATA5L1 | spermatogenesis associated 5-like 1 | 1.766241  | Inlier  |
| siRNA Disorazole DMSO Run1   | NM_014300 | SPC18    | SEC11-like 1 (S. cerevisiae)        | -4.089688 | Outlier |
| siRNA-Temozolomide Run2-DMSO | NM_014300 | SPC18    | SEC11-like 1 (S. cerevisiae)        | -1.931071 | Inlier  |
| siRNA-Temozolomide Run1-DMSO | NM_014300 | SPC18    | SEC11-like 1 (S. cerevisiae)        | -0.881947 | Inlier  |
| siRNA-Vinblastine Run1-DMSO  | NM_014300 | SPC18    | SEC11-like 1 (S. cerevisiae)        | -0.201871 | Inlier  |
| siRNA-Temozolomide Run3-DMSO | NM_014300 | SPC18    | SEC11-like 1 (S. cerevisiae)        | 0.201872  | Inlier  |
| siRNA Disorazole DMSO Run2   | NM_014300 | SPC18    | SEC11-like 1 (S. cerevisiae)        | 0.409125  | Inlier  |
| siRNA-Vinblastine Run2-DMSO  | NM_014300 | SPC18    | SEC11-like 1 (S. cerevisiae)        | 0.467053  | Inlier  |
| siRNA Disorazole DMSO Run3   | NM_014300 | SPC18    | SEC11-like 1 (S. cerevisiae)        | 1.201914  | Inlier  |
| siRNA-Temozolomide Run2-DMSO | NM_182756 | SPDY1    | speedy homolog 1 (Drosophila)       | -1.835749 | Inlier  |

Identification of Survival Genes in Human Glioblastoma Cells Using siRNA Screening

Nikhil G Thaker, Fang Zhang, Peter R. McDonald, Tong Ying Shun, Michael D Lewen, Ian F. Pollack, and John S.

Lazo

Molecular Pharmacology

|                                  |               |       |                                                                                                   |           |        |
|----------------------------------|---------------|-------|---------------------------------------------------------------------------------------------------|-----------|--------|
| siRNA Disorazole DMSO Run2       | NM_1827<br>56 | SPDY1 | speedy<br>homolog 1<br>(Drosophil<br>a)                                                           | -0.942654 | Inlier |
| siRNA-Temozolomide Run3-<br>DMSO | NM_1827<br>56 | SPDY1 | speedy<br>homolog 1<br>(Drosophil<br>a)                                                           | -0.649014 | Inlier |
| siRNA-Temozolomide Run1-<br>DMSO | NM_1827<br>56 | SPDY1 | speedy<br>homolog 1<br>(Drosophil<br>a)                                                           | -0.122269 | Inlier |
| siRNA Disorazole DMSO Run1       | NM_1827<br>56 | SPDY1 | speedy<br>homolog 1<br>(Drosophil<br>a)                                                           | 0.122269  | Inlier |
| siRNA Disorazole DMSO Run3       | NM_1827<br>56 | SPDY1 | speedy<br>homolog 1<br>(Drosophil<br>a)                                                           | 0.548699  | Inlier |
| siRNA-Vinblastine Run1-<br>DMSO  | NM_1827<br>56 | SPDY1 | speedy<br>homolog 1<br>(Drosophil<br>a)                                                           | 0.699986  | Inlier |
| siRNA-Vinblastine Run2-<br>DMSO  | NM_1827<br>56 | SPDY1 | speedy<br>homolog 1<br>(Drosophil<br>a)                                                           | 1.005528  | Inlier |
| siRNA-Temozolomide Run3-<br>DMSO | NM_1993<br>67 | SPG7  | spastic<br>paraplegia<br>7,<br>paraplegin<br>(pure and complicate<br>d<br>autosomal<br>recessive) | -1.242479 | Inlier |

Identification of Survival Genes in Human Glioblastoma Cells Using siRNA Screening

Nikhil G Thaker, Fang Zhang, Peter R. McDonald, Tong Ying Shun, Michael D Lewen, Ian F. Pollack, and John S. Lazo

Molecular Pharmacology

|                              |           |      |                                                                             |           |        |
|------------------------------|-----------|------|-----------------------------------------------------------------------------|-----------|--------|
| siRNA-Temozolomide Run2-DMSO | NM_199367 | SPG7 | spastic paraplegia 7, paraplegin (pure and complicated autosomal recessive) | -0.809718 | Inlier |
| siRNA Disorazole DMSO Run2   | NM_199367 | SPG7 | spastic paraplegia 7, paraplegin (pure and complicated autosomal recessive) | -0.59429  | Inlier |
| siRNA-Temozolomide Run1-DMSO | NM_199367 | SPG7 | spastic paraplegia 7, paraplegin (pure and complicated autosomal recessive) | -0.006692 | Inlier |
| siRNA Disorazole DMSO Run3   | NM_199367 | SPG7 | spastic paraplegia 7, paraplegin (pure and complicated autosomal recessive) | 0.006692  | Inlier |
| siRNA Disorazole DMSO Run1   | NM_199367 | SPG7 | spastic paraplegia 7, paraplegin (pure and complicated autosomal recessive) | 0.194154  | Inlier |

Identification of Survival Genes in Human Glioblastoma Cells Using siRNA Screening  
 Nikhil G Thaker, Fang Zhang, Peter R. McDonald, Tong Ying Shun, Michael D Lewen, Ian F. Pollack, and John S. Lazo  
 Molecular Pharmacology

|                              |           |       |                                                                             |           |        |
|------------------------------|-----------|-------|-----------------------------------------------------------------------------|-----------|--------|
| siRNA-Vinblastine Run1-DMSO  | NM_199367 | SPG7  | spastic paraplegia 7, paraplegin (pure and complicated autosomal recessive) | 0.75471   | Inlier |
| siRNA-Vinblastine Run2-DMSO  | NM_199367 | SPG7  | spastic paraplegia 7, paraplegin (pure and complicated autosomal recessive) | 0.918384  | Inlier |
| siRNA-Temozolomide Run2-DMSO | NM_182965 | SPHK1 | sphingosine kinase 1                                                        | -1.607063 | Inlier |
| siRNA-Temozolomide Run3-DMSO | NM_182965 | SPHK1 | sphingosine kinase 1                                                        | -1.426051 | Inlier |
| siRNA Disorazole DMSO Run1   | NM_182965 | SPHK1 | sphingosine kinase 1                                                        | -0.51638  | Inlier |
| siRNA Disorazole DMSO Run3   | NM_182965 | SPHK1 | sphingosine kinase 1                                                        | -0.184459 | Inlier |
| siRNA Disorazole DMSO Run2   | NM_182965 | SPHK1 | sphingosine kinase 1                                                        | 0.184459  | Inlier |
| siRNA-Vinblastine Run2-DMSO  | NM_182965 | SPHK1 | sphingosine kinase 1                                                        | 0.513806  | Inlier |
| siRNA-Temozolomide Run1-DMSO | NM_182965 | SPHK1 | sphingosine kinase 1                                                        | 0.83262   | Inlier |
| siRNA-Vinblastine Run1-DMSO  | NM_182965 | SPHK1 | sphingosine kinase 1                                                        | 0.858699  | Inlier |
| siRNA Disorazole DMSO Run2   | NM_020126 | SPHK2 | sphingosine kinase 2                                                        | -1.743673 | Inlier |
| siRNA-Temozolomide Run3-DMSO | NM_020126 | SPHK2 | sphingosine kinase 2                                                        | -0.974062 | Inlier |

Identification of Survival Genes in Human Glioblastoma Cells Using siRNA Screening

Nikhil G Thaker, Fang Zhang, Peter R. McDonald, Tong Ying Shun, Michael D Lewen, Ian F. Pollack, and John S.

Lazo

Molecular Pharmacology

|                              |               |        |                                                     |           |         |
|------------------------------|---------------|--------|-----------------------------------------------------|-----------|---------|
| siRNA-Temozolomide Run1-DMSO | NM_0201<br>26 | SPHK2  | sphingosin<br>e kinase 2                            | -0.163801 | Inlier  |
| siRNA-Temozolomide Run2-DMSO | NM_0201<br>26 | SPHK2  | sphingosin<br>e kinase 2                            | -0.063276 | Inlier  |
| siRNA Disorazole DMSO Run1   | NM_0201<br>26 | SPHK2  | sphingosin<br>e kinase 2                            | 0.063276  | Inlier  |
| siRNA-Vinblastine Run1-DMSO  | NM_0201<br>26 | SPHK2  | sphingosin<br>e kinase 2                            | 0.374938  | Inlier  |
| siRNA Disorazole DMSO Run3   | NM_0201<br>26 | SPHK2  | sphingosin<br>e kinase 2                            | 1.224462  | Inlier  |
| siRNA-Vinblastine Run2-DMSO  | NM_0201<br>26 | SPHK2  | sphingosin<br>e kinase 2                            | 1.464607  | Inlier  |
| siRNA-Temozolomide Run2-DMSO | NM_0031<br>22 | SPINK1 | serine<br>protease<br>inhibitor,<br>Kazal type<br>1 | -0.707864 | Inlier  |
| siRNA-Temozolomide Run3-DMSO | NM_0031<br>22 | SPINK1 | serine<br>protease<br>inhibitor,<br>Kazal type<br>1 | -0.641136 | Inlier  |
| siRNA Disorazole DMSO Run3   | NM_0031<br>22 | SPINK1 | serine<br>protease<br>inhibitor,<br>Kazal type<br>1 | -0.493737 | Inlier  |
| siRNA-Temozolomide Run1-DMSO | NM_0031<br>22 | SPINK1 | serine<br>protease<br>inhibitor,<br>Kazal type<br>1 | -0.143219 | Inlier  |
| siRNA Disorazole DMSO Run1   | NM_0031<br>22 | SPINK1 | serine<br>protease<br>inhibitor,<br>Kazal type<br>1 | 0.143219  | Inlier  |
| siRNA Disorazole DMSO Run2   | NM_0031<br>22 | SPINK1 | serine<br>protease<br>inhibitor,<br>Kazal type<br>1 | 3.680363  | Outlier |

Identification of Survival Genes in Human Glioblastoma Cells Using siRNA Screening  
 Nikhil G Thaker, Fang Zhang, Peter R. McDonald, Tong Ying Shun, Michael D Lewen, Ian F. Pollack, and John S. Lazo

Molecular Pharmacology

|                              |               |        |                                                                                        |                  |
|------------------------------|---------------|--------|----------------------------------------------------------------------------------------|------------------|
| siRNA-Vinblastine Run1-DMSO  | NM_0031<br>22 | SPINK1 | serine<br>protease<br>inhibitor,<br>Kazal type<br>1                                    | 5.184735 Outlier |
| siRNA-Vinblastine Run2-DMSO  | NM_0031<br>22 | SPINK1 | serine<br>protease<br>inhibitor,<br>Kazal type<br>1                                    | 5.473429 Outlier |
| siRNA Disorazole DMSO Run1   | NM_0211<br>14 | SPINK2 | serine<br>protease<br>inhibitor,<br>Kazal type<br>2 (acrosin-<br>trypsin<br>inhibitor) | -1.303946 Inlier |
| siRNA-Temozolomide Run2-DMSO | NM_0211<br>14 | SPINK2 | serine<br>protease<br>inhibitor,<br>Kazal type<br>2 (acrosin-<br>trypsin<br>inhibitor) | -1.055959 Inlier |
| siRNA-Temozolomide Run1-DMSO | NM_0211<br>14 | SPINK2 | serine<br>protease<br>inhibitor,<br>Kazal type<br>2 (acrosin-<br>trypsin<br>inhibitor) | -0.453464 Inlier |
| siRNA Disorazole DMSO Run3   | NM_0211<br>14 | SPINK2 | serine<br>protease<br>inhibitor,<br>Kazal type<br>2 (acrosin-<br>trypsin<br>inhibitor) | -0.070471 Inlier |
| siRNA-Temozolomide Run3-DMSO | NM_0211<br>14 | SPINK2 | serine<br>protease<br>inhibitor,<br>Kazal type<br>2 (acrosin-<br>trypsin<br>inhibitor) | 0.070472 Inlier  |



Identification of Survival Genes in Human Glioblastoma Cells Using siRNA Screening  
 Nikhil G Thaker, Fang Zhang, Peter R. McDonald, Tong Ying Shun, Michael D Lewen, Ian F. Pollack, and John S. Lazo  
 Molecular Pharmacology

|                              |               |        |                                                                                        |                  |
|------------------------------|---------------|--------|----------------------------------------------------------------------------------------|------------------|
| siRNA-Vinblastine Run2-DMSO  | NM_0211<br>14 | SPINK2 | serine<br>protease<br>inhibitor,<br>Kazal type<br>2 (acrosin-<br>trypsin<br>inhibitor) | 0.136801 Inlier  |
| siRNA Disorazole DMSO Run2   | NM_0211<br>14 | SPINK2 | serine<br>protease<br>inhibitor,<br>Kazal type<br>2 (acrosin-<br>trypsin<br>inhibitor) | 0.895536 Inlier  |
| siRNA-Vinblastine Run1-DMSO  | NM_0211<br>14 | SPINK2 | serine<br>protease<br>inhibitor,<br>Kazal type<br>2 (acrosin-<br>trypsin<br>inhibitor) | 2.171983 Inlier  |
| siRNA-Temozolomide Run3-DMSO | NM_0144<br>71 | SPINK4 | serine<br>protease<br>inhibitor,<br>Kazal type<br>4                                    | -1.424337 Inlier |
| siRNA-Temozolomide Run2-DMSO | NM_0144<br>71 | SPINK4 | serine<br>protease<br>inhibitor,<br>Kazal type<br>4                                    | -0.967099 Inlier |
| siRNA Disorazole DMSO Run1   | NM_0144<br>71 | SPINK4 | serine<br>protease<br>inhibitor,<br>Kazal type<br>4                                    | -0.207102 Inlier |
| siRNA-Temozolomide Run1-DMSO | NM_0144<br>71 | SPINK4 | serine<br>protease<br>inhibitor,<br>Kazal type<br>4                                    | -0.169164 Inlier |
| siRNA Disorazole DMSO Run3   | NM_0144<br>71 | SPINK4 | serine<br>protease<br>inhibitor,<br>Kazal type<br>4                                    | 0.169164 Inlier  |

Identification of Survival Genes in Human Glioblastoma Cells Using siRNA Screening  
 Nikhil G Thaker, Fang Zhang, Peter R. McDonald, Tong Ying Shun, Michael D Lewen, Ian F. Pollack, and John S. Lazo

Molecular Pharmacology

|                                  |               |        |                                                     |           |        |
|----------------------------------|---------------|--------|-----------------------------------------------------|-----------|--------|
| siRNA Disorazole DMSO Run2       | NM_0144<br>71 | SPINK4 | serine<br>protease<br>inhibitor,<br>Kazal type<br>4 | 0.381901  | Inlier |
| siRNA-Vinblastine Run2-<br>DMSO  | NM_0144<br>71 | SPINK4 | serine<br>protease<br>inhibitor,<br>Kazal type<br>4 | 0.99308   | Inlier |
| siRNA-Vinblastine Run1-<br>DMSO  | NM_0144<br>71 | SPINK4 | serine<br>protease<br>inhibitor,<br>Kazal type<br>4 | 1.642796  | Inlier |
| siRNA-Temozolomide Run3-<br>DMSO | NM_0068<br>46 | SPINK5 | serine<br>protease<br>inhibitor,<br>Kazal type<br>5 | -1.590181 | Inlier |
| siRNA-Temozolomide Run2-<br>DMSO | NM_0068<br>46 | SPINK5 | serine<br>protease<br>inhibitor,<br>Kazal type<br>5 | -0.742914 | Inlier |
| siRNA-Temozolomide Run1-<br>DMSO | NM_0068<br>46 | SPINK5 | serine<br>protease<br>inhibitor,<br>Kazal type<br>5 | -0.606086 | Inlier |
| siRNA Disorazole DMSO Run3       | NM_0068<br>46 | SPINK5 | serine<br>protease<br>inhibitor,<br>Kazal type<br>5 | -0.000186 | Inlier |
| siRNA Disorazole DMSO Run2       | NM_0068<br>46 | SPINK5 | serine<br>protease<br>inhibitor,<br>Kazal type<br>5 | 0.000186  | Inlier |
| siRNA Disorazole DMSO Run1       | NM_0068<br>46 | SPINK5 | serine<br>protease<br>inhibitor,<br>Kazal type<br>5 | 0.070248  | Inlier |
| siRNA-Vinblastine Run2-<br>DMSO  | NM_0068<br>46 | SPINK5 | serine<br>protease<br>inhibitor,<br>Kazal type<br>5 | 1.356739  | Inlier |

Identification of Survival Genes in Human Glioblastoma Cells Using siRNA Screening  
 Nikhil G Thaker, Fang Zhang, Peter R. McDonald, Tong Ying Shun, Michael D Lewen, Ian F. Pollack, and John S. Lazo

Molecular Pharmacology

|                              |               |        |                                                       |           |        |
|------------------------------|---------------|--------|-------------------------------------------------------|-----------|--------|
| siRNA-Vinblastine Run1-DMSO  | NM_0068<br>46 | SPINK5 | serine<br>protease<br>inhibitor,<br>Kazal type<br>5   | 2.899586  | Inlier |
| siRNA-Temozolomide Run3-DMSO | NM_0037<br>10 | SPINT1 | serine<br>protease<br>inhibitor,<br>Kunitz<br>type 1  | -1.358084 | Inlier |
| siRNA-Temozolomide Run2-DMSO | NM_0037<br>10 | SPINT1 | serine<br>protease<br>inhibitor,<br>Kunitz<br>type 1  | -1.001428 | Inlier |
| siRNA-Temozolomide Run1-DMSO | NM_0037<br>10 | SPINT1 | serine<br>protease<br>inhibitor,<br>Kunitz<br>type 1  | -0.612364 | Inlier |
| siRNA Disorazole DMSO Run1   | NM_0037<br>10 | SPINT1 | serine<br>protease<br>inhibitor,<br>Kunitz<br>type 1  | -0.272991 | Inlier |
| siRNA Disorazole DMSO Run3   | NM_0037<br>10 | SPINT1 | serine<br>protease<br>inhibitor,<br>Kunitz<br>type 1  | 0.272991  | Inlier |
| siRNA Disorazole DMSO Run2   | NM_0037<br>10 | SPINT1 | serine<br>protease<br>inhibitor,<br>Kunitz<br>type 1  | 0.495382  | Inlier |
| siRNA-Vinblastine Run1-DMSO  | NM_0037<br>10 | SPINT1 | serine<br>protease<br>inhibitor,<br>Kunitz<br>type 1  | 0.736636  | Inlier |
| siRNA-Vinblastine Run2-DMSO  | NM_0037<br>10 | SPINT1 | serine<br>protease<br>inhibitor,<br>Kunitz<br>type 1  | 1.015679  | Inlier |
| siRNA-Temozolomide Run2-DMSO | NM_0211<br>02 | SPINT2 | serine<br>protease<br>inhibitor,<br>Kunitz<br>type, 2 | -1.103294 | Inlier |

Identification of Survival Genes in Human Glioblastoma Cells Using siRNA Screening  
 Nikhil G Thaker, Fang Zhang, Peter R. McDonald, Tong Ying Shun, Michael D Lewen, Ian F. Pollack, and John S. Lazo

Molecular Pharmacology

|                              |           |        |                                           |           |        |
|------------------------------|-----------|--------|-------------------------------------------|-----------|--------|
| siRNA-Temozolomide Run3-DMSO | NM_021102 | SPINT2 | serine protease inhibitor, Kunitz type, 2 | -0.968197 | Inlier |
| siRNA-Temozolomide Run1-DMSO | NM_021102 | SPINT2 | serine protease inhibitor, Kunitz type, 2 | -0.548918 | Inlier |
| siRNA Disorazole DMSO Run3   | NM_021102 | SPINT2 | serine protease inhibitor, Kunitz type, 2 | -0.011128 | Inlier |
| siRNA Disorazole DMSO Run1   | NM_021102 | SPINT2 | serine protease inhibitor, Kunitz type, 2 | 0.011128  | Inlier |
| siRNA Disorazole DMSO Run2   | NM_021102 | SPINT2 | serine protease inhibitor, Kunitz type, 2 | 0.351546  | Inlier |
| siRNA-Vinblastine Run2-DMSO  | NM_021102 | SPINT2 | serine protease inhibitor, Kunitz type, 2 | 0.800082  | Inlier |
| siRNA-Vinblastine Run1-DMSO  | NM_021102 | SPINT2 | Kunitz type, 2                            | 1.096614  | Inlier |
| siRNA-Temozolomide Run3-DMSO | NM_032802 | SPPL2A | SPPL2A                                    | -0.877742 | Inlier |
| siRNA-Temozolomide Run1-DMSO | NM_032802 | SPPL2A | SPPL2A                                    | -0.471258 | Inlier |
| siRNA-Temozolomide Run2-DMSO | NM_032802 | SPPL2A | SPPL2A                                    | -0.39174  | Inlier |
| siRNA Disorazole DMSO Run2   | NM_032802 | SPPL2A | SPPL2A                                    | -0.293555 | Inlier |
| siRNA Disorazole DMSO Run1   | NM_032802 | SPPL2A | SPPL2A                                    | 0.293555  | Inlier |
| siRNA Disorazole DMSO Run3   | NM_032802 | SPPL2A | SPPL2A                                    | 1.322922  | Inlier |
| siRNA-Vinblastine Run1-DMSO  | NM_032802 | SPPL2A | SPPL2A                                    | 1.59251   | Inlier |
| siRNA-Vinblastine Run2-DMSO  | NM_032802 | SPPL2A | SPPL2A                                    | 1.837455  | Inlier |

Identification of Survival Genes in Human Glioblastoma Cells Using siRNA Screening

Nikhil G Thaker, Fang Zhang, Peter R. McDonald, Tong Ying Shun, Michael D Lewen, Ian F. Pollack, and John S. Lazo

| siRNA-Temozolomide Run3-<br>DMSO | NM_1529<br>88 | SPPL2B | SPPL2B                                                                                     | -1.78753  | Inlier |
|----------------------------------|---------------|--------|--------------------------------------------------------------------------------------------|-----------|--------|
| siRNA-Temozolomide Run1-<br>DMSO | NM_1529<br>88 | SPPL2B | SPPL2B                                                                                     | -0.672482 | Inlier |
| siRNA-Temozolomide Run2-<br>DMSO | NM_1529<br>88 | SPPL2B | SPPL2B                                                                                     | -0.354927 | Inlier |
| siRNA Disorazole DMSO Run1       | NM_1529<br>88 | SPPL2B | SPPL2B                                                                                     | -0.118681 | Inlier |
| siRNA-Vinblastine Run1-<br>DMSO  | NM_1529<br>88 | SPPL2B | SPPL2B                                                                                     | 0.118681  | Inlier |
| siRNA Disorazole DMSO Run2       | NM_1529<br>88 | SPPL2B | SPPL2B                                                                                     | 0.676518  | Inlier |
| siRNA-Vinblastine Run2-<br>DMSO  | NM_1529<br>88 | SPPL2B | SPPL2B                                                                                     | 0.704774  | Inlier |
| siRNA Disorazole DMSO Run3       | NM_1529<br>88 | SPPL2B | SPPL2B                                                                                     | 1.432072  | Inlier |
| siRNA-Temozolomide Run3-<br>DMSO | NM_0031<br>24 | SPR    | sepiapterin<br>reductase<br>(7,8-<br>dihydrobio<br>pterin:NA<br>DP+<br>oxidoredu<br>ctase) | -1.400434 | Inlier |
| siRNA-Temozolomide Run2-<br>DMSO | NM_0031<br>24 | SPR    | sepiapterin<br>reductase<br>(7,8-<br>dihydrobio<br>pterin:NA<br>DP+<br>oxidoredu<br>ctase) | -0.69768  | Inlier |
| siRNA Disorazole DMSO Run1       | NM_0031<br>24 | SPR    | sepiapterin<br>reductase<br>(7,8-<br>dihydrobio<br>pterin:NA<br>DP+<br>oxidoredu<br>ctase) | -0.517801 | Inlier |
| siRNA-Temozolomide Run1-<br>DMSO | NM_0031<br>24 | SPR    | sepiapterin<br>reductase<br>(7,8-<br>dihydrobio<br>pterin:NA<br>DP+<br>oxidoredu<br>ctase) | -0.412304 | Inlier |

Identification of Survival Genes in Human Glioblastoma Cells Using siRNA Screening

Nikhil G Thaker, Fang Zhang, Peter R. McDonald, Tong Ying Shun, Michael D Lewen, Ian F. Pollack, and John S. Lazo

Molecular Pharmacology

|                              |               |        |                                                                    |           |        |
|------------------------------|---------------|--------|--------------------------------------------------------------------|-----------|--------|
| siRNA-Vinblastine Run2-DMSO  | NM_0031<br>24 | SPR    | sepiapterin reductase (7,8-dihydrobiopterin:NA DP+ oxidoreductase) | 0.412304  | Inlier |
| siRNA Disorazole DMSO Run3   | NM_0031<br>24 | SPR    | sepiapterin reductase (7,8-dihydrobiopterin:NA DP+ oxidoreductase) | 0.65132   | Inlier |
| siRNA-Vinblastine Run1-DMSO  | NM_0031<br>24 | SPR    | sepiapterin reductase (7,8-dihydrobiopterin:NA DP+ oxidoreductase) | 1.506026  | Inlier |
| siRNA Disorazole DMSO Run2   | NM_0031<br>24 | SPR    | sepiapterin reductase (7,8-dihydrobiopterin:NA DP+ oxidoreductase) | 1.687182  | Inlier |
| siRNA-Temozolomide Run2-DMSO | NM_1783<br>24 | SPTLC1 | serine palmitoyltransferase, long chain base subunit 1             | -0.750541 | Inlier |
| siRNA-Temozolomide Run3-DMSO | NM_1783<br>24 | SPTLC1 | serine palmitoyltransferase, long chain base subunit 1             | -0.598459 | Inlier |

Identification of Survival Genes in Human Glioblastoma Cells Using siRNA Screening  
 Nikhil G Thaker, Fang Zhang, Peter R. McDonald, Tong Ying Shun, Michael D Lewen, Ian F. Pollack, and John S. Lazo  
 Molecular Pharmacology

|                              |               |        |                                                                    |           |         |
|------------------------------|---------------|--------|--------------------------------------------------------------------|-----------|---------|
| siRNA Disorazole DMSO Run3   | NM_1783<br>24 | SPTLC1 | serine<br>palmitoyltransferase,<br>long chain<br>base<br>subunit 1 | -0.45183  | Inlier  |
| siRNA Disorazole DMSO Run1   | NM_1783<br>24 | SPTLC1 | serine<br>palmitoyltransferase,<br>long chain<br>base<br>subunit 1 | -0.247429 | Inlier  |
| siRNA-Vinblastine Run2-DMSO  | NM_1783<br>24 | SPTLC1 | serine<br>palmitoyltransferase,<br>long chain<br>base<br>subunit 1 | 0.247429  | Inlier  |
| siRNA-Temozolomide Run1-DMSO | NM_1783<br>24 | SPTLC1 | serine<br>palmitoyltransferase,<br>long chain<br>base<br>subunit 1 | 1.048206  | Inlier  |
| siRNA-Vinblastine Run1-DMSO  | NM_1783<br>24 | SPTLC1 | serine<br>palmitoyltransferase,<br>long chain<br>base<br>subunit 1 | 11.35417  | Outlier |
| siRNA Disorazole DMSO Run2   | NM_1783<br>24 | SPTLC1 | serine<br>palmitoyltransferase,<br>long chain<br>base<br>subunit 1 | 20.35526  | Outlier |
| siRNA Disorazole DMSO Run3   | NM_0048<br>63 | SPTLC2 | serine<br>palmitoyltransferase,<br>long chain<br>base<br>subunit 2 | -1.12153  | Inlier  |

Identification of Survival Genes in Human Glioblastoma Cells Using siRNA Screening  
 Nikhil G Thaker, Fang Zhang, Peter R. McDonald, Tong Ying Shun, Michael D Lewen, Ian F. Pollack, and John S. Lazo  
 Molecular Pharmacology

|                              |               |        |                                                                    |           |        |
|------------------------------|---------------|--------|--------------------------------------------------------------------|-----------|--------|
| siRNA Disorazole DMSO Run1   | NM_0048<br>63 | SPTLC2 | serine<br>palmitoyltransferase,<br>long chain<br>base<br>subunit 2 | -0.712273 | Inlier |
| siRNA-Temozolomide Run3-DMSO | NM_0048<br>63 | SPTLC2 | serine<br>palmitoyltransferase,<br>long chain<br>base<br>subunit 2 | -0.163664 | Inlier |
| siRNA-Temozolomide Run2-DMSO | NM_0048<br>63 | SPTLC2 | serine<br>palmitoyltransferase,<br>long chain<br>base<br>subunit 2 | -0.093913 | Inlier |
| siRNA-Vinblastine Run2-DMSO  | NM_0048<br>63 | SPTLC2 | serine<br>palmitoyltransferase,<br>long chain<br>base<br>subunit 2 | 0.093912  | Inlier |
| siRNA-Vinblastine Run1-DMSO  | NM_0048<br>63 | SPTLC2 | serine<br>palmitoyltransferase,<br>long chain<br>base<br>subunit 2 | 0.636727  | Inlier |
| siRNA-Temozolomide Run1-DMSO | NM_0048<br>63 | SPTLC2 | serine<br>palmitoyltransferase,<br>long chain<br>base<br>subunit 2 | 1.043956  | Inlier |
| siRNA Disorazole DMSO Run2   | NM_0048<br>63 | SPTLC2 | serine<br>palmitoyltransferase,<br>long chain<br>base<br>subunit 2 | 1.644619  | Inlier |
| siRNA-Temozolomide Run3-DMSO | NM_0031<br>29 | SQLE   | squalene<br>epoxidase                                              | -0.914982 | Inlier |



Identification of Survival Genes in Human Glioblastoma Cells Using siRNA Screening

Nikhil G Thaker, Fang Zhang, Peter R. McDonald, Tong Ying Shun, Michael D Lewen, Ian F. Pollack, and John S.

Lazo

|                              |               |       |                                                  |           |        |
|------------------------------|---------------|-------|--------------------------------------------------|-----------|--------|
| siRNA-Temozolomide Run2-DMSO | NM_0031<br>29 | SQLE  | squalene<br>epoxidase                            | -0.599951 | Inlier |
| siRNA-Temozolomide Run1-DMSO | NM_0031<br>29 | SQLE  | squalene<br>epoxidase                            | -0.249402 | Inlier |
| siRNA-Vinblastine Run2-DMSO  | NM_0031<br>29 | SQLE  | squalene<br>epoxidase                            | -0.137798 | Inlier |
| siRNA Disorazole DMSO Run1   | NM_0031<br>29 | SQLE  | squalene<br>epoxidase                            | 0.137799  | Inlier |
| siRNA-Vinblastine Run1-DMSO  | NM_0031<br>29 | SQLE  | squalene<br>epoxidase                            | 0.749049  | Inlier |
| siRNA Disorazole DMSO Run3   | NM_0031<br>29 | SQLE  | squalene<br>epoxidase                            | 0.814621  | Inlier |
| siRNA Disorazole DMSO Run2   | NM_0031<br>29 | SQLE  | squalene<br>epoxidase                            | 2.073656  | Inlier |
| siRNA Disorazole DMSO Run1   | NM_0211<br>99 | SQRDL | sulfide<br>quinone<br>reductase-<br>like (yeast) | -1.961291 | Inlier |
| siRNA-Temozolomide Run2-DMSO | NM_0211<br>99 | SQRDL | sulfide<br>quinone<br>reductase-<br>like (yeast) | -0.897196 | Inlier |
| siRNA-Temozolomide Run1-DMSO | NM_0211<br>99 | SQRDL | sulfide<br>quinone<br>reductase-<br>like (yeast) | -0.890923 | Inlier |
| siRNA Disorazole DMSO Run3   | NM_0211<br>99 | SQRDL | sulfide<br>quinone<br>reductase-<br>like (yeast) | -0.31907  | Inlier |
| siRNA-Vinblastine Run1-DMSO  | NM_0211<br>99 | SQRDL | sulfide<br>quinone<br>reductase-<br>like (yeast) | 0.31907   | Inlier |
| siRNA-Vinblastine Run2-DMSO  | NM_0211<br>99 | SQRDL | sulfide<br>quinone<br>reductase-<br>like (yeast) | 0.4132    | Inlier |
| siRNA-Temozolomide Run3-DMSO | NM_0211<br>99 | SQRDL | sulfide<br>quinone<br>reductase-<br>like (yeast) | 0.458077  | Inlier |

Identification of Survival Genes in Human Glioblastoma Cells Using siRNA Screening

Nikhil G Thaker, Fang Zhang, Peter R. McDonald, Tong Ying Shun, Michael D Lewen, Ian F. Pollack, and John S. Lazo

Molecular Pharmacology

|                                  |               |       |                                                                                                                                              |           |        |
|----------------------------------|---------------|-------|----------------------------------------------------------------------------------------------------------------------------------------------|-----------|--------|
| siRNA Disorazole DMSO Run2       | NM_0211<br>99 | SQRDL | sulfide<br>quinone<br>reductase-<br>like (yeast)<br>v-src<br>sarcoma<br>(Schmidt-<br>Ruppin A-<br>2) viral<br>oncogene<br>homolog<br>(avian) | 3.413849  | Inlier |
| siRNA Disorazole DMSO Run2       | NM_1982<br>91 | SRC   | v-src<br>sarcoma<br>(Schmidt-<br>Ruppin A-<br>2) viral<br>oncogene<br>homolog<br>(avian)                                                     | -0.989639 | Inlier |
| siRNA Disorazole DMSO Run3       | NM_1982<br>91 | SRC   | v-src<br>sarcoma<br>(Schmidt-<br>Ruppin A-<br>2) viral<br>oncogene<br>homolog<br>(avian)                                                     | -0.795145 | Inlier |
| siRNA-Temozolomide Run3-<br>DMSO | NM_1982<br>91 | SRC   | v-src<br>sarcoma<br>(Schmidt-<br>Ruppin A-<br>2) viral<br>oncogene<br>homolog<br>(avian)                                                     | -0.561574 | Inlier |
| siRNA-Temozolomide Run2-<br>DMSO | NM_1982<br>91 | SRC   | v-src<br>sarcoma<br>(Schmidt-<br>Ruppin A-<br>2) viral<br>oncogene<br>homolog<br>(avian)                                                     | -0.523477 | Inlier |
| siRNA Disorazole DMSO Run1       | NM_1982<br>91 | SRC   | v-src<br>sarcoma<br>(Schmidt-<br>Ruppin A-<br>2) viral<br>oncogene<br>homolog<br>(avian)                                                     | 0.523477  | Inlier |

Identification of Survival Genes in Human Glioblastoma Cells Using siRNA Screening

Nikhil G Thaker, Fang Zhang, Peter R. McDonald, Tong Ying Shun, Michael D Lewen, Ian F. Pollack, and John S. Lazo

Molecular Pharmacology

|                              |               |         |                                                                         |           |        |
|------------------------------|---------------|---------|-------------------------------------------------------------------------|-----------|--------|
| siRNA-Temozolomide Run1-DMSO | NM_1982<br>91 | SRC     | v-src sarcoma (Schmidt-Ruppin A-2) viral oncogene homolog (avian)       | 0.526088  | Inlier |
| siRNA-Vinblastine Run1-DMSO  | NM_1982<br>91 | SRC     | v-src sarcoma (Schmidt-Ruppin A-2) viral oncogene homolog (avian)       | 0.787426  | Inlier |
| siRNA-Vinblastine Run2-DMSO  | NM_1982<br>91 | SRC     | v-src sarcoma (Schmidt-Ruppin A-2) viral oncogene homolog (avian)       | 1.456411  | Inlier |
| siRNA-Vinblastine Run2-DMSO  | NM_0807<br>44 | SRCRB4D | scavenger receptor cysteine rich domain containing, group B (4 domains) | -0.735463 | Inlier |
| siRNA Disorazole DMSO Run1   | NM_0807<br>44 | SRCRB4D | scavenger receptor cysteine rich domain containing, group B (4 domains) | -0.613537 | Inlier |
| siRNA-Temozolomide Run2-DMSO | NM_0807<br>44 | SRCRB4D | scavenger receptor cysteine rich domain containing, group B (4 domains) | -0.412102 | Inlier |

Identification of Survival Genes in Human Glioblastoma Cells Using siRNA Screening  
 Nikhil G Thaker, Fang Zhang, Peter R. McDonald, Tong Ying Shun, Michael D Lewen, Ian F. Pollack, and John S. Lazo  
 Molecular Pharmacology

|                                  |               |         |                                                                                              |           |         |
|----------------------------------|---------------|---------|----------------------------------------------------------------------------------------------|-----------|---------|
| siRNA Disorazole DMSO Run3       | NM_0807<br>44 | SRCRB4D | scavenger<br>receptor<br>cysteine<br>rich<br>domain<br>containing,<br>group B (4<br>domains) | -0.291887 | Inlier  |
| siRNA-Temozolomide Run3-<br>DMSO | NM_0807<br>44 | SRCRB4D | scavenger<br>receptor<br>cysteine<br>rich<br>domain<br>containing,<br>group B (4<br>domains) | 0.291888  | Inlier  |
| siRNA-Temozolomide Run1-<br>DMSO | NM_0807<br>44 | SRCRB4D | scavenger<br>receptor<br>cysteine<br>rich<br>domain<br>containing,<br>group B (4<br>domains) | 2.735916  | Inlier  |
| siRNA Disorazole DMSO Run2       | NM_0807<br>44 | SRCRB4D | scavenger<br>receptor<br>cysteine<br>rich<br>domain<br>containing,<br>group B (4<br>domains) | 9.514282  | Outlier |
| siRNA-Vinblastine Run1-<br>DMSO  | NM_0807<br>44 | SRCRB4D | scavenger<br>receptor<br>cysteine<br>rich<br>domain<br>containing,<br>group B (4<br>domains) | 12.48388  | Outlier |

Identification of Survival Genes in Human Glioblastoma Cells Using siRNA Screening

Nikhil G Thaker, Fang Zhang, Peter R. McDonald, Tong Ying Shun, Michael D Lewen, Ian F. Pollack, and John S. Lazo

Molecular Pharmacology

|                              |           |        |                                                                                                      |           |        |
|------------------------------|-----------|--------|------------------------------------------------------------------------------------------------------|-----------|--------|
| siRNA-Temozolomide Run2-DMSO | NM_001047 | SRD5A1 | steroid-5-alpha-reductase, alpha polypeptide 1 (3-oxo-5 alpha-steroid delta 4-dehydrogenase alpha 1) | -1.170422 | Inlier |
| siRNA-Vinblastine Run2-DMSO  | NM_001047 | SRD5A1 | steroid-5-alpha-reductase, alpha polypeptide 1 (3-oxo-5 alpha-steroid delta 4-dehydrogenase alpha 1) | -0.768863 | Inlier |
| siRNA-Temozolomide Run3-DMSO | NM_001047 | SRD5A1 | steroid-5-alpha-reductase, alpha polypeptide 1 (3-oxo-5 alpha-steroid delta 4-dehydrogenase alpha 1) | -0.580137 | Inlier |
| siRNA Disorazole DMSO Run1   | NM_001047 | SRD5A1 | steroid-5-alpha-reductase, alpha polypeptide 1 (3-oxo-5 alpha-steroid delta 4-dehydrogenase alpha 1) | -0.287454 | Inlier |

Identification of Survival Genes in Human Glioblastoma Cells Using siRNA Screening

Nikhil G Thaker, Fang Zhang, Peter R. McDonald, Tong Ying Shun, Michael D Lewen, Ian F. Pollack, and John S.

Lazo

Molecular Pharmacology

|                              |           |        |                                                                                                      |          |        |
|------------------------------|-----------|--------|------------------------------------------------------------------------------------------------------|----------|--------|
| siRNA-Temozolomide Run1-DMSO | NM_001047 | SRD5A1 | steroid-5-alpha-reductase, alpha polypeptide 1 (3-oxo-5 alpha-steroid delta 4-dehydrogenase alpha 1) | 0.287454 | Inlier |
| siRNA Disorazole DMSO Run3   | NM_001047 | SRD5A1 | steroid-5-alpha-reductase, alpha polypeptide 1 (3-oxo-5 alpha-steroid delta 4-dehydrogenase alpha 1) | 0.396277 | Inlier |
| siRNA Disorazole DMSO Run2   | NM_001047 | SRD5A1 | steroid-5-alpha-reductase, alpha polypeptide 1 (3-oxo-5 alpha-steroid delta 4-dehydrogenase alpha 1) | 1.293358 | Inlier |
| siRNA-Vinblastine Run1-DMSO  | NM_001047 | SRD5A1 | steroid-5-alpha-reductase, alpha polypeptide 1 (3-oxo-5 alpha-steroid delta 4-dehydrogenase alpha 1) | 2.471771 | Inlier |

Identification of Survival Genes in Human Glioblastoma Cells Using siRNA Screening

Nikhil G Thaker, Fang Zhang, Peter R. McDonald, Tong Ying Shun, Michael D Lewen, Ian F. Pollack, and John S. Lazo

Molecular Pharmacology

|                              |           |        |                                                                                                      |           |        |
|------------------------------|-----------|--------|------------------------------------------------------------------------------------------------------|-----------|--------|
| siRNA-Vinblastine Run2-DMSO  | NM_000348 | SRD5A2 | steroid-5-alpha-reductase, alpha polypeptide 2 (3-oxo-5 alpha-steroid delta 4-dehydrogenase alpha 2) | -0.962854 | Inlier |
| siRNA-Temozolomide Run2-DMSO | NM_000348 | SRD5A2 | steroid-5-alpha-reductase, alpha polypeptide 2 (3-oxo-5 alpha-steroid delta 4-dehydrogenase alpha 2) | -0.527963 | Inlier |
| siRNA-Temozolomide Run3-DMSO | NM_000348 | SRD5A2 | steroid-5-alpha-reductase, alpha polypeptide 2 (3-oxo-5 alpha-steroid delta 4-dehydrogenase alpha 2) | -0.310804 | Inlier |
| siRNA Disorazole DMSO Run1   | NM_000348 | SRD5A2 | steroid-5-alpha-reductase, alpha polypeptide 2 (3-oxo-5 alpha-steroid delta 4-dehydrogenase alpha 2) | -0.143203 | Inlier |

Identification of Survival Genes in Human Glioblastoma Cells Using siRNA Screening

Nikhil G Thaker, Fang Zhang, Peter R. McDonald, Tong Ying Shun, Michael D Lewen, Ian F. Pollack, and John S. Lazo

Molecular Pharmacology

|                              |           |        |                                                                                                      |          |        |
|------------------------------|-----------|--------|------------------------------------------------------------------------------------------------------|----------|--------|
| siRNA-Temozolomide Run1-DMSO | NM_000348 | SRD5A2 | steroid-5-alpha-reductase, alpha polypeptide 2 (3-oxo-5 alpha-steroid delta 4-dehydrogenase alpha 2) | 0.143203 | Inlier |
| siRNA Disorazole DMSO Run3   | NM_000348 | SRD5A2 | steroid-5-alpha-reductase, alpha polypeptide 2 (3-oxo-5 alpha-steroid delta 4-dehydrogenase alpha 2) | 0.821037 | Inlier |
| siRNA Disorazole DMSO Run2   | NM_000348 | SRD5A2 | steroid-5-alpha-reductase, alpha polypeptide 2 (3-oxo-5 alpha-steroid delta 4-dehydrogenase alpha 2) | 1.577813 | Inlier |
| siRNA-Vinblastine Run1-DMSO  | NM_000348 | SRD5A2 | steroid-5-alpha-reductase, alpha polypeptide 2 (3-oxo-5 alpha-steroid delta 4-dehydrogenase alpha 2) | 1.942644 | Inlier |
| siRNA Disorazole DMSO Run1   | NM_003132 | SRM    | spermidine synthase                                                                                  | -1.38632 | Inlier |



Identification of Survival Genes in Human Glioblastoma Cells Using siRNA Screening

Nikhil G Thaker, Fang Zhang, Peter R. McDonald, Tong Ying Shun, Michael D Lewen, Ian F. Pollack, and John S. Lazo

Molecular Pharmacology

|                              |               |      |                                                                                                                            |           |        |
|------------------------------|---------------|------|----------------------------------------------------------------------------------------------------------------------------|-----------|--------|
| siRNA-Temozolomide Run1-DMSO | NM_0031<br>32 | SRM  | spermidin<br>e synthase                                                                                                    | -1.030794 | Inlier |
| siRNA-Temozolomide Run3-DMSO | NM_0031<br>32 | SRM  | spermidin<br>e synthase                                                                                                    | -0.318206 | Inlier |
| siRNA Disorazole DMSO Run3   | NM_0031<br>32 | SRM  | spermidin<br>e synthase                                                                                                    | -0.008721 | Inlier |
| siRNA-Vinblastine Run2-DMSO  | NM_0031<br>32 | SRM  | spermidin<br>e synthase                                                                                                    | 0.00872   | Inlier |
| siRNA-Temozolomide Run2-DMSO | NM_0031<br>32 | SRM  | spermidin<br>e synthase                                                                                                    | 0.069137  | Inlier |
| siRNA Disorazole DMSO Run2   | NM_0031<br>32 | SRM  | spermidin<br>e synthase                                                                                                    | 1.208495  | Inlier |
| siRNA-Vinblastine Run1-DMSO  | NM_0031<br>32 | SRM  | spermidin<br>e synthase                                                                                                    | 1.454958  | Inlier |
| siRNA Disorazole DMSO Run2   | NM_0808<br>23 | SRMS | src-related<br>kinase<br>lacking C-<br>terminal<br>regulatory<br>tyrosine<br>and N-<br>terminal<br>myristylati<br>on sites | -1.154733 | Inlier |
| siRNA-Temozolomide Run3-DMSO | NM_0808<br>23 | SRMS | src-related<br>kinase<br>lacking C-<br>terminal<br>regulatory<br>tyrosine<br>and N-<br>terminal<br>myristylati<br>on sites | -0.41765  | Inlier |

Identification of Survival Genes in Human Glioblastoma Cells Using siRNA Screening

Nikhil G Thaker, Fang Zhang, Peter R. McDonald, Tong Ying Shun, Michael D Lewen, Ian F. Pollack, and John S. Lazo

Molecular Pharmacology

|                                  |               |      |                                                                                                                            |           |        |
|----------------------------------|---------------|------|----------------------------------------------------------------------------------------------------------------------------|-----------|--------|
| siRNA Disorazole DMSO Run3       | NM_0808<br>23 | SRMS | src-related<br>kinase<br>lacking C-<br>terminal<br>regulatory<br>tyrosine<br>and N-<br>terminal<br>myristylati<br>on sites | -0.155748 | Inlier |
| siRNA-Temozolomide Run2-<br>DMSO | NM_0808<br>23 | SRMS | src-related<br>kinase<br>lacking C-<br>terminal<br>regulatory<br>tyrosine<br>and N-<br>terminal<br>myristylati<br>on sites | -0.127709 | Inlier |
| siRNA-Temozolomide Run1-<br>DMSO | NM_0808<br>23 | SRMS | src-related<br>kinase<br>lacking C-<br>terminal<br>regulatory<br>tyrosine<br>and N-<br>terminal<br>myristylati<br>on sites | 0.12771   | Inlier |
| siRNA-Vinblastine Run1-<br>DMSO  | NM_0808<br>23 | SRMS | src-related<br>kinase<br>lacking C-<br>terminal<br>regulatory<br>tyrosine<br>and N-<br>terminal<br>myristylati<br>on sites | 0.93135   | Inlier |

Identification of Survival Genes in Human Glioblastoma Cells Using siRNA Screening  
 Nikhil G Thaker, Fang Zhang, Peter R. McDonald, Tong Ying Shun, Michael D Lewen, Ian F. Pollack, and John S. Lazo  
 Molecular Pharmacology

|                              |               |       |                                                                                                                |           |        |
|------------------------------|---------------|-------|----------------------------------------------------------------------------------------------------------------|-----------|--------|
| siRNA-Vinblastine Run2-DMSO  | NM_0808<br>23 | SRMS  | src-related<br>kinase<br>lacking C-terminal<br>regulatory<br>tyrosine<br>and N-terminal<br>myristylation sites | 1.055503  | Inlier |
| siRNA Disorazole DMSO Run1   | NM_0808<br>23 | SRMS  | src-related<br>kinase<br>lacking C-terminal<br>regulatory<br>tyrosine<br>and N-terminal<br>myristylation sites | 1.275702  | Inlier |
| siRNA Disorazole DMSO Run2   | NM_0031<br>37 | SRPK1 | SFRS<br>protein<br>kinase 1                                                                                    | -2.275729 | Inlier |
| siRNA-Temozolomide Run3-DMSO | NM_0031<br>37 | SRPK1 | SFRS<br>protein<br>kinase 1                                                                                    | -0.832498 | Inlier |
| siRNA-Temozolomide Run1-DMSO | NM_0031<br>37 | SRPK1 | SFRS<br>protein<br>kinase 1                                                                                    | -0.307407 | Inlier |
| siRNA-Temozolomide Run2-DMSO | NM_0031<br>37 | SRPK1 | SFRS<br>protein<br>kinase 1                                                                                    | -0.109543 | Inlier |
| siRNA Disorazole DMSO Run3   | NM_0031<br>37 | SRPK1 | SFRS<br>protein<br>kinase 1                                                                                    | 0.109543  | Inlier |
| siRNA-Vinblastine Run1-DMSO  | NM_0031<br>37 | SRPK1 | SFRS<br>protein<br>kinase 1                                                                                    | 0.620445  | Inlier |
| siRNA Disorazole DMSO Run1   | NM_0031<br>37 | SRPK1 | SFRS<br>protein<br>kinase 1                                                                                    | 0.728555  | Inlier |
| siRNA-Vinblastine Run2-DMSO  | NM_0031<br>37 | SRPK1 | SFRS<br>protein<br>kinase 1                                                                                    | 1.876365  | Inlier |
| siRNA Disorazole DMSO Run2   | NM_0031<br>38 | SRPK2 | SFRS<br>protein<br>kinase 2                                                                                    | -1.447017 | Inlier |
| siRNA Disorazole DMSO Run3   | NM_0031<br>38 | SRPK2 | SFRS<br>protein<br>kinase 2                                                                                    | -0.683822 | Inlier |

Identification of Survival Genes in Human Glioblastoma Cells Using siRNA Screening

Nikhil G Thaker, Fang Zhang, Peter R. McDonald, Tong Ying Shun, Michael D Lewen, Ian F. Pollack, and John S. Lazo

Molecular Pharmacology

|                              |               |       |                                                                                                                                                                                                                                                                                                      |           |        |
|------------------------------|---------------|-------|------------------------------------------------------------------------------------------------------------------------------------------------------------------------------------------------------------------------------------------------------------------------------------------------------|-----------|--------|
| siRNA-Temozolomide Run3-DMSO | NM_0031<br>38 | SRPK2 | SFRS<br>protein<br>kinase 2                                                                                                                                                                                                                                                                          | -0.665178 | Inlier |
| siRNA-Temozolomide Run2-DMSO | NM_0031<br>38 | SRPK2 | SFRS<br>protein<br>kinase 2                                                                                                                                                                                                                                                                          | -0.148894 | Inlier |
| siRNA-Temozolomide Run1-DMSO | NM_0031<br>38 | SRPK2 | SFRS<br>protein<br>kinase 2                                                                                                                                                                                                                                                                          | 0.148894  | Inlier |
| siRNA Disorazole DMSO Run1   | NM_0031<br>38 | SRPK2 | SFRS<br>protein<br>kinase 2                                                                                                                                                                                                                                                                          | 0.394871  | Inlier |
| siRNA-Vinblastine Run1-DMSO  | NM_0031<br>38 | SRPK2 | SFRS<br>protein<br>kinase 2                                                                                                                                                                                                                                                                          | 0.739675  | Inlier |
| siRNA-Vinblastine Run2-DMSO  | NM_0031<br>38 | SRPK2 | SFRS<br>protein<br>kinase 2                                                                                                                                                                                                                                                                          | 0.809376  | Inlier |
| siRNA-Temozolomide Run3-DMSO | NM_0031<br>39 | SRPR  | signal<br>recognitio<br>n particle<br>receptor<br>(docking<br>protein)<br>signal<br>recognitio<br>n particle<br>receptor<br>(docking<br>protein)<br>signal<br>recognitio<br>n particle<br>receptor<br>(docking<br>protein)<br>signal<br>recognitio<br>n particle<br>receptor<br>(docking<br>protein) | -0.832504 | Inlier |
| siRNA-Temozolomide Run2-DMSO | NM_0031<br>39 | SRPR  | signal<br>recognitio<br>n particle<br>receptor<br>(docking<br>protein)<br>signal<br>recognitio<br>n particle<br>receptor<br>(docking<br>protein)<br>signal<br>recognitio<br>n particle<br>receptor<br>(docking<br>protein)                                                                           | -0.743886 | Inlier |
| siRNA-Vinblastine Run2-DMSO  | NM_0031<br>39 | SRPR  | signal<br>recognitio<br>n particle<br>receptor<br>(docking<br>protein)<br>signal<br>recognitio<br>n particle<br>receptor<br>(docking<br>protein)                                                                                                                                                     | -0.617519 | Inlier |
| siRNA Disorazole DMSO Run3   | NM_0031<br>39 | SRPR  | signal<br>recognitio<br>n particle<br>receptor<br>(docking<br>protein)<br>signal<br>recognitio<br>n particle<br>receptor<br>(docking<br>protein)                                                                                                                                                     | -0.126445 | Inlier |
| siRNA Disorazole DMSO Run1   | NM_0031<br>39 | SRPR  | signal<br>recognitio<br>n particle<br>receptor<br>(docking<br>protein)                                                                                                                                                                                                                               | 0.126445  | Inlier |

Identification of Survival Genes in Human Glioblastoma Cells Using siRNA Screening  
 Nikhil G Thaker, Fang Zhang, Peter R. McDonald, Tong Ying Shun, Michael D Lewen, Ian F. Pollack, and John S. Lazo

Molecular Pharmacology

|                              |               |      |                                                                        |           |        |
|------------------------------|---------------|------|------------------------------------------------------------------------|-----------|--------|
| siRNA-Temozolomide Run1-DMSO | NM_0031<br>39 | SRPR | signal<br>recognitio<br>n particle<br>receptor<br>(docking<br>protein) | 0.623849  | Inlier |
| siRNA-Vinblastine Run1-DMSO  | NM_0031<br>39 | SRPR | signal<br>recognitio<br>n particle<br>receptor<br>(docking<br>protein) | 0.725151  | Inlier |
| siRNA Disorazole DMSO Run2   | NM_0031<br>39 | SRPR | signal<br>recognitio<br>n particle<br>receptor<br>(docking<br>protein) | 1.232593  | Inlier |
| siRNA-Temozolomide Run3-DMSO | NM_0219<br>47 | SRR  | serine<br>racemase                                                     | -1.596856 | Inlier |
| siRNA-Vinblastine Run2-DMSO  | NM_0219<br>47 | SRR  | serine<br>racemase                                                     | -0.720047 | Inlier |
| siRNA Disorazole DMSO Run1   | NM_0219<br>47 | SRR  | serine<br>racemase                                                     | -0.611093 | Inlier |
| siRNA-Temozolomide Run2-DMSO | NM_0219<br>47 | SRR  | serine<br>racemase                                                     | -0.517433 | Inlier |
| siRNA-Temozolomide Run1-DMSO | NM_0219<br>47 | SRR  | serine<br>racemase                                                     | 0.517433  | Inlier |
| siRNA Disorazole DMSO Run3   | NM_0219<br>47 | SRR  | serine<br>racemase                                                     | 0.628953  | Inlier |
| siRNA-Vinblastine Run1-DMSO  | NM_0219<br>47 | SRR  | serine<br>racemase                                                     | 2.327763  | Inlier |
| siRNA Disorazole DMSO Run2   | NM_0219<br>47 | SRR  | serine<br>racemase                                                     | 2.747564  | Inlier |
| siRNA-Temozolomide Run3-DMSO | NM_0251<br>06 | SSB1 | SSB1                                                                   | -0.888996 | Inlier |
| siRNA-Temozolomide Run2-DMSO | NM_0251<br>06 | SSB1 | SSB1                                                                   | -0.460004 | Inlier |
| siRNA Disorazole DMSO Run3   | NM_0251<br>06 | SSB1 | SSB1                                                                   | -0.177663 | Inlier |
| siRNA-Temozolomide Run1-DMSO | NM_0251<br>06 | SSB1 | SSB1                                                                   | -0.173454 | Inlier |
| siRNA-Vinblastine Run2-DMSO  | NM_0251<br>06 | SSB1 | SSB1                                                                   | 0.173454  | Inlier |
| siRNA Disorazole DMSO Run1   | NM_0251<br>06 | SSB1 | SSB1                                                                   | 1.025621  | Inlier |
| siRNA Disorazole DMSO Run2   | NM_0251<br>06 | SSB1 | SSB1                                                                   | 2.215255  | Inlier |
| siRNA-Vinblastine Run1-DMSO  | NM_0251<br>06 | SSB1 | SSB1                                                                   | 2.961649  | Inlier |
| siRNA-Temozolomide Run3-DMSO | NM_0808<br>61 | SSB3 | SSB3                                                                   | -1.361136 | Inlier |

Identification of Survival Genes in Human Glioblastoma Cells Using siRNA Screening

Nikhil G Thaker, Fang Zhang, Peter R. McDonald, Tong Ying Shun, Michael D Lewen, Ian F. Pollack, and John S.

Lazo

|                                  |               |      |                                            |           |        |
|----------------------------------|---------------|------|--------------------------------------------|-----------|--------|
| siRNA-Temozolomide Run2-<br>DMSO | NM_0808<br>61 | SSB3 | SSB3                                       | -1.083758 | Inlier |
| siRNA-Vinblastine Run2-<br>DMSO  | NM_0808<br>61 | SSB3 | SSB3                                       | -0.160638 | Inlier |
| siRNA Disorazole DMSO Run3       | NM_0808<br>61 | SSB3 | SSB3                                       | -0.138694 | Inlier |
| siRNA Disorazole DMSO Run1       | NM_0808<br>61 | SSB3 | SSB3                                       | 0.138694  | Inlier |
| siRNA-Temozolomide Run1-<br>DMSO | NM_0808<br>61 | SSB3 | SSB3                                       | 0.265242  | Inlier |
| siRNA Disorazole DMSO Run2       | NM_0808<br>61 | SSB3 | SSB3                                       | 1.810883  | Inlier |
| siRNA-Vinblastine Run1-<br>DMSO  | NM_0808<br>61 | SSB3 | SSB3                                       | 2.89828   | Inlier |
| siRNA-Temozolomide Run2-<br>DMSO | NM_0189<br>84 | SSH1 | slingshot<br>homolog 1<br>(Drosophil<br>a) | -0.916377 | Inlier |
| siRNA Disorazole DMSO Run3       | NM_0189<br>84 | SSH1 | slingshot<br>homolog 1<br>(Drosophil<br>a) | -0.730893 | Inlier |
| siRNA Disorazole DMSO Run2       | NM_0189<br>84 | SSH1 | slingshot<br>homolog 1<br>(Drosophil<br>a) | -0.455702 | Inlier |
| siRNA-Temozolomide Run1-<br>DMSO | NM_0189<br>84 | SSH1 | slingshot<br>homolog 1<br>(Drosophil<br>a) | -0.413695 | Inlier |
| siRNA Disorazole DMSO Run1       | NM_0189<br>84 | SSH1 | slingshot<br>homolog 1<br>(Drosophil<br>a) | 0.413696  | Inlier |
| siRNA-Temozolomide Run3-<br>DMSO | NM_0189<br>84 | SSH1 | slingshot<br>homolog 1<br>(Drosophil<br>a) | 0.618107  | Inlier |
| siRNA-Vinblastine Run2-<br>DMSO  | NM_0189<br>84 | SSH1 | slingshot<br>homolog 1<br>(Drosophil<br>a) | 1.001843  | Inlier |

Identification of Survival Genes in Human Glioblastoma Cells Using siRNA Screening  
 Nikhil G Thaker, Fang Zhang, Peter R. McDonald, Tong Ying Shun, Michael D Lewen, Ian F. Pollack, and John S. Lazo  
 Molecular Pharmacology

|                              |               |      |                                  |           |        |
|------------------------------|---------------|------|----------------------------------|-----------|--------|
| siRNA-Vinblastine Run1-DMSO  | NM_0189<br>84 | SSH1 | slingshot homolog 1 (Drosophila) | 1.308621  | Inlier |
| siRNA-Temozolomide Run2-DMSO | NM_0182<br>76 | SSH3 | slingshot homolog 3 (Drosophila) | -2.39825  | Inlier |
| siRNA-Temozolomide Run3-DMSO | NM_0182<br>76 | SSH3 | slingshot homolog 3 (Drosophila) | -1.711227 | Inlier |
| siRNA-Temozolomide Run1-DMSO | NM_0182<br>76 | SSH3 | slingshot homolog 3 (Drosophila) | -0.921567 | Inlier |
| siRNA Disorazole DMSO Run1   | NM_0182<br>76 | SSH3 | slingshot homolog 3 (Drosophila) | -0.111293 | Inlier |
| siRNA Disorazole DMSO Run3   | NM_0182<br>76 | SSH3 | slingshot homolog 3 (Drosophila) | 0.111292  | Inlier |
| siRNA Disorazole DMSO Run2   | NM_0182<br>76 | SSH3 | slingshot homolog 3 (Drosophila) | 0.213859  | Inlier |
| siRNA-Vinblastine Run1-DMSO  | NM_0182<br>76 | SSH3 | slingshot homolog 3 (Drosophila) | 0.478789  | Inlier |
| siRNA-Vinblastine Run2-DMSO  | NM_0182<br>76 | SSH3 | slingshot homolog 3 (Drosophila) | 0.870211  | Inlier |
| siRNA-Temozolomide Run2-DMSO | NM_0320<br>37 | SSTK | testis-specific serine kinase 6  | -0.961979 | Inlier |

Identification of Survival Genes in Human Glioblastoma Cells Using siRNA Screening  
 Nikhil G Thaker, Fang Zhang, Peter R. McDonald, Tong Ying Shun, Michael D Lewen, Ian F. Pollack, and John S. Lazo

Molecular Pharmacology

|                              |               |       |                                 |           |        |
|------------------------------|---------------|-------|---------------------------------|-----------|--------|
| siRNA-Temozolomide Run3-DMSO | NM_0320<br>37 | SSTK  | testis-specific serine kinase 6 | -0.769767 | Inlier |
| siRNA-Vinblastine Run1-DMSO  | NM_0320<br>37 | SSTK  | testis-specific serine kinase 6 | -0.579233 | Inlier |
| siRNA Disorazole DMSO Run2   | NM_0320<br>37 | SSTK  | testis-specific serine kinase 6 | -0.071479 | Inlier |
| siRNA-Temozolomide Run1-DMSO | NM_0320<br>37 | SSTK  | testis-specific serine kinase 6 | 0.071478  | Inlier |
| siRNA Disorazole DMSO Run1   | NM_0320<br>37 | SSTK  | testis-specific serine kinase 6 | 0.356837  | Inlier |
| siRNA-Vinblastine Run2-DMSO  | NM_0320<br>37 | SSTK  | testis-specific serine kinase 6 | 0.835153  | Inlier |
| siRNA Disorazole DMSO Run3   | NM_0320<br>37 | SSTK  | testis-specific serine kinase 6 | 0.905851  | Inlier |
| siRNA-Temozolomide Run3-DMSO | NM_0010<br>49 | SSTR1 | somatostatin receptor 1         | -1.609257 | Inlier |
| siRNA-Temozolomide Run2-DMSO | NM_0010<br>49 | SSTR1 | somatostatin receptor 1         | -0.664331 | Inlier |
| siRNA Disorazole DMSO Run1   | NM_0010<br>49 | SSTR1 | somatostatin receptor 1         | -0.660031 | Inlier |
| siRNA-Temozolomide Run1-DMSO | NM_0010<br>49 | SSTR1 | somatostatin receptor 1         | -0.562044 | Inlier |
| siRNA-Vinblastine Run2-DMSO  | NM_0010<br>49 | SSTR1 | somatostatin receptor 1         | 0.562043  | Inlier |
| siRNA Disorazole DMSO Run2   | NM_0010<br>49 | SSTR1 | somatostatin receptor 1         | 0.684669  | Inlier |
| siRNA-Vinblastine Run1-DMSO  | NM_0010<br>49 | SSTR1 | somatostatin receptor 1         | 0.715656  | Inlier |
| siRNA Disorazole DMSO Run3   | NM_0010<br>49 | SSTR1 | somatostatin receptor 1         | 1.014124  | Inlier |



Identification of Survival Genes in Human Glioblastoma Cells Using siRNA Screening  
 Nikhil G Thaker, Fang Zhang, Peter R. McDonald, Tong Ying Shun, Michael D Lewen, Ian F. Pollack, and John S. Lazo

| Molecular Pharmacology       |               |       |            | somatosta |         |  |
|------------------------------|---------------|-------|------------|-----------|---------|--|
| siRNA-Temozolomide Run3-DMSO | NM_0010<br>50 | SSTR2 | receptor 2 | -1.890736 | Inlier  |  |
| siRNA-Temozolomide Run2-DMSO | NM_0010<br>50 | SSTR2 | receptor 2 | -0.863399 | Inlier  |  |
| siRNA Disorazole DMSO Run1   | NM_0010<br>50 | SSTR2 | receptor 2 | -0.485601 | Inlier  |  |
| siRNA-Vinblastine Run2-DMSO  | NM_0010<br>50 | SSTR2 | receptor 2 | -0.011373 | Inlier  |  |
| siRNA-Temozolomide Run1-DMSO | NM_0010<br>50 | SSTR2 | receptor 2 | 0.011373  | Inlier  |  |
| siRNA-Vinblastine Run1-DMSO  | NM_0010<br>50 | SSTR2 | receptor 2 | 0.4631    | Inlier  |  |
| siRNA Disorazole DMSO Run2   | NM_0010<br>50 | SSTR2 | receptor 2 | 1.586131  | Inlier  |  |
| siRNA Disorazole DMSO Run3   | NM_0010<br>50 | SSTR2 | receptor 2 | 4.103874  | Outlier |  |
| siRNA Disorazole DMSO Run3   | NM_0010<br>51 | SSTR3 | receptor 3 | -2.839144 | Inlier  |  |
| siRNA-Temozolomide Run3-DMSO | NM_0010<br>51 | SSTR3 | receptor 3 | -1.177009 | Inlier  |  |
| siRNA-Temozolomide Run1-DMSO | NM_0010<br>51 | SSTR3 | receptor 3 | -0.493324 | Inlier  |  |
| siRNA Disorazole DMSO Run1   | NM_0010<br>51 | SSTR3 | receptor 3 | -0.364249 | Inlier  |  |
| siRNA-Temozolomide Run2-DMSO | NM_0010<br>51 | SSTR3 | receptor 3 | 0.364249  | Inlier  |  |
| siRNA Disorazole DMSO Run2   | NM_0010<br>51 | SSTR3 | receptor 3 | 0.587458  | Inlier  |  |
| siRNA-Vinblastine Run1-DMSO  | NM_0010<br>51 | SSTR3 | receptor 3 | 0.761542  | Inlier  |  |
| siRNA-Vinblastine Run2-DMSO  | NM_0010<br>51 | SSTR3 | receptor 3 | 0.779285  | Inlier  |  |
| siRNA-Temozolomide Run3-DMSO | NM_0010<br>52 | SSTR4 | receptor 4 | -2.750859 | Inlier  |  |

Identification of Survival Genes in Human Glioblastoma Cells Using siRNA Screening  
 Nikhil G Thaker, Fang Zhang, Peter R. McDonald, Tong Ying Shun, Michael D Lewen, Ian F. Pollack, and John S. Lazo

| Molecular Pharmacology       |               |       |            | somatosta |         |
|------------------------------|---------------|-------|------------|-----------|---------|
| siRNA-Temozolomide Run2-DMSO | NM_0010<br>52 | SSTR4 | receptor 4 | -1.248469 | Inlier  |
| siRNA-Temozolomide Run1-DMSO | NM_0010<br>52 | SSTR4 | receptor 4 | -0.232356 | Inlier  |
| siRNA Disorazole DMSO Run1   | NM_0010<br>52 | SSTR4 | receptor 4 | -0.102402 | Inlier  |
| siRNA Disorazole DMSO Run2   | NM_0010<br>52 | SSTR4 | receptor 4 | 0.102402  | Inlier  |
| siRNA-Vinblastine Run2-DMSO  | NM_0010<br>52 | SSTR4 | receptor 4 | 0.588839  | Inlier  |
| siRNA-Vinblastine Run1-DMSO  | NM_0010<br>52 | SSTR4 | receptor 4 | 0.760161  | Inlier  |
| siRNA Disorazole DMSO Run3   | NM_0010<br>52 | SSTR4 | receptor 4 | 3.399905  | Inlier  |
| siRNA Disorazole DMSO Run3   | NM_0010<br>53 | SSTR5 | receptor 5 | -2.084974 | Inlier  |
| siRNA-Temozolomide Run1-DMSO | NM_0010<br>53 | SSTR5 | receptor 5 | -0.784531 | Inlier  |
| siRNA-Temozolomide Run3-DMSO | NM_0010<br>53 | SSTR5 | receptor 5 | -0.629118 | Inlier  |
| siRNA-Temozolomide Run2-DMSO | NM_0010<br>53 | SSTR5 | receptor 5 | -0.198317 | Inlier  |
| siRNA Disorazole DMSO Run1   | NM_0010<br>53 | SSTR5 | receptor 5 | 0.198317  | Inlier  |
| siRNA-Vinblastine Run1-DMSO  | NM_0010<br>53 | SSTR5 | receptor 5 | 0.607552  | Inlier  |
| siRNA-Vinblastine Run2-DMSO  | NM_0010<br>53 | SSTR5 | receptor 5 | 0.719882  | Inlier  |
| siRNA Disorazole DMSO Run2   | NM_0010<br>53 | SSTR5 | receptor 5 | 3.723123  | Outlier |

Identification of Survival Genes in Human Glioblastoma Cells Using siRNA Screening

Nikhil G Thaker, Fang Zhang, Peter R. McDonald, Tong Ying Shun, Michael D Lewen, Ian F. Pollack, and John S. Lazo

Molecular Pharmacology

| siRNA                        | Gene      | Cell Line | Suppression of tumorigenicity 14 (colon carcinoma) | Value     | Outlier |
|------------------------------|-----------|-----------|----------------------------------------------------|-----------|---------|
| siRNA-Temozolomide Run3-DMSO | NM_021978 | ST14      | matriptase, epithin)                               | -1.236688 | Inlier  |
| siRNA-Temozolomide Run2-DMSO | NM_021978 | ST14      | matriptase, epithin)                               | -1.021238 | Inlier  |
| siRNA Disorazole DMSO Run1   | NM_021978 | ST14      | matriptase, epithin)                               | -0.874372 | Inlier  |
| siRNA Disorazole DMSO Run2   | NM_021978 | ST14      | matriptase, epithin)                               | -0.032742 | Inlier  |
| siRNA Disorazole DMSO Run3   | NM_021978 | ST14      | matriptase, epithin)                               | 0.032742  | Inlier  |

Identification of Survival Genes in Human Glioblastoma Cells Using siRNA Screening

Nikhil G Thaker, Fang Zhang, Peter R. McDonald, Tong Ying Shun, Michael D Lewen, Ian F. Pollack, and John S. Lazo

Molecular Pharmacology

| siRNA Treatment              | Gene ID   | Cell Line | Gene Name                                                               | Value     | Category |
|------------------------------|-----------|-----------|-------------------------------------------------------------------------|-----------|----------|
| siRNA-Temozolomide Run1-DMSO | NM_021978 | ST14      | suppression of tumorigenicity 14 (colon carcinoma)                      | 0.064715  | Inlier   |
| siRNA-Vinblastine Run2-DMSO  | NM_021978 | ST14      | matriptase, epithin) suppression of tumorigenicity 14 (colon carcinoma) | 0.635174  | Inlier   |
| siRNA-Vinblastine Run1-DMSO  | NM_021978 | ST14      | matriptase, epithin) ST6 beta-galactosamide                             | 0.713826  | Inlier   |
| siRNA-Temozolomide Run3-DMSO | NM_032528 | ST6GalIII | alpha-2,6-sialyltransferase 2 ST6 beta-galactosamide                    | -0.722618 | Inlier   |
| siRNA Disorazole DMSO Run3   | NM_032528 | ST6GalIII | alpha-2,6-sialyltransferase 2 ST6 beta-galactosamide                    | -0.626382 | Inlier   |
| siRNA-Temozolomide Run2-DMSO | NM_032528 | ST6GalIII | alpha-2,6-sialyltransferase 2 ST6 beta-galactosamide                    | -0.460804 | Inlier   |
| siRNA-Vinblastine Run2-DMSO  | NM_032528 | ST6GalIII | alpha-2,6-sialyltransferase 2                                           | -0.107659 | Inlier   |

Identification of Survival Genes in Human Glioblastoma Cells Using siRNA Screening  
 Nikhil G Thaker, Fang Zhang, Peter R. McDonald, Tong Ying Shun, Michael D Lewen, Ian F. Pollack, and John S. Lazo

Molecular Pharmacology

|                              |               |           |                                                      |           |        |
|------------------------------|---------------|-----------|------------------------------------------------------|-----------|--------|
| siRNA Disorazole DMSO Run1   | NM_0325<br>28 | ST6GalIII | ST6 beta-galactosamide alpha-2,6-sialyltransferase 2 | 0.107659  | Inlier |
| siRNA-Vinblastine Run1-DMSO  | NM_0325<br>28 | ST6GalIII | ST6 beta-galactosamide alpha-2,6-sialyltransferase 2 | 0.928272  | Inlier |
| siRNA Disorazole DMSO Run2   | NM_0325<br>28 | ST6GalIII | ST6 beta-galactosamide alpha-2,6-sialyltransferase 2 | 1.070467  | Inlier |
| siRNA-Temozolomide Run1-DMSO | NM_0325<br>28 | ST6GalIII | ST6 beta-galactosamide alpha-2,6-sialyltransferase 2 | 1.174428  | Inlier |
| siRNA-Temozolomide Run3-DMSO | NM_0528<br>51 | STARD13   | START domain containing 13                           | -1.330972 | Inlier |
| siRNA-Temozolomide Run2-DMSO | NM_0528<br>51 | STARD13   | START domain containing 13                           | -0.790987 | Inlier |
| siRNA Disorazole DMSO Run1   | NM_0528<br>51 | STARD13   | START domain containing 13                           | -0.123007 | Inlier |
| siRNA-Temozolomide Run1-DMSO | NM_0528<br>51 | STARD13   | START domain containing 13                           | -0.034968 | Inlier |
| siRNA-Vinblastine Run2-DMSO  | NM_0528<br>51 | STARD13   | START domain containing 13                           | 0.034968  | Inlier |
| siRNA Disorazole DMSO Run3   | NM_0528<br>51 | STARD13   | START domain containing 13                           | 0.558013  | Inlier |
| siRNA Disorazole DMSO Run2   | NM_0528<br>51 | STARD13   | START domain containing 13                           | 2.298152  | Inlier |

Identification of Survival Genes in Human Glioblastoma Cells Using siRNA Screening  
 Nikhil G Thaker, Fang Zhang, Peter R. McDonald, Tong Ying Shun, Michael D Lewen, Ian F. Pollack, and John S. Lazo

Molecular Pharmacology

|                              |               |         |                                                            |           |         |
|------------------------------|---------------|---------|------------------------------------------------------------|-----------|---------|
| siRNA-Vinblastine Run1-DMSO  | NM_0528<br>51 | STARD13 | START domain containing 13                                 | 2.324545  | Inlier  |
| siRNA-Temozolomide Run3-DMSO | NM_0147<br>25 | STARD8  | START domain containing 8                                  | -1.310462 | Inlier  |
| siRNA Disorazole DMSO Run3   | NM_0147<br>25 | STARD8  | START domain containing 8                                  | -0.72111  | Inlier  |
| siRNA-Vinblastine Run2-DMSO  | NM_0147<br>25 | STARD8  | START domain containing 8                                  | -0.511596 | Inlier  |
| siRNA-Temozolomide Run2-DMSO | NM_0147<br>25 | STARD8  | START domain containing 8                                  | -0.054272 | Inlier  |
| siRNA Disorazole DMSO Run1   | NM_0147<br>25 | STARD8  | START domain containing 8                                  | 0.054272  | Inlier  |
| siRNA-Temozolomide Run1-DMSO | NM_0147<br>25 | STARD8  | START domain containing 8                                  | 0.62789   | Inlier  |
| siRNA-Vinblastine Run1-DMSO  | NM_0147<br>25 | STARD8  | START domain containing 8                                  | 4.304945  | Outlier |
| siRNA Disorazole DMSO Run2   | NM_0147<br>25 | STARD8  | START domain containing 8                                  | 5.600674  | Outlier |
| siRNA-Temozolomide Run3-DMSO | NM_0073<br>15 | STAT1   | signal transducer and activator of transcripti on 1, 91kDa | -0.875094 | Inlier  |
| siRNA-Temozolomide Run2-DMSO | NM_0073<br>15 | STAT1   | signal transducer and activator of transcripti on 1, 91kDa | -0.815969 | Inlier  |

Identification of Survival Genes in Human Glioblastoma Cells Using siRNA Screening  
 Nikhil G Thaker, Fang Zhang, Peter R. McDonald, Tong Ying Shun, Michael D Lewen, Ian F. Pollack, and John S. Lazo

Molecular Pharmacology

| siRNA Treatment              | Gene ID   | Gene Name | Protein Name                                              | Value     | Category |
|------------------------------|-----------|-----------|-----------------------------------------------------------|-----------|----------|
| siRNA-Temozolomide Run1-DMSO | NM_007315 | STAT1     | signal transducer and activator of transcription 1, 91kDa | -0.439811 | Inlier   |
| siRNA Disorazole DMSO Run3   | NM_007315 | STAT1     | signal transducer and activator of transcription 1, 91kDa | -0.142878 | Inlier   |
| siRNA Disorazole DMSO Run1   | NM_007315 | STAT1     | signal transducer and activator of transcription 1, 91kDa | 0.142878  | Inlier   |
| siRNA Disorazole DMSO Run2   | NM_007315 | STAT1     | signal transducer and activator of transcription 1, 91kDa | 0.533031  | Inlier   |
| siRNA-Vinblastine Run2-DMSO  | NM_007315 | STAT1     | signal transducer and activator of transcription 1, 91kDa | 0.92057   | Inlier   |
| siRNA-Vinblastine Run1-DMSO  | NM_007315 | STAT1     | signal transducer and activator of transcription 1, 91kDa | 0.958239  | Inlier   |
| siRNA-Temozolomide Run3-DMSO | NM_005990 | STK10     | serine/threonine kinase 10                                | -1.985958 | Inlier   |

Identification of Survival Genes in Human Glioblastoma Cells Using siRNA Screening  
 Nikhil G Thaker, Fang Zhang, Peter R. McDonald, Tong Ying Shun, Michael D Lewen, Ian F. Pollack, and John S. Lazo

| Molecular Pharmacology       |               |       |                                                           |           |        |
|------------------------------|---------------|-------|-----------------------------------------------------------|-----------|--------|
| siRNA-Temozolomide Run1-DMSO | NM_0059<br>90 | STK10 | serine/threonine<br>kinase 10                             | -1.75467  | Inlier |
| siRNA-Temozolomide Run2-DMSO | NM_0059<br>90 | STK10 | serine/threonine<br>kinase 10                             | -0.722835 | Inlier |
| siRNA Disorazole DMSO Run2   | NM_0059<br>90 | STK10 | serine/threonine<br>kinase 10                             | -0.1762   | Inlier |
| siRNA-Vinblastine Run1-DMSO  | NM_0059<br>90 | STK10 | serine/threonine<br>kinase 10                             | 0.1762    | Inlier |
| siRNA Disorazole DMSO Run1   | NM_0059<br>90 | STK10 | serine/threonine<br>kinase 10                             | 0.363824  | Inlier |
| siRNA Disorazole DMSO Run3   | NM_0059<br>90 | STK10 | serine/threonine<br>kinase 10                             | 0.626165  | Inlier |
| siRNA-Vinblastine Run2-DMSO  | NM_0059<br>90 | STK10 | serine/threonine<br>kinase 10                             | 1.981706  | Inlier |
| siRNA-Temozolomide Run3-DMSO | NM_0004<br>55 | STK11 | serine/threonine<br>kinase 11<br>(Peutz-Jeghers syndrome) | -1.329212 | Inlier |
| siRNA-Vinblastine Run1-DMSO  | NM_0004<br>55 | STK11 | serine/threonine<br>kinase 11<br>(Peutz-Jeghers syndrome) | -0.748147 | Inlier |
| siRNA-Temozolomide Run1-DMSO | NM_0004<br>55 | STK11 | serine/threonine<br>kinase 11<br>(Peutz-Jeghers syndrome) | -0.716301 | Inlier |
| siRNA-Temozolomide Run2-DMSO | NM_0004<br>55 | STK11 | serine/threonine<br>kinase 11<br>(Peutz-Jeghers syndrome) | -0.23889  | Inlier |



Identification of Survival Genes in Human Glioblastoma Cells Using siRNA Screening  
 Nikhil G Thaker, Fang Zhang, Peter R. McDonald, Tong Ying Shun, Michael D Lewen, Ian F. Pollack, and John S. Lazo  
 Molecular Pharmacology

|                              |               |         |                                                     |           |        |
|------------------------------|---------------|---------|-----------------------------------------------------|-----------|--------|
| siRNA Disorazole DMSO Run1   | NM_0004<br>55 | STK11   | serine/threonine kinase 11 (Peutz-Jeghers syndrome) | 0.238889  | Inlier |
| siRNA Disorazole DMSO Run2   | NM_0004<br>55 | STK11   | serine/threonine kinase 11 (Peutz-Jeghers syndrome) | 0.396134  | Inlier |
| siRNA Disorazole DMSO Run3   | NM_0004<br>55 | STK11   | serine/threonine kinase 11 (Peutz-Jeghers syndrome) | 0.632699  | Inlier |
| siRNA-Vinblastine Run2-DMSO  | NM_0004<br>55 | STK11   | serine/threonine kinase 11 (Peutz-Jeghers syndrome) | 1.24284   | Inlier |
| siRNA-Vinblastine Run1-DMSO  | NM_0529<br>02 | STK11IP | serine/threonine kinase 11 interacting protein      | -1.104893 | Inlier |
| siRNA-Temozolomide Run1-DMSO | NM_0529<br>02 | STK11IP | serine/threonine kinase 11 interacting protein      | -0.728853 | Inlier |
| siRNA-Temozolomide Run3-DMSO | NM_0529<br>02 | STK11IP | serine/threonine kinase 11 interacting protein      | -0.377595 | Inlier |
| siRNA Disorazole DMSO Run1   | NM_0529<br>02 | STK11IP | serine/threonine kinase 11 interacting protein      | -0.114128 | Inlier |

Identification of Survival Genes in Human Glioblastoma Cells Using siRNA Screening  
 Nikhil G Thaker, Fang Zhang, Peter R. McDonald, Tong Ying Shun, Michael D Lewen, Ian F. Pollack, and John S. Lazo

Molecular Pharmacology

|                              |           |         |                                                  |           |         |
|------------------------------|-----------|---------|--------------------------------------------------|-----------|---------|
| siRNA-Temozolomide Run2-DMSO | NM_052902 | STK11IP | serine/threonine kinase 11 interacting protein   | 0.114127  | Inlier  |
| siRNA-Vinblastine Run2-DMSO  | NM_052902 | STK11IP | serine/threonine kinase 11 interacting protein   | 0.620147  | Inlier  |
| siRNA Disorazole DMSO Run2   | NM_052902 | STK11IP | serine/threonine kinase 11 interacting protein   | 0.826024  | Inlier  |
| siRNA Disorazole DMSO Run3   | NM_052902 | STK11IP | serine/threonine kinase 11 interacting protein   | 2.395548  | Inlier  |
| siRNA Disorazole DMSO Run2   | NM_003691 | STK16   | serine/threonine kinase 16                       | -0.80355  | Inlier  |
| siRNA-Temozolomide Run3-DMSO | NM_003691 | STK16   | serine/threonine kinase 16                       | -0.54545  | Inlier  |
| siRNA-Temozolomide Run1-DMSO | NM_003691 | STK16   | serine/threonine kinase 16                       | -0.084576 | Inlier  |
| siRNA-Temozolomide Run2-DMSO | NM_003691 | STK16   | serine/threonine kinase 16                       | -0.038208 | Inlier  |
| siRNA Disorazole DMSO Run3   | NM_003691 | STK16   | serine/threonine kinase 16                       | 0.038208  | Inlier  |
| siRNA Disorazole DMSO Run1   | NM_003691 | STK16   | serine/threonine kinase 16                       | 3.289538  | Inlier  |
| siRNA-Vinblastine Run2-DMSO  | NM_003691 | STK16   | serine/threonine kinase 16                       | 5.170557  | Outlier |
| siRNA-Vinblastine Run1-DMSO  | NM_003691 | STK16   | serine/threonine kinase 16                       | 5.427166  | Outlier |
| siRNA-Temozolomide Run3-DMSO | NM_004760 | STK17A  | serine/threonine kinase 17a (apoptosis-inducing) | -0.842964 | Inlier  |

Identification of Survival Genes in Human Glioblastoma Cells Using siRNA Screening  
 Nikhil G Thaker, Fang Zhang, Peter R. McDonald, Tong Ying Shun, Michael D Lewen, Ian F. Pollack, and John S. Lazo  
 Molecular Pharmacology

|                              |               |        |                                                  |           |        |
|------------------------------|---------------|--------|--------------------------------------------------|-----------|--------|
| siRNA-Temozolomide Run2-DMSO | NM_0047<br>60 | STK17A | serine/threonine kinase 17a (apoptosis-inducing) | -0.782904 | Inlier |
| siRNA-Vinblastine Run1-DMSO  | NM_0047<br>60 | STK17A | serine/threonine kinase 17a (apoptosis-inducing) | -0.229571 | Inlier |
| siRNA-Temozolomide Run1-DMSO | NM_0047<br>60 | STK17A | serine/threonine kinase 17a (apoptosis-inducing) | -0.177387 | Inlier |
| siRNA Disorazole DMSO Run3   | NM_0047<br>60 | STK17A | serine/threonine kinase 17a (apoptosis-inducing) | 0.177386  | Inlier |
| siRNA Disorazole DMSO Run1   | NM_0047<br>60 | STK17A | serine/threonine kinase 17a (apoptosis-inducing) | 0.586216  | Inlier |
| siRNA Disorazole DMSO Run2   | NM_0047<br>60 | STK17A | serine/threonine kinase 17a (apoptosis-inducing) | 0.762784  | Inlier |
| siRNA-Vinblastine Run2-DMSO  | NM_0047<br>60 | STK17A | serine/threonine kinase 17a (apoptosis-inducing) | 1.127221  | Inlier |

Identification of Survival Genes in Human Glioblastoma Cells Using siRNA Screening

Nikhil G Thaker, Fang Zhang, Peter R. McDonald, Tong Ying Shun, Michael D Lewen, Ian F. Pollack, and John S. Lazo

Molecular Pharmacology

|                              |               |        |                                                        |           |        |
|------------------------------|---------------|--------|--------------------------------------------------------|-----------|--------|
| siRNA Disorazole DMSO Run3   | NM_0042<br>26 | STK17B | serine/threonine<br>kinase 17b<br>(apoptosis-inducing) | -1.589829 | Inlier |
| siRNA-Temozolomide Run1-DMSO | NM_0042<br>26 | STK17B | serine/threonine<br>kinase 17b<br>(apoptosis-inducing) | -0.774041 | Inlier |
| siRNA-Temozolomide Run3-DMSO | NM_0042<br>26 | STK17B | serine/threonine<br>kinase 17b<br>(apoptosis-inducing) | -0.574959 | Inlier |
| siRNA Disorazole DMSO Run1   | NM_0042<br>26 | STK17B | serine/threonine<br>kinase 17b<br>(apoptosis-inducing) | -0.023955 | Inlier |
| siRNA-Temozolomide Run2-DMSO | NM_0042<br>26 | STK17B | serine/threonine<br>kinase 17b<br>(apoptosis-inducing) | 0.023953  | Inlier |
| siRNA Disorazole DMSO Run2   | NM_0042<br>26 | STK17B | serine/threonine<br>kinase 17b<br>(apoptosis-inducing) | 0.226616  | Inlier |
| siRNA-Vinblastine Run1-DMSO  | NM_0042<br>26 | STK17B | serine/threonine<br>kinase 17b<br>(apoptosis-inducing) | 1.356732  | Inlier |

Identification of Survival Genes in Human Glioblastoma Cells Using siRNA Screening  
 Nikhil G Thaker, Fang Zhang, Peter R. McDonald, Tong Ying Shun, Michael D Lewen, Ian F. Pollack, and John S. Lazo  
 Molecular Pharmacology

|                              |               |        |                                                         |           |         |
|------------------------------|---------------|--------|---------------------------------------------------------|-----------|---------|
| siRNA-Vinblastine Run2-DMSO  | NM_0042<br>26 | STK17B | serine/threonine kinase 17b (apoptosis-inducing)        | 4.174557  | Outlier |
| siRNA Disorazole DMSO Run2   | NM_0324<br>54 | STK19  | serine/threonine kinase 19                              | -0.846864 | Inlier  |
| siRNA Disorazole DMSO Run3   | NM_0324<br>54 | STK19  | serine/threonine kinase 19                              | -0.782591 | Inlier  |
| siRNA-Temozolomide Run3-DMSO | NM_0324<br>54 | STK19  | serine/threonine kinase 19                              | -0.732625 | Inlier  |
| siRNA-Temozolomide Run1-DMSO | NM_0324<br>54 | STK19  | serine/threonine kinase 19                              | -0.069957 | Inlier  |
| siRNA Disorazole DMSO Run1   | NM_0324<br>54 | STK19  | serine/threonine kinase 19                              | 0.069957  | Inlier  |
| siRNA-Temozolomide Run2-DMSO | NM_0324<br>54 | STK19  | serine/threonine kinase 19                              | 0.07344   | Inlier  |
| siRNA-Vinblastine Run1-DMSO  | NM_0324<br>54 | STK19  | serine/threonine kinase 19                              | 0.616375  | Inlier  |
| siRNA-Vinblastine Run2-DMSO  | NM_0324<br>54 | STK19  | serine/threonine kinase 19                              | 0.792773  | Inlier  |
| siRNA Disorazole DMSO Run3   | NM_0530<br>06 | STK22B | serine/threonine kinase 22B (spermiogenesis associated) | -1.523076 | Inlier  |
| siRNA Disorazole DMSO Run2   | NM_0530<br>06 | STK22B | serine/threonine kinase 22B (spermiogenesis associated) | -0.967969 | Inlier  |

Identification of Survival Genes in Human Glioblastoma Cells Using siRNA Screening

Nikhil G Thaker, Fang Zhang, Peter R. McDonald, Tong Ying Shun, Michael D Lewen, Ian F. Pollack, and John S. Lazo

Molecular Pharmacology

|                              |           |        |                                                         |           |        |
|------------------------------|-----------|--------|---------------------------------------------------------|-----------|--------|
| siRNA-Temozolomide Run2-DMSO | NM_053006 | STK22B | serine/threonine kinase 22B (spermiogenesis associated) | -0.584183 | Inlier |
| siRNA-Vinblastine Run1-DMSO  | NM_053006 | STK22B | serine/threonine kinase 22B (spermiogenesis associated) | -0.228745 | Inlier |
| siRNA Disorazole DMSO Run1   | NM_053006 | STK22B | serine/threonine kinase 22B (spermiogenesis associated) | 0.228744  | Inlier |
| siRNA-Temozolomide Run1-DMSO | NM_053006 | STK22B | serine/threonine kinase 22B (spermiogenesis associated) | 0.602022  | Inlier |
| siRNA-Temozolomide Run3-DMSO | NM_053006 | STK22B | serine/threonine kinase 22B (spermiogenesis associated) | 0.746978  | Inlier |
| siRNA-Vinblastine Run2-DMSO  | NM_053006 | STK22B | serine/threonine kinase 22B (spermiogenesis associated) | 2.975535  | Inlier |

Identification of Survival Genes in Human Glioblastoma Cells Using siRNA Screening

Nikhil G Thaker, Fang Zhang, Peter R. McDonald, Tong Ying Shun, Michael D Lewen, Ian F. Pollack, and John S. Lazo

Molecular Pharmacology

|                              |               |        |                                                         |           |        |
|------------------------------|---------------|--------|---------------------------------------------------------|-----------|--------|
| siRNA-Temozolomide Run3-DMSO | NM_0528<br>41 | STK22C | serine/threonine kinase 22C (spermiogenesis associated) | -2.189356 | Inlier |
| siRNA Disorazole DMSO Run2   | NM_0528<br>41 | STK22C | serine/threonine kinase 22C (spermiogenesis associated) | -0.801311 | Inlier |
| siRNA-Temozolomide Run2-DMSO | NM_0528<br>41 | STK22C | serine/threonine kinase 22C (spermiogenesis associated) | -0.260609 | Inlier |
| siRNA-Vinblastine Run1-DMSO  | NM_0528<br>41 | STK22C | serine/threonine kinase 22C (spermiogenesis associated) | -0.005542 | Inlier |
| siRNA-Temozolomide Run1-DMSO | NM_0528<br>41 | STK22C | serine/threonine kinase 22C (spermiogenesis associated) | 0.005542  | Inlier |
| siRNA Disorazole DMSO Run3   | NM_0528<br>41 | STK22C | serine/threonine kinase 22C (spermiogenesis associated) | 0.547689  | Inlier |

Identification of Survival Genes in Human Glioblastoma Cells Using siRNA Screening

Nikhil G Thaker, Fang Zhang, Peter R. McDonald, Tong Ying Shun, Michael D Lewen, Ian F. Pollack, and John S. Lazo

Molecular Pharmacology

|                              |               |        |                                                         |           |        |
|------------------------------|---------------|--------|---------------------------------------------------------|-----------|--------|
| siRNA Disorazole DMSO Run1   | NM_0528<br>41 | STK22C | serine/threonine kinase 22C (spermiogenesis associated) | 0.925944  | Inlier |
| siRNA-Vinblastine Run2-DMSO  | NM_0528<br>41 | STK22C | serine/threonine kinase 22D (spermiogenesis associated) | 3.27123   | Inlier |
| siRNA Disorazole DMSO Run3   | NM_0320<br>28 | STK22D | serine/threonine kinase 22D (spermiogenesis associated) | -0.904607 | Inlier |
| siRNA-Temozolomide Run3-DMSO | NM_0320<br>28 | STK22D | serine/threonine kinase 22D (spermiogenesis associated) | -0.70934  | Inlier |
| siRNA-Vinblastine Run1-DMSO  | NM_0320<br>28 | STK22D | serine/threonine kinase 22D (spermiogenesis associated) | -0.672629 | Inlier |
| siRNA-Temozolomide Run2-DMSO | NM_0320<br>28 | STK22D | serine/threonine kinase 22D (spermiogenesis associated) | -0.3186   | Inlier |



Identification of Survival Genes in Human Glioblastoma Cells Using siRNA Screening  
 Nikhil G Thaker, Fang Zhang, Peter R. McDonald, Tong Ying Shun, Michael D Lewen, Ian F. Pollack, and John S. Lazo

Molecular Pharmacology

|                              |               |        |                                                         |           |        |
|------------------------------|---------------|--------|---------------------------------------------------------|-----------|--------|
| siRNA-Temozolomide Run1-DMSO | NM_0320<br>28 | STK22D | serine/threonine kinase 22D (spermiogenesis associated) | 0.318601  | Inlier |
| siRNA Disorazole DMSO Run1   | NM_0320<br>28 | STK22D | serine/threonine kinase 22D (spermiogenesis associated) | 0.3677    | Inlier |
| siRNA Disorazole DMSO Run2   | NM_0320<br>28 | STK22D | serine/threonine kinase 22D (spermiogenesis associated) | 0.676371  | Inlier |
| siRNA-Vinblastine Run2-DMSO  | NM_0320<br>28 | STK22D | serine/threonine kinase 23                              | 1.473512  | Inlier |
| siRNA Disorazole DMSO Run2   | NM_0143<br>70 | STK23  | serine/threonine kinase 23                              | -0.71856  | Inlier |
| siRNA-Temozolomide Run1-DMSO | NM_0143<br>70 | STK23  | serine/threonine kinase 23                              | -0.661692 | Inlier |
| siRNA-Temozolomide Run3-DMSO | NM_0143<br>70 | STK23  | serine/threonine kinase 23                              | -0.314041 | Inlier |
| siRNA-Temozolomide Run2-DMSO | NM_0143<br>70 | STK23  | serine/threonine kinase 23                              | -0.134957 | Inlier |
| siRNA Disorazole DMSO Run3   | NM_0143<br>70 | STK23  | serine/threonine kinase 23                              | 0.134957  | Inlier |
| siRNA-Vinblastine Run1-DMSO  | NM_0143<br>70 | STK23  | serine/threonine kinase 23                              | 0.687308  | Inlier |

Identification of Survival Genes in Human Glioblastoma Cells Using siRNA Screening  
 Nikhil G Thaker, Fang Zhang, Peter R. McDonald, Tong Ying Shun, Michael D Lewen, Ian F. Pollack, and John S. Lazo

Molecular Pharmacology

| siRNA Treatment              | Gene ID   | Gene Name | Protein Name                                      | Log2 Fold Change | Outlier Status |
|------------------------------|-----------|-----------|---------------------------------------------------|------------------|----------------|
| siRNA Disorazole DMSO Run1   | NM_014370 | STK23     | serine/threonine kinase 23                        | 1.456394         | Inlier         |
| siRNA-Vinblastine Run2-DMSO  | NM_014370 | STK23     | serine/threonine kinase 23                        | 1.547011         | Inlier         |
| siRNA-Temozolomide Run1-DMSO | NM_003576 | STK24     | serine/threonine kinase 24 (STE20 homolog, yeast) | -1.208092        | Inlier         |
| siRNA-Temozolomide Run3-DMSO | NM_003576 | STK24     | serine/threonine kinase 24 (STE20 homolog, yeast) | -1.205497        | Inlier         |
| siRNA-Temozolomide Run2-DMSO | NM_003576 | STK24     | serine/threonine kinase 24 (STE20 homolog, yeast) | -0.840944        | Inlier         |
| siRNA Disorazole DMSO Run1   | NM_003576 | STK24     | serine/threonine kinase 24 (STE20 homolog, yeast) | -0.383968        | Inlier         |
| siRNA-Vinblastine Run2-DMSO  | NM_003576 | STK24     | serine/threonine kinase 24 (STE20 homolog, yeast) | 0.383969         | Inlier         |
| siRNA-Vinblastine Run1-DMSO  | NM_003576 | STK24     | serine/threonine kinase 24 (STE20 homolog, yeast) | 0.503821         | Inlier         |
| siRNA Disorazole DMSO Run3   | NM_003576 | STK24     | serine/threonine kinase 24 (STE20 homolog, yeast) | 0.508056         | Inlier         |



Identification of Survival Genes in Human Glioblastoma Cells Using siRNA Screening  
 Nikhil G Thaker, Fang Zhang, Peter R. McDonald, Tong Ying Shun, Michael D Lewen, Ian F. Pollack, and John S. Lazo

Molecular Pharmacology

|                              |               |       |                                                   |           |        |
|------------------------------|---------------|-------|---------------------------------------------------|-----------|--------|
| siRNA-Vinblastine Run2-DMSO  | NM_0063<br>74 | STK25 | serine/threonine kinase 25 (STE20 homolog, yeast) | 1.12122   | Inlier |
| siRNA-Vinblastine Run1-DMSO  | NM_0039<br>57 | STK29 | serine/threonine kinase 2                         | -1.123998 | Inlier |
| siRNA-Temozolomide Run2-DMSO | NM_0039<br>57 | STK29 | serine/threonine kinase 2                         | -0.656718 | Inlier |
| siRNA-Temozolomide Run1-DMSO | NM_0039<br>57 | STK29 | serine/threonine kinase 2                         | -0.393106 | Inlier |
| siRNA-Temozolomide Run3-DMSO | NM_0039<br>57 | STK29 | serine/threonine kinase 2                         | -0.051661 | Inlier |
| siRNA Disorazole DMSO Run1   | NM_0039<br>57 | STK29 | serine/threonine kinase 2                         | 0.051661  | Inlier |
| siRNA-Vinblastine Run2-DMSO  | NM_0039<br>57 | STK29 | serine/threonine kinase 2                         | 0.692282  | Inlier |
| siRNA Disorazole DMSO Run2   | NM_0039<br>57 | STK29 | serine/threonine kinase 2                         | 1.571117  | Inlier |
| siRNA Disorazole DMSO Run3   | NM_0039<br>57 | STK29 | serine/threonine kinase 2                         | 2.045327  | Inlier |
| siRNA-Temozolomide Run3-DMSO | NM_0062<br>81 | STK3  | serine/threonine kinase 3 (STE20 homolog, yeast)  | -0.786035 | Inlier |
| siRNA-Temozolomide Run2-DMSO | NM_0062<br>81 | STK3  | serine/threonine kinase 3 (STE20 homolog, yeast)  | -0.562965 | Inlier |

Identification of Survival Genes in Human Glioblastoma Cells Using siRNA Screening  
 Nikhil G Thaker, Fang Zhang, Peter R. McDonald, Tong Ying Shun, Michael D Lewen, Ian F. Pollack, and John S. Lazo

Molecular Pharmacology

|                              |               |       |                                                  |           |        |
|------------------------------|---------------|-------|--------------------------------------------------|-----------|--------|
| siRNA-Vinblastine Run1-DMSO  | NM_0062<br>81 | STK3  | serine/threonine kinase 3 (STE20 homolog, yeast) | -0.473938 | Inlier |
| siRNA-Temozolomide Run1-DMSO | NM_0062<br>81 | STK3  | serine/threonine kinase 3 (STE20 homolog, yeast) | -0.05838  | Inlier |
| siRNA Disorazole DMSO Run3   | NM_0062<br>81 | STK3  | serine/threonine kinase 3 (STE20 homolog, yeast) | 0.05838   | Inlier |
| siRNA Disorazole DMSO Run2   | NM_0062<br>81 | STK3  | serine/threonine kinase 3 (STE20 homolog, yeast) | 1.341945  | Inlier |
| siRNA Disorazole DMSO Run1   | NM_0062<br>81 | STK3  | serine/threonine kinase 3 (STE20 homolog, yeast) | 1.627545  | Inlier |
| siRNA-Vinblastine Run2-DMSO  | NM_0062<br>81 | STK3  | serine/threonine kinase 3 (STE20 homolog, yeast) | 2.029606  | Inlier |
| siRNA-Temozolomide Run3-DMSO | NM_0329<br>44 | STK31 | serine/threonine kinase 31                       | -1.23814  | Inlier |
| siRNA Disorazole DMSO Run2   | NM_0329<br>44 | STK31 | serine/threonine kinase 31                       | -1.150268 | Inlier |
| siRNA-Temozolomide Run1-DMSO | NM_0329<br>44 | STK31 | serine/threonine kinase 31                       | -0.641702 | Inlier |
| siRNA-Temozolomide Run2-DMSO | NM_0329<br>44 | STK31 | serine/threonine kinase 31                       | -0.073523 | Inlier |
| siRNA Disorazole DMSO Run3   | NM_0329<br>44 | STK31 | serine/threonine kinase 31                       | 0.073522  | Inlier |

Identification of Survival Genes in Human Glioblastoma Cells Using siRNA Screening  
 Nikhil G Thaker, Fang Zhang, Peter R. McDonald, Tong Ying Shun, Michael D Lewen, Ian F. Pollack, and John S. Lazo

Molecular Pharmacology

| siRNA Treatment              | Gene ID       | Gene Name | Protein Name                | Log2 Fold Change | Classification |
|------------------------------|---------------|-----------|-----------------------------|------------------|----------------|
| siRNA Disorazole DMSO Run1   | NM_0329<br>44 | STK31     | serine/threonine kinase 31  | 0.449092         | Inlier         |
| siRNA-Vinblastine Run1-DMSO  | NM_0329<br>44 | STK31     | serine/threonine kinase 31  | 0.707298         | Inlier         |
| siRNA-Vinblastine Run2-DMSO  | NM_0329<br>44 | STK31     | serine/threonine kinase 31  | 0.800314         | Inlier         |
| siRNA-Temozolomide Run3-DMSO | NM_1450<br>01 | STK32A    | serine/threonine kinase 32A | -1.382111        | Inlier         |
| siRNA-Temozolomide Run1-DMSO | NM_1450<br>01 | STK32A    | serine/threonine kinase 32A | -0.545546        | Inlier         |
| siRNA Disorazole DMSO Run2   | NM_1450<br>01 | STK32A    | serine/threonine kinase 32A | -0.335967        | Inlier         |
| siRNA-Temozolomide Run2-DMSO | NM_1450<br>01 | STK32A    | serine/threonine kinase 32A | -0.009898        | Inlier         |
| siRNA Disorazole DMSO Run1   | NM_1450<br>01 | STK32A    | serine/threonine kinase 32A | 0.009899         | Inlier         |
| siRNA Disorazole DMSO Run3   | NM_1450<br>01 | STK32A    | serine/threonine kinase 32A | 0.803454         | Inlier         |
| siRNA-Vinblastine Run1-DMSO  | NM_1450<br>01 | STK32A    | serine/threonine kinase 32A | 2.266437         | Inlier         |
| siRNA-Vinblastine Run2-DMSO  | NM_1450<br>01 | STK32A    | serine/threonine kinase 32A | 2.328755         | Inlier         |
| siRNA Disorazole DMSO Run2   | NM_0184<br>01 | STK32B    | serine/threonine kinase 32B | -0.825684        | Inlier         |
| siRNA-Temozolomide Run3-DMSO | NM_0184<br>01 | STK32B    | serine/threonine kinase 32B | -0.523316        | Inlier         |

Identification of Survival Genes in Human Glioblastoma Cells Using siRNA Screening  
 Nikhil G Thaker, Fang Zhang, Peter R. McDonald, Tong Ying Shun, Michael D Lewen, Ian F. Pollack, and John S. Lazo

Molecular Pharmacology

|                              |               |        |                                   |           |         |
|------------------------------|---------------|--------|-----------------------------------|-----------|---------|
| siRNA-Temozolomide Run1-DMSO | NM_0184<br>01 | STK32B | serine/threonine<br>kinase<br>32B | -0.333893 | Inlier  |
| siRNA Disorazole DMSO Run3   | NM_0184<br>01 | STK32B | serine/threonine<br>kinase<br>32B | -0.236704 | Inlier  |
| siRNA-Temozolomide Run2-DMSO | NM_0184<br>01 | STK32B | serine/threonine<br>kinase<br>32B | 0.236705  | Inlier  |
| siRNA Disorazole DMSO Run1   | NM_0184<br>01 | STK32B | serine/threonine<br>kinase<br>32B | 2.07424   | Inlier  |
| siRNA-Vinblastine Run2-DMSO  | NM_0184<br>01 | STK32B | serine/threonine<br>kinase<br>32B | 3.257233  | Inlier  |
| siRNA-Vinblastine Run1-DMSO  | NM_0184<br>01 | STK32B | serine/threonine<br>kinase<br>32B | 3.72928   | Outlier |
| siRNA-Temozolomide Run3-DMSO | NM_1735<br>75 | STK32C | serine/threonine<br>kinase<br>32C | -1.362699 | Inlier  |
| siRNA Disorazole DMSO Run2   | NM_1735<br>75 | STK32C | serine/threonine<br>kinase<br>32C | -0.494249 | Inlier  |
| siRNA Disorazole DMSO Run3   | NM_1735<br>75 | STK32C | serine/threonine<br>kinase<br>32C | -0.455374 | Inlier  |
| siRNA-Temozolomide Run1-DMSO | NM_1735<br>75 | STK32C | serine/threonine<br>kinase<br>32C | -0.23791  | Inlier  |
| siRNA-Temozolomide Run2-DMSO | NM_1735<br>75 | STK32C | serine/threonine<br>kinase<br>32C | 0.23791   | Inlier  |
| siRNA Disorazole DMSO Run1   | NM_1735<br>75 | STK32C | serine/threonine<br>kinase<br>32C | 0.854751  | Inlier  |
| siRNA-Vinblastine Run1-DMSO  | NM_1735<br>75 | STK32C | serine/threonine<br>kinase<br>32C | 1.669243  | Inlier  |

Identification of Survival Genes in Human Glioblastoma Cells Using siRNA Screening  
 Nikhil G Thaker, Fang Zhang, Peter R. McDonald, Tong Ying Shun, Michael D Lewen, Ian F. Pollack, and John S. Lazo

Molecular Pharmacology

| siRNA Treatment              | Gene ID   | Gene Name | Protein Name                | Log2 Fold Change | Outlier Status |
|------------------------------|-----------|-----------|-----------------------------|------------------|----------------|
| siRNA-Vinblastine Run2-DMSO  | NM_173575 | STK32C    | serine/threonine kinase 32C | 2.228579         | Inlier         |
| siRNA Disorazole DMSO Run2   | NM_030906 | STK33     | serine/threonine kinase 33  | -1.808526        | Inlier         |
| siRNA Disorazole DMSO Run3   | NM_030906 | STK33     | serine/threonine kinase 33  | -0.259172        | Inlier         |
| siRNA-Temozolomide Run1-DMSO | NM_030906 | STK33     | serine/threonine kinase 33  | -0.082929        | Inlier         |
| siRNA-Temozolomide Run3-DMSO | NM_030906 | STK33     | serine/threonine kinase 33  | -0.082003        | Inlier         |
| siRNA-Temozolomide Run2-DMSO | NM_030906 | STK33     | serine/threonine kinase 33  | 0.082003         | Inlier         |
| siRNA-Vinblastine Run1-DMSO  | NM_030906 | STK33     | serine/threonine kinase 33  | 1.089828         | Inlier         |
| siRNA Disorazole DMSO Run1   | NM_030906 | STK33     | serine/threonine kinase 33  | 1.363657         | Inlier         |
| siRNA-Vinblastine Run2-DMSO  | NM_030906 | STK33     | serine/threonine kinase 33  | 1.968591         | Inlier         |
| siRNA-Temozolomide Run3-DMSO | NM_080836 | STK35     | serine/threonine kinase 35  | -0.863293        | Inlier         |
| siRNA Disorazole DMSO Run2   | NM_080836 | STK35     | serine/threonine kinase 35  | -0.794977        | Inlier         |
| siRNA-Temozolomide Run1-DMSO | NM_080836 | STK35     | serine/threonine kinase 35  | -0.503738        | Inlier         |
| siRNA-Temozolomide Run2-DMSO | NM_080836 | STK35     | serine/threonine kinase 35  | -0.420137        | Inlier         |
| siRNA Disorazole DMSO Run1   | NM_080836 | STK35     | serine/threonine kinase 35  | 0.420137         | Inlier         |
| siRNA Disorazole DMSO Run3   | NM_080836 | STK35     | serine/threonine kinase 35  | 0.554023         | Inlier         |
| siRNA-Vinblastine Run2-DMSO  | NM_080836 | STK35     | serine/threonine kinase 35  | 0.996476         | Inlier         |
| siRNA-Vinblastine Run1-DMSO  | NM_080836 | STK35     | serine/threonine kinase 35  | 1.169711         | Inlier         |



Identification of Survival Genes in Human Glioblastoma Cells Using siRNA Screening  
 Nikhil G Thaker, Fang Zhang, Peter R. McDonald, Tong Ying Shun, Michael D Lewen, Ian F. Pollack, and John S. Lazo

Molecular Pharmacology

|                              |               |       |                                                        |           |        |
|------------------------------|---------------|-------|--------------------------------------------------------|-----------|--------|
| siRNA Disorazole DMSO Run2   | NM_0156<br>90 | STK36 | serine/threonine kinase 36 (fused homolog, Drosophila) | -1.261123 | Inlier |
| siRNA-Temozolomide Run3-DMSO | NM_0156<br>90 | STK36 | serine/threonine kinase 36 (fused homolog, Drosophila) | -1.0429   | Inlier |
| siRNA Disorazole DMSO Run3   | NM_0156<br>90 | STK36 | serine/threonine kinase 36 (fused homolog, Drosophila) | -0.525954 | Inlier |
| siRNA-Temozolomide Run1-DMSO | NM_0156<br>90 | STK36 | serine/threonine kinase 36 (fused homolog, Drosophila) | -0.027936 | Inlier |
| siRNA-Temozolomide Run2-DMSO | NM_0156<br>90 | STK36 | serine/threonine kinase 36 (fused homolog, Drosophila) | 0.027937  | Inlier |
| siRNA Disorazole DMSO Run1   | NM_0156<br>90 | STK36 | serine/threonine kinase 36 (fused homolog, Drosophila) | 0.3632    | Inlier |
| siRNA-Vinblastine Run2-DMSO  | NM_0156<br>90 | STK36 | serine/threonine kinase 36 (fused homolog, Drosophila) | 0.823046  | Inlier |

Identification of Survival Genes in Human Glioblastoma Cells Using siRNA Screening  
 Nikhil G Thaker, Fang Zhang, Peter R. McDonald, Tong Ying Shun, Michael D Lewen, Ian F. Pollack, and John S. Lazo

Molecular Pharmacology

|                              |           |        |                                                        |           |        |
|------------------------------|-----------|--------|--------------------------------------------------------|-----------|--------|
| siRNA-Vinblastine Run1-DMSO  | NM_015690 | STK36  | serine/threonine kinase 36 (fused homolog, Drosophila) | 1.008854  | Inlier |
| siRNA Disorazole DMSO Run2   | NM_007271 | STK38  | serine/threonine kinase 38                             | -2.323968 | Inlier |
| siRNA Disorazole DMSO Run3   | NM_007271 | STK38  | serine/threonine kinase 38                             | -1.226718 | Inlier |
| siRNA-Temozolomide Run1-DMSO | NM_007271 | STK38  | serine/threonine kinase 38                             | -0.392955 | Inlier |
| siRNA-Temozolomide Run2-DMSO | NM_007271 | STK38  | serine/threonine kinase 38                             | -0.025781 | Inlier |
| siRNA-Temozolomide Run3-DMSO | NM_007271 | STK38  | serine/threonine kinase 38                             | 0.025781  | Inlier |
| siRNA-Vinblastine Run2-DMSO  | NM_007271 | STK38  | serine/threonine kinase 38                             | 0.642095  | Inlier |
| siRNA Disorazole DMSO Run1   | NM_007271 | STK38  | serine/threonine kinase 38                             | 0.706905  | Inlier |
| siRNA-Vinblastine Run1-DMSO  | NM_007271 | STK38  | serine/threonine kinase 38                             | 0.966777  | Inlier |
| siRNA Disorazole DMSO Run2   | NM_015000 | STK38L | serine/threonine kinase 38 like                        | -1.503042 | Inlier |
| siRNA-Temozolomide Run2-DMSO | NM_015000 | STK38L | serine/threonine kinase 38 like                        | -0.834139 | Inlier |
| siRNA-Temozolomide Run3-DMSO | NM_015000 | STK38L | serine/threonine kinase 38 like                        | -0.534811 | Inlier |
| siRNA Disorazole DMSO Run3   | NM_015000 | STK38L | serine/threonine kinase 38 like                        | -0.067686 | Inlier |
| siRNA-Vinblastine Run1-DMSO  | NM_015000 | STK38L | serine/threonine kinase 38 like                        | 0.067687  | Inlier |

Identification of Survival Genes in Human Glioblastoma Cells Using siRNA Screening

Nikhil G Thaker, Fang Zhang, Peter R. McDonald, Tong Ying Shun, Michael D Lewen, Ian F. Pollack, and John S. Lazo

Molecular Pharmacology

|                              |           |        |                                                         |           |        |
|------------------------------|-----------|--------|---------------------------------------------------------|-----------|--------|
| siRNA-Temozolomide Run1-DMSO | NM_015000 | STK38L | serine/threonine kinase 38 like                         | 0.312291  | Inlier |
| siRNA Disorazole DMSO Run1   | NM_015000 | STK38L | serine/threonine kinase 38 like                         | 0.814189  | Inlier |
| siRNA-Vinblastine Run2-DMSO  | NM_015000 | STK38L | serine/threonine kinase 38 like                         | 2.242362  | Inlier |
| siRNA-Temozolomide Run1-DMSO | NM_013233 | STK39  | serine threonine kinase 39 (STE20/S PS1 homolog, yeast) | -1.193901 | Inlier |
| siRNA-Vinblastine Run1-DMSO  | NM_013233 | STK39  | serine threonine kinase 39 (STE20/S PS1 homolog, yeast) | -0.668421 | Inlier |
| siRNA-Temozolomide Run2-DMSO | NM_013233 | STK39  | serine threonine kinase 39 (STE20/S PS1 homolog, yeast) | -0.372335 | Inlier |
| siRNA Disorazole DMSO Run2   | NM_013233 | STK39  | serine threonine kinase 39 (STE20/S PS1 homolog, yeast) | -0.121325 | Inlier |
| siRNA-Temozolomide Run3-DMSO | NM_013233 | STK39  | serine threonine kinase 39 (STE20/S PS1 homolog, yeast) | 0.121327  | Inlier |

Identification of Survival Genes in Human Glioblastoma Cells Using siRNA Screening  
 Nikhil G Thaker, Fang Zhang, Peter R. McDonald, Tong Ying Shun, Michael D Lewen, Ian F. Pollack, and John S. Lazo

Molecular Pharmacology

|                                  |               |       |                                                                           |           |        |
|----------------------------------|---------------|-------|---------------------------------------------------------------------------|-----------|--------|
| siRNA Disorazole DMSO Run1       | NM_0132<br>33 | STK39 | serine<br>threonine<br>kinase 39<br>(STE20/S<br>PS1<br>homolog,<br>yeast) | 0.680579  | Inlier |
| siRNA Disorazole DMSO Run3       | NM_0132<br>33 | STK39 | serine<br>threonine<br>kinase 39<br>(STE20/S<br>PS1<br>homolog,<br>yeast) | 2.469985  | Inlier |
| siRNA-Vinblastine Run2-<br>DMSO  | NM_0132<br>33 | STK39 | serine/thre<br>onine                                                      | 2.928756  | Inlier |
| siRNA Disorazole DMSO Run2       | NM_0062<br>82 | STK4  | kinase 4                                                                  | -1.654593 | Inlier |
| siRNA-Temozolomide Run3-<br>DMSO | NM_0062<br>82 | STK4  | kinase 4                                                                  | -1.63546  | Inlier |
| siRNA-Temozolomide Run1-<br>DMSO | NM_0062<br>82 | STK4  | kinase 4                                                                  | -0.51837  | Inlier |
| siRNA-Temozolomide Run2-<br>DMSO | NM_0062<br>82 | STK4  | kinase 4                                                                  | -0.020136 | Inlier |
| siRNA Disorazole DMSO Run3       | NM_0062<br>82 | STK4  | kinase 4                                                                  | 0.020136  | Inlier |
| siRNA-Vinblastine Run1-<br>DMSO  | NM_0062<br>82 | STK4  | kinase 4                                                                  | 0.58548   | Inlier |
| siRNA Disorazole DMSO Run1       | NM_0062<br>82 | STK4  | kinase 4                                                                  | 0.76352   | Inlier |
| siRNA-Vinblastine Run2-<br>DMSO  | NM_0062<br>82 | STK4  | kinase 4                                                                  | 1.747714  | Inlier |
| siRNA-Temozolomide Run3-<br>DMSO | NM_1984<br>34 | STK6  | kinase 6                                                                  | -0.892602 | Inlier |
| siRNA-Temozolomide Run2-<br>DMSO | NM_1984<br>34 | STK6  | kinase 6                                                                  | -0.79313  | Inlier |

Identification of Survival Genes in Human Glioblastoma Cells Using siRNA Screening  
 Nikhil G Thaker, Fang Zhang, Peter R. McDonald, Tong Ying Shun, Michael D Lewen, Ian F. Pollack, and John S. Lazo

Molecular Pharmacology

|                              |               |      |                                                            |           |        |
|------------------------------|---------------|------|------------------------------------------------------------|-----------|--------|
| siRNA Disorazole DMSO Run3   | NM_1984<br>34 | STK6 | serine/threonine<br>kinase 6                               | -0.57655  | Inlier |
| siRNA Disorazole DMSO Run1   | NM_1984<br>34 | STK6 | serine/threonine<br>kinase 6                               | -0.057496 | Inlier |
| siRNA-Temozolomide Run1-DMSO | NM_1984<br>34 | STK6 | serine/threonine<br>kinase 6                               | 0.057496  | Inlier |
| siRNA Disorazole DMSO Run2   | NM_1984<br>34 | STK6 | serine/threonine<br>kinase 6                               | 0.533352  | Inlier |
| siRNA-Vinblastine Run2-DMSO  | NM_1984<br>34 | STK6 | serine/threonine<br>kinase 6                               | 0.77245   | Inlier |
| siRNA-Vinblastine Run1-DMSO  | NM_1984<br>34 | STK6 | serine/threonine<br>kinase 6                               | 1.143861  | Inlier |
| siRNA-Temozolomide Run3-DMSO | NM_0003<br>51 | STS  | steroid sulfatase (microsomal), arylsulfatase C, isozyme S | -1.137028 | Inlier |
| siRNA-Temozolomide Run2-DMSO | NM_0003<br>51 | STS  | steroid sulfatase (microsomal), arylsulfatase C, isozyme S | -0.844258 | Inlier |
| siRNA-Vinblastine Run2-DMSO  | NM_0003<br>51 | STS  | steroid sulfatase (microsomal), arylsulfatase C, isozyme S | -0.156528 | Inlier |
| siRNA Disorazole DMSO Run1   | NM_0003<br>51 | STS  | steroid sulfatase (microsomal), arylsulfatase C, isozyme S | -0.10272  | Inlier |

Identification of Survival Genes in Human Glioblastoma Cells Using siRNA Screening  
 Nikhil G Thaker, Fang Zhang, Peter R. McDonald, Tong Ying Shun, Michael D Lewen, Ian F. Pollack, and John S. Lazo  
 Molecular Pharmacology

|                              |           |       |                                                            |           |        |
|------------------------------|-----------|-------|------------------------------------------------------------|-----------|--------|
| siRNA-Temozolomide Run1-DMSO | NM_000351 | STS   | steroid sulfatase (microsomal), arylsulfatase C, isozyme S | 0.10272   | Inlier |
| siRNA Disorazole DMSO Run3   | NM_000351 | STS   | steroid sulfatase (microsomal), arylsulfatase C, isozyme S | 0.518659  | Inlier |
| siRNA-Vinblastine Run1-DMSO  | NM_000351 | STS   | steroid sulfatase (microsomal), arylsulfatase C, isozyme S | 0.830341  | Inlier |
| siRNA Disorazole DMSO Run2   | NM_000351 | STS   | steroid sulfatase (microsomal), arylsulfatase C, isozyme S | 1.770987  | Inlier |
| siRNA-Temozolomide Run3-DMSO | NM_003765 | STX10 | syntaxin 10                                                | -1.377459 | Inlier |
| siRNA-Temozolomide Run2-DMSO | NM_003765 | STX10 | syntaxin 10                                                | -1.151178 | Inlier |
| siRNA-Temozolomide Run1-DMSO | NM_003765 | STX10 | syntaxin 10                                                | -0.426716 | Inlier |
| siRNA Disorazole DMSO Run1   | NM_003765 | STX10 | syntaxin 10                                                | -0.365864 | Inlier |
| siRNA-Vinblastine Run1-DMSO  | NM_003765 | STX10 | syntaxin 10                                                | 0.365864  | Inlier |
| siRNA Disorazole DMSO Run3   | NM_003765 | STX10 | syntaxin 10                                                | 0.480457  | Inlier |
| siRNA-Vinblastine Run2-DMSO  | NM_003765 | STX10 | syntaxin 10                                                | 0.868543  | Inlier |
| siRNA Disorazole DMSO Run2   | NM_003765 | STX10 | syntaxin 10                                                | 1.416602  | Inlier |
| siRNA-Temozolomide Run1-DMSO | NM_003764 | STX11 | syntaxin 11                                                | -2.72102  | Inlier |
| siRNA-Temozolomide Run3-DMSO | NM_003764 | STX11 | syntaxin 11                                                | -2.323849 | Inlier |

Identification of Survival Genes in Human Glioblastoma Cells Using siRNA Screening  
 Nikhil G Thaker, Fang Zhang, Peter R. McDonald, Tong Ying Shun, Michael D Lewen, Ian F. Pollack, and John S. Lazo

|                              |         |       |            |                   |
|------------------------------|---------|-------|------------|-------------------|
| Molecular Pharmacology       | NM_0037 |       | syntaxin   |                   |
| siRNA Disorazole DMSO Run3   | 64      | STX11 | 11         | -0.396325 Inlier  |
| siRNA-Vinblastine Run2-DMSO  | NM_0037 |       | syntaxin   |                   |
|                              | 64      | STX11 | 11         | -0.39567 Inlier   |
|                              | NM_0037 |       | syntaxin   |                   |
| siRNA Disorazole DMSO Run1   | 64      | STX11 | 11         | 0.39567 Inlier    |
| siRNA-Temozolomide Run2-DMSO | NM_0037 |       | syntaxin   |                   |
|                              | 64      | STX11 | 11         | 0.514482 Inlier   |
| siRNA-Vinblastine Run1-DMSO  | NM_0037 |       | syntaxin   |                   |
|                              | 64      | STX11 | 11         | 0.834518 Inlier   |
|                              | NM_0037 |       | syntaxin   |                   |
| siRNA Disorazole DMSO Run2   | 64      | STX11 | 11         | 1.426292 Inlier   |
| siRNA-Temozolomide Run1-DMSO | NM_0010 |       | syntaxin   |                   |
|                              | 01434   | STX16 | 16         | -2.383333 Inlier  |
| siRNA-Temozolomide Run3-DMSO | NM_0010 |       | syntaxin   |                   |
|                              | 01434   | STX16 | 16         | -0.501137 Inlier  |
| siRNA-Vinblastine Run1-DMSO  | NM_0010 |       | syntaxin   |                   |
|                              | 01434   | STX16 | 16         | -0.446511 Inlier  |
| siRNA-Vinblastine Run2-DMSO  | NM_0010 |       | syntaxin   |                   |
|                              | 01434   | STX16 | 16         | -0.233674 Inlier  |
| siRNA-Temozolomide Run2-DMSO | NM_0010 |       | syntaxin   |                   |
|                              | 01434   | STX16 | 16         | 0.233672 Inlier   |
|                              | NM_0010 |       | syntaxin   |                   |
| siRNA Disorazole DMSO Run1   | 01434   | STX16 | 16         | 0.847863 Inlier   |
|                              | NM_0010 |       | syntaxin   |                   |
| siRNA Disorazole DMSO Run2   | 01434   | STX16 | 16         | 2.287738 Inlier   |
|                              | NM_0010 |       | syntaxin   |                   |
| siRNA Disorazole DMSO Run3   | 01434   | STX16 | 16         | 4.291064 Outlier  |
| siRNA-Temozolomide Run3-DMSO | NM_0169 |       | syntaxin   |                   |
|                              | 30      | STX18 | 18         | -1.425672 Inlier  |
| siRNA-Temozolomide Run2-DMSO | NM_0169 |       | syntaxin   |                   |
|                              | 30      | STX18 | 18         | -0.657017 Inlier  |
|                              | NM_0169 |       | syntaxin   |                   |
| siRNA Disorazole DMSO Run2   | 30      | STX18 | 18         | -0.583389 Inlier  |
| siRNA-Temozolomide Run1-DMSO | NM_0169 |       | syntaxin   |                   |
|                              | 30      | STX18 | 18         | -0.014961 Inlier  |
|                              | NM_0169 |       | syntaxin   |                   |
| siRNA Disorazole DMSO Run1   | 30      | STX18 | 18         | 0.014961 Inlier   |
| siRNA-Vinblastine Run2-DMSO  | NM_0169 |       | syntaxin   |                   |
|                              | 30      | STX18 | 18         | 0.691983 Inlier   |
| siRNA-Vinblastine Run1-DMSO  | NM_0169 |       | syntaxin   |                   |
|                              | 30      | STX18 | 18         | 0.700358 Inlier   |
|                              | NM_0169 |       | syntaxin   |                   |
| siRNA Disorazole DMSO Run3   | 30      | STX18 | 18         | 0.946552 Inlier   |
| siRNA-Temozolomide Run3-DMSO | NM_0046 |       | syntaxin   |                   |
|                              | 03      | STX1A | 1A (brain) | -3.503639 Outlier |
| siRNA-Temozolomide Run1-DMSO | NM_0046 |       | syntaxin   |                   |
|                              | 03      | STX1A | 1A (brain) | -0.807993 Inlier  |
|                              | NM_0046 |       | syntaxin   |                   |
| siRNA Disorazole DMSO Run2   | 03      | STX1A | 1A (brain) | -0.580371 Inlier  |
| siRNA-Temozolomide Run2-DMSO | NM_0046 |       | syntaxin   |                   |
|                              | 03      | STX1A | 1A (brain) | -0.369004 Inlier  |

Identification of Survival Genes in Human Glioblastoma Cells Using siRNA Screening

Nikhil G Thaker, Fang Zhang, Peter R. McDonald, Tong Ying Shun, Michael D Lewen, Ian F. Pollack, and John S.

Lazo

|                            |         |       |             |                  |
|----------------------------|---------|-------|-------------|------------------|
| Molecular Pharmacology     | NM_0046 |       | syntaxin    |                  |
| siRNA Disorazole DMSO Run1 | 03      | STX1A | 1A (brain)  | 0.369004 Inlier  |
| siRNA-Vinblastine Run1-    | NM_0046 |       | syntaxin    |                  |
| DMSO                       | 03      | STX1A | 1A (brain)  | 0.46149 Inlier   |
| siRNA-Vinblastine Run2-    | NM_0046 |       | syntaxin    |                  |
| DMSO                       | 03      | STX1A | 1A (brain)  | 0.768629 Inlier  |
|                            | NM_0046 |       | syntaxin    |                  |
| siRNA Disorazole DMSO Run3 | 03      | STX1A | 1A (brain)  | 0.926808 Inlier  |
| siRNA-Temozolomide Run3-   | NM_0041 |       | syntaxin    |                  |
| DMSO                       | 77      | STX3A | 3A          | -2.269829 Inlier |
| siRNA-Temozolomide Run2-   | NM_0041 |       | syntaxin    |                  |
| DMSO                       | 77      | STX3A | 3A          | -1.186465 Inlier |
| siRNA-Temozolomide Run1-   | NM_0041 |       | syntaxin    |                  |
| DMSO                       | 77      | STX3A | 3A          | -0.228819 Inlier |
|                            | NM_0041 |       | syntaxin    |                  |
| siRNA Disorazole DMSO Run2 | 77      | STX3A | 3A          | -0.210785 Inlier |
|                            | NM_0041 |       | syntaxin    |                  |
| siRNA Disorazole DMSO Run1 | 77      | STX3A | 3A          | 0.210785 Inlier  |
| siRNA-Vinblastine Run1-    | NM_0041 |       | syntaxin    |                  |
| DMSO                       | 77      | STX3A | 3A          | 0.673132 Inlier  |
| siRNA-Vinblastine Run2-    | NM_0041 |       | syntaxin    |                  |
| DMSO                       | 77      | STX3A | 3A          | 0.675868 Inlier  |
|                            | NM_0041 |       | syntaxin    |                  |
| siRNA Disorazole DMSO Run3 | 77      | STX3A | 3A          | 0.766759 Inlier  |
|                            |         |       | syntaxin    |                  |
| siRNA-Temozolomide Run3-   | NM_0046 |       | 4A          |                  |
| DMSO                       | 04      | STX4A | (placental) | -1.160188 Inlier |
|                            |         |       | syntaxin    |                  |
| siRNA-Temozolomide Run1-   | NM_0046 |       | 4A          |                  |
| DMSO                       | 04      | STX4A | (placental) | -1.019249 Inlier |
|                            |         |       | syntaxin    |                  |
| siRNA-Temozolomide Run2-   | NM_0046 |       | 4A          |                  |
| DMSO                       | 04      | STX4A | (placental) | -0.419502 Inlier |
|                            |         |       | syntaxin    |                  |
| siRNA-Vinblastine Run1-    | NM_0046 |       | 4A          |                  |
| DMSO                       | 04      | STX4A | (placental) | -0.075542 Inlier |
|                            |         |       | syntaxin    |                  |
| siRNA-Vinblastine Run2-    | NM_0046 |       | 4A          |                  |
| DMSO                       | 04      | STX4A | (placental) | 0.075543 Inlier  |
|                            |         |       | syntaxin    |                  |
|                            | NM_0046 |       | 4A          |                  |
| siRNA Disorazole DMSO Run2 | 04      | STX4A | (placental) | 0.117532 Inlier  |
|                            |         |       | syntaxin    |                  |
|                            | NM_0046 |       | 4A          |                  |
| siRNA Disorazole DMSO Run3 | 04      | STX4A | (placental) | 0.929498 Inlier  |



Identification of Survival Genes in Human Glioblastoma Cells Using siRNA Screening  
 Nikhil G Thaker, Fang Zhang, Peter R. McDonald, Tong Ying Shun, Michael D Lewen, Ian F. Pollack, and John S. Lazo

Molecular Pharmacology

|                                  |               |       |                |                  |
|----------------------------------|---------------|-------|----------------|------------------|
|                                  |               |       | syntaxin<br>4A |                  |
| siRNA Disorazole DMSO Run1       | NM_0046<br>04 | STX4A | (placental)    | 1.2058 Inlier    |
| siRNA-Temozolomide Run3-<br>DMSO | NM_0031<br>64 | STX5A | 5A             | -1.454123 Inlier |
| siRNA-Temozolomide Run1-<br>DMSO | NM_0031<br>64 | STX5A | 5A             | -1.02565 Inlier  |
|                                  | NM_0031       |       | syntaxin       |                  |
| siRNA Disorazole DMSO Run1       | 64            | STX5A | 5A             | -0.019009 Inlier |
|                                  | NM_0031       |       | syntaxin       |                  |
| siRNA Disorazole DMSO Run2       | 64            | STX5A | 5A             | -0.011312 Inlier |
| siRNA-Temozolomide Run2-<br>DMSO | NM_0031<br>64 | STX5A | 5A             | 0.011312 Inlier  |
|                                  | NM_0031       |       | syntaxin       |                  |
| siRNA Disorazole DMSO Run3       | 64            | STX5A | 5A             | 0.565138 Inlier  |
| siRNA-Vinblastine Run2-<br>DMSO  | NM_0031<br>64 | STX5A | 5A             | 0.783862 Inlier  |
| siRNA-Vinblastine Run1-<br>DMSO  | NM_0031<br>64 | STX5A | 5A             | 0.916502 Inlier  |
| siRNA-Temozolomide Run3-<br>DMSO | NM_0035<br>69 | STX7  | syntaxin 7     | -1.847852 Inlier |
| siRNA-Temozolomide Run2-<br>DMSO | NM_0035<br>69 | STX7  | syntaxin 7     | -0.731294 Inlier |
|                                  | NM_0035       |       | syntaxin 7     |                  |
| siRNA Disorazole DMSO Run3       | 69            | STX7  | syntaxin 7     | -0.617706 Inlier |
|                                  | NM_0035       |       | syntaxin 7     |                  |
| siRNA Disorazole DMSO Run2       | 69            | STX7  | syntaxin 7     | -0.449811 Inlier |
| siRNA-Temozolomide Run1-<br>DMSO | NM_0035<br>69 | STX7  | syntaxin 7     | 0.449811 Inlier  |
|                                  | NM_0035       |       | syntaxin 7     |                  |
| siRNA Disorazole DMSO Run1       | 69            | STX7  | syntaxin 7     | 0.541147 Inlier  |
| siRNA-Vinblastine Run1-<br>DMSO  | NM_0035<br>69 | STX7  | syntaxin 7     | 2.09964 Inlier   |
| siRNA-Vinblastine Run2-<br>DMSO  | NM_0035<br>69 | STX7  | syntaxin 7     | 2.349875 Inlier  |
| siRNA-Temozolomide Run3-<br>DMSO | NM_0048<br>53 | STX8  | syntaxin 8     | -1.475418 Inlier |
| siRNA-Temozolomide Run2-<br>DMSO | NM_0048<br>53 | STX8  | syntaxin 8     | -1.412466 Inlier |
| siRNA-Vinblastine Run2-<br>DMSO  | NM_0048<br>53 | STX8  | syntaxin 8     | -0.062468 Inlier |
| siRNA-Temozolomide Run1-<br>DMSO | NM_0048<br>53 | STX8  | syntaxin 8     | -0.024619 Inlier |
|                                  | NM_0048       |       | syntaxin 8     |                  |
| siRNA Disorazole DMSO Run1       | 53            | STX8  | syntaxin 8     | 0.024619 Inlier  |
|                                  | NM_0048       |       | syntaxin 8     |                  |
| siRNA Disorazole DMSO Run3       | 53            | STX8  | syntaxin 8     | 0.285246 Inlier  |
| siRNA-Vinblastine Run1-<br>DMSO  | NM_0048<br>53 | STX8  | syntaxin 8     | 1.063754 Inlier  |
|                                  | NM_0048       |       | syntaxin 8     |                  |
| siRNA Disorazole DMSO Run2       | 53            | STX8  | syntaxin 8     | 2.059021 Inlier  |

Identification of Survival Genes in Human Glioblastoma Cells Using siRNA Screening  
 Nikhil G Thaker, Fang Zhang, Peter R. McDonald, Tong Ying Shun, Michael D Lewen, Ian F. Pollack, and John S. Lazo

Molecular Pharmacology

|                              |               |       |                                                    |           |        |
|------------------------------|---------------|-------|----------------------------------------------------|-----------|--------|
| siRNA Disorazole DMSO Run2   | NM_0184<br>23 | STYK1 | serine/threonine/tyrosine kinase<br>1              | -3.234323 | Inlier |
| siRNA Disorazole DMSO Run3   | NM_0184<br>23 | STYK1 | serine/threonine/tyrosine kinase<br>1              | -1.277952 | Inlier |
| siRNA-Temozolomide Run2-DMSO | NM_0184<br>23 | STYK1 | serine/threonine/tyrosine kinase<br>1              | -0.508001 | Inlier |
| siRNA-Temozolomide Run3-DMSO | NM_0184<br>23 | STYK1 | serine/threonine/tyrosine kinase<br>1              | -0.341903 | Inlier |
| siRNA-Temozolomide Run1-DMSO | NM_0184<br>23 | STYK1 | serine/threonine/tyrosine kinase<br>1              | 0.341903  | Inlier |
| siRNA Disorazole DMSO Run1   | NM_0184<br>23 | STYK1 | serine/threonine/tyrosine kinase<br>1              | 0.539314  | Inlier |
| siRNA-Vinblastine Run1-DMSO  | NM_0184<br>23 | STYK1 | serine/threonine/tyrosine kinase<br>1              | 0.809686  | Inlier |
| siRNA-Vinblastine Run2-DMSO  | NM_0184<br>23 | STYK1 | serine/threonine/tyrosine kinase<br>1              | 1.111795  | Inlier |
| siRNA-Temozolomide Run3-DMSO | NM_1452<br>51 | STYX  | serine/threonine/tyrosine interacting protein<br>1 | -1.616779 | Inlier |
| siRNA-Temozolomide Run1-DMSO | NM_1452<br>51 | STYX  | serine/threonine/tyrosine interacting protein<br>1 | -0.610175 | Inlier |
| siRNA Disorazole DMSO Run2   | NM_1452<br>51 | STYX  | serine/threonine/tyrosine interacting protein<br>1 | -0.13656  | Inlier |
| siRNA Disorazole DMSO Run1   | NM_1452<br>51 | STYX  | serine/threonine/tyrosine interacting protein<br>1 | -0.050264 | Inlier |

Identification of Survival Genes in Human Glioblastoma Cells Using siRNA Screening

Nikhil G Thaker, Fang Zhang, Peter R. McDonald, Tong Ying Shun, Michael D Lewen, Ian F. Pollack, and John S. Lazo

Molecular Pharmacology

|                              |               |        |                                                                                               |           |        |
|------------------------------|---------------|--------|-----------------------------------------------------------------------------------------------|-----------|--------|
| siRNA-Vinblastine Run2-DMSO  | NM_1452<br>51 | STYX   | serine/threonine/tyrosine interacting protein                                                 | 0.050264  | Inlier |
| siRNA-Temozolomide Run2-DMSO | NM_1452<br>51 | STYX   | serine/threonine/tyrosine interacting protein                                                 | 0.738825  | Inlier |
| siRNA-Vinblastine Run1-DMSO  | NM_1452<br>51 | STYX   | serine/threonine/tyrosine interacting protein                                                 | 0.791629  | Inlier |
| siRNA Disorazole DMSO Run3   | NM_1452<br>51 | STYX   | serine/threonine/tyrosine interacting protein succinate-CoA ligase, ADP-forming, beta subunit | 0.962194  | Inlier |
| siRNA-Vinblastine Run2-DMSO  | NM_0038<br>50 | SUCLA2 | serine/threonine/tyrosine interacting protein succinate-CoA ligase, ADP-forming, beta subunit | -1.315032 | Inlier |
| siRNA Disorazole DMSO Run1   | NM_0038<br>50 | SUCLA2 | serine/threonine/tyrosine interacting protein succinate-CoA ligase, ADP-forming, beta subunit | -1.276312 | Inlier |
| siRNA Disorazole DMSO Run3   | NM_0038<br>50 | SUCLA2 | serine/threonine/tyrosine interacting protein succinate-CoA ligase, ADP-forming, beta subunit | -0.581487 | Inlier |
| siRNA-Temozolomide Run2-DMSO | NM_0038<br>50 | SUCLA2 | serine/threonine/tyrosine interacting protein succinate-CoA ligase, ADP-forming, beta subunit | -0.342598 | Inlier |

Identification of Survival Genes in Human Glioblastoma Cells Using siRNA Screening

Nikhil G Thaker, Fang Zhang, Peter R. McDonald, Tong Ying Shun, Michael D Lewen, Ian F. Pollack, and John S. Lazo

Molecular Pharmacology

|                              |               |        |                                                  |           |        |
|------------------------------|---------------|--------|--------------------------------------------------|-----------|--------|
| siRNA-Temozolomide Run1-DMSO | NM_0038<br>50 | SUCLA2 | succinate-CoA ligase, ADP-forming, beta subunit  | 0.342598  | Inlier |
| siRNA-Temozolomide Run3-DMSO | NM_0038<br>50 | SUCLA2 | succinate-CoA ligase, ADP-forming, beta subunit  | 0.536772  | Inlier |
| siRNA Disorazole DMSO Run2   | NM_0038<br>50 | SUCLA2 | succinate-CoA ligase, ADP-forming, beta subunit  | 0.767513  | Inlier |
| siRNA-Vinblastine Run1-DMSO  | NM_0038<br>50 | SUCLA2 | succinate-CoA ligase, ADP-forming, beta subunit  | 2.339033  | Inlier |
| siRNA-Temozolomide Run2-DMSO | NM_0038<br>49 | SUCLG1 | succinate-CoA ligase, GDP-forming, alpha subunit | -0.902484 | Inlier |
| siRNA Disorazole DMSO Run3   | NM_0038<br>49 | SUCLG1 | succinate-CoA ligase, GDP-forming, alpha subunit | -0.868079 | Inlier |
| siRNA Disorazole DMSO Run1   | NM_0038<br>49 | SUCLG1 | succinate-CoA ligase, GDP-forming, alpha subunit | -0.480921 | Inlier |

Identification of Survival Genes in Human Glioblastoma Cells Using siRNA Screening

Nikhil G Thaker, Fang Zhang, Peter R. McDonald, Tong Ying Shun, Michael D Lewen, Ian F. Pollack, and John S. Lazo

Molecular Pharmacology

|                              |               |        |                                                  |           |        |
|------------------------------|---------------|--------|--------------------------------------------------|-----------|--------|
| siRNA-Temozolomide Run3-DMSO | NM_0038<br>49 | SUCLG1 | succinate-CoA ligase, GDP-forming, alpha subunit | -0.076395 | Inlier |
| siRNA-Temozolomide Run1-DMSO | NM_0038<br>49 | SUCLG1 | succinate-CoA ligase, GDP-forming, alpha subunit | 0.076395  | Inlier |
| siRNA-Vinblastine Run2-DMSO  | NM_0038<br>49 | SUCLG1 | succinate-CoA ligase, GDP-forming, alpha subunit | 0.191536  | Inlier |
| siRNA Disorazole DMSO Run2   | NM_0038<br>49 | SUCLG1 | succinate-CoA ligase, GDP-forming, alpha subunit | 1.665218  | Inlier |
| siRNA-Vinblastine Run1-DMSO  | NM_0038<br>49 | SUCLG1 | succinate-CoA ligase, GDP-forming, alpha subunit | 1.792296  | Inlier |
| siRNA Disorazole DMSO Run3   | NM_0038<br>48 | SUCLG2 | succinate-CoA ligase, GDP-forming, beta subunit  | -2.73614  | Inlier |
| siRNA-Vinblastine Run2-DMSO  | NM_0038<br>48 | SUCLG2 | succinate-CoA ligase, GDP-forming, beta subunit  | -0.691342 | Inlier |

Identification of Survival Genes in Human Glioblastoma Cells Using siRNA Screening  
 Nikhil G Thaker, Fang Zhang, Peter R. McDonald, Tong Ying Shun, Michael D Lewen, Ian F. Pollack, and John S. Lazo

Molecular Pharmacology

|                              |               |        |                                         |                                         |         |
|------------------------------|---------------|--------|-----------------------------------------|-----------------------------------------|---------|
|                              |               |        |                                         | succinate-CoA ligase, GDP-forming, beta |         |
| siRNA Disorazole DMSO Run1   | NM_0038<br>48 | SUCLG2 | subunit                                 | -0.657658                               | Inlier  |
|                              |               |        | succinate-CoA ligase, GDP-forming, beta |                                         |         |
| siRNA-Temozolomide Run2-DMSO | NM_0038<br>48 | SUCLG2 | subunit                                 | -0.301048                               | Inlier  |
|                              |               |        | succinate-CoA ligase, GDP-forming, beta |                                         |         |
| siRNA-Temozolomide Run1-DMSO | NM_0038<br>48 | SUCLG2 | subunit                                 | 0.301049                                | Inlier  |
|                              |               |        | succinate-CoA ligase, GDP-forming, beta |                                         |         |
| siRNA-Temozolomide Run3-DMSO | NM_0038<br>48 | SUCLG2 | subunit                                 | 0.45687                                 | Inlier  |
|                              |               |        | succinate-CoA ligase, GDP-forming, beta |                                         |         |
| siRNA-Vinblastine Run1-DMSO  | NM_0038<br>48 | SUCLG2 | subunit                                 | 2.639797                                | Inlier  |
|                              |               |        | succinate-CoA ligase, GDP-forming, beta |                                         |         |
| siRNA Disorazole DMSO Run2   | NM_0038<br>48 | SUCLG2 | subunit                                 | 5.668684                                | Outlier |
|                              | NM_0330       |        | succinate                               |                                         |         |
| siRNA Disorazole DMSO Run3   | 50            | SUCNR1 | receptor 1                              | -2.561348                               | Inlier  |
| siRNA-Temozolomide Run3-DMSO | NM_0330<br>50 | SUCNR1 | receptor 1                              | -1.18503                                | Inlier  |
| siRNA-Temozolomide Run2-DMSO | NM_0330<br>50 | SUCNR1 | receptor 1                              | -0.15259                                | Inlier  |
|                              | NM_0330       |        | succinate                               |                                         |         |
| siRNA Disorazole DMSO Run1   | 50            | SUCNR1 | receptor 1                              | -0.144946                               | Inlier  |
|                              | NM_0330       |        | succinate                               |                                         |         |
| siRNA Disorazole DMSO Run2   | 50            | SUCNR1 | receptor 1                              | 0.144945                                | Inlier  |

Identification of Survival Genes in Human Glioblastoma Cells Using siRNA Screening

Nikhil G Thaker, Fang Zhang, Peter R. McDonald, Tong Ying Shun, Michael D Lewen, Ian F. Pollack, and John S.

Lazo

|                                  |               |         |                                                                                         |           |        |
|----------------------------------|---------------|---------|-----------------------------------------------------------------------------------------|-----------|--------|
| siRNA-Temozolomide Run1-<br>DMSO | NM_0330<br>50 | SUCNR1  | succinate<br>receptor 1                                                                 | 0.648712  | Inlier |
| siRNA-Vinblastine Run2-<br>DMSO  | NM_0330<br>50 | SUCNR1  | succinate<br>receptor 1                                                                 | 0.700288  | Inlier |
| siRNA-Vinblastine Run1-<br>DMSO  | NM_0330<br>50 | SUCNR1  | succinate<br>receptor 1                                                                 | 0.74074   | Inlier |
| siRNA-Temozolomide Run3-<br>DMSO | NM_0151<br>70 | SULF1   | sulfatase 1                                                                             | -1.569156 | Inlier |
| siRNA-Temozolomide Run2-<br>DMSO | NM_0151<br>70 | SULF1   | sulfatase 1                                                                             | -0.678971 | Inlier |
| siRNA-Vinblastine Run2-<br>DMSO  | NM_0151<br>70 | SULF1   | sulfatase 1                                                                             | -0.383833 | Inlier |
| siRNA-Temozolomide Run1-<br>DMSO | NM_0151<br>70 | SULF1   | sulfatase 1                                                                             | -0.248731 | Inlier |
| siRNA Disorazole DMSO Run1       | NM_0151<br>70 | SULF1   | sulfatase 1                                                                             | 0.24873   | Inlier |
| siRNA Disorazole DMSO Run3       | NM_0151<br>70 | SULF1   | sulfatase 1                                                                             | 0.670029  | Inlier |
| siRNA Disorazole DMSO Run2       | NM_0151<br>70 | SULF1   | sulfatase 1                                                                             | 0.83911   | Inlier |
| siRNA-Vinblastine Run1-<br>DMSO  | NM_0151<br>70 | SULF1   | sulfatase 1                                                                             | 1.011655  | Inlier |
| siRNA-Temozolomide Run3-<br>DMSO | NM_1985<br>96 | SULF2   | sulfatase 2                                                                             | -2.297385 | Inlier |
| siRNA-Temozolomide Run2-<br>DMSO | NM_1985<br>96 | SULF2   | sulfatase 2                                                                             | -0.83288  | Inlier |
| siRNA-Vinblastine Run2-<br>DMSO  | NM_1985<br>96 | SULF2   | sulfatase 2                                                                             | -0.631121 | Inlier |
| siRNA-Temozolomide Run1-<br>DMSO | NM_1985<br>96 | SULF2   | sulfatase 2                                                                             | -0.287107 | Inlier |
| siRNA Disorazole DMSO Run1       | NM_1985<br>96 | SULF2   | sulfatase 2                                                                             | 0.287107  | Inlier |
| siRNA Disorazole DMSO Run3       | NM_1985<br>96 | SULF2   | sulfatase 2                                                                             | 0.294149  | Inlier |
| siRNA Disorazole DMSO Run2       | NM_1985<br>96 | SULF2   | sulfatase 2                                                                             | 0.717879  | Inlier |
| siRNA-Vinblastine Run1-<br>DMSO  | NM_1985<br>96 | SULF2   | sulfatase 2                                                                             | 2.3109    | Inlier |
| siRNA Disorazole DMSO Run1       | NM_1775<br>36 | SULT1A1 | sulfotransf<br>erase<br>family,<br>cytosolic,<br>1A, phenol-<br>preferring,<br>member 1 | -1.052005 | Inlier |

Identification of Survival Genes in Human Glioblastoma Cells Using siRNA Screening  
 Nikhil G Thaker, Fang Zhang, Peter R. McDonald, Tong Ying Shun, Michael D Lewen, Ian F. Pollack, and John S. Lazo  
 Molecular Pharmacology

|                              |               |         |                                                                                         |           |        |
|------------------------------|---------------|---------|-----------------------------------------------------------------------------------------|-----------|--------|
| siRNA-Vinblastine Run2-DMSO  | NM_1775<br>36 | SULT1A1 | sulfotransf<br>erase<br>family,<br>cytosolic,<br>1A, phenol-<br>preferring,<br>member 1 | -0.614885 | Inlier |
| siRNA-Temozolomide Run2-DMSO | NM_1775<br>36 | SULT1A1 | sulfotransf<br>erase<br>family,<br>cytosolic,<br>1A, phenol-<br>preferring,<br>member 1 | -0.512382 | Inlier |
| siRNA Disorazole DMSO Run3   | NM_1775<br>36 | SULT1A1 | sulfotransf<br>erase<br>family,<br>cytosolic,<br>1A, phenol-<br>preferring,<br>member 1 | -0.070089 | Inlier |
| siRNA-Temozolomide Run3-DMSO | NM_1775<br>36 | SULT1A1 | sulfotransf<br>erase<br>family,<br>cytosolic,<br>1A, phenol-<br>preferring,<br>member 1 | 0.070089  | Inlier |
| siRNA-Vinblastine Run1-DMSO  | NM_1775<br>36 | SULT1A1 | sulfotransf<br>erase<br>family,<br>cytosolic,<br>1A, phenol-<br>preferring,<br>member 1 | 0.734115  | Inlier |
| siRNA Disorazole DMSO Run2   | NM_1775<br>36 | SULT1A1 | sulfotransf<br>erase<br>family,<br>cytosolic,<br>1A, phenol-<br>preferring,<br>member 1 | 1.021515  | Inlier |



Identification of Survival Genes in Human Glioblastoma Cells Using siRNA Screening

Nikhil G Thaker, Fang Zhang, Peter R. McDonald, Tong Ying Shun, Michael D Lewen, Ian F. Pollack, and John S. Lazo

Molecular Pharmacology

|                              |               |         |                                                                                         |           |        |
|------------------------------|---------------|---------|-----------------------------------------------------------------------------------------|-----------|--------|
| siRNA-Temozolomide Run1-DMSO | NM_1775<br>36 | SULT1A1 | sulfotransf<br>erase<br>family,<br>cytosolic,<br>1A, phenol-<br>preferring,<br>member 1 | 1.609325  | Inlier |
| siRNA-Temozolomide Run3-DMSO | NM_1775<br>28 | SULT1A2 | sulfotransf<br>erase<br>family,<br>cytosolic,<br>1A, phenol-<br>preferring,<br>member 2 | -1.573046 | Inlier |
| siRNA Disorazole DMSO Run3   | NM_1775<br>28 | SULT1A2 | sulfotransf<br>erase<br>family,<br>cytosolic,<br>1A, phenol-<br>preferring,<br>member 2 | -0.677343 | Inlier |
| siRNA-Vinblastine Run2-DMSO  | NM_1775<br>28 | SULT1A2 | sulfotransf<br>erase<br>family,<br>cytosolic,<br>1A, phenol-<br>preferring,<br>member 2 | -0.134093 | Inlier |
| siRNA-Temozolomide Run2-DMSO | NM_1775<br>28 | SULT1A2 | sulfotransf<br>erase<br>family,<br>cytosolic,<br>1A, phenol-<br>preferring,<br>member 2 | -0.101636 | Inlier |
| siRNA Disorazole DMSO Run1   | NM_1775<br>28 | SULT1A2 | sulfotransf<br>erase<br>family,<br>cytosolic,<br>1A, phenol-<br>preferring,<br>member 2 | 0.101636  | Inlier |

Identification of Survival Genes in Human Glioblastoma Cells Using siRNA Screening

Nikhil G Thaker, Fang Zhang, Peter R. McDonald, Tong Ying Shun, Michael D Lewen, Ian F. Pollack, and John S. Lazo

Molecular Pharmacology

|                              |               |         |                                                                                         |                  |
|------------------------------|---------------|---------|-----------------------------------------------------------------------------------------|------------------|
| siRNA-Temozolomide Run1-DMSO | NM_1775<br>28 | SULT1A2 | sulfotransf<br>erase<br>family,<br>cytosolic,<br>1A, phenol-<br>preferring,<br>member 2 | 0.671657 Inlier  |
| siRNA-Vinblastine Run1-DMSO  | NM_1775<br>28 | SULT1A2 | sulfotransf<br>erase<br>family,<br>cytosolic,<br>1A, phenol-<br>preferring,<br>member 2 | 0.851248 Inlier  |
| siRNA Disorazole DMSO Run2   | NM_1775<br>28 | SULT1A2 | sulfotransf<br>erase<br>family,<br>cytosolic,<br>1A, phenol-<br>preferring,<br>member 2 | 1.57212 Inlier   |
| siRNA-Vinblastine Run2-DMSO  | NM_1775<br>52 | SULT1A3 | sulfotransf<br>erase<br>family,<br>cytosolic,<br>1A, phenol-<br>preferring,<br>member 3 | -2.051403 Inlier |
| siRNA Disorazole DMSO Run3   | NM_1775<br>52 | SULT1A3 | sulfotransf<br>erase<br>family,<br>cytosolic,<br>1A, phenol-<br>preferring,<br>member 3 | -0.609073 Inlier |
| siRNA-Temozolomide Run1-DMSO | NM_1775<br>52 | SULT1A3 | sulfotransf<br>erase<br>family,<br>cytosolic,<br>1A, phenol-<br>preferring,<br>member 3 | -0.169994 Inlier |

Identification of Survival Genes in Human Glioblastoma Cells Using siRNA Screening  
 Nikhil G Thaker, Fang Zhang, Peter R. McDonald, Tong Ying Shun, Michael D Lewen, Ian F. Pollack, and John S. Lazo  
 Molecular Pharmacology

|                                  |               |         |                                                                                         |           |        |
|----------------------------------|---------------|---------|-----------------------------------------------------------------------------------------|-----------|--------|
| siRNA Disorazole DMSO Run1       | NM_1775<br>52 | SULT1A3 | sulfotransf<br>erase<br>family,<br>cytosolic,<br>1A, phenol-<br>preferring,<br>member 3 | -0.166799 | Inlier |
| siRNA-Temozolomide Run2-<br>DMSO | NM_1775<br>52 | SULT1A3 | sulfotransf<br>erase<br>family,<br>cytosolic,<br>1A, phenol-<br>preferring,<br>member 3 | 0.166799  | Inlier |
| siRNA-Temozolomide Run3-<br>DMSO | NM_1775<br>52 | SULT1A3 | sulfotransf<br>erase<br>family,<br>cytosolic,<br>1A, phenol-<br>preferring,<br>member 3 | 0.739927  | Inlier |
| siRNA Disorazole DMSO Run2       | NM_1775<br>52 | SULT1A3 | sulfotransf<br>erase<br>family,<br>cytosolic,<br>1A, phenol-<br>preferring,<br>member 3 | 1.802286  | Inlier |
| siRNA-Vinblastine Run1-<br>DMSO  | NM_1775<br>52 | SULT1A3 | sulfotransf<br>erase<br>family,<br>cytosolic,<br>1A, phenol-<br>preferring,<br>member 3 | 3.411331  | Inlier |
| siRNA Disorazole DMSO Run3       | NM_0144<br>65 | SULT1B1 | sulfotransf<br>erase<br>family,<br>cytosolic,<br>1B,<br>member 1                        | -0.854591 | Inlier |
| siRNA-Vinblastine Run2-<br>DMSO  | NM_0144<br>65 | SULT1B1 | sulfotransf<br>erase<br>family,<br>cytosolic,<br>1B,<br>member 1                        | -0.805026 | Inlier |

Identification of Survival Genes in Human Glioblastoma Cells Using siRNA Screening  
 Nikhil G Thaker, Fang Zhang, Peter R. McDonald, Tong Ying Shun, Michael D Lewen, Ian F. Pollack, and John S. Lazo

Molecular Pharmacology

|                              |               |         |                                                                  |           |        |
|------------------------------|---------------|---------|------------------------------------------------------------------|-----------|--------|
| siRNA-Temozolomide Run2-DMSO | NM_0144<br>65 | SULT1B1 | sulfotransf<br>erase<br>family,<br>cytosolic,<br>1B,<br>member 1 | -0.783816 | Inlier |
| siRNA Disorazole DMSO Run1   | NM_0144<br>65 | SULT1B1 | sulfotransf<br>erase<br>family,<br>cytosolic,<br>1B,<br>member 1 | -0.021439 | Inlier |
| siRNA-Temozolomide Run1-DMSO | NM_0144<br>65 | SULT1B1 | sulfotransf<br>erase<br>family,<br>cytosolic,<br>1B,<br>member 1 | 0.021439  | Inlier |
| siRNA-Temozolomide Run3-DMSO | NM_0144<br>65 | SULT1B1 | sulfotransf<br>erase<br>family,<br>cytosolic,<br>1B,<br>member 1 | 0.079608  | Inlier |
| siRNA Disorazole DMSO Run2   | NM_0144<br>65 | SULT1B1 | sulfotransf<br>erase<br>family,<br>cytosolic,<br>1B,<br>member 1 | 0.565184  | Inlier |
| siRNA-Vinblastine Run1-DMSO  | NM_0144<br>65 | SULT1B1 | sulfotransf<br>erase<br>family,<br>cytosolic,<br>1B,<br>member 1 | 0.984546  | Inlier |
| siRNA-Vinblastine Run2-DMSO  | NM_0010<br>56 | SULT1C1 | sulfotransf<br>erase<br>family,<br>cytosolic,<br>1C,<br>member 1 | -2.061716 | Inlier |
| siRNA Disorazole DMSO Run1   | NM_0010<br>56 | SULT1C1 | sulfotransf<br>erase<br>family,<br>cytosolic,<br>1C,<br>member 1 | -1.120122 | Inlier |

Identification of Survival Genes in Human Glioblastoma Cells Using siRNA Screening  
 Nikhil G Thaker, Fang Zhang, Peter R. McDonald, Tong Ying Shun, Michael D Lewen, Ian F. Pollack, and John S. Lazo

Molecular Pharmacology

|                                  |               |         |                                                                  |           |        |
|----------------------------------|---------------|---------|------------------------------------------------------------------|-----------|--------|
| siRNA Disorazole DMSO Run3       | NM_0010<br>56 | SULT1C1 | sulfotransf<br>erase<br>family,<br>cytosolic,<br>1C,<br>member 1 | -0.652752 | Inlier |
| siRNA-Temozolomide Run1-<br>DMSO | NM_0010<br>56 | SULT1C1 | sulfotransf<br>erase<br>family,<br>cytosolic,<br>1C,<br>member 1 | -0.156502 | Inlier |
| siRNA-Temozolomide Run3-<br>DMSO | NM_0010<br>56 | SULT1C1 | sulfotransf<br>erase<br>family,<br>cytosolic,<br>1C,<br>member 1 | 0.156502  | Inlier |
| siRNA-Temozolomide Run2-<br>DMSO | NM_0010<br>56 | SULT1C1 | sulfotransf<br>erase<br>family,<br>cytosolic,<br>1C,<br>member 1 | 0.330362  | Inlier |
| siRNA Disorazole DMSO Run2       | NM_0010<br>56 | SULT1C1 | sulfotransf<br>erase<br>family,<br>cytosolic,<br>1C,<br>member 1 | 0.696248  | Inlier |
| siRNA-Vinblastine Run1-<br>DMSO  | NM_0010<br>56 | SULT1C1 | sulfotransf<br>erase<br>family,<br>cytosolic,<br>1C,<br>member 1 | 2.599772  | Inlier |
| siRNA-Temozolomide Run2-<br>DMSO | NM_0065<br>88 | SULT1C2 | sulfotransf<br>erase<br>family,<br>cytosolic,<br>1C,<br>member 2 | -2.351262 | Inlier |
| siRNA-Temozolomide Run1-<br>DMSO | NM_0065<br>88 | SULT1C2 | sulfotransf<br>erase<br>family,<br>cytosolic,<br>1C,<br>member 2 | -1.332337 | Inlier |

Identification of Survival Genes in Human Glioblastoma Cells Using siRNA Screening  
 Nikhil G Thaker, Fang Zhang, Peter R. McDonald, Tong Ying Shun, Michael D Lewen, Ian F. Pollack, and John S. Lazo

Molecular Pharmacology

|                              |           |         |                                                           |           |        |
|------------------------------|-----------|---------|-----------------------------------------------------------|-----------|--------|
| siRNA-Vinblastine Run2-DMSO  | NM_006588 | SULT1C2 | sulfotransferase family, cytosolic, 1C, member 2          | -0.277327 | Inlier |
| siRNA Disorazole DMSO Run1   | NM_006588 | SULT1C2 | sulfotransferase family, cytosolic, 1C, member 2          | -0.03671  | Inlier |
| siRNA Disorazole DMSO Run3   | NM_006588 | SULT1C2 | sulfotransferase family, cytosolic, 1C, member 2          | 0.036709  | Inlier |
| siRNA-Temozolomide Run3-DMSO | NM_006588 | SULT1C2 | sulfotransferase family, cytosolic, 1C, member 2          | 0.232701  | Inlier |
| siRNA Disorazole DMSO Run2   | NM_006588 | SULT1C2 | sulfotransferase family, cytosolic, 1C, member 2          | 1.071673  | Inlier |
| siRNA-Vinblastine Run1-DMSO  | NM_006588 | SULT1C2 | sulfotransferase family 1E, estrogen-preferring, member 1 | 2.803092  | Inlier |
| siRNA-Temozolomide Run1-DMSO | NM_005420 | SULT1E1 | sulfotransferase family 1E, estrogen-preferring, member 1 | -2.090817 | Inlier |
| siRNA-Temozolomide Run3-DMSO | NM_005420 | SULT1E1 | sulfotransferase family 1E, estrogen-preferring, member 1 | -1.313448 | Inlier |

Identification of Survival Genes in Human Glioblastoma Cells Using siRNA Screening

Nikhil G Thaker, Fang Zhang, Peter R. McDonald, Tong Ying Shun, Michael D Lewen, Ian F. Pollack, and John S. Lazo

Molecular Pharmacology

|                                  |               |         |                                                                                                                              |           |        |
|----------------------------------|---------------|---------|------------------------------------------------------------------------------------------------------------------------------|-----------|--------|
| siRNA Disorazole DMSO Run3       | NM_0054<br>20 | SULT1E1 | sulfotransf<br>erase<br>family 1E,<br>estrogen-<br>preferring,<br>member 1                                                   | -0.65359  | Inlier |
| siRNA-Vinblastine Run2-<br>DMSO  | NM_0054<br>20 | SULT1E1 | sulfotransf<br>erase<br>family 1E,<br>estrogen-<br>preferring,<br>member 1                                                   | -0.029865 | Inlier |
| siRNA Disorazole DMSO Run1       | NM_0054<br>20 | SULT1E1 | sulfotransf<br>erase<br>family 1E,<br>estrogen-<br>preferring,<br>member 1                                                   | 0.029865  | Inlier |
| siRNA Disorazole DMSO Run2       | NM_0054<br>20 | SULT1E1 | sulfotransf<br>erase<br>family 1E,<br>estrogen-<br>preferring,<br>member 1                                                   | 0.598348  | Inlier |
| siRNA-Temozolomide Run2-<br>DMSO | NM_0054<br>20 | SULT1E1 | sulfotransf<br>erase<br>family 1E,<br>estrogen-<br>preferring,<br>member 1                                                   | 0.69541   | Inlier |
| siRNA-Vinblastine Run1-<br>DMSO  | NM_0054<br>20 | SULT1E1 | sulfotransf<br>erase<br>family,<br>cytosolic,<br>2A,<br>dehydroep<br>iandroster<br>one<br>(DHEA)-<br>preferring,<br>member 1 | 1.895241  | Inlier |
| siRNA-Temozolomide Run2-<br>DMSO | NM_0031<br>67 | SULT2A1 | sulfotransf<br>erase<br>family,<br>cytosolic,<br>2A,<br>dehydroep<br>iandroster<br>one<br>(DHEA)-<br>preferring,<br>member 1 | -1.291238 | Inlier |

Identification of Survival Genes in Human Glioblastoma Cells Using siRNA Screening

Nikhil G Thaker, Fang Zhang, Peter R. McDonald, Tong Ying Shun, Michael D Lewen, Ian F. Pollack, and John S.

Lazo

Molecular Pharmacology

|                              |           |         |                                                                                            |           |        |
|------------------------------|-----------|---------|--------------------------------------------------------------------------------------------|-----------|--------|
| siRNA-Temozolomide Run1-DMSO | NM_003167 | SULT2A1 | sulfotransferase family, cytosolic, 2A, dehydroepiandrosterone (DHEA)-preferring, member 1 | -0.616222 | Inlier |
| siRNA-Vinblastine Run2-DMSO  | NM_003167 | SULT2A1 | sulfotransferase family, cytosolic, 2A, dehydroepiandrosterone (DHEA)-preferring, member 1 | -0.401841 | Inlier |
| siRNA Disorazole DMSO Run3   | NM_003167 | SULT2A1 | sulfotransferase family, cytosolic, 2A, dehydroepiandrosterone (DHEA)-preferring, member 1 | -0.202262 | Inlier |
| siRNA Disorazole DMSO Run1   | NM_003167 | SULT2A1 | sulfotransferase family, cytosolic, 2A, dehydroepiandrosterone (DHEA)-preferring, member 1 | 0.202262  | Inlier |



Identification of Survival Genes in Human Glioblastoma Cells Using siRNA Screening

Nikhil G Thaker, Fang Zhang, Peter R. McDonald, Tong Ying Shun, Michael D Lewen, Ian F. Pollack, and John S. Lazo

Molecular Pharmacology

| siRNA Treatment              | Gene ID   | Gene Name | Log2 Fold Change | Inlier |
|------------------------------|-----------|-----------|------------------|--------|
| siRNA-Temozolomide Run3-DMSO | NM_003167 | SULT2A1   | 0.732778         | Inlier |
| siRNA Disorazole DMSO Run2   | NM_003167 | SULT2A1   | 1.214424         | Inlier |
| siRNA-Vinblastine Run1-DMSO  | NM_003167 | SULT2A1   | 2.118116         | Inlier |
| siRNA-Temozolomide Run3-DMSO | NM_177973 | SULT2B1   | -1.086297        | Inlier |
| siRNA-Vinblastine Run2-DMSO  | NM_177973 | SULT2B1   | -0.915923        | Inlier |
| siRNA Disorazole DMSO Run2   | NM_177973 | SULT2B1   | -0.466745        | Inlier |

sulfotransferase family, cytosolic, 2A, dehydroepiandrosterone (DHEA)-preferring, member 1  
sulfotransferase family, cytosolic, 2A, dehydroepiandrosterone (DHEA)-preferring, member 1  
sulfotransferase family, cytosolic, 2A, dehydroepiandrosterone (DHEA)-preferring, member 1  
sulfotransferase family, cytosolic, 2B, member 1  
sulfotransferase family, cytosolic, 2B, member 1

Identification of Survival Genes in Human Glioblastoma Cells Using siRNA Screening  
 Nikhil G Thaker, Fang Zhang, Peter R. McDonald, Tong Ying Shun, Michael D Lewen, Ian F. Pollack, and John S. Lazo

Molecular Pharmacology

|                                  |               |         |                                                                  |           |         |
|----------------------------------|---------------|---------|------------------------------------------------------------------|-----------|---------|
| siRNA Disorazole DMSO Run1       | NM_1779<br>73 | SULT2B1 | sulfotransf<br>erase<br>family,<br>cytosolic,<br>2B,<br>member 1 | -0.179471 | Inlier  |
| siRNA Disorazole DMSO Run3       | NM_1779<br>73 | SULT2B1 | sulfotransf<br>erase<br>family,<br>cytosolic,<br>2B,<br>member 1 | 0.179469  | Inlier  |
| siRNA-Temozolomide Run2-<br>DMSO | NM_1779<br>73 | SULT2B1 | sulfotransf<br>erase<br>family,<br>cytosolic,<br>2B,<br>member 1 | 0.518192  | Inlier  |
| siRNA-Temozolomide Run1-<br>DMSO | NM_1779<br>73 | SULT2B1 | sulfotransf<br>erase<br>family,<br>cytosolic,<br>2B,<br>member 1 | 0.830808  | Inlier  |
| siRNA-Vinblastine Run1-<br>DMSO  | NM_1779<br>73 | SULT2B1 | sulfotransf<br>erase<br>family,<br>cytosolic,<br>2B,<br>member 1 | 3.431688  | Inlier  |
| siRNA-Temozolomide Run2-<br>DMSO | NM_1768<br>74 | SULT4A1 | family 4A,<br>member 1                                           | -4.971998 | Outlier |
| siRNA Disorazole DMSO Run1       | NM_1768<br>74 | SULT4A1 | sulfotransf<br>erase<br>family 4A,<br>member 1                   | -0.870439 | Inlier  |
| siRNA-Temozolomide Run3-<br>DMSO | NM_1768<br>74 | SULT4A1 | sulfotransf<br>erase<br>family 4A,<br>member 1                   | -0.478561 | Inlier  |
| siRNA-Temozolomide Run1-<br>DMSO | NM_1768<br>74 | SULT4A1 | sulfotransf<br>erase<br>family 4A,<br>member 1                   | -0.026129 | Inlier  |
| siRNA Disorazole DMSO Run3       | NM_1768<br>74 | SULT4A1 | sulfotransf<br>erase<br>family 4A,<br>member 1                   | 0.026129  | Inlier  |

Identification of Survival Genes in Human Glioblastoma Cells Using siRNA Screening  
 Nikhil G Thaker, Fang Zhang, Peter R. McDonald, Tong Ying Shun, Michael D Lewen, Ian F. Pollack, and John S. Lazo

Molecular Pharmacology

|                              |               |         |                                             |           |         |
|------------------------------|---------------|---------|---------------------------------------------|-----------|---------|
| siRNA-Vinblastine Run2-DMSO  | NM_1768<br>74 | SULT4A1 | sulfotransferase family 4A, member 1        | 0.423875  | Inlier  |
| siRNA Disorazole DMSO Run2   | NM_1768<br>74 | SULT4A1 | sulfotransferase family 4A, member 1        | 8.773888  | Outlier |
| siRNA-Vinblastine Run1-DMSO  | NM_1768<br>74 | SULT4A1 | sulfotransferase family 4A, member 1        | 13.7402   | Outlier |
| siRNA-Temozolomide Run3-DMSO | NM_0004<br>56 | SUOX    | sulfite oxidase                             | -2.739578 | Inlier  |
| siRNA Disorazole DMSO Run3   | NM_0004<br>56 | SUOX    | sulfite oxidase                             | -0.565647 | Inlier  |
| siRNA-Vinblastine Run2-DMSO  | NM_0004<br>56 | SUOX    | sulfite oxidase                             | -0.16403  | Inlier  |
| siRNA Disorazole DMSO Run1   | NM_0004<br>56 | SUOX    | sulfite oxidase                             | -0.099575 | Inlier  |
| siRNA-Vinblastine Run1-DMSO  | NM_0004<br>56 | SUOX    | sulfite oxidase                             | 0.099576  | Inlier  |
| siRNA-Temozolomide Run1-DMSO | NM_0004<br>56 | SUOX    | sulfite oxidase                             | 0.783353  | Inlier  |
| siRNA Disorazole DMSO Run2   | NM_0004<br>56 | SUOX    | sulfite oxidase                             | 0.925478  | Inlier  |
| siRNA-Temozolomide Run2-DMSO | NM_0004<br>56 | SUOX    | sulfite oxidase                             | 1.565463  | Inlier  |
| siRNA-Temozolomide Run3-DMSO | NM_0071<br>92 | SUPT16H | suppressor of Ty 16 homolog (S. cerevisiae) | -1.577561 | Inlier  |
| siRNA-Temozolomide Run2-DMSO | NM_0071<br>92 | SUPT16H | suppressor of Ty 16 homolog (S. cerevisiae) | -0.860566 | Inlier  |
| siRNA-Temozolomide Run1-DMSO | NM_0071<br>92 | SUPT16H | suppressor of Ty 16 homolog (S. cerevisiae) | -0.488434 | Inlier  |

Identification of Survival Genes in Human Glioblastoma Cells Using siRNA Screening  
 Nikhil G Thaker, Fang Zhang, Peter R. McDonald, Tong Ying Shun, Michael D Lewen, Ian F. Pollack, and John S. Lazo  
 Molecular Pharmacology

|                                  |               |         |                                                                          |           |        |
|----------------------------------|---------------|---------|--------------------------------------------------------------------------|-----------|--------|
| siRNA Disorazole DMSO Run3       | NM_0071<br>92 | SUPT16H | suppresso<br>r of Ty 16<br>homolog<br>(S.<br>cerevisiae)                 | -0.050103 | Inlier |
| siRNA Disorazole DMSO Run1       | NM_0071<br>92 | SUPT16H | suppresso<br>r of Ty 16<br>homolog<br>(S.<br>cerevisiae)                 | 0.050103  | Inlier |
| siRNA Disorazole DMSO Run2       | NM_0071<br>92 | SUPT16H | suppresso<br>r of Ty 16<br>homolog<br>(S.<br>cerevisiae)                 | 0.248474  | Inlier |
| siRNA-Vinblastine Run2-<br>DMSO  | NM_0071<br>92 | SUPT16H | suppresso<br>r of Ty 16<br>homolog<br>(S.<br>cerevisiae)                 | 0.898155  | Inlier |
| siRNA-Vinblastine Run1-<br>DMSO  | NM_0071<br>92 | SUPT16H | suppresso<br>r of Ty 16<br>homolog<br>(S.<br>cerevisiae)                 | 1.073646  | Inlier |
| siRNA-Temozolomide Run2-<br>DMSO | NM_0031<br>73 | SUV39H1 | suppresso<br>r of<br>variegation<br>3-9<br>homolog 1<br>(Drosophil<br>a) | -2.593388 | Inlier |
| siRNA Disorazole DMSO Run1       | NM_0031<br>73 | SUV39H1 | suppresso<br>r of<br>variegation<br>3-9<br>homolog 1<br>(Drosophil<br>a) | -0.902152 | Inlier |

Identification of Survival Genes in Human Glioblastoma Cells Using siRNA Screening  
 Nikhil G Thaker, Fang Zhang, Peter R. McDonald, Tong Ying Shun, Michael D Lewen, Ian F. Pollack, and John S. Lazo  
 Molecular Pharmacology

|                              |           |         |                                                      |           |        |
|------------------------------|-----------|---------|------------------------------------------------------|-----------|--------|
| siRNA-Vinblastine Run2-DMSO  | NM_003173 | SUV39H1 | suppressor of variegation 3-9 homolog 1 (Drosophila) | -0.264972 | Inlier |
| siRNA-Temozolomide Run1-DMSO | NM_003173 | SUV39H1 | suppressor of variegation 3-9 homolog 1 (Drosophila) | -0.13773  | Inlier |
| siRNA Disorazole DMSO Run3   | NM_003173 | SUV39H1 | suppressor of variegation 3-9 homolog 1 (Drosophila) | 0.13773   | Inlier |
| siRNA-Temozolomide Run3-DMSO | NM_003173 | SUV39H1 | suppressor of variegation 3-9 homolog 1 (Drosophila) | 0.446848  | Inlier |
| siRNA Disorazole DMSO Run2   | NM_003173 | SUV39H1 | suppressor of variegation 3-9 homolog 1 (Drosophila) | 1.621947  | Inlier |
| siRNA-Vinblastine Run1-DMSO  | NM_003173 | SUV39H1 | suppressor of variegation 3-9 homolog 1 (Drosophila) | 3.13657   | Inlier |

Identification of Survival Genes in Human Glioblastoma Cells Using siRNA Screening  
 Nikhil G Thaker, Fang Zhang, Peter R. McDonald, Tong Ying Shun, Michael D Lewen, Ian F. Pollack, and John S. Lazo  
 Molecular Pharmacology

|                              |           |         |                                                      |           |        |
|------------------------------|-----------|---------|------------------------------------------------------|-----------|--------|
| siRNA-Temozolomide Run3-DMSO | NM_024670 | SUV39H2 | suppressor of variegation 3-9 homolog 2 (Drosophila) | -1.089455 | Inlier |
| siRNA-Temozolomide Run2-DMSO | NM_024670 | SUV39H2 | suppressor of variegation 3-9 homolog 2 (Drosophila) | -0.712181 | Inlier |
| siRNA Disorazole DMSO Run1   | NM_024670 | SUV39H2 | suppressor of variegation 3-9 homolog 2 (Drosophila) | -0.393166 | Inlier |
| siRNA-Temozolomide Run1-DMSO | NM_024670 | SUV39H2 | suppressor of variegation 3-9 homolog 2 (Drosophila) | -0.368008 | Inlier |
| siRNA Disorazole DMSO Run3   | NM_024670 | SUV39H2 | suppressor of variegation 3-9 homolog 2 (Drosophila) | 0.368007  | Inlier |
| siRNA-Vinblastine Run1-DMSO  | NM_024670 | SUV39H2 | suppressor of variegation 3-9 homolog 2 (Drosophila) | 0.636819  | Inlier |

Identification of Survival Genes in Human Glioblastoma Cells Using siRNA Screening  
 Nikhil G Thaker, Fang Zhang, Peter R. McDonald, Tong Ying Shun, Michael D Lewen, Ian F. Pollack, and John S. Lazo  
 Molecular Pharmacology

|                                  |               |         |                                                                          |           |         |
|----------------------------------|---------------|---------|--------------------------------------------------------------------------|-----------|---------|
| siRNA Disorazole DMSO Run2       | NM_0246<br>70 | SUV39H2 | suppresso<br>r of<br>variegation<br>3-9<br>homolog 2<br>(Drosophil<br>a) | 0.87399   | Inlier  |
| siRNA-Vinblastine Run2-<br>DMSO  | NM_0246<br>70 | SUV39H2 | suppresso<br>r of<br>variegation<br>3-9<br>homolog 2<br>(Drosophil<br>a) | 0.877207  | Inlier  |
| siRNA-Temozolomide Run3-<br>DMSO | NM_0031<br>77 | SYK     | spleen<br>tyrosine<br>kinase                                             | -1.067873 | Inlier  |
| siRNA Disorazole DMSO Run2       | NM_0031<br>77 | SYK     | spleen<br>tyrosine<br>kinase                                             | -0.604356 | Inlier  |
| siRNA-Temozolomide Run1-<br>DMSO | NM_0031<br>77 | SYK     | spleen<br>tyrosine<br>kinase                                             | -0.534707 | Inlier  |
| siRNA Disorazole DMSO Run3       | NM_0031<br>77 | SYK     | spleen<br>tyrosine<br>kinase                                             | -0.073053 | Inlier  |
| siRNA-Temozolomide Run2-<br>DMSO | NM_0031<br>77 | SYK     | spleen<br>tyrosine<br>kinase                                             | 0.073053  | Inlier  |
| siRNA Disorazole DMSO Run1       | NM_0031<br>77 | SYK     | spleen<br>tyrosine<br>kinase                                             | 0.744644  | Inlier  |
| siRNA-Vinblastine Run2-<br>DMSO  | NM_0031<br>77 | SYK     | spleen<br>tyrosine<br>kinase                                             | 0.874583  | Inlier  |
| siRNA-Vinblastine Run1-<br>DMSO  | NM_0031<br>77 | SYK     | spleen<br>tyrosine<br>kinase                                             | 1.05256   | Inlier  |
| siRNA-Temozolomide Run3-<br>DMSO | NM_0038<br>95 | SYNJ1   | synaptojan<br>in 1                                                       | -4.722863 | Outlier |
| siRNA-Temozolomide Run2-<br>DMSO | NM_0038<br>95 | SYNJ1   | synaptojan<br>in 1                                                       | -3.503432 | Outlier |
| siRNA-Temozolomide Run1-<br>DMSO | NM_0038<br>95 | SYNJ1   | synaptojan<br>in 1                                                       | -0.770957 | Inlier  |
| siRNA Disorazole DMSO Run3       | NM_0038<br>95 | SYNJ1   | synaptojan<br>in 1                                                       | -0.131631 | Inlier  |
| siRNA Disorazole DMSO Run2       | NM_0038<br>95 | SYNJ1   | synaptojan<br>in 1                                                       | 0.131631  | Inlier  |
| siRNA Disorazole DMSO Run1       | NM_0038<br>95 | SYNJ1   | synaptojan<br>in 1                                                       | 0.359446  | Inlier  |

Identification of Survival Genes in Human Glioblastoma Cells Using siRNA Screening

Nikhil G Thaker, Fang Zhang, Peter R. McDonald, Tong Ying Shun, Michael D Lewen, Ian F. Pollack, and John S.

Lazo

|                                  |               |       |                                   |           |        |
|----------------------------------|---------------|-------|-----------------------------------|-----------|--------|
| siRNA-Vinblastine Run1-<br>DMSO  | NM_0038<br>95 | SYNJ1 | synaptojan<br>in 1                | 0.578042  | Inlier |
| siRNA-Vinblastine Run2-<br>DMSO  | NM_0038<br>95 | SYNJ1 | synaptojan<br>in 1                | 1.153223  | Inlier |
| siRNA-Temozolomide Run2-<br>DMSO | NM_0038<br>98 | SYNJ2 | synaptojan<br>in 2                | -1.41764  | Inlier |
| siRNA-Temozolomide Run3-<br>DMSO | NM_0038<br>98 | SYNJ2 | synaptojan<br>in 2                | -0.805993 | Inlier |
| siRNA Disorazole DMSO Run2       | NM_0038<br>98 | SYNJ2 | synaptojan<br>in 2                | -0.084998 | Inlier |
| siRNA-Temozolomide Run1-<br>DMSO | NM_0038<br>98 | SYNJ2 | synaptojan<br>in 2                | -0.052606 | Inlier |
| siRNA Disorazole DMSO Run3       | NM_0038<br>98 | SYNJ2 | synaptojan<br>in 2                | 0.052606  | Inlier |
| siRNA Disorazole DMSO Run1       | NM_0038<br>98 | SYNJ2 | synaptojan<br>in 2                | 0.543007  | Inlier |
| siRNA-Vinblastine Run2-<br>DMSO  | NM_0038<br>98 | SYNJ2 | synaptojan<br>in 2                | 1.021707  | Inlier |
| siRNA-Vinblastine Run1-<br>DMSO  | NM_0038<br>98 | SYNJ2 | synaptojan<br>in 2                | 1.210056  | Inlier |
| siRNA-Temozolomide Run3-<br>DMSO | NM_0252<br>28 | T3JAM | TRAF3<br>interacting<br>protein 3 | -0.881804 | Inlier |
| siRNA-Temozolomide Run2-<br>DMSO | NM_0252<br>28 | T3JAM | TRAF3<br>interacting<br>protein 3 | -0.467196 | Inlier |
| siRNA-Temozolomide Run1-<br>DMSO | NM_0252<br>28 | T3JAM | TRAF3<br>interacting<br>protein 3 | -0.430637 | Inlier |
| siRNA Disorazole DMSO Run2       | NM_0252<br>28 | T3JAM | TRAF3<br>interacting<br>protein 3 | -0.144621 | Inlier |
| siRNA Disorazole DMSO Run1       | NM_0252<br>28 | T3JAM | TRAF3<br>interacting<br>protein 3 | 0.144622  | Inlier |
| siRNA-Vinblastine Run1-<br>DMSO  | NM_0252<br>28 | T3JAM | TRAF3<br>interacting<br>protein 3 | 0.904083  | Inlier |
| siRNA-Vinblastine Run2-<br>DMSO  | NM_0252<br>28 | T3JAM | TRAF3<br>interacting<br>protein 3 | 1.200064  | Inlier |
| siRNA Disorazole DMSO Run3       | NM_0252<br>28 | T3JAM | TRAF3<br>interacting<br>protein 3 | 2.236498  | Inlier |



Identification of Survival Genes in Human Glioblastoma Cells Using siRNA Screening

Nikhil G Thaker, Fang Zhang, Peter R. McDonald, Tong Ying Shun, Michael D Lewen, Ian F. Pollack, and John S.

Lazo

|                                  |               |      |                                                              |           |        |
|----------------------------------|---------------|------|--------------------------------------------------------------|-----------|--------|
| siRNA-Vinblastine Run2-<br>DMSO  | NM_1983<br>12 | TAB3 | TAB3                                                         | -1.280832 | Inlier |
| siRNA Disorazole DMSO Run3       | NM_1983<br>12 | TAB3 | TAB3                                                         | -1.171793 | Inlier |
| siRNA-Temozolomide Run2-<br>DMSO | NM_1983<br>12 | TAB3 | TAB3                                                         | -0.535626 | Inlier |
| siRNA-Temozolomide Run3-<br>DMSO | NM_1983<br>12 | TAB3 | TAB3                                                         | -0.130361 | Inlier |
| siRNA Disorazole DMSO Run2       | NM_1983<br>12 | TAB3 | TAB3                                                         | 0.130362  | Inlier |
| siRNA-Vinblastine Run1-<br>DMSO  | NM_1983<br>12 | TAB3 | TAB3                                                         | 0.596383  | Inlier |
| siRNA Disorazole DMSO Run1       | NM_1983<br>12 | TAB3 | TAB3                                                         | 0.752617  | Inlier |
| siRNA-Temozolomide Run1-<br>DMSO | NM_1983<br>12 | TAB3 | TAB3                                                         | 1.051316  | Inlier |
| siRNA-Vinblastine Run2-<br>DMSO  | NM_0132<br>51 | TAC3 | tachykinin<br>3<br>(neuromed<br>in K,<br>neurokinin<br>beta) | -0.960569 | Inlier |
| siRNA-Temozolomide Run3-<br>DMSO | NM_0132<br>51 | TAC3 | tachykinin<br>3<br>(neuromed<br>in K,<br>neurokinin<br>beta) | -0.843389 | Inlier |
| siRNA-Vinblastine Run1-<br>DMSO  | NM_0132<br>51 | TAC3 | tachykinin<br>3<br>(neuromed<br>in K,<br>neurokinin<br>beta) | -0.505611 | Inlier |
| siRNA Disorazole DMSO Run3       | NM_0132<br>51 | TAC3 | tachykinin<br>3<br>(neuromed<br>in K,<br>neurokinin<br>beta) | -0.12932  | Inlier |
| siRNA-Temozolomide Run2-<br>DMSO | NM_0132<br>51 | TAC3 | tachykinin<br>3<br>(neuromed<br>in K,<br>neurokinin<br>beta) | 0.12932   | Inlier |
| siRNA Disorazole DMSO Run2       | NM_0132<br>51 | TAC3 | tachykinin<br>3<br>(neuromed<br>in K,<br>neurokinin<br>beta) | 0.503348  | Inlier |

Identification of Survival Genes in Human Glioblastoma Cells Using siRNA Screening  
 Nikhil G Thaker, Fang Zhang, Peter R. McDonald, Tong Ying Shun, Michael D Lewen, Ian F. Pollack, and John S. Lazo

Molecular Pharmacology

|                              |               |       |                                                              |           |         |
|------------------------------|---------------|-------|--------------------------------------------------------------|-----------|---------|
|                              |               |       | tachykinin<br>3<br>(neuromed<br>in K,<br>neurokinin<br>beta) | 0.998927  | Inlier  |
| siRNA Disorazole DMSO Run1   | NM_0132<br>51 | TAC3  | tachykinin<br>3<br>(neuromed<br>in K,<br>neurokinin<br>beta) | 1.052352  | Inlier  |
| siRNA-Temozolomide Run1-DMSO | NM_0132<br>51 | TAC3  | tachykinin<br>receptor 1                                     | -1.576507 | Inlier  |
| siRNA-Temozolomide Run3-DMSO | NM_0010<br>58 | TACR1 | tachykinin<br>receptor 1                                     | -0.656729 | Inlier  |
| siRNA-Temozolomide Run2-DMSO | NM_0010<br>58 | TACR1 | tachykinin<br>receptor 1                                     | -0.210318 | Inlier  |
| siRNA-Temozolomide Run1-DMSO | NM_0010<br>58 | TACR1 | tachykinin<br>receptor 1                                     | -0.104915 | Inlier  |
| siRNA Disorazole DMSO Run2   | NM_0010<br>58 | TACR1 | tachykinin<br>receptor 1                                     | 0.104914  | Inlier  |
| siRNA Disorazole DMSO Run1   | NM_0010<br>58 | TACR1 | tachykinin<br>receptor 1                                     | 0.692271  | Inlier  |
| siRNA Disorazole DMSO Run3   | NM_0010<br>58 | TACR1 | tachykinin<br>receptor 1                                     | 0.766762  | Inlier  |
| siRNA-Vinblastine Run1-DMSO  | NM_0010<br>58 | TACR1 | tachykinin<br>receptor 1                                     | 0.857212  | Inlier  |
| siRNA-Vinblastine Run2-DMSO  | NM_0010<br>58 | TACR1 | tachykinin<br>receptor 1                                     | -4.662433 | Outlier |
| siRNA Disorazole DMSO Run2   | NM_0010<br>57 | TACR2 | tachykinin<br>receptor 2                                     | -2.095203 | Inlier  |
| siRNA-Temozolomide Run3-DMSO | NM_0010<br>57 | TACR2 | tachykinin<br>receptor 2                                     | -0.643686 | Inlier  |
| siRNA-Temozolomide Run2-DMSO | NM_0010<br>57 | TACR2 | tachykinin<br>receptor 2                                     | -0.188319 | Inlier  |
| siRNA Disorazole DMSO Run1   | NM_0010<br>57 | TACR2 | tachykinin<br>receptor 2                                     | 0.188318  | Inlier  |
| siRNA-Temozolomide Run1-DMSO | NM_0010<br>57 | TACR2 | tachykinin<br>receptor 2                                     | 0.48777   | Inlier  |
| siRNA Disorazole DMSO Run3   | NM_0010<br>57 | TACR2 | tachykinin<br>receptor 2                                     | 0.705314  | Inlier  |
| siRNA-Vinblastine Run1-DMSO  | NM_0010<br>57 | TACR2 | tachykinin<br>receptor 2                                     | 1.19815   | Inlier  |
| siRNA-Vinblastine Run2-DMSO  | NM_0010<br>57 | TACR2 | tachykinin<br>receptor 2                                     | -0.784439 | Inlier  |
| siRNA-Temozolomide Run3-DMSO | NM_0010<br>59 | TACR3 | tachykinin<br>receptor 3                                     | -0.564561 | Inlier  |
| siRNA-Temozolomide Run2-DMSO | NM_0010<br>59 | TACR3 | tachykinin<br>receptor 3                                     | -0.559853 | Inlier  |
| siRNA-Temozolomide Run1-DMSO | NM_0010<br>59 | TACR3 | tachykinin<br>receptor 3                                     | -0.559853 | Inlier  |
| siRNA Disorazole DMSO Run2   | NM_0010<br>59 | TACR3 | tachykinin<br>receptor 3                                     | -0.245322 | Inlier  |

Identification of Survival Genes in Human Glioblastoma Cells Using siRNA Screening  
 Nikhil G Thaker, Fang Zhang, Peter R. McDonald, Tong Ying Shun, Michael D Lewen, Ian F. Pollack, and John S. Lazo

|                              |         |       |                                                                                  |           |        |
|------------------------------|---------|-------|----------------------------------------------------------------------------------|-----------|--------|
| Molecular Pharmacology       | NM_0010 |       | tachykinin                                                                       |           |        |
| siRNA Disorazole DMSO Run1   | 59      | TACR3 | receptor 3                                                                       | 0.245322  | Inlier |
|                              | NM_0010 |       | tachykinin                                                                       |           |        |
| siRNA Disorazole DMSO Run3   | 59      | TACR3 | receptor 3                                                                       | 0.790378  | Inlier |
| siRNA-Vinblastine Run1-DMSO  | NM_0010 |       | tachykinin                                                                       |           |        |
|                              | 59      | TACR3 | receptor 3                                                                       | 1.237349  | Inlier |
| siRNA-Vinblastine Run2-DMSO  | NM_0010 |       | tachykinin                                                                       |           |        |
|                              | 59      | TACR3 | receptor 3                                                                       | 1.462333  | Inlier |
|                              |         |       | TAF1 RNA polymerase II, TATA box binding protein (TBP)-associated factor, 250kDa |           |        |
| siRNA-Temozolomide Run3-DMSO | NM_1389 | TAF1  | 250kDa                                                                           | -1.568768 | Inlier |
|                              | 23      |       | TAF1 RNA polymerase II, TATA box binding protein (TBP)-associated factor, 250kDa |           |        |
|                              | NM_1389 |       | 250kDa                                                                           |           |        |
| siRNA Disorazole DMSO Run2   | 23      | TAF1  | 250kDa                                                                           | -0.900118 | Inlier |
|                              |         |       | TAF1 RNA polymerase II, TATA box binding protein (TBP)-associated factor, 250kDa |           |        |
|                              | NM_1389 |       | 250kDa                                                                           |           |        |
| siRNA Disorazole DMSO Run3   | 23      | TAF1  | 250kDa                                                                           | -0.80427  | Inlier |
|                              |         |       | TAF1 RNA polymerase II, TATA box binding protein (TBP)-associated factor, 250kDa |           |        |
|                              | NM_1389 |       | 250kDa                                                                           |           |        |
| siRNA-Temozolomide Run1-DMSO | NM_1389 | TAF1  | 250kDa                                                                           | -0.029895 | Inlier |
|                              | 23      |       | TAF1 RNA polymerase II, TATA box binding protein (TBP)-associated factor, 250kDa |           |        |

Identification of Survival Genes in Human Glioblastoma Cells Using siRNA Screening

Nikhil G Thaker, Fang Zhang, Peter R. McDonald, Tong Ying Shun, Michael D Lewen, Ian F. Pollack, and John S. Lazo

Molecular Pharmacology

|                              |               |      |                                                                                  |          |        |
|------------------------------|---------------|------|----------------------------------------------------------------------------------|----------|--------|
| siRNA-Temozolomide Run2-DMSO | NM_1389<br>23 | TAF1 | TAF1 RNA polymerase II, TATA box binding protein (TBP)-associated factor, 250kDa | 0.029895 | Inlier |
| siRNA Disorazole DMSO Run1   | NM_1389<br>23 | TAF1 | TAF1 RNA polymerase II, TATA box binding protein (TBP)-associated factor, 250kDa | 0.225491 | Inlier |
| siRNA-Vinblastine Run1-DMSO  | NM_1389<br>23 | TAF1 | TAF1 RNA polymerase II, TATA box binding protein (TBP)-associated factor, 250kDa | 0.66451  | Inlier |
| siRNA-Vinblastine Run2-DMSO  | NM_1389<br>23 | TAF1 | TAF1 RNA polymerase II, TATA box binding protein (TBP)-associated factor, 250kDa | 0.68449  | Inlier |

Identification of Survival Genes in Human Glioblastoma Cells Using siRNA Screening

Nikhil G Thaker, Fang Zhang, Peter R. McDonald, Tong Ying Shun, Michael D Lewen, Ian F. Pollack, and John S. Lazo

Molecular Pharmacology

| siRNA Treatment              | Gene ID   | Gene Name | Protein Name                                                                     | Protein Weight | Log Fold Change | Classification |
|------------------------------|-----------|-----------|----------------------------------------------------------------------------------|----------------|-----------------|----------------|
| siRNA-Temozolomide Run3-DMSO | NM_139215 | TAF15     | TAF15<br>RNA<br>polymerase II, TATA box binding protein (TBP)-associated factor, | 68kDa          | -4.925114       | Outlier        |
| siRNA Disorazole DMSO Run1   | NM_139215 | TAF15     | TAF15<br>RNA<br>polymerase II, TATA box binding protein (TBP)-associated factor, | 68kDa          | -0.777002       | Inlier         |
| siRNA-Temozolomide Run2-DMSO | NM_139215 | TAF15     | TAF15<br>RNA<br>polymerase II, TATA box binding protein (TBP)-associated factor, | 68kDa          | -0.428328       | Inlier         |
| siRNA Disorazole DMSO Run3   | NM_139215 | TAF15     | TAF15<br>RNA<br>polymerase II, TATA box binding protein (TBP)-associated factor, | 68kDa          | -0.107315       | Inlier         |

Identification of Survival Genes in Human Glioblastoma Cells Using siRNA Screening

Nikhil G Thaker, Fang Zhang, Peter R. McDonald, Tong Ying Shun, Michael D Lewen, Ian F. Pollack, and John S. Lazo

Molecular Pharmacology

| siRNA Treatment              | Gene ID   | Gene Name | Protein Name | Weight | Classification  |
|------------------------------|-----------|-----------|--------------|--------|-----------------|
| siRNA-Vinblastine Run2-DMSO  | NM_139215 | TAF15     | TAF15        | 68kDa  | 0.107315 Inlier |
| siRNA-Vinblastine Run1-DMSO  | NM_139215 | TAF15     | TAF15        | 68kDa  | 0.571998 Inlier |
| siRNA Disorazole DMSO Run2   | NM_139215 | TAF15     | TAF15        | 68kDa  | 3.102566 Inlier |
| siRNA-Temozolomide Run1-DMSO | NM_139215 | TAF15     | TAF15        | 68kDa  | 5.24952 Outlier |

TAF15  
RNA  
polymerase II, TATA  
box  
binding  
protein  
(TBP)-  
associated  
factor,

TAF15  
RNA  
polymerase II, TATA  
box  
binding  
protein  
(TBP)-  
associated  
factor,

TAF15  
RNA  
polymerase II, TATA  
box  
binding  
protein  
(TBP)-  
associated  
factor,

TAF15  
RNA  
polymerase II, TATA  
box  
binding  
protein  
(TBP)-  
associated  
factor,

Identification of Survival Genes in Human Glioblastoma Cells Using siRNA Screening

Nikhil G Thaker, Fang Zhang, Peter R. McDonald, Tong Ying Shun, Michael D Lewen, Ian F. Pollack, and John S. Lazo

Molecular Pharmacology

| siRNA Treatment              | Gene ID   | Gene Name | Weight    | Outlier Status |
|------------------------------|-----------|-----------|-----------|----------------|
| siRNA Disorazole DMSO Run2   | NM_153809 | TAF1L     | -2.200262 | Inlier         |
| siRNA-Temozolomide Run3-DMSO | NM_153809 | TAF1L     | -1.804279 | Inlier         |
| siRNA Disorazole DMSO Run3   | NM_153809 | TAF1L     | -0.984529 | Inlier         |
| siRNA-Temozolomide Run1-DMSO | NM_153809 | TAF1L     | -0.021139 | Inlier         |

TAF1-like  
RNA  
polymerase II, TATA  
box  
binding  
protein  
(TBP)-  
associated  
factor,  
210kDa

TAF1-like  
RNA  
polymerase II, TATA  
box  
binding  
protein  
(TBP)-  
associated  
factor,  
210kDa

TAF1-like  
RNA  
polymerase II, TATA  
box  
binding  
protein  
(TBP)-  
associated  
factor,  
210kDa

TAF1-like  
RNA  
polymerase II, TATA  
box  
binding  
protein  
(TBP)-  
associated  
factor,  
210kDa

Identification of Survival Genes in Human Glioblastoma Cells Using siRNA Screening

Nikhil G Thaker, Fang Zhang, Peter R. McDonald, Tong Ying Shun, Michael D Lewen, Ian F. Pollack, and John S. Lazo

Molecular Pharmacology

| siRNA Treatment              | Gene ID   | Gene Name | Protein Name                                                                          | Value    | Category |
|------------------------------|-----------|-----------|---------------------------------------------------------------------------------------|----------|----------|
| siRNA Disorazole DMSO Run1   | NM_153809 | TAF1L     | TAF1-like RNA polymerase II, TATA box binding protein (TBP)-associated factor, 210kDa | 0.021139 | Inlier   |
| siRNA-Temozolomide Run2-DMSO | NM_153809 | TAF1L     | TAF1-like RNA polymerase II, TATA box binding protein (TBP)-associated factor, 210kDa | 0.178723 | Inlier   |
| siRNA-Vinblastine Run2-DMSO  | NM_153809 | TAF1L     | TAF1-like RNA polymerase II, TATA box binding protein (TBP)-associated factor, 210kDa | 0.628481 | Inlier   |
| siRNA-Vinblastine Run1-DMSO  | NM_153809 | TAF1L     | TAF1-like RNA polymerase II, TATA box binding protein (TBP)-associated factor, 210kDa | 0.720519 | Inlier   |



Identification of Survival Genes in Human Glioblastoma Cells Using siRNA Screening

Nikhil G Thaker, Fang Zhang, Peter R. McDonald, Tong Ying Shun, Michael D Lewen, Ian F. Pollack, and John S. Lazo

Molecular Pharmacology

|                              |           |      |                                                                                  |           |        |
|------------------------------|-----------|------|----------------------------------------------------------------------------------|-----------|--------|
| siRNA-Vinblastine Run2-DMSO  | NM_003184 | TAF2 | TAF2 RNA polymerase II, TATA box binding protein (TBP)-associated factor, 150kDa | -3.226235 | Inlier |
| siRNA-Temozolomide Run3-DMSO | NM_003184 | TAF2 | TAF2 RNA polymerase II, TATA box binding protein (TBP)-associated factor, 150kDa | -2.20304  | Inlier |
| siRNA-Temozolomide Run1-DMSO | NM_003184 | TAF2 | TAF2 RNA polymerase II, TATA box binding protein (TBP)-associated factor, 150kDa | -0.230321 | Inlier |
| siRNA-Temozolomide Run2-DMSO | NM_003184 | TAF2 | TAF2 RNA polymerase II, TATA box binding protein (TBP)-associated factor, 150kDa | -0.027981 | Inlier |

Identification of Survival Genes in Human Glioblastoma Cells Using siRNA Screening

Nikhil G Thaker, Fang Zhang, Peter R. McDonald, Tong Ying Shun, Michael D Lewen, Ian F. Pollack, and John S. Lazo

Molecular Pharmacology

|                              |               |       |                                                                                  |           |        |
|------------------------------|---------------|-------|----------------------------------------------------------------------------------|-----------|--------|
| siRNA Disorazole DMSO Run1   | NM_0031<br>84 | TAF2  | TAF2 RNA polymerase II, TATA box binding protein (TBP)-associated factor, 150kDa | 0.027981  | Inlier |
| siRNA Disorazole DMSO Run2   | NM_0031<br>84 | TAF2  | TAF2 RNA polymerase II, TATA box binding protein (TBP)-associated factor, 150kDa | 0.591326  | Inlier |
| siRNA-Vinblastine Run1-DMSO  | NM_0031<br>84 | TAF2  | TAF2 RNA polymerase II, TATA box binding protein (TBP)-associated factor, 150kDa | 0.757674  | Inlier |
| siRNA Disorazole DMSO Run3   | NM_0031<br>84 | TAF2  | TAF2 RNA polymerase II, TATA box binding protein (TBP)-associated factor, 150kDa | 2.509853  | Inlier |
| siRNA-Temozolomide Run3-DMSO | NM_1388<br>10 | TAGAP | T-cell activation GTPase activating protein                                      | -1.094844 | Inlier |

Identification of Survival Genes in Human Glioblastoma Cells Using siRNA Screening  
 Nikhil G Thaker, Fang Zhang, Peter R. McDonald, Tong Ying Shun, Michael D Lewen, Ian F. Pollack, and John S. Lazo

Molecular Pharmacology

|                                  |               |        |                                                         |           |        |
|----------------------------------|---------------|--------|---------------------------------------------------------|-----------|--------|
| siRNA Disorazole DMSO Run3       | NM_1388<br>10 | TAGAP  | T-cell<br>activation<br>GTPase<br>activating<br>protein | -0.254156 | Inlier |
| siRNA-Temozolomide Run2-<br>DMSO | NM_1388<br>10 | TAGAP  | T-cell<br>activation<br>GTPase<br>activating<br>protein | -0.04268  | Inlier |
| siRNA-Temozolomide Run1-<br>DMSO | NM_1388<br>10 | TAGAP  | T-cell<br>activation<br>GTPase<br>activating<br>protein | -0.039966 | Inlier |
| siRNA-Vinblastine Run2-<br>DMSO  | NM_1388<br>10 | TAGAP  | T-cell<br>activation<br>GTPase<br>activating<br>protein | 0.039966  | Inlier |
| siRNA Disorazole DMSO Run1       | NM_1388<br>10 | TAGAP  | T-cell<br>activation<br>GTPase<br>activating<br>protein | 1.37556   | Inlier |
| siRNA Disorazole DMSO Run2       | NM_1388<br>10 | TAGAP  | T-cell<br>activation<br>GTPase<br>activating<br>protein | 2.907012  | Inlier |
| siRNA-Vinblastine Run1-<br>DMSO  | NM_1388<br>10 | TAGAP  | T-cell<br>activation<br>GTPase<br>activating<br>protein | 2.94106   | Inlier |
| siRNA-Temozolomide Run3-<br>DMSO | NM_0067<br>55 | TALDO1 | transaldol<br>ase 1                                     | -1.175375 | Inlier |
| siRNA-Temozolomide Run1-<br>DMSO | NM_0067<br>55 | TALDO1 | transaldol<br>ase 1                                     | -1.045103 | Inlier |
| siRNA-Temozolomide Run2-<br>DMSO | NM_0067<br>55 | TALDO1 | transaldol<br>ase 1                                     | -0.303897 | Inlier |
| siRNA Disorazole DMSO Run1       | NM_0067<br>55 | TALDO1 | transaldol<br>ase 1                                     | -0.209677 | Inlier |
| siRNA-Vinblastine Run2-<br>DMSO  | NM_0067<br>55 | TALDO1 | transaldol<br>ase 1                                     | 0.209676  | Inlier |
| siRNA Disorazole DMSO Run3       | NM_0067<br>55 | TALDO1 | transaldol<br>ase 1                                     | 0.252263  | Inlier |
| siRNA-Vinblastine Run1-<br>DMSO  | NM_0067<br>55 | TALDO1 | transaldol<br>ase 1                                     | 1.108398  | Inlier |
| siRNA Disorazole DMSO Run2       | NM_0067<br>55 | TALDO1 | transaldol<br>ase 1                                     | 1.567864  | Inlier |

Identification of Survival Genes in Human Glioblastoma Cells Using siRNA Screening

Nikhil G Thaker, Fang Zhang, Peter R. McDonald, Tong Ying Shun, Michael D Lewen, Ian F. Pollack, and John S. Lazo

|                                  |               |      |                                                                                    |           |        |
|----------------------------------|---------------|------|------------------------------------------------------------------------------------|-----------|--------|
| siRNA-Temozolomide Run2-<br>DMSO | NM_0047<br>83 | TAO1 | TAO<br>kinase 2                                                                    | -1.692479 | Inlier |
| siRNA-Temozolomide Run3-<br>DMSO | NM_0047<br>83 | TAO1 | TAO<br>kinase 2                                                                    | -1.053244 | Inlier |
| siRNA-Temozolomide Run1-<br>DMSO | NM_0047<br>83 | TAO1 | TAO<br>kinase 2                                                                    | -0.65662  | Inlier |
| siRNA Disorazole DMSO Run1       | NM_0047<br>83 | TAO1 | TAO<br>kinase 2                                                                    | -0.03607  | Inlier |
| siRNA Disorazole DMSO Run3       | NM_0047<br>83 | TAO1 | TAO<br>kinase 2                                                                    | 0.03607   | Inlier |
| siRNA-Vinblastine Run2-<br>DMSO  | NM_0047<br>83 | TAO1 | TAO<br>kinase 2                                                                    | 0.42324   | Inlier |
| siRNA Disorazole DMSO Run2       | NM_0047<br>83 | TAO1 | TAO<br>kinase 2                                                                    | 0.69238   | Inlier |
| siRNA-Vinblastine Run1-<br>DMSO  | NM_0047<br>83 | TAO1 | TAO<br>kinase 2                                                                    | 1.042614  | Inlier |
| siRNA Disorazole DMSO Run2       | NM_0005<br>93 | TAP1 | transporter<br>1, ATP-<br>binding<br>cassette,<br>sub-family<br>B<br>(MDR/TAP<br>) | -2.747316 | Inlier |
| siRNA Disorazole DMSO Run1       | NM_0005<br>93 | TAP1 | transporter<br>1, ATP-<br>binding<br>cassette,<br>sub-family<br>B<br>(MDR/TAP<br>) | -2.352912 | Inlier |
| siRNA-Temozolomide Run3-<br>DMSO | NM_0005<br>93 | TAP1 | transporter<br>1, ATP-<br>binding<br>cassette,<br>sub-family<br>B<br>(MDR/TAP<br>) | -1.548043 | Inlier |
| siRNA-Vinblastine Run2-<br>DMSO  | NM_0005<br>93 | TAP1 | (MDR/TAP<br>)                                                                      | -0.252478 | Inlier |

Identification of Survival Genes in Human Glioblastoma Cells Using siRNA Screening

Nikhil G Thaker, Fang Zhang, Peter R. McDonald, Tong Ying Shun, Michael D Lewen, Ian F. Pollack, and John S. Lazo

Molecular Pharmacology

|                              |           |      |                                                             |           |        |
|------------------------------|-----------|------|-------------------------------------------------------------|-----------|--------|
| siRNA-Temozolomide Run2-DMSO | NM_000593 | TAP1 | transporter 1, ATP-binding cassette, sub-family B (MDR/TAP) | 0.252478  | Inlier |
| siRNA Disorazole DMSO Run3   | NM_000593 | TAP1 | transporter 1, ATP-binding cassette, sub-family B (MDR/TAP) | 0.278432  | Inlier |
| siRNA-Vinblastine Run1-DMSO  | NM_000593 | TAP1 | transporter 1, ATP-binding cassette, sub-family B (MDR/TAP) | 0.545288  | Inlier |
| siRNA-Temozolomide Run1-DMSO | NM_000593 | TAP1 | transporter 2, ATP-binding cassette, sub-family B (MDR/TAP) | 0.803712  | Inlier |
| siRNA Disorazole DMSO Run1   | NM_000544 | TAP2 | transporter 2, ATP-binding cassette, sub-family B (MDR/TAP) | -1.067223 | Inlier |
| siRNA-Temozolomide Run2-DMSO | NM_000544 | TAP2 | transporter 2, ATP-binding cassette, sub-family B (MDR/TAP) | -0.619224 | Inlier |

Identification of Survival Genes in Human Glioblastoma Cells Using siRNA Screening  
 Nikhil G Thaker, Fang Zhang, Peter R. McDonald, Tong Ying Shun, Michael D Lewen, Ian F. Pollack, and John S. Lazo

Molecular Pharmacology

|                              |           |         |                                                             |           |        |
|------------------------------|-----------|---------|-------------------------------------------------------------|-----------|--------|
| siRNA-Temozolomide Run3-DMSO | NM_000544 | TAP2    | transporter 2, ATP-binding cassette, sub-family B (MDR/TAP) | -0.127726 | Inlier |
| siRNA-Vinblastine Run2-DMSO  | NM_000544 | TAP2    | transporter 2, ATP-binding cassette, sub-family B (MDR/TAP) | -0.05997  | Inlier |
| siRNA-Temozolomide Run1-DMSO | NM_000544 | TAP2    | transporter 2, ATP-binding cassette, sub-family B (MDR/TAP) | 0.05997   | Inlier |
| siRNA-Vinblastine Run1-DMSO  | NM_000544 | TAP2    | transporter 2, ATP-binding cassette, sub-family B (MDR/TAP) | 0.729776  | Inlier |
| siRNA Disorazole DMSO Run2   | NM_000544 | TAP2    | transporter 2, ATP-binding cassette, sub-family B (MDR/TAP) | 1.364667  | Inlier |
| siRNA Disorazole DMSO Run3   | NM_000544 | TAP2    | transporter 2, ATP-binding cassette, sub-family B (MDR/TAP) | 2.398439  | Inlier |
| siRNA-Temozolomide Run2-DMSO | NM_139283 | TA-PP2C | TA-PP2C                                                     | -0.742888 | Inlier |
| siRNA Disorazole DMSO Run3   | NM_139283 | TA-PP2C | TA-PP2C                                                     | -0.656846 | Inlier |

Identification of Survival Genes in Human Glioblastoma Cells Using siRNA Screening  
 Nikhil G Thaker, Fang Zhang, Peter R. McDonald, Tong Ying Shun, Michael D Lewen, Ian F. Pollack, and John S. Lazo

|                              |               |         |                                  |           |        |
|------------------------------|---------------|---------|----------------------------------|-----------|--------|
| siRNA-Temozolomide Run3-DMSO | NM_1392<br>83 | TA-PP2C | TA-PP2C                          | -0.627635 | Inlier |
| siRNA-Temozolomide Run1-DMSO | NM_1392<br>83 | TA-PP2C | TA-PP2C                          | -0.096942 | Inlier |
| siRNA Disorazole DMSO Run1   | NM_1392<br>83 | TA-PP2C | TA-PP2C                          | 0.096942  | Inlier |
| siRNA Disorazole DMSO Run2   | 83            | TA-PP2C | TA-PP2C                          | 0.692154  | Inlier |
| siRNA-Vinblastine Run2-DMSO  | NM_1392<br>83 | TA-PP2C | TA-PP2C                          | 0.84009   | Inlier |
| siRNA-Vinblastine Run1-DMSO  | NM_1392<br>83 | TA-PP2C | TA-PP2C                          | 0.983663  | Inlier |
| siRNA Disorazole DMSO Run3   | NM_1522<br>95 | TARS    | threonyl-tRNA synthetase         | -2.673773 | Inlier |
| siRNA-Vinblastine Run2-DMSO  | NM_1522<br>95 | TARS    | threonyl-tRNA synthetase         | -0.999703 | Inlier |
| siRNA-Temozolomide Run3-DMSO | NM_1522<br>95 | TARS    | threonyl-tRNA synthetase         | -0.653733 | Inlier |
| siRNA-Vinblastine Run1-DMSO  | NM_1522<br>95 | TARS    | threonyl-tRNA synthetase         | -0.072309 | Inlier |
| siRNA-Temozolomide Run2-DMSO | NM_1522<br>95 | TARS    | threonyl-tRNA synthetase         | 0.072309  | Inlier |
| siRNA Disorazole DMSO Run1   | NM_1522<br>95 | TARS    | threonyl-tRNA synthetase         | 0.270655  | Inlier |
| siRNA Disorazole DMSO Run2   | NM_1522<br>95 | TARS    | threonyl-tRNA synthetase         | 0.695267  | Inlier |
| siRNA-Temozolomide Run1-DMSO | NM_1522<br>95 | TARS    | threonyl-tRNA synthetase         | 0.799879  | Inlier |
| siRNA-Temozolomide Run3-DMSO | NM_1775<br>41 | TAS1R1  | taste receptor, type 1, member 1 | -1.282988 | Inlier |
| siRNA-Temozolomide Run2-DMSO | NM_1775<br>41 | TAS1R1  | taste receptor, type 1, member 1 | -0.681819 | Inlier |

Identification of Survival Genes in Human Glioblastoma Cells Using siRNA Screening  
 Nikhil G Thaker, Fang Zhang, Peter R. McDonald, Tong Ying Shun, Michael D Lewen, Ian F. Pollack, and John S. Lazo

Molecular Pharmacology

| siRNA Treatment              | Gene ID       | Gene Name | Gene Description                 | Value     | Category |
|------------------------------|---------------|-----------|----------------------------------|-----------|----------|
| siRNA Disorazole DMSO Run2   | NM_1775<br>41 | TAS1R1    | taste receptor, type 1, member 1 | -0.667181 | Inlier   |
| siRNA Disorazole DMSO Run3   | NM_1775<br>41 | TAS1R1    | taste receptor, type 1, member 1 | -0.291674 | Inlier   |
| siRNA Disorazole DMSO Run1   | NM_1775<br>41 | TAS1R1    | taste receptor, type 1, member 1 | 0.291674  | Inlier   |
| siRNA-Temozolomide Run1-DMSO | NM_1775<br>41 | TAS1R1    | taste receptor, type 1, member 1 | 0.468829  | Inlier   |
| siRNA-Vinblastine Run1-DMSO  | NM_1775<br>41 | TAS1R1    | taste receptor, type 1, member 1 | 1.262128  | Inlier   |
| siRNA-Vinblastine Run2-DMSO  | NM_1775<br>41 | TAS1R1    | taste receptor, type 1, member 1 | 1.421165  | Inlier   |
| siRNA-Temozolomide Run3-DMSO | NM_1522<br>32 | TAS1R2    | taste receptor, type 1, member 2 | -3.794684 | Outlier  |
| siRNA Disorazole DMSO Run1   | NM_1522<br>32 | TAS1R2    | taste receptor, type 1, member 2 | -0.701282 | Inlier   |
| siRNA-Temozolomide Run1-DMSO | NM_1522<br>32 | TAS1R2    | taste receptor, type 1, member 2 | -0.647718 | Inlier   |
| siRNA-Temozolomide Run2-DMSO | NM_1522<br>32 | TAS1R2    | taste receptor, type 1, member 2 | -0.350133 | Inlier   |
| siRNA Disorazole DMSO Run2   | NM_1522<br>32 | TAS1R2    | taste receptor, type 1, member 2 | 0.350134  | Inlier   |
| siRNA-Vinblastine Run1-DMSO  | NM_1522<br>32 | TAS1R2    | taste receptor, type 1, member 2 | 0.499967  | Inlier   |
| siRNA-Vinblastine Run2-DMSO  | NM_1522<br>32 | TAS1R2    | taste receptor, type 1, member 2 | 0.739281  | Inlier   |



Identification of Survival Genes in Human Glioblastoma Cells Using siRNA Screening  
 Nikhil G Thaker, Fang Zhang, Peter R. McDonald, Tong Ying Shun, Michael D Lewen, Ian F. Pollack, and John S. Lazo

Molecular Pharmacology

|                                  |               |        |                                           |           |        |
|----------------------------------|---------------|--------|-------------------------------------------|-----------|--------|
| siRNA Disorazole DMSO Run3       | NM_1522<br>32 | TAS1R2 | taste<br>receptor,<br>type 1,<br>member 2 | 3.039127  | Inlier |
| siRNA-Temozolomide Run3-<br>DMSO | XM_37121<br>0 | TAS1R3 | taste<br>receptor,<br>type 1,<br>member 3 | -1.217691 | Inlier |
| siRNA-Temozolomide Run2-<br>DMSO | XM_37121<br>0 | TAS1R3 | taste<br>receptor,<br>type 1,<br>member 3 | -0.316436 | Inlier |
| siRNA-Vinblastine Run2-<br>DMSO  | XM_37121<br>0 | TAS1R3 | taste<br>receptor,<br>type 1,<br>member 3 | -0.14222  | Inlier |
| siRNA Disorazole DMSO Run3       | XM_37121<br>0 | TAS1R3 | taste<br>receptor,<br>type 1,<br>member 3 | -0.091412 | Inlier |
| siRNA Disorazole DMSO Run1       | XM_37121<br>0 | TAS1R3 | taste<br>receptor,<br>type 1,<br>member 3 | 0.091412  | Inlier |
| siRNA-Temozolomide Run1-<br>DMSO | XM_37121<br>0 | TAS1R3 | taste<br>receptor,<br>type 1,<br>member 3 | 1.032564  | Inlier |
| siRNA-Vinblastine Run1-<br>DMSO  | XM_37121<br>0 | TAS1R3 | taste<br>receptor,<br>type 1,<br>member 3 | 2.239354  | Inlier |
| siRNA Disorazole DMSO Run2       | XM_37121<br>0 | TAS1R3 | taste<br>receptor,<br>type 1,<br>member 3 | 2.709817  | Inlier |
| siRNA-Temozolomide Run3-<br>DMSO | NM_0195<br>99 | TAS2R1 | taste<br>receptor,<br>type 2,<br>member 1 | -0.983858 | Inlier |
| siRNA-Temozolomide Run2-<br>DMSO | NM_0195<br>99 | TAS2R1 | taste<br>receptor,<br>type 2,<br>member 1 | -0.782114 | Inlier |
| siRNA Disorazole DMSO Run2       | NM_0195<br>99 | TAS2R1 | taste<br>receptor,<br>type 2,<br>member 1 | -0.208767 | Inlier |
| siRNA-Temozolomide Run1-<br>DMSO | NM_0195<br>99 | TAS2R1 | taste<br>receptor,<br>type 2,<br>member 1 | -0.096002 | Inlier |

Identification of Survival Genes in Human Glioblastoma Cells Using siRNA Screening  
 Nikhil G Thaker, Fang Zhang, Peter R. McDonald, Tong Ying Shun, Michael D Lewen, Ian F. Pollack, and John S. Lazo

Molecular Pharmacology

|                                  |               |         |                                               |           |        |
|----------------------------------|---------------|---------|-----------------------------------------------|-----------|--------|
| siRNA Disorazole DMSO Run1       | NM_0195<br>99 | TAS2R1  | taste<br>receptor,<br>type 2,<br>member 1     | 0.096002  | Inlier |
| siRNA Disorazole DMSO Run3       | NM_0195<br>99 | TAS2R1  | taste<br>receptor,<br>type 2,<br>member 1     | 0.566886  | Inlier |
| siRNA-Vinblastine Run1-<br>DMSO  | NM_0195<br>99 | TAS2R1  | taste<br>receptor,<br>type 2,<br>member 1     | 0.900229  | Inlier |
| siRNA-Vinblastine Run2-<br>DMSO  | NM_0195<br>99 | TAS2R1  | taste<br>receptor,<br>type 2,<br>member 1     | 0.919463  | Inlier |
| siRNA-Temozolomide Run3-<br>DMSO | NM_0239<br>21 | TAS2R10 | taste<br>receptor,<br>type 2,<br>member<br>10 | -3.225733 | Inlier |
| siRNA-Temozolomide Run2-<br>DMSO | NM_0239<br>21 | TAS2R10 | taste<br>receptor,<br>type 2,<br>member<br>10 | -1.007518 | Inlier |
| siRNA-Temozolomide Run1-<br>DMSO | NM_0239<br>21 | TAS2R10 | taste<br>receptor,<br>type 2,<br>member<br>10 | -0.341482 | Inlier |
| siRNA Disorazole DMSO Run3       | NM_0239<br>21 | TAS2R10 | taste<br>receptor,<br>type 2,<br>member<br>10 | -0.063503 | Inlier |
| siRNA Disorazole DMSO Run2       | NM_0239<br>21 | TAS2R10 | taste<br>receptor,<br>type 2,<br>member<br>10 | 0.063502  | Inlier |
| siRNA Disorazole DMSO Run1       | NM_0239<br>21 | TAS2R10 | taste<br>receptor,<br>type 2,<br>member<br>10 | 0.180073  | Inlier |
| siRNA-Vinblastine Run1-<br>DMSO  | NM_0239<br>21 | TAS2R10 | taste<br>receptor,<br>type 2,<br>member<br>10 | 1.120463  | Inlier |

Identification of Survival Genes in Human Glioblastoma Cells Using siRNA Screening  
 Nikhil G Thaker, Fang Zhang, Peter R. McDonald, Tong Ying Shun, Michael D Lewen, Ian F. Pollack, and John S. Lazo

Molecular Pharmacology

|                              |               |         |                                               |           |         |
|------------------------------|---------------|---------|-----------------------------------------------|-----------|---------|
| siRNA-Vinblastine Run2-DMSO  | NM_0239<br>21 | TAS2R10 | taste<br>receptor,<br>type 2,<br>member<br>10 | 1.448918  | Inlier  |
| siRNA-Temozolomide Run3-DMSO | NM_0239<br>20 | TAS2R13 | taste<br>receptor,<br>type 2,<br>member<br>13 | -5.277015 | Outlier |
| siRNA-Temozolomide Run2-DMSO | NM_0239<br>20 | TAS2R13 | taste<br>receptor,<br>type 2,<br>member<br>13 | -2.2955   | Inlier  |
| siRNA-Temozolomide Run1-DMSO | NM_0239<br>20 | TAS2R13 | taste<br>receptor,<br>type 2,<br>member<br>13 | -0.694302 | Inlier  |
| siRNA-Vinblastine Run2-DMSO  | NM_0239<br>20 | TAS2R13 | taste<br>receptor,<br>type 2,<br>member<br>13 | -0.072144 | Inlier  |
| siRNA Disorazole DMSO Run1   | NM_0239<br>20 | TAS2R13 | taste<br>receptor,<br>type 2,<br>member<br>13 | 0.072143  | Inlier  |
| siRNA Disorazole DMSO Run3   | NM_0239<br>20 | TAS2R13 | taste<br>receptor,<br>type 2,<br>member<br>13 | 0.386736  | Inlier  |
| siRNA Disorazole DMSO Run2   | NM_0239<br>20 | TAS2R13 | taste<br>receptor,<br>type 2,<br>member<br>13 | 0.654698  | Inlier  |
| siRNA-Vinblastine Run1-DMSO  | NM_0239<br>20 | TAS2R13 | taste<br>receptor,<br>type 2,<br>member<br>13 | 0.745695  | Inlier  |
| siRNA-Temozolomide Run3-DMSO | NM_0239<br>22 | TAS2R14 | taste<br>receptor,<br>type 2,<br>member<br>14 | -3.580491 | Outlier |

Identification of Survival Genes in Human Glioblastoma Cells Using siRNA Screening  
 Nikhil G Thaker, Fang Zhang, Peter R. McDonald, Tong Ying Shun, Michael D Lewen, Ian F. Pollack, and John S. Lazo

Molecular Pharmacology

|                              |               |         |                                   |           |        |
|------------------------------|---------------|---------|-----------------------------------|-----------|--------|
| siRNA-Temozolomide Run1-DMSO | NM_0239<br>22 | TAS2R14 | taste receptor, type 2, member 14 | -0.996165 | Inlier |
| siRNA-Temozolomide Run2-DMSO | NM_0239<br>22 | TAS2R14 | taste receptor, type 2, member 14 | -0.604599 | Inlier |
| siRNA Disorazole DMSO Run1   | NM_0239<br>22 | TAS2R14 | taste receptor, type 2, member 14 | -0.011044 | Inlier |
| siRNA-Vinblastine Run2-DMSO  | NM_0239<br>22 | TAS2R14 | taste receptor, type 2, member 14 | 0.011044  | Inlier |
| siRNA Disorazole DMSO Run2   | NM_0239<br>22 | TAS2R14 | taste receptor, type 2, member 14 | 0.358488  | Inlier |
| siRNA-Vinblastine Run1-DMSO  | NM_0239<br>22 | TAS2R14 | taste receptor, type 2, member 14 | 0.744401  | Inlier |
| siRNA Disorazole DMSO Run3   | NM_0239<br>22 | TAS2R14 | taste receptor, type 2, member 14 | 0.90032   | Inlier |
| siRNA-Temozolomide Run3-DMSO | NM_0169<br>45 | TAS2R16 | taste receptor, type 2, member 16 | -2.453356 | Inlier |
| siRNA Disorazole DMSO Run1   | NM_0169<br>45 | TAS2R16 | taste receptor, type 2, member 16 | -0.723366 | Inlier |
| siRNA-Temozolomide Run2-DMSO | NM_0169<br>45 | TAS2R16 | taste receptor, type 2, member 16 | -0.593001 | Inlier |

Identification of Survival Genes in Human Glioblastoma Cells Using siRNA Screening  
 Nikhil G Thaker, Fang Zhang, Peter R. McDonald, Tong Ying Shun, Michael D Lewen, Ian F. Pollack, and John S. Lazo

Molecular Pharmacology

| siRNA Treatment              | Gene ID | Accession | Gene Name | Value    | Outlier Status   |
|------------------------------|---------|-----------|-----------|----------|------------------|
| siRNA-Temozolomide Run1-DMSO | NM_0169 | 45        | TAS2R16   | 16       | -0.250921 Inlier |
| siRNA Disorazole DMSO Run3   | NM_0169 | 45        | TAS2R16   | 16       | 0.250921 Inlier  |
| siRNA Disorazole DMSO Run2   | NM_0169 | 45        | TAS2R16   | 16       | 0.628022 Inlier  |
| siRNA-Vinblastine Run2-DMSO  | NM_0169 | 45        | TAS2R16   | 16       | 0.720978 Inlier  |
| siRNA-Vinblastine Run1-DMSO  | NM_0169 | 45        | TAS2R16   | 16       | 1.052641 Inlier  |
| siRNA-Temozolomide Run3-DMSO | NM_0169 | 43        | TAS2R3    | member 3 | -0.980755 Inlier |
| siRNA-Temozolomide Run2-DMSO | NM_0169 | 43        | TAS2R3    | member 3 | -0.368245 Inlier |
| siRNA-Temozolomide Run1-DMSO | NM_0169 | 43        | TAS2R3    | member 3 | -0.132647 Inlier |
| siRNA Disorazole DMSO Run2   | NM_0169 | 43        | TAS2R3    | member 3 | -0.074658 Inlier |
| siRNA Disorazole DMSO Run3   | NM_0169 | 43        | TAS2R3    | member 3 | 0.074658 Inlier  |
| siRNA Disorazole DMSO Run1   | NM_0169 | 43        | TAS2R3    | member 3 | 1.040891 Inlier  |

Identification of Survival Genes in Human Glioblastoma Cells Using siRNA Screening  
 Nikhil G Thaker, Fang Zhang, Peter R. McDonald, Tong Ying Shun, Michael D Lewen, Ian F. Pollack, and John S. Lazo

Molecular Pharmacology

| siRNA                        | Gene      | Gene ID | Gene Name                         | Log2FC    | Classification |
|------------------------------|-----------|---------|-----------------------------------|-----------|----------------|
| siRNA-Vinblastine Run1-DMSO  | NM_016943 | TAS2R3  | taste receptor, type 2, member 3  | 1.911417  | Inlier         |
| siRNA-Vinblastine Run2-DMSO  | NM_016943 | TAS2R3  | taste receptor, type 2, member 3  | 2.376777  | Inlier         |
| siRNA-Temozolomide Run3-DMSO | NM_176817 | TAS2R38 | taste receptor, type 2, member 38 | -4.423667 | Outlier        |
| siRNA-Temozolomide Run2-DMSO | NM_176817 | TAS2R38 | taste receptor, type 2, member 38 | -1.719019 | Inlier         |
| siRNA-Temozolomide Run1-DMSO | NM_176817 | TAS2R38 | taste receptor, type 2, member 38 | -1.454669 | Inlier         |
| siRNA Disorazole DMSO Run3   | NM_176817 | TAS2R38 | taste receptor, type 2, member 38 | -0.133477 | Inlier         |
| siRNA Disorazole DMSO Run1   | NM_176817 | TAS2R38 | taste receptor, type 2, member 38 | 0.133477  | Inlier         |
| siRNA-Vinblastine Run2-DMSO  | NM_176817 | TAS2R38 | taste receptor, type 2, member 38 | 0.321521  | Inlier         |
| siRNA Disorazole DMSO Run2   | NM_176817 | TAS2R38 | taste receptor, type 2, member 38 | 0.338779  | Inlier         |
| siRNA-Vinblastine Run1-DMSO  | NM_176817 | TAS2R38 | taste receptor, type 2, member 38 | 1.010221  | Inlier         |

Identification of Survival Genes in Human Glioblastoma Cells Using siRNA Screening  
 Nikhil G Thaker, Fang Zhang, Peter R. McDonald, Tong Ying Shun, Michael D Lewen, Ian F. Pollack, and John S. Lazo

Molecular Pharmacology

| siRNA                        | Gene    | Run | Condition | Gene                              | Value     | Category |
|------------------------------|---------|-----|-----------|-----------------------------------|-----------|----------|
| siRNA Disorazole DMSO Run1   | NM_1768 | 81  | TAS2R39   | taste receptor, type 2, member 39 | -5.074915 | Outlier  |
| siRNA-Temozolomide Run1-DMSO | NM_1768 | 81  | TAS2R39   | taste receptor, type 2, member 39 | -1.122854 | Inlier   |
| siRNA-Temozolomide Run3-DMSO | NM_1768 | 81  | TAS2R39   | taste receptor, type 2, member 39 | -0.226146 | Inlier   |
| siRNA-Temozolomide Run2-DMSO | NM_1768 | 81  | TAS2R39   | taste receptor, type 2, member 39 | -0.082194 | Inlier   |
| siRNA-Vinblastine Run2-DMSO  | NM_1768 | 81  | TAS2R39   | taste receptor, type 2, member 39 | 0.082194  | Inlier   |
| siRNA-Vinblastine Run1-DMSO  | NM_1768 | 81  | TAS2R39   | taste receptor, type 2, member 39 | 0.217253  | Inlier   |
| siRNA Disorazole DMSO Run2   | NM_1768 | 81  | TAS2R39   | taste receptor, type 2, member 39 | 3.176635  | Inlier   |
| siRNA Disorazole DMSO Run3   | NM_1768 | 81  | TAS2R39   | taste receptor, type 2, member 39 | 5.336225  | Outlier  |
| siRNA-Temozolomide Run3-DMSO | NM_0169 | 44  | TAS2R4    | taste receptor, type 2, member 4  | -1.003511 | Inlier   |
| siRNA Disorazole DMSO Run2   | NM_0169 | 44  | TAS2R4    | taste receptor, type 2, member 4  | -0.355844 | Inlier   |
| siRNA Disorazole DMSO Run3   | NM_0169 | 44  | TAS2R4    | taste receptor, type 2, member 4  | -0.231364 | Inlier   |

Identification of Survival Genes in Human Glioblastoma Cells Using siRNA Screening  
 Nikhil G Thaker, Fang Zhang, Peter R. McDonald, Tong Ying Shun, Michael D Lewen, Ian F. Pollack, and John S. Lazo

Molecular Pharmacology

| siRNA Treatment              | Gene ID       | Gene Name | Gene Description                  | Value     | Category |
|------------------------------|---------------|-----------|-----------------------------------|-----------|----------|
| siRNA-Temozolomide Run2-DMSO | NM_0169<br>44 | TAS2R4    | taste receptor, type 2, member 4  | -0.054365 | Inlier   |
| siRNA-Temozolomide Run1-DMSO | NM_0169<br>44 | TAS2R4    | taste receptor, type 2, member 4  | 0.054365  | Inlier   |
| siRNA Disorazole DMSO Run1   | NM_0169<br>44 | TAS2R4    | taste receptor, type 2, member 4  | 0.993156  | Inlier   |
| siRNA-Vinblastine Run1-DMSO  | NM_0169<br>44 | TAS2R4    | taste receptor, type 2, member 4  | 2.102804  | Inlier   |
| siRNA-Vinblastine Run2-DMSO  | NM_0169<br>44 | TAS2R4    | taste receptor, type 2, member 4  | 2.136769  | Inlier   |
| siRNA-Temozolomide Run3-DMSO | NM_1768<br>82 | TAS2R40   | taste receptor, type 2, member 40 | -3.126445 | Inlier   |
| siRNA-Temozolomide Run1-DMSO | NM_1768<br>82 | TAS2R40   | taste receptor, type 2, member 40 | -0.972396 | Inlier   |
| siRNA-Temozolomide Run2-DMSO | NM_1768<br>82 | TAS2R40   | taste receptor, type 2, member 40 | -0.376867 | Inlier   |
| siRNA Disorazole DMSO Run1   | NM_1768<br>82 | TAS2R40   | taste receptor, type 2, member 40 | -0.16483  | Inlier   |
| siRNA-Vinblastine Run2-DMSO  | NM_1768<br>82 | TAS2R40   | taste receptor, type 2, member 40 | 0.16483   | Inlier   |
| siRNA-Vinblastine Run1-DMSO  | NM_1768<br>82 | TAS2R40   | taste receptor, type 2, member 40 | 0.430892  | Inlier   |



Identification of Survival Genes in Human Glioblastoma Cells Using siRNA Screening  
 Nikhil G Thaker, Fang Zhang, Peter R. McDonald, Tong Ying Shun, Michael D Lewen, Ian F. Pollack, and John S. Lazo

Molecular Pharmacology

| siRNA                         | Gene    | Accession | Gene ID | Gene Name                         | Value     | Category |
|-------------------------------|---------|-----------|---------|-----------------------------------|-----------|----------|
| siRNA Disorazole DMSO Run2    | NM_1768 | 82        | TAS2R40 | taste receptor, type 2, member 40 | 0.918108  | Inlier   |
| siRNA Disorazole DMSO Run3    | NM_1768 | 82        | TAS2R40 | taste receptor, type 2, member 40 | 5.164618  | Outlier  |
| siRNA-Temozolomide DMSO Run3- | NM_1768 | 83        | TAS2R41 | taste receptor, type 2, member 41 | -1.471381 | Inlier   |
| siRNA Disorazole DMSO Run2    | NM_1768 | 83        | TAS2R41 | taste receptor, type 2, member 41 | -0.681099 | Inlier   |
| siRNA Disorazole DMSO Run1    | NM_1768 | 83        | TAS2R41 | taste receptor, type 2, member 41 | -0.418742 | Inlier   |
| siRNA-Temozolomide Run2-DMSO  | NM_1768 | 83        | TAS2R41 | taste receptor, type 2, member 41 | -0.385587 | Inlier   |
| siRNA-Temozolomide Run1-DMSO  | NM_1768 | 83        | TAS2R41 | taste receptor, type 2, member 41 | 0.385587  | Inlier   |
| siRNA-Vinblastine Run1-DMSO   | NM_1768 | 83        | TAS2R41 | taste receptor, type 2, member 41 | 0.667901  | Inlier   |
| siRNA-Vinblastine Run2-DMSO   | NM_1768 | 83        | TAS2R41 | taste receptor, type 2, member 41 | 0.953062  | Inlier   |
| siRNA Disorazole DMSO Run3    | NM_1768 | 83        | TAS2R41 | taste receptor, type 2, member 41 | 2.153546  | Inlier   |

Identification of Survival Genes in Human Glioblastoma Cells Using siRNA Screening  
 Nikhil G Thaker, Fang Zhang, Peter R. McDonald, Tong Ying Shun, Michael D Lewen, Ian F. Pollack, and John S. Lazo

Molecular Pharmacology

|                              |               |         |                                               |           |         |
|------------------------------|---------------|---------|-----------------------------------------------|-----------|---------|
| siRNA-Temozolomide Run2-DMSO | NM_1768<br>84 | TAS2R43 | taste<br>receptor,<br>type 2,<br>member<br>43 | -1.449752 | Inlier  |
| siRNA-Temozolomide Run3-DMSO | NM_1768<br>84 | TAS2R43 | taste<br>receptor,<br>type 2,<br>member<br>43 | -1.206543 | Inlier  |
| siRNA-Vinblastine Run2-DMSO  | NM_1768<br>84 | TAS2R43 | taste<br>receptor,<br>type 2,<br>member<br>43 | -0.291955 | Inlier  |
| siRNA Disorazole DMSO Run1   | NM_1768<br>84 | TAS2R43 | taste<br>receptor,<br>type 2,<br>member<br>43 | -0.199573 | Inlier  |
| siRNA Disorazole DMSO Run3   | NM_1768<br>84 | TAS2R43 | taste<br>receptor,<br>type 2,<br>member<br>43 | 0.199574  | Inlier  |
| siRNA-Temozolomide Run1-DMSO | NM_1768<br>84 | TAS2R43 | taste<br>receptor,<br>type 2,<br>member<br>43 | 0.47026   | Inlier  |
| siRNA-Vinblastine Run1-DMSO  | NM_1768<br>84 | TAS2R43 | taste<br>receptor,<br>type 2,<br>member<br>43 | 0.87874   | Inlier  |
| siRNA Disorazole DMSO Run2   | NM_1768<br>84 | TAS2R43 | taste<br>receptor,<br>type 2,<br>member<br>43 | 1.359452  | Inlier  |
| siRNA-Temozolomide Run3-DMSO | NM_1768<br>85 | TAS2R44 | taste<br>receptor,<br>type 2,<br>member<br>44 | -5.303958 | Outlier |
| siRNA Disorazole DMSO Run1   | NM_1768<br>85 | TAS2R44 | taste<br>receptor,<br>type 2,<br>member<br>44 | -3.40502  | Inlier  |

Identification of Survival Genes in Human Glioblastoma Cells Using siRNA Screening  
 Nikhil G Thaker, Fang Zhang, Peter R. McDonald, Tong Ying Shun, Michael D Lewen, Ian F. Pollack, and John S. Lazo

Molecular Pharmacology

|                                  |               |         |                                               |           |        |
|----------------------------------|---------------|---------|-----------------------------------------------|-----------|--------|
| siRNA Disorazole DMSO Run2       | NM_1768<br>85 | TAS2R44 | taste<br>receptor,<br>type 2,<br>member<br>44 | -0.375931 | Inlier |
| siRNA-Temozolomide Run2-<br>DMSO | NM_1768<br>85 | TAS2R44 | taste<br>receptor,<br>type 2,<br>member<br>44 | -0.18241  | Inlier |
| siRNA Disorazole DMSO Run3       | NM_1768<br>85 | TAS2R44 | taste<br>receptor,<br>type 2,<br>member<br>44 | 0.18241   | Inlier |
| siRNA-Temozolomide Run1-<br>DMSO | NM_1768<br>85 | TAS2R44 | taste<br>receptor,<br>type 2,<br>member<br>44 | 0.212698  | Inlier |
| siRNA-Vinblastine Run2-<br>DMSO  | NM_1768<br>85 | TAS2R44 | taste<br>receptor,<br>type 2,<br>member<br>44 | 0.973069  | Inlier |
| siRNA-Vinblastine Run1-<br>DMSO  | NM_1768<br>85 | TAS2R44 | taste<br>receptor,<br>type 2,<br>member<br>44 | 2.30629   | Inlier |
| siRNA-Temozolomide Run3-<br>DMSO | NM_1768<br>87 | TAS2R46 | taste<br>receptor,<br>type 2,<br>member<br>46 | -2.300413 | Inlier |
| siRNA-Temozolomide Run2-<br>DMSO | NM_1768<br>87 | TAS2R46 | taste<br>receptor,<br>type 2,<br>member<br>46 | -0.761989 | Inlier |
| siRNA Disorazole DMSO Run2       | NM_1768<br>87 | TAS2R46 | taste<br>receptor,<br>type 2,<br>member<br>46 | -0.430586 | Inlier |
| siRNA-Temozolomide Run1-<br>DMSO | NM_1768<br>87 | TAS2R46 | taste<br>receptor,<br>type 2,<br>member<br>46 | -0.205075 | Inlier |

Identification of Survival Genes in Human Glioblastoma Cells Using siRNA Screening  
 Nikhil G Thaker, Fang Zhang, Peter R. McDonald, Tong Ying Shun, Michael D Lewen, Ian F. Pollack, and John S. Lazo

Molecular Pharmacology

| siRNA                        | Gene    | Accession | Gene    | Value | Outlier          |
|------------------------------|---------|-----------|---------|-------|------------------|
| siRNA Disorazole DMSO Run1   | NM_1768 | 87        | TAS2R46 | 46    | 0.205075 Inlier  |
| siRNA Disorazole DMSO Run3   | NM_1768 | 87        | TAS2R46 | 46    | 0.587011 Inlier  |
| siRNA-Vinblastine Run1-DMSO  | NM_1768 | 87        | TAS2R46 | 46    | 1.294569 Inlier  |
| siRNA-Vinblastine Run2-DMSO  | NM_1768 | 87        | TAS2R46 | 46    | 1.483651 Inlier  |
| siRNA-Temozolomide Run3-DMSO | NM_1768 | 88        | TAS2R48 | 48    | -2.105208 Inlier |
| siRNA-Temozolomide Run1-DMSO | NM_1768 | 88        | TAS2R48 | 48    | -1.12598 Inlier  |
| siRNA-Temozolomide Run2-DMSO | NM_1768 | 88        | TAS2R48 | 48    | -0.806639 Inlier |
| siRNA Disorazole DMSO Run1   | NM_1768 | 88        | TAS2R48 | 48    | -0.242185 Inlier |
| siRNA Disorazole DMSO Run3   | NM_1768 | 88        | TAS2R48 | 48    | 0.242185 Inlier  |
| siRNA-Vinblastine Run2-DMSO  | NM_1768 | 88        | TAS2R48 | 48    | 0.529697 Inlier  |

Identification of Survival Genes in Human Glioblastoma Cells Using siRNA Screening  
 Nikhil G Thaker, Fang Zhang, Peter R. McDonald, Tong Ying Shun, Michael D Lewen, Ian F. Pollack, and John S. Lazo

Molecular Pharmacology

| siRNA                        | Gene    | Accession | Gene    | Accession | Value     | Outlier |
|------------------------------|---------|-----------|---------|-----------|-----------|---------|
| siRNA Disorazole DMSO Run2   | NM_1768 | 88        | TAS2R48 | 48        | 0.542361  | Inlier  |
| siRNA-Vinblastine Run1-DMSO  | NM_1768 | 88        | TAS2R48 | 48        | 1.010718  | Inlier  |
| siRNA-Temozolomide Run3-DMSO | NM_1768 | 89        | TAS2R49 | 49        | -1.79458  | Inlier  |
| siRNA-Vinblastine Run2-DMSO  | NM_1768 | 89        | TAS2R49 | 49        | -1.025513 | Inlier  |
| siRNA-Temozolomide Run2-DMSO | NM_1768 | 89        | TAS2R49 | 49        | -0.718075 | Inlier  |
| siRNA-Temozolomide Run1-DMSO | NM_1768 | 89        | TAS2R49 | 49        | -0.191523 | Inlier  |
| siRNA-Vinblastine Run1-DMSO  | NM_1768 | 89        | TAS2R49 | 49        | 0.191522  | Inlier  |
| siRNA Disorazole DMSO Run1   | NM_1768 | 89        | TAS2R49 | 49        | 0.268587  | Inlier  |
| siRNA Disorazole DMSO Run2   | NM_1768 | 89        | TAS2R49 | 49        | 0.630925  | Inlier  |
| siRNA Disorazole DMSO Run3   | NM_1768 | 89        | TAS2R49 | 49        | 1.523914  | Inlier  |

Identification of Survival Genes in Human Glioblastoma Cells Using siRNA Screening  
 Nikhil G Thaker, Fang Zhang, Peter R. McDonald, Tong Ying Shun, Michael D Lewen, Ian F. Pollack, and John S. Lazo

Molecular Pharmacology

|                              |               |         |                                   |           |        |
|------------------------------|---------------|---------|-----------------------------------|-----------|--------|
| siRNA-Temozolomide Run3-DMSO | NM_0189<br>80 | TAS2R5  | taste receptor, type 2, member 5  | -0.982845 | Inlier |
| siRNA-Temozolomide Run2-DMSO | NM_0189<br>80 | TAS2R5  | taste receptor, type 2, member 5  | -0.366155 | Inlier |
| siRNA Disorazole DMSO Run2   | NM_0189<br>80 | TAS2R5  | taste receptor, type 2, member 5  | -0.11206  | Inlier |
| siRNA-Temozolomide Run1-DMSO | NM_0189<br>80 | TAS2R5  | taste receptor, type 2, member 5  | -0.013034 | Inlier |
| siRNA Disorazole DMSO Run3   | NM_0189<br>80 | TAS2R5  | taste receptor, type 2, member 5  | 0.013034  | Inlier |
| siRNA Disorazole DMSO Run1   | NM_0189<br>80 | TAS2R5  | taste receptor, type 2, member 5  | 1.020375  | Inlier |
| siRNA-Vinblastine Run2-DMSO  | NM_0189<br>80 | TAS2R5  | taste receptor, type 2, member 5  | 1.658201  | Inlier |
| siRNA-Vinblastine Run1-DMSO  | NM_0189<br>80 | TAS2R5  | taste receptor, type 2, member 5  | 2.006815  | Inlier |
| siRNA-Temozolomide Run3-DMSO | NM_1768<br>90 | TAS2R50 | taste receptor, type 2, member 50 | -1.24557  | Inlier |
| siRNA-Temozolomide Run2-DMSO | NM_1768<br>90 | TAS2R50 | taste receptor, type 2, member 50 | -1.013268 | Inlier |
| siRNA-Temozolomide Run1-DMSO | NM_1768<br>90 | TAS2R50 | taste receptor, type 2, member 50 | -0.37952  | Inlier |
| siRNA Disorazole DMSO Run2   | NM_1768<br>90 | TAS2R50 | taste receptor, type 2, member 50 | -0.161214 | Inlier |

Identification of Survival Genes in Human Glioblastoma Cells Using siRNA Screening  
 Nikhil G Thaker, Fang Zhang, Peter R. McDonald, Tong Ying Shun, Michael D Lewen, Ian F. Pollack, and John S. Lazo

Molecular Pharmacology

| siRNA Treatment              | Gene ID | Accession | Probe | Value     | Outlier |
|------------------------------|---------|-----------|-------|-----------|---------|
| siRNA Disorazole DMSO Run1   | NM_1768 | TAS2R50   | 50    | 0.161214  | Inlier  |
| siRNA Disorazole DMSO Run3   | NM_1768 | TAS2R50   | 50    | 0.280431  | Inlier  |
| siRNA-Vinblastine Run1-DMSO  | NM_1768 | TAS2R50   | 50    | 0.96948   | Inlier  |
| siRNA-Vinblastine Run2-DMSO  | NM_1768 | TAS2R50   | 50    | 1.066657  | Inlier  |
| siRNA-Temozolomide Run3-DMSO | NM_1774 | TAS2R60   | 60    | -0.921115 | Inlier  |
| siRNA-Temozolomide Run2-DMSO | NM_1774 | TAS2R60   | 60    | -0.861458 | Inlier  |
| siRNA Disorazole DMSO Run3   | NM_1774 | TAS2R60   | 60    | -0.2847   | Inlier  |
| siRNA-Temozolomide Run1-DMSO | NM_1774 | TAS2R60   | 60    | -0.145086 | Inlier  |
| siRNA Disorazole DMSO Run2   | NM_1774 | TAS2R60   | 60    | 0.145086  | Inlier  |
| siRNA Disorazole DMSO Run1   | NM_1774 | TAS2R60   | 60    | 0.487542  | Inlier  |

Identification of Survival Genes in Human Glioblastoma Cells Using siRNA Screening  
 Nikhil G Thaker, Fang Zhang, Peter R. McDonald, Tong Ying Shun, Michael D Lewen, Ian F. Pollack, and John S. Lazo

Molecular Pharmacology

|                              |               |         |                                   |           |         |
|------------------------------|---------------|---------|-----------------------------------|-----------|---------|
| siRNA-Vinblastine Run2-DMSO  | NM_1774<br>37 | TAS2R60 | taste receptor, type 2, member 60 | 0.890213  | Inlier  |
| siRNA-Vinblastine Run1-DMSO  | NM_1774<br>37 | TAS2R60 | taste receptor, type 2, member 60 | 1.158219  | Inlier  |
| siRNA-Temozolomide Run3-DMSO | NM_0239<br>19 | TAS2R7  | taste receptor, type 2, member 7  | -2.399394 | Inlier  |
| siRNA Disorazole DMSO Run2   | NM_0239<br>19 | TAS2R7  | taste receptor, type 2, member 7  | -1.658212 | Inlier  |
| siRNA-Temozolomide Run2-DMSO | NM_0239<br>19 | TAS2R7  | taste receptor, type 2, member 7  | -0.987932 | Inlier  |
| siRNA Disorazole DMSO Run1   | NM_0239<br>19 | TAS2R7  | taste receptor, type 2, member 7  | -0.125744 | Inlier  |
| siRNA Disorazole DMSO Run3   | NM_0239<br>19 | TAS2R7  | taste receptor, type 2, member 7  | 0.125744  | Inlier  |
| siRNA-Temozolomide Run1-DMSO | NM_0239<br>19 | TAS2R7  | taste receptor, type 2, member 7  | 0.141231  | Inlier  |
| siRNA-Vinblastine Run2-DMSO  | NM_0239<br>19 | TAS2R7  | taste receptor, type 2, member 7  | 0.361068  | Inlier  |
| siRNA-Vinblastine Run1-DMSO  | NM_0239<br>19 | TAS2R7  | taste receptor, type 2, member 7  | 1.077828  | Inlier  |
| siRNA-Temozolomide Run3-DMSO | NM_0239<br>18 | TAS2R8  | taste receptor, type 2, member 8  | -4.169637 | Outlier |
| siRNA-Temozolomide Run2-DMSO | NM_0239<br>18 | TAS2R8  | taste receptor, type 2, member 8  | -0.903777 | Inlier  |



Identification of Survival Genes in Human Glioblastoma Cells Using siRNA Screening  
 Nikhil G Thaker, Fang Zhang, Peter R. McDonald, Tong Ying Shun, Michael D Lewen, Ian F. Pollack, and John S. Lazo

Molecular Pharmacology

| siRNA                        | Gene    | Gene ID | Gene Name | Value     | Outlier |
|------------------------------|---------|---------|-----------|-----------|---------|
| siRNA-Vinblastine Run2-DMSO  | NM_0239 | 18      | TAS2R8    | -0.445223 | Inlier  |
| siRNA-Temozolomide Run1-DMSO | NM_0239 | 18      | TAS2R8    | -0.103785 | Inlier  |
| siRNA Disorazole DMSO Run1   | NM_0239 | 18      | TAS2R8    | 0.103784  | Inlier  |
| siRNA Disorazole DMSO Run2   | NM_0239 | 18      | TAS2R8    | 0.111196  | Inlier  |
| siRNA-Vinblastine Run1-DMSO  | NM_0239 | 18      | TAS2R8    | 1.109938  | Inlier  |
| siRNA Disorazole DMSO Run3   | NM_0239 | 18      | TAS2R8    | 1.210257  | Inlier  |
| siRNA-Temozolomide Run3-DMSO | NM_0239 | 17      | TAS2R9    | -1.196167 | Inlier  |
| siRNA Disorazole DMSO Run2   | NM_0239 | 17      | TAS2R9    | -0.993367 | Inlier  |
| siRNA-Temozolomide Run2-DMSO | NM_0239 | 17      | TAS2R9    | -0.33328  | Inlier  |
| siRNA Disorazole DMSO Run1   | NM_0239 | 17      | TAS2R9    | -0.146976 | Inlier  |
| siRNA-Temozolomide Run1-DMSO | NM_0239 | 17      | TAS2R9    | 0.146975  | Inlier  |
| siRNA-Vinblastine Run2-DMSO  | NM_0239 | 17      | TAS2R9    | 0.536698  | Inlier  |
| siRNA-Vinblastine Run1-DMSO  | NM_0239 | 17      | TAS2R9    | 0.812302  | Inlier  |

Identification of Survival Genes in Human Glioblastoma Cells Using siRNA Screening  
 Nikhil G Thaker, Fang Zhang, Peter R. McDonald, Tong Ying Shun, Michael D Lewen, Ian F. Pollack, and John S. Lazo

Molecular Pharmacology

|                              |               |        |                                                                                                |           |         |
|------------------------------|---------------|--------|------------------------------------------------------------------------------------------------|-----------|---------|
| siRNA Disorazole DMSO Run3   | NM_0239<br>17 | TAS2R9 | taste receptor, type 2, member 9                                                               | 1.131907  | Inlier  |
| siRNA Disorazole DMSO Run3   | NM_0003<br>53 | TAT    | tyrosine aminotransferase                                                                      | -1.000452 | Inlier  |
| siRNA-Temozolomide Run3-DMSO | NM_0003<br>53 | TAT    | tyrosine aminotransferase                                                                      | -0.776383 | Inlier  |
| siRNA-Vinblastine Run2-DMSO  | NM_0003<br>53 | TAT    | tyrosine aminotransferase                                                                      | -0.222656 | Inlier  |
| siRNA Disorazole DMSO Run1   | NM_0003<br>53 | TAT    | tyrosine aminotransferase                                                                      | -0.055048 | Inlier  |
| siRNA-Temozolomide Run2-DMSO | NM_0003<br>53 | TAT    | tyrosine aminotransferase                                                                      | 0.055048  | Inlier  |
| siRNA-Temozolomide Run1-DMSO | NM_0003<br>53 | TAT    | tyrosine aminotransferase                                                                      | 0.572617  | Inlier  |
| siRNA Disorazole DMSO Run2   | NM_0003<br>53 | TAT    | tyrosine aminotransferase                                                                      | 1.894702  | Inlier  |
| siRNA-Vinblastine Run1-DMSO  | NM_0003<br>53 | TAT    | tyrosine aminotransferase                                                                      | 4.294457  | Outlier |
| siRNA Disorazole DMSO Run1   | NM_1813<br>13 | TAZ    | tafazzin (cardiomyopathy, dilated 3A (X-linked); endocardial fibroelastosis 2; Barth syndrome) | -1.335829 | Inlier  |
| siRNA-Vinblastine Run2-DMSO  | NM_1813<br>13 | TAZ    | tafazzin (cardiomyopathy, dilated 3A (X-linked); endocardial fibroelastosis 2; Barth syndrome) | -0.819663 | Inlier  |

Identification of Survival Genes in Human Glioblastoma Cells Using siRNA Screening

Nikhil G Thaker, Fang Zhang, Peter R. McDonald, Tong Ying Shun, Michael D Lewen, Ian F. Pollack, and John S. Lazo

Molecular Pharmacology

|                              |           |     |                                                                                                |           |        |
|------------------------------|-----------|-----|------------------------------------------------------------------------------------------------|-----------|--------|
| siRNA-Temozolomide Run2-DMSO | NM_181313 | TAZ | tafazzin (cardiomyopathy, dilated 3A (X-linked); endocardial fibroelastosis 2; Barth syndrome) | -0.187607 | Inlier |
| siRNA Disorazole DMSO Run3   | NM_181313 | TAZ | tafazzin (cardiomyopathy, dilated 3A (X-linked); endocardial fibroelastosis 2; Barth syndrome) | -0.176746 | Inlier |
| siRNA-Temozolomide Run1-DMSO | NM_181313 | TAZ | tafazzin (cardiomyopathy, dilated 3A (X-linked); endocardial fibroelastosis 2; Barth syndrome) | 0.176746  | Inlier |
| siRNA-Temozolomide Run3-DMSO | NM_181313 | TAZ | tafazzin (cardiomyopathy, dilated 3A (X-linked); endocardial fibroelastosis 2; Barth syndrome) | 0.529337  | Inlier |

Identification of Survival Genes in Human Glioblastoma Cells Using siRNA Screening  
 Nikhil G Thaker, Fang Zhang, Peter R. McDonald, Tong Ying Shun, Michael D Lewen, Ian F. Pollack, and John S. Lazo  
 Molecular Pharmacology

|                              |               |        |                                                                                                   |           |        |
|------------------------------|---------------|--------|---------------------------------------------------------------------------------------------------|-----------|--------|
| siRNA Disorazole DMSO Run2   | NM_1813<br>13 | TAZ    | tafazzin<br>(cardiomyopathy, dilated 3A (X-linked); endocardial fibroelastosis 2; Barth syndrome) | 1.690973  | Inlier |
| siRNA-Vinblastine Run1-DMSO  | NM_1813<br>13 | TAZ    | tafazzin<br>(cardiomyopathy, dilated 3A (X-linked); endocardial fibroelastosis 2; Barth syndrome) | 1.965337  | Inlier |
| siRNA-Temozolomide Run2-DMSO | NM_0322<br>58 | TBC1D3 | TBC1 domain family, member 3                                                                      | -2.451223 | Inlier |
| siRNA Disorazole DMSO Run1   | NM_0322<br>58 | TBC1D3 | TBC1 domain family, member 3                                                                      | -1.337    | Inlier |
| siRNA-Temozolomide Run3-DMSO | NM_0322<br>58 | TBC1D3 | TBC1 domain family, member 3                                                                      | -0.538608 | Inlier |
| siRNA-Vinblastine Run1-DMSO  | NM_0322<br>58 | TBC1D3 | TBC1 domain family, member 3                                                                      | -0.285774 | Inlier |
| siRNA Disorazole DMSO Run2   | NM_0322<br>58 | TBC1D3 | TBC1 domain family, member 3                                                                      | 0.285774  | Inlier |
| siRNA-Temozolomide Run1-DMSO | NM_0322<br>58 | TBC1D3 | TBC1 domain family, member 3                                                                      | 0.640894  | Inlier |
| siRNA-Vinblastine Run2-DMSO  | NM_0322<br>58 | TBC1D3 | TBC1 domain family, member 3                                                                      | 0.708106  | Inlier |

Identification of Survival Genes in Human Glioblastoma Cells Using siRNA Screening  
 Nikhil G Thaker, Fang Zhang, Peter R. McDonald, Tong Ying Shun, Michael D Lewen, Ian F. Pollack, and John S. Lazo

Molecular Pharmacology

|                              |         |    |        |                              |           |         |
|------------------------------|---------|----|--------|------------------------------|-----------|---------|
| siRNA Disorazole DMSO Run3   | NM_0322 | 58 | TBC1D3 | TBC1 domain family, member 3 | 5.962583  | Outlier |
| siRNA Disorazole DMSO Run2   | NM_0132 | 54 | TBK1   | TANK-binding kinase 1        | -0.772314 | Inlier  |
| siRNA Disorazole DMSO Run3   | NM_0132 | 54 | TBK1   | TANK-binding kinase 1        | -0.576686 | Inlier  |
| siRNA-Temozolomide Run2-DMSO | NM_0132 | 54 | TBK1   | TANK-binding kinase 1        | -0.438485 | Inlier  |
| siRNA-Temozolomide Run3-DMSO | NM_0132 | 54 | TBK1   | TANK-binding kinase 1        | -0.418684 | Inlier  |
| siRNA-Temozolomide Run1-DMSO | NM_0132 | 54 | TBK1   | TANK-binding kinase 1        | 0.418684  | Inlier  |
| siRNA Disorazole DMSO Run1   | NM_0132 | 54 | TBK1   | TANK-binding kinase 1        | 1.246874  | Inlier  |
| siRNA-Vinblastine Run1-DMSO  | NM_0132 | 54 | TBK1   | TANK-binding kinase 1        | 1.611608  | Inlier  |
| siRNA-Vinblastine Run2-DMSO  | NM_0132 | 54 | TBK1   | TANK-binding kinase 1        | 2.183154  | Inlier  |
| siRNA-Temozolomide Run3-DMSO | NM_2016 | 36 | TBXA2R | thromboxane A2 receptor      | -3.449932 | Inlier  |
| siRNA Disorazole DMSO Run3   | NM_2016 | 36 | TBXA2R | thromboxane A2 receptor      | -1.726119 | Inlier  |
| siRNA-Temozolomide Run2-DMSO | NM_2016 | 36 | TBXA2R | thromboxane A2 receptor      | -0.279313 | Inlier  |
| siRNA-Temozolomide Run1-DMSO | NM_2016 | 36 | TBXA2R | thromboxane A2 receptor      | -0.129753 | Inlier  |
| siRNA Disorazole DMSO Run2   | NM_2016 | 36 | TBXA2R | thromboxane A2 receptor      | 0.129753  | Inlier  |
| siRNA Disorazole DMSO Run1   | NM_2016 | 36 | TBXA2R | thromboxane A2 receptor      | 0.318765  | Inlier  |
| siRNA-Vinblastine Run1-DMSO  | NM_2016 | 36 | TBXA2R | thromboxane A2 receptor      | 1.030235  | Inlier  |
| siRNA-Vinblastine Run2-DMSO  | NM_2016 | 36 | TBXA2R | thromboxane A2 receptor      | 1.139551  | Inlier  |

Identification of Survival Genes in Human Glioblastoma Cells Using siRNA Screening

Nikhil G Thaker, Fang Zhang, Peter R. McDonald, Tong Ying Shun, Michael D Lewen, Ian F. Pollack, and John S. Lazo

Molecular Pharmacology

|                              |           |        |                                                                             |           |        |
|------------------------------|-----------|--------|-----------------------------------------------------------------------------|-----------|--------|
| siRNA-Temozolomide Run2-DMSO | NM_030984 | TBXAS1 | thromboxane A synthase 1 (platelet, cytochrome P450, family 5, subfamily A) | -0.892594 | Inlier |
| siRNA-Temozolomide Run3-DMSO | NM_030984 | TBXAS1 | thromboxane A synthase 1 (platelet, cytochrome P450, family 5, subfamily A) | -0.665678 | Inlier |
| siRNA Disorazole DMSO Run1   | NM_030984 | TBXAS1 | thromboxane A synthase 1 (platelet, cytochrome P450, family 5, subfamily A) | -0.225423 | Inlier |
| siRNA-Temozolomide Run1-DMSO | NM_030984 | TBXAS1 | thromboxane A synthase 1 (platelet, cytochrome P450, family 5, subfamily A) | -0.175923 | Inlier |
| siRNA Disorazole DMSO Run3   | NM_030984 | TBXAS1 | thromboxane A synthase 1 (platelet, cytochrome P450, family 5, subfamily A) | 0.175923  | Inlier |

Identification of Survival Genes in Human Glioblastoma Cells Using siRNA Screening  
 Nikhil G Thaker, Fang Zhang, Peter R. McDonald, Tong Ying Shun, Michael D Lewen, Ian F. Pollack, and John S. Lazo  
 Molecular Pharmacology

|                              |               |        |                                                                             |           |        |
|------------------------------|---------------|--------|-----------------------------------------------------------------------------|-----------|--------|
| siRNA Disorazole DMSO Run2   | NM_0309<br>84 | TBXAS1 | thromboxane A synthase 1 (platelet, cytochrome P450, family 5, subfamily A) | 0.683322  | Inlier |
| siRNA-Vinblastine Run1-DMSO  | NM_0309<br>84 | TBXAS1 | thromboxane A synthase 1 (platelet, cytochrome P450, family 5, subfamily A) | 0.773915  | Inlier |
| siRNA-Vinblastine Run2-DMSO  | NM_0309<br>84 | TBXAS1 | thromboxane A synthase 1 (platelet, cytochrome P450, family 5, subfamily A) | 1.225821  | Inlier |
| siRNA-Vinblastine Run2-DMSO  | NM_0032<br>11 | TDG    | thymine-DNA glycosylase                                                     | -1.583058 | Inlier |
| siRNA Disorazole DMSO Run3   | NM_0032<br>11 | TDG    | thymine-DNA glycosylase                                                     | -1.130746 | Inlier |
| siRNA-Temozolomide Run2-DMSO | NM_0032<br>11 | TDG    | thymine-DNA glycosylase                                                     | -0.904615 | Inlier |
| siRNA-Temozolomide Run3-DMSO | NM_0032<br>11 | TDG    | thymine-DNA glycosylase                                                     | -0.016443 | Inlier |
| siRNA-Temozolomide Run1-DMSO | NM_0032<br>11 | TDG    | thymine-DNA glycosylase                                                     | 0.016443  | Inlier |

Identification of Survival Genes in Human Glioblastoma Cells Using siRNA Screening  
 Nikhil G Thaker, Fang Zhang, Peter R. McDonald, Tong Ying Shun, Michael D Lewen, Ian F. Pollack, and John S. Lazo

Molecular Pharmacology

|                              |               |      |                                    |           |        |
|------------------------------|---------------|------|------------------------------------|-----------|--------|
| siRNA Disorazole DMSO Run1   | NM_0032<br>11 | TDG  | thymine-DNA<br>glycosylase         | 0.411406  | Inlier |
| siRNA-Vinblastine Run1-DMSO  | NM_0032<br>11 | TDG  | thymine-DNA<br>glycosylase         | 0.444385  | Inlier |
| siRNA Disorazole DMSO Run2   | NM_0032<br>11 | TDG  | thymine-DNA<br>glycosylase         | 0.977891  | Inlier |
| siRNA-Vinblastine Run2-DMSO  | NM_0056<br>51 | TDO2 | tryptophan<br>2,3-dioxygenase      | -1.668999 | Inlier |
| siRNA-Temozolomide Run2-DMSO | NM_0056<br>51 | TDO2 | tryptophan<br>2,3-dioxygenase      | -0.791603 | Inlier |
| siRNA Disorazole DMSO Run1   | NM_0056<br>51 | TDO2 | tryptophan<br>2,3-dioxygenase      | -0.557397 | Inlier |
| siRNA-Temozolomide Run3-DMSO | NM_0056<br>51 | TDO2 | tryptophan<br>2,3-dioxygenase      | -0.062045 | Inlier |
| siRNA-Temozolomide Run1-DMSO | NM_0056<br>51 | TDO2 | tryptophan<br>2,3-dioxygenase      | 0.062046  | Inlier |
| siRNA Disorazole DMSO Run3   | NM_0056<br>51 | TDO2 | tryptophan<br>2,3-dioxygenase      | 0.084965  | Inlier |
| siRNA Disorazole DMSO Run2   | NM_0056<br>51 | TDO2 | tryptophan<br>2,3-dioxygenase      | 1.198333  | Inlier |
| siRNA-Vinblastine Run1-DMSO  | NM_0056<br>51 | TDO2 | tryptophan<br>2,3-dioxygenase      | 2.441759  | Inlier |
| siRNA Disorazole DMSO Run3   | NM_0183<br>19 | TDP1 | tyrosyl-DNA<br>phosphodiesterase 1 | -1.646088 | Inlier |



Identification of Survival Genes in Human Glioblastoma Cells Using siRNA Screening  
 Nikhil G Thaker, Fang Zhang, Peter R. McDonald, Tong Ying Shun, Michael D Lewen, Ian F. Pollack, and John S. Lazo  
 Molecular Pharmacology

|                              |               |      |                                 |           |        |
|------------------------------|---------------|------|---------------------------------|-----------|--------|
| siRNA-Temozolomide Run3-DMSO | NM_0183<br>19 | TDP1 | tyrosyl-DNA phosphodiesterase 1 | -1.629246 | Inlier |
| siRNA Disorazole DMSO Run1   | NM_0183<br>19 | TDP1 | tyrosyl-DNA phosphodiesterase 1 | -0.380144 | Inlier |
| siRNA-Temozolomide Run2-DMSO | NM_0183<br>19 | TDP1 | tyrosyl-DNA phosphodiesterase 1 | -0.212557 | Inlier |
| siRNA Disorazole DMSO Run2   | NM_0183<br>19 | TDP1 | tyrosyl-DNA phosphodiesterase 1 | 0.212557  | Inlier |
| siRNA-Temozolomide Run1-DMSO | NM_0183<br>19 | TDP1 | tyrosyl-DNA phosphodiesterase 1 | 0.446492  | Inlier |
| siRNA-Vinblastine Run2-DMSO  | NM_0183<br>19 | TDP1 | tyrosyl-DNA phosphodiesterase 1 | 0.902507  | Inlier |
| siRNA-Vinblastine Run1-DMSO  | NM_0183<br>19 | TDP1 | tyrosyl-DNA phosphodiesterase 1 | 1.403021  | Inlier |
| siRNA Disorazole DMSO Run3   | NM_0032<br>15 | TEC  | tec protein tyrosine kinase     | -0.732796 | Inlier |
| siRNA Disorazole DMSO Run2   | NM_0032<br>15 | TEC  | tec protein tyrosine kinase     | -0.616204 | Inlier |
| siRNA-Temozolomide Run3-DMSO | NM_0032<br>15 | TEC  | tec protein tyrosine kinase     | -0.547091 | Inlier |
| siRNA-Temozolomide Run2-DMSO | NM_0032<br>15 | TEC  | tec protein tyrosine kinase     | -0.056549 | Inlier |

Identification of Survival Genes in Human Glioblastoma Cells Using siRNA Screening  
 Nikhil G Thaker, Fang Zhang, Peter R. McDonald, Tong Ying Shun, Michael D Lewen, Ian F. Pollack, and John S. Lazo

Molecular Pharmacology

|                              |               |     |                                                                                         |                  |
|------------------------------|---------------|-----|-----------------------------------------------------------------------------------------|------------------|
| siRNA-Temozolomide Run1-DMSO | NM_0032<br>15 | TEC | tec protein tyrosine kinase                                                             | 0.05655 Inlier   |
| siRNA-Vinblastine Run2-DMSO  | NM_0032<br>15 | TEC | tec protein tyrosine kinase                                                             | 1.821255 Inlier  |
| siRNA Disorazole DMSO Run1   | NM_0032<br>15 | TEC | tec protein tyrosine kinase                                                             | 2.468704 Inlier  |
| siRNA-Vinblastine Run1-DMSO  | NM_0032<br>15 | TEC | tec protein tyrosine kinase                                                             | 2.595698 Inlier  |
| siRNA Disorazole DMSO Run2   | NM_0004<br>59 | TEK | TEK tyrosine kinase, endothelial (venous malformations, multiple cutaneous and mucosal) | -1.218725 Inlier |
| siRNA-Temozolomide Run3-DMSO | NM_0004<br>59 | TEK | TEK tyrosine kinase, endothelial (venous malformations, multiple cutaneous and mucosal) | -1.089475 Inlier |
| siRNA Disorazole DMSO Run3   | NM_0004<br>59 | TEK | TEK tyrosine kinase, endothelial (venous malformations, multiple cutaneous and mucosal) | -0.866054 Inlier |

Identification of Survival Genes in Human Glioblastoma Cells Using siRNA Screening

Nikhil G Thaker, Fang Zhang, Peter R. McDonald, Tong Ying Shun, Michael D Lewen, Ian F. Pollack, and John S. Lazo

Molecular Pharmacology

| siRNA Treatment              | Gene ID   | Gene Name                                                                                  | Log2 Fold Change | Outlier Status |
|------------------------------|-----------|--------------------------------------------------------------------------------------------|------------------|----------------|
| siRNA-Temozolomide Run1-DMSO | NM_000459 | TEK<br>tyrosine kinase, endothelial (venous malformations, multiple cutaneous and mucosal) | -0.172962        | Inlier         |
| siRNA-Temozolomide Run2-DMSO | NM_000459 | TEK<br>tyrosine kinase, endothelial (venous malformations, multiple cutaneous and mucosal) | 0.172962         | Inlier         |
| siRNA Disorazole DMSO Run1   | NM_000459 | TEK<br>tyrosine kinase, endothelial (venous malformations, multiple cutaneous and mucosal) | 0.417396         | Inlier         |
| siRNA-Vinblastine Run1-DMSO  | NM_000459 | TEK<br>tyrosine kinase, endothelial (venous malformations, multiple cutaneous and mucosal) | 0.51973          | Inlier         |

Identification of Survival Genes in Human Glioblastoma Cells Using siRNA Screening

Nikhil G Thaker, Fang Zhang, Peter R. McDonald, Tong Ying Shun, Michael D Lewen, Ian F. Pollack, and John S. Lazo

Molecular Pharmacology

| siRNA Treatment              | Gene ID   | Gene Name | Gene Description                                                                        | Log Fold Change | Outlier Status |
|------------------------------|-----------|-----------|-----------------------------------------------------------------------------------------|-----------------|----------------|
| siRNA-Vinblastine Run2-DMSO  | NM_000459 | TEK       | TEK tyrosine kinase, endothelial (venous malformations, multiple cutaneous and mucosal) | 0.82927         | Inlier         |
| siRNA-Temozolomide Run2-DMSO | NM_198316 | TENC1     | tensin like C1 domain containing phosphatase                                            | -1.837362       | Inlier         |
| siRNA-Temozolomide Run1-DMSO | NM_198316 | TENC1     | tensin like C1 domain containing phosphatase                                            | -1.310584       | Inlier         |
| siRNA Disorazole DMSO Run1   | NM_198316 | TENC1     | tensin like C1 domain containing phosphatase                                            | -0.879983       | Inlier         |
| siRNA-Vinblastine Run2-DMSO  | NM_198316 | TENC1     | tensin like C1 domain containing phosphatase                                            | -0.016828       | Inlier         |
| siRNA-Vinblastine Run1-DMSO  | NM_198316 | TENC1     | tensin like C1 domain containing phosphatase                                            | 0.016828        | Inlier         |
| siRNA-Temozolomide Run3-DMSO | NM_198316 | TENC1     | tensin like C1 domain containing phosphatase                                            | 0.380224        | Inlier         |

Identification of Survival Genes in Human Glioblastoma Cells Using siRNA Screening  
 Nikhil G Thaker, Fang Zhang, Peter R. McDonald, Tong Ying Shun, Michael D Lewen, Ian F. Pollack, and John S. Lazo  
 Molecular Pharmacology

|                              |               |       |                                                           |           |         |
|------------------------------|---------------|-------|-----------------------------------------------------------|-----------|---------|
| siRNA Disorazole DMSO Run3   | NM_1983<br>16 | TENC1 | tensin like<br>C1 domain<br>containing<br>phosphata<br>se | 0.469017  | Inlier  |
| siRNA Disorazole DMSO Run2   | NM_1983<br>16 | TENC1 | tensin like<br>C1 domain<br>containing<br>phosphata<br>se | 4.07978   | Outlier |
| siRNA-Temozolomide Run3-DMSO | NM_1392<br>43 | Tenr  | Tenr                                                      | -0.840169 | Inlier  |
| siRNA-Temozolomide Run2-DMSO | NM_1392<br>43 | Tenr  | Tenr                                                      | -0.675882 | Inlier  |
| siRNA Disorazole DMSO Run2   | NM_1392<br>43 | Tenr  | Tenr                                                      | -0.673118 | Inlier  |
| siRNA-Temozolomide Run1-DMSO | NM_1392<br>43 | Tenr  | Tenr                                                      | -0.051901 | Inlier  |
| siRNA Disorazole DMSO Run3   | NM_1392<br>43 | Tenr  | Tenr                                                      | 0.051901  | Inlier  |
| siRNA Disorazole DMSO Run1   | NM_1392<br>43 | Tenr  | Tenr                                                      | 0.553682  | Inlier  |
| siRNA-Vinblastine Run1-DMSO  | NM_1392<br>43 | Tenr  | Tenr                                                      | 1.129976  | Inlier  |
| siRNA-Vinblastine Run2-DMSO  | NM_1392<br>43 | Tenr  | Tenr                                                      | 1.161263  | Inlier  |
| siRNA-Temozolomide Run2-DMSO | NM_1982<br>55 | TERT  | telomeras<br>e reverse<br>transcripta<br>se               | -2.016808 | Inlier  |
| siRNA Disorazole DMSO Run1   | NM_1982<br>55 | TERT  | telomeras<br>e reverse<br>transcripta<br>se               | -0.566216 | Inlier  |
| siRNA-Temozolomide Run3-DMSO | NM_1982<br>55 | TERT  | telomeras<br>e reverse<br>transcripta<br>se               | -0.162226 | Inlier  |
| siRNA-Vinblastine Run2-DMSO  | NM_1982<br>55 | TERT  | telomeras<br>e reverse<br>transcripta<br>se               | -0.098156 | Inlier  |
| siRNA-Temozolomide Run1-DMSO | NM_1982<br>55 | TERT  | telomeras<br>e reverse<br>transcripta<br>se               | 0.098156  | Inlier  |
| siRNA Disorazole DMSO Run3   | NM_1982<br>55 | TERT  | telomeras<br>e reverse<br>transcripta<br>se               | 0.782784  | Inlier  |

Identification of Survival Genes in Human Glioblastoma Cells Using siRNA Screening  
 Nikhil G Thaker, Fang Zhang, Peter R. McDonald, Tong Ying Shun, Michael D Lewen, Ian F. Pollack, and John S. Lazo

Molecular Pharmacology

|                              |               |       |                                  |           |        |
|------------------------------|---------------|-------|----------------------------------|-----------|--------|
| siRNA-Vinblastine Run1-DMSO  | NM_1982<br>55 | TERT  | telomerase reverse transcriptase | 2.661583  | Inlier |
| siRNA Disorazole DMSO Run2   | NM_1982<br>55 | TERT  | telomerase reverse transcriptase | 2.779232  | Inlier |
| siRNA Disorazole DMSO Run2   | NM_0062<br>85 | TESK1 | testis-specific kinase 1         | -1.573292 | Inlier |
| siRNA-Temozolomide Run3-DMSO | NM_0062<br>85 | TESK1 | testis-specific kinase 1         | -1.05196  | Inlier |
| siRNA-Temozolomide Run2-DMSO | NM_0062<br>85 | TESK1 | testis-specific kinase 1         | -0.58178  | Inlier |
| siRNA-Temozolomide Run1-DMSO | NM_0062<br>85 | TESK1 | testis-specific kinase 1         | -0.091576 | Inlier |
| siRNA Disorazole DMSO Run1   | NM_0062<br>85 | TESK1 | testis-specific kinase 1         | 0.091576  | Inlier |
| siRNA Disorazole DMSO Run3   | NM_0062<br>85 | TESK1 | testis-specific kinase 1         | 0.613007  | Inlier |
| siRNA-Vinblastine Run1-DMSO  | NM_0062<br>85 | TESK1 | testis-specific kinase 1         | 0.735993  | Inlier |
| siRNA-Vinblastine Run2-DMSO  | NM_0062<br>85 | TESK1 | testis-specific kinase 1         | 0.957968  | Inlier |
| siRNA Disorazole DMSO Run2   | NM_0071<br>70 | TESK2 | testis-specific kinase 2         | -1.172847 | Inlier |
| siRNA-Temozolomide Run3-DMSO | NM_0071<br>70 | TESK2 | testis-specific kinase 2         | -0.861411 | Inlier |
| siRNA-Temozolomide Run2-DMSO | NM_0071<br>70 | TESK2 | testis-specific kinase 2         | -0.487589 | Inlier |
| siRNA-Temozolomide Run1-DMSO | NM_0071<br>70 | TESK2 | testis-specific kinase 2         | -0.156963 | Inlier |
| siRNA Disorazole DMSO Run3   | NM_0071<br>70 | TESK2 | testis-specific kinase 2         | 0.156963  | Inlier |
| siRNA Disorazole DMSO Run1   | NM_0071<br>70 | TESK2 | testis-specific kinase 2         | 0.220425  | Inlier |

Identification of Survival Genes in Human Glioblastoma Cells Using siRNA Screening  
 Nikhil G Thaker, Fang Zhang, Peter R. McDonald, Tong Ying Shun, Michael D Lewen, Ian F. Pollack, and John S. Lazo

|                              |               |        |                               |                 |         |
|------------------------------|---------------|--------|-------------------------------|-----------------|---------|
| Molecular Pharmacology       |               |        |                               | testis-specific |         |
| siRNA-Vinblastine Run1-DMSO  | NM_0071<br>70 | TESK2  | kinase 2                      | 1.30091         | Inlier  |
| siRNA-Vinblastine Run2-DMSO  | NM_0071<br>70 | TESK2  | kinase 2                      | 1.636305        | Inlier  |
| siRNA-Temozolomide Run3-DMSO | NM_1833<br>79 | TESSP1 | TESSP1                        | -1.739892       | Inlier  |
| siRNA Disorazole DMSO Run1   | NM_1833<br>79 | TESSP1 | TESSP1                        | -1.128069       | Inlier  |
| siRNA-Temozolomide Run2-DMSO | NM_1833<br>79 | TESSP1 | TESSP1                        | -0.920258       | Inlier  |
| siRNA-Temozolomide Run1-DMSO | NM_1833<br>79 | TESSP1 | TESSP1                        | -0.209778       | Inlier  |
| siRNA-Vinblastine Run1-DMSO  | NM_1833<br>79 | TESSP1 | TESSP1                        | 0.209778        | Inlier  |
| siRNA Disorazole DMSO Run2   | NM_1833<br>79 | TESSP1 | TESSP1                        | 0.476251        | Inlier  |
| siRNA Disorazole DMSO Run3   | NM_1833<br>79 | TESSP1 | TESSP1                        | 0.540037        | Inlier  |
| siRNA-Vinblastine Run2-DMSO  | NM_1833<br>79 | TESSP1 | TESSP1                        | 0.808963        | Inlier  |
| siRNA-Temozolomide Run3-DMSO | NM_1827<br>02 | TESSP2 | TESSP2                        | -2.726986       | Inlier  |
| siRNA Disorazole DMSO Run3   | NM_1827<br>02 | TESSP2 | TESSP2                        | -0.58409        | Inlier  |
| siRNA Disorazole DMSO Run1   | NM_1827<br>02 | TESSP2 | TESSP2                        | -0.275832       | Inlier  |
| siRNA-Temozolomide Run2-DMSO | NM_1827<br>02 | TESSP2 | TESSP2                        | -0.028223       | Inlier  |
| siRNA Disorazole DMSO Run2   | NM_1827<br>02 | TESSP2 | TESSP2                        | 0.028224        | Inlier  |
| siRNA-Temozolomide Run1-DMSO | NM_1827<br>02 | TESSP2 | TESSP2                        | 0.76491         | Inlier  |
| siRNA-Vinblastine Run2-DMSO  | NM_1827<br>02 | TESSP2 | TESSP2                        | 2.480096        | Inlier  |
| siRNA-Vinblastine Run1-DMSO  | NM_1827<br>02 | TESSP2 | TESSP2                        | 3.223058        | Inlier  |
| siRNA-Temozolomide Run3-DMSO | NM_0312<br>74 | TEX13A | testis expressed sequence 13A | -4.292866       | Outlier |
| siRNA-Temozolomide Run2-DMSO | NM_0312<br>74 | TEX13A | testis expressed sequence 13A | -3.317612       | Inlier  |

Identification of Survival Genes in Human Glioblastoma Cells Using siRNA Screening  
 Nikhil G Thaker, Fang Zhang, Peter R. McDonald, Tong Ying Shun, Michael D Lewen, Ian F. Pollack, and John S. Lazo  
 Molecular Pharmacology

|                                  |               |        |                                        |                  |
|----------------------------------|---------------|--------|----------------------------------------|------------------|
| siRNA Disorazole DMSO Run3       | NM_0312<br>74 | TEX13A | testis<br>expressed<br>sequence<br>13A | -0.579355 Inlier |
| siRNA-Temozolomide Run1-<br>DMSO | NM_0312<br>74 | TEX13A | testis<br>expressed<br>sequence<br>13A | -0.103348 Inlier |
| siRNA-Vinblastine Run2-<br>DMSO  | NM_0312<br>74 | TEX13A | testis<br>expressed<br>sequence<br>13A | 0.103348 Inlier  |
| siRNA Disorazole DMSO Run1       | NM_0312<br>74 | TEX13A | testis<br>expressed<br>sequence<br>13A | 0.522982 Inlier  |
| siRNA-Vinblastine Run1-<br>DMSO  | NM_0312<br>74 | TEX13A | testis<br>expressed<br>sequence<br>13A | 0.769645 Inlier  |
| siRNA Disorazole DMSO Run2       | NM_0312<br>74 | TEX13A | testis<br>expressed<br>sequence<br>13A | 2.475327 Inlier  |
| siRNA Disorazole DMSO Run2       | NM_0312<br>72 | TEX14  | testis<br>expressed<br>sequence<br>14  | -1.970795 Inlier |
| siRNA-Temozolomide Run1-<br>DMSO | NM_0312<br>72 | TEX14  | testis<br>expressed<br>sequence<br>14  | -0.929036 Inlier |
| siRNA-Temozolomide Run3-<br>DMSO | NM_0312<br>72 | TEX14  | testis<br>expressed<br>sequence<br>14  | -0.437624 Inlier |
| siRNA-Temozolomide Run2-<br>DMSO | NM_0312<br>72 | TEX14  | testis<br>expressed<br>sequence<br>14  | -0.029052 Inlier |



Identification of Survival Genes in Human Glioblastoma Cells Using siRNA Screening  
 Nikhil G Thaker, Fang Zhang, Peter R. McDonald, Tong Ying Shun, Michael D Lewen, Ian F. Pollack, and John S. Lazo  
 Molecular Pharmacology

|                                  |               |       |                                                                                                           |           |        |
|----------------------------------|---------------|-------|-----------------------------------------------------------------------------------------------------------|-----------|--------|
| siRNA Disorazole DMSO Run1       | NM_0312<br>72 | TEX14 | testis<br>expressed<br>sequence<br>14                                                                     | 0.029052  | Inlier |
| siRNA-Vinblastine Run1-<br>DMSO  | NM_0312<br>72 | TEX14 | testis<br>expressed<br>sequence<br>14                                                                     | 0.623196  | Inlier |
| siRNA-Vinblastine Run2-<br>DMSO  | NM_0312<br>72 | TEX14 | testis<br>expressed<br>sequence<br>14                                                                     | 0.725804  | Inlier |
| siRNA Disorazole DMSO Run3       | NM_0312<br>72 | TEX14 | testis<br>expressed<br>sequence<br>14                                                                     | 0.975139  | Inlier |
| siRNA-Temozolomide Run3-<br>DMSO | NM_0062<br>87 | TFPI  | tissue<br>factor<br>pathway<br>inhibitor<br>(lipoprotei<br>n-<br>associated<br>coagulatio<br>n inhibitor) | -0.716201 | Inlier |
| siRNA-Temozolomide Run2-<br>DMSO | NM_0062<br>87 | TFPI  | tissue<br>factor<br>pathway<br>inhibitor<br>(lipoprotei<br>n-<br>associated<br>coagulatio<br>n inhibitor) | -0.636491 | Inlier |

Identification of Survival Genes in Human Glioblastoma Cells Using siRNA Screening  
 Nikhil G Thaker, Fang Zhang, Peter R. McDonald, Tong Ying Shun, Michael D Lewen, Ian F. Pollack, and John S. Lazo  
 Molecular Pharmacology

|                              |           |      |                                                                                |           |        |
|------------------------------|-----------|------|--------------------------------------------------------------------------------|-----------|--------|
| siRNA-Temozolomide Run1-DMSO | NM_006287 | TFPI | tissue factor pathway inhibitor (lipoprotein-associated coagulation inhibitor) | -0.495977 | Inlier |
| siRNA Disorazole DMSO Run1   | NM_006287 | TFPI | tissue factor pathway inhibitor (lipoprotein-associated coagulation inhibitor) | -0.311511 | Inlier |
| siRNA Disorazole DMSO Run3   | NM_006287 | TFPI | tissue factor pathway inhibitor (lipoprotein-associated coagulation inhibitor) | 0.311511  | Inlier |
| siRNA Disorazole DMSO Run2   | NM_006287 | TFPI | tissue factor pathway inhibitor (lipoprotein-associated coagulation inhibitor) | 0.712509  | Inlier |

Identification of Survival Genes in Human Glioblastoma Cells Using siRNA Screening

Nikhil G Thaker, Fang Zhang, Peter R. McDonald, Tong Ying Shun, Michael D Lewen, Ian F. Pollack, and John S. Lazo

Molecular Pharmacology

|                              |           |       |                                                                                |           |        |
|------------------------------|-----------|-------|--------------------------------------------------------------------------------|-----------|--------|
| siRNA-Vinblastine Run2-DMSO  | NM_006287 | TFPI  | tissue factor pathway inhibitor (lipoprotein-associated coagulation inhibitor) | 1.340449  | Inlier |
| siRNA-Vinblastine Run1-DMSO  | NM_006287 | TFPI  | tissue factor pathway inhibitor (lipoprotein-associated coagulation inhibitor) | 2.281523  | Inlier |
| siRNA-Temozolomide Run3-DMSO | NM_006528 | TFPI2 | tissue factor pathway inhibitor 2                                              | -2.788916 | Inlier |
| siRNA Disorazole DMSO Run1   | NM_006528 | TFPI2 | tissue factor pathway inhibitor 2                                              | -0.859798 | Inlier |
| siRNA-Temozolomide Run2-DMSO | NM_006528 | TFPI2 | tissue factor pathway inhibitor 2                                              | -0.489202 | Inlier |
| siRNA-Temozolomide Run1-DMSO | NM_006528 | TFPI2 | tissue factor pathway inhibitor 2                                              | -0.119804 | Inlier |
| siRNA Disorazole DMSO Run2   | NM_006528 | TFPI2 | tissue factor pathway inhibitor 2                                              | 0.119804  | Inlier |
| siRNA Disorazole DMSO Run3   | NM_006528 | TFPI2 | tissue factor pathway inhibitor 2                                              | 0.365696  | Inlier |
| siRNA-Vinblastine Run1-DMSO  | NM_006528 | TFPI2 | tissue factor pathway inhibitor 2                                              | 2.317985  | Inlier |

Identification of Survival Genes in Human Glioblastoma Cells Using siRNA Screening  
 Nikhil G Thaker, Fang Zhang, Peter R. McDonald, Tong Ying Shun, Michael D Lewen, Ian F. Pollack, and John S. Lazo

Molecular Pharmacology

|                              |               |       | tissue factor pathway inhibitor 2 |                  |
|------------------------------|---------------|-------|-----------------------------------|------------------|
| siRNA-Vinblastine Run2-DMSO  | NM_0065<br>28 | TFPI2 | inhibitor 2                       | 3.002255 Inlier  |
| siRNA-Temozolomide Run2-DMSO | NM_0032<br>27 | TFR2  | transferrin receptor 2            | -0.885872 Inlier |
| siRNA-Vinblastine Run2-DMSO  | NM_0032<br>27 | TFR2  | transferrin receptor 2            | -0.799342 Inlier |
| siRNA-Temozolomide Run3-DMSO | NM_0032<br>27 | TFR2  | transferrin receptor 2            | -0.549658 Inlier |
| siRNA-Temozolomide Run1-DMSO | NM_0032<br>27 | TFR2  | transferrin receptor 2            | -0.170112 Inlier |
| siRNA Disorazole DMSO Run3   | NM_0032<br>27 | TFR2  | transferrin receptor 2            | 0.170112 Inlier  |
| siRNA Disorazole DMSO Run1   | NM_0032<br>27 | TFR2  | transferrin receptor 2            | 0.285628 Inlier  |
| siRNA Disorazole DMSO Run2   | NM_0032<br>27 | TFR2  | transferrin receptor 2            | 2.150465 Inlier  |
| siRNA-Vinblastine Run1-DMSO  | NM_0032<br>27 | TFR2  | transferrin receptor 2            | 2.757975 Inlier  |
| siRNA-Temozolomide Run2-DMSO | NM_0032<br>34 | TFRC  | transferrin receptor (p90, CD71)  | -0.688858 Inlier |
| siRNA-Vinblastine Run2-DMSO  | NM_0032<br>34 | TFRC  | transferrin receptor (p90, CD71)  | -0.668446 Inlier |
| siRNA Disorazole DMSO Run3   | NM_0032<br>34 | TFRC  | transferrin receptor (p90, CD71)  | -0.20872 Inlier  |
| siRNA-Temozolomide Run3-DMSO | NM_0032<br>34 | TFRC  | transferrin receptor (p90, CD71)  | -0.120182 Inlier |
| siRNA Disorazole DMSO Run1   | NM_0032<br>34 | TFRC  | transferrin receptor (p90, CD71)  | 0.120182 Inlier  |
| siRNA-Temozolomide Run1-DMSO | NM_0032<br>34 | TFRC  | transferrin receptor (p90, CD71)  | 0.680554 Inlier  |
| siRNA-Vinblastine Run1-DMSO  | NM_0032<br>34 | TFRC  | transferrin receptor (p90, CD71)  | 0.844524 Inlier  |
| siRNA Disorazole DMSO Run2   | NM_0032<br>34 | TFRC  | transferrin receptor (p90, CD71)  | 0.888847 Inlier  |

Identification of Survival Genes in Human Glioblastoma Cells Using siRNA Screening  
 Nikhil G Thaker, Fang Zhang, Peter R. McDonald, Tong Ying Shun, Michael D Lewen, Ian F. Pollack, and John S. Lazo

|                                  |               |      |                                            |           |        |
|----------------------------------|---------------|------|--------------------------------------------|-----------|--------|
| siRNA-Temozolomide Run3-<br>DMSO | NM_0032<br>35 | TG   | thyroglobul<br>in                          | -3.140067 | Inlier |
| siRNA-Temozolomide Run2-<br>DMSO | NM_0032<br>35 | TG   | thyroglobul<br>in                          | -2.808649 | Inlier |
| siRNA-Vinblastine Run2-<br>DMSO  | NM_0032<br>35 | TG   | thyroglobul<br>in                          | -0.580572 | Inlier |
| siRNA-Temozolomide Run1-<br>DMSO | NM_0032<br>35 | TG   | thyroglobul<br>in                          | -0.473021 | Inlier |
| siRNA Disorazole DMSO Run2       | NM_0032<br>35 | TG   | thyroglobul<br>in                          | 0.473021  | Inlier |
| siRNA Disorazole DMSO Run3       | NM_0032<br>35 | TG   | thyroglobul<br>in                          | 0.598346  | Inlier |
| siRNA Disorazole DMSO Run1       | NM_0032<br>35 | TG   | thyroglobul<br>in                          | 0.750654  | Inlier |
| siRNA-Vinblastine Run1-<br>DMSO  | NM_0032<br>35 | TG   | thyroglobul<br>in                          | 1.368822  | Inlier |
| siRNA-Temozolomide Run3-<br>DMSO | NM_0143<br>05 | TGDS | TDP-<br>glucose<br>4,6-<br>dehydrata<br>se | -1.508489 | Inlier |
| siRNA-Vinblastine Run2-<br>DMSO  | NM_0143<br>05 | TGDS | TDP-<br>glucose<br>4,6-<br>dehydrata<br>se | -0.89013  | Inlier |
| siRNA-Temozolomide Run2-<br>DMSO | NM_0143<br>05 | TGDS | TDP-<br>glucose<br>4,6-<br>dehydrata<br>se | -0.45887  | Inlier |
| siRNA Disorazole DMSO Run3       | NM_0143<br>05 | TGDS | TDP-<br>glucose<br>4,6-<br>dehydrata<br>se | -0.420315 | Inlier |
| siRNA-Temozolomide Run1-<br>DMSO | NM_0143<br>05 | TGDS | TDP-<br>glucose<br>4,6-<br>dehydrata<br>se | 0.420315  | Inlier |
| siRNA Disorazole DMSO Run1       | NM_0143<br>05 | TGDS | TDP-<br>glucose<br>4,6-<br>dehydrata<br>se | 0.446628  | Inlier |
| siRNA Disorazole DMSO Run2       | NM_0143<br>05 | TGDS | TDP-<br>glucose<br>4,6-<br>dehydrata<br>se | 0.928376  | Inlier |

Identification of Survival Genes in Human Glioblastoma Cells Using siRNA Screening  
 Nikhil G Thaker, Fang Zhang, Peter R. McDonald, Tong Ying Shun, Michael D Lewen, Ian F. Pollack, and John S. Lazo

Molecular Pharmacology

| siRNA                        | Gene      | Gene ID | Gene Name                                              | Log2 Fold Change | Category |
|------------------------------|-----------|---------|--------------------------------------------------------|------------------|----------|
| siRNA-Vinblastine Run1-DMSO  | NM_014305 | TGDS    | TDP-glucose 4,6-dehydratase                            | 1.616978         | Inlier   |
| siRNA Disorazole DMSO Run2   | NM_015927 | TGFB111 | transforming growth factor beta 1 induced transcript 1 | -3.478111        | Inlier   |
| siRNA-Temozolomide Run3-DMSO | NM_015927 | TGFB111 | transforming growth factor beta 1 induced transcript 1 | -0.831746        | Inlier   |
| siRNA-Temozolomide Run1-DMSO | NM_015927 | TGFB111 | transforming growth factor beta 1 induced transcript 1 | -0.517254        | Inlier   |
| siRNA-Temozolomide Run2-DMSO | NM_015927 | TGFB111 | transforming growth factor beta 1 induced transcript 1 | -0.066405        | Inlier   |
| siRNA Disorazole DMSO Run1   | NM_015927 | TGFB111 | transforming growth factor beta 1 induced transcript 1 | 0.066404         | Inlier   |
| siRNA Disorazole DMSO Run3   | NM_015927 | TGFB111 | transforming growth factor beta 1 induced transcript 1 | 0.170634         | Inlier   |

Identification of Survival Genes in Human Glioblastoma Cells Using siRNA Screening

Nikhil G Thaker, Fang Zhang, Peter R. McDonald, Tong Ying Shun, Michael D Lewen, Ian F. Pollack, and John S.

Lazo

Molecular Pharmacology

|                              |               |         |                                                                                             |           |        |
|------------------------------|---------------|---------|---------------------------------------------------------------------------------------------|-----------|--------|
| siRNA-Vinblastine Run1-DMSO  | NM_0159<br>27 | TGFB111 | transforming growth factor beta 1 induced transcript<br>1                                   | 1.220748  | Inlier |
| siRNA-Vinblastine Run2-DMSO  | NM_0159<br>27 | TGFB111 | transforming growth factor beta 1 induced transcript<br>1                                   | 2.96498   | Inlier |
| siRNA Disorazole DMSO Run2   | NM_0046<br>12 | TGFBR1  | transforming growth factor, beta receptor I (activin A receptor type II-like kinase, 53kDa) | -3.074316 | Inlier |
| siRNA-Temozolomide Run3-DMSO | NM_0046<br>12 | TGFBR1  | transforming growth factor, beta receptor I (activin A receptor type II-like kinase, 53kDa) | -1.039873 | Inlier |
| siRNA-Temozolomide Run2-DMSO | NM_0046<br>12 | TGFBR1  | transforming growth factor, beta receptor I (activin A receptor type II-like kinase, 53kDa) | -0.946382 | Inlier |

Identification of Survival Genes in Human Glioblastoma Cells Using siRNA Screening

Nikhil G Thaker, Fang Zhang, Peter R. McDonald, Tong Ying Shun, Michael D Lewen, Ian F. Pollack, and John S. Lazo

Molecular Pharmacology

| siRNA Treatment              | Gene ID   | Gene Name | Gene Description                                                                            | Value     | Category |
|------------------------------|-----------|-----------|---------------------------------------------------------------------------------------------|-----------|----------|
| siRNA-Vinblastine Run1-DMSO  | NM_004612 | TGFBR1    | transforming growth factor, beta receptor I (activin A receptor type II-like kinase, 53kDa) | -0.258992 | Inlier   |
| siRNA-Temozolomide Run1-DMSO | NM_004612 | TGFBR1    | transforming growth factor, beta receptor I (activin A receptor type II-like kinase, 53kDa) | 0.258992  | Inlier   |
| siRNA-Vinblastine Run2-DMSO  | NM_004612 | TGFBR1    | transforming growth factor, beta receptor I (activin A receptor type II-like kinase, 53kDa) | 0.598296  | Inlier   |
| siRNA Disorazole DMSO Run3   | NM_004612 | TGFBR1    | transforming growth factor, beta receptor I (activin A receptor type II-like kinase, 53kDa) | 0.647917  | Inlier   |
| siRNA Disorazole DMSO Run1   | NM_004612 | TGFBR1    | transforming growth factor, beta receptor I (activin A receptor type II-like kinase, 53kDa) | 0.701083  | Inlier   |



Identification of Survival Genes in Human Glioblastoma Cells Using siRNA Screening

Nikhil G Thaker, Fang Zhang, Peter R. McDonald, Tong Ying Shun, Michael D Lewen, Ian F. Pollack, and John S. Lazo

Molecular Pharmacology

|                              |               |        |                                                         |           |        |
|------------------------------|---------------|--------|---------------------------------------------------------|-----------|--------|
| siRNA Disorazole DMSO Run2   | NM_0032<br>42 | TGFBR2 | transforming growth factor, beta receptor II (70/80kDa) | -2.31992  | Inlier |
| siRNA Disorazole DMSO Run3   | NM_0032<br>42 | TGFBR2 | transforming growth factor, beta receptor II (70/80kDa) | -1.050774 | Inlier |
| siRNA-Temozolomide Run2-DMSO | NM_0032<br>42 | TGFBR2 | transforming growth factor, beta receptor II (70/80kDa) | -0.649276 | Inlier |
| siRNA-Temozolomide Run3-DMSO | NM_0032<br>42 | TGFBR2 | transforming growth factor, beta receptor II (70/80kDa) | -0.270703 | Inlier |
| siRNA-Temozolomide Run1-DMSO | NM_0032<br>42 | TGFBR2 | transforming growth factor, beta receptor II (70/80kDa) | 0.270703  | Inlier |
| siRNA-Vinblastine Run1-DMSO  | NM_0032<br>42 | TGFBR2 | transforming growth factor, beta receptor II (70/80kDa) | 0.357058  | Inlier |
| siRNA Disorazole DMSO Run1   | NM_0032<br>42 | TGFBR2 | transforming growth factor, beta receptor II (70/80kDa) | 0.699724  | Inlier |

Identification of Survival Genes in Human Glioblastoma Cells Using siRNA Screening  
 Nikhil G Thaker, Fang Zhang, Peter R. McDonald, Tong Ying Shun, Michael D Lewen, Ian F. Pollack, and John S. Lazo

Molecular Pharmacology

|                              |           |        |                                                                    |           |        |
|------------------------------|-----------|--------|--------------------------------------------------------------------|-----------|--------|
| siRNA-Vinblastine Run2-DMSO  | NM_003242 | TGFBR2 | transforming growth factor, beta receptor II (70/80kDa)            | 2.579828  | Inlier |
| siRNA-Vinblastine Run2-DMSO  | NM_003243 | TGFBR3 | transforming growth factor, beta receptor III (betaglycan, 300kDa) | -0.74609  | Inlier |
| siRNA-Temozolomide Run3-DMSO | NM_003243 | TGFBR3 | transforming growth factor, beta receptor III (betaglycan, 300kDa) | -0.602909 | Inlier |
| siRNA-Temozolomide Run2-DMSO | NM_003243 | TGFBR3 | transforming growth factor, beta receptor III (betaglycan, 300kDa) | -0.3082   | Inlier |
| siRNA Disorazole DMSO Run3   | NM_003243 | TGFBR3 | transforming growth factor, beta receptor III (betaglycan, 300kDa) | -0.094344 | Inlier |
| siRNA Disorazole DMSO Run1   | NM_003243 | TGFBR3 | transforming growth factor, beta receptor III (betaglycan, 300kDa) | 0.094344  | Inlier |

Identification of Survival Genes in Human Glioblastoma Cells Using siRNA Screening

Nikhil G Thaker, Fang Zhang, Peter R. McDonald, Tong Ying Shun, Michael D Lewen, Ian F. Pollack, and John S. Lazo

Molecular Pharmacology

|                              |           |        |                                                                                                  |           |        |
|------------------------------|-----------|--------|--------------------------------------------------------------------------------------------------|-----------|--------|
| siRNA-Vinblastine Run1-DMSO  | NM_003243 | TGFBR3 | transforming growth factor, beta receptor III (betaglycan, 300kDa)                               | 1.043392  | Inlier |
| siRNA-Temozolomide Run1-DMSO | NM_003243 | TGFBR3 | transforming growth factor, beta receptor III (betaglycan, 300kDa)                               | 1.44206   | Inlier |
| siRNA Disorazole DMSO Run2   | NM_003243 | TGFBR3 | transforming growth factor, beta receptor III (betaglycan, 300kDa)                               | 2.062469  | Inlier |
| siRNA-Temozolomide Run2-DMSO | NM_000359 | TGM1   | transglutaminase 1 (K polypeptide epidermal type I, protein-glutamine-gamma-glutamyltransferase) | -1.212927 | Inlier |

Identification of Survival Genes in Human Glioblastoma Cells Using siRNA Screening

Nikhil G Thaker, Fang Zhang, Peter R. McDonald, Tong Ying Shun, Michael D Lewen, Ian F. Pollack, and John S. Lazo

Molecular Pharmacology

|                              |               |      |                                                                                                  |           |        |
|------------------------------|---------------|------|--------------------------------------------------------------------------------------------------|-----------|--------|
| siRNA Disorazole DMSO Run1   | NM_0003<br>59 | TGM1 | transglutaminase 1 (K polypeptide epidermal type I, protein-glutamine-gamma-glutamyltransferase) | -0.726682 | Inlier |
| siRNA-Temozolomide Run1-DMSO | NM_0003<br>59 | TGM1 | transglutaminase 1 (K polypeptide epidermal type I, protein-glutamine-gamma-glutamyltransferase) | -0.622318 | Inlier |
| siRNA-Vinblastine Run2-DMSO  | NM_0003<br>59 | TGM1 | transglutaminase 1 (K polypeptide epidermal type I, protein-glutamine-gamma-glutamyltransferase) | -0.183421 | Inlier |
| siRNA-Temozolomide Run3-DMSO | NM_0003<br>59 | TGM1 | transglutaminase 1 (K polypeptide epidermal type I, protein-glutamine-gamma-glutamyltransferase) | 0.183421  | Inlier |

Identification of Survival Genes in Human Glioblastoma Cells Using siRNA Screening

Nikhil G Thaker, Fang Zhang, Peter R. McDonald, Tong Ying Shun, Michael D Lewen, Ian F. Pollack, and John S. Lazo

Molecular Pharmacology

|                             |               |      |                                                                                                  |           |        |
|-----------------------------|---------------|------|--------------------------------------------------------------------------------------------------|-----------|--------|
| siRNA Disorazole DMSO Run3  | NM_0003<br>59 | TGM1 | transglutaminase 1 (K polypeptide epidermal type I, protein-glutamine-gamma-glutamyltransferase) | 0.580791  | Inlier |
| siRNA-Vinblastine Run1-DMSO | NM_0003<br>59 | TGM1 | transglutaminase 1 (K polypeptide epidermal type I, protein-glutamine-gamma-glutamyltransferase) | 0.796682  | Inlier |
| siRNA Disorazole DMSO Run2  | NM_0003<br>59 | TGM1 | transglutaminase 1 (K polypeptide epidermal type I, protein-glutamine-gamma-glutamyltransferase) | 1.1145    | Inlier |
| siRNA-Vinblastine Run2-DMSO | NM_1989<br>51 | TGM2 | transglutaminase 2 (C polypeptide, protein-glutamine-gamma-glutamyltransferase)                  | -0.930286 | Inlier |

Identification of Survival Genes in Human Glioblastoma Cells Using siRNA Screening

Nikhil G Thaker, Fang Zhang, Peter R. McDonald, Tong Ying Shun, Michael D Lewen, Ian F. Pollack, and John S. Lazo

Molecular Pharmacology

|                              |               |      |                                                                                 |           |        |
|------------------------------|---------------|------|---------------------------------------------------------------------------------|-----------|--------|
| siRNA-Temozolomide Run3-DMSO | NM_1989<br>51 | TGM2 | transglutaminase 2 (C polypeptide, protein-glutamine-gamma-glutamyltransferase) | -0.877309 | Inlier |
| siRNA Disorazole DMSO Run1   | NM_1989<br>51 | TGM2 | transglutaminase 2 (C polypeptide, protein-glutamine-gamma-glutamyltransferase) | -0.812472 | Inlier |
| siRNA-Temozolomide Run1-DMSO | NM_1989<br>51 | TGM2 | transglutaminase 2 (C polypeptide, protein-glutamine-gamma-glutamyltransferase) | -0.105266 | Inlier |
| siRNA-Temozolomide Run2-DMSO | NM_1989<br>51 | TGM2 | transglutaminase 2 (C polypeptide, protein-glutamine-gamma-glutamyltransferase) | 0.105266  | Inlier |
| siRNA Disorazole DMSO Run2   | NM_1989<br>51 | TGM2 | transglutaminase 2 (C polypeptide, protein-glutamine-gamma-glutamyltransferase) | 0.432828  | Inlier |

Identification of Survival Genes in Human Glioblastoma Cells Using siRNA Screening

Nikhil G Thaker, Fang Zhang, Peter R. McDonald, Tong Ying Shun, Michael D Lewen, Ian F. Pollack, and John S. Lazo

Molecular Pharmacology

|                              |               |      |                                                                                 |           |        |
|------------------------------|---------------|------|---------------------------------------------------------------------------------|-----------|--------|
| siRNA Disorazole DMSO Run3   | NM_1989<br>51 | TGM2 | transglutaminase 2 (C polypeptide, protein-glutamine-gamma-glutamyltransferase) | 0.536528  | Inlier |
| siRNA-Vinblastine Run1-DMSO  | NM_1989<br>51 | TGM2 | transglutaminase 2 (C polypeptide, protein-glutamine-gamma-glutamyltransferase) | 2.239573  | Inlier |
| siRNA Disorazole DMSO Run1   | NM_0032<br>45 | TGM3 | transglutaminase 3 (E polypeptide, protein-glutamine-gamma-glutamyltransferase) | -2.781914 | Inlier |
| siRNA-Temozolomide Run2-DMSO | NM_0032<br>45 | TGM3 | transglutaminase 3 (E polypeptide, protein-glutamine-gamma-glutamyltransferase) | -1.485934 | Inlier |
| siRNA Disorazole DMSO Run3   | NM_0032<br>45 | TGM3 | transglutaminase 3 (E polypeptide, protein-glutamine-gamma-glutamyltransferase) | -0.709553 | Inlier |

Identification of Survival Genes in Human Glioblastoma Cells Using siRNA Screening

Nikhil G Thaker, Fang Zhang, Peter R. McDonald, Tong Ying Shun, Michael D Lewen, Ian F. Pollack, and John S. Lazo

Molecular Pharmacology

|                              |           |      |                                                                                 |           |        |
|------------------------------|-----------|------|---------------------------------------------------------------------------------|-----------|--------|
| siRNA-Temozolomide Run3-DMSO | NM_003245 | TGM3 | transglutaminase 3 (E polypeptide, protein-glutamine-gamma-glutamyltransferase) | -0.133229 | Inlier |
| siRNA-Vinblastine Run2-DMSO  | NM_003245 | TGM3 | transglutaminase 3 (E polypeptide, protein-glutamine-gamma-glutamyltransferase) | 0.133231  | Inlier |
| siRNA-Temozolomide Run1-DMSO | NM_003245 | TGM3 | transglutaminase 3 (E polypeptide, protein-glutamine-gamma-glutamyltransferase) | 0.144542  | Inlier |
| siRNA Disorazole DMSO Run2   | NM_003245 | TGM3 | transglutaminase 3 (E polypeptide, protein-glutamine-gamma-glutamyltransferase) | 0.639447  | Inlier |
| siRNA-Vinblastine Run1-DMSO  | NM_003245 | TGM3 | transglutaminase 3 (E polypeptide, protein-glutamine-gamma-glutamyltransferase) | 1.82419   | Inlier |



Identification of Survival Genes in Human Glioblastoma Cells Using siRNA Screening  
 Nikhil G Thaker, Fang Zhang, Peter R. McDonald, Tong Ying Shun, Michael D Lewen, Ian F. Pollack, and John S. Lazo

| Molecular Pharmacology       |               |      |                        | transgluta |        |
|------------------------------|---------------|------|------------------------|------------|--------|
| siRNA-Temozolomide Run3-DMSO | NM_0032<br>41 | TGM4 | minase 4<br>(prostate) | -0.981455  | Inlier |
| siRNA-Temozolomide Run1-DMSO | NM_0032<br>41 | TGM4 | minase 4<br>(prostate) | -0.916326  | Inlier |
| siRNA-Vinblastine Run2-DMSO  | NM_0032<br>41 | TGM4 | minase 4<br>(prostate) | -0.385147  | Inlier |
| siRNA-Temozolomide Run2-DMSO | NM_0032<br>41 | TGM4 | minase 4<br>(prostate) | -0.061342  | Inlier |
| siRNA Disorazole DMSO Run3   | NM_0032<br>41 | TGM4 | minase 4<br>(prostate) | 0.061342   | Inlier |
| siRNA Disorazole DMSO Run1   | NM_0032<br>41 | TGM4 | minase 4<br>(prostate) | 0.492138   | Inlier |
| siRNA-Vinblastine Run1-DMSO  | NM_0032<br>41 | TGM4 | minase 4<br>(prostate) | 0.856862   | Inlier |
| siRNA Disorazole DMSO Run2   | NM_0032<br>41 | TGM4 | minase 4<br>(prostate) | 1.136908   | Inlier |
| siRNA Disorazole DMSO Run3   | NM_2016<br>31 | TGM5 | minase 5               | -0.960249  | Inlier |
| siRNA Disorazole DMSO Run1   | NM_2016<br>31 | TGM5 | minase 5               | -0.695992  | Inlier |
| siRNA-Vinblastine Run2-DMSO  | NM_2016<br>31 | TGM5 | minase 5               | -0.653008  | Inlier |
| siRNA-Temozolomide Run2-DMSO | NM_2016<br>31 | TGM5 | minase 5               | -0.046496  | Inlier |
| siRNA-Temozolomide Run3-DMSO | NM_2016<br>31 | TGM5 | minase 5               | 0.046496   | Inlier |
| siRNA-Temozolomide Run1-DMSO | NM_2016<br>31 | TGM5 | minase 5               | 0.200765   | Inlier |
| siRNA Disorazole DMSO Run2   | NM_2016<br>31 | TGM5 | minase 5               | 0.969566   | Inlier |
| siRNA-Vinblastine Run1-DMSO  | NM_2016<br>31 | TGM5 | minase 5               | 1.491678   | Inlier |
| siRNA-Temozolomide Run2-DMSO | NM_1989<br>94 | TGM6 | minase 6               | -0.82284   | Inlier |
| siRNA-Vinblastine Run2-DMSO  | NM_1989<br>94 | TGM6 | minase 6               | -0.643742  | Inlier |
| siRNA Disorazole DMSO Run1   | NM_1989<br>94 | TGM6 | minase 6               | -0.282453  | Inlier |
| siRNA Disorazole DMSO Run3   | NM_1989<br>94 | TGM6 | minase 6               | -0.128221  | Inlier |
| siRNA-Temozolomide Run1-DMSO | NM_1989<br>94 | TGM6 | minase 6               | 0.128221   | Inlier |
| siRNA-Temozolomide Run3-DMSO | NM_1989<br>94 | TGM6 | minase 6               | 0.705258   | Inlier |

Identification of Survival Genes in Human Glioblastoma Cells Using siRNA Screening  
 Nikhil G Thaker, Fang Zhang, Peter R. McDonald, Tong Ying Shun, Michael D Lewen, Ian F. Pollack, and John S. Lazo

|                              |         |      |            |                  |
|------------------------------|---------|------|------------|------------------|
| Molecular Pharmacology       | NM_1989 |      | transgluta |                  |
| siRNA Disorazole DMSO Run2   | 94      | TGM6 | minase 6   | 0.715528 Inlier  |
| siRNA-Vinblastine Run1-DMSO  | NM_1989 |      | transgluta |                  |
|                              | 94      | TGM6 | minase 6   | 0.724779 Inlier  |
| siRNA-Temozolomide Run1-DMSO | NM_0529 |      | transgluta |                  |
|                              | 55      | TGM7 | minase 7   | -0.82499 Inlier  |
|                              | NM_0529 |      | transgluta |                  |
| siRNA Disorazole DMSO Run1   | 55      | TGM7 | minase 7   | -0.52401 Inlier  |
| siRNA-Temozolomide Run2-DMSO | NM_0529 |      | transgluta |                  |
|                              | 55      | TGM7 | minase 7   | -0.292334 Inlier |
| siRNA-Temozolomide Run3-DMSO | NM_0529 |      | transgluta |                  |
|                              | 55      | TGM7 | minase 7   | -0.065621 Inlier |
|                              | NM_0529 |      | transgluta |                  |
| siRNA Disorazole DMSO Run3   | 55      | TGM7 | minase 7   | 0.065621 Inlier  |
| siRNA-Vinblastine Run2-DMSO  | NM_0529 |      | transgluta |                  |
|                              | 55      | TGM7 | minase 7   | 1.243771 Inlier  |
| siRNA-Vinblastine Run1-DMSO  | NM_0529 |      | transgluta |                  |
|                              | 55      | TGM7 | minase 7   | 1.717797 Inlier  |
|                              | NM_0529 |      | transgluta |                  |
| siRNA Disorazole DMSO Run2   | 55      | TGM7 | minase 7   | 2.311254 Inlier  |
|                              |         |      | tyrosine   |                  |
| siRNA-Temozolomide Run3-DMSO | NM_1992 |      | hydroxylas |                  |
|                              | 92      | TH   | e          | -0.960769 Inlier |
|                              |         |      | tyrosine   |                  |
| siRNA-Temozolomide Run2-DMSO | NM_1992 |      | hydroxylas |                  |
|                              | 92      | TH   | e          | -0.795803 Inlier |
|                              |         |      | tyrosine   |                  |
| siRNA Disorazole DMSO Run3   | NM_1992 |      | hydroxylas |                  |
|                              | 92      | TH   | e          | -0.553197 Inlier |
|                              |         |      | tyrosine   |                  |
| siRNA-Vinblastine Run2-DMSO  | NM_1992 |      | hydroxylas |                  |
|                              | 92      | TH   | e          | -0.133121 Inlier |
|                              |         |      | tyrosine   |                  |
| siRNA-Temozolomide Run1-DMSO | NM_1992 |      | hydroxylas |                  |
|                              | 92      | TH   | e          | 0.133121 Inlier  |
|                              |         |      | tyrosine   |                  |
| siRNA Disorazole DMSO Run1   | NM_1992 |      | hydroxylas |                  |
|                              | 92      | TH   | e          | 0.151536 Inlier  |
|                              |         |      | tyrosine   |                  |
| siRNA Disorazole DMSO Run2   | NM_1992 |      | hydroxylas |                  |
|                              | 92      | TH   | e          | 2.870775 Inlier  |
|                              |         |      | tyrosine   |                  |
| siRNA-Vinblastine Run1-DMSO  | NM_1992 |      | hydroxylas |                  |
|                              | 92      | TH   | e          | 3.419546 Inlier  |
|                              |         |      | thioestera |                  |
|                              |         |      | se,        |                  |
| siRNA-Temozolomide Run3-DMSO | NM_1471 |      | adipose    |                  |
|                              | 61      | THEA | associated | -1.074289 Inlier |

Identification of Survival Genes in Human Glioblastoma Cells Using siRNA Screening  
 Nikhil G Thaker, Fang Zhang, Peter R. McDonald, Tong Ying Shun, Michael D Lewen, Ian F. Pollack, and John S. Lazo  
 Molecular Pharmacology

|                              |               |        |                                  |           |        |
|------------------------------|---------------|--------|----------------------------------|-----------|--------|
| siRNA-Temozolomide Run2-DMSO | NM_1471<br>61 | THEA   | thioesterase, adipose associated | -0.73654  | Inlier |
| siRNA-Temozolomide Run1-DMSO | NM_1471<br>61 | THEA   | thioesterase, adipose associated | -0.61246  | Inlier |
| siRNA-Vinblastine Run2-DMSO  | NM_1471<br>61 | THEA   | thioesterase, adipose associated | -0.10206  | Inlier |
| siRNA Disorazole DMSO Run3   | NM_1471<br>61 | THEA   | thioesterase, adipose associated | 0.102061  | Inlier |
| siRNA Disorazole DMSO Run1   | NM_1471<br>61 | THEA   | thioesterase, adipose associated | 0.210417  | Inlier |
| siRNA Disorazole DMSO Run2   | NM_1471<br>61 | THEA   | thioesterase, adipose associated | 0.811473  | Inlier |
| siRNA-Vinblastine Run1-DMSO  | NM_1471<br>61 | THEA   | thioesterase, adipose associated | 0.872772  | Inlier |
| siRNA-Temozolomide Run3-DMSO | NM_0183<br>24 | THEDC1 | thioesterase domain containing 1 | -1.150287 | Inlier |
| siRNA-Temozolomide Run2-DMSO | NM_0183<br>24 | THEDC1 | thioesterase domain containing 1 | -0.923836 | Inlier |
| siRNA-Vinblastine Run2-DMSO  | NM_0183<br>24 | THEDC1 | thioesterase domain containing 1 | -0.532796 | Inlier |

Identification of Survival Genes in Human Glioblastoma Cells Using siRNA Screening  
 Nikhil G Thaker, Fang Zhang, Peter R. McDonald, Tong Ying Shun, Michael D Lewen, Ian F. Pollack, and John S. Lazo  
 Molecular Pharmacology

|                              |               |        |                                      |           |        |
|------------------------------|---------------|--------|--------------------------------------|-----------|--------|
| siRNA-Temozolomide Run1-DMSO | NM_0183<br>24 | THEDC1 | thioesterase domain containing<br>1  | -0.128627 | Inlier |
| siRNA-Vinblastine Run1-DMSO  | NM_0183<br>24 | THEDC1 | thioesterase domain containing<br>1  | 0.128627  | Inlier |
| siRNA Disorazole DMSO Run3   | NM_0183<br>24 | THEDC1 | thioesterase domain containing<br>1  | 0.425801  | Inlier |
| siRNA Disorazole DMSO Run1   | NM_0183<br>24 | THEDC1 | thioesterase domain containing<br>1  | 0.816204  | Inlier |
| siRNA Disorazole DMSO Run2   | NM_0183<br>24 | THEDC1 | thioesterase domain containing<br>1  | 1.097216  | Inlier |
| siRNA-Temozolomide Run2-DMSO | NM_0184<br>73 | THEM2  | thioesterase superfamily member<br>2 | -0.868439 | Inlier |
| siRNA-Temozolomide Run3-DMSO | NM_0184<br>73 | THEM2  | thioesterase superfamily member<br>2 | -0.79286  | Inlier |
| siRNA-Vinblastine Run2-DMSO  | NM_0184<br>73 | THEM2  | thioesterase superfamily member<br>2 | -0.556139 | Inlier |
| siRNA Disorazole DMSO Run3   | NM_0184<br>73 | THEM2  | thioesterase superfamily member<br>2 | -0.011106 | Inlier |
| siRNA-Temozolomide Run1-DMSO | NM_0184<br>73 | THEM2  | thioesterase superfamily member<br>2 | 0.011106  | Inlier |

Identification of Survival Genes in Human Glioblastoma Cells Using siRNA Screening  
 Nikhil G Thaker, Fang Zhang, Peter R. McDonald, Tong Ying Shun, Michael D Lewen, Ian F. Pollack, and John S. Lazo

Molecular Pharmacology

|                              |               |       |                                                                                                   |           |        |
|------------------------------|---------------|-------|---------------------------------------------------------------------------------------------------|-----------|--------|
| siRNA Disorazole DMSO Run1   | NM_0184<br>73 | THEM2 | thioesterase superfamily member 2                                                                 | 0.392245  | Inlier |
| siRNA Disorazole DMSO Run2   | NM_0184<br>73 | THEM2 | thioesterase superfamily member 2                                                                 | 2.719115  | Inlier |
| siRNA-Vinblastine Run1-DMSO  | NM_0184<br>73 | THEM2 | thioesterase superfamily member 2                                                                 | 2.898965  | Inlier |
| siRNA-Temozolomide Run3-DMSO | NM_0032<br>49 | THOP1 | thimet oligopeptidase 1                                                                           | -1.514381 | Inlier |
| siRNA Disorazole DMSO Run2   | NM_0032<br>49 | THOP1 | thimet oligopeptidase 1                                                                           | -0.548753 | Inlier |
| siRNA-Temozolomide Run1-DMSO | NM_0032<br>49 | THOP1 | thimet oligopeptidase 1                                                                           | -0.16556  | Inlier |
| siRNA-Temozolomide Run2-DMSO | NM_0032<br>49 | THOP1 | thimet oligopeptidase 1                                                                           | -0.05957  | Inlier |
| siRNA Disorazole DMSO Run1   | NM_0032<br>49 | THOP1 | thimet oligopeptidase 1                                                                           | 0.05957   | Inlier |
| siRNA-Vinblastine Run2-DMSO  | NM_0032<br>49 | THOP1 | thimet oligopeptidase 1                                                                           | 0.800247  | Inlier |
| siRNA Disorazole DMSO Run3   | NM_0032<br>49 | THOP1 | thimet oligopeptidase 1                                                                           | 1.125408  | Inlier |
| siRNA-Vinblastine Run1-DMSO  | NM_0032<br>49 | THOP1 | thimet oligopeptidase 1                                                                           | 1.189539  | Inlier |
| siRNA Disorazole DMSO Run3   | NM_1993<br>34 | THRA  | thyroid hormone receptor, alpha (erythroblastic leukemia viral (v-erb-a) oncogene homolog, avian) | -2.283203 | Inlier |

Identification of Survival Genes in Human Glioblastoma Cells Using siRNA Screening

Nikhil G Thaker, Fang Zhang, Peter R. McDonald, Tong Ying Shun, Michael D Lewen, Ian F. Pollack, and John S. Lazo

Molecular Pharmacology

| siRNA Treatment              | Gene ID   | Gene Name | Log Fold Change | Outlier Status |
|------------------------------|-----------|-----------|-----------------|----------------|
| siRNA-Temozolomide Run3-DMSO | NM_199334 | THRA      | -1.533328       | Inlier         |
| siRNA Disorazole DMSO Run2   | NM_199334 | THRA      | -1.179418       | Inlier         |
| siRNA-Temozolomide Run2-DMSO | NM_199334 | THRA      | -0.068502       | Inlier         |
| siRNA-Temozolomide Run1-DMSO | NM_199334 | THRA      | 0.068502        | Inlier         |

thyroid hormone receptor, alpha (erythroblastic leukemia viral (v-erb-a) oncogene homolog, avian)  
 thyroid hormone receptor, alpha (erythroblastic leukemia viral (v-erb-a) oncogene homolog, avian)  
 thyroid hormone receptor, alpha (erythroblastic leukemia viral (v-erb-a) oncogene homolog, avian)  
 thyroid hormone receptor, alpha (erythroblastic leukemia viral (v-erb-a) oncogene homolog, avian)

Identification of Survival Genes in Human Glioblastoma Cells Using siRNA Screening

Nikhil G Thaker, Fang Zhang, Peter R. McDonald, Tong Ying Shun, Michael D Lewen, Ian F. Pollack, and John S. Lazo

Molecular Pharmacology

|                              |               |        |                                                                                                   |           |        |
|------------------------------|---------------|--------|---------------------------------------------------------------------------------------------------|-----------|--------|
| siRNA Disorazole DMSO Run1   | NM_1993<br>34 | THRA   | thyroid hormone receptor, alpha (erythroblastic leukemia viral (v-erb-a) oncogene homolog, avian) | 0.2289    | Inlier |
| siRNA-Vinblastine Run1-DMSO  | NM_1993<br>34 | THRA   | thyroid hormone receptor, alpha (erythroblastic leukemia viral (v-erb-a) oncogene homolog, avian) | 0.670705  | Inlier |
| siRNA-Vinblastine Run2-DMSO  | NM_1993<br>34 | THRA   | thyroid hormone receptor, alpha (erythroblastic leukemia viral (v-erb-a) oncogene homolog, avian) | 0.678295  | Inlier |
| siRNA-Temozolomide Run3-DMSO | NM_0051<br>21 | THRAP1 | thyroid hormone receptor associated protein 1                                                     | -0.970501 | Inlier |
| siRNA-Vinblastine Run1-DMSO  | NM_0051<br>21 | THRAP1 | thyroid hormone receptor associated protein 1                                                     | -0.378499 | Inlier |

Identification of Survival Genes in Human Glioblastoma Cells Using siRNA Screening  
 Nikhil G Thaker, Fang Zhang, Peter R. McDonald, Tong Ying Shun, Michael D Lewen, Ian F. Pollack, and John S. Lazo  
 Molecular Pharmacology

|                              |               |        |                                               |           |         |
|------------------------------|---------------|--------|-----------------------------------------------|-----------|---------|
| siRNA-Temozolomide Run2-DMSO | NM_0051<br>21 | THRAP1 | thyroid hormone receptor associated protein 1 | -0.347069 | Inlier  |
| siRNA-Temozolomide Run1-DMSO | NM_0051<br>21 | THRAP1 | thyroid hormone receptor associated protein 1 | -0.012554 | Inlier  |
| siRNA Disorazole DMSO Run1   | NM_0051<br>21 | THRAP1 | thyroid hormone receptor associated protein 1 | 0.012554  | Inlier  |
| siRNA-Vinblastine Run2-DMSO  | NM_0051<br>21 | THRAP1 | thyroid hormone receptor associated protein 1 | 2.463004  | Inlier  |
| siRNA Disorazole DMSO Run2   | NM_0051<br>21 | THRAP1 | thyroid hormone receptor associated protein 1 | 2.702627  | Inlier  |
| siRNA Disorazole DMSO Run3   | NM_0051<br>21 | THRAP1 | thyroid hormone receptor associated protein 1 | 8.926672  | Outlier |
| siRNA-Temozolomide Run3-DMSO | NM_0051<br>19 | THRAP3 | thyroid hormone receptor associated protein 3 | -2.613507 | Inlier  |
| siRNA-Temozolomide Run1-DMSO | NM_0051<br>19 | THRAP3 | thyroid hormone receptor associated protein 3 | -1.424904 | Inlier  |



Identification of Survival Genes in Human Glioblastoma Cells Using siRNA Screening  
 Nikhil G Thaker, Fang Zhang, Peter R. McDonald, Tong Ying Shun, Michael D Lewen, Ian F. Pollack, and John S. Lazo  
 Molecular Pharmacology

|                              |               |        |                                               |           |        |
|------------------------------|---------------|--------|-----------------------------------------------|-----------|--------|
| siRNA-Temozolomide Run2-DMSO | NM_0051<br>19 | THRAP3 | thyroid hormone receptor associated protein 3 | -0.75042  | Inlier |
| siRNA Disorazole DMSO Run1   | NM_0051<br>19 | THRAP3 | thyroid hormone receptor associated protein 3 | -0.171827 | Inlier |
| siRNA Disorazole DMSO Run2   | NM_0051<br>19 | THRAP3 | thyroid hormone receptor associated protein 3 | 0.171828  | Inlier |
| siRNA-Vinblastine Run2-DMSO  | NM_0051<br>19 | THRAP3 | thyroid hormone receptor associated protein 3 | 0.524654  | Inlier |
| siRNA-Vinblastine Run1-DMSO  | NM_0051<br>19 | THRAP3 | thyroid hormone receptor associated protein 3 | 0.59858   | Inlier |
| siRNA Disorazole DMSO Run3   | NM_0051<br>19 | THRAP3 | thyroid hormone receptor associated protein 3 | 1.082918  | Inlier |
| siRNA-Temozolomide Run3-DMSO | NM_0148<br>15 | THRAP4 | thyroid hormone receptor associated protein 4 | -1.459618 | Inlier |
| siRNA-Temozolomide Run1-DMSO | NM_0148<br>15 | THRAP4 | thyroid hormone receptor associated protein 4 | -1.165182 | Inlier |

Identification of Survival Genes in Human Glioblastoma Cells Using siRNA Screening  
 Nikhil G Thaker, Fang Zhang, Peter R. McDonald, Tong Ying Shun, Michael D Lewen, Ian F. Pollack, and John S. Lazo  
 Molecular Pharmacology

|                              |               |        |                                               |           |        |
|------------------------------|---------------|--------|-----------------------------------------------|-----------|--------|
| siRNA Disorazole DMSO Run2   | NM_0148<br>15 | THRAP4 | thyroid hormone receptor associated protein 4 | -0.921185 | Inlier |
| siRNA-Temozolomide Run2-DMSO | NM_0148<br>15 | THRAP4 | thyroid hormone receptor associated protein 4 | -0.146489 | Inlier |
| siRNA Disorazole DMSO Run3   | NM_0148<br>15 | THRAP4 | thyroid hormone receptor associated protein 4 | 0.146489  | Inlier |
| siRNA-Vinblastine Run1-DMSO  | NM_0148<br>15 | THRAP4 | thyroid hormone receptor associated protein 4 | 0.381381  | Inlier |
| siRNA Disorazole DMSO Run1   | NM_0148<br>15 | THRAP4 | thyroid hormone receptor associated protein 4 | 0.427815  | Inlier |
| siRNA-Vinblastine Run2-DMSO  | NM_0148<br>15 | THRAP4 | thyroid hormone receptor associated protein 4 | 1.812373  | Inlier |
| siRNA-Temozolomide Run3-DMSO | NM_0054<br>81 | THRAP5 | thyroid hormone receptor associated protein 5 | -3.343704 | Inlier |
| siRNA-Temozolomide Run2-DMSO | NM_0054<br>81 | THRAP5 | thyroid hormone receptor associated protein 5 | -0.750363 | Inlier |

Identification of Survival Genes in Human Glioblastoma Cells Using siRNA Screening  
 Nikhil G Thaker, Fang Zhang, Peter R. McDonald, Tong Ying Shun, Michael D Lewen, Ian F. Pollack, and John S. Lazo  
 Molecular Pharmacology

|                              |               |        |                                               |           |        |
|------------------------------|---------------|--------|-----------------------------------------------|-----------|--------|
| siRNA-Temozolomide Run1-DMSO | NM_0054<br>81 | THRAP5 | thyroid hormone receptor associated protein 5 | -0.598637 | Inlier |
| siRNA Disorazole DMSO Run1   | NM_0054<br>81 | THRAP5 | thyroid hormone receptor associated protein 5 | -0.074703 | Inlier |
| siRNA Disorazole DMSO Run2   | NM_0054<br>81 | THRAP5 | thyroid hormone receptor associated protein 5 | 0.074704  | Inlier |
| siRNA-Vinblastine Run1-DMSO  | NM_0054<br>81 | THRAP5 | thyroid hormone receptor associated protein 5 | 0.153963  | Inlier |
| siRNA-Vinblastine Run2-DMSO  | NM_0054<br>81 | THRAP5 | thyroid hormone receptor associated protein 5 | 1.107807  | Inlier |
| siRNA Disorazole DMSO Run3   | NM_0054<br>81 | THRAP5 | thyroid hormone receptor associated protein 5 | 1.381682  | Inlier |
| siRNA-Temozolomide Run3-DMSO | NM_0806<br>51 | THRAP6 | thyroid hormone receptor associated protein 6 | -1.967093 | Inlier |
| siRNA Disorazole DMSO Run1   | NM_0806<br>51 | THRAP6 | thyroid hormone receptor associated protein 6 | -0.787086 | Inlier |

Identification of Survival Genes in Human Glioblastoma Cells Using siRNA Screening

Nikhil G Thaker, Fang Zhang, Peter R. McDonald, Tong Ying Shun, Michael D Lewen, Ian F. Pollack, and John S. Lazo

Molecular Pharmacology

|                              |               |        |                                                                                                    |           |         |
|------------------------------|---------------|--------|----------------------------------------------------------------------------------------------------|-----------|---------|
| siRNA-Temozolomide Run1-DMSO | NM_0806<br>51 | THRAP6 | thyroid hormone receptor associated protein 6                                                      | -0.561914 | Inlier  |
| siRNA-Temozolomide Run2-DMSO | NM_0806<br>51 | THRAP6 | thyroid hormone receptor associated protein 6                                                      | -0.167989 | Inlier  |
| siRNA Disorazole DMSO Run2   | NM_0806<br>51 | THRAP6 | thyroid hormone receptor associated protein 6                                                      | 0.167989  | Inlier  |
| siRNA Disorazole DMSO Run3   | NM_0806<br>51 | THRAP6 | thyroid hormone receptor associated protein 6                                                      | 0.433216  | Inlier  |
| siRNA-Vinblastine Run1-DMSO  | NM_0806<br>51 | THRAP6 | thyroid hormone receptor associated protein 6                                                      | 1.014865  | Inlier  |
| siRNA-Vinblastine Run2-DMSO  | NM_0806<br>51 | THRAP6 | thyroid hormone receptor associated protein 6                                                      | 1.41958   | Inlier  |
| siRNA Disorazole DMSO Run2   | NM_0004<br>61 | THRAB  | thyroid hormone receptor, beta (erythroblastic leukemia viral (v-erb-a) oncogene homolog 2, avian) | -3.958238 | Outlier |

Identification of Survival Genes in Human Glioblastoma Cells Using siRNA Screening

Nikhil G Thaker, Fang Zhang, Peter R. McDonald, Tong Ying Shun, Michael D Lewen, Ian F. Pollack, and John S.

Lazo

Molecular Pharmacology

| siRNA Treatment              | Gene ID   | Gene Name | Log Fold Change | Outlier Status |
|------------------------------|-----------|-----------|-----------------|----------------|
| siRNA-Temozolomide Run3-DMSO | NM_000461 | THRB      | -1.437697       | Inlier         |
| siRNA-Temozolomide Run2-DMSO | NM_000461 | THRB      | -0.646369       | Inlier         |
| siRNA Disorazole DMSO Run1   | NM_000461 | THRB      | -0.149387       | Inlier         |
| siRNA-Vinblastine Run1-DMSO  | NM_000461 | THRB      | 0.149387        | Inlier         |

thyroid hormone receptor, beta (erythroblastic leukemia viral (v-erb-a) oncogene homolog 2, avian)

thyroid hormone receptor, beta (erythroblastic leukemia viral (v-erb-a) oncogene homolog 2, avian)

Identification of Survival Genes in Human Glioblastoma Cells Using siRNA Screening  
 Nikhil G Thaker, Fang Zhang, Peter R. McDonald, Tong Ying Shun, Michael D Lewen, Ian F. Pollack, and John S. Lazo

Molecular Pharmacology

| siRNA Treatment              | Gene ID   | Gene Name | Gene Description                                                                                   | Value     | Category |
|------------------------------|-----------|-----------|----------------------------------------------------------------------------------------------------|-----------|----------|
| siRNA-Temozolomide Run1-DMSO | NM_000461 | THRB      | thyroid hormone receptor, beta (erythroblastic leukemia viral (v-erb-a) oncogene homolog 2, avian) | 0.176586  | Inlier   |
| siRNA-Vinblastine Run2-DMSO  | NM_000461 | THRB      | thyroid hormone receptor, beta (erythroblastic leukemia viral (v-erb-a) oncogene homolog 2, avian) | 0.702631  | Inlier   |
| siRNA Disorazole DMSO Run3   | NM_000461 | THRB      | thyroid hormone receptor, beta (erythroblastic leukemia viral (v-erb-a) oncogene homolog 2, avian) | 3.542902  | Outlier  |
| siRNA-Vinblastine Run2-DMSO  | NM_025264 | THUMPD2   | THUMP domain containing 2                                                                          | -1.094836 | Inlier   |
| siRNA-Temozolomide Run3-DMSO | NM_025264 | THUMPD2   | THUMP domain containing 2                                                                          | -0.979963 | Inlier   |
| siRNA Disorazole DMSO Run3   | NM_025264 | THUMPD2   | THUMP domain containing 2                                                                          | -0.521762 | Inlier   |
| siRNA-Temozolomide Run2-DMSO | NM_025264 | THUMPD2   | THUMP domain containing 2                                                                          | -0.201699 | Inlier   |

Identification of Survival Genes in Human Glioblastoma Cells Using siRNA Screening  
 Nikhil G Thaker, Fang Zhang, Peter R. McDonald, Tong Ying Shun, Michael D Lewen, Ian F. Pollack, and John S. Lazo

Molecular Pharmacology

| siRNA Treatment              | Gene    | Gene ID       | Gene Description                             | Score     | Category |
|------------------------------|---------|---------------|----------------------------------------------|-----------|----------|
| siRNA Disorazole DMSO Run1   | THUMPD2 | NM_0252<br>64 | THUMP domain containing<br>2                 | 0.201699  | Inlier   |
| siRNA Disorazole DMSO Run2   | THUMPD2 | NM_0252<br>64 | THUMP domain containing<br>2                 | 0.301448  | Inlier   |
| siRNA-Temozolomide Run1-DMSO | THUMPD2 | NM_0252<br>64 | THUMP domain containing<br>2                 | 0.827238  | Inlier   |
| siRNA-Vinblastine Run1-DMSO  | THUMPD2 | NM_0252<br>64 | THUMP domain containing<br>2                 | 0.909372  | Inlier   |
| siRNA Disorazole DMSO Run3   | TIAM1   | NM_0032<br>53 | T-cell lymphoma invasion and metastasis<br>1 | -1.303339 | Inlier   |
| siRNA-Temozolomide Run2-DMSO | TIAM1   | NM_0032<br>53 | T-cell lymphoma invasion and metastasis<br>1 | -1.056096 | Inlier   |
| siRNA-Temozolomide Run1-DMSO | TIAM1   | NM_0032<br>53 | T-cell lymphoma invasion and metastasis<br>1 | -0.292904 | Inlier   |
| siRNA-Temozolomide Run3-DMSO | TIAM1   | NM_0032<br>53 | T-cell lymphoma invasion and metastasis<br>1 | -0.041105 | Inlier   |
| siRNA-Vinblastine Run2-DMSO  | TIAM1   | NM_0032<br>53 | T-cell lymphoma invasion and metastasis<br>1 | 0.041101  | Inlier   |
| siRNA Disorazole DMSO Run1   | TIAM1   | NM_0032<br>53 | T-cell lymphoma invasion and metastasis<br>1 | 0.127184  | Inlier   |

Identification of Survival Genes in Human Glioblastoma Cells Using siRNA Screening  
 Nikhil G Thaker, Fang Zhang, Peter R. McDonald, Tong Ying Shun, Michael D Lewen, Ian F. Pollack, and John S. Lazo

Molecular Pharmacology

|                              |               |       |                                                                 |           |         |
|------------------------------|---------------|-------|-----------------------------------------------------------------|-----------|---------|
| siRNA-Vinblastine Run1-DMSO  | NM_0032<br>53 | TIAM1 | T-cell lymphoma invasion and metastasis 1                       | 5.161466  | Outlier |
| siRNA Disorazole DMSO Run2   | NM_0032<br>53 | TIAM1 | T-cell lymphoma invasion and metastasis 1                       | 7.857607  | Outlier |
| siRNA Disorazole DMSO Run2   | NM_0054<br>24 | TIE   | tyrosine kinase with immunoglobulin-like and EGF-like domains 1 | -2.904732 | Inlier  |
| siRNA Disorazole DMSO Run3   | NM_0054<br>24 | TIE   | tyrosine kinase with immunoglobulin-like and EGF-like domains 1 | -1.054168 | Inlier  |
| siRNA Disorazole DMSO Run1   | NM_0054<br>24 | TIE   | tyrosine kinase with immunoglobulin-like and EGF-like domains 1 | -0.44472  | Inlier  |
| siRNA-Temozolomide Run2-DMSO | NM_0054<br>24 | TIE   | tyrosine kinase with immunoglobulin-like and EGF-like domains 1 | -0.101934 | Inlier  |



Identification of Survival Genes in Human Glioblastoma Cells Using siRNA Screening  
 Nikhil G Thaker, Fang Zhang, Peter R. McDonald, Tong Ying Shun, Michael D Lewen, Ian F. Pollack, and John S. Lazo  
 Molecular Pharmacology

|                              |           |      |                                                                 |           |        |
|------------------------------|-----------|------|-----------------------------------------------------------------|-----------|--------|
| siRNA-Temozolomide Run1-DMSO | NM_005424 | TIE  | tyrosine kinase with immunoglobulin-like and EGF-like domains 1 | 0.101935  | Inlier |
| siRNA-Temozolomide Run3-DMSO | NM_005424 | TIE  | tyrosine kinase with immunoglobulin-like and EGF-like domains 1 | 0.667759  | Inlier |
| siRNA-Vinblastine Run1-DMSO  | NM_005424 | TIE  | tyrosine kinase with immunoglobulin-like and EGF-like domains 1 | 0.681241  | Inlier |
| siRNA-Vinblastine Run2-DMSO  | NM_005424 | TIE  | tyrosine kinase with immunoglobulin-like and EGF-like domains 1 | 0.987267  | Inlier |
| siRNA-Temozolomide Run3-DMSO | NM_015905 | TIF1 | transcriptional intermediary factor 1                           | -1.211624 | Inlier |
| siRNA Disorazole DMSO Run2   | NM_015905 | TIF1 | transcriptional intermediary factor 1                           | -0.810421 | Inlier |
| siRNA-Temozolomide Run1-DMSO | NM_015905 | TIF1 | transcriptional intermediary factor 1                           | -0.453192 | Inlier |

Identification of Survival Genes in Human Glioblastoma Cells Using siRNA Screening  
 Nikhil G Thaker, Fang Zhang, Peter R. McDonald, Tong Ying Shun, Michael D Lewen, Ian F. Pollack, and John S. Lazo  
 Molecular Pharmacology

|                              |           |        |                                                                |           |        |
|------------------------------|-----------|--------|----------------------------------------------------------------|-----------|--------|
| siRNA-Temozolomide Run2-DMSO | NM_015905 | TIF1   | transcriptional intermediary factor 1                          | -0.132658 | Inlier |
| siRNA Disorazole DMSO Run3   | NM_015905 | TIF1   | transcriptional intermediary factor 1                          | 0.132658  | Inlier |
| siRNA Disorazole DMSO Run1   | NM_015905 | TIF1   | transcriptional intermediary factor 1                          | 0.538579  | Inlier |
| siRNA-Vinblastine Run2-DMSO  | NM_015905 | TIF1   | transcriptional intermediary factor 1                          | 1.266855  | Inlier |
| siRNA-Vinblastine Run1-DMSO  | NM_015905 | TIF1   | transcriptional intermediary factor 1                          | 1.378453  | Inlier |
| siRNA-Temozolomide Run3-DMSO | NM_012456 | TIMM10 | translocase of inner mitochondrial membrane 10 homolog (yeast) | -2.059689 | Inlier |
| siRNA-Temozolomide Run2-DMSO | NM_012456 | TIMM10 | translocase of inner mitochondrial membrane 10 homolog (yeast) | -0.721868 | Inlier |
| siRNA-Temozolomide Run1-DMSO | NM_012456 | TIMM10 | translocase of inner mitochondrial membrane 10 homolog (yeast) | -0.627132 | Inlier |

Identification of Survival Genes in Human Glioblastoma Cells Using siRNA Screening

Nikhil G Thaker, Fang Zhang, Peter R. McDonald, Tong Ying Shun, Michael D Lewen, Ian F. Pollack, and John S. Lazo

Molecular Pharmacology

|                             |               |        |                                                                |           |        |
|-----------------------------|---------------|--------|----------------------------------------------------------------|-----------|--------|
| siRNA-Vinblastine Run2-DMSO | NM_0124<br>56 | TIMM10 | translocase of inner mitochondrial membrane 10 homolog (yeast) | -0.150907 | Inlier |
| siRNA Disorazole DMSO Run3  | NM_0124<br>56 | TIMM10 | translocase of inner mitochondrial membrane 10 homolog (yeast) | 0.150906  | Inlier |
| siRNA Disorazole DMSO Run1  | NM_0124<br>56 | TIMM10 | translocase of inner mitochondrial membrane 10 homolog (yeast) | 0.578692  | Inlier |
| siRNA-Vinblastine Run1-DMSO | NM_0124<br>56 | TIMM10 | translocase of inner mitochondrial membrane 10 homolog (yeast) | 2.709084  | Inlier |
| siRNA Disorazole DMSO Run2  | NM_0124<br>56 | TIMM10 | translocase of inner mitochondrial membrane 10 homolog (yeast) | 3.43017   | Inlier |

Identification of Survival Genes in Human Glioblastoma Cells Using siRNA Screening

Nikhil G Thaker, Fang Zhang, Peter R. McDonald, Tong Ying Shun, Michael D Lewen, Ian F. Pollack, and John S. Lazo

Molecular Pharmacology

|                              |           |        |                                                                |           |        |
|------------------------------|-----------|--------|----------------------------------------------------------------|-----------|--------|
| siRNA-Temozolomide Run3-DMSO | NM_012458 | TIMM13 | translocase of inner mitochondrial membrane 13 homolog (yeast) | -1.431793 | Inlier |
| siRNA Disorazole DMSO Run2   | NM_012458 | TIMM13 | translocase of inner mitochondrial membrane 13 homolog (yeast) | -1.283433 | Inlier |
| siRNA-Temozolomide Run2-DMSO | NM_012458 | TIMM13 | translocase of inner mitochondrial membrane 13 homolog (yeast) | -0.591093 | Inlier |
| siRNA Disorazole DMSO Run3   | NM_012458 | TIMM13 | translocase of inner mitochondrial membrane 13 homolog (yeast) | -0.214602 | Inlier |
| siRNA-Temozolomide Run1-DMSO | NM_012458 | TIMM13 | translocase of inner mitochondrial membrane 13 homolog (yeast) | 0.214602  | Inlier |

Identification of Survival Genes in Human Glioblastoma Cells Using siRNA Screening

Nikhil G Thaker, Fang Zhang, Peter R. McDonald, Tong Ying Shun, Michael D Lewen, Ian F. Pollack, and John S.

Lazo

Molecular Pharmacology

|                                  |               |        |                                                                                       |           |        |
|----------------------------------|---------------|--------|---------------------------------------------------------------------------------------|-----------|--------|
| siRNA Disorazole DMSO Run1       | NM_0124<br>58 | TIMM13 | translocas<br>e of inner<br>mitochond<br>rial<br>membrane<br>13<br>homolog<br>(yeast) | 0.250009  | Inlier |
| siRNA-Vinblastine Run1-<br>DMSO  | NM_0124<br>58 | TIMM13 | translocas<br>e of inner<br>mitochond<br>rial<br>membrane<br>13<br>homolog<br>(yeast) | 0.757907  | Inlier |
| siRNA-Vinblastine Run2-<br>DMSO  | NM_0124<br>58 | TIMM13 | translocas<br>e of inner<br>mitochond<br>rial<br>membrane<br>13<br>homolog<br>(yeast) | 0.827478  | Inlier |
| siRNA-Temozolomide Run2-<br>DMSO | NM_0063<br>27 | TIMM23 | translocas<br>e of inner<br>mitochond<br>rial<br>membrane<br>23<br>homolog<br>(yeast) | -1.313134 | Inlier |
| siRNA-Temozolomide Run1-<br>DMSO | NM_0063<br>27 | TIMM23 | translocas<br>e of inner<br>mitochond<br>rial<br>membrane<br>23<br>homolog<br>(yeast) | -0.730498 | Inlier |

Identification of Survival Genes in Human Glioblastoma Cells Using siRNA Screening

Nikhil G Thaker, Fang Zhang, Peter R. McDonald, Tong Ying Shun, Michael D Lewen, Ian F. Pollack, and John S. Lazo

Molecular Pharmacology

|                              |               |        |                                                                |           |        |
|------------------------------|---------------|--------|----------------------------------------------------------------|-----------|--------|
| siRNA-Vinblastine Run2-DMSO  | NM_0063<br>27 | TIMM23 | translocase of inner mitochondrial membrane 23 homolog (yeast) | -0.350751 | Inlier |
| siRNA-Temozolomide Run3-DMSO | NM_0063<br>27 | TIMM23 | translocase of inner mitochondrial membrane 23 homolog (yeast) | -0.260962 | Inlier |
| siRNA Disorazole DMSO Run3   | NM_0063<br>27 | TIMM23 | translocase of inner mitochondrial membrane 23 homolog (yeast) | 0.260963  | Inlier |
| siRNA Disorazole DMSO Run1   | NM_0063<br>27 | TIMM23 | translocase of inner mitochondrial membrane 23 homolog (yeast) | 0.618502  | Inlier |
| siRNA-Vinblastine Run1-DMSO  | NM_0063<br>27 | TIMM23 | translocase of inner mitochondrial membrane 23 homolog (yeast) | 1.646217  | Inlier |

Identification of Survival Genes in Human Glioblastoma Cells Using siRNA Screening  
 Nikhil G Thaker, Fang Zhang, Peter R. McDonald, Tong Ying Shun, Michael D Lewen, Ian F. Pollack, and John S. Lazo  
 Molecular Pharmacology

|                                  |               |        |                                                                                       |           |        |
|----------------------------------|---------------|--------|---------------------------------------------------------------------------------------|-----------|--------|
| siRNA Disorazole DMSO Run2       | NM_0063<br>27 | TIMM23 | translocas<br>e of inner<br>mitochond<br>rial<br>membrane<br>23<br>homolog<br>(yeast) | 2.873011  | Inlier |
| siRNA Disorazole DMSO Run2       | NM_0040<br>85 | TIMM8A | translocas<br>e of inner<br>mitochond<br>rial<br>membrane<br>8 homolog<br>A (yeast)   | -1.817454 | Inlier |
| siRNA-Temozolomide Run3-<br>DMSO | NM_0040<br>85 | TIMM8A | translocas<br>e of inner<br>mitochond<br>rial<br>membrane<br>8 homolog<br>A (yeast)   | -1.703096 | Inlier |
| siRNA-Temozolomide Run2-<br>DMSO | NM_0040<br>85 | TIMM8A | translocas<br>e of inner<br>mitochond<br>rial<br>membrane<br>8 homolog<br>A (yeast)   | -0.334403 | Inlier |
| siRNA-Temozolomide Run1-<br>DMSO | NM_0040<br>85 | TIMM8A | translocas<br>e of inner<br>mitochond<br>rial<br>membrane<br>8 homolog<br>A (yeast)   | -0.188514 | Inlier |

Identification of Survival Genes in Human Glioblastoma Cells Using siRNA Screening  
 Nikhil G Thaker, Fang Zhang, Peter R. McDonald, Tong Ying Shun, Michael D Lewen, Ian F. Pollack, and John S. Lazo  
 Molecular Pharmacology

|                                  |               |        |                                                                                     |                  |
|----------------------------------|---------------|--------|-------------------------------------------------------------------------------------|------------------|
| siRNA Disorazole DMSO Run1       | NM_0040<br>85 | TIMM8A | translocas<br>e of inner<br>mitochond<br>rial<br>membrane<br>8 homolog<br>A (yeast) | 0.188515 Inlier  |
| siRNA-Vinblastine Run2-<br>DMSO  | NM_0040<br>85 | TIMM8A | translocas<br>e of inner<br>mitochond<br>rial<br>membrane<br>8 homolog<br>A (yeast) | 0.614105 Inlier  |
| siRNA Disorazole DMSO Run3       | NM_0040<br>85 | TIMM8A | translocas<br>e of inner<br>mitochond<br>rial<br>membrane<br>8 homolog<br>A (yeast) | 0.734895 Inlier  |
| siRNA-Vinblastine Run1-<br>DMSO  | NM_0040<br>85 | TIMM8A | translocas<br>e of inner<br>mitochond<br>rial<br>membrane<br>8 homolog<br>A (yeast) | 1.332673 Inlier  |
| siRNA-Temozolomide Run3-<br>DMSO | NM_0124<br>59 | TIMM8B | translocas<br>e of inner<br>mitochond<br>rial<br>membrane<br>8 homolog<br>B (yeast) | -1.678228 Inlier |



Identification of Survival Genes in Human Glioblastoma Cells Using siRNA Screening

Nikhil G Thaker, Fang Zhang, Peter R. McDonald, Tong Ying Shun, Michael D Lewen, Ian F. Pollack, and John S. Lazo

Molecular Pharmacology

|                                  |               |        |                                                                                     |           |        |
|----------------------------------|---------------|--------|-------------------------------------------------------------------------------------|-----------|--------|
| siRNA Disorazole DMSO Run3       | NM_0124<br>59 | TIMM8B | translocas<br>e of inner<br>mitochond<br>rial<br>membrane<br>8 homolog<br>B (yeast) | -1.301907 | Inlier |
| siRNA-Temozolomide Run2-<br>DMSO | NM_0124<br>59 | TIMM8B | translocas<br>e of inner<br>mitochond<br>rial<br>membrane<br>8 homolog<br>B (yeast) | -0.801737 | Inlier |
| siRNA Disorazole DMSO Run1       | NM_0124<br>59 | TIMM8B | translocas<br>e of inner<br>mitochond<br>rial<br>membrane<br>8 homolog<br>B (yeast) | -0.06139  | Inlier |
| siRNA Disorazole DMSO Run2       | NM_0124<br>59 | TIMM8B | translocas<br>e of inner<br>mitochond<br>rial<br>membrane<br>8 homolog<br>B (yeast) | 0.061389  | Inlier |
| siRNA-Temozolomide Run1-<br>DMSO | NM_0124<br>59 | TIMM8B | translocas<br>e of inner<br>mitochond<br>rial<br>membrane<br>8 homolog<br>B (yeast) | 0.111569  | Inlier |

Identification of Survival Genes in Human Glioblastoma Cells Using siRNA Screening  
 Nikhil G Thaker, Fang Zhang, Peter R. McDonald, Tong Ying Shun, Michael D Lewen, Ian F. Pollack, and John S. Lazo  
 Molecular Pharmacology

|                              |           |        |                                                                 |           |        |
|------------------------------|-----------|--------|-----------------------------------------------------------------|-----------|--------|
| siRNA-Vinblastine Run1-DMSO  | NM_012459 | TIMM8B | translocase of inner mitochondrial membrane 8 homolog B (yeast) | 0.547263  | Inlier |
| siRNA-Vinblastine Run2-DMSO  | NM_012459 | TIMM8B | translocase of inner mitochondrial membrane 8 homolog B (yeast) | 1.071597  | Inlier |
| siRNA-Temozolomide Run2-DMSO | NM_012460 | TIMM9  | translocase of inner mitochondrial membrane 9 homolog (yeast)   | -1.492182 | Inlier |
| siRNA-Vinblastine Run2-DMSO  | NM_012460 | TIMM9  | translocase of inner mitochondrial membrane 9 homolog (yeast)   | -0.686706 | Inlier |
| siRNA-Temozolomide Run1-DMSO | NM_012460 | TIMM9  | translocase of inner mitochondrial membrane 9 homolog (yeast)   | -0.662294 | Inlier |

Identification of Survival Genes in Human Glioblastoma Cells Using siRNA Screening  
 Nikhil G Thaker, Fang Zhang, Peter R. McDonald, Tong Ying Shun, Michael D Lewen, Ian F. Pollack, and John S. Lazo  
 Molecular Pharmacology

|                                  |               |       |                                                                                   |           |        |
|----------------------------------|---------------|-------|-----------------------------------------------------------------------------------|-----------|--------|
| siRNA Disorazole DMSO Run3       | NM_0124<br>60 | TIMM9 | translocas<br>e of inner<br>mitochond<br>rial<br>membrane<br>9 homolog<br>(yeast) | -0.318086 | Inlier |
| siRNA Disorazole DMSO Run1       | NM_0124<br>60 | TIMM9 | translocas<br>e of inner<br>mitochond<br>rial<br>membrane<br>9 homolog<br>(yeast) | 0.318087  | Inlier |
| siRNA-Temozolomide Run3-<br>DMSO | NM_0124<br>60 | TIMM9 | translocas<br>e of inner<br>mitochond<br>rial<br>membrane<br>9 homolog<br>(yeast) | 0.548353  | Inlier |
| siRNA-Vinblastine Run1-<br>DMSO  | NM_0124<br>60 | TIMM9 | translocas<br>e of inner<br>mitochond<br>rial<br>membrane<br>9 homolog<br>(yeast) | 1.317461  | Inlier |
| siRNA Disorazole DMSO Run2       | NM_0124<br>60 | TIMM9 | translocas<br>e of inner<br>mitochond<br>rial<br>membrane<br>9 homolog<br>(yeast) | 1.74342   | Inlier |

Identification of Survival Genes in Human Glioblastoma Cells Using siRNA Screening

Nikhil G Thaker, Fang Zhang, Peter R. McDonald, Tong Ying Shun, Michael D Lewen, Ian F. Pollack, and John S. Lazo

Molecular Pharmacology

|                              |               |       |                                                                                                  |           |        |
|------------------------------|---------------|-------|--------------------------------------------------------------------------------------------------|-----------|--------|
| siRNA-Temozolomide Run3-DMSO | NM_0032<br>54 | TIMP1 | tissue inhibitor of metalloproteinase 1 (erythroid potentiating activity, collagenase inhibitor) | -1.917361 | Inlier |
|------------------------------|---------------|-------|--------------------------------------------------------------------------------------------------|-----------|--------|

|                              |               |       |                                                                                                  |           |        |
|------------------------------|---------------|-------|--------------------------------------------------------------------------------------------------|-----------|--------|
| siRNA-Temozolomide Run1-DMSO | NM_0032<br>54 | TIMP1 | tissue inhibitor of metalloproteinase 1 (erythroid potentiating activity, collagenase inhibitor) | -0.591261 | Inlier |
|------------------------------|---------------|-------|--------------------------------------------------------------------------------------------------|-----------|--------|

|                              |               |       |                                                                                                  |           |        |
|------------------------------|---------------|-------|--------------------------------------------------------------------------------------------------|-----------|--------|
| siRNA-Temozolomide Run2-DMSO | NM_0032<br>54 | TIMP1 | tissue inhibitor of metalloproteinase 1 (erythroid potentiating activity, collagenase inhibitor) | -0.435819 | Inlier |
|------------------------------|---------------|-------|--------------------------------------------------------------------------------------------------|-----------|--------|

|                            |               |       |                                                                                                  |           |        |
|----------------------------|---------------|-------|--------------------------------------------------------------------------------------------------|-----------|--------|
| siRNA Disorazole DMSO Run3 | NM_0032<br>54 | TIMP1 | tissue inhibitor of metalloproteinase 1 (erythroid potentiating activity, collagenase inhibitor) | -0.411625 | Inlier |
|----------------------------|---------------|-------|--------------------------------------------------------------------------------------------------|-----------|--------|

Identification of Survival Genes in Human Glioblastoma Cells Using siRNA Screening

Nikhil G Thaker, Fang Zhang, Peter R. McDonald, Tong Ying Shun, Michael D Lewen, Ian F. Pollack, and John S. Lazo

Molecular Pharmacology

|                             |               |       |                                                                                                  |          |        |
|-----------------------------|---------------|-------|--------------------------------------------------------------------------------------------------|----------|--------|
| siRNA Disorazole DMSO Run1  | NM_0032<br>54 | TIMP1 | tissue inhibitor of metalloproteinase 1 (erythroid potentiating activity, collagenase inhibitor) | 0.411625 | Inlier |
| siRNA-Vinblastine Run1-DMSO | NM_0032<br>54 | TIMP1 | tissue inhibitor of metalloproteinase 1 (erythroid potentiating activity, collagenase inhibitor) | 0.757739 | Inlier |
| siRNA-Vinblastine Run2-DMSO | NM_0032<br>54 | TIMP1 | tissue inhibitor of metalloproteinase 1 (erythroid potentiating activity, collagenase inhibitor) | 0.846433 | Inlier |
| siRNA Disorazole DMSO Run2  | NM_0032<br>54 | TIMP1 | tissue inhibitor of metalloproteinase 1 (erythroid potentiating activity, collagenase inhibitor) | 1.466429 | Inlier |

Identification of Survival Genes in Human Glioblastoma Cells Using siRNA Screening

Nikhil G Thaker, Fang Zhang, Peter R. McDonald, Tong Ying Shun, Michael D Lewen, Ian F. Pollack, and John S. Lazo

Molecular Pharmacology

|                              |               |       |                                                                                       |           |        |
|------------------------------|---------------|-------|---------------------------------------------------------------------------------------|-----------|--------|
| siRNA-Temozolomide Run1-DMSO | NM_0032<br>55 | TIMP2 | tissue inhibitor of metalloproteinase 2                                               | -1.639654 | Inlier |
| siRNA-Temozolomide Run3-DMSO | NM_0032<br>55 | TIMP2 | tissue inhibitor of metalloproteinase 2                                               | -0.863376 | Inlier |
| siRNA-Temozolomide Run2-DMSO | NM_0032<br>55 | TIMP2 | tissue inhibitor of metalloproteinase 2                                               | -0.632378 | Inlier |
| siRNA Disorazole DMSO Run2   | NM_0032<br>55 | TIMP2 | tissue inhibitor of metalloproteinase 2                                               | -0.02744  | Inlier |
| siRNA Disorazole DMSO Run1   | NM_0032<br>55 | TIMP2 | tissue inhibitor of metalloproteinase 2                                               | 0.027439  | Inlier |
| siRNA Disorazole DMSO Run3   | NM_0032<br>55 | TIMP2 | tissue inhibitor of metalloproteinase 2                                               | 0.449306  | Inlier |
| siRNA-Vinblastine Run2-DMSO  | NM_0032<br>55 | TIMP2 | tissue inhibitor of metalloproteinase 2                                               | 0.716622  | Inlier |
| siRNA-Vinblastine Run1-DMSO  | NM_0032<br>55 | TIMP2 | tissue inhibitor of metalloproteinase 2                                               | 1.106729  | Inlier |
| siRNA-Temozolomide Run3-DMSO | NM_0003<br>62 | TIMP3 | tissue inhibitor of metalloproteinase 3 (Sorsby fundus dystrophy, pseudoinflammatory) | -1.842115 | Inlier |

Identification of Survival Genes in Human Glioblastoma Cells Using siRNA Screening

Nikhil G Thaker, Fang Zhang, Peter R. McDonald, Tong Ying Shun, Michael D Lewen, Ian F. Pollack, and John S. Lazo

Molecular Pharmacology

|                              |           |       |                                                                                        |           |        |
|------------------------------|-----------|-------|----------------------------------------------------------------------------------------|-----------|--------|
| siRNA-Vinblastine Run2-DMSO  | NM_000362 | TIMP3 | tissue inhibitor of metalloproteinase 3 (Sorsby fundus dystrophy, pseudo-inflammatory) | -0.97758  | Inlier |
| siRNA Disorazole DMSO Run3   | NM_000362 | TIMP3 | tissue inhibitor of metalloproteinase 3 (Sorsby fundus dystrophy, pseudo-inflammatory) | -0.753242 | Inlier |
| siRNA-Temozolomide Run2-DMSO | NM_000362 | TIMP3 | tissue inhibitor of metalloproteinase 3 (Sorsby fundus dystrophy, pseudo-inflammatory) | -0.320301 | Inlier |
| siRNA Disorazole DMSO Run1   | NM_000362 | TIMP3 | tissue inhibitor of metalloproteinase 3 (Sorsby fundus dystrophy, pseudo-inflammatory) | 0.320301  | Inlier |

Identification of Survival Genes in Human Glioblastoma Cells Using siRNA Screening

Nikhil G Thaker, Fang Zhang, Peter R. McDonald, Tong Ying Shun, Michael D Lewen, Ian F. Pollack, and John S. Lazo

Molecular Pharmacology

|                              |           |       |                                                                                       |           |        |
|------------------------------|-----------|-------|---------------------------------------------------------------------------------------|-----------|--------|
| siRNA-Temozolomide Run1-DMSO | NM_000362 | TIMP3 | tissue inhibitor of metalloproteinase 3 (Sorsby fundus dystrophy, pseudoinflammatory) | 0.400158  | Inlier |
| siRNA Disorazole DMSO Run2   | NM_000362 | TIMP3 | tissue inhibitor of metalloproteinase 3 (Sorsby fundus dystrophy, pseudoinflammatory) | 0.595758  | Inlier |
| siRNA-Vinblastine Run1-DMSO  | NM_000362 | TIMP3 | tissue inhibitor of metalloproteinase 3 (Sorsby fundus dystrophy, pseudoinflammatory) | 1.152777  | Inlier |
| siRNA-Temozolomide Run2-DMSO | NM_000356 | TIMP4 | tissue inhibitor of metalloproteinase 4                                               | -2.15195  | Inlier |
| siRNA-Temozolomide Run3-DMSO | NM_000356 | TIMP4 | tissue inhibitor of metalloproteinase 4                                               | -1.943682 | Inlier |
| siRNA-Temozolomide Run1-DMSO | NM_000356 | TIMP4 | tissue inhibitor of metalloproteinase 4                                               | -0.726505 | Inlier |



Identification of Survival Genes in Human Glioblastoma Cells Using siRNA Screening  
 Nikhil G Thaker, Fang Zhang, Peter R. McDonald, Tong Ying Shun, Michael D Lewen, Ian F. Pollack, and John S. Lazo  
 Molecular Pharmacology

|                              |               |       |                                         |           |        |
|------------------------------|---------------|-------|-----------------------------------------|-----------|--------|
| siRNA Disorazole DMSO Run3   | NM_0032<br>56 | TIMP4 | tissue inhibitor of metalloproteinase 4 | -0.201468 | Inlier |
| siRNA Disorazole DMSO Run2   | NM_0032<br>56 | TIMP4 | tissue inhibitor of metalloproteinase 4 | 0.201467  | Inlier |
| siRNA Disorazole DMSO Run1   | NM_0032<br>56 | TIMP4 | tissue inhibitor of metalloproteinase 4 | 0.241399  | Inlier |
| siRNA-Vinblastine Run2-DMSO  | NM_0032<br>56 | TIMP4 | tissue inhibitor of metalloproteinase 4 | 0.639743  | Inlier |
| siRNA-Vinblastine Run1-DMSO  | NM_0032<br>56 | TIMP4 | tissue inhibitor of metalloproteinase 4 | 0.709257  | Inlier |
| siRNA-Temozolomide Run3-DMSO | NM_0144<br>64 | TINAG | tubulointerstitial nephritis antigen    | -2.281285 | Inlier |
| siRNA-Temozolomide Run2-DMSO | NM_0144<br>64 | TINAG | tubulointerstitial nephritis antigen    | -0.690289 | Inlier |
| siRNA Disorazole DMSO Run1   | NM_0144<br>64 | TINAG | tubulointerstitial nephritis antigen    | -0.658711 | Inlier |
| siRNA-Temozolomide Run1-DMSO | NM_0144<br>64 | TINAG | tubulointerstitial nephritis antigen    | -0.529623 | Inlier |
| siRNA-Vinblastine Run1-DMSO  | NM_0144<br>64 | TINAG | tubulointerstitial nephritis antigen    | 0.529624  | Inlier |
| siRNA Disorazole DMSO Run2   | NM_0144<br>64 | TINAG | tubulointerstitial nephritis antigen    | 0.561598  | Inlier |

Identification of Survival Genes in Human Glioblastoma Cells Using siRNA Screening  
 Nikhil G Thaker, Fang Zhang, Peter R. McDonald, Tong Ying Shun, Michael D Lewen, Ian F. Pollack, and John S. Lazo

Molecular Pharmacology

|                              |               |       |                                      |           |         |
|------------------------------|---------------|-------|--------------------------------------|-----------|---------|
| siRNA-Vinblastine Run2-DMSO  | NM_0144<br>64 | TINAG | tubulointerstitial nephritis antigen | 1.334431  | Inlier  |
| siRNA Disorazole DMSO Run3   | NM_0144<br>64 | TINAG | tubulointerstitial nephritis antigen | 5.259692  | Outlier |
| siRNA-Temozolomide Run3-DMSO | NM_0032<br>58 | TK1   | thymidine kinase 1, soluble          | -0.875741 | Inlier  |
| siRNA-Temozolomide Run2-DMSO | NM_0032<br>58 | TK1   | thymidine kinase 1, soluble          | -0.473259 | Inlier  |
| siRNA-Temozolomide Run1-DMSO | NM_0032<br>58 | TK1   | thymidine kinase 1, soluble          | -0.32824  | Inlier  |
| siRNA Disorazole DMSO Run1   | NM_0032<br>58 | TK1   | thymidine kinase 1, soluble          | -0.116161 | Inlier  |
| siRNA Disorazole DMSO Run3   | NM_0032<br>58 | TK1   | thymidine kinase 1, soluble          | 0.116161  | Inlier  |
| siRNA-Vinblastine Run2-DMSO  | NM_0032<br>58 | TK1   | thymidine kinase 1, soluble          | 0.961549  | Inlier  |
| siRNA Disorazole DMSO Run2   | NM_0032<br>58 | TK1   | thymidine kinase 1, soluble          | 1.308253  | Inlier  |
| siRNA-Vinblastine Run1-DMSO  | NM_0032<br>58 | TK1   | thymidine kinase 1, soluble          | 1.364197  | Inlier  |
| siRNA Disorazole DMSO Run2   | NM_0046<br>14 | TK2   | thymidine kinase 2, mitochondrial    | -1.649757 | Inlier  |
| siRNA-Temozolomide Run3-DMSO | NM_0046<br>14 | TK2   | thymidine kinase 2, mitochondrial    | -1.164647 | Inlier  |
| siRNA-Temozolomide Run2-DMSO | NM_0046<br>14 | TK2   | thymidine kinase 2, mitochondrial    | -0.160553 | Inlier  |
| siRNA-Vinblastine Run1-DMSO  | NM_0046<br>14 | TK2   | thymidine kinase 2, mitochondrial    | -0.028982 | Inlier  |
| siRNA Disorazole DMSO Run1   | NM_0046<br>14 | TK2   | thymidine kinase 2, mitochondrial    | 0.028982  | Inlier  |

Identification of Survival Genes in Human Glioblastoma Cells Using siRNA Screening

Nikhil G Thaker, Fang Zhang, Peter R. McDonald, Tong Ying Shun, Michael D Lewen, Ian F. Pollack, and John S. Lazo

Molecular Pharmacology

|                              |               |     |                                             |           |        |
|------------------------------|---------------|-----|---------------------------------------------|-----------|--------|
| siRNA-Temozolomide Run1-DMSO | NM_0046<br>14 | TK2 | thymidine kinase 2, mitochondrial           | 0.184353  | Inlier |
| siRNA-Vinblastine Run2-DMSO  | NM_0046<br>14 | TK2 | thymidine kinase 2, mitochondrial           | 1.248337  | Inlier |
| siRNA Disorazole DMSO Run3   | NM_0046<br>14 | TK2 | thymidine kinase 2, mitochondrial           | 1.467398  | Inlier |
| siRNA-Temozolomide Run2-DMSO | NM_0010<br>64 | TKT | transketolase (Wernicke-Korsakoff syndrome) | -1.791075 | Inlier |
| siRNA Disorazole DMSO Run1   | NM_0010<br>64 | TKT | transketolase (Wernicke-Korsakoff syndrome) | -0.813029 | Inlier |
| siRNA-Vinblastine Run2-DMSO  | NM_0010<br>64 | TKT | transketolase (Wernicke-Korsakoff syndrome) | -0.535971 | Inlier |
| siRNA-Temozolomide Run3-DMSO | NM_0010<br>64 | TKT | transketolase (Wernicke-Korsakoff syndrome) | -0.113277 | Inlier |
| siRNA Disorazole DMSO Run3   | NM_0010<br>64 | TKT | transketolase (Wernicke-Korsakoff syndrome) | 0.113276  | Inlier |
| siRNA-Temozolomide Run1-DMSO | NM_0010<br>64 | TKT | transketolase (Wernicke-Korsakoff syndrome) | 0.389257  | Inlier |

Identification of Survival Genes in Human Glioblastoma Cells Using siRNA Screening  
 Nikhil G Thaker, Fang Zhang, Peter R. McDonald, Tong Ying Shun, Michael D Lewen, Ian F. Pollack, and John S. Lazo  
 Molecular Pharmacology

|                              |               |       |                                                |           |        |
|------------------------------|---------------|-------|------------------------------------------------|-----------|--------|
| siRNA Disorazole DMSO Run2   | NM_0010<br>64 | TKT   | transketolase<br>(Wernicke-Korsakoff syndrome) | 1.749194  | Inlier |
| siRNA-Vinblastine Run1-DMSO  | NM_0010<br>64 | TKT   | transketolase<br>(Wernicke-Korsakoff syndrome) | 2.192265  | Inlier |
| siRNA-Temozolomide Run2-DMSO | NM_0122<br>53 | TKTL1 | transketolase-like 1                           | -0.831439 | Inlier |
| siRNA-Temozolomide Run1-DMSO | NM_0122<br>53 | TKTL1 | transketolase-like 1                           | -0.661558 | Inlier |
| siRNA-Temozolomide Run3-DMSO | NM_0122<br>53 | TKTL1 | transketolase-like 1                           | -0.439269 | Inlier |
| siRNA Disorazole DMSO Run1   | NM_0122<br>53 | TKTL1 | transketolase-like 1                           | -0.218966 | Inlier |
| siRNA Disorazole DMSO Run3   | NM_0122<br>53 | TKTL1 | transketolase-like 1                           | 0.218966  | Inlier |
| siRNA-Vinblastine Run1-DMSO  | NM_0122<br>53 | TKTL1 | transketolase-like 1                           | 0.687442  | Inlier |
| siRNA-Vinblastine Run2-DMSO  | NM_0122<br>53 | TKTL1 | transketolase-like 1                           | 1.353429  | Inlier |
| siRNA Disorazole DMSO Run2   | NM_0122<br>53 | TKTL1 | transketolase-like 1                           | 2.589977  | Inlier |
| siRNA-Temozolomide Run3-DMSO | NM_0122<br>90 | TLK1  | tousled-like kinase 1                          | -1.488164 | Inlier |
| siRNA-Temozolomide Run2-DMSO | NM_0122<br>90 | TLK1  | tousled-like kinase 1                          | -0.711812 | Inlier |
| siRNA Disorazole DMSO Run2   | NM_0122<br>90 | TLK1  | tousled-like kinase 1                          | -0.496668 | Inlier |
| siRNA-Temozolomide Run1-DMSO | NM_0122<br>90 | TLK1  | tousled-like kinase 1                          | -0.219535 | Inlier |
| siRNA Disorazole DMSO Run1   | NM_0122<br>90 | TLK1  | tousled-like kinase 1                          | 0.219535  | Inlier |
| siRNA-Vinblastine Run1-DMSO  | NM_0122<br>90 | TLK1  | tousled-like kinase 1                          | 0.637188  | Inlier |
| siRNA-Vinblastine Run2-DMSO  | NM_0122<br>90 | TLK1  | tousled-like kinase 1                          | 1.012629  | Inlier |
| siRNA Disorazole DMSO Run3   | NM_0122<br>90 | TLK1  | tousled-like kinase 1                          | 1.561913  | Inlier |

Identification of Survival Genes in Human Glioblastoma Cells Using siRNA Screening  
 Nikhil G Thaker, Fang Zhang, Peter R. McDonald, Tong Ying Shun, Michael D Lewen, Ian F. Pollack, and John S. Lazo

Molecular Pharmacology

|                              |         |      |                     |           |        |
|------------------------------|---------|------|---------------------|-----------|--------|
|                              | NM_0068 |      | tousled-like kinase |           |        |
| siRNA Disorazole DMSO Run2   | 52      | TLK2 | 2                   | -1.917215 | Inlier |
|                              | NM_0068 |      | tousled-like kinase |           |        |
| siRNA-Temozolomide Run3-DMSO | 52      | TLK2 | 2                   | -1.717672 | Inlier |
|                              | NM_0068 |      | tousled-like kinase |           |        |
| siRNA Disorazole DMSO Run3   | 52      | TLK2 | 2                   | -0.35274  | Inlier |
|                              | NM_0068 |      | tousled-like kinase |           |        |
| siRNA Disorazole DMSO Run1   | 52      | TLK2 | 2                   | -0.008139 | Inlier |
|                              | NM_0068 |      | tousled-like kinase |           |        |
| siRNA-Temozolomide Run2-DMSO | 52      | TLK2 | 2                   | 0.00814   | Inlier |
|                              | NM_0068 |      | tousled-like kinase |           |        |
| siRNA-Temozolomide Run1-DMSO | 52      | TLK2 | 2                   | 0.283668  | Inlier |
|                              | NM_0068 |      | tousled-like kinase |           |        |
| siRNA-Vinblastine Run1-DMSO  | 52      | TLK2 | 2                   | 0.99626   | Inlier |
|                              | NM_0068 |      | tousled-like kinase |           |        |
| siRNA-Vinblastine Run2-DMSO  | 52      | TLK2 | 2                   | 1.371823  | Inlier |
|                              | NM_0124 |      | tolloid-like        |           |        |
| siRNA-Temozolomide Run3-DMSO | 64      | TLL1 | 1                   | -1.683888 | Inlier |
|                              | NM_0124 |      | tolloid-like        |           |        |
| siRNA Disorazole DMSO Run2   | 64      | TLL1 | 1                   | -0.637392 | Inlier |
|                              | NM_0124 |      | tolloid-like        |           |        |
| siRNA-Temozolomide Run1-DMSO | 64      | TLL1 | 1                   | -0.32749  | Inlier |
|                              | NM_0124 |      | tolloid-like        |           |        |
| siRNA-Temozolomide Run2-DMSO | 64      | TLL1 | 1                   | -0.230307 | Inlier |
|                              | NM_0124 |      | tolloid-like        |           |        |
| siRNA Disorazole DMSO Run3   | 64      | TLL1 | 1                   | 0.230307  | Inlier |
|                              | NM_0124 |      | tolloid-like        |           |        |
| siRNA Disorazole DMSO Run1   | 64      | TLL1 | 1                   | 0.711608  | Inlier |
|                              | NM_0124 |      | tolloid-like        |           |        |
| siRNA-Vinblastine Run2-DMSO  | 64      | TLL1 | 1                   | 0.816728  | Inlier |
|                              | NM_0124 |      | tolloid-like        |           |        |
| siRNA-Vinblastine Run1-DMSO  | 64      | TLL1 | 1                   | 1.085735  | Inlier |
|                              | NM_0124 |      | tolloid-like        |           |        |
| siRNA-Temozolomide Run3-DMSO | 65      | TLL2 | 2                   | -2.886652 | Inlier |
|                              | NM_0124 |      | tolloid-like        |           |        |
| siRNA-Temozolomide Run2-DMSO | 65      | TLL2 | 2                   | -1.502281 | Inlier |
|                              | NM_0124 |      | tolloid-like        |           |        |
| siRNA Disorazole DMSO Run2   | 65      | TLL2 | 2                   | -0.399377 | Inlier |
|                              | NM_0124 |      | tolloid-like        |           |        |
| siRNA Disorazole DMSO Run1   | 65      | TLL2 | 2                   | -0.05518  | Inlier |
|                              | NM_0124 |      | tolloid-like        |           |        |
| siRNA Disorazole DMSO Run3   | 65      | TLL2 | 2                   | 0.05518   | Inlier |
|                              | NM_0124 |      | tolloid-like        |           |        |
| siRNA-Temozolomide Run1-DMSO | 65      | TLL2 | 2                   | 0.241828  | Inlier |

Identification of Survival Genes in Human Glioblastoma Cells Using siRNA Screening

Nikhil G Thaker, Fang Zhang, Peter R. McDonald, Tong Ying Shun, Michael D Lewen, Ian F. Pollack, and John S.

Lazo

|                              |               |       |                                                          |           |        |
|------------------------------|---------------|-------|----------------------------------------------------------|-----------|--------|
| siRNA-Vinblastine Run2-DMSO  | NM_0124<br>65 | TLL2  | tolloid-like<br>2                                        | 0.949623  | Inlier |
| siRNA-Vinblastine Run1-DMSO  | NM_0124<br>65 | TLL2  | tolloid-like<br>2                                        | 1.163689  | Inlier |
| siRNA-Temozolomide Run3-DMSO | NM_0159<br>13 | TLP19 | thioredoxin domain containing 12 (endoplasmic reticulum) | -0.938728 | Inlier |
| siRNA-Vinblastine Run2-DMSO  | NM_0159<br>13 | TLP19 | thioredoxin domain containing 12 (endoplasmic reticulum) | -0.616651 | Inlier |
| siRNA Disorazole DMSO Run1   | NM_0159<br>13 | TLP19 | thioredoxin domain containing 12 (endoplasmic reticulum) | -0.56568  | Inlier |
| siRNA Disorazole DMSO Run3   | NM_0159<br>13 | TLP19 | thioredoxin domain containing 12 (endoplasmic reticulum) | -0.333058 | Inlier |
| siRNA-Temozolomide Run2-DMSO | NM_0159<br>13 | TLP19 | thioredoxin domain containing 12 (endoplasmic reticulum) | 0.333058  | Inlier |
| siRNA-Temozolomide Run1-DMSO | NM_0159<br>13 | TLP19 | thioredoxin domain containing 12 (endoplasmic reticulum) | 0.732349  | Inlier |

Identification of Survival Genes in Human Glioblastoma Cells Using siRNA Screening  
 Nikhil G Thaker, Fang Zhang, Peter R. McDonald, Tong Ying Shun, Michael D Lewen, Ian F. Pollack, and John S. Lazo

Molecular Pharmacology

|                              |               |       |                                                          |           |        |
|------------------------------|---------------|-------|----------------------------------------------------------|-----------|--------|
| siRNA-Vinblastine Run1-DMSO  | NM_0159<br>13 | TLP19 | thioredoxin domain containing 12 (endoplasmic reticulum) | 1.616338  | Inlier |
| siRNA Disorazole DMSO Run2   | NM_0159<br>13 | TLP19 | thioredoxin domain containing 12 (endoplasmic reticulum) | 2.035999  | Inlier |
| siRNA-Vinblastine Run2-DMSO  | NM_0032<br>63 | TLR1  | toll-like receptor 1                                     | -0.772649 | Inlier |
| siRNA Disorazole DMSO Run1   | NM_0032<br>63 | TLR1  | toll-like receptor 1                                     | -0.576351 | Inlier |
| siRNA Disorazole DMSO Run3   | NM_0032<br>63 | TLR1  | toll-like receptor 1                                     | -0.475019 | Inlier |
| siRNA-Temozolomide Run2-DMSO | NM_0032<br>63 | TLR1  | toll-like receptor 1                                     | -0.233489 | Inlier |
| siRNA-Temozolomide Run3-DMSO | NM_0032<br>63 | TLR1  | toll-like receptor 1                                     | 0.233489  | Inlier |
| siRNA Disorazole DMSO Run2   | NM_0032<br>63 | TLR1  | toll-like receptor 1                                     | 1.313933  | Inlier |
| siRNA-Temozolomide Run1-DMSO | NM_0032<br>63 | TLR1  | toll-like receptor 1                                     | 1.583823  | Inlier |
| siRNA-Vinblastine Run1-DMSO  | NM_0032<br>63 | TLR1  | toll-like receptor 1                                     | 1.828368  | Inlier |
| siRNA-Vinblastine Run2-DMSO  | NM_0309<br>56 | TLR10 | toll-like receptor 10                                    | -1.102233 | Inlier |
| siRNA-Temozolomide Run3-DMSO | NM_0309<br>56 | TLR10 | toll-like receptor 10                                    | -0.391709 | Inlier |
| siRNA Disorazole DMSO Run3   | NM_0309<br>56 | TLR10 | toll-like receptor 10                                    | -0.256013 | Inlier |
| siRNA-Temozolomide Run2-DMSO | NM_0309<br>56 | TLR10 | toll-like receptor 10                                    | -0.165658 | Inlier |
| siRNA Disorazole DMSO Run1   | NM_0309<br>56 | TLR10 | toll-like receptor 10                                    | 0.165658  | Inlier |
| siRNA-Temozolomide Run1-DMSO | NM_0309<br>56 | TLR10 | toll-like receptor 10                                    | 0.957291  | Inlier |
| siRNA-Vinblastine Run1-DMSO  | NM_0309<br>56 | TLR10 | toll-like receptor 10                                    | 1.147813  | Inlier |

Identification of Survival Genes in Human Glioblastoma Cells Using siRNA Screening  
 Nikhil G Thaker, Fang Zhang, Peter R. McDonald, Tong Ying Shun, Michael D Lewen, Ian F. Pollack, and John S. Lazo

Molecular Pharmacology

|                              |               |       |                      |                  |
|------------------------------|---------------|-------|----------------------|------------------|
|                              | NM_0309       |       | toll-like receptor   |                  |
| siRNA Disorazole DMSO Run2   | 56            | TLR10 | 10                   | 1.933628 Inlier  |
| siRNA-Temozolomide Run3-DMSO | NM_0032<br>64 | TLR2  | toll-like receptor 2 | -0.704926 Inlier |
| siRNA Disorazole DMSO Run1   | NM_0032<br>64 | TLR2  | toll-like receptor 2 | -0.644074 Inlier |
| siRNA-Vinblastine Run2-DMSO  | NM_0032<br>64 | TLR2  | toll-like receptor 2 | -0.205251 Inlier |
| siRNA Disorazole DMSO Run3   | NM_0032<br>64 | TLR2  | toll-like receptor 2 | -0.188839 Inlier |
| siRNA-Temozolomide Run1-DMSO | NM_0032<br>64 | TLR2  | toll-like receptor 2 | 0.188838 Inlier  |
| siRNA-Temozolomide Run2-DMSO | NM_0032<br>64 | TLR2  | toll-like receptor 2 | 2.137319 Inlier  |
| siRNA Disorazole DMSO Run2   | NM_0032<br>64 | TLR2  | toll-like receptor 2 | 5.642161 Outlier |
| siRNA-Vinblastine Run1-DMSO  | NM_0032<br>64 | TLR2  | toll-like receptor 2 | 8.37928 Outlier  |
| siRNA-Vinblastine Run2-DMSO  | NM_0032<br>65 | TLR3  | toll-like receptor 3 | -0.825453 Inlier |
| siRNA Disorazole DMSO Run3   | NM_0032<br>65 | TLR3  | toll-like receptor 3 | -0.80502 Inlier  |
| siRNA Disorazole DMSO Run1   | NM_0032<br>65 | TLR3  | toll-like receptor 3 | -0.230199 Inlier |
| siRNA-Temozolomide Run2-DMSO | NM_0032<br>65 | TLR3  | toll-like receptor 3 | -0.072551 Inlier |
| siRNA-Temozolomide Run3-DMSO | NM_0032<br>65 | TLR3  | toll-like receptor 3 | 0.072551 Inlier  |
| siRNA-Temozolomide Run1-DMSO | NM_0032<br>65 | TLR3  | toll-like receptor 3 | 0.54398 Inlier   |
| siRNA-Vinblastine Run1-DMSO  | NM_0032<br>65 | TLR3  | toll-like receptor 3 | 2.991558 Inlier  |
| siRNA Disorazole DMSO Run2   | NM_0032<br>65 | TLR3  | toll-like receptor 3 | 4.047384 Outlier |
| siRNA-Temozolomide Run2-DMSO | NM_1385<br>57 | TLR4  | toll-like receptor 4 | -0.865652 Inlier |
| siRNA-Vinblastine Run2-DMSO  | NM_1385<br>57 | TLR4  | toll-like receptor 4 | -0.483348 Inlier |
| siRNA Disorazole DMSO Run1   | NM_1385<br>57 | TLR4  | toll-like receptor 4 | -0.310788 Inlier |
| siRNA Disorazole DMSO Run3   | NM_1385<br>57 | TLR4  | toll-like receptor 4 | -0.017522 Inlier |
| siRNA-Temozolomide Run3-DMSO | NM_1385<br>57 | TLR4  | toll-like receptor 4 | 0.017522 Inlier  |
| siRNA-Temozolomide Run1-DMSO | NM_1385<br>57 | TLR4  | toll-like receptor 4 | 0.889381 Inlier  |
| siRNA Disorazole DMSO Run2   | NM_1385<br>57 | TLR4  | toll-like receptor 4 | 4.835945 Outlier |
| siRNA-Vinblastine Run1-DMSO  | NM_1385<br>57 | TLR4  | toll-like receptor 4 | 5.724826 Outlier |



Identification of Survival Genes in Human Glioblastoma Cells Using siRNA Screening  
 Nikhil G Thaker, Fang Zhang, Peter R. McDonald, Tong Ying Shun, Michael D Lewen, Ian F. Pollack, and John S. Lazo

|                                  |               |      |                         |           |        |
|----------------------------------|---------------|------|-------------------------|-----------|--------|
| siRNA-Vinblastine Run2-<br>DMSO  | NM_0032<br>68 | TLR5 | toll-like<br>receptor 5 | -2.488439 | Inlier |
|                                  | NM_0032<br>68 | TLR5 | toll-like<br>receptor 5 | -0.645138 | Inlier |
| siRNA Disorazole DMSO Run3       | NM_0032<br>68 | TLR5 | toll-like<br>receptor 5 | -0.440189 | Inlier |
| siRNA Disorazole DMSO Run1       | NM_0032<br>68 | TLR5 | toll-like<br>receptor 5 | -0.078138 | Inlier |
| siRNA-Temozolomide Run2-<br>DMSO | NM_0032<br>68 | TLR5 | toll-like<br>receptor 5 | 0.078138  | Inlier |
| siRNA-Temozolomide Run3-<br>DMSO | NM_0032<br>68 | TLR5 | toll-like<br>receptor 5 | 0.703862  | Inlier |
| siRNA-Temozolomide Run1-<br>DMSO | NM_0032<br>68 | TLR5 | toll-like<br>receptor 5 | 0.71737   | Inlier |
| siRNA Disorazole DMSO Run2       | NM_0032<br>68 | TLR5 | toll-like<br>receptor 5 | 0.761357  | Inlier |
| siRNA-Vinblastine Run1-<br>DMSO  | NM_0165<br>62 | TLR7 | toll-like<br>receptor 7 | -0.766777 | Inlier |
| siRNA-Vinblastine Run2-<br>DMSO  | NM_0165<br>62 | TLR7 | toll-like<br>receptor 7 | -0.691232 | Inlier |
| siRNA-Temozolomide Run3-<br>DMSO | NM_0165<br>62 | TLR7 | toll-like<br>receptor 7 | -0.657768 | Inlier |
| siRNA-Temozolomide Run2-<br>DMSO | NM_0165<br>62 | TLR7 | toll-like<br>receptor 7 | -0.244938 | Inlier |
| siRNA Disorazole DMSO Run3       | NM_0165<br>62 | TLR7 | toll-like<br>receptor 7 | 0.244938  | Inlier |
| siRNA Disorazole DMSO Run1       | NM_0165<br>62 | TLR7 | toll-like<br>receptor 7 | 0.580422  | Inlier |
| siRNA-Temozolomide Run1-<br>DMSO | NM_0165<br>62 | TLR7 | toll-like<br>receptor 7 | 1.203868  | Inlier |
| siRNA Disorazole DMSO Run2       | NM_0165<br>62 | TLR7 | toll-like<br>receptor 7 | 1.846588  | Inlier |
| siRNA-Vinblastine Run1-<br>DMSO  | NM_0166<br>10 | TLR8 | toll-like<br>receptor 8 | -0.77174  | Inlier |
| siRNA-Vinblastine Run2-<br>DMSO  | NM_0166<br>10 | TLR8 | toll-like<br>receptor 8 | -0.689197 | Inlier |
| siRNA Disorazole DMSO Run1       | NM_0166<br>10 | TLR8 | toll-like<br>receptor 8 | -0.466324 | Inlier |
| siRNA Disorazole DMSO Run3       | NM_0166<br>10 | TLR8 | toll-like<br>receptor 8 | -0.306543 | Inlier |
| siRNA-Temozolomide Run3-<br>DMSO | NM_0166<br>10 | TLR8 | toll-like<br>receptor 8 | 0.306542  | Inlier |
| siRNA-Temozolomide Run1-<br>DMSO | NM_0166<br>10 | TLR8 | toll-like<br>receptor 8 | 0.659803  | Inlier |
| siRNA-Vinblastine Run1-<br>DMSO  | NM_0166<br>10 | TLR8 | toll-like<br>receptor 8 | 0.749226  | Inlier |
| siRNA Disorazole DMSO Run2       | NM_0166<br>10 | TLR8 | toll-like<br>receptor 8 | 1.235403  | Inlier |
| siRNA-Temozolomide Run2-<br>DMSO | NM_1386<br>88 | TLR9 | toll-like<br>receptor 9 | -0.826266 | Inlier |
| siRNA-Vinblastine Run2-<br>DMSO  | NM_1386<br>88 | TLR9 | toll-like<br>receptor 9 | -0.522734 | Inlier |

Identification of Survival Genes in Human Glioblastoma Cells Using siRNA Screening

Nikhil G Thaker, Fang Zhang, Peter R. McDonald, Tong Ying Shun, Michael D Lewen, Ian F. Pollack, and John S. Lazo

|                              |         |        |                                                              |           |        |
|------------------------------|---------|--------|--------------------------------------------------------------|-----------|--------|
| Molecular Pharmacology       | NM_1386 |        | toll-like                                                    |           |        |
| siRNA Disorazole DMSO Run1   | 88      | TLR9   | receptor 9                                                   | -0.472185 | Inlier |
|                              | NM_1386 |        | toll-like                                                    |           |        |
| siRNA Disorazole DMSO Run3   | 88      | TLR9   | receptor 9                                                   | -0.295814 | Inlier |
| siRNA-Temozolomide Run3-DMSO | NM_1386 |        | toll-like                                                    |           |        |
|                              | 88      | TLR9   | receptor 9                                                   | 0.295814  | Inlier |
| siRNA-Temozolomide Run1-DMSO | NM_1386 |        | toll-like                                                    |           |        |
|                              | 88      | TLR9   | receptor 9                                                   | 0.950495  | Inlier |
|                              | NM_1386 |        | toll-like                                                    |           |        |
| siRNA Disorazole DMSO Run2   | 88      | TLR9   | receptor 9                                                   | 1.089156  | Inlier |
| siRNA-Vinblastine Run1-DMSO  | NM_1386 |        | toll-like                                                    |           |        |
|                              | 88      | TLR9   | receptor 9                                                   | 1.319666  | Inlier |
|                              |         |        | transmembrane 7 superfamily member 1 (upregulated in kidney) |           |        |
| siRNA-Temozolomide Run3-DMSO | NM_0032 | TM7SF1 | transmembrane 7 superfamily member 1 (upregulated in kidney) | -1.794878 | Inlier |
|                              | 72      |        |                                                              |           |        |
|                              | NM_0032 |        | (upregulated in kidney)                                      |           |        |
| siRNA Disorazole DMSO Run1   | 72      | TM7SF1 | transmembrane 7 superfamily member 1 (upregulated in kidney) | -0.750501 | Inlier |
|                              |         |        |                                                              |           |        |
|                              | NM_0032 |        | (upregulated in kidney)                                      |           |        |
| siRNA-Vinblastine Run2-DMSO  | 72      | TM7SF1 | transmembrane 7 superfamily member 1 (upregulated in kidney) | -0.497529 | Inlier |
|                              |         |        |                                                              |           |        |
|                              | NM_0032 |        | (upregulated in kidney)                                      |           |        |
| siRNA Disorazole DMSO Run3   | 72      | TM7SF1 | transmembrane 7 superfamily member 1 (upregulated in kidney) | -0.450436 | Inlier |
|                              |         |        |                                                              |           |        |
|                              | NM_0032 |        | (upregulated in kidney)                                      |           |        |
| siRNA-Temozolomide Run2-DMSO | 72      | TM7SF1 | kidney)                                                      | 0.450436  | Inlier |

Identification of Survival Genes in Human Glioblastoma Cells Using siRNA Screening  
 Nikhil G Thaker, Fang Zhang, Peter R. McDonald, Tong Ying Shun, Michael D Lewen, Ian F. Pollack, and John S. Lazo

Molecular Pharmacology

| siRNA Treatment              | Gene ID   | Transcript | Family                                                       | Value     | Outlier |
|------------------------------|-----------|------------|--------------------------------------------------------------|-----------|---------|
| siRNA-Temozolomide Run1-DMSO | NM_003272 | TM7SF1     | transmembrane 7 superfamily member 1 (upregulated in kidney) | 0.598499  | Inlier  |
| siRNA Disorazole DMSO Run2   | NM_003272 | TM7SF1     | transmembrane 7 superfamily member 1 (upregulated in kidney) | 2.766503  | Inlier  |
| siRNA-Vinblastine Run1-DMSO  | NM_003272 | TM7SF1     | transmembrane 7 superfamily member 1 (upregulated in kidney) | 3.148359  | Inlier  |
| siRNA-Temozolomide Run3-DMSO | NM_003273 | TM7SF2     | transmembrane 7 superfamily member 2                         | -1.460991 | Inlier  |
| siRNA Disorazole DMSO Run1   | NM_003273 | TM7SF2     | transmembrane 7 superfamily member 2                         | -0.986962 | Inlier  |
| siRNA-Vinblastine Run2-DMSO  | NM_003273 | TM7SF2     | transmembrane 7 superfamily member 2                         | -0.362038 | Inlier  |
| siRNA Disorazole DMSO Run3   | NM_003273 | TM7SF2     | transmembrane 7 superfamily member 2                         | -0.083938 | Inlier  |
| siRNA-Temozolomide Run1-DMSO | NM_003273 | TM7SF2     | transmembrane 7 superfamily member 2                         | 0.083938  | Inlier  |

Identification of Survival Genes in Human Glioblastoma Cells Using siRNA Screening  
 Nikhil G Thaker, Fang Zhang, Peter R. McDonald, Tong Ying Shun, Michael D Lewen, Ian F. Pollack, and John S. Lazo

Molecular Pharmacology

| siRNA Treatment              | Gene ID   | TM     | Family                               | Score     | Outlier |
|------------------------------|-----------|--------|--------------------------------------|-----------|---------|
| siRNA-Temozolomide Run2-DMSO | NM_003273 | TM7SF2 | transmembrane 7 superfamily member 2 | 0.101662  | Inlier  |
| siRNA Disorazole DMSO Run2   | NM_003273 | TM7SF2 | transmembrane 7 superfamily member 2 | 2.252791  | Inlier  |
| siRNA-Vinblastine Run1-DMSO  | NM_003273 | TM7SF2 | transmembrane 7 superfamily member 2 | 2.553734  | Inlier  |
| siRNA-Temozolomide Run3-DMSO | NM_030788 | TM7SF4 | transmembrane 7 superfamily member 4 | -2.924397 | Inlier  |
| siRNA-Temozolomide Run2-DMSO | NM_030788 | TM7SF4 | transmembrane 7 superfamily member 4 | -0.808628 | Inlier  |
| siRNA-Temozolomide Run1-DMSO | NM_030788 | TM7SF4 | transmembrane 7 superfamily member 4 | -0.247318 | Inlier  |
| siRNA-Vinblastine Run2-DMSO  | NM_030788 | TM7SF4 | transmembrane 7 superfamily member 4 | -0.090907 | Inlier  |
| siRNA Disorazole DMSO Run1   | NM_030788 | TM7SF4 | transmembrane 7 superfamily member 4 | 0.090907  | Inlier  |
| siRNA Disorazole DMSO Run3   | NM_030788 | TM7SF4 | transmembrane 7 superfamily member 4 | 0.540372  | Inlier  |
| siRNA Disorazole DMSO Run2   | NM_030788 | TM7SF4 | transmembrane 7 superfamily member 4 | 2.63993   | Inlier  |

Identification of Survival Genes in Human Glioblastoma Cells Using siRNA Screening  
 Nikhil G Thaker, Fang Zhang, Peter R. McDonald, Tong Ying Shun, Michael D Lewen, Ian F. Pollack, and John S. Lazo

Molecular Pharmacology

|                              |           |        |                                      |           |        |
|------------------------------|-----------|--------|--------------------------------------|-----------|--------|
| siRNA-Vinblastine Run1-DMSO  | NM_030788 | TM7SF4 | transmembrane 7 superfamily member 4 | 2.848461  | Inlier |
| siRNA Disorazole DMSO Run1   | NM_003274 | TMEM1  | transmembrane protein 1              | -1.16466  | Inlier |
| siRNA-Temozolomide Run3-DMSO | NM_003274 | TMEM1  | transmembrane protein 1              | -1.055452 | Inlier |
| siRNA-Temozolomide Run1-DMSO | NM_003274 | TMEM1  | transmembrane protein 1              | -0.083327 | Inlier |
| siRNA-Vinblastine Run2-DMSO  | NM_003274 | TMEM1  | transmembrane protein 1              | -0.012835 | Inlier |
| siRNA-Temozolomide Run2-DMSO | NM_003274 | TMEM1  | transmembrane protein 1              | 0.012835  | Inlier |
| siRNA-Vinblastine Run1-DMSO  | NM_003274 | TMEM1  | transmembrane protein 1              | 0.393279  | Inlier |
| siRNA Disorazole DMSO Run3   | NM_003274 | TMEM1  | transmembrane protein 1              | 0.955721  | Inlier |
| siRNA Disorazole DMSO Run2   | NM_003274 | TMEM1  | transmembrane protein 1              | 1.122515  | Inlier |
| siRNA-Temozolomide Run3-DMSO | NM_018196 | TMLHE  | trimethyllysine hydroxylase, epsilon | -1.250922 | Inlier |
| siRNA-Temozolomide Run2-DMSO | NM_018196 | TMLHE  | trimethyllysine hydroxylase, epsilon | -0.595721 | Inlier |
| siRNA-Vinblastine Run2-DMSO  | NM_018196 | TMLHE  | trimethyllysine hydroxylase, epsilon | -0.376376 | Inlier |
| siRNA Disorazole DMSO Run1   | NM_018196 | TMLHE  | trimethyllysine hydroxylase, epsilon | -0.283122 | Inlier |

Identification of Survival Genes in Human Glioblastoma Cells Using siRNA Screening  
 Nikhil G Thaker, Fang Zhang, Peter R. McDonald, Tong Ying Shun, Michael D Lewen, Ian F. Pollack, and John S. Lazo  
 Molecular Pharmacology

|                                  |               |         |                                                 |           |         |
|----------------------------------|---------------|---------|-------------------------------------------------|-----------|---------|
| siRNA Disorazole DMSO Run3       | NM_0181<br>96 | TMLHE   | trimethylly<br>sine<br>hydroxylas<br>e, epsilon | 0.283122  | Inlier  |
| siRNA-Temozolomide Run1-<br>DMSO | NM_0181<br>96 | TMLHE   | trimethylly<br>sine<br>hydroxylas<br>e, epsilon | 0.753279  | Inlier  |
| siRNA-Vinblastine Run1-<br>DMSO  | NM_0181<br>96 | TMLHE   | trimethylly<br>sine<br>hydroxylas<br>e, epsilon | 2.876352  | Inlier  |
| siRNA Disorazole DMSO Run2       | NM_0181<br>96 | TMLHE   | trimethylly<br>sine<br>hydroxylas<br>e, epsilon | 2.966924  | Inlier  |
| siRNA-Temozolomide Run3-<br>DMSO | NM_0056<br>56 | TMPRSS2 | transmem<br>brane<br>protease,<br>serine 2      | -3.602119 | Outlier |
| siRNA-Temozolomide Run2-<br>DMSO | NM_0056<br>56 | TMPRSS2 | transmem<br>brane<br>protease,<br>serine 2      | -2.920946 | Inlier  |
| siRNA Disorazole DMSO Run2       | NM_0056<br>56 | TMPRSS2 | transmem<br>brane<br>protease,<br>serine 2      | -1.83517  | Inlier  |
| siRNA-Temozolomide Run1-<br>DMSO | NM_0056<br>56 | TMPRSS2 | transmem<br>brane<br>protease,<br>serine 2      | -0.163259 | Inlier  |
| siRNA Disorazole DMSO Run1       | NM_0056<br>56 | TMPRSS2 | transmem<br>brane<br>protease,<br>serine 2      | 0.16326   | Inlier  |
| siRNA Disorazole DMSO Run3       | NM_0056<br>56 | TMPRSS2 | transmem<br>brane<br>protease,<br>serine 2      | 0.250873  | Inlier  |
| siRNA-Vinblastine Run2-<br>DMSO  | NM_0056<br>56 | TMPRSS2 | transmem<br>brane<br>protease,<br>serine 2      | 0.277854  | Inlier  |
| siRNA-Vinblastine Run1-<br>DMSO  | NM_0056<br>56 | TMPRSS2 | transmem<br>brane<br>protease,<br>serine 2      | 1.071146  | Inlier  |

Identification of Survival Genes in Human Glioblastoma Cells Using siRNA Screening  
 Nikhil G Thaker, Fang Zhang, Peter R. McDonald, Tong Ying Shun, Michael D Lewen, Ian F. Pollack, and John S. Lazo

Molecular Pharmacology

| siRNA Treatment              | Gene ID   | Gene Name | Protein Description              | Log2 Fold Change | Outlier Status |
|------------------------------|-----------|-----------|----------------------------------|------------------|----------------|
| siRNA-Temozolomide Run2-DMSO | NM_024022 | TMPRSS3   | transmembrane protease, serine 3 | -1.150605        | Inlier         |
| siRNA Disorazole DMSO Run1   | NM_024022 | TMPRSS3   | transmembrane protease, serine 3 | -0.809608        | Inlier         |
| siRNA-Temozolomide Run3-DMSO | NM_024022 | TMPRSS3   | transmembrane protease, serine 3 | -0.69769         | Inlier         |
| siRNA-Temozolomide Run1-DMSO | NM_024022 | TMPRSS3   | transmembrane protease, serine 3 | -0.279691        | Inlier         |
| siRNA-Vinblastine Run2-DMSO  | NM_024022 | TMPRSS3   | transmembrane protease, serine 3 | 0.279691         | Inlier         |
| siRNA Disorazole DMSO Run2   | NM_024022 | TMPRSS3   | transmembrane protease, serine 3 | 0.425358         | Inlier         |
| siRNA-Vinblastine Run1-DMSO  | NM_024022 | TMPRSS3   | transmembrane protease, serine 3 | 0.65131          | Inlier         |
| siRNA Disorazole DMSO Run3   | NM_024022 | TMPRSS3   | transmembrane protease, serine 3 | 1.359143         | Inlier         |
| siRNA-Temozolomide Run3-DMSO | NM_183247 | TMPRSS4   | transmembrane protease, serine 4 | -1.736927        | Inlier         |
| siRNA-Temozolomide Run2-DMSO | NM_183247 | TMPRSS4   | transmembrane protease, serine 4 | -0.819545        | Inlier         |
| siRNA Disorazole DMSO Run1   | NM_183247 | TMPRSS4   | transmembrane protease, serine 4 | -0.529455        | Inlier         |
| siRNA-Temozolomide Run1-DMSO | NM_183247 | TMPRSS4   | transmembrane protease, serine 4 | -0.103996        | Inlier         |
| siRNA Disorazole DMSO Run3   | NM_183247 | TMPRSS4   | transmembrane protease, serine 4 | 0.103995         | Inlier         |

Identification of Survival Genes in Human Glioblastoma Cells Using siRNA Screening  
 Nikhil G Thaker, Fang Zhang, Peter R. McDonald, Tong Ying Shun, Michael D Lewen, Ian F. Pollack, and John S. Lazo

Molecular Pharmacology

| siRNA Treatment              | Gene ID       | Gene Name | Protein Description                         | Value     | Category |
|------------------------------|---------------|-----------|---------------------------------------------|-----------|----------|
| siRNA-Vinblastine Run2-DMSO  | NM_1832<br>47 | TMPRSS4   | transmembrane protease, serine 4            | 0.205062  | Inlier   |
| siRNA-Vinblastine Run1-DMSO  | NM_1832<br>47 | TMPRSS4   | transmembrane protease, serine 4            | 0.896587  | Inlier   |
| siRNA Disorazole DMSO Run2   | NM_1832<br>47 | TMPRSS4   | transmembrane protease, serine 4            | 1.114555  | Inlier   |
| siRNA-Temozolomide Run3-DMSO | NM_0307<br>70 | TMPRSS5   | transmembrane protease, serine 5 (spinesin) | -0.899126 | Inlier   |
| siRNA-Temozolomide Run1-DMSO | NM_0307<br>70 | TMPRSS5   | transmembrane protease, serine 5 (spinesin) | -0.629804 | Inlier   |
| siRNA-Temozolomide Run2-DMSO | NM_0307<br>70 | TMPRSS5   | transmembrane protease, serine 5 (spinesin) | -0.470572 | Inlier   |
| siRNA Disorazole DMSO Run1   | NM_0307<br>70 | TMPRSS5   | transmembrane protease, serine 5 (spinesin) | -0.400938 | Inlier   |
| siRNA-Vinblastine Run2-DMSO  | NM_0307<br>70 | TMPRSS5   | transmembrane protease, serine 5 (spinesin) | 0.400939  | Inlier   |
| siRNA-Vinblastine Run1-DMSO  | NM_0307<br>70 | TMPRSS5   | transmembrane protease, serine 5 (spinesin) | 0.719196  | Inlier   |
| siRNA Disorazole DMSO Run2   | NM_0307<br>70 | TMPRSS5   | transmembrane protease, serine 5 (spinesin) | 1.767198  | Inlier   |
| siRNA Disorazole DMSO Run3   | NM_0307<br>70 | TMPRSS5   | transmembrane protease, serine 5 (spinesin) | 1.98185   | Inlier   |



Identification of Survival Genes in Human Glioblastoma Cells Using siRNA Screening  
 Nikhil G Thaker, Fang Zhang, Peter R. McDonald, Tong Ying Shun, Michael D Lewen, Ian F. Pollack, and John S. Lazo

Molecular Pharmacology

|                              |               |         |                                        |           |        |
|------------------------------|---------------|---------|----------------------------------------|-----------|--------|
| siRNA-Temozolomide Run3-DMSO | NM_1530<br>19 | TMPRSS6 | transmembrane<br>protease,<br>serine 6 | -1.290298 | Inlier |
| siRNA-Temozolomide Run2-DMSO | NM_1530<br>19 | TMPRSS6 | transmembrane<br>protease,<br>serine 6 | -0.705776 | Inlier |
| siRNA Disorazole DMSO Run2   | NM_1530<br>19 | TMPRSS6 | transmembrane<br>protease,<br>serine 6 | -0.643224 | Inlier |
| siRNA Disorazole DMSO Run1   | NM_1530<br>19 | TMPRSS6 | transmembrane<br>protease,<br>serine 6 | -0.098093 | Inlier |
| siRNA Disorazole DMSO Run3   | NM_1530<br>19 | TMPRSS6 | transmembrane<br>protease,<br>serine 6 | 0.098092  | Inlier |
| siRNA-Temozolomide Run1-DMSO | NM_1530<br>19 | TMPRSS6 | transmembrane<br>protease,<br>serine 6 | 0.380599  | Inlier |
| siRNA-Vinblastine Run1-DMSO  | NM_1530<br>19 | TMPRSS6 | transmembrane<br>protease,<br>serine 6 | 1.255092  | Inlier |
| siRNA-Vinblastine Run2-DMSO  | NM_1530<br>19 | TMPRSS6 | transmembrane<br>protease,<br>serine 6 | 1.367157  | Inlier |
| siRNA-Temozolomide Run3-DMSO | NM_1829<br>73 | TMPRSS9 | transmembrane<br>serine<br>protease 9  | -1.629206 | Inlier |
| siRNA-Temozolomide Run2-DMSO | NM_1829<br>73 | TMPRSS9 | transmembrane<br>serine<br>protease 9  | -0.938231 | Inlier |
| siRNA Disorazole DMSO Run2   | NM_1829<br>73 | TMPRSS9 | transmembrane<br>serine<br>protease 9  | -0.108295 | Inlier |
| siRNA Disorazole DMSO Run1   | NM_1829<br>73 | TMPRSS9 | transmembrane<br>serine<br>protease 9  | -0.034878 | Inlier |

Identification of Survival Genes in Human Glioblastoma Cells Using siRNA Screening  
 Nikhil G Thaker, Fang Zhang, Peter R. McDonald, Tong Ying Shun, Michael D Lewen, Ian F. Pollack, and John S. Lazo  
 Molecular Pharmacology

|                              |               |         |                                 |           |        |
|------------------------------|---------------|---------|---------------------------------|-----------|--------|
| siRNA Disorazole DMSO Run3   | NM_1829<br>73 | TMPRSS9 | transmembrane serine protease 9 | 0.034878  | Inlier |
| siRNA-Temozolomide Run1-DMSO | NM_1829<br>73 | TMPRSS9 | transmembrane serine protease 9 | 0.410769  | Inlier |
| siRNA-Vinblastine Run2-DMSO  | NM_1829<br>73 | TMPRSS9 | transmembrane serine protease 9 | 1.020685  | Inlier |
| siRNA-Vinblastine Run1-DMSO  | NM_1829<br>73 | TMPRSS9 | transmembrane serine protease 9 | 1.253196  | Inlier |
| siRNA-Temozolomide Run3-DMSO | NM_0021<br>60 | TNC     | tenascin C (hexabrachion)       | -0.960902 | Inlier |
| siRNA-Temozolomide Run2-DMSO | NM_0021<br>60 | TNC     | tenascin C (hexabrachion)       | -0.527553 | Inlier |
| siRNA Disorazole DMSO Run3   | NM_0021<br>60 | TNC     | tenascin C (hexabrachion)       | -0.361331 | Inlier |
| siRNA-Vinblastine Run2-DMSO  | NM_0021<br>60 | TNC     | tenascin C (hexabrachion)       | -0.1703   | Inlier |
| siRNA-Temozolomide Run1-DMSO | NM_0021<br>60 | TNC     | tenascin C (hexabrachion)       | 0.1703    | Inlier |
| siRNA Disorazole DMSO Run1   | NM_0021<br>60 | TNC     | tenascin C (hexabrachion)       | 0.821447  | Inlier |
| siRNA-Vinblastine Run1-DMSO  | NM_0021<br>60 | TNC     | tenascin C (hexabrachion)       | 1.352763  | Inlier |
| siRNA Disorazole DMSO Run2   | NM_0021<br>60 | TNC     | tenascin C (hexabrachion)       | 1.611663  | Inlier |

Identification of Survival Genes in Human Glioblastoma Cells Using siRNA Screening

Nikhil G Thaker, Fang Zhang, Peter R. McDonald, Tong Ying Shun, Michael D Lewen, Ian F. Pollack, and John S. Lazo

Molecular Pharmacology

| siRNA Treatment              | Gene ID   | Gene Name | Protein Name                                                 | Value     | Category |
|------------------------------|-----------|-----------|--------------------------------------------------------------|-----------|----------|
| siRNA-Temozolomide Run3-DMSO | NM_021137 | TNFAIP1   | tumor necrosis factor, alpha-induced protein 1 (endothelial) | -5.930988 | Outlier  |
| siRNA-Temozolomide Run2-DMSO | NM_021137 | TNFAIP1   | tumor necrosis factor, alpha-induced protein 1 (endothelial) | -3.141303 | Inlier   |
| siRNA Disorazole DMSO Run1   | NM_021137 | TNFAIP1   | tumor necrosis factor, alpha-induced protein 1 (endothelial) | -0.88316  | Inlier   |
| siRNA Disorazole DMSO Run3   | NM_021137 | TNFAIP1   | tumor necrosis factor, alpha-induced protein 1 (endothelial) | -0.104013 | Inlier   |
| siRNA-Temozolomide Run1-DMSO | NM_021137 | TNFAIP1   | tumor necrosis factor, alpha-induced protein 1 (endothelial) | 0.104014  | Inlier   |
| siRNA-Vinblastine Run2-DMSO  | NM_021137 | TNFAIP1   | tumor necrosis factor, alpha-induced protein 1 (endothelial) | 0.361629  | Inlier   |

Identification of Survival Genes in Human Glioblastoma Cells Using siRNA Screening

Nikhil G Thaker, Fang Zhang, Peter R. McDonald, Tong Ying Shun, Michael D Lewen, Ian F. Pollack, and John S.

Lazo

Molecular Pharmacology

| siRNA Treatment              | Gene ID   | Gene Name | Protein Name                                                 | Value     | Outlier Status |
|------------------------------|-----------|-----------|--------------------------------------------------------------|-----------|----------------|
| siRNA-Vinblastine Run1-DMSO  | NM_021137 | TNFAIP1   | tumor necrosis factor, alpha-induced protein 1 (endothelial) | 0.46584   | Inlier         |
| siRNA Disorazole DMSO Run2   | NM_021137 | TNFAIP1   | tumor necrosis factor, alpha-induced protein 1 (endothelial) | 1.41054   | Inlier         |
| siRNA-Temozolomide Run3-DMSO | NM_006290 | TNFAIP3   | tumor necrosis factor, alpha-induced protein 3               | -0.797015 | Inlier         |
| siRNA-Temozolomide Run2-DMSO | NM_006290 | TNFAIP3   | tumor necrosis factor, alpha-induced protein 3               | -0.649764 | Inlier         |
| siRNA-Temozolomide Run1-DMSO | NM_006290 | TNFAIP3   | tumor necrosis factor, alpha-induced protein 3               | -0.210608 | Inlier         |
| siRNA Disorazole DMSO Run1   | NM_006290 | TNFAIP3   | tumor necrosis factor, alpha-induced protein 3               | -0.086418 | Inlier         |
| siRNA Disorazole DMSO Run3   | NM_006290 | TNFAIP3   | tumor necrosis factor, alpha-induced protein 3               | 0.086418  | Inlier         |
| siRNA Disorazole DMSO Run2   | NM_006290 | TNFAIP3   | tumor necrosis factor, alpha-induced protein 3               | 0.699236  | Inlier         |

Identification of Survival Genes in Human Glioblastoma Cells Using siRNA Screening  
 Nikhil G Thaker, Fang Zhang, Peter R. McDonald, Tong Ying Shun, Michael D Lewen, Ian F. Pollack, and John S. Lazo

Molecular Pharmacology

|                              |           |           |                                                        |           |        |
|------------------------------|-----------|-----------|--------------------------------------------------------|-----------|--------|
| siRNA-Vinblastine Run2-DMSO  | NM_006290 | TNFAIP3   | tumor necrosis factor, alpha-induced protein 3         | 1.540282  | Inlier |
| siRNA-Vinblastine Run1-DMSO  | NM_006290 | TNFAIP3   | tumor necrosis factor, alpha-induced protein 3         | 1.553029  | Inlier |
| siRNA-Temozolomide Run2-DMSO | NM_003844 | TNFRSF10A | tumor necrosis factor receptor superfamily, member 10a | -0.706965 | Inlier |
| siRNA-Temozolomide Run3-DMSO | NM_003844 | TNFRSF10A | tumor necrosis factor receptor superfamily, member 10a | -0.703537 | Inlier |
| siRNA-Temozolomide Run1-DMSO | NM_003844 | TNFRSF10A | tumor necrosis factor receptor superfamily, member 10a | -0.421769 | Inlier |
| siRNA Disorazole DMSO Run1   | NM_003844 | TNFRSF10A | tumor necrosis factor receptor superfamily, member 10a | -0.104483 | Inlier |
| siRNA Disorazole DMSO Run3   | NM_003844 | TNFRSF10A | tumor necrosis factor receptor superfamily, member 10a | 0.104483  | Inlier |

Identification of Survival Genes in Human Glioblastoma Cells Using siRNA Screening  
 Nikhil G Thaker, Fang Zhang, Peter R. McDonald, Tong Ying Shun, Michael D Lewen, Ian F. Pollack, and John S. Lazo  
 Molecular Pharmacology

| siRNA Treatment              | Gene ID   | Accession | Gene Name                                              | Score     | Outlier Status |
|------------------------------|-----------|-----------|--------------------------------------------------------|-----------|----------------|
| siRNA Disorazole DMSO Run2   | NM_003844 | TNFRSF10A | tumor necrosis factor receptor superfamily, member 10a | 0.645463  | Inlier         |
| siRNA-Vinblastine Run2-DMSO  | NM_003844 | TNFRSF10A | tumor necrosis factor receptor superfamily, member 10a | 0.733996  | Inlier         |
| siRNA-Vinblastine Run1-DMSO  | NM_003844 | TNFRSF10A | tumor necrosis factor receptor superfamily, member 10a | 0.940188  | Inlier         |
| siRNA-Temozolomide Run2-DMSO | NM_147187 | TNFRSF10B | tumor necrosis factor receptor superfamily, member 10b | -0.782826 | Inlier         |
| siRNA-Temozolomide Run1-DMSO | NM_147187 | TNFRSF10B | tumor necrosis factor receptor superfamily, member 10b | -0.566174 | Inlier         |
| siRNA-Temozolomide Run3-DMSO | NM_147187 | TNFRSF10B | tumor necrosis factor receptor superfamily, member 10b | -0.51387  | Inlier         |

Identification of Survival Genes in Human Glioblastoma Cells Using siRNA Screening  
 Nikhil G Thaker, Fang Zhang, Peter R. McDonald, Tong Ying Shun, Michael D Lewen, Ian F. Pollack, and John S. Lazo  
 Molecular Pharmacology

|                                 |               |               |                                                                                                                            |           |        |
|---------------------------------|---------------|---------------|----------------------------------------------------------------------------------------------------------------------------|-----------|--------|
| siRNA Disorazole DMSO Run3      | NM_1471<br>87 | TNFRSF1<br>0B | tumor<br>necrosis<br>factor<br>receptor<br>superfamil<br>y, member<br>10b                                                  | -0.106112 | Inlier |
| siRNA Disorazole DMSO Run1      | NM_1471<br>87 | TNFRSF1<br>0B | tumor<br>necrosis<br>factor<br>receptor<br>superfamil<br>y, member<br>10b                                                  | 0.106112  | Inlier |
| siRNA Disorazole DMSO Run2      | NM_1471<br>87 | TNFRSF1<br>0B | tumor<br>necrosis<br>factor<br>receptor<br>superfamil<br>y, member<br>10b                                                  | 2.184697  | Inlier |
| siRNA-Vinblastine Run2-<br>DMSO | NM_1471<br>87 | TNFRSF1<br>0B | tumor<br>necrosis<br>factor<br>receptor<br>superfamil<br>y, member<br>10b                                                  | 3.194753  | Inlier |
| siRNA-Vinblastine Run1-<br>DMSO | NM_1471<br>87 | TNFRSF1<br>0B | tumor<br>necrosis<br>factor<br>receptor<br>superfamil<br>y, member<br>10b                                                  | 3.243656  | Inlier |
| siRNA-Vinblastine Run2-<br>DMSO | NM_0038<br>41 | TNFRSF1<br>0C | tumor<br>necrosis<br>factor<br>receptor<br>superfamil<br>y, member<br>10c, decoy<br>without an<br>intracellula<br>r domain | -1.617331 | Inlier |

Identification of Survival Genes in Human Glioblastoma Cells Using siRNA Screening

Nikhil G Thaker, Fang Zhang, Peter R. McDonald, Tong Ying Shun, Michael D Lewen, Ian F. Pollack, and John S. Lazo

Molecular Pharmacology

|                              |           |           |                                                                                               |           |        |
|------------------------------|-----------|-----------|-----------------------------------------------------------------------------------------------|-----------|--------|
| siRNA-Temozolomide Run3-DMSO | NM_003841 | TNFRSF10C | tumor necrosis factor receptor superfamily, member 10c, decoy without an intracellular domain | -0.562051 | Inlier |
| siRNA Disorazole DMSO Run1   | NM_003841 | TNFRSF10C | tumor necrosis factor receptor superfamily, member 10c, decoy without an intracellular domain | -0.362044 | Inlier |
| siRNA Disorazole DMSO Run3   | NM_003841 | TNFRSF10C | tumor necrosis factor receptor superfamily, member 10c, decoy without an intracellular domain | -0.101914 | Inlier |
| siRNA-Temozolomide Run2-DMSO | NM_003841 | TNFRSF10C | tumor necrosis factor receptor superfamily, member 10c, decoy without an intracellular domain | 0.101914  | Inlier |



Identification of Survival Genes in Human Glioblastoma Cells Using siRNA Screening

Nikhil G Thaker, Fang Zhang, Peter R. McDonald, Tong Ying Shun, Michael D Lewen, Ian F. Pollack, and John S.

Lazo

Molecular Pharmacology

|                              |           |           |                                                                                               |           |        |
|------------------------------|-----------|-----------|-----------------------------------------------------------------------------------------------|-----------|--------|
| siRNA-Temozolomide Run1-DMSO | NM_003841 | TNFRSF10C | tumor necrosis factor receptor superfamily, member 10c, decoy without an intracellular domain | 0.786949  | Inlier |
| siRNA-Vinblastine Run1-DMSO  | NM_003841 | TNFRSF10C | tumor necrosis factor receptor superfamily, member 10c, decoy without an intracellular domain | 2.242589  | Inlier |
| siRNA Disorazole DMSO Run2   | NM_003841 | TNFRSF10C | tumor necrosis factor receptor superfamily, member 10c, decoy without an intracellular domain | 3.130668  | Inlier |
| siRNA-Temozolomide Run3-DMSO | NM_003840 | TNFRSF10D | tumor necrosis factor receptor superfamily, member 10d, decoy with truncated death domain     | -1.941544 | Inlier |

Identification of Survival Genes in Human Glioblastoma Cells Using siRNA Screening

Nikhil G Thaker, Fang Zhang, Peter R. McDonald, Tong Ying Shun, Michael D Lewen, Ian F. Pollack, and John S. Lazo

Molecular Pharmacology

|                              |           |           |                                                                                           |           |        |
|------------------------------|-----------|-----------|-------------------------------------------------------------------------------------------|-----------|--------|
| siRNA-Temozolomide Run2-DMSO | NM_003840 | TNFRSF10D | tumor necrosis factor receptor superfamily, member 10d, decoy with truncated death domain | -1.306978 | Inlier |
| siRNA-Temozolomide Run1-DMSO | NM_003840 | TNFRSF10D | tumor necrosis factor receptor superfamily, member 10d, decoy with truncated death domain | -0.634021 | Inlier |
| siRNA Disorazole DMSO Run3   | NM_003840 | TNFRSF10D | tumor necrosis factor receptor superfamily, member 10d, decoy with truncated death domain | -0.03972  | Inlier |
| siRNA Disorazole DMSO Run1   | NM_003840 | TNFRSF10D | tumor necrosis factor receptor superfamily, member 10d, decoy with truncated death domain | 0.03972   | Inlier |

Identification of Survival Genes in Human Glioblastoma Cells Using siRNA Screening

Nikhil G Thaker, Fang Zhang, Peter R. McDonald, Tong Ying Shun, Michael D Lewen, Ian F. Pollack, and John S. Lazo

Molecular Pharmacology

|                                  |    |         |               |                                                                                                                          |           |        |
|----------------------------------|----|---------|---------------|--------------------------------------------------------------------------------------------------------------------------|-----------|--------|
| siRNA Disorazole DMSO Run2       | 40 | NM_0038 | TNFRSF1<br>0D | tumor<br>necrosis<br>factor<br>receptor<br>superfamil<br>y, member<br>10d, decoy<br>with<br>truncated<br>death<br>domain | 0.428264  | Inlier |
| siRNA-Vinblastine Run2-<br>DMSO  | 40 | NM_0038 | TNFRSF1<br>0D | tumor<br>necrosis<br>factor<br>receptor<br>superfamil<br>y, member<br>10d, decoy<br>with<br>truncated<br>death<br>domain | 0.714979  | Inlier |
| siRNA-Vinblastine Run1-<br>DMSO  | 40 | NM_0038 | TNFRSF1<br>0D | tumor<br>necrosis<br>factor<br>receptor<br>superfamil<br>y, member<br>10d, decoy<br>with<br>truncated<br>death<br>domain | 1.137027  | Inlier |
| siRNA-Temozolomide Run2-<br>DMSO | 39 | NM_0038 | TNFRSF1<br>1A | tumor<br>necrosis<br>factor<br>receptor<br>superfamil<br>y, member<br>11a,<br>activator<br>of NFKB                       | -0.734028 | Inlier |

Identification of Survival Genes in Human Glioblastoma Cells Using siRNA Screening

Nikhil G Thaker, Fang Zhang, Peter R. McDonald, Tong Ying Shun, Michael D Lewen, Ian F. Pollack, and John S. Lazo

Molecular Pharmacology

|                              |           |           |                                                                           |           |        |
|------------------------------|-----------|-----------|---------------------------------------------------------------------------|-----------|--------|
| siRNA-Temozolomide Run1-DMSO | NM_003839 | TNFRSF11A | tumor necrosis factor receptor superfamily, member 11a, activator of NFkB | -0.614972 | Inlier |
| siRNA Disorazole DMSO Run3   | NM_003839 | TNFRSF11A | tumor necrosis factor receptor superfamily, member 11a, activator of NFkB | -0.181436 | Inlier |
| siRNA-Temozolomide Run3-DMSO | NM_003839 | TNFRSF11A | tumor necrosis factor receptor superfamily, member 11a, activator of NFkB | -0.05853  | Inlier |
| siRNA Disorazole DMSO Run2   | NM_003839 | TNFRSF11A | tumor necrosis factor receptor superfamily, member 11a, activator of NFkB | 0.05853   | Inlier |
| siRNA-Vinblastine Run2-DMSO  | NM_003839 | TNFRSF11A | tumor necrosis factor receptor superfamily, member 11a, activator of NFkB | -1.104758 | Inlier |

Identification of Survival Genes in Human Glioblastoma Cells Using siRNA Screening

Nikhil G Thaker, Fang Zhang, Peter R. McDonald, Tong Ying Shun, Michael D Lewen, Ian F. Pollack, and John S. Lazo

Molecular Pharmacology

|                                  |               |               |                                                                                                    |           |        |
|----------------------------------|---------------|---------------|----------------------------------------------------------------------------------------------------|-----------|--------|
| siRNA Disorazole DMSO Run3       | NM_0038<br>39 | TNFRSF1<br>1A | tumor<br>necrosis<br>factor<br>receptor<br>superfamil<br>y, member<br>11a,<br>activator<br>of NFKB | -0.244242 | Inlier |
| siRNA Disorazole DMSO Run1       | NM_0038<br>39 | TNFRSF1<br>1A | tumor<br>necrosis<br>factor<br>receptor<br>superfamil<br>y, member<br>11a,<br>activator<br>of NFKB | 1.103602  | Inlier |
| siRNA-Temozolomide Run3-<br>DMSO | NM_0038<br>39 | TNFRSF1<br>1A | tumor<br>necrosis<br>factor<br>receptor<br>superfamil<br>y, member<br>11a,<br>activator<br>of NFKB | -0.077621 | Inlier |
| siRNA-Temozolomide Run2-<br>DMSO | NM_0038<br>39 | TNFRSF1<br>1A | tumor<br>necrosis<br>factor<br>receptor<br>superfamil<br>y, member<br>11a,<br>activator<br>of NFKB | -0.070907 | Inlier |
| siRNA Disorazole DMSO Run1       | NM_0038<br>39 | TNFRSF1<br>1A | tumor<br>necrosis<br>factor<br>receptor<br>superfamil<br>y, member<br>11a,<br>activator<br>of NFKB | 0.070907  | Inlier |

Identification of Survival Genes in Human Glioblastoma Cells Using siRNA Screening

Nikhil G Thaker, Fang Zhang, Peter R. McDonald, Tong Ying Shun, Michael D Lewen, Ian F. Pollack, and John S. Lazo

Molecular Pharmacology

|                                  |               |               |                                                                                                    |          |        |
|----------------------------------|---------------|---------------|----------------------------------------------------------------------------------------------------|----------|--------|
| siRNA Disorazole DMSO Run2       | NM_0038<br>39 | TNFRSF1<br>1A | tumor<br>necrosis<br>factor<br>receptor<br>superfamil<br>y, member<br>11a,<br>activator<br>of NFKB | 1.115838 | Inlier |
| siRNA-Vinblastine Run1-<br>DMSO  | NM_0038<br>39 | TNFRSF1<br>1A | tumor<br>necrosis<br>factor<br>receptor<br>superfamil<br>y, member<br>11a,<br>activator<br>of NFKB | 1.721125 | Inlier |
| siRNA-Vinblastine Run1-<br>DMSO  | NM_0038<br>39 | TNFRSF1<br>1A | tumor<br>necrosis<br>factor<br>receptor<br>superfamil<br>y, member<br>11a,<br>activator<br>of NFKB | 1.456797 | Inlier |
| siRNA-Temozolomide Run1-<br>DMSO | NM_0038<br>39 | TNFRSF1<br>1A | tumor<br>necrosis<br>factor<br>receptor<br>superfamil<br>y, member<br>11a,<br>activator<br>of NFKB | 1.728827 | Inlier |
| siRNA-Vinblastine Run2-<br>DMSO  | NM_0038<br>39 | TNFRSF1<br>1A | tumor<br>necrosis<br>factor<br>receptor<br>superfamil<br>y, member<br>11a,<br>activator<br>of NFKB | 2.269662 | Inlier |

Identification of Survival Genes in Human Glioblastoma Cells Using siRNA Screening

Nikhil G Thaker, Fang Zhang, Peter R. McDonald, Tong Ying Shun, Michael D Lewen, Ian F. Pollack, and John S. Lazo

Molecular Pharmacology

|                              |           |           |                                                                          |           |        |
|------------------------------|-----------|-----------|--------------------------------------------------------------------------|-----------|--------|
| siRNA-Vinblastine Run2-DMSO  | NM_002546 | TNFRSF11B | tumor necrosis factor receptor superfamily, member 11b (osteoprotegerin) | -3.230526 | Inlier |
| siRNA Disorazole DMSO Run3   | NM_002546 | TNFRSF11B | tumor necrosis factor receptor superfamily, member 11b (osteoprotegerin) | -1.214564 | Inlier |
| siRNA Disorazole DMSO Run1   | NM_002546 | TNFRSF11B | tumor necrosis factor receptor superfamily, member 11b (osteoprotegerin) | -0.476819 | Inlier |
| siRNA-Vinblastine Run1-DMSO  | NM_002546 | TNFRSF11B | tumor necrosis factor receptor superfamily, member 11b (osteoprotegerin) | -0.042214 | Inlier |
| siRNA-Temozolomide Run2-DMSO | NM_002546 | TNFRSF11B | tumor necrosis factor receptor superfamily, member 11b (osteoprotegerin) | 0.042214  | Inlier |

Identification of Survival Genes in Human Glioblastoma Cells Using siRNA Screening

Nikhil G Thaker, Fang Zhang, Peter R. McDonald, Tong Ying Shun, Michael D Lewen, Ian F. Pollack, and John S. Lazo

Molecular Pharmacology

|                              |           |           |                                                                          |           |         |
|------------------------------|-----------|-----------|--------------------------------------------------------------------------|-----------|---------|
| siRNA-Temozolomide Run1-DMSO | NM_002546 | TNFRSF11B | tumor necrosis factor receptor superfamily, member 11b (osteoprotegerin) | 0.620373  | Inlier  |
| siRNA-Temozolomide Run3-DMSO | NM_002546 | TNFRSF11B | tumor necrosis factor receptor superfamily, member 11b (osteoprotegerin) | 0.728627  | Inlier  |
| siRNA Disorazole DMSO Run2   | NM_002546 | TNFRSF11B | tumor necrosis factor receptor superfamily, member 11b (osteoprotegerin) | 0.990024  | Inlier  |
| siRNA-Temozolomide Run3-DMSO | NM_012452 | TNFRSF13B | tumor necrosis factor receptor superfamily, member 13B                   | -6.250272 | Outlier |
| siRNA Disorazole DMSO Run3   | NM_012452 | TNFRSF13B | tumor necrosis factor receptor superfamily, member 13B                   | -0.8202   | Inlier  |



Identification of Survival Genes in Human Glioblastoma Cells Using siRNA Screening

Nikhil G Thaker, Fang Zhang, Peter R. McDonald, Tong Ying Shun, Michael D Lewen, Ian F. Pollack, and John S. Lazo

Molecular Pharmacology

| siRNA Treatment              | Gene ID   | Accession | Gene Name                                              | Value     | Category |
|------------------------------|-----------|-----------|--------------------------------------------------------|-----------|----------|
| siRNA-Temozolomide Run2-DMSO | NM_012452 | TNFRSF13B | tumor necrosis factor receptor superfamily, member 13B | -0.467203 | Inlier   |
| siRNA-Vinblastine Run2-DMSO  | NM_012452 | TNFRSF13B | tumor necrosis factor receptor superfamily, member 13B | -0.11169  | Inlier   |
| siRNA Disorazole DMSO Run1   | NM_012452 | TNFRSF13B | tumor necrosis factor receptor superfamily, member 13B | 0.11169   | Inlier   |
| siRNA-Temozolomide Run1-DMSO | NM_012452 | TNFRSF13B | tumor necrosis factor receptor superfamily, member 13B | 0.5288    | Inlier   |
| siRNA Disorazole DMSO Run2   | NM_012452 | TNFRSF13B | tumor necrosis factor receptor superfamily, member 13B | 1.855227  | Inlier   |
| siRNA-Vinblastine Run1-DMSO  | NM_012452 | TNFRSF13B | tumor necrosis factor receptor superfamily, member 13B | 4.112649  | Outlier  |

Identification of Survival Genes in Human Glioblastoma Cells Using siRNA Screening

Nikhil G Thaker, Fang Zhang, Peter R. McDonald, Tong Ying Shun, Michael D Lewen, Ian F. Pollack, and John S. Lazo

Molecular Pharmacology

|                              |               |              |                                                                                                                 |                  |
|------------------------------|---------------|--------------|-----------------------------------------------------------------------------------------------------------------|------------------|
| siRNA-Temozolomide Run3-DMSO | NM_0038<br>20 | TNFRSF1<br>4 | tumor<br>necrosis<br>factor<br>receptor<br>superfamil<br>y, member<br>14<br>(herpesvir<br>us entry<br>mediator) | -3.220161 Inlier |
| siRNA Disorazole DMSO Run1   | NM_0038<br>20 | TNFRSF1<br>4 | tumor<br>necrosis<br>factor<br>receptor<br>superfamil<br>y, member<br>14<br>(herpesvir<br>us entry<br>mediator) | -1.375269 Inlier |
| siRNA Disorazole DMSO Run2   | NM_0038<br>20 | TNFRSF1<br>4 | tumor<br>necrosis<br>factor<br>receptor<br>superfamil<br>y, member<br>14<br>(herpesvir<br>us entry<br>mediator) | -0.476811 Inlier |
| siRNA-Temozolomide Run1-DMSO | NM_0038<br>20 | TNFRSF1<br>4 | tumor<br>necrosis<br>factor<br>receptor<br>superfamil<br>y, member<br>14<br>(herpesvir<br>us entry<br>mediator) | -0.287107 Inlier |

Identification of Survival Genes in Human Glioblastoma Cells Using siRNA Screening  
 Nikhil G Thaker, Fang Zhang, Peter R. McDonald, Tong Ying Shun, Michael D Lewen, Ian F. Pollack, and John S. Lazo  
 Molecular Pharmacology

|                                  |               |              |                                                                                                                 |                   |
|----------------------------------|---------------|--------------|-----------------------------------------------------------------------------------------------------------------|-------------------|
| siRNA Disorazole DMSO Run3       | NM_0038<br>20 | TNFRSF1<br>4 | tumor<br>necrosis<br>factor<br>receptor<br>superfamil<br>y, member<br>14<br>(herpesvir<br>us entry<br>mediator) | 0.287109 Inlier   |
| siRNA-Vinblastine Run1-<br>DMSO  | NM_0038<br>20 | TNFRSF1<br>4 | tumor<br>necrosis<br>factor<br>receptor<br>superfamil<br>y, member<br>14<br>(herpesvir<br>us entry<br>mediator) | 0.65078 Inlier    |
| siRNA-Temozolomide Run2-<br>DMSO | NM_0038<br>20 | TNFRSF1<br>4 | tumor<br>necrosis<br>factor<br>receptor<br>superfamil<br>y, member<br>14<br>(herpesvir<br>us entry<br>mediator) | 0.69822 Inlier    |
| siRNA-Vinblastine Run2-<br>DMSO  | NM_0038<br>20 | TNFRSF1<br>4 | tumor<br>necrosis<br>factor<br>receptor<br>superfamil<br>y, member<br>14<br>(herpesvir<br>us entry<br>mediator) | 4.049907 Outlier  |
| siRNA-Temozolomide Run3-<br>DMSO | NM_0011<br>92 | TNFRSF1<br>7 | tumor<br>necrosis<br>factor<br>receptor<br>superfamil<br>y, member<br>17                                        | -5.269984 Outlier |

Identification of Survival Genes in Human Glioblastoma Cells Using siRNA Screening  
 Nikhil G Thaker, Fang Zhang, Peter R. McDonald, Tong Ying Shun, Michael D Lewen, Ian F. Pollack, and John S. Lazo  
 Molecular Pharmacology

|                                  |               |              |                                                                          |           |        |
|----------------------------------|---------------|--------------|--------------------------------------------------------------------------|-----------|--------|
| siRNA Disorazole DMSO Run1       | NM_0011<br>92 | TNFRSF1<br>7 | tumor<br>necrosis<br>factor<br>receptor<br>superfamil<br>y, member<br>17 | -1.169411 | Inlier |
| siRNA Disorazole DMSO Run3       | NM_0011<br>92 | TNFRSF1<br>7 | tumor<br>necrosis<br>factor<br>receptor<br>superfamil<br>y, member<br>17 | -0.762507 | Inlier |
| siRNA-Temozolomide Run2-<br>DMSO | NM_0011<br>92 | TNFRSF1<br>7 | tumor<br>necrosis<br>factor<br>receptor<br>superfamil<br>y, member<br>17 | -0.284764 | Inlier |
| siRNA-Vinblastine Run1-<br>DMSO  | NM_0011<br>92 | TNFRSF1<br>7 | tumor<br>necrosis<br>factor<br>receptor<br>superfamil<br>y, member<br>17 | 0.284764  | Inlier |
| siRNA-Vinblastine Run2-<br>DMSO  | NM_0011<br>92 | TNFRSF1<br>7 | tumor<br>necrosis<br>factor<br>receptor<br>superfamil<br>y, member<br>17 | 0.418813  | Inlier |
| siRNA-Temozolomide Run1-<br>DMSO | NM_0011<br>92 | TNFRSF1<br>7 | tumor<br>necrosis<br>factor<br>receptor<br>superfamil<br>y, member<br>17 | 0.586493  | Inlier |

Identification of Survival Genes in Human Glioblastoma Cells Using siRNA Screening

Nikhil G Thaker, Fang Zhang, Peter R. McDonald, Tong Ying Shun, Michael D Lewen, Ian F. Pollack, and John S. Lazo

Molecular Pharmacology

|                              |           |          |                                                                          |           |        |
|------------------------------|-----------|----------|--------------------------------------------------------------------------|-----------|--------|
| siRNA Disorazole DMSO Run2   | NM_001192 | TNFRSF17 | tumor<br>necrosis<br>factor<br>receptor<br>superfamil<br>y, member<br>17 | 1.885394  | Inlier |
| siRNA-Temozolomide Run3-DMSO | NM_148901 | TNFRSF18 | tumor<br>necrosis<br>factor<br>receptor<br>superfamil<br>y, member<br>18 | -3.196456 | Inlier |
| siRNA-Temozolomide Run1-DMSO | NM_148901 | TNFRSF18 | tumor<br>necrosis<br>factor<br>receptor<br>superfamil<br>y, member<br>18 | -0.727587 | Inlier |
| siRNA Disorazole DMSO Run3   | NM_148901 | TNFRSF18 | tumor<br>necrosis<br>factor<br>receptor<br>superfamil<br>y, member<br>18 | -0.344351 | Inlier |
| siRNA-Temozolomide Run2-DMSO | NM_148901 | TNFRSF18 | tumor<br>necrosis<br>factor<br>receptor<br>superfamil<br>y, member<br>18 | -0.305286 | Inlier |
| siRNA-Vinblastine Run2-DMSO  | NM_148901 | TNFRSF18 | tumor<br>necrosis<br>factor<br>receptor<br>superfamil<br>y, member<br>18 | 0.305286  | Inlier |

Identification of Survival Genes in Human Glioblastoma Cells Using siRNA Screening  
 Nikhil G Thaker, Fang Zhang, Peter R. McDonald, Tong Ying Shun, Michael D Lewen, Ian F. Pollack, and John S. Lazo  
 Molecular Pharmacology

|                                  |               |              |                                                                          |                  |
|----------------------------------|---------------|--------------|--------------------------------------------------------------------------|------------------|
| siRNA Disorazole DMSO Run2       | NM_1489<br>01 | TNFRSF1<br>8 | tumor<br>necrosis<br>factor<br>receptor<br>superfamil<br>y, member<br>18 | 0.621413 Inlier  |
| siRNA Disorazole DMSO Run1       | NM_1489<br>01 | TNFRSF1<br>8 | tumor<br>necrosis<br>factor<br>receptor<br>superfamil<br>y, member<br>18 | 0.784632 Inlier  |
| siRNA-Vinblastine Run1-<br>DMSO  | NM_1489<br>01 | TNFRSF1<br>8 | tumor<br>necrosis<br>factor<br>receptor<br>superfamil<br>y, member<br>18 | 2.01684 Inlier   |
| siRNA-Temozolomide Run3-<br>DMSO | NM_1489<br>57 | TNFRSF1<br>9 | tumor<br>necrosis<br>factor<br>receptor<br>superfamil<br>y, member<br>19 | -1.226666 Inlier |
| siRNA Disorazole DMSO Run3       | NM_1489<br>57 | TNFRSF1<br>9 | tumor<br>necrosis<br>factor<br>receptor<br>superfamil<br>y, member<br>19 | -0.554257 Inlier |
| siRNA-Vinblastine Run2-<br>DMSO  | NM_1489<br>57 | TNFRSF1<br>9 | tumor<br>necrosis<br>factor<br>receptor<br>superfamil<br>y, member<br>19 | -0.289518 Inlier |

Identification of Survival Genes in Human Glioblastoma Cells Using siRNA Screening

Nikhil G Thaker, Fang Zhang, Peter R. McDonald, Tong Ying Shun, Michael D Lewen, Ian F. Pollack, and John S. Lazo

Molecular Pharmacology

|                              |           |          |                                                       |           |        |
|------------------------------|-----------|----------|-------------------------------------------------------|-----------|--------|
| siRNA-Temozolomide Run2-DMSO | NM_148957 | TNFRSF19 | tumor necrosis factor receptor superfamily, member 19 | -0.271095 | Inlier |
| siRNA-Temozolomide Run1-DMSO | NM_148957 | TNFRSF19 | tumor necrosis factor receptor superfamily, member 19 | 0.271095  | Inlier |
| siRNA Disorazole DMSO Run1   | NM_148957 | TNFRSF19 | tumor necrosis factor receptor superfamily, member 19 | 0.794743  | Inlier |
| siRNA-Vinblastine Run1-DMSO  | NM_148957 | TNFRSF19 | tumor necrosis factor receptor superfamily, member 19 | 1.492627  | Inlier |
| siRNA Disorazole DMSO Run2   | NM_148957 | TNFRSF19 | tumor necrosis factor receptor superfamily, member 19 | 1.894089  | Inlier |
| siRNA-Temozolomide Run1-DMSO | NM_001065 | TNFRSF1A | tumor necrosis factor receptor superfamily, member 1A | -1.153228 | Inlier |

Identification of Survival Genes in Human Glioblastoma Cells Using siRNA Screening

Nikhil G Thaker, Fang Zhang, Peter R. McDonald, Tong Ying Shun, Michael D Lewen, Ian F. Pollack, and John S. Lazo

Molecular Pharmacology

| siRNA Treatment              | Gene ID   | Accession | Gene Name                                             | Family    | Value  | Outlier Status |
|------------------------------|-----------|-----------|-------------------------------------------------------|-----------|--------|----------------|
| siRNA-Temozolomide Run2-DMSO | NM_001065 | TNFRSF1A  | tumor necrosis factor receptor superfamily, member 1A | -0.96905  | Inlier |                |
| siRNA Disorazole DMSO Run1   | NM_001065 | TNFRSF1A  | tumor necrosis factor receptor superfamily, member 1A | -0.100596 | Inlier |                |
| siRNA-Temozolomide Run3-DMSO | NM_001065 | TNFRSF1A  | tumor necrosis factor receptor superfamily, member 1A | -0.020315 | Inlier |                |
| siRNA-Vinblastine Run2-DMSO  | NM_001065 | TNFRSF1A  | tumor necrosis factor receptor superfamily, member 1A | 0.020316  | Inlier |                |
| siRNA Disorazole DMSO Run3   | NM_001065 | TNFRSF1A  | tumor necrosis factor receptor superfamily, member 1A | 0.379949  | Inlier |                |
| siRNA Disorazole DMSO Run2   | NM_001065 | TNFRSF1A  | tumor necrosis factor receptor superfamily, member 1A | 1.239934  | Inlier |                |



Identification of Survival Genes in Human Glioblastoma Cells Using siRNA Screening  
 Nikhil G Thaker, Fang Zhang, Peter R. McDonald, Tong Ying Shun, Michael D Lewen, Ian F. Pollack, and John S. Lazo  
 Molecular Pharmacology

|                              |           |          |                                                       |           |        |
|------------------------------|-----------|----------|-------------------------------------------------------|-----------|--------|
| siRNA-Vinblastine Run1-DMSO  | NM_001065 | TNFRSF1A | tumor necrosis factor receptor superfamily, member 1A | 2.063137  | Inlier |
| siRNA-Temozolomide Run3-DMSO | NM_001066 | TNFRSF1B | tumor necrosis factor receptor superfamily, member 1B | -1.63498  | Inlier |
| siRNA-Temozolomide Run2-DMSO | NM_001066 | TNFRSF1B | tumor necrosis factor receptor superfamily, member 1B | -0.986307 | Inlier |
| siRNA-Temozolomide Run1-DMSO | NM_001066 | TNFRSF1B | tumor necrosis factor receptor superfamily, member 1B | -0.706245 | Inlier |
| siRNA Disorazole DMSO Run1   | NM_001066 | TNFRSF1B | tumor necrosis factor receptor superfamily, member 1B | -0.301054 | Inlier |
| siRNA Disorazole DMSO Run3   | NM_001066 | TNFRSF1B | tumor necrosis factor receptor superfamily, member 1B | 0.301053  | Inlier |

Identification of Survival Genes in Human Glioblastoma Cells Using siRNA Screening

Nikhil G Thaker, Fang Zhang, Peter R. McDonald, Tong Ying Shun, Michael D Lewen, Ian F. Pollack, and John S. Lazo

Molecular Pharmacology

|                                  |               |              |                                                                          |                  |
|----------------------------------|---------------|--------------|--------------------------------------------------------------------------|------------------|
| siRNA Disorazole DMSO Run2       | NM_0010<br>66 | TNFRSF1<br>B | tumor<br>necrosis<br>factor<br>receptor<br>superfamil<br>y, member<br>1B | 0.631424 Inlier  |
| siRNA-Vinblastine Run2-<br>DMSO  | NM_0010<br>66 | TNFRSF1<br>B | tumor<br>necrosis<br>factor<br>receptor<br>superfamil<br>y, member<br>1B | 0.642755 Inlier  |
| siRNA-Vinblastine Run1-<br>DMSO  | NM_0010<br>66 | TNFRSF1<br>B | tumor<br>necrosis<br>factor<br>receptor<br>superfamil<br>y, member<br>1B | 0.934408 Inlier  |
| siRNA-Temozolomide Run2-<br>DMSO | NM_1489<br>73 | TNFRSF2<br>5 | tumor<br>necrosis<br>factor<br>receptor<br>superfamil<br>y, member<br>25 | -0.81164 Inlier  |
| siRNA-Temozolomide Run1-<br>DMSO | NM_1489<br>73 | TNFRSF2<br>5 | tumor<br>necrosis<br>factor<br>receptor<br>superfamil<br>y, member<br>25 | -0.694307 Inlier |
| siRNA Disorazole DMSO Run1       | NM_1489<br>73 | TNFRSF2<br>5 | tumor<br>necrosis<br>factor<br>receptor<br>superfamil<br>y, member<br>25 | -0.654693 Inlier |

Identification of Survival Genes in Human Glioblastoma Cells Using siRNA Screening  
 Nikhil G Thaker, Fang Zhang, Peter R. McDonald, Tong Ying Shun, Michael D Lewen, Ian F. Pollack, and John S. Lazo  
 Molecular Pharmacology

|                                  |               |              |                                                                          |           |        |
|----------------------------------|---------------|--------------|--------------------------------------------------------------------------|-----------|--------|
| siRNA Disorazole DMSO Run3       | NM_1489<br>73 | TNFRSF2<br>5 | tumor<br>necrosis<br>factor<br>receptor<br>superfamil<br>y, member<br>25 | -0.073489 | Inlier |
| siRNA-Temozolomide Run3-<br>DMSO | NM_1489<br>73 | TNFRSF2<br>5 | tumor<br>necrosis<br>factor<br>receptor<br>superfamil<br>y, member<br>25 | 0.073489  | Inlier |
| siRNA-Vinblastine Run2-<br>DMSO  | NM_1489<br>73 | TNFRSF2<br>5 | tumor<br>necrosis<br>factor<br>receptor<br>superfamil<br>y, member<br>25 | 0.592505  | Inlier |
| siRNA Disorazole DMSO Run2       | NM_1489<br>73 | TNFRSF2<br>5 | tumor<br>necrosis<br>factor<br>receptor<br>superfamil<br>y, member<br>25 | 1.955931  | Inlier |
| siRNA-Vinblastine Run1-<br>DMSO  | NM_1489<br>73 | TNFRSF2<br>5 | tumor<br>necrosis<br>factor<br>receptor<br>superfamil<br>y, member<br>25 | 2.498733  | Inlier |
| siRNA Disorazole DMSO Run3       | NM_0033<br>27 | TNFRSF4<br>4 | tumor<br>necrosis<br>factor<br>receptor<br>superfamil<br>y, member<br>4  | -3.446055 | Inlier |

Identification of Survival Genes in Human Glioblastoma Cells Using siRNA Screening

Nikhil G Thaker, Fang Zhang, Peter R. McDonald, Tong Ying Shun, Michael D Lewen, Ian F. Pollack, and John S. Lazo

Molecular Pharmacology

| siRNA Treatment              | Gene    | Accession | Gene Description                                     | Log Fold Change | Classification |
|------------------------------|---------|-----------|------------------------------------------------------|-----------------|----------------|
| siRNA-Temozolomide Run1-DMSO | TNFRSF4 | NM_003327 | tumor necrosis factor receptor superfamily, member 4 | -0.493791       | Inlier         |
| siRNA-Vinblastine Run2-DMSO  | TNFRSF4 | NM_003327 | tumor necrosis factor receptor superfamily, member 4 | -0.409551       | Inlier         |
| siRNA Disorazole DMSO Run2   | TNFRSF4 | NM_003327 | tumor necrosis factor receptor superfamily, member 4 | -0.275067       | Inlier         |
| siRNA Disorazole DMSO Run1   | TNFRSF4 | NM_003327 | tumor necrosis factor receptor superfamily, member 4 | 0.275067        | Inlier         |
| siRNA-Temozolomide Run3-DMSO | TNFRSF4 | NM_003327 | tumor necrosis factor receptor superfamily, member 4 | 0.855209        | Inlier         |
| siRNA-Temozolomide Run2-DMSO | TNFRSF4 | NM_003327 | tumor necrosis factor receptor superfamily, member 4 | 5.282187        | Outlier        |
| siRNA-Vinblastine Run1-DMSO  | TNFRSF4 | NM_003327 | tumor necrosis factor receptor superfamily, member 4 | 6.881078        | Outlier        |

Identification of Survival Genes in Human Glioblastoma Cells Using siRNA Screening  
 Nikhil G Thaker, Fang Zhang, Peter R. McDonald, Tong Ying Shun, Michael D Lewen, Ian F. Pollack, and John S. Lazo

Molecular Pharmacology

| siRNA Treatment              | Gene ID   | Gene Name | CD40 antigen (TNF receptor superfamily member 5) | Value     | Category |
|------------------------------|-----------|-----------|--------------------------------------------------|-----------|----------|
| siRNA-Temozolomide Run3-DMSO | NM_152854 | TNFRSF5   | CD40 antigen (TNF receptor superfamily member 5) | -5.213503 | Outlier  |
| siRNA Disorazole DMSO Run1   | NM_152854 | TNFRSF5   | CD40 antigen (TNF receptor superfamily member 5) | -1.00835  | Inlier   |
| siRNA-Temozolomide Run1-DMSO | NM_152854 | TNFRSF5   | CD40 antigen (TNF receptor superfamily member 5) | -0.262109 | Inlier   |
| siRNA-Vinblastine Run2-DMSO  | NM_152854 | TNFRSF5   | CD40 antigen (TNF receptor superfamily member 5) | -0.02881  | Inlier   |
| siRNA Disorazole DMSO Run3   | NM_152854 | TNFRSF5   | CD40 antigen (TNF receptor superfamily member 5) | 0.028808  | Inlier   |
| siRNA-Temozolomide Run2-DMSO | NM_152854 | TNFRSF5   | CD40 antigen (TNF receptor superfamily member 5) | 0.34065   | Inlier   |
| siRNA Disorazole DMSO Run2   | NM_152854 | TNFRSF5   | CD40 antigen (TNF receptor superfamily member 5) | 2.613737  | Inlier   |

Identification of Survival Genes in Human Glioblastoma Cells Using siRNA Screening  
 Nikhil G Thaker, Fang Zhang, Peter R. McDonald, Tong Ying Shun, Michael D Lewen, Ian F. Pollack, and John S. Lazo

Molecular Pharmacology

| siRNA Treatment              | Gene ID   | Gene Name | Protein Description                              | Log Fold Change | Classification |
|------------------------------|-----------|-----------|--------------------------------------------------|-----------------|----------------|
| siRNA-Vinblastine Run1-DMSO  | NM_152854 | TNFRSF5   | CD40 antigen (TNF receptor superfamily member 5) | 4.444355        | Outlier        |
| siRNA-Temozolomide Run3-DMSO | NM_152873 | TNFRSF6   | Fas (TNF receptor superfamily member 6)          | -1.232226       | Inlier         |
| siRNA-Temozolomide Run2-DMSO | NM_152873 | TNFRSF6   | Fas (TNF receptor superfamily member 6)          | -0.909465       | Inlier         |
| siRNA-Vinblastine Run2-DMSO  | NM_152873 | TNFRSF6   | Fas (TNF receptor superfamily member 6)          | -0.315322       | Inlier         |
| siRNA Disorazole DMSO Run3   | NM_152873 | TNFRSF6   | Fas (TNF receptor superfamily member 6)          | -0.235511       | Inlier         |
| siRNA-Temozolomide Run1-DMSO | NM_152873 | TNFRSF6   | Fas (TNF receptor superfamily member 6)          | 0.235511        | Inlier         |
| siRNA Disorazole DMSO Run1   | NM_152873 | TNFRSF6   | Fas (TNF receptor superfamily member 6)          | 0.439534        | Inlier         |
| siRNA Disorazole DMSO Run2   | NM_152873 | TNFRSF6   | Fas (TNF receptor superfamily member 6)          | 2.448175        | Inlier         |

Identification of Survival Genes in Human Glioblastoma Cells Using siRNA Screening

Nikhil G Thaker, Fang Zhang, Peter R. McDonald, Tong Ying Shun, Michael D Lewen, Ian F. Pollack, and John S. Lazo

Molecular Pharmacology

|                              |           |          |                                                              |           |        |
|------------------------------|-----------|----------|--------------------------------------------------------------|-----------|--------|
| siRNA-Vinblastine Run1-DMSO  | NM_152873 | TNFRSF6  | Fas (TNF receptor superfamily, member 6)                     | 2.783188  | Inlier |
| siRNA-Temozolomide Run3-DMSO | NM_015647 | TNFRSF6B | tumor necrosis factor receptor superfamily, member 6b, decoy | -2.04008  | Inlier |
| siRNA Disorazole DMSO Run3   | NM_015647 | TNFRSF6B | tumor necrosis factor receptor superfamily, member 6b, decoy | -0.678316 | Inlier |
| siRNA-Temozolomide Run2-DMSO | NM_015647 | TNFRSF6B | tumor necrosis factor receptor superfamily, member 6b, decoy | -0.670684 | Inlier |
| siRNA-Temozolomide Run1-DMSO | NM_015647 | TNFRSF6B | tumor necrosis factor receptor superfamily, member 6b, decoy | -0.238995 | Inlier |
| siRNA Disorazole DMSO Run1   | NM_015647 | TNFRSF6B | tumor necrosis factor receptor superfamily, member 6b, decoy | 0.238995  | Inlier |

Identification of Survival Genes in Human Glioblastoma Cells Using siRNA Screening  
 Nikhil G Thaker, Fang Zhang, Peter R. McDonald, Tong Ying Shun, Michael D Lewen, Ian F. Pollack, and John S. Lazo  
 Molecular Pharmacology

|                              |               |              |                                                                                 |           |        |
|------------------------------|---------------|--------------|---------------------------------------------------------------------------------|-----------|--------|
| siRNA-Vinblastine Run1-DMSO  | NM_0156<br>47 | TNFRSF6<br>B | tumor<br>necrosis<br>factor<br>receptor<br>superfamil<br>y, member<br>6b, decoy | 0.636945  | Inlier |
| siRNA-Vinblastine Run2-DMSO  | NM_0156<br>47 | TNFRSF6<br>B | tumor<br>necrosis<br>factor<br>receptor<br>superfamil<br>y, member<br>6b, decoy | 1.110356  | Inlier |
| siRNA Disorazole DMSO Run2   | NM_0156<br>47 | TNFRSF6<br>B | tumor<br>necrosis<br>factor<br>receptor<br>superfamil<br>y, member<br>6b, decoy | 1.23323   | Inlier |
| siRNA-Temozolomide Run3-DMSO | NM_0012<br>42 | TNFRSF7      | tumor<br>necrosis<br>factor<br>receptor<br>superfamil<br>y, member<br>7         | -2.693953 | Inlier |
| siRNA Disorazole DMSO Run2   | NM_0012<br>42 | TNFRSF7      | tumor<br>necrosis<br>factor<br>receptor<br>superfamil<br>y, member<br>7         | -0.400574 | Inlier |
| siRNA-Temozolomide Run2-DMSO | NM_0012<br>42 | TNFRSF7      | tumor<br>necrosis<br>factor<br>receptor<br>superfamil<br>y, member<br>7         | -0.392536 | Inlier |
| siRNA-Temozolomide Run1-DMSO | NM_0012<br>42 | TNFRSF7      | tumor<br>necrosis<br>factor<br>receptor<br>superfamil<br>y, member<br>7         | -0.381894 | Inlier |



Identification of Survival Genes in Human Glioblastoma Cells Using siRNA Screening  
 Nikhil G Thaker, Fang Zhang, Peter R. McDonald, Tong Ying Shun, Michael D Lewen, Ian F. Pollack, and John S. Lazo

Molecular Pharmacology

| siRNA Treatment              | Accession | Gene    | Gene Description                                     | Score     | Outlier |
|------------------------------|-----------|---------|------------------------------------------------------|-----------|---------|
| siRNA Disorazole DMSO Run1   | NM_001242 | TNFRSF7 | tumor necrosis factor receptor superfamily, member 7 | 0.381894  | Inlier  |
| siRNA-Vinblastine Run2-DMSO  | NM_001242 | TNFRSF7 | tumor necrosis factor receptor superfamily, member 7 | 0.948426  | Inlier  |
| siRNA-Vinblastine Run1-DMSO  | NM_001242 | TNFRSF7 | tumor necrosis factor receptor superfamily, member 7 | 1.096407  | Inlier  |
| siRNA Disorazole DMSO Run3   | NM_001242 | TNFRSF7 | tumor necrosis factor receptor superfamily, member 7 | 1.262709  | Inlier  |
| siRNA Disorazole DMSO Run1   | NM_152942 | TNFRSF8 | tumor necrosis factor receptor superfamily, member 8 | -0.751797 | Inlier  |
| siRNA-Temozolomide Run2-DMSO | NM_152942 | TNFRSF8 | tumor necrosis factor receptor superfamily, member 8 | -0.597203 | Inlier  |
| siRNA-Temozolomide Run3-DMSO | NM_152942 | TNFRSF8 | tumor necrosis factor receptor superfamily, member 8 | -0.534501 | Inlier  |

Identification of Survival Genes in Human Glioblastoma Cells Using siRNA Screening  
 Nikhil G Thaker, Fang Zhang, Peter R. McDonald, Tong Ying Shun, Michael D Lewen, Ian F. Pollack, and John S. Lazo

Molecular Pharmacology

| siRNA Treatment              | Gene    | Accession | Gene ID | Log Fold Change | Classification |
|------------------------------|---------|-----------|---------|-----------------|----------------|
| siRNA Disorazole DMSO Run3   | TNFRSF8 | NM_1529   | 8       | -0.275231       | Inlier         |
| siRNA-Vinblastine Run2-DMSO  | TNFRSF8 | NM_1529   | 8       | 0.275231        | Inlier         |
| siRNA-Temozolomide Run1-DMSO | TNFRSF8 | NM_1529   | 8       | 1.072382        | Inlier         |
| siRNA Disorazole DMSO Run2   | TNFRSF8 | NM_1529   | 8       | 3.108076        | Inlier         |
| siRNA-Vinblastine Run1-DMSO  | TNFRSF8 | NM_1529   | 8       | 5.549821        | Outlier        |
| siRNA-Temozolomide Run2-DMSO | TNFRSF9 | NM_0015   | 9       | -0.858608       | Inlier         |
| siRNA-Temozolomide Run3-DMSO | TNFRSF9 | NM_0015   | 9       | -0.802815       | Inlier         |

tumor  
 necrosis  
 factor  
 receptor  
 superfamil  
 y, member

Identification of Survival Genes in Human Glioblastoma Cells Using siRNA Screening

Nikhil G Thaker, Fang Zhang, Peter R. McDonald, Tong Ying Shun, Michael D Lewen, Ian F. Pollack, and John S. Lazo

Molecular Pharmacology

|                                  |               |         |                                                                         |           |        |
|----------------------------------|---------------|---------|-------------------------------------------------------------------------|-----------|--------|
| siRNA Disorazole DMSO Run1       | NM_0015<br>61 | TNFRSF9 | tumor<br>necrosis<br>factor<br>receptor<br>superfamil<br>y, member<br>9 | -0.411105 | Inlier |
| siRNA Disorazole DMSO Run3       | NM_0015<br>61 | TNFRSF9 | tumor<br>necrosis<br>factor<br>receptor<br>superfamil<br>y, member<br>9 | -0.008782 | Inlier |
| siRNA-Vinblastine Run2-<br>DMSO  | NM_0015<br>61 | TNFRSF9 | tumor<br>necrosis<br>factor<br>receptor<br>superfamil<br>y, member<br>9 | 0.008781  | Inlier |
| siRNA-Temozolomide Run1-<br>DMSO | NM_0015<br>61 | TNFRSF9 | tumor<br>necrosis<br>factor<br>receptor<br>superfamil<br>y, member<br>9 | 0.546185  | Inlier |
| siRNA Disorazole DMSO Run2       | NM_0015<br>61 | TNFRSF9 | tumor<br>necrosis<br>factor<br>receptor<br>superfamil<br>y, member<br>9 | 2.696701  | Inlier |
| siRNA-Vinblastine Run1-<br>DMSO  | NM_0015<br>61 | TNFRSF9 | tumor<br>necrosis<br>factor<br>receptor<br>superfamil<br>y, member<br>9 | 2.995975  | Inlier |
| siRNA-Temozolomide Run1-<br>DMSO | NM_0039<br>85 | TNK1    | tyrosine<br>kinase,<br>non-<br>receptor, 1                              | -0.929068 | Inlier |
| siRNA-Temozolomide Run3-<br>DMSO | NM_0039<br>85 | TNK1    | tyrosine<br>kinase,<br>non-<br>receptor, 1                              | -0.741481 | Inlier |

Identification of Survival Genes in Human Glioblastoma Cells Using siRNA Screening

Nikhil G Thaker, Fang Zhang, Peter R. McDonald, Tong Ying Shun, Michael D Lewen, Ian F. Pollack, and John S. Lazo

Molecular Pharmacology

|                                  |               |      |                                                                                                                           |           |        |
|----------------------------------|---------------|------|---------------------------------------------------------------------------------------------------------------------------|-----------|--------|
| siRNA Disorazole DMSO Run2       | NM_0039<br>85 | TNK1 | tyrosine<br>kinase,<br>non-<br>receptor, 1                                                                                | -0.607519 | Inlier |
| siRNA-Temozolomide Run2-<br>DMSO | NM_0039<br>85 | TNK1 | tyrosine<br>kinase,<br>non-<br>receptor, 1                                                                                | -0.49176  | Inlier |
| siRNA Disorazole DMSO Run1       | NM_0039<br>85 | TNK1 | tyrosine<br>kinase,<br>non-<br>receptor, 1                                                                                | 0.49176   | Inlier |
| siRNA Disorazole DMSO Run3       | NM_0039<br>85 | TNK1 | tyrosine<br>kinase,<br>non-<br>receptor, 1                                                                                | 0.55408   | Inlier |
| siRNA-Vinblastine Run1-<br>DMSO  | NM_0039<br>85 | TNK1 | tyrosine<br>kinase,<br>non-<br>receptor, 1                                                                                | 0.747113  | Inlier |
| siRNA-Vinblastine Run2-<br>DMSO  | NM_0039<br>85 | TNK1 | tyrosine<br>kinase,<br>non-<br>receptor, 1<br>tankyrase,<br>TRF1-<br>interacting<br>ankyrin-<br>related<br>ADP-<br>ribose | 0.88466   | Inlier |
| siRNA-Temozolomide Run3-<br>DMSO | NM_0037<br>47 | TNKS | polymeras<br>e<br>tankyrase,<br>TRF1-<br>interacting<br>ankyrin-<br>related<br>ADP-<br>ribose                             | -1.289818 | Inlier |
| siRNA-Temozolomide Run1-<br>DMSO | NM_0037<br>47 | TNKS | polymeras<br>e                                                                                                            | -1.059075 | Inlier |

Identification of Survival Genes in Human Glioblastoma Cells Using siRNA Screening

Nikhil G Thaker, Fang Zhang, Peter R. McDonald, Tong Ying Shun, Michael D Lewen, Ian F. Pollack, and John S.

Lazo

Molecular Pharmacology

| siRNA Treatment              | Gene ID   | Gene Name | Log Fold Change | Outlier Status |
|------------------------------|-----------|-----------|-----------------|----------------|
| siRNA-Temozolomide Run2-DMSO | NM_003747 | TNKS      | -0.505505       | Inlier         |
| siRNA Disorazole DMSO Run1   | NM_003747 | TNKS      | -0.029704       | Inlier         |
| siRNA Disorazole DMSO Run3   | NM_003747 | TNKS      | 0.029703        | Inlier         |
| siRNA-Vinblastine Run2-DMSO  | NM_003747 | TNKS      | 0.380702        | Inlier         |
| siRNA Disorazole DMSO Run2   | NM_003747 | TNKS      | 0.843495        | Inlier         |

tankyrase, TRF1-interacting ankyrin-related ADP-ribose polymerase  
 tankyrase, TRF1-interacting ankyrin-related ADP-ribose polymerase

Identification of Survival Genes in Human Glioblastoma Cells Using siRNA Screening

Nikhil G Thaker, Fang Zhang, Peter R. McDonald, Tong Ying Shun, Michael D Lewen, Ian F. Pollack, and John S.

Lazo

Molecular Pharmacology

|                              |               |       |                                                                                                 |           |        |
|------------------------------|---------------|-------|-------------------------------------------------------------------------------------------------|-----------|--------|
| siRNA-Vinblastine Run1-DMSO  | NM_0037<br>47 | TNKS  | tankyrase,<br>TRF1-<br>interacting<br>ankyrin-<br>related<br>ADP-<br>ribose<br>polymeras<br>e   | 1.323454  | Inlier |
| siRNA-Vinblastine Run2-DMSO  | NM_0252<br>35 | TNKS2 | tankyrase,<br>TRF1-<br>interacting<br>ankyrin-<br>related<br>ADP-<br>ribose<br>polymeras<br>e 2 | -0.826875 | Inlier |
| siRNA Disorazole DMSO Run1   | NM_0252<br>35 | TNKS2 | tankyrase,<br>TRF1-<br>interacting<br>ankyrin-<br>related<br>ADP-<br>ribose<br>polymeras<br>e 2 | -0.638735 | Inlier |
| siRNA-Temozolomide Run2-DMSO | NM_0252<br>35 | TNKS2 | tankyrase,<br>TRF1-<br>interacting<br>ankyrin-<br>related<br>ADP-<br>ribose<br>polymeras<br>e 2 | -0.495982 | Inlier |
| siRNA Disorazole DMSO Run3   | NM_0252<br>35 | TNKS2 | tankyrase,<br>TRF1-<br>interacting<br>ankyrin-<br>related<br>ADP-<br>ribose<br>polymeras<br>e 2 | -0.092137 | Inlier |

Identification of Survival Genes in Human Glioblastoma Cells Using siRNA Screening  
 Nikhil G Thaker, Fang Zhang, Peter R. McDonald, Tong Ying Shun, Michael D Lewen, Ian F. Pollack, and John S. Lazo

Molecular Pharmacology

|                              |           |        |                                                                     |           |        |
|------------------------------|-----------|--------|---------------------------------------------------------------------|-----------|--------|
| siRNA-Temozolomide Run1-DMSO | NM_025235 | TNKS2  | tankyrase, TRF1-interacting ankyrin-related ADP-ribose polymerase 2 | 0.092137  | Inlier |
| siRNA-Temozolomide Run3-DMSO | NM_025235 | TNKS2  | tankyrase, TRF1-interacting ankyrin-related ADP-ribose polymerase 2 | 0.710265  | Inlier |
| siRNA-Vinblastine Run1-DMSO  | NM_025235 | TNKS2  | tankyrase, TRF1-interacting ankyrin-related ADP-ribose polymerase 2 | 1.281868  | Inlier |
| siRNA Disorazole DMSO Run2   | NM_025235 | TNKS2  | tankyrase, TRF1-interacting ankyrin-related ADP-ribose polymerase 2 | 1.295929  | Inlier |
| siRNA-Temozolomide Run3-DMSO | NM_015978 | TNNI3K | TNNI3 interacting kinase                                            | -0.745886 | Inlier |
| siRNA-Temozolomide Run1-DMSO | NM_015978 | TNNI3K | TNNI3 interacting kinase                                            | -0.603114 | Inlier |
| siRNA-Temozolomide Run2-DMSO | NM_015978 | TNNI3K | TNNI3 interacting kinase                                            | -0.581855 | Inlier |
| siRNA Disorazole DMSO Run3   | NM_015978 | TNNI3K | TNNI3 interacting kinase                                            | -0.036073 | Inlier |
| siRNA Disorazole DMSO Run2   | NM_015978 | TNNI3K | TNNI3 interacting kinase                                            | 0.036073  | Inlier |

Identification of Survival Genes in Human Glioblastoma Cells Using siRNA Screening  
 Nikhil G Thaker, Fang Zhang, Peter R. McDonald, Tong Ying Shun, Michael D Lewen, Ian F. Pollack, and John S. Lazo

Molecular Pharmacology

|                              |               |        |                                                                                                   |           |         |
|------------------------------|---------------|--------|---------------------------------------------------------------------------------------------------|-----------|---------|
| siRNA Disorazole DMSO Run1   | NM_0159<br>78 | TNNI3K | TNNI3<br>interacting<br>kinase                                                                    | 5.063917  | Outlier |
| siRNA-Vinblastine Run2-DMSO  | NM_0159<br>78 | TNNI3K | TNNI3<br>interacting<br>kinase                                                                    | 5.194977  | Outlier |
| siRNA-Vinblastine Run1-DMSO  | NM_0159<br>78 | TNNI3K | TNNI3<br>interacting<br>kinase                                                                    | 6.108506  | Outlier |
| siRNA-Temozolomide Run2-DMSO | NM_0032<br>85 | TNR    | tenascin R<br>(restrictin,<br>janusin)                                                            | -0.915586 | Inlier  |
| siRNA-Temozolomide Run3-DMSO | NM_0032<br>85 | TNR    | tenascin R<br>(restrictin,<br>janusin)                                                            | -0.806419 | Inlier  |
| siRNA Disorazole DMSO Run3   | NM_0032<br>85 | TNR    | tenascin R<br>(restrictin,<br>janusin)                                                            | -0.372417 | Inlier  |
| siRNA-Vinblastine Run2-DMSO  | NM_0032<br>85 | TNR    | tenascin R<br>(restrictin,<br>janusin)                                                            | -0.173636 | Inlier  |
| siRNA Disorazole DMSO Run1   | NM_0032<br>85 | TNR    | tenascin R<br>(restrictin,<br>janusin)                                                            | 0.173636  | Inlier  |
| siRNA-Temozolomide Run1-DMSO | NM_0032<br>85 | TNR    | tenascin R<br>(restrictin,<br>janusin)                                                            | 0.542581  | Inlier  |
| siRNA Disorazole DMSO Run2   | NM_0032<br>85 | TNR    | tenascin R<br>(restrictin,<br>janusin)                                                            | 0.91383   | Inlier  |
| siRNA-Vinblastine Run1-DMSO  | NM_0032<br>85 | TNR    | tenascin R<br>(restrictin,<br>janusin)                                                            | 1.080728  | Inlier  |
| siRNA-Temozolomide Run3-DMSO | NM_0051<br>20 | TNRC11 | mediator<br>of RNA<br>polymeras<br>e II<br>transcripti<br>on,<br>subunit 12<br>homolog<br>(yeast) | -1.584673 | Inlier  |



Identification of Survival Genes in Human Glioblastoma Cells Using siRNA Screening

Nikhil G Thaker, Fang Zhang, Peter R. McDonald, Tong Ying Shun, Michael D Lewen, Ian F. Pollack, and John S. Lazo

Molecular Pharmacology

|                              |               |        |                                                                         |           |        |
|------------------------------|---------------|--------|-------------------------------------------------------------------------|-----------|--------|
| siRNA Disorazole DMSO Run2   | NM_0051<br>20 | TNRC11 | mediator of RNA polymerase II transcription, subunit 12 homolog (yeast) | -1.305409 | Inlier |
| siRNA-Temozolomide Run2-DMSO | NM_0051<br>20 | TNRC11 | mediator of RNA polymerase II transcription, subunit 12 homolog (yeast) | -0.950607 | Inlier |
| siRNA-Temozolomide Run1-DMSO | NM_0051<br>20 | TNRC11 | mediator of RNA polymerase II transcription, subunit 12 homolog (yeast) | -0.065022 | Inlier |
| siRNA Disorazole DMSO Run1   | NM_0051<br>20 | TNRC11 | mediator of RNA polymerase II transcription, subunit 12 homolog (yeast) | 0.065021  | Inlier |
| siRNA Disorazole DMSO Run3   | NM_0051<br>20 | TNRC11 | mediator of RNA polymerase II transcription, subunit 12 homolog (yeast) | 0.314228  | Inlier |

Identification of Survival Genes in Human Glioblastoma Cells Using siRNA Screening  
 Nikhil G Thaker, Fang Zhang, Peter R. McDonald, Tong Ying Shun, Michael D Lewen, Ian F. Pollack, and John S. Lazo  
 Molecular Pharmacology

|                              |           |        |                                                                         |           |        |
|------------------------------|-----------|--------|-------------------------------------------------------------------------|-----------|--------|
| siRNA-Vinblastine Run1-DMSO  | NM_005120 | TNRC11 | mediator of RNA polymerase II transcription, subunit 12 homolog (yeast) | 0.398393  | Inlier |
| siRNA-Vinblastine Run2-DMSO  | NM_005120 | TNRC11 | mediator of RNA polymerase II transcription, subunit 12 homolog (yeast) | 1.2009    | Inlier |
| siRNA Disorazole DMSO Run3   | NM_032470 | TNXB   | tenascin XB                                                             | -1.389491 | Inlier |
| siRNA-Temozolomide Run3-DMSO | NM_032470 | TNXB   | tenascin XB                                                             | -0.88482  | Inlier |
| siRNA-Temozolomide Run2-DMSO | NM_032470 | TNXB   | tenascin XB                                                             | -0.46418  | Inlier |
| siRNA-Vinblastine Run2-DMSO  | NM_032470 | TNXB   | tenascin XB                                                             | -0.031502 | Inlier |
| siRNA-Temozolomide Run1-DMSO | NM_032470 | TNXB   | tenascin XB                                                             | 0.031502  | Inlier |
| siRNA Disorazole DMSO Run1   | NM_032470 | TNXB   | tenascin XB                                                             | 0.286238  | Inlier |
| siRNA-Vinblastine Run1-DMSO  | NM_032470 | TNXB   | tenascin XB                                                             | 1.259079  | Inlier |
| siRNA Disorazole DMSO Run2   | NM_032470 | TNXB   | tenascin XB                                                             | 1.453977  | Inlier |
| siRNA Disorazole DMSO Run1   | NM_003286 | TOP1   | topoisomerase (DNA) I                                                   | -1.035777 | Inlier |
| siRNA Disorazole DMSO Run3   | NM_003286 | TOP1   | topoisomerase (DNA) I                                                   | -0.962419 | Inlier |
| siRNA-Vinblastine Run2-DMSO  | NM_003286 | TOP1   | topoisomerase (DNA) I                                                   | -0.61849  | Inlier |
| siRNA-Temozolomide Run1-DMSO | NM_003286 | TOP1   | topoisomerase (DNA) I                                                   | -0.057543 | Inlier |
| siRNA-Temozolomide Run3-DMSO | NM_003286 | TOP1   | topoisomerase (DNA) I                                                   | 0.057545  | Inlier |

Identification of Survival Genes in Human Glioblastoma Cells Using siRNA Screening  
 Nikhil G Thaker, Fang Zhang, Peter R. McDonald, Tong Ying Shun, Michael D Lewen, Ian F. Pollack, and John S. Lazo

| siRNA Treatment                                           | Gene ID       | Target | Gene Name                                          | Z-score   | Outlier Status |
|-----------------------------------------------------------|---------------|--------|----------------------------------------------------|-----------|----------------|
| Molecular Pharmacology<br>siRNA-Vinblastine Run1-<br>DMSO | NM_0032<br>86 | TOP1   | topoisome<br>rase<br>(DNA) I                       | 0.435893  | Inlier         |
| siRNA-Temozolomide Run2-<br>DMSO                          | NM_0032<br>86 | TOP1   | topoisome<br>rase<br>(DNA) I                       | 0.73051   | Inlier         |
| siRNA Disorazole DMSO Run2                                | NM_0032<br>86 | TOP1   | topoisome<br>rase<br>(DNA) I                       | 1.648386  | Inlier         |
| siRNA-Vinblastine Run1-<br>DMSO                           | NM_0529<br>63 | TOP1MT | topoisome<br>rase<br>(DNA) I,<br>mitochond<br>rial | -0.929084 | Inlier         |
| siRNA Disorazole DMSO Run1                                | NM_0529<br>63 | TOP1MT | topoisome<br>rase<br>(DNA) I,<br>mitochond<br>rial | -0.7732   | Inlier         |
| siRNA-Temozolomide Run2-<br>DMSO                          | NM_0529<br>63 | TOP1MT | topoisome<br>rase<br>(DNA) I,<br>mitochond<br>rial | -0.5758   | Inlier         |
| siRNA-Vinblastine Run2-<br>DMSO                           | NM_0529<br>63 | TOP1MT | topoisome<br>rase<br>(DNA) I,<br>mitochond<br>rial | -0.186882 | Inlier         |
| siRNA-Temozolomide Run1-<br>DMSO                          | NM_0529<br>63 | TOP1MT | topoisome<br>rase<br>(DNA) I,<br>mitochond<br>rial | 0.186881  | Inlier         |
| siRNA Disorazole DMSO Run2                                | NM_0529<br>63 | TOP1MT | topoisome<br>rase<br>(DNA) I,<br>mitochond<br>rial | 0.40382   | Inlier         |
| siRNA-Temozolomide Run3-<br>DMSO                          | NM_0529<br>63 | TOP1MT | topoisome<br>rase<br>(DNA) I,<br>mitochond<br>rial | 0.793316  | Inlier         |
| siRNA Disorazole DMSO Run3                                | NM_0529<br>63 | TOP1MT | topoisome<br>rase<br>(DNA) I,<br>mitochond<br>rial | 0.876671  | Inlier         |

Identification of Survival Genes in Human Glioblastoma Cells Using siRNA Screening  
 Nikhil G Thaker, Fang Zhang, Peter R. McDonald, Tong Ying Shun, Michael D Lewen, Ian F. Pollack, and John S. Lazo

Molecular Pharmacology

|                              |           |       |                                     |           |        |
|------------------------------|-----------|-------|-------------------------------------|-----------|--------|
| siRNA-Temozolomide Run3-DMSO | NM_001067 | TOP2A | topoisomerase (DNA) II alpha 170kDa | -0.866229 | Inlier |
| siRNA Disorazole DMSO Run3   | NM_001067 | TOP2A | topoisomerase (DNA) II alpha 170kDa | -0.842855 | Inlier |
| siRNA-Vinblastine Run2-DMSO  | NM_001067 | TOP2A | topoisomerase (DNA) II alpha 170kDa | -0.506145 | Inlier |
| siRNA-Temozolomide Run2-DMSO | NM_001067 | TOP2A | topoisomerase (DNA) II alpha 170kDa | -0.223428 | Inlier |
| siRNA Disorazole DMSO Run1   | NM_001067 | TOP2A | topoisomerase (DNA) II alpha 170kDa | 0.223428  | Inlier |
| siRNA-Temozolomide Run1-DMSO | NM_001067 | TOP2A | topoisomerase (DNA) II alpha 170kDa | 0.41861   | Inlier |
| siRNA-Vinblastine Run1-DMSO  | NM_001067 | TOP2A | topoisomerase (DNA) II alpha 170kDa | 2.022901  | Inlier |
| siRNA Disorazole DMSO Run2   | NM_001067 | TOP2A | topoisomerase (DNA) II alpha 170kDa | 2.516605  | Inlier |
| siRNA-Temozolomide Run3-DMSO | NM_001068 | TOP2B | topoisomerase (DNA) II beta 180kDa  | -1.299462 | Inlier |
| siRNA-Temozolomide Run2-DMSO | NM_001068 | TOP2B | topoisomerase (DNA) II beta 180kDa  | -1.043893 | Inlier |

Identification of Survival Genes in Human Glioblastoma Cells Using siRNA Screening  
 Nikhil G Thaker, Fang Zhang, Peter R. McDonald, Tong Ying Shun, Michael D Lewen, Ian F. Pollack, and John S. Lazo

Molecular Pharmacology

|                              |               |       |                                                 |           |        |
|------------------------------|---------------|-------|-------------------------------------------------|-----------|--------|
| siRNA-Temozolomide Run1-DMSO | NM_0010<br>68 | TOP2B | topoisome<br>rase<br>(DNA) II<br>beta<br>180kDa | -0.217479 | Inlier |
| siRNA Disorazole DMSO Run3   | NM_0010<br>68 | TOP2B | topoisome<br>rase<br>(DNA) II<br>beta<br>180kDa | -0.014056 | Inlier |
| siRNA Disorazole DMSO Run1   | NM_0010<br>68 | TOP2B | topoisome<br>rase<br>(DNA) II<br>beta<br>180kDa | 0.014057  | Inlier |
| siRNA-Vinblastine Run2-DMSO  | NM_0010<br>68 | TOP2B | topoisome<br>rase<br>(DNA) II<br>beta<br>180kDa | 0.499492  | Inlier |
| siRNA-Vinblastine Run1-DMSO  | NM_0010<br>68 | TOP2B | topoisome<br>rase<br>(DNA) II<br>beta<br>180kDa | 0.849508  | Inlier |
| siRNA Disorazole DMSO Run2   | NM_0010<br>68 | TOP2B | topoisome<br>rase<br>(DNA) II<br>beta<br>180kDa | 2.271644  | Inlier |
| siRNA-Temozolomide Run2-DMSO | NM_0046<br>18 | TOP3A | topoisome<br>rase<br>(DNA) III<br>alpha         | -1.186525 | Inlier |
| siRNA-Temozolomide Run3-DMSO | NM_0046<br>18 | TOP3A | topoisome<br>rase<br>(DNA) III<br>alpha         | -0.463352 | Inlier |
| siRNA Disorazole DMSO Run1   | NM_0046<br>18 | TOP3A | topoisome<br>rase<br>(DNA) III<br>alpha         | -0.310208 | Inlier |
| siRNA Disorazole DMSO Run3   | NM_0046<br>18 | TOP3A | topoisome<br>rase<br>(DNA) III<br>alpha         | -0.048706 | Inlier |
| siRNA-Vinblastine Run2-DMSO  | NM_0046<br>18 | TOP3A | topoisome<br>rase<br>(DNA) III<br>alpha         | 0.048706  | Inlier |

Identification of Survival Genes in Human Glioblastoma Cells Using siRNA Screening  
 Nikhil G Thaker, Fang Zhang, Peter R. McDonald, Tong Ying Shun, Michael D Lewen, Ian F. Pollack, and John S. Lazo

Molecular Pharmacology

|                              |               |        |                               |           |        |
|------------------------------|---------------|--------|-------------------------------|-----------|--------|
| siRNA-Temozolomide Run1-DMSO | NM_0046<br>18 | TOP3A  | topoisomerase (DNA) III alpha | 0.885648  | Inlier |
| siRNA Disorazole DMSO Run2   | NM_0046<br>18 | TOP3A  | topoisomerase (DNA) III alpha | 1.796556  | Inlier |
| siRNA-Vinblastine Run1-DMSO  | NM_0046<br>18 | TOP3A  | topoisomerase (DNA) III alpha | 2.179893  | Inlier |
| siRNA-Temozolomide Run2-DMSO | NM_0039<br>35 | TOP3B  | topoisomerase (DNA) III beta  | -1.004639 | Inlier |
| siRNA-Temozolomide Run3-DMSO | NM_0039<br>35 | TOP3B  | topoisomerase (DNA) III beta  | -0.618936 | Inlier |
| siRNA Disorazole DMSO Run3   | NM_0039<br>35 | TOP3B  | topoisomerase (DNA) III beta  | -0.473994 | Inlier |
| siRNA-Vinblastine Run2-DMSO  | NM_0039<br>35 | TOP3B  | topoisomerase (DNA) III beta  | -0.306095 | Inlier |
| siRNA Disorazole DMSO Run1   | NM_0039<br>35 | TOP3B  | topoisomerase (DNA) III beta  | 0.306094  | Inlier |
| siRNA-Vinblastine Run1-DMSO  | NM_0039<br>35 | TOP3B  | topoisomerase (DNA) III beta  | 0.730064  | Inlier |
| siRNA-Temozolomide Run1-DMSO | NM_0039<br>35 | TOP3B  | topoisomerase (DNA) III beta  | 0.85871   | Inlier |
| siRNA Disorazole DMSO Run2   | NM_0039<br>35 | TOP3B  | topoisomerase (DNA) III beta  | 1.418449  | Inlier |
| siRNA-Temozolomide Run2-DMSO | NM_0070<br>27 | TOPBP1 | (DNA) II binding protein 1    | -1.575779 | Inlier |

Identification of Survival Genes in Human Glioblastoma Cells Using siRNA Screening  
 Nikhil G Thaker, Fang Zhang, Peter R. McDonald, Tong Ying Shun, Michael D Lewen, Ian F. Pollack, and John S. Lazo

Molecular Pharmacology

|                              |               |        |                                                       |           |        |
|------------------------------|---------------|--------|-------------------------------------------------------|-----------|--------|
| siRNA-Temozolomide Run3-DMSO | NM_0070<br>27 | TOPBP1 | topoisome<br>rase<br>(DNA) II<br>binding<br>protein 1 | -0.818009 | Inlier |
| siRNA Disorazole DMSO Run3   | NM_0070<br>27 | TOPBP1 | topoisome<br>rase<br>(DNA) II<br>binding<br>protein 1 | -0.530991 | Inlier |
| siRNA-Temozolomide Run1-DMSO | NM_0070<br>27 | TOPBP1 | topoisome<br>rase<br>(DNA) II<br>binding<br>protein 1 | -0.037629 | Inlier |
| siRNA-Vinblastine Run2-DMSO  | NM_0070<br>27 | TOPBP1 | topoisome<br>rase<br>(DNA) II<br>binding<br>protein 1 | 0.037629  | Inlier |
| siRNA Disorazole DMSO Run1   | NM_0070<br>27 | TOPBP1 | topoisome<br>rase<br>(DNA) II<br>binding<br>protein 1 | 0.349259  | Inlier |
| siRNA-Vinblastine Run1-DMSO  | NM_0070<br>27 | TOPBP1 | topoisome<br>rase<br>(DNA) II<br>binding<br>protein 1 | 0.866609  | Inlier |
| siRNA Disorazole DMSO Run2   | NM_0070<br>27 | TOPBP1 | topoisome<br>rase<br>(DNA) II<br>binding<br>protein 1 | 1.291268  | Inlier |
| siRNA Disorazole DMSO Run2   | NM_0184<br>92 | TOPK   | binding<br>kinase<br>PDZ                              | -1.140898 | Inlier |
| siRNA-Temozolomide Run3-DMSO | NM_0184<br>92 | TOPK   | binding<br>kinase<br>PDZ                              | -1.071774 | Inlier |
| siRNA Disorazole DMSO Run3   | NM_0184<br>92 | TOPK   | binding<br>kinase<br>PDZ                              | -0.085039 | Inlier |
| siRNA-Temozolomide Run2-DMSO | NM_0184<br>92 | TOPK   | binding<br>kinase<br>PDZ                              | -0.022784 | Inlier |
| siRNA-Temozolomide Run1-DMSO | NM_0184<br>92 | TOPK   | binding<br>kinase                                     | 0.022784  | Inlier |

Identification of Survival Genes in Human Glioblastoma Cells Using siRNA Screening  
 Nikhil G Thaker, Fang Zhang, Peter R. McDonald, Tong Ying Shun, Michael D Lewen, Ian F. Pollack, and John S. Lazo

Molecular Pharmacology

| siRNA Treatment              | Gene ID   | Gene Name | Protein                                       | Score     | Category |
|------------------------------|-----------|-----------|-----------------------------------------------|-----------|----------|
| siRNA Disorazole DMSO Run1   | NM_018492 | TOPK      | PDZ binding kinase                            | 0.666324  | Inlier   |
| siRNA-Vinblastine Run2-DMSO  | NM_018492 | TOPK      | PDZ binding kinase                            | 0.682676  | Inlier   |
| siRNA-Vinblastine Run1-DMSO  | NM_018492 | TOPK      | PDZ binding kinase topoisomerase I            | 0.920002  | Inlier   |
| siRNA-Temozolomide Run3-DMSO | NM_005802 | TOPORS    | binding, arginine/serine-rich topoisomerase I | -1.512501 | Inlier   |
| siRNA Disorazole DMSO Run1   | NM_005802 | TOPORS    | binding, arginine/serine-rich topoisomerase I | -0.859126 | Inlier   |
| siRNA-Temozolomide Run2-DMSO | NM_005802 | TOPORS    | binding, arginine/serine-rich topoisomerase I | -0.489874 | Inlier   |
| siRNA Disorazole DMSO Run3   | NM_005802 | TOPORS    | binding, arginine/serine-rich topoisomerase I | -0.054974 | Inlier   |
| siRNA-Temozolomide Run1-DMSO | NM_005802 | TOPORS    | binding, arginine/serine-rich topoisomerase I | 0.054974  | Inlier   |
| siRNA-Vinblastine Run2-DMSO  | NM_005802 | TOPORS    | binding, arginine/serine-rich topoisomerase I | 0.48124   | Inlier   |
| siRNA Disorazole DMSO Run2   | NM_005802 | TOPORS    | binding, arginine/serine-rich topoisomerase I | 7.02118   | Outlier  |
| siRNA-Vinblastine Run1-DMSO  | NM_005802 | TOPORS    | binding, arginine/serine-rich                 | 8.096858  | Outlier  |



Identification of Survival Genes in Human Glioblastoma Cells Using siRNA Screening  
 Nikhil G Thaker, Fang Zhang, Peter R. McDonald, Tong Ying Shun, Michael D Lewen, Ian F. Pollack, and John S. Lazo  
 Molecular Pharmacology

|                              |           |      |                                          |           |        |
|------------------------------|-----------|------|------------------------------------------|-----------|--------|
| siRNA-Temozolomide Run3-DMSO | NM_000546 | TP53 | tumor protein p53 (Li-Fraumeni syndrome) | -1.018215 | Inlier |
| siRNA-Temozolomide Run2-DMSO | NM_000546 | TP53 | tumor protein p53 (Li-Fraumeni syndrome) | -1.018108 | Inlier |
| siRNA Disorazole DMSO Run3   | NM_000546 | TP53 | tumor protein p53 (Li-Fraumeni syndrome) | -0.259276 | Inlier |
| siRNA Disorazole DMSO Run1   | NM_000546 | TP53 | tumor protein p53 (Li-Fraumeni syndrome) | -0.059753 | Inlier |
| siRNA-Temozolomide Run1-DMSO | NM_000546 | TP53 | tumor protein p53 (Li-Fraumeni syndrome) | 0.059753  | Inlier |
| siRNA Disorazole DMSO Run2   | NM_000546 | TP53 | tumor protein p53 (Li-Fraumeni syndrome) | 0.532375  | Inlier |
| siRNA-Vinblastine Run2-DMSO  | NM_000546 | TP53 | tumor protein p53 (Li-Fraumeni syndrome) | 0.816625  | Inlier |
| siRNA-Vinblastine Run1-DMSO  | NM_000546 | TP53 | tumor protein p53 (Li-Fraumeni syndrome) | 1.091286  | Inlier |

Identification of Survival Genes in Human Glioblastoma Cells Using siRNA Screening  
 Nikhil G Thaker, Fang Zhang, Peter R. McDonald, Tong Ying Shun, Michael D Lewen, Ian F. Pollack, and John S. Lazo

Molecular Pharmacology

|                                  |               |        |                                                   |           |        |
|----------------------------------|---------------|--------|---------------------------------------------------|-----------|--------|
| siRNA Disorazole DMSO Run1       | NM_1471<br>84 | TP53I3 | tumor<br>protein<br>p53<br>inducible<br>protein 3 | -0.89906  | Inlier |
| siRNA-Temozolomide Run2-<br>DMSO | NM_1471<br>84 | TP53I3 | tumor<br>protein<br>p53<br>inducible<br>protein 3 | -0.830126 | Inlier |
| siRNA-Temozolomide Run3-<br>DMSO | NM_1471<br>84 | TP53I3 | tumor<br>protein<br>p53<br>inducible<br>protein 3 | -0.570435 | Inlier |
| siRNA-Temozolomide Run1-<br>DMSO | NM_1471<br>84 | TP53I3 | tumor<br>protein<br>p53<br>inducible<br>protein 3 | -0.227473 | Inlier |
| siRNA-Vinblastine Run2-<br>DMSO  | NM_1471<br>84 | TP53I3 | tumor<br>protein<br>p53<br>inducible<br>protein 3 | 0.227473  | Inlier |
| siRNA Disorazole DMSO Run3       | NM_1471<br>84 | TP53I3 | tumor<br>protein<br>p53<br>inducible<br>protein 3 | 0.35736   | Inlier |
| siRNA Disorazole DMSO Run2       | NM_1471<br>84 | TP53I3 | tumor<br>protein<br>p53<br>inducible<br>protein 3 | 0.778565  | Inlier |
| siRNA-Vinblastine Run1-<br>DMSO  | NM_1471<br>84 | TP53I3 | TP53<br>inducible<br>protein 3                    | 0.947309  | Inlier |
| siRNA Disorazole DMSO Run2       | NM_0335<br>50 | TP53RK | TP53<br>regulating<br>kinase                      | -1.29904  | Inlier |
| siRNA-Temozolomide Run3-<br>DMSO | NM_0335<br>50 | TP53RK | TP53<br>regulating<br>kinase                      | -1.198958 | Inlier |
| siRNA-Temozolomide Run2-<br>DMSO | NM_0335<br>50 | TP53RK | TP53<br>regulating<br>kinase                      | -0.28681  | Inlier |
| siRNA Disorazole DMSO Run1       | NM_0335<br>50 | TP53RK | TP53<br>regulating<br>kinase                      | -0.02323  | Inlier |

Identification of Survival Genes in Human Glioblastoma Cells Using siRNA Screening  
 Nikhil G Thaker, Fang Zhang, Peter R. McDonald, Tong Ying Shun, Michael D Lewen, Ian F. Pollack, and John S. Lazo

| Molecular Pharmacology       | siRNA         | Gene   | TP53                             | Value     | Inlier |
|------------------------------|---------------|--------|----------------------------------|-----------|--------|
| siRNA-Temozolomide Run1-DMSO | NM_0335<br>50 | TP53RK | regulating<br>kinase             | 0.023229  | Inlier |
| siRNA-Vinblastine Run2-DMSO  | NM_0335<br>50 | TP53RK | regulating<br>kinase             | 0.51217   | Inlier |
| siRNA Disorazole DMSO Run3   | NM_0335<br>50 | TP53RK | regulating<br>kinase             | 0.83683   | Inlier |
| siRNA-Vinblastine Run1-DMSO  | NM_0335<br>50 | TP53RK | regulating<br>kinase             | 1.129292  | Inlier |
| siRNA-Temozolomide Run3-DMSO | NM_0179<br>01 | TPCN1  | two pore<br>segment<br>channel 1 | -2.079782 | Inlier |
| siRNA Disorazole DMSO Run3   | NM_0179<br>01 | TPCN1  | two pore<br>segment<br>channel 1 | -0.733422 | Inlier |
| siRNA Disorazole DMSO Run2   | NM_0179<br>01 | TPCN1  | two pore<br>segment<br>channel 1 | -0.524814 | Inlier |
| siRNA-Temozolomide Run2-DMSO | NM_0179<br>01 | TPCN1  | two pore<br>segment<br>channel 1 | -0.474965 | Inlier |
| siRNA-Temozolomide Run1-DMSO | NM_0179<br>01 | TPCN1  | two pore<br>segment<br>channel 1 | 0.474965  | Inlier |
| siRNA Disorazole DMSO Run1   | NM_0179<br>01 | TPCN1  | two pore<br>segment<br>channel 1 | 0.615578  | Inlier |
| siRNA-Vinblastine Run2-DMSO  | NM_0179<br>01 | TPCN1  | two pore<br>segment<br>channel 1 | 1.801586  | Inlier |
| siRNA-Vinblastine Run1-DMSO  | NM_0179<br>01 | TPCN1  | two pore<br>segment<br>channel 1 | 2.114508  | Inlier |
| siRNA-Temozolomide Run3-DMSO | NM_1390<br>75 | TPCN2  | two pore<br>segment<br>channel 2 | -1.046389 | Inlier |
| siRNA-Temozolomide Run2-DMSO | NM_1390<br>75 | TPCN2  | two pore<br>segment<br>channel 2 | -0.704528 | Inlier |
| siRNA Disorazole DMSO Run3   | NM_1390<br>75 | TPCN2  | two pore<br>segment<br>channel 2 | -0.644472 | Inlier |
| siRNA Disorazole DMSO Run2   | NM_1390<br>75 | TPCN2  | two pore<br>segment<br>channel 2 | -0.156702 | Inlier |
| siRNA-Temozolomide Run1-DMSO | NM_1390<br>75 | TPCN2  | two pore<br>segment<br>channel 2 | 0.156702  | Inlier |

Identification of Survival Genes in Human Glioblastoma Cells Using siRNA Screening  
 Nikhil G Thaker, Fang Zhang, Peter R. McDonald, Tong Ying Shun, Michael D Lewen, Ian F. Pollack, and John S. Lazo

Molecular Pharmacology

|                              |               |       |                                                                             |           |        |
|------------------------------|---------------|-------|-----------------------------------------------------------------------------|-----------|--------|
| siRNA Disorazole DMSO Run1   | NM_1390<br>75 | TPCN2 | two pore<br>segment<br>channel 2                                            | 0.225968  | Inlier |
| siRNA-Vinblastine Run2-DMSO  | NM_1390<br>75 | TPCN2 | two pore<br>segment<br>channel 2                                            | 0.793146  | Inlier |
| siRNA-Vinblastine Run1-DMSO  | NM_1390<br>75 | TPCN2 | two pore<br>segment<br>channel 2                                            | 0.824148  | Inlier |
| siRNA-Temozolomide Run3-DMSO | NM_0041<br>79 | TPH1  | tryptophan<br>hydroxylas<br>e 1<br>(tryptopha<br>n 5-<br>monooxyg<br>enase) | -1.320917 | Inlier |
| siRNA-Temozolomide Run2-DMSO | NM_0041<br>79 | TPH1  | tryptophan<br>hydroxylas<br>e 1<br>(tryptopha<br>n 5-<br>monooxyg<br>enase) | -0.766715 | Inlier |
| siRNA Disorazole DMSO Run3   | NM_0041<br>79 | TPH1  | tryptophan<br>hydroxylas<br>e 1<br>(tryptopha<br>n 5-<br>monooxyg<br>enase) | -0.582285 | Inlier |
| siRNA-Vinblastine Run2-DMSO  | NM_0041<br>79 | TPH1  | tryptophan<br>hydroxylas<br>e 1<br>(tryptopha<br>n 5-<br>monooxyg<br>enase) | -0.034561 | Inlier |
| siRNA Disorazole DMSO Run1   | NM_0041<br>79 | TPH1  | tryptophan<br>hydroxylas<br>e 1<br>(tryptopha<br>n 5-<br>monooxyg<br>enase) | 0.034561  | Inlier |

Identification of Survival Genes in Human Glioblastoma Cells Using siRNA Screening  
 Nikhil G Thaker, Fang Zhang, Peter R. McDonald, Tong Ying Shun, Michael D Lewen, Ian F. Pollack, and John S. Lazo  
 Molecular Pharmacology

|                              |               |      |                                                       |           |        |
|------------------------------|---------------|------|-------------------------------------------------------|-----------|--------|
| siRNA-Temozolomide Run1-DMSO | NM_0041<br>79 | TPH1 | tryptophan hydroxylase 1 (tryptophan 5-monooxygenase) | 0.373688  | Inlier |
| siRNA-Vinblastine Run1-DMSO  | NM_0041<br>79 | TPH1 | tryptophan hydroxylase 1 (tryptophan 5-monooxygenase) | 1.730635  | Inlier |
| siRNA Disorazole DMSO Run2   | NM_0041<br>79 | TPH1 | tryptophan hydroxylase 1 (tryptophan 5-monooxygenase) | 1.817645  | Inlier |
| siRNA-Temozolomide Run3-DMSO | NM_1733<br>53 | TPH2 | tryptophan hydroxylase 2                              | -1.090207 | Inlier |
| siRNA Disorazole DMSO Run3   | NM_1733<br>53 | TPH2 | tryptophan hydroxylase 2                              | -0.861082 | Inlier |
| siRNA-Vinblastine Run2-DMSO  | NM_1733<br>53 | TPH2 | tryptophan hydroxylase 2                              | -0.487918 | Inlier |
| siRNA-Temozolomide Run1-DMSO | NM_1733<br>53 | TPH2 | tryptophan hydroxylase 2                              | -0.170728 | Inlier |
| siRNA-Temozolomide Run2-DMSO | NM_1733<br>53 | TPH2 | tryptophan hydroxylase 2                              | 0.170728  | Inlier |
| siRNA Disorazole DMSO Run1   | NM_1733<br>53 | TPH2 | tryptophan hydroxylase 2                              | 0.482282  | Inlier |
| siRNA Disorazole DMSO Run2   | NM_1733<br>53 | TPH2 | tryptophan hydroxylase 2                              | 1.346123  | Inlier |

Identification of Survival Genes in Human Glioblastoma Cells Using siRNA Screening  
 Nikhil G Thaker, Fang Zhang, Peter R. McDonald, Tong Ying Shun, Michael D Lewen, Ian F. Pollack, and John S. Lazo

Molecular Pharmacology

|                              |               |      |                                       |           |        |
|------------------------------|---------------|------|---------------------------------------|-----------|--------|
| siRNA-Vinblastine Run1-DMSO  | NM_1733<br>53 | TPH2 | tryptophan<br>hydroxylas<br>e 2       | 1.756623  | Inlier |
| siRNA-Temozolomide Run2-DMSO | NM_0003<br>65 | TPI1 | triosephos<br>phate<br>isomerase<br>1 | -0.96169  | Inlier |
| siRNA-Temozolomide Run3-DMSO | NM_0003<br>65 | TPI1 | triosephos<br>phate<br>isomerase<br>1 | -0.861911 | Inlier |
| siRNA-Temozolomide Run1-DMSO | NM_0003<br>65 | TPI1 | triosephos<br>phate<br>isomerase<br>1 | -0.487089 | Inlier |
| siRNA-Vinblastine Run2-DMSO  | NM_0003<br>65 | TPI1 | triosephos<br>phate<br>isomerase<br>1 | -0.105232 | Inlier |
| siRNA Disorazole DMSO Run1   | NM_0003<br>65 | TPI1 | triosephos<br>phate<br>isomerase<br>1 | 0.105232  | Inlier |
| siRNA Disorazole DMSO Run3   | NM_0003<br>65 | TPI1 | triosephos<br>phate<br>isomerase<br>1 | 0.252723  | Inlier |
| siRNA Disorazole DMSO Run2   | NM_0003<br>65 | TPI1 | triosephos<br>phate<br>isomerase<br>1 | 1.509929  | Inlier |
| siRNA-Vinblastine Run1-DMSO  | NM_0003<br>65 | TPI1 | triosephos<br>phate<br>isomerase<br>1 | 1.850018  | Inlier |
| siRNA-Temozolomide Run3-DMSO | NM_0224<br>45 | TPK1 | thiamin<br>pyrophosp<br>hokinase 1    | -1.527174 | Inlier |
| siRNA-Temozolomide Run1-DMSO | NM_0224<br>45 | TPK1 | thiamin<br>pyrophosp<br>hokinase 1    | -0.499671 | Inlier |
| siRNA Disorazole DMSO Run2   | NM_0224<br>45 | TPK1 | thiamin<br>pyrophosp<br>hokinase 1    | -0.343537 | Inlier |
| siRNA Disorazole DMSO Run1   | NM_0224<br>45 | TPK1 | thiamin<br>pyrophosp<br>hokinase 1    | -0.035156 | Inlier |

Identification of Survival Genes in Human Glioblastoma Cells Using siRNA Screening  
 Nikhil G Thaker, Fang Zhang, Peter R. McDonald, Tong Ying Shun, Michael D Lewen, Ian F. Pollack, and John S. Lazo

Molecular Pharmacology

|                              |                  |      |                                    |           |        |
|------------------------------|------------------|------|------------------------------------|-----------|--------|
| siRNA-Temozolomide Run2-DMSO | NM_0224<br>45    | TPK1 | thiamin<br>pyrophosp<br>hokinase 1 | 0.035155  | Inlier |
| siRNA-Vinblastine Run1-DMSO  | NM_0224<br>45    | TPK1 | thiamin<br>pyrophosp<br>hokinase 1 | 0.849329  | Inlier |
| siRNA-Vinblastine Run2-DMSO  | NM_0224<br>45    | TPK1 | thiamin<br>pyrophosp<br>hokinase 1 | 1.060223  | Inlier |
| siRNA Disorazole DMSO Run3   | NM_0224<br>45    | TPK1 | thiamin<br>pyrophosp<br>hokinase 1 | 1.339157  | Inlier |
| siRNA-Temozolomide Run3-DMSO | NM_0010<br>18005 | TPM1 | tropomyos<br>in 1<br>(alpha)       | -1.465286 | Inlier |
| siRNA-Temozolomide Run2-DMSO | NM_0010<br>18005 | TPM1 | tropomyos<br>in 1<br>(alpha)       | -0.829314 | Inlier |
| siRNA Disorazole DMSO Run1   | NM_0010<br>18005 | TPM1 | tropomyos<br>in 1<br>(alpha)       | -0.640298 | Inlier |
| siRNA-Temozolomide Run1-DMSO | NM_0010<br>18005 | TPM1 | tropomyos<br>in 1<br>(alpha)       | -0.099359 | Inlier |
| siRNA Disorazole DMSO Run3   | NM_0010<br>18005 | TPM1 | tropomyos<br>in 1<br>(alpha)       | 0.099359  | Inlier |
| siRNA-Vinblastine Run2-DMSO  | NM_0010<br>18005 | TPM1 | tropomyos<br>in 1<br>(alpha)       | 0.288912  | Inlier |
| siRNA Disorazole DMSO Run2   | NM_0010<br>18005 | TPM1 | tropomyos<br>in 1<br>(alpha)       | 0.708702  | Inlier |
| siRNA-Vinblastine Run1-DMSO  | NM_0010<br>18005 | TPM1 | tropomyos<br>in 1<br>(alpha)       | 1.479647  | Inlier |
| siRNA-Temozolomide Run3-DMSO | NM_0032<br>89    | TPM2 | tropomyos<br>in 2 (beta)           | -2.196807 | Inlier |
| siRNA-Temozolomide Run2-DMSO | NM_0032<br>89    | TPM2 | tropomyos<br>in 2 (beta)           | -1.224202 | Inlier |
| siRNA-Temozolomide Run1-DMSO | NM_0032<br>89    | TPM2 | tropomyos<br>in 2 (beta)           | -0.29308  | Inlier |
| siRNA Disorazole DMSO Run3   | NM_0032<br>89    | TPM2 | tropomyos<br>in 2 (beta)           | -0.097122 | Inlier |

Identification of Survival Genes in Human Glioblastoma Cells Using siRNA Screening  
 Nikhil G Thaker, Fang Zhang, Peter R. McDonald, Tong Ying Shun, Michael D Lewen, Ian F. Pollack, and John S. Lazo

Molecular Pharmacology

|                                  |               |      |                                           |           |        |
|----------------------------------|---------------|------|-------------------------------------------|-----------|--------|
| siRNA Disorazole DMSO Run1       | NM_0032<br>89 | TPM2 | tropomyos<br>in 2 (beta)                  | 0.097122  | Inlier |
| siRNA-Vinblastine Run2-<br>DMSO  | NM_0032<br>89 | TPM2 | tropomyos<br>in 2 (beta)                  | 0.185675  | Inlier |
| siRNA-Vinblastine Run1-<br>DMSO  | NM_0032<br>89 | TPM2 | tropomyos<br>in 2 (beta)                  | 1.05592   | Inlier |
| siRNA Disorazole DMSO Run2       | NM_0032<br>89 | TPM2 | tropomyos<br>in 2 (beta)                  | 1.086046  | Inlier |
| siRNA-Temozolomide Run3-<br>DMSO | NM_1522<br>63 | TPM3 | tropomyos<br>in 3                         | -1.185526 | Inlier |
| siRNA-Vinblastine Run2-<br>DMSO  | NM_1522<br>63 | TPM3 | tropomyos<br>in 3                         | -0.72624  | Inlier |
| siRNA-Temozolomide Run2-<br>DMSO | NM_1522<br>63 | TPM3 | tropomyos<br>in 3                         | -0.329955 | Inlier |
| siRNA Disorazole DMSO Run1       | NM_1522<br>63 | TPM3 | tropomyos<br>in 3                         | -0.02013  | Inlier |
| siRNA Disorazole DMSO Run3       | NM_1522<br>63 | TPM3 | tropomyos<br>in 3                         | 0.02013   | Inlier |
| siRNA-Temozolomide Run1-<br>DMSO | NM_1522<br>63 | TPM3 | tropomyos<br>in 3                         | 0.62276   | Inlier |
| siRNA Disorazole DMSO Run2       | NM_1522<br>63 | TPM3 | tropomyos<br>in 3                         | 2.605632  | Inlier |
| siRNA-Vinblastine Run1-<br>DMSO  | NM_1522<br>63 | TPM3 | tropomyos<br>in 3                         | 2.62191   | Inlier |
| siRNA-Temozolomide Run2-<br>DMSO | NM_0032<br>90 | TPM4 | tropomyos<br>in 4                         | -2.067501 | Inlier |
| siRNA-Temozolomide Run3-<br>DMSO | NM_0032<br>90 | TPM4 | tropomyos<br>in 4                         | -1.793339 | Inlier |
| siRNA-Temozolomide Run1-<br>DMSO | NM_0032<br>90 | TPM4 | tropomyos<br>in 4                         | -0.665263 | Inlier |
| siRNA Disorazole DMSO Run3       | NM_0032<br>90 | TPM4 | tropomyos<br>in 4                         | -0.143078 | Inlier |
| siRNA-Vinblastine Run2-<br>DMSO  | NM_0032<br>90 | TPM4 | tropomyos<br>in 4                         | 0.143078  | Inlier |
| siRNA-Vinblastine Run1-<br>DMSO  | NM_0032<br>90 | TPM4 | tropomyos<br>in 4                         | 0.667541  | Inlier |
| siRNA Disorazole DMSO Run2       | NM_0032<br>90 | TPM4 | tropomyos<br>in 4                         | 0.681459  | Inlier |
| siRNA Disorazole DMSO Run1       | NM_0032<br>90 | TPM4 | tropomyos<br>in 4                         | 1.143271  | Inlier |
| siRNA-Temozolomide Run2-<br>DMSO | NM_0003<br>67 | TPMT | thiopurine<br>S-<br>methyltran<br>sferase | -1.506869 | Inlier |
| siRNA-Temozolomide Run1-<br>DMSO | NM_0003<br>67 | TPMT | thiopurine<br>S-<br>methyltran<br>sferase | -0.682174 | Inlier |



Identification of Survival Genes in Human Glioblastoma Cells Using siRNA Screening  
 Nikhil G Thaker, Fang Zhang, Peter R. McDonald, Tong Ying Shun, Michael D Lewen, Ian F. Pollack, and John S. Lazo

Molecular Pharmacology

|                                  |               |      |                                           |           |        |
|----------------------------------|---------------|------|-------------------------------------------|-----------|--------|
| siRNA Disorazole DMSO Run1       | NM_0003<br>67 | TPMT | thiopurine<br>S-<br>methyltran<br>sferase | -0.374933 | Inlier |
| siRNA Disorazole DMSO Run3       | NM_0003<br>67 | TPMT | thiopurine<br>S-<br>methyltran<br>sferase | -0.173624 | Inlier |
| siRNA-Vinblastine Run2-<br>DMSO  | NM_0003<br>67 | TPMT | thiopurine<br>S-<br>methyltran<br>sferase | 0.173623  | Inlier |
| siRNA-Temozolomide Run3-<br>DMSO | NM_0003<br>67 | TPMT | thiopurine<br>S-<br>methyltran<br>sferase | 0.666826  | Inlier |
| siRNA Disorazole DMSO Run2       | NM_0003<br>67 | TPMT | thiopurine<br>S-<br>methyltran<br>sferase | 1.101663  | Inlier |
| siRNA-Vinblastine Run1-<br>DMSO  | NM_0003<br>67 | TPMT | thiopurine<br>S-<br>methyltran<br>sferase | 2.013302  | Inlier |
| siRNA-Temozolomide Run3-<br>DMSO | NM_1757<br>21 | TPO  | thyroid<br>peroxidas<br>e                 | -0.940661 | Inlier |
| siRNA Disorazole DMSO Run3       | NM_1757<br>21 | TPO  | thyroid<br>peroxidas<br>e                 | -0.425523 | Inlier |
| siRNA Disorazole DMSO Run1       | NM_1757<br>21 | TPO  | thyroid<br>peroxidas<br>e                 | -0.425508 | Inlier |
| siRNA-Vinblastine Run2-<br>DMSO  | NM_1757<br>21 | TPO  | thyroid<br>peroxidas<br>e                 | -0.23255  | Inlier |
| siRNA-Temozolomide Run2-<br>DMSO | NM_1757<br>21 | TPO  | thyroid<br>peroxidas<br>e                 | 0.232549  | Inlier |
| siRNA-Temozolomide Run1-<br>DMSO | NM_1757<br>21 | TPO  | thyroid<br>peroxidas<br>e                 | 0.923477  | Inlier |
| siRNA Disorazole DMSO Run2       | NM_1757<br>21 | TPO  | thyroid<br>peroxidas<br>e                 | 2.048269  | Inlier |
| siRNA-Vinblastine Run1-<br>DMSO  | NM_1757<br>21 | TPO  | thyroid<br>peroxidas<br>e                 | 2.681191  | Inlier |
| siRNA-Temozolomide Run3-<br>DMSO | NM_0032<br>91 | TPP2 | tripeptidyl<br>peptidase<br>II            | -2.146404 | Inlier |

Identification of Survival Genes in Human Glioblastoma Cells Using siRNA Screening  
 Nikhil G Thaker, Fang Zhang, Peter R. McDonald, Tong Ying Shun, Michael D Lewen, Ian F. Pollack, and John S. Lazo

| Molecular Pharmacology       |               |        |                                          |           |        |
|------------------------------|---------------|--------|------------------------------------------|-----------|--------|
| siRNA-Temozolomide Run2-DMSO | NM_0032<br>91 | TPP2   | tripeptidyl<br>peptidase<br>II           | -1.602607 | Inlier |
| siRNA-Temozolomide Run1-DMSO | NM_0032<br>91 | TPP2   | tripeptidyl<br>peptidase<br>II           | -0.688336 | Inlier |
| siRNA Disorazole DMSO Run1   | NM_0032<br>91 | TPP2   | tripeptidyl<br>peptidase<br>II           | -0.519784 | Inlier |
| siRNA-Vinblastine Run1-DMSO  | NM_0032<br>91 | TPP2   | tripeptidyl<br>peptidase<br>II           | 0.519783  | Inlier |
| siRNA-Vinblastine Run2-DMSO  | NM_0032<br>91 | TPP2   | tripeptidyl<br>peptidase<br>II           | 0.648709  | Inlier |
| siRNA Disorazole DMSO Run3   | NM_0032<br>91 | TPP2   | tripeptidyl<br>peptidase<br>II           | 0.660664  | Inlier |
| siRNA Disorazole DMSO Run2   | NM_0032<br>91 | TPP2   | tripeptidyl<br>peptidase<br>II           | 0.845898  | Inlier |
| siRNA-Temozolomide Run3-DMSO | NM_0163<br>72 | TPRA40 | G protein-<br>coupled<br>receptor<br>175 | -0.900809 | Inlier |
| siRNA-Vinblastine Run2-DMSO  | NM_0163<br>72 | TPRA40 | G protein-<br>coupled<br>receptor<br>175 | -0.863512 | Inlier |
| siRNA Disorazole DMSO Run3   | NM_0163<br>72 | TPRA40 | G protein-<br>coupled<br>receptor<br>175 | -0.137054 | Inlier |
| siRNA Disorazole DMSO Run2   | NM_0163<br>72 | TPRA40 | G protein-<br>coupled<br>receptor<br>175 | -0.136267 | Inlier |
| siRNA-Temozolomide Run1-DMSO | NM_0163<br>72 | TPRA40 | G protein-<br>coupled<br>receptor<br>175 | 0.136265  | Inlier |
| siRNA-Temozolomide Run2-DMSO | NM_0163<br>72 | TPRA40 | G protein-<br>coupled<br>receptor<br>175 | 0.485488  | Inlier |
| siRNA Disorazole DMSO Run1   | NM_0163<br>72 | TPRA40 | G protein-<br>coupled<br>receptor<br>175 | 1.82806   | Inlier |

Identification of Survival Genes in Human Glioblastoma Cells Using siRNA Screening  
 Nikhil G Thaker, Fang Zhang, Peter R. McDonald, Tong Ying Shun, Michael D Lewen, Ian F. Pollack, and John S. Lazo

Molecular Pharmacology

| siRNA Treatment              | Gene ID   | Gene Name | Protein Name               | Log2 Fold Change | Outlier Status |
|------------------------------|-----------|-----------|----------------------------|------------------|----------------|
| siRNA-Vinblastine Run1-DMSO  | NM_016372 | TPRA40    | G protein-coupled receptor | 2.322794         | Inlier         |
| siRNA-Vinblastine Run2-DMSO  | NM_014317 | TPRT      | trans-prenyltransferase    | -1.469612        | Inlier         |
| siRNA Disorazole DMSO Run1   | NM_014317 | TPRT      | trans-prenyltransferase    | -1.093426        | Inlier         |
| siRNA Disorazole DMSO Run3   | NM_014317 | TPRT      | trans-prenyltransferase    | -0.777855        | Inlier         |
| siRNA-Temozolomide Run1-DMSO | NM_014317 | TPRT      | trans-prenyltransferase    | -0.116829        | Inlier         |
| siRNA-Temozolomide Run2-DMSO | NM_014317 | TPRT      | trans-prenyltransferase    | 0.116829         | Inlier         |
| siRNA-Temozolomide Run3-DMSO | NM_014317 | TPRT      | trans-prenyltransferase    | 0.423822         | Inlier         |
| siRNA Disorazole DMSO Run2   | NM_014317 | TPRT      | trans-prenyltransferase    | 0.571145         | Inlier         |
| siRNA-Vinblastine Run1-DMSO  | NM_014317 | TPRT      | trans-prenyltransferase    | 0.93331          | Inlier         |
| siRNA-Temozolomide Run3-DMSO | NM_003294 | TPSB1     | tryptase alpha/beta 1      | -1.3707          | Inlier         |
| siRNA Disorazole DMSO Run1   | NM_003294 | TPSB1     | tryptase alpha/beta 1      | -0.687582        | Inlier         |
| siRNA-Temozolomide Run3-DMSO | NM_003294 | TPSB1     | tryptase alpha/beta 1      | -1.54377         | Inlier         |
| siRNA-Temozolomide Run2-DMSO | NM_003294 | TPSB1     | tryptase alpha/beta 1      | -0.435626        | Inlier         |
| siRNA Disorazole DMSO Run2   | NM_003294 | TPSB1     | tryptase alpha/beta 1      | -0.213965        | Inlier         |
| siRNA Disorazole DMSO Run1   | NM_003294 | TPSB1     | tryptase alpha/beta 1      | -0.900285        | Inlier         |
| siRNA Disorazole DMSO Run2   | NM_003294 | TPSB1     | tryptase alpha/beta 1      | -0.561313        | Inlier         |
| siRNA-Temozolomide Run2-DMSO | NM_003294 | TPSB1     | tryptase alpha/beta 1      | -0.252879        | Inlier         |

Identification of Survival Genes in Human Glioblastoma Cells Using siRNA Screening  
 Nikhil G Thaker, Fang Zhang, Peter R. McDonald, Tong Ying Shun, Michael D Lewen, Ian F. Pollack, and John S. Lazo

Molecular Pharmacology

|                              |               |       |                             |           |        |
|------------------------------|---------------|-------|-----------------------------|-----------|--------|
| siRNA-Temozolomide Run1-DMSO | NM_0032<br>94 | TPSB1 | tryptase<br>alpha/beta<br>1 | 0.213965  | Inlier |
| siRNA Disorazole DMSO Run3   | NM_0032<br>94 | TPSB1 | tryptase<br>alpha/beta<br>1 | 0.252879  | Inlier |
| siRNA-Temozolomide Run1-DMSO | NM_0032<br>94 | TPSB1 | tryptase<br>alpha/beta<br>1 | 0.377065  | Inlier |
| siRNA-Vinblastine Run2-DMSO  | NM_0032<br>94 | TPSB1 | tryptase<br>alpha/beta<br>1 | 0.787687  | Inlier |
| siRNA Disorazole DMSO Run3   | NM_0032<br>94 | TPSB1 | tryptase<br>alpha/beta<br>1 | 0.661418  | Inlier |
| siRNA-Vinblastine Run2-DMSO  | NM_0032<br>94 | TPSB1 | tryptase<br>alpha/beta<br>1 | 0.701368  | Inlier |
| siRNA-Vinblastine Run1-DMSO  | NM_0032<br>94 | TPSB1 | tryptase<br>alpha/beta<br>1 | 0.735137  | Inlier |
| siRNA-Vinblastine Run1-DMSO  | NM_0032<br>94 | TPSB1 | tryptase<br>alpha/beta<br>1 | 1.3022    | Inlier |
| siRNA-Temozolomide Run3-DMSO | NM_0241<br>64 | TPSB2 | tryptase<br>beta 2          | -1.829546 | Inlier |
| siRNA Disorazole DMSO Run1   | NM_0241<br>64 | TPSB2 | tryptase<br>beta 2          | -1.460275 | Inlier |
| siRNA-Temozolomide Run2-DMSO | NM_0241<br>64 | TPSB2 | tryptase<br>beta 2          | -0.820485 | Inlier |
| siRNA-Temozolomide Run1-DMSO | NM_0241<br>64 | TPSB2 | tryptase<br>beta 2          | -0.126774 | Inlier |
| siRNA-Vinblastine Run2-DMSO  | NM_0241<br>64 | TPSB2 | tryptase<br>beta 2          | 0.126773  | Inlier |
| siRNA-Vinblastine Run1-DMSO  | NM_0241<br>64 | TPSB2 | tryptase<br>beta 2          | 0.308107  | Inlier |
| siRNA Disorazole DMSO Run2   | NM_0241<br>64 | TPSB2 | tryptase<br>beta 2          | 0.63653   | Inlier |
| siRNA Disorazole DMSO Run3   | NM_0241<br>64 | TPSB2 | tryptase<br>beta 2          | 0.71247   | Inlier |
| siRNA-Temozolomide Run3-DMSO | NM_0122<br>17 | TPSD1 | tryptase<br>delta 1         | -1.219251 | Inlier |
| siRNA-Temozolomide Run2-DMSO | NM_0122<br>17 | TPSD1 | tryptase<br>delta 1         | -0.803496 | Inlier |
| siRNA Disorazole DMSO Run2   | NM_0122<br>17 | TPSD1 | tryptase<br>delta 1         | -0.453483 | Inlier |
| siRNA-Temozolomide Run1-DMSO | NM_0122<br>17 | TPSD1 | tryptase<br>delta 1         | -0.076794 | Inlier |
| siRNA Disorazole DMSO Run1   | NM_0122<br>17 | TPSD1 | tryptase<br>delta 1         | 0.076794  | Inlier |
| siRNA Disorazole DMSO Run3   | NM_0122<br>17 | TPSD1 | tryptase<br>delta 1         | 0.545504  | Inlier |

Identification of Survival Genes in Human Glioblastoma Cells Using siRNA Screening

Nikhil G Thaker, Fang Zhang, Peter R. McDonald, Tong Ying Shun, Michael D Lewen, Ian F. Pollack, and John S.

Lazo

|                                  |               |       |                                              |           |         |
|----------------------------------|---------------|-------|----------------------------------------------|-----------|---------|
| siRNA-Vinblastine Run2-<br>DMSO  | NM_0122<br>17 | TPSD1 | tryptase<br>delta 1                          | 0.848031  | Inlier  |
| siRNA-Vinblastine Run1-<br>DMSO  | NM_0122<br>17 | TPSD1 | tryptase<br>delta 1                          | 1.23484   | Inlier  |
| siRNA-Temozolomide Run3-<br>DMSO | NM_0124<br>67 | TPSG1 | tryptase<br>gamma 1                          | -1.993718 | Inlier  |
| siRNA Disorazole DMSO Run3       | NM_0124<br>67 | TPSG1 | tryptase<br>gamma 1                          | -0.754924 | Inlier  |
| siRNA-Temozolomide Run2-<br>DMSO | NM_0124<br>67 | TPSG1 | tryptase<br>gamma 1                          | -0.210199 | Inlier  |
| siRNA-Temozolomide Run1-<br>DMSO | NM_0124<br>67 | TPSG1 | tryptase<br>gamma 1                          | -0.010921 | Inlier  |
| siRNA Disorazole DMSO Run2       | NM_0124<br>67 | TPSG1 | tryptase<br>gamma 1                          | 0.010922  | Inlier  |
| siRNA Disorazole DMSO Run1       | NM_0124<br>67 | TPSG1 | tryptase<br>gamma 1                          | 0.594076  | Inlier  |
| siRNA-Vinblastine Run2-<br>DMSO  | NM_0124<br>67 | TPSG1 | tryptase<br>gamma 1                          | 3.790014  | Outlier |
| siRNA-Vinblastine Run1-<br>DMSO  | NM_0124<br>67 | TPSG1 | tryptase<br>gamma 1                          | 3.80621   | Outlier |
| siRNA-Temozolomide Run2-<br>DMSO | NM_0035<br>96 | TPST1 | tyrosylprot<br>ein<br>sulfotransf<br>erase 1 | -1.182503 | Inlier  |
| siRNA Disorazole DMSO Run1       | NM_0035<br>96 | TPST1 | tyrosylprot<br>ein<br>sulfotransf<br>erase 1 | -0.449419 | Inlier  |
| siRNA-Vinblastine Run2-<br>DMSO  | NM_0035<br>96 | TPST1 | tyrosylprot<br>ein<br>sulfotransf<br>erase 1 | -0.060539 | Inlier  |
| siRNA Disorazole DMSO Run3       | NM_0035<br>96 | TPST1 | tyrosylprot<br>ein<br>sulfotransf<br>erase 1 | -0.019707 | Inlier  |
| siRNA-Temozolomide Run1-<br>DMSO | NM_0035<br>96 | TPST1 | tyrosylprot<br>ein<br>sulfotransf<br>erase 1 | 0.019707  | Inlier  |
| siRNA-Temozolomide Run3-<br>DMSO | NM_0035<br>96 | TPST1 | tyrosylprot<br>ein<br>sulfotransf<br>erase 1 | 0.899581  | Inlier  |
| siRNA Disorazole DMSO Run2       | NM_0035<br>96 | TPST1 | tyrosylprot<br>ein<br>sulfotransf<br>erase 1 | 1.370742  | Inlier  |
| siRNA-Vinblastine Run1-<br>DMSO  | NM_0035<br>96 | TPST1 | tyrosylprot<br>ein<br>sulfotransf<br>erase 1 | 2.182683  | Inlier  |

Identification of Survival Genes in Human Glioblastoma Cells Using siRNA Screening  
 Nikhil G Thaker, Fang Zhang, Peter R. McDonald, Tong Ying Shun, Michael D Lewen, Ian F. Pollack, and John S. Lazo

Molecular Pharmacology

|                              |               |       |                                                                 |           |        |
|------------------------------|---------------|-------|-----------------------------------------------------------------|-----------|--------|
| siRNA-Vinblastine Run2-DMSO  | NM_0035<br>95 | TPST2 | tyrosylprot<br>ein<br>sulfotransf<br>erase 2                    | -1.031995 | Inlier |
| siRNA Disorazole DMSO Run1   | NM_0035<br>95 | TPST2 | tyrosylprot<br>ein<br>sulfotransf<br>erase 2                    | -0.776502 | Inlier |
| siRNA-Temozolomide Run1-DMSO | NM_0035<br>95 | TPST2 | tyrosylprot<br>ein<br>sulfotransf<br>erase 2                    | -0.572498 | Inlier |
| siRNA-Temozolomide Run2-DMSO | NM_0035<br>95 | TPST2 | tyrosylprot<br>ein<br>sulfotransf<br>erase 2                    | -0.144461 | Inlier |
| siRNA Disorazole DMSO Run3   | NM_0035<br>95 | TPST2 | tyrosylprot<br>ein<br>sulfotransf<br>erase 2                    | 0.144461  | Inlier |
| siRNA-Temozolomide Run3-DMSO | NM_0035<br>95 | TPST2 | tyrosylprot<br>ein<br>sulfotransf<br>erase 2                    | 0.430702  | Inlier |
| siRNA Disorazole DMSO Run2   | NM_0035<br>95 | TPST2 | tyrosylprot<br>ein<br>sulfotransf<br>erase 2                    | 0.781575  | Inlier |
| siRNA-Vinblastine Run1-DMSO  | NM_0035<br>95 | TPST2 | tyrosylprot<br>ein<br>sulfotransf<br>erase 2                    | 1.325046  | Inlier |
| siRNA-Temozolomide Run3-DMSO | NM_1992<br>61 | TPTE  | transmem<br>brane<br>phosphata<br>se with<br>tensin<br>homology | -0.899328 | Inlier |
| siRNA Disorazole DMSO Run2   | NM_1992<br>61 | TPTE  | transmem<br>brane<br>phosphata<br>se with<br>tensin<br>homology | -0.725438 | Inlier |
| siRNA-Temozolomide Run2-DMSO | NM_1992<br>61 | TPTE  | transmem<br>brane<br>phosphata<br>se with<br>tensin<br>homology | -0.623562 | Inlier |

Identification of Survival Genes in Human Glioblastoma Cells Using siRNA Screening

Nikhil G Thaker, Fang Zhang, Peter R. McDonald, Tong Ying Shun, Michael D Lewen, Ian F. Pollack, and John S. Lazo

Molecular Pharmacology

|                              |               |       |                                                                   |           |        |
|------------------------------|---------------|-------|-------------------------------------------------------------------|-----------|--------|
| siRNA Disorazole DMSO Run3   | NM_1992<br>61 | TPTE  | transmembrane phosphatase with tensin homology                    | -0.173799 | Inlier |
| siRNA Disorazole DMSO Run1   | NM_1992<br>61 | TPTE  | transmembrane phosphatase with tensin homology                    | 0.173799  | Inlier |
| siRNA-Temozolomide Run1-DMSO | NM_1992<br>61 | TPTE  | transmembrane phosphatase with tensin homology                    | 0.417568  | Inlier |
| siRNA-Vinblastine Run2-DMSO  | NM_1992<br>61 | TPTE  | transmembrane phosphatase with tensin homology                    | 0.79446   | Inlier |
| siRNA-Vinblastine Run1-DMSO  | NM_1992<br>61 | TPTE  | transmembrane phosphatase with tensin homology                    | 0.893005  | Inlier |
| siRNA-Temozolomide Run2-DMSO | NM_1992<br>54 | TPTE2 | transmembrane phosphoinositide 3-phosphatase and tensin homolog 2 | -1.176251 | Inlier |
| siRNA-Temozolomide Run3-DMSO | NM_1992<br>54 | TPTE2 | transmembrane phosphoinositide 3-phosphatase and tensin homolog 2 | -0.497241 | Inlier |

Identification of Survival Genes in Human Glioblastoma Cells Using siRNA Screening

Nikhil G Thaker, Fang Zhang, Peter R. McDonald, Tong Ying Shun, Michael D Lewen, Ian F. Pollack, and John S. Lazo

Molecular Pharmacology

|                              |               |       |                                                                   |           |        |
|------------------------------|---------------|-------|-------------------------------------------------------------------|-----------|--------|
| siRNA Disorazole DMSO Run3   | NM_1992<br>54 | TPTE2 | transmembrane phosphoinositide 3-phosphatase and tensin homolog 2 | -0.234251 | Inlier |
| siRNA Disorazole DMSO Run1   | NM_1992<br>54 | TPTE2 | transmembrane phosphoinositide 3-phosphatase and tensin homolog 2 | -0.136152 | Inlier |
| siRNA-Temozolomide Run1-DMSO | NM_1992<br>54 | TPTE2 | transmembrane phosphoinositide 3-phosphatase and tensin homolog 2 | 0.136152  | Inlier |
| siRNA Disorazole DMSO Run2   | NM_1992<br>54 | TPTE2 | transmembrane phosphoinositide 3-phosphatase and tensin homolog 2 | 0.851759  | Inlier |
| siRNA-Vinblastine Run2-DMSO  | NM_1992<br>54 | TPTE2 | transmembrane phosphoinositide 3-phosphatase and tensin homolog 2 | 1.252546  | Inlier |



Identification of Survival Genes in Human Glioblastoma Cells Using siRNA Screening  
 Nikhil G Thaker, Fang Zhang, Peter R. McDonald, Tong Ying Shun, Michael D Lewen, Ian F. Pollack, and John S. Lazo  
 Molecular Pharmacology

|                              |           |       |                                                                   |           |         |
|------------------------------|-----------|-------|-------------------------------------------------------------------|-----------|---------|
| siRNA-Vinblastine Run1-DMSO  | NM_199254 | TPTE2 | transmembrane phosphoinositide 3-phosphatase and tensin homolog 2 | 1.650701  | Inlier  |
| siRNA-Temozolomide Run3-DMSO | NM_003299 | TRA1  | tumor rejection antigen (gp96) 1                                  | -1.935184 | Inlier  |
| siRNA-Vinblastine Run2-DMSO  | NM_003299 | TRA1  | tumor rejection antigen (gp96) 1                                  | -0.613427 | Inlier  |
| siRNA-Temozolomide Run1-DMSO | NM_003299 | TRA1  | tumor rejection antigen (gp96) 1                                  | -0.251235 | Inlier  |
| siRNA Disorazole DMSO Run3   | NM_003299 | TRA1  | tumor rejection antigen (gp96) 1                                  | -0.007077 | Inlier  |
| siRNA-Temozolomide Run2-DMSO | NM_003299 | TRA1  | tumor rejection antigen (gp96) 1                                  | 0.007077  | Inlier  |
| siRNA Disorazole DMSO Run1   | NM_003299 | TRA1  | tumor rejection antigen (gp96) 1                                  | 0.735573  | Inlier  |
| siRNA Disorazole DMSO Run2   | NM_003299 | TRA1  | tumor rejection antigen (gp96) 1                                  | 2.662278  | Inlier  |
| siRNA-Vinblastine Run1-DMSO  | NM_003299 | TRA1  | tumor rejection antigen (gp96) 1                                  | 3.135614  | Inlier  |
| siRNA-Temozolomide Run3-DMSO | NM_016292 | TRAP1 | TNF receptor-associated protein 1                                 | -3.741095 | Outlier |
| siRNA-Temozolomide Run2-DMSO | NM_016292 | TRAP1 | TNF receptor-associated protein 1                                 | -0.539215 | Inlier  |

Identification of Survival Genes in Human Glioblastoma Cells Using siRNA Screening  
 Nikhil G Thaker, Fang Zhang, Peter R. McDonald, Tong Ying Shun, Michael D Lewen, Ian F. Pollack, and John S. Lazo  
 Molecular Pharmacology

|                              |               |       |                                             |           |                  |
|------------------------------|---------------|-------|---------------------------------------------|-----------|------------------|
| siRNA-Temozolomide Run1-DMSO | NM_0162<br>92 | TRAP1 | TNF<br>receptor-<br>associated<br>protein 1 | -0.487722 | Inlier           |
| siRNA Disorazole DMSO Run1   | NM_0162<br>92 | TRAP1 | TNF<br>receptor-<br>associated<br>protein 1 | -0.153754 | Inlier           |
| siRNA-Vinblastine Run2-DMSO  | NM_0162<br>92 | TRAP1 | TNF<br>receptor-<br>associated<br>protein 1 | 0.153754  | Inlier           |
| siRNA Disorazole DMSO Run3   | NM_0162<br>92 | TRAP1 | TNF<br>receptor-<br>associated<br>protein 1 | 0.809785  | Inlier           |
| siRNA Disorazole DMSO Run2   | NM_0162<br>92 | TRAP1 | TNF<br>receptor-<br>associated<br>protein 1 | 3.128052  | Inlier           |
| siRNA-Vinblastine Run1-DMSO  | NM_0162<br>92 | TRAP1 | TNF<br>receptor-<br>associated<br>protein 1 | 3.736989  | Outlier<br>trace |
| siRNA-Temozolomide Run3-DMSO | NM_1383<br>27 | TRAR1 | amine<br>receptor 1                         | -1.191968 | Inlier<br>trace  |
| siRNA Disorazole DMSO Run2   | NM_1383<br>27 | TRAR1 | amine<br>receptor 1                         | -0.76147  | Inlier<br>trace  |
| siRNA-Temozolomide Run2-DMSO | NM_1383<br>27 | TRAR1 | amine<br>receptor 1                         | -0.603881 | Inlier<br>trace  |
| siRNA-Temozolomide Run1-DMSO | NM_1383<br>27 | TRAR1 | amine<br>receptor 1                         | -0.009276 | Inlier<br>trace  |
| siRNA Disorazole DMSO Run1   | NM_1383<br>27 | TRAR1 | amine<br>receptor 1                         | 0.009276  | Inlier<br>trace  |
| siRNA-Vinblastine Run2-DMSO  | NM_1383<br>27 | TRAR1 | amine<br>receptor 1                         | 0.106476  | Inlier<br>trace  |
| siRNA-Vinblastine Run1-DMSO  | NM_1383<br>27 | TRAR1 | amine<br>receptor 1                         | 0.745119  | Inlier           |

Identification of Survival Genes in Human Glioblastoma Cells Using siRNA Screening  
 Nikhil G Thaker, Fang Zhang, Peter R. McDonald, Tong Ying Shun, Michael D Lewen, Ian F. Pollack, and John S. Lazo

Molecular Pharmacology

|                                  |               |       |                     |           |        |
|----------------------------------|---------------|-------|---------------------|-----------|--------|
|                                  |               |       | trace               |           |        |
|                                  |               |       | amine               |           |        |
| siRNA Disorazole DMSO Run3       | NM_1383<br>27 | TRAR1 | receptor 1          | 1.289376  | Inlier |
|                                  |               |       | trace               |           |        |
| siRNA-Temozolomide Run3-<br>DMSO | NM_1750<br>57 | TRAR3 | amine<br>receptor 3 | -0.878847 | Inlier |
|                                  |               |       | trace               |           |        |
| siRNA Disorazole DMSO Run3       | NM_1750<br>57 | TRAR3 | amine<br>receptor 3 | -0.768273 | Inlier |
|                                  |               |       | trace               |           |        |
| siRNA Disorazole DMSO Run2       | NM_1750<br>57 | TRAR3 | amine<br>receptor 3 | -0.580727 | Inlier |
|                                  |               |       | trace               |           |        |
| siRNA-Temozolomide Run1-<br>DMSO | NM_1750<br>57 | TRAR3 | amine<br>receptor 3 | -0.174306 | Inlier |
|                                  |               |       | trace               |           |        |
| siRNA-Temozolomide Run2-<br>DMSO | NM_1750<br>57 | TRAR3 | amine<br>receptor 3 | 0.174306  | Inlier |
|                                  |               |       | trace               |           |        |
| siRNA Disorazole DMSO Run1       | NM_1750<br>57 | TRAR3 | amine<br>receptor 3 | 0.189764  | Inlier |
|                                  |               |       | trace               |           |        |
| siRNA-Vinblastine Run1-<br>DMSO  | NM_1750<br>57 | TRAR3 | amine<br>receptor 3 | 1.125305  | Inlier |
|                                  |               |       | trace               |           |        |
| siRNA-Vinblastine Run2-<br>DMSO  | NM_1750<br>57 | TRAR3 | amine<br>receptor 3 | 1.550574  | Inlier |
|                                  |               |       | trace               |           |        |
| siRNA Disorazole DMSO Run2       | NM_1750<br>67 | TRAR4 | amine<br>receptor 4 | -1.536686 | Inlier |
|                                  |               |       | trace               |           |        |
| siRNA-Temozolomide Run3-<br>DMSO | NM_1750<br>67 | TRAR4 | amine<br>receptor 4 | -0.650726 | Inlier |
|                                  |               |       | trace               |           |        |
| siRNA Disorazole DMSO Run3       | NM_1750<br>67 | TRAR4 | amine<br>receptor 4 | -0.453893 | Inlier |
|                                  |               |       | trace               |           |        |
| siRNA Disorazole DMSO Run1       | NM_1750<br>67 | TRAR4 | amine<br>receptor 4 | -0.059488 | Inlier |
|                                  |               |       | trace               |           |        |
| siRNA-Temozolomide Run2-<br>DMSO | NM_1750<br>67 | TRAR4 | amine<br>receptor 4 | 0.059487  | Inlier |
|                                  |               |       | trace               |           |        |
| siRNA-Temozolomide Run1-<br>DMSO | NM_1750<br>67 | TRAR4 | amine<br>receptor 4 | 0.698274  | Inlier |
|                                  |               |       | trace               |           |        |
| siRNA-Vinblastine Run1-<br>DMSO  | NM_1750<br>67 | TRAR4 | amine<br>receptor 4 | 1.146617  | Inlier |
|                                  |               |       | trace               |           |        |
| siRNA-Vinblastine Run2-<br>DMSO  | NM_1750<br>67 | TRAR4 | amine<br>receptor 4 | 1.343445  | Inlier |

Identification of Survival Genes in Human Glioblastoma Cells Using siRNA Screening  
 Nikhil G Thaker, Fang Zhang, Peter R. McDonald, Tong Ying Shun, Michael D Lewen, Ian F. Pollack, and John S. Lazo

| Condition                                                  | Gene ID       | Gene Name | Protein Description                                         | Log Fold Change | Classification |
|------------------------------------------------------------|---------------|-----------|-------------------------------------------------------------|-----------------|----------------|
| Molecular Pharmacology<br>siRNA-Temozolomide Run3-<br>DMSO | NM_0532<br>78 | TRAR5     | trace<br>amine<br>receptor 5                                | -4.033505       | Outlier        |
| siRNA Disorazole DMSO Run2                                 | NM_0532<br>78 | TRAR5     | trace<br>amine<br>receptor 5                                | -0.653824       | Inlier         |
| siRNA-Temozolomide Run1-<br>DMSO                           | NM_0532<br>78 | TRAR5     | trace<br>amine<br>receptor 5                                | -0.435662       | Inlier         |
| siRNA Disorazole DMSO Run1                                 | NM_0532<br>78 | TRAR5     | trace<br>amine<br>receptor 5                                | -0.105247       | Inlier         |
| siRNA-Temozolomide Run2-<br>DMSO                           | NM_0532<br>78 | TRAR5     | trace<br>amine<br>receptor 5                                | 0.105245        | Inlier         |
| siRNA-Vinblastine Run2-<br>DMSO                            | NM_0532<br>78 | TRAR5     | trace<br>amine<br>receptor 5                                | 0.695176        | Inlier         |
| siRNA-Vinblastine Run1-<br>DMSO                            | NM_0532<br>78 | TRAR5     | trace<br>amine<br>receptor 5                                | 0.698033        | Inlier         |
| siRNA Disorazole DMSO Run3                                 | NM_0532<br>78 | TRAR5     | trace<br>amine<br>receptor 5                                | 3.189861        | Inlier         |
| siRNA-Vinblastine Run2-<br>DMSO                            | NM_0071<br>80 | TREH      | trehalase<br>(brush-<br>border<br>membrane<br>glycoprotein) | -1.353612       | Inlier         |
| siRNA Disorazole DMSO Run3                                 | NM_0071<br>80 | TREH      | trehalase<br>(brush-<br>border<br>membrane<br>glycoprotein) | -0.854627       | Inlier         |
| siRNA-Temozolomide Run2-<br>DMSO                           | NM_0071<br>80 | TREH      | trehalase<br>(brush-<br>border<br>membrane<br>glycoprotein) | -0.36588        | Inlier         |
| siRNA Disorazole DMSO Run1                                 | NM_0071<br>80 | TREH      | trehalase<br>(brush-<br>border<br>membrane<br>glycoprotein) | -0.223491       | Inlier         |

Identification of Survival Genes in Human Glioblastoma Cells Using siRNA Screening  
 Nikhil G Thaker, Fang Zhang, Peter R. McDonald, Tong Ying Shun, Michael D Lewen, Ian F. Pollack, and John S. Lazo  
 Molecular Pharmacology

|                              |           |       |                                                  |           |        |
|------------------------------|-----------|-------|--------------------------------------------------|-----------|--------|
| siRNA-Temozolomide Run3-DMSO | NM_007180 | TREH  | trehalase (brush-border membrane glycoprotein)   | 0.223491  | Inlier |
| siRNA-Temozolomide Run1-DMSO | NM_007180 | TREH  | trehalase (brush-border membrane glycoprotein)   | 0.499083  | Inlier |
| siRNA Disorazole DMSO Run2   | NM_007180 | TREH  | trehalase (brush-border membrane glycoprotein)   | 0.849917  | Inlier |
| siRNA-Vinblastine Run1-DMSO  | NM_007180 | TREH  | trehalase (brush-border membrane glycoprotein)   | 1.349926  | Inlier |
| siRNA-Temozolomide Run3-DMSO | NM_018643 | TREM1 | triggering receptor expressed on myeloid cells 1 | -1.095118 | Inlier |
| siRNA-Temozolomide Run2-DMSO | NM_018643 | TREM1 | triggering receptor expressed on myeloid cells 1 | -0.663276 | Inlier |
| siRNA-Vinblastine Run2-DMSO  | NM_018643 | TREM1 | triggering receptor expressed on myeloid cells 1 | -0.628538 | Inlier |
| siRNA Disorazole DMSO Run3   | NM_018643 | TREM1 | triggering receptor expressed on myeloid cells 1 | -0.007499 | Inlier |

Identification of Survival Genes in Human Glioblastoma Cells Using siRNA Screening  
 Nikhil G Thaker, Fang Zhang, Peter R. McDonald, Tong Ying Shun, Michael D Lewen, Ian F. Pollack, and John S. Lazo  
 Molecular Pharmacology

|                                  |               |       |                                                              |                  |
|----------------------------------|---------------|-------|--------------------------------------------------------------|------------------|
| siRNA Disorazole DMSO Run1       | NM_0186<br>43 | TREM1 | triggering<br>receptor<br>expressed<br>on myeloid<br>cells 1 | 0.007499 Inlier  |
| siRNA-Temozolomide Run1-<br>DMSO | NM_0186<br>43 | TREM1 | triggering<br>receptor<br>expressed<br>on myeloid<br>cells 1 | 0.685724 Inlier  |
| siRNA Disorazole DMSO Run2       | NM_0186<br>43 | TREM1 | triggering<br>receptor<br>expressed<br>on myeloid<br>cells 1 | 2.081526 Inlier  |
| siRNA-Vinblastine Run1-<br>DMSO  | NM_0186<br>43 | TREM1 | triggering<br>receptor<br>expressed<br>on myeloid<br>cells 1 | 2.312168 Inlier  |
| siRNA-Temozolomide Run3-<br>DMSO | NM_0189<br>65 | TREM2 | triggering<br>receptor<br>expressed<br>on myeloid<br>cells 2 | -1.534801 Inlier |
| siRNA-Vinblastine Run2-<br>DMSO  | NM_0189<br>65 | TREM2 | triggering<br>receptor<br>expressed<br>on myeloid<br>cells 2 | -0.624513 Inlier |
| siRNA Disorazole DMSO Run3       | NM_0189<br>65 | TREM2 | triggering<br>receptor<br>expressed<br>on myeloid<br>cells 2 | -0.456038 Inlier |
| siRNA-Temozolomide Run2-<br>DMSO | NM_0189<br>65 | TREM2 | triggering<br>receptor<br>expressed<br>on myeloid<br>cells 2 | -0.09729 Inlier  |

Identification of Survival Genes in Human Glioblastoma Cells Using siRNA Screening  
 Nikhil G Thaker, Fang Zhang, Peter R. McDonald, Tong Ying Shun, Michael D Lewen, Ian F. Pollack, and John S. Lazo  
 Molecular Pharmacology

|                                  |               |        |                                                              |                  |
|----------------------------------|---------------|--------|--------------------------------------------------------------|------------------|
| siRNA Disorazole DMSO Run1       | NM_0189<br>65 | TREM2  | triggering<br>receptor<br>expressed<br>on myeloid<br>cells 2 | 0.09729 Inlier   |
| siRNA-Temozolomide Run1-<br>DMSO | NM_0189<br>65 | TREM2  | triggering<br>receptor<br>expressed<br>on myeloid<br>cells 2 | 0.724487 Inlier  |
| siRNA Disorazole DMSO Run2       | NM_0189<br>65 | TREM2  | triggering<br>receptor<br>expressed<br>on myeloid<br>cells 2 | 1.000897 Inlier  |
| siRNA-Vinblastine Run1-<br>DMSO  | NM_0189<br>65 | TREM2  | triggering<br>receptor<br>expressed<br>on myeloid<br>cells 2 | 1.622527 Inlier  |
| siRNA-Temozolomide Run3-<br>DMSO | NM_0335<br>01 | TRERF1 | transcripti<br>onal<br>regulating<br>factor 1                | -0.80878 Inlier  |
| siRNA Disorazole DMSO Run2       | NM_0335<br>01 | TRERF1 | transcripti<br>onal<br>regulating<br>factor 1                | -0.8053 Inlier   |
| siRNA Disorazole DMSO Run3       | NM_0335<br>01 | TRERF1 | transcripti<br>onal<br>regulating<br>factor 1                | -0.317766 Inlier |
| siRNA-Temozolomide Run1-<br>DMSO | NM_0335<br>01 | TRERF1 | transcripti<br>onal<br>regulating<br>factor 1                | -0.250329 Inlier |
| siRNA-Temozolomide Run2-<br>DMSO | NM_0335<br>01 | TRERF1 | transcripti<br>onal<br>regulating<br>factor 1                | 0.250329 Inlier  |
| siRNA Disorazole DMSO Run1       | NM_0335<br>01 | TRERF1 | transcripti<br>onal<br>regulating<br>factor 1                | 0.5437 Inlier    |
| siRNA-Vinblastine Run1-<br>DMSO  | NM_0335<br>01 | TRERF1 | transcripti<br>onal<br>regulating<br>factor 1                | 1.449562 Inlier  |

Identification of Survival Genes in Human Glioblastoma Cells Using siRNA Screening  
 Nikhil G Thaker, Fang Zhang, Peter R. McDonald, Tong Ying Shun, Michael D Lewen, Ian F. Pollack, and John S. Lazo

Molecular Pharmacology

| siRNA                        | Gene      | Gene    | Function                                  | Score     | Outlier |
|------------------------------|-----------|---------|-------------------------------------------|-----------|---------|
| siRNA-Vinblastine Run2-DMSO  | NM_033501 | TRETF1  | transcriptional regulating factor 1       | 1.841222  | Inlier  |
| siRNA-Temozolomide Run3-DMSO | NM_181840 | TRESK-2 | potassium channel, subfamily K, member 18 | -1.290642 | Inlier  |
| siRNA-Temozolomide Run2-DMSO | NM_181840 | TRESK-2 | potassium channel, subfamily K, member 18 | -0.971617 | Inlier  |
| siRNA-Temozolomide Run1-DMSO | NM_181840 | TRESK-2 | potassium channel, subfamily K, member 18 | -0.419951 | Inlier  |
| siRNA Disorazole DMSO Run3   | NM_181840 | TRESK-2 | potassium channel, subfamily K, member 18 | -0.25989  | Inlier  |
| siRNA Disorazole DMSO Run2   | NM_181840 | TRESK-2 | potassium channel, subfamily K, member 18 | 0.25989   | Inlier  |
| siRNA Disorazole DMSO Run1   | NM_181840 | TRESK-2 | potassium channel, subfamily K, member 18 | 0.301149  | Inlier  |



Identification of Survival Genes in Human Glioblastoma Cells Using siRNA Screening  
 Nikhil G Thaker, Fang Zhang, Peter R. McDonald, Tong Ying Shun, Michael D Lewen, Ian F. Pollack, and John S. Lazo  
 Molecular Pharmacology

|                              |               |         |                                           |           |        |
|------------------------------|---------------|---------|-------------------------------------------|-----------|--------|
| siRNA-Vinblastine Run2-DMSO  | NM_1818<br>40 | TRESK-2 | potassium channel, subfamily K, member 18 | 0.929049  | Inlier |
| siRNA-Vinblastine Run1-DMSO  | NM_1818<br>40 | TRESK-2 | potassium channel, subfamily K, member 18 | 1.185424  | Inlier |
| siRNA-Temozolomide Run3-DMSO | NM_1303<br>84 | TREX1   | three prime repair exonuclease 1          | -1.162915 | Inlier |
| siRNA-Temozolomide Run2-DMSO | NM_1303<br>84 | TREX1   | three prime repair exonuclease 1          | -0.713934 | Inlier |
| siRNA Disorazole DMSO Run2   | NM_1303<br>84 | TREX1   | three prime repair exonuclease 1          | -0.635066 | Inlier |
| siRNA Disorazole DMSO Run3   | NM_1303<br>84 | TREX1   | three prime repair exonuclease 1          | -0.017318 | Inlier |
| siRNA-Vinblastine Run2-DMSO  | NM_1303<br>84 | TREX1   | three prime repair exonuclease 1          | 0.017318  | Inlier |
| siRNA-Temozolomide Run1-DMSO | NM_1303<br>84 | TREX1   | three prime repair exonuclease 1          | 0.324523  | Inlier |
| siRNA Disorazole DMSO Run1   | NM_1303<br>84 | TREX1   | three prime repair exonuclease 1          | 1.461605  | Inlier |

Identification of Survival Genes in Human Glioblastoma Cells Using siRNA Screening  
 Nikhil G Thaker, Fang Zhang, Peter R. McDonald, Tong Ying Shun, Michael D Lewen, Ian F. Pollack, and John S. Lazo

Molecular Pharmacology

|                              |           |       |                                                |           |        |
|------------------------------|-----------|-------|------------------------------------------------|-----------|--------|
| siRNA-Vinblastine Run1-DMSO  | NM_130384 | TREX1 | three prime repair exonuclease 1               | 1.85122   | Inlier |
| siRNA-Temozolomide Run3-DMSO | NM_080701 | TREX2 | three prime repair exonuclease 2               | -1.464243 | Inlier |
| siRNA-Vinblastine Run2-DMSO  | NM_080701 | TREX2 | three prime repair exonuclease 2               | -0.685864 | Inlier |
| siRNA-Temozolomide Run2-DMSO | NM_080701 | TREX2 | three prime repair exonuclease 2               | -0.663136 | Inlier |
| siRNA Disorazole DMSO Run3   | NM_080701 | TREX2 | three prime repair exonuclease 2               | -0.174997 | Inlier |
| siRNA-Temozolomide Run1-DMSO | NM_080701 | TREX2 | three prime repair exonuclease 2               | 0.174997  | Inlier |
| siRNA Disorazole DMSO Run1   | NM_080701 | TREX2 | three prime repair exonuclease 2               | 0.246704  | Inlier |
| siRNA Disorazole DMSO Run2   | NM_080701 | TREX2 | three prime repair exonuclease 2               | 1.911777  | Inlier |
| siRNA-Vinblastine Run1-DMSO  | NM_080701 | TREX2 | three prime repair exonuclease 2               | 2.056699  | Inlier |
| siRNA-Temozolomide Run3-DMSO | NM_013381 | TRHDE | thyrotropin-releasing hormone degrading enzyme | -1.137499 | Inlier |

Identification of Survival Genes in Human Glioblastoma Cells Using siRNA Screening

Nikhil G Thaker, Fang Zhang, Peter R. McDonald, Tong Ying Shun, Michael D Lewen, Ian F. Pollack, and John S. Lazo

Molecular Pharmacology

|                              |               |       |                                                |                  |
|------------------------------|---------------|-------|------------------------------------------------|------------------|
| siRNA-Temozolomide Run2-DMSO | NM_0133<br>81 | TRHDE | thyrotropin-releasing hormone degrading enzyme | -0.69473 Inlier  |
| siRNA Disorazole DMSO Run3   | NM_0133<br>81 | TRHDE | thyrotropin-releasing hormone degrading enzyme | -0.608773 Inlier |
| siRNA Disorazole DMSO Run2   | NM_0133<br>81 | TRHDE | thyrotropin-releasing hormone degrading enzyme | -0.090528 Inlier |
| siRNA-Temozolomide Run1-DMSO | NM_0133<br>81 | TRHDE | thyrotropin-releasing hormone degrading enzyme | 0.090528 Inlier  |
| siRNA Disorazole DMSO Run1   | NM_0133<br>81 | TRHDE | thyrotropin-releasing hormone degrading enzyme | 0.65427 Inlier   |
| siRNA-Vinblastine Run2-DMSO  | NM_0133<br>81 | TRHDE | thyrotropin-releasing hormone degrading enzyme | 1.376392 Inlier  |
| siRNA-Vinblastine Run1-DMSO  | NM_0133<br>81 | TRHDE | thyrotropin-releasing hormone degrading enzyme | 1.501265 Inlier  |
| siRNA-Temozolomide Run3-DMSO | NM_0033<br>01 | TRHR  | thyrotropin-releasing hormone receptor         | -2.57101 Inlier  |
| siRNA-Temozolomide Run2-DMSO | NM_0033<br>01 | TRHR  | thyrotropin-releasing hormone receptor         | -1.920535 Inlier |

Identification of Survival Genes in Human Glioblastoma Cells Using siRNA Screening  
 Nikhil G Thaker, Fang Zhang, Peter R. McDonald, Tong Ying Shun, Michael D Lewen, Ian F. Pollack, and John S. Lazo  
 Molecular Pharmacology

|                              |               |       |                                        |           |         |
|------------------------------|---------------|-------|----------------------------------------|-----------|---------|
| siRNA Disorazole DMSO Run2   | NM_0033<br>01 | TRHR  | thyrotropin-releasing hormone receptor | -1.134725 | Inlier  |
| siRNA Disorazole DMSO Run3   | NM_0033<br>01 | TRHR  | thyrotropin-releasing hormone receptor | -0.18861  | Inlier  |
| siRNA-Temozolomide Run1-DMSO | NM_0033<br>01 | TRHR  | thyrotropin-releasing hormone receptor | 0.18861   | Inlier  |
| siRNA-Vinblastine Run1-DMSO  | NM_0033<br>01 | TRHR  | thyrotropin-releasing hormone receptor | 0.421779  | Inlier  |
| siRNA Disorazole DMSO Run1   | NM_0033<br>01 | TRHR  | thyrotropin-releasing hormone receptor | 0.429129  | Inlier  |
| siRNA-Vinblastine Run2-DMSO  | NM_0033<br>01 | TRHR  | thyrotropin-releasing hormone receptor | 0.919871  | Inlier  |
| siRNA-Temozolomide Run3-DMSO | NM_0251<br>95 | TRIB1 | tribbles homolog 1 (Drosophila)        | -4.896986 | Outlier |
| siRNA-Vinblastine Run1-DMSO  | NM_0251<br>95 | TRIB1 | tribbles homolog 1 (Drosophila)        | -2.533019 | Inlier  |
| siRNA-Temozolomide Run2-DMSO | NM_0251<br>95 | TRIB1 | tribbles homolog 1 (Drosophila)        | -0.482777 | Inlier  |
| siRNA Disorazole DMSO Run3   | NM_0251<br>95 | TRIB1 | tribbles homolog 1 (Drosophila)        | -0.091003 | Inlier  |

Identification of Survival Genes in Human Glioblastoma Cells Using siRNA Screening  
 Nikhil G Thaker, Fang Zhang, Peter R. McDonald, Tong Ying Shun, Michael D Lewen, Ian F. Pollack, and John S. Lazo  
 Molecular Pharmacology

|                              |               |       |                                       |                  |
|------------------------------|---------------|-------|---------------------------------------|------------------|
| siRNA-Temozolomide Run1-DMSO | NM_0251<br>95 | TRIB1 | tribbles<br>homolog 1<br>(Drosophila) | 0.091003 Inlier  |
| siRNA Disorazole DMSO Run1   | NM_0251<br>95 | TRIB1 | tribbles<br>homolog 1<br>(Drosophila) | 0.100463 Inlier  |
| siRNA Disorazole DMSO Run2   | NM_0251<br>95 | TRIB1 | tribbles<br>homolog 1<br>(Drosophila) | 0.866223 Inlier  |
| siRNA-Vinblastine Run2-DMSO  | NM_0251<br>95 | TRIB1 | tribbles<br>homolog 1<br>(Drosophila) | 1.584819 Inlier  |
| siRNA-Vinblastine Run1-DMSO  | NM_0216<br>43 | TRIB2 | tribbles<br>homolog 2<br>(Drosophila) | -0.891213 Inlier |
| siRNA-Temozolomide Run3-DMSO | NM_0216<br>43 | TRIB2 | tribbles<br>homolog 2<br>(Drosophila) | -0.50288 Inlier  |
| siRNA-Temozolomide Run1-DMSO | NM_0216<br>43 | TRIB2 | tribbles<br>homolog 2<br>(Drosophila) | -0.22436 Inlier  |
| siRNA-Temozolomide Run2-DMSO | NM_0216<br>43 | TRIB2 | tribbles<br>homolog 2<br>(Drosophila) | -0.092297 Inlier |
| siRNA Disorazole DMSO Run1   | NM_0216<br>43 | TRIB2 | tribbles<br>homolog 2<br>(Drosophila) | 0.092296 Inlier  |
| siRNA-Vinblastine Run2-DMSO  | NM_0216<br>43 | TRIB2 | tribbles<br>homolog 2<br>(Drosophila) | 0.84612 Inlier   |

Identification of Survival Genes in Human Glioblastoma Cells Using siRNA Screening  
 Nikhil G Thaker, Fang Zhang, Peter R. McDonald, Tong Ying Shun, Michael D Lewen, Ian F. Pollack, and John S. Lazo  
 Molecular Pharmacology

|                                  |               |       |                                           |                  |
|----------------------------------|---------------|-------|-------------------------------------------|------------------|
| siRNA Disorazole DMSO Run3       | NM_0216<br>43 | TRIB2 | tribbles<br>homolog 2<br>(Drosophil<br>a) | 1.110037 Inlier  |
| siRNA Disorazole DMSO Run2       | NM_0216<br>43 | TRIB2 | tribbles<br>homolog 2<br>(Drosophil<br>a) | 1.367307 Inlier  |
| siRNA-Vinblastine Run1-<br>DMSO  | NM_0211<br>58 | TRIB3 | tribbles<br>homolog 3<br>(Drosophil<br>a) | -0.948048 Inlier |
| siRNA-Temozolomide Run2-<br>DMSO | NM_0211<br>58 | TRIB3 | tribbles<br>homolog 3<br>(Drosophil<br>a) | -0.400952 Inlier |
| siRNA-Temozolomide Run3-<br>DMSO | NM_0211<br>58 | TRIB3 | tribbles<br>homolog 3<br>(Drosophil<br>a) | -0.286032 Inlier |
| siRNA-Temozolomide Run1-<br>DMSO | NM_0211<br>58 | TRIB3 | tribbles<br>homolog 3<br>(Drosophil<br>a) | -0.267956 Inlier |
| siRNA Disorazole DMSO Run1       | NM_0211<br>58 | TRIB3 | tribbles<br>homolog 3<br>(Drosophil<br>a) | 0.267956 Inlier  |
| siRNA Disorazole DMSO Run2       | NM_0211<br>58 | TRIB3 | tribbles<br>homolog 3<br>(Drosophil<br>a) | 1.077664 Inlier  |
| siRNA Disorazole DMSO Run3       | NM_0211<br>58 | TRIB3 | tribbles<br>homolog 3<br>(Drosophil<br>a) | 1.48912 Inlier   |
| siRNA-Vinblastine Run2-<br>DMSO  | NM_0211<br>58 | TRIB3 | tribbles<br>homolog 3<br>(Drosophil<br>a) | 2.30031 Inlier   |

Identification of Survival Genes in Human Glioblastoma Cells Using siRNA Screening  
 Nikhil G Thaker, Fang Zhang, Peter R. McDonald, Tong Ying Shun, Michael D Lewen, Ian F. Pollack, and John S. Lazo

Molecular Pharmacology

|                              |               |        |                                   |           |        |
|------------------------------|---------------|--------|-----------------------------------|-----------|--------|
| siRNA-Temozolomide Run3-DMSO | NM_1452<br>14 | TRIM11 | tripartite motif-containing<br>11 | -1.645557 | Inlier |
| siRNA-Temozolomide Run2-DMSO | NM_1452<br>14 | TRIM11 | tripartite motif-containing<br>11 | -1.104476 | Inlier |
| siRNA Disorazole DMSO Run3   | NM_1452<br>14 | TRIM11 | tripartite motif-containing<br>11 | -0.244524 | Inlier |
| siRNA-Vinblastine Run2-DMSO  | NM_1452<br>14 | TRIM11 | tripartite motif-containing<br>11 | -0.079574 | Inlier |
| siRNA-Temozolomide Run1-DMSO | NM_1452<br>14 | TRIM11 | tripartite motif-containing<br>11 | 0.079574  | Inlier |
| siRNA Disorazole DMSO Run1   | NM_1452<br>14 | TRIM11 | tripartite motif-containing<br>11 | 0.08105   | Inlier |
| siRNA Disorazole DMSO Run2   | NM_1452<br>14 | TRIM11 | tripartite motif-containing<br>11 | 1.4786    | Inlier |
| siRNA-Vinblastine Run1-DMSO  | NM_1452<br>14 | TRIM11 | tripartite motif-containing<br>11 | 1.525376  | Inlier |
| siRNA-Temozolomide Run3-DMSO | NM_0064<br>70 | TRIM16 | tripartite motif-containing<br>16 | -1.926582 | Inlier |
| siRNA-Temozolomide Run2-DMSO | NM_0064<br>70 | TRIM16 | tripartite motif-containing<br>16 | -1.035939 | Inlier |
| siRNA-Vinblastine Run2-DMSO  | NM_0064<br>70 | TRIM16 | tripartite motif-containing<br>16 | -0.240501 | Inlier |
| siRNA Disorazole DMSO Run3   | NM_0064<br>70 | TRIM16 | tripartite motif-containing<br>16 | -0.039581 | Inlier |
| siRNA Disorazole DMSO Run1   | NM_0064<br>70 | TRIM16 | tripartite motif-containing<br>16 | 0.039581  | Inlier |

Identification of Survival Genes in Human Glioblastoma Cells Using siRNA Screening  
 Nikhil G Thaker, Fang Zhang, Peter R. McDonald, Tong Ying Shun, Michael D Lewen, Ian F. Pollack, and John S. Lazo

Molecular Pharmacology

| siRNA Treatment              | Gene ID   | Gene   | Tripartite Motif               | Score     | Outlier Status |
|------------------------------|-----------|--------|--------------------------------|-----------|----------------|
| siRNA-Temozolomide Run1-DMSO | NM_006470 | TRIM16 | tripartite motif-containing 16 | 0.31306   | Inlier         |
| siRNA Disorazole DMSO Run2   | NM_006470 | TRIM16 | tripartite motif-containing 16 | 1.172975  | Inlier         |
| siRNA-Vinblastine Run1-DMSO  | NM_006470 | TRIM16 | tripartite motif-containing 16 | 2.25207   | Inlier         |
| siRNA-Temozolomide Run3-DMSO | NM_001656 | TRIM23 | tripartite motif-containing 23 | -2.260507 | Inlier         |
| siRNA-Temozolomide Run1-DMSO | NM_001656 | TRIM23 | tripartite motif-containing 23 | -0.74126  | Inlier         |
| siRNA-Temozolomide Run2-DMSO | NM_001656 | TRIM23 | tripartite motif-containing 23 | -0.60774  | Inlier         |
| siRNA-Vinblastine Run2-DMSO  | NM_001656 | TRIM23 | tripartite motif-containing 23 | -0.040327 | Inlier         |
| siRNA Disorazole DMSO Run3   | NM_001656 | TRIM23 | tripartite motif-containing 23 | 0.040326  | Inlier         |
| siRNA Disorazole DMSO Run1   | NM_001656 | TRIM23 | tripartite motif-containing 23 | 0.581433  | Inlier         |
| siRNA-Vinblastine Run1-DMSO  | NM_001656 | TRIM23 | tripartite motif-containing 23 | 0.875462  | Inlier         |
| siRNA Disorazole DMSO Run2   | NM_001656 | TRIM23 | tripartite motif-containing 23 | 1.617797  | Inlier         |
| siRNA-Temozolomide Run2-DMSO | NM_005082 | TRIM25 | tripartite motif-containing 25 | -1.841102 | Inlier         |
| siRNA-Temozolomide Run3-DMSO | NM_005082 | TRIM25 | tripartite motif-containing 25 | -1.75616  | Inlier         |



Identification of Survival Genes in Human Glioblastoma Cells Using siRNA Screening  
 Nikhil G Thaker, Fang Zhang, Peter R. McDonald, Tong Ying Shun, Michael D Lewen, Ian F. Pollack, and John S. Lazo

Molecular Pharmacology

|                              |               |        |                                   |           |        |
|------------------------------|---------------|--------|-----------------------------------|-----------|--------|
| siRNA-Vinblastine Run2-DMSO  | NM_0050<br>82 | TRIM25 | tripartite motif-containing<br>25 | -0.39617  | Inlier |
| siRNA Disorazole DMSO Run1   | NM_0050<br>82 | TRIM25 | tripartite motif-containing<br>25 | -0.037568 | Inlier |
| siRNA Disorazole DMSO Run3   | NM_0050<br>82 | TRIM25 | tripartite motif-containing<br>25 | 0.037568  | Inlier |
| siRNA-Temozolomide Run1-DMSO | NM_0050<br>82 | TRIM25 | tripartite motif-containing<br>25 | 0.040056  | Inlier |
| siRNA Disorazole DMSO Run2   | NM_0050<br>82 | TRIM25 | tripartite motif-containing<br>25 | 0.95283   | Inlier |
| siRNA-Vinblastine Run1-DMSO  | NM_0050<br>82 | TRIM25 | tripartite motif-containing<br>25 | 1.63227   | Inlier |
| siRNA-Temozolomide Run3-DMSO | NM_0057<br>62 | TRIM28 | tripartite motif-containing<br>28 | -1.12915  | Inlier |
| siRNA Disorazole DMSO Run2   | NM_0057<br>62 | TRIM28 | tripartite motif-containing<br>28 | -0.872002 | Inlier |
| siRNA-Temozolomide Run1-DMSO | NM_0057<br>62 | TRIM28 | tripartite motif-containing<br>28 | -0.039973 | Inlier |
| siRNA-Temozolomide Run2-DMSO | NM_0057<br>62 | TRIM28 | tripartite motif-containing<br>28 | -0.014557 | Inlier |
| siRNA Disorazole DMSO Run3   | NM_0057<br>62 | TRIM28 | tripartite motif-containing<br>28 | 0.014557  | Inlier |
| siRNA Disorazole DMSO Run1   | NM_0057<br>62 | TRIM28 | tripartite motif-containing<br>28 | 0.476998  | Inlier |
| siRNA-Vinblastine Run1-DMSO  | NM_0057<br>62 | TRIM28 | tripartite motif-containing<br>28 | 1.228044  | Inlier |

Identification of Survival Genes in Human Glioblastoma Cells Using siRNA Screening  
 Nikhil G Thaker, Fang Zhang, Peter R. McDonald, Tong Ying Shun, Michael D Lewen, Ian F. Pollack, and John S. Lazo

Molecular Pharmacology

|                              |               |        |                                   |           |         |
|------------------------------|---------------|--------|-----------------------------------|-----------|---------|
| siRNA-Vinblastine Run2-DMSO  | NM_0057<br>62 | TRIM28 | tripartite motif-containing<br>28 | 1.372534  | Inlier  |
| siRNA Disorazole DMSO Run2   | NM_0330<br>20 | TRIM33 | tripartite motif-containing<br>33 | -4.706584 | Outlier |
| siRNA-Temozolomide Run3-DMSO | NM_0330<br>20 | TRIM33 | tripartite motif-containing<br>33 | -3.063927 | Inlier  |
| siRNA Disorazole DMSO Run3   | NM_0330<br>20 | TRIM33 | tripartite motif-containing<br>33 | -2.109057 | Inlier  |
| siRNA-Temozolomide Run1-DMSO | NM_0330<br>20 | TRIM33 | tripartite motif-containing<br>33 | -0.024165 | Inlier  |
| siRNA-Temozolomide Run2-DMSO | NM_0330<br>20 | TRIM33 | tripartite motif-containing<br>33 | 0.024166  | Inlier  |
| siRNA Disorazole DMSO Run1   | NM_0330<br>20 | TRIM33 | tripartite motif-containing<br>33 | 0.347431  | Inlier  |
| siRNA-Vinblastine Run1-DMSO  | NM_0330<br>20 | TRIM33 | tripartite motif-containing<br>33 | 0.636591  | Inlier  |
| siRNA-Vinblastine Run2-DMSO  | NM_0330<br>20 | TRIM33 | tripartite motif-containing<br>33 | 0.712409  | Inlier  |
| siRNA-Temozolomide Run2-DMSO | NM_0187<br>00 | TRIM36 | tripartite motif-containing<br>36 | -0.785247 | Inlier  |
| siRNA-Temozolomide Run3-DMSO | NM_0187<br>00 | TRIM36 | tripartite motif-containing<br>36 | -0.752954 | Inlier  |
| siRNA-Vinblastine Run2-DMSO  | NM_0187<br>00 | TRIM36 | tripartite motif-containing<br>36 | -0.596046 | Inlier  |
| siRNA Disorazole DMSO Run3   | NM_0187<br>00 | TRIM36 | tripartite motif-containing<br>36 | -0.240414 | Inlier  |

Identification of Survival Genes in Human Glioblastoma Cells Using siRNA Screening  
 Nikhil G Thaker, Fang Zhang, Peter R. McDonald, Tong Ying Shun, Michael D Lewen, Ian F. Pollack, and John S. Lazo

Molecular Pharmacology

|                                  |               |         |                                           |           |        |
|----------------------------------|---------------|---------|-------------------------------------------|-----------|--------|
| siRNA Disorazole DMSO Run1       | NM_0187<br>00 | TRIM36  | tripartite<br>motif-<br>containing<br>36  | 0.240414  | Inlier |
| siRNA-Temozolomide Run1-<br>DMSO | NM_0187<br>00 | TRIM36  | tripartite<br>motif-<br>containing<br>36  | 0.249142  | Inlier |
| siRNA Disorazole DMSO Run2       | NM_0187<br>00 | TRIM36  | tripartite<br>motif-<br>containing<br>36  | 1.03459   | Inlier |
| siRNA-Vinblastine Run1-<br>DMSO  | NM_0187<br>00 | TRIM36  | tripartite<br>motif-<br>containing<br>36  | 1.415191  | Inlier |
| siRNA-Temozolomide Run3-<br>DMSO | NM_1781<br>25 | TRIM50A | tripartite<br>motif-<br>containing<br>50A | -1.442668 | Inlier |
| siRNA-Temozolomide Run2-<br>DMSO | NM_1781<br>25 | TRIM50A | tripartite<br>motif-<br>containing<br>50A | -0.99982  | Inlier |
| siRNA-Vinblastine Run2-<br>DMSO  | NM_1781<br>25 | TRIM50A | tripartite<br>motif-<br>containing<br>50A | -0.2261   | Inlier |
| siRNA Disorazole DMSO Run3       | NM_1781<br>25 | TRIM50A | tripartite<br>motif-<br>containing<br>50A | -0.032241 | Inlier |
| siRNA-Temozolomide Run1-<br>DMSO | NM_1781<br>25 | TRIM50A | tripartite<br>motif-<br>containing<br>50A | 0.032241  | Inlier |
| siRNA Disorazole DMSO Run1       | NM_1781<br>25 | TRIM50A | tripartite<br>motif-<br>containing<br>50A | 0.34918   | Inlier |
| siRNA Disorazole DMSO Run2       | NM_1781<br>25 | TRIM50A | tripartite<br>motif-<br>containing<br>50A | 1.499465  | Inlier |
| siRNA-Vinblastine Run1-<br>DMSO  | NM_1781<br>25 | TRIM50A | tripartite<br>motif-<br>containing<br>50A | 2.439023  | Inlier |
| siRNA-Temozolomide Run3-<br>DMSO | NM_0326<br>81 | TRIM51  | tripartite<br>motif-<br>containing<br>51  | -2.962999 | Inlier |

Identification of Survival Genes in Human Glioblastoma Cells Using siRNA Screening  
 Nikhil G Thaker, Fang Zhang, Peter R. McDonald, Tong Ying Shun, Michael D Lewen, Ian F. Pollack, and John S. Lazo

Molecular Pharmacology

|                              |               |        |                                               |           |        |
|------------------------------|---------------|--------|-----------------------------------------------|-----------|--------|
| siRNA-Temozolomide Run2-DMSO | NM_0326<br>81 | TRIM51 | tripartite motif-containing<br>51             | -1.071203 | Inlier |
| siRNA Disorazole DMSO Run1   | NM_0326<br>81 | TRIM51 | tripartite motif-containing<br>51             | -0.277797 | Inlier |
| siRNA-Temozolomide Run1-DMSO | NM_0326<br>81 | TRIM51 | tripartite motif-containing<br>51             | -0.027256 | Inlier |
| siRNA Disorazole DMSO Run3   | NM_0326<br>81 | TRIM51 | tripartite motif-containing<br>51             | 0.027256  | Inlier |
| siRNA-Vinblastine Run2-DMSO  | NM_0326<br>81 | TRIM51 | tripartite motif-containing<br>51             | 0.050312  | Inlier |
| siRNA Disorazole DMSO Run2   | NM_0326<br>81 | TRIM51 | tripartite motif-containing<br>51             | 2.087081  | Inlier |
| siRNA-Vinblastine Run1-DMSO  | NM_0326<br>81 | TRIM51 | tripartite motif-containing<br>51             | 3.325251  | Inlier |
| siRNA Disorazole DMSO Run2   | NM_0071<br>18 | TRIO   | triple functional domain (PTPRF interacting ) | -0.737872 | Inlier |
| siRNA-Temozolomide Run3-DMSO | NM_0071<br>18 | TRIO   | triple functional domain (PTPRF interacting ) | -0.611128 | Inlier |
| siRNA-Temozolomide Run1-DMSO | NM_0071<br>18 | TRIO   | triple functional domain (PTPRF interacting ) | -0.508561 | Inlier |
| siRNA Disorazole DMSO Run3   | NM_0071<br>18 | TRIO   | triple functional domain (PTPRF interacting ) | -0.393445 | Inlier |

Identification of Survival Genes in Human Glioblastoma Cells Using siRNA Screening  
 Nikhil G Thaker, Fang Zhang, Peter R. McDonald, Tong Ying Shun, Michael D Lewen, Ian F. Pollack, and John S. Lazo

Molecular Pharmacology

|                              |               |        |                                               |           |        |
|------------------------------|---------------|--------|-----------------------------------------------|-----------|--------|
| siRNA-Temozolomide Run2-DMSO | NM_0071<br>18 | TRIO   | triple functional domain (PTPRF interacting ) | 0.393445  | Inlier |
| siRNA Disorazole DMSO Run1   | NM_0071<br>18 | TRIO   | triple functional domain (PTPRF interacting ) | 0.89857   | Inlier |
| siRNA-Vinblastine Run1-DMSO  | NM_0071<br>18 | TRIO   | triple functional domain (PTPRF interacting ) | 1.337262  | Inlier |
| siRNA-Vinblastine Run2-DMSO  | NM_0071<br>18 | TRIO   | triple functional domain (PTPRF interacting ) | 2.182422  | Inlier |
| siRNA-Temozolomide Run3-DMSO | NM_0042<br>38 | TRIP12 | thyroid hormone receptor interactor 12        | -1.222165 | Inlier |
| siRNA-Temozolomide Run2-DMSO | NM_0042<br>38 | TRIP12 | thyroid hormone receptor interactor 12        | -0.789294 | Inlier |
| siRNA-Temozolomide Run1-DMSO | NM_0042<br>38 | TRIP12 | thyroid hormone receptor interactor 12        | -0.559706 | Inlier |
| siRNA Disorazole DMSO Run3   | NM_0042<br>38 | TRIP12 | thyroid hormone receptor interactor 12        | -0.273405 | Inlier |
| siRNA Disorazole DMSO Run2   | NM_0042<br>38 | TRIP12 | thyroid hormone receptor interactor 12        | 0.273405  | Inlier |

Identification of Survival Genes in Human Glioblastoma Cells Using siRNA Screening  
 Nikhil G Thaker, Fang Zhang, Peter R. McDonald, Tong Ying Shun, Michael D Lewen, Ian F. Pollack, and John S. Lazo

Molecular Pharmacology

| siRNA                        | Gene          | TRIP   | Value | Category         |
|------------------------------|---------------|--------|-------|------------------|
| siRNA Disorazole DMSO Run1   | NM_0042<br>38 | TRIP12 | 12    | 0.328655 Inlier  |
| siRNA-Vinblastine Run1-DMSO  | NM_0042<br>38 | TRIP12 | 12    | 0.858416 Inlier  |
| siRNA-Vinblastine Run2-DMSO  | NM_0042<br>38 | TRIP12 | 12    | 1.1866 Inlier    |
| siRNA-Temozolomide Run3-DMSO | NM_0047<br>73 | TRIP3  | 3     | -1.727447 Inlier |
| siRNA-Temozolomide Run2-DMSO | NM_0047<br>73 | TRIP3  | 3     | -0.969314 Inlier |
| siRNA-Temozolomide Run1-DMSO | NM_0047<br>73 | TRIP3  | 3     | -0.344898 Inlier |
| siRNA Disorazole DMSO Run1   | NM_0047<br>73 | TRIP3  | 3     | -0.012037 Inlier |
| siRNA Disorazole DMSO Run2   | NM_0047<br>73 | TRIP3  | 3     | 0.012037 Inlier  |
| siRNA Disorazole DMSO Run3   | NM_0047<br>73 | TRIP3  | 3     | 0.379686 Inlier  |
| siRNA-Vinblastine Run1-DMSO  | NM_0047<br>73 | TRIP3  | 3     | 2.078785 Inlier  |

Identification of Survival Genes in Human Glioblastoma Cells Using siRNA Screening  
 Nikhil G Thaker, Fang Zhang, Peter R. McDonald, Tong Ying Shun, Michael D Lewen, Ian F. Pollack, and John S. Lazo

Molecular Pharmacology

|                              |               |       |                                       |           |        |
|------------------------------|---------------|-------|---------------------------------------|-----------|--------|
| siRNA-Vinblastine Run2-DMSO  | NM_0047<br>73 | TRIP3 | thyroid hormone receptor interactor 3 | 2.780978  | Inlier |
| siRNA Disorazole DMSO Run2   | NM_0162<br>13 | TRIP4 | thyroid hormone receptor interactor 4 | -0.955236 | Inlier |
| siRNA-Temozolomide Run3-DMSO | NM_0162<br>13 | TRIP4 | thyroid hormone receptor interactor 4 | -0.735227 | Inlier |
| siRNA Disorazole DMSO Run3   | NM_0162<br>13 | TRIP4 | thyroid hormone receptor interactor 4 | -0.613773 | Inlier |
| siRNA-Temozolomide Run2-DMSO | NM_0162<br>13 | TRIP4 | thyroid hormone receptor interactor 4 | -0.055266 | Inlier |
| siRNA Disorazole DMSO Run1   | NM_0162<br>13 | TRIP4 | thyroid hormone receptor interactor 4 | 0.055267  | Inlier |
| siRNA-Temozolomide Run1-DMSO | NM_0162<br>13 | TRIP4 | thyroid hormone receptor interactor 4 | 0.073798  | Inlier |
| siRNA-Vinblastine Run2-DMSO  | NM_0162<br>13 | TRIP4 | thyroid hormone receptor interactor 4 | 0.773626  | Inlier |
| siRNA-Vinblastine Run1-DMSO  | NM_0162<br>13 | TRIP4 | thyroid hormone receptor interactor 4 | 0.874417  | Inlier |
| siRNA-Temozolomide Run2-DMSO | NM_0176<br>46 | TRIT1 | tRNA isopentenyltransferase 1         | -2.327847 | Inlier |

Identification of Survival Genes in Human Glioblastoma Cells Using siRNA Screening  
 Nikhil G Thaker, Fang Zhang, Peter R. McDonald, Tong Ying Shun, Michael D Lewen, Ian F. Pollack, and John S. Lazo

Molecular Pharmacology

|                              |               |       |                                                           |           |        |
|------------------------------|---------------|-------|-----------------------------------------------------------|-----------|--------|
| siRNA-Temozolomide Run1-DMSO | NM_0176<br>46 | TRIT1 | tRNA<br>isopenteny<br>ltransferas<br>e 1                  | -2.288841 | Inlier |
| siRNA Disorazole DMSO Run1   | NM_0176<br>46 | TRIT1 | tRNA<br>isopenteny<br>ltransferas<br>e 1                  | -1.504591 | Inlier |
| siRNA Disorazole DMSO Run3   | NM_0176<br>46 | TRIT1 | tRNA<br>isopenteny<br>ltransferas<br>e 1                  | -0.056161 | Inlier |
| siRNA-Temozolomide Run3-DMSO | NM_0176<br>46 | TRIT1 | tRNA<br>isopenteny<br>ltransferas<br>e 1                  | 0.056161  | Inlier |
| siRNA-Vinblastine Run2-DMSO  | NM_0176<br>46 | TRIT1 | tRNA<br>isopenteny<br>ltransferas<br>e 1                  | 0.079827  | Inlier |
| siRNA Disorazole DMSO Run2   | NM_0176<br>46 | TRIT1 | tRNA<br>isopenteny<br>ltransferas<br>e 1                  | 0.386261  | Inlier |
| siRNA-Vinblastine Run1-DMSO  | NM_0176<br>46 | TRIT1 | tRNA<br>isopenteny<br>ltransferas<br>e 1                  | 0.962739  | Inlier |
| siRNA-Temozolomide Run2-DMSO | NM_1829<br>16 | TRNT1 | tRNA<br>nucleotidyl<br>transferas<br>e, CCA-<br>adding, 1 | -1.326992 | Inlier |
| siRNA Disorazole DMSO Run1   | NM_1829<br>16 | TRNT1 | tRNA<br>nucleotidyl<br>transferas<br>e, CCA-<br>adding, 1 | -0.702336 | Inlier |
| siRNA-Temozolomide Run1-DMSO | NM_1829<br>16 | TRNT1 | tRNA<br>nucleotidyl<br>transferas<br>e, CCA-<br>adding, 1 | -0.232298 | Inlier |
| siRNA-Vinblastine Run2-DMSO  | NM_1829<br>16 | TRNT1 | tRNA<br>nucleotidyl<br>transferas<br>e, CCA-<br>adding, 1 | -0.14055  | Inlier |



Identification of Survival Genes in Human Glioblastoma Cells Using siRNA Screening  
 Nikhil G Thaker, Fang Zhang, Peter R. McDonald, Tong Ying Shun, Michael D Lewen, Ian F. Pollack, and John S. Lazo  
 Molecular Pharmacology

|                              |               |       |                                                                                         |                  |
|------------------------------|---------------|-------|-----------------------------------------------------------------------------------------|------------------|
| siRNA-Temozolomide Run3-DMSO | NM_1829<br>16 | TRNT1 | tRNA<br>nucleotidyl<br>transferase, CCA-<br>adding, 1                                   | 0.14055 Inlier   |
| siRNA Disorazole DMSO Run3   | NM_1829<br>16 | TRNT1 | tRNA<br>nucleotidyl<br>transferase, CCA-<br>adding, 1                                   | 0.646664 Inlier  |
| siRNA Disorazole DMSO Run2   | NM_1829<br>16 | TRNT1 | tRNA<br>nucleotidyl<br>transferase, CCA-<br>adding, 1                                   | 1.826379 Inlier  |
| siRNA-Vinblastine Run1-DMSO  | NM_1829<br>16 | TRNT1 | tRNA<br>nucleotidyl<br>transferase, CCA-<br>adding, 1                                   | 3.200009 Inlier  |
| siRNA-Temozolomide Run3-DMSO | NM_0073<br>32 | TRPA1 | transient<br>receptor<br>potential<br>cation<br>channel,<br>subfamily<br>A,<br>member 1 | -1.21781 Inlier  |
| siRNA Disorazole DMSO Run3   | NM_0073<br>32 | TRPA1 | transient<br>receptor<br>potential<br>cation<br>channel,<br>subfamily<br>A,<br>member 1 | -0.881217 Inlier |
| siRNA Disorazole DMSO Run2   | NM_0073<br>32 | TRPA1 | transient<br>receptor<br>potential<br>cation<br>channel,<br>subfamily<br>A,<br>member 1 | -0.467783 Inlier |

Identification of Survival Genes in Human Glioblastoma Cells Using siRNA Screening

Nikhil G Thaker, Fang Zhang, Peter R. McDonald, Tong Ying Shun, Michael D Lewen, Ian F. Pollack, and John S. Lazo

Molecular Pharmacology

|                              |           |       |                                                                    |           |         |
|------------------------------|-----------|-------|--------------------------------------------------------------------|-----------|---------|
| siRNA-Temozolomide Run2-DMSO | NM_007332 | TRPA1 | transient receptor potential cation channel, subfamily A, member 1 | -0.111068 | Inlier  |
| siRNA Disorazole DMSO Run1   | NM_007332 | TRPA1 | transient receptor potential cation channel, subfamily A, member 1 | 0.111068  | Inlier  |
| siRNA-Temozolomide Run1-DMSO | NM_007332 | TRPA1 | transient receptor potential cation channel, subfamily A, member 1 | 0.206965  | Inlier  |
| siRNA-Vinblastine Run1-DMSO  | NM_007332 | TRPA1 | transient receptor potential cation channel, subfamily A, member 1 | 1.00779   | Inlier  |
| siRNA-Vinblastine Run2-DMSO  | NM_007332 | TRPA1 | transient receptor potential cation channel, subfamily A, member 1 | 1.201555  | Inlier  |
| siRNA-Temozolomide Run3-DMSO | NM_003304 | TRPC1 | transient receptor potential cation channel, subfamily C, member 1 | -6.073033 | Outlier |

Identification of Survival Genes in Human Glioblastoma Cells Using siRNA Screening

Nikhil G Thaker, Fang Zhang, Peter R. McDonald, Tong Ying Shun, Michael D Lewen, Ian F. Pollack, and John S. Lazo

Molecular Pharmacology

|                                  |               |       |                                                                                         |           |        |
|----------------------------------|---------------|-------|-----------------------------------------------------------------------------------------|-----------|--------|
| siRNA Disorazole DMSO Run1       | NM_0033<br>04 | TRPC1 | transient<br>receptor<br>potential<br>cation<br>channel,<br>subfamily<br>C,<br>member 1 | -2.050246 | Inlier |
| siRNA-Temozolomide Run2-<br>DMSO | NM_0033<br>04 | TRPC1 | transient<br>receptor<br>potential<br>cation<br>channel,<br>subfamily<br>C,<br>member 1 | -0.789059 | Inlier |
| siRNA-Temozolomide Run1-<br>DMSO | NM_0033<br>04 | TRPC1 | transient<br>receptor<br>potential<br>cation<br>channel,<br>subfamily<br>C,<br>member 1 | -0.038032 | Inlier |
| siRNA Disorazole DMSO Run3       | NM_0033<br>04 | TRPC1 | transient<br>receptor<br>potential<br>cation<br>channel,<br>subfamily<br>C,<br>member 1 | 0.038032  | Inlier |
| siRNA Disorazole DMSO Run2       | NM_0033<br>04 | TRPC1 | transient<br>receptor<br>potential<br>cation<br>channel,<br>subfamily<br>C,<br>member 1 | 0.123264  | Inlier |
| siRNA-Vinblastine Run2-<br>DMSO  | NM_0033<br>04 | TRPC1 | transient<br>receptor<br>potential<br>cation<br>channel,<br>subfamily<br>C,<br>member 1 | 0.559941  | Inlier |

Identification of Survival Genes in Human Glioblastoma Cells Using siRNA Screening

Nikhil G Thaker, Fang Zhang, Peter R. McDonald, Tong Ying Shun, Michael D Lewen, Ian F. Pollack, and John S. Lazo

Molecular Pharmacology

|                              |           |       |                                                                    |           |        |
|------------------------------|-----------|-------|--------------------------------------------------------------------|-----------|--------|
| siRNA-Vinblastine Run1-DMSO  | NM_003304 | TRPC1 | transient receptor potential cation channel, subfamily C, member 1 | 2.027744  | Inlier |
| siRNA Disorazole DMSO Run1   | NM_003305 | TRPC3 | transient receptor potential cation channel, subfamily C, member 3 | -0.979274 | Inlier |
| siRNA-Temozolomide Run3-DMSO | NM_003305 | TRPC3 | transient receptor potential cation channel, subfamily C, member 3 | -0.545729 | Inlier |
| siRNA-Vinblastine Run2-DMSO  | NM_003305 | TRPC3 | transient receptor potential cation channel, subfamily C, member 3 | -0.501283 | Inlier |
| siRNA Disorazole DMSO Run2   | NM_003305 | TRPC3 | transient receptor potential cation channel, subfamily C, member 3 | -0.433167 | Inlier |
| siRNA Disorazole DMSO Run3   | NM_003305 | TRPC3 | transient receptor potential cation channel, subfamily C, member 3 | 0.433167  | Inlier |

Identification of Survival Genes in Human Glioblastoma Cells Using siRNA Screening

Nikhil G Thaker, Fang Zhang, Peter R. McDonald, Tong Ying Shun, Michael D Lewen, Ian F. Pollack, and John S. Lazo

Molecular Pharmacology

|                              |           |       |                                                                    |           |        |
|------------------------------|-----------|-------|--------------------------------------------------------------------|-----------|--------|
| siRNA-Vinblastine Run1-DMSO  | NM_003305 | TRPC3 | transient receptor potential cation channel, subfamily C, member 3 | 0.803271  | Inlier |
| siRNA-Temozolomide Run1-DMSO | NM_003305 | TRPC3 | transient receptor potential cation channel, subfamily C, member 3 | 1.163292  | Inlier |
| siRNA-Temozolomide Run2-DMSO | NM_003305 | TRPC3 | transient receptor potential cation channel, subfamily C, member 3 | 1.401094  | Inlier |
| siRNA Disorazole DMSO Run1   | NM_016179 | TRPC4 | transient receptor potential cation channel, subfamily C, member 4 | -0.905588 | Inlier |
| siRNA-Vinblastine Run2-DMSO  | NM_016179 | TRPC4 | transient receptor potential cation channel, subfamily C, member 4 | -0.497759 | Inlier |
| siRNA-Temozolomide Run1-DMSO | NM_016179 | TRPC4 | transient receptor potential cation channel, subfamily C, member 4 | -0.220741 | Inlier |

Identification of Survival Genes in Human Glioblastoma Cells Using siRNA Screening

Nikhil G Thaker, Fang Zhang, Peter R. McDonald, Tong Ying Shun, Michael D Lewen, Ian F. Pollack, and John S. Lazo

Molecular Pharmacology

|                              |           |         |                                                                                       |           |        |
|------------------------------|-----------|---------|---------------------------------------------------------------------------------------|-----------|--------|
| siRNA-Temozolomide Run3-DMSO | NM_016179 | TRPC4   | transient receptor potential cation channel, subfamily C, member 4                    | -0.096526 | Inlier |
| siRNA-Temozolomide Run2-DMSO | NM_016179 | TRPC4   | transient receptor potential cation channel, subfamily C, member 4                    | 0.096526  | Inlier |
| siRNA-Vinblastine Run1-DMSO  | NM_016179 | TRPC4   | transient receptor potential cation channel, subfamily C, member 4                    | 0.851241  | Inlier |
| siRNA Disorazole DMSO Run2   | NM_016179 | TRPC4   | transient receptor potential cation channel, subfamily C, member 4                    | 1.6066    | Inlier |
| siRNA Disorazole DMSO Run3   | NM_016179 | TRPC4   | transient receptor potential cation channel, subfamily C, member 4                    | 2.235648  | Inlier |
| siRNA-Temozolomide Run2-DMSO | NM_199368 | TRPC4AP | transient receptor potential cation channel, subfamily C, member 4 associated protein | -0.992471 | Inlier |

Identification of Survival Genes in Human Glioblastoma Cells Using siRNA Screening

Nikhil G Thaker, Fang Zhang, Peter R. McDonald, Tong Ying Shun, Michael D Lewen, Ian F. Pollack, and John S. Lazo

Molecular Pharmacology

|                              |           |         |                                                                                       |           |        |
|------------------------------|-----------|---------|---------------------------------------------------------------------------------------|-----------|--------|
| siRNA-Temozolomide Run1-DMSO | NM_199368 | TRPC4AP | transient receptor potential cation channel, subfamily C, member 4 associated protein | -0.71138  | Inlier |
| siRNA Disorazole DMSO Run1   | NM_199368 | TRPC4AP | transient receptor potential cation channel, subfamily C, member 4 associated protein | -0.637619 | Inlier |
| siRNA-Vinblastine Run2-DMSO  | NM_199368 | TRPC4AP | transient receptor potential cation channel, subfamily C, member 4 associated protein | -0.022387 | Inlier |
| siRNA-Vinblastine Run1-DMSO  | NM_199368 | TRPC4AP | transient receptor potential cation channel, subfamily C, member 4 associated protein | 0.022387  | Inlier |
| siRNA-Temozolomide Run3-DMSO | NM_199368 | TRPC4AP | transient receptor potential cation channel, subfamily C, member 4 associated protein | 0.266644  | Inlier |

Identification of Survival Genes in Human Glioblastoma Cells Using siRNA Screening

Nikhil G Thaker, Fang Zhang, Peter R. McDonald, Tong Ying Shun, Michael D Lewen, Ian F. Pollack, and John S.

Lazo

Molecular Pharmacology

|                              |               |         |                                                                                       |           |         |
|------------------------------|---------------|---------|---------------------------------------------------------------------------------------|-----------|---------|
| siRNA Disorazole DMSO Run2   | NM_1993<br>68 | TRPC4AP | transient receptor potential cation channel, subfamily C, member 4 associated protein | 0.882358  | Inlier  |
| siRNA Disorazole DMSO Run3   | NM_1993<br>68 | TRPC4AP | transient receptor potential cation channel, subfamily C, member 4 associated protein | 1.247749  | Inlier  |
| siRNA-Temozolomide Run3-DMSO | NM_0124<br>71 | TRPC5   | transient receptor potential cation channel, subfamily C, member 5                    | -11.07772 | Outlier |
| siRNA-Temozolomide Run2-DMSO | NM_0124<br>71 | TRPC5   | transient receptor potential cation channel, subfamily C, member 5                    | -0.727224 | Inlier  |
| siRNA Disorazole DMSO Run1   | NM_0124<br>71 | TRPC5   | transient receptor potential cation channel, subfamily C, member 5                    | -0.504908 | Inlier  |
| siRNA Disorazole DMSO Run2   | NM_0124<br>71 | TRPC5   | transient receptor potential cation channel, subfamily C, member 5                    | -0.353734 | Inlier  |



Identification of Survival Genes in Human Glioblastoma Cells Using siRNA Screening

Nikhil G Thaker, Fang Zhang, Peter R. McDonald, Tong Ying Shun, Michael D Lewen, Ian F. Pollack, and John S. Lazo

Molecular Pharmacology

|                                  |               |       |                                                                                         |           |         |
|----------------------------------|---------------|-------|-----------------------------------------------------------------------------------------|-----------|---------|
| siRNA Disorazole DMSO Run3       | NM_0124<br>71 | TRPC5 | transient<br>receptor<br>potential<br>cation<br>channel,<br>subfamily<br>C,<br>member 5 | 0.353732  | Inlier  |
| siRNA-Temozolomide Run1-<br>DMSO | NM_0124<br>71 | TRPC5 | transient<br>receptor<br>potential<br>cation<br>channel,<br>subfamily<br>C,<br>member 5 | 0.621776  | Inlier  |
| siRNA-Vinblastine Run2-<br>DMSO  | NM_0124<br>71 | TRPC5 | transient<br>receptor<br>potential<br>cation<br>channel,<br>subfamily<br>C,<br>member 5 | 3.161216  | Inlier  |
| siRNA-Vinblastine Run1-<br>DMSO  | NM_0124<br>71 | TRPC5 | transient<br>receptor<br>potential<br>cation<br>channel,<br>subfamily<br>C,<br>member 5 | 4.411567  | Outlier |
| siRNA-Temozolomide Run3-<br>DMSO | NM_0046<br>21 | TRPC6 | transient<br>receptor<br>potential<br>cation<br>channel,<br>subfamily<br>C,<br>member 6 | -4.57821  | Outlier |
| siRNA-Temozolomide Run2-<br>DMSO | NM_0046<br>21 | TRPC6 | transient<br>receptor<br>potential<br>cation<br>channel,<br>subfamily<br>C,<br>member 6 | -0.533801 | Inlier  |

Identification of Survival Genes in Human Glioblastoma Cells Using siRNA Screening

Nikhil G Thaker, Fang Zhang, Peter R. McDonald, Tong Ying Shun, Michael D Lewen, Ian F. Pollack, and John S. Lazo

Molecular Pharmacology

|                                  |               |       |                                                                                         |           |        |
|----------------------------------|---------------|-------|-----------------------------------------------------------------------------------------|-----------|--------|
| siRNA Disorazole DMSO Run1       | NM_0046<br>21 | TRPC6 | transient<br>receptor<br>potential<br>cation<br>channel,<br>subfamily<br>C,<br>member 6 | -0.476238 | Inlier |
| siRNA-Temozolomide Run1-<br>DMSO | NM_0046<br>21 | TRPC6 | transient<br>receptor<br>potential<br>cation<br>channel,<br>subfamily<br>C,<br>member 6 | -0.124032 | Inlier |
| siRNA Disorazole DMSO Run3       | NM_0046<br>21 | TRPC6 | transient<br>receptor<br>potential<br>cation<br>channel,<br>subfamily<br>C,<br>member 6 | 0.124032  | Inlier |
| siRNA-Vinblastine Run2-<br>DMSO  | NM_0046<br>21 | TRPC6 | transient<br>receptor<br>potential<br>cation<br>channel,<br>subfamily<br>C,<br>member 6 | 0.815199  | Inlier |
| siRNA Disorazole DMSO Run2       | NM_0046<br>21 | TRPC6 | transient<br>receptor<br>potential<br>cation<br>channel,<br>subfamily<br>C,<br>member 6 | 0.85777   | Inlier |
| siRNA-Vinblastine Run1-<br>DMSO  | NM_0046<br>21 | TRPC6 | transient<br>receptor<br>potential<br>cation<br>channel,<br>subfamily<br>C,<br>member 6 | 0.969049  | Inlier |

Identification of Survival Genes in Human Glioblastoma Cells Using siRNA Screening

Nikhil G Thaker, Fang Zhang, Peter R. McDonald, Tong Ying Shun, Michael D Lewen, Ian F. Pollack, and John S. Lazo

Molecular Pharmacology

|                              |           |       |                                                                    |           |        |
|------------------------------|-----------|-------|--------------------------------------------------------------------|-----------|--------|
| siRNA-Temozolomide Run3-DMSO | NM_020389 | TRPC7 | transient receptor potential cation channel, subfamily C, member 7 | -2.185174 | Inlier |
| siRNA Disorazole DMSO Run3   | NM_020389 | TRPC7 | transient receptor potential cation channel, subfamily C, member 7 | -1.158991 | Inlier |
| siRNA-Temozolomide Run2-DMSO | NM_020389 | TRPC7 | transient receptor potential cation channel, subfamily C, member 7 | -0.253753 | Inlier |
| siRNA Disorazole DMSO Run1   | NM_020389 | TRPC7 | transient receptor potential cation channel, subfamily C, member 7 | -0.154806 | Inlier |
| siRNA-Temozolomide Run1-DMSO | NM_020389 | TRPC7 | transient receptor potential cation channel, subfamily C, member 7 | 0.154806  | Inlier |
| siRNA-Vinblastine Run2-DMSO  | NM_020389 | TRPC7 | transient receptor potential cation channel, subfamily C, member 7 | 0.521851  | Inlier |

Identification of Survival Genes in Human Glioblastoma Cells Using siRNA Screening

Nikhil G Thaker, Fang Zhang, Peter R. McDonald, Tong Ying Shun, Michael D Lewen, Ian F. Pollack, and John S. Lazo

Molecular Pharmacology

|                              |           |       |                                                                    |           |        |
|------------------------------|-----------|-------|--------------------------------------------------------------------|-----------|--------|
| siRNA-Vinblastine Run1-DMSO  | NM_020389 | TRPC7 | transient receptor potential cation channel, subfamily C, member 7 | 0.827149  | Inlier |
| siRNA Disorazole DMSO Run2   | NM_020389 | TRPC7 | transient receptor potential cation channel, subfamily C, member 7 | 3.004896  | Inlier |
| siRNA-Temozolomide Run3-DMSO | NM_002420 | TRPM1 | transient receptor potential cation channel, subfamily M, member 1 | -1.223438 | Inlier |
| siRNA-Temozolomide Run2-DMSO | NM_002420 | TRPM1 | transient receptor potential cation channel, subfamily M, member 1 | -0.74815  | Inlier |
| siRNA Disorazole DMSO Run3   | NM_002420 | TRPM1 | transient receptor potential cation channel, subfamily M, member 1 | -0.60085  | Inlier |
| siRNA Disorazole DMSO Run1   | NM_002420 | TRPM1 | transient receptor potential cation channel, subfamily M, member 1 | -0.195333 | Inlier |

Identification of Survival Genes in Human Glioblastoma Cells Using siRNA Screening

Nikhil G Thaker, Fang Zhang, Peter R. McDonald, Tong Ying Shun, Michael D Lewen, Ian F. Pollack, and John S. Lazo

Molecular Pharmacology

|                              |               |       |                                                                                         |           |        |
|------------------------------|---------------|-------|-----------------------------------------------------------------------------------------|-----------|--------|
| siRNA-Temozolomide Run1-DMSO | NM_0024<br>20 | TRPM1 | transient<br>receptor<br>potential<br>cation<br>channel,<br>subfamily<br>M,<br>member 1 | 0.195334  | Inlier |
| siRNA-Vinblastine Run2-DMSO  | NM_0024<br>20 | TRPM1 | transient<br>receptor<br>potential<br>cation<br>channel,<br>subfamily<br>M,<br>member 1 | 0.424429  | Inlier |
| siRNA-Vinblastine Run1-DMSO  | NM_0024<br>20 | TRPM1 | transient<br>receptor<br>potential<br>cation<br>channel,<br>subfamily<br>M,<br>member 1 | 0.814851  | Inlier |
| siRNA Disorazole DMSO Run2   | NM_0024<br>20 | TRPM1 | transient<br>receptor<br>potential<br>cation<br>channel,<br>subfamily<br>M,<br>member 1 | 2.110869  | Inlier |
| siRNA-Temozolomide Run3-DMSO | NM_0033<br>07 | TRPM2 | transient<br>receptor<br>potential<br>cation<br>channel,<br>subfamily<br>M,<br>member 2 | -1.169612 | Inlier |
| siRNA Disorazole DMSO Run3   | NM_0033<br>07 | TRPM2 | transient<br>receptor<br>potential<br>cation<br>channel,<br>subfamily<br>M,<br>member 2 | -0.721931 | Inlier |

Identification of Survival Genes in Human Glioblastoma Cells Using siRNA Screening

Nikhil G Thaker, Fang Zhang, Peter R. McDonald, Tong Ying Shun, Michael D Lewen, Ian F. Pollack, and John S. Lazo

Molecular Pharmacology

|                                  |               |       |                                                                                         |           |        |
|----------------------------------|---------------|-------|-----------------------------------------------------------------------------------------|-----------|--------|
| siRNA Disorazole DMSO Run2       | NM_0033<br>07 | TRPM2 | transient<br>receptor<br>potential<br>cation<br>channel,<br>subfamily<br>M,<br>member 2 | -0.627069 | Inlier |
| siRNA-Temozolomide Run2-<br>DMSO | NM_0033<br>07 | TRPM2 | transient<br>receptor<br>potential<br>cation<br>channel,<br>subfamily<br>M,<br>member 2 | -0.155946 | Inlier |
| siRNA Disorazole DMSO Run1       | NM_0033<br>07 | TRPM2 | transient<br>receptor<br>potential<br>cation<br>channel,<br>subfamily<br>M,<br>member 2 | 0.155946  | Inlier |
| siRNA-Temozolomide Run1-<br>DMSO | NM_0033<br>07 | TRPM2 | transient<br>receptor<br>potential<br>cation<br>channel,<br>subfamily<br>M,<br>member 2 | 0.495851  | Inlier |
| siRNA-Vinblastine Run2-<br>DMSO  | NM_0033<br>07 | TRPM2 | transient<br>receptor<br>potential<br>cation<br>channel,<br>subfamily<br>M,<br>member 2 | 1.306993  | Inlier |
| siRNA-Vinblastine Run1-<br>DMSO  | NM_0033<br>07 | TRPM2 | transient<br>receptor<br>potential<br>cation<br>channel,<br>subfamily<br>M,<br>member 2 | 1.38764   | Inlier |

Identification of Survival Genes in Human Glioblastoma Cells Using siRNA Screening

Nikhil G Thaker, Fang Zhang, Peter R. McDonald, Tong Ying Shun, Michael D Lewen, Ian F. Pollack, and John S. Lazo

Molecular Pharmacology

|                                  |               |       |                                                                                         |           |        |
|----------------------------------|---------------|-------|-----------------------------------------------------------------------------------------|-----------|--------|
| siRNA Disorazole DMSO Run2       | NM_2069<br>48 | TRPM3 | transient<br>receptor<br>potential<br>cation<br>channel,<br>subfamily<br>M,<br>member 3 | -1.20748  | Inlier |
| siRNA-Temozolomide Run2-<br>DMSO | NM_2069<br>48 | TRPM3 | transient<br>receptor<br>potential<br>cation<br>channel,<br>subfamily<br>M,<br>member 3 | -1.195354 | Inlier |
| siRNA-Temozolomide Run3-<br>DMSO | NM_2069<br>48 | TRPM3 | transient<br>receptor<br>potential<br>cation<br>channel,<br>subfamily<br>M,<br>member 3 | -1.143257 | Inlier |
| siRNA Disorazole DMSO Run3       | NM_2069<br>48 | TRPM3 | transient<br>receptor<br>potential<br>cation<br>channel,<br>subfamily<br>M,<br>member 3 | -0.34252  | Inlier |
| siRNA-Temozolomide Run1-<br>DMSO | NM_2069<br>48 | TRPM3 | transient<br>receptor<br>potential<br>cation<br>channel,<br>subfamily<br>M,<br>member 3 | 0.34252   | Inlier |
| siRNA-Vinblastine Run2-<br>DMSO  | NM_2069<br>48 | TRPM3 | transient<br>receptor<br>potential<br>cation<br>channel,<br>subfamily<br>M,<br>member 3 | 0.433575  | Inlier |

Identification of Survival Genes in Human Glioblastoma Cells Using siRNA Screening

Nikhil G Thaker, Fang Zhang, Peter R. McDonald, Tong Ying Shun, Michael D Lewen, Ian F. Pollack, and John S. Lazo

Molecular Pharmacology

|                              |               |       |                                                                    |           |        |
|------------------------------|---------------|-------|--------------------------------------------------------------------|-----------|--------|
| siRNA-Vinblastine Run1-DMSO  | NM_2069<br>48 | TRPM3 | transient receptor potential cation channel, subfamily M, member 3 | 0.490405  | Inlier |
| siRNA Disorazole DMSO Run1   | NM_2069<br>48 | TRPM3 | transient receptor potential cation channel, subfamily M, member 3 | 0.858595  | Inlier |
| siRNA-Temozolomide Run3-DMSO | NM_0176<br>36 | TRPM4 | transient receptor potential cation channel, subfamily M, member 4 | -0.853332 | Inlier |
| siRNA Disorazole DMSO Run2   | NM_0176<br>36 | TRPM4 | transient receptor potential cation channel, subfamily M, member 4 | -0.750185 | Inlier |
| siRNA-Temozolomide Run2-DMSO | NM_0176<br>36 | TRPM4 | transient receptor potential cation channel, subfamily M, member 4 | -0.681725 | Inlier |
| siRNA Disorazole DMSO Run3   | NM_0176<br>36 | TRPM4 | transient receptor potential cation channel, subfamily M, member 4 | -0.012098 | Inlier |



Identification of Survival Genes in Human Glioblastoma Cells Using siRNA Screening

Nikhil G Thaker, Fang Zhang, Peter R. McDonald, Tong Ying Shun, Michael D Lewen, Ian F. Pollack, and John S. Lazo

Molecular Pharmacology

| siRNA Treatment              | Gene ID       | Gene Name | Gene Description                                                   | Value     | Outlier Status |
|------------------------------|---------------|-----------|--------------------------------------------------------------------|-----------|----------------|
| siRNA Disorazole DMSO Run1   | NM_0176<br>36 | TRPM4     | transient receptor potential cation channel, subfamily M, member 4 | 0.012098  | Inlier         |
| siRNA-Temozolomide Run1-DMSO | NM_0176<br>36 | TRPM4     | transient receptor potential cation channel, subfamily M, member 4 | 0.20197   | Inlier         |
| siRNA-Vinblastine Run2-DMSO  | NM_0176<br>36 | TRPM4     | transient receptor potential cation channel, subfamily M, member 4 | 0.667275  | Inlier         |
| siRNA-Vinblastine Run1-DMSO  | NM_0176<br>36 | TRPM4     | transient receptor potential cation channel, subfamily M, member 4 | 0.897266  | Inlier         |
| siRNA Disorazole DMSO Run2   | NM_0145<br>55 | TRPM5     | transient receptor potential cation channel, subfamily M, member 5 | -1.35034  | Inlier         |
| siRNA Disorazole DMSO Run3   | NM_0145<br>55 | TRPM5     | transient receptor potential cation channel, subfamily M, member 5 | -0.766128 | Inlier         |

Identification of Survival Genes in Human Glioblastoma Cells Using siRNA Screening

Nikhil G Thaker, Fang Zhang, Peter R. McDonald, Tong Ying Shun, Michael D Lewen, Ian F. Pollack, and John S. Lazo

Molecular Pharmacology

| siRNA Treatment              | Gene ID   | Gene Name | Gene Description                                                   | Score     | Outlier Status |
|------------------------------|-----------|-----------|--------------------------------------------------------------------|-----------|----------------|
| siRNA-Temozolomide Run2-DMSO | NM_014555 | TRPM5     | transient receptor potential cation channel, subfamily M, member 5 | -0.704456 | Inlier         |
| siRNA-Temozolomide Run3-DMSO | NM_014555 | TRPM5     | transient receptor potential cation channel, subfamily M, member 5 | -0.273287 | Inlier         |
| siRNA Disorazole DMSO Run1   | NM_014555 | TRPM5     | transient receptor potential cation channel, subfamily M, member 5 | 0.273287  | Inlier         |
| siRNA-Temozolomide Run1-DMSO | NM_014555 | TRPM5     | transient receptor potential cation channel, subfamily M, member 5 | 0.496397  | Inlier         |
| siRNA-Vinblastine Run2-DMSO  | NM_014555 | TRPM5     | transient receptor potential cation channel, subfamily M, member 5 | 0.644544  | Inlier         |
| siRNA-Vinblastine Run1-DMSO  | NM_014555 | TRPM5     | transient receptor potential cation channel, subfamily M, member 5 | 0.836604  | Inlier         |

Identification of Survival Genes in Human Glioblastoma Cells Using siRNA Screening

Nikhil G Thaker, Fang Zhang, Peter R. McDonald, Tong Ying Shun, Michael D Lewen, Ian F. Pollack, and John S. Lazo

Molecular Pharmacology

|                                  |               |       |                                                                                         |           |        |
|----------------------------------|---------------|-------|-----------------------------------------------------------------------------------------|-----------|--------|
| siRNA Disorazole DMSO Run3       | NM_0176<br>62 | TRPM6 | transient<br>receptor<br>potential<br>cation<br>channel,<br>subfamily<br>M,<br>member 6 | -1.477075 | Inlier |
| siRNA-Temozolomide Run2-<br>DMSO | NM_0176<br>62 | TRPM6 | transient<br>receptor<br>potential<br>cation<br>channel,<br>subfamily<br>M,<br>member 6 | -0.800999 | Inlier |
| siRNA Disorazole DMSO Run1       | NM_0176<br>62 | TRPM6 | transient<br>receptor<br>potential<br>cation<br>channel,<br>subfamily<br>M,<br>member 6 | -0.437718 | Inlier |
| siRNA-Temozolomide Run3-<br>DMSO | NM_0176<br>62 | TRPM6 | transient<br>receptor<br>potential<br>cation<br>channel,<br>subfamily<br>M,<br>member 6 | -0.42733  | Inlier |
| siRNA-Temozolomide Run1-<br>DMSO | NM_0176<br>62 | TRPM6 | transient<br>receptor<br>potential<br>cation<br>channel,<br>subfamily<br>M,<br>member 6 | 0.42733   | Inlier |
| siRNA Disorazole DMSO Run2       | NM_0176<br>62 | TRPM6 | transient<br>receptor<br>potential<br>cation<br>channel,<br>subfamily<br>M,<br>member 6 | 0.548001  | Inlier |

Identification of Survival Genes in Human Glioblastoma Cells Using siRNA Screening

Nikhil G Thaker, Fang Zhang, Peter R. McDonald, Tong Ying Shun, Michael D Lewen, Ian F. Pollack, and John S. Lazo

Molecular Pharmacology

|                              |           |       |                                                                    |           |        |
|------------------------------|-----------|-------|--------------------------------------------------------------------|-----------|--------|
| siRNA-Vinblastine Run1-DMSO  | NM_017662 | TRPM6 | transient receptor potential cation channel, subfamily M, member 6 | 0.941736  | Inlier |
| siRNA-Vinblastine Run2-DMSO  | NM_017662 | TRPM6 | transient receptor potential cation channel, subfamily M, member 6 | 1.470582  | Inlier |
| siRNA Disorazole DMSO Run2   | NM_017672 | TRPM7 | transient receptor potential cation channel, subfamily M, member 7 | -1.307652 | Inlier |
| siRNA-Temozolomide Run3-DMSO | NM_017672 | TRPM7 | transient receptor potential cation channel, subfamily M, member 7 | -0.746691 | Inlier |
| siRNA Disorazole DMSO Run1   | NM_017672 | TRPM7 | transient receptor potential cation channel, subfamily M, member 7 | -0.468307 | Inlier |
| siRNA-Temozolomide Run2-DMSO | NM_017672 | TRPM7 | transient receptor potential cation channel, subfamily M, member 7 | -0.186018 | Inlier |

Identification of Survival Genes in Human Glioblastoma Cells Using siRNA Screening

Nikhil G Thaker, Fang Zhang, Peter R. McDonald, Tong Ying Shun, Michael D Lewen, Ian F. Pollack, and John S. Lazo

Molecular Pharmacology

|                                  |               |       |                                                                                         |           |         |
|----------------------------------|---------------|-------|-----------------------------------------------------------------------------------------|-----------|---------|
| siRNA Disorazole DMSO Run3       | NM_0176<br>72 | TRPM7 | transient<br>receptor<br>potential<br>cation<br>channel,<br>subfamily<br>M,<br>member 7 | 0.186018  | Inlier  |
| siRNA-Temozolomide Run1-<br>DMSO | NM_0176<br>72 | TRPM7 | transient<br>receptor<br>potential<br>cation<br>channel,<br>subfamily<br>M,<br>member 7 | 0.602309  | Inlier  |
| siRNA-Vinblastine Run2-<br>DMSO  | NM_0176<br>72 | TRPM7 | transient<br>receptor<br>potential<br>cation<br>channel,<br>subfamily<br>M,<br>member 7 | 1.898217  | Inlier  |
| siRNA-Vinblastine Run1-<br>DMSO  | NM_0176<br>72 | TRPM7 | transient<br>receptor<br>potential<br>cation<br>channel,<br>subfamily<br>M,<br>member 7 | 2.604385  | Inlier  |
| siRNA-Temozolomide Run3-<br>DMSO | NM_0240<br>80 | TRPM8 | transient<br>receptor<br>potential<br>cation<br>channel,<br>subfamily<br>M,<br>member 8 | -4.691209 | Outlier |
| siRNA Disorazole DMSO Run1       | NM_0240<br>80 | TRPM8 | transient<br>receptor<br>potential<br>cation<br>channel,<br>subfamily<br>M,<br>member 8 | -0.827318 | Inlier  |

Identification of Survival Genes in Human Glioblastoma Cells Using siRNA Screening

Nikhil G Thaker, Fang Zhang, Peter R. McDonald, Tong Ying Shun, Michael D Lewen, Ian F. Pollack, and John S. Lazo

Molecular Pharmacology

|                              |           |       |                                                                    |           |        |
|------------------------------|-----------|-------|--------------------------------------------------------------------|-----------|--------|
| siRNA-Temozolomide Run2-DMSO | NM_024080 | TRPM8 | transient receptor potential cation channel, subfamily M, member 8 | -0.349406 | Inlier |
| siRNA-Temozolomide Run1-DMSO | NM_024080 | TRPM8 | transient receptor potential cation channel, subfamily M, member 8 | -0.273998 | Inlier |
| siRNA Disorazole DMSO Run3   | NM_024080 | TRPM8 | transient receptor potential cation channel, subfamily M, member 8 | 0.273998  | Inlier |
| siRNA Disorazole DMSO Run2   | NM_024080 | TRPM8 | transient receptor potential cation channel, subfamily M, member 8 | 0.521682  | Inlier |
| siRNA-Vinblastine Run2-DMSO  | NM_024080 | TRPM8 | transient receptor potential cation channel, subfamily M, member 8 | 2.447285  | Inlier |
| siRNA-Vinblastine Run1-DMSO  | NM_024080 | TRPM8 | transient receptor potential cation channel, subfamily M, member 8 | 3.173529  | Inlier |

Identification of Survival Genes in Human Glioblastoma Cells Using siRNA Screening

Nikhil G Thaker, Fang Zhang, Peter R. McDonald, Tong Ying Shun, Michael D Lewen, Ian F. Pollack, and John S. Lazo

Molecular Pharmacology

| siRNA                        | Gene      | Gene ID | Gene Name                                                          | Gene Description | Log2 Fold Change | Outlier Status |
|------------------------------|-----------|---------|--------------------------------------------------------------------|------------------|------------------|----------------|
| siRNA-Temozolomide Run3-DMSO | NM_080706 | TRPV1   | transient receptor potential cation channel, subfamily V, member 1 | -1.012997        | Inlier           |                |
| siRNA Disorazole DMSO Run2   | NM_080706 | TRPV1   | transient receptor potential cation channel, subfamily V, member 1 | -0.741111        | Inlier           |                |
| siRNA Disorazole DMSO Run3   | NM_080706 | TRPV1   | transient receptor potential cation channel, subfamily V, member 1 | -0.535625        | Inlier           |                |
| siRNA-Temozolomide Run2-DMSO | NM_080706 | TRPV1   | transient receptor potential cation channel, subfamily V, member 1 | -0.238108        | Inlier           |                |
| siRNA Disorazole DMSO Run1   | NM_080706 | TRPV1   | transient receptor potential cation channel, subfamily V, member 1 | 0.238108         | Inlier           |                |
| siRNA-Temozolomide Run1-DMSO | NM_080706 | TRPV1   | transient receptor potential cation channel, subfamily V, member 1 | 0.607889         | Inlier           |                |

Identification of Survival Genes in Human Glioblastoma Cells Using siRNA Screening

Nikhil G Thaker, Fang Zhang, Peter R. McDonald, Tong Ying Shun, Michael D Lewen, Ian F. Pollack, and John S. Lazo

Molecular Pharmacology

|                              |           |       |                                                                    |           |        |
|------------------------------|-----------|-------|--------------------------------------------------------------------|-----------|--------|
| siRNA-Vinblastine Run2-DMSO  | NM_080706 | TRPV1 | transient receptor potential cation channel, subfamily V, member 1 | 1.458314  | Inlier |
| siRNA-Vinblastine Run1-DMSO  | NM_080706 | TRPV1 | transient receptor potential cation channel, subfamily V, member 1 | 1.484293  | Inlier |
| siRNA Disorazole DMSO Run2   | NM_016113 | TRPV2 | transient receptor potential cation channel, subfamily V, member 2 | -3.369182 | Inlier |
| siRNA Disorazole DMSO Run1   | NM_016113 | TRPV2 | transient receptor potential cation channel, subfamily V, member 2 | -1.333004 | Inlier |
| siRNA-Vinblastine Run2-DMSO  | NM_016113 | TRPV2 | transient receptor potential cation channel, subfamily V, member 2 | -0.280185 | Inlier |
| siRNA-Temozolomide Run2-DMSO | NM_016113 | TRPV2 | transient receptor potential cation channel, subfamily V, member 2 | -0.238679 | Inlier |



Identification of Survival Genes in Human Glioblastoma Cells Using siRNA Screening

Nikhil G Thaker, Fang Zhang, Peter R. McDonald, Tong Ying Shun, Michael D Lewen, Ian F. Pollack, and John S. Lazo

Molecular Pharmacology

|                              |               |       |                                                                                         |           |        |
|------------------------------|---------------|-------|-----------------------------------------------------------------------------------------|-----------|--------|
| siRNA-Temozolomide Run1-DMSO | NM_0161<br>13 | TRPV2 | transient<br>receptor<br>potential<br>cation<br>channel,<br>subfamily<br>V,<br>member 2 | 0.238679  | Inlier |
| siRNA Disorazole DMSO Run3   | NM_0161<br>13 | TRPV2 | transient<br>receptor<br>potential<br>cation<br>channel,<br>subfamily<br>V,<br>member 2 | 0.257543  | Inlier |
| siRNA-Vinblastine Run1-DMSO  | NM_0161<br>13 | TRPV2 | transient<br>receptor<br>potential<br>cation<br>channel,<br>subfamily<br>V,<br>member 2 | 1.068815  | Inlier |
| siRNA-Temozolomide Run3-DMSO | NM_0161<br>13 | TRPV2 | transient<br>receptor<br>potential<br>cation<br>channel,<br>subfamily<br>V,<br>member 2 | 1.895714  | Inlier |
| siRNA Disorazole DMSO Run2   | NM_1450<br>68 | TRPV3 | transient<br>receptor<br>potential<br>cation<br>channel,<br>subfamily<br>V,<br>member 3 | -2.447438 | Inlier |
| siRNA-Temozolomide Run3-DMSO | NM_1450<br>68 | TRPV3 | transient<br>receptor<br>potential<br>cation<br>channel,<br>subfamily<br>V,<br>member 3 | -1.488083 | Inlier |

Identification of Survival Genes in Human Glioblastoma Cells Using siRNA Screening

Nikhil G Thaker, Fang Zhang, Peter R. McDonald, Tong Ying Shun, Michael D Lewen, Ian F. Pollack, and John S. Lazo

Molecular Pharmacology

|                              |           |       |                                                                    |           |        |
|------------------------------|-----------|-------|--------------------------------------------------------------------|-----------|--------|
| siRNA-Temozolomide Run2-DMSO | NM_145068 | TRPV3 | transient receptor potential cation channel, subfamily V, member 3 | -1.021707 | Inlier |
| siRNA-Temozolomide Run1-DMSO | NM_145068 | TRPV3 | transient receptor potential cation channel, subfamily V, member 3 | -0.093619 | Inlier |
| siRNA Disorazole DMSO Run1   | NM_145068 | TRPV3 | transient receptor potential cation channel, subfamily V, member 3 | 0.093619  | Inlier |
| siRNA-Vinblastine Run2-DMSO  | NM_145068 | TRPV3 | transient receptor potential cation channel, subfamily V, member 3 | 0.106413  | Inlier |
| siRNA Disorazole DMSO Run3   | NM_145068 | TRPV3 | transient receptor potential cation channel, subfamily V, member 3 | 0.327293  | Inlier |
| siRNA-Vinblastine Run1-DMSO  | NM_145068 | TRPV3 | transient receptor potential cation channel, subfamily V, member 3 | 1.954203  | Inlier |

Identification of Survival Genes in Human Glioblastoma Cells Using siRNA Screening

Nikhil G Thaker, Fang Zhang, Peter R. McDonald, Tong Ying Shun, Michael D Lewen, Ian F. Pollack, and John S. Lazo

Molecular Pharmacology

|                              |           |       |                                                                    |           |        |
|------------------------------|-----------|-------|--------------------------------------------------------------------|-----------|--------|
| siRNA-Temozolomide Run3-DMSO | NM_147204 | TRPV4 | transient receptor potential cation channel, subfamily V, member 4 | -1.3769   | Inlier |
| siRNA-Temozolomide Run2-DMSO | NM_147204 | TRPV4 | transient receptor potential cation channel, subfamily V, member 4 | -0.820227 | Inlier |
| siRNA Disorazole DMSO Run2   | NM_147204 | TRPV4 | transient receptor potential cation channel, subfamily V, member 4 | -0.53482  | Inlier |
| siRNA Disorazole DMSO Run1   | NM_147204 | TRPV4 | transient receptor potential cation channel, subfamily V, member 4 | -0.128716 | Inlier |
| siRNA Disorazole DMSO Run3   | NM_147204 | TRPV4 | transient receptor potential cation channel, subfamily V, member 4 | 0.128716  | Inlier |
| siRNA-Temozolomide Run1-DMSO | NM_147204 | TRPV4 | transient receptor potential cation channel, subfamily V, member 4 | 0.289928  | Inlier |

Identification of Survival Genes in Human Glioblastoma Cells Using siRNA Screening

Nikhil G Thaker, Fang Zhang, Peter R. McDonald, Tong Ying Shun, Michael D Lewen, Ian F. Pollack, and John S. Lazo

Molecular Pharmacology

|                              |           |       |                                                                    |           |        |
|------------------------------|-----------|-------|--------------------------------------------------------------------|-----------|--------|
| siRNA-Vinblastine Run2-DMSO  | NM_147204 | TRPV4 | transient receptor potential cation channel, subfamily V, member 4 | 0.81418   | Inlier |
| siRNA-Vinblastine Run1-DMSO  | NM_147204 | TRPV4 | transient receptor potential cation channel, subfamily V, member 4 | 1.183688  | Inlier |
| siRNA Disorazole DMSO Run1   | NM_019841 | TRPV5 | transient receptor potential cation channel, subfamily V, member 5 | -1.888431 | Inlier |
| siRNA-Temozolomide Run3-DMSO | NM_019841 | TRPV5 | transient receptor potential cation channel, subfamily V, member 5 | -1.570378 | Inlier |
| siRNA-Vinblastine Run2-DMSO  | NM_019841 | TRPV5 | transient receptor potential cation channel, subfamily V, member 5 | -0.045892 | Inlier |
| siRNA Disorazole DMSO Run2   | NM_019841 | TRPV5 | transient receptor potential cation channel, subfamily V, member 5 | -0.022125 | Inlier |

Identification of Survival Genes in Human Glioblastoma Cells Using siRNA Screening

Nikhil G Thaker, Fang Zhang, Peter R. McDonald, Tong Ying Shun, Michael D Lewen, Ian F. Pollack, and John S. Lazo

Molecular Pharmacology

| siRNA Treatment              | Gene ID       | Gene Name | Gene Description                                                   | Value     | Category |
|------------------------------|---------------|-----------|--------------------------------------------------------------------|-----------|----------|
| siRNA Disorazole DMSO Run3   | NM_0198<br>41 | TRPV5     | transient receptor potential cation channel, subfamily V, member 5 | 0.022125  | Inlier   |
| siRNA-Temozolomide Run1-DMSO | NM_0198<br>41 | TRPV5     | transient receptor potential cation channel, subfamily V, member 5 | 0.664757  | Inlier   |
| siRNA-Temozolomide Run2-DMSO | NM_0198<br>41 | TRPV5     | transient receptor potential cation channel, subfamily V, member 5 | 0.684243  | Inlier   |
| siRNA-Vinblastine Run1-DMSO  | NM_0198<br>41 | TRPV5     | transient receptor potential cation channel, subfamily V, member 5 | 3.849956  | Outlier  |
| siRNA-Temozolomide Run3-DMSO | NM_0186<br>46 | TRPV6     | transient receptor potential cation channel, subfamily V, member 6 | -1.595403 | Inlier   |
| siRNA Disorazole DMSO Run1   | NM_0186<br>46 | TRPV6     | transient receptor potential cation channel, subfamily V, member 6 | -0.840906 | Inlier   |

Identification of Survival Genes in Human Glioblastoma Cells Using siRNA Screening

Nikhil G Thaker, Fang Zhang, Peter R. McDonald, Tong Ying Shun, Michael D Lewen, Ian F. Pollack, and John S. Lazo

Molecular Pharmacology

| siRNA Treatment              | Gene      | Gene ID | Gene Name                                                          | Gene Description | Log Fold Change | Outlier Status |
|------------------------------|-----------|---------|--------------------------------------------------------------------|------------------|-----------------|----------------|
| siRNA-Temozolomide Run2-DMSO | NM_018646 | TRPV6   | transient receptor potential cation channel, subfamily V, member 6 | -0.46219         | Inlier          |                |
| siRNA-Vinblastine Run2-DMSO  | NM_018646 | TRPV6   | transient receptor potential cation channel, subfamily V, member 6 | -0.255203        | Inlier          |                |
| siRNA-Temozolomide Run1-DMSO | NM_018646 | TRPV6   | transient receptor potential cation channel, subfamily V, member 6 | 0.255203         | Inlier          |                |
| siRNA Disorazole DMSO Run2   | NM_018646 | TRPV6   | transient receptor potential cation channel, subfamily V, member 6 | 0.508094         | Inlier          |                |
| siRNA-Vinblastine Run1-DMSO  | NM_018646 | TRPV6   | transient receptor potential cation channel, subfamily V, member 6 | 1.245872         | Inlier          |                |
| siRNA Disorazole DMSO Run3   | NM_018646 | TRPV6   | transient receptor potential cation channel, subfamily V, member 6 | 2.060538         | Inlier          |                |

Identification of Survival Genes in Human Glioblastoma Cells Using siRNA Screening  
 Nikhil G Thaker, Fang Zhang, Peter R. McDonald, Tong Ying Shun, Michael D Lewen, Ian F. Pollack, and John S. Lazo

Molecular Pharmacology

|                                  |               |       |                                                                          |           |        |
|----------------------------------|---------------|-------|--------------------------------------------------------------------------|-----------|--------|
| siRNA Disorazole DMSO Run2       | NM_0034<br>96 | TRRAP | transforma<br>tion/transc<br>ription<br>domain-<br>associated<br>protein | -2.228922 | Inlier |
| siRNA-Temozolomide Run3-<br>DMSO | NM_0034<br>96 | TRRAP | transforma<br>tion/transc<br>ription<br>domain-<br>associated<br>protein | -1.783887 | Inlier |
| siRNA Disorazole DMSO Run3       | NM_0034<br>96 | TRRAP | transforma<br>tion/transc<br>ription<br>domain-<br>associated<br>protein | -0.393477 | Inlier |
| siRNA-Temozolomide Run1-<br>DMSO | NM_0034<br>96 | TRRAP | transforma<br>tion/transc<br>ription<br>domain-<br>associated<br>protein | -0.073852 | Inlier |
| siRNA Disorazole DMSO Run1       | NM_0034<br>96 | TRRAP | transforma<br>tion/transc<br>ription<br>domain-<br>associated<br>protein | 0.073852  | Inlier |
| siRNA-Vinblastine Run1-<br>DMSO  | NM_0034<br>96 | TRRAP | transforma<br>tion/transc<br>ription<br>domain-<br>associated<br>protein | 0.625683  | Inlier |
| siRNA-Vinblastine Run2-<br>DMSO  | NM_0034<br>96 | TRRAP | transforma<br>tion/transc<br>ription<br>domain-<br>associated<br>protein | 0.723317  | Inlier |
| siRNA-Temozolomide Run2-<br>DMSO | NM_0034<br>96 | TRRAP | transforma<br>tion/transc<br>ription<br>domain-<br>associated<br>protein | 1.027023  | Inlier |

Identification of Survival Genes in Human Glioblastoma Cells Using siRNA Screening  
 Nikhil G Thaker, Fang Zhang, Peter R. McDonald, Tong Ying Shun, Michael D Lewen, Ian F. Pollack, and John S. Lazo

Molecular Pharmacology

|                              |               |        |                                                                   |           |        |
|------------------------------|---------------|--------|-------------------------------------------------------------------|-----------|--------|
| siRNA-Temozolomide Run2-DMSO | NM_1391<br>69 | TRUB1  | TruB<br>pseudouridine (psi)<br>synthase<br>homolog 1<br>(E. coli) | -1.083762 | Inlier |
| siRNA Disorazole DMSO Run1   | NM_1391<br>69 | TRUB1  | TruB<br>pseudouridine (psi)<br>synthase<br>homolog 1<br>(E. coli) | -0.915971 | Inlier |
| siRNA-Vinblastine Run2-DMSO  | NM_1391<br>69 | TRUB1  | TruB<br>pseudouridine (psi)<br>synthase<br>homolog 1<br>(E. coli) | -0.809336 | Inlier |
| siRNA Disorazole DMSO Run3   | NM_1391<br>69 | TRUB1  | TruB<br>pseudouridine (psi)<br>synthase<br>homolog 1<br>(E. coli) | -0.382536 | Inlier |
| siRNA-Temozolomide Run3-DMSO | NM_1391<br>69 | TRUB1  | TruB<br>pseudouridine (psi)<br>synthase<br>homolog 1<br>(E. coli) | 0.382536  | Inlier |
| siRNA-Temozolomide Run1-DMSO | NM_1391<br>69 | TRUB1  | TruB<br>pseudouridine (psi)<br>synthase<br>homolog 1<br>(E. coli) | 0.490892  | Inlier |
| siRNA Disorazole DMSO Run2   | NM_1391<br>69 | TRUB1  | TruB<br>pseudouridine (psi)<br>synthase<br>homolog 1<br>(E. coli) | 0.539664  | Inlier |
| siRNA-Vinblastine Run1-DMSO  | NM_1391<br>69 | TRUB1  | TruB<br>pseudouridine (psi)<br>synthase<br>homolog 1<br>(E. coli) | 1.824857  | Inlier |
| siRNA-Temozolomide Run2-DMSO | NM_0187<br>18 | TSGA14 | testis<br>specific,<br>14                                         | -1.669368 | Inlier |



Identification of Survival Genes in Human Glioblastoma Cells Using siRNA Screening  
 Nikhil G Thaker, Fang Zhang, Peter R. McDonald, Tong Ying Shun, Michael D Lewen, Ian F. Pollack, and John S. Lazo

| Molecular Pharmacology       |                  |        |                                      |           |        |
|------------------------------|------------------|--------|--------------------------------------|-----------|--------|
| siRNA-Temozolomide Run3-DMSO | NM_0187<br>18    | TSGA14 | testis specific,<br>14               | -0.958925 | Inlier |
| siRNA-Temozolomide Run1-DMSO | NM_0187<br>18    | TSGA14 | testis specific,<br>14               | -0.319268 | Inlier |
| siRNA Disorazole DMSO Run1   | NM_0187<br>18    | TSGA14 | testis specific,<br>14               | -0.266389 | Inlier |
| siRNA Disorazole DMSO Run3   | NM_0187<br>18    | TSGA14 | testis specific,<br>14               | 0.266388  | Inlier |
| siRNA-Vinblastine Run2-DMSO  | NM_0187<br>18    | TSGA14 | testis specific,<br>14               | 0.430367  | Inlier |
| siRNA-Vinblastine Run1-DMSO  | NM_0187<br>18    | TSGA14 | testis specific,<br>14               | 0.918633  | Inlier |
| siRNA Disorazole DMSO Run2   | NM_0187<br>18    | TSGA14 | testis specific,<br>14               | 1.226403  | Inlier |
| siRNA-Temozolomide Run3-DMSO | NM_0010<br>18036 | TSHR   | thyroid stimulating hormone receptor | -2.489106 | Inlier |
| siRNA Disorazole DMSO Run3   | NM_0010<br>18036 | TSHR   | thyroid stimulating hormone receptor | -2.194954 | Inlier |
| siRNA-Temozolomide Run1-DMSO | NM_0010<br>18036 | TSHR   | thyroid stimulating hormone receptor | -0.438398 | Inlier |
| siRNA-Temozolomide Run2-DMSO | NM_0010<br>18036 | TSHR   | thyroid stimulating hormone receptor | -0.357753 | Inlier |
| siRNA Disorazole DMSO Run2   | NM_0010<br>18036 | TSHR   | thyroid stimulating hormone receptor | 0.357753  | Inlier |
| siRNA-Vinblastine Run1-DMSO  | NM_0010<br>18036 | TSHR   | thyroid stimulating hormone receptor | 0.651805  | Inlier |

Identification of Survival Genes in Human Glioblastoma Cells Using siRNA Screening  
 Nikhil G Thaker, Fang Zhang, Peter R. McDonald, Tong Ying Shun, Michael D Lewen, Ian F. Pollack, and John S. Lazo  
 Molecular Pharmacology

|                                  |                  |       |                                                         |           |         |
|----------------------------------|------------------|-------|---------------------------------------------------------|-----------|---------|
| siRNA Disorazole DMSO Run1       | NM_0010<br>18036 | TSHR  | thyroid<br>stimulating<br>hormone<br>receptor           | 0.697195  | Inlier  |
| siRNA-Vinblastine Run2-<br>DMSO  | NM_0010<br>18036 | TSHR  | thyroid<br>stimulating<br>hormone<br>receptor           | 1.561479  | Inlier  |
| siRNA Disorazole DMSO Run2       | NM_0217<br>33    | TSKS  | TSKS                                                    | -2.838373 | Inlier  |
| siRNA-Temozolomide Run3-<br>DMSO | NM_0217<br>33    | TSKS  | TSKS                                                    | -2.457931 | Inlier  |
| siRNA Disorazole DMSO Run1       | NM_0217<br>33    | TSKS  | TSKS                                                    | -0.708154 | Inlier  |
| siRNA-Temozolomide Run1-<br>DMSO | NM_0217<br>33    | TSKS  | TSKS                                                    | -0.074375 | Inlier  |
| siRNA-Temozolomide Run2-<br>DMSO | NM_0217<br>33    | TSKS  | TSKS                                                    | 0.074376  | Inlier  |
| siRNA Disorazole DMSO Run3       | NM_0217<br>33    | TSKS  | TSKS                                                    | 0.548833  | Inlier  |
| siRNA-Vinblastine Run1-<br>DMSO  | NM_0217<br>33    | TSKS  | TSKS                                                    | 0.640846  | Inlier  |
| siRNA-Vinblastine Run2-<br>DMSO  | NM_0217<br>33    | TSKS  | TSKS                                                    | 1.682598  | Inlier  |
| siRNA-Temozolomide Run3-<br>DMSO | NM_0132<br>70    | TSP50 | TSP50                                                   | -3.536215 | Outlier |
| siRNA-Temozolomide Run2-<br>DMSO | NM_0132<br>70    | TSP50 | TSP50                                                   | -1.921438 | Inlier  |
| siRNA Disorazole DMSO Run3       | NM_0132<br>70    | TSP50 | TSP50                                                   | -0.344674 | Inlier  |
| siRNA Disorazole DMSO Run2       | NM_0132<br>70    | TSP50 | TSP50                                                   | -0.099871 | Inlier  |
| siRNA-Temozolomide Run1-<br>DMSO | NM_0132<br>70    | TSP50 | TSP50                                                   | 0.099871  | Inlier  |
| siRNA Disorazole DMSO Run1       | NM_0132<br>70    | TSP50 | TSP50                                                   | 0.373644  | Inlier  |
| siRNA-Vinblastine Run2-<br>DMSO  | NM_0132<br>70    | TSP50 | TSP50                                                   | 0.975356  | Inlier  |
| siRNA-Vinblastine Run1-<br>DMSO  | NM_0132<br>70    | TSP50 | TSP50                                                   | 2.249443  | Inlier  |
| siRNA-Temozolomide Run1-<br>DMSO | NM_0033<br>12    | TST   | thiosulfate<br>sulfurtrans<br>ferase<br>(rhodanes<br>e) | -0.761619 | Inlier  |
| siRNA-Temozolomide Run2-<br>DMSO | NM_0033<br>12    | TST   | thiosulfate<br>sulfurtrans<br>ferase<br>(rhodanes<br>e) | -0.587381 | Inlier  |

Identification of Survival Genes in Human Glioblastoma Cells Using siRNA Screening  
 Nikhil G Thaker, Fang Zhang, Peter R. McDonald, Tong Ying Shun, Michael D Lewen, Ian F. Pollack, and John S. Lazo

Molecular Pharmacology

|                                  |               |       |                                                              |           |         |
|----------------------------------|---------------|-------|--------------------------------------------------------------|-----------|---------|
| siRNA Disorazole DMSO Run1       | NM_0033<br>12 | TST   | thiosulfate<br>sulfurtrans<br>ferase<br>(rhodanes<br>e)      | -0.499946 | Inlier  |
| siRNA-Vinblastine Run2-<br>DMSO  | NM_0033<br>12 | TST   | thiosulfate<br>sulfurtrans<br>ferase<br>(rhodanes<br>e)      | -0.274941 | Inlier  |
| siRNA Disorazole DMSO Run3       | NM_0033<br>12 | TST   | thiosulfate<br>sulfurtrans<br>ferase<br>(rhodanes<br>e)      | 0.274941  | Inlier  |
| siRNA-Temozolomide Run3-<br>DMSO | NM_0033<br>12 | TST   | thiosulfate<br>sulfurtrans<br>ferase<br>(rhodanes<br>e)      | 1.286669  | Inlier  |
| siRNA Disorazole DMSO Run2       | NM_0033<br>12 | TST   | thiosulfate<br>sulfurtrans<br>ferase<br>(rhodanes<br>e)      | 2.184605  | Inlier  |
| siRNA-Vinblastine Run1-<br>DMSO  | NM_0033<br>12 | TST   | thiosulfate<br>sulfurtrans<br>ferase<br>(rhodanes<br>e)      | 3.511523  | Outlier |
| siRNA-Temozolomide Run3-<br>DMSO | NM_0033<br>13 | TSTA3 | tissue<br>specific<br>transplant<br>ation<br>antigen<br>P35B | -1.833904 | Inlier  |
| siRNA-Temozolomide Run1-<br>DMSO | NM_0033<br>13 | TSTA3 | tissue<br>specific<br>transplant<br>ation<br>antigen<br>P35B | -1.318287 | Inlier  |
| siRNA Disorazole DMSO Run1       | NM_0033<br>13 | TSTA3 | tissue<br>specific<br>transplant<br>ation<br>antigen<br>P35B | -0.13549  | Inlier  |

Identification of Survival Genes in Human Glioblastoma Cells Using siRNA Screening  
 Nikhil G Thaker, Fang Zhang, Peter R. McDonald, Tong Ying Shun, Michael D Lewen, Ian F. Pollack, and John S. Lazo

Molecular Pharmacology

| siRNA Treatment              | Gene ID   | Gene Name | Gene Description                             | Log Fold Change | Outlier Status |
|------------------------------|-----------|-----------|----------------------------------------------|-----------------|----------------|
| siRNA Disorazole DMSO Run3   | NM_003313 | TSTA3     | tissue specific transplantation antigen P35B | -0.068172       | Inlier         |
| siRNA-Vinblastine Run2-DMSO  | NM_003313 | TSTA3     | tissue specific transplantation antigen P35B | 0.068172        | Inlier         |
| siRNA-Temozolomide Run2-DMSO | NM_003313 | TSTA3     | tissue specific transplantation antigen P35B | 0.098994        | Inlier         |
| siRNA-Vinblastine Run1-DMSO  | NM_003313 | TSTA3     | tissue specific transplantation antigen P35B | 1.21351         | Inlier         |
| siRNA Disorazole DMSO Run2   | NM_003313 | TSTA3     | tissue specific transplantation antigen P35B | 1.496043        | Inlier         |
| siRNA-Temozolomide Run1-DMSO | NM_173500 | TTBK2     | tau tubulin kinase 2                         | -2.436948       | Inlier         |
| siRNA-Temozolomide Run2-DMSO | NM_173500 | TTBK2     | tau tubulin kinase 2                         | -0.711939       | Inlier         |
| siRNA-Temozolomide Run3-DMSO | NM_173500 | TTBK2     | tau tubulin kinase 2                         | -0.623107       | Inlier         |
| siRNA Disorazole DMSO Run1   | NM_173500 | TTBK2     | tau tubulin kinase 2                         | -0.208519       | Inlier         |
| siRNA Disorazole DMSO Run2   | NM_173500 | TTBK2     | tau tubulin kinase 2                         | 0.20852         | Inlier         |
| siRNA-Vinblastine Run1-DMSO  | NM_173500 | TTBK2     | tau tubulin kinase 2                         | 0.637061        | Inlier         |
| siRNA Disorazole DMSO Run3   | NM_173500 | TTBK2     | tau tubulin kinase 2                         | 1.384682        | Inlier         |

Identification of Survival Genes in Human Glioblastoma Cells Using siRNA Screening

Nikhil G Thaker, Fang Zhang, Peter R. McDonald, Tong Ying Shun, Michael D Lewen, Ian F. Pollack, and John S.

Lazo

Molecular Pharmacology

|                              |           |       |                                                              |           |         |
|------------------------------|-----------|-------|--------------------------------------------------------------|-----------|---------|
| siRNA-Vinblastine Run2-DMSO  | NM_173500 | TTBK2 | tau tubulin kinase 2 transcripti on terminatio n factor, RNA | 4.957933  | Outlier |
| siRNA-Temozolomide Run3-DMSO | NM_007344 | TTF1  | polymeras e I transcripti on terminatio n factor, RNA        | -0.954809 | Inlier  |
| siRNA-Temozolomide Run2-DMSO | NM_007344 | TTF1  | polymeras e I transcripti on terminatio n factor, RNA        | -0.771864 | Inlier  |
| siRNA-Vinblastine Run2-DMSO  | NM_007344 | TTF1  | polymeras e I transcripti on terminatio n factor, RNA        | -0.577136 | Inlier  |
| siRNA Disorazole DMSO Run3   | NM_007344 | TTF1  | polymeras e I transcripti on terminatio n factor, RNA        | -0.100309 | Inlier  |
| siRNA-Temozolomide Run1-DMSO | NM_007344 | TTF1  | polymeras e I transcripti on terminatio n factor, RNA        | 0.100309  | Inlier  |
| siRNA Disorazole DMSO Run1   | NM_007344 | TTF1  | polymeras e I transcripti on terminatio n factor, RNA        | 0.288674  | Inlier  |
| siRNA-Vinblastine Run1-DMSO  | NM_007344 | TTF1  | polymeras e I                                                | 0.884826  | Inlier  |

Identification of Survival Genes in Human Glioblastoma Cells Using siRNA Screening  
 Nikhil G Thaker, Fang Zhang, Peter R. McDonald, Tong Ying Shun, Michael D Lewen, Ian F. Pollack, and John S. Lazo

Molecular Pharmacology

| siRNA Treatment              | Gene ID | Gene Name | Protein Name | Value     | Outlier Status |
|------------------------------|---------|-----------|--------------|-----------|----------------|
| siRNA Disorazole DMSO Run2   | NM_0073 | 44        | TTF1         | 1.094074  | Inlier         |
| siRNA Disorazole DMSO Run2   | NM_0033 | 18        | TTK          | -1.345852 | Inlier         |
| siRNA-Temozolomide Run3-DMSO | NM_0033 | 18        | TTK          | -1.076045 | Inlier         |
| siRNA-Temozolomide Run1-DMSO | NM_0033 | 18        | TTK          | -0.353084 | Inlier         |
| siRNA-Temozolomide Run2-DMSO | NM_0033 | 18        | TTK          | -0.069884 | Inlier         |
| siRNA Disorazole DMSO Run3   | NM_0033 | 18        | TTK          | 0.069885  | Inlier         |
| siRNA Disorazole DMSO Run1   | NM_0033 | 18        | TTK          | 0.469132  | Inlier         |
| siRNA-Vinblastine Run1-DMSO  | NM_0033 | 18        | TTK          | 0.879868  | Inlier         |
| siRNA-Vinblastine Run2-DMSO  | NM_0033 | 18        | TTK          | 1.03371   | Inlier         |
| siRNA-Temozolomide Run1-DMSO | NM_1537 | 12        | TTL          | -1.017241 | Inlier         |
| siRNA-Temozolomide Run2-DMSO | NM_1537 | 12        | TTL          | -0.759626 | Inlier         |
| siRNA-Vinblastine Run2-DMSO  | NM_1537 | 12        | TTL          | -0.581716 | Inlier         |
| siRNA-Temozolomide Run3-DMSO | NM_1537 | 12        | TTL          | -0.53421  | Inlier         |
| siRNA Disorazole DMSO Run3   | NM_1537 | 12        | TTL          | 0.53421   | Inlier         |
| siRNA-Vinblastine Run1-DMSO  | NM_1537 | 12        | TTL          | 0.639438  | Inlier         |
| siRNA Disorazole DMSO Run2   | NM_1537 | 12        | TTL          | 0.709562  | Inlier         |

transcripti  
 on  
 terminatio  
 n factor,  
 RNA  
 polymeras  
 e I  
 TTK

protein  
 kinase  
 tubulin

tyrosine  
 ligase  
 tubulin

tyrosine  
 ligase

Identification of Survival Genes in Human Glioblastoma Cells Using siRNA Screening

Nikhil G Thaker, Fang Zhang, Peter R. McDonald, Tong Ying Shun, Michael D Lewen, Ian F. Pollack, and John S. Lazo

Molecular Pharmacology

|                                  |               |       |                                                           |           |        |
|----------------------------------|---------------|-------|-----------------------------------------------------------|-----------|--------|
| siRNA Disorazole DMSO Run1       | NM_1537<br>12 | TTL   | tubulin<br>tyrosine<br>ligase                             | 1.254894  | Inlier |
| siRNA-Temozolomide Run3-<br>DMSO | NM_0122<br>63 | TTLL1 | tubulin<br>tyrosine<br>ligase-like<br>family,<br>member 1 | -1.757191 | Inlier |
| siRNA-Temozolomide Run2-<br>DMSO | NM_0122<br>63 | TTLL1 | tubulin<br>tyrosine<br>ligase-like<br>family,<br>member 1 | -0.673484 | Inlier |
| siRNA-Vinblastine Run2-<br>DMSO  | NM_0122<br>63 | TTLL1 | tubulin<br>tyrosine<br>ligase-like<br>family,<br>member 1 | -0.359959 | Inlier |
| siRNA-Temozolomide Run1-<br>DMSO | NM_0122<br>63 | TTLL1 | tubulin<br>tyrosine<br>ligase-like<br>family,<br>member 1 | -0.078821 | Inlier |
| siRNA Disorazole DMSO Run3       | NM_0122<br>63 | TTLL1 | tubulin<br>tyrosine<br>ligase-like<br>family,<br>member 1 | 0.078821  | Inlier |
| siRNA Disorazole DMSO Run1       | NM_0122<br>63 | TTLL1 | tubulin<br>tyrosine<br>ligase-like<br>family,<br>member 1 | 0.675516  | Inlier |
| siRNA Disorazole DMSO Run2       | NM_0122<br>63 | TTLL1 | tubulin<br>tyrosine<br>ligase-like<br>family,<br>member 1 | 2.188288  | Inlier |
| siRNA-Vinblastine Run1-<br>DMSO  | NM_0122<br>63 | TTLL1 | tubulin<br>tyrosine<br>ligase-like<br>family,<br>member 1 | 2.360752  | Inlier |
| siRNA-Vinblastine Run1-<br>DMSO  | NM_1333<br>79 | TTN   | titin                                                     | -0.749884 | Inlier |
| siRNA-Temozolomide Run3-<br>DMSO | NM_1333<br>79 | TTN   | titin                                                     | -0.679184 | Inlier |
| siRNA Disorazole DMSO Run2       | NM_1333<br>79 | TTN   | titin                                                     | -0.379947 | Inlier |
| siRNA-Temozolomide Run1-<br>DMSO | NM_1333<br>79 | TTN   | titin                                                     | -0.26909  | Inlier |

Identification of Survival Genes in Human Glioblastoma Cells Using siRNA Screening

Nikhil G Thaker, Fang Zhang, Peter R. McDonald, Tong Ying Shun, Michael D Lewen, Ian F. Pollack, and John S.

Lazo

|                                  |               |      |                                                                                                                   |           |        |
|----------------------------------|---------------|------|-------------------------------------------------------------------------------------------------------------------|-----------|--------|
| siRNA-Temozolomide Run2-<br>DMSO | NM_1333<br>79 | TTN  | titin                                                                                                             | 0.26909   | Inlier |
| siRNA Disorazole DMSO Run1       | NM_1333<br>79 | TTN  | titin                                                                                                             | 0.669816  | Inlier |
| siRNA Disorazole DMSO Run3       | NM_1333<br>79 | TTN  | titin                                                                                                             | 0.921383  | Inlier |
| siRNA-Vinblastine Run2-<br>DMSO  | NM_1333<br>79 | TTN  | titin                                                                                                             | 2.008483  | Inlier |
| siRNA-Temozolomide Run1-<br>DMSO | NM_0003<br>70 | TTPA | tocopherol<br>(alpha)<br>transfer<br>protein<br>(ataxia<br>(Friedreich-<br>like) with<br>vitamin E<br>deficiency) | -1.326705 | Inlier |
| siRNA-Temozolomide Run2-<br>DMSO | NM_0003<br>70 | TTPA | tocopherol<br>(alpha)<br>transfer<br>protein<br>(ataxia<br>(Friedreich-<br>like) with<br>vitamin E<br>deficiency) | -0.826769 | Inlier |
| siRNA-Vinblastine Run2-<br>DMSO  | NM_0003<br>70 | TTPA | tocopherol<br>(alpha)<br>transfer<br>protein<br>(ataxia<br>(Friedreich-<br>like) with<br>vitamin E<br>deficiency) | -0.678641 | Inlier |
| siRNA Disorazole DMSO Run1       | NM_0003<br>70 | TTPA | tocopherol<br>(alpha)<br>transfer<br>protein<br>(ataxia<br>(Friedreich-<br>like) with<br>vitamin E<br>deficiency) | -0.015914 | Inlier |



Identification of Survival Genes in Human Glioblastoma Cells Using siRNA Screening

Nikhil G Thaker, Fang Zhang, Peter R. McDonald, Tong Ying Shun, Michael D Lewen, Ian F. Pollack, and John S. Lazo

Molecular Pharmacology

|                              |    |         |       |                                                                                          |           |        |
|------------------------------|----|---------|-------|------------------------------------------------------------------------------------------|-----------|--------|
| siRNA Disorazole DMSO Run3   | 70 | NM_0003 | TPPA  | tocopherol (alpha) transfer protein (ataxia (Friedreich-like) with vitamin E deficiency) | 0.015914  | Inlier |
| siRNA-Temozolomide Run3-DMSO | 70 | NM_0003 | TPPA  | tocopherol (alpha) transfer protein (ataxia (Friedreich-like) with vitamin E deficiency) | 0.302744  | Inlier |
| siRNA-Vinblastine Run1-DMSO  | 70 | NM_0003 | TPPA  | tocopherol (alpha) transfer protein (ataxia (Friedreich-like) with vitamin E deficiency) | 0.670359  | Inlier |
| siRNA Disorazole DMSO Run2   | 70 | NM_0003 | TPPA  | tocopherol (alpha) transfer protein (ataxia (Friedreich-like) with vitamin E deficiency) | 1.025339  | Inlier |
| siRNA-Vinblastine Run2-DMSO  | 00 | NM_0060 | TUBA1 | tubulin, alpha 1 (testis specific)                                                       | -1.473982 | Inlier |
| siRNA-Temozolomide Run2-DMSO | 00 | NM_0060 | TUBA1 | tubulin, alpha 1 (testis specific)                                                       | -0.432283 | Inlier |

Identification of Survival Genes in Human Glioblastoma Cells Using siRNA Screening  
 Nikhil G Thaker, Fang Zhang, Peter R. McDonald, Tong Ying Shun, Michael D Lewen, Ian F. Pollack, and John S. Lazo

Molecular Pharmacology

|                              |           |       |                                    |           |        |
|------------------------------|-----------|-------|------------------------------------|-----------|--------|
| siRNA-Temozolomide Run1-DMSO | NM_006000 | TUBA1 | tubulin, alpha 1 (testis specific) | -0.35389  | Inlier |
| siRNA Disorazole DMSO Run3   | NM_006000 | TUBA1 | tubulin, alpha 1 (testis specific) | -0.070203 | Inlier |
| siRNA Disorazole DMSO Run1   | NM_006000 | TUBA1 | tubulin, alpha 1 (testis specific) | 0.070202  | Inlier |
| siRNA-Temozolomide Run3-DMSO | NM_006000 | TUBA1 | tubulin, alpha 1 (testis specific) | 0.916717  | Inlier |
| siRNA Disorazole DMSO Run2   | NM_006000 | TUBA1 | tubulin, alpha 1 (testis specific) | 1.212428  | Inlier |
| siRNA-Vinblastine Run1-DMSO  | NM_006000 | TUBA1 | tubulin, alpha 1 (testis specific) | 1.276532  | Inlier |
| siRNA-Temozolomide Run3-DMSO | NM_006001 | TUBA2 | tubulin, alpha 2                   | -2.959533 | Inlier |
| siRNA-Vinblastine Run2-DMSO  | NM_006001 | TUBA2 | tubulin, alpha 2                   | -0.326556 | Inlier |
| siRNA-Temozolomide Run1-DMSO | NM_006001 | TUBA2 | tubulin, alpha 2                   | -0.164325 | Inlier |
| siRNA Disorazole DMSO Run3   | NM_006001 | TUBA2 | tubulin, alpha 2                   | -0.055987 | Inlier |
| siRNA-Temozolomide Run2-DMSO | NM_006001 | TUBA2 | tubulin, alpha 2                   | 0.055987  | Inlier |
| siRNA Disorazole DMSO Run1   | NM_006001 | TUBA2 | tubulin, alpha 2                   | 1.022444  | Inlier |
| siRNA-Vinblastine Run1-DMSO  | NM_006001 | TUBA2 | tubulin, alpha 2                   | 1.64487   | Inlier |
| siRNA Disorazole DMSO Run2   | NM_006001 | TUBA2 | tubulin, alpha 2                   | 2.271208  | Inlier |
| siRNA-Temozolomide Run3-DMSO | NM_006009 | TUBA3 | TUBA3                              | -0.858743 | Inlier |
| siRNA-Temozolomide Run2-DMSO | NM_006009 | TUBA3 | TUBA3                              | -0.68399  | Inlier |
| siRNA-Temozolomide Run1-DMSO | NM_006009 | TUBA3 | TUBA3                              | -0.66501  | Inlier |
| siRNA-Vinblastine Run2-DMSO  | NM_006009 | TUBA3 | TUBA3                              | -0.296941 | Inlier |
| siRNA Disorazole DMSO Run1   | NM_006009 | TUBA3 | TUBA3                              | 0.296941  | Inlier |
| siRNA Disorazole DMSO Run3   | NM_006009 | TUBA3 | TUBA3                              | 0.557478  | Inlier |

Identification of Survival Genes in Human Glioblastoma Cells Using siRNA Screening  
 Nikhil G Thaker, Fang Zhang, Peter R. McDonald, Tong Ying Shun, Michael D Lewen, Ian F. Pollack, and John S. Lazo

| siRNA/Vinblastine Run        | Gene      | Gene  | Gene             | Value     | Category |
|------------------------------|-----------|-------|------------------|-----------|----------|
| siRNA-Vinblastine Run1-DMSO  | NM_006009 | TUBA3 | TUBA3            | 0.75569   | Inlier   |
| siRNA Disorazole DMSO Run2   | NM_006009 | TUBA3 | TUBA3            | 1.030884  | Inlier   |
| siRNA Disorazole DMSO Run3   | NM_025019 | TUBA4 | tubulin, alpha 4 | -1.389672 | Inlier   |
| siRNA-Vinblastine Run2-DMSO  | NM_025019 | TUBA4 | tubulin, alpha 4 | -1.226589 | Inlier   |
| siRNA-Temozolomide Run3-DMSO | NM_025019 | TUBA4 | tubulin, alpha 4 | -0.593403 | Inlier   |
| siRNA-Temozolomide Run2-DMSO | NM_025019 | TUBA4 | tubulin, alpha 4 | -0.173615 | Inlier   |
| siRNA-Temozolomide Run1-DMSO | NM_025019 | TUBA4 | tubulin, alpha 4 | 0.173615  | Inlier   |
| siRNA-Vinblastine Run1-DMSO  | NM_025019 | TUBA4 | tubulin, alpha 4 | 0.556652  | Inlier   |
| siRNA Disorazole DMSO Run1   | NM_025019 | TUBA4 | tubulin, alpha 4 | 0.755597  | Inlier   |
| siRNA Disorazole DMSO Run2   | NM_025019 | TUBA4 | tubulin, alpha 4 | 1.65932   | Inlier   |
| siRNA-Temozolomide Run2-DMSO | NM_032704 | TUBA6 | TUBA6            | -0.827837 | Inlier   |
| siRNA-Temozolomide Run3-DMSO | NM_032704 | TUBA6 | TUBA6            | -0.644862 | Inlier   |
| siRNA Disorazole DMSO Run3   | NM_032704 | TUBA6 | TUBA6            | -0.611479 | Inlier   |
| siRNA-Vinblastine Run2-DMSO  | NM_032704 | TUBA6 | TUBA6            | -0.13406  | Inlier   |
| siRNA-Temozolomide Run1-DMSO | NM_032704 | TUBA6 | TUBA6            | 0.134061  | Inlier   |
| siRNA Disorazole DMSO Run1   | NM_032704 | TUBA6 | TUBA6            | 0.704138  | Inlier   |
| siRNA-Vinblastine Run1-DMSO  | NM_032704 | TUBA6 | TUBA6            | 1.685097  | Inlier   |
| siRNA Disorazole DMSO Run2   | NM_032704 | TUBA6 | TUBA6            | 1.722341  | Inlier   |
| siRNA-Temozolomide Run3-DMSO | NM_018943 | TUBA8 | tubulin, alpha 8 | -2.695742 | Inlier   |
| siRNA-Temozolomide Run2-DMSO | NM_018943 | TUBA8 | tubulin, alpha 8 | -0.462361 | Inlier   |
| siRNA-Vinblastine Run2-DMSO  | NM_018943 | TUBA8 | tubulin, alpha 8 | -0.35181  | Inlier   |
| siRNA-Temozolomide Run1-DMSO | NM_018943 | TUBA8 | tubulin, alpha 8 | -0.114688 | Inlier   |
| siRNA Disorazole DMSO Run3   | NM_018943 | TUBA8 | tubulin, alpha 8 | 0.114688  | Inlier   |
| siRNA-Vinblastine Run1-DMSO  | NM_018943 | TUBA8 | tubulin, alpha 8 | 0.886639  | Inlier   |
| siRNA Disorazole DMSO Run2   | NM_018943 | TUBA8 | tubulin, alpha 8 | 1.083464  | Inlier   |
| siRNA Disorazole DMSO Run1   | NM_018943 | TUBA8 | tubulin, alpha 8 | 1.253794  | Inlier   |

Identification of Survival Genes in Human Glioblastoma Cells Using siRNA Screening  
 Nikhil G Thaker, Fang Zhang, Peter R. McDonald, Tong Ying Shun, Michael D Lewen, Ian F. Pollack, and John S. Lazo

| Molecular Pharmacology       |               |        |                    | tubulin,<br>alpha-like |        |
|------------------------------|---------------|--------|--------------------|------------------------|--------|
| siRNA-Temozolomide Run1-DMSO | NM_0248<br>03 | TUBAL3 | 3                  | -0.912423              | Inlier |
| siRNA-Temozolomide Run2-DMSO | NM_0248<br>03 | TUBAL3 | 3                  | -0.859207              | Inlier |
| siRNA Disorazole DMSO Run1   | NM_0248<br>03 | TUBAL3 | 3                  | -0.803511              | Inlier |
| siRNA-Vinblastine Run2-DMSO  | NM_0248<br>03 | TUBAL3 | 3                  | -0.279321              | Inlier |
| siRNA Disorazole DMSO Run3   | NM_0248<br>03 | TUBAL3 | 3                  | 0.27932                | Inlier |
| siRNA-Temozolomide Run3-DMSO | NM_0248<br>03 | TUBAL3 | 3                  | 0.40016                | Inlier |
| siRNA-Vinblastine Run1-DMSO  | NM_0248<br>03 | TUBAL3 | 3                  | 0.545489               | Inlier |
| siRNA Disorazole DMSO Run2   | NM_0248<br>03 | TUBAL3 | 3                  | 1.225256               | Inlier |
| siRNA-Temozolomide Run3-DMSO | NM_0010<br>69 | TUBB   | tubulin,<br>beta 2 | -1.375721              | Inlier |
| siRNA-Temozolomide Run2-DMSO | NM_0010<br>69 | TUBB   | tubulin,<br>beta 2 | -0.674005              | Inlier |
| siRNA Disorazole DMSO Run3   | NM_0010<br>69 | TUBB   | tubulin,<br>beta 2 | -0.228778              | Inlier |
| siRNA-Vinblastine Run2-DMSO  | NM_0010<br>69 | TUBB   | tubulin,<br>beta 2 | -0.10316               | Inlier |
| siRNA-Temozolomide Run1-DMSO | NM_0010<br>69 | TUBB   | tubulin,<br>beta 2 | 0.103159               | Inlier |
| siRNA Disorazole DMSO Run1   | NM_0010<br>69 | TUBB   | tubulin,<br>beta 2 | 0.674995               | Inlier |
| siRNA-Vinblastine Run1-DMSO  | NM_0010<br>69 | TUBB   | tubulin,<br>beta 2 | 0.826336               | Inlier |
| siRNA Disorazole DMSO Run2   | NM_0010<br>69 | TUBB   | tubulin,<br>beta 2 | 1.162965               | Inlier |
| siRNA-Temozolomide Run2-DMSO | NM_0307<br>73 | TUBB1  | tubulin,<br>beta 1 | -0.796853              | Inlier |
| siRNA-Temozolomide Run3-DMSO | NM_0307<br>73 | TUBB1  | tubulin,<br>beta 1 | -0.552147              | Inlier |
| siRNA-Vinblastine Run2-DMSO  | NM_0307<br>73 | TUBB1  | tubulin,<br>beta 1 | -0.08905               | Inlier |
| siRNA Disorazole DMSO Run3   | NM_0307<br>73 | TUBB1  | tubulin,<br>beta 1 | -0.073566              | Inlier |
| siRNA-Temozolomide Run1-DMSO | NM_0307<br>73 | TUBB1  | tubulin,<br>beta 1 | 0.073566               | Inlier |
| siRNA Disorazole DMSO Run1   | NM_0307<br>73 | TUBB1  | tubulin,<br>beta 1 | 0.861682               | Inlier |

Identification of Survival Genes in Human Glioblastoma Cells Using siRNA Screening  
 Nikhil G Thaker, Fang Zhang, Peter R. McDonald, Tong Ying Shun, Michael D Lewen, Ian F. Pollack, and John S. Lazo

|                              |               |        |                                                    |           |        |
|------------------------------|---------------|--------|----------------------------------------------------|-----------|--------|
| Molecular Pharmacology       | NM_0307       |        | tubulin,                                           |           |        |
| siRNA Disorazole DMSO Run2   | 73            | TUBB1  | beta 1                                             | 1.210071  | Inlier |
| siRNA-Vinblastine Run1-DMSO  | NM_0307<br>73 | TUBB1  | tubulin,<br>beta 1                                 | 1.241897  | Inlier |
| siRNA-Temozolomide Run3-DMSO | NM_0060<br>88 | TUBB2  | TUBB2                                              | -1.940392 | Inlier |
| siRNA-Temozolomide Run2-DMSO | NM_0060<br>88 | TUBB2  | TUBB2                                              | -1.632595 | Inlier |
| siRNA-Temozolomide Run1-DMSO | NM_0060<br>88 | TUBB2  | TUBB2                                              | -0.502622 | Inlier |
| siRNA-Vinblastine Run2-DMSO  | NM_0060<br>88 | TUBB2  | TUBB2                                              | -0.175914 | Inlier |
| siRNA Disorazole DMSO Run3   | NM_0060<br>88 | TUBB2  | TUBB2                                              | 0.175914  | Inlier |
| siRNA Disorazole DMSO Run1   | NM_0060<br>88 | TUBB2  | TUBB2                                              | 0.550326  | Inlier |
| siRNA-Vinblastine Run1-DMSO  | NM_0060<br>88 | TUBB2  | TUBB2                                              | 0.798674  | Inlier |
| siRNA Disorazole DMSO Run2   | NM_0060<br>88 | TUBB2  | TUBB2                                              | 1.448073  | Inlier |
| siRNA-Temozolomide Run3-DMSO | NM_0060<br>86 | TUBB4  | tubulin,<br>beta 3                                 | -1.230357 | Inlier |
| siRNA-Temozolomide Run2-DMSO | NM_0060<br>86 | TUBB4  | tubulin,<br>beta 3                                 | -0.658757 | Inlier |
| siRNA Disorazole DMSO Run3   | NM_0060<br>86 | TUBB4  | tubulin,<br>beta 3                                 | -0.59257  | Inlier |
| siRNA Disorazole DMSO Run2   | NM_0060<br>86 | TUBB4  | tubulin,<br>beta 3                                 | -0.326564 | Inlier |
| siRNA-Vinblastine Run2-DMSO  | NM_0060<br>86 | TUBB4  | tubulin,<br>beta 3                                 | 0.326563  | Inlier |
| siRNA-Temozolomide Run1-DMSO | NM_0060<br>86 | TUBB4  | tubulin,<br>beta 3                                 | 0.690243  | Inlier |
| siRNA Disorazole DMSO Run1   | NM_0060<br>86 | TUBB4  | tubulin,<br>beta 3                                 | 1.120167  | Inlier |
| siRNA-Vinblastine Run1-DMSO  | NM_0060<br>86 | TUBB4  | tubulin,<br>beta 3                                 | 1.990174  | Inlier |
| siRNA-Temozolomide Run2-DMSO | NM_0200<br>40 | TUBB4Q | tubulin,<br>beta<br>polypeptid<br>e 4,<br>member Q | -1.565742 | Inlier |
| siRNA-Temozolomide Run3-DMSO | NM_0200<br>40 | TUBB4Q | tubulin,<br>beta<br>polypeptid<br>e 4,<br>member Q | -1.267471 | Inlier |

Identification of Survival Genes in Human Glioblastoma Cells Using siRNA Screening  
 Nikhil G Thaker, Fang Zhang, Peter R. McDonald, Tong Ying Shun, Michael D Lewen, Ian F. Pollack, and John S. Lazo  
 Molecular Pharmacology

|                              |               |        |                                                    |           |         |
|------------------------------|---------------|--------|----------------------------------------------------|-----------|---------|
| siRNA Disorazole DMSO Run3   | NM_0200<br>40 | TUBB4Q | tubulin,<br>beta<br>polypeptid<br>e 4,<br>member Q | -0.41893  | Inlier  |
| siRNA-Temozolomide Run1-DMSO | NM_0200<br>40 | TUBB4Q | tubulin,<br>beta<br>polypeptid<br>e 4,<br>member Q | -0.030747 | Inlier  |
| siRNA-Vinblastine Run2-DMSO  | NM_0200<br>40 | TUBB4Q | tubulin,<br>beta<br>polypeptid<br>e 4,<br>member Q | 0.030747  | Inlier  |
| siRNA Disorazole DMSO Run2   | NM_0200<br>40 | TUBB4Q | tubulin,<br>beta<br>polypeptid<br>e 4,<br>member Q | 0.672851  | Inlier  |
| siRNA Disorazole DMSO Run1   | NM_0200<br>40 | TUBB4Q | tubulin,<br>beta<br>polypeptid<br>e 4,<br>member Q | 0.676149  | Inlier  |
| siRNA-Vinblastine Run1-DMSO  | NM_0200<br>40 | TUBB4Q | tubulin,<br>beta<br>polypeptid<br>e 4,<br>member Q | 1.009475  | Inlier  |
| siRNA Disorazole DMSO Run1   | NM_0060<br>87 | TUBB5  | tubulin,<br>beta 4                                 | -0.970751 | Inlier  |
| siRNA-Vinblastine Run2-DMSO  | NM_0060<br>87 | TUBB5  | tubulin,<br>beta 4                                 | -0.378249 | Inlier  |
| siRNA Disorazole DMSO Run3   | NM_0060<br>87 | TUBB5  | tubulin,<br>beta 4                                 | -0.190938 | Inlier  |
| siRNA-Temozolomide Run3-DMSO | NM_0060<br>87 | TUBB5  | tubulin,<br>beta 4                                 | -0.143005 | Inlier  |
| siRNA-Temozolomide Run2-DMSO | NM_0060<br>87 | TUBB5  | tubulin,<br>beta 4                                 | 0.143003  | Inlier  |
| siRNA-Temozolomide Run1-DMSO | NM_0060<br>87 | TUBB5  | tubulin,<br>beta 4                                 | 1.223347  | Inlier  |
| siRNA-Vinblastine Run1-DMSO  | NM_0060<br>87 | TUBB5  | tubulin,<br>beta 4                                 | 3.422815  | Inlier  |
| siRNA Disorazole DMSO Run2   | NM_0060<br>87 | TUBB5  | tubulin,<br>beta 4                                 | 3.601464  | Outlier |

Identification of Survival Genes in Human Glioblastoma Cells Using siRNA Screening  
 Nikhil G Thaker, Fang Zhang, Peter R. McDonald, Tong Ying Shun, Michael D Lewen, Ian F. Pollack, and John S. Lazo

| siRNA-Treatment              | Gene    | Accession | Protein | Value     | Category |
|------------------------------|---------|-----------|---------|-----------|----------|
| siRNA-Temozolomide Run3-DMSO | NM_0162 | 61        | TUBD1   | -0.834798 | Inlier   |
| siRNA-Temozolomide Run2-DMSO | NM_0162 | 61        | TUBD1   | -0.514202 | Inlier   |
| siRNA-Temozolomide Run1-DMSO | NM_0162 | 61        | TUBD1   | -0.236237 | Inlier   |
| siRNA Disorazole DMSO Run3   | NM_0162 | 61        | TUBD1   | -0.089733 | Inlier   |
| siRNA-Vinblastine Run2-DMSO  | NM_0162 | 61        | TUBD1   | 0.089732  | Inlier   |
| siRNA Disorazole DMSO Run1   | NM_0162 | 61        | TUBD1   | 0.97761   | Inlier   |
| siRNA Disorazole DMSO Run2   | NM_0162 | 61        | TUBD1   | 1.163274  | Inlier   |
| siRNA-Vinblastine Run1-DMSO  | NM_0162 | 61        | TUBD1   | 1.193388  | Inlier   |
| siRNA-Temozolomide Run3-DMSO | NM_0162 | 62        | TUBE1   | -1.833329 | Inlier   |
| siRNA-Temozolomide Run2-DMSO | NM_0162 | 62        | TUBE1   | -0.916617 | Inlier   |
| siRNA Disorazole DMSO Run3   | NM_0162 | 62        | TUBE1   | -0.432383 | Inlier   |
| siRNA-Vinblastine Run2-DMSO  | NM_0162 | 62        | TUBE1   | -0.315766 | Inlier   |
| siRNA Disorazole DMSO Run1   | NM_0162 | 62        | TUBE1   | 0.315766  | Inlier   |
| siRNA-Temozolomide Run1-DMSO | NM_0162 | 62        | TUBE1   | 0.337233  | Inlier   |
| siRNA-Vinblastine Run1-DMSO  | NM_0162 | 62        | TUBE1   | 1.097723  | Inlier   |
| siRNA Disorazole DMSO Run2   | NM_0162 | 62        | TUBE1   | 1.729253  | Inlier   |
| siRNA-Temozolomide Run3-DMSO | NM_0010 | 70        | TUBG1   | -1.550965 | Inlier   |
| siRNA-Temozolomide Run2-DMSO | NM_0010 | 70        | TUBG1   | -0.999638 | Inlier   |
| siRNA Disorazole DMSO Run1   | NM_0010 | 70        | TUBG1   | -0.057443 | Inlier   |
| siRNA-Temozolomide Run1-DMSO | NM_0010 | 70        | TUBG1   | -0.05088  | Inlier   |
| siRNA Disorazole DMSO Run3   | NM_0010 | 70        | TUBG1   | 0.050881  | Inlier   |
| siRNA-Vinblastine Run2-DMSO  | NM_0010 | 70        | TUBG1   | 0.349362  | Inlier   |
| siRNA Disorazole DMSO Run2   | NM_0010 | 70        | TUBG1   | 1.983463  | Inlier   |
| siRNA-Vinblastine Run1-DMSO  | NM_0010 | 70        | TUBG1   | 2.090994  | Inlier   |
| siRNA-Temozolomide Run2-DMSO | NM_0164 | 37        | TUBG2   | -1.535085 | Inlier   |
| siRNA-Vinblastine Run2-DMSO  | NM_0164 | 37        | TUBG2   | -0.795879 | Inlier   |

Identification of Survival Genes in Human Glioblastoma Cells Using siRNA Screening  
 Nikhil G Thaker, Fang Zhang, Peter R. McDonald, Tong Ying Shun, Michael D Lewen, Ian F. Pollack, and John S. Lazo

|                                  |               |         |                                                         |           |        |
|----------------------------------|---------------|---------|---------------------------------------------------------|-----------|--------|
| siRNA-Temozolomide Run3-<br>DMSO | NM_0164<br>37 | TUBG2   | tubulin,<br>gamma 2                                     | -0.453589 | Inlier |
| siRNA Disorazole DMSO Run3       | NM_0164<br>37 | TUBG2   | tubulin,<br>gamma 2                                     | -0.415548 | Inlier |
| siRNA-Temozolomide Run1-<br>DMSO | NM_0164<br>37 | TUBG2   | tubulin,<br>gamma 2                                     | 0.415548  | Inlier |
| siRNA Disorazole DMSO Run1       | NM_0164<br>37 | TUBG2   | tubulin,<br>gamma 2                                     | 0.553121  | Inlier |
| siRNA-Vinblastine Run1-<br>DMSO  | NM_0164<br>37 | TUBG2   | tubulin,<br>gamma 2                                     | 1.754839  | Inlier |
| siRNA Disorazole DMSO Run2       | NM_0164<br>37 | TUBG2   | tubulin,<br>gamma 2                                     | 2.319479  | Inlier |
| siRNA-Vinblastine Run2-<br>DMSO  | NM_0204<br>61 | TUBGCP6 | tubulin,<br>gamma<br>complex<br>associated<br>protein 6 | -0.883802 | Inlier |
| siRNA Disorazole DMSO Run3       | NM_0204<br>61 | TUBGCP6 | tubulin,<br>gamma<br>complex<br>associated<br>protein 6 | -0.705853 | Inlier |
| siRNA-Temozolomide Run3-<br>DMSO | NM_0204<br>61 | TUBGCP6 | tubulin,<br>gamma<br>complex<br>associated<br>protein 6 | -0.643147 | Inlier |
| siRNA-Temozolomide Run2-<br>DMSO | NM_0204<br>61 | TUBGCP6 | tubulin,<br>gamma<br>complex<br>associated<br>protein 6 | -0.144061 | Inlier |
| siRNA Disorazole DMSO Run1       | NM_0204<br>61 | TUBGCP6 | tubulin,<br>gamma<br>complex<br>associated<br>protein 6 | 0.144061  | Inlier |
| siRNA-Temozolomide Run1-<br>DMSO | NM_0204<br>61 | TUBGCP6 | tubulin,<br>gamma<br>complex<br>associated<br>protein 6 | 0.571699  | Inlier |



Identification of Survival Genes in Human Glioblastoma Cells Using siRNA Screening  
 Nikhil G Thaker, Fang Zhang, Peter R. McDonald, Tong Ying Shun, Michael D Lewen, Ian F. Pollack, and John S. Lazo  
 Molecular Pharmacology

|                              |               |         |                                                                |           |         |
|------------------------------|---------------|---------|----------------------------------------------------------------|-----------|---------|
| siRNA-Vinblastine Run1-DMSO  | NM_0204<br>61 | TUBGCP6 | tubulin,<br>gamma<br>complex<br>associated<br>protein 6        | 8.631815  | Outlier |
| siRNA Disorazole DMSO Run2   | NM_0204<br>61 | TUBGCP6 | tubulin,<br>gamma<br>complex<br>associated<br>protein 6<br>TXK | 10.15995  | Outlier |
| siRNA Disorazole DMSO Run2   | NM_0033<br>28 | TXK     | tyrosine<br>kinase<br>TXK                                      | -3.034457 | Inlier  |
| siRNA Disorazole DMSO Run3   | NM_0033<br>28 | TXK     | tyrosine<br>kinase<br>TXK                                      | -0.652448 | Inlier  |
| siRNA-Temozolomide Run3-DMSO | NM_0033<br>28 | TXK     | tyrosine<br>kinase<br>TXK                                      | -0.388644 | Inlier  |
| siRNA-Temozolomide Run1-DMSO | NM_0033<br>28 | TXK     | tyrosine<br>kinase<br>TXK                                      | -0.058552 | Inlier  |
| siRNA-Temozolomide Run2-DMSO | NM_0033<br>28 | TXK     | tyrosine<br>kinase<br>TXK                                      | 0.058552  | Inlier  |
| siRNA Disorazole DMSO Run1   | NM_0033<br>28 | TXK     | tyrosine<br>kinase<br>TXK                                      | 0.696552  | Inlier  |
| siRNA-Vinblastine Run2-DMSO  | NM_0033<br>28 | TXK     | tyrosine<br>kinase<br>TXK                                      | 0.931213  | Inlier  |
| siRNA-Vinblastine Run1-DMSO  | NM_0033<br>28 | TXK     | tyrosine<br>kinase                                             | 1.095903  | Inlier  |
| siRNA-Temozolomide Run3-DMSO | NM_0033<br>29 | TXN     | thioredoxi<br>n                                                | -0.870621 | Inlier  |
| siRNA-Temozolomide Run2-DMSO | NM_0033<br>29 | TXN     | thioredoxi<br>n                                                | -0.478379 | Inlier  |
| siRNA-Temozolomide Run1-DMSO | NM_0033<br>29 | TXN     | thioredoxi<br>n                                                | -0.457466 | Inlier  |
| siRNA Disorazole DMSO Run3   | NM_0033<br>29 | TXN     | thioredoxi<br>n                                                | -0.357945 | Inlier  |
| siRNA-Vinblastine Run2-DMSO  | NM_0033<br>29 | TXN     | thioredoxi<br>n                                                | 0.357945  | Inlier  |
| siRNA Disorazole DMSO Run1   | NM_0033<br>29 | TXN     | thioredoxi<br>n                                                | 1.746377  | Inlier  |
| siRNA-Vinblastine Run1-DMSO  | NM_0033<br>29 | TXN     | thioredoxi<br>n                                                | 1.753831  | Inlier  |
| siRNA Disorazole DMSO Run2   | NM_0033<br>29 | TXN     | thioredoxi<br>n                                                | 2.8656    | Inlier  |

Identification of Survival Genes in Human Glioblastoma Cells Using siRNA Screening  
 Nikhil G Thaker, Fang Zhang, Peter R. McDonald, Tong Ying Shun, Michael D Lewen, Ian F. Pollack, and John S. Lazo

| Molecular Pharmacology       |               |        | thioredoxi                                       |           |        |
|------------------------------|---------------|--------|--------------------------------------------------|-----------|--------|
| siRNA-Temozolomide Run3-DMSO | NM_0307<br>55 | TXNDC  | n domain<br>containing                           | -0.743082 | Inlier |
| siRNA-Temozolomide Run2-DMSO | NM_0307<br>55 | TXNDC  | n domain<br>containing                           | -0.605918 | Inlier |
| siRNA Disorazole DMSO Run3   | NM_0307<br>55 | TXNDC  | n domain<br>containing                           | -0.539839 | Inlier |
| siRNA-Vinblastine Run2-DMSO  | NM_0307<br>55 | TXNDC  | n domain<br>containing                           | -0.466927 | Inlier |
| siRNA Disorazole DMSO Run1   | NM_0307<br>55 | TXNDC  | n domain<br>containing                           | 0.466927  | Inlier |
| siRNA-Temozolomide Run1-DMSO | NM_0307<br>55 | TXNDC  | n domain<br>containing                           | 0.769044  | Inlier |
| siRNA Disorazole DMSO Run2   | NM_0307<br>55 | TXNDC  | n domain<br>containing                           | 0.897795  | Inlier |
| siRNA-Vinblastine Run1-DMSO  | NM_0307<br>55 | TXNDC  | n domain<br>containing                           | 0.9482    | Inlier |
| siRNA-Temozolomide Run3-DMSO | NM_0166<br>16 | TXNDC3 | n domain<br>containing<br>3<br>(spermato<br>zoa) | -0.784048 | Inlier |
| siRNA-Temozolomide Run2-DMSO | NM_0166<br>16 | TXNDC3 | n domain<br>containing<br>3<br>(spermato<br>zoa) | -0.564952 | Inlier |
| siRNA Disorazole DMSO Run3   | NM_0166<br>16 | TXNDC3 | n domain<br>containing<br>3<br>(spermato<br>zoa) | -0.44881  | Inlier |
| siRNA-Temozolomide Run1-DMSO | NM_0166<br>16 | TXNDC3 | n domain<br>containing<br>3<br>(spermato<br>zoa) | -0.273839 | Inlier |

Identification of Survival Genes in Human Glioblastoma Cells Using siRNA Screening  
 Nikhil G Thaker, Fang Zhang, Peter R. McDonald, Tong Ying Shun, Michael D Lewen, Ian F. Pollack, and John S. Lazo

Molecular Pharmacology

|                              |               |        |                                               |           |        |
|------------------------------|---------------|--------|-----------------------------------------------|-----------|--------|
| siRNA Disorazole DMSO Run1   | NM_0166<br>16 | TXNDC3 | thioredoxin domain containing 3 (spermatozoa) | 0.273839  | Inlier |
| siRNA Disorazole DMSO Run2   | NM_0166<br>16 | TXNDC3 | thioredoxin domain containing 3 (spermatozoa) | 1.079433  | Inlier |
| siRNA-Vinblastine Run2-DMSO  | NM_0166<br>16 | TXNDC3 | thioredoxin domain containing 3 (spermatozoa) | 1.587847  | Inlier |
| siRNA-Vinblastine Run1-DMSO  | NM_0166<br>16 | TXNDC3 | thioredoxin domain containing 3 (spermatozoa) | 1.674459  | Inlier |
| siRNA-Temozolomide Run3-DMSO | NM_1781<br>30 | TXNDC6 | thioredoxin domain containing 6               | -2.871532 | Inlier |
| siRNA-Temozolomide Run1-DMSO | NM_1781<br>30 | TXNDC6 | thioredoxin domain containing 6               | -0.904799 | Inlier |
| siRNA Disorazole DMSO Run3   | NM_1781<br>30 | TXNDC6 | thioredoxin domain containing 6               | -0.182758 | Inlier |
| siRNA Disorazole DMSO Run1   | NM_1781<br>30 | TXNDC6 | thioredoxin domain containing 6               | -0.144894 | Inlier |
| siRNA-Temozolomide Run2-DMSO | NM_1781<br>30 | TXNDC6 | thioredoxin domain containing 6               | 0.144894  | Inlier |
| siRNA Disorazole DMSO Run2   | NM_1781<br>30 | TXNDC6 | thioredoxin domain containing 6               | 0.444201  | Inlier |
| siRNA-Vinblastine Run2-DMSO  | NM_1781<br>30 | TXNDC6 | thioredoxin domain containing 6               | 2.476836  | Inlier |

Identification of Survival Genes in Human Glioblastoma Cells Using siRNA Screening

Nikhil G Thaker, Fang Zhang, Peter R. McDonald, Tong Ying Shun, Michael D Lewen, Ian F. Pollack, and John S. Lazo

Molecular Pharmacology

|                              |               |        |   |                                                               |           |        |
|------------------------------|---------------|--------|---|---------------------------------------------------------------|-----------|--------|
| siRNA-Vinblastine Run1-DMSO  | NM_1781<br>30 | TXNDC6 | 6 | thioredoxin domain containing 6                               | 2.792117  | Inlier |
| siRNA-Temozolomide Run2-DMSO | NM_0057<br>42 | TXNDC7 | 7 | thioredoxin domain containing 7 (protein disulfide isomerase) | -0.956194 | Inlier |
| siRNA-Temozolomide Run3-DMSO | NM_0057<br>42 | TXNDC7 | 7 | thioredoxin domain containing 7 (protein disulfide isomerase) | -0.764991 | Inlier |
| siRNA-Vinblastine Run2-DMSO  | NM_0057<br>42 | TXNDC7 | 7 | thioredoxin domain containing 7 (protein disulfide isomerase) | -0.452016 | Inlier |
| siRNA Disorazole DMSO Run3   | NM_0057<br>42 | TXNDC7 | 7 | thioredoxin domain containing 7 (protein disulfide isomerase) | -0.215651 | Inlier |
| siRNA-Temozolomide Run1-DMSO | NM_0057<br>42 | TXNDC7 | 7 | thioredoxin domain containing 7 (protein disulfide isomerase) | 0.215651  | Inlier |
| siRNA Disorazole DMSO Run1   | NM_0057<br>42 | TXNDC7 | 7 | thioredoxin domain containing 7 (protein disulfide isomerase) | 0.584009  | Inlier |

Identification of Survival Genes in Human Glioblastoma Cells Using siRNA Screening  
 Nikhil G Thaker, Fang Zhang, Peter R. McDonald, Tong Ying Shun, Michael D Lewen, Ian F. Pollack, and John S. Lazo

Molecular Pharmacology

|                              |               |        |                                                               |           |         |
|------------------------------|---------------|--------|---------------------------------------------------------------|-----------|---------|
| siRNA-Vinblastine Run1-DMSO  | NM_0057<br>42 | TXNDC7 | thioredoxin domain containing 7 (protein disulfide isomerase) | 3.916948  | Outlier |
| siRNA Disorazole DMSO Run2   | NM_0057<br>42 | TXNDC7 | thioredoxin domain containing 7 (protein disulfide isomerase) | 4.047339  | Outlier |
| siRNA-Temozolomide Run1-DMSO | NM_0047<br>86 | TXNL1  | thioredoxin-like 1                                            | -1.8498   | Inlier  |
| siRNA-Temozolomide Run3-DMSO | NM_0047<br>86 | TXNL1  | thioredoxin-like 1                                            | -0.896345 | Inlier  |
| siRNA Disorazole DMSO Run3   | NM_0047<br>86 | TXNL1  | thioredoxin-like 1                                            | -0.658819 | Inlier  |
| siRNA-Vinblastine Run2-DMSO  | NM_0047<br>86 | TXNL1  | thioredoxin-like 1                                            | -0.026737 | Inlier  |
| siRNA Disorazole DMSO Run1   | NM_0047<br>86 | TXNL1  | thioredoxin-like 1                                            | 0.026736  | Inlier  |
| siRNA-Temozolomide Run2-DMSO | NM_0047<br>86 | TXNL1  | thioredoxin-like 1                                            | 0.218248  | Inlier  |
| siRNA-Vinblastine Run1-DMSO  | NM_0047<br>86 | TXNL1  | thioredoxin-like 1                                            | 0.690181  | Inlier  |
| siRNA Disorazole DMSO Run2   | NM_0047<br>86 | TXNL1  | thioredoxin-like 1                                            | 0.786234  | Inlier  |
| siRNA Disorazole DMSO Run1   | NM_0065<br>41 | TXNL2  | thioredoxin-like 2                                            | -1.007598 | Inlier  |
| siRNA-Temozolomide Run3-DMSO | NM_0065<br>41 | TXNL2  | thioredoxin-like 2                                            | -0.341402 | Inlier  |
| siRNA Disorazole DMSO Run3   | NM_0065<br>41 | TXNL2  | thioredoxin-like 2                                            | -0.28009  | Inlier  |
| siRNA-Temozolomide Run1-DMSO | NM_0065<br>41 | TXNL2  | thioredoxin-like 2                                            | -0.046388 | Inlier  |
| siRNA-Temozolomide Run2-DMSO | NM_0065<br>41 | TXNL2  | thioredoxin-like 2                                            | 0.046388  | Inlier  |
| siRNA-Vinblastine Run2-DMSO  | NM_0065<br>41 | TXNL2  | thioredoxin-like 2                                            | 1.292032  | Inlier  |
| siRNA-Vinblastine Run1-DMSO  | NM_0065<br>41 | TXNL2  | thioredoxin-like 2                                            | 1.584844  | Inlier  |
| siRNA Disorazole DMSO Run2   | NM_0065<br>41 | TXNL2  | thioredoxin-like 2                                            | 3.099925  | Inlier  |
| siRNA-Temozolomide Run1-DMSO | NM_0067<br>01 | TXNL4A | thioredoxin-like 4A                                           | -1.104367 | Inlier  |
| siRNA-Temozolomide Run3-DMSO | NM_0067<br>01 | TXNL4A | thioredoxin-like 4A                                           | -0.681763 | Inlier  |
| siRNA-Temozolomide Run2-DMSO | NM_0067<br>01 | TXNL4A | thioredoxin-like 4A                                           | -0.667237 | Inlier  |

Identification of Survival Genes in Human Glioblastoma Cells Using siRNA Screening  
 Nikhil G Thaker, Fang Zhang, Peter R. McDonald, Tong Ying Shun, Michael D Lewen, Ian F. Pollack, and John S. Lazo

|                            |         |        |            |           |         |
|----------------------------|---------|--------|------------|-----------|---------|
| Molecular Pharmacology     | NM_0067 |        | thioredoxi |           |         |
| siRNA Disorazole DMSO Run3 | 01      | TXNL4A | n-like 4A  | -0.031293 | Inlier  |
|                            | NM_0067 |        | thioredoxi |           |         |
| siRNA Disorazole DMSO Run1 | 01      | TXNL4A | n-like 4A  | 0.031293  | Inlier  |
| siRNA-Vinblastine Run2-    | NM_0067 |        | thioredoxi |           |         |
| DMSO                       | 01      | TXNL4A | n-like 4A  | 0.395858  | Inlier  |
|                            | NM_0067 |        | thioredoxi |           |         |
| siRNA Disorazole DMSO Run2 | 01      | TXNL4A | n-like 4A  | 1.791992  | Inlier  |
| siRNA-Vinblastine Run1-    | NM_0067 |        | thioredoxi |           |         |
| DMSO                       | 01      | TXNL4A | n-like 4A  | 1.943113  | Inlier  |
|                            |         |        | thioredoxi |           |         |
|                            |         |        | n          |           |         |
| siRNA-Temozolomide Run2-   | NM_1827 |        | reductase  |           |         |
| DMSO                       | 29      | TXNRD1 | 1          | -0.897318 | Inlier  |
|                            |         |        | thioredoxi |           |         |
|                            |         |        | n          |           |         |
|                            | NM_1827 |        | reductase  |           |         |
| siRNA Disorazole DMSO Run3 | 29      | TXNRD1 | 1          | -0.451682 | Inlier  |
|                            |         |        | thioredoxi |           |         |
|                            |         |        | n          |           |         |
| siRNA-Temozolomide Run3-   | NM_1827 |        | reductase  |           |         |
| DMSO                       | 29      | TXNRD1 | 1          | -0.422036 | Inlier  |
|                            |         |        | thioredoxi |           |         |
|                            |         |        | n          |           |         |
|                            | NM_1827 |        | reductase  |           |         |
| siRNA Disorazole DMSO Run1 | 29      | TXNRD1 | 1          | -0.193208 | Inlier  |
|                            |         |        | thioredoxi |           |         |
|                            |         |        | n          |           |         |
| siRNA-Vinblastine Run2-    | NM_1827 |        | reductase  |           |         |
| DMSO                       | 29      | TXNRD1 | 1          | 0.193208  | Inlier  |
|                            |         |        | thioredoxi |           |         |
|                            |         |        | n          |           |         |
| siRNA-Temozolomide Run1-   | NM_1827 |        | reductase  |           |         |
| DMSO                       | 29      | TXNRD1 | 1          | 3.004031  | Inlier  |
|                            |         |        | thioredoxi |           |         |
|                            |         |        | n          |           |         |
| siRNA-Vinblastine Run1-    | NM_1827 |        | reductase  |           |         |
| DMSO                       | 29      | TXNRD1 | 1          | 7.733291  | Outlier |
|                            |         |        | thioredoxi |           |         |
|                            |         |        | n          |           |         |
|                            | NM_1827 |        | reductase  |           |         |
| siRNA Disorazole DMSO Run2 | 29      | TXNRD1 | 1          | 8.058417  | Outlier |
|                            |         |        | thioredoxi |           |         |
|                            |         |        | n          |           |         |
| siRNA-Temozolomide Run3-   | NM_1457 |        | reductase  |           |         |
| DMSO                       | 47      | TXNRD2 | 2          | -0.937199 | Inlier  |
|                            |         |        | thioredoxi |           |         |
|                            |         |        | n          |           |         |
|                            | NM_1457 |        | reductase  |           |         |
| siRNA Disorazole DMSO Run3 | 47      | TXNRD2 | 2          | -0.687237 | Inlier  |

Identification of Survival Genes in Human Glioblastoma Cells Using siRNA Screening  
 Nikhil G Thaker, Fang Zhang, Peter R. McDonald, Tong Ying Shun, Michael D Lewen, Ian F. Pollack, and John S. Lazo

Molecular Pharmacology

|                              |               |        |                        |                  |
|------------------------------|---------------|--------|------------------------|------------------|
|                              |               |        | thioredoxin reductase  |                  |
| siRNA Disorazole DMSO Run1   | NM_1457<br>47 | TXNRD2 | 2                      | -0.661763 Inlier |
| siRNA-Vinblastine Run2-DMSO  | NM_1457<br>47 | TXNRD2 | 2                      | -0.058568 Inlier |
| siRNA-Temozolomide Run2-DMSO | NM_1457<br>47 | TXNRD2 | 2                      | 0.058569 Inlier  |
| siRNA-Temozolomide Run1-DMSO | NM_1457<br>47 | TXNRD2 | 2                      | 0.576855 Inlier  |
| siRNA-Vinblastine Run1-DMSO  | NM_1457<br>47 | TXNRD2 | 2                      | 1.548541 Inlier  |
| siRNA Disorazole DMSO Run2   | NM_1457<br>47 | TXNRD2 | 2                      | 2.761212 Inlier  |
| siRNA-Temozolomide Run3-DMSO | NM_0033<br>31 | TYK2   | tyrosine kinase 2      | -0.901143 Inlier |
| siRNA-Temozolomide Run2-DMSO | NM_0033<br>31 | TYK2   | tyrosine kinase 2      | -0.880539 Inlier |
| siRNA-Temozolomide Run1-DMSO | NM_0033<br>31 | TYK2   | tyrosine kinase 2      | -0.584359 Inlier |
| siRNA Disorazole DMSO Run2   | NM_0033<br>31 | TYK2   | tyrosine kinase 2      | -0.243695 Inlier |
| siRNA Disorazole DMSO Run3   | NM_0033<br>31 | TYK2   | tyrosine kinase 2      | 0.243695 Inlier  |
| siRNA Disorazole DMSO Run1   | NM_0033<br>31 | TYK2   | tyrosine kinase 2      | 0.631103 Inlier  |
| siRNA-Vinblastine Run1-DMSO  | NM_0033<br>31 | TYK2   | tyrosine kinase 2      | 0.717897 Inlier  |
| siRNA-Vinblastine Run2-DMSO  | NM_0033<br>31 | TYK2   | tyrosine kinase 2      | 1.204082 Inlier  |
| siRNA-Temozolomide Run2-DMSO | NM_0010<br>71 | TYMS   | thymidylate synthetase | -1.75689 Inlier  |
| siRNA Disorazole DMSO Run1   | NM_0010<br>71 | TYMS   | thymidylate synthetase | -1.072196 Inlier |
| siRNA-Temozolomide Run1-DMSO | NM_0010<br>71 | TYMS   | thymidylate synthetase | -0.276804 Inlier |

Identification of Survival Genes in Human Glioblastoma Cells Using siRNA Screening  
 Nikhil G Thaker, Fang Zhang, Peter R. McDonald, Tong Ying Shun, Michael D Lewen, Ian F. Pollack, and John S. Lazo  
 Molecular Pharmacology

|                              |               |      |                                         |           |        |
|------------------------------|---------------|------|-----------------------------------------|-----------|--------|
| siRNA Disorazole DMSO Run3   | NM_0010<br>71 | TYMS | thymidylate synthetase                  | -0.104099 | Inlier |
| siRNA-Temozolomide Run3-DMSO | NM_0010<br>71 | TYMS | thymidylate synthetase                  | 0.104098  | Inlier |
| siRNA-Vinblastine Run2-DMSO  | NM_0010<br>71 | TYMS | thymidylate synthetase                  | 0.114266  | Inlier |
| siRNA-Vinblastine Run1-DMSO  | NM_0010<br>71 | TYMS | thymidylate synthetase                  | 1.596359  | Inlier |
| siRNA Disorazole DMSO Run2   | NM_0010<br>71 | TYMS | thymidylate synthetase                  | 1.737622  | Inlier |
| siRNA Disorazole DMSO Run1   | NM_0003<br>72 | TYR  | tyrosinase (oculocutaneous albinism IA) | -0.819321 | Inlier |
| siRNA Disorazole DMSO Run3   | NM_0003<br>72 | TYR  | tyrosinase (oculocutaneous albinism IA) | -0.575214 | Inlier |
| siRNA Disorazole DMSO Run2   | NM_0003<br>72 | TYR  | tyrosinase (oculocutaneous albinism IA) | -0.491081 | Inlier |
| siRNA-Temozolomide Run1-DMSO | NM_0003<br>72 | TYR  | tyrosinase (oculocutaneous albinism IA) | -0.444215 | Inlier |
| siRNA-Temozolomide Run2-DMSO | NM_0003<br>72 | TYR  | tyrosinase (oculocutaneous albinism IA) | 0.444215  | Inlier |



Identification of Survival Genes in Human Glioblastoma Cells Using siRNA Screening  
 Nikhil G Thaker, Fang Zhang, Peter R. McDonald, Tong Ying Shun, Michael D Lewen, Ian F. Pollack, and John S. Lazo  
 Molecular Pharmacology

|                              |           |       |                                         |                  |
|------------------------------|-----------|-------|-----------------------------------------|------------------|
| siRNA-Vinblastine Run1-DMSO  | NM_000372 | TYR   | tyrosinase (oculocutaneous albinism IA) | 0.773786 Inlier  |
| siRNA-Vinblastine Run2-DMSO  | NM_000372 | TYR   | tyrosinase (oculocutaneous albinism IA) | 1.515301 Inlier  |
| siRNA-Temozolomide Run3-DMSO | NM_000372 | TYR   | tyrosinase (oculocutaneous albinism IA) | 2.018549 Inlier  |
| siRNA-Temozolomide Run3-DMSO | NM_006293 | TYRO3 | TYRO3 protein tyrosine kinase           | -0.940863 Inlier |
| siRNA-Temozolomide Run2-DMSO | NM_006293 | TYRO3 | TYRO3 protein tyrosine kinase           | -0.66294 Inlier  |
| siRNA-Temozolomide Run1-DMSO | NM_006293 | TYRO3 | TYRO3 protein tyrosine kinase           | -0.349362 Inlier |
| siRNA Disorazole DMSO Run3   | NM_006293 | TYRO3 | TYRO3 protein tyrosine kinase           | -0.039797 Inlier |
| siRNA Disorazole DMSO Run1   | NM_006293 | TYRO3 | TYRO3 protein tyrosine kinase           | 0.039798 Inlier  |
| siRNA Disorazole DMSO Run2   | NM_006293 | TYRO3 | TYRO3 protein tyrosine kinase           | 0.68606 Inlier   |
| siRNA-Vinblastine Run2-DMSO  | NM_006293 | TYRO3 | TYRO3 protein tyrosine kinase           | 0.969719 Inlier  |
| siRNA-Vinblastine Run1-DMSO  | NM_006293 | TYRO3 | TYRO3 protein tyrosine kinase           | 1.056551 Inlier  |

Identification of Survival Genes in Human Glioblastoma Cells Using siRNA Screening  
 Nikhil G Thaker, Fang Zhang, Peter R. McDonald, Tong Ying Shun, Michael D Lewen, Ian F. Pollack, and John S. Lazo

| Molecular Pharmacology       | siRNA         | Gene   | Protein                      | Score     | Inlier |
|------------------------------|---------------|--------|------------------------------|-----------|--------|
| siRNA-Vinblastine Run2-DMSO  | NM_0005<br>50 | TYRP1  | tyrosinase-related protein 1 | -1.035515 | Inlier |
| siRNA-Temozolomide Run1-DMSO | NM_0005<br>50 | TYRP1  | tyrosinase-related protein 1 | -0.785751 | Inlier |
| siRNA-Temozolomide Run3-DMSO | NM_0005<br>50 | TYRP1  | tyrosinase-related protein 1 | -0.563249 | Inlier |
| siRNA Disorazole DMSO Run1   | NM_0005<br>50 | TYRP1  | tyrosinase-related protein 1 | -0.165627 | Inlier |
| siRNA Disorazole DMSO Run3   | NM_0005<br>50 | TYRP1  | tyrosinase-related protein 1 | 0.165627  | Inlier |
| siRNA-Temozolomide Run2-DMSO | NM_0005<br>50 | TYRP1  | tyrosinase-related protein 1 | 0.541673  | Inlier |
| siRNA-Vinblastine Run1-DMSO  | NM_0005<br>50 | TYRP1  | tyrosinase-related protein 1 | 0.876265  | Inlier |
| siRNA Disorazole DMSO Run2   | NM_0005<br>50 | TYRP1  | tyrosinase-related protein 1 | 1.837916  | Inlier |
| siRNA-Temozolomide Run3-DMSO | NM_1735<br>55 | TYSND1 | trypsin domain containing 1  | -1.428223 | Inlier |
| siRNA-Temozolomide Run1-DMSO | NM_1735<br>55 | TYSND1 | trypsin domain containing 1  | -1.075076 | Inlier |
| siRNA-Temozolomide Run2-DMSO | NM_1735<br>55 | TYSND1 | trypsin domain containing 1  | -0.446229 | Inlier |
| siRNA Disorazole DMSO Run1   | NM_1735<br>55 | TYSND1 | trypsin domain containing 1  | -0.219683 | Inlier |
| siRNA Disorazole DMSO Run3   | NM_1735<br>55 | TYSND1 | trypsin domain containing 1  | 0.219683  | Inlier |
| siRNA Disorazole DMSO Run2   | NM_1735<br>55 | TYSND1 | trypsin domain containing 1  | 0.323113  | Inlier |
| siRNA-Vinblastine Run2-DMSO  | NM_1735<br>55 | TYSND1 | trypsin domain containing 1  | 0.902771  | Inlier |

Identification of Survival Genes in Human Glioblastoma Cells Using siRNA Screening  
 Nikhil G Thaker, Fang Zhang, Peter R. McDonald, Tong Ying Shun, Michael D Lewen, Ian F. Pollack, and John S. Lazo

Molecular Pharmacology

|                              |               |        |                                                            |           |         |
|------------------------------|---------------|--------|------------------------------------------------------------|-----------|---------|
| siRNA-Vinblastine Run1-DMSO  | NM_1735<br>55 | TYSND1 | trypsin<br>domain<br>containing<br>1                       | 1.191617  | Inlier  |
| siRNA-Temozolomide Run2-DMSO | NM_0031<br>15 | UAP1   | UDP-N-<br>acteylgluc<br>osamine<br>pyrophosp<br>horylase 1 | -2.746992 | Inlier  |
| siRNA-Temozolomide Run1-DMSO | NM_0031<br>15 | UAP1   | UDP-N-<br>acteylgluc<br>osamine<br>pyrophosp<br>horylase 1 | -0.859313 | Inlier  |
| siRNA Disorazole DMSO Run1   | NM_0031<br>15 | UAP1   | UDP-N-<br>acteylgluc<br>osamine<br>pyrophosp<br>horylase 1 | -0.100139 | Inlier  |
| siRNA-Vinblastine Run2-DMSO  | NM_0031<br>15 | UAP1   | UDP-N-<br>acteylgluc<br>osamine<br>pyrophosp<br>horylase 1 | -0.060678 | Inlier  |
| siRNA Disorazole DMSO Run3   | NM_0031<br>15 | UAP1   | UDP-N-<br>acteylgluc<br>osamine<br>pyrophosp<br>horylase 1 | 0.060678  | Inlier  |
| siRNA-Temozolomide Run3-DMSO | NM_0031<br>15 | UAP1   | UDP-N-<br>acteylgluc<br>osamine<br>pyrophosp<br>horylase 1 | 0.489686  | Inlier  |
| siRNA-Vinblastine Run1-DMSO  | NM_0031<br>15 | UAP1   | UDP-N-<br>acteylgluc<br>osamine<br>pyrophosp<br>horylase 1 | 4.816761  | Outlier |
| siRNA Disorazole DMSO Run2   | NM_0031<br>15 | UAP1   | UDP-N-<br>acteylgluc<br>osamine<br>pyrophosp<br>horylase 1 | 5.063455  | Outlier |

Identification of Survival Genes in Human Glioblastoma Cells Using siRNA Screening  
 Nikhil G Thaker, Fang Zhang, Peter R. McDonald, Tong Ying Shun, Michael D Lewen, Ian F. Pollack, and John S. Lazo  
 Molecular Pharmacology

|                              |               |         |   |                                                 |           |         |
|------------------------------|---------------|---------|---|-------------------------------------------------|-----------|---------|
| siRNA-Temozolomide Run3-DMSO | NM_0189<br>61 | UBASH3A | A | ubiquitin associated and SH3 domain containing, | -6.561478 | Outlier |
| siRNA Disorazole DMSO Run3   | NM_0189<br>61 | UBASH3A | A | ubiquitin associated and SH3 domain containing, | -0.603708 | Inlier  |
| siRNA-Vinblastine Run2-DMSO  | NM_0189<br>61 | UBASH3A | A | ubiquitin associated and SH3 domain containing, | -0.358106 | Inlier  |
| siRNA-Temozolomide Run2-DMSO | NM_0189<br>61 | UBASH3A | A | ubiquitin associated and SH3 domain containing, | -0.166113 | Inlier  |
| siRNA Disorazole DMSO Run1   | NM_0189<br>61 | UBASH3A | A | ubiquitin associated and SH3 domain containing, | 0.166115  | Inlier  |
| siRNA-Temozolomide Run1-DMSO | NM_0189<br>61 | UBASH3A | A | ubiquitin associated and SH3 domain containing, | 0.745292  | Inlier  |
| siRNA Disorazole DMSO Run2   | NM_0189<br>61 | UBASH3A | A | ubiquitin associated and SH3 domain containing, | 3.799563  | Outlier |

Identification of Survival Genes in Human Glioblastoma Cells Using siRNA Screening  
 Nikhil G Thaker, Fang Zhang, Peter R. McDonald, Tong Ying Shun, Michael D Lewen, Ian F. Pollack, and John S. Lazo  
 Molecular Pharmacology

|                              |               |         |   |                                                                                       |           |         |
|------------------------------|---------------|---------|---|---------------------------------------------------------------------------------------|-----------|---------|
| siRNA-Vinblastine Run1-DMSO  | NM_0189<br>61 | UBASH3A | A | ubiquitin associated and SH3 domain containing,                                       | 4.252467  | Outlier |
| siRNA-Temozolomide Run3-DMSO | NM_0063<br>98 | UBD     |   | ubiquitin D                                                                           | -1.038156 | Inlier  |
| siRNA-Temozolomide Run2-DMSO | NM_0063<br>98 | UBD     |   | ubiquitin D                                                                           | -0.857153 | Inlier  |
| siRNA Disorazole DMSO Run3   | NM_0063<br>98 | UBD     |   | ubiquitin D                                                                           | -0.34454  | Inlier  |
| siRNA-Vinblastine Run2-DMSO  | NM_0063<br>98 | UBD     |   | ubiquitin D                                                                           | -0.05655  | Inlier  |
| siRNA Disorazole DMSO Run1   | NM_0063<br>98 | UBD     |   | ubiquitin D                                                                           | 0.05655   | Inlier  |
| siRNA-Temozolomide Run1-DMSO | NM_0063<br>98 | UBD     |   | ubiquitin D                                                                           | 0.491847  | Inlier  |
| siRNA Disorazole DMSO Run2   | NM_0063<br>98 | UBD     |   | ubiquitin D                                                                           | 1.39717   | Inlier  |
| siRNA-Vinblastine Run1-DMSO  | NM_0063<br>98 | UBD     |   | ubiquitin D                                                                           | 2.258488  | Inlier  |
| siRNA-Temozolomide Run2-DMSO | NM_0033<br>34 | UBE1    |   | ubiquitin-activating enzyme E1 (A1S9T and BN75 temperature sensitivity complementing) | -0.964913 | Inlier  |
| siRNA-Temozolomide Run3-DMSO | NM_0033<br>34 | UBE1    |   | ubiquitin-activating enzyme E1 (A1S9T and BN75 temperature sensitivity complementing) | -0.922467 | Inlier  |

Identification of Survival Genes in Human Glioblastoma Cells Using siRNA Screening

Nikhil G Thaker, Fang Zhang, Peter R. McDonald, Tong Ying Shun, Michael D Lewen, Ian F. Pollack, and John S. Lazo

Molecular Pharmacology

| siRNA                        | Gene | Gene ID   | Gene Name                                                                             | Value     | Category |
|------------------------------|------|-----------|---------------------------------------------------------------------------------------|-----------|----------|
| siRNA-Vinblastine Run2-DMSO  | UBE1 | NM_003334 | ubiquitin-activating enzyme E1 (A1S9T and BN75 temperature sensitivity complementing) | -0.426533 | Inlier   |
| siRNA Disorazole DMSO Run3   | UBE1 | NM_003334 | ubiquitin-activating enzyme E1 (A1S9T and BN75 temperature sensitivity complementing) | -0.281374 | Inlier   |
| siRNA Disorazole DMSO Run1   | UBE1 | NM_003334 | ubiquitin-activating enzyme E1 (A1S9T and BN75 temperature sensitivity complementing) | 0.281374  | Inlier   |
| siRNA-Temozolomide Run1-DMSO | UBE1 | NM_003334 | ubiquitin-activating enzyme E1 (A1S9T and BN75 temperature sensitivity complementing) | 0.29262   | Inlier   |

Identification of Survival Genes in Human Glioblastoma Cells Using siRNA Screening

Nikhil G Thaker, Fang Zhang, Peter R. McDonald, Tong Ying Shun, Michael D Lewen, Ian F. Pollack, and John S. Lazo

Molecular Pharmacology

|                              |    |         |       |                                                                                       |           |        |
|------------------------------|----|---------|-------|---------------------------------------------------------------------------------------|-----------|--------|
| siRNA Disorazole DMSO Run2   | 34 | NM_0033 | UBE1  | ubiquitin-activating enzyme E1 (A1S9T and BN75 temperature sensitivity complementing) | 1.435692  | Inlier |
| siRNA-Vinblastine Run1-DMSO  | 34 | NM_0033 | UBE1  | ubiquitin-activating enzyme E1C (UBA3 homolog, yeast)                                 | 1.838545  | Inlier |
| siRNA-Temozolomide Run3-DMSO | 97 | NM_1981 | UBE1C | ubiquitin-activating enzyme E1C (UBA3 homolog, yeast)                                 | -1.604012 | Inlier |
| siRNA-Temozolomide Run2-DMSO | 97 | NM_1981 | UBE1C | ubiquitin-activating enzyme E1C (UBA3 homolog, yeast)                                 | -1.182734 | Inlier |
| siRNA Disorazole DMSO Run3   | 97 | NM_1981 | UBE1C | ubiquitin-activating enzyme E1C (UBA3 homolog, yeast)                                 | -0.198177 | Inlier |
| siRNA Disorazole DMSO Run1   | 97 | NM_1981 | UBE1C | ubiquitin-activating enzyme E1C (UBA3 homolog, yeast)                                 | -0.096117 | Inlier |

Identification of Survival Genes in Human Glioblastoma Cells Using siRNA Screening  
 Nikhil G Thaker, Fang Zhang, Peter R. McDonald, Tong Ying Shun, Michael D Lewen, Ian F. Pollack, and John S. Lazo

Molecular Pharmacology

|                              |               |       |                                                       |           |         |
|------------------------------|---------------|-------|-------------------------------------------------------|-----------|---------|
| siRNA-Temozolomide Run1-DMSO | NM_1981<br>97 | UBE1C | ubiquitin-activating enzyme E1C (UBA3 homolog, yeast) | 0.096117  | Inlier  |
| siRNA-Vinblastine Run2-DMSO  | NM_1981<br>97 | UBE1C | ubiquitin-activating enzyme E1C (UBA3 homolog, yeast) | 0.184476  | Inlier  |
| siRNA Disorazole DMSO Run2   | NM_1981<br>97 | UBE1C | ubiquitin-activating enzyme E1C (UBA3 homolog, yeast) | 1.150823  | Inlier  |
| siRNA-Vinblastine Run1-DMSO  | NM_1981<br>97 | UBE1C | ubiquitin-activating enzyme E1C (UBA3 homolog, yeast) | 1.569546  | Inlier  |
| siRNA-Temozolomide Run3-DMSO | NM_0033<br>35 | UBE1L | ubiquitin-activating enzyme E1-like                   | -4.113832 | Outlier |
| siRNA-Temozolomide Run2-DMSO | NM_0033<br>35 | UBE1L | ubiquitin-activating enzyme E1-like                   | -3.370664 | Inlier  |
| siRNA-Temozolomide Run1-DMSO | NM_0033<br>35 | UBE1L | ubiquitin-activating enzyme E1-like                   | -0.582171 | Inlier  |
| siRNA Disorazole DMSO Run1   | NM_0033<br>35 | UBE1L | ubiquitin-activating enzyme E1-like                   | -0.090759 | Inlier  |
| siRNA-Vinblastine Run2-DMSO  | NM_0033<br>35 | UBE1L | ubiquitin-activating enzyme E1-like                   | 0.090759  | Inlier  |
| siRNA Disorazole DMSO Run3   | NM_0033<br>35 | UBE1L | ubiquitin-activating enzyme E1-like                   | 0.510117  | Inlier  |



Identification of Survival Genes in Human Glioblastoma Cells Using siRNA Screening  
 Nikhil G Thaker, Fang Zhang, Peter R. McDonald, Tong Ying Shun, Michael D Lewen, Ian F. Pollack, and John S. Lazo

Molecular Pharmacology

|                              |               |       |                                                 |           |        |
|------------------------------|---------------|-------|-------------------------------------------------|-----------|--------|
| siRNA Disorazole DMSO Run2   | NM_0033<br>35 | UBE1L | ubiquitin-activating enzyme E1-like             | 0.766828  | Inlier |
| siRNA-Vinblastine Run1-DMSO  | NM_0033<br>35 | UBE1L | ubiquitin-activating enzyme E1-like             | 1.364809  | Inlier |
| siRNA-Temozolomide Run2-DMSO | NM_0033<br>36 | UBE2A | ubiquitin-conjugating enzyme E2A (RAD6 homolog) | -2.197601 | Inlier |
| siRNA-Temozolomide Run3-DMSO | NM_0033<br>36 | UBE2A | ubiquitin-conjugating enzyme E2A (RAD6 homolog) | -1.974936 | Inlier |
| siRNA-Temozolomide Run1-DMSO | NM_0033<br>36 | UBE2A | ubiquitin-conjugating enzyme E2A (RAD6 homolog) | -0.140563 | Inlier |
| siRNA-Vinblastine Run2-DMSO  | NM_0033<br>36 | UBE2A | ubiquitin-conjugating enzyme E2A (RAD6 homolog) | -0.00878  | Inlier |
| siRNA Disorazole DMSO Run1   | NM_0033<br>36 | UBE2A | ubiquitin-conjugating enzyme E2A (RAD6 homolog) | 0.00878   | Inlier |
| siRNA Disorazole DMSO Run3   | NM_0033<br>36 | UBE2A | ubiquitin-conjugating enzyme E2A (RAD6 homolog) | 0.329004  | Inlier |
| siRNA Disorazole DMSO Run2   | NM_0033<br>36 | UBE2A | ubiquitin-conjugating enzyme E2A (RAD6 homolog) | 1.019995  | Inlier |

Identification of Survival Genes in Human Glioblastoma Cells Using siRNA Screening  
 Nikhil G Thaker, Fang Zhang, Peter R. McDonald, Tong Ying Shun, Michael D Lewen, Ian F. Pollack, and John S. Lazo

Molecular Pharmacology

| siRNA Treatment              | Gene ID   | Gene Name | Protein Name                                    | Log Fold Change | Outlier Status |
|------------------------------|-----------|-----------|-------------------------------------------------|-----------------|----------------|
| siRNA-Vinblastine Run1-DMSO  | NM_003336 | UBE2A     | ubiquitin-conjugating enzyme E2A (RAD6 homolog) | 1.369444        | Inlier         |
| siRNA-Temozolomide Run3-DMSO | NM_003337 | UBE2B     | ubiquitin-conjugating enzyme E2B (RAD6 homolog) | -1.077053       | Inlier         |
| siRNA-Temozolomide Run1-DMSO | NM_003337 | UBE2B     | ubiquitin-conjugating enzyme E2B (RAD6 homolog) | -0.271947       | Inlier         |
| siRNA-Temozolomide Run2-DMSO | NM_003337 | UBE2B     | ubiquitin-conjugating enzyme E2B (RAD6 homolog) | -0.207478       | Inlier         |
| siRNA Disorazole DMSO Run3   | NM_003337 | UBE2B     | ubiquitin-conjugating enzyme E2B (RAD6 homolog) | -0.172841       | Inlier         |
| siRNA-Vinblastine Run2-DMSO  | NM_003337 | UBE2B     | ubiquitin-conjugating enzyme E2B (RAD6 homolog) | 0.172841        | Inlier         |
| siRNA Disorazole DMSO Run1   | NM_003337 | UBE2B     | ubiquitin-conjugating enzyme E2B (RAD6 homolog) | 1.256979        | Inlier         |
| siRNA Disorazole DMSO Run2   | NM_003337 | UBE2B     | ubiquitin-conjugating enzyme E2B (RAD6 homolog) | 1.649131        | Inlier         |

Identification of Survival Genes in Human Glioblastoma Cells Using siRNA Screening  
 Nikhil G Thaker, Fang Zhang, Peter R. McDonald, Tong Ying Shun, Michael D Lewen, Ian F. Pollack, and John S. Lazo

Molecular Pharmacology

|                              |           |        |                                                            |           |        |
|------------------------------|-----------|--------|------------------------------------------------------------|-----------|--------|
| siRNA-Vinblastine Run1-DMSO  | NM_003337 | UBE2B  | ubiquitin-conjugating enzyme E2B (RAD6 homolog)            | 2.207191  | Inlier |
| siRNA-Temozolomide Run3-DMSO | NM_181801 | UBE2C  | ubiquitin-conjugating enzyme E2C                           | -0.79955  | Inlier |
| siRNA-Temozolomide Run2-DMSO | NM_181801 | UBE2C  | ubiquitin-conjugating enzyme E2C                           | -0.791808 | Inlier |
| siRNA-Vinblastine Run2-DMSO  | NM_181801 | UBE2C  | ubiquitin-conjugating enzyme E2C                           | -0.557192 | Inlier |
| siRNA-Temozolomide Run1-DMSO | NM_181801 | UBE2C  | ubiquitin-conjugating enzyme E2C                           | -0.288342 | Inlier |
| siRNA Disorazole DMSO Run1   | NM_181801 | UBE2C  | ubiquitin-conjugating enzyme E2C                           | 0.288342  | Inlier |
| siRNA Disorazole DMSO Run3   | NM_181801 | UBE2C  | ubiquitin-conjugating enzyme E2C                           | 0.468124  | Inlier |
| siRNA Disorazole DMSO Run2   | NM_181801 | UBE2C  | ubiquitin-conjugating enzyme E2C                           | 1.557701  | Inlier |
| siRNA-Vinblastine Run1-DMSO  | NM_181801 | UBE2C  | ubiquitin-conjugating enzyme E2C                           | 1.779472  | Inlier |
| siRNA-Temozolomide Run3-DMSO | NM_003338 | UBE2D1 | ubiquitin-conjugating enzyme E2D 1 (UBC4/5 homolog, yeast) | -1.12384  | Inlier |
| siRNA-Temozolomide Run2-DMSO | NM_003338 | UBE2D1 | ubiquitin-conjugating enzyme E2D 1 (UBC4/5 homolog, yeast) | -0.96028  | Inlier |

Identification of Survival Genes in Human Glioblastoma Cells Using siRNA Screening  
 Nikhil G Thaker, Fang Zhang, Peter R. McDonald, Tong Ying Shun, Michael D Lewen, Ian F. Pollack, and John S. Lazo

Molecular Pharmacology

|                              |               |        |                                                            |           |        |
|------------------------------|---------------|--------|------------------------------------------------------------|-----------|--------|
| siRNA Disorazole DMSO Run3   | NM_0033<br>38 | UBE2D1 | ubiquitin-conjugating enzyme E2D 1 (UBC4/5 homolog, yeast) | -0.236298 | Inlier |
| siRNA-Vinblastine Run2-DMSO  | NM_0033<br>38 | UBE2D1 | ubiquitin-conjugating enzyme E2D 1 (UBC4/5 homolog, yeast) | -0.017944 | Inlier |
| siRNA-Temozolomide Run1-DMSO | NM_0033<br>38 | UBE2D1 | ubiquitin-conjugating enzyme E2D 1 (UBC4/5 homolog, yeast) | 0.017944  | Inlier |
| siRNA Disorazole DMSO Run1   | NM_0033<br>38 | UBE2D1 | ubiquitin-conjugating enzyme E2D 1 (UBC4/5 homolog, yeast) | 0.38872   | Inlier |
| siRNA Disorazole DMSO Run2   | NM_0033<br>38 | UBE2D1 | ubiquitin-conjugating enzyme E2D 1 (UBC4/5 homolog, yeast) | 1.115311  | Inlier |
| siRNA-Vinblastine Run1-DMSO  | NM_0033<br>38 | UBE2D1 | ubiquitin-conjugating enzyme E2D 2 (UBC4/5 homolog, yeast) | 1.130476  | Inlier |
| siRNA-Temozolomide Run2-DMSO | NM_0033<br>39 | UBE2D2 | ubiquitin-conjugating enzyme E2D 2 (UBC4/5 homolog, yeast) | -0.740895 | Inlier |

Identification of Survival Genes in Human Glioblastoma Cells Using siRNA Screening

Nikhil G Thaker, Fang Zhang, Peter R. McDonald, Tong Ying Shun, Michael D Lewen, Ian F. Pollack, and John S. Lazo

Molecular Pharmacology

| siRNA Treatment              | Gene ID   | Gene Name | Description                                                | Score     | Category |
|------------------------------|-----------|-----------|------------------------------------------------------------|-----------|----------|
| siRNA-Temozolomide Run3-DMSO | NM_003339 | UBE2D2    | ubiquitin-conjugating enzyme E2D 2 (UBC4/5 homolog, yeast) | -0.608105 | Inlier   |
| siRNA-Vinblastine Run2-DMSO  | NM_003339 | UBE2D2    | ubiquitin-conjugating enzyme E2D 2 (UBC4/5 homolog, yeast) | -0.374204 | Inlier   |
| siRNA Disorazole DMSO Run3   | NM_003339 | UBE2D2    | ubiquitin-conjugating enzyme E2D 2 (UBC4/5 homolog, yeast) | -0.217276 | Inlier   |
| siRNA Disorazole DMSO Run1   | NM_003339 | UBE2D2    | ubiquitin-conjugating enzyme E2D 2 (UBC4/5 homolog, yeast) | 0.217276  | Inlier   |
| siRNA-Temozolomide Run1-DMSO | NM_003339 | UBE2D2    | ubiquitin-conjugating enzyme E2D 2 (UBC4/5 homolog, yeast) | 1.173092  | Inlier   |
| siRNA-Vinblastine Run1-DMSO  | NM_003339 | UBE2D2    | ubiquitin-conjugating enzyme E2D 2 (UBC4/5 homolog, yeast) | 5.649798  | Outlier  |
| siRNA Disorazole DMSO Run2   | NM_003339 | UBE2D2    | ubiquitin-conjugating enzyme E2D 2 (UBC4/5 homolog, yeast) | 5.766036  | Outlier  |

Identification of Survival Genes in Human Glioblastoma Cells Using siRNA Screening

Nikhil G Thaker, Fang Zhang, Peter R. McDonald, Tong Ying Shun, Michael D Lewen, Ian F. Pollack, and John S. Lazo

Molecular Pharmacology

| siRNA Treatment              | Gene ID   | Gene Name | Gene Description                                           | Score     | Outlier Status |
|------------------------------|-----------|-----------|------------------------------------------------------------|-----------|----------------|
| siRNA-Temozolomide Run1-DMSO | NM_181886 | UBE2D3    | ubiquitin-conjugating enzyme E2D 3 (UBC4/5 homolog, yeast) | -0.745102 | Inlier         |
| siRNA Disorazole DMSO Run1   | NM_181886 | UBE2D3    | ubiquitin-conjugating enzyme E2D 3 (UBC4/5 homolog, yeast) | -0.603898 | Inlier         |
| siRNA-Vinblastine Run2-DMSO  | NM_181886 | UBE2D3    | ubiquitin-conjugating enzyme E2D 3 (UBC4/5 homolog, yeast) | -0.474279 | Inlier         |
| siRNA Disorazole DMSO Run3   | NM_181886 | UBE2D3    | ubiquitin-conjugating enzyme E2D 3 (UBC4/5 homolog, yeast) | -0.130109 | Inlier         |
| siRNA-Temozolomide Run2-DMSO | NM_181886 | UBE2D3    | ubiquitin-conjugating enzyme E2D 3 (UBC4/5 homolog, yeast) | 0.130107  | Inlier         |
| siRNA-Temozolomide Run3-DMSO | NM_181886 | UBE2D3    | ubiquitin-conjugating enzyme E2D 3 (UBC4/5 homolog, yeast) | 0.939757  | Inlier         |
| siRNA Disorazole DMSO Run2   | NM_181886 | UBE2D3    | ubiquitin-conjugating enzyme E2D 3 (UBC4/5 homolog, yeast) | 2.332429  | Inlier         |

Identification of Survival Genes in Human Glioblastoma Cells Using siRNA Screening  
 Nikhil G Thaker, Fang Zhang, Peter R. McDonald, Tong Ying Shun, Michael D Lewen, Ian F. Pollack, and John S. Lazo

Molecular Pharmacology

|                              |           |        |                                                           |           |        |
|------------------------------|-----------|--------|-----------------------------------------------------------|-----------|--------|
| siRNA-Vinblastine Run1-DMSO  | NM_181886 | UBE2D3 | ubiquitin-conjugating enzyme E2D3 (UBC4/5 homolog, yeast) | 2.43733   | Inlier |
| siRNA-Temozolomide Run3-DMSO | NM_003341 | UBE2E1 | ubiquitin-conjugating enzyme E2E1 (UBC4/5 homolog, yeast) | -1.810665 | Inlier |
| siRNA Disorazole DMSO Run1   | NM_003341 | UBE2E1 | ubiquitin-conjugating enzyme E2E1 (UBC4/5 homolog, yeast) | -1.176921 | Inlier |
| siRNA-Temozolomide Run2-DMSO | NM_003341 | UBE2E1 | ubiquitin-conjugating enzyme E2E1 (UBC4/5 homolog, yeast) | -0.466319 | Inlier |
| siRNA-Temozolomide Run1-DMSO | NM_003341 | UBE2E1 | ubiquitin-conjugating enzyme E2E1 (UBC4/5 homolog, yeast) | -0.178166 | Inlier |
| siRNA-Vinblastine Run2-DMSO  | NM_003341 | UBE2E1 | ubiquitin-conjugating enzyme E2E1 (UBC4/5 homolog, yeast) | 0.178167  | Inlier |
| siRNA Disorazole DMSO Run2   | NM_003341 | UBE2E1 | ubiquitin-conjugating enzyme E2E1 (UBC4/5 homolog, yeast) | 0.533912  | Inlier |

Identification of Survival Genes in Human Glioblastoma Cells Using siRNA Screening

Nikhil G Thaker, Fang Zhang, Peter R. McDonald, Tong Ying Shun, Michael D Lewen, Ian F. Pollack, and John S. Lazo

Molecular Pharmacology

|                              |               |        |                                                            |           |        |
|------------------------------|---------------|--------|------------------------------------------------------------|-----------|--------|
| siRNA Disorazole DMSO Run3   | NM_0033<br>41 | UBE2E1 | ubiquitin-conjugating enzyme E2E 1 (UBC4/5 homolog, yeast) | 0.815088  | Inlier |
| siRNA-Vinblastine Run1-DMSO  | NM_0033<br>41 | UBE2E1 | ubiquitin-conjugating enzyme E2E 1 (UBC4/5 homolog, yeast) | 1.014183  | Inlier |
| siRNA Disorazole DMSO Run1   | NM_0063<br>57 | UBE2E3 | ubiquitin-conjugating enzyme E2E 3 (UBC4/5 homolog, yeast) | -1.43414  | Inlier |
| siRNA-Temozolomide Run2-DMSO | NM_0063<br>57 | UBE2E3 | ubiquitin-conjugating enzyme E2E 3 (UBC4/5 homolog, yeast) | -1.0953   | Inlier |
| siRNA-Temozolomide Run3-DMSO | NM_0063<br>57 | UBE2E3 | ubiquitin-conjugating enzyme E2E 3 (UBC4/5 homolog, yeast) | -0.475649 | Inlier |
| siRNA Disorazole DMSO Run3   | NM_0063<br>57 | UBE2E3 | ubiquitin-conjugating enzyme E2E 3 (UBC4/5 homolog, yeast) | -0.080674 | Inlier |
| siRNA-Vinblastine Run2-DMSO  | NM_0063<br>57 | UBE2E3 | ubiquitin-conjugating enzyme E2E 3 (UBC4/5 homolog, yeast) | 0.080673  | Inlier |



Identification of Survival Genes in Human Glioblastoma Cells Using siRNA Screening  
 Nikhil G Thaker, Fang Zhang, Peter R. McDonald, Tong Ying Shun, Michael D Lewen, Ian F. Pollack, and John S. Lazo

Molecular Pharmacology

|                              |           |        |                                                              |           |        |
|------------------------------|-----------|--------|--------------------------------------------------------------|-----------|--------|
| siRNA-Temozolomide Run1-DMSO | NM_006357 | UBE2E3 | ubiquitin-conjugating enzyme E2E3 (UBC4/5 homolog, yeast)    | 0.331317  | Inlier |
| siRNA-Vinblastine Run1-DMSO  | NM_006357 | UBE2E3 | ubiquitin-conjugating enzyme E2E3 (UBC4/5 homolog, yeast)    | 0.873351  | Inlier |
| siRNA Disorazole DMSO Run2   | NM_006357 | UBE2E3 | ubiquitin-conjugating enzyme E2G1 (UBC7 homolog, C. elegans) | 0.965611  | Inlier |
| siRNA Disorazole DMSO Run1   | NM_003342 | UBE2G1 | ubiquitin-conjugating enzyme E2G1 (UBC7 homolog, C. elegans) | -1.462078 | Inlier |
| siRNA-Temozolomide Run3-DMSO | NM_003342 | UBE2G1 | ubiquitin-conjugating enzyme E2G1 (UBC7 homolog, C. elegans) | -0.794113 | Inlier |
| siRNA-Temozolomide Run2-DMSO | NM_003342 | UBE2G1 | ubiquitin-conjugating enzyme E2G1 (UBC7 homolog, C. elegans) | -0.290721 | Inlier |

Identification of Survival Genes in Human Glioblastoma Cells Using siRNA Screening

Nikhil G Thaker, Fang Zhang, Peter R. McDonald, Tong Ying Shun, Michael D Lewen, Ian F. Pollack, and John S. Lazo

Molecular Pharmacology

|                              |           |        |                                                               |           |        |
|------------------------------|-----------|--------|---------------------------------------------------------------|-----------|--------|
| siRNA-Temozolomide Run1-DMSO | NM_003342 | UBE2G1 | ubiquitin-conjugating enzyme E2G 1 (UBC7 homolog, C. elegans) | -0.042418 | Inlier |
| siRNA-Vinblastine Run2-DMSO  | NM_003342 | UBE2G1 | ubiquitin-conjugating enzyme E2G 1 (UBC7 homolog, C. elegans) | 0.042418  | Inlier |
| siRNA Disorazole DMSO Run3   | NM_003342 | UBE2G1 | ubiquitin-conjugating enzyme E2G 1 (UBC7 homolog, C. elegans) | 0.554887  | Inlier |
| siRNA-Vinblastine Run1-DMSO  | NM_003342 | UBE2G1 | ubiquitin-conjugating enzyme E2G 1 (UBC7 homolog, C. elegans) | 1.727416  | Inlier |
| siRNA Disorazole DMSO Run2   | NM_003342 | UBE2G1 | ubiquitin-conjugating enzyme E2G 2 (UBC7 homolog, yeast)      | 2.354146  | Inlier |
| siRNA Disorazole DMSO Run1   | NM_003343 | UBE2G2 | ubiquitin-conjugating enzyme E2G 2 (UBC7 homolog, yeast)      | -2.623287 | Inlier |

Identification of Survival Genes in Human Glioblastoma Cells Using siRNA Screening  
 Nikhil G Thaker, Fang Zhang, Peter R. McDonald, Tong Ying Shun, Michael D Lewen, Ian F. Pollack, and John S. Lazo

Molecular Pharmacology

| siRNA Treatment              | Gene ID   | Gene Name | Gene Description                                         | Log Fold Change | Outlier Status |
|------------------------------|-----------|-----------|----------------------------------------------------------|-----------------|----------------|
| siRNA-Temozolomide Run2-DMSO | NM_003343 | UBE2G2    | ubiquitin-conjugating enzyme E2G 2 (UBC7 homolog, yeast) | -0.792433       | Inlier         |
| siRNA-Vinblastine Run2-DMSO  | NM_003343 | UBE2G2    | ubiquitin-conjugating enzyme E2G 2 (UBC7 homolog, yeast) | -0.259461       | Inlier         |
| siRNA-Temozolomide Run1-DMSO | NM_003343 | UBE2G2    | ubiquitin-conjugating enzyme E2G 2 (UBC7 homolog, yeast) | -0.046123       | Inlier         |
| siRNA-Temozolomide Run3-DMSO | NM_003343 | UBE2G2    | ubiquitin-conjugating enzyme E2G 2 (UBC7 homolog, yeast) | 0.046123        | Inlier         |
| siRNA Disorazole DMSO Run3   | NM_003343 | UBE2G2    | ubiquitin-conjugating enzyme E2G 2 (UBC7 homolog, yeast) | 0.556567        | Inlier         |
| siRNA Disorazole DMSO Run2   | NM_003343 | UBE2G2    | ubiquitin-conjugating enzyme E2G 2 (UBC7 homolog, yeast) | 1.310663        | Inlier         |
| siRNA-Vinblastine Run1-DMSO  | NM_003343 | UBE2G2    | ubiquitin-conjugating enzyme E2G 2 (UBC7 homolog, yeast) | 1.360808        | Inlier         |

Identification of Survival Genes in Human Glioblastoma Cells Using siRNA Screening

Nikhil G Thaker, Fang Zhang, Peter R. McDonald, Tong Ying Shun, Michael D Lewen, Ian F. Pollack, and John S. Lazo

Molecular Pharmacology

|                              |           |       |                                                        |           |        |
|------------------------------|-----------|-------|--------------------------------------------------------|-----------|--------|
| siRNA-Temozolomide Run2-DMSO | NM_182697 | UBE2H | ubiquitin-conjugating enzyme E2H (UBC8 homolog, yeast) | -1.432976 | Inlier |
| siRNA-Temozolomide Run3-DMSO | NM_182697 | UBE2H | ubiquitin-conjugating enzyme E2H (UBC8 homolog, yeast) | -0.841887 | Inlier |
| siRNA Disorazole DMSO Run2   | NM_182697 | UBE2H | ubiquitin-conjugating enzyme E2H (UBC8 homolog, yeast) | -0.507113 | Inlier |
| siRNA-Vinblastine Run2-DMSO  | NM_182697 | UBE2H | ubiquitin-conjugating enzyme E2H (UBC8 homolog, yeast) | -0.040339 | Inlier |
| siRNA-Temozolomide Run1-DMSO | NM_182697 | UBE2H | ubiquitin-conjugating enzyme E2H (UBC8 homolog, yeast) | 0.040339  | Inlier |
| siRNA Disorazole DMSO Run1   | NM_182697 | UBE2H | ubiquitin-conjugating enzyme E2H (UBC8 homolog, yeast) | 0.091616  | Inlier |
| siRNA Disorazole DMSO Run3   | NM_182697 | UBE2H | ubiquitin-conjugating enzyme E2H (UBC8 homolog, yeast) | 2.98031   | Inlier |

Identification of Survival Genes in Human Glioblastoma Cells Using siRNA Screening  
 Nikhil G Thaker, Fang Zhang, Peter R. McDonald, Tong Ying Shun, Michael D Lewen, Ian F. Pollack, and John S. Lazo

Molecular Pharmacology

|                              |           |       |                                                        |           |         |
|------------------------------|-----------|-------|--------------------------------------------------------|-----------|---------|
| siRNA-Vinblastine Run1-DMSO  | NM_182697 | UBE2H | ubiquitin-conjugating enzyme E2H (UBC8 homolog, yeast) | 5.260227  | Outlier |
| siRNA-Temozolomide Run3-DMSO | NM_194261 | UBE2I | ubiquitin-conjugating enzyme E2I (UBC9 homolog, yeast) | -1.559058 | Inlier  |
| siRNA-Temozolomide Run2-DMSO | NM_194261 | UBE2I | ubiquitin-conjugating enzyme E2I (UBC9 homolog, yeast) | -0.735518 | Inlier  |
| siRNA Disorazole DMSO Run1   | NM_194261 | UBE2I | ubiquitin-conjugating enzyme E2I (UBC9 homolog, yeast) | -0.560515 | Inlier  |
| siRNA-Temozolomide Run1-DMSO | NM_194261 | UBE2I | ubiquitin-conjugating enzyme E2I (UBC9 homolog, yeast) | -0.363146 | Inlier  |
| siRNA-Vinblastine Run2-DMSO  | NM_194261 | UBE2I | ubiquitin-conjugating enzyme E2I (UBC9 homolog, yeast) | 0.363146  | Inlier  |
| siRNA Disorazole DMSO Run3   | NM_194261 | UBE2I | ubiquitin-conjugating enzyme E2I (UBC9 homolog, yeast) | 0.613482  | Inlier  |

Identification of Survival Genes in Human Glioblastoma Cells Using siRNA Screening  
 Nikhil G Thaker, Fang Zhang, Peter R. McDonald, Tong Ying Shun, Michael D Lewen, Ian F. Pollack, and John S. Lazo  
 Molecular Pharmacology

|                              |               |        |                                                           |           |        |
|------------------------------|---------------|--------|-----------------------------------------------------------|-----------|--------|
| siRNA-Vinblastine Run1-DMSO  | NM_1942<br>61 | UBE2I  | ubiquitin-conjugating enzyme E2I (UBC9 homolog, yeast)    | 1.943289  | Inlier |
| siRNA Disorazole DMSO Run2   | NM_1942<br>61 | UBE2I  | ubiquitin-conjugating enzyme E2I (UBC9 homolog, yeast)    | 2.10552   | Inlier |
| siRNA Disorazole DMSO Run1   | NM_1944<br>58 | UBE2J2 | ubiquitin-conjugating enzyme E2, J2 (UBC6 homolog, yeast) | -1.147945 | Inlier |
| siRNA-Temozolomide Run2-DMSO | NM_1944<br>58 | UBE2J2 | ubiquitin-conjugating enzyme E2, J2 (UBC6 homolog, yeast) | -0.201055 | Inlier |
| siRNA-Vinblastine Run2-DMSO  | NM_1944<br>58 | UBE2J2 | ubiquitin-conjugating enzyme E2, J2 (UBC6 homolog, yeast) | -0.117006 | Inlier |
| siRNA-Temozolomide Run1-DMSO | NM_1944<br>58 | UBE2J2 | ubiquitin-conjugating enzyme E2, J2 (UBC6 homolog, yeast) | -0.072751 | Inlier |
| siRNA Disorazole DMSO Run3   | NM_1944<br>58 | UBE2J2 | ubiquitin-conjugating enzyme E2, J2 (UBC6 homolog, yeast) | 0.072751  | Inlier |

Identification of Survival Genes in Human Glioblastoma Cells Using siRNA Screening  
 Nikhil G Thaker, Fang Zhang, Peter R. McDonald, Tong Ying Shun, Michael D Lewen, Ian F. Pollack, and John S. Lazo

Molecular Pharmacology

|                              |               |        |                                                           |           |        |
|------------------------------|---------------|--------|-----------------------------------------------------------|-----------|--------|
| siRNA-Temozolomide Run3-DMSO | NM_1944<br>58 | UBE2J2 | ubiquitin-conjugating enzyme E2, J2 (UBC6 homolog, yeast) | 2.18787   | Inlier |
| siRNA-Vinblastine Run1-DMSO  | NM_1944<br>58 | UBE2J2 | ubiquitin-conjugating enzyme E2, J2 (UBC6 homolog, yeast) | 2.86752   | Inlier |
| siRNA Disorazole DMSO Run2   | NM_1944<br>58 | UBE2J2 | ubiquitin-conjugating enzyme E2, J2 (UBC6 homolog, yeast) | 2.957191  | Inlier |
| siRNA-Vinblastine Run2-DMSO  | NM_1981<br>57 | UBE2L3 | ubiquitin-conjugating enzyme E2L 3                        | -0.72156  | Inlier |
| siRNA Disorazole DMSO Run3   | NM_1981<br>57 | UBE2L3 | ubiquitin-conjugating enzyme E2L 3                        | -0.62744  | Inlier |
| siRNA-Temozolomide Run3-DMSO | NM_1981<br>57 | UBE2L3 | ubiquitin-conjugating enzyme E2L 3                        | -0.609233 | Inlier |
| siRNA-Temozolomide Run2-DMSO | NM_1981<br>57 | UBE2L3 | ubiquitin-conjugating enzyme E2L 3                        | -0.021598 | Inlier |
| siRNA Disorazole DMSO Run1   | NM_1981<br>57 | UBE2L3 | ubiquitin-conjugating enzyme E2L 3                        | 0.021598  | Inlier |
| siRNA-Temozolomide Run1-DMSO | NM_1981<br>57 | UBE2L3 | ubiquitin-conjugating enzyme E2L 3                        | 0.905866  | Inlier |
| siRNA Disorazole DMSO Run2   | NM_1981<br>57 | UBE2L3 | ubiquitin-conjugating enzyme E2L 3                        | 2.931931  | Inlier |

Identification of Survival Genes in Human Glioblastoma Cells Using siRNA Screening  
 Nikhil G Thaker, Fang Zhang, Peter R. McDonald, Tong Ying Shun, Michael D Lewen, Ian F. Pollack, and John S. Lazo

Molecular Pharmacology

|                              |               |        |                                                         |           |        |
|------------------------------|---------------|--------|---------------------------------------------------------|-----------|--------|
| siRNA-Vinblastine Run1-DMSO  | NM_1981<br>57 | UBE2L3 | ubiquitin-conjugating enzyme E2L 3                      | 3.014218  | Inlier |
| siRNA Disorazole DMSO Run1   | NM_1981<br>83 | UBE2L6 | ubiquitin-conjugating enzyme E2L 6                      | -1.139201 | Inlier |
| siRNA-Temozolomide Run1-DMSO | NM_1981<br>83 | UBE2L6 | ubiquitin-conjugating enzyme E2L 6                      | -0.625999 | Inlier |
| siRNA-Temozolomide Run2-DMSO | NM_1981<br>83 | UBE2L6 | ubiquitin-conjugating enzyme E2L 6                      | -0.329623 | Inlier |
| siRNA Disorazole DMSO Run3   | NM_1981<br>83 | UBE2L6 | ubiquitin-conjugating enzyme E2L 6                      | -0.111607 | Inlier |
| siRNA Disorazole DMSO Run2   | NM_1981<br>83 | UBE2L6 | ubiquitin-conjugating enzyme E2L 6                      | 0.111608  | Inlier |
| siRNA-Temozolomide Run3-DMSO | NM_1981<br>83 | UBE2L6 | ubiquitin-conjugating enzyme E2L 6                      | 0.723001  | Inlier |
| siRNA-Vinblastine Run2-DMSO  | NM_1981<br>83 | UBE2L6 | ubiquitin-conjugating enzyme E2L 6                      | 1.004671  | Inlier |
| siRNA-Vinblastine Run1-DMSO  | NM_1981<br>83 | UBE2L6 | ubiquitin-conjugating enzyme E2L 6                      | 1.528113  | Inlier |
| siRNA-Temozolomide Run3-DMSO | NM_0039<br>69 | UBE2M  | ubiquitin-conjugating enzyme E2M (UBC12 homolog, yeast) | -2.162639 | Inlier |
| siRNA Disorazole DMSO Run3   | NM_0039<br>69 | UBE2M  | ubiquitin-conjugating enzyme E2M (UBC12 homolog, yeast) | -0.829933 | Inlier |



Identification of Survival Genes in Human Glioblastoma Cells Using siRNA Screening  
 Nikhil G Thaker, Fang Zhang, Peter R. McDonald, Tong Ying Shun, Michael D Lewen, Ian F. Pollack, and John S. Lazo

Molecular Pharmacology

|                              |           |       |                                                         |           |        |
|------------------------------|-----------|-------|---------------------------------------------------------|-----------|--------|
| siRNA-Temozolomide Run2-DMSO | NM_003969 | UBE2M | ubiquitin-conjugating enzyme E2M (UBC12 homolog, yeast) | -0.519067 | Inlier |
| siRNA Disorazole DMSO Run1   | NM_003969 | UBE2M | ubiquitin-conjugating enzyme E2M (UBC12 homolog, yeast) | -0.249808 | Inlier |
| siRNA-Temozolomide Run1-DMSO | NM_003969 | UBE2M | ubiquitin-conjugating enzyme E2M (UBC12 homolog, yeast) | 0.249808  | Inlier |
| siRNA-Vinblastine Run2-DMSO  | NM_003969 | UBE2M | ubiquitin-conjugating enzyme E2M (UBC12 homolog, yeast) | 0.434164  | Inlier |
| siRNA Disorazole DMSO Run2   | NM_003969 | UBE2M | ubiquitin-conjugating enzyme E2M (UBC12 homolog, yeast) | 1.839659  | Inlier |
| siRNA-Vinblastine Run1-DMSO  | NM_003969 | UBE2M | ubiquitin-conjugating enzyme E2N (UBC13 homolog, yeast) | 2.01334   | Inlier |
| siRNA-Temozolomide Run3-DMSO | NM_003348 | UBE2N | ubiquitin-conjugating enzyme E2N (UBC13 homolog, yeast) | -1.764185 | Inlier |

Identification of Survival Genes in Human Glioblastoma Cells Using siRNA Screening  
 Nikhil G Thaker, Fang Zhang, Peter R. McDonald, Tong Ying Shun, Michael D Lewen, Ian F. Pollack, and John S. Lazo

Molecular Pharmacology

|                              |               |       |                                                         |           |        |
|------------------------------|---------------|-------|---------------------------------------------------------|-----------|--------|
| siRNA Disorazole DMSO Run1   | NM_0033<br>48 | UBE2N | ubiquitin-conjugating enzyme E2N (UBC13 homolog, yeast) | -0.842609 | Inlier |
| siRNA-Temozolomide Run2-DMSO | NM_0033<br>48 | UBE2N | ubiquitin-conjugating enzyme E2N (UBC13 homolog, yeast) | -0.104169 | Inlier |
| siRNA-Vinblastine Run2-DMSO  | NM_0033<br>48 | UBE2N | ubiquitin-conjugating enzyme E2N (UBC13 homolog, yeast) | -0.029493 | Inlier |
| siRNA-Temozolomide Run1-DMSO | NM_0033<br>48 | UBE2N | ubiquitin-conjugating enzyme E2N (UBC13 homolog, yeast) | 0.029493  | Inlier |
| siRNA Disorazole DMSO Run3   | NM_0033<br>48 | UBE2N | ubiquitin-conjugating enzyme E2N (UBC13 homolog, yeast) | 0.506391  | Inlier |
| siRNA Disorazole DMSO Run2   | NM_0033<br>48 | UBE2N | ubiquitin-conjugating enzyme E2N (UBC13 homolog, yeast) | 0.904626  | Inlier |
| siRNA-Vinblastine Run1-DMSO  | NM_0033<br>48 | UBE2N | ubiquitin-conjugating enzyme E2N (UBC13 homolog, yeast) | 2.444183  | Inlier |

Identification of Survival Genes in Human Glioblastoma Cells Using siRNA Screening  
 Nikhil G Thaker, Fang Zhang, Peter R. McDonald, Tong Ying Shun, Michael D Lewen, Ian F. Pollack, and John S. Lazo

Molecular Pharmacology

|                              |               |        |                                             |           |        |
|------------------------------|---------------|--------|---------------------------------------------|-----------|--------|
| siRNA-Temozolomide Run3-DMSO | NM_0175<br>82 | UBE2Q  | ubiquitin-conjugating enzyme E2Q (putative) | -0.89792  | Inlier |
| siRNA-Temozolomide Run1-DMSO | NM_0175<br>82 | UBE2Q  | ubiquitin-conjugating enzyme E2Q (putative) | -0.71235  | Inlier |
| siRNA-Temozolomide Run2-DMSO | NM_0175<br>82 | UBE2Q  | ubiquitin-conjugating enzyme E2Q (putative) | -0.708467 | Inlier |
| siRNA Disorazole DMSO Run1   | NM_0175<br>82 | UBE2Q  | ubiquitin-conjugating enzyme E2Q (putative) | -0.474992 | Inlier |
| siRNA-Vinblastine Run2-DMSO  | NM_0175<br>82 | UBE2Q  | ubiquitin-conjugating enzyme E2Q (putative) | 0.474992  | Inlier |
| siRNA-Vinblastine Run1-DMSO  | NM_0175<br>82 | UBE2Q  | ubiquitin-conjugating enzyme E2Q (putative) | 0.528428  | Inlier |
| siRNA Disorazole DMSO Run3   | NM_0175<br>82 | UBE2Q  | ubiquitin-conjugating enzyme E2Q (putative) | 0.640532  | Inlier |
| siRNA Disorazole DMSO Run2   | NM_0175<br>82 | UBE2Q  | ubiquitin-conjugating enzyme E2Q (putative) | 0.801245  | Inlier |
| siRNA-Temozolomide Run2-DMSO | NM_0178<br>11 | UBE2R2 | ubiquitin-conjugating enzyme E2R 2          | -1.078184 | Inlier |
| siRNA Disorazole DMSO Run3   | NM_0178<br>11 | UBE2R2 | ubiquitin-conjugating enzyme E2R 2          | -0.648934 | Inlier |
| siRNA-Temozolomide Run1-DMSO | NM_0178<br>11 | UBE2R2 | ubiquitin-conjugating enzyme E2R 2          | -0.50555  | Inlier |

Identification of Survival Genes in Human Glioblastoma Cells Using siRNA Screening  
 Nikhil G Thaker, Fang Zhang, Peter R. McDonald, Tong Ying Shun, Michael D Lewen, Ian F. Pollack, and John S. Lazo

Molecular Pharmacology

|                              |               |        |                                    |           |        |
|------------------------------|---------------|--------|------------------------------------|-----------|--------|
| siRNA-Vinblastine Run2-DMSO  | NM_0178<br>11 | UBE2R2 | ubiquitin-conjugating enzyme E2R 2 | -0.481091 | Inlier |
| siRNA-Temozolomide Run3-DMSO | NM_0178<br>11 | UBE2R2 | ubiquitin-conjugating enzyme E2R 2 | 0.481092  | Inlier |
| siRNA Disorazole DMSO Run1   | NM_0178<br>11 | UBE2R2 | ubiquitin-conjugating enzyme E2R 2 | 0.700066  | Inlier |
| siRNA Disorazole DMSO Run2   | NM_0178<br>11 | UBE2R2 | ubiquitin-conjugating enzyme E2R 2 | 0.792888  | Inlier |
| siRNA-Vinblastine Run1-DMSO  | NM_0178<br>11 | UBE2R2 | ubiquitin-conjugating enzyme E2R 2 | 1.423819  | Inlier |
| siRNA-Temozolomide Run3-DMSO | NM_0145<br>01 | UBE2S  | ubiquitin-conjugating enzyme E2S   | -1.507834 | Inlier |
| siRNA-Temozolomide Run2-DMSO | NM_0145<br>01 | UBE2S  | ubiquitin-conjugating enzyme E2S   | -0.792958 | Inlier |
| siRNA-Temozolomide Run1-DMSO | NM_0145<br>01 | UBE2S  | ubiquitin-conjugating enzyme E2S   | -0.328032 | Inlier |
| siRNA Disorazole DMSO Run1   | NM_0145<br>01 | UBE2S  | ubiquitin-conjugating enzyme E2S   | -0.296231 | Inlier |
| siRNA-Vinblastine Run2-DMSO  | NM_0145<br>01 | UBE2S  | ubiquitin-conjugating enzyme E2S   | 0.296231  | Inlier |
| siRNA Disorazole DMSO Run3   | NM_0145<br>01 | UBE2S  | ubiquitin-conjugating enzyme E2S   | 0.556042  | Inlier |
| siRNA-Vinblastine Run1-DMSO  | NM_0145<br>01 | UBE2S  | ubiquitin-conjugating enzyme E2S   | 2.179632  | Inlier |
| siRNA Disorazole DMSO Run2   | NM_0145<br>01 | UBE2S  | ubiquitin-conjugating enzyme E2S   | 2.543565  | Inlier |

Identification of Survival Genes in Human Glioblastoma Cells Using siRNA Screening  
 Nikhil G Thaker, Fang Zhang, Peter R. McDonald, Tong Ying Shun, Michael D Lewen, Ian F. Pollack, and John S. Lazo

Molecular Pharmacology

|                              |               |        |                                                                                               |           |         |
|------------------------------|---------------|--------|-----------------------------------------------------------------------------------------------|-----------|---------|
| siRNA-Vinblastine Run2-DMSO  | NM_0033<br>50 | UBE2V2 | ubiquitin-conjugating enzyme E2 variant 2                                                     | -0.867328 | Inlier  |
| siRNA Disorazole DMSO Run3   | NM_0033<br>50 | UBE2V2 | ubiquitin-conjugating enzyme E2 variant 2                                                     | -0.757374 | Inlier  |
| siRNA-Temozolomide Run3-DMSO | NM_0033<br>50 | UBE2V2 | ubiquitin-conjugating enzyme E2 variant 2                                                     | -0.591626 | Inlier  |
| siRNA-Temozolomide Run2-DMSO | NM_0033<br>50 | UBE2V2 | ubiquitin-conjugating enzyme E2 variant 2                                                     | -0.332246 | Inlier  |
| siRNA Disorazole DMSO Run1   | NM_0033<br>50 | UBE2V2 | ubiquitin-conjugating enzyme E2 variant 2                                                     | 0.332246  | Inlier  |
| siRNA-Temozolomide Run1-DMSO | NM_0033<br>50 | UBE2V2 | ubiquitin-conjugating enzyme E2 variant 2                                                     | 0.567906  | Inlier  |
| siRNA-Vinblastine Run1-DMSO  | NM_0033<br>50 | UBE2V2 | ubiquitin-conjugating enzyme E2 variant 2                                                     | 3.87117   | Outlier |
| siRNA Disorazole DMSO Run2   | NM_0033<br>50 | UBE2V2 | ubiquitin-conjugating enzyme E2 variant 2                                                     | 4.914126  | Outlier |
| siRNA-Temozolomide Run3-DMSO | NM_1308<br>38 | UBE3A  | ubiquitin protein ligase E3A (human papilloma virus E6-associated protein, Angelman syndrome) | -1.52458  | Inlier  |

Identification of Survival Genes in Human Glioblastoma Cells Using siRNA Screening  
 Nikhil G Thaker, Fang Zhang, Peter R. McDonald, Tong Ying Shun, Michael D Lewen, Ian F. Pollack, and John S. Lazo  
 Molecular Pharmacology

|                              |           |       |                                                                                               |           |        |
|------------------------------|-----------|-------|-----------------------------------------------------------------------------------------------|-----------|--------|
| siRNA-Temozolomide Run2-DMSO | NM_130838 | UBE3A | ubiquitin protein ligase E3A (human papilloma virus E6-associated protein, Angelman syndrome) | -0.981715 | Inlier |
| siRNA Disorazole DMSO Run3   | NM_130838 | UBE3A | ubiquitin protein ligase E3A (human papilloma virus E6-associated protein, Angelman syndrome) | -0.529432 | Inlier |
| siRNA-Vinblastine Run2-DMSO  | NM_130838 | UBE3A | ubiquitin protein ligase E3A (human papilloma virus E6-associated protein, Angelman syndrome) | -0.096076 | Inlier |
| siRNA-Temozolomide Run1-DMSO | NM_130838 | UBE3A | ubiquitin protein ligase E3A (human papilloma virus E6-associated protein, Angelman syndrome) | 0.096076  | Inlier |

Identification of Survival Genes in Human Glioblastoma Cells Using siRNA Screening  
 Nikhil G Thaker, Fang Zhang, Peter R. McDonald, Tong Ying Shun, Michael D Lewen, Ian F. Pollack, and John S. Lazo  
 Molecular Pharmacology

|                                  |               |       |                                                                                                                           |           |        |
|----------------------------------|---------------|-------|---------------------------------------------------------------------------------------------------------------------------|-----------|--------|
| siRNA Disorazole DMSO Run1       | NM_1308<br>38 | UBE3A | ubiquitin<br>protein<br>ligase E3A<br>(human<br>papilloma<br>virus E6-<br>associated<br>protein,<br>Angelman<br>syndrome) | 0.289249  | Inlier |
| siRNA-Vinblastine Run1-<br>DMSO  | NM_1308<br>38 | UBE3A | ubiquitin<br>protein<br>ligase E3A<br>(human<br>papilloma<br>virus E6-<br>associated<br>protein,<br>Angelman<br>syndrome) | 0.819568  | Inlier |
| siRNA Disorazole DMSO Run2       | NM_1308<br>38 | UBE3A | ubiquitin<br>protein<br>ligase E3A<br>(human<br>papilloma<br>virus E6-<br>associated<br>protein,<br>Angelman<br>syndrome) | 0.907254  | Inlier |
| siRNA-Temozolomide Run3-<br>DMSO | NM_1834<br>15 | UBE3B | ubiquitin<br>protein<br>ligase E3B                                                                                        | -0.925758 | Inlier |
| siRNA-Vinblastine Run2-<br>DMSO  | NM_1834<br>15 | UBE3B | ubiquitin<br>protein<br>ligase E3B                                                                                        | -0.785964 | Inlier |
| siRNA Disorazole DMSO Run3       | NM_1834<br>15 | UBE3B | ubiquitin<br>protein<br>ligase E3B                                                                                        | -0.57031  | Inlier |
| siRNA-Temozolomide Run2-<br>DMSO | NM_1834<br>15 | UBE3B | ubiquitin<br>protein<br>ligase E3B                                                                                        | -0.493774 | Inlier |

Identification of Survival Genes in Human Glioblastoma Cells Using siRNA Screening  
 Nikhil G Thaker, Fang Zhang, Peter R. McDonald, Tong Ying Shun, Michael D Lewen, Ian F. Pollack, and John S. Lazo  
 Molecular Pharmacology

|                                  |               |       |                                                                                                    |           |        |
|----------------------------------|---------------|-------|----------------------------------------------------------------------------------------------------|-----------|--------|
| siRNA Disorazole DMSO Run1       | NM_1834<br>15 | UBE3B | ubiquitin<br>protein<br>ligase E3B                                                                 | 0.493773  | Inlier |
| siRNA-Temozolomide Run1-<br>DMSO | NM_1834<br>15 | UBE3B | ubiquitin<br>protein<br>ligase E3B                                                                 | 0.609399  | Inlier |
| siRNA Disorazole DMSO Run2       | NM_1834<br>15 | UBE3B | ubiquitin<br>protein<br>ligase E3B                                                                 | 0.739601  | Inlier |
| siRNA-Vinblastine Run1-<br>DMSO  | NM_1834<br>15 | UBE3B | ubiquitin<br>protein<br>ligase E3B                                                                 | 2.145945  | Inlier |
| siRNA-Temozolomide Run3-<br>DMSO | NM_0047<br>88 | UBE4A | ubiquitin<br>protein<br>ligase E3B<br>ubiquitin<br>on factor<br>E4A<br>(UFD2<br>homolog,<br>yeast) | -1.731711 | Inlier |
| siRNA-Temozolomide Run2-<br>DMSO | NM_0047<br>88 | UBE4A | ubiquitin<br>protein<br>ligase E3B<br>ubiquitin<br>on factor<br>E4A<br>(UFD2<br>homolog,<br>yeast) | -0.73041  | Inlier |
| siRNA Disorazole DMSO Run3       | NM_0047<br>88 | UBE4A | ubiquitin<br>protein<br>ligase E3B<br>ubiquitin<br>on factor<br>E4A<br>(UFD2<br>homolog,<br>yeast) | -0.271986 | Inlier |
| siRNA-Vinblastine Run2-<br>DMSO  | NM_0047<br>88 | UBE4A | ubiquitin<br>protein<br>ligase E3B<br>ubiquitin<br>on factor<br>E4A<br>(UFD2<br>homolog,<br>yeast) | -0.271924 | Inlier |
| siRNA Disorazole DMSO Run1       | NM_0047<br>88 | UBE4A | ubiquitin<br>protein<br>ligase E3B<br>ubiquitin<br>on factor<br>E4A<br>(UFD2<br>homolog,<br>yeast) | 0.271925  | Inlier |
| siRNA-Temozolomide Run1-<br>DMSO | NM_0047<br>88 | UBE4A | ubiquitin<br>protein<br>ligase E3B<br>ubiquitin<br>on factor<br>E4A<br>(UFD2<br>homolog,<br>yeast) | 0.61859   | Inlier |





Identification of Survival Genes in Human Glioblastoma Cells Using siRNA Screening  
 Nikhil G Thaker, Fang Zhang, Peter R. McDonald, Tong Ying Shun, Michael D Lewen, Ian F. Pollack, and John S. Lazo

Molecular Pharmacology

|                                  |               |       |                                                                 |           |         |
|----------------------------------|---------------|-------|-----------------------------------------------------------------|-----------|---------|
| siRNA Disorazole DMSO Run2       | NM_0060<br>48 | UBE4B | ubiquitinati<br>on factor<br>E4B<br>(UFD2<br>homolog,<br>yeast) | 2.097909  | Inlier  |
| siRNA-Vinblastine Run1-<br>DMSO  | NM_0060<br>48 | UBE4B | ubiquitinati<br>on factor<br>E4B<br>(UFD2<br>homolog,<br>yeast) | 2.552049  | Inlier  |
| siRNA-Temozolomide Run3-<br>DMSO | NM_0242<br>92 | UBL5  | ubiquitin-<br>like 5                                            | -1.32626  | Inlier  |
| siRNA-Temozolomide Run1-<br>DMSO | NM_0242<br>92 | UBL5  | ubiquitin-<br>like 5                                            | -0.711953 | Inlier  |
| siRNA Disorazole DMSO Run3       | NM_0242<br>92 | UBL5  | ubiquitin-<br>like 5                                            | -0.637047 | Inlier  |
| siRNA Disorazole DMSO Run1       | NM_0242<br>92 | UBL5  | ubiquitin-<br>like 5                                            | -0.006554 | Inlier  |
| siRNA-Temozolomide Run2-<br>DMSO | NM_0242<br>92 | UBL5  | ubiquitin-<br>like 5                                            | 0.006553  | Inlier  |
| siRNA-Vinblastine Run2-<br>DMSO  | NM_0242<br>92 | UBL5  | ubiquitin-<br>like 5                                            | 0.344484  | Inlier  |
| siRNA Disorazole DMSO Run2       | NM_0242<br>92 | UBL5  | ubiquitin-<br>like 5                                            | 11.34486  | Outlier |
| siRNA-Vinblastine Run1-<br>DMSO  | NM_0242<br>92 | UBL5  | ubiquitin-<br>like 5                                            | 18.36638  | Outlier |
| siRNA-Temozolomide Run2-<br>DMSO | NM_0175<br>49 | UCC1  | ependymin<br>related<br>protein 1<br>(zebrafish)                | -0.83454  | Inlier  |
| siRNA-Temozolomide Run3-<br>DMSO | NM_0175<br>49 | UCC1  | ependymin<br>related<br>protein 1<br>(zebrafish)                | -0.773995 | Inlier  |
| siRNA Disorazole DMSO Run1       | NM_0175<br>49 | UCC1  | ependymin<br>related<br>protein 1<br>(zebrafish)                | -0.482237 | Inlier  |
| siRNA-Temozolomide Run1-<br>DMSO | NM_0175<br>49 | UCC1  | ependymin<br>related<br>protein 1<br>(zebrafish)                | -0.142969 | Inlier  |

Identification of Survival Genes in Human Glioblastoma Cells Using siRNA Screening  
 Nikhil G Thaker, Fang Zhang, Peter R. McDonald, Tong Ying Shun, Michael D Lewen, Ian F. Pollack, and John S. Lazo  
 Molecular Pharmacology

|                                  |               |       |                                                                                      |           |        |
|----------------------------------|---------------|-------|--------------------------------------------------------------------------------------|-----------|--------|
| siRNA Disorazole DMSO Run2       | NM_0175<br>49 | UCC1  | ependymin<br>related<br>protein 1<br>(zebrafish)                                     | 0.142969  | Inlier |
| siRNA-Vinblastine Run2-<br>DMSO  | NM_0175<br>49 | UCC1  | ependymin<br>related<br>protein 1<br>(zebrafish)                                     | 0.662082  | Inlier |
| siRNA Disorazole DMSO Run3       | NM_0175<br>49 | UCC1  | ependymin<br>related<br>protein 1<br>(zebrafish)                                     | 0.686918  | Inlier |
| siRNA-Vinblastine Run1-<br>DMSO  | NM_0175<br>49 | UCC1  | ependymin<br>related<br>protein 1<br>(zebrafish)                                     | 0.919866  | Inlier |
| siRNA-Temozolomide Run3-<br>DMSO | NM_0041<br>81 | UCHL1 | ubiquitin<br>carboxyl-<br>terminal<br>esterase<br>L1<br>(ubiquitin<br>thiolesterase) | -1.37074  | Inlier |
| siRNA Disorazole DMSO Run2       | NM_0041<br>81 | UCHL1 | ubiquitin<br>carboxyl-<br>terminal<br>esterase<br>L1<br>(ubiquitin<br>thiolesterase) | -0.767089 | Inlier |
| siRNA Disorazole DMSO Run1       | NM_0041<br>81 | UCHL1 | ubiquitin<br>carboxyl-<br>terminal<br>esterase<br>L1<br>(ubiquitin<br>thiolesterase) | -0.453604 | Inlier |
| siRNA-Temozolomide Run2-<br>DMSO | NM_0041<br>81 | UCHL1 | ubiquitin<br>thiolesterase)                                                          | -0.070262 | Inlier |

Identification of Survival Genes in Human Glioblastoma Cells Using siRNA Screening

Nikhil G Thaker, Fang Zhang, Peter R. McDonald, Tong Ying Shun, Michael D Lewen, Ian F. Pollack, and John S. Lazo

Molecular Pharmacology

|                              |               |       |                                                                                      |           |         |
|------------------------------|---------------|-------|--------------------------------------------------------------------------------------|-----------|---------|
| siRNA-Vinblastine Run1-DMSO  | NM_0041<br>81 | UCHL1 | ubiquitin<br>carboxyl-<br>terminal<br>esterase<br>L1<br>(ubiquitin<br>thiolesterase) | 0.07026   | Inlier  |
| siRNA-Temozolomide Run1-DMSO | NM_0041<br>81 | UCHL1 | ubiquitin<br>carboxyl-<br>terminal<br>esterase<br>L1<br>(ubiquitin<br>thiolesterase) | 0.581911  | Inlier  |
| siRNA-Vinblastine Run2-DMSO  | NM_0041<br>81 | UCHL1 | ubiquitin<br>carboxyl-<br>terminal<br>esterase<br>L1<br>(ubiquitin<br>thiolesterase) | 2.926854  | Inlier  |
| siRNA Disorazole DMSO Run3   | NM_0041<br>81 | UCHL1 | ubiquitin<br>carboxyl-<br>terminal<br>esterase<br>L1<br>(ubiquitin<br>thiolesterase) | 15.65414  | Outlier |
| siRNA-Temozolomide Run3-DMSO | NM_0060<br>02 | UCHL3 | ubiquitin<br>carboxyl-<br>terminal<br>esterase<br>L3<br>(ubiquitin<br>thiolesterase) | -2.026294 | Inlier  |
| siRNA-Temozolomide Run2-DMSO | NM_0060<br>02 | UCHL3 | ubiquitin<br>carboxyl-<br>terminal<br>esterase<br>L3<br>(ubiquitin<br>thiolesterase) | -1.189642 | Inlier  |

Identification of Survival Genes in Human Glioblastoma Cells Using siRNA Screening

Nikhil G Thaker, Fang Zhang, Peter R. McDonald, Tong Ying Shun, Michael D Lewen, Ian F. Pollack, and John S. Lazo

Molecular Pharmacology

|                              |           |       |                                                                   |           |        |
|------------------------------|-----------|-------|-------------------------------------------------------------------|-----------|--------|
| siRNA-Temozolomide Run1-DMSO | NM_006002 | UCHL3 | ubiquitin carboxyl-terminal esterase L3 (ubiquitin thiolesterase) | -0.387673 | Inlier |
| siRNA Disorazole DMSO Run1   | NM_006002 | UCHL3 | ubiquitin carboxyl-terminal esterase L3 (ubiquitin thiolesterase) | -0.189566 | Inlier |
| siRNA-Vinblastine Run1-DMSO  | NM_006002 | UCHL3 | ubiquitin carboxyl-terminal esterase L3 (ubiquitin thiolesterase) | 0.189566  | Inlier |
| siRNA-Vinblastine Run2-DMSO  | NM_006002 | UCHL3 | ubiquitin carboxyl-terminal esterase L3 (ubiquitin thiolesterase) | 0.617896  | Inlier |
| siRNA Disorazole DMSO Run2   | NM_006002 | UCHL3 | ubiquitin carboxyl-terminal esterase L3 (ubiquitin thiolesterase) | 0.731104  | Inlier |
| siRNA Disorazole DMSO Run3   | NM_006002 | UCHL3 | ubiquitin carboxyl-terminal esterase L3 (ubiquitin thiolesterase) | 3.010537  | Inlier |

Identification of Survival Genes in Human Glioblastoma Cells Using siRNA Screening  
 Nikhil G Thaker, Fang Zhang, Peter R. McDonald, Tong Ying Shun, Michael D Lewen, Ian F. Pollack, and John S. Lazo

Molecular Pharmacology

|                                  |               |       |                                                       |           |        |
|----------------------------------|---------------|-------|-------------------------------------------------------|-----------|--------|
| siRNA Disorazole DMSO Run2       | NM_0159<br>84 | UCHL5 | ubiquitin<br>carboxyl-<br>terminal<br>hydrolase<br>L5 | -2.540536 | Inlier |
| siRNA-Temozolomide Run3-<br>DMSO | NM_0159<br>84 | UCHL5 | ubiquitin<br>carboxyl-<br>terminal<br>hydrolase<br>L5 | -1.963512 | Inlier |
| siRNA-Temozolomide Run2-<br>DMSO | NM_0159<br>84 | UCHL5 | ubiquitin<br>carboxyl-<br>terminal<br>hydrolase<br>L5 | -0.272745 | Inlier |
| siRNA-Temozolomide Run1-<br>DMSO | NM_0159<br>84 | UCHL5 | ubiquitin<br>carboxyl-<br>terminal<br>hydrolase<br>L5 | -0.202765 | Inlier |
| siRNA Disorazole DMSO Run3       | NM_0159<br>84 | UCHL5 | ubiquitin<br>carboxyl-<br>terminal<br>hydrolase<br>L5 | 0.202764  | Inlier |
| siRNA Disorazole DMSO Run1       | NM_0159<br>84 | UCHL5 | ubiquitin<br>carboxyl-<br>terminal<br>hydrolase<br>L5 | 0.513351  | Inlier |
| siRNA-Vinblastine Run2-<br>DMSO  | NM_0159<br>84 | UCHL5 | ubiquitin<br>carboxyl-<br>terminal<br>hydrolase<br>L5 | 0.835649  | Inlier |
| siRNA-Vinblastine Run1-<br>DMSO  | NM_0159<br>84 | UCHL5 | ubiquitin<br>carboxyl-<br>terminal<br>hydrolase<br>L5 | 0.984251  | Inlier |
| siRNA-Temozolomide Run2-<br>DMSO | NM_0314<br>32 | UCK1  | uridine-<br>cytidine<br>kinase 1                      | -2.955266 | Inlier |
| siRNA-Temozolomide Run1-<br>DMSO | NM_0314<br>32 | UCK1  | uridine-<br>cytidine<br>kinase 1                      | -0.853615 | Inlier |
| siRNA-Temozolomide Run3-<br>DMSO | NM_0314<br>32 | UCK1  | uridine-<br>cytidine<br>kinase 1                      | -0.752177 | Inlier |
| siRNA Disorazole DMSO Run1       | NM_0314<br>32 | UCK1  | uridine-<br>cytidine<br>kinase 1                      | -0.462299 | Inlier |

Identification of Survival Genes in Human Glioblastoma Cells Using siRNA Screening  
 Nikhil G Thaker, Fang Zhang, Peter R. McDonald, Tong Ying Shun, Michael D Lewen, Ian F. Pollack, and John S. Lazo

Molecular Pharmacology

|                                  |               |       |                                             |                  |
|----------------------------------|---------------|-------|---------------------------------------------|------------------|
| siRNA Disorazole DMSO Run2       | NM_0314<br>32 | UCK1  | uridine-<br>cytidine<br>kinase 1            | 0.4623 Inlier    |
| siRNA-Vinblastine Run2-<br>DMSO  | NM_0314<br>32 | UCK1  | uridine-<br>cytidine<br>kinase 1            | 0.58212 Inlier   |
| siRNA-Vinblastine Run1-<br>DMSO  | NM_0314<br>32 | UCK1  | uridine-<br>cytidine<br>kinase 1            | 0.596823 Inlier  |
| siRNA Disorazole DMSO Run3       | NM_0314<br>32 | UCK1  | uridine-<br>cytidine<br>kinase 1            | 2.214978 Inlier  |
| siRNA Disorazole DMSO Run2       | NM_0124<br>74 | UCK2  | uridine-<br>cytidine<br>kinase 2            | -1.052572 Inlier |
| siRNA-Temozolomide Run3-<br>DMSO | NM_0124<br>74 | UCK2  | uridine-<br>cytidine<br>kinase 2            | -0.715845 Inlier |
| siRNA-Temozolomide Run1-<br>DMSO | NM_0124<br>74 | UCK2  | uridine-<br>cytidine<br>kinase 2            | -0.098072 Inlier |
| siRNA-Temozolomide Run2-<br>DMSO | NM_0124<br>74 | UCK2  | uridine-<br>cytidine<br>kinase 2            | -0.093525 Inlier |
| siRNA Disorazole DMSO Run1       | NM_0124<br>74 | UCK2  | uridine-<br>cytidine<br>kinase 2            | 0.093524 Inlier  |
| siRNA Disorazole DMSO Run3       | NM_0124<br>74 | UCK2  | uridine-<br>cytidine<br>kinase 2            | 0.633155 Inlier  |
| siRNA-Vinblastine Run2-<br>DMSO  | NM_0124<br>74 | UCK2  | uridine-<br>cytidine<br>kinase 2            | 0.732975 Inlier  |
| siRNA-Vinblastine Run1-<br>DMSO  | NM_0124<br>74 | UCK2  | uridine-<br>cytidine<br>kinase 2            | 0.799571 Inlier  |
| siRNA Disorazole DMSO Run2       | NM_0178<br>59 | UCKL1 | uridine-<br>cytidine<br>kinase 1-<br>like 1 | -0.767457 Inlier |
| siRNA Disorazole DMSO Run1       | NM_0178<br>59 | UCKL1 | uridine-<br>cytidine<br>kinase 1-<br>like 1 | -0.707253 Inlier |
| siRNA-Temozolomide Run3-<br>DMSO | NM_0178<br>59 | UCKL1 | uridine-<br>cytidine<br>kinase 1-<br>like 1 | -0.698898 Inlier |
| siRNA-Temozolomide Run1-<br>DMSO | NM_0178<br>59 | UCKL1 | uridine-<br>cytidine<br>kinase 1-<br>like 1 | -0.155012 Inlier |

Identification of Survival Genes in Human Glioblastoma Cells Using siRNA Screening  
 Nikhil G Thaker, Fang Zhang, Peter R. McDonald, Tong Ying Shun, Michael D Lewen, Ian F. Pollack, and John S. Lazo

Molecular Pharmacology

|                              |               |       |                                                      |           |        |
|------------------------------|---------------|-------|------------------------------------------------------|-----------|--------|
| siRNA-Temozolomide Run2-DMSO | NM_0178<br>59 | UCKL1 | uridine-cytidine kinase 1-like 1                     | 0.155012  | Inlier |
| siRNA Disorazole DMSO Run3   | NM_0178<br>59 | UCKL1 | uridine-cytidine kinase 1-like 1                     | 0.446249  | Inlier |
| siRNA-Vinblastine Run1-DMSO  | NM_0178<br>59 | UCKL1 | uridine-cytidine kinase 1-like 1                     | 0.650102  | Inlier |
| siRNA-Vinblastine Run2-DMSO  | NM_0178<br>59 | UCKL1 | uridine-cytidine kinase 1-like 1                     | 0.740055  | Inlier |
| siRNA-Temozolomide Run3-DMSO | NM_0218<br>33 | UCP1  | uncoupling protein 1 (mitochondrial, proton carrier) | -1.858867 | Inlier |
| siRNA-Temozolomide Run1-DMSO | NM_0218<br>33 | UCP1  | uncoupling protein 1 (mitochondrial, proton carrier) | -0.695058 | Inlier |
| siRNA-Temozolomide Run2-DMSO | NM_0218<br>33 | UCP1  | uncoupling protein 1 (mitochondrial, proton carrier) | -0.653942 | Inlier |
| siRNA Disorazole DMSO Run1   | NM_0218<br>33 | UCP1  | uncoupling protein 1 (mitochondrial, proton carrier) | -0.058033 | Inlier |
| siRNA-Vinblastine Run2-DMSO  | NM_0218<br>33 | UCP1  | uncoupling protein 1 (mitochondrial, proton carrier) | 0.058033  | Inlier |



Identification of Survival Genes in Human Glioblastoma Cells Using siRNA Screening  
 Nikhil G Thaker, Fang Zhang, Peter R. McDonald, Tong Ying Shun, Michael D Lewen, Ian F. Pollack, and John S. Lazo  
 Molecular Pharmacology

|                              |               |      |                                                      |           |        |
|------------------------------|---------------|------|------------------------------------------------------|-----------|--------|
| siRNA Disorazole DMSO Run3   | NM_0218<br>33 | UCP1 | uncoupling protein 1 (mitochondrial, proton carrier) | 0.647984  | Inlier |
| siRNA-Vinblastine Run1-DMSO  | NM_0218<br>33 | UCP1 | uncoupling protein 1 (mitochondrial, proton carrier) | 1.658553  | Inlier |
| siRNA Disorazole DMSO Run2   | NM_0218<br>33 | UCP1 | uncoupling protein 1 (mitochondrial, proton carrier) | 2.023155  | Inlier |
| siRNA-Vinblastine Run2-DMSO  | NM_0033<br>55 | UCP2 | uncoupling protein 2 (mitochondrial, proton carrier) | -1.043422 | Inlier |
| siRNA Disorazole DMSO Run1   | NM_0033<br>55 | UCP2 | uncoupling protein 2 (mitochondrial, proton carrier) | -0.796033 | Inlier |
| siRNA-Temozolomide Run1-DMSO | NM_0033<br>55 | UCP2 | uncoupling protein 2 (mitochondrial, proton carrier) | -0.552967 | Inlier |
| siRNA-Temozolomide Run2-DMSO | NM_0033<br>55 | UCP2 | uncoupling protein 2 (mitochondrial, proton carrier) | -0.026609 | Inlier |

Identification of Survival Genes in Human Glioblastoma Cells Using siRNA Screening  
 Nikhil G Thaker, Fang Zhang, Peter R. McDonald, Tong Ying Shun, Michael D Lewen, Ian F. Pollack, and John S. Lazo  
 Molecular Pharmacology

|                              |               |      |                                                      |           |        |
|------------------------------|---------------|------|------------------------------------------------------|-----------|--------|
| siRNA Disorazole DMSO Run3   | NM_0033<br>55 | UCP2 | uncoupling protein 2 (mitochondrial, proton carrier) | 0.026609  | Inlier |
| siRNA-Temozolomide Run3-DMSO | NM_0033<br>55 | UCP2 | uncoupling protein 2 (mitochondrial, proton carrier) | 0.377316  | Inlier |
| siRNA-Vinblastine Run1-DMSO  | NM_0033<br>55 | UCP2 | uncoupling protein 2 (mitochondrial, proton carrier) | 1.818547  | Inlier |
| siRNA Disorazole DMSO Run2   | NM_0033<br>55 | UCP2 | uncoupling protein 2 (mitochondrial, proton carrier) | 1.819999  | Inlier |
| siRNA-Temozolomide Run3-DMSO | NM_0033<br>56 | UCP3 | uncoupling protein 3 (mitochondrial, proton carrier) | -1.477101 | Inlier |
| siRNA-Temozolomide Run2-DMSO | NM_0033<br>56 | UCP3 | uncoupling protein 3 (mitochondrial, proton carrier) | -0.766118 | Inlier |
| siRNA-Temozolomide Run1-DMSO | NM_0033<br>56 | UCP3 | uncoupling protein 3 (mitochondrial, proton carrier) | -0.26489  | Inlier |

Identification of Survival Genes in Human Glioblastoma Cells Using siRNA Screening  
 Nikhil G Thaker, Fang Zhang, Peter R. McDonald, Tong Ying Shun, Michael D Lewen, Ian F. Pollack, and John S. Lazo  
 Molecular Pharmacology

|                              |               |      |                                                      |           |        |
|------------------------------|---------------|------|------------------------------------------------------|-----------|--------|
| siRNA-Vinblastine Run2-DMSO  | NM_0033<br>56 | UCP3 | uncoupling protein 3 (mitochondrial, proton carrier) | -0.246554 | Inlier |
| siRNA Disorazole DMSO Run1   | NM_0033<br>56 | UCP3 | uncoupling protein 3 (mitochondrial, proton carrier) | 0.246555  | Inlier |
| siRNA Disorazole DMSO Run3   | NM_0033<br>56 | UCP3 | uncoupling protein 3 (mitochondrial, proton carrier) | 0.582882  | Inlier |
| siRNA-Vinblastine Run1-DMSO  | NM_0033<br>56 | UCP3 | uncoupling protein 3 (mitochondrial, proton carrier) | 1.989049  | Inlier |
| siRNA Disorazole DMSO Run2   | NM_0033<br>56 | UCP3 | uncoupling protein 3 (mitochondrial, proton carrier) | 2.071052  | Inlier |
| siRNA-Temozolomide Run3-DMSO | NM_0183<br>14 | UEV3 | UEV3                                                 | -0.69809  | Inlier |
| siRNA-Temozolomide Run2-DMSO | NM_0183<br>14 | UEV3 | UEV3                                                 | -0.65091  | Inlier |
| siRNA Disorazole DMSO Run1   | NM_0183<br>14 | UEV3 | UEV3                                                 | -0.621055 | Inlier |
| siRNA-Temozolomide Run1-DMSO | NM_0183<br>14 | UEV3 | UEV3                                                 | -0.084191 | Inlier |
| siRNA-Vinblastine Run2-DMSO  | NM_0183<br>14 | UEV3 | UEV3                                                 | 0.084191  | Inlier |
| siRNA Disorazole DMSO Run3   | NM_0183<br>14 | UEV3 | UEV3                                                 | 1.454534  | Inlier |
| siRNA Disorazole DMSO Run2   | NM_0183<br>14 | UEV3 | UEV3                                                 | 1.913588  | Inlier |
| siRNA-Vinblastine Run1-DMSO  | NM_0183<br>14 | UEV3 | UEV3                                                 | 3.443861  | Inlier |

Identification of Survival Genes in Human Glioblastoma Cells Using siRNA Screening  
 Nikhil G Thaker, Fang Zhang, Peter R. McDonald, Tong Ying Shun, Michael D Lewen, Ian F. Pollack, and John S. Lazo

Molecular Pharmacology

|                              |               |        |                                                       |           |         |
|------------------------------|---------------|--------|-------------------------------------------------------|-----------|---------|
| siRNA-Temozolomide Run2-DMSO | NM_0033<br>58 | UGCG   | UDP-glucose<br>ceramide<br>glucosyltransferase        | -0.903384 | Inlier  |
| siRNA Disorazole DMSO Run3   | NM_0033<br>58 | UGCG   | UDP-glucose<br>ceramide<br>glucosyltransferase        | -0.445616 | Inlier  |
| siRNA Disorazole DMSO Run1   | NM_0033<br>58 | UGCG   | UDP-glucose<br>ceramide<br>glucosyltransferase        | -0.363323 | Inlier  |
| siRNA-Vinblastine Run2-DMSO  | NM_0033<br>58 | UGCG   | UDP-glucose<br>ceramide<br>glucosyltransferase        | -0.138765 | Inlier  |
| siRNA-Temozolomide Run3-DMSO | NM_0033<br>58 | UGCG   | UDP-glucose<br>ceramide<br>glucosyltransferase        | 0.138765  | Inlier  |
| siRNA-Temozolomide Run1-DMSO | NM_0033<br>58 | UGCG   | UDP-glucose<br>ceramide<br>glucosyltransferase        | 1.172491  | Inlier  |
| siRNA Disorazole DMSO Run2   | NM_0033<br>58 | UGCG   | UDP-glucose<br>ceramide<br>glucosyltransferase        | 3.936756  | Outlier |
| siRNA-Vinblastine Run1-DMSO  | NM_0033<br>58 | UGCG   | UDP-glucose<br>ceramide<br>glucosyltransferase        | 4.05414   | Outlier |
| siRNA-Temozolomide Run2-DMSO | NM_0201<br>21 | UGCGL2 | glucosyltransferase-like 2<br>UDP-glucose<br>ceramide | -3.566888 | Outlier |
| siRNA-Temozolomide Run1-DMSO | NM_0201<br>21 | UGCGL2 | glucosyltransferase-like 2                            | -0.883838 | Inlier  |

Identification of Survival Genes in Human Glioblastoma Cells Using siRNA Screening  
 Nikhil G Thaker, Fang Zhang, Peter R. McDonald, Tong Ying Shun, Michael D Lewen, Ian F. Pollack, and John S. Lazo

Molecular Pharmacology

|                                  |               |        |                                                                   |           |        |
|----------------------------------|---------------|--------|-------------------------------------------------------------------|-----------|--------|
| siRNA Disorazole DMSO Run1       | NM_0201<br>21 | UGCGL2 | UDP-<br>glucose<br>ceramide<br>glucosyltra<br>nsferase-<br>like 2 | -0.445914 | Inlier |
| siRNA-Temozolomide Run3-<br>DMSO | NM_0201<br>21 | UGCGL2 | UDP-<br>glucose<br>ceramide<br>glucosyltra<br>nsferase-<br>like 2 | -0.013594 | Inlier |
| siRNA Disorazole DMSO Run3       | NM_0201<br>21 | UGCGL2 | UDP-<br>glucose<br>ceramide<br>glucosyltra<br>nsferase-<br>like 2 | 0.013596  | Inlier |
| siRNA-Vinblastine Run2-<br>DMSO  | NM_0201<br>21 | UGCGL2 | UDP-<br>glucose<br>ceramide<br>glucosyltra<br>nsferase-<br>like 2 | 0.465162  | Inlier |
| siRNA Disorazole DMSO Run2       | NM_0201<br>21 | UGCGL2 | UDP-<br>glucose<br>ceramide<br>glucosyltra<br>nsferase-<br>like 2 | 2.310099  | Inlier |
| siRNA-Vinblastine Run1-<br>DMSO  | NM_0201<br>21 | UGCGL2 | UDP-<br>glucose<br>ceramide<br>glucosyltra<br>nsferase-<br>like 2 | 3.322152  | Inlier |
| siRNA-Temozolomide Run2-<br>DMSO | NM_0033<br>59 | UGDH   | glucose<br>dehydroge<br>nase                                      | -1.055195 | Inlier |
| siRNA-Temozolomide Run3-<br>DMSO | NM_0033<br>59 | UGDH   | UDP-<br>glucose<br>dehydroge<br>nase                              | -0.97419  | Inlier |
| siRNA-Vinblastine Run2-<br>DMSO  | NM_0033<br>59 | UGDH   | UDP-<br>glucose<br>dehydroge<br>nase                              | -0.288305 | Inlier |
| siRNA Disorazole DMSO Run1       | NM_0033<br>59 | UGDH   | UDP-<br>glucose<br>dehydroge<br>nase                              | -0.085609 | Inlier |

Identification of Survival Genes in Human Glioblastoma Cells Using siRNA Screening  
 Nikhil G Thaker, Fang Zhang, Peter R. McDonald, Tong Ying Shun, Michael D Lewen, Ian F. Pollack, and John S. Lazo

Molecular Pharmacology

|                                  |                  |      |                                            |           |        |
|----------------------------------|------------------|------|--------------------------------------------|-----------|--------|
| siRNA Disorazole DMSO Run3       | NM_0033<br>59    | UGDH | UDP-<br>glucose<br>dehydroge<br>nase       | 0.085608  | Inlier |
| siRNA-Temozolomide Run1-<br>DMSO | NM_0033<br>59    | UGDH | UDP-<br>glucose<br>dehydroge<br>nase       | 0.37481   | Inlier |
| siRNA Disorazole DMSO Run2       | NM_0033<br>59    | UGDH | UDP-<br>glucose<br>dehydroge<br>nase       | 2.48876   | Inlier |
| siRNA-Vinblastine Run1-<br>DMSO  | NM_0033<br>59    | UGDH | UDP-<br>glucose<br>dehydroge<br>nase       | 2.51754   | Inlier |
| siRNA-Temozolomide Run3-<br>DMSO | NM_0010<br>01521 | UGP2 | UDP-<br>glucose<br>pyrophosp<br>horylase 2 | -0.68166  | Inlier |
| siRNA Disorazole DMSO Run2       | NM_0010<br>01521 | UGP2 | UDP-<br>glucose<br>pyrophosp<br>horylase 2 | -0.66734  | Inlier |
| siRNA-Temozolomide Run2-<br>DMSO | NM_0010<br>01521 | UGP2 | UDP-<br>glucose<br>pyrophosp<br>horylase 2 | -0.274415 | Inlier |
| siRNA-Temozolomide Run1-<br>DMSO | NM_0010<br>01521 | UGP2 | UDP-<br>glucose<br>pyrophosp<br>horylase 2 | -0.080535 | Inlier |
| siRNA Disorazole DMSO Run3       | NM_0010<br>01521 | UGP2 | UDP-<br>glucose<br>pyrophosp<br>horylase 2 | 0.080536  | Inlier |
| siRNA Disorazole DMSO Run1       | NM_0010<br>01521 | UGP2 | UDP-<br>glucose<br>pyrophosp<br>horylase 2 | 1.057023  | Inlier |
| siRNA-Vinblastine Run2-<br>DMSO  | NM_0010<br>01521 | UGP2 | UDP-<br>glucose<br>pyrophosp<br>horylase 2 | 2.082569  | Inlier |

Identification of Survival Genes in Human Glioblastoma Cells Using siRNA Screening  
 Nikhil G Thaker, Fang Zhang, Peter R. McDonald, Tong Ying Shun, Michael D Lewen, Ian F. Pollack, and John S. Lazo  
 Molecular Pharmacology

|                              |              |        |                                                  |           |        |
|------------------------------|--------------|--------|--------------------------------------------------|-----------|--------|
| siRNA-Vinblastine Run1-DMSO  | NM_001001521 | UGP2   | UDP-glucose pyrophosphorylase 2                  | 2.21076   | Inlier |
| siRNA-Temozolomide Run1-DMSO | NM_000463    | UGT1A1 | UDP glycosyltransferase 1 family, polypeptide A1 | -2.447237 | Inlier |
| siRNA Disorazole DMSO Run3   | NM_000463    | UGT1A1 | UDP glycosyltransferase 1 family, polypeptide A1 | -0.66844  | Inlier |
| siRNA-Temozolomide Run2-DMSO | NM_000463    | UGT1A1 | UDP glycosyltransferase 1 family, polypeptide A1 | -0.448906 | Inlier |
| siRNA Disorazole DMSO Run1   | NM_000463    | UGT1A1 | UDP glycosyltransferase 1 family, polypeptide A1 | -0.208876 | Inlier |
| siRNA-Vinblastine Run2-DMSO  | NM_000463    | UGT1A1 | UDP glycosyltransferase 1 family, polypeptide A1 | 0.208876  | Inlier |
| siRNA-Temozolomide Run3-DMSO | NM_000463    | UGT1A1 | UDP glycosyltransferase 1 family, polypeptide A1 | 0.68056   | Inlier |
| siRNA Disorazole DMSO Run2   | NM_000463    | UGT1A1 | UDP glycosyltransferase 1 family, polypeptide A1 | 2.134315  | Inlier |

Identification of Survival Genes in Human Glioblastoma Cells Using siRNA Screening  
 Nikhil G Thaker, Fang Zhang, Peter R. McDonald, Tong Ying Shun, Michael D Lewen, Ian F. Pollack, and John S. Lazo

Molecular Pharmacology

| siRNA Treatment              | Gene ID   | Gene Name | Protein Name                                      | Score     | Category |
|------------------------------|-----------|-----------|---------------------------------------------------|-----------|----------|
| siRNA-Vinblastine Run1-DMSO  | NM_000463 | UGT1A1    | UDP glycosyltransferase 1 family, polypeptide A1  | 2.14627   | Inlier   |
| siRNA-Temozolomide Run2-DMSO | NM_019075 | UGT1A10   | UDP glycosyltransferase 1 family, polypeptide A10 | -4.094473 | Outlier  |
| siRNA Disorazole DMSO Run1   | NM_019075 | UGT1A10   | UDP glycosyltransferase 1 family, polypeptide A10 | -0.832904 | Inlier   |
| siRNA-Temozolomide Run1-DMSO | NM_019075 | UGT1A10   | UDP glycosyltransferase 1 family, polypeptide A10 | -0.516096 | Inlier   |
| siRNA Disorazole DMSO Run3   | NM_019075 | UGT1A10   | UDP glycosyltransferase 1 family, polypeptide A10 | -0.063708 | Inlier   |
| siRNA-Temozolomide Run3-DMSO | NM_019075 | UGT1A10   | UDP glycosyltransferase 1 family, polypeptide A10 | 0.06371   | Inlier   |
| siRNA-Vinblastine Run2-DMSO  | NM_019075 | UGT1A10   | UDP glycosyltransferase 1 family, polypeptide A10 | 0.416098  | Inlier   |
| siRNA Disorazole DMSO Run2   | NM_019075 | UGT1A10   | UDP glycosyltransferase 1 family, polypeptide A10 | 1.548364  | Inlier   |



Identification of Survival Genes in Human Glioblastoma Cells Using siRNA Screening  
 Nikhil G Thaker, Fang Zhang, Peter R. McDonald, Tong Ying Shun, Michael D Lewen, Ian F. Pollack, and John S. Lazo

Molecular Pharmacology

| siRNA Treatment              | Gene ID   | Gene Name | Gene Description                                  | Value     | Category |
|------------------------------|-----------|-----------|---------------------------------------------------|-----------|----------|
| siRNA-Vinblastine Run1-DMSO  | NM_019075 | UGT1A10   | UDP glycosyltransferase 1 family, polypeptide A10 | 4.05167   | Outlier  |
| siRNA-Vinblastine Run2-DMSO  | NM_019093 | UGT1A3    | UDP glycosyltransferase 1 family, polypeptide A3  | -1.413598 | Inlier   |
| siRNA Disorazole DMSO Run1   | NM_019093 | UGT1A3    | UDP glycosyltransferase 1 family, polypeptide A3  | -1.226218 | Inlier   |
| siRNA Disorazole DMSO Run3   | NM_019093 | UGT1A3    | UDP glycosyltransferase 1 family, polypeptide A3  | -0.5701   | Inlier   |
| siRNA-Temozolomide Run1-DMSO | NM_019093 | UGT1A3    | UDP glycosyltransferase 1 family, polypeptide A3  | -0.423875 | Inlier   |
| siRNA Disorazole DMSO Run2   | NM_019093 | UGT1A3    | UDP glycosyltransferase 1 family, polypeptide A3  | 0.423875  | Inlier   |
| siRNA-Temozolomide Run2-DMSO | NM_019093 | UGT1A3    | UDP glycosyltransferase 1 family, polypeptide A3  | 0.502356  | Inlier   |
| siRNA-Temozolomide Run3-DMSO | NM_019093 | UGT1A3    | UDP glycosyltransferase 1 family, polypeptide A3  | 0.7789    | Inlier   |

Identification of Survival Genes in Human Glioblastoma Cells Using siRNA Screening  
 Nikhil G Thaker, Fang Zhang, Peter R. McDonald, Tong Ying Shun, Michael D Lewen, Ian F. Pollack, and John S. Lazo

Molecular Pharmacology

|                              |           |        |                                                  |           |        |
|------------------------------|-----------|--------|--------------------------------------------------|-----------|--------|
| siRNA-Vinblastine Run1-DMSO  | NM_019093 | UGT1A3 | UDP glycosyltransferase 1 family, polypeptide A3 | 1.15244   | Inlier |
| siRNA-Temozolomide Run2-DMSO | NM_007120 | UGT1A4 | UDP glycosyltransferase 1 family, polypeptide A4 | -0.764232 | Inlier |
| siRNA Disorazole DMSO Run1   | NM_007120 | UGT1A4 | UDP glycosyltransferase 1 family, polypeptide A4 | -0.584768 | Inlier |
| siRNA-Temozolomide Run1-DMSO | NM_007120 | UGT1A4 | UDP glycosyltransferase 1 family, polypeptide A4 | -0.49089  | Inlier |
| siRNA Disorazole DMSO Run3   | NM_007120 | UGT1A4 | UDP glycosyltransferase 1 family, polypeptide A4 | -0.046532 | Inlier |
| siRNA-Vinblastine Run2-DMSO  | NM_007120 | UGT1A4 | UDP glycosyltransferase 1 family, polypeptide A4 | 0.046532  | Inlier |
| siRNA-Temozolomide Run3-DMSO | NM_007120 | UGT1A4 | UDP glycosyltransferase 1 family, polypeptide A4 | 0.810537  | Inlier |
| siRNA Disorazole DMSO Run2   | NM_007120 | UGT1A4 | UDP glycosyltransferase 1 family, polypeptide A4 | 1.890304  | Inlier |

Identification of Survival Genes in Human Glioblastoma Cells Using siRNA Screening  
 Nikhil G Thaker, Fang Zhang, Peter R. McDonald, Tong Ying Shun, Michael D Lewen, Ian F. Pollack, and John S. Lazo

Molecular Pharmacology

| siRNA Treatment              | Gene ID   | Gene Name | Enzyme                                           | Value     | Category |
|------------------------------|-----------|-----------|--------------------------------------------------|-----------|----------|
| siRNA-Vinblastine Run1-DMSO  | NM_007120 | UGT1A4    | UDP glycosyltransferase 1 family, polypeptide A4 | 3.2658    | Inlier   |
| siRNA-Temozolomide Run3-DMSO | NM_001072 | UGT1A6    | UDP glycosyltransferase 1 family, polypeptide A6 | -1.440102 | Inlier   |
| siRNA-Temozolomide Run1-DMSO | NM_001072 | UGT1A6    | UDP glycosyltransferase 1 family, polypeptide A6 | -1.360291 | Inlier   |
| siRNA Disorazole DMSO Run1   | NM_001072 | UGT1A6    | UDP glycosyltransferase 1 family, polypeptide A6 | -0.428077 | Inlier   |
| siRNA-Temozolomide Run2-DMSO | NM_001072 | UGT1A6    | UDP glycosyltransferase 1 family, polypeptide A6 | -0.087127 | Inlier   |
| siRNA-Vinblastine Run2-DMSO  | NM_001072 | UGT1A6    | UDP glycosyltransferase 1 family, polypeptide A6 | 0.087127  | Inlier   |
| siRNA Disorazole DMSO Run2   | NM_001072 | UGT1A6    | UDP glycosyltransferase 1 family, polypeptide A6 | 0.152656  | Inlier   |
| siRNA Disorazole DMSO Run3   | NM_001072 | UGT1A6    | UDP glycosyltransferase 1 family, polypeptide A6 | 0.920923  | Inlier   |

Identification of Survival Genes in Human Glioblastoma Cells Using siRNA Screening  
 Nikhil G Thaker, Fang Zhang, Peter R. McDonald, Tong Ying Shun, Michael D Lewen, Ian F. Pollack, and John S. Lazo

Molecular Pharmacology

| siRNA Treatment              | Gene ID   | Gene Name | Family                                           | Value     | Category |
|------------------------------|-----------|-----------|--------------------------------------------------|-----------|----------|
| siRNA-Vinblastine Run1-DMSO  | NM_001072 | UGT1A6    | UDP glycosyltransferase 1 family, polypeptide A6 | 1.664075  | Inlier   |
| siRNA-Temozolomide Run2-DMSO | NM_019077 | UGT1A7    | UDP glycosyltransferase 1 family, polypeptide A7 | -1.740916 | Inlier   |
| siRNA Disorazole DMSO Run1   | NM_019077 | UGT1A7    | UDP glycosyltransferase 1 family, polypeptide A7 | -1.588691 | Inlier   |
| siRNA-Temozolomide Run1-DMSO | NM_019077 | UGT1A7    | UDP glycosyltransferase 1 family, polypeptide A7 | -0.567347 | Inlier   |
| siRNA Disorazole DMSO Run3   | NM_019077 | UGT1A7    | UDP glycosyltransferase 1 family, polypeptide A7 | -0.068825 | Inlier   |
| siRNA-Vinblastine Run2-DMSO  | NM_019077 | UGT1A7    | UDP glycosyltransferase 1 family, polypeptide A7 | 0.068825  | Inlier   |
| siRNA-Temozolomide Run3-DMSO | NM_019077 | UGT1A7    | UDP glycosyltransferase 1 family, polypeptide A7 | 0.113103  | Inlier   |
| siRNA Disorazole DMSO Run2   | NM_019077 | UGT1A7    | UDP glycosyltransferase 1 family, polypeptide A7 | 0.781653  | Inlier   |

Identification of Survival Genes in Human Glioblastoma Cells Using siRNA Screening  
 Nikhil G Thaker, Fang Zhang, Peter R. McDonald, Tong Ying Shun, Michael D Lewen, Ian F. Pollack, and John S. Lazo

Molecular Pharmacology

| siRNA Treatment              | Gene ID   | Gene Name | Gene Description                                 | Log2 Fold Change | Outlier Status |
|------------------------------|-----------|-----------|--------------------------------------------------|------------------|----------------|
| siRNA-Vinblastine Run1-DMSO  | NM_019077 | UGT1A7    | UDP glycosyltransferase 1 family, polypeptide A7 | 1.479699         | Inlier         |
| siRNA Disorazole DMSO Run1   | NM_019076 | UGT1A8    | UDP glycosyltransferase 1 family, polypeptide A8 | -2.475955        | Inlier         |
| siRNA-Vinblastine Run2-DMSO  | NM_019076 | UGT1A8    | UDP glycosyltransferase 1 family, polypeptide A8 | -0.806123        | Inlier         |
| siRNA-Temozolomide Run2-DMSO | NM_019076 | UGT1A8    | UDP glycosyltransferase 1 family, polypeptide A8 | -0.429259        | Inlier         |
| siRNA-Temozolomide Run1-DMSO | NM_019076 | UGT1A8    | UDP glycosyltransferase 1 family, polypeptide A8 | -0.26397         | Inlier         |
| siRNA-Temozolomide Run3-DMSO | NM_019076 | UGT1A8    | UDP glycosyltransferase 1 family, polypeptide A8 | 0.26397          | Inlier         |
| siRNA Disorazole DMSO Run2   | NM_019076 | UGT1A8    | UDP glycosyltransferase 1 family, polypeptide A8 | 0.542877         | Inlier         |
| siRNA-Vinblastine Run1-DMSO  | NM_019076 | UGT1A8    | UDP glycosyltransferase 1 family, polypeptide A8 | 2.541855         | Inlier         |



Identification of Survival Genes in Human Glioblastoma Cells Using siRNA Screening

Nikhil G Thaker, Fang Zhang, Peter R. McDonald, Tong Ying Shun, Michael D Lewen, Ian F. Pollack, and John S.

Lazo

Molecular Pharmacology

|                              |           |        |                                                  |           |        |
|------------------------------|-----------|--------|--------------------------------------------------|-----------|--------|
| siRNA-Vinblastine Run1-DMSO  | NM_021027 | UGT1A9 | UDP glycosyltransferase 1 family, polypeptide A9 | 2.204736  | Inlier |
| siRNA-Vinblastine Run2-DMSO  | NM_006798 | UGT2A1 | UDP glycosyltransferase 2 family, polypeptide A1 | -1.01616  | Inlier |
| siRNA Disorazole DMSO Run1   | NM_006798 | UGT2A1 | UDP glycosyltransferase 2 family, polypeptide A1 | -0.912195 | Inlier |
| siRNA Disorazole DMSO Run3   | NM_006798 | UGT2A1 | UDP glycosyltransferase 2 family, polypeptide A1 | -0.735567 | Inlier |
| siRNA-Temozolomide Run2-DMSO | NM_006798 | UGT2A1 | UDP glycosyltransferase 2 family, polypeptide A1 | -0.310977 | Inlier |
| siRNA-Temozolomide Run1-DMSO | NM_006798 | UGT2A1 | UDP glycosyltransferase 2 family, polypeptide A1 | 0.310977  | Inlier |
| siRNA-Temozolomide Run3-DMSO | NM_006798 | UGT2A1 | UDP glycosyltransferase 2 family, polypeptide A1 | 0.565523  | Inlier |
| siRNA Disorazole DMSO Run2   | NM_006798 | UGT2A1 | UDP glycosyltransferase 2 family, polypeptide A1 | 0.613433  | Inlier |

Identification of Survival Genes in Human Glioblastoma Cells Using siRNA Screening  
 Nikhil G Thaker, Fang Zhang, Peter R. McDonald, Tong Ying Shun, Michael D Lewen, Ian F. Pollack, and John S. Lazo

Molecular Pharmacology

|                              |           |         |                                                   |           |        |
|------------------------------|-----------|---------|---------------------------------------------------|-----------|--------|
| siRNA-Vinblastine Run1-DMSO  | NM_006798 | UGT2A1  | UDP glycosyltransferase 2 family, polypeptide A1  | 1.778724  | Inlier |
| siRNA-Temozolomide Run2-DMSO | NM_001075 | UGT2B10 | UDP glycosyltransferase 2 family, polypeptide B10 | -0.862987 | Inlier |
| siRNA-Temozolomide Run1-DMSO | NM_001075 | UGT2B10 | UDP glycosyltransferase 2 family, polypeptide B10 | -0.836525 | Inlier |
| siRNA-Vinblastine Run2-DMSO  | NM_001075 | UGT2B10 | UDP glycosyltransferase 2 family, polypeptide B10 | -0.267897 | Inlier |
| siRNA Disorazole DMSO Run1   | NM_001075 | UGT2B10 | UDP glycosyltransferase 2 family, polypeptide B10 | -0.229992 | Inlier |
| siRNA Disorazole DMSO Run3   | NM_001075 | UGT2B10 | UDP glycosyltransferase 2 family, polypeptide B10 | 0.229992  | Inlier |
| siRNA-Temozolomide Run3-DMSO | NM_001075 | UGT2B10 | UDP glycosyltransferase 2 family, polypeptide B10 | 0.512475  | Inlier |
| siRNA Disorazole DMSO Run2   | NM_001075 | UGT2B10 | UDP glycosyltransferase 2 family, polypeptide B10 | 1.878531  | Inlier |



Identification of Survival Genes in Human Glioblastoma Cells Using siRNA Screening

Nikhil G Thaker, Fang Zhang, Peter R. McDonald, Tong Ying Shun, Michael D Lewen, Ian F. Pollack, and John S. Lazo

Molecular Pharmacology

| siRNA Treatment              | Gene ID   | Gene Name                                         | Enzyme  | Value     | Category |
|------------------------------|-----------|---------------------------------------------------|---------|-----------|----------|
| siRNA-Vinblastine Run1-DMSO  | NM_001075 | UDP glycosyltransferase 2 family, polypeptide B10 | UGT2B10 | 3.446896  | Inlier   |
| siRNA-Temozolomide Run2-DMSO | NM_001073 | UDP glycosyltransferase 2 family, polypeptide B11 | UGT2B11 | -3.779981 | Outlier  |
| siRNA Disorazole DMSO Run3   | NM_001073 | UDP glycosyltransferase 2 family, polypeptide B11 | UGT2B11 | -1.008631 | Inlier   |
| siRNA-Temozolomide Run1-DMSO | NM_001073 | UDP glycosyltransferase 2 family, polypeptide B11 | UGT2B11 | -0.340369 | Inlier   |
| siRNA-Vinblastine Run2-DMSO  | NM_001073 | UDP glycosyltransferase 2 family, polypeptide B11 | UGT2B11 | -0.15327  | Inlier   |
| siRNA Disorazole DMSO Run1   | NM_001073 | UDP glycosyltransferase 2 family, polypeptide B11 | UGT2B11 | 0.15327   | Inlier   |
| siRNA-Temozolomide Run3-DMSO | NM_001073 | UDP glycosyltransferase 2 family, polypeptide B11 | UGT2B11 | 0.320846  | Inlier   |
| siRNA Disorazole DMSO Run2   | NM_001073 | UDP glycosyltransferase 2 family, polypeptide B11 | UGT2B11 | 3.736657  | Outlier  |

Identification of Survival Genes in Human Glioblastoma Cells Using siRNA Screening  
 Nikhil G Thaker, Fang Zhang, Peter R. McDonald, Tong Ying Shun, Michael D Lewen, Ian F. Pollack, and John S. Lazo

Molecular Pharmacology

| siRNA Treatment              | Gene ID   | Gene Name | Protein Name                                      | Log2 Fold Change | Significance |
|------------------------------|-----------|-----------|---------------------------------------------------|------------------|--------------|
| siRNA-Vinblastine Run1-DMSO  | NM_001073 | UGT2B11   | UDP glycosyltransferase 2 family, polypeptide B11 | 6.593152         | Outlier      |
| siRNA-Temozolomide Run2-DMSO | NM_001076 | UGT2B15   | UDP glycosyltransferase 2 family, polypeptide B15 | -1.311347        | Inlier       |
| siRNA-Temozolomide Run1-DMSO | NM_001076 | UGT2B15   | UDP glycosyltransferase 2 family, polypeptide B15 | -0.283413        | Inlier       |
| siRNA-Temozolomide Run3-DMSO | NM_001076 | UGT2B15   | UDP glycosyltransferase 2 family, polypeptide B15 | -0.246209        | Inlier       |
| siRNA-Vinblastine Run2-DMSO  | NM_001076 | UGT2B15   | UDP glycosyltransferase 2 family, polypeptide B15 | -0.038801        | Inlier       |
| siRNA Disorazole DMSO Run1   | NM_001076 | UGT2B15   | UDP glycosyltransferase 2 family, polypeptide B15 | 0.038801         | Inlier       |
| siRNA Disorazole DMSO Run3   | NM_001076 | UGT2B15   | UDP glycosyltransferase 2 family, polypeptide B15 | 1.065587         | Inlier       |
| siRNA Disorazole DMSO Run2   | NM_001076 | UGT2B15   | UDP glycosyltransferase 2 family, polypeptide B15 | 2.095365         | Inlier       |

Identification of Survival Genes in Human Glioblastoma Cells Using siRNA Screening

Nikhil G Thaker, Fang Zhang, Peter R. McDonald, Tong Ying Shun, Michael D Lewen, Ian F. Pollack, and John S.

Lazo

Molecular Pharmacology

| siRNA Treatment              | Gene ID   | Gene Name | Protein Name                                      | Value     | Category |
|------------------------------|-----------|-----------|---------------------------------------------------|-----------|----------|
| siRNA-Vinblastine Run1-DMSO  | NM_001076 | UGT2B15   | UDP glycosyltransferase 2 family, polypeptide B15 | 3.69096   | Outlier  |
| siRNA-Temozolomide Run1-DMSO | NM_001077 | UGT2B17   | UDP glycosyltransferase 2 family, polypeptide B17 | -1.237706 | Inlier   |
| siRNA-Temozolomide Run3-DMSO | NM_001077 | UGT2B17   | UDP glycosyltransferase 2 family, polypeptide B17 | -1.036036 | Inlier   |
| siRNA-Temozolomide Run2-DMSO | NM_001077 | UGT2B17   | UDP glycosyltransferase 2 family, polypeptide B17 | -0.154461 | Inlier   |
| siRNA Disorazole DMSO Run1   | NM_001077 | UGT2B17   | UDP glycosyltransferase 2 family, polypeptide B17 | -0.135138 | Inlier   |
| siRNA Disorazole DMSO Run2   | NM_001077 | UGT2B17   | UDP glycosyltransferase 2 family, polypeptide B17 | 0.135137  | Inlier   |
| siRNA Disorazole DMSO Run3   | NM_001077 | UGT2B17   | UDP glycosyltransferase 2 family, polypeptide B17 | 0.312964  | Inlier   |
| siRNA-Vinblastine Run2-DMSO  | NM_001077 | UGT2B17   | UDP glycosyltransferase 2 family, polypeptide B17 | 1.855465  | Inlier   |

Identification of Survival Genes in Human Glioblastoma Cells Using siRNA Screening  
 Nikhil G Thaker, Fang Zhang, Peter R. McDonald, Tong Ying Shun, Michael D Lewen, Ian F. Pollack, and John S. Lazo

Molecular Pharmacology

| siRNA Treatment              | Gene ID   | Gene Name | Protein Name                                      | Log2 Fold Change | Outlier Status |
|------------------------------|-----------|-----------|---------------------------------------------------|------------------|----------------|
| siRNA-Vinblastine Run1-DMSO  | NM_001077 | UGT2B17   | UDP glycosyltransferase 2 family, polypeptide B17 | 2.182096         | Inlier         |
| siRNA-Temozolomide Run2-DMSO | NM_053039 | UGT2B28   | UDP glycosyltransferase 2 family, polypeptide B28 | -1.673976        | Inlier         |
| siRNA-Temozolomide Run1-DMSO | NM_053039 | UGT2B28   | UDP glycosyltransferase 2 family, polypeptide B28 | -1.466674        | Inlier         |
| siRNA-Temozolomide Run3-DMSO | NM_053039 | UGT2B28   | UDP glycosyltransferase 2 family, polypeptide B28 | -0.724791        | Inlier         |
| siRNA-Vinblastine Run2-DMSO  | NM_053039 | UGT2B28   | UDP glycosyltransferase 2 family, polypeptide B28 | -0.005544        | Inlier         |
| siRNA Disorazole DMSO Run1   | NM_053039 | UGT2B28   | UDP glycosyltransferase 2 family, polypeptide B28 | 0.005544         | Inlier         |
| siRNA Disorazole DMSO Run3   | NM_053039 | UGT2B28   | UDP glycosyltransferase 2 family, polypeptide B28 | 0.088237         | Inlier         |
| siRNA Disorazole DMSO Run2   | NM_053039 | UGT2B28   | UDP glycosyltransferase 2 family, polypeptide B28 | 0.624209         | Inlier         |

Identification of Survival Genes in Human Glioblastoma Cells Using siRNA Screening

Nikhil G Thaker, Fang Zhang, Peter R. McDonald, Tong Ying Shun, Michael D Lewen, Ian F. Pollack, and John S. Lazo

Molecular Pharmacology

| siRNA Treatment              | Gene ID   | Gene Name | Gene Description                                  | Value     | Category |
|------------------------------|-----------|-----------|---------------------------------------------------|-----------|----------|
| siRNA-Vinblastine Run1-DMSO  | NM_053039 | UGT2B28   | UDP glycosyltransferase 2 family, polypeptide B28 | 0.87528   | Inlier   |
| siRNA-Temozolomide Run3-DMSO | NM_021139 | UGT2B4    | UDP glycosyltransferase 2 family, polypeptide B4  | -0.947498 | Inlier   |
| siRNA Disorazole DMSO Run1   | NM_021139 | UGT2B4    | UDP glycosyltransferase 2 family, polypeptide B4  | -0.650818 | Inlier   |
| siRNA-Vinblastine Run1-DMSO  | NM_021139 | UGT2B4    | UDP glycosyltransferase 2 family, polypeptide B4  | -0.117151 | Inlier   |
| siRNA-Vinblastine Run2-DMSO  | NM_021139 | UGT2B4    | UDP glycosyltransferase 2 family, polypeptide B4  | -0.057215 | Inlier   |
| siRNA-Temozolomide Run2-DMSO | NM_021139 | UGT2B4    | UDP glycosyltransferase 2 family, polypeptide B4  | 0.057214  | Inlier   |
| siRNA Disorazole DMSO Run2   | NM_021139 | UGT2B4    | UDP glycosyltransferase 2 family, polypeptide B4  | 0.698182  | Inlier   |
| siRNA-Temozolomide Run1-DMSO | NM_021139 | UGT2B4    | UDP glycosyltransferase 2 family, polypeptide B4  | 0.948865  | Inlier   |

Identification of Survival Genes in Human Glioblastoma Cells Using siRNA Screening  
 Nikhil G Thaker, Fang Zhang, Peter R. McDonald, Tong Ying Shun, Michael D Lewen, Ian F. Pollack, and John S. Lazo

Molecular Pharmacology

| siRNA              | Condition | Run  | Gene   | Accession | Gene Description                                 | Value     | Category |
|--------------------|-----------|------|--------|-----------|--------------------------------------------------|-----------|----------|
| siRNA Disorazole   | DMSO      | Run3 | UGT2B4 | NM_021139 | UDP glycosyltransferase 2 family, polypeptide B4 | 1.620341  | Inlier   |
| siRNA-Temozolomide | Run1-DMSO |      | UGT2B7 | NM_001074 | UDP glycosyltransferase 2 family, polypeptide B7 | -0.699396 | Inlier   |
| siRNA-Temozolomide | Run2-DMSO |      | UGT2B7 | NM_001074 | UDP glycosyltransferase 2 family, polypeptide B7 | -0.649604 | Inlier   |
| siRNA-Vinblastine  | Run2-DMSO |      | UGT2B7 | NM_001074 | UDP glycosyltransferase 2 family, polypeptide B7 | -0.213135 | Inlier   |
| siRNA Disorazole   | DMSO      | Run3 | UGT2B7 | NM_001074 | UDP glycosyltransferase 2 family, polypeptide B7 | -0.184466 | Inlier   |
| siRNA Disorazole   | DMSO      | Run1 | UGT2B7 | NM_001074 | UDP glycosyltransferase 2 family, polypeptide B7 | 0.184466  | Inlier   |
| siRNA-Temozolomide | Run3-DMSO |      | UGT2B7 | NM_001074 | UDP glycosyltransferase 2 family, polypeptide B7 | 0.718311  | Inlier   |
| siRNA Disorazole   | DMSO      | Run2 | UGT2B7 | NM_001074 | UDP glycosyltransferase 2 family, polypeptide B7 | 1.304474  | Inlier   |

Identification of Survival Genes in Human Glioblastoma Cells Using siRNA Screening  
 Nikhil G Thaker, Fang Zhang, Peter R. McDonald, Tong Ying Shun, Michael D Lewen, Ian F. Pollack, and John S. Lazo

Molecular Pharmacology

| siRNA Treatment              | Gene ID   | Gene Name | Enzyme                                                                   | Value     | Inlier |
|------------------------------|-----------|-----------|--------------------------------------------------------------------------|-----------|--------|
| siRNA-Vinblastine Run1-DMSO  | NM_001074 | UGT2B7    | UDP glycosyltransferase 2 family, polypeptide B7                         | 1.657918  | Inlier |
| siRNA Disorazole DMSO Run1   | NM_003360 | UGT8      | UDP glycosyltransferase 8 (UDP-galactose ceramide galactosyltransferase) | -2.382647 | Inlier |
| siRNA-Vinblastine Run2-DMSO  | NM_003360 | UGT8      | UDP glycosyltransferase 8 (UDP-galactose ceramide galactosyltransferase) | -0.48036  | Inlier |
| siRNA-Temozolomide Run1-DMSO | NM_003360 | UGT8      | UDP glycosyltransferase 8 (UDP-galactose ceramide galactosyltransferase) | -0.127841 | Inlier |
| siRNA Disorazole DMSO Run3   | NM_003360 | UGT8      | UDP glycosyltransferase 8 (UDP-galactose ceramide galactosyltransferase) | -0.034677 | Inlier |
| siRNA-Temozolomide Run2-DMSO | NM_003360 | UGT8      | UDP glycosyltransferase 8 (UDP-galactose ceramide galactosyltransferase) | 0.034677  | Inlier |

Identification of Survival Genes in Human Glioblastoma Cells Using siRNA Screening  
 Nikhil G Thaker, Fang Zhang, Peter R. McDonald, Tong Ying Shun, Michael D Lewen, Ian F. Pollack, and John S. Lazo

Molecular Pharmacology

|                              |           |      |                                                                          |           |        |
|------------------------------|-----------|------|--------------------------------------------------------------------------|-----------|--------|
| siRNA-Temozolomide Run3-DMSO | NM_003360 | UGT8 | UDP glycosyltransferase 8 (UDP-galactose ceramide galactosyltransferase) | 0.86864   | Inlier |
| siRNA Disorazole DMSO Run2   | NM_003360 | UGT8 | UDP glycosyltransferase 8 (UDP-galactose ceramide galactosyltransferase) | 1.257329  | Inlier |
| siRNA-Vinblastine Run1-DMSO  | NM_003360 | UGT8 | UDP glycosyltransferase 8 (UDP-galactose ceramide galactosyltransferase) | 2.838679  | Inlier |
| siRNA Disorazole DMSO Run2   | NM_003565 | ULK1 | unc-51-like kinase 1 (C. elegans)                                        | -1.413452 | Inlier |
| siRNA-Temozolomide Run1-DMSO | NM_003565 | ULK1 | unc-51-like kinase 1 (C. elegans)                                        | -1.301653 | Inlier |
| siRNA-Temozolomide Run2-DMSO | NM_003565 | ULK1 | unc-51-like kinase 1 (C. elegans)                                        | -0.774927 | Inlier |
| siRNA-Temozolomide Run3-DMSO | NM_003565 | ULK1 | unc-51-like kinase 1 (C. elegans)                                        | -0.380328 | Inlier |
| siRNA-Vinblastine Run1-DMSO  | NM_003565 | ULK1 | unc-51-like kinase 1 (C. elegans)                                        | 0.380328  | Inlier |



Identification of Survival Genes in Human Glioblastoma Cells Using siRNA Screening  
 Nikhil G Thaker, Fang Zhang, Peter R. McDonald, Tong Ying Shun, Michael D Lewen, Ian F. Pollack, and John S. Lazo  
 Molecular Pharmacology

|                              |               |      |                                   |           |        |
|------------------------------|---------------|------|-----------------------------------|-----------|--------|
| siRNA-Vinblastine Run2-DMSO  | NM_0035<br>65 | ULK1 | unc-51-like kinase 1 (C. elegans) | 0.433483  | Inlier |
| siRNA Disorazole DMSO Run1   | NM_0035<br>65 | ULK1 | unc-51-like kinase 1 (C. elegans) | 0.574073  | Inlier |
| siRNA Disorazole DMSO Run3   | NM_0035<br>65 | ULK1 | unc-51-like kinase 1 (C. elegans) | 0.992415  | Inlier |
| siRNA-Temozolomide Run3-DMSO | NM_0146<br>83 | ULK2 | unc-51-like kinase 2 (C. elegans) | -0.740021 | Inlier |
| siRNA-Temozolomide Run2-DMSO | NM_0146<br>83 | ULK2 | unc-51-like kinase 2 (C. elegans) | -0.608979 | Inlier |
| siRNA-Temozolomide Run1-DMSO | NM_0146<br>83 | ULK2 | unc-51-like kinase 2 (C. elegans) | -0.555807 | Inlier |
| siRNA Disorazole DMSO Run2   | NM_0146<br>83 | ULK2 | unc-51-like kinase 2 (C. elegans) | -0.477929 | Inlier |
| siRNA Disorazole DMSO Run3   | NM_0146<br>83 | ULK2 | unc-51-like kinase 2 (C. elegans) | 0.477929  | Inlier |
| siRNA Disorazole DMSO Run1   | NM_0146<br>83 | ULK2 | unc-51-like kinase 2 (C. elegans) | 1.633956  | Inlier |
| siRNA-Vinblastine Run1-DMSO  | NM_0146<br>83 | ULK2 | unc-51-like kinase 2 (C. elegans) | 2.711088  | Inlier |

Identification of Survival Genes in Human Glioblastoma Cells Using siRNA Screening  
 Nikhil G Thaker, Fang Zhang, Peter R. McDonald, Tong Ying Shun, Michael D Lewen, Ian F. Pollack, and John S. Lazo  
 Molecular Pharmacology

|                              |               |          |                                                                                                     |           |         |
|------------------------------|---------------|----------|-----------------------------------------------------------------------------------------------------|-----------|---------|
| siRNA-Vinblastine Run2-DMSO  | NM_0146<br>83 | ULK2     | unc-51-like kinase 2 (C. elegans)                                                                   | 3.595309  | Outlier |
| siRNA Disorazole DMSO Run2   | NM_0163<br>08 | UMP-CMPK | cytidylate kinase                                                                                   | -3.386687 | Inlier  |
| siRNA-Temozolomide Run3-DMSO | NM_0163<br>08 | UMP-CMPK | cytidylate kinase                                                                                   | -3.18562  | Inlier  |
| siRNA-Temozolomide Run2-DMSO | NM_0163<br>08 | UMP-CMPK | cytidylate kinase                                                                                   | -0.936859 | Inlier  |
| siRNA Disorazole DMSO Run3   | NM_0163<br>08 | UMP-CMPK | cytidylate kinase                                                                                   | -0.024132 | Inlier  |
| siRNA-Temozolomide Run1-DMSO | NM_0163<br>08 | UMP-CMPK | cytidylate kinase                                                                                   | 0.024132  | Inlier  |
| siRNA Disorazole DMSO Run1   | NM_0163<br>08 | UMP-CMPK | cytidylate kinase                                                                                   | 0.518508  | Inlier  |
| siRNA-Vinblastine Run1-DMSO  | NM_0163<br>08 | UMP-CMPK | cytidylate kinase                                                                                   | 0.595462  | Inlier  |
| siRNA-Vinblastine Run2-DMSO  | NM_0163<br>08 | UMP-CMPK | cytidylate kinase                                                                                   | 0.753538  | Inlier  |
| siRNA-Temozolomide Run2-DMSO | NM_0003<br>73 | UMPS     | uridine monophosphate synthetase (orotate phosphoribosyl transferase and orotidine-5-decarboxylase) | -11.3824  | Outlier |
| siRNA Disorazole DMSO Run1   | NM_0003<br>73 | UMPS     | uridine monophosphate synthetase (orotate phosphoribosyl transferase and orotidine-5-decarboxylase) | -5.473431 | Outlier |

Identification of Survival Genes in Human Glioblastoma Cells Using siRNA Screening

Nikhil G Thaker, Fang Zhang, Peter R. McDonald, Tong Ying Shun, Michael D Lewen, Ian F. Pollack, and John S. Lazo

Molecular Pharmacology

|                                  |               |      |                                                                                                                                           |           |        |
|----------------------------------|---------------|------|-------------------------------------------------------------------------------------------------------------------------------------------|-----------|--------|
| siRNA Disorazole DMSO Run2       | NM_0003<br>73 | UMPS | uridine<br>monophos<br>phate<br>synthetase<br>(orotate<br>phosphori<br>bosyl<br>transferas<br>e and<br>orotidine-5-<br>decarboxyl<br>ase) | -0.481079 | Inlier |
| siRNA Disorazole DMSO Run3       | NM_0003<br>73 | UMPS | uridine<br>monophos<br>phate<br>synthetase<br>(orotate<br>phosphori<br>bosyl<br>transferas<br>e and<br>orotidine-5-<br>decarboxyl<br>ase) | -0.475347 | Inlier |
| siRNA-Temozolomide Run1-<br>DMSO | NM_0003<br>73 | UMPS | uridine<br>monophos<br>phate<br>synthetase<br>(orotate<br>phosphori<br>bosyl<br>transferas<br>e and<br>orotidine-5-<br>decarboxyl<br>ase) | 0.475347  | Inlier |
| siRNA-Vinblastine Run2-<br>DMSO  | NM_0003<br>73 | UMPS | uridine<br>monophos<br>phate<br>synthetase<br>(orotate<br>phosphori<br>bosyl<br>transferas<br>e and<br>orotidine-5-<br>decarboxyl<br>ase) | 0.54615   | Inlier |

Identification of Survival Genes in Human Glioblastoma Cells Using siRNA Screening  
 Nikhil G Thaker, Fang Zhang, Peter R. McDonald, Tong Ying Shun, Michael D Lewen, Ian F. Pollack, and John S. Lazo  
 Molecular Pharmacology

|                              |           |        |                                                                                                     |           |         |
|------------------------------|-----------|--------|-----------------------------------------------------------------------------------------------------|-----------|---------|
| siRNA-Temozolomide Run3-DMSO | NM_000373 | UMPS   | uridine monophosphate synthetase (orotate phosphoribosyl transferase and orotidine-5-decarboxylase) | 0.80285   | Inlier  |
| siRNA-Vinblastine Run1-DMSO  | NM_000373 | UMPS   | uridine monophosphate synthetase (orotate phosphoribosyl transferase and orotidine-5-decarboxylase) | 7.757367  | Outlier |
| siRNA-Temozolomide Run3-DMSO | NM_054035 | UNC119 | unc-119 homolog (C. elegans)                                                                        | -1.178314 | Inlier  |
| siRNA-Temozolomide Run2-DMSO | NM_054035 | UNC119 | unc-119 homolog (C. elegans)                                                                        | -0.515479 | Inlier  |
| siRNA Disorazole DMSO Run3   | NM_054035 | UNC119 | unc-119 homolog (C. elegans)                                                                        | -0.250168 | Inlier  |
| siRNA-Vinblastine Run2-DMSO  | NM_054035 | UNC119 | unc-119 homolog (C. elegans)                                                                        | -0.188243 | Inlier  |
| siRNA-Temozolomide Run1-DMSO | NM_054035 | UNC119 | unc-119 homolog (C. elegans)                                                                        | 0.188243  | Inlier  |
| siRNA Disorazole DMSO Run1   | NM_054035 | UNC119 | unc-119 homolog (C. elegans)                                                                        | 0.833521  | Inlier  |

Identification of Survival Genes in Human Glioblastoma Cells Using siRNA Screening  
 Nikhil G Thaker, Fang Zhang, Peter R. McDonald, Tong Ying Shun, Michael D Lewen, Ian F. Pollack, and John S. Lazo

Molecular Pharmacology

|                              |               |        |                              |                  |
|------------------------------|---------------|--------|------------------------------|------------------|
|                              |               |        | unc-119 homolog (C. elegans) |                  |
| siRNA Disorazole DMSO Run2   | NM_0540<br>35 | UNC119 | unc-119 homolog (C. elegans) | 4.086349 Outlier |
| siRNA-Vinblastine Run1-DMSO  | NM_0540<br>35 | UNC119 | unc-5 homolog C (C. elegans) | 4.162697 Outlier |
| siRNA-Temozolomide Run2-DMSO | NM_0037<br>28 | UNC5C  | unc-5 homolog C (C. elegans) | -3.173982 Inlier |
| siRNA-Temozolomide Run3-DMSO | NM_0037<br>28 | UNC5C  | unc-5 homolog C (C. elegans) | -3.134094 Inlier |
| siRNA-Vinblastine Run2-DMSO  | NM_0037<br>28 | UNC5C  | unc-5 homolog C (C. elegans) | -0.402439 Inlier |
| siRNA Disorazole DMSO Run3   | NM_0037<br>28 | UNC5C  | unc-5 homolog C (C. elegans) | -0.031507 Inlier |
| siRNA Disorazole DMSO Run1   | NM_0037<br>28 | UNC5C  | unc-5 homolog C (C. elegans) | 0.031506 Inlier  |
| siRNA-Temozolomide Run1-DMSO | NM_0037<br>28 | UNC5C  | unc-5 homolog C (C. elegans) | 0.186266 Inlier  |
| siRNA Disorazole DMSO Run2   | NM_0037<br>28 | UNC5C  | unc-5 homolog C (C. elegans) | 0.946561 Inlier  |
| siRNA-Vinblastine Run1-DMSO  | NM_0037<br>28 | UNC5C  | unc-5 homolog C (C. elegans) | 3.146029 Inlier  |
| siRNA Disorazole DMSO Run3   | NM_0809<br>11 | UNG    | uracil-DNA glycosylase       | -1.916442 Inlier |
| siRNA-Vinblastine Run1-DMSO  | NM_0809<br>11 | UNG    | uracil-DNA glycosylase       | -0.944828 Inlier |
| siRNA-Temozolomide Run3-DMSO | NM_0809<br>11 | UNG    | uracil-DNA glycosylase       | -0.494352 Inlier |

Identification of Survival Genes in Human Glioblastoma Cells Using siRNA Screening  
 Nikhil G Thaker, Fang Zhang, Peter R. McDonald, Tong Ying Shun, Michael D Lewen, Ian F. Pollack, and John S. Lazo  
 Molecular Pharmacology

|                              |                  |      |                                 |           |        |
|------------------------------|------------------|------|---------------------------------|-----------|--------|
| siRNA Disorazole DMSO Run2   | NM_0809<br>11    | UNG  | uracil-DNA<br>glycosylas<br>e   | -0.039497 | Inlier |
| siRNA-Vinblastine Run2-DMSO  | NM_0809<br>11    | UNG  | uracil-DNA<br>glycosylas<br>e   | 0.039497  | Inlier |
| siRNA Disorazole DMSO Run1   | NM_0809<br>11    | UNG  | uracil-DNA<br>glycosylas<br>e   | 0.65998   | Inlier |
| siRNA-Temozolomide Run2-DMSO | NM_0809<br>11    | UNG  | uracil-DNA<br>glycosylas<br>e   | 0.68902   | Inlier |
| siRNA-Temozolomide Run1-DMSO | NM_0809<br>11    | UNG  | uracil-DNA<br>glycosylas<br>e   | 1.287559  | Inlier |
| siRNA-Vinblastine Run2-DMSO  | NM_0010<br>24592 | UNG2 | uracil-DNA<br>glycosylas<br>e 2 | -2.921367 | Inlier |
| siRNA Disorazole DMSO Run3   | NM_0010<br>24592 | UNG2 | uracil-DNA<br>glycosylas<br>e 2 | -2.717101 | Inlier |
| siRNA-Temozolomide Run2-DMSO | NM_0010<br>24592 | UNG2 | uracil-DNA<br>glycosylas<br>e 2 | -0.624177 | Inlier |
| siRNA-Temozolomide Run3-DMSO | NM_0010<br>24592 | UNG2 | uracil-DNA<br>glycosylas<br>e 2 | -0.091587 | Inlier |
| siRNA Disorazole DMSO Run2   | NM_0010<br>24592 | UNG2 | uracil-DNA<br>glycosylas<br>e 2 | 0.091587  | Inlier |
| siRNA-Temozolomide Run1-DMSO | NM_0010<br>24592 | UNG2 | uracil-DNA<br>glycosylas<br>e 2 | 0.585711  | Inlier |
| siRNA Disorazole DMSO Run1   | NM_0010<br>24592 | UNG2 | uracil-DNA<br>glycosylas<br>e 2 | 0.724823  | Inlier |
| siRNA-Vinblastine Run1-DMSO  | NM_0010<br>24592 | UNG2 | uracil-DNA<br>glycosylas<br>e 2 | 1.159276  | Inlier |

Identification of Survival Genes in Human Glioblastoma Cells Using siRNA Screening  
 Nikhil G Thaker, Fang Zhang, Peter R. McDonald, Tong Ying Shun, Michael D Lewen, Ian F. Pollack, and John S. Lazo

|                              |               |         |                         |           |         |
|------------------------------|---------------|---------|-------------------------|-----------|---------|
| Molecular Pharmacology       | NM_1984       |         |                         |           |         |
| siRNA Disorazole DMSO Run3   | 64            | UNQ9391 | UNQ9391                 | -2.04614  | Inlier  |
| siRNA-Temozolomide Run3-DMSO | NM_1984<br>64 | UNQ9391 | UNQ9391                 | -2.022236 | Inlier  |
| siRNA Disorazole DMSO Run1   | NM_1984<br>64 | UNQ9391 | UNQ9391                 | -0.340875 | Inlier  |
| siRNA Disorazole DMSO Run2   | NM_1984<br>64 | UNQ9391 | UNQ9391                 | -0.144305 | Inlier  |
| siRNA-Temozolomide Run2-DMSO | NM_1984<br>64 | UNQ9391 | UNQ9391                 | 0.144305  | Inlier  |
| siRNA-Temozolomide Run1-DMSO | NM_1984<br>64 | UNQ9391 | UNQ9391                 | 0.21586   | Inlier  |
| siRNA-Vinblastine Run2-DMSO  | NM_1984<br>64 | UNQ9391 | UNQ9391                 | 1.008125  | Inlier  |
| siRNA-Vinblastine Run1-DMSO  | NM_1984<br>64 | UNQ9391 | UNQ9391                 | 1.768189  | Inlier  |
|                              |               |         | uridine phosphorylase 1 |           |         |
| siRNA Disorazole DMSO Run1   | NM_1815<br>97 | UPP1    | ase 1                   | -2.763445 | Inlier  |
| siRNA-Temozolomide Run2-DMSO | NM_1815<br>97 | UPP1    | uridine phosphorylase 1 | -0.642426 | Inlier  |
| siRNA-Temozolomide Run3-DMSO | NM_1815<br>97 | UPP1    | uridine phosphorylase 1 | -0.584327 | Inlier  |
| siRNA Disorazole DMSO Run3   | NM_1815<br>97 | UPP1    | uridine phosphorylase 1 | -0.039232 | Inlier  |
| siRNA-Vinblastine Run2-DMSO  | NM_1815<br>97 | UPP1    | uridine phosphorylase 1 | 0.039234  | Inlier  |
| siRNA-Temozolomide Run1-DMSO | NM_1815<br>97 | UPP1    | uridine phosphorylase 1 | 0.706574  | Inlier  |
| siRNA-Vinblastine Run1-DMSO  | NM_1815<br>97 | UPP1    | uridine phosphorylase 1 | 4.218447  | Outlier |
| siRNA Disorazole DMSO Run2   | NM_1815<br>97 | UPP1    | uridine phosphorylase 1 | 4.330699  | Outlier |
| siRNA Disorazole DMSO Run1   | NM_1733<br>55 | UPP2    | uridine phosphorylase 2 | -1.203165 | Inlier  |
| siRNA-Temozolomide Run3-DMSO | NM_1733<br>55 | UPP2    | uridine phosphorylase 2 | -1.040491 | Inlier  |
| siRNA-Temozolomide Run2-DMSO | NM_1733<br>55 | UPP2    | uridine phosphorylase 2 | -0.746404 | Inlier  |
| siRNA-Temozolomide Run1-DMSO | NM_1733<br>55 | UPP2    | uridine phosphorylase 2 | -0.259137 | Inlier  |

Identification of Survival Genes in Human Glioblastoma Cells Using siRNA Screening  
 Nikhil G Thaker, Fang Zhang, Peter R. McDonald, Tong Ying Shun, Michael D Lewen, Ian F. Pollack, and John S. Lazo

| Molecular Pharmacology       | siRNA         | Gene | Protein                                          | Value     | Outlier |
|------------------------------|---------------|------|--------------------------------------------------|-----------|---------|
| siRNA-Vinblastine Run2-DMSO  | NM_1733<br>55 | UPP2 | uridine phosphorylase 2                          | 0.259137  | Inlier  |
| siRNA Disorazole DMSO Run2   | NM_1733<br>55 | UPP2 | uridine phosphorylase 2                          | 0.38921   | Inlier  |
| siRNA-Vinblastine Run1-DMSO  | NM_1733<br>55 | UPP2 | uridine phosphorylase 2                          | 0.602596  | Inlier  |
| siRNA Disorazole DMSO Run3   | NM_1733<br>55 | UPP2 | uridine phosphorylase 2                          | 1.164797  | Inlier  |
| siRNA-Temozolomide Run3-DMSO | NM_0068<br>30 | UQCR | ubiquinol cytochrome c reductase, 6.4kDa subunit | -1.567818 | Inlier  |
| siRNA-Temozolomide Run2-DMSO | NM_0068<br>30 | UQCR | ubiquinol cytochrome c reductase, 6.4kDa subunit | -0.715355 | Inlier  |
| siRNA Disorazole DMSO Run3   | NM_0068<br>30 | UQCR | ubiquinol cytochrome c reductase, 6.4kDa subunit | -0.633645 | Inlier  |
| siRNA Disorazole DMSO Run1   | NM_0068<br>30 | UQCR | ubiquinol cytochrome c reductase, 6.4kDa subunit | -0.137897 | Inlier  |
| siRNA-Temozolomide Run1-DMSO | NM_0068<br>30 | UQCR | ubiquinol cytochrome c reductase, 6.4kDa subunit | 0.137897  | Inlier  |
| siRNA-Vinblastine Run2-DMSO  | NM_0068<br>30 | UQCR | ubiquinol cytochrome c reductase, 6.4kDa subunit | 0.405545  | Inlier  |



Identification of Survival Genes in Human Glioblastoma Cells Using siRNA Screening  
 Nikhil G Thaker, Fang Zhang, Peter R. McDonald, Tong Ying Shun, Michael D Lewen, Ian F. Pollack, and John S. Lazo

Molecular Pharmacology

| siRNA Treatment              | Gene ID   | Gene Name | Protein Name                                     | Score     | Category |
|------------------------------|-----------|-----------|--------------------------------------------------|-----------|----------|
| siRNA-Vinblastine Run1-DMSO  | NM_006830 | UQCR      | ubiquinol cytochrome c reductase, 6.4kDa subunit | 1.402783  | Inlier   |
| siRNA Disorazole DMSO Run2   | NM_006830 | UQCR      | ubiquinol cytochrome c reductase, 6.4kDa subunit | 2.128426  | Inlier   |
| siRNA-Temozolomide Run3-DMSO | NM_006294 | UQCRB     | ubiquinol-cytochrome c reductase binding protein | -1.357816 | Inlier   |
| siRNA-Temozolomide Run1-DMSO | NM_006294 | UQCRB     | ubiquinol-cytochrome c reductase binding protein | -0.634701 | Inlier   |
| siRNA Disorazole DMSO Run1   | NM_006294 | UQCRB     | ubiquinol-cytochrome c reductase binding protein | -0.553705 | Inlier   |
| siRNA-Temozolomide Run2-DMSO | NM_006294 | UQCRB     | ubiquinol-cytochrome c reductase binding protein | -0.015099 | Inlier   |
| siRNA Disorazole DMSO Run3   | NM_006294 | UQCRB     | ubiquinol-cytochrome c reductase binding protein | 0.015099  | Inlier   |
| siRNA-Vinblastine Run2-DMSO  | NM_006294 | UQCRB     | ubiquinol-cytochrome c reductase binding protein | 0.714299  | Inlier   |

Identification of Survival Genes in Human Glioblastoma Cells Using siRNA Screening  
 Nikhil G Thaker, Fang Zhang, Peter R. McDonald, Tong Ying Shun, Michael D Lewen, Ian F. Pollack, and John S. Lazo

Molecular Pharmacology

| siRNA Treatment              | Gene ID   | Gene Name | Log Fold Change | Classification |
|------------------------------|-----------|-----------|-----------------|----------------|
| siRNA-Vinblastine Run1-DMSO  | NM_006294 | UQCRB     | 1.493568        | Inlier         |
| siRNA Disorazole DMSO Run2   | NM_006294 | UQCRB     | 4.556748        | Outlier        |
| siRNA-Temozolomide Run3-DMSO | NM_003365 | UQCRC1    | -2.358513       | Inlier         |
| siRNA Disorazole DMSO Run2   | NM_003365 | UQCRC1    | -0.658795       | Inlier         |
| siRNA Disorazole DMSO Run3   | NM_003365 | UQCRC1    | -0.301812       | Inlier         |
| siRNA-Temozolomide Run2-DMSO | NM_003365 | UQCRC1    | -0.098711       | Inlier         |
| siRNA-Temozolomide Run1-DMSO | NM_003365 | UQCRC1    | 0.098711        | Inlier         |
| siRNA Disorazole DMSO Run1   | NM_003365 | UQCRC1    | 0.690205        | Inlier         |

ubiquinol-cytochrome c reductase binding protein  
 ubiquinol-cytochrome c reductase core protein I  
 ubiquinol-cytochrome c reductase core protein I

Identification of Survival Genes in Human Glioblastoma Cells Using siRNA Screening  
 Nikhil G Thaker, Fang Zhang, Peter R. McDonald, Tong Ying Shun, Michael D Lewen, Ian F. Pollack, and John S. Lazo

Molecular Pharmacology

|                              |           |        |                                                  |           |        |
|------------------------------|-----------|--------|--------------------------------------------------|-----------|--------|
| siRNA-Vinblastine Run1-DMSO  | NM_003365 | UQCRC1 | ubiquinol-cytochrome c reductase core protein I  | 1.743984  | Inlier |
| siRNA-Vinblastine Run2-DMSO  | NM_003365 | UQCRC1 | ubiquinol-cytochrome c reductase core protein I  | 1.95133   | Inlier |
| siRNA Disorazole DMSO Run2   | NM_003366 | UQCRC2 | ubiquinol-cytochrome c reductase core protein II | -1.741881 | Inlier |
| siRNA-Temozolomide Run3-DMSO | NM_003366 | UQCRC2 | ubiquinol-cytochrome c reductase core protein II | -1.326427 | Inlier |
| siRNA-Temozolomide Run2-DMSO | NM_003366 | UQCRC2 | ubiquinol-cytochrome c reductase core protein II | -0.716534 | Inlier |
| siRNA-Temozolomide Run1-DMSO | NM_003366 | UQCRC2 | ubiquinol-cytochrome c reductase core protein II | -0.011537 | Inlier |
| siRNA-Vinblastine Run2-DMSO  | NM_003366 | UQCRC2 | ubiquinol-cytochrome c reductase core protein II | 0.011538  | Inlier |
| siRNA Disorazole DMSO Run3   | NM_003366 | UQCRC2 | ubiquinol-cytochrome c reductase core protein II | 0.089174  | Inlier |

Identification of Survival Genes in Human Glioblastoma Cells Using siRNA Screening

Nikhil G Thaker, Fang Zhang, Peter R. McDonald, Tong Ying Shun, Michael D Lewen, Ian F. Pollack, and John S. Lazo

Molecular Pharmacology

| siRNA Treatment              | Gene ID   | Gene Name | Protein                                                            | Score     | Outlier Status |
|------------------------------|-----------|-----------|--------------------------------------------------------------------|-----------|----------------|
| siRNA Disorazole DMSO Run1   | NM_003366 | UQCRC2    | ubiquinol-cytochrome c reductase core protein II                   | 0.632466  | Inlier         |
| siRNA-Vinblastine Run1-DMSO  | NM_003366 | UQCRC2    | ubiquinol-cytochrome c reductase core protein II                   | 0.823874  | Inlier         |
| siRNA-Temozolomide Run3-DMSO | NM_006003 | UQCRFS1   | ubiquinol-cytochrome c reductase, Rieske iron-sulfur polypeptide 1 | -0.849716 | Inlier         |
| siRNA-Temozolomide Run2-DMSO | NM_006003 | UQCRFS1   | ubiquinol-cytochrome c reductase, Rieske iron-sulfur polypeptide 1 | -0.84747  | Inlier         |
| siRNA-Vinblastine Run2-DMSO  | NM_006003 | UQCRFS1   | ubiquinol-cytochrome c reductase, Rieske iron-sulfur polypeptide 1 | -0.50153  | Inlier         |
| siRNA Disorazole DMSO Run3   | NM_006003 | UQCRFS1   | ubiquinol-cytochrome c reductase, Rieske iron-sulfur polypeptide 1 | -0.013909 | Inlier         |
| siRNA Disorazole DMSO Run1   | NM_006003 | UQCRFS1   | ubiquinol-cytochrome c reductase, Rieske iron-sulfur polypeptide 1 | 0.013909  | Inlier         |

Identification of Survival Genes in Human Glioblastoma Cells Using siRNA Screening  
 Nikhil G Thaker, Fang Zhang, Peter R. McDonald, Tong Ying Shun, Michael D Lewen, Ian F. Pollack, and John S. Lazo

Molecular Pharmacology

|                              |           |         |                                                                    |           |        |
|------------------------------|-----------|---------|--------------------------------------------------------------------|-----------|--------|
| siRNA-Temozolomide Run1-DMSO | NM_006003 | UQCRFS1 | ubiquinol-cytochrome c reductase, Rieske iron-sulfur polypeptide 1 | 0.174406  | Inlier |
| siRNA-Vinblastine Run1-DMSO  | NM_006003 | UQCRFS1 | ubiquinol-cytochrome c reductase, Rieske iron-sulfur polypeptide 1 | 1.196051  | Inlier |
| siRNA Disorazole DMSO Run2   | NM_006003 | UQCRFS1 | ubiquinol-cytochrome c reductase, Rieske iron-sulfur polypeptide 1 | 1.716455  | Inlier |
| siRNA-Temozolomide Run3-DMSO | NM_006004 | UQCRH   | ubiquinol-cytochrome c reductase hinge protein                     | -1.162727 | Inlier |
| siRNA Disorazole DMSO Run1   | NM_006004 | UQCRH   | ubiquinol-cytochrome c reductase hinge protein                     | -0.760504 | Inlier |
| siRNA-Temozolomide Run2-DMSO | NM_006004 | UQCRH   | ubiquinol-cytochrome c reductase hinge protein                     | -0.588496 | Inlier |
| siRNA Disorazole DMSO Run3   | NM_006004 | UQCRH   | ubiquinol-cytochrome c reductase hinge protein                     | -0.045305 | Inlier |

Identification of Survival Genes in Human Glioblastoma Cells Using siRNA Screening  
 Nikhil G Thaker, Fang Zhang, Peter R. McDonald, Tong Ying Shun, Michael D Lewen, Ian F. Pollack, and John S. Lazo

Molecular Pharmacology

|                              |           |       |                                                                 |           |         |
|------------------------------|-----------|-------|-----------------------------------------------------------------|-----------|---------|
| siRNA-Vinblastine Run2-DMSO  | NM_006004 | UQCRH | ubiquinol-cytochrome c reductase hinge protein                  | 0.045305  | Inlier  |
| siRNA-Temozolomide Run1-DMSO | NM_006004 | UQCRH | ubiquinol-cytochrome c reductase hinge protein                  | 0.073471  | Inlier  |
| siRNA-Vinblastine Run1-DMSO  | NM_006004 | UQCRH | ubiquinol-cytochrome c reductase hinge protein                  | 1.474423  | Inlier  |
| siRNA Disorazole DMSO Run2   | NM_006004 | UQCRH | ubiquinol-cytochrome c reductase hinge protein uroporphyrinogen | 3.083646  | Inlier  |
| siRNA-Temozolomide Run3-DMSO | NM_000374 | UROD  | decarboxylase uroporphyrinogen                                  | -1.006075 | Inlier  |
| siRNA Disorazole DMSO Run3   | NM_000374 | UROD  | decarboxylase uroporphyrinogen                                  | -0.77535  | Inlier  |
| siRNA-Temozolomide Run1-DMSO | NM_000374 | UROD  | decarboxylase uroporphyrinogen                                  | -0.57365  | Inlier  |
| siRNA-Vinblastine Run2-DMSO  | NM_000374 | UROD  | decarboxylase uroporphyrinogen                                  | -0.313406 | Inlier  |
| siRNA-Temozolomide Run2-DMSO | NM_000374 | UROD  | decarboxylase uroporphyrinogen                                  | 0.313406  | Inlier  |
| siRNA Disorazole DMSO Run1   | NM_000374 | UROD  | decarboxylase uroporphyrinogen                                  | 0.572797  | Inlier  |
| siRNA Disorazole DMSO Run2   | NM_000374 | UROD  | decarboxylase                                                   | 5.601532  | Outlier |

Identification of Survival Genes in Human Glioblastoma Cells Using siRNA Screening

Nikhil G Thaker, Fang Zhang, Peter R. McDonald, Tong Ying Shun, Michael D Lewen, Ian F. Pollack, and John S. Lazo

Molecular Pharmacology

|                              |           |      |                                                                     |           |         |
|------------------------------|-----------|------|---------------------------------------------------------------------|-----------|---------|
| siRNA-Vinblastine Run1-DMSO  | NM_000374 | UROD | uroporphyrinogen decarboxylase                                      | 5.967105  | Outlier |
| siRNA Disorazole DMSO Run3   | NM_000375 | UROS | uroporphyrinogen III synthase (congenital erythropoietic porphyria) | -1.71627  | Inlier  |
| siRNA-Vinblastine Run2-DMSO  | NM_000375 | UROS | uroporphyrinogen III synthase (congenital erythropoietic porphyria) | -1.101923 | Inlier  |
| siRNA Disorazole DMSO Run1   | NM_000375 | UROS | uroporphyrinogen III synthase (congenital erythropoietic porphyria) | -0.218961 | Inlier  |
| siRNA-Temozolomide Run1-DMSO | NM_000375 | UROS | uroporphyrinogen III synthase (congenital erythropoietic porphyria) | -0.16229  | Inlier  |
| siRNA-Temozolomide Run3-DMSO | NM_000375 | UROS | uroporphyrinogen III synthase (congenital erythropoietic porphyria) | 0.162288  | Inlier  |
| siRNA-Temozolomide Run2-DMSO | NM_000375 | UROS | uroporphyrinogen III synthase (congenital erythropoietic porphyria) | 0.247077  | Inlier  |

Identification of Survival Genes in Human Glioblastoma Cells Using siRNA Screening  
 Nikhil G Thaker, Fang Zhang, Peter R. McDonald, Tong Ying Shun, Michael D Lewen, Ian F. Pollack, and John S. Lazo

Molecular Pharmacology

|                              |                  |       |                                                                     |           |         |
|------------------------------|------------------|-------|---------------------------------------------------------------------|-----------|---------|
| siRNA Disorazole DMSO Run2   | NM_0003<br>75    | UROS  | uroporphyrinogen III synthase (congenital erythropoietic porphyria) | 1.640011  | Inlier  |
| siRNA-Vinblastine Run1-DMSO  | NM_0003<br>75    | UROS  | uroporphyrinogen III synthase (congenital erythropoietic porphyria) | 4.187882  | Outlier |
| siRNA Disorazole DMSO Run2   | NM_0010<br>17416 | USP1  | ubiquitin specific protease 1                                       | -1.042027 | Inlier  |
| siRNA-Temozolomide Run3-DMSO | NM_0010<br>17416 | USP1  | ubiquitin specific protease 1                                       | -0.86987  | Inlier  |
| siRNA Disorazole DMSO Run3   | NM_0010<br>17416 | USP1  | ubiquitin specific protease 1                                       | -0.453522 | Inlier  |
| siRNA-Temozolomide Run2-DMSO | NM_0010<br>17416 | USP1  | ubiquitin specific protease 1                                       | -0.345497 | Inlier  |
| siRNA Disorazole DMSO Run1   | NM_0010<br>17416 | USP1  | ubiquitin specific protease 1                                       | 0.345496  | Inlier  |
| siRNA-Temozolomide Run1-DMSO | NM_0010<br>17416 | USP1  | ubiquitin specific protease 1                                       | 0.47913   | Inlier  |
| siRNA-Vinblastine Run2-DMSO  | NM_0010<br>17416 | USP1  | ubiquitin specific protease 1                                       | 0.975054  | Inlier  |
| siRNA-Vinblastine Run1-DMSO  | NM_0010<br>17416 | USP1  | ubiquitin specific protease 1                                       | 1.169066  | Inlier  |
| siRNA Disorazole DMSO Run2   | NM_0051<br>53    | USP10 | ubiquitin specific protease 10                                      | -1.187107 | Inlier  |



Identification of Survival Genes in Human Glioblastoma Cells Using siRNA Screening  
 Nikhil G Thaker, Fang Zhang, Peter R. McDonald, Tong Ying Shun, Michael D Lewen, Ian F. Pollack, and John S. Lazo

Molecular Pharmacology

|                              |               |       |                                         |           |        |
|------------------------------|---------------|-------|-----------------------------------------|-----------|--------|
| siRNA-Temozolomide Run3-DMSO | NM_0051<br>53 | USP10 | ubiquitin<br>specific<br>protease<br>10 | -0.909339 | Inlier |
| siRNA Disorazole DMSO Run3   | NM_0051<br>53 | USP10 | ubiquitin<br>specific<br>protease<br>10 | -0.445617 | Inlier |
| siRNA Disorazole DMSO Run1   | NM_0051<br>53 | USP10 | ubiquitin<br>specific<br>protease<br>10 | -0.081702 | Inlier |
| siRNA-Temozolomide Run1-DMSO | NM_0051<br>53 | USP10 | ubiquitin<br>specific<br>protease<br>10 | 0.081702  | Inlier |
| siRNA-Temozolomide Run2-DMSO | NM_0051<br>53 | USP10 | ubiquitin<br>specific<br>protease<br>10 | 0.365587  | Inlier |
| siRNA-Vinblastine Run1-DMSO  | NM_0051<br>53 | USP10 | ubiquitin<br>specific<br>protease<br>10 | 0.903383  | Inlier |
| siRNA-Vinblastine Run2-DMSO  | NM_0051<br>53 | USP10 | ubiquitin<br>specific<br>protease<br>10 | 1.346571  | Inlier |
| siRNA-Temozolomide Run3-DMSO | NM_0046<br>51 | USP11 | ubiquitin<br>specific<br>protease<br>11 | -1.233056 | Inlier |
| siRNA-Temozolomide Run2-DMSO | NM_0046<br>51 | USP11 | ubiquitin<br>specific<br>protease<br>11 | -0.735052 | Inlier |
| siRNA Disorazole DMSO Run2   | NM_0046<br>51 | USP11 | ubiquitin<br>specific<br>protease<br>11 | -0.548575 | Inlier |
| siRNA-Temozolomide Run1-DMSO | NM_0046<br>51 | USP11 | ubiquitin<br>specific<br>protease<br>11 | -0.069329 | Inlier |
| siRNA Disorazole DMSO Run1   | NM_0046<br>51 | USP11 | ubiquitin<br>specific<br>protease<br>11 | 0.069329  | Inlier |
| siRNA Disorazole DMSO Run3   | NM_0046<br>51 | USP11 | ubiquitin<br>specific<br>protease<br>11 | 0.613948  | Inlier |

Identification of Survival Genes in Human Glioblastoma Cells Using siRNA Screening  
 Nikhil G Thaker, Fang Zhang, Peter R. McDonald, Tong Ying Shun, Michael D Lewen, Ian F. Pollack, and John S. Lazo

Molecular Pharmacology

|                              |               |       |                                                   |           |        |
|------------------------------|---------------|-------|---------------------------------------------------|-----------|--------|
| siRNA-Vinblastine Run2-DMSO  | NM_0046<br>51 | USP11 | ubiquitin specific protease 11                    | 1.055711  | Inlier |
| siRNA-Vinblastine Run1-DMSO  | NM_0046<br>51 | USP11 | ubiquitin specific protease 11                    | 1.079291  | Inlier |
| siRNA Disorazole DMSO Run2   | NM_1824<br>88 | USP12 | ubiquitin specific protease 12                    | -1.04604  | Inlier |
| siRNA-Temozolomide Run3-DMSO | NM_1824<br>88 | USP12 | ubiquitin specific protease 12                    | -0.781287 | Inlier |
| siRNA-Temozolomide Run2-DMSO | NM_1824<br>88 | USP12 | ubiquitin specific protease 12                    | -0.162299 | Inlier |
| siRNA-Temozolomide Run1-DMSO | NM_1824<br>88 | USP12 | ubiquitin specific protease 12                    | -0.155598 | Inlier |
| siRNA Disorazole DMSO Run1   | NM_1824<br>88 | USP12 | ubiquitin specific protease 12                    | 0.155598  | Inlier |
| siRNA-Vinblastine Run1-DMSO  | NM_1824<br>88 | USP12 | ubiquitin specific protease 12                    | 0.567713  | Inlier |
| siRNA-Vinblastine Run2-DMSO  | NM_1824<br>88 | USP12 | ubiquitin specific protease 12                    | 1.145917  | Inlier |
| siRNA Disorazole DMSO Run3   | NM_1824<br>88 | USP12 | ubiquitin specific protease 12                    | 1.249846  | Inlier |
| siRNA Disorazole DMSO Run1   | NM_0039<br>40 | USP13 | ubiquitin specific protease 13 (isopeptidase T-3) | -1.412756 | Inlier |
| siRNA-Temozolomide Run2-DMSO | NM_0039<br>40 | USP13 | ubiquitin specific protease 13 (isopeptidase T-3) | -1.104044 | Inlier |

Identification of Survival Genes in Human Glioblastoma Cells Using siRNA Screening

Nikhil G Thaker, Fang Zhang, Peter R. McDonald, Tong Ying Shun, Michael D Lewen, Ian F. Pollack, and John S. Lazo

Molecular Pharmacology

|                              |               |       |                                                                |           |        |
|------------------------------|---------------|-------|----------------------------------------------------------------|-----------|--------|
| siRNA-Temozolomide Run3-DMSO | NM_0039<br>40 | USP13 | ubiquitin specific protease 13 (isopeptidase T-3)              | -1.011114 | Inlier |
| siRNA-Temozolomide Run1-DMSO | NM_0039<br>40 | USP13 | ubiquitin specific protease 13 (isopeptidase T-3)              | -0.1488   | Inlier |
| siRNA-Vinblastine Run1-DMSO  | NM_0039<br>40 | USP13 | ubiquitin specific protease 13 (isopeptidase T-3)              | 0.1488    | Inlier |
| siRNA-Vinblastine Run2-DMSO  | NM_0039<br>40 | USP13 | ubiquitin specific protease 13 (isopeptidase T-3)              | 0.555338  | Inlier |
| siRNA Disorazole DMSO Run3   | NM_0039<br>40 | USP13 | ubiquitin specific protease 13 (isopeptidase T-3)              | 0.579697  | Inlier |
| siRNA Disorazole DMSO Run2   | NM_0039<br>40 | USP13 | ubiquitin specific protease 13 (isopeptidase T-3)              | 0.769304  | Inlier |
| siRNA Disorazole DMSO Run2   | NM_0051<br>51 | USP14 | ubiquitin specific protease 14 (tRNA-guanine transglycosylase) | -1.754505 | Inlier |
| siRNA Disorazole DMSO Run1   | NM_0051<br>51 | USP14 | ubiquitin specific protease 14 (tRNA-guanine transglycosylase) | -1.382899 | Inlier |

Identification of Survival Genes in Human Glioblastoma Cells Using siRNA Screening  
 Nikhil G Thaker, Fang Zhang, Peter R. McDonald, Tong Ying Shun, Michael D Lewen, Ian F. Pollack, and John S. Lazo

Molecular Pharmacology

|                              |               |       |                                                                                    |           |        |
|------------------------------|---------------|-------|------------------------------------------------------------------------------------|-----------|--------|
| siRNA-Temozolomide Run2-DMSO | NM_0051<br>51 | USP14 | ubiquitin<br>specific<br>protease<br>14 (tRNA-<br>guanine<br>transglyco<br>sylase) | -0.608078 | Inlier |
| siRNA-Temozolomide Run3-DMSO | NM_0051<br>51 | USP14 | ubiquitin<br>specific<br>protease<br>14 (tRNA-<br>guanine<br>transglyco<br>sylase) | -0.303146 | Inlier |
| siRNA-Vinblastine Run1-DMSO  | NM_0051<br>51 | USP14 | ubiquitin<br>specific<br>protease<br>14 (tRNA-<br>guanine<br>transglyco<br>sylase) | 0.303145  | Inlier |
| siRNA-Temozolomide Run1-DMSO | NM_0051<br>51 | USP14 | ubiquitin<br>specific<br>protease<br>14 (tRNA-<br>guanine<br>transglyco<br>sylase) | 0.313907  | Inlier |
| siRNA Disorazole DMSO Run3   | NM_0051<br>51 | USP14 | ubiquitin<br>specific<br>protease<br>14 (tRNA-<br>guanine<br>transglyco<br>sylase) | 0.740922  | Inlier |
| siRNA-Vinblastine Run2-DMSO  | NM_0051<br>51 | USP14 | ubiquitin<br>specific<br>protease<br>14 (tRNA-<br>guanine<br>transglyco<br>sylase) | 0.887545  | Inlier |
| siRNA-Temozolomide Run3-DMSO | NM_0063<br>13 | USP15 | ubiquitin<br>specific<br>protease<br>15                                            | -0.762002 | Inlier |
| siRNA Disorazole DMSO Run2   | NM_0063<br>13 | USP15 | ubiquitin<br>specific<br>protease<br>15                                            | -0.634423 | Inlier |

Identification of Survival Genes in Human Glioblastoma Cells Using siRNA Screening  
 Nikhil G Thaker, Fang Zhang, Peter R. McDonald, Tong Ying Shun, Michael D Lewen, Ian F. Pollack, and John S. Lazo

Molecular Pharmacology

| siRNA Treatment              | Gene ID       | Gene Name | Protein                        | Value     | Outlier Status |
|------------------------------|---------------|-----------|--------------------------------|-----------|----------------|
| siRNA-Temozolomide Run2-DMSO | NM_0063<br>13 | USP15     | ubiquitin specific protease 15 | -0.126012 | Inlier         |
| siRNA-Temozolomide Run1-DMSO | NM_0063<br>13 | USP15     | ubiquitin specific protease 15 | -0.092963 | Inlier         |
| siRNA Disorazole DMSO Run1   | NM_0063<br>13 | USP15     | ubiquitin specific protease 15 | 0.092962  | Inlier         |
| siRNA-Vinblastine Run1-DMSO  | NM_0063<br>13 | USP15     | ubiquitin specific protease 15 | 0.714577  | Inlier         |
| siRNA-Vinblastine Run2-DMSO  | NM_0063<br>13 | USP15     | ubiquitin specific protease 15 | 0.820353  | Inlier         |
| siRNA Disorazole DMSO Run3   | NM_0063<br>13 | USP15     | ubiquitin specific protease 15 | 0.920241  | Inlier         |
| siRNA Disorazole DMSO Run2   | NM_0064<br>47 | USP16     | ubiquitin specific protease 16 | -1.515695 | Inlier         |
| siRNA-Temozolomide Run3-DMSO | NM_0064<br>47 | USP16     | ubiquitin specific protease 16 | -1.293911 | Inlier         |
| siRNA Disorazole DMSO Run1   | NM_0064<br>47 | USP16     | ubiquitin specific protease 16 | -0.336655 | Inlier         |
| siRNA-Temozolomide Run2-DMSO | NM_0064<br>47 | USP16     | ubiquitin specific protease 16 | -0.063179 | Inlier         |
| siRNA Disorazole DMSO Run3   | NM_0064<br>47 | USP16     | ubiquitin specific protease 16 | 0.063178  | Inlier         |
| siRNA-Temozolomide Run1-DMSO | NM_0064<br>47 | USP16     | ubiquitin specific protease 16 | 0.289777  | Inlier         |
| siRNA-Vinblastine Run1-DMSO  | NM_0064<br>47 | USP16     | ubiquitin specific protease 16 | 1.012345  | Inlier         |

Identification of Survival Genes in Human Glioblastoma Cells Using siRNA Screening  
 Nikhil G Thaker, Fang Zhang, Peter R. McDonald, Tong Ying Shun, Michael D Lewen, Ian F. Pollack, and John S. Lazo

Molecular Pharmacology

|                              |               |       |                                         |           |        |
|------------------------------|---------------|-------|-----------------------------------------|-----------|--------|
| siRNA-Vinblastine Run2-DMSO  | NM_0064<br>47 | USP16 | ubiquitin<br>specific<br>protease<br>16 | 1.272267  | Inlier |
| siRNA-Temozolomide Run3-DMSO | NM_0174<br>14 | USP18 | ubiquitin<br>specific<br>protease<br>18 | -0.72996  | Inlier |
| siRNA Disorazole DMSO Run2   | NM_0174<br>14 | USP18 | ubiquitin<br>specific<br>protease<br>18 | -0.642684 | Inlier |
| siRNA-Temozolomide Run2-DMSO | NM_0174<br>14 | USP18 | ubiquitin<br>specific<br>protease<br>18 | -0.464503 | Inlier |
| siRNA Disorazole DMSO Run3   | NM_0174<br>14 | USP18 | ubiquitin<br>specific<br>protease<br>18 | -0.080664 | Inlier |
| siRNA-Temozolomide Run1-DMSO | NM_0174<br>14 | USP18 | ubiquitin<br>specific<br>protease<br>18 | 0.080664  | Inlier |
| siRNA Disorazole DMSO Run1   | NM_0174<br>14 | USP18 | ubiquitin<br>specific<br>protease<br>18 | 0.706316  | Inlier |
| siRNA-Vinblastine Run1-DMSO  | NM_0174<br>14 | USP18 | ubiquitin<br>specific<br>protease<br>18 | 1.744296  | Inlier |
| siRNA-Vinblastine Run2-DMSO  | NM_0174<br>14 | USP18 | ubiquitin<br>specific<br>protease<br>18 | 1.855822  | Inlier |
| siRNA-Temozolomide Run3-DMSO | XM_11432<br>5 | USP19 | ubiquitin<br>specific<br>protease<br>19 | -1.043544 | Inlier |
| siRNA-Temozolomide Run2-DMSO | XM_11432<br>5 | USP19 | ubiquitin<br>specific<br>protease<br>19 | -0.805648 | Inlier |
| siRNA Disorazole DMSO Run3   | XM_11432<br>5 | USP19 | ubiquitin<br>specific<br>protease<br>19 | -0.543352 | Inlier |
| siRNA-Vinblastine Run2-DMSO  | XM_11432<br>5 | USP19 | ubiquitin<br>specific<br>protease<br>19 | -0.063097 | Inlier |

Identification of Survival Genes in Human Glioblastoma Cells Using siRNA Screening  
 Nikhil G Thaker, Fang Zhang, Peter R. McDonald, Tong Ying Shun, Michael D Lewen, Ian F. Pollack, and John S. Lazo

Molecular Pharmacology

|                                  |               |       |                                         |           |        |
|----------------------------------|---------------|-------|-----------------------------------------|-----------|--------|
| siRNA Disorazole DMSO Run1       | XM_11432<br>5 | USP19 | ubiquitin<br>specific<br>protease<br>19 | 0.063097  | Inlier |
| siRNA-Temozolomide Run1-<br>DMSO | XM_11432<br>5 | USP19 | ubiquitin<br>specific<br>protease<br>19 | 0.341475  | Inlier |
| siRNA-Vinblastine Run1-<br>DMSO  | XM_11432<br>5 | USP19 | ubiquitin<br>specific<br>protease<br>19 | 1.010491  | Inlier |
| siRNA Disorazole DMSO Run2       | XM_11432<br>5 | USP19 | ubiquitin<br>specific<br>protease<br>19 | 1.028217  | Inlier |
| siRNA Disorazole DMSO Run2       | NM_0042<br>05 | USP2  | ubiquitin<br>specific<br>protease 2     | -1.556492 | Inlier |
| siRNA-Temozolomide Run3-<br>DMSO | NM_0042<br>05 | USP2  | ubiquitin<br>specific<br>protease 2     | -0.515751 | Inlier |
| siRNA Disorazole DMSO Run1       | NM_0042<br>05 | USP2  | ubiquitin<br>specific<br>protease 2     | -0.234217 | Inlier |
| siRNA-Temozolomide Run1-<br>DMSO | NM_0042<br>05 | USP2  | ubiquitin<br>specific<br>protease 2     | -0.219058 | Inlier |
| siRNA-Temozolomide Run2-<br>DMSO | NM_0042<br>05 | USP2  | ubiquitin<br>specific<br>protease 2     | 0.219058  | Inlier |
| siRNA-Vinblastine Run1-<br>DMSO  | NM_0042<br>05 | USP2  | ubiquitin<br>specific<br>protease 2     | 0.833249  | Inlier |
| siRNA Disorazole DMSO Run3       | NM_0042<br>05 | USP2  | ubiquitin<br>specific<br>protease 2     | 1.098608  | Inlier |
| siRNA-Vinblastine Run2-<br>DMSO  | NM_0042<br>05 | USP2  | ubiquitin<br>specific<br>protease 2     | 1.132373  | Inlier |
| siRNA Disorazole DMSO Run2       | NM_0066<br>76 | USP20 | ubiquitin<br>specific<br>protease<br>20 | -2.288121 | Inlier |

Identification of Survival Genes in Human Glioblastoma Cells Using siRNA Screening  
 Nikhil G Thaker, Fang Zhang, Peter R. McDonald, Tong Ying Shun, Michael D Lewen, Ian F. Pollack, and John S. Lazo

Molecular Pharmacology

|                              |               |       |                                         |           |         |
|------------------------------|---------------|-------|-----------------------------------------|-----------|---------|
| siRNA-Temozolomide Run1-DMSO | NM_0066<br>76 | USP20 | ubiquitin<br>specific<br>protease<br>20 | -0.866186 | Inlier  |
| siRNA Disorazole DMSO Run1   | NM_0066<br>76 | USP20 | ubiquitin<br>specific<br>protease<br>20 | -0.256021 | Inlier  |
| siRNA-Temozolomide Run2-DMSO | NM_0066<br>76 | USP20 | ubiquitin<br>specific<br>protease<br>20 | -0.1565   | Inlier  |
| siRNA-Vinblastine Run1-DMSO  | NM_0066<br>76 | USP20 | ubiquitin<br>specific<br>protease<br>20 | 0.1565    | Inlier  |
| siRNA-Temozolomide Run3-DMSO | NM_0066<br>76 | USP20 | ubiquitin<br>specific<br>protease<br>20 | 0.482814  | Inlier  |
| siRNA-Vinblastine Run2-DMSO  | NM_0066<br>76 | USP20 | ubiquitin<br>specific<br>protease<br>20 | 2.474224  | Inlier  |
| siRNA Disorazole DMSO Run3   | NM_0066<br>76 | USP20 | ubiquitin<br>specific<br>protease<br>20 | 10.40523  | Outlier |
| siRNA Disorazole DMSO Run2   | NM_0124<br>75 | USP21 | ubiquitin<br>specific<br>protease<br>21 | -1.001565 | Inlier  |
| siRNA Disorazole DMSO Run1   | NM_0124<br>75 | USP21 | ubiquitin<br>specific<br>protease<br>21 | -0.731953 | Inlier  |
| siRNA-Temozolomide Run3-DMSO | NM_0124<br>75 | USP21 | ubiquitin<br>specific<br>protease<br>21 | -0.617047 | Inlier  |
| siRNA-Vinblastine Run1-DMSO  | NM_0124<br>75 | USP21 | ubiquitin<br>specific<br>protease<br>21 | -0.364011 | Inlier  |
| siRNA-Temozolomide Run2-DMSO | NM_0124<br>75 | USP21 | ubiquitin<br>specific<br>protease<br>21 | 0.364012  | Inlier  |
| siRNA-Temozolomide Run1-DMSO | NM_0124<br>75 | USP21 | ubiquitin<br>specific<br>protease<br>21 | 0.537917  | Inlier  |



Identification of Survival Genes in Human Glioblastoma Cells Using siRNA Screening  
 Nikhil G Thaker, Fang Zhang, Peter R. McDonald, Tong Ying Shun, Michael D Lewen, Ian F. Pollack, and John S. Lazo

Molecular Pharmacology

|                              |               |       |                                |           |        |
|------------------------------|---------------|-------|--------------------------------|-----------|--------|
| siRNA-Vinblastine Run2-DMSO  | NM_0124<br>75 | USP21 | ubiquitin specific protease 21 | 1.153805  | Inlier |
| siRNA Disorazole DMSO Run3   | NM_0124<br>75 | USP21 | ubiquitin specific protease 21 | 3.24379   | Inlier |
| siRNA Disorazole DMSO Run3   | XM_04269<br>8 | USP22 | ubiquitin specific protease 22 | -1.448271 | Inlier |
| siRNA-Vinblastine Run2-DMSO  | XM_04269<br>8 | USP22 | ubiquitin specific protease 22 | -0.940767 | Inlier |
| siRNA Disorazole DMSO Run1   | XM_04269<br>8 | USP22 | ubiquitin specific protease 22 | -0.660898 | Inlier |
| siRNA-Temozolomide Run2-DMSO | XM_04269<br>8 | USP22 | ubiquitin specific protease 22 | -0.070949 | Inlier |
| siRNA-Temozolomide Run3-DMSO | XM_04269<br>8 | USP22 | ubiquitin specific protease 22 | 0.070949  | Inlier |
| siRNA-Temozolomide Run1-DMSO | XM_04269<br>8 | USP22 | ubiquitin specific protease 22 | 0.214539  | Inlier |
| siRNA-Vinblastine Run1-DMSO  | XM_04269<br>8 | USP22 | ubiquitin specific protease 22 | 0.688102  | Inlier |
| siRNA Disorazole DMSO Run2   | XM_04269<br>8 | USP22 | ubiquitin specific protease 22 | 1.141382  | Inlier |
| siRNA-Temozolomide Run3-DMSO | XM_16597<br>3 | USP24 | ubiquitin specific protease 24 | -2.60363  | Inlier |
| siRNA-Vinblastine Run1-DMSO  | XM_16597<br>3 | USP24 | ubiquitin specific protease 24 | -0.893809 | Inlier |
| siRNA-Vinblastine Run2-DMSO  | XM_16597<br>3 | USP24 | ubiquitin specific protease 24 | -0.856212 | Inlier |

Identification of Survival Genes in Human Glioblastoma Cells Using siRNA Screening  
 Nikhil G Thaker, Fang Zhang, Peter R. McDonald, Tong Ying Shun, Michael D Lewen, Ian F. Pollack, and John S. Lazo

Molecular Pharmacology

|                              |          |    |       |                                |           |        |
|------------------------------|----------|----|-------|--------------------------------|-----------|--------|
| siRNA Disorazole DMSO Run2   | XM_16597 | 3  | USP24 | ubiquitin specific protease 24 | -0.146805 | Inlier |
| siRNA Disorazole DMSO Run3   | XM_16597 | 3  | USP24 | ubiquitin specific protease 24 | 0.146805  | Inlier |
| siRNA-Temozolomide Run2-DMSO | XM_16597 | 3  | USP24 | ubiquitin specific protease 24 | 0.327934  | Inlier |
| siRNA-Temozolomide Run1-DMSO | XM_16597 | 3  | USP24 | ubiquitin specific protease 24 | 0.492788  | Inlier |
| siRNA Disorazole DMSO Run1   | XM_16597 | 3  | USP24 | ubiquitin specific protease 24 | 1.13087   | Inlier |
| siRNA-Temozolomide Run3-DMSO | NM_0133  | 96 | USP25 | ubiquitin specific protease 25 | -0.822749 | Inlier |
| siRNA Disorazole DMSO Run2   | NM_0133  | 96 | USP25 | ubiquitin specific protease 25 | -0.750184 | Inlier |
| siRNA-Temozolomide Run2-DMSO | NM_0133  | 96 | USP25 | ubiquitin specific protease 25 | -0.306581 | Inlier |
| siRNA Disorazole DMSO Run1   | NM_0133  | 96 | USP25 | ubiquitin specific protease 25 | -0.061835 | Inlier |
| siRNA-Temozolomide Run1-DMSO | NM_0133  | 96 | USP25 | ubiquitin specific protease 25 | 0.061835  | Inlier |
| siRNA Disorazole DMSO Run3   | NM_0133  | 96 | USP25 | ubiquitin specific protease 25 | 0.598816  | Inlier |
| siRNA-Vinblastine Run1-DMSO  | NM_0133  | 96 | USP25 | ubiquitin specific protease 25 | 1.064098  | Inlier |
| siRNA-Vinblastine Run2-DMSO  | NM_0133  | 96 | USP25 | ubiquitin specific protease 25 | 1.864815  | Inlier |

Identification of Survival Genes in Human Glioblastoma Cells Using siRNA Screening  
 Nikhil G Thaker, Fang Zhang, Peter R. McDonald, Tong Ying Shun, Michael D Lewen, Ian F. Pollack, and John S. Lazo

Molecular Pharmacology

|                                  |               |       |                                         |           |        |
|----------------------------------|---------------|-------|-----------------------------------------|-----------|--------|
| siRNA Disorazole DMSO Run2       | NM_0319<br>07 | USP26 | ubiquitin<br>specific<br>protease<br>26 | -1.617674 | Inlier |
| siRNA-Temozolomide Run3-<br>DMSO | NM_0319<br>07 | USP26 | ubiquitin<br>specific<br>protease<br>26 | -1.076715 | Inlier |
| siRNA-Temozolomide Run2-<br>DMSO | NM_0319<br>07 | USP26 | ubiquitin<br>specific<br>protease<br>26 | -0.603604 | Inlier |
| siRNA-Temozolomide Run1-<br>DMSO | NM_0319<br>07 | USP26 | ubiquitin<br>specific<br>protease<br>26 | -0.054049 | Inlier |
| siRNA Disorazole DMSO Run1       | NM_0319<br>07 | USP26 | ubiquitin<br>specific<br>protease<br>26 | 0.054049  | Inlier |
| siRNA Disorazole DMSO Run3       | NM_0319<br>07 | USP26 | ubiquitin<br>specific<br>protease<br>26 | 0.184547  | Inlier |
| siRNA-Vinblastine Run1-<br>DMSO  | NM_0319<br>07 | USP26 | ubiquitin<br>specific<br>protease<br>26 | 0.745396  | Inlier |
| siRNA-Vinblastine Run2-<br>DMSO  | NM_0319<br>07 | USP26 | ubiquitin<br>specific<br>protease<br>26 | 1.030933  | Inlier |
| siRNA-Temozolomide Run3-<br>DMSO | NM_0208<br>86 | USP28 | ubiquitin<br>specific<br>protease<br>28 | -0.762033 | Inlier |
| siRNA Disorazole DMSO Run2       | NM_0208<br>86 | USP28 | ubiquitin<br>specific<br>protease<br>28 | -0.70111  | Inlier |
| siRNA-Temozolomide Run2-<br>DMSO | NM_0208<br>86 | USP28 | ubiquitin<br>specific<br>protease<br>28 | -0.615634 | Inlier |
| siRNA Disorazole DMSO Run3       | NM_0208<br>86 | USP28 | ubiquitin<br>specific<br>protease<br>28 | -0.241051 | Inlier |
| siRNA Disorazole DMSO Run1       | NM_0208<br>86 | USP28 | ubiquitin<br>specific<br>protease<br>28 | 0.241051  | Inlier |

Identification of Survival Genes in Human Glioblastoma Cells Using siRNA Screening  
 Nikhil G Thaker, Fang Zhang, Peter R. McDonald, Tong Ying Shun, Michael D Lewen, Ian F. Pollack, and John S. Lazo

Molecular Pharmacology

| siRNA Treatment              | Gene ID   | Gene Name | Protein                        | Value     | Outlier Status |
|------------------------------|-----------|-----------|--------------------------------|-----------|----------------|
| siRNA-Vinblastine Run1-DMSO  | NM_020886 | USP28     | ubiquitin specific protease 28 | 0.64789   | Inlier         |
| siRNA-Temozolomide Run1-DMSO | NM_020886 | USP28     | ubiquitin specific protease 28 | 0.740679  | Inlier         |
| siRNA-Vinblastine Run2-DMSO  | NM_020886 | USP28     | ubiquitin specific protease 28 | 1.002921  | Inlier         |
| siRNA-Temozolomide Run3-DMSO | NM_020903 | USP29     | ubiquitin specific protease 29 | -1.106023 | Inlier         |
| siRNA Disorazole DMSO Run2   | NM_020903 | USP29     | ubiquitin specific protease 29 | -0.983028 | Inlier         |
| siRNA-Temozolomide Run2-DMSO | NM_020903 | USP29     | ubiquitin specific protease 29 | -0.794099 | Inlier         |
| siRNA Disorazole DMSO Run3   | NM_020903 | USP29     | ubiquitin specific protease 29 | -0.018488 | Inlier         |
| siRNA Disorazole DMSO Run1   | NM_020903 | USP29     | ubiquitin specific protease 29 | 0.018488  | Inlier         |
| siRNA-Temozolomide Run1-DMSO | NM_020903 | USP29     | ubiquitin specific protease 29 | 0.05349   | Inlier         |
| siRNA-Vinblastine Run2-DMSO  | NM_020903 | USP29     | ubiquitin specific protease 29 | 0.554901  | Inlier         |
| siRNA-Vinblastine Run1-DMSO  | NM_020903 | USP29     | ubiquitin specific protease 29 | 1.071194  | Inlier         |
| siRNA Disorazole DMSO Run2   | NM_006537 | USP3      | ubiquitin specific protease 3  | -0.886348 | Inlier         |
| siRNA-Temozolomide Run3-DMSO | NM_006537 | USP3      | ubiquitin specific protease 3  | -0.63903  | Inlier         |

Identification of Survival Genes in Human Glioblastoma Cells Using siRNA Screening  
 Nikhil G Thaker, Fang Zhang, Peter R. McDonald, Tong Ying Shun, Michael D Lewen, Ian F. Pollack, and John S. Lazo  
 Molecular Pharmacology

|                                  |               |       |                                         |           |        |
|----------------------------------|---------------|-------|-----------------------------------------|-----------|--------|
| siRNA Disorazole DMSO Run3       | NM_0065<br>37 | USP3  | ubiquitin<br>specific<br>protease 3     | -0.272063 | Inlier |
| siRNA-Temozolomide Run2-<br>DMSO | NM_0065<br>37 | USP3  | ubiquitin<br>specific<br>protease 3     | -0.010372 | Inlier |
| siRNA-Temozolomide Run1-<br>DMSO | NM_0065<br>37 | USP3  | ubiquitin<br>specific<br>protease 3     | 0.010372  | Inlier |
| siRNA Disorazole DMSO Run1       | NM_0065<br>37 | USP3  | ubiquitin<br>specific<br>protease 3     | 0.70997   | Inlier |
| siRNA-Vinblastine Run2-<br>DMSO  | NM_0065<br>37 | USP3  | ubiquitin<br>specific<br>protease 3     | 1.49612   | Inlier |
| siRNA-Vinblastine Run1-<br>DMSO  | NM_0065<br>37 | USP3  | ubiquitin<br>specific<br>protease 3     | 1.775972  | Inlier |
| siRNA Disorazole DMSO Run2       | NM_0326<br>63 | USP30 | ubiquitin<br>specific<br>protease<br>30 | -0.687209 | Inlier |
| siRNA-Temozolomide Run3-<br>DMSO | NM_0326<br>63 | USP30 | ubiquitin<br>specific<br>protease<br>30 | -0.661791 | Inlier |
| siRNA-Temozolomide Run2-<br>DMSO | NM_0326<br>63 | USP30 | ubiquitin<br>specific<br>protease<br>30 | -0.537184 | Inlier |
| siRNA-Temozolomide Run1-<br>DMSO | NM_0326<br>63 | USP30 | ubiquitin<br>specific<br>protease<br>30 | -0.378762 | Inlier |
| siRNA Disorazole DMSO Run1       | NM_0326<br>63 | USP30 | ubiquitin<br>specific<br>protease<br>30 | 0.378762  | Inlier |
| siRNA Disorazole DMSO Run3       | NM_0326<br>63 | USP30 | ubiquitin<br>specific<br>protease<br>30 | 0.919135  | Inlier |
| siRNA-Vinblastine Run1-<br>DMSO  | NM_0326<br>63 | USP30 | ubiquitin<br>specific<br>protease<br>30 | 1.038999  | Inlier |

Identification of Survival Genes in Human Glioblastoma Cells Using siRNA Screening  
 Nikhil G Thaker, Fang Zhang, Peter R. McDonald, Tong Ying Shun, Michael D Lewen, Ian F. Pollack, and John S. Lazo

Molecular Pharmacology

|                              |               |       |                                |           |        |
|------------------------------|---------------|-------|--------------------------------|-----------|--------|
| siRNA-Vinblastine Run2-DMSO  | NM_0326<br>63 | USP30 | ubiquitin specific protease 30 | 1.274041  | Inlier |
| siRNA-Temozolomide Run3-DMSO | NM_0207<br>18 | USP31 | ubiquitin specific protease 31 | -1.213011 | Inlier |
| siRNA-Temozolomide Run2-DMSO | NM_0207<br>18 | USP31 | ubiquitin specific protease 31 | -1.159242 | Inlier |
| siRNA Disorazole DMSO Run1   | NM_0207<br>18 | USP31 | ubiquitin specific protease 31 | -0.442461 | Inlier |
| siRNA-Temozolomide Run1-DMSO | NM_0207<br>18 | USP31 | ubiquitin specific protease 31 | -0.238589 | Inlier |
| siRNA Disorazole DMSO Run3   | NM_0207<br>18 | USP31 | ubiquitin specific protease 31 | 0.238589  | Inlier |
| siRNA-Vinblastine Run2-DMSO  | NM_0207<br>18 | USP31 | ubiquitin specific protease 31 | 0.669622  | Inlier |
| siRNA-Vinblastine Run1-DMSO  | NM_0207<br>18 | USP31 | ubiquitin specific protease 31 | 0.679378  | Inlier |
| siRNA Disorazole DMSO Run2   | NM_0207<br>18 | USP31 | ubiquitin specific protease 31 | 0.769573  | Inlier |
| siRNA-Temozolomide Run3-DMSO | NM_0325<br>82 | USP32 | ubiquitin specific protease 32 | -0.84019  | Inlier |
| siRNA-Temozolomide Run1-DMSO | NM_0325<br>82 | USP32 | ubiquitin specific protease 32 | -0.50881  | Inlier |
| siRNA-Temozolomide Run2-DMSO | NM_0325<br>82 | USP32 | ubiquitin specific protease 32 | -0.16098  | Inlier |
| siRNA Disorazole DMSO Run2   | NM_0325<br>82 | USP32 | ubiquitin specific protease 32 | -0.001587 | Inlier |

Identification of Survival Genes in Human Glioblastoma Cells Using siRNA Screening  
 Nikhil G Thaker, Fang Zhang, Peter R. McDonald, Tong Ying Shun, Michael D Lewen, Ian F. Pollack, and John S. Lazo

Molecular Pharmacology

|                                  |               |       |                                         |           |        |
|----------------------------------|---------------|-------|-----------------------------------------|-----------|--------|
| siRNA Disorazole DMSO Run1       | NM_0325<br>82 | USP32 | ubiquitin<br>specific<br>protease<br>32 | 0.001587  | Inlier |
| siRNA Disorazole DMSO Run3       | NM_0325<br>82 | USP32 | ubiquitin<br>specific<br>protease<br>32 | 0.875557  | Inlier |
| siRNA-Vinblastine Run2-<br>DMSO  | NM_0325<br>82 | USP32 | ubiquitin<br>specific<br>protease<br>32 | 1.356615  | Inlier |
| siRNA-Vinblastine Run1-<br>DMSO  | NM_0325<br>82 | USP32 | ubiquitin<br>specific<br>protease<br>32 | 1.37188   | Inlier |
| siRNA-Temozolomide Run3-<br>DMSO | NM_2016<br>26 | USP33 | ubiquitin<br>specific<br>protease<br>33 | -1.253205 | Inlier |
| siRNA Disorazole DMSO Run1       | NM_2016<br>26 | USP33 | ubiquitin<br>specific<br>protease<br>33 | -0.696542 | Inlier |
| siRNA-Temozolomide Run1-<br>DMSO | NM_2016<br>26 | USP33 | ubiquitin<br>specific<br>protease<br>33 | -0.652458 | Inlier |
| siRNA Disorazole DMSO Run3       | NM_2016<br>26 | USP33 | ubiquitin<br>specific<br>protease<br>33 | -0.066507 | Inlier |
| siRNA-Temozolomide Run2-<br>DMSO | NM_2016<br>26 | USP33 | ubiquitin<br>specific<br>protease<br>33 | 0.066507  | Inlier |
| siRNA Disorazole DMSO Run2       | NM_2016<br>26 | USP33 | ubiquitin<br>specific<br>protease<br>33 | 0.233832  | Inlier |
| siRNA-Vinblastine Run2-<br>DMSO  | NM_2016<br>26 | USP33 | ubiquitin<br>specific<br>protease<br>33 | 0.916412  | Inlier |
| siRNA-Vinblastine Run1-<br>DMSO  | NM_2016<br>26 | USP33 | ubiquitin<br>specific<br>protease<br>33 | 1.037428  | Inlier |
| siRNA-Temozolomide Run3-<br>DMSO | NM_0147<br>09 | USP34 | ubiquitin<br>specific<br>protease<br>34 | -1.450647 | Inlier |

Identification of Survival Genes in Human Glioblastoma Cells Using siRNA Screening  
 Nikhil G Thaker, Fang Zhang, Peter R. McDonald, Tong Ying Shun, Michael D Lewen, Ian F. Pollack, and John S. Lazo

Molecular Pharmacology

|                              |               |       |                                         |           |        |
|------------------------------|---------------|-------|-----------------------------------------|-----------|--------|
| siRNA-Temozolomide Run2-DMSO | NM_0147<br>09 | USP34 | ubiquitin<br>specific<br>protease<br>34 | -0.749863 | Inlier |
| siRNA Disorazole DMSO Run3   | NM_0147<br>09 | USP34 | ubiquitin<br>specific<br>protease<br>34 | -0.599137 | Inlier |
| siRNA-Vinblastine Run2-DMSO  | NM_0147<br>09 | USP34 | ubiquitin<br>specific<br>protease<br>34 | -0.475944 | Inlier |
| siRNA-Temozolomide Run1-DMSO | NM_0147<br>09 | USP34 | ubiquitin<br>specific<br>protease<br>34 | 0.475943  | Inlier |
| siRNA Disorazole DMSO Run2   | NM_0147<br>09 | USP34 | ubiquitin<br>specific<br>protease<br>34 | 0.484384  | Inlier |
| siRNA Disorazole DMSO Run1   | NM_0147<br>09 | USP34 | ubiquitin<br>specific<br>protease<br>34 | 1.809876  | Inlier |
| siRNA-Vinblastine Run1-DMSO  | NM_0147<br>09 | USP34 | ubiquitin<br>specific<br>protease<br>34 | 3.461319  | Inlier |
| siRNA Disorazole DMSO Run3   | XM_29052<br>7 | USP35 | ubiquitin<br>specific<br>protease<br>35 | -1.108535 | Inlier |
| siRNA-Vinblastine Run2-DMSO  | XM_29052<br>7 | USP35 | ubiquitin<br>specific<br>protease<br>35 | -0.917933 | Inlier |
| siRNA-Temozolomide Run1-DMSO | XM_29052<br>7 | USP35 | ubiquitin<br>specific<br>protease<br>35 | -0.431067 | Inlier |
| siRNA Disorazole DMSO Run1   | XM_29052<br>7 | USP35 | ubiquitin<br>specific<br>protease<br>35 | -0.117666 | Inlier |
| siRNA-Temozolomide Run3-DMSO | XM_29052<br>7 | USP35 | ubiquitin<br>specific<br>protease<br>35 | 0.117665  | Inlier |
| siRNA-Temozolomide Run2-DMSO | XM_29052<br>7 | USP35 | ubiquitin<br>specific<br>protease<br>35 | 0.419572  | Inlier |



Identification of Survival Genes in Human Glioblastoma Cells Using siRNA Screening  
 Nikhil G Thaker, Fang Zhang, Peter R. McDonald, Tong Ying Shun, Michael D Lewen, Ian F. Pollack, and John S. Lazo

Molecular Pharmacology

|                                  |               |       |                                         |           |         |
|----------------------------------|---------------|-------|-----------------------------------------|-----------|---------|
| siRNA Disorazole DMSO Run2       | XM_29052<br>7 | USP35 | ubiquitin<br>specific<br>protease<br>35 | 1.04827   | Inlier  |
| siRNA-Vinblastine Run1-<br>DMSO  | XM_29052<br>7 | USP35 | ubiquitin<br>specific<br>protease<br>35 | 4.026392  | Outlier |
| siRNA-Temozolomide Run3-<br>DMSO | NM_0250<br>90 | USP36 | ubiquitin<br>specific<br>protease<br>36 | -1.358421 | Inlier  |
| siRNA-Temozolomide Run1-<br>DMSO | NM_0250<br>90 | USP36 | ubiquitin<br>specific<br>protease<br>36 | -0.805547 | Inlier  |
| siRNA-Temozolomide Run2-<br>DMSO | NM_0250<br>90 | USP36 | ubiquitin<br>specific<br>protease<br>36 | -0.543453 | Inlier  |
| siRNA Disorazole DMSO Run1       | NM_0250<br>90 | USP36 | ubiquitin<br>specific<br>protease<br>36 | -0.190803 | Inlier  |
| siRNA Disorazole DMSO Run3       | NM_0250<br>90 | USP36 | ubiquitin<br>specific<br>protease<br>36 | 0.190803  | Inlier  |
| siRNA Disorazole DMSO Run2       | NM_0250<br>90 | USP36 | ubiquitin<br>specific<br>protease<br>36 | 0.270166  | Inlier  |
| siRNA-Vinblastine Run2-<br>DMSO  | NM_0250<br>90 | USP36 | ubiquitin<br>specific<br>protease<br>36 | 3.180978  | Inlier  |
| siRNA-Vinblastine Run1-<br>DMSO  | NM_0250<br>90 | USP36 | ubiquitin<br>specific<br>protease<br>36 | 3.541408  | Outlier |
| siRNA Disorazole DMSO Run2       | NM_0209<br>35 | USP37 | ubiquitin<br>specific<br>protease<br>37 | -1.374828 | Inlier  |
| siRNA Disorazole DMSO Run3       | NM_0209<br>35 | USP37 | ubiquitin<br>specific<br>protease<br>37 | -1.146149 | Inlier  |
| siRNA-Temozolomide Run2-<br>DMSO | NM_0209<br>35 | USP37 | ubiquitin<br>specific<br>protease<br>37 | -0.677197 | Inlier  |

Identification of Survival Genes in Human Glioblastoma Cells Using siRNA Screening  
 Nikhil G Thaker, Fang Zhang, Peter R. McDonald, Tong Ying Shun, Michael D Lewen, Ian F. Pollack, and John S. Lazo

Molecular Pharmacology

|                                  |               |       |                                         |           |        |
|----------------------------------|---------------|-------|-----------------------------------------|-----------|--------|
| siRNA Disorazole DMSO Run1       | NM_0209<br>35 | USP37 | ubiquitin<br>specific<br>protease<br>37 | -0.063534 | Inlier |
| siRNA-Temozolomide Run3-<br>DMSO | NM_0209<br>35 | USP37 | ubiquitin<br>specific<br>protease<br>37 | 0.063534  | Inlier |
| siRNA-Temozolomide Run1-<br>DMSO | NM_0209<br>35 | USP37 | ubiquitin<br>specific<br>protease<br>37 | 0.443935  | Inlier |
| siRNA-Vinblastine Run1-<br>DMSO  | NM_0209<br>35 | USP37 | ubiquitin<br>specific<br>protease<br>37 | 0.671803  | Inlier |
| siRNA-Vinblastine Run2-<br>DMSO  | NM_0209<br>35 | USP37 | ubiquitin<br>specific<br>protease<br>37 | 0.723505  | Inlier |
| siRNA Disorazole DMSO Run3       | NM_0325<br>57 | USP38 | ubiquitin<br>specific<br>protease<br>38 | -0.977537 | Inlier |
| siRNA-Temozolomide Run3-<br>DMSO | NM_0325<br>57 | USP38 | ubiquitin<br>specific<br>protease<br>38 | -0.67519  | Inlier |
| siRNA Disorazole DMSO Run2       | NM_0325<br>57 | USP38 | ubiquitin<br>specific<br>protease<br>38 | -0.67381  | Inlier |
| siRNA Disorazole DMSO Run1       | NM_0325<br>57 | USP38 | ubiquitin<br>specific<br>protease<br>38 | -0.074917 | Inlier |
| siRNA-Temozolomide Run2-<br>DMSO | NM_0325<br>57 | USP38 | ubiquitin<br>specific<br>protease<br>38 | 0.074917  | Inlier |
| siRNA-Temozolomide Run1-<br>DMSO | NM_0325<br>57 | USP38 | ubiquitin<br>specific<br>protease<br>38 | 0.433592  | Inlier |
| siRNA-Vinblastine Run2-<br>DMSO  | NM_0325<br>57 | USP38 | ubiquitin<br>specific<br>protease<br>38 | 2.166662  | Inlier |
| siRNA-Vinblastine Run1-<br>DMSO  | NM_0325<br>57 | USP38 | ubiquitin<br>specific<br>protease<br>38 | 2.200691  | Inlier |

Identification of Survival Genes in Human Glioblastoma Cells Using siRNA Screening  
 Nikhil G Thaker, Fang Zhang, Peter R. McDonald, Tong Ying Shun, Michael D Lewen, Ian F. Pollack, and John S. Lazo

Molecular Pharmacology

|                              |               |       |                                                             |           |        |
|------------------------------|---------------|-------|-------------------------------------------------------------|-----------|--------|
| siRNA-Temozolomide Run3-DMSO | NM_0065<br>90 | USP39 | ubiquitin<br>specific<br>protease<br>39                     | -0.806078 | Inlier |
| siRNA-Temozolomide Run2-DMSO | NM_0065<br>90 | USP39 | ubiquitin<br>specific<br>protease<br>39                     | -0.542922 | Inlier |
| siRNA-Temozolomide Run1-DMSO | NM_0065<br>90 | USP39 | ubiquitin<br>specific<br>protease<br>39                     | -0.243059 | Inlier |
| siRNA Disorazole DMSO Run1   | NM_0065<br>90 | USP39 | ubiquitin<br>specific<br>protease<br>39                     | -0.224425 | Inlier |
| siRNA Disorazole DMSO Run2   | NM_0065<br>90 | USP39 | ubiquitin<br>specific<br>protease<br>39                     | 0.224425  | Inlier |
| siRNA Disorazole DMSO Run3   | NM_0065<br>90 | USP39 | ubiquitin<br>specific<br>protease<br>39                     | 1.338834  | Inlier |
| siRNA-Vinblastine Run2-DMSO  | NM_0065<br>90 | USP39 | ubiquitin<br>specific<br>protease<br>39                     | 1.39225   | Inlier |
| siRNA-Vinblastine Run1-DMSO  | NM_0065<br>90 | USP39 | ubiquitin<br>specific<br>protease<br>39                     | 1.4871    | Inlier |
| siRNA Disorazole DMSO Run3   | NM_1994<br>43 | USP4  | ubiquitin<br>specific<br>protease 4<br>(proto-<br>oncogene) | -1.45373  | Inlier |
| siRNA Disorazole DMSO Run2   | NM_1994<br>43 | USP4  | ubiquitin<br>specific<br>protease 4<br>(proto-<br>oncogene) | -0.631182 | Inlier |
| siRNA-Temozolomide Run3-DMSO | NM_1994<br>43 | USP4  | ubiquitin<br>specific<br>protease 4<br>(proto-<br>oncogene) | -0.377295 | Inlier |

Identification of Survival Genes in Human Glioblastoma Cells Using siRNA Screening  
 Nikhil G Thaker, Fang Zhang, Peter R. McDonald, Tong Ying Shun, Michael D Lewen, Ian F. Pollack, and John S. Lazo  
 Molecular Pharmacology

|                              |               |       |                                                             |           |        |
|------------------------------|---------------|-------|-------------------------------------------------------------|-----------|--------|
| siRNA-Temozolomide Run2-DMSO | NM_1994<br>43 | USP4  | ubiquitin<br>specific<br>protease 4<br>(proto-<br>oncogene) | -0.067299 | Inlier |
| siRNA Disorazole DMSO Run1   | NM_1994<br>43 | USP4  | ubiquitin<br>specific<br>protease 4<br>(proto-<br>oncogene) | 0.067299  | Inlier |
| siRNA-Temozolomide Run1-DMSO | NM_1994<br>43 | USP4  | ubiquitin<br>specific<br>protease 4<br>(proto-<br>oncogene) | 0.717818  | Inlier |
| siRNA-Vinblastine Run1-DMSO  | NM_1994<br>43 | USP4  | ubiquitin<br>specific<br>protease 4<br>(proto-<br>oncogene) | 1.164103  | Inlier |
| siRNA-Vinblastine Run2-DMSO  | NM_1994<br>43 | USP4  | ubiquitin<br>specific<br>protease 4<br>(proto-<br>oncogene) | 1.776681  | Inlier |
| siRNA-Temozolomide Run3-DMSO | NM_0182<br>18 | USP40 | ubiquitin<br>specific<br>protease<br>40                     | -1.495711 | Inlier |
| siRNA-Temozolomide Run2-DMSO | NM_0182<br>18 | USP40 | ubiquitin<br>specific<br>protease<br>40                     | -1.063329 | Inlier |
| siRNA-Temozolomide Run1-DMSO | NM_0182<br>18 | USP40 | ubiquitin<br>specific<br>protease<br>40                     | -0.742581 | Inlier |
| siRNA Disorazole DMSO Run1   | NM_0182<br>18 | USP40 | ubiquitin<br>specific<br>protease<br>40                     | -0.192933 | Inlier |
| siRNA Disorazole DMSO Run2   | NM_0182<br>18 | USP40 | ubiquitin<br>specific<br>protease<br>40                     | 0.192933  | Inlier |

Identification of Survival Genes in Human Glioblastoma Cells Using siRNA Screening  
 Nikhil G Thaker, Fang Zhang, Peter R. McDonald, Tong Ying Shun, Michael D Lewen, Ian F. Pollack, and John S. Lazo

Molecular Pharmacology

|                                  |               |       |                                         |           |        |
|----------------------------------|---------------|-------|-----------------------------------------|-----------|--------|
| siRNA Disorazole DMSO Run3       | NM_0182<br>18 | USP40 | ubiquitin<br>specific<br>protease<br>40 | 0.355452  | Inlier |
| siRNA-Vinblastine Run2-<br>DMSO  | NM_0182<br>18 | USP40 | ubiquitin<br>specific<br>protease<br>40 | 0.606419  | Inlier |
| siRNA-Vinblastine Run1-<br>DMSO  | NM_0182<br>18 | USP40 | ubiquitin<br>specific<br>protease<br>40 | 1.079173  | Inlier |
| siRNA-Temozolomide Run3-<br>DMSO | XM_03672<br>9 | USP41 | ubiquitin<br>specific<br>protease<br>41 | -2.135914 | Inlier |
| siRNA-Temozolomide Run2-<br>DMSO | XM_03672<br>9 | USP41 | ubiquitin<br>specific<br>protease<br>41 | -1.085786 | Inlier |
| siRNA Disorazole DMSO Run1       | XM_03672<br>9 | USP41 | ubiquitin<br>specific<br>protease<br>41 | -0.125109 | Inlier |
| siRNA-Temozolomide Run1-<br>DMSO | XM_03672<br>9 | USP41 | ubiquitin<br>specific<br>protease<br>41 | -0.060885 | Inlier |
| siRNA-Vinblastine Run2-<br>DMSO  | XM_03672<br>9 | USP41 | ubiquitin<br>specific<br>protease<br>41 | 0.060885  | Inlier |
| siRNA Disorazole DMSO Run3       | XM_03672<br>9 | USP41 | ubiquitin<br>specific<br>protease<br>41 | 0.263214  | Inlier |
| siRNA-Vinblastine Run1-<br>DMSO  | XM_03672<br>9 | USP41 | ubiquitin<br>specific<br>protease<br>41 | 2.026913  | Inlier |
| siRNA Disorazole DMSO Run2       | XM_03672<br>9 | USP41 | ubiquitin<br>specific<br>protease<br>41 | 2.075282  | Inlier |
| siRNA-Temozolomide Run3-<br>DMSO | XM_37187<br>2 | USP42 | ubiquitin<br>specific<br>protease<br>42 | -1.249394 | Inlier |
| siRNA Disorazole DMSO Run3       | XM_37187<br>2 | USP42 | ubiquitin<br>specific<br>protease<br>42 | -0.497185 | Inlier |

Identification of Survival Genes in Human Glioblastoma Cells Using siRNA Screening  
 Nikhil G Thaker, Fang Zhang, Peter R. McDonald, Tong Ying Shun, Michael D Lewen, Ian F. Pollack, and John S. Lazo

Molecular Pharmacology

|                              |               |       |                                |           |        |
|------------------------------|---------------|-------|--------------------------------|-----------|--------|
| siRNA-Vinblastine Run2-DMSO  | XM_37187<br>2 | USP42 | ubiquitin specific protease 42 | -0.458677 | Inlier |
| siRNA-Temozolomide Run2-DMSO | XM_37187<br>2 | USP42 | ubiquitin specific protease 42 | -0.382391 | Inlier |
| siRNA-Temozolomide Run1-DMSO | XM_37187<br>2 | USP42 | ubiquitin specific protease 42 | 0.382391  | Inlier |
| siRNA Disorazole DMSO Run1   | XM_37187<br>2 | USP42 | ubiquitin specific protease 42 | 0.851815  | Inlier |
| siRNA Disorazole DMSO Run2   | XM_37187<br>2 | USP42 | ubiquitin specific protease 42 | 1.361239  | Inlier |
| siRNA-Vinblastine Run1-DMSO  | XM_37187<br>2 | USP42 | ubiquitin specific protease 42 | 1.570396  | Inlier |
| siRNA Disorazole DMSO Run1   | NM_0321<br>47 | USP44 | ubiquitin specific protease 44 | -3.368242 | Inlier |
| siRNA-Temozolomide Run3-DMSO | NM_0321<br>47 | USP44 | ubiquitin specific protease 44 | -2.845812 | Inlier |
| siRNA Disorazole DMSO Run2   | NM_0321<br>47 | USP44 | ubiquitin specific protease 44 | -0.596206 | Inlier |
| siRNA-Temozolomide Run2-DMSO | NM_0321<br>47 | USP44 | ubiquitin specific protease 44 | -0.193835 | Inlier |
| siRNA-Temozolomide Run1-DMSO | NM_0321<br>47 | USP44 | ubiquitin specific protease 44 | 0.193835  | Inlier |
| siRNA Disorazole DMSO Run3   | NM_0321<br>47 | USP44 | ubiquitin specific protease 44 | 0.597346  | Inlier |
| siRNA-Vinblastine Run2-DMSO  | NM_0321<br>47 | USP44 | ubiquitin specific protease 44 | 0.751654  | Inlier |

Identification of Survival Genes in Human Glioblastoma Cells Using siRNA Screening  
 Nikhil G Thaker, Fang Zhang, Peter R. McDonald, Tong Ying Shun, Michael D Lewen, Ian F. Pollack, and John S. Lazo

Molecular Pharmacology

|                              |               |       |                                   |           |         |
|------------------------------|---------------|-------|-----------------------------------|-----------|---------|
| siRNA-Vinblastine Run1-DMSO  | NM_0321<br>47 | USP44 | ubiquitin specific protease<br>44 | 1.64746   | Inlier  |
| siRNA-Temozolomide Run2-DMSO | NM_0228<br>32 | USP46 | ubiquitin specific protease<br>46 | -0.763573 | Inlier  |
| siRNA-Temozolomide Run1-DMSO | NM_0228<br>32 | USP46 | ubiquitin specific protease<br>46 | -0.585427 | Inlier  |
| siRNA-Temozolomide Run3-DMSO | NM_0228<br>32 | USP46 | ubiquitin specific protease<br>46 | -0.545591 | Inlier  |
| siRNA Disorazole DMSO Run2   | NM_0228<br>32 | USP46 | ubiquitin specific protease<br>46 | -0.532015 | Inlier  |
| siRNA Disorazole DMSO Run1   | NM_0228<br>32 | USP46 | ubiquitin specific protease<br>46 | 0.532015  | Inlier  |
| siRNA Disorazole DMSO Run3   | NM_0228<br>32 | USP46 | ubiquitin specific protease<br>46 | 1.025616  | Inlier  |
| siRNA-Vinblastine Run1-DMSO  | NM_0228<br>32 | USP46 | ubiquitin specific protease<br>46 | 2.539386  | Inlier  |
| siRNA-Vinblastine Run2-DMSO  | NM_0228<br>32 | USP46 | ubiquitin specific protease<br>46 | 3.805386  | Outlier |
| siRNA-Temozolomide Run3-DMSO | NM_0179<br>44 | USP47 | ubiquitin specific protease<br>47 | -0.738361 | Inlier  |
| siRNA-Temozolomide Run2-DMSO | NM_0179<br>44 | USP47 | ubiquitin specific protease<br>47 | -0.610639 | Inlier  |
| siRNA Disorazole DMSO Run2   | NM_0179<br>44 | USP47 | ubiquitin specific protease<br>47 | -0.174013 | Inlier  |
| siRNA Disorazole DMSO Run3   | NM_0179<br>44 | USP47 | ubiquitin specific protease<br>47 | -0.001718 | Inlier  |

Identification of Survival Genes in Human Glioblastoma Cells Using siRNA Screening  
 Nikhil G Thaker, Fang Zhang, Peter R. McDonald, Tong Ying Shun, Michael D Lewen, Ian F. Pollack, and John S. Lazo

Molecular Pharmacology

| siRNA Treatment              | Gene ID       | Gene Name | Protein                        | Value     | Outlier Status |
|------------------------------|---------------|-----------|--------------------------------|-----------|----------------|
| siRNA-Temozolomide Run1-DMSO | NM_0179<br>44 | USP47     | ubiquitin specific protease 47 | 0.001718  | Inlier         |
| siRNA Disorazole DMSO Run1   | NM_0179<br>44 | USP47     | ubiquitin specific protease 47 | 1.052637  | Inlier         |
| siRNA-Vinblastine Run1-DMSO  | NM_0179<br>44 | USP47     | ubiquitin specific protease 47 | 1.608254  | Inlier         |
| siRNA-Vinblastine Run2-DMSO  | NM_0179<br>44 | USP47     | ubiquitin specific protease 47 | 1.964849  | Inlier         |
| siRNA-Temozolomide Run3-DMSO | NM_0322<br>36 | USP48     | ubiquitin specific protease 48 | -1.239054 | Inlier         |
| siRNA Disorazole DMSO Run1   | NM_0322<br>36 | USP48     | ubiquitin specific protease 48 | -0.421744 | Inlier         |
| siRNA Disorazole DMSO Run2   | NM_0322<br>36 | USP48     | ubiquitin specific protease 48 | -0.363138 | Inlier         |
| siRNA-Temozolomide Run1-DMSO | NM_0322<br>36 | USP48     | ubiquitin specific protease 48 | -0.014251 | Inlier         |
| siRNA-Temozolomide Run2-DMSO | NM_0322<br>36 | USP48     | ubiquitin specific protease 48 | 0.014251  | Inlier         |
| siRNA Disorazole DMSO Run3   | NM_0322<br>36 | USP48     | ubiquitin specific protease 48 | 0.927256  | Inlier         |
| siRNA-Vinblastine Run2-DMSO  | NM_0322<br>36 | USP48     | ubiquitin specific protease 48 | 1.171098  | Inlier         |
| siRNA-Vinblastine Run1-DMSO  | NM_0322<br>36 | USP48     | ubiquitin specific protease 48 | 1.275376  | Inlier         |
| siRNA-Temozolomide Run3-DMSO | NM_0042<br>75 | USP49     | ubiquitin specific protease 49 | -1.144561 | Inlier         |



Identification of Survival Genes in Human Glioblastoma Cells Using siRNA Screening  
 Nikhil G Thaker, Fang Zhang, Peter R. McDonald, Tong Ying Shun, Michael D Lewen, Ian F. Pollack, and John S. Lazo

Molecular Pharmacology

|                              |               |       |                                                |           |        |
|------------------------------|---------------|-------|------------------------------------------------|-----------|--------|
| siRNA-Temozolomide Run2-DMSO | NM_0042<br>75 | USP49 | ubiquitin specific protease 49                 | -0.925732 | Inlier |
| siRNA Disorazole DMSO Run1   | NM_0042<br>75 | USP49 | ubiquitin specific protease 49                 | -0.273922 | Inlier |
| siRNA Disorazole DMSO Run3   | NM_0042<br>75 | USP49 | ubiquitin specific protease 49                 | -0.018932 | Inlier |
| siRNA-Temozolomide Run1-DMSO | NM_0042<br>75 | USP49 | ubiquitin specific protease 49                 | 0.018932  | Inlier |
| siRNA-Vinblastine Run1-DMSO  | NM_0042<br>75 | USP49 | ubiquitin specific protease 49                 | 0.423268  | Inlier |
| siRNA-Vinblastine Run2-DMSO  | NM_0042<br>75 | USP49 | ubiquitin specific protease 49                 | 1.315805  | Inlier |
| siRNA Disorazole DMSO Run2   | NM_0042<br>75 | USP49 | ubiquitin specific protease 49                 | 1.39652   | Inlier |
| siRNA Disorazole DMSO Run2   | NM_0034<br>81 | USP5  | ubiquitin specific protease 5 (isopeptidase T) | -0.956206 | Inlier |
| siRNA-Temozolomide Run3-DMSO | NM_0034<br>81 | USP5  | ubiquitin specific protease 5 (isopeptidase T) | -0.392794 | Inlier |
| siRNA-Temozolomide Run2-DMSO | NM_0034<br>81 | USP5  | ubiquitin specific protease 5 (isopeptidase T) | -0.36387  | Inlier |
| siRNA Disorazole DMSO Run1   | NM_0034<br>81 | USP5  | ubiquitin specific protease 5 (isopeptidase T) | -0.226786 | Inlier |

Identification of Survival Genes in Human Glioblastoma Cells Using siRNA Screening  
 Nikhil G Thaker, Fang Zhang, Peter R. McDonald, Tong Ying Shun, Michael D Lewen, Ian F. Pollack, and John S. Lazo  
 Molecular Pharmacology

|                              |               |       |                                                |           |        |
|------------------------------|---------------|-------|------------------------------------------------|-----------|--------|
| siRNA-Temozolomide Run1-DMSO | NM_0034<br>81 | USP5  | ubiquitin specific protease 5 (isopeptidase T) | 0.226786  | Inlier |
| siRNA-Vinblastine Run1-DMSO  | NM_0034<br>81 | USP5  | ubiquitin specific protease 5 (isopeptidase T) | 1.362017  | Inlier |
| siRNA-Vinblastine Run2-DMSO  | NM_0034<br>81 | USP5  | ubiquitin specific protease 5 (isopeptidase T) | 2.212406  | Inlier |
| siRNA Disorazole DMSO Run3   | NM_0034<br>81 | USP5  | ubiquitin specific protease 5 (isopeptidase T) | 2.938522  | Inlier |
| siRNA-Temozolomide Run3-DMSO | NM_2012<br>86 | USP51 | ubiquitin specific protease 51                 | -1.698544 | Inlier |
| siRNA-Temozolomide Run2-DMSO | NM_2012<br>86 | USP51 | ubiquitin specific protease 51                 | -1.10022  | Inlier |
| siRNA-Temozolomide Run1-DMSO | NM_2012<br>86 | USP51 | ubiquitin specific protease 51                 | -0.833952 | Inlier |
| siRNA Disorazole DMSO Run3   | NM_2012<br>86 | USP51 | ubiquitin specific protease 51                 | -0.092367 | Inlier |
| siRNA Disorazole DMSO Run1   | NM_2012<br>86 | USP51 | ubiquitin specific protease 51                 | 0.092367  | Inlier |
| siRNA Disorazole DMSO Run2   | NM_2012<br>86 | USP51 | ubiquitin specific protease 51                 | 0.148215  | Inlier |
| siRNA-Vinblastine Run2-DMSO  | NM_2012<br>86 | USP51 | ubiquitin specific protease 51                 | 0.515048  | Inlier |

Identification of Survival Genes in Human Glioblastoma Cells Using siRNA Screening  
 Nikhil G Thaker, Fang Zhang, Peter R. McDonald, Tong Ying Shun, Michael D Lewen, Ian F. Pollack, and John S. Lazo

Molecular Pharmacology

|                              |           |       |                                                |           |        |
|------------------------------|-----------|-------|------------------------------------------------|-----------|--------|
| siRNA-Vinblastine Run1-DMSO  | NM_201286 | USP51 | ubiquitin specific protease 51                 | 1.445833  | Inlier |
| siRNA-Temozolomide Run3-DMSO | NM_014871 | USP52 | ubiquitin specific protease 52                 | -1.154663 | Inlier |
| siRNA-Temozolomide Run2-DMSO | NM_014871 | USP52 | ubiquitin specific protease 52                 | -0.935304 | Inlier |
| siRNA Disorazole DMSO Run3   | NM_014871 | USP52 | ubiquitin specific protease 52                 | -0.695787 | Inlier |
| siRNA Disorazole DMSO Run2   | NM_014871 | USP52 | ubiquitin specific protease 52                 | -0.059558 | Inlier |
| siRNA Disorazole DMSO Run1   | NM_014871 | USP52 | ubiquitin specific protease 52                 | 0.059558  | Inlier |
| siRNA-Temozolomide Run1-DMSO | NM_014871 | USP52 | ubiquitin specific protease 52                 | 0.431529  | Inlier |
| siRNA-Vinblastine Run1-DMSO  | NM_014871 | USP52 | ubiquitin specific protease 52                 | 0.653212  | Inlier |
| siRNA-Vinblastine Run2-DMSO  | NM_014871 | USP52 | ubiquitin specific protease 52                 | 1.396447  | Inlier |
| siRNA-Temozolomide Run3-DMSO | NM_004505 | USP6  | ubiquitin specific protease 6 (Tre-2 oncogene) | -1.93665  | Inlier |
| siRNA Disorazole DMSO Run2   | NM_004505 | USP6  | ubiquitin specific protease 6 (Tre-2 oncogene) | -0.569269 | Inlier |

Identification of Survival Genes in Human Glioblastoma Cells Using siRNA Screening  
 Nikhil G Thaker, Fang Zhang, Peter R. McDonald, Tong Ying Shun, Michael D Lewen, Ian F. Pollack, and John S. Lazo  
 Molecular Pharmacology

|                                  |               |      |                                                                             |           |        |
|----------------------------------|---------------|------|-----------------------------------------------------------------------------|-----------|--------|
| siRNA Disorazole DMSO Run3       | NM_0045<br>05 | USP6 | ubiquitin<br>specific<br>protease 6<br>(Tre-2<br>oncogene)                  | -0.366506 | Inlier |
| siRNA-Temozolomide Run2-<br>DMSO | NM_0045<br>05 | USP6 | ubiquitin<br>specific<br>protease 6<br>(Tre-2<br>oncogene)                  | -0.232154 | Inlier |
| siRNA Disorazole DMSO Run1       | NM_0045<br>05 | USP6 | ubiquitin<br>specific<br>protease 6<br>(Tre-2<br>oncogene)                  | 0.232154  | Inlier |
| siRNA-Temozolomide Run1-<br>DMSO | NM_0045<br>05 | USP6 | ubiquitin<br>specific<br>protease 6<br>(Tre-2<br>oncogene)                  | 0.779731  | Inlier |
| siRNA-Vinblastine Run1-<br>DMSO  | NM_0045<br>05 | USP6 | ubiquitin<br>specific<br>protease 6<br>(Tre-2<br>oncogene)                  | 2.905486  | Inlier |
| siRNA-Vinblastine Run2-<br>DMSO  | NM_0045<br>05 | USP6 | ubiquitin<br>specific<br>protease 6<br>(Tre-2<br>oncogene)                  | 2.924086  | Inlier |
| siRNA-Temozolomide Run3-<br>DMSO | NM_0034<br>70 | USP7 | ubiquitin<br>specific<br>protease 7<br>(herpes<br>virus-<br>associated<br>) | -1.380595 | Inlier |
| siRNA Disorazole DMSO Run1       | NM_0034<br>70 | USP7 | ubiquitin<br>specific<br>protease 7<br>(herpes<br>virus-<br>associated<br>) | -1.156261 | Inlier |

Identification of Survival Genes in Human Glioblastoma Cells Using siRNA Screening

Nikhil G Thaker, Fang Zhang, Peter R. McDonald, Tong Ying Shun, Michael D Lewen, Ian F. Pollack, and John S. Lazo

Molecular Pharmacology

|                                  |               |      |                                                                             |           |        |
|----------------------------------|---------------|------|-----------------------------------------------------------------------------|-----------|--------|
| siRNA Disorazole DMSO Run2       | NM_0034<br>70 | USP7 | ubiquitin<br>specific<br>protease 7<br>(herpes<br>virus-<br>associated<br>) | -0.287504 | Inlier |
| siRNA-Temozolomide Run1-<br>DMSO | NM_0034<br>70 | USP7 | ubiquitin<br>specific<br>protease 7<br>(herpes<br>virus-<br>associated<br>) | -0.268923 | Inlier |
| siRNA-Temozolomide Run2-<br>DMSO | NM_0034<br>70 | USP7 | ubiquitin<br>specific<br>protease 7<br>(herpes<br>virus-<br>associated<br>) | 0.268923  | Inlier |
| siRNA-Vinblastine Run1-<br>DMSO  | NM_0034<br>70 | USP7 | ubiquitin<br>specific<br>protease 7<br>(herpes<br>virus-<br>associated<br>) | 0.64999   | Inlier |
| siRNA-Vinblastine Run2-<br>DMSO  | NM_0034<br>70 | USP7 | ubiquitin<br>specific<br>protease 7<br>(herpes<br>virus-<br>associated<br>) | 0.69901   | Inlier |
| siRNA Disorazole DMSO Run3       | NM_0034<br>70 | USP7 | ubiquitin<br>specific<br>protease 7<br>(herpes<br>virus-<br>associated<br>) | 0.70836   | Inlier |
| siRNA-Temozolomide Run2-<br>DMSO | NM_0051<br>54 | USP8 | ubiquitin<br>specific<br>protease 8                                         | -1.15572  | Inlier |
| siRNA-Temozolomide Run3-<br>DMSO | NM_0051<br>54 | USP8 | ubiquitin<br>specific<br>protease 8                                         | -0.876828 | Inlier |

Identification of Survival Genes in Human Glioblastoma Cells Using siRNA Screening  
 Nikhil G Thaker, Fang Zhang, Peter R. McDonald, Tong Ying Shun, Michael D Lewen, Ian F. Pollack, and John S. Lazo

Molecular Pharmacology

|                              |               |       |                                                                        |           |        |
|------------------------------|---------------|-------|------------------------------------------------------------------------|-----------|--------|
| siRNA-Temozolomide Run1-DMSO | NM_0051<br>54 | USP8  | ubiquitin specific protease 8                                          | -0.459054 | Inlier |
| siRNA Disorazole DMSO Run2   | NM_0051<br>54 | USP8  | ubiquitin specific protease 8                                          | -0.358576 | Inlier |
| siRNA Disorazole DMSO Run3   | NM_0051<br>54 | USP8  | ubiquitin specific protease 8                                          | 0.358576  | Inlier |
| siRNA Disorazole DMSO Run1   | NM_0051<br>54 | USP8  | ubiquitin specific protease 8                                          | 0.472172  | Inlier |
| siRNA-Vinblastine Run2-DMSO  | NM_0051<br>54 | USP8  | ubiquitin specific protease 8                                          | 2.44219   | Inlier |
| siRNA-Vinblastine Run1-DMSO  | NM_0051<br>54 | USP8  | ubiquitin specific protease 8                                          | 2.85539   | Inlier |
| siRNA Disorazole DMSO Run2   | NM_0219<br>06 | USP9X | ubiquitin specific protease 9, X-linked (fat facets-like, Drosophila ) | -1.217236 | Inlier |
| siRNA Disorazole DMSO Run1   | NM_0219<br>06 | USP9X | ubiquitin specific protease 9, X-linked (fat facets-like, Drosophila ) | -0.829485 | Inlier |
| siRNA-Temozolomide Run2-DMSO | NM_0219<br>06 | USP9X | ubiquitin specific protease 9, X-linked (fat facets-like, Drosophila ) | -0.597817 | Inlier |

Identification of Survival Genes in Human Glioblastoma Cells Using siRNA Screening  
 Nikhil G Thaker, Fang Zhang, Peter R. McDonald, Tong Ying Shun, Michael D Lewen, Ian F. Pollack, and John S. Lazo  
 Molecular Pharmacology

|                              |           |       |                                                                        |          |        |
|------------------------------|-----------|-------|------------------------------------------------------------------------|----------|--------|
| siRNA-Temozolomide Run3-DMSO | NM_021906 | USP9X | ubiquitin specific protease 9, X-linked (fat facets-like, Drosophila ) | -0.23397 | Inlier |
| siRNA-Vinblastine Run1-DMSO  | NM_021906 | USP9X | ubiquitin specific protease 9, X-linked (fat facets-like, Drosophila ) | 0.233971 | Inlier |
| siRNA-Temozolomide Run1-DMSO | NM_021906 | USP9X | ubiquitin specific protease 9, X-linked (fat facets-like, Drosophila ) | 0.275334 | Inlier |
| siRNA-Vinblastine Run2-DMSO  | NM_021906 | USP9X | ubiquitin specific protease 9, X-linked (fat facets-like, Drosophila ) | 0.751183 | Inlier |
| siRNA Disorazole DMSO Run3   | NM_021906 | USP9X | ubiquitin specific protease 9, X-linked (fat facets-like, Drosophila ) | 1.280633 | Inlier |

Identification of Survival Genes in Human Glioblastoma Cells Using siRNA Screening

Nikhil G Thaker, Fang Zhang, Peter R. McDonald, Tong Ying Shun, Michael D Lewen, Ian F. Pollack, and John S. Lazo

Molecular Pharmacology

|                              |           |       |                                                                        |           |        |
|------------------------------|-----------|-------|------------------------------------------------------------------------|-----------|--------|
| siRNA-Temozolomide Run3-DMSO | NM_004654 | USP9Y | ubiquitin specific protease 9, Y-linked (fat facets-like, Drosophila ) | -1.53044  | Inlier |
| siRNA-Temozolomide Run2-DMSO | NM_004654 | USP9Y | ubiquitin specific protease 9, Y-linked (fat facets-like, Drosophila ) | -1.402167 | Inlier |
| siRNA-Temozolomide Run1-DMSO | NM_004654 | USP9Y | ubiquitin specific protease 9, Y-linked (fat facets-like, Drosophila ) | -0.668145 | Inlier |
| siRNA Disorazole DMSO Run2   | NM_004654 | USP9Y | ubiquitin specific protease 9, Y-linked (fat facets-like, Drosophila ) | -0.091125 | Inlier |
| siRNA Disorazole DMSO Run1   | NM_004654 | USP9Y | ubiquitin specific protease 9, Y-linked (fat facets-like, Drosophila ) | 0.091125  | Inlier |



Identification of Survival Genes in Human Glioblastoma Cells Using siRNA Screening

Nikhil G Thaker, Fang Zhang, Peter R. McDonald, Tong Ying Shun, Michael D Lewen, Ian F. Pollack, and John S.

Lazo

Molecular Pharmacology

|                                  |               |       |                                                                                              |           |        |
|----------------------------------|---------------|-------|----------------------------------------------------------------------------------------------|-----------|--------|
| siRNA Disorazole DMSO Run3       | NM_0046<br>54 | USP9Y | ubiquitin<br>specific<br>protease<br>9, Y-linked<br>(fat facets-<br>like,<br>Drosophila<br>) | 0.414715  | Inlier |
| siRNA-Vinblastine Run1-<br>DMSO  | NM_0046<br>54 | USP9Y | ubiquitin<br>specific<br>protease<br>9, Y-linked<br>(fat facets-<br>like,<br>Drosophila<br>) | 0.680855  | Inlier |
| siRNA-Vinblastine Run2-<br>DMSO  | NM_0046<br>54 | USP9Y | ubiquitin<br>specific<br>protease<br>9, Y-linked<br>(fat facets-<br>like,<br>Drosophila<br>) | 1.511499  | Inlier |
| siRNA-Vinblastine Run2-<br>DMSO  | NM_0057<br>15 | UST   | uronyl-2-<br>sulfotransf<br>erase                                                            | -0.838661 | Inlier |
| siRNA Disorazole DMSO Run3       | NM_0057<br>15 | UST   | uronyl-2-<br>sulfotransf<br>erase                                                            | -0.718934 | Inlier |
| siRNA Disorazole DMSO Run1       | NM_0057<br>15 | UST   | uronyl-2-<br>sulfotransf<br>erase                                                            | -0.630066 | Inlier |
| siRNA-Vinblastine Run1-<br>DMSO  | NM_0057<br>15 | UST   | uronyl-2-<br>sulfotransf<br>erase                                                            | -0.127312 | Inlier |
| siRNA Disorazole DMSO Run2       | NM_0057<br>15 | UST   | uronyl-2-<br>sulfotransf<br>erase                                                            | 0.127311  | Inlier |
| siRNA-Temozolomide Run2-<br>DMSO | NM_0057<br>15 | UST   | uronyl-2-<br>sulfotransf<br>erase                                                            | 0.336244  | Inlier |
| siRNA-Temozolomide Run3-<br>DMSO | NM_0057<br>15 | UST   | uronyl-2-<br>sulfotransf<br>erase                                                            | 0.892227  | Inlier |
| siRNA-Temozolomide Run1-<br>DMSO | NM_0057<br>15 | UST   | uronyl-2-<br>sulfotransf<br>erase                                                            | 0.918426  | Inlier |

Identification of Survival Genes in Human Glioblastoma Cells Using siRNA Screening  
 Nikhil G Thaker, Fang Zhang, Peter R. McDonald, Tong Ying Shun, Michael D Lewen, Ian F. Pollack, and John S. Lazo

|                                  |               |       |                                                |           |        |
|----------------------------------|---------------|-------|------------------------------------------------|-----------|--------|
| siRNA-Temozolomide Run3-<br>DMSO | NM_0189<br>49 | UTS2R | urotensin<br>2 receptor                        | -1.65232  | Inlier |
| siRNA-Temozolomide Run2-<br>DMSO | NM_0189<br>49 | UTS2R | urotensin<br>2 receptor                        | -1.110425 | Inlier |
| siRNA Disorazole DMSO Run3       | NM_0189<br>49 | UTS2R | urotensin<br>2 receptor                        | -0.389039 | Inlier |
| siRNA-Temozolomide Run1-<br>DMSO | NM_0189<br>49 | UTS2R | urotensin<br>2 receptor                        | -0.196467 | Inlier |
| siRNA Disorazole DMSO Run1       | NM_0189<br>49 | UTS2R | urotensin<br>2 receptor                        | 0.196467  | Inlier |
| siRNA-Vinblastine Run2-<br>DMSO  | NM_0189<br>49 | UTS2R | urotensin<br>2 receptor                        | 0.473112  | Inlier |
| siRNA Disorazole DMSO Run2       | NM_0189<br>49 | UTS2R | urotensin<br>2 receptor                        | 0.875888  | Inlier |
| siRNA-Vinblastine Run1-<br>DMSO  | NM_0189<br>49 | UTS2R | urotensin<br>2 receptor                        | 1.633549  | Inlier |
| siRNA-Temozolomide Run3-<br>DMSO | NM_0250<br>76 | UXS1  | UDP-<br>glucuronat<br>e<br>decarboxyl<br>ase 1 | -0.989952 | Inlier |
| siRNA Disorazole DMSO Run1       | NM_0250<br>76 | UXS1  | UDP-<br>glucuronat<br>e<br>decarboxyl<br>ase 1 | -0.678986 | Inlier |
| siRNA-Temozolomide Run2-<br>DMSO | NM_0250<br>76 | UXS1  | UDP-<br>glucuronat<br>e<br>decarboxyl<br>ase 1 | -0.670014 | Inlier |
| siRNA Disorazole DMSO Run3       | NM_0250<br>76 | UXS1  | UDP-<br>glucuronat<br>e<br>decarboxyl<br>ase 1 | -0.097714 | Inlier |
| siRNA-Vinblastine Run2-<br>DMSO  | NM_0250<br>76 | UXS1  | UDP-<br>glucuronat<br>e<br>decarboxyl<br>ase 1 | 0.097714  | Inlier |
| siRNA-Temozolomide Run1-<br>DMSO | NM_0250<br>76 | UXS1  | UDP-<br>glucuronat<br>e<br>decarboxyl<br>ase 1 | 0.274959  | Inlier |
| siRNA-Vinblastine Run1-<br>DMSO  | NM_0250<br>76 | UXS1  | UDP-<br>glucuronat<br>e<br>decarboxyl<br>ase 1 | 1.294389  | Inlier |

Identification of Survival Genes in Human Glioblastoma Cells Using siRNA Screening  
 Nikhil G Thaker, Fang Zhang, Peter R. McDonald, Tong Ying Shun, Michael D Lewen, Ian F. Pollack, and John S. Lazo

Molecular Pharmacology

|                              |               |      |                                                           |           |        |
|------------------------------|---------------|------|-----------------------------------------------------------|-----------|--------|
| siRNA Disorazole DMSO Run2   | NM_0250<br>76 | UXS1 | UDP-glucuronate decarboxylase 1                           | 1.747279  | Inlier |
| siRNA-Temozolomide Run2-DMSO | NM_0062<br>95 | VAR2 | valyl-tRNA synthetase 2                                   | -0.903242 | Inlier |
| siRNA Disorazole DMSO Run1   | NM_0062<br>95 | VAR2 | valyl-tRNA synthetase 2                                   | -0.445758 | Inlier |
| siRNA Disorazole DMSO Run3   | NM_0062<br>95 | VAR2 | valyl-tRNA synthetase 2                                   | -0.328012 | Inlier |
| siRNA-Vinblastine Run2-DMSO  | NM_0062<br>95 | VAR2 | valyl-tRNA synthetase 2                                   | -0.260535 | Inlier |
| siRNA-Temozolomide Run1-DMSO | NM_0062<br>95 | VAR2 | valyl-tRNA synthetase 2                                   | 0.260536  | Inlier |
| siRNA Disorazole DMSO Run2   | NM_0062<br>95 | VAR2 | valyl-tRNA synthetase 2                                   | 1.075059  | Inlier |
| siRNA-Temozolomide Run3-DMSO | NM_0062<br>95 | VAR2 | valyl-tRNA synthetase 2                                   | 1.202346  | Inlier |
| siRNA-Vinblastine Run1-DMSO  | NM_0062<br>95 | VAR2 | valyl-tRNA synthetase 2                                   | 2.921143  | Inlier |
| siRNA Disorazole DMSO Run1   | NM_0063<br>73 | VAT1 | vesicle amine transport protein 1 homolog (T californica) | -1.304566 | Inlier |

Identification of Survival Genes in Human Glioblastoma Cells Using siRNA Screening

Nikhil G Thaker, Fang Zhang, Peter R. McDonald, Tong Ying Shun, Michael D Lewen, Ian F. Pollack, and John S. Lazo

Molecular Pharmacology

|                              |           |      |                                                                             |           |        |
|------------------------------|-----------|------|-----------------------------------------------------------------------------|-----------|--------|
| siRNA-Temozolomide Run1-DMSO | NM_006373 | VAT1 | vesicle<br>amine<br>transport<br>protein 1<br>homolog<br>(T<br>californica) | -0.46455  | Inlier |
| siRNA-Temozolomide Run3-DMSO | NM_006373 | VAT1 | vesicle<br>amine<br>transport<br>protein 1<br>homolog<br>(T<br>californica) | -0.242919 | Inlier |
| siRNA-Vinblastine Run2-DMSO  | NM_006373 | VAT1 | vesicle<br>amine<br>transport<br>protein 1<br>homolog<br>(T<br>californica) | -0.045437 | Inlier |
| siRNA-Temozolomide Run2-DMSO | NM_006373 | VAT1 | vesicle<br>amine<br>transport<br>protein 1<br>homolog<br>(T<br>californica) | 0.045437  | Inlier |
| siRNA Disorazole DMSO Run3   | NM_006373 | VAT1 | vesicle<br>amine<br>transport<br>protein 1<br>homolog<br>(T<br>californica) | 0.88445   | Inlier |
| siRNA Disorazole DMSO Run2   | NM_006373 | VAT1 | vesicle<br>amine<br>transport<br>protein 1<br>homolog<br>(T<br>californica) | 1.688359  | Inlier |

Identification of Survival Genes in Human Glioblastoma Cells Using siRNA Screening  
 Nikhil G Thaker, Fang Zhang, Peter R. McDonald, Tong Ying Shun, Michael D Lewen, Ian F. Pollack, and John S. Lazo  
 Molecular Pharmacology

|                              |               |      |                                                                             |           |        |
|------------------------------|---------------|------|-----------------------------------------------------------------------------|-----------|--------|
| siRNA-Vinblastine Run1-DMSO  | NM_0063<br>73 | VAT1 | vesicle<br>amine<br>transport<br>protein 1<br>homolog<br>(T<br>californica) | 2.163603  | Inlier |
| siRNA Disorazole DMSO Run3   | NM_0054<br>28 | VAV1 | vav 1<br>oncogene                                                           | -1.05512  | Inlier |
| siRNA-Vinblastine Run2-DMSO  | NM_0054<br>28 | VAV1 | vav 1<br>oncogene                                                           | -0.894003 | Inlier |
| siRNA-Temozolomide Run3-DMSO | NM_0054<br>28 | VAV1 | vav 1<br>oncogene                                                           | -0.820891 | Inlier |
| siRNA-Temozolomide Run1-DMSO | NM_0054<br>28 | VAV1 | vav 1<br>oncogene                                                           | -0.135006 | Inlier |
| siRNA Disorazole DMSO Run1   | NM_0054<br>28 | VAV1 | vav 1<br>oncogene                                                           | 0.135006  | Inlier |
| siRNA-Temozolomide Run2-DMSO | NM_0054<br>28 | VAV1 | vav 1<br>oncogene                                                           | 0.2258    | Inlier |
| siRNA Disorazole DMSO Run2   | NM_0054<br>28 | VAV1 | vav 1<br>oncogene                                                           | 0.602787  | Inlier |
| siRNA-Vinblastine Run1-DMSO  | NM_0054<br>28 | VAV1 | vav 1<br>oncogene                                                           | 0.746213  | Inlier |
| siRNA-Temozolomide Run1-DMSO | NM_0033<br>71 | VAV2 | vav 2<br>oncogene                                                           | -1.401913 | Inlier |
| siRNA Disorazole DMSO Run1   | NM_0033<br>71 | VAV2 | vav 2<br>oncogene                                                           | -1.26619  | Inlier |
| siRNA-Vinblastine Run2-DMSO  | NM_0033<br>71 | VAV2 | vav 2<br>oncogene                                                           | -0.535606 | Inlier |
| siRNA-Temozolomide Run2-DMSO | NM_0033<br>71 | VAV2 | vav 2<br>oncogene                                                           | -0.441228 | Inlier |
| siRNA-Vinblastine Run1-DMSO  | NM_0033<br>71 | VAV2 | vav 2<br>oncogene                                                           | 0.441228  | Inlier |
| siRNA Disorazole DMSO Run3   | NM_0033<br>71 | VAV2 | vav 2<br>oncogene                                                           | 0.611196  | Inlier |
| siRNA Disorazole DMSO Run2   | NM_0033<br>71 | VAV2 | vav 2<br>oncogene                                                           | 0.737804  | Inlier |
| siRNA-Temozolomide Run3-DMSO | NM_0033<br>71 | VAV2 | vav 2<br>oncogene                                                           | 0.979538  | Inlier |
| siRNA-Temozolomide Run2-DMSO | NM_0061<br>13 | VAV3 | vav 3<br>oncogene                                                           | -0.897088 | Inlier |
| siRNA-Temozolomide Run1-DMSO | NM_0061<br>13 | VAV3 | vav 3<br>oncogene                                                           | -0.451912 | Inlier |
| siRNA Disorazole DMSO Run1   | NM_0061<br>13 | VAV3 | vav 3<br>oncogene                                                           | -0.214179 | Inlier |
| siRNA-Temozolomide Run3-DMSO | NM_0061<br>13 | VAV3 | vav 3<br>oncogene                                                           | -0.111421 | Inlier |
| siRNA-Vinblastine Run2-DMSO  | NM_0061<br>13 | VAV3 | vav 3<br>oncogene                                                           | 0.111422  | Inlier |
| siRNA Disorazole DMSO Run3   | NM_0061<br>13 | VAV3 | vav 3<br>oncogene                                                           | 1.002297  | Inlier |

Identification of Survival Genes in Human Glioblastoma Cells Using siRNA Screening  
 Nikhil G Thaker, Fang Zhang, Peter R. McDonald, Tong Ying Shun, Michael D Lewen, Ian F. Pollack, and John S. Lazo

|                              |               |       |                                   |                   |
|------------------------------|---------------|-------|-----------------------------------|-------------------|
| Molecular Pharmacology       | NM_0061       |       | vav 3                             |                   |
| siRNA Disorazole DMSO Run2   | 13            | VAV3  | oncogene                          | 1.280136 Inlier   |
| siRNA-Vinblastine Run1-DMSO  | NM_0061<br>13 | VAV3  | vav 3<br>oncogene                 | 1.946347 Inlier   |
| siRNA-Temozolomide Run2-DMSO | NM_0033<br>73 | VCL   | vinculin                          | -1.14294 Inlier   |
| siRNA-Temozolomide Run1-DMSO | NM_0033<br>73 | VCL   | vinculin                          | -0.746295 Inlier  |
| siRNA Disorazole DMSO Run1   | NM_0033<br>73 | VCL   | vinculin                          | -0.602705 Inlier  |
| siRNA-Temozolomide Run3-DMSO | NM_0033<br>73 | VCL   | vinculin                          | -0.37368 Inlier   |
| siRNA-Vinblastine Run2-DMSO  | NM_0033<br>73 | VCL   | vinculin                          | 0.373679 Inlier   |
| siRNA Disorazole DMSO Run3   | NM_0033<br>73 | VCL   | vinculin                          | 0.535349 Inlier   |
| siRNA Disorazole DMSO Run2   | NM_0033<br>73 | VCL   | vinculin                          | 1.615111 Inlier   |
| siRNA-Vinblastine Run1-DMSO  | NM_0033<br>73 | VCL   | vinculin                          | 2.297517 Inlier   |
| siRNA-Vinblastine Run2-DMSO  | NM_0071<br>26 | VCP   | valosin-containing protein        | -1.437646 Inlier  |
| siRNA Disorazole DMSO Run3   | NM_0071<br>26 | VCP   | valosin-containing protein        | -0.914062 Inlier  |
| siRNA-Temozolomide Run2-DMSO | NM_0071<br>26 | VCP   | valosin-containing protein        | -0.434938 Inlier  |
| siRNA-Temozolomide Run1-DMSO | NM_0071<br>26 | VCP   | valosin-containing protein        | -0.019072 Inlier  |
| siRNA Disorazole DMSO Run1   | NM_0071<br>26 | VCP   | valosin-containing protein        | 0.019072 Inlier   |
| siRNA-Temozolomide Run3-DMSO | NM_0071<br>26 | VCP   | valosin-containing protein        | 0.092821 Inlier   |
| siRNA Disorazole DMSO Run2   | NM_0071<br>26 | VCP   | valosin-containing protein        | 5.575455 Outlier  |
| siRNA-Vinblastine Run1-DMSO  | NM_0071<br>26 | VCP   | valosin-containing protein        | 6.524886 Outlier  |
| siRNA-Temozolomide Run3-DMSO | NM_0033<br>74 | VDAC1 | voltage-dependent anion channel 1 | -3.638886 Outlier |
| siRNA Disorazole DMSO Run1   | NM_0033<br>74 | VDAC1 | voltage-dependent anion channel 1 | -1.427548 Inlier  |

Identification of Survival Genes in Human Glioblastoma Cells Using siRNA Screening  
 Nikhil G Thaker, Fang Zhang, Peter R. McDonald, Tong Ying Shun, Michael D Lewen, Ian F. Pollack, and John S. Lazo

Molecular Pharmacology

|                              |               |       |                                   |           |         |
|------------------------------|---------------|-------|-----------------------------------|-----------|---------|
| siRNA-Temozolomide Run1-DMSO | NM_0033<br>74 | VDAC1 | voltage-dependent anion channel 1 | -0.256902 | Inlier  |
| siRNA Disorazole DMSO Run3   | NM_0033<br>74 | VDAC1 | voltage-dependent anion channel 1 | -0.130417 | Inlier  |
| siRNA-Temozolomide Run2-DMSO | NM_0033<br>74 | VDAC1 | voltage-dependent anion channel 1 | 0.130418  | Inlier  |
| siRNA-Vinblastine Run2-DMSO  | NM_0033<br>74 | VDAC1 | voltage-dependent anion channel 1 | 0.135214  | Inlier  |
| siRNA-Vinblastine Run1-DMSO  | NM_0033<br>74 | VDAC1 | voltage-dependent anion channel 1 | 1.092098  | Inlier  |
| siRNA Disorazole DMSO Run2   | NM_0033<br>74 | VDAC1 | voltage-dependent anion channel 1 | 4.593156  | Outlier |
| siRNA Disorazole DMSO Run1   | NM_0033<br>75 | VDAC2 | voltage-dependent anion channel 2 | -1.362149 | Inlier  |
| siRNA-Vinblastine Run2-DMSO  | NM_0033<br>75 | VDAC2 | voltage-dependent anion channel 2 | -0.886505 | Inlier  |
| siRNA-Temozolomide Run2-DMSO | NM_0033<br>75 | VDAC2 | voltage-dependent anion channel 2 | -0.462495 | Inlier  |
| siRNA-Temozolomide Run1-DMSO | NM_0033<br>75 | VDAC2 | voltage-dependent anion channel 2 | -0.052719 | Inlier  |
| siRNA-Temozolomide Run3-DMSO | NM_0033<br>75 | VDAC2 | voltage-dependent anion channel 2 | 0.052719  | Inlier  |
| siRNA-Vinblastine Run1-DMSO  | NM_0033<br>75 | VDAC2 | voltage-dependent anion channel 2 | 0.297218  | Inlier  |
| siRNA Disorazole DMSO Run3   | NM_0033<br>75 | VDAC2 | voltage-dependent anion channel 2 | 0.982465  | Inlier  |

Identification of Survival Genes in Human Glioblastoma Cells Using siRNA Screening  
 Nikhil G Thaker, Fang Zhang, Peter R. McDonald, Tong Ying Shun, Michael D Lewen, Ian F. Pollack, and John S. Lazo

Molecular Pharmacology

|                                  |                  |       |                                                             |           |        |
|----------------------------------|------------------|-------|-------------------------------------------------------------|-----------|--------|
| siRNA Disorazole DMSO Run2       | NM_0033<br>75    | VDAC2 | voltage-<br>dependent<br>anion<br>channel 2                 | 1.595007  | Inlier |
| siRNA-Temozolomide Run3-<br>DMSO | NM_0056<br>62    | VDAC3 | voltage-<br>dependent<br>anion<br>channel 3                 | -1.234341 | Inlier |
| siRNA-Temozolomide Run2-<br>DMSO | NM_0056<br>62    | VDAC3 | voltage-<br>dependent<br>anion<br>channel 3                 | -1.003592 | Inlier |
| siRNA Disorazole DMSO Run3       | NM_0056<br>62    | VDAC3 | voltage-<br>dependent<br>anion<br>channel 3                 | -0.378456 | Inlier |
| siRNA Disorazole DMSO Run1       | NM_0056<br>62    | VDAC3 | voltage-<br>dependent<br>anion<br>channel 3                 | -0.295411 | Inlier |
| siRNA-Temozolomide Run1-<br>DMSO | NM_0056<br>62    | VDAC3 | voltage-<br>dependent<br>anion<br>channel 3                 | 0.295411  | Inlier |
| siRNA Disorazole DMSO Run2       | NM_0056<br>62    | VDAC3 | voltage-<br>dependent<br>anion<br>channel 3                 | 0.330626  | Inlier |
| siRNA-Vinblastine Run2-<br>DMSO  | NM_0056<br>62    | VDAC3 | voltage-<br>dependent<br>anion<br>channel 3                 | 0.970544  | Inlier |
| siRNA-Vinblastine Run1-<br>DMSO  | NM_0056<br>62    | VDAC3 | voltage-<br>dependent<br>anion<br>channel 3                 | 1.199152  | Inlier |
| siRNA-Temozolomide Run3-<br>DMSO | NM_0010<br>17535 | VDR   | vitamin D<br>(1,25-<br>dihydroxyv<br>itamin D3)<br>receptor | -1.249692 | Inlier |
| siRNA Disorazole DMSO Run2       | NM_0010<br>17535 | VDR   | vitamin D<br>(1,25-<br>dihydroxyv<br>itamin D3)<br>receptor | -0.825717 | Inlier |



Identification of Survival Genes in Human Glioblastoma Cells Using siRNA Screening  
 Nikhil G Thaker, Fang Zhang, Peter R. McDonald, Tong Ying Shun, Michael D Lewen, Ian F. Pollack, and John S. Lazo  
 Molecular Pharmacology

|                                  |                  |       |                                                                                                                                                                 |           |        |
|----------------------------------|------------------|-------|-----------------------------------------------------------------------------------------------------------------------------------------------------------------|-----------|--------|
| siRNA Disorazole DMSO Run3       | NM_0010<br>17535 | VDR   | vitamin D<br>(1,25-<br>dihydroxyv<br>itamin D3)<br>receptor                                                                                                     | -0.650897 | Inlier |
| siRNA-Temozolomide Run2-<br>DMSO | NM_0010<br>17535 | VDR   | vitamin D<br>(1,25-<br>dihydroxyv<br>itamin D3)<br>receptor                                                                                                     | -0.129132 | Inlier |
| siRNA Disorazole DMSO Run1       | NM_0010<br>17535 | VDR   | vitamin D<br>(1,25-<br>dihydroxyv<br>itamin D3)<br>receptor                                                                                                     | 0.129131  | Inlier |
| siRNA-Temozolomide Run1-<br>DMSO | NM_0010<br>17535 | VDR   | vitamin D<br>(1,25-<br>dihydroxyv<br>itamin D3)<br>receptor                                                                                                     | 0.135738  | Inlier |
| siRNA-Vinblastine Run1-<br>DMSO  | NM_0010<br>17535 | VDR   | vitamin D<br>(1,25-<br>dihydroxyv<br>itamin D3)<br>receptor                                                                                                     | 0.698103  | Inlier |
| siRNA-Vinblastine Run2-<br>DMSO  | NM_0010<br>17535 | VDR   | vitamin D<br>(1,25-<br>dihydroxyv<br>itamin D3)<br>receptor<br>mediator<br>of RNA<br>polymeras<br>e II<br>transcripti<br>on,<br>subunit 4<br>homolog<br>(yeast) | 0.999646  | Inlier |
| siRNA Disorazole DMSO Run2       | NM_0141<br>66    | VDRIP |                                                                                                                                                                 | -2.585096 | Inlier |

Identification of Survival Genes in Human Glioblastoma Cells Using siRNA Screening

Nikhil G Thaker, Fang Zhang, Peter R. McDonald, Tong Ying Shun, Michael D Lewen, Ian F. Pollack, and John S. Lazo

Molecular Pharmacology

| siRNA Treatment              | Gene ID   | Method | Score     | Outlier Status | Gene Description                                                       |
|------------------------------|-----------|--------|-----------|----------------|------------------------------------------------------------------------|
| siRNA-Temozolomide Run3-DMSO | NM_014166 | VDRIP  | -0.879438 | Inlier         | mediator of RNA polymerase II transcription, subunit 4 homolog (yeast) |
| siRNA Disorazole DMSO Run1   | NM_014166 | VDRIP  | -0.611657 | Inlier         | mediator of RNA polymerase II transcription, subunit 4 homolog (yeast) |
| siRNA-Temozolomide Run2-DMSO | NM_014166 | VDRIP  | -0.138292 | Inlier         | mediator of RNA polymerase II transcription, subunit 4 homolog (yeast) |
| siRNA-Temozolomide Run1-DMSO | NM_014166 | VDRIP  | 0.138292  | Inlier         | mediator of RNA polymerase II transcription, subunit 4 homolog (yeast) |
| siRNA-Vinblastine Run1-DMSO  | NM_014166 | VDRIP  | 0.523973  | Inlier         | mediator of RNA polymerase II transcription, subunit 4 homolog (yeast) |

Identification of Survival Genes in Human Glioblastoma Cells Using siRNA Screening  
 Nikhil G Thaker, Fang Zhang, Peter R. McDonald, Tong Ying Shun, Michael D Lewen, Ian F. Pollack, and John S. Lazo

Molecular Pharmacology

| siRNA Treatment              | Gene ID   | Method | Value     | Category | Description                                                            |
|------------------------------|-----------|--------|-----------|----------|------------------------------------------------------------------------|
| siRNA Disorazole DMSO Run3   | NM_014166 | VDRIP  | 0.737343  | Inlier   | mediator of RNA polymerase II transcription, subunit 4 homolog (yeast) |
| siRNA-Vinblastine Run2-DMSO  | NM_014166 | VDRIP  | 1.390663  | Inlier   | mediator of RNA polymerase II transcription, subunit 4 homolog (yeast) |
| siRNA-Temozolomide Run3-DMSO | NM_052867 | VGCNL1 | -1.187953 | Inlier   | voltage gated channel like 1                                           |
| siRNA-Temozolomide Run2-DMSO | NM_052867 | VGCNL1 | -1.081512 | Inlier   | voltage gated channel like 1                                           |
| siRNA Disorazole DMSO Run3   | NM_052867 | VGCNL1 | -0.344072 | Inlier   | voltage gated channel like 1                                           |
| siRNA-Temozolomide Run1-DMSO | NM_052867 | VGCNL1 | -0.020512 | Inlier   | voltage gated channel like 1                                           |
| siRNA Disorazole DMSO Run1   | NM_052867 | VGCNL1 | 0.020512  | Inlier   | voltage gated channel like 1                                           |
| siRNA Disorazole DMSO Run2   | NM_052867 | VGCNL1 | 0.455441  | Inlier   | voltage gated channel like 1                                           |
| siRNA-Vinblastine Run1-DMSO  | NM_052867 | VGCNL1 | 0.893559  | Inlier   | voltage gated channel like 1                                           |
| siRNA-Vinblastine Run2-DMSO  | NM_052867 | VGCNL1 | 1.080182  | Inlier   | voltage gated channel like 1                                           |

Identification of Survival Genes in Human Glioblastoma Cells Using siRNA Screening  
 Nikhil G Thaker, Fang Zhang, Peter R. McDonald, Tong Ying Shun, Michael D Lewen, Ian F. Pollack, and John S. Lazo

Molecular Pharmacology

|                              |               |       |                                                                 |           |         |
|------------------------------|---------------|-------|-----------------------------------------------------------------|-----------|---------|
| siRNA-Temozolomide Run3-DMSO | NM_0805<br>52 | VIAAT | solute carrier family 32 (GABA vesicular transporter), member 1 | -14.35935 | Outlier |
| siRNA-Temozolomide Run2-DMSO | NM_0805<br>52 | VIAAT | solute carrier family 32 (GABA vesicular transporter), member 1 | -2.973161 | Inlier  |
| siRNA Disorazole DMSO Run1   | NM_0805<br>52 | VIAAT | solute carrier family 32 (GABA vesicular transporter), member 1 | -0.428224 | Inlier  |
| siRNA Disorazole DMSO Run2   | NM_0805<br>52 | VIAAT | solute carrier family 32 (GABA vesicular transporter), member 1 | -0.008348 | Inlier  |
| siRNA-Temozolomide Run1-DMSO | NM_0805<br>52 | VIAAT | solute carrier family 32 (GABA vesicular transporter), member 1 | 0.008348  | Inlier  |
| siRNA-Vinblastine Run2-DMSO  | NM_0805<br>52 | VIAAT | solute carrier family 32 (GABA vesicular transporter), member 1 | 0.62078   | Inlier  |

Identification of Survival Genes in Human Glioblastoma Cells Using siRNA Screening  
 Nikhil G Thaker, Fang Zhang, Peter R. McDonald, Tong Ying Shun, Michael D Lewen, Ian F. Pollack, and John S. Lazo

Molecular Pharmacology

|                              |               |       |                                                                 |           |         |
|------------------------------|---------------|-------|-----------------------------------------------------------------|-----------|---------|
| siRNA Disorazole DMSO Run3   | NM_0805<br>52 | VIAAT | solute carrier family 32 (GABA vesicular transporter), member 1 | 0.72822   | Inlier  |
| siRNA-Vinblastine Run1-DMSO  | NM_0805<br>52 | VIAAT | solute carrier family 32 (GABA vesicular transporter), member 1 | 4.873427  | Outlier |
| siRNA-Temozolomide Run2-DMSO | NM_0046<br>24 | VIPR1 | vasoactive intestinal peptide receptor 1                        | -0.903803 | Inlier  |
| siRNA-Temozolomide Run3-DMSO | NM_0046<br>24 | VIPR1 | vasoactive intestinal peptide receptor 1                        | -0.76945  | Inlier  |
| siRNA Disorazole DMSO Run3   | NM_0046<br>24 | VIPR1 | vasoactive intestinal peptide receptor 1                        | -0.57955  | Inlier  |
| siRNA-Temozolomide Run1-DMSO | NM_0046<br>24 | VIPR1 | vasoactive intestinal peptide receptor 1                        | -0.390291 | Inlier  |
| siRNA-Vinblastine Run2-DMSO  | NM_0046<br>24 | VIPR1 | vasoactive intestinal peptide receptor 1                        | 0.390292  | Inlier  |
| siRNA Disorazole DMSO Run2   | NM_0046<br>24 | VIPR1 | vasoactive intestinal peptide receptor 1                        | 0.411712  | Inlier  |
| siRNA Disorazole DMSO Run1   | NM_0046<br>24 | VIPR1 | vasoactive intestinal peptide receptor 1                        | 1.116145  | Inlier  |
| siRNA-Vinblastine Run1-DMSO  | NM_0046<br>24 | VIPR1 | vasoactive intestinal peptide receptor 1                        | 1.421638  | Inlier  |
| siRNA-Temozolomide Run3-DMSO | NM_0033<br>82 | VIPR2 | vasoactive intestinal peptide receptor 2                        | -1.365979 | Inlier  |

Identification of Survival Genes in Human Glioblastoma Cells Using siRNA Screening  
 Nikhil G Thaker, Fang Zhang, Peter R. McDonald, Tong Ying Shun, Michael D Lewen, Ian F. Pollack, and John S. Lazo

Molecular Pharmacology

|                                  |                  |       |                                                   |           |        |
|----------------------------------|------------------|-------|---------------------------------------------------|-----------|--------|
| siRNA Disorazole DMSO Run2       | NM_0033<br>82    | VIPR2 | vasoactive<br>intestinal<br>peptide<br>receptor 2 | -1.072865 | Inlier |
| siRNA-Temozolomide Run2-<br>DMSO | NM_0033<br>82    | VIPR2 | vasoactive<br>intestinal<br>peptide<br>receptor 2 | -0.721336 | Inlier |
| siRNA-Temozolomide Run1-<br>DMSO | NM_0033<br>82    | VIPR2 | vasoactive<br>intestinal<br>peptide<br>receptor 2 | -0.33064  | Inlier |
| siRNA Disorazole DMSO Run1       | NM_0033<br>82    | VIPR2 | vasoactive<br>intestinal<br>peptide<br>receptor 2 | 0.33064   | Inlier |
| siRNA Disorazole DMSO Run3       | NM_0033<br>82    | VIPR2 | vasoactive<br>intestinal<br>peptide<br>receptor 2 | 0.568951  | Inlier |
| siRNA-Vinblastine Run1-<br>DMSO  | NM_0033<br>82    | VIPR2 | vasoactive<br>intestinal<br>peptide<br>receptor 2 | 0.627664  | Inlier |
| siRNA-Vinblastine Run2-<br>DMSO  | NM_0033<br>82    | VIPR2 | vasoactive<br>intestinal<br>peptide<br>receptor 2 | 0.832429  | Inlier |
| siRNA-Temozolomide Run3-<br>DMSO | NM_0010<br>18056 | VLDLR | very low<br>density<br>lipoprotein<br>receptor    | -2.230134 | Inlier |
| siRNA Disorazole DMSO Run1       | NM_0010<br>18056 | VLDLR | very low<br>density<br>lipoprotein<br>receptor    | -0.696621 | Inlier |
| siRNA-Temozolomide Run2-<br>DMSO | NM_0010<br>18056 | VLDLR | very low<br>density<br>lipoprotein<br>receptor    | -0.652379 | Inlier |
| siRNA Disorazole DMSO Run3       | NM_0010<br>18056 | VLDLR | very low<br>density<br>lipoprotein<br>receptor    | -0.254024 | Inlier |
| siRNA-Temozolomide Run1-<br>DMSO | NM_0010<br>18056 | VLDLR | very low<br>density<br>lipoprotein<br>receptor    | 0.254024  | Inlier |
| siRNA-Vinblastine Run2-<br>DMSO  | NM_0010<br>18056 | VLDLR | very low<br>density<br>lipoprotein<br>receptor    | 0.549412  | Inlier |

Identification of Survival Genes in Human Glioblastoma Cells Using siRNA Screening  
 Nikhil G Thaker, Fang Zhang, Peter R. McDonald, Tong Ying Shun, Michael D Lewen, Ian F. Pollack, and John S. Lazo

Molecular Pharmacology

|                                  |                  |       |                                                             |           |         |
|----------------------------------|------------------|-------|-------------------------------------------------------------|-----------|---------|
| siRNA Disorazole DMSO Run2       | NM_0010<br>18056 | VLDLR | very low<br>density<br>lipoprotein<br>receptor              | 2.820147  | Inlier  |
| siRNA-Vinblastine Run1-<br>DMSO  | NM_0010<br>18056 | VLDLR | very low<br>density<br>lipoprotein<br>receptor<br>vomeronal | 4.62248   | Outlier |
| siRNA-Temozolomide Run3-<br>DMSO | NM_0206<br>33    | VN1R1 | receptor 1<br>vomeronal                                     | -0.724777 | Inlier  |
| siRNA Disorazole DMSO Run3       | NM_0206<br>33    | VN1R1 | receptor 1<br>vomeronal                                     | -0.634256 | Inlier  |
| siRNA-Temozolomide Run2-<br>DMSO | NM_0206<br>33    | VN1R1 | receptor 1<br>vomeronal                                     | -0.24038  | Inlier  |
| siRNA-Temozolomide Run1-<br>DMSO | NM_0206<br>33    | VN1R1 | receptor 1<br>vomeronal                                     | -0.093118 | Inlier  |
| siRNA Disorazole DMSO Run2       | NM_0206<br>33    | VN1R1 | receptor 1<br>vomeronal                                     | 0.093118  | Inlier  |
| siRNA Disorazole DMSO Run1       | NM_0206<br>33    | VN1R1 | receptor 1<br>vomeronal                                     | 0.714744  | Inlier  |
| siRNA-Vinblastine Run2-<br>DMSO  | NM_0206<br>33    | VN1R1 | receptor 1<br>vomeronal                                     | 1.623435  | Inlier  |
| siRNA-Vinblastine Run1-<br>DMSO  | NM_0206<br>33    | VN1R1 | receptor 1<br>vomeronal                                     | 1.62382   | Inlier  |
| siRNA Disorazole DMSO Run3       | NM_1738<br>56    | VN1R2 | receptor 2<br>vomeronal                                     | -1.092309 | Inlier  |
| siRNA-Temozolomide Run3-<br>DMSO | NM_1738<br>56    | VN1R2 | receptor 2<br>vomeronal                                     | -1.017547 | Inlier  |
| siRNA Disorazole DMSO Run2       | NM_1738<br>56    | VN1R2 | receptor 2<br>vomeronal                                     | -0.901663 | Inlier  |
| siRNA-Temozolomide Run1-<br>DMSO | NM_1738<br>56    | VN1R2 | receptor 2<br>vomeronal                                     | -0.055617 | Inlier  |
| siRNA-Temozolomide Run2-<br>DMSO | NM_1738<br>56    | VN1R2 | receptor 2<br>vomeronal                                     | 0.055617  | Inlier  |
| siRNA Disorazole DMSO Run1       | NM_1738<br>56    | VN1R2 | receptor 2                                                  | 0.126586  | Inlier  |

Identification of Survival Genes in Human Glioblastoma Cells Using siRNA Screening  
 Nikhil G Thaker, Fang Zhang, Peter R. McDonald, Tong Ying Shun, Michael D Lewen, Ian F. Pollack, and John S. Lazo

| Molecular Pharmacology       |               |       |            | vomeronasal 1 |        |
|------------------------------|---------------|-------|------------|---------------|--------|
| siRNA-Vinblastine Run2-DMSO  | NM_1738<br>56 | VN1R2 | receptor 2 | 0.447337      | Inlier |
| siRNA-Vinblastine Run1-DMSO  | NM_1738<br>56 | VN1R2 | receptor 2 | 0.966432      | Inlier |
| siRNA-Temozolomide Run3-DMSO | NM_1738<br>57 | VN1R4 | receptor 4 | -1.865955     | Inlier |
| siRNA Disorazole DMSO Run1   | NM_1738<br>57 | VN1R4 | receptor 4 | -1.06675      | Inlier |
| siRNA-Temozolomide Run2-DMSO | NM_1738<br>57 | VN1R4 | receptor 4 | -0.752987     | Inlier |
| siRNA-Temozolomide Run1-DMSO | NM_1738<br>57 | VN1R4 | receptor 4 | -0.369677     | Inlier |
| siRNA Disorazole DMSO Run2   | NM_1738<br>57 | VN1R4 | receptor 4 | 0.369676      | Inlier |
| siRNA-Vinblastine Run2-DMSO  | NM_1738<br>57 | VN1R4 | receptor 4 | 0.379019      | Inlier |
| siRNA-Vinblastine Run1-DMSO  | NM_1738<br>57 | VN1R4 | receptor 4 | 0.596013      | Inlier |
| siRNA Disorazole DMSO Run3   | NM_1738<br>57 | VN1R4 | receptor 4 | 2.578834      | Inlier |
| siRNA Disorazole DMSO Run2   | NM_1738<br>58 | VN1R5 | receptor 5 | -1.361566     | Inlier |
| siRNA-Temozolomide Run3-DMSO | NM_1738<br>58 | VN1R5 | receptor 5 | -1.197844     | Inlier |
| siRNA-Temozolomide Run2-DMSO | NM_1738<br>58 | VN1R5 | receptor 5 | -0.285253     | Inlier |
| siRNA Disorazole DMSO Run1   | NM_1738<br>58 | VN1R5 | receptor 5 | -0.01414      | Inlier |
| siRNA-Temozolomide Run1-DMSO | NM_1738<br>58 | VN1R5 | receptor 5 | 0.01414       | Inlier |
| siRNA Disorazole DMSO Run3   | NM_1738<br>58 | VN1R5 | receptor 5 | 0.102192      | Inlier |
| siRNA-Vinblastine Run1-DMSO  | NM_1738<br>58 | VN1R5 | receptor 5 | 1.063747      | Inlier |



Identification of Survival Genes in Human Glioblastoma Cells Using siRNA Screening  
 Nikhil G Thaker, Fang Zhang, Peter R. McDonald, Tong Ying Shun, Michael D Lewen, Ian F. Pollack, and John S. Lazo

| Molecular Pharmacology       |               | vomeronasal 1 receptor 5 |            |                  |
|------------------------------|---------------|--------------------------|------------|------------------|
| siRNA-Vinblastine Run2-DMSO  | NM_1738<br>58 | VN1R5                    | receptor 5 | 1.267896 Inlier  |
| siRNA-Temozolomide Run3-DMSO | NM_0046<br>66 | VNN1                     | vanin 1    | -1.390086 Inlier |
| siRNA-Vinblastine Run2-DMSO  | NM_0046<br>66 | VNN1                     | vanin 1    | -0.748778 Inlier |
| siRNA Disorazole DMSO Run3   | NM_0046<br>66 | VNN1                     | vanin 1    | -0.603241 Inlier |
| siRNA-Vinblastine Run1-DMSO  | NM_0046<br>66 | VNN1                     | vanin 1    | -0.183294 Inlier |
| siRNA-Temozolomide Run2-DMSO | NM_0046<br>66 | VNN1                     | vanin 1    | 0.183293 Inlier  |
| siRNA-Temozolomide Run1-DMSO | NM_0046<br>66 | VNN1                     | vanin 1    | 0.251131 Inlier  |
| siRNA Disorazole DMSO Run2   | NM_0046<br>66 | VNN1                     | vanin 1    | 0.745759 Inlier  |
| siRNA Disorazole DMSO Run1   | NM_0046<br>66 | VNN1                     | vanin 1    | 1.137043 Inlier  |
| siRNA-Temozolomide Run3-DMSO | NM_0046<br>65 | VNN2                     | vanin 2    | -0.963699 Inlier |
| siRNA-Temozolomide Run2-DMSO | NM_0046<br>65 | VNN2                     | vanin 2    | -0.824473 Inlier |
| siRNA Disorazole DMSO Run3   | NM_0046<br>65 | VNN2                     | vanin 2    | -0.412561 Inlier |
| siRNA-Temozolomide Run1-DMSO | NM_0046<br>65 | VNN2                     | vanin 2    | -0.310958 Inlier |
| siRNA-Vinblastine Run2-DMSO  | NM_0046<br>65 | VNN2                     | vanin 2    | 0.310958 Inlier  |
| siRNA Disorazole DMSO Run1   | NM_0046<br>65 | VNN2                     | vanin 2    | 0.524527 Inlier  |
| siRNA Disorazole DMSO Run2   | NM_0046<br>65 | VNN2                     | vanin 2    | 0.958481 Inlier  |
| siRNA-Vinblastine Run1-DMSO  | NM_0046<br>65 | VNN2                     | vanin 2    | 1.136605 Inlier  |
| siRNA-Temozolomide Run3-DMSO | NM_0183<br>99 | VNN3                     | vanin 3    | -1.119711 Inlier |
| siRNA-Temozolomide Run2-DMSO | NM_0183<br>99 | VNN3                     | vanin 3    | -0.229289 Inlier |
| siRNA Disorazole DMSO Run3   | NM_0183<br>99 | VNN3                     | vanin 3    | -0.154088 Inlier |
| siRNA-Vinblastine Run2-DMSO  | NM_0183<br>99 | VNN3                     | vanin 3    | -0.096583 Inlier |
| siRNA-Temozolomide Run1-DMSO | NM_0183<br>99 | VNN3                     | vanin 3    | 0.096583 Inlier  |
| siRNA Disorazole DMSO Run1   | NM_0183<br>99 | VNN3                     | vanin 3    | 1.488679 Inlier  |
| siRNA-Vinblastine Run1-DMSO  | NM_0183<br>99 | VNN3                     | vanin 3    | 2.993316 Inlier  |
| siRNA Disorazole DMSO Run2   | NM_0183<br>99 | VNN3                     | vanin 3    | 4.075646 Outlier |

Identification of Survival Genes in Human Glioblastoma Cells Using siRNA Screening  
 Nikhil G Thaker, Fang Zhang, Peter R. McDonald, Tong Ying Shun, Michael D Lewen, Ian F. Pollack, and John S. Lazo

Molecular Pharmacology

|                              |               |       |                                     |           |        |
|------------------------------|---------------|-------|-------------------------------------|-----------|--------|
| siRNA-Temozolomide Run3-DMSO | NM_0571<br>80 | VPS29 | vacuolar protein sorting 29 (yeast) | -1.81463  | Inlier |
| siRNA Disorazole DMSO Run2   | NM_0571<br>80 | VPS29 | vacuolar protein sorting 29 (yeast) | -0.847568 | Inlier |
| siRNA-Temozolomide Run1-DMSO | NM_0571<br>80 | VPS29 | vacuolar protein sorting 29 (yeast) | -0.538742 | Inlier |
| siRNA-Temozolomide Run2-DMSO | NM_0571<br>80 | VPS29 | vacuolar protein sorting 29 (yeast) | -0.454078 | Inlier |
| siRNA-Vinblastine Run1-DMSO  | NM_0571<br>80 | VPS29 | vacuolar protein sorting 29 (yeast) | 0.454078  | Inlier |
| siRNA Disorazole DMSO Run3   | NM_0571<br>80 | VPS29 | vacuolar protein sorting 29 (yeast) | 0.604206  | Inlier |
| siRNA Disorazole DMSO Run1   | NM_0571<br>80 | VPS29 | vacuolar protein sorting 29 (yeast) | 0.744794  | Inlier |
| siRNA-Vinblastine Run2-DMSO  | NM_0571<br>80 | VPS29 | vacuolar protein sorting 29 (yeast) | 1.112656  | Inlier |
| siRNA Disorazole DMSO Run2   | NM_0033<br>84 | VRK1  | vaccinia related kinase 1           | -2.882574 | Inlier |
| siRNA Disorazole DMSO Run3   | NM_0033<br>84 | VRK1  | vaccinia related kinase 1           | -1.326224 | Inlier |
| siRNA-Temozolomide Run2-DMSO | NM_0033<br>84 | VRK1  | vaccinia related kinase 1           | -0.398135 | Inlier |
| siRNA-Temozolomide Run3-DMSO | NM_0033<br>84 | VRK1  | vaccinia related kinase 1           | -0.363616 | Inlier |
| siRNA-Temozolomide Run1-DMSO | NM_0033<br>84 | VRK1  | vaccinia related kinase 1           | 0.363616  | Inlier |
| siRNA Disorazole DMSO Run1   | NM_0033<br>84 | VRK1  | vaccinia related kinase 1           | 0.488039  | Inlier |

Identification of Survival Genes in Human Glioblastoma Cells Using siRNA Screening  
 Nikhil G Thaker, Fang Zhang, Peter R. McDonald, Tong Ying Shun, Michael D Lewen, Ian F. Pollack, and John S. Lazo

| Molecular Pharmacology       |               |      |                              |           |        |
|------------------------------|---------------|------|------------------------------|-----------|--------|
| siRNA-Vinblastine Run1-DMSO  | NM_0033<br>84 | VRK1 | vaccinia related<br>kinase 1 | 0.860961  | Inlier |
| siRNA-Vinblastine Run2-DMSO  | NM_0033<br>84 | VRK1 | vaccinia related<br>kinase 1 | 1.255361  | Inlier |
| siRNA Disorazole DMSO Run2   | NM_0062<br>96 | VRK2 | vaccinia related<br>kinase 2 | -2.890155 | Inlier |
| siRNA Disorazole DMSO Run3   | NM_0062<br>96 | VRK2 | vaccinia related<br>kinase 2 | -1.125524 | Inlier |
| siRNA-Temozolomide Run3-DMSO | NM_0062<br>96 | VRK2 | vaccinia related<br>kinase 2 | -0.641639 | Inlier |
| siRNA-Temozolomide Run2-DMSO | NM_0062<br>96 | VRK2 | vaccinia related<br>kinase 2 | -0.263401 | Inlier |
| siRNA-Vinblastine Run1-DMSO  | NM_0062<br>96 | VRK2 | vaccinia related<br>kinase 2 | 0.263401  | Inlier |
| siRNA-Temozolomide Run1-DMSO | NM_0062<br>96 | VRK2 | vaccinia related<br>kinase 2 | 0.481439  | Inlier |
| siRNA Disorazole DMSO Run1   | NM_0062<br>96 | VRK2 | vaccinia related<br>kinase 2 | 0.707361  | Inlier |
| siRNA-Vinblastine Run2-DMSO  | NM_0062<br>96 | VRK2 | vaccinia related<br>kinase 2 | 1.192492  | Inlier |
| siRNA Disorazole DMSO Run2   | NM_0164<br>40 | VRK3 | vaccinia related<br>kinase 3 | -0.997856 | Inlier |
| siRNA-Temozolomide Run3-DMSO | NM_0164<br>40 | VRK3 | vaccinia related<br>kinase 3 | -0.98853  | Inlier |
| siRNA Disorazole DMSO Run3   | NM_0164<br>40 | VRK3 | vaccinia related<br>kinase 3 | -0.75447  | Inlier |
| siRNA-Temozolomide Run1-DMSO | NM_0164<br>40 | VRK3 | vaccinia related<br>kinase 3 | -0.022717 | Inlier |
| siRNA-Temozolomide Run2-DMSO | NM_0164<br>40 | VRK3 | vaccinia related<br>kinase 3 | 0.022717  | Inlier |
| siRNA Disorazole DMSO Run1   | NM_0164<br>40 | VRK3 | vaccinia related<br>kinase 3 | 0.318824  | Inlier |
| siRNA-Vinblastine Run1-DMSO  | NM_0164<br>40 | VRK3 | vaccinia related<br>kinase 3 | 0.59453   | Inlier |

Identification of Survival Genes in Human Glioblastoma Cells Using siRNA Screening  
 Nikhil G Thaker, Fang Zhang, Peter R. McDonald, Tong Ying Shun, Michael D Lewen, Ian F. Pollack, and John S. Lazo

| Molecular Pharmacology       |               |      |                               |           |        |  |
|------------------------------|---------------|------|-------------------------------|-----------|--------|--|
| siRNA-Vinblastine Run2-DMSO  | NM_0164<br>40 | VRK3 | vaccinia related<br>kinase 3  | 0.812667  | Inlier |  |
| siRNA-Temozolomide Run3-DMSO | NM_0005<br>52 | VWF  | Willebrand factor             | -0.800429 | Inlier |  |
| siRNA-Temozolomide Run2-DMSO | NM_0005<br>52 | VWF  | Willebrand factor             | -0.608524 | Inlier |  |
| siRNA-Temozolomide Run1-DMSO | NM_0005<br>52 | VWF  | Willebrand factor             | -0.590675 | Inlier |  |
| siRNA Disorazole DMSO Run1   | NM_0005<br>52 | VWF  | Willebrand factor             | -0.363886 | Inlier |  |
| siRNA Disorazole DMSO Run2   | NM_0005<br>52 | VWF  | Willebrand factor             | 0.363887  | Inlier |  |
| siRNA-Vinblastine Run2-DMSO  | NM_0005<br>52 | VWF  | Willebrand factor             | 0.740476  | Inlier |  |
| siRNA Disorazole DMSO Run3   | NM_0005<br>52 | VWF  | Willebrand factor             | 0.831614  | Inlier |  |
| siRNA-Vinblastine Run1-DMSO  | NM_0005<br>52 | VWF  | Willebrand factor             | 1.586127  | Inlier |  |
| siRNA-Temozolomide Run2-DMSO | NM_1737<br>01 | WARS | tryptophan yl-tRNA synthetase | -1.2359   | Inlier |  |
| siRNA-Temozolomide Run3-DMSO | NM_1737<br>01 | WARS | tryptophan yl-tRNA synthetase | -0.522477 | Inlier |  |
| siRNA Disorazole DMSO Run3   | NM_1737<br>01 | WARS | tryptophan yl-tRNA synthetase | -0.249255 | Inlier |  |
| siRNA-Vinblastine Run2-DMSO  | NM_1737<br>01 | WARS | tryptophan yl-tRNA synthetase | -0.189267 | Inlier |  |
| siRNA Disorazole DMSO Run1   | NM_1737<br>01 | WARS | tryptophan yl-tRNA synthetase | 0.189267  | Inlier |  |
| siRNA-Temozolomide Run1-DMSO | NM_1737<br>01 | WARS | tryptophan yl-tRNA synthetase | 0.826523  | Inlier |  |

Identification of Survival Genes in Human Glioblastoma Cells Using siRNA Screening  
 Nikhil G Thaker, Fang Zhang, Peter R. McDonald, Tong Ying Shun, Michael D Lewen, Ian F. Pollack, and John S. Lazo  
 Molecular Pharmacology

|                                  |               |       |                                                                 |           |        |
|----------------------------------|---------------|-------|-----------------------------------------------------------------|-----------|--------|
| siRNA Disorazole DMSO Run2       | NM_1737<br>01 | WARS  | tryptophan<br>yl-tRNA<br>synthetase                             | 1.248044  | Inlier |
| siRNA-Vinblastine Run1-<br>DMSO  | NM_1737<br>01 | WARS  | tryptophan<br>yl-tRNA<br>synthetase                             | 1.816424  | Inlier |
| siRNA-Temozolomide Run2-<br>DMSO | NM_2012<br>63 | WARS2 | tryptophan<br>yl tRNA<br>synthetase<br>2<br>(mitochon<br>drial) | -1.652215 | Inlier |
| siRNA Disorazole DMSO Run3       | NM_2012<br>63 | WARS2 | tryptophan<br>yl tRNA<br>synthetase<br>2<br>(mitochon<br>drial) | -0.718755 | Inlier |
| siRNA-Temozolomide Run1-<br>DMSO | NM_2012<br>63 | WARS2 | tryptophan<br>yl tRNA<br>synthetase<br>2<br>(mitochon<br>drial) | -0.422672 | Inlier |
| siRNA-Vinblastine Run2-<br>DMSO  | NM_2012<br>63 | WARS2 | tryptophan<br>yl tRNA<br>synthetase<br>2<br>(mitochon<br>drial) | -0.009231 | Inlier |
| siRNA Disorazole DMSO Run1       | NM_2012<br>63 | WARS2 | tryptophan<br>yl tRNA<br>synthetase<br>2<br>(mitochon<br>drial) | 0.009231  | Inlier |
| siRNA-Temozolomide Run3-<br>DMSO | NM_2012<br>63 | WARS2 | tryptophan<br>yl tRNA<br>synthetase<br>2<br>(mitochon<br>drial) | 0.630245  | Inlier |
| siRNA Disorazole DMSO Run2       | NM_2012<br>63 | WARS2 | tryptophan<br>yl tRNA<br>synthetase<br>2<br>(mitochon<br>drial) | 1.378647  | Inlier |

Identification of Survival Genes in Human Glioblastoma Cells Using siRNA Screening  
 Nikhil G Thaker, Fang Zhang, Peter R. McDonald, Tong Ying Shun, Michael D Lewen, Ian F. Pollack, and John S. Lazo

Molecular Pharmacology

|                              |           |         |                                                |           |        |
|------------------------------|-----------|---------|------------------------------------------------|-----------|--------|
| siRNA-Vinblastine Run1-DMSO  | NM_201263 | WARS2   | tryptophanyl tRNA synthetase 2 (mitochondrial) | 2.323497  | Inlier |
| siRNA-Vinblastine Run2-DMSO  | NM_148916 | WBSCR21 | abhydrolase domain containing 11               | -0.701941 | Inlier |
| siRNA Disorazole DMSO Run3   | NM_148916 | WBSCR21 | abhydrolase domain containing 11               | -0.647059 | Inlier |
| siRNA-Temozolomide Run3-DMSO | NM_148916 | WBSCR21 | abhydrolase domain containing 11               | -0.473766 | Inlier |
| siRNA-Temozolomide Run1-DMSO | NM_148916 | WBSCR21 | abhydrolase domain containing 11               | -0.189981 | Inlier |
| siRNA-Temozolomide Run2-DMSO | NM_148916 | WBSCR21 | abhydrolase domain containing 11               | 0.189982  | Inlier |
| siRNA-Vinblastine Run1-DMSO  | NM_148916 | WBSCR21 | abhydrolase domain containing 11               | 0.710916  | Inlier |
| siRNA Disorazole DMSO Run1   | NM_148916 | WBSCR21 | abhydrolase domain containing 11               | 1.245262  | Inlier |
| siRNA Disorazole DMSO Run2   | NM_148916 | WBSCR21 | abhydrolase domain containing 11               | 1.631068  | Inlier |
| siRNA-Temozolomide Run2-DMSO | NM_017528 | WBSCR22 | Williams Beuren syndrome chromosome region 22  | -1.213849 | Inlier |

Identification of Survival Genes in Human Glioblastoma Cells Using siRNA Screening  
 Nikhil G Thaker, Fang Zhang, Peter R. McDonald, Tong Ying Shun, Michael D Lewen, Ian F. Pollack, and John S. Lazo

Molecular Pharmacology

|                                  |                  |             |                                                               |           |        |
|----------------------------------|------------------|-------------|---------------------------------------------------------------|-----------|--------|
| siRNA Disorazole DMSO Run3       | NM_0175<br>28    | WBSCR2<br>2 | Williams<br>Beuren<br>syndrome<br>chromoso<br>me region<br>22 | -0.827152 | Inlier |
| siRNA Disorazole DMSO Run1       | NM_0175<br>28    | WBSCR2<br>2 | Williams<br>Beuren<br>syndrome<br>chromoso<br>me region<br>22 | -0.521848 | Inlier |
| siRNA-Temozolomide Run1-<br>DMSO | NM_0175<br>28    | WBSCR2<br>2 | Williams<br>Beuren<br>syndrome<br>chromoso<br>me region<br>22 | -0.236392 | Inlier |
| siRNA-Temozolomide Run3-<br>DMSO | NM_0175<br>28    | WBSCR2<br>2 | Williams<br>Beuren<br>syndrome<br>chromoso<br>me region<br>22 | 0.236392  | Inlier |
| siRNA-Vinblastine Run2-<br>DMSO  | NM_0175<br>28    | WBSCR2<br>2 | Williams<br>Beuren<br>syndrome<br>chromoso<br>me region<br>22 | 0.315993  | Inlier |
| siRNA Disorazole DMSO Run2       | NM_0175<br>28    | WBSCR2<br>2 | Williams<br>Beuren<br>syndrome<br>chromoso<br>me region<br>22 | 2.386841  | Inlier |
| siRNA-Vinblastine Run1-<br>DMSO  | NM_0175<br>28    | WBSCR2<br>2 | Williams<br>Beuren<br>syndrome<br>chromoso<br>me region<br>22 | 2.787901  | Inlier |
| siRNA-Temozolomide Run3-<br>DMSO | NM_0010<br>12361 | WDR31       | WD repeat<br>domain 31                                        | -2.949175 | Inlier |
| siRNA-Temozolomide Run1-<br>DMSO | NM_0010<br>12361 | WDR31       | WD repeat<br>domain 31                                        | -1.454671 | Inlier |

Identification of Survival Genes in Human Glioblastoma Cells Using siRNA Screening  
 Nikhil G Thaker, Fang Zhang, Peter R. McDonald, Tong Ying Shun, Michael D Lewen, Ian F. Pollack, and John S. Lazo  
 Molecular Pharmacology

|                              |                  |       |                         |           |        |
|------------------------------|------------------|-------|-------------------------|-----------|--------|
| siRNA-Vinblastine Run2-DMSO  | NM_0010<br>12361 | WDR31 | WD repeat domain 31     | -0.355607 | Inlier |
| siRNA-Temozolomide Run2-DMSO | NM_0010<br>12361 | WDR31 | WD repeat domain 31     | -0.290116 | Inlier |
| siRNA Disorazole DMSO Run1   | NM_0010<br>12361 | WDR31 | WD repeat domain 31     | 0.290116  | Inlier |
| siRNA-Vinblastine Run1-DMSO  | NM_0010<br>12361 | WDR31 | WD repeat domain 31     | 0.572732  | Inlier |
| siRNA Disorazole DMSO Run3   | NM_0010<br>12361 | WDR31 | WD repeat domain 31     | 0.776268  | Inlier |
| siRNA Disorazole DMSO Run2   | NM_0010<br>12361 | WDR31 | WD repeat domain 31     | 1.742298  | Inlier |
| siRNA-Temozolomide Run2-DMSO | NM_0033<br>90    | WEE1  | WEE1 homolog (S. pombe) | -0.987186 | Inlier |
| siRNA-Temozolomide Run3-DMSO | NM_0033<br>90    | WEE1  | WEE1 homolog (S. pombe) | -0.811335 | Inlier |
| siRNA Disorazole DMSO Run2   | NM_0033<br>90    | WEE1  | WEE1 homolog (S. pombe) | -0.502239 | Inlier |
| siRNA-Temozolomide Run1-DMSO | NM_0033<br>90    | WEE1  | WEE1 homolog (S. pombe) | -0.188543 | Inlier |
| siRNA Disorazole DMSO Run1   | NM_0033<br>90    | WEE1  | WEE1 homolog (S. pombe) | 0.188543  | Inlier |
| siRNA-Vinblastine Run1-DMSO  | NM_0033<br>90    | WEE1  | WEE1 homolog (S. pombe) | 0.537665  | Inlier |
| siRNA Disorazole DMSO Run3   | NM_0033<br>90    | WEE1  | WEE1 homolog (S. pombe) | 0.903757  | Inlier |



Identification of Survival Genes in Human Glioblastoma Cells Using siRNA Screening  
 Nikhil G Thaker, Fang Zhang, Peter R. McDonald, Tong Ying Shun, Michael D Lewen, Ian F. Pollack, and John S. Lazo

Molecular Pharmacology

|                              |               |        |                                       |           |        |
|------------------------------|---------------|--------|---------------------------------------|-----------|--------|
| siRNA-Vinblastine Run2-DMSO  | NM_0033<br>90 | WEE1   | WEE1 homolog (S. pombe)               | 1.078101  | Inlier |
| siRNA Disorazole DMSO Run3   | NM_0005<br>53 | WRN    | Werner syndrome                       | -0.946975 | Inlier |
| siRNA-Temozolomide Run3-DMSO | NM_0005<br>53 | WRN    | Werner syndrome                       | -0.803917 | Inlier |
| siRNA-Temozolomide Run2-DMSO | NM_0005<br>53 | WRN    | Werner syndrome                       | -0.545083 | Inlier |
| siRNA-Vinblastine Run2-DMSO  | NM_0005<br>53 | WRN    | Werner syndrome                       | -0.242044 | Inlier |
| siRNA-Temozolomide Run1-DMSO | NM_0005<br>53 | WRN    | Werner syndrome                       | 0.242044  | Inlier |
| siRNA Disorazole DMSO Run1   | NM_0005<br>53 | WRN    | Werner syndrome                       | 0.323606  | Inlier |
| siRNA-Vinblastine Run1-DMSO  | NM_0005<br>53 | WRN    | Werner syndrome                       | 1.022365  | Inlier |
| siRNA Disorazole DMSO Run2   | NM_0005<br>53 | WRN    | Werner syndrome                       | 1.381063  | Inlier |
| siRNA-Temozolomide Run2-DMSO | NM_1303<br>95 | WRNIP1 | Werner helicase interacting protein 1 | -0.69876  | Inlier |
| siRNA-Temozolomide Run3-DMSO | NM_1303<br>95 | WRNIP1 | Werner helicase interacting protein 1 | -0.65024  | Inlier |
| siRNA-Temozolomide Run1-DMSO | NM_1303<br>95 | WRNIP1 | Werner helicase interacting protein 1 | -0.150354 | Inlier |
| siRNA-Vinblastine Run2-DMSO  | NM_1303<br>95 | WRNIP1 | Werner helicase interacting protein 1 | -0.018758 | Inlier |
| siRNA Disorazole DMSO Run3   | NM_1303<br>95 | WRNIP1 | Werner helicase interacting protein 1 | 0.018758  | Inlier |
| siRNA Disorazole DMSO Run1   | NM_1303<br>95 | WRNIP1 | Werner helicase interacting protein 1 | 1.092368  | Inlier |

Identification of Survival Genes in Human Glioblastoma Cells Using siRNA Screening  
 Nikhil G Thaker, Fang Zhang, Peter R. McDonald, Tong Ying Shun, Michael D Lewen, Ian F. Pollack, and John S. Lazo  
 Molecular Pharmacology

|                                  |               |        |                                                  |           |        |
|----------------------------------|---------------|--------|--------------------------------------------------|-----------|--------|
| siRNA Disorazole DMSO Run2       | NM_1303<br>95 | WRNIP1 | Werner<br>helicase<br>interacting<br>protein 1   | 1.766471  | Inlier |
| siRNA-Vinblastine Run1-<br>DMSO  | NM_1303<br>95 | WRNIP1 | Werner<br>helicase<br>interacting<br>protein 1   | 1.954164  | Inlier |
| siRNA-Temozolomide Run1-<br>DMSO | NM_1307<br>92 | WWOX   | WW<br>domain<br>containing<br>oxidoredu<br>ctase | -0.880782 | Inlier |
| siRNA Disorazole DMSO Run1       | NM_1307<br>92 | WWOX   | WW<br>domain<br>containing<br>oxidoredu<br>ctase | -0.468218 | Inlier |
| siRNA-Temozolomide Run3-<br>DMSO | NM_1307<br>92 | WWOX   | WW<br>domain<br>containing<br>oxidoredu<br>ctase | -0.393137 | Inlier |
| siRNA-Temozolomide Run2-<br>DMSO | NM_1307<br>92 | WWOX   | WW<br>domain<br>containing<br>oxidoredu<br>ctase | -0.365196 | Inlier |
| siRNA-Vinblastine Run2-<br>DMSO  | NM_1307<br>92 | WWOX   | WW<br>domain<br>containing<br>oxidoredu<br>ctase | 0.365196  | Inlier |
| siRNA Disorazole DMSO Run2       | NM_1307<br>92 | WWOX   | WW<br>domain<br>containing<br>oxidoredu<br>ctase | 1.710444  | Inlier |
| siRNA Disorazole DMSO Run3       | NM_1307<br>92 | WWOX   | WW<br>domain<br>containing<br>oxidoredu<br>ctase | 1.794775  | Inlier |
| siRNA-Vinblastine Run1-<br>DMSO  | NM_1307<br>92 | WWOX   | WW<br>domain<br>containing<br>oxidoredu<br>ctase | 2.088335  | Inlier |

Identification of Survival Genes in Human Glioblastoma Cells Using siRNA Screening  
 Nikhil G Thaker, Fang Zhang, Peter R. McDonald, Tong Ying Shun, Michael D Lewen, Ian F. Pollack, and John S. Lazo

Molecular Pharmacology

|                              |                  |      |                                      |           |        |
|------------------------------|------------------|------|--------------------------------------|-----------|--------|
| siRNA-Temozolomide Run3-DMSO | NM_0010<br>24644 | XCR1 | chemokine<br>(C motif)<br>receptor 1 | -1.062549 | Inlier |
| siRNA Disorazole DMSO Run2   | NM_0010<br>24644 | XCR1 | chemokine<br>(C motif)<br>receptor 1 | -0.998182 | Inlier |
| siRNA Disorazole DMSO Run3   | NM_0010<br>24644 | XCR1 | chemokine<br>(C motif)<br>receptor 1 | -0.559121 | Inlier |
| siRNA Disorazole DMSO Run1   | NM_0010<br>24644 | XCR1 | chemokine<br>(C motif)<br>receptor 1 | -0.065928 | Inlier |
| siRNA-Temozolomide Run1-DMSO | NM_0010<br>24644 | XCR1 | chemokine<br>(C motif)<br>receptor 1 | 0.065928  | Inlier |
| siRNA-Temozolomide Run2-DMSO | NM_0010<br>24644 | XCR1 | chemokine<br>(C motif)<br>receptor 1 | 0.231844  | Inlier |
| siRNA-Vinblastine Run2-DMSO  | NM_0010<br>24644 | XCR1 | chemokine<br>(C motif)<br>receptor 1 | 0.789879  | Inlier |
| siRNA-Vinblastine Run1-DMSO  | NM_0010<br>24644 | XCR1 | chemokine<br>(C motif)<br>receptor 1 | 1.04186   | Inlier |
| siRNA-Temozolomide Run2-DMSO | NM_0003<br>79    | XDH  | xanthine<br>dehydroge<br>nase        | -0.880714 | Inlier |
| siRNA-Temozolomide Run3-DMSO | NM_0003<br>79    | XDH  | xanthine<br>dehydroge<br>nase        | -0.859675 | Inlier |
| siRNA-Vinblastine Run2-DMSO  | NM_0003<br>79    | XDH  | xanthine<br>dehydroge<br>nase        | -0.648876 | Inlier |
| siRNA-Temozolomide Run1-DMSO | NM_0003<br>79    | XDH  | xanthine<br>dehydroge<br>nase        | -0.199358 | Inlier |
| siRNA Disorazole DMSO Run3   | NM_0003<br>79    | XDH  | xanthine<br>dehydroge<br>nase        | 0.199358  | Inlier |
| siRNA Disorazole DMSO Run1   | NM_0003<br>79    | XDH  | xanthine<br>dehydroge<br>nase        | 0.313145  | Inlier |



Identification of Survival Genes in Human Glioblastoma Cells Using siRNA Screening  
 Nikhil G Thaker, Fang Zhang, Peter R. McDonald, Tong Ying Shun, Michael D Lewen, Ian F. Pollack, and John S. Lazo

Molecular Pharmacology

| siRNA Treatment              | Gene ID   | Gene Name | Protein Name                                          | Score     | Category |
|------------------------------|-----------|-----------|-------------------------------------------------------|-----------|----------|
| siRNA-Vinblastine Run2-DMSO  | NM_021083 | XK        | Kell blood group precursor (McLeod phenotype)         | 1.043212  | Inlier   |
| siRNA-Temozolomide Run3-DMSO | NM_020383 | XPNPEP1   | X-prolyl aminopeptidase (aminopeptidase P) 1, soluble | -2.712686 | Inlier   |
| siRNA-Temozolomide Run2-DMSO | NM_020383 | XPNPEP1   | X-prolyl aminopeptidase (aminopeptidase P) 1, soluble | -1.987557 | Inlier   |
| siRNA Disorazole DMSO Run2   | NM_020383 | XPNPEP1   | X-prolyl aminopeptidase (aminopeptidase P) 1, soluble | -0.552896 | Inlier   |
| siRNA Disorazole DMSO Run3   | NM_020383 | XPNPEP1   | X-prolyl aminopeptidase (aminopeptidase P) 1, soluble | -0.22326  | Inlier   |
| siRNA-Temozolomide Run1-DMSO | NM_020383 | XPNPEP1   | X-prolyl aminopeptidase (aminopeptidase P) 1, soluble | 0.223261  | Inlier   |
| siRNA Disorazole DMSO Run1   | NM_020383 | XPNPEP1   | X-prolyl aminopeptidase (aminopeptidase P) 1, soluble | 0.469073  | Inlier   |
| siRNA-Vinblastine Run2-DMSO  | NM_020383 | XPNPEP1   | X-prolyl aminopeptidase (aminopeptidase P) 1, soluble | 0.796104  | Inlier   |

Identification of Survival Genes in Human Glioblastoma Cells Using siRNA Screening

Nikhil G Thaker, Fang Zhang, Peter R. McDonald, Tong Ying Shun, Michael D Lewen, Ian F. Pollack, and John S.

Lazo

Molecular Pharmacology

|                              |           |         |                                                              |           |        |
|------------------------------|-----------|---------|--------------------------------------------------------------|-----------|--------|
| siRNA-Vinblastine Run1-DMSO  | NM_020383 | XPNPEP1 | X-prolyl aminopeptidase (aminopeptidase P) 1, soluble        | 1.96419   | Inlier |
| siRNA-Temozolomide Run2-DMSO | NM_003399 | XPNPEP2 | X-prolyl aminopeptidase (aminopeptidase P) 2, membrane-bound | -1.446049 | Inlier |
| siRNA-Temozolomide Run3-DMSO | NM_003399 | XPNPEP2 | X-prolyl aminopeptidase (aminopeptidase P) 2, membrane-bound | -1.334079 | Inlier |
| siRNA Disorazole DMSO Run3   | NM_003399 | XPNPEP2 | X-prolyl aminopeptidase (aminopeptidase P) 2, membrane-bound | -0.519965 | Inlier |
| siRNA Disorazole DMSO Run2   | NM_003399 | XPNPEP2 | X-prolyl aminopeptidase (aminopeptidase P) 2, membrane-bound | -0.177792 | Inlier |
| siRNA Disorazole DMSO Run1   | NM_003399 | XPNPEP2 | X-prolyl aminopeptidase (aminopeptidase P) 2, membrane-bound | 0.177791  | Inlier |

Identification of Survival Genes in Human Glioblastoma Cells Using siRNA Screening  
 Nikhil G Thaker, Fang Zhang, Peter R. McDonald, Tong Ying Shun, Michael D Lewen, Ian F. Pollack, and John S. Lazo

Molecular Pharmacology

|                              |           |         |                                                              |                  |
|------------------------------|-----------|---------|--------------------------------------------------------------|------------------|
|                              |           |         | X-prolyl aminopeptidase (aminopeptidase P) 2, membrane-bound |                  |
| siRNA-Temozolomide Run1-DMSO | NM_003399 | XPNPEP2 | X-prolyl aminopeptidase (aminopeptidase P) 2, membrane-bound | 0.415019 Inlier  |
| siRNA-Vinblastine Run1-DMSO  | NM_003399 | XPNPEP2 | X-prolyl aminopeptidase (aminopeptidase P) 2, membrane-bound | 0.829035 Inlier  |
| siRNA-Vinblastine Run2-DMSO  | NM_003399 | XPNPEP2 | X-prolyl aminopeptidase (aminopeptidase P) 2, membrane-bound | 1.347522 Inlier  |
| siRNA-Temozolomide Run3-DMSO | NM_003400 | XPO1    | exportin 1 (CRM1 homolog, yeast)                             | -1.693311 Inlier |
| siRNA-Temozolomide Run2-DMSO | NM_003400 | XPO1    | exportin 1 (CRM1 homolog, yeast)                             | -0.880649 Inlier |
| siRNA-Temozolomide Run1-DMSO | NM_003400 | XPO1    | exportin 1 (CRM1 homolog, yeast)                             | -0.14209 Inlier  |
| siRNA Disorazole DMSO Run3   | NM_003400 | XPO1    | exportin 1 (CRM1 homolog, yeast)                             | -0.102143 Inlier |
| siRNA Disorazole DMSO Run1   | NM_003400 | XPO1    | exportin 1 (CRM1 homolog, yeast)                             | 0.102143 Inlier  |
| siRNA-Vinblastine Run2-DMSO  | NM_003400 | XPO1    | exportin 1 (CRM1 homolog, yeast)                             | 0.468351 Inlier  |
| siRNA Disorazole DMSO Run2   | NM_003400 | XPO1    | exportin 1 (CRM1 homolog, yeast)                             | 2.391503 Inlier  |

Identification of Survival Genes in Human Glioblastoma Cells Using siRNA Screening

Nikhil G Thaker, Fang Zhang, Peter R. McDonald, Tong Ying Shun, Michael D Lewen, Ian F. Pollack, and John S. Lazo

Molecular Pharmacology

|                              |           |      |                                                    |           |        |
|------------------------------|-----------|------|----------------------------------------------------|-----------|--------|
| siRNA-Vinblastine Run1-DMSO  | NM_003400 | XPO1 | exportin 1 (CRM1 homolog, yeast)                   | 3.116369  | Inlier |
| siRNA-Temozolomide Run3-DMSO | NM_007235 | XPOT | exportin, tRNA (nuclear export receptor for tRNAs) | -1.593769 | Inlier |
| siRNA-Temozolomide Run2-DMSO | NM_007235 | XPOT | exportin, tRNA (nuclear export receptor for tRNAs) | -1.280382 | Inlier |
| siRNA-Temozolomide Run1-DMSO | NM_007235 | XPOT | exportin, tRNA (nuclear export receptor for tRNAs) | -0.328396 | Inlier |
| siRNA Disorazole DMSO Run3   | NM_007235 | XPOT | exportin, tRNA (nuclear export receptor for tRNAs) | -0.102802 | Inlier |
| siRNA Disorazole DMSO Run1   | NM_007235 | XPOT | exportin, tRNA (nuclear export receptor for tRNAs) | 0.102802  | Inlier |
| siRNA-Vinblastine Run2-DMSO  | NM_007235 | XPOT | exportin, tRNA (nuclear export receptor for tRNAs) | 0.153057  | Inlier |



Identification of Survival Genes in Human Glioblastoma Cells Using siRNA Screening  
 Nikhil G Thaker, Fang Zhang, Peter R. McDonald, Tong Ying Shun, Michael D Lewen, Ian F. Pollack, and John S. Lazo  
 Molecular Pharmacology

|                                  |               |      |                                                                   |           |        |
|----------------------------------|---------------|------|-------------------------------------------------------------------|-----------|--------|
| siRNA Disorazole DMSO Run2       | NM_0072<br>35 | XPOT | exportin,<br>tRNA<br>(nuclear<br>export<br>receptor<br>for tRNAs) | 1.020604  | Inlier |
| siRNA-Vinblastine Run1-<br>DMSO  | NM_0072<br>35 | XPOT | exportin,<br>tRNA<br>(nuclear<br>export<br>receptor<br>for tRNAs) | 1.477668  | Inlier |
| siRNA Disorazole DMSO Run2       | NM_0047<br>36 | XPR1 | xenotropic<br>and<br>polytropic<br>retrovirus<br>receptor         | -0.96034  | Inlier |
| siRNA-Temozolomide Run3-<br>DMSO | NM_0047<br>36 | XPR1 | xenotropic<br>and<br>polytropic<br>retrovirus<br>receptor         | -0.884568 | Inlier |
| siRNA Disorazole DMSO Run3       | NM_0047<br>36 | XPR1 | xenotropic<br>and<br>polytropic<br>retrovirus<br>receptor         | -0.676567 | Inlier |
| siRNA-Temozolomide Run1-<br>DMSO | NM_0047<br>36 | XPR1 | xenotropic<br>and<br>polytropic<br>retrovirus<br>receptor         | -0.06327  | Inlier |
| siRNA-Temozolomide Run2-<br>DMSO | NM_0047<br>36 | XPR1 | xenotropic<br>and<br>polytropic<br>retrovirus<br>receptor         | 0.06327   | Inlier |
| siRNA Disorazole DMSO Run1       | NM_0047<br>36 | XPR1 | xenotropic<br>and<br>polytropic<br>retrovirus<br>receptor         | 0.071931  | Inlier |
| siRNA-Vinblastine Run2-<br>DMSO  | NM_0047<br>36 | XPR1 | xenotropic<br>and<br>polytropic<br>retrovirus<br>receptor         | 0.672433  | Inlier |

Identification of Survival Genes in Human Glioblastoma Cells Using siRNA Screening  
 Nikhil G Thaker, Fang Zhang, Peter R. McDonald, Tong Ying Shun, Michael D Lewen, Ian F. Pollack, and John S. Lazo

Molecular Pharmacology

|                              |               |      |                                                   |           |         |
|------------------------------|---------------|------|---------------------------------------------------|-----------|---------|
| siRNA-Vinblastine Run1-DMSO  | NM_0047<br>36 | XPR1 | xenotropic and polytropic retrovirus receptor 5-3 | 0.724482  | Inlier  |
| siRNA-Temozolomide Run3-DMSO | NM_0122<br>55 | XRN2 | exoribonuclease 2 5-3                             | -0.912875 | Inlier  |
| siRNA Disorazole DMSO Run3   | NM_0122<br>55 | XRN2 | exoribonuclease 2 5-3                             | -0.780827 | Inlier  |
| siRNA-Vinblastine Run2-DMSO  | NM_0122<br>55 | XRN2 | exoribonuclease 2 5-3                             | -0.568173 | Inlier  |
| siRNA-Temozolomide Run1-DMSO | NM_0122<br>55 | XRN2 | exoribonuclease 2 5-3                             | -0.191713 | Inlier  |
| siRNA-Temozolomide Run2-DMSO | NM_0122<br>55 | XRN2 | exoribonuclease 2 5-3                             | 0.191713  | Inlier  |
| siRNA Disorazole DMSO Run1   | NM_0122<br>55 | XRN2 | exoribonuclease 2 5-3                             | 0.300397  | Inlier  |
| siRNA Disorazole DMSO Run2   | NM_0122<br>55 | XRN2 | exoribonuclease 2 5-3                             | 3.543059  | Outlier |
| siRNA-Vinblastine Run1-DMSO  | NM_0122<br>55 | XRN2 | exoribonuclease 2                                 | 3.875112  | Outlier |
| siRNA Disorazole DMSO Run2   | NM_0051<br>08 | XYLB | xylulokinase homolog (H. influenzae)              | -1.307813 | Inlier  |
| siRNA Disorazole DMSO Run1   | NM_0051<br>08 | XYLB | xylulokinase homolog (H. influenzae)              | -1.193517 | Inlier  |
| siRNA-Temozolomide Run2-DMSO | NM_0051<br>08 | XYLB | xylulokinase homolog (H. influenzae)              | -0.137064 | Inlier  |

Identification of Survival Genes in Human Glioblastoma Cells Using siRNA Screening  
 Nikhil G Thaker, Fang Zhang, Peter R. McDonald, Tong Ying Shun, Michael D Lewen, Ian F. Pollack, and John S. Lazo  
 Molecular Pharmacology

|                              |           |       |                                                |           |        |
|------------------------------|-----------|-------|------------------------------------------------|-----------|--------|
| siRNA-Temozolomide Run3-DMSO | NM_005108 | XYLB  | xylulokinas<br>e homolog<br>(H.<br>influenzae) | -0.134004 | Inlier |
| siRNA-Temozolomide Run1-DMSO | NM_005108 | XYLB  | xylulokinas<br>e homolog<br>(H.<br>influenzae) | 0.134003  | Inlier |
| siRNA-Vinblastine Run2-DMSO  | NM_005108 | XYLB  | xylulokinas<br>e homolog<br>(H.<br>influenzae) | 0.283115  | Inlier |
| siRNA-Vinblastine Run1-DMSO  | NM_005108 | XYLB  | xylulokinas<br>e homolog<br>(H.<br>influenzae) | 1.065885  | Inlier |
| siRNA Disorazole DMSO Run3   | NM_005108 | XYLB  | xylulokinas<br>e homolog<br>(H.<br>influenzae) | 2.025608  | Inlier |
| siRNA-Temozolomide Run2-DMSO | NM_022166 | XYLT1 | xylosyltran<br>sferase I                       | -1.390797 | Inlier |
| siRNA-Temozolomide Run1-DMSO | NM_022166 | XYLT1 | xylosyltran<br>sferase I                       | -1.20622  | Inlier |
| siRNA-Temozolomide Run3-DMSO | NM_022166 | XYLT1 | xylosyltran<br>sferase I                       | -0.504819 | Inlier |
| siRNA Disorazole DMSO Run1   | NM_022166 | XYLT1 | xylosyltran<br>sferase I                       | -0.186418 | Inlier |
| siRNA-Vinblastine Run2-DMSO  | NM_022166 | XYLT1 | xylosyltran<br>sferase I                       | 0.186418  | Inlier |
| siRNA Disorazole DMSO Run3   | NM_022166 | XYLT1 | xylosyltran<br>sferase I                       | 0.301943  | Inlier |
| siRNA Disorazole DMSO Run2   | NM_022166 | XYLT1 | xylosyltran<br>sferase I                       | 0.844181  | Inlier |
| siRNA-Vinblastine Run1-DMSO  | NM_022166 | XYLT1 | xylosyltran<br>sferase I                       | 1.405896  | Inlier |
| siRNA Disorazole DMSO Run1   | NM_022167 | XYLT2 | xylosyltran<br>sferase II                      | -0.86441  | Inlier |
| siRNA-Temozolomide Run2-DMSO | NM_022167 | XYLT2 | xylosyltran<br>sferase II                      | -0.567689 | Inlier |
| siRNA-Temozolomide Run1-DMSO | NM_022167 | XYLT2 | xylosyltran<br>sferase II                      | -0.142775 | Inlier |

Identification of Survival Genes in Human Glioblastoma Cells Using siRNA Screening  
 Nikhil G Thaker, Fang Zhang, Peter R. McDonald, Tong Ying Shun, Michael D Lewen, Ian F. Pollack, and John S. Lazo

|                                  |               |       |                                                                    |           |        |
|----------------------------------|---------------|-------|--------------------------------------------------------------------|-----------|--------|
| siRNA-Vinblastine Run2-<br>DMSO  | NM_0221<br>67 | XYLT2 | xylosyltran<br>sferase II                                          | -0.05727  | Inlier |
| siRNA Disorazole DMSO Run3       | NM_0221<br>67 | XYLT2 | xylosyltran<br>sferase II                                          | 0.05727   | Inlier |
| siRNA-Temozolomide Run3-<br>DMSO | NM_0221<br>67 | XYLT2 | xylosyltran<br>sferase II                                          | 0.781311  | Inlier |
| siRNA Disorazole DMSO Run2       | NM_0221<br>67 | XYLT2 | xylosyltran<br>sferase II                                          | 2.036694  | Inlier |
| siRNA-Vinblastine Run1-<br>DMSO  | NM_0221<br>67 | XYLT2 | xylosyltran<br>sferase II                                          | 2.361326  | Inlier |
| siRNA Disorazole DMSO Run1       | NM_0036<br>80 | YARS  | tyrosyl-<br>tRNA<br>synthetase                                     | -0.968274 | Inlier |
| siRNA-Vinblastine Run2-<br>DMSO  | NM_0036<br>80 | YARS  | tyrosyl-<br>tRNA<br>synthetase                                     | -0.761891 | Inlier |
| siRNA Disorazole DMSO Run3       | NM_0036<br>80 | YARS  | tyrosyl-<br>tRNA<br>synthetase                                     | -0.587109 | Inlier |
| siRNA-Temozolomide Run2-<br>DMSO | NM_0036<br>80 | YARS  | tyrosyl-<br>tRNA<br>synthetase                                     | -0.063497 | Inlier |
| siRNA-Temozolomide Run3-<br>DMSO | NM_0036<br>80 | YARS  | tyrosyl-<br>tRNA<br>synthetase                                     | 0.063496  | Inlier |
| siRNA Disorazole DMSO Run2       | NM_0036<br>80 | YARS  | tyrosyl-<br>tRNA<br>synthetase                                     | 0.269703  | Inlier |
| siRNA-Vinblastine Run1-<br>DMSO  | NM_0036<br>80 | YARS  | tyrosyl-<br>tRNA<br>synthetase                                     | 0.777513  | Inlier |
| siRNA-Temozolomide Run1-<br>DMSO | NM_0036<br>80 | YARS  | tyrosyl-<br>tRNA<br>synthetase                                     | 1.050019  | Inlier |
| siRNA Disorazole DMSO Run2       | NM_0054<br>33 | YES1  | v-yes-1<br>Yamaguch<br>i sarcoma<br>viral<br>oncogene<br>homolog 1 | -2.151146 | Inlier |

Identification of Survival Genes in Human Glioblastoma Cells Using siRNA Screening  
 Nikhil G Thaker, Fang Zhang, Peter R. McDonald, Tong Ying Shun, Michael D Lewen, Ian F. Pollack, and John S. Lazo  
 Molecular Pharmacology

|                              |               |      |                                                       |           |        |
|------------------------------|---------------|------|-------------------------------------------------------|-----------|--------|
| siRNA-Temozolomide Run3-DMSO | NM_0054<br>33 | YES1 | v-yes-1<br>Yamaguchi sarcoma viral oncogene homolog 1 | -1.322844 | Inlier |
| siRNA-Temozolomide Run2-DMSO | NM_0054<br>33 | YES1 | v-yes-1<br>Yamaguchi sarcoma viral oncogene homolog 1 | -0.8204   | Inlier |
| siRNA Disorazole DMSO Run3   | NM_0054<br>33 | YES1 | v-yes-1<br>Yamaguchi sarcoma viral oncogene homolog 1 | -0.201143 | Inlier |
| siRNA-Temozolomide Run1-DMSO | NM_0054<br>33 | YES1 | v-yes-1<br>Yamaguchi sarcoma viral oncogene homolog 1 | 0.201143  | Inlier |
| siRNA-Vinblastine Run1-DMSO  | NM_0054<br>33 | YES1 | v-yes-1<br>Yamaguchi sarcoma viral oncogene homolog 1 | 0.278552  | Inlier |
| siRNA Disorazole DMSO Run1   | NM_0054<br>33 | YES1 | v-yes-1<br>Yamaguchi sarcoma viral oncogene homolog 1 | 0.5286    | Inlier |

Identification of Survival Genes in Human Glioblastoma Cells Using siRNA Screening  
 Nikhil G Thaker, Fang Zhang, Peter R. McDonald, Tong Ying Shun, Michael D Lewen, Ian F. Pollack, and John S. Lazo  
 Molecular Pharmacology

|                              |           |        |                                                                                          |           |        |
|------------------------------|-----------|--------|------------------------------------------------------------------------------------------|-----------|--------|
| siRNA-Vinblastine Run2-DMSO  | NM_005433 | YES1   | v-yes-1<br>Yamaguchi sarcoma viral oncogene homolog 1                                    | 2.402271  | Inlier |
| siRNA-Temozolomide Run3-DMSO | NM_139313 | YME1L1 | YME1-like 1 (S. cerevisiae)                                                              | -1.116883 | Inlier |
| siRNA-Temozolomide Run2-DMSO | NM_139313 | YME1L1 | YME1-like 1 (S. cerevisiae)                                                              | -0.732428 | Inlier |
| siRNA Disorazole DMSO Run3   | NM_139313 | YME1L1 | YME1-like 1 (S. cerevisiae)                                                              | -0.46083  | Inlier |
| siRNA Disorazole DMSO Run2   | NM_139313 | YME1L1 | YME1-like 1 (S. cerevisiae)                                                              | -0.160272 | Inlier |
| siRNA-Temozolomide Run1-DMSO | NM_139313 | YME1L1 | YME1-like 1 (S. cerevisiae)                                                              | 0.160272  | Inlier |
| siRNA Disorazole DMSO Run1   | NM_139313 | YME1L1 | YME1-like 1 (S. cerevisiae)                                                              | 0.616572  | Inlier |
| siRNA-Vinblastine Run1-DMSO  | NM_139313 | YME1L1 | YME1-like 1 (S. cerevisiae)                                                              | 2.583604  | Inlier |
| siRNA-Vinblastine Run2-DMSO  | NM_139313 | YME1L1 | YME1-like 1 (S. cerevisiae)                                                              | 2.767903  | Inlier |
| siRNA-Temozolomide Run3-DMSO | NM_139323 | YWHAB  | tyrosine 3-monooxygenase/tryptophan 5-monooxygenase activation protein, beta polypeptide | -0.973202 | Inlier |

Identification of Survival Genes in Human Glioblastoma Cells Using siRNA Screening

Nikhil G Thaker, Fang Zhang, Peter R. McDonald, Tong Ying Shun, Michael D Lewen, Ian F. Pollack, and John S. Lazo

Molecular Pharmacology

|                              |               |       |                                                                                          |           |        |
|------------------------------|---------------|-------|------------------------------------------------------------------------------------------|-----------|--------|
| siRNA-Temozolomide Run2-DMSO | NM_1393<br>23 | YWHAB | tyrosine 3-monooxygenase/tryptophan 5-monooxygenase activation protein, beta polypeptide | -0.805928 | Inlier |
| siRNA-Temozolomide Run1-DMSO | NM_1393<br>23 | YWHAB | tyrosine 3-monooxygenase/tryptophan 5-monooxygenase activation protein, beta polypeptide | -0.457968 | Inlier |
| siRNA Disorazole DMSO Run3   | NM_1393<br>23 | YWHAB | tyrosine 3-monooxygenase/tryptophan 5-monooxygenase activation protein, beta polypeptide | -0.047032 | Inlier |
| siRNA Disorazole DMSO Run1   | NM_1393<br>23 | YWHAB | tyrosine 3-monooxygenase/tryptophan 5-monooxygenase activation protein, beta polypeptide | 0.047033  | Inlier |

Identification of Survival Genes in Human Glioblastoma Cells Using siRNA Screening

Nikhil G Thaker, Fang Zhang, Peter R. McDonald, Tong Ying Shun, Michael D Lewen, Ian F. Pollack, and John S. Lazo

Molecular Pharmacology

|                             |               |       |                                                                                             |           |        |
|-----------------------------|---------------|-------|---------------------------------------------------------------------------------------------|-----------|--------|
| siRNA-Vinblastine Run2-DMSO | NM_1393<br>23 | YWHAB | tyrosine 3-monooxygenase/tryptophan 5-monooxygenase activation protein, beta polypeptide    | 0.543072  | Inlier |
| siRNA Disorazole DMSO Run2  | NM_1393<br>23 | YWHAB | tyrosine 3-monooxygenase/tryptophan 5-monooxygenase activation protein, beta polypeptide    | 0.959228  | Inlier |
| siRNA-Vinblastine Run1-DMSO | NM_1393<br>23 | YWHAB | tyrosine 3-monooxygenase/tryptophan 5-monooxygenase activation protein, beta polypeptide    | 1.023487  | Inlier |
| siRNA-Vinblastine Run2-DMSO | NM_0067<br>61 | YWHAE | tyrosine 3-monooxygenase/tryptophan 5-monooxygenase activation protein, epsilon polypeptide | -2.059705 | Inlier |



Identification of Survival Genes in Human Glioblastoma Cells Using siRNA Screening

Nikhil G Thaker, Fang Zhang, Peter R. McDonald, Tong Ying Shun, Michael D Lewen, Ian F. Pollack, and John S. Lazo

Molecular Pharmacology

|                              |           |       |                                                                                             |           |        |
|------------------------------|-----------|-------|---------------------------------------------------------------------------------------------|-----------|--------|
| siRNA-Temozolomide Run2-DMSO | NM_006761 | YWHAE | tyrosine 3-monooxygenase/tryptophan 5-monooxygenase activation protein, epsilon polypeptide | -0.686438 | Inlier |
| siRNA Disorazole DMSO Run1   | NM_006761 | YWHAE | tyrosine 3-monooxygenase/tryptophan 5-monooxygenase activation protein, epsilon polypeptide | -0.662562 | Inlier |
| siRNA-Temozolomide Run1-DMSO | NM_006761 | YWHAE | tyrosine 3-monooxygenase/tryptophan 5-monooxygenase activation protein, epsilon polypeptide | -0.150569 | Inlier |
| siRNA-Temozolomide Run3-DMSO | NM_006761 | YWHAE | tyrosine 3-monooxygenase/tryptophan 5-monooxygenase activation protein, epsilon polypeptide | 0.150569  | Inlier |

Identification of Survival Genes in Human Glioblastoma Cells Using siRNA Screening

Nikhil G Thaker, Fang Zhang, Peter R. McDonald, Tong Ying Shun, Michael D Lewen, Ian F. Pollack, and John S. Lazo

Molecular Pharmacology

|                             |               |       |                                                                                             |           |        |
|-----------------------------|---------------|-------|---------------------------------------------------------------------------------------------|-----------|--------|
| siRNA Disorazole DMSO Run3  | NM_0067<br>61 | YWHAE | tyrosine 3-monooxygenase/tryptophan 5-monooxygenase activation protein, epsilon polypeptide | 0.224953  | Inlier |
| siRNA-Vinblastine Run1-DMSO | NM_0067<br>61 | YWHAE | tyrosine 3-monooxygenase/tryptophan 5-monooxygenase activation protein, epsilon polypeptide | 2.203224  | Inlier |
| siRNA Disorazole DMSO Run2  | NM_0067<br>61 | YWHAE | tyrosine 3-monooxygenase/tryptophan 5-monooxygenase activation protein, epsilon polypeptide | 2.416732  | Inlier |
| siRNA-Vinblastine Run2-DMSO | NM_0124<br>79 | YWHAG | tyrosine 3-monooxygenase/tryptophan 5-monooxygenase activation protein, gamma polypeptide   | -0.729405 | Inlier |

Identification of Survival Genes in Human Glioblastoma Cells Using siRNA Screening

Nikhil G Thaker, Fang Zhang, Peter R. McDonald, Tong Ying Shun, Michael D Lewen, Ian F. Pollack, and John S. Lazo

Molecular Pharmacology

|                              |           |       |                                                                                           |           |        |
|------------------------------|-----------|-------|-------------------------------------------------------------------------------------------|-----------|--------|
| siRNA-Temozolomide Run2-DMSO | NM_012479 | YWHAG | tyrosine 3-monooxygenase/tryptophan 5-monooxygenase activation protein, gamma polypeptide | -0.619595 | Inlier |
| siRNA Disorazole DMSO Run1   | NM_012479 | YWHAG | tyrosine 3-monooxygenase/tryptophan 5-monooxygenase activation protein, gamma polypeptide | -0.593327 | Inlier |
| siRNA-Temozolomide Run1-DMSO | NM_012479 | YWHAG | tyrosine 3-monooxygenase/tryptophan 5-monooxygenase activation protein, gamma polypeptide | -0.227672 | Inlier |
| siRNA-Temozolomide Run3-DMSO | NM_012479 | YWHAG | tyrosine 3-monooxygenase/tryptophan 5-monooxygenase activation protein, gamma polypeptide | 0.227672  | Inlier |

Identification of Survival Genes in Human Glioblastoma Cells Using siRNA Screening

Nikhil G Thaker, Fang Zhang, Peter R. McDonald, Tong Ying Shun, Michael D Lewen, Ian F. Pollack, and John S. Lazo

Molecular Pharmacology

|                              |               |       |                                                                                           |           |        |
|------------------------------|---------------|-------|-------------------------------------------------------------------------------------------|-----------|--------|
| siRNA Disorazole DMSO Run2   | NM_0124<br>79 | YWHAG | tyrosine 3-monooxygenase/tryptophan 5-monooxygenase activation protein, gamma polypeptide | 0.951953  | Inlier |
| siRNA-Vinblastine Run1-DMSO  | NM_0124<br>79 | YWHAG | tyrosine 3-monooxygenase/tryptophan 5-monooxygenase activation protein, gamma polypeptide | 1.19684   | Inlier |
| siRNA Disorazole DMSO Run3   | NM_0124<br>79 | YWHAG | tyrosine 3-monooxygenase/tryptophan 5-monooxygenase activation protein, gamma polypeptide | 1.257608  | Inlier |
| siRNA-Temozolomide Run2-DMSO | NM_0034<br>05 | YWHAG | tyrosine 3-monooxygenase/tryptophan 5-monooxygenase activation protein, eta polypeptide   | -1.019383 | Inlier |

Identification of Survival Genes in Human Glioblastoma Cells Using siRNA Screening

Nikhil G Thaker, Fang Zhang, Peter R. McDonald, Tong Ying Shun, Michael D Lewen, Ian F. Pollack, and John S. Lazo

Molecular Pharmacology

|                              |           |       |                                                                                         |           |        |
|------------------------------|-----------|-------|-----------------------------------------------------------------------------------------|-----------|--------|
| siRNA-Vinblastine Run2-DMSO  | NM_003405 | YWHAH | tyrosine 3-monooxygenase/tryptophan 5-monooxygenase activation protein, eta polypeptide | -0.953799 | Inlier |
| siRNA Disorazole DMSO Run3   | NM_003405 | YWHAH | tyrosine 3-monooxygenase/tryptophan 5-monooxygenase activation protein, eta polypeptide | -0.250201 | Inlier |
| siRNA Disorazole DMSO Run1   | NM_003405 | YWHAH | tyrosine 3-monooxygenase/tryptophan 5-monooxygenase activation protein, eta polypeptide | -0.141799 | Inlier |
| siRNA-Temozolomide Run1-DMSO | NM_003405 | YWHAH | tyrosine 3-monooxygenase/tryptophan 5-monooxygenase activation protein, eta polypeptide | 0.141799  | Inlier |

Identification of Survival Genes in Human Glioblastoma Cells Using siRNA Screening

Nikhil G Thaker, Fang Zhang, Peter R. McDonald, Tong Ying Shun, Michael D Lewen, Ian F. Pollack, and John S. Lazo

Molecular Pharmacology

|                              |           |       |                                                                                           |           |        |
|------------------------------|-----------|-------|-------------------------------------------------------------------------------------------|-----------|--------|
| siRNA-Temozolomide Run3-DMSO | NM_003405 | YWHAH | tyrosine 3-monooxygenase/tryptophan 5-monooxygenase activation protein, eta polypeptide   | 0.395201  | Inlier |
| siRNA-Vinblastine Run1-DMSO  | NM_003405 | YWHAH | tyrosine 3-monooxygenase/tryptophan 5-monooxygenase activation protein, eta polypeptide   | 1.382863  | Inlier |
| siRNA Disorazole DMSO Run2   | NM_003405 | YWHAH | tyrosine 3-monooxygenase/tryptophan 5-monooxygenase activation protein, eta polypeptide   | 1.424548  | Inlier |
| siRNA-Vinblastine Run2-DMSO  | NM_006826 | YWHAQ | tyrosine 3-monooxygenase/tryptophan 5-monooxygenase activation protein, theta polypeptide | -1.782513 | Inlier |

Identification of Survival Genes in Human Glioblastoma Cells Using siRNA Screening

Nikhil G Thaker, Fang Zhang, Peter R. McDonald, Tong Ying Shun, Michael D Lewen, Ian F. Pollack, and John S. Lazo

Molecular Pharmacology

|                              |               |       |                                                                                           |           |        |
|------------------------------|---------------|-------|-------------------------------------------------------------------------------------------|-----------|--------|
| siRNA Disorazole DMSO Run1   | NM_0068<br>26 | YWHAQ | tyrosine 3-monooxygenase/tryptophan 5-monooxygenase activation protein, theta polypeptide | -0.760512 | Inlier |
| siRNA-Temozolomide Run1-DMSO | NM_0068<br>26 | YWHAQ | tyrosine 3-monooxygenase/tryptophan 5-monooxygenase activation protein, theta polypeptide | -0.588488 | Inlier |
| siRNA-Temozolomide Run3-DMSO | NM_0068<br>26 | YWHAQ | tyrosine 3-monooxygenase/tryptophan 5-monooxygenase activation protein, theta polypeptide | -0.194303 | Inlier |
| siRNA-Temozolomide Run2-DMSO | NM_0068<br>26 | YWHAQ | tyrosine 3-monooxygenase/tryptophan 5-monooxygenase activation protein, theta polypeptide | 0.194303  | Inlier |

Identification of Survival Genes in Human Glioblastoma Cells Using siRNA Screening

Nikhil G Thaker, Fang Zhang, Peter R. McDonald, Tong Ying Shun, Michael D Lewen, Ian F. Pollack, and John S. Lazo

Molecular Pharmacology

|                             |               |       |                                                                                           |           |        |
|-----------------------------|---------------|-------|-------------------------------------------------------------------------------------------|-----------|--------|
| siRNA Disorazole DMSO Run3  | NM_0068<br>26 | YWHAQ | tyrosine 3-monooxygenase/tryptophan 5-monooxygenase activation protein, theta polypeptide | 0.409167  | Inlier |
| siRNA Disorazole DMSO Run2  | NM_0068<br>26 | YWHAQ | tyrosine 3-monooxygenase/tryptophan 5-monooxygenase activation protein, theta polypeptide | 1.515907  | Inlier |
| siRNA-Vinblastine Run1-DMSO | NM_0068<br>26 | YWHAQ | tyrosine 3-monooxygenase/tryptophan 5-monooxygenase activation protein, theta polypeptide | 1.990311  | Inlier |
| siRNA-Vinblastine Run2-DMSO | NM_0034<br>06 | YWHAZ | tyrosine 3-monooxygenase/tryptophan 5-monooxygenase activation protein, zeta polypeptide  | -1.057333 | Inlier |



Identification of Survival Genes in Human Glioblastoma Cells Using siRNA Screening

Nikhil G Thaker, Fang Zhang, Peter R. McDonald, Tong Ying Shun, Michael D Lewen, Ian F. Pollack, and John S. Lazo

Molecular Pharmacology

|                              |           |       |                                                                                          |           |        |
|------------------------------|-----------|-------|------------------------------------------------------------------------------------------|-----------|--------|
| siRNA-Temozolomide Run2-DMSO | NM_003406 | YWHAZ | tyrosine 3-monooxygenase/tryptophan 5-monooxygenase activation protein, zeta polypeptide | -0.33288  | Inlier |
| siRNA-Temozolomide Run1-DMSO | NM_003406 | YWHAZ | tyrosine 3-monooxygenase/tryptophan 5-monooxygenase activation protein, zeta polypeptide | -0.307595 | Inlier |
| siRNA Disorazole DMSO Run1   | NM_003406 | YWHAZ | tyrosine 3-monooxygenase/tryptophan 5-monooxygenase activation protein, zeta polypeptide | -0.012425 | Inlier |
| siRNA-Temozolomide Run3-DMSO | NM_003406 | YWHAZ | tyrosine 3-monooxygenase/tryptophan 5-monooxygenase activation protein, zeta polypeptide | 0.012425  | Inlier |

Identification of Survival Genes in Human Glioblastoma Cells Using siRNA Screening

Nikhil G Thaker, Fang Zhang, Peter R. McDonald, Tong Ying Shun, Michael D Lewen, Ian F. Pollack, and John S. Lazo

Molecular Pharmacology

|                              |           |        |                                                                                          |           |        |
|------------------------------|-----------|--------|------------------------------------------------------------------------------------------|-----------|--------|
| siRNA Disorazole DMSO Run3   | NM_003406 | YWHAZ  | tyrosine 3-monooxygenase/tryptophan 5-monooxygenase activation protein, zeta polypeptide | 1.01612   | Inlier |
| siRNA-Vinblastine Run1-DMSO  | NM_003406 | YWHAZ  | tyrosine 3-monooxygenase/tryptophan 5-monooxygenase activation protein, zeta polypeptide | 1.060076  | Inlier |
| siRNA Disorazole DMSO Run2   | NM_003406 | YWHAZ  | tyrosine 3-monooxygenase/tryptophan 5-monooxygenase activation protein, zeta polypeptide | 1.351478  | Inlier |
| siRNA-Temozolomide Run3-DMSO | NM_020205 | ZA20D1 | zinc finger, A20 domain containing 1                                                     | -1.088095 | Inlier |
| siRNA-Temozolomide Run1-DMSO | NM_020205 | ZA20D1 | zinc finger, A20 domain containing 1                                                     | -0.60021  | Inlier |

Identification of Survival Genes in Human Glioblastoma Cells Using siRNA Screening  
 Nikhil G Thaker, Fang Zhang, Peter R. McDonald, Tong Ying Shun, Michael D Lewen, Ian F. Pollack, and John S. Lazo  
 Molecular Pharmacology

|                              |           |        |                                                         |           |        |
|------------------------------|-----------|--------|---------------------------------------------------------|-----------|--------|
| siRNA-Temozolomide Run2-DMSO | NM_020205 | ZA20D1 | zinc finger, A20 domain containing 1                    | -0.532391 | Inlier |
| siRNA Disorazole DMSO Run1   | NM_020205 | ZA20D1 | zinc finger, A20 domain containing 1                    | -0.266212 | Inlier |
| siRNA Disorazole DMSO Run3   | NM_020205 | ZA20D1 | zinc finger, A20 domain containing 1                    | 0.266212  | Inlier |
| siRNA Disorazole DMSO Run2   | NM_020205 | ZA20D1 | zinc finger, A20 domain containing 1                    | 0.74879   | Inlier |
| siRNA-Vinblastine Run1-DMSO  | NM_020205 | ZA20D1 | zinc finger, A20 domain containing 1                    | 0.922192  | Inlier |
| siRNA-Vinblastine Run2-DMSO  | NM_020205 | ZA20D1 | zinc finger, A20 domain containing 1                    | 1.238234  | Inlier |
| siRNA-Temozolomide Run2-DMSO | NM_152444 | ZADH1  | zinc binding alcohol dehydrogenase, domain containing 1 | -1.283318 | Inlier |
| siRNA-Temozolomide Run3-DMSO | NM_152444 | ZADH1  | zinc binding alcohol dehydrogenase, domain containing 1 | -0.968834 | Inlier |

Identification of Survival Genes in Human Glioblastoma Cells Using siRNA Screening

Nikhil G Thaker, Fang Zhang, Peter R. McDonald, Tong Ying Shun, Michael D Lewen, Ian F. Pollack, and John S. Lazo

Molecular Pharmacology

|                              |               |       |                                                                               |           |        |
|------------------------------|---------------|-------|-------------------------------------------------------------------------------|-----------|--------|
| siRNA-Temozolomide Run1-DMSO | NM_1524<br>44 | ZADH1 | zinc<br>binding<br>alcohol<br>dehydroge<br>nase,<br>domain<br>containing<br>1 | -0.414077 | Inlier |
| siRNA-Vinblastine Run2-DMSO  | NM_1524<br>44 | ZADH1 | zinc<br>binding<br>alcohol<br>dehydroge<br>nase,<br>domain<br>containing<br>1 | -0.133483 | Inlier |
| siRNA Disorazole DMSO Run3   | NM_1524<br>44 | ZADH1 | zinc<br>binding<br>alcohol<br>dehydroge<br>nase,<br>domain<br>containing<br>1 | 0.133483  | Inlier |
| siRNA Disorazole DMSO Run1   | NM_1524<br>44 | ZADH1 | zinc<br>binding<br>alcohol<br>dehydroge<br>nase,<br>domain<br>containing<br>1 | 0.252655  | Inlier |
| siRNA Disorazole DMSO Run2   | NM_1524<br>44 | ZADH1 | zinc<br>binding<br>alcohol<br>dehydroge<br>nase,<br>domain<br>containing<br>1 | 0.934923  | Inlier |
| siRNA-Vinblastine Run1-DMSO  | NM_1524<br>44 | ZADH1 | zinc<br>binding<br>alcohol<br>dehydroge<br>nase,<br>domain<br>containing<br>1 | 1.019216  | Inlier |

Identification of Survival Genes in Human Glioblastoma Cells Using siRNA Screening

Nikhil G Thaker, Fang Zhang, Peter R. McDonald, Tong Ying Shun, Michael D Lewen, Ian F. Pollack, and John S. Lazo

Molecular Pharmacology

| siRNA Treatment              | Gene ID   | Gene Name | zinc binding alcohol dehydrogenase, domain containing 2 | Value     | Category |
|------------------------------|-----------|-----------|---------------------------------------------------------|-----------|----------|
| siRNA-Temozolomide Run1-DMSO | NM_175907 | ZADH2     | zinc binding alcohol dehydrogenase, domain containing 2 | -0.853119 | Inlier   |
| siRNA Disorazole DMSO Run1   | NM_175907 | ZADH2     | zinc binding alcohol dehydrogenase, domain containing 2 | -0.531633 | Inlier   |
| siRNA-Temozolomide Run3-DMSO | NM_175907 | ZADH2     | zinc binding alcohol dehydrogenase, domain containing 2 | -0.40826  | Inlier   |
| siRNA-Temozolomide Run2-DMSO | NM_175907 | ZADH2     | zinc binding alcohol dehydrogenase, domain containing 2 | -0.391618 | Inlier   |
| siRNA Disorazole DMSO Run3   | NM_175907 | ZADH2     | zinc binding alcohol dehydrogenase, domain containing 2 | 0.391618  | Inlier   |
| siRNA-Vinblastine Run2-DMSO  | NM_175907 | ZADH2     | zinc binding alcohol dehydrogenase, domain containing 2 | 0.817367  | Inlier   |

Identification of Survival Genes in Human Glioblastoma Cells Using siRNA Screening  
 Nikhil G Thaker, Fang Zhang, Peter R. McDonald, Tong Ying Shun, Michael D Lewen, Ian F. Pollack, and John S. Lazo

Molecular Pharmacology

| siRNA                        | Gene    | Run | Condition | Gene   | Gene                                                    | Value     | Outlier |
|------------------------------|---------|-----|-----------|--------|---------------------------------------------------------|-----------|---------|
| siRNA Disorazole DMSO Run2   | NM_1759 | 07  | ZADH2     | ZADH2  | zinc binding alcohol dehydrogenase, domain containing 2 | 2.570592  | Inlier  |
| siRNA-Vinblastine Run1-DMSO  | NM_1759 | 07  | ZADH2     | ZADH2  | zinc binding alcohol dehydrogenase, domain containing 2 | 3.253235  | Inlier  |
| siRNA-Temozolomide Run3-DMSO | NM_0166 | 53  | ZAK       | ZAK    | ZAK                                                     | -2.231575 | Inlier  |
| siRNA-Temozolomide Run1-DMSO | NM_0166 | 53  | ZAK       | ZAK    | ZAK                                                     | -0.888787 | Inlier  |
| siRNA-Temozolomide Run2-DMSO | NM_0166 | 53  | ZAK       | ZAK    | ZAK                                                     | -0.460213 | Inlier  |
| siRNA Disorazole DMSO Run2   | NM_0166 | 53  | ZAK       | ZAK    | ZAK                                                     | -0.251019 | Inlier  |
| siRNA Disorazole DMSO Run3   | NM_0166 | 53  | ZAK       | ZAK    | ZAK                                                     | 0.251019  | Inlier  |
| siRNA Disorazole DMSO Run1   | NM_0166 | 53  | ZAK       | ZAK    | ZAK                                                     | 0.352445  | Inlier  |
| siRNA-Vinblastine Run2-DMSO  | NM_0166 | 53  | ZAK       | ZAK    | ZAK                                                     | 1.230028  | Inlier  |
| siRNA-Vinblastine Run1-DMSO  | NM_0166 | 53  | ZAK       | ZAK    | ZAK                                                     | 1.389889  | Inlier  |
| siRNA-Temozolomide Run3-DMSO | NM_0068 | 21  | ZAP128    | ZAP128 | ZAP128                                                  | -0.91972  | Inlier  |
| siRNA-Temozolomide Run2-DMSO | NM_0068 | 21  | ZAP128    | ZAP128 | ZAP128                                                  | -0.42928  | Inlier  |
| siRNA-Temozolomide Run1-DMSO | NM_0068 | 21  | ZAP128    | ZAP128 | ZAP128                                                  | -0.295547 | Inlier  |
| siRNA Disorazole DMSO Run3   | NM_0068 | 21  | ZAP128    | ZAP128 | ZAP128                                                  | -0.134602 | Inlier  |
| siRNA-Vinblastine Run2-DMSO  | NM_0068 | 21  | ZAP128    | ZAP128 | ZAP128                                                  | 0.134602  | Inlier  |
| siRNA Disorazole DMSO Run1   | NM_0068 | 21  | ZAP128    | ZAP128 | ZAP128                                                  | 2.727582  | Inlier  |
| siRNA Disorazole DMSO Run2   | NM_0068 | 21  | ZAP128    | ZAP128 | ZAP128                                                  | 14.20984  | Outlier |
| siRNA-Vinblastine Run1-DMSO  | NM_0068 | 21  | ZAP128    | ZAP128 | ZAP128                                                  | 15.18488  | Outlier |

Identification of Survival Genes in Human Glioblastoma Cells Using siRNA Screening  
 Nikhil G Thaker, Fang Zhang, Peter R. McDonald, Tong Ying Shun, Michael D Lewen, Ian F. Pollack, and John S. Lazo  
 Molecular Pharmacology

|                              |           |       |                                                  |           |        |
|------------------------------|-----------|-------|--------------------------------------------------|-----------|--------|
| siRNA-Temozolomide Run3-DMSO | NM_001079 | ZAP70 | zeta-chain (TCR) associated protein kinase 70kDa | -0.995664 | Inlier |
| siRNA-Vinblastine Run1-DMSO  | NM_001079 | ZAP70 | zeta-chain (TCR) associated protein kinase 70kDa | -0.587795 | Inlier |
| siRNA-Temozolomide Run1-DMSO | NM_001079 | ZAP70 | zeta-chain (TCR) associated protein kinase 70kDa | -0.347574 | Inlier |
| siRNA-Temozolomide Run2-DMSO | NM_001079 | ZAP70 | zeta-chain (TCR) associated protein kinase 70kDa | -0.289042 | Inlier |
| siRNA Disorazole DMSO Run1   | NM_001079 | ZAP70 | zeta-chain (TCR) associated protein kinase 70kDa | 0.289043  | Inlier |
| siRNA Disorazole DMSO Run2   | NM_001079 | ZAP70 | zeta-chain (TCR) associated protein kinase 70kDa | 0.761205  | Inlier |
| siRNA-Vinblastine Run2-DMSO  | NM_001079 | ZAP70 | zeta-chain (TCR) associated protein kinase 70kDa | 1.212256  | Inlier |

Identification of Survival Genes in Human Glioblastoma Cells Using siRNA Screening  
 Nikhil G Thaker, Fang Zhang, Peter R. McDonald, Tong Ying Shun, Michael D Lewen, Ian F. Pollack, and John S. Lazo  
 Molecular Pharmacology

|                                  |               |        |                                                                 |           |        |
|----------------------------------|---------------|--------|-----------------------------------------------------------------|-----------|--------|
| siRNA Disorazole DMSO Run3       | NM_0010<br>79 | ZAP70  | zeta-chain<br>(TCR)<br>associated<br>protein<br>kinase<br>70kDa | 1.804715  | Inlier |
| siRNA-Temozolomide Run2-<br>DMSO | NM_0246<br>57 | ZCWCC2 | zinc finger,<br>CW type<br>with coiled-<br>coil<br>domain 2     | -1.131475 | Inlier |
| siRNA-Temozolomide Run3-<br>DMSO | NM_0246<br>57 | ZCWCC2 | zinc finger,<br>CW type<br>with coiled-<br>coil<br>domain 2     | -0.955684 | Inlier |
| siRNA-Temozolomide Run1-<br>DMSO | NM_0246<br>57 | ZCWCC2 | zinc finger,<br>CW type<br>with coiled-<br>coil<br>domain 2     | -0.086086 | Inlier |
| siRNA-Vinblastine Run2-<br>DMSO  | NM_0246<br>57 | ZCWCC2 | zinc finger,<br>CW type<br>with coiled-<br>coil<br>domain 2     | -0.065463 | Inlier |
| siRNA Disorazole DMSO Run1       | NM_0246<br>57 | ZCWCC2 | zinc finger,<br>CW type<br>with coiled-<br>coil<br>domain 2     | 0.065463  | Inlier |
| siRNA Disorazole DMSO Run3       | NM_0246<br>57 | ZCWCC2 | zinc finger,<br>CW type<br>with coiled-<br>coil<br>domain 2     | 0.393316  | Inlier |
| siRNA Disorazole DMSO Run2       | NM_0246<br>57 | ZCWCC2 | zinc finger,<br>CW type<br>with coiled-<br>coil<br>domain 2     | 1.839445  | Inlier |



Identification of Survival Genes in Human Glioblastoma Cells Using siRNA Screening  
 Nikhil G Thaker, Fang Zhang, Peter R. McDonald, Tong Ying Shun, Michael D Lewen, Ian F. Pollack, and John S. Lazo  
 Molecular Pharmacology

|                              |               |        |                                                             |           |        |
|------------------------------|---------------|--------|-------------------------------------------------------------|-----------|--------|
| siRNA-Vinblastine Run1-DMSO  | NM_0246<br>57 | ZCWCC2 | zinc finger,<br>CW type<br>with coiled-<br>coil<br>domain 2 | 1.847092  | Inlier |
| siRNA-Temozolomide Run3-DMSO | NM_0165<br>98 | ZDHHC3 | zinc finger,<br>DHHC<br>domain<br>containing<br>3           | -0.802912 | Inlier |
| siRNA Disorazole DMSO Run2   | NM_0165<br>98 | ZDHHC3 | zinc finger,<br>DHHC<br>domain<br>containing<br>3           | -0.744149 | Inlier |
| siRNA-Temozolomide Run2-DMSO | NM_0165<br>98 | ZDHHC3 | zinc finger,<br>DHHC<br>domain<br>containing<br>3           | -0.604851 | Inlier |
| siRNA Disorazole DMSO Run3   | NM_0165<br>98 | ZDHHC3 | zinc finger,<br>DHHC<br>domain<br>containing<br>3           | -0.102031 | Inlier |
| siRNA-Temozolomide Run1-DMSO | NM_0165<br>98 | ZDHHC3 | zinc finger,<br>DHHC<br>domain<br>containing<br>3           | 0.102031  | Inlier |
| siRNA Disorazole DMSO Run1   | NM_0165<br>98 | ZDHHC3 | zinc finger,<br>DHHC<br>domain<br>containing<br>3           | 0.471602  | Inlier |
| siRNA-Vinblastine Run1-DMSO  | NM_0165<br>98 | ZDHHC3 | zinc finger,<br>DHHC<br>domain<br>containing<br>3           | 1.25662   | Inlier |

Identification of Survival Genes in Human Glioblastoma Cells Using siRNA Screening  
 Nikhil G Thaker, Fang Zhang, Peter R. McDonald, Tong Ying Shun, Michael D Lewen, Ian F. Pollack, and John S. Lazo  
 Molecular Pharmacology

|                              |               |        |                                                   |           |        |
|------------------------------|---------------|--------|---------------------------------------------------|-----------|--------|
| siRNA-Vinblastine Run2-DMSO  | NM_0165<br>98 | ZDHHC3 | zinc finger,<br>DHHC<br>domain<br>containing<br>3 | 2.037881  | Inlier |
| siRNA-Temozolomide Run3-DMSO | NM_0073<br>23 | ZFYVE9 | zinc finger,<br>FYVE<br>domain<br>containing<br>9 | -1.608328 | Inlier |
| siRNA-Temozolomide Run2-DMSO | NM_0073<br>23 | ZFYVE9 | zinc finger,<br>FYVE<br>domain<br>containing<br>9 | -0.949639 | Inlier |
| siRNA-Temozolomide Run1-DMSO | NM_0073<br>23 | ZFYVE9 | zinc finger,<br>FYVE<br>domain<br>containing<br>9 | -0.114346 | Inlier |
| siRNA Disorazole DMSO Run1   | NM_0073<br>23 | ZFYVE9 | zinc finger,<br>FYVE<br>domain<br>containing<br>9 | -0.016282 | Inlier |
| siRNA Disorazole DMSO Run3   | NM_0073<br>23 | ZFYVE9 | zinc finger,<br>FYVE<br>domain<br>containing<br>9 | 0.016282  | Inlier |
| siRNA-Vinblastine Run2-DMSO  | NM_0073<br>23 | ZFYVE9 | zinc finger,<br>FYVE<br>domain<br>containing<br>9 | 0.399361  | Inlier |
| siRNA Disorazole DMSO Run2   | NM_0073<br>23 | ZFYVE9 | zinc finger,<br>FYVE<br>domain<br>containing<br>9 | 1.013925  | Inlier |

Identification of Survival Genes in Human Glioblastoma Cells Using siRNA Screening  
 Nikhil G Thaker, Fang Zhang, Peter R. McDonald, Tong Ying Shun, Michael D Lewen, Ian F. Pollack, and John S. Lazo  
 Molecular Pharmacology

|                              |               |         |   |                                               |           |        |
|------------------------------|---------------|---------|---|-----------------------------------------------|-----------|--------|
| siRNA-Vinblastine Run1-DMSO  | NM_0073<br>23 | ZFYVE9  | 9 | zinc finger, FYVE domain containing           | 1.544168  | Inlier |
| siRNA Disorazole DMSO Run2   | NM_0058<br>57 | ZMPSTE2 | 4 | zinc metalloproteinase (STE24 homolog, yeast) | -1.498911 | Inlier |
| siRNA Disorazole DMSO Run1   | NM_0058<br>57 | ZMPSTE2 | 4 | zinc metalloproteinase (STE24 homolog, yeast) | -0.961259 | Inlier |
| siRNA-Temozolomide Run2-DMSO | NM_0058<br>57 | ZMPSTE2 | 4 | zinc metalloproteinase (STE24 homolog, yeast) | -0.911874 | Inlier |
| siRNA-Temozolomide Run3-DMSO | NM_0058<br>57 | ZMPSTE2 | 4 | zinc metalloproteinase (STE24 homolog, yeast) | -0.017317 | Inlier |
| siRNA Disorazole DMSO Run3   | NM_0058<br>57 | ZMPSTE2 | 4 | zinc metalloproteinase (STE24 homolog, yeast) | 0.017317  | Inlier |
| siRNA-Temozolomide Run1-DMSO | NM_0058<br>57 | ZMPSTE2 | 4 | zinc metalloproteinase (STE24 homolog, yeast) | 0.220252  | Inlier |
| siRNA-Vinblastine Run2-DMSO  | NM_0058<br>57 | ZMPSTE2 | 4 | zinc metalloproteinase (STE24 homolog, yeast) | 0.559682  | Inlier |

Identification of Survival Genes in Human Glioblastoma Cells Using siRNA Screening  
 Nikhil G Thaker, Fang Zhang, Peter R. McDonald, Tong Ying Shun, Michael D Lewen, Ian F. Pollack, and John S. Lazo

Molecular Pharmacology

|                              |            |           | zinc metalloproteinase (STE24 homolog, yeast) |                  |
|------------------------------|------------|-----------|-----------------------------------------------|------------------|
| siRNA-Vinblastine Run1-DMSO  | NM_0058 57 | ZMPSTE2 4 | zinc finger protein                           | 0.789318 Inlier  |
| siRNA-Temozolomide Run3-DMSO | NM_0220 95 | ZNF335    | zinc finger protein                           | -1.216549 Inlier |
| siRNA Disorazole DMSO Run3   | NM_0220 95 | ZNF335    | zinc finger protein                           | -0.877809 Inlier |
| siRNA Disorazole DMSO Run2   | NM_0220 95 | ZNF335    | zinc finger protein                           | -0.471191 Inlier |
| siRNA Disorazole DMSO Run1   | NM_0220 95 | ZNF335    | zinc finger protein                           | -0.416633 Inlier |
| siRNA-Temozolomide Run1-DMSO | NM_0220 95 | ZNF335    | zinc finger protein                           | 0.416633 Inlier  |
| siRNA-Temozolomide Run2-DMSO | NM_0220 95 | ZNF335    | zinc finger protein                           | 0.424849 Inlier  |
| siRNA-Vinblastine Run1-DMSO  | NM_0220 95 | ZNF335    | zinc finger protein                           | 1.565554 Inlier  |
| siRNA-Vinblastine Run2-DMSO  | NM_0220 95 | ZNF335    | zinc finger protein                           | 1.647362 Inlier  |
| siRNA Disorazole DMSO Run2   | NM_0187 13 | ZNT8      | ZNT8                                          | -1.390913 Inlier |
| siRNA-Temozolomide Run3-DMSO | NM_0187 13 | ZNT8      | ZNT8                                          | -1.082686 Inlier |
| siRNA-Temozolomide Run2-DMSO | NM_0187 13 | ZNT8      | ZNT8                                          | -0.366813 Inlier |
| siRNA Disorazole DMSO Run3   | NM_0187 13 | ZNT8      | ZNT8                                          | -0.242591 Inlier |
| siRNA Disorazole DMSO Run1   | NM_0187 13 | ZNT8      | ZNT8                                          | 0.242591 Inlier  |
| siRNA-Temozolomide Run1-DMSO | NM_0187 13 | ZNT8      | ZNT8                                          | 0.328884 Inlier  |
| siRNA-Vinblastine Run2-DMSO  | NM_0187 13 | ZNT8      | ZNT8                                          | 0.982187 Inlier  |
| siRNA-Vinblastine Run1-DMSO  | NM_0187 13 | ZNT8      | ZNT8                                          | 1.222348 Inlier  |

Identification of Survival Genes in Human Glioblastoma Cells Using siRNA Screening  
 Nikhil G Thaker, Fang Zhang, Peter R. McDonald, Tong Ying Shun, Michael D Lewen, Ian F. Pollack, and John S. Lazo  
 Molecular Pharmacology

|                              |               |        |                                                              |           |        |
|------------------------------|---------------|--------|--------------------------------------------------------------|-----------|--------|
| siRNA-Temozolomide Run3-DMSO | NM_0175<br>80 | ZRANB1 | zinc finger,<br>RAN-<br>binding<br>domain<br>containing<br>1 | -1.738601 | Inlier |
| siRNA Disorazole DMSO Run3   | NM_0175<br>80 | ZRANB1 | zinc finger,<br>RAN-<br>binding<br>domain<br>containing<br>1 | -1.32957  | Inlier |
| siRNA-Temozolomide Run2-DMSO | NM_0175<br>80 | ZRANB1 | zinc finger,<br>RAN-<br>binding<br>domain<br>containing<br>1 | -1.295388 | Inlier |
| siRNA-Vinblastine Run2-DMSO  | NM_0175<br>80 | ZRANB1 | zinc finger,<br>RAN-<br>binding<br>domain<br>containing<br>1 | -0.151576 | Inlier |
| siRNA Disorazole DMSO Run1   | NM_0175<br>80 | ZRANB1 | zinc finger,<br>RAN-<br>binding<br>domain<br>containing<br>1 | 0.151576  | Inlier |
| siRNA Disorazole DMSO Run2   | NM_0175<br>80 | ZRANB1 | zinc finger,<br>RAN-<br>binding<br>domain<br>containing<br>1 | 0.394473  | Inlier |
| siRNA-Temozolomide Run1-DMSO | NM_0175<br>80 | ZRANB1 | zinc finger,<br>RAN-<br>binding<br>domain<br>containing<br>1 | 0.403592  | Inlier |

Identification of Survival Genes in Human Glioblastoma Cells Using siRNA Screening  
 Nikhil G Thaker, Fang Zhang, Peter R. McDonald, Tong Ying Shun, Michael D Lewen, Ian F. Pollack, and John S. Lazo  
 Molecular Pharmacology

|                              |               |        |                                                              |                  |
|------------------------------|---------------|--------|--------------------------------------------------------------|------------------|
| siRNA-Vinblastine Run1-DMSO  | NM_0175<br>80 | ZRANB1 | zinc finger,<br>RAN-<br>binding<br>domain<br>containing<br>1 | 0.945408 Inlier  |
| siRNA-Temozolomide Run3-DMSO | NM_0321<br>43 | ZRANB3 | zinc finger,<br>RAN-<br>binding<br>domain<br>containing<br>3 | -2.472792 Inlier |
| siRNA Disorazole DMSO Run3   | NM_0321<br>43 | ZRANB3 | zinc finger,<br>RAN-<br>binding<br>domain<br>containing<br>3 | -0.640283 Inlier |
| siRNA Disorazole DMSO Run1   | NM_0321<br>43 | ZRANB3 | zinc finger,<br>RAN-<br>binding<br>domain<br>containing<br>3 | -0.577176 Inlier |
| siRNA-Temozolomide Run1-DMSO | NM_0321<br>43 | ZRANB3 | zinc finger,<br>RAN-<br>binding<br>domain<br>containing<br>3 | -0.368734 Inlier |
| siRNA-Vinblastine Run2-DMSO  | NM_0321<br>43 | ZRANB3 | zinc finger,<br>RAN-<br>binding<br>domain<br>containing<br>3 | 0.368733 Inlier  |
| siRNA-Vinblastine Run1-DMSO  | NM_0321<br>43 | ZRANB3 | zinc finger,<br>RAN-<br>binding<br>domain<br>containing<br>3 | 0.708717 Inlier  |

Identification of Survival Genes in Human Glioblastoma Cells Using siRNA Screening

Nikhil G Thaker, Fang Zhang, Peter R. McDonald, Tong Ying Shun, Michael D Lewen, Ian F. Pollack, and John S. Lazo

Molecular Pharmacology

|                                  |               |        |                                                              |          |        |
|----------------------------------|---------------|--------|--------------------------------------------------------------|----------|--------|
| siRNA Disorazole DMSO Run2       | NM_0321<br>43 | ZRANB3 | zinc finger,<br>RAN-<br>binding<br>domain<br>containing<br>3 | 1.522697 | Inlier |
| siRNA-Temozolomide Run2-<br>DMSO | NM_0321<br>43 | ZRANB3 | zinc finger,<br>RAN-<br>binding<br>domain<br>containing<br>3 | 3.363985 | Inlier |
